# Supplementary material
Source: PubMed Central journal article supplement (PMC4139173)
Supplement: ac501380s_si_001.pdf [file ac501380s_si_001.pdf]

**SI Table S1.** Quantitative protein and peptide data of the 11 time-course groups (n=5/group)

*Time point 0.5 hour*

| Accession number | Protein DESCRIPTION                                               | Protein Ratio (0.5h) | P-value (0.5h) | Peptide number (0.5h) |
|------------------|-------------------------------------------------------------------|----------------------|----------------|-----------------------|
| Accession number | Peptide sequence                                                  | Peptide Ratio (0.5h) | Charge state   | Xcorr                 |
| <b>A0JPJ7</b>    | <b>OLA1 Obg_like ATPase 1</b>                                     | <b>1.315815199</b>   | <b>0.00988</b> | <b>2</b>              |
| A0JPJ7           | IGIVGLPNVGK                                                       | 1.405806436          | 2              | 2.652685404           |
| A0JPJ7           | YLEANMTQSALPK                                                     | 1.315701829          | 2              | 2.78365469            |
| <b>A0JPM9</b>    | <b>EIF3J Eukaryotic translation initiation factor 3 subunit J</b> | <b>1.12065691</b>    | <b>0.82792</b> | <b>2</b>              |
| A0JPM9           | EEAEVKPEVKISEK                                                    | 1.062914851          | 2              | 2.334575653           |
| A0JPM9           | RLEEPEESK                                                         | 1.130084442          | 2              | 2.49113059            |
| <b>A0JPQ8</b>    | <b>ALKMO Alkylglycerol monooxygenase</b>                          | <b>1.370471014</b>   | <b>0.00368</b> | <b>2</b>              |
| A0JPQ8           | LDDILTSMSAGVVSR                                                   | 1.710010531          | 2              | 2.827005386           |
| A0JPQ8           | SITHLASGSWK                                                       | 1.355726197          | 2              | 2.418783665           |
| <b>A1A5P5</b>    | <b>ARMC9 LisH domain_containing protein ARMC9</b>                 | <b>1.012220178</b>   | <b>0.9997</b>  | <b>2</b>              |
| A1A5P5           | CFIKEGNAEMIR+Oxidation(10)                                        | 1.012287997          | 2              | 2.713591814           |
| A1A5P5           | LYLAQNTKVLRLMLEGR+Oxidation(12)                                   | 1.004945665          | 2              | 2.306550741           |
| <b>A2ADY9</b>    | <b>DDI2 Protein DDI1 homolog 2</b>                                | <b>1.038965396</b>   | <b>0.98707</b> | <b>2</b>              |
| A2ADY9           | IDFSSIAVPGTSPNPQQR                                                | 0.927131523          | 2              | 2.561553717           |
| A2ADY9           | VLVEQQQDR                                                         | 1.041071237          | 2              | 2.768367529           |
| <b>A2AF47</b>    | <b>DOC11 Dedicator of cytokinesis protein 11</b>                  | <b>1.055581849</b>   | <b>0.72712</b> | <b>2</b>              |
| A2AF47           | NLLMCYLYIVK                                                       | 1.055834256          | 2              | 2.494649887           |
| A2AF47           | MPFAWAARPIFKDVQGSGLDLDGR+Oxidation(1)                             | 0.850277362          | 3              | 3.358799696           |
| <b>A2AGT5</b>    | <b>CKAP5 Cytoskeleton_associated protein 5</b>                    | <b>0.610215595</b>   | <b>0.00138</b> | <b>2</b>              |
| A2AGT5           | DQVLAMLEKAKANMPSKPAAPAK+Oxidation(14)                             | 0.189192761          | 2              | 2.829661608           |
| A2AGT5           | IGSKENTKEGLAELYEYK                                                | 0.614038165          | 2              | 2.466874123           |
| <b>A2AJL3</b>    | <b>FGGY FGGY carbohydrate kinase domain_containing protein</b>    | <b>1.16276762</b>    | <b>0.01654</b> | <b>2</b>              |
| A2AJL3           | GHGLTCEGQPVTSR                                                    | 1.349709508          | 2              | 3.664535046           |
| A2AJL3           | MSKVGKVVFEHADK                                                    | 1.049487927          | 2              | 2.385738134           |
| <b>A2AL36</b>    | <b>CNTRL Centriolin</b>                                           | <b>1.172972236</b>   | <b>0.42268</b> | <b>3</b>              |
| A2AL36           | NQDKLNK                                                           | 1.160877877          | 1              | 2.169896126           |
| A2AL36           | EQQLDIMNR+Oxidation(7)                                            | 1.194066064          | 2              | 2.332228422           |
| A2AL36           | LQDEKETLLQR                                                       | 1.304018757          | 2              | 2.407828331           |
| <b>A2AQP0</b>    | <b>MYH7B Myosin_7B</b>                                            | <b>0.788335546</b>   | <b>0.71305</b> | <b>6</b>              |
| A2AQP0           | AITDAAMMAEELKK                                                    | 0.755192068          | 2              | 3.50283885            |
| A2AQP0           | DIDDLELTLAK                                                       | 0.605824665          | 2              | 3.550842762           |
| A2AQP0           | EQDTS AHLER                                                       | 0.987867134          | 2              | 2.382186174           |
| A2AQP0           | KDIDDLELTLAK                                                      | 0.955224027          | 2              | 2.325482607           |
| A2AQP0           | SIQELEK                                                           | 1.026368908          | 2              | 2.399574995           |
| A2AQP0           | VGNEYVTK                                                          | 0.88629975           | 2              | 2.621120691           |
| <b>A2ASS6</b>    | <b>TITIN Titin</b>                                                | <b>1.080968309</b>   | <b>0.1702</b>  | <b>11</b>             |

|               |                                                                    |                    |                |             |
|---------------|--------------------------------------------------------------------|--------------------|----------------|-------------|
| A2ASS6        | TFLQDQLVSLQVLK                                                     | 0.950749933        | 1              | 1.93290627  |
| A2ASS6        | AENRFGIGPPAETIQRTTAR                                               | 0.826908809        | 2              | 2.674449682 |
| A2ASS6        | DVLEEPEIDLVALR                                                     | 0.804856236        | 2              | 2.820721626 |
| A2ASS6        | KDLNMVVSAAARISCGGAIR                                               | 0.927074184        | 2              | 2.307215214 |
| A2ASS6        | KGDGTQLACKVTGTPIIK                                                 | 0.442644734        | 2              | 2.727824926 |
| A2ASS6        | SSVLSWSRPKDDGGSR                                                   | 1.006707428        | 2              | 2.343025684 |
| A2ASS6        | TCEIEIGQLK                                                         | 1.126747516        | 2              | 2.455161333 |
| A2ASS6        | VGDDAWIKDTTGTALR                                                   | 1.131864           | 2              | 2.499356985 |
| A2ASS6        | VKNAMPEDIDEYAVEIEGK+Oxidation(5)                                   | 4.470479804        | 2              | 2.342764378 |
| A2ASS6        | VMKLTGEEYQFRIK+Oxidation(2)                                        | 1.206652504        | 2              | 2.345289707 |
| A2ASS6        | YDGGHKLTYIVEK                                                      | 0.551149212        | 2              | 2.302132607 |
| <b>A2VCW9</b> | <b>AASS Alpha_aminoadipic semialdehyde synthase_ mitochondrial</b> | <b>1.148662426</b> | <b>1</b>       | <b>9</b>    |
| A2VCW9        | AGGILQEDITEACLILGVK                                                | 1.196496165        | 2              | 2.619549751 |
| A2VCW9        | AQEANMSLLDEVLK                                                     | 1.064174381        | 2              | 3.045842648 |
| A2VCW9        | GAQEVFNELPCEYVEPELHK                                               | 1.070314865        | 2              | 4.684628487 |
| A2VCW9        | KYDINTVNVTVGK                                                      | 1.1452932          | 2              | 3.977996826 |
| A2VCW9        | REDVNAWER                                                          | 1.187291608        | 2              | 2.788863897 |
| A2VCW9        | SSVVPVEGCPPELPHK                                                   | 0.984896366        | 2              | 3.071965933 |
| A2VCW9        | YDINTVNVTVGK                                                       | 0.982003502        | 2              | 2.778713942 |
| A2VCW9        | KTDGVYDPVEYKYPYR                                                   | 1.143690468        | 3              | 3.688358784 |
| A2VCW9        | LQSLVESQDLVISLLPYVLHPVAK                                           | 1.027365179        | 3              | 3.672071695 |
| <b>A3KMP2</b> | <b>TTC38 Tetratricopeptide repeat protein 38</b>                   | <b>1.193346476</b> | <b>0.15206</b> | <b>2</b>    |
| A3KMP2        | DVGLPLCQALLEAENGNPDR                                               | 1.199728175        | 2              | 2.392767429 |
| A3KMP2        | VLELLPIR                                                           | 0.827878469        | 2              | 2.722713709 |
| <b>A7VJC2</b> | <b>ROA2 Heterogeneous nuclear ribonucleoproteins A2/B1</b>         | <b>1.008284748</b> | <b>0.01073</b> | <b>11</b>   |
| A7VJC2        | NYEQWGK                                                            | 0.969327487        | 1              | 2.369861841 |
| A7VJC2        | EESGKPGAHVTVK                                                      | 1.09431043         | 2              | 3.260646582 |
| A7VJC2        | GGGGNFGPGPGSNFR                                                    | 1.126209151        | 2              | 3.142210484 |
| A7VJC2        | GGNFGFGDSR                                                         | 1.064224507        | 2              | 2.876637459 |
| A7VJC2        | IDTIEIITDR                                                         | 1.022690428        | 2              | 3.887227297 |
| A7VJC2        | LFIGGLSFETTEESLR                                                   | 1.348370676        | 2              | 4.544666767 |
| A7VJC2        | LTDCVVMR                                                           | 1.17576985         | 2              | 2.64514327  |
| A7VJC2        | NMGGPYGGGNYGPGSGGGYGGGR                                            | 1.118034706        | 2              | 5.964814186 |
| A7VJC2        | QEMQEVQSSR                                                         | 1.009424694        | 2              | 3.077036619 |
| A7VJC2        | QEMQEVQSSR+Oxidation(3)                                            | 1.454998232        | 2              | 2.563605547 |
| A7VJC2        | YHTINGHNAEVR                                                       | 1.365446233        | 2              | 3.866345644 |
| <b>B0BN93</b> | <b>PSD13 26S proteasome non_ATPase regulatory subunit 13</b>       | <b>1.118559462</b> | <b>0.87172</b> | <b>2</b>    |
| B0BN93        | GSIDEVDKR                                                          | 1.127265554        | 2              | 2.482929468 |
| B0BN93        | SAWQQPDLAANEALLR                                                   | 1.076886764        | 2              | 3.321202517 |
| <b>B0BNE5</b> | <b>ESTD S_formylglutathione hydrolase</b>                          | <b>1.083868712</b> | <b>0.9999</b>  | <b>8</b>    |
| B0BNE5        | AFNGYLGPDQSK                                                       | 1.00416869         | 2              | 3.686881542 |

|               |                                                                        |                    |                |             |
|---------------|------------------------------------------------------------------------|--------------------|----------------|-------------|
| B0BNE5        | AYDATCLVK                                                              | 1.081487653        | 2              | 2.403613806 |
| B0BNE5        | FAIYLPPQAESAK                                                          | 1.045494249        | 2              | 2.586284637 |
| B0BNE5        | SGCQQAASEHGLVVIAPDTSR                                                  | 1.111794954        | 2              | 5.641798496 |
| B0BNE5        | SVSAFAPICNPVLCPWGK                                                     | 0.98349855         | 2              | 4.66455555  |
| B0BNE5        | VFEHSSVELK                                                             | 1.069165544        | 2              | 2.565324783 |
| B0BNE5        | MYSYVTEELPQLINANFPVDPQR                                                | 0.986580355        | 3              | 5.166892529 |
| B0BNE5        | SYSGPQIDILIDQGGKDFLSNGQLLPDNFIAACTEK                                   | 1.177114046        | 3              | 5.446433544 |
| <b>B0BNN3</b> | <b>CAH1 Carbonic anhydrase 1</b>                                       | <b>1.04007202</b>  | <b>0.97396</b> | <b>3</b>    |
| B0BNN3        | ADGLAIGVLMK                                                            | 0.752056186        | 2              | 2.847889185 |
| B0BNN3        | VLDALSSVK                                                              | 1.037709874        | 2              | 2.403592587 |
| B0BNN3        | HDSSLKPVSVSNPATAK                                                      | 1.050064806        | 3              | 4.797493935 |
| <b>B0K020</b> | <b>CISD1 CDGSH iron_sulfur domain_containing protein 1</b>             | <b>1.053639878</b> | <b>0.05972</b> | <b>2</b>    |
| B0K020        | HNEETGDNVGPLIK                                                         | 1.080300497        | 2              | 5.714765072 |
| B0K020        | VVHAFDMEDLGDK                                                          | 1.087160048        | 2              | 3.651798964 |
| <b>B2GV24</b> | <b>UFL1 E3 UFM1_protein ligase 1</b>                                   | <b>0.966955027</b> | <b>0.38102</b> | <b>3</b>    |
| B2GV24        | QLVSQNK                                                                | 0.452671297        | 1              | 1.919166803 |
| B2GV24        | TYDLPGDFLTQALTQR                                                       | 1.226002944        | 2              | 2.737926483 |
| B2GV24        | VNIVDLQQVINVDLTHIENR                                                   | 1.024285649        | 3              | 4.159801483 |
| <b>B2RX88</b> | <b>CSPP1 Centrosome and spindle pole associated protein 1</b>          | <b>1.398674553</b> | <b>0.00011</b> | <b>2</b>    |
| B2RX88        | SISSVNVDQVRMRNEDR                                                      | 1.439127914        | 2              | 2.558050156 |
| B2RX88        | SISSVNVDQVRMRNEDR+Oxidation(12)                                        | 1.560779148        | 2              | 2.558271646 |
| <b>B2RY56</b> | <b>RBM25 RNA_binding protein 25</b>                                    | <b>0.764257816</b> | <b>0.73931</b> | <b>2</b>    |
| B2RY56        | FEDESDDDVPRKR                                                          | 0.718114528        | 2              | 2.333686113 |
| B2RY56        | LLIYETEA                                                               | 1.015932755        | 2              | 2.499816656 |
| <b>B2RYW9</b> | <b>FAHD2 Fumarylacetoacetate hydrolase domain_containing protein 2</b> | <b>0.977945116</b> | <b>0.86884</b> | <b>4</b>    |
| B2RYW9        | ATDVMAYVAGFTVAHDVSAR                                                   | 1.222841506        | 2              | 3.059402227 |
| B2RYW9        | KGDEVQCEIEELGVIINK                                                     | 0.965474158        | 2              | 5.327217102 |
| B2RYW9        | TFDTFCPLGPALVTK                                                        | 0.84188831         | 2              | 5.067196846 |
| B2RYW9        | VNGEIVQSSNTNQMVFK                                                      | 0.801949518        | 2              | 4.388745308 |
| <b>B2RZ78</b> | <b>VPS29 Vacuolar protein sorting_associated protein 29</b>            | <b>1.148588349</b> | <b>0.0687</b>  | <b>2</b>    |
| B2RZ78        | GDFDESLNYPEQK                                                          | 1.14556445         | 2              | 3.319764853 |
| B2RZ78        | IQHILCTGNLCTK                                                          | 1.307255095        | 2              | 3.306453943 |
| <b>B3DMA2</b> | <b>ACD11 Acyl_CoA dehydrogenase family member 11</b>                   | <b>1.164576498</b> | <b>0.64944</b> | <b>4</b>    |
| B3DMA2        | AVLTVTQYR                                                              | 1.173905812        | 2              | 2.304055214 |
| B3DMA2        | NLPDSDNEECLVHGDFK                                                      | 1.039295686        | 2              | 3.593083382 |
| B3DMA2        | RGQEVLTR                                                               | 0.532494084        | 2              | 2.713801146 |
| B3DMA2        | SGQSNPTFFLQK                                                           | 1.046478726        | 2              | 2.943371058 |
| <b>B5DFC8</b> | <b>EIF3C Eukaryotic translation initiation factor 3 subunit C</b>      | <b>1.242430384</b> | <b>0.01196</b> | <b>4</b>    |
| B5DFC8        | GCILTLVER                                                              | 1.112476461        | 2              | 2.392477751 |
| B5DFC8        | GTEITHAVVIK                                                            | 1.246962659        | 2              | 2.461471319 |

|               |                                                                      |                    |                |             |
|---------------|----------------------------------------------------------------------|--------------------|----------------|-------------|
| B5DFC8        | SEQDQAENEGEDSAVLMER                                                  | 2.429500905        | 2              | 4.687895298 |
| B5DFC8        | TEPTAQQLNALQLAEK                                                     | 1.195895126        | 2              | 4.75485754  |
| <b>D3ZTX0</b> | <b>TMED7 Transmembrane emp24 domain_containing protein 7</b>         | <b>0.759395376</b> | <b>0.00106</b> | <b>2</b>    |
| D3ZTX0        | SVIDYQTHFR                                                           | 1.695068319        | 2              | 2.590851068 |
| D3ZTX0        | VSALTQMESACVSIHEALK                                                  | 0.516780011        | 2              | 2.475839376 |
| <b>D3ZW55</b> | <b>ITPA Inosine triphosphate pyrophosphatase</b>                     | <b>1.027268514</b> | <b>0.96045</b> | <b>3</b>    |
| D3ZW55        | IDLPEYQGEPEDEISIQK                                                   | 0.9785072          | 2              | 4.306489944 |
| D3ZW55        | LQEYFGVTDGAGDH                                                       | 0.862232433        | 2              | 3.208432674 |
| D3ZW55        | KLEEVIIQLGDKFPCTLVAQK                                                | 1.015767506        | 3              | 4.228414536 |
| <b>D3ZZL9</b> | <b>GCC2 GRIP and coiled_coil domain_containing protein 2</b>         | <b>0.982609638</b> | <b>0.1901</b>  | <b>2</b>    |
| D3ZZL9        | IEDLEQEMKIQK                                                         | 0.538646442        | 2              | 2.435746193 |
| D3ZZL9        | MLQETVTKAEELR+Oxidation(1)                                           | 1.147339339        | 2              | 2.374644756 |
| <b>D4A4T9</b> | <b>CHRD1 Cysteine and histidine_rich domain_containing protein 1</b> | <b>1.235665848</b> | <b>0.03644</b> | <b>2</b>    |
| D4A4T9        | KEEDSDEIKIGTSCK                                                      | 1.685960769        | 2              | 2.594999075 |
| D4A4T9        | LSSGNEEDKKEEDSDEIK                                                   | 1.231131041        | 3              | 4.351505756 |
| <b>E9Q557</b> | <b>DESP Desmoplakin</b>                                              | <b>1.111024562</b> | <b>0.98065</b> | <b>2</b>    |
| E9Q557        | KQVQTSQKNLTLR                                                        | 1.124915163        | 1              | 1.99945426  |
| E9Q557        | SQCTQVVQER                                                           | 1.030879929        | 2              | 2.79091239  |
| <b>O08550</b> | <b>MLL4 Histone_lysin N_methyltransferase MLL4</b>                   | <b>1.25547674</b>  | <b>0.07174</b> | <b>2</b>    |
| O08550        | HAAVALGQARAMVPEDVPR                                                  | 1.226129237        | 2              | 2.401769876 |
| O08550        | RGEEGTERMVQALTELLR                                                   | 1.255628962        | 2              | 2.83263135  |
| <b>O08557</b> | <b>DDAH1 N(G)_N(G)_dimethylarginine dimethylaminohydrolase 1</b>     | <b>1.402483228</b> | <b>0.06194</b> | <b>9</b>    |
| O08557        | GAEILADTFK                                                           | 1.175689927        | 1              | 2.139324903 |
| O08557        | DYAVSTVPVADSLHLK                                                     | 1.080853681        | 2              | 3.469610453 |
| O08557        | LKDHLLIPVSNSEMEK                                                     | 1.194686794        | 2              | 3.511649609 |
| O08557        | LTVPDDMAANCIYLNIPSK                                                  | 1.244304489        | 2              | 3.429961443 |
| O08557        | SFCSMAGPNLIAIGSSESAQK                                                | 1.054505439        | 2              | 4.64247942  |
| O08557        | SQGEEVDFAR                                                           | 1.128132026        | 2              | 2.422720671 |
| O08557        | VDGLLTCCSVFINK                                                       | 0.873831689        | 2              | 3.436801195 |
| O08557        | GAEILADTFKDYAVSTVPVADSLHLK                                           | 1.213656406        | 3              | 3.507713556 |
| O08557        | LQLNIVEMKDENATLDGGDVLFTGR                                            | 1.454836969        | 3              | 3.402597666 |
| <b>O08583</b> | <b>THOC4 THO complex subunit 4</b>                                   | <b>1.102239253</b> | <b>0.64635</b> | <b>2</b>    |
| O08583        | QQLSAEELDAQLDAYNAR                                                   | 1.01969946         | 2              | 2.902570248 |
| O08583        | SLGTADVHFER                                                          | 1.109656533        | 2              | 2.398238659 |
| <b>O08601</b> | <b>MTP Microsomal triglyceride transfer protein large subunit</b>    | <b>0.897829566</b> | <b>3.4E-15</b> | <b>11</b>   |
| O08601        | NALLPEGIPLLLK                                                        | 1.645786539        | 1              | 2.748514414 |
| O08601        | EFYSYENEPVGIENLK                                                     | 0.912611565        | 2              | 4.645369053 |
| O08601        | GCPSLAEHWKSIR                                                        | 1.40258143         | 2              | 4.021571636 |
| O08601        | GHTTGSLNNER                                                          | 1.505922499        | 2              | 2.6936059   |
| O08601        | MLSASGDPVSVVK                                                        | 1.241121923        | 2              | 3.71732688  |

|               |                                                            |                    |                |             |
|---------------|------------------------------------------------------------|--------------------|----------------|-------------|
| O08601        | NILLSIGELPK                                                | 1.245345857        | 2              | 4.036984444 |
| O08601        | SDSSIILQER                                                 | 1.356468907        | 2              | 2.403862476 |
| O08601        | SGSSSAYTGYVER                                              | 1.285284847        | 2              | 3.72904706  |
| O08601        | SNLNIFQYIGK                                                | 1.40453061         | 2              | 3.088437796 |
| O08601        | VKEFYSYENEPVGIENLK                                         | 1.315066169        | 2              | 3.447844744 |
| O08601        | REEILQILK                                                  | 1.196248391        | 3              | 3.394383907 |
| <b>O08795</b> | <b>GLU2B Glucosidase 2 subunit beta</b>                    | <b>0.859171733</b> | <b>2.6E-07</b> | <b>6</b>    |
| O08795        | ETVVTSTTEPSR                                               | 0.693991615        | 2              | 2.959150553 |
| O08795        | KLWEEQAAAK                                                 | 1.103979872        | 2              | 3.431666374 |
| O08795        | LWEEQAAAK                                                  | 0.893613482        | 2              | 2.322457075 |
| O08795        | MPPYDEETQAIIDAAQEAR                                        | 0.92924588         | 2              | 5.391526222 |
| O08795        | SLEDQVETLR                                                 | 0.910196023        | 2              | 3.431058645 |
| O08795        | YEQGTGCWQGPNR                                              | 0.995512338        | 2              | 3.907977343 |
| <b>O08874</b> | <b>PKN2 Serine/threonine_protein kinase N2</b>             | <b>1.292875046</b> | <b>0.5501</b>  | <b>3</b>    |
| O08874        | QLDIELK                                                    | 1.330289853        | 1              | 2.359610558 |
| O08874        | ATSVALPGWSPENRSSFMSR                                       | 1.020504982        | 2              | 2.339031458 |
| O08874        | YSLEQRLNELPKNHPK                                           | 0.83246165         | 2              | 2.401260853 |
| <b>O08949</b> | <b>TF2AA Transcription initiation factor IIA subunit 1</b> | <b>1.188832759</b> | <b>0.31777</b> | <b>2</b>    |
| O08949        | DGIMNLNGRDYIFSK+Oxidation(4)                               | 1.238135624        | 2              | 2.59036684  |
| O08949        | MANSANTNTVPK                                               | 0.820005922        | 2              | 2.564783812 |
| <b>O09158</b> | <b>CP3AP Cytochrome P450 3A25</b>                          | <b>0.786720521</b> | <b>0.11199</b> | <b>2</b>    |
| O09158        | DVEINGVFIPK                                                | 0.547302647        | 2              | 2.472405195 |
| O09158        | VDFLQLMMNTQNSK                                             | 0.79296395         | 2              | 2.606653452 |
| <b>O09171</b> | <b>BHMT1 Betaine__homocysteine S_methyltransferase 1</b>   | <b>1.291874985</b> | <b>9.9E-20</b> | <b>13</b>   |
| O09171        | AGAAIVGVNCHFDPSTSLQTIK                                     | 1.323195875        | 2              | 6.022236347 |
| O09171        | AGPWTPEAAVEHPEAVR                                          | 0.819874414        | 2              | 5.192662239 |
| O09171        | AGSNVMQTFTFYASEDKLENR                                      | 0.819018339        | 2              | 4.68469286  |
| O09171        | GAAELMQQK                                                  | 1.202421033        | 2              | 3.500292778 |
| O09171        | GAAELMQQK+Oxidation(6)                                     | 1.362426167        | 2              | 2.782459259 |
| O09171        | IFHQQLVFMK                                                 | 1.376112632        | 2              | 2.882479668 |
| O09171        | QGFIDLPEFPFGLLEPR                                          | 1.124513801        | 2              | 5.17962122  |
| O09171        | QVADEGDALVAGGVSQTPSYLSCK                                   | 1.239878003        | 2              | 6.10487318  |
| O09171        | VNEAACDIAR                                                 | 1.268996074        | 2              | 3.986949444 |
| O09171        | KEYWQNLN                                                   | 1.32158986         | 3              | 3.425658703 |
| O09171        | LNAGEVVIGDGGFVFALEK                                        | 1.321525334        | 3              | 5.90617466  |
| O09171        | TSGKPIAATMCIGPEGDLHGVSPGEC AVR                             | 1.239612031        | 3              | 6.454136372 |
| O09171        | TSGKPIAATMCIGPEGDLHGVSPGEC AVR+Oxidation(10)               | 1.471874359        | 3              | 6.185049534 |
| <b>O09173</b> | <b>HGD Homogentisate 1_2_dioxygenase</b>                   | <b>1.033365517</b> | <b>0.27849</b> | <b>9</b>    |
| O09173        | CFYNSDGDFLIVPQK                                            | 2.096925753        | 2              | 4.164485455 |
| O09173        | FSVDVFEETR                                                 | 1.03335707         | 2              | 3.827785015 |
| O09173        | LLIYTEFGK                                                  | 1.785687383        | 2              | 2.516003132 |
| O09173        | NCMSEFMGLIK                                                | 0.943564961        | 2              | 3.119481087 |

|               |                                                                            |                    |                |             |
|---------------|----------------------------------------------------------------------------|--------------------|----------------|-------------|
| O09173        | QDVSPFNVAWHGNYTPYK                                                         | 1.11193741         | 2              | 3.498546124 |
| O09173        | SLRPGVAIADFVIFPPR                                                          | 1.083909923        | 2              | 3.731158972 |
| O09173        | YISGFGNECASEDPR                                                            | 1.953898747        | 2              | 3.84489727  |
| O09173        | GYILEVYGVHFELPDLPDLPDPIGANLANPR                                            | 1.321286521        | 3              | 5.27784729  |
| O09173        | QGGFLPGGSLHSAMTPHGPADCFEK                                                  | 1.109859811        | 3              | 3.422561407 |
| <b>O35077</b> | <b>GPDA Glycerol_3_phosphate dehydrogenase [NAD_] cytoplasmic</b>          | <b>1.070043069</b> | <b>6.4E-09</b> | <b>17</b>   |
| O35077        | ELHSILQHK                                                                  | 0.874838602        | 1              | 2.705610275 |
| O35077        | ANTIGISLIK                                                                 | 1.093599685        | 2              | 3.11797452  |
| O35077        | FCETTIGCK                                                                  | 1.034894522        | 2              | 2.711673737 |
| O35077        | FCETTIGCKDPAQGQLLK                                                         | 1.148111011        | 2              | 5.040987492 |
| O35077        | GIDEGPNGLK                                                                 | 1.097511406        | 2              | 2.730050802 |
| O35077        | ITVVQEVDTVEICGALK                                                          | 0.985410398        | 2              | 4.912765026 |
| O35077        | IVGSNASQLAHFDPR                                                            | 2.469519107        | 2              | 3.084201336 |
| O35077        | KLTEIINTQHENVK                                                             | 1.190333731        | 2              | 5.200676441 |
| O35077        | LTEIINTQHENVK                                                              | 1.096919753        | 2              | 4.374824524 |
| O35077        | NIVAVGAGFCDLGLFGDNTK                                                       | 0.972501741        | 2              | 4.861309528 |
| O35077        | SIEQLEK                                                                    | 1.026368908        | 2              | 2.465974331 |
| O35077        | VCIVGSGNWGSAIAK                                                            | 1.252932713        | 2              | 4.577895641 |
| O35077        | VTMWVFEEDIGGR                                                              | 1.363130727        | 2              | 3.334704876 |
| O35077        | GLVDKFLFTAVYK                                                              | 0.983800572        | 3              | 3.962428093 |
| O35077        | ICDQLKGHLK                                                                 | 1.170613793        | 3              | 3.337562323 |
| O35077        | LPPNVVAVPDVVQAATGADILVFVPHQFIGK                                            | 0.960180697        | 3              | 4.643340588 |
| O35077        | VCYEQPVGEFICCLQNHPEHM                                                      | 1.009449193        | 3              | 4.406251907 |
| <b>O35078</b> | <b>OXDA D_amino_acid oxidase</b>                                           | <b>1.255083234</b> | <b>0.77425</b> | <b>2</b>    |
| O35078        | GQIIQVEAPWIK                                                               | 1.034996615        | 2              | 3.030266047 |
| O35078        | SCCQLEPTLK                                                                 | 1.487269299        | 2              | 2.745720387 |
| <b>O35094</b> | <b>TIM44 Mitochondrial import inner membrane translocase subunit TIM44</b> | <b>1.090401192</b> | <b>0.49012</b> | <b>3</b>    |
| O35094        | KLEESDALQEAR                                                               | 1.090643249        | 2              | 3.410974503 |
| O35094        | TEMSEVLTEILR                                                               | 0.781855598        | 2              | 2.501097441 |
| O35094        | VTDLLGGLFSK                                                                | 1.106694834        | 2              | 3.512970209 |
| <b>O35142</b> | <b>COPB2 Coatomer subunit beta_</b>                                        | <b>1.146914031</b> | <b>4.1E-05</b> | <b>5</b>    |
| O35142        | AAESLADPTEYENLFPGLK                                                        | 1.148050831        | 2              | 4.130021095 |
| O35142        | FELALQLGELK                                                                | 1.147030433        | 2              | 2.952200651 |
| O35142        | GSNNVALGYDEGSIIVK                                                          | 1.173307219        | 2              | 3.468582392 |
| O35142        | HSEVQQANLK                                                                 | 0.735620047        | 2              | 3.725630522 |
| O35142        | TFEVCCLPVR                                                                 | 1.135036965        | 2              | 2.622041941 |
| <b>O35180</b> | <b>SH3G3 Endophilin_A3</b>                                                 | <b>1.193918262</b> | <b>0.3197</b>  | <b>2</b>    |
| O35180        | AVAEILSK                                                                   | 1.233803843        | 1              | 1.94412601  |
| O35180        | QSTEILQELQNK                                                               | 1.124915163        | 1              | 2.029147863 |
| <b>O35244</b> | <b>PRDX6 Peroxiredoxin_6</b>                                               | <b>1.04810079</b>  | <b>0.94615</b> | <b>9</b>    |
| O35244        | NFDEILR                                                                    | 1.074227625        | 1              | 2.377286673 |
| O35244        | DINAYNGAAPTEK                                                              | 0.9932294          | 2              | 3.968900442 |

|               |                                                                                  |                    |                |             |
|---------------|----------------------------------------------------------------------------------|--------------------|----------------|-------------|
| O35244        | DLAILLGMLDPAEKDEK                                                                | 1.012013569        | 2              | 3.54870677  |
| O35244        | GESVMVLPTLPEEEAK                                                                 | 0.887966812        | 2              | 3.068173647 |
| O35244        | KGESVMVLPTLPEEEAK                                                                | 1.037599701        | 2              | 5.048854828 |
| O35244        | LIALSIDSVEDHFAWSK                                                                | 1.317841269        | 2              | 4.417764187 |
| O35244        | LSILYPATTGR                                                                      | 1.588613371        | 2              | 3.006505966 |
| O35244        | VVDSLQLTASNVPVVDWK                                                               | 1.078360729        | 2              | 6.051705837 |
| O35244        | VVFIFGPDKK                                                                       | 1.140895368        | 2              | 2.492742538 |
| <b>O35469</b> | <b>3BHS6 3 beta_hydroxysteroid dehydrogenase/Delta 5__4_isomerase type 6</b>     | <b>0.847192164</b> | <b>0.50599</b> | <b>2</b>    |
| O35469        | DLGYEPLVSWEEAK                                                                   | 0.782514198        | 2              | 4.267533779 |
| O35469        | TSEWIGTLVEQHR                                                                    | 1.24553296         | 2              | 3.51987648  |
| <b>O35509</b> | <b>RB11B Ras_related protein Rab_11B</b>                                         | <b>0.997127687</b> | <b>0.84537</b> | <b>5</b>    |
| O35509        | NEFNLESK                                                                         | 1.104118771        | 1              | 2.101644278 |
| O35509        | AQIWDTAGQER                                                                      | 1.007383273        | 2              | 2.342137337 |
| O35509        | GAVGALLVYDIAK                                                                    | 0.973923961        | 2              | 3.515868425 |
| O35509        | HLTYENVER                                                                        | 1.286561028        | 2              | 2.543623209 |
| O35509        | VVLIGDSGVGK                                                                      | 1.122947152        | 2              | 2.603195429 |
| <b>O35567</b> | <b>PUR9 Bifunctional purine biosynthesis protein PURH</b>                        | <b>1.128753964</b> | <b>9.7E-06</b> | <b>7</b>    |
| O35567        | ALFEEVPELLTEAEK                                                                  | 1.067642143        | 2              | 2.83424902  |
| O35567        | DGQVIGIGAGQQSR                                                                   | 0.921880002        | 2              | 3.000334501 |
| O35567        | EVSDGIVAPGYEEALK                                                                 | 1.145347112        | 2              | 3.593898296 |
| O35567        | HVSPAGAAVGVPLSEDEAR                                                              | 1.366003867        | 2              | 5.438792706 |
| O35567        | MSSFGDFVALSDVCDVPTAK                                                             | 1.305164844        | 2              | 3.935188293 |
| O35567        | VTVVCEPEDYGAVAAEMQGSGNK                                                          | 1.037359777        | 2              | 5.37996006  |
| O35567        | YTQNSVCIYAK                                                                      | 1.091247243        | 2              | 2.805931568 |
| <b>O35660</b> | <b>GSTM6 Glutathione S_transferase Mu 6</b>                                      | <b>1.125148244</b> | <b>0.73381</b> | <b>2</b>    |
| O35660        | RYAMGDAPDYDR                                                                     | 1.21043435         | 2              | 3.906485796 |
| O35660        | YAMGDAPDYDR+Oxidation(3)                                                         | 1.098243494        | 2              | 2.823656797 |
| <b>O35760</b> | <b>IDI1 Isopentenyl_diphosphate Delta_isomerase 1</b>                            | <b>0.768884636</b> | <b>0.99699</b> | <b>4</b>    |
| O35760        | AELGIPLLEVDLNEMNYLTR                                                             | 0.946155723        | 2              | 3.846392632 |
| O35760        | NCHLNENIDK                                                                       | 0.706395148        | 2              | 2.999662399 |
| O35760        | NVTLNPDNEIK                                                                      | 0.832470424        | 2              | 2.822279692 |
| O35760        | ITFPGCFTNSCCSHPLNNGELEDAMGVK                                                     | 1.028068379        | 3              | 5.499254704 |
| <b>O35763</b> | <b>MOES Moesin</b>                                                               | <b>0.99710329</b>  | <b>0.34677</b> | <b>5</b>    |
| O35763        | ALTSELANAR                                                                       | 1.095553456        | 2              | 2.601706028 |
| O35763        | AQMVQEDLEK                                                                       | 0.92645744         | 2              | 2.36089468  |
| O35763        | AQQELEEQTR                                                                       | 0.787281048        | 2              | 3.201079845 |
| O35763        | IQVWHEEHR                                                                        | 1.208103205        | 2              | 2.4082129   |
| O35763        | TQEQLASEMAELTAR                                                                  | 0.997697413        | 2              | 3.232579947 |
| <b>O35783</b> | <b>CALU Calumenin</b>                                                            | <b>1.055042262</b> | <b>0.82382</b> | <b>2</b>    |
| O35783        | HLVYESDQDKDGK                                                                    | 0.973419572        | 2              | 4.475465775 |
| O35783        | VHNDAQNFYDHDHDAFLGAEAK                                                           | 1.185620754        | 3              | 4.94550848  |
| <b>O35796</b> | <b>C1QBP Complement component 1 Q subcomponent_binding protein_mitochondrial</b> | <b>1.109603522</b> | <b>0.40752</b> | <b>3</b>    |



|               |                                                                                          |                    |                |             |
|---------------|------------------------------------------------------------------------------------------|--------------------|----------------|-------------|
| O35796        | AEEQEPELTSTPNFVVEVTK                                                                     | 1.158394263        | 2              | 4.669938087 |
| O35796        | AFVEFLTDEIKEEK                                                                           | 0.859042726        | 2              | 2.830543518 |
| O35796        | TLVLDCHYPEDEIGHDEAESDIFSIK                                                               | 1.302125109        | 3              | 5.091276169 |
| <b>O35814</b> | <b>STIP1 Stress_induced_phosphoprotein 1</b>                                             | <b>0.87639389</b>  | <b>1.4E-09</b> | <b>8</b>    |
| O35814        | ALDLSSCK                                                                                 | 1.162914819        | 1              | 2.113708735 |
| O35814        | ALSAGNIDDALQCYSEAIK                                                                      | 0.842323437        | 2              | 5.0334692   |
| O35814        | AMADPEVQQIMSDPAMR                                                                        | 0.867294347        | 2              | 4.239911079 |
| O35814        | DCEECIQLEPTFIK                                                                           | 0.972400671        | 2              | 3.949631214 |
| O35814        | ELIEQLQNKPSDLGTK                                                                         | 0.712401849        | 2              | 4.105322838 |
| O35814        | LDPQNHVLYSNR                                                                             | 1.497205565        | 2              | 3.123892069 |
| O35814        | LMDVGLIAIR                                                                               | 1.010263124        | 2              | 3.372227669 |
| O35814        | TVDLKPDWVGK                                                                              | 1.080773632        | 2              | 2.448185682 |
| <b>O35826</b> | <b>GLCNE Bifunctional UDP_N_acetylglucosamine 2_epimerase/N_acetylmannosamine kinase</b> | <b>1.757205914</b> | <b>8.9E-10</b> | <b>9</b>    |
| O35826        | EVGAFGTPVINLGR                                                                           | 1.116583752        | 2              | 2.756300926 |
| O35826        | ILLAGCPSYDK                                                                              | 2.62221061         | 2              | 2.402135134 |
| O35826        | LIQEWNSVDLR                                                                              | 1.471415758        | 2              | 2.369228363 |
| O35826        | MIEQDDFDINTR                                                                             | 1.582048967        | 2              | 2.472289562 |
| O35826        | SIDLQEPLQK                                                                               | 1.605257674        | 2              | 2.535382032 |
| O35826        | TLVLFPNIDAGSK                                                                            | 1.640008139        | 2              | 2.313866377 |
| O35826        | VNPQEGVVLHSTK                                                                            | 1.459104614        | 2              | 2.343410254 |
| O35826        | ILHIEGGEVSGTIDDSIR                                                                       | 1.71682997         | 3              | 4.064212799 |
| O35826        | TPLSDTLHLPVWVDNDGNCAAMAER                                                                | 1.915496597        | 3              | 5.795366764 |
| <b>O35867</b> | <b>NEB1 Neurabin_1</b>                                                                   | <b>1.149104744</b> | <b>0.27283</b> | <b>2</b>    |
| O35867        | DSNSRPSSNKQATDTEEPEK                                                                     | 1.187000696        | 2              | 2.365522623 |
| O35867        | EKAGEAEPQDEWGGSKSNR                                                                      | 0.654316614        | 2              | 2.341050625 |
| <b>O35913</b> | <b>SO1A4 Solute carrier organic anion transporter family member 1A4</b>                  | <b>0.810449555</b> | <b>2.7E-10</b> | <b>6</b>    |
| O35913        | EGLQENVDTENAK                                                                            | 0.60418995         | 2              | 3.444642544 |
| O35913        | ILAGIPAPIYFGALIDR                                                                        | 1.16215173         | 2              | 2.427643061 |
| O35913        | LYLGLPAALR                                                                               | 2.374134862        | 2              | 2.636874199 |
| O35913        | SLSGTYMNSMLTQIER                                                                         | 0.832989382        | 2              | 4.215642452 |
| O35913        | SQTLNPTQDPSECVK                                                                          | 0.874153602        | 2              | 4.295593262 |
| O35913        | TFQFPGDISSK                                                                              | 0.556737846        | 2              | 2.498107195 |
| <b>O35952</b> | <b>GLO2 Hydroxyacylglutathione hydrolase_mitochondrial</b>                               | <b>1.439052482</b> | <b>0.61861</b> | <b>6</b>    |
| O35952        | HVEPGNTAVQEK                                                                             | 1.087946855        | 1              | 3.957814693 |
| O35952        | ALLEVLGR                                                                                 | 1.035028035        | 2              | 2.844345808 |
| O35952        | FYEGTADEMYK                                                                              | 1.501773786        | 2              | 2.756554127 |
| O35952        | NAIGEPTVPSTLAEFTYNPFMR                                                                   | 1.135653           | 2              | 4.058031082 |
| O35952        | TVQQHAGETDPVTMTR                                                                         | 1.073945542        | 2              | 5.594100952 |
| O35952        | LTTVLTHHHWDHAGGNEK                                                                       | 1.562984554        | 3              | 3.722848415 |
| <b>O35987</b> | <b>NSF1C NSF1 cofactor p47</b>                                                           | <b>1.046837458</b> | <b>0.54907</b> | <b>5</b>    |
| O35987        | ASSSILINEAEPPTNIQIR                                                                      | 1.03994172         | 2              | 5.063035011 |

|               |                                                                                           |                    |                |             |
|---------------|-------------------------------------------------------------------------------------------|--------------------|----------------|-------------|
| O35987        | LGAAPPEESAYVAGER                                                                          | 0.993960087        | 2              | 4.04073     |
| O35987        | LGSTAPQVLNTSSPAQAENEAK                                                                    | 1.882332962        | 2              | 3.868021488 |
| O35987        | SYQDPSNAQFLESIR                                                                           | 1.036505858        | 2              | 4.747212887 |
| O35987        | TGFSLDNGDLR                                                                               | 1.124299453        | 2              | 2.703923941 |
| <b>O54975</b> | <b>XPP1 Xaa_Pro aminopeptidase 1</b>                                                      | <b>1.193143981</b> | <b>0.00036</b> | <b>2</b>    |
| O54975        | GSLTFEPLTLVPIQTK                                                                          | 1.316732781        | 2              | 3.941550255 |
| O54975        | IENVVLVPAK                                                                                | 1.211787022        | 2              | 3.244685411 |
| <b>O55012</b> | <b>PICA Phosphatidylinositol_binding clathrin assembly protein</b>                        | <b>0.917662023</b> | <b>6.1E-07</b> | <b>3</b>    |
| O55012        | ATTLNAVSSLASTGLSLTK                                                                       | 1.520318909        | 2              | 4.145849228 |
| O55012        | ITAAQHSVTGSAVSK                                                                           | 1.44164671         | 2              | 4.28246069  |
| O55012        | STNVAVDSGGGLLKPTVASQNQLPVAK                                                               | 0.859378936        | 3              | 4.636709213 |
| <b>O55096</b> | <b>DPP3 Dipeptidyl peptidase 3</b>                                                        | <b>1.132228203</b> | <b>0.07402</b> | <b>4</b>    |
| O55096        | AGLLALEFYTPETANWR                                                                         | 1.129152488        | 2              | 4.286039829 |
| O55096        | LASVLNTEPALDSELTSK                                                                        | 2.312392181        | 2              | 3.780650616 |
| O55096        | SYEFQGNHFQVTR                                                                             | 1.128051466        | 2              | 3.823973417 |
| O55096        | VLLEAGEGLVTPTTGS DGRPDAR                                                                  | 1.075270187        | 3              | 4.272258282 |
| <b>O55125</b> | <b>NIPS1 Protein NipSnap homolog 1</b>                                                    | <b>1.051767418</b> | <b>0.3433</b>  | <b>4</b>    |
| O55125        | AGPNIYELR                                                                                 | 1.020786626        | 2              | 3.018843412 |
| O55125        | FSGGYPALMDCMNK                                                                            | 1.021730643        | 2              | 2.978015423 |
| O55125        | GW DENVYYTVPLVR                                                                           | 0.633145678        | 2              | 3.475094318 |
| O55125        | IQFHNVKPECLDAYNSLTEAVLPK                                                                  | 1.548064663        | 3              | 4.732031345 |
| <b>O55171</b> | <b>ACOT2 Acyl_coenzyme A thioesterase 2_mitochondrial</b>                                 | <b>1.071458374</b> | <b>0.99914</b> | <b>6</b>    |
| O55171        | ADAGGELDLAR                                                                               | 1.122029562        | 2              | 2.949822664 |
| O55171        | DGLLDVVEALQSPVLDK                                                                         | 1.073857694        | 2              | 4.547800541 |
| O55171        | GGELGLAMASFLK                                                                             | 1.097430213        | 2              | 3.554387569 |
| O55171        | IEYFEEAVNYLR                                                                              | 1.10375954         | 2              | 3.315134525 |
| O55171        | SCWDEPLSITVR                                                                              | 1.027201155        | 2              | 3.910436153 |
| O55171        | DVQKPYVVEVLVDGHEPDGGQR                                                                    | 1.040607727        | 3              | 4.010867119 |
| <b>O70127</b> | <b>ABCBB Bile salt export pump</b>                                                        | <b>1.119144161</b> | <b>0.88029</b> | <b>4</b>    |
| O70127        | AGQITSEALS NIR                                                                            | 0.917478275        | 2              | 3.349183798 |
| O70127        | ILLLDEATSALDTESEK                                                                         | 1.17522311         | 2              | 4.49362278  |
| O70127        | ILLDMATSALDNESEAR                                                                         | 0.625849887        | 2              | 3.979476452 |
| O70127        | ILDNLMSVIKPGETTALVGSSGAGK                                                                 | 1.034072615        | 3              | 3.506204844 |
| <b>O70133</b> | <b>DHX9 ATP_dependent RNA helicase A</b>                                                  | <b>1.048676454</b> | <b>0.00835</b> | <b>3</b>    |
| O70133        | ELDALDANDELTP LGR                                                                         | 0.78839257         | 2              | 2.481321335 |
| O70133        | KMTPAYEIRAVGNK                                                                            | 1.063560161        | 2              | 2.406519651 |
| O70133        | TTQVPQYILDDFIQNDR                                                                         | 1.392913763        | 2              | 3.379849195 |
| <b>O70173</b> | <b>P3C2G Phosphatidylinositol_4_phosphate 3_kinase C2 domain_containing subunit gamma</b> | <b>0.852164401</b> | <b>0.50029</b> | <b>2</b>    |
| O70173        | FLGHAQTFGGIKR                                                                             | 1.075051793        | 1              | 1.990355134 |
| O70173        | WTFSHPLEALGLLTSR                                                                          | 0.675487609        | 2              | 2.348977089 |
| <b>O70196</b> | <b>PPCE Prolyl endopeptidase</b>                                                          | <b>1.450188706</b> | <b>2.2E-11</b> | <b>2</b>    |

|               |                                                    |                    |                |             |
|---------------|----------------------------------------------------|--------------------|----------------|-------------|
| O70196        | SDGTETSTNLHQK                                      | 1.450813717        | 2              | 3.228951693 |
| O70196        | VFLDPNTLSDDGTVALR                                  | 1.452772671        | 2              | 3.717586279 |
| <b>O70199</b> | <b>UGDH UDP_glucose 6_dehydrogenase</b>            | <b>1.067950359</b> | <b>0.02005</b> | <b>14</b>   |
| O70199        | EADLVFISVNTPTK                                     | 0.94541935         | 2              | 3.176719904 |
| O70199        | EQIVVDLSHPGVSADDQVSR                               | 1.020087611        | 2              | 5.84453392  |
| O70199        | FSLQDPPNKKPK                                       | 0.979751899        | 2              | 2.466976166 |
| O70199        | IIDSLFNTVTDK                                       | 1.620979695        | 2              | 2.55908823  |
| O70199        | IIDSLFNTVTDKK                                      | 1.414202847        | 2              | 3.175640583 |
| O70199        | ILTTNTWSSELSK                                      | 1.535953758        | 2              | 3.217821836 |
| O70199        | INAWNSPTLPIYEPGLK                                  | 1.53727738         | 2              | 4.287862778 |
| O70199        | NLFFSTNIDDAIR                                      | 0.828396467        | 2              | 3.17403841  |
| O70199        | VLDGLHNELQTIGFQIETIGK                              | 1.037425274        | 2              | 5.184099674 |
| O70199        | VLIGGDETPEGQR                                      | 1.197243784        | 2              | 3.841752768 |
| O70199        | VTVVDVNEAR                                         | 1.104876417        | 2              | 3.446736336 |
| O70199        | YWQQVIDMNDYQR                                      | 0.947866961        | 2              | 4.499551773 |
| O70199        | IFDANTKPNLNLQVLSNPEFLAEGTAIK                       | 1.317065507        | 3              | 6.623196125 |
| O70199        | VLDGLHNELQTIGFQIETIGKK                             | 0.912160665        | 3              | 3.364318848 |
| <b>O70251</b> | <b>EF1B Elongation factor 1_beta</b>               | <b>1.153208081</b> | <b>0.69889</b> | <b>4</b>    |
| O70251        | SIQADGLVWGSSK                                      | 1.161506503        | 2              | 4.078268051 |
| O70251        | SSILLDVKPWDEETDMTK                                 | 0.994685656        | 2              | 4.491770744 |
| O70251        | TPAGLQVLNDYLADK                                    | 1.197970285        | 2              | 4.135920048 |
| O70251        | SSILLDVKPWDEETDMTKLEECVR                           | 1.079313587        | 3              | 5.005930901 |
| <b>O70351</b> | <b>HCD2 3_hydroxyacyl_CoA dehydrogenase type_2</b> | <b>1.166907892</b> | <b>6.9E-09</b> | <b>16</b>   |
| O70351        | GGIVGMTLPIAR                                       | 0.99752082         | 2              | 3.586050749 |
| O70351        | GLVAVITGGASGLGLSTAK                                | 1.065734919        | 2              | 4.469354153 |
| O70351        | IDVAVNCAGIAVAIK                                    | 1.16480889         | 2              | 4.580410004 |
| O70351        | KLGGNCIFAPANVTSEK                                  | 1.34944922         | 2              | 4.976331234 |
| O70351        | KNQVHTLEDFQR                                       | 1.196484029        | 2              | 4.033670425 |
| O70351        | LGGNCIFAPANVTSEK                                   | 1.386136358        | 2              | 3.379862547 |
| O70351        | LVAGVMGQNEPDQGGQR                                  | 1.551249416        | 2              | 5.50302124  |
| O70351        | LVGQGATAVLLDVPNSEGETEAK                            | 2.048671209        | 2              | 5.300712109 |
| O70351        | NFLASQVPPFSR                                       | 1.055029043        | 2              | 4.511791706 |
| O70351        | NQVHTLEDFQR                                        | 1.218974287        | 2              | 3.662584782 |
| O70351        | RLVGQGATAVLLDVPNSEGETEAK                           | 1.181268192        | 2              | 6.089731216 |
| O70351        | VINVNLIPTFNVIR                                     | 1.232649465        | 2              | 4.142115593 |
| O70351        | VVTIAPGLFATPLLTLPDK                                | 1.249205597        | 2              | 4.873594761 |
| O70351        | GVIINTASVAAFEGQVQAAAYSASK                          | 0.584128899        | 3              | 3.997257233 |
| O70351        | LGDPAEYAHLVQMVIENPFLNGEVIR                         | 1.068195994        | 3              | 5.53706646  |
| O70351        | LVGQGATAVLLDVPNSEGETEAKK                           | 1.509050117        | 3              | 3.665767908 |
| <b>O70456</b> | <b>1433S 14_3_3 protein sigma</b>                  | <b>1.447040724</b> | <b>0.00028</b> | <b>3</b>    |
| O70456        | VLSSIEQK                                           | 1.447367681        | 1              | 2.196409464 |
| O70456        | DSTLIMQLLR                                         | 1.058048697        | 2              | 3.697201252 |
| O70456        | NLLSVAYK                                           | 1.054074732        | 2              | 2.309886932 |

|               |                                                                            |                    |                |             |
|---------------|----------------------------------------------------------------------------|--------------------|----------------|-------------|
| <b>O88428</b> | <b>PAPS2 Bifunctional 3__phosphoadenosine 5__phosphosulfate synthase 2</b> | <b>1.125567177</b> | <b>0.05988</b> | <b>8</b>    |
| O88428        | GCTVWLTGLSGAGK                                                             | 1.138945177        | 2              | 3.52943635  |
| O88428        | GFTGIDSDYEKPEKPECVLK                                                       | 1.25023126         | 2              | 4.953738213 |
| O88428        | GIHELFPENK                                                                 | 1.147317047        | 2              | 3.036515951 |
| O88428        | KDLYEPHGGK                                                                 | 1.057396679        | 2              | 2.65147543  |
| O88428        | NLGFSAGDREENIR                                                             | 1.055409378        | 2              | 3.350319386 |
| O88428        | STNVVYQAHVSR                                                               | 1.142826162        | 2              | 2.904532194 |
| O88428        | VLSMAPGLTSVEIIPFR                                                          | 1.482890113        | 2              | 3.412371635 |
| O88428        | IHESAGLPFFEIFVDAPLNICESR                                                   | 0.750837828        | 3              | 4.041903973 |
| <b>O88600</b> | <b>HSP74 Heat shock 70 kDa protein 4</b>                                   | <b>1.054674747</b> | <b>9.2E-09</b> | <b>17</b>   |
| O88600        | AESEEMETSQAGSK                                                             | 1.316843924        | 2              | 4.372684956 |
| O88600        | AFSDPFVEAEK                                                                | 1.04574518         | 2              | 2.856027365 |
| O88600        | AGGIETIANEYSDR                                                             | 0.792107757        | 2              | 3.283239841 |
| O88600        | FQESEERPK                                                                  | 1.282593534        | 2              | 2.710899115 |
| O88600        | FVSEDRNFTLK                                                                | 1.393834824        | 2              | 2.878988743 |
| O88600        | GCALQCAILSPAFAK                                                            | 1.216619061        | 2              | 3.70980835  |
| O88600        | LEDTENWLYEDGEDQPK                                                          | 1.476084555        | 2              | 4.365236282 |
| O88600        | MIMQDKLEK+Oxidation(1)                                                     | 1.09668952         | 2              | 2.363325357 |
| O88600        | NFTTEQVTAMLLSK                                                             | 1.104753022        | 2              | 3.315846205 |
| O88600        | SNLAYDIVQLPTGLTGIK                                                         | 1.590636857        | 2              | 4.916441917 |
| O88600        | SVMDATQIAGLNCLR                                                            | 1.092135969        | 2              | 2.59881258  |
| O88600        | TSTVDLPIESQLLWQLDR                                                         | 1.194835717        | 2              | 3.862757683 |
| O88600        | VLATAFDTTLGGR                                                              | 1.214185083        | 2              | 3.786184788 |
| O88600        | WNSPAEEGSSDCEVFPK                                                          | 1.280709869        | 2              | 4.043489456 |
| O88600        | HAEQNGPVDGQDNPQTAAEHGADTAVPSDGDK                                           | 1.12534742         | 3              | 5.96833849  |
| O88600        | MQVDQEEPHTEEQQPQTPAENK                                                     | 0.869152133        | 3              | 5.138442993 |
| O88600        | NKEDQYEHDAADMTK                                                            | 1.026184595        | 3              | 3.990259409 |
| <b>O88618</b> | <b>FTCD Formimidoyltransferase_cyclodeaminase</b>                          | <b>1.193201433</b> | <b>7.3E-06</b> | <b>21</b>   |
| O88618        | AFAACLGAIK                                                                 | 1.269829185        | 2              | 2.514373779 |
| O88618        | AGEYEALPEK                                                                 | 1.140449561        | 2              | 2.580494404 |
| O88618        | ALLDAAAFYCDK                                                               | 1.458563414        | 2              | 3.888640881 |
| O88618        | ALLDAAAFYCDKEK                                                             | 1.363446106        | 2              | 3.691847086 |
| O88618        | GVSMDECVLCAK                                                               | 1.139397589        | 2              | 3.87451601  |
| O88618        | IIEYLVPSDGPESLLDASLR                                                       | 1.168619708        | 2              | 5.580385208 |
| O88618        | ISSLLQEAK                                                                  | 1.565868264        | 2              | 2.541893005 |
| O88618        | KVQGIGWYLEEK                                                               | 1.274286764        | 2              | 2.787406683 |
| O88618        | LAEELNVPVLYGEEAQMPSR                                                       | 1.142818715        | 2              | 4.737108231 |
| O88618        | LFVLEEEHR                                                                  | 1.371497934        | 2              | 2.92692852  |
| O88618        | LGLDSLAPFDPK                                                               | 1.273673691        | 2              | 3.60929203  |
| O88618        | LIPFFHAASAQLTSLVDADAR                                                      | 1.670213067        | 2              | 3.824771643 |
| O88618        | MGALDVCFIPVR                                                               | 1.096095841        | 2              | 4.078537464 |
| O88618        | MGALDVCFIPVR+Oxidation(1)                                                  | 1.194723383        | 2              | 2.807260513 |

|               |                                                                                   |                    |                |             |
|---------------|-----------------------------------------------------------------------------------|--------------------|----------------|-------------|
| O88618        | QAEWVPDFGPSSFVPSWGATVTGAR                                                         | 1.188199084        | 2              | 3.702193975 |
| O88618        | TCALQEGLR                                                                         | 1.38959046         | 2              | 3.176256657 |
| O88618        | TQAALVLGSLEAR                                                                     | 1.154311656        | 2              | 4.782528877 |
| O88618        | TVYTFVGQPECVVEGALSAAR                                                             | 0.964814316        | 2              | 4.350530148 |
| O88618        | VQGIGWYLEEK                                                                       | 1.254660847        | 2              | 3.240135908 |
| O88618        | EAQELNLPVVGSQLVGLVPLK                                                             | 1.109920353        | 3              | 4.431312561 |
| O88618        | NLAQVSTNLLDFEVTALHTVYEEAR                                                         | 1.55781825         | 3              | 4.034054279 |
| <b>O88637</b> | <b>PCY2 Ethanolamine_phosphate cytidyltransferase</b>                             | <b>1.217458292</b> | <b>0.01822</b> | <b>5</b>    |
| O88637        | HKGPPVFTQEER                                                                      | 1.265195019        | 2              | 2.99806428  |
| O88637        | TEIVPDRDGSDPYEEPK                                                                 | 1.151735971        | 2              | 2.944588661 |
| O88637        | TQGVSTTDLVGR                                                                      | 1.157571423        | 2              | 3.277355194 |
| O88637        | AHSSQEMSSEYR                                                                      | 1.362764392        | 3              | 3.399446487 |
| O88637        | HNCDFCVHGNIDITLTVDGR                                                              | 1.047350319        | 3              | 4.30518198  |
| <b>O88656</b> | <b>ARC1B Actin_related protein 2/3 complex subunit 1B</b>                         | <b>1.374042167</b> | <b>0.47576</b> | <b>2</b>    |
| O88656        | ASSEGAATGAGLDSLHK                                                                 | 1.091835667        | 2              | 4.152938366 |
| O88656        | NSVSQISVLSGGK                                                                     | 2.342397505        | 2              | 2.922357798 |
| <b>O88696</b> | <b>CLPP Putative ATP_dependent Clp protease proteolytic subunit_mitochondrial</b> | <b>0.912474118</b> | <b>0.95752</b> | <b>2</b>    |
| O88696        | GQATDIAIQAEIIMK                                                                   | 1.034270849        | 2              | 2.553423643 |
| O88696        | VLVHPPQDGEDEPELVQK                                                                | 0.912464805        | 3              | 3.972308159 |
| <b>O88735</b> | <b>MAP7 Ensconsin</b>                                                             | <b>1.128902469</b> | <b>0.32252</b> | <b>2</b>    |
| O88735        | KTTEQRNGDIAK                                                                      | 1.190094022        | 2              | 2.507984638 |
| O88735        | TSAGTTDPEEATR                                                                     | 0.907920168        | 2              | 2.385059357 |
| <b>O88761</b> | <b>PSMD1 26S proteasome non_ATPase regulatory subunit 1</b>                       | <b>1.173004731</b> | <b>0.273</b>   | <b>2</b>    |
| O88761        | DTSEIEELVEPVAAHGPK                                                                | 1.165327996        | 2              | 5.098733425 |
| O88761        | TVGTPIASVPGSTNTGTVPGEK                                                            | 1.175439554        | 2              | 3.757750511 |
| <b>O88767</b> | <b>PARK7 Protein DJ_1</b>                                                         | <b>0.980476934</b> | <b>0.89518</b> | <b>8</b>    |
| O88767        | ALVILAK                                                                           | 0.93737361         | 2              | 2.305561781 |
| O88767        | DVVICPDTSLLEAK                                                                    | 0.873023805        | 2              | 3.664283037 |
| O88767        | GAEEMETVIPVDIMR                                                                   | 0.991509148        | 2              | 3.481728315 |
| O88767        | GLIAAICAGPTALLAHEVGFCK                                                            | 0.983717736        | 2              | 4.359347343 |
| O88767        | VEKDGLILSR                                                                        | 0.963178949        | 2              | 2.338358402 |
| O88767        | VTVAGLAGKDPVQCSR                                                                  | 1.21469905         | 2              | 4.362809181 |
| O88767        | KGLIAAICAGPTALLAHEVGFCK                                                           | 1.083214073        | 3              | 5.502694607 |
| O88767        | TQGPYDVVVLPGGNLGAQNLSESALVK                                                       | 0.931026541        | 3              | 5.622874737 |
| <b>O88794</b> | <b>PNPO Pyridoxine_5__phosphate oxidase</b>                                       | <b>0.986955597</b> | <b>0.22727</b> | <b>3</b>    |
| O88794        | KKNEELGQLYR                                                                       | 1.371014845        | 2              | 2.376026392 |
| O88794        | SSQIGAVVSR                                                                        | 0.73364704         | 2              | 2.485803604 |
| O88794        | GLATGDSPLGPMTHHGEEEDWVYER                                                         | 1.022514637        | 3              | 3.564765453 |
| <b>O88813</b> | <b>ACSL5 Long_chain_fatty_acid__CoA ligase 5</b>                                  | <b>1.0705182</b>   | <b>0.1076</b>  | <b>16</b>   |
| O88813        | AILEDLQK                                                                          | 1.141921685        | 1              | 2.208765745 |
| O88813        | FFQTQIK                                                                           | 1.026402581        | 1              | 1.933111548 |
| O88813        | ADISVVICDTPQK                                                                     | 1.096832745        | 2              | 3.111206293 |

|               |                                                                   |                    |                |             |
|---------------|-------------------------------------------------------------------|--------------------|----------------|-------------|
| O88813        | AEYLGSCLLHK                                                       | 1.236329119        | 2              | 2.499963999 |
| O88813        | FLLNLAISK                                                         | 1.301120487        | 2              | 2.986961603 |
| O88813        | GLAVSDNGPCLGYR                                                    | 1.01200377         | 2              | 2.528308868 |
| O88813        | GSFEELCQNQCVK                                                     | 1.055856562        | 2              | 4.732886314 |
| O88813        | IGFFQGDIR                                                         | 1.731453505        | 2              | 3.331885576 |
| O88813        | LMITGAAPISTPVLTFRR                                                | 1.277106089        | 2              | 3.051851273 |
| O88813        | LVQGVIFSCGGK                                                      | 1.19180791         | 2              | 2.888515949 |
| O88813        | SFLIGVVVPDPELPSFAAK                                               | 1.21811974         | 2              | 3.605300665 |
| O88813        | SIFVHPEPFSIENLLTPTLK                                              | 1.657606609        | 2              | 2.852311611 |
| O88813        | TVILMDPFDDDLMK                                                    | 1.033445575        | 2              | 3.288805246 |
| O88813        | GAMLTHQNVSNMAAFLK                                                 | 1.004043845        | 3              | 3.643492937 |
| O88813        | SRPILQVFVHGESLR                                                   | 1.028468223        | 3              | 3.534984589 |
| O88813        | TQEVLDKDGWLHTGDIGR                                                | 1.012901749        | 3              | 3.791064501 |
| <b>O88867</b> | <b>KMO Kynurenine 3_monooxygenase</b>                             | <b>1.084396196</b> | <b>0.99968</b> | <b>5</b>    |
| O88867        | AVGLEDQIVSK                                                       | 1.054363238        | 2              | 2.307790756 |
| O88867        | DFFLLPAQPMISVK                                                    | 1.233418557        | 2              | 2.510764837 |
| O88867        | DITCDLIVGCDGAYSTVR                                                | 1.100465474        | 2              | 2.574083567 |
| O88867        | FNNDLSVCLPEFSR                                                    | 1.01944602         | 2              | 3.96233511  |
| O88867        | NFPDAIPLMGEQALMR                                                  | 0.969513331        | 2              | 3.578394413 |
| <b>O88941</b> | <b>MOGS Mannosyl_oligosaccharide glucosidase</b>                  | <b>1.111973557</b> | <b>0.65526</b> | <b>2</b>    |
| O88941        | ALESHAAAFK                                                        | 1.127354132        | 2              | 2.454850435 |
| O88941        | MDPSLFPPVPLFSGVPSR                                                | 1.103408069        | 2              | 3.09273839  |
| <b>O88986</b> | <b>KBL 2_amino_3_ketobutyrate coenzyme A ligase_mitochondrial</b> | <b>1.160992847</b> | <b>0.70973</b> | <b>4</b>    |
| O88986        | ALDLLMESNAIIQSMAAK+Oxidation(6)                                   | 1.38339901         | 2              | 2.522479773 |
| O88986        | GTDELLGVMDQVTIINSTLGK                                             | 1.022978314        | 2              | 2.616819859 |
| O88986        | MEAAGFTVSGADHPICPVMLGDAR+Oxidation(1)                             | 1.052182874        | 2              | 2.623003721 |
| O88986        | VQISAVHSEEDIDR                                                    | 1.250941088        | 2              | 4.038550377 |
| <b>O88989</b> | <b>MDHC Malate dehydrogenase_cytoplasmic</b>                      | <b>1.138084336</b> | <b>9.9E-20</b> | <b>9</b>    |
| O88989        | EKMDLTAKELTEEK+Oxidation(3)                                       | 1.4029254          | 2              | 2.385555983 |
| O88989        | ELTEEKETAFFLSSA                                                   | 1.237725641        | 2              | 3.732053518 |
| O88989        | EVGVYEALKDSDWLK                                                   | 0.715206286        | 2              | 3.829363585 |
| O88989        | FVEGLPINDFSR                                                      | 0.986658702        | 2              | 3.44061923  |
| O88989        | GEFITTVQQR                                                        | 1.179825095        | 2              | 3.874038935 |
| O88989        | LGVTADDVK                                                         | 1.252904646        | 2              | 2.842994928 |
| O88989        | NVIWGNHSSTQYPDVNHAK                                               | 1.271093873        | 2              | 5.666488647 |
| O88989        | VIVVGNPANTNCLTASK                                                 | 1.212403213        | 2              | 5.565514088 |
| O88989        | DLDVAVLVGSMR                                                      | 0.903895893        | 3              | 3.854241133 |
| <b>O88990</b> | <b>ACTN3 Alpha_actinin_3</b>                                      | <b>0.989304828</b> | <b>0.9993</b>  | <b>4</b>    |
| O88990        | ALDFIASK                                                          | 1.055047173        | 2              | 2.622205973 |
| O88990        | CQLEINFNTLQTK                                                     | 0.993342296        | 2              | 3.582752943 |
| O88990        | FAIQDISVEETSAK                                                    | 1.043013922        | 2              | 3.919304609 |
| O88990        | HEAFESDLAAHQDR                                                    | 0.893737442        | 3              | 3.957798719 |

|               |                                                             |                    |                |             |
|---------------|-------------------------------------------------------------|--------------------|----------------|-------------|
| <b>O88994</b> | <b>MOSC2 MOSC domain_containing protein 2_mitochondrial</b> | <b>1.052379861</b> | <b>0.98589</b> | <b>6</b>    |
| O88994        | QLQQVGTVSK                                                  | 1.096202741        | 1              | 2.284577608 |
| O88994        | CVLTTVDPDTGIIDR                                             | 1.009311931        | 2              | 4.195524216 |
| O88994        | GVSVCETECTDMGLR                                             | 1.018170396        | 2              | 3.428885937 |
| O88994        | RQLQQVGTVSK                                                 | 1.032765084        | 2              | 3.281895161 |
| O88994        | SLYQSSPLFGMYFSVEK                                           | 1.477957413        | 2              | 3.726329327 |
| O88994        | LYPSESYLQNYEVAYPDCSPIHLISEASLVDLNTR                         | 1.190767856        | 3              | 3.743320704 |
| <b>O89000</b> | <b>DPYD Dihydropyrimidine dehydrogenase [NADP_]</b>         | <b>1.068982908</b> | <b>8.8E-07</b> | <b>7</b>    |
| O89000        | EGGADGVTATNTVSGLMGLK                                        | 1.012877335        | 2              | 3.347672701 |
| O89000        | GAVIVLGAGDTAFDCATSALR                                       | 1.38041058         | 2              | 4.819698334 |
| O89000        | GMGLACGQDPELVR                                              | 1.080651449        | 2              | 3.310385466 |
| O89000        | LENNFDDIK                                                   | 1.019149576        | 2              | 2.655248404 |
| O89000        | QEYVGGSTSEIPQFR                                             | 1.295453306        | 2              | 3.574075222 |
| O89000        | TEQDETGNWVEDEEQIVR                                          | 1.245818471        | 2              | 5.078963757 |
| O89000        | TFSLDKDIVTNVSPR                                             | 1.159817999        | 2              | 2.831040382 |
| <b>O89032</b> | <b>SPD2A SH3 and PX domain_containing protein 2A</b>        | <b>1.004346174</b> | <b>0.78623</b> | <b>2</b>    |
| O89032        | DDSDINTSKTGEVSKR                                            | 0.849576685        | 2              | 2.515427828 |
| O89032        | FPIEGGQKDPK                                                 | 1.051565435        | 2              | 2.345448971 |
| <b>O89046</b> | <b>COR1B Coronin_1B</b>                                     | <b>0.530552994</b> | <b>0.01116</b> | <b>4</b>    |
| O89046        | KCEPIVMTVPR                                                 | 0.676319813        | 2              | 2.601777077 |
| O89046        | NDQCYEDIR                                                   | 0.146578374        | 2              | 2.824823141 |
| O89046        | NVLSDSKPAGYSR                                               | 1.22301876         | 2              | 2.927918911 |
| O89046        | SGVSTATAITDIPSGNLAGSGEAGK                                   | 1.130036697        | 2              | 4.232242107 |
| <b>O89049</b> | <b>TRXR1 Thioredoxin reductase 1_cytoplasmic</b>            | <b>0.986403416</b> | <b>0.92599</b> | <b>7</b>    |
| O89049        | IEQIEAGTPGR                                                 | 1.125086622        | 2              | 2.984171152 |
| O89049        | IEQIEAGTPGRLK                                               | 1.161673665        | 2              | 2.361508608 |
| O89049        | LELTPVAIQAGR                                                | 1.03841026         | 2              | 2.811136246 |
| O89049        | STNSEETIEDEFNTVLLAVGR                                       | 1.067720885        | 2              | 2.323794603 |
| O89049        | VMVLDFVTPPLGTR                                              | 1.027791558        | 2              | 2.785917997 |
| O89049        | VVGFHVLGPNAGEVTQGFAAALK                                     | 0.532718482        | 2              | 2.405636787 |
| O89049        | WGLGGTCVNVGCIPIK                                            | 1.07926168         | 2              | 3.565220356 |
| <b>P00173</b> | <b>CYB5 Cytochrome b5</b>                                   | <b>1.045119325</b> | <b>0.9877</b>  | <b>6</b>    |
| P00173        | VYDLTK                                                      | 1.122824885        | 1              | 1.969877243 |
| P00173        | EQAGGDATENFEDVGHSTDR                                        | 1.101211877        | 2              | 5.446107864 |
| P00173        | FLEEHPGGEEVLR                                               | 1.06807341         | 2              | 4.166350365 |
| P00173        | STWVILHHK                                                   | 1.230164841        | 2              | 2.913404942 |
| P00173        | TYIIGELHPDDR                                                | 0.99374542         | 2              | 4.062681675 |
| P00173        | YTTLEEIQK                                                   | 1.043029987        | 2              | 2.887542486 |
| <b>P00388</b> | <b>NCPR NADPH__cytochrome P450 reductase</b>                | <b>1.005888634</b> | <b>0.91776</b> | <b>7</b>    |
| P00388        | GMSADPEEYDLADLSSLPEIDK                                      | 1.142723463        | 2              | 5.095649242 |
| P00388        | RSDEDLYR                                                    | 0.975173941        | 2              | 2.843274117 |
| P00388        | SYENQKPPFDAK                                                | 1.005396049        | 2              | 3.2051301   |

|               |                                                         |                    |                |             |
|---------------|---------------------------------------------------------|--------------------|----------------|-------------|
| P00388        | DVQNTFYDIVAEFGPMEHTQAVDYVK                              | 0.872423622        | 3              | 4.305461407 |
| P00388        | LIHEGGAHIYVCGDAR                                        | 1.314563772        | 3              | 3.844526529 |
| P00388        | TNVLYELAQYASEPSEQEHLHK                                  | 0.843415222        | 3              | 3.614204884 |
| P00388        | VHPNSVHICAVAVEYEAK                                      | 1.077480384        | 3              | 3.569468498 |
| <b>P00406</b> | <b>COX2 Cytochrome c oxidase subunit 2</b>              | <b>1.034709472</b> | <b>0.99823</b> | <b>3</b>    |
| P00406        | ILYMMDEINNPVLTVK                                        | 0.988557935        | 2              | 3.601320982 |
| P00406        | LLEVDNR                                                 | 1.077699381        | 2              | 2.528322935 |
| P00406        | VVLPMEPIR                                               | 1.014007416        | 2              | 2.517837524 |
| <b>P00481</b> | <b>OTC Ornithine carbamoyltransferase_mitochondrial</b> | <b>1.249320859</b> | <b>0.98197</b> | <b>19</b>   |
| P00481        | QSDLILAK                                                | 1.05174755         | 1              | 1.964445233 |
| P00481        | GEYLPLLQ GK                                             | 1.102092986        | 2              | 3.0811553   |
| P00481        | GGNVLITDTWISMGQEDEK                                     | 1.0250244          | 2              | 5.548265934 |
| P00481        | GGNVLITDTWISMGQEDEKK                                    | 1.024000723        | 2              | 4.82241869  |
| P00481        | GYEPDPNIVK                                              | 1.077737678        | 2              | 2.582421303 |
| P00481        | LQAFQGYQVTMK                                            | 1.878171662        | 2              | 4.246646404 |
| P00481        | LQAFQGYQVTMK+Oxidation(11)                              | 1.565886068        | 2              | 2.322446585 |
| P00481        | LSMTNDPLEAAR                                            | 1.29018101         | 2              | 2.910248756 |
| P00481        | QKGEYLPLLQ GK                                           | 1.237463704        | 2              | 3.666311979 |
| P00481        | SLGMIFEK                                                | 1.116724229        | 2              | 2.391788483 |
| P00481        | SLGMIFEK+Oxidation(4)                                   | 0.899821997        | 2              | 2.397035122 |
| P00481        | SLVFPEAENR                                              | 1.050783137        | 2              | 2.674598455 |
| P00481        | SLVFPEAENRK                                             | 1.170409047        | 2              | 2.883150101 |
| P00481        | VLSSMTDAVLAR                                            | 1.251011408        | 2              | 3.833729982 |
| P00481        | VLSSMTDAVLAR+Oxidation(5)                               | 1.14555884         | 2              | 2.686970949 |
| P00481        | YGKPVQSQVQLK                                            | 0.892741765        | 2              | 2.794847965 |
| P00481        | FGMHLQAATPK                                             | 1.220699592        | 3              | 3.646673918 |
| P00481        | GLTLSWIGDGNLHLSIMMSAAK                                  | 1.393431137        | 3              | 4.473722458 |
| P00481        | LSTETGFALLGGHPSFLTQDIHLGVNESLTDAR                       | 1.384814531        | 3              | 7.252273083 |
| <b>P00502</b> | <b>GSTA1 Glutathione S_transferase alpha_1</b>          | <b>0.568317339</b> | <b>0.00156</b> | <b>2</b>    |
| P00502        | FIQSPEDLEK                                              | 0.622446398        | 2              | 2.770030022 |
| P00502        | WLLAAAGVEFDEK                                           | 0.498796539        | 2              | 4.530766964 |
| <b>P00507</b> | <b>AATM Aspartate aminotransferase_mitochondrial</b>    | <b>1.117538423</b> | <b>4.5E-06</b> | <b>19</b>   |
| P00507        | KQWLQEVK                                                | 1.24235527         | 1              | 2.394308805 |
| P00507        | QWLQEVK                                                 | 1.3397754          | 1              | 2.061826468 |
| P00507        | ASAELALGENSEVLK                                         | 1.166672361        | 2              | 4.63685751  |
| P00507        | DAGMQLQGYR                                              | 0.458112277        | 2              | 2.809578657 |
| P00507        | DDNGKPYVLPVSR                                           | 0.980335141        | 2              | 3.283000469 |
| P00507        | EYLPIGGLADFCK                                           | 0.877988847        | 2              | 2.619502306 |
| P00507        | FVTVQTISGTGALR                                          | 1.237511728        | 2              | 4.803735733 |
| P00507        | ISVAGVTSGNVGYLAHAHQVTK                                  | 1.521048523        | 2              | 2.675931931 |
| P00507        | KMNLGVGAYR                                              | 1.161528485        | 2              | 2.545520306 |
| P00507        | MNLGVGAYR                                               | 1.309066959        | 2              | 3.010416746 |
| P00507        | NLDKEYLPIGGLADFCK                                       | 1.122449801        | 2              | 5.871150494 |



|               |                                               |                    |                |             |
|---------------|-----------------------------------------------|--------------------|----------------|-------------|
| P00507        | NMGLYGER                                      | 1.123275791        | 2              | 2.636112928 |
| P00507        | TCGFDFSGALEDISK                               | 1.108527144        | 2              | 5.022319317 |
| P00507        | VGAFTVVK                                      | 1.184967635        | 2              | 3.345834494 |
| P00507        | VGASFLQR                                      | 1.466069893        | 2              | 3.112003326 |
| P00507        | EGSSHNWQHITDQIGMFCFTGLKPEQVER                 | 1.224683457        | 3              | 5.266993046 |
| P00507        | HFIEQGINVCLCQSYAK                             | 1.224956726        | 3              | 5.263133049 |
| P00507        | ILIRPLYSNPPLNGAR                              | 2.869399583        | 3              | 3.353263378 |
| P00507        | IPEQSVLLLHACAHNPTGVDPRPEQWK                   | 0.915846282        | 3              | 4.523588181 |
| <b>P00564</b> | <b>KCRM Creatine kinase M_type</b>            | <b>0.630904694</b> | <b>0.00373</b> | <b>7</b>    |
| P00564        | GGDDLDPNYVLSSR                                | 0.606516181        | 2              | 4.649000168 |
| P00564        | GQSIDDMIPAQK                                  | 0.450488201        | 2              | 2.96390152  |
| P00564        | GTGGVDTAAVGAVFDISNADR                         | 0.571419841        | 2              | 5.905533791 |
| P00564        | LGSSEVEQVQLVVDGVK                             | 0.551706564        | 2              | 4.613338947 |
| P00564        | LSVEALNSLTGEFK                                | 0.653696312        | 2              | 4.163503647 |
| P00564        | RGTGGVDTAAVGAVFDISNADR                        | 0.386626542        | 2              | 4.330402374 |
| P00564        | SMTEQEQQQLIDHFLFKPVSPLLASGMAR                 | 0.597766191        | 3              | 6.314071655 |
| <b>P00787</b> | <b>CATB Cathepsin B</b>                       | <b>1.354124765</b> | <b>9.9E-20</b> | <b>3</b>    |
| P00787        | GENHCGIESEIVAGIPR                             | 1.354885631        | 2              | 4.860041618 |
| P00787        | MCEAGYSTSYKEDK                                | 1.073142186        | 2              | 3.92348814  |
| P00787        | HEAGDVMGGHAIR                                 | 1.171832129        | 3              | 3.965120792 |
| <b>P00884</b> | <b>ALDOB Fructose_bisphosphate aldolase B</b> | <b>1.380489483</b> | <b>9.9E-20</b> | <b>18</b>   |
| P00884        | ELSEIAQR                                      | 0.407830038        | 1              | 1.935182571 |
| P00884        | GIVVGIK                                       | 1.402928907        | 1              | 1.913529992 |
| P00884        | ALQASALAAWGGK                                 | 1.472391299        | 2              | 4.771947384 |
| P00884        | ATQEAFMK                                      | 1.195671467        | 2              | 2.684629679 |
| P00884        | ETTIQGLDGLSER                                 | 0.835929168        | 2              | 3.892059803 |
| P00884        | FPALTSEK                                      | 1.200752697        | 2              | 2.364191294 |
| P00884        | GILAADESVGTMGNR                               | 1.210144113        | 2              | 5.668917179 |
| P00884        | GILAADESVGTMGNR+Oxidation(12)                 | 1.299306654        | 2              | 5.025375843 |
| P00884        | IKVENTEENR                                    | 1.251354727        | 2              | 2.6895051   |
| P00884        | IKVENTEENRR                                   | 1.568095285        | 2              | 2.777957439 |
| P00884        | ISDQCPSLAIQENANALAR                           | 1.38142032         | 2              | 6.619446754 |
| P00884        | KELSEIAQR                                     | 1.306718836        | 2              | 2.615085125 |
| P00884        | LDQGGAPLAGTNK                                 | 1.277308996        | 2              | 4.578846931 |
| P00884        | YTPEQVAMATVTALHR                              | 1.324920157        | 2              | 4.813942909 |
| P00884        | YTPEQVAMATVTALHR+Oxidation(8)                 | 1.355662436        | 2              | 3.666167736 |
| P00884        | KYTPEQVAMATVTALHR                             | 1.358483207        | 3              | 6.198992729 |
| P00884        | KYTPEQVAMATVTALHR+Oxidation(9)                | 1.329488682        | 3              | 3.544509649 |
| P00884        | YASICQQNGLVPIVEVLPDGDHDLHCQYVSEK              | 0.87654109         | 3              | 5.149598122 |
| <b>P01026</b> | <b>CO3 Complement C3</b>                      | <b>1.211184613</b> | <b>2.5E-12</b> | <b>17</b>   |
| P01026        | ACEPGVDYVYK                                   | 1.091999379        | 2              | 2.944654703 |
| P01026        | ADIGCTPGSGK                                   | 1.217400845        | 2              | 2.792225361 |
| P01026        | AFYEHPK                                       | 1.259440388        | 2              | 2.356638432 |

|               |                                             |                    |                |             |
|---------------|---------------------------------------------|--------------------|----------------|-------------|
| P01026        | EYVLPSFEVLVEPTEK                            | 1.167194518        | 2              | 3.434158802 |
| P01026        | IFTVDNLLPVGK                                | 1.269662345        | 2              | 3.388560057 |
| P01026        | IGLQEVEVK                                   | 1.135712305        | 2              | 2.590595484 |
| P01026        | NEQVEIRAVLFNRY                              | 1.171403251        | 2              | 2.314445019 |
| P01026        | QNEGFSLTAK                                  | 1.127791377        | 2              | 2.383964777 |
| P01026        | SDVDEDIPEEDIISR                             | 0.975268189        | 2              | 4.571992397 |
| P01026        | SGSDEVQAGQER                                | 1.31471639         | 2              | 4.130421162 |
| P01026        | TNQGLQTDQR                                  | 1.095957125        | 2              | 2.85435462  |
| P01026        | TVLTGATGHLNR                                | 1.246266583        | 2              | 2.951196671 |
| P01026        | TVVIVIETPDGVPIKR                            | 1.157978489        | 2              | 3.000169039 |
| P01026        | VLIEDGSGEAVLSR                              | 1.236719514        | 2              | 3.827539206 |
| P01026        | RVPVVTQGSDAQALTQDDGVAK                      | 1.239118332        | 3              | 5.303939819 |
| P01026        | TNQGLQTDQREDPECAKPAAR                       | 1.32308041         | 3              | 4.071914196 |
| P01026        | VELKPGDNLNVNFHLR                            | 1.037227669        | 3              | 4.008153915 |
| <b>P01946</b> | <b>HBA Hemoglobin subunit alpha_1/2</b>     | <b>0.744285078</b> | <b>1</b>       | <b>9</b>    |
| P01946        | FLASVSTVLTSK                                | 0.637902154        | 2              | 4.05183506  |
| P01946        | IGGHGGEYGEEALQR                             | 0.766819808        | 2              | 4.977880001 |
| P01946        | LRVDPVNFK                                   | 0.860015815        | 2              | 2.538651943 |
| P01946        | MFAAFPTTK                                   | 0.571101784        | 2              | 3.093313217 |
| P01946        | MFAAFPTTK+Oxidation(1)                      | 0.754462667        | 2              | 2.654871702 |
| P01946        | TYFSHIDVSPGSAQVK                            | 0.666323824        | 2              | 5.215978146 |
| P01946        | AADHVEDLPGALSTLSDLHAHK                      | 0.772370756        | 3              | 7.673351288 |
| P01946        | FLSHCLLVTLACHHPGDFTPAMHASLDK                | 0.660336774        | 4              | 5.808580399 |
| P01946        | FLSHCLLVTLACHHPGDFTPAMHASLDKFLASVSTVLTSK    | 0.816299016        | 4              | 6.229043961 |
| <b>P02089</b> | <b>HBB2 Hemoglobin subunit beta_2</b>       | <b>0.603577299</b> | <b>1</b>       | <b>4</b>    |
| P02089        | GTFASLSELHCDK                               | 0.767987886        | 2              | 3.688642263 |
| P02089        | LHVDPENFR                                   | 0.728339163        | 2              | 2.75852704  |
| P02089        | YFDSFGDLSSASAIMGNPK                         | 0.652667467        | 2              | 6.615319729 |
| P02089        | YFDSFGDLSSASAIMGNPK+Oxidation(15)           | 0.608369755        | 2              | 4.957607269 |
| <b>P02091</b> | <b>HBB1 Hemoglobin subunit beta_1</b>       | <b>0.758574544</b> | <b>1</b>       | <b>9</b>    |
| P02091        | EFTPCAQAAFQK                                | 0.626606948        | 2              | 3.126243353 |
| P02091        | GTFHLSLHCDK                                 | 0.744971218        | 2              | 4.473133087 |
| P02091        | KVINAFNDGLK                                 | 0.706426871        | 2              | 3.701747179 |
| P02091        | LLGNMIVIVLGHHLGK                            | 0.962582923        | 2              | 3.3463974   |
| P02091        | VINAFNDGLK                                  | 0.71954057         | 2              | 3.00209403  |
| P02091        | VNPDDVGEALGR                                | 0.627036339        | 2              | 4.293959141 |
| P02091        | VVAGVASALAHK                                | 0.788361725        | 2              | 3.822754622 |
| P02091        | GTFHLSLHCDKLHVDPENFR                        | 0.767383294        | 3              | 4.592807293 |
| P02091        | LLGNMIVIVLGHHLGKFTPCAQAAFQK                 | 0.648752566        | 3              | 5.415453434 |
| <b>P02401</b> | <b>RLA2 60S acidic ribosomal protein P2</b> | <b>0.946931937</b> | <b>1.8E-14</b> | <b>7</b>    |
| P02401        | VISELNGK                                    | 1.307087985        | 1              | 2.064009905 |
| P02401        | ILDSVGIEADDER                               | 1.106321954        | 2              | 4.60929203  |
| P02401        | ILDSVGIEADDERLNK                            | 1.375225343        | 2              | 3.196656704 |

|               |                                                             |                    |                |             |
|---------------|-------------------------------------------------------------|--------------------|----------------|-------------|
| P02401        | KILDSVGIEADDER                                              | 0.61631914         | 2              | 3.942422867 |
| P02401        | NIEDVIAQGVGK                                                | 1.012520137        | 2              | 4.772317886 |
| P02401        | YVASYLLAALGGNSNPSAK                                         | 1.300307634        | 2              | 5.79398632  |
| P02401        | LASVPAGGAVAVSAAPGSAAPAAGSAPAAAEK                            | 1.394562738        | 3              | 6.558177471 |
| <b>P02564</b> | <b>MYH7 Myosin_7</b>                                        | <b>0.657591345</b> | <b>0.19818</b> | <b>25</b>   |
| P02564        | ANDDLKENIAIVER                                              | 0.564869266        | 2              | 3.362997055 |
| P02564        | DLEEATLQHEATAAALR                                           | 1.0982568          | 2              | 5.402421951 |
| P02564        | EQYEEETEAKE                                                 | 0.671678323        | 2              | 2.504103661 |
| P02564        | GTLEDQIIQANPALEAFGNAK                                       | 0.7245935          | 2              | 5.170654297 |
| P02564        | IEDEQALGSQLQK                                               | 0.546875442        | 2              | 4.073475361 |
| P02564        | IEEEEELEAER                                                 | 0.381833356        | 2              | 4.111586571 |
| P02564        | ILNPAAIPEGQFIDSR                                            | 1.052455554        | 2              | 3.354573011 |
| P02564        | KLAEQELIETSER                                               | 0.819967667        | 2              | 3.976933956 |
| P02564        | KMEGDLNEMEIQLSHANR+Oxidation(2)                             | 1.024797881        | 2              | 2.501081228 |
| P02564        | KVQHELDEAEER                                                | 1.248986437        | 2              | 2.791472197 |
| P02564        | LDEAEQIALK                                                  | 0.589820464        | 2              | 3.369658709 |
| P02564        | LELDDVTSNMEQIIK                                             | 1.030330487        | 2              | 3.493429899 |
| P02564        | LQDAEEAVEAVNAK                                              | 0.565062758        | 2              | 4.711004734 |
| P02564        | LQNEIEDLMVDVER                                              | 0.822019119        | 2              | 3.445061207 |
| P02564        | MDADLSQLQTEVEEAVQECR                                        | 0.875544183        | 2              | 4.805260658 |
| P02564        | NLQEEISDLTEQLGSTGK                                          | 0.728725144        | 2              | 5.673125744 |
| P02564        | NLTEEMAGLDEIIVK                                             | 1.072320671        | 2              | 3.139538288 |
| P02564        | NNLLQAELEELR                                                | 0.631979351        | 2              | 2.861516237 |
| P02564        | QAEEAEEQANTNLSK                                             | 0.967143159        | 2              | 4.78076458  |
| P02564        | QKYEESQSELESSQK                                             | 1.157284001        | 2              | 2.95824337  |
| P02564        | TLEDQMNEHR                                                  | 0.733129014        | 2              | 2.593061209 |
| P02564        | VQLLHSQNTSLINQK                                             | 0.649955503        | 2              | 3.847197294 |
| P02564        | VVDSLQTSLSAETR                                              | 0.673692777        | 2              | 2.727909327 |
| P02564        | ALQEAHQALDDLQAEEDKVNTLTK                                    | 0.524549134        | 3              | 5.485077381 |
| P02564        | QLEAEKLELQSALEEAESLEHEEGK                                   | 0.530538303        | 3              | 4.503925323 |
| <b>P02600</b> | <b>MYL1 Myosin light chain 1/3_ skeletal muscle isoform</b> | <b>0.515090209</b> | <b>0.00112</b> | <b>8</b>    |
| P02600        | ALGTNPTNAEVK                                                | 0.475423112        | 2              | 3.224626541 |
| P02600        | ALGTNPTNAEVKK                                               | 0.485657528        | 2              | 2.720016956 |
| P02600        | DQGGYEDFVEGLR                                               | 0.413358314        | 2              | 3.587915659 |
| P02600        | IEFEQFLPMMQAISNNK                                           | 1.052606097        | 2              | 2.736751795 |
| P02600        | ITLSQVGDVLR                                                 | 0.591606596        | 2              | 3.089337349 |
| P02600        | KIEFEQFLPMMQAISNNK                                          | 0.666226416        | 2              | 5.458103657 |
| P02600        | VLGNPSNEEMNAK                                               | 0.419097318        | 2              | 3.849383593 |
| P02600        | VLGNPSNEEMNAK+Oxidation(10)                                 | 0.855528682        | 2              | 2.573149681 |
| <b>P02625</b> | <b>PRVA Parvalbumin alpha</b>                               | <b>0.750835726</b> | <b>0.31735</b> | <b>4</b>    |
| P02625        | AIGAFTAADSFHKK                                              | 0.218047624        | 2              | 3.911603212 |
| P02625        | SGFIEEDELGSILK                                              | 1.009790686        | 2              | 2.851767778 |
| P02625        | TLMAAGDKDGDGK                                               | 0.85860526         | 2              | 3.179671288 |

|               |                                               |                    |                |             |
|---------------|-----------------------------------------------|--------------------|----------------|-------------|
| P02625        | TLMAAGDKDGDGK+Oxidation(3)                    | 0.317242421        | 2              | 3.359597206 |
| <b>P02650</b> | <b>APOE Apolipoprotein E</b>                  | <b>1.311608661</b> | <b>0.6047</b>  | <b>13</b>   |
| P02650        | ELEEQLGPVAEETR                                | 0.971810118        | 2              | 4.331418037 |
| P02650        | GRLEEVGNQAR                                   | 1.12246003         | 2              | 3.700950384 |
| P02650        | GWFEPLVEDMQR                                  | 1.201401613        | 2              | 3.239335775 |
| P02650        | LEEVGNQAR                                     | 1.049550946        | 2              | 2.56681776  |
| P02650        | LGADMEDLR                                     | 1.104729784        | 2              | 3.03110671  |
| P02650        | LGPLVEQGR                                     | 1.18814855         | 2              | 2.309450865 |
| P02650        | LQAEIFQAR                                     | 1.369995936        | 2              | 2.711163044 |
| P02650        | MEEQTQQIR                                     | 0.759033101        | 2              | 3.238872528 |
| P02650        | MEEQTQQIR+Oxidation(1)                        | 1.172441212        | 2              | 2.876990795 |
| P02650        | NEVNTMLGQSTEELR                               | 1.035038613        | 2              | 4.490174294 |
| P02650        | SKMEEQTQQIR                                   | 1.090242481        | 2              | 3.2987957   |
| P02650        | SKMEEQTQQIR+Oxidation(3)                      | 1.528990168        | 2              | 3.560912132 |
| P02650        | TANLGAGAAQPLR                                 | 0.974673889        | 2              | 2.37243557  |
| <b>P02680</b> | <b>FIBG Fibrinogen gamma chain</b>            | <b>1.184636828</b> | <b>0.91405</b> | <b>3</b>    |
| P02680        | VGPESDKYR                                     | 1.162196203        | 2              | 2.592888117 |
| P02680        | YEALLTHESSIR                                  | 1.106709534        | 2              | 3.71654582  |
| P02680        | YLQDIYTSNK                                    | 1.078174337        | 2              | 2.785181999 |
| <b>P02692</b> | <b>FABPL Fatty acid_binding protein_liver</b> | <b>1.080191951</b> | <b>9.9E-20</b> | <b>13</b>   |
| P02692        | MVTTFK                                        | 1.180588936        | 1              | 1.913039923 |
| P02692        | MVTTFK+Oxidation(1)                           | 1.465288859        | 1              | 2.022849083 |
| P02692        | AMGLPEDLIQK                                   | 1.145505835        | 2              | 3.633579254 |
| P02692        | AMGLPEDLIQK+Oxidation(2)                      | 1.266888278        | 2              | 3.373602867 |
| P02692        | GVSEIVHEGK                                    | 1.192246681        | 2              | 3.492818117 |
| P02692        | GVSEIVHEGKK                                   | 1.215989028        | 2              | 3.327571154 |
| P02692        | SVTEFNGDTITNTMTLGDIVYK                        | 1.247193376        | 2              | 5.653516293 |
| P02692        | SVTEFNGDTITNTMTLGDIVYK+Oxidation(14)          | 1.076583906        | 2              | 5.642945766 |
| P02692        | SVTEFNGDTITNTMTLGDIVYKR                       | 1.366411255        | 2              | 3.735480309 |
| P02692        | YQVQSQENFEPFMK                                | 1.247666649        | 2              | 6.053904533 |
| P02692        | YQVQSQENFEPFMK+Oxidation(13)                  | 1.359652031        | 2              | 5.280806541 |
| P02692        | VIHNEFTLGEECELETMTGEK                         | 1.240152039        | 3              | 6.306419849 |
| P02692        | VIHNEFTLGEECELETMTGEK+Oxidation(17)           | 1.271776045        | 3              | 5.510181904 |
| <b>P02696</b> | <b>RET1 Retinol_binding protein 1</b>         | <b>1.195343103</b> | <b>0.99866</b> | <b>8</b>    |
| P02696        | ALDVNVALR                                     | 1.085862948        | 2              | 3.277495623 |
| P02696        | CMTTVSWDGDKLQCVQK                             | 1.072905199        | 2              | 4.543385029 |
| P02696        | EFEEDLTGIDDR                                  | 0.966497599        | 2              | 2.343901157 |
| P02696        | EFEEDLTGIDDRK                                 | 1.04065049         | 2              | 2.752989054 |
| P02696        | GWTQWIEGDELHLEMR                              | 1.075061789        | 2              | 4.309483051 |
| P02696        | MLSNENFEEYLR                                  | 1.10852486         | 2              | 3.630520821 |
| P02696        | MLSNENFEEYLR+Oxidation(1)                     | 1.427743388        | 2              | 2.969955683 |
| P02696        | NYIMDFQVGKEFEEDLTGIDDRK                       | 1.135349408        | 3              | 3.465123177 |
| <b>P02706</b> | <b>ASGR1 Asialoglycoprotein receptor 1</b>    | <b>1.032277483</b> | <b>0.9487</b>  | <b>6</b>    |

|               |                                      |                    |                |             |
|---------------|--------------------------------------|--------------------|----------------|-------------|
| P02706        | LVESQLEK                             | 1.015507205        | 1              | 2.067113876 |
| P02706        | QLVSDVR                              | 0.452671297        | 1              | 2.070900679 |
| P02706        | SLSCQMAALR                           | 0.923197654        | 2              | 3.051878691 |
| P02706        | WVCETELGK                            | 1.008541784        | 2              | 2.362579584 |
| P02706        | WVDGTDYETGFK                         | 1.050998173        | 2              | 3.464968681 |
| P02706        | DYQDFQHLDNENDHHQLQR                  | 1.173156747        | 3              | 3.414072037 |
| <b>P02770</b> | <b>ALBU Serum albumin</b>            | <b>1.251425171</b> | <b>1</b>       | <b>27</b>   |
| P02770        | SIHTLFGDK                            | 0.514475916        | 1              | 2.283918619 |
| P02770        | AADKDNCFATEGPNLVAR                   | 0.770237081        | 2              | 4.928193569 |
| P02770        | AETFTFHSDICTLPDKEK                   | 1.193869577        | 2              | 3.745814562 |
| P02770        | CCSGSLVER                            | 0.736407423        | 2              | 3.231502295 |
| P02770        | CCTLPEAQR                            | 0.895371044        | 2              | 2.773377895 |
| P02770        | DLGEQHFK                             | 0.7582788          | 2              | 2.309936047 |
| P02770        | DNCFATEGPNLVAR                       | 0.629476222        | 2              | 3.363330841 |
| P02770        | DNYGELADCCAK                         | 0.174535981        | 2              | 3.366791725 |
| P02770        | ECCHGDLLECADDR                       | 0.91596082         | 2              | 3.936957836 |
| P02770        | ECCHGDLLECADDRAELAK                  | 1.069564073        | 2              | 5.328629017 |
| P02770        | GLVLIAFSQYLQK                        | 0.97503866         | 2              | 4.08360672  |
| P02770        | KYEATLEK                             | 1.091602341        | 2              | 2.693745852 |
| P02770        | LQACCDKPVLQK                         | 1.173216048        | 2              | 4.277095318 |
| P02770        | LRDNYGELADCCAK                       | 0.375980221        | 2              | 3.34416151  |
| P02770        | LVQEVTDFAK                           | 1.113955797        | 2              | 3.708904505 |
| P02770        | QEPERNECFLQHK                        | 0.231377929        | 2              | 2.355108976 |
| P02770        | TCVADENAENCDK                        | 1.013594602        | 2              | 4.645998478 |
| P02770        | TNCELYEK                             | 1.089449344        | 2              | 2.821719646 |
| P02770        | TVMGDFFAQFVDK                        | 0.701924264        | 2              | 4.271928787 |
| P02770        | YMCENQATISSK                         | 1.026436545        | 2              | 4.414502621 |
| P02770        | YMCENQATISSK+Oxidation(2)            | 0.988624156        | 2              | 3.68944335  |
| P02770        | YNEVLTQCCTESDK                       | 0.847958769        | 2              | 5.734190464 |
| P02770        | CCAEGDPPACYGTVLAEFQPLVEEPK           | 0.943675023        | 3              | 5.322396278 |
| P02770        | FKDLGEQHFK                           | 1.124087356        | 3              | 4.180323124 |
| P02770        | INKECCHGDLLECADDRAELAK               | 1.156711545        | 3              | 5.444173336 |
| P02770        | KQTALAELVK                           | 1.111171881        | 3              | 4.126062393 |
| P02770        | RHPDYSVSLLR                          | 1.124569026        | 3              | 4.809328079 |
| <b>P02803</b> | <b>MT1 Metallothionein_1</b>         | <b>1.115660231</b> | <b>0.63007</b> | <b>2</b>    |
| <b>P04041</b> | <b>GPX1 Glutathione peroxidase 1</b> | <b>1.103298015</b> | <b>0.00096</b> | <b>10</b>   |
| P04041        | FLVGPDGVPVR                          | 1.039460243        | 2              | 3.246809483 |
| P04041        | FLVGPDGVPVRR                         | 1.237142116        | 2              | 2.319866896 |
| P04041        | GLVVLGFPCNQFGHQENK                   | 1.300606658        | 2              | 4.285676956 |
| P04041        | NALPAPSDDPTALMTDPK                   | 0.994902074        | 2              | 3.474921227 |
| P04041        | NDISWNFEK                            | 1.03850122         | 2              | 2.904446125 |
| P04041        | NEEILNSLK                            | 1.046113352        | 2              | 2.541545153 |
| P04041        | YIIWSPVCR                            | 1.086119585        | 2              | 2.936386824 |

|               |                                                        |                    |                |             |
|---------------|--------------------------------------------------------|--------------------|----------------|-------------|
| P04041        | YVRPGGGFEPNFTLFEK                                      | 1.272024374        | 2              | 4.581185818 |
| P04041        | GLVVLGFPNCQFGHQENKNEEILNSLK                            | 0.975957461        | 3              | 4.329761028 |
| P04041        | TIDIEPDIEALLSK                                         | 1.269373932        | 3              | 4.279593945 |
| <b>P04167</b> | <b>CP2B2 Cytochrome P450 2B2</b>                       | <b>1.063281012</b> | <b>0.9998</b>  | <b>2</b>    |
| P04167        | GTIAVIEPIFK                                            | 1.104070483        | 2              | 2.560103416 |
| P04167        | NLQEILDYIGHIVEK                                        | 1.063279543        | 2              | 4.228871822 |
| <b>P04176</b> | <b>PH4H Phenylalanine_4_hydroxylase</b>                | <b>0.937537473</b> | <b>6.3E-07</b> | <b>16</b>   |
| P04176        | AYGAGLLSSFGEQLYCLSDPKK                                 | 0.664512609        | 2              | 4.140900135 |
| P04176        | LRPVAGLLSSR                                            | 3.20996589         | 2              | 2.711697578 |
| P04176        | NDIGATVHELRS                                           | 1.12991262         | 2              | 3.75592804  |
| P04176        | QFADIAYNYR                                             | 0.870283808        | 2              | 2.815701008 |
| P04176        | SFAQFSQEIGLASLGAPDEYIEK                                | 0.704954797        | 2              | 4.825675011 |
| P04176        | VEVDNTQQLK                                             | 0.99015647         | 2              | 3.84534359  |
| P04176        | VEYTEEEK                                               | 1.011297439        | 2              | 2.696576834 |
| P04176        | VEYTEEEKQTWGTVFR                                       | 1.11278363         | 2              | 4.336387634 |
| P04176        | EDNIPQLEDVSQLTCTGFR                                    | 0.950378335        | 3              | 4.727074146 |
| P04176        | FANQILSYGAELDADHPGFK                                   | 0.598734663        | 3              | 3.979325771 |
| P04176        | FANQILSYGAELDADHPGFKDPVYR                              | 0.849419906        | 3              | 5.362295151 |
| P04176        | ILADSINSEVGILCNALQK                                    | 1.245975797        | 3              | 6.608252525 |
| P04176        | LNKDEYEFFTYLDRK                                        | 2.947870696        | 3              | 3.605403185 |
| P04176        | TACQEYSVTEFQPLYVAESFSDAK                               | 0.689789147        | 3              | 3.692085981 |
| P04176        | THACYEHNHIFLLEK                                        | 1.206492276        | 3              | 4.730014801 |
| P04176        | YCGFREDNIPQLEDVSQLTCTGFR                               | 1.019314913        | 3              | 5.301527023 |
| <b>P04182</b> | <b>OAT Ornithine aminotransferase_ mitochondrial</b>   | <b>0.646576773</b> | <b>1.6E-05</b> | <b>9</b>    |
| P04182        | AFYNNVLGEYEEYITK                                       | 0.6374993          | 2              | 4.485980988 |
| P04182        | GIYMWDVEGR                                             | 0.775769464        | 2              | 2.718210936 |
| P04182        | GLLNAIVIR                                              | 0.651878438        | 2              | 3.141702414 |
| P04182        | HQVLFIADEIQTGLAR                                       | 0.465140923        | 2              | 4.04962492  |
| P04182        | IIEAMKSQVDK                                            | 0.826793359        | 2              | 2.332972288 |
| P04182        | KTEQGPPSSEYIFER                                        | 0.744418093        | 2              | 3.922631025 |
| P04182        | TEQGPPSSEYIFER                                         | 0.637218944        | 2              | 4.121782303 |
| P04182        | VLPMNTGVEAGETACK                                       | 0.674235425        | 2              | 3.984940052 |
| P04182        | WLAVDHENVRPDIVLLGK                                     | 0.407961262        | 2              | 4.935504913 |
| <b>P04256</b> | <b>ROA1 Heterogeneous nuclear ribonucleoprotein A1</b> | <b>1.217203735</b> | <b>0.64316</b> | <b>4</b>    |
| P04256        | EDSQRPGAHLTVK                                          | 1.110551149        | 2              | 3.220856905 |
| P04256        | IEVIEIMTDR                                             | 1.109826916        | 2              | 3.135530233 |
| P04256        | NQGGYGGSSSSSYGSGR                                      | 1.182740332        | 2              | 4.731561184 |
| P04256        | YHTVNGHNCEVR                                           | 1.263368261        | 2              | 3.317225933 |
| <b>P04276</b> | <b>VTDB Vitamin D_binding protein</b>                  | <b>1.245975973</b> | <b>9.9E-20</b> | <b>2</b>    |
| P04276        | SCESDAPFPVHPGTSECCCK                                   | 1.369275257        | 2              | 4.741000652 |
| P04276        | YCSSQIDAEMR                                            | 0.930636291        | 2              | 2.875705004 |
| <b>P04355</b> | <b>MT2 Metallothionein_2</b>                           | <b>1.086785687</b> | <b>0.3197</b>  | <b>2</b>    |
| <b>P04462</b> | <b>MYH8 Myosin_8 (Fragment)</b>                        | <b>0.716677171</b> | <b>0.33934</b> | <b>3</b>    |

|               |                                                                      |                    |                |             |
|---------------|----------------------------------------------------------------------|--------------------|----------------|-------------|
| P04462        | LQHELEEAER                                                           | 0.691988434        | 2              | 3.649016142 |
| P04462        | RAALQAEIEELR                                                         | 0.505889478        | 2              | 3.875791788 |
| P04462        | KLQHELEEAER                                                          | 0.633278158        | 3              | 3.893842459 |
| <b>P04466</b> | <b>MLRS Myosin regulatory light chain 2_ skeletal muscle isoform</b> | <b>0.548578003</b> | <b>0.2343</b>  | <b>7</b>    |
| P04466        | AAAEGSSNVFSMFDQTQIQEFK                                               | 0.809587482        | 2              | 4.493775845 |
| P04466        | GADPEDVITGAFK                                                        | 0.774778398        | 2              | 3.849882364 |
| P04466        | KQFLEELLTQCDR                                                        | 0.749920015        | 2              | 4.107820034 |
| P04466        | NICYVITHGDAKDQE                                                      | 0.459996564        | 2              | 4.703526497 |
| P04466        | NMWAAFPPDVGGNVQDYK                                                   | 0.475450733        | 2              | 3.095844746 |
| P04466        | QFLEELLTQCDR                                                         | 0.62734394         | 2              | 3.777317047 |
| P04466        | LKGADPEDVITGAFK                                                      | 0.712503121        | 3              | 4.462659359 |
| <b>P04550</b> | <b>PTMS Parathyrosin</b>                                             | <b>0.92474017</b>  | <b>1.1E-12</b> | <b>4</b>    |
| P04550        | SVEAAAELSAK                                                          | 0.834999105        | 2              | 3.644512892 |
| P04550        | TAEEDDEADPK                                                          | 0.864635517        | 2              | 3.32467556  |
| P04550        | TAEEDDEADPKR                                                         | 1.172091225        | 2              | 3.700356007 |
| P04550        | RTAEEDDEADPKR                                                        | 1.090210001        | 3              | 4.034061432 |
| <b>P04636</b> | <b>MDHM Malate dehydrogenase_ mitochondrial</b>                      | <b>0.935916353</b> | <b>9.9E-20</b> | <b>16</b>   |
| P04636        | EGVIECSFVQSK                                                         | 0.506119646        | 1              | 3.036523104 |
| P04636        | AGAGSATLSMAYAGAR                                                     | 1.013022436        | 2              | 4.657131672 |
| P04636        | ANTFVAELK                                                            | 1.107787353        | 2              | 2.778107643 |
| P04636        | ETECTYFSTPLLLGK                                                      | 0.387408366        | 2              | 3.503462315 |
| P04636        | FVFLVDAMNGK                                                          | 1.192528529        | 2              | 4.426695824 |
| P04636        | GCDVVVIPAGVPR                                                        | 1.08844629         | 2              | 4.370471001 |
| P04636        | GylGPEQLPDCLK                                                        | 1.09262132         | 2              | 4.126103401 |
| P04636        | IFGVTTLDIVR                                                          | 1.397644158        | 2              | 3.60158062  |
| P04636        | IQEAGTEVVK                                                           | 1.05959094         | 2              | 2.880748272 |
| P04636        | MIAEAIPELK                                                           | 0.905070301        | 2              | 3.211016655 |
| P04636        | MIAEAIPELK+Oxidation(1)                                              | 1.33580916         | 2              | 2.539983034 |
| P04636        | TIIP LISQCTPK                                                        | 1.045307628        | 2              | 3.511655331 |
| P04636        | VAVLGASGGIGQPLSLLLK                                                  | 0.981110586        | 2              | 6.118106365 |
| P04636        | VDFPQDQLATLTGR                                                       | 1.071322075        | 2              | 4.869530678 |
| P04636        | VNVPVIGGHAGK                                                         | 1.050838653        | 2              | 3.210429192 |
| P04636        | LTLYDIAHTPGVAADLSHIETR                                               | 1.290802284        | 3              | 7.018770218 |
| <b>P04639</b> | <b>APOA1 Apolipoprotein A_I</b>                                      | <b>0.927719214</b> | <b>1</b>       | <b>6</b>    |
| P04639        | AKPALDDLGGQLMPVLEAWK                                                 | 1.004097593        | 2              | 3.742036819 |
| P04639        | LQEQLGPVTQEFWANLEK                                                   | 1.002559275        | 2              | 4.89842701  |
| P04639        | NEMNKDLENVK                                                          | 1.047590612        | 2              | 3.4349823   |
| P04639        | QLNLNLLDNWDTLGSTVGR                                                  | 0.852118563        | 2              | 4.502742767 |
| P04639        | VKDFATVYVDAVK                                                        | 1.143778999        | 2              | 3.111225128 |
| P04639        | WNEEVEAYR                                                            | 0.897651633        | 2              | 2.370805979 |
| <b>P04642</b> | <b>LDHA L_lactate dehydrogenase A chain</b>                          | <b>1.036845798</b> | <b>4E-10</b>   | <b>22</b>   |
| P04642        | NVNIFK                                                               | 1.198959336        | 1              | 2.087940931 |

|               |                                       |                    |                |             |
|---------------|---------------------------------------|--------------------|----------------|-------------|
| P04642        | DLADELALVDVIEDK                       | 1.08301851         | 2              | 5.479312897 |
| P04642        | DLADELALVDVIEDKLK                     | 1.369467798        | 2              | 4.615240097 |
| P04642        | DQLIVNLLK                             | 0.886385821        | 2              | 2.945695877 |
| P04642        | DQLIVNLLKEEQVPQNK                     | 1.199687124        | 2              | 4.867084026 |
| P04642        | EDVFLSVPCILGQNGISDVVK                 | 1.124801154        | 2              | 4.798501492 |
| P04642        | FIIPNVVK                              | 1.107478758        | 2              | 2.394251108 |
| P04642        | GEMMDLQHGSFLK                         | 1.268245514        | 2              | 3.855429649 |
| P04642        | GEMMDLQHGSFLK+Oxidation(3)            | 1.368909505        | 2              | 3.452834368 |
| P04642        | GEMMDLQHGSFLK+Oxidation(4)            | 1.364676234        | 2              | 3.147318602 |
| P04642        | KSADTLWGIQK                           | 1.172786851        | 2              | 3.09570241  |
| P04642        | LKGEMMDLQHGSFLK                       | 1.336645435        | 2              | 3.999520063 |
| P04642        | LLIVSNPVDILTYVAWK                     | 1.308397954        | 2              | 4.876182556 |
| P04642        | QVVD SAYEVIK                          | 1.102782304        | 2              | 3.119016409 |
| P04642        | RVHPISTMIK                            | 1.022188096        | 2              | 2.372539759 |
| P04642        | SADTLWGIQK                            | 1.122018735        | 2              | 3.940787554 |
| P04642        | SLNPQLGTDADK                          | 0.938588084        | 2              | 2.674868107 |
| P04642        | SLNPQLGTDADKEQWK                      | 1.09051496         | 2              | 4.840538979 |
| P04642        | SLNPQLGTDADKEQWKDVHK                  | 1.281692959        | 2              | 4.680558205 |
| P04642        | VTLTPDEEAR                            | 1.103414475        | 2              | 2.928517342 |
| P04642        | GLYGIKEDVFLSVPCILGQNGISDVVK           | 1.684702313        | 3              | 3.354486704 |
| P04642        | LGVHPLSCHGWVLGEHGSSVPVWVG VNVAGVSLK   | 1.720537067        | 3              | 5.727637768 |
| <b>P04644</b> | <b>RS17 40S ribosomal protein S17</b> | <b>1.195611068</b> | <b>1.2E-05</b> | <b>4</b>    |
| P04644        | DNYVPEVSALDQEIIEVDPDTK                | 1.04192164         | 2              | 4.33566761  |
| P04644        | LGNDFHTNK                             | 1.202883584        | 2              | 2.923883677 |
| P04644        | LLDFGSLSNLQVTQPTVGMNFK                | 1.462003044        | 2              | 4.119847298 |
| P04644        | VCEEIAIPSK                            | 1.019111041        | 2              | 3.114224672 |
| <b>P04692</b> | <b>TPM1 Tropomyosin alpha_1 chain</b> | <b>0.792348045</b> | <b>0.26906</b> | <b>10</b>   |
| P04692        | AISELDHALNDMTSI                       | 0.596156402        | 2              | 2.627863169 |
| P04692        | AQKDEEKMEIQEIQLK                      | 0.82169778         | 2              | 3.851212263 |
| P04692        | GTEDELDKYSEALK                        | 1.17039542         | 2              | 2.308058023 |
| P04692        | KLVIIESDLER                           | 0.767737808        | 2              | 3.653575182 |
| P04692        | LDKENALDR                             | 0.84612377         | 2              | 2.389130354 |
| P04692        | LKGTEDELDK                            | 0.64839868         | 2              | 2.621469021 |
| P04692        | LVIIESDLER                            | 0.707298989        | 2              | 3.233721972 |
| P04692        | MEIQEIQLK                             | 0.934506283        | 2              | 2.850198507 |
| P04692        | QLEDELVSLQK                           | 0.692850341        | 2              | 2.487179518 |
| P04692        | SIDDEDELYAQK                          | 0.431961006        | 2              | 3.702502012 |
| <b>P04694</b> | <b>ATTY Tyrosine aminotransferase</b> | <b>1.078463412</b> | <b>0.54647</b> | <b>2</b>    |
| <b>P04762</b> | <b>CATA Catalase</b>                  | <b>5.829707923</b> | <b>2.4E-13</b> | <b>30</b>   |
| P04762        | DYPLIPVGK                             | 0.780643024        | 1              | 2.529969692 |
| P04762        | DAMLFPSFIHSQK                         | 0.598281163        | 2              | 2.354496956 |
| P04762        | DAQLFIQR                              | 0.479471306        | 2              | 3.089246988 |
| P04762        | EAETFPFNPFDLTK                        | 0.807356087        | 2              | 4.349022865 |



|               |                                             |                    |                |             |
|---------------|---------------------------------------------|--------------------|----------------|-------------|
| P04762        | FNSANEDNVTQVR                               | 0.906977176        | 2              | 4.709765911 |
| P04762        | FSTVAGESGSADTVR                             | 0.890307101        | 2              | 5.190100193 |
| P04762        | FSTVAGESGSADTVRDPR                          | 0.953186828        | 2              | 2.966955423 |
| P04762        | GAGAFGYFEVTHDITR                            | 0.973752909        | 2              | 5.118216038 |
| P04762        | GPLLVDVFTDEMAHFDR                           | 1.050191151        | 2              | 5.71143198  |
| P04762        | HMNGYGSHTFK+Oxidation(2)                    | 1.053803259        | 2              | 2.76322937  |
| P04762        | LAQEDPDYGLR                                 | 1.223435999        | 2              | 2.639903784 |
| P04762        | LFAYPDTHR                                   | 1.233747997        | 2              | 2.876427174 |
| P04762        | LGPNYLQIPVNCYPYR                            | 1.169157433        | 2              | 4.395477295 |
| P04762        | LNIMTAGPR                                   | 1.038499739        | 2              | 3.16048336  |
| P04762        | LVNANGEAVYCK                                | 1.264272           | 2              | 4.050684452 |
| P04762        | NAIHTYVQAGSHIAAK                            | 1.050274962        | 2              | 5.337962627 |
| P04762        | NFTDVHPDYGAR                                | 0.932045154        | 2              | 4.083245277 |
| P04762        | NLPVEEAGR                                   | 0.939210422        | 2              | 2.383164167 |
| P04762        | RFNSANEDNVTQVR                              | 1.023678389        | 2              | 5.180953979 |
| P04762        | VFEHIGK                                     | 0.997638009        | 2              | 2.443536043 |
| P04762        | VFEHIGKR                                    | 0.907399159        | 2              | 2.391176224 |
| P04762        | VLNEEER                                     | 1.023921698        | 2              | 2.863687515 |
| P04762        | VQALLDQYNSQKPK                              | 0.996539389        | 2              | 5.120443821 |
| P04762        | VWPHKDYPLIPVGK                              | 1.037206207        | 2              | 3.852797747 |
| P04762        | FYTEDGNWDLVGNNTPIFFIR                       | 1.558867267        | 3              | 6.274604797 |
| P04762        | HMNGYGSHTFK                                 | 0.863942967        | 3              | 4.200131893 |
| P04762        | LCENIANHLK                                  | 1.129418096        | 3              | 4.051400661 |
| P04762        | NPANYFAVEEQMAFDPSNMPPGIEPSPDK               | 0.362276503        | 3              | 6.38896513  |
| P04762        | NPANYFAVEEQMAFDPSNMPPGIEPSPDK+Oxidation(19) | 0.573918435        | 3              | 3.917787075 |
| P04762        | DGPMCMHDNQGGAPNYYPNSFSAPEQQGSALEHHSQCSADVK  | 0.957371023        | 4              | 5.17080307  |
| <b>P04764</b> | <b>ENOA Alpha_enolase</b>                   | <b>0.990729975</b> | <b>0.99863</b> | <b>17</b>   |
| P04764        | AGYTDQVIGMDVAASEFYR                         | 0.861664533        | 2              | 5.546107769 |
| P04764        | DATNVGDEGGFAPNILENK                         | 0.885288955        | 2              | 5.442581654 |
| P04764        | DYPVVSIEDPFDQDDWDAWQK                       | 0.995230076        | 2              | 4.741069317 |
| P04764        | FTATAGIQVVGDDLTVTNP                         | 0.807375211        | 2              | 5.175417423 |
| P04764        | GNPTVEVDLYTAK                               | 1.265926136        | 2              | 4.058582783 |
| P04764        | IDQLMIEMDGTENK                              | 0.905299639        | 2              | 4.64170599  |
| P04764        | IEEELGSK                                    | 1.13629022         | 2              | 2.400004625 |
| P04764        | IGAEVYHNLK                                  | 1.178254078        | 2              | 3.321850538 |
| P04764        | KLNVVEQEK                                   | 1.044095896        | 2              | 2.353833437 |
| P04764        | LNVEQEK                                     | 1.082990107        | 2              | 2.733103514 |
| P04764        | SCNCLLLK                                    | 1.209693688        | 2              | 3.057877779 |
| P04764        | VNQIGSVTESLQACK                             | 1.03014398         | 2              | 5.182933331 |
| P04764        | YITPDQLADLYK                                | 1.083301195        | 2              | 3.319537878 |
| P04764        | HIADLAGNPEVILPVPAFNVINGGSHAGNK              | 1.034837253        | 3              | 6.571229458 |
| P04764        | KLNVVEQEKIDQLMIEMDGTENK                     | 1.148725578        | 3              | 6.04055357  |

|               |                                                     |                    |                |             |
|---------------|-----------------------------------------------------|--------------------|----------------|-------------|
| P04764        | LNVVEQEKIDQLMIEMDGTENK                              | 1.134792869        | 3              | 4.596259594 |
| P04764        | SFIKDYPPVVSIEDPFDQDDWDAWQK                          | 0.960659449        | 3              | 4.354124546 |
| <b>P04785</b> | <b>PDIA1 Protein disulfide_isomerase</b>            | <b>1.22208234</b>  | <b>9.9E-20</b> | <b>24</b>   |
| P04785        | SVSDYDGK                                            | 1.572140279        | 1              | 2.259652615 |
| P04785        | DHENIVIAK                                           | 1.018585127        | 2              | 2.916556597 |
| P04785        | HNQLPLVIEFTEQTAPK                                   | 1.188146192        | 2              | 5.613448143 |
| P04785        | ILEFFGLK                                            | 1.192762032        | 2              | 3.144329309 |
| P04785        | ILFIFIDSDHTDNQR                                     | 1.250690456        | 2              | 3.840448856 |
| P04785        | ITQFCHHFLEGG                                        | 0.879710232        | 2              | 3.08998704  |
| P04785        | LITLEEEMTK                                          | 1.078938469        | 2              | 3.710759163 |
| P04785        | LKAEGSEIR                                           | 1.355077264        | 2              | 2.426496029 |
| P04785        | LLDFIK                                              | 1.160584159        | 2              | 2.413236618 |
| P04785        | MDSTANEVEAVK                                        | 1.036812967        | 2              | 4.234432697 |
| P04785        | MDSTANEVEAVK+Oxidation(1)                           | 1.176345336        | 2              | 3.730894804 |
| P04785        | NFEEVAFDEK                                          | 1.124208788        | 2              | 3.200937033 |
| P04785        | NFEEVAFDEKK                                         | 1.163695321        | 2              | 4.047382355 |
| P04785        | NNFEGEITK                                           | 1.148116387        | 2              | 2.55672431  |
| P04785        | THILLFLPK                                           | 1.094639187        | 2              | 2.982904911 |
| P04785        | TVIDYNGER                                           | 1.10190824         | 2              | 2.66856885  |
| P04785        | VDATEESDLAQQYGVR                                    | 0.911635256        | 2              | 5.429687977 |
| P04785        | YQLDKDGVVLFK                                        | 1.208447627        | 2              | 3.839205742 |
| P04785        | IKPHLMSQELPEDWDKQPVK+Oxidation(6)                   | 1.753960703        | 3              | 3.873647928 |
| P04785        | LGETYKDHENIVIAK                                     | 1.298960881        | 3              | 5.082270622 |
| P04785        | QFLAAEAVDDIPFGITSNSDVFSK                            | 1.004684179        | 3              | 6.293552399 |
| P04785        | TGPAATTLSDTAAAESLVSSEVTVIGFFK                       | 1.16523621         | 3              | 6.733226299 |
| P04785        | YKPESDELTAEK                                        | 1.161324124        | 3              | 4.453520298 |
| P04785        | IKPHLMSQELPEDWDKQPVK                                | 1.432116987        | 4              | 5.603489399 |
| <b>P04797</b> | <b>G3P Glyceraldehyde_3_phosphate dehydrogenase</b> | <b>1.194696928</b> | <b>9.9E-20</b> | <b>13</b>   |
| P04797        | GAAQNIIPASTGAAK                                     | 1.252221938        | 2              | 4.138769627 |
| P04797        | IVSNASCTTNCLAPLAK                                   | 1.368743936        | 2              | 4.965082169 |
| P04797        | LISWYDNEYGYSNR                                      | 2.032232492        | 2              | 4.337045193 |
| P04797        | VIISAPSADAPMFVMGVNHEK                               | 1.237685047        | 2              | 4.294912815 |
| P04797        | VIISAPSADAPMFVMGVNHEK+Oxidation(12)                 | 1.427016623        | 2              | 3.850122452 |
| P04797        | VIISAPSADAPMFVMGVNHEK+Oxidation(15)                 | 1.427016623        | 2              | 3.524465799 |
| P04797        | VPTPNVSVVDTLTCR                                     | 1.365375505        | 2              | 2.608547926 |
| P04797        | VVDLMAYMASK                                         | 0.738270132        | 2              | 4.433794022 |
| P04797        | WGDAGAEYVVESTGVFTTMEK                               | 1.055339627        | 2              | 5.23757267  |
| P04797        | LVINGKPITIFQER                                      | 1.330987018        | 3              | 3.569601297 |
| P04797        | RVIISAPSADAPMFVMGVNHEK                              | 1.091747407        | 3              | 5.469033718 |
| P04797        | VIHDNFGIVEGLMTTVHAITATQK                            | 1.226268604        | 3              | 7.705269814 |
| P04797        | VIHDNFGIVEGLMTTVHAITATQK+Oxidation(13)              | 1.371494817        | 4              | 4.664880753 |
| <b>P04799</b> | <b>CP1A2 Cytochrome P450 1A2</b>                    | <b>0.977621958</b> | <b>0.00029</b> | <b>6</b>    |
| P04799        | DFVENVTSGNAVDFFPVLR                                 | 0.962372182        | 2              | 3.217481613 |

|               |                                                |                    |                |             |
|---------------|------------------------------------------------|--------------------|----------------|-------------|
| P04799        | FLTNDNTAIDK                                    | 1.176977624        | 2              | 3.067927599 |
| P04799        | IGSTPVVVLSTGLNTIK                              | 1.242207921        | 2              | 2.417352676 |
| P04799        | NSIQDITGALFK                                   | 0.779738452        | 2              | 3.12713027  |
| P04799        | SMTFNPDSGVPVWAAR                               | 3.578599941        | 2              | 3.310022593 |
| P04799        | TVQEHYQDFNK                                    | 1.05821668         | 2              | 3.426420689 |
| <b>P04903</b> | <b>GSTA2 Glutathione S_transferase alpha_2</b> | <b>0.820877047</b> | <b>9.9E-20</b> | <b>10</b>   |
| P04903        | YDLYGK                                         | 0.815494531        | 1              | 2.010271311 |
| P04903        | YLPAFEK                                        | 0.887117537        | 1              | 2.038910866 |
| P04903        | DGNLMFDQVPMVEIDGMK                             | 0.658659911        | 2              | 4.884653568 |
| P04903        | DGNLMFDQVPMVEIDGMK+Oxidation(11)               | 0.752798144        | 2              | 4.611674786 |
| P04903        | DGNLMFDQVPMVEIDGMK+Oxidation(17)               | 0.778195782        | 2              | 3.445337534 |
| P04903        | DGNLMFDQVPMVEIDGMK+Oxidation(5)                | 0.741150509        | 2              | 4.233358383 |
| P04903        | KDGNLMFDQVPMVEIDGMK                            | 0.785079905        | 2              | 4.921662807 |
| P04903        | LIQSPEDLEK                                     | 1.466628279        | 2              | 3.06853056  |
| P04903        | LKKGDNLMFDQVPMVEIDGMK                          | 1.688266582        | 2              | 3.187908888 |
| P04903        | WLLAAAGVEFEEK                                  | 0.960067673        | 2              | 4.388711452 |
| <b>P04904</b> | <b>GSTA3 Glutathione S_transferase alpha_3</b> | <b>0.972534967</b> | <b>9.9E-11</b> | <b>8</b>    |
| P04904        | LRNDGSLMFQQVPMVEIDGMK                          | 1.658050503        | 2              | 4.665158272 |
| P04904        | NDGSLMFQQVPMVEIDGMK                            | 1.050944552        | 2              | 5.374155045 |
| P04904        | NDGSLMFQQVPMVEIDGMK+Oxidation(12)              | 1.055404201        | 2              | 4.44112587  |
| P04904        | NDGSLMFQQVPMVEIDGMK+Oxidation(18)              | 1.068574308        | 2              | 4.106361866 |
| P04904        | NDGSLMFQQVPMVEIDGMK+Oxidation(6)               | 1.047830471        | 2              | 4.02233696  |
| P04904        | SHGQDYLVGNR                                    | 0.95102551         | 2              | 3.922860861 |
| P04904        | WLLAAAGVEFEEQFLK                               | 1.252634848        | 2              | 6.153484344 |
| P04904        | ALIDMYAEGVADLDEIVLHYPYIPPGEK                   | 0.742470012        | 4              | 6.987894058 |
| <b>P04905</b> | <b>GSTM1 Glutathione S_transferase Mu 1</b>    | <b>1.173855183</b> | <b>9.9E-20</b> | <b>15</b>   |
| P04905        | ADIVENQVMDNR                                   | 1.081128004        | 2              | 4.18138361  |
| P04905        | ADIVENQVMDNR+Oxidation(9)                      | 1.149291785        | 2              | 3.738868713 |
| P04905        | CLDAFPNLKDFLAR                                 | 1.110247007        | 2              | 3.249734879 |
| P04905        | FKLGLDFPNLPYLIDGSR                             | 1.406454805        | 2              | 4.553408623 |
| P04905        | IRADIVENQVMDNR                                 | 1.485025099        | 2              | 3.982368231 |
| P04905        | ITQSNAIMR                                      | 1.266229002        | 2              | 3.106966019 |
| P04905        | ITQSNAIMR+Oxidation(8)                         | 1.472577182        | 2              | 2.830822229 |
| P04905        | LGLDFPNLPYLIDGSR                               | 1.172711946        | 2              | 4.746170521 |
| P04905        | MQLIMLCYNPDFEK                                 | 1.189851362        | 2              | 4.408873558 |
| P04905        | YLSTPIFSK                                      | 1.051019802        | 2              | 2.598889351 |
| P04905        | HHLCGETEEER                                    | 1.219189546        | 3              | 3.782840729 |
| P04905        | KHHLCGETEEER                                   | 0.759430984        | 3              | 4.457825661 |
| P04905        | KITQSNAIMR                                     | 1.104725742        | 3              | 3.827308655 |
| P04905        | KITQSNAIMR+Oxidation(9)                        | 1.262746484        | 3              | 3.44760251  |
| P04905        | VTYVDFLAYDILDQYHIFEPK                          | 1.024936458        | 3              | 3.633151531 |
| <b>P04906</b> | <b>GSTP1 Glutathione S_transferase P</b>       | <b>0.876496358</b> | <b>0.55039</b> | <b>2</b>    |
| P04906        | STCLYQLPK                                      | 1.108190087        | 1              | 1.921939492 |

|               |                                               |                    |                |             |
|---------------|-----------------------------------------------|--------------------|----------------|-------------|
| P04906        | EAALVDMVNDGVEDLR                              | 0.879266803        | 2              | 4.656117439 |
| <b>P04937</b> | <b>FINC Fibronectin</b>                       | <b>1.149352945</b> | <b>0.02844</b> | <b>4</b>    |
| P04937        | FTQVSPTTLTAQWTAPSVK                           | 1.535401943        | 2              | 4.756765842 |
| P04937        | SSPVVIDASTAIDAPSNLR                           | 1.159876328        | 2              | 4.494763374 |
| P04937        | SYTITGLQPGTDYK                                | 0.795508424        | 2              | 2.577772856 |
| P04937        | VVTPLSPPTNLHLEANPDTGVLTVSWER                  | 1.120695314        | 3              | 4.162885666 |
| <b>P05065</b> | <b>ALDOA Fructose_bisphosphate aldolase A</b> | <b>0.67153936</b>  | <b>0.32924</b> | <b>8</b>    |
| P05065        | ALANSLACQGK                                   | 0.69882468         | 2              | 2.442160845 |
| P05065        | FSNEEIAMATVTALR                               | 0.786233531        | 2              | 3.896584272 |
| P05065        | FSNEEIAMATVTALRR                              | 0.541672786        | 2              | 2.387432337 |
| P05065        | GILAADESTGSIK                                 | 0.713383664        | 2              | 3.969165087 |
| P05065        | GVVPLAGTNGETTTQGLDGLSER                       | 0.737013285        | 2              | 5.52686882  |
| P05065        | IGEHTPSSLAIMENANVLAR                          | 0.453846495        | 2              | 4.820976257 |
| P05065        | LQSIGTENTEENR                                 | 0.936869503        | 2              | 3.612361193 |
| P05065        | RLQSIGTENTEENR                                | 0.760936138        | 2              | 2.784571171 |
| <b>P05178</b> | <b>CP2C6 Cytochrome P450 2C6</b>              | <b>0.958589458</b> | <b>0.99997</b> | <b>8</b>    |
| P05178        | EALIDHGEEFAER                                 | 0.940814693        | 2              | 2.971801043 |
| P05178        | FIDLIPTNLPHAVTCDIK                            | 0.942205158        | 2              | 3.99672389  |
| P05178        | GTTIITSLSSVLHDSK                              | 0.90700786         | 2              | 3.675725937 |
| P05178        | MCAGEGLAR                                     | 0.884634366        | 2              | 2.615818501 |
| P05178        | NITQSLTSFSK                                   | 0.907179905        | 2              | 3.079434633 |
| P05178        | TNGSPCDPTFILGCAPCNVICSIIFQNR                  | 1.084996099        | 2              | 2.546616554 |
| P05178        | FDYKDQDFLNLMEK                                | 1.014425613        | 3              | 4.924890995 |
| P05178        | GTTIITSLSSVLHDSKEFPDPEIFDPGHFLDGNGK           | 0.795140967        | 4              | 4.778802872 |
| <b>P05179</b> | <b>CP2C7 Cytochrome P450 2C7</b>              | <b>1.314327581</b> | <b>0.68909</b> | <b>8</b>    |
| P05179        | ACVGEGLAR                                     | 1.063993063        | 2              | 3.019695044 |
| P05179        | HMPYTDAMIHEVQR                                | 0.956675019        | 2              | 4.155092716 |
| P05179        | IEEHQESLDVTNPR                                | 1.234778526        | 2              | 4.848712921 |
| P05179        | KIEEHQESLDVTNPR                               | 1.352997303        | 2              | 4.980474472 |
| P05179        | VLTSLSVLHDSK                                  | 1.863516234        | 2              | 3.404206753 |
| P05179        | FINFVPTNLPHAVTCDIK                            | 1.200561088        | 3              | 3.533191919 |
| P05179        | KLPPGPTPLPIIGNFLQIDVK                         | 1.064383349        | 3              | 5.984199047 |
| P05179        | TYGPVFTLYLGSQPTVILHGYEAIK                     | 1.174205999        | 3              | 3.444455862 |
| <b>P05182</b> | <b>CP2E1 Cytochrome P450 2E1</b>              | <b>1.144808379</b> | <b>0.95494</b> | <b>12</b>   |
| P05182        | AKEHLQSLDINCAR                                | 1.185116724        | 2              | 4.489892483 |
| P05182        | DIDLSPVTVGFGSIPPQFK                           | 0.794285775        | 2              | 3.340556145 |
| P05182        | DTVFQGYVIPK                                   | 2.023123514        | 2              | 2.357030392 |
| P05182        | DVTDCLLIEMEKEK                                | 0.809889256        | 2              | 3.295629263 |
| P05182        | EHLQSLDINCAR                                  | 0.917211009        | 2              | 2.483947039 |
| P05182        | FGPVFTLHLGSR                                  | 1.22792046         | 2              | 2.509732485 |
| P05182        | FINLVPSNLPHEATR                               | 1.194668506        | 2              | 3.880681753 |
| P05182        | FKPEHFLNENGK                                  | 1.052259366        | 2              | 3.245394707 |
| P05182        | FSLSILR                                       | 1.226673869        | 2              | 2.387015104 |

|               |                                  |                    |                |             |
|---------------|----------------------------------|--------------------|----------------|-------------|
| P05182        | GTVVIPTLDSLLYSHEFPDPEK           | 1.07318386         | 2              | 4.707065582 |
| P05182        | LDMPYMDAVVHEIQR                  | 1.004356965        | 2              | 3.1217978   |
| P05182        | YGLLILMK                         | 1.261198094        | 2              | 3.161237717 |
| <b>P05183</b> | <b>CP3A2 Cytochrome P450 3A2</b> | <b>1.846496338</b> | <b>7.5E-12</b> | <b>12</b>   |
| P05183        | DIELDGLFIPK                      | 0.409329389        | 2              | 3.563749313 |
| P05183        | EMFPIIEQYGDILVK                  | 0.864525728        | 2              | 3.763849974 |
| P05183        | KLQEEIDGALPSK                    | 0.933358406        | 2              | 3.570443153 |
| P05183        | LKEMFPIIEQYGDILVK                | 2.128551709        | 2              | 3.266082764 |
| P05183        | LQEEIDGALPSK                     | 0.927654582        | 2              | 4.094852924 |
| P05183        | QAILEPEKPIVLK                    | 0.911261295        | 2              | 3.29446888  |
| P05183        | QEAETGKPVMTK                     | 0.822468684        | 2              | 3.42798543  |
| P05183        | QEAETGKPVMTK+Oxidation(11)       | 1.028601755        | 2              | 3.183372498 |
| P05183        | VDFLQLMLNAHNNSK                  | 1.104360389        | 2              | 4.094488144 |
| P05183        | YLKQEAETGKPVMTK                  | 1.001909334        | 2              | 3.789287806 |
| P05183        | KDIELDGLFIPK                     | 0.867394539        | 3              | 3.739842176 |
| P05183        | VDFLQLMLNAHNNSKDEVSHK            | 1.529526125        | 3              | 3.491888762 |
| <b>P05197</b> | <b>EF2 Elongation factor 2</b>   | <b>1.235515557</b> | <b>9.9E-20</b> | <b>27</b>   |
| P05197        | YFDPANGK                         | 1.245994792        | 1              | 2.046126842 |
| P05197        | ALLELQLEPEELYQTFQR               | 1.409932484        | 2              | 5.28370285  |
| P05197        | AYLPVNESFGFTADLR                 | 0.82415192         | 2              | 4.521506786 |
| P05197        | CELLYEGPPDDEAAMGIK               | 1.093433179        | 2              | 4.252473831 |
| P05197        | CLYASVLTAQPR                     | 0.775930887        | 2              | 2.616899967 |
| P05197        | DLEEDHACIPIKK                    | 1.162668509        | 2              | 3.385225534 |
| P05197        | EGIPALDNFLDKL                    | 0.982423607        | 2              | 3.43691206  |
| P05197        | ETVSEESNVLCLSK                   | 0.691682284        | 2              | 4.32697916  |
| P05197        | GEGQLGAAER                       | 1.180984129        | 2              | 3.659483671 |
| P05197        | GHVFEESQVAGTPMFVVK               | 1.028205555        | 2              | 6.091641426 |
| P05197        | IWCFGPDGTGPNILTDITK              | 1.664333606        | 2              | 5.1323843   |
| P05197        | KIWCFGPDGTGPNILTDITK             | 1.16431318         | 2              | 4.752459526 |
| P05197        | KVEDMMK+Oxidation(5)Oxidation(6) | 1.754153896        | 2              | 2.310080051 |
| P05197        | KVEDMMK+Oxidation(6)             | 1.323020472        | 2              | 2.390286207 |
| P05197        | NMSVIAHVDHGK                     | 0.989320993        | 2              | 3.875102997 |
| P05197        | NMSVIAHVDHGK+Oxidation(2)        | 1.594053699        | 2              | 3.524287701 |
| P05197        | STLTDSLCK                        | 1.13030658         | 2              | 3.126808882 |
| P05197        | TFCQLLDPIFK                      | 1.100852733        | 2              | 4.197811127 |
| P05197        | TGTITTFEHAHNMR                   | 1.075549515        | 2              | 3.984627962 |
| P05197        | VFDAIMNFR                        | 1.103566317        | 2              | 2.682761908 |
| P05197        | VFSGVVSTGLK                      | 1.214691285        | 2              | 2.996866941 |
| P05197        | YEWVDAEAR                        | 1.060363612        | 2              | 2.977055073 |
| P05197        | ARPPDGLAEDIDKGEVSAR              | 1.250757962        | 3              | 5.691037178 |
| P05197        | LDSEDKDKEGKPLLK                  | 1.378229072        | 3              | 3.968532085 |
| P05197        | LMEPIYLVEIQCEQVVGIIYGLNR         | 1.175315913        | 3              | 5.066856384 |
| P05197        | WLPAGDALLQMITIHLSPVTAQK          | 0.993055241        | 3              | 3.56220746  |

|               |                                                   |                    |                |             |
|---------------|---------------------------------------------------|--------------------|----------------|-------------|
| P05197        | YVEPIEDVPCGNIVGLVGVQFLVK                          | 1.521619819        | 3              | 5.757658958 |
| <b>P05369</b> | <b>FPPS Farnesyl pyrophosphate synthase</b>       | <b>1.22408903</b>  | <b>1</b>       | <b>11</b>   |
| P05369        | ALYEELDLR                                         | 0.990882073        | 2              | 3.110642672 |
| P05369        | EVLEYNTVGGK                                       | 0.961642013        | 2              | 3.002253294 |
| P05369        | GLTVVQTFQELVEPR                                   | 0.958241365        | 2              | 3.999997377 |
| P05369        | IKEVLEYNTVGGK                                     | 1.13852147         | 2              | 4.472659111 |
| P05369        | QILEENYGQK                                        | 0.835587752        | 2              | 2.422171116 |
| P05369        | QILEENYGQKDPEK                                    | 1.118611675        | 2              | 3.624308586 |
| P05369        | QNFQHFHSQIVK                                      | 0.801940491        | 2              | 2.483190536 |
| P05369        | SLIEQCSAPLPPSIFLELANK                             | 0.930485695        | 2              | 5.199175835 |
| P05369        | VGTDIQDNK                                         | 1.117569414        | 2              | 3.767540693 |
| P05369        | VLTEDELGHPEK                                      | 1.065754878        | 2              | 2.521546602 |
| P05369        | VLTEDELGHPEKGDAITR                                | 1.245759143        | 2              | 4.737894058 |
| <b>P05426</b> | <b>RL7 60S ribosomal protein L7</b>               | <b>1.454304925</b> | <b>8.9E-08</b> | <b>6</b>    |
| P05426        | AGNFYVPAEPK                                       | 1.164631581        | 2              | 2.989900589 |
| P05426        | IVEPYIAWGYPNLK                                    | 1.166001507        | 2              | 3.631530046 |
| P05426        | KKVPAVPETLK                                       | 1.224602283        | 2              | 3.000320435 |
| P05426        | TTHFVEGGDAGNR                                     | 1.13158602         | 2              | 2.748411417 |
| P05426        | TTHFVEGGDAGNREDQINR                               | 1.215730019        | 2              | 4.435407162 |
| P05426        | FGIICMEDLIHEIYTVGK                                | 1.37685175         | 3              | 4.352676868 |
| <b>P05544</b> | <b>SPA3L Serine protease inhibitor A3L</b>        | <b>0.90486334</b>  | <b>0.91845</b> | <b>6</b>    |
| P05544        | AVLDVDETGTEATAATGVATVIR                           | 1.258468683        | 2              | 2.810756683 |
| P05544        | DSTMEEILEGLK                                      | 0.801985322        | 2              | 2.887428522 |
| P05544        | IAELFSDLEER                                       | 1.109070449        | 2              | 2.553490639 |
| P05544        | MQQVESSLQPETLK                                    | 0.899429486        | 2              | 4.153573036 |
| P05544        | MQQVESSLQPETLKK                                   | 0.838111188        | 2              | 3.304696798 |
| P05544        | VFSQQADLSR                                        | 1.266083359        | 2              | 2.933134794 |
| <b>P05545</b> | <b>SPA3K Serine protease inhibitor A3K</b>        | <b>1.005113854</b> | <b>0.69167</b> | <b>5</b>    |
| P05545        | AVLDVDETGTEGAAATAVTAALK                           | 0.946344678        | 2              | 6.174769878 |
| P05545        | FSISTDYNLEEVLPGLGIR                               | 1.113272286        | 2              | 3.910863638 |
| P05545        | IAELFSELDER                                       | 1.04246531         | 2              | 3.013139009 |
| P05545        | IFSQQADLSR                                        | 1.320262309        | 2              | 2.4812181   |
| P05545        | NLHVSQVVHK                                        | 1.288875313        | 2              | 2.619493246 |
| <b>P05765</b> | <b>RS21 40S ribosomal protein S21</b>             | <b>1.063406685</b> | <b>0.38577</b> | <b>3</b>    |
| P05765        | DHASIQMNVAEVDR                                    | 0.787299415        | 2              | 3.687282562 |
| P05765        | MGESDDSILR                                        | 0.995600167        | 2              | 3.009903431 |
| P05765        | TYGICGAIR                                         | 1.144119341        | 2              | 2.440311193 |
| <b>P06214</b> | <b>HEM2 Delta_aminolevulinic acid dehydratase</b> | <b>1.164021513</b> | <b>0.89793</b> | <b>9</b>    |
| P06214        | AGADIIITYFAPQLLK                                  | 0.885251649        | 2              | 4.470230103 |
| P06214        | AGAFDLR                                           | 1.086043189        | 2              | 2.577320576 |
| P06214        | AGCQVVAPSDMMMDGR                                  | 1.434112006        | 2              | 3.912256479 |
| P06214        | CVLIFGVPSR                                        | 1.540869382        | 2              | 2.482594967 |
| P06214        | DEQGSAAEDSPSTIEAVR                                | 0.952884641        | 2              | 5.917180061 |

|               |                                                                   |                    |                |             |
|---------------|-------------------------------------------------------------------|--------------------|----------------|-------------|
| P06214        | DIQEGADILMVKGPLPYLDMVQEVK                                         | 0.880976789        | 2              | 3.900589228 |
| P06214        | TAVLESMTAFR                                                       | 1.060971864        | 2              | 3.213579178 |
| P06214        | VPKDEQGSAADESDSPTIEAVR                                            | 1.084980105        | 2              | 5.983965874 |
| P06214        | YGVNQLEEMLRPLVEAGLR                                               | 1.147469221        | 3              | 4.29485178  |
| <b>P06302</b> | <b>PTMA Prothymosin alpha</b>                                     | <b>1.152691217</b> | <b>2.1E-14</b> | <b>3</b>    |
| P06302        | VAEDEDDDDVETK                                                     | 1.054489217        | 2              | 4.316760063 |
| P06302        | VAEDEDDDDVETKK                                                    | 1.244560642        | 2              | 4.581508636 |
| P06302        | RVAEDEDDDDVETKK                                                   | 1.288426318        | 3              | 5.832990646 |
| <b>P06399</b> | <b>FIBA Fibrinogen alpha chain</b>                                | <b>0.977539614</b> | <b>0.99956</b> | <b>9</b>    |
| P06399        | AQQIQVLQK                                                         | 1.17412981         | 1              | 2.08348608  |
| P06399        | GDFANANNFDNTFGQVSEDLR                                             | 1.064859711        | 2              | 4.997902393 |
| P06399        | GDKELLIGNEK                                                       | 1.223966957        | 2              | 2.775907516 |
| P06399        | GLIDEANQDFTNR                                                     | 1.047347082        | 2              | 3.030899763 |
| P06399        | MADEAASEAHQEGDTR                                                  | 0.948761856        | 2              | 3.846734047 |
| P06399        | SQLQEGPPEWK                                                       | 1.039796159        | 2              | 2.908297539 |
| P06399        | EVVTSDDGSDCGDGMGLTHSFSGR                                          | 0.853051456        | 3              | 4.41502142  |
| P06399        | GDFANANNFDNTFGQVSEDLRR                                            | 0.989992729        | 3              | 3.414928436 |
| P06399        | TSDSDIFTDIENPSSHVPEFSSSK                                          | 0.932503034        | 3              | 3.480721235 |
| <b>P06685</b> | <b>AT1A1 Sodium/potassium_transporting ATPase subunit alpha_1</b> | <b>1.060935057</b> | <b>0.39712</b> | <b>6</b>    |
| P06685        | AVAGDASESALLK                                                     | 1.021437598        | 2              | 3.630400658 |
| P06685        | AVFQANQENLPILK                                                    | 1.131259346        | 2              | 2.681112051 |
| P06685        | LNIPVNQVNPR                                                       | 1.25025127         | 2              | 3.137957335 |
| P06685        | MSINAEDVVVDLVEVK                                                  | 0.859917661        | 2              | 3.510727406 |
| P06685        | YEPAAVSEHGDKK                                                     | 1.230168172        | 2              | 3.36372757  |
| P06685        | EQPLDEELKDAFQNAVLELGGGLGER                                        | 1.222130928        | 3              | 3.351732254 |
| <b>P06687</b> | <b>AT1A3 Sodium/potassium_transporting ATPase subunit alpha_3</b> | <b>1.067839315</b> | <b>0.99986</b> | <b>3</b>    |
| P06687        | DGNALTPPPTTPEWVK                                                  | 1.081852939        | 2              | 2.970988035 |
| P06687        | GVGIISEGNETVEDIAAR                                                | 1.06705186         | 2              | 4.467101574 |
| P06687        | QGAIVAVTGDGVNDSPALK                                               | 1.123995993        | 2              | 5.045359612 |
| <b>P06757</b> | <b>ADH1 Alcohol dehydrogenase 1</b>                               | <b>1.065888419</b> | <b>0.98657</b> | <b>19</b>   |
| P06757        | GAIFGGFK                                                          | 1.080391685        | 2              | 2.69597578  |
| P06757        | GALLDGTSR                                                         | 1.125749311        | 2              | 2.796796083 |
| P06757        | HPESNLCCQTK                                                       | 1.452691445        | 2              | 3.244339705 |
| P06757        | IDAAAPLDK                                                         | 1.010360029        | 2              | 2.974300385 |
| P06757        | IIAVDINKDK                                                        | 1.24187763         | 2              | 2.896382809 |
| P06757        | INEAFDLLR                                                         | 1.083068517        | 2              | 3.711343288 |
| P06757        | LVADFMAK                                                          | 1.199396054        | 2              | 2.403615952 |
| P06757        | MVATGVCR                                                          | 1.082459846        | 2              | 2.607994318 |
| P06757        | MVATGVCR+Oxidation(1)                                             | 1.274045524        | 2              | 2.526633739 |
| P06757        | VCLIGCFSTGYGSAVQVAK                                               | 1.246508397        | 2              | 6.477605343 |
| P06757        | VIPLFSPQCGK                                                       | 0.95066231         | 2              | 2.598103762 |
| P06757        | AAVLWEPHKPFTIEDIEVAPPK                                            | 1.146846787        | 3              | 5.60936594  |

|               |                                               |                    |                |             |
|---------------|-----------------------------------------------|--------------------|----------------|-------------|
| P06757        | FPLEPLITHVLPFEK                               | 1.191249846        | 3              | 4.682451248 |
| P06757        | GKPIHHFISTSTFSQYTVVDDIAVAK                    | 0.608824459        | 3              | 5.403717995 |
| P06757        | ICKHPESNLCCQTK                                | 0.917127241        | 3              | 3.88413763  |
| P06757        | IDAAAPLDKVCLIGCGFSTGYGSAVQVAK                 | 1.27597992         | 3              | 3.317619801 |
| P06757        | KFPLEPLITHVLPFEK                              | 1.126781681        | 3              | 4.526114941 |
| P06757        | VTPGSTCAVFLGGVGLSVVIGCK                       | 1.127325057        | 3              | 5.261638641 |
| P06757        | SDDHAVSGSLFTPLPAVLGHEGAGIVESIGEGVTCVKPGDK     | 0.9649248          | 4              | 7.900928497 |
| <b>P06761</b> | <b>GRP78 78 kDa glucose_regulated protein</b> | <b>0.986487496</b> | <b>9.9E-20</b> | <b>28</b>   |
| P06761        | DAGTIAGLNVMR                                  | 0.754576774        | 2              | 3.328724146 |
| P06761        | DNHLLGTFDLTGIPPAPR                            | 0.724489592        | 2              | 4.77969265  |
| P06761        | ELEEIVQPIISK                                  | 0.975692559        | 2              | 4.04531765  |
| P06761        | FEELNMDLFR                                    | 1.018944071        | 2              | 3.538638353 |
| P06761        | IEIESFFEGEDFSETLTR                            | 1.010228071        | 2              | 5.730442524 |
| P06761        | IEWLESHQDADIEDFK                              | 1.087472733        | 2              | 5.681033611 |
| P06761        | IINEPTAAAIYGLDKR                              | 1.393290639        | 2              | 4.428890705 |
| P06761        | ITITNDQNR                                     | 1.217103509        | 2              | 2.676016569 |
| P06761        | ITPSYVAFTPEGER                                | 1.244147686        | 2              | 4.055995941 |
| P06761        | KKELEEIVQPIISK                                | 1.164727674        | 2              | 5.423585892 |
| P06761        | KSDIDEIVLVGGSTR                               | 1.122785357        | 2              | 5.167689323 |
| P06761        | KSQIFSTASDNQPTVTIK                            | 1.170859557        | 2              | 5.328254223 |
| P06761        | LYGSGGPPPTGEEDTSEKDEL                         | 1.566084215        | 2              | 5.497441769 |
| P06761        | MKETAEAYLGK                                   | 1.046164268        | 2              | 3.375916958 |
| P06761        | MKETAEAYLGK+Oxidation(1)                      | 1.194265595        | 2              | 2.931211233 |
| P06761        | NELESYAYSLK                                   | 1.367987728        | 2              | 3.591028452 |
| P06761        | NQLTSNPENTVFDK                                | 1.042506768        | 2              | 5.289854527 |
| P06761        | SDIDEIVLVGGSTR                                | 0.962073818        | 2              | 3.450711966 |
| P06761        | SQIFSTASDNQPTVTIK                             | 0.996103595        | 2              | 5.446584225 |
| P06761        | TFAPEEISAMVLTK                                | 1.021594324        | 2              | 4.756736279 |
| P06761        | TKPYIQVDIGGGQTK                               | 1.183351917        | 2              | 4.351467133 |
| P06761        | TWNDPSVQQDIK                                  | 1.084248947        | 2              | 4.165688992 |
| P06761        | VLEDSLK                                       | 1.171718808        | 2              | 2.346911907 |
| P06761        | VLEDSLKK                                      | 1.238001908        | 2              | 2.455084324 |
| P06761        | VTHAVVTVPAYFNDAQR                             | 1.403330702        | 2              | 5.049962997 |
| P06761        | VYGERPLTK                                     | 1.186640751        | 2              | 2.908306599 |
| P06761        | AKFEELNMDLFR                                  | 1.205568477        | 3              | 4.639408112 |
| P06761        | IEWLESHQDADIEDFKAK                            | 1.249957951        | 3              | 4.597001553 |
| <b>P06766</b> | <b>DPOLB DNA polymerase beta</b>              | <b>1.139963091</b> | <b>0.31831</b> | <b>2</b>    |
| P06766        | EEMLQMQDIVLNEVKK+Oxidation(6)                 | 1.138400941        | 2              | 2.327768326 |
| P06766        | QDDTSSSINFLTR                                 | 1.187532268        | 2              | 2.398083687 |
| <b>P06866</b> | <b>HPT Haptoglobin</b>                        | <b>0.738992385</b> | <b>1.7E-08</b> | <b>6</b>    |
| P06866        | NQLVEIEK                                      | 0.773456456        | 1              | 2.251029253 |
| P06866        | SVVDIGLIK                                     | 0.757959724        | 1              | 1.920938969 |
| P06866        | ATDLKDWVQETMAK                                | 0.903264946        | 2              | 2.709246635 |



|               |                                                                                      |                    |                |             |
|---------------|--------------------------------------------------------------------------------------|--------------------|----------------|-------------|
| P06866        | GAVSPVGVQPILNK                                                                       | 0.640872696        | 2              | 3.59387517  |
| P06866        | LQTEGDGIYTLNSEK                                                                      | 0.67540843         | 2              | 4.378346443 |
| P06866        | YVMLPVADQEK                                                                          | 0.534495755        | 2              | 2.596458435 |
| <b>P07150</b> | <b>ANXA1 Annexin A1</b>                                                              | <b>1.107458952</b> | <b>0.00011</b> | <b>2</b>    |
| P07150        | GLGTDEDTLIEILTTR                                                                     | 1.582507644        | 2              | 4.49952507  |
| P07150        | GGPGSAVSPYPSFNPSSDVAALHK                                                             | 1.011936613        | 3              | 3.940739393 |
| <b>P07153</b> | <b>RPN1 Dolichyl_diphosphooligosaccharide__protein glycosyltransferase subunit 1</b> | <b>1.118120282</b> | <b>9.9E-20</b> | <b>14</b>   |
| P07153        | ASSFVLALEPELESR                                                                      | 1.254430616        | 2              | 3.959182978 |
| P07153        | AVTSEIAVLQSR                                                                         | 1.19355757         | 2              | 3.694245338 |
| P07153        | FVDHVFDEQVIDSLTVK                                                                    | 1.164720325        | 2              | 4.495520592 |
| P07153        | GEDEEDNNLEVR                                                                         | 1.184843609        | 2              | 3.777470827 |
| P07153        | HFDETVNR                                                                             | 1.186549708        | 2              | 2.790056229 |
| P07153        | LKTEGSDLCDR                                                                          | 1.363131828        | 2              | 2.959554911 |
| P07153        | NIQVDSPYDISR                                                                         | 1.212268483        | 2              | 3.653958797 |
| P07153        | SEDILDYGPFK                                                                          | 1.038050708        | 2              | 3.62311697  |
| P07153        | TEGSDLCDR                                                                            | 1.166305576        | 2              | 2.414081812 |
| P07153        | TVDLSSHLAK                                                                           | 1.348259392        | 2              | 2.409823179 |
| P07153        | VHYENNSPFLTITSMTR                                                                    | 1.201249579        | 2              | 3.341266632 |
| P07153        | VTAEVVLAHPGGSTAR                                                                     | 1.256340184        | 2              | 4.480870724 |
| P07153        | ISIVVETVYTHVLHPYPTQITQSEK                                                            | 1.124253583        | 3              | 4.673970699 |
| P07153        | NLVEQHIQDIVVHYTFNK                                                                   | 1.070474662        | 3              | 4.465881824 |
| <b>P07323</b> | <b>ENOG Gamma_enolase</b>                                                            | <b>0.941801014</b> | <b>0.03771</b> | <b>4</b>    |
| P07323        | AAVPSGASTGIYEALER                                                                    | 1.280339465        | 2              | 5.223526955 |
| P07323        | FGANAILGVSLAVCK                                                                      | 0.834202549        | 2              | 3.771245003 |
| P07323        | GNPTVEVDLHTAK                                                                        | 0.439594787        | 2              | 2.952318668 |
| P07323        | SGETEDTFIADLVVGLCTGQIK                                                               | 1.08393976         | 2              | 4.977723122 |
| <b>P07335</b> | <b>KCRB Creatine kinase B_type</b>                                                   | <b>1.280849009</b> | <b>0.00301</b> | <b>3</b>    |
| P07335        | FCTGLTQIETLFK                                                                        | 1.448534101        | 2              | 3.016513109 |
| P07335        | LGFSEVELVQMVDGVK                                                                     | 0.854031149        | 2              | 2.682432652 |
| P07335        | TDLNPDNLQGGDDLDPNVLSSR                                                               | 1.052182874        | 2              | 2.890532017 |
| <b>P07340</b> | <b>AT1B1 Sodium/potassium_transporting ATPase subunit beta_1</b>                     | <b>0.963240352</b> | <b>0.42551</b> | <b>3</b>    |
| P07340        | AYGENIGYSEK                                                                          | 1.167239188        | 2              | 2.532585859 |
| P07340        | VAPPGLTQIPQIQK                                                                       | 1.035320656        | 2              | 2.692167521 |
| P07340        | YNPNVLPVQCTGK                                                                        | 0.861720956        | 2              | 2.48489213  |
| <b>P07379</b> | <b>PCKGC Phosphoenolpyruvate carboxykinase_cytosolic [GTP]</b>                       | <b>1.021074519</b> | <b>1</b>       | <b>12</b>   |
| P07379        | TVIITQEQR                                                                            | 0.954823407        | 1              | 1.913128734 |
| P07379        | AINPENGGFVAPGTSVK                                                                    | 0.904912435        | 2              | 4.277411461 |
| P07379        | FLWPGFGNSR                                                                           | 0.993430821        | 2              | 2.546698809 |
| P07379        | GLGDVNVEELFGISK                                                                      | 1.067599066        | 2              | 3.705416679 |
| P07379        | IGIELTDSPIVVASMR                                                                     | 1.003229226        | 2              | 4.205003738 |
| P07379        | MGTSVLEALGDGEFIK                                                                     | 1.004489143        | 2              | 3.86515522  |

|               |                                                                 |                    |                |             |
|---------------|-----------------------------------------------------------------|--------------------|----------------|-------------|
| P07379        | VECVGDDIAWMK                                                    | 0.884741413        | 2              | 3.510163307 |
| P07379        | VIQGSLSLDPQEV                                                   | 0.975800885        | 2              | 3.711210728 |
| P07379        | YLAFAFSPACGK                                                    | 1.004803727        | 2              | 2.941397667 |
| P07379        | YLEDQVNADLPYEIER                                                | 1.046197988        | 2              | 4.789985657 |
| P07379        | EEGWLAEHMLLIGITNPEGK                                            | 0.922610636        | 3              | 3.773885012 |
| P07379        | FVEGNAQLCQPEYIHCDSGSEEEYGR                                      | 0.729088829        | 3              | 4.274688244 |
| <b>P07632</b> | <b>SODC Superoxide dismutase [Cu_Zn]</b>                        | <b>0.899748502</b> | <b>1E-15</b>   | <b>5</b>    |
| P07632        | DGVANVSIEDR                                                     | 0.547407729        | 2              | 2.830558538 |
| P07632        | GDGPVQGVVHFEQK                                                  | 0.904628463        | 2              | 3.887235403 |
| P07632        | HVGDLDGVAAGK                                                    | 0.909196583        | 2              | 3.980212927 |
| P07632        | QDDLKGGNEESTK                                                   | 1.330806417        | 2              | 3.611913919 |
| P07632        | VISLSGEHSIIGR                                                   | 0.99446338         | 2              | 3.121565104 |
| <b>P07633</b> | <b>PCCB Propionyl_CoA carboxylase beta chain_ mitochondrial</b> | <b>1.300030727</b> | <b>0.2937</b>  | <b>10</b>   |
| P07633        | AFDNDVDALCNLR                                                   | 1.300365427        | 2              | 3.648095608 |
| P07633        | AYNMLDIIHVIDER                                                  | 1.138624305        | 2              | 4.191164494 |
| P07633        | GFVDDIIQPSSTR                                                   | 1.067167305        | 2              | 3.091489553 |
| P07633        | HLLGDTNYAWPTAEIAVMGAK                                           | 0.745350015        | 2              | 5.72321701  |
| P07633        | ICCDLEVLASK                                                     | 1.269950178        | 2              | 3.539125443 |
| P07633        | IMDQAITVGAPVIGLNDSSGGAR                                         | 1.34494105         | 2              | 5.038619518 |
| P07633        | IQEGVESLAGYADIFLR                                               | 1.071048007        | 2              | 4.423560619 |
| P07633        | LVPELDTVVPLESSK                                                 | 1.048345868        | 2              | 3.573656797 |
| P07633        | SVTNEDVTQEQLGGAK                                                | 1.050954404        | 2              | 5.233456135 |
| P07633        | TVGIVGNQPNVASGCLDINSSVK                                         | 1.090484236        | 2              | 5.049739361 |
| <b>P07687</b> | <b>HYEP Epoxide hydrolase 1</b>                                 | <b>0.842230625</b> | <b>8.7E-07</b> | <b>25</b>   |
| P07687        | IIPLLTDPK                                                       | 1.596255475        | 1              | 1.97014153  |
| P07687        | DIELLYPYK                                                       | 0.764741529        | 2              | 3.032964706 |
| P07687        | EDESIRPFK                                                       | 0.958751311        | 2              | 2.713902712 |
| P07687        | ENLGQGIMVHK                                                     | 0.861976421        | 2              | 2.961742163 |
| P07687        | FHYGFNSNYMK                                                     | 0.982532489        | 2              | 2.654889345 |
| P07687        | FLGYTEKDIELLYPYK                                                | 1.243310054        | 2              | 4.867154121 |
| P07687        | FVSLAELQ                                                        | 1.052537191        | 2              | 2.455443621 |
| P07687        | GGHFAAFEEP                                                      | 1.146155036        | 2              | 3.325154781 |
| P07687        | GLHLNMAFISR                                                     | 1.294636981        | 2              | 2.881347895 |
| P07687        | GLNSVATAR                                                       | 1.252668585        | 2              | 2.454266548 |
| P07687        | KFVSLAELQ                                                       | 1.38935344         | 2              | 2.448912144 |
| P07687        | LLAQDIR                                                         | 1.376618375        | 2              | 2.438859224 |
| P07687        | QVEILNQYPFK                                                     | 1.256137464        | 2              | 3.556695938 |
| P07687        | VETSDEEIK                                                       | 0.920715051        | 2              | 2.488401413 |
| P07687        | VETSDEEIKDLHQR                                                  | 1.030028341        | 2              | 4.86286211  |
| P07687        | VFVPTGFSAFPSELLHAPEK                                            | 1.390658304        | 2              | 5.122310162 |
| P07687        | DKEETLPLGDGWWGPGSKPSAK                                          | 1.104050775        | 3              | 4.930778503 |
| P07687        | EDESIRPFKVETSDEEIKDLHQR                                         | 0.95794826         | 3              | 6.37014246  |

|               |                                                                  |                    |                |             |
|---------------|------------------------------------------------------------------|--------------------|----------------|-------------|
| P07687        | ESGYLHIQATKPDTVGCALNDSPVGLAAYILEK                                | 1.425418745        | 3              | 6.128227711 |
| P07687        | FYIQGGDWGSLICTNMAQMVPNHVK                                        | 1.254113735        | 3              | 4.070290565 |
| P07687        | IEGLDIHFHVKPPQLPSGR                                              | 1.337445556        | 3              | 4.309512615 |
| P07687        | KQVEILNQYPHF                                                     | 1.279356287        | 3              | 5.452825546 |
| P07687        | SHGLSDEHVFEVICPSIPGYGYSEASSK                                     | 1.078108957        | 3              | 6.293729305 |
| P07687        | SHGLSDEHVFEVICPSIPGYGYSEASSKK                                    | 1.474545257        | 3              | 5.167556763 |
| P07687        | TKIEGLDIHFHVKPPQLPSGR                                            | 1.158768495        | 3              | 4.199641705 |
| <b>P07756</b> | <b>CPSM Carbamoyl_phosphate synthase [ammonia]_mitochondrial</b> | <b>0.973192151</b> | <b>9.9E-20</b> | <b>98</b>   |
| P07756        | DELGLNK                                                          | 1.072562342        | 1              | 2.243742466 |
| P07756        | DILNMDK                                                          | 0.649364144        | 1              | 1.927698255 |
| P07756        | EIEYEVVR                                                         | 0.617966697        | 1              | 2.06334424  |
| P07756        | ETLMDLGTK                                                        | 0.628334977        | 1              | 2.359094143 |
| P07756        | EVEMDAVGK                                                        | 0.389896156        | 1              | 2.222835302 |
| P07756        | QNLIAEVSTK                                                       | 0.968430434        | 1              | 2.534120798 |
| P07756        | SFPFVSK                                                          | 1.056426408        | 1              | 1.916057587 |
| P07756        | YMESDGIK                                                         | 1.061268285        | 1              | 2.14819026  |
| P07756        | YMESDGIK+Oxidation(2)                                            | 1.195449367        | 1              | 2.300519466 |
| P07756        | AADTIGYPVMIR                                                     | 1.123628995        | 2              | 3.932675838 |
| P07756        | AADTIGYPVMIR+Oxidation(10)                                       | 1.214424698        | 2              | 3.365308285 |
| P07756        | AFAISGPFNVQFLVK                                                  | 0.983198094        | 2              | 5.021260262 |
| P07756        | AFAMTNQILVER                                                     | 1.12912667         | 2              | 4.378676891 |
| P07756        | AFAMTNQILVER+Oxidation(4)                                        | 1.061008237        | 2              | 3.79375577  |
| P07756        | ALENNMSLDEIVK                                                    | 1.017713507        | 2              | 4.758444309 |
| P07756        | ALENNMSLDEIVK+Oxidation(6)                                       | 0.983807033        | 2              | 3.962586164 |
| P07756        | AMLSTGFK                                                         | 1.026863993        | 2              | 2.531510353 |
| P07756        | AQTAHIVLEDGTK                                                    | 0.743171897        | 2              | 4.476671696 |
| P07756        | ATGYPLAFIAAK                                                     | 1.164765245        | 2              | 3.104708672 |
| P07756        | CLGLTEAQTR                                                       | 1.06618632         | 2              | 3.604779482 |
| P07756        | DGSIDLVINLPNNNTK                                                 | 0.691335959        | 2              | 5.539203167 |
| P07756        | EPLFGISTGNIITGLAAGAK                                             | 1.161728589        | 2              | 5.324253082 |
| P07756        | FLEEATR                                                          | 1.0336015          | 2              | 2.477151155 |
| P07756        | FLGVAEQLHNEGFK                                                   | 1.057529001        | 2              | 4.884843349 |
| P07756        | GILIGIQSFRPR                                                     | 1.004039306        | 2              | 2.477206945 |
| P07756        | GLNSESVTEETLR                                                    | 0.82161176         | 2              | 4.868316174 |
| P07756        | GNDVLVIECNLR                                                     | 1.091411427        | 2              | 4.349513054 |
| P07756        | GQILTMANPIINGGAPDPTAR                                            | 0.873054969        | 2              | 6.45637846  |
| P07756        | GQILTMANPIINGGAPDPTAR+Oxidation(6)                               | 0.817589326        | 2              | 4.893274784 |
| P07756        | GQNPVNLITNR                                                      | 0.994302602        | 2              | 4.299999714 |
| P07756        | GTTITSVLPKALVASR                                                 | 1.035650759        | 2              | 3.651688099 |
| P07756        | HLPtleQPIIPSDYVAIK                                               | 0.678433767        | 2              | 5.15389061  |
| P07756        | IALGIPLPEIK                                                      | 1.49646311         | 2              | 2.975263834 |
| P07756        | IAPSFAVESMEDALK                                                  | 1.616633135        | 2              | 5.284111977 |

|        |                                               |             |   |             |
|--------|-----------------------------------------------|-------------|---|-------------|
| P07756 | IAPSFAVESMEDALK+Oxidation(10)                 | 1.20915521  | 2 | 3.455365658 |
| P07756 | IEFEGQSVDFVDPNK                               | 0.956715133 | 2 | 5.557072639 |
| P07756 | IMGTSPLQIDR                                   | 1.668603263 | 2 | 3.054864168 |
| P07756 | IMGTSPLQIDR+Oxidation(2)                      | 1.753506698 | 2 | 3.093187809 |
| P07756 | IMGTSPLQIDRAEDR                               | 0.869498901 | 2 | 2.44207859  |
| P07756 | KELSEPSSTR                                    | 0.859148215 | 2 | 2.739980221 |
| P07756 | KEPLFGISTGNIITGLAAGAK                         | 0.949515766 | 2 | 5.468696594 |
| P07756 | KTVVVCNPNPETVSTDFDECDK                        | 0.300483392 | 2 | 5.12185955  |
| P07756 | LFAEAVQK                                      | 1.052459106 | 2 | 3.42457366  |
| P07756 | LTSIDKWFLYK                                   | 1.297703372 | 2 | 2.480920792 |
| P07756 | LYFEELSLR                                     | 0.570447136 | 2 | 3.46032238  |
| P07756 | MRDILNMDK                                     | 0.944154576 | 2 | 3.037030458 |
| P07756 | MRDILNMDK+Oxidation(1)                        | 1.254715864 | 2 | 2.748796701 |
| P07756 | QLFSDKLNEINEK                                 | 1.021411801 | 2 | 3.851453066 |
| P07756 | RFLEEATR                                      | 1.000965189 | 2 | 2.994326115 |
| P07756 | RTAVDSGIALLTNFQVTK                            | 0.96045973  | 2 | 4.754297733 |
| P07756 | SAYALGGLSGGICPNK                              | 1.146645691 | 2 | 4.958547592 |
| P07756 | SIFSAVLDELK                                   | 0.838742641 | 2 | 3.928220987 |
| P07756 | SLGQWLQEEK                                    | 1.049738834 | 2 | 4.186653137 |
| P07756 | SLGQWLQEEKVPAIYGVDR                           | 0.985800324 | 2 | 3.937293768 |
| P07756 | SVGEVMAIGR                                    | 0.964552942 | 2 | 3.590549231 |
| P07756 | SVGEVMAIGR+Oxidation(6)                       | 1.002717432 | 2 | 3.098220825 |
| P07756 | TFEESFQK                                      | 0.975672537 | 2 | 2.540362597 |
| P07756 | TLGVDFIDVATK                                  | 1.010949257 | 2 | 4.181095123 |
| P07756 | TSACFEPGLDYMVTK                               | 0.899518833 | 2 | 4.72636795  |
| P07756 | TSACFEPGLDYMVTK+Oxidation(12)                 | 0.871764485 | 2 | 3.560952187 |
| P07756 | TSINVVR                                       | 1.03593717  | 2 | 2.439437866 |
| P07756 | TVLMNPNIASVQTNEVGLK                           | 1.032116073 | 2 | 6.626826763 |
| P07756 | TVLMNPNIASVQTNEVGLK+Oxidation(4)              | 1.073361447 | 2 | 5.957698345 |
| P07756 | TVVVVCNPNPETVSTDFDECDK                        | 0.31484475  | 2 | 5.625226498 |
| P07756 | VLGTSVESIMATEDR                               | 1.100962079 | 2 | 4.901515007 |
| P07756 | VLGTSVESIMATEDR+Oxidation(10)                 | 1.069232469 | 2 | 4.221991539 |
| P07756 | VLILGSGGLSIGQAGEFDYSGSQAVK                    | 0.985891788 | 2 | 5.814639091 |
| P07756 | VMIGESVDEK                                    | 0.917238431 | 2 | 3.569792509 |
| P07756 | VMIGESVDEK+Oxidation(2)                       | 0.899699272 | 2 | 3.009068966 |
| P07756 | VSQEHVVLTK                                    | 1.002950806 | 2 | 3.982559919 |
| P07756 | VVAVDCGIK                                     | 1.064809203 | 2 | 2.592153311 |
| P07756 | AERPDGLILGMGGQTALNCGVELFK                     | 1.036505958 | 3 | 6.726362228 |
| P07756 | AERPDGLILGMGGQTALNCGVELFK+Oxidation(11)       | 0.742253448 | 3 | 6.184842587 |
| P07756 | CEMASTGEVACFGEGIHAFK                          | 0.961194416 | 3 | 4.784420967 |
| P07756 | CEMASTGEVACFGEGIHAFK+Oxidation(3)             | 1.002525555 | 3 | 4.702718735 |
| P07756 | DADDNCVTVCNMENVNDAMGVHTGDSVVVAPAQTLNSNAEFQMLR | 1.095772643 | 3 | 6.446156979 |

|               |                                                       |                    |                |             |
|---------------|-------------------------------------------------------|--------------------|----------------|-------------|
| P07756        | FVHDNYVIR                                             | 1.251792311        | 3              | 3.529940844 |
| P07756        | GAEVHLPWNHDFMQDYDGLLIAGGPGNPALAQPLIQNVK               | 1.149500954        | 3              | 6.114260197 |
| P07756        | GAEVHLPWNHDFMQDYDGLLIAGGPGNPALAQPLIQNVK+Oxidation(16) | 1.013433385        | 3              | 5.750696659 |
| P07756        | GQILTMANPIINGGAPDPTTARDELGLNK                         | 0.971091611        | 3              | 4.843554974 |
| P07756        | GQILTMANPIINGGAPDPTTARDELGLNK+Oxidation(6)            | 1.039705143        | 3              | 3.432430267 |
| P07756        | GYSFGHPSSVAGEVVFNTGLGGYSEALTDPAYK                     | 0.318472678        | 3              | 6.451427937 |
| P07756        | HLGIVGECNIQFALHPTSMEYCIIEVNAR                         | 0.950125762        | 3              | 4.849568844 |
| P07756        | IEFEGQSVDFVDPNKQNLIAEVSTK                             | 1.011325615        | 3              | 5.149014473 |
| P07756        | ILDIYHQEACNGCIISVGGQIPNNLAVPLYK                       | 1.193100401        | 3              | 6.074044228 |
| P07756        | ILESDRKEPLFGISTGNIITGLAAGAK                           | 1.024445948        | 3              | 3.784959078 |
| P07756        | LFATEATSDWLNANNVPATPVAWPSQEGQNPSLSSIR                 | 0.967766672        | 3              | 5.127151489 |
| P07756        | LRDADPILR                                             | 1.13378774         | 3              | 3.514882565 |
| P07756        | MCHPSVDGFTPR                                          | 0.970604505        | 3              | 5.048313618 |
| P07756        | MCHPSVDGFTPR+Oxidation(1)                             | 1.165663598        | 3              | 4.331572056 |
| P07756        | QADAVYFLPITPQFVTEVIK                                  | 0.200324115        | 3              | 4.411620617 |
| P07756        | QIDTLAAEYPSVTNYLYVTYNGQEHDIK                          | 1.00568507         | 3              | 3.359024048 |
| P07756        | SAYALGGLGSGICPNKETLMDLGTK                             | 1.117392319        | 3              | 4.971365929 |
| P07756        | SIFSAVLDELKVAQAPWK                                    | 0.660791816        | 3              | 3.444389343 |
| P07756        | TAVDSGIALLTNFGVTK                                     | 1.17240412         | 3              | 6.386646748 |
| P07756        | TVVVNCPETVSTDFDECDKLYFEELSLER                         | 0.666041245        | 3              | 6.006108284 |
| P07756        | VISHAISEHVEDAGVHSGDATLMLPTQTISQGAIEK                  | 0.98003324         | 3              | 7.590694427 |
| P07756        | VISHAISEHVEDAGVHSGDATLMLPTQTISQGAIEK+Oxidation(23)    | 0.967676247        | 3              | 7.040621281 |
| <b>P07824</b> | <b>ARGI1 Arginase_1</b>                               | <b>1.236224034</b> | <b>6.2E-11</b> | <b>15</b>   |
| P07824        | YFSMTEVDK                                             | 1.084622948        | 1              | 2.248888969 |
| P07824        | ANEQLAAVVAETQK                                        | 1.120702932        | 2              | 5.359277248 |
| P07824        | DHGDALFVDVDPNDSPFQIVK                                 | 0.993179439        | 2              | 6.239706516 |
| P07824        | DIVYIGLR                                              | 1.047884496        | 2              | 2.710651875 |
| P07824        | DVDPGEHYIK                                            | 0.717682671        | 2              | 3.293957472 |
| P07824        | EGNHKPETDYLKPPK                                       | 1.036228006        | 2              | 2.707977057 |
| P07824        | TGLLSGLDIMEVNPTLGK                                    | 1.179321975        | 2              | 5.726959705 |
| P07824        | TGLLSGLDIMEVNPTLGK+Oxidation(10)                      | 0.845890538        | 2              | 2.671370983 |
| P07824        | TVNTAVALTLSCFGTK                                      | 1.145130817        | 2              | 4.25558567  |
| P07824        | VMEETFSYLLGR                                          | 1.003731359        | 2              | 3.827658176 |
| P07824        | YFSMTEVDKLGIGK+Oxidation(4)                           | 1.056769463        | 2              | 2.588949442 |
| P07824        | GKFPDVPGFVWVTPCISAK                                   | 1.324723069        | 3              | 4.657401085 |
| P07824        | LKETEYNVR                                             | 1.277272419        | 3              | 3.710442781 |
| P07824        | NGTISVVLGGDHSMAIGSISGHAR                              | 1.236265463        | 3              | 4.50948143  |
| P07824        | VHPDLCVIWVDAHTDINTPLTTSSGNLHGQPVAFLK                  | 1.293977016        | 4              | 4.623486042 |
| <b>P07871</b> | <b>THIKB 3_ketoacyl_CoA thiolase B_peroxisomal</b>    | <b>0.988318681</b> | <b>2.5E-09</b> | <b>16</b>   |
| P07871        | AEELGLPILGVLR                                         | 1.031457179        | 2              | 4.41574955  |
| P07871        | AEIVPVTTTVLDDK                                        | 0.89278978         | 2              | 4.625771046 |

|               |                                                      |                    |                |             |
|---------------|------------------------------------------------------|--------------------|----------------|-------------|
| P07871        | AEIVPVTTTLDLDDKGDR                                   | 1.001476151        | 2              | 3.946777582 |
| P07871        | AEIVPVTTTLDLDDKGDRK                                  | 1.018816317        | 2              | 4.380599499 |
| P07871        | DCLIPMGITSENAER                                      | 0.534110596        | 2              | 3.771882296 |
| P07871        | DGGSTTAGNSSQVSDGAAVLLAR                              | 0.99902            | 2              | 6.220921993 |
| P07871        | IAQFLSGIPETVPLSAVNR                                  | 1.348451982        | 2              | 4.105624199 |
| P07871        | QCSSGLQAVANIAGGIR                                    | 0.869498901        | 2              | 4.907503128 |
| P07871        | QDAFALASQQK                                          | 0.852896873        | 2              | 3.939664841 |
| P07871        | QKQDAFALASQQK                                        | 0.995305441        | 2              | 3.971053362 |
| P07871        | QVVTLLNELK                                           | 1.054111739        | 2              | 2.479454994 |
| P07871        | SKAEELGLPILGVLR                                      | 1.014149938        | 2              | 4.039048672 |
| P07871        | TITVSQDEGVRPSTTMEGLAK                                | 0.971301669        | 2              | 4.34833622  |
| P07871        | VNPLGGAIALGHPLGCTGAR                                 | 1.223603238        | 2              | 5.203404427 |
| P07871        | LKPECLGDISVGNVLPQGAGAAMAR                            | 0.859027828        | 3              | 5.14951992  |
| P07871        | SYAVVGVPPDIMGIGPAYAIPAALQK                           | 1.007243983        | 3              | 4.820228577 |
| <b>P07872</b> | <b>ACOX1 Peroxisomal acyl_coenzyme A oxidase 1</b>   | <b>0.86720898</b>  | <b>1.3E-06</b> | <b>20</b>   |
| P07872        | IYDQVR                                               | 1.101686972        | 1              | 1.994236827 |
| P07872        | LVEIAAK                                              | 1.203411414        | 1              | 2.080260277 |
| P07872        | AFTTWTANAGIEECR                                      | 1.187491762        | 2              | 4.057673931 |
| P07872        | EIENLILNDPDFQHEDYNFLTR                               | 1.30982479         | 2              | 4.400592804 |
| P07872        | EIGTHKPLPGITVGDIGPK                                  | 0.978623994        | 2              | 4.045987606 |
| P07872        | EVAWNLTSDVLR                                         | 0.674022546        | 2              | 2.868701696 |
| P07872        | EYGISDPPEIMWFK                                       | 0.686074716        | 2              | 3.573589087 |
| P07872        | FGYEEMDNGYLK                                         | 0.96608596         | 2              | 3.020596266 |
| P07872        | GGDFLEGSIIITGAQLSQVNAR                               | 0.973295454        | 2              | 5.995479107 |
| P07872        | GLETTATYDPK                                          | 0.983568722        | 2              | 3.502531528 |
| P07872        | NLCLLYSLYISQK                                        | 0.789035824        | 2              | 3.247888327 |
| P07872        | QSEPEPQLDFQTQQYK                                     | 1.056483844        | 2              | 4.868469715 |
| P07872        | SFLVGNAAQSLK                                         | 1.101734699        | 2              | 3.768397093 |
| P07872        | SKEVAWNLTSDVLR                                       | 1.118057231        | 2              | 3.376637459 |
| P07872        | TQEFILNSPTVTSIK                                      | 0.937593367        | 2              | 4.342841148 |
| P07872        | YDGNVYENLFEWAK                                       | 1.099679013        | 2              | 5.441574574 |
| P07872        | ASATFNPELITHILDGSPENR                                | 0.711704947        | 3              | 4.578322411 |
| P07872        | ASEAHCHYVVVK                                         | 1.148769318        | 3              | 4.015044689 |
| P07872        | INESIGQGDLSLPELHALTAGLK                              | 1.054423411        | 3              | 5.29580307  |
| P07872        | TSNHAIVLAQLITQGECYGLHAFVPIR                          | 0.840906681        | 4              | 4.972455025 |
| <b>P07895</b> | <b>SODM Superoxide dismutase [Mn]_ mitochondrial</b> | <b>0.96398301</b>  | <b>0.99957</b> | <b>4</b>    |
| P07895        | AIWNVINWENVSQR                                       | 1.011544216        | 2              | 3.766192198 |
| P07895        | GDVTTQVALQPALK                                       | 0.874633954        | 2              | 3.37852025  |
| P07895        | HHATYVNNLNVTEEK                                      | 1.007164487        | 2              | 4.732997894 |
| P07895        | NVRPDYLK                                             | 0.897097757        | 2              | 2.437200785 |
| <b>P07896</b> | <b>ECHP Peroxisomal bifunctional enzyme</b>          | <b>1.092906249</b> | <b>0.93047</b> | <b>21</b>   |
| P07896        | GGPMFYAASVGLPTVLEK                                   | 0.661681233        | 2              | 3.987511873 |
| P07896        | GQGLTGPSLPPGTPVR                                     | 0.942592184        | 2              | 4.23901701  |

|               |                                             |                    |                |             |
|---------------|---------------------------------------------|--------------------|----------------|-------------|
| P07896        | GWYQYDKPLGR                                 | 1.060939501        | 2              | 3.079889536 |
| P07896        | IGVVVGNCGYGFVGNR                            | 1.411733923        | 2              | 3.294219971 |
| P07896        | IIDKPIEPR                                   | 1.149819252        | 2              | 2.584297657 |
| P07896        | KGQGLTGPSPGTPVR                             | 1.016442567        | 2              | 4.66442585  |
| P07896        | KQYPGVLAPETCVR                              | 1.200895035        | 2              | 4.063900471 |
| P07896        | LCNPPVNAVSPTVIR                             | 1.478001555        | 2              | 4.772686958 |
| P07896        | LGILDAVVK                                   | 1.092024887        | 2              | 2.912793636 |
| P07896        | LLEVIPSR                                    | 0.943739475        | 2              | 2.410527468 |
| P07896        | QNPDIQLEPSDYLR                              | 0.884195762        | 2              | 3.963437796 |
| P07896        | QYPGVLAPETCVR                               | 0.992945866        | 2              | 2.970385075 |
| P07896        | TASAQPVSSVGLGLTMGR                          | 1.058195353        | 2              | 5.141682625 |
| P07896        | TISKEILER                                   | 1.19793934         | 2              | 2.964619637 |
| P07896        | VGISVVAVESDPK                               | 1.012011414        | 2              | 4.197182655 |
| P07896        | VGLPEVTLGILPGAR                             | 1.178565694        | 2              | 3.445039034 |
| P07896        | VSDLAGLDVGVWK                               | 1.020709498        | 2              | 4.500705242 |
| P07896        | YLSADEALR                                   | 1.124756122        | 2              | 3.116860867 |
| P07896        | YSPLGDMICEAGR                               | 1.000772846        | 2              | 3.861076593 |
| P07896        | YSSPTTIATVMMSLK                             | 1.146442513        | 2              | 3.230472803 |
| P07896        | IFNKPVPSLPNMDSVFAEIAK                       | 1.711029679        | 3              | 3.99486661  |
| <b>P07943</b> | <b>ALDR Aldose reductase</b>                | <b>1.21718416</b>  | <b>0.563</b>   | <b>2</b>    |
| P07943        | AIGVSNFNPLQIER                              | 1.248164319        | 2              | 3.075436831 |
| P07943        | HIDCAQVYQNEK                                | 1.205588944        | 2              | 3.928550482 |
| <b>P08009</b> | <b>GSTM4 Glutathione S_transferase Yb_3</b> | <b>1.242855726</b> | <b>9.9E-20</b> | <b>6</b>    |
| P08009        | LCYNPDFEK                                   | 2.464641675        | 1              | 2.267436743 |
| P08009        | LLLEYTDSSYEK                                | 1.293689086        | 2              | 4.917578697 |
| P08009        | LLLEYTDSSYEKR                               | 1.340612975        | 2              | 4.132488251 |
| P08009        | NQVFEATCLDAFPNLK                            | 0.782801903        | 2              | 4.254366398 |
| P08009        | SQWLNEK                                     | 1.136011648        | 2              | 2.684843779 |
| P08009        | YTMGDAPDFDR                                 | 0.879915612        | 2              | 2.371947527 |
| <b>P08010</b> | <b>GSTM2 Glutathione S_transferase Mu 2</b> | <b>0.976103054</b> | <b>0.05484</b> | <b>14</b>   |
| P08010        | FLSKPIFAK                                   | 1.720161709        | 1              | 2.193525791 |
| P08010        | ITYVDFLVYDVLQHR                             | 1.964190494        | 2              | 5.224453449 |
| P08010        | KPEYLEGLPEK                                 | 1.244442699        | 2              | 3.197163582 |
| P08010        | KYSMGDAPDYDR                                | 1.085011187        | 2              | 3.437572241 |
| P08010        | LFLEYTDTSYEDK                               | 1.244712792        | 2              | 5.490555286 |
| P08010        | LFLEYTDTSYEDKK                              | 1.033739327        | 2              | 4.784173965 |
| P08010        | LQLAMVCYSPDFER                              | 1.163641963        | 2              | 4.155865669 |
| P08010        | LQLAMVCYSPDFER+Oxidation(5)                 | 2.01030636         | 2              | 3.643967152 |
| P08010        | VDVLENQAMDTR                                | 1.129959969        | 2              | 4.63296175  |
| P08010        | VDVLENQAMDTR+Oxidation(9)                   | 1.217956946        | 2              | 3.741384268 |
| P08010        | YSMGDAPDYDR                                 | 1.094357633        | 2              | 3.545629501 |
| P08010        | YSMGDAPDYDR+Oxidation(3)                    | 1.283728315        | 2              | 2.65854001  |
| P08010        | IRVDVLENQAMDTR                              | 1.437965288        | 3              | 4.548021793 |

|               |                                                                                                                      |                    |                |             |
|---------------|----------------------------------------------------------------------------------------------------------------------|--------------------|----------------|-------------|
| P08010        | KKPEYLEGLPEK                                                                                                         | 1.077479552        | 3              | 4.34089756  |
| <b>P08011</b> | <b>MGST1 Microsomal glutathione S_transferase 1</b>                                                                  | <b>1.042359828</b> | <b>0.00177</b> | <b>6</b>    |
| P08011        | IYHTIAYLTPLPQPNR                                                                                                     | 0.83367355         | 2              | 5.113888741 |
| P08011        | MMFLSSATAFQR                                                                                                         | 1.277107408        | 2              | 4.029896736 |
| P08011        | MMFLSSATAFQR+Oxidation(1)                                                                                            | 1.210011208        | 2              | 3.099094391 |
| P08011        | MMFLSSATAFQR+Oxidation(2)                                                                                            | 1.216416933        | 2              | 3.458062649 |
| P08011        | VFANPEDCAGFGK                                                                                                        | 1.137844939        | 2              | 4.789256096 |
| P08011        | VFANPEDCAGFGKGENAK                                                                                                   | 1.096322371        | 2              | 4.781914711 |
| <b>P08032</b> | <b>SPTA1 Spectrin alpha chain_ erythrocyte</b>                                                                       | <b>1.050491115</b> | <b>0.60882</b> | <b>2</b>    |
| P08032        | ADVVESWIGEK                                                                                                          | 1.204451484        | 2              | 3.061196566 |
| P08032        | IEDLGDSMEEALILDIK                                                                                                    | 1.050445664        | 2              | 2.495487452 |
| <b>P08081</b> | <b>CLCA Clathrin light chain A</b>                                                                                   | <b>0.974329007</b> | <b>0.93447</b> | <b>2</b>    |
| P08081        | LEALDANSR                                                                                                            | 0.971379093        | 2              | 2.478680372 |
| P08081        | WREEQTER                                                                                                             | 1.069331586        | 2              | 2.366039515 |
| <b>P08461</b> | <b>ODP2 Dihydrolipoyllysine_residue acetyltransferase component of pyruvate dehydrogenase complex_ mitochondrial</b> | <b>1.152685209</b> | <b>9.5E-10</b> | <b>4</b>    |
| P08461        | DVPLGTPLCIIVEK                                                                                                       | 0.960956388        | 2              | 3.875911951 |
| P08461        | DVPVGSIICTVEKPDIEAFK                                                                                                 | 1.316200326        | 2              | 3.459570885 |
| P08461        | GLETIASDVVSLASK                                                                                                      | 1.197112168        | 2              | 4.112021446 |
| P08461        | VAPTAPAGVFIDIPIISNIR                                                                                                 | 1.331816301        | 2              | 4.599755287 |
| <b>P08503</b> | <b>ACADM Medium_chain specific acyl_CoA dehydrogenase_ mitochondrial</b>                                             | <b>0.923255527</b> | <b>2.3E-05</b> | <b>8</b>    |
| P08503        | AFTGFIVEADTPGIHIGK                                                                                                   | 1.101353669        | 2              | 4.244825363 |
| P08503        | EEIIPVAPDYDK                                                                                                         | 0.843296581        | 2              | 3.552479029 |
| P08503        | IYQIYEGTAQIQR                                                                                                        | 1.135272038        | 2              | 4.513210297 |
| P08503        | KGDEVVINGQK                                                                                                          | 1.03730592         | 2              | 4.226099014 |
| P08503        | MTEQPMMCAYCVTEPSAGSDVAGIK                                                                                            | 0.195974587        | 2              | 4.603645802 |
| P08503        | QEPGLGFSFELTEQQK                                                                                                     | 0.755992199        | 2              | 3.734213829 |
| P08503        | SGEYPPFLIK                                                                                                           | 0.969325756        | 2              | 2.653902769 |
| P08503        | TRPTVAAGAVGLAQR                                                                                                      | 1.16277751         | 2              | 4.213721752 |
| <b>P08541</b> | <b>UD2B2 UDP_glucuronosyltransferase 2B2</b>                                                                         | <b>1.295350183</b> | <b>4.9E-13</b> | <b>10</b>   |
| P08541        | DELQNHFIK                                                                                                            | 1.275806356        | 2              | 2.789991617 |
| P08541        | LLDVWTYELPR                                                                                                          | 1.741366114        | 2              | 3.645707369 |
| P08541        | NVMLLSTIHHDQPMKPLDR                                                                                                  | 1.228434237        | 2              | 4.157388687 |
| P08541        | VEIWLIR                                                                                                              | 1.350467851        | 2              | 2.892772675 |
| P08541        | VLVWPMDFSHWMNIK                                                                                                      | 1.480041578        | 2              | 3.505607843 |
| P08541        | FEIFSTSISKDELQNHFIK                                                                                                  | 1.233931477        | 3              | 3.502398729 |
| P08541        | FILPPSYVPVILSGLAGK                                                                                                   | 1.392062802        | 3              | 5.590003014 |
| P08541        | GHEVTVLKPSAYFFLDPK                                                                                                   | 1.624147301        | 3              | 4.69409132  |
| P08541        | HKEWDTFYSEILGRPTTVDETMSK                                                                                             | 0.783804766        | 3              | 4.326952457 |
| P08541        | NVMLLSTIHHDQPMKPLDR+Oxidation(3)                                                                                     | 1.390923355        | 3              | 3.391382694 |
| <b>P08542</b> | <b>UDB17 UDP_glucuronosyltransferase 2B17</b>                                                                        | <b>1.213340622</b> | <b>0.7888</b>  | <b>6</b>    |
| P08542        | EIINNPYK                                                                                                             | 0.858376348        | 1              | 2.213383436 |



|               |                                            |                    |                |             |
|---------------|--------------------------------------------|--------------------|----------------|-------------|
| P08542        | FETFPTSFSKDELENYFIK                        | 1.107854305        | 2              | 4.172694206 |
| P08542        | KWDPFYSEILGRPTTLAETMGK                     | 1.132122809        | 2              | 4.497436047 |
| P08542        | LVDVWTYELQR                                | 1.25075948         | 2              | 3.256995678 |
| P08542        | WDPFYSEILGRPTTLAETMGK                      | 1.288483405        | 2              | 4.008360386 |
| P08542        | NAVWLSTIHHDQPMKPLDK                        | 1.154109771        | 3              | 3.716145992 |
| <b>P08683</b> | <b>CP2CB Cytochrome P450 2C11</b>          | <b>1.318985382</b> | <b>0.99988</b> | <b>16</b>   |
| P08683        | FNENFR                                     | 1.088989938        | 1              | 2.018418789 |
| P08683        | NYVLEK                                     | 1.236263133        | 1              | 1.938961744 |
| P08683        | EALVDLGEEFSGR                              | 0.96145275         | 2              | 3.620311975 |
| P08683        | EHQESLDKDNPR                               | 1.034558817        | 2              | 4.219596863 |
| P08683        | FDPGHFLDER                                 | 1.113596454        | 2              | 2.664953709 |
| P08683        | ICAGEALAR                                  | 1.212076486        | 2              | 2.782515287 |
| P08683        | LPPGPTPLPIIGNTLQIYMK                       | 0.940909974        | 2              | 3.81854248  |
| P08683        | SQMPYTDVAVVHEIQR                           | 0.9480653          | 2              | 4.658567905 |
| P08683        | VQEEIER                                    | 1.100513315        | 2              | 2.642582178 |
| P08683        | YGLLLLLK                                   | 1.475153485        | 2              | 3.454749346 |
| P08683        | YIDLVPNTLPHLVTR                            | 1.09988993         | 2              | 3.558331013 |
| P08683        | DIDTTPAISGFGHLPFFYEACFIPVQR                | 0.910905798        | 3              | 5.474644661 |
| P08683        | FDYKDPTFLNLMHR                             | 1.295296777        | 3              | 4.908605099 |
| P08683        | GTNVIVLSLHDDKEFPNPEK                       | 1.089463609        | 3              | 5.433080673 |
| P08683        | LFSSPWLQVCNTFPAIIDYFPGSHNQVLK              | 1.240584209        | 3              | 4.237119675 |
| P08683        | VKEHQESLDKDNPR                             | 1.234196583        | 3              | 4.938120842 |
| <b>P09006</b> | <b>SPA3N Serine protease inhibitor A3N</b> | <b>1.235042902</b> | <b>0.98957</b> | <b>2</b>    |
| <b>P09034</b> | <b>ASSY Argininosuccinate synthase</b>     | <b>1.125168839</b> | <b>0.80859</b> | <b>14</b>   |
| P09034        | APNTPDVLEIEFK                              | 1.132809438        | 2              | 2.772825956 |
| P09034        | DGTTHTSLDLFMYLNEVAGK                       | 2.632628845        | 2              | 5.055802345 |
| P09034        | EFVEEFIWPAVQSSALYEDR                       | 1.581335068        | 2              | 5.674581528 |
| P09034        | FAELVYTGFWHSPECFVR                         | 0.447173505        | 2              | 4.370034218 |
| P09034        | FELTCYSLAPQIK                              | 0.678967838        | 2              | 4.236130714 |
| P09034        | GRNDLMEYAK                                 | 0.948863022        | 2              | 2.93580389  |
| P09034        | IDIVENR                                    | 1.104522535        | 2              | 2.551079512 |
| P09034        | KVFIEDVSK                                  | 1.10521527         | 2              | 2.764323235 |
| P09034        | NDLMEYAK                                   | 0.887157073        | 2              | 2.663493395 |
| P09034        | TQDPAKAPNTPDVLEIEFK                        | 1.14074271         | 2              | 4.801448345 |
| P09034        | VFIEDVSK                                   | 1.024149865        | 2              | 2.582131863 |
| P09034        | EQGYDVIAYLANIGQK                           | 0.806871246        | 3              | 3.762732029 |
| P09034        | SPWSMDENLMHISYEAGILENPK                    | 1.010365217        | 3              | 4.854954243 |
| P09034        | TQDPAKAPNTPDVLEIEFKK                       | 1.080459339        | 3              | 4.208372593 |
| <b>P09041</b> | <b>PGK2 Phosphoglycerate kinase 2</b>      | <b>1.040258856</b> | <b>0.69567</b> | <b>5</b>    |
| P09041        | VDFNVPMK                                   | 1.0342891          | 1              | 2.212665796 |
| P09041        | FHVEEEGK                                   | 1.050572166        | 2              | 2.686316967 |
| P09041        | FHVEEEGK GK                                | 1.014720472        | 2              | 2.81999898  |
| P09041        | LGDVYVNDAFGTAHR                            | 1.143821548        | 2              | 4.003675461 |

|               |                                                                           |                    |                |             |
|---------------|---------------------------------------------------------------------------|--------------------|----------------|-------------|
| P09041        | VSHVSTGGGASLELLEGGK                                                       | 1.079101947        | 2              | 5.295320034 |
| <b>P09117</b> | <b>ALDOC Fructose_bisphosphate aldolase C</b>                             | <b>1.281317251</b> | <b>0.00171</b> | <b>3</b>    |
| P09117        | VLAAVYK                                                                   | 1.359182595        | 2              | 2.67524457  |
| P09117        | YASICQQNGIVPIVEPEILPDGDHDLK                                               | 0.719060077        | 3              | 5.820940971 |
| P09117        | YASICQQNGIVPIVEPEILPDGDHDLKR                                              | 0.808701198        | 3              | 5.020802498 |
| <b>P09139</b> | <b>SPYA Serine__pyruvate aminotransferase_mitochondrial</b>               | <b>1.890431322</b> | <b>0.11868</b> | <b>2</b>    |
| P09139        | LLGPGPSNLAPR                                                              | 2.521416435        | 2              | 2.553364277 |
| P09139        | VLNAPPGISLISFNDK                                                          | 1.704770486        | 2              | 2.637414217 |
| <b>P09367</b> | <b>SDHL L_serine dehydratase/L_threonine deaminase</b>                    | <b>1.224249509</b> | <b>0.17976</b> | <b>2</b>    |
| <b>P09456</b> | <b>KAPO cAMP_dependent protein kinase type I_alpha regulatory subunit</b> | <b>1.096277509</b> | <b>0.98087</b> | <b>2</b>    |
| P09456        | LTVADALEPVQFEDGQK                                                         | 1.184677973        | 2              | 4.177518368 |
| P09456        | SENEEFVEVGR                                                               | 1.014282609        | 2              | 2.318448544 |
| <b>P09495</b> | <b>TPM4 Tropomyosin alpha_4 chain</b>                                     | <b>1.062932914</b> | <b>0.00047</b> | <b>11</b>   |
| P09495        | EDKYEIEIK                                                                 | 0.47041845         | 1              | 2.21056509  |
| P09495        | EENVGLHQTLDTLNLNLCI                                                       | 1.791827593        | 2              | 4.836336136 |
| P09495        | IQALQQQADDAEDR                                                            | 1.393373496        | 2              | 4.660092831 |
| P09495        | IQLVEEELDR                                                                | 0.892101661        | 2              | 3.430251598 |
| P09495        | IQLVEEELDRAQER                                                            | 0.946722647        | 2              | 3.119031668 |
| P09495        | KLVILEGELER                                                               | 0.699445791        | 2              | 2.958195925 |
| P09495        | LEEAEKAADESER                                                             | 0.754701703        | 2              | 4.061527729 |
| P09495        | LVILEGELER                                                                | 0.826844371        | 2              | 3.336939335 |
| P09495        | MEIQEMQLK                                                                 | 0.550212281        | 2              | 2.518589258 |
| P09495        | RIQLVEEELDR                                                               | 0.870858591        | 2              | 2.712732792 |
| P09495        | YSEKEDKYEIEIK                                                             | 1.274339649        | 2              | 4.544022083 |
| <b>P09527</b> | <b>RAB7A Ras_related protein Rab_7a</b>                                   | <b>0.982849785</b> | <b>0.96577</b> | <b>7</b>    |
| P09527        | ATIGADFLTK                                                                | 1.076922457        | 2              | 2.354333162 |
| P09527        | DPENFPFVVLGNK                                                             | 0.944938242        | 2              | 3.264183998 |
| P09527        | GADCCVLVFDVTAPNTFK                                                        | 1.143079246        | 2              | 4.194108009 |
| P09527        | TSLMNQYVVK                                                                | 1.049143907        | 2              | 2.638431787 |
| P09527        | TSLMNQYVNKK                                                               | 1.036797666        | 2              | 2.326337099 |
| P09527        | VIIIGDSGVGK                                                               | 1.169119314        | 2              | 2.362135649 |
| P09527        | TLDSWRDEFLIQASPR                                                          | 1.055976933        | 3              | 3.834145308 |
| <b>P09605</b> | <b>KCRS Creatine kinase S_type_mitochondrial</b>                          | <b>0.92832429</b>  | <b>0.99735</b> | <b>2</b>    |
| P09605        | GTGGVDAAVADVDYDISNDR                                                      | 0.987750768        | 2              | 3.58598876  |
| P09605        | LSEMTEQDQQR                                                               | 0.928302516        | 2              | 3.349126101 |
| <b>P09606</b> | <b>GLNA Glutamine synthetase</b>                                          | <b>1.326142183</b> | <b>0.06972</b> | <b>8</b>    |
| P09606        | CIEEAIDK                                                                  | 1.143023784        | 2              | 2.322644949 |
| P09606        | LTGFHETSNINDFSAGVANR                                                      | 1.414030314        | 2              | 5.877891064 |
| P09606        | MGDHLWVAR                                                                 | 1.131946443        | 2              | 3.001159906 |
| P09606        | QMYMNLPGQEK                                                               | 1.093104651        | 2              | 2.5490098   |
| P09606        | TCLLNETGDEPFQYK                                                           | 1.117303714        | 2              | 5.436609745 |
| P09606        | TCLLNETGDEPFQYKN                                                          | 1.857432678        | 2              | 5.199202061 |

|               |                                                          |                    |                |             |
|---------------|----------------------------------------------------------|--------------------|----------------|-------------|
| P09606        | ITGTNAEVMPAQWFEQIGPCEGIR                                 | 1.305924779        | 3              | 4.982322693 |
| P09606        | RLTGFHETSININDFSAGVANR                                   | 1.097653363        | 3              | 5.439883709 |
| <b>P09626</b> | <b>ATP4A Potassium_transporting ATPase alpha chain 1</b> | <b>0.998033356</b> | <b>0.16497</b> | <b>2</b>    |
| P09626        | VDNSSLTGESEPPQTR                                         | 0.992614408        | 2              | 4.37604475  |
| P09626        | VIMVTGDHPITAK                                            | 1.585091466        | 2              | 2.927926779 |
| <b>P09739</b> | <b>TNNT3 Troponin T_ fast skeletal muscle</b>            | <b>1.031859969</b> | <b>0.30344</b> | <b>3</b>    |
| P09739        | ELWDTLYQLETDKFEFGEK                                      | 0.848107373        | 2              | 3.999119759 |
| P09739        | KEEEEIALK                                                | 1.055559084        | 2              | 2.329298019 |
| P09739        | KKEEEEEIALK                                              | 0.685603818        | 3              | 3.674286366 |
| <b>P09811</b> | <b>PYGL Glycogen phosphorylase_ liver form</b>           | <b>1.118647372</b> | <b>0.55838</b> | <b>23</b>   |
| P09811        | DLSQLTK                                                  | 0.968008571        | 1              | 2.043612719 |
| P09811        | IFVDIEK                                                  | 1.254755622        | 1              | 1.956813574 |
| P09811        | VDDVAALDK                                                | 1.027470348        | 1              | 1.958987355 |
| P09811        | DFSELEPDKFQNK                                            | 0.821371883        | 2              | 3.328881979 |
| P09811        | EGWQVEEADDWLR                                            | 0.91277418         | 2              | 3.569577694 |
| P09811        | GIVGVENVAELK                                             | 0.915018792        | 2              | 3.228814602 |
| P09811        | GIVGVENVAELKK                                            | 1.160694433        | 2              | 3.401254416 |
| P09811        | HLQIYEINQK                                               | 1.009897265        | 2              | 3.870623112 |
| P09811        | LVIDQIDNGFFSPNQPDFK                                      | 1.190962881        | 2              | 4.902861595 |
| P09811        | LVTSAEVVNNNDPMVGSK                                       | 1.301906023        | 2              | 4.281748772 |
| P09811        | MSLIEEEGGKR                                              | 1.331749226        | 2              | 2.793661833 |
| P09811        | TFAYTNHTVLPEALER                                         | 1.209797455        | 2              | 4.448800564 |
| P09811        | VFADYEAYVK                                               | 1.083974469        | 2              | 2.750363111 |
| P09811        | VIPATDLSEQISTAGTEASGTGNMK                                | 1.159498434        | 2              | 6.078500748 |
| P09811        | VLYPNDNFFEGK                                             | 1.072079545        | 2              | 2.907433033 |
| P09811        | VSQLYMNQK                                                | 1.065750443        | 2              | 2.601977587 |
| P09811        | WLLLCNPLGLADLIAEK                                        | 1.008181477        | 2              | 4.710886955 |
| P09811        | WVDTQVVLALPYDTPVPGYMNNTVNTMR                             | 0.850019119        | 2              | 2.92583704  |
| P09811        | YEYGFNQK                                                 | 1.12385032         | 2              | 2.326445818 |
| P09811        | DGVGTVFDAPDQVAIQLNDTHPALAIPELMR                          | 1.222605093        | 3              | 5.589896202 |
| P09811        | INMAHLCIVGCHAVNGVAK                                      | 1.425550254        | 3              | 4.179925442 |
| P09811        | LHSFVGDDIFLR                                             | 3.687260394        | 3              | 3.321690321 |
| P09811        | VDDVAALDKK                                               | 1.163418632        | 3              | 3.303032398 |
| <b>P09812</b> | <b>PYGM Glycogen phosphorylase_ muscle form</b>          | <b>1.080969928</b> | <b>0.67454</b> | <b>2</b>    |
| P09812        | NLAENISR                                                 | 1.070023181        | 1              | 2.753947258 |
| P09812        | VIFLENYR                                                 | 1.653358143        | 2              | 2.457214117 |
| <b>P09838</b> | <b>TDT DNA nucleotidylexotransferase</b>                 | <b>1.043813886</b> | <b>0.95833</b> | <b>2</b>    |
| P09838        | KMMLDNHALYDRTK+Oxidation(2)                              | 1.043813886        | 2              | 2.34814477  |
| P09838        | KMMLDNHALYDRTK+Oxidation(3)                              | 1.043813886        | 2              | 2.400234699 |
| <b>P09875</b> | <b>UD2B1 UDP_glucuronosyltransferase 2B1</b>             | <b>0.988673504</b> | <b>0.99998</b> | <b>8</b>    |
| P09875        | FDGKKPDTLGSNTR                                           | 1.261836319        | 2              | 2.707607031 |
| P09875        | FSGGLPLPPSYVPVVLSELSDR                                   | 1.048659077        | 2              | 3.897190332 |
| P09875        | IILNELAQR                                                | 1.274639326        | 2              | 2.408900499 |

|               |                                                                           |                    |                |             |
|---------------|---------------------------------------------------------------------------|--------------------|----------------|-------------|
| P09875        | SDLEYSFAK                                                                 | 0.959048737        | 2              | 2.648369312 |
| P09875        | SWSQFYSDVLGRPTTLTEMMGK                                                    | 1.017265885        | 2              | 3.871595144 |
| P09875        | VDFSILSTTGLLTALK                                                          | 1.104665199        | 2              | 4.370866299 |
| P09875        | VFNEYSDVVENLCK                                                            | 1.008112314        | 2              | 2.885116577 |
| P09875        | ANVVASALAIQIPQK                                                           | 0.947204732        | 3              | 4.334767342 |
| <b>P09895</b> | <b>RL5 60S ribosomal protein L5</b>                                       | <b>1.103754866</b> | <b>0.01027</b> | <b>6</b>    |
| P09895        | GAVDGGLSIPHSTK                                                            | 1.15315258         | 2              | 4.977292061 |
| P09895        | HIMGQNVADYMR                                                              | 0.985632115        | 2              | 3.22737956  |
| P09895        | NNVTPDMMEEEMYK                                                            | 1.006282702        | 2              | 3.035978317 |
| P09895        | RFPGYDSESK                                                                | 1.070516723        | 2              | 2.607470989 |
| P09895        | YLMEEDEDAYKK                                                              | 1.187740128        | 2              | 3.473121405 |
| P09895        | IEGDMIVCAAYAHELPK                                                         | 1.013546016        | 3              | 3.387053013 |
| <b>POC057</b> | <b>H2AZ Histone H2A.Z</b>                                                 | <b>1.109688331</b> | <b>0.99983</b> | <b>2</b>    |
| POC057        | GDEELDSLK                                                                 | 0.973359146        | 1              | 2.196940899 |
| POC057        | ATIAGGGVIPHIHK                                                            | 1.109065409        | 2              | 3.704195023 |
| <b>POC2X9</b> | <b>AL4A1 Delta_1_pyrrroline_5_carboxylate dehydrogenase_mitochondrial</b> | <b>1.014575196</b> | <b>0.52392</b> | <b>20</b>   |
| POC2X9        | AIEAAVLAR                                                                 | 1.03451175         | 2              | 2.933066845 |
| POC2X9        | ALNDLKDQTEAIPCVVGDEEVWTS DVR                                              | 0.855286728        | 2              | 5.257025719 |
| POC2X9        | DPQEPIMKEEIFGPVLT VYVYPDEK                                                | 1.341879416        | 2              | 2.974384785 |
| POC2X9        | DQTEAIPCVVGDEEVWTS DVR                                                    | 0.703291791        | 2              | 5.221261501 |
| POC2X9        | EEIFGPVLT VYVYPDEK                                                        | 0.958451058        | 2              | 4.393566132 |
| POC2X9        | ETLQLVDSTTSYGLTGAVFAQDK                                                   | 0.716945211        | 2              | 4.445161819 |
| POC2X9        | KEWDLKPVADR                                                               | 1.005725675        | 2              | 3.593531847 |
| POC2X9        | LLEEHSR                                                                   | 0.831282216        | 2              | 2.371658087 |
| POC2X9        | LYVPQSLWPQIK                                                              | 3.388540923        | 2              | 3.569741011 |
| POC2X9        | NAAGNFYINDK                                                               | 1.360545053        | 2              | 2.468804598 |
| POC2X9        | NHFHVVHSSADV SVSGTLR                                                      | 1.157997159        | 2              | 5.692126751 |
| POC2X9        | SAFEYGGQK                                                                 | 1.12986388         | 2              | 2.903755665 |
| POC2X9        | STGSVVGQQPFGGAR                                                           | 1.003702557        | 2              | 4.229782104 |
| POC2X9        | TIVQEATR                                                                  | 1.072534721        | 2              | 2.543223381 |
| POC2X9        | VANEPILAFTQGSPER                                                          | 1.051095264        | 2              | 5.336018085 |
| POC2X9        | VGNPAEDFGTFFSAVIDAK                                                       | 0.860002747        | 2              | 4.828312874 |
| POC2X9        | YQLSPFNHGK                                                                | 1.16838065         | 2              | 2.9401052   |
| POC2X9        | EAGLPPNVIQFVPADGPTFGDVT SSEHLCGINFTG SVPTFK                               | 0.93259409         | 3              | 3.723867893 |
| POC2X9        | SSPSLSILAGGQC NESVGYFVEPCIIESK                                            | 0.886266372        | 3              | 5.979300022 |
| POC2X9        | YRETLQLVDSTTSYGLTGAVFAQDK                                                 | 0.721248566        | 3              | 3.378230095 |
| <b>POC5H9</b> | <b>MANF Mesencephalic astrocyte_derived neurotrophic factor</b>           | <b>1.156519194</b> | <b>1E-07</b>   | <b>4</b>    |
| POC5H9        | DRDVTFSPATIEELIK                                                          | 1.102449089        | 2              | 4.972234726 |
| POC5H9        | DVTFSPATIEELIK                                                            | 1.011146922        | 2              | 2.989422321 |
| POC5H9        | ILDDWGEMCK                                                                | 1.144453402        | 2              | 3.160619736 |
| POC5H9        | IINEVSKPLAHHIPVEK                                                         | 1.277132853        | 3              | 4.259290695 |
| <b>POC6F1</b> | <b>DYH2 Dynein heavy chain 2_axonemal</b>                                 | <b>1.105469096</b> | <b>0.24539</b> | <b>2</b>    |

|               |                                                   |                    |                |             |
|---------------|---------------------------------------------------|--------------------|----------------|-------------|
| POC6F1        | EKVEVMSLELEDAK+Oxidation(6)                       | 1.104994437        | 2              | 2.68745923  |
| POC6F1        | TMPLISDLR+Oxidation(2)                            | 1.113992701        | 2              | 2.306237221 |
| <b>P10111</b> | <b>PPIA Peptidyl_prolyl cis_trans isomerase A</b> | <b>1.112266896</b> | <b>9.9E-20</b> | <b>10</b>   |
| P10111        | EGMSIVEAMER                                       | 0.662506534        | 2              | 3.195190191 |
| P10111        | FEDEFILK                                          | 1.140430423        | 2              | 3.217045784 |
| P10111        | IIPGFMCQGGDFTR                                    | 1.53894246         | 2              | 2.886377811 |
| P10111        | KITISDCGQL                                        | 1.277803669        | 2              | 3.483732462 |
| P10111        | SIYGEKFEDEFILK                                    | 1.189059585        | 2              | 4.674582481 |
| P10111        | TEWLDGK                                           | 1.027940427        | 2              | 2.383071184 |
| P10111        | VCFELFADK                                         | 1.339953627        | 2              | 3.364836931 |
| P10111        | HTGPGILSMANAGPNTNGSQFFICTAK                       | 1.008219           | 3              | 6.275004864 |
| P10111        | VCFELFADKVPK                                      | 1.321383778        | 3              | 3.717035055 |
| P10111        | VKEGMSIVEAMER                                     | 1.23081188         | 3              | 3.443871737 |
| <b>P10536</b> | <b>RAB1B Ras_related protein Rab_1B</b>           | <b>1.068582929</b> | <b>0.12198</b> | <b>3</b>    |
| P10536        | MGPGAASGGERPNLK                                   | 1.293609473        | 2              | 3.894422293 |
| P10536        | NATNVEQAFMTMAAEIK+Oxidation(10)                   | 0.954225117        | 2              | 4.160442352 |
| P10536        | NATNVEQAFMTMAAEIK+Oxidation(12)                   | 0.954382032        | 2              | 3.801312923 |
| <b>P10633</b> | <b>CP2D1 Cytochrome P450 2D1</b>                  | <b>1.246278402</b> | <b>0.17342</b> | <b>4</b>    |
| P10633        | SQGVILASYGPEWR                                    | 0.642553611        | 2              | 3.994930029 |
| P10633        | TFMALLDNLLAENR                                    | 1.460191086        | 2              | 3.691400766 |
| P10633        | YGDVFSLQK                                         | 0.941338815        | 2              | 2.522557735 |
| P10633        | GTTLIINLSSVLKDETVWEKPHR                           | 1.057205154        | 3              | 3.959924936 |
| <b>P10634</b> | <b>CP2DQ Cytochrome P450 2D26</b>                 | <b>1.145686051</b> | <b>0.0251</b>  | <b>20</b>   |
| P10634        | ACLGEPLAR                                         | 0.822810154        | 2              | 2.751560926 |
| P10634        | DMTDAFLAEMQK                                      | 0.590455433        | 2              | 2.544116735 |
| P10634        | EAEHPFNPSILLSK                                    | 0.720940472        | 2              | 2.485780716 |
| P10634        | FADIVPTNIPHMTSR                                   | 1.229641643        | 2              | 2.594512463 |
| P10634        | FADIVPTNIPHMTSRDIK                                | 1.446085382        | 2              | 2.410597086 |
| P10634        | FEYEDPFFNR                                        | 0.884543657        | 2              | 2.380530596 |
| P10634        | FHPEHFLDAQGNFVK                                   | 0.975826243        | 2              | 4.687509537 |
| P10634        | FQGFLIPK                                          | 0.85841349         | 2              | 2.480246544 |
| P10634        | GNPESSFNDENLR                                     | 1.016070939        | 2              | 4.353241444 |
| P10634        | GTTLIPNLSSVLK                                     | 0.935214814        | 2              | 2.522253513 |
| P10634        | GTTLIPNLSSVLKDETVWEKPLR                           | 1.126897009        | 2              | 4.660493851 |
| P10634        | GVLAPYGPEWR                                       | 0.997177663        | 2              | 3.276290417 |
| P10634        | LNSFIALVDK                                        | 1.64701411         | 2              | 2.821019888 |
| P10634        | RFEYEDPFFNR                                       | 1.079500544        | 2              | 3.535578966 |
| P10634        | RVHEEIDEVIGQVR                                    | 1.055080209        | 2              | 4.150885105 |
| P10634        | SLEQWVTEEAGHLCDTFAK                               | 1.085733419        | 2              | 5.27866745  |
| P10634        | SWDPAQPPR                                         | 0.924347637        | 2              | 2.652755976 |
| P10634        | VHEEIDEVIGQVR                                     | 0.962665483        | 2              | 4.940594196 |
| P10634        | AVSNVIASLVYAR                                     | 1.022013991        | 3              | 4.389504433 |
| P10634        | ELLVTYGEDTADRPLLPYIYHLYGYNK                       | 0.807858357        | 3              | 5.411210537 |

| <b>P10719</b> | <b>ATPB ATP synthase subunit beta_ mitochondrial</b> | <b>1.068222923</b> | <b>3.2E-12</b> | <b>28</b>   |
|---------------|------------------------------------------------------|--------------------|----------------|-------------|
| P10719        | ILQDYK                                               | 1.233507774        | 1              | 2.085426807 |
| P10719        | AHGGYSVFAGVGER                                       | 0.977164639        | 2              | 3.98884058  |
| P10719        | AIAELGIYPAVDPLDSTSR                                  | 0.958155478        | 2              | 4.928899765 |
| P10719        | EGNDLYHEMIESGVINLK                                   | 0.86858182         | 2              | 5.368168354 |
| P10719        | FLSQPFQVAEVFTGHMGK                                   | 1.216468257        | 2              | 4.758239269 |
| P10719        | FTQAGSEVSALLGR                                       | 1.120919884        | 2              | 4.798026085 |
| P10719        | IGLFGGAGVGK                                          | 1.505730651        | 2              | 3.324647188 |
| P10719        | IMDPNIVGSEHYDVAR                                     | 1.104932297        | 2              | 4.641401768 |
| P10719        | IMDPNIVGSEHYDVAR+Oxidation(2)                        | 1.237771207        | 2              | 3.975841284 |
| P10719        | IMNVIGEPIDER                                         | 1.561897131        | 2              | 4.037744045 |
| P10719        | IMNVIGEPIDER+Oxidation(2)                            | 1.650457157        | 2              | 3.335940123 |
| P10719        | IPSAVGYQPTLATDMGTMQER                                | 1.565061217        | 2              | 4.889055729 |
| P10719        | LVLEVAQHLGESTVR                                      | 1.325329788        | 2              | 4.844874382 |
| P10719        | TIAMDGTEGLVR                                         | 1.008280042        | 2              | 3.642417669 |
| P10719        | TIAMDGTEGLVR+Oxidation(4)                            | 1.214519446        | 2              | 2.711362839 |
| P10719        | TREGNDLYHEMIESGVINLK                                 | 1.074520336        | 2              | 6.040424347 |
| P10719        | TVLIMELINNVAK                                        | 0.820991483        | 2              | 5.063540936 |
| P10719        | TVLIMELINNVAK+Oxidation(5)                           | 0.882984164        | 2              | 2.787698746 |
| P10719        | VALTGLTVAEYFR                                        | 1.633399305        | 2              | 4.106044769 |
| P10719        | VALVYQMNEPPGAR                                       | 1.010842559        | 2              | 3.550090075 |
| P10719        | VLDGAPIK                                             | 1.076449804        | 2              | 3.032022953 |
| P10719        | VVDLLAPYAK                                           | 1.186399413        | 2              | 3.234768629 |
| P10719        | GFQQILAGDYDHLPEQAFYMVGPPIEEAVAK                      | 1.125589448        | 3              | 4.984230518 |
| P10719        | GSITSVQAIYVPADDLTPAPATTFHAHLDATTVLSR                 | 1.186967404        | 3              | 3.719862223 |
| P10719        | QFAPIHAEAPEFIEMSVEQEILVTGIK                          | 0.73642682         | 3              | 4.875733376 |
| P10719        | SLQDIIAILGMDELSEEDKLTVSR                             | 1.23413412         | 3              | 5.341989994 |
| P10719        | SLQDIIAILGMDELSEEDKLTVSR+Oxidation(11)               | 0.9899915          | 3              | 3.781440258 |
| P10719        | VLDGAPIKIPVGPETLGR                                   | 1.035881836        | 3              | 4.454595089 |
| <b>P10760</b> | <b>SAHH Adenosylhomocysteinase</b>                   | <b>1.101554282</b> | <b>9.9E-20</b> | <b>16</b>   |
| P10760        | SKFDNLYGCR                                           | 1.19982286         | 1              | 3.197076797 |
| P10760        | AGIPVFAWK                                            | 1.102747606        | 2              | 2.72345233  |
| P10760        | ALDIAENEMPGLMR                                       | 1.06438973         | 2              | 3.189830542 |
| P10760        | ATDVMIAGK                                            | 1.040776179        | 2              | 2.777018547 |
| P10760        | DGPLNMILDGGDLTNLIHTK                                 | 1.21007634         | 2              | 5.570093632 |
| P10760        | FDNLYGCR                                             | 1.194141986        | 2              | 2.764606237 |
| P10760        | GETDEEYLWCIEQTLHFK                                   | 1.347857062        | 2              | 4.330360889 |
| P10760        | GISETTTGVHNLYK                                       | 1.105456248        | 2              | 4.260594368 |
| P10760        | IILLAAGR                                             | 1.486505237        | 2              | 2.717395306 |
| P10760        | KLDEAVAEHLGK                                         | 1.167771838        | 2              | 4.782101631 |
| P10760        | LDEAVAEHLGK                                          | 1.118314778        | 2              | 3.355521202 |
| P10760        | VAVVAGYGDVVGK                                        | 1.373772929        | 2              | 4.158931255 |
| P10760        | VNIKPQVDR                                            | 1.233659326        | 2              | 2.815467358 |

|               |                                                              |                    |                |             |
|---------------|--------------------------------------------------------------|--------------------|----------------|-------------|
| P10760        | WLNENAVEK                                                    | 1.134806867        | 2              | 2.723619699 |
| P10760        | WSSCNIFSTQDHAAAAIAK                                          | 1.437184078        | 2              | 5.017638206 |
| P10760        | DGPLNMILDDGGDLTNIHTK+Oxidation(6)                            | 0.95025849         | 3              | 3.368877411 |
| <b>P10818</b> | <b>CX6A1 Cytochrome c oxidase subunit 6A1_ mitochondrial</b> | <b>1.085632661</b> | <b>0.21722</b> | <b>2</b>    |
| P10818        | HEEHERPEFVAYPHLR                                             | 1.015605502        | 3              | 3.825531483 |
| P10818        | SRHEEHERPEFVAYPHLR                                           | 1.109655719        | 3              | 3.952997446 |
| <b>P10860</b> | <b>DHE3 Glutamate dehydrogenase 1_ mitochondrial</b>         | <b>1.330164842</b> | <b>9.9E-20</b> | <b>26</b>   |
| P10860        | ALASLMTYK                                                    | 1.052850663        | 2              | 3.454084873 |
| P10860        | CAVVDVPFGGAK                                                 | 1.145005197        | 2              | 3.288215399 |
| P10860        | CVGVGESDGSIWNPDGIDPK                                         | 1.082176937        | 2              | 5.305278301 |
| P10860        | DDGSWEVIEGYR                                                 | 0.636622865        | 2              | 3.950361013 |
| P10860        | DIVHSGLAYTMR                                                 | 0.661318835        | 2              | 3.381713867 |
| P10860        | DSNYHLLMSVQESLER                                             | 0.911458189        | 2              | 4.173229694 |
| P10860        | GASIVEDKLVEDLK                                               | 1.472566563        | 2              | 3.683504343 |
| P10860        | GFIGPGIDVPAPDMSTGER                                          | 1.106629049        | 2              | 5.171654701 |
| P10860        | GFIGPGIDVPAPDMSTGER+Oxidation(14)                            | 1.068002775        | 2              | 4.548741817 |
| P10860        | HGGTIPVVPTAEFQDR                                             | 1.138512646        | 2              | 4.675029278 |
| P10860        | IIAEGANGPTTPEADK                                             | 1.05053605         | 2              | 5.367348194 |
| P10860        | IIAEGANGPTTPEADKIFLER                                        | 1.195727852        | 2              | 4.975968361 |
| P10860        | KGFIGPGIDVPAPDMSTGER                                         | 1.114875913        | 2              | 5.035651684 |
| P10860        | MVEGFFDR                                                     | 1.143524231        | 2              | 3.028182983 |
| P10860        | MVEGFFDR+Oxidation(1)                                        | 1.280938375        | 2              | 2.470053196 |
| P10860        | NLNHVSYGR                                                    | 1.190776962        | 2              | 2.369826794 |
| P10860        | NYTDNELEK                                                    | 1.116725724        | 2              | 2.496811867 |
| P10860        | RDDGSWEVIEGYR                                                | 1.210345513        | 2              | 3.616101742 |
| P10860        | RFTMELAK                                                     | 1.269978614        | 2              | 2.471533537 |
| P10860        | TAAYVNAIEK                                                   | 1.24565475         | 2              | 3.414144993 |
| P10860        | TFVVQGFVGNVGLHSMR                                            | 1.2871201          | 2              | 4.527501106 |
| P10860        | YNLGLDLR                                                     | 1.125111899        | 2              | 3.25063467  |
| P10860        | YSTDVSVDEVK                                                  | 1.039853298        | 2              | 3.373617172 |
| P10860        | IIKPCNHVLSLSPFIR                                             | 1.188679216        | 3              | 3.517613173 |
| P10860        | LQHGSILGFPK                                                  | 1.617020136        | 3              | 3.390925407 |
| P10860        | VYEGSILEADCDILIPAASEK                                        | 1.087394676        | 3              | 5.838824749 |
| <b>P10867</b> | <b>GGLO L_gulonolactone oxidase</b>                          | <b>1.100654186</b> | <b>0.24365</b> | <b>5</b>    |
| P10867        | GDDILLSPCFQR                                                 | 0.932252398        | 2              | 3.107581615 |
| P10867        | LDPTGMFLNSYLEK                                               | 0.9273902          | 2              | 4.134648323 |
| P10867        | LDYWLAYETIMK                                                 | 1.065746473        | 2              | 4.068061352 |
| P10867        | TYGCSPEVYYQPTSVEEVR                                          | 0.878191042        | 2              | 4.987960815 |
| P10867        | VVAHYPVEVR                                                   | 1.220826494        | 2              | 2.48660183  |
| <b>P10868</b> | <b>GAMT Guanidinoacetate N_methyltransferase</b>             | <b>1.096438596</b> | <b>0.52285</b> | <b>6</b>    |
| P10868        | ENICTEVMALVPPADCR                                            | 0.821100646        | 2              | 3.075416088 |
| P10868        | LQNWALK                                                      | 1.101125311        | 2              | 2.451489925 |

|               |                                                                      |                    |                |             |
|---------------|----------------------------------------------------------------------|--------------------|----------------|-------------|
| P10868        | WETPYMHSLAAAAASR                                                     | 1.387614388        | 2              | 2.887610912 |
| P10868        | YYAFPQMITPLVTK                                                       | 0.819408211        | 2              | 3.851308823 |
| P10868        | EHWIECNDGVFQR                                                        | 0.890471518        | 3              | 3.37182641  |
| P10868        | YTDITAMFEETQVPALLEAGFQR                                              | 1.154638995        | 3              | 6.898396492 |
| <b>P10888</b> | <b>COX41 Cytochrome c oxidase subunit 4 isoform 1_ mitochondrial</b> | <b>1.048626183</b> | <b>0.22105</b> | <b>4</b>    |
| P10888        | DYPLPDVAHVK                                                          | 0.826229294        | 2              | 2.705712795 |
| P10888        | IQFNESFAEMNK                                                         | 1.183236502        | 2              | 3.8960042   |
| P10888        | SEDYALPSYVDR                                                         | 1.014826581        | 2              | 3.979999304 |
| P10888        | VNPIQGFSK                                                            | 1.208552626        | 2              | 2.318281174 |
| <b>P10959</b> | <b>EST2 Liver carboxylesterase 1</b>                                 | <b>0.971455027</b> | <b>0.18539</b> | <b>2</b>    |
| P10959        | AISESGVLTTLNLDKK                                                     | 0.768777045        | 2              | 3.52784586  |
| P10959        | EGASEEETNLSKLVMK                                                     | 1.304804422        | 2              | 2.326089859 |
| <b>P11030</b> | <b>ACBP Acyl_CoA_binding protein</b>                                 | <b>1.14509099</b>  | <b>0.8364</b>  | <b>4</b>    |
| P11030        | WDSWNK                                                               | 0.94669814         | 1              | 1.946791053 |
| P11030        | QATVGDVNTDRPGLDLK                                                    | 1.257132898        | 2              | 3.390898466 |
| P11030        | TQPTDEEMLFYSHFK                                                      | 1.54667975         | 2              | 4.342547417 |
| P11030        | TYVEKVEELK                                                           | 1.096950372        | 2              | 2.831024408 |
| <b>P11232</b> | <b>THIO Thioredoxin</b>                                              | <b>1.109327394</b> | <b>9.9E-20</b> | <b>2</b>    |
| P11232        | EAFQEALAAAGDK                                                        | 0.557253809        | 2              | 4.800396442 |
| P11232        | VGEFSGANK                                                            | 1.110170099        | 2              | 3.073779106 |
| <b>P11240</b> | <b>COX5A Cytochrome c oxidase subunit 5A_ mitochondrial</b>          | <b>1.076240655</b> | <b>0.27328</b> | <b>6</b>    |
| P11240        | GMNTLVGYDLVPEPK                                                      | 1.034525618        | 2              | 4.410397053 |
| P11240        | IIDAALR                                                              | 1.10267327         | 2              | 2.332580805 |
| P11240        | LNDFASAVR                                                            | 1.066534449        | 2              | 3.336289644 |
| P11240        | RLNDFASAVR                                                           | 1.342409464        | 2              | 2.420677423 |
| P11240        | EIYPYVIQELRPTLNELGISTPEELGLDK                                        | 0.458827367        | 3              | 6.863557816 |
| P11240        | EIYPYVIQELRPTLNELGISTPEELGLDKV                                       | 1.423105261        | 3              | 7.046726227 |
| <b>P11348</b> | <b>DHPR Dihydropteridine reductase</b>                               | <b>1.14957946</b>  | <b>0.9565</b>  | <b>10</b>   |
| P11348        | NCDLMWK                                                              | 1.109695585        | 1              | 2.315269232 |
| P11348        | AALDGTPGMIGYMAK                                                      | 1.372220021        | 2              | 3.796345472 |
| P11348        | EGLLTLGAK                                                            | 1.070983808        | 2              | 2.767081976 |
| P11348        | GAVHQLCQSLAGK                                                        | 1.294873483        | 2              | 3.839771271 |
| P11348        | MTDSFTEQADQVTAEVGK                                                   | 0.88060778         | 2              | 5.769455433 |
| P11348        | MTDSFTEQADQVTAEVGK+Oxidation(1)                                      | 1.239240466        | 2              | 4.853416443 |
| P11348        | NSGMPSGAAAIIVLPVTLTPMNR                                              | 1.165804176        | 2              | 5.299614429 |
| P11348        | QSIWTSTISSHLATK                                                      | 1.216093944        | 2              | 3.606249332 |
| P11348        | RPNSGSLIQVVTDTGK                                                     | 0.67613325         | 2              | 3.765700579 |
| P11348        | VDAILCVAGGWAGGNAK                                                    | 1.144791743        | 2              | 4.200397491 |
| <b>P11442</b> | <b>CLH Clathrin heavy chain 1</b>                                    | <b>1.175811093</b> | <b>8.1E-11</b> | <b>40</b>   |
| P11442        | ADDPSSYMEVVQAANTSGNWEELVK                                            | 0.652413615        | 2              | 5.466551781 |
| P11442        | AFMTADLPNELIELLEK                                                    | 1.157233969        | 2              | 4.172587872 |
| P11442        | AHIAQLCEK                                                            | 1.639534448        | 2              | 2.588712454 |



|               |                                                                  |                    |                |             |
|---------------|------------------------------------------------------------------|--------------------|----------------|-------------|
| P11442        | ALEHFTDLYDIK                                                     | 1.190848795        | 2              | 3.3691504   |
| P11442        | CNEPAVWSQLAK                                                     | 1.03257661         | 2              | 2.672060728 |
| P11442        | EDKLECSEELGDLVK                                                  | 0.967435325        | 2              | 2.98283577  |
| P11442        | FNALFAQGNYSEAAK                                                  | 0.941962917        | 2              | 4.278571606 |
| P11442        | GQCDLELINVCNENSLFK                                               | 1.012493691        | 2              | 4.904414177 |
| P11442        | GQFSTDELVAEVEK                                                   | 1.330772651        | 2              | 3.851697922 |
| P11442        | GQFSTDELVAEVEKR                                                  | 1.074015581        | 2              | 3.521629572 |
| P11442        | HELIEFR                                                          | 1.017853437        | 2              | 2.629707336 |
| P11442        | HSSLAGCQIINYR                                                    | 1.100015992        | 2              | 3.143580437 |
| P11442        | IHEGCEEPATHNALAK                                                 | 1.187765909        | 2              | 5.160325527 |
| P11442        | ISGETIFVTAPHEATAGIIGVNR                                          | 1.175192131        | 2              | 5.499844074 |
| P11442        | IVLDNSVFSEHR                                                     | 1.556425354        | 2              | 2.813750029 |
| P11442        | IYIDSNNNPER                                                      | 1.053212566        | 2              | 3.07195282  |
| P11442        | KFNALFAQGNYSEAAK                                                 | 1.185117223        | 2              | 3.62978673  |
| P11442        | LAELEEFINGPNNNAHIQQVGDR                                          | 1.043080598        | 2              | 5.22302866  |
| P11442        | LECSEELGDLVK                                                     | 1.320169589        | 2              | 3.013247728 |
| P11442        | LHIIIEVGTPTGNQPFPK                                               | 1.139161234        | 2              | 4.128503323 |
| P11442        | LLYNNVSNFGR                                                      | 1.172336297        | 2              | 2.777089834 |
| P11442        | LPVVIGGLLDVDCSEDIK                                               | 1.124232287        | 2              | 5.113552094 |
| P11442        | LTDQLPLIIVCDR                                                    | 1.015574076        | 2              | 3.229765415 |
| P11442        | NLQNLLILTAIK                                                     | 1.229907792        | 2              | 4.343196869 |
| P11442        | NNLAGAEELFAR                                                     | 0.957934338        | 2              | 3.782678604 |
| P11442        | SVDPTLALSIVLR                                                    | 0.968357708        | 2              | 2.64977622  |
| P11442        | SVNESLNNLFITEEDYQALR                                             | 1.09289619         | 2              | 4.644442558 |
| P11442        | TLQIFNIEMK                                                       | 1.021634892        | 2              | 2.796615839 |
| P11442        | TSIDAYDNFDNISLAQR                                                | 1.011081907        | 2              | 4.987639904 |
| P11442        | VDKLDASESLR                                                      | 1.182215206        | 2              | 2.533713102 |
| P11442        | VGEQAQVVIIDMNDPSNPIR                                             | 1.0032315          | 2              | 5.296023846 |
| P11442        | VIQFAETGQVQK                                                     | 1.301127546        | 2              | 4.75095129  |
| P11442        | VSQPIEGHAASFAQFK                                                 | 1.086763599        | 2              | 4.136192799 |
| P11442        | WLLLTGISAQQNR                                                    | 1.21362539         | 2              | 2.634001732 |
| P11442        | YESLELCRPVLQQGR                                                  | 0.970862501        | 2              | 3.210555077 |
| P11442        | KDPELWGSVLLENPYR                                                 | 1.130043694        | 3              | 3.484855413 |
| P11442        | KFDVNTSAVQVLIHIGNLDR                                             | 1.135139195        | 3              | 5.905497551 |
| P11442        | LLEMNLMHAPQVADAILGNQMFTHYDR                                      | 1.041338099        | 3              | 3.95717907  |
| P11442        | NNRPSEGPLQTR                                                     | 1.103007108        | 3              | 3.933251619 |
| P11442        | RPLIDQVVQTALSETQDPEEVSIVTK                                       | 1.035463557        | 3              | 5.842098236 |
| <b>P11497</b> | <b>ACACA Acetyl_CoA carboxylase 1</b>                            | <b>0.881869058</b> | <b>0.55637</b> | <b>3</b>    |
| P11497        | ECSQPVMVYIPPAELR+Oxidation(7)                                    | 0.88182268         | 2              | 2.439479113 |
| P11497        | LPELLLK                                                          | 0.913707801        | 2              | 2.492558002 |
| P11497        | TLRDPSLPLELQDIMTSVSGR                                            | 1.284313439        | 3              | 3.969368696 |
| <b>P11507</b> | <b>AT2A2 Sarcoplasmic/endoplasmic reticulum calcium ATPase 2</b> | <b>0.87746502</b>  | <b>0.27734</b> | <b>5</b>    |

|               |                                             |                    |                |             |
|---------------|---------------------------------------------|--------------------|----------------|-------------|
| P11507        | DIVPGDIVEIAVGDKVPADIR                       | 1.060874763        | 2              | 3.685843229 |
| P11507        | IRDEMVAEQER                                 | 1.021568153        | 2              | 3.193726301 |
| P11507        | KSEIGIAMGSGTAVAK                            | 0.799926643        | 2              | 3.186424255 |
| P11507        | TASEMVLADDNFSTIVAAVEEGR                     | 1.147644498        | 2              | 2.869868279 |
| P11507        | VDQSILTGESVSVIK                             | 0.794582581        | 2              | 4.111185551 |
| <b>P11598</b> | <b>PDIA3 Protein disulfide_isomerase A3</b> | <b>1.158765174</b> | <b>9.9E-20</b> | <b>25</b>   |
| P11598        | DGEEAGAYDGPR                                | 0.74014958         | 2              | 3.445865393 |
| P11598        | DLLTAYYDVDYEK                               | 0.920916216        | 2              | 3.668124437 |
| P11598        | DPNIVIAK                                    | 1.447107565        | 2              | 2.377151012 |
| P11598        | EATNPPIIQEEKPK                              | 0.906533143        | 2              | 3.648104191 |
| P11598        | EYDDNGEGITIFRPLHLANK                        | 0.979209926        | 2              | 3.987533569 |
| P11598        | FISDKDASVVGFFR                              | 1.350618604        | 2              | 4.558806419 |
| P11598        | FLQEYFDGNLK                                 | 1.04220807         | 2              | 3.72903657  |
| P11598        | FLQEYFDGNLKR                                | 1.418196292        | 2              | 3.707463026 |
| P11598        | FVMQEEFSR                                   | 1.289563388        | 2              | 2.989457846 |
| P11598        | GFPTIYFSPANK                                | 0.892978032        | 2              | 2.797986746 |
| P11598        | IFRDGEEAGAYDGPR                             | 1.191203639        | 2              | 4.139390469 |
| P11598        | KQAGPASVPLR                                 | 1.264470634        | 2              | 2.412615776 |
| P11598        | LAPEYAAAATR                                 | 1.121989043        | 2              | 2.875238895 |
| P11598        | LNFAVASR                                    | 1.709092732        | 2              | 2.667378664 |
| P11598        | MDATANDVPSPYEVK                             | 1.198268308        | 2              | 4.330312252 |
| P11598        | MDATANDVPSPYEVK+Oxidation(1)                | 1.234506422        | 2              | 3.988277674 |
| P11598        | RLAPEYAAAATR                                | 1.132887888        | 2              | 3.350922108 |
| P11598        | SEPIPETNEGPVK                               | 1.103410039        | 2              | 2.954803228 |
| P11598        | TFSHELSDFGLESTTGEIPVVAIR                    | 1.139023265        | 2              | 5.975343227 |
| P11598        | VDCTANTNTCNK                                | 1.204727102        | 2              | 4.460864544 |
| P11598        | YGVSGYPTLK                                  | 1.09125184         | 2              | 2.893121004 |
| P11598        | EYDDNGEGITIFRPLHLANKFEDK                    | 1.152696435        | 3              | 3.809692621 |
| P11598        | FIQESIFGLCPHMTEDNKDLIQGK                    | 1.115746429        | 3              | 5.281380177 |
| P11598        | KTFSHELSDFGLESTTGEIPVVAIR                   | 1.177899548        | 3              | 4.451574326 |
| P11598        | LSKDPNIVIAK                                 | 1.273148326        | 3              | 4.333740234 |
| <b>P11608</b> | <b>ATP8 ATP synthase protein 8</b>          | <b>1.125861262</b> | <b>0.85935</b> | <b>2</b>    |
| P11608        | ISSQTFPAPPSPK                               | 1.14310629         | 2              | 2.375633478 |
| P11608        | TNNPWESK                                    | 1.080236822        | 2              | 2.359498739 |
| <b>P11711</b> | <b>CP2A1 Cytochrome P450 2A1</b>            | <b>0.996189614</b> | <b>0.99987</b> | <b>5</b>    |
| P11711        | GEQATYNTLFK                                 | 0.942345563        | 2              | 3.128634453 |
| P11711        | GTDVFPILGSLMTDPK                            | 1.016012976        | 2              | 3.473768711 |
| P11711        | ILEEAGYLIK                                  | 1.120139064        | 2              | 2.78407979  |
| P11711        | TVSNVISSIVFGER                              | 1.140398654        | 2              | 3.170994759 |
| P11711        | VHEEIEQVIGR                                 | 0.948402742        | 2              | 3.420905352 |
| <b>P11714</b> | <b>CP2D9 Cytochrome P450 2D9</b>            | <b>1.177216464</b> | <b>0.04303</b> | <b>2</b>    |
| P11714        | GNPESSFNDENLLMVVR                           | 1.03078707         | 2              | 2.579715252 |
| P11714        | VQQEIDEVIGQVR                               | 1.191103349        | 2              | 4.621613503 |

|               |                                                    |                    |                |             |
|---------------|----------------------------------------------------|--------------------|----------------|-------------|
| <b>P11862</b> | <b>GAS2 Growth arrest_specific protein 2</b>       | <b>1.074378482</b> | <b>0.92481</b> | <b>3</b>    |
| P11862        | EIEQEETLSAPSPSPSSK                                 | 1.437941621        | 2              | 3.909667253 |
| P11862        | LDNGALLCQLAATVQEK                                  | 1.059428502        | 2              | 3.902297735 |
| P11862        | YGVPEPGLIK                                         | 1.084797626        | 2              | 2.523393393 |
| <b>P11884</b> | <b>ALDH2 Aldehyde dehydrogenase_ mitochondrial</b> | <b>1.021048513</b> | <b>9.9E-20</b> | <b>24</b>   |
| P11884        | DGMTIAKEEIFGPVMQILK                                | 1.003296404        | 2              | 3.823958874 |
| P11884        | EEIFGPVMQILK                                       | 0.771276444        | 2              | 3.910346746 |
| P11884        | ELGEYGLQAYTEVK                                     | 0.677769933        | 2              | 4.570565224 |
| P11884        | GYFIQPTVFGDVK                                      | 0.825981932        | 2              | 3.924601316 |
| P11884        | LGPALATGNVVVMK                                     | 1.308724653        | 2              | 4.067557335 |
| P11884        | LGPALATGNVVVMK+Oxidation(13)                       | 1.437479151        | 2              | 3.59059     |
| P11884        | LLCGGAAADR                                         | 1.597346982        | 2              | 3.784983635 |
| P11884        | RVTLELGGK                                          | 1.115203927        | 2              | 2.784054041 |
| P11884        | TEQGPQVDETQFK                                      | 1.020940136        | 2              | 4.543169975 |
| P11884        | TEQGPQVDETQFKK                                     | 1.178759221        | 2              | 3.850818396 |
| P11884        | TFPTVNPSTGEVICQVAEGNK                              | 0.649126236        | 2              | 5.299621105 |
| P11884        | TFPTVNPSTGEVICQVAEGNKEDVDK                         | 0.994338144        | 2              | 4.290913105 |
| P11884        | TFVQEDVYDEFVER                                     | 1.165154638        | 2              | 5.23867321  |
| P11884        | TIEEVVGR                                           | 1.015989095        | 2              | 3.024271965 |
| P11884        | TIPIDGFFSYTR                                       | 0.916907949        | 2              | 2.511714458 |
| P11884        | VAEQTPLTALYVANLIK                                  | 1.457232617        | 2              | 5.490668774 |
| P11884        | VAFTGSTEVGHLIQVAAGSSNLK                            | 1.044316066        | 2              | 5.785320282 |
| P11884        | VTLELGGK                                           | 1.117310053        | 2              | 2.304816723 |
| P11884        | VVGPNFDSR                                          | 1.020836536        | 2              | 3.042837143 |
| P11884        | YGLAAAVFTK                                         | 1.128757249        | 2              | 3.872758627 |
| P11884        | YYAGWADK                                           | 1.063632173        | 2              | 2.550104141 |
| P11884        | EAGFPPGVNIVPGFGPTAGAAIASHEDVDK                     | 0.908685622        | 3              | 4.206560612 |
| P11884        | KTFTVNPSTGEVICQVAEGNKEDVDK                         | 1.019056803        | 3              | 4.131679058 |
| P11884        | VAFTGSTEVGHLIQVAAGSSNLKR                           | 1.079125717        | 3              | 3.803150177 |
| <b>P11915</b> | <b>NLTP Non_specific lipid_transfer protein</b>    | <b>0.99348808</b>  | <b>0.01483</b> | <b>22</b>   |
| P11915        | ADCTITMADSDLLALMTGK                                | 1.324680299        | 2              | 5.335825443 |
| P11915        | ADCTITMADSDLLALMTGK+Oxidation(7)                   | 1.003491554        | 2              | 3.626098871 |
| P11915        | ANLIFK                                             | 1.08345928         | 2              | 2.392467737 |
| P11915        | AVEIVAQEMVTDMPSTFEK                                | 1.162225142        | 2              | 4.339728355 |
| P11915        | GSVLPDSDKK                                         | 1.058791085        | 2              | 2.781841993 |
| P11915        | HIDVLINK                                           | 1.092966102        | 2              | 2.868802786 |
| P11915        | IGGIFAFK                                           | 2.202191959        | 2              | 2.428835869 |
| P11915        | KADCTITMADSDLLALMTGK                               | 1.22984606         | 2              | 4.259275913 |
| P11915        | KLEEEGEEFVK                                        | 1.037028881        | 2              | 4.324304104 |
| P11915        | LEEEGEEFVK                                         | 1.250109494        | 2              | 3.029355049 |
| P11915        | LEEEGEEFVKK                                        | 1.116736689        | 2              | 3.687112331 |
| P11915        | LQSLQLQPKD                                         | 1.453001191        | 2              | 3.298052549 |
| P11915        | MGFPEAASSFR                                        | 1.252909438        | 2              | 2.920224667 |

|               |                                                                                    |                    |                |             |
|---------------|------------------------------------------------------------------------------------|--------------------|----------------|-------------|
| P11915        | MNPQSAFFQ GK                                                                       | 1.015372712        | 2              | 3.19330883  |
| P11915        | MNPQSAFFQ GK+Oxidation(1)                                                          | 0.221307236        | 2              | 2.576643467 |
| P11915        | THQISAAPTSSAGDGFK                                                                  | 1.384763446        | 2              | 4.49084425  |
| P11915        | WVINPSGGLISK                                                                       | 1.152845285        | 2              | 2.891032457 |
| P11915        | YGMSACPFAPQLFGSAGK                                                                 | 0.843366259        | 2              | 4.384728909 |
| P11915        | HGLQSKAVEIVAQEMVTDMPSTFEKSVIK+Oxidation(15)Oxidation(19)                           | 0.942958667        | 3              | 3.384591579 |
| P11915        | HSVNNPYSQFQDEYSLDEIMK                                                              | 1.06251929         | 3              | 5.664580345 |
| P11915        | KLEEEGEEFVKK                                                                       | 1.111177407        | 3              | 4.748982906 |
| P11915        | SRPVDFLTVLQCCPTSDGAAAAIVSSEEFVQK                                                   | 1.363783916        | 3              | 5.530677795 |
| <b>P11960</b> | <b>ODBA 2_oxoisovalerate dehydrogenase subunit alpha_ mitochondrial (Fragment)</b> | <b>1.035627151</b> | <b>0.73007</b> | <b>10</b>   |
| P11960        | TDLVFGQYR                                                                          | 1.055283813        | 1              | 1.982256174 |
| P11960        | AVAENQPFLIEAMTYR                                                                   | 1.097588976        | 2              | 3.791732311 |
| P11960        | HFVTISSPLATQIPQAVGAAYAAK                                                           | 0.841597869        | 2              | 4.131171703 |
| P11960        | NNGYAISTPTSEQYR                                                                    | 1.034319718        | 2              | 3.977689266 |
| P11960        | QGQIINPSEDPHLPQEEVLK                                                               | 1.03693031         | 2              | 2.520677328 |
| P11960        | QYLLNQGWWDDEEQEK                                                                   | 0.826439105        | 2              | 3.593105078 |
| P11960        | SVDEVNYWDK                                                                         | 1.106089229        | 2              | 2.465878725 |
| P11960        | VMEAFEQAER                                                                         | 1.009541543        | 2              | 3.618213177 |
| P11960        | HLQTYGEHYPLDHFDK                                                                   | 0.880070332        | 3              | 3.415318966 |
| P11960        | IGHHSTSDSSAYR                                                                      | 1.537761566        | 3              | 4.056050777 |
| <b>P11980</b> | <b>KPYM Pyruvate kinase isozymes M1/M2</b>                                         | <b>0.91883621</b>  | <b>0.90927</b> | <b>3</b>    |
| P11980        | GVNLPGAADVLPVAVSEK                                                                 | 1.048521522        | 2              | 3.856466055 |
| P11980        | NTGIICTIGPASR                                                                      | 0.926232788        | 2              | 3.630494833 |
| P11980        | AEGSDVANAVLDGADCIMLSGETAK                                                          | 0.780213237        | 3              | 3.648101091 |
| <b>P12001</b> | <b>RL18 60S ribosomal protein L18</b>                                              | <b>1.147985097</b> | <b>4.5E-08</b> | <b>5</b>    |
| P12001        | GTVLLSGPR                                                                          | 1.101125932        | 2              | 2.697547674 |
| P12001        | ILTFDQLALESPK                                                                      | 1.454793325        | 2              | 4.8977561   |
| P12001        | TAVVVGITITDDVR                                                                     | 1.20299334         | 2              | 4.058363914 |
| P12001        | TNSTFNQVVLK                                                                        | 1.028227586        | 2              | 3.064238071 |
| P12001        | TNRPPLSLR                                                                          | 1.152309834        | 3              | 3.376418829 |
| <b>P12007</b> | <b>IVD Isovaleryl_CoA dehydrogenase_ mitochondrial</b>                             | <b>0.947367268</b> | <b>0.99985</b> | <b>9</b>    |
| P12007        | AQEIDQSNDFK                                                                        | 0.74230498         | 2              | 3.557794809 |
| P12007        | FVQENLAPK                                                                          | 1.050340507        | 2              | 2.849884748 |
| P12007        | FWITNGPDADVLVVYAK                                                                  | 1.182931338        | 2              | 4.609944344 |
| P12007        | GSNTCELVFEDCK                                                                      | 0.954815208        | 2              | 4.24366188  |
| P12007        | GYYVLMGLDLER                                                                       | 0.9875435          | 2              | 3.72927022  |
| P12007        | IGQFQLMQGK                                                                         | 1.458842374        | 2              | 2.668593407 |
| P12007        | LYEIGGGTSEVR                                                                       | 1.11523244         | 2              | 2.830498934 |
| P12007        | TDLTAVPASR                                                                         | 1.091523145        | 2              | 2.851703882 |
| P12007        | GSNTCELVFEDCKVPAANILSQESK                                                          | 1.167104955        | 3              | 5.398565769 |
| <b>P12346</b> | <b>TRFE Serotransferrin</b>                                                        | <b>1.095200911</b> | <b>0.00108</b> | <b>19</b>   |
| P12346        | ADRDQYELLCLDNTR                                                                    | 1.291368777        | 2              | 4.336149693 |

|               |                                                                            |                    |                |             |
|---------------|----------------------------------------------------------------------------|--------------------|----------------|-------------|
| P12346        | ASDSSINWNNLK                                                               | 1.244067159        | 2              | 3.187478304 |
| P12346        | DFQLFGSPLGK                                                                | 0.728801199        | 2              | 2.982681751 |
| P12346        | DLKQEDFQLLCPDGTK                                                           | 1.096147401        | 2              | 5.024483204 |
| P12346        | EGVCPEGSIDSAPVK                                                            | 0.648148618        | 2              | 3.848221779 |
| P12346        | FDEFFSQGCAPGYK                                                             | 1.14846357         | 2              | 4.540841103 |
| P12346        | GDKDCTGNFCLFR                                                              | 1.010334489        | 2              | 3.440336943 |
| P12346        | GTFQNLQLQGK                                                                | 1.091221947        | 2              | 3.193485498 |
| P12346        | GYAVAVVK                                                                   | 1.084265762        | 2              | 2.388500929 |
| P12346        | HQTVLENTNGK                                                                | 0.884611965        | 2              | 3.042891502 |
| P12346        | HTTIFEVLQK                                                                 | 1.121292742        | 2              | 3.47261858  |
| P12346        | KGTFQNLQLQGK                                                               | 1.154135731        | 2              | 4.154240608 |
| P12346        | LPEGTTYEYLGAEYLQAVGNIR                                                     | 1.184250728        | 2              | 4.733694077 |
| P12346        | QEDFQLLCPDGTK                                                              | 1.105043727        | 2              | 3.61021471  |
| P12346        | SKDFQLFGSPLGK                                                              | 0.841975908        | 2              | 3.31851697  |
| P12346        | VSTVLTAAK                                                                  | 1.211859133        | 2              | 2.766580343 |
| P12346        | WCALSHQER                                                                  | 1.794423649        | 2              | 3.146803856 |
| P12346        | WCAVSEHENTK                                                                | 1.169315951        | 2              | 3.791657448 |
| P12346        | NGDGKEDLIWEILK                                                             | 1.095512421        | 3              | 3.520635605 |
| <b>P12368</b> | <b>KAP2 cAMP_dependent protein kinase type II_alpha regulatory subunit</b> | <b>1.414248914</b> | <b>0.10819</b> | <b>2</b>    |
| P12368        | NLDQEQLSQVLDAMFEK                                                          | 1.426839685        | 2              | 4.761984825 |
| P12368        | SVGQYDNRGSFGEALMYNTPR                                                      | 1.199327556        | 2              | 2.389774799 |
| <b>P12711</b> | <b>ADHX Alcohol dehydrogenase class_3</b>                                  | <b>0.920499284</b> | <b>0.00532</b> | <b>10</b>   |
| P12711        | AFDLMHSGNSIR                                                               | 0.646574677        | 2              | 3.118848801 |
| P12711        | AGDTVIPLYIPQCGECK                                                          | 1.00228778         | 2              | 3.064471483 |
| P12711        | AKEFGATECINPQDFSK                                                          | 1.070180445        | 2              | 4.767474174 |
| P12711        | EFGATECINPQDFSK                                                            | 0.821007241        | 2              | 4.629048824 |
| P12711        | IIGIDINK                                                                   | 1.189891688        | 2              | 2.42186451  |
| P12711        | IIGIDINKDK                                                                 | 1.267625265        | 2              | 2.416529655 |
| P12711        | VLLGCGISTGYGAAVNTAK                                                        | 1.419956049        | 2              | 5.676909924 |
| P12711        | VDEFVTGNLSFDQINK                                                           | 0.924611711        | 2              | 4.955120564 |
| P12711        | VEPGSTCAVFLGGVGLAVIMGCK                                                    | 1.311518384        | 2              | 4.091789722 |
| P12711        | AAVAWEAGKPLSIEIEVAPPQAHEVR                                                 | 1.170511658        | 3              | 5.930791378 |
| <b>P12749</b> | <b>RL26 60S ribosomal protein L26</b>                                      | <b>1.116409314</b> | <b>3.5E-08</b> | <b>5</b>    |
| P12749        | FNPFVTSR                                                                   | 1.04676185         | 2              | 2.600344658 |
| P12749        | KDDEVQVVR                                                                  | 1.282145551        | 2              | 3.160134315 |
| P12749        | KIMSSPLSKELR+Oxidation(3)                                                  | 1.421728035        | 2              | 2.473786592 |
| P12749        | YKEETIEK                                                                   | 1.160534281        | 2              | 2.895754576 |
| P12749        | HFNAPSHIR                                                                  | 1.122336347        | 3              | 3.972728252 |
| <b>P12785</b> | <b>FAS Fatty acid synthase</b>                                             | <b>1.243960938</b> | <b>9.4E-06</b> | <b>41</b>   |
| P12785        | ACIDTALENLSTLK                                                             | 1.56417687         | 2              | 3.928814888 |
| P12785        | AGSDTELAAPK                                                                | 1.193308264        | 2              | 3.488818407 |
| P12785        | ALIAEATK                                                                   | 1.320623284        | 2              | 2.314914227 |

|               |                                   |                    |                |             |
|---------------|-----------------------------------|--------------------|----------------|-------------|
| P12785        | DANLPAGSMAAVGLSWEECK              | 0.710241322        | 2              | 4.293672562 |
| P12785        | DGGFLLMHTVLK                      | 0.944302338        | 2              | 2.546758652 |
| P12785        | DHKDNLEFFLTNLGK                   | 1.896316945        | 2              | 2.368258238 |
| P12785        | EEEEPEAMLPGAQPTLISAISK            | 1.146046183        | 2              | 4.049019814 |
| P12785        | EQGVTFPSGAEQQLIR                  | 1.272619486        | 2              | 4.398286343 |
| P12785        | FDASFFGVHPK                       | 1.329496165        | 2              | 3.405438423 |
| P12785        | FVFTPHVEPECLSESAILQK              | 1.063546502        | 2              | 4.369114876 |
| P12785        | GLESIINIIHSSLAEPR                 | 1.355913805        | 2              | 4.624364853 |
| P12785        | GNAGQSNYGFANSTMER                 | 1.211387985        | 2              | 4.485902309 |
| P12785        | GVDLVLNSLAEEK                     | 1.095662163        | 2              | 3.340507984 |
| P12785        | LFDHPEVPIPAESVSR                  | 1.155932366        | 2              | 4.393259048 |
| P12785        | LTPGCEAEAEAEICFFIK                | 1.342601028        | 2              | 4.666091442 |
| P12785        | MTVPGLEDLPQHGLPR                  | 1.234006175        | 2              | 3.495958328 |
| P12785        | QAQLNLSILLVNPEGPTLTR              | 1.325677224        | 2              | 4.358307362 |
| P12785        | QQEQLVPTLEK                       | 0.732686868        | 2              | 2.625486135 |
| P12785        | RQQEQLVPTLEK                      | 0.940803734        | 2              | 2.987709761 |
| P12785        | SDEALKPLGVK                       | 1.247554054        | 2              | 2.991137028 |
| P12785        | SFDDSGNGYCR                       | 1.447393216        | 2              | 3.034501076 |
| P12785        | SLYQPGGVAPESLEYIEAHGTGTK          | 1.248643078        | 2              | 5.562194824 |
| P12785        | SNMGHPEPASGLAALTK                 | 1.057837232        | 2              | 3.191679716 |
| P12785        | TGGTYGEDLGADYNLSQVCDGK            | 1.135317432        | 2              | 4.865222454 |
| P12785        | TMEAVQGLLEQGR                     | 1.007252313        | 2              | 3.568962336 |
| P12785        | VGDPQELNGITR                      | 1.458319736        | 2              | 2.737977505 |
| P12785        | VHLTGIDINPNALFPPVEFPVPR           | 1.212409433        | 2              | 5.232684135 |
| P12785        | VLEALLPLK                         | 1.25969231         | 2              | 2.625289679 |
| P12785        | VLES DLVMNVYR                     | 1.130777335        | 2              | 3.043799639 |
| P12785        | VTAIYIDPATHLQK                    | 1.315734782        | 2              | 3.558335543 |
| P12785        | VYATILNAGTNTDGGK                  | 1.064519158        | 2              | 4.898737907 |
| P12785        | VYMLEGDTQVADVTTSR                 | 0.580769918        | 2              | 4.839961052 |
| P12785        | VYQWEDPSK                         | 0.995232341        | 2              | 3.317261934 |
| P12785        | WLSTSIPEAQWQSSLAR                 | 1.106184598        | 2              | 3.535788298 |
| P12785        | YNGTLNLDR                         | 1.129660204        | 2              | 2.583141088 |
| P12785        | CPPGVVPACHNSEDTVTISGPQAAVNEFVEQLK | 1.179880671        | 3              | 3.442133188 |
| P12785        | GHALGETLACLPEVQPGPSFLSQEEWESLFSR  | 1.535351282        | 3              | 5.904062271 |
| P12785        | LLLPEDPLISGLLSQALK                | 1.892257096        | 3              | 5.125070572 |
| P12785        | LSPQDKPIFLPVEDTSFQWVDSLK          | 0.909184462        | 3              | 3.913658381 |
| P12785        | SLSLSLEETPVVFENVTFHQATILPR        | 1.131853281        | 3              | 4.131784439 |
| P12785        | VSVHIIEGDHR                       | 1.504731451        | 3              | 3.474067211 |
| <b>P12791</b> | <b>CP2BA Cytochrome P450 2B10</b> | <b>1.096852639</b> | <b>0.99999</b> | <b>2</b>    |
| P12791        | IQEEAQCLVEELR                     | 1.006527101        | 2              | 4.581433773 |
| P12791        | IQEEAQCLVEELRK                    | 1.211122627        | 2              | 3.824499607 |
| <b>P12847</b> | <b>MYH3 Myosin_3</b>              | <b>0.607935079</b> | <b>0.20992</b> | <b>6</b>    |
| P12847        | EQYEEEQEGK                        | 1.254755898        | 2              | 3.069120169 |

|               |                                          |                    |                |             |
|---------------|------------------------------------------|--------------------|----------------|-------------|
| P12847        | GQEDLKEQLAIVER                           | 1.807317308        | 2              | 3.983333826 |
| P12847        | GTLEDQIISANPLLEAFGNAK                    | 0.791186531        | 2              | 3.287407637 |
| P12847        | IEAQNQPFDAK                              | 0.540008648        | 2              | 2.378525972 |
| P12847        | MKGTLEDQIISANPLLEAFGNAK+Oxidation(1)     | 0.688411372        | 2              | 4.399733543 |
| P12847        | MKGTLEDQIISANPLLEAFGNAK                  | 0.475753572        | 3              | 6.98020792  |
| <b>P12928</b> | <b>KPYR Pyruvate kinase isozymes R/L</b> | <b>1.441597273</b> | <b>9.9E-20</b> | <b>19</b>   |
| P12928        | AETSDVANAVLDGADCIMLSGETAK                | 1.19472441         | 2              | 5.517800808 |
| P12928        | CCAAAIIVLTK                              | 1.166409907        | 2              | 2.865659952 |
| P12928        | EATESFATSPLSYRPAIALDTK                   | 1.031657414        | 2              | 3.888613939 |
| P12928        | EPPEAIWADDVDR                            | 1.184504747        | 2              | 2.464012623 |
| P12928        | GDLGIEIPAEK                              | 1.221309865        | 2              | 3.134979248 |
| P12928        | GSFPVEAVMMQHAIAIR                        | 1.230231735        | 2              | 3.236725092 |
| P12928        | GSQVLVTVDPK                              | 1.190706836        | 2              | 2.86613965  |
| P12928        | GVNLPNTEVDLPGLSEQDLLDLR                  | 1.399590479        | 2              | 5.25019598  |
| P12928        | IGPEGLVTEVEHGILGSR                       | 1.457437162        | 2              | 5.284585953 |
| P12928        | IYIDDGLISLVVQK                           | 1.515440869        | 2              | 4.519283295 |
| P12928        | RVQFGIESGK                               | 1.307189389        | 2              | 2.461746693 |
| P12928        | STSIIATIGPASR                            | 1.197737955        | 2              | 3.324488401 |
| P12928        | TGVLQGGPESEVEIVK                         | 0.870488803        | 2              | 4.457147121 |
| P12928        | TVWVDYHNITR                              | 1.331907885        | 2              | 2.330378532 |
| P12928        | VQFGIESGK                                | 1.245879644        | 2              | 2.833667517 |
| P12928        | CNLAGKPVVCATQMLSEMITK                    | 1.281659719        | 3              | 4.838200569 |
| P12928        | KFDEILEVSDGIMVAR                         | 0.171004922        | 3              | 4.172465801 |
| P12928        | KGVNLPNTEVDLPGLSEQDLLDLR                 | 1.513692094        | 3              | 4.803504467 |
| P12928        | LNFSHGSHEYHAESIANIR                      | 1.878661901        | 3              | 5.138937473 |
| <b>P12938</b> | <b>CP2D3 Cytochrome P450 2D3</b>         | <b>0.882456911</b> | <b>0.99109</b> | <b>7</b>    |
| P12938        | DLTDAFLAEIEK                             | 0.867271324        | 2              | 3.862091303 |
| P12938        | FDYGDPDFIK                               | 0.958175194        | 2              | 2.921566725 |
| P12938        | GNPESSFNDANLR                            | 0.908014024        | 2              | 3.935704708 |
| P12938        | RFDYGDPDFIK                              | 1.074684433        | 2              | 3.120231867 |
| P12938        | TFLTMVDNLVTEHK                           | 1.176134827        | 2              | 3.09592104  |
| P12938        | AVQELLVTCGEDTADRPEMIFQHIGYGHK            | 0.72951195         | 3              | 3.730769873 |
| P12938        | TWDPDQPPRDLTDAFLAEIEK                    | 1.039878947        | 3              | 4.041320801 |
| <b>P12939</b> | <b>CP2DA Cytochrome P450 2D10</b>        | <b>1.335918929</b> | <b>6.4E-14</b> | <b>9</b>    |
| P12939        | ALCNVIASLIFAR                            | 1.768776753        | 2              | 2.544020176 |
| P12939        | FEYEDPYLIR                               | 1.264220249        | 2              | 2.848116875 |
| P12939        | FGDIAPLNLP                               | 1.543459861        | 2              | 3.447325706 |
| P12939        | ITSCDIEVQDFVIK                           | 1.714133306        | 2              | 4.18802309  |
| P12939        | NLTDAFLAEVEK                             | 1.199044697        | 2              | 4.046593189 |
| P12939        | RFEYEDPYLIR                              | 1.439720085        | 2              | 2.978718042 |
| P12939        | TFMAFLDNLLAENR                           | 1.565971032        | 2              | 3.068898201 |
| P12939        | TTWDPAQPPR                               | 1.250153439        | 2              | 2.36779356  |
| P12939        | AVQEVLVTHGEDTADRPPVPIFK                  | 1.425546493        | 3              | 5.331332207 |

|               |                                                                               |                    |                |             |
|---------------|-------------------------------------------------------------------------------|--------------------|----------------|-------------|
| <b>P13084</b> | <b>NPM Nucleophosmin</b>                                                      | <b>1.328978993</b> | <b>1.2E-05</b> | <b>2</b>    |
| P13084        | MTDQEAIQDLWQWR                                                                | 1.183186442        | 2              | 2.841659784 |
| P13084        | VDNDENEHQLSLR                                                                 | 1.504467321        | 2              | 3.887588978 |
| <b>P13086</b> | <b>SUCA Succinyl_CoA ligase [ADP/GDP_forming] subunit alpha_mitochondrial</b> | <b>1.098441719</b> | <b>0.00611</b> | <b>5</b>    |
| P13086        | MGHAGAIAGGK                                                                   | 1.068967666        | 1              | 2.840764761 |
| P13086        | NIYIDK                                                                        | 1.214429725        | 1              | 1.98727262  |
| P13086        | HLGLPVFNTVK                                                                   | 1.045458668        | 2              | 2.377262115 |
| P13086        | LIGPNCPIINPGECK                                                               | 1.685960769        | 2              | 4.877100468 |
| P13086        | QGTFFHSQQALEYGTK                                                              | 1.13402621         | 2              | 2.78468442  |
| <b>P13107</b> | <b>CP2B3 Cytochrome P450 2B3</b>                                              | <b>0.959952916</b> | <b>0.17685</b> | <b>7</b>    |
| P13107        | SFIQLQEK                                                                      | 1.247955074        | 1              | 2.353750706 |
| P13107        | ATLDPNAPR                                                                     | 1.103261446        | 2              | 2.630428314 |
| P13107        | EVLDYIDHSVENHR                                                                | 1.031187259        | 2              | 4.078854084 |
| P13107        | FSDVSPMGLPCR                                                                  | 0.792944784        | 2              | 3.293252945 |
| P13107        | MCLGEGIAR                                                                     | 1.081722415        | 2              | 2.82668829  |
| P13107        | QSVEDQIKEEAK                                                                  | 0.959864664        | 2              | 2.585967064 |
| P13107        | GIIAVLQPIMQEYGVSVFNEER                                                        | 1.463040257        | 3              | 6.340869904 |
| <b>P13221</b> | <b>AATC Aspartate aminotransferase_cytoplasmic</b>                            | <b>1.17055993</b>  | <b>0.34985</b> | <b>4</b>    |
| P13221        | ITWSNPPAQGAR                                                                  | 1.218962857        | 2              | 3.196347475 |
| P13221        | NLDYVATSINEAVTK                                                               | 1.095779949        | 2              | 3.999975681 |
| P13221        | SCASQLVLGDNSPALR                                                              | 1.342086147        | 2              | 4.521241188 |
| P13221        | TDDSQPWVLPVVR                                                                 | 0.961904468        | 2              | 2.886639118 |
| <b>P13255</b> | <b>GNMT Glycine N_methyltransferase</b>                                       | <b>0.990579988</b> | <b>0.08056</b> | <b>6</b>    |
| P13255        | AHMVTLDYTVQVPGAGR                                                             | 1.067738907        | 2              | 5.19588089  |
| P13255        | AWLLGLLR                                                                      | 1.211168678        | 2              | 2.784122944 |
| P13255        | DITTSVLTVNKK                                                                  | 0.933027755        | 2              | 3.516041994 |
| P13255        | NYDYILSTGCAPP GK                                                              | 0.967175557        | 2              | 4.805923462 |
| P13255        | SDLTKDITTSVLTVNKK                                                             | 1.647969903        | 2              | 2.746668577 |
| P13255        | SLGVAAEGIPDQYADGEAAR                                                          | 1.001492465        | 2              | 5.511157513 |
| <b>P13383</b> | <b>NUCL Nucleolin</b>                                                         | <b>0.97057439</b>  | <b>0.5919</b>  | <b>6</b>    |
| P13383        | NDLAAVDVR                                                                     | 1.038638539        | 1              | 1.905761719 |
| P13383        | GFGFVDFNSEEDAK                                                                | 0.958147867        | 2              | 3.344038725 |
| P13383        | GSPNARSQPSKTLFVK                                                              | 1.049507529        | 2              | 2.3621068   |
| P13383        | SEADAEKNLEEK                                                                  | 0.667173774        | 2              | 2.568212509 |
| P13383        | TLVLSNLSYSATEETLQEVFEK                                                        | 1.15139143         | 2              | 2.766373634 |
| P13383        | NLSFNITEDELKEVFEDA VEIR                                                       | 0.651969701        | 3              | 3.436611176 |
| <b>P13437</b> | <b>THIM 3_ketoacyl_CoA thiolase_mitochondrial</b>                             | <b>1.055761921</b> | <b>1E-09</b>   | <b>22</b>   |
| P13437        | AANEAGYFNEEMAPIEVK                                                            | 0.911784886        | 2              | 5.136263847 |
| P13437        | AANEAGYFNEEMAPIEVK+Oxidation(12)                                              | 1.098108713        | 2              | 4.87476778  |
| P13437        | DAEVVLCGGTESMSQSPYSVR                                                         | 0.609332454        | 2              | 4.566064835 |
| P13437        | DFTATDLTEFAAR                                                                 | 0.683463894        | 2              | 3.467659235 |
| P13437        | DMDLIDVNEAFAPQFLAVQK+Oxidation(2)                                             | 1.055837076        | 2              | 3.430994034 |



|               |                                                           |                    |                |             |
|---------------|-----------------------------------------------------------|--------------------|----------------|-------------|
| P13437        | EGTVTAGNASGMSDGAGVVIIASEDAVK                              | 0.891117485        | 2              | 5.777636051 |
| P13437        | FGLDLK                                                    | 1.089234059        | 2              | 2.336063147 |
| P13437        | GVFIVAAK                                                  | 1.092054935        | 2              | 2.521404505 |
| P13437        | HNFTPLAR                                                  | 1.226745375        | 2              | 2.330615759 |
| P13437        | ITAHLVHELK                                                | 2.033718395        | 2              | 3.306064606 |
| P13437        | LCGSGFQSIIVSGCQEICK                                       | 2.052694487        | 2              | 5.547416687 |
| P13437        | LEDTLWAGLTDQHVK                                           | 1.057166361        | 2              | 5.247082233 |
| P13437        | RTPFGAYGGLLK                                              | 1.522901262        | 2              | 3.035877943 |
| P13437        | SLDLPSK                                                   | 1.056473105        | 2              | 2.620229244 |
| P13437        | TNVSGGAIALGHPLGSGSR                                       | 1.072352848        | 2              | 5.854893208 |
| P13437        | VGVPTETGALTLNR                                            | 1.17918478         | 2              | 3.683221579 |
| P13437        | YAVGSACIGGGQGISLIQNTA                                     | 0.882679718        | 2              | 4.308791161 |
| P13437        | DMDLIDVNEAFAPQLAVQK                                       | 1.56889776         | 3              | 6.969806671 |
| P13437        | EGTVTAGNASGMSDGAGVVIIASEDAVKK                             | 1.047320165        | 3              | 4.983426571 |
| P13437        | VPPETIDSVIVGNVMQSSDAAYLAR                                 | 1.05336633         | 3              | 6.662649155 |
| P13437        | VVGYFVSGCDPAIMGIGPVPAITGALK                               | 1.195684088        | 3              | 5.078184128 |
| P13437        | VVGYFVSGCDPAIMGIGPVPAITGALKK                              | 1.144652205        | 3              | 4.208768845 |
| <b>P13444</b> | <b>METK1 S_adenosylmethionine synthase isoform type_1</b> | <b>1.214561867</b> | <b>9.9E-20</b> | <b>8</b>    |
| P13444        | FVIGGPQGDAGVTGR                                           | 1.186060076        | 2              | 4.565331936 |
| P13444        | HIGYDDSAK                                                 | 1.178329356        | 2              | 2.797793388 |
| P13444        | SEFPWEVPK                                                 | 1.130740098        | 2              | 2.319064617 |
| P13444        | SGVLPWLRPDSK                                              | 1.350277358        | 2              | 2.969911337 |
| P13444        | TQVTVQYVQDNGAVIPVR                                        | 1.370007853        | 2              | 4.342388153 |
| P13444        | ICDQISDAVLDAHLK                                           | 1.286183102        | 3              | 5.633167744 |
| P13444        | NEEDVVGAGDQQLMGFYATDETEECMPLTIVLAHK                       | 1.416080241        | 3              | 6.753329754 |
| P13444        | TCNVLVALEQQSPDIAQCVHLDR                                   | 1.306429811        | 3              | 5.493741512 |
| <b>P13471</b> | <b>RS14 40S ribosomal protein S14</b>                     | <b>1.104088902</b> | <b>2.9E-10</b> | <b>2</b>    |
| P13471        | ADRDESSPYAAMLAAQDVAQR                                     | 0.690400603        | 2              | 5.436663628 |
| P13471        | IEDVTPIPSDSTR                                             | 1.142007128        | 2              | 3.936299324 |
| <b>P13601</b> | <b>AL1A7 Aldehyde dehydrogenase_ cytosolic 1</b>          | <b>0.794926799</b> | <b>0.78613</b> | <b>20</b>   |
| P13601        | ANNTPYGLAAGVFTK                                           | 0.565634226        | 2              | 3.937418938 |
| P13601        | EEIFGPVQQIMK                                              | 0.753063574        | 2              | 3.529680967 |
| P13601        | EMGEQGVYEYTELK                                            | 0.593063655        | 2              | 3.678078175 |
| P13601        | GFFVQPTVFSNVTDEMRR                                        | 0.974412908        | 2              | 4.179467201 |
| P13601        | IFINNEWHNSLNGK                                            | 1.078224827        | 2              | 4.032707691 |
| P13601        | ILDLESK                                                   | 0.8259371          | 2              | 3.220338106 |
| P13601        | ILDLESK                                                   | 0.968592588        | 2              | 2.951691628 |
| P13601        | LFVEESIYDEFVR                                             | 0.704150123        | 2              | 4.186003685 |
| P13601        | VLLATMESMNAK                                              | 0.660063488        | 2              | 4.074687958 |
| P13601        | VSFTGSTEVGK                                               | 0.602876279        | 2              | 3.186300755 |
| P13601        | YVLGNPLDSGISQGPQIDK                                       | 0.62414293         | 2              | 4.610680103 |
| P13601        | YVLGNPLDSGISQGPQIDKEQHAK                                  | 0.684206885        | 2              | 4.245731831 |

|               |                                                                        |                    |                |             |
|---------------|------------------------------------------------------------------------|--------------------|----------------|-------------|
| P13601        | EAGFPPGVVNVVPGYGSTAGAAISSHMDIDK                                        | 0.629967307        | 3              | 3.78903985  |
| P13601        | FPVINPATEEVICHVEEGDK                                                   | 0.577250237        | 3              | 3.749338865 |
| P13601        | IAKEEIFGPVQQIMK                                                        | 1.167418246        | 3              | 3.472584009 |
| P13601        | IHGQTIPSDGDVFTYTR                                                      | 1.037714969        | 3              | 4.462311268 |
| P13601        | KFPVINPATEEVICHVEEGDK                                                  | 1.141947159        | 3              | 3.368245363 |
| P13601        | KYVLGNPLDSGISQGPQDKQEQHAK                                              | 1.232788765        | 3              | 5.277019024 |
| P13601        | FPVINPATEEVICHVEEGDKADVDK                                              | 1.025139568        | 4              | 5.193379879 |
| P13601        | KFPVINPATEEVICHVEEGDKADVDK                                             | 1.305196666        | 4              | 4.826226711 |
| <b>P13697</b> | <b>MAOX NADP_dependent malic enzyme</b>                                | <b>1.101380598</b> | <b>0.99537</b> | <b>5</b>    |
| P13697        | AECSAEECYK                                                             | 0.986475079        | 2              | 3.05233717  |
| P13697        | AIFASGSPFDPVTLPDGR                                                     | 1.256002814        | 2              | 4.804337978 |
| P13697        | GHIASVLNAWPEDVVK                                                       | 1.111592734        | 2              | 4.057563782 |
| P13697        | HINDSVFLTTAEVISQQVSDK                                                  | 0.937097055        | 2              | 5.886251926 |
| P13697        | ILGLGDLGCNGMGIPIVGK                                                    | 1.161111873        | 2              | 2.683139086 |
| <b>P13803</b> | <b>ETFA Electron transfer flavoprotein subunit alpha_mitochondrial</b> | <b>1.11904223</b>  | <b>4E-12</b>   | <b>13</b>   |
| P13803        | AAVDAGFVPNDMQVGQTGK                                                    | 1.105375215        | 2              | 4.542864799 |
| P13803        | AAVDAGFVPNDMQVGQTGK+Oxidation(12)                                      | 1.51773564         | 2              | 3.714374304 |
| P13803        | GLLPEELTPLILETQK                                                       | 1.172390234        | 2              | 4.893165112 |
| P13803        | GTSFEAAAASGGSASSEK                                                     | 1.210497488        | 2              | 5.160123825 |
| P13803        | LGGEVSVCLVAGTK                                                         | 1.119064427        | 2              | 4.749477386 |
| P13803        | LLYDLADQLHAAVGSAR                                                      | 1.388701291        | 2              | 4.933016777 |
| P13803        | LNVAPEVSDIIEIK                                                         | 1.293993421        | 2              | 4.127431393 |
| P13803        | QFSYTHICAGASAFGK                                                       | 1.019429771        | 2              | 3.129345894 |
| P13803        | TIYAGNALCTVK                                                           | 1.082415175        | 2              | 3.704957008 |
| P13803        | VLVAQHDAYK                                                             | 1.177778811        | 2              | 3.320490837 |
| P13803        | VVQDLCK                                                                | 1.094344478        | 2              | 2.801054478 |
| P13803        | SDRPELTGAK                                                             | 1.111614096        | 3              | 3.448247194 |
| P13803        | TIVAINKDPEAPIFQVADYGVADLFK                                             | 0.970730026        | 3              | 6.951367855 |
| <b>P13832</b> | <b>MRLCA Myosin regulatory light chain RLC_A</b>                       | <b>1.194105142</b> | <b>0.00126</b> | <b>3</b>    |
| P13832        | ATSNVFAMFDQSQIQEFK                                                     | 1.408601139        | 2              | 5.135836601 |
| P13832        | FTDEEVDELYR                                                            | 1.145225154        | 2              | 3.442534924 |
| P13832        | GNFNIEFTR                                                              | 1.219677396        | 2              | 2.719451904 |
| <b>P14046</b> | <b>A1I3 Alpha_1_inhibitor 3</b>                                        | <b>1.139809069</b> | <b>0.9912</b>  | <b>6</b>    |
| P14046        | FSIDTNGISDYSYSLNIK                                                     | 1.085027336        | 2              | 2.458673716 |
| P14046        | GMYESLPVVAVK                                                           | 1.047376922        | 2              | 3.289045095 |
| P14046        | ISLCHGNPTFSSETK                                                        | 1.870988488        | 2              | 3.861707687 |
| P14046        | LVDIKGDIPNEQVLIK                                                       | 1.164097071        | 2              | 3.415861368 |
| P14046        | QQNSYGGFSSTQDQTVVALDALSK                                               | 1.29892697         | 2              | 4.394548893 |
| P14046        | QSPGPCGSEVATVPETGR                                                     | 1.09641479         | 2              | 3.350817204 |
| <b>P14141</b> | <b>CAH3 Carbonic anhydrase 3</b>                                       | <b>1.069457318</b> | <b>7.8E-16</b> | <b>16</b>   |
| P14141        | EPMTVSSDQMAK                                                           | 1.758937769        | 1              | 2.974419355 |
| P14141        | EAPFNHFDPSCLFPACR                                                      | 0.627261019        | 2              | 4.424545288 |

|               |                                                |                    |                |             |
|---------------|------------------------------------------------|--------------------|----------------|-------------|
| P14141        | EKGEFQILLDALDK                                 | 0.847580649        | 2              | 4.52233696  |
| P14141        | EKGEFQILLDALDKIK                               | 1.157004031        | 2              | 3.574609995 |
| P14141        | GDNQSPIELHTK                                   | 1.019681141        | 2              | 3.648750067 |
| P14141        | GEFQILLDALDK                                   | 1.091210683        | 2              | 4.758408546 |
| P14141        | GEFQILLDALDKIK                                 | 1.33100132         | 2              | 3.672061205 |
| P14141        | GGPLSGPYR                                      | 1.091882359        | 2              | 2.800245762 |
| P14141        | QFHLHWGSSDDHGSEHTVDGVK                         | 1.075999293        | 2              | 4.729166985 |
| P14141        | VVFDDTFDR                                      | 1.030681602        | 2              | 3.430849791 |
| P14141        | YAAELHLVHWNPK                                  | 1.060364738        | 2              | 4.41928196  |
| P14141        | EWGYASHNGPEHWHELYPIAK                          | 0.699318699        | 3              | 5.032088757 |
| P14141        | GKEAPFNHFDPSCLFPACR                            | 1.028799759        | 3              | 4.452027321 |
| P14141        | HDPSLQPWSVSYDPGSAK                             | 1.064244894        | 3              | 4.839396    |
| P14141        | SLFASAENEPVPLVGNWRPPQPIK                       | 0.809944394        | 3              | 6.016844273 |
| P14141        | YNTFGEALKQPDGIAVVGIFLK                         | 0.967025723        | 3              | 5.935792446 |
| <b>P14173</b> | <b>DDC Aromatic_L-amino-acid decarboxylase</b> | <b>1.126996414</b> | <b>0.80204</b> | <b>8</b>    |
| P14173        | AGEGGGVIQGSASEATLVALLAAR                       | 1.201895645        | 2              | 4.989021301 |
| P14173        | ALIPTTAPQEPETYEDIIR                            | 1.059486335        | 2              | 3.832613468 |
| P14173        | GSNQLNETLLQR                                   | 1.304018757        | 2              | 3.0522089   |
| P14173        | HSHQDSGLITDYR                                  | 1.126996203        | 2              | 3.465000629 |
| P14173        | LVAYTSDQAHSSVER                                | 1.627750564        | 2              | 4.516513824 |
| P14173        | MLELPEAFLAGR                                   | 1.074314473        | 2              | 2.621317148 |
| P14173        | TDLTEAFNMDPVYLR                                | 0.953261352        | 2              | 3.707056999 |
| P14173        | TVESAHVQLAWEHIR                                | 1.042946708        | 3              | 4.505698681 |
| <b>P14408</b> | <b>FUMH Fumarate hydratase_mitochondrial</b>   | <b>1.153348219</b> | <b>0.04084</b> | <b>15</b>   |
| P14408        | YYGAQTVR                                       | 1.178402771        | 1              | 1.923023582 |
| P14408        | AAAEVNQEYGLDPK                                 | 1.229999394        | 2              | 4.014422894 |
| P14408        | AIEMLGELGSK                                    | 1.15228144         | 2              | 3.920088291 |
| P14408        | IEYDTFGELK                                     | 1.144642121        | 2              | 3.156110525 |
| P14408        | IEYDTFGELKVPTDK                                | 0.958956387        | 2              | 3.47807312  |
| P14408        | IYELAAGGTAVGTGLNTR                             | 1.213260108        | 2              | 5.473001003 |
| P14408        | SGLGELILPENEPGSSIMPGK                          | 1.058917613        | 2              | 4.798383236 |
| P14408        | SGLGELILPENEPGSSIMPGK+Oxidation(18)            | 0.961651579        | 2              | 3.278529882 |
| P14408        | SKEFAQVIK                                      | 1.144465611        | 2              | 2.323045015 |
| P14408        | TAIELGYLTAEQFDEWVKPK                           | 1.307276378        | 2              | 4.899390697 |
| P14408        | KTAIELGYLTAEQFDEWVKPK                          | 1.188064064        | 3              | 4.735435486 |
| P14408        | LMNESLMLVLTALNPHIGYDK                          | 1.643553182        | 3              | 5.38368082  |
| P14408        | LNDHFPLVVWQTGSGTQTNMNVNEVISNR                  | 0.963460273        | 3              | 6.588690758 |
| P14408        | SQSSNDTFPTAMHIAAALEVHQVLLPGLQK                 | 1.14301468         | 3              | 5.033370495 |
| P14408        | THTQDAVPLTLGQEFSGYVQVQYAMER                    | 0.772707081        | 3              | 6.408947468 |
| <b>P14480</b> | <b>FIBB Fibrinogen beta chain</b>              | <b>1.042770578</b> | <b>0.99937</b> | <b>7</b>    |
| P14480        | DNENVINEYSSILEDQK                              | 0.989867247        | 2              | 3.271347523 |
| P14480        | GFGNIATNEDTK                                   | 1.116169632        | 2              | 3.037185669 |
| P14480        | GFGNIATNEDTKK                                  | 1.079732717        | 2              | 3.165142298 |

|               |                                                                 |                    |                |             |
|---------------|-----------------------------------------------------------------|--------------------|----------------|-------------|
| P14480        | LYIDETVNDNIPLNLR                                                | 1.118178442        | 2              | 3.265820742 |
| P14480        | TENGGWTVIQNR                                                    | 0.856023304        | 2              | 2.786273479 |
| P14480        | YCGLPGEYWLGN DK                                                 | 0.83611653         | 2              | 3.273317099 |
| P14480        | LESDISAQTEYCHTPCTVNCNIPVVS GK                                   | 1.001788098        | 3              | 4.990393162 |
| <b>P14604</b> | <b>ECHM Enoyl_CoA hydratase_mitochondrial</b>                   | <b>1.255446321</b> | <b>0.80572</b> | <b>10</b>   |
| P14604        | AFAAGADIK                                                       | 1.014475741        | 2              | 3.045915842 |
| P14604        | AQFGQPEILLGTIPGAGGTQR                                           | 0.979862932        | 2              | 5.695135593 |
| P14604        | ESVNAAFEMTLTEGNKLEK                                             | 0.628610525        | 2              | 3.735871315 |
| P14604        | FLSHWDHITR                                                      | 1.02999998         | 2              | 3.135186195 |
| P14604        | IFPVETLVEEAIQCAEK                                               | 1.245201515        | 2              | 5.532610893 |
| P14604        | LFYSTFATDDR                                                     | 1.046979791        | 2              | 2.520432234 |
| P14604        | NSSVGLIQLNRPK                                                   | 1.085689339        | 2              | 3.452644348 |
| P14604        | SLAMEMVLTGDR                                                    | 0.916106622        | 2              | 3.654171705 |
| P14604        | SLAMEMVLTGDRISAQDAK+Oxidation(4)Oxidation(6)                    | 0.948655013        | 2              | 2.357272387 |
| P14604        | TFQDCYS GK                                                      | 1.103413945        | 2              | 2.564814568 |
| <b>P14668</b> | <b>ANXA5 Annexin A5</b>                                         | <b>1.223169841</b> | <b>0.00072</b> | <b>3</b>    |
| P14668        | ETSGNLELLAVVK                                                   | 1.088693816        | 2              | 2.515480518 |
| P14668        | GLGTDEDSILNLLTAR                                                | 1.54469047         | 2              | 4.530513287 |
| P14668        | GTVTDFSGFDGR                                                    | 1.052567338        | 2              | 2.954829693 |
| <b>P14669</b> | <b>ANXA3 Annexin A3</b>                                         | <b>1.138216865</b> | <b>0.02817</b> | <b>8</b>    |
| P14669        | GMGTD EDTLIEILTR                                                | 1.142700341        | 2              | 4.289757729 |
| P14669        | GTINNYPGFNPSVDAE AIR                                            | 1.01969946         | 2              | 3.626094103 |
| P14669        | KDAQTLYDAGEK                                                    | 1.448834777        | 2              | 2.943830729 |
| P14669        | KDAQTLYDAGEKK                                                   | 1.096425781        | 2              | 3.331220388 |
| P14669        | QYQEAYEQALK                                                     | 1.080258379        | 2              | 3.018727541 |
| P14669        | SEIDLLDIR                                                       | 1.235496443        | 2              | 2.684845448 |
| P14669        | TLINILTR                                                        | 1.388967593        | 2              | 2.944310427 |
| P14669        | WGTD EDKFTEILCLR                                                | 1.218940791        | 2              | 3.559969902 |
| <b>P14685</b> | <b>PSMD3 26S proteasome non_ATPase regulatory subunit 3</b>     | <b>1.099566445</b> | <b>0.80008</b> | <b>3</b>    |
| P14685        | AIQLEYSEAR                                                      | 0.993630655        | 2              | 2.71694994  |
| P14685        | LQLDSPEDA EFIVAK                                                | 1.100321297        | 2              | 3.893123865 |
| P14685        | SVFPEQANNNEWAR                                                  | 1.057921912        | 2              | 2.530438662 |
| <b>P14740</b> | <b>DPP4 Dipeptidyl peptidase 4</b>                              | <b>1.092932022</b> | <b>0.15792</b> | <b>3</b>    |
| P14740        | LGTLEVEDQIEAAR                                                  | 1.043997844        | 2              | 3.940571547 |
| P14740        | VLEDNSALDK                                                      | 1.186048225        | 2              | 3.042428493 |
| P14740        | YMGLPTPEDNLDHYR                                                 | 1.40945254         | 2              | 2.467093706 |
| <b>P14882</b> | <b>PCCA Propionyl_CoA carboxylase alpha chain_mitochondrial</b> | <b>1.061124826</b> | <b>0.9983</b>  | <b>11</b>   |
| P14882        | FLSDVYPDGFK                                                     | 1.132216418        | 2              | 3.007523298 |
| P14882        | FSSQEAASSFGDDR                                                  | 1.009525576        | 2              | 3.795495749 |
| P14882        | HGNALWLNER                                                      | 0.884163521        | 2              | 2.935956955 |
| P14882        | HIEIQVLGDK                                                      | 1.064031103        | 2              | 2.363935947 |
| P14882        | MADEAVCVGPAPTSK                                                 | 1.038894056        | 2              | 4.183652878 |

|               |                                                                        |                    |                |             |
|---------------|------------------------------------------------------------------------|--------------------|----------------|-------------|
| P14882        | SYLNMDAIMEAIKK                                                         | 0.934638916        | 2              | 2.417435884 |
| P14882        | TGAQAVHPGYGFLENK                                                       | 1.068017208        | 2              | 3.527343035 |
| P14882        | TVAIHSDVDASSVHVK                                                       | 1.015072979        | 2              | 3.482520342 |
| P14882        | VVEEAPSIFLDPETR                                                        | 1.187387102        | 2              | 4.093249798 |
| P14882        | LHDEDHTVVASNNGPTFNVEVDGSK                                              | 1.282025882        | 3              | 5.781293392 |
| P14882        | LQVEHPVTECITGLDLVQEMILVAK                                              | 1.146141671        | 3              | 4.070876598 |
| <b>P14942</b> | <b>GSTA4 Glutathione S_transferase alpha_4</b>                         | <b>1.20354758</b>  | <b>1.1E-10</b> | <b>2</b>    |
| P14942        | YFPVFEK                                                                | 1.175759898        | 1              | 1.912090898 |
| P14942        | KPPPDGHYVDVVR                                                          | 1.204445822        | 2              | 2.90515399  |
| <b>P15083</b> | <b>PIGR Polymeric immunoglobulin receptor</b>                          | <b>1.045352237</b> | <b>0.9952</b>  | <b>4</b>    |
| P15083        | EIQNAGDQAQENR                                                          | 1.008278844        | 2              | 3.868920565 |
| P15083        | FSVLITGLR                                                              | 1.222567881        | 2              | 2.614567757 |
| P15083        | GVTGGSVAIVCPYNPK                                                       | 1.055199556        | 2              | 4.069482803 |
| P15083        | SSVTFECDLGR                                                            | 1.083655823        | 2              | 2.63517952  |
| <b>P15149</b> | <b>CP2A2 Cytochrome P450 2A2</b>                                       | <b>1.110306056</b> | <b>0.9996</b>  | <b>11</b>   |
| P15149        | DVYSSITQLSER                                                           | 0.738269453        | 2              | 2.905100107 |
| P15149        | FSNLAPLIPR                                                             | 1.181793293        | 2              | 3.210529089 |
| P15149        | GELPTFNILFK                                                            | 1.034561976        | 2              | 2.392362118 |
| P15149        | GTDVFPPIIGSLMTEPK                                                      | 1.092145079        | 2              | 4.162041664 |
| P15149        | GYGFSLSNVEQAK                                                          | 1.024212347        | 2              | 3.403674603 |
| P15149        | IVVLYGYDAVK                                                            | 1.864128757        | 2              | 2.67362833  |
| P15149        | NFIDSLIR                                                               | 1.148159735        | 2              | 2.964167833 |
| P15149        | TLQGTGAPIDPSIYLSK                                                      | 0.995953477        | 2              | 4.677064896 |
| P15149        | TVSNVINSIVFGNR                                                         | 0.896567162        | 2              | 3.091063023 |
| P15149        | DVQECILEEAGYLIK                                                        | 0.927124715        | 3              | 3.621809959 |
| P15149        | FKFPMNLEDINEYPSPIGFTR                                                  | 1.047213338        | 3              | 4.651076317 |
| <b>P15178</b> | <b>SYDC Aspartyl_tRNA synthetase_ cytoplasmic</b>                      | <b>1.083220963</b> | <b>4.7E-06</b> | <b>2</b>    |
| P15178        | FQTEIQTVNK                                                             | 1.081863207        | 2              | 2.556355476 |
| P15178        | QMVKFAANINK+Oxidation(2)                                               | 1.291955913        | 2              | 2.804523706 |
| <b>P15429</b> | <b>ENOB Beta_enolase</b>                                               | <b>0.625151224</b> | <b>0.00198</b> | <b>5</b>    |
| P15429        | IEEALGDK                                                               | 0.428336371        | 1              | 2.316432476 |
| P15429        | TAIQAAGYPDK                                                            | 0.461295955        | 2              | 2.440401077 |
| P15429        | VNQIGSVTESIQACK                                                        | 1.03014398         | 2              | 5.182933331 |
| P15429        | DATNVGDEGGFAPNILENNEALELLK                                             | 0.494834242        | 3              | 5.529212475 |
| P15429        | HIADLAGNPDVLPVPAFNVINGGSHAGNK                                          | 0.488861322        | 3              | 4.766695976 |
| <b>P15650</b> | <b>ACADL Long_chain specific acyl_CoA dehydrogenase_ mitochondrial</b> | <b>1.08646854</b>  | <b>9.9E-20</b> | <b>22</b>   |
| P15650        | LDSASASMAK                                                             | 1.100261071        | 1              | 2.331483126 |
| P15650        | SGSDWILNGSK                                                            | 1.135717011        | 1              | 2.275664806 |
| P15650        | AFVDSCLQLHETK                                                          | 1.263273068        | 2              | 4.089658737 |
| P15650        | AQDTAELFFEDVR                                                          | 1.293284205        | 2              | 4.876450062 |
| P15650        | CIGAIAMTEPGAGSDLQGVR                                                   | 0.902482571        | 2              | 5.275468826 |
| P15650        | CIGAIAMTEPGAGSDLQGVR+Oxidation(7)                                      | 1.054278322        | 2              | 5.18063736  |

|               |                                                                        |                    |                |             |
|---------------|------------------------------------------------------------------------|--------------------|----------------|-------------|
| P15650        | EQIEQFIPQMTAGK                                                         | 0.507550657        | 2              | 4.397865772 |
| P15650        | FFQEEVIPYHEEWEK                                                        | 1.142685805        | 2              | 4.990666389 |
| P15650        | GFYYLMQELPQER                                                          | 1.116444414        | 2              | 4.287563801 |
| P15650        | IFSEHDIFR                                                              | 1.093086744        | 2              | 2.933987617 |
| P15650        | KFFQEEVIPYHEEWEK                                                       | 1.215182292        | 2              | 5.197075844 |
| P15650        | KLTDIGIR                                                               | 1.135362828        | 2              | 2.430160761 |
| P15650        | LDSASASMAK+Oxidation(8)                                                | 1.131670061        | 2              | 2.528651714 |
| P15650        | LPASALLGEENK                                                           | 0.944623256        | 2              | 2.677301884 |
| P15650        | LTDIGIR                                                                | 1.107578453        | 2              | 2.3446455   |
| P15650        | QGLLGINIAEK                                                            | 0.991994336        | 2              | 3.253712177 |
| P15650        | RLDSASASMAK                                                            | 1.088206895        | 2              | 3.5289042   |
| P15650        | RLDSASASMAK+Oxidation(9)                                               | 1.300262895        | 2              | 3.076704264 |
| P15650        | TNICVTR                                                                | 1.082318322        | 2              | 2.50199151  |
| P15650        | VQPIYGGTNEIMK                                                          | 1.010288553        | 2              | 3.427618265 |
| P15650        | VQPIYGGTNEIMK+Oxidation(12)                                            | 1.093059047        | 2              | 2.700313568 |
| P15650        | AQDTAELFFEDVRLPASALLGEENK                                              | 1.179854574        | 3              | 5.305358887 |
| <b>P15651</b> | <b>ACADS Short_chain specific acyl_CoA dehydrogenase_mitochondrial</b> | <b>1.138441139</b> | <b>0.00218</b> | <b>9</b>    |
| P15651        | ASSTANLIFEDCR                                                          | 1.2285357          | 2              | 3.20798564  |
| P15651        | EEGDSWVLNGTK                                                           | 0.97598442         | 2              | 2.963784933 |
| P15651        | ELVPIAAQLDK                                                            | 0.692307847        | 2              | 2.476452589 |
| P15651        | ELVPIAAQLDKEHLFPTSQVK                                                  | 0.451174035        | 2              | 4.688177109 |
| P15651        | GISAFLVPMPTPLTLGK                                                      | 0.782451328        | 2              | 3.053979397 |
| P15651        | IGCFALSEPGNGSDAGAASTTAR                                                | 1.621039415        | 2              | 5.861381531 |
| P15651        | ITEIYEGTSEIQR                                                          | 1.022551399        | 2              | 4.978203297 |
| P15651        | IGIASQALGIAQASLDCAVK                                                   | 1.482068775        | 3              | 4.720147133 |
| P15651        | LAASEAATAISHQAIQILGGMGYVTEMPAER                                        | 1.181279877        | 3              | 3.340387583 |
| <b>P15684</b> | <b>AMPN Aminopeptidase N</b>                                           | <b>1.215680925</b> | <b>0.00476</b> | <b>4</b>    |
| P15684        | ALGDTPAPNIDTTELVER                                                     | 1.294541767        | 2              | 4.177735329 |
| P15684        | AQIIHDSFNLASAGK                                                        | 1.362087805        | 2              | 3.2882061   |
| P15684        | LSALACSNEVWILNR                                                        | 1.118178442        | 2              | 2.349259853 |
| P15684        | VVATTQMQAADAR                                                          | 1.215556728        | 2              | 3.786349297 |
| <b>P15709</b> | <b>ST2A1 Bile salt sulfotransferase</b>                                | <b>1.14315403</b>  | <b>0.99977</b> | <b>2</b>    |
| P15709        | NHFTVSQAEAFDK                                                          | 1.173443666        | 2              | 4.03877449  |
| P15709        | SIFTGIGLMR                                                             | 0.786955749        | 2              | 2.69509387  |
| <b>P15919</b> | <b>RAG1 V(D)J recombination_activating protein 1</b>                   | <b>1.053626809</b> | <b>0.37761</b> | <b>2</b>    |
| P15919        | EEGGDVKAVCLTLFLALR                                                     | 1.09839117         | 2              | 2.56061244  |
| P15919        | SQDLDDYLNGPFTVVVK                                                      | 0.737470061        | 2              | 2.572839499 |
| <b>P15978</b> | <b>HA11 Class I histocompatibility antigen_Non_RT1.A alpha_1 chain</b> | <b>1.088794793</b> | <b>0.00031</b> | <b>3</b>    |
| P15978        | GYEQHAYDGR                                                             | 2.929945392        | 2              | 2.811419725 |
| P15978        | VEHEGLPEPLSQR                                                          | 1.123991952        | 2              | 3.126129389 |
| P15978        | YSDAENPR                                                               | 1.380757589        | 2              | 2.471601725 |
| <b>P15999</b> | <b>ATPA ATP synthase subunit alpha_mitochondrial</b>                   | <b>1.014356119</b> | <b>6.2E-06</b> | <b>24</b>   |

|               |                                                      |                    |                |             |
|---------------|------------------------------------------------------|--------------------|----------------|-------------|
| P15999        | GYLDKLEPSK                                           | 1.148171151        | 1              | 3.006398201 |
| P15999        | AVDSLVPPIGR                                          | 1.062152365        | 2              | 3.628524303 |
| P15999        | EVAFAQFGSDLDAATQQLSR                                 | 1.026892197        | 2              | 6.790812969 |
| P15999        | GMSLNLEPDNVGVVFGNDK                                  | 1.227723999        | 2              | 5.74031496  |
| P15999        | GMSLNLEPDNVGVVFGNDK+Oxidation(2)                     | 0.968206573        | 2              | 4.28827858  |
| P15999        | ILGADTSVDLEETGR                                      | 1.089503744        | 2              | 5.062841415 |
| P15999        | LELAQYR                                              | 1.092781916        | 2              | 2.725661278 |
| P15999        | LKEIVTNFLAGFEP                                       | 1.343782135        | 2              | 3.05903101  |
| P15999        | LTDADAMK                                             | 0.94720507         | 2              | 2.553508043 |
| P15999        | LYCIYVAIGQK                                          | 0.979046817        | 2              | 2.712709427 |
| P15999        | NVQAEEMVEFSSGLK                                      | 0.584151158        | 2              | 4.338400841 |
| P15999        | RLTDADAMK                                            | 1.046826711        | 2              | 2.600925922 |
| P15999        | RLTDADAMK+Oxidation(8)                               | 1.170687759        | 2              | 2.326205492 |
| P15999        | RTGAIVDVPVGDPELLGR                                   | 1.046421818        | 2              | 3.914255857 |
| P15999        | STVAQLVK                                             | 1.057748284        | 2              | 2.395340204 |
| P15999        | TGAIVDVPVGDPELLGR                                    | 1.051277027        | 2              | 4.720200062 |
| P15999        | TGTAEMSSILEER                                        | 0.860350296        | 2              | 4.486801624 |
| P15999        | TGTAEMSSILEER+Oxidation(6)                           | 0.852557918        | 2              | 3.154788017 |
| P15999        | TSIAIDTIINQK                                         | 1.023159043        | 2              | 4.67326498  |
| P15999        | VLSIGDGIAR                                           | 0.923275836        | 2              | 3.161044121 |
| P15999        | VVDALGNAIDGK                                         | 1.133200791        | 2              | 4.481194973 |
| P15999        | FESAFLSHVVSQHQSLGNIR                                 | 1.183411565        | 3              | 6.095953465 |
| P15999        | GIRPAINVGLSVSR                                       | 1.158826389        | 3              | 3.862540722 |
| P15999        | QGQYSPMAIEEQVAVIYAGVR                                | 0.57183957         | 3              | 5.253682137 |
| <b>P16036</b> | <b>MPCP Phosphate carrier protein_ mitochondrial</b> | <b>0.978562692</b> | <b>0.98252</b> | <b>8</b>    |
| P16036        | EEGLNAFYK                                            | 1.004651382        | 1              | 2.404520512 |
| P16036        | FGFYEVFK                                             | 1.19925978         | 1              | 2.25841713  |
| P16036        | ALYSNILGEENTYLWR                                     | 0.881154542        | 2              | 3.17017436  |
| P16036        | GIFNGFSITLK                                          | 1.187187496        | 2              | 3.335949898 |
| P16036        | GSTASQVLQR                                           | 1.126699889        | 2              | 3.301098108 |
| P16036        | GWAPTIGYSMQLCK                                       | 0.966948068        | 2              | 2.958094835 |
| P16036        | IQTQPGYANTLR                                         | 1.207800525        | 2              | 3.773623943 |
| P16036        | MYKEEGLNAFYK                                         | 1.010794081        | 3              | 3.467235565 |
| <b>P16086</b> | <b>SPTA2 Spectrin alpha chain_ brain</b>             | <b>1.180451577</b> | <b>9.9E-20</b> | <b>28</b>   |
| P16086        | ALINADELANDVAGAEALLDR                                | 1.051035859        | 2              | 4.863788605 |
| P16086        | ALSSEGKPYVTK                                         | 1.267691626        | 2              | 2.920911789 |
| P16086        | DLASVQALLR                                           | 1.284850618        | 2              | 2.958594799 |
| P16086        | DLSSVQTLTK                                           | 0.950251007        | 2              | 2.537048817 |
| P16086        | GVIDMGNSLIER                                         | 0.94128498         | 2              | 2.956037998 |
| P16086        | HQAFAEELSANQSR                                       | 0.975972597        | 2              | 4.123606682 |
| P16086        | LFGAAEVQR                                            | 1.1666711          | 2              | 2.511528969 |
| P16086        | LGDSHDLQR                                            | 1.217883896        | 2              | 3.157053709 |
| P16086        | LGESQTLQQFSR                                         | 1.092815454        | 2              | 3.434172153 |

|               |                                                            |                    |                |             |
|---------------|------------------------------------------------------------|--------------------|----------------|-------------|
| P16086        | LIQEQHPPEELIK                                              | 1.223149048        | 2              | 3.554828882 |
| P16086        | LQQSHPLSANQIQVK                                            | 1.398263412        | 2              | 4.242005348 |
| P16086        | LQTASDESYKDPTNIQSK                                         | 1.318427934        | 2              | 4.511181831 |
| P16086        | LQVASDENYKDPTNLQGK                                         | 1.139014555        | 2              | 5.532623768 |
| P16086        | LSDDNTIGQEIIQQR                                            | 1.230690861        | 2              | 3.277731895 |
| P16086        | MTLVASEDYGDTLAAIQGLLK                                      | 0.903698824        | 2              | 4.370153427 |
| P16086        | NQALNTDNYGHDLASVQALQR                                      | 1.238252453        | 2              | 5.753691673 |
| P16086        | QFQDAGHFDAENIKK                                            | 1.142423952        | 2              | 2.556478262 |
| P16086        | REELITNWEQIR                                               | 1.258839371        | 2              | 4.118757248 |
| P16086        | SQLLGSAAHEVQR                                              | 0.658620816        | 2              | 3.229640007 |
| P16086        | SSLSSAQADFNQLAELDR                                         | 1.217868973        | 2              | 5.209545612 |
| P16086        | TATDEAYKDPNSNLQGK                                          | 1.129757856        | 2              | 3.677365303 |
| P16086        | TKQEEVNAAWQR                                               | 1.173216048        | 2              | 2.93573451  |
| P16086        | VLETAEDIQER                                                | 0.783019084        | 2              | 3.489853859 |
| P16086        | VNDVCTNGQDLIK                                              | 1.379012635        | 2              | 3.201797247 |
| P16086        | VNSLGETAQR                                                 | 1.35203986         | 2              | 2.688143253 |
| P16086        | HQALQAEIAGHEPR                                             | 1.172227789        | 3              | 4.148955822 |
| P16086        | HQLLEADISAHEDR                                             | 1.142515683        | 3              | 3.788481474 |
| P16086        | KFEFEQTDLAAHEER                                            | 1.042657151        | 3              | 5.316686153 |
| <b>P16232</b> | <b>DHI1 Corticosteroid 11_beta_dehydrogenase isozyme 1</b> | <b>1.029206489</b> | <b>0.9991</b>  | <b>9</b>    |
| P16232        | EECALEIK                                                   | 0.980444602        | 1              | 2.013290405 |
| P16232        | FVVEAGK                                                    | 0.973849948        | 1              | 1.919831753 |
| P16232        | KDEVYYDK                                                   | 1.093606479        | 1              | 2.73098731  |
| P16232        | ETSGIILSQAAPK                                              | 0.979300193        | 2              | 3.505043983 |
| P16232        | FALDGGFFSTIR                                               | 1.015705756        | 2              | 2.430719376 |
| P16232        | IMEFSLR                                                    | 1.921727875        | 2              | 2.510408878 |
| P16232        | MGAHVVLTR                                                  | 1.28766236         | 2              | 2.878896952 |
| P16232        | MTQPLIASYSASK                                              | 0.89324538         | 2              | 3.396929741 |
| P16232        | SSWTPLLLGNPGR                                              | 0.989791008        | 2              | 3.651449919 |
| <b>P16290</b> | <b>PGAM2 Phosphoglycerate mutase 2</b>                     | <b>1.261248068</b> | <b>6.8E-05</b> | <b>5</b>    |
| P16290        | HYGGLTGLNK                                                 | 1.06251823         | 1              | 3.137686014 |
| P16290        | AMEAVAAQGK                                                 | 1.066349219        | 2              | 2.593196392 |
| P16290        | AMEAVAAQGK+Oxidation(2)                                    | 1.347895854        | 2              | 2.436759472 |
| P16290        | HGESSWNQENR                                                | 0.583104146        | 2              | 3.62318182  |
| P16290        | VLIAAHGNSLR                                                | 1.273064917        | 2              | 2.673626184 |
| <b>P16303</b> | <b>CES3 Carboxylesterase 3</b>                             | <b>0.845424904</b> | <b>0.08739</b> | <b>18</b>   |
| P16303        | FAPPQPAEPWNFVK                                             | 1.408375486        | 1              | 2.470395565 |
| P16303        | MIPVVAEK                                                   | 0.895013987        | 1              | 1.950248718 |
| P16303        | AKEAAEESHWK                                                | 0.955140034        | 2              | 4.024044991 |
| P16303        | DGASEEETNLSK                                               | 0.810242465        | 2              | 4.112846375 |
| P16303        | EAAEESHWK                                                  | 0.795992169        | 2              | 2.784585953 |
| P16303        | ENIPLQFSEDCLYLNVPADLTK                                     | 0.477789004        | 2              | 4.283071041 |



|               |                                                     |                    |                |             |
|---------------|-----------------------------------------------------|--------------------|----------------|-------------|
| P16303        | IGASTQAAQR                                          | 0.403812038        | 2              | 3.301632881 |
| P16303        | LDLLGNPK                                            | 0.957788813        | 2              | 2.333940029 |
| P16303        | QKTEDELLETSLK                                       | 1.005251939        | 2              | 3.603182316 |
| P16303        | SFNTVPYIVGINK                                       | 0.762765928        | 2              | 2.897765636 |
| P16303        | TEDELLETSLK                                         | 0.918457765        | 2              | 3.591706753 |
| P16303        | TTTSAVMVHCLR                                        | 1.12982366         | 2              | 3.062420607 |
| P16303        | TVIGDHGDELFSVFGSPFLK                                | 1.035023135        | 2              | 5.394604206 |
| P16303        | YFGGTDDPAK                                          | 0.943850465        | 2              | 3.246355534 |
| P16303        | AISESGVVLTSALITTDSPKPIANLIATLSGCK                   | 1.002666565        | 3              | 5.558481693 |
| P16303        | ESYFPLPTVIDGVVLPK                                   | 0.780491128        | 3              | 4.110737801 |
| P16303        | QEFGWIIPTLMGYPLSE GK                                | 0.649115784        | 3              | 4.091054916 |
| P16303        | YVNLEGFAQPVAVFLGIPFAKPPLGSLR                        | 0.77570101         | 3              | 3.745062113 |
| <b>P16332</b> | <b>MUTA Methylmalonyl_CoA mutase_ mitochondrial</b> | <b>1.001893469</b> | <b>0.99627</b> | <b>5</b>    |
| P16332        | GDVGMAGVAIDTVEDTK                                   | 0.99619622         | 2              | 3.463490725 |
| P16332        | IDSGSEVIVGVNK                                       | 1.083510534        | 2              | 4.019878387 |
| P16332        | NTQIIIQEESGIPK                                      | 0.977043881        | 2              | 3.023189783 |
| P16332        | TGLQAGLTIDEFAPR                                     | 0.967755386        | 2              | 3.659989595 |
| P16332        | EVAQQAVDADVHAVGVSTLAAGHK                            | 1.107364622        | 3              | 3.412843704 |
| <b>P16409</b> | <b>MYL3 Myosin light chain 3</b>                    | <b>0.72622825</b>  | <b>0.36871</b> | <b>10</b>   |
| P16409        | LTEDEVEK                                            | 0.553376445        | 1              | 2.196972609 |
| P16409        | AAPAPAAAAPAAPEPERPK                                 | 0.654166516        | 2              | 4.032061577 |
| P16409        | ALGQNPTQAEVLR                                       | 0.704097595        | 2              | 4.40128994  |
| P16409        | DTGTYEDFVEGLR                                       | 0.834500385        | 2              | 2.981570005 |
| P16409        | EGNGTVMGAELR                                        | 0.943398104        | 2              | 2.530056477 |
| P16409        | IEFTPEQIEEFK                                        | 0.807355745        | 2              | 2.332529068 |
| P16409        | LMAGQEDSNGCINYEAFVK                                 | 1.150542304        | 2              | 4.926936626 |
| P16409        | NKDTGTYEDFVEGLR                                     | 0.885307562        | 2              | 4.188948154 |
| P16409        | VFDKEGNGTVMGAELR                                    | 1.080596942        | 2              | 3.972046852 |
| P16409        | MMDFETFLPMLQHISK                                    | 0.838246429        | 3              | 4.022271633 |
| <b>P16617</b> | <b>PGK1 Phosphoglycerate kinase 1</b>               | <b>1.014299002</b> | <b>0.34634</b> | <b>18</b>   |
| P16617        | IQLINNMLDK+Oxidation(7)                             | 2.083180582        | 1              | 2.027346134 |
| P16617        | AHSSMVGVNLPQK+Oxidation(5)                          | 1.048182284        | 2              | 2.463469982 |
| P16617        | GCITIIGGGDTATCCAK                                   | 0.970430614        | 2              | 5.537135124 |
| P16617        | IQLINNMLDK                                          | 0.946214498        | 2              | 2.794849634 |
| P16617        | ITLPVDFVTADK                                        | 1.094916976        | 2              | 2.330098152 |
| P16617        | ITLPVDFVTADKFDENAK                                  | 1.590615217        | 2              | 5.184028149 |
| P16617        | QVWNGPVGVFWEAFAR                                    | 1.063099278        | 2              | 4.124938488 |
| P16617        | SLMDEVVK                                            | 0.953634396        | 2              | 2.313436508 |
| P16617        | TGQATVASGIPAGWMLDCGTESSK                            | 0.887682467        | 2              | 4.703309536 |
| P16617        | VLNNMEIGTSLYDEEGAK                                  | 1.133946512        | 2              | 5.210412025 |
| P16617        | VLPVDALS NV                                         | 1.216693849        | 2              | 2.758839607 |
| P16617        | YSLEPVAAELK                                         | 1.064231145        | 2              | 3.145616055 |
| P16617        | AHSSMVGVNLPQK                                       | 1.006158279        | 3              | 3.777389765 |

|               |                                                         |                    |                |             |
|---------------|---------------------------------------------------------|--------------------|----------------|-------------|
| P16617        | ALESPERFLAILGGAK                                        | 0.752640729        | 3              | 4.597068787 |
| P16617        | DCVGSEVENACANPAAGTVILLENLR                              | 1.126599622        | 3              | 6.364088058 |
| P16617        | TGQATVASGIPAGWMLDCGTESSKK                               | 1.084943744        | 3              | 4.217716694 |
| P16617        | WNTEDKVSHVSTGGGASLELLEGGK                               | 1.063627855        | 3              | 4.661272526 |
| P16617        | SVVLMSHLGRPDGVPMPDKYSLEPVAELK                           | 1.041897127        | 4              | 5.281949043 |
| <b>P16638</b> | <b>ACLY ATP_citrate synthase</b>                        | <b>0.874235183</b> | <b>8.2E-06</b> | <b>21</b>   |
| P16638        | AFDSGIIPMEFVNK                                          | 1.212029305        | 2              | 4.110857487 |
| P16638        | DEPSVAAMVYPFTGDHK                                       | 0.85777162         | 2              | 2.638434172 |
| P16638        | EAYPEEAYIADLDAK                                         | 1.157332308        | 2              | 3.065079212 |
| P16638        | EEADEYVDIGALNGVFLGR                                     | 1.121816265        | 2              | 4.199786186 |
| P16638        | FGGALDAAAK                                              | 1.257776957        | 2              | 2.861598253 |
| P16638        | GAIVPAQEVPPPTVPMDDYSWAR                                 | 1.078027979        | 2              | 3.810249805 |
| P16638        | GVTIIGPATVGGIKPGCFK                                     | 1.205785469        | 2              | 3.628886938 |
| P16638        | HLLVHAPEDKK                                             | 1.496965538        | 2              | 3.363459349 |
| P16638        | IGNTGGMLDNILASK                                         | 1.631881931        | 2              | 3.206224203 |
| P16638        | LGLVGVNLSLDGVK                                          | 2.367189293        | 2              | 2.316249609 |
| P16638        | RGGPNYQEGLR                                             | 1.358645793        | 2              | 3.218430996 |
| P16638        | SAYDSTMETMNYAQIR                                        | 1.251342109        | 2              | 4.117153645 |
| P16638        | SGGMSNELNNISR                                           | 0.973570754        | 2              | 3.74579978  |
| P16638        | TIAIIAEGIPEALTR                                         | 1.109500498        | 2              | 4.067539215 |
| P16638        | TTDGVYEGVAIGDDR                                         | 1.158806145        | 2              | 2.871428013 |
| P16638        | V DATADYICK                                             | 1.474465985        | 2              | 2.550135136 |
| P16638        | WGDIEFPPPFGR                                            | 1.133578981        | 2              | 3.832359076 |
| P16638        | YICTTSAIQNR                                             | 1.10649471         | 2              | 2.883973122 |
| P16638        | DLVSSLTSGLLTIGDR                                        | 0.709425477        | 3              | 3.922989368 |
| P16638        | QHFPATPLLDYALEVEK                                       | 0.985400763        | 3              | 4.242563248 |
| P16638        | TTDGVYEGVAIGDDRYPGSTFMDHVLR                             | 0.990414943        | 3              | 3.62030077  |
| <b>P16970</b> | <b>ABCD3 ATP_binding cassette sub_family D member 3</b> | <b>1.05396737</b>  | <b>0.33596</b> | <b>9</b>    |
| P16970        | ITEDTVEFGS                                              | 0.951465376        | 1              | 1.902376175 |
| P16970        | DQVIYPDGKEDQK                                           | 0.718846644        | 2              | 3.243852139 |
| P16970        | EGGWDSVQDWMDVLSGGKE                                     | 1.001933183        | 2              | 4.382962227 |
| P16970        | GYLDNVQLGHILER                                          | 0.892501374        | 2              | 3.42316246  |
| P16970        | ITELMQVLK                                               | 0.988596643        | 2              | 2.522975445 |
| P16970        | SGANVLICGPNCGCK                                         | 0.977888839        | 2              | 3.303839922 |
| P16970        | FDHVPLATPNGDILIQDLSFEVR                                 | 1.265759053        | 3              | 3.856988907 |
| P16970        | GIEGAQASPLIPGAGEIINADNIIK                               | 0.84566826         | 3              | 5.151042938 |
| P16970        | HLHSTHSELLEDYYSQGR                                      | 1.097894418        | 3              | 5.330324173 |
| <b>P17077</b> | <b>RL9 60S ribosomal protein L9</b>                     | <b>0.993167006</b> | <b>0.00147</b> | <b>7</b>    |
| P17077        | GTVQQPDE                                                | 1.362233153        | 1              | 2.182544708 |
| P17077        | FLDGIYVSEK                                              | 0.955271993        | 2              | 3.05948925  |
| P17077        | KFLDGIYVSEK                                             | 1.11046958         | 2              | 2.971188307 |
| P17077        | TGVACSVSQAQK                                            | 1.060516488        | 2              | 3.259533644 |
| P17077        | TICSHVQNMIIK                                            | 1.245030334        | 2              | 3.68726325  |

|               |                                                             |                    |                |             |
|---------------|-------------------------------------------------------------|--------------------|----------------|-------------|
| P17077        | TILSNQTVDIPENVDTLK                                          | 0.913823136        | 2              | 4.836412907 |
| P17077        | DFNHINVELSLLGK                                              | 0.750527643        | 3              | 3.51505518  |
| <b>P17078</b> | <b>RL35 60S ribosomal protein L35</b>                       | <b>1.105264079</b> | <b>0.02774</b> | <b>2</b>    |
| P17078        | QLDDLKVELSCLR                                               | 1.133185448        | 2              | 2.493783712 |
| P17078        | VLTVINQTQK                                                  | 1.170596709        | 2              | 3.02412653  |
| <b>P17178</b> | <b>CP27A Sterol 26_hydroxylase_mitochondrial</b>            | <b>1.136658397</b> | <b>0.54774</b> | <b>4</b>    |
| P17178        | DHESTEGPGTGQDRPR                                            | 1.282784807        | 2              | 2.7344172   |
| P17178        | TNVNLSAPLLEQVMR                                             | 1.136623228        | 2              | 4.198735237 |
| P17178        | VGCLEPSIPEDTATFIR                                           | 1.24629935         | 2              | 3.420549631 |
| P17178        | YEVVLSPGMGEVK                                               | 1.318101736        | 2              | 3.26356411  |
| <b>P17209</b> | <b>MYL4 Myosin light chain 4</b>                            | <b>0.581985245</b> | <b>0.37964</b> | <b>2</b>    |
| P17209        | HVLATLGEK                                                   | 0.556071812        | 1              | 2.569966793 |
| P17209        | ITYGQCQDVLR                                                 | 0.896082903        | 2              | 2.47546792  |
| <b>P17425</b> | <b>HMCS1 Hydroxymethylglutaryl_CoA synthase_cytoplasmic</b> | <b>0.876416963</b> | <b>0.99998</b> | <b>11</b>   |
| P17425        | ITASLCDLK                                                   | 0.960214403        | 1              | 1.95508039  |
| P17425        | ASAELFNQK                                                   | 0.65408636         | 2              | 2.569483757 |
| P17425        | LEDTYFDRDVEK                                                | 0.724454301        | 2              | 2.995756865 |
| P17425        | MFLNDFLNDQNR                                                | 0.769714121        | 2              | 2.86577177  |
| P17425        | MGFCTDREDINSLCLTVVQK                                        | 0.802227829        | 2              | 4.548354149 |
| P17425        | NSIYSGLEAFGDVK                                              | 0.872063475        | 2              | 2.776197672 |
| P17425        | NLSYDCIGR                                                   | 0.627626689        | 2              | 2.860199213 |
| P17425        | TCVAPDVFAENMK                                               | 0.754582482        | 2              | 3.616374731 |
| P17425        | VTQDATPGSALDK                                               | 0.973753805        | 2              | 3.618481874 |
| P17425        | YTIGLGQAR                                                   | 0.775029778        | 2              | 2.785285234 |
| P17425        | GTHMQHAYDFYKPDMLSEYPVVDGK                                   | 0.701622326        | 3              | 5.31103611  |
| <b>P17426</b> | <b>AP2A1 AP_2 complex subunit alpha_1</b>                   | <b>1.064849278</b> | <b>0.83959</b> | <b>3</b>    |
| P17426        | FFQPTEMAAQDFQR+Oxidation(7)                                 | 1.242090366        | 2              | 3.552829027 |
| P17426        | NADVLELQQR                                                  | 1.031030623        | 2              | 2.505679131 |
| P17426        | VGGYILGEFGNLIAGDPR                                          | 1.257758741        | 2              | 4.169583797 |
| <b>P17475</b> | <b>A1AT Alpha_1_antiproteinase</b>                          | <b>0.858837973</b> | <b>0.85364</b> | <b>4</b>    |
| P17475        | VINDYVEK                                                    | 1.024375375        | 1              | 2.290829182 |
| P17475        | MQHLEQLTK                                                   | 0.79138721         | 2              | 2.68606925  |
| P17475        | TLLSSLGTR                                                   | 0.845325887        | 2              | 2.903346777 |
| P17475        | VFNNADLSGITEDAPLK                                           | 0.92147296         | 2              | 5.212237835 |
| <b>P17764</b> | <b>THIL Acetyl_CoA acetyltransferase_mitochondrial</b>      | <b>1.284418236</b> | <b>9.9E-20</b> | <b>15</b>   |
| P17764        | EEQDKYAIGSYTR                                               | 1.067922868        | 2              | 3.394931793 |
| P17764        | ENGTVTAANASTLNDGAAAVVLMTAEAAQR                              | 0.841016702        | 2              | 4.530545235 |
| P17764        | EVYMGNVIQGGEGQAPTR                                          | 0.910435959        | 2              | 5.247784615 |
| P17764        | FANEITPITISVK                                               | 1.016030992        | 2              | 3.977552652 |
| P17764        | GKPDVVVKEDEEYK                                              | 1.068812275        | 2              | 3.683993101 |
| P17764        | GKPDVVVKEDEEYKR                                             | 1.321630332        | 2              | 4.612516403 |
| P17764        | IAAFADAADVDPIDFLAPAYAVPK                                    | 1.978271396        | 2              | 5.234680653 |

|               |                                                  |                    |                |             |
|---------------|--------------------------------------------------|--------------------|----------------|-------------|
| P17764        | IHMGNCAENTAK                                     | 1.574312565        | 2              | 3.404375315 |
| P17764        | IHMGNCAENTAK+Oxidation(3)                        | 2.222837692        | 2              | 3.495884657 |
| P17764        | LEDLIVK                                          | 1.253944782        | 2              | 2.429467678 |
| P17764        | LGTIAIQGAIEK                                     | 1.748215074        | 2              | 3.304086924 |
| P17764        | QATLGAGLPIATPCTTVNK                              | 1.174234371        | 2              | 5.10218811  |
| P17764        | QGEFGLASICNGGGASAVLIEK                           | 1.091211813        | 2              | 4.734839439 |
| P17764        | TPIGSFLGSLASQPATK                                | 1.43666426         | 2              | 4.210940361 |
| P17764        | VNVHGGAVSLGHPIGMSGAR                             | 1.254939388        | 2              | 5.732958317 |
| <b>P17879</b> | <b>HS71B Heat shock 70 kDa protein 1B</b>        | <b>1.110176795</b> | <b>1</b>       | <b>3</b>    |
| P17879        | TTPSYVAFTDTER                                    | 1.024258735        | 2              | 3.598173857 |
| P17879        | VEIANDQGNR                                       | 0.995426191        | 2              | 3.667200565 |
| P17879        | QTQTFTTYSDNQPGVLIQVYEGER                         | 0.864050715        | 3              | 5.333651066 |
| <b>P17988</b> | <b>ST1A1 Sulfotransferase 1A1</b>                | <b>1.083833825</b> | <b>0.10432</b> | <b>6</b>    |
| P17988        | CPGVPSGLETLEETPAPR                               | 1.135765547        | 2              | 4.495327473 |
| P17988        | FDAHAK                                           | 1.199188555        | 2              | 2.356271982 |
| P17988        | NTFTVAQNER                                       | 1.049225742        | 2              | 2.988041162 |
| P17988        | SLPEETVDSIVHHTSFK                                | 1.183074374        | 2              | 4.522598743 |
| P17988        | THLPLSLLPQSLLDQK                                 | 1.337899723        | 2              | 5.007662773 |
| P17988        | YFAETIGPLQNFTAWPDDLLISTYPK                       | 0.981199576        | 3              | 4.152879715 |
| <b>P18163</b> | <b>ACSL1 Long_chain_fatty_acid__CoA ligase 1</b> | <b>1.285092937</b> | <b>1.1E-10</b> | <b>27</b>   |
| P18163        | TMYDGFQR                                         | 1.139756168        | 1              | 1.913467407 |
| P18163        | AELSVIFADKPEK                                    | 1.285306623        | 2              | 3.565847635 |
| P18163        | AILEDNVK                                         | 1.028050903        | 2              | 2.472254753 |
| P18163        | ALEDLGR                                          | 1.070955432        | 2              | 2.461280823 |
| P18163        | ALKPPCDLSMQSVEVTGTTEGVR                          | 1.173489409        | 2              | 4.554934502 |
| P18163        | CGVEIIGLK                                        | 1.037027741        | 2              | 2.704549789 |
| P18163        | GAMVTHQNMNDSCSGFIK                               | 1.610423177        | 2              | 5.332997799 |
| P18163        | GFQGSFEELCR                                      | 1.225341575        | 2              | 3.392648697 |
| P18163        | GIAVHPELFSIDNGLLPTLK                             | 1.272642112        | 2              | 5.727280617 |
| P18163        | GIQVSNDGPCLGSR                                   | 1.064070838        | 2              | 4.485711098 |
| P18163        | IENIYLR                                          | 1.058223385        | 2              | 2.964355707 |
| P18163        | IFGQANTSVK                                       | 1.253270075        | 2              | 2.60531497  |
| P18163        | IIVIMDSYDNDLVER                                  | 1.268246953        | 2              | 4.929255962 |
| P18163        | LLLEGVENK                                        | 1.190521285        | 2              | 3.183618069 |
| P18163        | LLMDDLK                                          | 1.128929978        | 2              | 2.4259305   |
| P18163        | LVDVEDMNYQAAK                                    | 0.845504427        | 2              | 4.577793121 |
| P18163        | LVDVEDMNYQAAK+Oxidation(7)                       | 0.651832294        | 2              | 2.762492418 |
| P18163        | NAGLKPFEQVK                                      | 1.118093473        | 2              | 4.004687309 |
| P18163        | QVAEMAECIGSALIQK                                 | 0.941384706        | 2              | 5.252670288 |
| P18163        | SAVLEDDKLLLYYDDVR                                | 0.757475983        | 2              | 4.234344959 |
| P18163        | SQIDELYSTIK                                      | 0.827490978        | 2              | 3.766600132 |
| P18163        | SQIDELYSTIKI                                     | 0.953141905        | 2              | 3.116420746 |
| P18163        | TAEALDKDGLWHTGDIGK                               | 1.239300471        | 2              | 5.354172707 |

|               |                                                           |                    |                |             |
|---------------|-----------------------------------------------------------|--------------------|----------------|-------------|
| P18163        | VLQPTIFPVVPR                                              | 1.154261308        | 2              | 3.676960468 |
| P18163        | WLLDFASK                                                  | 1.094111163        | 2              | 2.612455606 |
| P18163        | LMITGAAPVSATVLTFLR                                        | 1.72057009         | 3              | 4.144877911 |
| P18163        | TKPKPPEPEDLAICFTSGTTGNPK                                  | 0.592794612        | 3              | 6.187456131 |
| <b>P18297</b> | <b>SPRE Sepiapterin reductase</b>                         | <b>1.089176495</b> | <b>0.09564</b> | <b>5</b>    |
| P18297        | LLLINNAGTLGDVSK                                           | 2.024439921        | 2              | 3.029378653 |
| P18297        | LNSEGELVDCGTSAQK                                          | 1.068212973        | 2              | 4.952135086 |
| P18297        | TVVNISSLCALQPFK                                           | 0.809902162        | 2              | 3.131248713 |
| P18297        | VLSYAPGPLDTNMQQQLAR                                       | 1.159131693        | 2              | 2.744343996 |
| P18297        | ALAPQLAGLLSPGSVLLLSAR                                     | 1.232078042        | 3              | 3.9368155   |
| <b>P18298</b> | <b>METK2 S_adenosylmethionine synthase isoform type_2</b> | <b>1.520178849</b> | <b>3.1E-08</b> | <b>3</b>    |
| P18298        | IIVDTYGGWGAHGGGAFSGK                                      | 1.576838819        | 2              | 5.64404583  |
| P18298        | YLDEDTIYHLQPSGR                                           | 1.120770779        | 2              | 4.389833927 |
| P18298        | KIIVDTYGGWGAHGGGAFSGK                                     | 1.182710044        | 3              | 3.423740864 |
| <b>P18418</b> | <b>CALR Calreticulin</b>                                  | <b>1.084427414</b> | <b>9.9E-20</b> | <b>17</b>   |
| P18418        | FYGDQEK                                                   | 1.347291461        | 1              | 2.02837038  |
| P18418        | FYGDQEKDK                                                 | 1.279280253        | 1              | 2.819950581 |
| P18418        | QIDNPDYK                                                  | 1.332780026        | 1              | 1.952384233 |
| P18418        | VHVIFNYK                                                  | 1.123910365        | 1              | 2.344139814 |
| P18418        | DMHGDSEYNIMFGPDICGPGTK                                    | 0.913457611        | 2              | 6.195069313 |
| P18418        | FYALSAR                                                   | 1.370902545        | 2              | 2.328241825 |
| P18418        | GQTLVVQFTVK                                               | 1.004567816        | 2              | 3.816910028 |
| P18418        | HEQNIDCGGGYVK                                             | 1.216078418        | 2              | 4.373522282 |
| P18418        | IDNSQVESGSLEDDWDFLPPK                                     | 0.856541194        | 2              | 5.51749754  |
| P18418        | IDNSQVESGSLEDDWDFLPPK                                     | 0.972761648        | 2              | 5.049960136 |
| P18418        | IKDPDAAKPEDWDER                                           | 1.271744803        | 2              | 4.368840694 |
| P18418        | LFPGLDQK                                                  | 1.58277014         | 2              | 2.339840889 |
| P18418        | AKIDDPTDSKPEDWDKPEHIPDPAK                                 | 1.272735488        | 3              | 6.03648901  |
| P18418        | CKDDEFTHLYTLIVRPDNTYEVK                                   | 0.85778062         | 3              | 5.412304878 |
| P18418        | KPEDWDEEMDGEWEPVQNPYK                                     | 1.085943558        | 3              | 5.700286865 |
| P18418        | SGTIFDNFLITNDEAYAEFGNETWGVTK                              | 1.205614188        | 3              | 5.494481564 |
| P18418        | IDDPTDSKPEDWDKPEHIPDPAK                                   | 1.196981866        | 4              | 4.665221214 |
| <b>P18420</b> | <b>PSA1 Proteasome subunit alpha type_1</b>               | <b>1.165939722</b> | <b>0.1224</b>  | <b>2</b>    |
| P18420        | AQPSQAADEPAEK                                             | 1.167640267        | 2              | 3.606403112 |
| P18420        | IHQIEYAMEAVK                                              | 1.036953194        | 2              | 2.300308466 |
| <b>P18421</b> | <b>PSB1 Proteasome subunit beta type_1</b>                | <b>1.253490124</b> | <b>0.00266</b> | <b>2</b>    |
| P18421        | AGGSASAMLQPLLDNQVGFK                                      | 1.288844901        | 2              | 4.796003342 |
| P18421        | NMQNVEHVPLTLDR                                            | 1.061050693        | 2              | 3.781368017 |
| <b>P18422</b> | <b>PSA3 Proteasome subunit alpha type_3</b>               | <b>1.264807142</b> | <b>0.0022</b>  | <b>3</b>    |
| P18422        | DGVVFGVEKLVLSK                                            | 1.781867526        | 1              | 1.945633531 |
| P18422        | AVENSSTAIGIR                                              | 1.265239028        | 2              | 3.310664892 |
| P18422        | HVGMAVAGLLADAR                                            | 1.101328619        | 3              | 3.609472036 |

|               |                                                                  |                    |                |             |
|---------------|------------------------------------------------------------------|--------------------|----------------|-------------|
| <b>P18437</b> | <b>HMG2 Non_histone chromosomal protein HMG_17</b>               | <b>0.924254481</b> | <b>0.94653</b> | <b>2</b>    |
| P18437        | DANNPAEDGDAK                                                     | 1.178966807        | 2              | 3.327004671 |
| P18437        | DANNPAEDGDAKTDQAQK                                               | 0.924205848        | 2              | 4.887946129 |
| <b>P18445</b> | <b>RL27A 60S ribosomal protein L27a</b>                          | <b>1.071967772</b> | <b>0.08396</b> | <b>3</b>    |
| P18445        | NGVAPIIDVVR                                                      | 1.290034148        | 1              | 2.507063866 |
| P18445        | NQSFCTVNLDK                                                      | 1.138458748        | 2              | 3.203341484 |
| P18445        | RNQSFCTVNLDK                                                     | 1.18760872         | 2              | 3.123755217 |
| <b>P18484</b> | <b>AP2A2 AP_2 complex subunit alpha_2</b>                        | <b>1.042224024</b> | <b>0.61294</b> | <b>5</b>    |
| P18484        | FFQPTEMASQDFFQR                                                  | 1.242090366        | 2              | 3.986418486 |
| P18484        | ILVAGDTMDSVK                                                     | 1.339106333        | 2              | 2.438645363 |
| P18484        | NNGVLFENQLLQIGLK                                                 | 0.886003087        | 2              | 2.552242756 |
| P18484        | YGGTFQNVSVK                                                      | 0.993368346        | 2              | 2.485367298 |
| P18484        | IIGFGSALLEEVDPNPANFVAGAGIIHTK                                    | 1.419011999        | 3              | 3.39960289  |
| <b>P18596</b> | <b>AT2A3 Sarcoplasmic/endoplasmic reticulum calcium ATPase 3</b> | <b>1.136756051</b> | <b>0.18027</b> | <b>4</b>    |
| P18596        | DIVPGDIVEVAVGDKVPADLR                                            | 0.468211746        | 2              | 3.329761028 |
| P18596        | SLPSVETLGCTSVICSDK                                               | 0.987127534        | 2              | 4.277377605 |
| P18596        | TGTLTTNQMSVCR                                                    | 1.208773904        | 2              | 2.864724398 |
| P18596        | VGEATETALTCLVEK                                                  | 1.041684706        | 2              | 4.972034454 |
| <b>P18757</b> | <b>CGL Cystathionine gamma_lyase</b>                             | <b>1.08689477</b>  | <b>0.99927</b> | <b>15</b>   |
| P18757        | AGDEVICMDEVYGGTNR                                                | 0.869553098        | 2              | 5.772587299 |
| P18757        | ATLGISDTLIR                                                      | 0.947668224        | 2              | 3.569734335 |
| P18757        | AVAALDGAK                                                        | 0.949932205        | 2              | 2.445112228 |
| P18757        | FLQNSLGAVPSPDFCYLCCR                                             | 1.430518306        | 2              | 3.619330168 |
| P18757        | LLEAAITPQTK                                                      | 1.003431775        | 2              | 3.613528013 |
| P18757        | LVWIETPTNPTLK                                                    | 1.168520938        | 2              | 3.802896023 |
| P18757        | QCTGCPGMVSFYIK                                                   | 1.088572517        | 2              | 3.827675819 |
| P18757        | QDSPGQSSGFVYSR                                                   | 0.783597425        | 2              | 3.896388769 |
| P18757        | RVASEFGLK                                                        | 1.088231162        | 2              | 2.650898218 |
| P18757        | VIYPGLPSHPQHELAK                                                 | 1.043388902        | 2              | 4.188634396 |
| P18757        | AVVLPISLATTFK                                                    | 0.877852323        | 3              | 4.987933636 |
| P18757        | GTLQHAQVFLK                                                      | 0.903362591        | 3              | 3.31622386  |
| P18757        | LFALAESLGGYESLAELPAIMTHASVPEK                                    | 1.347510383        | 3              | 3.798883438 |
| P18757        | LSVGLEDEKDLLEDLGQALK                                             | 1.105467297        | 3              | 6.644096851 |
| P18757        | LFALAESLGGYESLAELPAIMTHASVPEKDR                                  | 2.047484114        | 4              | 5.756370544 |
| <b>P18886</b> | <b>CPT2 Carnitine O_palmitoyltransferase 2_mitochondrial</b>     | <b>1.262708399</b> | <b>9.4E-10</b> | <b>10</b>   |
| P18886        | ATNLTVSAVR                                                       | 1.272822977        | 2              | 3.514708519 |
| P18886        | ELHAHLAQDK                                                       | 0.348076862        | 2              | 3.467175961 |
| P18886        | LIFDGNEETLK                                                      | 1.304716327        | 2              | 3.249944687 |
| P18886        | QYGQTVATYESCSTAAFK                                               | 1.161340487        | 2              | 4.033313274 |
| P18886        | SEYNDQLTR                                                        | 1.067088384        | 2              | 2.482808828 |
| P18886        | TETIRPASIFTK                                                     | 1.390770222        | 2              | 3.071148396 |
| P18886        | TLQAGLLEPEVFHNLNSK                                               | 4.30805384         | 2              | 4.059551716 |

|               |                                                                           |                    |                |             |
|---------------|---------------------------------------------------------------------------|--------------------|----------------|-------------|
| P18886        | TLSIDSIQFQR                                                               | 1.164586735        | 2              | 3.398393154 |
| P18886        | YILSDSSPVPEFPVAYLTSENK                                                    | 1.229180381        | 2              | 5.211328983 |
| P18886        | YLNAQKPLLDSSQFR                                                           | 1.257140382        | 2              | 4.710803509 |
| <b>P19112</b> | <b>F16P1 Fructose_1_6_bisphosphatase 1</b>                                | <b>1.120497089</b> | <b>9.9E-20</b> | <b>16</b>   |
| P19112        | AGGTGEMTQLLNSLCTAIK                                                       | 1.160872981        | 2              | 5.396643162 |
| P19112        | APVIMGSTEDVQEFLEIYNK                                                      | 1.364476845        | 2              | 4.337750912 |
| P19112        | DFDPAINIYIQR                                                              | 0.467611846        | 2              | 3.57267189  |
| P19112        | GNIYSINEGYAK                                                              | 1.041492124        | 2              | 3.942631483 |
| P19112        | KGNIYSINEGYAK                                                             | 1.130271993        | 2              | 4.215837479 |
| P19112        | KLDILSNDLVINMLK                                                           | 1.169660564        | 2              | 5.060664654 |
| P19112        | LDILSNDLVINMLK                                                            | 1.316622321        | 2              | 4.852484703 |
| P19112        | LLYECNPIAYVMEK                                                            | 1.393473519        | 2              | 4.364347935 |
| P19112        | QAGIAQLYGIAGSTNVTGDQVK                                                    | 1.166046007        | 2              | 5.899817467 |
| P19112        | SRPSLPLQSR                                                                | 1.100079057        | 2              | 3.302189589 |
| P19112        | TLVYGGIFLYPANK                                                            | 0.697829417        | 2              | 3.983035564 |
| P19112        | TSANEPSEKDALQPGR                                                          | 1.171941382        | 2              | 4.455714226 |
| P19112        | AGGLATTGNEDILDIVPTEIHQK                                                   | 1.140114932        | 3              | 6.215169907 |
| P19112        | APVIMGSTEDVQEFLEIYNKDK                                                    | 1.201043587        | 3              | 3.445442915 |
| P19112        | KTSANEPSEKDALQPGR                                                         | 1.229903459        | 3              | 3.87502408  |
| P19112        | SSYATCVLVSEEDTHAIIIEPEKR                                                  | 1.313984189        | 3              | 6.003943443 |
| <b>P19225</b> | <b>CP270 Cytochrome P450 2C70</b>                                         | <b>1.22993687</b>  | <b>0.06589</b> | <b>12</b>   |
| P19225        | FSLMVLRSMMGMGK+Oxidation(4)                                               | 1.316029468        | 1              | 1.972090364 |
| P19225        | IQEEITR                                                                   | 1.320473629        | 1              | 2.117668152 |
| P19225        | EALIDRGEEFSDK                                                             | 1.062791874        | 2              | 2.498483181 |
| P19225        | FDPGHFLDEK                                                                | 1.216912376        | 2              | 2.666654587 |
| P19225        | FILMEINR                                                                  | 1.238222279        | 2              | 2.378604174 |
| P19225        | IQEEVVYLLEALR                                                             | 0.840416569        | 2              | 3.859040737 |
| P19225        | KLPPGPTPLPIFGNILQVGVK                                                     | 1.42784205         | 2              | 2.42874527  |
| P19225        | LPPGPTPLPIFGNILQVGVK                                                      | 1.14522851         | 2              | 4.151506424 |
| P19225        | YIDFVPIPLPR                                                               | 1.100142582        | 2              | 3.110712051 |
| P19225        | ASLNLSNPQDFIDYFLIK                                                        | 0.953615477        | 3              | 4.099287987 |
| P19225        | GTSVMACLTSALHDDKEFPNPEK                                                   | 1.170068697        | 3              | 4.1864748   |
| P19225        | TNGSPCDPSFLLACVPCNVISSVIFQHR                                              | 1.104421114        | 3              | 3.462341309 |
| <b>P19234</b> | <b>NDUV2 NADH dehydrogenase [ubiquinone] flavoprotein 2_mitochondrial</b> | <b>0.948768931</b> | <b>0.83889</b> | <b>5</b>    |
| P19234        | DIEEIIDELR                                                                | 0.887246259        | 2              | 3.639214039 |
| P19234        | DTPENNPDPFDFTPENYER                                                       | 0.780578959        | 2              | 4.876343727 |
| P19234        | FCCEPAGGLTSLTEPPK                                                         | 1.048489529        | 2              | 3.294402838 |
| P19234        | FCCEPAGGLTSLTEPPKPGFGVQAGL                                                | 1.159509122        | 2              | 3.0144701   |
| P19234        | YHIQVCTTTPCMLR                                                            | 1.111573793        | 2              | 3.324624538 |
| <b>P19468</b> | <b>GSH1 Glutamate__cysteine ligase catalytic subunit</b>                  | <b>1.048578079</b> | <b>0.97714</b> | <b>8</b>    |
| P19468        | ASGELMTVAR                                                                | 1.10855175         | 2              | 2.337459087 |
| P19468        | CNQJANELCEPELLGSGFR                                                       | 1.016287646        | 2              | 5.084675312 |

|               |                                                   |                    |                |             |
|---------------|---------------------------------------------------|--------------------|----------------|-------------|
| P19468        | DKNTSPFVETFPEDDEEASK                              | 0.785539488        | 2              | 3.589823008 |
| P19468        | NTPSPFVETFPEDDEEASK                               | 0.956145668        | 2              | 4.229588985 |
| P19468        | SLFFPDEAINK                                       | 1.149758584        | 2              | 2.477593422 |
| P19468        | SRYDSIDSYLSK                                      | 0.955406487        | 2              | 2.925888777 |
| P19468        | VQLLLNGGDVLETLQEK                                 | 1.198623985        | 2              | 4.990014076 |
| P19468        | WGVISASVDDR                                       | 1.037123838        | 2              | 3.067216635 |
| <b>P19488</b> | <b>UDB37 UDP-glucuronosyltransferase 2B37</b>     | <b>0.920340319</b> | <b>1</b>       | <b>8</b>    |
| P19488        | AEMWLIR                                           | 1.073550813        | 2              | 2.89594698  |
| P19488        | FETFPTSVMKDELEK                                   | 0.971994713        | 2              | 4.031106472 |
| P19488        | GAAVTLNIR                                         | 0.801976823        | 2              | 2.597839594 |
| P19488        | GHEVTVLKPSAYVLDPK                                 | 1.165626933        | 2              | 4.443253517 |
| P19488        | NWDPFYTEILGRPTTLAETMGK                            | 1.132122809        | 2              | 5.319781303 |
| P19488        | SDLFNALK                                          | 1.002264626        | 2              | 2.945985556 |
| P19488        | TILDELVQR                                         | 1.006442554        | 2              | 3.530071735 |
| P19488        | ANAIAWALAIQIPQK                                   | 1.101003287        | 3              | 6.591358185 |
| <b>P19511</b> | <b>AT5F1 ATP synthase subunit b_mitochondrial</b> | <b>1.071774818</b> | <b>0.99904</b> | <b>6</b>    |
| P19511        | HVIQSISAQKEK                                      | 1.079302855        | 2              | 4.001601696 |
| P19511        | HLYFDVQR                                          | 1.064157992        | 2              | 2.695663929 |
| P19511        | LNEEKIAQLEEIK                                     | 0.99489552         | 2              | 2.5854671   |
| P19511        | HVIQSISAQKEKETIAK                                 | 1.107768791        | 3              | 4.501843929 |
| P19511        | LDYHISVQDMMR                                      | 1.157264581        | 3              | 3.869146824 |
| P19511        | YGASIGEFIDKLNEEK                                  | 1.156030541        | 3              | 3.600708485 |
| <b>P19643</b> | <b>AOFB Amine oxidase [flavin-containing] B</b>   | <b>1.139029569</b> | <b>0.35688</b> | <b>13</b>   |
| P19643        | YVISAIPPVLGMK                                     | 1.351326044        | 1              | 2.854526997 |
| P19643        | FIGGSGQVSER                                       | 1.231833699        | 2              | 3.463067532 |
| P19643        | IISTTNGGQER                                       | 1.529773708        | 2              | 2.862328768 |
| P19643        | KFIGGSGQVSER                                      | 0.994782565        | 2              | 3.265601873 |
| P19643        | KLCELYAK                                          | 1.732083214        | 2              | 2.350284338 |
| P19643        | LLHDCGLSVVLEAR                                    | 1.831314205        | 2              | 3.763983011 |
| P19643        | TLNHEIYEAK                                        | 1.205357008        | 2              | 2.550701857 |
| P19643        | TMDEMGQEIPSDAPWK                                  | 1.018275328        | 2              | 4.525197983 |
| P19643        | TYTIRKNVK                                         | 0.881670626        | 2              | 2.411031246 |
| P19643        | VLNSQEALQPVHYEEK                                  | 1.226334967        | 2              | 4.529945374 |
| P19643        | YVDLGGSYVGPTQNR                                   | 1.172748603        | 2              | 5.032373428 |
| P19643        | IPEDEIWQPEPESVDVPARPITNTFLER                      | 0.888166016        | 3              | 4.80675745  |
| P19643        | LERPVIHIDQTGENVVVK                                | 1.123351006        | 3              | 5.532964706 |
| <b>P19804</b> | <b>NDKB Nucleoside diphosphate kinase B</b>       | <b>0.787527028</b> | <b>9.9E-20</b> | <b>9</b>    |
| P19804        | DRPFFPGLVK                                        | 0.642296388        | 2              | 2.379807711 |
| P19804        | EIGLWFKPEELIDYK                                   | 1.039241243        | 2              | 4.233841419 |
| P19804        | GDFCIQVGR                                         | 1.219745243        | 2              | 3.28501296  |
| P19804        | NIIHGSDSVESA EK                                   | 1.189295357        | 2              | 4.039561749 |
| P19804        | TFIAIKPDGVQR                                      | 1.258186683        | 2              | 2.980665207 |
| P19804        | VMLGETNPADSKPGTIR                                 | 1.277472606        | 2              | 4.470665932 |



|               |                                                                                     |                    |                |             |
|---------------|-------------------------------------------------------------------------------------|--------------------|----------------|-------------|
| P19804        | VMLGETNPADSKPGTIR+Oxidation(2)                                                      | 1.405057271        | 2              | 4.252462387 |
| P19804        | YMNSGPVVAMVWEGLNVVK                                                                 | 1.289731506        | 2              | 5.272873402 |
| P19804        | NIIHGSDSVESAEKEIGLWFKPEELIDYK                                                       | 1.202185471        | 4              | 5.651983261 |
| <b>P19944</b> | <b>RLA1 60S acidic ribosomal protein P1</b>                                         | <b>0.950274943</b> | <b>0.98684</b> | <b>2</b>    |
| P19944        | INALIK                                                                              | 1.114727607        | 2              | 2.421574354 |
| P19944        | ALANVNIGSLICNVGAGGPAPAAGAAPAGGPAPSAAAAAPAEK                                         | 0.99356303         | 4              | 5.808135033 |
| <b>P19945</b> | <b>RLA0 60S acidic ribosomal protein P0</b>                                         | <b>1.198707701</b> | <b>9.9E-20</b> | <b>9</b>    |
| P19945        | AFLADPSAFAAAAAPVAAATTAAPAAAAAPAK                                                    | 1.093101312        | 2              | 5.896059036 |
| P19945        | CFIVGADNVGSK                                                                        | 1.06413373         | 2              | 3.659412861 |
| P19945        | GHLENNPALEK                                                                         | 1.205588418        | 2              | 3.633954287 |
| P19945        | GTIEILSDVQLIK                                                                       | 1.172853814        | 2              | 3.110620737 |
| P19945        | IIQLLDYDPK                                                                          | 1.815064312        | 2              | 3.463037014 |
| P19945        | TSFFQALGITTK                                                                        | 1.231626206        | 2              | 4.034369946 |
| P19945        | VLALSVETDYTFPLAEK                                                                   | 1.301760722        | 2              | 4.494778156 |
| P19945        | AGAIAPCEVTVPAQNTGLGPEK                                                              | 1.16808214         | 3              | 5.121566772 |
| P19945        | NVASVCLQIGYPTVASVPHSIINGYK                                                          | 1.092214851        | 3              | 3.64301753  |
| <b>P20059</b> | <b>HEMO Hemopexin</b>                                                               | <b>1.094284411</b> | <b>0.99997</b> | <b>6</b>    |
| P20059        | ELGSPPGISLDTIDAAFSCPGSSK                                                            | 0.973034345        | 2              | 4.752447128 |
| P20059        | FNPVTGEVPPR                                                                         | 0.904523097        | 2              | 2.551001787 |
| P20059        | GECQSEGLVFFQGNR                                                                     | 1.075263942        | 2              | 3.925517082 |
| P20059        | SGAQATWAELSWPHEK                                                                    | 0.854903119        | 2              | 3.418834686 |
| P20059        | VDGALCLEK                                                                           | 0.89709421         | 2              | 2.433994293 |
| P20059        | LFQEEFPGIPYPPDAAVECHR                                                               | 0.906019395        | 3              | 4.466547012 |
| <b>P20070</b> | <b>NB5R3 NADH_cytochrome b5 reductase 3</b>                                         | <b>0.972694134</b> | <b>0.97917</b> | <b>8</b>    |
| P20070        | DILLRPELELR                                                                         | 0.892608102        | 2              | 2.526962757 |
| P20070        | MSQYLENMNIGDTIEFR                                                                   | 0.911902724        | 2              | 5.306854248 |
| P20070        | SSPAITLENPDIK                                                                       | 0.983734601        | 2              | 3.596059084 |
| P20070        | SSPAITLENPDIKYPLR                                                                   | 1.135398149        | 2              | 3.961005688 |
| P20070        | SVGMIAGGTGITPMLQVIR                                                                 | 0.985648748        | 2              | 4.632184505 |
| P20070        | SVGMIAGGTGITPMLQVIR+Oxidation(14)                                                   | 1.323494258        | 2              | 2.322671413 |
| P20070        | IDGNLVIRPYTPVSSDDDKGFVDLVVK                                                         | 0.920886665        | 3              | 5.687831879 |
| P20070        | LIDKEIISHDTR                                                                        | 1.097960163        | 3              | 3.750200272 |
| <b>P20280</b> | <b>RL21 60S ribosomal protein L21</b>                                               | <b>1.317190924</b> | <b>9.9E-20</b> | <b>4</b>    |
| P20280        | KGDIVDIK                                                                            | 1.357997583        | 1              | 2.090175629 |
| P20280        | HGVVPLATYMR                                                                         | 1.286603416        | 2              | 2.50098896  |
| P20280        | TNGKEPELLEPIPYEFMA                                                                  | 0.774148042        | 2              | 3.427423239 |
| P20280        | VYNVTQHAVGIIVNK                                                                     | 1.303284322        | 2              | 4.139404297 |
| <b>P20651</b> | <b>PP2BB Serine/threonine_protein phosphatase 2B catalytic subunit beta isoform</b> | <b>1.851567259</b> | <b>0.21672</b> | <b>2</b>    |
| P20651        | VVKAVFPPTHR                                                                         | 1.852090481        | 1              | 1.953714013 |
| P20651        | GLTPTGMLPSGVLGGR                                                                    | 1.150294196        | 2              | 2.425142765 |
| <b>P20673</b> | <b>ARLY Argininosuccinate lyase</b>                                                 | <b>0.871997755</b> | <b>0.82834</b> | <b>16</b>   |
| P20673        | HLWNVDLQGSK                                                                         | 0.940536073        | 1              | 3.375018835 |

|               |                                                                  |                    |                |             |
|---------------|------------------------------------------------------------------|--------------------|----------------|-------------|
| P20673        | AEAECEVLFPGYTHLQR                                                | 1.286348845        | 2              | 4.162320137 |
| P20673        | AEMQQILQGLDK                                                     | 0.989606791        | 2              | 4.469894886 |
| P20673        | EFNFVQLSDAYSTGSSLMPPQK                                           | 0.985812012        | 2              | 5.133170605 |
| P20673        | FNSSIAADR                                                        | 1.067539553        | 2              | 2.437246323 |
| P20673        | INVLPPLGSGAIAGNPLGVDR                                            | 0.690295588        | 2              | 5.656494141 |
| P20673        | KNPDSLELIR                                                       | 0.962692755        | 2              | 2.380158186 |
| P20673        | LKELIGEAAAGK                                                     | 1.183807636        | 2              | 3.19137311  |
| P20673        | LYPNDEDIHTANER                                                   | 0.974589861        | 2              | 3.873672724 |
| P20673        | MAEDLILYGTK                                                      | 1.123456291        | 2              | 3.945381403 |
| P20673        | MAEDLILYGTK+Oxidation(1)                                         | 1.163192803        | 2              | 2.368430376 |
| P20673        | NDQVVTDLR                                                        | 1.007192989        | 2              | 3.147680044 |
| P20673        | SRNDQVVTDLR                                                      | 1.05596496         | 2              | 3.060928345 |
| P20673        | VAEEWAQGIFK                                                      | 1.114571381        | 2              | 3.44796896  |
| P20673        | VLIEAMVDR                                                        | 1.125698259        | 2              | 2.591138601 |
| P20673        | VLIEAMVDRAEAECEVLFPGYTHLQR                                       | 1.294309746        | 3              | 4.70818615  |
| <b>P20788</b> | <b>UCRI Cytochrome b_c1 complex subunit Rieske_mitochondrial</b> | <b>1.06145986</b>  | <b>0.12277</b> | <b>5</b>    |
| P20788        | EIDQEAAVEVSQLR                                                   | 0.787817635        | 2              | 3.543031216 |
| P20788        | ESLSGQAATRPLVATVGLNVPASVR                                        | 0.561567222        | 2              | 2.771337509 |
| P20788        | SGPFAPVLSATSR                                                    | 1.001230926        | 2              | 2.879316092 |
| P20788        | EIDQEAAVEVSQLRDPQHDLER                                           | 0.940985703        | 3              | 3.434633017 |
| P20788        | GVAGALRPLLQSAVPATSEPPVLDVK                                       | 1.152940716        | 3              | 5.112568855 |
| <b>P20801</b> | <b>TNNC2 Troponin C_skeletal muscle</b>                          | <b>0.576953815</b> | <b>0.47181</b> | <b>3</b>    |
| P20801        | GKSEEEEAECFR                                                     | 0.568123734        | 2              | 3.391043663 |
| P20801        | NADGYIDAEELAEIFR                                                 | 0.87020894         | 2              | 4.783592224 |
| P20801        | SEEEEAECFR                                                       | 0.478438508        | 2              | 3.263453245 |
| <b>P20812</b> | <b>CP2A3 Cytochrome P450 2A3</b>                                 | <b>1.067012062</b> | <b>0.90728</b> | <b>2</b>    |
| P20812        | ELQGLEDFITKKVEQNQR                                               | 1.068812514        | 2              | 2.471184254 |
| P20812        | YGPVFTIHLGPR                                                     | 0.96959614         | 2              | 3.04289341  |
| <b>P20814</b> | <b>CP2CD Cytochrome P450 2C13_male_specific</b>                  | <b>1.060588699</b> | <b>0.98872</b> | <b>3</b>    |
| P20814        | FDYEDKDFLNLIK                                                    | 1.076814912        | 2              | 2.324587822 |
| P20814        | GTAVLTSLSVLHDSK                                                  | 1.049383029        | 2              | 3.269942045 |
| P20814        | IKEHEESLDVSNPR                                                   | 1.060673648        | 3              | 3.592621326 |
| <b>P20817</b> | <b>CP4AE Cytochrome P450 4A14</b>                                | <b>1.385514891</b> | <b>0.99758</b> | <b>6</b>    |
| P20817        | ACQIAHEHTDGVK                                                    | 1.082720469        | 2              | 4.265432835 |
| P20817        | AQLQNEEELQK                                                      | 1.087431043        | 2              | 3.313856602 |
| P20817        | AVEDLNNLFFR                                                      | 1.067558932        | 2              | 3.608228445 |
| P20817        | HLDFLDILLFAK                                                     | 1.427534311        | 2              | 4.209019661 |
| P20817        | MRKAQLQNEEELQK+Oxidation(1)                                      | 1.285441991        | 2              | 3.088461637 |
| P20817        | VLLYDPDYVK                                                       | 1.190741805        | 2              | 2.528860569 |
| <b>P20852</b> | <b>CP2A5 Cytochrome P450 2A5</b>                                 | <b>1.540529557</b> | <b>0.51416</b> | <b>2</b>    |
| P20852        | DFIDSLIR                                                         | 1.558911918        | 2              | 2.940039873 |
| P20852        | EALVDQAEFSGR                                                     | 0.865858019        | 2              | 2.868562698 |

|               |                                                 |                    |                |             |
|---------------|-------------------------------------------------|--------------------|----------------|-------------|
| <b>P21213</b> | <b>HUTH Histidine ammonia_lyase</b>             | <b>1.484340256</b> | <b>3.3E-11</b> | <b>15</b>   |
| P21213        | NSATIPESDDL                                     | 0.938302497        | 1              | 1.961559653 |
| P21213        | ALDYLAIGVHELAAISER                              | 1.397661081        | 2              | 4.520086288 |
| P21213        | DIITTELNSATDNPMVFASR                            | 1.244843215        | 2              | 4.475279808 |
| P21213        | EGLALINGTQMITSLGCEAVER                          | 1.398747382        | 2              | 3.245096445 |
| P21213        | GETISGGNFHGEYPAK                                | 0.988576198        | 2              | 4.027246952 |
| P21213        | GEWLAVPCQDGK                                    | 1.559366048        | 2              | 3.044139624 |
| P21213        | GYSGISLETLK                                     | 1.435692563        | 2              | 2.356289387 |
| P21213        | LQELQVNLVR                                      | 1.651435781        | 2              | 3.279755831 |
| P21213        | NKPDNGGFTSVDEVR                                 | 1.549298915        | 2              | 3.709554195 |
| P21213        | SHSSGVGKPLSPER                                  | 1.48517702         | 2              | 4.068227291 |
| P21213        | TVVYGITTFGFK                                    | 1.377583852        | 2              | 3.621262074 |
| P21213        | VQDAYTLR                                        | 1.11099876         | 2              | 2.57219243  |
| P21213        | VWEVAAPYIEK                                     | 1.220874197        | 2              | 2.58398962  |
| P21213        | YIALDGDLSLSTEDLVNLGK                            | 1.211894085        | 2              | 5.302823067 |
| P21213        | SLLDSDHHPSEIAESHR                               | 1.257786618        | 3              | 4.608310699 |
| <b>P21396</b> | <b>AOFA Amine oxidase [flavin_containing] A</b> | <b>1.164059573</b> | <b>0.47866</b> | <b>10</b>   |
| P21396        | NLPSVPGLLK                                      | 1.104997006        | 1              | 1.925306082 |
| P21396        | DVPAIEITHTFLEK                                  | 0.963403878        | 2              | 3.57749033  |
| P21396        | FVGGSGQVSEQIMGLLGDK                             | 0.938896174        | 2              | 3.117954969 |
| P21396        | IFSVTNGGQER                                     | 1.172312038        | 2              | 2.486310959 |
| P21396        | INVLVLEAR                                       | 1.415893005        | 2              | 3.137600899 |
| P21396        | KDIWVEEPESK                                     | 1.113768926        | 2              | 3.859616995 |
| P21396        | KICELYAK                                        | 1.732083214        | 2              | 2.350284338 |
| P21396        | VLGSQEALYPVHYEEK                                | 1.030486097        | 2              | 3.609202623 |
| P21396        | WVDVGGAYVGPTQNR                                 | 1.114928349        | 2              | 4.343579769 |
| P21396        | YVISAIPPILTAK                                   | 1.215621252        | 2              | 3.121562958 |
| <b>P21531</b> | <b>RL3 60S ribosomal protein L3</b>             | <b>1.079891155</b> | <b>0.00208</b> | <b>8</b>    |
| P21531        | FIDTTSK                                         | 1.03162493         | 1              | 2.027659655 |
| P21531        | AHLMEIQVNGGTVAEK                                | 1.082722772        | 2              | 5.251093864 |
| P21531        | HGSLGFLPR                                       | 1.305907585        | 2              | 3.033504963 |
| P21531        | LEQQVPVNQVFGQDEMIDVIGVK                         | 0.989030867        | 2              | 5.06789732  |
| P21531        | NNASTDYDLSDK                                    | 1.141082799        | 2              | 3.377257824 |
| P21531        | TVFAEHISDECK                                    | 1.112439811        | 2              | 3.782171965 |
| P21531        | ERLEQQVPVNQVFGQDEMIDVIGVK                       | 0.859157253        | 3              | 5.406507492 |
| P21531        | SINPLGGFVHYGEVTNDFIMLK                          | 0.97463622         | 3              | 3.383485317 |
| <b>P21533</b> | <b>RL6 60S ribosomal protein L6</b>             | <b>1.235882921</b> | <b>2.8E-07</b> | <b>9</b>    |
| P21533        | FVIATSTK                                        | 1.427023406        | 1              | 2.226892471 |
| P21533        | YYPTEDVPR                                       | 1.136795114        | 1              | 1.966498375 |
| P21533        | AVDSQILPK                                       | 1.075779149        | 2              | 2.468883514 |
| P21533        | HLTDAYFK                                        | 1.082718096        | 2              | 2.383720398 |
| P21533        | HQEGEIFDTEK                                     | 1.091016576        | 2              | 3.296468973 |
| P21533        | HQEGEIFDTEKEK                                   | 1.215380712        | 2              | 4.127365589 |

|               |                                                                                     |                    |                |             |
|---------------|-------------------------------------------------------------------------------------|--------------------|----------------|-------------|
| P21533        | QLGSGLLLVGTGPLALNR                                                                  | 1.355998595        | 2              | 5.174674988 |
| P21533        | SSITPGTVLILITGR                                                                     | 1.142772078        | 2              | 4.2042346   |
| P21533        | HQEGEIFDTEKEKYEITEQR                                                                | 1.110029522        | 3              | 4.734498978 |
| <b>P21571</b> | <b>ATP5J ATP synthase_coupling factor 6_ mitochondrial</b>                          | <b>1.106366423</b> | <b>0.0027</b>  | <b>5</b>    |
| P21571        | FEVLDPKQS                                                                           | 0.919242498        | 1              | 2.008687735 |
| P21571        | LASGGPVDTGPEYQQEVDNR                                                                | 1.57142046         | 2              | 5.288843632 |
| P21571        | GEMDKFPTFNFDPK                                                                      | 0.847050636        | 3              | 3.486589432 |
| P21571        | GEMDKFPTFNFDPKFEVLDPKQS                                                             | 1.01037514         | 3              | 3.968932152 |
| P21571        | LASGGPVDTGPEYQQEVDRELFK                                                             | 2.181233562        | 3              | 3.446192265 |
| <b>P21643</b> | <b>T23O Tryptophan 2_3_dioxygenase</b>                                              | <b>1.099679013</b> | <b>0.99289</b> | <b>2</b>    |
| P21643        | YNHVCMVHRMLGSK+Oxidation(10)                                                        | 1.099679013        | 2              | 2.462922096 |
| P21643        | YNHVCMVHRMLGSK+Oxidation(6)                                                         | 1.099679013        | 2              | 2.302551985 |
| <b>P21670</b> | <b>PSA4 Proteasome subunit alpha type_4</b>                                         | <b>1.595952586</b> | <b>0.02146</b> | <b>4</b>    |
| P21670        | ATCIGNNSAAAVSMLK                                                                    | 2.40185741         | 2              | 3.310961962 |
| P21670        | LLDEFFSEK                                                                           | 1.601965409        | 2              | 3.123696089 |
| P21670        | LNEDMACSVAGITSDANVLTNELR                                                            | 1.623118972        | 2              | 5.077010155 |
| P21670        | YLLQYQEPICEQLVTALCDIK                                                               | 1.164440429        | 2              | 4.041108608 |
| <b>P21775</b> | <b>THIKA 3_ketoacyl_CoA thiolase A_ peroxisomal</b>                                 | <b>1.037435191</b> | <b>1</b>       | <b>2</b>    |
| P21775        | LKPECLGDISVGNVLEPGAGAVMAR                                                           | 1.051767747        | 3              | 5.458117962 |
| P21775        | LKPECLGDISVGNVLEPGAGAVMAR+Oxidation(23)                                             | 0.944102408        | 3              | 4.449806213 |
| <b>P21913</b> | <b>DHSB Succinate dehydrogenase [ubiquinone] iron_sulfur subunit_ mitochondrial</b> | <b>1.003374437</b> | <b>0.66157</b> | <b>5</b>    |
| P21913        | CGPMVLDALIK                                                                         | 1.035437002        | 2              | 2.728055    |
| P21913        | CGPMVLDALIKIK                                                                       | 0.808337535        | 2              | 2.442568064 |
| P21913        | CHTIMNCTQTCPK                                                                       | 0.918261397        | 2              | 3.994816065 |
| P21913        | IKNEIDSTLTFR                                                                        | 1.309178005        | 2              | 3.416602135 |
| P21913        | RIDTDLGK                                                                            | 1.131174302        | 2              | 2.568562746 |
| <b>P21981</b> | <b>TGM2 Protein_glutamine gamma_glutamyltransferase 2</b>                           | <b>1.054101262</b> | <b>0.9074</b>  | <b>5</b>    |
| P21981        | CDLEIQANGR                                                                          | 1.056469647        | 2              | 2.920935631 |
| P21981        | DHHTADLCQEK                                                                         | 0.392003414        | 2              | 2.843559504 |
| P21981        | SEGTYCCGPVSVR                                                                       | 1.216666272        | 2              | 3.71941781  |
| P21981        | VDFPTDIGLHK                                                                         | 0.985867194        | 2              | 2.730942726 |
| P21981        | YSGCLTESNLK                                                                         | 1.038495797        | 2              | 2.696643353 |
| <b>P22734</b> | <b>COMT Catechol O_methyltransferase</b>                                            | <b>0.740818953</b> | <b>7.7E-05</b> | <b>12</b>   |
| P22734        | EWAMNVGDAK                                                                          | 0.325379899        | 1              | 2.504380703 |
| P22734        | AIYQGPSSPDKS                                                                        | 0.723364339        | 2              | 3.350111485 |
| P22734        | GQIMDAVIR                                                                           | 0.736219989        | 2              | 3.378092051 |
| P22734        | GSSSFECTHYSSYLEYMK                                                                  | 0.124677414        | 2              | 4.331179619 |
| P22734        | KGTVLLADNVIVPGTPDFLAYVR                                                             | 0.847725826        | 2              | 4.543992043 |
| P22734        | KYDVTLDMMVFLDHWK                                                                    | 0.773250124        | 2              | 4.997812271 |
| P22734        | VTILNGASQDLIPQLK                                                                    | 0.750198574        | 2              | 4.416718006 |
| P22734        | YDVTLDMMVFLDHWK                                                                     | 0.879759523        | 2              | 4.055151939 |
| P22734        | YLPDTLLEK                                                                           | 0.784386346        | 2              | 3.094539881 |

|               |                                                                |                    |                |             |
|---------------|----------------------------------------------------------------|--------------------|----------------|-------------|
| P22734        | GTVLLADNVIVPGTDFLAYVR                                          | 0.869402091        | 3              | 5.05449152  |
| P22734        | LLTMEPNPDYAAITQQMLNFAGLQDK                                     | 0.958786118        | 3              | 3.867681026 |
| P22734        | YVQQNAKPGDPQSVLEAIDTYCTQK                                      | 0.793428286        | 3              | 6.630687714 |
| <b>P22789</b> | <b>ST2A2 Alcohol sulfotransferase A</b>                        | <b>1.05981916</b>  | <b>0.9988</b>  | <b>4</b>    |
| P22789        | ETLQNVCKN                                                      | 0.797779691        | 2              | 2.344160795 |
| P22789        | KLEPDELVLVK                                                    | 1.067711006        | 2              | 3.728842974 |
| P22789        | LEPDELVLVK                                                     | 0.935632041        | 2              | 2.338692188 |
| P22789        | NHFTVAQAEAFDK                                                  | 1.706664955        | 2              | 3.394924641 |
| <b>P22791</b> | <b>HMCS2 Hydroxymethylglutaryl_CoA synthase_ mitochondrial</b> | <b>1.124006763</b> | <b>1.2E-12</b> | <b>23</b>   |
| P22791        | TDTWPK                                                         | 1.274859407        | 1              | 1.929580688 |
| P22791        | ASLDMFNK                                                       | 1.058937581        | 2              | 2.752293587 |
| P22791        | ASLDMFNKK                                                      | 1.192937913        | 2              | 2.931014776 |
| P22791        | GLKLEETYTNK                                                    | 1.193562427        | 2              | 2.761961699 |
| P22791        | IGAFSYGSGLAASFFSFR                                             | 1.197332478        | 2              | 4.387377262 |
| P22791        | LEETYTNK                                                       | 1.172956308        | 2              | 3.408850431 |
| P22791        | LEETYTNKDVVK                                                   | 1.263426026        | 2              | 4.274282455 |
| P22791        | LEVGTETIIDK                                                    | 1.084690912        | 2              | 3.800287485 |
| P22791        | LMFNDFLSSSSDK                                                  | 2.335985079        | 2              | 3.794752359 |
| P22791        | LMFNDFLSSSSDK+Oxidation(2)                                     | 2.247177496        | 2              | 4.066440582 |
| P22791        | LMFNDFLSSSSDKQNNLYK                                            | 2.475554491        | 2              | 4.732571125 |
| P22791        | LSIQCYLR                                                       | 2.542093846        | 2              | 2.454970121 |
| P22791        | LVSSVSDLPK                                                     | 1.376402187        | 2              | 3.711685896 |
| P22791        | MGFCSVQEDINSLCLTVVQR                                           | 1.011419733        | 2              | 4.268334389 |
| P22791        | MSPEEFTEIMNQR                                                  | 1.028286381        | 2              | 4.773990154 |
| P22791        | MSPEEFTEIMNQR+Oxidation(1)                                     | 1.136649403        | 2              | 3.849300623 |
| P22791        | MSPEEFTEIMNQR+Oxidation(10)                                    | 0.996137138        | 2              | 3.529051304 |
| P22791        | VNFSPPGDTSNLFPGTWYLER                                          | 1.379681342        | 2              | 4.877635002 |
| P22791        | YTVGLGQTR                                                      | 1.111359022        | 2              | 3.416113853 |
| P22791        | DVGILALEVYFPAQYVDQTDLEK                                        | 1.219094743        | 3              | 6.246345997 |
| P22791        | GTHMENAYDFYKPNLASEYPLVDGK                                      | 1.000617673        | 3              | 6.929349422 |
| P22791        | GTHMENAYDFYKPNLASEYPLVDGK+Oxidation(4)                         | 1.084352917        | 3              | 5.631859303 |
| P22791        | TKLPWDAVGR                                                     | 1.197945319        | 3              | 4.031892776 |
| <b>P22985</b> | <b>XDH Xanthine dehydrogenase/oxidase</b>                      | <b>1.108480906</b> | <b>0.96063</b> | <b>9</b>    |
| P22985        | TNLPSENTAFR                                                    | 1.075007984        | 1              | 2.181307793 |
| P22985        | DPPANVQLFQEVPK                                                 | 1.11755642         | 2              | 3.662600517 |
| P22985        | LDPTFASATLLFQK                                                 | 1.101366238        | 2              | 3.793518543 |
| P22985        | NQPEPTVEEIEENAFQGNLCR                                          | 1.393257568        | 2              | 4.857160568 |
| P22985        | QLFQLDSPATPEK                                                  | 1.104950503        | 2              | 3.226982117 |
| P22985        | TLLRPEEILLSIEIPYSK                                             | 1.266160408        | 2              | 2.72729969  |
| P22985        | DEVTCVGHIGAVVADTPEHAQR                                         | 1.203145163        | 3              | 4.507471085 |
| P22985        | SVASIGGNIITASPIDLNPVFMASGAK                                    | 0.950408082        | 3              | 5.8927145   |
| P22985        | TGTVVALEVAHFSNGGNTEDLSR                                        | 1.192853498        | 3              | 4.833966255 |

|               |                                                       |                    |                |             |
|---------------|-------------------------------------------------------|--------------------|----------------|-------------|
| <b>P23358</b> | <b>RL12 60S ribosomal protein L12</b>                 | <b>1.259348249</b> | <b>3.9E-09</b> | <b>5</b>    |
| P23358        | CTGGEVGATSALAPK                                       | 1.313699731        | 2              | 4.303649902 |
| P23358        | EILGTAQSVGCNVDGR                                      | 0.769758701        | 2              | 4.312339306 |
| P23358        | HNGNITFDEIVNIAR                                       | 1.040224888        | 2              | 3.944396257 |
| P23358        | HPHDIIDDINSGAVECPAS                                   | 1.173566837        | 2              | 4.502219677 |
| P23358        | QAQIEVVPASALIHK                                       | 1.294495475        | 2              | 3.617325783 |
| <b>P23457</b> | <b>DIDH 3_alpha_hydroxysteroid dehydrogenase</b>      | <b>1.229126465</b> | <b>2.9E-06</b> | <b>9</b>    |
| P23457        | MLDYCK                                                | 1.129541814        | 1              | 1.985561609 |
| P23457        | ELTQVFEFQLASEDMK                                      | 0.833075445        | 2              | 4.593788624 |
| P23457        | HFDSAYLYVEVEEVGQAIR                                   | 0.887217452        | 2              | 6.112951756 |
| P23457        | LLFETVDICDTWEAMEK                                     | 2.047946456        | 2              | 4.613921642 |
| P23457        | SIGVSNFNCR                                            | 1.156923448        | 2              | 3.188670635 |
| P23457        | SKDIILVSYCTLGSSR                                      | 1.118682511        | 2              | 4.45343399  |
| P23457        | VALNDGNFIPVLFGFTVPEK                                  | 1.512259884        | 2              | 4.724995136 |
| P23457        | YFDDHPNHPFTDE                                         | 1.482390608        | 2              | 3.732545614 |
| P23457        | YKPVCNQVECHLYLNQSK                                    | 0.995824467        | 2              | 4.63280344  |
| <b>P23514</b> | <b>COPB Coatomer subunit beta</b>                     | <b>1.205771386</b> | <b>0.0137</b>  | <b>6</b>    |
| P23514        | EAGELKPEEEITVGPVQK                                    | 1.207390777        | 2              | 3.67300272  |
| P23514        | TNNVSEHEDTDKYR                                        | 1.282324197        | 2              | 4.598968983 |
| P23514        | VLQDLVMDILR                                           | 1.032084853        | 2              | 3.207043886 |
| P23514        | VLSECSPLMNDIFNK                                       | 1.306849274        | 2              | 2.609308481 |
| P23514        | YEAAGTLVTLSSAPTAIK                                    | 1.097279952        | 2              | 4.522890091 |
| P23514        | NFENLIPDAPELIHDFLVNEK                                 | 1.101542423        | 3              | 4.226730347 |
| <b>P23965</b> | <b>EC11 Enoyl_CoA delta isomerase 1_mitochondrial</b> | <b>0.873964471</b> | <b>4.4E-07</b> | <b>8</b>    |
| P23965        | ALQLGTLFPPAEALK                                       | 1.13493368         | 2              | 5.436872482 |
| P23965        | ATADNLIK                                              | 1.086181011        | 2              | 2.689707518 |
| P23965        | DNYVNTIGHR                                            | 0.839551943        | 2              | 2.784561634 |
| P23965        | QREADIQNFTSFISR                                       | 1.231522759        | 2              | 2.913761854 |
| P23965        | SLHVYLEK                                              | 1.243166642        | 2              | 2.370505095 |
| P23965        | VGLVDEVVPEDQVHSK                                      | 1.156621715        | 2              | 4.881798744 |
| P23965        | WFTIPDHSR                                             | 1.113283056        | 2              | 2.632999659 |
| P23965        | GVILTSEKPGIFSAGLDLMEYGR                               | 1.267871842        | 3              | 5.42027998  |
| <b>P24049</b> | <b>RL17 60S ribosomal protein L17</b>                 | <b>1.031051838</b> | <b>0.99967</b> | <b>3</b>    |
| P24049        | YSLDPENPTK                                            | 1.009407599        | 1              | 2.738854647 |
| P24049        | EQIVPKPEEEVAQK                                        | 0.984288197        | 2              | 3.791962624 |
| P24049        | GLDVDSLVIHQVQNK                                       | 1.068396168        | 2              | 4.904154778 |
| <b>P24050</b> | <b>RS5 40S ribosomal protein S5</b>                   | <b>1.241322784</b> | <b>0.70503</b> | <b>2</b>    |
| P24050        | VNQAIWLLCTGAR                                         | 1.271255692        | 2              | 2.909425735 |
| P24050        | WSTDDVQINDISLQDYIAVK                                  | 1.090681527        | 2              | 4.333250523 |
| <b>P24063</b> | <b>ITAL Integrin alpha_L</b>                          | <b>1.059355315</b> | <b>0.87471</b> | <b>2</b>    |
| P24063        | ASEAQVLVKVDLIEK                                       | 1.060079671        | 2              | 2.320819855 |
| P24063        | DFEKILEFMK                                            | 1.061022396        | 3              | 3.681478739 |
| <b>P24090</b> | <b>FETUA Alpha_2_HS_glycoprotein</b>                  | <b>1.010489497</b> | <b>0.2404</b>  | <b>5</b>    |

|               |                                                   |                    |                |             |
|---------------|---------------------------------------------------|--------------------|----------------|-------------|
| P24090        | LGGEVSVACK                                        | 0.99581124         | 2              | 3.456698895 |
| P24090        | VGQPGDAGAAGPVAPLCPGR                              | 1.113744199        | 2              | 5.126104355 |
| P24090        | ELACDDPETEHVALIAVDYLNK                            | 1.443696833        | 3              | 4.167754173 |
| P24090        | HAFSPVASVESASGEVLHSPK                             | 0.929480392        | 3              | 5.920415401 |
| P24090        | VLHAQCHSTPDSAEDVRK                                | 1.200689375        | 3              | 3.749132395 |
| <b>P24268</b> | <b>CATD Cathepsin D</b>                           | <b>1.256093252</b> | <b>0.01502</b> | <b>4</b>    |
| P24268        | AIGAVPLIQGEYMIPCEK                                | 1.263689475        | 2              | 3.365305185 |
| P24268        | DPTGQPGGELMLGGTDSR                                | 1.094398811        | 2              | 4.575200558 |
| P24268        | GGCEAIVDTGTSLLVGPVDEVK                            | 1.222579311        | 2              | 3.223855972 |
| P24268        | LGGQNYELHPEK                                      | 1.442190452        | 2              | 2.474981308 |
| <b>P24329</b> | <b>THTR Thiosulfate sulfurtransferase</b>         | <b>1.068975294</b> | <b>0.00229</b> | <b>11</b>   |
| P24329        | EGHPVTSEPSRPEPAVFK                                | 0.744576406        | 2              | 4.871678829 |
| P24329        | FQLVDSR                                           | 1.058141045        | 2              | 2.304784298 |
| P24329        | GSVNVPFMFLTEDGFVK                                 | 1.076700012        | 2              | 3.499294758 |
| P24329        | HVPGASFFDIEEKR                                    | 1.180585666        | 2              | 4.056631088 |
| P24329        | KVDLSQPLIATCR                                     | 1.081871078        | 2              | 4.631714344 |
| P24329        | RFQLVDSR                                          | 1.086542951        | 2              | 2.335967064 |
| P24329        | TVSVLNGGFR                                        | 1.036444234        | 2              | 3.104261637 |
| P24329        | TYEQVLENLQSK                                      | 1.074692008        | 2              | 4.998729229 |
| P24329        | VDLSQPLIATCR                                      | 1.099474826        | 2              | 4.002289772 |
| P24329        | VLDASWYSPGTR                                      | 0.960876897        | 2              | 3.778036594 |
| P24329        | YLGTPPEPDAVGLDSGHIR                               | 1.089321645        | 2              | 4.756073952 |
| <b>P24368</b> | <b>PPIB Peptidyl_prolyl cis_trans isomerase B</b> | <b>1.213888157</b> | <b>0.05593</b> | <b>9</b>    |
| P24368        | DVIIVDCGK                                         | 1.125060348        | 1              | 1.945339799 |
| P24368        | DKPLKDVIIVDCGK                                    | 1.009272956        | 2              | 3.907006502 |
| P24368        | DTNGSQFFITVK                                      | 1.018168968        | 2              | 3.903661966 |
| P24368        | HYGPGWVSMANAGK                                    | 0.74208759         | 2              | 3.989025116 |
| P24368        | IEVEKPFAIAK                                       | 1.121338546        | 2              | 3.208997965 |
| P24368        | IEVEKPFAIAKE                                      | 1.26888628         | 2              | 3.531745911 |
| P24368        | TVDNFVALATGEK                                     | 1.208302322        | 2              | 3.361536741 |
| P24368        | VLEGM DVVR                                        | 1.141193129        | 2              | 2.910602331 |
| P24368        | VYFDFQIGDEPVGR                                    | 1.093618054        | 2              | 3.968120813 |
| <b>P24457</b> | <b>CP2DB Cytochrome P450 2D11</b>                 | <b>1.121699172</b> | <b>0.97955</b> | <b>2</b>    |
| P24457        | RFSVSTLR                                          | 1.139402902        | 2              | 2.552740335 |
| P24457        | SLEEVVTK                                          | 1.120379526        | 2              | 2.437288761 |
| <b>P24470</b> | <b>CP2CN Cytochrome P450 2C23</b>                 | <b>1.036989168</b> | <b>0.00421</b> | <b>11</b>   |
| P24470        | ACVGESLAR                                         | 1.222583551        | 2              | 2.456404448 |
| P24470        | EALLQQGDEFLGR                                     | 0.972427629        | 2              | 2.466630697 |
| P24470        | FGLLLMK                                           | 1.986821409        | 2              | 3.153158665 |
| P24470        | GTTVLPMLSSVMLDQK                                  | 0.990330852        | 2              | 3.841703653 |
| P24470        | GYGLIFSNGER                                       | 1.121754711        | 2              | 3.526362658 |
| P24470        | IEEEKDNLK                                         | 1.250759962        | 2              | 2.817461252 |
| P24470        | LPPGPTPLPIIGNLLQLNLK                              | 1.09468495         | 2              | 4.21538496  |

|               |                                                                                      |                    |                |             |
|---------------|--------------------------------------------------------------------------------------|--------------------|----------------|-------------|
| P24470        | TFLNLMDLLNK                                                                          | 1.349491785        | 2              | 3.80478406  |
| P24470        | YITLLPSSLPHAVVQDTK                                                                   | 0.908531868        | 2              | 3.944270611 |
| P24470        | DLDIKPITTTGIINLPPPYK                                                                 | 1.003197507        | 3              | 4.331919193 |
| P24470        | SEFHLENLAVCGSNLFTAGTETTSTTLR                                                         | 0.997604933        | 3              | 4.288266659 |
| <b>P24473</b> | <b>GSTK1 Glutathione S_transferase kappa 1</b>                                       | <b>0.88790189</b>  | <b>0.6116</b>  | <b>8</b>    |
| P24473        | AGMATAQAQHLLNK                                                                       | 1.011580157        | 2              | 4.151591778 |
| P24473        | DEDITESQNILSAAEK                                                                     | 0.851467653        | 2              | 5.096897125 |
| P24473        | DSGNQPPAMVPHK                                                                        | 0.955919588        | 2              | 2.601180077 |
| P24473        | FLTAVSMEQPEMLEK                                                                      | 0.890537184        | 2              | 5.052872181 |
| P24473        | MELLAYLLGEK                                                                          | 1.126392           | 2              | 3.983911037 |
| P24473        | QLFQVPMSVPK                                                                          | 0.784598546        | 2              | 2.664340496 |
| P24473        | YGAFGLPTTVAHVDGK                                                                     | 0.708893317        | 2              | 3.908105373 |
| P24473        | IWSRDEDITESQNILSAAEK                                                                 | 1.126308544        | 3              | 3.696666479 |
| <b>P25093</b> | <b>FAAA Fumarylacetoacetase</b>                                                      | <b>1.179380118</b> | <b>8.9E-16</b> | <b>15</b>   |
| P25093        | HLFTGPVLSK                                                                           | 1.084693085        | 1              | 2.765454531 |
| P25093        | AIDVGQGQTR                                                                           | 1.070327669        | 2              | 3.394204617 |
| P25093        | AQEHIFGMVLMDWSAR                                                                     | 1.026430172        | 2              | 3.629671574 |
| P25093        | ASLQNLLSASQAQLR                                                                      | 1.10395385         | 2              | 4.883368015 |
| P25093        | ASLQNLLSASQAQLRDDK                                                                   | 1.230729627        | 2              | 3.945441008 |
| P25093        | ASSVVVSGTPIR                                                                         | 1.093126449        | 2              | 3.669288158 |
| P25093        | DIQQWEYVPLGPFLGK                                                                     | 0.685331039        | 2              | 4.596293449 |
| P25093        | FGPEPIISK                                                                            | 1.016621821        | 2              | 2.820636511 |
| P25093        | GEGMSQAATICR                                                                         | 1.237285262        | 2              | 3.64031148  |
| P25093        | GEGMSQAATICR+Oxidation(4)                                                            | 1.857382191        | 2              | 3.114842415 |
| P25093        | HQHVFDETTLNSFMGLGQAAWK                                                               | 1.230725899        | 2              | 5.369887352 |
| P25093        | IGVAIGDQILDLSVIK                                                                     | 1.754293108        | 2              | 5.240512371 |
| P25093        | TFLLDGDEVIITGHCCQGDGYR                                                               | 1.161119005        | 2              | 5.223490238 |
| P25093        | VGFGQCAGK                                                                            | 1.379175631        | 2              | 2.715004206 |
| P25093        | GKENALLPNWLHLPVGYHGR                                                                 | 1.253603931        | 3              | 4.552680016 |
| <b>P25113</b> | <b>PGAM1 Phosphoglycerate mutase 1</b>                                               | <b>1.129590512</b> | <b>0.99931</b> | <b>7</b>    |
| P25113        | ALPFWNEEIVPQIK                                                                       | 1.223158607        | 2              | 3.504539967 |
| P25113        | FSGWYDADLSPAGHEEAK                                                                   | 1.069909013        | 2              | 5.050189018 |
| P25113        | HGESAWNLENR                                                                          | 1.127510089        | 2              | 4.107781887 |
| P25113        | SYDVPPPPMEPDHPFYSNISK                                                                | 0.928655941        | 2              | 4.433281898 |
| P25113        | YADLTEDQLPSCESLK                                                                     | 1.011949937        | 2              | 5.598347664 |
| P25113        | YADLTEDQLPSCESLKDTIAR                                                                | 1.119972843        | 2              | 5.375968933 |
| P25113        | HLEGLSEEAIMELNLPTGIPIVYELDK                                                          | 1.176510019        | 3              | 4.064957142 |
| <b>P25235</b> | <b>RPN2 Dolichyl_diphosphooligosaccharide__protein glycosyltransferase subunit 2</b> | <b>1.168230011</b> | <b>9.9E-20</b> | <b>13</b>   |
| P25235        | EDQVIQLMNTIFSK                                                                       | 1.011272852        | 2              | 3.433978796 |
| P25235        | FPEEEAPSTVLSQNLFTPK                                                                  | 1.266760164        | 2              | 4.208042622 |
| P25235        | ISTEVGITNVDLSTVDKQSIAPK                                                              | 1.243495037        | 2              | 4.760773659 |
| P25235        | KNFESLSEAFSVASAAAALSQNR                                                              | 1.486002324        | 2              | 5.59980154  |



|               |                                                        |                    |                |             |
|---------------|--------------------------------------------------------|--------------------|----------------|-------------|
| P25235        | LQVSSVLSQPLAQAAVK                                      | 1.579471699        | 2              | 5.728624821 |
| P25235        | NFESLSEAFSVASAAAALSQNR                                 | 1.218648891        | 2              | 3.129725695 |
| P25235        | TGQEVVFAEPDNK                                          | 0.573643167        | 2              | 3.858957291 |
| P25235        | YIANTVELR                                              | 1.049551273        | 2              | 2.658235312 |
| P25235        | EETVLATVQALHTASHLSQQADLR                               | 1.144338252        | 3              | 4.829692364 |
| P25235        | LMDHVGTEPSIKEDQVIQLMNTIFSK                             | 1.15496367         | 3              | 4.440647602 |
| P25235        | LSKEETVLATVQALHTASHLSQQADLR                            | 1.427846446        | 3              | 5.588846684 |
| P25235        | NIVEEIEDLVAR                                           | 1.145479743        | 3              | 4.325499535 |
| P25235        | YHVPVVVPEGSASDTQEAILR                                  | 1.056926659        | 3              | 5.76707077  |
| <b>P25318</b> | <b>CO8A2 Collagen alpha_2(VIII) chain</b>              | <b>1.011362528</b> | <b>0.54206</b> | <b>2</b>    |
| P25318        | GQYLEMPLPMLPMDLKGEPGPPGKPGPR+Oxidation(6)Oxidation(10) | 1.034958873        | 2              | 2.381000519 |
| P25318        | GQYLEMPLPMLPMDLKGEPGPPGKPGPR+Oxidation(6)Oxidation(13) | 1.131567944        | 2              | 2.491301537 |
| <b>P25977</b> | <b>UBF1 Nucleolar transcription factor 1</b>           | <b>1.188833457</b> | <b>0.80461</b> | <b>2</b>    |
| P25977        | AKYAKLHPMSNLDLTK                                       | 1.093389538        | 2              | 2.554172277 |
| P25977        | ALKAMEMTWNNMEKK+Oxidation(12)                          | 1.193678047        | 2              | 2.326903582 |
| <b>P26039</b> | <b>TLN1 Talin_1</b>                                    | <b>1.230295923</b> | <b>1.9E-11</b> | <b>23</b>   |
| P26039        | ADAEGESDLENSRK                                         | 1.007713523        | 2              | 3.609754562 |
| P26039        | AGALQCSPSDVYTK                                         | 1.446715045        | 2              | 2.829824686 |
| P26039        | AQEACGPLEMDSALSVVQNLEK                                 | 1.013833617        | 2              | 4.08805418  |
| P26039        | ASAGPQPLLVSCK                                          | 1.051241099        | 2              | 2.370123625 |
| P26039        | AVAEQIPLLQGVV                                          | 1.111504676        | 2              | 2.921387672 |
| P26039        | EAAEGLRMTNAAAQNAIKK                                    | 1.293043503        | 2              | 2.443385363 |
| P26039        | EADESLNFEEQILEAAK                                      | 0.837919264        | 2              | 4.337168217 |
| P26039        | GLAGAVSELLR                                            | 1.202753156        | 2              | 3.249569178 |
| P26039        | GVGAAATAVTQALNELLQHVK                                  | 1.261071161        | 2              | 3.837661743 |
| P26039        | ILAQATSDLVNAIK                                         | 2.140871615        | 2              | 3.531150341 |
| P26039        | LGAASLGAEDPETQVVLINAVK                                 | 1.944575161        | 2              | 4.704748631 |
| P26039        | LLGEIAQGNENYAGIAAR                                     | 1.049130184        | 2              | 4.408174515 |
| P26039        | LNEAAAGLNQAATELVQASR                                   | 1.122951738        | 2              | 5.413677692 |
| P26039        | NCGQMSEIEAK                                            | 0.933362058        | 2              | 3.073689222 |
| P26039        | SNTSPEELGPLANQLTSDYGR                                  | 1.331727879        | 2              | 3.715160131 |
| P26039        | TMLESAGGLIQTAR                                         | 0.8449146          | 2              | 2.516405106 |
| P26039        | VGAIPANALDDGQWSQGLISAAR                                | 1.116111852        | 2              | 4.738274574 |
| P26039        | VLGEAMTGISQNAK                                         | 1.230309801        | 2              | 3.271969795 |
| P26039        | VLVQNAAGSQEK                                           | 1.235855044        | 2              | 3.164654732 |
| P26039        | VSQMAQYFEPLTAAVGAASK                                   | 1.077256368        | 2              | 3.112826824 |
| P26039        | VVAPTISPVCQEQLVEAGR                                    | 1.221055939        | 2              | 5.1501441   |
| P26039        | MVAAATNNLCEAANAQVGHASQEK                               | 1.439714297        | 3              | 3.660537958 |
| P26039        | TEDSGLTQVIAAATQCALSTSQLVACTK                           | 1.040572234        | 3              | 4.324841022 |
| <b>P26043</b> | <b>RADI Radixin</b>                                    | <b>1.115254859</b> | <b>9.7E-13</b> | <b>13</b>   |
| P26043        | AFAAQEDLEK                                             | 1.078443827        | 2              | 3.217357397 |
| P26043        | ALELEQER                                               | 1.131409592        | 2              | 2.523349285 |

|               |                                                                                            |                    |                |             |
|---------------|--------------------------------------------------------------------------------------------|--------------------|----------------|-------------|
| P26043        | AQKELEEQR                                                                                  | 0.787281048        | 2              | 2.639369488 |
| P26043        | IQNWHEEHR                                                                                  | 1.264873857        | 2              | 2.787378788 |
| P26043        | KEEEATEWQHK                                                                                | 1.131361277        | 2              | 2.924817324 |
| P26043        | KKEEEATEWQHK                                                                               | 1.29123272         | 2              | 4.34168005  |
| P26043        | KTQNDVLHAENVK                                                                              | 1.215824992        | 2              | 5.154298782 |
| P26043        | NQEQLAAELAEFTAK                                                                            | 0.981705075        | 2              | 5.276311398 |
| P26043        | QLQALSSELAQAR                                                                              | 0.946550145        | 2              | 4.362291336 |
| P26043        | RKPDITIEVQQMK                                                                              | 1.172099972        | 2              | 3.403125525 |
| P26043        | TQNDVLHAENVK                                                                               | 0.965265402        | 2              | 3.902241707 |
| P26043        | FFPEDVSEELIQEITQR                                                                          | 1.15784755         | 3              | 4.2845788   |
| P26043        | GTELWLGVDALGLNIYEHDDKLTTPK                                                                 | 1.29755384         | 3              | 3.466474533 |
| <b>P26231</b> | <b>CTNA1 Catenin alpha_1</b>                                                               | <b>1.457965911</b> | <b>0.0678</b>  | <b>5</b>    |
| P26231        | LIEVANLACISISNNEEGVK                                                                       | 1.133374897        | 2              | 5.879324913 |
| P26231        | LLEPLVTQVTTLVNTNSK                                                                         | 1.232296171        | 2              | 4.158715248 |
| P26231        | QIIVDPLSFSEER                                                                              | 1.086200296        | 2              | 2.367936611 |
| P26231        | SAAGEFADDPCCSVK                                                                            | 1.465394724        | 2              | 2.962716818 |
| P26231        | TIADHCPDSACK                                                                               | 5.087837831        | 2              | 3.30973196  |
| <b>P26284</b> | <b>ODPA Pyruvate dehydrogenase E1 component subunit alpha_ somatic form_ mitochondrial</b> | <b>1.142127945</b> | <b>0.00454</b> | <b>8</b>    |
| P26284        | AILAELTGR                                                                                  | 1.155264393        | 2              | 2.622756004 |
| P26284        | LEEGPPVTTVLTR                                                                              | 1.153862872        | 2              | 3.559135675 |
| P26284        | MVNSNLASVEELKEIDVEVR                                                                       | 1.320547839        | 2              | 4.344293594 |
| P26284        | NFYGGNGIVGAQVPLGAGIALACK                                                                   | 1.60941771         | 2              | 3.740194798 |
| P26284        | RGDFIPGLR                                                                                  | 1.283670012        | 2              | 2.387872458 |
| P26284        | TREEIQEVR                                                                                  | 1.15724352         | 2              | 3.061421156 |
| P26284        | VDGMDILCVR                                                                                 | 1.139162637        | 2              | 2.574897528 |
| P26284        | GFCHLCDGQEACCVGLEAGINPTDHLITAYR                                                            | 0.914328012        | 3              | 7.260267735 |
| <b>P26453</b> | <b>BASI Basigin</b>                                                                        | <b>1.261492497</b> | <b>0.01545</b> | <b>8</b>    |
| P26453        | GNINVEGPPR                                                                                 | 1.104947948        | 2              | 3.359060526 |
| P26453        | KSEHASEGEFVK                                                                               | 1.081400208        | 2              | 3.346899033 |
| P26453        | SGEYSCIFLPEPVGR                                                                            | 1.002758341        | 2              | 3.934657574 |
| P26453        | VLQEDTLPDLQMK                                                                              | 1.13053384         | 2              | 4.011968613 |
| P26453        | YTVDADDR                                                                                   | 1.083003796        | 2              | 2.415110111 |
| P26453        | RKPDQTLDEDDPGAAPLK                                                                         | 1.212420028        | 3              | 4.269199371 |
| P26453        | SEASHPPVDEWVWFK                                                                            | 0.927241572        | 3              | 3.369357347 |
| P26453        | SEHASEGEFVK                                                                                | 1.254322005        | 3              | 3.60509944  |
| <b>P26516</b> | <b>PSD7 26S proteasome non_ATPase regulatory subunit 7</b>                                 | <b>1.081403041</b> | <b>0.74175</b> | <b>2</b>    |
| P26516        | SVVALHNLINNK                                                                               | 1.108313515        | 2              | 2.800028086 |
| P26516        | TFEHVTSEIGAEAEVGVHLLR                                                                      | 1.012717791        | 3              | 3.714164257 |
| <b>P26772</b> | <b>CH10 10 kDa heat shock protein_ mitochondrial</b>                                       | <b>1.13887923</b>  | <b>0.04087</b> | <b>8</b>    |
| P26772        | VLLPEYGGTK                                                                                 | 1.17934074         | 1              | 2.010956287 |
| P26772        | GGEIQPVSVK                                                                                 | 0.960325815        | 2              | 3.605909348 |
| P26772        | GGIMLPEK                                                                                   | 0.915623463        | 2              | 2.532717943 |

|               |                                                            |                    |                |             |
|---------------|------------------------------------------------------------|--------------------|----------------|-------------|
| P26772        | GGIMLPEK+Oxidation(4)                                      | 1.014250718        | 2              | 2.708327293 |
| P26772        | GKGGEIQPVSVK                                               | 1.205277802        | 2              | 3.539177418 |
| P26772        | KFLPLFDR                                                   | 1.355760099        | 2              | 2.376558304 |
| P26772        | VLQATVVAVGSGGK                                             | 1.063899752        | 2              | 5.282898426 |
| P26772        | VVLDDKDYFLFR                                               | 1.007353694        | 2              | 3.474089861 |
| <b>P27139</b> | <b>CAH2 Carbonic anhydrase 2</b>                           | <b>1.046894773</b> | <b>0.99923</b> | <b>4</b>    |
| P27139        | AVQHDPDGLAVLGIFLK                                          | 0.939879208        | 2              | 3.813611746 |
| P27139        | IGPASQGLQK                                                 | 0.892641349        | 2              | 3.402122021 |
| P27139        | ITEALHSIK                                                  | 0.888378375        | 2              | 2.352903843 |
| P27139        | QSPVDIDTGTQAQHDPQLLICYDK                                   | 1.028531332        | 3              | 3.603748322 |
| <b>P27321</b> | <b>ICAL Calpastatin</b>                                    | <b>1.168223892</b> | <b>0.80287</b> | <b>3</b>    |
| P27321        | FQDAPSADGESVAGGVTATASDK                                    | 0.709929575        | 2              | 5.307972908 |
| P27321        | KGSDEVTASSAATGTSPR                                         | 1.185364937        | 2              | 4.722723484 |
| P27321        | SQSSEPPVIHEK                                               | 1.119231168        | 2              | 2.641834021 |
| <b>P27364</b> | <b>3BHSS 3 beta_hydroxysteroid dehydrogenase type 5</b>    | <b>1.1829074</b>   | <b>0.49404</b> | <b>7</b>    |
| P27364        | QTILDVNVK                                                  | 1.233554878        | 1              | 2.210381031 |
| P27364        | AVLAANGSILK                                                | 1.231546788        | 2              | 2.934461117 |
| P27364        | ETILNDREEEHR                                               | 1.031056679        | 2              | 2.962894678 |
| P27364        | GDIVDAQFLR                                                 | 1.120519214        | 2              | 3.351875782 |
| P27364        | IVQMLVQEK                                                  | 1.676796411        | 2              | 3.132189274 |
| P27364        | NGGTFHTCALR                                                | 1.220717675        | 2              | 2.554223776 |
| P27364        | SQSIQQQFYISDDTPHQSYDDLNYTLK                                | 0.773403974        | 3              | 4.178978443 |
| <b>P27605</b> | <b>HPRT Hypoxanthine_guanine phosphoribosyltransferase</b> | <b>1.198705195</b> | <b>0.00026</b> | <b>6</b>    |
| P27605        | DLNHVCVISESGK                                              | 0.910376339        | 2              | 3.489212275 |
| P27605        | FFADLLDIK                                                  | 1.433381825        | 2              | 3.370615482 |
| P27605        | NVLIVEDIIDTGG                                              | 1.150651692        | 2              | 3.913418293 |
| P27605        | SYCNDQSTGDIK                                               | 1.295134245        | 2              | 3.903835773 |
| P27605        | VIGGDDLSTLTGK                                              | 0.130023181        | 2              | 3.995244503 |
| P27605        | SVGYRPFVGFIPDK                                             | 1.063973078        | 3              | 3.591121674 |
| <b>P27653</b> | <b>C1TC_C_1_tetrahydrofolate synthase_cytoplasmic</b>      | <b>1.174056941</b> | <b>8E-14</b>   | <b>16</b>   |
| P27653        | ASQAPSSFQLLYDLK                                            | 1.258883078        | 2              | 4.298936844 |
| P27653        | AYTEEDLDLVEK                                               | 0.905095322        | 2              | 3.343456268 |
| P27653        | IFHELTQTDK                                                 | 1.328830049        | 2              | 2.660971642 |
| P27653        | IYGADDIELLPEAQNK                                           | 1.079133999        | 2              | 5.272947788 |
| P27653        | KITIGQAPTEK                                                | 0.960880583        | 2              | 3.127436876 |
| P27653        | KVVGDVAYDEAK                                               | 1.364594536        | 2              | 3.743204117 |
| P27653        | LDIDPETITWQR                                               | 1.113982651        | 2              | 3.843300581 |
| P27653        | MHGGGPTVTAGLPLPK                                           | 1.197695679        | 2              | 2.6892941   |
| P27653        | QGFGNLPICMAK                                               | 1.153987903        | 2              | 3.621730804 |
| P27653        | TDPAALTDDEINR                                              | 1.061896424        | 2              | 4.367473602 |
| P27653        | THLSLSHNPEQK                                               | 1.332414989        | 2              | 3.834512949 |
| P27653        | VVGDVAYDEAK                                                | 1.174791651        | 2              | 3.676102161 |

|               |                                                                |                    |                |             |
|---------------|----------------------------------------------------------------|--------------------|----------------|-------------|
| P27653        | YVVVTGITPTPLGEGK                                               | 1.20826697         | 2              | 4.841324329 |
| P27653        | CTHWAEGGQGALALAAQAVQR                                          | 1.173727323        | 3              | 3.661638021 |
| P27653        | GEWIKPGAVVIDCGINYPDDTKPNGR                                     | 1.219141585        | 3              | 4.27814436  |
| P27653        | TADLDKEVNKGDILVVATGQPEMVK                                      | 1.168901425        | 3              | 4.746803284 |
| <b>P27661</b> | <b>H2AX Histone H2A.x</b>                                      | <b>1.037094453</b> | <b>0.01269</b> | <b>3</b>    |
| P27661        | AGLQFPVGR                                                      | 1.038718111        | 2              | 3.043129444 |
| P27661        | HLQLAIR                                                        | 1.313960234        | 2              | 2.730419874 |
| P27661        | LLGGVTIAQGGVLPNIQAVLLPK                                        | 1.309279572        | 2              | 5.250966072 |
| <b>P27867</b> | <b>DHSO Sorbitol dehydrogenase</b>                             | <b>1.052832986</b> | <b>9.9E-20</b> | <b>15</b>   |
| P27867        | HSADFCYK                                                       | 1.190946476        | 1              | 2.891199589 |
| P27867        | AKEVGADFTIQVAK                                                 | 1.216156671        | 2              | 2.821359634 |
| P27867        | AMGASQVVVIDLSASR                                               | 0.943211284        | 2              | 4.743847847 |
| P27867        | EVGADFTIQVAK                                                   | 0.736901244        | 2              | 3.142116785 |
| P27867        | GENLSLVVHGPDIR                                                 | 1.076207014        | 2              | 3.756174088 |
| P27867        | IGDFVVK                                                        | 0.984916194        | 2              | 2.63384366  |
| P27867        | LENYPIPELGPNDVLLK                                              | 0.99706793         | 2              | 4.999317646 |
| P27867        | LPDSVTFEEGALIEPLSVGIYACR                                       | 1.466802419        | 2              | 4.73684454  |
| P27867        | TLNVKPLVTHR                                                    | 1.244647285        | 2              | 3.083122015 |
| P27867        | VAIEPGVPR                                                      | 1.310427244        | 2              | 2.314198732 |
| P27867        | VAIEPGVPREIDEFCKIGR                                            | 0.826908809        | 2              | 2.494354248 |
| P27867        | YCNTWPMMAVSMMLASK                                              | 1.088496472        | 2              | 3.396667004 |
| P27867        | YNLTPSIFFCATPPDDGNLCR                                          | 0.693826233        | 2              | 4.076542377 |
| P27867        | MHSVIGICGSDVHYWEHGR+Oxidation(1)                               | 1.380151076        | 3              | 4.054058075 |
| P27867        | VLVCGAGPIGIVTLLVAK                                             | 2.030818558        | 3              | 5.478995323 |
| <b>P27952</b> | <b>RS2 40S ribosomal protein S2</b>                            | <b>1.137194887</b> | <b>0.0273</b>  | <b>5</b>    |
| P27952        | AEDKEWIPVTK                                                    | 1.131983275        | 2              | 3.553625822 |
| P27952        | AFVAIGDYNHVGVLGVK                                              | 1.285332173        | 2              | 3.70253849  |
| P27952        | GCTATLGNFAK                                                    | 1.184371349        | 2              | 2.798514128 |
| P27952        | GTGIVSAPVPK                                                    | 1.143094065        | 2              | 2.849607468 |
| P27952        | TYSYLPDLWK                                                     | 1.14840185         | 2              | 2.451853991 |
| <b>P28037</b> | <b>AL1L1 Cytosolic 10_formyltetrahydrofolate dehydrogenase</b> | <b>1.102859083</b> | <b>1.4E-06</b> | <b>27</b>   |
| P28037        | ADPLGLEAEK                                                     | 1.121974746        | 1              | 1.928585172 |
| P28037        | NIQLEDGK                                                       | 1.144605536        | 1              | 2.244835377 |
| P28037        | TDVAAPFGGFK                                                    | 1.111962136        | 1              | 2.047585249 |
| P28037        | ANATEFGLASGVFTR                                                | 1.040795936        | 2              | 4.538104057 |
| P28037        | AVQMGMSVFFNK                                                   | 1.101067042        | 2              | 4.078591347 |
| P28037        | DLGEAALNEYLR                                                   | 0.601010999        | 2              | 3.671352386 |
| P28037        | DTNHGPNHEAHLR                                                  | 1.152344941        | 2              | 3.629118681 |
| P28037        | ECEVLDDTVSTLYNR                                                | 1.143323435        | 2              | 3.817711115 |
| P28037        | EESFGPIMIISR                                                   | 0.654632109        | 2              | 2.834797144 |
| P28037        | EGHEVVGVTIPDKDGK                                               | 0.972654722        | 2              | 4.639080048 |
| P28037        | GNDKVPGAWTEACGQK                                               | 1.027452034        | 2              | 4.010484695 |

|               |                                                                 |                    |                |             |
|---------------|-----------------------------------------------------------------|--------------------|----------------|-------------|
| P28037        | GQALPEVAK                                                       | 1.060742071        | 2              | 2.626609802 |
| P28037        | GSASSDLELTEAELATAEAVR                                           | 0.983342919        | 2              | 6.67671299  |
| P28037        | GVVNLPGSGSLVGQR                                                 | 1.050354138        | 2              | 4.788880348 |
| P28037        | IGFTGSTEVGK                                                     | 1.442954594        | 2              | 2.582347155 |
| P28037        | ILPNVPEVEDSTDFK                                                 | 1.324891214        | 2              | 3.405344248 |
| P28037        | INWDQPAEAIHNWIR                                                 | 1.146697925        | 2              | 3.833553314 |
| P28037        | KIGFTGSTEVGK                                                    | 1.152092595        | 2              | 2.731748819 |
| P28037        | KLVEYCQR                                                        | 1.575180332        | 2              | 2.667683363 |
| P28037        | LFVEESIHNFVQK                                                   | 1.032091533        | 2              | 4.796468258 |
| P28037        | LIAEGTAPR                                                       | 1.206175648        | 2              | 3.634975195 |
| P28037        | LSDHPDVR                                                        | 1.285076528        | 2              | 2.380564451 |
| P28037        | TAACLAAGNTVVIKPAQVPTLTK                                         | 1.194958701        | 2              | 4.159995079 |
| P28037        | THVGMSIQTFR                                                     | 1.240052043        | 2              | 2.927773952 |
| P28037        | TYNTINPTDGSVICQVSLAQVSDVDK                                      | 0.833376657        | 2              | 5.122963428 |
| P28037        | VVEEVEK                                                         | 1.082538576        | 2              | 2.437713385 |
| P28037        | KEGHEVVGVTIPDKDGK                                               | 1.022922695        | 3              | 4.494100094 |
| <b>P28480</b> | <b>TCPA T_complex protein 1 subunit alpha</b>                   | <b>1.018151611</b> | <b>1.6E-08</b> | <b>11</b>   |
| P28480        | NADELVK                                                         | 1.41622257         | 1              | 1.933566093 |
| P28480        | AFHNEAQVNPFR                                                    | 0.913133372        | 2              | 3.415516376 |
| P28480        | FATEAAITLR                                                      | 1.267543656        | 2              | 3.101143837 |
| P28480        | HGGYENAVHSGALDD                                                 | 1.022952686        | 2              | 4.177913666 |
| P28480        | ICDELILIK                                                       | 1.104799984        | 2              | 3.469373941 |
| P28480        | LLEVEHPAAK                                                      | 1.36686088         | 2              | 2.682475328 |
| P28480        | MLVDDIGDVTITNDGATLK                                             | 1.223034315        | 2              | 3.565364122 |
| P28480        | SLLVIPNTLAVNAAQDSTDLVAK                                         | 1.421863948        | 2              | 4.569278717 |
| P28480        | SQNVMAAASIANIVK                                                 | 0.990771487        | 2              | 4.773455143 |
| P28480        | SSLGPVGLDK                                                      | 0.976462432        | 2              | 2.77135253  |
| P28480        | YINENLIINTDELGR                                                 | 1.078960268        | 2              | 4.642449856 |
| <b>P28492</b> | <b>GLSL Glutaminase liver isoform_mitochondrial</b>             | <b>0.858518567</b> | <b>0.99749</b> | <b>3</b>    |
| P28492        | ATGLQTS DPR                                                     | 0.936680309        | 2              | 2.473162651 |
| P28492        | FVIPDFEFTGHVDR                                                  | 0.903782067        | 2              | 2.994664192 |
| P28492        | SNPDLWGVSLCTVDGQR                                               | 0.857284841        | 2              | 3.63273859  |
| <b>P28650</b> | <b>PURA1 Adenylosuccinate synthetase isozyme 1</b>              | <b>0.850075933</b> | <b>0.93385</b> | <b>2</b>    |
| P28650        | LDILDVLSEIK                                                     | 0.966990536        | 2              | 3.129473686 |
| P28650        | VVDLLATDADIVSR                                                  | 0.885450365        | 2              | 2.673437357 |
| <b>P29117</b> | <b>PPIF Peptidyl_prolyl cis_trans isomerase F_mitochondrial</b> | <b>0.966850518</b> | <b>0.8795</b>  | <b>2</b>    |
| P29117        | GANSSSQNPLVYLDVGADGQPLGR                                        | 1.051468229        | 2              | 4.019591808 |
| P29117        | KIVITDCGQLS                                                     | 0.920096305        | 2              | 2.48963666  |
| <b>P29147</b> | <b>BDH D_beta_hydroxybutyrate dehydrogenase_mitochondrial</b>   | <b>1.131628831</b> | <b>0.79679</b> | <b>15</b>   |
| P29147        | YEMHPLGVK                                                       | 1.123364173        | 1              | 2.412760973 |
| P29147        | AVLVTGCDSGFGFSLAK                                               | 0.893506765        | 2              | 5.88231802  |
| P29147        | FGVEAFSDCLR                                                     | 1.224495627        | 2              | 3.725776196 |

|               |                                                                |                    |                |             |
|---------------|----------------------------------------------------------------|--------------------|----------------|-------------|
| P29147        | GFLVFAGCLK                                                     | 0.865835189        | 2              | 2.976827383 |
| P29147        | KMWDELPEVVR                                                    | 1.110909547        | 2              | 3.399260044 |
| P29147        | MQVMTHFPGAISDK                                                 | 1.143719198        | 2              | 4.512424946 |
| P29147        | MQVMTHFPGAISDK+Oxidation(1)                                    | 1.445299867        | 2              | 3.432653904 |
| P29147        | MQVMTHFPGAISDK+Oxidation(4)                                    | 1.429466264        | 2              | 3.715347767 |
| P29147        | MWDELPEVVR                                                     | 0.990937739        | 2              | 3.260728836 |
| P29147        | MWDELPEVVR+Oxidation(1)                                        | 1.036502804        | 2              | 3.50850749  |
| P29147        | TIQLNVCNSEEVEK                                                 | 0.931542763        | 2              | 4.40609026  |
| P29147        | VSVVEPGNFIAATSLYSER                                            | 0.994918547        | 2              | 6.01061964  |
| P29147        | VVNISMLGR                                                      | 1.160418864        | 2              | 3.870239496 |
| P29147        | METYCNSGSTDSSVINAVTHALTAATPYTR                                 | 1.440321807        | 3              | 6.257657528 |
| P29147        | METYCNSGSTDSSVINAVTHALTAATPYTR+Oxidation(1)                    | 1.097519845        | 3              | 4.50835228  |
| <b>P29266</b> | <b>3HIDH 3_hydroxyisobutyrate dehydrogenase_ mitochondrial</b> | <b>1.191652172</b> | <b>0.51691</b> | <b>6</b>    |
| P29266        | DLGLAQDSATSK                                                   | 0.763547117        | 2              | 3.945106506 |
| P29266        | EAGEQVASSPADVAEK                                               | 0.84573427         | 2              | 4.807677269 |
| P29266        | GSLLDSTIDPSVSK                                                 | 0.895853108        | 2              | 4.648542881 |
| P29266        | HGYPLILYDVPDVCK                                                | 1.203573216        | 2              | 4.874583721 |
| P29266        | KGSLLDSTIDPSVSK                                                | 1.017534016        | 2              | 4.046681404 |
| P29266        | MGAVFMDAPVSGGVAAR                                              | 1.161482456        | 2              | 5.024012566 |
| <b>P29314</b> | <b>RS9 40S ribosomal protein S9</b>                            | <b>1.277262384</b> | <b>0.00012</b> | <b>8</b>    |
| P29314        | IGVLDEGK                                                       | 1.139047           | 2              | 2.310127974 |
| P29314        | KGQGGAGAGDDEEED                                                | 1.8647191          | 2              | 4.33377409  |
| P29314        | KQVVNIPSFIVR                                                   | 1.051871317        | 2              | 2.514836311 |
| P29314        | LDYILGLK                                                       | 0.9912682          | 2              | 2.74566865  |
| P29314        | LFEGNALLR                                                      | 1.442318534        | 2              | 2.656370878 |
| P29314        | QVVNIPSFIVR                                                    | 1.298076226        | 2              | 3.01960659  |
| P29314        | RLQTQVFK                                                       | 1.263877653        | 2              | 2.310749531 |
| P29314        | SRLDQELK                                                       | 1.253370275        | 3              | 3.388149738 |
| <b>P29315</b> | <b>RINI Ribonuclease inhibitor</b>                             | <b>0.943120018</b> | <b>0.07895</b> | <b>8</b>    |
| P29315        | ASLQELDLGSNK                                                   | 0.366961379        | 2              | 2.969290972 |
| P29315        | LDDCGLTEVR                                                     | 0.927280956        | 2              | 3.182410479 |
| P29315        | LENCGITSANCK                                                   | 1.071569426        | 2              | 3.32412672  |
| P29315        | LGNTGIAALCSGLLLPSCR                                            | 1.191483854        | 2              | 2.72560215  |
| P29315        | LSLQNCSTEAGCVLPDVLR                                            | 1.270256635        | 2              | 2.912808418 |
| P29315        | SAIQANPALTELSLR                                                | 1.150294196        | 2              | 4.496706486 |
| P29315        | TCSLTAASCPHFCSVLTK                                             | 1.008392556        | 2              | 2.92780304  |
| P29315        | TNELGDAGVGLVLQGLQNPTCK                                         | 1.165166669        | 2              | 5.291962147 |
| <b>P29410</b> | <b>KAD2 Adenylate kinase 2_ mitochondrial</b>                  | <b>1.129057386</b> | <b>0.00651</b> | <b>11</b>   |
| P29410        | AMVASGSELGK                                                    | 0.970198401        | 2              | 2.812905073 |
| P29410        | AMVASGSELGKK                                                   | 1.221125327        | 2              | 2.848814964 |
| P29410        | AVLLGPPGAGK                                                    | 1.052878312        | 2              | 2.854625463 |
| P29410        | EAMKDDITGEPLIR                                                 | 1.030137336        | 2              | 2.322304487 |

|               |                                                            |                    |                |             |
|---------------|------------------------------------------------------------|--------------------|----------------|-------------|
| P29410        | LEAYHTQTTPLVEYYR                                           | 1.233328741        | 2              | 5.380480289 |
| P29410        | LVSDMVMVELIEK                                              | 0.943122702        | 2              | 4.149550915 |
| P29410        | NGFLLDGFPR                                                 | 0.936097429        | 2              | 2.643473148 |
| P29410        | NLETPSCK                                                   | 1.109177053        | 2              | 2.36560297  |
| P29410        | GIHCAIDASQTPDVVFASILAAFSK                                  | 1.02019772         | 3              | 4.690304756 |
| P29410        | SYHEEFNPPK                                                 | 1.129913427        | 3              | 3.517333746 |
| P29410        | TRLEAYHTQTTPLVEYYR                                         | 1.146539746        | 3              | 3.462128639 |
| <b>P29411</b> | <b>KAD3 GTP:AMP phosphotransferase_mitochondrial</b>       | <b>0.98957067</b>  | <b>0.85595</b> | <b>6</b>    |
| P29411        | AYEAQTEPVLQYYQK                                            | 0.944797369        | 2              | 3.617428541 |
| P29411        | EDDKPETVIK                                                 | 1.064046002        | 2              | 2.51937294  |
| P29411        | NLTQCSWLLDGFPR                                             | 1.086500754        | 2              | 2.644672155 |
| P29411        | TVGIDDLTGEPLIQR                                            | 0.906231324        | 2              | 3.966644287 |
| P29411        | VYNIEFNPPK                                                 | 1.061288167        | 2              | 2.803151131 |
| P29411        | VYQIDTVINLNVPEVIK                                          | 1.164340717        | 2              | 4.404606819 |
| <b>P29419</b> | <b>ATP5I ATP synthase subunit e_mitochondrial</b>          | <b>1.083741756</b> | <b>9.9E-20</b> | <b>2</b>    |
| P29419        | ELAEAEDVSIFK                                               | 0.680985346        | 1              | 3.055395126 |
| P29419        | YSALILGMAYGAK                                              | 1.064771816        | 2              | 3.894043207 |
| <b>P29994</b> | <b>ITPR1 Inositol 1_4_5_trisphosphate receptor type 1</b>  | <b>1.121033871</b> | <b>0.8356</b>  | <b>3</b>    |
| P29994        | AKDDLEMSAVITIMQPILR+Oxidation(7)Oxidation(14)              | 1.064728745        | 2              | 2.680905581 |
| P29994        | CVVQPEAGDLNPPKK                                            | 1.092838694        | 2              | 2.337486029 |
| P29994        | EGASNLVIDLIMNASSDR                                         | 1.168896482        | 2              | 2.430640221 |
| <b>P30009</b> | <b>MARCS Myristoylated alanine_rich C_kinase substrate</b> | <b>1.089266965</b> | <b>0.94632</b> | <b>3</b>    |
| P30009        | AEDGAAPSPSSETPK                                            | 1.089617408        | 2              | 3.674095154 |
| P30009        | EAEAAPEQPEQPEQPAEEPR                                       | 1.059675927        | 2              | 3.863767147 |
| P30009        | GEAAAERPGEAAVASSPSK                                        | 0.869048281        | 2              | 3.488724232 |
| <b>P30349</b> | <b>LKHA4 Leukotriene A_4 hydrolase</b>                     | <b>1.061470179</b> | <b>0.89126</b> | <b>3</b>    |
| P30349        | GSPMEISLPIALSK                                             | 1.181541333        | 2              | 2.444993973 |
| P30349        | SSALQWLTPSEQTSGK                                           | 1.107645777        | 2              | 3.378072977 |
| P30349        | SLSNVIAHEISHSWTGNLVTNK                                     | 1.05668762         | 3              | 3.511677742 |
| <b>P30427</b> | <b>PLEC Plectin</b>                                        | <b>0.950971007</b> | <b>0.0091</b>  | <b>4</b>    |
| P30427        | LLDPEDVDVPQPDEK                                            | 0.885356388        | 2              | 3.591024637 |
| P30427        | MSAAQALKKGWLYEAGQR+Oxidation(1)                            | 1.219725509        | 2              | 2.420744181 |
| P30427        | REEAAVDAQQQK                                               | 1.639445519        | 2              | 3.53455472  |
| P30427        | VLALPEPSPAAPTLR                                            | 0.917922763        | 2              | 2.433952332 |
| <b>P30713</b> | <b>GSTT2 Glutathione S_transferase theta_2</b>             | <b>1.187250299</b> | <b>0.9283</b>  | <b>8</b>    |
| P30713        | AQVHEYLGHADNIR                                             | 1.181098901        | 2              | 5.108009338 |
| P30713        | GQHLSEQFSQVNCLK                                            | 1.18257653         | 2              | 4.877961636 |
| P30713        | GTFGVLLWTK                                                 | 1.667119584        | 2              | 2.501968861 |
| P30713        | NSMVLALQR                                                  | 0.976992024        | 2              | 2.781214714 |
| P30713        | VLGPLIGVQVPEEK                                             | 1.118148631        | 2              | 3.932375431 |
| P30713        | YQVADHWYPADLQAR                                            | 1.184047327        | 2              | 5.113251686 |
| P30713        | ERVEAFLGAELCQEAHNPIMSVLGQAAK                               | 0.878616588        | 3              | 4.814851284 |
| P30713        | VEAFLGAELCQEAHNPIMSVLGQAAK                                 | 0.913330991        | 3              | 4.59752512  |

|               |                                                         |                    |                |             |
|---------------|---------------------------------------------------------|--------------------|----------------|-------------|
| <b>P30835</b> | <b>K6PL 6_phosphofruktokinase_liver type</b>            | <b>0.934781612</b> | <b>0.52555</b> | <b>2</b>    |
| P30835        | NEWGSLLEELVK                                            | 0.960840431        | 2              | 2.56702733  |
| P30835        | VFANAPDSACVIGLR                                         | 0.568266223        | 2              | 2.774189711 |
| <b>P30839</b> | <b>AL3A2 Fatty aldehyde dehydrogenase</b>               | <b>1.052647408</b> | <b>0.77392</b> | <b>8</b>    |
| P30839        | EKDILAAIAADLSK                                          | 0.803574819        | 2              | 4.254760742 |
| P30839        | FDHILYTGNTAVGK                                          | 0.83735353         | 2              | 4.193453789 |
| P30839        | LQQLEALR                                                | 1.274424397        | 2              | 2.585543633 |
| P30839        | NVEEAINFINDR                                            | 1.244592962        | 2              | 3.807792902 |
| P30839        | VMQEEIFGPILPIVSVK                                       | 1.03470654         | 2              | 4.646743774 |
| P30839        | VMQEEIFGPILPIVSVK+Oxidation(2)                          | 1.064941243        | 2              | 4.134921074 |
| P30839        | YIAPTILTDVDPNSK                                         | 1.037718033        | 2              | 4.147580147 |
| P30839        | HLTPVTLELGGK                                            | 1.044891583        | 3              | 3.768920898 |
| <b>P30904</b> | <b>MIF Macrophage migration inhibitory factor</b>       | <b>1.147305685</b> | <b>0.65672</b> | <b>2</b>    |
| P30904        | LHISPR                                                  | 1.097235269        | 1              | 1.973350763 |
| P30904        | LLGLLSDR                                                | 1.681723282        | 2              | 2.798320532 |
| <b>P31000</b> | <b>VIME Vimentin</b>                                    | <b>1.09274932</b>  | <b>0.27924</b> | <b>13</b>   |
| P31000        | DGQVINETSQHDDLE                                         | 0.898026853        | 2              | 3.233851433 |
| P31000        | KLLEGEESR                                               | 1.146796945        | 2              | 2.800938606 |
| P31000        | KVESLQEEIAFLK                                           | 1.149306113        | 2              | 3.861921787 |
| P31000        | LGDLYEEEMR                                              | 1.262119786        | 2              | 3.092240572 |
| P31000        | LLEGEESR                                                | 1.06315547         | 2              | 2.810749769 |
| P31000        | LQDEIQNMKEEMAR                                          | 1.104271267        | 2              | 3.826996803 |
| P31000        | NLQEAEEWYK                                              | 1.054513689        | 2              | 3.09701252  |
| P31000        | QDVDNASLAR                                              | 1.232433665        | 2              | 2.91217351  |
| P31000        | QVQSLTCEVDALK                                           | 1.128489527        | 2              | 3.419394493 |
| P31000        | RQVDQLTNDK                                              | 1.141266819        | 2              | 3.132071018 |
| P31000        | TNEKVELQELNDR                                           | 1.187617205        | 2              | 3.628848553 |
| P31000        | VELQELNDR                                               | 1.054851666        | 2              | 2.656137705 |
| P31000        | LHDEEIQLQAQIQEQHVQIDVDVSKPDLTAALR                       | 1.122027205        | 4              | 5.039466858 |
| <b>P31044</b> | <b>PEBP1 Phosphatidylethanolamine_binding protein 1</b> | <b>0.761010766</b> | <b>3.7E-08</b> | <b>6</b>    |
| P31044        | GNDISSGTVLSEYVGSPPK                                     | 1.04811948         | 2              | 6.294384003 |
| P31044        | LYTLVLTDPDAPSR                                          | 1.265658723        | 2              | 4.429330826 |
| P31044        | VDYGGVTVDELGK                                           | 0.995520332        | 2              | 5.04155159  |
| P31044        | YHLGAPVAGTCFQAEWDDSVPK                                  | 0.314371111        | 2              | 5.391111374 |
| P31044        | YVWLVEQEQLNCDEPILSNK                                    | 1.259252365        | 2              | 5.25710535  |
| P31044        | VLTPTQVMNRPSSISWDGLDPGK                                 | 0.832232517        | 3              | 5.126684189 |
| <b>P31210</b> | <b>AK1D1 3_oxo_5_beta_steroid 4_dehydrogenase</b>       | <b>1.231018092</b> | <b>0.9663</b>  | <b>21</b>   |
| P31210        | DIEALNK                                                 | 1.061932988        | 1              | 2.463108063 |
| P31210        | DELLTSLGK                                               | 1.203552901        | 2              | 2.715799809 |
| P31210        | EEMKDIEALNK                                             | 0.906187147        | 2              | 3.679901123 |
| P31210        | ENFQIFDFSLTK                                            | 1.224915199        | 2              | 2.850292444 |
| P31210        | GLVVIK                                                  | 1.313443967        | 2              | 2.388926268 |
| P31210        | HIDGAYVYR                                               | 1.462046213        | 2              | 2.907973766 |



|               |                                                                                    |                    |                |             |
|---------------|------------------------------------------------------------------------------------|--------------------|----------------|-------------|
| P31210        | LWSTDHDPEMVRPALER                                                                  | 1.666636718        | 2              | 2.356253147 |
| P31210        | NEHEVGEAIR                                                                         | 1.255684151        | 2              | 3.076349258 |
| P31210        | NPLWVNVSSPPLLK                                                                     | 1.704307606        | 2              | 4.128967762 |
| P31210        | QLEVILNKPGLK                                                                       | 1.457278757        | 2              | 3.593202829 |
| P31210        | REEIFYCGK                                                                          | 0.592935948        | 2              | 2.792121887 |
| P31210        | SLGVSFNFR                                                                          | 0.980649346        | 2              | 2.398679256 |
| P31210        | SNLCATWEALEACK                                                                     | 1.162143088        | 2              | 4.607090473 |
| P31210        | SNLCATWEALEACKDAGLVK                                                               | 1.346882893        | 2              | 4.80440855  |
| P31210        | TAIDEGYR                                                                           | 1.295610722        | 2              | 2.898334503 |
| P31210        | TQAQIVLR                                                                           | 1.228781518        | 2              | 2.912289143 |
| P31210        | YKPVTNQVECHPYFTQTK                                                                 | 1.172342338        | 2              | 5.614727974 |
| P31210        | FVEMLMWSDHPEYPFHDEY                                                                | 0.998818497        | 3              | 3.872775316 |
| P31210        | IKENFQIFDFSLTK                                                                     | 2.19301021         | 3              | 4.121700764 |
| P31210        | NPLWVNVSSPPLLKDELLTSLGK                                                            | 1.52536437         | 3              | 5.820475101 |
| P31210        | RQLEVILNKPGLK                                                                      | 1.279805075        | 3              | 4.249275208 |
| <b>P31230</b> | <b>AIMP1 Aminoacyl tRNA synthase complex_interacting multifunctional protein 1</b> | <b>1.350960562</b> | <b>0.18106</b> | <b>2</b>    |
| P31230        | KEIEELK                                                                            | 1.320473629        | 1              | 1.949190736 |
| P31230        | TVVSGLVNHPLEQMQR                                                                   | 1.414834224        | 3              | 3.44866848  |
| <b>P31232</b> | <b>TAGL Transgelin</b>                                                             | <b>1.388791625</b> | <b>0.05162</b> | <b>2</b>    |
| P31232        | KYDEELEER                                                                          | 1.392440213        | 2              | 2.586951733 |
| P31232        | TVMALGSLAVTK                                                                       | 1.112260078        | 2              | 2.819388866 |
| <b>P31254</b> | <b>UBA1Y Ubiquitin_like modifier_activating enzyme 1 Y</b>                         | <b>1.065196776</b> | <b>0.87087</b> | <b>2</b>    |
| P31254        | YDGQVAVFGSDLQEK                                                                    | 1.06275495         | 2              | 4.524292469 |
| P31254        | YFLVGAGAIGCELLK                                                                    | 1.16759792         | 2              | 2.765663862 |
| <b>P31399</b> | <b>ATP5H ATP synthase subunit d_mitochondrial</b>                                  | <b>1.011187845</b> | <b>0.9713</b>  | <b>9</b>    |
| P31399        | ANVDKPLVDDFK                                                                       | 1.017862031        | 2              | 3.908787966 |
| P31399        | KYPYWPHQPIENL                                                                      | 1.362166715        | 2              | 2.846992493 |
| P31399        | NCAQFVTGSQAR                                                                       | 0.865649082        | 2              | 3.866711617 |
| P31399        | NMIPFDQMTIDDLNEVPETK                                                               | 1.035918933        | 2              | 5.288871765 |
| P31399        | NMIPFDQMTIDDLNEVPETK+Oxidation(2)                                                  | 0.918080592        | 2              | 3.133387566 |
| P31399        | NMIPFDQMTIDDLNEVPETK+Oxidation(8)                                                  | 0.918080592        | 2              | 2.311555624 |
| P31399        | SWNETFHTR                                                                          | 1.084633556        | 2              | 2.717628479 |
| P31399        | TIDWVSFVEIMPQNQK                                                                   | 1.172898931        | 2              | 3.284012556 |
| P31399        | YTALVDAEEKEDVK                                                                     | 0.979446074        | 2              | 3.565298319 |
| <b>P32089</b> | <b>TXTP Tricarboxylate transport protein_mitochondrial</b>                         | <b>1.161122217</b> | <b>0.99422</b> | <b>4</b>    |
| P32089        | FIHDQTSSNPK                                                                        | 1.097347372        | 1              | 3.749800444 |
| P32089        | GLSLLYGSIPK                                                                        | 1.011715889        | 2              | 3.822352409 |
| P32089        | NTLDCGVQILK                                                                        | 1.071180567        | 2              | 3.799686909 |
| P32089        | TQLQLDER                                                                           | 1.079435717        | 2              | 2.609786272 |
| <b>P32198</b> | <b>CPT1A Carnitine O_palmitoyltransferase 1_liver isoform</b>                      | <b>0.939438346</b> | <b>0.7528</b>  | <b>3</b>    |
| P32198        | ELEQQMQQIILDDPSEPQPGAEK                                                            | 0.798189973        | 2              | 4.06369257  |
| P32198        | LLGSTIPLCSAQWER                                                                    | 0.942259338        | 2              | 3.010069609 |

|               |                                                              |                    |                |             |
|---------------|--------------------------------------------------------------|--------------------|----------------|-------------|
| P32198        | MTALAQDFAVNLGPK                                              | 0.957278086        | 2              | 4.235921383 |
| <b>P32232</b> | <b>CBS Cystathionine beta_synthase</b>                       | <b>1.187727533</b> | <b>0.01141</b> | <b>8</b>    |
| P32232        | FDSPESHVGVAVR                                                | 1.140547198        | 2              | 3.291404724 |
| P32232        | NASNPLAHYDDTAEELQQCDGK                                       | 1.303575806        | 2              | 5.56080246  |
| P32232        | SNDDDSFAFAR                                                  | 1.152235526        | 2              | 3.056133747 |
| P32232        | VDMLVASAGTGGTITGIAR                                          | 1.042867669        | 2              | 4.605305195 |
| P32232        | AGTLKPGDTIIEPTSGNTGIGLALAAAVK                                | 1.09443645         | 3              | 5.325117588 |
| P32232        | LKNEIPNSHILDQYR                                              | 1.837620665        | 3              | 3.551264286 |
| P32232        | VQELSLAPLTVLPTVTCEHTAILR                                     | 1.032157312        | 3              | 4.199677467 |
| P32232        | VRPSDEVCK                                                    | 1.245939277        | 3              | 3.60828495  |
| <b>P32551</b> | <b>QCR2 Cytochrome b_c1 complex subunit 2_ mitochondrial</b> | <b>1.050095346</b> | <b>0.00163</b> | <b>11</b>   |
| P32551        | AVAFQNPQTR                                                   | 1.106599506        | 2              | 3.432546139 |
| P32551        | AVAQGNLSSADVQAAK                                             | 1.028521152        | 2              | 5.082112789 |
| P32551        | GNNTTSLLSQSVAK                                               | 0.951027746        | 2              | 3.972553253 |
| P32551        | IENLHDVAYK                                                   | 1.191733234        | 2              | 4.046308041 |
| P32551        | NALANPLYCPDYR                                                | 1.005404015        | 2              | 3.373339891 |
| P32551        | RGNNTTSLLSQSVAK                                              | 0.974493202        | 2              | 2.787323713 |
| P32551        | RWEVAALR                                                     | 1.329539449        | 2              | 2.76017499  |
| P32551        | SMTASGNLGHPTFLDEL                                            | 0.993721722        | 2              | 3.147227287 |
| P32551        | TSAPGGVPLQPQLEFTK                                            | 1.039551282        | 2              | 3.826017857 |
| P32551        | YENYNLGTSHLLR                                                | 1.740264551        | 2              | 4.069802284 |
| P32551        | ITSEELHYFVQNHFTSAR                                           | 1.820936082        | 3              | 3.473325014 |
| <b>P32755</b> | <b>HPPD 4_hydroxyphenylpyruvate dioxygenase</b>              | <b>1.263650692</b> | <b>2.8E-06</b> | <b>19</b>   |
| P32755        | ILVDYDEK                                                     | 1.148182816        | 1              | 1.986255288 |
| P32755        | AFEEEEQALR                                                   | 1.131240477        | 2              | 3.375731707 |
| P32755        | DIAFEVEDCEHIVQK                                              | 1.225833473        | 2              | 3.998969555 |
| P32755        | ENMDVLEELK                                                   | 0.772410404        | 2              | 2.669015646 |
| P32755        | FAVLQTYGDTTHTLVEK                                            | 1.302653813        | 2              | 5.14359808  |
| P32755        | FLPGFEAPTYK                                                  | 1.200986841        | 2              | 2.562648773 |
| P32755        | FWSVDDTQVHTEYSSLR                                            | 0.732928702        | 2              | 5.678789616 |
| P32755        | GMEFLAVPSSYYR                                                | 1.04750359         | 2              | 2.628211975 |
| P32755        | GNLTDLETNGVR                                                 | 1.125284575        | 2              | 3.676733017 |
| P32755        | IVFVLCALNPWNK                                                | 1.613613182        | 2              | 2.53188777  |
| P32755        | MGFEPLAYK                                                    | 1.583498486        | 2              | 2.602234125 |
| P32755        | SIVVANYEESIK                                                 | 1.131779641        | 2              | 4.067883968 |
| P32755        | SQIQEYVDYNGGAGVQHIALR                                        | 1.212154831        | 2              | 5.592956543 |
| P32755        | TEDIITIR                                                     | 1.135443598        | 2              | 3.342715979 |
| P32755        | FLHFHSVTFVWVGNK                                              | 1.019165585        | 3              | 3.466375113 |
| P32755        | HGDGVKDIAFEVEDCEHIVQK                                        | 1.392280361        | 3              | 4.850141048 |
| P32755        | HNHQGFGAGNFNSLFK                                             | 1.240177702        | 3              | 4.690702438 |
| P32755        | IVREPWVEEDKFGK                                               | 1.440798316        | 3              | 4.353768826 |
| P32755        | LPSCNLEIIDHIVGNQPDQEMESASEWYLK                               | 1.245606831        | 3              | 7.422192097 |

|               |                                                             |                    |                |             |
|---------------|-------------------------------------------------------------|--------------------|----------------|-------------|
| <b>P33124</b> | <b>ACSL6 Long_chain_fatty_acid__CoA ligase 6</b>            | <b>1.131702443</b> | <b>0.99449</b> | <b>2</b>    |
| P33124        | ALRPTIFPVVPR                                                | 1.143695877        | 2              | 3.25879097  |
| P33124        | IENIYIR                                                     | 1.058223385        | 2              | 2.964355707 |
| <b>P34058</b> | <b>HS90B Heat shock protein HSP 90_beta</b>                 | <b>1.066336844</b> | <b>9.9E-20</b> | <b>27</b>   |
| P34058        | ADLNNLGTIAK                                                 | 1.041609106        | 2              | 4.223329544 |
| P34058        | EDQTEYLEER                                                  | 0.91014811         | 2              | 3.492019653 |
| P34058        | EGLELPEDEEEK                                                | 0.931733777        | 2              | 2.460272551 |
| P34058        | EGLELPEDEEEKKK                                              | 1.139767951        | 2              | 3.149965763 |
| P34058        | ELISNASDALDK                                                | 0.765819987        | 2              | 3.706088543 |
| P34058        | GFEVVYMTPEIDYCVQQLK                                         | 0.757229535        | 2              | 3.425091267 |
| P34058        | GVVDSIDLPLNISR                                              | 1.092206737        | 2              | 4.869516373 |
| P34058        | HFSVEGQLEFR                                                 | 1.049754744        | 2              | 2.943310976 |
| P34058        | HLEINPDHPIVETLR                                             | 1.059494957        | 2              | 4.457112789 |
| P34058        | HSQFIGYPITLYLEK                                             | 1.428328222        | 2              | 3.947757483 |
| P34058        | IDIIPNPQER                                                  | 1.021326365        | 2              | 2.919069052 |
| P34058        | KHLEINPDHPIVETLR                                            | 1.148842243        | 2              | 4.891440392 |
| P34058        | LGIHEDSTNR                                                  | 1.183894437        | 2              | 3.041154861 |
| P34058        | LGLGIDEDEVTAEEPSAAVPDEIPPLEGDEEDASR                         | 1.500422063        | 2              | 4.512372017 |
| P34058        | NPDDITQEEYGEFYK                                             | 1.023580594        | 2              | 4.608767986 |
| P34058        | RAPFDLFENK                                                  | 1.264826221        | 2              | 3.024918079 |
| P34058        | SIYYITGESK                                                  | 1.230888897        | 2              | 2.629929304 |
| P34058        | SLTNDWEDHLAVK                                               | 1.196314696        | 2              | 4.325899601 |
| P34058        | TLTLVDTGIGMTK                                               | 1.031348469        | 2              | 4.342950344 |
| P34058        | TLTLVDTGIGMTK+Oxidation(11)                                 | 1.068426249        | 2              | 3.389466763 |
| P34058        | VFIMDSCDELIPEYLNFR                                          | 1.530856735        | 2              | 2.481673002 |
| P34058        | YESLTDPSK                                                   | 1.122465392        | 2              | 2.918346167 |
| P34058        | YESLTDPSKLDGK                                               | 1.441116818        | 2              | 3.458040953 |
| P34058        | YHTSQSGDEMTSLSEYVSR                                         | 1.123286803        | 2              | 5.499484062 |
| P34058        | YIDQEELNK                                                   | 1.09515611         | 2              | 3.489870787 |
| P34058        | GEKEEEDKEDEEKPK                                             | 1.498993815        | 3              | 4.104837418 |
| P34058        | VILHLKEDQTEYLEER                                            | 1.44658924         | 3              | 4.544484615 |
| <b>P34064</b> | <b>PSA5 Proteasome subunit alpha type_5</b>                 | <b>1.31589476</b>  | <b>1.6E-15</b> | <b>2</b>    |
| P34064        | AIGSASEGAQSSQLQEVYHK                                        | 1.3145924          | 2              | 4.512516975 |
| P34064        | LNATNIELATVQPGQNFHMFTK                                      | 1.760917167        | 3              | 3.392017841 |
| <b>P34067</b> | <b>PSB4 Proteasome subunit beta type_4</b>                  | <b>1.360346948</b> | <b>0.00012</b> | <b>4</b>    |
| P34067        | FDCGVVIAADMLGSYGSLAR                                        | 0.9285797          | 2              | 3.93522954  |
| P34067        | GVEIEGPLSAQTNWDIAHMISGFE                                    | 1.169594675        | 2              | 4.030925274 |
| P34067        | TQNPMVTGTSVLVGK                                             | 1.068695468        | 2              | 2.366650343 |
| P34067        | VNDSTMLGASGDYADFQYLK                                        | 1.378362243        | 2              | 5.345889091 |
| <b>P35171</b> | <b>CX7A2 Cytochrome c oxidase subunit 7A2_mitochondrial</b> | <b>1.085178929</b> | <b>1</b>       | <b>2</b>    |
| P35171        | GGTSDALLYR                                                  | 1.037203171        | 2              | 3.244963408 |
| P35171        | LFQEDNGMPVHLK                                               | 1.079496134        | 2              | 3.695898771 |

|               |                                                      |                    |                |             |
|---------------|------------------------------------------------------|--------------------|----------------|-------------|
| <b>P35213</b> | <b>1433B 14_3_3 protein beta/alpha</b>               | <b>1.001467236</b> | <b>0.09549</b> | <b>7</b>    |
| P35213        | AVTEQGHLSNEER                                        | 0.751758975        | 2              | 4.483836174 |
| P35213        | QTTVSNSQQAYQEAFEISK                                  | 1.321706357        | 2              | 5.435275555 |
| P35213        | TAFDEAIAELDTLNEESYK                                  | 1.226890258        | 2              | 4.911929607 |
| P35213        | YDDMAAAMK                                            | 0.781944808        | 2              | 2.659874678 |
| P35213        | YLILNATHAESK                                         | 1.297417204        | 2              | 3.539207458 |
| P35213        | YLSEVASGDNK                                          | 1.129609217        | 2              | 3.142864466 |
| P35213        | EKIEAELQDICSVDLELLDK                                 | 1.247671782        | 3              | 5.31281805  |
| <b>P35278</b> | <b>RAB5C Ras_related protein Rab_5C</b>              | <b>1.021984976</b> | <b>0.83155</b> | <b>3</b>    |
| P35278        | FEIWDTAGQER                                          | 0.726410697        | 2              | 2.834126234 |
| P35278        | GVDLQESNPASR                                         | 1.023088635        | 2              | 3.208179951 |
| P35278        | NEPQNAAGAPGR                                         | 1.047979974        | 2              | 3.106112957 |
| <b>P35427</b> | <b>RL13A 60S ribosomal protein L13a</b>              | <b>1.178002328</b> | <b>0.03897</b> | <b>3</b>    |
| P35427        | CEGINISGNFYR                                         | 1.162576466        | 2              | 2.960158587 |
| P35427        | VLDGIPPPYDK                                          | 1.186782757        | 2              | 2.661778927 |
| P35427        | YQAVTATLEEK                                          | 1.18435022         | 2              | 3.202342749 |
| <b>P35434</b> | <b>ATPD ATP synthase subunit delta_mitochondrial</b> | <b>1.017901116</b> | <b>0.99037</b> | <b>2</b>    |
| P35434        | AQSELSGAADEAAR                                       | 1.063831124        | 2              | 4.661328793 |
| P35434        | IEANEALVK                                            | 1.04027738         | 2              | 2.540045977 |
| <b>P35435</b> | <b>ATPG ATP synthase subunit gamma_mitochondrial</b> | <b>1.08299561</b>  | <b>1.1E-16</b> | <b>6</b>    |
| P35435        | NASDMIDK                                             | 1.230868194        | 1              | 2.124659538 |
| P35435        | THSDQFLVSFK                                          | 1.217238882        | 1              | 2.872419119 |
| P35435        | GLCGAIHSSVAK                                         | 1.249417718        | 2              | 3.606096268 |
| P35435        | HLIIGVSSDR                                           | 1.128522225        | 2              | 3.234421015 |
| P35435        | NDMAALTAAGK                                          | 1.052100741        | 2              | 3.769015789 |
| P35435        | VYGTGSLALYEK                                         | 1.517089365        | 2              | 3.454094172 |
| <b>P35559</b> | <b>IDE Insulin_degrading enzyme</b>                  | <b>1.48576899</b>  | <b>0.01625</b> | <b>2</b>    |
| P35559        | YTLETRPNQEGIDVR                                      | 1.582381664        | 2              | 2.513833761 |
| P35559        | SNPGHYLGHGHEGPGSLLSELK                               | 1.32048861         | 3              | 3.76112628  |
| <b>P35565</b> | <b>CALX Calnexin</b>                                 | <b>1.112365809</b> | <b>0.99787</b> | <b>9</b>    |
| P35565        | GSLSGWILSK                                           | 0.925162028        | 2              | 2.357779503 |
| P35565        | NKGDEEEEEKLEEK                                       | 1.015190166        | 2              | 5.183688164 |
| P35565        | SDTSTPPSPK                                           | 0.918409522        | 2              | 2.880451918 |
| P35565        | TSELNLDQFHDK                                         | 1.086058383        | 2              | 3.784151077 |
| P35565        | VVDDWANDGWGLK                                        | 0.778262915        | 2              | 3.710409164 |
| P35565        | VVDDWANDGWGLKK                                       | 1.257526409        | 2              | 3.291986227 |
| P35565        | WEVDEMKETK                                           | 1.12512914         | 2              | 2.558961153 |
| P35565        | KIPNPDFFEDLEPFR                                      | 1.080881318        | 3              | 4.962648392 |
| P35565        | TDAPQPDKDEEGKEEEK                                    | 1.158812662        | 3              | 4.066793919 |
| <b>P35704</b> | <b>PRDX2 Peroxiredoxin_2</b>                         | <b>1.133770457</b> | <b>1</b>       | <b>4</b>    |
| P35704        | EGGLGPLNIPLLDVTK                                     | 1.059364564        | 2              | 3.49646759  |
| P35704        | KEGGLGPLNIPLLDVTK                                    | 0.993149983        | 2              | 4.739411354 |
| P35704        | QITVNDLPVGR                                          | 1.058583851        | 2              | 3.233533144 |

|               |                                                                        |                    |                |             |
|---------------|------------------------------------------------------------------------|--------------------|----------------|-------------|
| P35704        | SLSQNYGVLK                                                             | 1.08558534         | 2              | 2.556364298 |
| <b>P35738</b> | <b>ODDB 2_oxoisovalerate dehydrogenase subunit beta_ mitochondrial</b> | <b>0.98889801</b>  | <b>0.97685</b> | <b>4</b>    |
| P35738        | MNLFQSITSALDNSLAK                                                      | 1.041216025        | 2              | 3.392501354 |
| P35738        | SGDLFNCGLTIR                                                           | 1.035511947        | 2              | 3.538057089 |
| P35738        | GLLLSCIEDKNPCIFFEPK                                                    | 1.178616575        | 3              | 4.013040066 |
| P35738        | IPLSQAEVIQEGSDVTLVAWGTQVHVIR                                           | 1.099048215        | 3              | 5.853898525 |
| <b>P35815</b> | <b>PPM1B Protein phosphatase 1B</b>                                    | <b>0.937012974</b> | <b>0.9588</b>  | <b>3</b>    |
| P35815        | ILSAENIPNLPPGGGLAGK                                                    | 1.121812966        | 2              | 2.508383751 |
| P35815        | IQNAGGSVMIQR                                                           | 1.024600923        | 2              | 2.323540688 |
| P35815        | SGFALEPSVENVK                                                          | 0.912779984        | 2              | 2.306948662 |
| <b>P36201</b> | <b>CRIP2 Cysteine_rich protein 2</b>                                   | <b>1.023347469</b> | <b>0.65857</b> | <b>3</b>    |
| P36201        | ASSVTFTGEPNMCPR                                                        | 0.345713405        | 2              | 3.658021212 |
| P36201        | GVNTGAVGSYIYDKDPEGTVQP                                                 | 1.020504982        | 2              | 4.872480869 |
| P36201        | GVNIGGAGSYIYEKPPTEAPQVTGPIEVPVVR                                       | 1.041565998        | 3              | 5.919444084 |
| <b>P36365</b> | <b>FMO1 Dimethylaniline monooxygenase [N_oxide_forming] 1</b>          | <b>0.870710858</b> | <b>0.9746</b>  | <b>9</b>    |
| P36365        | AILTQWDR                                                               | 0.642205769        | 1              | 2.030872822 |
| P36365        | FTEHVEEGR                                                              | 1.026410968        | 2              | 3.382514715 |
| P36365        | NLLPTPVVSWLISK                                                         | 1.010234549        | 2              | 2.581128836 |
| P36365        | SCDLGGLWR                                                              | 0.997077122        | 2              | 2.696571827 |
| P36365        | VAIVGAGVSGLASIK                                                        | 1.306489716        | 2              | 3.072285891 |
| P36365        | VEDGQASLYK                                                             | 0.999031337        | 2              | 3.18401742  |
| P36365        | VLVVGMGNSGTDIAVEASHLAK                                                 | 1.013718274        | 2              | 5.218905449 |
| P36365        | ALQSDYITYIDDLTISINAKPDLR                                               | 1.41142694         | 3              | 3.982517481 |
| P36365        | TQLREPVLNDELPGR                                                        | 0.993658003        | 3              | 4.011910439 |
| <b>P36511</b> | <b>UDB15 UDP_glucuronosyltransferase 2B15</b>                          | <b>1.163202263</b> | <b>0.22256</b> | <b>8</b>    |
| P36511        | FVTFPTSFSSHDLENFFTR                                                    | 1.200926327        | 2              | 4.574592113 |
| P36511        | IILEELVQK                                                              | 1.093816674        | 2              | 3.368931055 |
| P36511        | ANIIAWALAQIPQK                                                         | 1.091924561        | 3              | 5.925393105 |
| P36511        | GHEVTVLRPSAFVFLDPK                                                     | 1.125016745        | 3              | 3.646332026 |
| P36511        | NAMWLSTIHHDQPTKPLDR                                                    | 1.219566761        | 3              | 3.445832253 |
| P36511        | NAMWLSTIHHDQPTKPLDR+Oxidation(3)                                       | 1.911775739        | 3              | 3.308521271 |
| P36511        | SDLLNALEEVIDNPFYK                                                      | 1.15608665         | 3              | 5.302687645 |
| P36511        | TLGRPTTLAEIMGK                                                         | 1.350134281        | 3              | 3.580854416 |
| <b>P36972</b> | <b>APT Adenine phosphoribosyltransferase</b>                           | <b>1.159906511</b> | <b>0.72768</b> | <b>3</b>    |
| P36972        | GFLFGPSLAQELGVGCVLIR                                                   | 1.091851774        | 2              | 4.203484535 |
| P36972        | IDYIAGLDSR                                                             | 1.021926477        | 2              | 2.472723007 |
| P36972        | SFPDFPIPGVLFIR                                                         | 1.166700237        | 2              | 3.073006392 |
| <b>P37397</b> | <b>CNN3 Calponin_3</b>                                                 | <b>0.859694352</b> | <b>0.8285</b>  | <b>4</b>    |
| P37397        | AGQSVIGLQMGTKN                                                         | 0.992340126        | 2              | 2.725144863 |
| P37397        | LTLQPVDNSTISLQMGTKN                                                    | 1.397519991        | 2              | 3.424619436 |
| P37397        | VNESSLNWPQLENIGNFIK                                                    | 0.944216399        | 2              | 3.901625395 |
| P37397        | YDQQAEDLR                                                              | 0.855716872        | 2              | 2.897398472 |

|               |                                                 |                    |                |             |
|---------------|-------------------------------------------------|--------------------|----------------|-------------|
| <b>P38650</b> | <b>DYHC1 Cytoplasmic dynein 1 heavy chain 1</b> | <b>1.003140038</b> | <b>0.89943</b> | <b>5</b>    |
| P38650        | FGNPLLQDVESYDPVLPVNLNR                          | 1.794579389        | 2              | 3.562012196 |
| P38650        | ILDDDTIITLLENLK                                 | 1.043080651        | 2              | 2.616546631 |
| P38650        | VQGLTVEQAEAVAR                                  | 1.090656067        | 2              | 2.969914913 |
| P38650        | VLRPQVTAVAQQNQGEAPEPQDMK                        | 0.961790596        | 3              | 5.071119785 |
| P38650        | VTDFGDKVEDPTFLNQLQSGVNR                         | 1.007396712        | 3              | 3.665153503 |
| <b>P38652</b> | <b>PGM1 Phosphoglucomutase_1</b>                | <b>1.03141766</b>  | <b>0.21465</b> | <b>18</b>   |
| P38652        | KQRVEDILK                                       | 1.279898839        | 1              | 2.018953323 |
| P38652        | QQFDLENK                                        | 1.067044441        | 1              | 2.095968723 |
| P38652        | SFVGKQFSANDK                                    | 0.760894729        | 1              | 1.924017429 |
| P38652        | ADNFEYSDPVDGSISK                                | 1.008691924        | 2              | 4.926165104 |
| P38652        | AIGGIILTASHNPGGPNDFGIK                          | 1.27978021         | 2              | 5.632178783 |
| P38652        | FFGNLMDASK                                      | 1.118222986        | 2              | 2.591431379 |
| P38652        | FNISNGGPAPEAITDK                                | 1.051160633        | 2              | 4.26755476  |
| P38652        | IDAMHGVVGPYVK                                   | 0.793558105        | 2              | 2.966551781 |
| P38652        | INQDPQVMLAPLISIALK                              | 1.064142532        | 2              | 3.585681677 |
| P38652        | LSGTGSAGATIR                                    | 1.43564662         | 2              | 3.472823381 |
| P38652        | LVIGQNGILSTPAVSCIIR                             | 1.792775232        | 2              | 4.770109653 |
| P38652        | NIFDFNALK                                       | 1.115398173        | 2              | 2.483455896 |
| P38652        | QEATLVVGGDGR                                    | 1.157126309        | 2              | 3.700804234 |
| P38652        | SGEHDFGAAFDGDGDR                                | 1.041481181        | 2              | 4.364538193 |
| P38652        | TIEEYAICPDLK                                    | 0.809590006        | 2              | 3.755599737 |
| P38652        | TQAYPDQKPGTSGLR                                 | 1.196908756        | 2              | 3.456156969 |
| P38652        | YDYEEVEAEGANK                                   | 0.971759525        | 2              | 5.317848206 |
| P38652        | ILCEELGAPANSAVNCVPLEDFGGHHPDNLTYAADLVETMK       | 0.855934665        | 3              | 3.370280981 |
| <b>P38656</b> | <b>LA Lupus La protein homolog</b>              | <b>1.167122544</b> | <b>0.10347</b> | <b>2</b>    |
| P38656        | ITDDQQESLNK                                     | 1.167243092        | 2              | 4.127904892 |
| P38656        | LDEGWVPLETMIK                                   | 1.095707483        | 2              | 2.782540083 |
| <b>P38659</b> | <b>PDIA4 Protein disulfide_isomerase A4</b>     | <b>1.112500237</b> | <b>9.9E-20</b> | <b>20</b>   |
| P38659        | TFDAIVMDPK                                      | 1.055123768        | 1              | 2.00869298  |
| P38659        | DLGLSESGEDVNAAILDESGKK                          | 1.140538084        | 2              | 5.145179272 |
| P38659        | DNDPPIAVAK                                      | 0.943414138        | 2              | 2.554540634 |
| P38659        | EVSQPDWTPPEVTLTLTK                              | 0.995650317        | 2              | 3.575316191 |
| P38659        | FDVSGYPTIK                                      | 1.096142344        | 2              | 2.969977856 |
| P38659        | FDVSGYPTLK                                      | 1.096142344        | 2              | 2.969977856 |
| P38659        | FIDEHATK                                        | 1.12722439         | 2              | 2.772375107 |
| P38659        | GQAVDYDGSR                                      | 1.17055432         | 2              | 2.482684135 |
| P38659        | GRPFDYNGPR                                      | 1.270861431        | 2              | 2.641290665 |
| P38659        | IDATSASMLASK                                    | 1.173687036        | 2              | 4.090368748 |
| P38659        | KGQAVDYDGSR                                     | 1.596249796        | 2              | 2.968010426 |
| P38659        | MDATANDITNDR                                    | 0.890454865        | 2              | 3.637084484 |
| P38659        | MHVMDVQGSTESAIAIK                               | 1.176457841        | 2              | 4.43625927  |

|               |                                                       |                    |                |             |
|---------------|-------------------------------------------------------|--------------------|----------------|-------------|
| P38659        | RFDVSGYPTLK                                           | 1.168299329        | 2              | 3.185270309 |
| P38659        | RSPPIPLAK                                             | 1.561928257        | 2              | 2.885532618 |
| P38659        | TQEEIVAK                                              | 1.138992524        | 2              | 2.326618195 |
| P38659        | VDATEQTDLAK                                           | 1.132795321        | 2              | 3.584650755 |
| P38659        | VEGFPTIYFAPSGDK                                       | 0.714814476        | 2              | 3.254150391 |
| P38659        | YGIVDYMVEQSGPPSK                                      | 1.104620588        | 2              | 3.456413507 |
| P38659        | MHVMDVQGSTEASAIKDYYVK                                 | 1.12950078         | 3              | 3.88319087  |
| <b>P38718</b> | <b>BR44 Brain protein 44</b>                          | <b>1.060759011</b> | <b>0.05169</b> | <b>3</b>    |
| P38718        | LMDKVELLLPK                                           | 0.635154714        | 2              | 2.721551895 |
| P38718        | LRPLYNHAPGPR                                          | 2.001221646        | 2              | 2.46547699  |
| P38718        | YSLVIIPK                                              | 1.040641998        | 2              | 2.350928307 |
| <b>P38918</b> | <b>ARK73 Aflatoxin B1 aldehyde reductase member 3</b> | <b>0.951004805</b> | <b>0.99288</b> | <b>7</b>    |
| P38918        | FFGNPFSQLYMDR                                         | 1.596627352        | 2              | 2.52821207  |
| P38918        | FYAFNPLAGLLTGR                                        | 1.184399916        | 2              | 4.753445148 |
| P38918        | MDVTSSASVR                                            | 0.883390478        | 2              | 3.776616335 |
| P38918        | QVETELFPCLR                                           | 0.933635383        | 2              | 2.559310675 |
| P38918        | RMDVTSSASVR                                           | 1.003811368        | 2              | 3.756806374 |
| P38918        | TTYGPTAPSMISAAVR                                      | 0.94783577         | 2              | 3.759147406 |
| P38918        | GHTEIDTAFVYANGQSETILGDLGLGLGR                         | 0.928584822        | 3              | 4.962246418 |
| <b>P38983</b> | <b>RSSA 40S ribosomal protein SA</b>                  | <b>1.077617613</b> | <b>0.00558</b> | <b>6</b>    |
| P38983        | SDGIYIINLK                                            | 0.966844175        | 1              | 2.120496035 |
| P38983        | AIVAIENPADVSVISSR                                     | 1.070606298        | 2              | 4.776054859 |
| P38983        | FTPGFTTNQIAAFR                                        | 1.070238977        | 2              | 4.529576302 |
| P38983        | YVDIAIPCNNK                                           | 1.129132727        | 2              | 3.15111208  |
| P38983        | ADHQLPLEASYVNLPTIALCNTDSPLR                           | 1.26989659         | 3              | 6.091676712 |
| P38983        | FLAAGTHLGGTNLDFQMEQYIYK                               | 0.927274689        | 3              | 4.056909084 |
| <b>P39032</b> | <b>RL36 60S ribosomal protein L36</b>                 | <b>1.12968257</b>  | <b>0.00013</b> | <b>2</b>    |
| P39032        | EELSNVLAAMRKAANK+Oxidation(10)                        | 0.688717642        | 2              | 2.325865507 |
| P39032        | KREELSNVLAAMR                                         | 1.141223267        | 3              | 3.301331997 |
| <b>P40112</b> | <b>PSB3 Proteasome subunit beta type_3</b>            | <b>1.194273205</b> | <b>0.98298</b> | <b>2</b>    |
| P40112        | FGIQAQMVTTDFQK                                        | 0.957503202        | 2              | 3.986826181 |
| P40112        | FGPYYTEPVIAGLDPK                                      | 1.186348382        | 2              | 3.052815437 |
| <b>P40307</b> | <b>PSB2 Proteasome subunit beta type_2</b>            | <b>1.301717405</b> | <b>0.00141</b> | <b>3</b>    |
| P40307        | FILNLPFVSVR                                           | 1.743772318        | 2              | 2.856540918 |
| P40307        | NGYELSPTAAANFTR                                       | 1.344108762        | 2              | 4.037248611 |
| P40307        | VIDKDGIIHNLENITFTK                                    | 1.145538312        | 2              | 4.036499977 |
| <b>P41034</b> | <b>TTPA Alpha_tocopherol transfer protein</b>         | <b>1.104306922</b> | <b>0.53525</b> | <b>5</b>    |
| P41034        | AECPELSADLHPR                                         | 1.073359893        | 2              | 3.09518075  |
| P41034        | AIFDLEGWQISHAFQITPSVAK                                | 0.836684773        | 2              | 4.322775841 |
| P41034        | AQEEGVPETPQLTDAFLLR                                   | 1.294328957        | 2              | 4.185168743 |
| P41034        | QLNEQPDHSPLVQPLAELR                                   | 1.061453956        | 3              | 3.641489267 |
| P41034        | GIHLINPEVIFHAVFSMIKPFLEK                              | 1.044161729        | 4              | 4.895967484 |
| <b>P41123</b> | <b>RL13 60S ribosomal protein L13</b>                 | <b>1.129710175</b> | <b>0.44065</b> | <b>5</b>    |

|               |                                                                      |                    |                |             |
|---------------|----------------------------------------------------------------------|--------------------|----------------|-------------|
| P41123        | AITEEEKNFK                                                           | 1.249513922        | 2              | 2.455186844 |
| P41123        | LATQLTGPVMPIR                                                        | 1.471200464        | 2              | 2.778961182 |
| P41123        | STESLQANVQR                                                          | 1.151585079        | 2              | 4.003963947 |
| P41123        | TIGISVDPR                                                            | 1.079971335        | 2              | 2.308715105 |
| P41123        | VDTWFNQPAR                                                           | 1.018931445        | 2              | 3.151993752 |
| <b>P41498</b> | <b>PPAC Low molecular weight phosphotyrosine protein phosphatase</b> | <b>1.0496959</b>   | <b>0.04528</b> | <b>3</b>    |
| P41498        | IDSAATSTYEVGNPPDYR                                                   | 1.111443446        | 2              | 4.658724785 |
| P41498        | IELLGSYDPQK                                                          | 1.744235404        | 2              | 3.662454128 |
| P41498        | LVTDENVSDNWR                                                         | 1.016005587        | 2              | 3.689095497 |
| <b>P41542</b> | <b>USO1 General vesicular transport factor p115</b>                  | <b>1.071389527</b> | <b>0.0001</b>  | <b>11</b>   |
| P41542        | AWFEVGDENPGWSAQK                                                     | 1.694806814        | 2              | 4.025725842 |
| P41542        | IVAFENAFER                                                           | 1.283766727        | 2              | 2.642039061 |
| P41542        | LQTENSELQQR                                                          | 1.053713814        | 2              | 3.055716038 |
| P41542        | LREEIEELR                                                            | 1.355726197        | 2              | 2.621761322 |
| P41542        | QLGPPVQIILVSPMGVSK                                                   | 1.054057183        | 2              | 4.268157959 |
| P41542        | SQLCSQSLEITR                                                         | 1.026854201        | 2              | 2.94369173  |
| P41542        | SVPVEGESELVTAAK                                                      | 1.017385314        | 2              | 3.374811411 |
| P41542        | TLEQHDNIVTHYK                                                        | 1.138980461        | 2              | 3.806278706 |
| P41542        | VLVSPTNPPGATSSCQK                                                    | 1.284430622        | 2              | 3.872002125 |
| P41542        | AETLAKSVPVEGESELVTAAK                                                | 1.030262618        | 3              | 3.323758602 |
| P41542        | CQNEQLQTAVTQQASQIQQHK                                                | 1.11630421         | 3              | 3.847817183 |
| <b>P41562</b> | <b>IDHC Isocitrate dehydrogenase [NADP] cytoplasmic</b>              | <b>1.505201989</b> | <b>9.9E-20</b> | <b>18</b>   |
| P41562        | GWPLYLSTK                                                            | 2.04869625         | 1              | 1.90683496  |
| P41562        | ATDFVVPGPVK                                                          | 1.12361562         | 2              | 3.383036613 |
| P41562        | CATITPDEK                                                            | 1.27331143         | 2              | 2.92148304  |
| P41562        | CATITPDEKR                                                           | 1.206217753        | 2              | 2.502599001 |
| P41562        | GQETSTNPIASIFAWSR                                                    | 1.23895894         | 2              | 5.309575081 |
| P41562        | IHGGSVEMQGDDEMTR                                                     | 1.322233627        | 2              | 5.1817379   |
| P41562        | IHWELIK                                                              | 1.185784475        | 2              | 2.345202684 |
| P41562        | LIDDMVAQAMK                                                          | 1.117542325        | 2              | 4.494102955 |
| P41562        | LILPYVELDLHSYDLGIENR                                                 | 2.770295738        | 2              | 5.197762489 |
| P41562        | LVTGWVKPIIIGR                                                        | 1.670058327        | 2              | 3.351747751 |
| P41562        | SDYLNTFEFMDK                                                         | 1.320850273        | 2              | 4.437115669 |
| P41562        | SEGGFIWACK                                                           | 1.175922952        | 2              | 3.51202178  |
| P41562        | SIEDFAHSSFQMALSK                                                     | 1.119936638        | 2              | 4.939804554 |
| P41562        | TVEAEAAHGTVTR                                                        | 1.216975548        | 2              | 3.941995859 |
| P41562        | VEITYTPK                                                             | 1.122107745        | 2              | 2.739459038 |
| P41562        | FKDIFQEIYDK                                                          | 1.130189701        | 3              | 4.606517792 |
| P41562        | KIHGGSVEMQGDDEMTR                                                    | 1.178412502        | 3              | 3.318214655 |
| P41562        | VTYLVHDFEEGGGVAMGMYNQDK                                              | 1.022506545        | 3              | 3.615740061 |
| <b>P42123</b> | <b>LDHB L_lactate dehydrogenase B chain</b>                          | <b>1.2929392</b>   | <b>1.3E-15</b> | <b>5</b>    |
| P42123        | DYSVTANSK                                                            | 0.866902708        | 2              | 2.821960449 |



|               |                                                       |                    |                |             |
|---------------|-------------------------------------------------------|--------------------|----------------|-------------|
| P42123        | IVADKDYSVTANSK                                        | 0.725434432        | 2              | 2.783463001 |
| P42123        | LIAPVADEETAVPNNK                                      | 1.118944018        | 2              | 2.584647655 |
| P42123        | SLADELALVDVLEDK                                       | 1.369457191        | 2              | 2.950399637 |
| P42123        | VIGSGCNLDSAR                                          | 1.272022818        | 2              | 3.804280758 |
| <b>P42930</b> | <b>HSPB1 Heat shock protein beta_1</b>                | <b>0.991587503</b> | <b>0.66199</b> | <b>2</b>    |
| P42930        | AQIGGPESEQSGAK                                        | 0.446463592        | 2              | 3.890389204 |
| P42930        | VSLDVNHFAPEELTVK                                      | 0.996843653        | 2              | 3.43201828  |
| <b>P42932</b> | <b>TCPQ T_complex protein 1 subunit theta</b>         | <b>1.215991679</b> | <b>2.7E-07</b> | <b>9</b>    |
| P42932        | AIAGTGANVIVTGGK                                       | 1.330420831        | 2              | 3.833057165 |
| P42932        | ELEVQHPAAK                                            | 1.249595666        | 2              | 2.984286785 |
| P42932        | GEENLMDAQVK                                           | 1.049143124        | 2              | 3.569110155 |
| P42932        | GSTDNLMDDIER                                          | 0.799442855        | 2              | 2.926175833 |
| P42932        | HEKEDGAISTIVLR                                        | 1.043396789        | 2              | 2.788162708 |
| P42932        | LFVTNDAATILR                                          | 1.748331967        | 2              | 2.998513222 |
| P42932        | LYSVHQEGNK                                            | 1.222584576        | 2              | 2.677674532 |
| P42932        | NVGLDIEAEVPAVK                                        | 0.992822642        | 2              | 3.687562704 |
| P42932        | QITSYGETCPGLEQYAIK                                    | 1.246468737        | 2              | 4.844157219 |
| <b>P43244</b> | <b>MATR3 Matrin_3</b>                                 | <b>1.287785624</b> | <b>0.02145</b> | <b>3</b>    |
| P43244        | ITPENLPQILLQLK                                        | 1.229535067        | 2              | 3.578965902 |
| P43244        | TENPAEGKEQEEK                                         | 1.199227784        | 2              | 3.314584494 |
| P43244        | YQLLQLVEPFGVISNHLILNK                                 | 1.779341814        | 3              | 4.061010361 |
| <b>P43274</b> | <b>H14 Histone H1.4</b>                               | <b>1.215361389</b> | <b>9.9E-20</b> | <b>3</b>    |
| P43274        | ALAAAGYDVEK                                           | 1.188473991        | 2              | 3.692065001 |
| P43274        | SGVSLAALK                                             | 0.955823119        | 2              | 3.140358686 |
| P43274        | SGVSLAALKK                                            | 1.108916871        | 2              | 2.47759223  |
| <b>P43276</b> | <b>H15 Histone H1.5</b>                               | <b>1.364704583</b> | <b>9.9E-20</b> | <b>2</b>    |
| P43276        | ALAAGGYDVEK                                           | 1.388207255        | 2              | 2.774060965 |
| P43276        | ATGPPVSELITK                                          | 1.126181598        | 2              | 2.967749834 |
| <b>P43278</b> | <b>H10 Histone H1.0</b>                               | <b>0.90135335</b>  | <b>0.94898</b> | <b>2</b>    |
| P43278        | VGENADSQIK                                            | 1.115954972        | 2              | 3.431298971 |
| P43278        | YSDMIVAAIQAEK                                         | 0.829607679        | 2              | 4.261011124 |
| <b>P43424</b> | <b>GALT Galactose_1_phosphate uridylyltransferase</b> | <b>1.041964859</b> | <b>0.05909</b> | <b>2</b>    |
| P43424        | HDPLNPLCPGATR                                         | 1.182673701        | 2              | 2.87984395  |
| P43424        | YNPLQDEWVLVSAHR                                       | 0.876307022        | 2              | 2.439340115 |
| <b>P45591</b> | <b>COF2 Cofilin_2</b>                                 | <b>1.108198938</b> | <b>0.86357</b> | <b>4</b>    |
| P45591        | KEDLVFIFWAPESAPLK                                     | 1.108658911        | 2              | 3.911050558 |
| P45591        | MASGVTVNDEVIK                                         | 1.057762906        | 2              | 2.483415604 |
| P45591        | QILVGDIGDVTEDPYTSFVK                                  | 1.095979703        | 2              | 5.174490452 |
| P45591        | HEWQVNGLDDIKDR                                        | 0.94595299         | 3              | 4.206285477 |
| <b>P45592</b> | <b>COF1 Cofilin_1</b>                                 | <b>1.25870089</b>  | <b>9.9E-20</b> | <b>4</b>    |
| P45592        | HELQANCYEEVK                                          | 1.281729401        | 2              | 3.319258213 |
| P45592        | LGGSAVISLEGKPL                                        | 1.918698606        | 2              | 2.431261778 |
| P45592        | NIILEEGKEILVGDVGTVDPPYTTFFVK                          | 1.364604353        | 2              | 5.019269466 |

|               |                                                                            |                    |                |             |
|---------------|----------------------------------------------------------------------------|--------------------|----------------|-------------|
| P45592        | HELQANCYEEVKDR                                                             | 1.268444019        | 3              | 5.493163586 |
| <b>P45878</b> | <b>FKBP2 Peptidyl_prolyl cis_trans isomerase FKBP2</b>                     | <b>1.179527043</b> | <b>0.19334</b> | <b>3</b>    |
| P45878        | GWDQGLLMCEGEK                                                              | 1.17830993         | 2              | 2.832413912 |
| P45878        | LEDGTEFDSSLPQNPVFSLGTGQVIK                                                 | 0.996903094        | 2              | 3.705191851 |
| P45878        | LVIPSELGYGER                                                               | 1.64341981         | 2              | 2.401523352 |
| <b>P45953</b> | <b>ACADV Very long_chain specific acyl_CoA dehydrogenase_mitochondrial</b> | <b>1.063500215</b> | <b>8.7E-05</b> | <b>20</b>   |
| P45953        | AMVENGLVTSNPLR                                                             | 0.892692164        | 2              | 2.740113497 |
| P45953        | AMVENGLVTSNPLRV                                                            | 1.336717472        | 2              | 4.140826702 |
| P45953        | ASNTSEVYFDGVK                                                              | 1.195566858        | 2              | 3.509231329 |
| P45953        | ELGAFGLQVPSELGGLSNTQYAR                                                    | 0.94314265         | 2              | 4.655416489 |
| P45953        | ENMASLQSNPQQQLFR                                                           | 1.213894222        | 2              | 3.892059326 |
| P45953        | FFEEVNDPAK                                                                 | 0.775599841        | 2              | 2.708445549 |
| P45953        | GIVNEQFLQR                                                                 | 1.11525746         | 2              | 3.219193935 |
| P45953        | IFEGTNDILR                                                                 | 1.206342567        | 2              | 3.003589869 |
| P45953        | IFGSEAAWK                                                                  | 0.708863655        | 2              | 2.654495955 |
| P45953        | IHNFGVIQEK                                                                 | 1.45598919         | 2              | 2.314133644 |
| P45953        | LFVALQGCMDK                                                                | 1.107153405        | 2              | 2.483862162 |
| P45953        | NDSLEKVEEDTLQGLK                                                           | 1.006826517        | 2              | 3.594150543 |
| P45953        | NPLGNVLLIGEASK                                                             | 1.224553449        | 2              | 2.682408571 |
| P45953        | SFGGVTHGLPEK                                                               | 1.179911666        | 2              | 2.71756506  |
| P45953        | SFGGVTHGLPEKK                                                              | 1.249881059        | 2              | 2.384603024 |
| P45953        | SLSEGYPTAQHEK                                                              | 1.197462776        | 2              | 3.347725391 |
| P45953        | TGIGSGLSLGIVHPELSR                                                         | 1.070790493        | 2              | 4.321165085 |
| P45953        | VEEDTLQGLK                                                                 | 0.955135095        | 2              | 2.588833094 |
| P45953        | FFEEVNDPAKNDSLEKVEEDTLQGLK                                                 | 1.072821005        | 3              | 4.563464642 |
| P45953        | SGELAVQALEQFATVVEAK                                                        | 1.000205426        | 3              | 4.955094337 |
| <b>P46418</b> | <b>GSTA5 Glutathione S_transferase alpha_5</b>                             | <b>1.032901356</b> | <b>0.99776</b> | <b>4</b>    |
| P46418        | AILNYIATK                                                                  | 0.867363733        | 2              | 3.372720003 |
| P46418        | SDGSLMFEQVPMVEIDGMK                                                        | 0.973476078        | 2              | 3.545745373 |
| P46418        | SHGQDYLVGNK                                                                | 1.085057936        | 2              | 3.569638252 |
| P46418        | VSNLPTVK                                                                   | 1.092704249        | 2              | 2.859722376 |
| <b>P46425</b> | <b>GSTP2 Glutathione S_transferase P 2</b>                                 | <b>1.085975723</b> | <b>0.98119</b> | <b>2</b>    |
| P46425        | ALPGHLKPFETLLSQNQGGK                                                       | 1.101352294        | 2              | 4.461594105 |
| P46425        | FEDGDLTLYQSNAIR                                                            | 0.860958501        | 2              | 4.537661076 |
| <b>P46462</b> | <b>TERA Transitional endoplasmic reticulum ATPase</b>                      | <b>1.107356444</b> | <b>5.2E-11</b> | <b>25</b>   |
| P46462        | AIANECQANFISIK                                                             | 1.328570163        | 2              | 2.494134188 |
| P46462        | EAVCIVLSDDTCSDEK                                                           | 1.130752003        | 2              | 3.747733831 |
| P46462        | EDEEESLNEVGYDDIGGCR                                                        | 1.083229013        | 2              | 4.849054337 |
| P46462        | ELQELVQYPVEHPDK                                                            | 1.045039491        | 2              | 4.625997543 |
| P46462        | ETVVEVPQVTWEDIGGLEDVK                                                      | 1.032402121        | 2              | 3.100064039 |
| P46462        | ETVVEVPQVTWEDIGGLEDVKR                                                     | 1.110317478        | 2              | 4.122541904 |
| P46462        | EVDIGIPDATGR                                                               | 0.63644902         | 2              | 3.1448071   |

|               |                                                                                           |                    |                |             |
|---------------|-------------------------------------------------------------------------------------------|--------------------|----------------|-------------|
| P46462        | GDDLSTAILK                                                                                | 0.880800212        | 2              | 2.972871304 |
| P46462        | GGNIGDGGGAADR                                                                             | 1.118180026        | 2              | 3.201267958 |
| P46462        | GILLYGPPGTGK                                                                              | 0.947543865        | 2              | 3.575330496 |
| P46462        | IVSQLLTLMDGLK                                                                             | 2.428646054        | 2              | 4.220181465 |
| P46462        | KYEMFAQTLQQSR                                                                             | 1.052642626        | 2              | 3.045798063 |
| P46462        | LAGESESNLRKAFEEAEK                                                                        | 1.023950347        | 2              | 2.42502141  |
| P46462        | LDQLIYIPLPDEK                                                                             | 1.0805802          | 2              | 4.847033501 |
| P46462        | LEILQIHTK                                                                                 | 1.086698581        | 2              | 2.912633896 |
| P46462        | LGDVISIQPCPDVK                                                                            | 1.128190847        | 2              | 4.46848774  |
| P46462        | LIVDEAINEDNSVLSLQPK                                                                       | 1.111816151        | 2              | 5.328796864 |
| P46462        | MDELQLFR                                                                                  | 0.845071777        | 2              | 3.199991703 |
| P46462        | MTNGFSGADLTEICQR                                                                          | 1.021533275        | 2              | 4.517092228 |
| P46462        | QTNPSAMEVEEDDPVEIR                                                                        | 0.966899371        | 2              | 4.611572266 |
| P46462        | RSVSDNDIR                                                                                 | 1.395856096        | 2              | 2.658648968 |
| P46462        | WALSQSNPSALR                                                                              | 1.143507344        | 2              | 2.599133492 |
| P46462        | LADDVDLEQVANETHGHVGADLAALCSEALQAIR                                                        | 1.355302425        | 3              | 6.792405128 |
| P46462        | NAPAIIFIDELDAIAPK                                                                         | 1.415358095        | 3              | 5.109483719 |
| P46462        | NVFIIGATNRPDIIDPAILRPGR                                                                   | 1.077588707        | 3              | 4.199270248 |
| <b>P46664</b> | <b>PURA2 Adenylosuccinate synthetase isozyme 2</b>                                        | <b>1.426556183</b> | <b>0.39684</b> | <b>3</b>    |
| P46664        | FIEDELQIPVK                                                                               | 1.013778539        | 2              | 3.165514231 |
| P46664        | VGIGAFPTEQDNEIGELLQTR                                                                     | 1.448152763        | 2              | 4.304396629 |
| P46664        | VVDLLAQDADIVCR                                                                            | 1.102860347        | 2              | 3.09315753  |
| <b>P46720</b> | <b>SO1A1 Solute carrier organic anion transporter family member 1A1</b>                   | <b>1.203783005</b> | <b>0.31555</b> | <b>3</b>    |
| P46720        | GIGETPIVPLGISYIEDFAK                                                                      | 1.207139987        | 2              | 3.589865923 |
| P46720        | GVQHQLHVESK                                                                               | 0.886165366        | 2              | 3.238781214 |
| P46720        | SENSPLYIGILEMGK                                                                           | 0.911604381        | 2              | 3.218569994 |
| <b>P46844</b> | <b>BIEA Biliverdin reductase A</b>                                                        | <b>1.015867245</b> | <b>0.99976</b> | <b>3</b>    |
| P46844        | FGVVVGVGR                                                                                 | 1.026818299        | 2              | 2.475596666 |
| P46844        | LLDQVSAEDLAAEK                                                                            | 0.866966062        | 2              | 3.807953835 |
| P46844        | MTVQLETQNK                                                                                | 1.05425142         | 2              | 2.814459324 |
| <b>P46953</b> | <b>3HAO 3_hydroxyanthranilate 3_4_dioxygenase</b>                                         | <b>1.179592657</b> | <b>0.2301</b>  | <b>6</b>    |
| P46953        | AQGSVALSVTQDPACK                                                                          | 1.024178822        | 2              | 4.411123276 |
| P46953        | ASFQPPVCNK                                                                                | 1.101089333        | 2              | 2.673982859 |
| P46953        | DLGTQLAPIIQEFFHSEQYR                                                                      | 1.013802731        | 2              | 3.165488243 |
| P46953        | QDVDVWLWQLEGSSK                                                                           | 1.392952308        | 2              | 3.309269428 |
| P46953        | YYVGDTEDVLF EK                                                                            | 1.166825858        | 2              | 4.052299023 |
| P46953        | TGKPNPDQLLK                                                                               | 1.163214054        | 3              | 3.593695402 |
| <b>P46978</b> | <b>STT3A Dolichyl_diphosphooligosaccharide__protein glycosyltransferase subunit STT3A</b> | <b>1.305143713</b> | <b>0.00043</b> | <b>4</b>    |
| P46978        | FGQVYTEAK                                                                                 | 1.231354379        | 2              | 2.602279425 |
| P46978        | FYSLLDPSYAK                                                                               | 1.165797797        | 2              | 3.093926668 |
| P46978        | VGQAMASTE EK                                                                              | 1.453695029        | 2              | 3.204134226 |
| P46978        | VGQAMASTE EK+Oxidation(5)                                                                 | 1.71542878         | 2              | 2.622654915 |

|               |                                                    |                    |                |             |
|---------------|----------------------------------------------------|--------------------|----------------|-------------|
| <b>P47198</b> | <b>RL22 60S ribosomal protein L22</b>              | <b>1.150643135</b> | <b>6.4E-05</b> | <b>2</b>    |
| P47198        | AGNLGGGVVTIER                                      | 1.145888694        | 2              | 3.16187501  |
| P47198        | FTLDCTHPVEDGIMDAANFEQLQER                          | 1.566668428        | 3              | 4.872404575 |
| <b>P47875</b> | <b>CSRP1 Cysteine and glycine_rich protein 1</b>   | <b>1.384677035</b> | <b>9.9E-20</b> | <b>4</b>    |
| P47875        | GFGFGQGAGALVHSE                                    | 1.107968835        | 2              | 3.079694748 |
| P47875        | GLESTTLADKDGEIYCK                                  | 1.39610164         | 2              | 4.980594635 |
| P47875        | NLDSTTVAVHGEEIYCK                                  | 0.955343017        | 2              | 4.353924751 |
| P47875        | HEEAPGHRPTTNPNAK                                   | 1.525462789        | 3              | 3.497723103 |
| <b>P47942</b> | <b>DPYL2 Dihydropyrimidinase_related protein 2</b> | <b>0.974324812</b> | <b>0.74836</b> | <b>3</b>    |
| P47942        | GLYDGPVCEVSTPK                                     | 0.969693936        | 2              | 3.581647396 |
| P47942        | QIGENLIVPGGVK                                      | 1.019414057        | 2              | 2.439012289 |
| P47942        | SITIANQTNCPYVTK                                    | 1.423724683        | 2              | 3.289038897 |
| <b>P48004</b> | <b>PSA7 Proteasome subunit alpha type_7</b>        | <b>1.142303725</b> | <b>0.71967</b> | <b>2</b>    |
| P48004        | NYTDDAIETDLTIK                                     | 0.974845324        | 2              | 4.706778049 |
| P48004        | YVAEIEKEKEENEK                                     | 1.161659995        | 2              | 4.028362274 |
| <b>P48037</b> | <b>ANXA6 Annexin A6</b>                            | <b>1.149775174</b> | <b>9.9E-20</b> | <b>17</b>   |
| P48037        | ALLALCGGED                                         | 1.42420528         | 1              | 2.190618992 |
| P48037        | GELSGDFEK                                          | 1.222982183        | 1              | 2.069562435 |
| P48037        | AANDFNPDAK                                         | 1.21972326         | 2              | 2.905189276 |
| P48037        | AINEAYKEDYHK                                       | 1.308997253        | 2              | 3.384114504 |
| P48037        | ALIEILATR                                          | 1.255196315        | 2              | 3.495878696 |
| P48037        | DLESDIIGDTSGHFQK                                   | 1.011286763        | 2              | 4.260920048 |
| P48037        | GFGSDKESILELITSR                                   | 0.941323181        | 2              | 4.132144451 |
| P48037        | GSVHDFADFANQDAEALYTAMK                             | 0.495391796        | 2              | 6.128281116 |
| P48037        | QRQEICQSYK                                         | 1.306970609        | 2              | 3.276952744 |
| P48037        | SEIDLLNIR                                          | 1.531013314        | 2              | 3.112278461 |
| P48037        | SLEDALSSDTSGHFK                                    | 1.134293112        | 2              | 3.288510323 |
| P48037        | TNEQIHQLVAAYK                                      | 1.324640569        | 2              | 3.872861385 |
| P48037        | TNYDIEHVIK                                         | 1.077477434        | 2              | 3.238611937 |
| P48037        | TTGKPIEASIR                                        | 1.323999735        | 2              | 2.503026962 |
| P48037        | WGTDEAQFIYILGNR                                    | 1.838920266        | 2              | 2.347768068 |
| P48037        | ENDDVVSEDLVQQDVLQDLYEAGELK                         | 1.075489957        | 3              | 5.089622021 |
| P48037        | GIGTDEATIIDIITQR                                   | 1.080391482        | 3              | 4.102993011 |
| <b>P48500</b> | <b>TPIS Triosephosphate isomerase</b>              | <b>1.212924092</b> | <b>1.2E-15</b> | <b>12</b>   |
| P48500        | FFVGGNWK                                           | 1.264627359        | 1              | 1.992959619 |
| P48500        | CNVSEGVAQCTR                                       | 1.119534422        | 2              | 3.832330942 |
| P48500        | DLGATWVVLGHSER                                     | 0.72379007         | 2              | 4.006038666 |
| P48500        | HIFGESDELIGQK                                      | 1.072143174        | 2              | 4.002853394 |
| P48500        | IYGGSVTGATCK                                       | 1.51432115         | 2              | 4.168003559 |
| P48500        | KFFVGGNWKMNDR                                      | 0.961232731        | 2              | 2.310231924 |
| P48500        | LPADTEVVCAPPTAYIDFAR                               | 0.300766871        | 2              | 4.472621918 |
| P48500        | RHIFGESDELIGQK                                     | 1.11553044         | 2              | 4.29209137  |
| P48500        | TATPQQAQEVHEK                                      | 1.213594707        | 2              | 3.633104801 |

|               |                                                           |                    |                |             |
|---------------|-----------------------------------------------------------|--------------------|----------------|-------------|
| P48500        | VNHALSEGLGVIACIGEK                                        | 1.155347048        | 2              | 5.179026127 |
| P48500        | VVLAYEPVWAIGTGK                                           | 1.047353104        | 2              | 4.134837151 |
| P48500        | ELASQPDVDGFLVGGASLKPEFVDIINAK                             | 1.028637538        | 4              | 5.37005806  |
| <b>P48508</b> | <b>GSH0 Glutamate__cysteine ligase regulatory subunit</b> | <b>0.947409844</b> | <b>0.6879</b>  | <b>6</b>    |
| P48508        | FFPDVLECTMSHAVEK                                          | 0.874303192        | 2              | 3.768867731 |
| P48508        | INPDEREEMK                                                | 1.1620082          | 2              | 2.472528458 |
| P48508        | LFIVGSNSSSSTR                                             | 1.118856868        | 2              | 3.510997057 |
| P48508        | QFDIQLLTHNDPK                                             | 1.347381612        | 2              | 2.612658024 |
| P48508        | TLNEWSSQISPDVLR                                           | 0.810787865        | 2              | 4.629065037 |
| P48508        | ASTLHLQTGNLLNWGR                                          | 1.325635142        | 3              | 3.838911533 |
| <b>P48675</b> | <b>DESM Desmin</b>                                        | <b>0.846997255</b> | <b>0.25238</b> | <b>3</b>    |
| P48675        | FLEQQNAALAAEVNR                                           | 0.904002127        | 2              | 4.231886864 |
| P48675        | HQIQSYTCEIDALK                                            | 1.824250125        | 2              | 3.552767992 |
| P48675        | VSDLTQAANK                                                | 0.836961288        | 2              | 2.850980997 |
| <b>P48679</b> | <b>LMNA Prelamin_A/C</b>                                  | <b>0.977755741</b> | <b>0.46722</b> | <b>14</b>   |
| P48679        | AQHEDQVEYQK                                               | 1.309805119        | 2              | 2.699162006 |
| P48679        | AQHEDQVEYQKK                                              | 1.182157736        | 2              | 4.380353928 |
| P48679        | IDSLSAQLSQLQK                                             | 0.983110882        | 2              | 3.041064978 |
| P48679        | ITESEEVSR                                                 | 0.996059988        | 2              | 2.832991838 |
| P48679        | LQEKEDLQELNDR                                             | 1.140582427        | 2              | 4.027468204 |
| P48679        | MQQQLDEYQELLDIK                                           | 1.188238015        | 2              | 4.884830475 |
| P48679        | NSNLVGAHEELQQSR                                           | 0.949299254        | 2              | 4.609542847 |
| P48679        | SGAQASSTPLSPTR                                            | 0.97869107         | 2              | 3.623058081 |
| P48679        | SLETENAGLR                                                | 1.44515394         | 2              | 2.628831625 |
| P48679        | SVGGSGGSGFGDNLVTR                                         | 0.999248265        | 2              | 3.432418346 |
| P48679        | TALINATGEEVAMR                                            | 1.030663586        | 2              | 2.847514391 |
| P48679        | TVLCGTCGQPADK                                             | 0.947523098        | 2              | 2.83457613  |
| P48679        | VAVEEVDEEGK                                               | 0.900321884        | 2              | 3.037405729 |
| P48679        | VAVEEVDEEGKFVR                                            | 0.997519295        | 2              | 2.940264702 |
| <b>P48721</b> | <b>GRP75 Stress_70 protein_ mitochondrial</b>             | <b>0.954612228</b> | <b>7.2E-14</b> | <b>27</b>   |
| P48721        | VINEPTAAALAYGLDK                                          | 1.449462188        | 1              | 3.381241798 |
| P48721        | AQFEGIVTDLIK                                              | 1.096893699        | 2              | 3.839066982 |
| P48721        | ASNGDAWVEAHGK                                             | 1.265524002        | 2              | 3.659946203 |
| P48721        | DAGQISGLNVLR                                              | 1.066076428        | 2              | 3.503056765 |
| P48721        | EEISKMRELLAR                                              | 1.094034948        | 2              | 2.437199593 |
| P48721        | EQQIVIQSSGGLSK                                            | 0.930810316        | 2              | 3.712967396 |
| P48721        | EQQIVIQSSGGLSKDDIENMVK                                    | 0.945011436        | 2              | 4.768486023 |
| P48721        | GAVVGIDLGTNSCVAVMEGK                                      | 0.908556867        | 2              | 5.069857121 |
| P48721        | LFEMAYK                                                   | 1.02092578         | 2              | 2.352840424 |
| P48721        | LLGQFTLIGIPPAPR                                           | 1.853224717        | 2              | 3.368118286 |
| P48721        | MEEFKDQLPADECNK                                           | 0.93467941         | 2              | 4.553418636 |
| P48721        | MEEFKDQLPADECNK+Oxidation(1)                              | 1.413451942        | 2              | 3.967645407 |
| P48721        | MKETAENYLGHTAK                                            | 0.989124519        | 2              | 4.216881275 |

|               |                                                                            |                    |                |             |
|---------------|----------------------------------------------------------------------------|--------------------|----------------|-------------|
| P48721        | NAVITVPAYFNDSQR                                                            | 1.11704278         | 2              | 3.157208443 |
| P48721        | QAVTNPNTFYATK                                                              | 0.956497122        | 2              | 3.418057919 |
| P48721        | RYDDPEVQK                                                                  | 1.082264044        | 2              | 2.951504707 |
| P48721        | RYDDPEVQKDTK                                                               | 1.399395966        | 2              | 3.756350517 |
| P48721        | SDIGEVILVGGMTR                                                             | 1.107814203        | 2              | 4.035479546 |
| P48721        | SQVFSTAADGQTQVEIK                                                          | 0.458981519        | 2              | 5.313323498 |
| P48721        | STNGDTFLGGEDFDQALLR                                                        | 1.212896897        | 2              | 5.319878578 |
| P48721        | TTPSVVAFTPDGER                                                             | 1.030580811        | 2              | 3.550759554 |
| P48721        | VEAVNMAEGIIHDTETK                                                          | 1.142150641        | 2              | 4.38138485  |
| P48721        | VLENAEGAR                                                                  | 1.126896877        | 2              | 3.13884902  |
| P48721        | VQQTQVQDLFGR                                                               | 1.064386552        | 2              | 3.490255356 |
| P48721        | YDDPEVQKDTK                                                                | 1.095920364        | 2              | 2.927332401 |
| P48721        | ERVEAVNMAEGIIHDTETK                                                        | 1.022058645        | 3              | 5.587630749 |
| P48721        | MKETAENYLGHATAK+Oxidation(1)                                               | 1.602511416        | 3              | 3.373778105 |
| <b>P48998</b> | <b>INVO Involucrin</b>                                                     | <b>1.060998019</b> | <b>0.93603</b> | <b>2</b>    |
| P48998        | HKLENLTQKEK                                                                | 1.077434343        | 1              | 1.965730667 |
| P48998        | ELLDQRLDQELVNK                                                             | 1.060995709        | 2              | 2.420773745 |
| <b>P49025</b> | <b>CTRO Citron Rho_interacting kinase</b>                                  | <b>0.96492917</b>  | <b>0.8132</b>  | <b>2</b>    |
| P49025        | LLMIAGEERALCLVDVK+Oxidation(3)                                             | 0.864574925        | 2              | 2.325179338 |
| P49025        | LMMNQLEEDLVSARR+Oxidation(2)                                               | 1.045474467        | 2              | 2.352519274 |
| <b>P49134</b> | <b>ITB1 Integrin beta_1</b>                                                | <b>0.99231736</b>  | <b>0.96781</b> | <b>4</b>    |
| P49134        | CNCQSHGIPASPK                                                              | 1.147794777        | 2              | 3.204071522 |
| P49134        | FCECDNFNCDR                                                                | 0.983736506        | 2              | 3.459947586 |
| P49134        | GICEGACK                                                                   | 0.994501737        | 2              | 2.318189621 |
| P49134        | WDTGENPIYK                                                                 | 1.131550691        | 2              | 2.384713888 |
| <b>P49242</b> | <b>RS3A 40S ribosomal protein S3a</b>                                      | <b>0.989362277</b> | <b>2.4E-11</b> | <b>10</b>   |
| P49242        | ADGYEPPVQESV                                                               | 1.013347466        | 1              | 2.009725809 |
| P49242        | ACQSIPLHDVFR                                                               | 1.38015979         | 2              | 3.778867722 |
| P49242        | EVQTNDLKEVVK                                                               | 0.913117869        | 2              | 2.331767559 |
| P49242        | LIPDSIGKDIEK                                                               | 1.479854389        | 2              | 2.907618999 |
| P49242        | LITEDVQGK                                                                  | 1.244003584        | 2              | 2.358298779 |
| P49242        | LMELHGEGGSSGK                                                              | 1.202367807        | 2              | 3.234148741 |
| P49242        | LMELHGEGGSSGK+Oxidation(2)                                                 | 1.269710699        | 2              | 3.103387594 |
| P49242        | NCLTNFHGMDLTR                                                              | 1.195068888        | 2              | 4.157990932 |
| P49242        | TTDGYLLR                                                                   | 1.133768782        | 2              | 2.991350412 |
| P49242        | VFEVSLADLQNDEVAFR                                                          | 1.019974797        | 2              | 4.789309978 |
| <b>P49432</b> | <b>ODPB Pyruvate dehydrogenase E1 component subunit beta_mitochondrial</b> | <b>1.018443313</b> | <b>0.46793</b> | <b>5</b>    |
| P49432        | EAINQGMDEELERDEK                                                           | 1.061878316        | 2              | 2.84861517  |
| P49432        | ILEDNSIPQVK                                                                | 1.001433752        | 2              | 3.461088657 |
| P49432        | IMEGPAFNFLDAPAVR                                                           | 1.024837502        | 2              | 4.558763027 |
| P49432        | TIRPMDIEAIEASVMK                                                           | 2.405487838        | 2              | 3.426910162 |
| P49432        | VLLGEEVAQYDGAYK                                                            | 0.920036432        | 2              | 3.501980543 |

|               |                                                   |                    |                |             |
|---------------|---------------------------------------------------|--------------------|----------------|-------------|
| <b>P49889</b> | <b>ST1E3 Estrogen sulfotransferase_ isoform 3</b> | <b>0.771622038</b> | <b>2.1E-12</b> | <b>10</b>   |
| P49889        | CKEDALFNR                                         | 1.062675692        | 2              | 2.375930786 |
| P49889        | FEEHYQQQMK                                        | 1.091485291        | 2              | 2.954859018 |
| P49889        | FMEGQVPYGSWYDHVK                                  | 0.792094021        | 2              | 4.335290432 |
| P49889        | IIQHTSFQEMK                                       | 1.899490585        | 2              | 3.216384649 |
| P49889        | NEDLINGIK                                         | 0.96444413         | 2              | 2.915210009 |
| P49889        | NNPCTNYSMLPETMIDLK                                | 0.738914739        | 2              | 4.364925385 |
| P49889        | NNPCTNYSMLPETMIDLK+Oxidation(14)                  | 0.770295822        | 2              | 3.112719536 |
| P49889        | NNPCTNYSMLPETMIDLK+Oxidation(9)                   | 0.770295822        | 2              | 4.146317005 |
| P49889        | SGSTWISEIVDMIYK                                   | 1.263299125        | 2              | 4.754103661 |
| P49889        | LIEFLERDPSAELVDR                                  | 1.030064697        | 3              | 4.730216503 |
| <b>P50137</b> | <b>TKT Transketolase</b>                          | <b>0.992521985</b> | <b>0.99928</b> | <b>20</b>   |
| P50137        | AVELAANTK                                         | 1.065464492        | 1              | 1.971679568 |
| P50137        | GITGIEDK                                          | 1.005803076        | 1              | 2.426312447 |
| P50137        | HQPTAIIAK                                         | 0.906154352        | 2              | 2.513094902 |
| P50137        | IIALDGTK                                          | 1.015705316        | 2              | 2.668824911 |
| P50137        | ISSDLDGHPVPK                                      | 0.990278868        | 2              | 3.352298975 |
| P50137        | KISSDLDGHPVPK                                     | 1.035971388        | 2              | 4.050012112 |
| P50137        | LDNLVAIFDINR                                      | 0.894802285        | 2              | 4.753306866 |
| P50137        | LGQSDPAPLQHQVDVYQK                                | 1.174963656        | 2              | 3.742672205 |
| P50137        | MFGIDKDAIVQAVK                                    | 0.958674358        | 2              | 4.381688118 |
| P50137        | NSTFSELFK                                         | 0.868344489        | 2              | 2.45201087  |
| P50137        | SVPMSTVFYPSDGVATEK                                | 0.848492495        | 2              | 4.690301895 |
| P50137        | VLDPFTIKPLDK                                      | 1.343247023        | 2              | 3.49276638  |
| P50137        | VLDPFTIKPLDKK                                     | 1.121966181        | 2              | 2.438898087 |
| P50137        | ILATPPQEDAPSVDIANIR                               | 1.159733904        | 3              | 4.92330265  |
| P50137        | ILTVEDHYEGGIGEAHSVAVVVGEPGVTVTR                   | 2.434805423        | 3              | 3.821249008 |
| P50137        | NMAEQIIQEISVQVQSK                                 | 0.932743147        | 3              | 6.513892174 |
| P50137        | SGKPAELLK                                         | 0.934244634        | 3              | 3.427255154 |
| P50137        | SKDDQTVIGAGVTLHEALAAEMLK                          | 0.980211514        | 3              | 5.446114063 |
| P50137        | TSRPENAIISNNEDFQVQAK                              | 0.898821573        | 3              | 5.596367359 |
| P50137        | SKDDQTVIGAGVTLHEALAAEMLKK                         | 1.20499387         | 4              | 5.550498009 |
| <b>P50169</b> | <b>RDH3 Retinol dehydrogenase 3</b>               | <b>1.040865017</b> | <b>6.5E-05</b> | <b>9</b>    |
| P50169        | FQDSYMK                                           | 1.100929346        | 1              | 1.935591459 |
| P50169        | GLWGLVNNAGISVPGPNEWMR                             | 1.046670041        | 2              | 3.56431222  |
| P50169        | KLWDQTTEEVK                                       | 1.463956285        | 2              | 2.557690144 |
| P50169        | LWDQTTEEVK                                        | 1.032132286        | 2              | 3.599947453 |
| P50169        | LWDQTTEEVKEIYGEK                                  | 1.064483493        | 2              | 4.993239403 |
| P50169        | MSLVGGGYCISK                                      | 1.183242802        | 2              | 3.909941435 |
| P50169        | AMESLVNTCSGDLSLVTDCEMEHALTSCHPR                   | 1.311910211        | 3              | 5.483289242 |
| P50169        | AMESLVNTCSGDLSLVTDCEMEHALTSCHPR+Oxidation(2)      | 1.241021763        | 3              | 4.308114052 |
| P50169        | KLWDQTTEEVKEIYGEK                                 | 1.019029781        | 3              | 4.301816463 |
| <b>P50237</b> | <b>ST1C1 Sulfotransferase 1C1</b>                 | <b>1.033419852</b> | <b>0.69022</b> | <b>9</b>    |

|               |                                                        |                    |                |             |
|---------------|--------------------------------------------------------|--------------------|----------------|-------------|
| P50237        | AGTTWTQEIVDMIQNDGDVQK                                  | 1.007383847        | 2              | 5.6509161   |
| P50237        | DISEEVLNK                                              | 0.813744685        | 2              | 2.627704144 |
| P50237        | DLHLGEQDLQPETR                                         | 0.897973867        | 2              | 3.95352149  |
| P50237        | FLEKDISEEVLNK                                          | 1.147339339        | 2              | 3.409332752 |
| P50237        | IWNFQAKPDDLLIATYAK                                     | 1.290701735        | 2              | 4.465745449 |
| P50237        | MKDLHLGEQDLQPETR                                       | 0.920718717        | 2              | 4.920691013 |
| P50237        | MLPDPGTLGEYIEQFK+Oxidation(1)                          | 1.116777466        | 2              | 3.070204496 |
| P50237        | VLWGSWYDHVK                                            | 1.486121748        | 2              | 3.183143854 |
| P50237        | MLPDPGTLGEYIEQFK                                       | 1.115726058        | 3              | 4.675834179 |
| <b>P50289</b> | <b>ASPX Acrosomal protein SP_10</b>                    | <b>0.937807102</b> | <b>0.4238</b>  | <b>2</b>    |
| P50289        | MQIMCCRNEPLCNK                                         | 0.934770703        | 2              | 2.348809719 |
| P50289        | MQIMCCRNEPLCNK+Oxidation(1)                            | 1.215694598        | 2              | 2.391864061 |
| <b>P50398</b> | <b>GDIA Rab GDP dissociation inhibitor alpha</b>       | <b>1.075478432</b> | <b>0.02457</b> | <b>7</b>    |
| P50398        | FDLGQDVIDFTGHALALYR                                    | 0.847836291        | 2              | 2.744448423 |
| P50398        | FQLLEGPPESMGR                                          | 1.037575463        | 2              | 3.684373856 |
| P50398        | KQNDVFGEADQ                                            | 0.912734004        | 2              | 3.312532663 |
| P50398        | NPYYGGESSITPLEELYK                                     | 1.327428132        | 2              | 5.890672207 |
| P50398        | QLICDPYIPDR                                            | 1.131589133        | 2              | 2.894898891 |
| P50398        | TDDYLDQPCLETINR                                        | 0.857826176        | 2              | 4.675558567 |
| P50398        | TFEGVDPQTSMR                                           | 0.96202825         | 2              | 3.223177195 |
| <b>P50399</b> | <b>GDIB Rab GDP dissociation inhibitor beta</b>        | <b>1.152394272</b> | <b>0.0611</b>  | <b>10</b>   |
| P50399        | DWNVDLIPK                                              | 1.01573452         | 2              | 2.353840351 |
| P50399        | EIRPALELLEPIEQK                                        | 1.043834513        | 2              | 3.498961687 |
| P50399        | FDLGQDVIDFTGHSLALYR                                    | 1.182132266        | 2              | 4.4165802   |
| P50399        | FVSISDLFVPK                                            | 1.155683694        | 2              | 3.510244846 |
| P50399        | MTGSEFDPEEMKR                                          | 1.13724167         | 2              | 2.732398033 |
| P50399        | NTNDANSCQIIPQNVNR                                      | 1.255503967        | 2              | 4.028598309 |
| P50399        | TDDYLDQPC CETINR                                       | 1.09419523         | 2              | 4.681679726 |
| P50399        | VICILSHPIK                                             | 1.421338112        | 2              | 2.510890722 |
| P50399        | AYDATTHFETTCDDIKDIYK                                   | 0.93638306         | 3              | 5.151251316 |
| P50399        | VLHMDQNPYYGGESASITPLEDLYK                              | 1.047140344        | 3              | 4.653731823 |
| <b>P50431</b> | <b>GLYC Serine hydroxymethyltransferase_ cytosolic</b> | <b>1.305741589</b> | <b>2.5E-07</b> | <b>8</b>    |
| P50431        | GLLEEDFQK                                              | 1.166970069        | 1              | 2.300783634 |
| P50431        | ALSDALTELYK                                            | 1.16143318         | 2              | 4.362866879 |
| P50431        | AVLEALGSLNNK                                           | 1.345240526        | 2              | 4.139972687 |
| P50431        | IMGLDLPDGGHLTHGFMTDK                                   | 1.054505439        | 2              | 2.845616102 |
| P50431        | IYQLQVLANCR                                            | 1.3123966          | 2              | 2.571626663 |
| P50431        | LIAGTSCYSR                                             | 1.690175296        | 2              | 2.363415718 |
| P50431        | VLEACSIACNK                                            | 1.288793316        | 2              | 3.999352455 |
| P50431        | YSEGYPGQR                                              | 1.099888771        | 2              | 2.441403866 |
| <b>P50475</b> | <b>SYAC Alanyl_tRNA synthetase_ cytoplasmic</b>        | <b>1.127281706</b> | <b>9.9E-20</b> | <b>14</b>   |
| P50475        | SVLGDADQK                                              | 1.53594469         | 1              | 2.282062054 |
| P50475        | ASEWVQVSGGLMDGK                                        | 1.020348272        | 2              | 4.042644024 |



|               |                                                            |                    |                |             |
|---------------|------------------------------------------------------------|--------------------|----------------|-------------|
| P50475        | AVFDEYDPDPVR                                               | 1.304407243        | 2              | 2.996023893 |
| P50475        | EIADLGEVLATAVIPQWQK                                        | 0.872462807        | 2              | 3.148565769 |
| P50475        | GLEATDDSPK                                                 | 1.248523823        | 2              | 2.671415091 |
| P50475        | ITCLCQVPQNAANR                                             | 1.363479423        | 2              | 4.130670547 |
| P50475        | IVAVTGAEAQK                                                | 1.347673152        | 2              | 2.45564723  |
| P50475        | MSNYDTDLFVPYFEAIQK                                         | 0.834345007        | 2              | 3.443878174 |
| P50475        | NSSHAGAFVIVTEEAIK                                          | 1.128594818        | 2              | 3.782939434 |
| P50475        | QIWQNLGLDEAK                                               | 1.080759602        | 2              | 2.825498581 |
| P50475        | RIVAVTGAEAQK                                               | 1.120294986        | 2              | 3.122610331 |
| P50475        | TITVALADGGRPDNTGR                                          | 1.2063144          | 2              | 2.760581493 |
| P50475        | VDDSSSEDKTEFTVK                                            | 1.284022698        | 2              | 4.013429165 |
| P50475        | VGAEDTDGIDMAYR                                             | 1.115166042        | 2              | 3.332469702 |
| <b>P50503</b> | <b>F10A1 Hsc70_interacting protein</b>                     | <b>1.305256009</b> | <b>9.9E-20</b> | <b>5</b>    |
| P50503        | AIDLFTDAIK                                                 | 1.210756403        | 2              | 2.533326149 |
| P50503        | AIEINPDSAQPYK                                              | 1.090080805        | 2              | 2.804926157 |
| P50503        | GAAIDALNDGELQK                                             | 1.252973632        | 2              | 3.311888218 |
| P50503        | KGAAIDALNDGELQK                                            | 1.568694049        | 2              | 4.767714977 |
| P50503        | LDYDEDASAMLR                                               | 1.070894691        | 2              | 3.282337666 |
| <b>P50554</b> | <b>GABT 4_aminobutyrate aminotransferase_mitochondrial</b> | <b>1.015780272</b> | <b>0.40983</b> | <b>10</b>   |
| P50554        | GTFCSFDPDEAIR                                              | 1.257895513        | 2              | 3.183335304 |
| P50554        | IDIPFDWPIAPFPR                                             | 1.221477598        | 2              | 3.651266813 |
| P50554        | IFNTWLGDPK                                                 | 1.125817411        | 2              | 2.336909056 |
| P50554        | TLLTGLLDLQAQYPQFVSR                                        | 1.191639239        | 2              | 4.235865593 |
| P50554        | TVAGIIVEPIQSEGGDNHASDDFFR                                  | 1.252213026        | 2              | 4.270765305 |
| P50554        | VDFEFDYDGPLMK                                              | 0.745614122        | 2              | 3.722331047 |
| P50554        | LVQQPQNASTFINRPALGILPPENFVVK                               | 1.240555646        | 3              | 4.99710083  |
| P50554        | MLDLYSQISSVPIGYNHPALAK                                     | 0.831513662        | 3              | 3.481969118 |
| P50554        | NLLLAEVINIIK                                               | 0.838476558        | 3              | 5.310154438 |
| P50554        | REDLLNVAHAGK                                               | 0.981722902        | 3              | 3.761541843 |
| <b>P50580</b> | <b>PA2G4 Proliferation_associated protein 2G4</b>          | <b>1.030900704</b> | <b>0.47582</b> | <b>2</b>    |
| P50580        | HELLQPFNVLYEK                                              | 1.302817066        | 2              | 2.409907341 |
| P50580        | TIIQNPTDQQK                                                | 1.0241189          | 2              | 2.757921219 |
| <b>P50878</b> | <b>RL4 60S ribosomal protein L4</b>                        | <b>1.108699904</b> | <b>0.0001</b>  | <b>10</b>   |
| P50878        | NIPGITLLNVSK                                               | 1.150413617        | 1              | 2.375369072 |
| P50878        | NVTLPVAFK                                                  | 0.849361989        | 1              | 2.225018501 |
| P50878        | FCIWTESAFR                                                 | 1.266072789        | 2              | 2.453387737 |
| P50878        | KLDELYGTWR                                                 | 1.106351801        | 2              | 3.094302893 |
| P50878        | LEAAAAALAAK                                                | 1.305527508        | 2              | 2.34503293  |
| P50878        | RGPCIIYNEDNGIIK                                            | 1.388264882        | 2              | 2.956162214 |
| P50878        | SGQGAFGNMCR                                                | 1.101583097        | 2              | 2.776360512 |
| P50878        | SNYNLPMHK                                                  | 1.058615996        | 2              | 2.418854237 |
| P50878        | YAICALAASALPALVMSK                                         | 1.223304677        | 2              | 3.681823254 |

|               |                                                                |                    |                |             |
|---------------|----------------------------------------------------------------|--------------------|----------------|-------------|
| P50878        | KLEAAAAALAAK                                                   | 1.264742441        | 3              | 3.786335945 |
| <b>P50904</b> | <b>RASA1 Ras GTPase_activating protein 1</b>                   | <b>0.922142801</b> | <b>0.71645</b> | <b>3</b>    |
| P50904        | LESLLLCTLNDR                                                   | 1.218377896        | 1              | 1.902323246 |
| P50904        | IMESKQSCELSPSK+Oxidation(2)                                    | 0.69991909         | 2              | 2.501337767 |
| P50904        | YNSIGDIIDHYRK                                                  | 1.020769842        | 2              | 2.429328918 |
| <b>P51538</b> | <b>CP3A9 Cytochrome P450 3A9</b>                               | <b>1.213116187</b> | <b>0.92994</b> | <b>2</b>    |
| P51538        | GFWEFDKYCHK                                                    | 0.999859849        | 1              | 2.230127811 |
| P51538        | EMFPIINQYTDMLVR                                                | 1.14433249         | 2              | 2.530366898 |
| <b>P51635</b> | <b>AK1A1 Alcohol dehydrogenase [NADP_]</b>                     | <b>1.087024277</b> | <b>5.5E-08</b> | <b>8</b>    |
| P51635        | QLDALNK                                                        | 1.215271098        | 1              | 1.989902377 |
| P51635        | ALEALVAK                                                       | 1.130795826        | 2              | 2.85836792  |
| P51635        | GLEVTAYSPLGSSDR                                                | 1.086004474        | 2              | 4.150090218 |
| P51635        | HIDCASVYGNETEIGEALK                                            | 1.158800444        | 2              | 5.872045994 |
| P51635        | ILQNIQVDFTFSPPEMK                                              | 3.837295645        | 2              | 4.523253918 |
| P51635        | HHPEDVEPAVR                                                    | 1.194045623        | 3              | 3.763026476 |
| P51635        | HIDCASVYGNETEIGEALKESVGAGK                                     | 0.957442178        | 3              | 6.803411961 |
| P51635        | HPDEPVLLLEEPVVLALAEK                                           | 1.679487218        | 3              | 5.668543816 |
| <b>P51647</b> | <b>AL1A1 Retinal dehydrogenase 1</b>                           | <b>1.015758815</b> | <b>2.8E-08</b> | <b>17</b>   |
| P51647        | YCAGWADK                                                       | 1.360863441        | 1              | 2.248506308 |
| P51647        | ANNTTYGLAAGVFTK                                                | 1.107059032        | 2              | 4.531414032 |
| P51647        | ELGEHGLYEYTELK                                                 | 1.093528065        | 2              | 3.456165552 |
| P51647        | IFINNEWHDSVSGK                                                 | 1.949878381        | 2              | 4.598176479 |
| P51647        | IFVEESVYDEFVR                                                  | 1.243419823        | 2              | 4.496495724 |
| P51647        | IHGQTIPSDGDIPTFR                                               | 2.064500102        | 2              | 4.356768608 |
| P51647        | LLLATIEAINGGK                                                  | 13.1930495         | 2              | 4.730998516 |
| P51647        | VFANAYLSDLGGSIK                                                | 1.796666045        | 2              | 4.644490242 |
| P51647        | YVLGNPLTQGINQGPPQIDK                                           | 1.462105766        | 2              | 5.060204029 |
| P51647        | YVLGNPLTQGINQGPPQIDKEQHDK                                      | 1.164313407        | 2              | 3.766478539 |
| P51647        | EAGFPPGVVNVIPGYPTAGAAISSHMDVVK                                 | 1.222356005        | 3              | 3.56138134  |
| P51647        | FPVLNPATEEVICHVEEGDK                                           | 0.577250237        | 3              | 3.749338865 |
| P51647        | IGPALSCGNTVVVKAPEQTPLTALHMASLIK                                | 1.744710445        | 3              | 4.749162197 |
| P51647        | KFPVLNPATEEVICHVEEGDK                                          | 1.141947159        | 3              | 3.368245363 |
| P51647        | KYVLGNPLTQGINQGPPQIDKEQHDK                                     | 1.418315959        | 3              | 3.838535547 |
| P51647        | FPVLNPATEEVICHVEEGDKADVVK                                      | 1.025139568        | 4              | 5.193379879 |
| P51647        | KFPVLNPATEEVICHVEEGDKADVVK                                     | 1.305196666        | 4              | 4.826226711 |
| <b>P51650</b> | <b>SSDH Succinate_semialdehyde dehydrogenase_mitochondrial</b> | <b>0.912589777</b> | <b>0.99978</b> | <b>9</b>    |
| P51650        | EVGEVLCTDPLVSK                                                 | 0.744769514        | 2              | 4.143151283 |
| P51650        | GIHDSFVTK                                                      | 1.059991698        | 2              | 2.301894903 |
| P51650        | HQSGGNFFPTLLSNVTR                                              | 0.965526604        | 2              | 3.936876297 |
| P51650        | IITAESGKPLK                                                    | 1.040099993        | 2              | 2.618567944 |
| P51650        | ILLHHAANSVK                                                    | 1.521466038        | 2              | 2.428305626 |
| P51650        | LGTVADCGVPEAR                                                  | 1.118315713        | 2              | 3.269433022 |

|               |                                                                                  |                    |                |             |
|---------------|----------------------------------------------------------------------------------|--------------------|----------------|-------------|
| P51650        | VGNGFEETTQGPLINEK                                                                | 0.860754438        | 2              | 4.881690025 |
| P51650        | WLPTPATFPVYDPASGAK                                                               | 0.869501857        | 2              | 3.038829803 |
| P51650        | YGIDEYLEVK                                                                       | 0.999817121        | 2              | 2.5931952   |
| <b>P51863</b> | <b>VA0D1 V_type proton ATPase subunit d 1</b>                                    | <b>1.16029934</b>  | <b>0.4266</b>  | <b>3</b>    |
| P51863        | LYPEGLAQLAR                                                                      | 1.134452871        | 1              | 1.901862025 |
| P51863        | ADDYEQVK                                                                         | 1.177513893        | 2              | 2.385859728 |
| P51863        | LHLQSTDYGNFLANEASPLTVSVIDDK                                                      | 1.445113158        | 3              | 3.606918335 |
| <b>P51869</b> | <b>CP4F4 Cytochrome P450 4F4</b>                                                 | <b>1.736326429</b> | <b>0.00257</b> | <b>4</b>    |
| P51869        | ALPSQHEDDILK                                                                     | 1.050068256        | 2              | 2.878508806 |
| P51869        | NISLMTLDSLQK                                                                     | 1.053459762        | 2              | 3.6509552   |
| P51869        | TLDFIDVLLLTk                                                                     | 1.890187196        | 2              | 3.800179243 |
| P51869        | WQDLASGGGAR                                                                      | 1.000385906        | 2              | 2.497128248 |
| <b>P51886</b> | <b>LUM Lumican</b>                                                               | <b>0.953407361</b> | <b>0.99861</b> | <b>4</b>    |
| P51886        | LDGNPLTQSSLPPDMECLR                                                              | 0.881188583        | 2              | 2.644064188 |
| P51886        | NNQIDHIDEK                                                                       | 0.938238465        | 2              | 3.330487728 |
| P51886        | SIPTVNENLENYYLEVnk                                                               | 0.960875131        | 2              | 4.131548405 |
| P51886        | SLQDLQLANNK                                                                      | 1.11211847         | 2              | 2.963608503 |
| <b>P52296</b> | <b>IMB1 Importin subunit beta_1</b>                                              | <b>1.233639607</b> | <b>0.01389</b> | <b>4</b>    |
| P52296        | AAVENLPTFLVELSR                                                                  | 1.262981754        | 2              | 3.26080966  |
| P52296        | TVSPDRLELEAAQK                                                                   | 1.240151616        | 2              | 3.324921846 |
| P52296        | VLANPGNSQVAR                                                                     | 1.164345223        | 2              | 3.516394854 |
| P52296        | VQHQDALQISDVVMASLLR                                                              | 1.060846603        | 2              | 2.473317385 |
| <b>P52303</b> | <b>AP1B1 AP_1 complex subunit beta_1</b>                                         | <b>0.869072505</b> | <b>0.63041</b> | <b>2</b>    |
| P52303        | NINLIVQK                                                                         | 0.854208119        | 1              | 2.026650667 |
| P52303        | NSFGLAAPLQVHAPLSPNQTVESLPLNTVGSVMK                                               | 1.037623888        | 3              | 4.775326252 |
| <b>P52504</b> | <b>NDUS6 NADH dehydrogenase [ubiquinone] iron_sulfur protein 6_mitochondrial</b> | <b>1.305758876</b> | <b>9.8E-14</b> | <b>2</b>    |
| P52504        | IIACDGGGGALGHPK                                                                  | 1.165241841        | 2              | 3.521810055 |
| P52504        | VYINLDKETK                                                                       | 1.51913804         | 2              | 2.98061204  |
| <b>P52555</b> | <b>ERP29 Endoplasmic reticulum resident protein 29</b>                           | <b>1.136451172</b> | <b>0.89725</b> | <b>5</b>    |
| P52555        | FDTQYPYGEK                                                                       | 1.18692745         | 2              | 2.545891523 |
| P52555        | ILDQGEDFPASELAR                                                                  | 1.190250793        | 2              | 4.638560295 |
| P52555        | QQQDGLSGVK                                                                       | 0.948369152        | 2              | 2.661386013 |
| P52555        | SLNLTAFR                                                                         | 1.285073186        | 2              | 2.529396057 |
| P52555        | GQGVYLGMPGCLPAYDALAGQFIEASSR                                                     | 1.235077794        | 3              | 4.141711712 |
| <b>P52631</b> | <b>STAT3 Signal transducer and activator of transcription 3</b>                  | <b>1.018641562</b> | <b>0.69845</b> | <b>2</b>    |
| <b>P52759</b> | <b>UK114 Ribonuclease UK114</b>                                                  | <b>1.038458906</b> | <b>0.91827</b> | <b>6</b>    |
| P52759        | IEIEAIVQGPFTTAGL                                                                 | 1.055668791        | 1              | 3.552279949 |
| P52759        | AAGCDFTNVVK                                                                      | 2.354883794        | 2              | 3.342602968 |
| P52759        | AAVQVAALPK                                                                       | 1.15448498         | 2              | 2.465381145 |
| P52759        | TIYVSGQIGMDPSSGQLVPGGVAEEAK                                                      | 0.807576745        | 2              | 4.433669567 |
| P52759        | TTVLLADINDFGTVNEIYK                                                              | 1.020647397        | 2              | 5.159482002 |
| P52759        | TYFQGNLPAR                                                                       | 0.993675649        | 2              | 2.594797611 |

|               |                                                            |                    |                |             |
|---------------|------------------------------------------------------------|--------------------|----------------|-------------|
| <b>P52845</b> | <b>ST1E2 Estrogen sulfotransferase_ isoform 2</b>          | <b>1.129057356</b> | <b>0.06182</b> | <b>2</b>    |
| P52845        | CKEDAIFNR                                                  | 1.062675692        | 2              | 2.375930786 |
| P52845        | SGSTWIGEIVDMIYK                                            | 1.306602794        | 2              | 2.932119846 |
| <b>P52847</b> | <b>ST1B1 Sulfotransferase family cytosolic 1B member 1</b> | <b>1.192597304</b> | <b>9.9E-20</b> | <b>8</b>    |
| P52847        | NYFTMTQSEK                                                 | 1.076850605        | 1              | 2.768094063 |
| P52847        | DNPLVNYTHLPTEIMDSK                                         | 1.213083252        | 2              | 4.060273647 |
| P52847        | FLAGNVAYGSWFDHVK                                           | 0.687956211        | 2              | 3.63775897  |
| P52847        | IVHHTSFVEMK                                                | 1.684515956        | 2              | 2.872457743 |
| P52847        | SGVELLKK                                                   | 1.438291968        | 2              | 2.362816572 |
| P52847        | TLDEHTLER                                                  | 1.20353762         | 2              | 2.863834143 |
| P52847        | IEEFQSRPCDIVIPTYK                                          | 1.251921707        | 3              | 4.521101475 |
| P52847        | THLPIDLLPK                                                 | 1.145535522        | 3              | 3.624888659 |
| <b>P52873</b> | <b>PYC Pyruvate carboxylase_ mitochondrial</b>             | <b>0.962615193</b> | <b>1.7E-07</b> | <b>38</b>   |
| P52873        | ADEAYLIGR                                                  | 0.996560253        | 1              | 2.10107708  |
| P52873        | DAHQSLATR                                                  | 0.718453996        | 1              | 3.271965027 |
| P52873        | FLYECPCR                                                   | 0.998821172        | 1              | 2.140245676 |
| P52873        | ADFAQACQDAGVR                                              | 1.041542404        | 2              | 4.643203735 |
| P52873        | AEAEQAEELESFPR                                             | 0.978367818        | 2              | 4.691789627 |
| P52873        | AGTHILCIK                                                  | 1.451138655        | 2              | 2.84563899  |
| P52873        | ALAVSDLNR                                                  | 1.091287569        | 2              | 2.754179001 |
| P52873        | AYSEALAAFNGALFVEK                                          | 1.162150339        | 2              | 3.714300632 |
| P52873        | AYVEANQMLGDLIK                                             | 0.791154377        | 2              | 4.687201977 |
| P52873        | DFTATFGPLDSLNR                                             | 0.606987103        | 2              | 3.752676964 |
| P52873        | DMAGLLKPAACTMLVSSLR                                        | 0.937470921        | 2              | 3.689877033 |
| P52873        | ENGVDAVHPGYGFLSER                                          | 0.870272405        | 2              | 3.155660152 |
| P52873        | FIGPSPEVVR                                                 | 1.114632126        | 2              | 2.322738886 |
| P52873        | GANAVGYTNPDNVVK                                            | 1.531914446        | 2              | 4.463457108 |
| P52873        | GLAPVQAYLHIPDIK                                            | 1.396515037        | 2              | 3.157716036 |
| P52873        | GQIGAPMPGK                                                 | 0.888280434        | 2              | 2.433309078 |
| P52873        | GTPLDTEVPLER                                               | 1.044675622        | 2              | 3.714527607 |
| P52873        | HGEEVTPEDVLSAAMPDVFAQFK                                    | 1.372860235        | 2              | 5.680670261 |
| P52873        | HYFIEVNSR                                                  | 1.286507455        | 2              | 2.488399744 |
| P52873        | IAEEFEVELER                                                | 0.890778674        | 2              | 3.192231178 |
| P52873        | IEGRPGASLPLNLK                                             | 1.023867972        | 2              | 3.535955429 |
| P52873        | INGCAIQCR                                                  | 1.500998629        | 2              | 2.957741499 |
| P52873        | IVGDLAQFMVQNGLSR                                           | 1.195555252        | 2              | 2.880027533 |
| P52873        | LDNASAFQGAVISPHYDSSLVK                                     | 1.030464643        | 2              | 5.776531219 |
| P52873        | NHQGLLLMDTTFR                                              | 0.926272659        | 2              | 2.906809568 |
| P52873        | QKADEAYLIGR                                                | 1.117796451        | 2              | 2.343159914 |
| P52873        | QVFFELNGQLR                                                | 0.956556255        | 2              | 3.047743082 |
| P52873        | QVGYENAGTVEFLVDK                                           | 0.991378909        | 2              | 3.914651394 |
| P52873        | SGEGMGIR                                                   | 0.948498664        | 2              | 2.614797592 |
| P52873        | SVVEFLQGYIGIPHGPFEPFR                                      | 1.261482227        | 2              | 4.566065788 |

|               |                                                                                                                       |                    |                |             |
|---------------|-----------------------------------------------------------------------------------------------------------------------|--------------------|----------------|-------------|
| P52873        | TVAVYSEQDTGQMHR                                                                                                       | 1.07238027         | 2              | 4.563057899 |
| P52873        | VFDYSEYWEGAR                                                                                                          | 1.081712436        | 2              | 4.310987949 |
| P52873        | VSPSPVDPIVPVPIGPPAGFR                                                                                                 | 1.106889327        | 2              | 4.313866138 |
| P52873        | VVEIAPATHLDPQLR                                                                                                       | 1.158402887        | 2              | 4.472713947 |
| P52873        | VVHSYEELEENYTR                                                                                                        | 1.136063207        | 2              | 5.249162197 |
| P52873        | HIEVQILGDQYGNILHLIER                                                                                                  | 1.277241778        | 3              | 6.67320776  |
| P52873        | YSLEYMGLAEELVR                                                                                                        | 1.108223147        | 3              | 4.917481422 |
| P52873        | LQVEHTVTEEITDVLVHAQIHVSEGR                                                                                            | 0.946418478        | 4              | 6.3476367   |
| <b>P52925</b> | <b>HMGB2 High mobility group protein B2</b>                                                                           | <b>1.203740545</b> | <b>0.42552</b> | <b>2</b>    |
| P52925        | KHPDSSVNFAEFSK                                                                                                        | 1.081242168        | 2              | 2.84177947  |
| P52925        | SEHPGLSIGDTAK                                                                                                         | 1.244882255        | 2              | 3.07004261  |
| <b>P53395</b> | <b>ODB2 Lipoamide acyltransferase component of branched_chain alpha_keto acid dehydrogenase complex_mitochondrial</b> | <b>1.342787539</b> | <b>0.17034</b> | <b>4</b>    |
| P53395        | LSEVVGSGK                                                                                                             | 1.131453449        | 1              | 1.929826975 |
| P53395        | LREELKPVALAR                                                                                                          | 1.345852025        | 2              | 2.685581446 |
| P53395        | LSDIGEGIR                                                                                                             | 0.965169278        | 2              | 2.473059177 |
| P53395        | SYLENPAFMLLDLK                                                                                                        | 1.824407607        | 2              | 4.334559441 |
| <b>P53987</b> | <b>MOT1 Monocarboxylate transporter 1</b>                                                                             | <b>1.066429755</b> | <b>0.00261</b> | <b>4</b>    |
| P53987        | DGKEDETSTDVDEKPK                                                                                                      | 1.412284213        | 2              | 5.042818069 |
| P53987        | ETQSPAPLQNSSGDPAAEESPV                                                                                                | 1.138871131        | 2              | 5.292596817 |
| P53987        | SDANTDLIGGSPK                                                                                                         | 1.02479536         | 2              | 3.90022707  |
| P53987        | DGKEDETSTDVDEKPKK                                                                                                     | 1.577706325        | 3              | 4.942588329 |
| <b>P54313</b> | <b>GBB2 Guanine nucleotide_binding protein G(I)/G(S)/G(T) subunit beta_2</b>                                          | <b>1.016841573</b> | <b>0.39066</b> | <b>2</b>    |
| P54313        | ACGDSTLTQITAGLDPVGR                                                                                                   | 1.077633265        | 2              | 4.456865311 |
| P54313        | TFVSGACDASIK                                                                                                          | 0.937812774        | 2              | 3.037605762 |
| <b>P54319</b> | <b>PLAP Phospholipase A_2_activating protein</b>                                                                      | <b>1.072867394</b> | <b>0.99302</b> | <b>3</b>    |
| P54319        | IGDVVGSSGANQQTSGK                                                                                                     | 1.036010574        | 2              | 4.497104645 |
| P54319        | TGDLGDINAEQLPGR                                                                                                       | 1.09013104         | 2              | 3.354496002 |
| P54319        | YVPGTSGPSNTVQTADPFTGAGR                                                                                               | 1.048746566        | 2              | 3.92414403  |
| <b>P54822</b> | <b>PUR8 Adenylosuccinate lyase</b>                                                                                    | <b>0.984078564</b> | <b>0.91199</b> | <b>2</b>    |
| P54822        | VLSQQAADVVK                                                                                                           | 1.154644483        | 2              | 2.838360786 |
| P54822        | KVDIEVLSVLASLGASVHK                                                                                                   | 0.965560664        | 3              | 3.857550621 |
| <b>P54921</b> | <b>SNAA Alpha_soluble NSF attachment protein</b>                                                                      | <b>1.087740542</b> | <b>0.62723</b> | <b>5</b>    |
| P54921        | AIDIYEQVGTSAMDSPLLK                                                                                                   | 0.970320379        | 2              | 4.51538229  |
| P54921        | HDAATCFVDAGNAFK                                                                                                       | 1.412167442        | 2              | 2.994300127 |
| P54921        | IEEACEIYAR                                                                                                            | 0.743287341        | 2              | 2.463450193 |
| P54921        | NSQSFFSGLFGGSSK                                                                                                       | 1.024672864        | 2              | 3.1457901   |
| P54921        | TIQGDEEDLR                                                                                                            | 1.147258511        | 2              | 2.407578468 |
| <b>P55006</b> | <b>RDH7 Retinol dehydrogenase 7</b>                                                                                   | <b>1.149043153</b> | <b>0.00226</b> | <b>11</b>   |
| P55006        | LETVILDVTK                                                                                                            | 0.919728693        | 2              | 3.662212133 |
| P55006        | TESIVAATQWVK                                                                                                          | 1.038812534        | 2              | 3.97608614  |
| P55006        | TNVTNMER                                                                                                              | 1.053980629        | 2              | 2.762046576 |

|               |                                                           |                    |                |             |
|---------------|-----------------------------------------------------------|--------------------|----------------|-------------|
| P55006        | TNVTNMER+Oxidation(6)                                     | 1.455403284        | 2              | 2.503949642 |
| P55006        | VAIIPEGGFK                                                | 1.48522194         | 2              | 2.301734447 |
| P55006        | VLAACLETK                                                 | 1.217697915        | 2              | 3.140192509 |
| P55006        | VVNIASTMGR                                                | 1.188067348        | 2              | 3.489846945 |
| P55006        | VVNIASTMGR+Oxidation(8)                                   | 1.154406085        | 2              | 2.73594594  |
| P55006        | YGVEAFSDSLR                                               | 1.208711396        | 2              | 3.756338835 |
| P55006        | YVFITGCDSGFGNLLAR                                         | 1.094914105        | 2              | 4.420186043 |
| P55006        | TSDRLETVILDVTK                                            | 1.036295528        | 3              | 4.585410595 |
| <b>P55007</b> | <b>BART1 Protein BART_1</b>                               | <b>1.362964165</b> | <b>0.44519</b> | <b>2</b>    |
| P55007        | MILMYEKNKNTNTR+Oxidation(1)                               | 1.078224827        | 2              | 2.363380432 |
| P55007        | YNSDEDLQSKLESSR                                           | 1.365215322        | 2              | 2.54420352  |
| <b>P55051</b> | <b>FABP7 Fatty acid_binding protein_brain</b>             | <b>1.298630326</b> | <b>0.14241</b> | <b>3</b>    |
| P55051        | LTDSQNFDEYMK                                              | 1.309961182        | 2              | 3.92359519  |
| P55051        | QVGNVTKPTVIISQEGGK                                        | 1.400676721        | 2              | 3.4454844   |
| P55051        | WDGKETNCVR                                                | 1.580397902        | 2              | 2.560559988 |
| <b>P55053</b> | <b>FABP5 Fatty acid_binding protein_epidermal</b>         | <b>1.239199318</b> | <b>0.17208</b> | <b>6</b>    |
| P55053        | FDETTADGR                                                 | 1.166394148        | 2              | 2.589968204 |
| P55053        | LVESHGFEDYMK                                              | 1.455291473        | 2              | 3.358900309 |
| P55053        | MVVECMNNAICTR                                             | 1.192822245        | 2              | 3.365865231 |
| P55053        | TETVCTFTDGALVQHQQ                                         | 1.24852506         | 2              | 4.533274651 |
| P55053        | KTETVCTFTDGALVQHQQ                                        | 1.380409253        | 3              | 5.675509453 |
| P55053        | MGAMAKPDCIITLDGNNLTVK                                     | 1.248448592        | 3              | 3.665053368 |
| <b>P55159</b> | <b>PON1 Serum paraoxonase/arylesterase 1</b>              | <b>0.996896131</b> | <b>0.89869</b> | <b>7</b>    |
| P55159        | GIEAGAEDLEILPGLTFFSTGLK                                   | 1.0983617          | 2              | 3.72413826  |
| P55159        | IFFYDSENPPGSEVLR                                          | 1.1545398          | 2              | 5.995079517 |
| P55159        | IQSILSEDPK                                                | 1.161180597        | 2              | 3.134261608 |
| P55159        | VVADGDFDFANGIGISLDGK                                      | 0.952162231        | 2              | 4.81074667  |
| P55159        | YVYIAELLAHK                                               | 1.268841858        | 2              | 2.966114759 |
| P55159        | TITHELLPSINDIAAVGPESFYATNDHYFADPYLR                       | 0.716500061        | 3              | 4.455825329 |
| P55159        | VLSFDTLVDNISVDPVTGDLWVGCHPNGMR                            | 1.063243044        | 3              | 6.174095154 |
| <b>P55260</b> | <b>ANXA4 Annexin A4</b>                                   | <b>0.979025109</b> | <b>1</b>       | <b>3</b>    |
| P55260        | AEIDMLDIPANFK                                             | 1.031676851        | 1              | 2.318104267 |
| P55260        | GAGTDEGLIEILASR                                           | 1.119214052        | 2              | 3.73858285  |
| P55260        | GLGTDEDAIIGVLACR                                          | 0.944647351        | 2              | 3.908058882 |
| <b>P55770</b> | <b>NH2L1 NHP2_like protein 1</b>                          | <b>1.145588384</b> | <b>0.47124</b> | <b>2</b>    |
| P55770        | LLDLVQQSCNYK                                              | 1.186060493        | 2              | 3.802531242 |
| P55770        | QQIQSIQSIER                                               | 1.091236893        | 2              | 2.895318508 |
| <b>P56399</b> | <b>UBP5 Ubiquitin carboxyl_terminal hydrolase 5</b>       | <b>1.126000509</b> | <b>0.00449</b> | <b>3</b>    |
| P56399        | GTGLQPGEELPDIAPPLVTPDEPK                                  | 1.109721106        | 2              | 4.331850529 |
| P56399        | IFQNAPTDPTQDFSTQVAK                                       | 1.461893768        | 2              | 4.504079342 |
| P56399        | IGEWELIQESGVPLKPLFGPGYTGIR                                | 0.918985024        | 3              | 4.418961048 |
| <b>P56522</b> | <b>ADRO NADPH:adenodoxin oxidoreductase_mitochondrial</b> | <b>1.159912654</b> | <b>0.23724</b> | <b>4</b>    |

|               |                                                            |                    |                |             |
|---------------|------------------------------------------------------------|--------------------|----------------|-------------|
| P56522        | AVPTGDVEDLPCGLLLSSVGYK                                     | 3.295354022        | 2              | 2.934486389 |
| P56522        | NVINTFTQTAR                                                | 1.664402749        | 2              | 2.850655556 |
| P56522        | TATEKPGVEEAAR                                              | 0.981678932        | 2              | 3.077511311 |
| P56522        | TDITEVALGVLR                                               | 0.889744419        | 2              | 3.435468197 |
| <b>P56574</b> | <b>IDHP Isocitrate dehydrogenase [NADP]_ mitochondrial</b> | <b>1.115626501</b> | <b>0.05154</b> | <b>13</b>   |
| P56574        | ATDFVDR                                                    | 1.130319508        | 2              | 2.391165257 |
| P56574        | DLAGCIHGLSNVK                                              | 1.042181572        | 2              | 3.736787796 |
| P56574        | DQTNDQVTIDSALATQK                                          | 0.65653866         | 2              | 3.919327259 |
| P56574        | FKDIFQEIFDK                                                | 1.072953387        | 2              | 3.514017582 |
| P56574        | GKLDGNQDLIR                                                | 1.253782362        | 2              | 3.351620436 |
| P56574        | LDGNQDLIR                                                  | 1.144967972        | 2              | 2.449467182 |
| P56574        | LIDDMVAQVLK                                                | 1.183609006        | 2              | 4.125781059 |
| P56574        | LNEHFLNTTDFLDTIK                                           | 1.441944691        | 2              | 4.427992344 |
| P56574        | NILGGTVFR                                                  | 1.087136841        | 2              | 2.705949306 |
| P56574        | SSGGFVWACK                                                 | 1.264013927        | 2              | 2.857958555 |
| P56574        | TIEAEEAAHGTVTR                                             | 1.032627193        | 2              | 3.87384963  |
| P56574        | VCVQTVESGAMTK                                              | 1.312723462        | 2              | 3.692461014 |
| P56574        | IKVEKPVVEMDGDDEMTR                                         | 1.573767798        | 3              | 3.418231487 |
| <b>P56593</b> | <b>CP2AC Cytochrome P450 2A12</b>                          | <b>0.928424883</b> | <b>0.99905</b> | <b>3</b>    |
| P56593        | MLQGTGAPIDPTIYLSK                                          | 0.867515309        | 2              | 4.733406544 |
| P56593        | NRQPQYEDHMK                                                | 1.045312652        | 3              | 3.458683491 |
| P56593        | NRQPQYEDHMK+Oxidation(10)                                  | 1.141187833        | 3              | 3.418986559 |
| <b>P56656</b> | <b>CP239 Cytochrome P450 2C39</b>                          | <b>1.085449961</b> | <b>0.99699</b> | <b>5</b>    |
| P56656        | NYLIPK                                                     | 0.861634255        | 1              | 2.044853449 |
| P56656        | EHQESLDVTNPR                                               | 0.895796508        | 2              | 3.698302984 |
| P56656        | IKEHQESLDVTNPR                                             | 1.126208613        | 2              | 5.02221632  |
| P56656        | VCAGEGLAR                                                  | 1.063993063        | 2              | 2.361390352 |
| P56656        | VQEEIDHVIGR                                                | 1.017749338        | 2              | 3.433795691 |
| <b>P56812</b> | <b>PDCD5 Programmed cell death protein 5</b>               | <b>1.137784527</b> | <b>0.05351</b> | <b>3</b>    |
| P56812        | HGDPGDAAQQAQK                                              | 1.18829724         | 2              | 4.202708244 |
| P56812        | NSILAQVLDQSAR                                              | 1.068429454        | 2              | 3.112371445 |
| P56812        | VSEQLIEILEK                                                | 0.88943325         | 2              | 3.075420856 |
| <b>P57093</b> | <b>PAHX Phytanoyl-CoA dioxygenase_ peroxisomal</b>         | <b>0.858019078</b> | <b>0.19268</b> | <b>7</b>    |
| P57093        | NLVSDDDIQR                                                 | 0.818887579        | 1              | 2.529603958 |
| P57093        | YCALPQIVK                                                  | 0.990046115        | 1              | 2.069173098 |
| P57093        | AISCHYGSSDCK                                               | 0.729747209        | 2              | 3.477989674 |
| P57093        | EVKPPGMTVMKDVAIAKQGYAPSER                                  | 1.034765539        | 2              | 2.377455711 |
| P57093        | IQDFQQNEELFR                                               | 1.292774269        | 2              | 3.234589338 |
| P57093        | KFYEENGFLVIK                                               | 0.980423426        | 2              | 3.151189089 |
| P57093        | NNGCLVVLPGTHK                                              | 0.852052659        | 2              | 2.417842865 |
| <b>P57113</b> | <b>MAAI Maleylacetoacetate isomerase</b>                   | <b>1.225429535</b> | <b>9.9E-20</b> | <b>11</b>   |
| P57113        | AITSGFNALEK                                                | 1.18385461         | 2              | 2.859687567 |

|               |                                                               |                    |                |             |
|---------------|---------------------------------------------------------------|--------------------|----------------|-------------|
| P57113        | ALLALEAFQVSHPCR                                               | 1.312026124        | 2              | 4.332039356 |
| P57113        | DGGQQFSEEFQTLNPMK                                             | 0.870847274        | 2              | 5.029709816 |
| P57113        | FKVDLSPYPTISHINK                                              | 1.203567135        | 2              | 4.823620319 |
| P57113        | GIDYEIVPINLIK                                                 | 1.021440448        | 2              | 4.109237194 |
| P57113        | MISDLIASGIQLQNLSVLK                                           | 1.411389738        | 2              | 5.598331451 |
| P57113        | MISDLIASGIQLQNLSVLK+Oxidation(1)                              | 1.342756704        | 2              | 5.422665119 |
| P57113        | QVGQENQMPWAQK                                                 | 1.023019521        | 2              | 3.942327976 |
| P57113        | VDLSPYPTISHINK                                                | 1.123701322        | 2              | 3.746309996 |
| P57113        | YCVGDEVSMADVCLAPQVANAER                                       | 0.98296277         | 3              | 5.941504955 |
| P57113        | IDGITIGQSLAILEYLEETRPIPR                                      | 1.071260063        | 4              | 4.879099846 |
| <b>P57722</b> | <b>PCBP3 Poly(rC)_binding protein 3</b>                       | <b>0.949489204</b> | <b>0.99842</b> | <b>2</b>    |
| P57722        | ESTGAQVQVAGDMLPNSTER                                          | 0.931672244        | 2              | 5.430318832 |
| P57722        | INISEGNCPER                                                   | 1.111127007        | 2              | 3.442995787 |
| <b>P58321</b> | <b>UCHL4 Ubiquitin carboxyl_terminal hydrolase isozyme L4</b> | <b>1.043688419</b> | <b>0.81652</b> | <b>2</b>    |
| P58321        | WLPLEANPEVTNQFLK                                              | 1.147307065        | 2              | 4.061931133 |
| P58321        | VTHETSAHEGQTEAPSIDEK                                          | 1.015981751        | 3              | 5.063393116 |
| <b>P58751</b> | <b>RELN Reelin</b>                                            | <b>1.143968341</b> | <b>0.96282</b> | <b>2</b>    |
| <b>P58775</b> | <b>TPM2 Tropomyosin beta chain</b>                            | <b>0.677555747</b> | <b>0.02727</b> | <b>11</b>   |
| P58775        | AISEELDNALNDITSL                                              | 0.588563232        | 2              | 3.54075098  |
| P58775        | ATDAEADVASLNR                                                 | 0.424194848        | 2              | 3.656267643 |
| P58775        | DAQEKLEQAEK                                                   | 0.696415805        | 2              | 2.849157095 |
| P58775        | KATDAEADVASLNR                                                | 0.566816493        | 2              | 3.375598192 |
| P58775        | LDKENAIDR                                                     | 0.84612377         | 2              | 2.389130354 |
| P58775        | LKGTEDEVEK                                                    | 0.64839868         | 2              | 2.75252533  |
| P58775        | MELQEMQLK                                                     | 0.550212281        | 2              | 2.518589258 |
| P58775        | QLEEEQALQK                                                    | 0.539968629        | 2              | 3.31009078  |
| P58775        | SLEAQADKYSTK                                                  | 1.229626345        | 2              | 2.872665882 |
| P58775        | TIDDLEDEVYAQK                                                 | 0.454331111        | 2              | 3.957789898 |
| P58775        | YSESVKDAQEK                                                   | 0.396611473        | 2              | 3.010276794 |
| <b>P59242</b> | <b>CING Cingulin</b>                                          | <b>1.020103057</b> | <b>0.88803</b> | <b>2</b>    |
| P59242        | LGQEQQALNR                                                    | 1.177730088        | 2              | 2.516333818 |
| P59242        | LQGLEQEAENK                                                   | 1.006968098        | 2              | 2.978303909 |
| <b>P59470</b> | <b>RPC2 DNA_directed RNA polymerase III subunit RPC2</b>      | <b>0.668839958</b> | <b>0.00539</b> | <b>2</b>    |
| P59470        | MPIMLRSSNCVLTGK+Oxidation(1)                                  | 0.678123288        | 2              | 2.537024736 |
| P59470        | NAKCTLR                                                       | 0.526861122        | 2              | 2.326963425 |
| <b>P59759</b> | <b>MKL2 MKL/myocardin_like protein 2</b>                      | <b>1.057752739</b> | <b>0.83093</b> | <b>2</b>    |
| P59759        | LVEVLK                                                        | 1.153617879        | 1              | 2.017632723 |
| P59759        | QIEELK                                                        | 0.782262199        | 1              | 2.062122107 |
| <b>P59999</b> | <b>ARPC4 Actin_related protein 2/3 complex subunit 4</b>      | <b>1.142467718</b> | <b>0.14479</b> | <b>3</b>    |
| P59999        | ELLQPVTISR                                                    | 0.786182772        | 2              | 2.45137763  |
| P59999        | HNKPEVEVR                                                     | 0.946532092        | 2              | 2.524792194 |
| P59999        | VLEGSINSVR                                                    | 1.171931914        | 2              | 2.9430902   |



|               |                                                         |                    |                |             |
|---------------|---------------------------------------------------------|--------------------|----------------|-------------|
| <b>P60335</b> | <b>PCBP1 Poly(rC)_binding protein 1</b>                 | <b>1.193903431</b> | <b>0.51245</b> | <b>6</b>    |
| P60335        | AITIAGVPQSVTECVK                                        | 1.115490536        | 2              | 3.287467718 |
| P60335        | IITLTGPTNAIFK                                           | 1.653033446        | 2              | 2.960630894 |
| P60335        | LVVPATQCGSLIGK                                          | 1.474471067        | 2              | 3.035526514 |
| P60335        | QICLVMLETLQSPQGR                                        | 1.281654791        | 2              | 2.430150032 |
| P60335        | VMTIPYQMPASSPVICAGGQDR                                  | 1.252626806        | 2              | 4.05454731  |
| P60335        | CSDAAGYPHATHDLEGPPLDAYSIQGQHTISPLDLAK                   | 1.278930269        | 4              | 5.644421101 |
| <b>P60843</b> | <b>IF4A1 Eukaryotic initiation factor 4A_I</b>          | <b>1.235702843</b> | <b>5.2E-08</b> | <b>5</b>    |
| P60843        | ATQALVLAPTR                                             | 1.371894092        | 1              | 2.167750835 |
| P60843        | GFKDQIYDIFQK                                            | 1.055905471        | 2              | 3.442202091 |
| P60843        | KEELTLEGIR                                              | 1.405317855        | 2              | 2.367393732 |
| P60843        | LQMEAPHIIVGTPGR                                         | 1.413069117        | 2              | 3.495971441 |
| P60843        | KGVAINMVTEEDKR                                          | 1.077303387        | 3              | 3.942266226 |
| <b>P60868</b> | <b>RS20 40S ribosomal protein S20</b>                   | <b>1.332087735</b> | <b>8.5E-15</b> | <b>2</b>    |
| P60868        | LIDLHSPSEIVK                                            | 1.451731446        | 2              | 2.907347918 |
| P60868        | DTGKTPVEPEVAIHR                                         | 1.066291549        | 3              | 3.936476469 |
| <b>P60892</b> | <b>PRPS1 Ribose_phosphate pyrophosphokinase 1</b>       | <b>0.999279546</b> | <b>0.59818</b> | <b>2</b>    |
| P60892        | FSNQETCVEIGESVR                                         | 0.98002976         | 2              | 2.774755955 |
| P60892        | NCTIVSPDAGGAK                                           | 1.773087882        | 2              | 2.313577175 |
| <b>P60901</b> | <b>PSA6 Proteasome subunit alpha type_6</b>             | <b>1.551578244</b> | <b>4.7E-05</b> | <b>4</b>    |
| P60901        | AINQGGLTSVAVR                                           | 1.27529903         | 2              | 3.953048229 |
| P60901        | GKDCAVIVTQK                                             | 2.182034628        | 2              | 3.163130522 |
| P60901        | ITENIGCVMTGMTADSR                                       | 1.562028578        | 2              | 4.387292385 |
| P60901        | LLDSSTVTHLFK                                            | 1.604601599        | 2              | 2.923425674 |
| <b>P61087</b> | <b>UBE2K Ubiquitin_conjugating enzyme E2 K</b>          | <b>1.342613457</b> | <b>0.00044</b> | <b>2</b>    |
| P61087        | GEIAGPPDTPYEGGR                                         | 1.34349543         | 2              | 2.988562822 |
| P61087        | VLDVDENFTELK                                            | 1.128704663        | 2              | 2.572960377 |
| <b>P61107</b> | <b>RAB14 Ras_related protein Rab_14</b>                 | <b>1.695699614</b> | <b>0.20038</b> | <b>4</b>    |
| P61107        | NLTNPNTVILIGNK                                          | 0.99549558         | 2              | 3.784221649 |
| P61107        | SCLLHQFTEK                                              | 1.131024585        | 2              | 3.061702728 |
| P61107        | IYQNIQDGSLDLNAAESGVQHKPSAPQGGR                          | 1.066624752        | 3              | 3.804285288 |
| P61107        | TGENVEDAFLEAAKK                                         | 1.299144582        | 3              | 3.693715572 |
| <b>P61222</b> | <b>ABCE1 ATP_binding cassette sub_family E member 1</b> | <b>1.202907636</b> | <b>0.0402</b>  | <b>2</b>    |
| P61222        | NTVANSPQTLGAMNK                                         | 1.088057303        | 2              | 2.904885054 |
| P61222        | NVEDLSGGELQR                                            | 1.239223201        | 2              | 2.625719309 |
| <b>P61314</b> | <b>RL15 60S ribosomal protein L15</b>                   | <b>1.170954533</b> | <b>0.22573</b> | <b>5</b>    |
| P61314        | GATYGKPVHHGVNQLK                                        | 1.152881322        | 2              | 4.465008736 |
| P61314        | SLQSVAEER                                               | 1.180831053        | 2              | 2.88703537  |
| P61314        | VLNSYWVGEDSTYK                                          | 1.188689167        | 2              | 4.038472652 |
| P61314        | YIQELWR                                                 | 1.147488141        | 2              | 2.482518196 |
| P61314        | FFEVLIDPFHK                                             | 1.220365035        | 3              | 3.867430687 |
| <b>P61459</b> | <b>PHS Pterin_4_alpha_carbinolamine dehydratase</b>     | <b>1.248034775</b> | <b>6.6E-07</b> | <b>4</b>    |
| P61459        | AVGWNELEGR                                              | 1.103971133        | 2              | 2.997452736 |

|               |                                                                                         |                    |                |             |
|---------------|-----------------------------------------------------------------------------------------|--------------------|----------------|-------------|
| P61459        | VHITLSTHECAGLSER                                                                        | 1.852434909        | 2              | 3.742439747 |
| P61459        | LDHHPEWFNVYNK                                                                           | 1.293182975        | 3              | 5.124075413 |
| P61459        | LSAEERDQLLPNLR                                                                          | 1.218732815        | 3              | 4.099134445 |
| <b>P61589</b> | <b>RHOA Transforming protein RhoA</b>                                                   | <b>1.498886488</b> | <b>6E-15</b>   | <b>6</b>    |
| P61589        | HFCPNVPIILVGNK                                                                          | 2.11377854         | 2              | 3.164068222 |
| P61589        | IGAFGYMECSAK                                                                            | 1.567368213        | 2              | 3.002639055 |
| P61589        | KKLVIVGDGACGK                                                                           | 1.105065212        | 2              | 2.428843498 |
| P61589        | MKQEPVKPEEGR+Oxidation(1)                                                               | 1.611905989        | 2              | 3.501302481 |
| P61589        | HFCPNVPIILVGNKK                                                                         | 1.188254392        | 3              | 3.940511703 |
| P61589        | MKQEPVKPEEGR                                                                            | 1.007308989        | 3              | 3.501685619 |
| <b>P61751</b> | <b>ARF4 ADP_ribosylation factor 4</b>                                                   | <b>1.049657438</b> | <b>0.3635</b>  | <b>5</b>    |
| P61751        | ILMVGLDAAGK                                                                             | 1.924461437        | 2              | 2.459672451 |
| P61751        | IQEAAVLQK                                                                               | 1.107558417        | 2              | 2.562535763 |
| P61751        | NICFTVWDVGGQDK                                                                          | 0.930460942        | 2              | 4.031912327 |
| P61751        | QDLPNAMAISEMTDK                                                                         | 1.187920834        | 2              | 3.462885141 |
| P61751        | LGEIVTTIPTIGFNVETVEYK                                                                   | 1.154160097        | 3              | 4.575340271 |
| <b>P61805</b> | <b>DAD1 Dolichyl_diphosphooligosaccharide__protein glycosyltransferase subunit DAD1</b> | <b>1.194375466</b> | <b>0.2548</b>  | <b>2</b>    |
| P61805        | ADFQGISPER                                                                              | 1.248930087        | 1              | 1.953309774 |
| P61805        | FLEEYLSSTPQR                                                                            | 1.194200157        | 2              | 3.740853786 |
| <b>P61924</b> | <b>COPZ1 Coatomer subunit zeta_1</b>                                                    | <b>1.016920146</b> | <b>0.96967</b> | <b>3</b>    |
| P61924        | AILILDNDGDR                                                                             | 0.85574477         | 2              | 2.901428938 |
| P61924        | GEDVPLTEQTVSQVLQSAK                                                                     | 1.068089529        | 2              | 5.139336586 |
| P61924        | YYDDTYPVK                                                                               | 1.070523091        | 2              | 2.47498107  |
| <b>P61972</b> | <b>NTF2 Nuclear transport factor 2</b>                                                  | <b>1.071163465</b> | <b>0.95132</b> | <b>2</b>    |
| P61972        | NINDAWVCTNDMFR                                                                          | 0.874666276        | 2              | 3.042766571 |
| P61972        | IQHSITAQDQHQPDPDSCIISMVVGQLK                                                            | 1.072824897        | 3              | 5.419419289 |
| <b>P61980</b> | <b>HNRPK Heterogeneous nuclear ribonucleoprotein K</b>                                  | <b>1.190521404</b> | <b>0.86438</b> | <b>11</b>   |
| P61980        | GSDFDCELR                                                                               | 0.884756148        | 2              | 2.460565805 |
| P61980        | GSYDGLGGPIITTQVTIPK                                                                     | 0.99508419         | 2              | 4.680757046 |
| P61980        | IDEPLEGSEDR                                                                             | 0.97240887         | 2              | 3.372882366 |
| P61980        | IILDISESPIK                                                                             | 1.146370775        | 2              | 3.927420616 |
| P61980        | LFQECCPHSTDR                                                                            | 1.232209722        | 2              | 3.559969664 |
| P61980        | LLIHQSLAGGIIGVK                                                                         | 2.182312836        | 2              | 2.587921858 |
| P61980        | NTDEMVELR                                                                               | 0.898821308        | 2              | 2.427403927 |
| P61980        | RSRNTDEMVELR                                                                            | 0.894277161        | 2              | 2.325223923 |
| P61980        | TDYNASVSPDSSGPER                                                                        | 0.918540042        | 2              | 4.652390957 |
| P61980        | VVLIGGKPD                                                                               | 1.222874957        | 2              | 2.535669804 |
| P61980        | IITITGTQDQIQNAQYLLQNSVK                                                                 | 1.05567024         | 3              | 6.684838772 |
| <b>P61983</b> | <b>1433G 14_3_3 protein gamma</b>                                                       | <b>1.050923728</b> | <b>3.7E-05</b> | <b>4</b>    |
| P61983        | AYSEAHEISK                                                                              | 1.23532012         | 2              | 3.352713346 |
| P61983        | NVTELNEPLSNEER                                                                          | 1.03236056         | 2              | 4.760193348 |
| P61983        | TAFDDAIAELDTLNEDSYK                                                                     | 0.99667585         | 2              | 5.55698204  |

|               |                                                                             |                    |                |             |
|---------------|-----------------------------------------------------------------------------|--------------------|----------------|-------------|
| P61983        | YLAEVATGEK                                                                  | 0.979861655        | 2              | 2.731076956 |
| <b>P62076</b> | <b>TIM13 Mitochondrial import inner membrane translocase subunit Tim13</b>  | <b>1.056311981</b> | <b>0.97876</b> | <b>4</b>    |
| P62076        | CIGKPGGSLDNSEQK                                                             | 1.047162772        | 2              | 4.235889912 |
| P62076        | KCIGKPGGSLDNSEQK                                                            | 1.132372786        | 2              | 4.305035591 |
| P62076        | VQIAVANAQELLQR                                                              | 1.086813263        | 2              | 4.409189224 |
| P62076        | YMDAWNTVSR                                                                  | 1.022510348        | 2              | 3.098544359 |
| <b>P62078</b> | <b>TIM8B Mitochondrial import inner membrane translocase subunit Tim8 B</b> | <b>1.034558347</b> | <b>0.98946</b> | <b>2</b>    |
| P62078        | FIDTTLAITGR                                                                 | 0.934397012        | 2              | 2.565805435 |
| P62078        | TENCLSSCVDR                                                                 | 1.034847499        | 2              | 2.323645115 |
| <b>P62083</b> | <b>RS7 40S ribosomal protein S7</b>                                         | <b>1.108471794</b> | <b>1.3E-08</b> | <b>5</b>    |
| P62083        | AIIFVPVPQLK                                                                 | 1.172868668        | 2              | 3.749596357 |
| P62083        | KAIIFVPVPQLK                                                                | 1.262445453        | 2              | 3.626477003 |
| P62083        | LDGSRLIK                                                                    | 1.213427555        | 2              | 2.332994461 |
| P62083        | TLTAVHDAILEDLVFPSEIVGK                                                      | 1.240943007        | 2              | 5.056869984 |
| P62083        | IVKPNGEKPDFESGISQALLEMNSDLK                                                 | 1.449063945        | 3              | 5.023117065 |
| <b>P62161</b> | <b>CALM Calmodulin</b>                                                      | <b>1.129919433</b> | <b>0.00242</b> | <b>4</b>    |
| P62161        | DGNGYISAAELR                                                                | 0.832967552        | 2              | 2.666472912 |
| P62161        | EADIDGDGQVNYEEFVQMMTAK                                                      | 1.279707332        | 2              | 4.89699316  |
| P62161        | EAFSLFDKDGDTITTK                                                            | 0.878908742        | 2              | 4.333684444 |
| P62161        | VFDKDGNGYISAAELR                                                            | 1.131876359        | 2              | 4.356308937 |
| <b>P62193</b> | <b>PRS4 26S protease regulatory subunit 4</b>                               | <b>0.91750476</b>  | <b>0.42768</b> | <b>4</b>    |
| P62193        | APQETYADIGGLDNQIQEIK                                                        | 0.722173295        | 2              | 4.97511816  |
| P62193        | AVANQTSATFLR                                                                | 1.100006884        | 2              | 2.602229357 |
| P62193        | NQEQMKPLEEK                                                                 | 1.306530171        | 2              | 2.913417101 |
| P62193        | TMLELLNQLDGFDSR                                                             | 1.112839541        | 2              | 3.999098301 |
| <b>P62198</b> | <b>PRS8 26S protease regulatory subunit 8</b>                               | <b>1.193058405</b> | <b>0.05507</b> | <b>4</b>    |
| P62198        | LEGGSGGDSEVQR                                                               | 1.190831968        | 2              | 3.533853054 |
| P62198        | TMLELLNQLDGFQATK                                                            | 1.374336429        | 2              | 3.368898153 |
| P62198        | VPDSTYEMIGGLDKQIK                                                           | 1.188238015        | 2              | 2.336406946 |
| P62198        | EVIELPVKHPELFEALGIAQPK                                                      | 1.183386583        | 3              | 3.903122902 |
| <b>P62243</b> | <b>RS8 40S ribosomal protein S8</b>                                         | <b>1.177252114</b> | <b>4.1E-11</b> | <b>8</b>    |
| P62243        | ADGYVLEGG                                                                   | 1.079563498        | 2              | 2.380846024 |
| P62243        | IIDVVYNASNNEVLR                                                             | 0.702066317        | 2              | 4.16358614  |
| P62243        | ISSLLEEQFQQGK                                                               | 1.396111012        | 2              | 3.990936279 |
| P62243        | KYELGRPAANTK                                                                | 1.240236016        | 2              | 3.752409458 |
| P62243        | LDVGNFSWGSECCTR                                                             | 1.469686897        | 2              | 3.908139944 |
| P62243        | LTPEEEIILNK                                                                 | 1.068008479        | 2              | 3.248128891 |
| P62243        | NCIVLIDSTPYR                                                                | 1.396343647        | 2              | 3.332680941 |
| P62243        | YELGRPAANTK                                                                 | 1.557845222        | 2              | 3.228212833 |
| <b>P62246</b> | <b>RS15A 40S ribosomal protein S15a</b>                                     | <b>1.214166405</b> | <b>7.3E-10</b> | <b>3</b>    |
| P62246        | HGYIGFEIIDDHR                                                               | 1.231750923        | 2              | 4.239281178 |
| P62246        | MNVLADALK                                                                   | 1.068778505        | 2              | 2.780020952 |

|               |                                                  |                    |                |             |
|---------------|--------------------------------------------------|--------------------|----------------|-------------|
| P62246        | WQNNLLPSR                                        | 1.250768732        | 2              | 2.672238111 |
| <b>P62250</b> | <b>RS16 40S ribosomal protein S16</b>            | <b>1.012018259</b> | <b>0.70439</b> | <b>5</b>    |
| P62250        | ALVAYYQK                                         | 1.138260773        | 1              | 2.388912678 |
| P62250        | GGGHVAQIYAIR                                     | 0.846596624        | 2              | 2.643356562 |
| P62250        | LLEPVLLLGK                                       | 1.157762333        | 2              | 2.723938704 |
| P62250        | TLLVADPR                                         | 1.190793937        | 2              | 2.452762842 |
| P62250        | VNGRPLEMIEPR                                     | 1.087207371        | 2              | 2.609104156 |
| <b>P62260</b> | <b>1433E 14_3_3 protein epsilon</b>              | <b>1.281204867</b> | <b>1.4E-09</b> | <b>7</b>    |
| P62260        | AAFDDAIAELDTLSEESYK                              | 1.270303015        | 2              | 6.160812855 |
| P62260        | HLIPAANTGESK                                     | 1.249260272        | 2              | 3.506571293 |
| P62260        | IISSIEQK                                         | 1.363573503        | 2              | 2.794229984 |
| P62260        | LICCDILDVLDK                                     | 1.761975586        | 2              | 4.062607765 |
| P62260        | YDEMVESMK                                        | 0.831765892        | 2              | 2.484943867 |
| P62260        | YLAEFATGNDR                                      | 0.840032977        | 2              | 2.796429157 |
| P62260        | YLAEFATGNDRK                                     | 1.329629265        | 2              | 2.720851183 |
| <b>P62271</b> | <b>RS18 40S ribosomal protein S18</b>            | <b>1.131195786</b> | <b>9.9E-20</b> | <b>4</b>    |
| P62271        | LREDLER                                          | 1.401804742        | 1              | 2.005393267 |
| P62271        | AGELTEDEVER                                      | 1.199570924        | 2              | 3.483625174 |
| P62271        | VLNTNIDGR                                        | 1.108228677        | 2              | 3.03602457  |
| P62271        | YSQVLANGLDNK                                     | 1.271283563        | 2              | 3.774343252 |
| <b>P62278</b> | <b>RS13 40S ribosomal protein S13</b>            | <b>1.432198716</b> | <b>2.6E-10</b> | <b>4</b>    |
| P62278        | LILIESR                                          | 1.294381715        | 1              | 1.935991764 |
| P62278        | GLAPDLPEDLYHLIK                                  | 1.417462927        | 2              | 2.97082305  |
| P62278        | GLTPSQIGVILR                                     | 1.032850041        | 2              | 2.760576487 |
| P62278        | KGLTPSQIGVILR                                    | 1.107035608        | 3              | 3.671672106 |
| <b>P62329</b> | <b>TYB4 Thymosin beta_4</b>                      | <b>1.173558342</b> | <b>0.00024</b> | <b>4</b>    |
| P62329        | ETIEQEKGAGES                                     | 1.059930912        | 2              | 3.080891132 |
| P62329        | KTETQEKNPLPSK                                    | 1.257379998        | 2              | 3.459882259 |
| P62329        | NPLPSKETIEQEK                                    | 1.214218686        | 2              | 3.007745028 |
| P62329        | TETQEKNPLPSK                                     | 1.166021152        | 2              | 3.795808077 |
| <b>P62332</b> | <b>ARF6 ADP_ribosylation factor 6</b>            | <b>0.753435615</b> | <b>0.38742</b> | <b>2</b>    |
| P62332        | FNVVDVGGQDK                                      | 0.753473237        | 2              | 3.002868414 |
| P62332        | LGQSVTTIPTVGFNVETVYK                             | 0.69198963         | 2              | 2.409654379 |
| <b>P62334</b> | <b>PRS10 26S protease regulatory subunit 10B</b> | <b>0.974188711</b> | <b>0.20194</b> | <b>6</b>    |
| P62334        | ALQSVGQIVGEVLK                                   | 1.064978997        | 2              | 2.41708827  |
| P62334        | AVASQLDCNFLK                                     | 0.907761404        | 2              | 2.440780401 |
| P62334        | EVIELPTNPELFQR                                   | 0.815634174        | 2              | 3.207231522 |
| P62334        | GCLLYGPPGTGK                                     | 0.766780372        | 2              | 2.512974024 |
| P62334        | HGEIDYEAIVK                                      | 0.991103641        | 2              | 3.752446651 |
| P62334        | IHIDLPEQAR                                       | 1.277750734        | 2              | 2.353969574 |
| <b>P62425</b> | <b>RL7A 60S ribosomal protein L7a</b>            | <b>1.189120495</b> | <b>9.9E-20</b> | <b>10</b>   |
| P62425        | HWGGNVLGPK                                       | 1.324217761        | 1              | 2.684365034 |
| P62425        | VAPAPAVVK                                        | 1.299622276        | 1              | 1.972314119 |

|               |                                                    |                    |                |             |
|---------------|----------------------------------------------------|--------------------|----------------|-------------|
| P62425        | AGVNTVTTLVENK                                      | 1.202413451        | 2              | 3.858448982 |
| P62425        | AGVNTVTTLVENKK                                     | 1.262208231        | 2              | 2.843029737 |
| P62425        | KVWNPLFEK                                          | 1.496226435        | 2              | 2.342804193 |
| P62425        | NFGIGQDIQPK                                        | 1.031923991        | 2              | 3.164599657 |
| P62425        | TCTTVAFTQVNSEDK                                    | 1.006007293        | 2              | 3.736149311 |
| P62425        | TCTTVAFTQVNSEDKGALAK                               | 1.265339758        | 2              | 4.067199707 |
| P62425        | VPPAINQFTQALDR                                     | 1.056318008        | 2              | 3.407683849 |
| P62425        | LKVPPAINQFTQALDR                                   | 1.461390939        | 3              | 4.654883862 |
| <b>P62630</b> | <b>EF1A1 Elongation factor 1_alpha 1</b>           | <b>1.096222346</b> | <b>9.9E-20</b> | <b>15</b>   |
| P62630        | YEEIVK                                             | 1.275582042        | 1              | 1.988847494 |
| P62630        | MDSTEPPYSQK                                        | 0.833974203        | 2              | 3.665522814 |
| P62630        | MDSTEPPYSQK+Oxidation(1)                           | 0.902864519        | 2              | 3.271005869 |
| P62630        | RYEEIVK                                            | 0.934100594        | 2              | 2.66200304  |
| P62630        | VETGVLPKGMVVTFAPVNVVTEVK                           | 1.152832302        | 2              | 5.60172224  |
| P62630        | YYVTIIDAPGHR                                       | 1.117773759        | 2              | 3.511394262 |
| P62630        | DGSASGTTLLEALDCILPPTTRPTDKPLR                      | 1.272212109        | 3              | 5.221583843 |
| P62630        | NDPPMEAAGFTAQVIILNHPGQISAGYAPVLDCHTAHIACK          | 1.067601124        | 3              | 6.271458626 |
| P62630        | SGDAAIVDMVPGKPMCVESFSDYPPPLGR                      | 1.17106787         | 3              | 5.211957932 |
| P62630        | SGDAAIVDMVPGKPMCVESFSDYPPPLGR+Oxidation(15)        | 1.135791065        | 3              | 3.791638136 |
| P62630        | SGDAAIVDMVPGKPMCVESFSDYPPPLGR+Oxidation(9)         | 1.0540959          | 3              | 3.425503016 |
| P62630        | VETGVLPKGMVVTFAPVNVVTEVK+Oxidation(10)             | 1.076435692        | 3              | 4.639975071 |
| P62630        | KDGSASGTTLLEALDCILPPTTRPTDKPLR                     | 1.395377905        | 4              | 5.938967228 |
| P62630        | RGNVAGDSKNDPPMEAAGFTAQVIILNHPGQISAGYAPVLDCHTAHIACK | 0.788203586        | 5              | 4.639298916 |
| P62630        | GNVAGDSKNDPPMEAAGFTAQVIILNHPGQISAGYAPVLDCHTAHIACK  | 1.137179506        | 6              | 4.526237965 |
| <b>P62632</b> | <b>EF1A2 Elongation factor 1_alpha 2</b>           | <b>1.200764835</b> | <b>9.9E-20</b> | <b>6</b>    |
| P62632        | EHALLAYTLGVK                                       | 0.991932703        | 1              | 3.590357065 |
| P62632        | QLIVGVNK                                           | 1.245912586        | 1              | 2.520667553 |
| P62632        | IGGIGTVPVGR                                        | 1.442093193        | 2              | 3.635869265 |
| P62632        | STTTGHLYK                                          | 1.234294035        | 2              | 3.145236254 |
| P62632        | THINIVVIGHVDSGK                                    | 1.193361326        | 2              | 5.64054203  |
| P62632        | NMITGTSQADCAVLIVAAGVGEFEAGISK                      | 1.10132991         | 3              | 5.858225822 |
| <b>P62634</b> | <b>CNBP Cellular nucleic acid_binding protein</b>  | <b>1.115229893</b> | <b>0.89776</b> | <b>2</b>    |
| P62634        | CGETGHVAINCSK                                      | 1.183255829        | 2              | 4.475936413 |
| P62634        | CYSCGEFGHIQK                                       | 1.07368535         | 2              | 3.115870953 |
| <b>P62703</b> | <b>RS4X 40S ribosomal protein S4_X isoform</b>     | <b>1.233134575</b> | <b>0.00158</b> | <b>5</b>    |
| P62703        | FDTGNLCMVTGGANLGR                                  | 1.191500332        | 2              | 5.072371483 |
| P62703        | GIPHLVTHDAR                                        | 1.416781271        | 2              | 2.359055281 |
| P62703        | LSNIFVIGK                                          | 1.86634029         | 2              | 3.209797382 |
| P62703        | TDITYPAGFMDVISIDK                                  | 1.143515899        | 2              | 5.146757126 |
| P62703        | VNDTIQIDLETGK                                      | 1.243148706        | 2              | 4.45044899  |
| <b>P62752</b> | <b>RL23A 60S ribosomal protein L23a</b>            | <b>1.136013645</b> | <b>7.1E-10</b> | <b>6</b>    |
| P62752        | LYDIDVAK                                           | 1.088069188        | 1              | 1.972061753 |

|               |                                                             |                    |                |             |
|---------------|-------------------------------------------------------------|--------------------|----------------|-------------|
| P62752        | LAPDYDALDVANK                                               | 1.13200337         | 2              | 3.747881174 |
| P62752        | LDHYAIK                                                     | 1.123316289        | 2              | 2.644943953 |
| P62752        | NKLDHYAIK                                                   | 1.4848726          | 2              | 2.76412034  |
| P62752        | VNTLIRPDGEK                                                 | 1.158450055        | 2              | 3.23205781  |
| P62752        | VNTLIRPDGEKK                                                | 1.380840032        | 2              | 2.912998676 |
| <b>P62755</b> | <b>RS6 40S ribosomal protein S6</b>                         | <b>1.225042613</b> | <b>0.00388</b> | <b>4</b>    |
| P62755        | DIPGLDTTVPR                                                 | 0.774703425        | 2              | 2.660520792 |
| P62755        | LIEVDDER                                                    | 1.137868424        | 2              | 2.764392138 |
| P62755        | LNISFPATGCQK                                                | 1.50453078         | 2              | 3.245526552 |
| P62755        | NKEEAAEYAK                                                  | 1.292658821        | 2              | 2.511170149 |
| <b>P62775</b> | <b>MTPN Myotrophin</b>                                      | <b>1.099648455</b> | <b>0.04532</b> | <b>2</b>    |
| P62775        | NGDLDEVKDYVAK                                               | 1.110627131        | 2              | 3.240452766 |
| P62775        | GADINAPDKHHITPLLSAVYEGHVSCVK                                | 1.026754827        | 4              | 5.225226879 |
| <b>P62804</b> | <b>H4 Histone H4</b>                                        | <b>0.802987183</b> | <b>9.9E-20</b> | <b>8</b>    |
| P62804        | DAVYTEHAK                                                   | 0.533439364        | 2              | 2.881001234 |
| P62804        | DNIQGITKPAIR                                                | 0.79387868         | 2              | 3.415593147 |
| P62804        | ISGLIYEETR                                                  | 1.282626211        | 2              | 3.644930124 |
| P62804        | KTVTAMDVVYALK                                               | 0.335847047        | 2              | 2.499256611 |
| P62804        | RISGLIYEETR                                                 | 1.181902275        | 2              | 2.306322336 |
| P62804        | TVTAMDVVYALK                                                | 0.735767035        | 2              | 4.044817448 |
| P62804        | TVTAMDVVYALK+Oxidation(5)                                   | 0.786421049        | 2              | 2.853513002 |
| P62804        | VFLENVIR                                                    | 1.105606309        | 2              | 3.265380383 |
| <b>P62815</b> | <b>VATB2 V_type proton ATPase subunit B_ brain isoform</b>  | <b>1.186373429</b> | <b>0.34819</b> | <b>2</b>    |
| P62815        | AVVQVFEGTSGIDAK                                             | 1.186403712        | 2              | 3.282146692 |
| P62815        | NFITQGPYENR                                                 | 1.181050739        | 2              | 2.480132103 |
| <b>P62832</b> | <b>RL23 60S ribosomal protein L23</b>                       | <b>1.276302124</b> | <b>0.02333</b> | <b>2</b>    |
| P62832        | GSAITGPVAK                                                  | 1.016190239        | 2              | 2.788820982 |
| P62832        | ISLGLPVGAVINCADNTGAK                                        | 1.61587768         | 2              | 4.777138233 |
| <b>P62845</b> | <b>RS15 40S ribosomal protein S15</b>                       | <b>0.822889196</b> | <b>0.54037</b> | <b>2</b>    |
| P62845        | DMIILPEMVGSMVGVYNGK                                         | 0.841817472        | 2              | 3.109612226 |
| P62845        | TFNQVEIKPEMIGHYLGFSITYKPKK                                  | 0.821825944        | 4              | 5.100975513 |
| <b>P62853</b> | <b>RS25 40S ribosomal protein S25</b>                       | <b>2.06058117</b>  | <b>9.5E-12</b> | <b>2</b>    |
| P62853        | GGDAPAAGEDA                                                 | 2.097707114        | 1              | 2.201814413 |
| P62853        | LNNLVLFDK                                                   | 1.462000285        | 2              | 2.867256641 |
| <b>P62856</b> | <b>RS26 40S ribosomal protein S26</b>                       | <b>1.21471945</b>  | <b>0.19616</b> | <b>2</b>    |
| P62856        | DISEASVFDAYVLPK                                             | 0.943215492        | 2              | 3.033699989 |
| P62856        | NIVEAAAVR                                                   | 1.147510037        | 2              | 3.048341036 |
| <b>P62859</b> | <b>RS28 40S ribosomal protein S28</b>                       | <b>0.748712133</b> | <b>3.2E-09</b> | <b>2</b>    |
| P62859        | EGDVLTLLESER                                                | 0.749478045        | 2              | 3.79795146  |
| P62859        | VEFMDDTSR                                                   | 1.013879202        | 2              | 2.328010321 |
| <b>P62870</b> | <b>ELOB Transcription elongation factor B polypeptide 2</b> | <b>1.141105012</b> | <b>0.70984</b> | <b>2</b>    |
| P62870        | ADDTFEALR                                                   | 1.103798787        | 2              | 2.620431185 |

|               |                                         |                    |                |             |
|---------------|-----------------------------------------|--------------------|----------------|-------------|
| P62870        | TLGECGFTSQRTARQPAPATVGLAFR              | 1.085585417        | 3              | 4.408924103 |
| <b>P62890</b> | <b>RL30 60S ribosomal protein L30</b>   | <b>1.182381889</b> | <b>1E-08</b>   | <b>3</b>    |
| P62890        | LVLANNCPALR                             | 1.099546376        | 2              | 3.067088604 |
| P62890        | TGVHHYSGNNIELGTACGK                     | 1.291376507        | 2              | 5.709477901 |
| P62890        | VCTLAIIDPGDSDIIR                        | 1.891624638        | 2              | 4.131717205 |
| <b>P62898</b> | <b>CYC Cytochrome c_somatic</b>         | <b>1.084773617</b> | <b>0.86267</b> | <b>6</b>    |
| P62898        | ADLIAYLK                                | 0.991412812        | 2              | 2.889705658 |
| P62898        | GITWGEDTLMEYLENPK                       | 1.11498437         | 2              | 5.227754116 |
| P62898        | GITWGEDTLMEYLENPKK                      | 1.220137792        | 2              | 4.654350281 |
| P62898        | KTGQAAGFSYTDANK                         | 1.175251247        | 2              | 3.947921753 |
| P62898        | TGPNLHGLFGR                             | 1.087706495        | 2              | 3.380541801 |
| P62898        | TGQAAGFSYTDANK                          | 1.041555286        | 2              | 4.323997498 |
| <b>P62902</b> | <b>RL31 60S ribosomal protein L31</b>   | <b>0.995073437</b> | <b>0.96617</b> | <b>3</b>    |
| P62902        | NLQTVNVNVDEN                            | 0.821820981        | 1              | 2.421167374 |
| P62902        | LYTLVTYVPVTFK                           | 0.980852756        | 2              | 3.199885845 |
| P62902        | SAINEVVTR                               | 1.150354905        | 2              | 2.562259197 |
| <b>P62907</b> | <b>RL10A 60S ribosomal protein L10a</b> | <b>1.119797965</b> | <b>0.03111</b> | <b>6</b>    |
| P62907        | ILGPGLNK                                | 1.945390751        | 1              | 1.932412982 |
| P62907        | AVDIPHMDIEALK                           | 1.01413478         | 2              | 2.690131903 |
| P62907        | FSVCVLGDQQHCDEAK                        | 1.164701116        | 2              | 4.402685642 |
| P62907        | KYDAFLASESLIK                           | 1.102881716        | 2              | 3.316598892 |
| P62907        | VLCLAVAVGHVK                            | 1.022285859        | 2              | 3.225061178 |
| P62907        | YDAFLASESLIK                            | 0.832827493        | 2              | 3.114611387 |
| <b>P62909</b> | <b>RS3 40S ribosomal protein S3</b>     | <b>1.320981688</b> | <b>1.3E-06</b> | <b>10</b>   |
| P62909        | ELTAVVQK                                | 1.062001219        | 1              | 2.098902941 |
| P62909        | AELNEFLTR                               | 1.095284003        | 2              | 2.623243093 |
| P62909        | DEILPTTPISEQK                           | 1.401201023        | 2              | 3.058280706 |
| P62909        | ELAEDGYSGVEVR                           | 1.049148834        | 2              | 3.326314926 |
| P62909        | FGFPEGSVELYAEK                          | 1.17194183         | 2              | 3.931038857 |
| P62909        | GCEVVVSGK                               | 1.402551359        | 2              | 2.581297159 |
| P62909        | GGKPEPPAMPQPVPPTA                       | 1.247353147        | 2              | 4.047960281 |
| P62909        | GLCAIAQAESLR                            | 1.364333737        | 2              | 3.247208595 |
| P62909        | TEIILATR                                | 1.334227175        | 2              | 3.153639555 |
| P62909        | FVDGLMIHSGDPVNYVDTAVR                   | 1.037368278        | 3              | 5.17329073  |
| <b>P62912</b> | <b>RL32 60S ribosomal protein L32</b>   | <b>1.060247016</b> | <b>9.9E-20</b> | <b>2</b>    |
| P62912        | GQILMPNIGYGSNK                          | 1.051608239        | 2              | 2.664583206 |
| P62912        | SYCAEIAHNVSSK                           | 1.250222329        | 2              | 4.278460503 |
| <b>P62914</b> | <b>RL11 60S ribosomal protein L11</b>   | <b>1.144597191</b> | <b>0.99584</b> | <b>2</b>    |
| P62914        | VLEQLTGQTPVFSK                          | 0.995207445        | 2              | 4.056946754 |
| P62914        | YDGILPGK                                | 1.081637923        | 2              | 3.270677567 |
| <b>P62919</b> | <b>RL8 60S ribosomal protein L8</b>     | <b>1.120308161</b> | <b>2.4E-07</b> | <b>3</b>    |
| P62919        | ASGNATVISHNPETK                         | 1.144650558        | 2              | 4.49216938  |
| P62919        | AVVGVVAGGGR                             | 1.211436607        | 2              | 3.347933292 |

|               |                                                           |                    |                |             |
|---------------|-----------------------------------------------------------|--------------------|----------------|-------------|
| P62919        | KAQLNIGNVLPVGTMPGEGTIVCCLEEKPGDR                          | 1.042846804        | 3              | 5.439704418 |
| <b>P62944</b> | <b>AP2B1 AP_2 complex subunit beta</b>                    | <b>1.152517223</b> | <b>0.32545</b> | <b>2</b>    |
| P62944        | LQNNNVYTIK                                                | 1.027392256        | 2              | 3.000480652 |
| P62944        | KPSETQELVQQVLSLATQDSDNPDLR                                | 1.366526199        | 3              | 3.64915657  |
| <b>P62959</b> | <b>HINT1 Histidine triad nucleotide_binding protein 1</b> | <b>0.969506155</b> | <b>0.99998</b> | <b>7</b>    |
| P62959        | AQVAQPGGDTIFGK                                            | 0.997908509        | 2              | 4.968637943 |
| P62959        | CAADLGLK                                                  | 1.050753247        | 2              | 2.507773638 |
| P62959        | IIFEDDR                                                   | 1.096842309        | 2              | 2.650553703 |
| P62959        | CLAFHDISPQAPTHFLVIPK                                      | 0.92758206         | 3              | 3.708772898 |
| P62959        | HISQISVADDDDESLLGHLMIVGK                                  | 0.89593975         | 3              | 7.645215034 |
| P62959        | KHISQISVADDDDESLLGHLMIVGK                                 | 1.053882893        | 3              | 5.090732574 |
| P62959        | MVVNEGADGGQSVYHIHLHLVGGRR                                 | 0.946947499        | 3              | 4.085944176 |
| <b>P62961</b> | <b>YBOX1 Nuclease_sensitive element_binding protein 1</b> | <b>1.196793458</b> | <b>0.3102</b>  | <b>4</b>    |
| P62961        | GAEAAVNTGPGGVPVQGSK                                       | 0.907829967        | 2              | 4.989742279 |
| P62961        | NEGSESAPEGQAQQR                                           | 0.649159222        | 2              | 5.129517078 |
| P62961        | EDGNEDKENQGDETQQQPPQR                                     | 1.080314666        | 3              | 5.004816055 |
| P62961        | RPQYSNPPVQGEVMEGADNQGAGEQGRPVR                            | 1.007217669        | 4              | 5.46954155  |
| <b>P62963</b> | <b>PROF1 Profilin_1</b>                                   | <b>1.227171622</b> | <b>0.00036</b> | <b>5</b>    |
| P62963        | DSLLQDGEFTMDLR                                            | 0.717576047        | 2              | 3.887597084 |
| P62963        | DSPSVWAAVPGK                                              | 1.051930277        | 2              | 2.9324615   |
| P62963        | SSFFVNGLTGGQK                                             | 1.268497064        | 2              | 3.927990675 |
| P62963        | STGGAPTFNVTVTMTAK                                         | 1.068217423        | 2              | 3.295814753 |
| P62963        | TFVSITPAEVGLVGGK                                          | 1.171037213        | 2              | 5.099938393 |
| <b>P63018</b> | <b>HSP7C Heat shock cognate 71 kDa protein</b>            | <b>1.196791721</b> | <b>9.9E-20</b> | <b>22</b>   |
| P63018        | DAGTIAGLNVLK                                              | 0.650958239        | 2              | 3.425006628 |
| P63018        | FDDAVVQSDMK                                               | 0.989536832        | 2              | 3.268348694 |
| P63018        | FEELNADLFR                                                | 0.989197602        | 2              | 3.151538134 |
| P63018        | FELTGIPPAPR                                               | 0.968887708        | 2              | 2.716971159 |
| P63018        | IINEPTAAAIAYGLDK                                          | 1.202566533        | 2              | 5.532402039 |
| P63018        | IINEPTAAAIAYGLDKK                                         | 1.524789529        | 2              | 4.171666145 |
| P63018        | LLQDFFNGK                                                 | 1.469310151        | 2              | 2.707604885 |
| P63018        | MKEIAEAYLGK                                               | 1.155800779        | 2              | 3.440849543 |
| P63018        | MVNHFAIEFK                                                | 1.119818108        | 2              | 3.179060936 |
| P63018        | NQTAEKEEFHQK                                              | 1.196821765        | 2              | 5.2484622   |
| P63018        | NQVAMNPTNTVFDK                                            | 1.044941651        | 2              | 5.075264931 |
| P63018        | NQVAMNPTNTVFDK+Oxidation(5)                               | 1.135923519        | 2              | 4.231907845 |
| P63018        | NSLESYAFNMK                                               | 1.387758588        | 2              | 3.934849501 |
| P63018        | RFDDAVVQSDMK                                              | 1.068702805        | 2              | 3.436346531 |
| P63018        | SFYPEEVSSMVLTK                                            | 1.089867838        | 2              | 5.203951836 |
| P63018        | SINPDEAVAYGAAVQAAILSGDK                                   | 0.605524131        | 2              | 6.262359619 |
| P63018        | SQIHDIIVLGGSTR                                            | 1.039986959        | 2              | 4.868242264 |
| P63018        | STAGDTHLGGEDFDNR                                          | 1.02447531         | 2              | 4.310505867 |



|               |                                                      |                    |                |             |
|---------------|------------------------------------------------------|--------------------|----------------|-------------|
| P63018        | VCNPIITK                                             | 1.187268558        | 2              | 2.434274912 |
| P63018        | VQVEYKGETK                                           | 1.238569496        | 2              | 2.474661589 |
| P63018        | ARFEELNADLFR                                         | 1.301915281        | 3              | 3.889532566 |
| P63018        | TVTNAVVTVPAYFNDSQR                                   | 1.157174392        | 3              | 4.394991398 |
| <b>P63025</b> | <b>VAMP3 Vesicle-associated membrane protein 3</b>   | <b>0.797899831</b> | <b>0.55198</b> | <b>2</b>    |
| P63025        | ADALQAGASQFETSAAK                                    | 0.788052881        | 2              | 4.679193497 |
| P63025        | LQQTQNVQVDEVVDIMR                                    | 0.947486057        | 2              | 3.611054659 |
| <b>P63029</b> | <b>TCTP Translationally-controlled tumor protein</b> | <b>0.768464185</b> | <b>1.5E-09</b> | <b>4</b>    |
| P63029        | DLISHDELFSDIYK                                       | 0.754815919        | 2              | 3.976761103 |
| P63029        | EIADGLCLEVEGK                                        | 1.023448783        | 2              | 2.829034805 |
| P63029        | GKLEEQKPER                                           | 1.642550464        | 2              | 3.412974358 |
| P63029        | VKPFMTGAAEQIK                                        | 1.20508384         | 2              | 2.513881922 |
| <b>P63036</b> | <b>DNJA1 Dnaj homolog subfamily A member 1</b>       | <b>1.199375863</b> | <b>0.54207</b> | <b>5</b>    |
| P63036        | QISQAYEVLADSK                                        | 1.086309293        | 2              | 2.579585791 |
| P63036        | TIVITSHPGQIVK                                        | 1.097567393        | 2              | 3.485225916 |
| P63036        | VNFPENGLFLSPDK                                       | 1.094355998        | 2              | 3.141109705 |
| P63036        | HYNGEAYEDDEHHPR                                      | 1.216720311        | 3              | 4.967424393 |
| P63036        | ITFHGEGDQEPGLEPGDIIIVLDQK                            | 0.959014194        | 3              | 4.167887211 |
| <b>P63039</b> | <b>CH60 60 kDa heat shock protein_mitochondrial</b>  | <b>1.034689891</b> | <b>2.8E-07</b> | <b>35</b>   |
| P63039        | DDAMLLKKG                                            | 0.456769473        | 1              | 1.921868324 |
| P63039        | DIGNIISDAMK                                          | 0.8803889          | 1              | 2.051076174 |
| P63039        | GIIDPTK                                              | 1.130818235        | 1              | 1.947704434 |
| P63039        | AAVEEGIVLGGGCALLR                                    | 1.045301493        | 2              | 5.708492279 |
| P63039        | CEFQDAYVLLSEK                                        | 1.407211897        | 2              | 4.536536694 |
| P63039        | CIPALDSLKPANEDQK                                     | 1.074907324        | 2              | 3.924773693 |
| P63039        | DDAMLLKKGDK+Oxidation(4)                             | 1.079773292        | 2              | 2.331838846 |
| P63039        | GVMLAVDAVIAELK                                       | 0.998613931        | 2              | 2.362944365 |
| P63039        | GVMLAVDAVIAELKK                                      | 1.280703734        | 2              | 4.570212364 |
| P63039        | GYISPYFINTSK                                         | 1.043151157        | 2              | 2.742613077 |
| P63039        | IGIEIIK                                              | 1.143030774        | 2              | 2.814539671 |
| P63039        | IQEITEQLDITTSEYEK                                    | 0.987357712        | 2              | 6.087544918 |
| P63039        | IQEITEQLDITTSEYEKEK                                  | 1.126902528        | 2              | 5.133924484 |
| P63039        | ISSVQSIVPALEIANAHR                                   | 1.458699144        | 2              | 4.472651482 |
| P63039        | KPLVIAEDVDGEALSTLVNLR                                | 1.226172958        | 2              | 6.099022388 |
| P63039        | LSDGVAVLK                                            | 1.16266278         | 2              | 2.994213343 |
| P63039        | LVQDVANNTNEEAGDGTATVLR                               | 1.227760607        | 2              | 6.496946335 |
| P63039        | NAGVEGSLIVEK                                         | 1.118773603        | 2              | 3.509324312 |
| P63039        | QSKPVTTPEEIAQVATISANGDK                              | 1.037693531        | 2              | 3.550752401 |
| P63039        | TLNDELEIIEGMK                                        | 1.090558349        | 2              | 4.848937988 |
| P63039        | TLNDELEIIEGMK+Oxidation(12)                          | 0.932632399        | 2              | 2.747194529 |
| P63039        | TVIIQSWGSPK                                          | 1.01628098         | 2              | 4.281285763 |
| P63039        | VGEVIVTK                                             | 1.12613828         | 2              | 3.094950676 |
| P63039        | VGEVIVTKDDAMLLK                                      | 1.170807855        | 2              | 3.788001299 |

|               |                                                                      |                    |                |             |
|---------------|----------------------------------------------------------------------|--------------------|----------------|-------------|
| P63039        | VGGTSDVEVNEK                                                         | 1.213831274        | 2              | 3.918417454 |
| P63039        | VGGTSDVEVNEKK                                                        | 1.235220206        | 2              | 3.734411716 |
| P63039        | VGLQVVAVK                                                            | 1.20545601         | 2              | 3.261184216 |
| P63039        | VTDALNATR                                                            | 1.087115891        | 2              | 3.522561073 |
| P63039        | ALMLQGVDLLADAVAVTMGPK+Oxidation(18)                                  | 1.050552398        | 3              | 4.406934738 |
| P63039        | ALMLQGVDLLADAVAVTMGPK+Oxidation(3)                                   | 1.089481884        | 3              | 3.754022121 |
| P63039        | DMAIATGGAVFGEEGLNLEEDVQAHDLGK                                        | 0.92012012         | 3              | 4.107060909 |
| P63039        | ILQSSSEVGYDAMLGDFVNMVEK                                              | 2.333223613        | 3              | 6.146465302 |
| P63039        | KISSVQSIVPALEIANHR                                                   | 1.451240509        | 3              | 3.924005032 |
| P63039        | QSKPVTTPEEIAQVATISANGDKDIGNIISDAMK                                   | 1.11684251         | 3              | 4.936254025 |
| P63039        | RGVMLAVDAVIAELKK                                                     | 1.120851206        | 3              | 5.896333218 |
| <b>P63102</b> | <b>1433Z 14_3_3 protein zeta/delta</b>                               | <b>1.103650311</b> | <b>1.4E-15</b> | <b>8</b>    |
| P63102        | DICNDVLSLLEK                                                         | 1.244471382        | 2              | 3.92897439  |
| P63102        | FLIPNASQPESK                                                         | 1.076143561        | 2              | 3.474337578 |
| P63102        | GIVDQSQQAYQEAFFEISK                                                  | 0.964429379        | 2              | 5.745241165 |
| P63102        | KGIVDQSQQAYQEAFFEISK                                                 | 1.695348047        | 2              | 5.040278435 |
| P63102        | SVTEQGAELSNEER                                                       | 0.734585109        | 2              | 5.100693703 |
| P63102        | TAFDEAIAELDTLSEESYK                                                  | 1.384816839        | 2              | 5.837608814 |
| P63102        | YDDMAACMK                                                            | 0.833177642        | 2              | 2.596227646 |
| P63102        | YLAEVAAGDDKK                                                         | 1.291955913        | 2              | 3.724322081 |
| <b>P63159</b> | <b>HMGB1 High mobility group protein B1</b>                          | <b>1.041747593</b> | <b>0.17591</b> | <b>5</b>    |
| P63159        | GEHPGLSIGDVAK                                                        | 1.039909116        | 2              | 3.15639925  |
| P63159        | IKGEHPGLSIGDVAK                                                      | 1.398756061        | 2              | 3.871833086 |
| P63159        | KHPDASVNFSEFSK                                                       | 1.096215605        | 3              | 4.10919714  |
| P63159        | KLGEMWNNTAADDKQPYEK                                                  | 0.848695971        | 3              | 4.314481735 |
| P63159        | LGEMWNNTAADDKQPYEK                                                   | 0.975551205        | 3              | 3.596772432 |
| <b>P63174</b> | <b>RL38 60S ribosomal protein L38</b>                                | <b>1.041108351</b> | <b>5.9E-05</b> | <b>3</b>    |
| P63174        | IEEIKDFLLTAR                                                         | 1.12890267         | 2              | 3.039553404 |
| P63174        | KIEEIKDFLLTAR                                                        | 1.247436502        | 2              | 4.592374325 |
| P63174        | YLYTLVITDKEK                                                         | 1.037237445        | 2              | 2.707944393 |
| <b>P63245</b> | <b>GBLP Guanine nucleotide_binding protein subunit beta_2_like 1</b> | <b>1.087882373</b> | <b>6.2E-14</b> | <b>13</b>   |
| P63245        | DETNYGIPQR                                                           | 0.823794961        | 2              | 3.008755445 |
| P63245        | DGQAMLWDLNEGK                                                        | 0.754954713        | 2              | 3.366820097 |
| P63245        | FSPNSSNPIIVSCGWDK                                                    | 1.276418935        | 2              | 4.269349098 |
| P63245        | HLYTLDGDDIINALCFSPNR                                                 | 1.606327052        | 2              | 5.606865406 |
| P63245        | IIVDELKQEVISTSSK                                                     | 1.330241979        | 2              | 4.129142284 |
| P63245        | LWDLTTGTTR                                                           | 1.159936955        | 2              | 2.955522537 |
| P63245        | LWNTLGVCK                                                            | 1.945923099        | 2              | 2.328050375 |
| P63245        | TNHIGHTGYLNTVTVSPDGLCASGGK                                           | 1.079607608        | 2              | 4.724562168 |
| P63245        | VWNLANCK                                                             | 0.920238058        | 2              | 2.677676439 |
| P63245        | VWQVTIGTR                                                            | 0.790943822        | 2              | 2.90550971  |
| P63245        | YTVQDESHSEWVSCVR                                                     | 1.253143266        | 2              | 3.309490681 |

|               |                                                                                      |                    |                |             |
|---------------|--------------------------------------------------------------------------------------|--------------------|----------------|-------------|
| P63245        | YWLCAATGPSIK                                                                         | 1.4108188          | 2              | 3.15877223  |
| P63245        | GHNGWVTQIATTPQFPDMILSASR                                                             | 0.83524393         | 3              | 4.288396835 |
| <b>P63259</b> | <b>ACTG Actin_cytoplasmic 2</b>                                                      | <b>1.125695699</b> | <b>9.9E-20</b> | <b>8</b>    |
| P63259        | DLYANTVLSGGTTMYPGIADR                                                                | 0.835098047        | 2              | 5.769021034 |
| P63259        | DLYANTVLSGGTTMYPGIADR+Oxidation(14)                                                  | 0.725873099        | 2              | 4.350805283 |
| P63259        | GYSFTTAER                                                                            | 1.134644939        | 2              | 3.370332718 |
| P63259        | KDLYANTVLSGGTTMYPGIADR                                                               | 1.070714213        | 2              | 6.162316322 |
| P63259        | LCYVALDFEQEMATAASSSSLEK                                                              | 2.14813767         | 2              | 5.209465027 |
| P63259        | VAPEEHPVLLTEAPLNPK                                                                   | 1.272255473        | 2              | 4.642065048 |
| P63259        | CPEALFQPSFLGMESCGIHETTFSIMK                                                          | 1.102478604        | 3              | 5.741781712 |
| P63259        | QEYDESGPSIVHR                                                                        | 1.060637587        | 3              | 3.517314434 |
| <b>P63269</b> | <b>ACTH Actin_gamma_enteric smooth muscle</b>                                        | <b>1.222123243</b> | <b>0.61125</b> | <b>2</b>    |
| P63269        | DLYANNVLSGGTTMYPGIADR                                                                | 1.152578578        | 2              | 3.436091185 |
| P63269        | KDLYANNVLSGGTTMYPGIADR                                                               | 1.326451031        | 2              | 5.080255032 |
| <b>P63324</b> | <b>RS12 40S ribosomal protein S12</b>                                                | <b>1.246662692</b> | <b>0.06754</b> | <b>3</b>    |
| P63324        | KVVGCSVVVK                                                                           | 1.223093864        | 2              | 2.629013777 |
| P63324        | LGEWVGLCK                                                                            | 1.24935305         | 2              | 3.14660573  |
| P63324        | VVGCSVVVK                                                                            | 1.145856148        | 2              | 3.031853914 |
| <b>P63331</b> | <b>PP2AA Serine/threonine_protein phosphatase 2A catalytic subunit alpha isoform</b> | <b>1.009328627</b> | <b>0.99006</b> | <b>2</b>    |
| P63331        | YSFLQFDPAPR                                                                          | 1.004174531        | 2              | 3.261454821 |
| P63331        | GAGYTFGQDISETFNHANGLTLVSR                                                            | 1.033358221        | 3              | 3.332388639 |
| <b>P67779</b> | <b>PHB Prohibitin</b>                                                                | <b>0.892757892</b> | <b>0.98511</b> | <b>10</b>   |
| P67779        | NVPVITGSK                                                                            | 1.004240676        | 1              | 2.470448017 |
| P67779        | AAELIANSLATAGDGLIELR                                                                 | 0.999629297        | 2              | 5.350703239 |
| P67779        | AAIISAEGDSK                                                                          | 1.142356423        | 2              | 2.403121471 |
| P67779        | DLQNVNITLR                                                                           | 0.932202002        | 2              | 3.784236193 |
| P67779        | FDAGELITQR                                                                           | 1.071713223        | 2              | 3.746639967 |
| P67779        | IYTSIGEDYDER                                                                         | 1.559331971        | 2              | 3.40908742  |
| P67779        | KLEAAEDIAYQLSR                                                                       | 0.89151599         | 2              | 4.912333488 |
| P67779        | QVSDDLTER                                                                            | 0.938414273        | 2              | 2.6317451   |
| P67779        | VLPSITTEILK                                                                          | 1.004469537        | 2              | 2.519778013 |
| P67779        | GVQDIVVGEGTHFLIPWVQKPIIFDCR                                                          | 1.02652339         | 3              | 5.326686382 |
| <b>P68037</b> | <b>UB2L3 Ubiquitin_conjugating enzyme E2 L3</b>                                      | <b>1.231894069</b> | <b>5.5E-12</b> | <b>4</b>    |
| P68037        | ADLAEYYSK                                                                            | 0.860948144        | 2              | 2.58318162  |
| P68037        | GQVCLPVisaENWKPATK                                                                   | 1.018044764        | 2              | 3.266385078 |
| P68037        | IEINFPAEYPFKPPK                                                                      | 1.353673811        | 2              | 3.694463015 |
| P68037        | TDQVIQSLIALVNDPQPEHLR                                                                | 1.202428603        | 2              | 4.870034218 |
| <b>P68101</b> | <b>IF2A Eukaryotic translation initiation factor 2 subunit 1</b>                     | <b>1.147851001</b> | <b>0.24322</b> | <b>5</b>    |
| P68101        | AGLNCSTETMPIK                                                                        | 1.108461936        | 2              | 2.860800982 |
| P68101        | TEGLSVLNQAMAVIK                                                                      | 1.173987462        | 2              | 3.80155921  |
| P68101        | VVTDTEDELAR                                                                          | 1.146900316        | 2              | 3.165407181 |
| P68101        | HAVSDPSILDSLNLNEDEREVLINNINR                                                         | 0.981867851        | 3              | 4.206168652 |

|               |                                              |                    |                |             |
|---------------|----------------------------------------------|--------------------|----------------|-------------|
| P68101        | HVAEVLEYTKDEQLESLFQR                         | 0.979770173        | 3              | 3.539818525 |
| <b>P68136</b> | <b>ACTS Actin_alpha skeletal muscle</b>      | <b>0.714829699</b> | <b>9.9E-20</b> | <b>16</b>   |
| P68136        | EITALAPSTMK                                  | 0.759520193        | 1              | 2.949130297 |
| P68136        | AGFAGDDAPR                                   | 1.24535447         | 2              | 3.363376856 |
| P68136        | AVFPSIVGRPR                                  | 1.115660682        | 2              | 2.951979399 |
| P68136        | DLYANNVMSGGTTMYPGIADR                        | 0.506586113        | 2              | 3.726366282 |
| P68136        | DSYVGDEAQSK                                  | 0.331020514        | 2              | 3.055640697 |
| P68136        | DSYVGDEAQSKR                                 | 1.729650898        | 2              | 2.466546297 |
| P68136        | EITALAPSTMK+Oxidation(10)                    | 0.839038976        | 2              | 2.766232967 |
| P68136        | GYSFVTTAER                                   | 0.595120799        | 2              | 3.80149889  |
| P68136        | KDLYANNVMSGGTTMYPGIADR                       | 0.568381325        | 2              | 5.20123291  |
| P68136        | QEYDEAGPSIVHR                                | 0.418906743        | 2              | 3.148323774 |
| P68136        | VAPEEHPTLLTEAPLNPK                           | 0.627394598        | 2              | 4.536060333 |
| P68136        | YPIEHGIITNWDDMEK                             | 1.276756028        | 2              | 4.545828342 |
| P68136        | CPETLFQPSFIGMESAGIHETTYNSIMK                 | 0.361069306        | 3              | 4.20481348  |
| P68136        | IWHHTFYNELR                                  | 1.174066788        | 3              | 3.712670803 |
| P68136        | TTGIVLDSGDGVTHNVPIYEGYALPHAIMR               | 0.482996535        | 3              | 6.719168663 |
| P68136        | TTGIVLDSGDGVTHNVPIYEGYALPHAIMR+Oxidation(29) | 0.763819248        | 3              | 5.513119698 |
| <b>P68255</b> | <b>1433T 14_3_3 protein theta</b>            | <b>1.238502517</b> | <b>0.0007</b>  | <b>5</b>    |
| P68255        | VISSIEQK                                     | 1.447367681        | 1              | 2.196409464 |
| P68255        | AVTEQGAELSNEER                               | 0.684950012        | 2              | 4.628492355 |
| P68255        | SICTTVLELLDK                                 | 1.193929523        | 2              | 2.770486593 |
| P68255        | TAFDEAIAELDTLNEDSYK                          | 1.19948733         | 2              | 4.521142006 |
| P68255        | YLIANATNPESK                                 | 1.141545575        | 2              | 3.574478388 |
| <b>P68511</b> | <b>1433F 14_3_3 protein eta</b>              | <b>1.024584884</b> | <b>1</b>       | <b>2</b>    |
| P68511        | AVTELNEPLSNEDR                               | 1.03462494         | 2              | 4.846217632 |
| P68511        | NSVVEASEAAYK                                 | 0.9987231          | 2              | 3.173925161 |
| <b>P69527</b> | <b>AMPO Aminopeptidase O</b>                 | <b>1.020009714</b> | <b>0.0845</b>  | <b>2</b>    |
| P69527        | LQQLAHRFCFELVK                               | 0.870488803        | 2              | 2.365371943 |
| P69527        | WHRLQDELQNSPEGMQVLRPNK                       | 1.300660704        | 2              | 2.493444204 |
| <b>P69897</b> | <b>TBB5 Tubulin beta_5 chain</b>             | <b>0.770103942</b> | <b>0.14264</b> | <b>4</b>    |
| P69897        | ALTVPELTQQVFDK                               | 1.005250417        | 2              | 3.419495583 |
| P69897        | ISVYYNEATGGK                                 | 1.02769059         | 2              | 2.888415813 |
| P69897        | LTTPTYGDLNHLVSATMSGVTTCLR                    | 1.086017363        | 2              | 5.224981308 |
| P69897        | FWEVISDEHGIDPTGYHGSDQLQDR                    | 0.781508143        | 3              | 5.777481556 |
| <b>P70372</b> | <b>ELAV1 ELAV_like protein 1</b>             | <b>1.099279321</b> | <b>0.93626</b> | <b>3</b>    |
| P70372        | SLFSSIGEVESAK                                | 1.101867848        | 2              | 3.415598154 |
| P70372        | TNLIVNYLPQNMTQEELR                           | 1.095983513        | 2              | 4.159861088 |
| P70372        | VLVDQTTGLSR                                  | 1.095617223        | 2              | 2.562122583 |
| <b>P70470</b> | <b>LYPA1 Acyl_protein thioesterase 1</b>     | <b>1.165385647</b> | <b>0.8641</b>  | <b>2</b>    |
| P70470        | ASFSQGPINSANR                                | 1.35583939         | 2              | 2.895800829 |
| P70470        | DISVLQCHGDCDPLVPLMFGSLTVER                   | 1.108962711        | 3              | 3.973758936 |
| <b>P70473</b> | <b>AMACR Alpha_methylacyl_CoA racemase</b>   | <b>0.953729357</b> | <b>0.00399</b> | <b>12</b>   |

|               |                                                                                 |                    |                |             |
|---------------|---------------------------------------------------------------------------------|--------------------|----------------|-------------|
| P70473        | ADVLLLEPFR                                                                      | 0.999264737        | 2              | 3.54111743  |
| P70473        | DYGFSQEEIHLHSDR                                                                 | 0.904705656        | 2              | 5.006958008 |
| P70473        | GQNLLDGGAPFYTTYK                                                                | 0.751701286        | 2              | 5.220074654 |
| P70473        | LGSVNHPHSLAR                                                                    | 2.023007613        | 2              | 2.914581299 |
| P70473        | LQLGPETLR                                                                       | 1.040681538        | 2              | 2.41605401  |
| P70473        | LSGFGQSGIFSK                                                                    | 2.520062651        | 2              | 2.778597832 |
| P70473        | TQAMGLWAQPR                                                                     | 0.899447011        | 2              | 3.512560844 |
| P70473        | AEWQCIFDGTDACVTPVLTLEEALHHQHNR                                                  | 1.077473423        | 3              | 5.555346012 |
| P70473        | GLGLESEELPSQMSIEDWPEMK                                                          | 1.055110249        | 3              | 4.662271976 |
| P70473        | GSFITDEEQHACPRPAPQLSR                                                           | 1.024081336        | 3              | 3.624453545 |
| P70473        | RDPSVGEHTVEVLK                                                                  | 0.9645083          | 3              | 4.365359306 |
| P70473        | RDPSVGEHTVEVLKDYGFSQEEIHLHSDR                                                   | 1.174377726        | 4              | 5.758040428 |
| <b>P70552</b> | <b>GFRP GTP cyclohydrolase 1 feedback regulatory protein</b>                    | <b>0.786353483</b> | <b>0.37822</b> | <b>2</b>    |
| P70552        | VLGNFYEYVNDPPR                                                                  | 1.222281235        | 2              | 3.969724655 |
| P70552        | MEVGPTMVGDEHSDPELMQQLGASK                                                       | 0.710584965        | 3              | 4.796403408 |
| <b>P70580</b> | <b>PGRC1 Membrane-associated progesterone receptor component 1</b>              | <b>1.217977049</b> | <b>0.74863</b> | <b>9</b>    |
| P70580        | RYDGVQDPR                                                                       | 1.188994591        | 1              | 2.181524277 |
| P70580        | EGEPTVYSDDEEPKDEAAR                                                             | 0.787242695        | 2              | 4.385364532 |
| P70580        | FYGPEGPYGVFAGR                                                                  | 0.975858247        | 2              | 4.09911871  |
| P70580        | GDQPGASGDNDDEPPPLPR                                                             | 1.068993282        | 2              | 5.144382954 |
| P70580        | KFYGPEGPYGVFAGR                                                                 | 1.030642781        | 2              | 3.817750216 |
| P70580        | YDGVQDPR                                                                        | 0.982521869        | 2              | 3.019557953 |
| P70580        | EALKDEYDDLTLPAQQETLNDWDSQFTFK                                                   | 1.226894367        | 3              | 5.462334156 |
| P70580        | IVRGDQPGASGDNDDEPPPLPR                                                          | 1.301243601        | 3              | 5.176754951 |
| P70580        | LLKEGEPTVYSDDEEPKDEAAR                                                          | 0.765626078        | 3              | 5.170353889 |
| <b>P70584</b> | <b>ACDSB Short/branched chain specific acyl-CoA dehydrogenase_mitochondrial</b> | <b>1.09251149</b>  | <b>1</b>       | <b>10</b>   |
| P70584        | ASSTCQLTFENVK                                                                   | 0.98307196         | 2              | 2.872116089 |
| P70584        | FAQEIQIAPLVSTMDENSK                                                             | 1.023950347        | 2              | 4.305191517 |
| P70584        | IGTIYEGTSNIQLNTIAK                                                              | 0.927542768        | 2              | 4.55360508  |
| P70584        | KFAQEIQIAPLVSTMDENSK                                                            | 0.934090341        | 2              | 5.426749229 |
| P70584        | SGNYVINGSK                                                                      | 1.073097748        | 2              | 2.618046999 |
| P70584        | SVIQGLFQQGMMGIEVEAK                                                             | 0.976965813        | 2              | 4.48707819  |
| P70584        | VDASVALLCDIQNTVINK                                                              | 0.898434418        | 2              | 4.913732529 |
| P70584        | YYASEVAGLTTSK                                                                   | 1.063280412        | 2              | 4.060379505 |
| P70584        | ASSTCQLTFENVKVPETSVLGK                                                          | 1.10417342         | 3              | 3.612604856 |
| P70584        | IFDFQGLQHVAHVATQLEAAR                                                           | 1.183379693        | 3              | 6.069091797 |
| <b>P70615</b> | <b>LMNB1 Lamin_B1</b>                                                           | <b>1.109646923</b> | <b>0.60064</b> | <b>3</b>    |
| P70615        | ALYETELADAR                                                                     | 1.058349068        | 2              | 3.241983414 |
| P70615        | LSSEMNTSTVNSAR                                                                  | 1.11439925         | 2              | 2.989428282 |
| P70615        | SLEGDLEDLKQIAQLEASLSAAK                                                         | 1.098320072        | 3              | 3.796171188 |
| <b>P70619</b> | <b>GSHR Glutathione reductase (Fragment)</b>                                    | <b>0.879408594</b> | <b>0.76678</b> | <b>2</b>    |

|               |                                               |                    |                |             |
|---------------|-----------------------------------------------|--------------------|----------------|-------------|
| P70619        | ALLTPVAIAAGR                                  | 0.879290225        | 2              | 2.726614952 |
| P70619        | LNNIYQNNLTK                                   | 1.10798663         | 2              | 3.053934813 |
| <b>P70694</b> | <b>DHB5 Estradiol 17 beta_dehydrogenase 5</b> | <b>0.828614534</b> | <b>0.00024</b> | <b>2</b>    |
| P70694        | REDIFYTSK                                     | 0.788817828        | 2              | 3.060360432 |
| P70694        | SIGVSNFNR                                     | 0.980649346        | 2              | 2.398679256 |
| <b>P70712</b> | <b>KYNU Kynureninase</b>                      | <b>1.205589034</b> | <b>5.8E-05</b> | <b>8</b>    |
| P70712        | IATELNCDPTDER                                 | 1.587874049        | 2              | 3.631254435 |
| P70712        | IGAYGHEVGK                                    | 1.282642139        | 2              | 2.841657639 |
| P70712        | LLTAILDSTERN                                  | 1.601759976        | 2              | 3.540504217 |
| P70712        | MEDILEVIEK                                    | 1.048780646        | 2              | 2.618864775 |
| P70712        | SILLTGYLEYLLK                                 | 1.201782111        | 2              | 3.106482267 |
| P70712        | TYLEEELDKWAK                                  | 0.644375157        | 2              | 2.954217911 |
| P70712        | VAPVPLYNSFHDVYK                               | 0.838749042        | 2              | 3.420878172 |
| P70712        | YLNSGAGGLAGAFIHEK                             | 1.254924404        | 2              | 4.454124451 |
| <b>P80067</b> | <b>CATC Dipeptidyl peptidase 1</b>            | <b>1.181714744</b> | <b>0.00325</b> | <b>5</b>    |
| P80067        | NQESCGSCYSFASLGMLEAR                          | 0.946205032        | 2              | 4.877143383 |
| P80067        | NSWGSQWGESGYFR                                | 0.961018128        | 2              | 3.031618834 |
| P80067        | RGTDECAIESIAMAAIPIK                           | 1.1529645          | 2              | 4.460057735 |
| P80067        | GTDECAIESIAMAAIPIK                            | 1.176997382        | 3              | 4.697886944 |
| P80067        | YAQDFGVVEENCFFPYTATDAPCKPK                    | 1.36101079         | 3              | 5.56243515  |
| <b>P80254</b> | <b>DOPD D_dopachrome decarboxylase</b>        | <b>0.858760711</b> | <b>0.81654</b> | <b>4</b>    |
| P80254        | FFPLEPWQIGK                                   | 0.863041305        | 2              | 3.027359724 |
| P80254        | FLTEELSLDQDR                                  | 0.868408512        | 2              | 3.730730057 |
| P80254        | LCAATATILDKPEDR                               | 1.864358448        | 2              | 4.233145714 |
| P80254        | STEPCAHLLISSIGVVGTAEQNR                       | 0.806152627        | 2              | 5.400578499 |
| <b>P80299</b> | <b>HYES Epoxide hydrolase 2</b>               | <b>1.222450889</b> | <b>0.00025</b> | <b>2</b>    |
| P80299        | ATEMGGILVGTPEDPK                              | 1.375634387        | 2              | 3.029355049 |
| P80299        | TEIQNPSVTSK                                   | 1.149956511        | 2              | 2.925995111 |
| <b>P80313</b> | <b>TCPH T_complex protein 1 subunit eta</b>   | <b>1.144507417</b> | <b>0.00268</b> | <b>4</b>    |
| P80313        | ATISNDGATILK                                  | 1.144156482        | 2              | 2.837523937 |
| P80313        | GGAEQFMEETER                                  | 1.209617389        | 2              | 2.504128218 |
| P80313        | QLCDNAGFDATNILNK                              | 1.296746762        | 2              | 3.52347517  |
| P80313        | SQDAEVGDGTTSVTLAAEFLK                         | 1.285096465        | 2              | 5.069993973 |
| <b>P80317</b> | <b>TCPZ T_complex protein 1 subunit zeta</b>  | <b>0.928318233</b> | <b>0.68032</b> | <b>9</b>    |
| P80317        | ALQFLEQVK                                     | 1.238220153        | 2              | 2.511016846 |
| P80317        | AQAALAVNISAAR                                 | 0.99445104         | 2              | 3.070793867 |
| P80317        | GIDPFSLDALAK                                  | 1.376846176        | 2              | 2.797105789 |
| P80317        | HKSETDTSLIR                                   | 1.10667278         | 2              | 2.676139116 |
| P80317        | TEVNSGFFYK                                    | 1.137481813        | 2              | 2.522156    |
| P80317        | VATAQDDITGDGTTSNVLIIGELLK                     | 1.000346537        | 2              | 4.962697506 |
| P80317        | VLAQNSGFDLQETLVK                              | 0.920155023        | 2              | 3.464996815 |
| P80317        | DGNVLLHEMQIQHTASLIAK                          | 1.036665154        | 3              | 4.781133175 |
| P80317        | NAIDGCVVPGAGAVEVALAEALIK                      | 1.112920845        | 3              | 5.038513184 |

|               |                                                                  |                    |                |             |
|---------------|------------------------------------------------------------------|--------------------|----------------|-------------|
| <b>P81155</b> | <b>VDAC2 Voltage_dependent anion_selective channel protein 2</b> | <b>0.854620904</b> | <b>0.40203</b> | <b>5</b>    |
| P81155        | LTFDTTFSPNTGK                                                    | 0.890744482        | 2              | 2.610927582 |
| P81155        | LTFDTTFSPNTGKK                                                   | 1.075386217        | 2              | 2.868081331 |
| P81155        | SCSGVEFSTSGSSNTDTGK                                              | 0.548938927        | 2              | 2.416996717 |
| P81155        | VNSSLIGVGYTQLRPGVK                                               | 0.656266106        | 2              | 3.61387682  |
| P81155        | YQLDPTASISAK                                                     | 1.008878237        | 2              | 2.948932409 |
| <b>P82995</b> | <b>HS90A Heat shock protein HSP 90_alpha</b>                     | <b>0.98591535</b>  | <b>1.7E-07</b> | <b>14</b>   |
| P82995        | FYEQFSK                                                          | 1.109102803        | 1              | 2.046714306 |
| P82995        | ELHINLIPNKQDR                                                    | 0.935695904        | 2              | 2.977379322 |
| P82995        | ELISNSSDALDK                                                     | 0.897011924        | 2              | 2.705179214 |
| P82995        | HIYFITGETK                                                       | 1.038969685        | 2              | 2.96289587  |
| P82995        | HSQFIGYPITLFVEK                                                  | 2.14855625         | 2              | 3.710536242 |
| P82995        | NPDDITNEEYGEFYK                                                  | 0.957242553        | 2              | 5.073233128 |
| P82995        | RAPFDLFENR                                                       | 1.350299242        | 2              | 2.364841461 |
| P82995        | SLTNDWEEHLAVK                                                    | 1.045663953        | 2              | 4.164336681 |
| P82995        | TLTIVDTGIGMTK                                                    | 1.031348469        | 2              | 4.342950344 |
| P82995        | TLTIVDTGIGMTK+Oxidation(11)                                      | 1.068426249        | 2              | 3.389466763 |
| P82995        | YYTSASGDEMVSJK                                                   | 1.02511405         | 2              | 3.424346685 |
| P82995        | HGLEVIYMIPIDEYCVQQLK                                             | 1.041836676        | 3              | 5.55117178  |
| P82995        | HLEINPDHSIETLR                                                   | 1.083800449        | 3              | 4.288922787 |
| P82995        | LGIHEDSQNR                                                       | 1.328859369        | 3              | 3.471329689 |
| <b>P83732</b> | <b>RL24 60S ribosomal protein L24</b>                            | <b>1.119382862</b> | <b>0.99972</b> | <b>2</b>    |
| P83732        | AITGASLADIMAK                                                    | 1.120735408        | 2              | 4.67363739  |
| P83732        | VELCSFSGYK                                                       | 1.030717195        | 2              | 2.370834827 |
| <b>P83868</b> | <b>TEBP Prostaglandin E synthase 3</b>                           | <b>1.45413899</b>  | <b>0.12916</b> | <b>2</b>    |
| P83868        | LTFSCGLGSDNFK                                                    | 1.444450199        | 2              | 2.768555164 |
| P83868        | HLNEIDLHFCIDPNDSK                                                | 1.533332692        | 3              | 3.304775476 |
| <b>P83883</b> | <b>RL36A 60S ribosomal protein L36a</b>                          | <b>1.372084883</b> | <b>0.00095</b> | <b>2</b>    |
| P83883        | HFELGGDK                                                         | 1.385620697        | 1              | 2.383584261 |
| P83883        | LECVENCR                                                         | 1.300516591        | 2              | 2.340214729 |
| <b>P83941</b> | <b>ELOC Transcription elongation factor B polypeptide 1</b>      | <b>1.136135171</b> | <b>0.03466</b> | <b>2</b>    |
| P83941        | AMLSGPGQFAENETNEVNFR                                             | 1.32006104         | 2              | 5.018530369 |
| P83941        | TYGGCEGPDAMYVK                                                   | 1.175436488        | 2              | 3.788761139 |
| <b>P84082</b> | <b>ARF2 ADP_ribosylation factor 2</b>                            | <b>0.953020222</b> | <b>0.99999</b> | <b>2</b>    |
| P84082        | NISFTVWDVGGQDK                                                   | 0.834382858        | 2              | 4.525797367 |
| P84082        | QDLPNAMNAEITDK                                                   | 1.06922074         | 2              | 3.861403942 |
| <b>P84083</b> | <b>ARF5 ADP_ribosylation factor 5</b>                            | <b>1.095456936</b> | <b>0.30916</b> | <b>2</b>    |
| P84083        | DAVLLVFANK                                                       | 1.057738442        | 2              | 2.487585545 |
| P84083        | VQESADELQK                                                       | 1.199080807        | 2              | 2.937437057 |
| <b>P84100</b> | <b>RL19 60S ribosomal protein L19</b>                            | <b>1.241540623</b> | <b>0.00031</b> | <b>2</b>    |
| P84100        | LLADQAEAR                                                        | 1.296770165        | 2              | 3.441292763 |
| P84100        | VWLDPNETNEIANANSR                                                | 1.091923582        | 2              | 5.813951492 |

|               |                                                               |                    |                |             |
|---------------|---------------------------------------------------------------|--------------------|----------------|-------------|
| <b>P84245</b> | <b>H33 Histone H3.3</b>                                       | <b>1.116327211</b> | <b>0.1765</b>  | <b>4</b>    |
| P84245        | RVTIMPKDIQLAR+Oxidation(5)                                    | 1.261550549        | 2              | 2.921031713 |
| P84245        | STELLIR                                                       | 1.112410016        | 2              | 2.513198376 |
| P84245        | YRPGTVALR                                                     | 1.09594384         | 2              | 2.360016346 |
| P84245        | FQSAAGALQEASEAYLVGLFEDTNLCAIHAK                               | 1.104571871        | 3              | 5.967076778 |
| <b>P84817</b> | <b>FIS1 Mitochondrial fission 1 protein</b>                   | <b>1.028014487</b> | <b>0.62651</b> | <b>4</b>    |
| P84817        | FQSEQAAGSVSK                                                  | 0.98084659         | 2              | 2.976790905 |
| P84817        | GIVLLELLPK                                                    | 1.233674193        | 2              | 2.317269802 |
| P84817        | GLLQTEPQNNQAK                                                 | 1.027986198        | 2              | 3.585855722 |
| P84817        | KFQSEQAAGSVSK                                                 | 1.067697511        | 2              | 4.055670738 |
| <b>P85834</b> | <b>EFTU Elongation factor Tu_ mitochondrial</b>               | <b>0.881714839</b> | <b>0.99548</b> | <b>16</b>   |
| P85834        | AEAGDNLGALVR                                                  | 1.012259709        | 2              | 3.74795413  |
| P85834        | DLEKPFLLPVESVYSIPGR                                           | 1.226713913        | 2              | 3.918323278 |
| P85834        | GDECELLGHNK                                                   | 1.04599607         | 2              | 2.590711355 |
| P85834        | GEETPVIVGSALCALEQR                                            | 0.917852316        | 2              | 4.593341351 |
| P85834        | GITINAAHVEYSTAAR                                              | 0.971758441        | 2              | 3.013216019 |
| P85834        | GTVVTGTLER                                                    | 1.01663913         | 2              | 2.874448776 |
| P85834        | HYAHTDCPGHADYVK                                               | 0.824452692        | 2              | 4.196345329 |
| P85834        | KYEEIDNAPEER                                                  | 1.094061426        | 2              | 3.57918644  |
| P85834        | LLDAVDTYIPVPTR                                                | 1.006040329        | 2              | 3.923561811 |
| P85834        | QIGVEHVVVVYVVK                                                | 0.887141492        | 2              | 2.858068705 |
| P85834        | TIGTGLVTDVPAMTEEDK                                            | 0.859948899        | 2              | 4.126779079 |
| P85834        | TIGTGLVTDVPAMTEEDKNIK                                         | 1.141481631        | 2              | 4.706573009 |
| P85834        | TVVTGIEMFHK                                                   | 0.896989947        | 2              | 2.451441526 |
| P85834        | YEEIDNAPEER                                                   | 1.094196558        | 2              | 3.185129404 |
| P85834        | DKPHVNVGTIGHVDHGK                                             | 0.945992889        | 3              | 3.480632067 |
| P85834        | KGDECELLGHNK                                                  | 1.099125213        | 3              | 3.93868351  |
| <b>P85968</b> | <b>6PGD 6_phosphogluconate dehydrogenase_ decarboxylating</b> | <b>1.003027742</b> | <b>3.2E-15</b> | <b>10</b>   |
| P85968        | YGPSLMPGGNK                                                   | 1.163999393        | 1              | 2.200737238 |
| P85968        | AGQAVDDFIEK                                                   | 1.22308592         | 2              | 2.926632643 |
| P85968        | CLSSLKEER                                                     | 1.313856531        | 2              | 2.403604507 |
| P85968        | FQDTDGKELLPK                                                  | 1.263895333        | 2              | 3.130638361 |
| P85968        | GILFVGSVSGGEEGAR                                              | 1.011887786        | 2              | 5.049153805 |
| P85968        | HEMLPANLIQAQR                                                 | 0.992131682        | 2              | 3.254577875 |
| P85968        | LVPLLDTGDIIDGGNSEYR                                           | 1.960957464        | 2              | 5.557896137 |
| P85968        | NPQLNLLDDFFK                                                  | 1.591864153        | 2              | 4.765734196 |
| P85968        | SAVDDCQDSWR                                                   | 0.708275638        | 2              | 2.947916508 |
| P85968        | VGTGEPCCDWVGDGAGHFVK                                          | 1.118608056        | 3              | 4.549165249 |
| <b>P85971</b> | <b>6PGL 6_phosphogluconolactonase</b>                         | <b>1.104715927</b> | <b>0.96171</b> | <b>5</b>    |
| P85971        | DLPAATAPAGPASFAR                                              | 0.912964903        | 2              | 2.414294958 |
| P85971        | ILEDQESALPAAMVQPR                                             | 1.144735486        | 2              | 4.168530941 |
| P85971        | LPIPSQVLTIDPALPVEDAAEDYAR                                     | 1.074298527        | 2              | 4.99045372  |



|               |                                                                     |                    |                |             |
|---------------|---------------------------------------------------------------------|--------------------|----------------|-------------|
| P85971        | TGALCWFLDEAAAR                                                      | 1.109365528        | 2              | 3.796179295 |
| P85971        | WTLGFCDER                                                           | 1.120856212        | 2              | 2.307162285 |
| <b>P85972</b> | <b>VINC Vinculin</b>                                                | <b>1.073260571</b> | <b>0.71275</b> | <b>12</b>   |
| P85972        | AIPDLTAPVAAVQAASVNLVR                                               | 1.055505021        | 2              | 3.352092505 |
| P85972        | AQQVSQGLDVLTAQ                                                      | 0.990091409        | 2              | 4.467333794 |
| P85972        | AVAGNISDPGLQK                                                       | 1.012331936        | 2              | 3.382884026 |
| P85972        | GQGASPVAMQK                                                         | 1.325373393        | 2              | 3.000859499 |
| P85972        | MLGQMTDQVADLR                                                       | 1.189598566        | 2              | 2.513656616 |
| P85972        | NRNFTVGKMSAEINEIIR+Oxidation(9)                                     | 1.08949061         | 2              | 2.730239868 |
| P85972        | QVATALQNLQTK                                                        | 1.084805737        | 2              | 3.721686602 |
| P85972        | SLLDASEEAQK                                                         | 1.165513395        | 2              | 2.633711815 |
| P85972        | STVEGIQASVK                                                         | 1.059503295        | 2              | 2.303559303 |
| P85972        | VLQLTSWDEDAWASK                                                     | 1.3198038          | 2              | 3.668216705 |
| P85972        | WIDNPTVDDR                                                          | 0.993207502        | 2              | 3.180115223 |
| P85972        | TNISDEESEQATEMLVHNAQNLMSVK                                          | 0.887311524        | 3              | 4.044253826 |
| <b>P85973</b> | <b>PNPH Purine nucleoside phosphorylase</b>                         | <b>0.987171235</b> | <b>0.04788</b> | <b>12</b>   |
| P85973        | ASHQEVLEAGK                                                         | 1.117242078        | 2              | 3.421037912 |
| P85973        | DHINLPGFCGQNPLR                                                     | 0.8816483          | 2              | 4.103766441 |
| P85973        | ELQEGTYIMSAGPTFETVAESCLLR                                           | 0.783833104        | 2              | 5.054265976 |
| P85973        | FEVGDIMLIR                                                          | 0.869178667        | 2              | 3.609839916 |
| P85973        | MLGADAVGMSTVPEVIVAR                                                 | 1.124358515        | 2              | 6.070861816 |
| P85973        | MLGADAVGMSTVPEVIVAR+Oxidation(1)                                    | 1.220630284        | 2              | 5.118424416 |
| P85973        | MLGADAVGMSTVPEVIVAR+Oxidation(9)                                    | 1.210369613        | 2              | 3.744544983 |
| P85973        | VFGFSLITNK                                                          | 1.141888276        | 2              | 2.816716671 |
| P85973        | VFHLLGVDTLVVTAAGGLNPK                                               | 1.250720251        | 2              | 5.835546017 |
| P85973        | VVMDYNNLEK                                                          | 1.101766125        | 2              | 2.606795549 |
| P85973        | HRPQVAVICGSLGLTAK                                                   | 1.015423725        | 3              | 6.297535419 |
| P85973        | LTQPQAFDYNEIPNPQSTVQGHAGR                                           | 1.75919929         | 3              | 4.737533092 |
| <b>P86048</b> | <b>RL10L 60S ribosomal protein L10_like</b>                         | <b>1.266925052</b> | <b>2.8E-07</b> | <b>4</b>    |
| P86048        | GAFGKPQGTVAR                                                        | 1.27987658         | 2              | 3.043518543 |
| P86048        | VHIGQVIMSIR                                                         | 1.318356567        | 2              | 2.824522495 |
| P86048        | AKVDEFPLCGHMVSDEYEQLSSEALEAAR                                       | 1.215648953        | 3              | 5.037976742 |
| P86048        | VDEFPLCGHMVSDEYEQLSSEALEAAR                                         | 0.966128775        | 3              | 5.803258896 |
| <b>P86252</b> | <b>PURA Transcriptional activator protein Pur_alpha (Fragments)</b> | <b>1.115824359</b> | <b>0.5756</b>  | <b>2</b>    |
| P86252        | LIDDYGVEEPAELPEGTSLVDNK                                             | 1.190142116        | 2              | 4.17131567  |
| P86252        | LIDDYGVEEPAELPEGTSLVDNKR                                            | 1.127815255        | 3              | 5.066577435 |
| <b>P97310</b> | <b>MCM2 DNA replication licensing factor MCM2</b>                   | <b>0.82760674</b>  | <b>0.38363</b> | <b>4</b>    |
| P97310        | EAGRGLGRMR                                                          | 1.176746401        | 2              | 2.547754049 |
| P97310        | HIESMIRMAEAHARMHLR                                                  | 0.799657917        | 2              | 2.667583704 |
| P97310        | LNQMDQDKVAR+Oxidation(4)                                            | 0.692861589        | 2              | 2.57703948  |
| P97310        | MITGLSKDQIQEK+Oxidation(1)                                          | 0.749740275        | 2              | 2.460684776 |
| <b>P97323</b> | <b>F16P3 Fructose_1_6_bisphosphatase isozyme 3 (Fragment)</b>       | <b>1.053538361</b> | <b>0.83208</b> | <b>2</b>    |

|               |                                                                   |                    |                |             |
|---------------|-------------------------------------------------------------------|--------------------|----------------|-------------|
| P97323        | GNIYSLNEGYAK                                                      | 1.041492124        | 2              | 3.942631483 |
| P97323        | KGNIYSLNEGYAK                                                     | 1.130271993        | 2              | 4.215837479 |
| <b>P97384</b> | <b>ANX11 Annexin A11</b>                                          | <b>1.021022247</b> | <b>0.27788</b> | <b>2</b>    |
| P97384        | GFGTDEQAIIIDCLGSR                                                 | 0.937677805        | 2              | 4.242279053 |
| P97384        | SELDLLDIR                                                         | 1.235496443        | 2              | 2.684845448 |
| <b>P97519</b> | <b>HMGCL Hydroxymethylglutaryl_CoA lyase_ mitochondrial</b>       | <b>1.039137504</b> | <b>0.36052</b> | <b>8</b>    |
| P97519        | GFEEAVAAGAK                                                       | 1.054885734        | 2              | 3.20173192  |
| P97519        | GYVSCALGCPYEGK                                                    | 1.187344437        | 2              | 3.726517677 |
| P97519        | KNVNCSEIESFQR                                                     | 1.092406496        | 2              | 3.561650276 |
| P97519        | LIDMLSEAGLPVIEATSFVSPK                                            | 1.303613547        | 2              | 4.858964443 |
| P97519        | LLEAGDFICQALNR                                                    | 1.165612225        | 2              | 4.500074863 |
| P97519        | NVNCSEIESFQR                                                      | 1.033813399        | 2              | 3.446860552 |
| P97519        | WVPQMADHSDVLK                                                     | 0.441897966        | 2              | 3.013937473 |
| P97519        | GASGNLATEDLVYMLTGLGIHTGVNLQK                                      | 0.903637148        | 3              | 3.892085791 |
| <b>P97521</b> | <b>MCAT Mitochondrial carnitine/acylcarnitine carrier protein</b> | <b>1.259342975</b> | <b>0.70967</b> | <b>5</b>    |
| P97521        | CLLQIQASSGK                                                       | 1.112160891        | 2              | 3.105041981 |
| P97521        | LQTQPPSLPGQPPMYSGTIDCFR                                           | 1.452621736        | 2              | 3.791845322 |
| P97521        | LYQEFQIR                                                          | 1.216678819        | 2              | 2.355670452 |
| P97521        | SVHDLVPR                                                          | 1.14674298         | 2              | 2.542304516 |
| P97521        | YSGTLCAK                                                          | 1.209854213        | 2              | 2.517919064 |
| <b>P97524</b> | <b>S27A2 Very long_chain acyl_CoA synthetase</b>                  | <b>1.237585836</b> | <b>9.4E-08</b> | <b>15</b>   |
| P97524        | ALHDHLGLR                                                         | 1.678953407        | 2              | 2.416388988 |
| P97524        | GEVGLLICK                                                         | 1.163945437        | 2              | 2.617999077 |
| P97524        | IQDTIEITGTFK                                                      | 1.021242547        | 2              | 2.50409317  |
| P97524        | ITELTPFFGYAGGK                                                    | 0.613113321        | 2              | 2.308541298 |
| P97524        | MKENYEFNGK                                                        | 0.909032087        | 2              | 3.256679296 |
| P97524        | SEVFTTTPAVYIYTSGTTGLPK                                            | 0.360175189        | 2              | 2.650690317 |
| P97524        | SLLHCFQCCGAK                                                      | 1.237801578        | 2              | 3.29537487  |
| P97524        | TILHVFLEQAR                                                       | 1.176190413        | 2              | 2.96387434  |
| P97524        | TYVPMTEDIYNAIIDK                                                  | 1.006228815        | 2              | 4.046018124 |
| P97524        | VLLASPELHEAVEEVLPTLK                                              | 1.318171046        | 2              | 3.867323875 |
| P97524        | VTLMEEGFNPSVIK                                                    | 0.744004716        | 2              | 3.676892519 |
| P97524        | YDVEKDEPVR                                                        | 1.3019188          | 2              | 2.835950851 |
| P97524        | YLCNTPQKPNDR                                                      | 1.255339705        | 2              | 3.040333509 |
| P97524        | YNATVIQYIGELLR                                                    | 1.407813763        | 2              | 2.753760099 |
| P97524        | TSNTNGVDTVLKDVGVSDPIPESWR                                         | 0.815033492        | 3              | 5.789157867 |
| <b>P97532</b> | <b>THTM 3_mercaptopyruvate sulfurtransferase</b>                  | <b>1.15174893</b>  | <b>0.43862</b> | <b>8</b>    |
| P97532        | AFGHHSVSLLDGGFR                                                   | 1.303157359        | 2              | 3.449926853 |
| P97532        | ALVSAQWVAEALK                                                     | 0.936052322        | 2              | 3.786030769 |
| P97532        | AQPEHVISQGR                                                       | 1.121898425        | 2              | 2.79148984  |
| P97532        | FQGTQPEPR                                                         | 1.045768519        | 2              | 2.943843842 |
| P97532        | LLDASWYLPK                                                        | 1.483400653        | 2              | 3.912312508 |

|               |                                                            |                    |                |             |
|---------------|------------------------------------------------------------|--------------------|----------------|-------------|
| P97532        | THEDILENLDR                                                | 1.078966524        | 2              | 3.375565767 |
| P97532        | YWLSQNLPISSGK                                              | 0.993070158        | 2              | 3.603411674 |
| P97532        | DGIEPGHIPGSVNIPFTEFLTSEGLEK                                | 1.16309959         | 3              | 6.766563416 |
| <b>P97536</b> | <b>CAND1 Cullin_associated NEDD8_dissociated protein 1</b> | <b>1.122929157</b> | <b>0.49132</b> | <b>5</b>    |
| P97536        | EGPAVVGQFIQDVK                                             | 1.051190716        | 2              | 2.758027554 |
| P97536        | ITSEALLVTQQLVK                                             | 1.266980584        | 2              | 2.347746134 |
| P97536        | LGTLALDILIK                                                | 1.850380755        | 2              | 2.534323215 |
| P97536        | LTLIDPETLLPR                                               | 1.429957695        | 2              | 2.680687428 |
| P97536        | TYIQCIAISR                                                 | 1.119284285        | 2              | 2.985819817 |
| <b>P97562</b> | <b>ACOX2 Peroxisomal acyl_coenzyme A oxidase 2</b>         | <b>1.082014686</b> | <b>0.65253</b> | <b>18</b>   |
| P97562        | ATASCTYEGENTVLYLQVAR                                       | 0.855084249        | 2              | 4.605514526 |
| P97562        | ATFADFCAQGAEICR                                            | 0.940994345        | 2              | 5.037241936 |
| P97562        | CSAQTAAEFR                                                 | 1.05003967         | 2              | 2.437994242 |
| P97562        | DFSLLPELHALSTGMK                                           | 0.930293017        | 2              | 2.608090878 |
| P97562        | EAFDLLPLIR                                                 | 0.795717864        | 2              | 2.711181879 |
| P97562        | ILEYQTQQQK                                                 | 1.148526252        | 2              | 3.91689992  |
| P97562        | KVESIIQSDPVFNK                                             | 1.046969328        | 2              | 4.949226379 |
| P97562        | LGTPQSNYLGMLVTR                                            | 1.760917167        | 2              | 3.515344143 |
| P97562        | LTNILDGGLPNTVLR                                            | 1.2381837          | 2              | 4.250740528 |
| P97562        | MGLEHIDNGFLQLNHVR                                          | 1.191565918        | 2              | 4.42318821  |
| P97562        | SLEDHTPLPGITVGDIGPK                                        | 0.96479171         | 2              | 4.551180363 |
| P97562        | SLGSDEQIAK                                                 | 1.085064288        | 2              | 2.849404812 |
| P97562        | VESIIQSDPVFNK                                              | 0.830889255        | 2              | 4.571508884 |
| P97562        | VLDGNVNLSLHGVMNAIR                                         | 1.08650571         | 2              | 5.008135796 |
| P97562        | DAILLTDAFDFSDHCLNSALGCYDGHVYER                             | 1.033767284        | 3              | 4.045087814 |
| P97562        | LCDLYALHGVLTNSGDFLHDGFLSGAQVDMAR                           | 1.801156567        | 3              | 5.698264122 |
| P97562        | LDKEPEIQR                                                  | 1.125015539        | 3              | 3.549217463 |
| P97562        | SGVDQHDAWNQTTVIHLQAAK                                      | 1.025816757        | 3              | 6.266915321 |
| <b>P97576</b> | <b>GRPE1 GrpE protein homolog 1_mitochondrial</b>          | <b>0.933666411</b> | <b>0.02232</b> | <b>3</b>    |
| P97576        | ALADTENLR                                                  | 1.079435717        | 2              | 2.306185007 |
| P97576        | DLLEVADILEK                                                | 0.858938319        | 2              | 2.432030201 |
| P97576        | EEVSNNNPHLK                                                | 0.933924554        | 2              | 3.284099102 |
| <b>P97584</b> | <b>PTGR1 Prostaglandin reductase 1</b>                     | <b>1.103649423</b> | <b>0.98332</b> | <b>5</b>    |
| P97584        | ALTDLMNWVSEGK                                              | 1.214568223        | 2              | 3.672785521 |
| P97584        | GGETVLVNAAAGAVGSVVGQIAK                                    | 1.203479591        | 2              | 4.741648674 |
| P97584        | HFEGFPTDSNFELR                                             | 1.023285385        | 2              | 3.899152994 |
| P97584        | TGPCPPGPSPEVIYQQLR                                         | 0.748352602        | 2              | 4.044153214 |
| P97584        | YHEYITEGFEK                                                | 1.077623364        | 2              | 2.927996874 |
| <b>P97608</b> | <b>OPLA 5_oxoprolinase</b>                                 | <b>1.173895427</b> | <b>0.84959</b> | <b>4</b>    |
| P97608        | AGDFGAAFVER                                                | 1.139745443        | 2              | 2.43717885  |
| P97608        | GSILDPSPEAAVVGGNVLTSSQR                                    | 1.232871616        | 2              | 5.046818256 |
| P97608        | LLESDPANYADAPTEGIR                                         | 0.941932391        | 2              | 3.844626904 |

|               |                                                                 |                    |                |             |
|---------------|-----------------------------------------------------------------|--------------------|----------------|-------------|
| P97608        | TGDILLEIQPVDLEALR                                               | 1.063879976        | 2              | 4.889736176 |
| <b>P97612</b> | <b>FAAH1 Fatty_acid amide hydrolase 1</b>                       | <b>1.515918347</b> | <b>0.01622</b> | <b>8</b>    |
| P97612        | EVEQLMTPQK                                                      | 0.623702782        | 2              | 2.323554277 |
| P97612        | GTNCVTSYLTDCETQLSQAPR                                           | 0.927109596        | 2              | 4.567977905 |
| P97612        | GYFGDIWDIILK                                                    | 1.53425406         | 2              | 3.401735067 |
| P97612        | LQHEIEMYSR                                                      | 1.110341752        | 2              | 2.376777172 |
| P97612        | LQSGELSPEAVFFTYLQK                                              | 1.665936998        | 2              | 4.523787498 |
| P97612        | NSVGLPVAVQCVALPWQEEELCLR                                        | 1.297379905        | 2              | 4.155115128 |
| P97612        | QGLLYGVPVSLK                                                    | 0.810406866        | 2              | 2.74480772  |
| P97612        | GHDSTLGLSLNEGMPSESDCVVVQVLK                                     | 1.147655487        | 3              | 4.691340923 |
| <b>P97700</b> | <b>M2OM Mitochondrial 2_oxoglutarate/malate carrier protein</b> | <b>1.206198197</b> | <b>0.1881</b>  | <b>3</b>    |
| P97700        | AVVVNAAQLASYSQSK                                                | 1.108165617        | 2              | 4.738537312 |
| P97700        | LGIYTVLFR                                                       | 2.635926219        | 2              | 3.058425426 |
| P97700        | LTGADGTPPGFLK                                                   | 1.2845451          | 2              | 2.820734024 |
| <b>P97852</b> | <b>DHB4 Peroxisomal multifunctional enzyme type 2</b>           | <b>1.112169274</b> | <b>7.3E-05</b> | <b>24</b>   |
| P97852        | AAVAVPSRPPDAVLR                                                 | 1.277808995        | 2              | 2.327848434 |
| P97852        | AVANYDSVEAGEK                                                   | 1.152044931        | 2              | 3.856596708 |
| P97852        | AYALFAER                                                        | 1.250245149        | 2              | 3.063968658 |
| P97852        | DTTSLNQAAALYSR                                                  | 0.703817677        | 2              | 2.658269644 |
| P97852        | FVYEGSADFSLPTFGVIVAQK                                           | 0.998042412        | 2              | 4.825916767 |
| P97852        | GALVVVNDLGGDFK                                                  | 0.988737171        | 2              | 3.658643007 |
| P97852        | GNIMLSQKLMILK+Oxidation(4)Oxidation(11)                         | 1.009068797        | 2              | 2.33970809  |
| P97852        | GSSAADKVVEEIR                                                   | 1.130929692        | 2              | 3.151083469 |
| P97852        | HVLQQFADNDVSR                                                   | 1.050209187        | 2              | 4.615936756 |
| P97852        | IDVVVNNAGILR                                                    | 1.023297355        | 2              | 3.654800415 |
| P97852        | ISDEDWDIIQR                                                     | 0.85830352         | 2              | 3.376808643 |
| P97852        | KNNIHCNTIAPNAGSR                                                | 1.196097004        | 2              | 4.782763004 |
| P97852        | LGLLGLANTLVIEGR                                                 | 1.971161288        | 2              | 3.407360315 |
| P97852        | LNPQNAFFSGR                                                     | 1.291456109        | 2              | 2.830401421 |
| P97852        | NGSGEVYQGPAAK                                                   | 1.012207589        | 2              | 3.515029669 |
| P97852        | NNIHCNTIAPNAGSR                                                 | 1.026731226        | 2              | 4.626990318 |
| P97852        | SIQESTGGIIEVLHK                                                 | 1.201604637        | 2              | 4.167755604 |
| P97852        | SLMSGGLAEVPGLSINFAK                                             | 1.073640216        | 2              | 4.597380161 |
| P97852        | SLMSGGLAEVPGLSINFAK+Oxidation(3)                                | 0.852132201        | 2              | 3.525694847 |
| P97852        | VLHGEQYLELYKPLPR                                                | 1.110254558        | 2              | 4.917131424 |
| P97852        | VNAVFEWHITK                                                     | 1.355234954        | 2              | 3.193546295 |
| P97852        | VVLVTGAGGGLGR                                                   | 1.089324376        | 2              | 4.554958344 |
| P97852        | ICDFSNASKPK                                                     | 1.313974489        | 3              | 3.791045904 |
| P97852        | IDSEGISQNHTGQVASADASGFAGVVGHK                                   | 1.180552674        | 3              | 6.135745525 |
| <b>Q00438</b> | <b>PTBP1 Polypyrimidine tract_binding protein 1</b>             | <b>1.091318161</b> | <b>0.56784</b> | <b>3</b>    |
| Q00438        | KLPSDVTEGEVISLGLPFGK                                            | 1.066254284        | 2              | 2.657301903 |
| Q00438        | NNQFQALLQYADPVSAQHAK                                            | 1.097108811        | 2              | 5.142713547 |

|               |                                                                                                                            |                    |                |             |
|---------------|----------------------------------------------------------------------------------------------------------------------------|--------------------|----------------|-------------|
| Q00438        | NFQNIFFPSATLHLSNIPPSVSEDDLK                                                                                                | 1.607097488        | 3              | 3.816119432 |
| <b>Q00PI9</b> | <b>HNRL2 Heterogeneous nuclear ribonucleoprotein U_like protein 2</b>                                                      | <b>1.45030438</b>  | <b>0.16492</b> | <b>4</b>    |
| Q00PI9        | EEAQPIVTKYK                                                                                                                | 1.169358685        | 1              | 1.949212432 |
| Q00PI9        | AVEEQGDDQDSEK                                                                                                              | 1.452763566        | 2              | 3.800951004 |
| Q00PI9        | DLLVQQASQCLSK                                                                                                              | 1.079034493        | 2              | 2.37082696  |
| Q00PI9        | SGDETPGSEAPGDK                                                                                                             | 1.037540366        | 2              | 2.68726778  |
| <b>Q01177</b> | <b>PLMN Plasminogen</b>                                                                                                    | <b>1.173592967</b> | <b>0.39863</b> | <b>3</b>    |
| Q01177        | ILGSDVQQIAVTK                                                                                                              | 1.152886499        | 2              | 3.400075197 |
| Q01177        | LVLEPNDADIALLK                                                                                                             | 1.268503428        | 2              | 2.649971962 |
| Q01177        | STELCAGHLAGGIDSCQGDSSGGLVCFEK                                                                                              | 1.092053554        | 3              | 4.977295876 |
| <b>Q01205</b> | <b>ODO2 Dihydropolyllysine_residue succinyltransferase component of 2_oxoglutarate dehydrogenase complex_mitochondrial</b> | <b>1.024371046</b> | <b>0.94631</b> | <b>4</b>    |
| Q01205        | ASAFALQEQPVVNAVIDDATK                                                                                                      | 1.166860096        | 2              | 6.39428997  |
| Q01205        | NDVITVQTPAFAESVTEGDVR                                                                                                      | 0.904961437        | 2              | 5.497101307 |
| Q01205        | NVETMNYADIER                                                                                                               | 0.977551838        | 2              | 3.519267559 |
| Q01205        | VEGGTPLFLTR                                                                                                                | 1.020167796        | 2              | 3.307943106 |
| <b>Q01405</b> | <b>SC23A Protein transport protein Sec23A</b>                                                                              | <b>1.013702965</b> | <b>6E-08</b>   | <b>4</b>    |
| Q01405        | AETEEGPDVLR                                                                                                                | 0.989249909        | 2              | 3.17017293  |
| Q01405        | AVLNPLCQVDYR                                                                                                               | 1.21896638         | 2              | 2.801267862 |
| Q01405        | YIDTEHGGSQAR                                                                                                               | 1.329166186        | 2              | 3.424380302 |
| Q01405        | HLLQAPVDDAQEILHSR                                                                                                          | 1.067060015        | 3              | 4.534856796 |
| <b>Q02253</b> | <b>MMSA Methylmalonate_semialdehyde dehydrogenase [acylating]_mitochondrial</b>                                            | <b>1.015840381</b> | <b>0.21358</b> | <b>29</b>   |
| Q02253        | NHGVVMPDANK                                                                                                                | 0.975552574        | 1              | 3.280660152 |
| Q02253        | AEMEAAVAACK                                                                                                                | 1.072865662        | 2              | 3.905119896 |
| Q02253        | AEMEAAVAACK+Oxidation(3)                                                                                                   | 1.092013073        | 2              | 2.863432169 |
| Q02253        | AEMEAAVAACKR                                                                                                               | 1.246911497        | 2              | 3.216963768 |
| Q02253        | AFPAWADTSILSR                                                                                                              | 1.110873966        | 2              | 4.202379704 |
| Q02253        | AISFVGSNQAGEYIFER                                                                                                          | 0.908487439        | 2              | 5.484769344 |
| Q02253        | CMALSTAVLVGEAK                                                                                                             | 1.120049079        | 2              | 4.563595772 |
| Q02253        | CMALSTAVLVGEAK+Oxidation(2)                                                                                                | 1.147225244        | 2              | 2.773892879 |
| Q02253        | EEDATLSSPAVVMPTMGR                                                                                                         | 0.8404729          | 2              | 4.908480167 |
| Q02253        | ENTLNQLVGAAFGAAGQR                                                                                                         | 0.831302632        | 2              | 5.017956257 |
| Q02253        | GDTNFGYK                                                                                                                   | 0.900152947        | 2              | 2.395291328 |
| Q02253        | GLQVVEHACSVTSLMLGETMPSITK                                                                                                  | 1.115941731        | 2              | 5.907081604 |
| Q02253        | GYENGNFVGPTIISNVKPSMTCYK                                                                                                   | 0.740766194        | 2              | 3.429329872 |
| Q02253        | IVNDNPYNGTAIFTTNGAIAR                                                                                                      | 1.141038925        | 2              | 5.57311058  |
| Q02253        | KWLPELVER                                                                                                                  | 0.925467747        | 2              | 2.324751854 |
| Q02253        | LITLEQ GK                                                                                                                  | 1.175848603        | 2              | 2.898320913 |
| Q02253        | NHGVVMPDANK+Oxidation(6)                                                                                                   | 1.222284204        | 2              | 3.113446474 |
| Q02253        | QGIQFYTLK                                                                                                                  | 0.897548667        | 2              | 2.854214668 |
| Q02253        | SDKWIDIHNPATNEVVGR                                                                                                         | 1.167814241        | 2              | 5.592189789 |

|               |                                            |                    |                |             |
|---------------|--------------------------------------------|--------------------|----------------|-------------|
| Q02253        | TITSQWKEEDATLSSPAVVMPTMGR                  | 0.880910358        | 2              | 5.416849613 |
| Q02253        | TLADAEGDVFR                                | 1.056755947        | 2              | 3.570842266 |
| Q02253        | VCNLIDSGAK                                 | 1.053624723        | 2              | 3.471072435 |
| Q02253        | VNAGDQPGADLGPLITPQAK                       | 1.033259794        | 2              | 5.999648094 |
| Q02253        | WIDIHNPATNEVVGR                            | 1.043717546        | 2              | 5.108803272 |
| Q02253        | WLPELVER                                   | 0.959210544        | 2              | 2.314651251 |
| Q02253        | LLQDSGAPDGTLNIIHGQHEAVNFICDHPDIK           | 1.413518636        | 3              | 4.821789265 |
| Q02253        | NHGVVMPDANKENTLNQLVGAAFGAAGQR              | 1.053710533        | 3              | 6.381165981 |
| Q02253        | NHGVVMPDANKENTLNQLVGAAFGAAGQR+Oxidation(6) | 1.025411445        | 3              | 4.817329407 |
| Q02253        | YAHMVDVGQVGVNPIVPLPMFSFTGSR                | 1.01672512         | 3              | 4.637993336 |
| <b>Q02769</b> | <b>FDFT Squalene synthase</b>              | <b>0.769271477</b> | <b>0.88136</b> | <b>3</b>    |
| Q02769        | TQSLPNCQLISR                               | 0.58281497         | 2              | 2.597066164 |
| Q02769        | VVLEDFPTISLEFR                             | 0.895611999        | 2              | 3.91082406  |
| Q02769        | KLEDFVKPENVDVAVK                           | 0.7690246          | 3              | 4.24852562  |
| <b>Q02974</b> | <b>KHK Ketoheokinase</b>                   | <b>1.153443262</b> | <b>0.74331</b> | <b>9</b>    |
| Q02974        | FGCQVAGK                                   | 1.037665524        | 2              | 2.878886223 |
| Q02974        | GGNASNSCTVLSLLGAR                          | 1.109085312        | 2              | 4.660804272 |
| Q02974        | GNSMQEALR                                  | 1.063663524        | 2              | 3.18398118  |
| Q02974        | IEQYNATQPLQKQ                              | 1.07996088         | 2              | 4.771267891 |
| Q02974        | TIILYDTNLPDVSAK                            | 1.138093147        | 2              | 4.822946072 |
| Q02974        | VSVEIEKPR                                  | 1.226519469        | 2              | 2.41057539  |
| Q02974        | GATLICAWAEEGADALPGDQLLHSDAFPPPR            | 1.171734435        | 3              | 5.863091469 |
| Q02974        | GVDVSQVAWQSQGDTPCSCCIVNNSNGSR              | 1.10237602         | 3              | 5.307177544 |
| Q02974        | RGVDVSQVAWQSQGDTPCSCCIVNNSNGSR             | 1.272842648        | 3              | 6.365031242 |
| <b>Q03248</b> | <b>BUP1 Beta_ureidopropionase</b>          | <b>1.08033804</b>  | <b>9.9E-20</b> | <b>13</b>   |
| Q03248        | AHHDLYGYFYSSYVAAPDGSR                      | 1.061128558        | 2              | 6.299263477 |
| Q03248        | ELAEAVKPNYSPIVVK                           | 1.003731124        | 2              | 4.328555107 |
| Q03248        | HLPPDLSQVK                                 | 1.219144517        | 2              | 2.306904316 |
| Q03248        | KHNMVVISPIER+Oxidation(4)                  | 1.068681723        | 2              | 2.782516956 |
| Q03248        | NAAIANHCFTCALNR                            | 1.492810472        | 2              | 4.71797657  |
| Q03248        | VGQEHYPNEFTSGDGK                           | 1.208078499        | 2              | 4.405058384 |
| Q03248        | EKLPWTEFAESAEDGLTTR                        | 0.92139841         | 3              | 5.011903763 |
| Q03248        | ELAEAVKPNYSPIVKEDLVLPSSG                   | 1.084921189        | 3              | 3.435462236 |
| Q03248        | HNMVVISPILER                               | 1.247465183        | 3              | 3.437039375 |
| Q03248        | IPLPTSAPVAEQVSALHK                         | 1.757509293        | 3              | 5.066462517 |
| Q03248        | KHNMVVISPIER                               | 1.13533867         | 3              | 3.525016546 |
| Q03248        | VGDFNESTYYMEGNLGHVPVFTQFGR                 | 1.284618917        | 3              | 4.806408405 |
| Q03248        | VGQEHYPNEFTSGDGKK                          | 1.370184227        | 3              | 5.190376759 |
| <b>Q03336</b> | <b>RGN Regucalcin</b>                      | <b>1.392058655</b> | <b>9.9E-20</b> | <b>19</b>   |
| Q03336        | CGESPVWEEASK                               | 1.188582914        | 2              | 4.566966057 |
| Q03336        | CLLFVDIPSK                                 | 1.659975319        | 2              | 3.268264055 |
| Q03336        | DEQIPDGMCIDVEGK                            | 1.208677804        | 2              | 4.634918213 |
| Q03336        | DYSEMYVTGAR                                | 0.491975117        | 2              | 2.501927614 |

|               |                                                        |                    |                |             |
|---------------|--------------------------------------------------------|--------------------|----------------|-------------|
| Q03336        | FNDGKVDPAGR                                            | 1.210047029        | 2              | 2.716225624 |
| Q03336        | GIAPYSYAG                                              | 1.32025062         | 2              | 2.538486004 |
| Q03336        | HQGSLSLFPDHSVK                                         | 1.243653959        | 2              | 4.597604752 |
| Q03336        | IECVLR                                                 | 1.111450682        | 2              | 2.418573618 |
| Q03336        | LWVACYNGGR                                             | 1.250867461        | 2              | 3.10249567  |
| Q03336        | MEKDEQIPDGMCIDVEGK                                     | 1.215948474        | 2              | 5.297059059 |
| Q03336        | MEKDEQIPDGMCIDVEGK+Oxidation(1)                        | 1.460811595        | 2              | 4.622582912 |
| Q03336        | MEKDEQIPDGMCIDVEGK+Oxidation(11)                       | 1.481507906        | 2              | 2.715712309 |
| Q03336        | QSGGYVATIGTK                                           | 1.062784086        | 2              | 2.776037931 |
| Q03336        | VGVDAPVSSVALR                                          | 1.318644302        | 2              | 3.715521812 |
| Q03336        | YFAGTMAEETAPAVLER                                      | 1.148196703        | 2              | 5.825893402 |
| Q03336        | YFAGTMAEETAPAVLER+Oxidation(6)                         | 1.222394588        | 2              | 5.420331478 |
| Q03336        | YFDQVDISGLDWSLDHK                                      | 1.100050919        | 2              | 4.528508186 |
| Q03336        | FCALNWEDQSVFILAMVDEDKK                                 | 2.281988713        | 3              | 4.193659306 |
| Q03336        | KYFDQVDISGLDWSLDHK                                     | 1.051948312        | 3              | 5.205665112 |
| <b>Q03410</b> | <b>SYCP1 Synaptonemal complex protein 1</b>            | <b>1.062833127</b> | <b>0.7397</b>  | <b>4</b>    |
| Q03410        | LQDENLK                                                | 1.160877877        | 1              | 1.988655686 |
| Q03410        | NIEELHQENKALK                                          | 1.107568808        | 1              | 1.908851027 |
| Q03410        | ATVDEAVKLQKEIDLR                                       | 0.675487609        | 2              | 2.366490841 |
| Q03410        | ISEEKLLGEVEK                                           | 0.955224027        | 2              | 2.308815956 |
| <b>Q03626</b> | <b>MUG1 Murinoglobulin_1</b>                           | <b>1.274033432</b> | <b>0.75168</b> | <b>7</b>    |
| Q03626        | EESSCIHSSCTAER                                         | 1.031081121        | 2              | 4.145668983 |
| Q03626        | GGEFEMMPLGVNK                                          | 0.836151545        | 2              | 3.150003672 |
| Q03626        | VQTVPLTCNNPK                                           | 1.178582799        | 2              | 2.77076292  |
| Q03626        | VYHKEESSCIHSSCTAER                                     | 1.176212461        | 2              | 5.465482712 |
| Q03626        | ESVVFVQTDKPVYKPGQSVK                                   | 0.828893969        | 3              | 3.46966958  |
| Q03626        | LTAQPAPSPEDLALSMGTIK                                   | 1.290838747        | 3              | 3.951302528 |
| Q03626        | NLHPLNELFPLAYIEDPK                                     | 1.284715315        | 3              | 4.114753246 |
| <b>Q04462</b> | <b>SYVC Valyl_tRNA synthetase</b>                      | <b>1.078500758</b> | <b>0.05378</b> | <b>3</b>    |
| Q04462        | ADFPAGIPECGTDALR                                       | 0.747113226        | 2              | 2.404207945 |
| Q04462        | ALNPLEEWLR                                             | 1.162871007        | 2              | 2.301828861 |
| Q04462        | SVTQQPGSEITAPQK                                        | 1.078399328        | 2              | 3.893895388 |
| <b>Q05144</b> | <b>RAC2 Ras_related C3 botulinum toxin substrate 2</b> | <b>1.128532965</b> | <b>0.22364</b> | <b>2</b>    |
| Q05144        | MQAIKCVVVDGAVGK+Oxidation(1)                           | 1.160696572        | 2              | 2.608152151 |
| Q05144        | YLECSALTQR                                             | 1.035300345        | 2              | 3.000401258 |
| <b>Q06647</b> | <b>ATPO ATP synthase subunit O_mitochondrial</b>       | <b>1.17250621</b>  | <b>0.00012</b> | <b>8</b>    |
| Q06647        | YATALYSAASK                                            | 0.23488364         | 1              | 2.120351315 |
| Q06647        | FSPLTANLMNLLAENGR                                      | 1.223486767        | 2              | 3.964576244 |
| Q06647        | GEVPCTVTTAFPLDEAVLSELK                                 | 1.187281138        | 2              | 5.331629276 |
| Q06647        | GQLNLEVK                                               | 1.128236567        | 2              | 2.664919853 |
| Q06647        | TDPSIMGGMIVR                                           | 0.998344259        | 2              | 3.26981473  |
| Q06647        | TVLNSFLSK                                              | 1.12470393         | 2              | 2.754984856 |
| Q06647        | VSLAVLNPIYIK                                           | 1.475583634        | 2              | 3.671344042 |

|               |                                                       |                    |                |             |
|---------------|-------------------------------------------------------|--------------------|----------------|-------------|
| Q06647        | LGNTQGVISAFSTIMSVHR                                   | 1.156204098        | 3              | 4.719233513 |
| <b>Q07071</b> | <b>GCKR Glucokinase regulatory protein</b>            | <b>1.434970211</b> | <b>9.9E-20</b> | <b>12</b>   |
| Q07071        | AAPISCHVQVAHEK                                        | 1.449921423        | 2              | 4.803567886 |
| Q07071        | GFLIGDHSDMFNQK                                        | 1.21263003         | 2              | 2.56756711  |
| Q07071        | GLGQKPLYTYLIAGGDR                                     | 1.038672763        | 2              | 2.608589172 |
| Q07071        | LLGQCDAEIFQEEGQIVPTYQR                                | 2.106475221        | 2              | 4.956361294 |
| Q07071        | LYSESVLTTMLQVAGK                                      | 1.368003815        | 2              | 3.297308445 |
| Q07071        | QEAFVLNPAIGPEGLSGSSR                                  | 1.101848944        | 2              | 4.249424458 |
| Q07071        | TVDQGVVSSQR                                           | 1.294788657        | 2              | 3.654975891 |
| Q07071        | VIPTALLSLLL                                           | 1.651804163        | 2              | 3.409047127 |
| Q07071        | VQEVLEKPDGGLVVLVSGGGTSGR                              | 1.313657931        | 2              | 5.236416817 |
| Q07071        | WVLNTVSTGAHVLLGK                                      | 1.461700902        | 2              | 3.437934637 |
| Q07071        | CQNIQALVHSTVGQSLPAPLKK                                | 1.322800988        | 3              | 4.859113216 |
| Q07071        | YQHVIETPEPGEWELSGYEAAPITEK                            | 0.854289406        | 3              | 4.010899067 |
| <b>Q07116</b> | <b>SUOX Sulfite oxidase_mitochondrial</b>             | <b>0.977221486</b> | <b>0.99893</b> | <b>8</b>    |
| Q07116        | AVDDSYNVQPDTVAPIWNLR                                  | 0.95032244         | 2              | 5.173858643 |
| Q07116        | HEVTVTLQCAGNR                                         | 1.480011154        | 2              | 3.095987082 |
| Q07116        | MSPPLEASDPYSNDPMR                                     | 0.757893483        | 2              | 3.938340664 |
| Q07116        | NHLPVPNLDPDTYR                                        | 1.00844114         | 2              | 2.798040867 |
| Q07116        | VSEVEESYSHWQR                                         | 0.970247621        | 2              | 4.036505699 |
| Q07116        | VVVPGVVGAR                                            | 1.000514414        | 2              | 2.746874571 |
| Q07116        | ETEAHVCFEGLSDPTGTAYGASIPLAR                           | 0.834489018        | 3              | 4.505449295 |
| Q07116        | INSQRPFNAEPPPELLTESYITPNPIFFTR                        | 1.479640188        | 3              | 4.477169514 |
| <b>Q07205</b> | <b>IF5 Eukaryotic translation initiation factor 5</b> | <b>1.165602658</b> | <b>0.24798</b> | <b>2</b>    |
| Q07205        | AMGPLVLTEVLFDEK                                       | 1.223502854        | 2              | 3.549428701 |
| Q07205        | TVIVNMVDVAK                                           | 1.136587899        | 2              | 2.350655079 |
| <b>Q07523</b> | <b>HAOX2 Hydroxyacid oxidase 2</b>                    | <b>1.015742632</b> | <b>0.98858</b> | <b>14</b>   |
| Q07523        | EDAELAMK                                              | 0.924305819        | 1              | 1.941813111 |
| Q07523        | ALKEEKPTQSVVPSFK                                      | 1.051954174        | 2              | 4.623281956 |
| Q07523        | ALVITIDTPVLGNR                                        | 0.972135124        | 2              | 4.009721756 |
| Q07523        | ASFCWNDLSLLQSITR                                      | 1.557699795        | 2              | 4.589102745 |
| Q07523        | CMTLSGCQSVAEISPDLIQFSR                                | 1.057571383        | 2              | 3.548344374 |
| Q07523        | E EKPTQSVVPSFK                                        | 0.889551282        | 2              | 2.944642067 |
| Q07523        | EVL DILTAELHR                                         | 0.844495964        | 2              | 3.173909903 |
| Q07523        | NQLNLEANILLK                                          | 0.814429163        | 2              | 3.619381666 |
| Q07523        | QLDEVASIDALR                                          | 0.952885852        | 2              | 3.119019747 |
| Q07523        | TGTDVLK                                               | 0.82864591         | 2              | 2.31738615  |
| Q07523        | TSWDFIEGEADDGITYSENIAAFK                              | 0.564508438        | 2              | 4.451080322 |
| Q07523        | GEDGVKEVLDILTAELHR                                    | 1.376175919        | 3              | 5.545389652 |
| Q07523        | HNVQGIVVSNHGGR                                        | 0.931441455        | 3              | 6.222715378 |
| Q07523        | TTIQQEISAPICISPTAFHSIAWPDGEK                          | 0.840079629        | 3              | 3.771000385 |
| <b>Q07936</b> | <b>ANXA2 Annexin A2</b>                               | <b>1.094851516</b> | <b>0.42852</b> | <b>4</b>    |
| Q07936        | AEDGSVIDYELIDQDAR                                     | 1.117562048        | 2              | 3.901085615 |



|               |                                                                    |                    |                |             |
|---------------|--------------------------------------------------------------------|--------------------|----------------|-------------|
| Q07936        | GLGTDEDSLIEIICSR                                                   | 1.10293055         | 2              | 3.975583553 |
| Q07936        | GVDEVTVNLTNR                                                       | 0.870871019        | 2              | 3.825793028 |
| Q07936        | TNQELQEINR                                                         | 1.095763914        | 2              | 3.107836723 |
| <b>Q07984</b> | <b>SSRD Translocon_associated protein subunit delta</b>            | <b>1.225493334</b> | <b>3.7E-06</b> | <b>2</b>    |
| Q07984        | FFDEESYSLLR                                                        | 1.209262744        | 2              | 3.12842536  |
| Q07984        | NNEDVSIIPPLFTVSVDHR                                                | 1.225251622        | 2              | 4.276744366 |
| <b>Q08163</b> | <b>CAP1 Adenylyl cyclase_associated protein 1</b>                  | <b>1.030362768</b> | <b>0.00349</b> | <b>9</b>    |
| Q08163        | ALLVTASQCQPAGNK                                                    | 0.922766069        | 2              | 4.224589348 |
| Q08163        | AYLSIWTELQAYIK                                                     | 0.890074727        | 2              | 2.301376104 |
| Q08163        | LSDLLAPISEQIQEVITFR                                                | 1.012700291        | 2              | 4.004083633 |
| Q08163        | NSLDCEIVSAK                                                        | 1.072611131        | 2              | 2.351902485 |
| Q08163        | SALFAQINQGESITHALK                                                 | 1.125009531        | 2              | 4.564942837 |
| Q08163        | SSEMNVLIPTEGGDFNEFPVPEQFK                                          | 1.229950549        | 2              | 4.07185173  |
| Q08163        | VENQENVSNLVIDDELK                                                  | 1.213586282        | 2              | 5.129750252 |
| Q08163        | ELSGLPSGSPVSGPPPPPPPPPPVPTSSGSDSASR                                | 1.241992484        | 3              | 4.706572533 |
| Q08163        | LEAVSHTSDMHCGYGDSPSK                                               | 0.962584524        | 3              | 5.015257359 |
| <b>Q08415</b> | <b>KAT1 Kynurenine__oxoglutarate transaminase 1_ mitochondrial</b> | <b>0.849749823</b> | <b>0.1751</b>  | <b>3</b>    |
| Q08415        | ILVLNTPNNPLGK                                                      | 2.222007915        | 2              | 3.386118174 |
| Q08415        | LGASNDWQLDPAELASK                                                  | 1.004341611        | 2              | 3.980907679 |
| Q08415        | EQQHFGQPSSYFLQLPQAMELNR                                            | 0.90963948         | 3              | 4.848612309 |
| <b>Q09073</b> | <b>ADT2 ADP/ATP translocase 2</b>                                  | <b>1.069613946</b> | <b>9.9E-20</b> | <b>7</b>    |
| Q09073        | DFLAGGVAAAIK                                                       | 0.632236899        | 2              | 5.010077953 |
| Q09073        | GLGDCLVK                                                           | 1.157623412        | 2              | 2.875092506 |
| Q09073        | GMGGAFVLVLYDEIKK                                                   | 1.328712209        | 2              | 3.61510396  |
| Q09073        | GTDIMYGTLDLCWR                                                     | 0.677283791        | 2              | 3.55932641  |
| Q09073        | KGTDIMYGTLDLCWR                                                    | 0.93319217         | 2              | 4.031659603 |
| Q09073        | LLLQVQHASK                                                         | 2.012983927        | 2              | 2.741006613 |
| Q09073        | QIFLGGVDKR                                                         | 1.203726578        | 2              | 2.3789258   |
| <b>Q0D2L3</b> | <b>SPEB Agmatinase_ mitochondrial</b>                              | <b>1.034422711</b> | <b>0.77805</b> | <b>9</b>    |
| Q0D2L3        | SVDEGLLDSK                                                         | 0.919242498        | 1              | 1.926742435 |
| Q0D2L3        | EESLMLGTVNPSTGALPFQSLR                                             | 0.767391392        | 2              | 3.893678665 |
| Q0D2L3        | SVDEGLLDSKR                                                        | 1.061253941        | 2              | 3.079544783 |
| Q0D2L3        | VADLGNVNVNLYNLQDSCR                                                | 1.205808563        | 2              | 5.178209305 |
| Q0D2L3        | VVLAEDCWMK                                                         | 1.598017137        | 2              | 2.405902386 |
| Q0D2L3        | EAYQNILATGCIPLTLGGDHTITYILQAVAK                                    | 1.614461119        | 3              | 3.395273209 |
| Q0D2L3        | EHGPVGLVHVGASNTSDKPLEDK                                            | 1.021659233        | 3              | 3.474751711 |
| Q0D2L3        | IREESLMLGTVNPSTGALPFQSLR                                           | 0.79435864         | 3              | 4.771517277 |
| Q0D2L3        | VCSMMHLPLQSSPEGLDAAFVGVPLDTGTSNRPGAR                               | 1.275817726        | 3              | 5.759459496 |
| <b>Q0VAV2</b> | <b>EXPH5 Exophilin_5</b>                                           | <b>1.234992863</b> | <b>0.35925</b> | <b>2</b>    |
| Q0VAV2        | DMDVSVSKDEQLNK+Oxidation(2)                                        | 1.249433392        | 2              | 2.528829813 |
| Q0VAV2        | SLSDQDPGQEQREEK                                                    | 1.234973957        | 2              | 2.304531574 |
| <b>Q0VGK3</b> | <b>GLCK Glycerate kinase</b>                                       | <b>1.14347158</b>  | <b>0.9057</b>  | <b>6</b>    |

|               |                                                           |                    |                |             |
|---------------|-----------------------------------------------------------|--------------------|----------------|-------------|
| Q0VGK3        | AVLGMAAADELQHLVQGVISVPK                                   | 1.13608855         | 2              | 4.849723816 |
| Q0VGK3        | GATIQELNTR                                                | 1.113545187        | 2              | 2.868217468 |
| Q0VGK3        | QLFDSAVGAVQPGPMLQR                                        | 0.994849304        | 2              | 4.805804253 |
| Q0VGK3        | VAAACLSSTAERPLEEEAK                                       | 1.087864063        | 2              | 3.201857567 |
| Q0VGK3        | ADSDPHGPHTCGHVNLNVIIGSNLALAEAAQR                          | 1.100574249        | 3              | 4.82085371  |
| Q0VGK3        | LHQLAAELQLPDLQLEEALEAVAK                                  | 1.565467573        | 3              | 3.610090494 |
| <b>Q0ZHH6</b> | <b>ATLA3 Atlastin_3</b>                                   | <b>1.10068041</b>  | <b>0.00116</b> | <b>8</b>    |
| Q0ZHH6        | ALASVLLQDHIR                                              | 1.406644686        | 2              | 2.655458689 |
| Q0ZHH6        | EHQHEEIQNVR                                               | 0.819094522        | 2              | 3.605910063 |
| Q0ZHH6        | EQLQTLIPYVNLPSK                                           | 0.825048441        | 2              | 3.26649189  |
| Q0ZHH6        | GGSDPETTGIIQWSEVFTVK                                      | 2.95543129         | 2              | 2.358603239 |
| Q0ZHH6        | IYQGEDLPHPK                                               | 1.123045775        | 2              | 2.788579464 |
| Q0ZHH6        | LAMDEIFQKPFQTMFLVR+Oxidation(3)                           | 1.125997913        | 2              | 2.489993811 |
| Q0ZHH6        | YQQLLEEEITELYENFCK                                        | 1.542190455        | 2              | 5.327203751 |
| Q0ZHH6        | YSGQYLELGGAGSAAAYVLEQASSHIGNSTQAAVR                       | 1.280072726        | 3              | 3.365163565 |
| <b>Q10728</b> | <b>MYPT1 Protein phosphatase 1 regulatory subunit 12A</b> | <b>1.090455676</b> | <b>0.93393</b> | <b>2</b>    |
| Q10728        | QEEKKESEVSR                                               | 0.840307896        | 2              | 2.339062214 |
| Q10728        | SLLEMEKRER+Oxidation(5)                                   | 1.081315861        | 2              | 2.400444508 |
| <b>Q10758</b> | <b>K2C8 Keratin_ type II cytoskeletal 8</b>               | <b>0.975096954</b> | <b>0.69363</b> | <b>25</b>   |
| Q10758        | QIHEEEIR                                                  | 1.040614224        | 1              | 2.316265821 |
| Q10758        | QLEALGQEK                                                 | 0.961014747        | 1              | 2.150196552 |
| Q10758        | AEAETMYQIK                                                | 1.046719899        | 2              | 3.122698784 |
| Q10758        | AQYEEIANR                                                 | 0.991995137        | 2              | 3.166008234 |
| Q10758        | ATLEAAIADAEQR                                             | 0.94076691         | 2              | 4.706914902 |
| Q10758        | DVDEAYMKNKVELESR                                          | 1.74602193         | 2              | 3.563874483 |
| Q10758        | ELQSQISDTSVVLMSDMSR                                       | 0.589992557        | 2              | 5.96615839  |
| Q10758        | GSLGGFGGAGVGGITAVTVNQSLLNPLK                              | 1.005659249        | 2              | 4.748090744 |
| Q10758        | KDVDEAYMKNK                                               | 0.975278284        | 2              | 2.576738119 |
| Q10758        | LEGLTDEINFLR                                              | 1.012576889        | 2              | 4.051198006 |
| Q10758        | LESGMQNMSIHTK                                             | 0.953285868        | 2              | 4.181872368 |
| Q10758        | LEVDPNIQAVR                                               | 0.940707493        | 2              | 3.830272913 |
| Q10758        | LEVELGNMQGLVEDFK                                          | 1.090956518        | 2              | 4.968849182 |
| Q10758        | LQAEIDALK                                                 | 1.043962825        | 2              | 2.975306273 |
| Q10758        | LVSESSDIMSK                                               | 1.139070537        | 2              | 3.332324743 |
| Q10758        | SKTEISEMNR                                                | 0.80544933         | 2              | 3.083977222 |
| Q10758        | SKTEISEMNR+Oxidation(8)                                   | 1.46273039         | 2              | 3.093940973 |
| Q10758        | SLDMDSIIAEVR                                              | 0.907140516        | 2              | 4.939464569 |
| Q10758        | SNMDNMFESYINNL                                            | 1.176552418        | 2              | 4.055940628 |
| Q10758        | SRAEAETMYQIK                                              | 1.056427969        | 2              | 3.441725969 |
| Q10758        | TEISEMNR                                                  | 0.926173205        | 2              | 2.444743872 |
| Q10758        | TEMENEFVLIK                                               | 0.96770091         | 2              | 3.651865482 |
| Q10758        | TEMENEFVLIK+Oxidation(3)                                  | 0.995496404        | 2              | 2.408712387 |
| Q10758        | WSLLQQQK                                                  | 0.951837145        | 2              | 2.934141159 |

|               |                                                                            |                    |                |             |
|---------------|----------------------------------------------------------------------------|--------------------|----------------|-------------|
| Q10758        | YEELQTLAGK                                                                 | 0.984598385        | 2              | 3.562259912 |
| <b>Q14DH7</b> | <b>ACSS3 Acyl-CoA synthetase short_chain family member 3_mitochondrial</b> | <b>1.081534956</b> | <b>0.99977</b> | <b>6</b>    |
| Q14DH7        | CVPGYNVMILDDNMQK                                                           | 0.806823531        | 2              | 2.63263154  |
| Q14DH7        | STLSALVNGKPYK                                                              | 0.99660776         | 2              | 2.450207949 |
| Q14DH7        | THFAASVADPER                                                               | 0.87531511         | 2              | 3.674227238 |
| Q14DH7        | VDDVINVAGHR                                                                | 1.006496503        | 2              | 3.745274544 |
| Q14DH7        | VLAEHGVAALFTAPTAIR                                                         | 0.931356887        | 2              | 4.45122385  |
| Q14DH7        | VTPTIEDPSIFGHIEEVLK                                                        | 1.112109014        | 2              | 2.912098885 |
| <b>Q1HCL7</b> | <b>NAKD1 NAD kinase domain_containing protein 1</b>                        | <b>0.947282828</b> | <b>1.5E-06</b> | <b>10</b>   |
| Q1HCL7        | ASYEISVDDGPWEK                                                             | 1.063007251        | 2              | 2.527392864 |
| Q1HCL7        | LKPVIGVNTDPER                                                              | 1.493747891        | 2              | 2.88496089  |
| Q1HCL7        | NVEHIIDSLRDEGIEVR                                                          | 1.314408638        | 2              | 3.455521584 |
| Q1HCL7        | QGNLTLPLNK                                                                 | 1.078908783        | 2              | 2.338242054 |
| Q1HCL7        | REYDEETVR                                                                  | 1.477389359        | 2              | 2.448055744 |
| Q1HCL7        | SEASGPQLLPVR                                                               | 0.924269093        | 2              | 2.951103449 |
| Q1HCL7        | SSGLNLCTGTGSK                                                              | 0.99695408         | 2              | 3.854199171 |
| Q1HCL7        | VTNEYNESLLYSPEEPK                                                          | 1.213558682        | 2              | 4.46385479  |
| Q1HCL7        | YTHSFPEALQK                                                                | 1.202771158        | 2              | 2.598319054 |
| Q1HCL7        | LYLEGTGINPSPVDLHEQQLSLNQHSR                                                | 1.106061654        | 3              | 4.710017681 |
| <b>Q1JU68</b> | <b>EIF3A Eukaryotic translation initiation factor 3 subunit A</b>          | <b>1.151093137</b> | <b>0.41535</b> | <b>3</b>    |
| Q1JU68        | LLDMDGIIVEK                                                                | 1.256174474        | 2              | 2.555736303 |
| Q1JU68        | NQLTAMSSVLAK                                                               | 1.133807507        | 2              | 2.650067568 |
| Q1JU68        | EQPEKEPELQQYVPQLQNNILR                                                     | 0.894142741        | 3              | 3.442136526 |
| <b>Q29RW1</b> | <b>MYH4 Myosin_4</b>                                                       | <b>0.463092673</b> | <b>0.01231</b> | <b>14</b>   |
| Q29RW1        | LQDLVDKQLTK                                                                | 1.145643385        | 1              | 1.938905001 |
| Q29RW1        | ANLMQAEIEELR                                                               | 0.765341045        | 2              | 3.010677099 |
| Q29RW1        | ELENEVENEQKR                                                               | 0.257936782        | 2              | 2.98761797  |
| Q29RW1        | LAQESTMDIENDKQQQLDEK                                                       | 0.28644068         | 2              | 4.940879345 |
| Q29RW1        | LQDAEEHVEAVNSK                                                             | 0.300859101        | 2              | 4.562023163 |
| Q29RW1        | MEGDLNEMEIQLNHANR                                                          | 0.635823233        | 2              | 4.341679096 |
| Q29RW1        | NAYEESLDQLETLK                                                             | 0.572972141        | 2              | 4.578883648 |
| Q29RW1        | NAYEESLDQLETLKR                                                            | 0.541672786        | 2              | 4.054221153 |
| Q29RW1        | SELQASLEEAASLEHEEGK                                                        | 0.258565246        | 2              | 5.287261486 |
| Q29RW1        | SNAACAALDKK                                                                | 0.81226443         | 2              | 2.451460123 |
| Q29RW1        | TEGGATVTVK                                                                 | 0.507510221        | 2              | 2.691892147 |
| Q29RW1        | TKLEQQVDDLEGSLEQEK                                                         | 1.191813155        | 2              | 5.655308247 |
| Q29RW1        | TKLEQQVDDLEGSLEQEKK                                                        | 0.475567271        | 3              | 5.108285427 |
| Q29RW1        | VRELENEVENEQKR                                                             | 0.511770184        | 3              | 3.707527399 |
| <b>Q2EMV9</b> | <b>PAR14 Poly [ADP_ribose] polymerase 14</b>                               | <b>1.120315117</b> | <b>0.47658</b> | <b>3</b>    |
| Q2EMV9        | LQEELTR                                                                    | 1.320473629        | 1              | 2.117668152 |
| Q2EMV9        | LIISEVLK                                                                   | 1.185784475        | 2              | 2.5172019   |
| Q2EMV9        | VLVEFEKESLNIAGK                                                            | 0.876719856        | 2              | 2.586992979 |

|               |                                                                     |                    |                |             |
|---------------|---------------------------------------------------------------------|--------------------|----------------|-------------|
| <b>Q2V057</b> | <b>PROD2 Probable proline dehydrogenase 2</b>                       | <b>1.2859189</b>   | <b>2.8E-08</b> | <b>8</b>    |
| Q2V057        | ASIQGFVAGETAEEVR                                                    | 1.068854897        | 2              | 4.22115469  |
| Q2V057        | EDCTQPDYEATSR                                                       | 1.001813046        | 2              | 3.542513371 |
| Q2V057        | GCVQQLQAIGLQPLLAVPTEEEPDSAAK                                        | 1.515794073        | 2              | 4.807704926 |
| Q2V057        | NLQLSCLSTEQNQHLQASLSR                                               | 1.293269013        | 2              | 5.75995779  |
| Q2V057        | REQALLSQELWR                                                        | 1.343016454        | 2              | 3.095223427 |
| Q2V057        | SIPYGCLEEVIPYLIR                                                    | 1.2759654          | 2              | 4.115543365 |
| Q2V057        | TSEAWYEGNLSAMLHCVDLR                                                | 0.731898014        | 2              | 2.629750252 |
| Q2V057        | SVTQLHGKEDCTQPDYEATSR                                               | 0.958058318        | 3              | 4.610406399 |
| <b>Q32LZ8</b> | <b>PLPL5 Patatin_like phospholipase domain_containing protein 5</b> | <b>1.081627399</b> | <b>0.86723</b> | <b>2</b>    |
| Q32LZ8        | NFIVTDFATR                                                          | 0.973810287        | 1              | 1.901532173 |
| Q32LZ8        | FYGSSGALNAMAIVFGK                                                   | 1.081852939        | 2              | 2.411370039 |
| <b>Q3B7D0</b> | <b>HEM6 Coproporphyrinogen_III oxidase_mitochondrial</b>            | <b>1.411598749</b> | <b>7.6E-08</b> | <b>2</b>    |
| Q3B7D0        | HCDDSYTPQDK                                                         | 1.412168263        | 2              | 3.406932354 |
| Q3B7D0        | TCAEAVVPSYVPIVK                                                     | 1.403254128        | 2              | 2.684961081 |
| <b>Q3B7U9</b> | <b>FKBP8 Peptidyl_prolyl_cis_trans isomerase FKBP8</b>              | <b>1.074589026</b> | <b>0.72435</b> | <b>4</b>    |
| Q3B7U9        | SCSQVLEHQPDNIK                                                      | 1.135639748        | 2              | 4.176351547 |
| Q3B7U9        | TAEDGPDLEMLSGQER                                                    | 0.96886415         | 2              | 4.123155594 |
| Q3B7U9        | VDMTCEEEEEELLQK                                                     | 1.191264058        | 2              | 4.140001774 |
| Q3B7U9        | VLAQQGEYSEAIPIR                                                     | 1.067659707        | 2              | 3.776660442 |
| <b>Q3B8Q2</b> | <b>IF4A3 Eukaryotic initiation factor 4A_III</b>                    | <b>1.101937033</b> | <b>0.84404</b> | <b>2</b>    |
| Q3B8Q2        | GIYAYGF EKPSAIQQR                                                   | 1.057430709        | 2              | 4.667364597 |
| Q3B8Q2        | GIYAYGF EKPSAIQQRRAIK                                               | 1.080207025        | 2              | 2.40851593  |
| <b>Q3KR86</b> | <b>IMMT Mitochondrial inner membrane protein (Fragment)</b>         | <b>1.049607339</b> | <b>7.7E-10</b> | <b>9</b>    |
| Q3KR86        | AVDEAADALLK                                                         | 1.405015128        | 2              | 2.542653322 |
| Q3KR86        | EIAGATPYITAAEEK                                                     | 0.592443592        | 2              | 3.04442668  |
| Q3KR86        | GIEQAVQSHAVAEEEAR                                                   | 1.238548094        | 2              | 4.86500597  |
| Q3KR86        | QTITAQNAAVQAVK                                                      | 1.192891449        | 2              | 4.237040997 |
| Q3KR86        | SEIQAEQDR                                                           | 1.201104988        | 2              | 2.799418688 |
| Q3KR86        | SLEDALNQTATVTR                                                      | 1.175682825        | 2              | 3.984568834 |
| Q3KR86        | TSSAEMPTIPLGSAVEAIR                                                 | 1.154261857        | 2              | 3.845381021 |
| Q3KR86        | VVSQYHELVVQAR                                                       | 1.470647596        | 2              | 3.563866138 |
| Q3KR86        | YSTSSSSGVTAGK                                                       | 0.994079569        | 2              | 2.774996281 |
| <b>Q3KRD8</b> | <b>IF6 Eukaryotic translation initiation factor 6</b>               | <b>1.183667233</b> | <b>0.29933</b> | <b>2</b>    |
| Q3KRD8        | HGLLPNNTTDQELQHIR                                                   | 1.028829927        | 3              | 5.102761745 |
| Q3KRD8        | TSIEDQDELSSLLQVPLVAGTVNR                                            | 1.16144133         | 3              | 4.402582645 |
| <b>Q3KRE0</b> | <b>ATAD3 ATPase family AAA domain_containing protein 3</b>          | <b>1.623184747</b> | <b>0.54674</b> | <b>2</b>    |
| Q3KRE0        | GEGTGPPLPPAQPGAESGGDR                                               | 1.172777182        | 2              | 2.664327621 |
| Q3KRE0        | ISVLEALR                                                            | 1.965300822        | 2              | 2.626279831 |
| <b>Q3KRE8</b> | <b>TBB2B Tubulin beta_2B chain</b>                                  | <b>0.74735101</b>  | <b>0.74728</b> | <b>3</b>    |
| Q3KRE8        | ALTVPELTQQMFDSK                                                     | 0.947887914        | 2              | 2.752089024 |

|               |                                                                               |                    |                |             |
|---------------|-------------------------------------------------------------------------------|--------------------|----------------|-------------|
| Q3KRE8        | EESCDCLQGFQLTHSLGGGTGSGMGTLLISK                                               | 0.886568181        | 3              | 4.383858204 |
| Q3KRE8        | FWEVISDEHGIDPTGSGYHGSDSLQLER                                                  | 0.744439786        | 3              | 3.37130785  |
| <b>Q3MIB4</b> | <b>LONP2 Lon protease homolog 2_ peroxisomal</b>                              | <b>0.783939891</b> | <b>0.75159</b> | <b>3</b>    |
| Q3MIB4        | MEIIQVPGYTQEEK                                                                | 0.918958117        | 2              | 2.499184608 |
| Q3MIB4        | TVGVNPNVFLLEDEVDK                                                             | 0.745580031        | 2              | 2.616867304 |
| Q3MIB4        | GTSLQSTILGVIPNTPDPASDSQDLPLHR                                                 | 1.016537606        | 3              | 3.59310627  |
| <b>Q3MIE0</b> | <b>ECHD3 Enoyl_ CoA hydratase domain_ containing protein 3_ mitochondrial</b> | <b>1.08882067</b>  | <b>0.87209</b> | <b>7</b>    |
| Q3MIE0        | DGQEGIEAFIQK                                                                  | 0.618938408        | 2              | 3.417719364 |
| Q3MIE0        | SDILHEAESEDLK                                                                 | 1.144857717        | 2              | 3.463267565 |
| Q3MIE0        | SSFATPGVNVGLFCSTPAVALGR                                                       | 1.038064146        | 2              | 4.171805382 |
| Q3MIE0        | VALEMLFTGEPISAQEALR                                                           | 0.849318513        | 2              | 4.062315941 |
| Q3MIE0        | VIIISAEGPVFSSGHDLK                                                            | 1.116855231        | 2              | 4.334732056 |
| Q3MIE0        | VVPEEQLEEEATR                                                                 | 1.069977696        | 2              | 3.763500929 |
| Q3MIE0        | SDILHEAESEDLKVIIIISAEGPVFSSGHDLK                                              | 0.956590047        | 4              | 5.75890255  |
| <b>Q3MIF4</b> | <b>XYLB Xylulose kinase</b>                                                   | <b>0.956264965</b> | <b>0.90409</b> | <b>6</b>    |
| Q3MIF4        | FNADNMEVSAPGDVEIR                                                             | 1.062616773        | 2              | 4.337610245 |
| Q3MIF4        | IRDESASCSWNK                                                                  | 1.121925845        | 2              | 4.087095261 |
| Q3MIF4        | LGSPVPSCSVVGAISSYVQR                                                          | 1.54297367         | 2              | 3.257169008 |
| Q3MIF4        | SAPQPSLAATPNPGASQVYAALLPR                                                     | 0.282825152        | 2              | 4.227624893 |
| Q3MIF4        | VVAFTGDNPASLAGMR                                                              | 1.2497052          | 2              | 3.913111448 |
| Q3MIF4        | YSPIDYSDGSGMNLQIQEK                                                           | 0.976255149        | 2              | 5.158540726 |
| <b>Q3T1J1</b> | <b>IF5A1 Eukaryotic translation initiation factor 5A_1</b>                    | <b>0.978370067</b> | <b>0.71298</b> | <b>4</b>    |
| Q3T1J1        | EDLRLPEGDLGK                                                                  | 0.964924925        | 2              | 2.821481466 |
| Q3T1J1        | EDLRLPEGDLGKEIEQK                                                             | 1.112245166        | 2              | 4.517254829 |
| Q3T1J1        | NDFQLIGIQDGYLSLLQDSGEVR                                                       | 1.20896479         | 2              | 5.084915638 |
| Q3T1J1        | RNDFQLIGIQDGYLSLLQDSGEVR                                                      | 1.510912905        | 3              | 3.634307384 |
| <b>Q3T1K5</b> | <b>CAZA2 F_ actin_ capping protein subunit alpha_2</b>                        | <b>0.941325478</b> | <b>0.59766</b> | <b>3</b>    |
| Q3T1K5        | FTVTPSTTQVVGILK                                                               | 1.153602868        | 2              | 3.827370405 |
| Q3T1K5        | LLLNNDNLLR                                                                    | 0.968596099        | 2              | 2.635862827 |
| Q3T1K5        | FIHAPPGEFNEVFNDVR                                                             | 1.138025857        | 3              | 3.989356279 |
| <b>Q3TVW5</b> | <b>TCHP Trichoplein keratin filament_ binding protein</b>                     | <b>1.255671788</b> | <b>0.01018</b> | <b>2</b>    |
| Q3TVW5        | RTQEIQEELEVDGRILQALLEK                                                        | 1.471594768        | 2              | 2.683987617 |
| Q3TVW5        | TELGRFLKHQYNAQLNR                                                             | 1.255628962        | 2              | 2.914061546 |
| <b>Q3U0J8</b> | <b>TBD2B TBC1 domain family member 2B</b>                                     | <b>1.197125649</b> | <b>0.00554</b> | <b>2</b>    |
| Q3U0J8        | DTTDIISQHPNPSAEK                                                              | 0.890537184        | 2              | 2.444278479 |
| Q3U0J8        | QIELDLLRTLPNNK                                                                | 1.331804144        | 2              | 2.758384466 |
| <b>Q3UHR0</b> | <b>BAHC1 BAH and coiled_ coil domain_ containing protein 1</b>                | <b>1.139999939</b> | <b>0.37687</b> | <b>2</b>    |
| Q3UHR0        | ACEERLGLPGRELLQLQDNK                                                          | 1.136970013        | 2              | 2.408666372 |
| Q3UHR0        | IESLWESWGSNMVVKVK                                                             | 1.231957854        | 2              | 2.354676485 |
| <b>Q3ULJ0</b> | <b>GPD1L Glycerol_3_ phosphate dehydrogenase 1_ like protein</b>              | <b>1.095399115</b> | <b>0.02081</b> | <b>3</b>    |
| Q3ULJ0        | GIDEGPDGLK                                                                    | 1.14097197         | 2              | 2.506152391 |

|               |                                                        |                    |                |             |
|---------------|--------------------------------------------------------|--------------------|----------------|-------------|
| Q3ULJ0        | LGLMEMIAFAK                                            | 1.779219504        | 2              | 3.947365284 |
| Q3ULJ0        | LTDIINNDHENVKYLPGHK                                    | 1.809168415        | 2              | 2.455640554 |
| <b>Q3UQ44</b> | <b>IQGA2 Ras GTPase_activating_like protein IQGAP2</b> | <b>0.841383117</b> | <b>3.3E-07</b> | <b>16</b>   |
| Q3UQ44        | ALVGSENPLTVIR                                          | 1.246755248        | 2              | 3.895332813 |
| Q3UQ44        | AWVQNLETQTGEASK                                        | 1.030931643        | 2              | 4.791055202 |
| Q3UQ44        | GVLGIDDLQTNQFK                                         | 1.11403878         | 2              | 4.589389324 |
| Q3UQ44        | HTDNTVQWLR                                             | 1.154896275        | 2              | 3.332205296 |
| Q3UQ44        | LGIAPQIQDLLGK                                          | 1.836792428        | 2              | 2.945426226 |
| Q3UQ44        | LPYDVTTEQALTYPEVK                                      | 1.339381212        | 2              | 4.570028782 |
| Q3UQ44        | LPYDVTTEQALTYPEVKNK                                    | 1.607640597        | 2              | 2.41396904  |
| Q3UQ44        | LSAEEMDER                                              | 1.043970098        | 2              | 2.901484251 |
| Q3UQ44        | NPNAVLTCVDDSLSEQYQK                                    | 1.179506726        | 2              | 5.312180519 |
| Q3UQ44        | SKVDQVQDIVTGNPTVIK                                     | 1.653447805        | 2              | 5.106618404 |
| Q3UQ44        | TLDTLLLPTANIR                                          | 0.996994845        | 2              | 2.596486807 |
| Q3UQ44        | TLEQTGHVSSK                                            | 0.705117522        | 2              | 3.100010395 |
| Q3UQ44        | VDFTEEEISNMR                                           | 0.992820557        | 2              | 2.921215773 |
| Q3UQ44        | VDQVQDIVTGNPTVIK                                       | 1.177702842        | 2              | 5.247410774 |
| Q3UQ44        | YQDILNEIAK                                             | 1.034317792        | 2              | 2.431580067 |
| Q3UQ44        | LFEGENEHLSSMNNYSETYQEFR                                | 1.624630972        | 3              | 4.694124699 |
| <b>Q3UVR3</b> | <b>TTBK2 Tau_tubulin kinase 2</b>                      | <b>1.128732039</b> | <b>0.72911</b> | <b>2</b>    |
| Q3UVR3        | NLADLR                                                 | 1.126265328        | 1              | 1.902606368 |
| Q3UVR3        | YKVLGSSNSDSLFSR                                        | 1.121198539        | 2              | 2.526452541 |
| <b>Q3V0K9</b> | <b>PLSI Plastin_1</b>                                  | <b>1.138697025</b> | <b>0.18361</b> | <b>3</b>    |
| Q3V0K9        | AYFHLLNQIAPK                                           | 1.188066518        | 2              | 2.847847939 |
| Q3V0K9        | KIENCNYAVELGK                                          | 0.838260898        | 2              | 3.674270391 |
| Q3V0K9        | QFVTPADVVSIGNPK                                        | 0.925270342        | 2              | 3.325225115 |
| <b>Q3V132</b> | <b>ADT4 ADP/ATP translocase 4</b>                      | <b>1.091659002</b> | <b>0.91627</b> | <b>2</b>    |
| Q3V132        | GNLANVIR                                               | 1.089173105        | 2              | 2.666749954 |
| Q3V132        | YFPTQALNFAFK                                           | 1.332789033        | 2              | 3.396478653 |
| <b>Q497B0</b> | <b>NIT2 Omega_amidase NIT2</b>                         | <b>1.079258536</b> | <b>0.1436</b>  | <b>17</b>   |
| Q497B0        | ADLYSVESK                                              | 1.177165961        | 2              | 2.91508317  |
| Q497B0        | AGTEETILYSIDLK                                         | 0.884319479        | 2              | 3.963971138 |
| Q497B0        | AGTEETILYSIDLKK                                        | 0.91285219         | 2              | 3.524597645 |
| Q497B0        | AVDNQVYVATASPAR                                        | 0.880108245        | 2              | 4.872796535 |
| Q497B0        | AVDNQVYVATASPARDEK                                     | 1.010019616        | 2              | 3.64772439  |
| Q497B0        | ENSIYLIGGSIPEDDGK                                      | 0.70146154         | 2              | 3.638831854 |
| Q497B0        | FAELAQIYAR                                             | 1.191873351        | 2              | 3.518334627 |
| Q497B0        | IHLFDIDVPGK                                            | 1.109846409        | 2              | 2.790529966 |
| Q497B0        | LALIQLQVSSIK                                           | 1.595317111        | 2              | 3.068480253 |
| Q497B0        | LYNTCAVFGPDGNLLVK                                      | 1.157328733        | 2              | 3.972441912 |
| Q497B0        | TLSPGDSFSTFDTPYCR                                      | 1.061252982        | 2              | 4.52126646  |
| Q497B0        | VGLGICYDMR                                             | 1.262812908        | 2              | 2.55745697  |
| Q497B0        | ASYVAWGHSTVVDPWGQVLTG                                  | 0.946961764        | 3              | 5.48963356  |

|               |                                                                 |                    |                |             |
|---------------|-----------------------------------------------------------------|--------------------|----------------|-------------|
| Q497B0        | ENSIYLIGGSIPEEDDGKLYNTCAVFGPDGNLLVK                             | 1.154347874        | 3              | 5.170785904 |
| Q497B0        | GCQLLVYPGAFNMTTGAHWELLQR                                        | 1.236963716        | 3              | 3.535847902 |
| Q497B0        | KIHLFDIDVPGK                                                    | 1.375381001        | 3              | 4.549983501 |
| Q497B0        | QGANIVSLPECFNSPYGTNYFPEYAEK                                     | 1.005706009        | 3              | 5.281800747 |
| <b>Q498D5</b> | <b>RMD2 Regulator of microtubule dynamics protein 2</b>         | <b>1.138813521</b> | <b>0.95059</b> | <b>5</b>    |
| Q498D5        | GQLQILEK                                                        | 1.072942208        | 1              | 1.946201086 |
| Q498D5        | AYGDMYDLSTNTQEK                                                 | 0.885733951        | 2              | 3.508284569 |
| Q498D5        | FCNLALLLPIVTK                                                   | 1.134419855        | 2              | 2.726423502 |
| Q498D5        | LNELLTNVEELKEEK                                                 | 1.187963464        | 2              | 3.098065615 |
| Q498D5        | ALNTHIEDLKLDVLLQK                                               | 0.947940956        | 3              | 3.440882683 |
| <b>Q499N5</b> | <b>ACSF2 Acyl_CoA synthetase family member 2_ mitochondrial</b> | <b>1.293835357</b> | <b>0.65017</b> | <b>8</b>    |
| Q499N5        | GATLSHHNIVNNSNLIGQR                                             | 1.213638637        | 2              | 4.611359119 |
| Q499N5        | GGENIYPAELEDFHFK                                                | 1.231204614        | 2              | 3.322753191 |
| Q499N5        | GGVIAGSLAPPELIR                                                 | 1.237501971        | 2              | 2.890384674 |
| Q499N5        | GYCVMQGYWGEPQK                                                  | 0.8999575          | 2              | 2.887845993 |
| Q499N5        | TFETVGQDR                                                       | 1.09901907         | 2              | 2.650983572 |
| Q499N5        | TGDIASMDEQGFCR                                                  | 1.103438605        | 2              | 3.746155262 |
| Q499N5        | TVGECLDATAQR                                                    | 1.291810818        | 2              | 2.994221687 |
| Q499N5        | YIVFVEGYPLTVSGK                                                 | 1.320348713        | 2              | 4.522711754 |
| <b>Q4AEF8</b> | <b>COPG Coatomer subunit gamma</b>                              | <b>1.136012107</b> | <b>0.08555</b> | <b>5</b>    |
| Q4AEF8        | ALQQYTLEPSEKPFDLK                                               | 1.134367439        | 2              | 3.346613407 |
| Q4AEF8        | FGAQNEEMLPSILVLLK                                               | 1.200007871        | 2              | 3.968838453 |
| Q4AEF8        | SSPEPVALTESETEYVIR                                              | 1.179593351        | 2              | 4.712357044 |
| Q4AEF8        | TLEEAVGNIVK                                                     | 1.062537359        | 2              | 2.346026897 |
| Q4AEF8        | VVLEHEEVR                                                       | 1.499015275        | 2              | 2.306049109 |
| <b>Q4FZT0</b> | <b>STML2 Stomatin_like protein 2</b>                            | <b>1.100182773</b> | <b>0.87568</b> | <b>5</b>    |
| Q4FZT0        | SELGKLSLDKVFR                                                   | 1.361943722        | 1              | 2.066349745 |
| Q4FZT0        | AEQINQAAGEASAVLAK                                               | 1.118004503        | 2              | 4.790539742 |
| Q4FZT0        | ASYGVEDPEYAVTQLAQTMR                                            | 1.263050665        | 2              | 4.837722778 |
| Q4FZT0        | ATVLESEGTR                                                      | 1.104473361        | 2              | 2.656892061 |
| Q4FZT0        | ILEPGLNVLIPVLDR                                                 | 1.011720138        | 2              | 2.880103111 |
| <b>Q4FZT9</b> | <b>PSMD2 26S proteasome non_ATPase regulatory subunit 2</b>     | <b>1.121227479</b> | <b>0.09646</b> | <b>5</b>    |
| Q4FZT9        | FGSGSQVDSAR                                                     | 1.130838455        | 2              | 3.629247665 |
| Q4FZT9        | SETELKDTYAR                                                     | 1.209702184        | 2              | 2.710785866 |
| Q4FZT9        | SSTTSMTSVPKPLK                                                  | 1.000585582        | 2              | 2.905899525 |
| Q4FZT9        | TPVQSQQPSATAPSGADEK                                             | 1.143173154        | 2              | 4.444346428 |
| Q4FZT9        | DKTPVQSQQPSATAPSGADEK                                           | 0.911289421        | 3              | 4.482903004 |
| <b>Q4FZX7</b> | <b>SRPRB Signal recognition particle receptor subunit beta</b>  | <b>1.39304784</b>  | <b>0.00041</b> | <b>4</b>    |
| Q4FZX7        | GDAGSADVQDLEK                                                   | 1.224803289        | 2              | 3.497640848 |
| Q4FZX7        | GNSLTLIDLPGHESLR                                                | 1.167517949        | 2              | 2.962847233 |
| Q4FZX7        | SAAPSTLDSSSTAPAQLGK                                             | 1.395471062        | 2              | 4.960078716 |

|               |                                                                                          |                    |                |             |
|---------------|------------------------------------------------------------------------------------------|--------------------|----------------|-------------|
| Q4FZX7        | VGDGAGGAFQPYLDSLR                                                                        | 1.121141609        | 2              | 2.407241821 |
| <b>Q4G061</b> | <b>EIF3B Eukaryotic translation initiation factor 3 subunit B</b>                        | <b>0.918756907</b> | <b>0.71388</b> | <b>3</b>    |
| Q4G061        | AEEEGSDGSAAEAEP                                                                          | 0.894582835        | 2              | 4.543288231 |
| Q4G061        | GTQGVVTFEIFR                                                                             | 1.091242633        | 2              | 2.330028772 |
| Q4G061        | AKPAAQSEETAASPAASPTQSAQEPSAPGK                                                           | 1.806082194        | 3              | 4.589909077 |
| <b>Q4KLF8</b> | <b>ARPC5 Actin_related protein 2/3 complex subunit 5</b>                                 | <b>0.933401788</b> | <b>0.41076</b> | <b>2</b>    |
| Q4KLF8        | ALAAGGVGSIVR                                                                             | 1.149212305        | 2              | 2.317006588 |
| Q4KLF8        | QGNMTAALQAALK                                                                            | 0.887002244        | 2              | 2.519743681 |
| <b>Q4KLP0</b> | <b>DHTK1 Probable 2_oxoglutarate dehydrogenase E1 component DHKTD1_mitochondrial</b>     | <b>1.277083155</b> | <b>1.1E-06</b> | <b>16</b>   |
| Q4KLP0        | SSLYSSDIGK                                                                               | 1.028334577        | 1              | 2.095977068 |
| Q4KLP0        | ARPSVDHGLAR                                                                              | 1.324514624        | 2              | 2.520576239 |
| Q4KLP0        | LEELCPFPLDSLQEQEMGK                                                                      | 1.349117664        | 2              | 5.122525215 |
| Q4KLP0        | LLLESQEFDFHFLATK                                                                         | 1.353913578        | 2              | 3.835387945 |
| Q4KLP0        | LVTVYCEHGK                                                                               | 1.218360757        | 2              | 2.831177235 |
| Q4KLP0        | QQSQEDGDYSPNGSAQPGDK                                                                     | 1.317314755        | 2              | 3.016624212 |
| Q4KLP0        | SVEVPEELQLHSHLLK                                                                         | 1.261151972        | 2              | 2.703264713 |
| Q4KLP0        | WQGLVQPAACVTTWDTGVPLELLR                                                                 | 1.205649742        | 2              | 4.991351128 |
| Q4KLP0        | HAMVVCQNTDDVYIPLNHMDPNQK                                                                 | 1.238108999        | 3              | 3.674619436 |
| Q4KLP0        | KSIPDTYAEHLIASGLMTQEEVSDIK                                                               | 1.185236182        | 3              | 4.30594635  |
| Q4KLP0        | LSAYGGITDIIGMPHR                                                                         | 2.194688294        | 3              | 3.533017635 |
| Q4KLP0        | QWGHNELDEPFFTNPVMYK                                                                      | 1.166472901        | 3              | 3.515598297 |
| Q4KLP0        | SIPDTYAEHLIASGLMTQEEVSDIK                                                                | 1.070655247        | 3              | 4.998397827 |
| Q4KLP0        | WLLQSGLVILLPHGYDAGDPDHSSCR                                                               | 1.376292224        | 3              | 3.831418991 |
| Q4KLP0        | YGGEGAESMMGFFHELLK                                                                       | 1.130484611        | 3              | 4.243721008 |
| Q4KLP0        | YPVAVSTLEEMAPGTAFKPVIQDSSVDPK                                                            | 1.086214571        | 3              | 4.337694168 |
| <b>Q4KLZ6</b> | <b>DHAK Bifunctional ATP_dependent dihydroxyacetone kinase/FAD_AMP lyase (cyclizing)</b> | <b>1.005782249</b> | <b>0.32128</b> | <b>13</b>   |
| Q4KLZ6        | AAPTEPAEPEATAAGGVASK                                                                     | 1.131314724        | 2              | 4.605414867 |
| Q4KLZ6        | AILEVLQTK                                                                                | 1.222356457        | 2              | 2.876458168 |
| Q4KLZ6        | ANTDLPAWSAAMDAGLK                                                                        | 1.27489989         | 2              | 3.260283709 |
| Q4KLZ6        | AVAQAGTAGTLLIVK                                                                          | 1.364505939        | 2              | 4.424355984 |
| Q4KLZ6        | EGPTPASPAQVLSK                                                                           | 1.136890868        | 2              | 3.303151608 |
| Q4KLZ6        | ISTTLIGLEEHLNALDR                                                                        | 2.677474366        | 2              | 4.154751778 |
| Q4KLZ6        | LIDAETNAK                                                                                | 1.143551011        | 2              | 3.056431532 |
| Q4KLZ6        | LSVLLLEK                                                                                 | 1.733889416        | 2              | 2.683353662 |
| Q4KLZ6        | MGGSSGALYGLFLTAAQPLK                                                                     | 0.879242774        | 2              | 4.596370697 |
| Q4KLZ6        | TMLDSLWAAAQELQAWK                                                                        | 0.89081189         | 2              | 4.305660248 |
| Q4KLZ6        | VAGALAEEGMGLEEITK                                                                        | 1.29408573         | 2              | 3.657215118 |
| Q4KLZ6        | MVNSVEGCAGDALAGFVACNPDLQLLQGYR                                                           | 1.102687785        | 3              | 5.096961021 |
| Q4KLZ6        | RGLCGTILHK                                                                               | 0.909817476        | 3              | 3.407773495 |
| <b>Q4KM35</b> | <b>PSB10 Proteasome subunit beta type_10</b>                                             | <b>1.314373148</b> | <b>0.01975</b> | <b>2</b>    |
| Q4KM35        | ALSSPIEPVQR                                                                              | 1.250254635        | 2              | 2.373132944 |



|               |                                                               |                    |                |             |
|---------------|---------------------------------------------------------------|--------------------|----------------|-------------|
| Q4KM35        | FAPGTTVPVQTQEV                                                | 1.314887578        | 2              | 2.843578577 |
| <b>Q4KM49</b> | <b>SYYC Tyrosyl_tRNA synthetase_cytoplasmic</b>               | <b>1.296164067</b> | <b>1.2E-08</b> | <b>3</b>    |
| Q4KM49        | QVEPLDPPAGSAPGER                                              | 1.087567254        | 2              | 2.578236103 |
| Q4KM49        | TVVSGLVQFVPK                                                  | 1.125792744        | 2              | 3.293801785 |
| Q4KM49        | VDAQFGGIDQR                                                   | 1.306735805        | 2              | 3.361602783 |
| <b>Q4KM62</b> | <b>PALMD Palmelphin</b>                                       | <b>1.398772839</b> | <b>0.08269</b> | <b>2</b>    |
| Q4KM62        | TGESVVLSSIPLPSDDFK                                            | 0.877648773        | 2              | 3.401993752 |
| Q4KM62        | VEKEEIPESIEDIYANIPDLPSYIPSR                                   | 1.399398714        | 3              | 3.426925659 |
| <b>Q4KM73</b> | <b>KCY UMP_CMP kinase</b>                                     | <b>1.164955738</b> | <b>0.00079</b> | <b>6</b>    |
| Q4KM73        | IQTYLESTKPIIDLYEEMGK                                          | 1.127071723        | 2              | 4.92602396  |
| Q4KM73        | IVPVEITISLLK                                                  | 1.037886947        | 2              | 3.041659832 |
| Q4KM73        | KNPDSQYGELIEK                                                 | 1.167119787        | 2              | 4.293810844 |
| Q4KM73        | NQDNLQGWNK                                                    | 1.02930325         | 2              | 2.940244913 |
| Q4KM73        | SVDEVFGDVMK                                                   | 0.976649942        | 2              | 3.166023016 |
| Q4KM73        | YGYTHLSAGELLR                                                 | 1.151714697        | 3              | 3.614707708 |
| <b>Q4KM74</b> | <b>SC22B Vesicle_trafficking protein SEC22b</b>               | <b>0.898067553</b> | <b>0.20692</b> | <b>4</b>    |
| Q4KM74        | DLQQYQSQAK                                                    | 0.88606264         | 2              | 3.392679214 |
| Q4KM74        | GEALSALDSK                                                    | 1.202942115        | 2              | 2.416548967 |
| Q4KM74        | IMVANIEEVLR                                                   | 1.319497039        | 2              | 2.705671549 |
| Q4KM74        | NLGSINTELQDVQR                                                | 1.068892608        | 2              | 4.165977955 |
| <b>Q4KMA2</b> | <b>RD23B UV excision repair protein RAD23 homolog B</b>       | <b>1.068470174</b> | <b>0.999</b>   | <b>4</b>    |
| Q4KMA2        | IDIDPEETVK                                                    | 1.059435707        | 1              | 2.633613348 |
| Q4KMA2        | NFVVVMVTKPK                                                   | 1.067524479        | 2              | 3.460596085 |
| Q4KMA2        | QIIQQNPSSLPLAQIGR                                             | 1.08889861         | 2              | 3.847612619 |
| Q4KMA2        | ESQAVVDPPPQAVSTGTPQSPAVAAAAATTTATTTTTSGGHPLEFLR               | 1.035169097        | 3              | 3.946579218 |
| <b>Q4QQV3</b> | <b>F162A Protein FAM162A</b>                                  | <b>1.120823834</b> | <b>0.60884</b> | <b>2</b>    |
| Q4QQV3        | EEEIPETISFEMLDAAK                                             | 1.089471878        | 2              | 3.452002764 |
| Q4QQV3        | RHESLTSNLNR                                                   | 1.127566735        | 2              | 2.759135485 |
| <b>Q4QQW3</b> | <b>HOT Hydroxyacid_oxoacid transhydrogenase_mitochondrial</b> | <b>1.068624975</b> | <b>0.97076</b> | <b>2</b>    |
| Q4QQW3        | HLETAEILGANIR                                                 | 1.068563986        | 2              | 3.278478861 |
| Q4QQW3        | IQDAGPVLADALR                                                 | 1.057306564        | 2              | 2.48977828  |
| <b>Q4QRB4</b> | <b>TBB3 Tubulin beta_3 chain</b>                              | <b>0.976588879</b> | <b>6.6E-08</b> | <b>5</b>    |
| Q4QRB4        | AILVDLEPGTMDSVR                                               | 1.130479082        | 2              | 4.561449528 |
| Q4QRB4        | AILVDLEPGTMDSVR+Oxidation(11)                                 | 1.1402093          | 2              | 2.63351965  |
| Q4QRB4        | EIVHIQAGQCGNQIGAK                                             | 0.760685124        | 2              | 5.107461452 |
| Q4QRB4        | IMNTFSVVPSPK                                                  | 1.059044705        | 2              | 3.44654727  |
| Q4QRB4        | ISEQFTAMFR                                                    | 1.141019306        | 2              | 3.359265089 |
| <b>Q4V7C7</b> | <b>ARP3 Actin_related protein 3</b>                           | <b>1.066101</b>    | <b>0.95173</b> | <b>6</b>    |
| Q4V7C7        | GVDDLDFFIGDEAIEKPTYATK                                        | 1.116983472        | 2              | 4.828017235 |
| Q4V7C7        | KDYEEIGPSICR                                                  | 1.045851646        | 2              | 3.903962851 |
| Q4V7C7        | LGYAGNTEPQFIIPSCIAIK                                          | 0.974631482        | 2              | 3.456576347 |
| Q4V7C7        | LSEELSGGR                                                     | 1.157907301        | 2              | 2.778646946 |

|               |                                                                                          |                    |                |             |
|---------------|------------------------------------------------------------------------------------------|--------------------|----------------|-------------|
| Q4V7C7        | NIVLSGGSTMFR                                                                             | 1.070630456        | 2              | 2.664943457 |
| Q4V7C7        | TLTGTVIDSGDGVTHVIPVAEGYVIGSCK                                                            | 0.857660728        | 2              | 4.597793579 |
| <b>Q4V8K1</b> | <b>STE4 Metalloreductase STEAP4</b>                                                      | <b>1.13271486</b>  | <b>0.89027</b> | <b>5</b>    |
| Q4V8K1        | QVFVCGNSDK                                                                               | 1.12005364         | 2              | 2.558608055 |
| Q4V8K1        | TCADFPLTVDSSEK                                                                           | 1.159710656        | 2              | 4.465877056 |
| Q4V8K1        | TLGLTPLDQGSVAAK                                                                          | 1.147555101        | 2              | 3.375766993 |
| Q4V8K1        | VLIDVSNNQK                                                                               | 1.071615286        | 2              | 2.314770699 |
| Q4V8K1        | MNQYPESNAEYLAQLVPGAHVVK                                                                  | 0.887338162        | 3              | 3.309345961 |
| <b>Q501J6</b> | <b>DDX17 Probable ATP_dependent RNA helicase DDX17</b>                                   | <b>0.912985523</b> | <b>0.53889</b> | <b>2</b>    |
| Q501J6        | ELAQQVQQVADDYGK                                                                          | 1.084132133        | 2              | 2.677911043 |
| Q501J6        | VLEEANQAINPK                                                                             | 0.912720857        | 2              | 2.711358786 |
| <b>Q505J8</b> | <b>SYFA Phenylalanyl_tRNA synthetase alpha chain</b>                                     | <b>1.25472378</b>  | <b>0.00117</b> | <b>5</b>    |
| Q505J8        | LQQVQAGQAEK                                                                              | 1.255049888        | 2              | 2.952146292 |
| Q505J8        | SIPLEGLVQSELMQLPSGK                                                                      | 1.192739557        | 2              | 2.766185284 |
| Q505J8        | SLQALGEVIEAELR                                                                           | 1.564200306        | 2              | 3.893519163 |
| Q505J8        | VVDSIEDEVQR                                                                              | 1.141536077        | 2              | 2.844742775 |
| Q505J8        | RLEVADGGLDSAELATQLGVEHQAVVGAVK                                                           | 1.051066477        | 3              | 5.149074554 |
| <b>Q561R9</b> | <b>LACB2 Beta_lactamase_like protein 2</b>                                               | <b>1.095714506</b> | <b>0.34511</b> | <b>4</b>    |
| Q561R9        | ANIIYPGHGPIVHNAAEK                                                                       | 1.093686244        | 2              | 4.080215454 |
| Q561R9        | ILIDTGEPSPVEYISCLK                                                                       | 1.145801262        | 2              | 3.521716118 |
| Q561R9        | NISNDATYCIK                                                                              | 0.935421456        | 2              | 2.724781513 |
| Q561R9        | NNREEQIITVFR                                                                             | 0.87072599         | 2              | 2.779378653 |
| <b>Q561S0</b> | <b>NDUAA NADH dehydrogenase [ubiquinone] 1 alpha subcomplex subunit 10_mitochondrial</b> | <b>1.37592442</b>  | <b>0.804</b>   | <b>5</b>    |
| Q561S0        | VITVDGNICSGK                                                                             | 0.978356935        | 2              | 3.128950357 |
| Q561S0        | VVEDIEYLNYNK                                                                             | 1.240116662        | 2              | 3.566642284 |
| Q561S0        | YAPGYNADVGDK                                                                             | 1.26669953         | 2              | 2.750463963 |
| Q561S0        | YGLLASILGDK                                                                              | 1.028763073        | 2              | 2.957306147 |
| Q561S0        | LTLPEYLPPIHAVIYIDVPVSEIQSR                                                               | 1.598447922        | 3              | 3.698609591 |
| <b>Q562C4</b> | <b>MET7B Methyltransferase_like protein 7B</b>                                           | <b>0.842728638</b> | <b>0.9519</b>  | <b>7</b>    |
| Q562C4        | VLQEVQR                                                                                  | 0.893858948        | 1              | 2.015970707 |
| Q562C4        | AQFSEVQLEWQPPPFK                                                                         | 0.869719804        | 2              | 4.814002037 |
| Q562C4        | FIVAYGENMK                                                                               | 0.852518524        | 2              | 2.348133087 |
| Q562C4        | GTSNEVTLLELGCCTGANFQFYPPGCK                                                              | 0.434972381        | 2              | 4.044890881 |
| Q562C4        | HIGDGCHLTR                                                                               | 0.902894269        | 2              | 2.757642984 |
| Q562C4        | KVLQEVQR                                                                                 | 1.053848642        | 2              | 2.523785353 |
| Q562C4        | VTCVDPNPNFEK                                                                             | 0.718323396        | 2              | 3.720582962 |
| <b>Q58FK9</b> | <b>KAT3 Kynurenine__oxoglutarate transaminase 3</b>                                      | <b>0.886049522</b> | <b>0.29043</b> | <b>10</b>   |
| Q58FK9        | AIILNTPHNPIGK                                                                            | 1.232062964        | 2              | 3.296651602 |
| Q58FK9        | DSTLDAEEIFR                                                                              | 0.617884258        | 2              | 2.998790979 |
| Q58FK9        | IEGLDQNVWVEFTK                                                                           | 1.104251706        | 2              | 4.550024986 |
| Q58FK9        | LGWSIGPGHLIK                                                                             | 2.143334827        | 2              | 2.435388327 |
| Q58FK9        | MDDPECYFNSLPK                                                                            | 0.891776754        | 2              | 4.117753983 |

|               |                                                                                         |                    |                |             |
|---------------|-----------------------------------------------------------------------------------------|--------------------|----------------|-------------|
| Q58FK9        | RIEGLDQNVVVEFTK                                                                         | 1.141166499        | 2              | 3.917770863 |
| Q58FK9        | RMDDPECYFNSLPK                                                                          | 1.027413873        | 2              | 2.352519274 |
| Q58FK9        | SDEPYDYK                                                                                | 1.266391607        | 2              | 2.481590271 |
| Q58FK9        | WTSSDWTFNPQELESK                                                                        | 1.084668705        | 2              | 5.183171749 |
| Q58FK9        | LAADPSVVNLGQGFPDITLPSYVQEELSK                                                           | 1.473169153        | 3              | 5.672567844 |
| <b>Q5BJQ0</b> | <b>ADCK3 Chaperone activity of bc1 complex_like_mitochondrial</b>                       | <b>1.12625547</b>  | <b>0.02091</b> | <b>2</b>    |
| Q5BJQ0        | AVLDSSPFLSEANAER                                                                        | 0.879742084        | 2              | 4.587979794 |
| Q5BJQ0        | TLNNDLGPVHR                                                                             | 1.214259706        | 2              | 3.012342691 |
| <b>Q5BJY9</b> | <b>K1C18 Keratin_type I cytoskeletal 18</b>                                             | <b>1.027069126</b> | <b>0.94706</b> | <b>23</b>   |
| Q5BJY9        | AQIFANSVDNAR                                                                            | 0.959389347        | 2              | 3.817731619 |
| Q5BJY9        | AQYEQLAQK                                                                               | 1.033709497        | 2              | 3.29735446  |
| Q5BJY9        | IREYLEK                                                                                 | 1.104628259        | 2              | 2.365219355 |
| Q5BJY9        | KVVDDTNITR                                                                              | 1.039034408        | 2              | 2.940171957 |
| Q5BJY9        | LEAEIATYR                                                                               | 0.907432817        | 2              | 3.23043704  |
| Q5BJY9        | LLEDGDDFSLNDALDSSNSMQTVQR                                                               | 0.880388904        | 2              | 5.300693035 |
| Q5BJY9        | LQLETEIEALKEELFMK                                                                       | 1.835050445        | 2              | 4.957084656 |
| Q5BJY9        | NHEEEVQGLEAQIASSGLTVEVDAPK                                                              | 0.868311253        | 2              | 6.53033638  |
| Q5BJY9        | NQNINLENNLGEVEAR                                                                        | 0.97883643         | 2              | 5.602835655 |
| Q5BJY9        | QSVESDIHGLR                                                                             | 0.971158944        | 2              | 3.315738201 |
| Q5BJY9        | QSVESDIHGLRK                                                                            | 1.086837213        | 2              | 2.690906048 |
| Q5BJY9        | QTQEYEALLNIK                                                                            | 1.133896139        | 2              | 3.535063028 |
| Q5BJY9        | SVWGGSVGSAGLAGMGGVQTEK                                                                  | 1.01969946         | 2              | 5.729651451 |
| Q5BJY9        | TLQTLEIDLDSMK                                                                           | 1.05539472         | 2              | 4.226108551 |
| Q5BJY9        | VKLEAEIATYR                                                                             | 0.990719323        | 2              | 2.603852034 |
| Q5BJY9        | VKYETELAMR                                                                              | 1.089632842        | 2              | 2.630768299 |
| Q5BJY9        | VRPASSAASVYAGAGGSGSR                                                                    | 0.584011192        | 2              | 5.605264664 |
| Q5BJY9        | VVDDTNITR                                                                               | 1.056070786        | 2              | 3.359093666 |
| Q5BJY9        | YWSQQIEESTTVTTK                                                                         | 1.298673253        | 2              | 4.325231552 |
| Q5BJY9        | KNHEEEVQGLEAQIASSGLTVEVDAPK                                                             | 0.898957081        | 3              | 4.301848888 |
| Q5BJY9        | NREELDKYWSQQIEESTTVTTK                                                                  | 1.005205206        | 3              | 5.704818726 |
| Q5BJY9        | SVWGGSVGSAGLAGMGGVQTEKETMQDLNDR                                                         | 1.051061717        | 3              | 4.825302124 |
| Q5BJY9        | VQMEQLNGVLLHLESELAQTR                                                                   | 1.075921194        | 3              | 5.259335041 |
| <b>Q5BK17</b> | <b>IYD1 Iodotyrosine dehalogenase 1</b>                                                 | <b>1.134849872</b> | <b>0.32307</b> | <b>2</b>    |
| Q5BK17        | FISSEVPMEVIDNVIK                                                                        | 1.06393338         | 2              | 3.265035868 |
| Q5BK17        | LLVLLPVGYPSR                                                                            | 2.001944361        | 2              | 2.634382963 |
| <b>Q5BK63</b> | <b>NDUA9 NADH dehydrogenase [ubiquinone] 1 alpha subcomplex subunit 9_mitochondrial</b> | <b>1.137154844</b> | <b>0.01422</b> | <b>5</b>    |
| Q5BK63        | AVQHSNVVINLIGR                                                                          | 1.074175805        | 2              | 2.548207521 |
| Q5BK63        | LFGLSPFEPWTTK                                                                           | 1.869945601        | 2              | 2.586514711 |
| Q5BK63        | NDFEDVFNIPR                                                                             | 1.297572721        | 2              | 3.954186678 |
| Q5BK63        | WLSSEIETKPAK                                                                            | 1.462866461        | 2              | 3.10594511  |
| Q5BK63        | IHISDVMATDLPGLLEDLGVQPTPLELK                                                            | 1.259087445        | 3              | 5.358795643 |
| <b>Q5BK81</b> | <b>PTGR2 Prostaglandin reductase 2</b>                                                  | <b>1.027858094</b> | <b>0.99979</b> | <b>3</b>    |

|               |                                                                         |                    |                |             |
|---------------|-------------------------------------------------------------------------|--------------------|----------------|-------------|
| Q5BK81        | DVPYPPPLPPAVEAIQK                                                       | 0.943400221        | 2              | 3.243910074 |
| Q5BK81        | TGNVAEQLR                                                               | 1.012202704        | 2              | 2.334260464 |
| Q5BK81        | VEEVSLPDTINEGQVR                                                        | 1.056498177        | 2              | 3.804463148 |
| <b>Q5BQE6</b> | <b>DHC24 Delta(24)_sterol reductase</b>                                 | <b>0.793831542</b> | <b>0.56919</b> | <b>2</b>    |
| Q5BQE6        | NIMINLMDILEVDTKK+Oxidation(3)Oxidation(7)                               | 0.91404926         | 2              | 2.413469553 |
| Q5BQE6        | QLGCQDAFPEVYDK                                                          | 0.793142881        | 2              | 3.76182723  |
| <b>Q5DU56</b> | <b>NLRC3 Protein NLRC3</b>                                              | <b>1.00117102</b>  | <b>0.44401</b> | <b>2</b>    |
| Q5DU56        | LTGLALGHLYR                                                             | 1.748215074        | 2              | 2.402391911 |
| Q5DU56        | TLEILDLR                                                                | 0.974495917        | 2              | 2.334411144 |
| <b>Q5EB77</b> | <b>RAB18 Ras_related protein Rab_18</b>                                 | <b>1.170237494</b> | <b>0.72933</b> | <b>2</b>    |
| Q5EB77        | NDIVNMLVGNK                                                             | 1.108959252        | 2              | 3.277287722 |
| Q5EB77        | TCDGVQCAFEELVEK                                                         | 1.208528317        | 2              | 3.738393307 |
| <b>Q5FVM4</b> | <b>NONO Non_POU domain_containing octamer_binding protein</b>           | <b>1.116693645</b> | <b>0.57967</b> | <b>2</b>    |
| Q5FVM4        | MEELHNQEVQK                                                             | 1.081773715        | 2              | 3.262027979 |
| Q5FVM4        | RMEELHNQEVQK                                                            | 1.119815721        | 3              | 4.003191948 |
| <b>Q5FVQ4</b> | <b>MLEC Malectin</b>                                                    | <b>1.268893076</b> | <b>3.4E-07</b> | <b>2</b>    |
| Q5FVQ4        | STPEDQILYQTER                                                           | 0.902419414        | 2              | 3.977519035 |
| Q5FVQ4        | KEEEEEEEYDEGSNLKR                                                       | 1.373262775        | 3              | 6.081984997 |
| <b>Q5FVR2</b> | <b>TYPH Thymidine phosphorylase</b>                                     | <b>1.037499971</b> | <b>0.21341</b> | <b>4</b>    |
| Q5FVR2        | AQDTQIGAMLMAIR+Oxidation(11)                                            | 1.236857863        | 2              | 2.60545969  |
| Q5FVR2        | DVTATVDSVPLITASILSK                                                     | 0.924488217        | 2              | 3.639132261 |
| Q5FVR2        | KQEELLSPADGIVECVR                                                       | 1.168817859        | 2              | 4.528800488 |
| Q5FVR2        | VHLDGPALSSQQR                                                           | 1.246049919        | 2              | 2.400645971 |
| <b>Q5FVR5</b> | <b>ACNT2 Acyl_coenzyme A amino acid N_acyltransferase 2</b>             | <b>1.492567437</b> | <b>0.43481</b> | <b>4</b>    |
| Q5FVR5        | DEKENLFQSK                                                              | 0.893346646        | 2              | 2.79954958  |
| Q5FVR5        | ILFIVGENDQCLASK                                                         | 1.5671573          | 2              | 3.746778011 |
| Q5FVR5        | IQQP GIGVISVSK                                                          | 1.468063892        | 2              | 2.761187792 |
| Q5FVR5        | VLLEEDLDYFEEAANFLAHPK                                                   | 1.336257364        | 3              | 3.809499979 |
| <b>Q5FW57</b> | <b>GLYAL Glycine N_acyltransferase_like protein</b>                     | <b>1.074292449</b> | <b>1</b>       | <b>2</b>    |
| Q5FW57        | AIDQEMFK                                                                | 1.00533918         | 2              | 2.705004692 |
| Q5FW57        | SSQMLQMLESLR                                                            | 1.082166044        | 2              | 3.87968564  |
| <b>Q5HZV9</b> | <b>PP1R7 Protein phosphatase 1 regulatory subunit 7</b>                 | <b>0.941153582</b> | <b>0.6582</b>  | <b>2</b>    |
| Q5HZV9        | AIENIDTLTNLESFLGK                                                       | 0.980300202        | 2              | 3.13882494  |
| Q5HZV9        | ELDLYDNQIKK                                                             | 0.440736541        | 2              | 2.378619432 |
| <b>Q5HZY2</b> | <b>SAR1B GTP_binding protein SAR1b</b>                                  | <b>1.039334582</b> | <b>0.9802</b>  | <b>2</b>    |
| Q5HZY2        | IDRPEAISEER                                                             | 1.035584224        | 2              | 2.926367998 |
| Q5HZY2        | LLESKEELDSLMTDETIANVPILILGNK                                            | 1.09963546         | 3              | 4.26350832  |
| <b>Q5I0C3</b> | <b>MCCA Methylcrotonoyl_CoA carboxylase subunit alpha_mitochondrial</b> | <b>0.981728291</b> | <b>0.24606</b> | <b>6</b>    |
| Q5I0C3        | HAPLVEFEVEEV                                                            | 0.975900465        | 2              | 2.873004913 |
| Q5I0C3        | IIEEAPAPGIDPEVR                                                         | 1.134771311        | 2              | 3.694898605 |
| Q5I0C3        | SEKEFQEQLSAR                                                            | 1.147906174        | 2              | 3.553263187 |

|               |                                                                                |                    |                |             |
|---------------|--------------------------------------------------------------------------------|--------------------|----------------|-------------|
| Q510C3        | VFFSEGAQANR                                                                    | 1.294706893        | 2              | 2.525081635 |
| Q510C3        | YLSPVSAEGTQGGTIAPMTGTIEK                                                       | 1.075560491        | 2              | 5.093858242 |
| Q510C3        | IYAEDPDNNFMPGAGPLVHLSTPPDMSTR                                                  | 1.077628393        | 3              | 6.018025398 |
| <b>Q510D1</b> | <b>GLOD4 Glyoxalase domain_containing protein 4</b>                            | <b>1.103557371</b> | <b>0.5716</b>  | <b>2</b>    |
| Q510D1        | ESQSILTPLVSLDTPGK                                                              | 1.104513102        | 2              | 3.505735397 |
| Q510D1        | HEEFEEGCK                                                                      | 1.086344376        | 2              | 2.648400784 |
| <b>Q510D5</b> | <b>LHPP Phospholysine phosphohistidine inorganic pyrophosphate phosphatase</b> | <b>1.11169989</b>  | <b>0.98954</b> | <b>2</b>    |
| Q510D5        | AFQVLMELNPVLISLGK                                                              | 1.040841493        | 2              | 2.65226078  |
| Q510D5        | LGFDISEGEVTAPAPATCQILK                                                         | 1.086307145        | 2              | 3.795943975 |
| <b>Q510D7</b> | <b>PEPD Xaa_Pro dipeptidase</b>                                                | <b>1.207004075</b> | <b>0.04936</b> | <b>2</b>    |
| Q510D7        | GVNTDSGNVCR                                                                    | 1.207005849        | 2              | 2.721880674 |
| Q510D7        | YAVDDVQYADEIASVLTSR                                                            | 1.169769633        | 2              | 4.208346844 |
| <b>Q510E7</b> | <b>TMED9 Transmembrane emp24 domain_containing protein 9</b>                   | <b>1.177909769</b> | <b>0.92956</b> | <b>2</b>    |
| Q510E7        | QLVEQVEQIQK                                                                    | 1.179192392        | 2              | 4.045115471 |
| Q510E7        | QREEYQPATPGLGMFVEVKDPEDK                                                       | 1.084916112        | 3              | 3.607738018 |
| <b>Q510G4</b> | <b>SYG Glycyl_tRNA synthetase (Fragment)</b>                                   | <b>1.214597541</b> | <b>0.49117</b> | <b>5</b>    |
| Q510G4        | AEVSELPVVR                                                                     | 1.052637926        | 2              | 3.23682332  |
| Q510G4        | LGDAVEQGVINNSVLGYFIGR                                                          | 1.23545557         | 2              | 3.04629755  |
| Q510G4        | TLHVEEVVPSVIEPSFGLGR                                                           | 1.378363133        | 2              | 4.123369694 |
| Q510G4        | TVNVVQFEPNK                                                                    | 0.392990985        | 2              | 2.478611469 |
| Q510G4        | VDDSSGSIGR                                                                     | 1.086472222        | 2              | 2.618674517 |
| <b>Q510H9</b> | <b>PDIA5 Protein disulfide_isomerase A5</b>                                    | <b>1.180312918</b> | <b>0.0043</b>  | <b>7</b>    |
| Q510H9        | DKNQDLCQQESVK                                                                  | 0.932884691        | 2              | 4.207155704 |
| Q510H9        | GPPLWEEDPGAK                                                                   | 1.285072915        | 2              | 2.829642057 |
| Q510H9        | GQGTICWVDCGDAESR                                                               | 1.227391091        | 2              | 4.205665112 |
| Q510H9        | NGEQQAVPALR                                                                    | 1.20644297         | 2              | 2.817538023 |
| Q510H9        | NQDLCQQESVK                                                                    | 1.125591423        | 2              | 2.642869473 |
| Q510H9        | GHTVLAGMNVYPPEFENIKEEYNVR                                                      | 0.489021018        | 3              | 4.962248802 |
| Q510H9        | NPQPPQPVPETPWADEGGSVYHLTDEDFDQFVK                                              | 1.537102337        | 3              | 4.51512289  |
| <b>Q510J9</b> | <b>ASPD Putative L_aspartate dehydrogenase</b>                                 | <b>1.146084342</b> | <b>1.8E-09</b> | <b>5</b>    |
| Q510J9        | IIHESGVQILR                                                                    | 1.069768171        | 2              | 2.631151199 |
| Q510J9        | LDAAGGLQSLR                                                                    | 1.201882429        | 2              | 3.741920471 |
| Q510J9        | LEGPLAAHSSGPR                                                                  | 1.202145721        | 2              | 3.582673788 |
| Q510J9        | MAGSVPPALQLEDLTTLEER                                                           | 1.418122301        | 2              | 3.886192799 |
| Q510J9        | HANLLVGSALADQTTTER                                                             | 1.109607755        | 3              | 5.100832462 |
| <b>Q510M2</b> | <b>NADC Nicotinate_nucleotide pyrophosphorylase [carboxylating]</b>            | <b>1.249985005</b> | <b>2.2E-07</b> | <b>3</b>    |
| Q510M2        | DNHVVAAGSMEK                                                                   | 1.059948579        | 2              | 2.937930584 |
| Q510M2        | LYAEGDIPVPHAR                                                                  | 1.208881632        | 2              | 3.322430611 |
| Q510M2        | EALQAAEAGADLVMLDNFKPEELHPTAATLK                                                | 1.385365681        | 3              | 5.670990944 |
| <b>Q5M7U6</b> | <b>ARP2 Actin_related protein 2</b>                                            | <b>1.055421637</b> | <b>0.33134</b> | <b>6</b>    |
| Q5M7U6        | GYAFNHSADFETVR                                                                 | 1.208316517        | 2              | 3.593050003 |

|               |                                                                         |                    |                |             |
|---------------|-------------------------------------------------------------------------|--------------------|----------------|-------------|
| Q5M7U6        | HLWDYTFGPEK                                                             | 1.166204927        | 2              | 3.391563177 |
| Q5M7U6        | ILLTEPPMNPTK                                                            | 0.908064441        | 2              | 3.059725761 |
| Q5M7U6        | LCYVGYNIEQEQQ                                                           | 0.720496021        | 2              | 3.312533855 |
| Q5M7U6        | SMLEVNYPMENGIVR                                                         | 1.064193997        | 2              | 4.464024544 |
| Q5M7U6        | VVVCNNGTGFVK                                                            | 1.054358823        | 2              | 2.951761723 |
| <b>Q5M7W5</b> | <b>MAP4 Microtubule-associated protein 4</b>                            | <b>0.97079953</b>  | <b>0.92392</b> | <b>9</b>    |
| Q5M7W5        | AAVGLTGNDIATPPNK                                                        | 1.13563099         | 2              | 3.333067894 |
| Q5M7W5        | ATSPSTLVSTGSSSR                                                         | 0.96625937         | 2              | 3.387913704 |
| Q5M7W5        | EAETALPIEMDLAPPEDVALPK                                                  | 1.320743728        | 2              | 2.483345509 |
| Q5M7W5        | ESEGPSDTDAAPGPDVTDLTK                                                   | 1.018184168        | 2              | 4.325022697 |
| Q5M7W5        | NTAPPEEETVPGK                                                           | 0.950660439        | 2              | 2.525020123 |
| Q5M7W5        | NTTPTGATPPAGMASTR                                                       | 1.093960664        | 2              | 2.40905571  |
| Q5M7W5        | STLPVDEGSPLEK                                                           | 0.918862116        | 2              | 2.350764036 |
| Q5M7W5        | VGSLDNVGHLPAGGTVK                                                       | 0.965042622        | 2              | 2.803241014 |
| Q5M7W5        | VTEFNNVTPLSEEEVASIK                                                     | 1.064492965        | 2              | 4.667416096 |
| <b>Q5M875</b> | <b>DHB13 17_beta_hydroxysteroid dehydrogenase 13</b>                    | <b>1.700251356</b> | <b>9.9E-20</b> | <b>6</b>    |
| Q5M875        | ALTAELDTLGK                                                             | 1.50037355         | 2              | 3.513955593 |
| Q5M875        | IQNIQFEAIVGHR                                                           | 1.713625287        | 2              | 3.683205128 |
| Q5M875        | NSGHIVTVASVCGHR                                                         | 1.628551116        | 2              | 4.211539268 |
| Q5M875        | SLIDGILTNK                                                              | 1.303268233        | 2              | 2.977232456 |
| Q5M875        | SVAGQTVLITGAGHGIGR                                                      | 1.717853341        | 2              | 3.985351086 |
| Q5M875        | TSCLCPVFVNTGFTK                                                         | 1.556790058        | 2              | 4.150798798 |
| <b>Q5M9G3</b> | <b>CAPR1 Caprin_1</b>                                                   | <b>1.267075382</b> | <b>6.5E-07</b> | <b>3</b>    |
| Q5M9G3        | LNQDQLDAVSK                                                             | 1.296873032        | 2              | 3.150937319 |
| Q5M9G3        | YQEVTTNLEFAK                                                            | 1.026095817        | 2              | 2.591183186 |
| Q5M9G3        | SSGPPPPSGSSGSEAAAGAAAPASQHPATGTGAVQTEAMK                                | 0.932457203        | 3              | 4.989726067 |
| <b>Q5M9I5</b> | <b>QCR6 Cytochrome b_c1 complex subunit 6_mitochondrial</b>             | <b>1.098023361</b> | <b>0.00032</b> | <b>2</b>    |
| Q5M9I5        | EEEEELVDPLTTVR                                                          | 1.085944592        | 2              | 3.332681417 |
| Q5M9I5        | SQTEEDCTEELDFLHAR                                                       | 2.102408018        | 2              | 5.020609379 |
| <b>Q5PPL3</b> | <b>NSDHL Sterol_4_alpha_carboxylate 3_dehydrogenase_decarboxylating</b> | <b>1.253826802</b> | <b>1.1E-05</b> | <b>10</b>   |
| Q5PPL3        | AVLDANDPK                                                               | 1.126510093        | 1              | 1.976686597 |
| Q5PPL3        | GYAVNVFDVR                                                              | 1.263612995        | 1              | 2.030426502 |
| Q5PPL3        | AVLDANDPKK                                                              | 1.499684026        | 2              | 2.478002787 |
| Q5PPL3        | CTVIGGSGFLGQHMVEQLLSR                                                   | 1.267472241        | 2              | 4.346493244 |
| Q5PPL3        | GQVTGTDLINEVSK                                                          | 1.034482497        | 2              | 4.07318306  |
| Q5PPL3        | GVSTVFHCASPPSNNK                                                        | 1.122519279        | 2              | 4.780426979 |
| Q5PPL3        | ILTGLNIEAPK                                                             | 1.391748559        | 2              | 3.420877695 |
| Q5PPL3        | KGQVTGTDLINEVSK                                                         | 1.139589682        | 2              | 4.50861454  |
| Q5PPL3        | VQFFIGDLCNQQDLYPALK                                                     | 1.584341152        | 2              | 4.710452557 |
| Q5PPL3        | NLVDFTFVENVVHGHILAAEHLR                                                 | 1.08060572         | 3              | 3.882331848 |
| <b>Q5PQT3</b> | <b>GLYAT Glycine N_acyltransferase</b>                                  | <b>1.383410772</b> | <b>2.5E-05</b> | <b>5</b>    |
| Q5PQT3        | AIQNLASIHSQVVK                                                          | 1.470808204        | 2              | 3.95813489  |

|               |                                                                      |                    |                |             |
|---------------|----------------------------------------------------------------------|--------------------|----------------|-------------|
| Q5PQT3        | KLFPSLLDTK                                                           | 1.459123377        | 2              | 2.467707396 |
| Q5PQT3        | LSSLDVTHAALVNK                                                       | 1.718934103        | 2              | 3.467075586 |
| Q5PQT3        | QHLQIQSSQSHLNK                                                       | 1.253911725        | 2              | 3.50531292  |
| Q5PQT3        | NFPSSCVLGPETPASWTLMQDTGEMR                                           | 0.855579485        | 3              | 4.036950111 |
| <b>Q5QNV8</b> | <b>CQ066 Uncharacterized protein C17orf66 homolog</b>                | <b>1.102246782</b> | <b>0.53515</b> | <b>2</b>    |
| Q5QNV8        | LEAPAFSIFYFSKPK                                                      | 0.994858819        | 2              | 2.369113922 |
| Q5QNV8        | YFKDSAQMPNLHVSISK+Oxidation(8)                                       | 1.186177151        | 2              | 2.412693739 |
| <b>Q5RJR8</b> | <b>LRC59 Leucine_rich repeat_containing protein 59</b>               | <b>1.051683702</b> | <b>0.12508</b> | <b>5</b>    |
| Q5RJR8        | ATVLDLSCNK                                                           | 1.169316816        | 2              | 2.396241188 |
| Q5RJR8        | DKLDGNELDLSLSDNEVPVK                                                 | 0.959639512        | 2              | 5.826883793 |
| Q5RJR8        | HHEILQWVLQTDQQ                                                       | 1.094720775        | 2              | 3.441896439 |
| Q5RJR8        | LDGNELDLSLSDNEVPVK                                                   | 0.860274773        | 2              | 4.329481125 |
| Q5RJR8        | LQQLPADFGR                                                           | 1.947168197        | 2              | 2.320665359 |
| <b>Q5RKI0</b> | <b>WDR1 WD repeat_containing protein 1</b>                           | <b>1.09242059</b>  | <b>0.42073</b> | <b>3</b>    |
| Q5RKI0        | YAPSGFYIASGDISGK                                                     | 1.123377861        | 2              | 4.160158634 |
| Q5RKI0        | AHDGGIYAISWSPDSTHLLSASGDK                                            | 0.993973564        | 3              | 5.274300098 |
| Q5RKI0        | CFSIDNPGYEPEVVAVHPGGDTVAVGGSDGNVR                                    | 0.649126236        | 3              | 3.737568617 |
| <b>Q5RKI1</b> | <b>IF4A2 Eukaryotic initiation factor 4A_II</b>                      | <b>1.117022729</b> | <b>2.8E-09</b> | <b>5</b>    |
| Q5RKI1        | ELAQQIQK                                                             | 1.139452591        | 1              | 2.174785376 |
| Q5RKI1        | GIDVQVSLVINYLPTNR                                                    | 1.007748331        | 2              | 4.738516331 |
| Q5RKI1        | GYDVIAQAQSGTGK                                                       | 1.199479325        | 2              | 5.208706856 |
| Q5RKI1        | MFVLDEADEMSLR                                                        | 1.038706459        | 2              | 4.724527836 |
| Q5RKI1        | VLITTDLLAR                                                           | 1.269305294        | 2              | 2.416933537 |
| <b>Q5SGE0</b> | <b>LPPRC Leucine_rich PPR motif_containing protein_mitochondrial</b> | <b>1.070226158</b> | <b>0.38476</b> | <b>11</b>   |
| Q5SGE0        | AALDLEQVPSELAVTR                                                     | 1.237813421        | 2              | 3.873970747 |
| Q5SGE0        | CIANNQVETLEK                                                         | 1.208039451        | 2              | 3.062364817 |
| Q5SGE0        | HCVTMDTPAEK                                                          | 1.31261423         | 2              | 3.191393852 |
| Q5SGE0        | HDNAEDALNLK                                                          | 1.059197857        | 2              | 3.737994909 |
| Q5SGE0        | LKAEGHPVGDPLK                                                        | 1.658165337        | 2              | 2.434809685 |
| Q5SGE0        | MEGANIQPNR                                                           | 1.140820805        | 2              | 2.596491575 |
| Q5SGE0        | SCGSLLPELSLAER                                                       | 1.078655724        | 2              | 2.495158434 |
| Q5SGE0        | SSLSSSSPSAGDTVTEK                                                    | 1.068535234        | 2              | 4.365277767 |
| Q5SGE0        | SYVADKDVASAK                                                         | 1.067484797        | 2              | 3.387579679 |
| Q5SGE0        | TLLELIPELR                                                           | 1.207310387        | 2              | 2.494793415 |
| Q5SGE0        | VQDAINILK                                                            | 1.085970978        | 2              | 2.305063725 |
| <b>Q5SVT3</b> | <b>ETAA1 Ewing_s tumor_associated antigen 1 homolog</b>              | <b>1.084442319</b> | <b>0.34177</b> | <b>2</b>    |
| Q5SVT3        | ELMKLAQQFDK+Oxidation(3)                                             | 0.96138284         | 2              | 2.508353949 |
| Q5SVT3        | NHDFIQMTSKMGHLDNHNK+Oxidation(7)Oxidation(11)                        | 3.814094161        | 2              | 2.48525095  |
| <b>Q5SX40</b> | <b>MYH1 Myosin_1</b>                                                 | <b>0.617812541</b> | <b>6.5E-12</b> | <b>75</b>   |
| Q5SX40        | EQYEEEQEAK                                                           | 0.166984659        | 1              | 3.023170233 |
| Q5SX40        | QLEEEIK                                                              | 1.320473629        | 1              | 2.075603485 |
| Q5SX40        | SSVFFVDAK                                                            | 0.436249419        | 1              | 2.314751625 |

|        |                      |             |   |             |
|--------|----------------------|-------------|---|-------------|
| Q5SX40 | TNAACAALDK           | 0.622058474 | 1 | 1.930557489 |
| Q5SX40 | YETDAIQR             | 0.218447792 | 1 | 2.088631153 |
| Q5SX40 | AAYLQNLNSADLLK       | 0.596893085 | 2 | 3.600010395 |
| Q5SX40 | ADIAESQVNK           | 0.54390154  | 2 | 3.398128033 |
| Q5SX40 | AEDEEEINAELTAK       | 0.551156848 | 2 | 3.953575134 |
| Q5SX40 | AGLLGLEEMR           | 0.693915601 | 2 | 3.888468981 |
| Q5SX40 | AGLLGLEEMRDDK        | 0.930899446 | 2 | 3.381224632 |
| Q5SX40 | ANLLQAEIEELR         | 0.502709126 | 2 | 4.009237289 |
| Q5SX40 | ANSEVAQWR            | 0.503093783 | 2 | 2.323421955 |
| Q5SX40 | DLEEATLQHEATAATLR    | 0.517675891 | 2 | 4.936537743 |
| Q5SX40 | DTQLHLDDALR          | 0.426390409 | 2 | 2.930723906 |
| Q5SX40 | EEQAEPDGTAVADK       | 0.506437172 | 2 | 3.146573544 |
| Q5SX40 | ELEGEVENEQK          | 0.475453484 | 2 | 2.963731527 |
| Q5SX40 | ELEGEVENEQKR         | 0.431248117 | 2 | 3.183594465 |
| Q5SX40 | ELTYQTEEDRK          | 0.913133372 | 2 | 3.142572403 |
| Q5SX40 | ENQSILITGESGAGK      | 0.562074982 | 2 | 3.678750277 |
| Q5SX40 | GQEDLKEQLAMVER       | 0.701313849 | 2 | 4.081747532 |
| Q5SX40 | GQTVQQVYNSVGALAK     | 0.495334524 | 2 | 3.015706301 |
| Q5SX40 | GSSFQTVSALFR         | 0.915063692 | 2 | 2.545173645 |
| Q5SX40 | HADSVAEELGEQIDNLQR   | 0.474530419 | 2 | 5.889241695 |
| Q5SX40 | IAEKDEEIDQLKR        | 1.258839371 | 2 | 2.435076237 |
| Q5SX40 | IAEQELLDASER         | 0.484942741 | 2 | 3.608406067 |
| Q5SX40 | IEAQNKPFDAK          | 0.560030839 | 2 | 2.790340662 |
| Q5SX40 | IEDEQALGMQLQK        | 0.434304431 | 2 | 4.429235458 |
| Q5SX40 | IEELEEIEAER          | 0.381833356 | 2 | 4.111586571 |
| Q5SX40 | IKLEQQVDDLEGSLEQEK   | 0.635922969 | 2 | 5.079025269 |
| Q5SX40 | INQLDTK              | 0.979223369 | 2 | 2.36048913  |
| Q5SX40 | IQHELEEAER           | 0.691988434 | 2 | 3.649016142 |
| Q5SX40 | IQLELNQVK            | 0.741598298 | 2 | 2.908679962 |
| Q5SX40 | KIAEQELLDASER        | 0.611857489 | 2 | 4.152240753 |
| Q5SX40 | KLEDECSELK           | 0.562458274 | 2 | 2.954327106 |
| Q5SX40 | KLETDISIQGEMEDIVQEAR | 0.580885803 | 2 | 5.37808609  |
| Q5SX40 | LAQESTMDVENDKQQLDEK  | 0.24135456  | 2 | 4.567634106 |
| Q5SX40 | LDEAEQLALK           | 0.589820464 | 2 | 3.369658709 |
| Q5SX40 | LEDECSELKK           | 0.59256354  | 2 | 3.100575209 |
| Q5SX40 | LEEAGGATSAQIEMNK     | 0.902659729 | 2 | 4.744553566 |
| Q5SX40 | LEQQVDDLEGSLEQEK     | 0.5450527   | 2 | 5.578268528 |
| Q5SX40 | LEQQVDDLEGSLEQEKK    | 0.838380929 | 2 | 4.823029041 |
| Q5SX40 | LETDISIQGEMEDIVQEAR  | 0.510067669 | 2 | 5.121719837 |
| Q5SX40 | LINELTAQR            | 0.574034257 | 2 | 2.95327282  |
| Q5SX40 | LQDAEEHVEAVNAK       | 0.414622616 | 2 | 4.577136993 |
| Q5SX40 | LQDLVDK              | 0.609187767 | 2 | 2.361414194 |
| Q5SX40 | LQNEVEDLMIDVER       | 0.592049322 | 2 | 4.472345352 |



|               |                                                               |                    |                |             |
|---------------|---------------------------------------------------------------|--------------------|----------------|-------------|
| Q5SX40        | LQTESGEYSR                                                    | 0.45151683         | 2              | 2.667229891 |
| Q5SX40        | MEIDDLASNMEVISK                                               | 0.522112799        | 2              | 4.394586563 |
| Q5SX40        | MEIDDLASNMEVISKSKGNLEK                                        | 0.980370687        | 2              | 2.430502176 |
| Q5SX40        | MQGTLEDQIISANPLLEAFGNAK+Oxidation(1)                          | 0.688411372        | 2              | 4.399733543 |
| Q5SX40        | NDLQLQVQSEADSLADAEER                                          | 0.606707268        | 2              | 5.579258442 |
| Q5SX40        | NKDPLNETVVGLYQK                                               | 0.460203481        | 2              | 4.54413271  |
| Q5SX40        | NLQQEISDLTEQIAEGGK                                            | 0.480247074        | 2              | 5.916985512 |
| Q5SX40        | NLQQEISDLTEQIAEGGKR                                           | 0.59388238         | 2              | 4.432350636 |
| Q5SX40        | NLTEEMAGLDETIAK                                               | 0.502614693        | 2              | 5.154585361 |
| Q5SX40        | QAEEAEEQSNVNLAKE                                              | 0.516940583        | 2              | 4.427749157 |
| Q5SX40        | QKYEETHAELEASQK                                               | 0.577442097        | 2              | 4.03924799  |
| Q5SX40        | QLDEKDSLVSQLSR                                                | 0.885963741        | 2              | 2.813599348 |
| Q5SX40        | QREEQAEPDGTVEADK                                              | 0.522023118        | 2              | 4.337385178 |
| Q5SX40        | SELQAALAEAEASLEHEEGK                                          | 0.57141676         | 2              | 5.433350563 |
| Q5SX40        | TKYETDAIQR                                                    | 0.610927149        | 2              | 3.315425873 |
| Q5SX40        | TLEDQVSELK                                                    | 0.589763659        | 2              | 3.179094791 |
| Q5SX40        | VKELTYQTEEDRK                                                 | 1.243069743        | 2              | 2.62993288  |
| Q5SX40        | VLNASAIPEGQFIDSK                                              | 0.504163087        | 2              | 4.488241673 |
| Q5SX40        | VQLLHTQNTSLINTK                                               | 0.453524501        | 2              | 4.899279594 |
| Q5SX40        | YEETHAELEASQK                                                 | 0.495411906        | 2              | 4.437749386 |
| Q5SX40        | ALQEAHQQLDDDLQAEEDKVNTLTK                                     | 0.533039209        | 3              | 6.559906006 |
| Q5SX40        | IKLEQQVDDLEGSLEQEKK                                           | 0.71320896         | 3              | 5.007100582 |
| Q5SX40        | KALQEAHQQLDDDLQAEEDKVNTLTK                                    | 0.462163964        | 3              | 4.190873623 |
| Q5SX40        | KIQHELEEAER                                                   | 0.633278158        | 3              | 3.893842459 |
| Q5SX40        | KKLETDISIQIGEMEDIVQEAR                                        | 0.792500399        | 3              | 5.14356041  |
| Q5SX40        | KLEDECSELKK                                                   | 0.477038262        | 3              | 4.052670956 |
| Q5SX40        | MQGTLEDQIISANPLLEAFGNAK                                       | 0.479971791        | 3              | 6.60423851  |
| Q5SX40        | TNAACAALDKK                                                   | 0.518895252        | 3              | 3.431129932 |
| Q5SX40        | VRELEGEVENEQKR                                                | 0.687949575        | 3              | 3.662515163 |
| <b>Q5TKR9</b> | <b>KAT6A Histone acetyltransferase KAT6A</b>                  | <b>1.090113217</b> | <b>0.56845</b> | <b>2</b>    |
| Q5TKR9        | ENKDQDSSSLIESEKKPEVK                                          | 0.925426642        | 2              | 2.386845112 |
| Q5TKR9        | KGYGRFLIDFSYLLSK                                              | 1.484331953        | 2              | 2.301556826 |
| <b>Q5U206</b> | <b>CALL3 Calmodulin_like protein 3</b>                        | <b>1.189852418</b> | <b>0.00016</b> | <b>5</b>    |
| Q5U206        | DTDSEEEIR                                                     | 0.923322732        | 2              | 2.416905165 |
| Q5U206        | KMKDTSSEEEIR                                                  | 1.23501912         | 2              | 2.625957727 |
| Q5U206        | KMKDTSSEEEIR+Oxidation(2)                                     | 1.421294749        | 2              | 2.482021809 |
| Q5U206        | MKDTSSEEEIR+Oxidation(1)                                      | 1.34155275         | 2              | 3.440978527 |
| Q5U206        | MKDTSSEEEIR                                                   | 1.051996461        | 3              | 4.169401646 |
| <b>Q5U211</b> | <b>SNX3 Sorting nexin_3</b>                                   | <b>1.0044227</b>   | <b>0.99371</b> | <b>2</b>    |
| Q5U211        | GDDGIFDDNFIEER                                                | 0.97509745         | 2              | 2.869857788 |
| Q5U211        | YSDFEWLR                                                      | 1.053108699        | 2              | 2.540637016 |
| <b>Q5U2Q7</b> | <b>ERF1 Eukaryotic peptide chain release factor subunit 1</b> | <b>1.232675588</b> | <b>3.1E-05</b> | <b>4</b>    |

|               |                                                                                    |                    |                |             |
|---------------|------------------------------------------------------------------------------------|--------------------|----------------|-------------|
| Q5U2Q7        | GFGGIGGILR                                                                         | 1.122975577        | 2              | 2.973564148 |
| Q5U2Q7        | LSVLGAITSVQQR                                                                      | 1.668434528        | 2              | 2.441142082 |
| Q5U2Q7        | YFDEISQDTGK                                                                        | 1.05853338         | 2              | 2.788476229 |
| Q5U2Q7        | YVLHCQGTEEEK                                                                       | 1.40884589         | 2              | 3.964041471 |
| <b>Q5U2U0</b> | <b>CLPX ATP_dependent Clp protease ATP_binding subunit clpX_like_mitochondrial</b> | <b>1.110859006</b> | <b>0.99989</b> | <b>2</b>    |
| Q5U2U0        | QQAEVEK                                                                            | 1.096364138        | 1              | 2.019519329 |
| Q5U2U0        | SGESNTHQDIEEKDR                                                                    | 0.940243834        | 3              | 3.689881563 |
| <b>Q5U300</b> | <b>UBA1 Ubiquitin_like modifier_activating enzyme 1</b>                            | <b>1.144136897</b> | <b>7.5E-10</b> | <b>12</b>   |
| Q5U300        | AENYDISPADR                                                                        | 0.820192441        | 2              | 2.444752693 |
| Q5U300        | DNPGVVTCLEARD                                                                      | 0.812059484        | 2              | 2.350698709 |
| Q5U300        | FEVQGLQPNGEEMTLK                                                                   | 1.013536933        | 2              | 2.795833349 |
| Q5U300        | FEVQGLQPNGEEMTLK+Oxidation(13)                                                     | 1.072648265        | 2              | 2.438231707 |
| Q5U300        | IYDDDFQNLGDGVANALDNVDAR                                                            | 1.262416026        | 2              | 5.608586311 |
| Q5U300        | LDQPMTEIVSR                                                                        | 1.05841983         | 2              | 3.124912977 |
| Q5U300        | NEEDATELVTLAQAVNAR                                                                 | 1.194537905        | 2              | 5.293211937 |
| Q5U300        | NFPNAIEHTLQWAR                                                                     | 1.041919917        | 2              | 3.560248137 |
| Q5U300        | SLPASLAEPDFVMTDFAK                                                                 | 1.075229911        | 2              | 4.069308281 |
| Q5U300        | SPPAVQQDNVDEDLIR                                                                   | 1.135794748        | 2              | 4.87026453  |
| Q5U300        | VVQGHQQLDSYK                                                                       | 1.53018031         | 2              | 3.31052804  |
| Q5U300        | AAVASLLQSVQVPEFTPK                                                                 | 1.234118711        | 3              | 3.422892809 |
| <b>Q5U312</b> | <b>RAI14 Ankyrin</b>                                                               | <b>1.076170544</b> | <b>0.71404</b> | <b>2</b>    |
| Q5U312        | MHLLYAVQGMDEDEVKVLK                                                                | 1.08392435         | 2              | 2.340395689 |
| Q5U312        | QDLQRALEESK                                                                        | 1.075850633        | 2              | 2.439958096 |
| <b>Q5U4E6</b> | <b>GOGA4 Golgin subfamily A member 4</b>                                           | <b>1.023487304</b> | <b>0.77677</b> | <b>2</b>    |
| Q5U4E6        | EFNTQLAQK                                                                          | 1.017274419        | 2              | 2.348141909 |
| Q5U4E6        | EQAQQILTEKENVILQMR+Oxidation(17)                                                   | 1.131599801        | 2              | 2.413443089 |
| <b>Q5XFW8</b> | <b>SEC13 Protein SEC13 homolog</b>                                                 | <b>0.97661358</b>  | <b>0.22884</b> | <b>2</b>    |
| Q5XFW8        | DVAWAPSIGLPTSTIASCSDGR                                                             | 0.93581355         | 2              | 3.583430529 |
| Q5XFW8        | LEAHSWVR                                                                           | 1.413153419        | 2              | 2.696453333 |
| <b>Q5XFX0</b> | <b>TAGL2 Transgelin_2</b>                                                          | <b>1.047307863</b> | <b>0.92943</b> | <b>5</b>    |
| Q5XFX0        | DDGLFSGDPNWFPK                                                                     | 0.500455551        | 2              | 3.427964449 |
| Q5XFX0        | NFSDNQLQEGK                                                                        | 1.054469414        | 2              | 3.249543428 |
| Q5XFX0        | NVIGLQMGTRN                                                                        | 1.036204262        | 2              | 2.775540829 |
| Q5XFX0        | TLMNLGGLAVAR                                                                       | 1.042065745        | 2              | 3.406979561 |
| Q5XFX0        | YGINTTDIFQTVDLWEGK                                                                 | 1.334423639        | 2              | 5.0701828   |
| <b>Q5XHY5</b> | <b>SYTC Threonyl_tRNA synthetase_cytoplasmic</b>                                   | <b>1.099451699</b> | <b>2.9E-06</b> | <b>11</b>   |
| Q5XHY5        | AEHDSILAEK                                                                         | 1.399205247        | 2              | 2.656368971 |
| Q5XHY5        | FLGDIEIWNQAEK                                                                      | 0.993508478        | 2              | 3.460999489 |
| Q5XHY5        | FMVDIDLDPGCTLNK                                                                    | 1.089153313        | 2              | 2.4584167   |
| Q5XHY5        | FNLTYSVSHGDDK                                                                      | 1.085051951        | 2              | 2.677567005 |
| Q5XHY5        | GFQEVVTPNIFNSR                                                                     | 1.158162048        | 2              | 3.556724072 |
| Q5XHY5        | LKAEHDSILAEK                                                                       | 1.0863266          | 2              | 3.36677289  |

|               |                                                                        |                    |                |             |
|---------------|------------------------------------------------------------------------|--------------------|----------------|-------------|
| Q5XHY5        | QLENSLNEFGEK                                                           | 1.039492796        | 2              | 2.901065588 |
| Q5XHY5        | QVMVVPVGPTEDEYAQK                                                      | 1.271958132        | 2              | 3.096116304 |
| Q5XHY5        | TTPYQIACGISQGLADNTVVAK                                                 | 1.329021047        | 2              | 4.006989956 |
| Q5XHY5        | VVWDLDRPLETDCTLELLK                                                    | 1.831340105        | 2              | 3.972016096 |
| Q5XHY5        | WELNPGDGAIFYGPK                                                        | 1.153486602        | 2              | 3.724630356 |
| <b>Q5XH20</b> | <b>TRAP1 Heat shock protein 75 kDa_mitochondrial</b>                   | <b>1.102420598</b> | <b>0.00431</b> | <b>13</b>   |
| Q5XH20        | AFLEALQHQAEISSR                                                        | 1.160503164        | 2              | 4.50467968  |
| Q5XH20        | AQLLQPTLEINPR                                                          | 1.184236521        | 2              | 3.079290628 |
| Q5XH20        | EGIVTTAEQDIKEDIAK                                                      | 0.853890246        | 2              | 2.399739265 |
| Q5XH20        | ELISNASDALEK                                                           | 0.966481427        | 2              | 2.953892231 |
| Q5XH20        | FEDTSPAGER                                                             | 0.886017725        | 2              | 2.895195246 |
| Q5XH20        | GTITIQDTGIGMTK                                                         | 0.960774945        | 2              | 2.883798838 |
| Q5XH20        | GVVDSEDIPLNSLR                                                         | 1.092206737        | 2              | 4.869516373 |
| Q5XH20        | HLAEHSPYYEAMK                                                          | 1.211302088        | 2              | 3.008198738 |
| Q5XH20        | SDCKDFANESR                                                            | 1.106680993        | 2              | 2.897912264 |
| Q5XH20        | YESSALPAGQLTSLSDYASR                                                   | 1.205395005        | 2              | 5.453862667 |
| Q5XH20        | YIAQAYDKPR                                                             | 1.269368725        | 2              | 2.806532621 |
| Q5XH20        | LDTHPAMVTVLEMGAAR                                                      | 0.961709196        | 3              | 4.040245533 |
| Q5XH20        | VCEGQVLPEMEIHLQTDAAK                                                   | 0.984180821        | 3              | 4.308713913 |
| <b>Q5XI22</b> | <b>THIC Acetyl_CoA acetyltransferase_cytosolic</b>                     | <b>1.10462715</b>  | <b>0.99998</b> | <b>9</b>    |
| Q5XI22        | AGHFDKEIVPVHVSSR                                                       | 1.137091542        | 2              | 4.776508331 |
| Q5XI22        | HGSNLEAMSK                                                             | 1.150911027        | 2              | 2.444938898 |
| Q5XI22        | HGSNLEAMSK+Oxidation(8)                                                | 0.922738558        | 2              | 3.269510508 |
| Q5XI22        | TAIGSFNGALSTVPVHNLGTTVIK                                               | 1.05856286         | 2              | 5.249322414 |
| Q5XI22        | VAPEEVSEVIFGHVLTAGCGQNPTK                                              | 0.866630452        | 2              | 5.35949707  |
| Q5XI22        | VNIDGGAIALGHPLGASGCR                                                   | 1.095472186        | 2              | 5.387734413 |
| Q5XI22        | LKPYFLTDGTGTVPANASGMNDGAAAVVLMK                                        | 1.196341761        | 3              | 5.158839226 |
| Q5XI22        | MGEVPLADSILCDGLTDAFHNYHMGITAENVAK                                      | 1.130869667        | 3              | 3.882935286 |
| Q5XI22        | MLKPLAQVVSWSQAGVEPSVMGVGPIPAIK                                         | 0.890133549        | 3              | 4.653283119 |
| <b>Q5XI29</b> | <b>CPSF7 Cleavage and polyadenylation specificity factor subunit 7</b> | <b>0.920691193</b> | <b>0.00133</b> | <b>2</b>    |
| Q5XI29        | QNLSQFEAQR                                                             | 0.86291701         | 2              | 2.372994661 |
| Q5XI29        | SIGVYDVVELK                                                            | 0.835150406        | 2              | 2.58266449  |
| <b>Q5XI32</b> | <b>CAPZB F_actin_capping protein subunit beta</b>                      | <b>0.991594968</b> | <b>0.6258</b>  | <b>6</b>    |
| Q5XI32        | GCWDSIHVVEVQEK                                                         | 1.327251441        | 2              | 3.209188223 |
| Q5XI32        | KLEVEANNAFDQYR                                                         | 1.082662114        | 2              | 4.140471935 |
| Q5XI32        | LEVEANNAFDQYR                                                          | 0.933729193        | 2              | 3.576242924 |
| Q5XI32        | LVEDMENK                                                               | 1.084182274        | 2              | 2.756031513 |
| Q5XI32        | NDLVEALK                                                               | 1.004035035        | 2              | 2.575969934 |
| Q5XI32        | SGSGTMNLGGSLTR                                                         | 1.066452628        | 2              | 3.255939007 |
| <b>Q5XI41</b> | <b>TRAM1 Translocating chain_associated membrane protein 1</b>         | <b>0.947182211</b> | <b>0.99106</b> | <b>2</b>    |
| Q5XI41        | EHSFAQAPPVK                                                            | 0.940251083        | 2              | 2.350444078 |
| Q5XI41        | LDFSTGNFNVLAVR                                                         | 1.047547222        | 2              | 3.066029787 |

|               |                                                         |                    |                |             |
|---------------|---------------------------------------------------------|--------------------|----------------|-------------|
| <b>Q5XI60</b> | <b>REEP6 Receptor expression_enhancing protein 6</b>    | <b>1.435076091</b> | <b>0.61558</b> | <b>3</b>    |
| Q5XI60        | ALDIAAGITR                                              | 1.061839414        | 2              | 2.564697504 |
| Q5XI60        | HHVALDSAASQLSGR                                         | 1.448836814        | 2              | 4.519289494 |
| Q5XI60        | NVATDALGALEAR                                           | 1.259647465        | 2              | 4.045724392 |
| <b>Q5XI72</b> | <b>IF4H Eukaryotic translation initiation factor 4H</b> | <b>1.127717534</b> | <b>0.48164</b> | <b>2</b>    |
| Q5XI72        | EALTYDGALLGDRSLR                                        | 1.301540973        | 2              | 2.601260424 |
| Q5XI72        | SLRVDIAEGRK                                             | 0.970031971        | 2              | 2.436845779 |
| <b>Q5XI73</b> | <b>GDIR1 Rho GDP_dissociation inhibitor 1</b>           | <b>1.106668174</b> | <b>0.21917</b> | <b>6</b>    |
| Q5XI73        | AEEYEFITPMEEAPK                                         | 1.193341235        | 2              | 4.116736889 |
| Q5XI73        | IDKTDYMGVSYGPR                                          | 1.107300667        | 2              | 4.006309986 |
| Q5XI73        | SIQEIQELDKDDESLR                                        | 1.089269646        | 2              | 5.290998936 |
| Q5XI73        | SIQEIQELDKDDESLRK                                       | 1.095800784        | 2              | 4.151248455 |
| Q5XI73        | VAVSADPNVNPVIVTR                                        | 1.246220718        | 2              | 4.108188629 |
| Q5XI73        | LTLVCSTAPGLELDTGDLESFKK                                 | 1.899043489        | 3              | 3.450900793 |
| <b>Q5XI78</b> | <b>ODO1 2_oxoglutarate dehydrogenase_mitochondrial</b>  | <b>0.932140027</b> | <b>0.96843</b> | <b>13</b>   |
| Q5XI78        | FGLEGCEVLIPALK                                          | 0.995663505        | 2              | 2.964377165 |
| Q5XI78        | ICEEAFTR                                                | 1.003904207        | 2              | 2.41024375  |
| Q5XI78        | IEQLSPFPDLLLLK                                          | 1.071896167        | 2              | 3.37631321  |
| Q5XI78        | LEAADEGSGDMK                                            | 1.02587153         | 2              | 2.893482208 |
| Q5XI78        | LNVLANVIR                                               | 1.353004896        | 2              | 2.531419516 |
| Q5XI78        | NITLSLVANPSHLEAADPVVMGK                                 | 0.843618692        | 2              | 4.911587715 |
| Q5XI78        | NTNAGAPPGTAYQSPLSLR                                     | 1.137158617        | 2              | 3.81319356  |
| Q5XI78        | SWDIFFR                                                 | 0.976870505        | 2              | 2.337411165 |
| Q5XI78        | VIPEDGPAAQNPDK                                          | 0.926824664        | 2              | 2.702236176 |
| Q5XI78        | GHHVAQLDPLGILDADLDSSVPADIISSTDK                         | 1.167037009        | 3              | 5.040868759 |
| Q5XI78        | HHVLHDQNVDK                                             | 0.590031472        | 3              | 3.372943163 |
| Q5XI78        | SSLATMAHAQSLVEAQPNVDK                                   | 0.554822897        | 3              | 3.906039953 |
| Q5XI78        | YAELLVSQGVVNQPEYEEISKYDK                                | 0.789428142        | 3              | 4.370318413 |
| <b>Q5XI95</b> | <b>ADH6 Alcohol dehydrogenase 6</b>                     | <b>1.139416332</b> | <b>0.96783</b> | <b>5</b>    |
| Q5XI95        | ATVLWKPGAPLAEIEVAPPK                                    | 1.315677475        | 2              | 3.647271395 |
| Q5XI95        | IIAVDINK                                                | 1.209247457        | 2              | 2.788011074 |
| Q5XI95        | MVATGVCGTDIK                                            | 1.014317144        | 2              | 2.684589148 |
| Q5XI95        | NNICTEIR                                                | 1.083747725        | 2              | 2.409723759 |
| Q5XI95        | TVGATDCVDPR                                             | 1.098483096        | 2              | 2.972200394 |
| <b>Q5XIA0</b> | <b>DZI1L Zinc finger protein DZIP1L</b>                 | <b>1.062312549</b> | <b>0.8398</b>  | <b>2</b>    |
| Q5XIA0        | EVCNHCRQPVPVLLK                                         | 1.062322399        | 2              | 2.368977785 |
| Q5XIA0        | GQQELGRQADELK                                           | 1.062312079        | 2              | 2.443547249 |
| <b>Q5XIC0</b> | <b>ECI2 Enoyl_CoA delta isomerase 2_mitochondrial</b>   | <b>1.110943949</b> | <b>0.99993</b> | <b>6</b>    |
| Q5XIC0        | ATQQDFENAMNQVK                                          | 0.941155253        | 2              | 4.523313522 |
| Q5XIC0        | GILVTSEGGITK                                            | 1.050955501        | 2              | 3.42509079  |
| Q5XIC0        | LHAVNEECTTLR                                            | 1.089349472        | 2              | 4.136922359 |
| Q5XIC0        | QNYVDLVSSLSSEASSQGK                                     | 0.892894638        | 2              | 5.114122868 |
| Q5XIC0        | WDAWNALGSLPK                                            | 1.126397986        | 2              | 3.436161041 |

|               |                                                                                  |                    |                |             |
|---------------|----------------------------------------------------------------------------------|--------------------|----------------|-------------|
| Q5XIC0        | WLSEECINAIMSFVTR                                                                 | 0.870323069        | 2              | 2.360720634 |
| <b>Q5XIC1</b> | <b>GMPPA Mannose_1_phosphate guanyltransferase alpha</b>                         | <b>1.164775571</b> | <b>0.08663</b> | <b>2</b>    |
| Q5XIC1        | VAPSAVLGPNVSIGK                                                                  | 1.548399771        | 2              | 2.617502213 |
| Q5XIC1        | VEGTPNDPNPNDR                                                                    | 0.658905892        | 2              | 2.602965117 |
| <b>Q5XIE6</b> | <b>HIBCH 3_hydroxyisobutyryl_CoA hydrolase_mitochondrial</b>                     | <b>1.18118514</b>  | <b>0.61119</b> | <b>7</b>    |
| Q5XIE6        | AGIATHFVDSEK                                                                     | 0.708304415        | 2              | 3.238562584 |
| Q5XIE6        | AVLIDKDQTPK                                                                      | 1.179298695        | 2              | 2.972886801 |
| Q5XIE6        | GCAGVITLNRPK                                                                     | 1.014725372        | 2              | 2.686513901 |
| Q5XIE6        | HTETAEVLLER                                                                      | 1.098555951        | 2              | 2.575521708 |
| Q5XIE6        | INSCFSANTVEQILENLR                                                               | 1.08949061         | 2              | 4.727361679 |
| Q5XIE6        | QDGSPFAMEQIK                                                                     | 1.171324912        | 2              | 2.56450963  |
| Q5XIE6        | LHVLEELLALK                                                                      | 1.186971753        | 3              | 4.61975193  |
| <b>Q5XIF3</b> | <b>NDUS4 NADH dehydrogenase [ubiquinone] iron_sulfur protein 4_mitochondrial</b> | <b>1.132542109</b> | <b>0.80544</b> | <b>2</b>    |
| Q5XIF3        | HGWSYDVEGR                                                                       | 1.111503618        | 2              | 2.699670553 |
| Q5XIF3        | LDVPTLTGVPEEHK                                                                   | 1.153597955        | 2              | 3.45411396  |
| <b>Q5XIF6</b> | <b>TBA4A Tubulin alpha_4A chain</b>                                              | <b>0.979458309</b> | <b>0.91582</b> | <b>5</b>    |
| Q5XIF6        | AVFVDLEPTVIDEIR                                                                  | 0.946252012        | 2              | 4.140595913 |
| Q5XIF6        | AYHEQLSVAEITNACFEPANQMVK                                                         | 1.028618575        | 2              | 5.47256279  |
| Q5XIF6        | DVNAAIAAIK                                                                       | 0.876636619        | 2              | 2.904357433 |
| Q5XIF6        | SIQFVDWCPTGFK                                                                    | 1.063585504        | 2              | 4.451962948 |
| Q5XIF6        | TIGGGDDSFTEFCETGAGK                                                              | 0.78841158         | 2              | 4.260843277 |
| <b>Q5XIG4</b> | <b>OCAD1 OCIA domain_containing protein 1</b>                                    | <b>1.092416414</b> | <b>0.76067</b> | <b>2</b>    |
| Q5XIG4        | SVPLAATSMLITQGLISK                                                               | 1.172812501        | 2              | 3.766812325 |
| Q5XIG4        | YDSNVSGQSSFQSPAADNIEK                                                            | 1.043462586        | 2              | 5.155099869 |
| <b>Q5XIH7</b> | <b>PHB2 Prohibitin_2</b>                                                         | <b>1.018453017</b> | <b>0.03947</b> | <b>10</b>   |
| Q5XIH7        | AQVSLLR                                                                          | 1.244709068        | 2              | 2.34243083  |
| Q5XIH7        | DLQMVNISLR                                                                       | 0.723417619        | 2              | 3.089460373 |
| Q5XIH7        | FNASQLITQR                                                                       | 1.049292537        | 2              | 3.761054277 |
| Q5XIH7        | IVQAEGEAEAAK                                                                     | 1.058361871        | 2              | 3.871401548 |
| Q5XIH7        | IYLTADNLVNLQDESFTR                                                               | 2.016769811        | 2              | 4.736650944 |
| Q5XIH7        | LGLDYEER                                                                         | 1.180347307        | 2              | 2.304040194 |
| Q5XIH7        | LLLGAAGAVAYGVR                                                                   | 3.370458279        | 2              | 3.473404408 |
| Q5XIH7        | VLPSIVNEVLK                                                                      | 0.904010008        | 2              | 2.730412722 |
| Q5XIH7        | VLSRPNAQELPSMYQR                                                                 | 1.179829251        | 2              | 4.583477497 |
| Q5XIH7        | IGGVQQDTILAEGLHFR                                                                | 1.364807042        | 3              | 4.201953888 |
| <b>Q5XIM9</b> | <b>TCPB T_complex protein 1 subunit beta</b>                                     | <b>1.202193327</b> | <b>0.00595</b> | <b>9</b>    |
| Q5XIM9        | EALLSSAVDHGSDEVK                                                                 | 1.067126114        | 2              | 4.206585884 |
| Q5XIM9        | GATQQILDEAER                                                                     | 1.184934851        | 2              | 3.968919039 |
| Q5XIM9        | GSGNLEAIHVIK                                                                     | 1.155960397        | 2              | 2.64897275  |
| Q5XIM9        | HGINCFINR                                                                        | 1.276389995        | 2              | 2.617143393 |
| Q5XIM9        | LGGSLADSYLDEGFLLDK                                                               | 1.381923683        | 2              | 4.147614956 |

|               |                                                                          |                    |                |             |
|---------------|--------------------------------------------------------------------------|--------------------|----------------|-------------|
| Q5XIM9        | SLHDALCVLAQTVK                                                           | 1.688514845        | 2              | 3.571403027 |
| Q5XIM9        | VAEIEHAEKEK                                                              | 1.590087287        | 2              | 2.448612213 |
| Q5XIM9        | VQDDEVGDGTTSVTVLAAELLR                                                   | 1.203961016        | 2              | 4.745425701 |
| Q5XIM9        | LGGSLADSYLDEGFLLDKK                                                      | 1.099606509        | 3              | 3.313374996 |
| <b>Q5XIN6</b> | <b>LETM1 LETM1 and EF_hand domain_containing protein 1_mitochondrial</b> | <b>1.030629095</b> | <b>0.81736</b> | <b>10</b>   |
| Q5XIN6        | AAEVEGEQVDNK                                                             | 1.127542706        | 2              | 4.090139866 |
| Q5XIN6        | AMYLPTLSPADQLK                                                           | 1.52383221         | 2              | 2.315105677 |
| Q5XIN6        | DIQPEVAEATVPGRPGAELQPK                                                   | 0.902891441        | 2              | 4.612581253 |
| Q5XIN6        | FLQDTIEEMALK                                                             | 1.193595226        | 2              | 2.910087824 |
| Q5XIN6        | KLEEGPVYSPPAQVVVK                                                        | 1.059197297        | 2              | 3.955680132 |
| Q5XIN6        | LEEGPVYSPPAQVVVK                                                         | 0.986585152        | 2              | 2.781867027 |
| Q5XIN6        | LLELQSIGTNNFLR                                                           | 1.025276221        | 2              | 3.352968693 |
| Q5XIN6        | STLQTLPEIVAK                                                             | 1.050297093        | 2              | 2.385340929 |
| Q5XIN6        | LDPAAASSPTGESVISVDELISAMK                                                | 1.067539892        | 3              | 4.759286404 |
| Q5XIN6        | LFDELTLDNLTRPQLVALCK                                                     | 1.225910671        | 3              | 4.837278366 |
| <b>Q5XIT9</b> | <b>MCCB Methylcrotonoyl_CoA carboxylase beta chain_mitochondrial</b>     | <b>1.134991697</b> | <b>0.04806</b> | <b>7</b>    |
| Q5XIT9        | AATGEEVSAEDLGGADLHCR                                                     | 1.19205197         | 2              | 5.007183075 |
| Q5XIT9        | ALYGDTLVTGFAR                                                            | 1.147326955        | 2              | 3.111362457 |
| Q5XIT9        | AQEIALQNR                                                                | 0.831605742        | 2              | 2.566584587 |
| Q5XIT9        | LGTQPDSGSSTYQENYEQMK                                                     | 1.162908265        | 2              | 4.940058708 |
| Q5XIT9        | LWDDGIIDPVDTR                                                            | 1.08841213         | 2              | 3.15926218  |
| Q5XIT9        | LYGEEVPAGGIITGIGR                                                        | 1.075832186        | 2              | 4.553246498 |
| Q5XIT9        | KLDVTVEPSEEPLFPADELYGIVGANLK                                             | 1.213730328        | 3              | 4.910382271 |
| <b>Q5XIU9</b> | <b>PGRC2 Membrane_associated progesterone receptor component 2</b>       | <b>1.153211206</b> | <b>0.53264</b> | <b>5</b>    |
| Q5XIU9        | GLATFCLDK                                                                | 1.085540886        | 1              | 1.957779408 |
| Q5XIU9        | VFDVTK                                                                   | 1.212500858        | 1              | 2.0025599   |
| Q5XIU9        | FYGPAGPYGIFAGR                                                           | 1.126476206        | 2              | 2.888855696 |
| Q5XIU9        | GGDGSPGGAGATAAR                                                          | 1.116379257        | 2              | 3.209258795 |
| Q5XIU9        | GLCSGPGAGEESPAATLPR                                                      | 1.118072509        | 2              | 4.802998543 |
| <b>Q60587</b> | <b>ECHB Trifunctional enzyme subunit beta_mitochondrial</b>              | <b>1.005776054</b> | <b>3.3E-06</b> | <b>6</b>    |
| Q60587        | AMDSDWFAQNYMGR                                                           | 0.964253605        | 2              | 3.214321613 |
| Q60587        | AQDEGHLSDIVPFK                                                           | 1.238179196        | 2              | 3.329460859 |
| Q60587        | DGGQYALVAACAAGQGQHAMIVEAYPK                                              | 1.038360176        | 2              | 5.268391609 |
| Q60587        | DNGIRPSSLEQMAK                                                           | 1.010121633        | 2              | 3.615104198 |
| Q60587        | DQLLLGPTYATPK                                                            | 0.67356696         | 2              | 3.727067232 |
| Q60587        | NIVVVEGVR                                                                | 1.077652029        | 2              | 3.009549379 |
| <b>Q60759</b> | <b>GCDH Glutaryl_CoA dehydrogenase_mitochondrial</b>                     | <b>1.169796126</b> | <b>0.76917</b> | <b>5</b>    |
| Q60759        | DILGGNGISDEYHVIR                                                         | 0.764585341        | 2              | 3.224007845 |
| Q60759        | DIVYEMGELGVLGPTIK                                                        | 1.204227087        | 2              | 3.029067993 |
| Q60759        | GYGCAGVSSVAYGLLTR                                                        | 0.942259338        | 2              | 3.981208324 |
| Q60759        | SMMSVQSSLMHPHPIYTGSEEQR                                                  | 1.096128026        | 3              | 3.839382172 |

|               |                                                                                 |                    |                |             |
|---------------|---------------------------------------------------------------------------------|--------------------|----------------|-------------|
| Q60759        | HAMNLEAVNTYEGTHDIHALILGR                                                        | 1.1468126          | 4              | 5.464575291 |
| <b>Q60817</b> | <b>NACA Nascent polypeptide-associated complex subunit alpha</b>                | <b>0.853372844</b> | <b>1</b>       | <b>2</b>    |
| Q60817        | IEDLSQQAQLAAAEK                                                                 | 1.035405973        | 2              | 4.552981377 |
| Q60817        | NILFVITKPDVYK                                                                   | 0.988401546        | 2              | 3.547375917 |
| <b>Q61029</b> | <b>LAP2B Lamina-associated polypeptide 2_ isoforms beta/delta/epsilon/gamma</b> | <b>0.951890333</b> | <b>0.99468</b> | <b>3</b>    |
| Q61029        | SELVANNVTLPAGEQR                                                                | 0.912062298        | 2              | 4.079693317 |
| Q61029        | SSTPLPTVSSAENTR                                                                 | 0.991948396        | 2              | 2.9060812   |
| Q61029        | YGVNPGPIVGTTR                                                                   | 1.094994437        | 2              | 3.07916069  |
| <b>Q61043</b> | <b>NIN Ninein</b>                                                               | <b>0.791095526</b> | <b>0.64533</b> | <b>2</b>    |
| Q61043        | ERATAAAMKQEQEILER                                                               | 0.794761065        | 2              | 2.335002422 |
| Q61043        | LQEENSILR                                                                       | 0.66225603         | 2              | 2.403963327 |
| <b>Q61233</b> | <b>PLSL Plastin_2</b>                                                           | <b>1.018647073</b> | <b>0.99968</b> | <b>2</b>    |
| Q61233        | ALENDPDCR                                                                       | 0.993617662        | 2              | 2.519220591 |
| Q61233        | MINLSVPDTIDER                                                                   | 1.027065669        | 2              | 3.581685543 |
| <b>Q61301</b> | <b>CTNA2 Catenin alpha_2</b>                                                    | <b>1.131847415</b> | <b>0.06972</b> | <b>2</b>    |
| Q61301        | LLEPLVTQVTTLVNTSNK                                                              | 1.232296171        | 2              | 4.043756008 |
| Q61301        | TSVQTEDDQLIAGQSAR                                                               | 1.0451857          | 2              | 4.621164799 |
| <b>Q61335</b> | <b>BAP31 B_cell receptor-associated protein 31</b>                              | <b>0.999076383</b> | <b>0.99903</b> | <b>5</b>    |
| Q61335        | AENEALAMQK                                                                      | 1.035459279        | 2              | 3.055585384 |
| Q61335        | LKDELASTK                                                                       | 0.872379252        | 2              | 2.622096539 |
| Q61335        | YMEENDQLK                                                                       | 1.054731038        | 2              | 2.410335064 |
| Q61335        | YMEENDQLKK                                                                      | 0.957034248        | 2              | 2.565962553 |
| Q61335        | KYMEENDQLKK+Oxidation(3)                                                        | 1.050287907        | 3              | 3.365251541 |
| <b>Q61599</b> | <b>GDIR2 Rho GDP-dissociation inhibitor 2</b>                                   | <b>1.129967761</b> | <b>0.1352</b>  | <b>2</b>    |
| Q61599        | TLLGDVPVADPTVPNVTVTR                                                            | 1.024741615        | 2              | 4.638727665 |
| Q61599        | ATFMVGSYGPRPEEYFLTPVEEAPK                                                       | 1.661595475        | 3              | 3.62484026  |
| <b>Q61656</b> | <b>DDX5 Probable ATP-dependent RNA helicase DDX5</b>                            | <b>0.99618345</b>  | <b>0.98849</b> | <b>3</b>    |
| Q61656        | ELAQQVQVAAEYCR                                                                  | 0.898563433        | 2              | 2.663357496 |
| Q61656        | GDBGICLVLAPTR                                                                   | 1.011773881        | 2              | 3.425886393 |
| Q61656        | MLDMGFEPQIR                                                                     | 0.917716807        | 2              | 3.380897045 |
| <b>Q61830</b> | <b>MRC1 Macrophage mannose receptor 1</b>                                       | <b>1.16006822</b>  | <b>0.4006</b>  | <b>3</b>    |
| Q61830        | KMDPQPK+Oxidation(2)                                                            | 1.160877877        | 1              | 1.915970087 |
| Q61830        | LKLPWHEAETYCK                                                                   | 1.098950819        | 2              | 2.302882671 |
| Q61830        | TGVAGGLWDVLSCEEK                                                                | 1.21358273         | 2              | 3.16429615  |
| <b>Q61941</b> | <b>NNTM NAD(P) transhydrogenase_mitochondrial</b>                               | <b>1.17510732</b>  | <b>0.9955</b>  | <b>11</b>   |
| Q61941        | EANSIVITPGYGLCAAK                                                               | 1.144485584        | 2              | 3.640205622 |
| Q61941        | FFTGQITAAGK                                                                     | 1.177736991        | 2              | 2.432063341 |
| Q61941        | GITHIGYDLPSR                                                                    | 1.053183682        | 2              | 3.553814173 |
| Q61941        | ILIVGGGVAGLASAGAAK                                                              | 1.423041437        | 2              | 4.577931881 |
| Q61941        | KTTVLAMDQVPR                                                                    | 0.979982476        | 2              | 3.498476505 |
| Q61941        | MATQASTLYSNITK                                                                  | 0.876341129        | 2              | 4.33093214  |
| Q61941        | QGFNVVVEGAGEASK                                                                 | 0.937944714        | 2              | 3.865109921 |

|               |                                                                           |                    |                |             |
|---------------|---------------------------------------------------------------------------|--------------------|----------------|-------------|
| Q61941        | SAPLLLPGR                                                                 | 1.65176437         | 2              | 2.34673357  |
| Q61941        | SLGAEPLEVDLK                                                              | 1.181637509        | 2              | 3.06028986  |
| Q61941        | TTVLAMDQVPR                                                               | 1.168318422        | 2              | 2.755830288 |
| Q61941        | VTIAQGYDALSSMANISGYK                                                      | 1.125699195        | 2              | 5.380628109 |
| <b>Q61990</b> | <b>PCBP2 Poly(rC)_binding protein 2</b>                                   | <b>1.182200685</b> | <b>0.56575</b> | <b>2</b>    |
| Q61990        | AITIAGIPQSIIECVK                                                          | 1.182181738        | 2              | 2.332728863 |
| Q61990        | IITLAGPTNAIFK                                                             | 1.210574162        | 2              | 2.730564594 |
| <b>Q62095</b> | <b>DDX3Y ATP_dependent RNA helicase DDX3Y</b>                             | <b>1.216821039</b> | <b>7E-12</b>   | <b>4</b>    |
| Q62095        | SFLDLLNATGK                                                               | 1.307808992        | 2              | 3.900295734 |
| Q62095        | VGNLGLATSFNER                                                             | 1.587001585        | 2              | 2.774291754 |
| Q62095        | VGSTSENITQK                                                               | 1.186455828        | 2              | 2.935770273 |
| Q62095        | HVINFDLPSDIEEYVHR                                                         | 1.411176032        | 3              | 4.260271549 |
| <b>Q62261</b> | <b>SPTB2 Spectrin beta chain_brain 1</b>                                  | <b>1.1739265</b>   | <b>3.7E-12</b> | <b>17</b>   |
| Q62261        | LISDINK                                                                   | 0.741404923        | 1              | 1.950804472 |
| Q62261        | ALVADSHPESEK                                                              | 1.100736899        | 2              | 3.275490284 |
| Q62261        | EGMQLISEKPEEAVVK                                                          | 0.964332832        | 2              | 2.82314539  |
| Q62261        | EGMQLISEKPEEAVVKEK                                                        | 1.258467416        | 2              | 2.388931513 |
| Q62261        | EIEELQSQALSQEGK                                                           | 1.518117828        | 2              | 2.821334839 |
| Q62261        | FESLEPEMNNQASR                                                            | 1.06887036         | 2              | 3.53976655  |
| Q62261        | HDSASTQSTPASSR                                                            | 1.528985586        | 2              | 2.796015739 |
| Q62261        | LLDPEDISVDHPDEK                                                           | 1.282570061        | 2              | 3.356891155 |
| Q62261        | LTTLELLEVR                                                                | 1.804962165        | 2              | 2.565802574 |
| Q62261        | LVSDGNINSDR                                                               | 1.215943475        | 2              | 2.82438612  |
| Q62261        | LVSQDNFGFDLPAVEAATK                                                       | 0.917967065        | 2              | 3.907705545 |
| Q62261        | SQNIITDSSSLNAEAIR                                                         | 1.416388197        | 2              | 4.990614414 |
| Q62261        | TLETPAAQMEGFLNR                                                           | 1.906899139        | 2              | 2.652644157 |
| Q62261        | TQTAIASEDMPNTLTAEK                                                        | 1.155781506        | 2              | 5.539876461 |
| Q62261        | VIESTQDLGNDLAGVMALQR                                                      | 0.224792418        | 2              | 3.834308863 |
| Q62261        | HQILEQAVEDYAETVHQLSK                                                      | 1.013513424        | 3              | 6.188471794 |
| Q62261        | LEDLEVIQHR                                                                | 0.852423282        | 3              | 3.358629942 |
| <b>Q62425</b> | <b>NDUA4 NADH dehydrogenase [ubiquinone] 1 alpha subcomplex subunit 4</b> | <b>0.87084605</b>  | <b>0.17269</b> | <b>3</b>    |
| Q62425        | FYSVNVVDYSK                                                               | 1.062451728        | 1              | 2.602736235 |
| Q62425        | KNNPEPWNK                                                                 | 1.108290657        | 2              | 2.566680193 |
| Q62425        | LGPNEQYK                                                                  | 1.099521758        | 2              | 2.344420671 |
| <b>Q62452</b> | <b>UD19 UDP_glucuronosyltransferase 1_9</b>                               | <b>1.157847211</b> | <b>0.99293</b> | <b>5</b>    |
| Q62452        | AMEIAEALGR                                                                | 0.959927166        | 2              | 3.624193907 |
| Q62452        | GAGVTLNVLEMTADDLENALK+Oxidation(11)                                       | 1.047131737        | 2              | 3.569714546 |
| Q62452        | WLPQNDLLGHPK                                                              | 1.111532363        | 2              | 3.349861145 |
| Q62452        | YTGTRPSNLAK                                                               | 1.025227117        | 2              | 2.981249332 |
| Q62452        | GAGVTLNVLEMTADDLENALK                                                     | 1.014145444        | 3              | 5.889406681 |
| <b>Q62465</b> | <b>VAT1 Synaptic vesicle membrane protein VAT_1 homolog</b>               | <b>1.095046827</b> | <b>0.90295</b> | <b>6</b>    |
| Q62465        | ACGLNFADLMGR                                                              | 1.340170723        | 2              | 2.804127216 |



|               |                                                                       |                    |                |             |
|---------------|-----------------------------------------------------------------------|--------------------|----------------|-------------|
| Q62465        | GVDIVMDPLGGSDTAK                                                      | 1.106521155        | 2              | 4.182638645 |
| Q62465        | IDSVWPF EK                                                            | 1.117152142        | 2              | 2.359446764 |
| Q62465        | TVENVTVFGTASASK                                                       | 1.052075755        | 2              | 3.25393343  |
| Q62465        | VLLVPGPEKET                                                           | 1.136212673        | 2              | 2.705144644 |
| Q62465        | VVTYGMANLLTGPK                                                        | 1.060457454        | 2              | 2.539130926 |
| <b>Q62636</b> | <b>RAP1B Ras_related protein Rap_1b</b>                               | <b>1.210587385</b> | <b>0.03101</b> | <b>2</b>    |
| Q62636        | INVNEIFYDLVR                                                          | 1.449742361        | 2              | 3.974482536 |
| Q62636        | LVVLGSGGVGK                                                           | 1.071888289        | 2              | 2.551850319 |
| <b>Q62651</b> | <b>ECH1 Delta(3_5)_Delta(2_4)_dienoyl_CoA isomerase_mitochondrial</b> | <b>1.018436937</b> | <b>0.88488</b> | <b>6</b>    |
| Q62651        | EVDVGLAADVGT LQR                                                      | 0.740670281        | 2              | 3.360381126 |
| Q62651        | HVLHVQLNRPEK                                                          | 1.152878084        | 2              | 3.43016696  |
| Q62651        | MMADEALD SGLVSR                                                       | 1.055992298        | 2              | 3.351325035 |
| Q62651        | SLVNELTFTAR                                                           | 1.008908593        | 2              | 3.5063622   |
| Q62651        | YCTQDAFFQVK                                                           | 2.132415883        | 2              | 2.714946747 |
| Q62651        | RIPEEVSDHNYESIQTSAQK                                                  | 0.98615841         | 3              | 6.449939728 |
| <b>Q62730</b> | <b>DHB2 Estradiol 17_beta_dehydrogenase 2</b>                         | <b>0.921322249</b> | <b>0.76633</b> | <b>5</b>    |
| Q62730        | AVLVTGADSGFGHALAK                                                     | 0.864596437        | 2              | 4.189218044 |
| Q62730        | EIQENYQGQEVHTQK                                                       | 0.749839021        | 2              | 4.520549774 |
| Q62730        | LSVLQMDVTKPEQIK                                                       | 1.182743999        | 2              | 3.635671854 |
| Q62730        | VVTIHPGGFQTNIVGSDSWDK                                                 | 0.806803529        | 2              | 5.586349487 |
| Q62730        | LSVLQMDVTKPEQIKDVHSEVAEK                                              | 0.899237855        | 3              | 4.227124691 |
| <b>Q62736</b> | <b>CALD1 Non_muscle caldesmon</b>                                     | <b>0.840446708</b> | <b>2.2E-16</b> | <b>11</b>   |
| Q62736        | EEIERR                                                                | 0.653322416        | 1              | 1.903689504 |
| Q62736        | ASGDKEAEGAPQVEAGK                                                     | 1.230742524        | 2              | 4.617053032 |
| Q62736        | EFDPTITDGSLSVPSR                                                      | 0.837773683        | 2              | 3.188447714 |
| Q62736        | GGNLGENQIKDEK                                                         | 1.137572079        | 2              | 3.314880848 |
| Q62736        | LEQYTNAIEGTK                                                          | 1.177776309        | 2              | 3.591938257 |
| Q62736        | NDDDEEEAAR                                                            | 4.40885659         | 2              | 2.714674473 |
| Q62736        | RGETESEEF EK                                                          | 1.228376736        | 2              | 2.935166121 |
| Q62736        | RRGETESEEF EK                                                         | 1.435056788        | 2              | 3.227398634 |
| Q62736        | VLEEEEQ R                                                             | 1.19180108         | 2              | 2.494880915 |
| Q62736        | ASGDKEAEGAPQVEAGKR                                                    | 1.306933687        | 3              | 3.80129981  |
| Q62736        | MQNNSAENETAEGEEKGESR                                                  | 0.830571159        | 3              | 4.60929966  |
| <b>Q62745</b> | <b>CD81 CD81 antigen</b>                                              | <b>1.099087946</b> | <b>0.55614</b> | <b>2</b>    |
| Q62745        | NSLCPSSNSFTQLLK                                                       | 1.188675696        | 2              | 2.900876522 |
| Q62745        | QFYDQALQQAVMDDDANNAK                                                  | 1.041853022        | 2              | 4.603666306 |
| <b>Q62769</b> | <b>UN13B Protein unc_13 homolog B</b>                                 | <b>1.077327062</b> | <b>0.95154</b> | <b>2</b>    |
| Q62769        | SNDEVAREFVK                                                           | 1.081060307        | 1              | 2.040540218 |
| Q62769        | DHVMREETRN LTPK                                                       | 1.069637724        | 2              | 2.525531292 |
| <b>Q62785</b> | <b>HAP28 28 kDa heat_and acid_stable phosphoprotein</b>               | <b>1.285955988</b> | <b>0.46503</b> | <b>5</b>    |
| Q62785        | ANEEDQE EEGDGASGDPK                                                   | 0.918336315        | 2              | 4.618529797 |
| Q62785        | GVEGLIDIENPNR                                                         | 0.984919147        | 2              | 2.349184752 |

|               |                                              |                    |                |             |
|---------------|----------------------------------------------|--------------------|----------------|-------------|
| Q62785        | KVTQLDLGPK                                   | 0.774300892        | 2              | 2.468475103 |
| Q62785        | YMKMHLAGKTEQAK                               | 1.104994437        | 2              | 2.437740326 |
| Q62785        | ANEDEQEEGDGASGDPKK                           | 1.351533211        | 3              | 3.306435347 |
| <b>Q62789</b> | <b>UD2B7 UDP_glucuronosyltransferase 2B7</b> | <b>1.158616455</b> | <b>1.8E-10</b> | <b>2</b>    |
| Q62789        | IILDELVQR                                    | 1.417463745        | 2              | 3.632585764 |
| Q62789        | WIPQNDLLGHPK                                 | 1.111532363        | 2              | 3.349861145 |
| <b>Q62812</b> | <b>MYH9 Myosin_9</b>                         | <b>1.051377298</b> | <b>9.9E-20</b> | <b>61</b>   |
| Q62812        | CQYLQAEK                                     | 1.374561066        | 1              | 1.930441737 |
| Q62812        | EEILAQAK                                     | 1.096833332        | 1              | 2.235195875 |
| Q62812        | ADFCIIHYAGK                                  | 0.842302439        | 2              | 2.697236538 |
| Q62812        | ALEEAMEQK                                    | 1.206908505        | 2              | 2.726024866 |
| Q62812        | ALELDSNLYR                                   | 1.218046956        | 2              | 3.554942846 |
| Q62812        | ALEQQVEEMK                                   | 0.815556147        | 2              | 3.012245178 |
| Q62812        | ANLQIDQINTDLNLER                             | 1.274886241        | 2              | 4.797300339 |
| Q62812        | ASIAALEAK                                    | 1.202688013        | 2              | 2.336327076 |
| Q62812        | ASREEILAQAK                                  | 0.754983876        | 2              | 3.121592522 |
| Q62812        | DLEAHIDTANK                                  | 0.830766753        | 2              | 3.638653755 |
| Q62812        | DLQGRDEQSEEK                                 | 1.173379875        | 2              | 3.215069532 |
| Q62812        | ELEDATETADAMNR                               | 1.015965091        | 2              | 4.239623547 |
| Q62812        | ELETQISELQEDLESER                            | 1.030387883        | 2              | 4.973768234 |
| Q62812        | HEAMITDLEER                                  | 1.180061422        | 2              | 3.434575081 |
| Q62812        | HEDELLAK                                     | 1.293000256        | 2              | 3.225544214 |
| Q62812        | HSQAVEELAEQLEQTK                             | 1.185295251        | 2              | 4.910439968 |
| Q62812        | IIGLDQVAGMSETALPGAFK                         | 1.446084563        | 2              | 5.89154768  |
| Q62812        | IRELETQISELQEDLESER                          | 1.191044131        | 2              | 5.164258957 |
| Q62812        | KEEELQAALAR                                  | 1.196867208        | 2              | 3.276796103 |
| Q62812        | KKVEAQLQELQVK                                | 1.26980592         | 2              | 4.72319603  |
| Q62812        | KLEEDQIIMEDQNCK                              | 1.074932843        | 2              | 5.685668468 |
| Q62812        | KLEGDSTDLSQIAELQAIAELK                       | 1.192557776        | 2              | 5.746975899 |
| Q62812        | KQELEEEICHDLER                               | 1.150578746        | 2              | 4.544197559 |
| Q62812        | KVEAQLQELQVK                                 | 1.27861851         | 2              | 3.943715572 |
| Q62812        | LEEDQIIMEDQNCK                               | 1.24950925         | 2              | 3.328718424 |
| Q62812        | LEGDSTDLSQIAELQAIAELK                        | 1.150308716        | 2              | 4.971636295 |
| Q62812        | LEVNLQAMK                                    | 1.243353784        | 2              | 2.677559376 |
| Q62812        | LQEMESAVK                                    | 1.040721972        | 2              | 2.417757988 |
| Q62812        | LQQELDLLVLDLHQR                              | 0.910763964        | 2              | 4.713189602 |
| Q62812        | LQVELDSVTGLLNQSDSK                           | 1.144328116        | 2              | 5.706380367 |
| Q62812        | LTEMETMQSQLMAEK                              | 1.112495873        | 2              | 4.405055046 |
| Q62812        | MEDGVGCLETAEEAK                              | 0.823816967        | 2              | 4.594924927 |
| Q62812        | MQQNIQELEEQLLEEESAR                          | 1.003666552        | 2              | 5.940896988 |
| Q62812        | NAEQFKDQADK                                  | 1.513057896        | 2              | 3.643934965 |
| Q62812        | NLPIYSEEIVDMYK                               | 1.358450375        | 2              | 3.280553102 |
| Q62812        | NMDPLNDNIATLLHQSSDK                          | 1.227187802        | 2              | 5.059238911 |

|               |                                                        |                    |                |             |
|---------------|--------------------------------------------------------|--------------------|----------------|-------------|
| Q62812        | NTDQASMPDNTAAQK                                        | 1.073030279        | 2              | 5.31372261  |
| Q62812        | NTDQASMPDNTAAQK+Oxidation(7)                           | 1.420808628        | 2              | 4.89611578  |
| Q62812        | QIATLHAQVTDK                                           | 0.726426029        | 2              | 2.362208366 |
| Q62812        | QLEEAEEEAQR                                            | 1.099910455        | 2              | 3.495079517 |
| Q62812        | QSVSNLEK                                               | 1.125418986        | 2              | 2.401685953 |
| Q62812        | QTLENERGELANEVK                                        | 1.207552282        | 2              | 3.404907465 |
| Q62812        | RGDMPFVTR                                              | 1.124072213        | 2              | 2.630325079 |
| Q62812        | RQLEEAEEEAQR                                           | 1.295416397        | 2              | 4.263204098 |
| Q62812        | SMEAEMIQLEELAAER                                       | 1.045265089        | 2              | 4.524121284 |
| Q62812        | TDLLEPYNK                                              | 1.294006649        | 2              | 2.681063414 |
| Q62812        | TELEDTLDSTAAQQELR                                      | 1.018093805        | 2              | 5.48874712  |
| Q62812        | THEAQIQEMR                                             | 1.155407074        | 2              | 3.475738764 |
| Q62812        | TQLEELEDELOATEDAK                                      | 1.064390347        | 2              | 6.67947197  |
| Q62812        | VAEFTTDLMEEEEK                                         | 1.141287526        | 2              | 4.222003937 |
| Q62812        | VEAQLQELQVK                                            | 1.468716755        | 2              | 3.675487995 |
| Q62812        | VEDMAELTCLNEASVLHNLK                                   | 1.284101788        | 2              | 4.317490101 |
| Q62812        | VISGVLQLGNIVFK                                         | 1.251181678        | 2              | 3.653894186 |
| Q62812        | VSHLLGINVDFTR                                          | 1.30051776         | 2              | 3.692348957 |
| Q62812        | YEILTPNSIPK                                            | 1.043528758        | 2              | 3.248054028 |
| Q62812        | DFSALESQLQDTQELLQEENR                                  | 1.115422348        | 3              | 6.353455067 |
| Q62812        | HSQAVEELAEQLEQTKR                                      | 1.169396924        | 3              | 5.717298031 |
| Q62812        | LDPHLVLDQLR                                            | 1.393330506        | 3              | 3.410103559 |
| Q62812        | NKHEAMITDLEER                                          | 1.245332359        | 3              | 3.668581963 |
| Q62812        | QAQQRDELADLANSSGK                                      | 1.155095757        | 3              | 4.15320015  |
| Q62812        | RKLEGDSTDLSQIAELQAIAELK                                | 1.089463829        | 3              | 5.664568901 |
| <b>Q62826</b> | <b>HNRPM Heterogeneous nuclear ribonucleoprotein M</b> | <b>0.995859057</b> | <b>0.10731</b> | <b>8</b>    |
| Q62826        | VGSEIER                                                | 1.064499058        | 1              | 1.963758111 |
| Q62826        | ADILEDKDGK                                             | 1.209860099        | 2              | 2.677770615 |
| Q62826        | AFITNIPFDVK                                            | 0.974170291        | 2              | 3.136331797 |
| Q62826        | GIGMGNLGPAGMGMEGIGFGINK                                | 1.141145782        | 2              | 4.880948544 |
| Q62826        | GNFGGSFAGSFGGAGGHAPGVAR                                | 1.075398209        | 2              | 4.889839172 |
| Q62826        | INEILSNALK                                             | 1.157194634        | 2              | 2.345985651 |
| Q62826        | MGANNLERMGLERMGANSER                                   | 1.043331239        | 2              | 2.40319252  |
| Q62826        | MGPVMDRMTGLER+Oxidation(1)Oxidation(5)Oxidation(8)     | 1.003202624        | 2              | 2.576577663 |
| <b>Q62871</b> | <b>DC112 Cytoplasmic dynein 1 intermediate chain 2</b> | <b>1.379695794</b> | <b>0.03415</b> | <b>2</b>    |
| Q62871        | ADAEAAAATR                                             | 1.442742563        | 2              | 2.630241156 |
| Q62871        | SVSTPSEAGSQDSGDGAVGSR                                  | 1.344344139        | 2              | 5.35132122  |
| <b>Q62902</b> | <b>LMAN1 Protein ERGIC_53</b>                          | <b>1.122745716</b> | <b>6.8E-05</b> | <b>5</b>    |
| Q62902        | GAGTPGQPQVSQQELDTVVR                                   | 1.117551908        | 2              | 4.28385973  |
| Q62902        | GHPDLQGQPADDIFESIGDR                                   | 0.99809441         | 2              | 5.221512794 |
| Q62902        | YQEEFEHFQQLDK                                          | 1.215694598        | 2              | 5.12994194  |
| Q62902        | YVSSLTEEISR                                            | 1.213750633        | 2              | 2.651608467 |

|               |                                               |                    |                |             |
|---------------|-----------------------------------------------|--------------------|----------------|-------------|
| Q62902        | NNPAIVVVGNNQINYDHQNDGATQALASCQR               | 1.407297367        | 3              | 4.137228966 |
| <b>Q62910</b> | <b>SYNJ1 Synaptojanin_1</b>                   | <b>0.365725508</b> | <b>0.10672</b> | <b>2</b>    |
| Q62910        | MLIQLPSASQSK+Oxidation(1)                     | 0.399018789        | 2              | 2.316416979 |
| Q62910        | NQTLTDWLLDAPK                                 | 0.306490031        | 2              | 2.489532232 |
| <b>Q62967</b> | <b>MVD1 Diphosphomevalonate decarboxylase</b> | <b>0.942270632</b> | <b>1</b>       | <b>2</b>    |
| Q62967        | GLQVAPVLLSDELK                                | 0.933961363        | 2              | 3.370207548 |
| Q62967        | VYGVEDLSEVAR                                  | 1.006078661        | 2              | 3.287140846 |
| <b>Q63041</b> | <b>A1M Alpha_1_macroglobulin</b>              | <b>1.218818638</b> | <b>0.96871</b> | <b>13</b>   |
| Q63041        | AEDITHNGIVYTPK                                | 1.024873109        | 2              | 3.351067066 |
| Q63041        | AEQGAYLGPLPYK                                 | 0.924821186        | 2              | 3.04494977  |
| Q63041        | DLSSDLTTASK                                   | 0.601178226        | 2              | 2.513082743 |
| Q63041        | DTVVKPVIVEPEGIEK                              | 0.787282669        | 2              | 3.032286167 |
| Q63041        | GSIFNSGSHVLPLEQ GK                            | 1.143697133        | 2              | 4.036331177 |
| Q63041        | HSQGN TWLTAFLVK                               | 0.915857019        | 2              | 2.356443405 |
| Q63041        | IKEDGTGIELTGTGSCIEANTLSK                      | 1.182704353        | 2              | 3.89410615  |
| Q63041        | KLQDQSNIQR                                    | 1.149988612        | 2              | 2.47674799  |
| Q63041        | LIVYTILPNEELIADVQK                            | 1.474913552        | 2              | 4.530250549 |
| Q63041        | LQDQSNIQR                                     | 0.998134373        | 2              | 2.799537182 |
| Q63041        | QDLNDNDAYSVFAQSIGLK                           | 0.847961959        | 2              | 2.663622856 |
| Q63041        | YNILPEAEGEAPFTLK                              | 0.947332752        | 2              | 4.227367401 |
| Q63041        | YVVLVPSSELYAGVPEK                             | 0.763311876        | 2              | 3.212722063 |
| <b>Q63060</b> | <b>GLPK Glycerol kinase</b>                   | <b>1.334081757</b> | <b>9.9E-20</b> | <b>11</b>   |
| Q63060        | AVLGPLVGAVDQGTSSSTR                           | 1.031492884        | 2              | 5.486318111 |
| Q63060        | CVFSEHGLLTTVAYK                               | 1.248511032        | 2              | 4.279586315 |
| Q63060        | DCGIPLSHLQVDGGMTSNK                           | 0.863696753        | 2              | 4.20494175  |
| Q63060        | EILQSVYECIEK                                  | 0.958617049        | 2              | 3.849361658 |
| Q63060        | FEPQINAESEIR                                  | 1.24999898         | 2              | 3.58185482  |
| Q63060        | KVQEA VEENR                                   | 1.497059718        | 2              | 3.560523748 |
| Q63060        | LGQLNIDISNIK                                  | 2.24542752         | 2              | 3.327306986 |
| Q63060        | NTYGTGCFLLCNTGHK                              | 1.364296499        | 2              | 3.939956188 |
| Q63060        | VQEA VEENR                                    | 1.150911027        | 2              | 3.373373747 |
| Q63060        | AGALEGVPISGCLGDQSAALVGQMC FQDQAK              | 1.25340323         | 3              | 4.299882889 |
| Q63060        | TAELLSHHQVEIK                                 | 1.60157258         | 3              | 3.769693613 |
| <b>Q63081</b> | <b>PDIA6 Protein disulfide_isomerase A6</b>   | <b>0.95728868</b>  | <b>0.91041</b> | <b>10</b>   |
| Q63081        | GESPVDYDGGR                                   | 1.105413332        | 2              | 2.916925669 |
| Q63081        | GSFSEQGINEFLR                                 | 1.040646998        | 2              | 4.108110428 |
| Q63081        | GSTAPVGGGSPNITPR                              | 1.106287417        | 2              | 4.826847553 |
| Q63081        | HQSLGGQYGVQGFPTIK                             | 1.133176358        | 2              | 5.030941486 |
| Q63081        | NLEPEWAAAATEVK                                | 1.089149156        | 2              | 4.19713974  |
| Q63081        | NSYLEVLLK                                     | 1.055763423        | 2              | 2.982584476 |
| Q63081        | TCEEHQLCVVAVLPHILDTGATGR                      | 1.171797307        | 2              | 5.073419094 |
| Q63081        | ALDLFSDNAPPELLEIINEDIAK                       | 1.135878315        | 3              | 6.054111958 |
| Q63081        | KTCEEHQLCVVAVLPHILDTGATGR                     | 0.991908036        | 3              | 5.39329195  |

|               |                                                                   |                    |                |             |
|---------------|-------------------------------------------------------------------|--------------------|----------------|-------------|
| Q63081        | TGEAIVDAALSALR                                                    | 1.033324162        | 3              | 4.717514038 |
| <b>Q63108</b> | <b>EST3 Liver carboxylesterase 3</b>                              | <b>0.990484311</b> | <b>0.94743</b> | <b>4</b>    |
| Q63108        | GGTSKEEINLSK                                                      | 1.118260358        | 2              | 3.727011681 |
| Q63108        | LDPMTATSLLK                                                       | 0.916297196        | 2              | 2.443587303 |
| Q63108        | QKTEEELETTLK                                                      | 0.942620735        | 2              | 3.445750475 |
| Q63108        | SSFLLNLPEEAIPVAVEK                                                | 1.11380739         | 2              | 4.76671648  |
| <b>Q63120</b> | <b>MRP2 Canalicular multispecific organic anion transporter 1</b> | <b>1.058910057</b> | <b>2.6E-09</b> | <b>4</b>    |
| Q63120        | NIQVQNMKNK                                                        | 1.042759178        | 1              | 1.901636481 |
| Q63120        | ACALLPDLEILPGGDMAEIGEK                                            | 1.469507057        | 2              | 4.246836662 |
| Q63120        | YFAWEPSFQEQVQ GIR                                                 | 1.437751006        | 2              | 4.454555511 |
| Q63120        | YLGDDLD TSAIR                                                     | 0.511845749        | 2              | 2.568296432 |
| <b>Q63150</b> | <b>DPYS Dihydropyrimidinase</b>                                   | <b>0.956749339</b> | <b>0.77266</b> | <b>9</b>    |
| Q63150        | ALGKDDFTK                                                         | 1.065396812        | 2              | 2.642771006 |
| Q63150        | DQTCTPIVKR                                                        | 0.902401453        | 2              | 2.496285439 |
| Q63150        | EIGAIAQVHAENGDLIAEGAK                                             | 1.0858343          | 2              | 5.153172016 |
| Q63150        | FVAVTSTNAAK                                                       | 1.023865847        | 2              | 2.97909832  |
| Q63150        | GSSLIEAFETWR                                                      | 1.118894917        | 2              | 3.184033155 |
| Q63150        | VVNDDFSQVADVLVEDGVVR                                              | 1.069070852        | 2              | 5.937115669 |
| Q63150        | VVYEAGVFDVTAGHGK                                                  | 1.1636923          | 2              | 4.235015392 |
| Q63150        | VVYGEPIAAGLGTGTQYWNK                                              | 0.944633295        | 2              | 5.366512299 |
| Q63150        | MLALGITGPEGHELCPAEVAAEATLR                                        | 1.052743826        | 3              | 3.717774868 |
| <b>Q63270</b> | <b>ACOC Cytoplasmic aconitate hydratase</b>                       | <b>1.124420354</b> | <b>2E-11</b>   | <b>18</b>   |
| Q63270        | NCDEFLVK                                                          | 1.310389529        | 1              | 2.239323139 |
| Q63270        | NQDLEFER                                                          | 1.11820516         | 1              | 2.658351898 |
| Q63270        | SWNALAAPSEK                                                       | 1.098079338        | 1              | 2.300641298 |
| Q63270        | AVEAGLNVPYVK                                                      | 1.242143819        | 2              | 2.67434144  |
| Q63270        | DFSQSSQDPDFTQVVELDLK                                              | 0.770152087        | 2              | 4.954069138 |
| Q63270        | FVEFFGPGVAQLSIADR                                                 | 1.088606544        | 2              | 5.336707115 |
| Q63270        | GFQVAPDHHNDHK                                                     | 1.400090214        | 2              | 3.448931694 |
| Q63270        | IIPPGSGIHQVNLEYLAR                                                | 1.702603465        | 2              | 3.466883183 |
| Q63270        | NDIENILNWSIMQHK                                                   | 1.223594557        | 2              | 3.17455554  |
| Q63270        | SIEVPFKPAR                                                        | 1.109076322        | 2              | 2.500580549 |
| Q63270        | TSLSPGSGVVITYLR                                                   | 1.165304749        | 2              | 3.135689259 |
| Q63270        | VILQDFTGVPVAVDFAAMR                                               | 0.924973387        | 2              | 4.651241302 |
| Q63270        | YQQAGLPLIVLAGK                                                    | 1.116518476        | 2              | 3.757121801 |
| Q63270        | IDFEKEPLGVNAQQQVFLK                                               | 1.115788409        | 3              | 4.994035244 |
| Q63270        | KNDIENILNWSIMQHK                                                  | 1.157714255        | 3              | 4.087688446 |
| Q63270        | QAPQTVHLPSGETLDVFDAER                                             | 1.3253802          | 3              | 3.655105352 |
| Q63270        | SIVDAYVLLNLGDSVTTDHISPA NIAR                                      | 1.453586057        | 3              | 4.968088627 |
| Q63270        | SPPFFESLTLDLQPPK                                                  | 0.971596643        | 3              | 3.593346834 |
| <b>Q63276</b> | <b>BAAT Bile acid_CoA:amino acid N_acyltransferase</b>            | <b>1.011659878</b> | <b>0.02254</b> | <b>17</b>   |
| Q63276        | AHGHLFVVGEDDKNLNSK                                                | 1.503149107        | 2              | 6.101480007 |

|               |                                                          |                    |          |             |
|---------------|----------------------------------------------------------|--------------------|----------|-------------|
| Q63276        | ASEVGEVDLER                                              | 1.022811374        | 2        | 3.940260172 |
| Q63276        | DDKGNLFNSQAFYR                                           | 1.22978803         | 2        | 3.530853748 |
| Q63276        | GNLFNSQAFYR                                              | 0.99514255         | 2        | 3.188331604 |
| Q63276        | LTAVPLSALVDEPVHIR                                        | 0.451354822        | 2        | 3.872433186 |
| Q63276        | NWTLLSYPGAGHLIEPPYSPLCSASR                               | 0.70588591         | 2        | 4.647769451 |
| Q63276        | QHLNPGFNSQL                                              | 1.323476452        | 2        | 3.526279688 |
| Q63276        | TFEETADKDSK                                              | 1.025521201        | 2        | 3.750548124 |
| Q63276        | VDLEYFEEGVFLLR                                           | 1.157537315        | 2        | 4.404406548 |
| Q63276        | VFQPTPCSEEFVTTNALGLVEFYR                                 | 1.381801208        | 2        | 5.603541374 |
| Q63276        | VISSSLDSLILER                                            | 1.033363017        | 2        | 4.403005123 |
| Q63276        | WYVAPGVTR                                                | 1.030206534        | 2        | 2.64707303  |
| Q63276        | YCFPIEK                                                  | 0.971986802        | 2        | 2.631840944 |
| Q63276        | LCHPYFPVEGK                                              | 1.73744131         | 3        | 3.466310263 |
| Q63276        | MPFVIPSINWGGGEVIPHAAAQEHSWK                              | 0.89605487         | 3        | 4.230904102 |
| Q63276        | QITATVLINGPNFVSSNPHVYR                                   | 1.081188025        | 3        | 4.943460464 |
| Q63276        | VTGLTPFQVVCLQASLK                                        | 1.120187542        | 3        | 4.145860195 |
| <b>Q63342</b> | <b>M2GD Dimethylglycine dehydrogenase_ mitochondrial</b> | <b>1.042145066</b> | <b>1</b> | <b>28</b>   |
| Q63342        | IHYDSIK                                                  | 1.220231992        | 1        | 2.104641199 |
| Q63342        | DGLLFGPYESQEK                                            | 0.478652401        | 2        | 2.606134653 |
| Q63342        | EGQESPPSPPEWK                                            | 0.731026199        | 2        | 2.495781422 |
| Q63342        | GGYDVEIR                                                 | 1.07049369         | 2        | 2.435756683 |
| Q63342        | GQDSTQLLDHLCANVIPK                                       | 1.346754123        | 2        | 4.15152216  |
| Q63342        | IHELFPLLNMDK                                             | 1.045846002        | 2        | 2.591301441 |
| Q63342        | IMNAGQEEGIDNFGTYALNALR                                   | 0.925061193        | 2        | 4.847625256 |
| Q63342        | ISDIPVTAIR                                               | 1.108522392        | 2        | 2.757280827 |
| Q63342        | ITEHVEAAMEMVPVLK                                         | 0.83953834         | 2        | 4.025818348 |
| Q63342        | LEEETGQVVGFGHQPGSIR                                      | 1.020986064        | 2        | 4.966467381 |
| Q63342        | LNKPADFTGK                                               | 1.508713781        | 2        | 2.655618668 |
| Q63342        | LTSEDLSDDFVK                                             | 1.179647827        | 2        | 3.837613344 |
| Q63342        | LVCLTLATDDVDPEGNESVWYK                                   | 3.270743776        | 2        | 2.872274399 |
| Q63342        | NITDELGVLGVAGPYAR                                        | 1.115426864        | 2        | 5.004398346 |
| Q63342        | REDSAALYER                                               | 0.961130972        | 2        | 3.035499811 |
| Q63342        | TNWHATEQYIIIEPEK                                         | 0.769912937        | 2        | 4.165535927 |
| Q63342        | VGFTNISHMLTPR                                            | 1.272801404        | 2        | 3.22311306  |
| Q63342        | VGVIDLSPFGK                                              | 1.09055118         | 2        | 3.227581263 |
| Q63342        | VIGNTTSGSYSYSIQK                                         | 1.016920296        | 2        | 4.547920227 |
| Q63342        | WIEEAAVR                                                 | 1.08753606         | 2        | 2.603426933 |
| Q63342        | WTTTQYTEAK                                               | 1.135144699        | 2        | 2.898115158 |
| Q63342        | ADIINIVNGPITYSPDILPMVGP HQGVR                            | 0.992436247        | 3        | 4.58571291  |
| Q63342        | AWGSEMNCDTNPLEAGLDYFIK                                   | 1.300716497        | 3        | 4.582043171 |
| Q63342        | ELFESDLDRITEHVEAAMEMVPVLK                                | 1.113967851        | 3        | 4.647511005 |
| Q63342        | KADIINIVNGPITYSPDILPMVGP HQGVR                           | 1.071234297        | 3        | 7.514883518 |

|               |                                                                           |                    |                |             |
|---------------|---------------------------------------------------------------------------|--------------------|----------------|-------------|
| Q63342        | NYPATIIQEPLVLTEPTR                                                        | 1.08415669         | 3              | 4.927755833 |
| Q63342        | VYAELTVSHQSPGPELLITGSGSELHDLR                                             | 1.007324937        | 3              | 5.881083012 |
| Q63342        | YLSDWILHGEPFDLIELDPNR                                                     | 1.152184055        | 3              | 4.706014633 |
| <b>Q63347</b> | <b>PRS7 26S protease regulatory subunit 7</b>                             | <b>1.094325549</b> | <b>0.05937</b> | <b>8</b>    |
| Q63347        | ALDEGDIALLK                                                               | 1.181803069        | 2              | 2.793187141 |
| Q63347        | ESDTGLAPPALWDLAADK                                                        | 1.075036472        | 2              | 2.47637248  |
| Q63347        | FDDGAGGDNEVQR                                                             | 1.120220559        | 2              | 4.210432529 |
| Q63347        | FVVDLSQVAPTIDIEEGMR                                                       | 1.28191981         | 2              | 3.377626181 |
| Q63347        | IINADSEDPK                                                                | 1.285625444        | 2              | 2.835820436 |
| Q63347        | QTLQSEQPLQVAR                                                             | 1.114051181        | 2              | 4.129840851 |
| Q63347        | QVEDDIQQLLK                                                               | 0.910265244        | 2              | 2.745229244 |
| Q63347        | TMLELINQLDGFDR                                                            | 1.2637415          | 2              | 3.182103872 |
| <b>Q63362</b> | <b>NDUA5 NADH dehydrogenase [ubiquinone] 1 alpha subcomplex subunit 5</b> | <b>0.92203474</b>  | <b>0.53441</b> | <b>4</b>    |
| Q63362        | YTEQITSEK                                                                 | 1.156881951        | 1              | 2.144310236 |
| Q63362        | KLELLQGGEVEEVILQAEK                                                       | 0.840964551        | 2              | 6.272477627 |
| Q63362        | LENLLQGGEVEEVILQAEK                                                       | 0.968666594        | 2              | 2.576205492 |
| Q63362        | TTGLVGLAVCDTPHER                                                          | 0.977136012        | 2              | 4.149106026 |
| <b>Q63377</b> | <b>AT1B3 Sodium/potassium_transporting ATPase subunit beta_3</b>          | <b>1.015915686</b> | <b>0.64045</b> | <b>2</b>    |
| Q63377        | EENIANIVTYPDDGLIDLK                                                       | 0.922651767        | 2              | 4.445621967 |
| Q63377        | LFIYNPTSGEFLGR                                                            | 1.19165988         | 2              | 2.521842957 |
| <b>Q63413</b> | <b>DX39B Spliceosome RNA helicase Ddx39b</b>                              | <b>1.184028678</b> | <b>0.17685</b> | <b>2</b>    |
| Q63413        | GLAITFVSDENDAK                                                            | 0.333627839        | 2              | 2.777574539 |
| Q63413        | NCPHIVGTPGR                                                               | 1.184121577        | 2              | 2.843339443 |
| <b>Q63429</b> | <b>UBC Polyubiquitin_C</b>                                                | <b>1.011903822</b> | <b>1</b>       | <b>2</b>    |
| Q63429        | TITLEVEPSDTIENVK                                                          | 1.035134313        | 2              | 4.819263935 |
| Q63429        | TLSDYNIQK                                                                 | 0.988533302        | 2              | 2.858415842 |
| <b>Q63448</b> | <b>ACOX3 Peroxisomal acyl_coenzyme A oxidase 3</b>                        | <b>1.160052341</b> | <b>0.12488</b> | <b>12</b>   |
| Q63448        | ADWLDSEAPLAAYR                                                            | 0.877302784        | 2              | 4.197645187 |
| Q63448        | EIHALASAGKPLASWTAQR                                                       | 0.988191971        | 2              | 4.542737961 |
| Q63448        | FHEHTHSSSVPPSLR                                                           | 1.160877877        | 2              | 2.737631559 |
| Q63448        | GGYISGEQTGK                                                               | 1.245235662        | 2              | 3.061327934 |
| Q63448        | LGASLGSLSSGR                                                              | 1.298617281        | 2              | 2.564835548 |
| Q63448        | NLWAAVLQQSGVLER                                                           | 1.072669319        | 2              | 4.019648075 |
| Q63448        | RDSVLWSDIPK                                                               | 1.628248546        | 2              | 2.301288366 |
| Q63448        | TIFLDLIELQR                                                               | 1.487308066        | 2              | 3.553589106 |
| Q63448        | TVNFLEAYPGILGQK                                                           | 1.16864707         | 2              | 5.401540756 |
| Q63448        | QFGPTDKEEIPVLEYPLQQWR                                                     | 0.599195841        | 3              | 4.07204628  |
| Q63448        | TIFSTLENDPLFARPFADLPLEK                                                   | 1.154264306        | 3              | 4.74618578  |
| Q63448        | TTAHYDPATQEILHSPDFEAAK                                                    | 1.12258511         | 3              | 4.77525568  |
| <b>Q63507</b> | <b>RL14 60S ribosomal protein L14</b>                                     | <b>1.473190729</b> | <b>0.0316</b>  | <b>2</b>    |
| Q63507        | CMQLTDFILK                                                                | 1.471729998        | 2              | 2.391203165 |
| Q63507        | LVAIVDVIDQNR                                                              | 1.45860092         | 2              | 4.491383076 |

|               |                                                               |                    |                |             |
|---------------|---------------------------------------------------------------|--------------------|----------------|-------------|
| <b>Q63520</b> | <b>SYCP3 Synaptonemal complex protein 3</b>                   | <b>0.789160387</b> | <b>0.00911</b> | <b>2</b>    |
| Q63520        | KVMMETQQQEMANVR                                               | 0.789160387        | 2              | 2.686218977 |
| Q63520        | VMMETQQQEMANVRK                                               | 0.789160387        | 2              | 2.542192459 |
| <b>Q63524</b> | <b>TMED2 Transmembrane emp24 domain_containing protein 2</b>  | <b>1.225812157</b> | <b>0.1914</b>  | <b>3</b>    |
| Q63524        | HEQEYMEVR                                                     | 1.11781717         | 2              | 3.392907381 |
| Q63524        | HEQEYMEVR+Oxidation(6)                                        | 1.256078346        | 2              | 2.49630928  |
| Q63524        | GQDMETEAHQNKLEEMINELAVAMTAVK                                  | 1.117347566        | 3              | 4.960169315 |
| <b>Q63525</b> | <b>NUDC Nuclear migration protein nudC</b>                    | <b>1.119416797</b> | <b>3.2E-05</b> | <b>4</b>    |
| Q63525        | GQAPVIDGELYNEVK                                               | 1.168630393        | 2              | 3.240917206 |
| Q63525        | LSDLSETR                                                      | 1.119415306        | 2              | 2.32303524  |
| Q63525        | LVTSDPEINTK                                                   | 1.455883359        | 2              | 2.900334358 |
| Q63525        | WTQTLSELDLAVPFR                                               | 1.066916271        | 2              | 2.614911079 |
| <b>Q63556</b> | <b>SPA3M Serine protease inhibitor A3M (Fragment)</b>         | <b>0.899354808</b> | <b>0.96223</b> | <b>2</b>    |
| Q63556        | MQQVEASLQPETLK+Oxidation(1)                                   | 0.899429486        | 2              | 3.406789064 |
| Q63556        | MQQVEASLQPETLKK+Oxidation(1)                                  | 0.840821347        | 2              | 2.816839218 |
| <b>Q63569</b> | <b>PRS6A 26S protease regulatory subunit 6A</b>               | <b>1.016899569</b> | <b>0.27754</b> | <b>7</b>    |
| Q63569        | CTDDFNGAQCK                                                   | 1.210224932        | 2              | 3.485991478 |
| Q63569        | DSYLILETLPTDYDSR                                              | 1.222871249        | 2              | 2.466905594 |
| Q63569        | MATVWDEAEQDGIGEEVLK                                           | 0.908237686        | 2              | 3.195255756 |
| Q63569        | MNVSPDVNYEELAR                                                | 1.125858652        | 2              | 3.379712343 |
| Q63569        | QTYFLPVIGLVDAEK                                               | 0.644560296        | 2              | 2.426525831 |
| Q63569        | TMLELLNQLDGFQPNQVK                                            | 0.938805472        | 2              | 3.714195251 |
| Q63569        | AMEVDERPTEQYSDIGGLDK                                          | 0.771275761        | 3              | 4.717461586 |
| <b>Q63570</b> | <b>PRS6B 26S protease regulatory subunit 6B</b>               | <b>1.02480655</b>  | <b>0.98307</b> | <b>4</b>    |
| Q63570        | FDAQTGADR                                                     | 1.099139469        | 2              | 2.513715506 |
| Q63570        | KDEQEHEFYK                                                    | 1.118817887        | 2              | 3.098102331 |
| Q63570        | RFDAQTGADR                                                    | 1.042193193        | 2              | 2.650105476 |
| Q63570        | IQDEIPALSVSRPQTGLSFLGPEPEDLEDLYSR                             | 1.015223547        | 3              | 5.848505974 |
| <b>Q63584</b> | <b>TMEDA Transmembrane emp24 domain_containing protein 10</b> | <b>1.371128097</b> | <b>8.5E-12</b> | <b>4</b>    |
| Q63584        | NYEEIAK                                                       | 1.343790094        | 1              | 2.171534777 |
| Q63584        | ITDSAGHILYAK                                                  | 1.385189816        | 2              | 3.673077583 |
| Q63584        | LEDLSESIVNDFAYMK                                              | 1.224914856        | 2              | 4.589953899 |
| Q63584        | RLEDLSESIVNDFAYMK                                             | 1.080604792        | 2              | 4.302197456 |
| <b>Q63598</b> | <b>PLST Plastin_3</b>                                         | <b>1.078122017</b> | <b>1.5E-05</b> | <b>12</b>   |
| Q63598        | AESMLQQADK                                                    | 0.973070834        | 2              | 3.143989563 |
| Q63598        | ATDDIIVNWVNGTLSEAGK                                           | 1.179217355        | 2              | 5.045184612 |
| Q63598        | HVIPMNPNTDDLK                                                 | 1.032105617        | 2              | 3.019182205 |
| Q63598        | IDINMSGFNETDDLKR                                              | 1.090720669        | 2              | 4.2491045   |
| Q63598        | INNFSADIK                                                     | 1.118403809        | 2              | 2.494403124 |
| Q63598        | KLENCNYAVELGK                                                 | 0.838260898        | 2              | 3.674270391 |
| Q63598        | NEALAALLR                                                     | 1.038651038        | 2              | 2.601296663 |
| Q63598        | VDLNSNGFICDYELHELK                                            | 1.254224778        | 2              | 4.113369942 |



|               |                                              |                    |                |             |
|---------------|----------------------------------------------|--------------------|----------------|-------------|
| Q63598        | VYALPEDLVEVKPK                               | 1.150325348        | 2              | 2.743694782 |
| Q63598        | YTLNVMEDLGEGQK                               | 0.87219881         | 2              | 3.881883144 |
| Q63598        | EGICALGGTSELSSEGTQHSYSEEEK                   | 0.829131356        | 3              | 3.488801956 |
| Q63598        | YPALTKPENQDIDWTLLEGETR                       | 0.812425355        | 3              | 5.238245487 |
| <b>Q63610</b> | <b>TPM3 Tropomyosin alpha_3 chain</b>        | <b>1.10764519</b>  | <b>0.00221</b> | <b>8</b>    |
| Q63610        | AREQAEEVASLNR                                | 1.716761244        | 2              | 2.897412777 |
| Q63610        | EQAEAEVASLNR                                 | 0.654645845        | 2              | 2.577198029 |
| Q63610        | IQVLQQQADDAEER                               | 1.20402928         | 2              | 5.086588383 |
| Q63610        | KIQVLQQQADDAEER                              | 1.0435641          | 2              | 4.864339828 |
| Q63610        | LVIIEGDLER                                   | 1.050200061        | 2              | 2.755397797 |
| Q63610        | MELQEIQLK                                    | 0.934506283        | 2              | 2.850198507 |
| Q63610        | YSQKEDKYEEIHK                                | 0.963957641        | 2              | 4.639174461 |
| Q63610        | KLVIIEGDLER                                  | 0.968671929        | 3              | 3.847391605 |
| <b>Q63617</b> | <b>HYOU1 Hypoxia up_regulated protein 1</b>  | <b>1.122060322</b> | <b>0.00042</b> | <b>11</b>   |
| Q63617        | GQAGPEGVPPAPEEEKK                            | 0.788949764        | 2              | 3.50480032  |
| Q63617        | LIPEMDQIFTDVEMTTLEK                          | 1.441709181        | 2              | 4.675857544 |
| Q63617        | LYQPEYQEVSTEEQR                              | 1.195000603        | 2              | 4.930164814 |
| Q63617        | NINADEAAAMGAVYQAAALSK                        | 0.858917693        | 2              | 5.194873333 |
| Q63617        | SLAEDFAEQPIKDAVITVPAFFNQAER                  | 1.23941461         | 2              | 3.869139194 |
| Q63617        | TLGGLEMLER                                   | 1.122174664        | 2              | 2.595779419 |
| Q63617        | VAIVKPGVPMIEVLNK                             | 1.37273572         | 2              | 2.657951117 |
| Q63617        | VEFEELCADLFR                                 | 1.498776757        | 2              | 3.590438843 |
| Q63617        | VESVFETLVEDSPEEESTLTK                        | 0.772549246        | 2              | 3.813996792 |
| Q63617        | VLQLINDNTATALSYGVFR                          | 1.262969293        | 2              | 5.275783539 |
| Q63617        | EGETPDEKESGDKSEAQKPNK                        | 1.588653509        | 3              | 3.545764685 |
| <b>Q63716</b> | <b>PRDX1 Peroxiredoxin_1</b>                 | <b>1.11394246</b>  | <b>4.5E-06</b> | <b>15</b>   |
| Q63716        | DISLSDYK                                     | 0.671509703        | 1              | 1.936965227 |
| Q63716        | ADEGISFR                                     | 1.111907886        | 2              | 3.150327206 |
| Q63716        | ATAVMPDGQFK                                  | 1.119766033        | 2              | 2.850000381 |
| Q63716        | ATAVMPDGQFK+Oxidation(5)                     | 1.223293833        | 2              | 2.337226152 |
| Q63716        | KQGGLGPMNIPLVSDPK                            | 1.054113186        | 2              | 3.983803749 |
| Q63716        | LVQAFQFTDK                                   | 2.621910665        | 2              | 3.372455359 |
| Q63716        | QGGGLGPMNIPLVSDPK                            | 1.34277668         | 2              | 3.171905279 |
| Q63716        | QGGGLGPMNIPLVSDPK+Oxidation(7)               | 1.225551126        | 2              | 2.783349752 |
| Q63716        | QITINDLPVGR                                  | 1.076485199        | 2              | 3.339039803 |
| Q63716        | RTIAQDYGVLK                                  | 1.177995117        | 2              | 2.69777751  |
| Q63716        | SVDEILR                                      | 1.156416917        | 2              | 2.489869833 |
| Q63716        | TIAQDYGVLK                                   | 1.089932782        | 2              | 3.460532904 |
| Q63716        | HGEVCPAGWKPGSDTIKPDVNK                       | 1.102786492        | 3              | 6.329619408 |
| Q63716        | KQGGLGPMNIPLVSDPKR                           | 0.982823581        | 3              | 4.042648315 |
| Q63716        | LNCQVIGASVDSHFCHLAWINTPK                     | 1.482087534        | 3              | 3.91787982  |
| <b>Q63755</b> | <b>PRDM2 PR domain zinc finger protein 2</b> | <b>0.890548701</b> | <b>0.66401</b> | <b>2</b>    |
| Q63755        | LSFNVELGKMSPNK                               | 0.749740275        | 2              | 2.423091888 |

|               |                                                           |                    |                |             |
|---------------|-----------------------------------------------------------|--------------------|----------------|-------------|
| Q63755        | VKAAATPFQGPFLKE                                           | 0.914973819        | 2              | 2.301956654 |
| <b>Q63768</b> | <b>CRK Adapter molecule crk</b>                           | <b>1.090657229</b> | <b>0.44106</b> | <b>2</b>    |
| Q63768        | IGDQEFDSLPALEFYK                                          | 1.054559336        | 2              | 3.627699375 |
| Q63768        | VPNAYDKTALALEVGELVK                                       | 1.454947515        | 2              | 2.908525944 |
| <b>Q63797</b> | <b>PSME1 Proteasome activator complex subunit 1</b>       | <b>1.182593736</b> | <b>0.7889</b>  | <b>8</b>    |
| Q63797        | ISELDAFLKEPALNEANLSNLK                                    | 0.870267187        | 2              | 5.269669533 |
| Q63797        | LEGFQTQISK                                                | 1.146047404        | 2              | 2.62213254  |
| Q63797        | QLVHELDEAEYQEIR                                           | 1.164782261        | 2              | 4.385774612 |
| Q63797        | TENLLGSYFPK                                               | 1.017155495        | 2              | 3.335464239 |
| Q63797        | VDFVREDLCSK                                               | 1.182967509        | 2              | 2.76590538  |
| Q63797        | VFELMTSLHTK                                               | 1.174231204        | 2              | 2.524885654 |
| Q63797        | KGDEDDKGPPCGPVNCNEK                                       | 1.015730181        | 3              | 5.036543369 |
| Q63797        | KISELDAFLKEPALNEANLSNLK                                   | 1.088596731        | 3              | 6.288860321 |
| <b>Q63798</b> | <b>PSME2 Proteasome activator complex subunit 2</b>       | <b>1.101657396</b> | <b>0.16635</b> | <b>4</b>    |
| Q63798        | AFYAELHHIISNLEK                                           | 1.159805371        | 2              | 3.725074291 |
| Q63798        | IEDGNDFGVAIQEK                                            | 1.105162573        | 2              | 4.526755333 |
| Q63798        | KIISLQLLQEDSLNVDLSSLR                                     | 1.731803033        | 2              | 4.521368504 |
| Q63798        | TKVEAFQTAISK                                              | 1.167344971        | 2              | 3.447448254 |
| <b>Q63836</b> | <b>SBP2 Selenium_binding protein 2</b>                    | <b>0.822094361</b> | <b>0.20655</b> | <b>4</b>    |
| Q63836        | EGSVMLQVDVDTVNGGLK                                        | 1.19682043         | 2              | 2.562051773 |
| Q63836        | GGSVQVLEDQELTCQPEPLVVK                                    | 0.888370201        | 2              | 5.190620899 |
| Q63836        | IYVVDVGSEPR                                               | 0.778323481        | 2              | 3.773953199 |
| Q63836        | LNPNFLVDFGKEPLGALAEHLR                                    | 1.016043696        | 3              | 4.190232754 |
| <b>Q63862</b> | <b>MYH11 Myosin_11 (Fragments)</b>                        | <b>0.767932417</b> | <b>0.19423</b> | <b>2</b>    |
| Q63862        | LQQELDDLVDLDNQR                                           | 0.639612116        | 2              | 4.292026043 |
| Q63862        | SLEAELMQLQEDLAAAEER                                       | 1.110583443        | 2              | 2.922306538 |
| <b>Q63945</b> | <b>SET Protein SET</b>                                    | <b>1.118045157</b> | <b>0.03481</b> | <b>2</b>    |
| Q63945        | IDFYFDENPYFENK                                            | 1.314680614        | 2              | 3.594690084 |
| Q63945        | VEVTEFEDIK                                                | 1.038120566        | 2              | 2.615303755 |
| <b>Q63965</b> | <b>SFXN1 Sideroflexin_1</b>                               | <b>1.064563749</b> | <b>0.12797</b> | <b>4</b>    |
| Q63965        | NILLTNEQLENAR                                             | 1.006063384        | 2              | 4.501932621 |
| Q63965        | QGIVPAGLTENELWR                                           | 1.043202285        | 2              | 2.696221828 |
| Q63965        | WDQSTFIGR                                                 | 0.94697168         | 2              | 2.364945889 |
| Q63965        | YAYDSAFHPDTGEK                                            | 1.255868064        | 2              | 4.298267365 |
| <b>Q64057</b> | <b>AL7A1 Alpha_aminoadipic semialdehyde dehydrogenase</b> | <b>1.266593133</b> | <b>9.9E-20</b> | <b>17</b>   |
| Q64057        | DYEETIGK                                                  | 0.718798127        | 1              | 2.055888176 |
| Q64057        | AWNIWADIPAPK                                              | 1.241479645        | 2              | 3.797827244 |
| Q64057        | EDNEGVFNWSWGGR                                            | 0.667672012        | 2              | 3.486234903 |
| Q64057        | FKNEEEVFEWNNEVK                                           | 1.200382875        | 2              | 5.802443981 |
| Q64057        | GAPTTSLVSIATVK                                            | 1.105402646        | 2              | 4.918702602 |
| Q64057        | GEVITTYCPANNEPIAR                                         | 1.044479428        | 2              | 5.399247169 |
| Q64057        | GSDCGIVNVNIPTSGAEIGGAFGGEK                                | 0.947148315        | 2              | 5.85716629  |

|               |                                                                                            |                    |                |             |
|---------------|--------------------------------------------------------------------------------------------|--------------------|----------------|-------------|
| Q64057        | LFLHESIHDEVVDR                                                                             | 1.348962907        | 2              | 3.966860056 |
| Q64057        | NEEEVFEWNNEVK                                                                              | 0.914128872        | 2              | 4.560766697 |
| Q64057        | QAVSMFVQAVEEAK                                                                             | 0.91873841         | 2              | 2.80875349  |
| Q64057        | QGLSSSIFTK                                                                                 | 1.061165479        | 2              | 2.374955893 |
| Q64057        | QVALMVQER                                                                                  | 1.057797469        | 2              | 2.427427769 |
| Q64057        | STCTINYSTALPLAQGIK                                                                         | 0.489021018        | 2              | 4.965934277 |
| Q64057        | VNLLSFTGSTQVVGK                                                                            | 1.611717985        | 2              | 4.751021385 |
| Q64057        | VGNPWDPNILYGPLHTK                                                                          | 1.52285417         | 3              | 3.684678316 |
| Q64057        | VMDHPGNYVEPTIVTGLVHDAPIVHK                                                                 | 1.022515099        | 3              | 6.065776348 |
| Q64057        | VMDHPGNYVEPTIVTGLVHDAPIVHK+Oxidation(2)                                                    | 1.069606907        | 3              | 6.038885117 |
| <b>Q640L5</b> | <b>CCD18 Coiled_coil domain_containing protein 18</b>                                      | <b>1.024491702</b> | <b>0.90828</b> | <b>2</b>    |
| Q640L5        | NEKIRSLESNINTEHEK                                                                          | 1.024176538        | 2              | 2.378394127 |
| Q640L5        | TELEKTTNSVKELER                                                                            | 1.078960268        | 2              | 2.333319902 |
| <b>Q64119</b> | <b>MYL6 Myosin light polypeptide 6</b>                                                     | <b>1.185556604</b> | <b>2E-06</b>   | <b>7</b>    |
| Q64119        | DQGTIEDYVEGLR                                                                              | 0.789900513        | 2              | 3.218517542 |
| Q64119        | EGNGTVMGAEIR                                                                               | 0.943398104        | 2              | 2.530056477 |
| Q64119        | HVLVTLGEK                                                                                  | 1.237456509        | 2              | 2.56329608  |
| Q64119        | ILYSQCGDVMR                                                                                | 1.886204197        | 2              | 3.139659643 |
| Q64119        | NKDQGTIEDYVEGLR                                                                            | 1.151192809        | 2              | 4.282741547 |
| Q64119        | VFDKEGNGTVMGAEIR                                                                           | 1.080596942        | 2              | 3.972046852 |
| Q64119        | VLDFEHFLPMLQTVAK                                                                           | 1.090819617        | 2              | 4.96607542  |
| <b>Q64122</b> | <b>MYL9 Myosin regulatory light polypeptide 9</b>                                          | <b>1.333590118</b> | <b>1.7E-11</b> | <b>2</b>    |
| Q64122        | DGFIDKEDLHDMLASLGK                                                                         | 1.432633661        | 2              | 5.248878956 |
| Q64122        | LNGTDPEDVIR                                                                                | 1.281245182        | 2              | 2.784110785 |
| <b>Q64176</b> | <b>EST22 Liver carboxylesterase 22</b>                                                     | <b>1.080448512</b> | <b>0.13512</b> | <b>4</b>    |
| Q64176        | AISESGVALTAGLVK                                                                            | 1.048291663        | 2              | 4.875881195 |
| Q64176        | EGYLQIGATTQQAQK                                                                            | 1.104994437        | 2              | 4.296083927 |
| Q64176        | LGIWGFSTGDEHSR                                                                             | 1.304448105        | 2              | 3.131472826 |
| Q64176        | NFNTVPYIVGINK                                                                              | 0.651881396        | 2              | 3.444725752 |
| <b>Q641Y0</b> | <b>OST48 Dolichyl_diphosphooligosaccharide__protein glycosyltransferase 48 kDa subunit</b> | <b>1.338310606</b> | <b>0.00185</b> | <b>7</b>    |
| Q641Y0        | ELGSECGIEFDEEK                                                                             | 1.037967093        | 2              | 3.694343805 |
| Q641Y0        | NLLIAGLQAR                                                                                 | 1.247093039        | 2              | 3.797177553 |
| Q641Y0        | TADDPSLSLIK                                                                                | 1.162002941        | 2              | 2.336344481 |
| Q641Y0        | TLVLLDNLNVR                                                                                | 1.344192339        | 2              | 3.935337782 |
| Q641Y0        | WVVPFDGDDIQLEFVR                                                                           | 1.327630831        | 2              | 3.336732864 |
| Q641Y0        | TAVIDHHNYDVSDLGQHTLIVADTENLLK                                                              | 1.163849543        | 3              | 6.137796879 |
| Q641Y0        | GVGMVADPDNPLVLDILTSSTSYFFDPKPITQYPHAVGR                                                    | 1.414233991        | 4              | 5.120691776 |
| <b>Q641Y2</b> | <b>NDUS2 NADH dehydrogenase [ubiquinone] iron_sulfur protein 2_mitochondrial</b>           | <b>1.027637301</b> | <b>0.07422</b> | <b>5</b>    |
| Q641Y2        | GSGIQWDLR                                                                                  | 1.09398417         | 2              | 2.710246086 |
| Q641Y2        | IDEVEEMLTNNR                                                                               | 1.08448092         | 2              | 3.49955821  |
| Q641Y2        | IIEQCLNK                                                                                   | 1.413310421        | 2              | 2.896279573 |
| Q641Y2        | LYTEGYQVPPGATYTAIEAPK                                                                      | 1.591668006        | 2              | 2.756647825 |

|               |                                                               |                    |                |             |
|---------------|---------------------------------------------------------------|--------------------|----------------|-------------|
| Q641Y2        | TQPYDVYDQVEFDVPIGSR                                           | 1.028367167        | 2              | 4.249838829 |
| <b>Q64232</b> | <b>TECR Trans_2_3_enoyl_CoA reductase</b>                     | <b>1.118525032</b> | <b>0.93737</b> | <b>3</b>    |
| Q64232        | HYEVEIR                                                       | 0.969282598        | 2              | 2.328707218 |
| Q64232        | LCFLDKVEPQATISEIK                                             | 1.088363408        | 2              | 4.541799068 |
| Q64232        | SLKDEDVLQK                                                    | 1.111236283        | 2              | 3.004000425 |
| <b>Q64240</b> | <b>AMBP Protein AMBP</b>                                      | <b>1.193052139</b> | <b>0.47631</b> | <b>3</b>    |
| Q64240        | AFAELWAFDAAQ GK                                               | 1.129228356        | 2              | 2.770967484 |
| Q64240        | AVLPQENEGSGSEPLITGTLK                                         | 1.194804042        | 2              | 4.795111656 |
| Q64240        | TIAACNLPIVQGPCR                                               | 1.136332463        | 2              | 3.96865654  |
| <b>Q64380</b> | <b>SARDH Sarcosine dehydrogenase_ mitochondrial</b>           | <b>1.22648134</b>  | <b>0.72272</b> | <b>17</b>   |
| Q64380        | AIDSLSIEK                                                     | 0.952857448        | 2              | 2.555262804 |
| Q64380        | AYGIESHVLSPAETK                                               | 1.043844798        | 2              | 4.293030739 |
| Q64380        | DGTMDPAGTCTTLTR                                               | 0.573318303        | 2              | 4.047020912 |
| Q64380        | DLYPLMNVDDLYGTYLVPR                                           | 1.024265502        | 2              | 3.49597168  |
| Q64380        | FHHSLTDHPR                                                    | 1.221696674        | 2              | 2.554536343 |
| Q64380        | FYLLGADAR                                                     | 1.154212532        | 2              | 2.545306683 |
| Q64380        | HGLVNAGYR                                                     | 1.08666748         | 2              | 2.352528572 |
| Q64380        | IEGIQNPVNR                                                    | 1.01294952         | 2              | 2.839958429 |
| Q64380        | LGVGGVLLER                                                    | 2.430351918        | 2              | 3.151747942 |
| Q64380        | LQGDALSVGGYEANPIFWDEVSDK                                      | 0.873305879        | 2              | 4.28136301  |
| Q64380        | NYSVVFPHDEPLAGR                                               | 0.936445486        | 2              | 3.879293203 |
| Q64380        | SDDSPLEAGLAFTCK                                               | 1.117833332        | 2              | 4.659955978 |
| Q64380        | DILQDVLADALSNEAFPSTHQLVR                                      | 1.183865505        | 3              | 5.026329041 |
| Q64380        | QVVDHLEETGLHTGWIQNGGLFIASNQQR                                 | 1.122083199        | 3              | 4.51250124  |
| Q64380        | RDPLHEELLQGQCVFQER                                            | 1.201471282        | 3              | 5.265172005 |
| Q64380        | STVCGPESFTPDKPLMGEAPELR                                       | 1.092885792        | 3              | 4.865081787 |
| Q64380        | VTAVETQHGSIQTPCVVNCAGVWASSVGR                                 | 1.043021851        | 3              | 5.117280483 |
| <b>Q64428</b> | <b>ECHA Trifunctional enzyme subunit alpha_ mitochondrial</b> | <b>1.050270186</b> | <b>0.01326</b> | <b>25</b>   |
| Q64428        | ALMGLYNGQVLCK                                                 | 1.173382055        | 2              | 3.277787685 |
| Q64428        | DSIFSNLIGQLDYK                                                | 0.661834621        | 2              | 2.540228844 |
| Q64428        | DTTASAVAVGLK                                                  | 0.98980627         | 2              | 3.771733284 |
| Q64428        | FGELALTK                                                      | 1.045304999        | 2              | 2.686711788 |
| Q64428        | FGGGSVELLK                                                    | 1.069522395        | 2              | 3.296212673 |
| Q64428        | FVDLYGAQK                                                     | 1.171005831        | 2              | 3.178231955 |
| Q64428        | GFYIYQSGSK                                                    | 1.202631629        | 2              | 3.035098314 |
| Q64428        | ILQEGVDPK                                                     | 1.113559428        | 2              | 3.150660515 |
| Q64428        | KTVLGVPEVLLGILPGAGGTQR                                        | 1.586014648        | 2              | 4.280008316 |
| Q64428        | KYESAYGTQFTPCQLLR                                             | 0.972821911        | 2              | 4.433245659 |
| Q64428        | MGLVDQLVDPLGPGIK                                              | 1.063585385        | 2              | 4.825469017 |
| Q64428        | MGLVDQLVDPLGPGIK+Oxidation(1)                                 | 1.052781821        | 2              | 2.451394796 |
| Q64428        | MQLLEIITDK                                                    | 1.095288058        | 2              | 4.020749092 |
| Q64428        | MVGVPAAFDMMMLTGR                                              | 1.080139458        | 2              | 3.235998154 |

|               |                                             |                    |                |             |
|---------------|---------------------------------------------|--------------------|----------------|-------------|
| Q64428        | NLNSEIDNILVNL                               | 1.14474664         | 2              | 4.788310051 |
| Q64428        | TGLEQGNDAGYLAESEK                           | 1.0372805          | 2              | 5.136666775 |
| Q64428        | YESAYGTQFTPCQLLR                            | 1.024775143        | 2              | 4.413252354 |
| Q64428        | ADMVIEAVFEDLAVK                             | 0.959243727        | 3              | 4.758580685 |
| Q64428        | EVESVTPEHCIFASNTSALPINQIAAVSQRPEK           | 0.762120233        | 3              | 6.849063396 |
| Q64428        | EVQSEFVEVMNEIWANDQIR                        | 1.070650505        | 3              | 3.322697401 |
| Q64428        | LPAKPEVSSDEDIQYR                            | 1.159009035        | 3              | 3.848047733 |
| Q64428        | TIEYLEEVAVNFAK                              | 1.016029946        | 3              | 4.148970127 |
| Q64428        | TVLGVPEVLLGILPGAGGTQR                       | 1.210363701        | 3              | 5.002803326 |
| Q64428        | TVQQLAILGAGLMGAGIAQVSVDK                    | 1.054037329        | 3              | 5.991014481 |
| Q64428        | KLDALTTGFGFPVGAATLADEVGIDVAQHVAEDLGK        | 1.165838918        | 4              | 5.037264347 |
| <b>Q64458</b> | <b>CP2CT Cytochrome P450 2C29</b>           | <b>1.163362269</b> | <b>0.97387</b> | <b>5</b>    |
| Q64458        | IKEHKESLDVTNPR                              | 1.059212563        | 2              | 5.02221632  |
| Q64458        | VQEEAQCLVEELR                               | 1.259500425        | 2              | 4.275462151 |
| Q64458        | VQEEAQCLVEELRK                              | 1.343833892        | 2              | 3.72656846  |
| Q64458        | VQEEIDR                                     | 1.044630516        | 2              | 2.495527506 |
| Q64458        | LPPGPTPLPIIGNFLQIDVK                        | 1.131806777        | 3              | 4.371341705 |
| <b>Q64481</b> | <b>CP3AG Cytochrome P450 3A16</b>           | <b>0.919618307</b> | <b>0.99999</b> | <b>2</b>    |
| Q64481        | GSIDPYVYLPFGNGPR                            | 0.83524393         | 2              | 3.943891525 |
| Q64481        | VLQNFQFQPK                                  | 1.039950073        | 2              | 2.609072685 |
| <b>Q64550</b> | <b>UD11 UDP_glucuronosyltransferase 1_1</b> | <b>1.008782945</b> | <b>1</b>       | <b>4</b>    |
| Q64550        | GHEVVVIAPEASIIHK                            | 0.893017318        | 2              | 4.664513111 |
| Q64550        | NMIIALTENFLCR                               | 1.121584424        | 2              | 4.659689903 |
| Q64550        | SVFDQDPFLLR                                 | 1.131908148        | 2              | 3.410800219 |
| Q64550        | VVYSPYGLATEILQK                             | 1.012563329        | 2              | 4.55074501  |
| <b>Q64563</b> | <b>ADH4 Alcohol dehydrogenase 4</b>         | <b>1.003692446</b> | <b>0.99974</b> | <b>16</b>   |
| Q64563        | AAVDCTVVGWGSCTVVGAK                         | 1.833374963        | 2              | 4.181503296 |
| Q64563        | ALGATDCLNPR                                 | 0.98019705         | 2              | 3.008248568 |
| Q64563        | IIAIDINSEKFPK                               | 1.043743346        | 2              | 2.650220156 |
| Q64563        | INDAIDL MNQ GK                              | 1.055790133        | 2              | 4.349094868 |
| Q64563        | LCLSPLTNLCGK                                | 2.249460673        | 2              | 2.319315434 |
| Q64563        | SVDSV PNLVTDYK                              | 0.903418465        | 2              | 3.25919795  |
| Q64563        | TDSPLCIEEIEVSPPK                            | 0.976655137        | 2              | 4.232413769 |
| Q64563        | VCLIGCGFTSGYGAAINTAK                        | 1.525114248        | 2              | 5.574826241 |
| Q64563        | VDDEANLER                                   | 1.006876896        | 2              | 2.675382853 |
| Q64563        | VDEM NISTVDMILGR                            | 0.983566878        | 2              | 3.387874842 |
| Q64563        | VIATCVCP TDINATNPK                          | 1.22711428         | 2              | 4.222022533 |
| Q64563        | ALFPVVLGH ECAGIVESVGPV TNFKPGDK             | 0.995654495        | 3              | 5.840706825 |
| Q64563        | DLDKPVQDVITELTGGGVDFSLDCAGTAQTLK            | 0.902376056        | 3              | 5.560966015 |
| Q64563        | FDL DLLVTHALPFDK                            | 1.180361328        | 3              | 3.320618391 |
| Q64563        | KFDL DLLVTHALPFDK                           | 0.976264676        | 3              | 5.691926479 |
| Q64563        | KFDL DLLVTHALPFDKINDAIDL MNQ GK             | 0.766525432        | 3              | 4.682949543 |

|               |                                                                            |                    |                |             |
|---------------|----------------------------------------------------------------------------|--------------------|----------------|-------------|
| <b>Q64565</b> | <b>AGT2 Alanine__glyoxylate aminotransferase 2_ mitochondrial</b>          | <b>1.037666363</b> | <b>0.69018</b> | <b>15</b>   |
| Q64565        | YIEQFK                                                                     | 1.255602735        | 1              | 2.050944805 |
| Q64565        | AYSNHTDIISFR                                                               | 1.234320187        | 2              | 3.354557514 |
| Q64565        | GGNFSQTFR                                                                  | 1.17350168         | 2              | 2.412196398 |
| Q64565        | GGVCIADDEVQTGFGR                                                           | 1.0626236          | 2              | 4.314655781 |
| Q64565        | GIGNGFPMAAVVTTP EIASSLAK                                                   | 1.065441525        | 2              | 3.196557522 |
| Q64565        | GLMVGIEMVQDK                                                               | 0.918574194        | 2              | 3.762531042 |
| Q64565        | HNMPPCDFSPEK                                                               | 1.034377416        | 2              | 3.320510387 |
| Q64565        | LRDEFDIVGDVR                                                               | 1.061932615        | 2              | 2.635327101 |
| Q64565        | LSALLPEPLK                                                                 | 2.331966523        | 2              | 2.584724665 |
| Q64565        | NSQEVGYMLLK                                                                | 1.095126919        | 2              | 2.375362396 |
| Q64565        | SALTQHMER                                                                  | 1.318129336        | 2              | 2.714660168 |
| Q64565        | TEVNQIHEDCK                                                                | 1.17099139         | 2              | 3.269109249 |
| Q64565        | TEVNQIHEDCKDMGLLVGR                                                        | 1.05445752         | 2              | 5.223378181 |
| Q64565        | VIFLVNSGSEANDLAMVMAR                                                       | 1.545246507        | 2              | 5.690999031 |
| Q64565        | YLDFFSGIVTVGVGHCHPK                                                        | 0.907514713        | 2              | 2.782546997 |
| <b>Q64578</b> | <b>AT2A1 Sarcoplasmic/endoplasmic reticulum calcium ATPase 1</b>           | <b>0.541240453</b> | <b>0.0316</b>  | <b>4</b>    |
| Q64578        | DIVPGDIVEVAVGDKVPADIR                                                      | 0.468211746        | 2              | 3.329761028 |
| Q64578        | IGIFSENEEVADR                                                              | 0.818891295        | 2              | 2.899600983 |
| Q64578        | VGEATETALTTLVEK                                                            | 0.540016708        | 2              | 4.032546043 |
| Q64578        | YGPNELPAEEGK                                                               | 0.784531014        | 2              | 2.542826176 |
| <b>Q64581</b> | <b>CP3A1 Cytochrome P450 3A18</b>                                          | <b>1.052373937</b> | <b>0.8837</b>  | <b>3</b>    |
| Q64581        | KLQNEIDR                                                                   | 0.95996849         | 2              | 2.358011007 |
| Q64581        | LAVIGVLQNFNIQPCEK                                                          | 1.868613755        | 2              | 4.049885273 |
| Q64581        | NPEYWLEPEEFNPER                                                            | 1.020983043        | 2              | 4.248091698 |
| <b>Q64591</b> | <b>DECR 2_4_dienoyl_CoA reductase_ mitochondrial</b>                       | <b>0.842748152</b> | <b>0.00035</b> | <b>9</b>    |
| Q64591        | NIDVLK                                                                     | 0.946204682        | 1              | 2.057032824 |
| Q64591        | ATAEEITSK                                                                  | 1.562808566        | 2              | 2.938466072 |
| Q64591        | EEWDVIEGLIR                                                                | 0.621825298        | 2              | 3.724044561 |
| Q64591        | FFPPIKPMPLPPNAFQGK                                                         | 1.138000339        | 2              | 3.905992031 |
| Q64591        | FNIIQPGPIK                                                                 | 0.875132915        | 2              | 3.115134001 |
| Q64591        | VAFITGGGTGLGK                                                              | 1.020641869        | 2              | 2.911386728 |
| Q64591        | DPDMVHNTVLELIK                                                             | 0.65749461         | 3              | 4.292530537 |
| Q64591        | VTKEEWDVIEGLIR                                                             | 0.889920962        | 3              | 5.016978264 |
| Q64591        | CDVRDPDMVHNTVLELIK                                                         | 0.980351111        | 4              | 4.551716328 |
| <b>Q64602</b> | <b>AADAT Kynurenine/alpha_aminoadipate aminotransferase_ mitochondrial</b> | <b>1.257767113</b> | <b>0.05606</b> | <b>7</b>    |
| Q64602        | ASFSQVTPAQMDLVFQR                                                          | 1.281521719        | 2              | 5.288329124 |
| Q64602        | DIISLAPGSPNPK                                                              | 0.923862883        | 2              | 3.079529285 |
| Q64602        | EILLVPGNSFFVDNSAPSSFFR                                                     | 0.874066846        | 2              | 2.32144928  |
| Q64602        | FLYTIPNGNPTGNSLTGDR                                                        | 1.252608377        | 2              | 4.142947674 |
| Q64602        | SAVFTVENGSTIR                                                              | 0.968599764        | 2              | 3.860829115 |

|               |                                                                   |                    |                |             |
|---------------|-------------------------------------------------------------------|--------------------|----------------|-------------|
| Q64602        | LHNPPTVNYSPNEGQMDLCITSGCQDGLCK                                    | 1.349409059        | 3              | 6.373969555 |
| Q64602        | VLSQWKPEDSKDPTKR                                                  | 2.118751524        | 3              | 3.946004629 |
| <b>Q64611</b> | <b>CSAD Cysteine sulfinic acid decarboxylase</b>                  | <b>0.985235647</b> | <b>0.99906</b> | <b>11</b>   |
| Q64611        | YLVEEIK                                                           | 1.220418199        | 1              | 2.297017574 |
| Q64611        | AQGGQGLEWR                                                        | 1.266923469        | 2              | 3.030952215 |
| Q64611        | CHGSQASYLFQQDK                                                    | 0.972283683        | 2              | 5.261312485 |
| Q64611        | FFNQLFSGLDPHALAGR                                                 | 0.942681393        | 2              | 4.701593876 |
| Q64611        | FYNVALDTGDK                                                       | 1.080135594        | 2              | 3.088741779 |
| Q64611        | GAAFLGLGTDVSR                                                     | 1.300502316        | 2              | 3.448966503 |
| Q64611        | IDQAFALTR                                                         | 1.033425334        | 2              | 3.189400673 |
| Q64611        | LLAAGLQCSALLLR                                                    | 4.761453016        | 2              | 3.303945541 |
| Q64611        | QLLDLELQSQGESR                                                    | 0.877061866        | 2              | 4.094171047 |
| Q64611        | TLDGDPVAVEALLR                                                    | 1.03198309         | 2              | 5.039214134 |
| Q64611        | VCEWKEPEELK                                                       | 1.133682467        | 3              | 3.801840544 |
| <b>Q64633</b> | <b>UD17 UDP_glucuronosyltransferase 1_7</b>                       | <b>0.98362834</b>  | <b>0.96105</b> | <b>2</b>    |
| Q64633        | QSSFDAVFLDPFDVCGLTVAK                                             | 0.983716594        | 2              | 2.383490562 |
| Q64633        | TYSVSHTEQEDLNR                                                    | 0.930769348        | 2              | 3.272384167 |
| <b>Q64638</b> | <b>UD15 UDP_glucuronosyltransferase 1_5</b>                       | <b>1.191108051</b> | <b>0.12196</b> | <b>2</b>    |
| Q64638        | VVFETGNYVK                                                        | 1.47968001         | 1              | 1.962199211 |
| Q64638        | TFLETSEILK                                                        | 0.958814325        | 2              | 2.406353951 |
| <b>Q64640</b> | <b>ADK Adenosine kinase</b>                                       | <b>1.06183804</b>  | <b>0.99444</b> | <b>11</b>   |
| Q64640        | AATFFGCIGIDK                                                      | 0.921065938        | 2              | 3.082792997 |
| Q64640        | FGEILK                                                            | 1.057661774        | 2              | 2.383528471 |
| Q64640        | HKELFDELVK                                                        | 0.899075828        | 2              | 2.750713825 |
| Q64640        | HLDLENNWMLVEK                                                     | 1.076094844        | 2              | 3.595920324 |
| Q64640        | SLVANLAAANCYK                                                     | 1.113612753        | 2              | 4.354123592 |
| Q64640        | VEYHAGGSTQNSMK                                                    | 1.04896697         | 2              | 3.819094181 |
| Q64640        | VEYHAGGSTQNSMK+Oxidation(13)                                      | 1.050552314        | 2              | 3.618259192 |
| Q64640        | AADAHVDAHYYEQNEQPTGTCAACITGGNR                                    | 1.142286259        | 3              | 7.148843765 |
| Q64640        | AGHYAASVIIR                                                       | 1.137923189        | 3              | 3.322164536 |
| Q64640        | FKVEYHAGGSTQNSMK                                                  | 1.13031699         | 3              | 3.44434762  |
| Q64640        | YSLKPNDQILAEDK                                                    | 1.101399373        | 3              | 4.234285355 |
| <b>Q64654</b> | <b>CP51A Lanosterol 14_alpha demethylase</b>                      | <b>1.041946764</b> | <b>0.99911</b> | <b>8</b>    |
| Q64654        | EPAEDILQTLDDSTYK                                                  | 1.025398092        | 2              | 3.467680931 |
| Q64654        | GVAVDVNPNAVFLQK                                                   | 1.099454646        | 2              | 4.034034729 |
| Q64654        | NEDLNAEEVYGR                                                      | 0.881075904        | 2              | 3.822248936 |
| Q64654        | SGLNIAHFK                                                         | 0.980554126        | 2              | 2.86670208  |
| Q64654        | TFTYLLGSDAAALLFNSK                                                | 0.839568683        | 2              | 2.932697535 |
| Q64654        | TVCGEDLPPLTYEQLK                                                  | 0.771915314        | 2              | 4.126359463 |
| Q64654        | YGPVFSFTMVGK                                                      | 0.888941231        | 2              | 2.729981899 |
| Q64654        | YLQDNPASGEK                                                       | 0.870553319        | 2              | 2.847353697 |
| <b>Q64737</b> | <b>PUR2 Trifunctional purine biosynthetic protein adenosine_3</b> | <b>0.945435637</b> | <b>0.94099</b> | <b>2</b>    |

|               |                                                                           |                    |                |             |
|---------------|---------------------------------------------------------------------------|--------------------|----------------|-------------|
| Q64737        | DSGVDAAGNMLVKK+Oxidation(11)                                              | 0.94541935         | 2              | 2.307566166 |
| Q64737        | FGDPECQVILPLLK                                                            | 0.979452856        | 2              | 2.453150272 |
| <b>Q65CL1</b> | <b>CTNA3 Catenin alpha_3</b>                                              | <b>1.202923903</b> | <b>0.6821</b>  | <b>2</b>    |
| Q65CL1        | MISEGSRMDVLAR+Oxidation(1)                                                | 1.212029305        | 2              | 2.600138664 |
| Q65CL1        | NLMNAVVTQTVK                                                              | 0.898295196        | 2              | 3.155761719 |
| <b>Q65Z40</b> | <b>WAPL Wings apart_like protein homolog</b>                              | <b>0.874572035</b> | <b>0.3447</b>  | <b>3</b>    |
| Q65Z40        | EKSISRIPEDNANK                                                            | 0.879831884        | 2              | 2.678282738 |
| Q65Z40        | LGQKRPNFKPDIQEIPK                                                         | 1.275523795        | 2              | 2.913098097 |
| Q65Z40        | TESPSESCPVKGSVR                                                           | 0.947475781        | 2              | 2.524430037 |
| <b>Q66H12</b> | <b>NAGAB Alpha_N_acetylglactosaminidase</b>                               | <b>1.326051566</b> | <b>0.00525</b> | <b>3</b>    |
| Q66H12        | CNINCEEDPK                                                                | 1.041632597        | 2              | 2.401847839 |
| Q66H12        | INQDPLGIQGR                                                               | 1.128609568        | 2              | 2.451294661 |
| Q66H12        | TISPQNIDILQNPLLIK                                                         | 1.341854745        | 2              | 3.881380081 |
| <b>Q66H15</b> | <b>RMD3 Regulator of microtubule dynamics protein 3</b>                   | <b>0.885784441</b> | <b>0.4289</b>  | <b>2</b>    |
| Q66H15        | AIPGEAGDAAMLSSLPQEGQEK                                                    | 1.393633309        | 2              | 4.198450089 |
| Q66H15        | AYSDMTELTEESEKK                                                           | 0.854259144        | 2              | 2.533581495 |
| <b>Q66H45</b> | <b>TTC36 Tetratricopeptide repeat protein 36</b>                          | <b>1.006898387</b> | <b>0.97619</b> | <b>2</b>    |
| Q66H45        | LQGDVAGALEDLER                                                            | 0.998676174        | 2              | 3.658977032 |
| Q66H45        | RDFEQAAR                                                                  | 1.044711574        | 2              | 2.304555893 |
| <b>Q66H71</b> | <b>CPPED Calcineurin_like phosphoesterase domain_containing protein 1</b> | <b>1.041544468</b> | <b>0.94444</b> | <b>2</b>    |
| Q66H71        | LTEQAVEAINK                                                               | 1.039699666        | 2              | 3.691011667 |
| Q66H71        | SIDEDDDYFNLTK                                                             | 1.361340878        | 2              | 2.835181952 |
| <b>Q66H80</b> | <b>COPD Coatomer subunit delta</b>                                        | <b>1.26772285</b>  | <b>0.01626</b> | <b>5</b>    |
| Q66H80        | GVQLQTHPNVDKK                                                             | 1.27801845         | 2              | 3.166584253 |
| Q66H80        | LFTAESLIGLK                                                               | 1.402993813        | 2              | 2.904071808 |
| Q66H80        | NSNILEDLETLR                                                              | 1.083595177        | 2              | 2.906677008 |
| Q66H80        | NTLEWCLPVIDAK                                                             | 1.010984497        | 2              | 3.299034595 |
| Q66H80        | VAPAPARPSGSPK                                                             | 1.172917157        | 2              | 2.498586416 |
| <b>Q66HA8</b> | <b>HS105 Heat shock protein 105 kDa</b>                                   | <b>1.097995436</b> | <b>0.79731</b> | <b>5</b>    |
| Q66HA8        | AGGIETIANEFSDR                                                            | 1.062700169        | 2              | 2.842128277 |
| Q66HA8        | FVVQNVSAQK                                                                | 1.112471388        | 2              | 2.683887243 |
| Q66HA8        | LKETAENNLK                                                                | 1.241592755        | 2              | 2.398279428 |
| Q66HA8        | NQQITHANNTVSSFK                                                           | 1.110375195        | 2              | 4.482751369 |
| Q66HA8        | SVLDAAQIVGLNCLR                                                           | 1.0896257          | 2              | 2.719074488 |
| <b>Q66HD0</b> | <b>ENPL Endoplasmic</b>                                                   | <b>1.005193719</b> | <b>9.9E-20</b> | <b>32</b>   |
| Q66HD0        | EVEEDEYK                                                                  | 0.865214102        | 1              | 2.38898325  |
| Q66HD0        | YNDTFWK                                                                   | 1.150619272        | 1              | 2.193241358 |
| Q66HD0        | DISTNYASQK                                                                | 0.337330142        | 2              | 3.067604542 |
| Q66HD0        | EATEKEFEPLLNWMK                                                           | 1.023554061        | 2              | 3.138513088 |
| Q66HD0        | EEASDYLELDTIK                                                             | 1.156734673        | 2              | 4.280916214 |
| Q66HD0        | EEEAIQLDGLNASQIR                                                          | 1.141216582        | 2              | 4.547014713 |
| Q66HD0        | EFEPLLNWMK                                                                | 1.000640921        | 2              | 2.315117359 |



|               |                                                                           |                    |                |             |
|---------------|---------------------------------------------------------------------------|--------------------|----------------|-------------|
| Q66HD0        | GLFDEYGSK                                                                 | 1.14801781         | 2              | 2.344799995 |
| Q66HD0        | GVVDSDDLPLNVS                                                             | 1.127194922        | 2              | 4.812913418 |
| Q66HD0        | GYEVIYLTEPVDEYCIQALPEFDGK                                                 | 0.488153492        | 2              | 3.721064091 |
| Q66HD0        | KEAESSPFVER                                                               | 1.13523106         | 2              | 3.605721951 |
| Q66HD0        | LGVIEDHSNR                                                                | 1.387663362        | 2              | 3.331030369 |
| Q66HD0        | LIINSLYK                                                                  | 1.943995398        | 2              | 2.426030397 |
| Q66HD0        | LISLTDENALAGNEELTVK                                                       | 1.454947515        | 2              | 5.851543903 |
| Q66HD0        | LTESPCALVASQYGWSGNMER                                                     | 1.124744363        | 2              | 5.566545486 |
| Q66HD0        | MKEKQDK                                                                   | 0.989060093        | 2              | 2.330203533 |
| Q66HD0        | NLLHVTDGTGVMTR+Oxidation(12)                                              | 1.293109561        | 2              | 2.987621784 |
| Q66HD0        | SGTSEFLNK                                                                 | 1.153719466        | 2              | 3.10225749  |
| Q66HD0        | SGYLLPDTK                                                                 | 1.081330194        | 2              | 3.169315338 |
| Q66HD0        | SILFVPTSAPR                                                               | 0.93667129         | 2              | 3.474208593 |
| Q66HD0        | TDDEVVQR                                                                  | 1.09283856         | 2              | 2.947075367 |
| Q66HD0        | TETVEEPLEETAQEEK                                                          | 0.776108087        | 2              | 5.18552494  |
| Q66HD0        | TFEINPR                                                                   | 1.130905553        | 2              | 2.725261211 |
| Q66HD0        | VFITDDFHDMMPK                                                             | 1.062812927        | 2              | 4.02559042  |
| Q66HD0        | FQSSHSTIDITSLDQYVER                                                       | 1.208556585        | 3              | 6.205788612 |
| Q66HD0        | GYEVIYLTEPVDEYCIQALPEFDGKR                                                | 0.526328379        | 3              | 4.024006844 |
| Q66HD0        | KGYEVIYLTEPVDEYCIQALPEFDGKR                                               | 0.674037529        | 3              | 4.419525146 |
| Q66HD0        | NLLHVTDGTGVMTR                                                            | 1.13213477         | 3              | 4.034244537 |
| Q66HD0        | RVFITDDFHDMMPK                                                            | 1.30565016         | 3              | 3.335545301 |
| Q66HD0        | TDDEVVQREEEAIQLDGLNASQIR                                                  | 1.20392669         | 3              | 5.351276875 |
| Q66HD0        | TVWDWELMNDIKPIWQRPSK                                                      | 1.212688852        | 3              | 4.027099609 |
| Q66HD0        | TETVEEPLEETAQEEKEEADDEAAVEEEEEKKPK                                        | 0.554365116        | 5              | 6.45001173  |
| <b>Q66HF1</b> | <b>NDUS1 NADH_ubiquinone oxidoreductase 75 kDa subunit_ mitochondrial</b> | <b>1.007385384</b> | <b>0.30275</b> | <b>12</b>   |
| Q66HF1        | GWNILTNSEK                                                                | 1.170003295        | 1              | 2.146276951 |
| Q66HF1        | ALSEIAGITLPHYDLDQVR                                                       | 1.188736784        | 2              | 3.979142189 |
| Q66HF1        | DDGAAILAAVSSIAQK                                                          | 1.017746027        | 2              | 4.337766171 |
| Q66HF1        | FASEIAGVDDLGTGR                                                           | 1.21263003         | 2              | 3.477347136 |
| Q66HF1        | GLLTYTSWEDALSR                                                            | 0.960293681        | 2              | 3.383852482 |
| Q66HF1        | ILQDIASGNHEFSK                                                            | 1.307345497        | 2              | 4.155754566 |
| Q66HF1        | LGEVSPNLVR                                                                | 1.148548399        | 2              | 3.160465717 |
| Q66HF1        | LVDQEFLADPLVPPQLTIK                                                       | 1.033931249        | 2              | 3.285637856 |
| Q66HF1        | VSDTLCTEEIFPNEGAGTDLR                                                     | 0.793206425        | 2              | 4.637685299 |
| Q66HF1        | YDHLGDSPK                                                                 | 0.965293825        | 2              | 2.555663109 |
| Q66HF1        | DCFIVYQGHGVDVGAPIADVILPGAAYTEK                                            | 0.965991418        | 3              | 4.199045658 |
| Q66HF1        | DLLNKVSDTLCTEEIFPNEGAGTDLR                                                | 1.018032081        | 3              | 4.519767761 |
| <b>Q66HF8</b> | <b>AL1B1 Aldehyde dehydrogenase X_ mitochondrial</b>                      | <b>0.853959284</b> | <b>1.7E-11</b> | <b>11</b>   |
| Q66HF8        | ADVDLAVR                                                                  | 1.251876484        | 2              | 2.357654095 |
| Q66HF8        | EEIFGPVQPLFK                                                              | 0.771916264        | 2              | 3.219243288 |
| Q66HF8        | LAPALATGNTVVMK                                                            | 2.035210138        | 2              | 3.287401676 |

|               |                                                                 |                    |                |             |
|---------------|-----------------------------------------------------------------|--------------------|----------------|-------------|
| Q66HF8        | TFPTVNPPTTGEVIGHVAEGDR                                          | 1.498663269        | 2              | 4.636391163 |
| Q66HF8        | TFVEESYHEFLER                                                   | 1.197421217        | 2              | 3.81672883  |
| Q66HF8        | VAEQTPLSALYLASLIK                                               | 1.213893067        | 2              | 3.178241968 |
| Q66HF8        | VGNPFELDTQQGPQVDK                                               | 1.258518989        | 2              | 3.041733027 |
| Q66HF8        | VGNPFELDTQQGPQVDKEQFEK                                          | 1.992289169        | 2              | 4.471832275 |
| Q66HF8        | YGLAAAVFTR                                                      | 1.229646918        | 2              | 3.856504679 |
| Q66HF8        | EAGFPPGVVNIITGYGPTAGAAIAQHMDVDK                                 | 1.366037315        | 3              | 3.854003668 |
| Q66HF8        | KVGNPFELDTQQGPQVDKEQFEK                                         | 1.779221           | 3              | 4.504412651 |
| <b>Q66HG4</b> | <b>GALM Aldose 1_epimerase</b>                                  | <b>1.019878384</b> | <b>1</b>       | <b>3</b>    |
| Q66HG4        | ASDVVLGFAELEGYLQK                                               | 1.045804008        | 2              | 4.706767559 |
| Q66HG4        | TVFGELPSGGGAVEK                                                 | 1.039271807        | 2              | 3.668407679 |
| Q66HG4        | VSPDGEEGYPGELK                                                  | 0.987202504        | 2              | 3.785018206 |
| <b>Q66X93</b> | <b>SND1 Staphylococcal nuclease domain_containing protein 1</b> | <b>1.165421334</b> | <b>1.8E-06</b> | <b>21</b>   |
| Q66X93        | ADDADEFGYSR                                                     | 2.185021864        | 2              | 2.783961773 |
| Q66X93        | ALLLPDHVLTVMLSGIK                                               | 1.222472178        | 2              | 3.328964949 |
| Q66X93        | DTNGENIAESLVAEGLASR                                             | 0.998233646        | 2              | 5.023663521 |
| Q66X93        | ETDGETPEPFAAEAK                                                 | 0.81325791         | 2              | 3.693834782 |
| Q66X93        | FVDGEWYR                                                        | 0.997306465        | 2              | 2.319098473 |
| Q66X93        | GDVGLGLVK                                                       | 1.050241697        | 2              | 2.707770109 |
| Q66X93        | LEGDNIQDK                                                       | 1.137290906        | 2              | 2.708917141 |
| Q66X93        | LSECEEQAK                                                       | 2.251580046        | 2              | 2.607335567 |
| Q66X93        | MVLGCAIIVR                                                      | 1.269033694        | 2              | 2.371476889 |
| Q66X93        | NLPGLVQEGEPFSEETLFTK                                            | 1.470628964        | 2              | 5.427797318 |
| Q66X93        | SAYYKPLLSAEAAK                                                  | 1.257728432        | 2              | 2.522879362 |
| Q66X93        | SSHYDELLAAEAR                                                   | 1.2710539          | 2              | 3.74548173  |
| Q66X93        | TCATVTIGGINIAEALVSK                                             | 1.256230735        | 2              | 3.926304817 |
| Q66X93        | TDAVDSVVR                                                       | 0.986679451        | 2              | 2.655802727 |
| Q66X93        | VITEYLNAQESAK                                                   | 1.0919313          | 2              | 3.786048174 |
| Q66X93        | VMQVLNADAIVVK                                                   | 1.504941232        | 2              | 3.98234129  |
| Q66X93        | DIQNTQCLLNVEHLSASCPHVTLQFADSK                                   | 1.02986085         | 3              | 5.562504292 |
| Q66X93        | HFVDSHHQKPVNAIIHVHR                                             | 1.113591714        | 3              | 4.868802547 |
| Q66X93        | SDISSHPPVEGAYAPR                                                | 1.098919248        | 3              | 4.613807201 |
| Q66X93        | VSVTVDIRPASPATETVPAFSEK                                         | 1.075566859        | 3              | 5.063763618 |
| Q66X93        | VVAHYEEQPVEEVMPVLEEK                                            | 0.836609851        | 3              | 4.577794552 |
| <b>Q67FY2</b> | <b>BCL9L B_cell CLL/lymphoma 9_like protein</b>                 | <b>0.769320621</b> | <b>0.53699</b> | <b>2</b>    |
| Q67FY2        | EAGTPSLDSEAKEVAPR                                               | 0.976681583        | 2              | 2.451547146 |
| Q67FY2        | NLVGSEGLSKEQLEHRER                                              | 0.742690372        | 2              | 2.353882313 |
| <b>Q68FP2</b> | <b>PON3 Serum paraoxonase/lactonase 3</b>                       | <b>1.064556897</b> | <b>0.93221</b> | <b>8</b>    |
| Q68FP2        | YVVVADVTAKE                                                     | 1.085748906        | 1              | 2.892066717 |
| Q68FP2        | HNNWDLTPVK                                                      | 0.957696173        | 2              | 3.308071375 |
| Q68FP2        | IFLMDLNEPYPK                                                    | 1.292468773        | 2              | 3.059904099 |
| Q68FP2        | IQDPLSDNPR                                                      | 0.99818902         | 2              | 2.878886938 |

|               |                                                 |                    |                |             |
|---------------|-------------------------------------------------|--------------------|----------------|-------------|
| Q68FP2        | LLIYNPEDPPGSEVLR                                | 1.431975044        | 2              | 4.306882381 |
| Q68FP2        | VIQLGLVDNLTVPATGDILAGCHPNPMK                    | 1.133942705        | 2              | 4.954349518 |
| Q68FP2        | VVAQGFSSANGITVSLDQK                             | 1.13538634         | 2              | 4.176673889 |
| Q68FP2        | LVALTVLGASLALLGER                               | 1.515684223        | 3              | 4.015354633 |
| <b>Q68FQ0</b> | <b>TCPE T_complex protein 1 subunit epsilon</b> | <b>1.365773143</b> | <b>1.9E-05</b> | <b>5</b>    |
| Q68FQ0        | GSNDMQYQHVIETLIGK                               | 1.261045497        | 2              | 3.559807062 |
| Q68FQ0        | HKLDVTSVEDYK                                    | 1.405413554        | 2              | 3.157534838 |
| Q68FQ0        | SLHDALCVIR                                      | 1.238623684        | 2              | 2.990057945 |
| Q68FQ0        | WVGGPEIELIAIATGGR                               | 1.410480376        | 2              | 3.885253191 |
| Q68FQ0        | ETGANLAICQWGFDEANHLLQNGLPAVR                    | 1.02946574         | 3              | 3.709010124 |
| <b>Q68FR6</b> | <b>EF1G Elongation factor 1_gamma</b>           | <b>1.29197713</b>  | <b>1.8E-15</b> | <b>8</b>    |
| Q68FR6        | AAAPAPEEEMDECEQALAAEPK                          | 1.303251597        | 2              | 5.338454247 |
| Q68FR6        | ALIAAQYSGAQIR                                   | 0.895592096        | 2              | 4.230010986 |
| Q68FR6        | GQDLAFPLSPDWQVDYESYTWIR                         | 1.587125757        | 2              | 3.763025284 |
| Q68FR6        | ILGLLDTHLK                                      | 1.721804944        | 2              | 2.64118433  |
| Q68FR6        | KAAAPAPEEEMDECEQALAAEPK                         | 1.113781468        | 2              | 4.26509428  |
| Q68FR6        | KLDPGSEETQTLVR                                  | 1.208064044        | 2              | 3.912443161 |
| Q68FR6        | LDPGSEETQTLVR                                   | 1.012915855        | 2              | 2.938840151 |
| Q68FR6        | STFVLDEFKR                                      | 1.087493682        | 2              | 2.711997509 |
| <b>Q68FR9</b> | <b>EF1D Elongation factor 1_delta</b>           | <b>1.191203495</b> | <b>0.00048</b> | <b>6</b>    |
| Q68FR9        | ATAPQTQHVSPMR                                   | 1.161036337        | 2              | 3.055468559 |
| Q68FR9        | FYEQMNGPVTAGSR                                  | 0.989036834        | 2              | 4.219642639 |
| Q68FR9        | GVVQDLQQAISK                                    | 1.17341439         | 2              | 3.426027536 |
| Q68FR9        | SIQLDGLVWGASK                                   | 1.129935468        | 2              | 2.788300276 |
| Q68FR9        | SLAGSSGPGASSGPGGDHSDLIVR                        | 1.180431318        | 2              | 5.316636562 |
| Q68FR9        | SSILLDVKPWDETDMAQLETCVR                         | 1.064756321        | 3              | 3.340085745 |
| <b>Q68FS4</b> | <b>AMPL Cytosol aminopeptidase</b>              | <b>1.022973772</b> | <b>0.00689</b> | <b>18</b>   |
| Q68FS4        | GLVLGIYSK                                       | 1.24838866         | 1              | 2.034808397 |
| Q68FS4        | ADMGGAATICSIAVSAAK                              | 1.222064684        | 2              | 5.388221264 |
| Q68FS4        | DKDDDVPQFTSAGENFNK                              | 0.913439412        | 2              | 5.099095821 |
| Q68FS4        | GITFDSGGISIK                                    | 1.025979396        | 2              | 3.242561817 |
| Q68FS4        | GVLFASGQNLAR                                    | 0.914997795        | 2              | 3.615752935 |
| Q68FS4        | LFEASVETGDR                                     | 1.140042295        | 2              | 3.505314589 |
| Q68FS4        | LHGSGDLEAWEK                                    | 1.571794996        | 2              | 3.57463026  |
| Q68FS4        | LNLPINIIGLAPLCEMMPGSK                           | 2.539950301        | 2              | 4.828619957 |
| Q68FS4        | QLMESPANEMTPTR                                  | 1.027937263        | 2              | 3.387782812 |
| Q68FS4        | QVIDCQLADVNNLKG                                 | 1.126222879        | 2              | 4.933416367 |
| Q68FS4        | SAGACTAAAFRL                                    | 1.417836245        | 2              | 3.690693378 |
| Q68FS4        | SAGVDDQENWHEGK                                  | 1.249233307        | 2              | 3.927734137 |
| Q68FS4        | SWIEEQEMGSFLSVAK                                | 1.19260655         | 2              | 5.508905411 |
| Q68FS4        | TFYGLHQDFPSVVVVGLGK                             | 0.851139929        | 2              | 4.902935028 |
| Q68FS4        | TIQVDNTDAEGR                                    | 1.069723665        | 2              | 4.194920063 |
| Q68FS4        | TLIEFLLR                                        | 1.141987167        | 2              | 2.696519136 |

|               |                                                                                       |                    |                |             |
|---------------|---------------------------------------------------------------------------------------|--------------------|----------------|-------------|
| Q68FS4        | GSEPPVFLEIHYTGSPNATEAPLVFVGK                                                          | 0.814835208        | 3              | 5.98961401  |
| Q68FS4        | WAHLDIAGVMTNKDEIPLYR                                                                  | 1.054511149        | 3              | 3.456581354 |
| <b>Q68FT1</b> | <b>COQ9 Ubiquinone biosynthesis protein COQ9_mitochondrial</b>                        | <b>1.213563718</b> | <b>0.03939</b> | <b>3</b>    |
| Q68FT1        | INDAMNMGHTAK+Oxidation(5)Oxidation(7)                                                 | 1.558862119        | 2              | 2.795644522 |
| Q68FT1        | LNHVLEEEQK                                                                            | 1.229070806        | 3              | 3.335385799 |
| Q68FT1        | YTDQSGEEEEDEYEESEQIHR                                                                 | 1.108974862        | 3              | 4.67617321  |
| <b>Q68FT3</b> | <b>PYRD2 Pyridine nucleotide_disulfide oxidoreductase domain_containing protein 2</b> | <b>1.014602123</b> | <b>1</b>       | <b>7</b>    |
| Q68FT3        | HVIGGAAVTEIIPGFK                                                                      | 1.106225303        | 2              | 3.651364803 |
| Q68FT3        | ISQLDTQSPVK                                                                           | 1.052415905        | 2              | 3.548380375 |
| Q68FT3        | SLLLGTDAENQK                                                                          | 0.912889594        | 2              | 2.883433819 |
| Q68FT3        | TLGAQLPQYYEVLTAPIK                                                                    | 1.011752229        | 2              | 4.771354675 |
| Q68FT3        | VFDCIEAYPGFK                                                                          | 0.872022782        | 2              | 2.332330942 |
| Q68FT3        | VLDQWFSEPLK                                                                           | 0.920426596        | 2              | 3.202563286 |
| Q68FT3        | VQGVVLQGGEEVR                                                                         | 0.979822429        | 2              | 3.370826483 |
| <b>Q68FT5</b> | <b>BHMT2 Betaine__homocysteine S_methyltransferase 2</b>                              | <b>1.098927391</b> | <b>0.00059</b> | <b>11</b>   |
| Q68FT5        | AGADVLQFTFSAADR                                                                       | 0.949745974        | 2              | 3.843240023 |
| Q68FT5        | AGANIIGVNCR                                                                           | 1.183485257        | 2              | 3.220835209 |
| Q68FT5        | AIAEELAPER                                                                            | 1.149349248        | 2              | 3.816420555 |
| Q68FT5        | EVGAPVAVTMCIGPEGDMHGVTPGEC AVR                                                        | 1.346039888        | 2              | 3.899584293 |
| Q68FT5        | FGPWTSLQTMK                                                                           | 0.930049882        | 2              | 3.088423729 |
| Q68FT5        | GGFVDLPEYFPGLEPR                                                                      | 1.182522164        | 2              | 4.072601795 |
| Q68FT5        | LDSGEVVVDGGFLFLEK                                                                     | 1.086451315        | 2              | 5.360916615 |
| Q68FT5        | YIGCCGFEPYHIR                                                                         | 2.262760251        | 2              | 4.624770641 |
| Q68FT5        | AGLWTPEAVVEYPSAVR                                                                     | 0.904721872        | 3              | 3.752787828 |
| Q68FT5        | DAGLQAHLMVQCLGFHTPCGK                                                                 | 1.121551862        | 3              | 4.681605339 |
| Q68FT5        | REYWETLLPASGRPFCSLSPDA                                                                | 1.636826566        | 3              | 3.472177029 |
| <b>Q68FT9</b> | <b>SCLY Selenocysteine lyase</b>                                                      | <b>1.311010462</b> | <b>0.10785</b> | <b>5</b>    |
| Q68FT9        | AEVDLIVQDLK                                                                           | 0.952902575        | 2              | 3.723337412 |
| Q68FT9        | CFHEQQLQGR                                                                            | 1.377389686        | 2              | 2.759497166 |
| Q68FT9        | VLVHTDAAQALGK                                                                         | 0.961829836        | 2              | 3.036961079 |
| Q68FT9        | RVDVEDLGVDFLTIVGHK                                                                    | 1.361870482        | 3              | 5.925532341 |
| Q68FT9        | TVDQISPEEGTRPHFITCTVEHDSIR                                                            | 1.200299478        | 3              | 3.613837719 |
| <b>Q68FU3</b> | <b>ETFB Electron transfer flavoprotein subunit beta</b>                               | <b>1.029627513</b> | <b>9.8E-07</b> | <b>12</b>   |
| Q68FU3        | AGDLGVDLTSK                                                                           | 1.067392239        | 2              | 3.727008104 |
| Q68FU3        | EIIAVSCGPPQCQETIR                                                                     | 0.863534442        | 2              | 4.861820698 |
| Q68FU3        | GIHVEVPGAEENLGPLQVAR                                                                  | 1.343150347        | 2              | 5.739820004 |
| Q68FU3        | HSMNPFCEIAVEEAVR                                                                      | 1.017771867        | 2              | 5.694419384 |
| Q68FU3        | HSMNPFCEIAVEEAVR+Oxidation(3)                                                         | 1.268233084        | 2              | 4.289790154 |
| Q68FU3        | RVIDFAVK                                                                              | 1.203000844        | 2              | 2.382764339 |
| Q68FU3        | SGVVTGDKV                                                                             | 0.955560739        | 2              | 2.888639688 |
| Q68FU3        | VDLLFLGK                                                                              | 0.923912091        | 2              | 2.982012272 |

|               |                                                                    |                    |                |             |
|---------------|--------------------------------------------------------------------|--------------------|----------------|-------------|
| Q68FU3        | VETTEDLVAK                                                         | 1.009836749        | 2              | 3.335743427 |
| Q68FU3        | VIDFAVK                                                            | 1.037370257        | 2              | 2.353140593 |
| Q68FU3        | QAIDDDCNQTGQMTAGLLDWPQGTAFASQVTLEGDKVK                             | 0.940622192        | 3              | 6.307808399 |
| Q68FU3        | VSVISVEEPPQR                                                       | 1.114454677        | 3              | 3.412222862 |
| <b>Q68FY0</b> | <b>QCR1 Cytochrome b_c1 complex subunit 1_mitochondrial</b>        | <b>1.022687141</b> | <b>0.99751</b> | <b>9</b>    |
| Q68FY0        | IEEVDAQMVR                                                         | 0.974776535        | 2              | 3.687473059 |
| Q68FY0        | LCTSATESEVTR                                                       | 1.148744638        | 2              | 3.173052788 |
| Q68FY0        | NALISHLDGTTTPCEDIGR                                                | 1.136431379        | 2              | 4.70270586  |
| Q68FY0        | NNGAGYFLEHLAFK                                                     | 1.138605224        | 2              | 3.425251722 |
| Q68FY0        | RIPLAEWESR                                                         | 1.137973505        | 2              | 2.780925751 |
| Q68FY0        | TDLTDYLSR                                                          | 1.088327136        | 2              | 2.665097713 |
| Q68FY0        | YFYDQCPAVAGYGPIEQLSDYNR                                            | 1.038167009        | 2              | 5.116642952 |
| Q68FY0        | HQQLDLAQDHFSSVSQVYEEDAVPSITPCR                                     | 0.928394999        | 3              | 5.880926609 |
| Q68FY0        | VVELLADIVQNISLEDSQIEK                                              | 0.991780363        | 3              | 5.734788895 |
| <b>Q68G31</b> | <b>PBLD Phenazine biosynthesis_like domain_containing protein</b>  | <b>1.281055487</b> | <b>0.99968</b> | <b>7</b>    |
| Q68G31        | AAIGDTTVQDIQYSPDTR                                                 | 1.054122798        | 2              | 4.68219614  |
| Q68G31        | GESGGQTPPYDFYSR                                                    | 1.237868892        | 2              | 4.278223038 |
| Q68G31        | LQPTDSFSQSSCFGLR                                                   | 1.021056011        | 2              | 3.488534451 |
| Q68G31        | NVNSTLTFVTLGELK                                                    | 1.008254343        | 2              | 3.790798426 |
| Q68G31        | VNTEPLPGIEK                                                        | 1.036379693        | 2              | 3.031413078 |
| Q68G31        | AEDGIVLDFPLYPTFPQDFHEVK                                            | 0.962836195        | 3              | 3.697976828 |
| Q68G31        | RAEDGIVLDFPLYPTFPQDFHEVK                                           | 1.175510229        | 3              | 5.739984512 |
| <b>Q69Z23</b> | <b>DYH17 Dynein heavy chain 17_axonemal</b>                        | <b>1.513245314</b> | <b>0.01123</b> | <b>2</b>    |
| Q69Z23        | YFIDLLMEK                                                          | 1.710789932        | 1              | 2.153031588 |
| Q69Z23        | GDPTRAEDQVLMRALR                                                   | 0.675487609        | 2              | 2.332085133 |
| <b>Q6A0A9</b> | <b>F120A Constitutive coactivator of PPAR_gamma_like protein 1</b> | <b>1.154648473</b> | <b>0.04741</b> | <b>2</b>    |
| Q6A0A9        | SQGGVQPIPSQGK                                                      | 1.094680392        | 2              | 3.141606808 |
| Q6A0A9        | VEGSSTASSGSQLAEGK                                                  | 1.156024443        | 2              | 4.299808979 |
| <b>Q6AXM8</b> | <b>PON2 Serum paraoxonase/arylesterase 2</b>                       | <b>1.330554787</b> | <b>7.1E-06</b> | <b>4</b>    |
| Q6AXM8        | FQEEENSLHLK                                                        | 1.312031933        | 2              | 3.43415761  |
| Q6AXM8        | LFVYDPNHPPSSEVLR                                                   | 1.132908018        | 2              | 2.501709223 |
| Q6AXM8        | LVAEGFDSANGINISPDKK                                                | 1.3335177          | 2              | 3.657101393 |
| Q6AXM8        | VLQLGTLVDNLSIDPSSGDIWVGCHPNGQK                                     | 1.013134747        | 3              | 4.429273129 |
| <b>Q6AXS5</b> | <b>PAIRB Plasminogen activator inhibitor 1 RNA_binding protein</b> | <b>1.025541842</b> | <b>0.84292</b> | <b>3</b>    |
| Q6AXS5        | EETQPPVALKK                                                        | 0.835803531        | 2              | 2.742065907 |
| Q6AXS5        | FDQLFDESPPFEVLK                                                    | 0.945287281        | 2              | 5.205064774 |
| Q6AXS5        | SAAQAAAQTNNAAGK                                                    | 1.025658281        | 2              | 5.098505497 |
| <b>Q6AXY0</b> | <b>GSTA6 Glutathione S_transferase A6</b>                          | <b>0.944020686</b> | <b>0.89251</b> | <b>2</b>    |
| Q6AXY0        | YFPAFEK                                                            | 1.09367481         | 1              | 1.911069512 |
| Q6AXY0        | FLQPGSQR                                                           | 0.919118237        | 2              | 2.512714624 |
| <b>Q6AY09</b> | <b>HNRH2 Heterogeneous nuclear ribonucleoprotein H2</b>            | <b>0.923043635</b> | <b>0.9426</b>  | <b>5</b>    |

|               |                                                               |                    |                |             |
|---------------|---------------------------------------------------------------|--------------------|----------------|-------------|
| Q6AY09        | ATENDIYNFFSPLNPMR                                             | 0.877346728        | 2              | 4.018090725 |
| Q6AY09        | GLPWSCSAEEVMR                                                 | 0.884807221        | 2              | 3.10272646  |
| Q6AY09        | HTGPNSPDTANDGFVR                                              | 0.915869129        | 2              | 4.194076061 |
| Q6AY09        | STGEAFVQFASQEIAEK                                             | 1.000178699        | 2              | 4.290854931 |
| Q6AY09        | STGEAFVQFASQEIAEKALKK                                         | 1.018295514        | 2              | 2.546010494 |
| <b>Q6AY20</b> | <b>MPRD Cation_dependent mannose_6_phosphate receptor</b>     | <b>0.969832733</b> | <b>0.75924</b> | <b>2</b>    |
| Q6AY20        | HTLAGNFNPVSEER                                                | 0.957691485        | 2              | 4.300218105 |
| Q6AY20        | SCDLVGEKDKESK                                                 | 1.200484519        | 2              | 3.720636606 |
| <b>Q6AY30</b> | <b>SCPDH Probable saccharopine dehydrogenase</b>              | <b>1.013906259</b> | <b>0.49908</b> | <b>6</b>    |
| Q6AY30        | LQQVLEK                                                       | 1.317522817        | 1              | 2.067964554 |
| Q6AY30        | ATLVLNCVGPYR                                                  | 0.981399904        | 2              | 2.56127286  |
| Q6AY30        | GGGVFTPGAAFSR                                                 | 1.005438303        | 2              | 2.364259958 |
| Q6AY30        | GVYIIGSSGFDSIPADLGLVLYTR                                      | 1.111315092        | 2              | 3.253741741 |
| Q6AY30        | SVSNLKPVPVIGSK                                                | 1.078119821        | 2              | 3.613881111 |
| Q6AY30        | ACIENGTSCIDICGEPQFLELMHVK                                     | 1.175265868        | 3              | 5.312945366 |
| <b>Q6AY56</b> | <b>TBA8 Tubulin alpha_8 chain</b>                             | <b>1.136941098</b> | <b>2.9E-11</b> | <b>9</b>    |
| Q6AY56        | EDAANNYAR                                                     | 1.058889246        | 1              | 2.073451042 |
| Q6AY56        | AFVHWYVYVGEEMEEGFSEAR                                         | 1.07619074         | 2              | 4.602024555 |
| Q6AY56        | AVCMLSNTTAAIEAWAR                                             | 1.023365702        | 2              | 4.625179291 |
| Q6AY56        | FDGALNVDLTEFQTNLVPYPR                                         | 1.290463184        | 2              | 5.410570145 |
| Q6AY56        | LISQVSSITASLR                                                 | 1.737487384        | 2              | 3.6666224   |
| Q6AY56        | NLDIERPTYTNLNR                                                | 1.131864           | 2              | 3.58130765  |
| Q6AY56        | QLFHPEQLITGK                                                  | 1.085514725        | 2              | 2.851508379 |
| Q6AY56        | TIQFVDWCPTGFK                                                 | 0.981926736        | 2              | 3.881794214 |
| Q6AY56        | VGINYQPPTVPPGGDLAK                                            | 1.161291517        | 2              | 4.843519688 |
| <b>Q6AY80</b> | <b>NQO2 Ribosyldihyronicotinamide dehydrogenase [quinone]</b> | <b>0.906658569</b> | <b>0.98347</b> | <b>2</b>    |
| Q6AY80        | NDVTGALSNEVFK                                                 | 0.977912314        | 2              | 3.415158272 |
| Q6AY80        | VLAPQISFGPEVSSEEQR                                            | 0.893616257        | 2              | 3.378974915 |
| <b>Q6AYH5</b> | <b>DCTN2 Dynactin subunit 2</b>                               | <b>0.923836586</b> | <b>0.38907</b> | <b>3</b>    |
| Q6AYH5        | ASVEDADTQNK                                                   | 0.876374151        | 2              | 3.222342014 |
| Q6AYH5        | LLGPDAAINLADPDGALAK                                           | 1.676652035        | 2              | 2.925565958 |
| Q6AYH5        | WSPVASTLPELVQR                                                | 1.368981471        | 2              | 2.570433378 |
| <b>Q6AYQ8</b> | <b>FAHD1 Acylpyruvase FAHD1_mitochondrial</b>                 | <b>0.904620908</b> | <b>0.56289</b> | <b>3</b>    |
| Q6AYQ8        | IITLEEGDLITGTPK                                               | 0.837570939        | 2              | 4.398078918 |
| Q6AYQ8        | SFTSSCPVSAFVPK                                                | 0.971638447        | 2              | 4.085939884 |
| Q6AYQ8        | NLHHEVELGVLLGR                                                | 1.026947178        | 3              | 4.438677311 |
| <b>Q6AYR8</b> | <b>SCRN2 Secernin_2</b>                                       | <b>1.04442928</b>  | <b>0.99975</b> | <b>3</b>    |
| Q6AYR8        | GHQAALGLMDEQEQAQLR                                            | 1.005211983        | 2              | 3.872862577 |
| Q6AYR8        | QEQQSLEQEGLEALR                                               | 1.092151387        | 2              | 4.02417469  |
| Q6AYR8        | TTASMVSVLPQDPTKPCVHFLTATPDPSR                                 | 1.008058041        | 3              | 3.571760416 |
| <b>Q6AYS7</b> | <b>ACY1A Aminoacylase_1A</b>                                  | <b>1.033531988</b> | <b>0.01342</b> | <b>2</b>    |
| Q6AYS7        | EMNLTLEPEIFPAATDSR                                            | 0.989283596        | 2              | 3.459307194 |

|               |                                                             |                    |                |             |
|---------------|-------------------------------------------------------------|--------------------|----------------|-------------|
| Q6AYS7        | ICTVQPNPDYGSVAVTFLEER                                       | 2.324416105        | 2              | 4.425976276 |
| <b>Q6AYS8</b> | <b>DHB11 Estradiol 17_beta_dehydrogenase 11</b>             | <b>0.849690697</b> | <b>0.9779</b>  | <b>3</b>    |
| Q6AYS8        | ALTDELAALGCTGVR                                             | 1.086279546        | 2              | 2.361281395 |
| Q6AYS8        | SVAGEIVLITGAGHGIGR                                          | 0.982580526        | 2              | 4.276732922 |
| Q6AYS8        | NPSTNLGPTLEPEEVVEHLMHGILTQK                                 | 1.059477999        | 3              | 3.6643641   |
| <b>Q6AYT9</b> | <b>ACSM5 Acyl_coenzyme A synthetase ACSM5_mitochondrial</b> | <b>0.851209332</b> | <b>0.83423</b> | <b>3</b>    |
| Q6AYT9        | AFIVLSPAYVSHDPEALTR                                         | 1.125012302        | 2              | 4.691833019 |
| Q6AYT9        | ASPPYDVQIVDEEGNVLPFGK                                       | 0.716959406        | 2              | 3.378476858 |
| Q6AYT9        | NDDVINSSSYR                                                 | 0.938219074        | 2              | 3.305897474 |
| <b>Q6AYZ1</b> | <b>TBA1C Tubulin alpha_1C chain</b>                         | <b>1.151426089</b> | <b>0.00029</b> | <b>6</b>    |
| Q6AYZ1        | AVFVDLEPTVIDEVR                                             | 1.065841498        | 2              | 5.301738739 |
| Q6AYZ1        | DVNAAIATIK                                                  | 1.022765815        | 2              | 3.295983553 |
| Q6AYZ1        | IHFPLATYAPVISA EK                                           | 1.683032309        | 2              | 3.901093006 |
| Q6AYZ1        | TIGGGDDSFNTFFSETGAGK                                        | 1.245889936        | 2              | 5.561451912 |
| Q6AYZ1        | VGINYQPPTVPPGDLAR                                           | 1.228957585        | 2              | 4.75199604  |
| Q6AYZ1        | AYHEQLTVAEITNACFEPANQMVK                                    | 0.860355931        | 3              | 4.255541801 |
| <b>Q6DGG1</b> | <b>ABHEB Abhydrolase domain_containing protein 14B</b>      | <b>0.977939878</b> | <b>1</b>       | <b>7</b>    |
| Q6DGG1        | AVAIDLPLGLGR                                                | 0.964523704        | 2              | 3.478761435 |
| Q6DGG1        | FSSETWQNLGTLHR                                              | 1.020718409        | 2              | 3.571706533 |
| Q6DGG1        | FSVLLHGIR                                                   | 1.172439797        | 2              | 3.01432538  |
| Q6DGG1        | GYVPVAPICTDK                                                | 0.997033543        | 2              | 2.542141914 |
| Q6DGG1        | INAADYAR                                                    | 1.049313927        | 2              | 2.401296616 |
| Q6DGG1        | TPTLIVYGDQDPMGSSSFQHLK                                      | 0.980995534        | 2              | 4.966036797 |
| Q6DGG1        | VLMMEGAGHPCYLDKPEWHTGLLDFLQELA                              | 0.932497432        | 3              | 3.891675234 |
| <b>Q6EDY6</b> | <b>LR16A Leucine_rich repeat_containing protein 16A</b>     | <b>1.056343671</b> | <b>0.99048</b> | <b>2</b>    |
| Q6EDY6        | ELMESIK+Oxidation(3)                                        | 1.054072132        | 1              | 2.192120552 |
| Q6EDY6        | IENYLLR                                                     | 1.058223385        | 2              | 2.503957272 |
| <b>Q6GQT9</b> | <b>NOMO1 Nodal modulator 1</b>                              | <b>1.089854998</b> | <b>0.79014</b> | <b>2</b>    |
| Q6GQT9        | SSIDSEPALVLGPKL                                             | 1.099304897        | 2              | 2.697806358 |
| Q6GQT9        | VQVVVPEAETR                                                 | 1.113181422        | 2              | 2.843816996 |
| <b>Q6I7R3</b> | <b>ISOC1 Isochorismatase domain_containing protein 1</b>    | <b>1.165251624</b> | <b>0.61973</b> | <b>2</b>    |
| Q6I7R3        | GLGSTVQEIDLTGVK                                             | 1.089584954        | 2              | 3.855787992 |
| Q6I7R3        | ILGIPVIITEQYPK                                              | 1.529252426        | 2              | 3.272509575 |
| <b>Q6IE52</b> | <b>MUG2 Murinoglobulin_2</b>                                | <b>1.178256123</b> | <b>0.99999</b> | <b>13</b>   |
| Q6IE52        | NLYPLKELVQDPK                                               | 1.124271794        | 1              | 2.149428606 |
| Q6IE52        | AHFSVMGDILSSAIK                                             | 1.028988151        | 2              | 3.643508673 |
| Q6IE52        | HGIPFFVK                                                    | 1.982168453        | 2              | 2.814110518 |
| Q6IE52        | HTSSWLVT PK                                                 | 1.057378758        | 2              | 2.625513554 |
| Q6IE52        | LPSSEEEESLDINIEGAK                                          | 1.202783561        | 2              | 5.402191162 |
| Q6IE52        | MLIYTILPDGEVIADSVK                                          | 1.057015854        | 2              | 4.316309929 |
| Q6IE52        | MLSGFIPLKPTVK                                               | 1.077824935        | 2              | 2.855487347 |
| Q6IE52        | QLSFSLSAEPIQGPYK                                            | 0.911321956        | 2              | 4.320585728 |

|               |                                                                 |                    |                |             |
|---------------|-----------------------------------------------------------------|--------------------|----------------|-------------|
| Q6IE52        | VKTVPLTCNNPK                                                    | 1.230058406        | 2              | 2.77076292  |
| Q6IE52        | VLIVEPEGIKK                                                     | 1.049373137        | 2              | 2.372513294 |
| Q6IE52        | VTASQSLCGLR                                                     | 1.135784508        | 2              | 2.595253229 |
| Q6IE52        | YMVLVPSQLYTETPEK                                                | 0.973874396        | 2              | 4.060165405 |
| Q6IE52        | VHLSFSPQSLPASQTHMR                                              | 1.08837082         | 3              | 3.559564352 |
| <b>Q6IFW6</b> | <b>K1C10 Keratin_ type I cytoskeletal 10</b>                    | <b>1.013069825</b> | <b>0.90964</b> | <b>2</b>    |
| <b>Q6IFX1</b> | <b>K1C24 Keratin_ type I cytoskeletal 24</b>                    | <b>1.135168843</b> | <b>0.10983</b> | <b>2</b>    |
| Q6IFX1        | LLNDR                                                           | 1.100640582        | 1              | 1.920396566 |
| Q6IFX1        | QEAEKQFNER                                                      | 1.13523106         | 2              | 2.562886238 |
| <b>Q6IG00</b> | <b>K2C4 Keratin_ type II cytoskeletal 4</b>                     | <b>1.103812032</b> | <b>0.44143</b> | <b>3</b>    |
| Q6IG00        | LMQDSVEDFK+Oxidation(2)                                         | 1.172854939        | 1              | 2.075060368 |
| Q6IG00        | NLDLDGIIAEVR                                                    | 0.839570973        | 2              | 3.267659426 |
| Q6IG00        | WNLLQQQTTTTSPR                                                  | 1.001640681        | 2              | 4.362920761 |
| <b>Q6IRK9</b> | <b>PGCP Plasma glutamate carboxypeptidase</b>                   | <b>0.955094865</b> | <b>0.99902</b> | <b>4</b>    |
| Q6IRK9        | IVVYNQPYTDYK                                                    | 0.900815539        | 2              | 2.406757832 |
| Q6IRK9        | TYPDTSFNTVAEITGSK                                               | 0.934368519        | 2              | 4.464190006 |
| Q6IRK9        | VGAVASLIR                                                       | 1.113993134        | 2              | 2.455492258 |
| Q6IRK9        | AIQIMYQNLQDGLNVHLEQVR                                           | 0.932267094        | 3              | 5.616140842 |
| <b>Q6MGB5</b> | <b>DHB8 Estradiol 17_beta_dehydrogenase 8</b>                   | <b>1.096795778</b> | <b>0.90629</b> | <b>4</b>    |
| Q6MGB5        | AGVIGLTQTAAR                                                    | 1.144131289        | 2              | 3.02583313  |
| Q6MGB5        | GSIINISSIVGK                                                    | 1.281044711        | 2              | 2.792261124 |
| Q6MGB5        | LAAEGAAVAACDLGAAQDTR                                            | 0.918976384        | 2              | 3.852378845 |
| Q6MGB5        | VGNIGQNTYASSK                                                   | 1.087857512        | 2              | 2.855432749 |
| <b>Q6NSR8</b> | <b>PEPL1 Probable aminopeptidase NPEPL1</b>                     | <b>1.039364058</b> | <b>0.12454</b> | <b>2</b>    |
| Q6NSR8        | TVEINNTDAEGR                                                    | 1.038081797        | 2              | 3.024205446 |
| Q6NSR8        | HNSPSAAHFTR                                                     | 1.181917706        | 3              | 4.136219025 |
| <b>Q6NYB7</b> | <b>RAB1A Ras_related protein Rab_1A</b>                         | <b>0.864394055</b> | <b>0.39254</b> | <b>4</b>    |
| Q6NYB7        | EFADSLGIPFLETSK                                                 | 0.754411471        | 2              | 3.033235073 |
| Q6NYB7        | MGPATAGGAEK                                                     | 0.921611196        | 2              | 3.545272112 |
| Q6NYB7        | MGPATAGGAEK+Oxidation(1)                                        | 1.279225874        | 2              | 2.442881107 |
| Q6NYB7        | NATNVEQSFMTMAAEIK                                               | 0.954225117        | 2              | 4.544320107 |
| <b>Q6NZJ6</b> | <b>IF4G1 Eukaryotic translation initiation factor 4 gamma 1</b> | <b>0.964384734</b> | <b>0.12498</b> | <b>6</b>    |
| Q6NZJ6        | GLPLVDDGGWNTVPISK                                               | 1.126742413        | 2              | 3.385184288 |
| Q6NZJ6        | IHNAENIQPGEQK                                                   | 0.975210294        | 2              | 4.045236111 |
| Q6NZJ6        | KVEYTLGEESEAPGQR                                                | 1.067923567        | 2              | 4.602254868 |
| Q6NZJ6        | LKEELEEAR                                                       | 1.111382671        | 2              | 2.672970533 |
| Q6NZJ6        | GSSGGSGAKPSDTASEATRPATLNR                                       | 1.253834983        | 3              | 3.356858015 |
| Q6NZJ6        | TASTPTPPQTGGSLPQNGESPQVAVIIRPDDR                                | 1.06120978         | 3              | 5.343784332 |
| <b>Q6P0K8</b> | <b>PLAK Junction plakoglobin</b>                                | <b>0.986726646</b> | <b>0.66333</b> | <b>4</b>    |
| Q6P0K8        | LLNDEDPVVTK                                                     | 1.219995386        | 2              | 2.745243311 |
| Q6P0K8        | TMQNTSDLDTAR                                                    | 0.856279374        | 2              | 2.955661774 |
| Q6P0K8        | MEEIVEGCTGALHILAR                                               | 1.314822022        | 3              | 3.30865097  |



|               |                                                                           |                    |                |             |
|---------------|---------------------------------------------------------------------------|--------------------|----------------|-------------|
| Q6P0K8        | NLALCPANHAPLQEAAVIPR                                                      | 0.927260998        | 3              | 3.95562458  |
| <b>Q6P2K6</b> | <b>P4R3A Serine/threonine_protein phosphatase 4 regulatory subunit 3A</b> | <b>1.125662363</b> | <b>0.90997</b> | <b>3</b>    |
| Q6P2K6        | ESEEKEVLLK                                                                | 1.025990097        | 1              | 2.026123047 |
| Q6P2K6        | FKEVIPISDPELK                                                             | 1.133787079        | 1              | 2.01321435  |
| Q6P2K6        | LDSMRSILR                                                                 | 1.107210995        | 1              | 2.024996281 |
| <b>Q6P502</b> | <b>TCPG T_complex protein 1 subunit gamma</b>                             | <b>1.344257359</b> | <b>0.00715</b> | <b>12</b>   |
| Q6P502        | AMTGVEQWPYR                                                               | 1.153538045        | 2              | 2.570135832 |
| Q6P502        | AVAQALEVIPR                                                               | 1.305400193        | 2              | 2.852933645 |
| Q6P502        | DMMLNIINSSITTK                                                            | 0.61994406         | 2              | 2.348280668 |
| Q6P502        | EIQVQHPAAK                                                                | 0.99890527         | 2              | 3.12741065  |
| Q6P502        | IVLLDSSLEYK                                                               | 1.453662618        | 2              | 2.460586786 |
| Q6P502        | KGESQTDIEITR                                                              | 1.155407317        | 2              | 2.902511835 |
| Q6P502        | NLQDAMQVCR                                                                | 1.195539141        | 2              | 3.172851086 |
| Q6P502        | NVLLDPQLVPGGASEMAVAHALTEK                                                 | 1.39508836         | 2              | 4.088465691 |
| Q6P502        | TAVETAVLLLR                                                               | 1.223861124        | 2              | 2.80806303  |
| Q6P502        | TLIQNCGASTIR                                                              | 1.232446496        | 2              | 3.094666481 |
| Q6P502        | WSSLACNIALDAVK                                                            | 1.183604379        | 2              | 3.63206625  |
| Q6P502        | IVSRPEELREDDVGTGAGLLEIK                                                   | 1.770037509        | 3              | 4.28635788  |
| <b>Q6P6M7</b> | <b>SPCS O_phosphoserine_tRNA(Sec) selenium transferase</b>                | <b>0.996388294</b> | <b>0.75405</b> | <b>4</b>    |
| Q6P6M7        | EMFVYLSTQLKK+Oxidation(2)                                                 | 0.456887753        | 2              | 2.957832575 |
| Q6P6M7        | KEMFVYLSTQLKK                                                             | 1.062914851        | 2              | 2.546669006 |
| Q6P6M7        | SGDISAVQPK                                                                | 0.999600144        | 2              | 2.593178034 |
| Q6P6M7        | SMVTAGFEPVVIENVLEGDELRL                                                   | 0.867751188        | 2              | 3.661745071 |
| <b>Q6P6R2</b> | <b>DLDH Dihydrolipoyl dehydrogenase_mitochondrial</b>                     | <b>1.019853738</b> | <b>1.2E-15</b> | <b>10</b>   |
| Q6P6R2        | ALTGGIAHLFK                                                               | 1.309764134        | 2              | 2.356988668 |
| Q6P6R2        | IDVSVEAASGGK                                                              | 1.096217457        | 2              | 3.216104269 |
| Q6P6R2        | NETLGGTCLNVGCIPSK                                                         | 1.104333337        | 2              | 5.259196281 |
| Q6P6R2        | NQVTATTADGSTQVIGTK                                                        | 1.115200155        | 2              | 5.374361515 |
| Q6P6R2        | TNADTDGMVK                                                                | 1.065352794        | 2              | 2.872279882 |
| Q6P6R2        | TNADTDGMVK+Oxidation(8)                                                   | 1.62064465         | 2              | 2.688243866 |
| Q6P6R2        | ILGAHILPGAGEMVNEAALALEYGASCEDVAR                                          | 1.272854453        | 3              | 4.43587923  |
| Q6P6R2        | RPFTQNLGLEELGIELDPK                                                       | 1.091185209        | 3              | 3.740945339 |
| Q6P6R2        | SEEQLKEEGVEFK                                                             | 0.922003901        | 3              | 3.894545078 |
| Q6P6R2        | VCHAHPTLSEAFR                                                             | 1.372280822        | 3              | 3.787272215 |
| <b>Q6P6S9</b> | <b>ENTP5 Ectonucleoside triphosphate diphosphohydrolase 5</b>             | <b>1.047933921</b> | <b>0.57613</b> | <b>4</b>    |
| Q6P6S9        | AQTLLEVEEIFK                                                              | 1.235192093        | 2              | 2.985926151 |
| Q6P6S9        | GQETVGTLDLGGASTQITFLPQLEK                                                 | 0.48825639         | 2              | 4.117293835 |
| Q6P6S9        | QGAETVQELLEVAK                                                            | 0.853883564        | 2              | 3.082659006 |
| Q6P6S9        | TSGQLPFLEGEIFDSVKPGLSAFVDQPK                                              | 1.133081218        | 3              | 4.701375008 |
| <b>Q6P6V0</b> | <b>G6PI Glucose_6_phosphate isomerase</b>                                 | <b>1.131294495</b> | <b>0.00034</b> | <b>9</b>    |
| Q6P6V0        | DVMPEVNVKVLDK+Oxidation(3)                                                | 1.606619687        | 2              | 2.369725704 |
| Q6P6V0        | HFVALSTNTDK                                                               | 1.204152106        | 2              | 3.167718887 |

|               |                                                 |                    |                |             |
|---------------|-------------------------------------------------|--------------------|----------------|-------------|
| Q6P6V0        | ILLANFLAQTEALMK                                 | 1.315975959        | 2              | 3.134547472 |
| Q6P6V0        | TFTTQETITNAETAK                                 | 1.112614503        | 2              | 5.133061409 |
| Q6P6V0        | VFEGNRPTNSIVFTK                                 | 1.271934525        | 2              | 3.255814075 |
| Q6P6V0        | VWFVSNIDGTHIAK                                  | 0.234530719        | 2              | 3.588757753 |
| Q6P6V0        | AITDIINIGIGSDLGPLMVTEALKPYSK                    | 0.939708066        | 3              | 3.808739185 |
| Q6P6V0        | KIEPELDGSSAVTSHDSSTNGLIGFIK                     | 1.129018588        | 3              | 4.835181236 |
| Q6P6V0        | TLANLNPESSLFIIASK                               | 1.224459588        | 3              | 5.021155357 |
| <b>Q6P7Q4</b> | <b>LGUL Lactoylglutathione lyase</b>            | <b>1.104843448</b> | <b>0.79792</b> | <b>5</b>    |
| Q6P7Q4        | FEELGVK                                         | 1.139436137        | 1              | 1.94432199  |
| Q6P7Q4        | DFLLQQTMLR                                      | 0.939504968        | 2              | 3.258581161 |
| Q6P7Q4        | GFGHIGIAVPDVEACK                                | 1.415856057        | 2              | 3.715379715 |
| Q6P7Q4        | GLAFVQDPDGYWIEILNPNK                            | 1.124374566        | 2              | 5.804505348 |
| Q6P7Q4        | VLGLTLLQK                                       | 1.147491873        | 2              | 2.722939968 |
| <b>Q6P7R8</b> | <b>DHB12 Estradiol 17_beta_dehydrogenase 12</b> | <b>1.258632768</b> | <b>0.39557</b> | <b>3</b>    |
| Q6P7R8        | LGEWAVVTGGTDGIGK                                | 1.199757254        | 2              | 4.123653412 |
| Q6P7R8        | LININVSICK                                      | 3.350235871        | 2              | 2.644697905 |
| Q6P7R8        | TIAVDFSLDDIYDK                                  | 0.938807362        | 2              | 2.969437599 |
| <b>Q6P9T8</b> | <b>TBB2C Tubulin beta_2C chain</b>              | <b>1.222096953</b> | <b>1.6E-11</b> | <b>13</b>   |
| Q6P9T8        | AVLVDLEPGTMDSVR                                 | 0.981874603        | 2              | 4.731951714 |
| Q6P9T8        | AVLVDLEPGTMDSVR+Oxidation(11)                   | 1.131931766        | 2              | 2.518610954 |
| Q6P9T8        | EIVHLQAGQCGNQIGAK                               | 0.760685124        | 2              | 5.107461452 |
| Q6P9T8        | EVDEQMLNVQNK                                    | 0.885334775        | 2              | 4.198689461 |
| Q6P9T8        | INVYYNEATGGK                                    | 0.987973849        | 2              | 3.652630568 |
| Q6P9T8        | LHFFMPGFAPLTSR                                  | 2.269687277        | 2              | 2.988349676 |
| Q6P9T8        | MSATFIGNSTAIQELFK                               | 1.424117279        | 2              | 4.366367817 |
| Q6P9T8        | TAVCDIPPR                                       | 0.420488502        | 2              | 2.388725996 |
| Q6P9T8        | YLTVAAVFR                                       | 1.105392387        | 2              | 2.710983992 |
| Q6P9T8        | EAESCDCLQGFQLTHSLGGTGSGMGTLLISK                 | 0.85858937         | 3              | 5.55760622  |
| Q6P9T8        | FWEVISDEHGIDPTGYHGSDLQLER                       | 0.706687901        | 3              | 5.468779564 |
| Q6P9T8        | KEAESCDCLQGFQLTHSLGGTGSGMGTLLISK                | 1.172628298        | 3              | 5.75967741  |
| Q6P9T8        | SGPFGQIFRPDNFVFGQSGAGNNWAK                      | 0.755103876        | 3              | 3.942024469 |
| <b>Q6PA06</b> | <b>ATLA2 Atlantin_2</b>                         | <b>1.220633748</b> | <b>0.36149</b> | <b>4</b>    |
| Q6PA06        | AGLTDQVSHHAR                                    | 1.600310869        | 2              | 3.084488153 |
| Q6PA06        | NLVPLLLAPENLVEK                                 | 1.068778363        | 2              | 2.820347309 |
| Q6PA06        | QNQHEELQNVN                                     | 1.081769651        | 2              | 2.867370129 |
| Q6PA06        | SMLQATAEANNLAAVAGAR                             | 1.335678791        | 2              | 3.217149258 |
| <b>Q6PCM2</b> | <b>INT6 Integrator complex subunit 6</b>        | <b>0.878041426</b> | <b>0.00617</b> | <b>2</b>    |
| Q6PCM2        | MLIEQLENFLDEIHRR+Oxidation(1)                   | 0.614038165        | 2              | 2.508454561 |
| Q6PCM2        | NPFLEPAIIITIDGSK                                | 1.909394316        | 2              | 2.349538326 |
| <b>Q6PDV7</b> | <b>RL10 60S ribosomal protein L10</b>           | <b>1.205396021</b> | <b>0.59134</b> | <b>2</b>    |
| Q6PDV7        | FNADEFEDMVAEK                                   | 1.139603801        | 2              | 3.733217239 |
| Q6PDV7        | FNADEFEDMVAEKR                                  | 1.034612864        | 2              | 2.650208712 |
| <b>Q6PEC1</b> | <b>TBCA Tubulin_specific chaperone A</b>        | <b>1.122804264</b> | <b>0.04554</b> | <b>4</b>    |

|               |                                                                                     |                    |                |             |
|---------------|-------------------------------------------------------------------------------------|--------------------|----------------|-------------|
| Q6PEC1        | AEDGENYAIKK                                                                         | 1.151659101        | 2              | 2.573964596 |
| Q6PEC1        | LEAAYTDLR                                                                           | 0.888863032        | 2              | 2.846982241 |
| Q6PEC1        | RLEAAYTDLR                                                                          | 1.134592868        | 2              | 2.472072601 |
| Q6PEC1        | QILESEKDLLEEAEYKEAR                                                                 | 0.91205896         | 3              | 4.098305702 |
| <b>Q6PEC4</b> | <b>SKP1 S_phase kinase_associated protein 1</b>                                     | <b>1.100911027</b> | <b>0.90198</b> | <b>3</b>    |
| Q6PEC4        | NDFTEEEEAQVR                                                                        | 1.092911531        | 2              | 3.18561244  |
| Q6PEC4        | RTDDIPVWDQEFLK                                                                      | 1.053774531        | 2              | 3.103571177 |
| Q6PEC4        | TDDIPVWDQEFLK                                                                       | 1.335293372        | 2              | 2.709439754 |
| <b>Q6PGB8</b> | <b>SMCA1 Probable global transcription activator SNF2L1</b>                         | <b>1.057292472</b> | <b>0.93534</b> | <b>2</b>    |
| Q6PGB8        | EMDPEYEEKMVNMPLK+Oxidation(13)                                                      | 1.026322528        | 2              | 2.410116673 |
| Q6PGB8        | IKTDVEKSLPPK                                                                        | 1.068055621        | 2              | 2.320291281 |
| <b>Q6Q0N1</b> | <b>CNDP2 Cytosolic non_specific dipeptidase</b>                                     | <b>0.939052392</b> | <b>0.64771</b> | <b>6</b>    |
| Q6Q0N1        | AVFQYIDENQDR                                                                        | 1.317674448        | 2              | 3.251579762 |
| Q6Q0N1        | EGGSIPVTLTFQEATGK                                                                   | 0.959894781        | 2              | 2.753709555 |
| Q6Q0N1        | LGGSVELVDIGK                                                                        | 1.458744569        | 2              | 2.389075279 |
| Q6Q0N1        | LVPDMIPEVSEQVSSYLSK                                                                 | 0.468766488        | 2              | 3.422594786 |
| Q6Q0N1        | MTEAAAADVQR                                                                         | 1.123760931        | 2              | 2.587192774 |
| Q6Q0N1        | TGQEIPVNLNR                                                                         | 1.031378274        | 2              | 2.495492458 |
| <b>Q6RT24</b> | <b>CENPE Centromere_associated protein E</b>                                        | <b>1.082528164</b> | <b>0.90594</b> | <b>2</b>    |
| Q6RT24        | DLLQKVQDEK                                                                          | 1.086858551        | 2              | 2.381723404 |
| Q6RT24        | MELENNMMLQEK                                                                        | 0.997519295        | 2              | 2.403448105 |
| <b>Q6RUV5</b> | <b>RAC1 Ras_related C3 botulinum toxin substrate 1</b>                              | <b>1.130222819</b> | <b>0.19265</b> | <b>2</b>    |
| Q6RUV5        | HHCNPTIILVGTK                                                                       | 1.121175813        | 2              | 3.115976572 |
| Q6RUV5        | LTPITYPQGLAMAK                                                                      | 1.300698181        | 2              | 2.985276699 |
| <b>Q6SKG1</b> | <b>ACSM3 Acyl_coenzyme A synthetase ACSM3_mitochondrial</b>                         | <b>1.225281117</b> | <b>0.83195</b> | <b>2</b>    |
| Q6SKG1        | FDSTSILQTLK                                                                         | 1.190943177        | 2              | 3.143416405 |
| Q6SKG1        | TGTVLIPGTTQLTQK                                                                     | 1.255354296        | 2              | 2.523626089 |
| <b>Q6TUG0</b> | <b>DJB11 DnaJ homolog subfamily B member 11</b>                                     | <b>1.143343649</b> | <b>0.00258</b> | <b>4</b>    |
| Q6TUG0        | FQDLGAAYEVLSDSEK                                                                    | 1.100939028        | 2              | 4.739874363 |
| Q6TUG0        | FQMTQEVCDECPNVK                                                                     | 1.16129433         | 2              | 5.050189495 |
| Q6TUG0        | KGEGLPNFDNNNIK                                                                      | 1.255452773        | 2              | 3.319294214 |
| Q6TUG0        | TLEVEIEPGVR                                                                         | 1.138615069        | 2              | 3.033923626 |
| <b>Q6UPE1</b> | <b>ETFDF Electron transfer flavoprotein_ubiquinone oxidoreductase_mitochondrial</b> | <b>1.055808706</b> | <b>0.42139</b> | <b>17</b>   |
| Q6UPE1        | AAQIGAHTLSGACLDPAAFK                                                                | 1.329952763        | 2              | 4.500598431 |
| Q6UPE1        | ALNEGGLQSIPK                                                                        | 1.060343093        | 2              | 3.480325937 |
| Q6UPE1        | ASCDAQTYGIGLK                                                                       | 0.974877452        | 2              | 3.826020002 |
| Q6UPE1        | FAEEADVIVGAGPAGLSAAIR                                                               | 0.887144411        | 2              | 4.657173634 |
| Q6UPE1        | FCPAGVYEFVPLEQGDGFR                                                                 | 1.376699774        | 2              | 4.884549618 |
| Q6UPE1        | GAPLNTPVTEDR                                                                        | 1.025097824        | 2              | 3.476269007 |
| Q6UPE1        | GIATNDVGIQK                                                                         | 1.039495959        | 2              | 3.5613451   |
| Q6UPE1        | HHPSIRPTLEGGK                                                                       | 0.977537453        | 2              | 2.317771673 |

|               |                                                            |                    |                |             |
|---------------|------------------------------------------------------------|--------------------|----------------|-------------|
| Q6UPE1        | LQINAQNCVHCK                                               | 1.314015747        | 2              | 3.507416487 |
| Q6UPE1        | LTFPGGLLIGCSPGMNVPK                                        | 1.355388004        | 2              | 3.468096972 |
| Q6UPE1        | NLSIYDGPEQR                                                | 0.994874804        | 2              | 2.628942728 |
| Q6UPE1        | QLTSENLOSK                                                 | 0.950402862        | 2              | 2.322185993 |
| Q6UPE1        | SGSLAAEAIFK                                                | 1.118389559        | 2              | 3.291090965 |
| Q6UPE1        | TAGLHVTEYEDNLK                                             | 0.822333175        | 2              | 3.694874525 |
| Q6UPE1        | TCDIKDPSQINWVWVEGGGGPAYNGM                                 | 1.116597869        | 2              | 4.520920753 |
| Q6UPE1        | VDHTVGWPLDR                                                | 1.052351185        | 2              | 2.491892815 |
| Q6UPE1        | VTIFAEGCHGLAK                                              | 1.263005468        | 2              | 3.792708874 |
| <b>Q6URK4</b> | <b>ROA3 Heterogeneous nuclear ribonucleoprotein A3</b>     | <b>1.137080789</b> | <b>0.00661</b> | <b>7</b>    |
| Q6URK4        | EDSVKPGAHLTVK                                              | 1.06538928         | 2              | 3.697330475 |
| Q6URK4        | GFAFVTFDDHDTVDK                                            | 1.061587236        | 2              | 3.847793341 |
| Q6URK4        | IETIEVMEDR                                                 | 1.035237491        | 2              | 3.36210537  |
| Q6URK4        | IFVGGIKEDTEEYNLR                                           | 1.966612062        | 2              | 4.263820648 |
| Q6URK4        | SSGSPYGGGYGSGGGSGGYGSR                                     | 0.830671458        | 2              | 4.6206007   |
| Q6URK4        | WGTLTDCVVMR                                                | 0.987551707        | 2              | 3.020562172 |
| Q6URK4        | YHTINGHNCEVK                                               | 1.289591606        | 2              | 3.574862957 |
| <b>Q6URW6</b> | <b>MYH14 Myosin_14</b>                                     | <b>1.192547277</b> | <b>2.2E-16</b> | <b>4</b>    |
| Q6URW6        | FDQLLAEEK                                                  | 1.005683669        | 1              | 2.019554377 |
| Q6URW6        | EDQSILCTGESGAGK                                            | 1.007571375        | 2              | 4.611320972 |
| Q6URW6        | KFDQLLAEEK                                                 | 1.283844063        | 2              | 3.167654276 |
| Q6URW6        | QLLQANPILEAFGNAK                                           | 1.229941708        | 2              | 4.591949463 |
| <b>Q6XQN1</b> | <b>PNCB Nicotinate phosphoribosyltransferase</b>           | <b>0.956292052</b> | <b>1</b>       | <b>4</b>    |
| Q6XQN1        | GSEVNVIGITNVVTCPK                                          | 0.94649426         | 2              | 3.831031084 |
| Q6XQN1        | LDSGDLQQAQ                                                 | 0.955908522        | 2              | 3.643898964 |
| Q6XQN1        | LYLQQGQPYEPLSLEESR                                         | 1.313820475        | 2              | 5.467859745 |
| Q6XQN1        | QLQNPAVYQValsek                                            | 1.080438029        | 2              | 3.153610706 |
| <b>Q6ZPJ3</b> | <b>UBE2O Ubiquitin_conjugating enzyme E2 O</b>             | <b>1.187849014</b> | <b>0.03435</b> | <b>2</b>    |
| Q6ZPJ3        | FRTTDIVIR                                                  | 0.816280245        | 2              | 2.5243752   |
| Q6ZPJ3        | NCAQGEESMAKKVK                                             | 1.333733932        | 2              | 2.903820515 |
| <b>Q70FJ1</b> | <b>AKAP9 A_kinase anchor protein 9</b>                     | <b>1.211236908</b> | <b>0.43013</b> | <b>2</b>    |
| Q70FJ1        | EDGGQPPPALPSEDLLK                                          | 1.088239775        | 2              | 2.7353127   |
| Q70FJ1        | HEAEITNYKIKLEMLEK+Oxidation(14)                            | 1.331256446        | 2              | 2.517131567 |
| <b>Q711G3</b> | <b>IAH1 Isoamyl acetate_hydrolyzing esterase 1 homolog</b> | <b>1.150929498</b> | <b>0.91428</b> | <b>4</b>    |
| Q711G3        | DCGTDVLDLWTLMQK                                            | 1.282142681        | 2              | 4.218900204 |
| Q711G3        | DVEETKPELSLLGDGDH                                          | 0.981782836        | 2              | 3.641267061 |
| Q711G3        | LNVAVGGEYAK                                                | 1.206197116        | 2              | 2.557029009 |
| Q711G3        | VILITPPPLCEAAWEK                                           | 1.181653096        | 2              | 2.830877781 |
| <b>Q71LX4</b> | <b>TLN2 Talin_2</b>                                        | <b>0.926488476</b> | <b>0.99531</b> | <b>4</b>    |
| Q71LX4        | NCGEMSEIEAK                                                | 1.002113785        | 2              | 2.427862644 |
| Q71LX4        | QEDVIATANLSR                                               | 0.860367837        | 2              | 3.116561174 |
| Q71LX4        | QELTVFQSKDIPEK                                             | 1.075297604        | 2              | 2.325152397 |
| Q71LX4        | QVAASTAQLLVACK                                             | 1.076840898        | 2              | 3.261856556 |

|               |                                                                                               |                    |                |             |
|---------------|-----------------------------------------------------------------------------------------------|--------------------|----------------|-------------|
| <b>Q71TY3</b> | <b>RS27 40S ribosomal protein S27</b>                                                         | <b>1.252648256</b> | <b>3.2E-11</b> | <b>3</b>    |
| Q71TY3        | DLLHPSPEEEK                                                                                   | 0.764413846        | 2              | 2.798995018 |
| Q71TY3        | LTEGCSFR                                                                                      | 1.33742028         | 2              | 2.317952871 |
| Q71TY3        | LVQSPNSYFMDVK                                                                                 | 1.422975824        | 2              | 2.880159855 |
| <b>Q75Q39</b> | <b>TOM70 Mitochondrial import receptor subunit TOM70</b>                                      | <b>1.265838176</b> | <b>0.01354</b> | <b>6</b>    |
| Q75Q39        | GLELISKAIEIDNK                                                                                | 1.426851576        | 2              | 2.332773209 |
| Q75Q39        | NADLSTFYQNR                                                                                   | 1.301727307        | 2              | 2.897637844 |
| Q75Q39        | NREPLMPSPQFIK                                                                                 | 0.99489552         | 2              | 2.320943594 |
| Q75Q39        | SDEDKDKEGEALEVK                                                                               | 1.269981758        | 2              | 3.907357693 |
| Q75Q39        | SYFSSFTDDIISQPMK                                                                              | 0.928882297        | 2              | 2.939303637 |
| Q75Q39        | YEQAICYTEAISLCPTEK                                                                            | 0.960242415        | 2              | 3.671491385 |
| <b>Q76MZ3</b> | <b>2AAA Serine/threonine_protein phosphatase 2A 65 kDa regulatory subunit A alpha isoform</b> | <b>1.218055759</b> | <b>0.00043</b> | <b>7</b>    |
| Q76MZ3        | IGPILDNSTLQSEVKPILEK                                                                          | 1.049762974        | 2              | 4.674767494 |
| Q76MZ3        | LNIISNLDCVNEVIGIR                                                                             | 1.178700272        | 2              | 3.941186428 |
| Q76MZ3        | LTQDQDQDVK                                                                                    | 1.106330227        | 2              | 3.179389954 |
| Q76MZ3        | NLCSDDTPMVR                                                                                   | 1.03112769         | 2              | 2.44692111  |
| Q76MZ3        | AISHEHSPDLEAHFVPLVK                                                                           | 1.277716006        | 3              | 5.721029758 |
| Q76MZ3        | DNTIEHLLPLFLAQLKDECEVR                                                                        | 1.02843252         | 3              | 5.080785751 |
| Q76MZ3        | QLSQSLLPAIVELAEDAK                                                                            | 1.288195934        | 3              | 4.244922638 |
| <b>Q78P75</b> | <b>DYL2 Dynein light chain 2_cytoplasmic</b>                                                  | <b>1.050202967</b> | <b>0.5425</b>  | <b>3</b>    |
| Q78P75        | NADMSQDQDAVDCATQAMEK                                                                          | 0.711228961        | 2              | 5.526954174 |
| Q78P75        | NFGSYVTHETK                                                                                   | 0.95426377         | 2              | 2.499804258 |
| Q78P75        | YNPTWHCIVGR                                                                                   | 1.25534578         | 2              | 2.944176912 |
| <b>Q791V5</b> | <b>MTCH2 Mitochondrial carrier homolog 2</b>                                                  | <b>1.048413871</b> | <b>0.19916</b> | <b>5</b>    |
| Q791V5        | EEGIVGFFAGLIPR                                                                                | 1.124181326        | 2              | 3.325727701 |
| Q791V5        | GLFTGLTPR                                                                                     | 1.037314053        | 2              | 2.571585655 |
| Q791V5        | LCSGVLGTVVHGK                                                                                 | 1.871848702        | 2              | 3.094375849 |
| Q791V5        | VLIQVGYEPLPPTIGR                                                                              | 1.053830335        | 2              | 4.332697392 |
| Q791V5        | YCGLCDISVTIYR                                                                                 | 1.219267604        | 2              | 2.846269608 |
| <b>Q794E4</b> | <b>HNRPF Heterogeneous nuclear ribonucleoprotein F</b>                                        | <b>1.123628988</b> | <b>7.2E-06</b> | <b>3</b>    |
| Q794E4        | ATENDIYNFFSPLNPVR                                                                             | 1.121954717        | 2              | 4.220320225 |
| Q794E4        | HSGPNSADSANDGFVR                                                                              | 1.036323612        | 2              | 3.753245115 |
| Q794E4        | VHIEIGPDGR                                                                                    | 1.135683854        | 2              | 2.955318689 |
| <b>Q7M0E3</b> | <b>DEST Dextrin</b>                                                                           | <b>1.234847013</b> | <b>4E-12</b>   | <b>3</b>    |
| Q7M0E3        | HEYQANGPEDLNR                                                                                 | 1.235313632        | 2              | 4.6347785   |
| Q7M0E3        | HFGVGLPEK                                                                                     | 0.950050161        | 2              | 2.40531826  |
| Q7M0E3        | HFGVGLPEKDRCR                                                                                 | 1.13616345         | 2              | 2.646548748 |
| <b>Q7TMA5</b> | <b>APOB Apolipoprotein B_100</b>                                                              | <b>1.059815116</b> | <b>0.99186</b> | <b>8</b>    |
| Q7TMA5        | GFEPTLEALFGK                                                                                  | 1.058735923        | 2              | 2.363183975 |
| Q7TMA5        | GIISLLEAMK                                                                                    | 0.872799068        | 2              | 2.437071085 |
| Q7TMA5        | IEGNLVFDPSSYLPK                                                                               | 1.06319424         | 2              | 3.419215918 |
| Q7TMA5        | IEIDIPLPLGGK                                                                                  | 0.962764425        | 2              | 2.823627949 |

|               |                                                             |                    |                |             |
|---------------|-------------------------------------------------------------|--------------------|----------------|-------------|
| Q7TMA5        | ITDNDVLIALDSAK                                              | 0.846920853        | 2              | 2.793828487 |
| Q7TMA5        | LSISEQNAQR                                                  | 1.020113239        | 2              | 2.40176177  |
| Q7TMA5        | TILFDTFVNDVAPVEK                                            | 1.129311063        | 2              | 2.722047567 |
| Q7TMA5        | NFVASHIANILNSEELYVQDLK                                      | 0.951018884        | 3              | 3.41705513  |
| <b>Q7TNG8</b> | <b>LDHD Probable D_lactate dehydrogenase_ mitochondrial</b> | <b>1.313145944</b> | <b>0.93413</b> | <b>4</b>    |
| Q7TNG8        | AVVGSPhVSTASAVR                                             | 1.259418577        | 2              | 3.146075726 |
| Q7TNG8        | AYSTDVCPISR                                                 | 1.126056537        | 2              | 3.791149378 |
| Q7TNG8        | GSQGGLSQDFVEALK                                             | 1.182941575        | 2              | 3.08360076  |
| Q7TNG8        | QLLQEEVGPVGVTMR                                             | 1.198621687        | 2              | 3.475400925 |
| <b>Q7TP47</b> | <b>HNRPQ Heterogeneous nuclear ribonucleoprotein Q</b>      | <b>1.290547468</b> | <b>0.40129</b> | <b>3</b>    |
| Q7TP47        | AGPIWDLR                                                    | 1.293558417        | 2              | 2.408130169 |
| Q7TP47        | DLFEDELVPLFEK                                               | 1.386251636        | 2              | 2.788420916 |
| Q7TP47        | NLANTVTEEILEK                                               | 0.928524505        | 2              | 2.810117722 |
| <b>Q7TP48</b> | <b>APMAP Adipocyte plasma membrane_associated protein</b>   | <b>1.559246508</b> | <b>0.01628</b> | <b>4</b>    |
| Q7TP48        | ANPGFSMLDFLSDKPFK                                           | 0.980798722        | 2              | 3.277083397 |
| Q7TP48        | LENGEIETIAR                                                 | 1.103012211        | 2              | 3.23254323  |
| Q7TP48        | LLSSETPIEGK                                                 | 1.72375263         | 2              | 3.056897879 |
| Q7TP48        | LFENQLNGPESIVNIGDVLFTGTADGR                                 | 0.982357286        | 3              | 4.214074612 |
| <b>Q7TP52</b> | <b>CMBL Carboxymethylenebutenolidase homolog</b>            | <b>1.178787349</b> | <b>1E-10</b>   | <b>7</b>    |
| Q7TP52        | NLIEWLNK                                                    | 1.129984806        | 1              | 2.293941498 |
| Q7TP52        | AGVSVYGIIR                                                  | 1.385528196        | 2              | 2.79576993  |
| Q7TP52        | EDCSPADKPYIEEAR                                             | 1.054394661        | 2              | 3.508070946 |
| Q7TP52        | LDYGGMGQEVQVEHIK                                            | 1.101541078        | 2              | 4.555503368 |
| Q7TP52        | LKEHCIVNYQVK                                                | 1.429875829        | 2              | 4.148532867 |
| Q7TP52        | TFSGQTHGFVHR                                                | 1.263506737        | 2              | 3.412432432 |
| Q7TP52        | KREDCSPADKPYIEEAR                                           | 1.066308975        | 3              | 3.780951023 |
| <b>Q7TPB1</b> | <b>TCPD T_complex protein 1 subunit delta</b>               | <b>1.022080828</b> | <b>1.1E-12</b> | <b>7</b>    |
| Q7TPB1        | ALIAGGGAPEIELALR                                            | 1.249011114        | 2              | 3.731241465 |
| Q7TPB1        | AQDIEAGDGTTSVIIAGSLLDSCTK                                   | 0.691212212        | 2              | 4.788865566 |
| Q7TPB1        | GDVTITNDGATILK                                              | 1.001680565        | 2              | 2.894594669 |
| Q7TPB1        | GLEILTDMSRPVQLSDR                                           | 1.183049007        | 2              | 2.506119013 |
| Q7TPB1        | LVIEEAER                                                    | 1.210180865        | 2              | 2.356992006 |
| Q7TPB1        | SIHDALCVIR                                                  | 1.238623684        | 2              | 2.990057945 |
| Q7TPB1        | VIDPATATSVDLR                                               | 1.253017405        | 2              | 4.016985893 |
| <b>Q7TPJ0</b> | <b>SSRA Translocon_associated protein subunit alpha</b>     | <b>1.193553141</b> | <b>0.21731</b> | <b>2</b>    |
| Q7TPJ0        | GEDFPANNIVK                                                 | 1.15504458         | 2              | 2.939582348 |
| Q7TPJ0        | GTEDFIVESLDASFR                                             | 1.056627905        | 2              | 4.090071201 |
| <b>Q7TQ20</b> | <b>DNJC2 Dnaj homolog subfamily C member 2</b>              | <b>1.234215524</b> | <b>0.34278</b> | <b>2</b>    |
| Q7TQ20        | MMEEVEKLCDR+Oxidation(1)                                    | 1.234215524        | 2              | 2.503757238 |
| Q7TQ20        | MMEEVEKLCDR+Oxidation(2)                                    | 1.234215524        | 2              | 2.406287432 |
| <b>Q7TQ94</b> | <b>NIT1 Nitrilase homolog 1</b>                             | <b>1.212458798</b> | <b>0.37597</b> | <b>2</b>    |
| Q7TQ94        | GQDWEQTQK                                                   | 1.307444529        | 2              | 2.381137371 |

|               |                                                                           |                    |                |             |
|---------------|---------------------------------------------------------------------------|--------------------|----------------|-------------|
| Q7TQ94        | NPAETLLLSEPLDGDLLGQYSQLAR                                                 | 1.185682093        | 3              | 3.546572924 |
| <b>Q7TQM4</b> | <b>SOAT2 Sterol O_acyltransferase 2</b>                                   | <b>1.322376038</b> | <b>0.04241</b> | <b>3</b>    |
| Q7TQM4        | AIWEAVQAYPK                                                               | 1.147099949        | 2              | 2.963289976 |
| Q7TQM4        | QDRPLPSTASDSTR                                                            | 1.175673289        | 2              | 3.422183752 |
| Q7TQM4        | TQCLEQAQR                                                                 | 1.523957763        | 2              | 2.952393055 |
| <b>Q7TSI0</b> | <b>ZNF12 Zinc finger protein 12</b>                                       | <b>0.88587572</b>  | <b>0.95115</b> | <b>2</b>    |
| Q7TSI0        | HMSRLMEEDQGGREENQSSSAVFSYR+Oxidation(2)                                   | 0.937761308        | 3              | 3.613743305 |
| Q7TSI0        | HMSRLMEEDQGGREENQSSSAVFSYR+Oxidation(6)                                   | 0.774849117        | 3              | 3.527656555 |
| <b>Q7TSQ1</b> | <b>CL18A C_type lectin domain family 18 member A</b>                      | <b>1.345528633</b> | <b>0.11524</b> | <b>2</b>    |
| Q7TSQ1        | MKCQGGKGGVLAQIESQK                                                        | 1.366003867        | 2              | 2.322629929 |
| Q7TSQ1        | QANDSAGALPVAGKPEPMAR+Oxidation(18)                                        | 1.106539442        | 2              | 2.778123379 |
| <b>Q80SY4</b> | <b>MIB1 E3 ubiquitin_protein ligase MIB1</b>                              | <b>0.9421611</b>   | <b>0.88044</b> | <b>2</b>    |
| Q80SY4        | LDIQDKDGTPLHEALR                                                          | 0.933464957        | 2              | 2.40635705  |
| Q80SY4        | NTLIMGLGTQGAEEK                                                           | 1.046822666        | 2              | 2.505900145 |
| <b>Q80W21</b> | <b>GSTM7 Glutathione S_transferase Mu 7</b>                               | <b>1.129780078</b> | <b>1</b>       | <b>13</b>   |
| Q80W21        | KISDYMK                                                                   | 1.109826416        | 1              | 1.954682946 |
| Q80W21        | CLDAFPNLK                                                                 | 1.092289559        | 2              | 3.112538576 |
| Q80W21        | CLDAFPNLKDFIAR                                                            | 1.110247007        | 2              | 3.249734879 |
| Q80W21        | HNLCGETEEER                                                               | 1.059964586        | 2              | 3.946029425 |
| Q80W21        | IRVDILENQLMDNR                                                            | 1.219977058        | 2              | 2.938523293 |
| Q80W21        | ITQSNAILR                                                                 | 1.396125732        | 2              | 3.077272079 |
| Q80W21        | LFLEYDSSYEK                                                               | 1.239462917        | 2              | 3.995661736 |
| Q80W21        | LKPGYLEQLPGMMR                                                            | 1.389273828        | 2              | 3.294069767 |
| Q80W21        | LYSEFLGK                                                                  | 1.167655878        | 2              | 2.460704565 |
| Q80W21        | VDILENQLMDNR                                                              | 0.921658171        | 2              | 3.505652428 |
| Q80W21        | FKLGLDFPNLPYLIDGSHK                                                       | 1.148508192        | 3              | 4.908658028 |
| Q80W21        | KHNLCGETEEER                                                              | 1.147712962        | 3              | 4.116714478 |
| Q80W21        | LGLDFPNLPYLIDGSHK                                                         | 1.247001653        | 3              | 4.791420937 |
| <b>Q80WE4</b> | <b>KI20B Kinesin_like protein KIF20B</b>                                  | <b>1.145335193</b> | <b>0.24699</b> | <b>2</b>    |
| Q80WE4        | IKDLEVIVETQKDECK                                                          | 1.184984326        | 2              | 2.399355888 |
| Q80WE4        | KEEDCAELKEK                                                               | 0.440736541        | 2              | 2.346516609 |
| <b>Q80WS3</b> | <b>FBLL1 rRNA/trNA 2__O_methyltransferase fibrillar_in_like protein 1</b> | <b>0.897648629</b> | <b>0.20298</b> | <b>2</b>    |
| Q80WS3        | TNIIPVLEDAR                                                               | 0.81365321         | 2              | 2.423078537 |
| Q80WS3        | DHAVVGVYRPPPK                                                             | 0.92973647         | 3              | 3.407886744 |
| <b>Q80X90</b> | <b>FLNB Filamin_B</b>                                                     | <b>1.249959659</b> | <b>0.82977</b> | <b>6</b>    |
| Q80X90        | GAGIGGLGITVEGPSESK                                                        | 1.110701649        | 2              | 3.622593641 |
| Q80X90        | IEYDDQNDGSCDVK                                                            | 0.866693614        | 2              | 4.030610561 |
| Q80X90        | IGNLQTDLSGLR                                                              | 1.252647932        | 2              | 2.66318059  |
| Q80X90        | VDIQTEDLEDGTCK                                                            | 1.03139333         | 2              | 3.975257158 |
| Q80X90        | VGEPGILCVCSEAGPTGLGLEAVSDSGAK                                             | 1.088187263        | 2              | 4.933664799 |
| Q80X90        | VTASGPGLSAYGVASPLVEFAIDAR                                                 | 1.168071459        | 2              | 3.096527815 |
| <b>Q80XB4</b> | <b>NRAP Nebulin_related_anchoring protein</b>                             | <b>1.454270567</b> | <b>0.15748</b> | <b>2</b>    |

|               |                                                                       |                    |                |             |
|---------------|-----------------------------------------------------------------------|--------------------|----------------|-------------|
| Q80XB4        | EAFERMKGQMLGSR+Oxidation(10)                                          | 1.171223179        | 2              | 2.376036406 |
| Q80XB4        | GRSQFHSRADQPGFLQAK                                                    | 1.454947515        | 2              | 2.649783611 |
| <b>Q80XC3</b> | <b>US6NL USP6 N_terminal_like protein</b>                             | <b>1.079518638</b> | <b>0.95798</b> | <b>2</b>    |
| Q80XC3        | HYNHAAANQNSNAISNVRK                                                   | 1.089129216        | 2              | 2.542774916 |
| Q80XC3        | SVDEGSKNLK                                                            | 0.983485952        | 2              | 2.380831003 |
| <b>Q80XI3</b> | <b>IF4G3 Eukaryotic translation initiation factor 4 gamma 3</b>       | <b>1.135326028</b> | <b>0.04761</b> | <b>2</b>    |
| Q80XI3        | EFEKDKADDDVFEK                                                        | 0.511081384        | 2              | 2.600506306 |
| Q80XI3        | NHDEESLECLR                                                           | 1.265539683        | 2              | 3.172860384 |
| <b>Q80Y84</b> | <b>KDM5B Lysine_specific demethylase 5B</b>                           | <b>1.046343794</b> | <b>0.99991</b> | <b>2</b>    |
| Q80Y84        | CDIGLLGLK                                                             | 1.042905974        | 2              | 2.305757046 |
| Q80Y84        | ETAAAMATLGEARLR                                                       | 1.010129804        | 2              | 2.410491228 |
| <b>Q80Z25</b> | <b>OFD1 Oral_facial_digital syndrome 1 protein homolog</b>            | <b>1.057510921</b> | <b>0.62016</b> | <b>3</b>    |
| Q80Z25        | MIEESLK+Oxidation(1)                                                  | 1.060280934        | 1              | 1.9516325   |
| Q80Z25        | ELEQEAERLEK                                                           | 1.306530171        | 2              | 2.559172869 |
| Q80Z25        | RMIEESLK+Oxidation(2)                                                 | 0.957589135        | 2              | 2.386195183 |
| <b>Q80Z29</b> | <b>NAMPT Nicotinamide phosphoribosyltransferase</b>                   | <b>1.364036059</b> | <b>4.5E-09</b> | <b>4</b>    |
| Q80Z29        | STEAPLIIRPDSGNPLDVLK                                                  | 1.078509975        | 2              | 3.877110004 |
| Q80Z29        | VIQGDGVDINTLQEIVEGMK                                                  | 1.385216005        | 2              | 4.487816811 |
| Q80Z29        | YLLETSGNLDGLEEK                                                       | 1.036427476        | 2              | 4.070201874 |
| Q80Z29        | TPAGTFVTLEEGKGDLEEYGHDLHTVFK                                          | 1.450097653        | 5              | 4.654572487 |
| <b>Q811D2</b> | <b>ANR26 Ankyrin repeat domain_containing protein 26</b>              | <b>1.079408728</b> | <b>0.52542</b> | <b>3</b>    |
| Q811D2        | AQEDFDK                                                               | 0.818024358        | 1              | 1.94186604  |
| Q811D2        | SNLEEEARDLK                                                           | 1.419619317        | 1              | 1.924129844 |
| Q811D2        | RSADQLSEKTMEQLR+Oxidation(11)                                         | 1.128939104        | 2              | 2.318179369 |
| <b>Q811L6</b> | <b>MAST4 Microtubule_associated serine/threonine_protein kinase 4</b> | <b>0.513616789</b> | <b>0.20839</b> | <b>2</b>    |
| Q811L6        | FPKATAQMEERLK+Oxidation(8)                                            | 0.791154377        | 2              | 2.338645458 |
| Q811L6        | SGHFENTSALPSPVSGLLK                                                   | 0.502357927        | 2              | 2.398220062 |
| <b>Q811Q2</b> | <b>CLIC6 Chloride intracellular channel protein 6</b>                 | <b>1.199633536</b> | <b>0.30686</b> | <b>2</b>    |
| Q811Q2        | AGSDGESIGNCPFSQR                                                      | 1.214767859        | 2              | 3.728628159 |
| Q811Q2        | FLDGDELTLADCNLLPK                                                     | 0.799322118        | 2              | 2.310149193 |
| <b>Q811X6</b> | <b>CRYL1 Lambda_crystallin homolog</b>                                | <b>1.069080028</b> | <b>0.00963</b> | <b>5</b>    |
| Q811X6        | EMKSLEQSGSLK+Oxidation(2)                                             | 1.008030879        | 1              | 1.967831016 |
| Q811X6        | IVDDQVILSSSSCLLPSK                                                    | 1.34103396         | 2              | 4.541796684 |
| Q811X6        | LVEEGIVSPNDLDLVMSDGLGMR                                               | 1.193734111        | 2              | 3.446676254 |
| Q811X6        | LYDIEQQQITNALESIR                                                     | 1.295503636        | 2              | 4.84074688  |
| Q811X6        | TFGPVPEFSGDTVEK                                                       | 1.064528692        | 2              | 3.023160696 |
| <b>Q8BFZ3</b> | <b>ACTBL Beta_actin_like protein 2</b>                                | <b>1.061527102</b> | <b>9.9E-20</b> | <b>10</b>   |
| Q8BFZ3        | DLTDYLMK                                                              | 0.506369559        | 1              | 2.300020695 |
| Q8BFZ3        | CDVDIRK                                                               | 1.153105492        | 2              | 2.499210596 |
| Q8BFZ3        | HQGVMVGMGQK+Oxidation(8)                                              | 1.071946081        | 2              | 2.82784462  |
| Q8BFZ3        | SYELPDGQVITIGNER                                                      | 0.846122627        | 2              | 5.148619175 |
| Q8BFZ3        | HQGVMVGMGQK                                                           | 1.005630804        | 3              | 3.946663618 |



|               |                                                              |                    |                |             |
|---------------|--------------------------------------------------------------|--------------------|----------------|-------------|
| Q8BFZ3        | HQGVMVGMGQK+Oxidation(5)                                     | 1.085051248        | 3              | 3.874840021 |
| Q8BFZ3        | HQGVMVGMGQK+Oxidation(5)Oxidation(8)                         | 1.354988062        | 3              | 3.585509777 |
| Q8BFZ3        | TTGIVMDSGDGVTHTVPIYEGYALPHAILR                               | 0.995580936        | 3              | 6.918212891 |
| Q8BFZ3        | TTGIVMDSGDGVTHTVPIYEGYALPHAILR+Oxidation(6)                  | 1.011728957        | 3              | 5.718425751 |
| Q8BFZ3        | VAPDEHPILLTEAPLNPK                                           | 1.269159085        | 3              | 3.993017435 |
| <b>Q8BG32</b> | <b>PSD11 26S proteasome non_ATPase regulatory subunit 11</b> | <b>0.988566384</b> | <b>0.9998</b>  | <b>3</b>    |
| Q8BG32        | LYDNLLEQNLIR                                                 | 1.092806333        | 2              | 2.852474928 |
| Q8BG32        | TTANAIYCPPK                                                  | 0.851354161        | 2              | 3.142029762 |
| Q8BG32        | VQIEHISSLIK                                                  | 1.003505625        | 2              | 2.851612329 |
| <b>Q8BGT5</b> | <b>ALAT2 Alanine aminotransferase 2</b>                      | <b>0.852460721</b> | <b>0.5002</b>  | <b>2</b>    |
| Q8BGT5        | LLEETGICVVPGSFGQR                                            | 0.762212751        | 2              | 3.163911819 |
| Q8BGT5        | VLCIINPGNPTGQVQSR                                            | 1.115505531        | 2              | 4.748867512 |
| <b>Q8BGY2</b> | <b>IF5A2 Eukaryotic translation initiation factor 5A_2</b>   | <b>1.199509439</b> | <b>0.0003</b>  | <b>4</b>    |
| Q8BGY2        | EDLKLPEGELGK                                                 | 1.198012728        | 2              | 2.428681374 |
| Q8BGY2        | YEDICPSTHNMDVPNIK                                            | 1.159843835        | 2              | 4.094659805 |
| Q8BGY2        | KYEDICPSTHNMDVPNIK                                           | 1.131414213        | 3              | 4.731079578 |
| Q8BGY2        | VHLVGIDIFTGK                                                 | 1.273325563        | 3              | 3.658273458 |
| <b>Q8BH00</b> | <b>AL8A1 Aldehyde dehydrogenase family 8 member A1</b>       | <b>1.178520217</b> | <b>5.9E-06</b> | <b>9</b>    |
| Q8BH00        | ELNLPFGGMK                                                   | 0.907978369        | 1              | 2.377738714 |
| Q8BH00        | LSLELGK                                                      | 1.118570859        | 1              | 1.911461353 |
| Q8BH00        | ELLMLENFIGGK                                                 | 0.673123636        | 2              | 3.913826942 |
| Q8BH00        | ILCGEGVDQLSLPLR                                              | 1.209903191        | 2              | 4.685049057 |
| Q8BH00        | ITQLSAPHCK                                                   | 1.302323839        | 2              | 3.117837429 |
| Q8BH00        | KLSLELGK                                                     | 1.370360397        | 2              | 2.404917955 |
| Q8BH00        | NPAAIFEDANLEECIPATVR                                         | 1.202899964        | 2              | 4.449766636 |
| Q8BH00        | SSFANQGEICLCTSR                                              | 1.141811578        | 2              | 4.162261963 |
| Q8BH00        | FLPCNSYIDSYDPSTGEVYCK                                        | 1.215443612        | 3              | 5.112445831 |
| <b>Q8BHN3</b> | <b>GANAB Neutral alpha_glucosidase AB</b>                    | <b>0.999114174</b> | <b>0.13388</b> | <b>7</b>    |
| Q8BHN3        | AEKDEPGAWEEETFK                                              | 1.037979989        | 2              | 4.243261814 |
| Q8BHN3        | MLDYLQGSGETPQTDIR                                            | 1.053664285        | 2              | 5.495077133 |
| Q8BHN3        | REPWLLASQYQDAIR                                              | 1.043595426        | 2              | 2.882961035 |
| Q8BHN3        | SGGIERPFLSR                                                  | 1.20169112         | 2              | 2.587230682 |
| Q8BHN3        | VTEGGEPYR                                                    | 0.80673816         | 2              | 2.370399714 |
| Q8BHN3        | VVIMGAGKPAAVVLQTK                                            | 1.109340305        | 3              | 3.32273531  |
| Q8BHN3        | THSDSKPYGPTSVGLDFSLPGMEHVYGIPEHADSLR                         | 1.215148155        | 4              | 5.020823956 |
| <b>Q8BIJ6</b> | <b>SYIM Isoleucyl_tRNA synthetase_mitochondrial</b>          | <b>1.025893221</b> | <b>0.99787</b> | <b>2</b>    |
| Q8BIJ6        | DTVLLPQTSFPMK                                                | 1.031676851        | 1              | 2.15258503  |
| Q8BIJ6        | SCQTALAEILDVLR                                               | 1.049822371        | 3              | 3.820162296 |
| <b>Q8BJ64</b> | <b>CHDH Choline dehydrogenase_mitochondrial</b>              | <b>1.038687811</b> | <b>1</b>       | <b>9</b>    |
| Q8BJ64        | ADSAYHPSTCK                                                  | 1.054270888        | 2              | 3.808933496 |
| Q8BJ64        | AEVQTLVSR                                                    | 1.1503535          | 2              | 2.756081581 |
| Q8BJ64        | ELQPGSHVQSDK                                                 | 0.925111282        | 2              | 3.154007912 |

|               |                                                                   |                    |                |             |
|---------------|-------------------------------------------------------------------|--------------------|----------------|-------------|
| Q8BJ64        | ELQPGSHVQSDKEIDAFVR                                               | 0.932736531        | 2              | 3.969662428 |
| Q8BJ64        | GGDGPLHVSR                                                        | 1.096766097        | 2              | 2.453290939 |
| Q8BJ64        | VIGVENLR                                                          | 1.041638154        | 2              | 2.726027012 |
| Q8BJ64        | VLLLEAGPK                                                         | 1.14071071         | 2              | 2.668742657 |
| Q8BJ64        | TNHPLHQAFQAAR                                                     | 0.957805779        | 3              | 4.560591221 |
| Q8BJ64        | SRPGVPHPDIQFHFLPSQVIDHGR                                          | 0.758773454        | 5              | 5.505509377 |
| <b>Q8BL66</b> | <b>EEA1 Early endosome antigen 1</b>                              | <b>1.29378715</b>  | <b>0.02286</b> | <b>2</b>    |
| Q8BL66        | AAVLDLEK                                                          | 1.294880708        | 1              | 1.983706236 |
| Q8BL66        | IQAGEGETAVLNQLQEK                                                 | 1.27199042         | 2              | 3.320890665 |
| <b>Q8BP47</b> | <b>SYNC Asparaginyl_tRNA synthetase_cytoplasmic</b>               | <b>1.043879357</b> | <b>0.76919</b> | <b>3</b>    |
| Q8BP47        | KEDGTFYFEGDDIPEAPER                                               | 1.196123404        | 2              | 3.954987764 |
| Q8BP47        | LMTDTINEPILLCR                                                    | 1.03934673         | 2              | 3.188336134 |
| Q8BP47        | LTESVDVLPMPNVEIVGGSMR                                             | 1.060277678        | 2              | 2.697900295 |
| <b>Q8BTM8</b> | <b>FLNA Filamin_A</b>                                             | <b>1.07001713</b>  | <b>0.73128</b> | <b>5</b>    |
| Q8BTM8        | AFGPGLQGGNAGSPAR                                                  | 1.26945721         | 2              | 3.074577332 |
| Q8BTM8        | ANLPQSFQVDTSK                                                     | 0.922616316        | 2              | 2.573916912 |
| Q8BTM8        | GAGTGGLGLAVEGPSEAK                                                | 1.038604439        | 2              | 3.530128956 |
| Q8BTM8        | GLVEPVDVVDNADGTQTVNYVPSR                                          | 1.131662609        | 2              | 5.516614437 |
| Q8BTM8        | ALGALVDSCAPGLCPDWDSDASKPVNNAR                                     | 1.121047072        | 3              | 4.895051479 |
| <b>Q8BTZ7</b> | <b>GMPPB Mannose_1_phosphate guanylttransferase beta</b>          | <b>1.102948982</b> | <b>0.00013</b> | <b>2</b>    |
| Q8BTZ7        | IGQNCSIGPNVSLGPGVVVEDGVCIR                                        | 0.942222914        | 2              | 2.741019011 |
| Q8BTZ7        | HHGQEGSILVTK                                                      | 1.348756796        | 3              | 3.570860147 |
| <b>Q8BU33</b> | <b>ILVBL Acetolactate synthase_like protein</b>                   | <b>1.145506305</b> | <b>0.78672</b> | <b>4</b>    |
| Q8BU33        | AAVETLGVPCFLGGMSR                                                 | 0.927650644        | 2              | 3.287715197 |
| Q8BU33        | LPNSLMGR+Oxidation(6)                                             | 1.095254876        | 2              | 2.348659277 |
| Q8BU33        | LTGTVGVAAVTAGPGLTNTVTAVK                                          | 1.396056268        | 2              | 3.158547878 |
| Q8BU33        | NAQVAQSPVLLGGAASTLLQK                                             | 0.889741869        | 2              | 4.930418015 |
| <b>Q8BWQ1</b> | <b>UD2A3 UDP_glucuronosyltransferase 2A3</b>                      | <b>1.124276926</b> | <b>0.8774</b>  | <b>2</b>    |
| Q8BWQ1        | ADIWLIR                                                           | 1.123812861        | 1              | 1.957116008 |
| Q8BWQ1        | IHHDQPVKPLDR                                                      | 1.204734469        | 3              | 3.758649349 |
| <b>Q8BX70</b> | <b>VP13C Vacuolar protein sorting_associated protein 13C</b>      | <b>0.963659152</b> | <b>0.31911</b> | <b>2</b>    |
| Q8BX70        | ENALSELDVPFKVK                                                    | 0.830889255        | 2              | 3.04153204  |
| Q8BX70        | TVLQADSPQHDVEILKPVNMLLCIQR+Oxidation(20)                          | 1.011087037        | 2              | 2.480703354 |
| <b>Q8BZ81</b> | <b>LRRT3 Leucine_rich repeat transmembrane neuronal protein 3</b> | <b>1.090577925</b> | <b>0.86392</b> | <b>2</b>    |
| Q8BZ81        | GLRENTIICASP                                                      | 0.899323897        | 1              | 1.943642139 |
| Q8BZ81        | YPASMKQLQQR+Oxidation(5)                                          | 1.090890988        | 2              | 2.583102226 |
| <b>Q8BZN6</b> | <b>DOC10 Dedicator of cytokinesis protein 10</b>                  | <b>1.009266358</b> | <b>0.58069</b> | <b>2</b>    |
| Q8BZN6        | IIQDSNKVNP                                                        | 0.99445104         | 2              | 2.585124016 |
| Q8BZN6        | LTQMEASALLYFFMRK+Oxidation(14)                                    | 1.191884425        | 2              | 2.382379532 |
| <b>Q8C547</b> | <b>HTR5B HEAT repeat_containing protein 5B</b>                    | <b>1.359639869</b> | <b>0.18527</b> | <b>2</b>    |
| Q8C547        | MVVVIAEDLLR+Oxidation(1)                                          | 1.403732073        | 2              | 2.309351206 |

|               |                                                             |                    |                |             |
|---------------|-------------------------------------------------------------|--------------------|----------------|-------------|
| Q8C547        | SAESQGRSEILMSLQK                                            | 1.213260108        | 2              | 2.330236912 |
| <b>Q8C7R4</b> | <b>UBA6 Ubiquitin_like modifier_activating enzyme 6</b>     | <b>1.047326141</b> | <b>0.99483</b> | <b>2</b>    |
| Q8C7R4        | GMVTVTDPDLIEK+Oxidation(2)                                  | 0.982351175        | 1              | 1.991837859 |
| Q8C7R4        | NFALLGVGTGREK                                               | 1.060941013        | 2              | 2.418986797 |
| <b>Q8C7X2</b> | <b>K0090 Uncharacterized protein KIAA0090</b>               | <b>1.212181359</b> | <b>0.11882</b> | <b>2</b>    |
| Q8C7X2        | FNVEDGEIVQQVR                                               | 1.489877128        | 2              | 4.066555977 |
| Q8C7X2        | VMGDRSVLYK+Oxidation(2)                                     | 0.986244851        | 2              | 2.539273977 |
| <b>Q8CC88</b> | <b>K0564 Uncharacterized protein KIAA0564 homolog</b>       | <b>1.325966157</b> | <b>3E-07</b>   | <b>4</b>    |
| Q8CC88        | FLPSLAQSALEK                                                | 1.007233776        | 2              | 2.512056112 |
| Q8CC88        | HQATGELDDAK                                                 | 1.33802724         | 2              | 3.080752611 |
| Q8CC88        | LQLTDEQLQNR                                                 | 1.031953864        | 2              | 2.387462378 |
| Q8CC88        | VSSDQLSSENLTSAVGQK                                          | 0.885763304        | 2              | 3.705358744 |
| <b>Q8CCF0</b> | <b>PRP31 U4/U6 small nuclear ribonucleoprotein Prp31</b>    | <b>1.119656517</b> | <b>0.86124</b> | <b>2</b>    |
| Q8CCF0        | YFSSMAEFLKVK                                                | 1.119878911        | 1              | 2.052215338 |
| Q8CCF0        | ERLGLTEIR                                                   | 1.110586575        | 2              | 2.479750395 |
| <b>Q8CDI6</b> | <b>CD158 Coiled_coil domain_containing protein 158</b>      | <b>0.89249396</b>  | <b>0.01217</b> | <b>2</b>    |
| Q8CDI6        | EKVANMEVALDK+Oxidation(6)                                   | 1.057762906        | 2              | 2.618868828 |
| Q8CDI6        | ELDDRNMEVQRLEALLK                                           | 0.614038165        | 2              | 2.359146357 |
| <b>Q8CDI7</b> | <b>CC150 Coiled_coil domain_containing protein 150</b>      | <b>1.202783563</b> | <b>0.89962</b> | <b>2</b>    |
| Q8CDI7        | EDNRKLAMSLEQALQTNHLSQK                                      | 99999.89988        | 2              | 2.347748518 |
| Q8CDI7        | MNIFHLQTEKESNPQK+Oxidation(1)                               | 1.202783561        | 2              | 2.589575529 |
| <b>Q8CDM4</b> | <b>CCD73 Coiled_coil domain_containing protein 73</b>       | <b>0.922371791</b> | <b>0.95488</b> | <b>2</b>    |
| Q8CDM4        | MEEESIDLIK                                                  | 0.906187147        | 2              | 2.309832573 |
| Q8CDM4        | VTCQHKMEEESIDLIK                                            | 0.949455022        | 2              | 2.512662411 |
| <b>Q8CFN2</b> | <b>CDC42 Cell division control protein 42 homolog</b>       | <b>1.172909395</b> | <b>0.14631</b> | <b>3</b>    |
| Q8CFN2        | DDPSTIEK                                                    | 1.228197068        | 1              | 2.090017557 |
| Q8CFN2        | YVECSALTQK                                                  | 1.205103207        | 2              | 3.128201485 |
| Q8CFN2        | NVFDEAILAALEPPEPK                                           | 1.172351877        | 3              | 4.855863094 |
| <b>Q8CG45</b> | <b>ARK72 Aflatoxin B1 aldehyde reductase member 2</b>       | <b>1.082859554</b> | <b>0.74964</b> | <b>9</b>    |
| Q8CG45        | EHHFEAIALVEK                                                | 0.861256981        | 2              | 2.937575579 |
| Q8CG45        | FFGNSWSETYR                                                 | 1.27545543         | 2              | 2.62629509  |
| Q8CG45        | FYAYNPLAGLLTGK                                              | 1.434679567        | 2              | 4.113083363 |
| Q8CG45        | MDASASAATVR                                                 | 1.049741667        | 2              | 3.43906188  |
| Q8CG45        | RMDASASAATVR                                                | 1.060516488        | 2              | 2.906724691 |
| Q8CG45        | TTYGTSAPSMTSALR                                             | 1.106142262        | 2              | 3.989971161 |
| Q8CG45        | WMYHHSQLQGTR                                                | 1.379907969        | 2              | 3.13119626  |
| Q8CG45        | AVSGAPLRPGTVLGTMEMGR                                        | 1.15337543         | 3              | 3.49970293  |
| Q8CG45        | VDLFYHLAPDHGTPIVETLQACQQLHQEGK                              | 1.176674042        | 3              | 5.482962608 |
| <b>Q8CG48</b> | <b>SMC2 Structural maintenance of chromosomes protein 2</b> | <b>1.25430377</b>  | <b>0.39582</b> | <b>2</b>    |
| Q8CG48        | EKLLLEK                                                     | 1.320473629        | 1              | 1.982037425 |
| Q8CG48        | KIKALNCEIEELER                                              | 1.210204744        | 2              | 2.40289402  |
| <b>Q8CGC7</b> | <b>SYEP Bifunctional aminoacyl_tRNA synthetase</b>          | <b>1.153866599</b> | <b>1.6E-06</b> | <b>8</b>    |

|               |                                                                   |                    |                |             |
|---------------|-------------------------------------------------------------------|--------------------|----------------|-------------|
| Q8CGC7        | AIQGATSHHLGQNFSK                                                  | 1.296962476        | 2              | 4.540873051 |
| Q8CGC7        | DQDVEPGAPSMGAK                                                    | 0.926400873        | 2              | 2.986260891 |
| Q8CGC7        | GDVSISVEEGKENLLR                                                  | 1.156011129        | 2              | 3.491641283 |
| Q8CGC7        | GSQFGQSCCLR                                                       | 0.989018352        | 2              | 2.796952724 |
| Q8CGC7        | KEENLAEWYSQVITK                                                   | 0.90560529         | 2              | 3.838823795 |
| Q8CGC7        | SLCIPFNPLCELQPGAMCVC GK                                           | 1.418361248        | 2              | 4.330032825 |
| Q8CGC7        | SQSGSLSSGGAGEGQGPK                                                | 1.15392563         | 2              | 4.680173397 |
| Q8CGC7        | TELAEP AI RPTSETVMYPAYAK                                          | 0.732218862        | 2              | 3.193164825 |
| <b>Q8CGN4</b> | <b>BCOR BCL_6 corepressor</b>                                     | <b>1.305960525</b> | <b>0.30005</b> | <b>2</b>    |
| Q8CGN4        | FLTDYLNDLQGR                                                      | 1.42219392         | 1              | 2.167698622 |
| Q8CGN4        | KQTQP SCTPASRLPAK                                                 | 1.143697133        | 2              | 2.32960701  |
| <b>Q8CHB8</b> | <b>TTL5 Tubulin polyglutamylase TTL5</b>                          | <b>1.020304194</b> | <b>0.07558</b> | <b>2</b>    |
| Q8CHB8        | ASSNLQHSLRMVLP SR+Oxidation(11)                                   | 1.229892188        | 2              | 2.621778011 |
| Q8CHB8        | ISSATTGGQKPNTLPQK                                                 | 1.007910411        | 2              | 2.328954697 |
| <b>Q8CHM7</b> | <b>HACL1 2_hydroxyacyl_CoA lyase 1</b>                            | <b>1.059699328</b> | <b>0.00012</b> | <b>7</b>    |
| Q8CHM7        | DTSKPCLINIMIEPQSTR                                                | 0.686362398        | 2              | 3.215198755 |
| Q8CHM7        | GVPDPNHPNCVGAAR                                                   | 1.192887853        | 2              | 3.441797733 |
| Q8CHM7        | GYFVQTPEELQDSL R                                                  | 1.113916131        | 2              | 3.481383801 |
| Q8CHM7        | LVELCNLPFLPTPMGK                                                  | 1.623161724        | 2              | 4.402967453 |
| Q8CHM7        | NCFIVSEGANTMDIGR                                                  | 1.20477682         | 2              | 4.699247837 |
| Q8CHM7        | NQEAMGAFQEF PQVEACR                                               | 1.100177039        | 2              | 6.068603992 |
| Q8CHM7        | SSYGRPGACYIDVPADLVTLQESTTSIK                                      | 0.702347777        | 3              | 4.66683054  |
| <b>Q8CIB5</b> | <b>FERM2 Fermitin family homolog 2</b>                            | <b>1.096589138</b> | <b>0.35955</b> | <b>2</b>    |
| Q8CIB5        | GCEVTPDVNISGQK                                                    | 1.073695454        | 2              | 2.926573515 |
| Q8CIB5        | TSTILGDITSIPELADYIK                                               | 1.152946469        | 2              | 3.637227058 |
| <b>Q8CIE6</b> | <b>COPA Coatomer subunit alpha</b>                                | <b>1.082307157</b> | <b>0.27827</b> | <b>11</b>   |
| Q8CIE6        | ASNLENSTYDLYTI PK                                                 | 1.107261427        | 2              | 3.157133341 |
| Q8CIE6        | DADSQNPDAPEGK                                                     | 0.816150206        | 2              | 3.849972963 |
| Q8CIE6        | GITGVDLFGTTDAVVK                                                  | 0.981362537        | 2              | 3.815433264 |
| Q8CIE6        | KKNLSPGAVESDVR                                                    | 1.034040247        | 2              | 2.343878031 |
| Q8CIE6        | LLELGPKEVAQQTR                                                    | 1.056013282        | 2              | 2.579835176 |
| Q8CIE6        | QQPLFVSGGDDYK                                                     | 1.17743858         | 2              | 2.396327496 |
| Q8CIE6        | SILLSVPLLVDNK                                                     | 1.111610684        | 2              | 3.048382282 |
| Q8CIE6        | SSGLTAVVVAR                                                       | 1.46300234         | 2              | 2.664338112 |
| Q8CIE6        | TLDLPIYVTR                                                        | 1.051293939        | 2              | 2.400628567 |
| Q8CIE6        | GTSPTQIWCNNSQLPVDHILAGSFETAMR                                     | 1.140673596        | 3              | 3.891744137 |
| Q8CIE6        | GVNWAAFHPTMPLIVSGADDR                                             | 1.108582313        | 3              | 3.653582096 |
| <b>Q8CJF7</b> | <b>ELYS Protein ELYS</b>                                          | <b>1.0046196</b>   | <b>0.22754</b> | <b>2</b>    |
| Q8CJF7        | QNSNRVNIEELLK                                                     | 0.99489552         | 2              | 2.661190033 |
| Q8CJF7        | SVENGQSTEILDDLK                                                   | 1.160696572        | 2              | 2.635882616 |
| <b>Q8JZN5</b> | <b>ACAD9 Acyl_CoA dehydrogenase family member 9_mitochondrial</b> | <b>1.040349369</b> | <b>0.6484</b>  | <b>3</b>    |
| Q8JZN5        | GIILVGNEEQK                                                       | 1.074251803        | 2              | 2.717178583 |

|               |                                                                    |                    |                |             |
|---------------|--------------------------------------------------------------------|--------------------|----------------|-------------|
| Q8JZN5        | GSNTCEVHFENTR                                                      | 1.163629096        | 2              | 4.031219959 |
| Q8JZN5        | SGNVTTVMETIGR                                                      | 0.82291626         | 2              | 3.405417204 |
| <b>Q8K009</b> | <b>AL1L2 Mitochondrial 10_formyltetrahydrofolate dehydrogenase</b> | <b>1.209181711</b> | <b>0.22249</b> | <b>16</b>   |
| Q8K009        | KVSLELGK                                                           | 1.40819567         | 1              | 2.130205393 |
| Q8K009        | NLQFEDGK                                                           | 1.22370939         | 1              | 2.044054985 |
| Q8K009        | YFAGWCDK                                                           | 1.217634825        | 1              | 2.091299772 |
| Q8K009        | AGFSVFWADDGLDTGPILLQR                                              | 0.869412163        | 2              | 4.641120911 |
| Q8K009        | AMVEAVQLIADGK                                                      | 1.148026871        | 2              | 3.956334829 |
| Q8K009        | ANNTEYGLASGVFTR                                                    | 1.148422369        | 2              | 4.432839394 |
| Q8K009        | DLGEEALNEYLK                                                       | 1.439477388        | 2              | 3.651471853 |
| Q8K009        | EESFGPIMVISK                                                       | 0.862088897        | 2              | 2.831002951 |
| Q8K009        | FLFPEGIK                                                           | 0.972556774        | 2              | 2.316706657 |
| Q8K009        | FQNGDIDGVLQR                                                       | 1.174491606        | 2              | 2.858817101 |
| Q8K009        | GVINIIPGSGGVAGQR                                                   | 1.16175567         | 2              | 3.81226778  |
| Q8K009        | HGSIIYHPSLLPR                                                      | 1.182238383        | 2              | 4.396770477 |
| Q8K009        | KLGFSTGTSVVGK                                                      | 0.906614249        | 2              | 2.43472743  |
| Q8K009        | SAACLAAGNTLVLPKPAQVPTLTK                                           | 1.205021425        | 2              | 4.036365986 |
| Q8K009        | SCDVKPNDTVDSLNR                                                    | 1.210321537        | 2              | 3.917734146 |
| Q8K009        | VVGFTVPPDKDGK                                                      | 1.271928933        | 2              | 3.325073242 |
| <b>Q8K442</b> | <b>ABC8A ATP_binding cassette sub_family A member 8_A</b>          | <b>1.393206353</b> | <b>0.00041</b> | <b>5</b>    |
| Q8K442        | GQITAILGHSGAGK                                                     | 1.5737335          | 2              | 3.442412138 |
| Q8K442        | LTGVCPQCQNVQFDLTVR                                                 | 1.398347212        | 2              | 3.274153709 |
| Q8K442        | NTQNILVQNLGGQK                                                     | 1.062914851        | 2              | 2.943261862 |
| Q8K442        | STLLNVLSGLCVPTK                                                    | 1.418495548        | 2              | 3.239352465 |
| Q8K442        | IDDFIHSLEQQNIALEVDAFGTR                                            | 1.308457658        | 3              | 4.260466099 |
| <b>Q8K4C0</b> | <b>FMO5 Dimethylaniline monooxygenase [N_oxide_forming] 5</b>      | <b>0.876611613</b> | <b>0.9703</b>  | <b>10</b>   |
| Q8K4C0        | CCLEEGLEPVCFER                                                     | 1.006953503        | 2              | 4.231117249 |
| Q8K4C0        | EYKNPVEFTGK                                                        | 0.811503517        | 2              | 2.373410463 |
| Q8K4C0        | FDHEMFGLPKK                                                        | 0.908853781        | 2              | 3.185684204 |
| Q8K4C0        | GYPIDILLSSR                                                        | 1.160804081        | 2              | 3.058079958 |
| Q8K4C0        | HSALGQHPTINDLPLNR                                                  | 1.021225935        | 2              | 4.504080772 |
| Q8K4C0        | IAVIGSGASGLTCK                                                     | 1.913382367        | 2              | 3.711714029 |
| Q8K4C0        | KLPSQSEMMAEINK                                                     | 0.866318021        | 2              | 4.170432091 |
| Q8K4C0        | KTILTTEDR                                                          | 0.96596677         | 2              | 2.700097561 |
| Q8K4C0        | SDDIGGLWR                                                          | 0.879061683        | 2              | 2.928570032 |
| Q8K4C0        | KQPDFSTSGQWQVVTEHEGK                                               | 1.078745156        | 3              | 4.590936184 |
| <b>Q8K4G6</b> | <b>MACD1 MACRO domain_containing protein 1 (Fragment)</b>          | <b>1.071280387</b> | <b>0.89647</b> | <b>3</b>    |
| Q8K4G6        | AAGSLLTDECR                                                        | 0.925761968        | 2              | 3.069678783 |
| Q8K4G6        | SCYLSLDDLLLEHR                                                     | 1.080904487        | 2              | 3.064972639 |
| Q8K4G6        | HVIHTVGPIAVGQPTASQAAELR                                            | 1.148334124        | 3              | 5.096166611 |
| <b>Q8K4T4</b> | <b>FLIP1 Filamin_A_interacting protein 1</b>                       | <b>1.079233979</b> | <b>0.96269</b> | <b>3</b>    |

|               |                                                                     |                    |                |             |
|---------------|---------------------------------------------------------------------|--------------------|----------------|-------------|
| Q8K4T4        | EVLNLTK                                                             | 1.108543529        | 1              | 2.056444883 |
| Q8K4T4        | IEELETNKSLOK                                                        | 1.046822666        | 2              | 2.409121752 |
| Q8K4T4        | SSIISSDGGKGPSEDAKK                                                  | 1.105573205        | 2              | 2.44810009  |
| <b>Q8K4Z3</b> | <b>AIBP Apolipoprotein A_I_binding protein</b>                      | <b>1.034668321</b> | <b>0.83304</b> | <b>3</b>    |
| Q8K4Z3        | GNPSGIQPDLLISLTAPK                                                  | 1.042066825        | 2              | 3.731160641 |
| Q8K4Z3        | LFGYQPTIYYPK                                                        | 1.625080452        | 2              | 2.39132905  |
| Q8K4Z3        | SPPTVLVICPGNNGDGLVCAR                                               | 1.031225718        | 2              | 5.523769379 |
| <b>Q8K586</b> | <b>RANT GTP_binding nuclear protein Ran_testis_specific isoform</b> | <b>0.915155025</b> | <b>0.98216</b> | <b>4</b>    |
| Q8K586        | FNVWDTAGQEK                                                         | 1.128130998        | 2              | 3.267007828 |
| Q8K586        | LVLVDGGTGK                                                          | 1.218213261        | 2              | 2.375268698 |
| Q8K586        | NLQYYDISAK                                                          | 1.081227073        | 2              | 2.772548199 |
| Q8K586        | VCENIPIVLCGNK                                                       | 0.913117869        | 2              | 4.064858437 |
| <b>Q8QZY1</b> | <b>EIF3L Eukaryotic translation initiation factor 3 subunit L</b>   | <b>0.882910342</b> | <b>0.50212</b> | <b>2</b>    |
| Q8QZY1        | VFSDEVQQAQLSTIR                                                     | 0.828769242        | 2              | 4.1369133   |
| Q8QZY1        | VYEIQDIYENSWTK                                                      | 1.012717791        | 2              | 3.812175512 |
| <b>Q8R081</b> | <b>HNRPL Heterogeneous nuclear ribonucleoprotein L</b>              | <b>1.108152576</b> | <b>0.62783</b> | <b>4</b>    |
| Q8R081        | SDALETLGFLNHYQMK                                                    | 1.178377088        | 2              | 3.645467758 |
| Q8R081        | SSSGLLEWDSK                                                         | 0.936478974        | 2              | 2.736476898 |
| Q8R081        | NDQDTWDYTNPNLSGQDPGSNPNKR                                           | 1.359347292        | 3              | 4.673249245 |
| Q8R081        | TENAGDQHGGGGGGSGAAGGGGGENYDDPHK                                     | 1.127540871        | 3              | 7.076634407 |
| <b>Q8R0F9</b> | <b>S14L4 SEC14_like protein 4</b>                                   | <b>1.107711743</b> | <b>0.81626</b> | <b>5</b>    |
| Q8R0F9        | FDNTYSLHTK                                                          | 1.181050739        | 2              | 3.201810598 |
| Q8R0F9        | GSSHQVENEILFPGCVLR                                                  | 1.084754842        | 2              | 5.200308323 |
| Q8R0F9        | VCEMLLHECELQSQK                                                     | 1.220478862        | 2              | 4.935697079 |
| Q8R0F9        | VGytaevllpdk                                                        | 0.813448471        | 2              | 2.596436262 |
| Q8R0F9        | VGytaevllpdkaceek                                                   | 0.91404926         | 2              | 2.411343336 |
| <b>Q8R164</b> | <b>BPHL Valacyclovir hydrolase</b>                                  | <b>1.016412615</b> | <b>0.91094</b> | <b>3</b>    |
| Q8R164        | FTLVAWDPR                                                           | 1.325522238        | 2              | 2.514173031 |
| Q8R164        | QVSLLGWSDGGITALIAAAK                                                | 1.192589307        | 2              | 3.941599846 |
| Q8R164        | TDFAPQLQSLNK                                                        | 1.014976523        | 2              | 3.803179264 |
| <b>Q8R1V4</b> | <b>TMED4 Transmembrane emp24 domain_containing protein 4</b>        | <b>1.091914882</b> | <b>0.96611</b> | <b>2</b>    |
| Q8R1V4        | CFIEEIPDETMVIGNYR                                                   | 0.974285934        | 2              | 3.580742836 |
| Q8R1V4        | QLLDQVEQIQK                                                         | 1.179192392        | 2              | 3.405798912 |
| <b>Q8R2H4</b> | <b>KLH12 Kelch_like protein 12</b>                                  | <b>0.534262819</b> | <b>0.13396</b> | <b>2</b>    |
| Q8R2H4        | DIMTNTHAKSILNSMNSLR+Oxidation(15)                                   | 0.534262819        | 2              | 2.39592433  |
| Q8R2H4        | DIMTNTHAKSILNSMNSLR+Oxidation(3)                                    | 0.534262819        | 2              | 2.655059099 |
| <b>Q8R3Q6</b> | <b>CCD58 Coiled_coil domain_containing protein 58</b>               | <b>0.931912295</b> | <b>0.54686</b> | <b>2</b>    |
| Q8R3Q6        | IVHELNTTVPTASFAGK                                                   | 0.629142627        | 2              | 3.692912817 |
| Q8R3Q6        | NCIAQTSAVVK                                                         | 0.970239754        | 2              | 3.003870726 |
| <b>Q8R491</b> | <b>EHD3 EH domain_containing protein 3</b>                          | <b>1.123974134</b> | <b>0.7576</b>  | <b>3</b>    |
| Q8R491        | ADQIETQQLMR                                                         | 1.145666797        | 2              | 3.081978321 |

|               |                                                                     |                    |                |             |
|---------------|---------------------------------------------------------------------|--------------------|----------------|-------------|
| Q8R491        | LFEAEEQDLFK                                                         | 0.976069702        | 2              | 3.372247696 |
| Q8R491        | MQDQLQAQDFSK                                                        | 1.161434616        | 2              | 3.641734838 |
| <b>Q8R508</b> | <b>FAT3 Protocadherin Fat 3</b>                                     | <b>1.252916006</b> | <b>0.01417</b> | <b>2</b>    |
| Q8R508        | FFIDPK                                                              | 1.254241492        | 2              | 2.331485271 |
| Q8R508        | QVSYHITGGNPR                                                        | 0.768152491        | 2              | 2.582986593 |
| <b>Q8R5M4</b> | <b>OPTN Optineurin</b>                                              | <b>1.124332681</b> | <b>0.87894</b> | <b>2</b>    |
| Q8R5M4        | NSATPSELNEK                                                         | 1.174403119        | 1              | 2.187112331 |
| Q8R5M4        | LELQVESMRSEIK+Oxidation(8)                                          | 1.066780458        | 2              | 2.41690731  |
| <b>Q8VBU2</b> | <b>NDRG2 Protein NDRG2</b>                                          | <b>0.93483075</b>  | <b>0.73148</b> | <b>3</b>    |
| Q8VBU2        | CPVMLVVGDAQPHEDAVVECNSK                                             | 0.928258313        | 2              | 5.835636616 |
| Q8VBU2        | TLSQSSESGTLPSPGPPGHTMEVSC                                           | 0.713457493        | 2              | 4.723073959 |
| Q8VBU2        | YALNHPDTEGLVLINIDPNAK                                               | 1.01859176         | 2              | 4.637427807 |
| <b>Q8VC12</b> | <b>HUTU Urocanate hydratase</b>                                     | <b>1.355291154</b> | <b>0.60642</b> | <b>6</b>    |
| Q8VC12        | HQLVVGSQLAR                                                         | 1.257893657        | 2              | 2.916214228 |
| Q8VC12        | LLALEFAQELR                                                         | 1.903746155        | 2              | 4.30324173  |
| Q8VC12        | LVITNGMVIPNYSSR                                                     | 1.465332093        | 2              | 3.599220514 |
| Q8VC12        | MMLSWDVSNGVAR                                                       | 1.115851924        | 2              | 2.468038797 |
| Q8VC12        | VAIAVAINQAIASGK                                                     | 1.431430304        | 2              | 2.667102814 |
| Q8VC12        | VFVTSGLGGMSGAAQAK                                                   | 1.314644521        | 2              | 4.463918209 |
| <b>Q8VC28</b> | <b>AK1CD Aldo_keto reductase family 1 member C13</b>                | <b>0.756994983</b> | <b>0.16005</b> | <b>2</b>    |
| Q8VC28        | ILNKPLK                                                             | 1.998435055        | 1              | 2.030481577 |
| Q8VC28        | YKEWVDQNSPVLNDPVLCDVAK                                              | 0.747843904        | 3              | 4.417491436 |
| <b>Q8VCD5</b> | <b>MED17 Mediator of RNA polymerase II transcription subunit 17</b> | <b>1.088880049</b> | <b>0.0517</b>  | <b>2</b>    |
| Q8VCD5        | EIFAQLSREAVQIK                                                      | 0.950749933        | 1              | 2.096586704 |
| Q8VCD5        | MELLSALSPELL+Oxidation(1)Oxidation(5)                               | 1.92544266         | 2              | 2.556518793 |
| <b>Q8VDC1</b> | <b>FYCO1 FYVE and coiled_coil domain_containing protein 1</b>       | <b>1.173691503</b> | <b>0.0969</b>  | <b>3</b>    |
| Q8VDC1        | GLELQVMQLQKEK                                                       | 1.321614737        | 2              | 2.39601469  |
| Q8VDC1        | MEEALASLAQELQDSK                                                    | 1.105573205        | 2              | 2.407505512 |
| Q8VDC1        | MLVSRQGGQLQVEK+Oxidation(1)                                         | 1.139293321        | 2              | 2.350479603 |
| <b>Q8VDD9</b> | <b>PHIP PH_interacting protein</b>                                  | <b>1.29165686</b>  | <b>0.76239</b> | <b>2</b>    |
| Q8VDD9        | EDLLQK                                                              | 0.865144607        | 1              | 1.963890433 |
| Q8VDD9        | MELREQELMKIVGIK                                                     | 1.293953516        | 2              | 2.444310665 |
| <b>Q8VE11</b> | <b>MTMR6 Myotubularin_related protein 6</b>                         | <b>1.050253893</b> | <b>0.73593</b> | <b>2</b>    |
| <b>Q8VED5</b> | <b>K2C79 Keratin_type II cytoskeletal 79</b>                        | <b>0.990921055</b> | <b>0.79293</b> | <b>3</b>    |
| Q8VED5        | YEDEINK                                                             | 1.422677948        | 1              | 2.178145885 |
| Q8VED5        | NKYEDEINK                                                           | 1.015026592        | 2              | 2.381468534 |
| Q8VED5        | NKYEDEINKR                                                          | 0.983642487        | 3              | 3.442986727 |
| <b>Q8VEK3</b> | <b>HNRPU Heterogeneous nuclear ribonucleoprotein U</b>              | <b>1.106029547</b> | <b>5.8E-05</b> | <b>10</b>   |
| Q8VEK3        | GGYSNRGNYNRGGMPNR                                                   | 1.304138943        | 2              | 2.353109837 |
| Q8VEK3        | LLEQYKEESK                                                          | 0.789575586        | 2              | 3.074449301 |
| Q8VEK3        | LLEQYKEESKK                                                         | 1.149182358        | 2              | 3.736121893 |
| Q8VEK3        | NFILDQTNVSAQAQR                                                     | 1.160696572        | 2              | 5.071896076 |

|               |                                                          |                    |                |             |
|---------------|----------------------------------------------------------|--------------------|----------------|-------------|
| Q8VEK3        | TCNCETEDYGEK                                             | 1.376518432        | 2              | 3.351394892 |
| Q8VEK3        | VSELKEELK                                                | 1.193618709        | 2              | 2.657158852 |
| Q8VEK3        | VSELKEELKK                                               | 1.176789082        | 2              | 2.541083097 |
| Q8VEK3        | YNILGTNTIMDK                                             | 1.030628716        | 2              | 3.314326763 |
| Q8VEK3        | EKPYFPIPEDCTFIQNVPLEDR                                   | 1.001365256        | 3              | 4.94856596  |
| Q8VEK3        | LQAALDNEAGGRPAMEPGNGSLDLGGDAAGR                          | 1.13721982         | 3              | 5.04553318  |
| <b>Q8VHE9</b> | <b>RETST All_trans_retinol_13_14_reductase</b>           | <b>0.893094069</b> | <b>0.112</b>   | <b>9</b>    |
| Q8VHE9        | ATVQSVLLDSAGR                                            | 0.875617471        | 2              | 3.010750532 |
| Q8VHE9        | FLPLPLTQLLNK                                             | 1.029395043        | 2              | 2.661053419 |
| Q8VHE9        | GATYGADHDLAR                                             | 0.802039377        | 2              | 3.111813784 |
| Q8VHE9        | NLYSDLQALGSK                                             | 0.785733166        | 2              | 3.701475859 |
| Q8VHE9        | RPPEPLVTDK                                               | 0.888146263        | 2              | 3.01343441  |
| Q8VHE9        | VESVTGGSPLTNQYYLAAHR                                     | 0.428338855        | 2              | 4.077107906 |
| Q8VHE9        | VLVLEQHTK                                                | 0.841591488        | 2              | 2.30949378  |
| Q8VHE9        | VVAHGVSHAILLK                                            | 0.798042843        | 2              | 2.823715925 |
| Q8VHE9        | RPPEPLVTDKEAR                                            | 1.051200117        | 3              | 3.893317938 |
| <b>Q8VHF5</b> | <b>CISY Citrate synthase_mitochondrial</b>               | <b>1.206730531</b> | <b>0.97779</b> | <b>4</b>    |
| Q8VHF5        | ALGVLAQLIWSR                                             | 1.021771134        | 2              | 2.74878788  |
| Q8VHF5        | GLVYETSVLDPDEGIR                                         | 1.088239775        | 2              | 3.507694006 |
| Q8VHF5        | GYSIPECQK                                                | 1.08770465         | 2              | 2.507483244 |
| Q8VHF5        | IVPNILLEQ GK                                             | 1.235910103        | 2              | 2.561623335 |
| <b>Q8VHN7</b> | <b>GPR98 G_protein coupled receptor 98</b>               | <b>1.028314553</b> | <b>0.78837</b> | <b>2</b>    |
| Q8VHN7        | FIVEEPEFNSVR                                             | 0.861705494        | 2              | 2.304203272 |
| Q8VHN7        | ITMVASDAPYGR                                             | 1.063568672        | 2              | 2.640762568 |
| <b>Q8VHT6</b> | <b>AS3MT Arsenite methyltransferase</b>                  | <b>1.134298344</b> | <b>0.06206</b> | <b>2</b>    |
| Q8VHT6        | SLQNVHEEVISR                                             | 1.126368336        | 2              | 3.298285723 |
| Q8VHT6        | TSADLQTNACVTPAK                                          | 1.211923237        | 2              | 3.977719545 |
| <b>Q8VHX6</b> | <b>FLNC Filamin_C</b>                                    | <b>1.113512377</b> | <b>0.50633</b> | <b>2</b>    |
| Q8VHX6        | GAGTGGGLTVEGPCEAK                                        | 1.113889136        | 2              | 3.876795769 |
| Q8VHX6        | IECDDKGDGSCDVR                                           | 0.446958651        | 2              | 3.602124214 |
| <b>Q8VI04</b> | <b>ASGL1 L_asparaginase</b>                              | <b>0.998407926</b> | <b>0.97684</b> | <b>3</b>    |
| Q8VI04        | GLGGLILINK                                               | 1.070747465        | 2              | 2.432905436 |
| Q8VI04        | GNLAYATSTGGIVNK                                          | 0.965138351        | 2              | 4.068856239 |
| Q8VI04        | TVDEAATLALDYMK                                           | 1.076788797        | 2              | 2.609549522 |
| <b>Q8VID1</b> | <b>DHRS4 Dehydrogenase/reductase SDR family member 4</b> | <b>1.056972703</b> | <b>2.8E-05</b> | <b>4</b>    |
| Q8VID1        | AVATLQGEGLSVTGVVCHVGK                                    | 1.331948387        | 2              | 4.57313633  |
| Q8VID1        | LAEDGAHVVISSR                                            | 0.669793517        | 2              | 3.70780015  |
| Q8VID1        | NFAAELAPK                                                | 0.927226839        | 2              | 2.326081514 |
| Q8VID1        | VNCLAPGLIK                                               | 0.663374437        | 2              | 2.489539146 |
| <b>Q8VIF7</b> | <b>SBP1 Selenium_binding protein 1</b>                   | <b>0.750528528</b> | <b>0.03261</b> | <b>10</b>   |
| Q8VIF7        | QYDISNPK                                                 | 0.804097567        | 1              | 1.992500424 |
| Q8VIF7        | CGPGYATPLEAMK                                            | 0.721851316        | 2              | 3.124633312 |



|               |                                                                            |                    |                |             |
|---------------|----------------------------------------------------------------------------|--------------------|----------------|-------------|
| Q8VIF7        | FLHDPDATQGFVGCALSSNIQR                                                     | 0.977437788        | 2              | 4.826551914 |
| Q8VIF7        | GGFVLLDGETFEVK                                                             | 0.867060984        | 2              | 4.277728558 |
| Q8VIF7        | GTWEKPGGEAPMGYDFWYQPR                                                      | 0.783424565        | 2              | 3.900733709 |
| Q8VIF7        | HEIIQTLQMK                                                                 | 0.791343477        | 2              | 2.714158058 |
| Q8VIF7        | HNIMVSTEWAAPNVFK                                                           | 0.740592944        | 2              | 4.73441267  |
| Q8VIF7        | LTGQIFLGGSIK                                                               | 0.900810414        | 2              | 3.471406698 |
| Q8VIF7        | NEGGTWSVEK                                                                 | 0.754765862        | 2              | 2.534460545 |
| Q8VIF7        | NTGIEAPDYLATVDVDPK                                                         | 0.735870915        | 2              | 4.629254818 |
| <b>Q8VIJ6</b> | <b>SFPQ Splicing factor_ proline_ and glutamine_rich</b>                   | <b>1.002758904</b> | <b>0.96939</b> | <b>2</b>    |
| Q8VIJ6        | FGQGGAGPVGQGGPR                                                            | 1.022851991        | 2              | 3.313546658 |
| Q8VIJ6        | YGEPGEVFINK                                                                | 0.941219274        | 2              | 2.328407526 |
| <b>Q91VA0</b> | <b>ACSM1 Acyl_coenzyme A synthetase ACSM1_ mitochondrial</b>               | <b>1.064177083</b> | <b>0.10932</b> | <b>5</b>    |
| Q91VA0        | AFIVLNPEFLSHDQEQLIK                                                        | 1.363486398        | 2              | 5.457888603 |
| Q91VA0        | AILPFDLQIIDEK                                                              | 1.058052694        | 2              | 4.200493813 |
| Q91VA0        | GNILPPNTEGYIGIR                                                            | 0.979566542        | 2              | 3.162102461 |
| Q91VA0        | HNQGLAFR                                                                   | 1.041612401        | 2              | 2.533815622 |
| Q91VA0        | KVEFVSELPK                                                                 | 1.006574534        | 3              | 3.407253265 |
| <b>Q91VM9</b> | <b>IPYR2 Inorganic pyrophosphatase 2_ mitochondrial</b>                    | <b>0.980460209</b> | <b>1</b>       | <b>2</b>    |
| Q91VM9        | IIAINVNDPEAEK                                                              | 1.00156704         | 2              | 2.974803448 |
| Q91VM9        | MEIATEEPLNPIK                                                              | 0.921293691        | 2              | 4.087888241 |
| <b>Q91W43</b> | <b>GCSF Glycine dehydrogenase [decarboxylating]_ mitochondrial</b>         | <b>1.164360836</b> | <b>0.92231</b> | <b>3</b>    |
| Q91W43        | EMLQALGLASIDELIEK                                                          | 0.894375016        | 2              | 2.484267235 |
| Q91W43        | NLLENSGWVTQYTPYQPEVSQGR                                                    | 1.257730009        | 2              | 4.244522095 |
| Q91W43        | VSFQPNPGAQGEYAGLATIR                                                       | 1.196308314        | 2              | 5.061907768 |
| <b>Q91W90</b> | <b>TXND5 Thioredoxin domain_ containing protein 5</b>                      | <b>1.084342398</b> | <b>0.94157</b> | <b>2</b>    |
| Q91W90        | SFEDTIAQGITFVK                                                             | 1.049528619        | 2              | 2.667158365 |
| Q91W90        | VDCTQHAYAVCSEHQVR                                                          | 1.084442645        | 3              | 4.735944748 |
| <b>Q91X77</b> | <b>CY250 Cytochrome P450 2C50</b>                                          | <b>1.152408469</b> | <b>0.24359</b> | <b>4</b>    |
| Q91X77        | NFLEK                                                                      | 1.228280829        | 1              | 2.086547375 |
| Q91X77        | EHEESLDVTIPR                                                               | 0.895796508        | 2              | 2.460468769 |
| Q91X77        | IKEHEESLDVTIPR                                                             | 1.17536802         | 2              | 3.751028299 |
| Q91X77        | YALLLLLK                                                                   | 1.372638356        | 2              | 2.684285879 |
| <b>Q91X78</b> | <b>ERLN1 Erlin_1</b>                                                       | <b>1.428532437</b> | <b>0.00012</b> | <b>2</b>    |
| Q91X78        | ISEIEDAAFLAR                                                               | 1.07372323         | 2              | 2.796798706 |
| Q91X78        | SVQTTLQTDEVK                                                               | 1.480894192        | 2              | 2.931272268 |
| <b>Q91Y81</b> | <b>SEPT2 Septin_2</b>                                                      | <b>1.142758334</b> | <b>0.67632</b> | <b>4</b>    |
| Q91Y81        | ASIPFSVVGSNQLIEAK                                                          | 1.201150193        | 2              | 3.161390305 |
| Q91Y81        | ILDEIEHSIK                                                                 | 0.713396943        | 2              | 2.896253586 |
| Q91Y81        | LTVVDTPGYGDAINSR                                                           | 1.12687825         | 2              | 3.923052788 |
| Q91Y81        | STLINSFLTDLYPER                                                            | 1.155781671        | 2              | 2.758109093 |
| <b>Q91YT0</b> | <b>NDUV1 NADH dehydrogenase [ubiquinone] flavoprotein 1_ mitochondrial</b> | <b>1.001510529</b> | <b>0.99234</b> | <b>8</b>    |

|               |                                                                   |                    |                |             |
|---------------|-------------------------------------------------------------------|--------------------|----------------|-------------|
| Q91YT0        | GAGAYICGEETALIESIEGK                                              | 1.009544593        | 2              | 4.396888733 |
| Q91YT0        | GEFYNEASNQVAIR                                                    | 1.056596692        | 2              | 3.404612064 |
| Q91YT0        | GGAGFPTGLK                                                        | 1.14129073         | 2              | 2.338701248 |
| Q91YT0        | KTSFGSLKDEDR                                                      | 1.209941431        | 2              | 2.848312616 |
| Q91YT0        | LVEGCLVGGR                                                        | 1.001470085        | 2              | 2.796410084 |
| Q91YT0        | YLVVNADEGEPGTCK                                                   | 1.004099172        | 2              | 5.211250782 |
| Q91YT0        | GDARPAEIDSLWEISK                                                  | 1.005916549        | 3              | 3.708158255 |
| Q91YT0        | LKPPFPADVGVFGCPTTVANVETVAVSPTICR                                  | 1.303719493        | 3              | 4.732461929 |
| <b>Q91Z53</b> | <b>GRHPR Glyoxylate reductase/hydroxypyruvate reductase</b>       | <b>1.083596113</b> | <b>0.01058</b> | <b>6</b>    |
| Q91Z53        | LLDAAGANLR                                                        | 1.178419102        | 2              | 2.515960217 |
| Q91Z53        | NCVILPHIGSATYK                                                    | 1.00E+00           | 2              | 3.583428144 |
| Q91Z53        | NTMSLLAANLLAGLR                                                   | 0.915475174        | 2              | 4.772294044 |
| Q91Z53        | RLPEAIEEVK                                                        | 1.097273696        | 2              | 2.784994602 |
| Q91Z53        | VISTLSVGVVDHLALDEIK                                               | 1.580246744        | 2              | 4.130730629 |
| Q91Z53        | GDVVNQEDLYQALASGQIAAAGLDVTTPELPPSHPLTLK                           | 1.172260047        | 3              | 6.913645267 |
| <b>Q91ZJ5</b> | <b>UGPA UTP__glucose_1_phosphate uridylyltransferase</b>          | <b>1.060439006</b> | <b>9.9E-20</b> | <b>16</b>   |
| Q91ZJ5        | EFPTVPLVK                                                         | 1.200994307        | 1              | 2.04294157  |
| Q91ZJ5        | FVQDSLK                                                           | 1.508113461        | 1              | 1.936302423 |
| Q91ZJ5        | GGTLTQYEGK                                                        | 1.34222195         | 2              | 2.670147181 |
| Q91ZJ5        | GLPDNISSVLNK                                                      | 1.170339067        | 2              | 3.306905508 |
| Q91ZJ5        | GTVIIIANHGDR                                                      | 1.279045122        | 2              | 3.097029448 |
| Q91ZJ5        | IDIPPGAVLENK                                                      | 1.330081321        | 2              | 3.029579639 |
| Q91ZJ5        | LNGGLGTSMGCK                                                      | 1.740952554        | 2              | 3.251587868 |
| Q91ZJ5        | LQEQNAIDMEIIVNPK                                                  | 1.052876137        | 2              | 4.192785263 |
| Q91ZJ5        | LVEIAQVPK                                                         | 1.272815289        | 2              | 2.461324692 |
| Q91ZJ5        | NENTFLDLTVQQIEHLNK                                                | 1.51309597         | 2              | 5.086017132 |
| Q91ZJ5        | SFENSLGINVPR                                                      | 1.064537261        | 2              | 3.459330082 |
| Q91ZJ5        | TLDGGLNVIQLETAVGAAIK                                              | 1.239074452        | 2              | 5.411497593 |
| Q91ZJ5        | TYNTDVPLVLMNSFNTDEDTKK                                            | 1.271477228        | 2              | 4.537339687 |
| Q91ZJ5        | AMSQDGASQFQEVILQELELSVK                                           | 1.178725624        | 3              | 4.976561069 |
| Q91ZJ5        | IQRPPEDSIQPYEK                                                    | 1.383689285        | 3              | 4.587617397 |
| Q91ZJ5        | RFESIPDMLELDHLTVSGDVTFGK                                          | 1.109081486        | 3              | 4.566628933 |
| <b>Q91ZU6</b> | <b>DYST Dystonin</b>                                              | <b>1.140756127</b> | <b>0.63908</b> | <b>4</b>    |
| Q91ZU6        | LQVEQNK                                                           | 1.330289853        | 1              | 1.925152898 |
| Q91ZU6        | MMLATEETSPDLIGVKR+Oxidation(1)                                    | 1.107086993        | 2              | 2.51303339  |
| Q91ZU6        | MMLATEETSPDLIGVKR+Oxidation(2)                                    | 1.107086993        | 2              | 2.513103724 |
| Q91ZU6        | SAETNIDQDITNLK                                                    | 1.24999898         | 2              | 2.432936192 |
| <b>Q91ZV0</b> | <b>MIA2 Melanoma inhibitory activity protein 2</b>                | <b>1.38372663</b>  | <b>0.15242</b> | <b>2</b>    |
| Q91ZV0        | CGDLECETLISRVLALR                                                 | 1.481900679        | 2              | 2.469432592 |
| Q91ZV0        | KMLDQDDIVENDK+Oxidation(2)                                        | 1.194856285        | 2              | 2.419124365 |
| <b>Q91ZX7</b> | <b>LRP1 Prolow_density lipoprotein receptor_related protein 1</b> | <b>0.955377778</b> | <b>0.86216</b> | <b>3</b>    |
| Q91ZX7        | GCHVNECLSR                                                        | 0.887991219        | 2              | 2.679976463 |

|               |                                                                                     |                    |                |             |
|---------------|-------------------------------------------------------------------------------------|--------------------|----------------|-------------|
| Q91ZX7        | MYDAQQQVGTNK                                                                        | 0.955503756        | 2              | 4.094335556 |
| Q91ZX7        | VFFTDYQGQPK                                                                         | 1.103812764        | 2              | 2.672917366 |
| <b>Q920A6</b> | <b>RISC Retinoid_inducible serine carboxypeptidase</b>                              | <b>0.939146953</b> | <b>0.42369</b> | <b>2</b>    |
| Q920A6        | DLDTVASDMMVLLK                                                                      | 1.136123254        | 2              | 2.389456749 |
| Q920A6        | GLAEVSDIAEQVLNAVNK                                                                  | 1.111641378        | 3              | 5.861097336 |
| <b>Q920B9</b> | <b>SP16H FACT complex subunit SPT16</b>                                             | <b>1.263591647</b> | <b>0.11396</b> | <b>2</b>    |
| Q920B9        | EMKIYIDK+Oxidation(2)                                                               | 1.238655201        | 1              | 1.911048412 |
| Q920B9        | ICDVYNSVMDVVKK                                                                      | 1.342300752        | 2              | 2.329063177 |
| <b>Q920D2</b> | <b>DYR Dihydrofolate reductase</b>                                                  | <b>1.19386026</b>  | <b>0.00067</b> | <b>4</b>    |
| Q920D2        | LIEQPELASK                                                                          | 1.211878978        | 1              | 2.02802515  |
| Q920D2        | IMQEFESDTFFPEIDLEK                                                                  | 1.344906502        | 2              | 5.029399872 |
| Q920D2        | LLPEYPGVLSEIQEEK                                                                    | 1.398123344        | 2              | 3.776790857 |
| Q920D2        | NGDLPWPLLR                                                                          | 1.163034127        | 2              | 2.825037479 |
| <b>Q920F5</b> | <b>DCMC Malonyl_CoA decarboxylase_mitochondrial</b>                                 | <b>0.992894287</b> | <b>0.06357</b> | <b>3</b>    |
| Q920F5        | EIAEVTGDPVHESLK                                                                     | 1.093975486        | 2              | 2.982332945 |
| Q920F5        | ISECEAVHPVK                                                                         | 0.722373819        | 2              | 3.234783649 |
| Q920F5        | WLLGLLNVQGK                                                                         | 1.566087245        | 2              | 2.366596699 |
| <b>Q920J4</b> | <b>TXNL1 Thioredoxin_like protein 1</b>                                             | <b>1.053854869</b> | <b>0.46984</b> | <b>2</b>    |
| Q920J4        | IDQYQGADAVGLEEK                                                                     | 1.064262507        | 2              | 4.54865551  |
| Q920J4        | AGCECLNESDEHGFNDCLR                                                                 | 1.159015305        | 3              | 3.794691801 |
| <b>Q920L2</b> | <b>DHSA Succinate dehydrogenase [ubiquinone] flavoprotein subunit_mitochondrial</b> | <b>1.084785848</b> | <b>0.98625</b> | <b>20</b>   |
| Q920L2        | ACALSIAESCRPGDK                                                                     | 1.02662989         | 2              | 2.354421616 |
| Q920L2        | ANAGEESVMNLDK                                                                       | 1.009170719        | 2              | 3.65202117  |
| Q920L2        | GEGGILINSQGER                                                                       | 1.116336665        | 2              | 3.502244473 |
| Q920L2        | GVIALCIEDGSIHR                                                                      | 0.977829773        | 2              | 4.024643421 |
| Q920L2        | HTLSYVDTK                                                                           | 1.058301978        | 2              | 2.742524147 |
| Q920L2        | IDEYDYSKPIEGQQK                                                                     | 1.007466581        | 2              | 4.463561535 |
| Q920L2        | KHTLSYVDTK                                                                          | 1.503686687        | 2              | 2.328847647 |
| Q920L2        | LGANSLDLVVFGR                                                                       | 1.568838402        | 2              | 2.361578465 |
| Q920L2        | NTIATGGYGR                                                                          | 0.973628208        | 2              | 2.438231468 |
| Q920L2        | SMQSHAAVFR                                                                          | 1.048340169        | 2              | 2.302069426 |
| Q920L2        | TGHSLHTLYGR                                                                         | 1.281010564        | 2              | 3.006803989 |
| Q920L2        | TLNEADCATVPPAIR                                                                     | 1.039473571        | 2              | 3.936993837 |
| Q920L2        | TYFSCTSHTSTGDGTAMVTR                                                                | 1.225886973        | 2              | 5.820820332 |
| Q920L2        | VGSVLQEGCEK                                                                         | 1.095044047        | 2              | 3.678835869 |
| Q920L2        | VSQLYGDLQHLK                                                                        | 1.175255946        | 2              | 3.481491327 |
| Q920L2        | VTLDYRPVIDK                                                                         | 1.021908352        | 2              | 3.133111715 |
| Q920L2        | ACALSIAESCRPGDKVPIK                                                                 | 1.321467683        | 3              | 3.344251156 |
| Q920L2        | AGLPCQDLEFVQFHPTGIYGAGCLITEGCR                                                      | 0.981287857        | 3              | 4.669754982 |
| Q920L2        | HVNGQDQIVPGLYACGEAACASVHGANK                                                        | 1.15170358         | 3              | 6.509884357 |
| Q920L2        | VSDAISTQYPVVDHEFDVAVVGAGGAGLR                                                       | 0.960377421        | 3              | 4.427851677 |
| <b>Q920P0</b> | <b>DCXR L_xylulose reductase</b>                                                    | <b>1.283483633</b> | <b>0.81959</b> | <b>7</b>    |

|               |                                                                               |                    |                |             |
|---------------|-------------------------------------------------------------------------------|--------------------|----------------|-------------|
| Q920P0        | AVVQVSQIVAR                                                                   | 1.077572551        | 1              | 2.460403442 |
| Q920P0        | SSMTTGSALPVDGGFLAT                                                            | 1.12047455         | 1              | 2.555672646 |
| Q920P0        | ALTNHTVYCSTK                                                                  | 0.600540947        | 2              | 3.549277306 |
| Q920P0        | GVPGAI NVSSQASQR                                                              | 1.063543905        | 2              | 5.619990349 |
| Q920P0        | STVLALQAAGA QVAVSR                                                            | 1.02820691         | 2              | 3.790534973 |
| Q920P0        | TREDLDSLVR                                                                    | 1.133619241        | 2              | 2.938616037 |
| Q920P0        | VNAVNP TVVMTPMGR                                                              | 0.679882326        | 2              | 3.288023233 |
| <b>Q920P6</b> | <b>ADA Adenosine deaminase</b>                                                | <b>2.005609096</b> | <b>0.03104</b> | <b>2</b>    |
| Q920P6        | FKDDQANYSLNSDDPLIFK                                                           | 2.040879778        | 2              | 2.660372734 |
| Q920P6        | TVHAGEVGS AEVVR                                                               | 1.915801231        | 2              | 3.456770897 |
| <b>Q921F2</b> | <b>TADBP TAR DNA_binding protein 43</b>                                       | <b>1.09820979</b>  | <b>0.8173</b>  | <b>4</b>    |
| Q921F2        | FGGNP GGFNGGGFNGSR                                                            | 1.105505562        | 2              | 4.178931713 |
| Q921F2        | GISVHISNAEPK                                                                  | 1.111214601        | 2              | 2.521897316 |
| Q921F2        | KDLKTGHSK                                                                     | 0.960670278        | 2              | 2.472450256 |
| Q921F2        | TSDLIVLGLPWK                                                                  | 1.051770847        | 2              | 2.813910007 |
| <b>Q922F4</b> | <b>TBB6 Tubulin beta_6 chain</b>                                              | <b>1.022996671</b> | <b>0.05809</b> | <b>7</b>    |
| Q922F4        | ALVPELTQQMFDAK                                                                | 0.951042493        | 2              | 4.0499897   |
| Q922F4        | GHYTEGAELVDSVLDVVR                                                            | 1.01827926         | 2              | 6.77488327  |
| Q922F4        | IREEYPDR                                                                      | 0.908544484        | 2              | 2.853942394 |
| Q922F4        | MASTFIGNSTAIQELFK                                                             | 1.424117279        | 2              | 4.438858509 |
| Q922F4        | NMMAACDPR                                                                     | 0.939128438        | 2              | 2.514367104 |
| Q922F4        | NSSYFVEWIPNNVK                                                                | 1.006751238        | 2              | 4.701595306 |
| Q922F4        | YLT VATVFRGPM SMK+Oxidation(14)                                               | 1.957826905        | 2              | 2.31305337  |
| <b>Q922J3</b> | <b>CLIP1 CAP_Gly domain_containing linker protein 1</b>                       | <b>1.196645226</b> | <b>0.00076</b> | <b>2</b>    |
| Q922J3        | EMETMQAKLMK+Oxidation(5)                                                      | 1.169823336        | 2              | 2.639829397 |
| Q922J3        | HEEILQNLQKMLADTEDK                                                            | 0.932736531        | 2              | 2.419271708 |
| <b>Q923D2</b> | <b>BLVRB Flavin reductase (NADPH)</b>                                         | <b>1.133993241</b> | <b>1.4E-06</b> | <b>3</b>    |
| Q923D2        | LQDVTDDHIR                                                                    | 1.146774813        | 2              | 3.305094242 |
| Q923D2        | TGLTTLAQAVQAGYEVTVLVR                                                         | 1.055428164        | 3              | 4.01170826  |
| Q923D2        | YVAVMPPHIGDQPLTGAYVTLDGR                                                      | 0.791900448        | 3              | 4.08564949  |
| <b>Q923J6</b> | <b>DYH12 Dynein heavy chain 12_axonemal</b>                                   | <b>1.034416933</b> | <b>0.51001</b> | <b>2</b>    |
| Q923J6        | LEFLTNLDIK                                                                    | 0.625137707        | 1              | 2.013311386 |
| Q923J6        | MSDPNKTAITAEKALNLK                                                            | 1.046129987        | 2              | 2.465999603 |
| <b>Q923K9</b> | <b>A1CF APOBEC1 complementation factor</b>                                    | <b>1.115169427</b> | <b>0.87278</b> | <b>2</b>    |
| Q923K9        | LAPQILEEICQK                                                                  | 1.299899185        | 2              | 2.429979324 |
| Q923K9        | TGYSLVQENGQR                                                                  | 1.063406473        | 2              | 2.771718264 |
| <b>Q923V8</b> | <b>SEP15 15 kDa selenoprotein</b>                                             | <b>1.072017925</b> | <b>0.31973</b> | <b>2</b>    |
| Q923V8        | GCCQEAEQFETK                                                                  | 0.955957641        | 2              | 4.15205574  |
| Q923V8        | LLDDNGNIAEELSILK                                                              | 1.337793281        | 2              | 3.655009508 |
| <b>Q924C3</b> | <b>ENPP1 Ectonucleotide pyrophosphatase/phosphodiesterase family member 1</b> | <b>0.7916597</b>   | <b>0.315</b>   | <b>4</b>    |
| Q924C3        | ELESPAAASLLAPMDLGEPELEK                                                       | 1.127566111        | 2              | 3.416186571 |

|               |                                                              |                    |                |             |
|---------------|--------------------------------------------------------------|--------------------|----------------|-------------|
| Q924C3        | SGTYFWPGSDVEIDGILPDIYK                                       | 0.731862849        | 2              | 3.698600054 |
| Q924C3        | SVSSDLGCTCDPSIVPIMDFEK                                       | 0.767039159        | 2              | 3.250379801 |
| Q924C3        | AEYLHTWGGLLPVISK                                             | 1.006983535        | 3              | 3.693504333 |
| <b>Q924S5</b> | <b>LONM Lon protease homolog_ mitochondrial</b>              | <b>1.085757451</b> | <b>0.99999</b> | <b>7</b>    |
| Q924S5        | AQSVLEEDHYGMEDVK                                             | 1.106735772        | 2              | 3.971151352 |
| Q924S5        | FSVGGMTDVAEIK                                                | 1.073248846        | 2              | 2.875715733 |
| Q924S5        | HVMDVVDEELSK                                                 | 1.078557857        | 2              | 3.824842215 |
| Q924S5        | MEMINVSQYVAQEK                                               | 0.941471834        | 2              | 3.779714346 |
| Q924S5        | QLEVEPEGLEPEAENK                                             | 1.069006931        | 2              | 4.163259506 |
| Q924S5        | TENPLVLIDEVDK                                                | 1.114001311        | 2              | 2.475800991 |
| Q924S5        | IVSGEAQTVHVTPELQDFVGKPVFTVER                                 | 0.940899504        | 3              | 6.393419743 |
| <b>Q924W5</b> | <b>SMC6 Structural maintenance of chromosomes protein 6</b>  | <b>1.157489297</b> | <b>0.54945</b> | <b>3</b>    |
| Q924W5        | ELDMKEKELQEK                                                 | 1.141304684        | 2              | 2.60380888  |
| Q924W5        | MEEQQVRLNDAEKK                                               | 0.985116509        | 2              | 2.387438297 |
| Q924W5        | TKEQINQGEERLTELK                                             | 1.243718316        | 2              | 2.561676025 |
| <b>Q99020</b> | <b>ROAA Heterogeneous nuclear ribonucleoprotein A/B</b>      | <b>1.105630948</b> | <b>0.09739</b> | <b>3</b>    |
| Q99020        | EYFGQFGEIEAIELPIDPK                                          | 1.051876562        | 2              | 4.11878109  |
| Q99020        | FGEVVDCTIK                                                   | 1.118985908        | 2              | 2.500708342 |
| Q99020        | IFVGGLNPEATEEK                                               | 1.69855029         | 2              | 3.753350496 |
| <b>Q99J14</b> | <b>PSMD6 26S proteasome non_ATPase regulatory subunit 6</b>  | <b>1.151846442</b> | <b>0.0078</b>  | <b>3</b>    |
| Q99J14        | GAEILEVLHSLPAVR                                              | 1.573402015        | 2              | 3.021803379 |
| Q99J14        | RLDEELEDAEK                                                  | 1.133117411        | 2              | 2.918748617 |
| Q99J14        | VNEIVETNRPSDK                                                | 1.215460998        | 2              | 3.332903624 |
| <b>Q99JW2</b> | <b>ACY1 Aminoacylase_1</b>                                   | <b>1.042362612</b> | <b>0.99734</b> | <b>2</b>    |
| Q99JW2        | FIEDTAAEK                                                    | 1.077236427        | 2              | 2.630792618 |
| Q99JW2        | SVSIQYLEAVR                                                  | 1.009982362        | 2              | 2.395458221 |
| <b>Q99K43</b> | <b>PRC1 Protein regulator of cytokinesis 1</b>               | <b>1.673946499</b> | <b>0.00033</b> | <b>2</b>    |
| Q99K43        | MNTTTMSSATPNSSIRPVFGGSVYR+Oxidation(1)                       | 1.673946499        | 2              | 2.368153572 |
| Q99K43        | MNTTTMSSATPNSSIRPVFGGSVYR+Oxidation(6)                       | 1.673946499        | 2              | 2.368328571 |
| <b>Q99KK9</b> | <b>SYHM Probable histidyl_tRNA synthetase_ mitochondrial</b> | <b>1.163458717</b> | <b>0.07937</b> | <b>2</b>    |
| Q99KK9        | IIAELWDAGIKAEMLYK+Oxidation(14)                              | 1.163334437        | 2              | 2.517407179 |
| Q99KK9        | YDLTVPFARYLAMNKLK+Oxidation(13)                              | 1.217624458        | 2              | 2.596557617 |
| <b>Q99KW3</b> | <b>TARA TRIO and F_actin_binding protein</b>                 | <b>1.014069113</b> | <b>0.6514</b>  | <b>2</b>    |
| Q99KW3        | AYQEELSRELSK                                                 | 1.053379539        | 1              | 2.030693769 |
| Q99KW3        | SEREIEQLK                                                    | 0.925607516        | 1              | 1.971695542 |
| <b>Q99L04</b> | <b>DHRS1 Dehydrogenase/reductase SDR family member 1</b>     | <b>0.782693706</b> | <b>0.8727</b>  | <b>2</b>    |
| Q99L04        | ATAQEAQSLGGR                                                 | 0.970964461        | 2              | 3.340855837 |
| Q99L04        | CVPVCDSSQESEVK                                               | 0.706103143        | 2              | 4.446412086 |
| <b>Q99LF4</b> | <b>RTCB tRNA_splicing ligase RtcB homolog</b>                | <b>1.053665689</b> | <b>1</b>       | <b>4</b>    |
| Q99LF4        | GLGHQVATDALVAMEK                                             | 0.997637868        | 2              | 2.309446573 |
| Q99LF4        | NLDFQDVLDK                                                   | 0.98570138         | 2              | 2.88338542  |

|               |                                                              |                    |                |             |
|---------------|--------------------------------------------------------------|--------------------|----------------|-------------|
| Q99LF4        | NVTDVVNTCHDAGISK                                             | 1.054476964        | 2              | 4.276314735 |
| Q99LF4        | TNLDES DVQPVK                                                | 1.05418244         | 2              | 3.692002773 |
| <b>Q99LH1</b> | <b>NOG2 Nucleolar GTP_binding protein 2</b>                  | <b>1.244576355</b> | <b>0.07157</b> | <b>2</b>    |
| Q99LH1        | GGEPDMLTVSKMVLNDWQR+Oxidation(12)                            | 1.244576355        | 2              | 2.330037355 |
| Q99LH1        | GGEPDMLTVSKMVLNDWQR+Oxidation(6)                             | 1.244576355        | 2              | 2.317301512 |
| <b>Q99M87</b> | <b>DNJA3 Dnaj homolog subfamily A member 3_mitochondrial</b> | <b>1.081108244</b> | <b>0.70217</b> | <b>2</b>    |
| Q99M87        | AQGLYETINVTIPAGIQTDQK                                        | 1.009612381        | 2              | 2.410283089 |
| Q99M87        | GSITNPCVVCR                                                  | 1.135046139        | 2              | 2.598234892 |
| <b>Q99ML9</b> | <b>RN111 E3 ubiquitin_protein ligase Arkadia</b>             | <b>1.562204207</b> | <b>0.0399</b>  | <b>2</b>    |
| Q99ML9        | LHPHEVMQRMEVQR+Oxidation(7)                                  | 1.21214341         | 2              | 2.412626028 |
| Q99ML9        | DMTGNQQEQEKSGVVRK                                            | 1.589888634        | 3              | 3.623355865 |
| <b>Q99MN1</b> | <b>SYK Lysyl_tRNA synthetase</b>                             | <b>1.229085248</b> | <b>0.03862</b> | <b>4</b>    |
| Q99MN1        | MATLQESEVKVDGEQKLSK+Oxidation(1)                             | 0.934090341        | 2              | 2.338323355 |
| Q99MN1        | RGDIIGVEGNPGK                                                | 1.248373942        | 2              | 3.326686621 |
| Q99MN1        | SEEEFVHINNK                                                  | 1.206260668        | 2              | 3.514252186 |
| Q99MN1        | YLDLILNDFVR                                                  | 1.20711695         | 2              | 2.691838503 |
| <b>Q99MQ1</b> | <b>BICC1 Protein bicaudal C homolog 1</b>                    | <b>1.128906125</b> | <b>0.58157</b> | <b>2</b>    |
| Q99MQ1        | EAKEMIMSVLDTK                                                | 1.200484519        | 2              | 2.398347378 |
| Q99MQ1        | QYLMGCLPLVLMFDMK+Oxidation(15)                               | 1.092399208        | 2              | 2.301759481 |
| <b>Q99MS0</b> | <b>S14L2 SEC14_like protein 2</b>                            | <b>1.315064531</b> | <b>0.69063</b> | <b>4</b>    |
| Q99MS0        | AGEMTEVLPNQR                                                 | 1.068210441        | 2              | 3.826982498 |
| Q99MS0        | CGYDLGCPVWYDIIGPLDAK                                         | 1.582237044        | 2              | 3.860684633 |
| Q99MS0        | DQVKQQYEHSVQISR                                              | 0.976474979        | 2              | 2.384320974 |
| Q99MS0        | HISPDQLPEYGGTMTDPDGNPK                                       | 1.204220224        | 2              | 4.780360222 |
| <b>Q99MZ8</b> | <b>LASP1 LIM and SH3 domain protein 1</b>                    | <b>0.983717954</b> | <b>0.23559</b> | <b>5</b>    |
| Q99MZ8        | TGDTGMLPANYVEAI                                              | 2.085234369        | 1              | 2.430654287 |
| Q99MZ8        | GFSVVADTPELQR                                                | 0.990023556        | 2              | 3.588947058 |
| Q99MZ8        | QQSELQSQVR                                                   | 1.010811493        | 2              | 2.520248413 |
| Q99MZ8        | QSFTMVADTPENLR                                               | 0.830465764        | 2              | 3.175507784 |
| Q99MZ8        | TQDQISNIK                                                    | 1.047791719        | 2              | 2.869517326 |
| <b>Q99PF5</b> | <b>FUBP2 Far upstream element_binding protein 2</b>          | <b>1.058047022</b> | <b>0.26958</b> | <b>5</b>    |
| Q99PF5        | GGGGPGGGGPGGGGASGGPSQPPGGGGPGIR                              | 0.842594116        | 2              | 6.942374229 |
| Q99PF5        | IGGDAATTVNNNTPDFGFGGQK                                       | 1.103893421        | 2              | 4.848217964 |
| Q99PF5        | IGQQPQQPGAPPQQDYTK                                           | 1.114106144        | 2              | 4.054358006 |
| Q99PF5        | IINDLLQSLR                                                   | 1.203498575        | 2              | 2.572946072 |
| Q99PF5        | SVSLTGAPESVQK                                                | 1.015897848        | 2              | 2.550324678 |
| <b>Q99PL5</b> | <b>RRBP1 Ribosome_binding protein 1</b>                      | <b>1.24415595</b>  | <b>1.6E-14</b> | <b>18</b>   |
| Q99PL5        | IQEELEK                                                      | 1.320473629        | 1              | 2.312760353 |
| Q99PL5        | AENSQLTER                                                    | 1.05562957         | 2              | 2.38333416  |
| Q99PL5        | DALNQATSQVESK                                                | 0.682217856        | 2              | 3.31478858  |
| Q99PL5        | EAEETQNSLQAECQYR                                             | 1.230668564        | 2              | 5.641663551 |
| Q99PL5        | EHTSHLEAELEK                                                 | 0.857366922        | 2              | 3.359024525 |

|               |                                                                                            |                    |                |             |
|---------------|--------------------------------------------------------------------------------------------|--------------------|----------------|-------------|
| Q99PL5        | GELESSDQVR                                                                                 | 1.112365779        | 2              | 3.198652267 |
| Q99PL5        | HMAAASAECQNYAK                                                                             | 1.056543255        | 2              | 4.309083939 |
| Q99PL5        | HMAAASAECQNYAK+Oxidation(2)                                                                | 1.552745897        | 2              | 3.958441496 |
| Q99PL5        | LKELESQVSCLEK                                                                              | 1.15811233         | 2              | 4.080004215 |
| Q99PL5        | LLATEQEDAAVAK                                                                              | 1.299260768        | 2              | 3.992249966 |
| Q99PL5        | LQQENSILR                                                                                  | 0.734473167        | 2              | 2.611452579 |
| Q99PL5        | QLHLAEAQTK                                                                                 | 1.13918985         | 2              | 2.351928473 |
| Q99PL5        | RLEEVTR                                                                                    | 0.962950166        | 2              | 2.443027973 |
| Q99PL5        | TGVIQDTWHK                                                                                 | 1.0671231          | 2              | 2.319155216 |
| Q99PL5        | TILAETEGMLK                                                                                | 1.082755174        | 2              | 3.165858269 |
| Q99PL5        | TLQEQLNGPNTQLAR                                                                            | 1.230983434        | 2              | 5.044582367 |
| Q99PL5        | TLVSTVGSMVFSEGEAQR                                                                         | 1.054399968        | 2              | 4.283988476 |
| Q99PL5        | VEPAVSSIVNSIQVLASK                                                                         | 1.21051671         | 2              | 4.011188507 |
| <b>Q99PV0</b> | <b>PRP8 Pre_mRNA_processing splicing factor 8</b>                                          | <b>1.101541078</b> | <b>0.78039</b> | <b>2</b>    |
| Q99PV0        | AAVMHDILDMMPGEGIK+Oxidation(4)Oxidation(10)                                                | 1.101541078        | 2              | 2.693808079 |
| Q99PV0        | AAVMHDILDMMPGEGIK+Oxidation(4)Oxidation(11)                                                | 1.101541078        | 2              | 2.650903225 |
| <b>Q9CPQ1</b> | <b>COX6C Cytochrome c oxidase subunit 6C</b>                                               | <b>1.081233665</b> | <b>0.99947</b> | <b>2</b>    |
| Q9CPQ1        | FGVAEPR                                                                                    | 1.103592791        | 2              | 2.432296038 |
| Q9CPQ1        | NYDSMKDFEEMR                                                                               | 0.913617908        | 2              | 3.796538591 |
| <b>Q9CRB9</b> | <b>CHCH3 Coiled_coil_helix_coiled_coil_helix domain_containing protein 3_mitochondrial</b> | <b>1.165344312</b> | <b>0.78481</b> | <b>2</b>    |
| Q9CRB9        | VAEELALEQAK                                                                                | 1.032833704        | 2              | 3.439563274 |
| Q9CRB9        | YEYHPVCADLQTK                                                                              | 1.117451897        | 2              | 3.678458452 |
| <b>Q9CTN4</b> | <b>RHBT3 Rho_related BTB domain_containing protein 3</b>                                   | <b>1.199294682</b> | <b>0.04663</b> | <b>2</b>    |
| Q9CTN4        | ELASMNLDIVDLLK                                                                             | 1.173987462        | 2              | 2.667444944 |
| Q9CTN4        | LKDSGDVSDIIEK                                                                              | 1.238964526        | 2              | 2.478770018 |
| <b>Q9CW42</b> | <b>MOSC1 MOSC domain_containing protein 1_mitochondrial</b>                                | <b>0.930294472</b> | <b>0.99719</b> | <b>3</b>    |
| Q9CW42        | DLLLPIPPATNPLLQCR                                                                          | 0.913990049        | 2              | 4.378838062 |
| Q9CW42        | GLSVSEAECTAMGLR                                                                            | 0.935742999        | 2              | 3.179822922 |
| Q9CW42        | LQQVGTVAQLWIYPIK                                                                           | 0.864998854        | 2              | 3.339229107 |
| <b>Q9CWH6</b> | <b>PSA7L Proteasome subunit alpha type_7_like</b>                                          | <b>0.984277119</b> | <b>0.5596</b>  | <b>3</b>    |
| Q9CWH6        | AITVFSPDGHLFQVEYAQEAVK                                                                     | 1.074634235        | 2              | 4.261363983 |
| Q9CWH6        | ALLEVVQSGGK                                                                                | 1.647413585        | 2              | 2.945260048 |
| Q9CWH6        | LTVEDPVTVEYITR                                                                             | 1.218017829        | 2              | 4.007008076 |
| <b>Q9CWK8</b> | <b>SNX2 Sorting nexin_2</b>                                                                | <b>1.341765986</b> | <b>0.20936</b> | <b>3</b>    |
| Q9CWK8        | ALSQLAEEVEEK                                                                               | 1.031042845        | 2              | 2.372405767 |
| Q9CWK8        | AVNTQALSGAGILR                                                                             | 1.214295633        | 2              | 3.517492056 |
| Q9CWK8        | QQQFENLDQQLR                                                                               | 1.630659029        | 2              | 2.513881683 |
| <b>Q9CXD6</b> | <b>CC90A Coiled_coil domain_containing protein 90A_mitochondrial</b>                       | <b>1.169002382</b> | <b>0.01292</b> | <b>2</b>    |
| Q9CXD6        | MLELRTEIVSLHAQQDR                                                                          | 1.78230575         | 2              | 2.683454752 |
| Q9CXD6        | VRTDTKLNFNLEK                                                                              | 1.066780458        | 2              | 2.484920502 |
| <b>Q9CYW4</b> | <b>HDHD3 Haloacid dehalogenase_like hydrolase domain_containing protein 3</b>              | <b>1.159215956</b> | <b>0.2662</b>  | <b>2</b>    |

|               |                                                                         |                    |                |             |
|---------------|-------------------------------------------------------------------------|--------------------|----------------|-------------|
| Q9CYW4        | LEDILTGLGLR                                                             | 1.112829988        | 2              | 3.744465828 |
| Q9CYW4        | RLEDILTGLGLR                                                            | 0.835987811        | 2              | 3.288958311 |
| <b>Q9CZY3</b> | <b>UB2V1 Ubiquitin_conjugating enzyme E2 variant 1</b>                  | <b>1.151832667</b> | <b>0.35354</b> | <b>2</b>    |
| Q9CZY3        | LLEEEEGQK                                                               | 1.177915798        | 2              | 2.811604023 |
| Q9CZY3        | VNMSGVSSNGVVDPR                                                         | 1.119990441        | 2              | 3.019990444 |
| <b>Q9D024</b> | <b>CC47 Coiled_coil domain_containing protein 47</b>                    | <b>0.875041853</b> | <b>0.0224</b>  | <b>3</b>    |
| Q9D024        | ERIMNEEDPEKQR                                                           | 1.111654126        | 2              | 2.585873365 |
| Q9D024        | IMQEEGQPLKLPDTK                                                         | 0.674532714        | 2              | 2.899211168 |
| Q9D024        | RLEEAALR                                                                | 1.073854434        | 2              | 2.618826866 |
| <b>Q9D0M3</b> | <b>CY1 Cytochrome c1_heme protein_mitochondrial</b>                     | <b>1.091994633</b> | <b>0.00068</b> | <b>5</b>    |
| Q9D0M3        | GLLSSLDHTSIR                                                            | 1.184706713        | 2              | 2.776491404 |
| Q9D0M3        | HGGEDYVFSLLTGYCEPPTGVSLR                                                | 1.073659359        | 2              | 5.265496254 |
| Q9D0M3        | HLVGVCYTEEEAK                                                           | 0.905263262        | 2              | 3.935879707 |
| Q9D0M3        | ALAEVEVQDGPNDGEMFMRPGK                                                  | 1.134998491        | 3              | 4.274136543 |
| Q9D0M3        | LSDYFPKYPNPEAAR                                                         | 1.275286722        | 3              | 3.413618326 |
| <b>Q9D0S9</b> | <b>HINT2 Histidine triad nucleotide_binding protein 2_mitochondrial</b> | <b>1.084804922</b> | <b>0.10029</b> | <b>3</b>    |
| Q9D0S9        | DVAPQAPVHFLVIPR                                                         | 0.81084129         | 2              | 2.944493532 |
| Q9D0S9        | ISQAEEDDQQLLGHLLLVAK                                                    | 1.310415766        | 2              | 5.235791206 |
| Q9D0S9        | SLPADILYEDQQCLVFR                                                       | 1.087262745        | 2              | 4.47976923  |
| <b>Q9D172</b> | <b>ES1 ES1 protein homolog_mitochondrial</b>                            | <b>1.115438501</b> | <b>0.60154</b> | <b>5</b>    |
| Q9D172        | NLSTFAVDGK                                                              | 1.16860043         | 1              | 2.920947552 |
| Q9D172        | NVLAESAR                                                                | 1.18573871         | 1              | 2.007691145 |
| Q9D172        | GVEVTVGHEQEEGGK                                                         | 1.009175697        | 2              | 3.793674469 |
| Q9D172        | GVTEAHVDQK                                                              | 0.728226929        | 2              | 2.827171803 |
| Q9D172        | ITSLAQLNAAANHDAIFPGGFGAAK                                               | 1.576604672        | 2              | 4.33207655  |
| <b>Q9D1Q6</b> | <b>ERP44 Endoplasmic reticulum resident protein 44</b>                  | <b>1.130820795</b> | <b>5.2E-05</b> | <b>4</b>    |
| Q9D1Q6        | NIIGYFEQK                                                               | 1.093797898        | 1              | 2.474280596 |
| Q9D1Q6        | MNPAVFLSLADLR+Oxidation(1)                                              | 1.082150296        | 2              | 2.369707823 |
| Q9D1Q6        | SNPVHEIQSLDEVTNLDR                                                      | 1.220390273        | 2              | 5.437285423 |
| Q9D1Q6        | VDCDQHSDIAQR                                                            | 1.244990707        | 2              | 3.54489994  |
| <b>Q9D2U9</b> | <b>H2B3A Histone H2B type 3_A</b>                                       | <b>1.265024333</b> | <b>9.9E-20</b> | <b>5</b>    |
| Q9D2U9        | AMGIMNSFVNDIFER                                                         | 1.323612054        | 2              | 5.177259445 |
| Q9D2U9        | AMGIMNSFVNDIFER+Oxidation(2)                                            | 1.296518444        | 2              | 4.357598782 |
| Q9D2U9        | AMGIMNSFVNDIFER+Oxidation(2)Oxidation(5)                                | 1.046174993        | 2              | 3.088084221 |
| Q9D2U9        | AMGIMNSFVNDIFER+Oxidation(5)                                            | 1.296869345        | 2              | 3.887322664 |
| Q9D2U9        | LLLPGELAK                                                               | 1.361866756        | 2              | 2.417346954 |
| <b>Q9D6M3</b> | <b>GHC1 Mitochondrial glutamate carrier 1</b>                           | <b>1.02074738</b>  | <b>0.99804</b> | <b>2</b>    |
| Q9D6M3        | GAAVNLTLVTPEK                                                           | 1.040878395        | 2              | 2.770613909 |
| Q9D6M3        | GVNEDTYSGLDCAR                                                          | 0.8999575          | 2              | 4.650985241 |
| <b>Q9D6Y9</b> | <b>GLGB 1_4_alpha_glucan_branching enzyme</b>                           | <b>1.113574495</b> | <b>1.3E-10</b> | <b>10</b>   |
| Q9D6Y9        | CVAYAESHDAQLVGDK                                                        | 1.154492316        | 2              | 4.957682133 |
| Q9D6Y9        | GTHDLWDSR                                                               | 1.18614856         | 2              | 2.36400485  |



|               |                                                                            |                    |                |             |
|---------------|----------------------------------------------------------------------------|--------------------|----------------|-------------|
| Q9D6Y9        | HFTSNVLPK                                                                  | 1.239991775        | 2              | 2.453317881 |
| Q9D6Y9        | IVLSDAAEYGGHQR                                                             | 1.115250948        | 2              | 4.491281509 |
| Q9D6Y9        | IYESHVGISSHEGK                                                             | 1.360878081        | 2              | 4.531390667 |
| Q9D6Y9        | NSEDGLNMFDDGTDSCYFHSQPR                                                    | 0.401214393        | 2              | 3.804407597 |
| Q9D6Y9        | QFNLTDDLLR                                                                 | 0.920502142        | 2              | 2.754038811 |
| Q9D6Y9        | RQFNLTDDLLR                                                                | 0.977363646        | 2              | 2.864859819 |
| Q9D6Y9        | WELYIPPK                                                                   | 1.2594803          | 2              | 2.385748386 |
| Q9D6Y9        | EKDEDWNMGIVYTLTNR                                                          | 0.881057619        | 3              | 3.911939859 |
| <b>Q9D6Z1</b> | <b>NOP56 Nucleolar protein 56</b>                                          | <b>1.072494258</b> | <b>0.91683</b> | <b>2</b>    |
| Q9D6Z1        | ELNEEKLEK                                                                  | 1.106599506        | 2              | 2.464313269 |
| Q9D6Z1        | IDCFSEVPTSVFGEK                                                            | 1.001615001        | 2              | 2.752813339 |
| <b>Q9D7B6</b> | <b>ACAD8 Isobutyryl-CoA dehydrogenase_mitochondrial</b>                    | <b>1.301249227</b> | <b>0.7118</b>  | <b>4</b>    |
| Q9D7B6        | AVIFEDCAVPVANR                                                             | 0.818265676        | 2              | 3.361348629 |
| Q9D7B6        | FASYCLTEPGSGSDAASLLTSAK                                                    | 1.303371966        | 2              | 4.9260149   |
| Q9D7B6        | IGTEGQGFLIAMK                                                              | 1.126229061        | 2              | 2.980456352 |
| Q9D7B6        | VHQILEGSNEVMR                                                              | 1.180424178        | 2              | 2.91190505  |
| <b>Q9D7X8</b> | <b>GGCT Gamma-glutamylcyclotransferase</b>                                 | <b>0.925354803</b> | <b>0.92671</b> | <b>2</b>    |
| Q9D7X8        | ISDEMEDIK                                                                  | 0.886863908        | 2              | 2.734996796 |
| Q9D7X8        | SNISLDEQEGVK                                                               | 1.029872906        | 2              | 3.743230104 |
| <b>Q9D819</b> | <b>IPYR Inorganic pyrophosphatase</b>                                      | <b>1.455596462</b> | <b>0.00491</b> | <b>5</b>    |
| Q9D819        | YVANLFPYK                                                                  | 1.144001392        | 1              | 2.131053686 |
| Q9D819        | GISCNMTTVSESPFK                                                            | 0.981802762        | 2              | 4.744656086 |
| Q9D819        | GQYISPFHDVPIYADK                                                           | 1.269542215        | 2              | 3.941816568 |
| Q9D819        | VLGILAMIDEGETDWK                                                           | 1.844921625        | 2              | 4.29685688  |
| Q9D819        | GQYISPFHDVPIYADKDVFHMMVEVPR                                                | 1.337802202        | 3              | 4.98183012  |
| <b>Q9D855</b> | <b>QCR7 Cytochrome b_c1 complex subunit 7</b>                              | <b>1.104162496</b> | <b>0.37399</b> | <b>2</b>    |
| Q9D855        | RLPEDLYNDR                                                                 | 1.113425798        | 2              | 2.544440508 |
| Q9D855        | YEEDKFYLEPYLK                                                              | 1.090183001        | 2              | 4.624572277 |
| <b>Q9D880</b> | <b>TIM50 Mitochondrial import inner membrane translocase subunit TIM50</b> | <b>0.935478906</b> | <b>0.79804</b> | <b>3</b>    |
| Q9D880        | TIALNQVEDVR                                                                | 0.91654218         | 2              | 3.127310514 |
| Q9D880        | TVLEHYALEDDPLEAFK                                                          | 1.149138261        | 2              | 4.925953865 |
| Q9D880        | VLLDLSAFLK                                                                 | 1.289926378        | 2              | 2.553409338 |
| <b>Q9D8W5</b> | <b>PSD12 26S proteasome non-ATPase regulatory subunit 12</b>               | <b>1.2029095</b>   | <b>0.36538</b> | <b>2</b>    |
| Q9D8W5        | MVQQCCTVVEITDLPVK                                                          | 1.486201872        | 2              | 4.889622688 |
| Q9D8W5        | WSTLVEDYGVELR                                                              | 0.915643979        | 2              | 3.08286643  |
| <b>Q9DB15</b> | <b>RM12 39S ribosomal protein L12_mitochondrial</b>                        | <b>0.997432167</b> | <b>0.52947</b> | <b>2</b>    |
| Q9DB15        | NYVQGINLVQAK                                                               | 0.996554207        | 2              | 2.781139851 |
| Q9DB15        | SEALAGAPLDNAPK                                                             | 1.891356476        | 2              | 3.19210124  |
| <b>Q9DBH5</b> | <b>LMAN2 Vesicular integral membrane protein VIP36</b>                     | <b>1.093730476</b> | <b>0.8402</b>  | <b>2</b>    |
| Q9DBH5        | WSELAGCTADFR                                                               | 1.04826695         | 2              | 3.283900261 |
| Q9DBH5        | LPTGYFASAGTGDLSDNHDIISK                                                    | 1.205629886        | 3              | 3.841823339 |

|               |                                                                                  |                    |                |             |
|---------------|----------------------------------------------------------------------------------|--------------------|----------------|-------------|
| <b>Q9DCJ5</b> | <b>NDUA8 NADH dehydrogenase [ubiquinone] 1 alpha subcomplex subunit 8</b>        | <b>1.07059282</b>  | <b>0.78548</b> | <b>2</b>    |
| Q9DCJ5        | ARPEPNPVIEGDLKPAK                                                                | 0.910990385        | 3              | 4.665341854 |
| Q9DCJ5        | TDRPLPENPYHSR                                                                    | 1.035942208        | 3              | 3.894039869 |
| <b>Q9DCM0</b> | <b>ETHE1 Protein ETHE1_mitochondrial</b>                                         | <b>0.945610519</b> | <b>0.99984</b> | <b>3</b>    |
| Q9DCM0        | SLLPGCQSVISR                                                                     | 0.932830214        | 2              | 3.073825121 |
| Q9DCM0        | TDFQQGCAK                                                                        | 0.968654655        | 2              | 2.91068387  |
| Q9DCM0        | IFTLPGNCLIYPAHDYHGLTVSTVEEER                                                     | 1.216088641        | 3              | 4.187090874 |
| <b>Q9DCS9</b> | <b>NDUBA NADH dehydrogenase [ubiquinone] 1 beta subcomplex subunit 10</b>        | <b>1.247919956</b> | <b>0.00043</b> | <b>3</b>    |
| Q9DCS9        | AYDLVVDWVPVTLVR                                                                  | 1.287053314        | 2              | 4.403495789 |
| Q9DCS9        | RVPDITECK                                                                        | 1.145155762        | 2              | 2.326785088 |
| Q9DCS9        | TPAPSPQTSLPNPITYLTK                                                              | 1.012173674        | 2              | 2.973173141 |
| <b>Q9DCT2</b> | <b>NDUS3 NADH dehydrogenase [ubiquinone] iron_sulfur protein 3_mitochondrial</b> | <b>1.230618027</b> | <b>0.42934</b> | <b>5</b>    |
| Q9DCT2        | FDLNSPWAEFPAYR                                                                   | 1.216378718        | 2              | 2.833332062 |
| Q9DCT2        | ILTDYGFEGHPFR                                                                    | 0.879975012        | 2              | 2.892276525 |
| Q9DCT2        | KFDLNSPWAEFPAYR                                                                  | 0.974452372        | 2              | 3.658503294 |
| Q9DCT2        | SLADLTAVDVPTR                                                                    | 1.148614643        | 2              | 2.736535549 |
| Q9DCT2        | VVAEPELAQEFR                                                                     | 1.02183304         | 2              | 3.649208784 |
| <b>Q9DCU9</b> | <b>HOGA1 Probable 4_hydroxy_2_oxoglutarate aldolase_mitochondrial</b>            | <b>1.13883559</b>  | <b>0.02463</b> | <b>3</b>    |
| Q9DCU9        | GFVVQGSTGEFPFLTSLR                                                               | 1.225345252        | 2              | 5.446032047 |
| Q9DCU9        | LIEPNTAVTR                                                                       | 1.104016233        | 2              | 3.190212488 |
| Q9DCU9        | TMDWFGYYGGPCR                                                                    | 1.138835933        | 2              | 3.536493778 |
| <b>Q9EP89</b> | <b>LACTB Serine beta_lactamase_like protein LACTB_mitochondrial</b>              | <b>0.986012157</b> | <b>0.81797</b> | <b>9</b>    |
| Q9EP89        | EVWSEGLGYADVNR                                                                   | 0.975908288        | 2              | 3.020353317 |
| Q9EP89        | FENSIESLR                                                                        | 0.962704708        | 2              | 2.97218442  |
| Q9EP89        | IFHDLMLTTVQEENEPVIYNR                                                            | 1.499219437        | 2              | 5.522389412 |
| Q9EP89        | IKDEVGAPGIVVGVSDGK                                                               | 1.17780568         | 2              | 4.163432121 |
| Q9EP89        | KNDFEQGELYLK                                                                     | 1.187532268        | 2              | 4.194926739 |
| Q9EP89        | LVNTPYVDNSYK                                                                     | 1.631031013        | 2              | 2.577412844 |
| Q9EP89        | WAGGGFLSTVGDLLK                                                                  | 1.143360885        | 2              | 4.632734299 |
| Q9EP89        | LDLDPVQHYVPEFPEK                                                                 | 0.942818839        | 3              | 3.688930988 |
| Q9EP89        | LDLDPVQHYVPEFPEKEYEGEK                                                           | 1.242024064        | 3              | 3.801635027 |
| <b>Q9EPH2</b> | <b>MRP MARCKS_related protein</b>                                                | <b>1.032214026</b> | <b>0.10764</b> | <b>2</b>    |
| Q9EPH2        | AAATPESQEPQAK                                                                    | 1.381307677        | 2              | 2.667475939 |
| Q9EPH2        | GDVTAEEAAGASPAK                                                                  | 1.025424121        | 2              | 3.050321341 |
| <b>Q9EPH8</b> | <b>PABP1 Polyadenylate_binding protein 1</b>                                     | <b>1.154862248</b> | <b>0.54632</b> | <b>7</b>    |
| Q9EPH8        | ALDTMNFVNIK                                                                      | 1.12754191         | 2              | 3.105648518 |
| Q9EPH8        | GFGFVCFSSPEEATK                                                                  | 1.661326923        | 2              | 2.655185223 |
| Q9EPH8        | GFGVFSFER                                                                        | 1.233407452        | 2              | 2.50764823  |
| Q9EPH8        | KEFSPFGTITSAK                                                                    | 1.028318047        | 2              | 3.188788652 |
| Q9EPH8        | SLGYAYVNFQQADAER                                                                 | 1.069474432        | 2              | 3.363800287 |

|               |                                                               |                    |                |             |
|---------------|---------------------------------------------------------------|--------------------|----------------|-------------|
| Q9EPH8        | ITGMLEIDNSELLHMLESPELR                                        | 0.925194215        | 3              | 4.733613491 |
| Q9EPH8        | SKVDEAVAVLQAHQAK                                              | 1.077856414        | 3              | 4.314959526 |
| <b>Q9EQ76</b> | <b>FMO3 Dimethylaniline monooxygenase [N_oxide_forming] 3</b> | <b>2.262349119</b> | <b>9.9E-20</b> | <b>13</b>   |
| Q9EQ76        | NNEVTLYK                                                      | 1.305124422        | 1              | 2.003182173 |
| Q9EQ76        | ASIQSVFTNSSK                                                  | 1.595183406        | 2              | 2.784206152 |
| Q9EQ76        | GTCILPSVNDMMDDIDEK                                            | 2.20214081         | 2              | 3.925513506 |
| Q9EQ76        | ILCGTVSIKPNVK                                                 | 1.785156344        | 2              | 2.914944887 |
| Q9EQ76        | KEPVFNDELPAR                                                  | 1.19833442         | 2              | 3.049708128 |
| Q9EQ76        | LQEYITSFATEK                                                  | 2.265943312        | 2              | 3.329575777 |
| Q9EQ76        | NNLPTAISDWWYMK                                                | 1.432792561        | 2              | 3.015808105 |
| Q9EQ76        | SCLEEGLEPTCFER                                                | 1.520654968        | 2              | 4.387738228 |
| Q9EQ76        | SDDVGGLWK                                                     | 2.050134708        | 2              | 2.835040808 |
| Q9EQ76        | VAVIGAGVSGLAAIR                                               | 1.274873308        | 2              | 3.93653512  |
| Q9EQ76        | VWNDGYPWDMVVITR                                               | 1.565145826        | 2              | 3.861160994 |
| Q9EQ76        | YIQFETLVTR                                                    | 2.997640495        | 2              | 2.854773045 |
| Q9EQ76        | VLVIGLGNSGCDIAAELSHVAQQVIISR                                  | 2.175502796        | 3              | 4.001115799 |
| <b>Q9EQH3</b> | <b>VPS35 Vacuolar protein sorting_associated protein 35</b>   | <b>1.311480624</b> | <b>1.7E-06</b> | <b>3</b>    |
| Q9EQH3        | IREDLPNLESSEETEIQNK                                           | 1.026859142        | 2              | 5.099476337 |
| Q9EQH3        | LNLEHIATSSAVSK                                                | 1.354889266        | 2              | 4.035788059 |
| Q9EQH3        | VLETTVEIFNK                                                   | 1.095675061        | 2              | 2.959443808 |
| <b>Q9EQS0</b> | <b>TALDO Transaldolase</b>                                    | <b>1.075680694</b> | <b>0.03145</b> | <b>7</b>    |
| Q9EQS0        | VSTEVDAR                                                      | 1.329615825        | 1              | 1.981729388 |
| Q9EQS0        | ALAGCDFLTISPK                                                 | 1.319493252        | 2              | 2.935023546 |
| Q9EQS0        | ILDWHVANTDKK                                                  | 1.221076244        | 2              | 3.2501719   |
| Q9EQS0        | LGGPQEEQIK                                                    | 1.291586773        | 2              | 2.679030895 |
| Q9EQS0        | LSSTWEGIQAGK                                                  | 0.547472618        | 2              | 2.714589119 |
| Q9EQS0        | SYEPQEDPGVK                                                   | 1.085676803        | 2              | 2.909102201 |
| Q9EQS0        | WLHNEDQMAVEK                                                  | 1.039348889        | 2              | 3.690667152 |
| <b>Q9EQW7</b> | <b>KI13A Kinesin_like protein KIF13A</b>                      | <b>1.145682983</b> | <b>0.79395</b> | <b>2</b>    |
| Q9EQW7        | DETIAVPLEENSALPK                                              | 1.069637724        | 2              | 2.663294554 |
| Q9EQW7        | VTQWAEER                                                      | 1.180831053        | 2              | 2.452829361 |
| <b>Q9EQX9</b> | <b>UBE2N Ubiquitin_conjugating enzyme E2 N</b>                | <b>1.168056701</b> | <b>4.6E-12</b> | <b>3</b>    |
| Q9EQX9        | LELFLPEEYPMAAPK                                               | 0.944465642        | 2              | 3.857037067 |
| Q9EQX9        | SNEAQAIETAR                                                   | 1.22927667         | 2              | 3.276730299 |
| Q9EQX9        | YFHVVIAGPQDSPFEGGTFK                                          | 0.795901122        | 3              | 3.996587992 |
| <b>Q9ER34</b> | <b>ACON Aconitate hydratase_mitochondrial</b>                 | <b>1.057593432</b> | <b>0.57233</b> | <b>17</b>   |
| Q9ER34        | FNPETDFLTGK                                                   | 1.018867212        | 1              | 2.288868189 |
| Q9ER34        | ADIANLAEFEK                                                   | 0.890536137        | 2              | 2.438708067 |
| Q9ER34        | CTTDHISAAGPWLK                                                | 1.140573024        | 2              | 3.906744003 |
| Q9ER34        | DINQEVYNFLATAGAK                                              | 0.99252196         | 2              | 4.154200077 |
| Q9ER34        | FKLEAPDADELPR                                                 | 1.150309553        | 2              | 3.696936369 |
| Q9ER34        | GHLDNISNLLIGAINIENGK                                          | 1.104368904        | 2              | 5.612960815 |

|               |                                                                            |                    |                |             |
|---------------|----------------------------------------------------------------------------|--------------------|----------------|-------------|
| Q9ER34        | IVYGHLDPPANQEIER                                                           | 1.248205143        | 2              | 4.731932163 |
| Q9ER34        | LTGTLGWTSPK                                                                | 1.45017587         | 2              | 3.116814613 |
| Q9ER34        | NAVQEFQVPVDTAR                                                             | 0.937123056        | 2              | 4.156704903 |
| Q9ER34        | QGLLPLTFADPSDYNK                                                           | 0.83225385         | 2              | 3.570981264 |
| Q9ER34        | SDFDPGQDQTYQHPPK                                                           | 0.985860769        | 2              | 2.913554668 |
| Q9ER34        | SQFTITPGSEQIR                                                              | 1.007388613        | 2              | 3.565665007 |
| Q9ER34        | VDVSPTSQR                                                                  | 0.948369152        | 2              | 2.521443844 |
| Q9ER34        | VGLIGSCTNSSYEDMGR                                                          | 1.279624522        | 2              | 4.231098175 |
| Q9ER34        | WVVGIDENYGEQSSR                                                            | 1.033735171        | 2              | 4.202404022 |
| Q9ER34        | LQLLEPFDKWDGKDLEDLQLIK                                                     | 1.283673394        | 3              | 4.097528934 |
| Q9ER34        | NDANPETHAFVTSPEIVTALAIAGTLK                                                | 0.986228822        | 3              | 4.214668274 |
| <b>Q9ER72</b> | <b>SYCC CysteinyI_tRNA synthetase_cytoplasmic</b>                          | <b>1.35821399</b>  | <b>0.17419</b> | <b>2</b>    |
| Q9ER72        | LSETTDPDKR                                                                 | 1.396279365        | 2              | 2.430091858 |
| Q9ER72        | QMLERIQNSVK+Oxidation(2)                                                   | 1.021168933        | 2              | 2.469664574 |
| <b>Q9ERK4</b> | <b>XPO2 Exportin_2</b>                                                     | <b>1.049960536</b> | <b>0.52303</b> | <b>3</b>    |
| Q9ERK4        | IIIPFIQK                                                                   | 1.361866756        | 2              | 2.398523808 |
| Q9ERK4        | LLQTDDEEEAGLLELLK                                                          | 1.04965903         | 2              | 2.384386539 |
| Q9ERK4        | SNNVNEFPVLK                                                                | 1.404641879        | 2              | 2.499286652 |
| <b>Q9ES21</b> | <b>SAC1 Phosphatidylinositide phosphatase SAC1</b>                         | <b>1.633575845</b> | <b>0.23361</b> | <b>3</b>    |
| Q9ES21        | HFDSQVIYQK                                                                 | 1.115472706        | 2              | 2.455652237 |
| Q9ES21        | LSNTSPEFQEMSLLR                                                            | 2.301929914        | 2              | 3.600185871 |
| Q9ES21        | TQLGLVMDGFNSLLR                                                            | 1.172043705        | 2              | 3.98378706  |
| <b>Q9ES38</b> | <b>S27A5 Bile acyl_CoA synthetase</b>                                      | <b>1.198179109</b> | <b>6.1E-15</b> | <b>12</b>   |
| Q9ES38        | ACQAAWALK                                                                  | 1.322576866        | 2              | 2.73195982  |
| Q9ES38        | ADVWENFQQR                                                                 | 1.243686733        | 2              | 3.064492941 |
| Q9ES38        | EGFDVGVADIADPLYILDNK                                                       | 1.125186326        | 2              | 4.912632942 |
| Q9ES38        | GATAILVLPK                                                                 | 1.312744133        | 2              | 2.929193735 |
| Q9ES38        | IQDSLEITNTYK                                                               | 1.200511419        | 2              | 3.650266171 |
| Q9ES38        | LKEATIQEDK                                                                 | 1.389792752        | 2              | 2.806114912 |
| Q9ES38        | MLTPLELVQFDIETAEPVRDK                                                      | 1.485356138        | 2              | 4.229716301 |
| Q9ES38        | SISALSVFLGLAK                                                              | 1.340278475        | 2              | 3.198299646 |
| Q9ES38        | SLMPDVYQAVCEGTWK                                                           | 1.016724921        | 2              | 3.916050911 |
| Q9ES38        | YLCNVPGQPEDK                                                               | 1.137752329        | 2              | 3.486678839 |
| Q9ES38        | YLCNVPGQPEDKK                                                              | 1.491214808        | 2              | 3.756635189 |
| Q9ES38        | QGFCIPVETGKPGLLTK                                                          | 1.101220648        | 3              | 3.662816048 |
| <b>Q9EST6</b> | <b>AN32B Acidic leucine_rich nuclear phosphoprotein 32 family member B</b> | <b>0.879909399</b> | <b>0.56647</b> | <b>2</b>    |
| Q9EST6        | LAEELPSLTHLNLSGNNLK                                                        | 0.862128596        | 2              | 3.790046215 |
| Q9EST6        | SLDLFGCEVTNR                                                               | 1.086676322        | 2              | 2.744765282 |
| <b>Q9ESW0</b> | <b>DDB1 DNA damage_binding protein 1</b>                                   | <b>1.310774067</b> | <b>0.29663</b> | <b>3</b>    |
| Q9ESW0        | QGGQLVTCGAFK                                                               | 0.945057442        | 2              | 2.359763861 |
| Q9ESW0        | IEVQDTSGGTTALRPSASTQALSSSVSSK                                              | 1.29987516         | 3              | 5.727999687 |
| Q9ESW0        | KTEPATGFIDGDIESFLDISRPK                                                    | 1.24473229         | 3              | 5.986730576 |

|               |                                                                                   |                    |                |             |
|---------------|-----------------------------------------------------------------------------------|--------------------|----------------|-------------|
| <b>Q9HB97</b> | <b>PARVA Alpha_parvin</b>                                                         | <b>1.088423071</b> | <b>0.27572</b> | <b>4</b>    |
| Q9HB97        | DLAEDLYDGQVLQK                                                                    | 1.158162048        | 2              | 2.359844685 |
| Q9HB97        | LNVAEVTQSEIAQK                                                                    | 1.088247425        | 2              | 3.146553993 |
| Q9HB97        | QIQEEITGNTEALSGR                                                                  | 1.331807808        | 2              | 3.167425156 |
| Q9HB97        | VLIDWINDVLVGER                                                                    | 0.999617042        | 2              | 3.237922668 |
| <b>Q9JHL4</b> | <b>DBNL Drebrin_like protein</b>                                                  | <b>1.081425743</b> | <b>0.61209</b> | <b>4</b>    |
| <b>Q9JHZ9</b> | <b>S38A3 Sodium_coupled neutral amino acid transporter 3</b>                      | <b>1.362560919</b> | <b>9.8E-05</b> | <b>2</b>    |
| Q9JHZ9        | AYEQLGYR                                                                          | 1.343785747        | 2              | 2.550028801 |
| Q9JHZ9        | HLEGLLPVGMPTADTQR                                                                 | 1.438763388        | 2              | 3.794389486 |
| <b>Q9JI57</b> | <b>GT2D1 General transcription factor II_I repeat domain_containing protein 1</b> | <b>1.01223477</b>  | <b>0.99494</b> | <b>2</b>    |
| Q9JI57        | EMEDINTLRECVQILFNSR                                                               | 1.02026845         | 2              | 2.322575808 |
| Q9JI57        | GTQPTTEGQAHLVLPTR                                                                 | 1.011678279        | 2              | 2.379821062 |
| <b>Q9JI85</b> | <b>NUCB2 Nucleobindin_2</b>                                                       | <b>1.064689363</b> | <b>0.25952</b> | <b>5</b>    |
| Q9JI85        | TRLDELK                                                                           | 1.623952689        | 1              | 2.028229952 |
| Q9JI85        | FQQGIAPSGPAGELK                                                                   | 1.175113312        | 2              | 2.663860798 |
| Q9JI85        | LSQELDLVSHK                                                                       | 1.457654207        | 2              | 2.758491755 |
| Q9JI85        | QEYQQAVQQLQEK                                                                     | 1.04617795         | 2              | 4.300695419 |
| Q9JI85        | VHNVEPVESAR                                                                       | 1.097079142        | 2              | 2.89632535  |
| <b>Q9JI91</b> | <b>ACTN2 Alpha_actinin_2</b>                                                      | <b>1.077233173</b> | <b>0.45365</b> | <b>8</b>    |
| Q9JI91        | ACLISMGYDLGAEAFAR                                                                 | 1.082750308        | 2              | 4.420625687 |
| Q9JI91        | GYEEWLLNEIR                                                                       | 1.438595064        | 2              | 2.850530863 |
| Q9JI91        | HRPDLIDYSK                                                                        | 1.066611456        | 2              | 2.417123318 |
| Q9JI91        | HTNYTMEHIR                                                                        | 1.098742187        | 2              | 2.806650877 |
| Q9JI91        | KHEAFESDLAAHQDR                                                                   | 1.101905853        | 2              | 5.297757626 |
| Q9JI91        | MLDAEDIVNTPKPEDR                                                                  | 0.849099489        | 2              | 3.088994741 |
| Q9JI91        | QSILAIQNEVEK                                                                      | 0.800244107        | 2              | 2.842998505 |
| Q9JI91        | TINEVETQILTR                                                                      | 0.773214208        | 2              | 3.164352655 |
| <b>Q9JJ19</b> | <b>NHRF1 Na( )/H( ) exchange regulatory cofactor NHE_RF1</b>                      | <b>1.012951083</b> | <b>5.7E-06</b> | <b>9</b>    |
| Q9JJ19        | AVDPDSPAEEASGLR                                                                   | 1.005859218        | 2              | 3.248405457 |
| Q9JJ19        | IVEVNGVCMEGK                                                                      | 0.960713962        | 2              | 3.674657345 |
| Q9JJ19        | LLVDPETDEQLK                                                                      | 0.983478872        | 2              | 2.689920187 |
| Q9JJ19        | LLVDPETDEQLKK                                                                     | 1.444810063        | 2              | 2.86783123  |
| Q9JJ19        | LVEPGSPA EK                                                                       | 1.183835684        | 2              | 2.56203723  |
| Q9JJ19        | LVEVNGENVEK                                                                       | 1.014343466        | 2              | 2.882863283 |
| Q9JJ19        | SEHTEPPAAADTK                                                                     | 0.693595564        | 2              | 3.206414461 |
| Q9JJ19        | SEHTEPPAAADTKK                                                                    | 1.035444434        | 3              | 4.611467838 |
| Q9JJ19        | VTPSQEHLDGPLPEPFSNGEIQK                                                           | 0.617904541        | 3              | 3.914588451 |
| <b>Q9JJ54</b> | <b>HNRPD Heterogeneous nuclear ribonucleoprotein D0</b>                           | <b>1.013446688</b> | <b>0.14658</b> | <b>3</b>    |
| Q9JJ54        | FGDVVDCTLK                                                                        | 0.985560333        | 2              | 2.722913504 |
| Q9JJ54        | IFVGGLSPDTPEEK                                                                    | 1.364312865        | 2              | 3.913995743 |
| Q9JJ54        | IDASKNEEDEGHSSNSPR                                                                | 1.171610898        | 3              | 3.897474289 |

|               |                                                                 |                    |                |             |
|---------------|-----------------------------------------------------------------|--------------------|----------------|-------------|
| <b>Q9JJ79</b> | <b>DYHC2 Cytoplasmic dynein 2 heavy chain 1</b>                 | <b>1.085709279</b> | <b>0.9208</b>  | <b>3</b>    |
| Q9JJ79        | ASDLKDLNSR                                                      | 1.082377661        | 2              | 2.352930784 |
| Q9JJ79        | DQIEVMKGNVKS                                                    | 1.012173291        | 2              | 2.366572618 |
| Q9JJ79        | NCLEEWTKAAGLEK                                                  | 1.091596899        | 2              | 2.372308016 |
| <b>Q9JJM9</b> | <b>SEPT5 Septin_5</b>                                           | <b>1.082553174</b> | <b>0.18694</b> | <b>2</b>    |
| Q9JJM9        | LIRMKDEELR                                                      | 1.903746155        | 2              | 2.481617451 |
| Q9JJM9        | MQEMLQMK+Oxidation(4)                                           | 0.615586995        | 2              | 2.417910814 |
| <b>Q9JJU8</b> | <b>SH3L1 SH3 domain_binding glutamic acid_rich_like protein</b> | <b>1.014656426</b> | <b>0.9972</b>  | <b>2</b>    |
| Q9JJU8        | GDYDAFFEAR                                                      | 1.048101297        | 2              | 2.544910192 |
| Q9JJU8        | QQDVLCFLEANK                                                    | 1.013880202        | 2              | 2.88103199  |
| <b>Q9JK38</b> | <b>GNA1 Glucosamine 6_phosphate N_acetyltransferase</b>         | <b>1.183963782</b> | <b>2E-06</b>   | <b>4</b>    |
| Q9JK38        | GRVEDVVVSDECR                                                   | 1.111166287        | 2              | 3.459815979 |
| Q9JK38        | ITLECLPQNVGFYK                                                  | 1.496753324        | 2              | 3.747694016 |
| Q9JK38        | VEDVVVSDECR                                                     | 1.191905538        | 2              | 3.7012043   |
| Q9JK38        | VLGQLTETGVVSPEQFMK                                              | 1.211183875        | 2              | 4.539330006 |
| <b>Q9JLA3</b> | <b>UGGG1 UDP_glucose:glycoprotein glucosyltransferase 1</b>     | <b>1.245626071</b> | <b>0.76969</b> | <b>8</b>    |
| Q9JLA3        | EGETYDVVAVVDPVTR                                                | 0.959830491        | 2              | 2.60989213  |
| Q9JLA3        | IVPEWQDYDQEI                                                    | 1.077559389        | 2              | 3.562581539 |
| Q9JLA3        | LNIQPSETDYAVDIR                                                 | 1.223842247        | 2              | 4.133049488 |
| Q9JLA3        | VEEDVASDLVMK                                                    | 1.118542361        | 2              | 3.258431673 |
| Q9JLA3        | YVLEPEISFTADNSFAK                                               | 1.104145781        | 2              | 3.722279549 |
| Q9JLA3        | AYNYVGQEVDDGYHAFQTLTQIYNK                                       | 0.568306733        | 3              | 3.918198347 |
| Q9JLA3        | GQYQGLSQDPNSLSNLDQDLPNNMIHQVPIK                                 | 1.141493191        | 3              | 6.133787632 |
| Q9JLA3        | LGIEGLSLHNILK                                                   | 1.59341832         | 3              | 3.886561632 |
| <b>Q9JLJ3</b> | <b>AL9A1 4_trimethylaminobutyraldehyde dehydrogenase</b>        | <b>0.918235852</b> | <b>0.00039</b> | <b>17</b>   |
| Q9JLJ3        | AGAPNGLFNVVQGAATGQFLCQHR                                        | 1.333531059        | 2              | 4.441753864 |
| Q9JLJ3        | ANDTTFGLAAGVFTR                                                 | 1.024749549        | 2              | 4.90164423  |
| Q9JLJ3        | CQVLLAAR                                                        | 1.225349265        | 2              | 3.037918329 |
| Q9JLJ3        | EQGATVLCGGEPYAPEDPK                                             | 1.084873223        | 2              | 4.690720558 |
| Q9JLJ3        | EQGATVLCGGEPYAPEDPKL                                            | 1.156990463        | 2              | 4.654038906 |
| Q9JLJ3        | EVNLAVENAK                                                      | 0.896049957        | 2              | 2.976658821 |
| Q9JLJ3        | GALLANFLTQGVCCNGTR                                              | 0.954299925        | 2              | 5.349894524 |
| Q9JLJ3        | HGYMTPCILTNTDDMTVCV                                             | 1.17295208         | 2              | 4.583210468 |
| Q9JLJ3        | IGDPLLEDTR                                                      | 1.202866907        | 2              | 3.927162886 |
| Q9JLJ3        | MGPLINAPHLER                                                    | 1.28140107         | 2              | 3.495093107 |
| Q9JLJ3        | MGPLINAPHLER+Oxidation(1)                                       | 1.3776815          | 2              | 3.016052961 |
| Q9JLJ3        | RDEIAIMETINNGK                                                  | 1.05306108         | 2              | 5.45677042  |
| Q9JLJ3        | VEPVDASGTEK                                                     | 1.203747474        | 2              | 2.323982239 |
| Q9JLJ3        | VSFTGSVPTGMK                                                    | 1.200148822        | 2              | 3.368051291 |
| Q9JLJ3        | VSFTGSVPTGMK+Oxidation(11)                                      | 1.298966494        | 2              | 2.814189911 |
| Q9JLJ3        | VTIEYSQLK                                                       | 1.15007905         | 2              | 3.192930937 |

|               |                                                            |                    |                |             |
|---------------|------------------------------------------------------------|--------------------|----------------|-------------|
| Q9JLJ3        | GIKPITLLEGGK                                               | 1.125076298        | 3              | 3.921104193 |
| <b>Q9JLTO</b> | <b>MYH10 Myosin_10</b>                                     | <b>1.279541654</b> | <b>1.9E-10</b> | <b>3</b>    |
| Q9JLTO        | DEELLKVKEK                                                 | 1.134452871        | 1              | 2.14849782  |
| Q9JLTO        | AGVLAHLEEEER                                               | 1.415941507        | 2              | 3.516296864 |
| Q9JLTO        | DAAGLESQIQDTQELLQEETR                                      | 0.670334725        | 2              | 3.746877909 |
| <b>Q9JLZ3</b> | <b>AUHM Methylglutaconyl_CoA hydratase_ mitochondrial</b>  | <b>1.084452693</b> | <b>0.28276</b> | <b>3</b>    |
| Q9JLZ3        | AVGLISHVLEQNQEGDAAYR                                       | 1.215360202        | 2              | 5.805500031 |
| Q9JLZ3        | SEVPGIFCAGADLK                                             | 1.066678629        | 2              | 3.259103298 |
| Q9JLZ3        | AVGLISHVLEQNQEGDAAYRK                                      | 1.100116906        | 3              | 4.581832409 |
| <b>Q9JM53</b> | <b>AIFM1 Apoptosis_inducing factor 1_ mitochondrial</b>    | <b>1.148117869</b> | <b>0.43022</b> | <b>13</b>   |
| Q9JM53        | DGEQHEDLNEVAK                                              | 0.853057662        | 2              | 3.926563025 |
| Q9JM53        | ILPEYLSNWTMEK                                              | 1.188601367        | 2              | 2.61017561  |
| Q9JM53        | KSQASGIEVIQLFPEK                                           | 1.030232106        | 2              | 3.647904158 |
| Q9JM53        | KVETDHIVTAVGLEPNVELAK                                      | 1.174710723        | 2              | 6.325231075 |
| Q9JM53        | LNDGSQITFEK                                                | 1.176977624        | 2              | 3.578783989 |
| Q9JM53        | SATEQSGTGIR                                                | 0.819553064        | 2              | 3.854152918 |
| Q9JM53        | SITVIGGGFLGSELACALGR                                       | 1.029655972        | 2              | 3.413947105 |
| Q9JM53        | SQASGIEVIQLFPEK                                            | 0.947905819        | 2              | 4.256615162 |
| Q9JM53        | TGGLEIDSDFGGFR                                             | 1.133486354        | 2              | 3.816315413 |
| Q9JM53        | VETDHIVTAVGLEPNVELAK                                       | 1.060020242        | 2              | 6.018784046 |
| Q9JM53        | VMPNAIVQSVGVSGGK                                           | 1.266117326        | 2              | 4.523158073 |
| Q9JM53        | VNAELQAR                                                   | 1.054084696        | 2              | 2.374446869 |
| Q9JM53        | VLIVSEDPPELYMRPPLSK                                        | 0.789225282        | 3              | 3.706329107 |
| <b>Q9JMA1</b> | <b>UBP14 Ubiquitin carboxyl_terminal hydrolase 14</b>      | <b>1.044677435</b> | <b>0.89199</b> | <b>2</b>    |
| Q9JMA1        | CTESEEEVTK                                                 | 1.028858773        | 2              | 3.644242048 |
| Q9JMA1        | EKESVNAKVLK                                                | 1.183609006        | 2              | 2.559516668 |
| <b>Q9JMB7</b> | <b>PIWL1 Piwi_like protein 1</b>                           | <b>0.953948896</b> | <b>0.72943</b> | <b>2</b>    |
| Q9JMB7        | ELIGLIVLTKYNNK                                             | 1.047272163        | 2              | 2.42495203  |
| Q9JMB7        | SQELQISAGFQELSLAERGRR                                      | 0.647581091        | 2              | 2.340773582 |
| <b>Q9JMD3</b> | <b>PCTL PCTP_like protein</b>                              | <b>1.21889155</b>  | <b>4.2E-07</b> | <b>6</b>    |
| Q9JMD3        | AVSIQTGYLIQSTGPK                                           | 1.114177962        | 2              | 4.544362545 |
| Q9JMD3        | ESVQVPDDQDFR                                               | 0.542492588        | 2              | 2.671562195 |
| Q9JMD3        | SSQFLAPK                                                   | 1.047591138        | 2              | 2.346596479 |
| Q9JMD3        | WDSNVIETFDIAR                                              | 1.203085741        | 2              | 4.122594357 |
| Q9JMD3        | MECCDVPAETLYDVLHDIEYR                                      | 1.219325013        | 3              | 4.43348074  |
| Q9JMD3        | MECCDVPAETLYDVLHDIEYR+Oxidation(1)                         | 1.245906141        | 3              | 3.570852995 |
| <b>Q9JMK8</b> | <b>VP54 Vacuolar protein sorting_associated protein 54</b> | <b>1.283738047</b> | <b>0.64672</b> | <b>2</b>    |
| Q9JMK8        | DKIAQIDK                                                   | 1.3397754          | 1              | 1.933704972 |
| Q9JMK8        | STSLGALQSQANK                                              | 0.989967483        | 2              | 2.353252888 |
| <b>Q9QVC8</b> | <b>FKBP4 Peptidyl_prolyl cis_trans isomerase FKBP4</b>     | <b>1.201225188</b> | <b>7.7E-10</b> | <b>5</b>    |
| Q9QVC8        | ALELDSNNEK                                                 | 1.021240527        | 2              | 2.415370941 |
| Q9QVC8        | GEPNNVAGNQAQVK                                             | 1.024202857        | 2              | 3.892968416 |

|               |                                                       |                    |                |             |
|---------------|-------------------------------------------------------|--------------------|----------------|-------------|
| Q9QVC8        | VAENGAQSAPLPLEGVDISPK                                 | 1.076726338        | 2              | 3.300282001 |
| Q9QVC8        | VLQLYPSNK                                             | 1.404077579        | 2              | 2.517601252 |
| Q9QVC8        | VEVCHITCKPEYAYGSAGSPPK                                | 1.20197179         | 3              | 6.195102215 |
| <b>Q9QWN8</b> | <b>SPTN2 Spectrin beta chain_ brain 2</b>             | <b>1.098341862</b> | <b>0.37142</b> | <b>2</b>    |
| Q9QWN8        | IIGTQEQLNQR                                           | 1.309613319        | 2              | 2.459606647 |
| Q9QWN8        | VGELTQEANALAAGHPAQAPAINTR                             | 1.092569696        | 3              | 3.960112095 |
| <b>Q9QX79</b> | <b>FETUB Fetuin_B</b>                                 | <b>1.195574941</b> | <b>0.20018</b> | <b>3</b>    |
| Q9QX79        | IFYETVHGQCK                                           | 1.260798509        | 2              | 2.884487629 |
| Q9QX79        | NTAPTSSPSITAPR                                        | 1.114772535        | 2              | 3.307208061 |
| Q9QX79        | GSIQHLPEQEPEPDSKGG                                    | 0.9036012          | 3              | 3.921628475 |
| <b>Q9QXG4</b> | <b>ACSA Acetyl_coenzyme A synthetase_ cytoplasmic</b> | <b>1.104130864</b> | <b>0.73523</b> | <b>2</b>    |
| Q9QXG4        | AELGMNDSPSQSPPVK                                      | 0.887757902        | 2              | 3.753323793 |
| Q9QXG4        | IGPIATPDYIQNAPGLPK                                    | 1.228532767        | 2              | 2.878663778 |
| <b>Q9QXK2</b> | <b>RAD18 E3 ubiquitin_protein ligase RAD18</b>        | <b>1.095697177</b> | <b>0.32522</b> | <b>2</b>    |
| Q9QXK2        | SAAEIVQEIESMEK                                        | 1.107568808        | 1              | 2.090774298 |
| Q9QXK2        | TVYNLLSDR                                             | 0.388777069        | 2              | 2.341837645 |
| <b>Q9QXK3</b> | <b>COPG2 Coatomer subunit gamma_2</b>                 | <b>1.255429619</b> | <b>0.30315</b> | <b>2</b>    |
| Q9QXK3        | SIATLAITLLK                                           | 1.184731218        | 2              | 3.025342464 |
| Q9QXK3        | SSEPVQLTEAETEFVR                                      | 1.329447558        | 2              | 3.84454751  |
| <b>Q9QXQ0</b> | <b>ACTN4 Alpha_actinin_4</b>                          | <b>1.19198529</b>  | <b>9.9E-20</b> | <b>28</b>   |
| Q9QXQ0        | NFITAEELR                                             | 1.22852318         | 1              | 2.142407894 |
| Q9QXQ0        | ACLISLGYDVENDR                                        | 1.10475239         | 2              | 3.960352898 |
| Q9QXQ0        | AGTQIENIDEDFR                                         | 1.063602597        | 2              | 2.836354017 |
| Q9QXQ0        | AGTQIENIDEDFRDGLK                                     | 1.29952537         | 2              | 4.472687721 |
| Q9QXQ0        | DDPVTNLNNAFEVAEK                                      | 0.394023762        | 2              | 3.639472008 |
| Q9QXQ0        | ETTDTDADQVIASF                                        | 0.892271768        | 2              | 4.884986401 |
| Q9QXQ0        | HRDYETATLSDIK                                         | 1.366958371        | 2              | 4.041306019 |
| Q9QXQ0        | HTNYTMEHLR                                            | 1.098742187        | 2              | 2.806650877 |
| Q9QXQ0        | ICDQWDNLGSLTHSR                                       | 1.190287607        | 2              | 4.033131599 |
| Q9QXQ0        | ISIEMNGTLEDQLSHLK                                     | 0.935345892        | 2              | 2.834712982 |
| Q9QXQ0        | LSGSNPYTSVTPQIINSK                                    | 1.363438804        | 2              | 4.471069813 |
| Q9QXQ0        | LVSIGAEIIVDGNK                                        | 1.395863187        | 2              | 3.682148218 |
| Q9QXQ0        | MAPYQGPDAAPGALDYK                                     | 1.206375962        | 2              | 4.320530415 |
| Q9QXQ0        | MAPYQGPDAAPGALDYK+Oxidation(1)                        | 1.136745818        | 2              | 3.093882561 |
| Q9QXQ0        | MLDAEDIVNTARPDEK                                      | 1.260643976        | 2              | 4.050361156 |
| Q9QXQ0        | MLDAEDIVNTARPDEK+Oxidation(1)                         | 1.002450507        | 2              | 2.640120029 |
| Q9QXQ0        | QLETIDQLHLEYAK                                        | 1.105267866        | 2              | 3.101920128 |
| Q9QXQ0        | TINEVENQILTR                                          | 0.726793172        | 2              | 3.366102457 |
| Q9QXQ0        | VEQIAAIAQELNELDYDHSNVNTR                              | 1.420273205        | 2              | 5.000962257 |
| Q9QXQ0        | VGWEQLLTIAR                                           | 1.276257751        | 2              | 4.240642071 |
| Q9QXQ0        | VLAGDKNFITAEELR                                       | 0.987880547        | 2              | 3.774789095 |
| Q9QXQ0        | VLAVNQENEHLMEDYER                                     | 1.196861783        | 2              | 5.552915573 |
| Q9QXQ0        | ACLISLGYDVENDRQGDAAFNR                                | 1.081239939        | 3              | 3.313280344 |



|               |                                                                   |                    |                |             |
|---------------|-------------------------------------------------------------------|--------------------|----------------|-------------|
| Q9QXQ0        | ASFNHFDKDHGGALGPPEEFK                                             | 1.145357809        | 3              | 3.709055662 |
| Q9QXQ0        | HRPELIEYDK                                                        | 1.066436936        | 3              | 4.724974155 |
| Q9QXQ0        | KDDPVTNLNNAFEVAEK                                                 | 1.052767141        | 3              | 4.932396412 |
| Q9QXQ0        | RDHALLEEQSK                                                       | 1.27973913         | 3              | 4.180046082 |
| Q9QXQ0        | SIVDYKPNLDLLEQQHQLIQEALIFDNK                                      | 1.205183921        | 3              | 3.648904562 |
| <b>Q9QXT0</b> | <b>CNPY2 Protein canopy homolog 2</b>                             | <b>1.123406756</b> | <b>0.59887</b> | <b>4</b>    |
| Q9QXT0        | ALVDELEWEIAR                                                      | 0.886673459        | 2              | 3.776273727 |
| Q9QXT0        | INPDGSQSVVEVPYAR                                                  | 1.128873349        | 2              | 3.74830389  |
| Q9QXT0        | TDLCDHALHR                                                        | 1.176297415        | 2              | 3.067386866 |
| Q9QXT0        | RTDLCDHALHR                                                       | 1.120888959        | 3              | 3.354558706 |
| <b>Q9QXX4</b> | <b>CMC2 Calcium_binding mitochondrial carrier protein Aralar2</b> | <b>1.073885419</b> | <b>9.5E-11</b> | <b>18</b>   |
| Q9QXX4        | DVEVTKEEFALAAQK                                                   | 0.849460922        | 2              | 4.085061073 |
| Q9QXX4        | FGLGSIAGAVGATAVYPIDLVK                                            | 1.309911424        | 2              | 6.553933144 |
| Q9QXX4        | FGLYLPFKPSASTSK                                                   | 1.11923091         | 2              | 2.605918407 |
| Q9QXX4        | GLLPQLLGVAPEK                                                     | 1.236268988        | 2              | 3.181954384 |
| Q9QXX4        | IAPLEEGMLPFNLAEAR                                                 | 1.286373782        | 2              | 5.390130997 |
| Q9QXX4        | ILREEGPK                                                          | 1.279700203        | 2              | 2.405819178 |
| Q9QXX4        | ITLPAPNPDHVGQYK                                                   | 1.424448331        | 2              | 2.416774273 |
| Q9QXX4        | KDVEVTKEEFALAAQK                                                  | 1.113576943        | 2              | 5.515861988 |
| Q9QXX4        | LQVAGEITGPR                                                       | 1.244901717        | 2              | 3.705809355 |
| Q9QXX4        | LTVNDFVR                                                          | 1.311445986        | 2              | 2.561140537 |
| Q9QXX4        | NGEFFMSPHDFVTR                                                    | 0.85390248         | 2              | 4.00643301  |
| Q9QXX4        | SSPQFGVTLTYELLQR                                                  | 1.423238967        | 2              | 4.538599491 |
| Q9QXX4        | STGSFVGELMYK                                                      | 1.033866616        | 2              | 3.085702419 |
| Q9QXX4        | TVELLSGVVDQTK                                                     | 1.212542272        | 2              | 3.96633482  |
| Q9QXX4        | YEGFFGLYR                                                         | 1.01869167         | 2              | 2.719932318 |
| Q9QXX4        | YLNIFGESQPNPK                                                     | 1.061325343        | 2              | 4.329919815 |
| Q9QXX4        | ASGDAARPFLLQLAESAYR                                               | 1.06598428         | 3              | 3.320191145 |
| Q9QXX4        | DIMVTIRPHVLTPEVECLVAAAGGTR                                        | 1.006375553        | 3              | 6.070115089 |
| <b>Q9QXY2</b> | <b>SRCN1 SRC kinase signaling inhibitor 1</b>                     | <b>1.011489557</b> | <b>0.79817</b> | <b>2</b>    |
| Q9QXY2        | DINRLEETQAELLK                                                    | 1.463326322        | 2              | 2.413820744 |
| Q9QXY2        | IIAELESGGGSVPPMK                                                  | 0.896224129        | 2              | 2.436297178 |
| <b>Q9QYU4</b> | <b>CRYM Thiomorpholine_carboxylate dehydrogenase</b>              | <b>0.914332479</b> | <b>0.94085</b> | <b>4</b>    |
| Q9QYU4        | GFLGVMPAYSAEALTTK                                                 | 0.877312032        | 2              | 4.05963707  |
| Q9QYU4        | SLGMAVEDLVAEK                                                     | 0.794859778        | 2              | 3.623161554 |
| Q9QYU4        | SSSLLIPPLEAALANFSK                                                | 0.900520634        | 2              | 3.137943983 |
| Q9QYU4        | RAPAFLSADEVQDHLR                                                  | 1.24701662         | 3              | 5.07879734  |
| <b>Q9QZ76</b> | <b>MYG Myoglobin</b>                                              | <b>0.669572287</b> | <b>0.68037</b> | <b>7</b>    |
| Q9QZ76        | GQHAAEIQLAQSHATK                                                  | 0.57355462         | 2              | 4.568988323 |
| Q9QZ76        | HGCTVLTALGTILK                                                    | 0.675998992        | 2              | 3.512140512 |
| Q9QZ76        | YSGDFGADAQGAMSK                                                   | 0.477771326        | 2              | 4.03223753  |
| Q9QZ76        | HGCTVLTALGTILK                                                    | 0.828715762        | 3              | 3.701293468 |

|               |                                                          |                    |                |             |
|---------------|----------------------------------------------------------|--------------------|----------------|-------------|
| Q9QZ76        | KGQHAAEIQLAQSHATK                                        | 0.158294434        | 3              | 4.783436775 |
| Q9QZ76        | KKGQHAAEIQLAQSHATK                                       | 0.605592951        | 3              | 4.597335815 |
| Q9QZ76        | VEGDLAGHGQEVLSLFK                                        | 0.57029744         | 3              | 4.345952988 |
| <b>Q9QZA2</b> | <b>PDC6I Programmed cell death 6_interacting protein</b> | <b>1.011261797</b> | <b>0.84838</b> | <b>8</b>    |
| Q9QZA2        | ATLVKPTPVNVPISQK                                         | 0.916009591        | 2              | 3.469152212 |
| Q9QZA2        | DTIALLCPEPELNAAIPSANPAK                                  | 1.203669585        | 2              | 2.506603956 |
| Q9QZA2        | FYNELTEILVR                                              | 0.889652926        | 2              | 2.706029654 |
| Q9QZA2        | LLDEEEATDNDLR                                            | 1.117752188        | 2              | 3.674225569 |
| Q9QZA2        | NIQVSHQEFSK                                              | 1.075850633        | 2              | 3.378335238 |
| Q9QZA2        | NLATAYDNFVELVANLK                                        | 1.067999675        | 2              | 4.433708668 |
| Q9QZA2        | STAVVEQGGIQTVDQLIK                                       | 1.012797743        | 2              | 4.446197987 |
| Q9QZA2        | TMQGSEVVNVLK                                             | 1.015611717        | 2              | 3.343164444 |
| <b>Q9QZD8</b> | <b>DIC Mitochondrial dicarboxylate carrier</b>           | <b>1.041153094</b> | <b>2.5E-05</b> | <b>7</b>    |
| Q9QZD8        | GALVTVQQLSCYDQAK                                         | 1.138809477        | 2              | 4.952244282 |
| Q9QZD8        | LFSGATMASSR                                              | 0.825685309        | 2              | 2.63167119  |
| Q9QZD8        | MTGMALQVVR                                               | 1.018184931        | 2              | 2.667765856 |
| Q9QZD8        | NYSHALDGLYR                                              | 1.029730034        | 2              | 2.923059702 |
| Q9QZD8        | VHLQTQQEVK                                               | 1.24317769         | 2              | 2.852312326 |
| Q9QZD8        | VLLGGISGLTGGFVGTADLVNVR                                  | 1.33264287         | 2              | 5.691683769 |
| Q9QZD8        | WYFGLASCGAACCTHPLDLLK                                    | 0.998815859        | 3              | 3.804111242 |
| <b>Q9QZH8</b> | <b>AAAD Arylacetamide deacetylase</b>                    | <b>1.077936668</b> | <b>1</b>       | <b>2</b>    |
| Q9QZH8        | LDVVVSTDYGLAPK                                           | 1.055746138        | 2              | 4.183673859 |
| Q9QZH8        | WFLQEDILEK                                               | 1.106656287        | 2              | 3.320789576 |
| <b>Q9QZU7</b> | <b>BODG Gamma_butyrobetaine dioxygenase</b>              | <b>1.148582881</b> | <b>0.40561</b> | <b>5</b>    |
| Q9QZU7        | IDANNVAYTTGK                                             | 0.825312265        | 2              | 3.308521509 |
| Q9QZU7        | IIELDKQVVR                                               | 1.122840163        | 2              | 2.53600359  |
| Q9QZU7        | LLLEALDVNIR                                              | 2.261325124        | 2              | 2.836933374 |
| Q9QZU7        | MNPGDVITFDNWR                                            | 0.933564153        | 2              | 2.72871685  |
| Q9QZU7        | QTVTGGDSEIVDGFNVQCQK                                     | 1.18145391         | 2              | 4.476000309 |
| <b>Q9R063</b> | <b>PRDX5 Peroxiredoxin_5_mitochondrial</b>               | <b>0.987761311</b> | <b>0.14261</b> | <b>10</b>   |
| Q9R063        | ETDLLDDSLVSLFGNR                                         | 1.091192152        | 2              | 4.488534927 |
| Q9R063        | GVLFVPGAFTPGCSK                                          | 0.919850914        | 2              | 4.538834572 |
| Q9R063        | KGVLFGVPGAFTPGCSK                                        | 0.974546394        | 2              | 3.501199484 |
| Q9R063        | KVNLAELFK                                                | 0.929395565        | 2              | 2.304795265 |
| Q9R063        | VGDTIPSVEVFEGEPGK                                        | 0.923684325        | 2              | 4.477273941 |
| Q9R063        | VGDTIPSVEVFEGEPGKK                                       | 1.101521418        | 2              | 3.900148392 |
| Q9R063        | VNLAELFK                                                 | 0.93982547         | 2              | 2.722461939 |
| Q9R063        | VQLLADPTGAFGK                                            | 1.107783361        | 2              | 3.710577488 |
| Q9R063        | ALNVEPDGTGLTCSLAPNLSQL                                   | 1.741056211        | 3              | 4.357468605 |
| Q9R063        | THLPGFVEQAGALK                                           | 0.967053343        | 3              | 4.343317986 |
| <b>Q9R064</b> | <b>GORS2 Golgi reassembly_stacking protein 2</b>         | <b>1.076055343</b> | <b>0.94357</b> | <b>2</b>    |
| Q9R064        | ADTSSLTVDMSPASK                                          | 1.069068843        | 2              | 3.47929287  |
| Q9R064        | LYVYNTDNDNCR                                             | 1.587874049        | 2              | 2.797038317 |

|               |                                                                    |                    |                |             |
|---------------|--------------------------------------------------------------------|--------------------|----------------|-------------|
| <b>Q9R0N0</b> | <b>GALK1 Galactokinase</b>                                         | <b>1.27394657</b>  | <b>0.0007</b>  | <b>4</b>    |
| Q9R0N0        | RQCEEVAQALGK                                                       | 1.182988113        | 2              | 2.857145548 |
| Q9R0N0        | SLETSVLPLSDPK                                                      | 1.33869336         | 2              | 3.356185198 |
| Q9R0N0        | TDGLVSLTTSK                                                        | 1.445430674        | 2              | 3.431886911 |
| Q9R0N0        | VEELLAEAR                                                          | 1.271095061        | 2              | 3.042392492 |
| <b>Q9R0T3</b> | <b>DNJC3 Dnaj homolog subfamily C member 3</b>                     | <b>1.221102383</b> | <b>0.34645</b> | <b>6</b>    |
| Q9R0T3        | AEPSVAEYTVR                                                        | 1.227383243        | 2              | 2.829093456 |
| Q9R0T3        | ICSEVLQLEPDNVNALK                                                  | 0.882040535        | 2              | 5.562837124 |
| Q9R0T3        | LIGSAEELIR                                                         | 1.44980039         | 2              | 2.860871077 |
| Q9R0T3        | LKNDNTEAFYK                                                        | 1.51726407         | 2              | 2.819411993 |
| Q9R0T3        | SNPSENEEKEAQSQLVK                                                  | 1.07891626         | 2              | 5.091547966 |
| Q9R0T3        | KFDDGEDPLDAETQQGGGSPFHR                                            | 1.202362073        | 3              | 5.408206463 |
| <b>Q9R112</b> | <b>SQRD Sulfide:quinone oxidoreductase_ mitochondrial</b>          | <b>1.15347175</b>  | <b>0.92052</b> | <b>3</b>    |
| Q9R112        | EGNALFTFPNTPVK                                                     | 0.903264954        | 2              | 3.046411753 |
| Q9R112        | STLSVIPSGVQWIQDR                                                   | 1.065435027        | 2              | 2.795131445 |
| Q9R112        | VGAENVAIVEPSER                                                     | 1.175499742        | 2              | 2.844654083 |
| <b>Q9R1M5</b> | <b>NALP5 NACHT_ LRR and PYD domains_ containing protein 5</b>      | <b>1.051333861</b> | <b>0.92432</b> | <b>2</b>    |
| Q9R1M5        | SLDLGNALGDK                                                        | 1.06326788         | 1              | 1.919072747 |
| Q9R1M5        | KMTSPENDSKSIQK                                                     | 0.98251797         | 2              | 2.39211154  |
| <b>Q9R1T3</b> | <b>CATZ Cathepsin Z</b>                                            | <b>1.121713539</b> | <b>0.20335</b> | <b>2</b>    |
| Q9R1T3        | HGIPDETCNNYQAK                                                     | 1.121609796        | 2              | 4.191784382 |
| Q9R1T3        | VGDYGSLSGR                                                         | 1.235873455        | 2              | 2.454202652 |
| <b>Q9R1T4</b> | <b>SEPT6 Septin_6</b>                                              | <b>1.038148622</b> | <b>0.12288</b> | <b>2</b>    |
| Q9R1T4        | QMFVQRVKEK+Oxidation(2)                                            | 1.293017618        | 1              | 1.997941136 |
| Q9R1T4        | STLMDTLFNTK                                                        | 0.757488091        | 2              | 2.442177534 |
| <b>Q9R1Z0</b> | <b>VDAC3 Voltage_ dependent anion_ selective channel protein 3</b> | <b>0.907708833</b> | <b>0.99982</b> | <b>4</b>    |
| Q9R1Z0        | LCQNNFALGYK                                                        | 1.165265801        | 2              | 2.835753202 |
| Q9R1Z0        | LTVDTIFVPNTGK                                                      | 1.06548351         | 2              | 2.588443279 |
| Q9R1Z0        | VNNASLIGLGYTQSLRPGVK                                               | 0.885650057        | 2              | 4.152097702 |
| Q9R1Z0        | WNTDNTLGTEISWENK                                                   | 0.986877203        | 2              | 3.084305048 |
| <b>Q9R257</b> | <b>HEBP1 Heme_ binding protein 1</b>                               | <b>1.31637179</b>  | <b>0.07731</b> | <b>2</b>    |
| Q9R257        | EAMPKIMKYVGGTNDK+Oxidation(3)                                      | 1.153521797        | 2              | 2.323169231 |
| Q9R257        | NSLFGSVETWPWQVLSTGGK                                               | 1.320251673        | 2              | 2.474430084 |
| <b>Q9WTT6</b> | <b>GUAD Guanine deaminase</b>                                      | <b>1.113583244</b> | <b>8E-13</b>   | <b>9</b>    |
| Q9WTT6        | AVMVSNNVLLINK                                                      | 0.924655298        | 2              | 2.853058338 |
| Q9WTT6        | EIGNFEVGKDFDALLINPR                                                | 1.186487223        | 2              | 4.545716286 |
| Q9WTT6        | ETTEESVKETER                                                       | 0.881296527        | 2              | 3.414883137 |
| Q9WTT6        | FQSTDVAEEVYTR                                                      | 1.07429828         | 2              | 3.482673645 |
| Q9WTT6        | FSLSCTETLMSELGNIK                                                  | 1.501969545        | 2              | 4.78656292  |
| Q9WTT6        | IVFLEESSQKEK                                                       | 1.217423461        | 2              | 4.163647175 |
| Q9WTT6        | NYTDVYDKNNLLTNK                                                    | 1.539776395        | 2              | 4.503720284 |

|               |                                                                             |                    |                |             |
|---------------|-----------------------------------------------------------------------------|--------------------|----------------|-------------|
| Q9WTT6        | VCMDLNNTVPEYK                                                               | 1.319531855        | 2              | 3.137197256 |
| Q9WTT6        | THDLYIQSHISENREEIEAVK                                                       | 1.492844067        | 3              | 4.066703796 |
| <b>Q9WU19</b> | <b>HAOX1 Hydroxyacid oxidase 1</b>                                          | <b>1.288049703</b> | <b>0.00166</b> | <b>9</b>    |
| Q9WU19        | AIFVTVDTPYLGNR                                                              | 1.224848065        | 2              | 3.741362095 |
| Q9WU19        | GVQDVLEILK                                                                  | 0.925199848        | 2              | 3.609725475 |
| Q9WU19        | GVQDVLEILKEEFR                                                              | 1.489398751        | 2              | 4.380950451 |
| Q9WU19        | MKNFETNDLAFSPK+Oxidation(1)                                                 | 0.981802762        | 2              | 2.675359488 |
| Q9WU19        | NFETNDLAFSPK                                                                | 1.123706969        | 2              | 3.404445648 |
| Q9WU19        | NVADIDLSTSVLGQR                                                             | 0.962064947        | 2              | 5.091208935 |
| Q9WU19        | VEVFLDGGVR                                                                  | 1.239377952        | 2              | 2.643554688 |
| Q9WU19        | AVFVGRPIIWGLAFQGEK                                                          | 1.067747837        | 3              | 4.126003265 |
| Q9WU19        | HGVDGILVSNHGAR                                                              | 1.023421658        | 3              | 4.840137005 |
| <b>Q9WU49</b> | <b>CHSP1 Calcium_regulated heat stable protein 1</b>                        | <b>1.153393062</b> | <b>0.04799</b> | <b>2</b>    |
| Q9WU49        | HETWSGHVISS                                                                 | 1.240608708        | 2              | 2.958870411 |
| Q9WU49        | LQAVEVVITHLAPGTK                                                            | 1.146091615        | 2              | 4.45315218  |
| <b>Q9WU65</b> | <b>GLPK2 Glycerol kinase 2</b>                                              | <b>1.064461083</b> | <b>0.44487</b> | <b>2</b>    |
| Q9WU65        | GIICGLTQFTNK                                                                | 1.043077722        | 2              | 3.564902544 |
| Q9WU65        | LAEVNIDISNIK                                                                | 2.039353783        | 2              | 2.338747978 |
| <b>Q9WU82</b> | <b>CTNB1 Catenin beta_1</b>                                                 | <b>1.14826083</b>  | <b>0.46509</b> | <b>3</b>    |
| Q9WU82        | HQEAEMAQNAVR                                                                | 1.09841888         | 2              | 3.347616911 |
| Q9WU82        | LLNDEDQVVVVK                                                                | 0.361190176        | 2              | 3.114640951 |
| Q9WU82        | TMQNTNDVETAR                                                                | 1.151980062        | 2              | 3.577583313 |
| <b>Q9WUC4</b> | <b>ATOX1 Copper transport protein ATOX1</b>                                 | <b>1.06816346</b>  | <b>0.95068</b> | <b>2</b>    |
| Q9WUC4        | LGGVEFNIDLPNKK                                                              | 1.150727924        | 2              | 3.788460016 |
| Q9WUC4        | VCIESEHSSDILLATLNK                                                          | 1.069006172        | 2              | 5.880673885 |
| <b>Q9WUH4</b> | <b>FHL1 Four and a half LIM domains protein 1</b>                           | <b>0.874804425</b> | <b>0.91514</b> | <b>2</b>    |
| Q9WUH4        | AIVAGDQNVVEYK                                                               | 0.874900891        | 2              | 2.392768383 |
| Q9WUH4        | FCANTCVECR                                                                  | 0.874789947        | 2              | 2.780707836 |
| <b>Q9WUJ8</b> | <b>ORC6 Origin recognition complex subunit 6</b>                            | <b>0.970366714</b> | <b>0.98216</b> | <b>2</b>    |
| Q9WUJ8        | LSGLNKMMYQSCLK+Oxidation(7)                                                 | 0.970366714        | 2              | 2.309640169 |
| Q9WUJ8        | LSGLNKMMYQSCLK+Oxidation(8)                                                 | 0.970366714        | 2              | 2.36095643  |
| <b>Q9WUS0</b> | <b>KAD4 Adenylate kinase isoenzyme 4_ mitochondrial</b>                     | <b>1.122025122</b> | <b>0.03302</b> | <b>4</b>    |
| Q9WUS0        | GVLHQFSGTETNR                                                               | 1.166984906        | 2              | 3.456543446 |
| Q9WUS0        | TLVQAEALDR                                                                  | 1.087837477        | 2              | 2.636130095 |
| Q9WUS0        | YKDAAKPVIELYK                                                               | 1.002158207        | 2              | 3.924734116 |
| Q9WUS0        | VYNLDFNPPQVLGVDDITGEPLVQQEDDKPEALAAR                                        | 1.67650421         | 3              | 5.468357563 |
| <b>Q9WVA1</b> | <b>TIM8A Mitochondrial import inner membrane translocase subunit Tim8 A</b> | <b>1.077814768</b> | <b>0.78712</b> | <b>2</b>    |
| Q9WVA1        | AEACFVNCVER                                                                 | 1.219270298        | 2              | 2.460909843 |
| Q9WVA1        | SKPVFSESLSD                                                                 | 1.076637206        | 2              | 2.911373615 |
| <b>Q9WVF7</b> | <b>DPOE1 DNA polymerase epsilon catalytic subunit A</b>                     | <b>0.714702368</b> | <b>0.35398</b> | <b>2</b>    |
| Q9WVF7        | AANMPDSELFELISENR                                                           | 0.792556856        | 2              | 2.432553768 |
| Q9WVF7        | MAWQWRGEFMPASR+Oxidation(1)Oxidation(10)                                    | 0.521519839        | 2              | 2.373280764 |

|               |                                                                           |                    |                |             |
|---------------|---------------------------------------------------------------------------|--------------------|----------------|-------------|
| <b>Q9WVK3</b> | <b>PECR Peroxisomal trans_2_enoyl_CoA reductase</b>                       | <b>1.072514361</b> | <b>0.57626</b> | <b>13</b>   |
| Q9WVK3        | AGVYNLTK                                                                  | 0.967496568        | 2              | 2.722889423 |
| Q9WVK3        | ASQPPSSSTQVTAIQCNI                                                        | 1.154639906        | 2              | 5.527894497 |
| Q9WVK3        | ELLHLGCNVVIASR                                                            | 0.792555733        | 2              | 4.050622463 |
| Q9WVK3        | INFLVNNAGGQFMAPAEDITAK                                                    | 1.26703533         | 2              | 5.459639549 |
| Q9WVK3        | INFLVNNAGGQFMAPAEDITAK+Oxidation(13)                                      | 1.245916852        | 2              | 3.557024002 |
| Q9WVK3        | LTAAVDEL                                                                  | 1.266386626        | 2              | 2.789311409 |
| Q9WVK3        | NFTIPDHDNWPVGAGDSSFIK                                                     | 0.869605986        | 2              | 5.074594021 |
| Q9WVK3        | SGQSYLAAGLLQNQVAVVTGGATGIGK                                               | 0.893872797        | 2              | 5.953708172 |
| Q9WVK3        | TMALTWASSGVR                                                              | 0.878089598        | 2              | 3.744310141 |
| Q9WVK3        | TMALTWASSGVR+Oxidation(2)                                                 | 1.285072915        | 2              | 2.30107522  |
| Q9WVK3        | DHGGSSIVNIIVLLNNGFPTAAHSGAAR                                              | 1.057733713        | 3              | 7.082596779 |
| Q9WVK3        | KEEEVNLLVK                                                                | 1.067907255        | 3              | 3.926213026 |
| Q9WVK3        | NFTIPDHDNWPVGAGDSSFIK                                                     | 0.967808881        | 3              | 4.067037582 |
| <b>Q9WVK7</b> | <b>HCDH Hydroxyacyl_coenzyme A dehydrogenase_mitochondrial</b>            | <b>1.025897719</b> | <b>6.4E-10</b> | <b>14</b>   |
| Q9WVK7        | LVEVIK                                                                    | 1.153617879        | 1              | 2.017632723 |
| Q9WVK7        | AADEFVEK                                                                  | 1.121142897        | 2              | 3.025589466 |
| Q9WVK7        | FAAEHTIFASNTSSLQITNIANATTR                                                | 0.934437002        | 2              | 5.716365814 |
| Q9WVK7        | GDASKEDIDTAMK                                                             | 1.03599484         | 2              | 3.92681694  |
| Q9WVK7        | GDASKEDIDTAMK+Oxidation(12)                                               | 1.352214769        | 2              | 3.188327074 |
| Q9WVK7        | KGIEESLK                                                                  | 1.217210214        | 2              | 2.544475555 |
| Q9WVK7        | LKNELFQR                                                                  | 1.421849188        | 2              | 2.544277906 |
| Q9WVK7        | LLVPYLIEAIR                                                               | 1.816105629        | 2              | 2.671334743 |
| Q9WVK7        | TFESLVDFCK                                                                | 1.2543281          | 2              | 3.589492559 |
| Q9WVK7        | FILDGWHEMDPENPLFQSPSMNLLVAQK                                              | 1.04732192         | 3              | 5.605311394 |
| Q9WVK7        | FILDGWHEMDPENPLFQSPSMNLLVAQK+Oxidation(22)                                | 1.000955301        | 3              | 3.715282917 |
| Q9WVK7        | FILDGWHEMDPENPLFQSPSMNLLVAQK+Oxidation(9)                                 | 1.000955301        | 3              | 3.986675978 |
| Q9WVK7        | HVTVIGGGLMGAGIAQVAAATGHTVVLVDQTEDILAK                                     | 1.076559464        | 3              | 7.799145699 |
| Q9WVK7        | TLSSLSTDAASVHSTDLVVEAIVENLK                                               | 1.044840621        | 3              | 6.464444637 |
| <b>Q9WVL6</b> | <b>EXTL3 Exostosin_like 3</b>                                             | <b>1.500548015</b> | <b>0.00119</b> | <b>2</b>    |
| Q9WVL6        | QDLLQLK                                                                   | 0.663728394        | 1              | 2.155037165 |
| Q9WVL6        | QELNSEIAKLNK                                                              | 1.719634952        | 2              | 2.571891069 |
| <b>Q9Z0N2</b> | <b>IF2H Eukaryotic translation initiation factor 2 subunit 3_Y_linked</b> | <b>1.410286507</b> | <b>1.7E-10</b> | <b>2</b>    |
| Q9Z0N2        | IVLTNPVCTEVGEK                                                            | 1.42276481         | 2              | 2.453890324 |
| Q9Z0N2        | VGQEIEVRPGIVSK                                                            | 1.409302279        | 2              | 3.562809467 |
| <b>Q9Z0U5</b> | <b>ADO Aldehyde oxidase</b>                                               | <b>1.065542172</b> | <b>0.99977</b> | <b>16</b>   |
| Q9Z0U5        | DLEPLILTIEEAIQHK                                                          | 0.891731398        | 2              | 3.005634546 |
| Q9Z0U5        | EFQPLDPTQELIFPELMR                                                        | 1.168694606        | 2              | 3.071500301 |
| Q9Z0U5        | ELSILYGGVGPPTIGAK                                                         | 0.876719856        | 2              | 3.813266516 |
| Q9Z0U5        | GTSTETVPNTNASGGSVVADLNGLAVK                                               | 1.127891727        | 2              | 4.808963299 |
| Q9Z0U5        | GYESNINWEK                                                                | 0.97260177         | 2              | 2.963125229 |

|               |                                                                      |                    |                |             |
|---------------|----------------------------------------------------------------------|--------------------|----------------|-------------|
| Q9Z0U5        | HIQDIVAATLK                                                          | 1.121038548        | 2              | 2.605260134 |
| Q9Z0U5        | KLECGNVDEAFK                                                         | 1.017946543        | 2              | 3.600631952 |
| Q9Z0U5        | LVLDEVTLGASAPGGK                                                     | 1.107165565        | 2              | 4.281523705 |
| Q9Z0U5        | MTWISPVTLLEELVEAK                                                    | 1.278057142        | 2              | 3.710557699 |
| Q9Z0U5        | NHPEPSLDQLTDALGGNLCSR                                                | 1.190304431        | 2              | 4.059614658 |
| Q9Z0U5        | NMASLGGHIVSR                                                         | 1.085615116        | 2              | 3.288194895 |
| Q9Z0U5        | QQNALAIVNSGMR                                                        | 1.282129453        | 2              | 2.582466602 |
| Q9Z0U5        | RLEPIISK                                                             | 1.118865599        | 2              | 2.359570742 |
| Q9Z0U5        | VVENNVDPPEMMLLPYLR                                                   | 1.586794322        | 2              | 3.466851711 |
| Q9Z0U5        | HLSDSLNPLLA VG NCTLNLLSK                                             | 1.416672339        | 3              | 5.119720459 |
| Q9Z0U5        | KCPDSLKPKQEVLVSVNIPCSR                                               | 1.070020107        | 3              | 3.982263088 |
| <b>Q9Z0V5</b> | <b>PRDX4 Peroxiredoxin_4</b>                                         | <b>1.095200139</b> | <b>0.05006</b> | <b>5</b>    |
| Q9Z0V5        | GLFIIDDK                                                             | 1.086803163        | 2              | 3.052164078 |
| Q9Z0V5        | QITLNDLPVGR                                                          | 1.076485199        | 2              | 3.339039803 |
| Q9Z0V5        | ENECHFYAGGQVYPGEVSR                                                  | 0.331095001        | 3              | 4.244266987 |
| Q9Z0V5        | HGEVCPAGWKPGSETIIPDPAGK                                              | 1.024145882        | 3              | 3.821614504 |
| Q9Z0V5        | TRENECHFYAGGQVYPGEVSR                                                | 0.650632186        | 3              | 6.412078381 |
| <b>Q9Z0V6</b> | <b>PRDX3 Thioredoxin_dependent peroxide reductase_ mitochondrial</b> | <b>0.976064701</b> | <b>1</b>       | <b>5</b>    |
| Q9Z0V6        | GLFIIDPNGVIK                                                         | 0.973147436        | 2              | 3.406084061 |
| Q9Z0V6        | GTAVVNGEFK                                                           | 1.018242164        | 2              | 2.610221148 |
| Q9Z0V6        | NGGLGHMNITLLSDLTK                                                    | 0.911317261        | 2              | 2.593870878 |
| Q9Z0V6        | AFQFVETHGEVCPANWTPESPTIKPSPTASK                                      | 1.057570324        | 3              | 6.427451134 |
| Q9Z0V6        | ANEFHDVNCSEVAVSVDSHFSLAWINTPR                                        | 0.974628336        | 4              | 4.532271862 |
| <b>Q9Z0W7</b> | <b>CLIC4 Chloride intracellular channel protein 4</b>                | <b>1.129823407</b> | <b>0.28271</b> | <b>2</b>    |
| Q9Z0W7        | FLDGDEMTLADCNLLPK                                                    | 0.911062533        | 2              | 4.164153099 |
| Q9Z0W7        | NSRPEANEALER                                                         | 1.131221634        | 3              | 3.489917278 |
| <b>Q9Z122</b> | <b>FADS2 Fatty acid desaturase 2</b>                                 | <b>1.019499352</b> | <b>0.98312</b> | <b>2</b>    |
| Q9Z122        | HGIEYQEKPLLR                                                         | 1.1565878          | 2              | 3.534074306 |
| Q9Z122        | AFHLDLDFVGK                                                          | 1.01871729         | 3              | 3.767548323 |
| <b>Q9Z1A6</b> | <b>VIGLN Vigilin</b>                                                 | <b>1.079833853</b> | <b>1.3E-15</b> | <b>21</b>   |
| Q9Z1A6        | LQDLELK                                                              | 1.330289853        | 1              | 2.451515436 |
| Q9Z1A6        | ANSFTVSSVSAPSWLHR                                                    | 1.114645876        | 2              | 3.255950689 |
| Q9Z1A6        | ASVITQVFHVPLEER                                                      | 0.628591852        | 2              | 3.427108288 |
| Q9Z1A6        | EALEALVPVTIEVEVPFDLHR                                                | 1.078801056        | 2              | 3.321467876 |
| Q9Z1A6        | ELQAEQEDR                                                            | 0.712673973        | 2              | 2.375046968 |
| Q9Z1A6        | GNSLQEILER                                                           | 1.225494753        | 2              | 2.651376963 |
| Q9Z1A6        | IDLPAENSNSETIVITGK                                                   | 1.133220775        | 2              | 5.229811192 |
| Q9Z1A6        | IEGDPQGVQQAK                                                         | 1.166678488        | 2              | 3.704582214 |
| Q9Z1A6        | IIFPAAEDKDQDLITIIGK                                                  | 0.959930475        | 2              | 2.981565952 |
| Q9Z1A6        | IVGELEQMVSEDPVLDHR                                                   | 1.019999911        | 2              | 4.564909458 |
| Q9Z1A6        | LGQALTEVYAK                                                          | 1.273309905        | 2              | 3.361284971 |
| Q9Z1A6        | LQTQASATVPIPK                                                        | 1.33412707         | 2              | 3.628298044 |

|               |                                                                      |                    |                |             |
|---------------|----------------------------------------------------------------------|--------------------|----------------|-------------|
| Q9Z1A6        | LVGEIMQETGTR                                                         | 1.139058552        | 2              | 3.694584608 |
| Q9Z1A6        | MDYVEINIDHK                                                          | 1.090280489        | 2              | 2.910159588 |
| Q9Z1A6        | MVADLVENSYSISVPIFK                                                   | 0.896434787        | 2              | 3.773902416 |
| Q9Z1A6        | RCDIIVISGR                                                           | 1.078287245        | 2              | 3.221526146 |
| Q9Z1A6        | TEIVFTGEKEQLAQAVAR                                                   | 0.516065802        | 2              | 4.404613972 |
| Q9Z1A6        | TKDLIEQR                                                             | 1.160089732        | 2              | 2.790896416 |
| Q9Z1A6        | HEVLLISAEQDKR                                                        | 0.908812352        | 3              | 4.395677567 |
| Q9Z1A6        | TGAHLELSLAK                                                          | 1.206176762        | 3              | 3.393668175 |
| Q9Z1A6        | VKELQAEQEDR                                                          | 1.283295995        | 3              | 4.044124603 |
| <b>Q9Z1J8</b> | <b>S14L3 SEC14_like protein 3</b>                                    | <b>1.625990376</b> | <b>0.00554</b> | <b>3</b>    |
| Q9Z1J8        | ENVQDVLPALPNPDDYFLLR                                                 | 1.282242554        | 2              | 2.848772287 |
| Q9Z1J8        | FRENVQDVLPALPNPDDYFLLR                                               | 1.692218776        | 2              | 4.349563122 |
| Q9Z1J8        | GSSHQVEYEIFPGCVLR                                                    | 1.272714404        | 2              | 4.860179901 |
| <b>Q9Z1P2</b> | <b>ACTN1 Alpha_actinin_1</b>                                         | <b>1.023362269</b> | <b>0.13884</b> | <b>5</b>    |
| Q9Z1P2        | DYETATLSEIK                                                          | 1.217369092        | 1              | 2.015165329 |
| Q9Z1P2        | GISQEQMNEFR                                                          | 1.248221263        | 2              | 2.588960886 |
| Q9Z1P2        | ICDQWDNLGALTQK                                                       | 1.13161602         | 2              | 3.458558321 |
| Q9Z1P2        | IDQLEGDHQLIQEALIFDNK                                                 | 0.971675239        | 2              | 4.600465775 |
| Q9Z1P2        | MVSDINNAWGCLEQAEK                                                    | 0.392521575        | 2              | 4.027552128 |
| <b>Q9Z1W6</b> | <b>LYRIC Protein LYRIC</b>                                           | <b>1.078958759</b> | <b>1</b>       | <b>4</b>    |
| Q9Z1W6        | SWQDELAQQAEEGSAR                                                     | 0.968341521        | 2              | 5.553553581 |
| Q9Z1W6        | TELGDLGLEPK                                                          | 0.967595292        | 2              | 3.326608419 |
| Q9Z1W6        | TLPPAISAEPVTLISK                                                     | 0.938430147        | 2              | 3.165914297 |
| Q9Z1W6        | KREEVTPPTAPEDPAQLK                                                   | 1.033669482        | 3              | 3.901822805 |
| <b>Q9Z1Y3</b> | <b>CADH2 Cadherin_2</b>                                              | <b>0.855245837</b> | <b>0.17018</b> | <b>5</b>    |
| Q9Z1Y3        | FLEAGIYEVPIVITDSGNPPK                                                | 1.301624566        | 2              | 3.723932981 |
| Q9Z1Y3        | IDPVNGQITTIIVLDR                                                     | 0.766122696        | 2              | 3.497877836 |
| Q9Z1Y3        | FAILTDPNSNDGLVTVVKPIDFETNR                                           | 0.979236341        | 3              | 4.273710251 |
| Q9Z1Y3        | YDEEGGGEEDQDYDLSLQQLQPDVPEPAIKPVGIR                                  | 1.182854146        | 3              | 5.947423458 |
| Q9Z1Y3        | YSVTGPGADQPPTGIFIINPISGQLSVTKPLDR                                    | 0.694929359        | 3              | 3.826067924 |
| <b>Q9Z221</b> | <b>PMFBP Polyamine_modulated factor 1_binding protein 1</b>          | <b>1.114441051</b> | <b>0.64492</b> | <b>2</b>    |
| Q9Z221        | DHLHNVMAHLQENK+Oxidation(7)                                          | 1.059327754        | 2              | 2.537157536 |
| Q9Z221        | ELTNSLSKLQDELAETK                                                    | 1.24652446         | 2              | 2.316555023 |
| <b>Q9Z269</b> | <b>VAPB Vesicle_associated membrane protein_associated protein B</b> | <b>1.123424844</b> | <b>0.18736</b> | <b>2</b>    |
| Q9Z269        | VEQVLSLEPQHELK                                                       | 1.123224107        | 2              | 3.813992739 |
| Q9Z269        | TEAPVAAKPLTSPDDAEVKK                                                 | 1.133014665        | 3              | 3.400276184 |
| <b>Q9Z270</b> | <b>VAPA Vesicle_associated membrane protein_associated protein A</b> | <b>1.00280037</b>  | <b>0.96621</b> | <b>3</b>    |
| Q9Z270        | FKGPFTDVVTTNLK                                                       | 1.046506963        | 2              | 2.992416382 |
| Q9Z270        | HEQILVLDPPSDLK                                                       | 0.996296858        | 2              | 3.923573256 |
| Q9Z270        | QDGPLPKPHSVSLNDTETR                                                  | 0.878346951        | 3              | 3.794166565 |
| <b>Q9Z277</b> | <b>BAZ1B Tyrosine_protein kinase BAZ1B</b>                           | <b>1.111488185</b> | <b>0.2799</b>  | <b>2</b>    |

|               |                                                                           |                    |                |             |
|---------------|---------------------------------------------------------------------------|--------------------|----------------|-------------|
| Q9Z277        | IHPLEKVDEEAVEK                                                            | 1.104994437        | 2              | 2.454237223 |
| Q9Z277        | IHPLEKVDEEAVEKK                                                           | 1.213260108        | 2              | 2.46698904  |
| <b>Q9Z2I8</b> | <b>SUCB2 Succinyl_CoA ligase [GDP_forming] subunit beta_mitochondrial</b> | <b>0.860583932</b> | <b>0.44186</b> | <b>9</b>    |
| Q9Z2I8        | IDATQVEVNPFGETPEGQVVCFDAK                                                 | 0.505798276        | 2              | 4.810449123 |
| Q9Z2I8        | INFDDNAEFR                                                                | 0.775213757        | 2              | 3.21979785  |
| Q9Z2I8        | LEGTNVQEAQNILK                                                            | 0.99489552         | 2              | 4.87168932  |
| Q9Z2I8        | SENEPIEENEAR                                                              | 0.825088061        | 2              | 4.080607414 |
| Q9Z2I8        | SHNGPVIVGSPQGGVDIEEVAASSPELIFK                                            | 0.966705735        | 2              | 6.245894432 |
| Q9Z2I8        | SSGLPITSAVDLEDAAK                                                         | 0.994067265        | 2              | 4.83935976  |
| Q9Z2I8        | SSGLPITSAVDLEDAAKK                                                        | 1.040474022        | 2              | 3.120940924 |
| Q9Z2I8        | VMVAEALDISR                                                               | 1.040224271        | 2              | 3.220794439 |
| Q9Z2I8        | DIFAMDDKSENEPIEENEAR                                                      | 0.833311017        | 3              | 4.332261562 |
| <b>Q9Z2I9</b> | <b>SUCB1 Succinyl_CoA ligase [ADP_forming] subunit beta_mitochondrial</b> | <b>1.276597502</b> | <b>0.12133</b> | <b>7</b>    |
| Q9Z2I9        | AVSSQMIGQK                                                                | 1.085235919        | 2              | 2.494864941 |
| Q9Z2I9        | ICNQVLVCER                                                                | 1.526103592        | 2              | 2.888119698 |
| Q9Z2I9        | ILACDDLDEAAK                                                              | 1.13798447         | 2              | 2.953155518 |
| Q9Z2I9        | INFDSNSAYR                                                                | 1.235979281        | 2              | 3.09645915  |
| Q9Z2I9        | MGFPSNIVDSAENMIK                                                          | 1.061225658        | 2              | 3.883609533 |
| Q9Z2I9        | SSDEAYAIK                                                                 | 1.136238849        | 2              | 3.454493761 |
| Q9Z2I9        | VQAILVNIFFGIMR                                                            | 1.218077028        | 2              | 4.227815151 |
| <b>Q9Z2L0</b> | <b>VDAC1 Voltage_dependent anion_selective channel protein 1</b>          | <b>1.016569765</b> | <b>0.99874</b> | <b>13</b>   |
| Q9Z2L0        | EHINLGCDVDFDIAGPSIR                                                       | 0.977895311        | 2              | 4.250332355 |
| Q9Z2L0        | KLETAVNLAWTAGNSNTR                                                        | 0.964690772        | 2              | 5.898197651 |
| Q9Z2L0        | LETAVNLAWTAGNSNTR                                                         | 0.829352706        | 2              | 2.65625     |
| Q9Z2L0        | LTFDSSFSPTGK                                                              | 1.261809886        | 2              | 3.89905405  |
| Q9Z2L0        | LTFDSSFSPTGKK                                                             | 1.231804565        | 2              | 3.216537952 |
| Q9Z2L0        | LTLSALLDGK                                                                | 2.032878561        | 2              | 2.35033536  |
| Q9Z2L0        | SENGLEFTSSGSANTETTK                                                       | 0.92014646         | 2              | 4.559126854 |
| Q9Z2L0        | TDEFQLHTNVNDGTEFGGSIYQK                                                   | 0.950828511        | 2              | 5.313694    |
| Q9Z2L0        | VNSSLIGLGYTQLKPGIK                                                        | 0.898360172        | 2              | 4.377214909 |
| Q9Z2L0        | VTQSNFAVGK                                                                | 1.165303855        | 2              | 3.179372549 |
| Q9Z2L0        | WNTDNTLGTEITVEDQLAR                                                       | 1.038833724        | 2              | 4.8481493   |
| Q9Z2L0        | WTEYGLTFTEK                                                               | 0.89306184         | 2              | 2.681206226 |
| Q9Z2L0        | YQVDPDACFSAK                                                              | 0.858912005        | 2              | 3.312426329 |
| <b>Q9Z2M4</b> | <b>DEC2 Peroxisomal 2_4_dienoyl_CoA reductase</b>                         | <b>1.000939355</b> | <b>0.72213</b> | <b>4</b>    |
| Q9Z2M4        | GQVLQLHAGAAK                                                              | 1.28509449         | 2              | 3.425955057 |
| Q9Z2M4        | HLAVEWGPQNIR                                                              | 0.979509222        | 2              | 3.114251852 |
| Q9Z2M4        | TVVDIDLGTGFNVSR                                                           | 0.880490416        | 2              | 2.839390278 |
| Q9Z2M4        | VNSLAPGAISGTEGLR                                                          | 1.039704296        | 2              | 2.9476192   |
| <b>Q9Z2Q1</b> | <b>SC31A Protein transport protein Sec31A</b>                             | <b>1.006118488</b> | <b>0.12617</b> | <b>14</b>   |
| Q9Z2Q1        | AQDGSNPLSLQDLIEK                                                          | 0.77075844         | 2              | 3.565805435 |



|               |                                                       |                    |                |             |
|---------------|-------------------------------------------------------|--------------------|----------------|-------------|
| Q9Z2Q1        | AVQLTQALDTNTVGALLAEK                                  | 0.94633661         | 2              | 5.501294613 |
| Q9Z2Q1        | CLSSATDPQTK                                           | 1.262186091        | 2              | 2.889880657 |
| Q9Z2Q1        | DQTLSPTIISGLHSIAR                                     | 1.088155783        | 2              | 3.753166437 |
| Q9Z2Q1        | IIAGDKEVVIAQK                                         | 1.275640762        | 2              | 2.469168425 |
| Q9Z2Q1        | LVTFENVGTGQPQQGAEQPR                                  | 1.341482637        | 2              | 5.133758068 |
| Q9Z2Q1        | QVQHILASASPSGR                                        | 1.323565531        | 2              | 2.428299904 |
| Q9Z2Q1        | RQPVFISQVVTEK                                         | 1.477262951        | 2              | 2.53900075  |
| Q9Z2Q1        | SSYEQPLPK                                             | 1.036672277        | 2              | 2.353846073 |
| Q9Z2Q1        | TQPPEDISCIAWNRR                                       | 0.997559407        | 2              | 3.585420132 |
| Q9Z2Q1        | TTFEDLIQR                                             | 0.994190633        | 2              | 2.683398724 |
| Q9Z2Q1        | VNFEEDSR                                              | 1.151646325        | 2              | 2.56008482  |
| Q9Z2Q1        | VYSIMGGSIDGLR                                         | 1.126797259        | 2              | 2.372255564 |
| Q9Z2Q1        | RQPVFISQVVTEKDFLSR                                    | 0.937311643        | 3              | 3.538206577 |
| <b>Q9Z2U2</b> | <b>ZN292 Zinc finger protein 292</b>                  | <b>1.100882834</b> | <b>0.12263</b> | <b>3</b>    |
| Q9Z2U2        | KGQKSNLNTPNHGK                                        | 1.375374317        | 2              | 2.579275608 |
| Q9Z2U2        | KLEVLNNPDRTVLK                                        | 1.181994961        | 2              | 2.400108337 |
| Q9Z2U2        | LINEDSTNAENQGNNTLK                                    | 1.062671154        | 2              | 2.965633631 |
| <b>Q9Z2Z8</b> | <b>DHCR7 7_dehydrocholesterol reductase</b>           | <b>1.074299633</b> | <b>0.99297</b> | <b>2</b>    |
| Q9Z2Z8        | AIECSYTSADGLK                                         | 0.977743467        | 2              | 3.628277779 |
| Q9Z2Z8        | FLPGYVGGVQEGAITPAGIVNK                                | 1.13026621         | 2              | 5.312107563 |
| <b>Q9Z311</b> | <b>MECR Trans_2_enoyl_CoA reductase_mitochondrial</b> | <b>0.79348937</b>  | <b>0.51591</b> | <b>2</b>    |
| Q9Z311        | DIPLQSAATLGVNPCTAYR                                   | 0.963635109        | 2              | 2.431901217 |
| Q9Z311        | LKDLGADYVLTTEELR                                      | 0.792701401        | 2              | 2.611778736 |
| <b>Q9Z339</b> | <b>GSTO1 Glutathione S_transferase omega_1</b>        | <b>1.084335328</b> | <b>0.0005</b>  | <b>5</b>    |
| Q9Z339        | GSAPPGPVPEGQIR                                        | 1.02266319         | 2              | 3.62902832  |
| Q9Z339        | LEALELNECIDHTPK                                       | 1.331568352        | 2              | 4.226669788 |
| Q9Z339        | LEEAMANKR                                             | 1.069182468        | 2              | 2.617623091 |
| Q9Z339        | LEEAMANKR+Oxidation(5)                                | 1.620200596        | 2              | 2.533723354 |
| Q9Z339        | NPFGLVPVLENTQGHLLITESVITCEYLDEAYPEKK                  | 1.215614606        | 3              | 4.782817364 |

*Time point 1.0 hour*

| Accession number | Protein DESCRIPTION                                               | Protein Ratio (1.0 h) | P-value (1.0 h)  | Peptide number (1.0 h) |
|------------------|-------------------------------------------------------------------|-----------------------|------------------|------------------------|
| Accession number | Peptide sequence                                                  | Peptide Ratio (1.0 h) | Charge state     | Xcorr                  |
| <b>A0JPJ7</b>    | <b>OLA1 Obg_like ATPase 1</b>                                     | <b>1.282611221</b>    | <b>0.004731</b>  | <b>2</b>               |
| A0JPJ7           | IGIVGLPNVVK                                                       | 1.464409671           | 2                | 2.6526854              |
| A0JPJ7           | YLEANMTQSALPK                                                     | 1.281359995           | 2                | 2.7836547              |
| <b>A0JPM9</b>    | <b>EIF3J Eukaryotic translation initiation factor 3 subunit J</b> | <b>1.067056765</b>    | <b>0.8616943</b> | <b>2</b>               |
| A0JPM9           | EEAEVKPEVKISEK                                                    | 1.077357415           | 2                | 2.3345757              |
| A0JPM9           | RLEEPPEESK                                                        | 1.052579615           | 2                | 2.4911306              |
| <b>A0JPQ8</b>    | <b>ALKMO Alkylglycerol monoxygenase</b>                           | <b>1.253052124</b>    | <b>0.113226</b>  | <b>2</b>               |
| A0JPQ8           | LDDILTSMSAGVVSRR                                                  | 1.629109884           | 2                | 2.8270054              |
| A0JPQ8           | SITHLASGSWK                                                       | 1.232822255           | 2                | 2.4187837              |
| <b>A1A5P5</b>    | <b>ARMC9 LisH domain_containing protein ARMC9</b>                 | <b>0.945666029</b>    | <b>0.7844031</b> | <b>2</b>               |
| A1A5P5           | CFIKEGNAEMIR+Oxidation(10)                                        | 0.939484672           | 2                | 2.7135918              |
| A1A5P5           | LYLAQNTKVLRLMLEGR+Oxidation(12)                                   | 1.11351373            | 2                | 2.3065507              |
| <b>A2ADY9</b>    | <b>DDI2 Protein DDI1 homolog 2</b>                                | <b>0.939627673</b>    | <b>0.7269738</b> | <b>2</b>               |
| A2ADY9           | IDFSSIAVPGTSPNPQQR                                                | 0.673248458           | 2                | 2.5615537              |
| A2ADY9           | VLVEQQQDR                                                         | 0.939765462           | 2                | 2.7683675              |
| <b>A2AF47</b>    | <b>DOC11 Dedicator of cytokinesis protein 11</b>                  | <b>0.993723478</b>    | <b>0.4100011</b> | <b>2</b>               |
| A2AF47           | MPFAWAARPIFKDVQGSLLDGR+Oxidation(1)                               | 0.715729158           | 3                | 3.3587997              |
| A2AF47           | NLLMCYLYIVK                                                       | 1.049503803           | 2                | 2.4946499              |
| <b>A2AGT5</b>    | <b>CKAP5 Cytoskeleton_associated protein 5</b>                    | <b>0.123256905</b>    | <b>0.0005366</b> | <b>2</b>               |
| A2AGT5           | DQVLAMLEKAKANMPSKPAAPAK+Oxidation(14)                             | 0.082994717           | 2                | 2.8296616              |
| A2AGT5           | IGSKENTKEGLAELYEYK                                                | 0.626211916           | 2                | 2.4668741              |
| <b>A2AJL3</b>    | <b>FGGY FGGY carbohydrate kinase domain_containing protein</b>    | <b>0.975832067</b>    | <b>0.9566252</b> | <b>2</b>               |
| A2AJL3           | GHGLTCEGQPVTSR                                                    | 1.130402696           | 2                | 3.664535               |
| A2AJL3           | MSKVGKVFPEHADK                                                    | 0.982435139           | 2                | 2.3857381              |
| <b>A2AL36</b>    | <b>CNTRL Centriolin</b>                                           | <b>1.213590124</b>    | <b>0.551845</b>  | <b>3</b>               |
| A2AL36           | EQQLDIMNR+Oxidation(7)                                            | 1.102825911           | 2                | 2.3322284              |
| A2AL36           | LQDEKETLLQR                                                       | 1.244693268           | 2                | 2.4078283              |
| A2AL36           | NQDKLNK                                                           | 1.066883444           | 1                | 2.1698961              |
| <b>A2AQP0</b>    | <b>MYH7B Myosin_7B</b>                                            | <b>0.958701021</b>    | <b>0.9993568</b> | <b>6</b>               |
| A2AQP0           | AITDAAMMAEELKK                                                    | 0.997241393           | 2                | 3.5028389              |
| A2AQP0           | DIDDLELTLAK                                                       | 0.801403416           | 2                | 3.5508428              |
| A2AQP0           | EQDTSÄHLER                                                        | 1.02127588            | 2                | 2.3821862              |
| A2AQP0           | KDIDDLELTLAK                                                      | 0.933129524           | 2                | 2.3254826              |
| A2AQP0           | SIQELEK                                                           | 0.963509147           | 2                | 2.399575               |
| A2AQP0           | VGNEYVTK                                                          | 0.983275318           | 2                | 2.6211207              |
| <b>A2ASS6</b>    | <b>TITIN Titin</b>                                                | <b>1.120042001</b>    | <b>0.1456303</b> | <b>11</b>              |
| A2ASS6           | AENRFGIGPPAETIQRRTAR                                              | 0.868440118           | 2                | 2.6744497              |
| A2ASS6           | DVLEPEIDLVALR                                                     | 1.006548773           | 2                | 2.8207216              |
| A2ASS6           | KDLNMVVSÄARISCGGÄIR                                               | 1.066454313           | 2                | 2.3072152              |
| A2ASS6           | KDGTQLACKVTGTPPIK                                                 | 0.492943185           | 2                | 2.7278249              |
| A2ASS6           | SSVSLWSRPKDDGGSR                                                  | 0.783433844           | 2                | 2.3430257              |
| A2ASS6           | TCEIEIGQLK                                                        | 1.106520863           | 2                | 2.4551613              |
| A2ASS6           | TFLQDQLVSLQVLK                                                    | 0.912101245           | 1                | 1.9329063              |
| A2ASS6           | VGDÄAWIKDTTGTÄLR                                                  | 1.165331893           | 2                | 2.499357               |
| A2ASS6           | VKNÄMPEDIDEYÄVEIEGK+Oxidation(5)                                  | 1.221749158           | 2                | 2.3427644              |
| A2ASS6           | VMKLTGEEYQFRIK+Oxidation(2)                                       | 1.203847282           | 2                | 2.3452897              |
| A2ASS6           | YDGGHKLTYIVEK                                                     | 1.313683895           | 2                | 2.3021326              |

|               |                                                                   |                    |                  |           |
|---------------|-------------------------------------------------------------------|--------------------|------------------|-----------|
| <b>A2VCW9</b> | <b>AASS Alpha_aminoadipic semialdehyde synthase_mitochondrial</b> | <b>0.88114129</b>  | <b>0.4087608</b> | <b>9</b>  |
| A2VCW9        | AGGILQEDITEACLILGVK                                               | 1.053240699        | 2                | 2.6195498 |
| A2VCW9        | AQEANMSLLDEVLK                                                    | 0.821384724        | 2                | 3.0458426 |
| A2VCW9        | GAQEVFNELPCEYVEPHELK                                              | 0.79082896         | 2                | 4.6846285 |
| A2VCW9        | KTDGVYDPVEYEKYPYER                                                | 0.801797854        | 3                | 3.6883588 |
| A2VCW9        | KYDINTVNVTVGK                                                     | 0.876688128        | 2                | 3.9779968 |
| A2VCW9        | LQSLVESQDLVISLLPYVLPVVAK                                          | 0.914070509        | 3                | 3.6720717 |
| A2VCW9        | REDVNAWER                                                         | 0.788441982        | 2                | 2.7888639 |
| A2VCW9        | SSVVPVEGCPPELPHK                                                  | 0.857181847        | 2                | 3.0719659 |
| A2VCW9        | YDINTVNVTVGK                                                      | 0.776544163        | 2                | 2.7787139 |
| <b>A3KMP2</b> | <b>TTC38 Tetraatricopeptide repeat protein 38</b>                 | <b>1.221616706</b> | <b>0.0772782</b> | <b>2</b>  |
| A3KMP2        | DVGLPLCQALLEAENGNPDR                                              | 1.232064174        | 2                | 2.3927674 |
| A3KMP2        | VLELLPIR                                                          | 0.790766402        | 2                | 2.7227137 |
| <b>A7VJC2</b> | <b>ROA2 Heterogeneous nuclear ribonucleoproteins A2/B1</b>        | <b>0.966637719</b> | <b>0.0296529</b> | <b>11</b> |
| A7VJC2        | EESGKPGAHVTVK                                                     | 0.711043518        | 2                | 3.2606466 |
| A7VJC2        | GGGGNFGPGPGSNFR                                                   | 1.027358664        | 2                | 3.1422105 |
| A7VJC2        | GGNFGFGDSR                                                        | 0.912970257        | 2                | 2.8766375 |
| A7VJC2        | IDTIEIITDR                                                        | 0.962352809        | 2                | 3.8872273 |
| A7VJC2        | LFIGGLSFETTEESLR                                                  | 1.278573557        | 2                | 4.5446668 |
| A7VJC2        | LTDCVVMR                                                          | 1.015508941        | 2                | 2.6451433 |
| A7VJC2        | NMGGPYGGGNYGPGSGSGGYGGR                                           | 0.944421089        | 2                | 5.9648142 |
| A7VJC2        | NYEQWGK                                                           | 1.075423937        | 1                | 2.3698618 |
| A7VJC2        | QEMQEVQSSR                                                        | 0.915627463        | 2                | 3.0770366 |
| A7VJC2        | QEMQEVQSSR+Oxidation(3)                                           | 1.444753931        | 2                | 2.5636055 |
| A7VJC2        | YHTINGHNAEVR                                                      | 1.243223546        | 2                | 3.8663456 |
| <b>B0BN93</b> | <b>PSD13 26S proteasome non_ATPase regulatory subunit 13</b>      | <b>1.035979839</b> | <b>0.9980742</b> | <b>2</b>  |
| B0BN93        | GSIDEVDKR                                                         | 0.978659239        | 2                | 2.4829295 |
| B0BN93        | SAWQQPDLAANEQLLR                                                  | 1.044086716        | 2                | 3.3212025 |
| <b>B0BNE5</b> | <b>ESTD S_formylglutathione hydrolase</b>                         | <b>1.110346573</b> | <b>0.8476847</b> | <b>8</b>  |
| B0BNE5        | AFNGYLGPDQSK                                                      | 0.959827584        | 2                | 3.6868815 |
| B0BNE5        | AYDATCLVK                                                         | 1.003641979        | 2                | 2.4036138 |
| B0BNE5        | FAIYLPPQAESAK                                                     | 1.019299363        | 2                | 2.5862846 |
| B0BNE5        | MYSYVTEELPQLINANFPVDPQR                                           | 1.141834292        | 3                | 5.1668925 |
| B0BNE5        | SGCQQAASEHGLVVIAPDTSR                                             | 1.08246856         | 2                | 5.6417985 |
| B0BNE5        | SVSAFAPICNPVLCPWGK                                                | 1.115899034        | 2                | 4.6645556 |
| B0BNE5        | SYSGPQIDILIDQKDEFLSNGQLLPDNFIAACTEK                               | 1.369214986        | 3                | 5.4464335 |
| B0BNE5        | VFEHSSVELK                                                        | 1.081269569        | 2                | 2.5653248 |
| <b>B0BNN3</b> | <b>CAH1 Carbonic anhydrase 1</b>                                  | <b>1.11014163</b>  | <b>0.9315382</b> | <b>3</b>  |
| B0BNN3        | ADGLAIIGVLMK                                                      | 0.760479005        | 2                | 2.8478892 |
| B0BNN3        | HDSSLKPVSVSNPATAK                                                 | 1.090772253        | 3                | 4.7974939 |
| B0BNN3        | VLDALSSVK                                                         | 0.920372846        | 2                | 2.4035926 |
| <b>B0K020</b> | <b>CISD1 CDGSH iron_sulfur domain_containing protein 1</b>        | <b>1.232795386</b> | <b>1.896E-11</b> | <b>2</b>  |
| B0K020        | HNEETGDNVGPLIK                                                    | 1.205610379        | 2                | 5.7147651 |
| B0K020        | VVHAFDMEDLGDK                                                     | 1.066976665        | 2                | 3.651799  |
| <b>B2GV24</b> | <b>UFL1 E3 UFM1_protein ligase 1</b>                              | <b>1.06516362</b>  | <b>0.6367753</b> | <b>3</b>  |
| B2GV24        | QLVSQNK                                                           | 0.339738457        | 1                | 1.9191668 |
| B2GV24        | TYDLPDGLTQALTQR                                                   | 1.075478525        | 2                | 2.7379265 |
| B2GV24        | VNIVDLQVINVDLTHIENR                                               | 1.055590347        | 3                | 4.1598015 |
| <b>B2RX88</b> | <b>CSPP1 Centrosome and spindle pole associated protein 1</b>     | <b>1.212899951</b> | <b>0.0795735</b> | <b>2</b>  |
| B2RX88        | SISSVNVQVRMRNEDR                                                  | 1.134722285        | 2                | 2.5580502 |
| B2RX88        | SISSVNVQVRMRNEDR+Oxidation(12)                                    | 1.411395828        | 2                | 2.5582716 |
| <b>B2RY56</b> | <b>RBM25 RNA_binding protein 25</b>                               | <b>1.022208214</b> | <b>0.3547781</b> | <b>2</b>  |
| B2RY56        | FEDESDDVPRKR                                                      | 0.604899039        | 2                | 2.3336861 |

|               |                                                                        |                    |                  |           |
|---------------|------------------------------------------------------------------------|--------------------|------------------|-----------|
| B2RY56        | LLIYETEA                                                               | 1.038108419        | 2                | 2.4998167 |
| <b>B2RYW9</b> | <b>FAHD2 Fumarylacetoacetate hydrolase domain_containing protein 2</b> | <b>0.974683087</b> | <b>0.9789159</b> | <b>4</b>  |
| B2RYW9        | ATDVMAYVAGFTVAHDVSAR                                                   | 1.110236912        | 2                | 3.0594022 |
| B2RYW9        | KGDEVQCEIEELGVIINK                                                     | 1.091545494        | 2                | 5.3272171 |
| B2RYW9        | TFDTFCPLGPALVTK                                                        | 0.862861991        | 2                | 5.0671968 |
| B2RYW9        | VNGEIVQSSNTNQMVFK                                                      | 0.822220256        | 2                | 4.3887453 |
| <b>B2RZ78</b> | <b>VPS29 Vacuolar protein sorting_associated protein 29</b>            | <b>1.062754852</b> | <b>0.4581708</b> | <b>2</b>  |
| B2RZ78        | GDFDESLNYPEQK                                                          | 1.061985332        | 2                | 3.3197649 |
| B2RZ78        | IQHILCTGNLCTK                                                          | 1.354639593        | 2                | 3.3064539 |
| <b>B3DMA2</b> | <b>ACD11 Acyl_CoA dehydrogenase family member 11</b>                   | <b>0.945604862</b> | <b>0.7098812</b> | <b>4</b>  |
| B3DMA2        | AVLTVTQYR                                                              | 0.946201703        | 2                | 2.3040552 |
| B3DMA2        | NLPDSDNEECLVHGDFK                                                      | 0.954751667        | 2                | 3.5930834 |
| B3DMA2        | RGQEVLTR                                                               | 0.363291701        | 2                | 2.7138011 |
| B3DMA2        | SGQSNPTFFLQK                                                           | 1.004463696        | 2                | 2.9433711 |
| <b>B5DFC8</b> | <b>EIF3C Eukaryotic translation initiation factor 3 subunit C</b>      | <b>1.098734265</b> | <b>0.1526584</b> | <b>4</b>  |
| B5DFC8        | GCILTLVER                                                              | 1.070544639        | 2                | 2.3924778 |
| B5DFC8        | GTEITHAVVIK                                                            | 1.089766327        | 2                | 2.4614713 |
| B5DFC8        | SEQDQAENEGEDSAVLMER                                                    | 2.717056051        | 2                | 4.6878953 |
| B5DFC8        | TEPTAQNLALQLAEK                                                        | 1.140701801        | 2                | 4.7548575 |
| <b>D3ZTX0</b> | <b>TMED7 Transmembrane emp24 domain_containing protein 7</b>           | <b>1.281102755</b> | <b>2.621E-09</b> | <b>2</b>  |
| D3ZTX0        | SVIDYQTHFR                                                             | 1.272173706        | 2                | 2.5908511 |
| D3ZTX0        | VSALTQMESACVSIHEALK                                                    | 0.396514444        | 2                | 2.4758394 |
| <b>D3ZW55</b> | <b>ITPA Inosine triphosphate pyrophosphatase</b>                       | <b>1.0548415</b>   | <b>0.9999997</b> | <b>3</b>  |
| D3ZW55        | IDLPEYQGEPEDEISIQK                                                     | 0.925931645        | 2                | 4.3064899 |
| D3ZW55        | KLEEVIIQLGDKFPCTLVAQK                                                  | 0.95802878         | 3                | 4.2284145 |
| D3ZW55        | LQEYFGVTDGAGDH                                                         | 0.976431985        | 2                | 3.2084327 |
| <b>D3ZZL9</b> | <b>GCC2 GRIP and coiled_coil domain_containing protein 2</b>           | <b>1.303207296</b> | <b>0.0563265</b> | <b>2</b>  |
| D3ZZL9        | IEDLEQEMKIQK                                                           | 0.94424965         | 2                | 2.4357462 |
| D3ZZL9        | MLQETVTKEAELR+Oxidation(1)                                             | 1.305076038        | 2                | 2.3746448 |
| <b>D4A4T9</b> | <b>CHRD1 Cysteine and histidine_rich domain_containing protein 1</b>   | <b>1.220481082</b> | <b>0.0034934</b> | <b>2</b>  |
| D4A4T9        | KEEDSDEIKIGTSCK                                                        | 1.468711755        | 2                | 2.5949991 |
| D4A4T9        | LSSGNEEDKKEEDSDEIK                                                     | 1.210432222        | 3                | 4.3515058 |
| <b>E9Q557</b> | <b>DESP Desmoplakin</b>                                                | <b>1.223796824</b> | <b>0.7054989</b> | <b>2</b>  |
| E9Q557        | KQVQTSQKNTLR                                                           | 1.230242974        | 1                | 1.9994543 |
| E9Q557        | SQCTQVVQER                                                             | 1.0566009          | 2                | 2.7909124 |
| <b>O08550</b> | <b>MLL4 Histone_lysine N_methyltransferase MLL4</b>                    | <b>1.414482882</b> | <b>0.0623595</b> | <b>2</b>  |
| O08550        | HAAVALGQARAMVPEDVPR                                                    | 0.961665636        | 2                | 2.4017699 |
| O08550        | RGEEGTERMVQALTELLR                                                     | 1.419869512        | 2                | 2.8326314 |
| <b>O08557</b> | <b>DDAH1 N(G)_N(G)_dimethylarginine dimethylaminohydrolase 1</b>       | <b>1.132835627</b> | <b>0.0943715</b> | <b>9</b>  |
| O08557        | DYAVSTVPVADSLHLK                                                       | 1.004435998        | 2                | 3.4696105 |
| O08557        | GAEILADTFK                                                             | 1.051825212        | 1                | 2.1393249 |
| O08557        | GAEILADTFKDYAVSTVPVADSLHLK                                             | 1.373418153        | 3                | 3.5077136 |
| O08557        | LKDHLIPVSNSEMEK                                                        | 1.075023049        | 2                | 3.5116496 |
| O08557        | LQLNIVEMKDENATLDGGDVLFTGR                                              | 1.626443612        | 3                | 3.4025977 |
| O08557        | LTVPDDMAANCIYLNIPSK                                                    | 1.182083724        | 2                | 3.4299614 |
| O08557        | SFCSMAGPNLIAIGSSESAQK                                                  | 0.908755041        | 2                | 4.6424794 |
| O08557        | SQGEEVDFAR                                                             | 1.032167729        | 2                | 2.4227207 |
| O08557        | VDGLLTCCSVFINK                                                         | 0.87485947         | 2                | 3.4368012 |
| <b>O08583</b> | <b>THOC4 THO complex subunit 4</b>                                     | <b>1.164923652</b> | <b>0.4258407</b> | <b>2</b>  |
| O08583        | QQLSAEELDAQLDAYNAR                                                     | 0.954287751        | 2                | 2.9025702 |
| O08583        | SLGTADVHFER                                                            | 1.164946157        | 2                | 2.3982387 |

|               |                                                                    |                    |                  |           |
|---------------|--------------------------------------------------------------------|--------------------|------------------|-----------|
| <b>O08601</b> | <b>MTP Microsomal triglyceride transfer protein large subunit</b>  | <b>1.286993018</b> | <b>0.0371156</b> | <b>11</b> |
| O08601        | EFYSYENEPVGIENLK                                                   | 1.015697157        | 2                | 4.6453691 |
| O08601        | GCPSLAEHWKSIR                                                      | 1.315057742        | 2                | 4.0215716 |
| O08601        | GHTTGLSLNNER                                                       | 1.325730342        | 2                | 2.6936059 |
| O08601        | MLSASGDPVSVVK                                                      | 0.950189746        | 2                | 3.7173269 |
| O08601        | NALLPEGIPLLLK                                                      | 1.423738745        | 1                | 2.7485144 |
| O08601        | NILLSIGELPK                                                        | 1.150956111        | 2                | 4.0369844 |
| O08601        | REEILQLK                                                           | 1.041824867        | 3                | 3.3943839 |
| O08601        | SDSSIILQER                                                         | 1.208029623        | 2                | 2.4038625 |
| O08601        | SGSSSAYTGYVER                                                      | 1.09083354         | 2                | 3.7290471 |
| O08601        | SNLNIFQYIGK                                                        | 1.253577936        | 2                | 3.0884378 |
| O08601        | VKEFYSYENEPVGIENLK                                                 | 1.160753474        | 2                | 3.4478447 |
| <b>O08795</b> | <b>GLU2B Glucosidase 2 subunit beta</b>                            | <b>0.925393201</b> | <b>0.9860837</b> | <b>6</b>  |
| O08795        | ETVVTSTTEPSR                                                       | 0.891485513        | 2                | 2.9591506 |
| O08795        | KLWEEQQAANK                                                        | 0.940034623        | 2                | 3.4316664 |
| O08795        | LWEEQQAANK                                                         | 1.300341843        | 2                | 2.3224571 |
| O08795        | MPPYDEETQAIIDAAQEAR                                                | 0.949872806        | 2                | 5.3915262 |
| O08795        | SLEDQVETLR                                                         | 0.93426207         | 2                | 3.4310586 |
| O08795        | YEQGTGCWQGNR                                                       | 0.942867512        | 2                | 3.9079773 |
| <b>O08874</b> | <b>PKN2 Serine/threonine_protein kinase N2</b>                     | <b>1.470142682</b> | <b>0.0001243</b> | <b>3</b>  |
| O08874        | ATSVALPGWSPSENRSFMSR                                               | 1.145321821        | 2                | 2.3390315 |
| O08874        | QLDIELK                                                            | 1.471399488        | 1                | 2.3596106 |
| O08874        | YSLEQRLNELPKNHPK                                                   | 0.872793142        | 2                | 2.4012609 |
| <b>O08949</b> | <b>TF2AA Transcription initiation factor IIA subunit 1</b>         | <b>1.210041922</b> | <b>0.1214202</b> | <b>2</b>  |
| O08949        | DGIMNLNGRDYIFSK+Oxidation(4)                                       | 1.256176388        | 2                | 2.5903668 |
| O08949        | MANSANTNTVPK                                                       | 0.714468313        | 2                | 2.5647838 |
| <b>O09158</b> | <b>CP3AP Cytochrome P450 3A25</b>                                  | <b>0.733453558</b> | <b>0.4044045</b> | <b>2</b>  |
| O09158        | DVEINGVFIK                                                         | 0.66862191         | 2                | 2.4724052 |
| O09158        | VDFLQLMMNTQNSK                                                     | 0.982644127        | 2                | 2.6066535 |
| <b>O09171</b> | <b>BHMT1 Betaine__homocysteine S_methyltransferase 1</b>           | <b>1.291750216</b> | <b>9.9E-20</b>   | <b>13</b> |
| O09171        | AGAAIVGNCHFDPTSLQTIK                                               | 1.209315016        | 2                | 6.0222363 |
| O09171        | AGPWTPEAAVEHPPEAVR                                                 | 1.112997313        | 2                | 5.1926622 |
| O09171        | AGSNVMQTFYASEDKLENR                                                | 1.388096701        | 2                | 4.6846929 |
| O09171        | GAAELMQQK                                                          | 1.178735963        | 2                | 3.5002928 |
| O09171        | GAAELMQQK+Oxidation(6)                                             | 1.367596747        | 2                | 2.7824593 |
| O09171        | IFHQQLVFMK                                                         | 1.3024421          | 2                | 2.8824797 |
| O09171        | KEYWQNLN                                                           | 1.208476315        | 3                | 3.4256587 |
| O09171        | LNAGEVVIKGGVFALEK                                                  | 1.80659963         | 3                | 5.9061747 |
| O09171        | QGFIDLPEPFGLEPR                                                    | 1.144189688        | 2                | 5.1796212 |
| O09171        | QVADEGDALVAGGVQTPSYLSCK                                            | 1.332705554        | 2                | 6.1048732 |
| O09171        | TSGKPIAATMCIGPEGDLHGVSPECAVR                                       | 1.222329426        | 3                | 6.4541364 |
| O09171        | TSGKPIAATMCIGPEGDLHGVSPECAVR+Oxidation(10)                         | 1.588592225        | 3                | 6.1850495 |
| O09171        | VNEAACDIAR                                                         | 1.2167606          | 2                | 3.9869494 |
| <b>O09173</b> | <b>HGD Homogentisate 1_2_dioxygenase</b>                           | <b>1.017636178</b> | <b>0.0002014</b> | <b>9</b>  |
| O09173        | CFYNSDGDFLIVPQK                                                    | 1.458942203        | 2                | 4.1644855 |
| O09173        | FSVDVFEETR                                                         | 1.031924784        | 2                | 3.827785  |
| O09173        | GYILEVYGVHFLPDLGPIGANLANPR                                         | 1.299298501        | 3                | 5.2778473 |
| O09173        | LLIYTEFGK                                                          | 1.305483938        | 2                | 2.5160031 |
| O09173        | NCMSEFMGLIK                                                        | 0.998643684        | 2                | 3.1194811 |
| O09173        | QDVSPFNVAWHGNYTPYK                                                 | 0.925217818        | 2                | 3.4985461 |
| O09173        | QGGFLPGGSLHSAMTPHGPDADCFEK                                         | 1.055550778        | 3                | 3.4225614 |
| O09173        | SLRPGVAIADFVIFPPR                                                  | 1.23802189         | 2                | 3.7311159 |
| O09173        | YISGFGNECASDPR                                                     | 1.048544099        | 2                | 3.8448973 |
| <b>O35077</b> | <b>GPDA Glycerol_3_phosphate dehydrogenase [NAD_]_ cytoplasmic</b> | <b>1.068876072</b> | <b>4.879E-11</b> | <b>17</b> |

|               |                                                                              |                    |                  |           |
|---------------|------------------------------------------------------------------------------|--------------------|------------------|-----------|
| O35077        | ANTIGISLIK                                                                   | 1.025143892        | 2                | 3.1179745 |
| O35077        | ELHSILQHK                                                                    | 0.800835128        | 1                | 2.7056103 |
| O35077        | FCETTIGCK                                                                    | 0.906307403        | 2                | 2.7116737 |
| O35077        | FCETTIGCKDPAQGQLK                                                            | 1.055544662        | 2                | 5.0409875 |
| O35077        | GIDEGPNGLK                                                                   | 0.954349408        | 2                | 2.7300508 |
| O35077        | GLVDKFPLFTAVYK                                                               | 1.201026043        | 3                | 3.9624281 |
| O35077        | ICDQLKGHLK                                                                   | 1.206757935        | 3                | 3.3375623 |
| O35077        | ITVVQEVDTVEICGALK                                                            | 0.942597829        | 2                | 4.912765  |
| O35077        | IVGSNASQLAHFDPR                                                              | 2.160697912        | 2                | 3.0842013 |
| O35077        | KLTEIINTQHENVK                                                               | 1.094855439        | 2                | 5.2006764 |
| O35077        | LPPNVVAVPDVVQAATGADILVFVVPHQFIGK                                             | 1.135973908        | 3                | 4.6433406 |
| O35077        | LTEIINTQHENVK                                                                | 1.022303504        | 2                | 4.3748245 |
| O35077        | NIVAVGAGFCDGLGFGDNTK                                                         | 0.956875928        | 2                | 4.8613095 |
| O35077        | SIEQLEK                                                                      | 0.963509147        | 2                | 2.4659743 |
| O35077        | VCIVGSGNWGSAIAK                                                              | 1.022367558        | 2                | 4.5778956 |
| O35077        | VCYEGQPVGEFICCLQNHPEHM                                                       | 1.177024315        | 3                | 4.4062519 |
| O35077        | VTMWVFEEDIGGR                                                                | 1.231721275        | 2                | 3.3347049 |
| <b>O35078</b> | <b>OXDA D_amino_acid oxidase</b>                                             | <b>1.223574431</b> | <b>0.969439</b>  | <b>2</b>  |
| O35078        | GQIIQVEAPWIK                                                                 | 1.181981041        | 2                | 3.030266  |
| O35078        | SCCQLEPTLK                                                                   | 1.243901821        | 2                | 2.7457204 |
| <b>O35094</b> | <b>TIM44 Mitochondrial import inner membrane translocase subunit TIM44</b>   | <b>0.958408394</b> | <b>0.9100133</b> | <b>3</b>  |
| O35094        | KLEESDALQEAR                                                                 | 1.023918186        | 2                | 3.4109745 |
| O35094        | TEMSEVLTEILR                                                                 | 0.841097126        | 2                | 2.5010974 |
| O35094        | VTDLLGGLFSK                                                                  | 0.956635432        | 2                | 3.5129702 |
| <b>O35142</b> | <b>COPB2 Coatomer subunit beta_</b>                                          | <b>1.044041676</b> | <b>0.0009015</b> | <b>5</b>  |
| O35142        | AAESLADPTEYENLFPGLK                                                          | 1.18855318         | 2                | 4.1300211 |
| O35142        | FELALQLGELK                                                                  | 1.171702758        | 2                | 2.9522007 |
| O35142        | GSNNVALGYDEGSIIVK                                                            | 1.071591618        | 2                | 3.4685824 |
| O35142        | HSEVQQANLK                                                                   | 0.574011099        | 2                | 3.7256305 |
| O35142        | TFEVCDLPVR                                                                   | 0.94045816         | 2                | 2.6220419 |
| <b>O35180</b> | <b>SH3G3 Endophilin_A3</b>                                                   | <b>1.247285192</b> | <b>0.1629548</b> | <b>2</b>  |
| O35180        | AVAEILSK                                                                     | 1.265484099        | 1                | 1.944126  |
| O35180        | QSTEILQELQNK                                                                 | 1.230242974        | 1                | 2.0291479 |
| <b>O35244</b> | <b>PRDX6 Peroxiredoxin_6</b>                                                 | <b>1.014736545</b> | <b>0.9003</b>    | <b>9</b>  |
| O35244        | DINAYNGAAPTEK                                                                | 1.029547947        | 2                | 3.9689004 |
| O35244        | DLAILLGMLDPAEKDEK                                                            | 1.074150248        | 2                | 3.5487068 |
| O35244        | GESVMVLPTLPEEEAK                                                             | 0.901261946        | 2                | 3.0681736 |
| O35244        | KGESVMVLPTLPEEEAK                                                            | 1.029436441        | 2                | 5.0488548 |
| O35244        | LIALSIDSVEDHFAWSK                                                            | 1.176792345        | 2                | 4.4177642 |
| O35244        | LSILYPATTGR                                                                  | 1.318825073        | 2                | 3.006506  |
| O35244        | NFDEILR                                                                      | 1.004905616        | 1                | 2.3772867 |
| O35244        | VVDSLQLTASNVPVATPVDWK                                                        | 1.079512348        | 2                | 6.0517058 |
| O35244        | VVFIFGPDCK                                                                   | 1.161336409        | 2                | 2.4927425 |
| <b>O35469</b> | <b>3BHS6 3 beta_hydroxysteroid dehydrogenase/Delta 5__4_isomerase type 6</b> | <b>1.099338424</b> | <b>0.9999575</b> | <b>2</b>  |
| O35469        | DLGYEPLVSWEEAK                                                               | 0.895925732        | 2                | 4.2675338 |
| O35469        | TSEWIGTLVEQHR                                                                | 1.093385897        | 2                | 3.5198765 |
| <b>O35509</b> | <b>RB11B Ras_related protein Rab_11B</b>                                     | <b>1.051195587</b> | <b>0.9084564</b> | <b>5</b>  |
| O35509        | AQIWDTAGQER                                                                  | 0.86140828         | 2                | 2.3421373 |
| O35509        | GAVGALLVYDIK                                                                 | 1.054707737        | 2                | 3.5158684 |
| O35509        | HLTYENVER                                                                    | 1.14672827         | 2                | 2.5436232 |
| O35509        | NEFNLESK                                                                     | 1.025325023        | 1                | 2.1016443 |
| O35509        | VVLIGDSGVGK                                                                  | 1.099732622        | 2                | 2.6031954 |
| <b>O35567</b> | <b>PUR9 Bifunctional purine biosynthesis protein PURH</b>                    | <b>1.055682977</b> | <b>0.0004264</b> | <b>7</b>  |
| O35567        | ALFEEVPELLTEAEK                                                              | 0.992064381        | 2                | 2.834249  |
| O35567        | DGQVIGIGAGQQSR                                                               | 0.919978928        | 2                | 3.0003345 |

|               |                                                                                          |                    |                  |           |
|---------------|------------------------------------------------------------------------------------------|--------------------|------------------|-----------|
| O35567        | EVSDGIVAPGYEEALK                                                                         | 1.046067345        | 2                | 3.5938983 |
| O35567        | HVSPAGAAVGVPLSEDEAR                                                                      | 1.223481716        | 2                | 5.4387927 |
| O35567        | MSSFVGFVALSDVCDVPTAK                                                                     | 1.35982339         | 2                | 3.9351883 |
| O35567        | VTVVCEPEDYGAVAAEMQGSNGK                                                                  | 1.278869419        | 2                | 5.3799601 |
| O35567        | YTQNSVVCYAK                                                                              | 1.217037719        | 2                | 2.8059316 |
| <b>O35660</b> | <b>GSTM6 Glutathione S_transferase Mu 6</b>                                              | <b>1.129938382</b> | <b>0.9990024</b> | <b>2</b>  |
| O35660        | RYAMGDAPDYDR                                                                             | 1.12978154         | 2                | 3.9064858 |
| O35660        | YAMGDAPDYDR+Oxidation(3)                                                                 | 1.042887627        | 2                | 2.8236568 |
| <b>O35760</b> | <b>IDI1 Isopentenyl_diphosphate Delta_isomerase 1</b>                                    | <b>0.795874346</b> | <b>0.7913543</b> | <b>4</b>  |
| O35760        | AELGIPLLEVDLNEMNYLTR                                                                     | 1.246943903        | 2                | 3.8463926 |
| O35760        | ITFPGCFTNSCCSHPLNNGELEENDAMGVK                                                           | 1.139293546        | 3                | 5.4992547 |
| O35760        | NCHLNENIDK                                                                               | 0.641691339        | 2                | 2.9996624 |
| O35760        | NVTLNPDNEIK                                                                              | 0.63595974         | 2                | 2.8222797 |
| <b>O35763</b> | <b>MOES Moesin</b>                                                                       | <b>1.028703847</b> | <b>0.9889003</b> | <b>5</b>  |
| O35763        | ALTSELANAR                                                                               | 1.030281352        | 2                | 2.601706  |
| O35763        | AQMVMQEDLEK                                                                              | 0.973843149        | 2                | 2.3608947 |
| O35763        | AQQUEEEQTR                                                                               | 0.935697339        | 2                | 3.2010798 |
| O35763        | IQVWHEEHR                                                                                | 1.164563824        | 2                | 2.4082129 |
| O35763        | TQEQLASEMAELTAR                                                                          | 1.020187881        | 2                | 3.2325799 |
| <b>O35783</b> | <b>CALU Calumenin</b>                                                                    | <b>1.028694013</b> | <b>0.9999121</b> | <b>2</b>  |
| O35783        | HLVYESDQDKDGK                                                                            | 1.062999837        | 2                | 4.4754658 |
| O35783        | VHNDANQNFYDHDHDAFLGAEAK                                                                  | 1.040193653        | 3                | 4.9455085 |
| <b>O35796</b> | <b>C1QBP Complement component 1 Q subcomponent_binding protein_mitochondrial</b>         | <b>0.964709999</b> | <b>0.0021156</b> | <b>3</b>  |
| O35796        | AEEQPELTSTPNFVVEVTK                                                                      | 0.999167136        | 2                | 4.6699381 |
| O35796        | AFVEFLTDEIKEEK                                                                           | 0.636943472        | 2                | 2.8305435 |
| O35796        | TLVLDCHYPEDEIGHDEAESDIFSİK                                                               | 1.52222989         | 3                | 5.0912762 |
| <b>O35814</b> | <b>STIP1 Stress_induced_phosphoprotein 1</b>                                             | <b>1.012224335</b> | <b>0.0232522</b> | <b>8</b>  |
| O35814        | ALDLDSSCK                                                                                | 1.016860928        | 1                | 2.1137087 |
| O35814        | ALSAGNIDDALQCYSEAIK                                                                      | 0.909810688        | 2                | 5.0334692 |
| O35814        | AMADPEVQQIMSDPAMR                                                                        | 0.705085121        | 2                | 4.2399111 |
| O35814        | DCEECIQLEPTFIK                                                                           | 1.01483195         | 2                | 3.9496312 |
| O35814        | ELIEQLQNKPSDLGTK                                                                         | 0.835761522        | 2                | 4.1053228 |
| O35814        | LDPQNHVLYSNR                                                                             | 2.391650758        | 2                | 3.1238921 |
| O35814        | LMDVGLIAIR                                                                               | 1.085444012        | 2                | 3.3722277 |
| O35814        | TVDLKPDWVGK                                                                              | 0.95234151         | 2                | 2.4481857 |
| <b>O35826</b> | <b>GLCNE Bifunctional UDP_N_acetylglucosamine 2_epimerase/N_acetylmannosamine kinase</b> | <b>1.291528693</b> | <b>0.0019671</b> | <b>9</b>  |
| O35826        | EVGAFGTPVINLGR                                                                           | 1.00415075         | 2                | 2.7563009 |
| O35826        | ILHIEGGEVSGTIDDSIR                                                                       | 1.183248088        | 3                | 4.0642128 |
| O35826        | ILLAGCPSYDK                                                                              | 1.390332457        | 2                | 2.4021351 |
| O35826        | LIQEWNSVDLR                                                                              | 1.364800549        | 2                | 2.3692284 |
| O35826        | MIEQDDFDINTR                                                                             | 1.291509868        | 2                | 2.4722896 |
| O35826        | SIDLQEPLQK                                                                               | 1.294660406        | 2                | 2.535382  |
| O35826        | TLVLFNIDAGSK                                                                             | 1.391552833        | 2                | 2.3138664 |
| O35826        | TPLSDTLHLPVWVDNDGNCAAMAER                                                                | 1.335897776        | 3                | 5.7953668 |
| O35826        | VNPQEGVVLHSTK                                                                            | 1.738794293        | 2                | 2.3434103 |
| <b>O35867</b> | <b>NEB1 Neurabin_1</b>                                                                   | <b>1.205028726</b> | <b>0.1395959</b> | <b>2</b>  |
| O35867        | DSNSRPSSNKQATDTEPEK                                                                      | 1.35023384         | 2                | 2.3655226 |
| O35867        | EKAGEAEPQDEWGGSKSNR                                                                      | 0.719233223        | 2                | 2.3410506 |
| <b>O35913</b> | <b>SO1A4 Solute carrier organic anion transporter family member 1A4</b>                  | <b>1.107415464</b> | <b>0.1197147</b> | <b>6</b>  |
| O35913        | EGLQENVDTENAK                                                                            | 0.91795639         | 2                | 3.4446425 |
| O35913        | ILAGIPAPIYFGALIDR                                                                        | 1.557504653        | 2                | 2.4276431 |
| O35913        | LYLGLPAALR                                                                               | 1.771738093        | 2                | 2.6368742 |
| O35913        | SLSGTYMNSMLTQIER                                                                         | 0.991858671        | 2                | 4.2156425 |
| O35913        | SQTLNPTQDPSECVK                                                                          | 1.117526508        | 2                | 4.2955933 |

|               |                                                                                           |                    |                  |           |
|---------------|-------------------------------------------------------------------------------------------|--------------------|------------------|-----------|
| O35913        | TFQFPGDIESSK                                                                              | 1.063760062        | 2                | 2.4981072 |
| <b>O35952</b> | <b>GLO2 Hydroxyacylglutathione hydrolase_mitochondrial</b>                                | <b>1.034431189</b> | <b>0.13903</b>   | <b>6</b>  |
| O35952        | ALLEVLGR                                                                                  | 0.94667816         | 2                | 2.8443458 |
| O35952        | FYEGTADEMYK                                                                               | 0.911811231        | 2                | 2.7565541 |
| O35952        | HVEPGNTAVQEK                                                                              | 0.973429668        | 1                | 3.9578147 |
| O35952        | LTTVLTHHHWDHAGGNEK                                                                        | 1.549244378        | 3                | 3.7228484 |
| O35952        | NAIGEPTVPSTLAEFTYNPFFMR                                                                   | 1.155282608        | 2                | 4.0580311 |
| O35952        | TVQQHAGETDPVTTMR                                                                          | 0.994869854        | 2                | 5.594101  |
| <b>O35987</b> | <b>NSF1C NSF1 cofactor p47</b>                                                            | <b>1.117400141</b> | <b>2.526E-09</b> | <b>5</b>  |
| O35987        | ASSSILINEAEPPTNIQIR                                                                       | 1.17674427         | 2                | 5.063035  |
| O35987        | LGAAPPEESAYVAGER                                                                          | 0.944354481        | 2                | 4.04073   |
| O35987        | LGSTAPQVLNTSPAQAENEAK                                                                     | 1.856353117        | 2                | 3.8680215 |
| O35987        | SYQDPSNAQFLESIR                                                                           | 1.066635951        | 2                | 4.7472129 |
| O35987        | TGFSLDNGDLR                                                                               | 1.975565588        | 2                | 2.7039239 |
| <b>O54975</b> | <b>XPP1 Xaa_Pro aminopeptidase 1</b>                                                      | <b>1.230862314</b> | <b>0.0117296</b> | <b>2</b>  |
| O54975        | GSLTFEPLTLVPIQTK                                                                          | 1.251313388        | 2                | 3.9415503 |
| O54975        | IENVVLVPAK                                                                                | 1.030011208        | 2                | 3.2446854 |
| <b>O55012</b> | <b>PICA Phosphatidylinositol_binding clathrin assembly protein</b>                        | <b>1.020073867</b> | <b>9.9E-20</b>   | <b>3</b>  |
| O55012        | ATTLSNAVSSLASTGLSLTK                                                                      | 1.110764397        | 2                | 4.1458492 |
| O55012        | ITAAQHSVTGSAVSK                                                                           | 1.467212882        | 2                | 4.2824607 |
| O55012        | STNVAVDSGGLLKPTVASQNQLPVAK                                                                | 0.817332455        | 3                | 4.6367092 |
| <b>O55096</b> | <b>DPP3 Dipeptidyl peptidase 3</b>                                                        | <b>1.014972097</b> | <b>0.0308218</b> | <b>4</b>  |
| O55096        | AGLLALEFYTPETANWR                                                                         | 1.209345428        | 2                | 4.2860398 |
| O55096        | LASVLNTEPALDSELSK                                                                         | 1.694226419        | 2                | 3.7806506 |
| O55096        | SYEFQGNHFQVTR                                                                             | 1.198380945        | 2                | 3.8239734 |
| O55096        | VLLEAGEGLVTPTTGDSDGRPDAR                                                                  | 0.922065327        | 3                | 4.2722583 |
| <b>O55125</b> | <b>NIPS1 Protein NipSnap homolog 1</b>                                                    | <b>0.996646856</b> | <b>0.0003758</b> | <b>4</b>  |
| O55125        | AGPNIYELR                                                                                 | 1.038937674        | 2                | 3.0188434 |
| O55125        | FSGGYPALMDCMNK                                                                            | 0.913074964        | 2                | 2.9780154 |
| O55125        | GWDENVYYTVPLVR                                                                            | 1.019449064        | 2                | 3.4750943 |
| O55125        | IQFHNKPECLDAYNSLTEAVLPK                                                                   | 1.606258068        | 3                | 4.7320313 |
| <b>O55171</b> | <b>ACOT2 Acyl_coenzyme A thioesterase 2_mitochondrial</b>                                 | <b>0.900925119</b> | <b>0.999255</b>  | <b>6</b>  |
| O55171        | ADAGGELDAR                                                                                | 0.89891313         | 2                | 2.9498227 |
| O55171        | DGLLDVVEALQSPVLDK                                                                         | 1.031829095        | 2                | 4.5478005 |
| O55171        | DVQKPYVVELEVLDGHEPDGGQR                                                                   | 1.030838955        | 3                | 4.0108671 |
| O55171        | GGELGLAMASFLK                                                                             | 0.989154224        | 2                | 3.5543876 |
| O55171        | IEYFEEAVNYLR                                                                              | 0.990169015        | 2                | 3.3151345 |
| O55171        | SCWDEPLSITVR                                                                              | 0.861595511        | 2                | 3.9104362 |
| <b>O70127</b> | <b>ABCBB Bile salt export pump</b>                                                        | <b>0.960640093</b> | <b>0.9914903</b> | <b>4</b>  |
| O70127        | AGQITSEALS NIR                                                                            | 0.919159141        | 2                | 3.3491838 |
| O70127        | ILDNLMSVIKPGETTALVGSSGAGK                                                                 | 1.09172149         | 3                | 3.5062048 |
| O70127        | ILLDEATSALDTESEK                                                                          | 1.034084996        | 2                | 4.4936228 |
| O70127        | ILLDMATSALDNESEAR                                                                         | 0.833214842        | 2                | 3.9794765 |
| <b>O70133</b> | <b>DHX9 ATP_dependent RNA helicase A</b>                                                  | <b>1.243349273</b> | <b>0.0060483</b> | <b>3</b>  |
| O70133        | ELDALDANDELTP LGR                                                                         | 0.847545343        | 2                | 2.4813213 |
| O70133        | KMTPAYEIRAVGNK                                                                            | 1.171901379        | 2                | 2.4065197 |
| O70133        | TTQVPQYILDDFIQNDR                                                                         | 1.456336174        | 2                | 3.3798492 |
| <b>O70173</b> | <b>P3C2G Phosphatidylinositol_4_phosphate 3_kinase C2 domain_containing subunit gamma</b> | <b>0.936259274</b> | <b>0.2103762</b> | <b>2</b>  |
| O70173        | FLGHAQTFGGIKR                                                                             | 0.512916578        | 1                | 1.9903551 |
| O70173        | WTFSHPLEALGLLTSR                                                                          | 1.409506882        | 2                | 2.3489771 |
| <b>O70196</b> | <b>PPCE Prolyl endopeptidase</b>                                                          | <b>1.29358916</b>  | <b>1.935E-11</b> | <b>2</b>  |
| O70196        | SDGTETSTNLHQK                                                                             | 1.278113932        | 2                | 3.2289517 |
| O70196        | VFLDPNTLSDDGTVALR                                                                         | 1.533188506        | 2                | 3.7175863 |



|               |                                                                            |                    |                  |           |
|---------------|----------------------------------------------------------------------------|--------------------|------------------|-----------|
| <b>O70199</b> | <b>UGDH UDP_glucose 6_dehydrogenase</b>                                    | <b>1.030415726</b> | <b>9E-11</b>     | <b>14</b> |
| O70199        | EADLVFISVNTPTK                                                             | 1.160020985        | 2                | 3.1767199 |
| O70199        | EQIVVDLSHPGVSADDQVSR                                                       | 1.085107218        | 2                | 5.8445339 |
| O70199        | FSLQDPPNKKPK                                                               | 0.935457241        | 2                | 2.4669762 |
| O70199        | IFDANTKPNLNLQVLSNPEFLAEGTAAIK                                              | 1.506903864        | 3                | 6.6231961 |
| O70199        | IIDSLFNTVTDK                                                               | 1.320141514        | 2                | 2.5590882 |
| O70199        | IIDSLFNTVTDK                                                               | 1.408035466        | 2                | 3.1756406 |
| O70199        | ILTTNTWSSELSK                                                              | 1.475199696        | 2                | 3.2178218 |
| O70199        | INAWNSPTLPIYEPGLK                                                          | 1.682921418        | 2                | 4.2878628 |
| O70199        | NLFFSTNIDDAIR                                                              | 1.02880933         | 2                | 3.1740384 |
| O70199        | VLDGLHNELQTIGFQIETIGK                                                      | 0.993190293        | 2                | 5.1840997 |
| O70199        | VLDGLHNELQTIGFQIETIGKK                                                     | 0.950278971        | 3                | 3.3643188 |
| O70199        | VLIGGDETPEGQR                                                              | 1.168812701        | 2                | 3.8417528 |
| O70199        | VTVVVDVNEAR                                                                | 1.074185733        | 2                | 3.4467363 |
| O70199        | YWQQVIDMNDYQR                                                              | 0.945072158        | 2                | 4.4995518 |
| <b>O70251</b> | <b>EF1B Elongation factor 1_beta</b>                                       | <b>1.219222948</b> | <b>0.9728134</b> | <b>4</b>  |
| O70251        | SIQADGLVWGSSK                                                              | 1.127653777        | 2                | 4.0782681 |
| O70251        | SSILLDVKPWDDDETDMTK                                                        | 0.959037512        | 2                | 4.4917707 |
| O70251        | SSILLDVKPWDDDETDMTKLEECVR                                                  | 1.062949742        | 3                | 5.0059309 |
| O70251        | TPAGLQVLNDYLADK                                                            | 1.208665523        | 2                | 4.13592   |
| <b>O70351</b> | <b>HCD2 3_hydroxyacyl_CoA dehydrogenase type_2</b>                         | <b>0.997067889</b> | <b>9.9E-20</b>   | <b>16</b> |
| O70351        | GGIVGMTLPIAR                                                               | 0.934763209        | 2                | 3.5860507 |
| O70351        | GLVAVITGGASGLGLSTAK                                                        | 1.016353365        | 2                | 4.4693542 |
| O70351        | GVIINTASVAAFEGQVGQAAYSASK                                                  | 0.952851037        | 3                | 3.9972572 |
| O70351        | IDVAVNCAGIAVAIK                                                            | 1.00757107         | 2                | 4.58041   |
| O70351        | KLGGNCIFAPANVTSEK                                                          | 1.218873434        | 2                | 4.9763312 |
| O70351        | KNQVHTLEDFQR                                                               | 1.108610794        | 2                | 4.0336704 |
| O70351        | LGDPAEYAHLVQMVIENPFLNGEVIR                                                 | 1.329800401        | 3                | 5.5370665 |
| O70351        | LGGNCIFAPANVTSEK                                                           | 1.239062245        | 2                | 3.3798625 |
| O70351        | LVAGVMGQNEPDQGGQR                                                          | 1.2323601          | 2                | 5.5030212 |
| O70351        | LVGQGATAVLLDVPNSEGETEAK                                                    | 1.836878359        | 2                | 5.3007121 |
| O70351        | LVGQGATAVLLDVPNSEGETEAKK                                                   | 1.285752701        | 3                | 3.6657679 |
| O70351        | NFLASQVPFPSR                                                               | 0.998417032        | 2                | 4.5117917 |
| O70351        | NQVHTLEDFQR                                                                | 1.142137414        | 2                | 3.6625848 |
| O70351        | RLVGQGATAVLLDVPNSEGETEAK                                                   | 1.116772658        | 2                | 6.0897312 |
| O70351        | VINVNLIGTFNVIR                                                             | 1.212079085        | 2                | 4.1421156 |
| O70351        | VVTIAPGLFATPLLTLPDK                                                        | 1.265450652        | 2                | 4.8735948 |
| <b>O70456</b> | <b>1433S 14_3_3 protein sigma</b>                                          | <b>1.232069819</b> | <b>0.059484</b>  | <b>3</b>  |
| O70456        | DSTLIMQLLR                                                                 | 1.137962828        | 2                | 3.6972013 |
| O70456        | NLLSVAYK                                                                   | 1.072515932        | 2                | 2.3098869 |
| O70456        | VLSSIEQK                                                                   | 1.240017053        | 1                | 2.1964095 |
| <b>O88428</b> | <b>PAPS2 Bifunctional 3__phosphoadenosine 5__phosphosulfate synthase 2</b> | <b>1.318440112</b> | <b>9.9E-20</b>   | <b>8</b>  |
| O88428        | GCTVWLTGLSGAGK                                                             | 1.269967009        | 2                | 3.5294364 |
| O88428        | GFTGIDSDYEKPECTPECVLK                                                      | 1.375643524        | 2                | 4.9537382 |
| O88428        | GIHELFPENK                                                                 | 1.33228414         | 2                | 3.036516  |
| O88428        | IHESAGLPFFEIFVDAPLNICESR                                                   | 1.396642338        | 3                | 4.041904  |
| O88428        | KDLYEPHGGK                                                                 | 1.145477362        | 2                | 2.6514754 |
| O88428        | NLGFSAGDREENIR                                                             | 1.188517134        | 2                | 3.3503194 |
| O88428        | STNVVYQAHHVSR                                                              | 1.298796521        | 2                | 2.9045322 |
| O88428        | VLSMAPGLTSVEIIPFR                                                          | 1.673880897        | 2                | 3.4123716 |
| <b>O88600</b> | <b>HSP74 Heat shock 70 kDa protein 4</b>                                   | <b>1.310409116</b> | <b>6.622E-07</b> | <b>17</b> |
| O88600        | AESEEMETSQAGSK                                                             | 1.038278582        | 2                | 4.372685  |
| O88600        | AFSDPFVEAEK                                                                | 1.001812928        | 2                | 2.8560274 |
| O88600        | AGGIETIANEYS DR                                                            | 0.985060871        | 2                | 3.2832398 |
| O88600        | FQESEERPK                                                                  | 1.239450374        | 2                | 2.7108991 |
| O88600        | FVSEDDRNFTLK                                                               | 1.432834347        | 2                | 2.8789887 |

|               |                                                                                   |                    |                  |           |
|---------------|-----------------------------------------------------------------------------------|--------------------|------------------|-----------|
| O88600        | GCALQCAILSPAFAK                                                                   | 1.191363108        | 2                | 3.7098084 |
| O88600        | HAEQNGPVDGQGDNPQTAAAEHGADTAVPSDGDK                                                | 1.330799675        | 3                | 5.9683385 |
| O88600        | LEDTENWLYEDGEDQPK                                                                 | 1.484104659        | 2                | 4.3652363 |
| O88600        | MIMQDKLEK+Oxidation(1)                                                            | 1.069337008        | 2                | 2.3633254 |
| O88600        | MQVDQEEPHTEEQQPTAENK                                                              | 1.027997659        | 3                | 5.138443  |
| O88600        | NFTTEQVTAMLLSK                                                                    | 1.169367357        | 2                | 3.3158462 |
| O88600        | NKEDQYEHDAADMTK                                                                   | 0.960223841        | 3                | 3.9902594 |
| O88600        | SNLAYDIVQLPTGLTGIK                                                                | 1.344529326        | 2                | 4.9164419 |
| O88600        | SVMDATQIAGLNCLR                                                                   | 0.958969289        | 2                | 2.5988126 |
| O88600        | TSTVDLPIESQLLWQLDR                                                                | 1.29807379         | 2                | 3.8627577 |
| O88600        | VLATAFDTTLGGR                                                                     | 1.116583366        | 2                | 3.7861848 |
| O88600        | WNSPAEEGSSDCEVFPK                                                                 | 1.133548517        | 2                | 4.0434895 |
| <b>O88618</b> | <b>FTCD Formimidoyltransferase_cyclodeaminase</b>                                 | <b>1.138471014</b> | <b>3.387E-12</b> | <b>21</b> |
| O88618        | AFAACLGAIK                                                                        | 1.129617463        | 2                | 2.5143738 |
| O88618        | AGEYEALPEK                                                                        | 1.017482631        | 2                | 2.5804944 |
| O88618        | ALLDAAAFYCDK                                                                      | 1.195902897        | 2                | 3.8886409 |
| O88618        | ALLDAAAFYCDKEK                                                                    | 1.358977337        | 2                | 3.6918471 |
| O88618        | EAQELNLPVVGSQLVGLVPLK                                                             | 1.117935383        | 3                | 4.4313126 |
| O88618        | GVSMDECVLCAK                                                                      | 1.055879159        | 2                | 3.874516  |
| O88618        | IIEYLVPSDGPESLLDASLR                                                              | 1.207594263        | 2                | 5.5803852 |
| O88618        | ISSLLQEAK                                                                         | 1.148513737        | 2                | 2.541893  |
| O88618        | KVQGIGWYLEEK                                                                      | 1.069986145        | 2                | 2.7874067 |
| O88618        | LAEELNVPVLYGEEAQMPSR                                                              | 1.28438263         | 2                | 4.7371082 |
| O88618        | LFVLEEEHR                                                                         | 1.209285126        | 2                | 2.9269285 |
| O88618        | LGLDSLAPFDPK                                                                      | 1.090944548        | 2                | 3.609292  |
| O88618        | LIPPFHAASAQLTSLVDADAR                                                             | 1.309213581        | 2                | 3.8247716 |
| O88618        | MGALDVCFIPVVR                                                                     | 0.867445171        | 2                | 4.0785375 |
| O88618        | MGALDVCFIPVVR+Oxidation(1)                                                        | 1.002021342        | 2                | 2.8072605 |
| O88618        | NLAQVSTNLLDFEVTALHTVYEEAR                                                         | 1.818581697        | 3                | 4.0340543 |
| O88618        | QAEWVPDFGSPSFVPSWGATVTGAR                                                         | 1.035647027        | 2                | 3.702194  |
| O88618        | TCALQEGLR                                                                         | 1.093840554        | 2                | 3.1762567 |
| O88618        | TQAALVLSLEAR                                                                      | 1.025264606        | 2                | 4.7825289 |
| O88618        | TVYTFVGQPECVVEGALSAAR                                                             | 1.250368076        | 2                | 4.3505301 |
| O88618        | VQGIGWYLEEK                                                                       | 1.018410621        | 2                | 3.2401359 |
| <b>O88637</b> | <b>PCY2 Ethanolamine_phosphate cytidyllyltransferase</b>                          | <b>1.122334787</b> | <b>0.3183231</b> | <b>5</b>  |
| O88637        | AHHSSQEMSSEYR                                                                     | 1.356577242        | 3                | 3.3994465 |
| O88637        | HKGPPVFTQEER                                                                      | 1.11892014         | 2                | 2.9980643 |
| O88637        | HNCDFCVHGNIDITLVDGR                                                               | 1.190417087        | 3                | 4.305182  |
| O88637        | TEIVPDRDGSDPYEEPK                                                                 | 1.13771546         | 2                | 2.9445887 |
| O88637        | TQGVSTTDLVGR                                                                      | 1.0527415          | 2                | 3.2773552 |
| <b>O88656</b> | <b>ARC1B Actin_related protein 2/3 complex subunit 1B</b>                         | <b>1.044101137</b> | <b>0.7523517</b> | <b>2</b>  |
| O88656        | ASSEGGAATGAGLDSLHK                                                                | 1.044387119        | 2                | 4.1529384 |
| O88656        | NSVSQISVLGGK                                                                      | 0.528281236        | 2                | 2.9223578 |
| <b>O88696</b> | <b>CLPP Putative ATP_dependent Clp protease proteolytic subunit_mitochondrial</b> | <b>0.882437305</b> | <b>0.8308269</b> | <b>2</b>  |
| O88696        | GQATDIAIQAEIIMK                                                                   | 0.911340308        | 2                | 2.5534236 |
| O88696        | VLVHPPQDGEPELVQK                                                                  | 0.881859144        | 3                | 3.9723082 |
| <b>O88735</b> | <b>MAP7 Enscosin</b>                                                              | <b>1.08559926</b>  | <b>0.8749385</b> | <b>2</b>  |
| O88735        | KTTEQRNGDIAK                                                                      | 1.030165519        | 2                | 2.5079846 |
| O88735        | TSAGTTDPEEATR                                                                     | 1.109720504        | 2                | 2.3850594 |
| <b>O88761</b> | <b>PSMD1 26S proteasome non_ATPase regulatory subunit 1</b>                       | <b>1.141076465</b> | <b>0.1748922</b> | <b>2</b>  |
| O88761        | DTSEDIIEELVEPVAAHGPK                                                              | 1.20766321         | 2                | 5.0987334 |
| O88761        | TVGTPIASVPGSTNTGTVPGEK                                                            | 1.108589059        | 2                | 3.7577505 |
| <b>O88767</b> | <b>PARK7 Protein DJ_1</b>                                                         | <b>0.891312591</b> | <b>0.9991503</b> | <b>8</b>  |
| O88767        | ALVILAK                                                                           | 0.811232677        | 2                | 2.3055618 |
| O88767        | DVVICPDTSLLEAK                                                                    | 0.885446894        | 2                | 3.664283  |

|               |                                                                   |                    |                  |           |
|---------------|-------------------------------------------------------------------|--------------------|------------------|-----------|
| O88767        | GAEEMETVIPVDIMR                                                   | 0.935018371        | 2                | 3.4817283 |
| O88767        | GLIAAICAGPTALLAHEVGFCK                                            | 1.054797568        | 2                | 4.3593473 |
| O88767        | KGLIAAICAGPTALLAHEVGFCK                                           | 0.900321155        | 3                | 5.5026946 |
| O88767        | TQGPYDVVVLPGGNGLGAQNLSEALVK                                       | 0.99524374         | 3                | 5.6228747 |
| O88767        | VEKDGLILTSR                                                       | 1.060771348        | 2                | 2.3383584 |
| O88767        | VTVAGLAGKDPVQCSR                                                  | 1.077694063        | 2                | 4.3628092 |
| <b>O88794</b> | <b>PNPO Pyridoxine_5__phosphate oxidase</b>                       | <b>0.962343993</b> | <b>0.3029304</b> | <b>3</b>  |
| O88794        | GLATGDSPLGPMTHHGEEEDWVYER                                         | 0.964610867        | 3                | 3.5647655 |
| O88794        | KKNEELGQLYR                                                       | 1.200382445        | 2                | 2.3760264 |
| O88794        | SSQIGAVVSR                                                        | 0.77464173         | 2                | 2.4858036 |
| <b>O88813</b> | <b>ACSL5 Long_chain_fatty_acid__CoA ligase 5</b>                  | <b>0.885875797</b> | <b>0.4289245</b> | <b>16</b> |
| O88813        | ADISVVICDTPQK                                                     | 0.84961075         | 2                | 3.1112063 |
| O88813        | AEYLGSCLLHK                                                       | 1.411184376        | 2                | 2.499964  |
| O88813        | AILEDLQK                                                          | 1.041015062        | 1                | 2.2087657 |
| O88813        | FFQTQIK                                                           | 0.887907361        | 1                | 1.9331115 |
| O88813        | FLLNLAIISK                                                        | 1.218637817        | 2                | 2.9869616 |
| O88813        | GAMLTHQNIIVSNMAAFLK                                               | 1.062785559        | 3                | 3.6434929 |
| O88813        | GLAVSDNGPCLGYR                                                    | 0.91756668         | 2                | 2.5283089 |
| O88813        | GSFEELCQNQCVK                                                     | 0.956938693        | 2                | 4.7328863 |
| O88813        | IGFFQGDIR                                                         | 1.327084703        | 2                | 3.3318856 |
| O88813        | LMITGAAPISTPVLTFRR                                                | 1.03838115         | 2                | 3.0518513 |
| O88813        | LVQGVIFSCGK                                                       | 1.103401879        | 2                | 2.8885159 |
| O88813        | SFLIGVVVPDPELSPFAAK                                               | 1.088698403        | 2                | 3.6053007 |
| O88813        | SIFVHPEPFSIENGLLTPTLK                                             | 1.619848519        | 2                | 2.8523116 |
| O88813        | SRPILQVFVHGESLR                                                   | 0.788629404        | 3                | 3.5349846 |
| O88813        | TQEVLDKDGWLHTGDIGR                                                | 0.862999442        | 3                | 3.7910645 |
| O88813        | TVILMDPFDDLMK                                                     | 0.900172434        | 2                | 3.2888052 |
| <b>O88867</b> | <b>KMO Kynurenine 3_monooxygenase</b>                             | <b>1.09499776</b>  | <b>0.7551097</b> | <b>5</b>  |
| O88867        | AVGLEDQIVSK                                                       | 0.982109202        | 2                | 2.3077908 |
| O88867        | DFLLPAQPMISVK                                                     | 1.371613934        | 2                | 2.5107648 |
| O88867        | DITCDLIVGCDGAYSTVR                                                | 1.488993568        | 2                | 2.5740836 |
| O88867        | FNNDLSVCLPEFSR                                                    | 1.097504423        | 2                | 3.9623351 |
| O88867        | NFPDAIPLMGEQALMR                                                  | 1.241009199        | 2                | 3.5783944 |
| <b>O88941</b> | <b>MOGS Mannosyl_oligosaccharide glucosidase</b>                  | <b>1.016604114</b> | <b>0.9932552</b> | <b>2</b>  |
| O88941        | ALESHAAAFK                                                        | 1.016468077        | 2                | 2.4548504 |
| O88941        | MDPSLFPVPLFSGVPSR                                                 | 1.088536429        | 2                | 3.0927384 |
| <b>O88986</b> | <b>KBL 2_amino_3_ketobutyrate coenzyme A ligase_mitochondrial</b> | <b>1.026047041</b> | <b>0.042342</b>  | <b>4</b>  |
| O88986        | ALDLLMESNAIIQSMAAK+Oxidation(6)                                   | 1.893827801        | 2                | 2.5224798 |
| O88986        | GTDELLGVMDQVTIINSTLGK                                             | 1.030019942        | 2                | 2.6168199 |
| O88986        | MEAAAGFTVSGADHPICPVMLGDAR+Oxidation(1)                            | 0.743434356        | 2                | 2.6230037 |
| O88986        | VQISAVHSEEDIDR                                                    | 1.139923747        | 2                | 4.0385504 |
| <b>O88989</b> | <b>MDHC Malate dehydrogenase_cytoplasmic</b>                      | <b>1.06096253</b>  | <b>1.374E-12</b> | <b>9</b>  |
| O88989        | DLDVAVLVGSMR                                                      | 0.803153662        | 3                | 3.8542411 |
| O88989        | EKMDLTAKELTEEK+Oxidation(3)                                       | 1.305982278        | 2                | 2.385556  |
| O88989        | ELTEEKETAFFLSSA                                                   | 1.4445332          | 2                | 3.7320535 |
| O88989        | EVGVYEALKDDSWLK                                                   | 0.770666537        | 2                | 3.8293636 |
| O88989        | FVEGLPINDFSR                                                      | 1.017931885        | 2                | 3.4406192 |
| O88989        | GEFITTVQQR                                                        | 1.061721992        | 2                | 3.8740389 |
| O88989        | LGVTADDVK                                                         | 1.067511837        | 2                | 2.8429949 |
| O88989        | NVIIWGNHSSTQYPDVNHAK                                              | 1.112842614        | 2                | 5.6664886 |
| O88989        | VIVVGNPANTNCLTASK                                                 | 1.102923636        | 2                | 5.5655141 |
| <b>O88990</b> | <b>ACTN3 Alpha_actinin_3</b>                                      | <b>1.133448477</b> | <b>0.9846544</b> | <b>4</b>  |
| O88990        | ALDFIASK                                                          | 1.084444316        | 2                | 2.622206  |
| O88990        | CQLEINFNTLQTK                                                     | 1.219705191        | 2                | 3.5827529 |
| O88990        | FAIQDISVEETSAK                                                    | 1.00894181         | 2                | 3.9193046 |
| O88990        | HEAFESDLAAHQDR                                                    | 0.968072609        | 3                | 3.9577987 |

|               |                                                             |                    |                  |           |
|---------------|-------------------------------------------------------------|--------------------|------------------|-----------|
| <b>O88994</b> | <b>MOSC2 MOSC domain_containing protein 2_mitochondrial</b> | <b>0.995378244</b> | <b>0.994761</b>  | <b>6</b>  |
| O88994        | CVLTTVDPDTGIIDR                                             | 0.840218942        | 2                | 4.1955242 |
| O88994        | GVSVCETECTDMGLR                                             | 0.94155543         | 2                | 3.4288859 |
| O88994        | LYPSESYLQNYEVAYPDCSPIHLISEASLVDLNR                          | 1.32001196         | 3                | 3.7433207 |
| O88994        | QLQQVGTVSK                                                  | 0.961714597        | 1                | 2.2845776 |
| O88994        | RQLQQVGTVSK                                                 | 0.846056072        | 2                | 3.2818952 |
| O88994        | SLYQSSPLFGMYFSVEK                                           | 0.998996734        | 2                | 3.7263293 |
| <b>O89000</b> | <b>DPYD Dihydropyrimidine dehydrogenase [NADP_]</b>         | <b>1.281433326</b> | <b>0.0002146</b> | <b>7</b>  |
| O89000        | EGGADGVTATNTVSGMLGLK                                        | 1.081395153        | 2                | 3.3476727 |
| O89000        | GAVIVLGAGDTAFDCATSALR                                       | 1.089937855        | 2                | 4.8196983 |
| O89000        | GMGLACGQDPELVR                                              | 1.002564448        | 2                | 3.3103855 |
| O89000        | LENNFDDIK                                                   | 0.922371432        | 2                | 2.6552484 |
| O89000        | QEYVGGSTSEIPQFR                                             | 1.397078873        | 2                | 3.5740752 |
| O89000        | TEQDETGNWVEDEEQIVR                                          | 1.04311645         | 2                | 5.0789638 |
| O89000        | TFSLDKDIVTNVSPR                                             | 1.014424252        | 2                | 2.8310404 |
| <b>O89032</b> | <b>SPD2A SH3 and PX domain_containing protein 2A</b>        | <b>1.103686784</b> | <b>0.9870073</b> | <b>2</b>  |
| O89032        | DDSDINTSKTGEVSKR                                            | 1.113467215        | 2                | 2.5154278 |
| O89032        | FPIEGGQKDPK                                                 | 1.003508173        | 2                | 2.345449  |
| <b>O89046</b> | <b>COR1B Coronin_1B</b>                                     | <b>1.026350082</b> | <b>0.9431831</b> | <b>4</b>  |
| O89046        | KCEPIVMTVPR                                                 | 0.741707512        | 2                | 2.6017771 |
| O89046        | NDQCYEDIR                                                   | 1.041295092        | 2                | 2.8248231 |
| O89046        | NVLSDSKPAGYSR                                               | 1.033651103        | 2                | 2.9279189 |
| O89046        | SGVSTATAITDIPSGNLAGSGEAGK                                   | 0.990148394        | 2                | 4.2322421 |
| <b>O89049</b> | <b>TRXR1 Thioredoxin reductase 1_cytoplasmic</b>            | <b>0.931491475</b> | <b>0.7918589</b> | <b>7</b>  |
| O89049        | IEQIEAGTPGR                                                 | 1.076804533        | 2                | 2.9841712 |
| O89049        | IEQIEAGTPGRLK                                               | 0.659257349        | 2                | 2.3615086 |
| O89049        | LELTPVAIQAGR                                                | 1.03237763         | 2                | 2.8111362 |
| O89049        | STNSEETIEDEFNTVLLAVGR                                       | 1.365714147        | 2                | 2.3237946 |
| O89049        | VMVLDFTPTPLGTR                                              | 1.049038116        | 2                | 2.785918  |
| O89049        | VVGFHVLGPNAGEVTQGFAAALK                                     | 0.627696967        | 2                | 2.4056368 |
| O89049        | WGLGGTCVNVGCIPK                                             | 0.91050662         | 2                | 3.5652204 |
| <b>P00173</b> | <b>CYB5 Cytochrome b5</b>                                   | <b>1.083553255</b> | <b>1.017E-05</b> | <b>6</b>  |
| P00173        | EQAGGDATENFEDVGHSTDR                                        | 1.205570491        | 2                | 5.4461079 |
| P00173        | FLEEHPGGEEVLR                                               | 1.107261366        | 2                | 4.1663504 |
| P00173        | STWVILHHK                                                   | 1.299724991        | 2                | 2.9134049 |
| P00173        | TYIIGELHPDDR                                                | 1.10947825         | 2                | 4.0626817 |
| P00173        | VYDLTK                                                      | 1.165558501        | 1                | 1.9698772 |
| P00173        | YYTLEEIQK                                                   | 1.125660292        | 2                | 2.8875425 |
| <b>P00388</b> | <b>NCPR NADPH_cytochrome P450 reductase</b>                 | <b>1.141244806</b> | <b>6.803E-05</b> | <b>7</b>  |
| P00388        | DVQNTFYDIVAEFGPMEHTQAVDVVK                                  | 1.144815742        | 3                | 4.3054614 |
| P00388        | GMSADPEEYDLADLSSLPEIDK                                      | 1.433639373        | 2                | 5.0956492 |
| P00388        | LIHEGGAHIYVCGDAR                                            | 1.366561061        | 3                | 3.8445265 |
| P00388        | RSDEDLYR                                                    | 1.024623507        | 2                | 2.8432741 |
| P00388        | SYENQKPPFDAK                                                | 1.113927215        | 2                | 3.2051301 |
| P00388        | TNVLYELAQYASEPSEQEHLHK                                      | 1.317041673        | 3                | 3.6142049 |
| P00388        | VHPNSVHICAVAVEYEAK                                          | 1.1579099          | 3                | 3.5694685 |
| <b>P00406</b> | <b>COX2 Cytochrome c oxidase subunit 2</b>                  | <b>0.990614851</b> | <b>0.9527314</b> | <b>3</b>  |
| P00406        | ILYMMDEINNPVLTVK                                            | 0.823314038        | 2                | 3.601321  |
| P00406        | LLEVDNR                                                     | 1.039640143        | 2                | 2.5283229 |
| P00406        | VVLPMEPIR                                                   | 0.936205047        | 2                | 2.5178375 |
| <b>P00481</b> | <b>OTC Ornithine carbamoyltransferase_mitochondrial</b>     | <b>1.189090815</b> | <b>1.961E-13</b> | <b>19</b> |
| P00481        | FGMHLQAATPK                                                 | 1.011427877        | 3                | 3.6466739 |
| P00481        | GEYLPQLQK                                                   | 0.998494619        | 2                | 3.0811553 |
| P00481        | GGNVLITDTWISMGQEDEK                                         | 1.137682684        | 2                | 5.5482659 |
| P00481        | GGNVLITDTWISMGQEDEKK                                        | 1.082448961        | 2                | 4.8224187 |
| P00481        | GLTLSWIGDGNLHLSIMMSAAK                                      | 1.394291067        | 3                | 4.4737225 |

|               |                                                      |                    |                  |           |
|---------------|------------------------------------------------------|--------------------|------------------|-----------|
| P00481        | GYEPDPNIVK                                           | 0.987425137        | 2                | 2.5824213 |
| P00481        | LQAFQGYQVTMK                                         | 1.548335378        | 2                | 4.2466464 |
| P00481        | LQAFQGYQVTMK+Oxidation(11)                           | 1.477219692        | 2                | 2.3224466 |
| P00481        | LSMTNDPLEAAR                                         | 0.942938309        | 2                | 2.9102488 |
| P00481        | LSTETGFALLGGHPSFLTQDIHLGVNESLTDAR                    | 1.421067953        | 3                | 7.2522731 |
| P00481        | QKGEYLP LLQ GK                                       | 1.192346333        | 2                | 3.666312  |
| P00481        | QSDLDILAK                                            | 1.074160198        | 1                | 1.9644452 |
| P00481        | SLGMIFEK                                             | 0.909779851        | 2                | 2.3917885 |
| P00481        | SLGMIFEK+Oxidation(4)                                | 0.87770619         | 2                | 2.3970351 |
| P00481        | SLVFPEAENR                                           | 0.97249245         | 2                | 2.6745985 |
| P00481        | SLVFPEAENRK                                          | 1.248890714        | 2                | 2.8831501 |
| P00481        | VLSSMTDAVLAR                                         | 1.073461335        | 2                | 3.83373   |
| P00481        | VLSSMTDAVLAR+Oxidation(5)                            | 1.136298213        | 2                | 2.6869709 |
| P00481        | YGKPVQSQVQLK                                         | 0.657442096        | 2                | 2.794848  |
| <b>P00502</b> | <b>GSTA1 Glutathione S transferase alpha_1</b>       | <b>0.993631704</b> | <b>1</b>         | <b>2</b>  |
| P00502        | FIQSPEDLEK                                           | 1.105804638        | 2                | 2.77003   |
| P00502        | WLLAAGVFEDEK                                         | 1.010386969        | 2                | 4.530767  |
| <b>P00507</b> | <b>AATM Aspartate aminotransferase_mitochondrial</b> | <b>1.064752752</b> | <b>5.056E-07</b> | <b>19</b> |
| P00507        | ASAELALGENSEVLK                                      | 1.169242732        | 2                | 4.6368575 |
| P00507        | DAGMQLQGYR                                           | 0.457097334        | 2                | 2.8095787 |
| P00507        | DDNGKPYVLP SVR                                       | 1.04032596         | 2                | 3.2830005 |
| P00507        | EGSSHNWQHITDQIGMFCFTGLKPEQVER                        | 1.480823468        | 3                | 5.266993  |
| P00507        | EYLP IGG LAD FCK                                     | 1.000842646        | 2                | 2.6195023 |
| P00507        | FVTVQTISGTGALR                                       | 1.170135276        | 2                | 4.8037357 |
| P00507        | HFIEQGINVCLCQSYAK                                    | 1.139963548        | 3                | 5.263133  |
| P00507        | ILIRPLYSNPPLNGAR                                     | 1.63196202         | 3                | 3.3532634 |
| P00507        | IPEQSVLLLHACAHNPTGVDPRPEQWK                          | 1.331824801        | 3                | 4.5235882 |
| P00507        | ISVAGVTSGNVGYLAHAHQVTK                               | 1.794592683        | 2                | 2.6759319 |
| P00507        | KMNLGVGAYR                                           | 0.844309014        | 2                | 2.5455203 |
| P00507        | KQWLQEVK                                             | 1.169282277        | 1                | 2.3943088 |
| P00507        | MNLGVGAYR                                            | 1.026609258        | 2                | 3.0104167 |
| P00507        | NLDKEYLP IGG LAD FCK                                 | 1.086290387        | 2                | 5.8711505 |
| P00507        | NMGLYGER                                             | 0.952531694        | 2                | 2.6361129 |
| P00507        | QWLQEVK                                              | 1.198550731        | 1                | 2.0618265 |
| P00507        | TCGFDFSGALEDISK                                      | 1.148607917        | 2                | 5.0223193 |
| P00507        | VGAF TVVCK                                           | 1.024255662        | 2                | 3.3458345 |
| P00507        | VGASFLQR                                             | 1.208110633        | 2                | 3.1120033 |
| <b>P00564</b> | <b>KCRM Creatine kinase M_type</b>                   | <b>0.868882495</b> | <b>1</b>         | <b>7</b>  |
| P00564        | GGDDLDPNYVLSSR                                       | 0.766245           | 2                | 4.6490002 |
| P00564        | GQSIDDMIPAQK                                         | 0.960226032        | 2                | 2.9639015 |
| P00564        | GTGGVDTA AVGAVFDISNADR                               | 0.993804186        | 2                | 5.9055338 |
| P00564        | LGSSEVEQVQLVVDGVK                                    | 1.088862491        | 2                | 4.6133389 |
| P00564        | LSVEALNSLTGEFK                                       | 1.096615121        | 2                | 4.1635036 |
| P00564        | RGTGGVDTA AVGAVFDISNADR                              | 1.021411542        | 2                | 4.3304024 |
| P00564        | SMTEQEQQQLIDHFLFDKPVSP LLLASGMAR                     | 1.275677563        | 3                | 6.3140717 |
| <b>P00787</b> | <b>CATB Cathepsin B</b>                              | <b>1.200977059</b> | <b>2.985E-07</b> | <b>3</b>  |
| P00787        | GENHCGIESEIVAGIPR                                    | 1.216276213        | 2                | 4.8600416 |
| P00787        | HEAGDVMGGHAIR                                        | 1.073801274        | 3                | 3.9651208 |
| P00787        | MCEAGYSTSYKEDK                                       | 1.043557879        | 2                | 3.9234881 |
| <b>P00884</b> | <b>ALDOB Fructose_bisphosphate aldolase B</b>        | <b>1.858687202</b> | <b>9.9E-20</b>   | <b>18</b> |
| P00884        | ALQASALAAWGGK                                        | 1.188203072        | 2                | 4.7719474 |
| P00884        | ATQEAFMK                                             | 0.948202575        | 2                | 2.6846297 |
| P00884        | ELSEIAQR                                             | 0.686553288        | 1                | 1.9351826 |
| P00884        | ETTIQGLDGLSER                                        | 0.882341643        | 2                | 3.8920598 |
| P00884        | FPALTSEQK                                            | 0.950339527        | 2                | 2.3641913 |
| P00884        | GILAADESVGTMG NR                                     | 1.019908157        | 2                | 5.6689172 |
| P00884        | GILAADESVGTMG NR+Oxidation(12)                       | 1.146109716        | 2                | 5.0253758 |

|               |                                             |                    |                 |           |
|---------------|---------------------------------------------|--------------------|-----------------|-----------|
| P00884        | GIVVGIK                                     | 1.139840031        | 1               | 1.91353   |
| P00884        | IKVENTEENR                                  | 1.022865424        | 2               | 2.6895051 |
| P00884        | IKVENTEENRR                                 | 1.288225124        | 2               | 2.7779574 |
| P00884        | ISDQCPSLAIQENANALAR                         | 1.219298154        | 2               | 6.6194468 |
| P00884        | KELSEIAQR                                   | 1.027324844        | 2               | 2.6150851 |
| P00884        | KYTPEQVAMATVTALHR                           | 1.17394211         | 3               | 6.1989927 |
| P00884        | KYTPEQVAMATVTALHR+Oxidation(9)              | 1.225453146        | 3               | 3.5445096 |
| P00884        | LDQGGAPLAGTNK                               | 1.039588117        | 2               | 4.5788469 |
| P00884        | YASICQQNGLVPIVEVLPDGDHDLHCQYVSEK            | 1.37866634         | 3               | 5.1495981 |
| P00884        | YTPEQVAMATVTALHR                            | 1.128876222        | 2               | 4.8139429 |
| P00884        | YTPEQVAMATVTALHR+Oxidation(8)               | 1.333929194        | 2               | 3.6661677 |
| <b>P01026</b> | <b>CO3 Complement C3</b>                    | <b>1.01973457</b>  | <b>0.752711</b> | <b>17</b> |
| P01026        | ACEPGVDYVYK                                 | 1.110219756        | 2               | 2.9446547 |
| P01026        | ADIGCTPGSGK                                 | 1.068271965        | 2               | 2.7922254 |
| P01026        | AFYEHPK                                     | 1.12614691         | 2               | 2.3566384 |
| P01026        | EYVLPSEVLVEPTEK                             | 1.11492648         | 2               | 3.4341588 |
| P01026        | IFTVDNLLPVGK                                | 1.237157272        | 2               | 3.3885601 |
| P01026        | IGLQEVEVK                                   | 1.043355836        | 2               | 2.5905955 |
| P01026        | NEQVEIRAVLFNYR                              | 1.008104112        | 2               | 2.314445  |
| P01026        | QNEGFSLTAK                                  | 1.016036835        | 2               | 2.3839648 |
| P01026        | RVPVVTQGSDAQALTQDDGVAK                      | 1.177843308        | 3               | 5.3039398 |
| P01026        | SDVDEIIPEDIISR                              | 0.908159778        | 2               | 4.5719924 |
| P01026        | SGSDEVQAGQER                                | 1.150940652        | 2               | 4.1304212 |
| P01026        | TNQGLQTDQR                                  | 0.823790186        | 2               | 2.8543546 |
| P01026        | TNQGLQTDQREDPECAKPAAR                       | 1.053778304        | 3               | 4.0719142 |
| P01026        | TVLTGATGHLNR                                | 1.25751116         | 2               | 2.9511967 |
| P01026        | TVVIVIETPDGVPIKR                            | 1.098183553        | 2               | 3.000169  |
| P01026        | VELKPGDNLNVNHLR                             | 1.050171585        | 3               | 4.0081539 |
| P01026        | VLIEDGSGEAVLSR                              | 1.185369986        | 2               | 3.8275392 |
| <b>P01946</b> | <b>HBA Hemoglobin subunit alpha_1/2</b>     | <b>0.833246767</b> | <b>1</b>        | <b>9</b>  |
| P01946        | AADHVEDLPGALSTLSDLHAHK                      | 0.846039507        | 3               | 7.6733513 |
| P01946        | FLASVSTVLTSK                                | 0.672946468        | 2               | 4.0518351 |
| P01946        | FLSHCLLVTLACHHPGDFTPMAMHASLDK               | 0.661690079        | 4               | 5.8085804 |
| P01946        | FLSHCLLVTLACHHPGDFTPMAMHASLDKFLASVSTVLTSK   | 0.908878648        | 4               | 6.229044  |
| P01946        | IGGHGGEYGEALQR                              | 0.820336423        | 2               | 4.97788   |
| P01946        | LRVDPVNFK                                   | 1.145039078        | 2               | 2.5386519 |
| P01946        | MFAAFPTTK                                   | 0.621548836        | 2               | 3.0933132 |
| P01946        | MFAAFPTTK+Oxidation(1)                      | 0.873012608        | 2               | 2.6548717 |
| P01946        | TYFSHIDVSPGSAQVK                            | 0.788758253        | 2               | 5.2159781 |
| <b>P02089</b> | <b>HBB2 Hemoglobin subunit beta_2</b>       | <b>0.809072598</b> | <b>1</b>        | <b>4</b>  |
| P02089        | GTFASLSELHCDK                               | 0.967807981        | 2               | 3.6886423 |
| P02089        | LHVDPENFR                                   | 0.78200589         | 2               | 2.758527  |
| P02089        | YFDSFGDLSSASAIMGNPK                         | 0.728077384        | 2               | 6.6153197 |
| P02089        | YFDSFGDLSSASAIMGNPK+Oxidation(15)           | 0.685969062        | 2               | 4.9576073 |
| <b>P02091</b> | <b>HBB1 Hemoglobin subunit beta_1</b>       | <b>0.890990492</b> | <b>1</b>        | <b>9</b>  |
| P02091        | EFTPCAQAAFQK                                | 0.744111797        | 2               | 3.1262434 |
| P02091        | GTFASLSELHCDK                               | 0.775157229        | 2               | 4.4731331 |
| P02091        | GTFASLSELHCDKLHVDPENFR                      | 0.941432356        | 3               | 4.5928073 |
| P02091        | KVINAFNDGLK                                 | 0.743056261        | 2               | 3.7017472 |
| P02091        | LLGNMIVIVLGHHLGK                            | 0.998553428        | 2               | 3.3463974 |
| P02091        | LLGNMIVIVLGHHLGKEFTPCAQAAFQK                | 0.618057247        | 3               | 5.4154534 |
| P02091        | VINAFNDGLK                                  | 0.784318557        | 2               | 3.002094  |
| P02091        | VNPDDVGGEALGR                               | 0.646164964        | 2               | 4.2939591 |
| P02091        | VVAGVASALAHK                                | 0.891287096        | 2               | 3.8227546 |
| <b>P02401</b> | <b>RLA2 60S acidic ribosomal protein P2</b> | <b>1.264520656</b> | <b>9.9E-20</b>  | <b>7</b>  |
| P02401        | ILDSVGIEADDER                               | 1.018620367        | 2               | 4.609292  |
| P02401        | ILDSVGIEADDERLNK                            | 1.478399347        | 2               | 3.1966567 |

|               |                                                             |                    |                  |           |
|---------------|-------------------------------------------------------------|--------------------|------------------|-----------|
| P02401        | KILDSVGI EADDER                                             | 0.930102748        | 2                | 3.9424229 |
| P02401        | LASVPAGGAVAVSAAPGSAAPAAGSAPAAAAEEK                          | 1.415089331        | 3                | 6.5581775 |
| P02401        | NIEDVIAQGVGK                                                | 0.984043258        | 2                | 4.7723179 |
| P02401        | VISELNGK                                                    | 1.189183417        | 1                | 2.0640099 |
| P02401        | YVASYLALALGGNSNPSAK                                         | 1.434309842        | 2                | 5.7939863 |
| <b>P02564</b> | <b>MYH7 Myosin_7</b>                                        | <b>1.206711037</b> | <b>1</b>         | <b>25</b> |
| P02564        | ALQEAHQALDDLQAEEDKVNTLTK                                    | 0.911886488        | 3                | 5.4850774 |
| P02564        | ANDDLKENIAIVER                                              | 0.725482148        | 2                | 3.3629971 |
| P02564        | DLEEATLQHEATAAALR                                           | 1.267695428        | 2                | 5.402422  |
| P02564        | EQYEEETEAK                                                  | 1.060202548        | 2                | 2.5041037 |
| P02564        | GTLEDQIIQANPALEAFGNAK                                       | 1.110575858        | 2                | 5.1706543 |
| P02564        | IEDEQALGSQLQK                                               | 0.814275377        | 2                | 4.0734754 |
| P02564        | IEEEEELEAER                                                 | 0.836288687        | 2                | 4.1115866 |
| P02564        | ILNPAAIPEGQFIDSR                                            | 1.191246503        | 2                | 3.354573  |
| P02564        | KLAEQELIETSER                                               | 1.074250074        | 2                | 3.976934  |
| P02564        | KMEGDLNEMEIQLSHANR+Oxidation(2)                             | 1.10318448         | 2                | 2.5010812 |
| P02564        | KVQHELDEAER                                                 | 1.258818727        | 2                | 2.7914722 |
| P02564        | LDEAEQIALK                                                  | 1.053051161        | 2                | 3.3696587 |
| P02564        | LELDDVTSNMEQIIK                                             | 1.107424957        | 2                | 3.4934299 |
| P02564        | LQDAEEAVEAVNAK                                              | 0.885256634        | 2                | 4.7110047 |
| P02564        | LQNEIEDLMVDVER                                              | 1.191139635        | 2                | 3.4450612 |
| P02564        | MDADLSQLQTEVEEAVQECR                                        | 1.128533264        | 2                | 4.8052607 |
| P02564        | NLQEEISDLTEQLGSTGK                                          | 1.029583532        | 2                | 5.6731257 |
| P02564        | NLTEEMAGLDEIIVK                                             | 1.060391412        | 2                | 3.1395383 |
| P02564        | NNLLQAELEELR                                                | 0.896438421        | 2                | 2.8615162 |
| P02564        | QAEAEQANTNLSK                                               | 1.005114208        | 2                | 4.7807646 |
| P02564        | QKYEESQSELESSQK                                             | 1.238641854        | 2                | 2.9582434 |
| P02564        | QLEAEKLELQSALEEAASLEHEEGK                                   | 0.864369022        | 3                | 4.5039253 |
| P02564        | TLEDQMNEHR                                                  | 0.898849309        | 2                | 2.5930612 |
| P02564        | VQLLHSQNTSLINQK                                             | 1.082499827        | 2                | 3.8471973 |
| P02564        | VVDSLQTS LDAETR                                             | 0.941309884        | 2                | 2.7279093 |
| <b>P02600</b> | <b>MYL1 Myosin light chain 1/3_ skeletal muscle isoform</b> | <b>0.944726677</b> | <b>0.9986639</b> | <b>8</b>  |
| P02600        | ALGTNPTNAEVK                                                | 0.984915782        | 2                | 3.2246265 |
| P02600        | ALGTNPTNAEVKK                                               | 1.198130194        | 2                | 2.720017  |
| P02600        | DQGGYEDFVEGLR                                               | 0.453595211        | 2                | 3.5879157 |
| P02600        | IEFEQFLPMMQAISNNK                                           | 0.72696944         | 2                | 2.7367518 |
| P02600        | ITLSQVGDVLR                                                 | 0.883888083        | 2                | 3.0893373 |
| P02600        | KIEFEQFLPMMQAISNNK                                          | 0.946437882        | 2                | 5.4581037 |
| P02600        | VLGNPSNEEMNAK                                               | 1.012331624        | 2                | 3.8493836 |
| P02600        | VLGNPSNEEMNAK+Oxidation(10)                                 | 1.166699211        | 2                | 2.5731497 |
| <b>P02625</b> | <b>PRVA Parvalbumin alpha</b>                               | <b>1.308282867</b> | <b>0.6519958</b> | <b>4</b>  |
| P02625        | AIGAFTAADSFHKK                                              | 1.133934372        | 2                | 3.9116032 |
| P02625        | SGFIEDELGSILK                                               | 1.136549828        | 2                | 2.8517678 |
| P02625        | TLMAAGDKDGDGK                                               | 1.30817467         | 2                | 3.1796713 |
| P02625        | TLMAAGDKDGDGK+Oxidation(3)                                  | 1.66373016         | 2                | 3.3595972 |
| <b>P02650</b> | <b>APOE Apolipoprotein E</b>                                | <b>1.10247069</b>  | <b>0.0001675</b> | <b>13</b> |
| P02650        | ELEEQLGPVAEETR                                              | 1.187023356        | 2                | 4.331418  |
| P02650        | GRLEEVGNQAR                                                 | 1.142529393        | 2                | 3.7009504 |
| P02650        | GWFEPLVEDMQR                                                | 1.236827756        | 2                | 3.2393358 |
| P02650        | LEEVGNQAR                                                   | 0.990508131        | 2                | 2.5668178 |
| P02650        | LGADMEDLR                                                   | 1.197977017        | 2                | 3.0311067 |
| P02650        | LGPLVEQGR                                                   | 1.090200086        | 2                | 2.3094509 |
| P02650        | LQAEIFQAR                                                   | 1.465001376        | 2                | 2.711163  |
| P02650        | MEEQTQQIR                                                   | 1.136642848        | 2                | 3.2388725 |
| P02650        | MEEQTQQIR+Oxidation(1)                                      | 1.168274422        | 2                | 2.8769908 |
| P02650        | NEVNTMLGQSTEELR                                             | 1.066044406        | 2                | 4.4901743 |
| P02650        | SKMEEQTQQIR                                                 | 1.20965784         | 2                | 3.2987957 |

|               |                                               |                    |                  |           |
|---------------|-----------------------------------------------|--------------------|------------------|-----------|
| P02650        | SKMEEQTQQIR+Oxidation(3)                      | 1.711520265        | 2                | 3.5609121 |
| P02650        | TANLGAGAAQPLR                                 | 0.851718485        | 2                | 2.3724356 |
| <b>P02680</b> | <b>FIBG Fibrinogen gamma chain</b>            | <b>1.078733804</b> | <b>0.9980565</b> | <b>3</b>  |
| P02680        | VGPESDKYR                                     | 1.051316472        | 2                | 2.5928881 |
| P02680        | YEALLTHESSIR                                  | 1.140074286        | 2                | 3.7165458 |
| P02680        | YLQDIYTSNK                                    | 1.018823648        | 2                | 2.785182  |
| <b>P02692</b> | <b>FABPL Fatty acid binding protein_liver</b> | <b>1.135985026</b> | <b>9.9E-20</b>   | <b>13</b> |
| P02692        | AMGLPEDLIQK                                   | 0.986832225        | 2                | 3.6335793 |
| P02692        | AMGLPEDLIQK+Oxidation(2)                      | 1.136794638        | 2                | 3.3736029 |
| P02692        | GVSEIVHEGK                                    | 0.949999153        | 2                | 3.4928181 |
| P02692        | GVSEIVHEGKK                                   | 1.038074047        | 2                | 3.3275712 |
| P02692        | MVTTFK                                        | 0.873012666        | 1                | 1.9130399 |
| P02692        | MVTTFK+Oxidation(1)                           | 1.100016647        | 1                | 2.0228491 |
| P02692        | SVTEFNGDTITNTMTLGDIVYK                        | 1.204267837        | 2                | 5.6535163 |
| P02692        | SVTEFNGDTITNTMTLGDIVYK+Oxidation(14)          | 1.009578815        | 2                | 5.6429458 |
| P02692        | SVTEFNGDTITNTMTLGDIVYKR                       | 1.302065375        | 2                | 3.7354803 |
| P02692        | VIHNEFTLGEECELETMTGKEK                        | 1.066392376        | 3                | 6.3064198 |
| P02692        | VIHNEFTLGEECELETMTGKEK+Oxidation(17)          | 1.17118256         | 3                | 5.5101819 |
| P02692        | YQVQSQENFEPFMK                                | 1.138079962        | 2                | 6.0539045 |
| P02692        | YQVQSQENFEPFMK+Oxidation(13)                  | 1.150098895        | 2                | 5.2808065 |
| <b>P02696</b> | <b>RET1 Retinol binding protein 1</b>         | <b>1.139802383</b> | <b>0.2488333</b> | <b>8</b>  |
| P02696        | ALDVNVALR                                     | 1.085350411        | 2                | 3.2774956 |
| P02696        | CMTTVSWDGDKLQCVQK                             | 1.097536297        | 2                | 4.543385  |
| P02696        | EFEDLTGIDDR                                   | 1.20602911         | 2                | 2.3439012 |
| P02696        | EFEDLTGIDDRK                                  | 1.315605854        | 2                | 2.7529891 |
| P02696        | GWWTQWIEGDELHLEMR                             | 1.114059768        | 2                | 4.3094831 |
| P02696        | MLSNENFEEYLR                                  | 1.356032159        | 2                | 3.6305208 |
| P02696        | MLSNENFEEYLR+Oxidation(1)                     | 1.899095667        | 2                | 2.9699557 |
| P02696        | NYIMDFQVGKEFEEDLTGIDDRK                       | 1.221576464        | 3                | 3.4651232 |
| <b>P02706</b> | <b>ASGR1 Asialoglycoprotein receptor 1</b>    | <b>0.947169545</b> | <b>0.5405579</b> | <b>6</b>  |
| P02706        | DYQDFQHLDNENDHHQLQR                           | 1.31862867         | 3                | 3.414072  |
| P02706        | LVESQLEK                                      | 1.059806703        | 1                | 2.0671139 |
| P02706        | QLVSDVR                                       | 0.339738457        | 1                | 2.0709007 |
| P02706        | SLSCQMAALR                                    | 0.829541119        | 2                | 3.0518787 |
| P02706        | WVCETELGK                                     | 0.995967141        | 2                | 2.3625796 |
| P02706        | WVDGTDYETGFK                                  | 1.027054773        | 2                | 3.4649687 |
| <b>P02770</b> | <b>ALBU Serum albumin</b>                     | <b>0.953699398</b> | <b>1</b>         | <b>27</b> |
| P02770        | AADKDNCFATEGPNLVAR                            | 0.711393681        | 2                | 4.9281936 |
| P02770        | AETFFHSDICTLPDKEK                             | 1.398653399        | 2                | 3.7458146 |
| P02770        | CCAEGDPPACYGTVLAEFQPLVVEPK                    | 1.29508197         | 3                | 5.3223963 |
| P02770        | CCSGSLVER                                     | 0.702288894        | 2                | 3.2315023 |
| P02770        | CCTLPEAQR                                     | 0.924322202        | 2                | 2.7733779 |
| P02770        | DLGEQHFH                                      | 0.840342949        | 2                | 2.309936  |
| P02770        | DNCFATEGPNLVAR                                | 0.59880318         | 2                | 3.3633308 |
| P02770        | DNYGELADCCA                                   | 0.283041754        | 2                | 3.3667917 |
| P02770        | ECCHGDLLECADDR                                | 0.972833772        | 2                | 3.9369578 |
| P02770        | ECCHGDLLECADDRAEALAK                          | 1.265834801        | 2                | 5.328629  |
| P02770        | FKDLGEQHFH                                    | 1.158160479        | 3                | 4.1803231 |
| P02770        | GLVLIAFSQYLQK                                 | 1.571200837        | 2                | 4.0836067 |
| P02770        | INKECCHGDLLECADDRAEALAK                       | 1.288956263        | 3                | 5.4441733 |
| P02770        | KQTALAELVK                                    | 1.133475662        | 3                | 4.1260624 |
| P02770        | KYEATLEK                                      | 1.079363042        | 2                | 2.6937459 |
| P02770        | LQACCDKPVQLQK                                 | 1.282782955        | 2                | 4.2770953 |
| P02770        | LRDNYGELADCCA                                 | 0.493771416        | 2                | 3.3441615 |
| P02770        | LVQEVDFAK                                     | 1.11937817         | 2                | 3.7089045 |
| P02770        | QEPERNECFLOHK                                 | 0.313422768        | 2                | 2.355109  |
| P02770        | RHPDYSVSLLLR                                  | 1.29667264         | 3                | 4.8093281 |



|               |                                                        |                    |                  |           |
|---------------|--------------------------------------------------------|--------------------|------------------|-----------|
| P02770        | SIHTLFGDK                                              | 0.618280622        | 1                | 2.2839186 |
| P02770        | TCVADENAENCDK                                          | 0.987653359        | 2                | 4.6459985 |
| P02770        | TNCELYEK                                               | 0.891325842        | 2                | 2.8217196 |
| P02770        | TVMGDFFAQFVDK                                          | 0.793124809        | 2                | 4.2719288 |
| P02770        | YMCENQATISSK                                           | 0.947049798        | 2                | 4.4145026 |
| P02770        | YMCENQATISSK+Oxidation(2)                              | 0.967232049        | 2                | 3.6894434 |
| P02770        | YNEVLTQCCTESDK                                         | 0.85045188         | 2                | 5.7341905 |
| <b>P02803</b> | <b>MT1 Metallothionein_1</b>                           | <b>1.074014593</b> | <b>0.4187868</b> | <b>2</b>  |
| <b>P04041</b> | <b>GPX1 Glutathione peroxidase 1</b>                   | <b>1.175558037</b> | <b>7.235E-08</b> | <b>10</b> |
| P04041        | FLVGPDPVVR                                             | 0.884603845        | 2                | 3.2468095 |
| P04041        | FLVGPDPVVR                                             | 1.005401564        | 2                | 2.3198669 |
| P04041        | GLVVLGFPCNQFGHQENK                                     | 1.137319294        | 2                | 4.285677  |
| P04041        | GLVVLGFPCNQFGHQENKNEEILNSLK                            | 0.897015758        | 3                | 4.329761  |
| P04041        | NALPAPSDPTALMTDPK                                      | 0.926827401        | 2                | 3.4749212 |
| P04041        | NDISWNFEK                                              | 0.860390817        | 2                | 2.9044461 |
| P04041        | NEEILNSLK                                              | 0.913262544        | 2                | 2.5415452 |
| P04041        | TIDIEPDIEALLSK                                         | 1.144111938        | 3                | 4.2795939 |
| P04041        | YIIWSPVCR                                              | 0.86463434         | 2                | 2.9363868 |
| P04041        | YVRPGGGFEPNFTLFEK                                      | 1.225712265        | 2                | 4.5811858 |
| <b>P04167</b> | <b>CP2B2 Cytochrome P450 2B2</b>                       | <b>0.696527077</b> | <b>0.2735377</b> | <b>2</b>  |
| P04167        | GTIAVIEPIFK                                            | 0.57908014         | 2                | 2.5601034 |
| P04167        | NLQEILDYIGHIVEK                                        | 0.712269483        | 2                | 4.2288718 |
| <b>P04176</b> | <b>PH4H Phenylalanine_4_hydroxylase</b>                | <b>1.122173794</b> | <b>9.9E-20</b>   | <b>16</b> |
| P04176        | AYGALLSFGELQYCLSDKPK                                   | 0.587220896        | 2                | 4.1409001 |
| P04176        | EDNIPQLEDVVSQFLQTCTGFR                                 | 1.122851338        | 3                | 4.7270741 |
| P04176        | FANQILSYGAELDADHPGFK                                   | 1.309722265        | 3                | 3.9793258 |
| P04176        | FANQILSYGAELDADHPGFKDPVYR                              | 1.262333175        | 3                | 5.3622952 |
| P04176        | ILADSINSEVGILCNALQK                                    | 1.322604732        | 3                | 6.6082525 |
| P04176        | LNKDEYEFFTYLDKR                                        | 3.914555938        | 3                | 3.6054032 |
| P04176        | LRPVAGLSSR                                             | 3.021006192        | 2                | 2.7116976 |
| P04176        | NDIGATVHELRS                                           | 1.148329255        | 2                | 3.755928  |
| P04176        | QFADIAYNYR                                             | 1.050115643        | 2                | 2.815701  |
| P04176        | SFAQFSQEIGLASLGAPDEYIEK                                | 1.302546234        | 2                | 4.825675  |
| P04176        | TACQEYSVTEFQPLYVVAESFSDAK                              | 1.734836125        | 3                | 3.692086  |
| P04176        | THACYEHNHIFLLEK                                        | 1.307186894        | 3                | 4.7300148 |
| P04176        | VEVLDNTQQLK                                            | 1.015604533        | 2                | 3.8453436 |
| P04176        | VEYTEEEK                                               | 1.084056198        | 2                | 2.6965768 |
| P04176        | VEYTEEEKQWGTVFR                                        | 1.206728648        | 2                | 4.3363876 |
| P04176        | YCGFREDNIPQLEDVVSQFLQTCTGFR                            | 1.290203618        | 3                | 5.301527  |
| <b>P04182</b> | <b>OAT Ornithine aminotransferase_ mitochondrial</b>   | <b>1.480347556</b> | <b>0.2338167</b> | <b>9</b>  |
| P04182        | AFYNNVLGEYEEYITK                                       | 1.331058844        | 2                | 4.485981  |
| P04182        | GIYMWDVEGR                                             | 1.077738907        | 2                | 2.7182109 |
| P04182        | GLLNAIVIR                                              | 1.427872426        | 2                | 3.1417024 |
| P04182        | HQVLFIADEIQTGLAR                                       | 1.468050119        | 2                | 4.0496249 |
| P04182        | IIEAMKSQVDK                                            | 0.790962517        | 2                | 2.3329723 |
| P04182        | KTEQGPPSSEYIFER                                        | 1.385380937        | 2                | 3.922631  |
| P04182        | TEQGPPSSEYIFER                                         | 1.178782134        | 2                | 4.1217823 |
| P04182        | VLPMTGVEAGETACK                                        | 2.002769727        | 2                | 3.9849401 |
| P04182        | WLAVDHENVRPDIVLLGK                                     | 1.301261227        | 2                | 4.9355049 |
| <b>P04256</b> | <b>ROA1 Heterogeneous nuclear ribonucleoprotein A1</b> | <b>1.355823834</b> | <b>0.8730367</b> | <b>4</b>  |
| P04256        | EDSQRPGAHLTVK                                          | 1.123772964        | 2                | 3.2208569 |
| P04256        | IEVIEIMTDR                                             | 1.011264528        | 2                | 3.1355302 |
| P04256        | NQGGYGGSSSSSYGSGR                                      | 1.058653555        | 2                | 4.7315612 |
| P04256        | YHTVNGHNCEVR                                           | 1.517271524        | 2                | 3.3172259 |
| <b>P04276</b> | <b>VTDB Vitamin D_binding protein</b>                  | <b>1.214643063</b> | <b>0.0001013</b> | <b>2</b>  |
| P04276        | SCESDAPFPVHPGTSECTK                                    | 1.214730093        | 2                | 4.7410007 |
| P04276        | YCSSQJDAEMR                                            | 1.027061563        | 2                | 2.875705  |

|               |                                                                     |                    |                  |           |
|---------------|---------------------------------------------------------------------|--------------------|------------------|-----------|
| <b>P04355</b> | <b>MT2 Metallothionein_2</b>                                        | <b>1.205335827</b> | <b>0.752912</b>  | <b>2</b>  |
| <b>P04462</b> | <b>MYH8 Myosin_8 (Fragment)</b>                                     | <b>0.936236038</b> | <b>1</b>         | <b>3</b>  |
| P04462        | KLQHELEEAER                                                         | 1.071480511        | 3                | 3.8938425 |
| P04462        | LQHELEEAER                                                          | 0.896071077        | 2                | 3.6490161 |
| P04462        | RAALQAEIEELR                                                        | 0.955864171        | 2                | 3.8757918 |
| <b>P04466</b> | <b>MLRS Myosin regulatory light chain 2_skeletal muscle isoform</b> | <b>1.068208089</b> | <b>0.9996565</b> | <b>7</b>  |
| P04466        | AAAEGSSNVFSMFDQTIQEFK                                               | 1.183250541        | 2                | 4.4937758 |
| P04466        | GADPEDVITGAFK                                                       | 0.838308413        | 2                | 3.8498824 |
| P04466        | KQFLEELLTQCDR                                                       | 1.279338666        | 2                | 4.10782   |
| P04466        | LKGADPEDVITGAFK                                                     | 1.321380142        | 3                | 4.4626594 |
| P04466        | NICYVITHGDAKDQE                                                     | 1.029352311        | 2                | 4.7035265 |
| P04466        | NMWAAFPPDVGGNVDYK                                                   | 0.933018763        | 2                | 3.0958447 |
| P04466        | QFLEELLTQCDR                                                        | 0.953573703        | 2                | 3.777317  |
| <b>P04550</b> | <b>PTMS Parathyrosin</b>                                            | <b>1.087070079</b> | <b>1.419E-05</b> | <b>4</b>  |
| P04550        | RTAEEDEADPKR                                                        | 1.101584517        | 3                | 4.0340614 |
| P04550        | SVEAAAELSAK                                                         | 1.039043405        | 2                | 3.6445129 |
| P04550        | TAEDEADPK                                                           | 0.896768328        | 2                | 3.3246756 |
| P04550        | TAEDEADPKR                                                          | 1.189031313        | 2                | 3.700356  |
| <b>P04636</b> | <b>MDHM Malate dehydrogenase_mitochondrial</b>                      | <b>0.889194747</b> | <b>9.9E-20</b>   | <b>16</b> |
| P04636        | AGAGSATLSMAYAGAR                                                    | 1.053305124        | 2                | 4.6571317 |
| P04636        | ANTFVAELK                                                           | 0.997308122        | 2                | 2.7781076 |
| P04636        | EGVIECSFVQSK                                                        | 0.717100616        | 1                | 3.0365231 |
| P04636        | ETECTYFSTPLLLGK                                                     | 0.793008244        | 2                | 3.5034623 |
| P04636        | FVFSLVDAMNGK                                                        | 1.139543272        | 2                | 4.4266958 |
| P04636        | GCDVVVIVAGVPR                                                       | 0.984808284        | 2                | 4.370471  |
| P04636        | GYLGPEQLPDCLK                                                       | 1.018487333        | 2                | 4.1261034 |
| P04636        | IFGVTTLDIVR                                                         | 1.487860532        | 2                | 3.6015806 |
| P04636        | IQEAGTEVVK                                                          | 0.951601107        | 2                | 2.8807483 |
| P04636        | LTYDIAHTPGVAADLSHIETR                                               | 1.281340797        | 3                | 7.0187702 |
| P04636        | MIAEAIPELK                                                          | 0.83453473         | 2                | 3.2110167 |
| P04636        | MIAEAIPELK+Oxidation(1)                                             | 1.474575834        | 2                | 2.539983  |
| P04636        | TIIPLIQCTPK                                                         | 0.998753541        | 2                | 3.5116553 |
| P04636        | VAVLGASGGIGQPLSLLK                                                  | 1.420423092        | 2                | 6.1181064 |
| P04636        | VDFPQQLATLTGR                                                       | 0.978366615        | 2                | 4.8695307 |
| P04636        | VNVPVIGGHAGK                                                        | 1.073155411        | 2                | 3.2104292 |
| <b>P04639</b> | <b>APOA1 Apolipoprotein A_I</b>                                     | <b>1.02687771</b>  | <b>0.5895147</b> | <b>6</b>  |
| P04639        | AKPALDDLQGLMPVLEAWK                                                 | 1.007083926        | 2                | 3.7420368 |
| P04639        | LQEQLGPVTQEFWANLEK                                                  | 1.414402423        | 2                | 4.898427  |
| P04639        | NEMNKDLENVK                                                         | 1.26432789         | 2                | 3.4349823 |
| P04639        | QLNLNLDNWDTLGSTVGR                                                  | 1.066442641        | 2                | 4.5027428 |
| P04639        | VKDFATVYVDAVK                                                       | 1.361322658        | 2                | 3.1112251 |
| P04639        | WNEEVEAYR                                                           | 1.021014713        | 2                | 2.370806  |
| <b>P04642</b> | <b>LDHA L_lactate dehydrogenase A chain</b>                         | <b>1.006370934</b> | <b>1.884E-10</b> | <b>22</b> |
| P04642        | DLADELALVDVIEDK                                                     | 1.139214536        | 2                | 5.4793129 |
| P04642        | DLADELALVDVIEDKLK                                                   | 1.492624562        | 2                | 4.6152401 |
| P04642        | DQLIVNLLK                                                           | 0.857298395        | 2                | 2.9456959 |
| P04642        | DQLIVNLLKEEQVPQNK                                                   | 1.07345204         | 2                | 4.867084  |
| P04642        | EDVFLSVPICLQNGISDVVK                                                | 1.131738719        | 2                | 4.7985015 |
| P04642        | FIIPNVVK                                                            | 0.994995522        | 2                | 2.3942511 |
| P04642        | GEMMDLQHGSLFLK                                                      | 1.049336932        | 2                | 3.8554296 |
| P04642        | GEMMDLQHGSLFLK+Oxidation(3)                                         | 1.267803043        | 2                | 3.4528344 |
| P04642        | GEMMDLQHGSLFLK+Oxidation(4)                                         | 1.279641532        | 2                | 3.1473186 |
| P04642        | GLYGIKEDVFLSVPICLQNGISDVVK                                          | 1.192171772        | 3                | 3.3544867 |
| P04642        | KSADTLWGIQK                                                         | 1.034902283        | 2                | 3.0957024 |
| P04642        | LGVHPLSCHGWVLGEHGDSSVPVWVSGVNVAGVSLK                                | 1.252346639        | 3                | 5.7276378 |
| P04642        | LKGEMMDLQHGSLFLK                                                    | 1.148357647        | 2                | 3.9995201 |

|               |                                             |                    |                  |           |
|---------------|---------------------------------------------|--------------------|------------------|-----------|
| P04642        | LLIVSNPVDILTYVAWK                           | 1.125611077        | 2                | 4.8761826 |
| P04642        | NVNIFK                                      | 1.04207547         | 1                | 2.0879409 |
| P04642        | QVVD SAYEVIK                                | 0.96704588         | 2                | 3.1190164 |
| P04642        | RVHPISMIK                                   | 0.825753196        | 2                | 2.3725398 |
| P04642        | SADTLWGIQK                                  | 0.930416049        | 2                | 3.9407876 |
| P04642        | SLNPQLGTDADK                                | 0.830098952        | 2                | 2.6748681 |
| P04642        | SLNPQLGTDADKEQWK                            | 0.996539131        | 2                | 4.840539  |
| P04642        | SLNPQLGTDADKEQWKDVHK                        | 1.263235365        | 2                | 4.6805582 |
| P04642        | VTLPDEEAR                                   | 0.924306217        | 2                | 2.9285173 |
| <b>P04644</b> | <b>RS17 40S ribosomal protein S17</b>       | <b>1.050526561</b> | <b>1.622E-08</b> | <b>4</b>  |
| P04644        | DNYVPEVSALDQEIIIVDPDK                       | 1.025462549        | 2                | 4.3356676 |
| P04644        | LGNDFHTNK                                   | 0.984175068        | 2                | 2.9238837 |
| P04644        | LLDFGSLSNLQVTQPTVGMNFK                      | 1.61974853         | 2                | 4.1198473 |
| P04644        | VCEEIAIIPSK                                 | 0.992458774        | 2                | 3.1142247 |
| <b>P04692</b> | <b>TPM1 Tropomyosin alpha_1 chain</b>       | <b>1.088148804</b> | <b>0.9999999</b> | <b>10</b> |
| P04692        | AISELDHALNDMTSI                             | 1.007800218        | 2                | 2.6278632 |
| P04692        | AQKDEEKMEIQEIQLK                            | 0.959126794        | 2                | 3.8512123 |
| P04692        | GTEDELDKYSEALK                              | 1.084536603        | 2                | 2.308058  |
| P04692        | KLVIIESDLER                                 | 0.977557937        | 2                | 3.6535752 |
| P04692        | LDKENALDR                                   | 0.992999877        | 2                | 2.3891304 |
| P04692        | LKGTEDELDK                                  | 1.140311825        | 2                | 2.621469  |
| P04692        | LVIIESDLER                                  | 1.002924663        | 2                | 3.233722  |
| P04692        | MEIQEIQLK                                   | 0.885497282        | 2                | 2.8501985 |
| P04692        | QLEDELVSLQK                                 | 0.892084195        | 2                | 2.4871795 |
| P04692        | SIDDELELYAQK                                | 1.009780627        | 2                | 3.702502  |
| <b>P04694</b> | <b>ATTY Tyrosine aminotransferase</b>       | <b>0.860668908</b> | <b>0.4321365</b> | <b>2</b>  |
| <b>P04762</b> | <b>CATA Catalase</b>                        | <b>1.134130102</b> | <b>9.9E-20</b>   | <b>30</b> |
| P04762        | DAMLFPSFIHSQK                               | 0.778342109        | 2                | 2.354497  |
| P04762        | DAQLFIQR                                    | 0.902930979        | 2                | 3.089247  |
| P04762        | DGPMCMHDNQGGAPNYPNSFSAPEQQGSALEHHSQCSADVK   | 1.06799584         | 4                | 5.1708031 |
| P04762        | DYPLIPVGK                                   | 1.036612673        | 1                | 2.5299697 |
| P04762        | EAETFPFNPFDLTK                              | 1.190028199        | 2                | 4.3490229 |
| P04762        | FNSANEDNVTQVR                               | 1.026066164        | 2                | 4.7097659 |
| P04762        | FSTVAGESGSADTVR                             | 1.032310611        | 2                | 5.1901002 |
| P04762        | FSTVAGESGSADTVRDRP                          | 1.139638872        | 2                | 2.9669554 |
| P04762        | FYTEDGNWDLVGNNTPIFFIR                       | 2.3027948          | 3                | 6.2746048 |
| P04762        | GAGAFGYFEVTHDITR                            | 1.118004801        | 2                | 5.118216  |
| P04762        | GPLLVDVVFTDEMAHFDR                          | 1.414335103        | 2                | 5.711432  |
| P04762        | HMNGYGSHTFK                                 | 1.149892012        | 3                | 4.2001319 |
| P04762        | HMNGYGSHTFK+Oxidation(2)                    | 1.198346511        | 2                | 2.7632294 |
| P04762        | LAQEDPDYGLR                                 | 1.303612141        | 2                | 2.6399038 |
| P04762        | LCENIANHLK                                  | 1.17502088         | 3                | 4.0514007 |
| P04762        | LFAYPDTHR                                   | 1.465039263        | 2                | 2.8764272 |
| P04762        | LGPNYLQIPVNCYPYR                            | 1.379355543        | 2                | 4.3954773 |
| P04762        | LNIMTAGPR                                   | 1.112878034        | 2                | 3.1604834 |
| P04762        | LVNANGEAVYCK                                | 1.31883807         | 2                | 4.0506845 |
| P04762        | NAIHTYVQAGSHIAAK                            | 1.074121714        | 2                | 5.3379626 |
| P04762        | NFTDVHPDYGAR                                | 1.046900521        | 2                | 4.0832453 |
| P04762        | NLPVEEAGR                                   | 1.079712764        | 2                | 2.3831642 |
| P04762        | NPANYFAEVEQMAFDPSNMPPGIEPSPDK               | 1.240285986        | 3                | 6.3889651 |
| P04762        | NPANYFAEVEQMAFDPSNMPPGIEPSPDK+Oxidation(19) | 1.570805484        | 3                | 3.9177871 |
| P04762        | RFNSANEDNVTQVR                              | 1.214267801        | 2                | 5.180954  |
| P04762        | VFEHIGK                                     | 1.003976746        | 2                | 2.443536  |
| P04762        | VFEHIGKR                                    | 1.159288802        | 2                | 2.3911762 |
| P04762        | VLNEEER                                     | 1.04857421         | 2                | 2.8636875 |
| P04762        | VQALLDQYNSQPK                               | 1.076702397        | 2                | 5.1204438 |

|               |                                                     |                    |                  |           |
|---------------|-----------------------------------------------------|--------------------|------------------|-----------|
| P04762        | VWPHKDYPLIPVGK                                      | 1.299411931        | 2                | 3.8527977 |
| <b>P04764</b> | <b>ENOA Alpha_enolase</b>                           | <b>0.971246781</b> | <b>0.9957392</b> | <b>17</b> |
| P04764        | AGYTDQVVIGMDVAASEFYR                                | 0.884680201        | 2                | 5.5461078 |
| P04764        | DATNVGDEGGFAPNILENK                                 | 0.867633898        | 2                | 5.4425817 |
| P04764        | DYPVVSIEDPFDQDDWDAWQK                               | 1.081061877        | 2                | 4.7410693 |
| P04764        | FTATAGIQVVGDDLTVTNPK                                | 0.98668878         | 2                | 5.1754174 |
| P04764        | GNPTVEVDLYTAK                                       | 1.334250034        | 2                | 4.0585828 |
| P04764        | HIADLAGNPEVILPVPFNVINGGSHAGNK                       | 1.147593572        | 3                | 6.5712295 |
| P04764        | IDQLMIEMDGTENK                                      | 0.83122884         | 2                | 4.641706  |
| P04764        | IEEELGSK                                            | 1.015127544        | 2                | 2.4000046 |
| P04764        | IGAEVYHNLK                                          | 1.210321853        | 2                | 3.3218505 |
| P04764        | KLNVEQEK                                            | 0.769272868        | 2                | 2.3538334 |
| P04764        | KLNVEQEKIDQLMIEMDGTENK                              | 1.010905659        | 3                | 6.0405536 |
| P04764        | LNVVEQEK                                            | 1.01148275         | 2                | 2.7331035 |
| P04764        | LNVVEQEKIDQLMIEMDGTENK                              | 0.860612632        | 3                | 4.5962596 |
| P04764        | SCNCLLLK                                            | 1.117122625        | 2                | 3.0578778 |
| P04764        | SFIKDYPVVSIEDPFDQDDWDAWQK                           | 1.021788264        | 3                | 4.3541245 |
| P04764        | VNQIGSVTESLQACK                                     | 1.025145059        | 2                | 5.1829333 |
| P04764        | YITPDQLADLYK                                        | 1.043271168        | 2                | 3.3195379 |
| <b>P04785</b> | <b>PDIA1 Protein disulfide_isomerase</b>            | <b>1.142236347</b> | <b>9.9E-20</b>   | <b>24</b> |
| P04785        | DHENIVIAK                                           | 0.957989273        | 2                | 2.9165566 |
| P04785        | HNQLPLVIEFTEQTAPK                                   | 1.233325901        | 2                | 5.6134481 |
| P04785        | KPHLMSQELPEDWDKQPVK                                 | 1.558668311        | 4                | 5.6034894 |
| P04785        | KPHLMSQELPEDWDKQPVK+Oxidation(6)                    | 2.125646868        | 3                | 3.8736479 |
| P04785        | ILEFFGLK                                            | 1.318556993        | 2                | 3.1443293 |
| P04785        | ILFIFIDSDHTDNQR                                     | 1.322471293        | 2                | 3.8404489 |
| P04785        | ITQFCHHFLEK                                         | 1.23048485         | 2                | 3.089987  |
| P04785        | LGETYKDHENIVIAK                                     | 1.231583636        | 3                | 5.0822706 |
| P04785        | LITLEEEMTK                                          | 1.025053646        | 2                | 3.7107592 |
| P04785        | LKAEGSEIR                                           | 1.188117593        | 2                | 2.426496  |
| P04785        | LLDFIK                                              | 1.114097692        | 2                | 2.4132366 |
| P04785        | MDSTANEVEAVK                                        | 0.954689685        | 2                | 4.2344327 |
| P04785        | MDSTANEVEAVK+Oxidation(1)                           | 1.247304461        | 2                | 3.7308948 |
| P04785        | NFEEVAFDEK                                          | 1.061861975        | 2                | 3.200937  |
| P04785        | NFEEVAFDEKK                                         | 1.141971779        | 2                | 4.0473824 |
| P04785        | NNFEGEITK                                           | 1.05743235         | 2                | 2.5567243 |
| P04785        | QFLAAEAVDDIPFGITSNSDVFSK                            | 1.378460081        | 3                | 6.2935524 |
| P04785        | SVSDYDGK                                            | 1.765531956        | 1                | 2.2596526 |
| P04785        | TGPAATTLSDTAAESLVDSEVTVIGFFK                        | 1.2675069          | 3                | 6.7332263 |
| P04785        | THILLFLPK                                           | 1.175079988        | 2                | 2.9829049 |
| P04785        | TVIDYNGER                                           | 1.088367162        | 2                | 2.6685689 |
| P04785        | VDATEESDLAQQYGVR                                    | 0.789004209        | 2                | 5.429688  |
| P04785        | YKPESDELTAEK                                        | 1.099179727        | 3                | 4.4535203 |
| P04785        | YQLDKDGVVLFK                                        | 1.217809474        | 2                | 3.8392057 |
| <b>P04797</b> | <b>G3P Glyceraldehyde_3_phosphate dehydrogenase</b> | <b>1.20349934</b>  | <b>9.9E-20</b>   | <b>13</b> |
| P04797        | GAAQNIIPASTGAAK                                     | 1.076352321        | 2                | 4.1387696 |
| P04797        | IVSNASCTTNCLAPLAK                                   | 1.257668463        | 2                | 4.9650822 |
| P04797        | LISWYDNEYGYSNR                                      | 1.785194584        | 2                | 4.3370452 |
| P04797        | LIVINGKPITIFQER                                     | 1.323922702        | 3                | 3.5696013 |
| P04797        | RVIISAPSADAPMFVMGVNHEK                              | 0.995299913        | 3                | 5.4690337 |
| P04797        | VIHDNFGIVEGLMTTVHAITATQK                            | 1.101613           | 3                | 7.7052698 |
| P04797        | VIHDNFGIVEGLMTTVHAITATQK+Oxidation(13)              | 1.445765868        | 4                | 4.6648808 |
| P04797        | VIISAPSADAPMFVMGVNHEK                               | 0.98617112         | 2                | 4.2949128 |
| P04797        | VIISAPSADAPMFVMGVNHEK+Oxidation(12)                 | 1.321138553        | 2                | 3.8501225 |
| P04797        | VIISAPSADAPMFVMGVNHEK+Oxidation(15)                 | 1.321138553        | 2                | 3.5244658 |
| P04797        | VPTPNVSVVDLTCR                                      | 0.982390694        | 2                | 2.6085479 |
| P04797        | VVDLMAYMASK                                         | 1.352388326        | 2                | 4.433794  |

|               |                                                |                    |                  |           |
|---------------|------------------------------------------------|--------------------|------------------|-----------|
| P04797        | WGDAGAEYVVSTGVFTTMEK                           | 1.256513097        | 2                | 5.2375727 |
| <b>P04799</b> | <b>CP1A2 Cytochrome P450 1A2</b>               | <b>1.188767551</b> | <b>0.0966398</b> | <b>6</b>  |
| P04799        | DFVENVTSGNAVDFFPVLR                            | 1.109200316        | 2                | 3.2174816 |
| P04799        | FLTNDNTAIDK                                    | 1.053742218        | 2                | 3.0679276 |
| P04799        | IGSTPVVLSGLNTIK                                | 1.539714876        | 2                | 2.4173527 |
| P04799        | NSIQDITGALFK                                   | 0.87490918         | 2                | 3.1271303 |
| P04799        | SMTFNPDSGPVWAAR                                | 3.830047208        | 2                | 3.3100226 |
| P04799        | TVQEHYQDFNK                                    | 1.087521243        | 2                | 3.4264207 |
| <b>P04903</b> | <b>GSTA2 Glutathione S_transferase alpha_2</b> | <b>0.853347463</b> | <b>0.0002301</b> | <b>10</b> |
| P04903        | DGNLMFDQVPMVEIDGMK                             | 0.891077822        | 2                | 4.8846536 |
| P04903        | DGNLMFDQVPMVEIDGMK+Oxidation(11)               | 1.164232182        | 2                | 4.6116748 |
| P04903        | DGNLMFDQVPMVEIDGMK+Oxidation(17)               | 1.276751443        | 2                | 3.4453375 |
| P04903        | DGNLMFDQVPMVEIDGMK+Oxidation(5)                | 1.131561002        | 2                | 4.2333584 |
| P04903        | KDGNLMFDQVPMVEIDGMK                            | 1.013486332        | 2                | 4.9216628 |
| P04903        | LIQSPEDLEK                                     | 1.054619647        | 2                | 3.0685306 |
| P04903        | LKKDGNLMFDQVPMVEIDGMK                          | 1.84222987         | 2                | 3.1879089 |
| P04903        | WLLAAAGVEFEEK                                  | 0.705642417        | 2                | 4.3887115 |
| P04903        | YDLYGK                                         | 1.071810866        | 1                | 2.0102713 |
| P04903        | YLPAFEK                                        | 1.160674924        | 1                | 2.0389109 |
| <b>P04904</b> | <b>GSTA3 Glutathione S_transferase alpha_3</b> | <b>1.22876295</b>  | <b>9.9E-20</b>   | <b>8</b>  |
| P04904        | ALIDMYAEGVADLDEIVLHYPYIPPGK                    | 1.636802334        | 4                | 6.9878941 |
| P04904        | LRNDGSLMFQQVPMVEIDGMK                          | 1.823015398        | 2                | 4.6651583 |
| P04904        | NDGSLMFQQVPMVEIDGMK                            | 1.179796717        | 2                | 5.374155  |
| P04904        | NDGSLMFQQVPMVEIDGMK+Oxidation(12)              | 1.241983184        | 2                | 4.4411259 |
| P04904        | NDGSLMFQQVPMVEIDGMK+Oxidation(18)              | 1.268375993        | 2                | 4.1063619 |
| P04904        | NDGSLMFQQVPMVEIDGMK+Oxidation(6)               | 1.236231365        | 2                | 4.022337  |
| P04904        | SHGQDYLGNR                                     | 1.071771821        | 2                | 3.9228609 |
| P04904        | WLLAAAGVEFEEQFLK                               | 1.516926174        | 2                | 6.1534843 |
| <b>P04905</b> | <b>GSTM1 Glutathione S_transferase Mu 1</b>    | <b>1.27804727</b>  | <b>9.9E-20</b>   | <b>15</b> |
| P04905        | ADIVENQVMDNR                                   | 1.095962008        | 2                | 4.1813836 |
| P04905        | ADIVENQVMDNR+Oxidation(9)                      | 1.203355001        | 2                | 3.7388687 |
| P04905        | CLDAFPNLKDFLAR                                 | 1.295384337        | 2                | 3.2497349 |
| P04905        | FKLGLDFPNLPYLIDGSR                             | 1.166124503        | 2                | 4.5534086 |
| P04905        | HHLCGETEER                                     | 1.170789725        | 3                | 3.7828407 |
| P04905        | IRADIVENQVMDNR                                 | 1.543120825        | 2                | 3.9823682 |
| P04905        | ITQSNAIMR                                      | 1.104916983        | 2                | 3.106966  |
| P04905        | ITQSNAIMR+Oxidation(8)                         | 1.330111291        | 2                | 2.8308222 |
| P04905        | KHHLCGETEER                                    | 0.71921247         | 3                | 4.4578257 |
| P04905        | KITQSNAIMR                                     | 0.731021102        | 3                | 3.8273087 |
| P04905        | KITQSNAIMR+Oxidation(9)                        | 1.110194219        | 3                | 3.4476025 |
| P04905        | LGLDFPNLPYLIDGSR                               | 0.965582103        | 2                | 4.7461705 |
| P04905        | MQLIMLCYNPDFEK                                 | 1.47268119         | 2                | 4.4088736 |
| P04905        | VTYVDFLAYDILDQYHIFEPK                          | 2.984649536        | 3                | 3.6331515 |
| P04905        | YLSTPIFSK                                      | 1.037643926        | 2                | 2.5988894 |
| <b>P04906</b> | <b>GSTP1 Glutathione S_transferase P</b>       | <b>1.048298097</b> | <b>0.3231937</b> | <b>2</b>  |
| P04906        | EAALVDMVNDGVEDLR                               | 0.983214048        | 2                | 4.6561174 |
| P04906        | STCLYGQLPK                                     | 1.240908158        | 1                | 1.9219395 |
| <b>P04937</b> | <b>FINC Fibronectin</b>                        | <b>1.321202386</b> | <b>0.075778</b>  | <b>4</b>  |
| P04937        | FTQVSPTTLTAQWTAPSVK                            | 1.430343872        | 2                | 4.7567658 |
| P04937        | SSPVVIDASTAIDAPSNLR                            | 1.040243617        | 2                | 4.4947634 |
| P04937        | SYTITGLQPGTDYK                                 | 1.077706221        | 2                | 2.5777729 |
| P04937        | VVTPSPPTNLHLEANPDTGVLTWSWER                    | 1.075975605        | 3                | 4.1628857 |
| <b>P05065</b> | <b>ALDOA Fructose_bisphosphate aldolase A</b>  | <b>1.025960884</b> | <b>1</b>         | <b>8</b>  |
| P05065        | ALANSLACQ GK                                   | 1.135796688        | 2                | 2.4421608 |
| P05065        | FSNEEIAMATVTALR                                | 1.020300456        | 2                | 3.8965843 |
| P05065        | FSNEEIAMATVTALRR                               | 0.903549725        | 2                | 2.3874323 |
| P05065        | GILAADESTGSIK                                  | 1.017949901        | 2                | 3.9691651 |

|               |                                     |                    |                  |           |
|---------------|-------------------------------------|--------------------|------------------|-----------|
| P05065        | GVVPLAGTNGETTTQGLDGLSER             | 1.269190014        | 2                | 5.5268688 |
| P05065        | IGEHTPSSLAIMENANVLAR                | 0.908421992        | 2                | 4.8209763 |
| P05065        | LQSIGTENTEENR                       | 1.023851477        | 2                | 3.6123612 |
| P05065        | RLQSIGTENTEENR                      | 1.271369887        | 2                | 2.7845712 |
| <b>P05178</b> | <b>CP2C6 Cytochrome P450 2C6</b>    | <b>0.892940729</b> | <b>0.7183337</b> | <b>8</b>  |
| P05178        | EALIDHGEEFAER                       | 1.196443748        | 2                | 2.971801  |
| P05178        | FDYKDQDFLNLMK                       | 1.300168709        | 3                | 4.924891  |
| P05178        | FIDLPTNLPHAVTCDIK                   | 1.091051953        | 2                | 3.9967239 |
| P05178        | GTTIITSLSSVLHDSK                    | 1.050847911        | 2                | 3.6757259 |
| P05178        | GTTIITSLSSVLHDSKEFPDPEIFDPGHFLDGNGK | 0.570882403        | 4                | 4.7788029 |
| P05178        | MCAGEGLAR                           | 0.848439187        | 2                | 2.6158185 |
| P05178        | NITQSLTSFSK                         | 0.914350589        | 2                | 3.0794346 |
| P05178        | TNGSPCDPTFILGCAPCNVICSIIFQNR        | 1.270720752        | 2                | 2.5466166 |
| <b>P05179</b> | <b>CP2C7 Cytochrome P450 2C7</b>    | <b>1.176129571</b> | <b>0.0692781</b> | <b>8</b>  |
| P05179        | ACVGEGLAR                           | 1.016446791        | 2                | 3.019695  |
| P05179        | FINFVPTNLPHAVTCDIK                  | 1.202301751        | 3                | 3.5331919 |
| P05179        | HMPYTDAMIHEVQR                      | 0.799077298        | 2                | 4.1550927 |
| P05179        | IEEHQESLDVTNPR                      | 1.072378757        | 2                | 4.8487129 |
| P05179        | KIEEHQESLDVTNPR                     | 1.276988993        | 2                | 4.9804745 |
| P05179        | KLPPGPTPLPIIGNFLQIDVK               | 1.27609824         | 3                | 5.984199  |
| P05179        | TYGPVFTLYLGSQPTVILHGYEAIK           | 1.019991994        | 3                | 3.4444559 |
| P05179        | VLTSLTSLVHDSK                       | 1.615763495        | 2                | 3.4042068 |
| <b>P05182</b> | <b>CP2E1 Cytochrome P450 2E1</b>    | <b>1.24813172</b>  | <b>0.0332875</b> | <b>12</b> |
| P05182        | AKEHLQSLDINCAR                      | 1.317964021        | 2                | 4.4898925 |
| P05182        | DIDLSPVTVGFGSIPPQFK                 | 0.860394607        | 2                | 3.3405561 |
| P05182        | DTVFGQYVIPK                         | 1.460635891        | 2                | 2.3570304 |
| P05182        | DVTDCLLIEMEKEK                      | 0.967590279        | 2                | 3.2956293 |
| P05182        | EHLQSLDINCAR                        | 0.926980221        | 2                | 2.483947  |
| P05182        | FGPVFTLHLGSR                        | 1.237264614        | 2                | 2.5097325 |
| P05182        | FINLVPSNLPHEATR                     | 1.251918927        | 2                | 3.8806818 |
| P05182        | FKPEHFLNENGG                        | 1.14361774         | 2                | 3.2453947 |
| P05182        | FLSILR                              | 1.133627124        | 2                | 2.3870151 |
| P05182        | GTVVIPTLDSLLYDSHEFPDPEK             | 1.161530607        | 2                | 4.7070656 |
| P05182        | LDMPYMDAVVHEIQR                     | 1.182012178        | 2                | 3.1217978 |
| P05182        | YGLLILMK                            | 1.165316685        | 2                | 3.1612377 |
| <b>P05183</b> | <b>CP3A2 Cytochrome P450 3A2</b>    | <b>1.328616233</b> | <b>5.86E-12</b>  | <b>12</b> |
| P05183        | DIELDGLFIPK                         | 0.853462051        | 2                | 3.5637493 |
| P05183        | EMFPIIEQYGDILVK                     | 1.302122107        | 2                | 3.76385   |
| P05183        | KDIELDGLFIPK                        | 1.228832484        | 3                | 3.7398422 |
| P05183        | KLQEEIDGALPSK                       | 1.079701284        | 2                | 3.5704432 |
| P05183        | LKEMFPIIEQYGDILVK                   | 1.289253033        | 2                | 3.2660828 |
| P05183        | LQEEIDGALPSK                        | 1.240056314        | 2                | 4.0948529 |
| P05183        | QAILEPEKPIVLK                       | 1.264401982        | 2                | 3.2944689 |
| P05183        | QEAETGKPVMTK                        | 1.106725471        | 2                | 3.4279854 |
| P05183        | QEAETGKPVMTK+Oxidation(11)          | 2.272346503        | 2                | 3.1833725 |
| P05183        | VDFLQLMLNAHNNNSK                    | 1.299083449        | 2                | 4.0944881 |
| P05183        | VDFLQLMLNAHNNNSKDEVSHK              | 1.58872172         | 3                | 3.4918888 |
| P05183        | YLKQEAETGKPVMTK                     | 1.602189004        | 2                | 3.7892878 |
| <b>P05197</b> | <b>EF2 Elongation factor 2</b>      | <b>1.272348054</b> | <b>9.9E-20</b>   | <b>27</b> |
| P05197        | ALLELQLEPEELYQTFQR                  | 1.796917078        | 2                | 5.2837029 |
| P05197        | ARPPFDGLAEDIDKGEVSAR                | 1.223512515        | 3                | 5.6910372 |
| P05197        | AYLPVNESFGFTADLR                    | 0.964400703        | 2                | 4.5215068 |
| P05197        | CELLYEGPPDDEAAMGIK                  | 1.365478747        | 2                | 4.2524738 |
| P05197        | CLYASVLTQPR                         | 0.9426149          | 2                | 2.6169    |
| P05197        | DLEEDHACIPIKK                       | 1.27935721         | 2                | 3.3852255 |
| P05197        | EGIPALDNFLDKL                       | 1.602094039        | 2                | 3.4369121 |
| P05197        | ETVSEESNVLCLSK                      | 0.930832053        | 2                | 4.3269792 |

|               |                                                   |                    |                  |           |
|---------------|---------------------------------------------------|--------------------|------------------|-----------|
| P05197        | GEGQLGAAER                                        | 1.036239489        | 2                | 3.6594837 |
| P05197        | GHVFEEQVAGTPMFVVK                                 | 1.154467853        | 2                | 6.0916414 |
| P05197        | IWCFGPDGTGPNILTDITK                               | 1.807892968        | 2                | 5.1323843 |
| P05197        | KIWCFGPDGTGPNILTDITK                              | 1.105962279        | 2                | 4.7524595 |
| P05197        | KVEDMMK+Oxidation(5)Oxidation(6)                  | 1.647348838        | 2                | 2.3100801 |
| P05197        | KVEDMMK+Oxidation(6)                              | 1.193106414        | 2                | 2.3902862 |
| P05197        | LDSSEKDKKEGKPLLK                                  | 1.4044622          | 3                | 3.9685321 |
| P05197        | LMEPIYLVEIQCEQVVGIIYGLNR                          | 1.196038763        | 3                | 5.0668564 |
| P05197        | NMSVIAHVDHGK                                      | 1.016900709        | 2                | 3.875103  |
| P05197        | NMSVIAHVDHGK+Oxidation(2)                         | 1.361625829        | 2                | 3.5242877 |
| P05197        | STLTDSLCK                                         | 1.05995948         | 2                | 3.1268089 |
| P05197        | TFCQLLDPIFK                                       | 1.272725804        | 2                | 4.1978111 |
| P05197        | TGTITTFEHAHNMR                                    | 0.789506688        | 2                | 3.984628  |
| P05197        | VFDAIMNFR                                         | 1.174040704        | 2                | 2.6827619 |
| P05197        | VFSGVVSTGLK                                       | 1.196282256        | 2                | 2.9968669 |
| P05197        | WLPAGDALLQMITIHLSPVTAQK                           | 1.304916599        | 3                | 3.5622075 |
| P05197        | YEWVVAEAR                                         | 1.05034788         | 2                | 2.9770551 |
| P05197        | YFDPANGK                                          | 1.242553443        | 1                | 2.0461268 |
| P05197        | YVEPIEDVPCGNIVGLVGDQFLVK                          | 1.846905497        | 3                | 5.757659  |
| <b>P05369</b> | <b>FPPS Farnesyl pyrophosphate synthase</b>       | <b>0.973179352</b> | <b>0.9999995</b> | <b>11</b> |
| P05369        | ALYEELDLR                                         | 0.925134801        | 2                | 3.1106427 |
| P05369        | EVLEYNTVGGK                                       | 1.535084381        | 2                | 3.0022533 |
| P05369        | GLTVVQTFQELVEPR                                   | 0.984355068        | 2                | 3.9999974 |
| P05369        | IKEVLEYNTVGGK                                     | 1.037595943        | 2                | 4.4726591 |
| P05369        | QILEENYGQK                                        | 0.697613459        | 2                | 2.4221711 |
| P05369        | QILEENYGQKDPEK                                    | 0.942157026        | 2                | 3.6243086 |
| P05369        | QNFIQHFSQIVK                                      | 1.107487862        | 2                | 2.4831905 |
| P05369        | SLIEQCSAPLPPSIFLELANK                             | 1.080443506        | 2                | 5.1991758 |
| P05369        | VGTDIQDNK                                         | 0.882736781        | 2                | 3.765407  |
| P05369        | VLTEDELGHPEK                                      | 0.881502651        | 2                | 2.5215466 |
| P05369        | VLTEDELGHPEKGDATR                                 | 0.923029027        | 2                | 4.7378941 |
| <b>P05426</b> | <b>RL7 60S ribosomal protein L7</b>               | <b>1.170653906</b> | <b>1.11E-15</b>  | <b>6</b>  |
| P05426        | AGNFYVPAEPK                                       | 1.065143577        | 2                | 2.9899006 |
| P05426        | FGIICMEDLIHEIYTVGK                                | 1.454749574        | 3                | 4.3526769 |
| P05426        | IVEPYIAWGYPNLK                                    | 1.409633166        | 2                | 3.63153   |
| P05426        | KKVPAVPETLK                                       | 1.159422585        | 2                | 3.0003204 |
| P05426        | TTHFVEGGDAGNR                                     | 1.186937397        | 2                | 2.7484114 |
| P05426        | TTHFVEGGDAGNREDQINR                               | 1.150304632        | 2                | 4.4354072 |
| <b>P05544</b> | <b>SPA3L Serine protease inhibitor A3L</b>        | <b>1.274296428</b> | <b>0.2535105</b> | <b>6</b>  |
| P05544        | AVLDVDETGTEATAATGVATVIR                           | 1.412773899        | 2                | 2.8107567 |
| P05544        | DSTMEEILEGLK                                      | 0.806379711        | 2                | 2.8874285 |
| P05544        | IAELFSDLEER                                       | 1.317193382        | 2                | 2.5534906 |
| P05544        | MQQVESSLQPETLK                                    | 1.162655478        | 2                | 4.153573  |
| P05544        | MQQVESSLQPETLKK                                   | 1.022717751        | 2                | 3.3046968 |
| P05544        | VFSQQADLSR                                        | 1.208859235        | 2                | 2.9331348 |
| <b>P05545</b> | <b>SPA3K Serine protease inhibitor A3K</b>        | <b>0.945349672</b> | <b>0.0125547</b> | <b>5</b>  |
| P05545        | AVLDVDETGTEGAAATAVTAALK                           | 1.073543266        | 2                | 6.1747699 |
| P05545        | FSISTDYNLEEVLPGLGIR                               | 1.307234236        | 2                | 3.9108636 |
| P05545        | IAELFSELDER                                       | 0.946494822        | 2                | 3.013139  |
| P05545        | IFSQQADLSR                                        | 1.407512564        | 2                | 2.4812181 |
| P05545        | NLHVSQVVHK                                        | 1.112554584        | 2                | 2.6194932 |
| <b>P05765</b> | <b>RS21 40S ribosomal protein S21</b>             | <b>0.868751414</b> | <b>0.8253413</b> | <b>3</b>  |
| P05765        | DHASIQMNVAEVDR                                    | 0.819717357        | 2                | 3.6872826 |
| P05765        | MGESDDSILR                                        | 0.882709423        | 2                | 3.0099034 |
| P05765        | TYGICGAIR                                         | 1.053373019        | 2                | 2.4403112 |
| <b>P06214</b> | <b>HEM2 Delta_aminolevulinic acid dehydratase</b> | <b>1.026904335</b> | <b>0.9481123</b> | <b>9</b>  |
| P06214        | AGADIIITYFAPQLLK                                  | 1.346282257        | 2                | 4.4702301 |

|               |                                                                   |                    |                  |           |
|---------------|-------------------------------------------------------------------|--------------------|------------------|-----------|
| P06214        | AGAFDLR                                                           | 0.928565047        | 2                | 2.5773206 |
| P06214        | AGCQVVAPSDMMDGR                                                   | 0.863093626        | 2                | 3.9122565 |
| P06214        | CVLIFGVPSR                                                        | 0.88674471         | 2                | 2.482595  |
| P06214        | DEQGSAADESDSPTIEAVR                                               | 0.835036279        | 2                | 5.9171801 |
| P06214        | DIQEGADILMVKGPLPYLDMVQEVK                                         | 1.202421929        | 2                | 3.9005892 |
| P06214        | TAVLESMTAFR                                                       | 0.845387044        | 2                | 3.2135792 |
| P06214        | VPKDEQGSAADESDSPTIEAVR                                            | 0.998190672        | 2                | 5.9839659 |
| P06214        | YGVNQLEEMLRPLVEAGLR                                               | 1.043145035        | 3                | 4.2948518 |
| <b>P06302</b> | <b>PTMA Prothymosin alpha</b>                                     | <b>1.213481246</b> | <b>3.907E-07</b> | <b>3</b>  |
| P06302        | RVAEDEDDEDDVETKK                                                  | 1.246013945        | 3                | 5.8329906 |
| P06302        | VAEDEDDEDDVETK                                                    | 1.022577415        | 2                | 4.3167601 |
| P06302        | VAEDEDDEDDVETKK                                                   | 1.213013515        | 2                | 4.5815086 |
| <b>P06399</b> | <b>FIBA Fibrinogen alpha chain</b>                                | <b>1.011823688</b> | <b>0.999739</b>  | <b>9</b>  |
| P06399        | AQQIQVLQK                                                         | 1.089154474        | 1                | 2.0834861 |
| P06399        | EVVTSDDGSDCGDGMGLTHSFSGR                                          | 0.809694698        | 3                | 4.4150214 |
| P06399        | GDFANANNFDNTFGQVSEDLR                                             | 1.02115901         | 2                | 4.9979024 |
| P06399        | GDFANANNFDNTFGQVSEDLRR                                            | 0.882332472        | 3                | 3.4149284 |
| P06399        | GDKELLIGNEK                                                       | 1.122760667        | 2                | 2.7759075 |
| P06399        | GLIDEANQDFTNR                                                     | 1.001745195        | 2                | 3.0308998 |
| P06399        | MADEAASEAHQEGDTR                                                  | 1.120813774        | 2                | 3.846734  |
| P06399        | SQLQEGPPEWK                                                       | 1.071909794        | 2                | 2.9082975 |
| P06399        | TSDSDIFTDIENPSSHVPEFSSSSK                                         | 0.923430347        | 3                | 3.4807212 |
| <b>P06685</b> | <b>AT1A1 Sodium/potassium_transporting ATPase subunit alpha_1</b> | <b>1.129517501</b> | <b>0.0195885</b> | <b>6</b>  |
| P06685        | AVAGDASESALLK                                                     | 1.004651917        | 2                | 3.6304007 |
| P06685        | AVFQANQENLPILK                                                    | 1.099663332        | 2                | 2.6811121 |
| P06685        | EQPLDEELKDAFQNAYLELGLGER                                          | 1.705847246        | 3                | 3.3517323 |
| P06685        | LNIPVNQVNPR                                                       | 1.170597545        | 2                | 3.1379573 |
| P06685        | MSINAEDVVVGDLDVEVK                                                | 0.909899609        | 2                | 3.5107274 |
| P06685        | YEPAAVSEHGDKK                                                     | 1.207424733        | 2                | 3.3637276 |
| <b>P06687</b> | <b>AT1A3 Sodium/potassium_transporting ATPase subunit alpha_3</b> | <b>1.14053942</b>  | <b>0.98536</b>   | <b>3</b>  |
| P06687        | DGNPALTPTTPEVVK                                                   | 0.974156424        | 2                | 2.970988  |
| P06687        | GVGIISEGNETVEDIAAR                                                | 1.007833629        | 2                | 4.4671016 |
| P06687        | QGAIIVAVTGDGVNDSPALK                                              | 1.159301691        | 2                | 5.0453596 |
| <b>P06757</b> | <b>ADH1 Alcohol dehydrogenase 1</b>                               | <b>0.926899201</b> | <b>1</b>         | <b>19</b> |
| P06757        | AAVLWEPHKPFTIEDIEVAPPK                                            | 0.989503374        | 3                | 5.6093659 |
| P06757        | FPLEPLITHVLPFEK                                                   | 1.119891207        | 3                | 4.6824512 |
| P06757        | GAIFGGFK                                                          | 0.867638595        | 2                | 2.6959758 |
| P06757        | GALLDGTSR                                                         | 0.836206671        | 2                | 2.7967961 |
| P06757        | GKPIHHFISTSTFSQYTVVDDIAVAK                                        | 0.669873664        | 3                | 5.403718  |
| P06757        | HPESNLCCQTK                                                       | 1.212201024        | 2                | 3.2443397 |
| P06757        | ICKHPESNLCCQTK                                                    | 0.91900127         | 3                | 3.8841376 |
| P06757        | IDAAAPLDK                                                         | 0.858122701        | 2                | 2.9743004 |
| P06757        | IDAAAPLDKVCLIGCGFSTGYGSAVQVAK                                     | 1.019697028        | 3                | 3.3176198 |
| P06757        | IIVDINKDK                                                         | 1.011912111        | 2                | 2.8963828 |
| P06757        | INEAFDLLR                                                         | 0.916490493        | 2                | 3.7113433 |
| P06757        | KFPLEPLITHVLPFEK                                                  | 0.947044445        | 3                | 4.5261149 |
| P06757        | LVADFMAK                                                          | 0.975645813        | 2                | 2.403616  |
| P06757        | MVATGVCR                                                          | 0.768362522        | 2                | 2.6079943 |
| P06757        | MVATGVCR+Oxidation(1)                                             | 0.982298237        | 2                | 2.5266337 |
| P06757        | SDDHAVSGSLFTPLPAVLGHEGAGIVESIGEGVTCVKPGDK                         | 0.967095206        | 4                | 7.9009285 |
| P06757        | VCLIGCGFSTGYGSAVQVAK                                              | 1.005618239        | 2                | 6.4776053 |
| P06757        | VIPLFSPQCGK                                                       | 1.005399486        | 2                | 2.5981038 |
| P06757        | VTPGSTCAVFLGGVGLSVVIGCK                                           | 0.875139402        | 3                | 5.2616386 |
| <b>P06761</b> | <b>GRP78 78 kDa glucose_regulated protein</b>                     | <b>1.113988783</b> | <b>9.9E-20</b>   | <b>28</b> |
| P06761        | AKFEELNMDLFR                                                      | 1.109701646        | 3                | 4.6394081 |



|               |                                                                                      |                    |                  |           |
|---------------|--------------------------------------------------------------------------------------|--------------------|------------------|-----------|
| P06761        | DAGTIAGLNVMR                                                                         | 0.859506262        | 2                | 3.3287241 |
| P06761        | DNHLLGTFDLTGIPPAPR                                                                   | 0.752339906        | 2                | 4.7796927 |
| P06761        | ELEEIVQPIISK                                                                         | 0.928291823        | 2                | 4.0453177 |
| P06761        | FEELNMDLFR                                                                           | 0.996342478        | 2                | 3.5386384 |
| P06761        | IEIESFFEGEDFSETLTR                                                                   | 1.096460543        | 2                | 5.7304425 |
| P06761        | IEWLESHQDADIEDFK                                                                     | 0.968119759        | 2                | 5.6810336 |
| P06761        | IEWLESHQDADIEDFKAK                                                                   | 1.284401268        | 3                | 4.5970016 |
| P06761        | IINEPTAAAIAYGLDKR                                                                    | 1.644952677        | 2                | 4.4288907 |
| P06761        | ITITNDQNR                                                                            | 1.032544271        | 2                | 2.6760166 |
| P06761        | ITPSYVAFTPEGER                                                                       | 1.208178796        | 2                | 4.0559959 |
| P06761        | KKELEEIVQPIISK                                                                       | 1.138032217        | 2                | 5.4235859 |
| P06761        | KSDIDEIVLVGGSTR                                                                      | 1.126687025        | 2                | 5.1676893 |
| P06761        | KSQIFSTASDNQPTVTIK                                                                   | 1.285317266        | 2                | 5.3282542 |
| P06761        | LYGSGGPPPTGEEDTSEKDEL                                                                | 1.395350379        | 2                | 5.4974418 |
| P06761        | MKETAEAYLGK                                                                          | 1.031128579        | 2                | 3.375917  |
| P06761        | MKETAEAYLGK+Oxidation(1)                                                             | 1.36892039         | 2                | 2.9312112 |
| P06761        | NELESYAYSLK                                                                          | 1.431054803        | 2                | 3.5910285 |
| P06761        | NQLTSNPENTVFDKAK                                                                     | 1.034710629        | 2                | 5.2898545 |
| P06761        | SDIDEIVLVGGSTR                                                                       | 1.04011641         | 2                | 3.450712  |
| P06761        | SQIFSTASDNQPTVTIK                                                                    | 1.020155632        | 2                | 5.4465842 |
| P06761        | TFAPEEISAMVLTK                                                                       | 1.142058287        | 2                | 4.7567363 |
| P06761        | TKPYIQVDIGGGQTK                                                                      | 1.194297409        | 2                | 4.3514671 |
| P06761        | TWNDPSVQQDIK                                                                         | 1.07650637         | 2                | 4.165689  |
| P06761        | VLEDSLK                                                                              | 1.126124042        | 2                | 2.3469119 |
| P06761        | VLEDSLKK                                                                             | 1.182223204        | 2                | 2.4550843 |
| P06761        | VTHAVVTVPAYFNDAQR                                                                    | 1.350772709        | 2                | 5.049963  |
| P06761        | VYEGERPLTK                                                                           | 1.106455032        | 2                | 2.9083066 |
| <b>P06766</b> | <b>DPOLB DNA polymerase beta</b>                                                     | <b>1.205335827</b> | <b>0.2287417</b> | <b>2</b>  |
| P06766        | EEMLQMQDIVLNEVKK+Oxidation(6)                                                        | 1.205366598        | 2                | 2.3277683 |
| P06766        | QDDTSSINFLTR                                                                         | 0.986752622        | 2                | 2.3980837 |
| <b>P06866</b> | <b>HPT Haptoglobin</b>                                                               | <b>0.948088808</b> | <b>0.9265279</b> | <b>6</b>  |
| P06866        | ATDLKDWVQETMAK                                                                       | 1.052571981        | 2                | 2.7092466 |
| P06866        | GAVSPVGVQPILNK                                                                       | 0.909249721        | 2                | 3.5938752 |
| P06866        | LQTEGDGIYTLNSEK                                                                      | 0.931937886        | 2                | 4.3783464 |
| P06866        | NQLVEIEK                                                                             | 0.917110603        | 1                | 2.2510293 |
| P06866        | SVVDIGLIK                                                                            | 0.950542031        | 1                | 1.920939  |
| P06866        | YVMLPVADQEK                                                                          | 0.662173301        | 2                | 2.5964584 |
| <b>P07150</b> | <b>ANXA1 Annexin A1</b>                                                              | <b>1.052921853</b> | <b>0.0011076</b> | <b>2</b>  |
| P07150        | GGPGSAVSPYPSFNPSSDVAALHK                                                             | 0.830565289        | 3                | 3.9407394 |
| P07150        | GLGTDEDTLIEILTTR                                                                     | 1.549331701        | 2                | 4.4995251 |
| <b>P07153</b> | <b>RPN1 Dolichyl_diphosphooligosaccharide__protein glycosyltransferase subunit 1</b> | <b>1.129621612</b> | <b>9.9E-20</b>   | <b>14</b> |
| P07153        | ASSFVLALEPELESR                                                                      | 1.25726184         | 2                | 3.959183  |
| P07153        | AVTSEIAVLQSR                                                                         | 1.025377432        | 2                | 3.6942453 |
| P07153        | FVDHVFDEQVIDSLTVK                                                                    | 1.246331607        | 2                | 4.4955206 |
| P07153        | GEDEEDNNLEVR                                                                         | 1.068844831        | 2                | 3.7774708 |
| P07153        | HFDETVNR                                                                             | 0.975543682        | 2                | 2.7900562 |
| P07153        | ISIVVETVYTHVLHPYPTQITQSEK                                                            | 0.91742583         | 3                | 4.6739707 |
| P07153        | LKTEGSDLCDR                                                                          | 1.381013554        | 2                | 2.9595549 |
| P07153        | NIQVDSPYDISR                                                                         | 1.165367744        | 2                | 3.6539588 |
| P07153        | NLVEQHIQDIVVHYTFNK                                                                   | 1.243853545        | 3                | 4.4658818 |
| P07153        | SEDILDYGPFK                                                                          | 1.025809122        | 2                | 3.623117  |
| P07153        | TEGSDLCDR                                                                            | 0.930747724        | 2                | 2.4140818 |
| P07153        | TVDLSSHLAK                                                                           | 1.227563375        | 2                | 2.4098232 |
| P07153        | VHYENNSPFLTITSMTR                                                                    | 1.883040535        | 2                | 3.3412666 |
| P07153        | VTAEVVLAHPGGSTAR                                                                     | 1.20834944         | 2                | 4.4808707 |
| <b>P07323</b> | <b>ENOG Gamma_enolase</b>                                                            | <b>1.004503425</b> | <b>0.4865367</b> | <b>4</b>  |

|               |                                                                  |                    |                  |           |
|---------------|------------------------------------------------------------------|--------------------|------------------|-----------|
| P07323        | AAVPSGASTGIYEALER                                                | 1.221532193        | 2                | 5.223527  |
| P07323        | FGANAILGVSLAVCK                                                  | 0.873785961        | 2                | 3.771245  |
| P07323        | GNPTVEVDLHTAK                                                    | 0.939623726        | 2                | 2.9523187 |
| P07323        | SGETEDTFIADLVVGLCTGQIK                                           | 1.205979267        | 2                | 4.9777231 |
| <b>P07335</b> | <b>KCRB Creatine kinase B_type</b>                               | <b>0.974866015</b> | <b>0.1260848</b> | <b>3</b>  |
| P07335        | FCTGLTQIETLFK                                                    | 1.228719461        | 2                | 3.0165131 |
| P07335        | LGFSEVELVQMVVVDGVK                                               | 1.089346847        | 2                | 2.6824327 |
| P07335        | TDLNPDNLQGGDDLPNYVLSSR                                           | 0.743434356        | 2                | 2.890532  |
| <b>P07340</b> | <b>AT1B1 Sodium/potassium_transporting ATPase subunit beta_1</b> | <b>0.984568446</b> | <b>0.9881677</b> | <b>3</b>  |
| P07340        | AYGENIGYSEK                                                      | 0.99118749         | 2                | 2.5325859 |
| P07340        | VAPPGLTQIPQIQK                                                   | 0.996076387        | 2                | 2.6921675 |
| P07340        | YNPNVLPVQCTGK                                                    | 0.91687999         | 2                | 2.4848921 |
| <b>P07379</b> | <b>PCKGC Phosphoenolpyruvate carboxykinase_ cytosolic [GTP]</b>  | <b>0.978695825</b> | <b>0.9929748</b> | <b>12</b> |
| P07379        | AINPENGFFGVAPGTSVK                                               | 1.034815263        | 2                | 4.2774115 |
| P07379        | EEGWLAEHMLILGITNPEGK                                             | 0.910351238        | 3                | 3.773885  |
| P07379        | FLWPGFGNSR                                                       | 1.078251983        | 2                | 2.5466988 |
| P07379        | FVEGNAQLCQPEYIHCDSGSEEEYGR                                       | 0.976447769        | 3                | 4.2746882 |
| P07379        | GLGDVNVEELFGISK                                                  | 1.358097859        | 2                | 3.7054167 |
| P07379        | IGIELTDSPIYVVASMR                                                | 1.240628009        | 2                | 4.2050037 |
| P07379        | MGTSVLEALGDGEFIK                                                 | 1.186029909        | 2                | 3.8651552 |
| P07379        | TVIITQEQR                                                        | 1.185681587        | 1                | 1.9131287 |
| P07379        | VECVGDDIAWMK                                                     | 1.022993989        | 2                | 3.5101633 |
| P07379        | VIQGSLSLDPQEVK                                                   | 1.212495242        | 2                | 3.7112107 |
| P07379        | YLAFAFSPACGK                                                     | 0.931627623        | 2                | 2.9413977 |
| P07379        | YLEDQVNADLPYEIER                                                 | 0.872772874        | 2                | 4.7899857 |
| <b>P07632</b> | <b>SODC Superoxide dismutase [Cu_Zn]</b>                         | <b>0.964778734</b> | <b>1.196E-07</b> | <b>5</b>  |
| P07632        | DGVANVSIEDR                                                      | 0.698111348        | 2                | 2.8305585 |
| P07632        | GDGPVQGVIFHEQK                                                   | 0.986869672        | 2                | 3.8872354 |
| P07632        | HVGDLGNVAAGK                                                     | 0.919451273        | 2                | 3.9802129 |
| P07632        | QDDLKGGNEESTK                                                    | 1.607076895        | 2                | 3.6119139 |
| P07632        | VISLSGEHSIIGR                                                    | 1.01706013         | 2                | 3.1215651 |
| <b>P07633</b> | <b>PCCB Propionyl_CoA carboxylase beta chain_ mitochondrial</b>  | <b>0.999128045</b> | <b>0.9530243</b> | <b>10</b> |
| P07633        | AFDNDVDALCNLR                                                    | 1.176629247        | 2                | 3.6480956 |
| P07633        | AYNMLDIIHAVIDER                                                  | 1.157350704        | 2                | 4.1911645 |
| P07633        | GFVDDIIQPSSTR                                                    | 0.979210538        | 2                | 3.0914896 |
| P07633        | HLLGDTNYAWPTAEIAVMGAK                                            | 1.034827048        | 2                | 5.723217  |
| P07633        | ICCDLEVLASK                                                      | 1.188508595        | 2                | 3.5391254 |
| P07633        | IMDQAITVGAPVIGLNDSGGAR                                           | 1.131144026        | 2                | 5.0386195 |
| P07633        | IQEGVESLAGYADIFLR                                                | 1.159096435        | 2                | 4.4235606 |
| P07633        | LVPEDTVVPLESSK                                                   | 0.930229024        | 2                | 3.5736568 |
| P07633        | SVTNEDVTQEQLGGAK                                                 | 0.935802851        | 2                | 5.2334561 |
| P07633        | TVGIVGNQPNVASGCLDINSSVK                                          | 0.939311404        | 2                | 5.0497394 |
| <b>P07687</b> | <b>HYEP Epoxide hydrolase 1</b>                                  | <b>1.449719039</b> | <b>9.9E-20</b>   | <b>25</b> |
| P07687        | DIELLYPYK                                                        | 0.908054396        | 2                | 3.0329647 |
| P07687        | DKEETLPLGDGWWGPGSKPSAK                                           | 1.44077772         | 3                | 4.9307785 |
| P07687        | EDESIRPFK                                                        | 1.171515822        | 2                | 2.7139027 |
| P07687        | EDESIRPFKVETSDEEIKDLHQR                                          | 1.51801132         | 3                | 6.3701425 |
| P07687        | ENLGQGIMVHK                                                      | 0.981064993        | 2                | 2.9617422 |
| P07687        | ESGYLHIQATKPDVTGICALNDSVPVGLAAYILEK                              | 1.740536993        | 3                | 6.1282277 |
| P07687        | FHYGFNSNYMK                                                      | 1.117285653        | 2                | 2.6548893 |
| P07687        | FLGYTEKDIELLYPYK                                                 | 1.446847746        | 2                | 4.8671541 |
| P07687        | FVSLAELQ                                                         | 1.145750987        | 2                | 2.4554436 |
| P07687        | FYIQGGDWGSLICTNMAQMPNHVK                                         | 1.466232126        | 3                | 4.0702906 |
| P07687        | GGHFAAFEEP                                                       | 1.150467816        | 2                | 3.3251548 |

|               |                                                                  |                    |                |           |
|---------------|------------------------------------------------------------------|--------------------|----------------|-----------|
| P07687        | GLHLNMAFISR                                                      | 1.403368622        | 2              | 2.8813479 |
| P07687        | GLNSVATAR                                                        | 1.073288185        | 2              | 2.4542665 |
| P07687        | IEGLDIHFHVKPPQLPSGR                                              | 1.411103766        | 3              | 4.3095126 |
| P07687        | IIPLLTDPK                                                        | 1.610899969        | 1              | 1.9701415 |
| P07687        | KFVSLAELQ                                                        | 1.359486924        | 2              | 2.4489121 |
| P07687        | KQVEILNQYPHFQ                                                    | 1.261631034        | 3              | 5.4528255 |
| P07687        | LLAQDIR                                                          | 1.371306521        | 2              | 2.4388592 |
| P07687        | QVEILNQYPHFQ                                                     | 1.342499109        | 2              | 3.5566959 |
| P07687        | SHGLSDEHVFEVICPSIPGYSEASSK                                       | 1.225444483        | 3              | 6.2937293 |
| P07687        | SHGLSDEHVFEVICPSIPGYSEASSKK                                      | 1.452628088        | 3              | 5.1675568 |
| P07687        | TKIEGLDIHFHVKPPQLPSGR                                            | 1.118925799        | 3              | 4.1996417 |
| P07687        | VETSDEEIK                                                        | 0.919770625        | 2              | 2.4884014 |
| P07687        | VETSDEEIKDLHQR                                                   | 1.373115806        | 2              | 4.8628621 |
| P07687        | VFVPTGFSAFPSELLHAPEK                                             | 1.867724626        | 2              | 5.1223102 |
| <b>P07756</b> | <b>CPSM Carbamoyl_phosphate synthase [ammonia]_mitochondrial</b> | <b>1.077081604</b> | <b>9.9E-20</b> | <b>98</b> |
| P07756        | AADTIGYPVMIR                                                     | 0.955655342        | 2              | 3.9326758 |
| P07756        | AADTIGYPVMIR+Oxidation(10)                                       | 1.114102119        | 2              | 3.3653083 |
| P07756        | AERPDGLILGMGGQTALNCGVELFK                                        | 1.121249282        | 3              | 6.7263622 |
| P07756        | AERPDGLILGMGGQTALNCGVELFK+Oxidation(11)                          | 0.828633123        | 3              | 6.1848426 |
| P07756        | AFAISGPFNVQFLVK                                                  | 1.230842057        | 2              | 5.0212603 |
| P07756        | AFAMTNQILVER                                                     | 1.082674024        | 2              | 4.3786769 |
| P07756        | AFAMTNQILVER+Oxidation(4)                                        | 1.151219865        | 2              | 3.7937558 |
| P07756        | ALENNMSLDEIVK                                                    | 1.043264842        | 2              | 4.7584443 |
| P07756        | ALENNMSLDEIVK+Oxidation(6)                                       | 1.014107031        | 2              | 3.9625862 |
| P07756        | AMLSTGFK                                                         | 0.877608003        | 2              | 2.5315104 |
| P07756        | AQTAHIVLEDGTK                                                    | 0.812213263        | 2              | 4.4766717 |
| P07756        | ATGYPLAFIAAK                                                     | 1.299005735        | 2              | 3.1047087 |
| P07756        | CEMASTGEVACFGEGIHAFK                                             | 0.996686216        | 3              | 4.784421  |
| P07756        | CEMASTGEVACFGEGIHAFK+Oxidation(3)                                | 1.04618811         | 3              | 4.7027187 |
| P07756        | CLGLTEAQR                                                        | 1.000830888        | 2              | 3.6047795 |
| P07756        | DADDNCVTVCMENVDAMGVHTGDSVVVAPAQTLNAEFQMLR                        | 1.170814813        | 3              | 6.446157  |
| P07756        | DELGLNK                                                          | 1.065151672        | 1              | 2.2437425 |
| P07756        | DGSIDLVINLPNNNTK                                                 | 0.795527165        | 2              | 5.5392032 |
| P07756        | DILNMDK                                                          | 0.711673575        | 1              | 1.9276983 |
| P07756        | EIEYEVVR                                                         | 0.774368589        | 1              | 2.0633442 |
| P07756        | EPLFGISTGNIITGLAAGAK                                             | 1.008196181        | 2              | 5.3242531 |
| P07756        | ETLMDLGTK                                                        | 0.746944479        | 1              | 2.3590941 |
| P07756        | EVEMDAVGK                                                        | 0.574897898        | 1              | 2.2228353 |
| P07756        | FLEEATR                                                          | 0.989315251        | 2              | 2.4771512 |
| P07756        | FLGVAEQLHNEGFK                                                   | 1.072677357        | 2              | 4.8848433 |
| P07756        | FVHDNYVIR                                                        | 1.073821016        | 3              | 3.5299408 |
| P07756        | GAEVHLVPWNHDFQMDYDGLLIAGGPGNPALAQPLIQNVK                         | 1.265552738        | 3              | 6.1142602 |
| P07756        | GAEVHLVPWNHDFQMDYDGLLIAGGPGNPALAQPLIQNVK+Oxidation(16)           | 1.295532547        | 3              | 5.7506967 |
| P07756        | GILIGIQSFRPR                                                     | 1.017879824        | 2              | 2.4772069 |
| P07756        | GLNSESVTEETLR                                                    | 0.977882881        | 2              | 4.8683162 |
| P07756        | GNDVLVIECNLR                                                     | 1.075166675        | 2              | 4.3495131 |
| P07756        | GQILTMANPIIGNGGAPDPTAR                                           | 0.928837205        | 2              | 6.4563785 |
| P07756        | GQILTMANPIIGNGGAPDPTAR+Oxidation(6)                              | 0.965528743        | 2              | 4.8932748 |
| P07756        | GQILTMANPIIGNGGAPDPTARDELGLNK                                    | 1.067330501        | 3              | 4.843555  |
| P07756        | GQILTMANPIIGNGGAPDPTARDELGLNK+Oxidation(6)                       | 0.818569612        | 3              | 3.4324303 |
| P07756        | GQNQPVLNITNR                                                     | 0.991646501        | 2              | 4.2999997 |
| P07756        | GTTITSVLPKALVASR                                                 | 1.049353907        | 2              | 3.6516881 |
| P07756        | GYSFGHPSSVAGEVVFNTGLGGYSEALDTPAYK                                | 0.985935508        | 3              | 6.4514279 |

|        |                                                    |             |   |           |
|--------|----------------------------------------------------|-------------|---|-----------|
| P07756 | HLGIVGECNIQFALHPTSMEYCIIEVNAR                      | 1.111254478 | 3 | 4.8495688 |
| P07756 | HLPTLEQPIIPSDYVAIK                                 | 1.015912303 | 2 | 5.1538906 |
| P07756 | IALGIPLPEIK                                        | 0.985979941 | 2 | 2.9752638 |
| P07756 | IAPSFAVESMEDALK                                    | 1.703144594 | 2 | 5.284112  |
| P07756 | IAPSFAVESMEDALK+Oxidation(10)                      | 1.256733476 | 2 | 3.4553657 |
| P07756 | IEFEGQSVDFVDPNK                                    | 0.920641633 | 2 | 5.5570726 |
| P07756 | IEFEGQSVDFVDPNKQNLIAEVSTK                          | 1.039180362 | 3 | 5.1490145 |
| P07756 | ILDIYHQEACNGCIISVGGQIPNNLAVPLYK                    | 1.214791484 | 3 | 6.0740442 |
| P07756 | ILESDRKEPLFGISTGNIITGLAAGAK                        | 1.10008543  | 3 | 3.7849591 |
| P07756 | IMGTSPLQIDR                                        | 1.461149193 | 2 | 3.0548642 |
| P07756 | IMGTSPLQIDR+Oxidation(2)                           | 1.693402938 | 2 | 3.0931878 |
| P07756 | IMGTSPLQIDRAEDR                                    | 0.698698456 | 2 | 2.4420786 |
| P07756 | KELSEPSSTR                                         | 0.743012471 | 2 | 2.7399802 |
| P07756 | KEPLFGISTGNIITGLAAGAK                              | 0.976850433 | 2 | 5.4686966 |
| P07756 | KTVVVNCNPETVSTDFDECDK                              | 0.157318746 | 2 | 5.1218596 |
| P07756 | LFAEAVQK                                           | 1.055639256 | 2 | 3.4245737 |
| P07756 | LFATEATSDWLNANNVPATPVAWPSQEGQNPSSLSSIR             | 1.308620729 | 3 | 5.1271515 |
| P07756 | LRDADPILR                                          | 1.142506262 | 3 | 3.5148826 |
| P07756 | LTSIDKWFLYK                                        | 1.122222345 | 2 | 2.4809208 |
| P07756 | LYFEELSLEK                                         | 1.492237906 | 2 | 3.4603224 |
| P07756 | MCHPSVDGFTPR                                       | 0.915850084 | 3 | 5.0483136 |
| P07756 | MCHPSVDGFTPR+Oxidation(1)                          | 1.220973938 | 3 | 4.3315721 |
| P07756 | MRDILNMDK                                          | 0.859916954 | 2 | 3.0370305 |
| P07756 | MRDILNMDK+Oxidation(1)                             | 1.384721826 | 2 | 2.7487967 |
| P07756 | QADAVYFLPITPQFVTEVIK                               | 1.208722028 | 3 | 4.4116206 |
| P07756 | QIDTLAAEYPSVTNYLYVYNGQEHDIK                        | 1.944661767 | 3 | 3.359024  |
| P07756 | QLFSDKLEINEK                                       | 1.087464943 | 2 | 3.8514531 |
| P07756 | QNLIAEVSTK                                         | 0.958168877 | 1 | 2.5341208 |
| P07756 | RFLEEATR                                           | 0.977125985 | 2 | 2.9943261 |
| P07756 | RTAVDSGIALLTNFQVTK                                 | 1.144686206 | 2 | 4.7542977 |
| P07756 | SAYALGGLGSGICPNK                                   | 1.030783056 | 2 | 4.9585476 |
| P07756 | SAYALGGLGSGICPNKETLMDLGTK                          | 1.115866665 | 3 | 4.9713659 |
| P07756 | SFPFVSK                                            | 1.029061176 | 1 | 1.9160576 |
| P07756 | SIFSAVLDELK                                        | 1.044301838 | 2 | 3.928221  |
| P07756 | SIFSAVLDELKVAQAPWK                                 | 0.727780897 | 3 | 3.4443893 |
| P07756 | SLGQWLQEEK                                         | 1.03218583  | 2 | 4.1866531 |
| P07756 | SLGQWLQEEKVPAIYGVDTDR                              | 1.121218864 | 2 | 3.9372938 |
| P07756 | SVGEVMAIGR                                         | 0.929227635 | 2 | 3.5905492 |
| P07756 | SVGEVMAIGR+Oxidation(6)                            | 1.064258521 | 2 | 3.0982208 |
| P07756 | TAVDSGIALLTNFQVTK                                  | 1.351464742 | 3 | 6.3866467 |
| P07756 | TFEESFQK                                           | 0.939473577 | 2 | 2.5403626 |
| P07756 | TLGVDFIDVATK                                       | 1.002943296 | 2 | 4.1810951 |
| P07756 | TSACFEPPLDYMVTK                                    | 0.962407904 | 2 | 4.726368  |
| P07756 | TSACFEPPLDYMVTK+Oxidation(12)                      | 1.133563053 | 2 | 3.5609522 |
| P07756 | TSINVVR                                            | 0.922879788 | 2 | 2.4394379 |
| P07756 | TVLMNPNIASVQTNEVGLK                                | 0.952757782 | 2 | 6.6268268 |
| P07756 | TVLMNPNIASVQTNEVGLK+Oxidation(4)                   | 1.133652222 | 2 | 5.9576983 |
| P07756 | TVVVNCNPETVSTDFDECDK                               | 0.258269399 | 2 | 5.6252265 |
| P07756 | TVVVNCNPETVSTDFDECDKLYFEELSLEK                     | 2.093014891 | 3 | 6.0061083 |
| P07756 | VISHAISEHVEDAGVHSGDATLMLPTQTISQGAIEK               | 1.163891368 | 3 | 7.5906944 |
| P07756 | VISHAISEHVEDAGVHSGDATLMLPTQTISQGAIEK+Oxidation(23) | 1.175694451 | 3 | 7.0406213 |
| P07756 | VLGTSVESIMATEDR                                    | 1.143291552 | 2 | 4.901515  |
| P07756 | VLGTSVESIMATEDR+Oxidation(10)                      | 1.111873018 | 2 | 4.2219915 |
| P07756 | VLILGSGLSIGQAGEFDYSGSQAVK                          | 1.001589523 | 2 | 5.8146391 |
| P07756 | VMIGESVDEK                                         | 0.867067022 | 2 | 3.5697925 |
| P07756 | VMIGESVDEK+Oxidation(2)                            | 1.042288577 | 2 | 3.009069  |

|               |                                                    |                    |                  |           |
|---------------|----------------------------------------------------|--------------------|------------------|-----------|
| P07756        | VSQEHPVVLTK                                        | 1.010733973        | 2                | 3.9825599 |
| P07756        | VVAVDCGIK                                          | 0.93216067         | 2                | 2.5921533 |
| P07756        | YMESDGIK                                           | 0.948659158        | 1                | 2.1481903 |
| P07756        | YMESDGIK+Oxidation(2)                              | 1.137989946        | 1                | 2.3005195 |
| <b>P07824</b> | <b>ARG1 Arginase_1</b>                             | <b>0.995133943</b> | <b>0.2842236</b> | <b>15</b> |
| P07824        | ANEQLAAVVAETQK                                     | 0.994879223        | 2                | 5.3592772 |
| P07824        | DHGDLAFVDVVPNDSPFQIVK                              | 0.977657495        | 2                | 6.2397065 |
| P07824        | DIVYIGLR                                           | 0.895346689        | 2                | 2.7106519 |
| P07824        | DVDPGEHYIK                                         | 0.869107883        | 2                | 3.2939575 |
| P07824        | EGNHKPEDYLPKPPK                                    | 0.954862959        | 2                | 2.7079771 |
| P07824        | GKFPDVPGFVWVTPCISAK                                | 1.114225226        | 3                | 4.6574011 |
| P07824        | LKETEYNVR                                          | 1.116557091        | 3                | 3.7104428 |
| P07824        | NGTISVVLGGDHSMAIGSISGHAR                           | 0.958982865        | 3                | 4.5094814 |
| P07824        | TGLLSGLDIMEVNP TLGK                                | 1.118680136        | 2                | 5.7269597 |
| P07824        | TGLLSGLDIMEVNP TLGK+Oxidation(10)                  | 0.753744978        | 2                | 2.671371  |
| P07824        | TVNTAVALTLS CFGTK                                  | 1.022583747        | 2                | 4.2555857 |
| P07824        | VHPDLCVIWVDAHTDINTPLTSSGNLHGQPVAFLK                | 1.293065122        | 4                | 4.623486  |
| P07824        | VMEETF SYLLGR                                      | 1.396785387        | 2                | 3.8276582 |
| P07824        | YFSMTEV DK                                         | 0.997038364        | 1                | 2.248889  |
| P07824        | YFSMTEVDKLGIGK+Oxidation(4)                        | 0.958476399        | 2                | 2.5889494 |
| <b>P07871</b> | <b>THIKB 3_ketoacyl_CoA thiolase B_peroxisomal</b> | <b>0.898243065</b> | <b>9.9E-20</b>   | <b>16</b> |
| P07871        | AEELGLPILGVL R                                     | 0.980457216        | 2                | 4.4157496 |
| P07871        | AEIVPVTTT VLDDK                                    | 0.845781537        | 2                | 4.625771  |
| P07871        | AEIVPVTTT VLDDKGD R                                | 0.855391349        | 2                | 3.9467776 |
| P07871        | AEIVPVTTT VLDDKGD R                                | 0.995780898        | 2                | 4.3805995 |
| P07871        | DCLIPMGITSENVAER                                   | 0.687865036        | 2                | 3.7718823 |
| P07871        | DGGSTTAGNSSQVSDGAAAVLLAR                           | 1.012790922        | 2                | 6.220922  |
| P07871        | IAQFLSGIPETVPLSAVNR                                | 1.675134244        | 2                | 4.1056242 |
| P07871        | LKPECLGDISVGNVLQPGAGAAMAR                          | 0.62508639         | 3                | 5.1495199 |
| P07871        | QCSSGLQAVANIAGGIR                                  | 0.698698456        | 2                | 4.9075031 |
| P07871        | QDAFALASQK                                         | 0.808992255        | 2                | 3.9396648 |
| P07871        | QKQDAFALASQK                                       | 0.891830684        | 2                | 3.9710534 |
| P07871        | QVVTLLNELK                                         | 1.107348578        | 2                | 2.479455  |
| P07871        | SKAEELGLPILGVL R                                   | 0.941905791        | 2                | 4.0390487 |
| P07871        | SYAVVGVPPDIMGIGPAYAIPAALQK                         | 0.900851548        | 3                | 4.8202286 |
| P07871        | TITVSQDEGVRPSTTMEGLAK                              | 0.891124054        | 2                | 4.3483362 |
| P07871        | VNPLGGAIALGHPLGCTGAR                               | 1.11095215         | 2                | 5.2034044 |
| <b>P07872</b> | <b>ACOX1 Peroxisomal acyl_coenzyme A oxidase 1</b> | <b>1.0265755</b>   | <b>0.0001217</b> | <b>20</b> |
| P07872        | AFTTWTANAGIEECR                                    | 1.134202639        | 2                | 4.0576739 |
| P07872        | ASATFNPELITHILDGSPENR                              | 0.815716801        | 3                | 4.5783224 |
| P07872        | ASEAHCHYVVVK                                       | 1.011766253        | 3                | 4.0150447 |
| P07872        | EIENLILNDPDPFHEDYNFLTR                             | 1.599870469        | 2                | 4.4005928 |
| P07872        | EIGTHKPLPGITVGDIGPK                                | 0.988905863        | 2                | 4.0459876 |
| P07872        | EVAWNLT SVDLVR                                     | 0.705503858        | 2                | 2.8687017 |
| P07872        | EYGISDP EIMWFK                                     | 0.771386621        | 2                | 3.5735891 |
| P07872        | FGYEEMDNGYLK                                       | 0.863568576        | 2                | 3.0205963 |
| P07872        | GGDFLEGSITGAQLSQVNAR                               | 0.998989515        | 2                | 5.9954791 |
| P07872        | GLETTATYDPK                                        | 0.890359515        | 2                | 3.5025315 |
| P07872        | INESIGQGDLSPELHALTAGLK                             | 1.066764456        | 3                | 5.2958031 |
| P07872        | IYDQVR                                             | 1.021957964        | 1                | 1.9942368 |
| P07872        | LVEIAAK                                            | 1.147761463        | 1                | 2.0802603 |
| P07872        | NLCLLYSLYISQK                                      | 1.124437578        | 2                | 3.2478883 |
| P07872        | QSEPEPQILDFQTQQYK                                  | 0.985808055        | 2                | 4.8684697 |
| P07872        | SFLVGNAAQSLK                                       | 0.989651328        | 2                | 3.7683971 |
| P07872        | SKEVAWNLT SVDLVR                                   | 1.07910141         | 2                | 3.3766375 |
| P07872        | TQEFILNSPTVTSIK                                    | 0.966903558        | 2                | 4.3428411 |
| P07872        | TSNHAIVLAQLITQGECYGLHAFVPIR                        | 0.940200533        | 4                | 4.972455  |

|               |                                                      |                    |                  |           |
|---------------|------------------------------------------------------|--------------------|------------------|-----------|
| P07872        | YDGNVYENLFEWAK                                       | 1.686960676        | 2                | 5.4415746 |
| <b>P07895</b> | <b>SODM Superoxide dismutase [Mn]_ mitochondrial</b> | <b>1.06569606</b>  | <b>0.4295503</b> | <b>4</b>  |
| P07895        | AIWNVINWENVSQR                                       | 1.216052155        | 2                | 3.7661922 |
| P07895        | GDVTTQVALQPALK                                       | 0.914211301        | 2                | 3.3785203 |
| P07895        | HHATYVNNLNVTEEK                                      | 1.005404713        | 2                | 4.7329979 |
| P07895        | NVRPDYLK                                             | 0.964826997        | 2                | 2.4372008 |
| <b>P07896</b> | <b>ECHP Peroxisomal bifunctional enzyme</b>          | <b>0.971680172</b> | <b>0.0986079</b> | <b>21</b> |
| P07896        | GGPMFYAASVGLPTVLEK                                   | 1.591009594        | 2                | 3.9875119 |
| P07896        | GQGLTGPSLPPGTPVR                                     | 0.947823466        | 2                | 4.239017  |
| P07896        | GWYQYDKPLGR                                          | 1.066390307        | 2                | 3.0798895 |
| P07896        | IFNKPVPSLPNMDSVFAEAIK                                | 1.543001213        | 3                | 3.9948666 |
| P07896        | IGVVVGNCYGFVGNR                                      | 1.197555031        | 2                | 3.29422   |
| P07896        | IIDKPIEPR                                            | 1.194986712        | 2                | 2.5842977 |
| P07896        | KGQGLTGPSLPPGTPVR                                    | 1.021224505        | 2                | 4.6644259 |
| P07896        | KQYPGVLAPETCVR                                       | 0.967699837        | 2                | 4.0639005 |
| P07896        | LCNPPVNAVSPTVIR                                      | 1.407062556        | 2                | 4.772687  |
| P07896        | LGILDAVVK                                            | 1.044891327        | 2                | 2.9127936 |
| P07896        | LLEVIPSR                                             | 0.83708647         | 2                | 2.4105275 |
| P07896        | QNPDIQLEPSDYLR                                       | 0.860732531        | 2                | 3.9634378 |
| P07896        | QYPGVLAPETCVR                                        | 0.895195133        | 2                | 2.9703851 |
| P07896        | TASAQPVSSVGLGLTMGR                                   | 0.968455413        | 2                | 5.1416826 |
| P07896        | TISKEILER                                            | 1.158239901        | 2                | 2.9646196 |
| P07896        | VGISVAVESDPK                                         | 0.919190221        | 2                | 4.1971827 |
| P07896        | VGLPEVTLGILPGAR                                      | 1.031835391        | 2                | 3.445039  |
| P07896        | VSDLAGLDVGVK                                         | 0.966799175        | 2                | 4.5007052 |
| P07896        | YLSADEALR                                            | 1.017939193        | 2                | 3.1168609 |
| P07896        | YSPLGDMICEAGR                                        | 0.962815856        | 2                | 3.8610766 |
| P07896        | YSSPTTIATVMSLSK                                      | 0.996098263        | 2                | 3.2304728 |
| <b>P07943</b> | <b>ALDR Aldose reductase</b>                         | <b>1.145505082</b> | <b>0.1442545</b> | <b>2</b>  |
| P07943        | AIGVSNFNPLQIER                                       | 1.099715774        | 2                | 3.0754368 |
| P07943        | HIDCAQVYQNEK                                         | 1.34479071         | 2                | 3.9285505 |
| <b>P08009</b> | <b>GSTM4 Glutathione S_ transferase Yb_3</b>         | <b>1.473938919</b> | <b>9.9E-20</b>   | <b>6</b>  |
| P08009        | LCYNPDFEK                                            | 2.422426889        | 1                | 2.2674367 |
| P08009        | LLLEYDSSYEK                                          | 1.259518755        | 2                | 4.9175787 |
| P08009        | LLLEYDSSYEKRR                                        | 1.362455705        | 2                | 4.1324883 |
| P08009        | NQVFEATCLDAFPNLK                                     | 1.160827669        | 2                | 4.2543664 |
| P08009        | SQWLNEK                                              | 1.04485204         | 2                | 2.6848438 |
| P08009        | YTMGDAPDFDR                                          | 0.945928726        | 2                | 2.3719475 |
| <b>P08010</b> | <b>GSTM2 Glutathione S_ transferase Mu_2</b>         | <b>1.285377789</b> | <b>9.9E-20</b>   | <b>14</b> |
| P08010        | FLSKPIFAK                                            | 1.685086042        | 1                | 2.1935258 |
| P08010        | IRVDVLENQAMDTR                                       | 1.452487923        | 3                | 4.5480218 |
| P08010        | ITYVDFLVYDVLQHR                                      | 3.332139462        | 2                | 5.2244534 |
| P08010        | KKPEYLEGLPEK                                         | 1.142177576        | 3                | 4.3408976 |
| P08010        | KPEYLEGLPEK                                          | 1.361961174        | 2                | 3.1971636 |
| P08010        | KYSMGDAPDYDR                                         | 1.281395739        | 2                | 3.4375722 |
| P08010        | LFLEYDTSYEDK                                         | 1.252581296        | 2                | 5.4905553 |
| P08010        | LFLEYDTSYEDKK                                        | 1.214266622        | 2                | 4.784174  |
| P08010        | LQLAMVCYSPDFER                                       | 1.250393072        | 2                | 4.1558657 |
| P08010        | LQLAMVCYSPDFER+Oxidation(5)                          | 1.931057644        | 2                | 3.6439672 |
| P08010        | VDVLENQAMDTR                                         | 1.133204161        | 2                | 4.6329618 |
| P08010        | VDVLENQAMDTR+Oxidation(9)                            | 1.258991049        | 2                | 3.7413843 |
| P08010        | YSMGDAPDYDR                                          | 1.035084566        | 2                | 3.5456295 |
| P08010        | YSMGDAPDYDR+Oxidation(3)                             | 1.072485552        | 2                | 2.65854   |
| <b>P08011</b> | <b>MGST1 Microsomal glutathione S_ transferase 1</b> | <b>1.026094876</b> | <b>1.113E-09</b> | <b>6</b>  |
| P08011        | IYHTIAYLTPLQPNR                                      | 1.16451218         | 2                | 5.1138887 |
| P08011        | MMFLSSATAFQR                                         | 1.123589504        | 2                | 4.0298967 |
| P08011        | MMFLSSATAFQR+Oxidation(1)                            | 1.275653768        | 2                | 3.0990944 |

|               |                                                                                                                       |                    |                  |           |
|---------------|-----------------------------------------------------------------------------------------------------------------------|--------------------|------------------|-----------|
| P08011        | MMFLSSATAFQR+Oxidation(2)                                                                                             | 1.280657883        | 2                | 3.4580626 |
| P08011        | VFANPEDCAGFGK                                                                                                         | 1.107743074        | 2                | 4.7892561 |
| P08011        | VFANPEDCAGFGKGENAK                                                                                                    | 1.210671629        | 2                | 4.7819147 |
| <b>P08032</b> | <b>SPTA1 Spectrin alpha chain_ erythrocyte</b>                                                                        | <b>0.942707909</b> | <b>0.4676204</b> | <b>2</b>  |
| P08032        | ADVVESWIGEK                                                                                                           | 1.09047113         | 2                | 3.0611966 |
| P08032        | IEDLGDSMEEALILDIK                                                                                                     | 0.579663675        | 2                | 2.4954875 |
| <b>P08081</b> | <b>CLCA Clathrin light chain A</b>                                                                                    | <b>1.031594381</b> | <b>0.7460679</b> | <b>2</b>  |
| P08081        | LEALDANSR                                                                                                             | 1.012112852        | 2                | 2.4786804 |
| P08081        | WREEQTER                                                                                                              | 1.149516292        | 2                | 2.3660395 |
| <b>P08461</b> | <b>ODP2 Dihydroliopoyllysine_residue acetyltransferase component of pyruvate dehydrogenase complex_ mitochondrial</b> | <b>1.292227231</b> | <b>5.551E-16</b> | <b>4</b>  |
| P08461        | DVPLGTPLCIIVEK                                                                                                        | 0.974204027        | 2                | 3.875912  |
| P08461        | DVPVGSIICTVEKPDIEAFK                                                                                                  | 0.92433806         | 2                | 3.4595709 |
| P08461        | GLETIASDVVSLASK                                                                                                       | 1.150236032        | 2                | 4.1120214 |
| P08461        | VAPTPAGVFIDIPIISNIR                                                                                                   | 1.452716947        | 2                | 4.5997553 |
| <b>P08503</b> | <b>ACADM Medium_chain specific acyl_CoA dehydrogenase_ mitochondrial</b>                                              | <b>0.993670775</b> | <b>0.9623649</b> | <b>8</b>  |
| P08503        | AFTGFIVEADTPGIHIGK                                                                                                    | 1.153986163        | 2                | 4.2448254 |
| P08503        | EEIIPVAPDYDK                                                                                                          | 0.985219906        | 2                | 3.552479  |
| P08503        | IYQIYEGTAQIQR                                                                                                         | 1.086723561        | 2                | 4.5132103 |
| P08503        | KGDEVVINGQK                                                                                                           | 1.041377364        | 2                | 4.226099  |
| P08503        | MTEQPMMCAYCVTEPSAGSDVAGIK                                                                                             | 0.758942228        | 2                | 4.6036458 |
| P08503        | QEPGLGFSFELTEQQK                                                                                                      | 0.909946878        | 2                | 3.7342138 |
| P08503        | SGEYFPFLIK                                                                                                            | 0.89653673         | 2                | 2.6539028 |
| P08503        | TRPTVAAGAVGLAQR                                                                                                       | 1.128998891        | 2                | 4.2137218 |
| <b>P08541</b> | <b>UD2B2 UDP_glucuronosyltransferase 2B2</b>                                                                          | <b>1.04008528</b>  | <b>0.9489424</b> | <b>10</b> |
| P08541        | DELQNHFIK                                                                                                             | 0.945577689        | 2                | 2.7899916 |
| P08541        | FEIFSTSISKDELQNHFIK                                                                                                   | 1.146099247        | 3                | 3.5023987 |
| P08541        | FILPPSYVPVILSGLAGK                                                                                                    | 1.113366867        | 3                | 5.590003  |
| P08541        | GHEVTVLKPSAYFFLDPK                                                                                                    | 1.326195708        | 3                | 4.6940913 |
| P08541        | HKEWDTFYSEILGRPTTVDETMSK                                                                                              | 0.647782577        | 3                | 4.3269525 |
| P08541        | LLDVWTYELPR                                                                                                           | 1.315195677        | 2                | 3.6457074 |
| P08541        | NVMLLSTIHHDQPMKPLDR                                                                                                   | 1.133036087        | 2                | 4.1573887 |
| P08541        | NVMLLSTIHHDQPMKPLDR+Oxidation(3)                                                                                      | 1.544085038        | 3                | 3.3913827 |
| P08541        | VEIWLIR                                                                                                               | 1.011300516        | 2                | 2.8927727 |
| P08541        | VLVWPMDFSHWMNIK                                                                                                       | 1.136015938        | 2                | 3.5056078 |
| <b>P08542</b> | <b>UDB17 UDP_glucuronosyltransferase 2B17</b>                                                                         | <b>1.434195712</b> | <b>2.331E-14</b> | <b>6</b>  |
| P08542        | EIINNPYK                                                                                                              | 1.066148217        | 1                | 2.2133834 |
| P08542        | FETFPYSVSKDELENYFIK                                                                                                   | 1.425056432        | 2                | 4.1726942 |
| P08542        | KWDPFYSEILGRPTTLAETMGK                                                                                                | 1.191231502        | 2                | 4.497436  |
| P08542        | LVDVWTYELQR                                                                                                           | 1.458269107        | 2                | 3.2569957 |
| P08542        | NAVWLSTIHHDQPMKPLDK                                                                                                   | 1.189437478        | 3                | 3.716146  |
| P08542        | WDPFYSEILGRPTTLAETMGK                                                                                                 | 1.532750932        | 2                | 4.0083604 |
| <b>P08683</b> | <b>CP2CB Cytochrome P450 2C11</b>                                                                                     | <b>1.24123214</b>  | <b>9.9E-20</b>   | <b>16</b> |
| P08683        | DIDTTPAISGFGHLPPFYEACFIPVQR                                                                                           | 1.131515056        | 3                | 5.4746447 |
| P08683        | EALVDLGEFSGR                                                                                                          | 1.102924206        | 2                | 3.620312  |
| P08683        | EHQESLDKDNPR                                                                                                          | 1.660736485        | 2                | 4.2195969 |
| P08683        | FDPGHFLDER                                                                                                            | 1.291803481        | 2                | 2.6649537 |
| P08683        | FDYKDPTFLNLMHR                                                                                                        | 1.502958905        | 3                | 4.9086051 |
| P08683        | FNENFR                                                                                                                | 1.219376624        | 1                | 2.0184188 |
| P08683        | GTNVIVSLSSILHDDKEFPNPEK                                                                                               | 1.386808548        | 3                | 5.4330807 |
| P08683        | ICAGEALAR                                                                                                             | 1.19097914         | 2                | 2.7825153 |
| P08683        | LFSSPWLQVCNTFPAIIDYFPGSHNQVLK                                                                                         | 1.190625573        | 3                | 4.2371197 |
| P08683        | LPPGPTPLPIIGNTLQIYMK                                                                                                  | 1.259788187        | 2                | 3.8185425 |
| P08683        | NYVLEK                                                                                                                | 1.334058483        | 1                | 1.9389617 |
| P08683        | SQMPYTDVAVVHEIQR                                                                                                      | 1.083063575        | 2                | 4.6585679 |

|               |                                                                           |                    |                  |           |
|---------------|---------------------------------------------------------------------------|--------------------|------------------|-----------|
| P08683        | VKEHQESLDKDNPR                                                            | 1.453375893        | 3                | 4.9381208 |
| P08683        | VQEEIER                                                                   | 1.042671514        | 2                | 2.6425822 |
| P08683        | YGLLLLLK                                                                  | 1.915349276        | 2                | 3.4547493 |
| P08683        | YIDLVPNTLPHLVTR                                                           | 1.300538719        | 2                | 3.558331  |
| <b>P09006</b> | <b>SPA3N Serine protease inhibitor A3N</b>                                | <b>1.032009804</b> | <b>0.6554818</b> | <b>2</b>  |
| <b>P09034</b> | <b>ASSY Argininosuccinate synthase</b>                                    | <b>1.110185503</b> | <b>2.454E-13</b> | <b>14</b> |
| P09034        | APNTPDVLEIEFK                                                             | 0.980456487        | 2                | 2.772826  |
| P09034        | DGTTHTSLDLFMYLNEVAGK                                                      | 3.130309672        | 2                | 5.0558023 |
| P09034        | EFVEEFIWPAVQSSALYEDR                                                      | 2.479505327        | 2                | 5.6745815 |
| P09034        | EQGYDVIAYLANIGQK                                                          | 1.18346528         | 3                | 3.762732  |
| P09034        | FAELVYTGFWHSPECFVR                                                        | 1.21308811         | 2                | 4.3700342 |
| P09034        | FELTCYSLAPQIK                                                             | 1.462048733        | 2                | 4.2361307 |
| P09034        | GRNDLMEYAK                                                                | 0.89044449         | 2                | 2.9358039 |
| P09034        | IDIVENR                                                                   | 0.933525856        | 2                | 2.5510795 |
| P09034        | KVFIEDVSK                                                                 | 1.063627112        | 2                | 2.7643232 |
| P09034        | NDLMEYAK                                                                  | 0.826262124        | 2                | 2.6634934 |
| P09034        | SPWSMDENLMHISYEAGILENPK                                                   | 1.231994235        | 3                | 4.8549542 |
| P09034        | TQDPAKAPNTPDVLEIEFK                                                       | 1.104620934        | 2                | 4.8014483 |
| P09034        | TQDPAKAPNTPDVLEIEFKK                                                      | 1.171930723        | 3                | 4.2083726 |
| P09034        | VFIEDVSK                                                                  | 1.059263556        | 2                | 2.5821319 |
| <b>P09041</b> | <b>PGK2 Phosphoglycerate kinase 2</b>                                     | <b>1.057613708</b> | <b>0.0022583</b> | <b>5</b>  |
| P09041        | FHVEEKGK                                                                  | 1.051511057        | 2                | 2.686317  |
| P09041        | FHVEEKGK GK                                                               | 0.871440436        | 2                | 2.819999  |
| P09041        | LGDVYVNDAFGTAHR                                                           | 1.168066973        | 2                | 4.0036755 |
| P09041        | VDFNVPMK                                                                  | 1.085176555        | 1                | 2.2126658 |
| P09041        | VSHVSTGGGASLELLEGGK                                                       | 1.126287196        | 2                | 5.29532   |
| <b>P09117</b> | <b>ALDOC Fructose_bisphosphate aldolase C</b>                             | <b>1.134812202</b> | <b>0.7881111</b> | <b>3</b>  |
| P09117        | VLAAVYK                                                                   | 1.124188396        | 2                | 2.6752446 |
| P09117        | YASICQQNGIVPIVEPEILPDGDHDLK                                               | 0.929082399        | 3                | 5.820941  |
| P09117        | YASICQQNGIVPIVEPEILPDGDHDLKR                                              | 1.09813877         | 3                | 5.0208025 |
| <b>P09139</b> | <b>SPYA Serine__pyruvate aminotransferase_mitochondrial</b>               | <b>1.381280101</b> | <b>0.1094228</b> | <b>2</b>  |
| P09139        | LLLGPGPSNLAPR                                                             | 1.391239538        | 2                | 2.5533643 |
| P09139        | VLNAPPGISLISFNDK                                                          | 1.220869442        | 2                | 2.6374142 |
| <b>P09367</b> | <b>SDHL L_serine dehydratase/L_threonine deaminase</b>                    | <b>1.142026505</b> | <b>0.0324456</b> | <b>2</b>  |
| <b>P09456</b> | <b>KAPO cAMP_dependent protein kinase type I_alpha regulatory subunit</b> | <b>1.385830036</b> | <b>7.652E-11</b> | <b>2</b>  |
| P09456        | LTVADALEPVQFEDGQK                                                         | 1.435936648        | 2                | 4.1775184 |
| P09456        | SENEEFVEVGR                                                               | 1.183964756        | 2                | 2.3184485 |
| <b>P09495</b> | <b>TPM4 Tropomyosin alpha_4 chain</b>                                     | <b>0.950633946</b> | <b>5.019E-10</b> | <b>11</b> |
| P09495        | EDKYEEEIK                                                                 | 0.809418273        | 1                | 2.2105651 |
| P09495        | EENVGLHQTLDQTLNELNCI                                                      | 2.443186831        | 2                | 4.8363361 |
| P09495        | IQALQQQADDAEDR                                                            | 1.200341391        | 2                | 4.6600928 |
| P09495        | IQLVEEELDR                                                                | 0.903941374        | 2                | 3.4302516 |
| P09495        | IQLVEEELDRAQER                                                            | 1.095023976        | 2                | 3.1190317 |
| P09495        | KLVILEGELER                                                               | 0.8162977          | 2                | 2.9581959 |
| P09495        | LEEAEKAADESER                                                             | 0.990932199        | 2                | 4.0615277 |
| P09495        | LVILEGELER                                                                | 0.910873809        | 2                | 3.3369393 |
| P09495        | MEIQEMQLK                                                                 | 0.523812834        | 2                | 2.5185893 |
| P09495        | RIQLVEEELDR                                                               | 1.031456752        | 2                | 2.7127328 |
| P09495        | YSEKEDKYEEEIK                                                             | 1.059781367        | 2                | 4.5440221 |
| <b>P09527</b> | <b>RAB7A Ras_related protein Rab_7a</b>                                   | <b>1.087275942</b> | <b>0.7514482</b> | <b>7</b>  |
| P09527        | ATIGADFLTK                                                                | 1.037001625        | 2                | 2.3543332 |
| P09527        | DPENFPFVVLGNK                                                             | 0.871687774        | 2                | 3.264184  |
| P09527        | GADCCVLVFDVTAPNTFK                                                        | 1.240193613        | 2                | 4.194108  |
| P09527        | TLDSWRDEFLIQASPR                                                          | 1.048357233        | 3                | 3.8341453 |
| P09527        | TSLMNQYVVK                                                                | 0.992063379        | 2                | 2.6384318 |



|               |                                                          |                    |                  |           |
|---------------|----------------------------------------------------------|--------------------|------------------|-----------|
| P09527        | TSLMNQYVNKK                                              | 0.934447673        | 2                | 2.3263371 |
| P09527        | VILGDSGVGK                                               | 1.200336667        | 2                | 2.3621356 |
| <b>P09605</b> | <b>KCRS Creatine kinase S_type_mitochondrial</b>         | <b>1.001911666</b> | <b>0.9904764</b> | <b>2</b>  |
| P09605        | GTGGVDTAAVADVYDISNIDR                                    | 1.062345726        | 2                | 3.5859888 |
| P09605        | LSEMTEQDQQR                                              | 0.969423104        | 2                | 3.3491261 |
| <b>P09606</b> | <b>GLNA Glutamine synthetase</b>                         | <b>1.334645413</b> | <b>9.9E-20</b>   | <b>8</b>  |
| P09606        | CIEEAIDK                                                 | 1.106673225        | 2                | 2.3226449 |
| P09606        | ITGTNAEVMPAQWEFQIGPCEGIR                                 | 1.475528915        | 3                | 4.9823227 |
| P09606        | LTGFHETSNINDFSAGVANR                                     | 1.496766396        | 2                | 5.8778911 |
| P09606        | MGDHLWVAR                                                | 1.108401679        | 2                | 3.0011599 |
| P09606        | QMYMNLPGQEK                                              | 1.164961769        | 2                | 2.5490098 |
| P09606        | RLTGFHETSNINDFSAGVANR                                    | 1.191450159        | 3                | 5.4398837 |
| P09606        | TCLLNETGDEPFQYK                                          | 1.360042643        | 2                | 5.4366097 |
| P09606        | TCLLNETGDEPFQYKN                                         | 2.625043755        | 2                | 5.1992021 |
| <b>P09626</b> | <b>ATP4A Potassium_transporting ATPase alpha chain 1</b> | <b>1.256882608</b> | <b>0.2611093</b> | <b>2</b>  |
| P09626        | VDNSSLTGESEPQTR                                          | 1.015016667        | 2                | 4.3760448 |
| P09626        | VIMVTGDHPITAK                                            | 1.340223523        | 2                | 2.9279268 |
| <b>P09739</b> | <b>TNNT3 Troponin T_fast skeletal muscle</b>             | <b>0.986131913</b> | <b>0.7618502</b> | <b>3</b>  |
| P09739        | ELWDTLYQLETDKFEFGK                                       | 1.590012326        | 2                | 3.9991198 |
| P09739        | KEEEELIALK                                               | 1.002349247        | 2                | 2.329298  |
| P09739        | KKEEEELIALK                                              | 0.906288701        | 3                | 3.6742864 |
| <b>P09811</b> | <b>PYGL Glycogen phosphorylase_liver form</b>            | <b>1.206130563</b> | <b>4.918E-05</b> | <b>23</b> |
| P09811        | DFSELEPDKFQNK                                            | 0.93413418         | 2                | 3.328882  |
| P09811        | DVGTVFDAFPQVAIQLNDTHPALAIPELMR                           | 1.473043747        | 3                | 5.5898962 |
| P09811        | DLSQLTK                                                  | 1.003727705        | 1                | 2.0436127 |
| P09811        | EGWQVEEADDWLR                                            | 0.935803691        | 2                | 3.5695777 |
| P09811        | GIVGVENVAELK                                             | 0.887204189        | 2                | 3.2288146 |
| P09811        | GIVGVENVAELKK                                            | 1.373596583        | 2                | 3.4012544 |
| P09811        | HLQIYEINQK                                               | 0.978887565        | 2                | 3.8706231 |
| P09811        | IFVDIEK                                                  | 1.142914609        | 1                | 1.9568136 |
| P09811        | INMAHLCIVGCHAVNGVAK                                      | 1.310227669        | 3                | 4.1799254 |
| P09811        | LHSFVGDDIFLR                                             | 2.044534546        | 3                | 3.3216903 |
| P09811        | LVIDQIDNGFFSPNPDLFK                                      | 1.284416421        | 2                | 4.9028616 |
| P09811        | LVTSAEVVNNNDPMVGSK                                       | 1.050793529        | 2                | 4.2817488 |
| P09811        | MSLIEEGGKR                                               | 1.173412528        | 2                | 2.7936618 |
| P09811        | TFAYTNHTVLPALER                                          | 1.165925191        | 2                | 4.4488006 |
| P09811        | VDDVAALDK                                                | 1.012683254        | 1                | 1.9589874 |
| P09811        | VDDVAALDKK                                               | 1.088982586        | 3                | 3.3030324 |
| P09811        | VFADYEAYVK                                               | 1.107633709        | 2                | 2.7503631 |
| P09811        | VIPATDLSEQISTAGTEASGTGNMK                                | 1.088440113        | 2                | 6.0785007 |
| P09811        | VLYPNDNFFEGK                                             | 1.029688566        | 2                | 2.907433  |
| P09811        | VSQLYMNQK                                                | 0.436038311        | 2                | 2.6019776 |
| P09811        | WLLLCNPLGLADLIAEK                                        | 1.3518264          | 2                | 4.710887  |
| P09811        | WVDTQVVLALPYDTPVPGYMNNTVNTMR                             | 1.577739863        | 2                | 2.925837  |
| P09811        | YEGIFNQK                                                 | 1.043824731        | 2                | 2.3264458 |
| <b>P09812</b> | <b>PYGM Glycogen phosphorylase_muscle form</b>           | <b>1.074158609</b> | <b>0.9673796</b> | <b>2</b>  |
| P09812        | NLAENISR                                                 | 1.070758969        | 1                | 2.7539473 |
| P09812        | VIFLENYR                                                 | 1.188670194        | 2                | 2.4572141 |
| <b>P09838</b> | <b>TDT DNA nucleotidylexotransferase</b>                 | <b>1.215579015</b> | <b>0.1014342</b> | <b>2</b>  |
| P09838        | KMMLDNHALYDRTK+Oxidation(2)                              | 1.215579015        | 2                | 2.3481448 |
| P09838        | KMMLDNHALYDRTK+Oxidation(3)                              | 1.215579015        | 2                | 2.4002347 |
| <b>P09875</b> | <b>UD2B1 UDP_glucuronosyltransferase 2B1</b>             | <b>1.269880142</b> | <b>0.9174917</b> | <b>8</b>  |
| P09875        | ANVVASALAIQIQK                                           | 1.04922458         | 3                | 4.3347673 |
| P09875        | FDGKKPDTLGSNTR                                           | 1.435292013        | 2                | 2.707607  |
| P09875        | FSGGLPLPPSYVPVLSLSDR                                     | 1.046273709        | 2                | 3.8971903 |
| P09875        | IILNELAQR                                                | 1.460523145        | 2                | 2.4089005 |
| P09875        | SDLEYSFAK                                                | 1.097248135        | 2                | 2.6483693 |

|               |                                                                           |                    |                  |           |
|---------------|---------------------------------------------------------------------------|--------------------|------------------|-----------|
| P09875        | SWSQFYSDVLRPTTLTEMMGK                                                     | 1.07882805         | 2                | 3.8715951 |
| P09875        | VDFSILSTTGLLTALK                                                          | 1.261796288        | 2                | 4.3708663 |
| P09875        | VFNEYSDVVENLCK                                                            | 0.776252612        | 2                | 2.8851166 |
| <b>P09895</b> | <b>RL5 60S ribosomal protein L5</b>                                       | <b>1.086595882</b> | <b>0.1121142</b> | <b>6</b>  |
| P09895        | GAVDGGLSIPHSTK                                                            | 1.150959153        | 2                | 4.9772921 |
| P09895        | HIMGQNVADYMR                                                              | 0.869013459        | 2                | 3.2273796 |
| P09895        | IEGDMIVCAAYAHLPK                                                          | 1.109791543        | 3                | 3.387053  |
| P09895        | NNVTPDMMEEMYK                                                             | 0.942411362        | 2                | 3.0359783 |
| P09895        | RFPGYDSESK                                                                | 1.10063119         | 2                | 2.607471  |
| P09895        | YLMEEDEDAYKK                                                              | 1.094705938        | 2                | 3.4731214 |
| <b>POC057</b> | <b>H2AZ Histone H2A.Z</b>                                                 | <b>1.09265894</b>  | <b>7.807E-06</b> | <b>2</b>  |
| POC057        | ATIAGGGVIPHIHK                                                            | 1.230218546        | 2                | 3.704195  |
| POC057        | GDEELDSLK                                                                 | 1.005701009        | 1                | 2.1969409 |
| <b>POC2X9</b> | <b>AL4A1 Delta_1_pyrroline_5_carboxylate dehydrogenase_ mitochondrial</b> | <b>0.98988927</b>  | <b>6.067E-08</b> | <b>20</b> |
| POC2X9        | AIEAAVLAR                                                                 | 0.991429755        | 2                | 2.9330668 |
| POC2X9        | ALNDLKDQTEAIPCVVGDEEVTSDVR                                                | 0.966260847        | 2                | 5.2570257 |
| POC2X9        | DPQEPIMKEIFGPVLTVVYYPDEK                                                  | 1.677727712        | 2                | 2.9743848 |
| POC2X9        | DQTEAIPCVVGDEEVTSDVR                                                      | 0.683743499        | 2                | 5.2212615 |
| POC2X9        | EAGLPPNVIQFVPADGPTFGDVTSSHLGGINFTGSVPTFK                                  | 1.238237479        | 3                | 3.7238679 |
| POC2X9        | EEIFGPVLTVVYYPDEK                                                         | 1.111977919        | 2                | 4.3935661 |
| POC2X9        | ETLQLVDSTTSYGLTGAVFAQDK                                                   | 0.79453044         | 2                | 4.4451618 |
| POC2X9        | KEWDLKPVADR                                                               | 0.982453745        | 2                | 3.5935318 |
| POC2X9        | LLEEHSR                                                                   | 0.674454328        | 2                | 2.3716581 |
| POC2X9        | LYVPQSLWPQIK                                                              | 1.926992402        | 2                | 3.569741  |
| POC2X9        | NAAGNFYINDK                                                               | 1.123118606        | 2                | 2.4688046 |
| POC2X9        | NFHFVHSSADVDSVSGTLR                                                       | 1.116250962        | 2                | 5.6921268 |
| POC2X9        | SAFEYGGQK                                                                 | 1.041799901        | 2                | 2.9037557 |
| POC2X9        | SSPSLSILAGGCNESVGVFVEPCIIESK                                              | 0.941162076        | 3                | 5.9793    |
| POC2X9        | STGSVVGQQPFGGAR                                                           | 1.00536423         | 2                | 4.2297821 |
| POC2X9        | TIVQEATR                                                                  | 0.920062938        | 2                | 2.5432234 |
| POC2X9        | VANEPILAFTQGSPER                                                          | 0.992477264        | 2                | 5.3360181 |
| POC2X9        | VGNPAEDFGTFFSAVIDAK                                                       | 1.150095868        | 2                | 4.8283129 |
| POC2X9        | YQLSPFNHGK                                                                | 1.242926499        | 2                | 2.9401052 |
| POC2X9        | YRETLQLVDSTTSYGLTGAVFAQDK                                                 | 0.9119118          | 3                | 3.3782301 |
| <b>POC5H9</b> | <b>MANF Mesencephalic astrocyte_derived neurotrophic factor</b>           | <b>1.205735122</b> | <b>9.9E-20</b>   | <b>4</b>  |
| POC5H9        | DRDVTFSPATIEELIK                                                          | 1.184537802        | 2                | 4.9722347 |
| POC5H9        | DVTFSPATIEELIK                                                            | 1.067641202        | 2                | 2.9894223 |
| POC5H9        | IINEVSKPLAHHIPVEK                                                         | 1.327015901        | 3                | 4.2592907 |
| POC5H9        | ILDDWGEMCK                                                                | 1.119952286        | 2                | 3.1606197 |
| <b>POC6F1</b> | <b>DYH2 Dynein heavy chain 2_ axonemal</b>                                | <b>1.184183416</b> | <b>0.0057001</b> | <b>2</b>  |
| POC6F1        | EKVEVMSLELEDAK+Oxidation(6)                                               | 1.234301759        | 2                | 2.6874592 |
| POC6F1        | TMPLISDLR+Oxidation(2)                                                    | 1.122477464        | 2                | 2.3062372 |
| <b>P10111</b> | <b>PPIA Peptidyl_prolyl cis_trans isomerase A</b>                         | <b>1.177019588</b> | <b>9.9E-20</b>   | <b>10</b> |
| P10111        | EGMSIVEAMER                                                               | 0.796291329        | 2                | 3.1951902 |
| P10111        | FEDENFILK                                                                 | 1.100924725        | 2                | 3.2170458 |
| P10111        | HTGPGILSMANAGPNTNGSQFFICTAK                                               | 1.115364698        | 3                | 6.2750049 |
| P10111        | IIPGFMCQGGDFTR                                                            | 1.366200839        | 2                | 2.8863778 |
| P10111        | KITISDCGQL                                                                | 1.298744072        | 2                | 3.4837325 |
| P10111        | SIYGEKFEDENFILK                                                           | 1.233187389        | 2                | 4.6745825 |
| P10111        | TEWLDGK                                                                   | 0.98962615         | 2                | 2.3830712 |
| P10111        | VCFELFADK                                                                 | 1.352284611        | 2                | 3.3648369 |
| P10111        | VCFELFADKVPK                                                              | 1.357810721        | 3                | 3.7170351 |
| P10111        | VKEGMSIVEAMER                                                             | 1.093220788        | 3                | 3.4438717 |
| <b>P10536</b> | <b>RAB1B Ras_related protein Rab_1B</b>                                   | <b>1.189129607</b> | <b>0.0399452</b> | <b>3</b>  |
| P10536        | MGPGAASGGERPNLK                                                           | 1.170245337        | 2                | 3.8944223 |

|               |                                                      |                   |                  |           |
|---------------|------------------------------------------------------|-------------------|------------------|-----------|
| P10536        | NATNVEQAFMTMAAEIK+Oxidation(10)                      | 1.2173956         | 2                | 4.1604424 |
| P10536        | NATNVEQAFMTMAAEIK+Oxidation(12)                      | 1.217443473       | 2                | 3.8013129 |
| <b>P10633</b> | <b>CP2D1 Cytochrome P450 2D1</b>                     | <b>1.16327605</b> | <b>8.105E-09</b> | <b>4</b>  |
| P10633        | GTTLIINLSSVLKDETVWEKPHR                              | 1.082531936       | 3                | 3.9599249 |
| P10633        | SQGVILASYGPEWR                                       | 0.737002717       | 2                | 3.99493   |
| P10633        | TFMALLDNLLAENR                                       | 1.731136019       | 2                | 3.6914008 |
| P10633        | YGDVFSLQK                                            | 1.173564503       | 2                | 2.5225577 |
| <b>P10634</b> | <b>CP2DQ Cytochrome P450 2D26</b>                    | <b>1.3633255</b>  | <b>0.0182104</b> | <b>20</b> |
| P10634        | ACLGEPLAR                                            | 0.813782865       | 2                | 2.7515609 |
| P10634        | AVSNVIASLVYAR                                        | 1.194817399       | 3                | 4.3895044 |
| P10634        | DMTDAFLAEMQK                                         | 0.985577706       | 2                | 2.5441167 |
| P10634        | EAEHPFNPSILLSK                                       | 1.048393262       | 2                | 2.4857807 |
| P10634        | ELLVITYGEDTADRLLPIYNHLGYGNK                          | 1.155344538       | 3                | 5.4112105 |
| P10634        | FADIVPTNIPHMTRS                                      | 1.313076956       | 2                | 2.5945125 |
| P10634        | FADIVPTNIPHMTRSRIK                                   | 0.894113188       | 2                | 2.4105971 |
| P10634        | FEYEDPFFNR                                           | 0.984615343       | 2                | 2.3805306 |
| P10634        | FHPEHFLDAQGNFVK                                      | 1.084239467       | 2                | 4.6875095 |
| P10634        | FQGFLLPK                                             | 0.97724214        | 2                | 2.4802465 |
| P10634        | GNPESSFNDENLR                                        | 1.170949651       | 2                | 4.3532414 |
| P10634        | GTTLIPNLSSVLK                                        | 0.978604699       | 2                | 2.5222535 |
| P10634        | GTTLIPNLSSVLKDETVWEKPLR                              | 1.287148809       | 2                | 4.6604939 |
| P10634        | GVVLAPYGPEWR                                         | 1.022244886       | 2                | 3.2762904 |
| P10634        | LNSFIALVDK                                           | 1.629838884       | 2                | 2.8210199 |
| P10634        | RFEYEDPFFNR                                          | 1.230536204       | 2                | 3.535579  |
| P10634        | RVHEEIDEVIGQVR                                       | 1.259589896       | 2                | 4.1508851 |
| P10634        | SLEQWVTEEAGHLCDTFAK                                  | 1.237350364       | 2                | 5.2786675 |
| P10634        | SWDPAQPPR                                            | 0.968436654       | 2                | 2.652756  |
| P10634        | VHEEIDEVIGQVR                                        | 1.041400701       | 2                | 4.9405942 |
| <b>P10719</b> | <b>ATPB ATP synthase subunit beta_ mitochondrial</b> | <b>1.06070827</b> | <b>9.9E-20</b>   | <b>28</b> |
| P10719        | AHGGYSVFAGVGER                                       | 1.099667598       | 2                | 3.9888406 |
| P10719        | AIAELGIYPAVDPLDSTSR                                  | 0.980797564       | 2                | 4.9288998 |
| P10719        | EGNDLYHEMIESGVINLK                                   | 0.900055681       | 2                | 5.3681684 |
| P10719        | FLSQPFQVAEVFTGHMKG                                   | 1.344649025       | 2                | 4.7582393 |
| P10719        | FTQAGSEVSALLGR                                       | 1.00064327        | 2                | 4.7980261 |
| P10719        | GFQQILAGDYDHLPEQAFYMGPIEEAVAK                        | 2.424437762       | 3                | 4.9842305 |
| P10719        | GSITSVQAIYVPADDLTDPAPTTFAHLDTTVLSR                   | 2.056112936       | 3                | 3.7198622 |
| P10719        | IGLFGGAGVGK                                          | 1.333995205       | 2                | 3.3246472 |
| P10719        | ILQDYK                                               | 1.186523624       | 1                | 2.0854268 |
| P10719        | IMDPNIVGSEHYDVAR                                     | 1.082272768       | 2                | 4.6414018 |
| P10719        | IMDPNIVGSEHYDVAR+Oxidation(2)                        | 1.320908073       | 2                | 3.9758413 |
| P10719        | IMNVIGEPIDER                                         | 1.413539444       | 2                | 4.037744  |
| P10719        | IMNVIGEPIDER+Oxidation(2)                            | 1.639055089       | 2                | 3.3359401 |
| P10719        | IPSAVGYQPTLATDMGTMQER                                | 1.100907719       | 2                | 4.8890557 |
| P10719        | LVLEVAQHLGESTVR                                      | 1.245862665       | 2                | 4.8448744 |
| P10719        | QFAPIHAEAPEFIEMSVEQEILVTGIK                          | 1.130693147       | 3                | 4.8757334 |
| P10719        | SLQDIIAILGMDELSEDKLTVSR                              | 1.311264223       | 3                | 5.34199   |
| P10719        | SLQDIIAILGMDELSEDKLTVSR+Oxidation(11)                | 1.036177492       | 3                | 3.7814403 |
| P10719        | TIAMDGTEGLVR                                         | 0.9538721         | 2                | 3.6424177 |
| P10719        | TIAMDGTEGLVR+Oxidation(4)                            | 1.260216931       | 2                | 2.7113628 |
| P10719        | TREGNDLYHEMIESGVINLK                                 | 1.147415464       | 2                | 6.0404243 |
| P10719        | TVLIMELINNVAK                                        | 1.028975851       | 2                | 5.0635409 |
| P10719        | TVLIMELINNVAK+Oxidation(5)                           | 1.101305252       | 2                | 2.7876987 |
| P10719        | VALTGLTVAEYFR                                        | 1.345192953       | 2                | 4.1060448 |
| P10719        | VALVYQMNNEPPGAR                                      | 0.96726506        | 2                | 3.5500901 |
| P10719        | VLDGAPIK                                             | 0.976935624       | 2                | 3.032023  |
| P10719        | VLDGAPIKIPVGPETLGR                                   | 0.917051904       | 3                | 4.4545951 |
| P10719        | VVDLLAPYAK                                           | 1.14716928        | 2                | 3.2347686 |

|               |                                                             |                    |                  |           |
|---------------|-------------------------------------------------------------|--------------------|------------------|-----------|
| <b>P10760</b> | <b>SAHH Adenosylhomocysteinase</b>                          | <b>1.086222986</b> | <b>9.9E-20</b>   | <b>16</b> |
| P10760        | AGIPVFAWK                                                   | 0.98283854         | 2                | 2.7234523 |
| P10760        | ALDIAENEMPLMR                                               | 1.003142847        | 2                | 3.1898305 |
| P10760        | ATDVMIAGK                                                   | 0.90883639         | 2                | 2.7770185 |
| P10760        | DGPLNMILDDGGDLTNIHTK                                        | 1.280989986        | 2                | 5.5700936 |
| P10760        | DGPLNMILDDGGDLTNIHTK+Oxidation(6)                           | 0.950843981        | 3                | 3.3688774 |
| P10760        | FDNLYGCR                                                    | 1.101260985        | 2                | 2.7646062 |
| P10760        | GETDEEYLWCIEQTLHFK                                          | 1.463269682        | 2                | 4.3303609 |
| P10760        | GISEETTTGVHNLK                                              | 1.076475838        | 2                | 4.2605944 |
| P10760        | IILLAAGR                                                    | 1.363077448        | 2                | 2.7173953 |
| P10760        | KLDEAVAEHLGK                                                | 1.126215877        | 2                | 4.7821016 |
| P10760        | LDEAVAEHLGK                                                 | 1.061112796        | 2                | 3.3555212 |
| P10760        | SKFDNLYGCR                                                  | 1.145716381        | 1                | 3.1970768 |
| P10760        | VAVVAGYGDVVK                                                | 1.167017388        | 2                | 4.1589313 |
| P10760        | VNIKPQVDR                                                   | 1.145711107        | 2                | 2.8154674 |
| P10760        | WLNENAVEK                                                   | 1.073257517        | 2                | 2.7236197 |
| P10760        | WSSCNIFSTQDHAAAAIAK                                         | 1.293656261        | 2                | 5.0176382 |
| <b>P10818</b> | <b>CX6A1 Cytochrome c oxidase subunit 6A1_mitochondrial</b> | <b>1.149149411</b> | <b>0.0864578</b> | <b>2</b>  |
| P10818        | HEEHERPEFVAYPHLR                                            | 1.095426457        | 3                | 3.8255315 |
| P10818        | SRHEEHERPEFVAYPHLR                                          | 1.156452367        | 3                | 3.9529974 |
| <b>P10860</b> | <b>DHE3 Glutamate dehydrogenase 1_mitochondrial</b>         | <b>1.046427168</b> | <b>1.424E-11</b> | <b>26</b> |
| P10860        | ALASLMTYK                                                   | 0.983679692        | 2                | 3.4540849 |
| P10860        | CAVVDVFPGGAK                                                | 1.060006208        | 2                | 3.2882154 |
| P10860        | CVGVGESDGSIWNPDIKDPK                                        | 0.94634857         | 2                | 5.3052783 |
| P10860        | DDGSWEVIEGYR                                                | 0.776228077        | 2                | 3.950361  |
| P10860        | DIVHSGLAYTMR                                                | 0.796687765        | 2                | 3.3817139 |
| P10860        | DSNYHLLMSVQESLER                                            | 1.016963502        | 2                | 4.1732297 |
| P10860        | GASIVEDKLVEDLK                                              | 1.323320844        | 2                | 3.6835043 |
| P10860        | GFIGPGIDVPAPDMSTGER                                         | 0.981369512        | 2                | 5.1716547 |
| P10860        | GFIGPGIDVPAPDMSTGER+Oxidation(14)                           | 0.989082274        | 2                | 4.5487418 |
| P10860        | HGGTIPVPTAEFQDR                                             | 1.040559064        | 2                | 4.6750293 |
| P10860        | IIEGANGPTTPEADK                                             | 0.943905296        | 2                | 5.3673482 |
| P10860        | IIEGANGPTTPEADKIFLER                                        | 1.100992495        | 2                | 4.9759684 |
| P10860        | IIKPCNHVLSLSPFR                                             | 1.101767418        | 3                | 3.5176132 |
| P10860        | KGFIGPGIDVPAPDMSTGER                                        | 0.919159455        | 2                | 5.0356517 |
| P10860        | LQHGSILGFPK                                                 | 1.414371997        | 3                | 3.3909254 |
| P10860        | MVEGFFDR                                                    | 0.886221688        | 2                | 3.028183  |
| P10860        | MVEGFFDR+Oxidation(1)                                       | 1.119114306        | 2                | 2.4700532 |
| P10860        | NLNHVSYGR                                                   | 0.975299277        | 2                | 2.3698268 |
| P10860        | NYTDNELEK                                                   | 0.990216412        | 2                | 2.4968119 |
| P10860        | RDDGSWEVIEGYR                                               | 0.943671654        | 2                | 3.6161017 |
| P10860        | RFTMELAK                                                    | 1.103844966        | 2                | 2.4715335 |
| P10860        | TAAYVNAIEK                                                  | 1.008723203        | 2                | 3.414145  |
| P10860        | TFVVQGFQGNVGLHSMR                                           | 1.071945828        | 2                | 4.5275011 |
| P10860        | VYEGSILEADCDLIPAAASEK                                       | 1.173044145        | 3                | 5.8388247 |
| P10860        | YNLGLDLR                                                    | 0.992584923        | 2                | 3.2506347 |
| P10860        | YSTDVSDEVK                                                  | 1.032592487        | 2                | 3.3736172 |
| <b>P10867</b> | <b>GGLO L_gulonolactone oxidase</b>                         | <b>1.284302415</b> | <b>0.1567014</b> | <b>5</b>  |
| P10867        | GDDILLSPCFQR                                                | 0.968908545        | 2                | 3.1075816 |
| P10867        | LDPTGMFLNSYLEK                                              | 1.183320551        | 2                | 4.1346483 |
| P10867        | LDYWLAYETIMK                                                | 1.272871017        | 2                | 4.0680614 |
| P10867        | TYGCSPEVYYQPTSVEEVR                                         | 1.1111722          | 2                | 4.9879608 |
| P10867        | VVAHYVPEVR                                                  | 1.291345455        | 2                | 2.4866018 |
| <b>P10868</b> | <b>GAMT Guanidinoacetate N_methyltransferase</b>            | <b>1.292541372</b> | <b>7.287E-05</b> | <b>6</b>  |
| P10868        | EHWIIECNDGVFQR                                              | 1.032060424        | 3                | 3.3718264 |
| P10868        | ENICTEVMALVPPADCR                                           | 1.071333686        | 2                | 3.0754161 |

|               |                                                                      |                    |                  |           |
|---------------|----------------------------------------------------------------------|--------------------|------------------|-----------|
| P10868        | LQNWALK                                                              | 1.565201888        | 2                | 2.4514899 |
| P10868        | WETPYMHSLAAAAASR                                                     | 1.590520082        | 2                | 2.8876109 |
| P10868        | YTDITAMFEETQVPALLEAGFQR                                              | 1.364805782        | 3                | 6.8983965 |
| P10868        | YYAFPQMITPLVTK                                                       | 1.441889588        | 2                | 3.8513088 |
| <b>P10888</b> | <b>COX41 Cytochrome c oxidase subunit 4 isoform 1_ mitochondrial</b> | <b>1.152053451</b> | <b>0.2971721</b> | <b>4</b>  |
| P10888        | DYPLPDVAHVK                                                          | 0.877187958        | 2                | 2.7057128 |
| P10888        | IQFNESFAEMNK                                                         | 1.192773511        | 2                | 3.8960042 |
| P10888        | SEDYALPSYVDR                                                         | 0.971097197        | 2                | 3.9799993 |
| P10888        | VNPIQGFSK                                                            | 1.234500153        | 2                | 2.3182812 |
| <b>P10959</b> | <b>EST2 Liver carboxylesterase 1</b>                                 | <b>0.928077571</b> | <b>0.3605693</b> | <b>2</b>  |
| P10959        | AISESGVLTNTLDDK                                                      | 0.925983883        | 2                | 3.5278459 |
| P10959        | EGASEEETNLSKLVMK                                                     | 1.362188226        | 2                | 2.3260899 |
| <b>P11030</b> | <b>ACBP Acyl_CoA_binding protein</b>                                 | <b>0.920736223</b> | <b>0.3461337</b> | <b>4</b>  |
| P11030        | QATVGDVNTDRPGLLDLK                                                   | 1.060811127        | 2                | 3.3908985 |
| P11030        | TQPTDEEMLFYSHFK                                                      | 2.657878901        | 2                | 4.3425474 |
| P11030        | TYVEKVEELK                                                           | 0.987435704        | 2                | 2.8310244 |
| P11030        | WDSWVK                                                               | 0.875144874        | 1                | 1.9467911 |
| <b>P11232</b> | <b>THIO Thioredoxin</b>                                              | <b>0.869426461</b> | <b>0.0038334</b> | <b>2</b>  |
| P11232        | EAFQEALAAAGDK                                                        | 0.797039517        | 2                | 4.8003964 |
| P11232        | VGEFSGANK                                                            | 1.029101294        | 2                | 3.0737791 |
| <b>P11240</b> | <b>COX5A Cytochrome c oxidase subunit 5A_ mitochondrial</b>          | <b>0.966847249</b> | <b>1.491E-13</b> | <b>6</b>  |
| P11240        | EIYPYVIQELRPTLNELGISTPEELGLDK                                        | 0.185422633        | 3                | 6.8635578 |
| P11240        | EIYPYVIQELRPTLNELGISTPEELGLDKV                                       | 1.934972708        | 3                | 7.0467262 |
| P11240        | GMNTLVGYDLVPEPK                                                      | 0.964995806        | 2                | 4.4103971 |
| P11240        | IIDAALR                                                              | 1.03602289         | 2                | 2.3325808 |
| P11240        | LNDFASAVR                                                            | 0.987789221        | 2                | 3.3362896 |
| P11240        | RLNDFASAVR                                                           | 1.29505204         | 2                | 2.4206774 |
| <b>P11348</b> | <b>DHPR Dihydropteridine reductase</b>                               | <b>1.168961664</b> | <b>0.0297192</b> | <b>10</b> |
| P11348        | AALDGTGPMIGYGMK                                                      | 0.965075003        | 2                | 3.7963455 |
| P11348        | EGLLTLGAK                                                            | 0.994426234        | 2                | 2.767082  |
| P11348        | GAVHQLCQSLAGK                                                        | 1.212335557        | 2                | 3.8397713 |
| P11348        | MTDSFTEQADQVTAEVGK                                                   | 0.825444322        | 2                | 5.7694554 |
| P11348        | MTDSFTEQADQVTAEVGK+Oxidation(1)                                      | 1.233680315        | 2                | 4.8534164 |
| P11348        | NCDLMWK                                                              | 0.987175434        | 1                | 2.3152692 |
| P11348        | NSGMPSGAAAIAVLPVTLDTPMNR                                             | 1.172619898        | 2                | 5.2996144 |
| P11348        | QSIWTSTISSHLATK                                                      | 1.13443854         | 2                | 3.6062493 |
| P11348        | RPNVSLIQVVTDDGK                                                      | 0.56084699         | 2                | 3.7657006 |
| P11348        | VDAILCVAGGWAGGNAK                                                    | 0.983024787        | 2                | 4.2003975 |
| <b>P11442</b> | <b>CLH Clathrin heavy chain 1</b>                                    | <b>1.172090375</b> | <b>9.9E-20</b>   | <b>40</b> |
| P11442        | ADDPSSYMEVVQAANTSGNWEELVK                                            | 0.883917777        | 2                | 5.4665518 |
| P11442        | AFMTADLPNELIELLEK                                                    | 1.260277298        | 2                | 4.1725879 |
| P11442        | AHIAQLCEK                                                            | 1.484565437        | 2                | 2.5887125 |
| P11442        | ALEHFTDLYDIK                                                         | 1.275990278        | 2                | 3.3691504 |
| P11442        | CNEPAVWSQLAK                                                         | 1.029477221        | 2                | 2.6720607 |
| P11442        | EDKLECSEELGDLVK                                                      | 0.834325169        | 2                | 2.9828358 |
| P11442        | FNALFAQGNYSEAAK                                                      | 0.824176605        | 2                | 4.2785716 |
| P11442        | GQCDLELINVCNENSLFK                                                   | 1.210758371        | 2                | 4.9044142 |
| P11442        | GQFSTDELVAEVEK                                                       | 1.195628236        | 2                | 3.8516979 |
| P11442        | GQFSTDELVAEVEKR                                                      | 1.110782601        | 2                | 3.5216296 |
| P11442        | HELIEFR                                                              | 1.041562054        | 2                | 2.6297073 |
| P11442        | HSSLAGCQIINYR                                                        | 1.147293549        | 2                | 3.1435804 |
| P11442        | IHEGCEEPATHNALAK                                                     | 1.185359188        | 2                | 5.1603255 |
| P11442        | ISGETIFVTAPHEATAGIIVNR                                               | 1.200707856        | 2                | 5.4998441 |
| P11442        | IVLDNSVFSEHR                                                         | 1.414995951        | 2                | 2.81375   |
| P11442        | IYIDSNVNPFR                                                          | 0.883895626        | 2                | 3.0719528 |

|               |                                                                  |                    |                  |           |
|---------------|------------------------------------------------------------------|--------------------|------------------|-----------|
| P11442        | KDPELWGSVLLESNPYR                                                | 1.175112698        | 3                | 3.4848554 |
| P11442        | KFDVNTSAVQVLIHIGNLDR                                             | 1.136685289        | 3                | 5.9054976 |
| P11442        | KFNALFAQGNYSEAAK                                                 | 1.210938146        | 2                | 3.6297867 |
| P11442        | LAELEEFINGPNNAHIQVVGDR                                           | 1.007175939        | 2                | 5.2230287 |
| P11442        | LECSEELGDLVK                                                     | 1.106042053        | 2                | 3.0132477 |
| P11442        | LHIEVGTPTGNQPFPK                                                 | 1.185148128        | 2                | 4.1285033 |
| P11442        | LLEMNLMHAPQVADAILGNQMFTHYDR                                      | 0.993295664        | 3                | 3.9571791 |
| P11442        | LLYNNVSNFGR                                                      | 1.290615427        | 2                | 2.7770898 |
| P11442        | LPVVIGLLDVDCSEDIK                                                | 1.10685623         | 2                | 5.1135521 |
| P11442        | LTDQLPLIIVCDR                                                    | 0.971665901        | 2                | 3.2297654 |
| P11442        | NLQNLLILTAIK                                                     | 1.271890276        | 2                | 4.3431969 |
| P11442        | NNLAGAEELFAR                                                     | 1.124412063        | 2                | 3.7826786 |
| P11442        | NNRPSEGPLQTR                                                     | 1.08103224         | 3                | 3.9332516 |
| P11442        | RPLIDQVVQTALSETQDPEEVSIVTK                                       | 1.223806064        | 3                | 5.8420982 |
| P11442        | SVDPTLALSIVYLR                                                   | 1.081810122        | 2                | 2.6497762 |
| P11442        | SVNESLNNLFITEEDYQALR                                             | 1.426325705        | 2                | 4.6444426 |
| P11442        | TLQIFNIEMK                                                       | 1.139100567        | 2                | 2.7966158 |
| P11442        | TSIDAYDNFNDNISLAQR                                               | 1.161753961        | 2                | 4.9876399 |
| P11442        | VDKLDASESLR                                                      | 0.939318469        | 2                | 2.5337131 |
| P11442        | VGEQAQVVIIDMNDPSNPIR                                             | 0.975221073        | 2                | 5.2960238 |
| P11442        | VIQCFAGTGVQVK                                                    | 1.057082444        | 2                | 4.7509513 |
| P11442        | VSQPIEGHAASFAQFK                                                 | 1.149568573        | 2                | 4.1361928 |
| P11442        | WLLLTGISAQQNR                                                    | 1.206160938        | 2                | 2.6340017 |
| P11442        | YESLELCRPVLQQGR                                                  | 0.830924211        | 2                | 3.2105551 |
| <b>P11497</b> | <b>ACACA Acetyl_CoA carboxylase 1</b>                            | <b>0.898487876</b> | <b>0.4421476</b> | <b>3</b>  |
| P11497        | ECSQPMVMVIPPQAEELR+Oxidation(7)                                  | 0.884686585        | 2                | 2.4394791 |
| P11497        | LPELLLK                                                          | 1.286072936        | 2                | 2.492558  |
| P11497        | TLRDPSPLELQDIMTSVSGR                                             | 1.016774777        | 3                | 3.9693687 |
| <b>P11507</b> | <b>AT2A2 Sarcoplasmic/endoplasmic reticulum calcium ATPase 2</b> | <b>1.041816724</b> | <b>0.5446349</b> | <b>5</b>  |
| P11507        | DIVPGDIVEIIVGDKVPADIR                                            | 1.142303017        | 2                | 3.6858432 |
| P11507        | IRDEMVAEQER                                                      | 1.02852788         | 2                | 3.1937263 |
| P11507        | KSEIGIAMGSGTAVAK                                                 | 0.862094596        | 2                | 3.1864243 |
| P11507        | TASEMVLADDNFSTIVAAVEEGR                                          | 1.617581955        | 2                | 2.8698683 |
| P11507        | VDQSILTGESVSVIK                                                  | 0.979141206        | 2                | 4.1111856 |
| <b>P11598</b> | <b>PDIA3 Protein disulfide_isomerase A3</b>                      | <b>1.041523845</b> | <b>9.9E-20</b>   | <b>25</b> |
| P11598        | DGEEAGAYDGPR                                                     | 0.950918592        | 2                | 3.4458654 |
| P11598        | DLLTAYYDVDYEK                                                    | 1.050089692        | 2                | 3.6681244 |
| P11598        | DPNIVIAK                                                         | 1.052218896        | 2                | 2.377151  |
| P11598        | EATNPPIIQEEKPK                                                   | 0.97509035         | 2                | 3.6481042 |
| P11598        | EYDDNGEGITIFRPLHLANK                                             | 1.056876913        | 2                | 3.9875336 |
| P11598        | EYDDNGEGITIFRPLHLANKFEDK                                         | 0.859571719        | 3                | 3.8096926 |
| P11598        | FIQESIFGLCPHMTEDNKDLIQGK                                         | 1.10976055         | 3                | 5.2813802 |
| P11598        | FISDKDASVVGFFR                                                   | 1.283835071        | 2                | 4.5588064 |
| P11598        | FLQEYFDGNLK                                                      | 1.030387972        | 2                | 3.7290366 |
| P11598        | FLQEYFDGNLKR                                                     | 1.336692948        | 2                | 3.707463  |
| P11598        | FVMQEEFSR                                                        | 1.124094218        | 2                | 2.9894578 |
| P11598        | GFPTIYFSPANK                                                     | 0.968172025        | 2                | 2.7979867 |
| P11598        | IFRDGEEAGAYDGPR                                                  | 1.214457531        | 2                | 4.1393905 |
| P11598        | KQAGPASVPLR                                                      | 1.049610858        | 2                | 2.4126158 |
| P11598        | KTFSHELSDFGLESTTGEIPVVAIR                                        | 1.237240512        | 3                | 4.4515743 |
| P11598        | LAPEYAAAATR                                                      | 1.103627318        | 2                | 2.8752389 |
| P11598        | LNFAVASR                                                         | 1.539380145        | 2                | 2.6673787 |
| P11598        | LSKDPNIVIAK                                                      | 1.224111549        | 3                | 4.3337402 |
| P11598        | MDATANDVPSPYEVK                                                  | 1.219299509        | 2                | 4.3303123 |
| P11598        | MDATANDVPSPYEVK+Oxidation(1)                                     | 1.28323817         | 2                | 3.9882777 |
| P11598        | RLAPEYAAAATR                                                     | 0.8337862          | 2                | 3.3509221 |

|               |                                                           |                    |                  |           |
|---------------|-----------------------------------------------------------|--------------------|------------------|-----------|
| P11598        | SEPIPETNEGPVK                                             | 1.106086225        | 2                | 2.9548032 |
| P11598        | TFSHELSDFGLESTTGEIPVVAIR                                  | 1.194447282        | 2                | 5.9753432 |
| P11598        | VDCTANTNTCNK                                              | 1.210384713        | 2                | 4.4608645 |
| P11598        | YGVSGYPTLK                                                | 1.042122761        | 2                | 2.893121  |
| <b>P11608</b> | <b>ATP8 ATP synthase protein 8</b>                        | <b>1.110496898</b> | <b>0.5010009</b> | <b>2</b>  |
| P11608        | ISSQTFPAPPSPK                                             | 1.173949365        | 2                | 2.3756335 |
| P11608        | TNNPWESK                                                  | 0.8803161          | 2                | 2.3594987 |
| <b>P11711</b> | <b>CP2A1 Cytochrome P450 2A1</b>                          | <b>1.077046252</b> | <b>0.6030909</b> | <b>5</b>  |
| P11711        | GEQATYNTLFK                                               | 1.176844697        | 2                | 3.1286345 |
| P11711        | GTDVFPILGSLMTDPK                                          | 1.061294938        | 2                | 3.4737687 |
| P11711        | ILEEAGYLIK                                                | 1.089690187        | 2                | 2.7840798 |
| P11711        | TVSNVISSIVFGER                                            | 1.031285146        | 2                | 3.1709948 |
| P11711        | VHEIEQVIGR                                                | 1.036276932        | 2                | 3.4209054 |
| <b>P11714</b> | <b>CP2D9 Cytochrome P450 2D9</b>                          | <b>1.223328486</b> | <b>0.0067447</b> | <b>2</b>  |
| P11714        | GNPESSFNENLLMVVR                                          | 1.08207428         | 2                | 2.5797153 |
| P11714        | VQQEIDEVIGQVR                                             | 1.224586816        | 2                | 4.6216135 |
| <b>P11862</b> | <b>GAS2 Growth arrest_specific protein 2</b>              | <b>1.055996367</b> | <b>0.9869501</b> | <b>3</b>  |
| P11862        | EIEQEETLSAPSPSPSSK                                        | 1.127865518        | 2                | 3.9096673 |
| P11862        | LDNGALLCQLAATVQEK                                         | 1.083092095        | 2                | 3.9022977 |
| P11862        | YGVPEPGLIK                                                | 1.020391243        | 2                | 2.5233934 |
| <b>P11884</b> | <b>ALDH2 Aldehyde dehydrogenase_mitochondrial</b>         | <b>0.969555255</b> | <b>9.9E-20</b>   | <b>24</b> |
| P11884        | DGMTIAKEEIFGPVMQILK                                       | 1.132294237        | 2                | 3.8239589 |
| P11884        | EAGFPPGVVNVVPGFPTAGAAIASHEDVVK                            | 0.433648441        | 3                | 4.2065606 |
| P11884        | EEIFGPVMQILK                                              | 0.839191969        | 2                | 3.9103467 |
| P11884        | ELGEYGLQAYTEVK                                            | 0.837812712        | 2                | 4.5705652 |
| P11884        | GYFIQPTVFGDVK                                             | 1.062538517        | 2                | 3.9246013 |
| P11884        | KTFPTVNPSTGEVICQVAEGNKEDVVK                               | 0.952917251        | 3                | 4.1316791 |
| P11884        | LGPALATGNVVVMK                                            | 1.191578724        | 2                | 4.0675573 |
| P11884        | LGPALATGNVVVMK+Oxidation(13)                              | 1.408404933        | 2                | 3.59059   |
| P11884        | LLCGGAAADR                                                | 1.414557606        | 2                | 3.7849836 |
| P11884        | RVTLELGGK                                                 | 0.840033709        | 2                | 2.784054  |
| P11884        | TEQGPQVDETFQK                                             | 0.979707412        | 2                | 4.54317   |
| P11884        | TEQGPQVDETFQFK                                            | 1.186223534        | 2                | 3.8508184 |
| P11884        | TFPTVNPSTGEVICQVAEGNK                                     | 0.73805856         | 2                | 5.2996211 |
| P11884        | TFPTVNPSTGEVICQVAEGNKEDVVK                                | 0.971711648        | 2                | 4.2909131 |
| P11884        | TFVQEDVYDEFVER                                            | 1.333632089        | 2                | 5.2386732 |
| P11884        | TIEEVVGR                                                  | 0.946319186        | 2                | 3.024272  |
| P11884        | TIPIDGDFFSYTR                                             | 1.43340992         | 2                | 2.5117145 |
| P11884        | VAEQTPLTALYVANLIK                                         | 1.66946469         | 2                | 5.4906688 |
| P11884        | VAFTGSTEVGHLIQVAAGSSNLK                                   | 1.015647894        | 2                | 5.7853203 |
| P11884        | VAFTGSTEVGHLIQVAAGSSNLKR                                  | 1.000833513        | 3                | 3.8031502 |
| P11884        | VTLELGGK                                                  | 0.99159815         | 2                | 2.3048167 |
| P11884        | VVGNPFDSR                                                 | 0.968714257        | 2                | 3.0428371 |
| P11884        | YGLAAAVFTK                                                | 1.025636262        | 2                | 3.8727586 |
| P11884        | YYAGWADK                                                  | 0.891955096        | 2                | 2.5501041 |
| <b>P11915</b> | <b>NLTP Non_specific lipid_transfer protein</b>           | <b>0.985459502</b> | <b>6.958E-08</b> | <b>22</b> |
| P11915        | ADCTITMADSDLLALMTGK                                       | 1.386730146        | 2                | 5.3358254 |
| P11915        | ADCTITMADSDLLALMTGK+Oxidation(7)                          | 1.373822334        | 2                | 3.6260989 |
| P11915        | ANLIFK                                                    | 0.965054322        | 2                | 2.3924677 |
| P11915        | AVEIVAQEMVTDMPSTFEEK                                      | 1.004568839        | 2                | 4.3397284 |
| P11915        | GSVLPDSDKK                                                | 0.892747244        | 2                | 2.781842  |
| P11915        | HGLQSKAVEIVAQEMVTDMPSTFEEKSVIK+Oxidation(15)Oxidation(19) | 1.255905527        | 3                | 3.3845916 |
| P11915        | HIDVLINK                                                  | 0.812373186        | 2                | 2.8688028 |
| P11915        | HSVNNPYSQFQDEYSLDEIMK                                     | 0.965503615        | 3                | 5.6645803 |
| P11915        | IGGIFAFK                                                  | 1.28099976         | 2                | 2.4288359 |
| P11915        | KADCTITMADSDLLALMTGK                                      | 1.418989169        | 2                | 4.2592759 |

|               |                                                                                    |                    |                  |           |
|---------------|------------------------------------------------------------------------------------|--------------------|------------------|-----------|
| P11915        | KLEEEGEEFVK                                                                        | 0.986983524        | 2                | 4.3243041 |
| P11915        | KLEEEGEEFVKK                                                                       | 1.020819995        | 3                | 4.7489829 |
| P11915        | LEEEGEEFVK                                                                         | 1.130139217        | 2                | 3.029355  |
| P11915        | LEEEGEEFVKK                                                                        | 0.985158213        | 2                | 3.6871123 |
| P11915        | LQSLQLQPK                                                                          | 1.38292825         | 2                | 3.2980525 |
| P11915        | MGFPEAASSFR                                                                        | 0.808974546        | 2                | 2.9202247 |
| P11915        | MNPQSAFFQ GK                                                                       | 0.92941872         | 2                | 3.1933088 |
| P11915        | MNPQSAFFQ GK+Oxidation(1)                                                          | 0.353790292        | 2                | 2.5766435 |
| P11915        | SRPVDFLTVLQCCTSDGAAAAIVSSEEFVQK                                                    | 1.318413743        | 3                | 5.5306778 |
| P11915        | THQISAAPTSSAGDGFK                                                                  | 1.033416258        | 2                | 4.4908443 |
| P11915        | WVINPSGGLISK                                                                       | 0.872216143        | 2                | 2.8910325 |
| P11915        | YGMSACPFAPQLFGSAGK                                                                 | 0.919245431        | 2                | 4.3847289 |
| <b>P11960</b> | <b>ODBA 2_oxoisovalerate dehydrogenase subunit alpha_ mitochondrial (Fragment)</b> | <b>0.915492611</b> | <b>0.2445898</b> | <b>10</b> |
| P11960        | AVAENQPFLEIAMTYR                                                                   | 1.468518416        | 2                | 3.7917323 |
| P11960        | HFVTISSPLATQIPQAVGAAAYAAK                                                          | 0.986972937        | 2                | 4.1311717 |
| P11960        | HLQTYGEHYPLDHFDK                                                                   | 0.91580948         | 3                | 3.415319  |
| P11960        | IGHHSTSDSSAYR                                                                      | 1.424578454        | 3                | 4.0560508 |
| P11960        | NNGYAISTPTSEQYR                                                                    | 1.007614165        | 2                | 3.9776893 |
| P11960        | QGQIINPSEDPHLPQEEVLK                                                               | 0.99264848         | 2                | 2.5206773 |
| P11960        | QYLLNQGWWDDEEK                                                                     | 0.849770091        | 2                | 3.5931051 |
| P11960        | SVDEVNYWVK                                                                         | 1.197892855        | 2                | 2.4658787 |
| P11960        | TDLVFGQYR                                                                          | 0.94928201         | 1                | 1.9822562 |
| P11960        | VMEAFEQAER                                                                         | 0.770968098        | 2                | 3.6182132 |
| <b>P11980</b> | <b>KPYM Pyruvate kinase isozymes M1/M2</b>                                         | <b>1.010889134</b> | <b>0.5963242</b> | <b>3</b>  |
| P11980        | AEGSDVANAVLDGADCIMLSGETAK                                                          | 1.075991386        | 3                | 3.6481011 |
| P11980        | GVNLPGAAVDLPVAVSEK                                                                 | 1.200523628        | 2                | 3.8564661 |
| P11980        | NTGIICTIGPASR                                                                      | 0.936330877        | 2                | 3.6304948 |
| <b>P12001</b> | <b>RL18 60S ribosomal protein L18</b>                                              | <b>1.492266872</b> | <b>9.9E-20</b>   | <b>5</b>  |
| P12001        | GTVLLSGPR                                                                          | 1.347038405        | 2                | 2.6975477 |
| P12001        | ILTFDQLALESPK                                                                      | 1.493516554        | 2                | 4.8977561 |
| P12001        | TAVVVGITITDDVR                                                                     | 1.175413228        | 2                | 4.0583639 |
| P12001        | TNRPPLSLR                                                                          | 1.075889802        | 3                | 3.3764188 |
| P12001        | TNSTFNQVVVK                                                                        | 1.152302804        | 2                | 3.0642381 |
| <b>P12007</b> | <b>IVD Isovaleryl_CoA dehydrogenase_ mitochondrial</b>                             | <b>1.001795002</b> | <b>0.560411</b>  | <b>9</b>  |
| P12007        | AQEIDQSNDFK                                                                        | 0.437772199        | 2                | 3.5577948 |
| P12007        | FVQENLAPK                                                                          | 0.935803704        | 2                | 2.8498847 |
| P12007        | FWITNGPDADVLVVYAK                                                                  | 1.303875389        | 2                | 4.6099443 |
| P12007        | GSNTCELVFEDCK                                                                      | 0.90803506         | 2                | 4.2436619 |
| P12007        | GSNTCELVFEDCKVPAANILSQESK                                                          | 1.144802107        | 3                | 5.3985658 |
| P12007        | GVYVLMGLDLER                                                                       | 1.108546936        | 2                | 3.7292702 |
| P12007        | IGQFQLMQGK                                                                         | 1.09848927         | 2                | 2.6685934 |
| P12007        | LYEIGGGTSEVR                                                                       | 1.107105632        | 2                | 2.8304989 |
| P12007        | TDLTAVPASR                                                                         | 1.032239278        | 2                | 2.8517039 |
| <b>P12346</b> | <b>TRFE Serotransferrin</b>                                                        | <b>1.038380932</b> | <b>0.0402809</b> | <b>19</b> |
| P12346        | ADRDQYELLCLDNTR                                                                    | 1.38533584         | 2                | 4.3361497 |
| P12346        | ASDSSINWNNLK                                                                       | 1.067476615        | 2                | 3.1874783 |
| P12346        | DFQLFGSPLGK                                                                        | 0.882878745        | 2                | 2.9826818 |
| P12346        | DLKQEDFQLLCPDGTK                                                                   | 0.921288049        | 2                | 5.0244832 |
| P12346        | EGVCPESIDSAPVK                                                                     | 0.814924074        | 2                | 3.8482218 |
| P12346        | FDEFFSQGCAPGYK                                                                     | 1.0536061          | 2                | 4.5408411 |
| P12346        | GDKDCTGNFCLFR                                                                      | 0.927261821        | 2                | 3.4403369 |
| P12346        | GTDQFLNQLQGGK                                                                      | 1.027841949        | 2                | 3.1934855 |
| P12346        | GYAVAVVK                                                                           | 1.023298577        | 2                | 2.3885009 |
| P12346        | HQTVLENTNGK                                                                        | 0.557908952        | 2                | 3.0428915 |
| P12346        | HTTIFEVLQPK                                                                        | 1.03968704         | 2                | 3.4726186 |
| P12346        | KGTDQFLNQLQGGK                                                                     | 1.035724282        | 2                | 4.1542406 |



|               |                                                                            |                    |                  |           |
|---------------|----------------------------------------------------------------------------|--------------------|------------------|-----------|
| P12346        | LPEGTTYEYLGAEYLQAVGNIR                                                     | 1.274017132        | 2                | 4.7336941 |
| P12346        | NGDGKEDLIWEILK                                                             | 0.978028159        | 3                | 3.5206356 |
| P12346        | QEDFQLLCPDGTK                                                              | 0.941259634        | 2                | 3.6102147 |
| P12346        | SKDFQLFGSPLGK                                                              | 1.062133855        | 2                | 3.318517  |
| P12346        | VSTVLTAQK                                                                  | 0.978562684        | 2                | 2.7665803 |
| P12346        | WCALSHQER                                                                  | 1.413382532        | 2                | 3.1468039 |
| P12346        | WCAVSEHENTK                                                                | 1.001966932        | 2                | 3.7916574 |
| <b>P12368</b> | <b>KAP2 cAMP_dependent protein kinase type II_alpha regulatory subunit</b> | <b>1.109813907</b> | <b>0.8332758</b> | <b>2</b>  |
| P12368        | NLDQEQLSQVLDAMFEK                                                          | 1.175799657        | 2                | 4.7619848 |
| P12368        | SVGQYDNRGSFGELALMYNTPR                                                     | 1.077376044        | 2                | 2.3897748 |
| <b>P12711</b> | <b>ADHX Alcohol dehydrogenase class_3</b>                                  | <b>1.043146914</b> | <b>0.0202066</b> | <b>10</b> |
| P12711        | AAVAWEAGKPLSIEIEVAPPQAHEVR                                                 | 1.112424734        | 3                | 5.9307914 |
| P12711        | AFDLMHSGNSIR                                                               | 0.649807028        | 2                | 3.1188488 |
| P12711        | AGDTVIPLEYPQCCECK                                                          | 1.011688615        | 2                | 3.0644715 |
| P12711        | AKEFGATECINPQDFSK                                                          | 0.955243211        | 2                | 4.7674742 |
| P12711        | EFGATECINPQDFSK                                                            | 0.924013626        | 2                | 4.6290488 |
| P12711        | IIGIDINK                                                                   | 0.982774605        | 2                | 2.4218645 |
| P12711        | IIGIDINKDK                                                                 | 1.030967046        | 2                | 2.4165297 |
| P12711        | VCLLGGISTGYGAAVNTAK                                                        | 1.411282023        | 2                | 5.6769099 |
| P12711        | VDEFVTGNLSFDQINK                                                           | 0.851217694        | 2                | 4.9551206 |
| P12711        | VEPGSTCAVFLGGVGLAVIMGCK                                                    | 1.401003978        | 2                | 4.0917897 |
| <b>P12749</b> | <b>RL26 60S ribosomal protein L26</b>                                      | <b>1.071127561</b> | <b>0.3785667</b> | <b>5</b>  |
| P12749        | FNPFVTSR                                                                   | 0.965058687        | 2                | 2.6003447 |
| P12749        | HFNAPSHIR                                                                  | 0.961591894        | 3                | 3.9727283 |
| P12749        | KDDEVQVVR                                                                  | 1.136253394        | 2                | 3.1601343 |
| P12749        | KIMSSPLSKELR+Oxidation(3)                                                  | 1.436121707        | 2                | 2.4737866 |
| P12749        | YKEETIEK                                                                   | 0.994315319        | 2                | 2.8957546 |
| <b>P12785</b> | <b>FAS Fatty acid synthase</b>                                             | <b>1.037059603</b> | <b>0.6967094</b> | <b>41</b> |
| P12785        | ACIDTALENLSTLK                                                             | 1.179091149        | 2                | 3.9288149 |
| P12785        | AGSDTELAAPK                                                                | 0.956706557        | 2                | 3.4888184 |
| P12785        | ALIAEATK                                                                   | 0.933355127        | 2                | 2.3149142 |
| P12785        | CPPGVVPACHNSEDTVITISGPQAAVNEFVEQLK                                         | 1.198311091        | 3                | 3.4421332 |
| P12785        | DANLPAGSMAAVGLSWECK                                                        | 0.7115954          | 2                | 4.2936726 |
| P12785        | DGGFLLMHTVLK                                                               | 0.934021413        | 2                | 2.5467587 |
| P12785        | DHKDNLEFFLTNLGK                                                            | 1.613643781        | 2                | 2.3682582 |
| P12785        | EEPEAMLPGAQPTLISAISK                                                       | 1.095689509        | 2                | 4.0490198 |
| P12785        | EQGVTFPSGEAQQLIR                                                           | 0.994477184        | 2                | 4.3982863 |
| P12785        | FDASFFGVHPK                                                                | 1.166310721        | 2                | 3.4054384 |
| P12785        | FVFTPHVEPECLSESAILQK                                                       | 0.835521739        | 2                | 4.3691149 |
| P12785        | GHALGETLACLPEVQPGPSFLSQEEWESLFSR                                           | 1.790344772        | 3                | 5.9040623 |
| P12785        | GLESIINIIHSSLAEP                                                           | 1.224955323        | 2                | 4.6243649 |
| P12785        | GNAGQSNYGFANSTMER                                                          | 1.009634794        | 2                | 4.4859023 |
| P12785        | GVDLVLNSLAEEK                                                              | 1.038035508        | 2                | 3.340508  |
| P12785        | LFDHPEVPIPAESESVSR                                                         | 0.970871946        | 2                | 4.393259  |
| P12785        | LLLPEDPLISGLLSQALK                                                         | 1.500684548        | 3                | 5.1250706 |
| P12785        | LSPQDKPIFLPVEDTSFQWVDSLK                                                   | 0.828702545        | 3                | 3.9136584 |
| P12785        | LTPGCEAEAEAEICFFIK                                                         | 1.67605961         | 2                | 4.6660914 |
| P12785        | MTVPGLLEDLPQHGLPR                                                          | 1.153305241        | 2                | 3.4959583 |
| P12785        | QAQLNLSILLVNPPEGTLTR                                                       | 1.046604608        | 2                | 4.3583074 |
| P12785        | QQEQLVPTLEK                                                                | 0.722785089        | 2                | 2.6254861 |
| P12785        | RQQEQLVPTLEK                                                               | 0.889541849        | 2                | 2.9877098 |
| P12785        | SDEALKPLGVK                                                                | 1.131235267        | 2                | 2.991137  |
| P12785        | SFDDSGNGYCR                                                                | 1.253967766        | 2                | 3.0345011 |
| P12785        | SLSLSLEETPVVFENVTFHQATILPR                                                 | 1.395098365        | 3                | 4.1317844 |
| P12785        | SLYQPGGVAPESLEYIEAHGTGTK                                                   | 1.109454266        | 2                | 5.5621948 |
| P12785        | SNMGHPEPASGLAALTK                                                          | 0.963990359        | 2                | 3.1916797 |

|               |                                          |                    |                  |           |
|---------------|------------------------------------------|--------------------|------------------|-----------|
| P12785        | TGGTYGEDLGADYNLSQVCDGK                   | 0.905375171        | 2                | 4.8652225 |
| P12785        | TMEAVQGLLEQGR                            | 0.772859399        | 2                | 3.5689623 |
| P12785        | VGDPQELNGITR                             | 1.42260904         | 2                | 2.7379775 |
| P12785        | VHLTGDINPNALFPPVEFPVPR                   | 0.985019782        | 2                | 5.2326841 |
| P12785        | VLEALLPLK                                | 0.966538811        | 2                | 2.6252897 |
| P12785        | VLES DLVMNVYR                            | 0.923791578        | 2                | 3.0437996 |
| P12785        | VSVHIEGDHR                               | 1.14996173         | 3                | 3.4740672 |
| P12785        | VTAIYIDPATHLQK                           | 1.028736601        | 2                | 3.5583355 |
| P12785        | VYATILNAGTNTDGCK                         | 1.134178411        | 2                | 4.8987379 |
| P12785        | VYMLEGDTQVADVTTSR                        | 0.721547927        | 2                | 4.8399611 |
| P12785        | VYQWEDPDSK                               | 0.823929963        | 2                | 3.3172619 |
| P12785        | WLSTSIPEAQWQSSLAR                        | 1.18004283         | 2                | 3.5357883 |
| P12785        | YNGTLNLDR                                | 0.982362649        | 2                | 2.5831411 |
| <b>P12791</b> | <b>CP2BA Cytochrome P450 2B10</b>        | <b>1.346756375</b> | <b>0.072944</b>  | <b>2</b>  |
| P12791        | IQEEAQLVEELR                             | 1.029004174        | 2                | 4.5814338 |
| P12791        | IQEEAQLVEELRK                            | 1.352725247        | 2                | 3.8244996 |
| <b>P12847</b> | <b>MYH3 Myosin_3</b>                     | <b>1.245433402</b> | <b>0.9905646</b> | <b>6</b>  |
| P12847        | EQYEEQEGK                                | 0.594229652        | 2                | 3.0691202 |
| P12847        | GQEDLKEQLAIVER                           | 1.560955528        | 2                | 3.9833338 |
| P12847        | GTLEDQIISANPLLEAFGNAK                    | 1.153351611        | 2                | 3.2874076 |
| P12847        | IEAQNQPFDAK                              | 0.769586352        | 2                | 2.378526  |
| P12847        | MKGTLEDQIISANPLLEAFGNAK                  | 1.111906908        | 3                | 6.9802079 |
| P12847        | MKGTLEDQIISANPLLEAFGNAK+Oxidation(1)     | 1.11970286         | 2                | 4.3997335 |
| <b>P12928</b> | <b>KPYR Pyruvate kinase isozymes R/L</b> | <b>1.087381711</b> | <b>0.9944923</b> | <b>19</b> |
| P12928        | AETSDVANAVLDGADCIMLSGETAK                | 1.014625449        | 2                | 5.5178008 |
| P12928        | CCAAAIIVLTK                              | 0.941997227        | 2                | 2.86566   |
| P12928        | CNLAGKPVVCATQMLESMTIK                    | 1.100344235        | 3                | 4.8382006 |
| P12928        | EATESFATSPLSYRVPVIAALDTK                 | 1.029203314        | 2                | 3.8886139 |
| P12928        | EPPEAIWADDVDR                            | 0.922170826        | 2                | 2.4640126 |
| P12928        | GDLGIEIPA EK                             | 1.05450527         | 2                | 3.1349792 |
| P12928        | GSFPVEAVMMQHA IAR                        | 1.042836987        | 2                | 3.2367251 |
| P12928        | GSQVLTVDPK                               | 0.915275676        | 2                | 2.8661397 |
| P12928        | GVNLPNTEVDLPGLSEQDLLDLR                  | 1.137462419        | 2                | 5.250196  |
| P12928        | IGPEGLVTEVEHGILGSR                       | 1.14090488         | 2                | 5.284586  |
| P12928        | IYIDGLISLVVQK                            | 1.227255507        | 2                | 4.5192833 |
| P12928        | KFDEILEVSDGIMVAR                         | 0.791173148        | 3                | 4.1724658 |
| P12928        | KGVNLPNTEVDLPGLSEQDLLDLR                 | 1.116642454        | 3                | 4.8035045 |
| P12928        | LNFSHGSHEYHAESIANIR                      | 1.815186921        | 3                | 5.1389375 |
| P12928        | RVQFGIESGK                               | 1.387344423        | 2                | 2.4617467 |
| P12928        | STSIIATIGPASR                            | 1.028699794        | 2                | 3.3244884 |
| P12928        | TGVLQGGPESEVEIVK                         | 0.95381157         | 2                | 4.4571471 |
| P12928        | TVWVDYHNITR                              | 1.308485606        | 2                | 2.3303785 |
| P12928        | VQFGIESGK                                | 0.933550901        | 2                | 2.8336675 |
| <b>P12938</b> | <b>CP2D3 Cytochrome P450 2D3</b>         | <b>1.108375869</b> | <b>0.1753848</b> | <b>7</b>  |
| P12938        | AVQELLVTCGEDTADRPEMIFQHIGYGHK            | 0.983590009        | 3                | 3.7307699 |
| P12938        | DLTDAFLAEIEK                             | 1.352782128        | 2                | 3.8620913 |
| P12938        | FDYGDPDFIK                               | 1.030733563        | 2                | 2.9215667 |
| P12938        | GNPESSFNDANLR                            | 1.026605953        | 2                | 3.9357047 |
| P12938        | RFDYGDPDFIK                              | 1.175184755        | 2                | 3.1202319 |
| P12938        | TFLTMVDNLVTEHK                           | 1.129363463        | 2                | 3.095921  |
| P12938        | TWDPDQPPRDLTDAFLAEIEK                    | 1.528252794        | 3                | 4.0413208 |
| <b>P12939</b> | <b>CP2DA Cytochrome P450 2D10</b>        | <b>1.397311676</b> | <b>9.9E-20</b>   | <b>9</b>  |
| P12939        | ALCNVIASLIFAR                            | 1.532568543        | 2                | 2.5440202 |
| P12939        | AVQEVLVTHGEDTADRPPVPIFK                  | 1.70032985         | 3                | 5.3313322 |
| P12939        | FEYEDPYLIR                               | 1.298146123        | 2                | 2.8481169 |
| P12939        | FGDIAPLNLPR                              | 1.652095532        | 2                | 3.4473257 |
| P12939        | ITSCDIEVQDFVIK                           | 1.720382867        | 2                | 4.1880231 |

|               |                                                                               |                    |                  |           |
|---------------|-------------------------------------------------------------------------------|--------------------|------------------|-----------|
| P12939        | NLTDAFLAEVEK                                                                  | 1.43767822         | 2                | 4.0465932 |
| P12939        | RFEYEDPYLIR                                                                   | 1.572010935        | 2                | 2.978718  |
| P12939        | TFMAFLDNLLAENR                                                                | 1.960620598        | 2                | 3.0688982 |
| P12939        | TTWDPAQPPR                                                                    | 1.285270236        | 2                | 2.3677936 |
| <b>P13084</b> | <b>NPM Nucleophosmin</b>                                                      | <b>1.498006997</b> | <b>1.276E-10</b> | <b>2</b>  |
| P13084        | MTDQEAIQDLWQWR                                                                | 1.29040237         | 2                | 2.8416598 |
| P13084        | VDNDENEHQLSLR                                                                 | 1.569693955        | 2                | 3.887589  |
| <b>P13086</b> | <b>SUCA Succinyl_CoA ligase [ADP/GDP_forming] subunit alpha_mitochondrial</b> | <b>1.139339139</b> | <b>3.886E-15</b> | <b>5</b>  |
| P13086        | HLGLPVFNTVK                                                                   | 1.097040459        | 2                | 2.3772621 |
| P13086        | LIGPNCPIINPGECK                                                               | 1.468711755        | 2                | 4.8771005 |
| P13086        | MGHAGAIAGGK                                                                   | 0.783506515        | 1                | 2.8407648 |
| P13086        | NIYIDK                                                                        | 1.050240488        | 1                | 1.9872726 |
| P13086        | QGTFHSQQALEYGTK                                                               | 1.138950657        | 2                | 2.7846844 |
| <b>P13107</b> | <b>CP2B3 Cytochrome P450 2B3</b>                                              | <b>1.815598944</b> | <b>9.178E-06</b> | <b>7</b>  |
| P13107        | ATLDPNAPR                                                                     | 1.155669512        | 2                | 2.6304283 |
| P13107        | EVLIDYIDHSVENHR                                                               | 1.170574827        | 2                | 4.0788541 |
| P13107        | FSDVSPMGLPCR                                                                  | 1.230151451        | 2                | 3.2932529 |
| P13107        | GIIAVLQPIMQEYGVSVFVNEER                                                       | 1.82872971         | 3                | 6.3408699 |
| P13107        | MCLGEGIAR                                                                     | 1.113255657        | 2                | 2.8266883 |
| P13107        | QSVEDQIKEAK                                                                   | 1.24156894         | 2                | 2.5859671 |
| P13107        | SFIQLQEK                                                                      | 1.37685108         | 1                | 2.3537507 |
| <b>P13221</b> | <b>AATC Aspartate aminotransferase_cytoplasmic</b>                            | <b>1.144170023</b> | <b>0.6343867</b> | <b>4</b>  |
| P13221        | ITWSNPPAQGAR                                                                  | 1.144129421        | 2                | 3.1963475 |
| P13221        | NLDYVATSINEAVTK                                                               | 1.07888244         | 2                | 3.9999757 |
| P13221        | SCASQLVLGDNSPALR                                                              | 1.239735614        | 2                | 4.5212412 |
| P13221        | TDDSQPWVLPVVR                                                                 | 0.766526869        | 2                | 2.8866391 |
| <b>P13255</b> | <b>GNMT Glycine N_methyltransferase</b>                                       | <b>1.253307173</b> | <b>2.478E-08</b> | <b>6</b>  |
| P13255        | AHMVTLDYTVQVPGAGR                                                             | 1.383350613        | 2                | 5.1958809 |
| P13255        | AWLLGLLR                                                                      | 1.572753146        | 2                | 2.7841229 |
| P13255        | DITTSVLTVNKK                                                                  | 1.251913178        | 2                | 3.516042  |
| P13255        | NYDYILSTGCAPPK                                                                | 1.209632543        | 2                | 4.8059235 |
| P13255        | SDLTKDITTSVLTVNKK                                                             | 1.544217271        | 2                | 2.7466686 |
| P13255        | SLGVAAEGIPDQYADGEAAR                                                          | 1.246763515        | 2                | 5.5111575 |
| <b>P13383</b> | <b>NUCL Nucleolin</b>                                                         | <b>1.006429042</b> | <b>0.083321</b>  | <b>6</b>  |
| P13383        | GFGFVDFNSEEDAK                                                                | 0.643868773        | 2                | 3.3440387 |
| P13383        | GSPNARSQPSKTLFVK                                                              | 1.22504047         | 2                | 2.3621068 |
| P13383        | NDLAAVDVR                                                                     | 1.129121877        | 1                | 1.9057617 |
| P13383        | NLSFNITEDELKEVFEDAVER                                                         | 0.751744373        | 3                | 3.4366112 |
| P13383        | SEADAENKLEEK                                                                  | 1.108855264        | 2                | 2.5682125 |
| P13383        | TLVLSNLSYSATEETLQEVFEK                                                        | 1.278427224        | 2                | 2.7663736 |
| <b>P13437</b> | <b>THIM 3_ketoacyl_CoA thiolase_mitochondrial</b>                             | <b>1.192827961</b> | <b>5.347E-13</b> | <b>22</b> |
| P13437        | AANEAGYFNEEMAPIEVK                                                            | 0.409837487        | 2                | 5.1362638 |
| P13437        | AANEAGYFNEEMAPIEVK+Oxidation(12)                                              | 0.967597423        | 2                | 4.8747678 |
| P13437        | DAEVVLCGGTESMSQSPYSVR                                                         | 0.809375281        | 2                | 4.5660648 |
| P13437        | DFTATDLTEFAAR                                                                 | 0.930126654        | 2                | 3.4676592 |
| P13437        | DMDLIDVNEAFAPQFLAVQK                                                          | 1.837973232        | 3                | 6.9698067 |
| P13437        | DMDLIDVNEAFAPQFLAVQK+Oxidation(2)                                             | 1.122568871        | 2                | 3.430994  |
| P13437        | EGTVTAGNASGMSDGAGVVIIASEDAVK                                                  | 0.732316655        | 2                | 5.7776361 |
| P13437        | EGTVTAGNASGMSDGAGVVIIASEDAVKK                                                 | 0.814052624        | 3                | 4.9834266 |
| P13437        | FGLDLK                                                                        | 0.847774316        | 2                | 2.3360631 |
| P13437        | GVFIVAAK                                                                      | 0.880496527        | 2                | 2.5214045 |
| P13437        | HNFTPLAR                                                                      | 0.95013196         | 2                | 2.3306158 |
| P13437        | ITAHLVHELK                                                                    | 1.254624415        | 2                | 3.3060646 |
| P13437        | LCGSGFQSIIVSGCQEICK                                                           | 1.442382622        | 2                | 5.5474167 |
| P13437        | LEDTLWAGLTDQHVK                                                               | 0.830728556        | 2                | 5.2470822 |
| P13437        | RTPFGAYGGLLK                                                                  | 1.150538954        | 2                | 3.0358779 |

|               |                                                                         |                    |                  |           |
|---------------|-------------------------------------------------------------------------|--------------------|------------------|-----------|
| P13437        | SLDLPSK                                                                 | 0.835202003        | 2                | 2.6202292 |
| P13437        | TNVSGGAIALGHPLGGSGSR                                                    | 0.887778996        | 2                | 5.8548932 |
| P13437        | VGVPTEGTALTLNR                                                          | 0.928543278        | 2                | 3.6832216 |
| P13437        | VPPETIDSVIVGNVMQSSDAAYLAR                                               | 1.035013357        | 3                | 6.6626492 |
| P13437        | VVGYFVSGCDPAIMGIGPVPAITGALK                                             | 1.020788441        | 3                | 5.0781841 |
| P13437        | VVGYFVSGCDPAIMGIGPVPAITGALKK                                            | 1.114675626        | 3                | 4.2087688 |
| P13437        | YAVGSACIGGGQGISLIQNTA                                                   | 0.808136953        | 2                | 4.3087912 |
| <b>P13444</b> | <b>METK1 S_adenosylmethionine synthase isoform type_1</b>               | <b>0.96218223</b>  | <b>2.497E-11</b> | <b>8</b>  |
| P13444        | FVIGGPQGDAGVTGR                                                         | 1.009871509        | 2                | 4.5653319 |
| P13444        | HIGYDDSAK                                                               | 0.965386629        | 2                | 2.7977934 |
| P13444        | ICDQISDAVLDAHLK                                                         | 1.059470821        | 3                | 5.6331677 |
| P13444        | NEEDVGAGDQGLMFGYATDETEECMPLTIVLAHK                                      | 1.570936264        | 3                | 6.7533298 |
| P13444        | SEFPWEVPK                                                               | 0.925953071        | 2                | 2.3190646 |
| P13444        | SGVLPWLRPDSK                                                            | 1.075286749        | 2                | 2.9699113 |
| P13444        | TCNVLVALEQQSPDIAQCVHLDR                                                 | 1.301659409        | 3                | 5.4937415 |
| P13444        | TQVTVQYVQDNGAVIPVR                                                      | 1.082630539        | 2                | 4.3423882 |
| <b>P13471</b> | <b>RS14 40S ribosomal protein S14</b>                                   | <b>1.184721547</b> | <b>1.201E-05</b> | <b>2</b>  |
| P13471        | ADRDESSPYAAMLAQDVAQR                                                    | 1.195069881        | 2                | 5.4366636 |
| P13471        | IEDVTPIPSDSTR                                                           | 1.120191291        | 2                | 3.9362993 |
| <b>P13601</b> | <b>AL1A7 Aldehyde dehydrogenase_ cytosolic 1</b>                        | <b>0.847875957</b> | <b>0.0009993</b> | <b>20</b> |
| P13601        | ANNTPYGLAAGVFTK                                                         | 0.729568078        | 2                | 3.9374189 |
| P13601        | EAGFPVGVVNVVPGYGSTAGAAISSHMDIDK                                         | 0.600238736        | 3                | 3.7890399 |
| P13601        | EEIFGPVQIMK                                                             | 0.614991262        | 2                | 3.529681  |
| P13601        | EMGEQGVYETELK                                                           | 0.667745923        | 2                | 3.6780782 |
| P13601        | FPVINPATEEVICHVEEGDK                                                    | 0.737576093        | 3                | 3.7493389 |
| P13601        | FPVINPATEEVICHVEEGDKADVDK                                               | 0.852635397        | 4                | 5.1933799 |
| P13601        | GFFVQPTVFSNVTDEMR                                                       | 1.28992495         | 2                | 4.1794672 |
| P13601        | IAKEEIFGPVQIMK                                                          | 0.923914799        | 3                | 3.472584  |
| P13601        | IFINNEWHNSLNGK                                                          | 0.989505894        | 2                | 4.0327077 |
| P13601        | IHGQTIPSDGDVFTYTR                                                       | 0.985077941        | 3                | 4.4623113 |
| P13601        | ILDIESGK                                                                | 0.64127202         | 2                | 3.2203381 |
| P13601        | ILDIESGKK                                                               | 0.741706471        | 2                | 2.9516916 |
| P13601        | KFPVINPATEEVICHVEEGDK                                                   | 0.867732548        | 3                | 3.3682454 |
| P13601        | KFPVINPATEEVICHVEEGDKADVDK                                              | 0.900697503        | 4                | 4.8262267 |
| P13601        | KYVLGNPLDSGISQGPQIDKEQHAK                                               | 0.825912671        | 3                | 5.277019  |
| P13601        | LFVEESYDEFVR                                                            | 0.678818972        | 2                | 4.1860037 |
| P13601        | VLLATMESMNAGK                                                           | 0.556893077        | 2                | 4.074688  |
| P13601        | VSFTGSTEVGK                                                             | 0.581409242        | 2                | 3.1863008 |
| P13601        | YVLGNPLDSGISQGPQIDK                                                     | 0.691234012        | 2                | 4.6106801 |
| P13601        | YVLGNPLDSGISQGPQIDKEQHAK                                                | 0.684928973        | 2                | 4.2457318 |
| <b>P13697</b> | <b>MAOX NADP_dependent malic enzyme</b>                                 | <b>1.177497594</b> | <b>0.6883647</b> | <b>5</b>  |
| P13697        | AECSAEECYK                                                              | 1.138789948        | 2                | 3.0523372 |
| P13697        | AIFASGSPFDPVTLPDGR                                                      | 1.326701576        | 2                | 4.804338  |
| P13697        | GHIASVLNAWPEDVVK                                                        | 1.161877476        | 2                | 4.0575638 |
| P13697        | HINDSVFLTTAEVISQQVSDK                                                   | 1.26053583         | 2                | 5.8862519 |
| P13697        | ILGLDGLGCNGMIGIPVGK                                                     | 1.081418978        | 2                | 2.6831391 |
| <b>P13803</b> | <b>ETFA Electron transfer flavoprotein subunit alpha_ mitochondrial</b> | <b>1.13007068</b>  | <b>9.9E-20</b>   | <b>13</b> |
| P13803        | AAVDAGFVPNDMQVGQTGK                                                     | 1.040405252        | 2                | 4.5428648 |
| P13803        | AAVDAGFVPNDMQVGQTGK+Oxidation(12)                                       | 1.562090609        | 2                | 3.7143743 |
| P13803        | GLLPEELTPLILETQK                                                        | 1.185017095        | 2                | 4.8931651 |
| P13803        | GTSFEAAAASGGSASSEK                                                      | 1.044591089        | 2                | 5.1601238 |
| P13803        | LGGEVSLVAGTK                                                            | 1.044147689        | 2                | 4.7494774 |
| P13803        | LLYDLADQLHAAVGASR                                                       | 1.443563939        | 2                | 4.9330168 |
| P13803        | LNVAPVSDIIEIK                                                           | 1.432746012        | 2                | 4.1274314 |
| P13803        | QFSYTHICAGASAFGK                                                        | 0.961835103        | 2                | 3.1293459 |

|               |                                                  |                    |                  |           |
|---------------|--------------------------------------------------|--------------------|------------------|-----------|
| P13803        | SDRPELTGAK                                       | 0.992839586        | 3                | 3.4482472 |
| P13803        | TIVAINKDPEAIFQVADYGVADLFK                        | 1.081279595        | 3                | 6.9513679 |
| P13803        | TIYAGNALCTVK                                     | 1.050991711        | 2                | 3.704957  |
| P13803        | VLVAQHDAYK                                       | 1.051478544        | 2                | 3.3204908 |
| P13803        | VVQDLCK                                          | 0.938699675        | 2                | 2.8010545 |
| <b>P13832</b> | <b>MRLCA Myosin regulatory light chain RLC_A</b> | <b>1.152534732</b> | <b>1.082E-09</b> | <b>3</b>  |
| P13832        | ATSNVFMFDQSQIQEFK                                | 1.656874378        | 2                | 5.1358366 |
| P13832        | FTDEEVDELYR                                      | 1.110076968        | 2                | 3.4425349 |
| P13832        | GNFNIEFTR                                        | 1.226061782        | 2                | 2.7194519 |
| <b>P14046</b> | <b>A1I3 Alpha_1_inhibitor 3</b>                  | <b>0.978625946</b> | <b>0.9972214</b> | <b>6</b>  |
| P14046        | FSIDTNGISDYSLNK                                  | 1.053049347        | 2                | 2.4586737 |
| P14046        | GMYESLPVVAVK                                     | 0.880613227        | 2                | 3.2890451 |
| P14046        | ISLCHGNPTFSSETK                                  | 1.576140556        | 2                | 3.8617077 |
| P14046        | LVDIKGDPINEQVLK                                  | 1.112816096        | 2                | 3.4158614 |
| P14046        | QQNSYGGFSSTQDTVVALDALS                           | 1.232914435        | 2                | 4.3945489 |
| P14046        | QSPGPCGSEVATVPETGR                               | 0.764047251        | 2                | 3.3508172 |
| <b>P14141</b> | <b>CAH3 Carbonic anhydrase 3</b>                 | <b>1.257975282</b> | <b>1.743E-14</b> | <b>16</b> |
| P14141        | EAPFNHFDPSCLFPACR                                | 0.971840425        | 2                | 4.4245453 |
| P14141        | EKGEFQILLDALDK                                   | 1.106661866        | 2                | 4.522337  |
| P14141        | EKGEFQILLDALDKIK                                 | 1.399667663        | 2                | 3.57461   |
| P14141        | EPMTVSSDQMAK                                     | 1.463507052        | 1                | 2.9744194 |
| P14141        | EWGYASHNGPEHWHELYPIAK                            | 0.991463335        | 3                | 5.0320888 |
| P14141        | GDNQSPIELHTK                                     | 1.140989239        | 2                | 3.6487501 |
| P14141        | GEFQILLDALDK                                     | 1.338702913        | 2                | 4.7584085 |
| P14141        | GEFQILLDALDKIK                                   | 1.655208307        | 2                | 3.6720612 |
| P14141        | GGPLSGPYR                                        | 1.117967473        | 2                | 2.8002458 |
| P14141        | GKEAPFNHFDPSCLFPACR                              | 1.353018648        | 3                | 4.4520273 |
| P14141        | HDPSLQPWSVSYDPGSAK                               | 1.238856824        | 3                | 4.839396  |
| P14141        | QFHLHWGSSDDHGSEHTVDGVK                           | 1.347633816        | 2                | 4.729167  |
| P14141        | SLFASAENEPVPLVGNWRPPQPIK                         | 1.185816095        | 3                | 6.0168443 |
| P14141        | VVFDDTFDR                                        | 1.152086847        | 2                | 3.4308498 |
| P14141        | YAAELHLVHWNPK                                    | 1.11700607         | 2                | 4.419282  |
| P14141        | YNTFGEALKQPDGIAVVGIFLK                           | 1.16123745         | 3                | 5.9357924 |
| <b>P14173</b> | <b>DDC Aromatic_L_amino_acid decarboxylase</b>   | <b>1.233854653</b> | <b>0.0414698</b> | <b>8</b>  |
| P14173        | AGEGGVVIQGSASEATLVALLAAR                         | 1.276759988        | 2                | 4.9890213 |
| P14173        | ALIPTTAPQEPETYEDIIR                              | 1.09411192         | 2                | 3.8326135 |
| P14173        | GSNQLNETLLQR                                     | 1.244693268        | 2                | 3.0522089 |
| P14173        | HSHQDSGLITDYR                                    | 1.194991561        | 2                | 3.4650006 |
| P14173        | LVAYTSDQAHSSVER                                  | 1.421269142        | 2                | 4.5165138 |
| P14173        | MLELPEAFLAGR                                     | 1.123618614        | 2                | 2.6213171 |
| P14173        | TDLTEAFNMDPVYLR                                  | 1.210314071        | 2                | 3.707057  |
| P14173        | TVESAHVQLAWEHIR                                  | 1.149980819        | 3                | 4.5056987 |
| <b>P14408</b> | <b>FUMH Fumarate hydratase_mitochondrial</b>     | <b>1.139984362</b> | <b>0.0078276</b> | <b>15</b> |
| P14408        | AAAENVNQEYGLDPK                                  | 0.904958751        | 2                | 4.0144229 |
| P14408        | AIEMLGELGSK                                      | 0.96896216         | 2                | 3.9200883 |
| P14408        | IEYDTFGELK                                       | 0.973348341        | 2                | 3.1561105 |
| P14408        | IEYDTFGELKVPTDK                                  | 0.956036527        | 2                | 3.4780731 |
| P14408        | IYELAAGGTAVGTGLNTR                               | 1.084018733        | 2                | 5.473001  |
| P14408        | KTAIELGYLTAEQFDEWVKPK                            | 1.040917205        | 3                | 4.7354355 |
| P14408        | LMNESLMLVTALNPHIGYDK                             | 1.562697727        | 3                | 5.3836808 |
| P14408        | LNDHFPLVWVWQTGSGTQTNMNVNEVISNR                   | 0.983026223        | 3                | 6.5886908 |
| P14408        | SGLGELILPENEPGSSIMPGK                            | 0.975473122        | 2                | 4.7983832 |
| P14408        | SGLGELILPENEPGSSIMPGK+Oxidation(18)              | 1.085865638        | 2                | 3.2785299 |
| P14408        | SKEFAQVIK                                        | 1.066190215        | 2                | 2.323045  |
| P14408        | SQSSNDTFTAMHIAAALEVHQVLLPGLQK                    | 1.034452747        | 3                | 5.0333705 |
| P14408        | TAIELGYLTAEQFDEWVKPK                             | 1.23857725         | 2                | 4.8993907 |
| P14408        | THTQDAVPLTLGQEFSGYVQVQYAMER                      | 0.78417292         | 3                | 6.4089475 |

|               |                                                                 |                    |                  |           |
|---------------|-----------------------------------------------------------------|--------------------|------------------|-----------|
| P14408        | YYGAQTVR                                                        | 1.030338978        | 1                | 1.9230236 |
| <b>P14480</b> | <b>FIBB Fibrinogen beta chain</b>                               | <b>1.018224882</b> | <b>0.9814619</b> | <b>7</b>  |
| P14480        | DNENVINEYSSILEDQK                                               | 1.096511699        | 2                | 3.2713475 |
| P14480        | GFGNIATNEDTK                                                    | 1.038811521        | 2                | 3.0371857 |
| P14480        | GFGNIATNEDTKK                                                   | 1.018783961        | 2                | 3.1651423 |
| P14480        | LESDISAQTEYCHTPCTVNCNIPVVS GK                                   | 0.904985567        | 3                | 4.9903932 |
| P14480        | LYIDETVNDNIPLNLR                                                | 1.124096702        | 2                | 3.2658207 |
| P14480        | TENGGWTVIQNR                                                    | 0.800151272        | 2                | 2.7862735 |
| P14480        | YCGLPGEYWLGN DK                                                 | 0.920979006        | 2                | 3.2733171 |
| <b>P14604</b> | <b>ECHM Enoyl_CoA hydratase_mitochondrial</b>                   | <b>0.971607699</b> | <b>5.546E-09</b> | <b>10</b> |
| P14604        | AFAAGADIK                                                       | 1.023229168        | 2                | 3.0459158 |
| P14604        | AQFGQPEILLGTIPGAGGTQR                                           | 1.06178743         | 2                | 5.6951356 |
| P14604        | ESVNAAFEMTLTEGNKLEK                                             | 0.765306613        | 2                | 3.7358713 |
| P14604        | FLSHWDHITR                                                      | 1.110476228        | 2                | 3.1351862 |
| P14604        | IFPVETLVEEAIQCAEK                                               | 1.161222236        | 2                | 5.5326109 |
| P14604        | LFYSTFATDDR                                                     | 1.396997062        | 2                | 2.5204322 |
| P14604        | NSSVGLIQLNRPK                                                   | 1.110312516        | 2                | 3.4526443 |
| P14604        | SLAMEMVLTGDR                                                    | 0.898700545        | 2                | 3.6541717 |
| P14604        | SLAMEMVLTGDRISAQDAK+Oxidation(4)Oxidation(6)                    | 1.150181781        | 2                | 2.3572724 |
| P14604        | TFQDCYSGK                                                       | 0.992066738        | 2                | 2.5648146 |
| <b>P14668</b> | <b>ANXA5 Annexin A5</b>                                         | <b>1.110041561</b> | <b>2.214E-09</b> | <b>3</b>  |
| P14668        | ETSGNLELLAVVK                                                   | 0.963407786        | 2                | 2.5154805 |
| P14668        | GLGTDEDSILNLLTAR                                                | 1.755157511        | 2                | 4.5305133 |
| P14668        | GTVTDFSGFDGR                                                    | 0.926133379        | 2                | 2.9548297 |
| <b>P14669</b> | <b>ANXA3 Annexin A3</b>                                         | <b>1.181072905</b> | <b>0.0028907</b> | <b>8</b>  |
| P14669        | GMGTDEDTLIEILTTR                                                | 1.295299413        | 2                | 4.2897577 |
| P14669        | GTINNYPGFNPSVDAEAIR                                             | 0.954287751        | 2                | 3.6260941 |
| P14669        | KDAQTLYDAGEK                                                    | 1.232155893        | 2                | 2.9438307 |
| P14669        | KDAQTLYDAGEKK                                                   | 1.057707793        | 2                | 3.3312204 |
| P14669        | QYQEAYEQALK                                                     | 1.012934802        | 2                | 3.0187275 |
| P14669        | SEIDLLDIR                                                       | 1.044832936        | 2                | 2.6848454 |
| P14669        | TLINILTER                                                       | 1.32483063         | 2                | 2.9443104 |
| P14669        | WGTDDEKFTAILCLR                                                 | 1.752193223        | 2                | 3.5599699 |
| <b>P14685</b> | <b>PSMD3 26S proteasome non_ATPase regulatory subunit 3</b>     | <b>1.066505676</b> | <b>0.9678652</b> | <b>3</b>  |
| P14685        | AIQLEYSEAR                                                      | 1.001425632        | 2                | 2.7169499 |
| P14685        | LQLDSPEDAEIFIVAK                                                | 1.086411577        | 2                | 3.8931239 |
| P14685        | SVFPEQANNNEWAR                                                  | 0.955291351        | 2                | 2.5304387 |
| <b>P14740</b> | <b>DPP4 Dipeptidyl peptidase 4</b>                              | <b>1.269315922</b> | <b>0.2862723</b> | <b>3</b>  |
| P14740        | LGTLEVEDQIEAAR                                                  | 0.984438365        | 2                | 3.9405715 |
| P14740        | VLEDNSALDK                                                      | 1.279017159        | 2                | 3.0424285 |
| P14740        | YMGLPTPEDNLDHYR                                                 | 0.989961113        | 2                | 2.4670937 |
| <b>P14882</b> | <b>PCCA Propionyl_CoA carboxylase alpha chain_mitochondrial</b> | <b>0.851998971</b> | <b>0.6506413</b> | <b>11</b> |
| P14882        | FLSDVYPDGFK                                                     | 0.945085866        | 2                | 3.0075233 |
| P14882        | FSSQEAASSFGDDR                                                  | 0.897684092        | 2                | 3.7954957 |
| P14882        | HGNALWLNER                                                      | 0.802786003        | 2                | 2.935957  |
| P14882        | HIEIQVLGDK                                                      | 0.874056391        | 2                | 2.3639359 |
| P14882        | LHDEDHTVVASNNNGPTFNVEVDGSK                                      | 1.164889898        | 3                | 5.7812934 |
| P14882        | LQVEHPVTECITGLDLVQEMILVAK                                       | 1.226714697        | 3                | 4.0708766 |
| P14882        | MADEAVCVGPAPTSK                                                 | 0.839749239        | 2                | 4.1836529 |
| P14882        | SYLNMDAIMEAIKK                                                  | 0.805091256        | 2                | 2.4174359 |
| P14882        | TGAQAVHPGYGFLENK                                                | 1.005355419        | 2                | 3.527343  |
| P14882        | TVAIHSDVDASSVHVK                                                | 0.883636018        | 2                | 3.4825203 |
| P14882        | VVEEAPSIFLDPETR                                                 | 0.996520136        | 2                | 4.0932498 |
| <b>P14942</b> | <b>GSTA4 Glutathione S_transferase alpha_4</b>                  | <b>1.103203871</b> | <b>0.000887</b>  | <b>2</b>  |
| P14942        | KPPPDGHYVDVVR                                                   | 1.10354991         | 2                | 2.905154  |

|               |                                                                        |                    |                  |           |
|---------------|------------------------------------------------------------------------|--------------------|------------------|-----------|
| P14942        | YFPVFEK                                                                | 1.048661519        | 1                | 1.9120909 |
| <b>P15083</b> | <b>PIGR Polymeric immunoglobulin receptor</b>                          | <b>1.164155074</b> | <b>0.270522</b>  | <b>4</b>  |
| P15083        | EIQNAGDQAQENR                                                          | 1.223579237        | 2                | 3.8689206 |
| P15083        | FSVLITGLR                                                              | 1.09033784         | 2                | 2.6145678 |
| P15083        | GVTGGSVAIVCPYNPK                                                       | 1.120147137        | 2                | 4.0694828 |
| P15083        | SSVTFECDLGR                                                            | 1.120339566        | 2                | 2.6351795 |
| <b>P15149</b> | <b>CP2A2 Cytochrome P450 2A2</b>                                       | <b>1.19394453</b>  | <b>5.184E-05</b> | <b>11</b> |
| P15149        | DVQECILEEAGYLIK                                                        | 1.006825471        | 3                | 3.62181   |
| P15149        | DVYSSITQLSER                                                           | 0.92434704         | 2                | 2.9051001 |
| P15149        | FKFPMNLEDINEYPSPIGFTR                                                  | 1.037076393        | 3                | 4.6510763 |
| P15149        | FSNLAPLGIPR                                                            | 1.22468119         | 2                | 3.2105291 |
| P15149        | GELPTFNILFK                                                            | 1.327070952        | 2                | 2.3923621 |
| P15149        | GTDVFPPIIGSLMTEPK                                                      | 1.211241366        | 2                | 4.1620417 |
| P15149        | GYGFSLSNVEQAK                                                          | 1.044648583        | 2                | 3.4036746 |
| P15149        | IVVLYGYDAVK                                                            | 1.345816984        | 2                | 2.6736283 |
| P15149        | NFIDSFLIR                                                              | 1.398891809        | 2                | 2.9641678 |
| P15149        | TLQGTGCGAPIDPSIYLSK                                                    | 1.327170938        | 2                | 4.6770649 |
| P15149        | TVSNVINSIVFGNR                                                         | 1.009812524        | 2                | 3.091063  |
| <b>P15178</b> | <b>SYDC Aspartyl_tRNA synthetase_cytoplasmic</b>                       | <b>1.269187535</b> | <b>9.9E-20</b>   | <b>2</b>  |
| P15178        | FQTEIQTVNK                                                             | 1.077480363        | 2                | 2.5563555 |
| P15178        | QMVKFAANINK+Oxidation(2)                                               | 1.28606324         | 2                | 2.8045237 |
| <b>P15429</b> | <b>ENOB Beta_enolase</b>                                               | <b>1.173358463</b> | <b>0.9999887</b> | <b>5</b>  |
| P15429        | DATNVGDEGGFAPNILENNEALELLK                                             | 0.864595785        | 3                | 5.5292125 |
| P15429        | HIADLAGNPDVLPVPFVINGGSHAGNK                                            | 1.096552676        | 3                | 4.766696  |
| P15429        | IEEALGDK                                                               | 1.144211394        | 1                | 2.3164325 |
| P15429        | TAIQAAGYPPDK                                                           | 0.88786141         | 2                | 2.4404011 |
| P15429        | VNQIGSVTESIQACK                                                        | 1.025145059        | 2                | 5.1829333 |
| <b>P15650</b> | <b>ACADL Long_chain specific acyl_CoA dehydrogenase_mitochondrial</b>  | <b>1.134845701</b> | <b>9.9E-20</b>   | <b>22</b> |
| P15650        | AFVDSCLQLHETK                                                          | 1.243890336        | 2                | 4.0896587 |
| P15650        | AQDTAELFFEDVR                                                          | 1.609470142        | 2                | 4.8764501 |
| P15650        | AQDTAELFFEDVRLPASALLGEENK                                              | 1.261527333        | 3                | 5.3053589 |
| P15650        | CIGAIAMTEPGAGSDLQGVR                                                   | 0.854313765        | 2                | 5.2754688 |
| P15650        | CIGAIAMTEPGAGSDLQGVR+Oxidation(7)                                      | 1.181578715        | 2                | 5.1806374 |
| P15650        | EQJIEQFIPQMTAGK                                                        | 0.668035517        | 2                | 4.3978658 |
| P15650        | FFQEEVIPYHEEWEK                                                        | 1.973852953        | 2                | 4.9906664 |
| P15650        | GFYYLMQELPQER                                                          | 1.698801363        | 2                | 4.2875638 |
| P15650        | IFSEHDIFR                                                              | 1.245704186        | 2                | 2.9339876 |
| P15650        | KFFQEEVIPYHEEWEK                                                       | 1.743025613        | 2                | 5.1970758 |
| P15650        | KLTDIGIR                                                               | 1.050316968        | 2                | 2.4301608 |
| P15650        | LDSASASMAK                                                             | 1.029308924        | 1                | 2.3314831 |
| P15650        | LDSASASMAK+Oxidation(8)                                                | 1.214057472        | 2                | 2.5286517 |
| P15650        | LPASALLGEENK                                                           | 0.964253471        | 2                | 2.6773019 |
| P15650        | LTDIGIR                                                                | 1.020338035        | 2                | 2.3446455 |
| P15650        | QGLLGINIAEK                                                            | 0.924237295        | 2                | 3.2537122 |
| P15650        | RLDSASASMAK                                                            | 0.951969948        | 2                | 3.5289042 |
| P15650        | RLDSASASMAK+Oxidation(9)                                               | 1.121607922        | 2                | 3.0767043 |
| P15650        | SGSDWILNGSK                                                            | 0.98339442         | 1                | 2.2756648 |
| P15650        | TNICVTR                                                                | 0.87031946         | 2                | 2.5019915 |
| P15650        | VQPIYGGTNEIMK                                                          | 0.965626338        | 2                | 3.4276183 |
| P15650        | VQPIYGGTNEIMK+Oxidation(12)                                            | 1.148687146        | 2                | 2.7003136 |
| <b>P15651</b> | <b>ACADS Short_chain specific acyl_CoA dehydrogenase_mitochondrial</b> | <b>0.864102548</b> | <b>2.22E-16</b>  | <b>9</b>  |
| P15651        | ASSTANLIFDCR                                                           | 0.930852795        | 2                | 3.2079856 |
| P15651        | EEGDSWVLNGTK                                                           | 0.853031874        | 2                | 2.9637849 |
| P15651        | ELVPIAAQLDK                                                            | 0.691943652        | 2                | 2.4764526 |
| P15651        | ELVPIAAQLDKEHLFPTSQVK                                                  | 0.204240224        | 2                | 4.6881771 |

|               |                                                                        |                    |                  |           |
|---------------|------------------------------------------------------------------------|--------------------|------------------|-----------|
| P15651        | GISAFVPMPTPGLTLGK                                                      | 0.786813748        | 2                | 3.0539794 |
| P15651        | IGCFALSEPGENSDAGAASTTAR                                                | 1.302385002        | 2                | 5.8613815 |
| P15651        | IGIASQALGIAQASLDCAVK                                                   | 1.201052491        | 3                | 4.7201471 |
| P15651        | ITEIYEGTSEIQR                                                          | 0.886443305        | 2                | 4.9782033 |
| P15651        | LAASEAATAISHQAIQILGGMGYVTEMPAER                                        | 1.148263915        | 3                | 3.3403876 |
| <b>P15684</b> | <b>AMPN Aminopeptidase N</b>                                           | <b>1.10122621</b>  | <b>0.0681096</b> | <b>4</b>  |
| P15684        | ALGDTAPAPNIDTTELVER                                                    | 1.270679295        | 2                | 4.1777353 |
| P15684        | AQIHDSFNLASAGK                                                         | 1.099262361        | 2                | 3.2882061 |
| P15684        | LRSALACSNEVWILNR                                                       | 1.124096702        | 2                | 2.3492599 |
| P15684        | VVATTQMQAADAR                                                          | 1.057938983        | 2                | 3.7863493 |
| <b>P15709</b> | <b>ST2A1 Bile salt sulfotransferase</b>                                | <b>0.992517082</b> | <b>0.999426</b>  | <b>2</b>  |
| P15709        | NHFTVSQAEAFDK                                                          | 0.867345654        | 2                | 4.0387745 |
| P15709        | SIFTGIGLMR                                                             | 0.774742759        | 2                | 2.6950939 |
| <b>P15919</b> | <b>RAG1 V(D)J recombination_activating protein 1</b>                   | <b>0.881045422</b> | <b>0.1725257</b> | <b>2</b>  |
| P15919        | EEGGDVKAVCLTLFLLALR                                                    | 0.917907885        | 2                | 2.5606124 |
| P15919        | SQDLDDYLNPFVTVVK                                                       | 0.626387826        | 2                | 2.5728395 |
| <b>P15978</b> | <b>HA11 Class I histocompatibility antigen_Non_RT1.A alpha_1 chain</b> | <b>1.121625912</b> | <b>3.208E-05</b> | <b>3</b>  |
| P15978        | GYEQHAYDGR                                                             | 3.915510857        | 2                | 2.8114197 |
| P15978        | VEHEGLPEPLSQR                                                          | 1.023604085        | 2                | 3.1261294 |
| P15978        | YSDAENPR                                                               | 1.895488685        | 2                | 2.4716017 |
| <b>P15999</b> | <b>ATPA ATP synthase subunit alpha_mitochondrial</b>                   | <b>0.984770683</b> | <b>0.0002267</b> | <b>24</b> |
| P15999        | AVDSLPIGR                                                              | 0.997344046        | 2                | 3.6285243 |
| P15999        | EVAFAQFGSDLDAAATQQLSR                                                  | 1.185060167        | 2                | 6.790813  |
| P15999        | FESAFSLSHVVSQHQSLGNIR                                                  | 1.21101623         | 3                | 6.0959535 |
| P15999        | GIRPAINVGLSVSR                                                         | 1.017323561        | 3                | 3.8625407 |
| P15999        | GMSLNLEPDNVGVVFGNDK                                                    | 1.261691001        | 2                | 5.740315  |
| P15999        | GMSLNLEPDNVGVVFGNDK+Oxidation(2)                                       | 1.020413245        | 2                | 4.2882786 |
| P15999        | GYLDKLEPSK                                                             | 1.082891125        | 1                | 3.0063982 |
| P15999        | ILGADTSVDLEETGR                                                        | 1.048553181        | 2                | 5.0628414 |
| P15999        | LELAQYR                                                                | 1.001696549        | 2                | 2.7256613 |
| P15999        | LKEIVTNFLAGFEP                                                         | 1.985791198        | 2                | 3.059031  |
| P15999        | LTDADAMK                                                               | 0.766012514        | 2                | 2.553508  |
| P15999        | LYCIYVAIGQK                                                            | 1.088423578        | 2                | 2.7127094 |
| P15999        | NVQAEMVFEFSSGLK                                                        | 1.031693997        | 2                | 4.3384008 |
| P15999        | QGQYSPMAIEEQVAVIYAGVR                                                  | 1.158066815        | 3                | 5.2536821 |
| P15999        | RLTDADAMK                                                              | 0.876193373        | 2                | 2.6009259 |
| P15999        | RLTDADAMK+Oxidation(8)                                                 | 1.047081682        | 2                | 2.3262055 |
| P15999        | RTGAIVDVPVGDPELLGR                                                     | 0.956650436        | 2                | 3.9142559 |
| P15999        | STVAQLVK                                                               | 0.927518818        | 2                | 2.3953402 |
| P15999        | TGAIVDVPVGDPELLGR                                                      | 1.040538488        | 2                | 4.7202001 |
| P15999        | TGTAEMSSILEER                                                          | 0.824476369        | 2                | 4.4868016 |
| P15999        | TGTAEMSSILEER+Oxidation(6)                                             | 0.774558233        | 2                | 3.154788  |
| P15999        | TSIAIDTIINQK                                                           | 0.946344177        | 2                | 4.673265  |
| P15999        | VLSIGDGIAR                                                             | 0.908781088        | 2                | 3.1610441 |
| P15999        | VVDALGNAIDGK                                                           | 1.058223591        | 2                | 4.481195  |
| <b>P16036</b> | <b>MPCP Phosphate carrier protein_mitochondrial</b>                    | <b>0.994340423</b> | <b>0.8856219</b> | <b>8</b>  |
| P16036        | ALYSNILGEENTYLWR                                                       | 1.316010251        | 2                | 3.1701744 |
| P16036        | EEGLNAFYK                                                              | 0.988063465        | 1                | 2.4045205 |
| P16036        | FGFYEVFK                                                               | 1.143452054        | 1                | 2.2584171 |
| P16036        | GIFNGFSITLK                                                            | 1.138622085        | 2                | 3.3359499 |
| P16036        | GSTASQVLQR                                                             | 0.995785149        | 2                | 3.3010981 |
| P16036        | GWAPTLIGYSMQGLCK                                                       | 1.149287274        | 2                | 2.9580948 |
| P16036        | IQTQPGYANTLR                                                           | 1.130743174        | 2                | 3.7736239 |
| P16036        | MYKEEGLNAFYK                                                           | 0.945405676        | 3                | 3.4672356 |
| <b>P16086</b> | <b>SPTA2 Spectrin alpha chain_brain</b>                                | <b>0.972781482</b> | <b>9.9E-20</b>   | <b>28</b> |
| P16086        | ALINADELANDVAGAEALLDR                                                  | 1.067463446        | 2                | 4.8637886 |



|               |                                                            |                    |                  |           |
|---------------|------------------------------------------------------------|--------------------|------------------|-----------|
| P16086        | ALSSEGKPYVTK                                               | 1.153979012        | 2                | 2.9209118 |
| P16086        | DLASVQALLR                                                 | 1.051865479        | 2                | 2.9585948 |
| P16086        | DLSSVQTLTK                                                 | 1.198282996        | 2                | 2.5370488 |
| P16086        | GVIDMGNSLIER                                               | 0.862107235        | 2                | 2.956038  |
| P16086        | HQAFAEELSANQSR                                             | 1.122983747        | 2                | 4.1236067 |
| P16086        | HQALQAEIAGHEPR                                             | 1.077528072        | 3                | 4.1489558 |
| P16086        | HQLLEADISAHEDR                                             | 1.214863647        | 3                | 3.7884815 |
| P16086        | KFEFQTDLAAHEER                                             | 1.018595346        | 3                | 5.3166862 |
| P16086        | LFGAAEVQR                                                  | 1.111331309        | 2                | 2.511529  |
| P16086        | LGDSHDLQR                                                  | 1.157535583        | 2                | 3.1570537 |
| P16086        | LGESQTLQQFSR                                               | 1.050827511        | 2                | 3.4341722 |
| P16086        | LIQEQHPPEELIK                                              | 1.332794921        | 2                | 3.5548289 |
| P16086        | LQSSHPLSANQIQVK                                            | 1.360029737        | 2                | 4.2420053 |
| P16086        | LQTASDESYKDPTNIQSK                                         | 1.141958503        | 2                | 4.5111818 |
| P16086        | LQVASDENYKDPTNLQGK                                         | 1.134220286        | 2                | 5.5326238 |
| P16086        | LSDDNTIGQEEIQR                                             | 1.128292384        | 2                | 3.2777319 |
| P16086        | MTLVASEDYGDTLAAIQGLLK                                      | 0.97984441         | 2                | 4.3701534 |
| P16086        | NQALNTDNYGHDLASVQALQR                                      | 1.228680501        | 2                | 5.7536917 |
| P16086        | QFQDAGHFDAENIKK                                            | 1.05288917         | 2                | 2.5564783 |
| P16086        | REELITNWEQIR                                               | 1.282581668        | 2                | 4.1187572 |
| P16086        | SQLLGSAAHEVQR                                              | 0.693388387        | 2                | 3.22964   |
| P16086        | SSLSSAQADFNQLAELDR                                         | 1.190984412        | 2                | 5.2095456 |
| P16086        | TATDEAYKDPNSLQGK                                           | 1.035105481        | 2                | 3.6773653 |
| P16086        | TKQEEVNAAWQR                                               | 1.282782955        | 2                | 2.9357345 |
| P16086        | VLETAEDIQER                                                | 0.761635081        | 2                | 3.4898539 |
| P16086        | VNDVCTNGQDLIK                                              | 1.238989721        | 2                | 3.2017972 |
| P16086        | VNSLGETAQR                                                 | 1.19216509         | 2                | 2.6881433 |
| <b>P16232</b> | <b>DH11 Corticosteroid 11_beta_dehydrogenase isozyme 1</b> | <b>1.037125321</b> | <b>0.9199111</b> | <b>9</b>  |
| P16232        | EECALEIIK                                                  | 0.934095039        | 1                | 2.0132904 |
| P16232        | ETSGIILSQAAPK                                              | 1.058136316        | 2                | 3.505044  |
| P16232        | FALDGGFFSTIR                                               | 1.075575715        | 2                | 2.4307194 |
| P16232        | FVVEAGK                                                    | 0.957056215        | 1                | 1.9198318 |
| P16232        | IMEFSLR                                                    | 2.476489726        | 2                | 2.5104089 |
| P16232        | KDEVYYDK                                                   | 0.998068589        | 1                | 2.7309873 |
| P16232        | MGAHVVLTR                                                  | 1.158468062        | 2                | 2.878897  |
| P16232        | MTQPLIASYSASK                                              | 0.922331609        | 2                | 3.3969297 |
| P16232        | SSWTPLLGNPGR                                               | 1.011830582        | 2                | 3.6514499 |
| <b>P16290</b> | <b>PGAM2 Phosphoglycerate mutase 2</b>                     | <b>1.181533327</b> | <b>0.2342197</b> | <b>5</b>  |
| P16290        | AMEAVAAQ GK                                                | 0.920573445        | 2                | 2.5931964 |
| P16290        | AMEAVAAQ GK+Oxidation(2)                                   | 1.237039662        | 2                | 2.4367595 |
| P16290        | HGESSWNQENR                                                | 1.181358203        | 2                | 3.6231818 |
| P16290        | HYGGLTGLNK                                                 | 1.041578658        | 1                | 3.137686  |
| P16290        | VLIAAHGNSLR                                                | 1.196934606        | 2                | 2.6736262 |
| <b>P16303</b> | <b>CES3 Carboxylesterase 3</b>                             | <b>0.99370373</b>  | <b>0.0035745</b> | <b>18</b> |
| P16303        | AISESGVVLTSALITTDSPKPIANLIATLSGCK                          | 1.083917321        | 3                | 5.5584817 |
| P16303        | AKEAAEESHWK                                                | 1.124919574        | 2                | 4.024045  |
| P16303        | DGASEEETNLSK                                               | 0.916375041        | 2                | 4.1128464 |
| P16303        | EAAEESHWK                                                  | 1.025529414        | 2                | 2.784586  |
| P16303        | ENIPLQFSEDCLYLNVTYPADLTK                                   | 1.334518836        | 2                | 4.283071  |
| P16303        | ESYPFLPTVIDGVVLPK                                          | 0.949714645        | 3                | 4.1107378 |
| P16303        | FAPPQPAEPWNFVK                                             | 1.642135168        | 1                | 2.4703956 |
| P16303        | IGASTQAAQR                                                 | 0.374396668        | 2                | 3.3016329 |
| P16303        | LDLLGNPK                                                   | 1.055156894        | 2                | 2.33394   |
| P16303        | MIPVVAEK                                                   | 0.958690321        | 1                | 1.9502487 |
| P16303        | QFEGWIIPTLMGYPLSEGK                                        | 1.185103004        | 3                | 4.0910549 |
| P16303        | QKTEDELLETSLK                                              | 1.049456137        | 2                | 3.6031823 |

|               |                                                    |                    |                  |           |
|---------------|----------------------------------------------------|--------------------|------------------|-----------|
| P16303        | SFNTVPYIVGINK                                      | 1.077090585        | 2                | 2.8977656 |
| P16303        | TEDELLETSK                                         | 0.940585766        | 2                | 3.5917068 |
| P16303        | TTTSAVMMVHCLR                                      | 1.11557159         | 2                | 3.0624206 |
| P16303        | TVIGDHGDELFSVFGSPFLK                               | 1.669060566        | 2                | 5.3946042 |
| P16303        | YFGGTDDPAK                                         | 0.959864821        | 2                | 3.2463555 |
| P16303        | YVNLEGFAQPVAVFLGIPFAKPPLGSLR                       | 0.995040013        | 3                | 3.7450621 |
| <b>P16332</b> | <b>MUTA Methylmalonyl_CoA mutase_mitochondrial</b> | <b>0.875383235</b> | <b>0.7949572</b> | <b>5</b>  |
| P16332        | EVAQQAVDADVHAVGVSTLAAGHK                           | 1.10603358         | 3                | 3.4128437 |
| P16332        | GDVGMAGVAIDTVEDTK                                  | 1.026111695        | 2                | 3.4634907 |
| P16332        | IDSGSEVIVGVNK                                      | 0.994087955        | 2                | 4.0198784 |
| P16332        | NTQIIIQEESGIPK                                     | 1.04380799         | 2                | 3.0231898 |
| P16332        | TGLQAGLTIDEFAPR                                    | 0.86511341         | 2                | 3.6599896 |
| <b>P16409</b> | <b>MYL3 Myosin light chain 3</b>                   | <b>0.99911607</b>  | <b>0.9936242</b> | <b>10</b> |
| P16409        | AAPAPAAAAPAAPEPERPK                                | 0.928950141        | 2                | 4.0320616 |
| P16409        | ALGQNPTQAEVLR                                      | 0.900128032        | 2                | 4.4012899 |
| P16409        | DTGTIEDFVEGLR                                      | 1.193091928        | 2                | 2.98157   |
| P16409        | EGNGTVMGAELR                                       | 0.980549563        | 2                | 2.5300565 |
| P16409        | IEFTPEQJEEFK                                       | 0.761467654        | 2                | 2.3325291 |
| P16409        | LMAGQEDSNGCINYEAFVK                                | 1.137742758        | 2                | 4.9269366 |
| P16409        | LTEDEVEK                                           | 0.788266619        | 1                | 2.1969726 |
| P16409        | MMDFETFLPMLQHISK                                   | 1.147626067        | 3                | 4.0222716 |
| P16409        | NKDTGTIEDFVEGLR                                    | 0.934423129        | 2                | 4.1889482 |
| P16409        | VFDKEGNGTVMGAELR                                   | 1.210810587        | 2                | 3.9720469 |
| <b>P16617</b> | <b>PGK1 Phosphoglycerate kinase 1</b>              | <b>1.210903849</b> | <b>9.9E-20</b>   | <b>18</b> |
| P16617        | AHSSMVGVNLPQK                                      | 1.001818793        | 3                | 3.7773898 |
| P16617        | AHSSMVGVNLPQK+Oxidation(5)                         | 1.263175672        | 2                | 2.46347   |
| P16617        | ALESPERFLAILGGAK                                   | 1.257709716        | 3                | 4.5970688 |
| P16617        | DCVSGSEVENACANPAAGTVILLENLR                        | 1.406909918        | 3                | 6.3640881 |
| P16617        | GCITIIGGGDTATCCAK                                  | 1.047312929        | 2                | 5.5371351 |
| P16617        | IQLINMLDK                                          | 0.915860153        | 2                | 2.7948496 |
| P16617        | IQLINMLDK+Oxidation(7)                             | 2.13473727         | 1                | 2.0273461 |
| P16617        | ITLPVDFVTADK                                       | 1.128893618        | 2                | 2.3300982 |
| P16617        | ITLPVDFVTADKFDENAK                                 | 1.863494533        | 2                | 5.1840281 |
| P16617        | QIVWNGPVGVEWEAFAR                                  | 1.451152047        | 2                | 4.1249385 |
| P16617        | SLMDEVVK                                           | 0.959918157        | 2                | 2.3134365 |
| P16617        | SVVLMSHLGRPDGVPMPDKYSLEPVAELK                      | 1.231508651        | 4                | 5.281949  |
| P16617        | TGQATVASGIPAGWMLDCGTESSK                           | 0.936612826        | 2                | 4.7033095 |
| P16617        | TGQATVASGIPAGWMLDCGTESSK                           | 1.112371727        | 3                | 4.2177167 |
| P16617        | VLNNMEIGTSLYDEEGAK                                 | 1.138812983        | 2                | 5.210412  |
| P16617        | VLPGVDAISNV                                        | 1.308525153        | 2                | 2.7588396 |
| P16617        | WNTEDKVSHVSTGGASLELLEGK                            | 1.007287253        | 3                | 4.6612725 |
| P16617        | YSLEPVAELK                                         | 1.083504849        | 2                | 3.1456161 |
| <b>P16638</b> | <b>ACLY ATP_citrate synthase</b>                   | <b>1.079301693</b> | <b>0.1012934</b> | <b>21</b> |
| P16638        | AFDSGIIPMEFVNK                                     | 1.204780892        | 2                | 4.1108575 |
| P16638        | DEPSVAAMVYPFTGDHK                                  | 0.917090002        | 2                | 2.6384342 |
| P16638        | DLVSSLTSGLLTIGDR                                   | 0.764312314        | 3                | 3.9229894 |
| P16638        | EAYPEEAYIADLDAK                                    | 1.120565612        | 2                | 3.0650792 |
| P16638        | EEADEYVDIGALNGVFLGR                                | 1.38677118         | 2                | 4.1997862 |
| P16638        | FGGALDAAK                                          | 1.048353982        | 2                | 2.8615983 |
| P16638        | GAIVPAQEVPPPTVPMDSWAR                              | 1.25152876         | 2                | 3.8102498 |
| P16638        | GVTIIGPATVGGIKPGCFK                                | 0.967362976        | 2                | 3.6288869 |
| P16638        | HLLVHAPEDKK                                        | 1.266890858        | 2                | 3.3634593 |
| P16638        | IGNTGGMMLDNILASK                                   | 1.562928081        | 2                | 3.2062242 |
| P16638        | LGLVGVNLSLDGVK                                     | 1.88399305         | 2                | 2.3162496 |
| P16638        | QHFPATPLLDYALEVEK                                  | 1.104569917        | 3                | 4.2425632 |
| P16638        | RGGPNYQEGLR                                        | 1.124289229        | 2                | 3.218431  |
| P16638        | SAYDSTMETMNYAQIR                                   | 1.09240202         | 2                | 4.1171536 |

|               |                                                             |                    |                  |           |
|---------------|-------------------------------------------------------------|--------------------|------------------|-----------|
| P16638        | SGGMSNELNIIISR                                              | 0.962756769        | 2                | 3.7457998 |
| P16638        | TIAIAEGIPEALTR                                              | 1.038960884        | 2                | 4.0675392 |
| P16638        | TTDGVYEGVAIGGDR                                             | 1.004171547        | 2                | 2.871428  |
| P16638        | TTDGVYEGVAIGGDRYPGSTFMDHVLR                                 | 1.069772773        | 3                | 3.6203008 |
| P16638        | VDATADYICK                                                  | 1.047923098        | 2                | 2.5501351 |
| P16638        | WGDIFFPPFGR                                                 | 1.012688555        | 2                | 3.8323591 |
| P16638        | YICTTSAIQNR                                                 | 0.964331092        | 2                | 2.8839731 |
| <b>P16970</b> | <b>ABCD3 ATP_binding cassette sub_family D member 3</b>     | <b>1.00208546</b>  | <b>0.8716084</b> | <b>9</b>  |
| P16970        | DQVIYPDGKEDQK                                               | 0.778243019        | 2                | 3.2438521 |
| P16970        | EGGWDSVQDWMVDVLSGGEK                                        | 1.136594013        | 2                | 4.3829622 |
| P16970        | FDHVPLATPNGDILIQDLSFEVR                                     | 1.180044847        | 3                | 3.8569889 |
| P16970        | GIEGAQASPLIPGAGEIINADNIIK                                   | 0.768771171        | 3                | 5.1510429 |
| P16970        | GYLDNVQLGHILER                                              | 1.035726148        | 2                | 3.4231625 |
| P16970        | HLHSTHSELLEDYYSQGR                                          | 1.072748546        | 3                | 5.3303242 |
| P16970        | ITEDTVEFGS                                                  | 1.015040865        | 1                | 1.9023762 |
| P16970        | ITELMQVLK                                                   | 1.014242826        | 2                | 2.5229754 |
| P16970        | SGANVLICGPNCGCK                                             | 1.05646281         | 2                | 3.3038399 |
| <b>P17077</b> | <b>RL9 60S ribosomal protein L9</b>                         | <b>1.113828261</b> | <b>0.0428265</b> | <b>7</b>  |
| P17077        | DFNHINVELSLLGK                                              | 0.839045023        | 3                | 3.5150552 |
| P17077        | FLDGIYVSEK                                                  | 0.955724467        | 2                | 3.0594893 |
| P17077        | GTVQQPDE                                                    | 1.278826674        | 1                | 2.1825447 |
| P17077        | KFLDGIYVSEK                                                 | 1.14490117         | 2                | 2.9711883 |
| P17077        | TGVACSVSQAQK                                                | 1.011655345        | 2                | 3.2595336 |
| P17077        | TICSHVQNMIIK                                                | 1.063434963        | 2                | 3.6872633 |
| P17077        | TILSNQTVDIPENVDTLTK                                         | 1.019342265        | 2                | 4.8364129 |
| <b>P17078</b> | <b>RL35 60S ribosomal protein L35</b>                       | <b>1.1178292</b>   | <b>0.8544552</b> | <b>2</b>  |
| P17078        | QLDDLKVELSCLR                                               | 1.119504532        | 2                | 2.4937837 |
| P17078        | VLTVINQTK                                                   | 1.070655809        | 2                | 3.0241265 |
| <b>P17178</b> | <b>CP27A Sterol 26_hydroxylase_mitochondrial</b>            | <b>1.044907658</b> | <b>0.0236879</b> | <b>4</b>  |
| P17178        | DHESTEGPGTGQDRPR                                            | 1.251329608        | 2                | 2.7344172 |
| P17178        | TNVNLASAPLLEQVMR                                            | 1.061874553        | 2                | 4.1987352 |
| P17178        | VGCLEPSIPEDTATFIR                                           | 1.35169934         | 2                | 3.4205496 |
| P17178        | YEVVLSPGMGEVK                                               | 0.895205343        | 2                | 3.2635641 |
| <b>P17209</b> | <b>MYL4 Myosin light chain 4</b>                            | <b>0.99493086</b>  | <b>0.9114634</b> | <b>2</b>  |
| P17209        | HVLATLGEK                                                   | 0.940837376        | 1                | 2.5699668 |
| P17209        | ITYGQCQGDVLR                                                | 1.161026453        | 2                | 2.4754679 |
| <b>P17425</b> | <b>HMCS1 Hydroxymethylglutaryl_CoA synthase_cytoplasmic</b> | <b>0.694705741</b> | <b>0.9995524</b> | <b>11</b> |
| P17425        | ASAELFNQK                                                   | 0.738560422        | 2                | 2.5694838 |
| P17425        | GTHMQHAYDFYKPDMLSEYPVVDGK                                   | 0.692483644        | 3                | 5.3110361 |
| P17425        | ITASLCDLK                                                   | 0.911974705        | 1                | 1.9550804 |
| P17425        | LEDTYFDRDVEK                                                | 0.720459987        | 2                | 2.9957569 |
| P17425        | MFLNDFLNDQNR                                                | 0.745620036        | 2                | 2.8657718 |
| P17425        | MGFCTDREDINSLCLTVVQK                                        | 0.73421962         | 2                | 4.5483541 |
| P17425        | NSIYSGLEAFGDVK                                              | 0.891193602        | 2                | 2.7761977 |
| P17425        | NLSYDCIGR                                                   | 0.577847521        | 2                | 2.8601992 |
| P17425        | TCVAPDVFAENMK                                               | 0.795744828        | 2                | 3.6163747 |
| P17425        | VTQDATPGSALDK                                               | 0.968432034        | 2                | 3.6184819 |
| P17425        | YTIGLGQAR                                                   | 0.737537726        | 2                | 2.7852852 |
| <b>P17426</b> | <b>AP2A1 AP_2 complex subunit alpha_1</b>                   | <b>0.920847892</b> | <b>0.0445655</b> | <b>3</b>  |
| P17426        | FFQPTEMAAQDFQR+Oxidation(7)                                 | 1.396532546        | 2                | 3.552829  |
| P17426        | NADVLEQQR                                                   | 0.919581361        | 2                | 2.5056791 |
| P17426        | VGGYILGEFGNLIAGDPR                                          | 1.40561143         | 2                | 4.1695838 |
| <b>P17475</b> | <b>A1AT Alpha_1_antiproteinase</b>                          | <b>1.037880908</b> | <b>0.9978445</b> | <b>4</b>  |
| P17475        | MQHLEQTLTK                                                  | 0.84647822         | 2                | 2.6860693 |
| P17475        | TLLSSLGITR                                                  | 1.014821541        | 2                | 2.9033468 |
| P17475        | VFNNADLSGITEDAPLK                                           | 1.060769573        | 2                | 5.2122378 |

|               |                                                        |                    |                  |           |
|---------------|--------------------------------------------------------|--------------------|------------------|-----------|
| P17475        | VINDYVEK                                               | 0.955163756        | 1                | 2.2908292 |
| <b>P17764</b> | <b>TH1L Acetyl_CoA acetyltransferase_mitochondrial</b> | <b>1.13493303</b>  | <b>9.9E-20</b>   | <b>15</b> |
| P17764        | EEQDKYAIGSYTR                                          | 0.928367943        | 2                | 3.3949318 |
| P17764        | ENGTVTAANASTLNDGAAAVLMTAEAAQR                          | 1.219665156        | 2                | 4.5305452 |
| P17764        | EVYMGNVIQGGEGQAPTR                                     | 0.77027746         | 2                | 5.2477846 |
| P17764        | FANEITPITISVK                                          | 0.825613861        | 2                | 3.9775527 |
| P17764        | GKPDVVVKEDEEYK                                         | 1.100253425        | 2                | 3.6839931 |
| P17764        | GKPDVVVKEDEEYKR                                        | 1.006529375        | 2                | 4.6125164 |
| P17764        | IAAFADAAVDPIDFLAPAYAVPK                                | 1.522154645        | 2                | 5.2346807 |
| P17764        | IHMGNCAENTAK                                           | 1.329446435        | 2                | 3.4043753 |
| P17764        | IHMGNCAENTAK+Oxidation(3)                              | 1.603624909        | 2                | 3.4958847 |
| P17764        | LEDLIVK                                                | 0.976313254        | 2                | 2.4294677 |
| P17764        | LGTIAIQGAIEK                                           | 1.45484934         | 2                | 3.3040869 |
| P17764        | QATLGAGLPIATPCTTVNK                                    | 0.951187142        | 2                | 5.1021881 |
| P17764        | QGEFGLASICNGGGGASAVLIEK                                | 1.006282388        | 2                | 4.7348394 |
| P17764        | TPIGSFLGSLASQPATK                                      | 0.979130982        | 2                | 4.2109404 |
| P17764        | VNVHGGAVSLGHPIGMSGAR                                   | 0.996679172        | 2                | 5.7329583 |
| <b>P17879</b> | <b>HS71B Heat shock 70 kDa protein 1B</b>              | <b>1.122821587</b> | <b>0.9999999</b> | <b>3</b>  |
| P17879        | QTQFTTYSDNQPGVLIQVYEGER                                | 1.095783915        | 3                | 5.3336511 |
| P17879        | TTPSYVAFTDTER                                          | 1.147824419        | 2                | 3.5981739 |
| P17879        | VEIIANDQGNR                                            | 1.019468796        | 2                | 3.6672006 |
| <b>P17988</b> | <b>ST1A1 Sulfotransferase 1A1</b>                      | <b>1.222756204</b> | <b>2.571E-05</b> | <b>6</b>  |
| P17988        | CPGVPSGLETLEETPAPR                                     | 1.130176317        | 2                | 4.4953275 |
| P17988        | FDAHAYAK                                               | 0.920057712        | 2                | 2.356272  |
| P17988        | NTFTVAQNER                                             | 0.893689851        | 2                | 2.9880412 |
| P17988        | SLPEETVDSIVHHTSFK                                      | 1.25253681         | 2                | 4.5225987 |
| P17988        | THLPLSLLPQSLLDQK                                       | 1.455186072        | 2                | 5.0076628 |
| P17988        | YFAETIGPLQNFTAWPDDLITYPK                               | 1.339142236        | 3                | 4.1528797 |
| <b>P18163</b> | <b>ACSL1 Long_chain_fatty_acid_CoA ligase 1</b>        | <b>0.963230069</b> | <b>7.772E-16</b> | <b>27</b> |
| P18163        | AELSVIFADKPEK                                          | 1.14710303         | 2                | 3.5658476 |
| P18163        | AILEDNVK                                               | 0.92825807         | 2                | 2.4722548 |
| P18163        | ALEDLGR                                                | 0.940799091        | 2                | 2.4612808 |
| P18163        | ALKPPCDLSMQSVEVTGTTEGVR                                | 1.049509281        | 2                | 4.5549345 |
| P18163        | CGVEIIGLK                                              | 0.92096864         | 2                | 2.7045498 |
| P18163        | GAMVTHQNMNDCSGFIK                                      | 1.512557909        | 2                | 5.3329978 |
| P18163        | GFQGSFEELCR                                            | 1.052957084        | 2                | 3.3926487 |
| P18163        | GIAVHPELFSIDNGLLTPTLK                                  | 1.220275642        | 2                | 5.7272806 |
| P18163        | GIQVSNDBGPCLSGR                                        | 0.980896668        | 2                | 4.4857111 |
| P18163        | IENIYLR                                                | 0.992523271        | 2                | 2.9643557 |
| P18163        | IFGQANTSVK                                             | 1.133539424        | 2                | 2.605315  |
| P18163        | IIVIMDSYDNDLVER                                        | 1.299910577        | 2                | 4.929256  |
| P18163        | LLLEGVENK                                              | 1.109025116        | 2                | 3.1836181 |
| P18163        | LLMDDLK                                                | 0.933447172        | 2                | 2.4259305 |
| P18163        | LMITGAAPVSATVLTFLR                                     | 1.550770193        | 3                | 4.1448779 |
| P18163        | LVDVEDMNYQAAK                                          | 1.119782897        | 2                | 4.5777931 |
| P18163        | LVDVEDMNYQAAK+Oxidation(7)                             | 0.981938916        | 2                | 2.7624924 |
| P18163        | NAGLKPFEQVK                                            | 0.983684286        | 2                | 4.0046873 |
| P18163        | QVAEMAECIGSALIQK                                       | 1.010981092        | 2                | 5.2526703 |
| P18163        | SAVLEDDKLLLYYDDVR                                      | 2.417038961        | 2                | 4.234345  |
| P18163        | SQIDELYSTIK                                            | 1.077029135        | 2                | 3.7666001 |
| P18163        | SQIDELYSTIKI                                           | 1.279992683        | 2                | 3.1164207 |
| P18163        | TAEALDKDGLWHTGDIGK                                     | 1.036974571        | 2                | 5.3541727 |
| P18163        | TKPKPPEPEDLAIICFTSGTTGNPK                              | 1.343291512        | 3                | 6.1874561 |
| P18163        | TMYDGFQR                                               | 1.014701485        | 1                | 1.9134674 |
| P18163        | VLQPTIFPVVPR                                           | 1.088764116        | 2                | 3.6769605 |
| P18163        | WLLDFASK                                               | 1.03331795         | 2                | 2.6124556 |
| <b>P18297</b> | <b>SPRE Sepiapterin reductase</b>                      | <b>0.949341581</b> | <b>0.0184348</b> | <b>5</b>  |

|               |                                                                  |                    |                  |           |
|---------------|------------------------------------------------------------------|--------------------|------------------|-----------|
| P18297        | ALAPQLAGLLSPGSVLLLSAR                                            | 1.257323522        | 3                | 3.9368155 |
| P18297        | LLINNAGTLGDVSK                                                   | 1.469610288        | 2                | 3.0293787 |
| P18297        | LNSEGELVDCGTSAQK                                                 | 0.948225943        | 2                | 4.9521351 |
| P18297        | TVVNISSCALQPFK                                                   | 1.084468643        | 2                | 3.1312487 |
| P18297        | VLSYAPGPLDTNMQQLAR                                               | 1.168610391        | 2                | 2.744344  |
| <b>P18298</b> | <b>METK2 S_adenosylmethionine synthase isoform type_2</b>        | <b>1.257013909</b> | <b>0.1676444</b> | <b>3</b>  |
| P18298        | IIVDTYGGWGAHGGAFFSGK                                             | 1.258587766        | 2                | 5.6440458 |
| P18298        | KIIVDTYGGWGAHGGAFFSGK                                            | 0.953052743        | 3                | 3.4237409 |
| P18298        | YLDEDTIYHLQPSGR                                                  | 1.100334868        | 2                | 4.3898339 |
| <b>P18418</b> | <b>CALR Calreticulin</b>                                         | <b>1.220932865</b> | <b>9.9E-20</b>   | <b>17</b> |
| P18418        | AKIDDPDTSKPEDWDKPEHIPDPAK                                        | 1.304447033        | 3                | 6.036489  |
| P18418        | CKDDEFTHLYTLIVRPDNTYEVK                                          | 1.220054523        | 3                | 5.4123049 |
| P18418        | DMHGDSEYNIMFGPDICGPGTK                                           | 1.003912439        | 2                | 6.1950693 |
| P18418        | FYALSAR                                                          | 1.528866851        | 2                | 2.3282418 |
| P18418        | FYGDQEK                                                          | 1.124669994        | 1                | 2.0283704 |
| P18418        | FYGDQEKDK                                                        | 1.204311135        | 1                | 2.8199506 |
| P18418        | GQTLVVQFTVK                                                      | 1.05715565         | 2                | 3.81691   |
| P18418        | HEQNIDCGGGYVK                                                    | 1.113076332        | 2                | 4.3735223 |
| P18418        | IDDPDTSKPEDWDKPEHIPDPAK                                          | 1.158492952        | 4                | 4.6652212 |
| P18418        | IDNSQVESGSLEDDWDFLPPK                                            | 1.296539443        | 2                | 5.5174975 |
| P18418        | IDNSQVESGSLEDDWDFLPPK                                            | 1.299838892        | 2                | 5.0499601 |
| P18418        | IKDPDAAKPEDWDER                                                  | 1.202954031        | 2                | 4.3688407 |
| P18418        | KPEDWDEEMDGEWEPPIQNPEYK                                          | 1.033691038        | 3                | 5.7002869 |
| P18418        | LFPGLDQK                                                         | 1.41139828         | 2                | 2.3398409 |
| P18418        | QIDNPDYK                                                         | 1.25249152         | 1                | 1.9523842 |
| P18418        | SGTIFDNFLITNDEAYAEFNETWGVTK                                      | 1.659730765        | 3                | 5.4944816 |
| P18418        | VHVIFNYK                                                         | 1.239133601        | 1                | 2.3441398 |
| <b>P18420</b> | <b>PSA1 Proteasome subunit alpha type_1</b>                      | <b>1.084370345</b> | <b>0.9895174</b> | <b>2</b>  |
| P18420        | AQPSQAADEPAEK                                                    | 1.086401323        | 2                | 3.6064031 |
| P18420        | IHQIYAMEAVK                                                      | 1.009177502        | 2                | 2.3003085 |
| <b>P18421</b> | <b>PSB1 Proteasome subunit beta type_1</b>                       | <b>1.230845563</b> | <b>1.019E-13</b> | <b>2</b>  |
| P18421        | AGGSASAMLQPLLDNQVGFK                                             | 1.302725054        | 2                | 4.7960033 |
| P18421        | NMQNVEHVPLTLDR                                                   | 1.013002688        | 2                | 3.781368  |
| <b>P18422</b> | <b>PSA3 Proteasome subunit alpha type_3</b>                      | <b>1.127233106</b> | <b>0.1140642</b> | <b>3</b>  |
| P18422        | AVENSSTAIGIR                                                     | 1.127389725        | 2                | 3.3106649 |
| P18422        | DGVVFGVEKLVLSK                                                   | 2.370689986        | 1                | 1.9456335 |
| P18422        | HVGMAVAGLLADAR                                                   | 0.874644728        | 3                | 3.609472  |
| <b>P18437</b> | <b>HMG2 Non_histone chromosomal protein HMG_17</b>               | <b>1.074014593</b> | <b>0.0011467</b> | <b>2</b>  |
| P18437        | DANNPAAEDGDAK                                                    | 1.488274722        | 2                | 3.3270047 |
| P18437        | DANNPAAEDGDAKTDQAQK                                              | 1.06032037         | 2                | 4.8879461 |
| <b>P18445</b> | <b>RL27A 60S ribosomal protein L27a</b>                          | <b>1.128145103</b> | <b>0.9516388</b> | <b>3</b>  |
| P18445        | NGVAPIIDVVR                                                      | 1.102219713        | 1                | 2.5070639 |
| P18445        | NQSFCTVNLDK                                                      | 1.086493261        | 2                | 3.2033415 |
| P18445        | RNQSFCTVNLDK                                                     | 1.130718801        | 2                | 3.1237552 |
| <b>P18484</b> | <b>AP2A2 AP_2 complex subunit alpha_2</b>                        | <b>1.021893094</b> | <b>0.1497284</b> | <b>5</b>  |
| P18484        | FFQPTEMASQDFQFR                                                  | 1.396532546        | 2                | 3.9864185 |
| P18484        | IIGFGSALLEEVDNPNANFVGAGIIHTK                                     | 1.155242463        | 3                | 3.3996029 |
| P18484        | ILVAGDTMDSVK                                                     | 1.389131333        | 2                | 2.4386454 |
| P18484        | NNGVLFENQLLQIGLK                                                 | 0.986845448        | 2                | 2.5522428 |
| P18484        | YGGTFQNVSVK                                                      | 0.877376257        | 2                | 2.4853673 |
| <b>P18596</b> | <b>AT2A3 Sarcoplasmic/endoplasmic reticulum calcium ATPase 3</b> | <b>1.123807113</b> | <b>0.9795799</b> | <b>4</b>  |
| P18596        | DIVPGDIVEVAVGDKVPADLR                                            | 1.460984156        | 2                | 3.329761  |
| P18596        | SLPSVETLGCTSVICSDK                                               | 1.096646853        | 2                | 4.2773776 |
| P18596        | TGTLTTNQMSVCR                                                    | 1.116353755        | 2                | 2.8647244 |
| P18596        | VGEATETALTCLVEK                                                  | 1.121434254        | 2                | 4.9720345 |

|               |                                                              |                    |                  |           |
|---------------|--------------------------------------------------------------|--------------------|------------------|-----------|
| <b>P18757</b> | <b>CGL Cystathionine gamma_lyase</b>                         | <b>1.076506834</b> | <b>2.887E-15</b> | <b>15</b> |
| P18757        | AGDEVICMDEVYGGTNR                                            | 0.874181748        | 2                | 5.7725873 |
| P18757        | ATLGISDTLIR                                                  | 0.973394626        | 2                | 3.5697343 |
| P18757        | AVAALDGAK                                                    | 0.95224727         | 2                | 2.4451122 |
| P18757        | AVVLPISLATTFK                                                | 0.969872527        | 3                | 4.9879336 |
| P18757        | FLQNSLGAVPSPFDCYLCCR                                         | 2.001574691        | 2                | 3.6193302 |
| P18757        | GTLQHAQVFLK                                                  | 1.045713036        | 3                | 3.3162239 |
| P18757        | LFALAESLGGYESLAELPAIMTHASVPEK                                | 1.655429811        | 3                | 3.7988834 |
| P18757        | LFALAESLGGYESLAELPAIMTHASVPEKDR                              | 2.158359657        | 4                | 5.7563705 |
| P18757        | LLEAAITPQTK                                                  | 1.021319131        | 2                | 3.613528  |
| P18757        | LSVGLLEDEKDLLEDLGQALK                                        | 1.176384707        | 3                | 6.6440969 |
| P18757        | LVWIETPTNPTLK                                                | 1.11695541         | 2                | 3.802896  |
| P18757        | QCTGCPGMVSYFIK                                               | 1.240435112        | 2                | 3.8276758 |
| P18757        | QDSPGQSSGFVYSR                                               | 0.975180546        | 2                | 3.8963888 |
| P18757        | RVASEFGLK                                                    | 1.050493406        | 2                | 2.6508982 |
| P18757        | VIYPGLPSHPQHELAK                                             | 1.137602915        | 2                | 4.1886344 |
| <b>P18886</b> | <b>CPT2 Carnitine O_palmitoyltransferase 2_mitochondrial</b> | <b>1.071122422</b> | <b>0.9902441</b> | <b>10</b> |
| P18886        | ATNLTVSAVR                                                   | 1.03682552         | 2                | 3.5147085 |
| P18886        | ELHAHLLAQDK                                                  | 1.016843729        | 2                | 3.467176  |
| P18886        | LIFDGNEETLK                                                  | 1.077116106        | 2                | 3.2499447 |
| P18886        | QYQQT VATYESCSTAAFK                                          | 1.087010775        | 2                | 4.0333133 |
| P18886        | SEYNDQLTR                                                    | 0.796893111        | 2                | 2.4828088 |
| P18886        | TETIRPASIFTK                                                 | 1.033445799        | 2                | 3.0711484 |
| P18886        | TLQAGLLEPEVFHNLNSK                                           | 10.63019844        | 2                | 4.0595517 |
| P18886        | TLSIDSIQFQR                                                  | 0.9343207          | 2                | 3.3983932 |
| P18886        | YILSDSSPVPEFPVAYLTSENK                                       | 1.263139375        | 2                | 5.211329  |
| P18886        | YLNAAQKPLLDSDQFR                                             | 0.956902028        | 2                | 4.7108035 |
| <b>P19112</b> | <b>F16P1 Fructose_1_6_bisphosphatase 1</b>                   | <b>1.020482161</b> | <b>0.0016275</b> | <b>16</b> |
| P19112        | AGGLATTGNEDILDIVPTEIHQK                                      | 0.993214215        | 3                | 6.2151699 |
| P19112        | AGGTGEMTQLLNSLCTAIK                                          | 1.070866823        | 2                | 5.3966432 |
| P19112        | APVIMGSTEDVQEFLEIYNK                                         | 1.301427189        | 2                | 4.3377509 |
| P19112        | APVIMGSTEDVQEFLEIYNKDK                                       | 1.247683653        | 3                | 3.4454429 |
| P19112        | DFDPAINIYIQR                                                 | 0.621121096        | 2                | 3.5726719 |
| P19112        | GNIYSINEGYAK                                                 | 1.013183874        | 2                | 3.9426315 |
| P19112        | KGNIYSINEGYAK                                                | 0.994636502        | 2                | 4.2158375 |
| P19112        | KLDILSNDLVINMLK                                              | 1.055012691        | 2                | 5.0606647 |
| P19112        | KTSANEPSEKDALQPGR                                            | 0.998239757        | 3                | 3.8750241 |
| P19112        | LDILSNDLVINMLK                                               | 1.128309386        | 2                | 4.8524847 |
| P19112        | LLYECNPIAYVMEK                                               | 1.43148501         | 2                | 4.3643479 |
| P19112        | QAGIAQLYGIAGSTNVTGDQVK                                       | 1.032801836        | 2                | 5.8998175 |
| P19112        | SRPSLPLQSR                                                   | 1.011485078        | 2                | 3.3021896 |
| P19112        | SSYATCVLVSEEDTHAIIIEPEKR                                     | 1.160943497        | 3                | 6.0039434 |
| P19112        | TLVYGGIFLYPANK                                               | 0.752490238        | 2                | 3.9830356 |
| P19112        | TSANEPSEKDALQPGR                                             | 1.024098172        | 2                | 4.4557142 |
| <b>P19225</b> | <b>CP270 Cytochrome P450 2C70</b>                            | <b>1.166738415</b> | <b>0.0051449</b> | <b>12</b> |
| P19225        | ASLNLSNPQDFIDYFLIK                                           | 1.445465368        | 3                | 4.099288  |
| P19225        | EALIDRGEFSDK                                                 | 1.23119103         | 2                | 2.4984832 |
| P19225        | FDPGHFLDEK                                                   | 1.273523294        | 2                | 2.6666546 |
| P19225        | FILMEINR                                                     | 1.252932172        | 2                | 2.3786042 |
| P19225        | FSLMVLRSMGMGK+Oxidation(4)                                   | 1.126174389        | 1                | 1.9720904 |
| P19225        | GTSVMACLTSALHDDKEFPNPEK                                      | 1.155323397        | 3                | 4.1864748 |
| P19225        | IQEEITR                                                      | 1.162721296        | 1                | 2.1176682 |
| P19225        | IQEEVVYLLEALR                                                | 2.024132962        | 2                | 3.8590407 |
| P19225        | KLPPGPTPLPIFGNILQVGVK                                        | 1.26059519         | 2                | 2.4287453 |
| P19225        | LPPGPTPLPIFGNILQVGVK                                         | 1.216313902        | 2                | 4.1515064 |
| P19225        | TNGSPCDPSFLLACVPCNVISSVIFQHR                                 | 1.286043812        | 3                | 3.4623413 |

|               |                                                                            |                    |                  |           |
|---------------|----------------------------------------------------------------------------|--------------------|------------------|-----------|
| P19225        | YIDFVPIPLPR                                                                | 1.057505522        | 2                | 3.1107121 |
| <b>P19234</b> | <b>NDUV2 NADH dehydrogenase [ubiquinone] flavoprotein 2_ mitochondrial</b> | <b>1.11611721</b>  | <b>0.9924874</b> | <b>5</b>  |
| P19234        | DIEEIIDELR                                                                 | 1.039068882        | 2                | 3.639214  |
| P19234        | DTPENNPDPFDFTPENYER                                                        | 0.874996379        | 2                | 4.8763437 |
| P19234        | FCCEPAGGLTSLTEPPK                                                          | 1.008264542        | 2                | 3.2944028 |
| P19234        | FCCEPAGGLTSLTEPPKPGFGVQAGL                                                 | 1.189768479        | 2                | 3.0144701 |
| P19234        | YHIQVCTTTPCMLR                                                             | 1.090909266        | 2                | 3.3246245 |
| <b>P19468</b> | <b>GSH1 Glutamate__cysteine ligase catalytic subunit</b>                   | <b>0.821918453</b> | <b>0.9999998</b> | <b>8</b>  |
| P19468        | ASGELMTVAR                                                                 | 1.006158312        | 2                | 2.3374591 |
| P19468        | CNQIANELCEPELLGSGFR                                                        | 1.033251448        | 2                | 5.0846753 |
| P19468        | DKNTSPFVETFPEDDEEASK                                                       | 0.974163746        | 2                | 3.589823  |
| P19468        | NTPSPFVETFPEDDEEASK                                                        | 0.992690871        | 2                | 4.229589  |
| P19468        | SLFFPDEAINK                                                                | 0.916026871        | 2                | 2.4775934 |
| P19468        | SRYDSIDSYLSK                                                               | 0.81936009         | 2                | 2.9258888 |
| P19468        | VQLLLNGGDVLETLEQK                                                          | 1.048660799        | 2                | 4.9900141 |
| P19468        | WGVISASVDDR                                                                | 1.018548797        | 2                | 3.0672166 |
| <b>P19488</b> | <b>UDB37 UDP_glucuronosyltransferase 2B37</b>                              | <b>1.0393782</b>   | <b>0.2065883</b> | <b>8</b>  |
| P19488        | AEMWLIR                                                                    | 1.06694245         | 2                | 2.895947  |
| P19488        | ANAIAWALAQIPQK                                                             | 1.068550408        | 3                | 6.5913582 |
| P19488        | FETFPTSFSKDELEK                                                            | 0.857727162        | 2                | 4.0311065 |
| P19488        | GAAVTLNIR                                                                  | 0.811913621        | 2                | 2.5978396 |
| P19488        | GHEVTVLKPSAYVLDPK                                                          | 1.334717287        | 2                | 4.4432535 |
| P19488        | NWDPFYTEILGRPTTLAETMGK                                                     | 1.191231502        | 2                | 5.3197813 |
| P19488        | SDLFNALK                                                                   | 1.29766689         | 2                | 2.9459856 |
| P19488        | TILDELVQR                                                                  | 0.966556623        | 2                | 3.5300717 |
| <b>P19511</b> | <b>AT5F1 ATP synthase subunit b_ mitochondrial</b>                         | <b>1.041715105</b> | <b>0.7935245</b> | <b>6</b>  |
| P19511        | HVIQSISAQKEK                                                               | 0.981278284        | 2                | 4.0016017 |
| P19511        | HVIQSISAQKEKETIAK                                                          | 1.098295853        | 3                | 4.5018439 |
| P19511        | HYLFDVQR                                                                   | 1.031214798        | 2                | 2.6956639 |
| P19511        | LDYHISVQDMMR                                                               | 0.983907117        | 3                | 3.8691468 |
| P19511        | LNEEKIAQLEEIK                                                              | 0.975087276        | 2                | 2.5854671 |
| P19511        | YGASIGEFIDKLNEEK                                                           | 1.18010988         | 3                | 3.6007085 |
| <b>P19643</b> | <b>AOFB Amine oxidase [flavin_containing] B</b>                            | <b>1.260830901</b> | <b>1.013E-11</b> | <b>13</b> |
| P19643        | FIGGSGQVSER                                                                | 1.207013975        | 2                | 3.4630675 |
| P19643        | IISTTNGGQER                                                                | 1.353168703        | 2                | 2.8623288 |
| P19643        | IPEDIWQPEPESVDVPPARPITNTFLER                                               | 1.041651836        | 3                | 4.8067575 |
| P19643        | KFIGGSGQVSER                                                               | 0.815344379        | 2                | 3.2656019 |
| P19643        | KLCELYAK                                                                   | 1.551969943        | 2                | 2.3502843 |
| P19643        | LERPVIHIDQTGENVVVK                                                         | 1.192995559        | 3                | 5.5329647 |
| P19643        | LLHDCGLSVVLEAR                                                             | 1.429522818        | 2                | 3.763983  |
| P19643        | TLNHEIYEAK                                                                 | 1.282985585        | 2                | 2.5507019 |
| P19643        | TMDEMGQEIPSDAPWK                                                           | 1.005103852        | 2                | 4.525198  |
| P19643        | TYTIRNKNVK                                                                 | 1.005112381        | 2                | 2.4110312 |
| P19643        | VLNSQEALQPVHYEEK                                                           | 1.243552011        | 2                | 4.5299454 |
| P19643        | YVDLGGSYVGPTQNR                                                            | 1.166875085        | 2                | 5.0323734 |
| P19643        | YVISAIPPVLGMK                                                              | 1.176490778        | 1                | 2.854527  |
| <b>P19804</b> | <b>NDKB Nucleoside diphosphate kinase B</b>                                | <b>1.415044724</b> | <b>9.9E-20</b>   | <b>9</b>  |
| P19804        | DRPFFPGLVK                                                                 | 0.764523219        | 2                | 2.3798077 |
| P19804        | EIGLWFKPEELIDYK                                                            | 1.030846135        | 2                | 4.2338414 |
| P19804        | GDFCIQVGR                                                                  | 1.078296986        | 2                | 3.285013  |
| P19804        | NIIHGSDSVESA EK                                                            | 1.086539364        | 2                | 4.0395617 |
| P19804        | NIIHGSDSVESA KEIGLWFKPEELIDYK                                              | 1.403383759        | 4                | 5.6519833 |
| P19804        | TFIAIKPDGVQR                                                               | 1.110637201        | 2                | 2.9806652 |
| P19804        | VMLGETNPADSKPGTIR                                                          | 1.056792154        | 2                | 4.4706659 |
| P19804        | VMLGETNPADSKPGTIR+Oxidation(2)                                             | 1.496084543        | 2                | 4.2524624 |
| P19804        | YMNSGPPVAMVVWVWGLNVVK                                                      | 1.410232324        | 2                | 5.2728734 |

|               |                                                                                     |                    |                  |           |
|---------------|-------------------------------------------------------------------------------------|--------------------|------------------|-----------|
| <b>P19944</b> | <b>RLA1 60S acidic ribosomal protein P1</b>                                         | <b>0.761712561</b> | <b>0.6124653</b> | <b>2</b>  |
| P19944        | ALANVNIQSLICNVGAGGPAPAAGAAPAGGPAPSAAAAPAEEK                                         | 1.084802947        | 4                | 5.808135  |
| P19944        | INALIK                                                                              | 0.760761097        | 2                | 2.4215744 |
| <b>P19945</b> | <b>RLA0 60S acidic ribosomal protein P0</b>                                         | <b>1.096316256</b> | <b>9.9E-20</b>   | <b>9</b>  |
| P19945        | AFLADPSAFAAAAAPVAAATTAAPAAAAAPAK                                                    | 1.147392177        | 2                | 5.896059  |
| P19945        | AGAIAPCEVTVPAQNTGLGPEK                                                              | 1.142516052        | 3                | 5.1215668 |
| P19945        | CFIVGADNVGSK                                                                        | 1.106220459        | 2                | 3.6594129 |
| P19945        | GHLENNPALEK                                                                         | 1.123940764        | 2                | 3.6339543 |
| P19945        | GTIEILSDVQLIK                                                                       | 1.244552816        | 2                | 3.1106207 |
| P19945        | IIQLLDYDPK                                                                          | 1.886785304        | 2                | 3.463037  |
| P19945        | NVASVCLQIGYPTVASVPHSIINGYK                                                          | 1.072177437        | 3                | 3.6430175 |
| P19945        | TSFFQALGITTK                                                                        | 1.177164632        | 2                | 4.0343699 |
| P19945        | VLALSVETDYTFPLAEK                                                                   | 1.333366553        | 2                | 4.4947782 |
| <b>P20059</b> | <b>HEMO Hemopexin</b>                                                               | <b>1.416372211</b> | <b>0.2706646</b> | <b>6</b>  |
| P20059        | ELGSPPGISLDTIDAAFSCPGSSK                                                            | 1.323652667        | 2                | 4.7524471 |
| P20059        | FNPVTGEVPPR                                                                         | 0.970566844        | 2                | 2.5510018 |
| P20059        | GECQSEGVLFFQGNR                                                                     | 1.539810001        | 2                | 3.9255171 |
| P20059        | LFQEEFPGIPYPPDAAVECHR                                                               | 1.132977917        | 3                | 4.466547  |
| P20059        | SGAQATWAELSWPHEK                                                                    | 0.949514634        | 2                | 3.4188347 |
| P20059        | VDGALCLEK                                                                           | 1.053978068        | 2                | 2.4339943 |
| <b>P20070</b> | <b>NB5R3 NADH_cytochrome b5 reductase 3</b>                                         | <b>1.035332933</b> | <b>8.882E-16</b> | <b>8</b>  |
| P20070        | DILLRPELEELR                                                                        | 1.091286617        | 2                | 2.5269628 |
| P20070        | IDGNLVRPYTPVSSDDDKGFVLDLVK                                                          | 1.099557277        | 3                | 5.6878319 |
| P20070        | LIDKEIISHDTR                                                                        | 1.354402494        | 3                | 3.7502003 |
| P20070        | MSQYLENMNIGDTIEFR                                                                   | 1.09323285         | 2                | 5.3068542 |
| P20070        | SSPAITLENPDIK                                                                       | 1.056274655        | 2                | 3.5960591 |
| P20070        | SSPAITLENPDIKYPLR                                                                   | 1.278047517        | 2                | 3.9610057 |
| P20070        | SVGMIAGGTGITPMLQVIR                                                                 | 1.139331393        | 2                | 4.6321845 |
| P20070        | SVGMIAGGTGITPMLQVIR+Oxidation(14)                                                   | 1.52045649         | 2                | 2.3226714 |
| <b>P20280</b> | <b>RL21 60S ribosomal protein L21</b>                                               | <b>1.262533581</b> | <b>2.39E-11</b>  | <b>4</b>  |
| P20280        | HGVVPLATYMR                                                                         | 1.384729276        | 2                | 2.500989  |
| P20280        | KGDIVDIK                                                                            | 1.125017989        | 1                | 2.0901756 |
| P20280        | TNGKEPELLEPIPYEFMA                                                                  | 0.651674673        | 2                | 3.4274232 |
| P20280        | VYNVVQHAVGIIVNK                                                                     | 1.308432689        | 2                | 4.1394043 |
| <b>P20651</b> | <b>PP2BB Serine/threonine_protein phosphatase 2B catalytic subunit beta isoform</b> | <b>1.219004437</b> | <b>0.4100556</b> | <b>2</b>  |
| P20651        | GLTPTGMLPSGVLGGR                                                                    | 1.2269218          | 2                | 2.4251428 |
| P20651        | VVKAVPFPPTHR                                                                        | 1.210856117        | 1                | 1.953714  |
| <b>P20673</b> | <b>ARLY Argininosuccinate lyase</b>                                                 | <b>1.219204709</b> | <b>0.0389949</b> | <b>16</b> |
| P20673        | AEAACEVLFPGYTHLQR                                                                   | 1.202451827        | 2                | 4.1623201 |
| P20673        | AEMQQILQGLDK                                                                        | 1.012887342        | 2                | 4.4698949 |
| P20673        | EFNFVQLSDAYSTGSSLMPQK                                                               | 1.220314769        | 2                | 5.1331706 |
| P20673        | FNSSIAADR                                                                           | 0.978195834        | 2                | 2.4372463 |
| P20673        | HLWNVDLQGSK                                                                         | 0.941750852        | 1                | 3.3750188 |
| P20673        | INVLPGLSGAIGNPLGVDR                                                                 | 0.911543528        | 2                | 5.6564941 |
| P20673        | KNPDSLELIR                                                                          | 0.894523443        | 2                | 2.3801582 |
| P20673        | LKELIGEAAAGK                                                                        | 1.135939297        | 2                | 3.1913731 |
| P20673        | LYPNDEDIHTANER                                                                      | 0.993591436        | 2                | 3.8736727 |
| P20673        | MAEDLILYGTK                                                                         | 0.95746185         | 2                | 3.9453814 |
| P20673        | MAEDLILYGTK+Oxidation(1)                                                            | 0.966880095        | 2                | 2.3684304 |
| P20673        | NDQVVTDLR                                                                           | 0.959221175        | 2                | 3.14768   |
| P20673        | SRNDQVVTDLR                                                                         | 1.118203933        | 2                | 3.0609283 |
| P20673        | VAEWAQGIFK                                                                          | 0.960108695        | 2                | 3.447969  |
| P20673        | VLIAMVDR                                                                            | 0.989748157        | 2                | 2.5911386 |
| P20673        | VLIAMVDRAEAACEVLFPGYTHLQR                                                           | 1.23777798         | 3                | 4.7081862 |



|               |                                                                  |                    |                  |           |
|---------------|------------------------------------------------------------------|--------------------|------------------|-----------|
| <b>P20788</b> | <b>UCRI Cytochrome b_c1 complex subunit Rieske_mitochondrial</b> | <b>0.966691088</b> | <b>2.353E-10</b> | <b>5</b>  |
| P20788        | EIDQEAAVEVSQLR                                                   | 0.894997079        | 2                | 3.5430312 |
| P20788        | EIDQEAAVEVSQLRDPQHDLR                                            | 1.151082297        | 3                | 3.434633  |
| P20788        | ESLSGQAATRPLVATVGLNVPASVR                                        | 0.71637133         | 2                | 2.7713375 |
| P20788        | GVAGALRPLLQSAVPATSEPPVLDVK                                       | 1.287044279        | 3                | 5.1125689 |
| P20788        | SGPFAPVLSATSR                                                    | 0.961062755        | 2                | 2.8793161 |
| <b>P20801</b> | <b>TNNC2 Troponin C_skeletal muscle</b>                          | <b>0.787396808</b> | <b>0.3396953</b> | <b>3</b>  |
| P20801        | GKSEEEAECFR                                                      | 0.984746486        | 2                | 3.3910437 |
| P20801        | NADGYIDAEELAEIFR                                                 | 1.589751902        | 2                | 4.7835922 |
| P20801        | SEEEAECFR                                                        | 0.480404369        | 2                | 3.2634532 |
| <b>P20812</b> | <b>CP2A3 Cytochrome P450 2A3</b>                                 | <b>1.3635893</b>   | <b>0.0042364</b> | <b>2</b>  |
| P20812        | ELQGLEDFITKKVEQNR                                                | 1.347979183        | 2                | 2.4711843 |
| P20812        | YGPVFTIHLGPR                                                     | 1.64935303         | 2                | 3.0428934 |
| <b>P20814</b> | <b>CP2CD Cytochrome P450 2C13_male specific</b>                  | <b>1.227647716</b> | <b>0.1213548</b> | <b>3</b>  |
| P20814        | FDYEDKDFLNLIK                                                    | 1.186628948        | 2                | 2.3245878 |
| P20814        | GTAVLTSLSVLHDSK                                                  | 1.231860851        | 2                | 3.269942  |
| P20814        | IKEHEESLDVSNPR                                                   | 1.190658548        | 3                | 3.5926213 |
| <b>P20817</b> | <b>CP4AE Cytochrome P450 4A14</b>                                | <b>1.079274158</b> | <b>1.776E-15</b> | <b>6</b>  |
| P20817        | ACQIAHEHTDGVIK                                                   | 1.054770055        | 2                | 4.2654328 |
| P20817        | AQLQNEEELQK                                                      | 1.134980308        | 2                | 3.3138566 |
| P20817        | AVEDLNNLTFFR                                                     | 1.153771238        | 2                | 3.6082284 |
| P20817        | HLDLFDILLFAK                                                     | 1.217490359        | 2                | 4.2090197 |
| P20817        | MRKAQLQNEEELQK+Oxidation(1)                                      | 1.276562433        | 2                | 3.0884616 |
| P20817        | VLLYDPDYVK                                                       | 1.228266712        | 2                | 2.5288606 |
| <b>P20852</b> | <b>CP2A5 Cytochrome P450 2A5</b>                                 | <b>1.230075876</b> | <b>4.164E-08</b> | <b>2</b>  |
| P20852        | DFIDSFLIR                                                        | 2.385626213        | 2                | 2.9400399 |
| P20852        | EALVDQAEFFSGR                                                    | 1.207747328        | 2                | 2.8685627 |
| <b>P21213</b> | <b>HUTH Histidine ammonia_lyase</b>                              | <b>1.1684594</b>   | <b>3.741E-09</b> | <b>15</b> |
| P21213        | ALDYLAIGVHELAAISER                                               | 1.491121551        | 2                | 4.5200863 |
| P21213        | DIITTELSATDNPMVFASR                                              | 1.408769255        | 2                | 4.4752798 |
| P21213        | EGLALINGTQMITSLGCEAVER                                           | 0.884303431        | 2                | 3.2450964 |
| P21213        | GETISGGNFHGEYPAK                                                 | 0.703396217        | 2                | 4.027247  |
| P21213        | GEWLAVPCQDQK                                                     | 0.945640435        | 2                | 3.0441396 |
| P21213        | GYSGISLETLK                                                      | 0.840084109        | 2                | 2.3562894 |
| P21213        | LQELQVNLVR                                                       | 0.899426922        | 2                | 3.2797558 |
| P21213        | NKPDNGGFTSVDEVR                                                  | 0.881048199        | 2                | 3.7095542 |
| P21213        | NSATIPESDDL                                                      | 0.637965761        | 1                | 1.9615597 |
| P21213        | SHSSGVGKPLSPER                                                   | 0.817458255        | 2                | 4.0682273 |
| P21213        | SLLDSDHHPSEIAESHR                                                | 0.794661988        | 3                | 4.6083107 |
| P21213        | TVVYGITTFGFK                                                     | 0.918568855        | 2                | 3.6212621 |
| P21213        | VQDAYTLR                                                         | 0.753712115        | 2                | 2.5721924 |
| P21213        | VVEVAAPYIEK                                                      | 0.839062463        | 2                | 2.5839896 |
| P21213        | YIALDGDLSLSTEDLVNLGK                                             | 1.30889325         | 2                | 5.3028231 |
| <b>P21396</b> | <b>AOFA Amine oxidase [flavin_containing] A</b>                  | <b>1.0734472</b>   | <b>0.9142688</b> | <b>10</b> |
| P21396        | DVPAIEITHFLER                                                    | 1.056694998        | 2                | 3.5774903 |
| P21396        | FVGGSGQVSEQIMGLLDGK                                              | 1.062066076        | 2                | 3.117955  |
| P21396        | IFSVTNGGQER                                                      | 1.04756694         | 2                | 2.486311  |
| P21396        | INVLVLEAR                                                        | 1.232924071        | 2                | 3.1376009 |
| P21396        | KDIWVEEPESK                                                      | 1.073735475        | 2                | 3.859617  |
| P21396        | KICELYAK                                                         | 1.551969943        | 2                | 2.3502843 |
| P21396        | NLPSVPGLLK                                                       | 0.867956428        | 1                | 1.9253061 |
| P21396        | VLGSQEALYPVHYEEK                                                 | 1.022962883        | 2                | 3.6092026 |
| P21396        | WVDVGGAYVGPQNR                                                   | 1.053382998        | 2                | 4.3435798 |
| P21396        | YVISAIPPILTAK                                                    | 1.142414371        | 2                | 3.121563  |
| <b>P21531</b> | <b>RL3 60S ribosomal protein L3</b>                              | <b>1.058873711</b> | <b>0.0039067</b> | <b>8</b>  |
| P21531        | AHLMEIQVNGGTVAEK                                                 | 1.055376441        | 2                | 5.2510939 |

|               |                                                                                    |                    |                  |           |
|---------------|------------------------------------------------------------------------------------|--------------------|------------------|-----------|
| P21531        | ERLEQQVPVNQVFGQDEMIDVIGVTK                                                         | 0.935760167        | 3                | 5.4065075 |
| P21531        | FIDTTSK                                                                            | 0.864755211        | 1                | 2.0276597 |
| P21531        | HGSLGFLPR                                                                          | 1.176889122        | 2                | 3.033505  |
| P21531        | LEQQVPVNQVFGQDEMIDVIGVTK                                                           | 1.145308034        | 2                | 5.0678973 |
| P21531        | NNASTDYDLSDK                                                                       | 1.074613484        | 2                | 3.3772578 |
| P21531        | SINPLGGFVHYGEVTNDFIMLK                                                             | 1.237443047        | 3                | 3.3834853 |
| P21531        | TVFAEHISDECK                                                                       | 1.14933107         | 2                | 3.782172  |
| <b>P21533</b> | <b>RL6 60S ribosomal protein L6</b>                                                | <b>1.372439165</b> | <b>7.099E-08</b> | <b>9</b>  |
| P21533        | AVDSQILPK                                                                          | 1.008442948        | 2                | 2.4688835 |
| P21533        | FVIATSTK                                                                           | 1.214833463        | 1                | 2.2268925 |
| P21533        | HLTDAYFK                                                                           | 1.009868462        | 2                | 2.3837204 |
| P21533        | HQEGEIFDTEK                                                                        | 0.997866871        | 2                | 3.296469  |
| P21533        | HQEGEIFDTEKEK                                                                      | 1.108040325        | 2                | 4.1273656 |
| P21533        | HQEGEIFDTEKEKYEITEQR                                                               | 1.248141141        | 3                | 4.734499  |
| P21533        | QLGSGLLLVGTGPLALNR                                                                 | 1.395900096        | 2                | 5.174675  |
| P21533        | SSITPGTVLIILTGR                                                                    | 1.251024632        | 2                | 4.2042346 |
| P21533        | YYPTEDVPR                                                                          | 1.163301411        | 1                | 1.9664984 |
| <b>P21571</b> | <b>ATP5J ATP synthase_coupling factor 6_mitochondrial</b>                          | <b>0.952275101</b> | <b>9.9E-20</b>   | <b>5</b>  |
| P21571        | FEVLDPKQS                                                                          | 0.922198954        | 1                | 2.0086877 |
| P21571        | GEMDKFPTNFEDPK                                                                     | 0.864997954        | 3                | 3.4865894 |
| P21571        | GEMDKFPTNFEDPKFEVLDPKQS                                                            | 1.074222667        | 3                | 3.9689322 |
| P21571        | LASGGPVDTGPEYQQEVDR                                                                | 1.574757461        | 2                | 5.2888436 |
| P21571        | LASGGPVDTGPEYQQEVDRLEFK                                                            | 2.25389268         | 3                | 3.4461923 |
| <b>P21643</b> | <b>T23O Tryptophan 2_3_dioxygenase</b>                                             | <b>1.686960676</b> | <b>0.4073189</b> | <b>2</b>  |
| P21643        | YNHVCMVHRMLGSK+Oxidation(10)                                                       | 1.686960676        | 2                | 2.4629221 |
| P21643        | YNHVCMVHRMLGSK+Oxidation(6)                                                        | 1.686960676        | 2                | 2.302552  |
| <b>P21670</b> | <b>PSA4 Proteasome subunit alpha type_4</b>                                        | <b>1.346965112</b> | <b>0.4568171</b> | <b>4</b>  |
| P21670        | ATCIGNNSAAAVSMLK                                                                   | 1.157434152        | 2                | 3.310962  |
| P21670        | LLDEVFFSEK                                                                         | 1.347042101        | 2                | 3.1236961 |
| P21670        | LNEDMACSVAGITSDANVLTNELR                                                           | 1.249258153        | 2                | 5.0770102 |
| P21670        | YLLQYQEPICEQLVTALCDIK                                                              | 0.993977275        | 2                | 4.0411086 |
| <b>P21775</b> | <b>THIKA 3_ketoacyl_CoA thiolase A_peroxisomal</b>                                 | <b>1.092305847</b> | <b>0.9998474</b> | <b>2</b>  |
| P21775        | LKPECLGDISVGNVLEPGAGAVMAR                                                          | 1.032789554        | 3                | 5.458118  |
| P21775        | LKPECLGDISVGNVLEPGAGAVMAR+Oxidation(23)                                            | 0.934510622        | 3                | 4.4498062 |
| <b>P21913</b> | <b>DHSB Succinate dehydrogenase [ubiquinone] iron_sulfur subunit_mitochondrial</b> | <b>1.045625284</b> | <b>0.5570939</b> | <b>5</b>  |
| P21913        | CGPMVLDALIK                                                                        | 1.046129372        | 2                | 2.728055  |
| P21913        | CGPMVLDALIKIK                                                                      | 1.006946529        | 2                | 2.4425681 |
| P21913        | CHTIMNCTQTCPK                                                                      | 0.930664348        | 2                | 3.9948161 |
| P21913        | IKNEIDSTLTFR                                                                       | 1.386188967        | 2                | 3.4166021 |
| P21913        | RIDTDLGK                                                                           | 0.998384788        | 2                | 2.5685627 |
| <b>P21981</b> | <b>TGM2 Protein_glutamine gamma_glutamyltransferase 2</b>                          | <b>0.91203767</b>  | <b>0.7883708</b> | <b>5</b>  |
| P21981        | CDLEIQANGR                                                                         | 0.917956074        | 2                | 2.9209356 |
| P21981        | DHHTADLCQEK                                                                        | 0.43965843         | 2                | 2.8435595 |
| P21981        | SEGTGCCGVSVR                                                                       | 0.912202172        | 2                | 3.7194178 |
| P21981        | VDLFPTDIGLHK                                                                       | 1.01904698         | 2                | 2.7309427 |
| P21981        | YSGCLTESLIK                                                                        | 0.84349839         | 2                | 2.6966434 |
| <b>P22734</b> | <b>COMT Catechol O_methyltransferase</b>                                           | <b>1.26259384</b>  | <b>2.408E-12</b> | <b>12</b> |
| P22734        | AIYQGPSSPKS                                                                        | 0.96919576         | 2                | 3.3501115 |
| P22734        | EWAMNVGDAK                                                                         | 0.726721512        | 1                | 2.5043807 |
| P22734        | GQIMDAVIR                                                                          | 0.96392397         | 2                | 3.3780921 |
| P22734        | GSSSFECTHYSSYLEYMK                                                                 | 2.656068297        | 2                | 4.3311796 |
| P22734        | GTVLLADNVIVPGTPDFLAYVR                                                             | 1.770989841        | 3                | 5.0544915 |
| P22734        | KGTVLLADNVIVPGTPDFLAYVR                                                            | 1.446054433        | 2                | 4.543992  |
| P22734        | KYDVDTLDMVFLDHWK                                                                   | 1.571729538        | 2                | 4.9978123 |
| P22734        | LLTMEINPDYAAITQQMLNFAGLQDK                                                         | 1.616333488        | 3                | 3.867681  |

|               |                                                               |                    |                  |           |
|---------------|---------------------------------------------------------------|--------------------|------------------|-----------|
| P22734        | VTILNGASQDLIPQLK                                              | 1.042352255        | 2                | 4.416718  |
| P22734        | YDVDTLDMVFLDHWK                                               | 2.193009766        | 2                | 4.0551519 |
| P22734        | YLPDTLLLEK                                                    | 1.057131712        | 2                | 3.0945399 |
| P22734        | YVQQNAKPGDPQSVLEAIDTYCTQK                                     | 1.297245745        | 3                | 6.6306877 |
| <b>P22789</b> | <b>ST2A2 Alcohol sulfotransferase A</b>                       | <b>0.721429244</b> | <b>0.0042392</b> | <b>4</b>  |
| P22789        | ETLQNVCK                                                      | 0.722896392        | 2                | 2.3441608 |
| P22789        | KLEPDELDELVLK                                                 | 0.694124358        | 2                | 3.728843  |
| P22789        | LEPDELDELVLK                                                  | 0.660880249        | 2                | 2.3386922 |
| P22789        | NHFTVAQAEAFDK                                                 | 0.522015035        | 2                | 3.3949246 |
| <b>P22791</b> | <b>HMCS2 Hydroxymethylglutaryl_CoA synthase_mitochondrial</b> | <b>1.15362652</b>  | <b>9.9E-20</b>   | <b>23</b> |
| P22791        | ASLDMFNK                                                      | 0.882238857        | 2                | 2.7522936 |
| P22791        | ASLDMFNKK                                                     | 1.029186277        | 2                | 2.9310148 |
| P22791        | DVGILALEVYFPAQYVDQTDLEK                                       | 1.383957411        | 3                | 6.246346  |
| P22791        | GLKLEETYTNK                                                   | 0.914264637        | 2                | 2.7619617 |
| P22791        | GTHMENAYDFYKPNLASEYPLVDGK                                     | 1.031722958        | 3                | 6.9293494 |
| P22791        | GTHMENAYDFYKPNLASEYPLVDGK+Oxidation(4)                        | 1.146567438        | 3                | 5.6318593 |
| P22791        | IGAFSYGSLAASF5FR                                              | 1.296027354        | 2                | 4.3873773 |
| P22791        | LEETYTNK                                                      | 1.016221878        | 2                | 3.4088504 |
| P22791        | LEETYTNKDVDK                                                  | 1.060217084        | 2                | 4.2742825 |
| P22791        | LEVGTETIIDK                                                   | 0.941259781        | 2                | 3.8002875 |
| P22791        | LMFNDFLSSSSDK                                                 | 1.613368704        | 2                | 3.7947524 |
| P22791        | LMFNDFLSSSSDK+Oxidation(2)                                    | 1.802457214        | 2                | 4.0664406 |
| P22791        | LMFNDFLSSSSDKQNNLYK                                           | 1.915169724        | 2                | 4.7325711 |
| P22791        | LSIQCYLR                                                      | 1.720850839        | 2                | 2.4549701 |
| P22791        | LVSSVSDLPK                                                    | 1.242675687        | 2                | 3.7116859 |
| P22791        | MGFCSVQEDINSLCLTVVQR                                          | 1.231847403        | 2                | 4.2683344 |
| P22791        | MSPEEFTEIMNQR                                                 | 0.96240649         | 2                | 4.7739902 |
| P22791        | MSPEEFTEIMNQR+Oxidation(1)                                    | 1.056918583        | 2                | 3.8493006 |
| P22791        | MSPEEFTEIMNQR+Oxidation(10)                                   | 0.965713861        | 2                | 3.5290513 |
| P22791        | TDTWPK                                                        | 0.855514833        | 1                | 1.9295807 |
| P22791        | TKLPWDAVGR                                                    | 0.999405904        | 3                | 4.0318928 |
| P22791        | VNFSPPGDTSNLFPGTWYLER                                         | 1.473649499        | 2                | 4.877635  |
| P22791        | YTVGLGQTR                                                     | 0.960011419        | 2                | 3.4161139 |
| <b>P22985</b> | <b>XDH Xanthine dehydrogenase/oxidase</b>                     | <b>1.181275807</b> | <b>0.7545602</b> | <b>9</b>  |
| P22985        | DEVTCVGHIIGAVVADTPEHAQR                                       | 0.924266527        | 3                | 4.5074711 |
| P22985        | DPPANVQLFQEVPK                                                | 1.148147003        | 2                | 3.6626005 |
| P22985        | LDPTFASATLLFQK                                                | 1.251303958        | 2                | 3.7935185 |
| P22985        | NQPEPTVEEIEENAFQGNLCR                                         | 0.946977081        | 2                | 4.8571606 |
| P22985        | QLFQLDSPATPEK                                                 | 1.149633556        | 2                | 3.2269821 |
| P22985        | SVASIGGNIITASPIDLNPFVFMASGAK                                  | 1.169959877        | 3                | 5.8927145 |
| P22985        | TGTVVALEVAHFSNGGNTEDLSR                                       | 1.137225524        | 3                | 4.8339663 |
| P22985        | TLLRPEEILLSIEIPYSK                                            | 1.242269629        | 2                | 2.7272997 |
| P22985        | TNLPSENTAFR                                                   | 1.208640236        | 1                | 2.1813078 |
| <b>P23358</b> | <b>RL12 60S ribosomal protein L12</b>                         | <b>1.211749487</b> | <b>0.0699774</b> | <b>5</b>  |
| P23358        | CTGGEVGATSALAPK                                               | 1.104024603        | 2                | 4.3036499 |
| P23358        | EILGTAQSVGCNVDR                                               | 0.8567744          | 2                | 4.3123393 |
| P23358        | HNGNITFDEIVNIAR                                               | 0.997250824        | 2                | 3.9443963 |
| P23358        | HPHDIIDDINGAVECPAS                                            | 1.095024758        | 2                | 4.5022197 |
| P23358        | QAQIEVPSASALIIK                                               | 1.212373653        | 2                | 3.6173258 |
| <b>P23457</b> | <b>DIDH 3_alpha_hydroxysteroid dehydrogenase</b>              | <b>1.068244918</b> | <b>0.0013363</b> | <b>9</b>  |
| P23457        | ELTQVFEFLASEDMK                                               | 1.178786901        | 2                | 4.5937886 |
| P23457        | HFDSAYLYEVEEVEGQAIR                                           | 1.53234222         | 2                | 6.1129518 |
| P23457        | LLFETVDICDTWEAMEK                                             | 2.027067848        | 2                | 4.6139216 |
| P23457        | MLDYCK                                                        | 1.055346173        | 1                | 1.9855616 |
| P23457        | SIGVSNFNCR                                                    | 1.044567821        | 2                | 3.1886706 |
| P23457        | SKDIIIVSYCTLGSSR                                              | 1.382583652        | 2                | 4.453434  |

|               |                                                        |                    |                  |           |
|---------------|--------------------------------------------------------|--------------------|------------------|-----------|
| P23457        | VALNDGNFIPVLGFGTTVPEK                                  | 1.185636881        | 2                | 4.7249951 |
| P23457        | YFDDHPNHPTDE                                           | 1.194556634        | 2                | 3.7325456 |
| P23457        | YKPVCNQVECHLYLNQSK                                     | 1.071624176        | 2                | 4.6328034 |
| <b>P23514</b> | <b>COPB Coatomer subunit beta</b>                      | <b>1.270916185</b> | <b>5.076E-05</b> | <b>6</b>  |
| P23514        | EAGELKPEEEITVGPVQK                                     | 1.116599254        | 2                | 3.6730027 |
| P23514        | NFENLIPDAPELIHDFLVNEK                                  | 1.253951061        | 3                | 4.2267303 |
| P23514        | TNNVSEHEDTDKYR                                         | 1.386190144        | 2                | 4.598969  |
| P23514        | VLQDLVMDILR                                            | 1.115503417        | 2                | 3.2070439 |
| P23514        | VLSECSPLMNDIFNK                                        | 1.416306783        | 2                | 2.6093085 |
| P23514        | YEAAGTLVTLSSAPTAIK                                     | 0.993343152        | 2                | 4.5228901 |
| <b>P23965</b> | <b>EC11 Enoyl_CoA delta isomerase 1_ mitochondrial</b> | <b>0.997212066</b> | <b>0.0217708</b> | <b>8</b>  |
| P23965        | ALQLGTLFPPAEALK                                        | 0.982978274        | 2                | 5.4368725 |
| P23965        | ATADNLK                                                | 0.889346852        | 2                | 2.6897075 |
| P23965        | DNYVNTIGHR                                             | 0.840812691        | 2                | 2.7845616 |
| P23965        | GVILTSEKPGIFASGLDLMEMYGR                               | 1.571106578        | 3                | 5.42028   |
| P23965        | QREADIQNFTSFISR                                        | 1.15003153         | 2                | 2.9137619 |
| P23965        | SLHVYLEK                                               | 0.994011849        | 2                | 2.3705051 |
| P23965        | VGLVDEVVPEDQVHSK                                       | 0.979004281        | 2                | 4.8817987 |
| P23965        | WFTIPDHSR                                              | 0.892134639        | 2                | 2.6329997 |
| <b>P24049</b> | <b>RL17 60S ribosomal protein L17</b>                  | <b>1.013273319</b> | <b>1</b>         | <b>3</b>  |
| P24049        | EQIVPKPEEEVAQK                                         | 1.026241996        | 2                | 3.7919626 |
| P24049        | GLDVDSLVIHQVQNK                                        | 1.002238317        | 2                | 4.9041548 |
| P24049        | YSLDPENPTK                                             | 1.005959527        | 1                | 2.7388546 |
| <b>P24050</b> | <b>RS5 40S ribosomal protein S5</b>                    | <b>1.202077286</b> | <b>0.1945447</b> | <b>2</b>  |
| P24050        | VNQAIWLLCTGAR                                          | 1.35367823         | 2                | 2.9094257 |
| P24050        | WSTDDVQINDISLQDYIAVK                                   | 1.135351073        | 2                | 4.3332505 |
| <b>P24063</b> | <b>ITAL Integrin alpha_L</b>                           | <b>1.129139748</b> | <b>0.7624887</b> | <b>2</b>  |
| P24063        | ASEAQVLVKVDLIHEK                                       | 0.99161243         | 2                | 2.3208199 |
| P24063        | DFEKILEFMK                                             | 1.059014919        | 3                | 3.6814787 |
| <b>P24090</b> | <b>FETUA Alpha_2_HS glycoprotein</b>                   | <b>1.516641644</b> | <b>0.4191768</b> | <b>5</b>  |
| P24090        | ELACDDPETEHVALIADVYLNK                                 | 1.722519197        | 3                | 4.1677542 |
| P24090        | HAFSPVASVESASGEVLHSPK                                  | 1.18596961         | 3                | 5.9204154 |
| P24090        | LGGEVSVACK                                             | 1.011074662        | 2                | 3.4566989 |
| P24090        | VGQPGDAGAAGPVAPLCPGR                                   | 1.16139285         | 2                | 5.1261044 |
| P24090        | VLHAQCHSTPDAEDVRK                                      | 1.214920695        | 3                | 3.7491324 |
| <b>P24268</b> | <b>CATD Cathepsin D</b>                                | <b>1.109844125</b> | <b>0.0007287</b> | <b>4</b>  |
| P24268        | AIGAVPLIQEYMIPCEK                                      | 1.021361674        | 2                | 3.3653052 |
| P24268        | DPTGQPGGELMLGGTDSR                                     | 0.976076097        | 2                | 4.5752006 |
| P24268        | GGCEAIVDTGTSLLVGPVDEVK                                 | 1.357164477        | 2                | 3.223856  |
| P24268        | LGGQNYELHPEK                                           | 1.456585168        | 2                | 2.4749813 |
| <b>P24329</b> | <b>THTR Thiosulfate sulfurtransferase</b>              | <b>1.029868608</b> | <b>0.6347546</b> | <b>11</b> |
| P24329        | EGHPVTSEPSRPEPAVFK                                     | 0.962230025        | 2                | 4.8716788 |
| P24329        | FQLVDSR                                                | 1.020789517        | 2                | 2.3047843 |
| P24329        | GSVNVPFMFLTEDGFKEK                                     | 1.833887763        | 2                | 3.4992948 |
| P24329        | HVPGASFFDIEECR                                         | 1.249065894        | 2                | 4.0566311 |
| P24329        | KVDLSQPLIATCR                                          | 1.036289268        | 2                | 4.6317143 |
| P24329        | RFQLVDSR                                               | 0.954365249        | 2                | 2.3359671 |
| P24329        | TVSVLNGGFR                                             | 1.018601974        | 2                | 3.1042616 |
| P24329        | TYEQVLENLQSK                                           | 1.008171353        | 2                | 4.9987292 |
| P24329        | VDSLQPLIATCR                                           | 1.028219644        | 2                | 4.0022898 |
| P24329        | VLDASWYSPGTR                                           | 0.905242824        | 2                | 3.7780366 |
| P24329        | YLGTQPEPDAVGLDSGHIR                                    | 1.055551472        | 2                | 4.756074  |
| <b>P24368</b> | <b>PPIB Peptidyl_prolyl cis_trans isomerase B</b>      | <b>1.085339877</b> | <b>0.5744912</b> | <b>9</b>  |
| P24368        | DKPLKDVIIVDCGK                                         | 0.98547871         | 2                | 3.9070065 |
| P24368        | DTNGSQFFITTVK                                          | 1.063534358        | 2                | 3.903662  |
| P24368        | DVIIVDCGK                                              | 1.007795945        | 1                | 1.9453398 |
| P24368        | HYGPGWVSMANAGK                                         | 0.800520041        | 2                | 3.9890251 |

|               |                                                                                      |                    |                  |           |
|---------------|--------------------------------------------------------------------------------------|--------------------|------------------|-----------|
| P24368        | IEVEKPFIAIK                                                                          | 1.027784442        | 2                | 3.208998  |
| P24368        | IEVEKPFIAIKE                                                                         | 1.219892199        | 2                | 3.5317459 |
| P24368        | TVDNFVALATGEK                                                                        | 1.116076861        | 2                | 3.3615367 |
| P24368        | VLEGMDEVVR                                                                           | 1.010707764        | 2                | 2.9106023 |
| P24368        | VYDFDQIGDEPVGR                                                                       | 1.075368508        | 2                | 3.9681208 |
| <b>P24457</b> | <b>CP2DB Cytochrome P450 2D11</b>                                                    | <b>1.07196168</b>  | <b>0.9685225</b> | <b>2</b>  |
| P24457        | RFSVSTLR                                                                             | 1.152345096        | 2                | 2.5527403 |
| P24457        | SLEEVVTK                                                                             | 1.071038535        | 2                | 2.4372888 |
| <b>P24470</b> | <b>CP2CN Cytochrome P450 2C23</b>                                                    | <b>1.062927272</b> | <b>0.0018366</b> | <b>11</b> |
| P24470        | ACVGESLAR                                                                            | 1.049392734        | 2                | 2.4564044 |
| P24470        | DLDIKPITGIIINLPPPYK                                                                  | 1.025740849        | 3                | 4.3319192 |
| P24470        | EALLQQGDEFGLGR                                                                       | 0.994075324        | 2                | 2.4666307 |
| P24470        | FGLLLLMK                                                                             | 2.022800635        | 2                | 3.1531587 |
| P24470        | GTTVLPMLSSVMLDQK                                                                     | 0.891424375        | 2                | 3.8417037 |
| P24470        | GYGLIFSNGER                                                                          | 1.132561123        | 2                | 3.5263627 |
| P24470        | IEEEKDNLK                                                                            | 1.168903557        | 2                | 2.8174613 |
| P24470        | LPPGPTPLPIIGNLLQLNLK                                                                 | 1.024985096        | 2                | 4.215385  |
| P24470        | SEFHLENLAVCGSNLFTAGTETTSTTLR                                                         | 1.007019623        | 3                | 4.2882667 |
| P24470        | TFLNLMDLLNK                                                                          | 1.294532007        | 2                | 3.8047841 |
| P24470        | YITLLPSSLPHAVVQDTK                                                                   | 0.85560713         | 2                | 3.9442706 |
| <b>P24473</b> | <b>GSTK1 Glutathione S_transferase kappa 1</b>                                       | <b>0.972698769</b> | <b>0.0670047</b> | <b>8</b>  |
| P24473        | AGMATAQAQHLLNK                                                                       | 0.863483082        | 2                | 4.1515918 |
| P24473        | DEDITESQNILSAAEK                                                                     | 1.003989099        | 2                | 5.0968971 |
| P24473        | DSGNQPPAMVPHK                                                                        | 1.018425824        | 2                | 2.6011801 |
| P24473        | FLTAVSMEQPEMLEK                                                                      | 0.821088156        | 2                | 5.0528722 |
| P24473        | IWSRDEDITESQNILSAAEK                                                                 | 1.314716619        | 3                | 3.6966665 |
| P24473        | MELLAYLLGEK                                                                          | 1.455083713        | 2                | 3.983911  |
| P24473        | QLFQVPMSPVK                                                                          | 0.932668339        | 2                | 2.6643405 |
| P24473        | YGAFGLPTTVAHVVDGK                                                                    | 1.01878247         | 2                | 3.9081054 |
| <b>P25093</b> | <b>FAAA Fumarylacetoacetase</b>                                                      | <b>0.986899436</b> | <b>9.9E-20</b>   | <b>15</b> |
| P25093        | AIDVGQGQTR                                                                           | 0.971851433        | 2                | 3.3942046 |
| P25093        | AQEHIFGMVLMDWSAR                                                                     | 1.300960987        | 2                | 3.6296716 |
| P25093        | ASLQNLISASQAQLR                                                                      | 1.111541442        | 2                | 4.883368  |
| P25093        | ASLQNLISASQAQLRDDK                                                                   | 1.185745252        | 2                | 3.945441  |
| P25093        | ASSVVVSGTPIR                                                                         | 1.027478255        | 2                | 3.6692882 |
| P25093        | DIQQWEYVPLGPFLGK                                                                     | 0.850382507        | 2                | 4.5962934 |
| P25093        | FGPEPIISK                                                                            | 0.943080857        | 2                | 2.8206365 |
| P25093        | GEGMSQAATICR                                                                         | 0.863590199        | 2                | 3.6403115 |
| P25093        | GEGMSQAATICR+Oxidation(4)                                                            | 1.352095998        | 2                | 3.1148424 |
| P25093        | GKENALLPNWLHLPVGYHGR                                                                 | 1.322845698        | 3                | 4.55268   |
| P25093        | HLFTGPVLSK                                                                           | 1.101231042        | 1                | 2.7654545 |
| P25093        | HQHVFDETTLNSFMGLGQAAWK                                                               | 1.428704134        | 2                | 5.3698874 |
| P25093        | IGVAIGDQILDLSVIK                                                                     | 1.796374598        | 2                | 5.2405124 |
| P25093        | TFLLDGDEVIIIGHCQGDGYR                                                                | 0.897248955        | 2                | 5.2234902 |
| P25093        | VGFGQCAGK                                                                            | 0.874728337        | 2                | 2.7150042 |
| <b>P25113</b> | <b>PGAM1 Phosphoglycerate mutase 1</b>                                               | <b>1.11584623</b>  | <b>0.9888027</b> | <b>7</b>  |
| P25113        | ALPFWNEEIVPQIK                                                                       | 1.24478961         | 2                | 3.50454   |
| P25113        | FSGWYDADLSPAGHEEAK                                                                   | 1.022971626        | 2                | 5.050189  |
| P25113        | HGESAWNLENR                                                                          | 1.02366107         | 2                | 4.1077819 |
| P25113        | HLEGLSEEAIMELNLPTGIPIVYELDK                                                          | 1.228740574        | 3                | 4.0649571 |
| P25113        | SYDVPPPPMEPDHPFYSNISK                                                                | 0.969534757        | 2                | 4.4332819 |
| P25113        | YADLTEDQLPSCESLK                                                                     | 0.946514206        | 2                | 5.5983477 |
| P25113        | YADLTEDQLPSCESLKD TIAR                                                               | 1.119224194        | 2                | 5.3759689 |
| <b>P25235</b> | <b>RPN2 Dolichyl_diphosphooligosaccharide__protein glycosyltransferase subunit 2</b> | <b>1.414980597</b> | <b>9.9E-20</b>   | <b>13</b> |
| P25235        | EDQVIQLMNTIFSK                                                                       | 1.104276794        | 2                | 3.4339788 |
| P25235        | EETVLATVQALHTASHLSQQADLR                                                             | 1.052346425        | 3                | 4.8296924 |

|               |                                                        |                    |                  |           |
|---------------|--------------------------------------------------------|--------------------|------------------|-----------|
| P25235        | FPEEEAPSTVLSQNLFTP                                     | 1.237925268        | 2                | 4.2080426 |
| P25235        | ISTEVGITNVDLSTVDKQSIAPK                                | 1.150335946        | 2                | 4.7607737 |
| P25235        | KNFESLSEAFSVASAAAALSQNR                                | 1.36079972         | 2                | 5.5998015 |
| P25235        | LMDHVGTEPSIKEDQVIQLMNTIFSK                             | 1.394527347        | 3                | 4.4406476 |
| P25235        | LQVSSVLSQPLAQAQAVK                                     | 1.453249419        | 2                | 5.7286248 |
| P25235        | LSKEETVLATVQALHTASHLSQQADLR                            | 1.585844913        | 3                | 5.5888467 |
| P25235        | NFESLSEAFSVASAAAALSQNR                                 | 1.156314368        | 2                | 3.1297257 |
| P25235        | NIVEEIEDLVAR                                           | 1.172922062        | 3                | 4.3254995 |
| P25235        | TGQEVVFAEPDNK                                          | 1.354585565        | 2                | 3.8589573 |
| P25235        | YHVPVVVVPEGSASDTQEAILR                                 | 1.260496708        | 3                | 5.7670708 |
| P25235        | YIANTVELR                                              | 1.013247837        | 2                | 2.6582353 |
| <b>P25318</b> | <b>CO8A2 Collagen alpha_2(VIII) chain</b>              | <b>1.181358606</b> | <b>0.4311805</b> | <b>2</b>  |
| P25318        | GQYLEMPLPMLPMDLKGEPGPPGKPGPR+Oxidation(6)Oxidation(10) | 1.183036181        | 2                | 2.3810005 |
| P25318        | GQYLEMPLPMLPMDLKGEPGPPGKPGPR+Oxidation(6)Oxidation(13) | 1.190171472        | 2                | 2.4913015 |
| <b>P25977</b> | <b>UBF1 Nucleolar transcription factor 1</b>           | <b>1.120887606</b> | <b>0.8740282</b> | <b>2</b>  |
| P25977        | AKYAKLHPEMSNDLTK                                       | 1.058542565        | 2                | 2.5541723 |
| P25977        | ALKAMEMTWNNMEKK+Oxidation(12)                          | 1.175570263        | 2                | 2.3269036 |
| <b>P26039</b> | <b>TLN1 Talin_1</b>                                    | <b>1.129935534</b> | <b>1.11E-16</b>  | <b>23</b> |
| P26039        | ADAEGESDLENSRK                                         | 1.100669406        | 2                | 3.6097546 |
| P26039        | AGALQCSPSDVYTK                                         | 1.258606437        | 2                | 2.8298247 |
| P26039        | AQEACGPLEMDSALSVVQNLEK                                 | 1.09475436         | 2                | 4.0880542 |
| P26039        | ASAGPQPLLVSCK                                          | 0.975111459        | 2                | 2.3701236 |
| P26039        | AVAEQIPLLQGVGR                                         | 1.085201027        | 2                | 2.9213877 |
| P26039        | EAAEGLRMATNAAAQNAIKK                                   | 1.39919965         | 2                | 2.4433854 |
| P26039        | EADESLNFEEQILEAAK                                      | 0.828169609        | 2                | 4.3371682 |
| P26039        | GLAGAVSELLR                                            | 1.09490122         | 2                | 3.2495692 |
| P26039        | GVGAAATAVTQALNELLQHVK                                  | 1.322662433        | 2                | 3.8376617 |
| P26039        | ILAQATSDLVNAIK                                         | 1.901331926        | 2                | 3.5311503 |
| P26039        | LGAASLGAEDPETQVVLINAVK                                 | 2.207274419        | 2                | 4.7047486 |
| P26039        | LLGEIAQGNENYAGIAAR                                     | 1.014943614        | 2                | 4.4081745 |
| P26039        | LNEAAAAGLNQAATELVQASR                                  | 1.144792665        | 2                | 5.4136777 |
| P26039        | MVAAATNNLCEAANAQVGHASQEK                               | 1.256602138        | 3                | 3.660538  |
| P26039        | NCGQMSEIEAK                                            | 0.860826719        | 2                | 3.0736892 |
| P26039        | SNTSPEELGPLANQLTSDYGR                                  | 1.164567884        | 2                | 3.7151601 |
| P26039        | TEDSGLQTVIAAATQCALSTSQLVACTK                           | 1.01842093         | 3                | 4.324841  |
| P26039        | TMLESAGGLIQTAR                                         | 0.918761796        | 2                | 2.5164051 |
| P26039        | VGAIPANALDDGQWSQGLISAAR                                | 0.995846154        | 2                | 4.7382746 |
| P26039        | VLGEAMTGISQNAK                                         | 1.274217939        | 2                | 3.2719698 |
| P26039        | VLVQNAAGSQEK                                           | 1.099512631        | 2                | 3.1646547 |
| P26039        | VSQMAQYFEPLTAAVGAASK                                   | 2.231007779        | 2                | 3.1128268 |
| P26039        | VVAPTISPVCQEQLVEAGR                                    | 1.087242498        | 2                | 5.1501441 |
| <b>P26043</b> | <b>RADI Radixin</b>                                    | <b>1.112131811</b> | <b>9.9E-20</b>   | <b>13</b> |
| P26043        | AFAAQEDLEK                                             | 1.343171964        | 2                | 3.2173574 |
| P26043        | ALELEQER                                               | 1.107369825        | 2                | 2.5233493 |
| P26043        | AQKELEEQTR                                             | 0.935697339        | 2                | 2.6393695 |
| P26043        | FFPEDVSEELIQEITQR                                      | 1.363797578        | 3                | 4.2845788 |
| P26043        | GTELWLGVDALGLNIYEHDDKLTTPK                             | 1.358506298        | 3                | 3.4664745 |
| P26043        | IQNWHEEHR                                              | 1.403485576        | 2                | 2.7873788 |
| P26043        | KEEEATEWQHK                                            | 1.081288379        | 2                | 2.9248173 |
| P26043        | KKEEEATEWQHK                                           | 1.21686412         | 2                | 4.3416801 |
| P26043        | KTQNDVLHAENVK                                          | 1.147677078        | 2                | 5.1542988 |
| P26043        | NQEQLAAELAEFTAK                                        | 1.204485355        | 2                | 5.2763114 |
| P26043        | QLQALSSELAQAR                                          | 1.055467987        | 2                | 4.3622913 |
| P26043        | RKPDTIEVQQMK                                           | 1.07452815         | 2                | 3.4031255 |
| P26043        | TQNDVLHAENVK                                           | 1.066093767        | 2                | 3.9022417 |

|               |                                                                                           |                    |                  |           |
|---------------|-------------------------------------------------------------------------------------------|--------------------|------------------|-----------|
| <b>P26231</b> | <b>CTNA1 Catenin alpha_1</b>                                                              | <b>1.281631336</b> | <b>6.775E-07</b> | <b>5</b>  |
| P26231        | LIEVANLACISINNEEGVK                                                                       | 1.215729798        | 2                | 5.8793249 |
| P26231        | LLEPLVTQVTTLVNTNSK                                                                        | 1.330301933        | 2                | 4.1587152 |
| P26231        | QIIVDPLSFSEER                                                                             | 1.143343548        | 2                | 2.3679366 |
| P26231        | SAAGFADDPCCSSVK                                                                           | 1.33684186         | 2                | 2.9627168 |
| P26231        | TIADHCPDSACK                                                                              | 2.828313813        | 2                | 3.309732  |
| <b>P26284</b> | <b>ODPA Pyruvate dehydrogenase E1 component subunit alpha_ somatic form_mitochondrial</b> | <b>1.035723561</b> | <b>0.9753541</b> | <b>8</b>  |
| P26284        | AILAELTGR                                                                                 | 0.923138418        | 2                | 2.622756  |
| P26284        | GFCHLCDGQEACCVGLEAGINPTDHLITAYR                                                           | 1.036472233        | 3                | 7.2602677 |
| P26284        | LEEGPPVTTVLTR                                                                             | 1.016500895        | 2                | 3.5591357 |
| P26284        | MVNSNLASVEELKEIDVEVR                                                                      | 1.201159812        | 2                | 4.3442936 |
| P26284        | NFYGGNGIVGAQVPLGAGIALACK                                                                  | 1.101781348        | 2                | 3.7401948 |
| P26284        | RGDFIPGLR                                                                                 | 1.151028447        | 2                | 2.3878725 |
| P26284        | TREEIQEVR                                                                                 | 0.969188066        | 2                | 3.0614212 |
| P26284        | VDGMDILCVR                                                                                | 0.737418421        | 2                | 2.5748975 |
| <b>P26453</b> | <b>BASI Basigin</b>                                                                       | <b>1.09189141</b>  | <b>0.4901788</b> | <b>8</b>  |
| P26453        | GNINVEGPPR                                                                                | 1.001215846        | 2                | 3.3590605 |
| P26453        | KSEHASEGEFVK                                                                              | 1.106948218        | 2                | 3.346899  |
| P26453        | RKPDQTLDEDDPGAAPLK                                                                        | 1.222184293        | 3                | 4.2691994 |
| P26453        | SEASHPPVDEWVWFK                                                                           | 1.04264074         | 3                | 3.3693573 |
| P26453        | SEHASEGEFVK                                                                               | 1.07544671         | 3                | 3.6050994 |
| P26453        | SGEYSCIFLPEPVGR                                                                           | 0.935160452        | 2                | 3.9346576 |
| P26453        | VLQEDTLPDLQMK                                                                             | 1.113751022        | 2                | 4.0119686 |
| P26453        | YTVDADDR                                                                                  | 0.963981769        | 2                | 2.4151101 |
| <b>P26516</b> | <b>PSD7 26S proteasome non_ATPase regulatory subunit 7</b>                                | <b>1.239297473</b> | <b>0.0991936</b> | <b>2</b>  |
| P26516        | SVVALHNLINNK                                                                              | 1.278166851        | 2                | 2.8000281 |
| P26516        | TFEHVTSEIGAEAEVGEVHELLR                                                                   | 1.082983543        | 3                | 3.7141643 |
| <b>P26772</b> | <b>CH10 10 kDa heat shock protein_mitochondrial</b>                                       | <b>0.930187105</b> | <b>0.852787</b>  | <b>8</b>  |
| P26772        | GGEIQPVSVK                                                                                | 0.868835035        | 2                | 3.6059093 |
| P26772        | GGIMLPEK                                                                                  | 0.795047606        | 2                | 2.5327179 |
| P26772        | GGIMLPEK+Oxidation(4)                                                                     | 0.898003232        | 2                | 2.7083273 |
| P26772        | GKGGEIQPVSVK                                                                              | 1.013965129        | 2                | 3.5391774 |
| P26772        | KFLPLFDR                                                                                  | 1.149965761        | 2                | 2.3765583 |
| P26772        | VLLPEYGGTK                                                                                | 1.045086376        | 1                | 2.0109563 |
| P26772        | VLQATVVAVGSGGK                                                                            | 0.932957407        | 2                | 5.2828984 |
| P26772        | VVLDDKDYFLFR                                                                              | 0.941717911        | 2                | 3.4740899 |
| <b>P27139</b> | <b>CAH2 Carbonic anhydrase 2</b>                                                          | <b>0.951142685</b> | <b>0.9839263</b> | <b>4</b>  |
| P27139        | AVQHHPDGLAVLGIFLK                                                                         | 0.903418549        | 2                | 3.8136117 |
| P27139        | IGPASQGLQK                                                                                | 0.891522026        | 2                | 3.402122  |
| P27139        | ITEALHSIK                                                                                 | 0.912029638        | 2                | 2.3529038 |
| P27139        | QSPVDIDTGTQAQHDPQLQLLICDYK                                                                | 1.205610829        | 3                | 3.6037483 |
| <b>P27321</b> | <b>ICAL Calpastatin</b>                                                                   | <b>1.089489399</b> | <b>0.8666288</b> | <b>3</b>  |
| P27321        | FQDAPSADGESVAGGVTVATASDK                                                                  | 0.766023238        | 2                | 5.3079729 |
| P27321        | KGSDEVTASSAATGTSPR                                                                        | 0.980309222        | 2                | 4.7227235 |
| P27321        | SQSSEPPVIHEK                                                                              | 1.090297984        | 2                | 2.641834  |
| <b>P27364</b> | <b>3BHS5 3 beta_hydroxysteroid dehydrogenase type 5</b>                                   | <b>1.086131478</b> | <b>0.9984246</b> | <b>7</b>  |
| P27364        | AVLAANGSILK                                                                               | 1.050016206        | 2                | 2.9344611 |
| P27364        | ETILNDREEEHR                                                                              | 1.080162154        | 2                | 2.9628947 |
| P27364        | GDIVDAQFLR                                                                                | 1.015990842        | 2                | 3.3518758 |
| P27364        | IVQMLVQEK                                                                                 | 1.233483034        | 2                | 3.1321893 |
| P27364        | NGGTFHTCALR                                                                               | 1.029523444        | 2                | 2.5542238 |
| P27364        | QTILDVNVK                                                                                 | 1.059940325        | 1                | 2.210381  |
| P27364        | SQSIQQGFYYISDDTPHQSYDDLNYTLK                                                              | 1.685315067        | 3                | 4.1789784 |
| <b>P27605</b> | <b>HPRT Hypoxanthine_guanine phosphoribosyltransferase</b>                                | <b>1.043619021</b> | <b>0.9023261</b> | <b>6</b>  |

|               |                                                                |                    |                  |           |
|---------------|----------------------------------------------------------------|--------------------|------------------|-----------|
| P27605        | DLNHVCVISESG                                                   | 0.945657392        | 2                | 3.4892123 |
| P27605        | FFADLLDYIK                                                     | 1.22082625         | 2                | 3.3706155 |
| P27605        | NVLIVEDIIDTGK                                                  | 1.053928457        | 2                | 3.9134183 |
| P27605        | SVGYRPFVGFVIPDK                                                | 0.843261377        | 3                | 3.5911217 |
| P27605        | SYCNDQSTGDIK                                                   | 1.095008617        | 2                | 3.9038358 |
| P27605        | VIGGDDLSTLTGK                                                  | 0.792428558        | 2                | 3.9952445 |
| <b>P27653</b> | <b>C1TC C_1_tetrahydrofolate synthase_cytoplasmic</b>          | <b>1.16734052</b>  | <b>9.9E-20</b>   | <b>16</b> |
| P27653        | ASQAPSSFQLLYDLK                                                | 1.794871769        | 2                | 4.2989368 |
| P27653        | AYTEEDLDLVEK                                                   | 0.744815964        | 2                | 3.3434563 |
| P27653        | CTHWAEGGQALALAAVQR                                             | 1.181566707        | 3                | 3.661638  |
| P27653        | GEWIKPGAVVIDCGINYPDDTKPNGR                                     | 1.243646355        | 3                | 4.2781444 |
| P27653        | IFHELTQTDK                                                     | 1.287720322        | 2                | 2.6609716 |
| P27653        | IYGADDIELLPEAQNK                                               | 1.19001466         | 2                | 5.2729478 |
| P27653        | KITIGQAPTEK                                                    | 1.08532262         | 2                | 3.1274369 |
| P27653        | KVVGDVAYDEAK                                                   | 1.324651614        | 2                | 3.7432041 |
| P27653        | LDIDPETITWQR                                                   | 1.071205866        | 2                | 3.8433006 |
| P27653        | MHGGGPTVTAGLPLPK                                               | 1.128321337        | 2                | 2.6892941 |
| P27653        | QGFGNLPICMAK                                                   | 1.026905361        | 2                | 3.6217308 |
| P27653        | TADLDKEVKNKGDILVVATGQPEMVK                                     | 1.085096007        | 3                | 4.7468033 |
| P27653        | TDPAALTDDEINR                                                  | 1.051658015        | 2                | 4.3674736 |
| P27653        | THLSLSHNPEQK                                                   | 1.209945902        | 2                | 3.8345129 |
| P27653        | VVGDVAYDEAK                                                    | 1.1797158          | 2                | 3.6761022 |
| P27653        | YVVVTGITPTPLGEGK                                               | 1.234798276        | 2                | 4.8413243 |
| <b>P27661</b> | <b>H2AX Histone H2A.x</b>                                      | <b>1.316541888</b> | <b>0.005442</b>  | <b>3</b>  |
| P27661        | AGLQFPVGR                                                      | 0.935346338        | 2                | 3.0431294 |
| P27661        | HLQLAIR                                                        | 1.171245374        | 2                | 2.7304199 |
| P27661        | LLGGVTIAQGGVLPNIQAVLLPK                                        | 1.337219228        | 2                | 5.2509661 |
| <b>P27867</b> | <b>DHSO Sorbitol dehydrogenase</b>                             | <b>1.11309243</b>  | <b>9.9E-20</b>   | <b>15</b> |
| P27867        | AKEVGADFTIQVAK                                                 | 1.191530893        | 2                | 2.8213596 |
| P27867        | AMGASQVVVIDLSASR                                               | 0.924265629        | 2                | 4.7438478 |
| P27867        | EVGADFTIQVAK                                                   | 0.896923332        | 2                | 3.1421168 |
| P27867        | GENLSLVVHGPDIR                                                 | 1.108862294        | 2                | 3.7561741 |
| P27867        | HSADFCYK                                                       | 1.116075393        | 1                | 2.8911996 |
| P27867        | IGDFVVK                                                        | 1.039988414        | 2                | 2.6338437 |
| P27867        | LENYPIPELGPNDVLLK                                              | 1.045557102        | 2                | 4.9993176 |
| P27867        | LPDSVTFEEGALIEPLSVGIYACR                                       | 1.62636271         | 2                | 4.7368445 |
| P27867        | MHSVIGCGSDVHYWEHGR+Oxidation(1)                                | 1.642513213        | 3                | 4.0540581 |
| P27867        | TLNVKPLVTHR                                                    | 1.181194222        | 2                | 3.083122  |
| P27867        | VAIEPGVPR                                                      | 1.047501988        | 2                | 2.3141987 |
| P27867        | VAIEPGVPREIDEFCKIGR                                            | 0.868440118        | 2                | 2.4943542 |
| P27867        | VLVCGAGPIGIVTLVAK                                              | 2.291619439        | 3                | 5.4789953 |
| P27867        | YCNTWPMVMSMLASK                                                | 1.309286561        | 2                | 3.396667  |
| P27867        | YNLTPSIFFCATPPDDGNLCR                                          | 1.992781416        | 2                | 4.0765424 |
| <b>P27952</b> | <b>RS2 40S ribosomal protein S2</b>                            | <b>1.113687461</b> | <b>0.8931338</b> | <b>5</b>  |
| P27952        | AEDKEWIPVTK                                                    | 1.040281719        | 2                | 3.5536258 |
| P27952        | AFVAIGDYNGHVGLGVK                                              | 1.25238167         | 2                | 3.7025385 |
| P27952        | GCTATLGNFAK                                                    | 1.136545116        | 2                | 2.7985141 |
| P27952        | GTGIVSAPVPK                                                    | 1.040629025        | 2                | 2.8496075 |
| P27952        | TYSYLTDLWK                                                     | 1.262827651        | 2                | 2.451854  |
| <b>P28037</b> | <b>AL11L Cytosolic 10_formyltetrahydrofolate dehydrogenase</b> | <b>1.40150214</b>  | <b>9.9E-20</b>   | <b>27</b> |
| P28037        | ADPLGLEAEK                                                     | 1.25088125         | 1                | 1.9285852 |
| P28037        | ANATEFGLASGVFTR                                                | 1.100184861        | 2                | 4.5381041 |
| P28037        | AVQMGMSSVFFNK                                                  | 1.041701607        | 2                | 4.0785913 |
| P28037        | DLGEAALNEYLR                                                   | 0.720186983        | 2                | 3.6713524 |
| P28037        | DTNHGPQNHEAHLR                                                 | 1.206112178        | 2                | 3.6291187 |
| P28037        | ECEVLDDTVSTLYNR                                                | 1.892868405        | 2                | 3.8177111 |



|               |                                                                 |                    |                  |           |
|---------------|-----------------------------------------------------------------|--------------------|------------------|-----------|
| P28037        | EESFGPIMIISR                                                    | 0.925266156        | 2                | 2.8347971 |
| P28037        | EGHEVVGVTIPDKDGK                                                | 1.242220042        | 2                | 4.63908   |
| P28037        | GNDKVPGAWTEACGQK                                                | 1.15962831         | 2                | 4.0104847 |
| P28037        | GQALPEVVAK                                                      | 1.116231543        | 2                | 2.6266098 |
| P28037        | GSASSDLELAEALATAEAVR                                            | 1.160121262        | 2                | 6.676713  |
| P28037        | GVVNILPGSGSLVGQR                                                | 1.104231488        | 2                | 4.7888803 |
| P28037        | IGFTGSTEVGK                                                     | 1.503494327        | 2                | 2.5823472 |
| P28037        | ILPNVPEVEDSTDFFK                                                | 1.56931085         | 2                | 3.4053442 |
| P28037        | INWDQPAAEAIHNWIR                                                | 1.384262171        | 2                | 3.8335533 |
| P28037        | KEGHEVVGVTIPDKDGK                                               | 1.163516081        | 3                | 4.4941001 |
| P28037        | KIGFTGSTEVGK                                                    | 1.157485478        | 2                | 2.7317488 |
| P28037        | KLVEYCQR                                                        | 1.653458252        | 2                | 2.6676834 |
| P28037        | LFVEESIHNQFVQK                                                  | 1.192318405        | 2                | 4.7964683 |
| P28037        | LIAEGTAPR                                                       | 1.334291538        | 2                | 3.6349752 |
| P28037        | LSDHPDVR                                                        | 1.287358244        | 2                | 2.3805645 |
| P28037        | NIQLEDGK                                                        | 1.272093893        | 1                | 2.2448354 |
| P28037        | TAACLAAGNTVIKPAQVPTLTK                                          | 1.388463121        | 2                | 4.1599951 |
| P28037        | TDVAAPFGGFK                                                     | 1.319571567        | 1                | 2.0475852 |
| P28037        | THVGMSIQTR                                                      | 1.414983419        | 2                | 2.927774  |
| P28037        | TYNTINPTDGSVICQVSLAQVSDVDK                                      | 1.075090977        | 2                | 5.1229634 |
| P28037        | VVEEVEK                                                         | 1.200504484        | 2                | 2.4377134 |
| <b>P28480</b> | <b>TCPA T_complex protein 1 subunit alpha</b>                   | <b>1.175393141</b> | <b>1.766E-06</b> | <b>11</b> |
| P28480        | AFHNEAQVNPFR                                                    | 1.046943417        | 2                | 3.4155164 |
| P28480        | FATEAAITLR                                                      | 1.036332576        | 2                | 3.1011438 |
| P28480        | HGGYENAVHSGALDD                                                 | 1.088141626        | 2                | 4.1779137 |
| P28480        | ICDDELILIK                                                      | 1.113558296        | 2                | 3.4693739 |
| P28480        | LLEVEHPAAK                                                      | 1.175553628        | 2                | 2.6824753 |
| P28480        | MLVDDIGDVTITNDGATILK                                            | 1.265155136        | 2                | 3.5653641 |
| P28480        | NADELVK                                                         | 1.264685259        | 1                | 1.9335661 |
| P28480        | SLLVIPNTLAVNAAQDSTDLVAK                                         | 1.347954855        | 2                | 4.5692787 |
| P28480        | SQNVMAAASIANIVK                                                 | 0.939860147        | 2                | 4.7734551 |
| P28480        | SSLGPVGLDK                                                      | 0.937920549        | 2                | 2.7713525 |
| P28480        | YINENLIINTDELGR                                                 | 1.066807757        | 2                | 4.6424499 |
| <b>P28492</b> | <b>GLSL Glutaminase liver isoform_mitochondrial</b>             | <b>0.913168173</b> | <b>0.7980306</b> | <b>3</b>  |
| P28492        | ATGLQTS DPR                                                     | 0.83750297         | 2                | 2.4731627 |
| P28492        | FVIPDFEFTGHVDR                                                  | 0.815143993        | 2                | 2.9946642 |
| P28492        | SNPDLWGVSLCTVDGQR                                               | 1.021108867        | 2                | 3.6327386 |
| <b>P28650</b> | <b>PURA1 Adenylosuccinate synthetase isozyme 1</b>              | <b>0.899385822</b> | <b>0.3596445</b> | <b>2</b>  |
| P28650        | LDILDVLSEIK                                                     | 1.371860414        | 2                | 3.1294737 |
| P28650        | VVDLLATDADIVSR                                                  | 0.868360584        | 2                | 2.6734374 |
| <b>P29117</b> | <b>PPIF Peptidyl_prolyl cis_trans isomerase F_mitochondrial</b> | <b>1.072499746</b> | <b>0.0752912</b> | <b>2</b>  |
| P29117        | GANSSSQNPLVYLDVGADGQPLGR                                        | 1.239794423        | 2                | 4.0195918 |
| P29117        | KIVITDCGQLS                                                     | 1.044829803        | 2                | 2.4896367 |
| <b>P29147</b> | <b>BDH D_beta_hydroxybutyrate dehydrogenase_mitochondrial</b>   | <b>1.170124573</b> | <b>1.162E-07</b> | <b>15</b> |
| P29147        | AVLVTGCDSGFGFSLAK                                               | 1.007767684        | 2                | 5.882318  |
| P29147        | FGVEAFSDCLR                                                     | 1.316141571        | 2                | 3.7257762 |
| P29147        | GFLVFAGCLK                                                      | 1.041743763        | 2                | 2.9768274 |
| P29147        | KMWDELPEVVR                                                     | 1.066322656        | 2                | 3.39926   |
| P29147        | METYCNSGSTDSSVINAVTHALTAATPYTR                                  | 1.453350532        | 3                | 6.2576575 |
| P29147        | METYCNSGSTDSSVINAVTHALTAATPYTR+Oxidation(1)                     | 0.969552322        | 3                | 4.5083523 |
| P29147        | MQVMTHFPGAISDK                                                  | 0.857628594        | 2                | 4.5124249 |
| P29147        | MQVMTHFPGAISDK+Oxidation(1)                                     | 1.245279151        | 2                | 3.4326539 |
| P29147        | MQVMTHFPGAISDK+Oxidation(4)                                     | 1.243942848        | 2                | 3.7153478 |
| P29147        | MWDELPEVVR                                                      | 1.039135646        | 2                | 3.2607288 |
| P29147        | MWDELPEVVR+Oxidation(1)                                         | 1.029589209        | 2                | 3.5085075 |

|               |                                                               |                    |                  |           |
|---------------|---------------------------------------------------------------|--------------------|------------------|-----------|
| P29147        | TIQLNVCNSEEVEK                                                | 1.034642557        | 2                | 4.4060903 |
| P29147        | VSVVEPGNFIAATSLYSER                                           | 1.135319924        | 2                | 6.0106196 |
| P29147        | VVNISMLGR                                                     | 1.07025927         | 2                | 3.8702395 |
| P29147        | YEMHPLGVK                                                     | 1.092026238        | 1                | 2.412761  |
| <b>P29266</b> | <b>3HIDH 3_hydroxyisobutyrate dehydrogenase_mitochondrial</b> | <b>1.052580663</b> | <b>9.513E-11</b> | <b>6</b>  |
| P29266        | DLGLAQDSATSK                                                  | 0.798824329        | 2                | 3.9451065 |
| P29266        | EAGEQVASSPADVAEK                                              | 0.854922745        | 2                | 4.8076773 |
| P29266        | GSLLDSSSTIDPSVSK                                              | 0.947236289        | 2                | 4.6485429 |
| P29266        | HGYPLILYDVFPDVCK                                              | 1.428822501        | 2                | 4.8745837 |
| P29266        | KGSLLDSSSTIDPSVSK                                             | 1.028637097        | 2                | 4.0466814 |
| P29266        | MGAVFMDAPVSGGVGAAR                                            | 0.897134927        | 2                | 5.0240126 |
| <b>P29314</b> | <b>RS9 40S ribosomal protein S9</b>                           | <b>1.364732415</b> | <b>3.038E-13</b> | <b>8</b>  |
| P29314        | IGVLDEGK                                                      | 1.018381652        | 2                | 2.310128  |
| P29314        | KGQGGAGAGDDEEED                                               | 2.393454306        | 2                | 4.3337741 |
| P29314        | KQVVNIPSFIVR                                                  | 1.03397751         | 2                | 2.5148363 |
| P29314        | LDYILGLK                                                      | 0.953352252        | 2                | 2.7456687 |
| P29314        | LFEGNALLR                                                     | 1.340825701        | 2                | 2.6563709 |
| P29314        | QVVNIPSFIVR                                                   | 1.15596427         | 2                | 3.0196066 |
| P29314        | RLQTQVFK                                                      | 1.043653606        | 2                | 2.3107495 |
| P29314        | SRLDQELK                                                      | 1.067749892        | 3                | 3.3881497 |
| <b>P29315</b> | <b>RINI Ribonuclease inhibitor</b>                            | <b>0.8552067</b>   | <b>4.072E-09</b> | <b>8</b>  |
| P29315        | ASLQELDLGSNK                                                  | 0.480417226        | 2                | 2.969291  |
| P29315        | LDDCGLTEVR                                                    | 0.846723146        | 2                | 3.1824105 |
| P29315        | LENCGITSANCK                                                  | 1.227365413        | 2                | 3.3241267 |
| P29315        | LGNTGIAALCSGLLLPSCR                                           | 1.427628456        | 2                | 2.7256022 |
| P29315        | LSLQNCSLTEAGCGVLPDVL                                          | 1.12485378         | 2                | 2.9128084 |
| P29315        | SAIQANPALTELSLR                                               | 1.2269218          | 2                | 4.4967065 |
| P29315        | TCSLTAASCPHFCSVLTK                                            | 0.938274381        | 2                | 2.927803  |
| P29315        | TNELGDAGVGLVLQGLQNPTCK                                        | 1.181415432        | 2                | 5.2919621 |
| <b>P29410</b> | <b>KAD2 Adenylate kinase 2_mitochondrial</b>                  | <b>1.081709279</b> | <b>1.053E-08</b> | <b>11</b> |
| P29410        | AMVASGSELGK                                                   | 0.907986433        | 2                | 2.8129051 |
| P29410        | AMVASGSELGKK                                                  | 1.065675457        | 2                | 2.848815  |
| P29410        | AVLLGPPGAGK                                                   | 0.926550586        | 2                | 2.8546255 |
| P29410        | EAMKDDITGEPLIR                                                | 1.043802142        | 2                | 2.3223045 |
| P29410        | GIHCAIDASQTPDVVFASILAAFSK                                     | 1.29053182         | 3                | 4.6903048 |
| P29410        | LEAYHTQTTPLVEYYR                                              | 1.358100413        | 2                | 5.3804803 |
| P29410        | LVSDEMVELIEK                                                  | 1.067823764        | 2                | 4.1495509 |
| P29410        | NGFLLDGFPR                                                    | 0.909648249        | 2                | 2.6434731 |
| P29410        | NLETPSCK                                                      | 0.951359687        | 2                | 2.365603  |
| P29410        | SYHEEFNPPK                                                    | 1.10884603         | 3                | 3.5173337 |
| P29410        | TRLEAYHTQTTPLVEYYR                                            | 1.152604997        | 3                | 3.4621286 |
| <b>P29411</b> | <b>KAD3 GTP:AMP phosphotransferase_mitochondrial</b>          | <b>1.072367597</b> | <b>0.8718745</b> | <b>6</b>  |
| P29411        | AYEAQTEPVLQYYQK                                               | 1.081843015        | 2                | 3.6174285 |
| P29411        | EDDKPETVIK                                                    | 1.003122365        | 2                | 2.5193729 |
| P29411        | NLTQCSWLLDGFPR                                                | 0.886406321        | 2                | 2.6446722 |
| P29411        | TVGIDDLTGEPLIQR                                               | 0.812919161        | 2                | 3.9666443 |
| P29411        | VYNIEFNPPK                                                    | 1.148462437        | 2                | 2.8031511 |
| P29411        | VYQIDTVINLNVPEVIK                                             | 0.943695304        | 2                | 4.4046068 |
| <b>P29419</b> | <b>ATP5I ATP synthase subunit e_mitochondrial</b>             | <b>0.894724689</b> | <b>1.214E-06</b> | <b>2</b>  |
| P29419        | ELAEAEVDSIFK                                                  | 0.817575927        | 1                | 3.0553951 |
| P29419        | YSALILGMAYGAK                                                 | 0.955020718        | 2                | 3.8940432 |
| <b>P29994</b> | <b>ITPR1 Inositol 1_4_5_trisphosphate receptor type 1</b>     | <b>0.983618153</b> | <b>0.0500434</b> | <b>3</b>  |
| P29994        | AKDDLEMSAVITIMQPILR+Oxidation(7)Oxidation(14)                 | 1.444439527        | 2                | 2.6809056 |
| P29994        | CVVQPEAGDLNPPKK                                               | 0.908398212        | 2                | 2.337486  |
| P29994        | EGASNLVIDLIMNASSDR                                            | 1.053054914        | 2                | 2.4306402 |
| <b>P30009</b> | <b>MARCS Myristoylated alanine_rich C_kinase substrate</b>    | <b>1.082592021</b> | <b>0.8333118</b> | <b>3</b>  |

|               |                                                                      |                    |                  |           |
|---------------|----------------------------------------------------------------------|--------------------|------------------|-----------|
| P30009        | AEDGAAPSPSETPK                                                       | 1.036951303        | 2                | 3.6740952 |
| P30009        | EAEAAPEPEQPEQPAEEPR                                                  | 1.042941327        | 2                | 3.8637671 |
| P30009        | GEAAAERPGEA AVASSPSK                                                 | 1.278665341        | 2                | 3.4887242 |
| <b>P30349</b> | <b>LKHA4 Leukotriene A<sub>4</sub> hydrolase</b>                     | <b>1.012027939</b> | <b>0.9998233</b> | <b>3</b>  |
| P30349        | GSPMEISLPIALSK                                                       | 1.003194726        | 2                | 2.444994  |
| P30349        | SLSNVIAHEISHSWTGNLVTNK                                               | 0.979051887        | 3                | 3.5116777 |
| P30349        | SSALQWLTPSEQTSGK                                                     | 1.030909755        | 2                | 3.378073  |
| <b>P30427</b> | <b>PLEC Plectin</b>                                                  | <b>0.922825995</b> | <b>0.7556308</b> | <b>4</b>  |
| P30427        | LLDPEDVDVPQPDEK                                                      | 0.915926193        | 2                | 3.5910246 |
| P30427        | MSAAQALKKGWLYEAGQR+Oxidation(1)                                      | 1.189840323        | 2                | 2.4207442 |
| P30427        | REEAAVDAQQK                                                          | 1.141641986        | 2                | 3.5345547 |
| P30427        | VLALPEPSPAAPTLR                                                      | 0.888881545        | 2                | 2.4339523 |
| <b>P30713</b> | <b>GSTT2 Glutathione S<sub>2</sub> transferase theta<sub>2</sub></b> | <b>1.344633509</b> | <b>0.0094673</b> | <b>8</b>  |
| P30713        | AQVHEYLGWHADNIR                                                      | 1.330029823        | 2                | 5.1080093 |
| P30713        | ERVEAFLGAELCQEAHNPIMSVLGQAAK                                         | 0.986465888        | 3                | 4.8148513 |
| P30713        | GQHLSEQFSQVNCLK                                                      | 1.388731329        | 2                | 4.8779616 |
| P30713        | GTFGVLLWTK                                                           | 1.824373827        | 2                | 2.5019689 |
| P30713        | NSMVLALQR                                                            | 0.963626226        | 2                | 2.7812147 |
| P30713        | VEAFLGAELCQEAHNPIMSVLGQAAK                                           | 0.914533165        | 3                | 4.5975251 |
| P30713        | VLGPLIGVQVPEEK                                                       | 1.135703298        | 2                | 3.9323754 |
| P30713        | YQVADHWYPADLQAR                                                      | 1.182828588        | 2                | 5.1132517 |
| <b>P30835</b> | <b>K6PL 6<sub>3</sub> phosphofructokinase<sub>3</sub> liver type</b> | <b>1.155847355</b> | <b>0.3557933</b> | <b>2</b>  |
| P30835        | NEWGSLLEELVK                                                         | 1.156003767        | 2                | 2.5670273 |
| P30835        | VFANAPDSACVIGLR                                                      | 0.534852313        | 2                | 2.7741897 |
| <b>P30839</b> | <b>AL3A2 Fatty aldehyde dehydrogenase</b>                            | <b>1.22468673</b>  | <b>3.776E-09</b> | <b>8</b>  |
| P30839        | EKDILAAIAADLSK                                                       | 1.03734826         | 2                | 4.2547607 |
| P30839        | FDHILYTGNTAVGK                                                       | 1.19752108         | 2                | 4.1934538 |
| P30839        | HLPVLTLELGGK                                                         | 1.10278358         | 3                | 3.7689209 |
| P30839        | LQQLEALR                                                             | 1.326893374        | 2                | 2.5855436 |
| P30839        | NVEEAINFINDR                                                         | 1.39366673         | 2                | 3.8077929 |
| P30839        | VMQEEIFGPILPIVSVK                                                    | 1.124497489        | 2                | 4.6467438 |
| P30839        | VMQEEIFGPILPIVSVK+Oxidation(2)                                       | 1.237782801        | 2                | 4.1349211 |
| P30839        | YIAPTILTDVDPNSK                                                      | 1.151715208        | 2                | 4.1475801 |
| <b>P30904</b> | <b>MIF Macrophage migration inhibitory factor</b>                    | <b>1.433829234</b> | <b>2.191E-08</b> | <b>2</b>  |
| P30904        | LHISPDR                                                              | 1.347568336        | 1                | 1.9733508 |
| P30904        | LLCGLLSDR                                                            | 1.786856351        | 2                | 2.7983205 |
| <b>P31000</b> | <b>VIME Vimentin</b>                                                 | <b>1.028508333</b> | <b>0.9739099</b> | <b>13</b> |
| P31000        | DGQVINETSQHDDLE                                                      | 0.861482904        | 2                | 3.2338514 |
| P31000        | KLLEGEESR                                                            | 1.051946404        | 2                | 2.8009386 |
| P31000        | KVESLQEEIAFLK                                                        | 1.040838043        | 2                | 3.8619218 |
| P31000        | LGDLYEEEMR                                                           | 1.078520914        | 2                | 3.0922406 |
| P31000        | LHDEEIQELQAQIQEQHVQIDVDVSKPDLTAALR                                   | 1.133755388        | 4                | 5.0394669 |
| P31000        | LLEGEESR                                                             | 0.981660218        | 2                | 2.8107498 |
| P31000        | LQDEIQNMKEEMAR                                                       | 1.211725044        | 2                | 3.8269968 |
| P31000        | NLQEAEEWYK                                                           | 1.009309949        | 2                | 3.0970125 |
| P31000        | QDVDNASLAR                                                           | 1.155383653        | 2                | 2.9121735 |
| P31000        | QVQSLTCEVDALK                                                        | 1.138920653        | 2                | 3.4193945 |
| P31000        | RQVDQLTNDK                                                           | 1.048403543        | 2                | 3.132071  |
| P31000        | TNEKVELQELNDR                                                        | 1.033500908        | 2                | 3.6288486 |
| P31000        | VELQELNDR                                                            | 1.217723018        | 2                | 2.6561377 |
| <b>P31044</b> | <b>PEBP1 Phosphatidylethanolamine<sub>3</sub> binding protein 1</b>  | <b>1.016321472</b> | <b>2.21E-08</b>  | <b>6</b>  |
| P31044        | GNDISSGTVLSEYVGSPPK                                                  | 1.05617709         | 2                | 6.294384  |
| P31044        | LYTLVLTPDPAPSR                                                       | 1.451176294        | 2                | 4.4293308 |
| P31044        | VDYGGVTVDDELGK                                                       | 1.05178304         | 2                | 5.0415516 |
| P31044        | VLTPQVMNRPSSISWDGLDPGK                                               | 0.898924142        | 3                | 5.1266842 |
| P31044        | YHLGAPVAGTCFQAEWDDSVPK                                               | 1.021054261        | 2                | 5.3911114 |
| P31044        | YVWLVEQEQPLNCDPILSNK                                                 | 1.434073022        | 2                | 5.2571054 |

|               |                                                                                    |                    |                  |           |
|---------------|------------------------------------------------------------------------------------|--------------------|------------------|-----------|
| <b>P31210</b> | <b>AK1D1 3_oxo_5_beta_steroid 4_dehydrogenase</b>                                  | <b>1.595518692</b> | <b>2.22E-16</b>  | <b>21</b> |
| P31210        | DELLTSLGK                                                                          | 1.38357289         | 2                | 2.7157998 |
| P31210        | DIEALNK                                                                            | 1.419085091        | 1                | 2.4631081 |
| P31210        | EEMKDIEALNK                                                                        | 1.120870547        | 2                | 3.6799011 |
| P31210        | ENFQIFDFSLTK                                                                       | 1.442901182        | 2                | 2.8502924 |
| P31210        | FVEMLMWSDHPEYPFHDEY                                                                | 1.599715827        | 3                | 3.8727753 |
| P31210        | GLVVIPK                                                                            | 1.393402123        | 2                | 2.3889263 |
| P31210        | HIDGAYVYR                                                                          | 1.468433871        | 2                | 2.9079738 |
| P31210        | IKENFQIFDFSLTK                                                                     | 2.678638915        | 3                | 4.1217008 |
| P31210        | LWSTDHDPPEMVRPALER                                                                 | 1.69063223         | 2                | 2.3562531 |
| P31210        | NEHEVGEAIR                                                                         | 1.322224877        | 2                | 3.0763493 |
| P31210        | NPLWVNVSSPPLLK                                                                     | 1.501088293        | 2                | 4.1289678 |
| P31210        | NPLWVNVSSPPLLKDELLTSLGK                                                            | 1.48688473         | 3                | 5.8204751 |
| P31210        | QLEVILNKPGLK                                                                       | 1.567767955        | 2                | 3.5932028 |
| P31210        | REEIFYCGK                                                                          | 1.660813861        | 2                | 2.7921219 |
| P31210        | RQLEVILNKPGLK                                                                      | 1.322698981        | 3                | 4.2492752 |
| P31210        | SLGVSFNFR                                                                          | 0.930369089        | 2                | 2.3986793 |
| P31210        | SNLCATWEALEACK                                                                     | 1.169754556        | 2                | 4.6070905 |
| P31210        | SNLCATWEALEACKDAGLVK                                                               | 1.569744614        | 2                | 4.8044086 |
| P31210        | TAIDEGYR                                                                           | 1.188827498        | 2                | 2.8983345 |
| P31210        | TQAQIVLR                                                                           | 1.21373792         | 2                | 2.9122891 |
| P31210        | YKPVTNQVECHPYFTQTK                                                                 | 1.410347148        | 2                | 5.614728  |
| <b>P31230</b> | <b>AIMP1 Aminoacyl tRNA synthase complex_interacting multifunctional protein 1</b> | <b>1.155172663</b> | <b>0.5271169</b> | <b>2</b>  |
| P31230        | KEIEELK                                                                            | 1.162721296        | 1                | 1.9491907 |
| P31230        | TVVSGLVNHPLEQMQR                                                                   | 1.134413108        | 3                | 3.4486685 |
| <b>P31232</b> | <b>TAGL Transgelin</b>                                                             | <b>1.205893818</b> | <b>0.4816868</b> | <b>2</b>  |
| P31232        | KYDEELEER                                                                          | 1.335552164        | 2                | 2.5869517 |
| P31232        | TVMALGSLAVTK                                                                       | 1.060249665        | 2                | 2.8193889 |
| <b>P31254</b> | <b>UBA1Y Ubiquitin_like modifier_activating enzyme 1 Y</b>                         | <b>1.173404988</b> | <b>0.5530779</b> | <b>2</b>  |
| P31254        | YDGQVAVFGSDLQEK                                                                    | 1.183416134        | 2                | 4.5242925 |
| P31254        | YFLVGAGAIGCELLK                                                                    | 0.982636592        | 2                | 2.7656639 |
| <b>P31399</b> | <b>ATP5H ATP synthase subunit d_mitochondrial</b>                                  | <b>1.188302638</b> | <b>6.442E-05</b> | <b>9</b>  |
| P31399        | ANVDKPLVDDFK                                                                       | 1.087487457        | 2                | 3.908788  |
| P31399        | KYPYWPHQPIENL                                                                      | 1.258472531        | 2                | 2.8469925 |
| P31399        | NCAQFVTGSQAR                                                                       | 0.757652669        | 2                | 3.8667116 |
| P31399        | NMIPFDQMTIDDLNEVFPETK                                                              | 1.303352991        | 2                | 5.2888718 |
| P31399        | NMIPFDQMTIDDLNEVFPETK+Oxidation(2)                                                 | 1.217988602        | 2                | 3.1333876 |
| P31399        | NMIPFDQMTIDDLNEVFPETK+Oxidation(8)                                                 | 1.217988602        | 2                | 2.3115556 |
| P31399        | SWNETFHTR                                                                          | 1.080387607        | 2                | 2.7176285 |
| P31399        | TIDWVSFVEIMPQNQK                                                                   | 1.570589037        | 2                | 3.2840126 |
| P31399        | YDALVDAEEKEDVK                                                                     | 0.983490962        | 2                | 3.5652983 |
| <b>P32089</b> | <b>TXTP Tricarboxylate transport protein_mitochondrial</b>                         | <b>1.315366665</b> | <b>0.0011773</b> | <b>4</b>  |
| P32089        | FIHDQTSSNPK                                                                        | 1.210863286        | 1                | 3.7498004 |
| P32089        | GLSLLYGSIPK                                                                        | 1.053243656        | 2                | 3.8223524 |
| P32089        | NTLDCGVQILK                                                                        | 1.093383257        | 2                | 3.7996869 |
| P32089        | TQLQLDER                                                                           | 1.08929156         | 2                | 2.6097863 |
| <b>P32198</b> | <b>CPT1A Carnitine O_palmitoyltransferase 1_liver isoform</b>                      | <b>1.183161212</b> | <b>0.7660886</b> | <b>3</b>  |
| P32198        | ELEQQMQQILDPEPQGEAK                                                                | 1.063114663        | 2                | 4.0636926 |
| P32198        | LLGSTIPLCSAQWER                                                                    | 1.033169214        | 2                | 3.0100696 |
| P32198        | MTALAQDFAVNLGPK                                                                    | 1.189628224        | 2                | 4.2359214 |
| <b>P32232</b> | <b>CBS Cystathionine beta_synthase</b>                                             | <b>1.074660748</b> | <b>0.0409356</b> | <b>8</b>  |
| P32232        | AGTLKPGDTIIEPTSGNTGIGLALAAVK                                                       | 1.128303731        | 3                | 5.3251176 |
| P32232        | FDSPESHVGVAWR                                                                      | 1.064614261        | 2                | 3.2914047 |
| P32232        | LKNEIPNSHILDQYR                                                                    | 1.760804016        | 3                | 3.5512643 |
| P32232        | NASNPLAHYDDTAEEILQQCDGK                                                            | 1.193771324        | 2                | 5.5608025 |

|               |                                                              |                    |                  |           |
|---------------|--------------------------------------------------------------|--------------------|------------------|-----------|
| P32232        | SNDDDSFAFAR                                                  | 1.10134611         | 2                | 3.0561337 |
| P32232        | VDMLVASAGTGGTITGIAR                                          | 0.875167565        | 2                | 4.6053052 |
| P32232        | VQELSLSAPLTVLPTVCEHTAILR                                     | 1.23697885         | 3                | 4.1996775 |
| P32232        | VRPSDEVCK                                                    | 1.081325264        | 3                | 3.608285  |
| <b>P32551</b> | <b>QCR2 Cytochrome b_c1 complex subunit 2_ mitochondrial</b> | <b>0.996351874</b> | <b>0.0348029</b> | <b>11</b> |
| P32551        | AVAFQNPQTR                                                   | 1.127010608        | 2                | 3.4325461 |
| P32551        | AVAQGNLSSADVQAAK                                             | 0.94563208         | 2                | 5.0821128 |
| P32551        | GNNNTSLLSQSVAK                                               | 1.026577268        | 2                | 3.9725533 |
| P32551        | IENLHDVAYK                                                   | 1.195493916        | 2                | 4.046308  |
| P32551        | ITSEELHYFVQNHFTSAR                                           | 1.092000331        | 3                | 3.473325  |
| P32551        | NALANPLYCPDYR                                                | 0.931863474        | 2                | 3.3733399 |
| P32551        | RGNNTSLLSQSVAK                                               | 1.016920955        | 2                | 2.7873237 |
| P32551        | RWEVAALR                                                     | 1.183644014        | 2                | 2.760175  |
| P32551        | SMTASGNLGHPTFLDEL                                            | 1.131297576        | 2                | 3.1472273 |
| P32551        | TSAPGGVPLQPQLEFTK                                            | 0.930386215        | 2                | 3.8260179 |
| P32551        | YENYNLGTSHLLR                                                | 1.748797702        | 2                | 4.0698023 |
| <b>P32755</b> | <b>HPPD 4_hydroxyphenylpyruvate dioxygenase</b>              | <b>1.192681655</b> | <b>9.9E-20</b>   | <b>19</b> |
| P32755        | AFEEEQALR                                                    | 1.126436801        | 2                | 3.3757317 |
| P32755        | DIAFEVEDCEHIVQK                                              | 1.318745967        | 2                | 3.9989696 |
| P32755        | ENMDVLEELK                                                   | 0.998526506        | 2                | 2.6690156 |
| P32755        | FAVLQTYGDTTHTLVEK                                            | 1.406239801        | 2                | 5.1435981 |
| P32755        | FLHFHSVTFWVGNAK                                              | 0.844136791        | 3                | 3.4663751 |
| P32755        | FLPGFEAPTYK                                                  | 1.169556788        | 2                | 2.5626488 |
| P32755        | FWSVDDTQVHTEYSSLR                                            | 1.286162241        | 2                | 5.6787896 |
| P32755        | GMEFLAVPSSYYR                                                | 1.355456396        | 2                | 2.628212  |
| P32755        | GNLTDLETNGVR                                                 | 1.234656687        | 2                | 3.676733  |
| P32755        | HGDGVKDIAFEVEDCEHIVQK                                        | 1.313212745        | 3                | 4.850141  |
| P32755        | HNHQGFAGAGFNLSLFK                                            | 1.265222093        | 3                | 4.6907024 |
| P32755        | ILVDYDEK                                                     | 1.207975736        | 1                | 1.9862553 |
| P32755        | IVFVLCALNPWNK                                                | 1.467188582        | 2                | 2.5318878 |
| P32755        | IVREPWVEEDKFGK                                               | 1.507809339        | 3                | 4.3537688 |
| P32755        | LPSCNLEIIDHIVGNQPDQEMESASEWYLK                               | 1.482297827        | 3                | 7.4221921 |
| P32755        | MGFEPLAYK                                                    | 1.678668662        | 2                | 2.6022341 |
| P32755        | SIVVANYEESIK                                                 | 1.128289112        | 2                | 4.067884  |
| P32755        | SQIQEYVDYNGGAGVQHIALR                                        | 1.281406108        | 2                | 5.5929565 |
| P32755        | TEDIITTR                                                     | 1.148240248        | 2                | 3.342716  |
| <b>P33124</b> | <b>ACSL6 Long_chain_fatty_acid_CoA ligase 6</b>              | <b>1.037217578</b> | <b>1</b>         | <b>2</b>  |
| P33124        | ALRPTIFPVVPR                                                 | 1.072574847        | 2                | 3.258791  |
| P33124        | IENIYIR                                                      | 0.992523271        | 2                | 2.9643557 |
| <b>P34058</b> | <b>HS90B Heat shock protein HSP 90_beta</b>                  | <b>1.178709526</b> | <b>9.9E-20</b>   | <b>27</b> |
| P34058        | ADLNNLGTIAK                                                  | 1.01955214         | 2                | 4.2233295 |
| P34058        | EDQTEYLEER                                                   | 0.932213063        | 2                | 3.4920197 |
| P34058        | EGLELPEDEEEK                                                 | 0.979143309        | 2                | 2.4602726 |
| P34058        | EGLELPEDEEEKK                                                | 1.19127502         | 2                | 3.1499658 |
| P34058        | ELISNASDALDK                                                 | 0.884261929        | 2                | 3.7060885 |
| P34058        | GEKEEEDKEDEEKPK                                              | 0.4649926          | 3                | 4.1048374 |
| P34058        | GFEVVMTEPIDEYCVQQLK                                          | 1.117486331        | 2                | 3.4250913 |
| P34058        | GVVDSLDLPLNISR                                               | 1.161577589        | 2                | 4.8695164 |
| P34058        | HFSVEGQLEFR                                                  | 1.115045529        | 2                | 2.943311  |
| P34058        | HLEINPDHPIVETLR                                              | 1.106524446        | 2                | 4.4571128 |
| P34058        | HSQFIGYPITLYLEK                                              | 3.135153588        | 2                | 3.9477575 |
| P34058        | IDIIPNPQER                                                   | 1.020593537        | 2                | 2.9190691 |
| P34058        | KHLEINPDHPIVETLR                                             | 1.195054467        | 2                | 4.8914404 |
| P34058        | LGIHEDSTNR                                                   | 1.139008943        | 2                | 3.0411549 |
| P34058        | LGLGIDEVTAEEPSAAVPDEIPPLEGDEDASR                             | 1.948619119        | 2                | 4.512372  |
| P34058        | NPDDITQEEYGEFYK                                              | 1.209669905        | 2                | 4.608768  |

|               |                                                              |                    |                  |           |
|---------------|--------------------------------------------------------------|--------------------|------------------|-----------|
| P34058        | RAPDFLFENK                                                   | 1.219919319        | 2                | 3.0249181 |
| P34058        | SIYYITGESK                                                   | 1.208707313        | 2                | 2.6299293 |
| P34058        | SLTNDWEDHLAVK                                                | 1.247765499        | 2                | 4.3258996 |
| P34058        | TLTLVDTGIGMTK                                                | 0.985614068        | 2                | 4.3429503 |
| P34058        | TLTLVDTGIGMTK+Oxidation(11)                                  | 1.223860152        | 2                | 3.3894668 |
| P34058        | VFIMDSCDELIPEYLNFR                                           | 1.613113989        | 2                | 2.481673  |
| P34058        | VILHLKEDQTEYLEER                                             | 1.478532639        | 3                | 4.5444846 |
| P34058        | YESLTDPSK                                                    | 1.096556802        | 2                | 2.9183462 |
| P34058        | YESLTDPSKLDGK                                                | 1.330291834        | 2                | 3.458041  |
| P34058        | YHTSQSGDEMTSLSEYVSR                                          | 1.148124217        | 2                | 5.4994841 |
| P34058        | YIDQEELNK                                                    | 1.068068145        | 2                | 3.4898708 |
| <b>P34064</b> | <b>PSA5 Proteasome subunit alpha type_5</b>                  | <b>1.349356262</b> | <b>5.218E-14</b> | <b>2</b>  |
| P34064        | AIGSASEGAQSSLQEVYHK                                          | 1.251594185        | 2                | 4.512517  |
| P34064        | LNATNIELATVQPGQNFHMFTK                                       | 1.680257951        | 3                | 3.3920178 |
| <b>P34067</b> | <b>PSB4 Proteasome subunit beta type_4</b>                   | <b>1.287825334</b> | <b>0.0005278</b> | <b>4</b>  |
| P34067        | FDCGVVIAADMLGSYGSLAR                                         | 0.745517372        | 2                | 3.9352295 |
| P34067        | GVEIEGPLSAQTNWIDAHMISGFE                                     | 1.134521413        | 2                | 4.0309253 |
| P34067        | TQNPMTVTGTSVLGVK                                             | 0.941953655        | 2                | 2.3666503 |
| P34067        | VNDSTMLGASGDYADFQYLK                                         | 1.35481768         | 2                | 5.3458891 |
| <b>P35171</b> | <b>CX7A2 Cytochrome c oxidase subunit 7A2_ mitochondrial</b> | <b>0.982519847</b> | <b>0.9960404</b> | <b>2</b>  |
| P35171        | GGTSDALLYR                                                   | 1.102920299        | 2                | 3.2449634 |
| P35171        | LFQEDNGMPVHLK                                                | 1.033970211        | 2                | 3.6958988 |
| <b>P35213</b> | <b>1433B 14_3_3 protein beta/alpha</b>                       | <b>1.131531205</b> | <b>0.0040335</b> | <b>7</b>  |
| P35213        | AVTEQGHLSNEER                                                | 1.00227434         | 2                | 4.4838362 |
| P35213        | EKIEAELQDICSQVLELLDK                                         | 1.25823225         | 3                | 5.3128181 |
| P35213        | QTTVSNSQQAYQEAFEISK                                          | 1.214087263        | 2                | 5.4352756 |
| P35213        | TAFDEAIAELDTLNEESYK                                          | 1.361630494        | 2                | 4.9119296 |
| P35213        | YDDMAAAMK                                                    | 0.631475899        | 2                | 2.6598747 |
| P35213        | YLILNATHAESK                                                 | 1.358440487        | 2                | 3.5392075 |
| P35213        | YLSEVASGDNK                                                  | 1.101075782        | 2                | 3.1428645 |
| <b>P35278</b> | <b>RAB5C Ras_related protein Rab_5C</b>                      | <b>1.118180961</b> | <b>0.0095149</b> | <b>3</b>  |
| P35278        | FEIWDTAGQER                                                  | 0.670222898        | 2                | 2.8341262 |
| P35278        | GVDLQESNPASR                                                 | 1.118335722        | 2                | 3.20818   |
| P35278        | NEPQNAAGAPGR                                                 | 0.984438726        | 2                | 3.106113  |
| <b>P35427</b> | <b>RL13A 60S ribosomal protein L13a</b>                      | <b>1.259335176</b> | <b>0.0157617</b> | <b>3</b>  |
| P35427        | CEGINISGNFYR                                                 | 1.193864264        | 2                | 2.9601586 |
| P35427        | VLGGIPPPYDK                                                  | 1.253231683        | 2                | 2.6617789 |
| P35427        | YQAVTATLEEK                                                  | 1.163614232        | 2                | 3.2023427 |
| <b>P35434</b> | <b>ATPD ATP synthase subunit delta_ mitochondrial</b>        | <b>0.95091058</b>  | <b>0.914465</b>  | <b>2</b>  |
| P35434        | AQSELSGAADEAAR                                               | 0.946949607        | 2                | 4.6613288 |
| P35434        | IEANEALVK                                                    | 0.915311537        | 2                | 2.540046  |
| <b>P35435</b> | <b>ATPG ATP synthase subunit gamma_ mitochondrial</b>        | <b>1.139027113</b> | <b>1.032E-05</b> | <b>6</b>  |
| P35435        | GLCGAIHSSVAK                                                 | 1.116073415        | 2                | 3.6060963 |
| P35435        | HLIIGVSSDR                                                   | 1.023338265        | 2                | 3.234421  |
| P35435        | NASDMIDK                                                     | 0.922895472        | 1                | 2.1246595 |
| P35435        | NDMAALTAAGK                                                  | 0.906732133        | 2                | 3.7690158 |
| P35435        | THSDQFLVSFK                                                  | 1.121051454        | 1                | 2.8724191 |
| P35435        | VYGTGSLALYEK                                                 | 1.478815729        | 2                | 3.4540942 |
| <b>P35559</b> | <b>IDE Insulin_degrading enzyme</b>                          | <b>1.382583982</b> | <b>0.0337298</b> | <b>2</b>  |
| P35559        | SNPGHYLGHGHEGPGSLLSELK                                       | 1.235797126        | 3                | 3.7611263 |
| P35559        | YTLETRPNQEGIDVR                                              | 1.511846942        | 2                | 2.5138338 |
| <b>P35565</b> | <b>CALX Calnexin</b>                                         | <b>1.136233081</b> | <b>9.572E-13</b> | <b>9</b>  |
| P35565        | GSLSGWILSK                                                   | 0.88829082         | 2                | 2.3577795 |
| P35565        | KIPNPFFEDLEPFR                                               | 1.248743919        | 3                | 4.9626484 |
| P35565        | NKGDEEEEEKLEEK                                               | 1.060251084        | 2                | 5.1836882 |
| P35565        | SDTSTPPSPK                                                   | 0.883412527        | 2                | 2.8804519 |

|               |                                                                      |                    |                  |           |
|---------------|----------------------------------------------------------------------|--------------------|------------------|-----------|
| P35565        | TDAPQPDVKDEEGKEEEK                                                   | 1.16201134         | 3                | 4.0667939 |
| P35565        | TSELNLDQFHDK                                                         | 1.178962981        | 2                | 3.7841511 |
| P35565        | VVDDWANDGWGLK                                                        | 0.827596965        | 2                | 3.7104092 |
| P35565        | VVDDWANDGWGLKK                                                       | 0.724938911        | 2                | 3.2919862 |
| P35565        | WEVDEMKETK                                                           | 1.067105254        | 2                | 2.5589612 |
| <b>P35704</b> | <b>PRDX2 Peroxiredoxin_2</b>                                         | <b>1.083052932</b> | <b>0.9999999</b> | <b>4</b>  |
| P35704        | EGGLGPLNIPLLADVTK                                                    | 1.05040461         | 2                | 3.4964676 |
| P35704        | KEGGLGPLNIPLLADVTK                                                   | 1.109627788        | 2                | 4.7394114 |
| P35704        | QITVNDLPVGR                                                          | 1.010077224        | 2                | 3.2335331 |
| P35704        | SLSQNYGVLK                                                           | 1.044893686        | 2                | 2.5563643 |
| <b>P35738</b> | <b>ODDB2_oxoisovalerate dehydrogenase subunit beta_mitochondrial</b> | <b>0.953391925</b> | <b>0.7471209</b> | <b>4</b>  |
| P35738        | GLLLSKIEDKNPCIFFEPK                                                  | 1.109814942        | 3                | 4.0130401 |
| P35738        | IPLSQAEVIQEGSDVTLVAWGTQVHVIR                                         | 1.047295713        | 3                | 5.8538985 |
| P35738        | MNLFQSITSALDNSLAK                                                    | 1.182411664        | 2                | 3.3925014 |
| P35738        | SGDLFNCGSLTIR                                                        | 0.881836441        | 2                | 3.5380571 |
| <b>P35815</b> | <b>PPM1B Protein phosphatase 1B</b>                                  | <b>1.04809771</b>  | <b>0.9092232</b> | <b>3</b>  |
| P35815        | ILSAENIPNPPGGGLAGK                                                   | 1.009488931        | 2                | 2.5083838 |
| P35815        | IQNAGGSVMIQR                                                         | 1.063652589        | 2                | 2.3235407 |
| P35815        | SGFALEPSVENVK                                                        | 0.900104936        | 2                | 2.3069487 |
| <b>P36201</b> | <b>CRIP2 Cysteine_rich protein 2</b>                                 | <b>1.131522565</b> | <b>0.9995892</b> | <b>3</b>  |
| P36201        | ASSVTTFTGEPNMCPR                                                     | 1.065721764        | 2                | 3.6580212 |
| P36201        | GVNIGGAGSYIYEKPPTEAPQVTGPIEVPVVR                                     | 1.01086321         | 3                | 5.9194441 |
| P36201        | GVNTGAVGSYIYDKDPEGTVPQ                                               | 1.145321821        | 2                | 4.8724809 |
| <b>P36365</b> | <b>FMO1 Dimethylaniline monooxygenase [N_oxide_forming] 1</b>        | <b>1.280388811</b> | <b>9.9E-20</b>   | <b>9</b>  |
| P36365        | AILTQWDR                                                             | 0.965141326        | 1                | 2.0308728 |
| P36365        | ALQSDYITYIDDLTISINAKPDLR                                             | 1.739693584        | 3                | 3.9825175 |
| P36365        | FTEHVEEGR                                                            | 1.214369314        | 2                | 3.3825147 |
| P36365        | NLLPTPVVSWLISK                                                       | 1.346509649        | 2                | 2.5811288 |
| P36365        | SCDLGGLWR                                                            | 1.108180809        | 2                | 2.6965718 |
| P36365        | TQLREPVLNDELPGR                                                      | 1.174677659        | 3                | 4.0119104 |
| P36365        | VAIVGAGVSLASIK                                                       | 1.035662717        | 2                | 3.0722859 |
| P36365        | VEDGQASLYK                                                           | 1.181784907        | 2                | 3.1840174 |
| P36365        | VLVVGMGNSGTDIHAVEASHLAK                                              | 1.431016238        | 2                | 5.2189054 |
| <b>P36511</b> | <b>UDB15 UDP_glucuronosyltransferase 2B15</b>                        | <b>1.280759439</b> | <b>9.9E-20</b>   | <b>8</b>  |
| P36511        | ANIIAWALAIQPK                                                        | 1.329118071        | 3                | 5.9253931 |
| P36511        | FVTFPTSFSHDLNFFTR                                                    | 1.78000529         | 2                | 4.5745921 |
| P36511        | GHEVTVLRPSAFVFLDPK                                                   | 1.991654892        | 3                | 3.646332  |
| P36511        | IILEELVQK                                                            | 1.159902899        | 2                | 3.3689311 |
| P36511        | NAMWLSTIHHDQPTKPLDR                                                  | 1.554670791        | 3                | 3.4458323 |
| P36511        | NAMWLSTIHHDQPTKPLDR+Oxidation(3)                                     | 2.413429425        | 3                | 3.3085213 |
| P36511        | SDLLNALEEVIDNPFYK                                                    | 1.491265701        | 3                | 5.3026876 |
| P36511        | TLGRPTTLAEIMGK                                                       | 1.593014582        | 3                | 3.5808544 |
| <b>P36972</b> | <b>APT Adenine phosphoribosyltransferase</b>                         | <b>1.173308588</b> | <b>0.0999455</b> | <b>3</b>  |
| P36972        | GFLFGPSLAQELGVGCVLIR                                                 | 1.241600891        | 2                | 4.2034845 |
| P36972        | IDYIAGLSR                                                            | 0.956706765        | 2                | 2.472723  |
| P36972        | SFPDFPIPGVLF                                                         | 1.163676613        | 2                | 3.0730064 |
| <b>P37397</b> | <b>CNN3 Calponin_3</b>                                               | <b>1.027354339</b> | <b>0.2522131</b> | <b>4</b>  |
| P37397        | AGQSVIGLQMGNTNK                                                      | 0.982675453        | 2                | 2.7251449 |
| P37397        | LTLQPVDNSTISLQMGNTNK                                                 | 1.374293375        | 2                | 3.4246194 |
| P37397        | VNESSLNWPQLNIGNFIK                                                   | 1.039341789        | 2                | 3.9016254 |
| P37397        | YDQQAEDLR                                                            | 0.818036868        | 2                | 2.8973985 |
| <b>P38650</b> | <b>DYHC1 Cytoplasmic dynein 1 heavy chain 1</b>                      | <b>1.035485011</b> | <b>0.6046362</b> | <b>5</b>  |
| P38650        | FGNPLLQDVESYDPLNPNVLR                                                | 1.245072349        | 2                | 3.5620122 |
| P38650        | ILDDDTIITLLENLK                                                      | 1.237040764        | 2                | 2.6165466 |
| P38650        | VLRPQVTAVAQQNQGEAPEPQDMK                                             | 1.025108137        | 3                | 5.0711198 |

|               |                                                       |                    |                  |           |
|---------------|-------------------------------------------------------|--------------------|------------------|-----------|
| P38650        | VQGLTVEQAEAVAR                                        | 0.999473735        | 2                | 2.9699149 |
| P38650        | VTDFGDKVEDPTFLNQLQSGVNR                               | 1.117252326        | 3                | 3.6651535 |
| <b>P38652</b> | <b>PGM1 Phosphoglucomutase_1</b>                      | <b>1.007241762</b> | <b>5.474E-06</b> | <b>18</b> |
| P38652        | ADNFEYSDPVDGSISK                                      | 0.968026071        | 2                | 4.9261651 |
| P38652        | AIGGIILTASHNPGGPNDFGIK                                | 1.18183005         | 2                | 5.6321788 |
| P38652        | FFGNLMDASK                                            | 1.055760133        | 2                | 2.5914314 |
| P38652        | FNISNGGPAPEAITDK                                      | 1.133516881        | 2                | 4.2675548 |
| P38652        | IDAMHGVVGPYVK                                         | 0.75692871         | 2                | 2.9665518 |
| P38652        | ILCEELGAPANSVNCVPLEDFGGHHPDNLTYAADLVETMK              | 1.675415155        | 3                | 3.370281  |
| P38652        | INQDPQVMLAPLISIALK                                    | 1.275541042        | 2                | 3.5856817 |
| P38652        | KQRVEDILK                                             | 1.042469897        | 1                | 2.0189533 |
| P38652        | LSGTGSAGATIR                                          | 1.39626133         | 2                | 3.4728234 |
| P38652        | LVIGQNGILSTPAVSCIIR                                   | 1.584326419        | 2                | 4.7701097 |
| P38652        | NIFDFNALK                                             | 1.05950793         | 2                | 2.4834559 |
| P38652        | QEATLVVGGDGR                                          | 1.097054833        | 2                | 3.7008042 |
| P38652        | QQFDLENK                                              | 1.030823084        | 1                | 2.0959687 |
| P38652        | SFVGKQFSANDK                                          | 0.799766674        | 1                | 1.9240174 |
| P38652        | SGEHDFGAAFDGDGDR                                      | 1.03829652         | 2                | 4.3645382 |
| P38652        | TIEEYAICPDLK                                          | 0.918459178        | 2                | 3.7555997 |
| P38652        | TQAYPDQKPGTSGLR                                       | 1.196448874        | 2                | 3.456157  |
| P38652        | YDYEEVEAEGANK                                         | 0.807564568        | 2                | 5.3178482 |
| <b>P38656</b> | <b>LA Lupus La protein homolog</b>                    | <b>1.150910534</b> | <b>0.0454026</b> | <b>2</b>  |
| P38656        | ITDDQQESLNK                                           | 1.151766771        | 2                | 4.1279049 |
| P38656        | LDEGWVPLETMIK                                         | 1.080372543        | 2                | 2.7825401 |
| <b>P38659</b> | <b>PDIA4 Protein disulfide isomerase A4</b>           | <b>0.9459077</b>   | <b>0.0085168</b> | <b>20</b> |
| P38659        | DLGLSEGEDVNAAILDESCHK                                 | 1.138745328        | 2                | 5.1451793 |
| P38659        | DNDPPIAVAK                                            | 0.887297153        | 2                | 2.5545406 |
| P38659        | EVSQPDWTPPEVTLTLTK                                    | 1.221692686        | 2                | 3.5753162 |
| P38659        | FDVSGYPTIK                                            | 0.99306649         | 2                | 2.9699779 |
| P38659        | FDVSGYPTLK                                            | 0.99306649         | 2                | 2.9699779 |
| P38659        | FIDEHATK                                              | 1.047714491        | 2                | 2.7723751 |
| P38659        | GQAVDYDGSR                                            | 1.05448302         | 2                | 2.4826841 |
| P38659        | GRPFDYNGPR                                            | 1.210421753        | 2                | 2.6412907 |
| P38659        | IDATSASMLASK                                          | 1.126929929        | 2                | 4.0903687 |
| P38659        | KGQAVDYDGSR                                           | 1.189673734        | 2                | 2.9680104 |
| P38659        | MDATANDITNDR                                          | 0.867801075        | 2                | 3.6370845 |
| P38659        | MHVMDVQGSTEASAIK                                      | 1.039328249        | 2                | 4.4362593 |
| P38659        | MHVMDVQGSTEASAIKDYVVK                                 | 1.083173513        | 3                | 3.8831909 |
| P38659        | RFDVSGYPTLK                                           | 0.927391371        | 2                | 3.1852703 |
| P38659        | RSPPIPLAK                                             | 1.234745048        | 2                | 2.8855326 |
| P38659        | TFDAIVMDPK                                            | 1.011723924        | 1                | 2.008693  |
| P38659        | TQEEIVAK                                              | 1.032950698        | 2                | 2.3266182 |
| P38659        | VDATEQTDLAK                                           | 1.065348856        | 2                | 3.5846508 |
| P38659        | VEGFPTIYFAPSGDK                                       | 1.16495585         | 2                | 3.2541504 |
| P38659        | YGIVDYMVEQSGPPSK                                      | 1.155421843        | 2                | 3.4564135 |
| <b>P38718</b> | <b>BR44 Brain protein 44</b>                          | <b>1.148980413</b> | <b>0.0090233</b> | <b>3</b>  |
| P38718        | LMDKVLELLPK                                           | 0.685836721        | 2                | 2.7215519 |
| P38718        | LRPLYNHAPGPR                                          | 1.85863721         | 2                | 2.465477  |
| P38718        | YSLVIIPK                                              | 1.090212037        | 2                | 2.3509283 |
| <b>P38918</b> | <b>ARK73 Aflatoxin B1 aldehyde reductase member 3</b> | <b>1.112524002</b> | <b>0.2598255</b> | <b>7</b>  |
| P38918        | FFGNPFSQLYMDR                                         | 2.005330884        | 2                | 2.5282121 |
| P38918        | FYAFNPLAGLLTGR                                        | 1.645902969        | 2                | 4.7534451 |
| P38918        | GHTEIDTAFVYANGQSETILGDLGLGLGR                         | 1.186880902        | 3                | 4.9622464 |
| P38918        | MDVTSSASVR                                            | 1.080025446        | 2                | 3.7766163 |
| P38918        | QVETELFPCLR                                           | 1.135412646        | 2                | 2.5593107 |
| P38918        | RMDVTSSASVR                                           | 1.123668375        | 2                | 3.7568064 |
| P38918        | TTYGPTAPSMISAAVR                                      | 1.136442051        | 2                | 3.7591474 |



|               |                                                                      |                    |                  |           |
|---------------|----------------------------------------------------------------------|--------------------|------------------|-----------|
| <b>P38983</b> | <b>RSSA 40S ribosomal protein SA</b>                                 | <b>1.138668948</b> | <b>8.193E-14</b> | <b>6</b>  |
| P38983        | ADHQPLTEASYVNLPTIALCNTDSPLR                                          | 1.526424368        | 3                | 6.0916767 |
| P38983        | AIVAIENPADVSVISSR                                                    | 1.033485723        | 2                | 4.7760549 |
| P38983        | FLAAGTHLGGTNLDFQMEQYIYK                                              | 1.25825513         | 3                | 4.0569091 |
| P38983        | FTPGFTTNQIQAAFR                                                      | 1.066008708        | 2                | 4.5295763 |
| P38983        | SDGIYIINLK                                                           | 1.12585573         | 1                | 2.120496  |
| P38983        | YVDIAIPCNNK                                                          | 1.081365766        | 2                | 3.1511121 |
| <b>P39032</b> | <b>RL36 60S ribosomal protein L36</b>                                | <b>1.1216257</b>   | <b>0.0152214</b> | <b>2</b>  |
| P39032        | EELSNVLAAMRKAANK+Oxidation(10)                                       | 0.693328435        | 2                | 2.3258655 |
| P39032        | KREELSNVLAAMR                                                        | 1.142763828        | 3                | 3.301332  |
| <b>P40112</b> | <b>PSB3 Proteasome subunit beta type_3</b>                           | <b>1.073315151</b> | <b>0.9935545</b> | <b>2</b>  |
| P40112        | FGIQAQMVTDFQK                                                        | 0.920878859        | 2                | 3.9868262 |
| P40112        | FGPYYTEPVIAGLDPK                                                     | 1.143959289        | 2                | 3.0528154 |
| <b>P40307</b> | <b>PSB2 Proteasome subunit beta type_2</b>                           | <b>1.221038143</b> | <b>1.259E-06</b> | <b>3</b>  |
| P40307        | FILNLPTFSVR                                                          | 1.57832208         | 2                | 2.8565409 |
| P40307        | NGYELSPTAAANFTR                                                      | 1.225097375        | 2                | 4.0372486 |
| P40307        | VIDKDGIIHNLENITFTK                                                   | 1.057297397        | 2                | 4.0365    |
| <b>P41034</b> | <b>TTPA Alpha_tocopherol transfer protein</b>                        | <b>0.956641477</b> | <b>8.199E-09</b> | <b>5</b>  |
| P41034        | AECPELSADLHPR                                                        | 1.003658665        | 2                | 3.0951808 |
| P41034        | AIFDLEGWQISHAFQITPSVAK                                               | 0.692476762        | 2                | 4.3227758 |
| P41034        | AQEEGVPETPQPLTDAFLLR                                                 | 1.521455504        | 2                | 4.1851687 |
| P41034        | GIHLINPEVIFHAVFSMIKPFLEK                                             | 1.534289196        | 4                | 4.8959675 |
| P41034        | QLNEQPDHSPLVQPLAELR                                                  | 1.123918093        | 3                | 3.6414893 |
| <b>P41123</b> | <b>RL13 60S ribosomal protein L13</b>                                | <b>0.946385281</b> | <b>0.0333041</b> | <b>5</b>  |
| P41123        | AITEEKNFK                                                            | 1.233219978        | 2                | 2.4551868 |
| P41123        | LATQLTGPVMPPIR                                                       | 1.174868849        | 2                | 2.7789612 |
| P41123        | STESLQANVQR                                                          | 1.053374322        | 2                | 4.0039639 |
| P41123        | TIGISVDPR                                                            | 1.001099954        | 2                | 2.3087151 |
| P41123        | VDTWFNQPAR                                                           | 1.043079449        | 2                | 3.1519938 |
| <b>P41498</b> | <b>PPAC Low molecular weight phosphotyrosine protein phosphatase</b> | <b>1.09161182</b>  | <b>0.5654463</b> | <b>3</b>  |
| P41498        | IDSAAATSTYEVGNPPDYR                                                  | 1.098179499        | 2                | 4.6587248 |
| P41498        | IELLGSYDPQK                                                          | 1.300442008        | 2                | 3.6624541 |
| P41498        | LVTDENVSDNWR                                                         | 1.021704822        | 2                | 3.6890955 |
| <b>P41542</b> | <b>USO1 General vesicular transport factor p115</b>                  | <b>1.166892526</b> | <b>0.0064392</b> | <b>11</b> |
| P41542        | AETLAKSVPVEGESELVTAAK                                                | 1.01838479         | 3                | 3.3237586 |
| P41542        | AWFEVGDENPGWSAQK                                                     | 1.327533678        | 2                | 4.0257258 |
| P41542        | CQNEQLQTAVTQQASQIQHK                                                 | 1.01771681         | 3                | 3.8478172 |
| P41542        | IVAFENAFER                                                           | 1.099219939        | 2                | 2.6420391 |
| P41542        | LQTENSELQQR                                                          | 1.115991316        | 2                | 3.055716  |
| P41542        | LREEIEELR                                                            | 1.232822255        | 2                | 2.6217613 |
| P41542        | QLGPPVQQIILVSPMGVSK                                                  | 1.213465534        | 2                | 4.268158  |
| P41542        | SQLCSQSLEITR                                                         | 1.10781093         | 2                | 2.9436917 |
| P41542        | SVPVEGESELVTAAK                                                      | 1.111963462        | 2                | 3.3748114 |
| P41542        | TLEQHDNIVTHYK                                                        | 1.318648211        | 2                | 3.8062787 |
| P41542        | VLVSPTNPPGATSSCQK                                                    | 1.101659252        | 2                | 3.8720021 |
| <b>P41562</b> | <b>IDHC Isocitrate dehydrogenase [NADP] cytoplasmic</b>              | <b>1.093884874</b> | <b>9.9E-20</b>   | <b>18</b> |
| P41562        | ATDFVVPGPVK                                                          | 1.013479198        | 2                | 3.3830366 |
| P41562        | CATITPDEK                                                            | 0.985856041        | 2                | 2.921483  |
| P41562        | CATITPDEKR                                                           | 1.095557537        | 2                | 2.502599  |
| P41562        | FKDIFQEIYDK                                                          | 1.049638981        | 3                | 4.6065178 |
| P41562        | GQETSTNPIASIFAWSR                                                    | 1.479246424        | 2                | 5.3095751 |
| P41562        | GWPLYLSTK                                                            | 2.14306447         | 1                | 1.906835  |
| P41562        | IHGGSVVEMQGDDEMTR                                                    | 1.120857875        | 2                | 5.1817379 |
| P41562        | IHWELIK                                                              | 1.113023624        | 2                | 2.3452027 |
| P41562        | KIHGGSVVEMQGDDEMTR                                                   | 1.068076295        | 3                | 3.3182147 |
| P41562        | LIDDMVAQAMK                                                          | 0.950277131        | 2                | 4.494103  |

|               |                                                        |                    |                  |           |
|---------------|--------------------------------------------------------|--------------------|------------------|-----------|
| P41562        | LILPYVELDLHSYDLGIENR                                   | 2.349322267        | 2                | 5.1977625 |
| P41562        | LVTGWVVKPIIIGR                                         | 1.316776831        | 2                | 3.3517478 |
| P41562        | SDYLNTFEFMDK                                           | 1.447115685        | 2                | 4.4371157 |
| P41562        | SEGGFIWACK                                             | 1.112697218        | 2                | 3.5120218 |
| P41562        | SIEDFAHSSFQMALS                                        | 1.094951476        | 2                | 4.9398046 |
| P41562        | TVEAEAAHGTVTR                                          | 1.113139358        | 2                | 3.9419959 |
| P41562        | VEITYTPK                                               | 0.981868116        | 2                | 2.739459  |
| P41562        | VTYLVHDFEEGGVAMGMYNQDK                                 | 1.08581182         | 3                | 3.6157401 |
| <b>P42123</b> | <b>LDHB L_lactate dehydrogenase B chain</b>            | <b>0.822692054</b> | <b>0.5876882</b> | <b>5</b>  |
| P42123        | DYSVTANSK                                              | 0.814469172        | 2                | 2.8219604 |
| P42123        | IVADKDYSVTANSK                                         | 1.233137813        | 2                | 2.783463  |
| P42123        | LIAPVADDETAVPNNK                                       | 1.236088113        | 2                | 2.5846477 |
| P42123        | SLADELALVDVLEDK                                        | 1.482371113        | 2                | 2.9503996 |
| P42123        | VIGSGCNLDSAR                                           | 1.080321778        | 2                | 3.8042808 |
| <b>P42930</b> | <b>HSPB1 Heat shock protein beta_1</b>                 | <b>0.852207067</b> | <b>0.8968793</b> | <b>2</b>  |
| P42930        | AQIGGPESEQSGAK                                         | 0.991939911        | 2                | 3.8903892 |
| P42930        | VSLDVNHFAPEELTVK                                       | 0.850063891        | 2                | 3.4320183 |
| <b>P42932</b> | <b>TCPQ T_complex protein 1 subunit theta</b>          | <b>1.192989986</b> | <b>0.0020623</b> | <b>9</b>  |
| P42932        | AIAGTGANVIVTGGK                                        | 1.075891117        | 2                | 3.8330572 |
| P42932        | ELEVQHPPAAK                                            | 1.074970623        | 2                | 2.9842868 |
| P42932        | GEENLMDAQVK                                            | 0.977807508        | 2                | 3.5691102 |
| P42932        | GSTDNLMDDIER                                           | 0.951485608        | 2                | 2.9261758 |
| P42932        | HEKEDGAISTIVLR                                         | 1.360170789        | 2                | 2.7881627 |
| P42932        | LFVTNDAATILR                                           | 1.418285076        | 2                | 2.9985132 |
| P42932        | LYSVHQEGNK                                             | 1.21229214         | 2                | 2.6776745 |
| P42932        | NVGLDIEAEVPAVK                                         | 0.894809072        | 2                | 3.6875627 |
| P42932        | QITSYGETCPGLEQYAIK                                     | 1.223379208        | 2                | 4.8441572 |
| <b>P43244</b> | <b>MATR3 Matrin_3</b>                                  | <b>1.465092954</b> | <b>9.9E-20</b>   | <b>3</b>  |
| P43244        | ITPENLPQILLQK                                          | 1.333923207        | 2                | 3.5789659 |
| P43244        | TENPAEGKEQEEK                                          | 1.466686813        | 2                | 3.3145845 |
| P43244        | YQLLQLVEPFGVISNHLINLK                                  | 1.672803926        | 3                | 4.0610104 |
| <b>P43274</b> | <b>H14 Histone H1.4</b>                                | <b>1.106335065</b> | <b>8.982E-11</b> | <b>3</b>  |
| P43274        | ALAAAGYDVEK                                            | 1.116051503        | 2                | 3.692065  |
| P43274        | SGVSLAALK                                              | 0.911180125        | 2                | 3.1403587 |
| P43274        | SGVSLAALKK                                             | 1.045747972        | 2                | 2.4775922 |
| <b>P43276</b> | <b>H15 Histone H1.5</b>                                | <b>1.2464578</b>   | <b>3.138E-06</b> | <b>2</b>  |
| P43276        | ALAAGGYDVEK                                            | 1.311008635        | 2                | 2.774061  |
| P43276        | ATGPPVSELITK                                           | 1.017555131        | 2                | 2.9677498 |
| <b>P43278</b> | <b>H10 Histone H1.0</b>                                | <b>0.884240306</b> | <b>0.9638246</b> | <b>2</b>  |
| P43278        | VGENADSQIK                                             | 0.957529769        | 2                | 3.431299  |
| P43278        | YSDMIVAAIQAEK                                          | 0.851299479        | 2                | 4.2610111 |
| <b>P43424</b> | <b>GALT Galactose_1_phosphate uridylyltransferase</b>  | <b>1.104249564</b> | <b>0.0614608</b> | <b>2</b>  |
| P43424        | HDPLNPLCPGATR                                          | 1.130213448        | 2                | 2.879844  |
| P43424        | YNPLQDEWVVLVSAHR                                       | 0.814005513        | 2                | 2.4393401 |
| <b>P45591</b> | <b>COF2 Cofilin_2</b>                                  | <b>0.992750139</b> | <b>0.9587831</b> | <b>4</b>  |
| P45591        | HEWQVNGLLDIKDR                                         | 1.038563344        | 3                | 4.2062855 |
| P45591        | KEDLVFIFWAPESAPLK                                      | 1.062844395        | 2                | 3.9110506 |
| P45591        | MASGVTVNDEVIK                                          | 0.989403614        | 2                | 2.4834156 |
| P45591        | QILVGDIGDTVEDPYTSFVK                                   | 1.146277701        | 2                | 5.1744905 |
| <b>P45592</b> | <b>COF1 Cofilin_1</b>                                  | <b>1.208025051</b> | <b>9.9E-20</b>   | <b>4</b>  |
| P45592        | HELQANCYEEVK                                           | 1.097981827        | 2                | 3.3192582 |
| P45592        | HELQANCYEEVKDR                                         | 1.179917599        | 3                | 5.4931636 |
| P45592        | LGGSAVISLEGKPL                                         | 1.516880635        | 2                | 2.4312618 |
| P45592        | NIILEEGKEILVGDVGTVDPPYTTFVK                            | 1.272636527        | 2                | 5.0192695 |
| <b>P45878</b> | <b>FKBP2 Peptidyl_prolyl cis_trans isomerase FKBP2</b> | <b>1.925307154</b> | <b>7.843E-05</b> | <b>3</b>  |
| P45878        | GWDQGLLMCEGEK                                          | 1.105043153        | 2                | 2.8324139 |
| P45878        | LEDGTEFDSSLPQNPVFLSGTGQVIK                             | 1.604481449        | 2                | 3.7051919 |

|               |                                                                            |                    |                  |           |
|---------------|----------------------------------------------------------------------------|--------------------|------------------|-----------|
| P45878        | LVIPSELGYGER                                                               | 1.653711425        | 2                | 2.4015234 |
| <b>P45953</b> | <b>ACADV Very long_chain specific acyl_CoA dehydrogenase_mitochondrial</b> | <b>1.068779274</b> | <b>0.1794215</b> | <b>20</b> |
| P45953        | AMVENGLVTSNPLR                                                             | 0.850571722        | 2                | 2.7401135 |
| P45953        | AMVENGLVTSNPLRV                                                            | 1.264206609        | 2                | 4.1408267 |
| P45953        | ASNTSEVYFDGVK                                                              | 1.061349635        | 2                | 3.5092313 |
| P45953        | ELGAFGLQVPSELGGLSNTQYAR                                                    | 0.935151072        | 2                | 4.6554165 |
| P45953        | ENMASLQSNPQQQLFR                                                           | 1.104343302        | 2                | 3.8920593 |
| P45953        | FFEEVNDPAK                                                                 | 0.893067839        | 2                | 2.7084455 |
| P45953        | FFEEVNDPAKNDSLEKVEEDTLQGLK                                                 | 1.041689984        | 3                | 4.5634646 |
| P45953        | GIVNEQFLQQR                                                                | 1.136658909        | 2                | 3.2191939 |
| P45953        | IFEGTNDILR                                                                 | 1.079816169        | 2                | 3.0035899 |
| P45953        | IFGSEAAWK                                                                  | 0.822517742        | 2                | 2.654496  |
| P45953        | IHNFGVIEK                                                                  | 1.2902198          | 2                | 2.3141336 |
| P45953        | LFVALQGCMDK                                                                | 1.012925399        | 2                | 2.4838622 |
| P45953        | NDSLEKVEEDTLQGLK                                                           | 0.93637392         | 2                | 3.5941505 |
| P45953        | NPLGNVLLIGEASK                                                             | 1.081836086        | 2                | 2.6824086 |
| P45953        | SFGGVTHGLPEK                                                               | 1.087934133        | 2                | 2.7175651 |
| P45953        | SFGGVTHGLPEKK                                                              | 1.155219013        | 2                | 2.384603  |
| P45953        | SGELAVQALEQFATVVEAK                                                        | 1.038526699        | 3                | 4.9550943 |
| P45953        | SLSEGYPTAQHEK                                                              | 1.087278741        | 2                | 3.3477254 |
| P45953        | TGIGSGLSLSGIVHPPELSR                                                       | 0.985621209        | 2                | 4.3211651 |
| P45953        | VEEDTLQGLK                                                                 | 0.766363029        | 2                | 2.5888331 |
| <b>P46418</b> | <b>GSTA5 Glutathione S_transferase alpha_5</b>                             | <b>1.016130936</b> | <b>0.999998</b>  | <b>4</b>  |
| P46418        | AILNYIATK                                                                  | 1.082948482        | 2                | 3.37272   |
| P46418        | SDGSLMFEQVPMVEIDGMK                                                        | 1.01899965         | 2                | 3.5457454 |
| P46418        | SHGQDYLGNK                                                                 | 1.030456007        | 2                | 3.5696383 |
| P46418        | VSNLPTVK                                                                   | 1.042794806        | 2                | 2.8597224 |
| <b>P46425</b> | <b>GSTP2 Glutathione S_transferase P 2</b>                                 | <b>1.175760792</b> | <b>0.9643056</b> | <b>2</b>  |
| P46425        | ALPGHLKPFETLLSQNGGK                                                        | 1.120139307        | 2                | 4.4615941 |
| P46425        | FEDGDLTYQSNAILR                                                            | 1.141524192        | 2                | 4.5376611 |
| <b>P46462</b> | <b>TERA Transitional endoplasmic reticulum ATPase</b>                      | <b>1.03177839</b>  | <b>9.9E-20</b>   | <b>25</b> |
| P46462        | AIANECQANFISIK                                                             | 1.32962922         | 2                | 2.4941342 |
| P46462        | EAVCIVLSDDTCSDEK                                                           | 1.075413948        | 2                | 3.7477338 |
| P46462        | EDEEESLNEVGYYDDIGCCR                                                       | 1.13758243         | 2                | 4.8490543 |
| P46462        | ELQELVQYPVEHPDK                                                            | 1.114004834        | 2                | 4.6259975 |
| P46462        | ETVVEVPQVTWEDIGLEDVK                                                       | 0.847241384        | 2                | 3.100064  |
| P46462        | ETVVEVPQVTWEDIGLEDVKR                                                      | 1.286976149        | 2                | 4.1225419 |
| P46462        | EVDIGIPDATGR                                                               | 0.826707347        | 2                | 3.1448071 |
| P46462        | GDDLSTAILK                                                                 | 0.847688299        | 2                | 2.9728713 |
| P46462        | GGNIGDGGGAADR                                                              | 1.133039101        | 2                | 3.201268  |
| P46462        | GILLYGPPGTGK                                                               | 1.026453362        | 2                | 3.5753305 |
| P46462        | IVSQLLTLMDGLK                                                              | 2.142418013        | 2                | 4.2201815 |
| P46462        | KYEMFAQTLQQR                                                               | 1.340146136        | 2                | 3.0457981 |
| P46462        | LADDVDLEQVANETHGHVGADLAALCSEALQAIR                                         | 1.456243524        | 3                | 6.7924051 |
| P46462        | LAGESESNLKAFEEAEK                                                          | 0.97965986         | 2                | 2.4250214 |
| P46462        | LDQLIYIPLPEK                                                               | 1.148338802        | 2                | 4.8470335 |
| P46462        | LEILQHTK                                                                   | 1.065642679        | 2                | 2.9126339 |
| P46462        | LGDVISIQPCPDVK                                                             | 1.100488782        | 2                | 4.4684877 |
| P46462        | LIVDEAINEDNSVLSQPK                                                         | 1.132964193        | 2                | 5.3287969 |
| P46462        | MDELQLFR                                                                   | 0.833750121        | 2                | 3.1999917 |
| P46462        | MTNGFSGADLTEICQR                                                           | 1.042437798        | 2                | 4.5170922 |
| P46462        | NAPAIIFIDELDAIAPK                                                          | 1.833219509        | 3                | 5.1094837 |
| P46462        | NVFIIGATNRPDIIDPAILRPGR                                                    | 1.057778884        | 3                | 4.1992702 |
| P46462        | QTNPSAMEVEEDDPVEIR                                                         | 1.030437265        | 2                | 4.6115723 |
| P46462        | RSVSDNDR                                                                   | 1.318782435        | 2                | 2.658649  |
| P46462        | WALSQSNPSALR                                                               | 0.905165938        | 2                | 2.5991335 |

|               |                                                                                           |                    |                  |           |
|---------------|-------------------------------------------------------------------------------------------|--------------------|------------------|-----------|
| <b>P46664</b> | <b>PURA2 Adenylosuccinate synthetase isozyme 2</b>                                        | <b>1.225467573</b> | <b>0.0250031</b> | <b>3</b>  |
| P46664        | FIEDELQIPVK                                                                               | 1.191469229        | 2                | 3.1655142 |
| P46664        | VGIGAFPTEQDNEIGELLQTR                                                                     | 1.335905303        | 2                | 4.3043966 |
| P46664        | VVDLLAQDADIVCR                                                                            | 1.156418552        | 2                | 3.0931575 |
| <b>P46720</b> | <b>SO1A1 Solute carrier organic anion transporter family member 1A1</b>                   | <b>1.056160927</b> | <b>9.961E-07</b> | <b>3</b>  |
| P46720        | GIGETPIVPLGISYIEDFAK                                                                      | 1.521731488        | 2                | 3.5898659 |
| P46720        | GVQHQLHVESK                                                                               | 1.021141395        | 2                | 3.2387812 |
| P46720        | SENSPLYIGILEMGK                                                                           | 1.241913344        | 2                | 3.21857   |
| <b>P46844</b> | <b>BIEA Biliverdin reductase A</b>                                                        | <b>0.978511811</b> | <b>0.9858334</b> | <b>3</b>  |
| P46844        | FGVVVGVGR                                                                                 | 1.104375887        | 2                | 2.4755967 |
| P46844        | LLDQVSAEDLAAEK                                                                            | 1.058589375        | 2                | 3.8079538 |
| P46844        | MTVQLETQNK                                                                                | 0.976903547        | 2                | 2.8144593 |
| <b>P46953</b> | <b>3HAO 3_hydroxyanthranilate 3_4_dioxygenase</b>                                         | <b>1.008845919</b> | <b>0.7540645</b> | <b>6</b>  |
| P46953        | AQGSVALSVTQDPACK                                                                          | 0.193379659        | 2                | 4.4111233 |
| P46953        | ASFQPPVCNK                                                                                | 0.85961268         | 2                | 2.6739829 |
| P46953        | DLGTQLAPIIQEFFHSEQYR                                                                      | 0.941741731        | 2                | 3.1654882 |
| P46953        | QDVDVWLWQLEGSSK                                                                           | 1.477654477        | 2                | 3.3092694 |
| P46953        | TGKPNPDQLLK                                                                               | 1.024976619        | 3                | 3.5936954 |
| P46953        | YYVGDTEVDLFEK                                                                             | 1.208885395        | 2                | 4.052299  |
| <b>P46978</b> | <b>STT3A Dolichyl_diphosphooligosaccharide__protein glycosyltransferase subunit STT3A</b> | <b>1.090340989</b> | <b>0.011832</b>  | <b>4</b>  |
| P46978        | FGQVYTEAK                                                                                 | 1.033419909        | 2                | 2.6022794 |
| P46978        | FYSLLDPSYAK                                                                               | 1.078247719        | 2                | 3.0939267 |
| P46978        | VGQAMASTEEL                                                                               | 1.0774878          | 2                | 3.2041342 |
| P46978        | VGQAMASTEEL+Oxidation(5)                                                                  | 1.629318749        | 2                | 2.6226549 |
| <b>P47198</b> | <b>RL22 60S ribosomal protein L22</b>                                                     | <b>1.100240556</b> | <b>1.989E-06</b> | <b>2</b>  |
| P47198        | AGNLGGGVVTIER                                                                             | 1.071230885        | 2                | 3.161875  |
| P47198        | FTLDCTHPVEDGIMDAANFEQLQER                                                                 | 1.896057638        | 3                | 4.8724046 |
| <b>P47875</b> | <b>CSRP1 Cysteine and glycine rich protein 1</b>                                          | <b>1.365514152</b> | <b>9.9E-20</b>   | <b>4</b>  |
| P47875        | GFGFGQGAGALVHSE                                                                           | 1.101436852        | 2                | 3.0796947 |
| P47875        | GLESTTLADKDEIYCK                                                                          | 1.532824674        | 2                | 4.9805946 |
| P47875        | HEEAPGHRPTTNPNASK                                                                         | 1.636135631        | 3                | 3.4977231 |
| P47875        | NLDSTTVAVHGEEIYCK                                                                         | 0.966065745        | 2                | 4.3539248 |
| <b>P47942</b> | <b>DPYL2 Dihydropyrimidinase related protein 2</b>                                        | <b>1.012877558</b> | <b>0.7064435</b> | <b>3</b>  |
| P47942        | GLYDGPVCEVSVTPK                                                                           | 1.01275931         | 2                | 3.5816474 |
| P47942        | QIGENLIVPGGVK                                                                             | 1.143860527        | 2                | 2.4390123 |
| P47942        | SITIANQTNCPYVTK                                                                           | 1.188137469        | 2                | 3.2890389 |
| <b>P48004</b> | <b>PSA7 Proteasome subunit alpha type 7</b>                                               | <b>1.013185884</b> | <b>0.9946927</b> | <b>2</b>  |
| P48004        | NYTDDAIETDDLTIK                                                                           | 0.92787288         | 2                | 4.706778  |
| P48004        | YVAEIEKEKEENEK                                                                            | 1.017806067        | 2                | 4.0283623 |
| <b>P48037</b> | <b>ANXA6 Annexin A6</b>                                                                   | <b>1.176187976</b> | <b>1.114E-08</b> | <b>17</b> |
| P48037        | AANDFNPDADAK                                                                              | 1.113962338        | 2                | 2.9051893 |
| P48037        | AINEAYKEDYHK                                                                              | 1.151825452        | 2                | 3.3841145 |
| P48037        | ALIEILATR                                                                                 | 1.064806116        | 2                | 3.4958787 |
| P48037        | ALLALCGGED                                                                                | 1.302298328        | 1                | 2.190619  |
| P48037        | DLESDIIGDTSGHFQK                                                                          | 0.987501959        | 2                | 4.26092   |
| P48037        | ENDDVVSEDLVQQDVQDLYEAGELK                                                                 | 1.035432285        | 3                | 5.089622  |
| P48037        | GELSGDFEK                                                                                 | 1.074508386        | 1                | 2.0695624 |
| P48037        | GFGSDKESILELITSR                                                                          | 0.935621295        | 2                | 4.1321445 |
| P48037        | GIGTDEATIIDIITQR                                                                          | 0.941664973        | 3                | 4.102993  |
| P48037        | GSVHDFADFANQDAEALYTAMK                                                                    | 1.138458197        | 2                | 6.1282811 |
| P48037        | QRQEICQSYK                                                                                | 1.051528407        | 2                | 3.2769527 |
| P48037        | SEIDLLNIR                                                                                 | 1.364818611        | 2                | 3.1122785 |
| P48037        | SLEDALSSDTSGHFK                                                                           | 1.061383064        | 2                | 3.2885103 |
| P48037        | TNEQIHQLVAAYK                                                                             | 1.244219557        | 2                | 3.8728614 |
| P48037        | TNYDIEHVIK                                                                                | 0.948496715        | 2                | 3.2386119 |

|               |                                                           |                    |                  |           |
|---------------|-----------------------------------------------------------|--------------------|------------------|-----------|
| P48037        | TTGKPIEASIR                                               | 1.149185926        | 2                | 2.503027  |
| P48037        | WGTDEAQFIYLGNR                                            | 2.019506395        | 2                | 2.3477681 |
| <b>P48500</b> | <b>TPIS Triosephosphate isomerase</b>                     | <b>0.909885099</b> | <b>9.9E-20</b>   | <b>12</b> |
| P48500        | CNVSEGVAQCTR                                              | 0.966285031        | 2                | 3.8323309 |
| P48500        | DLGATWVVLGHSER                                            | 0.819938579        | 2                | 4.0060387 |
| P48500        | ELASQPDVDGFLVGGASLKPEFVDIINAK                             | 1.074535883        | 4                | 5.3700581 |
| P48500        | FFVGGNWK                                                  | 1.103065845        | 1                | 1.9929596 |
| P48500        | HIFGESDELIGQK                                             | 1.037158699        | 2                | 4.0028534 |
| P48500        | IYGGSVTGATCK                                              | 1.435106679        | 2                | 4.1680036 |
| P48500        | KFFVGGNWKMNDR                                             | 0.995355787        | 2                | 2.3102319 |
| P48500        | LPADTEVVCAPPTAYIDFAR                                      | 0.180105506        | 2                | 4.4726219 |
| P48500        | RHIFGESDELIGQK                                            | 1.055050629        | 2                | 4.2920914 |
| P48500        | TATPQQAQEVHEK                                             | 1.200266383        | 2                | 3.6331048 |
| P48500        | VNHALSEGLGVIACIGEK                                        | 1.007148003        | 2                | 5.1790261 |
| P48500        | VVLAYEPVWAIGTGK                                           | 0.995115586        | 2                | 4.1348372 |
| <b>P48508</b> | <b>GSH0 Glutamate__cysteine ligase regulatory subunit</b> | <b>0.981661003</b> | <b>0.9964004</b> | <b>6</b>  |
| P48508        | ASTLHLQGTGNLLNWGR                                         | 1.167883852        | 3                | 3.8389115 |
| P48508        | FFPDVLECTMSHAVEK                                          | 0.933683791        | 2                | 3.7688677 |
| P48508        | INPDEREEMK                                                | 1.071676873        | 2                | 2.4725285 |
| P48508        | LFIVGSNSSSSTR                                             | 0.813094364        | 2                | 3.5109971 |
| P48508        | QFDIQLLTHNDPK                                             | 1.282661742        | 2                | 2.612658  |
| P48508        | TLNEWSSQISPDLVR                                           | 1.085330281        | 2                | 4.629065  |
| <b>P48675</b> | <b>DESM Desmin</b>                                        | <b>0.948633818</b> | <b>0.6945858</b> | <b>3</b>  |
| P48675        | FLEQQNAALAAEVNR                                           | 1.22079853         | 2                | 4.2318869 |
| P48675        | HQIQSYTCEIDALK                                            | 1.342805925        | 2                | 3.552768  |
| P48675        | VSDLTQAANK                                                | 0.936883724        | 2                | 2.850981  |
| <b>P48679</b> | <b>LMNA Prelamin_A/C</b>                                  | <b>1.007785942</b> | <b>2.036E-10</b> | <b>14</b> |
| P48679        | AQHEDQVEQYK                                               | 1.205305526        | 2                | 2.699162  |
| P48679        | AQHEDQVEQYK                                               | 1.259516823        | 2                | 4.3803539 |
| P48679        | IDSLSAQLSQLQK                                             | 0.874297593        | 2                | 3.041065  |
| P48679        | ITESEEVVSR                                                | 0.997715462        | 2                | 2.8329918 |
| P48679        | LQEKEDLQELNDR                                             | 1.171162252        | 2                | 4.0274682 |
| P48679        | MQQQLDEYQELLDIK                                           | 1.478167196        | 2                | 4.8848305 |
| P48679        | NSNLVGAHEELQQSR                                           | 0.934384248        | 2                | 4.6095428 |
| P48679        | SGAASSTPLSPTR                                             | 1.00446379         | 2                | 3.6230581 |
| P48679        | SLETENAGLR                                                | 1.048258897        | 2                | 2.6288316 |
| P48679        | SVGGSGGSGFGDNLVTR                                         | 0.911457342        | 2                | 3.4324183 |
| P48679        | TALINATGEEVAMR                                            | 0.96804929         | 2                | 2.8475144 |
| P48679        | TVLCGTCGQPADK                                             | 0.97299118         | 2                | 2.8345761 |
| P48679        | VAVEEVDEEGK                                               | 0.833502961        | 2                | 3.0374057 |
| P48679        | VAVEEVDEEGKFVR                                            | 1.144387314        | 2                | 2.9402647 |
| <b>P48721</b> | <b>GRP75 Stress_70 protein_mitochondrial</b>              | <b>1.055381162</b> | <b>9.9E-20</b>   | <b>27</b> |
| P48721        | AQFEGIVTDLIK                                              | 1.024145852        | 2                | 3.839067  |
| P48721        | ASNGDAWVEAHGK                                             | 1.046467426        | 2                | 3.6599462 |
| P48721        | DAGQISGLNVLR                                              | 1.078035488        | 2                | 3.5030568 |
| P48721        | EEISKMRELLAR                                              | 0.86281341         | 2                | 2.4371996 |
| P48721        | EQQIVIQSSGGLSK                                            | 0.84866558         | 2                | 3.7129674 |
| P48721        | EQQIVIQSSGGLSKDDIENMVK                                    | 0.950246152        | 2                | 4.768486  |
| P48721        | ERVEAVNMAEGIIHDTETK                                       | 0.998570342        | 3                | 5.5876307 |
| P48721        | GAVVGIDLGTNSCVAVMEGK                                      | 0.838491954        | 2                | 5.0698571 |
| P48721        | LFEMAYK                                                   | 0.977052359        | 2                | 2.3528404 |
| P48721        | LLGQFTLIGIPPAPR                                           | 2.026206533        | 2                | 3.3681183 |
| P48721        | MEEFKDQLPADECNK                                           | 0.914638415        | 2                | 4.5534186 |
| P48721        | MEEFKDQLPADECNK+Oxidation(1)                              | 1.435901056        | 2                | 3.9676454 |
| P48721        | MKETAENYLGHTAK                                            | 0.937946455        | 2                | 4.2168813 |
| P48721        | MKETAENYLGHTAK+Oxidation(1)                               | 1.475328841        | 3                | 3.3737781 |
| P48721        | NAVITVPAYFNDSQR                                           | 1.123919461        | 2                | 3.1572084 |

|               |                                                                            |                    |                  |           |
|---------------|----------------------------------------------------------------------------|--------------------|------------------|-----------|
| P48721        | QAVTNPNNFYATK                                                              | 1.05360121         | 2                | 3.4180579 |
| P48721        | RYDDPEVQK                                                                  | 0.981831063        | 2                | 2.9515047 |
| P48721        | RYDDPEVQKDTK                                                               | 1.348175656        | 2                | 3.7563505 |
| P48721        | SDIGEVILVGGMTR                                                             | 0.978638309        | 2                | 4.0354795 |
| P48721        | SQVFSTAADGQTQVEIK                                                          | 1.175530769        | 2                | 5.3133235 |
| P48721        | STNGDTFLGGEDFDQALLR                                                        | 1.145719675        | 2                | 5.3198786 |
| P48721        | TTPSVVAFTPDGER                                                             | 0.955075681        | 2                | 3.5507596 |
| P48721        | VEAVNMAEGIIHDTETK                                                          | 1.121138298        | 2                | 4.3813849 |
| P48721        | VINEPTAAALAYGLDK                                                           | 1.53370718         | 1                | 3.3812418 |
| P48721        | VLENAEGAR                                                                  | 0.993968148        | 2                | 3.138849  |
| P48721        | VQQTVQDLFGR                                                                | 1.000809619        | 2                | 3.4902554 |
| P48721        | YDDPEVQKDTK                                                                | 1.144218045        | 2                | 2.9273324 |
| <b>P48998</b> | <b>INVO Involucrin</b>                                                     | <b>1.021408127</b> | <b>0.9654486</b> | <b>2</b>  |
| P48998        | ELLDQRDLQELVNK                                                             | 1.021276207        | 2                | 2.4207737 |
| P48998        | HKLENLTQKEK                                                                | 1.059553074        | 1                | 1.9657307 |
| <b>P49025</b> | <b>CTRO Citron Rho_interacting kinase</b>                                  | <b>1.038524518</b> | <b>0.6400014</b> | <b>2</b>  |
| P49025        | LLMIAGEERALCLVDVK+Oxidation(3)                                             | 1.056807073        | 2                | 2.3251793 |
| P49025        | LMMNQLEEDLVSARR+Oxidation(2)                                               | 0.871928789        | 2                | 2.3525193 |
| <b>P49134</b> | <b>ITB1 Integrin beta_1</b>                                                | <b>0.806709057</b> | <b>0.6978152</b> | <b>4</b>  |
| P49134        | CNCQSHGIPASPK                                                              | 1.106277616        | 2                | 3.2040715 |
| P49134        | FCECDNFNCDR                                                                | 0.898796065        | 2                | 3.4599476 |
| P49134        | GICEGACK                                                                   | 0.805578539        | 2                | 2.3181896 |
| P49134        | WDTGENPIYK                                                                 | 0.842240464        | 2                | 2.3847139 |
| <b>P49242</b> | <b>RS3A 40S ribosomal protein S3a</b>                                      | <b>1.048764311</b> | <b>9.9E-20</b>   | <b>10</b> |
| P49242        | ACQSIPLHDVFVR                                                              | 1.349860958        | 2                | 3.7788677 |
| P49242        | ADGYEPPVQESV                                                               | 1.037013145        | 1                | 2.0097258 |
| P49242        | EVQTNLKEVVNK                                                               | 1.042382393        | 2                | 2.3317676 |
| P49242        | LIPDSIGKDIEK                                                               | 1.475329451        | 2                | 2.907619  |
| P49242        | LITEDVQ GK                                                                 | 1.139493035        | 2                | 2.3582988 |
| P49242        | LMELHGEGGSSGK                                                              | 1.046989086        | 2                | 3.2341487 |
| P49242        | LMELHGEGGSSGK+Oxidation(2)                                                 | 1.17536713         | 2                | 3.1033876 |
| P49242        | NCLTNFHGMDLTR                                                              | 1.150666454        | 2                | 4.1579909 |
| P49242        | TTDGYLLR                                                                   | 1.074464811        | 2                | 2.9913504 |
| P49242        | VFEVSLADLQNEVAFR                                                           | 1.175513878        | 2                | 4.78931   |
| <b>P49432</b> | <b>ODPB Pyruvate dehydrogenase E1 component subunit beta_mitochondrial</b> | <b>0.944614336</b> | <b>0.0990228</b> | <b>5</b>  |
| P49432        | EAINQGMDEELERDEK                                                           | 0.971181721        | 2                | 2.8486152 |
| P49432        | ILEDNSIPQVK                                                                | 0.919628433        | 2                | 3.4610887 |
| P49432        | IMEGPAFNFLDAPAVR                                                           | 1.056794383        | 2                | 4.558763  |
| P49432        | TIRPMDIEAIEASVMK                                                           | 2.489888793        | 2                | 3.4269102 |
| P49432        | VFLLGEEVAQYDGAYK                                                           | 1.132387865        | 2                | 3.5019805 |
| <b>P49889</b> | <b>ST1E3 Estrogen sulfotransferase_ isoform 3</b>                          | <b>0.978175495</b> | <b>0.0109701</b> | <b>10</b> |
| P49889        | CKEDALFNR                                                                  | 1.206994377        | 2                | 2.3759308 |
| P49889        | FEEHYQQQMK                                                                 | 1.254346579        | 2                | 2.954859  |
| P49889        | FMEGQVPYGSWYDHSV                                                           | 1.176190753        | 2                | 4.3352904 |
| P49889        | IIQHTSFQEMK                                                                | 1.146636039        | 2                | 3.2163846 |
| P49889        | LIEFLERDPSAELVDR                                                           | 1.139284788        | 3                | 4.7302165 |
| P49889        | NEDLINGIK                                                                  | 0.959206464        | 2                | 2.91521   |
| P49889        | NNPCTNYSMLPETMIDLK                                                         | 1.16856466         | 2                | 4.3649254 |
| P49889        | NNPCTNYSMLPETMIDLK+Oxidation(14)                                           | 1.103130985        | 2                | 3.1127195 |
| P49889        | NNPCTNYSMLPETMIDLK+Oxidation(9)                                            | 1.103130985        | 2                | 4.146317  |
| P49889        | SGSTWISEIVDMIYK                                                            | 2.073290529        | 2                | 4.7541037 |
| <b>P50137</b> | <b>TKT Transketolase</b>                                                   | <b>1.13007746</b>  | <b>1.469E-08</b> | <b>20</b> |
| P50137        | AVELAANTK                                                                  | 0.852573982        | 1                | 1.9716796 |
| P50137        | GITGIEDK                                                                   | 0.897363278        | 1                | 2.4263124 |
| P50137        | HQPTAIIAK                                                                  | 0.649609077        | 2                | 2.5130949 |
| P50137        | IIALDGDTK                                                                  | 0.943832735        | 2                | 2.6688249 |

|               |                                                  |                    |                  |           |
|---------------|--------------------------------------------------|--------------------|------------------|-----------|
| P50137        | ILATPPQEDAPSVDIANIR                              | 0.942722143        | 3                | 4.9233027 |
| P50137        | ILTVEDHYEGGIGEAVSAVVVGEVTVTR                     | 2.924251514        | 3                | 3.821249  |
| P50137        | ISSDLDGHPVPK                                     | 0.900907979        | 2                | 3.352299  |
| P50137        | KISSDLDGHPVPK                                    | 0.957799969        | 2                | 4.0500121 |
| P50137        | LDNLVAIFDINR                                     | 0.81806111         | 2                | 4.7533069 |
| P50137        | LGQSDPAPLQHQVDVYQK                               | 1.071823299        | 2                | 3.7426722 |
| P50137        | MFGIDKDAIVQAVK                                   | 0.736101593        | 2                | 4.3816881 |
| P50137        | NMAEQIQEIYSQVQSK                                 | 0.941800736        | 3                | 6.5138922 |
| P50137        | NSTFSELFK                                        | 0.754657096        | 2                | 2.4520109 |
| P50137        | SGKPAELLK                                        | 0.725591557        | 3                | 3.4272552 |
| P50137        | SKDDQVTVIGAGVTLHEALAAAEMLK                       | 0.873114427        | 3                | 5.4461141 |
| P50137        | SKDDQVTVIGAGVTLHEALAAAEMLKK                      | 1.012498871        | 4                | 5.550498  |
| P50137        | SVPMSTVFYPSDGVATEK                               | 0.80020795         | 2                | 4.6903019 |
| P50137        | TSRPENAIISNNEDFVQVQAK                            | 0.869351181        | 3                | 5.5963674 |
| P50137        | VLDPFTIKPLDK                                     | 1.144179016        | 2                | 3.4927664 |
| P50137        | VLDPFTIKPLDKK                                    | 0.918733906        | 2                | 2.4388981 |
| <b>P50169</b> | <b>RDH3 Retinol dehydrogenase 3</b>              | <b>1.070066014</b> | <b>4.052E-14</b> | <b>9</b>  |
| P50169        | AMESLVNTCSGDLSLVTDCMEHALTSCHPR                   | 1.437743334        | 3                | 5.4832892 |
| P50169        | AMESLVNTCSGDLSLVTDCMEHALTSCHPR+Oxidation(2)      | 1.172104909        | 3                | 4.3081141 |
| P50169        | FQDSYMK                                          | 1.059179079        | 1                | 1.9355915 |
| P50169        | GLWGLVNNAGISVPGPNEWMR                            | 1.00686804         | 2                | 3.5643122 |
| P50169        | KLWDQTTEEVK                                      | 1.444734132        | 2                | 2.5576901 |
| P50169        | KLWDQTTEEVKEIYGEK                                | 1.100926604        | 3                | 4.3018165 |
| P50169        | LWDQTTEEVK                                       | 1.039193019        | 2                | 3.5999475 |
| P50169        | LWDQTTEEVKEIYGEK                                 | 1.231829501        | 2                | 4.9932394 |
| P50169        | MSLVGGGYCISK                                     | 1.070788343        | 2                | 3.9099414 |
| <b>P50237</b> | <b>ST1C1 Sulfotransferase 1C1</b>                | <b>1.092821616</b> | <b>1.4E-12</b>   | <b>9</b>  |
| P50237        | AGTTWTQEIVDMIQNDGDVQK                            | 1.204952807        | 2                | 5.6509161 |
| P50237        | DISEEVLNK                                        | 0.940183226        | 2                | 2.6277041 |
| P50237        | DLHLGEQDLQPETR                                   | 1.066391547        | 2                | 3.9535215 |
| P50237        | FLEKDISEEVLNK                                    | 1.305076038        | 2                | 3.4093328 |
| P50237        | IWNFQAKPDDLLIATYAK                               | 1.39988195         | 2                | 4.4657454 |
| P50237        | MKDLHLGEQDLQPETR                                 | 1.021865534        | 2                | 4.920691  |
| P50237        | MLPDPGTLGEYIEQFK                                 | 1.363905254        | 3                | 4.6758342 |
| P50237        | MLPDPGTLGEYIEQFK+Oxidation(1)                    | 1.312066658        | 2                | 3.0702045 |
| P50237        | VLWGSWYDHVK                                      | 1.299725528        | 2                | 3.1831439 |
| <b>P50289</b> | <b>ASPX Acrosomal protein SP_10</b>              | <b>1.025891779</b> | <b>0.7378636</b> | <b>2</b>  |
| P50289        | MQIMCCRNEPLCNK                                   | 0.919694029        | 2                | 2.3488097 |
| P50289        | MQIMCCRNEPLCNK+Oxidation(1)                      | 1.133671266        | 2                | 2.3918641 |
| <b>P50398</b> | <b>GDIA Rab GDP dissociation inhibitor alpha</b> | <b>1.111167108</b> | <b>0.676396</b>  | <b>7</b>  |
| P50398        | FDLGQDVIDFTGHALALYR                              | 0.884394732        | 2                | 2.7444484 |
| P50398        | FQLLEGPPESMGR                                    | 0.948924045        | 2                | 3.6843739 |
| P50398        | KQNDVFGEADQ                                      | 0.97854885         | 2                | 3.3125327 |
| P50398        | NPYYGGESSITPLEELYK                               | 1.236515847        | 2                | 5.8906722 |
| P50398        | QLICDPYIPDR                                      | 1.229348045        | 2                | 2.8948989 |
| P50398        | TDDYLDQPCLTINR                                   | 0.978306498        | 2                | 4.6755586 |
| P50398        | TFEGVDPQTSMR                                     | 0.871067525        | 2                | 3.2231772 |
| <b>P50399</b> | <b>GDIB Rab GDP dissociation inhibitor beta</b>  | <b>1.201811306</b> | <b>0.0015835</b> | <b>10</b> |
| P50399        | AYDATTHFETCDDIKDIYK                              | 0.988753403        | 3                | 5.1512513 |
| P50399        | DWNVDLIPK                                        | 1.124718615        | 2                | 2.3538404 |
| P50399        | EIRPALELLEPIEQK                                  | 1.002436419        | 2                | 3.4989617 |
| P50399        | FDLGQDVIDFTGHSLALYR                              | 1.494772961        | 2                | 4.4165802 |
| P50399        | FVSISDLFVPK                                      | 1.230723397        | 2                | 3.5102448 |
| P50399        | MTGSEFDPEEMKR                                    | 1.198549192        | 2                | 2.732398  |
| P50399        | NTNDANSCQIIPQNVNR                                | 1.251369151        | 2                | 4.0285983 |
| P50399        | TDDYLDQPCCETINR                                  | 1.207607957        | 2                | 4.6816797 |
| P50399        | VICILSHPIK                                       | 1.030785916        | 2                | 2.5108907 |

|               |                                                             |                    |                  |           |
|---------------|-------------------------------------------------------------|--------------------|------------------|-----------|
| P50399        | VLHMDQNPYYGGESASITPLEDLK                                    | 1.153353339        | 3                | 4.6537318 |
| <b>P50431</b> | <b>GLYC Serine hydroxymethyltransferase_ cytosolic</b>      | <b>1.069267776</b> | <b>0.135806</b>  | <b>8</b>  |
| P50431        | ALSDALTELGK                                                 | 1.14267423         | 2                | 4.3628669 |
| P50431        | AVLEALGSLNNK                                                | 1.21313233         | 2                | 4.1399727 |
| P50431        | GLLEEDFK                                                    | 1.099088053        | 1                | 2.3007836 |
| P50431        | IMGLDLPDGGHLTHGFMTDK                                        | 0.908755041        | 2                | 2.8456161 |
| P50431        | IYQLQVLANCR                                                 | 1.184099524        | 2                | 2.5716267 |
| P50431        | LIIAGTSCYSR                                                 | 1.586066376        | 2                | 2.3634157 |
| P50431        | VLEACSIACNK                                                 | 1.119263561        | 2                | 3.9993525 |
| P50431        | YSEGYPGQR                                                   | 0.974596685        | 2                | 2.4414039 |
| <b>P50475</b> | <b>SYAC Alanyl_tRNA synthetase_ cytoplasmic</b>             | <b>1.153049312</b> | <b>9.9E-20</b>   | <b>14</b> |
| P50475        | ASEWVQVSGLMDGK                                              | 1.037952564        | 2                | 4.042644  |
| P50475        | AVFDEYDPVPR                                                 | 1.168480939        | 2                | 2.9960239 |
| P50475        | EIADLGEVLATAVIPQWQK                                         | 1.055486778        | 2                | 3.1485658 |
| P50475        | GLEATDDSPK                                                  | 1.081417708        | 2                | 2.6714151 |
| P50475        | ITCLCQVPQNAANR                                              | 1.300418022        | 2                | 4.1306705 |
| P50475        | IVAVTGAEAQK                                                 | 1.261364935        | 2                | 2.4556472 |
| P50475        | MSNYDSDLFVYFEAIQK                                           | 1.495576184        | 2                | 3.4438782 |
| P50475        | NSSHAGAFVIVTEEAIK                                           | 1.193022925        | 2                | 3.7829394 |
| P50475        | QIWQNLGLDEAK                                                | 1.227676853        | 2                | 2.8254986 |
| P50475        | RIVAVTGAEAQK                                                | 1.018177814        | 2                | 3.1226103 |
| P50475        | SVLGDADQK                                                   | 1.591005684        | 1                | 2.2820621 |
| P50475        | TITVALADGGRPDNTGR                                           | 1.19622876         | 2                | 2.7605815 |
| P50475        | VDDSSSEDKTEFTVK                                             | 1.229231532        | 2                | 4.0134292 |
| P50475        | VGAEDTDGIDMAYR                                              | 1.043474909        | 2                | 3.3324697 |
| <b>P50503</b> | <b>F10A1 Hsc70_interacting protein</b>                      | <b>1.284439506</b> | <b>1.028E-08</b> | <b>5</b>  |
| P50503        | AIDLFTDAIK                                                  | 1.225066716        | 2                | 2.5333261 |
| P50503        | AIEINPDSAPYK                                                | 1.231118249        | 2                | 2.8049262 |
| P50503        | GAAIDALNDGELQK                                              | 1.22011173         | 2                | 3.3118882 |
| P50503        | KGAAIDALNDGELQK                                             | 1.351634859        | 2                | 4.767715  |
| P50503        | LDYDEASAMLR                                                 | 1.080772292        | 2                | 3.2823377 |
| <b>P50554</b> | <b>GABT 4_aminobutyrate aminotransferase_ mitochondrial</b> | <b>0.980702087</b> | <b>0.2005077</b> | <b>10</b> |
| P50554        | GTFCSFDPDEAIR                                               | 1.036577837        | 2                | 3.1833353 |
| P50554        | IDIPFDWPIAPFPR                                              | 1.16815004         | 2                | 3.6512668 |
| P50554        | IFNTWLGDPK                                                  | 0.961519967        | 2                | 2.3369091 |
| P50554        | LVQQPQNASTFINRPALGILPPENFVVK                                | 1.106343856        | 3                | 4.9971008 |
| P50554        | MLDLYSQISSVPIGYNHPALAK                                      | 1.020975263        | 3                | 3.4819691 |
| P50554        | NLLLAEVINIK                                                 | 1.01972511         | 3                | 5.3101544 |
| P50554        | REDLLNNVAHAGK                                               | 1.032371591        | 3                | 3.7615418 |
| P50554        | TLLTGLLDLQAQYPQFVSR                                         | 1.399814352        | 2                | 4.2358656 |
| P50554        | TVAGIIVEPIQSEGGDNHASDDFFR                                   | 0.991089605        | 2                | 4.2707653 |
| P50554        | VDFEFDYDGPLMK                                               | 0.77577827         | 2                | 3.722331  |
| <b>P50580</b> | <b>PA2G4 Proliferation_associated protein 2G4</b>           | <b>0.982399246</b> | <b>0.0150526</b> | <b>2</b>  |
| P50580        | HELLQPFNVLYEK                                               | 2.057960046        | 2                | 2.4099073 |
| P50580        | TIIQNPTDQK                                                  | 0.980134715        | 2                | 2.7579212 |
| <b>P50878</b> | <b>RL4 60S ribosomal protein L4</b>                         | <b>1.133424533</b> | <b>0.0404791</b> | <b>10</b> |
| P50878        | FCIWTESAFR                                                  | 0.940451604        | 2                | 2.4533877 |
| P50878        | KLDELYGTWR                                                  | 1.127745846        | 2                | 3.0943029 |
| P50878        | KLEAAAAALAAK                                                | 1.191532935        | 3                | 3.7863359 |
| P50878        | LEAAAAALAAK                                                 | 1.201866038        | 2                | 2.3450329 |
| P50878        | NIPGITLLNVSK                                                | 1.191537981        | 1                | 2.3753691 |
| P50878        | NVTLPVAFK                                                   | 0.990364706        | 1                | 2.2250185 |
| P50878        | RGPCIIYNEDNGIHK                                             | 1.153481153        | 2                | 2.9561622 |
| P50878        | SGQGAFGNMCR                                                 | 0.877850432        | 2                | 2.7763605 |
| P50878        | SNYNLPMHK                                                   | 1.077213069        | 2                | 2.4188542 |
| P50878        | YAICSAALASALPALVMSK                                         | 1.640749321        | 2                | 3.6818233 |



|               |                                                                |                    |                  |           |
|---------------|----------------------------------------------------------------|--------------------|------------------|-----------|
| <b>P50904</b> | <b>RASA1 Ras GTPase_activating protein 1</b>                   | <b>0.996812202</b> | <b>0.8249905</b> | <b>3</b>  |
| P50904        | IMESKQSCELSPSK+Oxidation(2)                                    | 0.784810894        | 2                | 2.5013378 |
| P50904        | LESLLLCTLNDR                                                   | 0.725229788        | 1                | 1.9023232 |
| P50904        | YYNSIGDIIDHYRK                                                 | 1.001697848        | 2                | 2.4293289 |
| <b>P51538</b> | <b>CP3A9 Cytochrome P450 3A9</b>                               | <b>0.998814205</b> | <b>0.0037588</b> | <b>2</b>  |
| P51538        | EMFPIINQYTDMLVR                                                | 1.284813931        | 2                | 2.5303669 |
| P51538        | GFWEFDKYCHK                                                    | 0.773015442        | 1                | 2.2301278 |
| <b>P51635</b> | <b>AK1A1 Alcohol dehydrogenase [NADP_]</b>                     | <b>1.040704162</b> | <b>1.155E-14</b> | <b>8</b>  |
| P51635        | ALEALVAK                                                       | 1.017992929        | 2                | 2.8583679 |
| P51635        | GLEVTAYSPLGSSDR                                                | 1.043743562        | 2                | 4.1500902 |
| P51635        | HHPEDVEPAVR                                                    | 1.078549894        | 3                | 3.7630265 |
| P51635        | HIDCASVYGNETEIGEALK                                            | 0.954661365        | 2                | 5.872046  |
| P51635        | HIDCASVYGNETEIGEALKESVGAGK                                     | 0.761773627        | 3                | 6.803412  |
| P51635        | HPDEPVLLEEPVVLALAEK                                            | 2.099108407        | 3                | 5.6685438 |
| P51635        | ILQNIQVDFDFTFSPEEMK                                            | 2.660819195        | 2                | 4.5232539 |
| P51635        | QLDALNK                                                        | 1.081401933        | 1                | 1.9899024 |
| <b>P51647</b> | <b>AL1A1 Retinal dehydrogenase 1</b>                           | <b>0.845637917</b> | <b>0.4038139</b> | <b>17</b> |
| P51647        | ANNNTTYGLAAGVFTK                                               | 0.783591876        | 2                | 4.531414  |
| P51647        | EAGFPPGVVNVIPGYPTAGAAISSHMDVDK                                 | 0.989306804        | 3                | 3.5613813 |
| P51647        | ELGEHGLYEYTELK                                                 | 0.779929721        | 2                | 3.4561656 |
| P51647        | FPVLNPATEEVICHVEEGDK                                           | 0.737576093        | 3                | 3.7493389 |
| P51647        | FPVLNPATEEVICHVEEGDKADVDK                                      | 0.852635397        | 4                | 5.1933799 |
| P51647        | IFINNEWHDSVSGK                                                 | 1.101319685        | 2                | 4.5981765 |
| P51647        | IFVEESVYDEFVR                                                  | 0.800691854        | 2                | 4.4964957 |
| P51647        | IGPALSCGNTVVVKAPEQTLTALHMASLIK                                 | 1.155066991        | 3                | 4.7491622 |
| P51647        | IHGQTIPSDGDIFTFTR                                              | 1.385440604        | 2                | 4.3567686 |
| P51647        | KFPVLNPATEEVICHVEEGDK                                          | 0.867732548        | 3                | 3.3682454 |
| P51647        | KFPVLNPATEEVICHVEEGDKADVDK                                     | 0.900697503        | 4                | 4.8262267 |
| P51647        | KYVLGNPLTQGINQGPDKEQHDK                                        | 0.962745749        | 3                | 3.8385355 |
| P51647        | LLLATIEAINGGK                                                  | 2.427652131        | 2                | 4.7309985 |
| P51647        | VFANAYLSDLGGSIK                                                | 0.872303451        | 2                | 4.6444902 |
| P51647        | YCAGWADK                                                       | 0.890684385        | 1                | 2.2485063 |
| P51647        | YVLGNPLTQGINQGPDQDK                                            | 0.767084405        | 2                | 5.060204  |
| P51647        | YVLGNPLTQGINQGPDKEQHDK                                         | 1.129484805        | 2                | 3.7664785 |
| <b>P51650</b> | <b>SSDH Succinate semialdehyde dehydrogenase_mitochondrial</b> | <b>0.907640423</b> | <b>0.9965396</b> | <b>9</b>  |
| P51650        | EVGEVLCTDPLVSK                                                 | 0.795885976        | 2                | 4.1431513 |
| P51650        | GIHDSFVTK                                                      | 1.017924143        | 2                | 2.3018949 |
| P51650        | HQSGGNFFPEPTLLSNVTR                                            | 1.016186267        | 2                | 3.9368763 |
| P51650        | IITAESGKPLK                                                    | 1.088301626        | 2                | 2.6185679 |
| P51650        | ILLHHAANSVK                                                    | 1.271703734        | 2                | 2.4283056 |
| P51650        | LGTVADCGVPEAR                                                  | 0.692463467        | 2                | 3.269433  |
| P51650        | VGNGFEEGTTQGPIINEK                                             | 0.873756496        | 2                | 4.88169   |
| P51650        | WLPTPATFPVYDPASGAK                                             | 0.925171261        | 2                | 3.0388298 |
| P51650        | YGIDEYLEVK                                                     | 0.97494947         | 2                | 2.5931952 |
| <b>P51863</b> | <b>VA0D1 V_type proton ATPase subunit d 1</b>                  | <b>1.106184605</b> | <b>0.7144331</b> | <b>3</b>  |
| P51863        | ADDYEQVK                                                       | 1.138158548        | 2                | 2.3858597 |
| P51863        | LHLQSTDYGNFLANEASPLTVSVIDDK                                    | 1.327702663        | 3                | 3.6069183 |
| P51863        | LYPEGLAQLAR                                                    | 1.072753063        | 1                | 1.901862  |
| <b>P51869</b> | <b>CP4F4 Cytochrome P450 4F4</b>                               | <b>1.204714545</b> | <b>1.11E-16</b>  | <b>4</b>  |
| P51869        | ALPSQHEDDILK                                                   | 1.220555711        | 2                | 2.8785088 |
| P51869        | NISLMTLDSLQK                                                   | 1.058019067        | 2                | 3.6509552 |
| P51869        | TLDFIDVLLLT                                                    | 2.184786884        | 2                | 3.8001792 |
| P51869        | WQDLASGGSAR                                                    | 0.940670217        | 2                | 2.4971282 |
| <b>P51886</b> | <b>LUM Lumican</b>                                             | <b>0.889479469</b> | <b>0.1605535</b> | <b>4</b>  |
| P51886        | LDGNPLTQSSLPPDMYECLR                                           | 0.767367563        | 2                | 2.6440642 |
| P51886        | NNQIDHIDEK                                                     | 1.165048519        | 2                | 3.3304877 |

|               |                                                                                  |                    |                  |           |
|---------------|----------------------------------------------------------------------------------|--------------------|------------------|-----------|
| P51886        | SIPTVNNENLENYYLEVNK                                                              | 1.348841187        | 2                | 4.1315484 |
| P51886        | SLQDLQLANNK                                                                      | 0.818826848        | 2                | 2.9636085 |
| <b>P52296</b> | <b>IMB1 Importin subunit beta_1</b>                                              | <b>1.103483648</b> | <b>0.0216844</b> | <b>4</b>  |
| P52296        | AAVENLPTFLVELSR                                                                  | 1.378361871        | 2                | 3.2608097 |
| P52296        | TVSPDRLELEAAQK                                                                   | 1.036896022        | 2                | 3.3249218 |
| P52296        | VLANPGNSQVAR                                                                     | 1.098743451        | 2                | 3.5163949 |
| P52296        | VQHQDALQJSDVVMASLLR                                                              | 1.320875594        | 2                | 2.4733174 |
| <b>P52303</b> | <b>AP1B1 AP_1 complex subunit beta_1</b>                                         | <b>0.882151668</b> | <b>0.1766628</b> | <b>2</b>  |
| P52303        | NINLIVQK                                                                         | 0.800656942        | 1                | 2.0266507 |
| P52303        | NSFGLAAPLQVHAPLSPNQTV EISLPLNTVGSVMK                                             | 1.099051634        | 3                | 4.7753263 |
| <b>P52504</b> | <b>NDUS6 NADH dehydrogenase [ubiquinone] iron_sulfur protein 6_mitochondrial</b> | <b>1.175225195</b> | <b>9.9E-20</b>   | <b>2</b>  |
| P52504        | IIACDGGGGALGHPK                                                                  | 1.152469637        | 2                | 3.5218101 |
| P52504        | VYINLDKETK                                                                       | 1.474147069        | 2                | 2.980612  |
| <b>P52555</b> | <b>ERP29 Endoplasmic reticulum resident protein 29</b>                           | <b>0.979872358</b> | <b>0.4326043</b> | <b>5</b>  |
| P52555        | FDTQYPYGEK                                                                       | 0.995439769        | 2                | 2.5458915 |
| P52555        | GQGVYLGMPGCLPAYDALAGQFIEASSR                                                     | 1.508061617        | 3                | 4.1417117 |
| P52555        | ILDQGEDFPASELAR                                                                  | 1.086711415        | 2                | 4.6385603 |
| P52555        | QGDGLSGVK                                                                        | 0.893111761        | 2                | 2.661386  |
| P52555        | SLNLTAFR                                                                         | 1.273464495        | 2                | 2.5293961 |
| <b>P52631</b> | <b>STAT3 Signal transducer and activator of transcription 3</b>                  | <b>1.142556624</b> | <b>0.7664655</b> | <b>2</b>  |
| <b>P52759</b> | <b>UK114 Ribonuclease UK114</b>                                                  | <b>1.194364167</b> | <b>0.0529708</b> | <b>6</b>  |
| P52759        | AAGCDFTNVVK                                                                      | 0.957989401        | 2                | 3.342603  |
| P52759        | AAYQVAALPK                                                                       | 1.044513462        | 2                | 2.4653811 |
| P52759        | IEIEAIAVQGPFTTAGL                                                                | 1.213908058        | 1                | 3.5522799 |
| P52759        | TIYVSGQIGMDPSSGQLVPGGVAEEAK                                                      | 0.803334629        | 2                | 4.4336696 |
| P52759        | TTVLLADINDFGTVNEIYK                                                              | 1.236366349        | 2                | 5.159482  |
| P52759        | TYFQGNLPAR                                                                       | 1.0643645          | 2                | 2.5947976 |
| <b>P52845</b> | <b>ST1E2 Estrogen sulfotransferase_ isoform 2</b>                                | <b>1.21526882</b>  | <b>0.7683882</b> | <b>2</b>  |
| P52845        | CKEDAIFNR                                                                        | 1.206994377        | 2                | 2.3759308 |
| P52845        | SGSTWIGEIVDMIYK                                                                  | 1.216752987        | 2                | 2.9321198 |
| <b>P52847</b> | <b>ST1B1 Sulfotransferase family cytosolic 1B member 1</b>                       | <b>1.060950518</b> | <b>0.2505128</b> | <b>8</b>  |
| P52847        | DNPLVNYTHLPT EIMDHSK                                                             | 1.054054005        | 2                | 4.0602736 |
| P52847        | FLAGNVAYGSWFDHVK                                                                 | 0.428630345        | 2                | 3.637759  |
| P52847        | IEEFQSRPCDIVIPTYK                                                                | 1.051339927        | 3                | 4.5211015 |
| P52847        | IVHHTSFEVMK                                                                      | 2.065575555        | 2                | 2.8724577 |
| P52847        | NYFTMTQSEK                                                                       | 0.988247956        | 1                | 2.7680941 |
| P52847        | SGVELLKK                                                                         | 1.09421875         | 2                | 2.3628166 |
| P52847        | THLPIDLLPK                                                                       | 0.960907287        | 3                | 3.6248887 |
| P52847        | TLDEHTLER                                                                        | 1.076041474        | 2                | 2.8638341 |
| <b>P52873</b> | <b>PYC Pyruvate carboxylase_mitochondrial</b>                                    | <b>1.295606443</b> | <b>5.551E-15</b> | <b>38</b> |
| P52873        | ADEAYLIGR                                                                        | 1.071955909        | 1                | 2.1010771 |
| P52873        | ADFAQACQDAGVR                                                                    | 0.997809893        | 2                | 4.6432037 |
| P52873        | AEAEAAQEELSFP                                                                    | 1.110244188        | 2                | 4.6917896 |
| P52873        | AGTHILCIK                                                                        | 1.42529322         | 2                | 2.845639  |
| P52873        | ALAVSDLNR                                                                        | 1.162978473        | 2                | 2.754179  |
| P52873        | AYSEALAAFNGALFVEK                                                                | 1.39124165         | 2                | 3.7143006 |
| P52873        | AYVEANQMLGDLIK                                                                   | 0.791366402        | 2                | 4.687202  |
| P52873        | DAHQSLLATR                                                                       | 0.947350495        | 1                | 3.271965  |
| P52873        | DFTATFGPLDSLNR                                                                   | 0.808583846        | 2                | 3.752677  |
| P52873        | DMAGLLKPAACTMLVSSLR                                                              | 0.924868339        | 2                | 3.689877  |
| P52873        | ENGVDVHPGYGFLSER                                                                 | 1.277931372        | 2                | 3.1556602 |
| P52873        | FIGPSPEVVR                                                                       | 1.074112788        | 2                | 2.3227389 |
| P52873        | FLYECVWR                                                                         | 1.033729704        | 1                | 2.1402457 |
| P52873        | GANAVGYTNP DN VVFK                                                               | 1.13646565         | 2                | 4.4634571 |
| P52873        | GLAPVQAYLHIPDIK                                                                  | 1.227619473        | 2                | 3.157716  |

|               |                                                                                                                      |                    |                  |           |
|---------------|----------------------------------------------------------------------------------------------------------------------|--------------------|------------------|-----------|
| P52873        | GQIGAPMPGK                                                                                                           | 0.736192644        | 2                | 2.4333091 |
| P52873        | GTPLDTEVPLER                                                                                                         | 1.048564872        | 2                | 3.7145276 |
| P52873        | HGEEVTPEDVLSAAMYPDVFAQFK                                                                                             | 1.675631996        | 2                | 5.6806703 |
| P52873        | HIEVQILGDQYGNILHLYER                                                                                                 | 1.435768131        | 3                | 6.6732078 |
| P52873        | HYFIEVNSR                                                                                                            | 1.244471685        | 2                | 2.4883997 |
| P52873        | IAEEFEVELER                                                                                                          | 0.976444642        | 2                | 3.1922312 |
| P52873        | IEGRPGASLPLNLK                                                                                                       | 1.183288784        | 2                | 3.5359554 |
| P52873        | INGCAIQCR                                                                                                            | 1.135419473        | 2                | 2.9577415 |
| P52873        | IVGDLAQFMVQNGLSR                                                                                                     | 1.352805759        | 2                | 2.8800275 |
| P52873        | LDNASAFQGAVISPHYDSSLVK                                                                                               | 1.072578651        | 2                | 5.7765312 |
| P52873        | LQVEHTVTEEITDVDLVHAQIHVSEGR                                                                                          | 0.99864373         | 4                | 6.3476367 |
| P52873        | NHQGLLLMDTTFR                                                                                                        | 1.097540672        | 2                | 2.9068096 |
| P52873        | QKADEAYLIGR                                                                                                          | 1.070236382        | 2                | 2.3431599 |
| P52873        | QVFFELNGQLR                                                                                                          | 0.942465951        | 2                | 3.0477431 |
| P52873        | QVGYENAGTVEFLVDK                                                                                                     | 1.113612548        | 2                | 3.9146514 |
| P52873        | SGEGMGIR                                                                                                             | 0.867560944        | 2                | 2.6147976 |
| P52873        | SVVEFLQGYIGIPHGFPPEFR                                                                                                | 1.425288911        | 2                | 4.5660658 |
| P52873        | TVAVYSEQDTGQMHR                                                                                                      | 1.202530742        | 2                | 4.5630579 |
| P52873        | VPDYSEYWEGAR                                                                                                         | 1.128241642        | 2                | 4.3109879 |
| P52873        | VSPSPVDPIVPVPIGPPAGFR                                                                                                | 1.194894512        | 2                | 4.3138661 |
| P52873        | VVEIAPATHLDPQLR                                                                                                      | 1.126246027        | 2                | 4.4727139 |
| P52873        | VVHSYEELEENYTR                                                                                                       | 1.186607072        | 2                | 5.2491622 |
| P52873        | YSLEYMGLAEELVR                                                                                                       | 1.18469028         | 3                | 4.9174814 |
| <b>P52925</b> | <b>HMGB2 High mobility group protein B2</b>                                                                          | <b>1.158447667</b> | <b>0.0055074</b> | <b>2</b>  |
| P52925        | KHPDSSVNFAEFSK                                                                                                       | 1.25681253         | 2                | 2.8417795 |
| P52925        | SEHPGLSIGDTAK                                                                                                        | 1.154730178        | 2                | 3.0700426 |
| <b>P53395</b> | <b>ODB2 Lipamide acyltransferase component of branched_chain alpha_keto acid dehydrogenase complex_mitochondrial</b> | <b>0.812844134</b> | <b>5.931E-11</b> | <b>4</b>  |
| P53395        | LREELKPVALAR                                                                                                         | 1.333631348        | 2                | 2.6855814 |
| P53395        | LSDIGEGIR                                                                                                            | 0.774537279        | 2                | 2.4730592 |
| P53395        | LSEVVGSGK                                                                                                            | 1.00781756         | 1                | 1.929827  |
| P53395        | SYLENPAFMLLDLK                                                                                                       | 2.424924476        | 2                | 4.3345594 |
| <b>P53987</b> | <b>MOT1 Monocarboxylate transporter 1</b>                                                                            | <b>1.059852393</b> | <b>0.662334</b>  | <b>4</b>  |
| P53987        | DGKEDETSTDVDEKPK                                                                                                     | 1.096051858        | 2                | 5.0428181 |
| P53987        | DGKEDETSTDVDEKPKK                                                                                                    | 1.352532051        | 3                | 4.9425883 |
| P53987        | ETQSPAPLQNSSGDPAAEEESPV                                                                                              | 1.096475094        | 2                | 5.2925968 |
| P53987        | SDANTDLIGGSPK                                                                                                        | 0.906186417        | 2                | 3.9002271 |
| <b>P54313</b> | <b>GBB2 Guanine nucleotide_binding protein G(I)/G(S)/G(T) subunit beta_2</b>                                         | <b>0.944461797</b> | <b>0.5785908</b> | <b>2</b>  |
| P54313        | ACGDSTLTQITAGLDPVGR                                                                                                  | 0.983041022        | 2                | 4.4568653 |
| P54313        | TFVSGACDASIK                                                                                                         | 0.921605874        | 2                | 3.0376058 |
| <b>P54319</b> | <b>PLAP Phospholipase A_2_activating protein</b>                                                                     | <b>1.037497074</b> | <b>0.9554391</b> | <b>3</b>  |
| P54319        | IGDVVGSSGANQQTSGK                                                                                                    | 1.056484421        | 2                | 4.4971046 |
| P54319        | TGDLGDINAEQLPGR                                                                                                      | 1.017003036        | 2                | 3.354496  |
| P54319        | YVPGTSGPSNTVQTADPFTGAGR                                                                                              | 1.059152701        | 2                | 3.924144  |
| <b>P54822</b> | <b>PUR8 Adenylosuccinate lyase</b>                                                                                   | <b>1.149272675</b> | <b>0.1874731</b> | <b>2</b>  |
| P54822        | KVDIEVLSVLASLGASVHK                                                                                                  | 1.266129214        | 3                | 3.8575506 |
| P54822        | VLSQQAADVVK                                                                                                          | 1.125245857        | 2                | 2.8383608 |
| <b>P54921</b> | <b>SNAA Alpha_soluble NSF attachment protein</b>                                                                     | <b>0.963550898</b> | <b>0.3641891</b> | <b>5</b>  |
| P54921        | AIDIYEQVGTSAMDSPLLK                                                                                                  | 1.078421065        | 2                | 4.5153823 |
| P54921        | HDAATCFVDAGNAFK                                                                                                      | 1.345090577        | 2                | 2.9943001 |
| P54921        | IEEACEIYAR                                                                                                           | 0.641331496        | 2                | 2.4634502 |
| P54921        | NSQSFFSGLFGGSSK                                                                                                      | 1.05009353         | 2                | 3.1457901 |
| P54921        | TIQGDEEDLR                                                                                                           | 1.086580856        | 2                | 2.4075785 |
| <b>P55006</b> | <b>RDH7 Retinol dehydrogenase 7</b>                                                                                  | <b>1.076470044</b> | <b>8.159E-09</b> | <b>11</b> |
| P55006        | LETWILDVTK                                                                                                           | 1.023487801        | 2                | 3.6622121 |

|               |                                                           |                    |                  |           |
|---------------|-----------------------------------------------------------|--------------------|------------------|-----------|
| P55006        | TESIVAATQWVK                                              | 1.035879689        | 2                | 3.9760861 |
| P55006        | TNVTNMER                                                  | 0.948645398        | 2                | 2.7620466 |
| P55006        | TNVTNMER+Oxidation(6)                                     | 1.456446867        | 2                | 2.5039496 |
| P55006        | TSDRLETVILDVTK                                            | 1.128449585        | 3                | 4.5854106 |
| P55006        | VAIIEPGGFK                                                | 1.214453676        | 2                | 2.3017344 |
| P55006        | VLAACLETK                                                 | 1.227591312        | 2                | 3.1401925 |
| P55006        | VVNIATMGR                                                 | 1.131378475        | 2                | 3.4898469 |
| P55006        | VVNIATMGR+Oxidation(8)                                    | 1.093586547        | 2                | 2.7359459 |
| P55006        | YGVEAFSDSLR                                               | 1.385608677        | 2                | 3.7563388 |
| P55006        | YVFITGCDSGFGNLLAR                                         | 1.429182906        | 2                | 4.420186  |
| <b>P55007</b> | <b>BART1 Protein BART_1</b>                               | <b>1.235651146</b> | <b>0.537719</b>  | <b>2</b>  |
| P55007        | MILMYEEKNKNT+Oxidation(1)                                 | 0.989505894        | 2                | 2.3633804 |
| P55007        | YNSDEDLQSKLESSR                                           | 1.370870744        | 2                | 2.5442035 |
| <b>P55051</b> | <b>FABP7 Fatty acid binding protein_brain</b>             | <b>1.154240124</b> | <b>0.9998401</b> | <b>3</b>  |
| P55051        | LTDSQNFDEYMK                                              | 1.079361772        | 2                | 3.9235952 |
| P55051        | QVGNVTKPTVIISQEGGK                                        | 1.23347248         | 2                | 3.4454844 |
| P55051        | WDGKETNCVR                                                | 1.136761098        | 2                | 2.56056   |
| <b>P55053</b> | <b>FABP5 Fatty acid binding protein_epidermal</b>         | <b>0.891323483</b> | <b>0.0217587</b> | <b>6</b>  |
| P55053        | FDETTADGR                                                 | 0.707479132        | 2                | 2.5899682 |
| P55053        | KTETVCTFTDGALVQHQQ                                        | 0.863641494        | 3                | 5.6755095 |
| P55053        | LVESHGFEYMK                                               | 1.024730797        | 2                | 3.3589003 |
| P55053        | MGAMAKPDCIITLDGNLTVK                                      | 0.769128755        | 3                | 3.6650534 |
| P55053        | MVVECVMNNAICTR                                            | 0.678235696        | 2                | 3.3658652 |
| P55053        | TETVCTFTDGALVQHQQ                                         | 0.781695312        | 2                | 4.5332747 |
| <b>P55159</b> | <b>PON1 Serum paraoxonase/arylesterase 1</b>              | <b>1.312308471</b> | <b>9.9E-20</b>   | <b>7</b>  |
| P55159        | GIEAGAEDEILPGLFFSTGLK                                     | 1.04325986         | 2                | 3.7241383 |
| P55159        | IFFYDSENPSPGSEVLR                                         | 1.295286428        | 2                | 5.9950795 |
| P55159        | IQSILSEDPK                                                | 1.382492748        | 2                | 3.1342616 |
| P55159        | TITHELLPSINDIAAVGPESFYATNDHYFADPYLR                       | 1.821572324        | 3                | 4.4558253 |
| P55159        | VLSFDTLVDNISVDPVTGDLWVGCHPNGMR                            | 1.41998095         | 3                | 6.1740952 |
| P55159        | VVADGDFDFANGIGISLDGK                                      | 1.192788187        | 2                | 4.8107467 |
| P55159        | YVYIAELLAHK                                               | 1.383497734        | 2                | 2.9661148 |
| <b>P55260</b> | <b>ANXA4 Annexin A4</b>                                   | <b>1.017801231</b> | <b>0.9961462</b> | <b>3</b>  |
| P55260        | AEIDMLDIPANFK                                             | 1.017683817        | 1                | 2.3181043 |
| P55260        | GAGTDEGLIEILASR                                           | 1.168453258        | 2                | 3.7385829 |
| P55260        | GLGTDEDAIIGVLACR                                          | 0.944876229        | 2                | 3.9080589 |
| <b>P55770</b> | <b>NH2L1 NHP2_like protein 1</b>                          | <b>1.144684416</b> | <b>0.1673296</b> | <b>2</b>  |
| P55770        | LLDLVQQSCNYK                                              | 1.175305404        | 2                | 3.8025312 |
| P55770        | QQIQSIQSIER                                               | 1.179973914        | 2                | 2.8953185 |
| <b>P56399</b> | <b>UBP5 Ubiquitin carboxyl terminal hydrolase 5</b>       | <b>1.096598872</b> | <b>0.0122152</b> | <b>3</b>  |
| P56399        | GTGLQPGEELPDIAPPLVTPDEPK                                  | 1.08588248         | 2                | 4.3318505 |
| P56399        | IFQNAPTDPTQDFSTQVAK                                       | 1.32886725         | 2                | 4.5040793 |
| P56399        | IGEWELIQESGVPLKPLFGPGYTGIR                                | 1.04371594         | 3                | 4.418961  |
| <b>P56522</b> | <b>ADRO NADPH:adenodoxin oxidoreductase_mitochondrial</b> | <b>1.067729908</b> | <b>0.7483977</b> | <b>4</b>  |
| P56522        | AVPTGDVEDLPCGLLSSVGK                                      | 2.67747589         | 2                | 2.9344864 |
| P56522        | NVINTFTQTAR                                               | 1.068315673        | 2                | 2.8506556 |
| P56522        | TATEKPGVEEAAR                                             | 0.940190592        | 2                | 3.0775113 |
| P56522        | TDITEVALGVLR                                              | 0.876876091        | 2                | 3.4354682 |
| <b>P56574</b> | <b>IDHP Isocitrate dehydrogenase [NADP]_mitochondrial</b> | <b>0.945485772</b> | <b>0.7139088</b> | <b>13</b> |
| P56574        | ATDFVVDVDR                                                | 0.948897545        | 2                | 2.3911653 |
| P56574        | DLAGCIHGLSNVK                                             | 0.851604384        | 2                | 3.7367878 |
| P56574        | DQTNDQVTIDSALATQK                                         | 0.552718783        | 2                | 3.9193273 |
| P56574        | FKDIFQEIFDK                                               | 0.929494415        | 2                | 3.5140176 |
| P56574        | GKLDGNQDLIR                                               | 1.133642867        | 2                | 3.3516204 |
| P56574        | IKVEKPVVEMDGDDEMTR                                        | 1.246317035        | 3                | 3.4182315 |

|               |                                                               |                    |                  |           |
|---------------|---------------------------------------------------------------|--------------------|------------------|-----------|
| P56574        | LDGNQDLIR                                                     | 0.80956464         | 2                | 2.4494672 |
| P56574        | LIDDMVAQVLK                                                   | 1.00507454         | 2                | 4.1257811 |
| P56574        | LNEHFLNTDFLDTIK                                               | 1.204486547        | 2                | 4.4279923 |
| P56574        | NILGGTVFR                                                     | 0.992515912        | 2                | 2.7059493 |
| P56574        | SSGGFVWACK                                                    | 1.082073223        | 2                | 2.8579586 |
| P56574        | TIEAEAAHGTVTR                                                 | 0.881816338        | 2                | 3.8738496 |
| P56574        | VCVQTVESGAMTK                                                 | 0.945570984        | 2                | 3.692461  |
| <b>P56593</b> | <b>CP2AC Cytochrome P450 2A12</b>                             | <b>1.152510346</b> | <b>0.0722322</b> | <b>3</b>  |
| P56593        | MLQGTGAPIDPTIYLSK                                             | 1.067570324        | 2                | 4.7334065 |
| P56593        | NRQPQYEDHMK                                                   | 1.412415969        | 3                | 3.4586835 |
| P56593        | NRQPQYEDHMK+Oxidation(10)                                     | 1.314374711        | 3                | 3.4189866 |
| <b>P56656</b> | <b>CP239 Cytochrome P450 2C39</b>                             | <b>1.184566413</b> | <b>0.9275284</b> | <b>5</b>  |
| P56656        | EHQESLDVTNPR                                                  | 0.918687564        | 2                | 3.698303  |
| P56656        | IKEHQESLDVTNPR                                                | 1.022609556        | 2                | 5.0222163 |
| P56656        | NYLIPK                                                        | 0.970892074        | 1                | 2.0448534 |
| P56656        | VCAGEGLAR                                                     | 1.016446791        | 2                | 2.3613904 |
| P56656        | VQEEIDHVIGR                                                   | 1.210616356        | 2                | 3.4337957 |
| <b>P56812</b> | <b>PDCD5 Programmed cell death protein 5</b>                  | <b>1.096208068</b> | <b>0.8111545</b> | <b>3</b>  |
| P56812        | HGDPGDAAQQEAK                                                 | 1.107113362        | 2                | 4.2027082 |
| P56812        | NSILAQVLDQSAR                                                 | 0.873521304        | 2                | 3.1123714 |
| P56812        | VSEQGLIEIEK                                                   | 1.039847858        | 2                | 3.0754209 |
| <b>P57093</b> | <b>PAHX Phytanoyl_CoA dioxygenase_peroxisomal</b>             | <b>0.903316955</b> | <b>0.8931412</b> | <b>7</b>  |
| P57093        | AISCHYGSSDCK                                                  | 0.857388837        | 2                | 3.4779897 |
| P57093        | EVKPPGMTVMKDVAIAKQGYAPSER                                     | 1.148648172        | 2                | 2.3774557 |
| P57093        | IQDFQQNEELFR                                                  | 1.281051194        | 2                | 3.2345893 |
| P57093        | KFYEENGFLVIK                                                  | 1.038703795        | 2                | 3.1511891 |
| P57093        | NLVSDDDIQR                                                    | 0.922890848        | 1                | 2.529604  |
| P57093        | NNGCLVVLPGTHK                                                 | 1.086988745        | 2                | 2.4178429 |
| P57093        | YCALPQIVK                                                     | 1.170200471        | 1                | 2.0691731 |
| <b>P57113</b> | <b>MAAI Maleylacetoacetate isomerase</b>                      | <b>1.060055298</b> | <b>9.9E-20</b>   | <b>11</b> |
| P57113        | AITSGFNALEK                                                   | 1.073563417        | 2                | 2.8596876 |
| P57113        | ALLALEAFQVSHPCR                                               | 1.242327832        | 2                | 4.3320394 |
| P57113        | DGGQQFSEEFQTLNPMK                                             | 0.974217024        | 2                | 5.0297098 |
| P57113        | FKVDLSPYPTISHINK                                              | 1.161794942        | 2                | 4.8236203 |
| P57113        | GIDYEIVPINLIK                                                 | 1.137669304        | 2                | 4.1092372 |
| P57113        | IDGITIGQSLAILEYLEETRPIPR                                      | 1.305708284        | 4                | 4.8790998 |
| P57113        | MISDLIASGIQPLQNLSVLK                                          | 1.424598305        | 2                | 5.5983315 |
| P57113        | MISDLIASGIQPLQNLSVLK+Oxidation(1)                             | 1.353029419        | 2                | 5.4226651 |
| P57113        | QVGQENQMPWAQK                                                 | 0.836123845        | 2                | 3.942328  |
| P57113        | VDLSPYPTISHINK                                                | 1.015695445        | 2                | 3.74631   |
| P57113        | YCVGDEVSMADVCLAPQVANAER                                       | 1.061804711        | 3                | 5.941505  |
| <b>P57722</b> | <b>PCBP3 Poly(rC)_binding protein 3</b>                       | <b>1.054884099</b> | <b>0.9453524</b> | <b>2</b>  |
| P57722        | ESTGAQVQVAGDMLPNSTER                                          | 0.878876251        | 2                | 5.4303188 |
| P57722        | INISEGNCPER                                                   | 1.068390785        | 2                | 3.4429958 |
| <b>P58321</b> | <b>UCHL4 Ubiquitin carboxyl_terminal hydrolase isozyme L4</b> | <b>1.063060194</b> | <b>0.9994635</b> | <b>2</b>  |
| P58321        | VTHETSAHEGQTEAPSIDEK                                          | 1.038350936        | 3                | 5.0633931 |
| P58321        | WLPLEANPEVTNQFLK                                              | 1.100159585        | 2                | 4.0619311 |
| <b>P58751</b> | <b>RELN Reelin</b>                                            | <b>1.176129669</b> | <b>0.7628198</b> | <b>2</b>  |
| <b>P58775</b> | <b>TPM2 Tropomyosin beta chain</b>                            | <b>1.13699149</b>  | <b>0.7221722</b> | <b>11</b> |
| P58775        | AISEELDNALNDITSL                                              | 1.28235461         | 2                | 3.540751  |
| P58775        | ATDAEADVASLNR                                                 | 0.901306721        | 2                | 3.6562676 |
| P58775        | DAQEKLEQAEK                                                   | 0.809877284        | 2                | 2.8491571 |
| P58775        | KATDAEADVASLNR                                                | 0.761953298        | 2                | 3.3755982 |
| P58775        | LDKENAIDR                                                     | 0.992999877        | 2                | 2.3891304 |
| P58775        | LKGTETEVEK                                                    | 1.140311825        | 2                | 2.7525253 |
| P58775        | MELQEMQLK                                                     | 0.523812834        | 2                | 2.5185893 |

|               |                                                          |                    |                  |           |
|---------------|----------------------------------------------------------|--------------------|------------------|-----------|
| P58775        | QLEEEQQAQK                                               | 0.984101853        | 2                | 3.3100908 |
| P58775        | SLEAQADKYSTK                                             | 1.191712293        | 2                | 2.8726659 |
| P58775        | TIDDELEDEVAQK                                            | 0.184378529        | 2                | 3.9577899 |
| P58775        | YSESVKDAQEK                                              | 0.21385161         | 2                | 3.0102768 |
| <b>P59242</b> | <b>CING Cingulin</b>                                     | <b>1.191025479</b> | <b>0.4485071</b> | <b>2</b>  |
| P59242        | LGQEQQALNR                                               | 1.191726902        | 2                | 2.5163338 |
| P59242        | LQGLEQEAEK                                               | 1.055911761        | 2                | 2.9783039 |
| <b>P59470</b> | <b>RPC2 DNA_directed RNA polymerase III subunit RPC2</b> | <b>0.926215939</b> | <b>0.7711596</b> | <b>2</b>  |
| P59470        | MPIMLRSSNCVLTGK+Oxidation(1)                             | 1.053972731        | 2                | 2.5370247 |
| P59470        | NAKCTLR                                                  | 0.88471441         | 2                | 2.3269634 |
| <b>P59759</b> | <b>MKL2 MKL/myocardin_like protein 2</b>                 | <b>1.060976982</b> | <b>0.9591282</b> | <b>2</b>  |
| P59759        | LVEVLK                                                   | 1.22196091         | 1                | 2.0176327 |
| P59759        | QIEELK                                                   | 0.984981218        | 1                | 2.0621221 |
| <b>P59999</b> | <b>ARPC4 Actin_related protein 2/3 complex subunit 4</b> | <b>1.098693408</b> | <b>0.3678892</b> | <b>3</b>  |
| P59999        | ELLQPVTISR                                               | 0.900944121        | 2                | 2.4513776 |
| P59999        | HNKPEVEVR                                                | 0.780139316        | 2                | 2.5247922 |
| P59999        | VLEGSINSVR                                               | 1.101408094        | 2                | 2.9430902 |
| <b>P60335</b> | <b>PCBP1 Poly(rC)_binding protein 1</b>                  | <b>1.147796822</b> | <b>2.862E-07</b> | <b>6</b>  |
| P60335        | AITIAGVPQSVTECVK                                         | 1.050678349        | 2                | 3.2874677 |
| P60335        | CSDAAGYPHATHDLEGPPLDAYSIQGQHTISPLDLAK                    | 1.408679833        | 4                | 5.6444211 |
| P60335        | IITLTGPTNAIFK                                            | 1.494342936        | 2                | 2.9606309 |
| P60335        | LVVPATQCGSLIGK                                           | 1.550837523        | 2                | 3.0355265 |
| P60335        | QICLVMLETLSQSPQGR                                        | 1.446436917        | 2                | 2.43015   |
| P60335        | VMTIPYQPMPASSPVICAGGQDR                                  | 1.18661287         | 2                | 4.0545473 |
| <b>P60843</b> | <b>IF4A1 Eukaryotic initiation factor 4A_1</b>           | <b>1.069145825</b> | <b>3.345E-05</b> | <b>5</b>  |
| P60843        | ATQALVLAPTR                                              | 1.314999377        | 1                | 2.1677508 |
| P60843        | GFKDQIYDIFQK                                             | 0.923118412        | 2                | 3.4422021 |
| P60843        | KEELTLEGIR                                               | 1.200272426        | 2                | 2.3673937 |
| P60843        | KGVAINMVTEDDKR                                           | 1.049091425        | 3                | 3.9422662 |
| P60843        | LQMEAPHIIVGTPGR                                          | 1.288057217        | 2                | 3.4959714 |
| <b>P60868</b> | <b>RS20 40S ribosomal protein S20</b>                    | <b>1.343960868</b> | <b>2.346E-13</b> | <b>2</b>  |
| P60868        | DTGKTPVEVAIHR                                            | 1.028455747        | 3                | 3.9364765 |
| P60868        | LIDLHSPSEIVK                                             | 1.4112121          | 2                | 2.9073479 |
| <b>P60892</b> | <b>PRPS1 Ribose_phosphate pyrophosphokinase 1</b>        | <b>1.062234687</b> | <b>0.9209906</b> | <b>2</b>  |
| P60892        | FSNQETCVEIGESVR                                          | 1.091704308        | 2                | 2.774756  |
| P60892        | NCTIVSPDAGGAK                                            | 1.000137151        | 2                | 2.3135772 |
| <b>P60901</b> | <b>PSA6 Proteasome subunit alpha type_6</b>              | <b>1.241599908</b> | <b>1.064E-07</b> | <b>4</b>  |
| P60901        | AINQGGLTSVAVR                                            | 1.246070062        | 2                | 3.9530482 |
| P60901        | GKDCAVIVTQK                                              | 1.097271447        | 2                | 3.1631305 |
| P60901        | ITENIGCVMTGMTADSR                                        | 0.781635943        | 2                | 4.3872924 |
| P60901        | LLDSSTVTHLFK                                             | 1.490763268        | 2                | 2.9234257 |
| <b>P61087</b> | <b>UBE2K Ubiquitin_conjugating enzyme E2 K</b>           | <b>1.203058245</b> | <b>0.1074748</b> | <b>2</b>  |
| P61087        | GEIAGPPDTPYEGGR                                          | 1.204192522        | 2                | 2.9885628 |
| P61087        | VDLVDENFTELK                                             | 1.084093464        | 2                | 2.5729604 |
| <b>P61107</b> | <b>RAB14 Ras_related protein Rab_14</b>                  | <b>1.227247211</b> | <b>0.0016523</b> | <b>4</b>  |
| P61107        | IYQNIQDGSLDLNAAESGVQHKPSAPQGGR                           | 1.28453601         | 3                | 3.8042853 |
| P61107        | NLTNPNTVILIGNK                                           | 1.242075248        | 2                | 3.7842216 |
| P61107        | SCLLHQFTEK                                               | 1.176164873        | 2                | 3.0617027 |
| P61107        | TGENVEDAFLEAAKK                                          | 1.314871305        | 3                | 3.6937156 |
| <b>P61222</b> | <b>ABCE1 ATP_binding cassette sub_family E member 1</b>  | <b>1.241414333</b> | <b>0.1129436</b> | <b>2</b>  |
| P61222        | NTVANSPTLLAGMNK                                          | 1.242664113        | 2                | 2.9048851 |
| P61222        | NVEDLSGGELQR                                             | 1.161564055        | 2                | 2.6257193 |
| <b>P61314</b> | <b>RL15 60S ribosomal protein L15</b>                    | <b>1.325639949</b> | <b>1.716E-08</b> | <b>5</b>  |
| P61314        | FFEVLIDPFHK                                              | 1.223860215        | 3                | 3.8674307 |
| P61314        | GATYGKPVHHGVNQLK                                         | 1.388215447        | 2                | 4.4650087 |
| P61314        | SLQSVAEER                                                | 1.058465472        | 2                | 2.8870354 |
| P61314        | VLNSYWVGEDSTYK                                           | 1.124613934        | 2                | 4.0384727 |

|               |                                                                                         |                    |                  |           |
|---------------|-----------------------------------------------------------------------------------------|--------------------|------------------|-----------|
| P61314        | YIQELWR                                                                                 | 0.955505084        | 2                | 2.4825182 |
| <b>P61459</b> | <b>PHS Pterin_4_alpha_carbinolamine dehydratase</b>                                     | <b>0.984759303</b> | <b>0.5039939</b> | <b>4</b>  |
| P61459        | AVGWNELEGR                                                                              | 0.924757445        | 2                | 2.9974527 |
| P61459        | LDHHPEWFWVYVK                                                                           | 1.207157777        | 3                | 5.1240754 |
| P61459        | LSAERDQLLPNLR                                                                           | 1.00779995         | 3                | 4.0991344 |
| P61459        | VHITLSTHECAGLSER                                                                        | 1.611072339        | 2                | 3.7424397 |
| <b>P61589</b> | <b>RHOA Transforming protein RhoA</b>                                                   | <b>1.445933017</b> | <b>5.124E-12</b> | <b>6</b>  |
| P61589        | HFCPNVPILVGNK                                                                           | 1.935703899        | 2                | 3.1640682 |
| P61589        | HFCPNVPILVGNKK                                                                          | 1.114300956        | 3                | 3.9405117 |
| P61589        | IGAFGYMECSAK                                                                            | 1.521859401        | 2                | 3.0026391 |
| P61589        | KKLVIVGDGACGK                                                                           | 0.877632239        | 2                | 2.4288435 |
| P61589        | MKQEPVKPEEGR                                                                            | 1.143521221        | 3                | 3.5016856 |
| P61589        | MKQEPVKPEEGR+Oxidation(1)                                                               | 1.444607635        | 2                | 3.5013025 |
| <b>P61751</b> | <b>ARF4 ADP_ribosylation factor 4</b>                                                   | <b>1.07970205</b>  | <b>1.291E-06</b> | <b>5</b>  |
| P61751        | ILMVGLDAAGK                                                                             | 1.368514683        | 2                | 2.4596725 |
| P61751        | IQEGA AVLQK                                                                             | 1.059230816        | 2                | 2.5625358 |
| P61751        | LGEIVTTIPTIGFNVETVEYK                                                                   | 1.428938426        | 3                | 4.5753403 |
| P61751        | NICFTVWDVGGQDK                                                                          | 1.213710953        | 2                | 4.0319123 |
| P61751        | QDLPNAMAISEMTDK                                                                         | 1.249545557        | 2                | 3.4628851 |
| <b>P61805</b> | <b>DAD1 Dolichyl_diphosphooligosaccharide__protein glycosyltransferase subunit DAD1</b> | <b>1.000328523</b> | <b>0.761471</b>  | <b>2</b>  |
| P61805        | ADFQGISPER                                                                              | 1.101794329        | 1                | 1.9533098 |
| P61805        | FLEEYLSSTPQR                                                                            | 0.999270252        | 2                | 3.7408538 |
| <b>P61924</b> | <b>COPZ1 Coatomer subunit zeta_1</b>                                                    | <b>1.039887327</b> | <b>0.9999824</b> | <b>3</b>  |
| P61924        | AILILDNDGDR                                                                             | 0.990830048        | 2                | 2.9014289 |
| P61924        | GEDVPLTEQTVSQVLQSAK                                                                     | 1.054236945        | 2                | 5.1393366 |
| P61924        | YYDDTYPSVK                                                                              | 0.977250999        | 2                | 2.4749811 |
| <b>P61972</b> | <b>NTF2 Nuclear transport factor 2</b>                                                  | <b>1.183831557</b> | <b>0.3007314</b> | <b>2</b>  |
| P61972        | IQHSITAQDHOPTDSCIIISMVVGQLK                                                             | 1.197546043        | 3                | 5.4194193 |
| P61972        | NINDAWVCTNDMFR                                                                          | 1.306074132        | 2                | 3.0427666 |
| <b>P61980</b> | <b>HNRPK Heterogeneous nuclear ribonucleoprotein K</b>                                  | <b>1.044616297</b> | <b>5.436E-06</b> | <b>11</b> |
| P61980        | GSDFDCELR                                                                               | 0.936718487        | 2                | 2.4605658 |
| P61980        | GSYGD LGPIITQVTIPK                                                                      | 0.970863573        | 2                | 4.680757  |
| P61980        | IDEPLEGSEDR                                                                             | 0.932049902        | 2                | 3.3728824 |
| P61980        | IILD LISEPIK                                                                            | 1.271131267        | 2                | 3.9274206 |
| P61980        | IITITGTQDQIQNAQYLLQNSVK                                                                 | 1.164989596        | 3                | 6.6848388 |
| P61980        | LFQECCPHSTDR                                                                            | 1.210708006        | 2                | 3.5599697 |
| P61980        | LLIHQSLAGGIIGVK                                                                         | 1.967298829        | 2                | 2.5879219 |
| P61980        | NTDEMVELR                                                                               | 0.882533596        | 2                | 2.4274039 |
| P61980        | RSRNTDEMVELR                                                                            | 0.888092965        | 2                | 2.3252239 |
| P61980        | TDYNASVSVPDSSGPER                                                                       | 0.99870274         | 2                | 4.652391  |
| P61980        | VVLIGGKPDR                                                                              | 1.117049698        | 2                | 2.5356698 |
| <b>P61983</b> | <b>1433G 14_3_3 protein gamma</b>                                                       | <b>1.029514383</b> | <b>0.0005005</b> | <b>4</b>  |
| P61983        | AYSEAHEISK                                                                              | 1.206059981        | 2                | 3.3527133 |
| P61983        | NVTE LNEPLSNEER                                                                         | 0.956873705        | 2                | 4.7601933 |
| P61983        | TAFDDAIAELDTLNEDSYK                                                                     | 1.015362215        | 2                | 5.556982  |
| P61983        | YLAEVATGEK                                                                              | 0.862701773        | 2                | 2.731077  |
| <b>P62076</b> | <b>TIM13 Mitochondrial import inner membrane translocase subunit Tim13</b>              | <b>0.912462513</b> | <b>0.5392002</b> | <b>4</b>  |
| P62076        | CIGKPGGSLDNSEQK                                                                         | 0.934525853        | 2                | 4.2358899 |
| P62076        | KCIGKPGGSLDNSEQK                                                                        | 0.970430142        | 2                | 4.3050356 |
| P62076        | VQIAVANAEQLLQR                                                                          | 0.924840514        | 2                | 4.4091892 |
| P62076        | YMDAWNTVSR                                                                              | 0.75880915         | 2                | 3.0985444 |
| <b>P62078</b> | <b>TIM8B Mitochondrial import inner membrane translocase subunit Tim8 B</b>             | <b>0.883160312</b> | <b>0.5825454</b> | <b>2</b>  |
| P62078        | FIDTTLAITGR                                                                             | 0.883802859        | 2                | 2.5658054 |
| P62078        | TENCLSSCVDR                                                                             | 0.797870655        | 2                | 2.3236451 |

|               |                                               |                    |                  |           |
|---------------|-----------------------------------------------|--------------------|------------------|-----------|
| <b>P62083</b> | <b>RS7 40S ribosomal protein S7</b>           | <b>1.134081329</b> | <b>9.9E-20</b>   | <b>5</b>  |
| P62083        | AIIFVVPQLK                                    | 1.09429215         | 2                | 3.7495964 |
| P62083        | IVKPNGEKPDFESGISQALLELEMNSDLK                 | 1.627864043        | 3                | 5.0231171 |
| P62083        | KAIIFVVPQLK                                   | 1.235274517        | 2                | 3.626477  |
| P62083        | LDGSRLIK                                      | 1.022919875        | 2                | 2.3329945 |
| P62083        | TLTAVHDAILEDLVFPSEIVGK                        | 1.380352652        | 2                | 5.05687   |
| <b>P62161</b> | <b>CALM Calmodulin</b>                        | <b>1.125698886</b> | <b>8.926E-13</b> | <b>4</b>  |
| P62161        | DNGYISAAELR                                   | 0.838166946        | 2                | 2.6664729 |
| P62161        | EADIDGGQVNYEEFVQMMTAK                         | 2.074730015        | 2                | 4.8969932 |
| P62161        | EAFSLFDKDGDTITTK                              | 1.105880821        | 2                | 4.3336844 |
| P62161        | VFDKDGNGYISAAELR                              | 1.134058593        | 2                | 4.3563089 |
| <b>P62193</b> | <b>PRS4 26S protease regulatory subunit 4</b> | <b>1.035220483</b> | <b>0.5688233</b> | <b>4</b>  |
| P62193        | APQETYADIGGLDNQIEIK                           | 1.028050467        | 2                | 4.9751182 |
| P62193        | AVANQTSATFLR                                  | 1.069677698        | 2                | 2.6022294 |
| P62193        | NQEQMKPLEEK                                   | 1.166547269        | 2                | 2.9134171 |
| P62193        | TMLELLNQLDGFDSR                               | 1.172569242        | 2                | 3.9990983 |
| <b>P62198</b> | <b>PRS8 26S protease regulatory subunit 8</b> | <b>1.173684198</b> | <b>0.0082827</b> | <b>4</b>  |
| P62198        | EVIELPVKHPELFEALGIAQPK                        | 1.106439671        | 3                | 3.9031229 |
| P62198        | LEGGSGGDSEVQR                                 | 1.174866469        | 2                | 3.5338531 |
| P62198        | TMLELLNQLDGFEEK                               | 1.381705096        | 2                | 3.3688982 |
| P62198        | VPDSTYEMIGGLDKQIK                             | 1.478167196        | 2                | 2.3364069 |
| <b>P62243</b> | <b>RS8 40S ribosomal protein S8</b>           | <b>1.034964746</b> | <b>0.9713571</b> | <b>8</b>  |
| P62243        | ADGYVLEGK                                     | 0.935297931        | 2                | 2.380846  |
| P62243        | IIDVVYNASNNEVLR                               | 1.056678132        | 2                | 4.1635861 |
| P62243        | ISSLLEEQFQGGK                                 | 1.237913049        | 2                | 3.9909363 |
| P62243        | KYELGRPAANTK                                  | 1.139494787        | 2                | 3.7524095 |
| P62243        | LDVGNFWSWGSECCTR                              | 1.181985022        | 2                | 3.9081399 |
| P62243        | LTPEEEEILNK                                   | 1.075659083        | 2                | 3.2481289 |
| P62243        | NCIVLIDSTPYR                                  | 1.169919325        | 2                | 3.3326809 |
| P62243        | YELGRPAANTK                                   | 1.022606954        | 2                | 3.2282128 |
| <b>P62246</b> | <b>RS15A 40S ribosomal protein S15a</b>       | <b>1.109817797</b> | <b>0.0001791</b> | <b>3</b>  |
| P62246        | HGYIGEFEIIDHR                                 | 1.174167732        | 2                | 4.2392812 |
| P62246        | MNVLADALK                                     | 0.962883102        | 2                | 2.780021  |
| P62246        | WQNNLLPSR                                     | 1.272604802        | 2                | 2.6722381 |
| <b>P62250</b> | <b>RS16 40S ribosomal protein S16</b>         | <b>1.085562631</b> | <b>0.3134755</b> | <b>5</b>  |
| P62250        | ALVAYYQK                                      | 1.097568687        | 1                | 2.3889127 |
| P62250        | GGGHVAQIYAIR                                  | 0.900475899        | 2                | 2.6433566 |
| P62250        | LLEPVLLGK                                     | 1.269163074        | 2                | 2.7239387 |
| P62250        | TLLVADPR                                      | 1.082901597        | 2                | 2.4527628 |
| P62250        | VNGRPLEMIEPR                                  | 1.110666841        | 2                | 2.6091042 |
| <b>P62260</b> | <b>1433E 14_3_3 protein epsilon</b>           | <b>1.19706238</b>  | <b>2.677E-13</b> | <b>7</b>  |
| P62260        | AAFDDAIAELDTLSEESYK                           | 1.423975739        | 2                | 6.1608129 |
| P62260        | HLIPAANTGESK                                  | 1.040886608        | 2                | 3.5065713 |
| P62260        | IISSIEQK                                      | 1.159418015        | 2                | 2.79423   |
| P62260        | LICCDILDVLDK                                  | 2.225035468        | 2                | 4.0626078 |
| P62260        | YDEMVESMK                                     | 0.609155229        | 2                | 2.4849439 |
| P62260        | YLAEFATGNDR                                   | 0.720437103        | 2                | 2.7964292 |
| P62260        | YLAEFATGNDRK                                  | 1.124174485        | 2                | 2.7208512 |
| <b>P62271</b> | <b>RS18 40S ribosomal protein S18</b>         | <b>1.080763556</b> | <b>4.963E-09</b> | <b>4</b>  |
| P62271        | AGELTEDEVER                                   | 1.131264804        | 2                | 3.4836252 |
| P62271        | LREDLER                                       | 1.193054462        | 1                | 2.0053933 |
| P62271        | VLNTNIDGR                                     | 1.029899366        | 2                | 3.0360246 |
| P62271        | YSQVLANGLDNK                                  | 1.216794574        | 2                | 3.7743433 |
| <b>P62278</b> | <b>RS13 40S ribosomal protein S13</b>         | <b>1.47239667</b>  | <b>5.156E-12</b> | <b>4</b>  |
| P62278        | GLAPDLPEDLYHLIK                               | 1.488607165        | 2                | 2.9708231 |
| P62278        | GLTPSQIGVILR                                  | 0.996535681        | 2                | 2.7605765 |
| P62278        | KGLTPSQIGVILR                                 | 0.925460298        | 3                | 3.6716721 |



|               |                                                   |                    |                  |           |
|---------------|---------------------------------------------------|--------------------|------------------|-----------|
| P62278        | LILIESR                                           | 1.257654397        | 1                | 1.9359918 |
| <b>P62329</b> | <b>TYB4 Thymosin beta_4</b>                       | <b>1.177974337</b> | <b>9.9E-20</b>   | <b>4</b>  |
| P62329        | ETIEQEKQAGES                                      | 1.227172324        | 2                | 3.0808911 |
| P62329        | KTETQKNPLPSK                                      | 1.19354658         | 2                | 3.4598823 |
| P62329        | NPLPSKETIEQEK                                     | 1.146164844        | 2                | 3.007745  |
| P62329        | TETQKNPLPSK                                       | 1.191095242        | 2                | 3.7958081 |
| <b>P62332</b> | <b>ARF6 ADP_ribosylation factor 6</b>             | <b>0.640022701</b> | <b>0.0383086</b> | <b>2</b>  |
| P62332        | FNVVDVGGQDK                                       | 0.548723703        | 2                | 3.0028684 |
| P62332        | LGQSVTTIPTVGFNVETVTYK                             | 0.994929983        | 2                | 2.4096544 |
| <b>P62334</b> | <b>PRS10 26S protease regulatory subunit 10B</b>  | <b>1.00225624</b>  | <b>0.1891681</b> | <b>6</b>  |
| P62334        | ALQSVGQIVGEVLK                                    | 1.018225881        | 2                | 2.4170883 |
| P62334        | AVASQLDCNFLK                                      | 0.788278727        | 2                | 2.4407804 |
| P62334        | EVIELPLTNPELFQR                                   | 0.895870073        | 2                | 3.2072315 |
| P62334        | GCLLYGPPGTGK                                      | 0.762038428        | 2                | 2.512974  |
| P62334        | HGEIDYEAIVK                                       | 1.005207091        | 2                | 3.7524467 |
| P62334        | IHIDLPEQAR                                        | 1.272406749        | 2                | 2.3539696 |
| <b>P62425</b> | <b>RL7A 60S ribosomal protein L7a</b>             | <b>1.581981053</b> | <b>3.828E-11</b> | <b>10</b> |
| P62425        | AGVNTVTTLVENK                                     | 1.119865565        | 2                | 3.858449  |
| P62425        | AGVNTVTTLVENKK                                    | 1.079585563        | 2                | 2.8430297 |
| P62425        | HWGGNVLGPK                                        | 1.252279387        | 1                | 2.684365  |
| P62425        | KVVNPLFEK                                         | 1.419878081        | 2                | 2.3428042 |
| P62425        | LKVPPAINQFTQALDR                                  | 1.505926002        | 3                | 4.6548839 |
| P62425        | NFGIGQDIQPK                                       | 0.996448848        | 2                | 3.1645997 |
| P62425        | TCTTVAFTQVNSEDK                                   | 1.354003993        | 2                | 3.7361493 |
| P62425        | TCTTVAFTQVNSEDKGALAK                              | 1.177643224        | 2                | 4.0671997 |
| P62425        | VAPAPAVVK                                         | 1.172988097        | 1                | 1.9723141 |
| P62425        | VPPAINQFTQALDR                                    | 1.119296441        | 2                | 3.4076838 |
| <b>P62630</b> | <b>EF1A1 Elongation factor 1_alpha 1</b>          | <b>1.104791074</b> | <b>9.9E-20</b>   | <b>15</b> |
| P62630        | DGSASGTTLEALDCILPPTKPLR                           | 1.251793636        | 3                | 5.2215838 |
| P62630        | GNVAGDSKNDPPMEAGFTAQVIILNHPGQISAGYAPVLDCHTAHIACK  | 1.258021244        | 6                | 4.526238  |
| P62630        | KDGSASGTTLEALDCILPPTKPLR                          | 1.347066046        | 4                | 5.9389672 |
| P62630        | MDSTEPPYSQK                                       | 1.049653774        | 2                | 3.6655228 |
| P62630        | MDSTEPPYSQK+Oxidation(1)                          | 1.224716246        | 2                | 3.2710059 |
| P62630        | NDPPMEAGFTAQVIILNHPGQISAGYAPVLDCHTAHIACK          | 1.082362525        | 3                | 6.2714586 |
| P62630        | RGNVAGDSKNDPPMEAGFTAQVIILNHPGQISAGYAPVLDCHTAHIACK | 1.112815894        | 5                | 4.6392989 |
| P62630        | RYEEIVK                                           | 1.071113542        | 2                | 2.662003  |
| P62630        | SGDAAIVDMVPGKPMCVESFSDYPPLGR                      | 1.216721437        | 3                | 5.2119579 |
| P62630        | SGDAAIVDMVPGKPMCVESFSDYPPLGR+Oxidation(15)        | 1.158670644        | 3                | 3.7916381 |
| P62630        | SGDAAIVDMVPGKPMCVESFSDYPPLGR+Oxidation(9)         | 1.146789513        | 3                | 3.425503  |
| P62630        | VETGVLPKGMVVTFAPVNVTEVK                           | 1.090001267        | 2                | 5.6017222 |
| P62630        | VETGVLPKGMVVTFAPVNVTEVK+Oxidation(10)             | 1.042900718        | 3                | 4.6399751 |
| P62630        | YEEIVK                                            | 1.060590512        | 1                | 1.9888475 |
| P62630        | YYVTIIDAPGHR                                      | 1.103255216        | 2                | 3.5113943 |
| <b>P62632</b> | <b>EF1A2 Elongation factor 1_alpha 2</b>          | <b>1.017722912</b> | <b>0.0025799</b> | <b>6</b>  |
| P62632        | EHALLAYTLGVK                                      | 1.204461395        | 1                | 3.5903571 |
| P62632        | IGGIGTVPVGR                                       | 1.248516341        | 2                | 3.6358693 |
| P62632        | NMITGTSQADCAVLIVAAGVGEFEAGISK                     | 1.075252565        | 3                | 5.8582258 |
| P62632        | QLIVGVNK                                          | 1.144848301        | 1                | 2.5206676 |
| P62632        | STTTGHLIYK                                        | 1.026472715        | 2                | 3.1452363 |
| P62632        | THINIVIGHVDSGK                                    | 1.064733234        | 2                | 5.640542  |
| <b>P62634</b> | <b>CNBP Cellular nucleic acid_binding protein</b> | <b>1.010907752</b> | <b>0.9993516</b> | <b>2</b>  |
| P62634        | CGETGHVAINCSK                                     | 0.991889851        | 2                | 4.4759364 |
| P62634        | CYSCGEFGHIQK                                      | 1.068109181        | 2                | 3.115871  |
| <b>P62703</b> | <b>RS4X 40S ribosomal protein S4_X isoform</b>    | <b>1.265884576</b> | <b>9.9E-20</b>   | <b>5</b>  |
| P62703        | FDTGNLCMVTGGANLGR                                 | 1.121134954        | 2                | 5.0723715 |

|               |                                                             |                    |                  |           |
|---------------|-------------------------------------------------------------|--------------------|------------------|-----------|
| P62703        | GIPHLVTHDAR                                                 | 1.372945688        | 2                | 2.3590553 |
| P62703        | LSNIFVIGK                                                   | 1.512031487        | 2                | 3.2097974 |
| P62703        | TDITYPAGFMDVISIDK                                           | 1.309818923        | 2                | 5.1467571 |
| P62703        | VNDTIQIDLETGK                                               | 1.165363929        | 2                | 4.450449  |
| <b>P62752</b> | <b>RL23A 60S ribosomal protein L23a</b>                     | <b>1.219341891</b> | <b>9.9E-20</b>   | <b>6</b>  |
| P62752        | LAPDYDALDVANK                                               | 1.034534289        | 2                | 3.7478812 |
| P62752        | LDHYAIK                                                     | 1.111138524        | 2                | 2.644944  |
| P62752        | LYDIDVAK                                                    | 1.06264466         | 1                | 1.9720618 |
| P62752        | NKLDHYAIK                                                   | 1.358287471        | 2                | 2.7641203 |
| P62752        | VNTLIRPDGEK                                                 | 1.127534949        | 2                | 3.2320578 |
| P62752        | VNTLIRPDGEKK                                                | 1.349529406        | 2                | 2.9129987 |
| <b>P62755</b> | <b>RS6 40S ribosomal protein S6</b>                         | <b>1.271051048</b> | <b>0.0290562</b> | <b>4</b>  |
| P62755        | DIPGLTDTTVPR                                                | 0.810078555        | 2                | 2.6605208 |
| P62755        | LIEVDDER                                                    | 1.032914936        | 2                | 2.7643921 |
| P62755        | LNISFPATGCQK                                                | 1.287489401        | 2                | 3.2455266 |
| P62755        | NKEEAAEYAK                                                  | 1.113799942        | 2                | 2.5111701 |
| <b>P62775</b> | <b>MTPN Myotrophin</b>                                      | <b>1.049016873</b> | <b>0.9838522</b> | <b>2</b>  |
| P62775        | GADINAPDKHHITPLLSAVYEGHVSCVK                                | 1.059115762        | 4                | 5.2252269 |
| P62775        | NGDLDEVKDYVAK                                               | 1.04900446         | 2                | 3.2404528 |
| <b>P62804</b> | <b>H4 Histone H4</b>                                        | <b>1.164325332</b> | <b>2.261E-07</b> | <b>8</b>  |
| P62804        | DAVITYEHAK                                                  | 0.776071308        | 2                | 2.8810012 |
| P62804        | DNIQGITKPAIR                                                | 0.88546258         | 2                | 3.4155931 |
| P62804        | ISGLIYEETR                                                  | 1.256365887        | 2                | 3.6449301 |
| P62804        | KTVTAMDVVYALK                                               | 1.067555256        | 2                | 2.4992566 |
| P62804        | RISGLIYEETR                                                 | 1.177629576        | 2                | 2.3063223 |
| P62804        | TVTAMDVVYALK                                                | 1.094156224        | 2                | 4.0448174 |
| P62804        | TVTAMDVVYALK+Oxidation(5)                                   | 1.24789357         | 2                | 2.853513  |
| P62804        | VFLENVIR                                                    | 1.051612765        | 2                | 3.2653804 |
| <b>P62815</b> | <b>VATB2 V_type proton ATPase subunit B_ brain isoform</b>  | <b>1.108279416</b> | <b>0.6543848</b> | <b>2</b>  |
| P62815        | AVVQVFEGTSGIDAK                                             | 1.063032894        | 2                | 3.2821467 |
| P62815        | NFITQGPYENR                                                 | 1.208437828        | 2                | 2.4801321 |
| <b>P62832</b> | <b>RL23 60S ribosomal protein L23</b>                       | <b>1.002200791</b> | <b>9.9E-20</b>   | <b>2</b>  |
| P62832        | GSAITGPVAK                                                  | 0.811279691        | 2                | 2.788821  |
| P62832        | ISGLPVGAVINCADNTGAK                                         | 1.607411079        | 2                | 4.7771382 |
| <b>P62845</b> | <b>RS15 40S ribosomal protein S15</b>                       | <b>1.067907496</b> | <b>0.9982872</b> | <b>2</b>  |
| P62845        | DMIILPEMVGSMVGVYNGK                                         | 0.922493047        | 2                | 3.1096122 |
| P62845        | TFNQVEIKPEMIGHYLGEFSITYKPVK                                 | 1.045708076        | 4                | 5.1009755 |
| <b>P62853</b> | <b>RS25 40S ribosomal protein S25</b>                       | <b>1.50816482</b>  | <b>9.9E-20</b>   | <b>2</b>  |
| P62853        | GGDAPAAGEDA                                                 | 2.137721721        | 1                | 2.2018144 |
| P62853        | LNNLVLFDK                                                   | 1.380492419        | 2                | 2.8672566 |
| <b>P62856</b> | <b>RS26 40S ribosomal protein S26</b>                       | <b>1.03144391</b>  | <b>0.4870869</b> | <b>2</b>  |
| P62856        | DISEASVFDAYVLPK                                             | 1.009288232        | 2                | 3.0337    |
| P62856        | NIVEAAVR                                                    | 1.129613641        | 2                | 3.048341  |
| <b>P62859</b> | <b>RS28 40S ribosomal protein S28</b>                       | <b>1.075665882</b> | <b>0.9826673</b> | <b>2</b>  |
| P62859        | EGDVLTLLESER                                                | 1.005458161        | 2                | 3.7979515 |
| P62859        | VEFMDDTSR                                                   | 0.939803213        | 2                | 2.3280103 |
| <b>P62870</b> | <b>ELOB Transcription elongation factor B polypeptide 2</b> | <b>1.159162769</b> | <b>0.7397561</b> | <b>2</b>  |
| P62870        | ADDTFEALR                                                   | 1.103336386        | 2                | 2.6204312 |
| P62870        | TLGECGFTSQATARQPATVGLAFR                                    | 1.120778623        | 3                | 4.4089241 |
| <b>P62890</b> | <b>RL30 60S ribosomal protein L30</b>                       | <b>1.048612842</b> | <b>1.811E-06</b> | <b>3</b>  |
| P62890        | LVLANNCPALR                                                 | 0.909474837        | 2                | 3.0670886 |
| P62890        | TGVHHYSGNNIELGTACGK                                         | 1.053307635        | 2                | 5.7094779 |
| P62890        | VCTLAIDPGDSDIIR                                             | 1.741954822        | 2                | 4.1317172 |
| <b>P62898</b> | <b>CYC Cytochrome c_somatic</b>                             | <b>1.02574126</b>  | <b>1.336E-11</b> | <b>6</b>  |
| P62898        | ADLIAYLK                                                    | 0.978121682        | 2                | 2.8897057 |
| P62898        | GITWGEDTLMEYLENPK                                           | 1.315371084        | 2                | 5.2277541 |
| P62898        | GITWGEDTLMEYLENPKK                                          | 1.453328938        | 2                | 4.6543503 |

|               |                                                           |                    |                  |           |
|---------------|-----------------------------------------------------------|--------------------|------------------|-----------|
| P62898        | KTGQAAGFSYTDANK                                           | 1.188912813        | 2                | 3.9479218 |
| P62898        | TGPNLHGLFGR                                               | 1.036174351        | 2                | 3.3805418 |
| P62898        | TGQAAGFSYTDANK                                            | 1.018546982        | 2                | 4.3239975 |
| <b>P62902</b> | <b>RL31 60S ribosomal protein L31</b>                     | <b>1.021472574</b> | <b>0.9807122</b> | <b>3</b>  |
| P62902        | LYTLVTVVPVTFK                                             | 1.254763579        | 2                | 3.1998858 |
| P62902        | NLQTVNVVDEN                                               | 1.033739165        | 1                | 2.4211674 |
| P62902        | SAINEVVTR                                                 | 0.953503606        | 2                | 2.5622592 |
| <b>P62907</b> | <b>RL10A 60S ribosomal protein L10a</b>                   | <b>1.108034671</b> | <b>1.632E-05</b> | <b>6</b>  |
| P62907        | AVDIPHMDIEALK                                             | 1.066206266        | 2                | 2.6901319 |
| P62907        | FSVCVLGDQQHCDEAK                                          | 1.217773361        | 2                | 4.4026856 |
| P62907        | ILGPGLNK                                                  | 1.671594489        | 1                | 1.932413  |
| P62907        | KYDAFLASESLIK                                             | 1.082985545        | 2                | 3.3165989 |
| P62907        | VLCLAVAVGHVK                                              | 0.696755994        | 2                | 3.2250612 |
| P62907        | YDAFLASESLIK                                              | 0.908723713        | 2                | 3.1146114 |
| <b>P62909</b> | <b>RS3 40S ribosomal protein S3</b>                       | <b>1.224779382</b> | <b>0.0008023</b> | <b>10</b> |
| P62909        | AELNEFLTR                                                 | 1.08355645         | 2                | 2.6232431 |
| P62909        | DEILPTPISEQK                                              | 1.259339197        | 2                | 3.0582807 |
| P62909        | ELAEDGYSGVEVR                                             | 0.950532804        | 2                | 3.3263149 |
| P62909        | ELTAVVQK                                                  | 1.018834504        | 1                | 2.0989029 |
| P62909        | FGFPEGSVELYAEK                                            | 1.739743211        | 2                | 3.9310389 |
| P62909        | FVDGLMIHSGDPVNYVDTAVR                                     | 1.132739071        | 3                | 5.1732907 |
| P62909        | GCEVVVSGK                                                 | 1.083369926        | 2                | 2.5812972 |
| P62909        | GGKPEPPAMPQPVPPTA                                         | 1.217369035        | 2                | 4.0479603 |
| P62909        | GLCAIAQAESLR                                              | 1.146163786        | 2                | 3.2472086 |
| P62909        | TEIILATR                                                  | 1.262423181        | 2                | 3.1536396 |
| <b>P62912</b> | <b>RL32 60S ribosomal protein L32</b>                     | <b>1.257930863</b> | <b>9.9E-20</b>   | <b>2</b>  |
| P62912        | GQILMPNIGYGSNK                                            | 1.021971152        | 2                | 2.6645832 |
| P62912        | SYCAEIAHNVSSK                                             | 1.2604263          | 2                | 4.2784605 |
| <b>P62914</b> | <b>RL11 60S ribosomal protein L11</b>                     | <b>0.995566139</b> | <b>0.9999996</b> | <b>2</b>  |
| P62914        | VLEQLTGQTPVFSK                                            | 1.006109586        | 2                | 4.0569468 |
| P62914        | YDGIILPGK                                                 | 0.992816717        | 2                | 3.2706776 |
| <b>P62919</b> | <b>RL8 60S ribosomal protein L8</b>                       | <b>1.106868159</b> | <b>0.001854</b>  | <b>3</b>  |
| P62919        | ASGNYATVISHNPETK                                          | 1.174865014        | 2                | 4.4921694 |
| P62919        | AVVGVVAGGGR                                               | 1.112241065        | 2                | 3.3479333 |
| P62919        | KAQLNIGNVLPVGTMPGTVCCLEEKPGDR                             | 1.035376611        | 3                | 5.4397044 |
| <b>P62944</b> | <b>AP2B1 AP_2 complex subunit beta</b>                    | <b>1.643812338</b> | <b>0.0118433</b> | <b>2</b>  |
| P62944        | KPSETQELVQQVLSLATQDSDNPDLR                                | 1.536690274        | 3                | 3.6491566 |
| P62944        | LQNNNVYTIK                                                | 1.139695741        | 2                | 3.0004807 |
| <b>P62959</b> | <b>HINT1 Histidine triad nucleotide_binding protein 1</b> | <b>0.99042522</b>  | <b>0.9999059</b> | <b>7</b>  |
| P62959        | AQVAQPGGDITFGK                                            | 0.99615895         | 2                | 4.9686379 |
| P62959        | CAADLGLK                                                  | 0.856670486        | 2                | 2.5077736 |
| P62959        | CLAFHDISPQAPTHFLVIPK                                      | 0.951217663        | 3                | 3.7087729 |
| P62959        | HISQISVADDDDESLLGHLMIVGK                                  | 0.898524874        | 3                | 7.645215  |
| P62959        | IIFEDDR                                                   | 1.084078658        | 2                | 2.6505537 |
| P62959        | KHISQISVADDDDESLLGHLMIVGK                                 | 1.052837649        | 3                | 5.0907326 |
| P62959        | MVVNEGADGGQSVYHIHLHVLGGR                                  | 0.985558854        | 3                | 4.0859442 |
| <b>P62961</b> | <b>YBOX1 Nuclease_sensitive element_binding protein 1</b> | <b>0.981669036</b> | <b>0.9999984</b> | <b>4</b>  |
| P62961        | EDGNEEDKENQGDETQGGQPPQR                                   | 0.992556561        | 3                | 5.0048161 |
| P62961        | GAEAAANVTGPGGVPVQGSK                                      | 0.930363602        | 2                | 4.9897423 |
| P62961        | NEGSESAPEGQAQQR                                           | 0.847043668        | 2                | 5.1295171 |
| P62961        | RPQYSNPPVQGEVMEGADNQGAGEQGRPVR                            | 0.975590914        | 4                | 5.4695416 |
| <b>P62963</b> | <b>PROF1 Profilin_1</b>                                   | <b>1.174886974</b> | <b>0.3688024</b> | <b>5</b>  |
| P62963        | DSLLQDGEFTMDLR                                            | 0.823821774        | 2                | 3.8875971 |
| P62963        | DSPSVWAAVPGK                                              | 1.194628825        | 2                | 2.9324615 |
| P62963        | SSFFVNGLTLGGQK                                            | 1.208673604        | 2                | 3.9279907 |
| P62963        | STGGAPTFNVTVTMTAK                                         | 1.048500634        | 2                | 3.2958148 |
| P62963        | TFVSITPAEVGLVVGK                                          | 1.141728382        | 2                | 5.0999384 |

|               |                                                      |                    |                  |           |
|---------------|------------------------------------------------------|--------------------|------------------|-----------|
| <b>P63018</b> | <b>HSP7C Heat shock cognate 71 kDa protein</b>       | <b>0.981044629</b> | <b>9.9E-20</b>   | <b>22</b> |
| P63018        | ARFEELNADLFR                                         | 1.352121372        | 3                | 3.8895326 |
| P63018        | DAGTIAGLNVL                                          | 0.734738687        | 2                | 3.4250066 |
| P63018        | FDDAVVQSDMK                                          | 0.993411509        | 2                | 3.2683487 |
| P63018        | FEELNADLFR                                           | 0.934937433        | 2                | 3.1515381 |
| P63018        | FELTGIPPAPR                                          | 1.035746161        | 2                | 2.7169712 |
| P63018        | IINEPTAAAIAYGLDK                                     | 1.232821556        | 2                | 5.532402  |
| P63018        | IINEPTAAAIAYGLDKK                                    | 1.892881616        | 2                | 4.1716661 |
| P63018        | LLQDFFNKG                                            | 1.422914218        | 2                | 2.7076049 |
| P63018        | MKEIAEAYLGK                                          | 1.115034839        | 2                | 3.4408495 |
| P63018        | MVNHFAIEFK                                           | 1.179667829        | 2                | 3.1790609 |
| P63018        | NQTAEKEEFHQK                                         | 1.190734263        | 2                | 5.2484622 |
| P63018        | NQVAMNPTNTVFDK                                       | 1.032945645        | 2                | 5.0752649 |
| P63018        | NQVAMNPTNTVFDK+Oxidation(5)                          | 1.386417845        | 2                | 4.2319078 |
| P63018        | NSLESYAFNMK                                          | 1.508568266        | 2                | 3.9348495 |
| P63018        | RFDDAVVQSDMK                                         | 1.025300699        | 2                | 3.4363465 |
| P63018        | SFYPEEVSSMVLTK                                       | 1.102662011        | 2                | 5.2039518 |
| P63018        | SINPDEAVAYGAAVQAAILSGDK                              | 1.296808402        | 2                | 6.2623596 |
| P63018        | SQIHDIIVLGGSTR                                       | 1.085110085        | 2                | 4.8682423 |
| P63018        | STAGDTHLGGEDFDNR                                     | 1.002949975        | 2                | 4.3105059 |
| P63018        | TVTNAVVTVPAYFNDSQR                                   | 1.189568068        | 3                | 4.3949914 |
| P63018        | VCNPIITK                                             | 1.080677864        | 2                | 2.4342749 |
| P63018        | VQVEYKGETK                                           | 1.366058334        | 2                | 2.4746616 |
| <b>P63025</b> | <b>VAMP3 Vesicle associated membrane protein 3</b>   | <b>0.693006258</b> | <b>0.0038581</b> | <b>2</b>  |
| P63025        | ADALQAGASQFETSAK                                     | 0.681347713        | 2                | 4.6791935 |
| P63025        | LQQTQNVQDEVVDIMR                                     | 0.915654699        | 2                | 3.6110547 |
| <b>P63029</b> | <b>TCTP Translationally controlled tumor protein</b> | <b>1.058793769</b> | <b>0.9999997</b> | <b>4</b>  |
| P63029        | DLISHDELFSDIYK                                       | 0.957060841        | 2                | 3.9767611 |
| P63029        | EIADGLCLEVEGK                                        | 0.98172353         | 2                | 2.8290348 |
| P63029        | GKLEEQKPER                                           | 1.151775084        | 2                | 3.4129744 |
| P63029        | VKPFMTGAAEQIK                                        | 1.004382813        | 2                | 2.5138819 |
| <b>P63036</b> | <b>DNJA1 Dnaj homolog subfamily A member 1</b>       | <b>1.216369789</b> | <b>2.461E-09</b> | <b>5</b>  |
| P63036        | HYNGEAYEDDEHHP                                       | 1.32936869         | 3                | 4.9674244 |
| P63036        | ITFHGEGDQEPGLEPGDIIIVLDQK                            | 1.295167349        | 3                | 4.1678872 |
| P63036        | QSQAYEVLADSK                                         | 1.124475943        | 2                | 2.5795858 |
| P63036        | TIVITSHPGQIVK                                        | 1.059567828        | 2                | 3.4852259 |
| P63036        | VNFPENGFSPDK                                         | 1.009151045        | 2                | 3.1411097 |
| <b>P63039</b> | <b>CH60 60 kDa heat shock protein_mitochondrial</b>  | <b>1.026833811</b> | <b>9.9E-20</b>   | <b>35</b> |
| P63039        | AAVEEGIVLGGGCALLR                                    | 0.960018687        | 2                | 5.7084923 |
| P63039        | ALMLQGVDLLADAVAVTMGPK+Oxidation(18)                  | 1.016687362        | 3                | 4.4069347 |
| P63039        | ALMLQGVDLLADAVAVTMGPK+Oxidation(3)                   | 1.054039949        | 3                | 3.7540221 |
| P63039        | CEFQDAYVLLSEK                                        | 1.802843555        | 2                | 4.5365367 |
| P63039        | CIPALDSLKPANEDQK                                     | 1.051357534        | 2                | 3.9247737 |
| P63039        | DDAMLLKGGK                                           | 0.918820038        | 1                | 1.9218683 |
| P63039        | DDAMLLKGGK+Oxidation(4)                              | 1.033087197        | 2                | 2.3318388 |
| P63039        | DIGNIISDAMK                                          | 0.849326857        | 1                | 2.0510762 |
| P63039        | DMAIATGGAVFGEEGLNLELVQAHDLGK                         | 0.917961847        | 3                | 4.1070609 |
| P63039        | GIIDPTK                                              | 1.012644959        | 1                | 1.9477044 |
| P63039        | GVMLAVDAVIAELK                                       | 0.913418771        | 2                | 2.3629444 |
| P63039        | GVMLAVDAVIAELKK                                      | 1.090128115        | 2                | 4.5702124 |
| P63039        | GYISPYFINTSK                                         | 1.258672061        | 2                | 2.7426131 |
| P63039        | IGIEIHK                                              | 1.030113604        | 2                | 2.8145397 |
| P63039        | ILQSSSEVGYDAMLGDFVNMVEK                              | 2.364107557        | 3                | 6.1464653 |
| P63039        | IQEITEQLDITSEYEK                                     | 0.923678867        | 2                | 6.0875449 |
| P63039        | IQEITEQLDITSEYEKEK                                   | 1.035588941        | 2                | 5.1339245 |
| P63039        | ISSVQSIVPALEIANHR                                    | 1.360114668        | 2                | 4.4726515 |
| P63039        | KISSVQSIVPALEIANHR                                   | 1.492746171        | 3                | 3.924005  |

|               |                                                                      |                    |                  |           |
|---------------|----------------------------------------------------------------------|--------------------|------------------|-----------|
| P63039        | KPLVIAEDVDGEALSTLVLNR                                                | 1.102675346        | 2                | 6.0990224 |
| P63039        | LSDGVAVLK                                                            | 1.01070722         | 2                | 2.9942133 |
| P63039        | LVQDVANNTNEEAGDGTATVLR                                               | 1.118608281        | 2                | 6.4969463 |
| P63039        | NAGVEGSLIVEK                                                         | 0.968593695        | 2                | 3.5093243 |
| P63039        | QSKPVTTPEEIAQVATISANGDK                                              | 1.008735384        | 2                | 3.5507524 |
| P63039        | QSKPVTTPEEIAQVATISANGDKDIGNIISDAMK                                   | 1.049464215        | 3                | 4.936254  |
| P63039        | RGVMLAVDAVIAELKK                                                     | 1.025185687        | 3                | 5.8963332 |
| P63039        | TLNDELEIIEGMK                                                        | 0.99521003         | 2                | 4.848938  |
| P63039        | TLNDELEIIEGMK+Oxidation(12)                                          | 0.888935611        | 2                | 2.7471945 |
| P63039        | TVIIEQSWGSPK                                                         | 0.906654234        | 2                | 4.2812858 |
| P63039        | VGEVIVTK                                                             | 0.948349095        | 2                | 3.0949507 |
| P63039        | VGEVIVTKDDAMLLK                                                      | 1.117675808        | 2                | 3.7880013 |
| P63039        | VGGTSDVEVNEK                                                         | 0.972217248        | 2                | 3.9184175 |
| P63039        | VGGTSDVEVNEKK                                                        | 1.105188625        | 2                | 3.7344117 |
| P63039        | VGLQVVAVK                                                            | 0.987392879        | 2                | 3.2611842 |
| P63039        | VTDALNATR                                                            | 0.984728914        | 2                | 3.5225611 |
| <b>P63102</b> | <b>1433Z 14_3_3 protein zeta/delta</b>                               | <b>1.284005365</b> | <b>9.9E-20</b>   | <b>8</b>  |
| P63102        | DICNDVLSLLEK                                                         | 1.587820877        | 2                | 3.9289744 |
| P63102        | FLIPNASQPESK                                                         | 1.063147774        | 2                | 3.4743376 |
| P63102        | GIVDQSQQAYQEAFEISK                                                   | 1.046658824        | 2                | 5.7452412 |
| P63102        | KGIVDQSQQAYQEAFEISK                                                  | 1.569680417        | 2                | 5.0402784 |
| P63102        | SVTEQGAELSNEER                                                       | 1.049361127        | 2                | 5.1006937 |
| P63102        | TAFDEAIAELDTLSEESYK                                                  | 1.710854922        | 2                | 5.8376088 |
| P63102        | YDDMAACMK                                                            | 0.76846491         | 2                | 2.5962276 |
| P63102        | YLAEVAAGDDKK                                                         | 1.28606324         | 2                | 3.7243221 |
| <b>P63159</b> | <b>HMGB1 High mobility group protein B1</b>                          | <b>1.155509839</b> | <b>9.9E-20</b>   | <b>5</b>  |
| P63159        | GEHPGLSIGDVAK                                                        | 1.07903703         | 2                | 3.1563993 |
| P63159        | IKGEHPGLSIGDVAK                                                      | 1.562010398        | 2                | 3.8718331 |
| P63159        | KHPDASVNFSEFSK                                                       | 1.260420703        | 3                | 4.1091971 |
| P63159        | KLGEMWNNTAADDKQPYEK                                                  | 0.961629518        | 3                | 4.3144817 |
| P63159        | LGEMWNNTAADDKQPYEK                                                   | 0.888069587        | 3                | 3.5967724 |
| <b>P63174</b> | <b>RL38 60S ribosomal protein L38</b>                                | <b>1.240106452</b> | <b>4.782E-06</b> | <b>3</b>  |
| P63174        | IEEIKDFLLTAR                                                         | 0.888175012        | 2                | 3.0395534 |
| P63174        | KIEEIKDFLLTAR                                                        | 1.248023009        | 2                | 4.5923743 |
| P63174        | YLYTLVITDKEK                                                         | 1.23679629         | 2                | 2.7079444 |
| <b>P63245</b> | <b>GBLP Guanine nucleotide_binding protein subunit beta_2_like 1</b> | <b>1.285679395</b> | <b>2.718E-12</b> | <b>13</b> |
| P63245        | DETNYGIPQR                                                           | 0.844175936        | 2                | 3.0087554 |
| P63245        | DGQAMLWDLNEGK                                                        | 0.939454303        | 2                | 3.3668201 |
| P63245        | FSPNSSNPIIVSCGWDK                                                    | 1.089470188        | 2                | 4.2693491 |
| P63245        | GHNGWVTQIATTPQFPDMILSASR                                             | 1.313705225        | 3                | 4.2883968 |
| P63245        | HLYTLGGDIINALCFSPNR                                                  | 1.376266902        | 2                | 5.6068654 |
| P63245        | IIVDELKQEVISTSSK                                                     | 1.300356146        | 2                | 4.1291423 |
| P63245        | LWDLTTGTTTR                                                          | 1.004905466        | 2                | 2.9555225 |
| P63245        | LWNTLGVCK                                                            | 1.357655892        | 2                | 2.3280504 |
| P63245        | TNHIGHTGYLNTVTVSPDGLSCASGGK                                          | 1.104869115        | 2                | 4.7245622 |
| P63245        | VWNLANCK                                                             | 0.826718099        | 2                | 2.6776764 |
| P63245        | VWQVTIGTR                                                            | 0.687900686        | 2                | 2.9055097 |
| P63245        | YTVQDESHSEWVSCVR                                                     | 1.153130347        | 2                | 3.3094907 |
| P63245        | YWLCAATGPSIK                                                         | 1.351853657        | 2                | 3.1587722 |
| <b>P63259</b> | <b>ACTG Actin_cytoplasmic 2</b>                                      | <b>1.098042342</b> | <b>9.9E-20</b>   | <b>8</b>  |
| P63259        | CPEALFQPSFLGMESCGIHETTFNSIMK                                         | 1.803646094        | 3                | 5.7417817 |
| P63259        | DLYANTVLSGGTTMYPGIADR                                                | 0.946523364        | 2                | 5.769021  |
| P63259        | DLYANTVLSGGTTMYPGIADR+Oxidation(14)                                  | 0.808950054        | 2                | 4.3508053 |
| P63259        | GYSFTTAER                                                            | 1.07990828         | 2                | 3.3703327 |
| P63259        | KDLYANTVLSGGTTMYPGIADR                                               | 0.967103293        | 2                | 6.1623163 |
| P63259        | LCYVALDFEQEMATAASSSSLEK                                              | 2.285763569        | 2                | 5.209465  |

|               |                                                                                       |                    |                  |           |
|---------------|---------------------------------------------------------------------------------------|--------------------|------------------|-----------|
| P63259        | QEYDESGPSIVHR                                                                         | 1.048630267        | 3                | 3.5173144 |
| P63259        | VAPEEHPVLLTEAPLNPK                                                                    | 1.294041923        | 2                | 4.642065  |
| <b>P63269</b> | <b>ACTH Actin_ gamma_ enteric smooth muscle</b>                                       | <b>0.72617463</b>  | <b>0.4112287</b> | <b>2</b>  |
| P63269        | DLYANNVLSGGTTMYPGIADR                                                                 | 0.76043507         | 2                | 3.4360912 |
| P63269        | KDLYANNVLSGGTTMYPGIADR                                                                | 0.707261784        | 2                | 5.080255  |
| <b>P63324</b> | <b>RS12 40S ribosomal protein S12</b>                                                 | <b>1.046550504</b> | <b>0.3651088</b> | <b>3</b>  |
| P63324        | KVVGCSVVVK                                                                            | 0.951467836        | 2                | 2.6290138 |
| P63324        | LGEWVGLCK                                                                             | 1.16458733         | 2                | 3.1466057 |
| P63324        | VVGCSCVVVK                                                                            | 1.007184376        | 2                | 3.0318539 |
| <b>P63331</b> | <b>PP2AA Serine/threonine_ protein phosphatase 2A catalytic subunit alpha isoform</b> | <b>0.94140351</b>  | <b>0.9480321</b> | <b>2</b>  |
| P63331        | GAGYTFGQDISETFNHANGLTLVSR                                                             | 0.92336997         | 3                | 3.3323886 |
| P63331        | YSFLQFDPAPR                                                                           | 0.966562785        | 2                | 3.2614548 |
| <b>P67779</b> | <b>PHB Prohibitin</b>                                                                 | <b>0.833804052</b> | <b>0.0025647</b> | <b>10</b> |
| P67779        | AAELIANSLATAGDGLIELR                                                                  | 0.881539123        | 2                | 5.3507032 |
| P67779        | AAISAEGDSK                                                                            | 0.767447446        | 2                | 2.4031215 |
| P67779        | DLQNVNITLR                                                                            | 0.825895852        | 2                | 3.7842362 |
| P67779        | FDAGELITQR                                                                            | 0.92631448         | 2                | 3.74664   |
| P67779        | GVQDIVVGEGTHFLIPWVQKPIIFDCR                                                           | 1.092203352        | 3                | 5.3266864 |
| P67779        | IYTSIGEDYDER                                                                          | 1.306070389        | 2                | 3.4090874 |
| P67779        | KLEAAEDIAYQLSR                                                                        | 0.92111836         | 2                | 4.9123335 |
| P67779        | NVPVITGSK                                                                             | 0.822102103        | 1                | 2.470448  |
| P67779        | QVSDDLTER                                                                             | 0.910131903        | 2                | 2.6317451 |
| P67779        | VLPSITTEILK                                                                           | 0.867142665        | 2                | 2.519778  |
| <b>P68037</b> | <b>UB2L3 Ubiquitin_ conjugating enzyme E2 L3</b>                                      | <b>1.21599766</b>  | <b>0.001988</b>  | <b>4</b>  |
| P68037        | ADLAEYSK                                                                              | 0.892443881        | 2                | 2.5831816 |
| P68037        | GQVCLPISAENWKPATK                                                                     | 0.830905351        | 2                | 3.2663851 |
| P68037        | IEINFPAEYFPKPPK                                                                       | 1.224284414        | 2                | 3.694463  |
| P68037        | TDQVIQSLIALVNDPQPEHLR                                                                 | 1.211961894        | 2                | 4.8700342 |
| <b>P68101</b> | <b>IF2A Eukaryotic translation initiation factor 2 subunit 1</b>                      | <b>1.010613815</b> | <b>0.9992475</b> | <b>5</b>  |
| P68101        | AGLNCSTETMPIK                                                                         | 1.050055885        | 2                | 2.860801  |
| P68101        | HAVSDPSILDSLNLNEDEREVLINNINR                                                          | 0.817202049        | 3                | 4.2061687 |
| P68101        | HVAEVLEYTKDEQLESFLQR                                                                  | 1.0043235          | 3                | 3.5398185 |
| P68101        | TEGLSVLNQAMAVIK                                                                       | 1.07399803         | 2                | 3.8015592 |
| P68101        | VVTDDETTELAR                                                                          | 1.020638194        | 2                | 3.1654072 |
| <b>P68136</b> | <b>ACTS Actin_ alpha skeletal muscle</b>                                              | <b>0.915472093</b> | <b>5.922E-06</b> | <b>16</b> |
| P68136        | AGFAGDDAPR                                                                            | 0.995697625        | 2                | 3.3633769 |
| P68136        | AVFPSIVGRPR                                                                           | 1.074145814        | 2                | 2.9519794 |
| P68136        | CPETLFQPSFIGMESAGIHETTYNSIMK                                                          | 0.816960256        | 3                | 4.2048135 |
| P68136        | DLYANNVMSGGTTMYPGIADR                                                                 | 0.661750803        | 2                | 3.7263663 |
| P68136        | DSYVGDEAQS                                                                            | 0.651668329        | 2                | 3.0556407 |
| P68136        | DSYVGDEAQSKR                                                                          | 0.89910707         | 2                | 2.4665463 |
| P68136        | EITALAPSTMK                                                                           | 0.882976992        | 1                | 2.9491303 |
| P68136        | EITALAPSTMK+Oxidation(10)                                                             | 0.918357929        | 2                | 2.766233  |
| P68136        | GYSFVTTAER                                                                            | 0.927647541        | 2                | 3.8014989 |
| P68136        | IWHHTFYNELR                                                                           | 1.646294415        | 3                | 3.7126708 |
| P68136        | KDLYANNVMSGGTTMYPGIADR                                                                | 0.854895526        | 2                | 5.2012329 |
| P68136        | QEYDEAGPSIVHR                                                                         | 0.879555803        | 2                | 3.1483238 |
| P68136        | TTGIVLDSGDGVTHNVPIYEGYALPHAIMR                                                        | 1.18939632         | 3                | 6.7191687 |
| P68136        | TTGIVLDSGDGVTHNVPIYEGYALPHAIMR+Oxidation(29)                                          | 1.190475869        | 3                | 5.5131197 |
| P68136        | VAPEEHPTLLTEAPLNPK                                                                    | 1.099835234        | 2                | 4.5360603 |
| P68136        | YPIEHGIITNWDDMEK                                                                      | 1.099042327        | 2                | 4.5458283 |
| <b>P68255</b> | <b>1433T 14_3_3 protein theta</b>                                                     | <b>1.032121796</b> | <b>0.1272415</b> | <b>5</b>  |
| P68255        | AVTEQGAELSNEER                                                                        | 0.855776925        | 2                | 4.6284924 |
| P68255        | SICTTVLELLDK                                                                          | 1.073060498        | 2                | 2.7704866 |
| P68255        | TAFDEAIAELDTLNEDSYK                                                                   | 1.32110901         | 2                | 4.521142  |

|               |                                                                                 |                    |                  |           |
|---------------|---------------------------------------------------------------------------------|--------------------|------------------|-----------|
| P68255        | VISSIEQK                                                                        | 1.240017053        | 1                | 2.1964095 |
| P68255        | YLIANATNPESK                                                                    | 0.939078346        | 2                | 3.5744784 |
| <b>P68511</b> | <b>1433F 14_3_3 protein eta</b>                                                 | <b>1.158269297</b> | <b>0.4944032</b> | <b>2</b>  |
| P68511        | AVTELNEPLSNEDR                                                                  | 1.155881776        | 2                | 4.8462176 |
| P68511        | NSVVEASEAAYK                                                                    | 1.13662354         | 2                | 3.1739252 |
| <b>P69527</b> | <b>AMPO Aminopeptidase O</b>                                                    | <b>1.334919219</b> | <b>0.0276389</b> | <b>2</b>  |
| P69527        | LQQLAHRFCFELVK                                                                  | 0.95381157         | 2                | 2.3653719 |
| P69527        | WHRLQDELQNSPEGMQVLRPNK                                                          | 1.430161146        | 2                | 2.4934442 |
| <b>P69897</b> | <b>TBB5 Tubulin beta_5 chain</b>                                                | <b>1.150357731</b> | <b>1.123E-07</b> | <b>4</b>  |
| P69897        | ALTVPELTQQVFDK                                                                  | 1.159971853        | 2                | 3.4194956 |
| P69897        | FWEVISDEHGIDPTGYHGDSDLQLDR                                                      | 0.87903047         | 3                | 5.7774816 |
| P69897        | ISVYYNEATGGK                                                                    | 1.130744812        | 2                | 2.8884158 |
| P69897        | LTTPTYGDLNHLVSATMSGVTTCLR                                                       | 1.318648657        | 2                | 5.2249813 |
| <b>P70372</b> | <b>ELAV1 ELAV_like protein 1</b>                                                | <b>1.028836849</b> | <b>0.9370979</b> | <b>3</b>  |
| P70372        | SLFSSIGEVESEK                                                                   | 0.971030121        | 2                | 3.4155982 |
| P70372        | TNLIVNYLPQNMTQEELR                                                              | 1.028971137        | 2                | 4.1598611 |
| P70372        | VLVDQTTGLSR                                                                     | 1.073500501        | 2                | 2.5621226 |
| <b>P70470</b> | <b>LYPA1 Acyl_protein thioesterase 1</b>                                        | <b>1.316482453</b> | <b>0.2712092</b> | <b>2</b>  |
| P70470        | ASFSQGPINSANR                                                                   | 1.248910964        | 2                | 2.8958008 |
| P70470        | DISVLQCHGDCDPLVPLMFGSLTVER                                                      | 1.318324061        | 3                | 3.9737589 |
| <b>P70473</b> | <b>AMACR Alpha_methylacyl_CoA racemase</b>                                      | <b>1.397043801</b> | <b>9.9E-20</b>   | <b>12</b> |
| P70473        | ADVLLPEFR                                                                       | 1.060792352        | 2                | 3.5411174 |
| P70473        | AEWCQIFDGTDCVTPVLTLEALHHQHNR                                                    | 1.276740962        | 3                | 5.555346  |
| P70473        | DYGFSQEEIHLHSDR                                                                 | 1.135898033        | 2                | 5.006958  |
| P70473        | GLGLESEELPSQMSIEDWPEMK                                                          | 1.2779261          | 3                | 4.662272  |
| P70473        | GQNLLDGGAPFYTTYK                                                                | 1.028505173        | 2                | 5.2200747 |
| P70473        | GSFITDEEQHACPRPAPQLSR                                                           | 1.171145643        | 3                | 3.6244535 |
| P70473        | LGSVNHPHSLAR                                                                    | 1.94420004         | 2                | 2.9145813 |
| P70473        | LQLGPETLR                                                                       | 1.03994825         | 2                | 2.416054  |
| P70473        | LSGFGQSGIFSK                                                                    | 1.663126279        | 2                | 2.7785978 |
| P70473        | RDPSVGEHTVEVLK                                                                  | 1.065993157        | 3                | 4.3653593 |
| P70473        | RDPSVGEHTVEVLKDYGFSQEEIHLHSDR                                                   | 1.364787168        | 4                | 5.7580404 |
| P70473        | TQAMGLWAQPR                                                                     | 0.865417854        | 2                | 3.5125608 |
| <b>P70552</b> | <b>GFRP GTP cyclohydrolase 1 feedback regulatory protein</b>                    | <b>0.885322874</b> | <b>0.026417</b>  | <b>2</b>  |
| P70552        | MEVGPTMVGDEHSDPELMQQLGASK                                                       | 0.827242108        | 3                | 4.7964034 |
| P70552        | VLGNNFYEYYVNDPPR                                                                | 1.366110776        | 2                | 3.9697247 |
| <b>P70580</b> | <b>PGRC1 Membrane_associated progesterone receptor component 1</b>              | <b>0.986392837</b> | <b>0.0003373</b> | <b>9</b>  |
| P70580        | EALKDEYDDLSDLTPAQQETLNDWDSQFTFK                                                 | 1.536106397        | 3                | 5.4623342 |
| P70580        | EGEPTVYSDDDEPKDEAAR                                                             | 0.953804378        | 2                | 4.3853645 |
| P70580        | FYGPEGPYGVFAGR                                                                  | 1.015548194        | 2                | 4.0991187 |
| P70580        | GDQPGASGDNDDEPPPLPR                                                             | 1.174175375        | 2                | 5.144383  |
| P70580        | IVRGDQPGASGDNDDEPPPLPR                                                          | 1.099677535        | 3                | 5.176755  |
| P70580        | KFYGPEGPYGVFAGR                                                                 | 1.217053341        | 2                | 3.8177502 |
| P70580        | LLKEGEPTVYSDDDEPKDEAAR                                                          | 1.087998797        | 3                | 5.1703539 |
| P70580        | RYDGVQDPR                                                                       | 1.24728451         | 1                | 2.1815243 |
| P70580        | YDGVQDPR                                                                        | 0.927666207        | 2                | 3.019558  |
| <b>P70584</b> | <b>ACDSB Short/branched chain specific acyl_CoA dehydrogenase_mitochondrial</b> | <b>1.133111217</b> | <b>0.5553834</b> | <b>10</b> |
| P70584        | ASSTCQLTFENVK                                                                   | 0.97690478         | 2                | 2.8721161 |
| P70584        | ASSTCQLTFENVKVPETSVLGG                                                          | 1.133732985        | 3                | 3.6126049 |
| P70584        | FAQEQAIPLVSTMDENSK                                                              | 0.97965986         | 2                | 4.3051915 |
| P70584        | IFDFQGLQHQAHVATQLEAAR                                                           | 1.176729166        | 3                | 6.0690918 |
| P70584        | IGTIYEGTSNIQLNTIAK                                                              | 0.992500318        | 2                | 4.5536051 |
| P70584        | KFAQEQAIPLVSTMDENSK                                                             | 0.954952284        | 2                | 5.4267492 |
| P70584        | SGNYVINGSK                                                                      | 0.968892084        | 2                | 2.618047  |

|               |                                                                  |                    |                  |           |
|---------------|------------------------------------------------------------------|--------------------|------------------|-----------|
| P70584        | SVIQGLFQQGMMGIEVEAK                                              | 0.928839422        | 2                | 4.4870782 |
| P70584        | VDASVALLCDIQNTVINK                                               | 1.146059733        | 2                | 4.9137325 |
| P70584        | YYASEVAGLTTSK                                                    | 1.071041774        | 2                | 4.0603795 |
| <b>P70615</b> | <b>LMNB1 Lamin_B1</b>                                            | <b>1.159626652</b> | <b>0.1209243</b> | <b>3</b>  |
| P70615        | ALYETELADAR                                                      | 1.020974441        | 2                | 3.2419834 |
| P70615        | LSSEMNTSTVNSAR                                                   | 1.032593949        | 2                | 2.9894283 |
| P70615        | SLEGDLEDLKDQJAQLEASLSAAK                                         | 1.284225774        | 3                | 3.7961712 |
| <b>P70619</b> | <b>GSHR Glutathione reductase (Fragment)</b>                     | <b>1.15362194</b>  | <b>0.7499379</b> | <b>2</b>  |
| P70619        | ALLTPVAIAAGR                                                     | 1.01576828         | 2                | 2.726615  |
| P70619        | LNNIYQNNLTK                                                      | 1.195908012        | 2                | 3.0539348 |
| <b>P70694</b> | <b>DHB5 Estradiol 17 beta_dehydrogenase 5</b>                    | <b>1.095541584</b> | <b>0.9143047</b> | <b>2</b>  |
| P70694        | REDIFYTSK                                                        | 1.088317316        | 2                | 3.0603604 |
| P70694        | SIGVSNFNR                                                        | 0.930369089        | 2                | 2.3986793 |
| <b>P70712</b> | <b>KYNU Kynureninase</b>                                         | <b>1.103518227</b> | <b>1.368E-06</b> | <b>8</b>  |
| P70712        | IATELNCDPTDER                                                    | 2.063266437        | 2                | 3.6312544 |
| P70712        | IGAYGHEVGK                                                       | 1.254978647        | 2                | 2.8416576 |
| P70712        | LLTAILDSTERN                                                     | 1.58694896         | 2                | 3.5405042 |
| P70712        | MEDILEVIEK                                                       | 1.02843715         | 2                | 2.6188648 |
| P70712        | SILLTGYLEYLLK                                                    | 1.564994999        | 2                | 3.1064823 |
| P70712        | TYLEEELDKWAK                                                     | 0.82846084         | 2                | 2.9542179 |
| P70712        | VAPVPLYNSFHDVYK                                                  | 0.613200386        | 2                | 3.4208782 |
| P70712        | YLNAGAGLAGAFIHEK                                                 | 1.226435415        | 2                | 4.4541245 |
| <b>P80067</b> | <b>CATC Dipeptidyl peptidase 1</b>                               | <b>1.294879115</b> | <b>2.918E-05</b> | <b>5</b>  |
| P80067        | GTDECAIESIAMAAIPIPK                                              | 1.199532897        | 3                | 4.6978869 |
| P80067        | NQESCGSCYSFASLGMLEAR                                             | 1.026785096        | 2                | 4.8771434 |
| P80067        | NSWGSQWGESGYFR                                                   | 1.00518147         | 2                | 3.0316188 |
| P80067        | RGTDECAIESIAMAAIPIPK                                             | 1.191618934        | 2                | 4.4600577 |
| P80067        | YAQDFGVVEENCFPYTATDAPCKPK                                        | 1.245513711        | 3                | 5.5624352 |
| <b>P80254</b> | <b>DOPD D_dopachrome decarboxylase</b>                           | <b>1.626650996</b> | <b>0.0323566</b> | <b>4</b>  |
| P80254        | FFPLEPWQIGK                                                      | 1.563284352        | 2                | 3.0273597 |
| P80254        | FLTEELSLDQDR                                                     | 1.587690945        | 2                | 3.7307301 |
| P80254        | LCAATATILDKPEDR                                                  | 3.309104291        | 2                | 4.2331457 |
| P80254        | STEPCAHLLISSIGVVGTAEQNR                                          | 1.543463727        | 2                | 5.4005785 |
| <b>P80299</b> | <b>HYES Epoxide hydrolase 2</b>                                  | <b>1.259001005</b> | <b>0.1265742</b> | <b>2</b>  |
| P80299        | AEMGGILVGTPEDPK                                                  | 1.39033027         | 2                | 3.029355  |
| P80299        | TEIQNPSVTSK                                                      | 0.891568328        | 2                | 2.9259951 |
| <b>P80313</b> | <b>TCPH T_complex protein 1 subunit eta</b>                      | <b>1.134541213</b> | <b>8.64E-05</b>  | <b>4</b>  |
| P80313        | ATISNDGATILK                                                     | 1.067701174        | 2                | 2.8375239 |
| P80313        | GGAEQFMEETER                                                     | 1.161395081        | 2                | 2.5041282 |
| P80313        | QLCDNAGFDATNILNK                                                 | 0.946535754        | 2                | 3.5234752 |
| P80313        | SQDAEVGDGTTSVTLAAEFLK                                            | 1.404869734        | 2                | 5.069994  |
| <b>P80317</b> | <b>TCPZ T_complex protein 1 subunit zeta</b>                     | <b>0.92037883</b>  | <b>0.826503</b>  | <b>9</b>  |
| P80317        | ALQFLEQVK                                                        | 1.201501797        | 2                | 2.5110168 |
| P80317        | AQAALAVNISAAR                                                    | 0.899922528        | 2                | 3.0707939 |
| P80317        | DGNVLLHEMQIQHPTASLIAK                                            | 1.147590155        | 3                | 4.7811332 |
| P80317        | GIDPFSLDALAK                                                     | 1.37583938         | 2                | 2.7971058 |
| P80317        | HKSETDTSLR                                                       | 1.101032358        | 2                | 2.6761391 |
| P80317        | NAIDDGCVVPGAGAVEVALAEALIK                                        | 1.155349633        | 3                | 5.0385132 |
| P80317        | TEVNSGFFYK                                                       | 1.074176324        | 2                | 2.522156  |
| P80317        | VATAQDDITGDGTTSNVLIIGELLK                                        | 1.018718497        | 2                | 4.9626975 |
| P80317        | VLAQNSGFDLQETLVK                                                 | 1.060492116        | 2                | 3.4649968 |
| <b>P81155</b> | <b>VDAC2 Voltage_dependent anion_selective channel protein 2</b> | <b>0.929931684</b> | <b>0.9588435</b> | <b>5</b>  |
| P81155        | LTFDITTFSPNTGK                                                   | 0.968770047        | 2                | 2.6109276 |
| P81155        | LTFDITTFSPNTGKK                                                  | 1.039398459        | 2                | 2.8680813 |
| P81155        | SCSGVEFSTSGSSNTDTGK                                              | 0.750185751        | 2                | 2.4169967 |
| P81155        | VNNSLIGVGYTQLRPGVK                                               | 1.041980775        | 2                | 3.6138768 |



|               |                                                             |                    |                  |           |
|---------------|-------------------------------------------------------------|--------------------|------------------|-----------|
| P81155        | YQLDPTASISAK                                                | 0.946567526        | 2                | 2.9489324 |
| <b>P82995</b> | <b>HS90A Heat shock protein HSP 90_alpha</b>                | <b>1.17517464</b>  | <b>3.963E-14</b> | <b>14</b> |
| P82995        | ELHINLIPNKQDR                                               | 0.911854945        | 2                | 2.9773793 |
| P82995        | ELISNSSDALDK                                                | 0.949394108        | 2                | 2.7051792 |
| P82995        | FYEQFSK                                                     | 1.131141351        | 1                | 2.0467143 |
| P82995        | HGLEVIYMIEPIDEYCVQQLK                                       | 1.213473704        | 3                | 5.5511718 |
| P82995        | HIYFITGETK                                                  | 1.047177515        | 2                | 2.9628959 |
| P82995        | HLEINPDHSIIETLR                                             | 1.116171944        | 3                | 4.2889228 |
| P82995        | HSQFIGYPITLFVEK                                             | 3.476649886        | 2                | 3.7105362 |
| P82995        | LGIHEDSQNR                                                  | 1.262761051        | 3                | 3.4713297 |
| P82995        | NPDDITNEEYGEFYK                                             | 1.01794841         | 2                | 5.0732331 |
| P82995        | RAPFDLFENR                                                  | 1.366148011        | 2                | 2.3648415 |
| P82995        | SLTNDWEEHLAVK                                               | 1.030024211        | 2                | 4.1643367 |
| P82995        | TLTIVDTGIGMTK                                               | 0.985614068        | 2                | 4.3429503 |
| P82995        | TLTIVDTGIGMTK+Oxidation(11)                                 | 1.223860152        | 2                | 3.3894668 |
| P82995        | YYTSASGDEMVSJK                                              | 1.073566937        | 2                | 3.4243467 |
| <b>P83732</b> | <b>RL24 60S ribosomal protein L24</b>                       | <b>1.076067485</b> | <b>0.9981371</b> | <b>2</b>  |
| P83732        | AITGASLADIMAK                                               | 1.07636136         | 2                | 4.6736374 |
| P83732        | VELCSFSGYK                                                  | 1.063770465        | 2                | 2.3708348 |
| <b>P83868</b> | <b>TEBP Prostaglandin E synthase 3</b>                      | <b>1.218651078</b> | <b>0.1454499</b> | <b>2</b>  |
| P83868        | HLNEIDLHFCIDPNDSK                                           | 1.696631203        | 3                | 3.3047755 |
| P83868        | LTFSCGGSDNFK                                                | 1.21673141         | 2                | 2.7685552 |
| <b>P83883</b> | <b>RL36A 60S ribosomal protein L36a</b>                     | <b>1.237644968</b> | <b>0.0005785</b> | <b>2</b>  |
| P83883        | HFELGGDK                                                    | 1.279408048        | 1                | 2.3835843 |
| P83883        | LECVENCR                                                    | 1.227550674        | 2                | 2.3402147 |
| <b>P83941</b> | <b>ELOC Transcription elongation factor B polypeptide 1</b> | <b>1.153315431</b> | <b>0.9964775</b> | <b>2</b>  |
| P83941        | AMLSGPGQFAENETNEVNR                                         | 1.096385459        | 2                | 5.0185304 |
| P83941        | TYGGCEGPDAMYVK                                              | 1.123221847        | 2                | 3.7887611 |
| <b>P84082</b> | <b>ARF2 ADP_ribosylation factor 2</b>                       | <b>1.125925976</b> | <b>0.9999253</b> | <b>2</b>  |
| P84082        | NISFTVWVDVGGQDK                                             | 0.800385835        | 2                | 4.5257974 |
| P84082        | QDLPNAMNAAEITDK                                             | 1.149679664        | 2                | 3.8614039 |
| <b>P84083</b> | <b>ARF5 ADP_ribosylation factor 5</b>                       | <b>1.16554971</b>  | <b>0.4751581</b> | <b>2</b>  |
| P84083        | DAVLLVFANK                                                  | 1.174985081        | 2                | 2.4875855 |
| P84083        | VQESADELQK                                                  | 1.161296974        | 2                | 2.9374371 |
| <b>P84100</b> | <b>RL19 60S ribosomal protein L19</b>                       | <b>1.289238165</b> | <b>0.0013175</b> | <b>2</b>  |
| P84100        | LLADQAEAR                                                   | 1.240135612        | 2                | 3.4412928 |
| P84100        | VWLDPNETNEIANANSR                                           | 0.998601185        | 2                | 5.8139515 |
| <b>P84245</b> | <b>H33 Histone H3.3</b>                                     | <b>1.088898282</b> | <b>2.46E-07</b>  | <b>4</b>  |
| P84245        | FQSAAIGALQEASEAYLVGLFEDTNLCAIHAK                            | 1.515856595        | 3                | 5.9670768 |
| P84245        | RVTIMPKDIQLAR+Oxidation(5)                                  | 1.264053156        | 2                | 2.9210317 |
| P84245        | STELLIR                                                     | 1.086442764        | 2                | 2.5131984 |
| P84245        | YRPGTVALR                                                   | 1.075252263        | 2                | 2.3600163 |
| <b>P84817</b> | <b>FIS1 Mitochondrial fission 1 protein</b>                 | <b>1.147004009</b> | <b>0.4080784</b> | <b>4</b>  |
| P84817        | FQSEQAAGSVSK                                                | 0.925902056        | 2                | 2.9767909 |
| P84817        | GIVLLELLPK                                                  | 1.303621769        | 2                | 2.3172698 |
| P84817        | GLLQTEPQNNQAK                                               | 1.077854211        | 2                | 3.5858557 |
| P84817        | KFQSEQAAGSVSK                                               | 0.999303354        | 2                | 4.0556707 |
| <b>P85834</b> | <b>EFTU Elongation factor Tu_mitochondrial</b>              | <b>0.903902512</b> | <b>0.3901839</b> | <b>16</b> |
| P85834        | AEAGDNLGALVR                                                | 0.89991319         | 2                | 3.7479541 |
| P85834        | DKPHVNVGTIGHVDHGK                                           | 0.952548317        | 3                | 3.4806321 |
| P85834        | DLEKPFLLPVESVYSIPGR                                         | 1.296758778        | 2                | 3.9183233 |
| P85834        | GDECELLGHNK                                                 | 0.936307387        | 2                | 2.5907114 |
| P85834        | GEETPVIVGSALCALEQR                                          | 0.974070554        | 2                | 4.5933414 |
| P85834        | GITINAAHVEYSTAAR                                            | 1.250414642        | 2                | 3.013216  |
| P85834        | GTVVTGTLER                                                  | 0.858215433        | 2                | 2.8744488 |
| P85834        | HYAHTDCPGHADYVK                                             | 0.975946204        | 2                | 4.1963453 |
| P85834        | KGDECELLGHNK                                                | 0.817182999        | 3                | 3.9386835 |

|               |                                                               |                    |                  |           |
|---------------|---------------------------------------------------------------|--------------------|------------------|-----------|
| P85834        | KYEEIDNAPEER                                                  | 0.873918778        | 2                | 3.5791864 |
| P85834        | LLDAVDYIPVPTR                                                 | 0.940767765        | 2                | 3.9235618 |
| P85834        | QIGVEHVVVVYVVK                                                | 0.763600747        | 2                | 2.8580687 |
| P85834        | TIGTGLVTDVPAMTEEDK                                            | 0.712910771        | 2                | 4.1267791 |
| P85834        | TIGTGLVTDVPAMTEEDKNIK                                         | 0.947730793        | 2                | 4.706573  |
| P85834        | TVVTGIEMFHK                                                   | 0.814641473        | 2                | 2.4514415 |
| P85834        | YEEIDNAPEER                                                   | 0.895030049        | 2                | 3.1851294 |
| <b>P85968</b> | <b>6PGD 6_phosphogluconate dehydrogenase_ decarboxylating</b> | <b>1.114327662</b> | <b>5.551E-15</b> | <b>10</b> |
| P85968        | AGQAVDDFIEK                                                   | 1.077997958        | 2                | 2.9266326 |
| P85968        | CLSSLKEER                                                     | 1.19030795         | 2                | 2.4036045 |
| P85968        | FQDTDGKELLPK                                                  | 1.198244373        | 2                | 3.1306384 |
| P85968        | GILFVGSVSGGEEGAR                                              | 1.122444879        | 2                | 5.0491538 |
| P85968        | HEMLPANLIQAQR                                                 | 1.06443237         | 2                | 3.2545779 |
| P85968        | LVPLLDTGDIIDGGNSEYR                                           | 1.806368474        | 2                | 5.5578961 |
| P85968        | NPELQNLDDFFK                                                  | 1.460964479        | 2                | 4.7657342 |
| P85968        | SAVDDCQDSWR                                                   | 0.52698355         | 2                | 2.9479165 |
| P85968        | VGTGEPCCDWVGDGAGHFVK                                          | 1.082980353        | 3                | 4.5491652 |
| P85968        | YGPSLMPGGNK                                                   | 0.948221177        | 1                | 2.2007372 |
| <b>P85971</b> | <b>6PGL 6_phosphogluconolactonase</b>                         | <b>1.381338825</b> | <b>0.2282776</b> | <b>5</b>  |
| P85971        | DLPAATAPAGPASFAR                                              | 0.887527086        | 2                | 2.414295  |
| P85971        | ILEDQESALPAAMVQPR                                             | 1.009203344        | 2                | 4.1685309 |
| P85971        | LPIPDSQVLTIDPALPVEDAAEDYAR                                    | 1.335186087        | 2                | 4.9904537 |
| P85971        | TGALCWFLDEAAAR                                                | 1.133323156        | 2                | 3.7961793 |
| P85971        | WTLGFCDER                                                     | 1.088702648        | 2                | 2.3071623 |
| <b>P85972</b> | <b>VINC Vinculin</b>                                          | <b>0.854313529</b> | <b>0.7750318</b> | <b>12</b> |
| P85972        | AIPDLTAPVAAVQAASNLVR                                          | 0.968971285        | 2                | 3.3520925 |
| P85972        | AQQVSQGLDLVTAK                                                | 0.853444889        | 2                | 4.4673338 |
| P85972        | AVAGNISDPGLQK                                                 | 0.837887172        | 2                | 3.382884  |
| P85972        | GQGASPVAMQK                                                   | 0.919304727        | 2                | 3.0008595 |
| P85972        | MLGQMTDQVADLR                                                 | 1.000415864        | 2                | 2.5136566 |
| P85972        | NRNFTVGKMSAEINEIR+Oxidation(9)                                | 1.039838711        | 2                | 2.7302399 |
| P85972        | QVATALQNLQTK                                                  | 1.052844346        | 2                | 3.7216866 |
| P85972        | SLLDASEEAIKK                                                  | 1.300783011        | 2                | 2.6337118 |
| P85972        | STVEGIQASVK                                                   | 0.966468254        | 2                | 2.3035593 |
| P85972        | TNISDEESEQATEMLVHNAQNLMSQVK                                   | 0.973277752        | 3                | 4.0442538 |
| P85972        | VLQLTSWDEDAWASK                                               | 1.447031488        | 2                | 3.6682167 |
| P85972        | WIDNPTVDDR                                                    | 0.931623269        | 2                | 3.1801152 |
| <b>P85973</b> | <b>PNPH Purine nucleoside phosphorylase</b>                   | <b>1.411895858</b> | <b>3.223E-07</b> | <b>12</b> |
| P85973        | ASHQEVLEAGK                                                   | 1.058376757        | 2                | 3.4210379 |
| P85973        | DHINLPGFCGQNPLR                                               | 0.996523057        | 2                | 4.1037664 |
| P85973        | ELQEGTYIMSAGPTFETVAESCLLR                                     | 1.046321559        | 2                | 5.054266  |
| P85973        | FEVGDIMLIR                                                    | 1.066166674        | 2                | 3.6098399 |
| P85973        | HRPQVAVICGSLGGLTAK                                            | 1.085093556        | 3                | 6.2975354 |
| P85973        | LTQPQAFDYNEIPFPQSTVQGHAGR                                     | 1.826390837        | 3                | 4.7375331 |
| P85973        | MLGADAVGMSTVPEVIVAR                                           | 1.267075121        | 2                | 6.0708618 |
| P85973        | MLGADAVGMSTVPEVIVAR+Oxidation(1)                              | 1.279894077        | 2                | 5.1184244 |
| P85973        | MLGADAVGMSTVPEVIVAR+Oxidation(9)                              | 1.264175762        | 2                | 3.744545  |
| P85973        | VFGFSLITNK                                                    | 1.331058306        | 2                | 2.8167167 |
| P85973        | VFHLLGVDTLVVVTAAGGLNPK                                        | 1.367478575        | 2                | 5.835546  |
| P85973        | VVMDYNNLEK                                                    | 1.135306483        | 2                | 2.6067955 |
| <b>P86048</b> | <b>RL10L 60S ribosomal protein L10_like</b>                   | <b>1.463269625</b> | <b>0.0015074</b> | <b>4</b>  |
| P86048        | AKVDEFPLCGHMSDEYEQLSSEALEAAR                                  | 1.356727611        | 3                | 5.0379767 |
| P86048        | GAFGKPGQTVAR                                                  | 1.143727642        | 2                | 3.0435185 |
| P86048        | VDEFPLCGHMSDEYEQLSSEALEAAR                                    | 1.279161984        | 3                | 5.8032589 |
| P86048        | VHIGQVIMSIR                                                   | 1.296902083        | 2                | 2.8245225 |

|               |                                                                     |                    |                  |           |
|---------------|---------------------------------------------------------------------|--------------------|------------------|-----------|
| <b>P86252</b> | <b>PURA Transcriptional activator protein Pur_alpha (Fragments)</b> | <b>1.310506383</b> | <b>5.056E-05</b> | <b>2</b>  |
| P86252        | LIDDYGVVEEPAELPEGTSLTVDNK                                           | 1.213315034        | 2                | 4.1713157 |
| P86252        | LIDDYGVVEEPAELPEGTSLTVDNKR                                          | 1.296951323        | 3                | 5.0665774 |
| <b>P97310</b> | <b>MCM2 DNA replication licensing factor MCM2</b>                   | <b>0.890986943</b> | <b>0.2009834</b> | <b>4</b>  |
| P97310        | EAGRGLGRMR                                                          | 1.042431493        | 2                | 2.547754  |
| P97310        | HIESMIRMAEAHARMHLR                                                  | 0.759887416        | 2                | 2.6675837 |
| P97310        | LNQMDQDKVAR+Oxidation(4)                                            | 0.596743378        | 2                | 2.5770395 |
| P97310        | MITGLSKDQQIGEK+Oxidation(1)                                         | 0.778983709        | 2                | 2.4606848 |
| <b>P97323</b> | <b>F16P3 Fructose_1_6_bisphosphatase isozyme 3 (Fragment)</b>       | <b>1.020469306</b> | <b>1</b>         | <b>2</b>  |
| P97323        | GNIYSLNEGAYK                                                        | 1.013183874        | 2                | 3.9426315 |
| P97323        | KGNIYSLNEGAYK                                                       | 0.994636502        | 2                | 4.2158375 |
| <b>P97384</b> | <b>ANX11 Annexin A11</b>                                            | <b>1.147440361</b> | <b>0.6273466</b> | <b>2</b>  |
| P97384        | GFGTDEQAIIIDCLGSR                                                   | 0.890213463        | 2                | 4.2422791 |
| P97384        | SELDLLDIR                                                           | 1.044832936        | 2                | 2.6848454 |
| <b>P97519</b> | <b>HMGCL Hydroxymethylglutaryl_CoA lyase_ mitochondrial</b>         | <b>1.268961988</b> | <b>0.1897487</b> | <b>8</b>  |
| P97519        | GASGNLATEDLVYMLTGLGIHTGVNLQK                                        | 1.268968351        | 3                | 3.8920858 |
| P97519        | GFEEAVAAGAK                                                         | 0.893903021        | 2                | 3.2017319 |
| P97519        | GYVSCALGCPYEGK                                                      | 1.082271749        | 2                | 3.7265177 |
| P97519        | KNVNCSEESFQR                                                        | 0.938315123        | 2                | 3.5616503 |
| P97519        | LIDMLSEAGLPVIEATSFVSPK                                              | 1.477892587        | 2                | 4.8589644 |
| P97519        | LLEAGDFICQALNR                                                      | 1.180640262        | 2                | 4.5000749 |
| P97519        | NVNCSEESFQR                                                         | 0.897016165        | 2                | 3.4468606 |
| P97519        | WVPQMADHSDVVK                                                       | 0.616292227        | 2                | 3.0139375 |
| <b>P97521</b> | <b>MCAT Mitochondrial carnitine/acylcarnitine carrier protein</b>   | <b>0.98980755</b>  | <b>0.9884229</b> | <b>5</b>  |
| P97521        | CLLQIQASSGK                                                         | 0.927378921        | 2                | 3.105042  |
| P97521        | LQTQPPSLPGQPPMYSGTIDCFR                                             | 1.2383871          | 2                | 3.7918453 |
| P97521        | LYQEFGIR                                                            | 1.098209416        | 2                | 2.3556705 |
| P97521        | SVHDLVPR                                                            | 1.143618952        | 2                | 2.5423045 |
| P97521        | YSGTLDCAK                                                           | 0.96751598         | 2                | 2.5179191 |
| <b>P97524</b> | <b>S27A2 Very long_chain acyl_CoA synthetase</b>                    | <b>0.975121061</b> | <b>9.659E-15</b> | <b>15</b> |
| P97524        | ALHDLHLGR                                                           | 1.279137809        | 2                | 2.416389  |
| P97524        | GEVGLLICK                                                           | 1.161997376        | 2                | 2.6179991 |
| P97524        | IQDTIEITGTFK                                                        | 1.036449209        | 2                | 2.5040932 |
| P97524        | ITELTPFFGYAGGK                                                      | 0.197182055        | 2                | 2.3085413 |
| P97524        | MKENYEFNGK                                                          | 0.965699543        | 2                | 3.2566793 |
| P97524        | SEVTFITPAVYIYTSGTTGLPK                                              | 0.500479959        | 2                | 2.6506903 |
| P97524        | SLLHCFQCCGAK                                                        | 1.693333146        | 2                | 3.2953749 |
| P97524        | TILHVFLQAR                                                          | 1.098494923        | 2                | 2.9638743 |
| P97524        | TSNTNGVDTVLDKVDGVSADPIPESWR                                         | 0.713712802        | 3                | 5.7891579 |
| P97524        | TYVPMTEDIYNAIIDK                                                    | 1.055314948        | 2                | 4.0460181 |
| P97524        | VLLASPELHEAVEEVLPPLK                                                | 1.270614464        | 2                | 3.8673239 |
| P97524        | VTLMEEGFNPSVIK                                                      | 0.696807945        | 2                | 3.6768925 |
| P97524        | YDVEKDEPVR                                                          | 1.316786628        | 2                | 2.8359509 |
| P97524        | YLCNTPQKPNDR                                                        | 1.338462012        | 2                | 3.0403335 |
| P97524        | YNATVIQYIGELLR                                                      | 1.704444595        | 2                | 2.7537601 |
| <b>P97532</b> | <b>THTM 3_mercaptopyruvate sulfurtransferase</b>                    | <b>1.00532321</b>  | <b>3.331E-16</b> | <b>8</b>  |
| P97532        | AFGHHSVSLLDGGFR                                                     | 1.392483956        | 2                | 3.4499269 |
| P97532        | ALVSAQWVAEALK                                                       | 0.917067148        | 2                | 3.7860308 |
| P97532        | AQPEHVISQGR                                                         | 1.015417223        | 2                | 2.7914898 |
| P97532        | DGIEPGHIPGSVNIPFTEFLTSEGLEK                                         | 1.737826866        | 3                | 6.7665634 |
| P97532        | FQGTQPEPR                                                           | 0.953349573        | 2                | 2.9438438 |
| P97532        | LLDASWYLPK                                                          | 1.311759751        | 2                | 3.9123125 |
| P97532        | THEDILENLDAR                                                        | 0.995435656        | 2                | 3.3755658 |

|               |                                                                 |                    |                  |           |
|---------------|-----------------------------------------------------------------|--------------------|------------------|-----------|
| P97532        | YWLSQNLPISSGK                                                   | 0.851275639        | 2                | 3.6034117 |
| <b>P97536</b> | <b>CAND1 Cullin_associated NEDD8_dissociated protein 1</b>      | <b>1.14234072</b>  | <b>0.0629709</b> | <b>5</b>  |
| P97536        | EGPAVVGQFIQDVK                                                  | 0.812214561        | 2                | 2.7580276 |
| P97536        | ITSEALLVTQQLVK                                                  | 1.107216083        | 2                | 2.3477461 |
| P97536        | LGTLSDILIK                                                      | 1.532342098        | 2                | 2.5343232 |
| P97536        | LTLIDPETLLPR                                                    | 1.324545796        | 2                | 2.6806874 |
| P97536        | TYIQCIAAISR                                                     | 1.136650415        | 2                | 2.9858198 |
| <b>P97562</b> | <b>ACOX2 Peroxisomal acyl_coenzyme A oxidase 2</b>              | <b>1.233674272</b> | <b>9.9E-20</b>   | <b>18</b> |
| P97562        | ATASCTYEGENTVLYLQVAR                                            | 1.798397846        | 2                | 4.6055145 |
| P97562        | ATFADFCAQGAEICR                                                 | 1.213802553        | 2                | 5.0372419 |
| P97562        | CSAQTAAEFR                                                      | 0.930361484        | 2                | 2.4379942 |
| P97562        | DAILLTDAFDFSDHCLNSALGCYDGHVYER                                  | 1.457674484        | 3                | 4.0450878 |
| P97562        | DFSLLPELHALSTGMK                                                | 0.860786504        | 2                | 2.6080909 |
| P97562        | EAFDLLPLIR                                                      | 1.026786317        | 2                | 2.7111819 |
| P97562        | ILEYQTQQK                                                       | 1.224929056        | 2                | 3.9168999 |
| P97562        | KVESIIQSDPVFNLK                                                 | 1.229430283        | 2                | 4.9492264 |
| P97562        | LCDLYALHGVLTNSGDFLHDGFLSGAQVDMAR                                | 1.84685428         | 3                | 5.6982641 |
| P97562        | LDKEPEIQR                                                       | 1.175911274        | 3                | 3.5492175 |
| P97562        | LGTPQSNYLGMLVTR                                                 | 1.680257951        | 2                | 3.5153441 |
| P97562        | LTNILDGGLPNTVLR                                                 | 1.406123712        | 2                | 4.2507405 |
| P97562        | MGLEHIDNGFLQLNHVR                                               | 1.374614365        | 2                | 4.4231882 |
| P97562        | SGVDQHDawnQTtVIHLQAAK                                           | 1.193268742        | 3                | 6.2669153 |
| P97562        | SLEDHTPLPGITVGDIGPK                                             | 1.072262827        | 2                | 4.5511804 |
| P97562        | SLGSDEQIAK                                                      | 1.157405172        | 2                | 2.8494048 |
| P97562        | VESIIQSDPVFNLK                                                  | 1.071201677        | 2                | 4.5715089 |
| P97562        | VLDGNVNLHLGVMNAIR                                               | 1.101226145        | 2                | 5.0081358 |
| <b>P97576</b> | <b>GRPE1 GrpE protein homolog 1_mitochondrial</b>               | <b>1.048547135</b> | <b>0.6053961</b> | <b>3</b>  |
| P97576        | ALADTENLR                                                       | 1.08929156         | 2                | 2.306185  |
| P97576        | DLLEVADILEK                                                     | 1.048395589        | 2                | 2.4320302 |
| P97576        | EEVSNNNPHLK                                                     | 1.049620772        | 2                | 3.2840991 |
| <b>P97584</b> | <b>PTGR1 Prostaglandin reductase 1</b>                          | <b>1.103662839</b> | <b>0.9699983</b> | <b>5</b>  |
| P97584        | ALDLMNWWVSEK                                                    | 1.142004501        | 2                | 3.6727855 |
| P97584        | GGETVLVNAAGAVGSVVGQIAK                                          | 1.130046351        | 2                | 4.7416487 |
| P97584        | HFEGFPTDSNFELR                                                  | 0.952184214        | 2                | 3.899153  |
| P97584        | TGPCPPGPSPEVIYQQLR                                              | 1.059708258        | 2                | 4.0441532 |
| P97584        | YHEYITEGFEK                                                     | 1.057509053        | 2                | 2.9279969 |
| <b>P97608</b> | <b>OPLA 5_oxoprolinase</b>                                      | <b>1.256797873</b> | <b>0.0047185</b> | <b>4</b>  |
| P97608        | AGDFGAAFVER                                                     | 1.12252075         | 2                | 2.4371789 |
| P97608        | GSILDPSPEAAVVGGNVLTQR                                           | 1.281111069        | 2                | 5.0468183 |
| P97608        | LLSEDPANYADAPTEGIR                                              | 1.128538601        | 2                | 3.8446269 |
| P97608        | TGDLEIQQPVDLEALR                                                | 1.21071693         | 2                | 4.8897362 |
| <b>P97612</b> | <b>FAAH1 Fatty_acid amide hydrolase 1</b>                       | <b>1.269469204</b> | <b>9.9E-20</b>   | <b>8</b>  |
| P97612        | EVEQLMTPQK                                                      | 0.592679819        | 2                | 2.3235543 |
| P97612        | GHDSTLGLSLNEGMPSESDCVVVQVLK                                     | 1.070009241        | 3                | 4.6913409 |
| P97612        | GTNCVTSYLTDCETQLSQAPR                                           | 1.05418182         | 2                | 4.5679779 |
| P97612        | GYFGDIWDIILK                                                    | 1.929461804        | 2                | 3.4017351 |
| P97612        | LQHEIEMR                                                        | 0.953692132        | 2                | 2.3767772 |
| P97612        | LQSGELSPAVFFTYLQK                                               | 2.081927917        | 2                | 4.5237875 |
| P97612        | NSVGLPVAVQCVALPWQEELCLR                                         | 1.668088718        | 2                | 4.1551151 |
| P97612        | QGLLYGVPVSLK                                                    | 0.933673209        | 2                | 2.7448077 |
| <b>P97700</b> | <b>M2OM Mitochondrial 2_oxoglutarate/malate carrier protein</b> | <b>1.040990739</b> | <b>8.928E-07</b> | <b>3</b>  |
| P97700        | AVVVNAAQLASYSQSK                                                | 1.020369212        | 2                | 4.7385373 |
| P97700        | LGIYTVLFR                                                       | 2.464161388        | 2                | 3.0584254 |
| P97700        | LTGADGTPPGFLK                                                   | 1.090337887        | 2                | 2.820734  |
| <b>P97852</b> | <b>DHB4 Peroxisomal multifunctional enzyme type 2</b>           | <b>1.126859793</b> | <b>9.9E-20</b>   | <b>24</b> |

|               |                                                                                                                             |                    |                  |           |
|---------------|-----------------------------------------------------------------------------------------------------------------------------|--------------------|------------------|-----------|
| P97852        | AAVAVPSRPPDAVLR                                                                                                             | 1.256643048        | 2                | 2.3278484 |
| P97852        | AVANYDSVEAGEK                                                                                                               | 1.169632834        | 2                | 3.8565967 |
| P97852        | AYALAFER                                                                                                                    | 1.390808354        | 2                | 3.0639687 |
| P97852        | DTTSLNQAALYR                                                                                                                | 0.86128781         | 2                | 2.6582696 |
| P97852        | FVYEGSADFCLPTFGVIVAQK                                                                                                       | 0.925069611        | 2                | 4.8259168 |
| P97852        | GALVVVNDLGGDFK                                                                                                              | 0.979947861        | 2                | 3.658643  |
| P97852        | GNIMLSQKLQMILK+Oxidation(4)Oxidation(11)                                                                                    | 1.308454081        | 2                | 2.3397081 |
| P97852        | GSSAADKVVEEIR                                                                                                               | 1.213643025        | 2                | 3.1510835 |
| P97852        | HVLQQFADNDVSR                                                                                                               | 1.102575079        | 2                | 4.6159368 |
| P97852        | ICDFSNASKPK                                                                                                                 | 1.444127198        | 3                | 3.7910459 |
| P97852        | IDSEGISQNHGTGQVASADASGFAGVVGHK                                                                                              | 1.177289156        | 3                | 6.1357455 |
| P97852        | IDVVVNNAGILR                                                                                                                | 1.094199903        | 2                | 3.6548004 |
| P97852        | ISDEDWDIIQR                                                                                                                 | 0.936863275        | 2                | 3.3768086 |
| P97852        | KNNIHCNTIAPNAGSR                                                                                                            | 1.102637598        | 2                | 4.782763  |
| P97852        | LGLLGLANTLVIEGR                                                                                                             | 1.660945396        | 2                | 3.4073603 |
| P97852        | LNPQNAFFSGR                                                                                                                 | 1.353126981        | 2                | 2.8304014 |
| P97852        | NGSGEVYQGPAAK                                                                                                               | 1.245675223        | 2                | 3.5150297 |
| P97852        | NNIHCNTIAPNAGSR                                                                                                             | 1.066986511        | 2                | 4.6269903 |
| P97852        | SIQESTGGIIEVLHK                                                                                                             | 1.291189334        | 2                | 4.1677556 |
| P97852        | SLMSGGLAEVPGLSINFAK                                                                                                         | 1.09023349         | 2                | 4.5973802 |
| P97852        | SLMSGGLAEVPGLSINFAK+Oxidation(3)                                                                                            | 0.831454783        | 2                | 3.5256948 |
| P97852        | VLHGGEQYLELYKPLPR                                                                                                           | 1.268883171        | 2                | 4.9171314 |
| P97852        | VNAVFEWHITK                                                                                                                 | 1.344292589        | 2                | 3.1935463 |
| P97852        | VVLVTGAGGGLGR                                                                                                               | 1.115671999        | 2                | 4.5549583 |
| <b>Q00438</b> | <b>PTBP1 Polypyrimidine tract_binding protein 1</b>                                                                         | <b>1.332120056</b> | <b>5.458E-09</b> | <b>3</b>  |
| Q00438        | KLPSDVTEGEVISLGLPFGK                                                                                                        | 1.168715279        | 2                | 2.6573019 |
| Q00438        | NFQNIFFPSATLHLSNIPPSVSEDDLK                                                                                                 | 1.810999886        | 3                | 3.8161194 |
| Q00438        | NNQFQALLQYADPVSAQHAK                                                                                                        | 1.338109534        | 2                | 5.1427135 |
| <b>Q00P19</b> | <b>HNRL2 Heterogeneous nuclear ribonucleoprotein U_like protein 2</b>                                                       | <b>1.377654022</b> | <b>0.5170388</b> | <b>4</b>  |
| Q00P19        | AVEEQGDDQDSEK                                                                                                               | 1.380428877        | 2                | 3.800951  |
| Q00P19        | DLLVQQASQCLSK                                                                                                               | 1.491404259        | 2                | 2.370827  |
| Q00P19        | EEAQPIVTKYK                                                                                                                 | 1.007557093        | 1                | 1.9492124 |
| Q00P19        | SGDETPGSEAPGDK                                                                                                              | 1.23921447         | 2                | 2.6872678 |
| <b>Q01177</b> | <b>PLMN Plasminogen</b>                                                                                                     | <b>1.356384663</b> | <b>0.1334826</b> | <b>3</b>  |
| Q01177        | ILGSDVQQIAVTK                                                                                                               | 1.174130873        | 2                | 3.4000752 |
| Q01177        | LVLEPNDADIALLK                                                                                                              | 1.445947235        | 2                | 2.649972  |
| Q01177        | STELCAGHLAGGIDSCQGDSSGGLVCFEK                                                                                               | 1.213826596        | 3                | 4.9772959 |
| <b>Q01205</b> | <b>ODO2 Dihydrolypoyllysine_residue succinyltransferase component of 2_oxoglutarate dehydrogenase complex_mitochondrial</b> | <b>1.047455583</b> | <b>0.9998367</b> | <b>4</b>  |
| Q01205        | ASAFALQEQPVVNAVIDDATK                                                                                                       | 1.148750983        | 2                | 6.39429   |
| Q01205        | NDVITVQTPAFAESVTEGDVR                                                                                                       | 0.936291037        | 2                | 5.4971013 |
| Q01205        | NVETMNYADIER                                                                                                                | 1.086604617        | 2                | 3.5192676 |
| Q01205        | VEGGTPLFLTR                                                                                                                 | 0.973138815        | 2                | 3.3079431 |
| <b>Q01405</b> | <b>SC23A Protein transport protein Sec23A</b>                                                                               | <b>1.001734493</b> | <b>0.0047645</b> | <b>4</b>  |
| Q01405        | AETEEGPDVLR                                                                                                                 | 1.000950462        | 2                | 3.1701729 |
| Q01405        | AVLNPLCQVDYR                                                                                                                | 1.150512774        | 2                | 2.8012679 |
| Q01405        | HLLQAPVDDAQEILHSR                                                                                                           | 1.133830741        | 3                | 4.5348568 |
| Q01405        | YIDTEHGGSQAR                                                                                                                | 1.206784959        | 2                | 3.4243803 |
| <b>Q02253</b> | <b>MMSA Methylmalonate_semialdehyde dehydrogenase [acylating]_mitochondrial</b>                                             | <b>1.028262407</b> | <b>0.0003629</b> | <b>29</b> |
| Q02253        | AEMEAAVAACK                                                                                                                 | 1.008000789        | 2                | 3.9051199 |
| Q02253        | AEMEAAVAACK+Oxidation(3)                                                                                                    | 1.307392442        | 2                | 2.8634322 |
| Q02253        | AEMEAAVAACKR                                                                                                                | 1.135537382        | 2                | 3.2169638 |
| Q02253        | AFPADWADTSILSR                                                                                                              | 1.170334925        | 2                | 4.2023797 |
| Q02253        | AISFVGSNQAGEYIFER                                                                                                           | 1.137865665        | 2                | 5.4847693 |

|               |                                            |                    |                  |           |
|---------------|--------------------------------------------|--------------------|------------------|-----------|
| Q02253        | CMALSTAVLVGEAK                             | 0.994437803        | 2                | 4.5635958 |
| Q02253        | CMALSTAVLVGEAK+Oxidation(2)                | 1.062026592        | 2                | 2.7738929 |
| Q02253        | EEDATLSSPAVVMPTMGR                         | 0.789767133        | 2                | 4.9084802 |
| Q02253        | ENTLNQLVGAAFGAAGQR                         | 0.914983944        | 2                | 5.0179563 |
| Q02253        | GDTNFGYK                                   | 0.964939255        | 2                | 2.3952913 |
| Q02253        | GLQVVEHACSVTSLMLGETMPSITK                  | 1.222705851        | 2                | 5.9070816 |
| Q02253        | GYENGNFVGPPTIISNVKPSMTCYK                  | 1.108367975        | 2                | 3.4293299 |
| Q02253        | IVNDNPYNGNTAIFTTNGAIAR                     | 1.301747374        | 2                | 5.5731106 |
| Q02253        | KWLPELVER                                  | 0.839928687        | 2                | 2.3247519 |
| Q02253        | LITLEQ GK                                  | 1.123381166        | 2                | 2.8983209 |
| Q02253        | LLQDSGAPDGTLLNIIHGQHEAVNFICDHPDIK          | 1.471108206        | 3                | 4.8217893 |
| Q02253        | NHGVVMPDANK                                | 0.92582944         | 1                | 3.2806602 |
| Q02253        | NHGVVMPDANK+Oxidation(6)                   | 1.288102529        | 2                | 3.1134465 |
| Q02253        | NHGVVMPDANKENTLNQLVGAAFGAAGQR              | 1.111905644        | 3                | 6.381166  |
| Q02253        | NHGVVMPDANKENTLNQLVGAAFGAAGQR+Oxidation(6) | 1.104285102        | 3                | 4.8173294 |
| Q02253        | QGIQFYTLK                                  | 1.222643191        | 2                | 2.8542147 |
| Q02253        | SDKWIDIHNPATNEVVGR                         | 1.079830529        | 2                | 5.5921898 |
| Q02253        | TITSQWKEEDATLSSPAVVMPTMGR                  | 0.905285883        | 2                | 5.4168496 |
| Q02253        | TLADAEGDVFR                                | 1.045178146        | 2                | 3.5708423 |
| Q02253        | VCNLIDSGAK                                 | 1.055831486        | 2                | 3.4710724 |
| Q02253        | VNAGDQPGADLGPLITPQAK                       | 1.003015308        | 2                | 5.9996481 |
| Q02253        | WIDIHNPATNEVVGR                            | 0.982844997        | 2                | 5.1088033 |
| Q02253        | WLPELVER                                   | 0.984320904        | 2                | 2.3146513 |
| Q02253        | YAHMVDVGVQVGNVPIVPLPMFSFTGSR               | 1.204098203        | 3                | 4.6379933 |
| <b>Q02769</b> | <b>FDFT Squalene synthase</b>              | <b>0.912974358</b> | <b>0.9835911</b> | <b>3</b>  |
| Q02769        | KLEDFVKPENVDVAVK                           | 0.890579669        | 3                | 4.2485256 |
| Q02769        | TQSLPNCQLISR                               | 0.680965535        | 2                | 2.5970662 |
| Q02769        | VVLEDFPTISLEFR                             | 1.14215085         | 2                | 3.9108241 |
| <b>Q02974</b> | <b>KHK Ketohexokinase</b>                  | <b>1.187018254</b> | <b>8.862E-05</b> | <b>9</b>  |
| Q02974        | FGCQVAGK                                   | 0.793753068        | 2                | 2.8788862 |
| Q02974        | GATLICAWAEEGADALPGDQQLLHSDAFPPPR           | 1.175693797        | 3                | 5.8630915 |
| Q02974        | GGNASNSCTVLSLLGAR                          | 1.11712931         | 2                | 4.6608043 |
| Q02974        | GNSMQEALR                                  | 0.882916343        | 2                | 3.1839812 |
| Q02974        | GVDVSQVAWQSQGDTPCCSCCIVNNSNGSR             | 1.067962624        | 3                | 5.3071775 |
| Q02974        | IEQYNATQPLQKQ                              | 1.078506555        | 2                | 4.7712679 |
| Q02974        | RGVDVSQVAWQSQGDTPCCSCCIVNNSNGSR            | 1.364731229        | 3                | 6.3650312 |
| Q02974        | TIILYDTNLPDVSAK                            | 1.051953661        | 2                | 4.8229461 |
| Q02974        | VSVEIEKPR                                  | 1.352240654        | 2                | 2.4105754 |
| <b>Q03248</b> | <b>BUP1 Beta_ureidopropionase</b>          | <b>1.327357427</b> | <b>9.9E-20</b>   | <b>13</b> |
| Q03248        | AHHDLYGYFGSSYVAAPDGSR                      | 1.155065919        | 2                | 6.2992635 |
| Q03248        | EKLPWTEFAESAEDGLTTR                        | 0.934556377        | 3                | 5.0119038 |
| Q03248        | ELAEAVKPNYSPNIVK                           | 1.115176395        | 2                | 4.3285551 |
| Q03248        | ELAEAVKPNYSPNIVKEDLVLPSSG                  | 1.105223124        | 3                | 3.4354622 |
| Q03248        | HLPDDLQVK                                  | 1.065653074        | 2                | 2.3069043 |
| Q03248        | HNMVVISPILER                               | 1.093530063        | 3                | 3.4370394 |
| Q03248        | IPLPTSAPVAEQVSALHK                         | 1.314650135        | 3                | 5.0664625 |
| Q03248        | KHNMVVISPILER                              | 1.074440368        | 3                | 3.5250165 |
| Q03248        | KHNMVVISPILER+Oxidation(4)                 | 1.139469329        | 2                | 2.782517  |
| Q03248        | NAAIANHCFTCALNR                            | 1.373941043        | 2                | 4.7179766 |
| Q03248        | VGDFNESTYYMEGNLGHVPFQTQFGR                 | 1.511419337        | 3                | 4.8064084 |
| Q03248        | VGQEHYPNEFTSGDGK                           | 1.194311109        | 2                | 4.4050584 |
| Q03248        | VGQEHYPNEFTSGDGK                           | 1.24839871         | 3                | 5.1903768 |
| <b>Q03336</b> | <b>RGN Regucalcin</b>                      | <b>1.111475893</b> | <b>9.9E-20</b>   | <b>19</b> |
| Q03336        | CGESPVWEEASK                               | 1.109909302        | 2                | 4.5669661 |
| Q03336        | CLLFVDIPSK                                 | 1.626964687        | 2                | 3.2682641 |
| Q03336        | DEQIPDGMCIDVEGK                            | 0.791421221        | 2                | 4.6349182 |
| Q03336        | DYSEMYVTCAR                                | 0.684507348        | 2                | 2.5019276 |

|               |                                                        |                    |                  |           |
|---------------|--------------------------------------------------------|--------------------|------------------|-----------|
| Q03336        | FCALNWEDQSVFILAMVDEDKK                                 | 3.161940284        | 3                | 4.1936593 |
| Q03336        | FNDGKVDPAGR                                            | 1.144730211        | 2                | 2.7162256 |
| Q03336        | GIAPYSYAG                                              | 1.870277613        | 2                | 2.538486  |
| Q03336        | HQGSLSLFPDHSVK                                         | 1.639684937        | 2                | 4.5976048 |
| Q03336        | IECVLR                                                 | 1.004923564        | 2                | 2.4185736 |
| Q03336        | KYFDQVDISNGLDWSLDHK                                    | 0.994581048        | 3                | 5.2056651 |
| Q03336        | LWVACYNGGR                                             | 1.110017691        | 2                | 3.1024957 |
| Q03336        | MEKDEQIPDGMCIDVEGK                                     | 1.09436664         | 2                | 5.2970591 |
| Q03336        | MEKDEQIPDGMCIDVEGK+Oxidation(1)                        | 1.273533598        | 2                | 4.6225829 |
| Q03336        | MEKDEQIPDGMCIDVEGK+Oxidation(11)                       | 1.331371066        | 2                | 2.7157123 |
| Q03336        | QSGGYVATIGTK                                           | 0.993626411        | 2                | 2.7760379 |
| Q03336        | VGVDAPVSSVALR                                          | 1.162665104        | 2                | 3.7155218 |
| Q03336        | YFAGTMAEETAPAVLER                                      | 1.126290337        | 2                | 5.8258934 |
| Q03336        | YFAGTMAEETAPAVLER+Oxidation(6)                         | 1.234646674        | 2                | 5.4203315 |
| Q03336        | YFDQVDISNGLDWSLDHK                                     | 1.052413628        | 2                | 4.5285082 |
| <b>Q03410</b> | <b>SYCP1 Synaptonemal complex protein 1</b>            | <b>0.970651663</b> | <b>0.7775538</b> | <b>4</b>  |
| Q03410        | ATVDEAVKLQKEIDLR                                       | 1.409506882        | 2                | 2.3664908 |
| Q03410        | ISEEKLLGEVEK                                           | 0.933129524        | 2                | 2.308816  |
| Q03410        | LQDENLK                                                | 1.066883444        | 1                | 1.9886557 |
| Q03410        | NIEELHQENKALK                                          | 1.100059948        | 1                | 1.908851  |
| <b>Q03626</b> | <b>MUG1 Murinoglobulin_1</b>                           | <b>1.201702373</b> | <b>5.965E-05</b> | <b>7</b>  |
| Q03626        | EESSCIHSSCTAER                                         | 1.069221745        | 2                | 4.145669  |
| Q03626        | ESVVFVQTDKPVYKPGQSVK                                   | 0.713890495        | 3                | 3.4696696 |
| Q03626        | GGEFEMMPLGVNK                                          | 0.918800904        | 2                | 3.1500037 |
| Q03626        | LTAQPAPSPEDLALSMGTIK                                   | 1.433018665        | 3                | 3.9513025 |
| Q03626        | NLHPLNELFPLAYIEDPK                                     | 1.611578959        | 3                | 4.1147532 |
| Q03626        | VQTVPLTCNNPK                                           | 1.13708333         | 2                | 2.7707629 |
| Q03626        | VYHKEESSCIHSSCTAER                                     | 0.814435712        | 2                | 5.4654827 |
| <b>Q04462</b> | <b>SYVC Valyl_tRNA synthetase</b>                      | <b>1.160914053</b> | <b>0.0863643</b> | <b>3</b>  |
| Q04462        | ADFPAGIPECGTDALR                                       | 0.863149615        | 2                | 2.4042079 |
| Q04462        | ALNPLEEWLR                                             | 1.161046607        | 2                | 2.3018289 |
| Q04462        | SVTQQPGSEITAPQK                                        | 0.991540379        | 2                | 3.8938954 |
| <b>Q05144</b> | <b>RAC2 Ras_related C3 botulinum toxin substrate 2</b> | <b>0.947203878</b> | <b>0.4410485</b> | <b>2</b>  |
| Q05144        | MQAIKCVVVDGAVGK+Oxidation(1)                           | 1.146104747        | 2                | 2.6081522 |
| Q05144        | YLECSALTQR                                             | 1.037018187        | 2                | 3.0004013 |
| <b>Q06647</b> | <b>ATPO ATP synthase subunit O_mitochondrial</b>       | <b>1.032074093</b> | <b>0.0001322</b> | <b>8</b>  |
| Q06647        | FSPLTANLMNLLAENGR                                      | 1.343590268        | 2                | 3.9645762 |
| Q06647        | GEVPCTVTTAFPLDEAVLSELK                                 | 1.188786818        | 2                | 5.3316293 |
| Q06647        | GQILNLEVK                                              | 1.11883274         | 2                | 2.6649199 |
| Q06647        | LGNTQGVISAFSTIMSVHR                                    | 1.276031927        | 3                | 4.7192335 |
| Q06647        | TDPSIMGGMIVR                                           | 0.858048943        | 2                | 3.2698147 |
| Q06647        | TVLNSFLSK                                              | 0.975169293        | 2                | 2.7549849 |
| Q06647        | VSLAVLNPIYIK                                           | 0.967995133        | 2                | 3.671344  |
| Q06647        | YATALYSAASK                                            | 1.09275903         | 1                | 2.1203513 |
| <b>Q07071</b> | <b>GCKR Glucokinase regulatory protein</b>             | <b>1.059930346</b> | <b>0.0004064</b> | <b>12</b> |
| Q07071        | AAPISCHVQVAHEK                                         | 1.074611196        | 2                | 4.8035679 |
| Q07071        | CQNIQALVHSTVQGSLPAPLKK                                 | 1.05526543         | 3                | 4.8591132 |
| Q07071        | GFLIGDHSDFNQK                                          | 1.125321535        | 2                | 2.5675671 |
| Q07071        | GLGQKPLYTYLIAGGDR                                      | 1.111905032        | 2                | 2.6085892 |
| Q07071        | LLGQCDAEIFQEEGQIVPTYQR                                 | 1.719969539        | 2                | 4.9563613 |
| Q07071        | LYSESVLTTMLQVAGK                                       | 1.141936539        | 2                | 3.2973084 |
| Q07071        | QEAFLNPAIGPEGLSGSSR                                    | 0.985618638        | 2                | 4.2494245 |
| Q07071        | TVDQGVVSSQR                                            | 1.028885447        | 2                | 3.6549759 |
| Q07071        | VIPTALLSLLLR                                           | 2.202556886        | 2                | 3.4090471 |
| Q07071        | VQEVLEKPDGGLVVLGGGTSGR                                 | 1.175394623        | 2                | 5.2364168 |
| Q07071        | WVLNTVSTGAHVLLGK                                       | 1.052602726        | 2                | 3.4379346 |
| Q07071        | YQHVIETPEPGEWELSGYEAAPITEK                             | 1.086396516        | 3                | 4.0108991 |

|               |                                                                    |                    |                  |           |
|---------------|--------------------------------------------------------------------|--------------------|------------------|-----------|
| <b>Q07116</b> | <b>SUOX Sulfite oxidase_ mitochondrial</b>                         | <b>0.931542183</b> | <b>0.2667247</b> | <b>8</b>  |
| Q07116        | AVDDSYNVQPDTVAPIWNLR                                               | 1.021899913        | 2                | 5.1738586 |
| Q07116        | ETEAHVCFEGLSDSPTGTAYGASIPLAR                                       | 0.932491089        | 3                | 4.5054493 |
| Q07116        | HEVTVTLQCAGNR                                                      | 1.144364152        | 2                | 3.0959871 |
| Q07116        | INSQRPFNAEPPPELLTESYITPNPIFFTR                                     | 1.703994821        | 3                | 4.4771695 |
| Q07116        | MSPPLEASDPYSNDPMPR                                                 | 0.531969286        | 2                | 3.9383407 |
| Q07116        | NHLPVPNLDPDTYR                                                     | 1.020798555        | 2                | 2.7980409 |
| Q07116        | VSVSEESYSHWQR                                                      | 1.036384359        | 2                | 4.0365057 |
| Q07116        | VVVPGVVGAR                                                         | 0.900819595        | 2                | 2.7468746 |
| <b>Q07205</b> | <b>IF5 Eukaryotic translation initiation factor 5</b>              | <b>1.297371325</b> | <b>0.0305496</b> | <b>2</b>  |
| Q07205        | AMGPLVLTEVLFDEK                                                    | 1.474574817        | 2                | 3.5494287 |
| Q07205        | TVIVNMVDVAK                                                        | 0.940721479        | 2                | 2.3506551 |
| <b>Q07523</b> | <b>HAOX2 Hydroxyacid oxidase 2</b>                                 | <b>1.003327653</b> | <b>0.0023168</b> | <b>14</b> |
| Q07523        | ALKEEKPTQSVPVSPFK                                                  | 1.169487399        | 2                | 4.623282  |
| Q07523        | ALVITIDTPVLGNR                                                     | 1.04803372         | 2                | 4.0097218 |
| Q07523        | ASFCWNDLSLLQSITR                                                   | 1.601002034        | 2                | 4.5891027 |
| Q07523        | CMTLSGCQSVAEISPDLIQFSR                                             | 1.309554117        | 2                | 3.5483444 |
| Q07523        | EDAELAMK                                                           | 1.072352167        | 1                | 1.9418131 |
| Q07523        | E EKPTQSVPVSPFK                                                    | 0.968276201        | 2                | 2.9446421 |
| Q07523        | EVL DILTAELHR                                                      | 1.039298605        | 2                | 3.1739099 |
| Q07523        | GEDGVKEVDILTAELHR                                                  | 1.551487251        | 3                | 5.5453897 |
| Q07523        | HN VQGIVVSNHGGR                                                    | 1.057463554        | 3                | 6.2227154 |
| Q07523        | NQLNLEANILK                                                        | 1.043873002        | 2                | 3.6193817 |
| Q07523        | QLDEV SASIDALR                                                     | 1.143580591        | 2                | 3.1190197 |
| Q07523        | TGTDV LK                                                           | 0.832790973        | 2                | 2.3173862 |
| Q07523        | TSWDFIEGEADDGITYSENIAAFK                                           | 1.127752378        | 2                | 4.4510803 |
| Q07523        | TTIQQEISAPICISPTAFHSIAWPDGEK                                       | 1.413389596        | 3                | 3.7710004 |
| <b>Q07936</b> | <b>ANXA2 Annexin A2</b>                                            | <b>1.071150457</b> | <b>0.9820729</b> | <b>4</b>  |
| Q07936        | AEDGSVIDYELIDQDAR                                                  | 1.037658346        | 2                | 3.9010856 |
| Q07936        | GLGTDEDSLIEICSR                                                    | 1.026729289        | 2                | 3.9755836 |
| Q07936        | GVDEV TIVNILTNR                                                    | 0.883956267        | 2                | 3.825793  |
| Q07936        | TNQELQEINR                                                         | 1.105925346        | 2                | 3.1078367 |
| <b>Q07984</b> | <b>SSRD Translocon_ associated protein subunit delta</b>           | <b>1.176050194</b> | <b>1.695E-06</b> | <b>2</b>  |
| Q07984        | FFDEESYLLR                                                         | 1.19627126         | 2                | 3.1284254 |
| Q07984        | NNEDVSIIPPLFTVSVDHR                                                | 1.195881836        | 2                | 4.2767444 |
| <b>Q08163</b> | <b>CAP1 Adenylyl cyclase_ associated protein 1</b>                 | <b>1.000321228</b> | <b>0.7347801</b> | <b>9</b>  |
| Q08163        | ALLVTASQCQQPAGNK                                                   | 0.989959079        | 2                | 4.2245893 |
| Q08163        | AYLSIWTELQAYIK                                                     | 0.864934783        | 2                | 2.3013761 |
| Q08163        | ELSGLPSGSPVSGSPPPPPGPPPPVPTSSGSDSASR                               | 1.021846978        | 3                | 4.7065725 |
| Q08163        | LEAVSHTSDMHCGYGDSPSK                                               | 0.965034           | 3                | 5.0152574 |
| Q08163        | LSDLLAPISEQIQEVITFR                                                | 1.006616947        | 2                | 4.0040836 |
| Q08163        | NSLDCEIVSAK                                                        | 0.848894935        | 2                | 2.3519025 |
| Q08163        | SALFAQINQGESITHALK                                                 | 1.124488861        | 2                | 4.5649428 |
| Q08163        | SSEMNVLIPTEGGDFNEFPVPEQFK                                          | 1.037899221        | 2                | 4.0718517 |
| Q08163        | VENQENVSNLVIDDTELK                                                 | 1.184372204        | 2                | 5.1297503 |
| <b>Q08415</b> | <b>KAT1 Kynurenine_ oxoglutarate transaminase 1_ mitochondrial</b> | <b>1.125435025</b> | <b>2.68E-08</b>  | <b>3</b>  |
| Q08415        | EQQHFGQPSSYFLQLPQAMELNR                                            | 1.064936076        | 3                | 4.8486123 |
| Q08415        | ILVLNTPNNPLGK                                                      | 2.100664013        | 2                | 3.3861182 |
| Q08415        | LGASNDWQLDPAELASK                                                  | 0.817631529        | 2                | 3.9809077 |
| <b>Q09073</b> | <b>ADT2 ADP/ATP translocase 2</b>                                  | <b>0.848360181</b> | <b>9.9E-20</b>   | <b>7</b>  |
| Q09073        | DFLAGGVAAAIK                                                       | 0.687403275        | 2                | 5.010078  |
| Q09073        | GLGDCLVK                                                           | 0.99535403         | 2                | 2.8750925 |
| Q09073        | GMGGAFVLVLYDEIKK                                                   | 1.389959888        | 2                | 3.615104  |
| Q09073        | GTDIMYGTLDLCWR                                                     | 0.95679043         | 2                | 3.5593264 |
| Q09073        | KGTDIMYGTLDLCWR                                                    | 1.036802847        | 2                | 4.0316596 |
| Q09073        | LLLQVQHASK                                                         | 1.860811728        | 2                | 2.7410066 |



|               |                                                           |                    |                  |           |
|---------------|-----------------------------------------------------------|--------------------|------------------|-----------|
| Q09073        | QIFLGGVDKR                                                | 1.210095792        | 2                | 2.3789258 |
| <b>Q0D2L3</b> | <b>SPEB Agmatinase_mitochondrial</b>                      | <b>0.973792172</b> | <b>0.9868545</b> | <b>9</b>  |
| Q0D2L3        | EAYQNILATGCIPLTLGGDHTITYPILQAVAK                          | 1.260602442        | 3                | 3.3952732 |
| Q0D2L3        | EESLMLGTVNPSTGALPFQSLR                                    | 1.017726409        | 2                | 3.8936787 |
| Q0D2L3        | EHGPVGLVHVGHAHSNTSDKPLEDK                                 | 0.995387477        | 3                | 3.4747517 |
| Q0D2L3        | IREESLMLGTVNPSTGALPFQSLR                                  | 0.876491525        | 3                | 4.7715173 |
| Q0D2L3        | SVDEGLLDSK                                                | 0.922198954        | 1                | 1.9267424 |
| Q0D2L3        | SVDEGLLDSKR                                               | 0.974995085        | 2                | 3.0795448 |
| Q0D2L3        | VADLGNVNVNLYNLQDSCR                                       | 1.243862935        | 2                | 5.1782093 |
| Q0D2L3        | VCSMMHLPLQSSPEGLDAAFVGVPLDTGTSNRPGAR                      | 1.258378962        | 3                | 5.7594595 |
| Q0D2L3        | VVLAEDCWMK                                                | 1.054816783        | 2                | 2.4059024 |
| <b>Q0VAV2</b> | <b>EXPH5 Exophilin_5</b>                                  | <b>1.253321245</b> | <b>0.0238421</b> | <b>2</b>  |
| Q0VAV2        | DMDVSVSKDEQLNK+Oxidation(2)                               | 1.246177239        | 2                | 2.5288298 |
| Q0VAV2        | SLSDQDPGQEQREEK                                           | 1.259104555        | 2                | 2.3045316 |
| <b>Q0VGK3</b> | <b>GLCTK Glycerate kinase</b>                             | <b>1.001495623</b> | <b>0.1171887</b> | <b>6</b>  |
| Q0VGK3        | ADSDPHGPHTCGHVNLVIIGSNSLALAEQAR                           | 1.026365367        | 3                | 4.8208537 |
| Q0VGK3        | AVLGMAAAADLLGQHLVQGVISVPK                                 | 1.015129949        | 2                | 4.8497238 |
| Q0VGK3        | GATIQELNTR                                                | 1.012159942        | 2                | 2.8682175 |
| Q0VGK3        | LHQLAAELQLPDLQEEALEAVAK                                   | 1.65145101         | 3                | 3.6100905 |
| Q0VGK3        | QLFDSAVGAVQPGPMLQR                                        | 0.996610936        | 2                | 4.8058043 |
| Q0VGK3        | VAAACLSSTAERPLEEAK                                        | 1.352037725        | 2                | 3.2018576 |
| <b>Q0ZHH6</b> | <b>ATLA3 Atlastin_3</b>                                   | <b>0.935552372</b> | <b>2.431E-14</b> | <b>8</b>  |
| Q0ZHH6        | ALASVLLQDHIR                                              | 1.377770022        | 2                | 2.6554587 |
| Q0ZHH6        | EHQHEEIQNVR                                               | 1.045658017        | 2                | 3.6059101 |
| Q0ZHH6        | EQLQTLIPYVNLNSK                                           | 1.215070877        | 2                | 3.2664919 |
| Q0ZHH6        | GGSDPETTGIIQWSEVFTVK                                      | 2.908165959        | 2                | 2.3586032 |
| Q0ZHH6        | IYQGEDLPHPK                                               | 1.167921247        | 2                | 2.7885795 |
| Q0ZHH6        | LAMDEIFQKPFQTLMLFVR+Oxidation(3)                          | 0.993451256        | 2                | 2.4899938 |
| Q0ZHH6        | YQQELEEEITELYENFCK                                        | 2.266557871        | 2                | 5.3272038 |
| Q0ZHH6        | YSGQYLELGGAIDSGAAYVLEQASSHIGNSTQAAVR                      | 1.269667721        | 3                | 3.3651636 |
| <b>Q10728</b> | <b>MYPT1 Protein phosphatase 1 regulatory subunit 12A</b> | <b>1.243450155</b> | <b>0.2209137</b> | <b>2</b>  |
| Q10728        | QEEKKESEVSR                                               | 1.054119854        | 2                | 2.3390622 |
| Q10728        | SLLEMEKRER+Oxidation(5)                                   | 1.23111936         | 2                | 2.4004445 |
| <b>Q10758</b> | <b>K2C8 Keratin_type II cytoskeletal 8</b>                | <b>0.985163159</b> | <b>0.217173</b>  | <b>25</b> |
| Q10758        | AEAETMYQIK                                                | 1.041194291        | 2                | 3.1226988 |
| Q10758        | AQYEEIANR                                                 | 0.910568492        | 2                | 3.1660082 |
| Q10758        | ATLEAAIADAEQR                                             | 0.948513181        | 2                | 4.7069149 |
| Q10758        | DVDEAYMNVKVELESR                                          | 2.772159376        | 2                | 3.5638745 |
| Q10758        | ELQSQISDTSVVLMSMDNSR                                      | 0.872992995        | 2                | 5.9661584 |
| Q10758        | GSLGGFGGAGVGGITAVTVNQSLNPLK                               | 0.991075194        | 2                | 4.7480907 |
| Q10758        | KDVDEAYMNVK                                               | 1.060931202        | 2                | 2.5767381 |
| Q10758        | LEGLTDEINFLR                                              | 1.04475854         | 2                | 4.051198  |
| Q10758        | LESGMQNMSIHTK                                             | 1.048361599        | 2                | 4.1818724 |
| Q10758        | LEVDPNIQAVR                                               | 0.899682334        | 2                | 3.8302729 |
| Q10758        | LEVELGNMQGLVEDFK                                          | 1.063922279        | 2                | 4.9688492 |
| Q10758        | LQAEIDALK                                                 | 1.073289897        | 2                | 2.9753063 |
| Q10758        | LVSESSDIMSK                                               | 0.889083796        | 2                | 3.323247  |
| Q10758        | QHHEEIR                                                   | 0.981800967        | 1                | 2.3162658 |
| Q10758        | QLEALGQEK                                                 | 0.937126865        | 1                | 2.1501966 |
| Q10758        | SKTEISEMNR                                                | 0.966784465        | 2                | 3.0839772 |
| Q10758        | SKTEISEMNR+Oxidation(8)                                   | 1.417701457        | 2                | 3.093941  |
| Q10758        | SLDMDSIIAEVR                                              | 0.946202798        | 2                | 4.9394646 |
| Q10758        | SNMDNMFESYINLR                                            | 1.368112322        | 2                | 4.0559406 |
| Q10758        | SRAEAETMYQIK                                              | 1.193725677        | 2                | 3.441726  |
| Q10758        | TEISEMNR                                                  | 0.866719209        | 2                | 2.4447439 |
| Q10758        | TEMENEFVLIK                                               | 0.998216767        | 2                | 3.6518655 |
| Q10758        | TEMENEFVLIK+Oxidation(3)                                  | 1.095614265        | 2                | 2.4087124 |

|               |                                                                            |                    |                  |           |
|---------------|----------------------------------------------------------------------------|--------------------|------------------|-----------|
| Q10758        | WLLQQQK                                                                    | 0.933277429        | 2                | 2.9341412 |
| Q10758        | YEELQTLAGK                                                                 | 1.056466013        | 2                | 3.5622599 |
| <b>Q14DH7</b> | <b>ACSS3 Acyl_CoA synthetase short_chain family member 3_mitochondrial</b> | <b>1.066977261</b> | <b>0.9904211</b> | <b>6</b>  |
| Q14DH7        | CVPGYNVMIILDDNMQK                                                          | 1.014164428        | 2                | 2.6326315 |
| Q14DH7        | STLSALVNGKPYK                                                              | 1.179957018        | 2                | 2.4502079 |
| Q14DH7        | THFAASVADPER                                                               | 1.107841276        | 2                | 3.6742272 |
| Q14DH7        | VDDVINVAGHR                                                                | 1.050141404        | 2                | 3.7452745 |
| Q14DH7        | VLAEHGVAALFTAPTAIR                                                         | 1.202227057        | 2                | 4.4512239 |
| Q14DH7        | VTPTIEDPSIFGHIEEVK                                                         | 1.112398596        | 2                | 2.9120989 |
| <b>Q1HCL7</b> | <b>NAKD1 NAD kinase domain_containing protein 1</b>                        | <b>1.064670762</b> | <b>9.9E-20</b>   | <b>10</b> |
| Q1HCL7        | ASYYEISVDDGDPWEK                                                           | 0.838193928        | 2                | 2.5273929 |
| Q1HCL7        | LKPVIGVNTDPER                                                              | 1.552622651        | 2                | 2.8849609 |
| Q1HCL7        | LYLEGTGINPSPVDLHEQQLSLNQHSR                                                | 1.007131739        | 3                | 4.7100177 |
| Q1HCL7        | NVEHIIDSLRDEGIEVR                                                          | 1.377152043        | 2                | 3.4555216 |
| Q1HCL7        | QGNLTLPLNK                                                                 | 0.962018469        | 2                | 2.3382421 |
| Q1HCL7        | REYDEETVR                                                                  | 1.026228518        | 2                | 2.4480557 |
| Q1HCL7        | SEASGPQLLPVR                                                               | 0.870383274        | 2                | 2.9511034 |
| Q1HCL7        | SSGLNLCTGTGSK                                                              | 0.915368123        | 2                | 3.8541992 |
| Q1HCL7        | VTNEYNESLLYSPPEPK                                                          | 1.238972549        | 2                | 4.4638548 |
| Q1HCL7        | YTHSFPEALQK                                                                | 1.008720785        | 2                | 2.5983191 |
| <b>Q1JU68</b> | <b>EIF3A Eukaryotic translation initiation factor 3 subunit A</b>          | <b>1.114255841</b> | <b>0.9539656</b> | <b>3</b>  |
| Q1JU68        | EQPEKEPELQYVPLQNNTILR                                                      | 1.022327993        | 3                | 3.4421365 |
| Q1JU68        | LLDMDGIIVEK                                                                | 1.022482353        | 2                | 2.5557363 |
| Q1JU68        | NQLTAMSSVLAK                                                               | 1.118155929        | 2                | 2.6500676 |
| <b>Q29RW1</b> | <b>MYH4 Myosin_4</b>                                                       | <b>0.969765305</b> | <b>0.9982488</b> | <b>14</b> |
| Q29RW1        | ANLMQAEIEELR                                                               | 1.403027699        | 2                | 3.0106771 |
| Q29RW1        | ELENEVENEQKR                                                               | 2.539262311        | 2                | 2.987618  |
| Q29RW1        | LAQESTMDIENDKQQLDEK                                                        | 3.238416479        | 2                | 4.9408793 |
| Q29RW1        | LQDAEEHVEAVNSK                                                             | 2.989636951        | 2                | 4.5620232 |
| Q29RW1        | LQDLVDKLTQK                                                                | 1.044070603        | 1                | 1.938905  |
| Q29RW1        | MEGDLNEMEIQLNHANR                                                          | 1.144252947        | 2                | 4.3416791 |
| Q29RW1        | NAYEESLDQLETLK                                                             | 0.784268793        | 2                | 4.5788836 |
| Q29RW1        | NAYEESLDQLETLKR                                                            | 0.903549725        | 2                | 4.0542212 |
| Q29RW1        | SELQASLEEAASLEHEEGK                                                        | 1.227193555        | 2                | 5.2872615 |
| Q29RW1        | SNAACAALDKK                                                                | 0.755328174        | 2                | 2.4514601 |
| Q29RW1        | TEGGATVTK                                                                  | 1.029254373        | 2                | 2.6918921 |
| Q29RW1        | TKLEQQVDDLEGSLEQEK                                                         | 0.727193041        | 2                | 5.6553082 |
| Q29RW1        | TKLEQQVDDLEGSLEQEKK                                                        | 2.007400973        | 3                | 5.1082854 |
| Q29RW1        | VRELENEVENEQKR                                                             | 1.816489115        | 3                | 3.7075274 |
| <b>Q2EMV9</b> | <b>PAR14 Poly [ADP_ribose] polymerase 14</b>                               | <b>1.146176966</b> | <b>0.6541089</b> | <b>3</b>  |
| Q2EMV9        | LIISEVLK                                                                   | 1.113023624        | 2                | 2.5172019 |
| Q2EMV9        | LQEELTR                                                                    | 1.162721296        | 1                | 2.1176682 |
| Q2EMV9        | VLVEFEKESLNIAGK                                                            | 1.250231706        | 2                | 2.586993  |
| <b>Q2V057</b> | <b>PROD2 Probable proline dehydrogenase 2</b>                              | <b>0.88936366</b>  | <b>0.0008454</b> | <b>8</b>  |
| Q2V057        | ASIYQFVAGETAEEVR                                                           | 0.9805181          | 2                | 4.2211547 |
| Q2V057        | EDCTQPDYEATSR                                                              | 0.900679137        | 2                | 3.5425134 |
| Q2V057        | GCVQQLQAIGLQPLAVPTTEEPDAAK                                                 | 1.18761921         | 2                | 4.8077049 |
| Q2V057        | NLQLSCLSTEQNQHLOASLSR                                                      | 1.129998781        | 2                | 5.7599578 |
| Q2V057        | REQALLSQELWR                                                               | 1.066055996        | 2                | 3.0952234 |
| Q2V057        | SIPYGCLEEVIPYLIR                                                           | 1.53223335         | 2                | 4.1155434 |
| Q2V057        | SVTQLHGKEDCTQPDYEATSR                                                      | 0.885257535        | 3                | 4.6104064 |
| Q2V057        | TSEAWYEGNLSAMLHCVDLSR                                                      | 0.788038489        | 2                | 2.6297503 |
| <b>Q32LZ8</b> | <b>PLPL5 Patatin_like phospholipase domain_containing protein 5</b>        | <b>0.90804083</b>  | <b>0.7917798</b> | <b>2</b>  |
| Q32LZ8        | FGSSSGALNAMAIVFGK                                                          | 0.974156424        | 2                | 2.41137   |

|               |                                                                            |                    |                  |           |
|---------------|----------------------------------------------------------------------------|--------------------|------------------|-----------|
| Q32LZ8        | NFIVTDFATR                                                                 | 0.897573297        | 1                | 1.9015322 |
| <b>Q3B7D0</b> | <b>HEM6 Coproporphyrinogen_III oxidase_mitochondrial</b>                   | <b>0.997880914</b> | <b>0.9094454</b> | <b>2</b>  |
| Q3B7D0        | HCDDSYTPQDK                                                                | 1.010908171        | 2                | 3.4069324 |
| Q3B7D0        | TCAEAVVPSYVPIVK                                                            | 0.851343865        | 2                | 2.6849611 |
| <b>Q3B7U9</b> | <b>FKBP8 Peptidyl_prolyl_cis_trans isomerase FKBP8</b>                     | <b>1.089088321</b> | <b>0.062101</b>  | <b>4</b>  |
| Q3B7U9        | SCSQVLEHQPDNIK                                                             | 1.062211396        | 2                | 4.1763515 |
| Q3B7U9        | TAEDGPDLEMLSGQER                                                           | 1.029967482        | 2                | 4.1231556 |
| Q3B7U9        | VDMTCEEEEEELLQK                                                            | 1.419450274        | 2                | 4.1400018 |
| Q3B7U9        | VLAQQGEYSEAIPILR                                                           | 1.020496407        | 2                | 3.7766604 |
| <b>Q3B8Q2</b> | <b>IF4A3 Eukaryotic initiation factor 4A_III</b>                           | <b>1.13439289</b>  | <b>0.8292281</b> | <b>2</b>  |
| Q3B8Q2        | GIYAYGFEKPSAIQQR                                                           | 1.110354912        | 2                | 4.6673646 |
| Q3B8Q2        | GIYAYGFEKPSAIQRAIK                                                         | 1.084765234        | 2                | 2.4085159 |
| <b>Q3KR86</b> | <b>IMMT Mitochondrial inner membrane protein (Fragment)</b>                | <b>0.93805892</b>  | <b>0.6433813</b> | <b>9</b>  |
| Q3KR86        | AVDEAADALLK                                                                | 1.237877451        | 2                | 2.5426533 |
| Q3KR86        | EIAGATPYITAAEEK                                                            | 0.802691478        | 2                | 3.0444267 |
| Q3KR86        | GIEQAVQSHAVAEEEAR                                                          | 1.013815532        | 2                | 4.865006  |
| Q3KR86        | QTITAQNAAVQAVK                                                             | 0.919195422        | 2                | 4.237041  |
| Q3KR86        | SEIQAEQDR                                                                  | 0.908350754        | 2                | 2.7994187 |
| Q3KR86        | SLEDALNQTATVTR                                                             | 0.965919083        | 2                | 3.9845688 |
| Q3KR86        | TSSAEMPTIPLGSAVEAIR                                                        | 0.963441324        | 2                | 3.845381  |
| Q3KR86        | VVSQYHELVVQAR                                                              | 1.154287514        | 2                | 3.5638661 |
| Q3KR86        | YSTSSSSGVTAGK                                                              | 0.701363881        | 2                | 2.7749963 |
| <b>Q3KRD8</b> | <b>IF6 Eukaryotic translation initiation factor 6</b>                      | <b>1.237329037</b> | <b>0.3775787</b> | <b>2</b>  |
| Q3KRD8        | HGLLVPNNTTDQELQHIR                                                         | 1.105309557        | 3                | 5.1027617 |
| Q3KRD8        | TSIEDQDELSSLLQVPLVAGTVNR                                                   | 1.069437774        | 3                | 4.4025826 |
| <b>Q3KRE0</b> | <b>ATAD3 ATPase family AAA domain_containing protein 3</b>                 | <b>1.039366139</b> | <b>0.9314445</b> | <b>2</b>  |
| Q3KRE0        | GEGTGPPLPPAQPAGAESGGDR                                                     | 1.080528389        | 2                | 2.6643276 |
| Q3KRE0        | ISVLEALR                                                                   | 1.011513233        | 2                | 2.6262798 |
| <b>Q3KRE8</b> | <b>TBB2B Tubulin beta_2B chain</b>                                         | <b>0.916975158</b> | <b>0.4401772</b> | <b>3</b>  |
| Q3KRE8        | ALTVPQLTQQMFDSK                                                            | 1.028507583        | 2                | 2.752089  |
| Q3KRE8        | ESESCDCLQGFQLTHSLGGGTGSGMGTLLISK                                           | 0.75399939         | 3                | 4.3838582 |
| Q3KRE8        | FWEVISDEHGIDPTGSHYHSDSLQLER                                                | 0.825852849        | 3                | 3.3713079 |
| <b>Q3MIB4</b> | <b>LONP2 Lon protease homolog 2_peroxisomal</b>                            | <b>1.04061766</b>  | <b>0.7025315</b> | <b>3</b>  |
| Q3MIB4        | GTSLQSTILGVIPNTPDPASDQDLPLHR                                               | 1.185462986        | 3                | 3.5931063 |
| Q3MIB4        | MEIIQVPGYTQEEK                                                             | 1.12647967         | 2                | 2.4991846 |
| Q3MIB4        | TVGVNPNVFLDDEVDK                                                           | 0.981101037        | 2                | 2.6168673 |
| <b>Q3MIE0</b> | <b>ECHD3 Enoyl_CoA hydratase domain_containing protein 3_mitochondrial</b> | <b>1.030593795</b> | <b>0.6863988</b> | <b>7</b>  |
| Q3MIE0        | DGQEGIEAFIQK                                                               | 0.6050882          | 2                | 3.4177194 |
| Q3MIE0        | SDILHEAESEDLK                                                              | 0.992396859        | 2                | 3.4632676 |
| Q3MIE0        | SDILHEAESEDLKVIISAEGPVFSSGHDLK                                             | 1.014292413        | 4                | 5.7589026 |
| Q3MIE0        | SSFATPGVNVGLFCSTPAVALGR                                                    | 1.07871996         | 2                | 4.1718054 |
| Q3MIE0        | VALEMLFTGEPISAQEALR                                                        | 1.185900238        | 2                | 4.0623159 |
| Q3MIE0        | VIIISAEGPVFSSGHDLK                                                         | 0.995038508        | 2                | 4.3347321 |
| Q3MIE0        | VVPEEQLEEEATR                                                              | 0.954755081        | 2                | 3.7635009 |
| <b>Q3MIF4</b> | <b>XYLB Xylulose kinase</b>                                                | <b>1.265450517</b> | <b>0.3799393</b> | <b>6</b>  |
| Q3MIF4        | FNADNMEVSAFP GDVEIR                                                        | 1.138883185        | 2                | 4.3376102 |
| Q3MIF4        | IRDESASCSWNK                                                               | 1.029829276        | 2                | 4.0870953 |
| Q3MIF4        | LGSPVPSCSVVGAISSYVQR                                                       | 1.571891692        | 2                | 3.257169  |
| Q3MIF4        | SAPQPSLAATPNPGASQVYAALLPR                                                  | 1.0223649          | 2                | 4.2276249 |
| Q3MIF4        | VVAFTGDNPASLAGMR                                                           | 1.026793309        | 2                | 3.9131114 |
| Q3MIF4        | YSPIDYSDGSGMNLQIQEK                                                        | 1.277330937        | 2                | 5.1585407 |
| <b>Q3T1J1</b> | <b>IF5A1 Eukaryotic translation initiation factor 5A_1</b>                 | <b>1.133512564</b> | <b>0.0149564</b> | <b>4</b>  |
| Q3T1J1        | EDLRLPEGDLGK                                                               | 1.103465003        | 2                | 2.8214815 |

|               |                                                                |                    |                  |           |
|---------------|----------------------------------------------------------------|--------------------|------------------|-----------|
| Q3T1J1        | EDLRLPEGDLGKEIEQK                                              | 1.162175998        | 2                | 4.5172548 |
| Q3T1J1        | NDFQLIGIQDGYLSLLQDSGEVR                                        | 1.369802032        | 2                | 5.0849156 |
| Q3T1J1        | RNDFQLIGIQDGYLSLLQDSGEVR                                       | 1.386534239        | 3                | 3.6343074 |
| <b>Q3T1K5</b> | <b>CAZA2 F_actin_capping protein subunit alpha_2</b>           | <b>1.094945366</b> | <b>0.2462911</b> | <b>3</b>  |
| Q3T1K5        | FIIHAPPGEFNEVFNDVR                                             | 1.225507812        | 3                | 3.9893563 |
| Q3T1K5        | FTVTPSTTQVVGILK                                                | 1.095081695        | 2                | 3.8273704 |
| Q3T1K5        | LLLNNNDLLR                                                     | 1.029589936        | 2                | 2.6358628 |
| <b>Q3TVW5</b> | <b>TCHP Trichoplein keratin filament_binding protein</b>       | <b>1.41987659</b>  | <b>0.0001508</b> | <b>2</b>  |
| Q3TVW5        | RTQEIQEELEVDGRILQALLEK                                         | 1.478632967        | 2                | 2.6839876 |
| Q3TVW5        | TELGRFLKHQYNAQLNR                                              | 1.419869512        | 2                | 2.9140615 |
| <b>Q3U0J8</b> | <b>TBD2B TBC1 domain family member 2B</b>                      | <b>0.881658868</b> | <b>0.0112474</b> | <b>2</b>  |
| Q3U0J8        | DTTDIISQHPNPSAEK                                               | 0.821088156        | 2                | 2.4442785 |
| Q3U0J8        | QIELDLLRTLNNK                                                  | 1.244818828        | 2                | 2.7583845 |
| <b>Q3UHR0</b> | <b>BAHC1 BAH and coiled_coil domain_containing protein 1</b>   | <b>1.121461178</b> | <b>0.4488634</b> | <b>2</b>  |
| Q3UHR0        | ACEERLGLPGRELLQDNK                                             | 1.109653082        | 2                | 2.4086664 |
| Q3UHR0        | IESLWESWGSNMVVKV                                               | 1.233050795        | 2                | 2.3546765 |
| <b>Q3ULJ0</b> | <b>GPD1L Glycerol_3_phosphate dehydrogenase 1_like protein</b> | <b>1.004332283</b> | <b>0.0152644</b> | <b>3</b>  |
| Q3ULJ0        | GIDEGPDGLK                                                     | 0.985989465        | 2                | 2.5061524 |
| Q3ULJ0        | LGLMEMIAFAK                                                    | 1.57360647         | 2                | 3.9473653 |
| Q3ULJ0        | LTDIINNDHENVKYLPGHK                                            | 0.964076589        | 2                | 2.4556406 |
| <b>Q3UQ44</b> | <b>IQGA2 Ras GTPase_activating_like protein IQGAP2</b>         | <b>1.036209407</b> | <b>4.976E-12</b> | <b>16</b> |
| Q3UQ44        | ALVGSNPPLTVIR                                                  | 1.299862547        | 2                | 3.8953328 |
| Q3UQ44        | AWVQNLETQTGEASK                                                | 0.990884684        | 2                | 4.7910552 |
| Q3UQ44        | GVLLGIDDLQTNQFK                                                | 0.994344729        | 2                | 4.5893893 |
| Q3UQ44        | HTDNTVQWLR                                                     | 1.091468642        | 2                | 3.3322053 |
| Q3UQ44        | LFEGENEHLSMNNYLSEYQEFR                                         | 2.142408876        | 3                | 4.6941247 |
| Q3UQ44        | LGIAPQIQDLLGK                                                  | 1.668796312        | 2                | 2.9454262 |
| Q3UQ44        | LPYDVTTEQALTYPEVK                                              | 1.107950764        | 2                | 4.5700288 |
| Q3UQ44        | LPYDVTTEQALTYPEVKNK                                            | 1.481036511        | 2                | 2.413969  |
| Q3UQ44        | LSAEEMDER                                                      | 0.951094426        | 2                | 2.9014843 |
| Q3UQ44        | NPNAVLTCVDDSLSQEYQK                                            | 1.126393           | 2                | 5.3121805 |
| Q3UQ44        | SKVDQVQDIVTGNPTVIK                                             | 1.327823957        | 2                | 5.1066184 |
| Q3UQ44        | TLDTLLLPTANIR                                                  | 1.02003419         | 2                | 2.5964868 |
| Q3UQ44        | TLEQTGHVSSK                                                    | 0.583423959        | 2                | 3.1000104 |
| Q3UQ44        | VDFTEEEISNMR                                                   | 0.963605992        | 2                | 2.9212158 |
| Q3UQ44        | VDQVQDIVTGNPTVIK                                               | 1.124994853        | 2                | 5.2474108 |
| Q3UQ44        | YQDILNEIAK                                                     | 0.978065901        | 2                | 2.4315801 |
| <b>Q3UVR3</b> | <b>TTBK2 Tau_tubulin kinase 2</b>                              | <b>0.938177051</b> | <b>0.9429084</b> | <b>2</b>  |
| Q3UVR3        | NLADLR                                                         | 1.063559111        | 1                | 1.9026064 |
| Q3UVR3        | YKVLGSSNSDSLFSR                                                | 0.971733516        | 2                | 2.5264525 |
| <b>Q3V0K9</b> | <b>PLSI Plastin_1</b>                                          | <b>1.177862943</b> | <b>0.4159551</b> | <b>3</b>  |
| Q3V0K9        | AYFHLLNQIAPK                                                   | 1.147594428        | 2                | 2.8478479 |
| Q3V0K9        | KIENCNYAVELGK                                                  | 1.163308073        | 2                | 3.6742704 |
| Q3V0K9        | QFVTPADVVSIGNPK                                                | 1.017666173        | 2                | 3.3252251 |
| <b>Q3V132</b> | <b>ADT4 ADP/ATP translocase 4</b>                              | <b>0.984750658</b> | <b>0.259632</b>  | <b>2</b>  |
| Q3V132        | GNLANVIR                                                       | 0.982138189        | 2                | 2.66675   |
| Q3V132        | YFPTQALNFAFK                                                   | 1.590392314        | 2                | 3.3964787 |
| <b>Q497B0</b> | <b>NIT2 Omega_amidase NIT2</b>                                 | <b>1.058206654</b> | <b>6.106E-15</b> | <b>17</b> |
| Q497B0        | ADLYSVESK                                                      | 1.297508335        | 2                | 2.9150832 |
| Q497B0        | AGTEETILYSIDLK                                                 | 1.624797941        | 2                | 3.9639711 |
| Q497B0        | AGTEETILYSIDLKK                                                | 1.27197314         | 2                | 3.5245976 |
| Q497B0        | ASYVAWGHSTVVDPWGQVLTG                                          | 0.992930851        | 3                | 5.4896336 |
| Q497B0        | AVDNQVYVATASPAR                                                | 1.235765157        | 2                | 4.8727965 |
| Q497B0        | AVDNQVYVATASPARDEK                                             | 1.38566777         | 2                | 3.6477244 |
| Q497B0        | ENSIYLIGGSIPEDDGK                                              | 0.834976793        | 2                | 3.6388319 |

|               |                                                                   |                    |                  |           |
|---------------|-------------------------------------------------------------------|--------------------|------------------|-----------|
| Q497B0        | ENSIYLIGGSIPEDDGKLYNTCAVFGPDGNLLVK                                | 1.394982884        | 3                | 5.1707859 |
| Q497B0        | FAELAQIYAR                                                        | 1.032144621        | 2                | 3.5183346 |
| Q497B0        | GCQLLVYPGAFNMTTGAHWELLQR                                          | 1.099648982        | 3                | 3.5358479 |
| Q497B0        | IHLFDIDVPGK                                                       | 0.944006936        | 2                | 2.79053   |
| Q497B0        | KIHLFDIDVPGK                                                      | 1.390101526        | 3                | 4.5499835 |
| Q497B0        | LALIQLQVSSIK                                                      | 1.366464677        | 2                | 3.0684803 |
| Q497B0        | LYNTCAVFGPDGNLLVK                                                 | 1.082376302        | 2                | 3.9724419 |
| Q497B0        | QGANIVSLPECFNSPYGTNYFPEYAEK                                       | 1.242490821        | 3                | 5.2818007 |
| Q497B0        | TLSPGDSFSTFDTPYCR                                                 | 1.372029749        | 2                | 4.5212665 |
| Q497B0        | VGLGICYDMR                                                        | 1.084111344        | 2                | 2.557457  |
| <b>Q498D5</b> | <b>RMD2 Regulator of microtubule dynamics protein 2</b>           | <b>1.074839655</b> | <b>0.472881</b>  | <b>5</b>  |
| Q498D5        | ALNTHIEDLKLDVLLQK                                                 | 0.686215329        | 3                | 3.4408827 |
| Q498D5        | AYGDMYDLSTNTQEK                                                   | 0.568571208        | 2                | 3.5082846 |
| Q498D5        | FCNLALLLPIVTK                                                     | 1.077053624        | 2                | 2.7264235 |
| Q498D5        | GQLQILEK                                                          | 1.081745775        | 1                | 1.9462011 |
| Q498D5        | LNELLTNVEELKEEIK                                                  | 1.104381621        | 2                | 3.0980656 |
| <b>Q499N5</b> | <b>ACSF2 Acyl_CoA synthetase family member 2_ mitochondrial</b>   | <b>1.28301827</b>  | <b>0.0005789</b> | <b>8</b>  |
| Q499N5        | GATLSHHNIVNNSNLIGQR                                               | 1.275079889        | 2                | 4.6113591 |
| Q499N5        | GGENIYPAELEDFHFK                                                  | 1.335019747        | 2                | 3.3227532 |
| Q499N5        | GGVIAGSLAPPELIR                                                   | 1.361310034        | 2                | 2.8903847 |
| Q499N5        | GYCVMQGYWGEPQK                                                    | 0.949890947        | 2                | 2.887846  |
| Q499N5        | TFETVGQDR                                                         | 1.318874213        | 2                | 2.6509836 |
| Q499N5        | TGDIASMDEQGFCR                                                    | 1.26315947         | 2                | 3.7461553 |
| Q499N5        | TVGECLDATAQR                                                      | 1.319926455        | 2                | 2.9942217 |
| Q499N5        | YIVFVEGYPLTVSGK                                                   | 1.554322761        | 2                | 4.5227118 |
| <b>Q4AEF8</b> | <b>COPG Coatomer subunit gamma</b>                                | <b>1.338725119</b> | <b>0.1645636</b> | <b>5</b>  |
| Q4AEF8        | ALQQYTLEPSEKPFDLK                                                 | 1.210008228        | 2                | 3.3466134 |
| Q4AEF8        | FGAQNEEMLPSILVLLK                                                 | 1.166607481        | 2                | 3.9688385 |
| Q4AEF8        | SSPEPVALTESEYVIR                                                  | 1.153406648        | 2                | 4.712357  |
| Q4AEF8        | TLEEAVGNIVK                                                       | 1.05652674         | 2                | 2.3460269 |
| Q4AEF8        | VVLEHEEVR                                                         | 1.34604724         | 2                | 2.3060491 |
| <b>Q4FZT0</b> | <b>STML2 Stomatin_like protein 2</b>                              | <b>1.057174112</b> | <b>0.6577873</b> | <b>5</b>  |
| Q4FZT0        | AEQINQAAGEASAVLAK                                                 | 0.997426783        | 2                | 4.7905397 |
| Q4FZT0        | ASYGVEDPEYAVTQLAQTTMR                                             | 1.14005138         | 2                | 4.8377228 |
| Q4FZT0        | ATVLESEGTR                                                        | 1.041646642        | 2                | 2.6568921 |
| Q4FZT0        | ILEPGLNVLIPVLDR                                                   | 1.075878986        | 2                | 2.8801031 |
| Q4FZT0        | SELGKLSLDKVFR                                                     | 5.976501015        | 1                | 2.0663497 |
| <b>Q4FZT9</b> | <b>PSMD2 26S proteasome non_ATPase regulatory subunit 2</b>       | <b>1.037928735</b> | <b>0.2210994</b> | <b>5</b>  |
| Q4FZT9        | DKTPVQSQQPSATAPSGADEK                                             | 0.830100154        | 3                | 4.482903  |
| Q4FZT9        | FGSGSQVDSAR                                                       | 1.10793378         | 2                | 3.6292477 |
| Q4FZT9        | SETELKDTYAR                                                       | 1.037929034        | 2                | 2.7107859 |
| Q4FZT9        | SSTTSMTSVPKPLK                                                    | 0.939950753        | 2                | 2.9058995 |
| Q4FZT9        | TPVQSQQPSATAPSGADEK                                               | 1.121449121        | 2                | 4.4443464 |
| <b>Q4FZX7</b> | <b>SRPRB Signal recognition particle receptor subunit beta</b>    | <b>1.131118109</b> | <b>0.5380341</b> | <b>4</b>  |
| Q4FZX7        | GDAGSADVQDLEK                                                     | 1.081735674        | 2                | 3.4976408 |
| Q4FZX7        | GNSLTLDLPGHESLR                                                   | 1.192190919        | 2                | 2.9628472 |
| Q4FZX7        | SAAPSTLSSSTAPAQLGK                                                | 1.132023372        | 2                | 4.9600787 |
| Q4FZX7        | VGDGAGGAFQPYLDSLRL                                                | 1.415854021        | 2                | 2.4072418 |
| <b>Q4G061</b> | <b>EIF3B Eukaryotic translation initiation factor 3 subunit B</b> | <b>1.080120861</b> | <b>0.7764192</b> | <b>3</b>  |
| Q4G061        | AEEEEGSDGSAEAEPR                                                  | 0.753526755        | 2                | 4.5432882 |
| Q4G061        | AKPAAQSEEETAASPAASPTPQSAQEPSAPGK                                  | 1.420091314        | 3                | 4.5899091 |
| Q4G061        | GTQGVVTNFEIFR                                                     | 0.967921688        | 2                | 2.3300288 |
| <b>Q4KLF8</b> | <b>ARPC5 Actin_related protein 2/3 complex subunit 5</b>          | <b>0.927708083</b> | <b>0.3806499</b> | <b>2</b>  |

|               |                                                                                          |                    |                  |           |
|---------------|------------------------------------------------------------------------------------------|--------------------|------------------|-----------|
| Q4KLF8        | ALAAGGVGSIVR                                                                             | 1.22650679         | 2                | 2.3170066 |
| Q4KLF8        | QGNMTAALQAALK                                                                            | 0.920169232        | 2                | 2.5197437 |
| <b>Q4KLP0</b> | <b>DHTK1 Probable 2_oxoglutarate dehydrogenase E1 component DHKTD1_mitochondrial</b>     | <b>1.169398658</b> | <b>1.887E-14</b> | <b>16</b> |
| Q4KLP0        | ARPSVDHGLAR                                                                              | 1.112605933        | 2                | 2.5205762 |
| Q4KLP0        | HAMVVQCNTDDVYIPLNHMDPNQK                                                                 | 1.018687702        | 3                | 3.6746194 |
| Q4KLP0        | KSIPDTYAEHLIASGLMTQEEVSDIK                                                               | 1.165622766        | 3                | 4.3059464 |
| Q4KLP0        | LEELCPFPLDSLQQEMGK                                                                       | 1.408274586        | 2                | 5.1225252 |
| Q4KLP0        | LLLESQEFDFHFLATK                                                                         | 1.41727565         | 2                | 3.8353879 |
| Q4KLP0        | LSAYGGITDIIIGMPHR                                                                        | 1.612939502        | 3                | 3.5330176 |
| Q4KLP0        | LVTVYCEHGK                                                                               | 1.119358476        | 2                | 2.8311772 |
| Q4KLP0        | QQSQEDGDYSPNGSAQPGDK                                                                     | 1.218062714        | 2                | 3.0166242 |
| Q4KLP0        | QWGHNELDEPFFTPNPMYK                                                                      | 1.26429325         | 3                | 3.5155983 |
| Q4KLP0        | SIPDTYAEHLIASGLMTQEEVSDIK                                                                | 1.21638365         | 3                | 4.9983978 |
| Q4KLP0        | SSLYSSDIGK                                                                               | 1.130254299        | 1                | 2.0959771 |
| Q4KLP0        | SVEVPEELQLHSHLLK                                                                         | 1.265454766        | 2                | 2.7032647 |
| Q4KLP0        | WLLQSGLVILLPHGYDGAGPDHSSCR                                                               | 1.298869146        | 3                | 3.831419  |
| Q4KLP0        | WQGLVQPAACVTTWDTGVPLELLR                                                                 | 1.217604018        | 2                | 4.9913511 |
| Q4KLP0        | YGGEGAESMMGFFHELLK                                                                       | 1.039544721        | 3                | 4.243721  |
| Q4KLP0        | YPVAVSTLEEMAPGTAFKPVIQDSSVDPK                                                            | 1.126992178        | 3                | 4.3376942 |
| <b>Q4KLZ6</b> | <b>DHAK Bifunctional ATP_dependent dihydroxyacetone kinase/FAD_AMP lyase (cyclizing)</b> | <b>0.97696822</b>  | <b>0.8011021</b> | <b>13</b> |
| Q4KLZ6        | AAPTEPAEPEATAAGGVASK                                                                     | 0.911631665        | 2                | 4.6054149 |
| Q4KLZ6        | AILEVLQTK                                                                                | 0.893930176        | 2                | 2.8764582 |
| Q4KLZ6        | ANTDLPAWSAAMDAGLK                                                                        | 1.103339156        | 2                | 3.2602837 |
| Q4KLZ6        | AVAQAGTAGTLLIVK                                                                          | 1.059985969        | 2                | 4.424356  |
| Q4KLZ6        | EGPTPASPAQVLSK                                                                           | 0.929832629        | 2                | 3.3031516 |
| Q4KLZ6        | ISTTLIGLEEHLNALDR                                                                        | 1.922424771        | 2                | 4.1547518 |
| Q4KLZ6        | LIDAETNAK                                                                                | 0.85008635         | 2                | 3.0564315 |
| Q4KLZ6        | LSVLLLEK                                                                                 | 1.269120458        | 2                | 2.6833537 |
| Q4KLZ6        | MGGSSGALYGLFLTAAQPLK                                                                     | 1.221911481        | 2                | 4.5963707 |
| Q4KLZ6        | MVNSVEGCAGDALAGFVACNPDLQLLQGYR                                                           | 0.982502461        | 3                | 5.096961  |
| Q4KLZ6        | RLCGTILHK                                                                                | 0.830978286        | 3                | 3.4077735 |
| Q4KLZ6        | TMLDSLWAAQELQAWK                                                                         | 0.991181587        | 2                | 4.3056602 |
| Q4KLZ6        | VAGALAEEGMGLEEITK                                                                        | 0.826273726        | 2                | 3.6572151 |
| <b>Q4KM35</b> | <b>PSB10 Proteasome subunit beta type_10</b>                                             | <b>1.371198459</b> | <b>4.128E-06</b> | <b>2</b>  |
| Q4KM35        | ALSSPIEPVQR                                                                              | 1.330053711        | 2                | 2.3731329 |
| Q4KM35        | FAPGTTVPQTQEVK                                                                           | 1.383998436        | 2                | 2.8435786 |
| <b>Q4KM49</b> | <b>SYYC Tyrosyl_tRNA synthetase_cytoplasmic</b>                                          | <b>1.091427003</b> | <b>0.9775504</b> | <b>3</b>  |
| Q4KM49        | QVEPLDPPAGSAPGER                                                                         | 1.107497305        | 2                | 2.5782361 |
| Q4KM49        | TVVSGLVQFVPK                                                                             | 0.977740175        | 2                | 3.2938018 |
| Q4KM49        | VDAQFGGIDQR                                                                              | 1.097175903        | 2                | 3.3616028 |
| <b>Q4KM62</b> | <b>PALMD Palmelphin</b>                                                                  | <b>1.255153903</b> | <b>0.0190269</b> | <b>2</b>  |
| Q4KM62        | TGESVVLSSIPLPSDDFK                                                                       | 0.939600968        | 2                | 3.4019938 |
| Q4KM62        | VEKEEIPESIEDIYANIPDLPSSYIPSR                                                             | 1.52794296         | 3                | 3.4269257 |
| <b>Q4KM73</b> | <b>KCY UMP_CMP kinase</b>                                                                | <b>1.024827925</b> | <b>2.85E-07</b>  | <b>6</b>  |
| Q4KM73        | IQTYLESTKPIIDLVEEMGK                                                                     | 1.32851822         | 2                | 4.926024  |
| Q4KM73        | IVPVEITISLLK                                                                             | 1.067938575        | 2                | 3.0416598 |
| Q4KM73        | KNPDSQYGELIEK                                                                            | 1.140386197        | 2                | 4.2938108 |
| Q4KM73        | NQDNLQGWNK                                                                               | 1.086426697        | 2                | 2.9402449 |
| Q4KM73        | SVDEVFGDVMK                                                                              | 0.937244976        | 2                | 3.166023  |
| Q4KM73        | YGYTHLSAGELLR                                                                            | 1.152549238        | 3                | 3.6147077 |
| <b>Q4KM74</b> | <b>SC22B Vesicle trafficking protein SEC22b</b>                                          | <b>1.079868676</b> | <b>0.3361452</b> | <b>4</b>  |
| Q4KM74        | DLQQYQSQAK                                                                               | 1.047366909        | 2                | 3.3926792 |
| Q4KM74        | GEALSALDSK                                                                               | 1.152966706        | 2                | 2.416549  |
| Q4KM74        | IMVANIEEVLQR                                                                             | 1.349653699        | 2                | 2.7056715 |
| Q4KM74        | NLGSINTELQDVQR                                                                           | 1.14163536         | 2                | 4.165978  |

|               |                                                                                           |                    |                  |           |
|---------------|-------------------------------------------------------------------------------------------|--------------------|------------------|-----------|
| <b>Q4KMA2</b> | <b>RD23B UV excision repair protein RAD23 homolog B</b>                                   | <b>1.040958132</b> | <b>0.7870583</b> | <b>4</b>  |
| Q4KMA2        | ESQAVVDPPPQAVSTGTPQSPAIAAAATTTATTTTTSGGHPLEFLR                                            | 1.19798611         | 3                | 3.9465792 |
| Q4KMA2        | IDIDPEETVK                                                                                | 1.083835196        | 1                | 2.6336133 |
| Q4KMA2        | NFVVVMVTKPK                                                                               | 1.000610711        | 2                | 3.4605961 |
| Q4KMA2        | QIIQQNPSLLPALLQQIGR                                                                       | 1.1308742          | 2                | 3.8476126 |
| <b>Q4QQV3</b> | <b>F162A Protein FAM162A</b>                                                              | <b>1.213319491</b> | <b>0.1261519</b> | <b>2</b>  |
| Q4QQV3        | EEEIPETISFEMLDAAK                                                                         | 1.350094674        | 2                | 3.4520028 |
| Q4QQV3        | RHESLTSNLER                                                                               | 1.155161603        | 2                | 2.7591355 |
| <b>Q4QQW3</b> | <b>HOT Hydroxyacid_oxoacid transhydrogenase_ mitochondrial</b>                            | <b>0.985051205</b> | <b>0.9767968</b> | <b>2</b>  |
| Q4QQW3        | HLETAEILGANIR                                                                             | 0.990027936        | 2                | 3.2784789 |
| Q4QQW3        | IQDAGPVLADALR                                                                             | 0.95781711         | 2                | 2.4897783 |
| <b>Q4QRB4</b> | <b>TBB3 Tubulin beta_3 chain</b>                                                          | <b>0.88508266</b>  | <b>0.4638358</b> | <b>5</b>  |
| Q4QRB4        | AILVDLEPGTMDSVR                                                                           | 0.978882509        | 2                | 4.5614495 |
| Q4QRB4        | AILVDLEPGTMDSVR+Oxidation(11)                                                             | 1.059491835        | 2                | 2.6335197 |
| Q4QRB4        | EIVHIQAGQCQGNQIGAK                                                                        | 0.855006919        | 2                | 5.1074615 |
| Q4QRB4        | IMNTFSVVPSPK                                                                              | 1.16119707         | 2                | 3.4465473 |
| Q4QRB4        | ISEQFTAMFR                                                                                | 1.085839656        | 2                | 3.3592651 |
| <b>Q4V7C7</b> | <b>ARP3 Actin_related protein 3</b>                                                       | <b>1.139334845</b> | <b>0.9658275</b> | <b>6</b>  |
| Q4V7C7        | GVDDLDFFIGDEAIEKPTYATK                                                                    | 0.969724595        | 2                | 4.8280172 |
| Q4V7C7        | KDYEEIGPSICR                                                                              | 1.01284185         | 2                | 3.9039629 |
| Q4V7C7        | LGYAGNTEPQFIIPSCIAIK                                                                      | 1.084843759        | 2                | 3.4565763 |
| Q4V7C7        | LSEELSGGR                                                                                 | 1.108749568        | 2                | 2.7786469 |
| Q4V7C7        | NIVLSGGSTMFR                                                                              | 0.984876916        | 2                | 2.6649435 |
| Q4V7C7        | TLTGTVIDSGDGVTHVIPVAEGYVIGSCIK                                                            | 1.08041243         | 2                | 4.5977936 |
| <b>Q4V8K1</b> | <b>STEAP4 Metalloredutase STEAP4</b>                                                      | <b>0.992530952</b> | <b>0.9851715</b> | <b>5</b>  |
| Q4V8K1        | MNQYPESNAEYLAQLVPGAHVVK                                                                   | 0.994064622        | 3                | 3.309346  |
| Q4V8K1        | QVFVCGNDSK                                                                                | 1.108446564        | 2                | 2.5586081 |
| Q4V8K1        | TCADFEPLTVDSSEK                                                                           | 1.021421223        | 2                | 4.4658771 |
| Q4V8K1        | TLGLPLDQGSVAALK                                                                           | 1.089884548        | 2                | 3.375767  |
| Q4V8K1        | VLIDVSNNQK                                                                                | 0.918167743        | 2                | 2.3147707 |
| <b>Q501J6</b> | <b>DDX17 Probable ATP_dependent RNA helicase DDX17</b>                                    | <b>0.928818753</b> | <b>0.9135214</b> | <b>2</b>  |
| Q501J6        | ELAQQVQQVADDYQK                                                                           | 1.077359321        | 2                | 2.677911  |
| Q501J6        | VLEEQAINPK                                                                                | 0.926100764        | 2                | 2.7113588 |
| <b>Q505J8</b> | <b>SYFA Phenylalanyl_tRNA synthetase alpha chain</b>                                      | <b>0.984953459</b> | <b>3.893E-08</b> | <b>5</b>  |
| Q505J8        | LQQVQAGQAEK                                                                               | 1.292524426        | 2                | 2.9521463 |
| Q505J8        | RLEVADGGGLDSAEALATQLGVEHQAVVGAVK                                                          | 1.017642319        | 3                | 5.1490746 |
| Q505J8        | SIPLEGLVQSELMQLPSGK                                                                       | 1.18760463         | 2                | 2.7661853 |
| Q505J8        | SLQALGEVIAELR                                                                             | 0.954819705        | 2                | 3.8935192 |
| Q505J8        | VVDSIEDEVQR                                                                               | 1.195039115        | 2                | 2.8447428 |
| <b>Q561R9</b> | <b>LACB2 Beta_lactamase_like protein 2</b>                                                | <b>1.092713678</b> | <b>0.9711122</b> | <b>4</b>  |
| Q561R9        | ANIYPGHGPVIHNAEAK                                                                         | 1.121877025        | 2                | 4.0802155 |
| Q561R9        | ILIDTGEPSVPEYISCLK                                                                        | 1.070124017        | 2                | 3.5217161 |
| Q561R9        | NISNDATYCIK                                                                               | 1.098603949        | 2                | 2.7247815 |
| Q561R9        | NNREEQIITVFR                                                                              | 1.095131932        | 2                | 2.7793787 |
| <b>Q561S0</b> | <b>NDUAA NADH dehydrogenase [ubiquinone] 1 alpha subcomplex subunit 10_ mitochondrial</b> | <b>1.215997816</b> | <b>0.0296927</b> | <b>5</b>  |
| Q561S0        | LTLPEYLPPHAVIYIDVPVSEIQSR                                                                 | 1.574857658        | 3                | 3.6986096 |
| Q561S0        | VITVDGNICSGK                                                                              | 0.905193365        | 2                | 3.1289504 |
| Q561S0        | VVEDIEYLNYNK                                                                              | 1.693446043        | 2                | 3.5666423 |
| Q561S0        | YAPGYNADVGDK                                                                              | 1.123518187        | 2                | 2.750464  |
| Q561S0        | YGLLASILGDK                                                                               | 1.092583499        | 2                | 2.9573061 |
| <b>Q562C4</b> | <b>MET7B Methyltransferase_like protein 7B</b>                                            | <b>1.221768199</b> | <b>0.0032413</b> | <b>7</b>  |
| Q562C4        | AQFSEVQLEWQPPPFK                                                                          | 1.666395814        | 2                | 4.814002  |
| Q562C4        | FIVAYGENMK                                                                                | 1.240824161        | 2                | 2.3481331 |
| Q562C4        | GTSNEVTLLLELCGTGANFQFYPPGCK                                                               | 1.231869357        | 2                | 4.0448909 |

|               |                                                                                          |                    |                  |           |
|---------------|------------------------------------------------------------------------------------------|--------------------|------------------|-----------|
| Q562C4        | HIGDGCCHLTR                                                                              | 1.53607186         | 2                | 2.757643  |
| Q562C4        | KVLQEVQR                                                                                 | 1.408197376        | 2                | 2.5237854 |
| Q562C4        | VLQEVQR                                                                                  | 1.286546456        | 1                | 2.0159707 |
| Q562C4        | VTCVDPNPNFEK                                                                             | 0.982754752        | 2                | 3.720583  |
| <b>Q58FK9</b> | <b>KAT3 Kynurenine__oxoglutarate transaminase 3</b>                                      | <b>1.175342897</b> | <b>0.2182075</b> | <b>10</b> |
| Q58FK9        | AIILNTPHNPIGK                                                                            | 1.081504219        | 2                | 3.2966516 |
| Q58FK9        | DSTLDAEEIFR                                                                              | 0.716671234        | 2                | 2.998791  |
| Q58FK9        | IEGLDQNVWVEFTK                                                                           | 1.204137149        | 2                | 4.550025  |
| Q58FK9        | LAADPSVVNLGQGFPDITLPSYVQEELSK                                                            | 1.634113048        | 3                | 5.6725678 |
| Q58FK9        | LGWSIGPGHLIK                                                                             | 1.588037711        | 2                | 2.4353883 |
| Q58FK9        | MDDPECYFNSLPK                                                                            | 0.931502656        | 2                | 4.117754  |
| Q58FK9        | RIEGLDQNVWVEFTK                                                                          | 1.135821834        | 2                | 3.9177709 |
| Q58FK9        | RMDDPECYFNSLPK                                                                           | 0.969861684        | 2                | 2.3525193 |
| Q58FK9        | SDEPYDYK                                                                                 | 1.225671845        | 2                | 2.4815903 |
| Q58FK9        | WTSSDWTFNPELESK                                                                          | 1.105711433        | 2                | 5.1831717 |
| <b>Q5BJQ0</b> | <b>ADCK3 Chaperone activity of bc1 complex_like_ mitochondrial</b>                       | <b>1.154565678</b> | <b>0.3241624</b> | <b>2</b>  |
| Q5BJQ0        | AVLDSSPFLSEANAER                                                                         | 1.028632553        | 2                | 4.5879798 |
| Q5BJQ0        | TLNNDLGPWHR                                                                              | 1.160628928        | 2                | 3.0123427 |
| <b>Q5BJY9</b> | <b>K1C18 Keratin_ type I cytoskeletal 18</b>                                             | <b>1.012913744</b> | <b>2.896E-06</b> | <b>23</b> |
| Q5BJY9        | AQIFANSVDNAR                                                                             | 1.09919252         | 2                | 3.8177316 |
| Q5BJY9        | AQYEQLAQK                                                                                | 1.013847143        | 2                | 3.2973545 |
| Q5BJY9        | IREYLEK                                                                                  | 1.054786789        | 2                | 2.3652194 |
| Q5BJY9        | KNHEEEVQGLEAQIASSGLTVEVDAPK                                                              | 0.755320986        | 3                | 4.3018489 |
| Q5BJY9        | KVVDNITR                                                                                 | 1.016769597        | 2                | 2.940172  |
| Q5BJY9        | LEAEIATYR                                                                                | 0.952679695        | 2                | 3.230437  |
| Q5BJY9        | LLEDGDDFSLNDALDSSNSMQTVQR                                                                | 0.904645296        | 2                | 5.300693  |
| Q5BJY9        | LQLETEIEALKEELLFMK                                                                       | 2.738400508        | 2                | 4.9570847 |
| Q5BJY9        | NHEEEVQGLEAQIASSGLTVEVDAPK                                                               | 0.902578258        | 2                | 6.5303364 |
| Q5BJY9        | NQNINLENNLGEVEAR                                                                         | 0.972506534        | 2                | 5.6028357 |
| Q5BJY9        | NREELDKYWSQQIEESTTVVTTK                                                                  | 0.985393674        | 3                | 5.7048187 |
| Q5BJY9        | QSVESDIHGLR                                                                              | 1.092480536        | 2                | 3.3157382 |
| Q5BJY9        | QSVESDIHGLRK                                                                             | 1.109387205        | 2                | 2.690906  |
| Q5BJY9        | QTQEYEAALLNIK                                                                            | 1.205940145        | 2                | 3.535063  |
| Q5BJY9        | SVWGGSVGSAGLAGMGGVQTEK                                                                   | 0.954287751        | 2                | 5.7296515 |
| Q5BJY9        | SVWGGSVGSAGLAGMGGVQTEKETMQDLNDR                                                          | 1.021518652        | 3                | 4.8253021 |
| Q5BJY9        | TLQTLIDLDLDSMK                                                                           | 1.084353288        | 2                | 4.2261086 |
| Q5BJY9        | VKLEAEIATYR                                                                              | 0.995934923        | 2                | 2.603852  |
| Q5BJY9        | VKYETELAMR                                                                               | 1.030142221        | 2                | 2.6307683 |
| Q5BJY9        | VQMEQLNGVLLHLESELAQTR                                                                    | 1.191630267        | 3                | 5.259335  |
| Q5BJY9        | VRPASSAASVYAGAGGSGSR                                                                     | 0.942825829        | 2                | 5.6052647 |
| Q5BJY9        | VVDNITR                                                                                  | 1.026314031        | 2                | 3.3590937 |
| Q5BJY9        | YWSQQIEESTTVVTTK                                                                         | 1.047381055        | 2                | 4.3252316 |
| <b>Q5BK17</b> | <b>IYD1 Iodotyrosine dehalogenase 1</b>                                                  | <b>1.075535787</b> | <b>0.4621634</b> | <b>2</b>  |
| Q5BK17        | FISSEVPMEVIDNVIK                                                                         | 1.085868503        | 2                | 3.2650359 |
| Q5BK17        | LLVLLPVGYPSR                                                                             | 1.450769107        | 2                | 2.634383  |
| <b>Q5BK63</b> | <b>NDUA9 NADH dehydrogenase [ubiquinone] 1 alpha subcomplex subunit 9_ mitochondrial</b> | <b>1.456810987</b> | <b>9.9E-20</b>   | <b>5</b>  |
| Q5BK63        | AVQHSNVVINLIGR                                                                           | 1.10970209         | 2                | 2.5482075 |
| Q5BK63        | IHISDVMATDLPGLEDLGVQPTPLELK                                                              | 1.624614566        | 3                | 5.3587956 |
| Q5BK63        | LFGLSPFEPWTTK                                                                            | 1.485781839        | 2                | 2.5865147 |
| Q5BK63        | NDFEDVFNIPR                                                                              | 1.715693989        | 2                | 3.9541867 |
| Q5BK63        | WLSSEIETKPAK                                                                             | 1.390133818        | 2                | 3.1059451 |
| <b>Q5BK81</b> | <b>PTGR2 Prostaglandin reductase 2</b>                                                   | <b>1.026068239</b> | <b>0.9999917</b> | <b>3</b>  |
| Q5BK81        | DVPYPPPLPFAVEAIQK                                                                        | 1.023266209        | 2                | 3.2439101 |
| Q5BK81        | TGNVAEQLR                                                                                | 1.057591204        | 2                | 2.3342605 |
| Q5BK81        | VEEVSLPDTINEGQVR                                                                         | 1.039114432        | 2                | 3.8044631 |



|               |                                                                                |                    |                  |           |
|---------------|--------------------------------------------------------------------------------|--------------------|------------------|-----------|
| <b>Q5BQE6</b> | <b>DHC24 Delta(24)_sterol reductase</b>                                        | <b>0.844710841</b> | <b>0.9364985</b> | <b>2</b>  |
| Q5BQE6        | NIMINLMDILEVDTKK+Oxidation(3)Oxidation(7)                                      | 0.980956128        | 2                | 2.4134696 |
| Q5BQE6        | QLGCQDAFPEVYDK                                                                 | 0.831888135        | 2                | 3.7618272 |
| <b>Q5DU56</b> | <b>NLRC3 Protein NLRC3</b>                                                     | <b>1.447529429</b> | <b>0.0935945</b> | <b>2</b>  |
| Q5DU56        | LTGLALGHLR                                                                     | 1.45484934         | 2                | 2.4023919 |
| Q5DU56        | TLEILDLR                                                                       | 0.988832702        | 2                | 2.3344111 |
| <b>Q5EB77</b> | <b>RAB18 Ras_related protein Rab_18</b>                                        | <b>1.150073692</b> | <b>0.0987228</b> | <b>2</b>  |
| Q5EB77        | NDIVNMLVGNK                                                                    | 1.000668803        | 2                | 3.2772877 |
| Q5EB77        | TCDGVQCAFEELVEK                                                                | 1.310873563        | 2                | 3.7383933 |
| <b>Q5FVM4</b> | <b>NONO Non_POU domain_containing octamer_binding protein</b>                  | <b>0.982792623</b> | <b>0.3834348</b> | <b>2</b>  |
| Q5FVM4        | MEELHNQEVQK                                                                    | 1.12060991         | 2                | 3.262028  |
| Q5FVM4        | RMEELHNQEVQK                                                                   | 0.970303064        | 3                | 4.0031919 |
| <b>Q5FVQ4</b> | <b>MLEC Malectin</b>                                                           | <b>1.246026287</b> | <b>8.105E-15</b> | <b>2</b>  |
| Q5FVQ4        | KEEEEEEEYDEGSNLKR                                                              | 1.25526224         | 3                | 6.081985  |
| Q5FVQ4        | STPEDQLYQTER                                                                   | 1.113138024        | 2                | 3.977519  |
| <b>Q5FVR2</b> | <b>TYPH Thymidine phosphorylase</b>                                            | <b>0.950456013</b> | <b>0.9336219</b> | <b>4</b>  |
| Q5FVR2        | AQDTQIGAMLMAIR+Oxidation(11)                                                   | 0.885640397        | 2                | 2.6054597 |
| Q5FVR2        | DVTATVDSVPLITASILSK                                                            | 0.974137253        | 2                | 3.6391323 |
| Q5FVR2        | KQEELSPADGIVECVR                                                               | 1.057277945        | 2                | 4.5288005 |
| Q5FVR2        | VHLDGPALSSQQR                                                                  | 1.111177377        | 2                | 2.400646  |
| <b>Q5FVR5</b> | <b>ACNT2 Acyl_coenzyme A amino acid N_acyltransferase 2</b>                    | <b>1.762014125</b> | <b>0.0399349</b> | <b>4</b>  |
| Q5FVR5        | DEKENLFQSK                                                                     | 0.768242158        | 2                | 2.7995496 |
| Q5FVR5        | ILFIVGENDQCLASK                                                                | 1.356158689        | 2                | 3.746778  |
| Q5FVR5        | IQQPGIGVISVSK                                                                  | 1.258647745        | 2                | 2.7611878 |
| Q5FVR5        | VLLEEDLDYFEEAANFLAHPK                                                          | 1.832233121        | 3                | 3.8095    |
| <b>Q5FW57</b> | <b>GLYAL Glycine N_acyltransferase_like protein</b>                            | <b>0.903235881</b> | <b>0.920479</b>  | <b>2</b>  |
| Q5FW57        | AIDQEMFK                                                                       | 0.85768787         | 2                | 2.7050047 |
| Q5FW57        | SSQMLQMLESSLR                                                                  | 0.940529121        | 2                | 3.8796856 |
| <b>Q5HZV9</b> | <b>PP1R7 Protein phosphatase 1 regulatory subunit 7</b>                        | <b>0.963381258</b> | <b>0.4101564</b> | <b>2</b>  |
| Q5HZV9        | AIENIDTLTNLESFLGK                                                              | 0.80811757         | 2                | 3.1388249 |
| Q5HZV9        | ELDLYDNQIKK                                                                    | 1.244798177        | 2                | 2.3786194 |
| <b>Q5HZY2</b> | <b>SAR1B GTP_binding protein SAR1b</b>                                         | <b>1.065087056</b> | <b>0.9976674</b> | <b>2</b>  |
| Q5HZY2        | IDRPEAISEER                                                                    | 1.065120696        | 2                | 2.926368  |
| Q5HZY2        | LLESKEELDSLMTDETIANVPILILGNK                                                   | 1.042448128        | 3                | 4.2635083 |
| <b>Q5I0C3</b> | <b>MCCA Methylcrotonoyl_CoA carboxylase subunit alpha_mitochondrial</b>        | <b>0.977090976</b> | <b>0.3683969</b> | <b>6</b>  |
| Q5I0C3        | HAPLVEFEEEV                                                                    | 0.888832522        | 2                | 2.8730049 |
| Q5I0C3        | IIEEAPAPGIDPEVR                                                                | 0.947551606        | 2                | 3.6948986 |
| Q5I0C3        | IYAEDPDNNFMPGAGPLVHLSTPPDMSTR                                                  | 0.941222519        | 3                | 6.0180254 |
| Q5I0C3        | SEKEFQEQLSAR                                                                   | 0.95576561         | 2                | 3.5532632 |
| Q5I0C3        | VFFSEGAQANR                                                                    | 1.162481563        | 2                | 2.5250816 |
| Q5I0C3        | YLSPVSAEGTQGGTIAPMTGTIEK                                                       | 1.010798767        | 2                | 5.0938582 |
| <b>Q5I0D1</b> | <b>GLOD4 Glyoxalase domain_containing protein 4</b>                            | <b>1.024916543</b> | <b>0.9999997</b> | <b>2</b>  |
| Q5I0D1        | ESQSILTPVSLDTPGK                                                               | 1.025012686        | 2                | 3.5057354 |
| Q5I0D1        | HEEFEEGCK                                                                      | 1.018537561        | 2                | 2.6484008 |
| <b>Q5I0D5</b> | <b>LHPP Phospholysine phosphohistidine inorganic pyrophosphate phosphatase</b> | <b>1.042441527</b> | <b>0.9556009</b> | <b>2</b>  |
| Q5I0D5        | AFQVLMELNPVLISLKG                                                              | 0.899366916        | 2                | 2.6522608 |
| Q5I0D5        | LGFDISEGEVTAPAPATCQILK                                                         | 1.068663206        | 2                | 3.795944  |
| <b>Q5I0D7</b> | <b>PEPD Xaa_Pro dipeptidase</b>                                                | <b>1.107460657</b> | <b>0.2097808</b> | <b>2</b>  |
| Q5I0D7        | GVNTDSGNVCR                                                                    | 1.100278264        | 2                | 2.7218807 |
| Q5I0D7        | YAVDDVQYADEIASVLTSR                                                            | 1.294790759        | 2                | 4.2083468 |
| <b>Q5I0E7</b> | <b>TMED9 Transmembrane emp24 domain_containing protein 9</b>                   | <b>1.186548645</b> | <b>0.7473762</b> | <b>2</b>  |
| Q5I0E7        | QLVEQVEQIQK                                                                    | 1.185201104        | 2                | 4.0451155 |

|               |                                                                     |                    |                  |           |
|---------------|---------------------------------------------------------------------|--------------------|------------------|-----------|
| Q5I0E7        | QREEYQPATPGLGMFVEVKDPEDK                                            | 1.227966581        | 3                | 3.607738  |
| <b>Q5I0G4</b> | <b>SYG Glycyl_tRNA synthetase (Fragment)</b>                        | <b>0.96000312</b>  | <b>0.9246731</b> | <b>5</b>  |
| Q5I0G4        | AEVSELPVVR                                                          | 0.9599957          | 2                | 3.2368233 |
| Q5I0G4        | LGDAVEQGVINNSVLGYFIGR                                               | 1.230710348        | 2                | 3.0462976 |
| Q5I0G4        | TLHVEEVVPSVIEPSFGLGR                                                | 1.10316334         | 2                | 4.1233697 |
| Q5I0G4        | TVNVVQFEPNK                                                         | 0.100962617        | 2                | 2.4786115 |
| Q5I0G4        | VDDSSGSIGR                                                          | 0.887415822        | 2                | 2.6186745 |
| <b>Q5I0H9</b> | <b>PDIA5 Protein disulfide_isomerase A5</b>                         | <b>0.986721342</b> | <b>0.2006217</b> | <b>7</b>  |
| Q5I0H9        | DKNQDLCQQESVK                                                       | 0.979979869        | 2                | 4.2071557 |
| Q5I0H9        | GHTVLAGMNVYPPEFENIKEEYNVR                                           | 0.859104893        | 3                | 4.9622488 |
| Q5I0H9        | GPPLWEEDPGAK                                                        | 1.077888731        | 2                | 2.8296421 |
| Q5I0H9        | GQGTICWVDCGDAESR                                                    | 0.901024467        | 2                | 4.2056651 |
| Q5I0H9        | NGEQQAVPALR                                                         | 1.067070582        | 2                | 2.817538  |
| Q5I0H9        | NPQPPQPVPETPWADEGGSVYHLTDEDQFVK                                     | 1.887248548        | 3                | 4.5151229 |
| Q5I0H9        | NQDLCQQESVK                                                         | 0.97677844         | 2                | 2.6428695 |
| <b>Q5I0J9</b> | <b>ASPD Putative L_aspartate dehydrogenase</b>                      | <b>1.177683268</b> | <b>3.856E-13</b> | <b>5</b>  |
| Q5I0J9        | HANLLVGSPPALADQTTTER                                                | 1.012312389        | 3                | 5.1008325 |
| Q5I0J9        | IHESGVQILR                                                          | 1.139770468        | 2                | 2.6311512 |
| Q5I0J9        | LDAAGGLQSLR                                                         | 1.136123447        | 2                | 3.7419205 |
| Q5I0J9        | LEGPLAAAHSSGPR                                                      | 1.205302568        | 2                | 3.5826738 |
| Q5I0J9        | MAGSVPPALQLEDLTTLEER                                                | 1.666568856        | 2                | 3.8861928 |
| <b>Q5I0M2</b> | <b>NADC Nicotinate_nucleotide pyrophosphorylase [carboxylating]</b> | <b>1.045986652</b> | <b>1.785E-12</b> | <b>3</b>  |
| Q5I0M2        | DNHVVAAGSMEK                                                        | 0.863577453        | 2                | 2.9379306 |
| Q5I0M2        | EALQAAEAGADLVMLDNFKPEELHPTAATLK                                     | 1.381455357        | 3                | 5.6709909 |
| Q5I0M2        | LYAEGDIPVPHAR                                                       | 1.171433149        | 2                | 3.3224306 |
| <b>Q5M7U6</b> | <b>ARP2 Actin_related protein 2</b>                                 | <b>1.143118982</b> | <b>0.3714715</b> | <b>6</b>  |
| Q5M7U6        | GYAFNHSADFETVR                                                      | 1.242758565        | 2                | 3.59305   |
| Q5M7U6        | HLWDYTFGPEK                                                         | 1.14449818         | 2                | 3.3915632 |
| Q5M7U6        | ILLTEPPMNPTK                                                        | 0.857661747        | 2                | 3.0597258 |
| Q5M7U6        | LCYVGYNIEQEQK                                                       | 0.772801876        | 2                | 3.3125339 |
| Q5M7U6        | SMLEVNYPMENGIVR                                                     | 0.955920205        | 2                | 4.4640245 |
| Q5M7U6        | VVVCNNGTGFVK                                                        | 1.109841417        | 2                | 2.9517617 |
| <b>Q5M7W5</b> | <b>MAP4 Microtubule_associated protein 4</b>                        | <b>0.966201144</b> | <b>0.3709795</b> | <b>9</b>  |
| Q5M7W5        | AAVGLTGNDIATPPNK                                                    | 1.038403721        | 2                | 3.3330679 |
| Q5M7W5        | ATSPSTLVSTGSSSR                                                     | 0.949415464        | 2                | 3.3879137 |
| Q5M7W5        | EAETALPIEMDLAPPEDVALPK                                              | 1.410179352        | 2                | 2.4833455 |
| Q5M7W5        | ESEGSPDTDAAPGPDVTLTK                                                | 1.293954132        | 2                | 4.3250227 |
| Q5M7W5        | NTAPPTEETVPGK                                                       | 1.030676682        | 2                | 2.5250201 |
| Q5M7W5        | NTTPTGATPPAGMASTR                                                   | 1.113874617        | 2                | 2.4090557 |
| Q5M7W5        | STLPVDEGSPEK                                                        | 0.893441776        | 2                | 2.350764  |
| Q5M7W5        | VGSLDNVGHLPAGGTVK                                                   | 0.906039492        | 2                | 2.803241  |
| Q5M7W5        | VTEFNNVTPLEEEVASIK                                                  | 1.127140585        | 2                | 4.6674161 |
| <b>Q5M875</b> | <b>DHB13 17_beta_hydroxysteroid dehydrogenase 13</b>                | <b>1.017865286</b> | <b>0.9981365</b> | <b>6</b>  |
| Q5M875        | ALTAELDTLTK                                                         | 1.091660678        | 2                | 3.5139556 |
| Q5M875        | IQNIQFEAIVGHR                                                       | 1.106892663        | 2                | 3.6832051 |
| Q5M875        | NSGHIVTVASVCGHR                                                     | 1.090477728        | 2                | 4.2115393 |
| Q5M875        | SLIDGILTNK                                                          | 0.993780524        | 2                | 2.9772325 |
| Q5M875        | SVAGQTVLITGAGHGIGR                                                  | 1.148751179        | 2                | 3.9853511 |
| Q5M875        | TSCLCPVFVNTGFTK                                                     | 0.854280295        | 2                | 4.1507988 |
| <b>Q5M9G3</b> | <b>CAPR1 Caprin_1</b>                                               | <b>1.248870665</b> | <b>1.356E-10</b> | <b>3</b>  |
| Q5M9G3        | LNQDQLDAVSK                                                         | 1.249445983        | 2                | 3.1509373 |
| Q5M9G3        | SSGPPPPSGSSGSEAAAGAAAPASQHPATGTGAVQTEAMK                            | 0.920789139        | 3                | 4.9897261 |
| Q5M9G3        | YQEVTNLEFAK                                                         | 1.148622953        | 2                | 2.5911832 |
| <b>Q5M9I5</b> | <b>QCR6 Cytochrome b_c1 complex subunit 6_mitochondrial</b>         | <b>1.082115994</b> | <b>3.846E-11</b> | <b>2</b>  |
| Q5M9I5        | EEEEELVDPLTTVR                                                      | 1.074174584        | 2                | 3.3326814 |

|               |                                                                          |                    |                  |           |
|---------------|--------------------------------------------------------------------------|--------------------|------------------|-----------|
| Q5M9I5        | SQTEEDCTEELFDLHAR                                                        | 2.505850328        | 2                | 5.0206094 |
| <b>Q5PPL3</b> | <b>NSDHL Sterol_4_alpha_carboxylate 3_dehydrogenase_ decarboxylating</b> | <b>1.290097122</b> | <b>0.1825553</b> | <b>10</b> |
| Q5PPL3        | AVLDANDPK                                                                | 0.995044029        | 1                | 1.9766866 |
| Q5PPL3        | AVLDANDPKK                                                               | 1.157476408        | 2                | 2.4780028 |
| Q5PPL3        | CTVIGGSGFLGQHMVEQLLSR                                                    | 1.225265332        | 2                | 4.3464932 |
| Q5PPL3        | GQVTGTDLINEVSK                                                           | 0.977941481        | 2                | 4.0731831 |
| Q5PPL3        | GVSTVFHCASPPSNSNNK                                                       | 1.159547289        | 2                | 4.780427  |
| Q5PPL3        | GYAVNVFVDR                                                               | 1.178436457        | 1                | 2.0304265 |
| Q5PPL3        | ILTGLNIEAPK                                                              | 1.309495572        | 2                | 3.4208777 |
| Q5PPL3        | KGQVTGTDLINEVSK                                                          | 0.942987007        | 2                | 4.5086145 |
| Q5PPL3        | NLVDFTFVENVVHGHIILAAEHLR                                                 | 1.207250475        | 3                | 3.8823318 |
| Q5PPL3        | VQFFIGDLCNQDLYPALK                                                       | 1.276729127        | 2                | 4.7104526 |
| <b>Q5PQT3</b> | <b>GLYAT Glycine N_acyltransferase</b>                                   | <b>1.238044093</b> | <b>0.0017833</b> | <b>5</b>  |
| Q5PQT3        | AIQNLASIHSLQVK                                                           | 1.252032764        | 2                | 3.9581349 |
| Q5PQT3        | KLFPSLLDTK                                                               | 1.036595072        | 2                | 2.4677074 |
| Q5PQT3        | LSSLDVTHAALVNK                                                           | 1.693538303        | 2                | 3.4670756 |
| Q5PQT3        | NFPSSCVLGPETPASWTLMQDQTGEMR                                              | 0.700513354        | 3                | 4.0369501 |
| Q5PQT3        | QHLQIQSSQSHLNK                                                           | 1.010336751        | 2                | 3.5053129 |
| <b>Q5QNV8</b> | <b>CQ066 Uncharacterized protein C17orf66 homolog</b>                    | <b>1.074889586</b> | <b>0.0197753</b> | <b>2</b>  |
| Q5QNV8        | LEAPAFSFFYFSKPK                                                          | 1.074640426        | 2                | 2.3691139 |
| Q5QNV8        | YFKDSAQMPNLHVSISK+Oxidation(8)                                           | 1.52499424         | 2                | 2.4126937 |
| <b>Q5RJR8</b> | <b>LRC59 Leucine_rich repeat_containing protein 59</b>                   | <b>1.011773148</b> | <b>0.4502701</b> | <b>5</b>  |
| Q5RJR8        | ATVLDLSCNK                                                               | 1.136096305        | 2                | 2.3962412 |
| Q5RJR8        | DKLDGNELDLSLDLNEVPVK                                                     | 1.085067299        | 2                | 5.8268838 |
| Q5RJR8        | HHEILQWVLQTDSSQ                                                          | 0.88803838         | 2                | 3.4418964 |
| Q5RJR8        | LDGNELDLSLDLNEVPVK                                                       | 1.042983253        | 2                | 4.3294811 |
| Q5RJR8        | LQQLPADFR                                                                | 1.634710048        | 2                | 2.3206654 |
| <b>Q5RKI0</b> | <b>WDR1 WD repeat_containing protein 1</b>                               | <b>1.05744247</b>  | <b>0.6475045</b> | <b>3</b>  |
| Q5RKI0        | AHDGGIYAISWSPDSTHLLSASGDK                                                | 1.039369341        | 3                | 5.2743001 |
| Q5RKI0        | CFSIDNPGYEPEVVAVHPGGDTVAVGGSDGNVR                                        | 0.73805856         | 3                | 3.7375686 |
| Q5RKI0        | YAPSGFYIASGDISGK                                                         | 1.098078272        | 2                | 4.1601586 |
| <b>Q5RKI1</b> | <b>IF4A2 Eukaryotic initiation factor 4A_II</b>                          | <b>1.071794868</b> | <b>0.5634065</b> | <b>5</b>  |
| Q5RKI1        | ELAQQIQK                                                                 | 1.138944922        | 1                | 2.1747854 |
| Q5RKI1        | GIDVQQVSLVINYLPTNR                                                       | 1.128623589        | 2                | 4.7385163 |
| Q5RKI1        | GYDVIAQAQSGTGK                                                           | 1.080441213        | 2                | 5.2087069 |
| Q5RKI1        | MFVLDEADEMLSR                                                            | 1.028616353        | 2                | 4.7245278 |
| Q5RKI1        | VLITTDLLAR                                                               | 1.131895383        | 2                | 2.4169335 |
| <b>Q5SGE0</b> | <b>LPPRC Leucine_rich PPR motif_containing protein_mitochondrial</b>     | <b>0.966344224</b> | <b>0.1478131</b> | <b>11</b> |
| Q5SGE0        | AALDLEQVPSELAVTR                                                         | 0.692872588        | 2                | 3.8739707 |
| Q5SGE0        | CIANNQVETLEK                                                             | 0.991140419        | 2                | 3.0623648 |
| Q5SGE0        | HCVTMDTPAEK                                                              | 1.067637783        | 2                | 3.1913939 |
| Q5SGE0        | HDNAEDALNLK                                                              | 1.560100417        | 2                | 3.7379949 |
| Q5SGE0        | LKAEGHPVGDPLK                                                            | 1.208464416        | 2                | 2.4348097 |
| Q5SGE0        | MEGANIQPNR                                                               | 0.977438238        | 2                | 2.5964916 |
| Q5SGE0        | SCGSLLPELSAER                                                            | 0.840892849        | 2                | 2.4951584 |
| Q5SGE0        | SSLSSSPSAGDTVTEK                                                         | 0.930952314        | 2                | 4.3652778 |
| Q5SGE0        | SYVADKDVASAK                                                             | 0.939086678        | 2                | 3.3875797 |
| Q5SGE0        | TLELPELRL                                                                | 1.022386818        | 2                | 2.4947934 |
| Q5SGE0        | VQDAINILK                                                                | 0.89814123         | 2                | 2.3050637 |
| <b>Q5SVT3</b> | <b>ETAA1 Ewing_s tumor_associated antigen 1 homolog</b>                  | <b>0.89234928</b>  | <b>0.0494533</b> | <b>2</b>  |
| Q5SVT3        | ELMKLAQQFDK+Oxidation(3)                                                 | 0.885900788        | 2                | 2.5083539 |
| Q5SVT3        | NHDFIQMTSKMGHLDNHK+Oxidation(7)Oxidation(11)                             | 3.640736968        | 2                | 2.485251  |
| <b>Q5SX40</b> | <b>MYH1 Myosin_1</b>                                                     | <b>0.721808174</b> | <b>1</b>         | <b>75</b> |
| Q5SX40        | AAYLQNLNSADLLK                                                           | 0.811312406        | 2                | 3.6000104 |
| Q5SX40        | ADIAESQVNK                                                               | 0.907857362        | 2                | 3.398128  |

|        |                                      |             |   |           |
|--------|--------------------------------------|-------------|---|-----------|
| Q5SX40 | AEDEEEINAELTAK                       | 0.954443832 | 2 | 3.9535751 |
| Q5SX40 | AGLLGLEEMR                           | 1.035495172 | 2 | 3.888469  |
| Q5SX40 | AGLLGLEEMRDDK                        | 1.058752436 | 2 | 3.3812246 |
| Q5SX40 | ALQEAHQQTLDLQAEEDKVNLTk              | 1.043318171 | 3 | 6.559906  |
| Q5SX40 | ANLLQAEIEELR                         | 0.940482747 | 2 | 4.0092373 |
| Q5SX40 | ANSEVAQWR                            | 0.640664484 | 2 | 2.323422  |
| Q5SX40 | DLEEATLQHEATAATLR                    | 0.79133235  | 2 | 4.9365377 |
| Q5SX40 | DTQLHLDDALR                          | 0.75945362  | 2 | 2.9307239 |
| Q5SX40 | EEQAEPDGTVEADK                       | 0.956002554 | 2 | 3.1465735 |
| Q5SX40 | ELEGEVENEQK                          | 0.611606785 | 2 | 2.9637315 |
| Q5SX40 | ELEGEVENEQKR                         | 0.754171231 | 2 | 3.1835945 |
| Q5SX40 | ELTYQTEEDRK                          | 1.046943417 | 2 | 3.1425724 |
| Q5SX40 | ENQSILITGESGAGK                      | 0.878454633 | 2 | 3.6787503 |
| Q5SX40 | EQYEEQEAK                            | 0.950370777 | 1 | 3.0231702 |
| Q5SX40 | GQEDLKEQLAMVER                       | 0.905489496 | 2 | 4.0817475 |
| Q5SX40 | GQTVQQVYNSVGALAK                     | 2.569249767 | 2 | 3.0157063 |
| Q5SX40 | GSSFQTVSALFR                         | 0.675692328 | 2 | 2.5451736 |
| Q5SX40 | HADSVaelGEQIDNlQR                    | 0.938990326 | 2 | 5.8892417 |
| Q5SX40 | IAEKDEEIDQLKR                        | 1.282581668 | 2 | 2.4350762 |
| Q5SX40 | IAEQELLDASER                         | 0.855550716 | 2 | 3.6084061 |
| Q5SX40 | IEAQNKPFDAK                          | 0.79546111  | 2 | 2.7903407 |
| Q5SX40 | IEDEQALGMQLQK                        | 0.96472219  | 2 | 4.4292355 |
| Q5SX40 | IEEEEEIEAER                          | 0.836288687 | 2 | 4.1115866 |
| Q5SX40 | IKLEQQVDDLEGSLEQEK                   | 1.167486059 | 2 | 5.0790253 |
| Q5SX40 | IKLEQQVDDLEGSLEQEKK                  | 1.043444632 | 3 | 5.0071006 |
| Q5SX40 | INQQLDTK                             | 1.024165113 | 2 | 2.3604891 |
| Q5SX40 | IQHELEEAER                           | 0.896071077 | 2 | 3.6490161 |
| Q5SX40 | IQLELNQVK                            | 0.960843805 | 2 | 2.90868   |
| Q5SX40 | KALQEAHQQTLDLQAEEDKVNLTk             | 1.224981329 | 3 | 4.1908736 |
| Q5SX40 | KIAEQELLDASER                        | 0.996654858 | 2 | 4.1522408 |
| Q5SX40 | KIQHELEEAER                          | 1.071480511 | 3 | 3.8938425 |
| Q5SX40 | KKLETDISIQGEMEDIVQEAR                | 1.16595699  | 3 | 5.1435604 |
| Q5SX40 | KLEDECSSELK                          | 0.991694346 | 2 | 2.9543271 |
| Q5SX40 | KLEDECSSELKK                         | 1.109252306 | 3 | 4.052671  |
| Q5SX40 | KLETDISIQGEMEDIVQEAR                 | 1.067980352 | 2 | 5.3780861 |
| Q5SX40 | LAQESTMDVENDKQQLDEK                  | 1.003378724 | 2 | 4.5676341 |
| Q5SX40 | LDEAEQLALK                           | 1.053051161 | 2 | 3.3696587 |
| Q5SX40 | LEDECSSELKK                          | 1.059311559 | 2 | 3.1005752 |
| Q5SX40 | LEEAGGATSAQIEMNK                     | 1.019508222 | 2 | 4.7445536 |
| Q5SX40 | LEQQVDDLEGSLEQEK                     | 0.721715641 | 2 | 5.5782685 |
| Q5SX40 | LEQQVDDLEGSLEQEKK                    | 1.268283214 | 2 | 4.823029  |
| Q5SX40 | LETDISIQGEMEDIVQEAR                  | 0.851257682 | 2 | 5.1217198 |
| Q5SX40 | LINELTAQR                            | 0.976966344 | 2 | 2.9532728 |
| Q5SX40 | LQDAEEHVEAVNAK                       | 1.022933444 | 2 | 4.577137  |
| Q5SX40 | LQDLVDK                              | 0.968286455 | 2 | 2.3614142 |
| Q5SX40 | LQNEVEDLMIDVER                       | 1.222228859 | 2 | 4.4723454 |
| Q5SX40 | LQTESGEYSR                           | 0.861615107 | 2 | 2.6672299 |
| Q5SX40 | MEIDDLASNMEVISK                      | 0.912758422 | 2 | 4.3945866 |
| Q5SX40 | MEIDDLASNMEVISKGNLEK                 | 0.834394274 | 2 | 2.4305022 |
| Q5SX40 | MQGTLEDQIISANPLLEAFGNAK              | 1.121931533 | 3 | 6.6042385 |
| Q5SX40 | MQGTLEDQIISANPLLEAFGNAK+Oxidation(1) | 1.11970286  | 2 | 4.3997335 |
| Q5SX40 | NDLQLQVQSEADSLADAEER                 | 0.596683739 | 2 | 5.5792584 |
| Q5SX40 | NKDPLNETVVGlyQK                      | 0.879464522 | 2 | 4.5441327 |
| Q5SX40 | NLQQEISDLTEQIAEGGK                   | 0.924530457 | 2 | 5.9169855 |
| Q5SX40 | NLQQEISDLTEQIAEGGKR                  | 0.964589903 | 2 | 4.4323506 |
| Q5SX40 | NLTEEMAGLDETIK                       | 0.892800285 | 2 | 5.1545854 |
| Q5SX40 | QAEEAEQSNVNLAK                       | 0.886568657 | 2 | 4.4277492 |

|               |                                                                                    |                    |                  |           |
|---------------|------------------------------------------------------------------------------------|--------------------|------------------|-----------|
| Q5SX40        | QKYEETHAELEASQK                                                                    | 1.065428699        | 2                | 4.039248  |
| Q5SX40        | QLDEKDSLVSQLSR                                                                     | 1.282553611        | 2                | 2.8135993 |
| Q5SX40        | QLEEEIK                                                                            | 1.162721296        | 1                | 2.0756035 |
| Q5SX40        | QREEQAEPDGTVEADK                                                                   | 1.08219736         | 2                | 4.3373852 |
| Q5SX40        | SELQAALAEAEASLEHEEGK                                                               | 0.877987831        | 2                | 5.4333506 |
| Q5SX40        | SSVFVVDK                                                                           | 0.922944386        | 1                | 2.3147516 |
| Q5SX40        | TKYETDAIQR                                                                         | 0.990080544        | 2                | 3.3154259 |
| Q5SX40        | TLEDQVSELK                                                                         | 0.913716899        | 2                | 3.1790948 |
| Q5SX40        | TNAACAALDK                                                                         | 1.110858696        | 1                | 1.9305575 |
| Q5SX40        | TNAACAALDKK                                                                        | 0.938552561        | 3                | 3.4311299 |
| Q5SX40        | VKELTYQTEEDRK                                                                      | 0.879649653        | 2                | 2.6299329 |
| Q5SX40        | VLNASAIPEGQFIDSK                                                                   | 1.148391889        | 2                | 4.4882417 |
| Q5SX40        | VQLLHTQNTSLINTK                                                                    | 1.040169142        | 2                | 4.8992796 |
| Q5SX40        | VRELEGEVENEQKR                                                                     | 0.972783202        | 3                | 3.6625152 |
| Q5SX40        | YEETHAELEASQK                                                                      | 0.856199787        | 2                | 4.4377494 |
| Q5SX40        | YETDAIQR                                                                           | 0.771107783        | 1                | 2.0886312 |
| <b>Q5TKR9</b> | <b>KAT6A Histone acetyltransferase KAT6A</b>                                       | <b>1.129174412</b> | <b>0.1415794</b> | <b>2</b>  |
| Q5TKR9        | ENKDKQDSSSLIESEKKPEVK                                                              | 1.045992816        | 2                | 2.3868451 |
| Q5TKR9        | KGYGRFLIDFSYLLSK                                                                   | 1.645453568        | 2                | 2.3015568 |
| <b>Q5U206</b> | <b>CALL3 Calmodulin_like protein 3</b>                                             | <b>1.223472986</b> | <b>0.0001718</b> | <b>5</b>  |
| Q5U206        | DTDSEEEIR                                                                          | 1.028511094        | 2                | 2.4169052 |
| Q5U206        | KMKDTSDEEEIR                                                                       | 1.21806248         | 2                | 2.6259577 |
| Q5U206        | KMKDTSDEEEIR+Oxidation(2)                                                          | 1.333657502        | 2                | 2.4820218 |
| Q5U206        | MKDTSDEEEIR                                                                        | 0.982783674        | 3                | 4.1694016 |
| Q5U206        | MKDTSDEEEIR+Oxidation(1)                                                           | 1.34817744         | 2                | 3.4409785 |
| <b>Q5U211</b> | <b>SNX3 Sorting nexin_3</b>                                                        | <b>0.988524135</b> | <b>0.3081064</b> | <b>2</b>  |
| Q5U211        | GDDGIFDDNFIEER                                                                     | 1.410458548        | 2                | 2.8698578 |
| Q5U211        | YSDFEWLR                                                                           | 0.927232228        | 2                | 2.540637  |
| <b>Q5U2Q7</b> | <b>ERF1 Eukaryotic peptide chain release factor subunit 1</b>                      | <b>1.055570344</b> | <b>7.398E-05</b> | <b>4</b>  |
| Q5U2Q7        | GFGGIGILR                                                                          | 0.995448947        | 2                | 2.9735641 |
| Q5U2Q7        | LSVLGAITSVQQR                                                                      | 1.300590876        | 2                | 2.4411421 |
| Q5U2Q7        | YFDEISQDTGK                                                                        | 1.071327501        | 2                | 2.7884762 |
| Q5U2Q7        | YVLHCQGTEEEK                                                                       | 1.301724265        | 2                | 3.9640415 |
| <b>Q5U2U0</b> | <b>CLPX ATP_dependent Clp protease ATP_binding subunit clpX_like_mitochondrial</b> | <b>1.405265917</b> | <b>0.2841349</b> | <b>2</b>  |
| Q5U2U0        | QQA EVEK                                                                           | 1.21131269         | 1                | 2.0195193 |
| Q5U2U0        | SGESNTHQDIEEKDR                                                                    | 1.171714698        | 3                | 3.6898816 |
| <b>Q5U300</b> | <b>UBA1 Ubiquitin_like modifier_activating enzyme 1</b>                            | <b>1.132545222</b> | <b>4.441E-16</b> | <b>12</b> |
| Q5U300        | AAVASLLQSVQVPEFTPK                                                                 | 1.226428864        | 3                | 3.4228928 |
| Q5U300        | AENYDISPADR                                                                        | 0.851016041        | 2                | 2.4447527 |
| Q5U300        | DNPGVVTCLDEAR                                                                      | 0.912729876        | 2                | 2.3506987 |
| Q5U300        | FEVQGLQPNGEEMTLK                                                                   | 1.032148294        | 2                | 2.7958333 |
| Q5U300        | FEVQGLQPNGEEMTLK+Oxidation(13)                                                     | 1.137056773        | 2                | 2.4382317 |
| Q5U300        | IYDDFFQNLQDGVANALDNVDAR                                                            | 1.316733304        | 2                | 5.6085863 |
| Q5U300        | LDQPMTEIVSR                                                                        | 0.91011164         | 2                | 3.124913  |
| Q5U300        | NEEDATELVTLAQAVNAR                                                                 | 1.186935526        | 2                | 5.2932119 |
| Q5U300        | NFPNAIEHTLQWAR                                                                     | 0.945008666        | 2                | 3.5602481 |
| Q5U300        | SLPASLAEPDFVMTDFAK                                                                 | 1.210886969        | 2                | 4.0693083 |
| Q5U300        | SPPAVQQDNVDEDLIR                                                                   | 1.037240476        | 2                | 4.8702645 |
| Q5U300        | VVQGHQQLDSYK                                                                       | 1.38374439         | 2                | 3.310528  |
| <b>Q5U312</b> | <b>RAI14 Ankycorbin</b>                                                            | <b>1.083336421</b> | <b>0.7130426</b> | <b>2</b>  |
| Q5U312        | MHLLYAVQGQMEDVQKVLK                                                                | 1.123430425        | 2                | 2.3403957 |
| Q5U312        | QDLQRALEESK                                                                        | 1.081662182        | 2                | 2.4399581 |
| <b>Q5U4E6</b> | <b>GOGA4 Golgin subfamily A member 4</b>                                           | <b>1.020794756</b> | <b>0.6429093</b> | <b>2</b>  |
| Q5U4E6        | EFNTQLAQK                                                                          | 0.996442259        | 2                | 2.3481419 |
| Q5U4E6        | EQAQQILTEKENVILQMR+Oxidation(17)                                                   | 1.209978097        | 2                | 2.4134431 |
| <b>Q5XFW8</b> | <b>SEC13 Protein SEC13 homolog</b>                                                 | <b>1.105917901</b> | <b>0.6764547</b> | <b>2</b>  |

|               |                                                                        |                    |                  |           |
|---------------|------------------------------------------------------------------------|--------------------|------------------|-----------|
| Q5XFW8        | DVAWAPSIGLPTSTIASCSQDGR                                                | 1.098054486        | 2                | 3.5834305 |
| Q5XFW8        | LEAHSWVVR                                                              | 1.138442722        | 2                | 2.6964533 |
| <b>Q5XFX0</b> | <b>TAGL2 Transgelin_2</b>                                              | <b>0.987261118</b> | <b>0.0023124</b> | <b>5</b>  |
| Q5XFX0        | DDGLFSGDPNWFPK                                                         | 0.530570006        | 2                | 3.4279644 |
| Q5XFX0        | NFSDNQLQEGK                                                            | 1.046020236        | 2                | 3.2495434 |
| Q5XFX0        | NVIGLQMGTR                                                             | 0.881143451        | 2                | 2.7755408 |
| Q5XFX0        | TLMNLGGLAVAR                                                           | 0.879922209        | 2                | 3.4069796 |
| Q5XFX0        | YGINTTDFQTVDLWEGK                                                      | 1.531319253        | 2                | 5.0701828 |
| <b>Q5XH5</b>  | <b>SYTC Threonyl_tRNA synthetase_cytoplasmic</b>                       | <b>1.015074448</b> | <b>5.498E-06</b> | <b>11</b> |
| Q5XH5         | AEHDSILAEK                                                             | 0.953348286        | 2                | 2.656369  |
| Q5XH5         | FLGDIEIWNQAEK                                                          | 1.011388568        | 2                | 3.4609995 |
| Q5XH5         | FMVDIDLDPGCTLNK                                                        | 1.350798143        | 2                | 2.4584167 |
| Q5XH5         | FNLTYVSHDGGDK                                                          | 1.101658374        | 2                | 2.677567  |
| Q5XH5         | GFQEVVTPNIFNSR                                                         | 1.015929512        | 2                | 3.5567241 |
| Q5XH5         | LKAEHDSILAEK                                                           | 0.690328772        | 2                | 3.3667729 |
| Q5XH5         | QLENSLNEFGEK                                                           | 0.895164121        | 2                | 2.9010656 |
| Q5XH5         | QVMVVPVPGTCDEYAQK                                                      | 1.110058047        | 2                | 3.0961163 |
| Q5XH5         | TTPYQIACGISQGLADNTVVAK                                                 | 1.258362317        | 2                | 4.00699   |
| Q5XH5         | VVWDLDRPLETDCTLELLK                                                    | 2.035290607        | 2                | 3.9720161 |
| Q5XH5         | WELNPGDGAFYGP                                                          | 0.872988067        | 2                | 3.7246304 |
| <b>Q5XH20</b> | <b>TRAP1 Heat shock protein 75 kDa_mitochondrial</b>                   | <b>1.256870394</b> | <b>0.0001573</b> | <b>13</b> |
| Q5XH20        | AFLEALQHQAEISSR                                                        | 1.118787979        | 2                | 4.5046797 |
| Q5XH20        | AQLLQPTLEINPR                                                          | 1.188135487        | 2                | 3.0792906 |
| Q5XH20        | EGIVTTAEQDIKEDIAK                                                      | 0.661032644        | 2                | 2.3997393 |
| Q5XH20        | ELISNASDALEK                                                           | 1.062348917        | 2                | 2.9538922 |
| Q5XH20        | FEDTSPAGER                                                             | 0.869360278        | 2                | 2.8951952 |
| Q5XH20        | GTITIQDTGIGMTK                                                         | 0.981954478        | 2                | 2.8837988 |
| Q5XH20        | GVVDESDIPLNSR                                                          | 1.161577589        | 2                | 4.8695164 |
| Q5XH20        | HIAEHSPYYEAMK                                                          | 1.277263678        | 2                | 3.0081987 |
| Q5XH20        | LDTHPAMVTVLEMGAAR                                                      | 1.036424173        | 3                | 4.0402455 |
| Q5XH20        | SDCKDFANESR                                                            | 1.110898376        | 2                | 2.8979123 |
| Q5XH20        | VCEGQVLPMEIHLQTDIAEK                                                   | 0.932432306        | 3                | 4.3087139 |
| Q5XH20        | YESSALPAGQLTSLSDYASR                                                   | 1.223053791        | 2                | 5.4538627 |
| Q5XH20        | YIAQAYDKPR                                                             | 1.234452957        | 2                | 2.8065326 |
| <b>Q5XI22</b> | <b>THIC Acetyl_CoA acetyltransferase_cytosolic</b>                     | <b>1.092763838</b> | <b>0.9575124</b> | <b>9</b>  |
| Q5XI22        | AGHFDKEIVPVHVSSR                                                       | 1.086469602        | 2                | 4.7765083 |
| Q5XI22        | HGSNLEAMSK                                                             | 0.925228764        | 2                | 2.4449389 |
| Q5XI22        | HGSNLEAMSK+Oxidation(8)                                                | 0.674722624        | 2                | 3.2695105 |
| Q5XI22        | LKPYFLTDGTGTVPANASGMNDGAAAVVLMK                                        | 1.448120636        | 3                | 5.1588392 |
| Q5XI22        | MGEVPLADSILCDGLTDAFHNYHMGITAENVAK                                      | 1.211400087        | 3                | 3.8829353 |
| Q5XI22        | MLKPLAQVVSWSQAGVEPSVMGVGPIPAIK                                         | 0.919580043        | 3                | 4.6532831 |
| Q5XI22        | TAIGSFNGALSTVPVHNLGTTVIK                                               | 1.071324659        | 2                | 5.2493224 |
| Q5XI22        | VAPEEVSEVIFGHVLTAGCGQNPTK                                              | 1.088409247        | 2                | 5.3594971 |
| Q5XI22        | VNIDGGAIALGHPLGASGCR                                                   | 1.052350466        | 2                | 5.3877344 |
| <b>Q5XI29</b> | <b>CPSF7 Cleavage and polyadenylation specificity factor subunit 7</b> | <b>1.021383383</b> | <b>0.8712307</b> | <b>2</b>  |
| Q5XI29        | QNLSQFEAQR                                                             | 0.925981248        | 2                | 2.3729947 |
| Q5XI29        | SIGVYDVVELK                                                            | 1.021427218        | 2                | 2.5826645 |
| <b>Q5XI32</b> | <b>CAPZB F_actin_capping protein subunit beta</b>                      | <b>1.058985894</b> | <b>0.0990773</b> | <b>6</b>  |
| Q5XI32        | GCWDSIHVVEVQEK                                                         | 1.430907476        | 2                | 3.2091882 |
| Q5XI32        | KLEVEANNAFDQYR                                                         | 1.059170522        | 2                | 4.1404719 |
| Q5XI32        | LEVEANNAFDQYR                                                          | 0.777600054        | 2                | 3.5762429 |
| Q5XI32        | LVEDMENK                                                               | 1.022423903        | 2                | 2.7560315 |
| Q5XI32        | NDLVEALK                                                               | 0.925689716        | 2                | 2.5759699 |
| Q5XI32        | SGSGTMNLGGSLTR                                                         | 1.065010578        | 2                | 3.255939  |
| <b>Q5XI41</b> | <b>TRAM1 Translocating chain_associated membrane protein 1</b>         | <b>1.068385678</b> | <b>0.9912859</b> | <b>2</b>  |

|               |                                                              |                    |                  |           |
|---------------|--------------------------------------------------------------|--------------------|------------------|-----------|
| Q5XI41        | EHSAFQAPPVK                                                  | 1.06920234         | 2                | 2.3504441 |
| Q5XI41        | LDFSTGNFNVLA VR                                              | 1.061965577        | 2                | 3.0660298 |
| <b>Q5XI60</b> | <b>REEP6 Receptor expression_enhancing protein 6</b>         | <b>1.119941239</b> | <b>0.9999775</b> | <b>3</b>  |
| Q5XI60        | ALDIAAGITR                                                   | 0.934135952        | 2                | 2.5646975 |
| Q5XI60        | HHVALDSAASQLSGR                                              | 1.128610402        | 2                | 4.5192895 |
| Q5XI60        | NVATDALGALEAR                                                | 1.105958207        | 2                | 4.0457244 |
| <b>Q5XI72</b> | <b>IF4H Eukaryotic translation initiation factor 4H</b>      | <b>0.946056686</b> | <b>0.8596743</b> | <b>2</b>  |
| Q5XI72        | EALTYDGALLGDRSLR                                             | 0.898241895        | 2                | 2.6012604 |
| Q5XI72        | SLRVDIAEGRK                                                  | 0.952849905        | 2                | 2.4368458 |
| <b>Q5XI73</b> | <b>GDIR1 Rho GDP_dissociation inhibitor 1</b>                | <b>1.096496015</b> | <b>0.2145044</b> | <b>6</b>  |
| Q5XI73        | AEEYEF LPMEEAPK                                              | 1.207261543        | 2                | 4.1167369 |
| Q5XI73        | IDKTDYMGVSGYGR                                               | 1.086365437        | 2                | 4.00631   |
| Q5XI73        | LTLVCSTAPGPLELDLTGDLESFKK                                    | 1.519733063        | 3                | 3.4509008 |
| Q5XI73        | SIQEIQLDKDDESLR                                              | 1.05098262         | 2                | 5.2909989 |
| Q5XI73        | SIQEIQLDKDDESLRK                                             | 0.921909494        | 2                | 4.1512485 |
| Q5XI73        | VAVSADPNV PNVIVTR                                            | 1.144429756        | 2                | 4.1081886 |
| <b>Q5XI78</b> | <b>ODO1 2_oxoglutarate dehydrogenase_mitochondrial</b>       | <b>0.958095144</b> | <b>0.4779858</b> | <b>13</b> |
| Q5XI78        | FGLEGCEVLIPALK                                               | 1.038744265        | 2                | 2.9643772 |
| Q5XI78        | GHHVAQLDPLGILDADLDSSVPADIISSTDK                              | 1.149270657        | 3                | 5.0408688 |
| Q5XI78        | HHVLHDQNVDK                                                  | 0.507461629        | 3                | 3.3729432 |
| Q5XI78        | ICEEAFTR                                                     | 0.890734848        | 2                | 2.4102438 |
| Q5XI78        | IEQLSPFPD LLLK                                               | 1.201819304        | 2                | 3.3763132 |
| Q5XI78        | LEAADEGSGDMK                                                 | 0.918804785        | 2                | 2.8934822 |
| Q5XI78        | LNVLANVIR                                                    | 1.164815293        | 2                | 2.5314195 |
| Q5XI78        | NITLSLVANPSHLEAADPVVMGK                                      | 0.988576379        | 2                | 4.9115877 |
| Q5XI78        | NTNAGAPPGTAYQSPLSLR                                          | 1.113096199        | 2                | 3.8131936 |
| Q5XI78        | SSLATMAHAQSLVEAQPNDK                                         | 0.436355399        | 3                | 3.90604   |
| Q5XI78        | SWDIFFR                                                      | 0.856877405        | 2                | 2.3374112 |
| Q5XI78        | VIPEDGPAAQNPDK                                               | 0.854152138        | 2                | 2.7022362 |
| Q5XI78        | YAELLVSQGVVNQPEYEEEISKYDK                                    | 0.912412109        | 3                | 4.3703184 |
| <b>Q5XI95</b> | <b>ADH6 Alcohol dehydrogenase 6</b>                          | <b>1.020043903</b> | <b>0.9999586</b> | <b>5</b>  |
| Q5XI95        | ATVLWKPGAPLAIEIEVAPPK                                        | 1.074482013        | 2                | 3.6472714 |
| Q5XI95        | IIAVDINK                                                     | 0.989557308        | 2                | 2.7880111 |
| Q5XI95        | MVATGVC GTDIK                                                | 0.975855122        | 2                | 2.6845891 |
| Q5XI95        | NNICTEIR                                                     | 0.896474401        | 2                | 2.4097238 |
| Q5XI95        | TVGATDCV DPR                                                 | 0.869055179        | 2                | 2.9722004 |
| <b>Q5XIA0</b> | <b>DZI1L Zinc finger protein DZIP1L</b>                      | <b>0.930664708</b> | <b>0.816247</b>  | <b>2</b>  |
| Q5XIA0        | EVCNHCRQPVPD VLLK                                            | 1.0607312          | 2                | 2.3689778 |
| Q5XIA0        | GQQLGRQADELK                                                 | 0.927259621        | 2                | 2.4435472 |
| <b>Q5XIC0</b> | <b>ECI2 Enoyl_CoA delta isomerase 2_mitochondrial</b>        | <b>1.054591085</b> | <b>9.978E-05</b> | <b>6</b>  |
| Q5XIC0        | ATQQDFENAMNQVK                                               | 0.824765917        | 2                | 4.5233135 |
| Q5XIC0        | GILVTSEGGITK                                                 | 0.977850864        | 2                | 3.4250908 |
| Q5XIC0        | LHAVNEECTTLR                                                 | 1.047628296        | 2                | 4.1369224 |
| Q5XIC0        | QNYVDLVSSLSSSEASSQGK                                         | 0.767494875        | 2                | 5.1141229 |
| Q5XIC0        | WDAWNALGSLPK                                                 | 1.464943086        | 2                | 3.436161  |
| Q5XIC0        | WLSEECINAIMSFVTR                                             | 0.914479539        | 2                | 2.3607206 |
| <b>Q5XIC1</b> | <b>GMPPA Mannose_1_phosphate guanyltransferase alpha</b>     | <b>1.302625815</b> | <b>0.1328038</b> | <b>2</b>  |
| Q5XIC1        | VAPSAVLGPNV SIGK                                             | 1.48884422         | 2                | 2.6175022 |
| Q5XIC1        | VEGTPNDPNPN DPR                                              | 0.65830146         | 2                | 2.6029651 |
| <b>Q5XIE6</b> | <b>HIBCH 3_hydroxyisobutyryl_CoA hydrolase_mitochondrial</b> | <b>1.060533697</b> | <b>0.8559982</b> | <b>7</b>  |
| Q5XIE6        | AGIATHFVDSEK                                                 | 0.674777104        | 2                | 3.2385626 |
| Q5XIE6        | AVLIDKDQTPK                                                  | 1.104632607        | 2                | 2.9728868 |
| Q5XIE6        | GCAGVITLNRPK                                                 | 1.063093636        | 2                | 2.6865139 |
| Q5XIE6        | HTETAEVLLER                                                  | 0.938866833        | 2                | 2.5755217 |
| Q5XIE6        | INSCFSANTVEQILENLR                                           | 1.039838711        | 2                | 4.7273617 |

|               |                                                                                  |                    |                  |           |
|---------------|----------------------------------------------------------------------------------|--------------------|------------------|-----------|
| Q5XIE6        | LHVLEEEELLALK                                                                    | 1.150542697        | 3                | 4.6197519 |
| Q5XIE6        | QDGSPFAMEQIK                                                                     | 1.11962046         | 2                | 2.5645096 |
| <b>Q5XIF3</b> | <b>NDUS4 NADH dehydrogenase [ubiquinone] iron_sulfur protein 4_mitochondrial</b> | <b>1.050317133</b> | <b>0.9930039</b> | <b>2</b>  |
| Q5XIF3        | HGWSYDVEGR                                                                       | 1.00151346         | 2                | 2.6996706 |
| Q5XIF3        | LDVTPLTGVPEEHIK                                                                  | 1.079142328        | 2                | 3.454114  |
| <b>Q5XIF6</b> | <b>TBA4A Tubulin alpha_4A chain</b>                                              | <b>1.030564763</b> | <b>0.0127753</b> | <b>5</b>  |
| Q5XIF6        | AVFVDLEPTVIDEIR                                                                  | 0.936795321        | 2                | 4.1405959 |
| Q5XIF6        | AYHEQLSVAEITNACFEPANQMVK                                                         | 1.103667113        | 2                | 5.4725628 |
| Q5XIF6        | DVNAAIAAIK                                                                       | 0.859046617        | 2                | 2.9043574 |
| Q5XIF6        | SIQFVDWCPTGFK                                                                    | 1.080170709        | 2                | 4.4519629 |
| Q5XIF6        | TIGGGDDSFITFCETGAGK                                                              | 2.200254119        | 2                | 4.2608433 |
| <b>Q5XIG4</b> | <b>OCAD1 OCIA domain_containing protein 1</b>                                    | <b>0.919228689</b> | <b>0.9984843</b> | <b>2</b>  |
| Q5XIG4        | SVPLAATSMILITQGLISK                                                              | 0.943331221        | 2                | 3.7668123 |
| Q5XIG4        | YDSNVSGQSFQSPAADNIEK                                                             | 0.917137459        | 2                | 5.1550999 |
| <b>Q5XIH7</b> | <b>PHB2 Prohibitin_2</b>                                                         | <b>0.929997311</b> | <b>9.567E-10</b> | <b>10</b> |
| Q5XIH7        | AQVSLIIR                                                                         | 0.999901188        | 2                | 2.3424308 |
| Q5XIH7        | DLQMVNISLR                                                                       | 0.719466437        | 2                | 3.0894604 |
| Q5XIH7        | FNASQLITQR                                                                       | 0.869584005        | 2                | 3.7610543 |
| Q5XIH7        | IGGVQQDTILAEGLHFR                                                                | 1.025610119        | 3                | 4.2019539 |
| Q5XIH7        | IVQAEGEAEAAK                                                                     | 0.85336298         | 2                | 3.8714015 |
| Q5XIH7        | IYLTADNLVNLQDESFR                                                                | 1.753391014        | 2                | 4.7366509 |
| Q5XIH7        | LGLDYEER                                                                         | 0.969263071        | 2                | 2.3040402 |
| Q5XIH7        | LLGAGAVAYGVR                                                                     | 2.190670126        | 2                | 3.4734044 |
| Q5XIH7        | VLPSIVNEVLK                                                                      | 0.920725596        | 2                | 2.7304127 |
| Q5XIH7        | VLSRPNAQELPSMYQR                                                                 | 1.122095164        | 2                | 4.5834775 |
| <b>Q5XIM9</b> | <b>TCPB T_complex protein 1 subunit beta</b>                                     | <b>1.129815997</b> | <b>1.898E-09</b> | <b>9</b>  |
| Q5XIM9        | EALLSSAVDHGSDEVK                                                                 | 1.152398569        | 2                | 4.2065859 |
| Q5XIM9        | GATQQILDEAER                                                                     | 1.136510048        | 2                | 3.968919  |
| Q5XIM9        | GSGNLEAIHVIK                                                                     | 1.254077349        | 2                | 2.6489728 |
| Q5XIM9        | HGINCFINR                                                                        | 1.060093924        | 2                | 2.6171434 |
| Q5XIM9        | LGGSLADSYLDEGFLLDK                                                               | 1.255465308        | 2                | 4.147615  |
| Q5XIM9        | LGGSLADSYLDEGFLLDK                                                               | 1.221383398        | 3                | 3.313375  |
| Q5XIM9        | SLHDALCVLAQTVK                                                                   | 0.74872371         | 2                | 3.571403  |
| Q5XIM9        | VAEIEHAEKEK                                                                      | 1.667266275        | 2                | 2.4486122 |
| Q5XIM9        | VQDDEVGDGTTSVTLAAELLR                                                            | 1.347669773        | 2                | 4.7454257 |
| <b>Q5XIN6</b> | <b>LETM1 LETM1 and EF_hand domain_containing protein 1_mitochondrial</b>         | <b>1.082988154</b> | <b>0.6487959</b> | <b>10</b> |
| Q5XIN6        | AAEVEGEQVDNK                                                                     | 1.170376398        | 2                | 4.0901399 |
| Q5XIN6        | AMYLPTLSPADQLK                                                                   | 1.06270974         | 2                | 2.3151057 |
| Q5XIN6        | DIQPEVAEATVPGRPGAELQPK                                                           | 1.029558328        | 2                | 4.6125813 |
| Q5XIN6        | FLQDTIEEMALK                                                                     | 1.192774283        | 2                | 2.9100878 |
| Q5XIN6        | KLEEGPVVYSPPAQVVVK                                                               | 1.195855211        | 2                | 3.9556801 |
| Q5XIN6        | LDPAAASSPTGESVISVDELISAMK                                                        | 1.110526984        | 3                | 4.7592864 |
| Q5XIN6        | LEEGPVVYSPPAQVVVK                                                                | 0.990745906        | 2                | 2.781867  |
| Q5XIN6        | LFDELTLNLRPQLVALCK                                                               | 1.439636592        | 3                | 4.8372784 |
| Q5XIN6        | LLELQSIGTNNFLR                                                                   | 0.951972077        | 2                | 3.3529687 |
| Q5XIN6        | STLQTLPEIVAK                                                                     | 1.092984216        | 2                | 2.3853409 |
| <b>Q5XIT9</b> | <b>MCCB Methylocrotonoyl_CoA carboxylase beta chain_mitochondrial</b>            | <b>1.032168503</b> | <b>0.0775443</b> | <b>7</b>  |
| Q5XIT9        | AATGEEVSAEDLGGADLHCR                                                             | 1.055182512        | 2                | 5.0071831 |
| Q5XIT9        | ALYGDTLVTGFAR                                                                    | 0.992220986        | 2                | 3.1113625 |
| Q5XIT9        | AQEIALQNR                                                                        | 0.843906739        | 2                | 2.5665846 |
| Q5XIT9        | KLDVTVEPSEELFPADELYGIVGANLK                                                      | 1.410873242        | 3                | 4.9103823 |
| Q5XIT9        | LGTQPDGSSSTYQENYEQMK                                                             | 1.011009056        | 2                | 4.9400587 |
| Q5XIT9        | LWDDGIIIDPVDR                                                                    | 1.150298138        | 2                | 3.1592622 |
| Q5XIT9        | LYGEEVPAGGIITGIGR                                                                | 0.96642271         | 2                | 4.5532465 |



|               |                                                                                |                    |                  |           |
|---------------|--------------------------------------------------------------------------------|--------------------|------------------|-----------|
| <b>Q5XIU9</b> | <b>PGRC2 Membrane associated progesterone receptor component 2</b>             | <b>1.15344856</b>  | <b>0.2557549</b> | <b>5</b>  |
| Q5XIU9        | FYGPAGPYGIFAGR                                                                 | 1.294746082        | 2                | 2.8888557 |
| Q5XIU9        | GGDGSPGGAGATAAR                                                                | 1.090660932        | 2                | 3.2092588 |
| Q5XIU9        | GLATFCLDK                                                                      | 1.439423497        | 1                | 1.9577794 |
| Q5XIU9        | GLCSGPGAGEESPAATLPR                                                            | 1.0136701          | 2                | 4.8029985 |
| Q5XIU9        | VFDVTK                                                                         | 1.174143347        | 1                | 2.0025599 |
| <b>Q60587</b> | <b>ECHB Trifunctional enzyme subunit beta_mitochondrial</b>                    | <b>1.097537868</b> | <b>0.9831598</b> | <b>6</b>  |
| Q60587        | AMDSWFAQNYMGR                                                                  | 1.043050902        | 2                | 3.2143216 |
| Q60587        | AQDEGHLSDIVPFK                                                                 | 1.086605488        | 2                | 3.3294609 |
| Q60587        | DGGQYALVAACAAGGQGHAMIVEAYPK                                                    | 0.869874558        | 2                | 5.2683916 |
| Q60587        | DNGIRPSSLEQMAK                                                                 | 0.876626856        | 2                | 3.6151042 |
| Q60587        | DQLLLGPTYATPK                                                                  | 0.850795587        | 2                | 3.7270672 |
| Q60587        | NIVVVEGVR                                                                      | 0.925669505        | 2                | 3.0095494 |
| <b>Q60759</b> | <b>GCDH Glutaryl_CoA dehydrogenase_mitochondrial</b>                           | <b>1.162957003</b> | <b>0.6914153</b> | <b>5</b>  |
| Q60759        | DILGGNGISDEYHVIR                                                               | 0.820303995        | 2                | 3.2240078 |
| Q60759        | DIVYEMGELGLGPTIK                                                               | 1.284172475        | 2                | 3.029068  |
| Q60759        | GYGCAGVSSVAYGLLTR                                                              | 1.033169214        | 2                | 3.9812083 |
| Q60759        | HAMNLEAVNTYEGTHDIHALILGR                                                       | 0.986730427        | 4                | 5.4645753 |
| Q60759        | SMMSVQSSLMHPIYTYGSEEQR                                                         | 0.944966571        | 3                | 3.8393822 |
| <b>Q60817</b> | <b>NACA Nascent polypeptide associated complex subunit alpha</b>               | <b>0.974389662</b> | <b>0.4544764</b> | <b>2</b>  |
| Q60817        | IEDLSQQAQLAAAEK                                                                | 0.974385494        | 2                | 4.5529814 |
| Q60817        | NILFVITKPDVYK                                                                  | 1.248315686        | 2                | 3.5473759 |
| <b>Q61029</b> | <b>LAP2B Lamina associated polypeptide 2_isoforms beta/delta/epsilon/gamma</b> | <b>0.999994502</b> | <b>0.994696</b>  | <b>3</b>  |
| Q61029        | SELVANNVTLPAGEQR                                                               | 1.010163436        | 2                | 4.0796933 |
| Q61029        | SSTPLPTVSSAENTR                                                                | 0.999932841        | 2                | 2.9060812 |
| Q61029        | YGVNPGPIVGTRR                                                                  | 1.107645804        | 2                | 3.0791607 |
| <b>Q61043</b> | <b>NIN Ninein</b>                                                              | <b>1.064984504</b> | <b>0.9053833</b> | <b>2</b>  |
| Q61043        | ERATAAAMKQEQEILER                                                              | 1.06864258         | 2                | 2.3350024 |
| Q61043        | LQEENSILR                                                                      | 0.799890383        | 2                | 2.4039633 |
| <b>Q61233</b> | <b>PLSL Plastin 2</b>                                                          | <b>1.013241645</b> | <b>0.9755713</b> | <b>2</b>  |
| Q61233        | ALENDPDCR                                                                      | 1.048121747        | 2                | 2.5192206 |
| Q61233        | MINLSVPDTIDER                                                                  | 1.013209504        | 2                | 3.5816855 |
| <b>Q61301</b> | <b>CTNA2 Catenin alpha 2</b>                                                   | <b>1.179701022</b> | <b>4.494E-07</b> | <b>2</b>  |
| Q61301        | LLEPLVTQVTTLVNTSNK                                                             | 1.330301933        | 2                | 4.043756  |
| Q61301        | TSVQTEDDQLIAGQSAR                                                              | 1.123361844        | 2                | 4.6211648 |
| <b>Q61335</b> | <b>BAP31 B_cell receptor associated protein 31</b>                             | <b>0.966826555</b> | <b>0.8536183</b> | <b>5</b>  |
| Q61335        | AENEALAMQK                                                                     | 0.966529161        | 2                | 3.0555854 |
| Q61335        | KYMEENDQLKK+Oxidation(3)                                                       | 1.086145884        | 3                | 3.3652515 |
| Q61335        | LKDELASTK                                                                      | 0.755093418        | 2                | 2.6220965 |
| Q61335        | YMEENDQLK                                                                      | 1.034094039        | 2                | 2.4103351 |
| Q61335        | YMEENDQLKK                                                                     | 1.009697339        | 2                | 2.5659626 |
| <b>Q61599</b> | <b>GDIR2 Rho GDP dissociation inhibitor 2</b>                                  | <b>1.017097545</b> | <b>0.8780173</b> | <b>2</b>  |
| Q61599        | ATFMVGSYGRPEEYFLTPVEEAPK                                                       | 1.204302067        | 3                | 3.6248403 |
| Q61599        | TLLGDVPVADPTVPNVTVTR                                                           | 0.965365764        | 2                | 4.6387277 |
| <b>Q61656</b> | <b>DDX5 Probable ATP dependent RNA helicase DDX5</b>                           | <b>0.856119684</b> | <b>0.4065185</b> | <b>3</b>  |
| Q61656        | ELAQQVQQVAAEYCR                                                                | 0.687557829        | 2                | 2.6633575 |
| Q61656        | GDPICLVLAPTR                                                                   | 0.947078084        | 2                | 3.4258864 |
| Q61656        | MLDMGFEPQIR                                                                    | 0.792374929        | 2                | 3.380897  |
| <b>Q61830</b> | <b>MRC1 Macrophage mannose receptor 1</b>                                      | <b>1.126234657</b> | <b>0.2483314</b> | <b>3</b>  |
| Q61830        | KMDPQPK+Oxidation(2)                                                           | 1.066883444        | 1                | 1.9159701 |
| Q61830        | LKLPWHEAETYCK                                                                  | 1.092107012        | 2                | 2.3028827 |
| Q61830        | TGVAGGLWDVLSCEEK                                                               | 1.289060084        | 2                | 3.1642962 |
| <b>Q61941</b> | <b>NNTM NAD(P) transhydrogenase_mitochondrial</b>                              | <b>0.95587109</b>  | <b>0.5756294</b> | <b>11</b> |

|               |                                                                           |                    |                  |           |
|---------------|---------------------------------------------------------------------------|--------------------|------------------|-----------|
| Q61941        | EANSIVITPGYGLCAAK                                                         | 0.860876067        | 2                | 3.6402056 |
| Q61941        | FFTQGITAAGK                                                               | 0.992461693        | 2                | 2.4320633 |
| Q61941        | GITHIGYTDLPSR                                                             | 1.041712973        | 2                | 3.5538142 |
| Q61941        | ILIVGGGVAGLASAGAAK                                                        | 1.14593177         | 2                | 4.5779319 |
| Q61941        | KTTVLAMDQVPR                                                              | 1.05912369         | 2                | 3.4984765 |
| Q61941        | MATQASTLYSNNITK                                                           | 1.01587723         | 2                | 4.3309321 |
| Q61941        | QGFNVVVEGAGEASK                                                           | 0.878877937        | 2                | 3.8651099 |
| Q61941        | SAPLLLPGR                                                                 | 1.390511478        | 2                | 2.3467336 |
| Q61941        | SLGAEPLEVDLK                                                              | 1.076893883        | 2                | 3.0602899 |
| Q61941        | TTVLAMDQVPR                                                               | 1.063457537        | 2                | 2.7558303 |
| Q61941        | VTIAQGYDALSSMANISGYK                                                      | 1.192636343        | 2                | 5.3806281 |
| <b>Q61990</b> | <b>PCBP2 Poly(rC)_binding protein 2</b>                                   | <b>1.469360972</b> | <b>0.0302106</b> | <b>2</b>  |
| Q61990        | AITIAGIPQSIIECVK                                                          | 1.065272738        | 2                | 2.3327289 |
| Q61990        | IITLAGPTNAIFK                                                             | 1.488237826        | 2                | 2.7305646 |
| <b>Q62095</b> | <b>DDX3Y ATP_dependent RNA helicase DDX3Y</b>                             | <b>1.174279458</b> | <b>1.11E-16</b>  | <b>4</b>  |
| Q62095        | HVINFDLPSDIEEYVHR                                                         | 1.643942936        | 3                | 4.2602715 |
| Q62095        | SFLDLLLNATGK                                                              | 1.382498312        | 2                | 3.9002957 |
| Q62095        | VGNLGLATSFNER                                                             | 1.363747816        | 2                | 2.7742918 |
| Q62095        | VGSTSENITQK                                                               | 1.129759295        | 2                | 2.9357703 |
| <b>Q62261</b> | <b>SPTB2 Spectrin beta chain_brain 1</b>                                  | <b>1.184712898</b> | <b>4.552E-15</b> | <b>17</b> |
| Q62261        | ALVADSHPESER                                                              | 1.133859196        | 2                | 3.2754903 |
| Q62261        | EGMQLISEKPETEAVVK                                                         | 1.050028082        | 2                | 2.8231454 |
| Q62261        | EGMQLISEKPETEAVVKEK                                                       | 1.256062565        | 2                | 2.3889315 |
| Q62261        | EIEELQSQAQALSQEGK                                                         | 1.478872664        | 2                | 2.8213348 |
| Q62261        | FESLEPEMNNQASR                                                            | 1.108963175        | 2                | 3.5397666 |
| Q62261        | HDSASTQSTPASSR                                                            | 1.428965944        | 2                | 2.7960157 |
| Q62261        | HQILEQAVEDYAETVHQLSK                                                      | 1.16030519         | 3                | 6.1884718 |
| Q62261        | LEDLEVIQHR                                                                | 1.008695346        | 3                | 3.3586299 |
| Q62261        | LISDINK                                                                   | 1.509044672        | 1                | 1.9508045 |
| Q62261        | LLDPEDISVDHPDEK                                                           | 1.21547075         | 2                | 3.3568912 |
| Q62261        | LTTLELLEVR                                                                | 1.678980025        | 2                | 2.5658026 |
| Q62261        | LVS DGNINSDR                                                              | 1.131395354        | 2                | 2.8243861 |
| Q62261        | LVSQDNFGFDLPAVEAATK                                                       | 1.10537152         | 2                | 3.9077055 |
| Q62261        | SQNIITDSSSLNAEAIR                                                         | 1.298010772        | 2                | 4.9906144 |
| Q62261        | TLETPAAQMEGFLNR                                                           | 2.34001437         | 2                | 2.6526442 |
| Q62261        | TQTAIASEDMPNTLTEAEK                                                       | 1.075350964        | 2                | 5.5398765 |
| Q62261        | VIESTQDLGNDLAGVMALQR                                                      | 0.114089998        | 2                | 3.8343089 |
| <b>Q62425</b> | <b>NDUA4 NADH dehydrogenase [ubiquinone] 1 alpha subcomplex subunit 4</b> | <b>0.983717757</b> | <b>0.9626096</b> | <b>3</b>  |
| Q62425        | FYSVNV DYSK                                                               | 1.199573981        | 1                | 2.6027362 |
| Q62425        | KNNPEPWNK                                                                 | 0.843184809        | 2                | 2.5666802 |
| Q62425        | LGPNEQYK                                                                  | 0.944347353        | 2                | 2.3444207 |
| <b>Q62452</b> | <b>UD19 UDP_glucuronosyltransferase 1_9</b>                               | <b>1.097787319</b> | <b>0.6255215</b> | <b>5</b>  |
| Q62452        | AMEIAEALGR                                                                | 0.905662059        | 2                | 3.6241939 |
| Q62452        | GAGVTLNVLEMTADDLENALK                                                     | 1.128122074        | 3                | 5.8894067 |
| Q62452        | GAGVTLNVLEMTADDLENALK+Oxidation(11)                                       | 1.563037631        | 2                | 3.5697145 |
| Q62452        | WLPQNDLLGHPK                                                              | 1.10349416         | 2                | 3.3498611 |
| Q62452        | YTGTRPSNLAK                                                               | 0.9372215          | 2                | 2.9812493 |
| <b>Q62465</b> | <b>VAT1 Synaptic vesicle membrane protein VAT_1 homolog</b>               | <b>1.003367577</b> | <b>0.9961193</b> | <b>6</b>  |
| Q62465        | ACGLNFADLMGR                                                              | 1.152138217        | 2                | 2.8041272 |
| Q62465        | GVDIVMDPLGGSDTAK                                                          | 0.935859382        | 2                | 4.1826386 |
| Q62465        | IDSVWPFEK                                                                 | 0.980463798        | 2                | 2.3594468 |
| Q62465        | TVENVTVFGTASASK                                                           | 1.146820875        | 2                | 3.2539334 |
| Q62465        | VLLVPGPEKET                                                               | 0.921228492        | 2                | 2.7051446 |
| Q62465        | VVTYGMANLLTGPK                                                            | 1.027471893        | 2                | 2.5391309 |
| <b>Q62636</b> | <b>RAP1B Ras_related protein Rap_1b</b>                                   | <b>1.030755702</b> | <b>3.662E-09</b> | <b>2</b>  |

|               |                                                                       |                    |                  |           |
|---------------|-----------------------------------------------------------------------|--------------------|------------------|-----------|
| Q62636        | INVNEIFYDLVR                                                          | 1.681431152        | 2                | 3.9744825 |
| Q62636        | LVVLGSGGVGK                                                           | 0.89302738         | 2                | 2.5518503 |
| <b>Q62651</b> | <b>ECH1 Delta(3_5)_Delta(2_4)_dienoyl_CoA isomerase_mitochondrial</b> | <b>0.948699939</b> | <b>0.9983059</b> | <b>6</b>  |
| Q62651        | EVDVGLAADVGTLQR                                                       | 0.844874667        | 2                | 3.3603811 |
| Q62651        | HVLHVQLNRPEK                                                          | 0.870579503        | 2                | 3.430167  |
| Q62651        | MMADEALDSGLVSR                                                        | 0.975241484        | 2                | 3.351325  |
| Q62651        | RIPEEVSDHNYESIQTSAQK                                                  | 0.90771621         | 3                | 6.4499397 |
| Q62651        | SLVNELTFTAR                                                           | 0.954923689        | 2                | 3.5063622 |
| Q62651        | YCTQDAFFQVK                                                           | 0.95084541         | 2                | 2.7149467 |
| <b>Q62730</b> | <b>DHB2 Estradiol 17_beta_dehydrogenase 2</b>                         | <b>1.674353805</b> | <b>0.305299</b>  | <b>5</b>  |
| Q62730        | AVLVTGADSGFGHALAK                                                     | 1.249804379        | 2                | 4.189218  |
| Q62730        | EIQENYQGEYVHTQK                                                       | 1.114689652        | 2                | 4.5205498 |
| Q62730        | LSVLQMDVTKPEQIK                                                       | 2.067453724        | 2                | 3.6356719 |
| Q62730        | LSVLQMDVTKPEQIKDVHSEVAEK                                              | 0.738858862        | 3                | 4.2271247 |
| Q62730        | VVTIHPGGFQTNIVGSDSWDK                                                 | 1.11990299         | 2                | 5.5863495 |
| <b>Q62736</b> | <b>CALD1 Non_muscle caldesmon</b>                                     | <b>0.882212801</b> | <b>0.0014119</b> | <b>11</b> |
| Q62736        | ASGDKEAEGAPQVEAGK                                                     | 1.030511528        | 2                | 4.617053  |
| Q62736        | ASGDKEAEGAPQVEAGKR                                                    | 1.052601389        | 3                | 3.8012998 |
| Q62736        | EEIERR                                                                | 0.894280738        | 1                | 1.9036895 |
| Q62736        | EFDPTITDGSLSVPSR                                                      | 0.881109994        | 2                | 3.1884477 |
| Q62736        | GGNLGENQIKDEK                                                         | 0.994115439        | 2                | 3.3148808 |
| Q62736        | LEQYTNAIEGTK                                                          | 1.035777594        | 2                | 3.5919383 |
| Q62736        | MQNNSAENETAEGEEKGESR                                                  | 0.876263794        | 3                | 4.6092997 |
| Q62736        | NDDDEEEAAR                                                            | 5.808626621        | 2                | 2.7146745 |
| Q62736        | RGETESEEFK                                                            | 1.083134902        | 2                | 2.9351661 |
| Q62736        | RRGETESEEFK                                                           | 1.311470766        | 2                | 3.2273986 |
| Q62736        | VLEEEQR                                                               | 1.08253698         | 2                | 2.4948809 |
| <b>Q62745</b> | <b>CD81 CD81 antigen</b>                                              | <b>1.031564335</b> | <b>0.9933646</b> | <b>2</b>  |
| Q62745        | NSLCPSSNSFTQLLK                                                       | 1.110512208        | 2                | 2.9008765 |
| Q62745        | QFYDQALQQAVMDDDANNAK                                                  | 1.006064349        | 2                | 4.6036663 |
| <b>Q62769</b> | <b>UN13B Protein unc_13 homolog B</b>                                 | <b>0.849770013</b> | <b>0.7627983</b> | <b>2</b>  |
| Q62769        | DHVMREETRNLTPK                                                        | 0.829869049        | 2                | 2.5255313 |
| Q62769        | SNDEVAREFVK                                                           | 1.008433538        | 1                | 2.0405402 |
| <b>Q62785</b> | <b>HAP28 28 kDa heat_and acid_stable phosphoprotein</b>               | <b>1.255907253</b> | <b>0.1695373</b> | <b>5</b>  |
| Q62785        | ANEEDEQEEGDGASGDPK                                                    | 0.904645859        | 2                | 4.6185298 |
| Q62785        | ANEEDEQEEGDGASGDPK                                                    | 1.531884885        | 3                | 3.3064353 |
| Q62785        | GVEGLIDIENPNR                                                         | 0.985595586        | 2                | 2.3491848 |
| Q62785        | KVTQLDLDPK                                                            | 0.835430349        | 2                | 2.4684751 |
| Q62785        | YMKMHLAAGKTEQAK                                                       | 1.234301759        | 2                | 2.4377403 |
| <b>Q62789</b> | <b>UD2B7 UDP_glucuronosyltransferase 2B7</b>                          | <b>1.107220388</b> | <b>0.9999995</b> | <b>2</b>  |
| Q62789        | IILDELVQR                                                             | 1.006589489        | 2                | 3.6325858 |
| Q62789        | WIPQNDLLGHPK                                                          | 1.10349416         | 2                | 3.3498611 |
| <b>Q62812</b> | <b>MYH9 Myosin_9</b>                                                  | <b>1.031333781</b> | <b>9.9E-20</b>   | <b>61</b> |
| Q62812        | ADFCIIHYAGK                                                           | 1.185512128        | 2                | 2.6972365 |
| Q62812        | ALEEAMEQK                                                             | 1.090314648        | 2                | 2.7260249 |
| Q62812        | ALELDSNLYR                                                            | 1.257042371        | 2                | 3.5549428 |
| Q62812        | ALEQQVEEMK                                                            | 0.641345254        | 2                | 3.0122452 |
| Q62812        | ANLQIDQINTDLNLER                                                      | 1.291584228        | 2                | 4.7973003 |
| Q62812        | ASIAALEAK                                                             | 1.036550073        | 2                | 2.3363271 |
| Q62812        | ASREEILAQAK                                                           | 0.797454368        | 2                | 3.1215925 |
| Q62812        | CQYLQAEK                                                              | 1.307612405        | 1                | 1.9304417 |
| Q62812        | DFSALESQLQDTQELLQEENR                                                 | 1.173350431        | 3                | 6.3534551 |
| Q62812        | DLEAHIDTANK                                                           | 0.866415365        | 2                | 3.6386538 |
| Q62812        | DLQGRDEQSEEK                                                          | 1.436506841        | 2                | 3.2150695 |
| Q62812        | EEILAQAK                                                              | 1.053467489        | 1                | 2.2351959 |
| Q62812        | ELEDATETADAMNR                                                        | 0.748112862        | 2                | 4.2396235 |

|               |                                                        |                    |                  |           |
|---------------|--------------------------------------------------------|--------------------|------------------|-----------|
| Q62812        | ELETQISELQEDLESER                                      | 1.014709016        | 2                | 4.9737682 |
| Q62812        | HEAMITDLEER                                            | 1.124669343        | 2                | 3.4345751 |
| Q62812        | HEDELLAK                                               | 1.164982386        | 2                | 3.2255442 |
| Q62812        | HSQAVEELAEQLEQTK                                       | 1.164731855        | 2                | 4.91044   |
| Q62812        | HSQAVEELAEQLEQTKR                                      | 1.121430649        | 3                | 5.717298  |
| Q62812        | IIGLDQVAGMSETALPGAFK                                   | 1.424591986        | 2                | 5.8915477 |
| Q62812        | IRELETQISELQEDLESER                                    | 1.198466806        | 2                | 5.164259  |
| Q62812        | KEEELQAALAR                                            | 1.174977952        | 2                | 3.2767961 |
| Q62812        | KKVEAQLQELQVK                                          | 1.186822467        | 2                | 4.723196  |
| Q62812        | KLEEDQIIMEDQNCK                                        | 1.038598993        | 2                | 5.6856685 |
| Q62812        | KLEGDSTDLSQIAELQAQIAELK                                | 1.150448372        | 2                | 5.7469759 |
| Q62812        | KQELEEICHDEAR                                          | 1.14572499         | 2                | 4.5441976 |
| Q62812        | KVEAQLQELQVK                                           | 1.18673233         | 2                | 3.9437156 |
| Q62812        | LDPHLVLDQLR                                            | 1.437668259        | 3                | 3.4101036 |
| Q62812        | LEEDQIIMEDQNCK                                         | 1.137150585        | 2                | 3.3287184 |
| Q62812        | LEGDSTDLSQIAELQAQIAELK                                 | 1.006070827        | 2                | 4.9716363 |
| Q62812        | LEVNLMQAMK                                             | 1.185515078        | 2                | 2.6775594 |
| Q62812        | LQEMESAVK                                              | 0.932945934        | 2                | 2.417758  |
| Q62812        | LQQELDDLLVDLDHQR                                       | 0.942572321        | 2                | 4.7131896 |
| Q62812        | LQVELDSVTGLLNQSDSK                                     | 1.206973967        | 2                | 5.7063804 |
| Q62812        | LTEMETMQSQLMAEK                                        | 1.024374548        | 2                | 4.405055  |
| Q62812        | MEDGVGCLETAEEAK                                        | 0.839064029        | 2                | 4.5949249 |
| Q62812        | MQQNIQELEEQLSEESAR                                     | 0.964028508        | 2                | 5.940897  |
| Q62812        | NAEQFKDQADK                                            | 1.313672225        | 2                | 3.643935  |
| Q62812        | NKHEAMITDLEER                                          | 1.067151741        | 3                | 3.668582  |
| Q62812        | NLPIYSEEIVDMYK                                         | 1.247797264        | 2                | 3.2805531 |
| Q62812        | NMDPLNDNIATLLHQSSDK                                    | 1.200663669        | 2                | 5.0592389 |
| Q62812        | NTDQASMPDNNTAAQK                                       | 1.000013819        | 2                | 5.3137226 |
| Q62812        | NTDQASMPDNNTAAQK+Oxidation(7)                          | 1.487110111        | 2                | 4.8961158 |
| Q62812        | QAQQRDELADEIANSSGK                                     | 1.067544546        | 3                | 4.1532002 |
| Q62812        | QIATLHAQVTDMK                                          | 0.594514866        | 2                | 2.3622084 |
| Q62812        | QLEEAEEEAQR                                            | 1.22727403         | 2                | 3.4950795 |
| Q62812        | QSVSNLEK                                               | 1.034934483        | 2                | 2.401686  |
| Q62812        | QTLENERGELANEVK                                        | 1.148445565        | 2                | 3.4049075 |
| Q62812        | RGDMPFVTR                                              | 0.981834163        | 2                | 2.6303251 |
| Q62812        | RKLEGDSTDLSQIAELQAQIAELK                               | 1.05746945         | 3                | 5.6645689 |
| Q62812        | RQLEEAEEEAQR                                           | 1.260656377        | 2                | 4.2632041 |
| Q62812        | SMEAEMIQLEELAAER                                       | 0.9840666          | 2                | 4.5241213 |
| Q62812        | TDLLLEPYNK                                             | 1.238030205        | 2                | 2.6810634 |
| Q62812        | TELEDTLNSTAAQQLR                                       | 0.964762873        | 2                | 5.4887471 |
| Q62812        | THEAQIQEMR                                             | 1.192570498        | 2                | 3.4757388 |
| Q62812        | TQLEEELEDELQATEDAK                                     | 1.049342744        | 2                | 6.679472  |
| Q62812        | VAEFTTDLMEEEEK                                         | 1.187629095        | 2                | 4.2220039 |
| Q62812        | VEAQLQELQVK                                            | 1.243093486        | 2                | 3.675488  |
| Q62812        | VEDMAELTCLNEASVLHNLK                                   | 1.366292479        | 2                | 4.3174901 |
| Q62812        | VISGVLQGNIVFK                                          | 1.047592767        | 2                | 3.6538942 |
| Q62812        | VSHLLGINVDFTR                                          | 1.251328257        | 2                | 3.692349  |
| Q62812        | YEILTPNSIPK                                            | 1.104300611        | 2                | 3.248054  |
| <b>Q62826</b> | <b>HNRPM Heterogeneous nuclear ribonucleoprotein M</b> | <b>1.137721859</b> | <b>0.7192763</b> | <b>8</b>  |
| Q62826        | ADILEDKDGK                                             | 1.0832586          | 2                | 2.6777706 |
| Q62826        | AFITNIPFDVK                                            | 0.745923012        | 2                | 3.1363318 |
| Q62826        | GIGMGNLGPAGMGMEGIGFGINK                                | 1.008771069        | 2                | 4.8809485 |
| Q62826        | GNFGGSFAGSFGGAGGHAPGVAR                                | 1.1599352          | 2                | 4.8898392 |
| Q62826        | INEILSNALK                                             | 1.111694627        | 2                | 2.3459857 |
| Q62826        | MGANNLERMGLERMGANSER                                   | 1.314126024        | 2                | 2.4031925 |
| Q62826        | MGPVMDRMTGLER+Oxidation(1)Oxidation(5)Oxidation(8)     | 0.921641091        | 2                | 2.5765777 |

|               |                                                        |                    |                  |           |
|---------------|--------------------------------------------------------|--------------------|------------------|-----------|
| Q62826        | VGSEIER                                                | 0.98457347         | 1                | 1.9637581 |
| <b>Q62871</b> | <b>DC1I2 Cytoplasmic dynein 1 intermediate chain 2</b> | <b>1.415760975</b> | <b>0.0007267</b> | <b>2</b>  |
| Q62871        | ADAEAAAATR                                             | 1.459906268        | 2                | 2.6302412 |
| Q62871        | SVSTPSEAGSQDSGDGAVGSR                                  | 1.400214618        | 2                | 5.3513212 |
| <b>Q62902</b> | <b>LMAN1 Protein ERGIC_53</b>                          | <b>1.103587783</b> | <b>0.0005169</b> | <b>5</b>  |
| Q62902        | GAGTPGQPGQVSSQQLDVTVR                                  | 1.096166997        | 2                | 4.2838597 |
| Q62902        | GHPDLQGQPADDIFESIGDR                                   | 0.990841896        | 2                | 5.2215128 |
| Q62902        | NNPAIVVVGNNQINVDHQNDGATQALASCQR                        | 1.355292715        | 3                | 4.137229  |
| Q62902        | YQEEFEHFQQLDK                                          | 1.133671266        | 2                | 5.1299419 |
| Q62902        | YVSSLTEEISR                                            | 1.254805012        | 2                | 2.6516085 |
| <b>Q62910</b> | <b>SYNJ1 Synaptojanin_1</b>                            | <b>0.703913289</b> | <b>0.290025</b>  | <b>2</b>  |
| Q62910        | MLIQLPSASQSK+Oxidation(1)                              | 0.81535313         | 2                | 2.316417  |
| Q62910        | NQTLTDWLLDAPK                                          | 0.213296869        | 2                | 2.4895322 |
| <b>Q62967</b> | <b>MVD1 Diphosphomevalonate decarboxylase</b>          | <b>0.987547383</b> | <b>0.9949903</b> | <b>2</b>  |
| Q62967        | GLQVAPVLLSDELK                                         | 0.987563567        | 2                | 3.3702075 |
| Q62967        | VYGVGDLSEVAR                                           | 0.890763987        | 2                | 3.2871408 |
| <b>Q63041</b> | <b>A1M Alpha_1_macroglubulin</b>                       | <b>1.081793911</b> | <b>0.6107794</b> | <b>13</b> |
| Q63041        | AEDITHNGIVYTPK                                         | 1.035604991        | 2                | 3.3510671 |
| Q63041        | AEQGAYLGPLYK                                           | 1.037286911        | 2                | 3.0449498 |
| Q63041        | DLSSDLTTASK                                            | 0.671069804        | 2                | 2.5130827 |
| Q63041        | DTVVKPVIVEPEGIEK                                       | 0.943132743        | 2                | 3.0322862 |
| Q63041        | GSIFNSGSHVLPLEQ GK                                     | 1.216436352        | 2                | 4.0363312 |
| Q63041        | HSQGNWTWLTAFVLK                                        | 1.269673342        | 2                | 2.3564434 |
| Q63041        | IKEDGTGIELTGTGSCIEANTLSK                               | 0.978188233        | 2                | 3.8941062 |
| Q63041        | KLQDQSNIQR                                             | 1.177382073        | 2                | 2.476748  |
| Q63041        | LIVYTILPNEELIADVQK                                     | 1.515591698        | 2                | 4.5302505 |
| Q63041        | LQDQSNIQR                                              | 0.933718756        | 2                | 2.7995372 |
| Q63041        | QDLNDNDAYSVFQSIGLK                                     | 0.855517709        | 2                | 2.6636229 |
| Q63041        | YNILPEAEGEAPFTLK                                       | 1.097810029        | 2                | 4.2273674 |
| Q63041        | YVVLVPSSELYAGVPEK                                      | 0.866983928        | 2                | 3.2127221 |
| <b>Q63060</b> | <b>GLPK Glycerol kinase</b>                            | <b>1.102334242</b> | <b>7.669E-11</b> | <b>11</b> |
| Q63060        | AGALEGVPISGCLGDQSAALVGMCFQDQAK                         | 1.066982642        | 3                | 4.2998829 |
| Q63060        | AVLGPLVGAVDQGTSSSTR                                    | 1.030233085        | 2                | 5.4863181 |
| Q63060        | CVFSEHGLLTTVAYK                                        | 1.277239328        | 2                | 4.2795863 |
| Q63060        | DCGIPLSHLQVDGGMSTSNK                                   | 1.153063419        | 2                | 4.2049418 |
| Q63060        | EILQSVYECIEK                                           | 1.070534939        | 2                | 3.8493617 |
| Q63060        | FEPQINAESEIR                                           | 1.076026181        | 2                | 3.5818548 |
| Q63060        | KVQEAveenr                                             | 1.247867891        | 2                | 3.5605237 |
| Q63060        | LGQLNIDISNIK                                           | 1.387225606        | 2                | 3.327307  |
| Q63060        | NTYGTGCFLLCNTGHK                                       | 1.262015659        | 2                | 3.9399562 |
| Q63060        | TAELLSHHQVEIK                                          | 1.45384445         | 3                | 3.7696936 |
| Q63060        | VQEAveenr                                              | 0.925228764        | 2                | 3.3733737 |
| <b>Q63081</b> | <b>PDIA6 Protein disulfide_isomerase A6</b>            | <b>1.148305861</b> | <b>4.411E-10</b> | <b>10</b> |
| Q63081        | ALDLFSDNAPPELLEIINEDIAK                                | 1.714891295        | 3                | 6.054112  |
| Q63081        | GESPVDYDGGR                                            | 1.096810321        | 2                | 2.9169257 |
| Q63081        | GSFSEQGINEFLR                                          | 0.957081795        | 2                | 4.1081104 |
| Q63081        | GSTAPVGGGSPNITPR                                       | 1.113279565        | 2                | 4.8268476 |
| Q63081        | HQSLGGQYGVQGFPTIK                                      | 1.08772497         | 2                | 5.0309415 |
| Q63081        | KTCEEHQLCVVAVLPHILDTGATGR                              | 0.790364122        | 3                | 5.393292  |
| Q63081        | NLEPEWAAAATEVK                                         | 1.046620305        | 2                | 4.1971397 |
| Q63081        | NSYLEVLLK                                              | 1.014773191        | 2                | 2.9825845 |
| Q63081        | TCEEHQLCVVAVLPHILDTGATGR                               | 1.225321144        | 2                | 5.0734191 |
| Q63081        | TGEAIVDAALSALR                                         | 1.015263958        | 3                | 4.717514  |
| <b>Q63108</b> | <b>EST3 Liver carboxylesterase 3</b>                   | <b>1.307980581</b> | <b>2.328E-09</b> | <b>4</b>  |
| Q63108        | GGTSKEEINLSK                                           | 1.203367072        | 2                | 3.7270117 |
| Q63108        | LDPMTATSLK                                             | 0.932088085        | 2                | 2.4435873 |
| Q63108        | QKTEEELETTLK                                           | 1.023633541        | 2                | 3.4457505 |

|               |                                                                   |                    |                  |           |
|---------------|-------------------------------------------------------------------|--------------------|------------------|-----------|
| Q63108        | SSFLNLPEEAIPVAVEK                                                 | 1.351946887        | 2                | 4.7667165 |
| <b>Q63120</b> | <b>MRP2 Canalicular multispecific organic anion transporter 1</b> | <b>1.14991983</b>  | <b>0.3204095</b> | <b>4</b>  |
| Q63120        | ACALLPDLEILPGGDMAEIGEK                                            | 1.266031361        | 2                | 4.2468367 |
| Q63120        | NIQVQNMKNK                                                        | 1.004593634        | 1                | 1.9016365 |
| Q63120        | YFAWEPSFQEQVQGIR                                                  | 1.18828264         | 2                | 4.4545555 |
| Q63120        | YLGDDLDTSAIR                                                      | 0.451816154        | 2                | 2.5682964 |
| <b>Q63150</b> | <b>DPYS Dihydropyrimidinase</b>                                   | <b>1.049682409</b> | <b>7.772E-16</b> | <b>9</b>  |
| Q63150        | ALGKDDFTK                                                         | 1.121040684        | 2                | 2.642771  |
| Q63150        | DQTCTPIPVKR                                                       | 1.048633219        | 2                | 2.4962854 |
| Q63150        | EIGAIAQVHAENGDLIAEGAK                                             | 1.144632477        | 2                | 5.153172  |
| Q63150        | FVAVTSTNAAK                                                       | 1.009124827        | 2                | 2.9790983 |
| Q63150        | GSSLIEAFETWR                                                      | 1.329048402        | 2                | 3.1840332 |
| Q63150        | MLALGITGPEGHELCPREAVEAEATLR                                       | 0.944108777        | 3                | 3.7177749 |
| Q63150        | VVNDDFSQVADVLVEDGVVR                                              | 1.343329542        | 2                | 5.9371157 |
| Q63150        | VVYEAGVFDVTAGHGK                                                  | 1.15506738         | 2                | 4.2350154 |
| Q63150        | VVYGEPIAAGLGTDTGTYWVK                                             | 0.999133653        | 2                | 5.3665123 |
| <b>Q63270</b> | <b>ACOC Cytoplasmic aconitate hydratase</b>                       | <b>1.062380387</b> | <b>7.514E-10</b> | <b>18</b> |
| Q63270        | AVEAGLNVPYVK                                                      | 1.138292761        | 2                | 2.6743414 |
| Q63270        | DFSDSSQDPDFTQVVELDLK                                              | 1.594404316        | 2                | 4.9540691 |
| Q63270        | FVEFFGPGVAQLSIADR                                                 | 1.436049364        | 2                | 5.3367071 |
| Q63270        | GFQVAPDHHNDHK                                                     | 1.220537093        | 2                | 3.4489317 |
| Q63270        | IDFEKEPLGVNAQQQVFLK                                               | 1.015657737        | 3                | 4.9940352 |
| Q63270        | IIPPGSGIHQVNLEYLAR                                                | 1.536837003        | 2                | 3.4668832 |
| Q63270        | KNDIENILNWSIMQHK                                                  | 1.070020437        | 3                | 4.0876884 |
| Q63270        | NCDEFLVK                                                          | 1.195329886        | 1                | 2.2393231 |
| Q63270        | NDIENILNWSIMQHK                                                   | 1.246424478        | 2                | 3.1745555 |
| Q63270        | NQDLEFER                                                          | 1.036017045        | 1                | 2.6583519 |
| Q63270        | QAPQTVHLPSGETLDVFDAAER                                            | 1.13565594         | 3                | 3.6551054 |
| Q63270        | SIEVPFKPAR                                                        | 1.129320124        | 2                | 2.5005805 |
| Q63270        | SIVDAYVLLNLGDSVTTDHPAGNIAR                                        | 1.580539411        | 3                | 4.9680886 |
| Q63270        | SPPFFESLTLDLQPPK                                                  | 0.95601205         | 3                | 3.5933468 |
| Q63270        | SWNALAAPSEK                                                       | 1.058409268        | 1                | 2.3006413 |
| Q63270        | TSLSPGSGVVITYLR                                                   | 1.250297098        | 2                | 3.1356893 |
| Q63270        | VILQDFTGVPVAVVDFAAAMR                                             | 1.485945868        | 2                | 4.6512413 |
| Q63270        | YQQAGLPLIVLAGK                                                    | 1.111916632        | 2                | 3.7571218 |
| <b>Q63276</b> | <b>BAAT Bile acid_CoA:amino acid N_acyltransferase</b>            | <b>1.301204764</b> | <b>9.9E-20</b>   | <b>17</b> |
| Q63276        | AHGHLFVVGEDDKNLNSK                                                | 1.691851456        | 2                | 6.10148   |
| Q63276        | ASEVGEVDLER                                                       | 1.136909988        | 2                | 3.9402602 |
| Q63276        | DDKGNLNFNSQAFYR                                                   | 1.386002742        | 2                | 3.5308537 |
| Q63276        | GNLNFNSQAFYR                                                      | 1.285350252        | 2                | 3.1883316 |
| Q63276        | LCHPYFPVEGK                                                       | 1.946846725        | 3                | 3.4663103 |
| Q63276        | LTAVPLSALVDEPVHIR                                                 | 2.434313628        | 2                | 3.8724332 |
| Q63276        | MPFVIPSINWGGEVIPHAAAQEHWSK                                        | 1.104043165        | 3                | 4.2309041 |
| Q63276        | NWTLLSYPGAGHLIEPPYSPLCSASR                                        | 1.420453031        | 2                | 4.6477695 |
| Q63276        | QHLNPGFNSQL                                                       | 1.465775974        | 2                | 3.5262797 |
| Q63276        | QITATVLINGPNFVSSNPVYR                                             | 1.368448582        | 3                | 4.9434605 |
| Q63276        | TFEETADKDSK                                                       | 1.114048402        | 2                | 3.7505481 |
| Q63276        | VDLEYFEEGVFLLR                                                    | 2.316291768        | 2                | 4.4044065 |
| Q63276        | VFQPTPCSEEFVTTNALGLVEFYR                                          | 2.130482403        | 2                | 5.6035414 |
| Q63276        | VISSLDSLILR                                                       | 0.46141977         | 2                | 4.4030051 |
| Q63276        | VTGLTPFQVVLQASLK                                                  | 1.492562587        | 3                | 4.1458602 |
| Q63276        | WYVAPGVTR                                                         | 1.111919852        | 2                | 2.647073  |
| Q63276        | YCFPIEK                                                           | 1.113395641        | 2                | 2.6318409 |
| <b>Q63342</b> | <b>M2GD Dimethylglycine dehydrogenase_mitochondrial</b>           | <b>1.233714752</b> | <b>0.5124166</b> | <b>28</b> |
| Q63342        | ADIINIVNGPITYSPDILPMVGPVQVVR                                      | 1.073276891        | 3                | 4.5857129 |

|               |                                                                           |                    |                  |           |
|---------------|---------------------------------------------------------------------------|--------------------|------------------|-----------|
| Q63342        | AWGSEMNCDTNPLEAGLDYFIK                                                    | 1.298766805        | 3                | 4.5820432 |
| Q63342        | DGLLFGPYESQEK                                                             | 0.807212063        | 2                | 2.6061347 |
| Q63342        | EGQESPPSPPEWK                                                             | 0.726839594        | 2                | 2.4957814 |
| Q63342        | ELFESDLDRITEHVEAAMEMVPLK                                                  | 1.247579075        | 3                | 4.647511  |
| Q63342        | GGYDVEIR                                                                  | 0.97449274         | 2                | 2.4357567 |
| Q63342        | GQDSTQLLDHLCANVIPK                                                        | 1.0679357          | 2                | 4.1515222 |
| Q63342        | IHELFPLLNMDK                                                              | 0.951538062        | 2                | 2.5913014 |
| Q63342        | IHYDSIK                                                                   | 1.115509363        | 1                | 2.1046412 |
| Q63342        | IMNAGQEEGIDNFGTYALNALR                                                    | 0.743366559        | 2                | 4.8476253 |
| Q63342        | ISDIPVTAIR                                                                | 1.063191752        | 2                | 2.7572808 |
| Q63342        | ITEHVEAAMEMVPLK                                                           | 0.724244157        | 2                | 4.0258183 |
| Q63342        | KADIINIVNGPITYSPDILPMVGP HQGVR                                            | 0.804978619        | 3                | 7.5148835 |
| Q63342        | LEEETGQVVGFGHPQGSIR                                                       | 1.130676249        | 2                | 4.9664674 |
| Q63342        | LNKPADFTGK                                                                | 1.469995458        | 2                | 2.6556187 |
| Q63342        | LTSEDLSDVFK                                                               | 1.110876588        | 2                | 3.8376133 |
| Q63342        | LVCLTLATDDVDPEGNESVWYK                                                    | 2.377674677        | 2                | 2.8722744 |
| Q63342        | NITDELGVLGVAGPYAR                                                         | 1.175176532        | 2                | 5.0043983 |
| Q63342        | NYPATIIQEPLVLTEPTR                                                        | 1.236123776        | 3                | 4.9277558 |
| Q63342        | REDSAALYER                                                                | 0.675686694        | 2                | 3.0354998 |
| Q63342        | TNWHATEQYIIIEPEK                                                          | 0.991517449        | 2                | 4.1655359 |
| Q63342        | VGFTNISHMLTPR                                                             | 1.15284125         | 2                | 3.2231131 |
| Q63342        | VGVIDLSPFGK                                                               | 1.045279048        | 2                | 3.2275813 |
| Q63342        | VIGNTTSGSYSYSIQK                                                          | 1.125292845        | 2                | 4.5479202 |
| Q63342        | VYAELTVSHQSPGPELLITGSGSELHDLR                                             | 1.147311498        | 3                | 5.881083  |
| Q63342        | WIEEA AVR                                                                 | 0.952518048        | 2                | 2.6034269 |
| Q63342        | WTTTQYTEAK                                                                | 1.133487616        | 2                | 2.8981152 |
| Q63342        | YLSDWILHGEPFDLIELDPNR                                                     | 1.515261607        | 3                | 4.7060146 |
| <b>Q63347</b> | <b>PRS7 26S protease regulatory subunit 7</b>                             | <b>1.11399831</b>  | <b>0.2264906</b> | <b>8</b>  |
| Q63347        | ALDEGDIALLK                                                               | 1.137962817        | 2                | 2.7931871 |
| Q63347        | ESDTGLAPPALWDLAADK                                                        | 0.871454714        | 2                | 2.4763725 |
| Q63347        | FDDGAGGDNEVQR                                                             | 1.08065595         | 2                | 4.2104325 |
| Q63347        | FVVDLSDQVAPTDIEEGMR                                                       | 1.135276462        | 2                | 3.3776262 |
| Q63347        | IINADSEDPK                                                                | 1.082260228        | 2                | 2.8358204 |
| Q63347        | QTLQSEQPLQVAR                                                             | 1.379472344        | 2                | 4.1298409 |
| Q63347        | QVEDDIQQLLK                                                               | 0.860879268        | 2                | 2.7452292 |
| Q63347        | TMLELINQLDGF DPR                                                          | 1.109368567        | 2                | 3.1821039 |
| <b>Q63362</b> | <b>NDUA5 NADH dehydrogenase [ubiquinone] 1 alpha subcomplex subunit 5</b> | <b>1.126152359</b> | <b>0.0841757</b> | <b>4</b>  |
| Q63362        | KLENLLQGGEVEEVILQAEK                                                      | 1.146496462        | 2                | 6.2724776 |
| Q63362        | LENLLQGGEVEEVILQAEK                                                       | 1.046281165        | 2                | 2.5762055 |
| Q63362        | TTGLVGLAVCDTPHER                                                          | 1.164130937        | 2                | 4.149106  |
| Q63362        | YTEQITSEK                                                                 | 1.275575391        | 1                | 2.1443102 |
| <b>Q63377</b> | <b>AT1B3 Sodium/potassium_transporting ATPase subunit beta_3</b>          | <b>1.18104137</b>  | <b>0.4523655</b> | <b>2</b>  |
| Q63377        | EENIANIVTYPDDGLIDLK                                                       | 1.196905184        | 2                | 4.445622  |
| Q63377        | LFIYNPTSGEFLGR                                                            | 1.16094049         | 2                | 2.521843  |
| <b>Q63413</b> | <b>DX39B Spliceosome RNA helicase Ddx39b</b>                              | <b>0.954416866</b> | <b>0.6797776</b> | <b>2</b>  |
| Q63413        | GLAITFVSDENDAK                                                            | 0.437871653        | 2                | 2.7775745 |
| Q63413        | NCPHIVGTGPR                                                               | 0.955394644        | 2                | 2.8433394 |
| <b>Q63429</b> | <b>UBC Polyubiquitin_C</b>                                                | <b>0.964076636</b> | <b>0.9999986</b> | <b>2</b>  |
| Q63429        | TITLEVEPSDTIENVK                                                          | 1.007612937        | 2                | 4.8192639 |
| Q63429        | TLSDYNIQK                                                                 | 0.963792207        | 2                | 2.8584158 |
| <b>Q63448</b> | <b>ACOX3 Peroxisomal acyl_coenzyme A oxidase 3</b>                        | <b>1.179894714</b> | <b>9.9E-20</b>   | <b>12</b> |
| Q63448        | ADWLDSEAPLAAYR                                                            | 1.064389604        | 2                | 4.1976452 |
| Q63448        | EIHALASAGKPLASWTAQR                                                       | 1.224436634        | 2                | 4.542738  |
| Q63448        | FHEHTHSSSVPPSLR                                                           | 1.066883444        | 2                | 2.7376316 |
| Q63448        | GGYISGEQTGK                                                               | 1.2936191          | 2                | 3.0613279 |

|               |                                                               |                    |                  |           |
|---------------|---------------------------------------------------------------|--------------------|------------------|-----------|
| Q63448        | LGASLGLSSGR                                                   | 1.090560194        | 2                | 2.5648355 |
| Q63448        | NLWAAVLQSQGVLER                                               | 1.139098114        | 2                | 4.0196481 |
| Q63448        | QFGPTDKKEIPVLEYPLQQWR                                         | 0.623336588        | 3                | 4.0720463 |
| Q63448        | RDSVLWSDIPK                                                   | 1.801311105        | 2                | 2.3012884 |
| Q63448        | TIFLDLIELQR                                                   | 2.211534736        | 2                | 3.5535891 |
| Q63448        | TIFSTLENDPLFARPFADLPLEK                                       | 1.404324178        | 3                | 4.7461858 |
| Q63448        | TTAHYDPATQEFILHSPDFEAAK                                       | 1.314710809        | 3                | 4.7752557 |
| Q63448        | TVNFLEAYPGILGQK                                               | 1.417890564        | 2                | 5.4015408 |
| <b>Q63507</b> | <b>RL14 60S ribosomal protein L14</b>                         | <b>1.306461005</b> | <b>0.0038642</b> | <b>2</b>  |
| Q63507        | CMQLTDFILK                                                    | 1.779108964        | 2                | 2.3912032 |
| Q63507        | LVAIVDVIDQNR                                                  | 1.320900063        | 2                | 4.4913831 |
| <b>Q63520</b> | <b>SYCP3 Synaptonemal complex protein 3</b>                   | <b>0.865914237</b> | <b>0.2325195</b> | <b>2</b>  |
| Q63520        | KVMMETQQEMANVR                                                | 0.865914237        | 2                | 2.686219  |
| Q63520        | VMMETQQEMANVRK                                                | 0.865914237        | 2                | 2.5421925 |
| <b>Q63524</b> | <b>TMED2 Transmembrane emp24 domain_containing protein 2</b>  | <b>1.238524061</b> | <b>0.0625355</b> | <b>3</b>  |
| Q63524        | GQDMETEAHQNKLEEMINELAVAMTAVK                                  | 0.885239219        | 3                | 4.9601693 |
| Q63524        | HEQEYMEVR                                                     | 1.171985285        | 2                | 3.3929074 |
| Q63524        | HEQEYMEVR+Oxidation(6)                                        | 1.291978953        | 2                | 2.4963093 |
| <b>Q63525</b> | <b>NUDC Nuclear migration protein nudC</b>                    | <b>1.028379606</b> | <b>4.187E-07</b> | <b>4</b>  |
| Q63525        | GQAPVIDGELYNEVK                                               | 1.315404131        | 2                | 3.2409172 |
| Q63525        | LSDLSETR                                                      | 0.92133738         | 2                | 2.3230352 |
| Q63525        | LVTSDPEINTK                                                   | 1.247962367        | 2                | 2.9003344 |
| Q63525        | WTQTLSELDAVPPFR                                               | 1.027499005        | 2                | 2.6149111 |
| <b>Q63556</b> | <b>SPA3M Serine protease inhibitor A3M (Fragment)</b>         | <b>1.176197224</b> | <b>0.5244227</b> | <b>2</b>  |
| Q63556        | MQQVEASLQPETLK+Oxidation(1)                                   | 1.162655478        | 2                | 3.4067891 |
| Q63556        | MQQVEASLQPETLKK+Oxidation(1)                                  | 1.02745635         | 2                | 2.8168392 |
| <b>Q63569</b> | <b>PRS6A 26S protease regulatory subunit 6A</b>               | <b>1.020032177</b> | <b>0.5289573</b> | <b>7</b>  |
| Q63569        | AMEVDERPTEQYSDIGGLDK                                          | 0.934128812        | 3                | 4.7174616 |
| Q63569        | CTDDFNGAQCK                                                   | 1.39358245         | 2                | 3.4859915 |
| Q63569        | DSYLILETLPTDYDSR                                              | 1.240806458        | 2                | 2.4669056 |
| Q63569        | MATVWDEAEQDGIGEEVLK                                           | 1.016577016        | 2                | 3.1952558 |
| Q63569        | MNVSPDVNYEELAR                                                | 1.090227305        | 2                | 3.3797123 |
| Q63569        | QTYFLPVIGLVDAEK                                               | 1.076932627        | 2                | 2.4265258 |
| Q63569        | TMLELLNQLDGFQNPNTQVK                                          | 0.731978856        | 2                | 3.7141953 |
| <b>Q63570</b> | <b>PRS6B 26S protease regulatory subunit 6B</b>               | <b>1.021008198</b> | <b>0.0004574</b> | <b>4</b>  |
| Q63570        | FDAQTGADR                                                     | 1.057224192        | 2                | 2.5137155 |
| Q63570        | IQDEIPALSVSRPQTGLSFLGPEPEDLEDLYSR                             | 1.831175636        | 3                | 5.848506  |
| Q63570        | KDEQEHEFYK                                                    | 0.891620852        | 2                | 3.0981023 |
| Q63570        | RFAQQTGADR                                                    | 0.998395691        | 2                | 2.6501055 |
| <b>Q63584</b> | <b>TMEDA Transmembrane emp24 domain_containing protein 10</b> | <b>1.421902344</b> | <b>3.419E-11</b> | <b>4</b>  |
| Q63584        | ITDSAGHILYAK                                                  | 1.421965157        | 2                | 3.6730776 |
| Q63584        | LEDLSESIVNDFAYMK                                              | 1.49455806         | 2                | 4.5899539 |
| Q63584        | NYEEIAK                                                       | 1.138371965        | 1                | 2.1715348 |
| Q63584        | RLEDLSESIVNDFAYMK                                             | 1.195912697        | 2                | 4.3021975 |
| <b>Q63598</b> | <b>PLST Plastin_3</b>                                         | <b>1.236893815</b> | <b>0.0104495</b> | <b>12</b> |
| Q63598        | AESMLQQADK                                                    | 0.970015852        | 2                | 3.1439896 |
| Q63598        | ATDDIIVNWVNGTLSEAGK                                           | 1.136872083        | 2                | 5.0451846 |
| Q63598        | EGICALGGTSELSSEGTQHSYSEEEK                                    | 1.014735745        | 3                | 3.488802  |
| Q63598        | HVIPMNPNTDDLK                                                 | 1.038522657        | 2                | 3.0191822 |
| Q63598        | IDINMSGFNETDDLKR                                              | 1.141972544        | 2                | 4.2491045 |
| Q63598        | INNFSADIK                                                     | 1.123994106        | 2                | 2.4944031 |
| Q63598        | KLENCNYAVELGK                                                 | 1.163308073        | 2                | 3.6742704 |
| Q63598        | NEALAALLR                                                     | 1.11056408         | 2                | 2.6012967 |
| Q63598        | VDLNSNGFICDYELHELK                                            | 1.262637346        | 2                | 4.1133699 |
| Q63598        | VYALPEDLVEVKPK                                                | 1.288878584        | 2                | 2.7436948 |



|               |                                                     |                    |                  |           |
|---------------|-----------------------------------------------------|--------------------|------------------|-----------|
| Q63598        | YPALTKPENQDIDWTLLEGETR                              | 0.951194576        | 3                | 5.2382455 |
| Q63598        | YTLNVMEDLGEGQK                                      | 1.141944259        | 2                | 3.8818831 |
| <b>Q63610</b> | <b>TPM3 Tropomyosin alpha_3 chain</b>               | <b>1.113175876</b> | <b>0.0025057</b> | <b>8</b>  |
| Q63610        | AREQAEAEVASLNR                                      | 1.823902454        | 2                | 2.8974128 |
| Q63610        | EQAEAEVASLNR                                        | 0.890398613        | 2                | 2.577198  |
| Q63610        | IQVLQQQADDAEER                                      | 1.20366432         | 2                | 5.0865884 |
| Q63610        | KIQVLQQQADDAEER                                     | 1.004793037        | 2                | 4.8643398 |
| Q63610        | KLVIIEGDLER                                         | 1.003408475        | 3                | 3.8473916 |
| Q63610        | LVIIEGDLER                                          | 0.984969651        | 2                | 2.7553978 |
| Q63610        | MELQEIQLK                                           | 0.885497282        | 2                | 2.8501985 |
| Q63610        | YSQKEDKYEEEIK                                       | 1.078694978        | 2                | 4.6391745 |
| <b>Q63617</b> | <b>HYOU1 Hypoxia up_regulated protein 1</b>         | <b>1.068218152</b> | <b>1.798E-07</b> | <b>11</b> |
| Q63617        | EGETPDEKESGDKSEAQKPNK                               | 1.538081322        | 3                | 3.5457647 |
| Q63617        | GQAGPEGVPPAPEEEK                                    | 0.87686624         | 2                | 3.5048003 |
| Q63617        | LIPEMDQIFTDVEMTTLEK                                 | 1.577631222        | 2                | 4.6758575 |
| Q63617        | LYQPEYQEVSTEEQR                                     | 1.065818238        | 2                | 4.9301648 |
| Q63617        | NINADEAAAMGAVYQAAASK                                | 1.127315177        | 2                | 5.1948733 |
| Q63617        | SLAEDFAEQPIKDAVITVPAFFNQAER                         | 1.242430464        | 2                | 3.8691392 |
| Q63617        | TLGGLEMELR                                          | 1.161451387        | 2                | 2.5957794 |
| Q63617        | VAIVKPGVPMIEVLNK                                    | 1.061308866        | 2                | 2.6579511 |
| Q63617        | VEFEELCADLFDR                                       | 1.752017583        | 2                | 3.5904388 |
| Q63617        | VESVFETLVEDSPEEESTLTK                               | 1.01531051         | 2                | 3.8139968 |
| Q63617        | VLQLINDNTATALSYGVFR                                 | 1.27983123         | 2                | 5.2757835 |
| <b>Q63716</b> | <b>PRDX1 Peroxiredoxin_1</b>                        | <b>1.092782949</b> | <b>7.803E-11</b> | <b>15</b> |
| Q63716        | ADEGISFR                                            | 1.012361573        | 2                | 3.1503272 |
| Q63716        | ATAVMPDGQFK                                         | 1.011301664        | 2                | 2.8500004 |
| Q63716        | ATAVMPDGQFK+Oxidation(5)                            | 1.204065253        | 2                | 2.3372262 |
| Q63716        | DISLSDYK                                            | 0.808740193        | 1                | 1.9369652 |
| Q63716        | HGEVCPAGWKPGSDTIKPDVNK                              | 1.060704182        | 3                | 6.3296194 |
| Q63716        | KQGGLGPMNIPLVSDPK                                   | 1.087170388        | 2                | 3.9838037 |
| Q63716        | KQGGLGPMNIPLVSDPKR                                  | 0.88073121         | 3                | 4.0426483 |
| Q63716        | LNCQVIGASVDSHFCHLAWINTPK                            | 1.556899121        | 3                | 3.9178798 |
| Q63716        | LVQAFQFTDK                                          | 2.356488011        | 2                | 3.3724554 |
| Q63716        | QGGGLGPMNIPLVSDPK                                   | 0.899918307        | 2                | 3.1719053 |
| Q63716        | QGGGLGPMNIPLVSDPK+Oxidation(7)                      | 1.429165113        | 2                | 2.7833498 |
| Q63716        | QITINDLPVGR                                         | 1.079327457        | 2                | 3.3390398 |
| Q63716        | RTIAQDYGVLK                                         | 1.09938434         | 2                | 2.6977775 |
| Q63716        | SVDEILR                                             | 1.086354173        | 2                | 2.4898698 |
| Q63716        | TIAQDYGVLK                                          | 1.053153959        | 2                | 3.4605329 |
| <b>Q63755</b> | <b>PRDM2 PR domain zinc finger protein 2</b>        | <b>0.889385657</b> | <b>0.7268903</b> | <b>2</b>  |
| Q63755        | LSFNVELGKMSPNK                                      | 0.778983709        | 2                | 2.4230919 |
| Q63755        | VKAAATPFQGPFLKE                                     | 0.903952168        | 2                | 2.3019567 |
| <b>Q63768</b> | <b>CRK Adapter molecule crk</b>                     | <b>0.923456197</b> | <b>0.384703</b>  | <b>2</b>  |
| Q63768        | IGDQEFDSLPALEFYK                                    | 0.942737686        | 2                | 3.6276994 |
| Q63768        | VPNAYDKTALALEVGELVK                                 | 1.310068063        | 2                | 2.9085259 |
| <b>Q63797</b> | <b>PSME1 Proteasome activator complex subunit 1</b> | <b>1.013280863</b> | <b>0.5729325</b> | <b>8</b>  |
| Q63797        | ISELDAFLKEPALNEANLSNLK                              | 0.954729262        | 2                | 5.2696695 |
| Q63797        | KGDEDDKGPCCGPNVNCNEK                                | 1.002608594        | 3                | 5.0365434 |
| Q63797        | KISELDAFLKEPALNEANLSNLK                             | 1.085393906        | 3                | 6.2888603 |
| Q63797        | LEGFQTQISK                                          | 1.206279822        | 2                | 2.6221325 |
| Q63797        | QLVHELDEAEYQEIR                                     | 1.092499302        | 2                | 4.3857746 |
| Q63797        | TENLLGSYFPK                                         | 0.977633868        | 2                | 3.3354642 |
| Q63797        | VDVFREDLCSK                                         | 1.135611423        | 2                | 2.7659054 |
| Q63797        | VFELMTSLHTK                                         | 1.350830623        | 2                | 2.5248857 |
| <b>Q63798</b> | <b>PSME2 Proteasome activator complex subunit 2</b> | <b>1.098429651</b> | <b>0.1211081</b> | <b>4</b>  |
| Q63798        | AFYAELHHIISNLEK                                     | 1.119294767        | 2                | 3.7250743 |
| Q63798        | IEDGNDFGVAIQEK                                      | 1.051549863        | 2                | 4.5267553 |

|               |                                                           |                    |                  |           |
|---------------|-----------------------------------------------------------|--------------------|------------------|-----------|
| Q63798        | KIISLSQLQEDSLNVADLSSLR                                    | 2.757643946        | 2                | 4.5213685 |
| Q63798        | TKVEAFQTAISK                                              | 1.187775205        | 2                | 3.4474483 |
| <b>Q63836</b> | <b>SBP2 Selenium_binding protein 2</b>                    | <b>0.819165446</b> | <b>0.0623499</b> | <b>4</b>  |
| Q63836        | EGSVMLQVDVDTVNGGLK                                        | 1.461658887        | 2                | 2.5620518 |
| Q63836        | GGSVQVLEDQELTCQPEPLVVK                                    | 0.905155075        | 2                | 5.1906209 |
| Q63836        | IYVVDVGSEPR                                               | 0.760583057        | 2                | 3.7739532 |
| Q63836        | LNPNFLVDFGKEPLGALAEHLR                                    | 1.033975951        | 3                | 4.1902328 |
| <b>Q63862</b> | <b>MYH11 Myosin_11 (Fragments)</b>                        | <b>0.876357245</b> | <b>0.0520475</b> | <b>2</b>  |
| Q63862        | LQQELDDLVDLDNQR                                           | 0.476666017        | 2                | 4.292026  |
| Q63862        | SLEAELMLQLEDLAAER                                         | 1.154968183        | 2                | 2.9223065 |
| <b>Q63945</b> | <b>SET Protein SET</b>                                    | <b>1.143046185</b> | <b>4.201E-06</b> | <b>2</b>  |
| Q63945        | IDFYFDENPYFENK                                            | 1.543001724        | 2                | 3.5946901 |
| Q63945        | VEVTEFEDIK                                                | 0.993459412        | 2                | 2.6153038 |
| <b>Q63965</b> | <b>SFXN1 Sideroflexin_1</b>                               | <b>1.027020727</b> | <b>0.9946348</b> | <b>4</b>  |
| Q63965        | NILLTNEQLENAR                                             | 0.873539893        | 2                | 4.5019326 |
| Q63965        | QGIVPAGLTENELWR                                           | 0.998902457        | 2                | 2.6962218 |
| Q63965        | WDQSTFIGR                                                 | 0.813600099        | 2                | 2.3649459 |
| Q63965        | YAYDSAFHPDTGEK                                            | 1.043622868        | 2                | 4.2982674 |
| <b>Q64057</b> | <b>AL7A1 Alpha_aminoadipic semialdehyde dehydrogenase</b> | <b>0.93916466</b>  | <b>2.018E-08</b> | <b>17</b> |
| Q64057        | AWNIIWADIPAPK                                             | 0.951303618        | 2                | 3.7978272 |
| Q64057        | DYEETIGK                                                  | 0.640471981        | 1                | 2.0558882 |
| Q64057        | EDNEGVFNQSWGGR                                            | 0.667853257        | 2                | 3.4862349 |
| Q64057        | FKNEEEVFEWNNNEVK                                          | 0.936360453        | 2                | 5.802444  |
| Q64057        | GAPTTSLVSIATVK                                            | 0.925173316        | 2                | 4.9187026 |
| Q64057        | GEVITTYCPANNEPIAR                                         | 0.911347368        | 2                | 5.3992472 |
| Q64057        | GSDCGIVNVNIPTSGAEIGGAFGGK                                 | 0.86204101         | 2                | 5.8571663 |
| Q64057        | LFLHESIHDEVVDR                                            | 1.270137058        | 2                | 3.9668601 |
| Q64057        | NEEEVFEWNNNEVK                                            | 0.76403017         | 2                | 4.5607667 |
| Q64057        | QAVSMFVQAVEEAK                                            | 0.773822255        | 2                | 2.8087535 |
| Q64057        | QGLSSSIFTK                                                | 0.762294277        | 2                | 2.3749559 |
| Q64057        | QVALMVQER                                                 | 0.886159886        | 2                | 2.4274278 |
| Q64057        | STCTINYSTALPLAQGIK                                        | 0.859104893        | 2                | 4.9659343 |
| Q64057        | VGNPWDPNILYGPLHTK                                         | 1.35449424         | 3                | 3.6846783 |
| Q64057        | VMDHPGNYVEPTIVTGLVHDAPIVHK                                | 0.865786518        | 3                | 6.0657763 |
| Q64057        | VMDHPGNYVEPTIVTGLVHDAPIVHK+Oxidation(2)                   | 1.041524036        | 3                | 6.0388851 |
| Q64057        | VNLLSFTGSTQVVGK                                           | 1.433952119        | 2                | 4.7510214 |
| <b>Q640L5</b> | <b>CCD18 Coiled_coil domain_containing protein 18</b>     | <b>1.053594074</b> | <b>0.8607859</b> | <b>2</b>  |
| Q640L5        | NEKIRSLESNINTEHEK                                         | 1.051857932        | 2                | 2.3783941 |
| Q640L5        | TELEKTTNSVKELER                                           | 1.066807757        | 2                | 2.3333199 |
| <b>Q64119</b> | <b>MYL6 Myosin light polypeptide 6</b>                    | <b>1.16693375</b>  | <b>2.357E-13</b> | <b>7</b>  |
| Q64119        | DQGTIEDYVEGLR                                             | 0.94348454         | 2                | 3.2185175 |
| Q64119        | EGNGTVMGAEIR                                              | 0.980549563        | 2                | 2.5300565 |
| Q64119        | HVLVTLGEK                                                 | 1.176892237        | 2                | 2.5632961 |
| Q64119        | ILYSQCGDVMR                                               | 2.039233405        | 2                | 3.1396596 |
| Q64119        | NKDQGTIEDYVEGLR                                           | 1.112867818        | 2                | 4.2827415 |
| Q64119        | VFDKEGNGTVMGAEIR                                          | 1.210810587        | 2                | 3.9720469 |
| Q64119        | VLDFEHFLPMLQTVAK                                          | 1.121985374        | 2                | 4.9660754 |
| <b>Q64122</b> | <b>MYL9 Myosin regulatory light polypeptide 9</b>         | <b>1.276052667</b> | <b>4.075E-06</b> | <b>2</b>  |
| Q64122        | DGFIDKEDLHDMLASLGK                                        | 1.279231158        | 2                | 5.248879  |
| Q64122        | LNGTDPEDVIR                                               | 1.224251157        | 2                | 2.7841108 |
| <b>Q64176</b> | <b>EST22 Liver carboxylesterase 22</b>                    | <b>1.23555121</b>  | <b>7.62E-09</b>  | <b>4</b>  |
| Q64176        | AISESGVALTAGLVK                                           | 1.085563196        | 2                | 4.8758812 |
| Q64176        | EGYLQIGATTQQAQK                                           | 1.234301759        | 2                | 4.2960839 |
| Q64176        | LGIWGFSTGDEHSR                                            | 1.441783943        | 2                | 3.1314728 |
| Q64176        | NFNTVPYIVGINK                                             | 1.198658718        | 2                | 3.4447258 |

|               |                                                                                            |                    |                  |           |
|---------------|--------------------------------------------------------------------------------------------|--------------------|------------------|-----------|
| <b>Q641Y0</b> | <b>OST48 Dolichyl_diphosphooligosaccharide__protein glycosyltransferase 48 kDa subunit</b> | <b>1.235263454</b> | <b>9.9E-20</b>   | <b>7</b>  |
| Q641Y0        | ELGSECGIEFDEEK                                                                             | 1.237576131        | 2                | 3.6943438 |
| Q641Y0        | GVGMVADPDNPLVLDILTGSSTYSFFDPKIPITQYPHAVGR                                                  | 1.692452714        | 4                | 5.1206918 |
| Q641Y0        | NLLIAGLQAR                                                                                 | 1.12403761         | 2                | 3.7971776 |
| Q641Y0        | TADDPSSLIK                                                                                 | 1.031929598        | 2                | 2.3363445 |
| Q641Y0        | TAVIDHHNYDVS DLGQHTLIVADTENLLK                                                             | 1.220359451        | 3                | 6.1377969 |
| Q641Y0        | TLVLLDNLNVR                                                                                | 1.293073918        | 2                | 3.9353378 |
| Q641Y0        | WVPFDGDDIQLEFVR                                                                            | 1.6891111          | 2                | 3.3367329 |
| <b>Q641Y2</b> | <b>NDUS2 NADH dehydrogenase [ubiquinone] iron_sulfur protein 2_ mitochondrial</b>          | <b>1.303551387</b> | <b>0.000102</b>  | <b>5</b>  |
| Q641Y2        | GSGIQWDLR                                                                                  | 0.995739899        | 2                | 2.7102461 |
| Q641Y2        | IDEVEEMLTNNR                                                                               | 1.121772544        | 2                | 3.4995582 |
| Q641Y2        | IIEQCLNK                                                                                   | 1.290383996        | 2                | 2.8962796 |
| Q641Y2        | LYTEGYQVPPGATYTAIEAPK                                                                      | 1.650525655        | 2                | 2.7566478 |
| Q641Y2        | TQPYDVYDQVEFDVPIGSR                                                                        | 1.378867244        | 2                | 4.2498388 |
| <b>Q64232</b> | <b>TECR Trans_2_3_ enoyl_CoA reductase</b>                                                 | <b>1.14236035</b>  | <b>0.004</b>     | <b>3</b>  |
| Q64232        | HYEVEIR                                                                                    | 0.887724535        | 2                | 2.3287072 |
| Q64232        | LCFLDKVEPQATISEIK                                                                          | 1.158798833        | 2                | 4.5417991 |
| Q64232        | SLKDEDVLQK                                                                                 | 1.181448624        | 2                | 3.0040004 |
| <b>Q64240</b> | <b>AMBP Protein AMBP</b>                                                                   | <b>1.015640825</b> | <b>0.7947292</b> | <b>3</b>  |
| Q64240        | AFAELWAFDAAQ GK                                                                            | 1.430061893        | 2                | 2.7709675 |
| Q64240        | AVLPQENEGSGSEPLITGTLK                                                                      | 0.985525955        | 2                | 4.7951117 |
| Q64240        | TIAACNLPIVQGPCR                                                                            | 1.018430454        | 2                | 3.9686565 |
| <b>Q64380</b> | <b>SARDH Sarcosine dehydrogenase_ mitochondrial</b>                                        | <b>0.973688725</b> | <b>0.0022073</b> | <b>17</b> |
| Q64380        | AIDSLSIEK                                                                                  | 0.848758668        | 2                | 2.5552628 |
| Q64380        | AYGIESHVLSPAETK                                                                            | 0.968393977        | 2                | 4.2930307 |
| Q64380        | DGTMDPAGTCTTLTR                                                                            | 0.739387475        | 2                | 4.0470209 |
| Q64380        | DILQDVLADLSNEAFPSTHQLVR                                                                    | 1.499396548        | 3                | 5.026329  |
| Q64380        | DLYPLMNVDDLYGTLYVPR                                                                        | 1.243857679        | 2                | 3.4959717 |
| Q64380        | FHSLTDHPR                                                                                  | 1.208447856        | 2                | 2.5545363 |
| Q64380        | FYLLGADAR                                                                                  | 0.871907894        | 2                | 2.5453067 |
| Q64380        | HGLVNAGYR                                                                                  | 0.842978988        | 2                | 2.3525286 |
| Q64380        | IEGIQNPVNR                                                                                 | 0.860679993        | 2                | 2.8399584 |
| Q64380        | LGVGGVLLER                                                                                 | 1.489429322        | 2                | 3.1517479 |
| Q64380        | LQGDALSVGGYEANPIFWDEVSDK                                                                   | 0.769486836        | 2                | 4.281363  |
| Q64380        | NYSVVPFHDEPLAGR                                                                            | 0.948947329        | 2                | 3.8792932 |
| Q64380        | QVSHDLEEETGLHTGWIQNGGLFIASNQQR                                                             | 0.827102642        | 3                | 4.5125012 |
| Q64380        | RDPLHEELLGQGCVFQER                                                                         | 1.020992813        | 3                | 5.265172  |
| Q64380        | SDDSPLEAGLAFTCK                                                                            | 0.94091559         | 2                | 4.659956  |
| Q64380        | STVCGPESFTPDKPLMGEAPELR                                                                    | 0.961313191        | 3                | 4.8650818 |
| Q64380        | VTAVETQHGSIQTPCVVNCAGVWASSVGR                                                              | 0.793257936        | 3                | 5.1172805 |
| <b>Q64428</b> | <b>ECHA Trifunctional enzyme subunit alpha_ mitochondrial</b>                              | <b>1.317067344</b> | <b>0.0018596</b> | <b>25</b> |
| Q64428        | ADMVIEAVFEDLAVK                                                                            | 1.134097532        | 3                | 4.7585807 |
| Q64428        | ALMGLYNGQVLCK                                                                              | 0.94849478         | 2                | 3.2777877 |
| Q64428        | DSIFSNLIGQLDYK                                                                             | 0.879688349        | 2                | 2.5402288 |
| Q64428        | DTTASAVAVGLK                                                                               | 0.916438811        | 2                | 3.7717333 |
| Q64428        | EVESVTPHECFASNTSALPINQIAAVSQRPEK                                                           | 0.877773321        | 3                | 6.8490634 |
| Q64428        | EVQSEFVEVMNEIWANDQIR                                                                       | 1.03547487         | 3                | 3.3226974 |
| Q64428        | FGELALTK                                                                                   | 0.925106746        | 2                | 2.6867118 |
| Q64428        | FGGGSVELLK                                                                                 | 0.890009957        | 2                | 3.2962127 |
| Q64428        | FVDLYGAQK                                                                                  | 1.031822154        | 2                | 3.178232  |
| Q64428        | GFYIYQSGSK                                                                                 | 1.001367455        | 2                | 3.0350983 |
| Q64428        | ILQEGVDPK                                                                                  | 0.926556776        | 2                | 3.1506605 |
| Q64428        | KLDALTTGFGFPVGAATLADEVGIDVAQHV AEDLGK                                                      | 1.358466115        | 4                | 5.0372643 |
| Q64428        | KTVLGVPEVLLGLPGAGGTQR                                                                      | 1.454020202        | 2                | 4.2800083 |

|               |                                                                 |                    |                  |           |
|---------------|-----------------------------------------------------------------|--------------------|------------------|-----------|
| Q64428        | KYESAYGTQFTPCQLLR                                               | 0.917288888        | 2                | 4.4332457 |
| Q64428        | LPAKPEVSSDEDIQYR                                                | 0.960377026        | 3                | 3.8480477 |
| Q64428        | MGLVDQLVDPLGPGIK                                                | 0.926557509        | 2                | 4.825469  |
| Q64428        | MGLVDQLVDPLGPGIK+Oxidation(1)                                   | 1.095310011        | 2                | 2.4513948 |
| Q64428        | MQLLEIITDK                                                      | 0.947832207        | 2                | 4.0207491 |
| Q64428        | MVGVPAAFDMMMLTGR                                                | 1.063453138        | 2                | 3.2359982 |
| Q64428        | NLNSEIDNILVNL                                                   | 1.15180772         | 2                | 4.7883101 |
| Q64428        | TGLEQGNDAGYLAESEK                                               | 1.019667416        | 2                | 5.1366668 |
| Q64428        | TIEYLEEVAVNFAK                                                  | 1.020776757        | 3                | 4.1489701 |
| Q64428        | TVLGVPEVLLGILPGAGGTQR                                           | 1.238670032        | 3                | 5.0028033 |
| Q64428        | TVQQLAILGAGLMGAGIAQVSVDK                                        | 0.888660535        | 3                | 5.9910145 |
| Q64428        | YESAYGTQFTPCQLLR                                                | 0.971351354        | 2                | 4.4132524 |
| <b>Q64458</b> | <b>CP2CT Cytochrome P450 2C29</b>                               | <b>1.258309876</b> | <b>0.9453032</b> | <b>5</b>  |
| Q64458        | IKEHKESLDVTNPR                                                  | 1.020813495        | 2                | 5.0222163 |
| Q64458        | LPPGPTPLPIIGNFLQIDVK                                            | 1.146498617        | 3                | 4.3713417 |
| Q64458        | VQEEAQCLVEELR                                                   | 1.194889857        | 2                | 4.2754622 |
| Q64458        | VQEEAQCLVEELRK                                                  | 1.155741751        | 2                | 3.7265685 |
| Q64458        | VQEEIDR                                                         | 0.946095231        | 2                | 2.4955275 |
| <b>Q64481</b> | <b>CP3AG Cytochrome P450 3A16</b>                               | <b>1.314747126</b> | <b>0.800765</b>  | <b>2</b>  |
| Q64481        | GSIDPYVYLPFGNGPR                                                | 1.313705225        | 2                | 3.9438915 |
| Q64481        | VLQNFSPQCK                                                      | 1.327481952        | 2                | 2.6090727 |
| <b>Q64550</b> | <b>UD11 UDP_glucuronosyltransferase 1_1</b>                     | <b>0.967780028</b> | <b>0.6607695</b> | <b>4</b>  |
| Q64550        | GHEVVVIAPEASIIHK                                                | 0.865501255        | 2                | 4.6645131 |
| Q64550        | NMIIALTENFLCR                                                   | 1.275392943        | 2                | 4.6596899 |
| Q64550        | SVFDQDPFLR                                                      | 1.172352774        | 2                | 3.4108002 |
| Q64550        | VVYSPYGLATEILQK                                                 | 1.182688493        | 2                | 4.550745  |
| <b>Q64563</b> | <b>ADH4 Alcohol dehydrogenase 4</b>                             | <b>1.4951663</b>   | <b>0.033105</b>  | <b>16</b> |
| Q64563        | AAVDCTVVGWGSCTVVGAK                                             | 1.262188791        | 2                | 4.1815033 |
| Q64563        | ALFPVVLGHECAGIVESVGPVTFNFKPGDK                                  | 1.445271891        | 3                | 5.8407068 |
| Q64563        | ALGATDCLNPR                                                     | 1.245823964        | 2                | 3.0082486 |
| Q64563        | DLDKPVQDVITELTGGGVDFSLDCAGTAQTLK                                | 1.287064286        | 3                | 5.560966  |
| Q64563        | FDLDLLVTHALPFDK                                                 | 1.335274651        | 3                | 3.3206184 |
| Q64563        | IIAIDINSEKFPK                                                   | 1.331094491        | 2                | 2.6502202 |
| Q64563        | INDAIDLMNQGK                                                    | 1.246594441        | 2                | 4.3490949 |
| Q64563        | KFDLDLLVTHALPFDK                                                | 1.363404123        | 3                | 5.6919265 |
| Q64563        | KFDLDLLVTHALPFDKINDAIDLMNQGK                                    | 0.978921459        | 3                | 4.6829495 |
| Q64563        | LCLSPLTNLCGK                                                    | 2.189000239        | 2                | 2.3193154 |
| Q64563        | SVDSVPNLVTDYK                                                   | 1.490728984        | 2                | 3.259198  |
| Q64563        | TDSPLCIEIEVSPPK                                                 | 1.228625788        | 2                | 4.2324138 |
| Q64563        | VCLIGCGFTSGYGAAINTAK                                            | 1.3538816          | 2                | 5.5748262 |
| Q64563        | VDDEANLER                                                       | 1.976548084        | 2                | 2.6753829 |
| Q64563        | VDEMNIIVDMILGR                                                  | 1.323504476        | 2                | 3.3878748 |
| Q64563        | VIATCVCPDINATNPK                                                | 1.500727844        | 2                | 4.2220225 |
| <b>Q64565</b> | <b>AGT2 Alanine_glyoxylate aminotransferase 2_mitochondrial</b> | <b>0.958121458</b> | <b>0.1939892</b> | <b>15</b> |
| Q64565        | AYSNHTDIISFR                                                    | 1.033400729        | 2                | 3.3545575 |
| Q64565        | GGNFSQTFR                                                       | 0.889087359        | 2                | 2.4121964 |
| Q64565        | GGVCIADDEVQTGFGR                                                | 0.86804749         | 2                | 4.3146558 |
| Q64565        | GIGNGFPMMAAVVTTPEIASSLAK                                        | 1.061471642        | 2                | 3.1965575 |
| Q64565        | GLMVGIEMVQDK                                                    | 0.773108329        | 2                | 3.762531  |
| Q64565        | HNMPPCDFSPK                                                     | 0.872693388        | 2                | 3.3205104 |
| Q64565        | LRDEFDIVGDVR                                                    | 1.080360642        | 2                | 2.6353271 |
| Q64565        | LSALLPEPLK                                                      | 1.522684724        | 2                | 2.5847247 |
| Q64565        | NSQEVGTYMLLK                                                    | 1.181910408        | 2                | 2.3753624 |
| Q64565        | SALTQHMER                                                       | 0.933972085        | 2                | 2.7146602 |
| Q64565        | TEVNQIHEDCK                                                     | 0.95628221         | 2                | 3.2691092 |
| Q64565        | TEVNQIHEDCKMGLLVGR                                              | 0.881527576        | 2                | 5.2233782 |

|               |                                                                           |                    |                  |           |
|---------------|---------------------------------------------------------------------------|--------------------|------------------|-----------|
| Q64565        | VIFLVNSGSEANDLAMVMAR                                                      | 1.364616693        | 2                | 5.690999  |
| Q64565        | YIEQFK                                                                    | 1.051453503        | 1                | 2.0509448 |
| Q64565        | YLDFFSGIVTVGVGHCHPK                                                       | 1.152485728        | 2                | 2.782547  |
| <b>Q64578</b> | <b>AT2A1 Sarcoplasmic/endoplasmic reticulum calcium ATPase 1</b>          | <b>1.436742471</b> | <b>0.988913</b>  | <b>4</b>  |
| Q64578        | DIVPGDIVEVAVGDKVPADIR                                                     | 1.460984156        | 2                | 3.329761  |
| Q64578        | IGIFSENEEVADR                                                             | 1.28929126         | 2                | 2.899601  |
| Q64578        | VGEATETALTTLVEK                                                           | 1.0649561          | 2                | 4.032546  |
| Q64578        | YGNELPAEEGK                                                               | 0.949369088        | 2                | 2.5428262 |
| <b>Q64581</b> | <b>CP3A1 Cytochrome P450 3A18</b>                                         | <b>1.013777522</b> | <b>0.1225016</b> | <b>3</b>  |
| Q64581        | KLQNEIDR                                                                  | 1.012101655        | 2                | 2.358011  |
| Q64581        | LAVIGVLQNFNIQPCCK                                                         | 1.635383855        | 2                | 4.0498853 |
| Q64581        | NPEYWLEPEEFNPER                                                           | 0.961757038        | 2                | 4.2480917 |
| <b>Q64591</b> | <b>DECR 2_4_dienoyl_CoA reductase_mitochondrial</b>                       | <b>0.91471756</b>  | <b>0.0624012</b> | <b>9</b>  |
| Q64591        | ATAEEITSK                                                                 | 1.034242725        | 2                | 2.9384661 |
| Q64591        | CDVRDPDMVHNTVLELIK                                                        | 0.849644452        | 4                | 4.5517163 |
| Q64591        | DPDMVHNTVLELIK                                                            | 0.648489231        | 3                | 4.2925305 |
| Q64591        | EEWDVIEGLIR                                                               | 0.651839549        | 2                | 3.7240446 |
| Q64591        | FFPILKPMPLPPNAFQGK                                                        | 1.18864259         | 2                | 3.905992  |
| Q64591        | FNIIQPGPIK                                                                | 0.833848383        | 2                | 3.115134  |
| Q64591        | NIDVLK                                                                    | 0.862058014        | 1                | 2.0570328 |
| Q64591        | VAFITGGGTGLGK                                                             | 0.849005698        | 2                | 2.9113867 |
| Q64591        | VTKEEWDVIEGLIR                                                            | 0.89190881         | 3                | 5.0169783 |
| <b>Q64602</b> | <b>AADAT Kynurenine/alpha_aminoadipate aminotransferase_mitochondrial</b> | <b>0.907517898</b> | <b>2.232E-06</b> | <b>7</b>  |
| Q64602        | ASFSQVTPAQMDLVFQR                                                         | 1.272016454        | 2                | 5.2883291 |
| Q64602        | DIISLAPGSPNPK                                                             | 0.905122847        | 2                | 3.0795293 |
| Q64602        | EILLVPGNSFFVDNSAPSSFFR                                                    | 1.141671955        | 2                | 2.3214493 |
| Q64602        | FLYTIPNGNNPTGNSLTGDR                                                      | 1.050477143        | 2                | 4.1429477 |
| Q64602        | LHNPPTVNYSPNEGQMDLCITSGCQDGLCK                                            | 1.277275241        | 3                | 6.3739696 |
| Q64602        | SAVFTVENGSTIR                                                             | 0.807722795        | 2                | 3.8608291 |
| Q64602        | VLSQWKPEDSKDPTKR                                                          | 1.217665048        | 3                | 3.9460046 |
| <b>Q64611</b> | <b>CSAD Cysteine sulfinic acid decarboxylase</b>                          | <b>0.928305174</b> | <b>0.9824936</b> | <b>11</b> |
| Q64611        | AQGQGLEWR                                                                 | 1.017173892        | 2                | 3.0309522 |
| Q64611        | CHGSQASYLFQQDK                                                            | 1.156033019        | 2                | 5.2613125 |
| Q64611        | FFNQLFSGLDPHALAGR                                                         | 1.063864354        | 2                | 4.7015939 |
| Q64611        | FYNVALDTGDK                                                               | 0.965781453        | 2                | 3.0887418 |
| Q64611        | GAAFLGLGTDSVR                                                             | 1.168298997        | 2                | 3.4489665 |
| Q64611        | IDQAFALTR                                                                 | 1.016064856        | 2                | 3.1894007 |
| Q64611        | LAAAGLQCSALLLR                                                            | 2.603869698        | 2                | 3.3039455 |
| Q64611        | QLLDLELQSQGESR                                                            | 0.806842597        | 2                | 4.094171  |
| Q64611        | TLDGDPVAVEALLR                                                            | 0.910701788        | 2                | 5.0392141 |
| Q64611        | VCEWKEPEELK                                                               | 1.024719994        | 3                | 3.8018405 |
| Q64611        | YLVEEIK                                                                   | 1.090584894        | 1                | 2.2970176 |
| <b>Q64633</b> | <b>UD17 UDP_glucuronosyltransferase 1_7</b>                               | <b>1.003214323</b> | <b>0.9527639</b> | <b>2</b>  |
| Q64633        | QSSFDAVFLDPFDVCGLTVAK                                                     | 0.958961857        | 2                | 2.3834906 |
| Q64633        | TYSVSHTEQEDLNR                                                            | 1.040540687        | 2                | 3.2723842 |
| <b>Q64638</b> | <b>UD15 UDP_glucuronosyltransferase 1_5</b>                               | <b>1.169855207</b> | <b>0.6007782</b> | <b>2</b>  |
| Q64638        | TFLETSEILK                                                                | 1.071907682        | 2                | 2.406354  |
| Q64638        | VVFETGNYVK                                                                | 1.170043249        | 1                | 1.9621992 |
| <b>Q64640</b> | <b>ADK Adenosine kinase</b>                                               | <b>1.187021115</b> | <b>4.62E-06</b>  | <b>11</b> |
| Q64640        | AADAHVDAHYYEQNEQPTGTCAACITGGNR                                            | 1.154664519        | 3                | 7.1488438 |
| Q64640        | AATFFGCIGIDK                                                              | 0.688255604        | 2                | 3.082793  |
| Q64640        | AGHYAASVIIR                                                               | 1.053669329        | 3                | 3.3221645 |
| Q64640        | FGEILK                                                                    | 0.991064157        | 2                | 2.3835285 |
| Q64640        | FKVEYHAGGSTQNSMK                                                          | 1.119575768        | 3                | 3.4443476 |
| Q64640        | HKELFDELVK                                                                | 0.861465529        | 2                | 2.7507138 |

|               |                                                                          |                    |                  |           |
|---------------|--------------------------------------------------------------------------|--------------------|------------------|-----------|
| Q64640        | HLDLENNWMLVEK                                                            | 1.23102575         | 2                | 3.5959203 |
| Q64640        | SLVANLAAANCYK                                                            | 1.102334809        | 2                | 4.3541236 |
| Q64640        | VEYHAGGSTQNSMK                                                           | 1.042252226        | 2                | 3.8190942 |
| Q64640        | VEYHAGGSTQNSMK+Oxidation(13)                                             | 0.955892042        | 2                | 3.6182592 |
| Q64640        | YSLKPNDQILAEDK                                                           | 1.151541504        | 3                | 4.2342854 |
| <b>Q64654</b> | <b>CP51A Lanosterol 14_alpha demethylase</b>                             | <b>0.907657717</b> | <b>0.9999949</b> | <b>8</b>  |
| Q64654        | EPAEDILQTLDDSTYK                                                         | 1.041197798        | 2                | 3.4676809 |
| Q64654        | GVAYDVPNAVFLQEK                                                          | 0.96888262         | 2                | 4.0340347 |
| Q64654        | NEDLNAAEEVYGR                                                            | 0.960474648        | 2                | 3.8222489 |
| Q64654        | SGLNIAHFK                                                                | 0.944694383        | 2                | 2.8667021 |
| Q64654        | TFTYLLGSDAAALLFNSK                                                       | 1.080584785        | 2                | 2.9326975 |
| Q64654        | TVCGEDLPPLTYEQLK                                                         | 0.813632471        | 2                | 4.1263595 |
| Q64654        | YGPVFSFTMVGK                                                             | 0.856334565        | 2                | 2.7299819 |
| Q64654        | YLQDNPASGEK                                                              | 0.821050228        | 2                | 2.8473537 |
| <b>Q64737</b> | <b>PUR2 Trifunctional purine biosynthetic protein adenosine_3</b>        | <b>1.042616545</b> | <b>0.8472233</b> | <b>2</b>  |
| Q64737        | DSGVDAIAGNMLVKK+Oxidation(11)                                            | 1.160020985        | 2                | 2.3075662 |
| Q64737        | FGDPECQVILPLLK                                                           | 1.042026303        | 2                | 2.4531503 |
| <b>Q65CL1</b> | <b>CTNA3 Catenin alpha_3</b>                                             | <b>1.203793282</b> | <b>0.7432678</b> | <b>2</b>  |
| Q65CL1        | MISESGSRMDVLAR+Oxidation(1)                                              | 1.204780892        | 2                | 2.6001387 |
| Q65CL1        | NLMNAVVTQVK                                                              | 1.091963955        | 2                | 3.1557617 |
| <b>Q65Z40</b> | <b>WAPL Wings apart like protein homolog</b>                             | <b>1.022500088</b> | <b>0.9924886</b> | <b>3</b>  |
| Q65Z40        | EKSISRIPEDNANK                                                           | 1.109038205        | 2                | 2.6782827 |
| Q65Z40        | LGQKRPNFKPDIQEIPK                                                        | 1.091010936        | 2                | 2.9130981 |
| Q65Z40        | TESPESPCVKGSVR                                                           | 0.937052304        | 2                | 2.52443   |
| <b>Q66H12</b> | <b>NAGAB Alpha_N_acetylgalactosaminidase</b>                             | <b>1.251044723</b> | <b>0.0812064</b> | <b>3</b>  |
| Q66H12        | CNINCEEDPK                                                               | 0.892419946        | 2                | 2.4018478 |
| Q66H12        | INQDPLGIQGR                                                              | 1.040895547        | 2                | 2.4512947 |
| Q66H12        | TISPQNIDILQNPLLIK                                                        | 1.265414443        | 2                | 3.8813801 |
| <b>Q66H15</b> | <b>RMD3 Regulator of microtubule dynamics protein 3</b>                  | <b>1.225879677</b> | <b>0.459101</b>  | <b>2</b>  |
| Q66H15        | AIPGEAGDAAMLSSLPQEGQEK                                                   | 1.383159354        | 2                | 4.1984501 |
| Q66H15        | AYSDMTELTEESEK                                                           | 1.225158175        | 2                | 2.5335815 |
| <b>Q66H45</b> | <b>TTC36 Tetratricopeptide repeat protein 36</b>                         | <b>0.81418019</b>  | <b>0.3112322</b> | <b>2</b>  |
| Q66H45        | LQGDVAGALEDLER                                                           | 0.931989219        | 2                | 3.658977  |
| Q66H45        | RDFEQAAR                                                                 | 0.784685806        | 2                | 2.3045559 |
| <b>Q66H71</b> | <b>CPED Calcineurin like phosphoesterase domain containing protein 1</b> | <b>1.115761525</b> | <b>0.4601146</b> | <b>2</b>  |
| Q66H71        | LTEQAVEAINK                                                              | 1.115163543        | 2                | 3.6910117 |
| Q66H71        | SIDEDDDYFNLTK                                                            | 1.972888668        | 2                | 2.835182  |
| <b>Q66H80</b> | <b>COPD Coatomer subunit delta</b>                                       | <b>1.221558725</b> | <b>3.419E-05</b> | <b>5</b>  |
| Q66H80        | GVQLQTHPNVDKK                                                            | 1.202218381        | 2                | 3.1665843 |
| Q66H80        | LFTAESLIGLK                                                              | 1.428276572        | 2                | 2.9040718 |
| Q66H80        | NSNILEDLETLR                                                             | 1.160085182        | 2                | 2.906677  |
| Q66H80        | NTLEWCLPVIDAK                                                            | 0.991031453        | 2                | 3.2990346 |
| Q66H80        | VAPAPARPSGSPK                                                            | 1.194539711        | 2                | 2.4985864 |
| <b>Q66HA8</b> | <b>HS105 Heat shock protein 105 kDa</b>                                  | <b>1.122132789</b> | <b>0.7814712</b> | <b>5</b>  |
| Q66HA8        | AGGIETIANEFSDR                                                           | 0.978906084        | 2                | 2.8421283 |
| Q66HA8        | FVVQNVSAQK                                                               | 1.003851807        | 2                | 2.6838872 |
| Q66HA8        | LKETAENNLK                                                               | 1.267465798        | 2                | 2.3982794 |
| Q66HA8        | NQQITHANNTVSSFK                                                          | 1.158023743        | 2                | 4.4827514 |
| Q66HA8        | SVLDAAQIVGLNCLR                                                          | 1.028202756        | 2                | 2.7190745 |
| <b>Q66HD0</b> | <b>ENPL Endoplasmic</b>                                                  | <b>1.069249414</b> | <b>9.9E-20</b>   | <b>32</b> |
| Q66HD0        | DISTNYYASQK                                                              | 0.88963018         | 2                | 3.0676045 |
| Q66HD0        | EATEKEFEPLLNWMK                                                          | 1.078534032        | 2                | 3.1385131 |
| Q66HD0        | EEASDYLELDTIK                                                            | 1.241144787        | 2                | 4.2809162 |
| Q66HD0        | EEEAQLDGLNASQIR                                                          | 0.784016715        | 2                | 4.5470147 |
| Q66HD0        | EFEPLLNWMK                                                               | 1.004820105        | 2                | 2.3151174 |

|               |                                                                           |                    |                  |           |
|---------------|---------------------------------------------------------------------------|--------------------|------------------|-----------|
| Q66HD0        | EVEEDEYK                                                                  | 1.020941149        | 1                | 2.3889833 |
| Q66HD0        | FQSSHSTDTISLDQYVER                                                        | 1.228108043        | 3                | 6.2057886 |
| Q66HD0        | GLFDEYGSK                                                                 | 1.097404504        | 2                | 2.3448    |
| Q66HD0        | GVVDSDDLPLNVSR                                                            | 1.113844137        | 2                | 4.8129134 |
| Q66HD0        | GYEVIYLTEPVDEYCIQALPEFDGK                                                 | 1.40902242         | 2                | 3.7210641 |
| Q66HD0        | GYEVIYLTEPVDEYCIQALPEFDGKR                                                | 1.584903236        | 3                | 4.0240068 |
| Q66HD0        | KEAESSPFVER                                                               | 1.212143488        | 2                | 3.605722  |
| Q66HD0        | KGYEVIYLTEPVDEYCIQALPEFDGKR                                               | 1.435288065        | 3                | 4.4195251 |
| Q66HD0        | LGVIEDHSNR                                                                | 1.254733295        | 2                | 3.3310304 |
| Q66HD0        | LIINSLYK                                                                  | 1.518905542        | 2                | 2.4260304 |
| Q66HD0        | LISLTDENALAGNEELTVK                                                       | 1.310068063        | 2                | 5.8515439 |
| Q66HD0        | LTESPCALVASQYGSNGMER                                                      | 1.08793067         | 2                | 5.5665455 |
| Q66HD0        | MKEKQDK                                                                   | 0.892421417        | 2                | 2.3302035 |
| Q66HD0        | NLLHVTDGTGVGMTR                                                           | 1.078995171        | 3                | 4.0342445 |
| Q66HD0        | NLLHVTDGTGVGMTR+Oxidation(12)                                             | 1.3992181          | 2                | 2.9876218 |
| Q66HD0        | RVFITDDFHDMMPK                                                            | 1.18056737         | 3                | 3.3355453 |
| Q66HD0        | SGTSEFLNK                                                                 | 1.048530935        | 2                | 3.1022575 |
| Q66HD0        | SGYLLPDTK                                                                 | 1.050472892        | 2                | 3.1693153 |
| Q66HD0        | SILFVPTSAPR                                                               | 1.086293935        | 2                | 3.4742086 |
| Q66HD0        | TDDEVVQR                                                                  | 1.031280157        | 2                | 2.9470754 |
| Q66HD0        | TDDEVVQREEEAIQLDGLNASQIR                                                  | 1.026872914        | 3                | 5.3512769 |
| Q66HD0        | TETVEEPLLEETAQEEK                                                         | 0.589552915        | 2                | 5.1855249 |
| Q66HD0        | TETVEEPLLEETAQEEKEADDEAAVEEEEEKKPK                                        | 0.288391877        | 5                | 6.4500117 |
| Q66HD0        | TFEINPR                                                                   | 1.049738295        | 2                | 2.7252612 |
| Q66HD0        | TVWDWELMNDIKPIWQRPSK                                                      | 1.269821272        | 3                | 4.0270996 |
| Q66HD0        | VFITDDFHDMMPK                                                             | 0.992194204        | 2                | 4.0255904 |
| Q66HD0        | YNDTFWK                                                                   | 1.124136418        | 1                | 2.1932414 |
| <b>Q66HF1</b> | <b>NDU51 NADH_ubiquinone oxidoreductase 75 kDa subunit_ mitochondrial</b> | <b>1.008169061</b> | <b>1.224E-08</b> | <b>12</b> |
| Q66HF1        | ALSEIAGITLPYDTLDQVR                                                       | 1.358010921        | 2                | 3.9791422 |
| Q66HF1        | DCFIVYQGHGHDVGAPIADVILPGAAYTEK                                            | 1.18325864         | 3                | 4.1990457 |
| Q66HF1        | DDGAAILAAVSSIAQK                                                          | 1.03171207         | 2                | 4.3377662 |
| Q66HF1        | DLLNKVSDTLCTEEIFPNEGAGTDLR                                                | 1.123489431        | 3                | 4.5197678 |
| Q66HF1        | FASEIAGVDDLGTGR                                                           | 1.125321535        | 2                | 3.4773471 |
| Q66HF1        | GLLYTYSWEDALS                                                             | 0.999570359        | 2                | 3.3838525 |
| Q66HF1        | GWNILTNSEK                                                                | 1.121938655        | 1                | 2.146277  |
| Q66HF1        | ILQDIASGNHEFSK                                                            | 1.344115111        | 2                | 4.1557546 |
| Q66HF1        | LGEVSPNLVR                                                                | 1.127161718        | 2                | 3.1604657 |
| Q66HF1        | LVDQEFADPLVPPQLTIK                                                        | 1.130159471        | 2                | 3.2856379 |
| Q66HF1        | VSDTLCTEEIFPNEGAGTDLR                                                     | 0.919369621        | 2                | 4.6376853 |
| Q66HF1        | YDHLGDSPK                                                                 | 0.871744665        | 2                | 2.5556631 |
| <b>Q66HF8</b> | <b>AL1B1 Aldehyde dehydrogenase X_ mitochondrial</b>                      | <b>1.021838943</b> | <b>0.018053</b>  | <b>11</b> |
| Q66HF8        | ADVDLAVR                                                                  | 1.06001525         | 2                | 2.3576541 |
| Q66HF8        | EAGFPPGVVNIITGYGPTAGAAIAQHMDVDK                                           | 0.89843289         | 3                | 3.8540037 |
| Q66HF8        | EEIFGPVQPLFK                                                              | 0.840974996        | 2                | 3.2192433 |
| Q66HF8        | KVGNPFELDTQQGPQVDKEQFEK                                                   | 1.009568164        | 3                | 4.5044127 |
| Q66HF8        | LAPALATGNTVVMK                                                            | 1.29617081         | 2                | 3.2874017 |
| Q66HF8        | TFPTVNPPTTGEVIGHVAEGDR                                                    | 0.835161646        | 2                | 4.6363912 |
| Q66HF8        | TFVEESYHEFLER                                                             | 0.896430559        | 2                | 3.8167288 |
| Q66HF8        | VAEQTPLSALYLASLIK                                                         | 1.293256282        | 2                | 3.178242  |
| Q66HF8        | VGNPFELDTQQGPQVDK                                                         | 1.321334754        | 2                | 3.041733  |
| Q66HF8        | VGNPFELDTQQGPQVDKEQFEK                                                    | 0.975477368        | 2                | 4.4718323 |
| Q66HF8        | YGLAAAVFTR                                                                | 0.930458088        | 2                | 3.8565047 |
| <b>Q66HG4</b> | <b>GALM Aldose 1_epimerase</b>                                            | <b>0.906542372</b> | <b>0.00293</b>   | <b>3</b>  |
| Q66HG4        | ASDVVLGFALEGLYKQ                                                          | 0.958988929        | 2                | 4.7067676 |
| Q66HG4        | TVFGELPSGGGAVEK                                                           | 0.907443781        | 2                | 3.6684077 |
| Q66HG4        | VSPDGEEGYGPELK                                                            | 0.884169235        | 2                | 3.7850182 |

|               |                                                                 |                    |                  |           |
|---------------|-----------------------------------------------------------------|--------------------|------------------|-----------|
| <b>Q66X93</b> | <b>SND1 Staphylococcal nuclease domain_containing protein 1</b> | <b>1.002578635</b> | <b>8.771E-15</b> | <b>21</b> |
| Q66X93        | ADDADEFGYSR                                                     | 1.360155347        | 2                | 2.7839618 |
| Q66X93        | ALLLPDHYLVTVMLSGIK                                              | 1.130113575        | 2                | 3.3289649 |
| Q66X93        | DIQNTQCLLNVEHLSASCPHVTLQFADSK                                   | 1.231988487        | 3                | 5.5625043 |
| Q66X93        | DTNGENIAESLVAEGLASR                                             | 1.066285633        | 2                | 5.0236635 |
| Q66X93        | ETDGSETPEPFAAEAK                                                | 1.048184366        | 2                | 3.6938348 |
| Q66X93        | FVDGEWYR                                                        | 1.026603929        | 2                | 2.3190985 |
| Q66X93        | GDVGLGLVK                                                       | 0.948789113        | 2                | 2.7077701 |
| Q66X93        | HFVDSHHQKPVNAIEHVR                                              | 1.220755819        | 3                | 4.8688025 |
| Q66X93        | LEGDNIQDK                                                       | 1.064593483        | 2                | 2.7089171 |
| Q66X93        | LSECEEQAK                                                       | 2.707835596        | 2                | 2.6073356 |
| Q66X93        | MVLSGCAIIVR                                                     | 1.14136309         | 2                | 2.3714769 |
| Q66X93        | NLPGLVQEGEPFSEATLFTK                                            | 1.156130808        | 2                | 5.4277973 |
| Q66X93        | SAYYKPLLSAEEAAK                                                 | 1.204625359        | 2                | 2.5228794 |
| Q66X93        | SDISSHPPVEGAYAPR                                                | 0.998767311        | 3                | 4.6138072 |
| Q66X93        | SSHYDELLAAEAR                                                   | 1.30152364         | 2                | 3.7454817 |
| Q66X93        | TCATVTIGGINIAEALVSK                                             | 1.331561437        | 2                | 3.9263048 |
| Q66X93        | TDAVDSVVR                                                       | 0.642832254        | 2                | 2.6558027 |
| Q66X93        | VITEYLNAQESAK                                                   | 1.206621335        | 2                | 3.7860482 |
| Q66X93        | VMQVLNADAIVVK                                                   | 1.318374506        | 2                | 3.9823413 |
| Q66X93        | VSVTVDYIRPASPATETVPAFSEK                                        | 1.06949001         | 3                | 5.0637636 |
| Q66X93        | VVAHYEEQPVVEEVMVLEEK                                            | 0.760335323        | 3                | 4.5777946 |
| <b>Q67FY2</b> | <b>BCL9L B_cell CLL/lymphoma 9_like protein</b>                 | <b>0.784874791</b> | <b>0.1656904</b> | <b>2</b>  |
| Q67FY2        | EAGTPSLDSEAKEVAPR                                               | 0.78581372         | 2                | 2.4515471 |
| Q67FY2        | NLVGSEGLSKEQLEHRER                                              | 0.68018844         | 2                | 2.3538823 |
| <b>Q68FP2</b> | <b>PON3 Serum paraoxonase/lactonase 3</b>                       | <b>1.20221963</b>  | <b>3.442E-15</b> | <b>8</b>  |
| Q68FP2        | HNNWDLTPVK                                                      | 1.098241254        | 2                | 3.3080714 |
| Q68FP2        | IFLMDLNEPYPK                                                    | 1.453333475        | 2                | 3.0599041 |
| Q68FP2        | IQDPLSDNPR                                                      | 1.078029733        | 2                | 2.8788869 |
| Q68FP2        | LLIYNPEDPPGSEVLR                                                | 1.706155166        | 2                | 4.3068824 |
| Q68FP2        | LVALTVLGASLALLGER                                               | 1.413528951        | 3                | 4.0153546 |
| Q68FP2        | VIQLGTLVDNLTVPATGDILAGCHPNPMK                                   | 1.463939448        | 2                | 4.9543495 |
| Q68FP2        | VVAQGFSSANGITVSLDQK                                             | 1.134099797        | 2                | 4.1766739 |
| Q68FP2        | YVYVADVTK                                                       | 1.129699804        | 1                | 2.8920667 |
| <b>Q68FQ0</b> | <b>TCPE T_complex protein 1 subunit epsilon</b>                 | <b>1.250719515</b> | <b>0.0002983</b> | <b>5</b>  |
| Q68FQ0        | ETGANLAICQWGFDEANHLLQNGLPAVR                                    | 0.971283264        | 3                | 3.7090101 |
| Q68FQ0        | GSNDMQYQHVIETLIGK                                               | 1.057204267        | 2                | 3.5598071 |
| Q68FQ0        | HKLDVTSVEDYK                                                    | 1.19093125         | 2                | 3.1575348 |
| Q68FQ0        | SLHDALCVIR                                                      | 1.273978182        | 2                | 2.9900579 |
| Q68FQ0        | WVGGEIIEIAIATGGR                                                | 1.488384803        | 2                | 3.8852532 |
| <b>Q68FR6</b> | <b>EF1G Elongation factor 1_gamma</b>                           | <b>1.258575553</b> | <b>9.9E-20</b>   | <b>8</b>  |
| Q68FR6        | AAAPAPEEEMDECEQALAAEPK                                          | 1.231510544        | 2                | 5.3384542 |
| Q68FR6        | ALIAAQYSGAQIR                                                   | 1.108442818        | 2                | 4.230011  |
| Q68FR6        | GQDLAFPLSPDWQVDYESYTWK                                          | 1.990468488        | 2                | 3.7630253 |
| Q68FR6        | ILGLDTHLK                                                       | 1.59224757         | 2                | 2.6411843 |
| Q68FR6        | KAAAPAPEEEMDECEQALAAEPK                                         | 1.134477423        | 2                | 4.2650943 |
| Q68FR6        | KLDPGSEETQTLVR                                                  | 1.258588655        | 2                | 3.9124432 |
| Q68FR6        | LDPGSEETQTLVR                                                   | 1.061197205        | 2                | 2.9388402 |
| Q68FR6        | STFVLDEFKR                                                      | 1.032536793        | 2                | 2.7119975 |
| <b>Q68FR9</b> | <b>EF1D Elongation factor 1_delta</b>                           | <b>1.149083047</b> | <b>8.794E-05</b> | <b>6</b>  |
| Q68FR9        | ATAPQTQHVSPMR                                                   | 1.005602906        | 2                | 3.0554686 |
| Q68FR9        | FYEQMNGPVTAGSR                                                  | 0.968004048        | 2                | 4.2196426 |
| Q68FR9        | GVVQDLQQAISK                                                    | 1.0468292          | 2                | 3.4260275 |
| Q68FR9        | SIQLDGLVWGASK                                                   | 1.030551525        | 2                | 2.7883003 |
| Q68FR9        | SLAGSSGPGASSGPGGDHSDLIVR                                        | 1.201036203        | 2                | 5.3166366 |
| Q68FR9        | SSILLVDPWDETDMAQLETQVLR                                         | 1.229540233        | 3                | 3.3400857 |



|               |                                                                                       |                    |                  |           |
|---------------|---------------------------------------------------------------------------------------|--------------------|------------------|-----------|
| <b>Q68FS4</b> | <b>AMPL Cytosol aminopeptidase</b>                                                    | <b>0.936221847</b> | <b>4.76E-13</b>  | <b>18</b> |
| Q68FS4        | ADMGGAATICSIVSAAK                                                                     | 0.993732955        | 2                | 5.3882213 |
| Q68FS4        | DKDDDVVPQFTSAGENFNK                                                                   | 0.92528115         | 2                | 5.0990958 |
| Q68FS4        | GITFDSGGISIK                                                                          | 1.098463823        | 2                | 3.2425618 |
| Q68FS4        | GLVLGIYSK                                                                             | 1.17843388         | 1                | 2.0348084 |
| Q68FS4        | GSEPPVFLEIHHTGSPNATEAPLVFVGK                                                          | 1.477217274        | 3                | 5.989614  |
| Q68FS4        | GVLFASGQNLAR                                                                          | 0.999355887        | 2                | 3.6157529 |
| Q68FS4        | LFEASVETGDR                                                                           | 1.058720962        | 2                | 3.5053146 |
| Q68FS4        | LHGSGDLEAWEK                                                                          | 1.379331658        | 2                | 3.5746303 |
| Q68FS4        | LNLPINIIGLAPLNCENMPSGK                                                                | 2.776462162        | 2                | 4.82862   |
| Q68FS4        | QLMESPANEMTPTR                                                                        | 0.89735243         | 2                | 3.3877828 |
| Q68FS4        | QVIDCQLADVNNLNGK                                                                      | 1.07402712         | 2                | 4.9334164 |
| Q68FS4        | SAGACTAAAFRL                                                                          | 1.148623613        | 2                | 3.6906934 |
| Q68FS4        | SAGVDDQENWHEGK                                                                        | 0.938932101        | 2                | 3.9277341 |
| Q68FS4        | SWIEEQEMGSFLSVAK                                                                      | 1.182991577        | 2                | 5.5089054 |
| Q68FS4        | TFYGLHQDFPSVVVVLGK                                                                    | 0.94851487         | 2                | 4.902935  |
| Q68FS4        | TIQVDNTDAEGR                                                                          | 1.01324621         | 2                | 4.1949201 |
| Q68FS4        | TLIEFLLR                                                                              | 1.210234975        | 2                | 2.6965191 |
| Q68FS4        | WAHLDIAGVMTNKDEIPLYR                                                                  | 1.080231263        | 3                | 3.4565814 |
| <b>Q68FT1</b> | <b>COQ9 Ubiquinone biosynthesis protein COQ9_ mitochondrial</b>                       | <b>1.076445749</b> | <b>0.1056723</b> | <b>3</b>  |
| Q68FT1        | INDAMNMGHTAK+Oxidation(5)Oxidation(7)                                                 | 1.860492181        | 2                | 2.7956445 |
| Q68FT1        | LNHVLEEEQK                                                                            | 1.067487833        | 3                | 3.3353858 |
| Q68FT1        | YTDQSGEEEEYEESEIQHR                                                                   | 0.749349564        | 3                | 4.6761732 |
| <b>Q68FT3</b> | <b>PYRD2 Pyridine nucleotide_disulfide oxidoreductase domain_containing protein 2</b> | <b>0.936452747</b> | <b>0.9711012</b> | <b>7</b>  |
| Q68FT3        | HVIGGAAVTEEIIIPGFK                                                                    | 0.889783309        | 2                | 3.6513648 |
| Q68FT3        | ISQLDTQSPVTK                                                                          | 1.029994342        | 2                | 3.5483804 |
| Q68FT3        | SLLLGTDVVAENQK                                                                        | 0.8786873          | 2                | 2.8834338 |
| Q68FT3        | TLGAQLPQYYEVLTAPIK                                                                    | 1.158551031        | 2                | 4.7713547 |
| Q68FT3        | VFDCIEAYAPGFK                                                                         | 0.701776383        | 2                | 2.3323309 |
| Q68FT3        | VLDQWFSEPLK                                                                           | 1.08027118         | 2                | 3.2025633 |
| Q68FT3        | VQGVVLQGGEEVR                                                                         | 0.878444399        | 2                | 3.3708265 |
| <b>Q68FT5</b> | <b>BHMT2 Betaine_homocysteine S_methyltransferase 2</b>                               | <b>1.090165701</b> | <b>9.9E-20</b>   | <b>11</b> |
| Q68FT5        | AGADVLQFTFSAADR                                                                       | 1.309585177        | 2                | 3.84324   |
| Q68FT5        | AGANIIGVNCR                                                                           | 1.136719983        | 2                | 3.2208352 |
| Q68FT5        | AGLWTPEAVVEYPSAVR                                                                     | 1.083417722        | 3                | 3.7527878 |
| Q68FT5        | AIAEELAPER                                                                            | 1.184744386        | 2                | 3.8164206 |
| Q68FT5        | DAGLQAHLMVQCLGFHTPCGK                                                                 | 0.973207583        | 3                | 4.6816053 |
| Q68FT5        | EVGAPVAVTMCIGPEGDMHGVTPGEC AVR                                                        | 1.302643597        | 2                | 3.8995843 |
| Q68FT5        | FGPWTSLQTMK                                                                           | 0.924780886        | 2                | 3.0884237 |
| Q68FT5        | GGFVDLPEYFPGLEPR                                                                      | 1.138781873        | 2                | 4.0726018 |
| Q68FT5        | LDSGEVVVDGGFLFLEK                                                                     | 1.106486547        | 2                | 5.3609166 |
| Q68FT5        | REYWETLLPASGRPFPCPSLSKPD A                                                            | 1.705167588        | 3                | 3.472177  |
| Q68FT5        | YIGCCGFEPYHIR                                                                         | 3.074568348        | 2                | 4.6247706 |
| <b>Q68FT9</b> | <b>SCLY Selenocysteine lyase</b>                                                      | <b>1.011389503</b> | <b>4.723E-11</b> | <b>5</b>  |
| Q68FT9        | AEVDLIVQDLK                                                                           | 0.949357841        | 2                | 3.7233374 |
| Q68FT9        | CFHEQTLQGR                                                                            | 1.318858748        | 2                | 2.7594972 |
| Q68FT9        | RVDVEDLGVDLTIIVGHK                                                                    | 2.047820729        | 3                | 5.9255323 |
| Q68FT9        | TVDQISPEEGTRPHFITCTVEHDSIR                                                            | 1.30963002         | 3                | 3.6138377 |
| Q68FT9        | VLVHTDAAQALGK                                                                         | 1.00497175         | 2                | 3.0369611 |
| <b>Q68FU3</b> | <b>ETFB Electron transfer flavoprotein subunit beta</b>                               | <b>1.034181479</b> | <b>2.22E-16</b>  | <b>12</b> |
| Q68FU3        | AGDLGVDLTSK                                                                           | 0.943450081        | 2                | 3.7270081 |
| Q68FU3        | EIIAVSCGPPQCQETIR                                                                     | 0.876853035        | 2                | 4.8618207 |
| Q68FU3        | GIHVEVPGAEAEENLGPLQVAR                                                                | 0.546823802        | 2                | 5.73982   |
| Q68FU3        | HSMNPFCEIAVEEAVR                                                                      | 1.026108468        | 2                | 5.6944194 |

|               |                                                                    |                    |                  |           |
|---------------|--------------------------------------------------------------------|--------------------|------------------|-----------|
| Q68FU3        | HSMNPFCEIAVEEAVR+Oxidation(3)                                      | 1.521178042        | 2                | 4.2897902 |
| Q68FU3        | QAIDDDCNQTGQMNTAGLLDWPQGTAFASQVTLEGDKVK                            | 0.975273934        | 3                | 6.3078084 |
| Q68FU3        | RVIDFAVK                                                           | 1.11890303         | 2                | 2.3827643 |
| Q68FU3        | SGVVTGDKV                                                          | 0.756854313        | 2                | 2.8886397 |
| Q68FU3        | VDLLFLGK                                                           | 1.039175438        | 2                | 2.9820123 |
| Q68FU3        | VETTEDLVAK                                                         | 0.928298898        | 2                | 3.3357434 |
| Q68FU3        | VIDFAVK                                                            | 0.999155193        | 2                | 2.3531406 |
| Q68FU3        | VSVISVEEPPQR                                                       | 1.035264523        | 3                | 3.4122229 |
| <b>Q68FY0</b> | <b>QCR1 Cytochrome b_c1 complex subunit 1_mitochondrial</b>        | <b>0.969477372</b> | <b>0.9999562</b> | <b>9</b>  |
| Q68FY0        | HQQLDLAQDHFSSVSQVYEEDAVPSITPCR                                     | 1.02798641         | 3                | 5.8809266 |
| Q68FY0        | IEEVDAQMVR                                                         | 0.977366464        | 2                | 3.6874731 |
| Q68FY0        | LCTSATESEVTR                                                       | 1.1003658          | 2                | 3.1730528 |
| Q68FY0        | NALISHLDGTTTPCEDIGR                                                | 1.064892745        | 2                | 4.7027059 |
| Q68FY0        | NNGAGYFLEHLAFK                                                     | 1.125058118        | 2                | 3.4252517 |
| Q68FY0        | RIPLAEWESR                                                         | 1.092709737        | 2                | 2.7809258 |
| Q68FY0        | TDLTDYLSR                                                          | 1.050291868        | 2                | 2.6650977 |
| Q68FY0        | VVELLADIVQNISLEDSQIEK                                              | 0.964191584        | 3                | 5.7347889 |
| Q68FY0        | YFYDQCPAVAGYGPIEQLSDYNR                                            | 1.154084959        | 2                | 5.116643  |
| <b>Q68G31</b> | <b>PBLD Phenazine biosynthesis_like domain_containing protein</b>  | <b>1.170823312</b> | <b>2.296E-12</b> | <b>7</b>  |
| Q68G31        | AAIGDTTVQDIQYSPDTR                                                 | 1.083976602        | 2                | 4.6821961 |
| Q68G31        | AEDGIVLDFPLYPTFPQDFHEVK                                            | 1.04823229         | 3                | 3.6979768 |
| Q68G31        | GESGGQTPPYDFYSR                                                    | 1.673065059        | 2                | 4.278223  |
| Q68G31        | LQPTDSFSQSSCFGLR                                                   | 1.112602722        | 2                | 3.4885345 |
| Q68G31        | NVNSTLTFVTLSELK                                                    | 1.229875319        | 2                | 3.7907984 |
| Q68G31        | RAEDGIVLDFPLYPTFPQDFHEVK                                           | 1.222568019        | 3                | 5.7399845 |
| Q68G31        | VNTEPLPGIEK                                                        | 1.089681997        | 2                | 3.0314131 |
| <b>Q69Z23</b> | <b>DYH17 Dynein heavy chain 17_axonemal</b>                        | <b>1.068983414</b> | <b>0.528378</b>  | <b>2</b>  |
| Q69Z23        | GDPTRAEDQVLMRALR                                                   | 1.409506882        | 2                | 2.3320851 |
| Q69Z23        | YFIDLLMEK                                                          | 1.068780002        | 1                | 2.1530316 |
| <b>Q6A0A9</b> | <b>F120A Constitutive coactivator of PPAR_gamma_like protein 1</b> | <b>1.104460535</b> | <b>0.0382458</b> | <b>2</b>  |
| Q6A0A9        | SQGGVQPIPSQGGK                                                     | 0.918540854        | 2                | 3.1416068 |
| Q6A0A9        | VEGSSTASSGSQLAEGK                                                  | 1.107857512        | 2                | 4.299809  |
| <b>Q6AXM8</b> | <b>PON2 Serum paraoxonase/arylesterase 2</b>                       | <b>1.314253531</b> | <b>5.486E-10</b> | <b>4</b>  |
| Q6AXM8        | FQEEENSLHLK                                                        | 1.397108131        | 2                | 3.4341576 |
| Q6AXM8        | LFVYDPNHPPSSEVLR                                                   | 1.248927786        | 2                | 2.5017092 |
| Q6AXM8        | LVAEGFDSANGINISPDKK                                                | 1.313402887        | 2                | 3.6571014 |
| Q6AXM8        | VLQLGTLVDNLSIDPSSGGDIWVGCHPNGQK                                    | 1.28171997         | 3                | 4.4292731 |
| <b>Q6AXS5</b> | <b>PAIRB Plasminogen activator inhibitor 1 RNA_binding protein</b> | <b>1.012416679</b> | <b>0.9998954</b> | <b>3</b>  |
| Q6AXS5        | EETQPPVALKK                                                        | 0.943598412        | 2                | 2.7420659 |
| Q6AXS5        | FDQLFDDSDPFVFLK                                                    | 0.992222811        | 2                | 5.2050648 |
| Q6AXS5        | SAAQAAAQTNNAAGK                                                    | 0.991258999        | 2                | 5.0985055 |
| <b>Q6AXY0</b> | <b>GSTA6 Glutathione S_transferase A6</b>                          | <b>1.000033106</b> | <b>0.8764477</b> | <b>2</b>  |
| Q6AXY0        | FLQPGSQR                                                           | 0.985500647        | 2                | 2.5127146 |
| Q6AXY0        | YFPAFEK                                                            | 1.09844537         | 1                | 1.9110695 |
| <b>Q6AY09</b> | <b>HNRH2 Heterogeneous nuclear ribonucleoprotein H2</b>            | <b>1.036784426</b> | <b>0.5099049</b> | <b>5</b>  |
| Q6AY09        | ATENDIYNFFSPLNPMR                                                  | 1.230680608        | 2                | 4.0180907 |
| Q6AY09        | GLPWSCSAEEVMR                                                      | 0.807211206        | 2                | 3.1027265 |
| Q6AY09        | HTGPNPDTANDGFVR                                                    | 1.032130317        | 2                | 4.1940761 |
| Q6AY09        | STGEAFVQFASQEIAEK                                                  | 1.403519814        | 2                | 4.2908549 |
| Q6AY09        | STGEAFVQFASQEIAEKALKK                                              | 1.104536096        | 2                | 2.5460105 |
| <b>Q6AY20</b> | <b>MPRD Cation_dependent mannose_6_phosphate receptor</b>          | <b>0.968927448</b> | <b>0.2265363</b> | <b>2</b>  |
| Q6AY20        | HTLAGNFNPVSEER                                                     | 0.968776895        | 2                | 4.3002181 |

|               |                                                                |                    |                  |           |
|---------------|----------------------------------------------------------------|--------------------|------------------|-----------|
| Q6AY20        | SCDLVGEKDKESK                                                  | 1.257375492        | 2                | 3.7206366 |
| <b>Q6AY30</b> | <b>SCP DH Probable saccharopine dehydrogenase</b>              | <b>1.103949395</b> | <b>0.0754905</b> | <b>6</b>  |
| Q6AY30        | ACIENGTSKIDICGEPQFLELMHVK                                      | 1.3627871          | 3                | 5.3129454 |
| Q6AY30        | ATLVNLCVGPYR                                                   | 0.994119546        | 2                | 2.5612729 |
| Q6AY30        | GGGVFTPGAASF                                                   | 1.023905672        | 2                | 2.36426   |
| Q6AY30        | GVYIIGSSGFDSIPADLGVLYTR                                        | 1.183997992        | 2                | 3.2537417 |
| Q6AY30        | LQQVLEK                                                        | 1.253295802        | 1                | 2.0679646 |
| Q6AY30        | SVSNLKPVPVIGSK                                                 | 1.090932665        | 2                | 3.6138811 |
| <b>Q6AY56</b> | <b>TBA8 Tubulin alpha_8 chain</b>                              | <b>1.187071162</b> | <b>9.9E-20</b>   | <b>9</b>  |
| Q6AY56        | AFVHWYVVGEMEEGEFSEAR                                           | 1.515636753        | 2                | 4.6020246 |
| Q6AY56        | AVCMLSNTTAAIEAWAR                                              | 1.072757634        | 2                | 4.6251793 |
| Q6AY56        | EDAANNYAR                                                      | 1.095950142        | 1                | 2.073451  |
| Q6AY56        | FDGALNVDLTFEQTNLVPYPR                                          | 1.438375268        | 2                | 5.4105701 |
| Q6AY56        | LISQIVSSITASLR                                                 | 1.430279437        | 2                | 3.6666224 |
| Q6AY56        | NLDIERPTYTNLNR                                                 | 1.165331893        | 2                | 3.5813077 |
| Q6AY56        | QLFHPEQLITGK                                                   | 1.157613776        | 2                | 2.8515084 |
| Q6AY56        | TIQFVDWCPTGFK                                                  | 1.101829149        | 2                | 3.8817942 |
| Q6AY56        | VGINYQPPTVPPGGDLAK                                             | 1.091288247        | 2                | 4.8435197 |
| <b>Q6AY80</b> | <b>NQO2 Ribosylidihyronicotinamide dehydrogenase [quinone]</b> | <b>0.930090416</b> | <b>0.9132444</b> | <b>2</b>  |
| Q6AY80        | NDVTGALSNEVFK                                                  | 0.925238804        | 2                | 3.4151583 |
| Q6AY80        | VLAPQISFGPEVSSEEQR                                             | 0.871851888        | 2                | 3.3789749 |
| <b>Q6AYH5</b> | <b>DCTN2 Dynactin subunit 2</b>                                | <b>1.149663048</b> | <b>0.1809188</b> | <b>3</b>  |
| Q6AYH5        | ASVEDADTQNK                                                    | 1.119783556        | 2                | 3.222342  |
| Q6AYH5        | LLGPDAAINLADPDGALAK                                            | 1.727896041        | 2                | 2.925566  |
| Q6AYH5        | WSPVASTLPELVQR                                                 | 1.072998907        | 2                | 2.5704334 |
| <b>Q6AYQ8</b> | <b>FAHD1 Acylpyruvase FAHD1_ mitochondrial</b>                 | <b>0.914103576</b> | <b>1</b>         | <b>3</b>  |
| Q6AYQ8        | IITLEEGDLILTGP                                                 | 1.04924403         | 2                | 4.3980789 |
| Q6AYQ8        | NLHHEVELGVLLGR                                                 | 0.976984621        | 3                | 4.4386773 |
| Q6AYQ8        | SFTSSCPVSAFVPK                                                 | 0.883150003        | 2                | 4.0859399 |
| <b>Q6AYR8</b> | <b>SCRN2 Secernin_2</b>                                        | <b>1.004698225</b> | <b>0.5664104</b> | <b>3</b>  |
| Q6AYR8        | GHQAALGLMDEQEQAQLR                                             | 1.010520544        | 2                | 3.8728626 |
| Q6AYR8        | QEQQSLEQEGLEALR                                                | 0.995091094        | 2                | 4.0241747 |
| Q6AYR8        | TTASMVSVLPQDPTKPCVHFLTATPDP                                    | 1.428123156        | 3                | 3.5717604 |
| <b>Q6AYS7</b> | <b>ACY1A Aminoacylase_1A</b>                                   | <b>1.390622487</b> | <b>2.331E-15</b> | <b>2</b>  |
| Q6AYS7        | EMNLTLEPEIFPAATDSR                                             | 1.213023499        | 2                | 3.4593072 |
| Q6AYS7        | ICTVQPNPDYGSVTFLEER                                            | 2.820259344        | 2                | 4.4259763 |
| <b>Q6AYS8</b> | <b>DHB11 Estradiol 17_beta_dehydrogenase 11</b>                | <b>0.924750599</b> | <b>0.9646387</b> | <b>3</b>  |
| Q6AYS8        | ALTDLAALGCTGVR                                                 | 1.021069226        | 2                | 2.3612814 |
| Q6AYS8        | NPSTNLGPTLEPEVVEHLMHGILT                                       | 1.080717491        | 3                | 3.6643641 |
| Q6AYS8        | SVAGEIVLITGAGHGIGR                                             | 0.93033325         | 2                | 4.2767329 |
| <b>Q6AYT9</b> | <b>ACSM5 Acyl_coenzyme A synthetase ACSM5_ mitochondrial</b>   | <b>1.393729878</b> | <b>0.5507546</b> | <b>3</b>  |
| Q6AYT9        | AFIVLSPAYVSHDPEALTR                                            | 1.309573142        | 2                | 4.691833  |
| Q6AYT9        | ASPPYDVQIVDEEGNVLP                                             | 1.125465787        | 2                | 3.3784769 |
| Q6AYT9        | NDDVINSSSYR                                                    | 1.225832006        | 2                | 3.3058975 |
| <b>Q6AYZ1</b> | <b>TBA1C Tubulin alpha_1C chain</b>                            | <b>1.340671539</b> | <b>9.9E-20</b>   | <b>6</b>  |
| Q6AYZ1        | AVFVDLEPTVIDEVR                                                | 1.120011128        | 2                | 5.3017387 |
| Q6AYZ1        | AYHEQLTVAEITNACFEPANQ                                          | 0.922226106        | 3                | 4.2555418 |
| Q6AYZ1        | DVNAAIATIK                                                     | 1.017661046        | 2                | 3.2959836 |
| Q6AYZ1        | IHFPLATYAPVISA                                                 | 1.671618396        | 2                | 3.901093  |
| Q6AYZ1        | TIGGGDDSFNTFFSETGAGK                                           | 1.980126311        | 2                | 5.5614519 |
| Q6AYZ1        | VGINYQPPTVPPGGDLAR                                             | 1.082272921        | 2                | 4.751996  |
| <b>Q6DGG1</b> | <b>ABHEB Abhydrolase domain_containing protein 14B</b>         | <b>1.150339278</b> | <b>0.8136104</b> | <b>7</b>  |
| Q6DGG1        | AVAILDPLGLR                                                    | 0.929451411        | 2                | 3.4787614 |
| Q6DGG1        | FSSETWQNLGTLHR                                                 | 1.110280506        | 2                | 3.5717065 |
| Q6DGG1        | FSVLLHGIR                                                      | 1.024850614        | 2                | 3.0143254 |

|               |                                                                 |                    |                  |           |
|---------------|-----------------------------------------------------------------|--------------------|------------------|-----------|
| Q6DGG1        | GYVPVAPICTDK                                                    | 1.040777806        | 2                | 2.5421419 |
| Q6DGG1        | INAADYAR                                                        | 0.994613269        | 2                | 2.4012966 |
| Q6DGG1        | TPTLIVYGDQDPMGSSSFQHLK                                          | 0.984812863        | 2                | 4.9660368 |
| Q6DGG1        | VLVMEGAGHPCYLDKPDEWHTGLLDFLQELA                                 | 2.28605131         | 3                | 3.8916752 |
| <b>Q6EDY6</b> | <b>LR16A Leucine_rich repeat_containing protein 16A</b>         | <b>0.9955653</b>   | <b>0.999998</b>  | <b>2</b>  |
| Q6EDY6        | ELMESIK+Oxidation(3)                                            | 1.013116918        | 1                | 2.1921206 |
| Q6EDY6        | IENYLLR                                                         | 0.992523271        | 2                | 2.5039573 |
| <b>Q6GQT9</b> | <b>NOMO1 Nodal modulator 1</b>                                  | <b>1.104656711</b> | <b>0.5675845</b> | <b>2</b>  |
| Q6GQT9        | SSIDSEPALVLGPLK                                                 | 1.142165488        | 2                | 2.6978064 |
| Q6GQT9        | VQVVVPEAETR                                                     | 1.010431143        | 2                | 2.843817  |
| <b>Q6I7R3</b> | <b>ISOC1 Isochorismatase domain_containing protein 1</b>        | <b>1.122568045</b> | <b>0.0076526</b> | <b>2</b>  |
| Q6I7R3        | GLGSTVQEIDLTGVK                                                 | 1.028139615        | 2                | 3.855788  |
| Q6I7R3        | ILGIPVIITEQYPK                                                  | 1.517267995        | 2                | 3.2725096 |
| <b>Q6IE52</b> | <b>MUG2 Murinoglobulin 2</b>                                    | <b>1.096862304</b> | <b>0.9674516</b> | <b>13</b> |
| Q6IE52        | AHFSVMGDILSSAIK                                                 | 1.183286418        | 2                | 3.6435087 |
| Q6IE52        | HGIPFFVK                                                        | 3.443513239        | 2                | 2.8141105 |
| Q6IE52        | HTSSWLVTPK                                                      | 0.976054922        | 2                | 2.6255136 |
| Q6IE52        | LPSSEEEESLDINIEGAK                                              | 1.252288021        | 2                | 5.4021912 |
| Q6IE52        | MLIYTILPDGEVIADSVK                                              | 1.149696244        | 2                | 4.3163099 |
| Q6IE52        | MLSGFIPLKPTVK                                                   | 1.009548961        | 2                | 2.8554873 |
| Q6IE52        | NLYPLKELVQDPK                                                   | 1.143595831        | 1                | 2.1494286 |
| Q6IE52        | QLSFSLSAEPIQGPYK                                                | 1.038819579        | 2                | 4.3205857 |
| Q6IE52        | VHLSFSPSQSLPASQTHMR                                             | 1.056859543        | 3                | 3.5595644 |
| Q6IE52        | VKTVPLTCNNPK                                                    | 1.172568623        | 2                | 2.7707629 |
| Q6IE52        | VLIVEPEGIKK                                                     | 1.200602925        | 2                | 2.3725133 |
| Q6IE52        | VTASPQSLCGLR                                                    | 1.240438004        | 2                | 2.5952532 |
| Q6IE52        | YMVLVPSQLYTETPEK                                                | 1.132601882        | 2                | 4.0601654 |
| <b>Q6IFW6</b> | <b>K1C10 Keratin_type I cytoskeletal 10</b>                     | <b>1.093333561</b> | <b>0.6398857</b> | <b>2</b>  |
| <b>Q6IFX1</b> | <b>K1C24 Keratin_type I cytoskeletal 24</b>                     | <b>1.161817358</b> | <b>0.0022475</b> | <b>2</b>  |
| Q6IFX1        | LLNDMR                                                          | 0.890652439        | 1                | 1.9203966 |
| Q6IFX1        | QEAEKQFNER                                                      | 1.212143488        | 2                | 2.5628862 |
| <b>Q6IG00</b> | <b>K2C4 Keratin_type II cytoskeletal 4</b>                      | <b>1.154847398</b> | <b>0.5127044</b> | <b>3</b>  |
| Q6IG00        | LMQDSVEDFK+Oxidation(2)                                         | 1.13785138         | 1                | 2.0750604 |
| Q6IG00        | NLDLDGIIAEVR                                                    | 0.902352886        | 2                | 3.2676594 |
| Q6IG00        | WNLLQQQTTTTSPR                                                  | 1.410120691        | 2                | 4.3629208 |
| <b>Q6IRK9</b> | <b>PGCP Plasma glutamate carboxypeptidase</b>                   | <b>1.028018305</b> | <b>0.6464886</b> | <b>4</b>  |
| Q6IRK9        | AIQIMYQNLQQDGLNVHLEQVR                                          | 0.970329576        | 3                | 5.6161408 |
| Q6IRK9        | IVVYNQPYTDYVK                                                   | 1.641446092        | 2                | 2.4067578 |
| Q6IRK9        | TYPDTDSFNTVAEITGSK                                              | 0.803915797        | 2                | 4.46419   |
| Q6IRK9        | VGAVASLIR                                                       | 1.019678639        | 2                | 2.4554923 |
| <b>Q6MGB5</b> | <b>DHB8 Estradiol 17_beta_dehydrogenase 8</b>                   | <b>0.866389931</b> | <b>0.4353467</b> | <b>4</b>  |
| Q6MGB5        | AGVIGLTQTAAR                                                    | 1.05064874         | 2                | 3.0258331 |
| Q6MGB5        | GSIINISSIVGK                                                    | 2.050812443        | 2                | 2.7922611 |
| Q6MGB5        | LAAEGAAVAACDLDGAAAQDTVR                                         | 0.828743248        | 2                | 3.8523788 |
| Q6MGB5        | VGNIGQNTYASSK                                                   | 1.118092921        | 2                | 2.8554327 |
| <b>Q6NSR8</b> | <b>PEPL1 Probable aminopeptidase NPEPL1</b>                     | <b>0.979691961</b> | <b>0.5135217</b> | <b>2</b>  |
| Q6NSR8        | HNSPSAAHFITR                                                    | 0.967155904        | 3                | 4.136219  |
| Q6NSR8        | TVEINNTDAEGR                                                    | 0.820502898        | 2                | 3.0242054 |
| <b>Q6NYB7</b> | <b>RAB1A Ras_related protein Rab_1A</b>                         | <b>1.073208402</b> | <b>0.4706117</b> | <b>4</b>  |
| Q6NYB7        | EFADSLGIPFLETSK                                                 | 0.970122819        | 2                | 3.0332351 |
| Q6NYB7        | MGPATAGGAEK                                                     | 0.841297209        | 2                | 3.5452721 |
| Q6NYB7        | MGPATAGGAEK+Oxidation(1)                                        | 1.420083764        | 2                | 2.4428811 |
| Q6NYB7        | NATNVEQSFMTMAAEIK                                               | 1.2173956          | 2                | 4.5443201 |
| <b>Q6NZJ6</b> | <b>IF4G1 Eukaryotic translation initiation factor 4 gamma 1</b> | <b>1.099923807</b> | <b>0.3287398</b> | <b>6</b>  |
| Q6NZJ6        | GLPLVDDGGWNTVPISK                                               | 1.019716721        | 2                | 3.3851843 |
| Q6NZJ6        | GSSGGSGAKPSDTASEATRPATLNR                                       | 1.017656097        | 3                | 3.356858  |

|               |                                                                           |                    |                  |           |
|---------------|---------------------------------------------------------------------------|--------------------|------------------|-----------|
| Q6NZJ6        | IHNAENIQPGEQK                                                             | 0.955844489        | 2                | 4.0452361 |
| Q6NZJ6        | KVEYTLGEESEAPGQR                                                          | 1.312208558        | 2                | 4.6022549 |
| Q6NZJ6        | LKEELEEAR                                                                 | 1.062964257        | 2                | 2.6729705 |
| Q6NZJ6        | TASTPTPPQTGGSLPQPNGESPQVAVIIRPDDR                                         | 1.097635123        | 3                | 5.3437843 |
| <b>Q6P0K8</b> | <b>PLAK Junction plakoglobin</b>                                          | <b>1.029546264</b> | <b>0.9956387</b> | <b>4</b>  |
| Q6P0K8        | LLNDEPVVVTK                                                               | 1.053044122        | 2                | 2.7452433 |
| Q6P0K8        | MEEIVEGCTGALHILAR                                                         | 1.07626392         | 3                | 3.308651  |
| Q6P0K8        | NLALCPANHAPLQEAAVIPR                                                      | 1.006353912        | 3                | 3.9556246 |
| Q6P0K8        | TMQNTSDLDTAR                                                              | 0.94190208         | 2                | 2.9556618 |
| <b>Q6P2K6</b> | <b>P4R3A Serine/threonine_protein phosphatase 4 regulatory subunit 3A</b> | <b>0.967537976</b> | <b>0.9745716</b> | <b>3</b>  |
| Q6P2K6        | ESEEKVVLLK                                                                | 0.854986076        | 1                | 2.026123  |
| Q6P2K6        | FKEVIPSDELK                                                               | 1.1042854          | 1                | 2.0132144 |
| Q6P2K6        | LDSMRSILR                                                                 | 0.932100038        | 1                | 2.0249963 |
| <b>Q6P502</b> | <b>TCPG T_complex protein 1 subunit gamma</b>                             | <b>0.987275647</b> | <b>0.0264209</b> | <b>12</b> |
| Q6P502        | AMTGVQWYPYR                                                               | 1.169588155        | 2                | 2.5701358 |
| Q6P502        | AVAQALEVIPR                                                               | 1.077697405        | 2                | 2.8529336 |
| Q6P502        | DMMLNIINSITTK                                                             | 0.501717785        | 2                | 2.3482807 |
| Q6P502        | EIQVQHPAAK                                                                | 0.912836117        | 2                | 3.1274107 |
| Q6P502        | IVLLDSLEYK                                                                | 1.403183989        | 2                | 2.4605868 |
| Q6P502        | IVSRPEELREDDVGTGAGLLEIK                                                   | 1.395926753        | 3                | 4.2863579 |
| Q6P502        | KGESQTDIEITR                                                              | 1.037634333        | 2                | 2.9025118 |
| Q6P502        | NLQDAMQVCR                                                                | 0.985405109        | 2                | 3.1728511 |
| Q6P502        | NVLLDPQLVPGGASEMAVAHALTEK                                                 | 1.593505072        | 2                | 4.0884657 |
| Q6P502        | TAVETAVLLLR                                                               | 1.302723554        | 2                | 2.808063  |
| Q6P502        | TLIQNGASTIR                                                               | 1.020613618        | 2                | 3.0946665 |
| Q6P502        | WSSLACNIALDAVK                                                            | 1.112544151        | 2                | 3.6320663 |
| <b>Q6P6M7</b> | <b>SPCS O_phosphoseryl_tRNA(Sec) selenium transferase</b>                 | <b>1.08441563</b>  | <b>0.9486736</b> | <b>4</b>  |
| Q6P6M7        | EMFVYLSTQLKK+Oxidation(2)                                                 | 0.959343122        | 2                | 2.9578326 |
| Q6P6M7        | KEMFVYLSTQLKK                                                             | 1.077357415        | 2                | 2.546669  |
| Q6P6M7        | SGDISAVQPK                                                                | 1.089395386        | 2                | 2.593178  |
| Q6P6M7        | SMVTAGFEPVVIENVLEGDEL                                                     | 1.192704311        | 2                | 3.6617451 |
| <b>Q6P6R2</b> | <b>DLDH Dihydrolipoyl dehydrogenase_mitochondrial</b>                     | <b>1.262507253</b> | <b>9.9E-20</b>   | <b>10</b> |
| Q6P6R2        | ALTGGIAHLFK                                                               | 1.167505238        | 2                | 2.3569887 |
| Q6P6R2        | IDVSVEAASGGK                                                              | 0.956240626        | 2                | 3.2161043 |
| Q6P6R2        | ILGAHILGPGAGEMVNEAALALEYGASCEDVAR                                         | 1.48646265         | 3                | 4.4358792 |
| Q6P6R2        | NETLGGTCLNVGCIPSK                                                         | 1.093014124        | 2                | 5.2591963 |
| Q6P6R2        | NQVTATTADGSTQVIGTK                                                        | 1.028085693        | 2                | 5.3743615 |
| Q6P6R2        | RPFTQNLGLEELGIELDPK                                                       | 1.052565166        | 3                | 3.7409453 |
| Q6P6R2        | SEEQLKEEGVEFK                                                             | 1.041680402        | 3                | 3.8945451 |
| Q6P6R2        | TNADTDGMVK                                                                | 0.956422036        | 2                | 2.8722799 |
| Q6P6R2        | TNADTDGMVK+Oxidation(8)                                                   | 1.683653636        | 2                | 2.6882439 |
| Q6P6R2        | VCHAHPTLSEAFR                                                             | 1.304111506        | 3                | 3.7872722 |
| <b>Q6P6S9</b> | <b>ENTP5 Ectonucleoside triphosphate diphosphohydrolase 5</b>             | <b>1.011300856</b> | <b>0.0627277</b> | <b>4</b>  |
| Q6P6S9        | AQTLLLEVEEIFK                                                             | 1.411688397        | 2                | 2.9859262 |
| Q6P6S9        | GQETVGTLDLGGASTQITFLPQLEK                                                 | 1.010949155        | 2                | 4.1172938 |
| Q6P6S9        | QGAETVQELLEVAK                                                            | 1.146891348        | 2                | 3.082659  |
| Q6P6S9        | TSGQLPFLEGEIFDSVKPGLSAFVDQPK                                              | 1.35185051         | 3                | 4.701375  |
| <b>Q6P6V0</b> | <b>G6PI Glucose_6_phosphate isomerase</b>                                 | <b>1.099538134</b> | <b>5.789E-05</b> | <b>9</b>  |
| Q6P6V0        | AITDIINIGIGSDLGPLMVTEALKPYSK                                              | 1.055957138        | 3                | 3.8087392 |
| Q6P6V0        | DVMPEVNKVLDK+Oxidation(3)                                                 | 1.079512889        | 2                | 2.3697257 |
| Q6P6V0        | HFVALSTNTDK                                                               | 1.04077448         | 2                | 3.1677189 |
| Q6P6V0        | ILLANFLAQTEALMK                                                           | 0.930348541        | 2                | 3.1345475 |
| Q6P6V0        | KIEPELDGSSAVTSHDSSTNGLIGFIK                                               | 1.088975942        | 3                | 4.8351812 |
| Q6P6V0        | TFTTQETITNAETAK                                                           | 1.10280566         | 2                | 5.1330614 |
| Q6P6V0        | TLANLNPESSLFIASK                                                          | 1.30340954         | 3                | 5.0211554 |

|               |                                                             |                    |                  |           |
|---------------|-------------------------------------------------------------|--------------------|------------------|-----------|
| Q6P6V0        | VFEGNRPTNSIVFTK                                             | 1.323349038        | 2                | 3.2558141 |
| Q6P6V0        | VWVFSNIDGTHIAK                                              | 0.182298027        | 2                | 3.5887578 |
| <b>Q6P7Q4</b> | <b>LGUL Lactoylglutathione lyase</b>                        | <b>1.127649237</b> | <b>1.256E-08</b> | <b>5</b>  |
| Q6P7Q4        | DFLLQQTMLR                                                  | 0.818991728        | 2                | 3.2585812 |
| Q6P7Q4        | FEELGVK                                                     | 1.158442557        | 1                | 1.944322  |
| Q6P7Q4        | GFGHIGIAVPDVYEACK                                           | 1.168088465        | 2                | 3.7153797 |
| Q6P7Q4        | GLAFVQDPDGYWIEILNPNK                                        | 1.525384099        | 2                | 5.8045053 |
| Q6P7Q4        | VLGLTLLQK                                                   | 1.182502301        | 2                | 2.72294   |
| <b>Q6P7R8</b> | <b>DHB12 Estradiol 17_beta_dehydrogenase 12</b>             | <b>1.090409249</b> | <b>0.096911</b>  | <b>3</b>  |
| Q6P7R8        | LGEWAVVTGGTDGIGK                                            | 1.09075783         | 2                | 4.1236534 |
| Q6P7R8        | LININVLSICK                                                 | 2.564689281        | 2                | 2.6446979 |
| Q6P7R8        | TIAVDFSLDDIYDK                                              | 0.896421388        | 2                | 2.9694376 |
| <b>Q6P9T8</b> | <b>TBB2C Tubulin beta_2C chain</b>                          | <b>1.05520721</b>  | <b>5.865E-10</b> | <b>13</b> |
| Q6P9T8        | AVLVDLEPGTMDSVR                                             | 0.961239892        | 2                | 4.7319517 |
| Q6P9T8        | AVLVDLEPGTMDSVR+Oxidation(11)                               | 1.365514915        | 2                | 2.518611  |
| Q6P9T8        | EAESCDCLQGFQLTHSLGGGTGSGMGTLISK                             | 1.029784793        | 3                | 5.5576062 |
| Q6P9T8        | EIVHLQAGQCGNQIGAK                                           | 0.855006919        | 2                | 5.1074615 |
| Q6P9T8        | EVDEQMLNVQNK                                                | 1.103768031        | 2                | 4.1986895 |
| Q6P9T8        | FWEVISDEHGIDPTGYHGSDQLQLER                                  | 0.861251943        | 3                | 5.4687796 |
| Q6P9T8        | INVYYNEATGGK                                                | 1.25020745         | 2                | 3.6526306 |
| Q6P9T8        | KEAESCDCLQGFQLTHSLGGGTGSGMGTLISK                            | 1.256877745        | 3                | 5.7596774 |
| Q6P9T8        | LHFFMPGFAPLTSR                                              | 1.635920587        | 2                | 2.9883497 |
| Q6P9T8        | MSATFIGNSTAIQELFK                                           | 1.506448143        | 2                | 4.3663678 |
| Q6P9T8        | SGPFGQIFRPDNFVFGQSGAGNNWAK                                  | 0.814017411        | 3                | 3.9420245 |
| Q6P9T8        | TAVCDIPPR                                                   | 0.360211999        | 2                | 2.388726  |
| Q6P9T8        | YLTVAAVFR                                                   | 1.05730931         | 2                | 2.710984  |
| <b>Q6PA06</b> | <b>ATLA2 Atlastin_2</b>                                     | <b>1.201470083</b> | <b>0.8733496</b> | <b>4</b>  |
| Q6PA06        | AGLTDQVSHHAR                                                | 1.259155068        | 2                | 3.0844882 |
| Q6PA06        | NLVPLLLAPENLVEK                                             | 1.083380944        | 2                | 2.8203473 |
| Q6PA06        | QNQHEELQNVK                                                 | 0.976898731        | 2                | 2.8673701 |
| Q6PA06        | SMLQATAEANNLAAVAGAR                                         | 1.055235508        | 2                | 3.2171493 |
| <b>Q6PCM2</b> | <b>INT6 Integrator complex subunit 6</b>                    | <b>0.690290408</b> | <b>0.0021681</b> | <b>2</b>  |
| Q6PCM2        | MLIEQLENFLDEIHRH+Oxidation(1)                               | 0.626211916        | 2                | 2.5084546 |
| Q6PCM2        | NPFLEPAIIITIDGSK                                            | 1.936134996        | 2                | 2.3495383 |
| <b>Q6PDV7</b> | <b>RL10 60S ribosomal protein L10</b>                       | <b>1.092384113</b> | <b>0.7186562</b> | <b>2</b>  |
| Q6PDV7        | FNADEFEDMVAEK                                               | 1.165953406        | 2                | 3.7332172 |
| Q6PDV7        | FNADEFEDMVAEKR                                              | 0.904417988        | 2                | 2.6502087 |
| <b>Q6PEC1</b> | <b>TBCA Tubulin_specific chaperone A</b>                    | <b>1.083147923</b> | <b>0.444607</b>  | <b>4</b>  |
| Q6PEC1        | AEDGENYAIAK                                                 | 1.251079381        | 2                | 2.5739646 |
| Q6PEC1        | LEAAYTDLR                                                   | 0.84850472         | 2                | 2.8469822 |
| Q6PEC1        | QILESEKDLEEAEEYKEAR                                         | 1.099897355        | 3                | 4.0983057 |
| Q6PEC1        | RLEAAYTDLR                                                  | 1.12623305         | 2                | 2.4720726 |
| <b>Q6PEC4</b> | <b>SKP1 S_phase kinase associated protein 1</b>             | <b>1.248595335</b> | <b>0.2706691</b> | <b>3</b>  |
| Q6PEC4        | NDFTEEEEAQVR                                                | 1.202427559        | 2                | 3.1856124 |
| Q6PEC4        | RTDDIPVWDQEFK                                               | 1.123877231        | 2                | 3.1035712 |
| Q6PEC4        | TDDIPVWDQEFK                                                | 1.47131567         | 2                | 2.7094398 |
| <b>Q6PGB8</b> | <b>SMCA1 Probable global transcription activator SNF2L1</b> | <b>1.053234731</b> | <b>0.9134721</b> | <b>2</b>  |
| Q6PGB8        | EMDPEYEEKMVNMPLK+Oxidation(13)                              | 0.925670083        | 2                | 2.4101167 |
| Q6PGB8        | IKTDVEKSLPPK                                                | 1.057272179        | 2                | 2.3202913 |
| <b>Q6Q0N1</b> | <b>CNDP2 Cytosolic non_specific dipeptidase</b>             | <b>1.062551537</b> | <b>0.0739734</b> | <b>6</b>  |
| Q6Q0N1        | AVFQYIDENQDR                                                | 2.192149583        | 2                | 3.2515798 |
| Q6Q0N1        | EGGSIPVTLTFQEATGK                                           | 0.988020749        | 2                | 2.7537096 |
| Q6Q0N1        | LGGSVELVDIGK                                                | 1.335376435        | 2                | 2.3890753 |
| Q6Q0N1        | LVPDMIPVSEVQVSSYLSK                                         | 0.270944461        | 2                | 3.4225948 |
| Q6Q0N1        | MTEAAAADVQR                                                 | 1.061564533        | 2                | 2.5871928 |
| Q6Q0N1        | TGQEIPVNLK                                                  | 1.004718891        | 2                | 2.4954925 |
| <b>Q6RT24</b> | <b>CENPE Centromere_associated protein E</b>                | <b>1.000882301</b> | <b>0.7018898</b> | <b>2</b>  |

|               |                                                                                    |                    |                  |           |
|---------------|------------------------------------------------------------------------------------|--------------------|------------------|-----------|
| Q6RT24        | DLLQKVQDEK                                                                         | 0.947632281        | 2                | 2.3817234 |
| Q6RT24        | MELENVNMKLQEK                                                                      | 1.144387314        | 2                | 2.4034481 |
| <b>Q6RUV5</b> | <b>RAC1 Ras_related C3 botulinum toxin substrate 1</b>                             | <b>0.942899218</b> | <b>0.9061824</b> | <b>2</b>  |
| Q6RUV5        | HHCNPNTPIILVGTK                                                                    | 0.942519421        | 2                | 3.1159766 |
| Q6RUV5        | LTPITYPQGLAMAK                                                                     | 1.149415566        | 2                | 2.9852767 |
| <b>Q6SKG1</b> | <b>ACSM3 Acyl_coenzyme A synthetase ACSM3_mitochondrial</b>                        | <b>0.932853428</b> | <b>0.982197</b>  | <b>2</b>  |
| Q6SKG1        | FDSTSILQTLTK                                                                       | 0.931564302        | 2                | 3.1434164 |
| Q6SKG1        | TGTVLIPGTTQLTQK                                                                    | 1.053586779        | 2                | 2.5236261 |
| <b>Q6TUG0</b> | <b>DJB11 DnaJ homolog subfamily B member 11</b>                                    | <b>1.239018588</b> | <b>5.41E-09</b>  | <b>4</b>  |
| Q6TUG0        | FQDLGAAYEVLSDSEK                                                                   | 1.11815962         | 2                | 4.7398744 |
| Q6TUG0        | FQMTQEVVCECPNVK                                                                    | 1.140926016        | 2                | 5.0501895 |
| Q6TUG0        | KGGLPNFDNNDIK                                                                      | 1.224941606        | 2                | 3.3192942 |
| Q6TUG0        | TLEVEIEPGVR                                                                        | 1.247883463        | 2                | 3.0339236 |
| <b>Q6UPE1</b> | <b>ETFD Electron transfer flavoprotein_ubiquinone oxidoreductase_mitochondrial</b> | <b>1.188547153</b> | <b>0.0013587</b> | <b>17</b> |
| Q6UPE1        | AAQIGAHTLSGACLDPAAFK                                                               | 1.123305943        | 2                | 4.5005984 |
| Q6UPE1        | ALNEGGLQSPK                                                                        | 0.985793985        | 2                | 3.4803259 |
| Q6UPE1        | ASCDAAQTYGIGLK                                                                     | 0.962589944        | 2                | 3.82602   |
| Q6UPE1        | FAEEADVIVGAGPAGLSAAIR                                                              | 0.900540867        | 2                | 4.6571736 |
| Q6UPE1        | FCPAGVYEFVPLEQGDGFR                                                                | 1.358645037        | 2                | 4.8845496 |
| Q6UPE1        | GAPLNTPVTEDR                                                                       | 1.011125432        | 2                | 3.476269  |
| Q6UPE1        | GIATNDVGIQK                                                                        | 0.954448015        | 2                | 3.5613451 |
| Q6UPE1        | HHPSIRPTLEGGK                                                                      | 0.92741472         | 2                | 2.3177717 |
| Q6UPE1        | LQJNAQNCVHCK                                                                       | 1.298708522        | 2                | 3.5074165 |
| Q6UPE1        | LTFPGGLLIGCSPGFMNVPK                                                               | 1.396990001        | 2                | 3.468097  |
| Q6UPE1        | NLSIYDGPEQR                                                                        | 0.987050373        | 2                | 2.6289427 |
| Q6UPE1        | QLTSENLSK                                                                          | 0.734557195        | 2                | 2.322186  |
| Q6UPE1        | SGSLAAEAIFK                                                                        | 1.066765542        | 2                | 3.291091  |
| Q6UPE1        | TAGLHVTEYEDNLK                                                                     | 0.74684008         | 2                | 3.6948745 |
| Q6UPE1        | TCDIKDPSQINWVWVEGGGPPAYNGM                                                         | 1.129149813        | 2                | 4.5209208 |
| Q6UPE1        | VDHTVGVPLDR                                                                        | 1.01784644         | 2                | 2.4918928 |
| Q6UPE1        | VTIFAEGCHGLAK                                                                      | 1.154109703        | 2                | 3.7927089 |
| <b>Q6URK4</b> | <b>ROA3 Heterogeneous nuclear ribonucleoprotein A3</b>                             | <b>1.011669912</b> | <b>9.9E-20</b>   | <b>7</b>  |
| Q6URK4        | EDSVKPGAHLTVK                                                                      | 1.262686769        | 2                | 3.6973305 |
| Q6URK4        | GFAFVTFDDHDTVDK                                                                    | 1.050212001        | 2                | 3.8477933 |
| Q6URK4        | IETIEVMEDR                                                                         | 1.038064874        | 2                | 3.3621054 |
| Q6URK4        | IFVGGIKEDTEENLR                                                                    | 1.95730098         | 2                | 4.2638206 |
| Q6URK4        | SSGSPYGGYGGGGGGYGSR                                                                | 0.739756051        | 2                | 4.6206007 |
| Q6URK4        | WGTLTDCVVMR                                                                        | 0.974138322        | 2                | 3.0205622 |
| Q6URK4        | YHTINGHNCEVK                                                                       | 1.464405873        | 2                | 3.574863  |
| <b>Q6URW6</b> | <b>MYH14 Myosin_14</b>                                                             | <b>1.097752745</b> | <b>9.9E-20</b>   | <b>4</b>  |
| Q6URW6        | EDQSILCTGESGAGK                                                                    | 1.06544023         | 2                | 4.611321  |
| Q6URW6        | FDQLLAEEK                                                                          | 1.126955756        | 1                | 2.0195544 |
| Q6URW6        | KFDQLLAEEK                                                                         | 1.222940652        | 2                | 3.1676543 |
| Q6URW6        | QLLQANPILEAFGNAK                                                                   | 1.282804204        | 2                | 4.5919495 |
| <b>Q6XQN1</b> | <b>PNCB Nicotinate phosphoribosyltransferase</b>                                   | <b>0.907089828</b> | <b>0.3601682</b> | <b>4</b>  |
| Q6XQN1        | GSEVNVIGIGTNVVTCPK                                                                 | 0.608372049        | 2                | 3.8310311 |
| Q6XQN1        | LDSGDLQQAQK                                                                        | 0.855742147        | 2                | 3.643899  |
| Q6XQN1        | LYLQQGQPYEPLPSLEESR                                                                | 1.196718735        | 2                | 5.4678597 |
| Q6XQN1        | QLQNPVAVYQValsek                                                                   | 1.163852161        | 2                | 3.1536107 |
| <b>Q6ZPJ3</b> | <b>UBE2O Ubiquitin_conjugating enzyme E2 O</b>                                     | <b>0.970877117</b> | <b>0.2204134</b> | <b>2</b>  |
| Q6ZPJ3        | FRTTDIVIR                                                                          | 0.744750495        | 2                | 2.5243752 |
| Q6ZPJ3        | NCAQGEESMAKKVK                                                                     | 1.046033848        | 2                | 2.9038205 |
| <b>Q70FJ1</b> | <b>AKAP9 A_kinase anchor protein 9</b>                                             | <b>1.160142019</b> | <b>0.1586349</b> | <b>2</b>  |
| Q70FJ1        | EDGGQPPPALPSEDLLK                                                                  | 1.094782122        | 2                | 2.7353127 |
| Q70FJ1        | HEAEITNYKIKLEMLEK+Oxidation(14)                                                    | 1.417696543        | 2                | 2.5171316 |

|               |                                                                                               |                    |                  |           |
|---------------|-----------------------------------------------------------------------------------------------|--------------------|------------------|-----------|
| <b>Q711G3</b> | <b>IAH1 Isoamyl acetate_hydrolyzing esterase 1 homolog</b>                                    | <b>1.061769857</b> | <b>0.0349901</b> | <b>4</b>  |
| Q711G3        | DCGTDVLDLWTLMOQK                                                                              | 1.422313168        | 2                | 4.2189002 |
| Q711G3        | DVEETKPELSLLGDGDH                                                                             | 0.938571235        | 2                | 3.6412671 |
| Q711G3        | LNVAVGEYAK                                                                                    | 1.199501014        | 2                | 2.557029  |
| Q711G3        | VILITPPPLCEAAWEK                                                                              | 1.239587343        | 2                | 2.8308778 |
| <b>Q71LX4</b> | <b>TLN2 Talin_2</b>                                                                           | <b>0.864696549</b> | <b>0.8078478</b> | <b>4</b>  |
| Q71LX4        | NCGEMSEIEAK                                                                                   | 1.475120473        | 2                | 2.4278626 |
| Q71LX4        | QEDVIATANLSR                                                                                  | 0.68271311         | 2                | 3.1165612 |
| Q71LX4        | QELTVFQSKDIPEK                                                                                | 1.218190078        | 2                | 2.3251524 |
| Q71LX4        | QVAASTAQLLVACK                                                                                | 1.051697888        | 2                | 3.2618566 |
| <b>Q71TY3</b> | <b>RS27 40S ribosomal protein S27</b>                                                         | <b>1.208336591</b> | <b>0.3165594</b> | <b>3</b>  |
| Q71TY3        | DLLHPSPEEEK                                                                                   | 0.883875333        | 2                | 2.798995  |
| Q71TY3        | LTEGCSFR                                                                                      | 1.10791183         | 2                | 2.3179529 |
| Q71TY3        | LVQSPNSYFMDVK                                                                                 | 1.209992505        | 2                | 2.8801599 |
| <b>Q75Q39</b> | <b>TOM70 Mitochondrial import receptor subunit TOM70</b>                                      | <b>1.151319738</b> | <b>0.3076286</b> | <b>6</b>  |
| Q75Q39        | GLELISKAIEIDNK                                                                                | 1.124985458        | 2                | 2.3327732 |
| Q75Q39        | NADLSTFYQNR                                                                                   | 1.181928069        | 2                | 2.8976378 |
| Q75Q39        | NREPLMPSPQFIK                                                                                 | 0.975087276        | 2                | 2.3209436 |
| Q75Q39        | SDEKDKKEGEALEVK                                                                               | 1.108306913        | 2                | 3.9073577 |
| Q75Q39        | SYFSSFTDDIISQPLMK                                                                             | 0.887729223        | 2                | 2.9393036 |
| Q75Q39        | YEQAICYTEAISLCPTEK                                                                            | 1.030517019        | 2                | 3.6714914 |
| <b>Q76MZ3</b> | <b>2AAA Serine/threonine_protein phosphatase 2A 65 kDa regulatory subunit A alpha isoform</b> | <b>1.321368137</b> | <b>9.055E-12</b> | <b>7</b>  |
| Q76MZ3        | AISHEHSPDLEAHFVPLVK                                                                           | 1.251739683        | 3                | 5.7210298 |
| Q76MZ3        | DNTIEHLLPLFLAQLKDECEVVR                                                                       | 1.199421656        | 3                | 5.0807858 |
| Q76MZ3        | IGPILDNSTLQSEVKPILEK                                                                          | 1.22559638         | 2                | 4.6747675 |
| Q76MZ3        | LNIISNLDVCVNEVIGIR                                                                            | 1.003765097        | 2                | 3.9411864 |
| Q76MZ3        | LTQDQDQDVK                                                                                    | 1.039869388        | 2                | 3.17939   |
| Q76MZ3        | NLCSDDTPMVR                                                                                   | 0.971601839        | 2                | 2.4469211 |
| Q76MZ3        | QLSQSLLPAIVELAEDAK                                                                            | 1.477010134        | 3                | 4.2449226 |
| <b>Q78P75</b> | <b>DYL2 Dynein light chain 2_cytoplasmic</b>                                                  | <b>1.000026578</b> | <b>0.8843046</b> | <b>3</b>  |
| Q78P75        | NADMSEDMQQDAVDCATQAMEK                                                                        | 0.723058164        | 2                | 5.5269542 |
| Q78P75        | NFGSYVTHETK                                                                                   | 0.95835637         | 2                | 2.4998043 |
| Q78P75        | YNPTWHCIVGR                                                                                   | 1.05022883         | 2                | 2.9441769 |
| <b>Q791V5</b> | <b>MTCH2 Mitochondrial carrier homolog 2</b>                                                  | <b>1.418480078</b> | <b>1.261E-11</b> | <b>5</b>  |
| Q791V5        | EEGIVGFFAGLIPR                                                                                | 1.331868796        | 2                | 3.3257277 |
| Q791V5        | GLFTGLTPR                                                                                     | 1.007028515        | 2                | 2.5715857 |
| Q791V5        | LCSGVLGTVVHGK                                                                                 | 1.728975881        | 2                | 3.0943758 |
| Q791V5        | VLIQVGYEPLPPTIGR                                                                              | 1.069262541        | 2                | 4.3326974 |
| Q791V5        | YCGLCDSIVTIYR                                                                                 | 1.169648164        | 2                | 2.8462696 |
| <b>Q794E4</b> | <b>HNRPF Heterogeneous nuclear ribonucleoprotein F</b>                                        | <b>0.97710014</b>  | <b>0.4706859</b> | <b>3</b>  |
| Q794E4        | ATENDIYNFFSPLNPVR                                                                             | 1.266468209        | 2                | 4.2203202 |
| Q794E4        | HSGPNSADSANDGFVR                                                                              | 1.007580576        | 2                | 3.7532451 |
| Q794E4        | VHIEIGPDGR                                                                                    | 1.054395758        | 2                | 2.9553187 |
| <b>Q7M0E3</b> | <b>DEST Dextrin</b>                                                                           | <b>1.126941105</b> | <b>0.0083107</b> | <b>3</b>  |
| Q7M0E3        | HEYQANGPEDLNR                                                                                 | 1.127086081        | 2                | 4.6347785 |
| Q7M0E3        | HFVGMLEPK                                                                                     | 0.870673332        | 2                | 2.4053183 |
| Q7M0E3        | HFVGMLEPKDCR                                                                                  | 1.2451959          | 2                | 2.6465487 |
| <b>Q7TMA5</b> | <b>APOB Apolipoprotein B_100</b>                                                              | <b>1.157746175</b> | <b>0.6093418</b> | <b>8</b>  |
| Q7TMA5        | GFEPTLEALFGK                                                                                  | 0.992842521        | 2                | 2.363184  |
| Q7TMA5        | GIISLLEAMK                                                                                    | 0.823171483        | 2                | 2.4370711 |
| Q7TMA5        | IEGNLVFDPSSYLPK                                                                               | 1.16158527         | 2                | 3.4192159 |
| Q7TMA5        | IEIDIPLPGGK                                                                                   | 1.182082472        | 2                | 2.8236279 |
| Q7TMA5        | ITDNDVLIALDSAK                                                                                | 0.818099966        | 2                | 2.7938285 |
| Q7TMA5        | LSISEQNAQR                                                                                    | 1.136336501        | 2                | 2.4017618 |
| Q7TMA5        | NFVASHIANILNSEELYVQDLK                                                                        | 1.004237422        | 3                | 3.4170551 |



|               |                                                             |                    |                  |           |
|---------------|-------------------------------------------------------------|--------------------|------------------|-----------|
| Q7TMA5        | TILFDTFVNDVAPVEK                                            | 1.112120936        | 2                | 2.7220476 |
| <b>Q7TNG8</b> | <b>LDHD Probable D_lactate dehydrogenase_ mitochondrial</b> | <b>1.121671734</b> | <b>0.9963472</b> | <b>4</b>  |
| Q7TNG8        | AVVGSPhVSTASAVR                                             | 1.11046281         | 2                | 3.1460757 |
| Q7TNG8        | AYSTDVCPISR                                                 | 1.103401774        | 2                | 3.7911494 |
| Q7TNG8        | GSQGLSQDFVEALK                                              | 1.126131723        | 2                | 3.0836008 |
| Q7TNG8        | QLLQEEVGPVGVETMR                                            | 0.917095163        | 2                | 3.4754009 |
| <b>Q7TP47</b> | <b>HNRPQ Heterogeneous nuclear ribonucleoprotein Q</b>      | <b>1.150963029</b> | <b>0.0779757</b> | <b>3</b>  |
| Q7TP47        | AGPIWDLR                                                    | 1.203930218        | 2                | 2.4081302 |
| Q7TP47        | DLFEDELPLFEK                                                | 1.618968685        | 2                | 2.7884209 |
| Q7TP47        | NLANTVTEEILEK                                               | 0.880572307        | 2                | 2.8101177 |
| <b>Q7TP48</b> | <b>APMAP Adipocyte plasma membrane_ associated protein</b>  | <b>1.263066524</b> | <b>7.588E-07</b> | <b>4</b>  |
| Q7TP48        | ANPGFSDLDFLSDKPFK                                           | 1.355705136        | 2                | 3.2770834 |
| Q7TP48        | LENGEIETIAR                                                 | 1.141483972        | 2                | 3.2325432 |
| Q7TP48        | LFENQLNGPESIVNIGDVLFTGTADGR                                 | 1.187979978        | 3                | 4.2140746 |
| Q7TP48        | LLLSSETPIEGK                                                | 1.648332087        | 2                | 3.0568979 |
| <b>Q7TP52</b> | <b>CMBL Carboxymethylenebutenolidase homolog</b>            | <b>1.051186026</b> | <b>0.2913683</b> | <b>7</b>  |
| Q7TP52        | AGVSVYGIIR                                                  | 1.109595182        | 2                | 2.7957699 |
| Q7TP52        | EDCSPADKPYIEEAR                                             | 1.001423118        | 2                | 3.5080709 |
| Q7TP52        | KREDCSPADKPYIEEAR                                           | 1.000266731        | 3                | 3.780951  |
| Q7TP52        | LDYGGMGQEVQVEHIK                                            | 1.045430749        | 2                | 4.5555034 |
| Q7TP52        | LKEHCIVNYQVK                                                | 1.337808924        | 2                | 4.1485329 |
| Q7TP52        | NLIEWLNK                                                    | 0.988244939        | 1                | 2.2939415 |
| Q7TP52        | TFSGQTHGFVHR                                                | 1.201655723        | 2                | 3.4124324 |
| <b>Q7TPB1</b> | <b>TCPD T_complex protein 1 subunit delta</b>               | <b>1.137518491</b> | <b>1.849E-05</b> | <b>7</b>  |
| Q7TPB1        | ALIAGGGAPEIELALR                                            | 1.247897802        | 2                | 3.7312415 |
| Q7TPB1        | AQDIEAGDGTTSVVIIAGSLDSCSTK                                  | 0.717967441        | 2                | 4.7888656 |
| Q7TPB1        | GDVTITNDGATILK                                              | 0.89003149         | 2                | 2.8945947 |
| Q7TPB1        | GLEILTDMSRPVQLSDR                                           | 0.954888891        | 2                | 2.506119  |
| Q7TPB1        | LVIEEAER                                                    | 1.079917957        | 2                | 2.356992  |
| Q7TPB1        | SIHDALCVIR                                                  | 1.273978182        | 2                | 2.9900579 |
| Q7TPB1        | VIDPATATSVDLR                                               | 1.159657289        | 2                | 4.0169859 |
| <b>Q7TPJ0</b> | <b>SSRA Translocon_ associated protein subunit alpha</b>    | <b>1.057771738</b> | <b>0.7509621</b> | <b>2</b>  |
| Q7TPJ0        | GEDFPANNIVK                                                 | 1.090529577        | 2                | 2.9395823 |
| Q7TPJ0        | GTEDFIVESLDASFR                                             | 1.136830605        | 2                | 4.0900712 |
| <b>Q7TQ20</b> | <b>DNJC2 Dnaj homolog subfamily C member 2</b>              | <b>1.026921177</b> | <b>0.9994514</b> | <b>2</b>  |
| Q7TQ20        | MMEEVEKLCDR+Oxidation(1)                                    | 1.026921177        | 2                | 2.5037572 |
| Q7TQ20        | MMEEVEKLCDR+Oxidation(2)                                    | 1.026921177        | 2                | 2.4062874 |
| <b>Q7TQ94</b> | <b>NIT1 Nitrilase homolog 1</b>                             | <b>1.44170396</b>  | <b>0.3277174</b> | <b>2</b>  |
| Q7TQ94        | GQDWEQTQK                                                   | 1.231036008        | 2                | 2.3811374 |
| Q7TQ94        | NPAETLLLSEPLDGLLGQYQLAR                                     | 1.227294692        | 3                | 3.5465729 |
| <b>Q7TQM4</b> | <b>SOAT2 Sterol O_acyltransferase 2</b>                     | <b>1.133999136</b> | <b>0.6120254</b> | <b>3</b>  |
| Q7TQM4        | AIWEAVQAYPK                                                 | 0.883665947        | 2                | 2.96329   |
| Q7TQM4        | QDRPLPSTASDSTR                                              | 1.043985123        | 2                | 3.4221838 |
| Q7TQM4        | TQCLEQAQR                                                   | 1.260463725        | 2                | 2.9523931 |
| <b>Q7TSI0</b> | <b>ZNF12 Zinc finger protein 12</b>                         | <b>0.905063053</b> | <b>0.956998</b>  | <b>2</b>  |
| Q7TSI0        | HMSRLMEEDQGGEEHQSSSAVFSYR+Oxidation(2)                      | 0.737795896        | 3                | 3.6137433 |
| Q7TSI0        | HMSRLMEEDQGGEEHQSSSAVFSYR+Oxidation(6)                      | 1.174073267        | 3                | 3.5276566 |
| <b>Q7TSQ1</b> | <b>CL18A C_type lectin domain family 18 member A</b>        | <b>1.180027564</b> | <b>0.0987944</b> | <b>2</b>  |
| Q7TSQ1        | MKCQGGKGGVLAQIESQK                                          | 1.223481716        | 2                | 2.3226299 |
| Q7TSQ1        | QANDSAGALPVAGKPEPMAR+Oxidation(18)                          | 1.167258326        | 2                | 2.7781234 |
| <b>Q80SY4</b> | <b>MIB1 E3 ubiquitin_ protein ligase MIB1</b>               | <b>0.96591299</b>  | <b>0.9203051</b> | <b>2</b>  |
| Q80SY4        | LDIQDKDGTPLHEALR                                            | 0.941777436        | 2                | 2.4063571 |
| Q80SY4        | NLIMGLGTQGAEEK                                              | 1.037073365        | 2                | 2.5059001 |
| <b>Q80W21</b> | <b>GSTM7 Glutathione S_transferase Mu 7</b>                 | <b>1.16795774</b>  | <b>9.9E-20</b>   | <b>13</b> |
| Q80W21        | CLDAFPNLK                                                   | 1.083046963        | 2                | 3.1125386 |

|               |                                                                         |                    |                  |           |
|---------------|-------------------------------------------------------------------------|--------------------|------------------|-----------|
| Q80W21        | CLDAFPNLKDFIAR                                                          | 1.295384337        | 2                | 3.2497349 |
| Q80W21        | FKLGLDFPNLPYLIDGSHK                                                     | 1.364328225        | 3                | 4.908658  |
| Q80W21        | HNLCGETEER                                                              | 1.132696108        | 2                | 3.9460294 |
| Q80W21        | IRVDILENQLMDNR                                                          | 1.27667805         | 2                | 2.9385233 |
| Q80W21        | ITQSNAILR                                                               | 1.328052187        | 2                | 3.0777271 |
| Q80W21        | KHNLCGETEER                                                             | 1.233381244        | 3                | 4.1167145 |
| Q80W21        | KISDYMK                                                                 | 1.105921573        | 1                | 1.9546829 |
| Q80W21        | LFLEYTSSYEK                                                             | 1.229330506        | 2                | 3.9956617 |
| Q80W21        | LGLDFPNLPYLIDGSHK                                                       | 1.398256251        | 3                | 4.7914209 |
| Q80W21        | LKPGYLEQLPGMMR                                                          | 1.165669745        | 2                | 3.2940698 |
| Q80W21        | LYSEFLGK                                                                | 1.240461146        | 2                | 2.4607046 |
| Q80W21        | VDILENQLMDNR                                                            | 0.752121561        | 2                | 3.5056524 |
| <b>Q80WE4</b> | <b>KI20B Kinesin_like protein KIF20B</b>                                | <b>1.248822649</b> | <b>0.1989124</b> | <b>2</b>  |
| Q80WE4        | IKDLEVIVETQKDECK                                                        | 1.262594729        | 2                | 2.3993559 |
| Q80WE4        | KEEDCAELKEK                                                             | 1.244798177        | 2                | 2.3465166 |
| <b>Q80WS3</b> | <b>FBLL1 rRNA/trNA 2_O_methyltransferase fibrillarin_like protein 1</b> | <b>0.873414391</b> | <b>0.4955114</b> | <b>2</b>  |
| Q80WS3        | DHAVVVGVRPPPK                                                           | 0.866886963        | 3                | 3.4078867 |
| Q80WS3        | TNIIPVLEDAR                                                             | 0.874743354        | 2                | 2.4230785 |
| <b>Q80X90</b> | <b>FLNB Filamin_B</b>                                                   | <b>1.070142333</b> | <b>0.3912912</b> | <b>6</b>  |
| Q80X90        | GAGIGGLGIVGPPSESK                                                       | 1.152249038        | 2                | 3.6225936 |
| Q80X90        | IEYDDQNDGSCDVK                                                          | 0.748378937        | 2                | 4.0306106 |
| Q80X90        | IGNLQTDLSDGLR                                                           | 1.057529979        | 2                | 2.6631806 |
| Q80X90        | VDIQTEDLEDGTCK                                                          | 0.855321018        | 2                | 3.9752572 |
| Q80X90        | VGEPGILCVCSEAGPGLGLEAVSDSGAK                                            | 1.012846843        | 2                | 4.9336648 |
| Q80X90        | VTASGPGLSAYGVPASLPVEFAIDAR                                              | 1.19653415         | 2                | 3.0965278 |
| <b>Q80XB4</b> | <b>NRAP Nebulin_related_anchoring protein</b>                           | <b>1.226372287</b> | <b>0.1566431</b> | <b>2</b>  |
| Q80XB4        | EAFERMKGQMLGSR+Oxidation(10)                                            | 1.201009434        | 2                | 2.3760364 |
| Q80XB4        | GRSQFHSRADQPGLQAK                                                       | 1.310068063        | 2                | 2.6497836 |
| <b>Q80XC3</b> | <b>US6NL USP6_N_terminal_like protein</b>                               | <b>0.956370614</b> | <b>0.6589976</b> | <b>2</b>  |
| Q80XC3        | HYNHAAANQNSNAISNVRK                                                     | 1.195991158        | 2                | 2.5427749 |
| Q80XC3        | SVDEGSKNLK                                                              | 0.956328084        | 2                | 2.380831  |
| <b>Q80XI3</b> | <b>IF4G3 Eukaryotic translation initiation factor 4 gamma 3</b>         | <b>1.204224888</b> | <b>0.4764016</b> | <b>2</b>  |
| Q80XI3        | EFEKDKADDDVFEK                                                          | 1.034232062        | 2                | 2.6005063 |
| Q80XI3        | NHDEESLECLR                                                             | 1.211223423        | 2                | 3.1728604 |
| <b>Q80Y84</b> | <b>KDM5B Lysine_specific demethylase 5B</b>                             | <b>1.298621191</b> | <b>0.8129729</b> | <b>2</b>  |
| Q80Y84        | CDIGLLGLK                                                               | 0.993568648        | 2                | 2.305757  |
| Q80Y84        | ETAAMATLGEARLR                                                          | 1.382413313        | 2                | 2.4104912 |
| <b>Q80Z25</b> | <b>OFD1 Oral_facial_digital syndrome 1 protein homolog</b>              | <b>0.986363714</b> | <b>0.9129679</b> | <b>3</b>  |
| Q80Z25        | ELEQEAERLEK                                                             | 1.166547269        | 2                | 2.5591729 |
| Q80Z25        | MIEESLK+Oxidation(1)                                                    | 1.017188923        | 1                | 1.9516325 |
| Q80Z25        | RMIEESLK+Oxidation(2)                                                   | 0.926831252        | 2                | 2.3861952 |
| <b>Q80Z29</b> | <b>NAMPT Nicotinamide phosphoribosyltransferase</b>                     | <b>1.20222989</b>  | <b>1.389E-08</b> | <b>4</b>  |
| Q80Z29        | STEAPLIIRPDSGNPLDTVLK                                                   | 0.957274081        | 2                | 3.87711   |
| Q80Z29        | TPAGTFVTLEEGGDLEEYGHLLHTVFK                                             | 1.466094142        | 5                | 4.6545725 |
| Q80Z29        | VIQGDGVDINTLQIEVGMK                                                     | 1.29744969         | 2                | 4.4878168 |
| Q80Z29        | YLLETSGNLDGLEYK                                                         | 1.038568715        | 2                | 4.0702019 |
| <b>Q811D2</b> | <b>ANR26 Ankyrin repeat domain_containing protein 26</b>                | <b>1.052368245</b> | <b>0.3240885</b> | <b>3</b>  |
| Q811D2        | AQEDFDK                                                                 | 0.71327778         | 1                | 1.941866  |
| Q811D2        | RSADQLSEKTMEQLR+Oxidation(11)                                           | 1.077551113        | 2                | 2.3181794 |
| Q811D2        | SNLEEEARDLK                                                             | 1.51553958         | 1                | 1.9241298 |
| <b>Q811L6</b> | <b>MAST4 Microtubule_associated serine/threonine_protein kinase 4</b>   | <b>0.83229663</b>  | <b>0.6802318</b> | <b>2</b>  |
| Q811L6        | FPKATAQMEERLK+Oxidation(8)                                              | 0.791366402        | 2                | 2.3386455 |
| Q811L6        | SGHFENTSALPVSGLLK                                                       | 1.162272885        | 2                | 2.3982201 |
| <b>Q811Q2</b> | <b>CLIC6 Chloride intracellular channel protein 6</b>                   | <b>0.958513196</b> | <b>0.0411825</b> | <b>2</b>  |

|               |                                                              |                    |                  |           |
|---------------|--------------------------------------------------------------|--------------------|------------------|-----------|
| Q811Q2        | AGSDGESIGNCPFSQR                                             | 1.275977089        | 2                | 3.7286282 |
| Q811Q2        | FLDGDELTLADCNLLPK                                            | 0.577202101        | 2                | 2.3101492 |
| <b>Q811X6</b> | <b>CRYL1 Lambda_crystallin homolog</b>                       | <b>1.04692661</b>  | <b>0.9358714</b> | <b>5</b>  |
| Q811X6        | EMKSLEQSGSLK+Oxidation(2)                                    | 0.995106433        | 1                | 1.967831  |
| Q811X6        | IVDDQVILSSSSCLLPSK                                           | 1.074020569        | 2                | 4.5417967 |
| Q811X6        | LVEEGIVSPNDLDLVMSDGLGMR                                      | 0.814605825        | 2                | 3.4466763 |
| Q811X6        | LYDIEQQQITNALESIR                                            | 1.22703424         | 2                | 4.8407469 |
| Q811X6        | TFGPVPEFSGDTVEK                                              | 0.836787129        | 2                | 3.0231607 |
| <b>Q8BFZ3</b> | <b>ACTBL Beta_actin_like protein 2</b>                       | <b>0.983768737</b> | <b>9.9E-20</b>   | <b>10</b> |
| Q8BFZ3        | CDVDIRK                                                      | 0.990772302        | 2                | 2.4992106 |
| Q8BFZ3        | DLTDYLMK                                                     | 0.636404339        | 1                | 2.3000207 |
| Q8BFZ3        | HQGVMVGMGQK                                                  | 0.85801351         | 3                | 3.9466636 |
| Q8BFZ3        | HQGVMVGMGQK+Oxidation(5)                                     | 1.10851791         | 3                | 3.87484   |
| Q8BFZ3        | HQGVMVGMGQK+Oxidation(5)Oxidation(8)                         | 1.35294037         | 3                | 3.5855098 |
| Q8BFZ3        | HQGVMVGMGQK+Oxidation(8)                                     | 1.091647916        | 2                | 2.8278446 |
| Q8BFZ3        | SYELPDGQVITIGNER                                             | 0.954458964        | 2                | 5.1486192 |
| Q8BFZ3        | TTGIVMDSGDGVTHTVPIYEGYALPHAILR                               | 1.171153995        | 3                | 6.9182129 |
| Q8BFZ3        | TTGIVMDSGDGVTHTVPIYEGYALPHAILR+Oxidation(6)                  | 1.240994172        | 3                | 5.7184258 |
| Q8BFZ3        | VAPDEHPILLTEAPLNPK                                           | 1.292521996        | 3                | 3.9930174 |
| <b>Q8BG32</b> | <b>PSD11 26S proteasome non_ATPase regulatory subunit 11</b> | <b>1.224517316</b> | <b>0.9698389</b> | <b>3</b>  |
| Q8BG32        | LYDNLLEQNLIR                                                 | 1.08302033         | 2                | 2.8524749 |
| Q8BG32        | TTANAIYCPPK                                                  | 0.774231938        | 2                | 3.1420298 |
| Q8BG32        | VQIEHISSLIK                                                  | 1.220090718        | 2                | 2.8516123 |
| <b>Q8BGT5</b> | <b>ALAT2 Alanine aminotransferase 2</b>                      | <b>1.124103152</b> | <b>0.508162</b>  | <b>2</b>  |
| Q8BGT5        | LLEETGICVVPGSFGQQR                                           | 0.777904476        | 2                | 3.1639118 |
| Q8BGT5        | VLCIINPGNPTGQVQSR                                            | 1.131716259        | 2                | 4.7488675 |
| <b>Q8BGY2</b> | <b>IF5A2 Eukaryotic translation initiation factor 5A_2</b>   | <b>1.120235797</b> | <b>0.0018969</b> | <b>4</b>  |
| Q8BGY2        | EDLKLPEGELGK                                                 | 1.189151032        | 2                | 2.4286814 |
| Q8BGY2        | KYEDICPSTHNMDVPNIK                                           | 1.093033342        | 3                | 4.7310796 |
| Q8BGY2        | VHLVGIDIFTGK                                                 | 1.217939425        | 3                | 3.6582735 |
| Q8BGY2        | YEDICPSTHNMDVPNIK                                            | 1.052908003        | 2                | 4.0946598 |
| <b>Q8BH00</b> | <b>AL8A1 Aldehyde dehydrogenase family 8 member A1</b>       | <b>1.087588207</b> | <b>3.478E-11</b> | <b>9</b>  |
| Q8BH00        | ELLMLENFIGGK                                                 | 0.913812453        | 2                | 3.9138269 |
| Q8BH00        | ELNLPFGGMK                                                   | 0.888616022        | 1                | 2.3777387 |
| Q8BH00        | FLPCNSYIDSYDPSTGEVYCK                                        | 1.072558647        | 3                | 5.1124458 |
| Q8BH00        | ILCGEGVDQLSLPLR                                              | 1.251002659        | 2                | 4.6850491 |
| Q8BH00        | ITQLSAPHCK                                                   | 1.349143259        | 2                | 3.1178374 |
| Q8BH00        | KLSLELGK                                                     | 1.211426696        | 2                | 2.404918  |
| Q8BH00        | LSLELGK                                                      | 0.993617104        | 1                | 1.9114614 |
| Q8BH00        | NPAIHFEDANLEECIPATVR                                         | 1.071265049        | 2                | 4.4497666 |
| Q8BH00        | SSFANQGEICLCTSR                                              | 1.011952581        | 2                | 4.162262  |
| <b>Q8BHN3</b> | <b>GANAB Neutral alpha_glucosidase AB</b>                    | <b>1.098162023</b> | <b>0.0010888</b> | <b>7</b>  |
| Q8BHN3        | AEKDEPGAWEEFK                                                | 1.088310195        | 2                | 4.2432618 |
| Q8BHN3        | MLDYLQGSGETPQTDIR                                            | 1.095181943        | 2                | 5.4950771 |
| Q8BHN3        | REPWLLASQYQDAIR                                              | 1.140645221        | 2                | 2.882961  |
| Q8BHN3        | SGGIERPFVLSR                                                 | 1.337640758        | 2                | 2.5872307 |
| Q8BHN3        | THSDSKPYGPTSVGLDFSLPGMEHVYGIPEHADSLR                         | 1.228953626        | 4                | 5.020824  |
| Q8BHN3        | VTEGGEPYR                                                    | 0.700344334        | 2                | 2.3703997 |
| Q8BHN3        | VVIMGAGKPAAVVLQTK                                            | 1.065111688        | 3                | 3.3227353 |
| <b>Q8BIJ6</b> | <b>SYIM Isoleucyl_tRNA synthetase_mitochondrial</b>          | <b>1.118719705</b> | <b>0.9991358</b> | <b>2</b>  |
| Q8BIJ6        | DTVLLPQTSFPMK                                                | 1.017683817        | 1                | 2.152585  |
| Q8BIJ6        | SCQTALAEILDVLR                                               | 1.072689578        | 3                | 3.8201623 |
| <b>Q8BJ64</b> | <b>CHDH Choline dehydrogenase_mitochondrial</b>              | <b>1.041810478</b> | <b>1</b>         | <b>9</b>  |
| Q8BJ64        | ADSAYHPSCTCK                                                 | 1.032187488        | 2                | 3.8089335 |
| Q8BJ64        | AEVQTLVSR                                                    | 1.144403132        | 2                | 2.7560816 |
| Q8BJ64        | ELQPGSHVQSDK                                                 | 0.974942516        | 2                | 3.1540079 |

|               |                                                                   |                    |                  |           |
|---------------|-------------------------------------------------------------------|--------------------|------------------|-----------|
| Q8BJ64        | ELQPGSHVQSDKEIDAFVR                                               | 1.078665526        | 2                | 3.9696624 |
| Q8BJ64        | GGDGPLHVSR                                                        | 1.058885212        | 2                | 2.4532909 |
| Q8BJ64        | SRPGVPHPDIQFHFLPSQVIDHGR                                          | 1.197367714        | 5                | 5.5055094 |
| Q8BJ64        | TNHPLHQAFLOAAR                                                    | 1.028812803        | 3                | 4.5605912 |
| Q8BJ64        | VIGVENLR                                                          | 1.002309947        | 2                | 2.726027  |
| Q8BJ64        | VLLLEAGPK                                                         | 1.079919563        | 2                | 2.6687427 |
| <b>Q8BL66</b> | <b>EEA1 Early endosome antigen 1</b>                              | <b>1.022553773</b> | <b>0.7872394</b> | <b>2</b>  |
| Q8BL66        | AAVLDLEK                                                          | 0.926934442        | 1                | 1.9837062 |
| Q8BL66        | IQAGEGETAVLNQLQEK                                                 | 1.041366681        | 2                | 3.3208907 |
| <b>Q8BP47</b> | <b>SYNC Asparaginyl_tRNA synthetase_ cytoplasmic</b>              | <b>1.024837537</b> | <b>0.9999972</b> | <b>3</b>  |
| Q8BP47        | KEDGTFYEFGDDIPEAPER                                               | 0.987437226        | 2                | 3.9549878 |
| Q8BP47        | LMTDTINEPILLCR                                                    | 1.015457375        | 2                | 3.1883361 |
| Q8BP47        | LTESVDVLPNVGEIVGGSMR                                              | 1.018744047        | 2                | 2.6979003 |
| <b>Q8BTM8</b> | <b>FLNA Filamin_A</b>                                             | <b>0.945008027</b> | <b>0.9740865</b> | <b>5</b>  |
| Q8BTM8        | AFGPGQLQGGNAGSPAR                                                 | 1.061518552        | 2                | 3.0745773 |
| Q8BTM8        | ALGALVDSCAPGLCPDWDSDASKPVNNAR                                     | 1.062049732        | 3                | 4.8950515 |
| Q8BTM8        | ANLPQSFQVDTSK                                                     | 0.944994323        | 2                | 2.5739169 |
| Q8BTM8        | GAGTGGLGLAVEGPSEAK                                                | 0.99051768         | 2                | 3.530129  |
| Q8BTM8        | GLVEPVDVVDNADGTQTVNYVPSR                                          | 0.655698069        | 2                | 5.5166144 |
| <b>Q8BTZ7</b> | <b>GMPPB Mannose_1_phosphate guanyltransferase beta</b>           | <b>1.146181987</b> | <b>0.8120959</b> | <b>2</b>  |
| Q8BTZ7        | HHGQEGSILVTK                                                      | 1.13747527         | 3                | 3.5708601 |
| Q8BTZ7        | IGQNCSIGPNVSLGPGVVVEDGVCIR                                        | 1.045965459        | 2                | 2.741019  |
| <b>Q8BU33</b> | <b>ILVBL Acetolactate synthase_like protein</b>                   | <b>1.12561164</b>  | <b>0.2862477</b> | <b>4</b>  |
| Q8BU33        | AAVETLGVPCFLGGMSR                                                 | 0.716646339        | 2                | 3.2877152 |
| Q8BU33        | LPNSLMGR+Oxidation(6)                                             | 1.120610604        | 2                | 2.3486593 |
| Q8BU33        | LTGTVGVAAVTAGPGLTNTVTAVK                                          | 1.257921007        | 2                | 3.1585479 |
| Q8BU33        | NAQVAQSPVLLLGGAASLLQK                                             | 1.078355226        | 2                | 4.930418  |
| <b>Q8BWQ1</b> | <b>UD2A3 UDP_glucuronosyltransferase 2A3</b>                      | <b>1.107777383</b> | <b>0.0004817</b> | <b>2</b>  |
| Q8BWQ1        | ADIWLIR                                                           | 1.069204141        | 1                | 1.957116  |
| Q8BWQ1        | IHHDQPVKPLDR                                                      | 1.319673392        | 3                | 3.7586493 |
| <b>Q8BX70</b> | <b>VP13C Vacuolar protein sorting_associated protein 13C</b>      | <b>1.157435744</b> | <b>0.5262562</b> | <b>2</b>  |
| Q8BX70        | ENALSELDVPFKVK                                                    | 1.071201677        | 2                | 3.041532  |
| Q8BX70        | TVLQADSPQHDEILKPVNMLLCIQR+Oxidation(20)                           | 1.133847006        | 2                | 2.4807034 |
| <b>Q8BZ81</b> | <b>LRRT3 Leucine_rich repeat transmembrane neuronal protein 3</b> | <b>0.995268415</b> | <b>0.9102668</b> | <b>2</b>  |
| Q8BZ81        | GLRENTIICASPK                                                     | 0.887528222        | 1                | 1.9436421 |
| Q8BZ81        | YPASMKQLQQR+Oxidation(5)                                          | 0.995269087        | 2                | 2.5831022 |
| <b>Q8BZN6</b> | <b>DOC10 Dedicator of cytokinesis protein 10</b>                  | <b>0.900846143</b> | <b>0.6126224</b> | <b>2</b>  |
| Q8BZN6        | IIQDSNKVNP                                                        | 0.899922528        | 2                | 2.585124  |
| Q8BZN6        | LTQMEASALLYFFMRK+Oxidation(14)                                    | 1.118544273        | 2                | 2.3823795 |
| <b>Q8C547</b> | <b>HTR5B HEAT repeat_containing protein 5B</b>                    | <b>1.093755937</b> | <b>0.0984127</b> | <b>2</b>  |
| Q8C547        | MVVSIAEDLLR+Oxidation(1)                                          | 1.493087167        | 2                | 2.3093512 |
| Q8C547        | SAESQGRSEILMSLQK                                                  | 1.084018733        | 2                | 2.3302369 |
| <b>Q8C7R4</b> | <b>UBA6 Ubiquitin_like modifier_activating enzyme 6</b>           | <b>1.245838562</b> | <b>0.2701685</b> | <b>2</b>  |
| Q8C7R4        | GMVTVTDPDLIEK+Oxidation(2)                                        | 0.628306605        | 1                | 1.9918379 |
| Q8C7R4        | NFALLGVGTGREK                                                     | 1.25313421         | 2                | 2.4189868 |
| <b>Q8C7X2</b> | <b>K0090 Uncharacterized protein KIAA0090</b>                     | <b>1.325821612</b> | <b>0.0296084</b> | <b>2</b>  |
| Q8C7X2        | FNVEDGEIVQQVR                                                     | 1.300454205        | 2                | 4.066556  |
| Q8C7X2        | VMGDRSVLYK+Oxidation(2)                                           | 1.326412938        | 2                | 2.539274  |
| <b>Q8CC88</b> | <b>K0564 Uncharacterized protein KIAA0564 homolog</b>             | <b>1.164918037</b> | <b>0.1029958</b> | <b>4</b>  |
| Q8CC88        | FLPSLAQSALEK                                                      | 1.025861663        | 2                | 2.5120561 |
| Q8CC88        | HQATGELDDAK                                                       | 1.167825673        | 2                | 3.0807526 |
| Q8CC88        | LQLTDEQLQNR                                                       | 1.050323534        | 2                | 2.3874624 |
| Q8CC88        | VSSDQLSSENLTSAVGQK                                                | 1.071423828        | 2                | 3.7053587 |
| <b>Q8CCF0</b> | <b>PRP31 U4/U6 small nuclear ribonucleoprotein Prp31</b>          | <b>1.109139887</b> | <b>0.8097948</b> | <b>2</b>  |

|               |                                                             |                    |                  |           |
|---------------|-------------------------------------------------------------|--------------------|------------------|-----------|
| Q8CCF0        | ERLGLTEIR                                                   | 1.061343483        | 2                | 2.4797504 |
| Q8CCF0        | YFSSMAEFLKVK                                                | 1.177269082        | 1                | 2.0522153 |
| <b>Q8CDI6</b> | <b>CD158 Coiled_coil domain_containing protein 158</b>      | <b>0.989360871</b> | <b>0.0141412</b> | <b>2</b>  |
| Q8CDI6        | EKVANMEVALDK+Oxidation(6)                                   | 0.989403614        | 2                | 2.6188688 |
| Q8CDI6        | ELDRNMEVQRLEALLK                                            | 0.626211916        | 2                | 2.3591464 |
| <b>Q8CDI7</b> | <b>CC150 Coiled_coil domain_containing protein 150</b>      | <b>1.252288346</b> | <b>0.797425</b>  | <b>2</b>  |
| Q8CDI7        | EDNRKLAMSLEQALQTNGHLQSK                                     | 99999.9            | 2                | 2.3477485 |
| Q8CDI7        | MNIFHLQTEKESNPQK+Oxidation(1)                               | 1.252288021        | 2                | 2.5895755 |
| <b>Q8CDM4</b> | <b>CCD73 Coiled_coil domain_containing protein 73</b>       | <b>1.104930282</b> | <b>0.9342718</b> | <b>2</b>  |
| Q8CDM4        | MEEESIDLIK                                                  | 1.120870547        | 2                | 2.3098326 |
| Q8CDM4        | VTCQHKMEEESIDLIK                                            | 1.090860685        | 2                | 2.5126624 |
| <b>Q8CFN2</b> | <b>CDC42 Cell division control protein 42 homolog</b>       | <b>1.213270386</b> | <b>0.2568036</b> | <b>3</b>  |
| Q8CFN2        | DDPSTIEK                                                    | 1.209663377        | 1                | 2.0900176 |
| Q8CFN2        | NVFDEAILAALEPPPEK                                           | 1.258175377        | 3                | 4.8558631 |
| Q8CFN2        | YVECSALTQK                                                  | 1.138178022        | 2                | 3.1282015 |
| <b>Q8CG45</b> | <b>ARK72 Aflatoxin B1 aldehyde reductase member 2</b>       | <b>1.169138142</b> | <b>0.0424938</b> | <b>9</b>  |
| Q8CG45        | AVSGAPLRPGTVLGTMEMGR                                        | 1.081798297        | 3                | 3.4997029 |
| Q8CG45        | EHHFEAIALVEK                                                | 1.007486384        | 2                | 2.9375756 |
| Q8CG45        | FFGNSWSETYR                                                 | 1.311792301        | 2                | 2.6262951 |
| Q8CG45        | FYAYNPLAGLLTGK                                              | 1.497645726        | 2                | 4.1130834 |
| Q8CG45        | MDASASAATVR                                                 | 0.953563509        | 2                | 3.4390619 |
| Q8CG45        | RMDASASAATVR                                                | 1.011655345        | 2                | 2.9067247 |
| Q8CG45        | TTYGTSAPSMTSAALR                                            | 1.175519527        | 2                | 3.9899712 |
| Q8CG45        | VDLFYLHAPDHGTPIVETLQACQQLHQEGK                              | 1.617750521        | 3                | 5.4829626 |
| Q8CG45        | WMYHHSQLQGTR                                                | 1.398730768        | 2                | 3.1311963 |
| <b>Q8CG48</b> | <b>SMC2 Structural maintenance of chromosomes protein 2</b> | <b>1.295093489</b> | <b>0.4809205</b> | <b>2</b>  |
| Q8CG48        | EEKLLEK                                                     | 1.162721296        | 1                | 1.9820374 |
| Q8CG48        | KIKALNCEIEELER                                              | 1.231150022        | 2                | 2.402894  |
| <b>Q8CGC7</b> | <b>SYEP Bifunctional aminoacyl_tRNA synthetase</b>          | <b>0.818062674</b> | <b>1.443E-15</b> | <b>8</b>  |
| Q8CGC7        | AIQGATSHHLGQNFSK                                            | 1.357603904        | 2                | 4.5408731 |
| Q8CGC7        | DQDVEPGAPSMGAK                                              | 0.817338675        | 2                | 2.9862609 |
| Q8CGC7        | GDVSVISVEEGKENLLR                                           | 1.173477467        | 2                | 3.4916413 |
| Q8CGC7        | GSQFGQSCCLR                                                 | 1.078544402        | 2                | 2.7969527 |
| Q8CGC7        | KEENLAEWYSQVITK                                             | 0.933119891        | 2                | 3.8388238 |
| Q8CGC7        | SLCIPFNPLCELQPGAMCVCGK                                      | 1.294417133        | 2                | 4.3300328 |
| Q8CGC7        | SQGSGLSSGGAGEGQPK                                           | 1.085854049        | 2                | 4.6801734 |
| Q8CGC7        | TELAEPPIAIRPTSETVMYPAYAK                                    | 0.674297114        | 2                | 3.1931648 |
| <b>Q8CGN4</b> | <b>BCOR BCL_6 corepressor</b>                               | <b>1.272426989</b> | <b>0.1219185</b> | <b>2</b>  |
| Q8CGN4        | FLTDYLNLDLQGR                                               | 1.307026851        | 1                | 2.1676986 |
| Q8CGN4        | KQTQPSTPASRLPAK                                             | 1.216436352        | 2                | 2.329607  |
| <b>Q8CHB8</b> | <b>TTL5 Tubulin polyglutamylase TTL5</b>                    | <b>1.215423709</b> | <b>0.0739793</b> | <b>2</b>  |
| Q8CHB8        | ASSNLQHSLRMVLPSP+Oxidation(11)                              | 1.145208072        | 2                | 2.621778  |
| Q8CHB8        | ISSATTGGQKPNTLPQK                                           | 1.402973422        | 2                | 2.3289547 |
| <b>Q8CHM7</b> | <b>HACL1 2_hydroxyacyl_CoA lyase 1</b>                      | <b>1.807057929</b> | <b>4.369E-06</b> | <b>7</b>  |
| Q8CHM7        | DTSKPCLINIMIEPQSTR                                          | 0.718980298        | 2                | 3.2151988 |
| Q8CHM7        | GVVPDNHPNCVGAAR                                             | 1.215142469        | 2                | 3.4417977 |
| Q8CHM7        | GYFVQTPEELQDSLRL                                            | 1.096891917        | 2                | 3.4813838 |
| Q8CHM7        | LVELCNLPLPPTPMGK                                            | 1.854350492        | 2                | 4.4029675 |
| Q8CHM7        | NCFIVSEGANTMDIGR                                            | 1.236071348        | 2                | 4.6992478 |
| Q8CHM7        | NQEAMGAFQEFPPQVEACR                                         | 1.063221325        | 2                | 6.068604  |
| Q8CHM7        | SSYGRPGACYIDVPADLVTLQESTTSIK                                | 0.526414574        | 3                | 4.6668305 |
| <b>Q8CIB5</b> | <b>FERM2 Fermitin family homolog 2</b>                      | <b>0.865009959</b> | <b>0.003254</b>  | <b>2</b>  |
| Q8CIB5        | GCEVTPDVNISGQK                                              | 1.101933927        | 2                | 2.9265735 |
| Q8CIB5        | TSTILGDITSIPELADYIK                                         | 1.216333685        | 2                | 3.6372271 |
| <b>Q8CIE6</b> | <b>COPA Coatomer subunit alpha</b>                          | <b>0.952079876</b> | <b>0.7613379</b> | <b>11</b> |
| Q8CIE6        | ASNLENSTYDLYTIPIK                                           | 1.272951424        | 2                | 3.1571333 |

|               |                                                                    |                    |                  |           |
|---------------|--------------------------------------------------------------------|--------------------|------------------|-----------|
| Q8CIE6        | DADSQNPDAPEGK                                                      | 0.947590353        | 2                | 3.849973  |
| Q8CIE6        | GITGVDLFGTTDAVVK                                                   | 0.995434789        | 2                | 3.8154333 |
| Q8CIE6        | GTSPTQIWCNNSQLPVDHILAGSFETAMR                                      | 1.155234571        | 3                | 3.8917441 |
| Q8CIE6        | GVNWAAFHPTMPLIVSGADDR                                              | 1.100243039        | 3                | 3.6535821 |
| Q8CIE6        | KKNLSPGAVESDVR                                                     | 0.825256378        | 2                | 2.343878  |
| Q8CIE6        | LLELGPKEVAQQTR                                                     | 1.346766615        | 2                | 2.5798352 |
| Q8CIE6        | QQPLFVSGDDYK                                                       | 0.998018509        | 2                | 2.3963275 |
| Q8CIE6        | SILLSVPLLVDNK                                                      | 1.26289583         | 2                | 3.0483823 |
| Q8CIE6        | SSGLTAVVVAR                                                        | 1.313145514        | 2                | 2.6643381 |
| Q8CIE6        | TLDLPIYVTR                                                         | 1.044044375        | 2                | 2.4006286 |
| <b>Q8CJF7</b> | <b>ELYS Protein ELYS</b>                                           | <b>1.056478181</b> | <b>0.442756</b>  | <b>2</b>  |
| Q8CJF7        | QNSNRVNIPELLK                                                      | 0.975087276        | 2                | 2.66119   |
| Q8CJF7        | SVENQSTEILDDLK                                                     | 1.146104747        | 2                | 2.6358826 |
| <b>Q8JZN5</b> | <b>ACAD9 Acyl_CoA dehydrogenase family member 9_ mitochondrial</b> | <b>0.993619613</b> | <b>0.9868357</b> | <b>3</b>  |
| Q8JZN5        | GIILVGNEEQK                                                        | 0.999596266        | 2                | 2.7171786 |
| Q8JZN5        | GSNTCEVHFENTR                                                      | 1.072644879        | 2                | 4.03122   |
| Q8JZN5        | SGNVTTVMETIGR                                                      | 0.958610576        | 2                | 3.4054172 |
| <b>Q8K009</b> | <b>AL1L2 Mitochondrial 10_formyltetrahydrofolate dehydrogenase</b> | <b>1.084448576</b> | <b>0.0284571</b> | <b>16</b> |
| Q8K009        | AGFSVFWADDGLDTPILLQR                                               | 1.12363274         | 2                | 4.6411209 |
| Q8K009        | AMVEAVQLIADGK                                                      | 0.885756343        | 2                | 3.9563348 |
| Q8K009        | ANNTEYGLASGVFTR                                                    | 0.935065711        | 2                | 4.4328394 |
| Q8K009        | DLGEEALNEYLK                                                       | 1.68333773         | 2                | 3.6514719 |
| Q8K009        | EESFGPIMVISK                                                       | 0.883991591        | 2                | 2.831003  |
| Q8K009        | FLFPEGIK                                                           | 0.988857892        | 2                | 2.3167067 |
| Q8K009        | FQNGDIDGVLQR                                                       | 0.902228839        | 2                | 2.8588171 |
| Q8K009        | GVINIIPGSGGVAGQR                                                   | 0.967344416        | 2                | 3.8122678 |
| Q8K009        | HGSIIYHPSSLPR                                                      | 1.300311398        | 2                | 4.3967705 |
| Q8K009        | KLGFSTGTSVKG                                                       | 0.644295578        | 2                | 2.4347274 |
| Q8K009        | KVSLELGK                                                           | 1.537677322        | 1                | 2.1302054 |
| Q8K009        | NLQFEDGK                                                           | 0.996436332        | 1                | 2.044055  |
| Q8K009        | SAACLAAGNTLVLPKPAQVPTLTK                                           | 1.140902521        | 2                | 4.036366  |
| Q8K009        | SCDVKPNDTVDSLNR                                                    | 0.961536096        | 2                | 3.9177341 |
| Q8K009        | VVGVFVTPDKDGK                                                      | 1.015460287        | 2                | 3.3250732 |
| Q8K009        | YFAGWCDK                                                           | 1.220696731        | 1                | 2.0912998 |
| <b>Q8K442</b> | <b>ABC8A ATP_binding cassette sub_family A member 8_A</b>          | <b>0.939023509</b> | <b>0.8229481</b> | <b>5</b>  |
| Q8K442        | GQITAILGHSGAGK                                                     | 0.987481421        | 2                | 3.4424121 |
| Q8K442        | IDDFIHSLEQQNIALEVDFAFGTR                                           | 0.863843782        | 3                | 4.2604661 |
| Q8K442        | LTGVCPQCNVQDFLTVR                                                  | 1.223680937        | 2                | 3.2741537 |
| Q8K442        | NTQNILVQNLGGQK                                                     | 1.077357415        | 2                | 2.9432619 |
| Q8K442        | STLLNVLSGLCVPTK                                                    | 0.990011383        | 2                | 3.2393525 |
| <b>Q8K4C0</b> | <b>FMO5 Dimethylaniline monooxygenase [N_oxide_forming] 5</b>      | <b>0.975286586</b> | <b>0.3328159</b> | <b>10</b> |
| Q8K4C0        | CLEEGLEPVCFER                                                      | 0.949550296        | 2                | 4.2311172 |
| Q8K4C0        | EYKNPVEFTGK                                                        | 0.936185516        | 2                | 2.3734105 |
| Q8K4C0        | FDHEMFGLPKP                                                        | 1.101542149        | 2                | 3.1856842 |
| Q8K4C0        | GYPIDILLSSR                                                        | 1.254490303        | 2                | 3.05808   |
| Q8K4C0        | HSALGQHPTINDDLPNR                                                  | 1.0117609          | 2                | 4.5040808 |
| Q8K4C0        | IAVISGASGLTCIK                                                     | 1.617158084        | 2                | 3.711714  |
| Q8K4C0        | KLPSQSEMMAEINK                                                     | 0.967056394        | 2                | 4.1704321 |
| Q8K4C0        | KQPDFSTSGWQVQVTEHEGK                                               | 0.943899968        | 3                | 4.5909362 |
| Q8K4C0        | KTILTTEDR                                                          | 1.002781974        | 2                | 2.7000976 |
| Q8K4C0        | SDDIGGLWR                                                          | 0.939336242        | 2                | 2.92857   |
| <b>Q8K4G6</b> | <b>MACD1 MACRO domain_containing protein 1 (Fragment)</b>          | <b>0.994607812</b> | <b>0.0164927</b> | <b>3</b>  |

|               |                                                                     |                    |                  |           |
|---------------|---------------------------------------------------------------------|--------------------|------------------|-----------|
| Q8K4G6        | AAGSLTDECR                                                          | 0.647456009        | 2                | 3.0696788 |
| Q8K4G6        | HVIHTVGPVAVGQPTASQAAELR                                             | 0.994570756        | 3                | 5.0961666 |
| Q8K4G6        | SCYLSLDLLEHR                                                        | 1.123246657        | 2                | 3.0649726 |
| <b>Q8K4T4</b> | <b>FLIP1 Filamin_A_interacting protein 1</b>                        | <b>1.345264564</b> | <b>0.1105216</b> | <b>3</b>  |
| Q8K4T4        | EVLNLTK                                                             | 1.368210661        | 1                | 2.0564449 |
| Q8K4T4        | IEEEETNKSLQK                                                        | 1.037073365        | 2                | 2.4091218 |
| Q8K4T4        | SSIISDGGKGPSEDAKK                                                   | 1.413800425        | 2                | 2.4481001 |
| <b>Q8K4Z3</b> | <b>AIBP Apolipoprotein A_I_binding protein</b>                      | <b>0.936708031</b> | <b>0.2506864</b> | <b>3</b>  |
| Q8K4Z3        | GNPSGIQPDLLISLTAPK                                                  | 1.156521672        | 2                | 3.7311606 |
| Q8K4Z3        | LFYQPTIYYPK                                                         | 1.543257526        | 2                | 2.3913291 |
| Q8K4Z3        | SPPTVLVICGPGNNGDGLVCAR                                              | 0.928025751        | 2                | 5.5237694 |
| <b>Q8K586</b> | <b>RANT GTP_binding nuclear protein Ran_testis_specific isoform</b> | <b>1.090937245</b> | <b>0.9232093</b> | <b>4</b>  |
| Q8K586        | FNVWDTAGQEK                                                         | 1.053858088        | 2                | 3.2670078 |
| Q8K586        | LVLVGDGGTGK                                                         | 1.171619535        | 2                | 2.3752687 |
| Q8K586        | NLQYYDISAK                                                          | 1.211027701        | 2                | 2.7725482 |
| Q8K586        | VCENIPIVLCGNK                                                       | 1.042382393        | 2                | 4.0648584 |
| <b>Q8QZY1</b> | <b>EIF3L Eukaryotic translation initiation factor 3 subunit L</b>   | <b>0.880891473</b> | <b>0.6173687</b> | <b>2</b>  |
| Q8QZY1        | VFSDEVQQQAQLSTIR                                                    | 0.866352303        | 2                | 4.1369133 |
| Q8QZY1        | VYEIQDIYENSWTK                                                      | 1.082983543        | 2                | 3.8121755 |
| <b>Q8R081</b> | <b>HNRPL Heterogeneous nuclear ribonucleoprotein L</b>              | <b>1.045904967</b> | <b>0.0624948</b> | <b>4</b>  |
| Q8R081        | NDQDTWDYTNPNLSGGDPSNPKNR                                            | 1.064665631        | 3                | 4.6732492 |
| Q8R081        | SDALETLGFLNHQYQMK                                                   | 1.136766603        | 2                | 3.6454678 |
| Q8R081        | SSSGLLEWDSK                                                         | 0.957168307        | 2                | 2.7364769 |
| Q8R081        | TENAGDQHGGGGGGGGAAGGGGGENYDDPHK                                     | 1.245393912        | 3                | 7.0766344 |
| <b>Q8R0F9</b> | <b>S14L4 SEC14_like protein 4</b>                                   | <b>1.232475002</b> | <b>0.3103821</b> | <b>5</b>  |
| Q8R0F9        | FDNTYSLHTK                                                          | 1.208437828        | 2                | 3.2018106 |
| Q8R0F9        | GSSHQVENEILFPGCVLR                                                  | 0.890845811        | 2                | 5.2003083 |
| Q8R0F9        | VCEMLLHECELQSQK                                                     | 1.316657294        | 2                | 4.9356971 |
| Q8R0F9        | VGYTAEVLLPDK                                                        | 0.797392053        | 2                | 2.5964363 |
| Q8R0F9        | VGYTAEVLLPDKACEEK                                                   | 0.980956128        | 2                | 2.4113433 |
| <b>Q8R164</b> | <b>BPHL Valacyclovir hydrolase</b>                                  | <b>1.152971197</b> | <b>0.9024161</b> | <b>3</b>  |
| Q8R164        | FTLVAWDPR                                                           | 1.133313869        | 2                | 2.514173  |
| Q8R164        | QVSLLGWSDGGITALIAAAK                                                | 1.142433388        | 2                | 3.9415998 |
| Q8R164        | TDFAPQLQLNKN                                                        | 0.95733799         | 2                | 3.8031793 |
| <b>Q8R1V4</b> | <b>TMED4 Transmembrane emp24 domain_containing protein 4</b>        | <b>1.163453599</b> | <b>0.9383064</b> | <b>2</b>  |
| Q8R1V4        | CFIEEIPDETMVIGNYR                                                   | 0.911013585        | 2                | 3.5807428 |
| Q8R1V4        | QLLDQVEQIQK                                                         | 1.185201104        | 2                | 3.4057989 |
| <b>Q8R2H4</b> | <b>KLH12 Kelch_like protein 12</b>                                  | <b>0.404061504</b> | <b>0.0263236</b> | <b>2</b>  |
| Q8R2H4        | DIMTNTHAKSILNSMNSLR+Oxidation(15)                                   | 0.404061504        | 2                | 2.3959243 |
| Q8R2H4        | DIMTNTHAKSILNSMNSLR+Oxidation(3)                                    | 0.404061504        | 2                | 2.6550591 |
| <b>Q8R3Q6</b> | <b>CCD58 Coiled_coil domain_containing protein 58</b>               | <b>0.858528417</b> | <b>0.487762</b>  | <b>2</b>  |
| Q8R3Q6        | IVHELNTTVPTASFAGK                                                   | 0.821959842        | 2                | 3.6929128 |
| Q8R3Q6        | NCIAQTSAVVK                                                         | 0.858813464        | 2                | 3.0038707 |
| <b>Q8R491</b> | <b>EHD3 EH domain_containing protein 3</b>                          | <b>1.006788924</b> | <b>0.9527801</b> | <b>3</b>  |
| Q8R491        | ADQIETQLLMR                                                         | 1.07636216         | 2                | 3.0819783 |
| Q8R491        | LFEAEEQDLFK                                                         | 0.85507842         | 2                | 3.3722477 |
| Q8R491        | MQDQLQAQDFSK                                                        | 1.047157509        | 2                | 3.6417348 |
| <b>Q8R508</b> | <b>FAT3 Protocadherin Fat 3</b>                                     | <b>0.895441478</b> | <b>0.2899356</b> | <b>2</b>  |
| Q8R508        | FFIDPK                                                              | 0.844014331        | 2                | 2.3314853 |
| Q8R508        | QVSYHITGGNPR                                                        | 0.897255386        | 2                | 2.5829866 |
| <b>Q8R5M4</b> | <b>OPTN Optineurin</b>                                              | <b>1.034514364</b> | <b>0.6969779</b> | <b>2</b>  |
| Q8R5M4        | LELQVESMRSEIK+Oxidation(8)                                          | 1.12191168         | 2                | 2.4169073 |
| Q8R5M4        | NSATPSELNEK                                                         | 0.814061526        | 1                | 2.1871123 |
| <b>Q8VBU2</b> | <b>NDRG2 Protein NDRG2</b>                                          | <b>1.193950419</b> | <b>0.0871794</b> | <b>3</b>  |

|               |                                                                     |                    |                  |           |
|---------------|---------------------------------------------------------------------|--------------------|------------------|-----------|
| Q8VBU2        | CPVMLVVGDAQPHEDAVVECNSK                                             | 1.171827233        | 2                | 5.8356366 |
| Q8VBU2        | TLSQSSSEGLTLPSPGPPGHTMEVSC                                          | 0.884445667        | 2                | 4.723074  |
| Q8VBU2        | YALNHPDTEGLVLINIDPNAK                                               | 1.378703837        | 2                | 4.6374278 |
| <b>Q8VC12</b> | <b>HUTU Urocanate hydratase</b>                                     | <b>0.992829093</b> | <b>3.596E-10</b> | <b>6</b>  |
| Q8VC12        | HQLVVGSQLR                                                          | 0.899788058        | 2                | 2.9162142 |
| Q8VC12        | LLALEFAQELR                                                         | 1.582800225        | 2                | 4.3032417 |
| Q8VC12        | LVITNGMVIPNYSSR                                                     | 1.028334236        | 2                | 3.5992205 |
| Q8VC12        | MMLSWDVSNQVAR                                                       | 0.844962118        | 2                | 2.4680388 |
| Q8VC12        | VAIAVAIQAIASGK                                                      | 0.874865199        | 2                | 2.6671028 |
| Q8VC12        | VFVTSGLGGMGAQAK                                                     | 0.913845949        | 2                | 4.4639182 |
| <b>Q8VC28</b> | <b>AK1CD Aldo_keto reductase family 1 member C13</b>                | <b>1.499493563</b> | <b>0.0172655</b> | <b>2</b>  |
| Q8VC28        | ILNKPGLK                                                            | 1.361141056        | 1                | 2.0304816 |
| Q8VC28        | YKEWVDQNSPVLNDPVLCDVAK                                              | 1.504118627        | 3                | 4.4174914 |
| <b>Q8VCD5</b> | <b>MED17 Mediator of RNA polymerase II transcription subunit 17</b> | <b>0.919132637</b> | <b>0.9312625</b> | <b>2</b>  |
| Q8VCD5        | EIFAQLSREAVQIK                                                      | 0.912101245        | 1                | 2.0965867 |
| Q8VCD5        | MELLSALSPELL+Oxidation(1)Oxidation(5)                               | 0.962400416        | 2                | 2.5565188 |
| <b>Q8VDC1</b> | <b>FYCO1 FYVE and coiled_coil domain_containing protein 1</b>       | <b>1.114932905</b> | <b>0.1206467</b> | <b>3</b>  |
| Q8VDC1        | GLELQVMQLQKEK                                                       | 1.231557155        | 2                | 2.3960147 |
| Q8VDC1        | MEEALASLAQELQDSK                                                    | 1.413800425        | 2                | 2.4075055 |
| Q8VDC1        | MLVSRQGGQLQVEK+Oxidation(1)                                         | 1.051594547        | 2                | 2.3504796 |
| <b>Q8VDD9</b> | <b>PHIP PH_interacting protein</b>                                  | <b>0.532064309</b> | <b>0.2026016</b> | <b>2</b>  |
| Q8VDD9        | EDLLQK                                                              | 0.597410951        | 1                | 1.9638904 |
| Q8VDD9        | MELREQELMKIVGIK                                                     | 0.531131229        | 2                | 2.4443107 |
| <b>Q8VE11</b> | <b>MTMR6 Myotubularin_related protein 6</b>                         | <b>1.041117441</b> | <b>0.5926424</b> | <b>2</b>  |
| <b>Q8VED5</b> | <b>K2C79 Keratin_type II cytoskeletal 79</b>                        | <b>0.994320439</b> | <b>0.9712071</b> | <b>3</b>  |
| Q8VED5        | NKYEDEINK                                                           | 1.044613708        | 2                | 2.3814685 |
| Q8VED5        | NKYEDEINKR                                                          | 0.984828655        | 3                | 3.4429867 |
| Q8VED5        | YEDEINK                                                             | 1.173983408        | 1                | 2.1781459 |
| <b>Q8VEK3</b> | <b>HNRPU Heterogeneous nuclear ribonucleoprotein U</b>              | <b>1.120514825</b> | <b>0.2165993</b> | <b>10</b> |
| Q8VEK3        | EKPYPPIPEDCTFIQNVPLEDR                                              | 1.098391749        | 3                | 4.948566  |
| Q8VEK3        | GGYSNRGNYNRGGMPNR                                                   | 1.623405226        | 2                | 2.3531098 |
| Q8VEK3        | LLEQYKEESK                                                          | 0.734485916        | 2                | 3.0744493 |
| Q8VEK3        | LLEQYKEESKK                                                         | 1.152560684        | 2                | 3.7361219 |
| Q8VEK3        | LQAALDNEAGGRPAMEPGNSLDLGGDAAGR                                      | 1.108873989        | 3                | 5.0455332 |
| Q8VEK3        | NFIELDQTNVSAQAQR                                                    | 1.146104747        | 2                | 5.0718961 |
| Q8VEK3        | TCNCETEDYGEK                                                        | 1.204359279        | 2                | 3.3513949 |
| Q8VEK3        | VSELKEELK                                                           | 1.096176419        | 2                | 2.6571589 |
| Q8VEK3        | VSELKEELKK                                                          | 1.143078583        | 2                | 2.5410831 |
| Q8VEK3        | YNILGTNTIMDK                                                        | 1.037214163        | 2                | 3.3143268 |
| <b>Q8VHE9</b> | <b>RETST All_trans_retinol 13_14_reductase</b>                      | <b>1.546715639</b> | <b>0.0740386</b> | <b>9</b>  |
| Q8VHE9        | ATVQSVLLDSAGR                                                       | 1.160193304        | 2                | 3.0107505 |
| Q8VHE9        | FLPLPLTQLLNK                                                        | 1.824404977        | 2                | 2.6610534 |
| Q8VHE9        | GATYGADHDLAR                                                        | 1.161012326        | 2                | 3.1118138 |
| Q8VHE9        | NLYSDLQALGSK                                                        | 1.114333416        | 2                | 3.7014759 |
| Q8VHE9        | RPPEPLVTDK                                                          | 1.286581691        | 2                | 3.0134344 |
| Q8VHE9        | RPPEPLVTDKEAR                                                       | 1.197861094        | 3                | 3.8933179 |
| Q8VHE9        | VESVTGGSPLTNQYYLAAHR                                                | 1.295547267        | 2                | 4.0771079 |
| Q8VHE9        | VLVLEQHTK                                                           | 1.203683288        | 2                | 2.3094938 |
| Q8VHE9        | VVAHGVSHAILLK                                                       | 1.089501612        | 2                | 2.8237159 |
| <b>Q8VHF5</b> | <b>CISY Citrate synthase_mitochondrial</b>                          | <b>1.022746002</b> | <b>0.9556749</b> | <b>4</b>  |
| Q8VHF5        | ALGVLAQLIWSR                                                        | 0.976662006        | 2                | 2.7487879 |
| Q8VHF5        | GLVYETSVLDPDEGIR                                                    | 1.094782122        | 2                | 3.507694  |
| Q8VHF5        | GYSIPECQK                                                           | 1.073672133        | 2                | 2.5074832 |
| Q8VHF5        | IVPNILLEQGK                                                         | 1.241829861        | 2                | 2.5616233 |
| <b>Q8VHN7</b> | <b>GPR98 G_protein coupled receptor 98</b>                          | <b>1.024474296</b> | <b>0.6303125</b> | <b>2</b>  |



|               |                                                                   |                    |                  |           |
|---------------|-------------------------------------------------------------------|--------------------|------------------|-----------|
| Q8VHN7        | FIVEEPEFNSVR                                                      | 1.595585754        | 2                | 2.3042033 |
| Q8VHN7        | ITMVASDAPYGR                                                      | 1.02268786         | 2                | 2.6407626 |
| <b>Q8VHT6</b> | <b>AS3MT Arsenite methyltransferase</b>                           | <b>0.999509394</b> | <b>1</b>         | <b>2</b>  |
| Q8VHT6        | SLQNVHEEVISR                                                      | 0.986886326        | 2                | 3.2982857 |
| Q8VHT6        | TSADLQTNACVTPAK                                                   | 1.029222361        | 2                | 3.9777195 |
| <b>Q8VHX6</b> | <b>FLNC Filamin_C</b>                                             | <b>1.06047646</b>  | <b>0.8854124</b> | <b>2</b>  |
| Q8VHX6        | GAGTGGGLGLTVEGPCEAK                                               | 1.061806595        | 2                | 3.8767958 |
| Q8VHX6        | IECDDKGDGSCDVR                                                    | 0.698543484        | 2                | 3.6021242 |
| <b>Q8VI04</b> | <b>ASGL1 L_asparaginase</b>                                       | <b>0.980042584</b> | <b>0.8660032</b> | <b>3</b>  |
| Q8VI04        | GLGGLLINK                                                         | 1.050947694        | 2                | 2.4329054 |
| Q8VI04        | GNLAYATSTGGIVNK                                                   | 0.974860526        | 2                | 4.0688562 |
| Q8VI04        | TVDEAATLALDYMK                                                    | 1.139295017        | 2                | 2.6095495 |
| <b>Q8VID1</b> | <b>DHRS4 Dehydrogenase/reductase SDR family member 4</b>          | <b>1.065240439</b> | <b>0.9360822</b> | <b>4</b>  |
| Q8VID1        | AVATLQGEGLSVTVVCHVGK                                              | 1.141837358        | 2                | 4.5731363 |
| Q8VID1        | LAEDGAHVVISSR                                                     | 1.024503727        | 2                | 3.7078002 |
| Q8VID1        | NFAAELAPK                                                         | 0.869006383        | 2                | 2.3260815 |
| Q8VID1        | VNCLAPGLIK                                                        | 0.894134148        | 2                | 2.4895391 |
| <b>Q8VIF7</b> | <b>SBP1 Selenium_binding protein 1</b>                            | <b>0.798829983</b> | <b>0.0297288</b> | <b>10</b> |
| Q8VIF7        | CGPGYATPLEAMK                                                     | 0.697548222        | 2                | 3.1246333 |
| Q8VIF7        | FLHDPDATQGFVGCALSSNIQR                                            | 0.830538315        | 2                | 4.8265519 |
| Q8VIF7        | GGFVLLDGETFEVK                                                    | 0.851846968        | 2                | 4.2777286 |
| Q8VIF7        | GTWEKPGGEAPMGYDFWYQPR                                             | 0.982447964        | 2                | 3.9007337 |
| Q8VIF7        | HEIIQTLQMK                                                        | 0.82233819         | 2                | 2.7141581 |
| Q8VIF7        | HNIMVSTEWAAPNVFK                                                  | 0.655232613        | 2                | 4.7344127 |
| Q8VIF7        | LTGQFLGGSIVK                                                      | 0.910256443        | 2                | 3.4714067 |
| Q8VIF7        | NEGGTWSVEK                                                        | 0.717286529        | 2                | 2.5344605 |
| Q8VIF7        | NTGIEAPDYLATVDVDPK                                                | 0.774811161        | 2                | 4.6292548 |
| Q8VIF7        | QYDISNPK                                                          | 0.929128527        | 1                | 1.9925004 |
| <b>Q8VIJ6</b> | <b>SFPQ Splicing factor_proline_and glutamine_rich</b>            | <b>0.958011723</b> | <b>0.8684058</b> | <b>2</b>  |
| Q8VIJ6        | FGQGGAGPVGGQGPR                                                   | 0.963752153        | 2                | 3.3135467 |
| Q8VIJ6        | YGEPGEVFINK                                                       | 1.131941153        | 2                | 2.3284075 |
| <b>Q91VA0</b> | <b>ACSM1 Acyl_coenzyme A synthetase ACSM1_mitochondrial</b>       | <b>1.006865202</b> | <b>0.9998031</b> | <b>5</b>  |
| Q91VA0        | AFIVLNPEFLSHDQEQLIK                                               | 1.439319696        | 2                | 5.4578886 |
| Q91VA0        | AILPFDLQIIDEK                                                     | 1.072565412        | 2                | 4.2004938 |
| Q91VA0        | GNILPPNTEGYIGIR                                                   | 1.019690629        | 2                | 3.1621025 |
| Q91VA0        | HNQGLAFR                                                          | 0.874412447        | 2                | 2.5338156 |
| Q91VA0        | KVEFVSELPK                                                        | 0.984036804        | 3                | 3.4072533 |
| <b>Q91VM9</b> | <b>IPYR2 Inorganic pyrophosphatase 2_mitochondrial</b>            | <b>0.837605453</b> | <b>0.882766</b>  | <b>2</b>  |
| Q91VM9        | IIAINVNDPEAEK                                                     | 0.884104698        | 2                | 2.9748034 |
| Q91VM9        | MEIATEEPLNPIK                                                     | 0.789518961        | 2                | 4.0878882 |
| <b>Q91W43</b> | <b>GCSP Glycine dehydrogenase [decarboxylating]_mitochondrial</b> | <b>0.881196511</b> | <b>0.9298269</b> | <b>3</b>  |
| Q91W43        | EMLQALGLASIDELIEK                                                 | 0.823939483        | 2                | 2.4842672 |
| Q91W43        | NLLENSGWVTQYTPYQPEVSQGR                                           | 1.087469288        | 2                | 4.2445221 |
| Q91W43        | VSFQPNSGAQGEYAGLATIR                                              | 0.880946272        | 2                | 5.0619078 |
| <b>Q91W90</b> | <b>TXND5 Thioredoxin domain_containing protein 5</b>              | <b>1.125682516</b> | <b>0.6711742</b> | <b>2</b>  |
| Q91W90        | SFEDTIAQGITVK                                                     | 1.040714703        | 2                | 2.6671584 |
| Q91W90        | VDCTQHYAVCSEHQVR                                                  | 1.126805629        | 3                | 4.7359447 |
| <b>Q91X77</b> | <b>CY250 Cytochrome P450 2C50</b>                                 | <b>1.035490071</b> | <b>0.9849448</b> | <b>4</b>  |
| Q91X77        | EHEESLDVTIPR                                                      | 0.918687564        | 2                | 2.4604688 |
| Q91X77        | IKEHEESLDVTIPR                                                    | 1.023457014        | 2                | 3.7510283 |
| Q91X77        | NFLLEK                                                            | 1.119967469        | 1                | 2.0865474 |
| Q91X77        | YALLLLLK                                                          | 1.274741998        | 2                | 2.6842859 |
| <b>Q91X78</b> | <b>ERLN1 Erlin_1</b>                                              | <b>1.027835157</b> | <b>0.0719891</b> | <b>2</b>  |
| Q91X78        | ISEIEDAAFLAR                                                      | 0.92811894         | 2                | 2.7967987 |

|               |                                                                           |                    |                  |           |
|---------------|---------------------------------------------------------------------------|--------------------|------------------|-----------|
| Q91X78        | SVQTTLQTDEVK                                                              | 1.376694175        | 2                | 2.9312723 |
| <b>Q91Y81</b> | <b>SEPT2 Septin 2</b>                                                     | <b>1.118189669</b> | <b>0.5674749</b> | <b>4</b>  |
| Q91Y81        | ASIPFSVVGSNQLIEAK                                                         | 0.950264171        | 2                | 3.1613903 |
| Q91Y81        | ILDEIEEHSIK                                                               | 0.835447108        | 2                | 2.8962536 |
| Q91Y81        | LTVVDTPGYGDAINSR                                                          | 1.149660852        | 2                | 3.9230528 |
| Q91Y81        | STLINSFLTDLYPER                                                           | 1.155711292        | 2                | 2.7581091 |
| <b>Q91YT0</b> | <b>NDUV1 NADH dehydrogenase [ubiquinone] flavoprotein 1_mitochondrial</b> | <b>0.919294979</b> | <b>0.3956687</b> | <b>8</b>  |
| Q91YT0        | GAGAYICGEETALIESIEGK                                                      | 1.142069508        | 2                | 4.3968887 |
| Q91YT0        | GDARPAEIDSLWEISK                                                          | 0.978033071        | 3                | 3.7081583 |
| Q91YT0        | GEFYNEASNQVAIR                                                            | 1.076268404        | 2                | 3.4046121 |
| Q91YT0        | GGAGFPTGLK                                                                | 1.086952697        | 2                | 2.3387012 |
| Q91YT0        | KTSFGSLKDEDR                                                              | 1.232384977        | 2                | 2.8483126 |
| Q91YT0        | LKPPFPADVGVFGCPTTVANVETVAVSPTICR                                          | 1.361585225        | 3                | 4.7324619 |
| Q91YT0        | LVEGCLVGGRR                                                               | 0.917431063        | 2                | 2.7964101 |
| Q91YT0        | YLVVNADEGEPGTCK                                                           | 1.113102751        | 2                | 5.2112508 |
| <b>Q91Z53</b> | <b>GRHPR Glyoxylate reductase/hydroxypyruvate reductase</b>               | <b>1.255342918</b> | <b>9.9E-20</b>   | <b>6</b>  |
| Q91Z53        | GDVVNQEDLYQALASGQIAAAGLDVTTPELPPSHPLTLK                                   | 1.366763755        | 3                | 6.9136453 |
| Q91Z53        | LLDAAGANLR                                                                | 1.258495755        | 2                | 2.5159602 |
| Q91Z53        | NCVILPHIGSATYK                                                            | 1.09496404         | 2                | 3.5834281 |
| Q91Z53        | NTMSLLAANNLLAGLR                                                          | 0.9220346          | 2                | 4.772294  |
| Q91Z53        | RLPEAIEEVK                                                                | 1.119490384        | 2                | 2.7849946 |
| Q91Z53        | VISTLSVGVVDHLALDEIK                                                       | 1.66117654         | 2                | 4.1307306 |
| <b>Q91ZJ5</b> | <b>UGPA UTP__glucose_1_phosphate uridylyltransferase</b>                  | <b>1.099322511</b> | <b>1.11E-16</b>  | <b>16</b> |
| Q91ZJ5        | AMSQDGASQFQEVILQELELSVK                                                   | 1.155600917        | 3                | 4.9765611 |
| Q91ZJ5        | EFPTVPLVK                                                                 | 1.097099253        | 1                | 2.0429416 |
| Q91ZJ5        | FVQDLSK                                                                   | 1.157941222        | 1                | 1.9363024 |
| Q91ZJ5        | GGTLTQYEGK                                                                | 1.071974562        | 2                | 2.6701472 |
| Q91ZJ5        | GLPDNISSVLNK                                                              | 1.037820696        | 2                | 3.3069055 |
| Q91ZJ5        | GTVIIIANHGDR                                                              | 1.110129961        | 2                | 3.0970294 |
| Q91ZJ5        | IDIPPGAVLENK                                                              | 1.12761745         | 2                | 3.0295796 |
| Q91ZJ5        | IQRPPEDSIQPYEK                                                            | 1.207421543        | 3                | 4.5876174 |
| Q91ZJ5        | LNGGLGTSMGCK                                                              | 1.2439691          | 2                | 3.2515879 |
| Q91ZJ5        | LQEQNAIDMEIIVNPK                                                          | 0.978525599        | 2                | 4.1927853 |
| Q91ZJ5        | LVEIAQVPK                                                                 | 1.101811748        | 2                | 2.4613247 |
| Q91ZJ5        | NENTFLDLTVQQIEHLNK                                                        | 1.372573677        | 2                | 5.0860171 |
| Q91ZJ5        | RFESIPDMLELDHLTVSGDVTFGK                                                  | 1.114568963        | 3                | 4.5666289 |
| Q91ZJ5        | SFENSLGINVPR                                                              | 1.062959457        | 2                | 3.4593301 |
| Q91ZJ5        | TLDGGLNVIQLETAVGAAIK                                                      | 1.005168007        | 2                | 5.4114976 |
| Q91ZJ5        | TYNTDVPLVLMNSFNTDEDTKK                                                    | 1.397246475        | 2                | 4.5373397 |
| <b>Q91ZU6</b> | <b>DYST Dystonin</b>                                                      | <b>1.468563185</b> | <b>0.0130153</b> | <b>4</b>  |
| Q91ZU6        | LQVEQNK                                                                   | 1.471399488        | 1                | 1.9251529 |
| Q91ZU6        | MMLATEETSPDLIGVKR+Oxidation(1)                                            | 1.586678495        | 2                | 2.5130334 |
| Q91ZU6        | MMLATEETSPDLIGVKR+Oxidation(2)                                            | 1.586678495        | 2                | 2.5131037 |
| Q91ZU6        | SAETNIDQDITNLK                                                            | 1.076026181        | 2                | 2.4329362 |
| <b>Q91ZV0</b> | <b>MIA2 Melanoma inhibitory activity protein 2</b>                        | <b>1.151649369</b> | <b>0.6022527</b> | <b>2</b>  |
| Q91ZV0        | CGDLECETLISRVLALR                                                         | 1.150473372        | 2                | 2.4694326 |
| Q91ZV0        | KMLDQDDIVENDK+Oxidation(2)                                                | 1.149697474        | 2                | 2.4191244 |
| <b>Q91ZX7</b> | <b>LRP1 Prolow_density lipoprotein receptor_related protein 1</b>         | <b>0.965709772</b> | <b>0.9942598</b> | <b>3</b>  |
| Q91ZX7        | GCHVNECLSR                                                                | 0.926251592        | 2                | 2.6799765 |
| Q91ZX7        | MYDAQQQVGTNK                                                              | 0.966298934        | 2                | 4.0943356 |
| Q91ZX7        | VFFTDYGQIPK                                                               | 0.93235577         | 2                | 2.6729174 |
| <b>Q920A6</b> | <b>RISC Retinoid inducible serine carboxypeptidase</b>                    | <b>1.231223109</b> | <b>0.0133801</b> | <b>2</b>  |
| Q920A6        | DLDTVASDMMVLLK                                                            | 1.213973006        | 2                | 2.3894567 |
| Q920A6        | GLAEVSDIAEQVLNAVNK                                                        | 1.188666141        | 3                | 5.8610973 |

|               |                                                                                      |                    |                  |           |
|---------------|--------------------------------------------------------------------------------------|--------------------|------------------|-----------|
| <b>Q920B9</b> | <b>SP16H FACT complex subunit SPT16</b>                                              | <b>1.151993737</b> | <b>0.4857485</b> | <b>2</b>  |
| Q920B9        | EMKIYIDK+Oxidation(2)                                                                | 1.151651891        | 1                | 1.9110484 |
| Q920B9        | ICDVYNSVMDVVKK                                                                       | 1.352106561        | 2                | 2.3290632 |
| <b>Q920D2</b> | <b>DYR Dihydrofolate reductase</b>                                                   | <b>1.33694936</b>  | <b>2.15E-09</b>  | <b>4</b>  |
| Q920D2        | IMQEFESDTFFPEIDLEK                                                                   | 1.536395277        | 2                | 5.0293999 |
| Q920D2        | LIEQPELASK                                                                           | 1.240358621        | 1                | 2.0280252 |
| Q920D2        | LLPEYPGVLSEIQEEK                                                                     | 1.504635794        | 2                | 3.7767909 |
| Q920D2        | NGDLPWPLLR                                                                           | 1.160271657        | 2                | 2.8250375 |
| <b>Q920F5</b> | <b>DCMC Malonyl_CoA decarboxylase_ mitochondrial</b>                                 | <b>1.040929411</b> | <b>0.1493404</b> | <b>3</b>  |
| Q920F5        | EIAEVTGDPVHESLK                                                                      | 1.153339508        | 2                | 2.9823329 |
| Q920F5        | ISECEAVHPVK                                                                          | 0.985195111        | 2                | 3.2347836 |
| Q920F5        | WLLGLLNVQGK                                                                          | 1.593266982        | 2                | 2.3665967 |
| <b>Q920J4</b> | <b>TXNL1 Thioredoxin_like protein 1</b>                                              | <b>1.223359768</b> | <b>0.0245109</b> | <b>2</b>  |
| Q920J4        | AGCECLNESDEHGFNDCLR                                                                  | 1.02149911         | 3                | 3.7946918 |
| Q920J4        | IDQYQGADAVGLEEK                                                                      | 1.183239139        | 2                | 4.5486555 |
| <b>Q920L2</b> | <b>DHSA Succinate dehydrogenase [ubiquinone] flavoprotein subunit_ mitochondrial</b> | <b>1.035560957</b> | <b>0.4097617</b> | <b>20</b> |
| Q920L2        | ACALSIAESCRPGDK                                                                      | 0.997065762        | 2                | 2.3544216 |
| Q920L2        | ACALSIAESCRPGDKVPIIK                                                                 | 1.449281777        | 3                | 3.3442512 |
| Q920L2        | AGLPCQDLEFVQFHPTGIYGAGCLITEGCR                                                       | 1.178799712        | 3                | 4.669755  |
| Q920L2        | ANAGEESVMNLDK                                                                        | 1.004921132        | 2                | 3.6520212 |
| Q920L2        | GEGGILINSQGER                                                                        | 1.05943498         | 2                | 3.5022445 |
| Q920L2        | GVIALCIEDGSIHR                                                                       | 0.960886839        | 2                | 4.0246434 |
| Q920L2        | HTLSYVDTK                                                                            | 1.023615414        | 2                | 2.7425241 |
| Q920L2        | HVNGQDQIVPGLYACGEAACASVHGANKR                                                        | 1.132149837        | 3                | 6.5098844 |
| Q920L2        | IDEYDYSKPIEGQQK                                                                      | 0.985463684        | 2                | 4.4635615 |
| Q920L2        | KHTLSYVDTK                                                                           | 1.329144903        | 2                | 2.3288476 |
| Q920L2        | LGANSLDLVVFR                                                                         | 1.480935355        | 2                | 2.3615785 |
| Q920L2        | NTIIATGGYGR                                                                          | 0.886095267        | 2                | 2.4382315 |
| Q920L2        | SMQSHAAVFR                                                                           | 0.912783084        | 2                | 2.3020694 |
| Q920L2        | TGHSLHLTYGR                                                                          | 0.963845913        | 2                | 3.006804  |
| Q920L2        | TLNEADCATVPPAIR                                                                      | 0.973436061        | 2                | 3.9369938 |
| Q920L2        | TYFSCTSHTSTGDGTAMVTR                                                                 | 1.19929619         | 2                | 5.8208203 |
| Q920L2        | VGSVLQEGCEK                                                                          | 1.033928917        | 2                | 3.6788359 |
| Q920L2        | VSDAISTQYPVVDHEFDVVVGGAGGLR                                                          | 0.958701256        | 3                | 4.4278517 |
| Q920L2        | VSQLYGDLQHLK                                                                         | 1.226447179        | 2                | 3.4814913 |
| Q920L2        | VTLDYRVIDK                                                                           | 1.04946376         | 2                | 3.1331117 |
| <b>Q920P0</b> | <b>DCXR L_xylulose reductase</b>                                                     | <b>1.161185897</b> | <b>0.5848289</b> | <b>7</b>  |
| Q920P0        | ALTNHTVYCSTK                                                                         | 0.914858508        | 2                | 3.5492773 |
| Q920P0        | AVVQVSQIVAR                                                                          | 1.065616595        | 1                | 2.4604034 |
| Q920P0        | GVPGAIVNVSSQASQR                                                                     | 1.078734267        | 2                | 5.6199903 |
| Q920P0        | SSMTTGSALPVDGGFLAT                                                                   | 1.211196005        | 1                | 2.5556726 |
| Q920P0        | STVLALQAAGAQQVAVSR                                                                   | 1.296217138        | 2                | 3.790535  |
| Q920P0        | TREDLDSLVR                                                                           | 1.168983373        | 2                | 2.938616  |
| Q920P0        | VNAVNPVVMTPMGR                                                                       | 0.617008451        | 2                | 3.2880232 |
| <b>Q920P6</b> | <b>ADA Adenosine deaminase</b>                                                       | <b>1.894937739</b> | <b>0.122463</b>  | <b>2</b>  |
| Q920P6        | FKDDQANYSLNSDDPLIFK                                                                  | 1.321284902        | 2                | 2.6603727 |
| Q920P6        | TVHAGEVGSAAEVVR                                                                      | 2.256560462        | 2                | 3.4567709 |
| <b>Q921F2</b> | <b>TADBP TAR DNA_binding protein 43</b>                                              | <b>1.015035587</b> | <b>0.3000175</b> | <b>4</b>  |
| Q921F2        | FGGNPGGFGNQGGFGNSR                                                                   | 1.090774859        | 2                | 4.1789317 |
| Q921F2        | GISVHISNAEPK                                                                         | 1.100951091        | 2                | 2.5218973 |
| Q921F2        | KDLKTGHSK                                                                            | 0.868974137        | 2                | 2.4724503 |
| Q921F2        | TSDLIVLGLPWK                                                                         | 1.071611118        | 2                | 2.81391   |
| <b>Q922F4</b> | <b>TBB6 Tubulin beta_6 chain</b>                                                     | <b>1.167875055</b> | <b>4.036E-08</b> | <b>7</b>  |
| Q922F4        | ALTVPELTQQMFDKAK                                                                     | 1.187267007        | 2                | 4.0499897 |
| Q922F4        | GHYTEGAELVDSVLDVVR                                                                   | 1.071583546        | 2                | 6.7748833 |
| Q922F4        | IREEYPDR                                                                             | 0.88210723         | 2                | 2.8539424 |

|               |                                                                               |                    |                  |           |
|---------------|-------------------------------------------------------------------------------|--------------------|------------------|-----------|
| Q922F4        | MASTFIGNSTAIQELFK                                                             | 1.506448143        | 2                | 4.4388585 |
| Q922F4        | NMMAACDPR                                                                     | 0.930278934        | 2                | 2.5143671 |
| Q922F4        | NSSYFVEWIPNNVK                                                                | 1.198814227        | 2                | 4.7015953 |
| Q922F4        | YLTVATVFRGPMSSMK+Oxidation(14)                                                | 1.181155215        | 2                | 2.3130534 |
| <b>Q922J3</b> | <b>CLIP1 CAP_Gly domain containing linker protein 1</b>                       | <b>1.13580296</b>  | <b>0.0034582</b> | <b>2</b>  |
| Q922J3        | EMETMQAKLMK+Oxidation(5)                                                      | 1.151119951        | 2                | 2.6398294 |
| Q922J3        | HEEILQNLQKMLADTEDK                                                            | 1.078665526        | 2                | 2.4192717 |
| <b>Q923D2</b> | <b>BLVRB Flavin reductase (NADPH)</b>                                         | <b>1.107689993</b> | <b>0.006845</b>  | <b>3</b>  |
| Q923D2        | LQDVTDDHIR                                                                    | 1.124931666        | 2                | 3.3050942 |
| Q923D2        | TGLTTLAQAVQAGYEVTLVLR                                                         | 1.078796462        | 3                | 4.0117083 |
| Q923D2        | YVAVMPPHIGDQPLTGAYVTLDGR                                                      | 0.97507388         | 3                | 4.0856495 |
| <b>Q923J6</b> | <b>DYH12 Dynein heavy chain 12_axonemal</b>                                   | <b>1.091964594</b> | <b>0.8350369</b> | <b>2</b>  |
| Q923J6        | LEFLTNDLIK                                                                    | 1.080855115        | 1                | 2.0133114 |
| Q923J6        | MSPDNKTAITAEKALNLK                                                            | 1.094651066        | 2                | 2.4659996 |
| <b>Q923K9</b> | <b>A1CF APOBEC1 complementation factor</b>                                    | <b>1.129413389</b> | <b>0.1170429</b> | <b>2</b>  |
| Q923K9        | LAPQILEEICQK                                                                  | 1.299287821        | 2                | 2.4299793 |
| Q923K9        | TGYSLVQENGQR                                                                  | 0.933568254        | 2                | 2.7717183 |
| <b>Q923V8</b> | <b>SEP15 15 kDa selenoprotein</b>                                             | <b>1.099052698</b> | <b>0.7004351</b> | <b>2</b>  |
| Q923V8        | GCCQEEAQFETK                                                                  | 1.088577488        | 2                | 4.1520557 |
| Q923V8        | LLDDNGNIAEELSILK                                                              | 1.226541763        | 2                | 3.6550095 |
| <b>Q924C3</b> | <b>ENPP1 Ectonucleotide pyrophosphatase/phosphodiesterase family member 1</b> | <b>1.07501261</b>  | <b>0.9991947</b> | <b>4</b>  |
| Q924C3        | AEYLHTWGLLPVISK                                                               | 1.034079843        | 3                | 3.6935043 |
| Q924C3        | ELESPAASLLAPMDLGEEPLEK                                                        | 1.064398502        | 2                | 3.4161866 |
| Q924C3        | SGTYFWPGSDVEIDGILPDIYK                                                        | 0.890874835        | 2                | 3.6986001 |
| Q924C3        | SVSSDLGCTCDPSIVPIMDFEK                                                        | 1.117285541        | 2                | 3.2503798 |
| <b>Q924S5</b> | <b>LONM Lon protease homolog_mitochondrial</b>                                | <b>1.018900216</b> | <b>0.2074624</b> | <b>7</b>  |
| Q924S5        | AQSVLEEDHYGMEDVK                                                              | 0.966075804        | 2                | 3.9711514 |
| Q924S5        | FSVGGMTDVAEIK                                                                 | 0.977771271        | 2                | 2.8757157 |
| Q924S5        | HVMDVVDEELSK                                                                  | 1.039615572        | 2                | 3.8248422 |
| Q924S5        | IVSGEAQTVHVTPELQDFVGKPVFTVER                                                  | 1.316495426        | 3                | 6.3934197 |
| Q924S5        | MEMINVSQYVAQEK                                                                | 0.855451662        | 2                | 3.7797143 |
| Q924S5        | QLEVEPEGLEPEAENK                                                              | 0.954479242        | 2                | 4.1632595 |
| Q924S5        | TENPLVLIDEVDK                                                                 | 1.002944482        | 2                | 2.475801  |
| <b>Q924W5</b> | <b>SMC6 Structural maintenance of chromosomes protein 6</b>                   | <b>1.194083061</b> | <b>0.0733597</b> | <b>3</b>  |
| Q924W5        | ELDMKEKELQEK                                                                  | 1.071355334        | 2                | 2.6038089 |
| Q924W5        | MEEQQVRLNDAEKK                                                                | 1.124246102        | 2                | 2.3874383 |
| Q924W5        | TKEQINQGEERLTELK                                                              | 1.352087719        | 2                | 2.561676  |
| <b>Q99020</b> | <b>ROAA Heterogeneous nuclear ribonucleoprotein A/B</b>                       | <b>1.079987668</b> | <b>9.9E-20</b>   | <b>3</b>  |
| Q99020        | EYFGQFGEIEAIELPIDPK                                                           | 1.5207327          | 2                | 4.1187811 |
| Q99020        | FGEVVDCTIK                                                                    | 1.051031492        | 2                | 2.5007083 |
| Q99020        | IFVGGLNPEATEEK                                                                | 1.788005233        | 2                | 3.7533505 |
| <b>Q99J14</b> | <b>PSMD6 26S proteasome non_ATPase regulatory subunit 6</b>                   | <b>1.105433715</b> | <b>0.0166294</b> | <b>3</b>  |
| Q99J14        | GAEILEVLHSLPAVR                                                               | 1.670507378        | 2                | 3.0218034 |
| Q99J14        | RLDEELEDAEK                                                                   | 1.118859894        | 2                | 2.9187486 |
| Q99J14        | VNEIVETNRPDSK                                                                 | 1.09242274         | 2                | 3.3329036 |
| <b>Q99JW2</b> | <b>ACY1 Aminoacylase_1</b>                                                    | <b>0.977651336</b> | <b>0.9863656</b> | <b>2</b>  |
| Q99JW2        | FIEDTAAEK                                                                     | 0.968666914        | 2                | 2.6307926 |
| Q99JW2        | SVSIQYLEAVR                                                                   | 1.04272877         | 2                | 2.3954582 |
| <b>Q99K43</b> | <b>PRC1 Protein regulator of cytokinesis 1</b>                                | <b>1.619196072</b> | <b>0.0189247</b> | <b>2</b>  |
| Q99K43        | MNTTTMSSATPNSSIRPVFGGSVYR+Oxidation(1)                                        | 1.619196072        | 2                | 2.3681536 |
| Q99K43        | MNTTTMSSATPNSSIRPVFGGSVYR+Oxidation(6)                                        | 1.619196072        | 2                | 2.3683286 |
| <b>Q99KK9</b> | <b>SYHM Probable histidyl_tRNA synthetase_mitochondrial</b>                   | <b>1.303412583</b> | <b>0.001073</b>  | <b>2</b>  |

|               |                                                              |                    |                  |           |
|---------------|--------------------------------------------------------------|--------------------|------------------|-----------|
| Q99KK9        | IIAELWDAGIKAEMLYK+Oxidation(14)                              | 1.500862433        | 2                | 2.5174072 |
| Q99KK9        | YDLTVPFARYLAMNKLK+Oxidation(13)                              | 1.186818077        | 2                | 2.5965576 |
| <b>Q99KW3</b> | <b>TARA TRIO and F_actin_binding protein</b>                 | <b>0.975936301</b> | <b>0.7886815</b> | <b>2</b>  |
| Q99KW3        | AYQEELSRELSK                                                 | 1.104812993        | 1                | 2.0306938 |
| Q99KW3        | SEREIEQLK                                                    | 0.9087764          | 1                | 1.9716955 |
| <b>Q99L04</b> | <b>DHRS1 Dehydrogenase/reductase SDR family member 1</b>     | <b>0.863228973</b> | <b>0.6285428</b> | <b>2</b>  |
| Q99L04        | ATAQEAQSLGGR                                                 | 0.94243256         | 2                | 3.3408558 |
| Q99L04        | CVPVVDSSQESEVK                                               | 0.60818857         | 2                | 4.4464121 |
| <b>Q99LF4</b> | <b>RTCB tRNA_splicing ligase RtcB homolog</b>                | <b>0.823832018</b> | <b>0.2616855</b> | <b>4</b>  |
| Q99LF4        | GLGHQVATDALVAMEK                                             | 0.985712113        | 2                | 2.3094466 |
| Q99LF4        | NLDFQDVLDK                                                   | 0.798622843        | 2                | 2.8833854 |
| Q99LF4        | NVTDVVNTCHDAGISK                                             | 0.978825264        | 2                | 4.2763147 |
| Q99LF4        | TNLDESVDQPVK                                                 | 1.005509792        | 2                | 3.6920028 |
| <b>Q99LH1</b> | <b>NOG2 Nucleolar GTP_binding protein 2</b>                  | <b>1.039874617</b> | <b>0.8965107</b> | <b>2</b>  |
| Q99LH1        | GGEPDMLTVSKMVLNDWQR+Oxidation(12)                            | 1.039874617        | 2                | 2.3300374 |
| Q99LH1        | GGEPDMLTVSKMVLNDWQR+Oxidation(6)                             | 1.039874617        | 2                | 2.3173015 |
| <b>Q99M87</b> | <b>DNJA3 Dnaj homolog subfamily A member 3_mitochondrial</b> | <b>1.019998668</b> | <b>0.8535158</b> | <b>2</b>  |
| Q99M87        | AQGLYETINVTIPAGIQTDQK                                        | 0.898635768        | 2                | 2.4102831 |
| Q99M87        | GSITNPCVVCR                                                  | 1.020581931        | 2                | 2.5982349 |
| <b>Q99ML9</b> | <b>RN111 E3 ubiquitin_protein ligase Arkadia</b>             | <b>1.389645106</b> | <b>0.0165496</b> | <b>2</b>  |
| Q99ML9        | DMTGNQQEQEKSGVVRK                                            | 1.582221409        | 3                | 3.6233559 |
| Q99ML9        | LHPHEVMQRMEVQR+Oxidation(7)                                  | 1.301283792        | 2                | 2.412626  |
| <b>Q99MN1</b> | <b>SYK Lysyl_tRNA synthetase</b>                             | <b>1.216445649</b> | <b>0.0543525</b> | <b>4</b>  |
| Q99MN1        | MATLQESEVKVDGGEQLSK+Oxidation(1)                             | 0.954952284        | 2                | 2.3383234 |
| Q99MN1        | RGDIIGVEGNPGK                                                | 1.192893607        | 2                | 3.3266866 |
| Q99MN1        | SEEEFVHINNK                                                  | 1.068026372        | 2                | 3.5142522 |
| Q99MN1        | YLDLILNDFVR                                                  | 1.392380573        | 2                | 2.6918385 |
| <b>Q99MQ1</b> | <b>BICC1 Protein bicaudal C homolog 1</b>                    | <b>1.078631005</b> | <b>0.5122634</b> | <b>2</b>  |
| Q99MQ1        | EAKEMIMSVLDTK                                                | 1.257375492        | 2                | 2.3983474 |
| Q99MQ1        | QYLMGCLPLVLMFDMK+Oxidation(15)                               | 0.97438512         | 2                | 2.3017595 |
| <b>Q99MS0</b> | <b>S14L2 SEC14_like protein 2</b>                            | <b>1.084960968</b> | <b>0.5699321</b> | <b>4</b>  |
| Q99MS0        | AGEMTEVLPNQR                                                 | 0.96054478         | 2                | 3.8269825 |
| Q99MS0        | CGYDLDGCPVWYDIIGPLDAK                                        | 1.726118467        | 2                | 3.8606846 |
| Q99MS0        | DQVKQQYEHSVQISR                                              | 0.90922439         | 2                | 2.384321  |
| Q99MS0        | HISPDQLPVEYGGTMDPDGNPK                                       | 1.149490331        | 2                | 4.7803602 |
| <b>Q99MZ8</b> | <b>LASP1 LIM and SH3 domain protein 1</b>                    | <b>0.984566529</b> | <b>0.012493</b>  | <b>5</b>  |
| Q99MZ8        | GFSVVADTPELQR                                                | 1.041930677        | 2                | 3.5889471 |
| Q99MZ8        | QQSELSQVR                                                    | 0.917466252        | 2                | 2.5202484 |
| Q99MZ8        | QSFTMVADTPENLR                                               | 0.941375686        | 2                | 3.1755078 |
| Q99MZ8        | TGDTGMLPANYVEAI                                              | 2.517430229        | 1                | 2.4306543 |
| Q99MZ8        | TQDQISNIK                                                    | 0.979182518        | 2                | 2.8695173 |
| <b>Q99PF5</b> | <b>FUBP2 Far upstream element_binding protein 2</b>          | <b>1.081986693</b> | <b>0.0128362</b> | <b>5</b>  |
| Q99PF5        | GGGGPGGGGPGGGGASGGPSQPPGGGGPGIR                              | 0.839393316        | 2                | 6.9423742 |
| Q99PF5        | IGGDAATTNNNTPDFGFGGQK                                        | 1.092649973        | 2                | 4.848218  |
| Q99PF5        | IGQQPQPQPGAPPQQDYTK                                          | 1.113114598        | 2                | 4.054358  |
| Q99PF5        | IINDLLQSLR                                                   | 1.218561044        | 2                | 2.5729461 |
| Q99PF5        | SVSLTGAPESVQK                                                | 0.942982736        | 2                | 2.5503247 |
| <b>Q99PL5</b> | <b>RRBP1 Ribosome_binding protein 1</b>                      | <b>1.306834342</b> | <b>9.9E-20</b>   | <b>18</b> |
| Q99PL5        | AENSQLTER                                                    | 0.854770169        | 2                | 2.3833342 |
| Q99PL5        | DALNQATSQVESK                                                | 0.758641466        | 2                | 3.3147886 |
| Q99PL5        | EAEETQNSLQAECQYR                                             | 1.328925338        | 2                | 5.6416636 |
| Q99PL5        | EHTSHLEAELEK                                                 | 1.047978798        | 2                | 3.3590245 |
| Q99PL5        | GELESSDQVR                                                   | 0.905293949        | 2                | 3.1986523 |
| Q99PL5        | HMAAASAECQNYAK                                               | 0.962002721        | 2                | 4.3090839 |
| Q99PL5        | HMAAASAECQNYAK+Oxidation(2)                                  | 1.34765623         | 2                | 3.9584415 |

|               |                                                                                            |                    |                  |           |
|---------------|--------------------------------------------------------------------------------------------|--------------------|------------------|-----------|
| Q99PL5        | IQEELEK                                                                                    | 1.162721296        | 1                | 2.3127604 |
| Q99PL5        | LKELESQVSCLEK                                                                              | 1.084381944        | 2                | 4.0800042 |
| Q99PL5        | LLATEQEDAATAVAK                                                                            | 1.23152852         | 2                | 3.99225   |
| Q99PL5        | LQQENSILR                                                                                  | 0.95938078         | 2                | 2.6114526 |
| Q99PL5        | QLHLAEAQTK                                                                                 | 1.037769377        | 2                | 2.3519285 |
| Q99PL5        | RLEEVTR                                                                                    | 0.645784599        | 2                | 2.443028  |
| Q99PL5        | TGVIQDTWHK                                                                                 | 0.945229242        | 2                | 2.3191552 |
| Q99PL5        | TILAETEGMLK                                                                                | 1.064685233        | 2                | 3.1658583 |
| Q99PL5        | TLQEQLNGPNTQLAR                                                                            | 1.148436364        | 2                | 5.0445824 |
| Q99PL5        | TLVSTVGSVMVFSEGEAQR                                                                        | 1.134315291        | 2                | 4.2839885 |
| Q99PL5        | VEPAVSSIVNSIQVLASK                                                                         | 1.464117483        | 2                | 4.0111885 |
| <b>Q99PV0</b> | <b>PRP8 Pre_mRNA_processing_splicing factor 8</b>                                          | <b>1.045430749</b> | <b>1</b>         | <b>2</b>  |
| Q99PV0        | AAVMHDILDMMPEGIK+Oxidation(4)Oxidation(10)                                                 | 1.045430749        | 2                | 2.6938081 |
| Q99PV0        | AAVMHDILDMMPEGIK+Oxidation(4)Oxidation(11)                                                 | 1.045430749        | 2                | 2.6509032 |
| <b>Q9CPQ1</b> | <b>COX6C Cytochrome c oxidase subunit 6C</b>                                               | <b>0.97923654</b>  | <b>1</b>         | <b>2</b>  |
| Q9CPQ1        | FGVAEPR                                                                                    | 0.994867735        | 2                | 2.432296  |
| Q9CPQ1        | NYDSMKDFEEMR                                                                               | 0.979748869        | 2                | 3.7965386 |
| <b>Q9CRB9</b> | <b>CHCH3 Coiled_coil_helix_coiled_coil_helix domain_containing protein 3_mitochondrial</b> | <b>0.928993324</b> | <b>0.0038375</b> | <b>2</b>  |
| Q9CRB9        | VAEELALEQAK                                                                                | 0.844690663        | 2                | 3.4395633 |
| Q9CRB9        | YEYHPVCADLQTK                                                                              | 0.94480756         | 2                | 3.6784585 |
| <b>Q9CTN4</b> | <b>RHBT3 Rho_related BTB domain_containing protein 3</b>                                   | <b>1.095424301</b> | <b>0.0764379</b> | <b>2</b>  |
| Q9CTN4        | ELASMNLDIVDLLK                                                                             | 1.07399803         | 2                | 2.6674449 |
| Q9CTN4        | LKDSGDVSDIIEK                                                                              | 1.582082052        | 2                | 2.47877   |
| <b>Q9CW42</b> | <b>MOSC1 MOSC domain_containing protein 1_mitochondrial</b>                                | <b>1.188197636</b> | <b>0.9977283</b> | <b>3</b>  |
| Q9CW42        | DLLLPTPPATNPLLQCR                                                                          | 1.016015243        | 2                | 4.3788381 |
| Q9CW42        | GLSVSEAECTAMGLR                                                                            | 0.964229742        | 2                | 3.1798229 |
| Q9CW42        | LQQVGTVAQLWVPIK                                                                            | 0.829296376        | 2                | 3.3392291 |
| <b>Q9CWH6</b> | <b>PSA7L Proteasome subunit alpha type 7_like</b>                                          | <b>1.225521332</b> | <b>0.1693685</b> | <b>3</b>  |
| Q9CWH6        | AITVFSPDGHFLFQVEYAQEAVK                                                                    | 1.137700085        | 2                | 4.261364  |
| Q9CWH6        | ALLEVVQSGGK                                                                                | 1.656639161        | 2                | 2.94526   |
| Q9CWH6        | LTVEDPVTVEYITR                                                                             | 1.177171348        | 2                | 4.0070081 |
| <b>Q9CWK8</b> | <b>SNX2 Sorting nexin 2</b>                                                                | <b>0.921092366</b> | <b>0.9967254</b> | <b>3</b>  |
| Q9CWK8        | ALSQLAEVEEK                                                                                | 1.043541626        | 2                | 2.3724058 |
| Q9CWK8        | AVNTQALSGAGILR                                                                             | 1.10315279         | 2                | 3.5174921 |
| Q9CWK8        | QQQFENLDQQLR                                                                               | 0.907075763        | 2                | 2.5138817 |
| <b>Q9CXD6</b> | <b>CC90A Coiled_coil domain_containing protein 90A_mitochondrial</b>                       | <b>1.132122009</b> | <b>0.007305</b>  | <b>2</b>  |
| Q9CXD6        | MLELRTEIVSLHAQQDR                                                                          | 1.673412279        | 2                | 2.6834548 |
| Q9CXD6        | VRTDTKLNFNLEK                                                                              | 1.12191168         | 2                | 2.4849205 |
| <b>Q9CYW4</b> | <b>HDHD3 Haloacid dehalogenase_like hydrolase domain_containing protein 3</b>              | <b>0.986224252</b> | <b>0.9962905</b> | <b>2</b>  |
| Q9CYW4        | LEDILTGLGLR                                                                                | 0.991019506        | 2                | 3.7444658 |
| Q9CYW4        | RLEDILTGLGLR                                                                               | 0.799503949        | 2                | 3.2889583 |
| <b>Q9CZY3</b> | <b>UB2V1 Ubiquitin_conjugating enzyme E2 variant 1</b>                                     | <b>1.006351165</b> | <b>0.8479664</b> | <b>2</b>  |
| Q9CZY3        | LLEELEEGQK                                                                                 | 1.009721152        | 2                | 2.811604  |
| Q9CZY3        | VNMSGVSSNGVVDPR                                                                            | 1.1705118          | 2                | 3.0199904 |
| <b>Q9D024</b> | <b>CC47 Coiled_coil domain_containing protein 47</b>                                       | <b>1.221213384</b> | <b>0.0380571</b> | <b>3</b>  |
| Q9D024        | ERIMNEEDPEKQR                                                                              | 1.677365011        | 2                | 2.5858734 |
| Q9D024        | IMQEEGQPLKLPDTK                                                                            | 0.767512597        | 2                | 2.8992112 |
| Q9D024        | RLEEAALR                                                                                   | 1.029750386        | 2                | 2.6188269 |
| <b>Q9D0M3</b> | <b>CY1 Cytochrome c1_heme protein_mitochondrial</b>                                        | <b>1.155403156</b> | <b>0.0027521</b> | <b>5</b>  |
| Q9D0M3        | ALAEVEVQDGPNDGEMFMRPGK                                                                     | 0.998254017        | 3                | 4.2741365 |
| Q9D0M3        | GLLSSLDHTSIR                                                                               | 1.076950012        | 2                | 2.7764914 |
| Q9D0M3        | HGGEDYVFSLLTGYCEPPTGVSLR                                                                   | 1.441634894        | 2                | 5.2654963 |
| Q9D0M3        | HLVGVCYTEEEAK                                                                              | 1.033700017        | 2                | 3.9358797 |

|               |                                                                         |                    |                  |           |
|---------------|-------------------------------------------------------------------------|--------------------|------------------|-----------|
| Q9D0M3        | LSDYFPKYPNPEAAR                                                         | 1.156762938        | 3                | 3.4136183 |
| <b>Q9D0S9</b> | <b>HINT2 Histidine triad nucleotide_binding protein 2_mitochondrial</b> | <b>0.954946886</b> | <b>8.282E-14</b> | <b>3</b>  |
| Q9D0S9        | DVAPQAPVHFLVIPR                                                         | 0.895854507        | 2                | 2.9444935 |
| Q9D0S9        | ISQAEEDDQQLLGHLLLVAK                                                    | 1.453796949        | 2                | 5.2357912 |
| Q9D0S9        | SLPADILYEDQQCLVFR                                                       | 1.304006001        | 2                | 4.4797692 |
| <b>Q9D172</b> | <b>ES1 ES1 protein homolog_mitochondrial</b>                            | <b>0.845785085</b> | <b>0.0071208</b> | <b>5</b>  |
| Q9D172        | GVEVTVGHEQEEGGK                                                         | 0.949026185        | 2                | 3.7936745 |
| Q9D172        | GVTEAHVDQK                                                              | 0.579854656        | 2                | 2.8271718 |
| Q9D172        | ITSLAQLNAANHDAIFPGGFGAAK                                                | 1.385240129        | 2                | 4.3320766 |
| Q9D172        | NLSTFAVDGK                                                              | 1.161173845        | 1                | 2.9209476 |
| Q9D172        | NVLAESAR                                                                | 0.996324071        | 1                | 2.0076911 |
| <b>Q9D1Q6</b> | <b>ERP44 Endoplasmic reticulum resident protein 44</b>                  | <b>1.064258617</b> | <b>0.061235</b>  | <b>4</b>  |
| Q9D1Q6        | MNPAVFLSLADLR+Oxidation(1)                                              | 1.032638694        | 2                | 2.3697078 |
| Q9D1Q6        | NIIGYFEQK                                                               | 1.06169301         | 1                | 2.4742806 |
| Q9D1Q6        | SNPVHEIQSLDEVTNLDR                                                      | 1.168193634        | 2                | 5.4372854 |
| Q9D1Q6        | VDCDQHSDIAQR                                                            | 1.160027291        | 2                | 3.5448999 |
| <b>Q9D2U9</b> | <b>H2B3A Histone H2B type 3_A</b>                                       | <b>1.220737667</b> | <b>9.9E-20</b>   | <b>5</b>  |
| Q9D2U9        | AMGIMNSFVNDIFER                                                         | 1.352867198        | 2                | 5.1772594 |
| Q9D2U9        | AMGIMNSFVNDIFER+Oxidation(2)                                            | 1.475522054        | 2                | 4.3575988 |
| Q9D2U9        | AMGIMNSFVNDIFER+Oxidation(2)Oxidation(5)                                | 1.36819455         | 2                | 3.0880842 |
| Q9D2U9        | AMGIMNSFVNDIFER+Oxidation(5)                                            | 1.485231158        | 2                | 3.8873227 |
| Q9D2U9        | LLPGE LAK                                                               | 1.307656024        | 2                | 2.417347  |
| <b>Q9D6M3</b> | <b>GHC1 Mitochondrial glutamate carrier 1</b>                           | <b>0.984047323</b> | <b>1</b>         | <b>2</b>  |
| Q9D6M3        | GAAVNLTIVTPEK                                                           | 1.014818932        | 2                | 2.7706139 |
| Q9D6M3        | GVNEDTYSGLDCAR                                                          | 0.949890947        | 2                | 4.6509852 |
| <b>Q9D6Y9</b> | <b>GLGB 1_4_alpha_glucan_branching enzyme</b>                           | <b>1.086678463</b> | <b>0.4643344</b> | <b>10</b> |
| Q9D6Y9        | CVAYAESHDAQLVGDK                                                        | 1.166884396        | 2                | 4.9576821 |
| Q9D6Y9        | EFKDEDWNMGNIIVYTLNTR                                                    | 1.075889065        | 3                | 3.9119399 |
| Q9D6Y9        | GTHDLWDSR                                                               | 1.047649318        | 2                | 2.3640049 |
| Q9D6Y9        | HFTSNVLPK                                                               | 1.057948535        | 2                | 2.4533179 |
| Q9D6Y9        | IVLSDAAEYGGHQK                                                          | 1.118300844        | 2                | 4.4912815 |
| Q9D6Y9        | IYESHVGISSHEGK                                                          | 1.191535539        | 2                | 4.5313907 |
| Q9D6Y9        | NSEDGLNMFDTGDCYFHSQPR                                                   | 1.056042617        | 2                | 3.8044076 |
| Q9D6Y9        | QFNLTDDDLLR                                                             | 0.7916887          | 2                | 2.7540388 |
| Q9D6Y9        | RQFNLTDDDLLR                                                            | 1.019272211        | 2                | 2.8648598 |
| Q9D6Y9        | WELYIPPK                                                                | 1.151422865        | 2                | 2.3857484 |
| <b>Q9D6Z1</b> | <b>NOP56 Nucleolar protein 56</b>                                       | <b>1.116791037</b> | <b>0.8900348</b> | <b>2</b>  |
| Q9D6Z1        | ELNEEKLEK                                                               | 1.127010608        | 2                | 2.4643133 |
| Q9D6Z1        | IDCFSEVPTSVFGEK                                                         | 0.941523016        | 2                | 2.7528133 |
| <b>Q9D7B6</b> | <b>ACAD8 Isobutyryl_CoA dehydrogenase_mitochondrial</b>                 | <b>1.068424215</b> | <b>0.2724248</b> | <b>4</b>  |
| Q9D7B6        | AVIFEDCAVPVANR                                                          | 0.907933574        | 2                | 3.3613486 |
| Q9D7B6        | FASYCLTEPGSGSDAASLLTSAK                                                 | 1.309420909        | 2                | 4.9260149 |
| Q9D7B6        | IGTEGQGF LIAMK                                                          | 1.239005165        | 2                | 2.9804564 |
| Q9D7B6        | VHQILEGSNEVMR                                                           | 1.273522965        | 2                | 2.9119051 |
| <b>Q9D7X8</b> | <b>GGCT Gamma_glutamylcyclotransferase</b>                              | <b>1.15993137</b>  | <b>0.9989631</b> | <b>2</b>  |
| Q9D7X8        | ISDEMEDIIK                                                              | 0.961529509        | 2                | 2.7349968 |
| Q9D7X8        | SNISSLDEQEGVK                                                           | 1.035207623        | 2                | 3.7432301 |
| <b>Q9D819</b> | <b>IPYR Inorganic pyrophosphatase</b>                                   | <b>0.913909329</b> | <b>9.9E-20</b>   | <b>5</b>  |
| Q9D819        | GISCMNTTVSESPFK                                                         | 0.913442465        | 2                | 4.7446561 |
| Q9D819        | GQYISPFHDVPIYADK                                                        | 1.65131366         | 2                | 3.9418166 |
| Q9D819        | GQYISPFHDVPIYADKDVFHMVVEVPR                                             | 1.007145473        | 3                | 4.9818301 |
| Q9D819        | VLGILAMIDEGETDWK                                                        | 2.100432404        | 2                | 4.2968569 |
| Q9D819        | YVANLFPYK                                                               | 0.984055967        | 1                | 2.1310537 |
| <b>Q9D855</b> | <b>QCR7 Cytochrome b_c1 complex subunit 7</b>                           | <b>1.01315246</b>  | <b>0.9946549</b> | <b>2</b>  |
| Q9D855        | RLPEDLYNDR                                                              | 1.003909488        | 2                | 2.5444405 |

|               |                                                                                   |                    |                  |           |
|---------------|-----------------------------------------------------------------------------------|--------------------|------------------|-----------|
| Q9D855        | YEEDKFYLEPYLK                                                                     | 1.114353948        | 2                | 4.6245723 |
| <b>Q9D880</b> | <b>TIM50 Mitochondrial import inner membrane translocase subunit TIM50</b>        | <b>0.990473006</b> | <b>0.0158016</b> | <b>3</b>  |
| Q9D880        | TIALNQVEDVR                                                                       | 0.911274608        | 2                | 3.1273105 |
| Q9D880        | TVLEHYALEDPPLEAFK                                                                 | 1.288822088        | 2                | 4.9259539 |
| Q9D880        | VLLDLSAFLK                                                                        | 1.153303002        | 2                | 2.5534093 |
| <b>Q9D8W5</b> | <b>PSD12 26S proteasome non_ATPase regulatory subunit 12</b>                      | <b>1.22921082</b>  | <b>0.7766758</b> | <b>2</b>  |
| Q9D8W5        | MVQQCCTVVEITDLPVK                                                                 | 1.331555957        | 2                | 4.8896227 |
| Q9D8W5        | WSTLVEDYGVLELR                                                                    | 1.038921995        | 2                | 3.0828664 |
| <b>Q9DB15</b> | <b>RM12 39S ribosomal protein L12_ mitochondrial</b>                              | <b>0.886218823</b> | <b>0.6496437</b> | <b>2</b>  |
| Q9DB15        | NYVQGINLVQAK                                                                      | 0.886664845        | 2                | 2.7811399 |
| Q9DB15        | SEALAGAPLDNAPK                                                                    | 0.744951578        | 2                | 3.1921012 |
| <b>Q9DBH5</b> | <b>LMAN2 Vesicular integral_ membrane protein VIP36</b>                           | <b>1.029473302</b> | <b>0.9295992</b> | <b>2</b>  |
| Q9DBH5        | LPTGYFGASAGTGDSLNDHDIISK                                                          | 1.124047054        | 3                | 3.8418233 |
| Q9DBH5        | WSELAGCTADFR                                                                      | 0.955731507        | 2                | 3.2839003 |
| <b>Q9DCJ5</b> | <b>NDUA8 NADH dehydrogenase [ubiquinone] 1 alpha subcomplex subunit 8</b>         | <b>1.05971843</b>  | <b>0.9762917</b> | <b>2</b>  |
| Q9DCJ5        | ARPEPNPVIEGDLKPAK                                                                 | 1.025329834        | 3                | 4.6653419 |
| Q9DCJ5        | TDRPLPENPYHSR                                                                     | 1.071623176        | 3                | 3.8940399 |
| <b>Q9DCM0</b> | <b>ETHE1 Protein ETHE1_ mitochondrial</b>                                         | <b>0.864520132</b> | <b>0.8465656</b> | <b>3</b>  |
| Q9DCM0        | IFTLPGNCLYPAHDYHGLTVSTVEEER                                                       | 1.169928755        | 3                | 4.1870909 |
| Q9DCM0        | SLLPGCQSVISR                                                                      | 0.866268111        | 2                | 3.0738251 |
| Q9DCM0        | TDFQQGCAK                                                                         | 0.837051686        | 2                | 2.9106839 |
| <b>Q9DCS9</b> | <b>NDUBA NADH dehydrogenase [ubiquinone] 1 beta subcomplex subunit 10</b>         | <b>1.200202036</b> | <b>4.947E-06</b> | <b>3</b>  |
| Q9DCS9        | AYDLVVDWVPVTLVR                                                                   | 1.282142079        | 2                | 4.4034958 |
| Q9DCS9        | RVPDITECK                                                                         | 1.179591726        | 2                | 2.3267851 |
| Q9DCS9        | TPAPSPQTSLPNPITYLTK                                                               | 1.41118718         | 2                | 2.9731731 |
| <b>Q9DCT2</b> | <b>NDUS3 NADH dehydrogenase [ubiquinone] iron_sulfur protein 3_ mitochondrial</b> | <b>1.459437113</b> | <b>1.785E-05</b> | <b>5</b>  |
| Q9DCT2        | FDLNSPWAEFPAYR                                                                    | 1.255652715        | 2                | 2.8333321 |
| Q9DCT2        | ILTDYGFEGHPFR                                                                     | 0.842833975        | 2                | 2.8922765 |
| Q9DCT2        | KFDLNSPWAEFPAYR                                                                   | 1.289043919        | 2                | 3.6585033 |
| Q9DCT2        | SLADLTAVDVPTTR                                                                    | 1.162149013        | 2                | 2.7365355 |
| Q9DCT2        | VVAEPEVLAQEFR                                                                     | 1.226888945        | 2                | 3.6492088 |
| <b>Q9DCU9</b> | <b>HOGA1 Probable 4_hydroxy_2_oxoglutarate aldolase_ mitochondrial</b>            | <b>1.115265154</b> | <b>9.032E-13</b> | <b>3</b>  |
| Q9DCU9        | GFVVQGSTGEFPFLTSLER                                                               | 1.179757208        | 2                | 5.446032  |
| Q9DCU9        | LIEPNTAVTR                                                                        | 1.097256558        | 2                | 3.1902125 |
| Q9DCU9        | TMDWFGYGGPCR                                                                      | 1.20717054         | 2                | 3.5364938 |
| <b>Q9EP89</b> | <b>LACTB Serine beta_lactamase_like protein LACTB_ mitochondrial</b>              | <b>1.010430354</b> | <b>0.8137214</b> | <b>9</b>  |
| Q9EP89        | EVWSEGLYADVENR                                                                    | 0.726991328        | 2                | 3.0203533 |
| Q9EP89        | FENSIESLR                                                                         | 0.856679552        | 2                | 2.9721844 |
| Q9EP89        | IFHDLMLTTVQEENEPVIYNR                                                             | 1.453154316        | 2                | 5.5223894 |
| Q9EP89        | IKDEVGAPGIVVGVSVGDK                                                               | 0.980633783        | 2                | 4.1634321 |
| Q9EP89        | KNDFEQGELYLK                                                                      | 0.986752622        | 2                | 4.1949267 |
| Q9EP89        | LDLDPVQHYVPEFPEK                                                                  | 1.104598292        | 3                | 3.688931  |
| Q9EP89        | LDLDPVQHYVPEFPEKEYEGEK                                                            | 1.19438106         | 3                | 3.801635  |
| Q9EP89        | LVNTPYVDNSYK                                                                      | 1.324201032        | 2                | 2.5774128 |
| Q9EP89        | WAGGGFLSTVGDLLK                                                                   | 0.922958263        | 2                | 4.6327343 |
| <b>Q9EPH2</b> | <b>MRP MARCKS_related protein</b>                                                 | <b>0.945837196</b> | <b>0.7860252</b> | <b>2</b>  |
| Q9EPH2        | AAATPESQEPQAK                                                                     | 1.071829037        | 2                | 2.6674759 |
| Q9EPH2        | GDVTAEEAAGASPAAK                                                                  | 0.945745366        | 2                | 3.0503213 |
| <b>Q9EPH8</b> | <b>PABP1 Polyadenylate_binding protein 1</b>                                      | <b>1.121514936</b> | <b>0.0459304</b> | <b>7</b>  |
| Q9EPH8        | ALDTMNFVVIK                                                                       | 0.987614366        | 2                | 3.1056485 |



|               |                                                               |                    |                  |           |
|---------------|---------------------------------------------------------------|--------------------|------------------|-----------|
| Q9EPH8        | GFGFVCFSSPEEATK                                               | 1.220330059        | 2                | 2.6551852 |
| Q9EPH8        | GFGFVSFER                                                     | 1.204816214        | 2                | 2.5076482 |
| Q9EPH8        | ITGMLEIDNSELLHMLESPELRL                                       | 1.128431123        | 3                | 4.7336135 |
| Q9EPH8        | KEFSPFGTITSAK                                                 | 0.984167165        | 2                | 3.1887887 |
| Q9EPH8        | SKVDEAVAVLQAHQAK                                              | 1.083693024        | 3                | 4.3149595 |
| Q9EPH8        | SLGYAYVNFQQPADAER                                             | 1.132532258        | 2                | 3.3638003 |
| <b>Q9EQ76</b> | <b>FMO3 Dimethylaniline monooxygenase [N_oxide_forming] 3</b> | <b>3.149761066</b> | <b>9.9E-20</b>   | <b>13</b> |
| Q9EQ76        | ASIYQSVFTNSSK                                                 | 1.944036486        | 2                | 2.7842062 |
| Q9EQ76        | GTCILPSVNDMMDDIDEK                                            | 2.253752567        | 2                | 3.9255135 |
| Q9EQ76        | ILCGTVSIKPNVK                                                 | 1.901432316        | 2                | 2.9149449 |
| Q9EQ76        | KEPVFNDLPLAR                                                  | 1.152675664        | 2                | 3.0497081 |
| Q9EQ76        | LQEYITSFATEK                                                  | 2.691759206        | 2                | 3.3295758 |
| Q9EQ76        | NNEVTLYK                                                      | 2.044676018        | 1                | 2.0031822 |
| Q9EQ76        | NNLPTAISDWWYMK                                                | 1.696326729        | 2                | 3.0158081 |
| Q9EQ76        | SCLEEGLEPTCFER                                                | 1.476218902        | 2                | 4.3877382 |
| Q9EQ76        | SDDVGGLWK                                                     | 2.15452802         | 2                | 2.8350408 |
| Q9EQ76        | VAVIGAGVSGLAAIR                                               | 1.025557411        | 2                | 3.9365351 |
| Q9EQ76        | VLVIGLGNCGDIAAELSHVAQQVIISR                                   | 2.192851979        | 3                | 4.0011158 |
| Q9EQ76        | VWNDGYPWDMVVITR                                               | 1.700439095        | 2                | 3.861161  |
| Q9EQ76        | YIQFETLVTR                                                    | 3.098635734        | 2                | 2.854773  |
| <b>Q9EQH3</b> | <b>VPS35 Vacuolar protein sorting associated protein 35</b>   | <b>1.19725564</b>  | <b>6.007E-06</b> | <b>3</b>  |
| Q9EQH3        | IREDLPNLESSEETEIQINK                                          | 1.209714395        | 2                | 5.0994763 |
| Q9EQH3        | LNLEHIATSSAVSK                                                | 1.32721192         | 2                | 4.0357881 |
| Q9EQH3        | VLETTVEIFNK                                                   | 1.067889056        | 2                | 2.9594438 |
| <b>Q9EQS0</b> | <b>TALDO Transaldolase</b>                                    | <b>1.351572177</b> | <b>5.826E-08</b> | <b>7</b>  |
| Q9EQS0        | ALAGCDFLTISPK                                                 | 1.28703545         | 2                | 2.9350235 |
| Q9EQS0        | ILDWHVANTDKK                                                  | 1.367404396        | 2                | 3.2501719 |
| Q9EQS0        | LGGPQEEQIK                                                    | 1.232278964        | 2                | 2.6790309 |
| Q9EQS0        | LSSTWEGIQAGK                                                  | 0.527648503        | 2                | 2.7145891 |
| Q9EQS0        | SYEPQEDPGVK                                                   | 1.147275084        | 2                | 2.9091022 |
| Q9EQS0        | VSTEVDAR                                                      | 1.3825588          | 1                | 1.9817294 |
| Q9EQS0        | WLHNEDQMAVEK                                                  | 1.061412153        | 2                | 3.6906672 |
| <b>Q9EQW7</b> | <b>KI13A Kinesin like protein KIF13A</b>                      | <b>0.829936881</b> | <b>0.7181647</b> | <b>2</b>  |
| Q9EQW7        | DETIAPLEENSALPK                                               | 0.829869049        | 2                | 2.6632946 |
| Q9EQW7        | VTQWAEER                                                      | 1.058465472        | 2                | 2.4528294 |
| <b>Q9EQX9</b> | <b>UBE2N Ubiquitin conjugating enzyme E2 N</b>                | <b>1.117140917</b> | <b>0.0001916</b> | <b>3</b>  |
| Q9EQX9        | LFLFLPEEYPMMAAPK                                              | 1.02872546         | 2                | 3.8570371 |
| Q9EQX9        | SNEAQAIETAR                                                   | 1.146227652        | 2                | 3.2767303 |
| Q9EQX9        | YFHVVIAGPQDSPFEGGTFK                                          | 0.985890173        | 3                | 3.996588  |
| <b>Q9ER34</b> | <b>ACON Aconitate hydratase mitochondrial</b>                 | <b>1.048814591</b> | <b>0.6473455</b> | <b>17</b> |
| Q9ER34        | ADIANLAEFEK                                                   | 1.009301143        | 2                | 2.4387081 |
| Q9ER34        | CTTDHISAAGPWLK                                                | 1.063448273        | 2                | 3.906744  |
| Q9ER34        | DINQEVYNFLATAGAK                                              | 0.882279315        | 2                | 4.1542001 |
| Q9ER34        | FKLEAPDADELPR                                                 | 1.149792           | 2                | 3.6969364 |
| Q9ER34        | FNPETDFLTGK                                                   | 0.986392794        | 1                | 2.2888682 |
| Q9ER34        | GHLDNISNLLIGAINIENGK                                          | 1.131452628        | 2                | 5.6129608 |
| Q9ER34        | IVYGHLDPPANQEIER                                              | 1.239966887        | 2                | 4.7319322 |
| Q9ER34        | LQLLEPFDKWDGKDLEDLQILIK                                       | 1.335527308        | 3                | 4.0975289 |
| Q9ER34        | LTGTLGWTSPK                                                   | 1.336999994        | 2                | 3.1168146 |
| Q9ER34        | NAVTVQEFQVPPDPTAR                                             | 0.954936218        | 2                | 4.1567049 |
| Q9ER34        | NDANPETHAFVTSPEIVTALAIAGTLK                                   | 0.989187812        | 3                | 4.2146683 |
| Q9ER34        | QGLLPLTFADPSDYNK                                              | 1.05835886         | 2                | 3.5709813 |
| Q9ER34        | SDFDPGQDQTYQHPPK                                              | 0.97021258         | 2                | 2.9135547 |
| Q9ER34        | SQFTITPGSEQIR                                                 | 0.987219768        | 2                | 3.565665  |
| Q9ER34        | VDVSPTSQR                                                     | 0.893111761        | 2                | 2.5214438 |
| Q9ER34        | VGLIGSCTNSSYEDMGR                                             | 1.181189831        | 2                | 4.2310982 |

|               |                                                                                   |                    |                  |           |
|---------------|-----------------------------------------------------------------------------------|--------------------|------------------|-----------|
| Q9ER34        | WVIGDENYEGSSR                                                                     | 1.049129545        | 2                | 4.202404  |
| <b>Q9ER72</b> | <b>SYCC CysteinyI_tRNA synthetase_cytoplasmic</b>                                 | <b>1.183568333</b> | <b>0.6171079</b> | <b>2</b>  |
| Q9ER72        | LSETTDPDKR                                                                        | 0.946456336        | 2                | 2.4300919 |
| Q9ER72        | QMLERIQNSVK+Oxidation(2)                                                          | 1.247326988        | 2                | 2.4696646 |
| <b>Q9ERK4</b> | <b>XPO2 Exportin_2</b>                                                            | <b>1.295185444</b> | <b>0.1861181</b> | <b>3</b>  |
| Q9ERK4        | IIPEIQK                                                                           | 1.307656024        | 2                | 2.3985238 |
| Q9ERK4        | LLQTDDEEEAGLELLK                                                                  | 1.030889353        | 2                | 2.3843865 |
| Q9ERK4        | SNNVNEFPVLK                                                                       | 1.406580544        | 2                | 2.4992867 |
| <b>Q9ES21</b> | <b>SAC1 Phosphatidylinositide phosphatase SAC1</b>                                | <b>1.225031944</b> | <b>0.0324213</b> | <b>3</b>  |
| Q9ES21        | HFDSQVIYVK                                                                        | 1.131421092        | 2                | 2.4556522 |
| Q9ES21        | LSNTSPEFQEMSLER                                                                   | 2.367651144        | 2                | 3.6001859 |
| Q9ES21        | TQLGLVMDGFNSLLR                                                                   | 1.16542318         | 2                | 3.9837871 |
| <b>Q9ES38</b> | <b>S27A5 Bile acyl_CoA synthetase</b>                                             | <b>1.293415838</b> | <b>0.0488048</b> | <b>12</b> |
| Q9ES38        | ACQAAWALK                                                                         | 1.161110259        | 2                | 2.7319598 |
| Q9ES38        | ADVWENFQQR                                                                        | 1.127482307        | 2                | 3.0644929 |
| Q9ES38        | EGFDVGVADPLYLDNK                                                                  | 1.347192319        | 2                | 4.9126329 |
| Q9ES38        | GATAILVLPK                                                                        | 1.09684237         | 2                | 2.9291937 |
| Q9ES38        | IQDSLEITNTYK                                                                      | 0.864157892        | 2                | 3.6502662 |
| Q9ES38        | LKEATIQEDK                                                                        | 1.223765569        | 2                | 2.8061149 |
| Q9ES38        | MLTPLELVQFDIETAEPVRDK                                                             | 1.155972655        | 2                | 4.2297163 |
| Q9ES38        | QGFCIPVETGKPGLLTK                                                                 | 0.926023118        | 3                | 3.662816  |
| Q9ES38        | SISALSVFLGLAK                                                                     | 1.603003885        | 2                | 3.1982996 |
| Q9ES38        | SLMPDVYQAVCEGTWK                                                                  | 1.111705928        | 2                | 3.9160509 |
| Q9ES38        | YLCNVPGQPEDK                                                                      | 1.11943886         | 2                | 3.4866788 |
| Q9ES38        | YLCNVPGQPEDKK                                                                     | 1.285030426        | 2                | 3.7566352 |
| <b>Q9EST6</b> | <b>AN32B Acidic leucine_rich nuclear phosphoprotein 32 family member B</b>        | <b>0.885533482</b> | <b>0.7060971</b> | <b>2</b>  |
| Q9EST6        | LAEELPSLTHLNSGNNLK                                                                | 0.862822349        | 2                | 3.7900462 |
| Q9EST6        | SLDLFGCEVTNR                                                                      | 1.064796925        | 2                | 2.7447653 |
| <b>Q9ESW0</b> | <b>DDB1 DNA damage_binding protein 1</b>                                          | <b>1.258802758</b> | <b>0.1978323</b> | <b>3</b>  |
| Q9ESW0        | IEVQDTSGGTTALRPSASTQALSSSVSSK                                                     | 1.250085009        | 3                | 5.7279997 |
| Q9ESW0        | KTEPATGFIDGDLIESFLDISRPK                                                          | 1.202654687        | 3                | 5.9867306 |
| Q9ESW0        | QGQQLVTCGAFK                                                                      | 1.005717515        | 2                | 2.3597639 |
| <b>Q9HB97</b> | <b>PARVA Alpha_parvin</b>                                                         | <b>1.258654512</b> | <b>0.0997909</b> | <b>4</b>  |
| Q9HB97        | DLAEDLYDGQVLQK                                                                    | 1.015929512        | 2                | 2.3598447 |
| Q9HB97        | LNVAEVTQSEIAQK                                                                    | 0.996723386        | 2                | 3.146554  |
| Q9HB97        | QIQEEITGNTEALSGR                                                                  | 1.346544706        | 2                | 3.1674252 |
| Q9HB97        | VLIDWINDVLVGER                                                                    | 1.004157392        | 2                | 3.2379227 |
| <b>Q9JHL4</b> | <b>DBNL Drebrin_like protein</b>                                                  | <b>1.11956214</b>  | <b>0.5120904</b> | <b>2</b>  |
| <b>Q9JHZ9</b> | <b>S38A3 Sodium_coupled neutral amino acid transporter 3</b>                      | <b>1.24367306</b>  | <b>0.5237893</b> | <b>2</b>  |
| Q9JHZ9        | AYEQLGYR                                                                          | 1.28640778         | 2                | 2.5500288 |
| Q9JHZ9        | HLEGLLPVGMPTADTQR                                                                 | 1.242160659        | 2                | 3.7943895 |
| <b>Q9JI57</b> | <b>GT2D1 General transcription factor II_I repeat domain_containing protein 1</b> | <b>1.013941721</b> | <b>0.8409157</b> | <b>2</b>  |
| Q9JI57        | EMEDINTLRECVQILFNSR                                                               | 1.047531285        | 2                | 2.3225758 |
| Q9JI57        | GTQPTTEGQAHLVLPTR                                                                 | 0.82026777         | 2                | 2.3798211 |
| <b>Q9JI85</b> | <b>NUCB2 Nucleobindin_2</b>                                                       | <b>0.960502666</b> | <b>0.124123</b>  | <b>5</b>  |
| Q9JI85        | FQQGIAPSGPAGELK                                                                   | 1.278278939        | 2                | 2.6638608 |
| Q9JI85        | LSQELDLVSHK                                                                       | 1.262900972        | 2                | 2.7584918 |
| Q9JI85        | QEYQQAVQLEEQK                                                                     | 0.960042542        | 2                | 4.3006954 |
| Q9JI85        | TRLDELK                                                                           | 0.973235989        | 1                | 2.02823   |
| Q9JI85        | VHNVEPVESAR                                                                       | 1.17645967         | 2                | 2.8963254 |
| <b>Q9JI91</b> | <b>ACTN2 Alpha_actinin_2</b>                                                      | <b>0.988119876</b> | <b>0.0028977</b> | <b>8</b>  |
| Q9JI91        | ACLISMGYDLGAEAFAR                                                                 | 1.016677           | 2                | 4.4206257 |
| Q9JI91        | GYEEWLLNEIR                                                                       | 1.904767399        | 2                | 2.8505309 |
| Q9JI91        | HRPDLIDYSK                                                                        | 1.224927578        | 2                | 2.4171233 |

|               |                                                                 |                    |                  |           |
|---------------|-----------------------------------------------------------------|--------------------|------------------|-----------|
| Q9JI91        | HTNYTMEHIR                                                      | 0.968679238        | 2                | 2.8066509 |
| Q9JI91        | KHEAFESDLAAHQDR                                                 | 1.06231686         | 2                | 5.2977576 |
| Q9JI91        | MLDAEDIVNTPKPDER                                                | 0.910797397        | 2                | 3.0889947 |
| Q9JI91        | QSILAIQNEVEK                                                    | 0.986159165        | 2                | 2.8429985 |
| Q9JI91        | TINEVETQILTR                                                    | 0.983888412        | 2                | 3.1643527 |
| <b>Q9JJ19</b> | <b>NHRF1 Na( )/H( ) exchange regulatory cofactor NHE_RF1</b>    | <b>1.041646412</b> | <b>2.144E-09</b> | <b>9</b>  |
| Q9JJ19        | AVDPDSPAASGLR                                                   | 1.232362984        | 2                | 3.2484055 |
| Q9JJ19        | IVEVNGVCMEGK                                                    | 1.203404998        | 2                | 3.6746573 |
| Q9JJ19        | LLVVDPETDEQLK                                                   | 1.431372119        | 2                | 2.6899202 |
| Q9JJ19        | LLVVDPETDEQLKK                                                  | 1.485759415        | 2                | 2.8678312 |
| Q9JJ19        | LVEPGSPA EK                                                     | 1.08057578         | 2                | 2.5620372 |
| Q9JJ19        | LVEVNGENVEK                                                     | 1.140510582        | 2                | 2.8828633 |
| Q9JJ19        | SEHTEPPAAADTK                                                   | 0.920963981        | 2                | 3.2064145 |
| Q9JJ19        | SEHTEPPAAADTKK                                                  | 0.948765023        | 3                | 4.6114678 |
| Q9JJ19        | VTPSQEHL DGPLPEPFSNGEIQK                                        | 0.913395137        | 3                | 3.9145885 |
| <b>Q9JJ54</b> | <b>HNRPD Heterogeneous nuclear ribonucleoprotein D0</b>         | <b>1.287293088</b> | <b>1.679E-09</b> | <b>3</b>  |
| Q9JJ54        | FGDVVDCTLK                                                      | 1.137172594        | 2                | 2.7229135 |
| Q9JJ54        | IDASKNEE DEGHSNSSPR                                             | 1.354471379        | 3                | 3.8974743 |
| Q9JJ54        | IFVGLSPDTPEEK                                                   | 1.39296616         | 2                | 3.9139957 |
| <b>Q9JJ79</b> | <b>DYHC2 Cytoplasmic dynein 2 heavy chain 1</b>                 | <b>0.814953965</b> | <b>0.8539567</b> | <b>3</b>  |
| Q9JJ79        | ASDLKDLNSR                                                      | 0.903482839        | 2                | 2.3529308 |
| Q9JJ79        | DQIEVMKGNVKS R                                                  | 0.796381156        | 2                | 2.3665726 |
| Q9JJ79        | NCLEEWTKAAGLEK                                                  | 1.053123184        | 2                | 2.372308  |
| <b>Q9JIM9</b> | <b>SEPT5 Septin_5</b>                                           | <b>1.103655724</b> | <b>0.0547288</b> | <b>2</b>  |
| Q9JIM9        | LIRMKDEELR                                                      | 1.582800225        | 2                | 2.4816175 |
| Q9JIM9        | MQEMLQMK+Oxidation(4)                                           | 0.798961464        | 2                | 2.4179108 |
| <b>Q9JUU8</b> | <b>SH3L1 SH3 domain_binding glutamic acid_rich_like protein</b> | <b>1.033060013</b> | <b>0.1550391</b> | <b>2</b>  |
| Q9JUU8        | GDYDAFFEAR                                                      | 1.394510773        | 2                | 2.5449102 |
| Q9JUU8        | QQDVLCFLEANK                                                    | 1.033059726        | 2                | 2.881032  |
| <b>Q9JK38</b> | <b>GNA1 Glucosamine 6_phosphate N_acetyltransferase</b>         | <b>1.199211217</b> | <b>4.271E-07</b> | <b>4</b>  |
| Q9JK38        | GRVEDVVVSDECR                                                   | 1.148166973        | 2                | 3.459816  |
| Q9JK38        | ITLECLPQNVGFYK                                                  | 1.566297227        | 2                | 3.747694  |
| Q9JK38        | VEDVVVSDECR                                                     | 1.1622654          | 2                | 3.7012043 |
| Q9JK38        | VLGQLTETGVVSPEQFMK                                              | 1.237868055        | 2                | 4.53933   |
| <b>Q9JLA3</b> | <b>UGGG1 UDP_glucose:glycoprotein glucosyltransferase 1</b>     | <b>0.991279521</b> | <b>0.0163591</b> | <b>8</b>  |
| Q9JLA3        | AYNYVQGEVDGYHAFQTLTIQYNK                                        | 0.669318478        | 3                | 3.9181983 |
| Q9JLA3        | EGETYDVA VAVVDPVTR                                              | 0.819279869        | 2                | 2.6098921 |
| Q9JLA3        | GQYQGLSQDPNLSLNLDQDLPNNMIHQVPIK                                 | 1.370867555        | 3                | 6.1337876 |
| Q9JLA3        | IVPEWQDYDQEIK                                                   | 1.002964236        | 2                | 3.5625815 |
| Q9JLA3        | LGIEGLSLHNILK                                                   | 1.481520657        | 3                | 3.8865616 |
| Q9JLA3        | LNIQSETDYAVDIR                                                  | 1.15128854         | 2                | 4.1330495 |
| Q9JLA3        | VEEDVASDLVMK                                                    | 0.937387833        | 2                | 3.2584317 |
| Q9JLA3        | YVLEPEISFTADNSFAK                                               | 0.940398274        | 2                | 3.7222795 |
| <b>Q9JLJ3</b> | <b>AL9A1 4_trimethylaminobutyraldehyde dehydrogenase</b>        | <b>1.030352987</b> | <b>1.109E-05</b> | <b>17</b> |
| Q9JLJ3        | AGAPNGLFNVVQGAATGQFLCQHR                                        | 1.204113883        | 2                | 4.4417539 |
| Q9JLJ3        | ANDTTFGLAAGVFTR                                                 | 1.055873683        | 2                | 4.9016442 |
| Q9JLJ3        | CQVLLAAR                                                        | 1.090490222        | 2                | 3.0379183 |
| Q9JLJ3        | EQGATVLCGGEPYAPEDPK                                             | 1.046997773        | 2                | 4.6907206 |
| Q9JLJ3        | EQGATVLCGGEPYAPEDPKLK                                           | 1.188770323        | 2                | 4.6540389 |
| Q9JLJ3        | EVNLAVENAK                                                      | 0.875551521        | 2                | 2.9766588 |
| Q9JLJ3        | GALLANFLTQQVCCNGTR                                              | 1.177011152        | 2                | 5.3498945 |
| Q9JLJ3        | GIKPITLLEGGK                                                    | 1.114392148        | 3                | 3.9211042 |
| Q9JLJ3        | HGYMTPCILNCTDDMTCVK                                             | 1.176152346        | 2                | 4.5832105 |

|               |                                                             |                    |                  |           |
|---------------|-------------------------------------------------------------|--------------------|------------------|-----------|
| Q9JLJ3        | IGDPLEEDTR                                                  | 1.11382704         | 2                | 3.9271629 |
| Q9JLJ3        | MGPLINAPHLER                                                | 1.121195254        | 2                | 3.4950931 |
| Q9JLJ3        | MGPLINAPHLER+Oxidation(1)                                   | 1.430069465        | 2                | 3.016053  |
| Q9JLJ3        | RDEIAIMETINNGK                                              | 0.956722249        | 2                | 5.4567704 |
| Q9JLJ3        | VEPVDASGTEK                                                 | 1.165331727        | 2                | 2.3239822 |
| Q9JLJ3        | VSFTGSVPTGMK                                                | 1.094035987        | 2                | 3.3680513 |
| Q9JLJ3        | VSFTGSVPTGMK+Oxidation(11)                                  | 1.292055025        | 2                | 2.8141899 |
| Q9JLJ3        | VTIEEYSQLK                                                  | 1.494265705        | 2                | 3.1929309 |
| <b>Q9JLTO</b> | <b>MYH10 Myosin_10</b>                                      | <b>1.377438974</b> | <b>9.9E-20</b>   | <b>3</b>  |
| Q9JLTO        | AGVLAHLEER                                                  | 1.400381682        | 2                | 3.5162969 |
| Q9JLTO        | DAAGLESQLQDTQELLQEETR                                       | 0.782942361        | 2                | 3.7468779 |
| Q9JLTO        | DEELLKVKEK                                                  | 1.072753063        | 1                | 2.1484978 |
| <b>Q9JLZ3</b> | <b>AUHM Methylglutaconyl_CoA hydratase_mitochondrial</b>    | <b>1.256499926</b> | <b>0.0100696</b> | <b>3</b>  |
| Q9JLZ3        | AVGLISHVLEQNQEGDAAYR                                        | 1.226289147        | 2                | 5.8055    |
| Q9JLZ3        | AVGLISHVLEQNQEGDAAYRK                                       | 1.172766395        | 3                | 4.5818324 |
| Q9JLZ3        | SEVPGIFCAGADLK                                              | 1.220898847        | 2                | 3.2591033 |
| <b>Q9JMS3</b> | <b>AIFM1 Apoptosis_inducing factor 1_mitochondrial</b>      | <b>1.057412131</b> | <b>0.7229941</b> | <b>13</b> |
| Q9JMS3        | DGEQHEDLNEVAK                                               | 0.852787898        | 2                | 3.926563  |
| Q9JMS3        | ILPEYLSNWTMEK                                               | 1.239548819        | 2                | 2.6101756 |
| Q9JMS3        | KSQASGIEVIQLFPEK                                            | 0.978009335        | 2                | 3.6479042 |
| Q9JMS3        | KVETDHIVTAVGLEPNVELAK                                       | 1.131759667        | 2                | 6.3252311 |
| Q9JMS3        | LNDGSQITFEK                                                 | 1.053742218        | 2                | 3.578784  |
| Q9JMS3        | SATEQSGTGIR                                                 | 0.730709407        | 2                | 3.8541529 |
| Q9JMS3        | SITVIGGGFLGSELACALGR                                        | 1.065956699        | 2                | 3.4139471 |
| Q9JMS3        | SQASGIEVIQLFPEK                                             | 0.897586948        | 2                | 4.2566152 |
| Q9JMS3        | TGGLEIDSDFGGFR                                              | 1.009451762        | 2                | 3.8163154 |
| Q9JMS3        | VETDHIVTAVGLEPNVELAK                                        | 1.009257254        | 2                | 6.018784  |
| Q9JMS3        | VLIVSEDPPELPMRPPSLK                                         | 1.23737735         | 3                | 3.7063291 |
| Q9JMS3        | VMPNAIVQSVGVSQGGK                                           | 1.091089362        | 2                | 4.5231581 |
| Q9JMS3        | VNAELQAR                                                    | 0.914195816        | 2                | 2.3744469 |
| <b>Q9JMA1</b> | <b>UBP14 Ubiquitin carboxyl_terminal hydrolase 14</b>       | <b>1.009751386</b> | <b>0.9999984</b> | <b>2</b>  |
| Q9JMA1        | CTESEEEVTK                                                  | 1.097566312        | 2                | 3.644242  |
| Q9JMA1        | EKESVNAKVLK                                                 | 1.00507454         | 2                | 2.5595167 |
| <b>Q9JMB7</b> | <b>PIWL1 Piwi_like protein 1</b>                            | <b>1.033349849</b> | <b>0.9648326</b> | <b>2</b>  |
| Q9JMB7        | ELIGLIVLTKYNNK                                              | 1.047705483        | 2                | 2.424952  |
| Q9JMB7        | SQELQISAGFQELSLAERGGRR                                      | 1.184211282        | 2                | 2.3407736 |
| <b>Q9JMD3</b> | <b>PCTL PCTP_like protein</b>                               | <b>1.928226275</b> | <b>9.9E-20</b>   | <b>6</b>  |
| Q9JMD3        | AVSIQTGYLIQSTGPK                                            | 1.142246866        | 2                | 4.5443625 |
| Q9JMD3        | ESVQVPDDQDFR                                                | 0.889171622        | 2                | 2.6715622 |
| Q9JMD3        | MECCDVPAETLYDVLHDIEYR                                       | 1.545383822        | 3                | 4.4334807 |
| Q9JMD3        | MECCDVPAETLYDVLHDIEYR+Oxidation(1)                          | 1.403051221        | 3                | 3.570853  |
| Q9JMD3        | SSQFLAPK                                                    | 0.987819785        | 2                | 2.3465965 |
| Q9JMD3        | WDSNVIETFDIAR                                               | 1.492766656        | 2                | 4.1225944 |
| <b>Q9JMK8</b> | <b>VPS54 Vacuolar protein sorting_associated protein 54</b> | <b>0.98623925</b>  | <b>0.8119953</b> | <b>2</b>  |
| Q9JMK8        | DKIAQIDK                                                    | 1.198550731        | 1                | 1.933705  |
| Q9JMK8        | STSLLGALQSQANK                                              | 0.977280869        | 2                | 2.3532529 |
| <b>Q9QVC8</b> | <b>FKBP4 Peptidyl_prolyl cis_trans isomerase FKBP4</b>      | <b>1.227952328</b> | <b>6.162E-14</b> | <b>5</b>  |
| Q9QVC8        | ALELDSNNEK                                                  | 1.194476511        | 2                | 2.4153709 |
| Q9QVC8        | GEPNNVAGNQAQVK                                              | 1.101093491        | 2                | 3.8929684 |
| Q9QVC8        | VAENGAQSAPLPLEGVDISPK                                       | 1.239584787        | 2                | 3.300282  |
| Q9QVC8        | VGEVCHITCKPEYAYGASGSPPK                                     | 1.35454988         | 3                | 6.1951022 |
| Q9QVC8        | VLQLYPSNK                                                   | 1.4973259          | 2                | 2.5176013 |
| <b>Q9QWN8</b> | <b>SPTN2 Spectrin beta chain_brain 2</b>                    | <b>0.880236019</b> | <b>0.0098974</b> | <b>2</b>  |
| Q9QWN8        | IIGTQEQLNQR                                                 | 1.430748378        | 2                | 2.4596066 |
| Q9QWN8        | VGELTQEANALAAGHPAQAPAINTR                                   | 0.879518117        | 3                | 3.9601121 |
| <b>Q9QX79</b> | <b>FETUB Fetuin_B</b>                                       | <b>1.223117703</b> | <b>0.3643188</b> | <b>3</b>  |

|               |                                                                   |                    |                  |           |
|---------------|-------------------------------------------------------------------|--------------------|------------------|-----------|
| Q9QX79        | GSIQHLPEQEPEDSK GK                                                | 1.228140162        | 3                | 3.9216285 |
| Q9QX79        | IFYETVHGQCK                                                       | 1.140490885        | 2                | 2.8844876 |
| Q9QX79        | NTAPTSSPSITAPR                                                    | 1.025465771        | 2                | 3.3072081 |
| <b>Q9QXG4</b> | <b>ACSA Acetyl_coenzyme A synthetase_cytoplasmic</b>              | <b>1.121895056</b> | <b>0.0225391</b> | <b>2</b>  |
| Q9QXG4        | AELGMNDSPSQSPPVK                                                  | 0.9136407          | 2                | 3.7533238 |
| Q9QXG4        | IGPIATPDYIQNAPGLPK                                                | 1.36390824         | 2                | 2.8786638 |
| <b>Q9QXK2</b> | <b>RAD18 E3 ubiquitin_protein ligase RAD18</b>                    | <b>1.051439313</b> | <b>0.2924139</b> | <b>2</b>  |
| Q9QXK2        | SAAEIVQEIESMEK                                                    | 1.100059948        | 1                | 2.0907743 |
| Q9QXK2        | TVYNLLSDR                                                         | 0.308634029        | 2                | 2.3418376 |
| <b>Q9QXK3</b> | <b>COPG2 Coatomer subunit gamma_2</b>                             | <b>1.089297184</b> | <b>0.8609404</b> | <b>2</b>  |
| Q9QXK3        | SIATLAITLLK                                                       | 0.97502421         | 2                | 3.0253425 |
| Q9QXK3        | SSEPVLTEAETEFVFR                                                  | 1.166374253        | 2                | 3.8445475 |
| <b>Q9QXQ0</b> | <b>ACTN4 Alpha_actinin_4</b>                                      | <b>1.174945071</b> | <b>9.9E-20</b>   | <b>28</b> |
| Q9QXQ0        | ACLISLGYDVENDR                                                    | 1.073718499        | 2                | 3.9603529 |
| Q9QXQ0        | ACLISLGYDVENDRQGD AEFNR                                           | 1.125256901        | 3                | 3.3132803 |
| Q9QXQ0        | AGTQIENIDEDFR                                                     | 0.981614562        | 2                | 2.836354  |
| Q9QXQ0        | AGTQIENIDEDFRDGLK                                                 | 1.376763711        | 2                | 4.4726877 |
| Q9QXQ0        | ASFNFHFDKDHGGALGP EEFK                                            | 1.217088477        | 3                | 3.7090557 |
| Q9QXQ0        | DDPVTNLNNAFEVAEK                                                  | 0.581116634        | 2                | 3.639472  |
| Q9QXQ0        | ETTD TADQVIASF K                                                  | 1.017091061        | 2                | 4.8849864 |
| Q9QXQ0        | HRDYETATLSDIK                                                     | 1.43550488         | 2                | 4.041306  |
| Q9QXQ0        | HRPELIEYDK                                                        | 1.110420057        | 3                | 4.7249742 |
| Q9QXQ0        | HTNYTMEHLR                                                        | 0.968679238        | 2                | 2.8066509 |
| Q9QXQ0        | ICDQWDNLGSLTHSR                                                   | 1.17826757         | 2                | 4.0331316 |
| Q9QXQ0        | ISIEMNGTLEDQLSHLK                                                 | 0.82223275         | 2                | 2.834713  |
| Q9QXQ0        | KDDPVTNLNNAFEVAEK                                                 | 1.015285434        | 3                | 4.9323964 |
| Q9QXQ0        | LSGSNPYTSVTPQIINSK                                                | 1.476915068        | 2                | 4.4710698 |
| Q9QXQ0        | LVSIGAE EIVDGN AK                                                 | 1.395116858        | 2                | 3.6821482 |
| Q9QXQ0        | MAPYQGPDAAPGALDYK                                                 | 1.125574049        | 2                | 4.3205304 |
| Q9QXQ0        | MAPYQGPDAAPGALDYK+Oxidation(1)                                    | 1.529017938        | 2                | 3.0938826 |
| Q9QXQ0        | MLDAEDIVNTARPDEK                                                  | 1.114131628        | 2                | 4.0503612 |
| Q9QXQ0        | MLDAEDIVNTARPDEK+Oxidation(1)                                     | 1.048536095        | 2                | 2.64012   |
| Q9QXQ0        | NFITAEELR                                                         | 1.102818937        | 1                | 2.1424079 |
| Q9QXQ0        | QLETIDQLHLEYAK                                                    | 1.330359436        | 2                | 3.1019201 |
| Q9QXQ0        | RDHALLEE QSK                                                      | 1.18368983         | 3                | 4.1800461 |
| Q9QXQ0        | SIVDYKPNLDLLEQQHQLIQEALIFDNK                                      | 1.425782805        | 3                | 3.6489046 |
| Q9QXQ0        | TINEVENQILTR                                                      | 0.665073978        | 2                | 3.3661025 |
| Q9QXQ0        | VEQIAAIAQELNELDYD SHNVNTR                                         | 1.638143741        | 2                | 5.0009623 |
| Q9QXQ0        | VGWEQLLTTIAR                                                      | 1.261559605        | 2                | 4.2406421 |
| Q9QXQ0        | VLAGDKNFITAEELR                                                   | 0.98651377         | 2                | 3.7747891 |
| Q9QXQ0        | VLAVNQENEHLMEDYER                                                 | 1.188144995        | 2                | 5.5529156 |
| <b>Q9QXT0</b> | <b>CNPY2 Protein canopy homolog 2</b>                             | <b>1.115659016</b> | <b>0.9528238</b> | <b>4</b>  |
| Q9QXT0        | ALVDELEWEIAR                                                      | 0.942568581        | 2                | 3.7762737 |
| Q9QXT0        | INPDGSQSVVEVPYAR                                                  | 1.118823727        | 2                | 3.7483039 |
| Q9QXT0        | RTDLCDHALHR                                                       | 1.146046568        | 3                | 3.3545587 |
| Q9QXT0        | TDLCDHALHR                                                        | 1.060344081        | 2                | 3.0673869 |
| <b>Q9QXX4</b> | <b>CMC2 Calcium_binding mitochondrial carrier protein Aralar2</b> | <b>1.47164793</b>  | <b>9.9E-20</b>   | <b>18</b> |
| Q9QXX4        | ASGDAARPFLLQLAESAYR                                               | 1.426791074        | 3                | 3.3201911 |
| Q9QXX4        | DIMVTIRPHVLT PFVEECLVAAAGGTR                                      | 1.052847549        | 3                | 6.0701151 |
| Q9QXX4        | DVEVTKEEFALAAQK                                                   | 1.062512305        | 2                | 4.0850611 |
| Q9QXX4        | FGLGSIAGAVGATAVYPIDLVK                                            | 1.298326781        | 2                | 6.5539331 |
| Q9QXX4        | FGLYLP LFKPSASTSK                                                 | 1.117618445        | 2                | 2.6059184 |
| Q9QXX4        | GLLPQLLGVAPEK                                                     | 1.265115993        | 2                | 3.1819544 |
| Q9QXX4        | IAPLEEGMLPFNLAE AQR                                               | 1.829909296        | 2                | 5.390131  |
| Q9QXX4        | ILREEGPK                                                          | 1.1692527          | 2                | 2.4058192 |
| Q9QXX4        | ITLPAPNP DHVGGYK                                                  | 1.375251105        | 2                | 2.4167743 |

|               |                                                          |                    |                  |           |
|---------------|----------------------------------------------------------|--------------------|------------------|-----------|
| Q9QXX4        | KDVEVTKEEFALAAQK                                         | 1.216490311        | 2                | 5.515862  |
| Q9QXX4        | LQVAGEITGPR                                              | 1.206375729        | 2                | 3.7058094 |
| Q9QXX4        | LTVNDFVR                                                 | 1.270597566        | 2                | 2.5611405 |
| Q9QXX4        | NGEFFMSPHDFVTR                                           | 0.938758813        | 2                | 4.006433  |
| Q9QXX4        | SSPQFGVTLTYELLQR                                         | 1.904514613        | 2                | 4.5385995 |
| Q9QXX4        | STGSFVGELEMYK                                            | 0.991262709        | 2                | 3.0857024 |
| Q9QXX4        | TVELLSGVVDQTK                                            | 1.387993244        | 2                | 3.9663348 |
| Q9QXX4        | YEGFFGLYR                                                | 1.059295846        | 2                | 2.7199323 |
| Q9QXX4        | YLNIFGESQPNPK                                            | 1.066999502        | 2                | 4.3299198 |
| <b>Q9QXY2</b> | <b>SRCN1 SRC kinase signaling inhibitor 1</b>            | <b>0.840126671</b> | <b>0.3475586</b> | <b>2</b>  |
| Q9QXY2        | DINRLLEETQAELLK                                          | 1.998510313        | 2                | 2.4138207 |
| Q9QXY2        | IIAELESGGGSVPPMK                                         | 0.70290762         | 2                | 2.4362972 |
| <b>Q9QYU4</b> | <b>CRYM Thiomorpholine_carboxylate dehydrogenase</b>     | <b>1.122103686</b> | <b>0.2182569</b> | <b>4</b>  |
| Q9QYU4        | GFLGVMPAYSAAEDALTTK                                      | 1.309391636        | 2                | 4.0596371 |
| Q9QYU4        | RAPAFLSADEVQDHLR                                         | 1.363615038        | 3                | 5.0787973 |
| Q9QYU4        | SLGMAVEDLVAAK                                            | 0.940729334        | 2                | 3.6231616 |
| Q9QYU4        | SSLLIPPLEAALANFSK                                        | 1.137267586        | 2                | 3.137944  |
| <b>Q9QZ76</b> | <b>MYG Myoglobin</b>                                     | <b>0.602576714</b> | <b>0.9998865</b> | <b>7</b>  |
| Q9QZ76        | GQHAAEIQLAQSHATK                                         | 0.47809472         | 2                | 4.5689883 |
| Q9QZ76        | HGCTVLTALGTILK                                           | 1.00802315         | 2                | 3.5121405 |
| Q9QZ76        | HGCTVLTALGTILKK                                          | 1.170530392        | 3                | 3.7012935 |
| Q9QZ76        | KGQHAAEIQLAQSHATK                                        | 1.263960993        | 3                | 4.7834368 |
| Q9QZ76        | KKGQHAAEIQLAQSHATK                                       | 1.55221367         | 3                | 4.5973358 |
| Q9QZ76        | VEGDLAGHGQEVLSLFK                                        | 1.166118851        | 3                | 4.345953  |
| Q9QZ76        | YSGDFGADAQGAMSK                                          | 0.757676327        | 2                | 4.0322375 |
| <b>Q9QZA2</b> | <b>PDC6I Programmed cell death 6_interacting protein</b> | <b>1.127653361</b> | <b>0.4954517</b> | <b>8</b>  |
| Q9QZA2        | ATLVKPTPVNVPISQK                                         | 1.049570625        | 2                | 3.4691522 |
| Q9QZA2        | DTIALLCCKPEPELNAIPSANPAK                                 | 1.262202136        | 2                | 2.5066004 |
| Q9QZA2        | FYNELTEILVR                                              | 0.923519478        | 2                | 2.7060297 |
| Q9QZA2        | LLDEEEATDNDLR                                            | 1.101401121        | 2                | 3.6742256 |
| Q9QZA2        | NIQVSHQEFK                                               | 1.081662182        | 2                | 3.3783352 |
| Q9QZA2        | NLATAYDNFVELVANLK                                        | 1.078008071        | 2                | 4.4337087 |
| Q9QZA2        | STAVVEQGGIQTVDQLIK                                       | 0.990900025        | 2                | 4.446198  |
| Q9QZA2        | TMQGSEVVNVLK                                             | 0.833934804        | 2                | 3.3431644 |
| <b>Q9QZD8</b> | <b>DIC Mitochondrial dicarboxylate carrier</b>           | <b>1.079223849</b> | <b>0.9011966</b> | <b>7</b>  |
| Q9QZD8        | GALVTVQQLSCYDQAK                                         | 0.930797787        | 2                | 4.9522443 |
| Q9QZD8        | LFSGATMASSR                                              | 0.757258502        | 2                | 2.6316712 |
| Q9QZD8        | MTGMALQVVR                                               | 0.89009817         | 2                | 2.6677659 |
| Q9QZD8        | NYSHALDGLYR                                              | 1.07725843         | 2                | 2.9230597 |
| Q9QZD8        | VHLQTQQEVK                                               | 1.075496436        | 2                | 2.8523123 |
| Q9QZD8        | VLLGGISGLTGGFVGPADLVNVR                                  | 1.23600761         | 2                | 5.6916838 |
| Q9QZD8        | WYFGGLASCGAACCTHPLDLLK                                   | 1.120020692        | 3                | 3.8041112 |
| <b>Q9QZH8</b> | <b>AAAD Arylacetamide deacetylase</b>                    | <b>1.025289645</b> | <b>1</b>         | <b>2</b>  |
| Q9QZH8        | LDVVVSTDYGLAPK                                           | 0.992036591        | 2                | 4.1836739 |
| Q9QZH8        | WFLQEDILEK                                               | 1.054932238        | 2                | 3.3207896 |
| <b>Q9QZU7</b> | <b>BODG Gamma_butyrobetaine dioxygenase</b>              | <b>1.140497449</b> | <b>1.118E-06</b> | <b>5</b>  |
| Q9QZU7        | IDANNVAYTTGK                                             | 1.164230388        | 2                | 3.3085215 |
| Q9QZU7        | IIELEDDKGQVVR                                            | 0.972388154        | 2                | 2.5360036 |
| Q9QZU7        | LLLEALDVNIR                                              | 1.83520911         | 2                | 2.8369334 |
| Q9QZU7        | MNPGDVITFDNWR                                            | 1.245874236        | 2                | 2.7287169 |
| Q9QZU7        | QTVTGGDSEIVDGFNVCCQK                                     | 1.266815239        | 2                | 4.4760003 |
| <b>Q9R063</b> | <b>PRDX5 Peroxiredoxin_5_mitochondrial</b>               | <b>1.016642421</b> | <b>9.9E-20</b>   | <b>10</b> |
| Q9R063        | ALNVEPDGTGLTCSLAPNLSQL                                   | 2.550610248        | 3                | 4.3574686 |
| Q9R063        | ETDLLLDDSLVSLFGNR                                        | 1.570181099        | 2                | 4.4885349 |
| Q9R063        | GVLFGVPGAFTPGCSK                                         | 0.955190059        | 2                | 4.5388346 |
| Q9R063        | KGVLFVPGAFTPGCSK                                         | 0.967364425        | 2                | 3.5011995 |
| Q9R063        | KVNLAELFK                                                | 0.801444747        | 2                | 2.3047953 |

|               |                                                                  |                    |                  |           |
|---------------|------------------------------------------------------------------|--------------------|------------------|-----------|
| Q9R063        | THLPGFVEQAGALK                                                   | 0.99565043         | 3                | 4.343318  |
| Q9R063        | VGDTIPSVEVFEGEPGK                                                | 0.953143646        | 2                | 4.4772739 |
| Q9R063        | VGDTIPSVEVFEGEPGKK                                               | 1.248232713        | 2                | 3.9001484 |
| Q9R063        | VNLAELFK                                                         | 0.947726158        | 2                | 2.7224619 |
| Q9R063        | VQLLADPTGAFGK                                                    | 1.144844957        | 2                | 3.7105775 |
| <b>Q9R064</b> | <b>GORS2 Golgi reassembly_stacking protein 2</b>                 | <b>1.058100534</b> | <b>0.4480298</b> | <b>2</b>  |
| Q9R064        | ADTSSLTVDVMSPASK                                                 | 1.018186812        | 2                | 3.4792929 |
| Q9R064        | LYVYNTDNDNCR                                                     | 2.063266437        | 2                | 2.7970383 |
| <b>Q9R0N0</b> | <b>GALK1 Galactokinase</b>                                       | <b>0.974774321</b> | <b>0.9993394</b> | <b>4</b>  |
| Q9R0N0        | RQCEEVAQALGK                                                     | 0.965730924        | 2                | 2.8571455 |
| Q9R0N0        | SLETSLVPLSDPK                                                    | 0.959650043        | 2                | 3.3561852 |
| Q9R0N0        | TDGLVSLLTTSK                                                     | 1.181664548        | 2                | 3.4318869 |
| Q9R0N0        | VEELLAEAR                                                        | 0.985697944        | 2                | 3.0423925 |
| <b>Q9R0T3</b> | <b>DNJC3 Dnal homolog subfamily C member 3</b>                   | <b>1.076405333</b> | <b>3.02E-05</b>  | <b>6</b>  |
| Q9R0T3        | AEPSVAEYTVR                                                      | 1.137879569        | 2                | 2.8290935 |
| Q9R0T3        | ICSEVLQLEPDNVNALK                                                | 0.748074951        | 2                | 5.5628371 |
| Q9R0T3        | KFDDGEDPLDAETQQGGGSPNFHR                                         | 1.126870482        | 3                | 5.4082065 |
| Q9R0T3        | LIGSAEELIR                                                       | 1.399951916        | 2                | 2.8608711 |
| Q9R0T3        | LKNDNTEAFYK                                                      | 1.534058268        | 2                | 2.819412  |
| Q9R0T3        | SNPSENEEKEAQSQLVK                                                | 1.079885507        | 2                | 5.091548  |
| <b>Q9R112</b> | <b>SQRD Sulfide:quinone oxidoreductase_mitochondrial</b>         | <b>0.907895184</b> | <b>0.9870469</b> | <b>3</b>  |
| Q9R112        | EGNALFTFPNTPVK                                                   | 1.095868282        | 2                | 3.0464118 |
| Q9R112        | STLSVIPSGVQWIQDR                                                 | 0.973533061        | 2                | 2.7951314 |
| Q9R112        | VGAENVAIVEPSE                                                    | 0.877094304        | 2                | 2.8446541 |
| <b>Q9R1M5</b> | <b>NALP5 NACHT_LRR and PYD domains_containing protein 5</b>      | <b>1.01726681</b>  | <b>0.9105521</b> | <b>2</b>  |
| Q9R1M5        | KMTSPENDSKSIQK                                                   | 1.100546555        | 2                | 2.3921115 |
| Q9R1M5        | SLDLGNALGDK                                                      | 1.016863758        | 1                | 1.9190727 |
| <b>Q9R1T3</b> | <b>CATZ Cathepsin Z</b>                                          | <b>1.153160229</b> | <b>0.3198932</b> | <b>2</b>  |
| Q9R1T3        | HGIPDETCNNYQAK                                                   | 1.056728859        | 2                | 4.1917844 |
| Q9R1T3        | VGDYGSLSGR                                                       | 1.195363772        | 2                | 2.4542027 |
| <b>Q9R1T4</b> | <b>SEPT6 Septin_6</b>                                            | <b>0.953278485</b> | <b>0.514439</b>  | <b>2</b>  |
| Q9R1T4        | QMFVQRVKEK+Oxidation(2)                                          | 1.187284652        | 1                | 1.9979411 |
| Q9R1T4        | STLMDTLFNTK                                                      | 0.904771848        | 2                | 2.4421775 |
| <b>Q9R1Z0</b> | <b>VDAC3 Voltage_dependent anion_selective channel protein 3</b> | <b>0.94393818</b>  | <b>0.9893984</b> | <b>4</b>  |
| Q9R1Z0        | LCQNNFALGYK                                                      | 0.801087083        | 2                | 2.8357532 |
| Q9R1Z0        | LTVDTIFVPNTGK                                                    | 0.980904579        | 2                | 2.5884433 |
| Q9R1Z0        | VNNASLIGLGYTQSLRPGVK                                             | 0.942626094        | 2                | 4.1520977 |
| Q9R1Z0        | WNTDNTLGTEISWENK                                                 | 0.999365942        | 2                | 3.084305  |
| <b>Q9R257</b> | <b>HEBP1 Heme_binding protein 1</b>                              | <b>1.643673681</b> | <b>0.0273378</b> | <b>2</b>  |
| Q9R257        | EAMPKIMKYVGGTNDK+Oxidation(3)                                    | 1.121365835        | 2                | 2.3231692 |
| Q9R257        | NSLFGSVETWPWQVLSTGGK                                             | 1.677413475        | 2                | 2.4744301 |
| <b>Q9WTT6</b> | <b>GUAD Guanine deaminase</b>                                    | <b>1.026858003</b> | <b>0.7388861</b> | <b>9</b>  |
| Q9WTT6        | AVMVSNNVLLINK                                                    | 0.712207348        | 2                | 2.8530583 |
| Q9WTT6        | EIGNFEVKGKDFDALLINPR                                             | 0.941735505        | 2                | 4.5457163 |
| Q9WTT6        | ETTEESVKETER                                                     | 0.907444291        | 2                | 3.4148831 |
| Q9WTT6        | FQSTDVAEEVYTR                                                    | 0.896143374        | 2                | 3.4826736 |
| Q9WTT6        | FSLSCTETLMSELGNIK                                                | 1.153695571        | 2                | 4.7865629 |
| Q9WTT6        | IVFLEESSQKEK                                                     | 0.999466025        | 2                | 4.1636472 |
| Q9WTT6        | NYTDVYDKNNLLTNK                                                  | 1.143900416        | 2                | 4.5037203 |
| Q9WTT6        | THDLYIQSHISENREEIAVK                                             | 1.265122351        | 3                | 4.0667038 |
| Q9WTT6        | VCMDLNNTVPEYK                                                    | 1.161136134        | 2                | 3.1371973 |
| <b>Q9WU19</b> | <b>HAOX1 Hydroxyacid oxidase 1</b>                               | <b>1.041858773</b> | <b>5.551E-16</b> | <b>9</b>  |
| Q9WU19        | AIFVTVDTPYLGNR                                                   | 1.53209378         | 2                | 3.7413621 |
| Q9WU19        | AVFVGRPIIWGLAFQGEK                                               | 1.213194888        | 3                | 4.1260033 |
| Q9WU19        | GVQDVLLEILK                                                      | 1.023846779        | 2                | 3.6097255 |

|               |                                                                             |                    |                  |           |
|---------------|-----------------------------------------------------------------------------|--------------------|------------------|-----------|
| Q9WU19        | GVQDVLEILKEEFR                                                              | 1.559715576        | 2                | 4.3809505 |
| Q9WU19        | HGVDGILVSNHGAR                                                              | 1.044823575        | 3                | 4.840137  |
| Q9WU19        | MKNFETNDLAFSPK+Oxidation(1)                                                 | 0.913442465        | 2                | 2.6753595 |
| Q9WU19        | NFETNDLAFSPK                                                                | 1.180234734        | 2                | 3.4044456 |
| Q9WU19        | NVADIDLSTSVLGQR                                                             | 0.987742793        | 2                | 5.0912089 |
| Q9WU19        | VEVFLDGGVR                                                                  | 1.930639492        | 2                | 2.6435547 |
| <b>Q9WU49</b> | <b>CHSP1 Calcium_regulated heat stable protein 1</b>                        | <b>1.076521929</b> | <b>0.0007273</b> | <b>2</b>  |
| Q9WU49        | HETWSGHVISS                                                                 | 1.03725402         | 2                | 2.9588704 |
| Q9WU49        | LQAVEVVITHLAPGTK                                                            | 1.23978268         | 2                | 4.4531522 |
| <b>Q9WU65</b> | <b>GLPK2 Glycerol kinase 2</b>                                              | <b>1.127685741</b> | <b>0.4087524</b> | <b>2</b>  |
| Q9WU65        | GIICGLTQFTNK                                                                | 0.989853591        | 2                | 3.5649025 |
| Q9WU65        | LAEVNIDISNIK                                                                | 1.347014564        | 2                | 2.338748  |
| <b>Q9WU82</b> | <b>CTNB1 Catenin beta_1</b>                                                 | <b>1.181587278</b> | <b>0.0159934</b> | <b>3</b>  |
| Q9WU82        | HQEAEAMAQNAVR                                                               | 1.192864112        | 2                | 3.3476169 |
| Q9WU82        | LLNDEDQVVVVK                                                                | 0.235131263        | 2                | 3.114641  |
| Q9WU82        | TMQNTNDVETAR                                                                | 1.066978276        | 2                | 3.5775833 |
| <b>Q9WUC4</b> | <b>ATOX1 Copper transport protein ATOX1</b>                                 | <b>1.030665704</b> | <b>0.657052</b>  | <b>2</b>  |
| Q9WUC4        | LGGVEFNIDLPNKK                                                              | 1.202825147        | 2                | 3.78846   |
| Q9WUC4        | VCIESEHSSDILLATLNK                                                          | 1.06235081         | 2                | 5.8806739 |
| <b>Q9WUH4</b> | <b>FHL1 Four and a half LIM domains protein 1</b>                           | <b>0.779928195</b> | <b>0.8792263</b> | <b>2</b>  |
| Q9WUH4        | AIVAGDQNVVEYK                                                               | 0.929495912        | 2                | 2.3927684 |
| Q9WUH4        | FCANTCVECR                                                                  | 0.770369781        | 2                | 2.7807078 |
| <b>Q9WUJ8</b> | <b>ORC6 Origin recognition complex subunit 6</b>                            | <b>1.111575068</b> | <b>0.7945547</b> | <b>2</b>  |
| Q9WUJ8        | LSGLNKMMYQSCLK+Oxidation(7)                                                 | 1.111575068        | 2                | 2.3096402 |
| Q9WUJ8        | LSGLNKMMYQSCLK+Oxidation(8)                                                 | 1.111575068        | 2                | 2.3609564 |
| <b>Q9WUS0</b> | <b>KAD4 Adenylate kinase isoenzyme 4_mitochondrial</b>                      | <b>1.142343187</b> | <b>2.304E-05</b> | <b>4</b>  |
| Q9WUS0        | GVLHQFSGTETNR                                                               | 1.013187038        | 2                | 3.4565434 |
| Q9WUS0        | TLVQAEALDR                                                                  | 1.035189865        | 2                | 2.6361301 |
| Q9WUS0        | VYNLDFNPPQVLGVDDITGPELVQQEDDKPEALAAR                                        | 1.882345192        | 3                | 5.4683576 |
| Q9WUS0        | YKDAAKPVIELYK                                                               | 1.265101122        | 2                | 3.9247341 |
| <b>Q9WVA1</b> | <b>TIM8A Mitochondrial import inner membrane translocase subunit Tim8 A</b> | <b>1.001397094</b> | <b>0.9816283</b> | <b>2</b>  |
| Q9WVA1        | AEACFVNCVER                                                                 | 1.07451466         | 2                | 2.4609098 |
| Q9WVA1        | SKPVFSESLSD                                                                 | 0.999690824        | 2                | 2.9113736 |
| <b>Q9WVF7</b> | <b>DPOE1 DNA polymerase epsilon catalytic subunit A</b>                     | <b>0.728125336</b> | <b>0.279115</b>  | <b>2</b>  |
| Q9WVF7        | AANMPDSELFELISENR                                                           | 0.63718343         | 2                | 2.4325538 |
| Q9WVF7        | MAWQWRGEMFASR+Oxidation(1)Oxidation(10)                                     | 0.906134124        | 2                | 2.3732808 |
| <b>Q9WVK3</b> | <b>PECR Peroxisomal trans_2_enoyl_CoA reductase</b>                         | <b>1.030853471</b> | <b>0.0003462</b> | <b>13</b> |
| Q9WVK3        | AGVYNLTK                                                                    | 1.019223668        | 2                | 2.7228894 |
| Q9WVK3        | ASQPPSSSTQVTAIQCNIR                                                         | 1.159314284        | 2                | 5.5278945 |
| Q9WVK3        | DHGGSVNIIIVLLNNGFPTAAHSGAAR                                                 | 1.235625088        | 3                | 7.0825968 |
| Q9WVK3        | ELLHLGCNVVIASR                                                              | 0.906508491        | 2                | 4.0506225 |
| Q9WVK3        | INFLVNNAGGQFMAPAEDITAK                                                      | 1.53833927         | 2                | 5.4596395 |
| Q9WVK3        | INFLVNNAGGQFMAPAEDITAK+Oxidation(13)                                        | 1.605556926        | 2                | 3.557024  |
| Q9WVK3        | KEEEVNNLVK                                                                  | 1.007944846        | 3                | 3.926213  |
| Q9WVK3        | LTAAVDELRL                                                                  | 1.233677382        | 2                | 2.7893114 |
| Q9WVK3        | NFTIPDHDNWPVGAGDSSFIK                                                       | 0.961924579        | 2                | 5.074594  |
| Q9WVK3        | NFTIPDHDNWPVGAGDSSFIKK                                                      | 1.012852245        | 3                | 4.0670376 |
| Q9WVK3        | SGQSYLAAGLLQNQVAVVTGGATGIGK                                                 | 1.061661107        | 2                | 5.9537082 |
| Q9WVK3        | TMALTWASSGVR                                                                | 0.95314479         | 2                | 3.7443101 |
| Q9WVK3        | TMALTWASSGVR+Oxidation(2)                                                   | 1.077888731        | 2                | 2.3010752 |
| <b>Q9WVK7</b> | <b>HCDH Hydroxyacyl_coenzyme A dehydrogenase_mitochondrial</b>              | <b>1.044868965</b> | <b>1.399E-10</b> | <b>14</b> |
| Q9WVK7        | AADEFVEK                                                                    | 1.029692413        | 2                | 3.0255895 |
| Q9WVK7        | FAAEHTIFASNTSSLQITNIANATTR                                                  | 0.903702752        | 2                | 5.7163658 |
| Q9WVK7        | FILDGWHEMDPENPLFQPSMNNLVAQK                                                 | 1.022947648        | 3                | 5.6053114 |



|               |                                                                           |                    |                  |           |
|---------------|---------------------------------------------------------------------------|--------------------|------------------|-----------|
| Q9WVK7        | FILDGWHEMDPENPLFQPSMNNLVAQK+Oxidation(22)                                 | 0.952806088        | 3                | 3.7152829 |
| Q9WVK7        | FILDGWHEMDPENPLFQPSMNNLVAQK+Oxidation(9)                                  | 0.952806088        | 3                | 3.986676  |
| Q9WVK7        | GDASKEDIDTAMK                                                             | 0.965735905        | 2                | 3.9268169 |
| Q9WVK7        | GDASKEDIDTAMK+Oxidation(12)                                               | 1.334323116        | 2                | 3.1883271 |
| Q9WVK7        | HVTVIGGGLMGAGIAQVAAATGHTVVLVDQTEDILAK                                     | 0.964287062        | 3                | 7.7991457 |
| Q9WVK7        | KGIEESLK                                                                  | 0.892201157        | 2                | 2.5444756 |
| Q9WVK7        | LKNELFQR                                                                  | 1.19424743         | 2                | 2.5442779 |
| Q9WVK7        | LLVPYLIEAIR                                                               | 1.778954643        | 2                | 2.6713347 |
| Q9WVK7        | LVEVIK                                                                    | 1.22196091         | 1                | 2.0176327 |
| Q9WVK7        | TFESLVDFCK                                                                | 0.913223163        | 2                | 3.5894926 |
| Q9WVK7        | TLSSLSTSDAASVVHSTDLVVEAIVENLK                                             | 1.192811863        | 3                | 6.4644446 |
| <b>Q9WVL6</b> | <b>EXTL3 Exostosin_like 3</b>                                             | <b>0.893872665</b> | <b>0.0481337</b> | <b>2</b>  |
| Q9WVL6        | QDLLQLK                                                                   | 0.505969605        | 1                | 2.1550372 |
| Q9WVL6        | QELNSEIAKLNK                                                              | 1.321060901        | 2                | 2.5718911 |
| <b>Q9Z0N2</b> | <b>IF2H Eukaryotic translation initiation factor 2 subunit 3_Y_linked</b> | <b>1.207716295</b> | <b>0.0289743</b> | <b>2</b>  |
| Q9Z0N2        | IVLTNPVCTEVGEK                                                            | 1.266707074        | 2                | 2.4538903 |
| Q9Z0N2        | VGQEIEVRPGIVSK                                                            | 1.139220417        | 2                | 3.5628095 |
| <b>Q9Z0U5</b> | <b>ADO Aldehyde oxidase</b>                                               | <b>1.448975154</b> | <b>0.1637439</b> | <b>16</b> |
| Q9Z0U5        | DLEPLILTIEEAIQHK                                                          | 0.947257233        | 2                | 3.0056345 |
| Q9Z0U5        | EFQPLDPTQELIFPELMR                                                        | 1.514807761        | 2                | 3.0715003 |
| Q9Z0U5        | ELSILYGGVGPPTIGAK                                                         | 1.250231706        | 2                | 3.8132665 |
| Q9Z0U5        | GTSTETVPNTNASGGSVVADLNLAVK                                                | 1.348661246        | 2                | 4.8089633 |
| Q9Z0U5        | GYESNINWEK                                                                | 1.220618867        | 2                | 2.9631252 |
| Q9Z0U5        | HIQDIVAATLK                                                               | 1.294728589        | 2                | 2.6052601 |
| Q9Z0U5        | HLSDLNPLLAVGNCTLNLLSK                                                     | 1.56008731         | 3                | 5.1197205 |
| Q9Z0U5        | KCPDSDLKPQEVLVSVNIPCSR                                                    | 1.167358311        | 3                | 3.9822631 |
| Q9Z0U5        | KLECGNVDEAFK                                                              | 1.150230519        | 2                | 3.600632  |
| Q9Z0U5        | LVLDEVTLAGSAPGGK                                                          | 1.354328955        | 2                | 4.2815237 |
| Q9Z0U5        | MTWISPVTLLEELVEAK                                                         | 1.515076363        | 2                | 3.7105577 |
| Q9Z0U5        | NHPEPSLDQLTDALGGNLCR                                                      | 1.041804498        | 2                | 4.0596147 |
| Q9Z0U5        | NMASLGGHIVSR                                                              | 1.100856461        | 2                | 3.2881949 |
| Q9Z0U5        | QQNALAIVNSGMR                                                             | 1.417313365        | 2                | 2.5824666 |
| Q9Z0U5        | RLEPIISK                                                                  | 1.420467468        | 2                | 2.3595707 |
| Q9Z0U5        | VVENNVDPPEMMLLPYLR                                                        | 2.058365049        | 2                | 3.4668517 |
| <b>Q9Z0V5</b> | <b>PRDX4 Peroxiredoxin_4</b>                                              | <b>1.025464277</b> | <b>0.9818552</b> | <b>5</b>  |
| Q9Z0V5        | ENECHFYAGGQVYPGEVSR                                                       | 0.727478569        | 3                | 4.244267  |
| Q9Z0V5        | GLFIIDDK                                                                  | 1.043174003        | 2                | 3.0521641 |
| Q9Z0V5        | HGEVCPAGWKPGSETIIPDPAGK                                                   | 0.893006051        | 3                | 3.8216145 |
| Q9Z0V5        | QITLNDLPVGR                                                               | 1.079327457        | 2                | 3.3390398 |
| Q9Z0V5        | TRENECHFYAGGQVYPGEVSR                                                     | 0.956390568        | 3                | 6.4120784 |
| <b>Q9Z0V6</b> | <b>PRDX3 Thioredoxin_dependent peroxide reductase_mitochondrial</b>       | <b>0.977688553</b> | <b>0.9971028</b> | <b>5</b>  |
| Q9Z0V6        | AFQFVETHGEVCPANWTPESPTIKPSPTASK                                           | 0.997108905        | 3                | 6.4274511 |
| Q9Z0V6        | ANEFHDVNCEVVAVSVDHFSHLAWINTPR                                             | 0.886128938        | 4                | 4.5322719 |
| Q9Z0V6        | GLFIIDPNGVIK                                                              | 0.961595201        | 2                | 3.4060841 |
| Q9Z0V6        | GTAVVNGEFK                                                                | 0.88236723         | 2                | 2.6102211 |
| Q9Z0V6        | NGGLGHMNTLLSDLTK                                                          | 1.107530741        | 2                | 2.5938709 |
| <b>Q9Z0W7</b> | <b>CLIC4 Chloride intracellular channel protein 4</b>                     | <b>1.113781571</b> | <b>0.1283922</b> | <b>2</b>  |
| Q9Z0W7        | FLDGDEMTLADCNLLPK                                                         | 0.986154453        | 2                | 4.1641531 |
| Q9Z0W7        | NSRPEANEALER                                                              | 1.123922993        | 3                | 3.4899173 |
| <b>Q9Z122</b> | <b>FADS2 Fatty acid desaturase 2</b>                                      | <b>0.865439263</b> | <b>0.8521228</b> | <b>2</b>  |
| Q9Z122        | AFHLDLDFVGK                                                               | 0.853241212        | 3                | 3.7675483 |
| Q9Z122        | HGIEYQEKPLLR                                                              | 0.987028788        | 2                | 3.5340743 |
| <b>Q9Z1A6</b> | <b>VIGLN Vigilin</b>                                                      | <b>1.387110705</b> | <b>5.092E-11</b> | <b>21</b> |
| Q9Z1A6        | ANSFTVSSVSAPSWLHR                                                         | 1.162025714        | 2                | 3.2559507 |

|               |                                                                      |                    |                  |           |
|---------------|----------------------------------------------------------------------|--------------------|------------------|-----------|
| Q9Z1A6        | ASVITQVFHVPLEER                                                      | 1.023768619        | 2                | 3.4271083 |
| Q9Z1A6        | EALEALVPVTIEVEVPFDLHR                                                | 1.315676417        | 2                | 3.3214679 |
| Q9Z1A6        | ELQAEQEDR                                                            | 0.948589584        | 2                | 2.375047  |
| Q9Z1A6        | GNSLQEILER                                                           | 1.105934283        | 2                | 2.651377  |
| Q9Z1A6        | HEVLLISAEQDKR                                                        | 0.973808055        | 3                | 4.3956776 |
| Q9Z1A6        | IDLPAENSNSSETIVITGK                                                  | 1.0070608          | 2                | 5.2298112 |
| Q9Z1A6        | IEGDPQGVQQAQ                                                         | 1.078417468        | 2                | 3.7045822 |
| Q9Z1A6        | IIFPAAEDKDQDLITIIGK                                                  | 1.233135469        | 2                | 2.981566  |
| Q9Z1A6        | IVGELEQMVSEDPVLDHR                                                   | 1.188832466        | 2                | 4.5649095 |
| Q9Z1A6        | LGQALTEVYAK                                                          | 1.196355226        | 2                | 3.361285  |
| Q9Z1A6        | LQDLELK                                                              | 1.471399488        | 1                | 2.4515154 |
| Q9Z1A6        | LQTQASATVPIPK                                                        | 1.148982633        | 2                | 3.628298  |
| Q9Z1A6        | LVGEIMQETGTR                                                         | 1.087915943        | 2                | 3.6945846 |
| Q9Z1A6        | MDYVEINIDHK                                                          | 0.89504672         | 2                | 2.9101596 |
| Q9Z1A6        | MVADLVENSYSIVPIFK                                                    | 0.885795573        | 2                | 3.7739024 |
| Q9Z1A6        | RCDIIVISGR                                                           | 1.151886797        | 2                | 3.2215261 |
| Q9Z1A6        | TEIVFTGEKEQLAQAVAR                                                   | 1.292916484        | 2                | 4.404614  |
| Q9Z1A6        | TGAHLELSLAK                                                          | 1.016375645        | 3                | 3.3936682 |
| Q9Z1A6        | TKDLIEQR                                                             | 1.121141705        | 2                | 2.7908964 |
| Q9Z1A6        | VKELQAEQEDR                                                          | 1.226675667        | 3                | 4.0441246 |
| <b>Q9Z1J8</b> | <b>S14L3 SEC14_like protein 3</b>                                    | <b>1.160831927</b> | <b>4.319E-08</b> | <b>3</b>  |
| Q9Z1J8        | ENVQDVLPALPNPDDYFLLR                                                 | 1.482733538        | 2                | 2.8487723 |
| Q9Z1J8        | FRENVQDVLPALPNPDDYFLLR                                               | 1.718745916        | 2                | 4.3495631 |
| Q9Z1J8        | GSSHQVEYEIFPGCVLR                                                    | 1.10400696         | 2                | 4.8601799 |
| <b>Q9Z1P2</b> | <b>ACTN1 Alpha_actinin_1</b>                                         | <b>1.397891386</b> | <b>0.1606374</b> | <b>5</b>  |
| Q9Z1P2        | DYETATLSEIK                                                          | 1.18451345         | 1                | 2.0151653 |
| Q9Z1P2        | GISQEQMNEFR                                                          | 1.140730827        | 2                | 2.5889609 |
| Q9Z1P2        | ICDQWDNLGALTQK                                                       | 1.349244356        | 2                | 3.4585583 |
| Q9Z1P2        | IDQLEGDHQLIQEALIFDNK                                                 | 1.086454287        | 2                | 4.6004658 |
| Q9Z1P2        | MVSDINNAWGCLEQAEK                                                    | 0.752062407        | 2                | 4.0275521 |
| <b>Q9Z1W6</b> | <b>LYRIC Protein LYRIC</b>                                           | <b>1.012863603</b> | <b>0.7102529</b> | <b>4</b>  |
| Q9Z1W6        | KREEVTPPTAPEDPAQLK                                                   | 1.081828508        | 3                | 3.9018228 |
| Q9Z1W6        | SWQDELAQQAEEGSAR                                                     | 0.874688258        | 2                | 5.5535536 |
| Q9Z1W6        | TELGDLGLEPK                                                          | 1.156180655        | 2                | 3.3266084 |
| Q9Z1W6        | TLPPAISAEPVTLTK                                                      | 0.920742967        | 2                | 3.1659143 |
| <b>Q9Z1Y3</b> | <b>CADH2 Cadherin_2</b>                                              | <b>1.107320423</b> | <b>0.986656</b>  | <b>5</b>  |
| Q9Z1Y3        | FAILTDPNSNDGLVTVVKPIDFETNR                                           | 1.123920187        | 3                | 4.2737103 |
| Q9Z1Y3        | FLEAGIYEVPIVITDSGNPPK                                                | 1.193659495        | 2                | 3.723933  |
| Q9Z1Y3        | IDPVNGQITTIIVLDR                                                     | 0.955220162        | 2                | 3.4978778 |
| Q9Z1Y3        | YDEEGGGEEDQDYDLSQLQPDVPEPAIKPVGIR                                    | 1.011503229        | 3                | 5.9474235 |
| Q9Z1Y3        | YSVTGPGADQPPTGIFINIPISGQLSVTKPLDR                                    | 0.964845021        | 3                | 3.8260679 |
| <b>Q9Z221</b> | <b>PMFBP Polyamine_modulated factor 1_binding protein 1</b>          | <b>1.190188337</b> | <b>0.1704908</b> | <b>2</b>  |
| Q9Z221        | DHLHNVMAHLQQENK+Oxidation(7)                                         | 1.247616261        | 2                | 2.5371575 |
| Q9Z221        | ELTNSLSKLQDELAETK                                                    | 0.933312866        | 2                | 2.316555  |
| <b>Q9Z269</b> | <b>VAPB Vesicle_associated membrane protein_associated protein B</b> | <b>1.137501322</b> | <b>0.0124547</b> | <b>2</b>  |
| Q9Z269        | TEAPVAAKPLTSPLDLDAEVKK                                               | 1.113804147        | 3                | 3.4002762 |
| Q9Z269        | VEQVLSLEPQHELK                                                       | 1.158048865        | 2                | 3.8139927 |
| <b>Q9Z270</b> | <b>VAPA Vesicle_associated membrane protein_associated protein A</b> | <b>1.042359855</b> | <b>0.7959035</b> | <b>3</b>  |
| Q9Z270        | FKGPFTDVVTTNLK                                                       | 1.108702051        | 2                | 2.9924164 |
| Q9Z270        | HEQILVLDPPSDLK                                                       | 1.019530769        | 2                | 3.9235733 |
| Q9Z270        | QDGPLPKPHSVSLNDTETR                                                  | 1.081562344        | 3                | 3.7941666 |
| <b>Q9Z277</b> | <b>BAZ1B Tyrosine_protein kinase BAZ1B</b>                           | <b>1.2172157</b>   | <b>0.0373049</b> | <b>2</b>  |
| Q9Z277        | IHPLEKVDEEAVEK                                                       | 1.234301759        | 2                | 2.4542372 |
| Q9Z277        | IHPLEKVDEEAVEK                                                       | 1.084018733        | 2                | 2.466989  |

|               |                                                                           |                    |                  |           |
|---------------|---------------------------------------------------------------------------|--------------------|------------------|-----------|
| <b>Q9Z2I8</b> | <b>SUCB2 Succinyl_CoA ligase [GDP_forming] subunit beta_mitochondrial</b> | <b>0.99669305</b>  | <b>0.9990493</b> | <b>9</b>  |
| Q9Z2I8        | DIFAMDDKSENEPIENEAAAR                                                     | 0.852223238        | 3                | 4.3322616 |
| Q9Z2I8        | IDATQVEVNPFGETPEGQVVCFAK                                                  | 1.153219595        | 2                | 4.8104491 |
| Q9Z2I8        | INFDDNAEFR                                                                | 0.91242475         | 2                | 3.2197979 |
| Q9Z2I8        | LEGTNVQEAQNILK                                                            | 0.975087276        | 2                | 4.8716893 |
| Q9Z2I8        | SENEPIENEAAAR                                                             | 0.819677918        | 2                | 4.0806074 |
| Q9Z2I8        | SHNGPVIWGSPQGGVDIEEVAASSPELIFK                                            | 1.046551698        | 2                | 6.2458944 |
| Q9Z2I8        | SSGLPITSAVDLEDAAK                                                         | 0.943519292        | 2                | 4.8393598 |
| Q9Z2I8        | SSGLPITSAVDLEDAAKK                                                        | 1.027513408        | 2                | 3.1209409 |
| Q9Z2I8        | VMVAEALDISR                                                               | 0.892209759        | 2                | 3.2207944 |
| <b>Q9Z2I9</b> | <b>SUCB1 Succinyl_CoA ligase [ADP_forming] subunit beta_mitochondrial</b> | <b>1.123198987</b> | <b>0.4084184</b> | <b>7</b>  |
| Q9Z2I9        | AVSSQMIGQK                                                                | 0.940301629        | 2                | 2.4948649 |
| Q9Z2I9        | ICNQVLVCER                                                                | 1.323544582        | 2                | 2.8881197 |
| Q9Z2I9        | ILACDDLDEAAK                                                              | 1.092528847        | 2                | 2.9531555 |
| Q9Z2I9        | INFDSNSAYR                                                                | 1.105063996        | 2                | 3.0964592 |
| Q9Z2I9        | MGFPSNIVDAAENMIK                                                          | 1.098465485        | 2                | 3.8836095 |
| Q9Z2I9        | SSDEAYAIK                                                                 | 1.075866648        | 2                | 3.4544938 |
| Q9Z2I9        | VQAILVNIFGGIMR                                                            | 1.188426836        | 2                | 4.2278152 |
| <b>Q9Z2L0</b> | <b>VDAC1 Voltage_dependent anion_selective channel protein 1</b>          | <b>1.160958586</b> | <b>0.040602</b>  | <b>13</b> |
| Q9Z2L0        | EHINLGCVDVFDIAGPSIR                                                       | 0.765121153        | 2                | 4.2503324 |
| Q9Z2L0        | KLETAVNLAWTAGNSNTR                                                        | 0.88923175         | 2                | 5.8981977 |
| Q9Z2L0        | LETAVNLAWTAGNSNTR                                                         | 0.658537444        | 2                | 2.65625   |
| Q9Z2L0        | LTFDSSFSPNTGK                                                             | 1.121084014        | 2                | 3.8990541 |
| Q9Z2L0        | LTFDSSFSPNTGKK                                                            | 1.272780805        | 2                | 3.216538  |
| Q9Z2L0        | LTLSALLDGK                                                                | 1.477712463        | 2                | 2.3503354 |
| Q9Z2L0        | SENGLEFTSSGSANTETTK                                                       | 1.057386466        | 2                | 4.5591269 |
| Q9Z2L0        | TDEFQLHTNVNDGTEFGGSIYQK                                                   | 0.988708167        | 2                | 5.313694  |
| Q9Z2L0        | VNSSLIGLGYTQLKPGIK                                                        | 1.105168302        | 2                | 4.3772149 |
| Q9Z2L0        | VTQSNFAVGK                                                                | 1.153341705        | 2                | 3.1793725 |
| Q9Z2L0        | WNTDNTLGTEITVEDQLAR                                                       | 0.856720514        | 2                | 4.8481493 |
| Q9Z2L0        | WTEYGLTFTEK                                                               | 1.186016371        | 2                | 2.6812062 |
| Q9Z2L0        | YQVDPDACFSAK                                                              | 1.107552297        | 2                | 3.3124263 |
| <b>Q9Z2M4</b> | <b>DECR2 Peroxisomal 2_4_dienoyl_CoA reductase</b>                        | <b>1.180482776</b> | <b>9.005E-05</b> | <b>4</b>  |
| Q9Z2M4        | GQVLQLHAGAAK                                                              | 1.275409849        | 2                | 3.4259551 |
| Q9Z2M4        | HLAVEWGPQNIR                                                              | 1.130542408        | 2                | 3.1142519 |
| Q9Z2M4        | TVVDIDLGTGFNVSR                                                           | 1.094995021        | 2                | 2.8393903 |
| Q9Z2M4        | VNSLAPGAISGTEGLR                                                          | 1.143831397        | 2                | 2.9476192 |
| <b>Q9Z2Q1</b> | <b>SC31A Protein transport protein Sec31A</b>                             | <b>0.950423773</b> | <b>0.0338736</b> | <b>14</b> |
| Q9Z2Q1        | AQDGSNPLSLQDLIEK                                                          | 0.826416693        | 2                | 3.5658054 |
| Q9Z2Q1        | AVQLTQALDNTVVGALLAEK                                                      | 1.186086445        | 2                | 5.5012946 |
| Q9Z2Q1        | CLSSATDPQTK                                                               | 1.326363592        | 2                | 2.8898807 |
| Q9Z2Q1        | DQTLSPTIISGLHSIAR                                                         | 1.126390909        | 2                | 3.7531664 |
| Q9Z2Q1        | IIAGDKVIVIAQK                                                             | 1.260324081        | 2                | 2.4691684 |
| Q9Z2Q1        | LVTFENVGTGQPQGAEQPR                                                       | 1.25194376         | 2                | 5.1337581 |
| Q9Z2Q1        | QVQHILASASPSGR                                                            | 1.284454245        | 2                | 2.4282999 |
| Q9Z2Q1        | RQPVFISQVVTEK                                                             | 1.484875178        | 2                | 2.5390008 |
| Q9Z2Q1        | RQPVFISQVVTEKDFLSR                                                        | 0.842692633        | 3                | 3.5382066 |
| Q9Z2Q1        | SSYEGQPLPK                                                                | 1.073503235        | 2                | 2.3538461 |
| Q9Z2Q1        | TQPPEDISCIAWNR                                                            | 0.942337025        | 2                | 3.5854201 |
| Q9Z2Q1        | TTFEDLIQR                                                                 | 1.00006718         | 2                | 2.6833987 |
| Q9Z2Q1        | VNFEEDSR                                                                  | 0.999164117        | 2                | 2.5600848 |
| Q9Z2Q1        | VYSIMGGSIDGLR                                                             | 1.026322677        | 2                | 2.3722556 |
| <b>Q9Z2U2</b> | <b>ZN292 Zinc finger protein 292</b>                                      | <b>1.110083441</b> | <b>0.6141092</b> | <b>3</b>  |
| Q9Z2U2        | KGQKSNNLNTPNHGK                                                           | 1.134100459        | 2                | 2.5792756 |

|               |                                                       |                    |                  |           |
|---------------|-------------------------------------------------------|--------------------|------------------|-----------|
| Q9Z2U2        | KLEVLNNPDRTVLK                                        | 1.133968673        | 2                | 2.4001083 |
| Q9Z2U2        | LINEDSTNAENQGNTTLK                                    | 1.049695298        | 2                | 2.9656336 |
| <b>Q9Z2Z8</b> | <b>DHCR7 7_dehydrocholesterol reductase</b>           | <b>1.194671811</b> | <b>0.3716408</b> | <b>2</b>  |
| Q9Z2Z8        | AIECSYTSADGLK                                         | 1.178445921        | 2                | 3.6282778 |
| Q9Z2Z8        | FLPGYVGGVQEGAITPAGIVNK                                | 1.212475737        | 2                | 5.3121076 |
| <b>Q9Z311</b> | <b>MECR Trans_2_enoyl_CoA reductase_mitochondrial</b> | <b>0.99190289</b>  | <b>0.7325038</b> | <b>2</b>  |
| Q9Z311        | DIPLQSAATLGVPNCTAYR                                   | 1.169252017        | 2                | 2.4319012 |
| Q9Z311        | LKDLGADYVLTTEEELR                                     | 0.953234578        | 2                | 2.6117787 |
| <b>Q9Z339</b> | <b>GSTO1 Glutathione S_transferase omega_1</b>        | <b>1.191327881</b> | <b>2.789E-10</b> | <b>5</b>  |
| Q9Z339        | GSAPPGPVPEGQIR                                        | 1.020146367        | 2                | 3.6290283 |
| Q9Z339        | LEALELNECIDHTPK                                       | 1.316788587        | 2                | 4.2266698 |
| Q9Z339        | LEEAMANKR                                             | 1.111175361        | 2                | 2.6176231 |
| Q9Z339        | LEEAMANKR+Oxidation(5)                                | 1.628432902        | 2                | 2.5337234 |
| Q9Z339        | NPFGLVPVLENTQGHILITESVITCEYLDEAYPEKK                  | 1.177462611        | 3                | 4.7828174 |

*Time point 2.0 hours*

| Accession number | Protein DESCRIPTION                                               | Protein Ratio (2.0 h) | P-value (2.0 h) | Peptide number (2.0 h) |
|------------------|-------------------------------------------------------------------|-----------------------|-----------------|------------------------|
| Accession number | Peptide sequence                                                  | Peptide Ratio (2.0 h) | Charge state    | Xcorr                  |
| <b>A0JPJ7</b>    | <b>OLA1 Obg_like ATPase 1</b>                                     | <b>1.299273203</b>    | <b>0.006487</b> | <b>2</b>               |
| A0JPJ7           | IGIVGLPNVVK                                                       | 1.59432171            | 2               | 2.65269                |
| A0JPJ7           | YLEANMTQSALPK                                                     | 1.291591456           | 2               | 2.78365                |
| <b>A0JPM9</b>    | <b>EIF3J Eukaryotic translation initiation factor 3 subunit J</b> | <b>1.120451294</b>    | <b>0.402165</b> | <b>2</b>               |
| A0JPM9           | EEAEVKPEVKISEK                                                    | 1.105832724           | 2               | 2.33458                |
| A0JPM9           | RLEEPPEESK                                                        | 1.164045769           | 2               | 2.49113                |
| <b>A0JPQ8</b>    | <b>ALKMO Alkylglycerol monoxygenase</b>                           | <b>1.12406748</b>     | <b>0.292935</b> | <b>2</b>               |
| A0JPQ8           | LDDILTSMSAGVVSRR                                                  | 1.113012553           | 2               | 2.82701                |
| A0JPQ8           | SITHLASGSWK                                                       | 1.137524644           | 2               | 2.41878                |
| <b>A1A5P5</b>    | <b>ARMC9 LisH domain_containing protein ARMC9</b>                 | <b>1.080271469</b>    | <b>0.776731</b> | <b>2</b>               |
| A1A5P5           | CFIKEGNAEMIR+Oxidation(10)                                        | 1.080276047           | 2               | 2.71359                |
| A1A5P5           | LYLAQNTKVLRLMLEGR+Oxidation(12)                                   | 1.076536161           | 2               | 2.30655                |
| <b>A2ADY9</b>    | <b>DDI2 Protein DDI1 homolog 2</b>                                | <b>1.022857897</b>    | <b>0.988501</b> | <b>2</b>               |
| A2ADY9           | IDFSSIAVPGTSPNPQQR                                                | 0.933719311           | 2               | 2.56155                |
| A2ADY9           | VLVEQQQDR                                                         | 1.022886122           | 2               | 2.76837                |
| <b>A2AF47</b>    | <b>DOC11 Dedicator of cytokinesis protein 11</b>                  | <b>0.934614669</b>    | <b>0.364298</b> | <b>2</b>               |
| A2AF47           | MPFAWAARPIFKDVQGSLLDGR+Oxidation(1)                               | 0.69008108            | 3               | 3.3588                 |
| A2AF47           | NLLMCYLYIVK                                                       | 1.039319973           | 2               | 2.49465                |
| <b>A2AGT5</b>    | <b>CKAP5 Cytoskeleton_associated protein 5</b>                    | <b>0.180207624</b>    | <b>0.000209</b> | <b>2</b>               |
| A2AGT5           | DQVLAMLEKAKANMPSKPAAPAK+Oxidation(14)                             | 0.174735754           | 2               | 2.82966                |
| A2AGT5           | IGSKENTKEGLAELYEYK                                                | 0.510272645           | 2               | 2.46687                |
| <b>A2AJL3</b>    | <b>FGGY FGGY carbohydrate kinase domain_containing protein</b>    | <b>1.065107427</b>    | <b>0.98662</b>  | <b>2</b>               |
| A2AJL3           | GHGLTCEGQPVTSR                                                    | 1.070439036           | 2               | 3.66454                |
| A2AJL3           | MSKVGKVFPEHADK                                                    | 0.980617128           | 2               | 2.38574                |
| <b>A2AL36</b>    | <b>CNTRL Centriolin</b>                                           | <b>1.136769698</b>    | <b>0.122834</b> | <b>3</b>               |
| A2AL36           | EQQLDIMNR+Oxidation(7)                                            | 1.143941188           | 2               | 2.33223                |
| A2AL36           | LQDEKETLLQR                                                       | 1.398454865           | 2               | 2.40783                |
| A2AL36           | NQDKLNK                                                           | 0.946805521           | 1               | 2.1699                 |
| <b>A2AQP0</b>    | <b>MYH7B Myosin_7B</b>                                            | <b>0.967952443</b>    | <b>0.946315</b> | <b>6</b>               |
| A2AQP0           | AITDAAMMAEELKK                                                    | 1.443431115           | 2               | 3.50284                |
| A2AQP0           | DIDDLELTLAK                                                       | 0.898379464           | 2               | 3.55084                |
| A2AQP0           | EQDTSÄHLER                                                        | 0.959399233           | 2               | 2.38219                |
| A2AQP0           | KDIDDLELTLAK                                                      | 0.9119632             | 2               | 2.32548                |
| A2AQP0           | SIQELEK                                                           | 1.170826917           | 2               | 2.39957                |
| A2AQP0           | VGNEYVTK                                                          | 1.202402124           | 2               | 2.62112                |
| <b>A2ASS6</b>    | <b>TITIN Titin</b>                                                | <b>0.893400636</b>    | <b>0.000156</b> | <b>11</b>              |
| A2ASS6           | AENRFGIGPPAETIQRRTAR                                              | 0.616705312           | 2               | 2.67445                |
| A2ASS6           | DVLEPEIDLVDVALR                                                   | 0.915069341           | 2               | 2.82072                |
| A2ASS6           | KDLNMVVSAARISCGGAIR                                               | 0.859938674           | 2               | 2.30722                |
| A2ASS6           | KDGTQLACKVTGTPPIK                                                 | 0.67951183            | 2               | 2.72782                |
| A2ASS6           | SSVLSWSRPKDDGGSR                                                  | 0.811079652           | 2               | 2.34303                |
| A2ASS6           | TCEIEIGQLK                                                        | 0.846115287           | 2               | 2.45516                |
| A2ASS6           | TFLQDQLVSLQVLK                                                    | 0.866122213           | 1               | 1.93291                |
| A2ASS6           | VGDDAWIKDTTGTLAR                                                  | 1.228738573           | 2               | 2.49936                |
| A2ASS6           | VKNAMPEDIDEYAVEIEGK+Oxidation(5)                                  | 0.534713818           | 2               | 2.34276                |
| A2ASS6           | VMKLTGEEYQFRK+Oxidation(2)                                        | 1.119074364           | 2               | 2.34529                |
| A2ASS6           | YDGGHKLTYGIVEK                                                    | 1.70593978            | 2               | 2.30213                |

|               |                                                                   |                    |                 |           |
|---------------|-------------------------------------------------------------------|--------------------|-----------------|-----------|
| <b>A2VCW9</b> | <b>AASS Alpha_aminoadipic semialdehyde synthase_mitochondrial</b> | <b>0.86446107</b>  | <b>0.011263</b> | <b>9</b>  |
| A2VCW9        | AGGILQEDITEACLILGVK                                               | 0.999660528        | 2               | 2.61955   |
| A2VCW9        | AQEANMSLLDEVLK                                                    | 0.844736414        | 2               | 3.04584   |
| A2VCW9        | GAQEVFNELPCEYVEPHELK                                              | 0.972004272        | 2               | 4.68463   |
| A2VCW9        | KTDGVYDPVEYEKYPYPER                                               | 0.920198938        | 3               | 3.68836   |
| A2VCW9        | KYDINTVNVTVGK                                                     | 0.901279607        | 2               | 3.978     |
| A2VCW9        | LQSLVESQDLVISLLPYVLPVPAK                                          | 0.765750374        | 3               | 3.67207   |
| A2VCW9        | REDVNAWER                                                         | 0.833227113        | 2               | 2.78886   |
| A2VCW9        | SSVVPVEGCPELPHK                                                   | 0.87482965         | 2               | 3.07197   |
| A2VCW9        | YDINTVNVTVGK                                                      | 0.767486865        | 2               | 2.77871   |
| <b>A3KMP2</b> | <b>TTC38 Tetratricopeptide repeat protein 38</b>                  | <b>1.109826635</b> | <b>0.316209</b> | <b>2</b>  |
| A3KMP2        | DVGLPLCQALLEAENGNPDR                                              | 1.182243354        | 2               | 2.39277   |
| A3KMP2        | VLELLLPPIR                                                        | 0.867424022        | 2               | 2.72271   |
| <b>A7VJC2</b> | <b>ROA2 Heterogeneous nuclear ribonucleoproteins A2/B1</b>        | <b>1.03090678</b>  | <b>0.252702</b> | <b>11</b> |
| A7VJC2        | EESGKPGAHVTVK                                                     | 1.278264229        | 2               | 3.26065   |
| A7VJC2        | GGGGNFGPGPGSNFR                                                   | 1.112915994        | 2               | 3.14221   |
| A7VJC2        | GGNFGFGDSR                                                        | 1.068521488        | 2               | 2.87664   |
| A7VJC2        | IDTIEIITDR                                                        | 1.042973251        | 2               | 3.88723   |
| A7VJC2        | LFIGGLSFETTEESLR                                                  | 1.320401837        | 2               | 4.54467   |
| A7VJC2        | LTDCVVMR                                                          | 1.227713317        | 2               | 2.64514   |
| A7VJC2        | NMGGPYGGGNYGPGSGSGGYGGR                                           | 0.955596998        | 2               | 5.96481   |
| A7VJC2        | NYEQWQWK                                                          | 1.008223061        | 1               | 2.36986   |
| A7VJC2        | QEMQEVQSSR                                                        | 0.994190768        | 2               | 3.07704   |
| A7VJC2        | QEMQEVQSSR+Oxidation(3)                                           | 1.369192578        | 2               | 2.56361   |
| A7VJC2        | YHTINGHNAEVR                                                      | 1.006085865        | 2               | 3.86635   |
| <b>B0BN93</b> | <b>PSD13 26S proteasome non_ATPase regulatory subunit 13</b>      | <b>1.035751077</b> | <b>0.998281</b> | <b>2</b>  |
| B0BN93        | GSIDEVDKR                                                         | 0.987608993        | 2               | 2.48293   |
| B0BN93        | SAWQQPDLAANEQQLLR                                                 | 1.050455826        | 2               | 3.3212    |
| <b>B0BNE5</b> | <b>ESTD S_formylglutathione hydrolase</b>                         | <b>1.083056369</b> | <b>0.879756</b> | <b>8</b>  |
| B0BNE5        | AFNGYLGPDQSK                                                      | 1.136556669        | 2               | 3.68688   |
| B0BNE5        | AYDATCLVK                                                         | 1.109954868        | 2               | 2.40361   |
| B0BNE5        | FAIYLPPQAESAK                                                     | 1.149721228        | 2               | 2.58628   |
| B0BNE5        | MYSYVTEELPQLINANFPVDPQR                                           | 1.18601009         | 3               | 5.16689   |
| B0BNE5        | SGCQQAASEHGLVVIAPDTSR                                             | 1.051536805        | 2               | 5.6418    |
| B0BNE5        | SVSAFAPICNPVLCPWGK                                                | 1.111606855        | 2               | 4.66456   |
| B0BNE5        | SYSGPQIDILIDQKDEFLSNGQLLPDNFIAAECTK                               | 1.378334641        | 3               | 5.44643   |
| B0BNE5        | VFEHSSVELK                                                        | 1.015878692        | 2               | 2.56532   |
| <b>B0BNN3</b> | <b>CAH1 Carbonic anhydrase 1</b>                                  | <b>1.029312072</b> | <b>0.915168</b> | <b>3</b>  |
| B0BNN3        | ADGLAIIGVLMK                                                      | 0.798696567        | 2               | 2.84789   |
| B0BNN3        | HDSSLKPVSVSNPATAK                                                 | 1.038619799        | 3               | 4.79749   |
| B0BNN3        | VLDALSSVK                                                         | 1.076600187        | 2               | 2.40359   |
| <b>B0K020</b> | <b>CISD1 CDGSH iron_sulfur domain_containing protein 1</b>        | <b>0.940591829</b> | <b>0.999968</b> | <b>2</b>  |
| B0K020        | HNEETGDNVGPLIK                                                    | 0.926707666        | 2               | 5.71477   |
| B0K020        | VVHAFDMEDLGDK                                                     | 0.98948212         | 2               | 3.6518    |
| <b>B2GV24</b> | <b>UFL1 E3 UFM1_protein ligase 1</b>                              | <b>1.063481737</b> | <b>0.143598</b> | <b>3</b>  |
| B2GV24        | QLVSQNK                                                           | 0.459636424        | 1               | 1.91917   |
| B2GV24        | TYDLPQDFTLQALQTR                                                  | 1.301517309        | 2               | 2.73793   |
| B2GV24        | VNIVDLQQVINVDLTHIENR                                              | 1.06229318         | 3               | 4.1598    |
| <b>B2RX88</b> | <b>CSPP1 Centrosome and spindle pole associated protein 1</b>     | <b>1.069687119</b> | <b>0.999765</b> | <b>2</b>  |
| B2RX88        | SISSVNVQVRMRNEDR                                                  | 1.07246905         | 2               | 2.55805   |
| B2RX88        | SISSVNVQVRMRNEDR+Oxidation(12)                                    | 1.075350547        | 2               | 2.55827   |
| <b>B2RY56</b> | <b>RBM25 RNA_binding protein 25</b>                               | <b>1.025086338</b> | <b>0.298102</b> | <b>2</b>  |

|               |                                                                        |                    |                 |          |
|---------------|------------------------------------------------------------------------|--------------------|-----------------|----------|
| B2RY56        | FEDESDDDVPRKR                                                          | 0.608054536        | 2               | 2.33369  |
| B2RY56        | LLIYETEAk                                                              | 1.095360917        | 2               | 2.49982  |
| <b>B2RYW9</b> | <b>FAHD2 Fumarylacetoacetate hydrolase domain_containing protein 2</b> | <b>1.027179988</b> | <b>0.963528</b> | <b>4</b> |
| B2RYW9        | ATDVMAYVAGFTVAHDVSAR                                                   | 1.103667322        | 2               | 3.0594   |
| B2RYW9        | KGDEVQCEIEELGVIINK                                                     | 1.105670875        | 2               | 5.32722  |
| B2RYW9        | TFDTFCPLGPALVTK                                                        | 0.903642955        | 2               | 5.0672   |
| B2RYW9        | VNGEIVQSSNTNQMVFK                                                      | 0.783970629        | 2               | 4.38875  |
| <b>B2RZ78</b> | <b>VPS29 Vacuolar protein sorting_associated protein 29</b>            | <b>1.057264434</b> | <b>0.892089</b> | <b>2</b> |
| B2RZ78        | GDFDESLNYPEQK                                                          | 1.052845681        | 2               | 3.31976  |
| B2RZ78        | IQHILCTGNLCTK                                                          | 1.216876032        | 2               | 3.30645  |
| <b>B3DMA2</b> | <b>ACD11 Acyl_CoA dehydrogenase family member 11</b>                   | <b>0.957212123</b> | <b>0.643447</b> | <b>4</b> |
| B3DMA2        | AVLTVTQYR                                                              | 1.194836102        | 2               | 2.30406  |
| B3DMA2        | NLPDSDNEECLVHGDFK                                                      | 0.932568338        | 2               | 3.59308  |
| B3DMA2        | RGQEVLTR                                                               | 0.963838141        | 2               | 2.7138   |
| B3DMA2        | SGQSNPTFFLQK                                                           | 0.884075535        | 2               | 2.94337  |
| <b>B5DFC8</b> | <b>EIF3C Eukaryotic translation initiation factor 3 subunit C</b>      | <b>1.155837071</b> | <b>0.34612</b>  | <b>4</b> |
| B5DFC8        | GCILTLVER                                                              | 1.122675138        | 2               | 2.39248  |
| B5DFC8        | GTEITHAVVIK                                                            | 1.031266779        | 2               | 2.46147  |
| B5DFC8        | SEQDQAENEGEDSAVLMER                                                    | 1.91249947         | 2               | 4.6879   |
| B5DFC8        | TEPTAQQLALQLAEK                                                        | 1.211713679        | 2               | 4.75486  |
| <b>D3ZTX0</b> | <b>TMED7 Transmembrane emp24 domain_containing protein 7</b>           | <b>1.145424784</b> | <b>4.79E-06</b> | <b>2</b> |
| D3ZTX0        | SVIDYQTHFR                                                             | 1.208791478        | 2               | 2.59085  |
| D3ZTX0        | VSALTQMESACVSIHEALK                                                    | 0.386772844        | 2               | 2.47584  |
| <b>D3ZW55</b> | <b>ITPA Inosine triphosphate pyrophosphatase</b>                       | <b>1.289591908</b> | <b>0.715715</b> | <b>3</b> |
| D3ZW55        | IDLPEYQGEPEISIQK                                                       | 0.992372263        | 2               | 4.30649  |
| D3ZW55        | KLEEVQILGDKFPCTLVAQK                                                   | 1.084732256        | 3               | 4.22841  |
| D3ZW55        | LQEYFGVTDGAGDH                                                         | 1.123710618        | 2               | 3.20843  |
| <b>D3ZZL9</b> | <b>GCC2 GRIP and coiled_coil domain_containing protein 2</b>           | <b>0.974438481</b> | <b>0.909665</b> | <b>2</b> |
| D3ZZL9        | IEDLEQEMKIQK                                                           | 0.872530608        | 2               | 2.43575  |
| D3ZZL9        | MLQETVKEAELR+Oxidation(1)                                              | 1.022532576        | 2               | 2.37464  |
| <b>D4A4T9</b> | <b>CHR1 Cysteine and histidine_rich domain_containing protein 1</b>    | <b>1.190773909</b> | <b>0.035017</b> | <b>2</b> |
| D4A4T9        | KEEDSDEIKIGTSCK                                                        | 1.363532774        | 2               | 2.595    |
| D4A4T9        | LSSGNEEDKKEEDSDEIK                                                     | 1.186144356        | 3               | 4.35151  |
| <b>E9Q557</b> | <b>DESP Desmoplakin</b>                                                | <b>0.920393962</b> | <b>0.9237</b>   | <b>2</b> |
| E9Q557        | KQVQTSQKNLTR                                                           | 0.968680301        | 1               | 1.99945  |
| E9Q557        | SQCTQVVQER                                                             | 0.897874697        | 2               | 2.79091  |
| <b>O08550</b> | <b>MLL4 Histone_lysin N_methyltransferase MLL4</b>                     | <b>1.175543292</b> | <b>0.06034</b>  | <b>2</b> |
| O08550        | HAAVALGQARAMVPEDVPR                                                    | 1.174316959        | 2               | 2.40177  |
| O08550        | RGEEGTERMVQALTELLR                                                     | 1.420795486        | 2               | 2.83263  |
| <b>O08557</b> | <b>DDAH1 N(G)_N(G)_dimethylarginine dimethylaminohydrolase 1</b>       | <b>1.152831123</b> | <b>0.872462</b> | <b>9</b> |
| O08557        | DYAVSTVPVADSLHLK                                                       | 1.029868253        | 2               | 3.46961  |
| O08557        | GAEILADTFK                                                             | 0.989228236        | 1               | 2.13932  |
| O08557        | GAEILADTFKDYAVSTVPVADSLHLK                                             | 1.139250215        | 3               | 3.50771  |
| O08557        | LKDHLIPVSNSEMEK                                                        | 0.866922695        | 2               | 3.51165  |
| O08557        | LQLNIVEMKDENATLDGGDVLFTGR                                              | 1.669425123        | 3               | 3.4026   |
| O08557        | LTVPDDMAANCIYLNIPSK                                                    | 1.026326272        | 2               | 3.42996  |
| O08557        | SFCSMAGPNLIAIGSSESAQK                                                  | 0.866632889        | 2               | 4.64248  |
| O08557        | SGGEEVDFAR                                                             | 0.869643723        | 2               | 2.42272  |
| O08557        | VDGLLTCCSVFINK                                                         | 0.826400326        | 2               | 3.4368   |

|               |                                                                   |                    |                 |           |
|---------------|-------------------------------------------------------------------|--------------------|-----------------|-----------|
| <b>O08583</b> | <b>THOC4 THO complex subunit 4</b>                                | <b>0.970187859</b> | <b>0.124336</b> | <b>2</b>  |
| O08583        | QQLSAEELDAQLDAYNAR                                                | 0.921663452        | 2               | 2.90257   |
| O08583        | SLGTADVHFER                                                       | 1.182534593        | 2               | 2.39824   |
| <b>O08601</b> | <b>MTP Microsomal triglyceride transfer protein large subunit</b> | <b>1.253874752</b> | <b>2.65E-14</b> | <b>11</b> |
| O08601        | EFYSYENEPVGIE NLK                                                 | 1.226016071        | 2               | 4.64537   |
| O08601        | GCPSLAEHWKSIR                                                     | 1.357612303        | 2               | 4.02157   |
| O08601        | GHTTGLSLNNER                                                      | 1.474194855        | 2               | 2.69361   |
| O08601        | MLSASGDPVSVVK                                                     | 1.259405319        | 2               | 3.71733   |
| O08601        | NALLPEGIPLLLK                                                     | 1.494676516        | 1               | 2.74851   |
| O08601        | NILLSIGELPK                                                       | 1.263501586        | 2               | 4.03698   |
| O08601        | REEILQILK                                                         | 1.102859784        | 3               | 3.39438   |
| O08601        | SDSSIILQER                                                        | 1.20674992         | 2               | 2.40386   |
| O08601        | SGSSSAYTYVER                                                      | 1.202025704        | 2               | 3.72905   |
| O08601        | SNLNIFQYIGK                                                       | 1.803849557        | 2               | 3.08844   |
| O08601        | VKEFYSYENEPVGIE NLK                                               | 1.329306235        | 2               | 3.44784   |
| <b>O08795</b> | <b>GLU2B Glucosidase 2 subunit beta</b>                           | <b>1.071959368</b> | <b>0.999998</b> | <b>6</b>  |
| O08795        | ETVVTSTTEPSR                                                      | 1.074453823        | 2               | 2.95915   |
| O08795        | KLWEEQQA AAK                                                      | 1.043166914        | 2               | 3.43167   |
| O08795        | LWEEQQA AAK                                                       | 1.124556691        | 2               | 2.32246   |
| O08795        | MPPYDEETQA IIDAAQEAR                                              | 0.931619382        | 2               | 5.39153   |
| O08795        | SLEDQVETLR                                                        | 0.994676294        | 2               | 3.43106   |
| O08795        | YEQGTGCWQGP NR                                                    | 1.069083075        | 2               | 3.90798   |
| <b>O08874</b> | <b>PKN2 Serine/threonine _protein kinase N2</b>                   | <b>1.200476072</b> | <b>0.142134</b> | <b>3</b>  |
| O08874        | ATSVALPGWSPENRSSFMSR                                              | 1.139865254        | 2               | 2.33903   |
| O08874        | QLDIELK                                                           | 1.225948415        | 1               | 2.35961   |
| O08874        | YSLEQRLNELPKNH PK                                                 | 0.829262455        | 2               | 2.40126   |
| <b>O08949</b> | <b>TF2AA Transcription initiation factor IIA subunit 1</b>        | <b>1.112093251</b> | <b>0.593396</b> | <b>2</b>  |
| O08949        | DGIMNLNGRDYIFSK+Oxidation(4)                                      | 1.042077737        | 2               | 2.59037   |
| O08949        | MANSANTNTV PK                                                     | 0.804931469        | 2               | 2.56478   |
| <b>O09158</b> | <b>CP3AP Cytochrome P450 3A25</b>                                 | <b>0.61304415</b>  | <b>0.039817</b> | <b>2</b>  |
| O09158        | DVEINGVFIPK                                                       | 0.541494073        | 2               | 2.47241   |
| O09158        | VDFLQLMMNTQNSK                                                    | 0.624155763        | 2               | 2.60665   |
| <b>O09171</b> | <b>BHMT1 Betaine _homocysteine S_ methyltransferase 1</b>         | <b>1.351161471</b> | <b>9.9E-20</b>  | <b>13</b> |
| O09171        | AGAAIVGVNCHFDPSTSLQTIK                                            | 1.308624891        | 2               | 6.02224   |
| O09171        | AGPWTPEAAVEHPEAVR                                                 | 1.257556459        | 2               | 5.19266   |
| O09171        | AGSNVMQFTFFYASEDKLENR                                             | 3.909435861        | 2               | 4.68469   |
| O09171        | GAAELMQQK                                                         | 1.300397932        | 2               | 3.50029   |
| O09171        | GAAELMQQK+Oxidation(6)                                            | 1.309982514        | 2               | 2.78246   |
| O09171        | IFHQQLLEVFMK                                                      | 1.269436424        | 2               | 2.88248   |
| O09171        | KEYWQNLR                                                          | 1.215878227        | 3               | 3.42566   |
| O09171        | LNAGEVVIGDGGFVFALEK                                               | 1.635279558        | 3               | 5.90617   |
| O09171        | QGFIDLPEFPFGLLEPR                                                 | 1.170481034        | 2               | 5.17962   |
| O09171        | QVADEGDALVAGGVSQTPSYLSCK                                          | 1.507681042        | 2               | 6.10487   |
| O09171        | TSGKPIAATMCIGPEGDLHGVSPEGCAVR                                     | 1.249710381        | 3               | 6.45414   |
| O09171        | TSGKPIAATMCIGPEGDLHGVSPEGCAVR+Oxidation(10)                       | 1.518703705        | 3               | 6.18505   |
| O09171        | VNEAACDIAR                                                        | 1.274906013        | 2               | 3.98695   |
| <b>O09173</b> | <b>HGD Homogentisate 1_2_dioxygenase</b>                          | <b>0.904068021</b> | <b>0.180097</b> | <b>9</b>  |
| O09173        | CFYNSDGDFLIVPQK                                                   | 1.685537429        | 2               | 4.16449   |
| O09173        | FSVDVFEETR                                                        | 1.171048899        | 2               | 3.82779   |
| O09173        | GYILEVYGVHFELPDLGPIGANLANPR                                       | 1.074935591        | 3               | 5.27785   |
| O09173        | LLIYTEFGK                                                         | 1.423261168        | 2               | 2.516     |
| O09173        | NCMSEFMGLIK                                                       | 1.173601262        | 2               | 3.11948   |
| O09173        | QDVSPFNVAWHGNYTPYK                                                | 0.95716258         | 2               | 3.49855   |
| O09173        | QGGFLPGGSLHSAMTPHGPDADCFEK                                        | 1.08064114         | 3               | 3.42256   |



|               |                                                                                |                    |                 |           |
|---------------|--------------------------------------------------------------------------------|--------------------|-----------------|-----------|
| O09173        | SLRPGVAIADFVIFPPR                                                              | 1.113421661        | 2               | 3.73116   |
| O09173        | YISGFGNECASEDPR                                                                | 1.221497662        | 2               | 3.8449    |
| <b>O35077</b> | <b>GPDA Glycerol_3_phosphate dehydrogenase [NAD_]_ cytoplasmic</b>             | <b>1.435586128</b> | <b>9.71E-11</b> | <b>17</b> |
| O35077        | ANTIGISLIK                                                                     | 1.184108972        | 2               | 3.11797   |
| O35077        | ELHSILQHK                                                                      | 1.201051679        | 1               | 2.70561   |
| O35077        | FCETTIGCK                                                                      | 1.185454774        | 2               | 2.71167   |
| O35077        | FCETTIGCKDPAQGQLLK                                                             | 1.246721459        | 2               | 5.04099   |
| O35077        | GIDEGPNGLK                                                                     | 1.227782955        | 2               | 2.73005   |
| O35077        | GLVDKFLFTAVYK                                                                  | 1.565599825        | 3               | 3.96243   |
| O35077        | ICDQLKGHLK                                                                     | 1.159077269        | 3               | 3.33756   |
| O35077        | ITVVQEVDTVEICGALK                                                              | 0.979946757        | 2               | 4.91277   |
| O35077        | IVGSNASQLAHFDPR                                                                | 2.336584452        | 2               | 3.0842    |
| O35077        | KLTEIINTQHENVK                                                                 | 1.179634452        | 2               | 5.20068   |
| O35077        | LPPNVVAVPDVVQAATGADILVFVVPHQFIGK                                               | 1.225605458        | 3               | 4.64334   |
| O35077        | LTEIINTQHENVK                                                                  | 1.151689454        | 2               | 4.37482   |
| O35077        | NIVAVGAGFCDLGFGDNTK                                                            | 1.218947116        | 2               | 4.86131   |
| O35077        | SIEQLEK                                                                        | 1.170826917        | 2               | 2.46597   |
| O35077        | VCIVGSGNWGSAIAK                                                                | 1.205023264        | 2               | 4.5779    |
| O35077        | VCYEQPVGEFICCLQNHPEHM                                                          | 1.292595082        | 3               | 4.40625   |
| O35077        | VTMWVFEEDIGGR                                                                  | 1.838677664        | 2               | 3.3347    |
| <b>O35078</b> | <b>OXDA D_ amino_ acid oxidase</b>                                             | <b>1.486490863</b> | <b>0.038137</b> | <b>2</b>  |
| O35078        | GQIIQVEAPWIK                                                                   | 1.360964148        | 2               | 3.03027   |
| O35078        | SCCQLEPTLK                                                                     | 1.740775529        | 2               | 2.74572   |
| <b>O35094</b> | <b>TIM44 Mitochondrial import inner membrane translocase subunit TIM44</b>     | <b>0.968252157</b> | <b>0.892508</b> | <b>3</b>  |
| O35094        | KLEESDALQEAR                                                                   | 0.998675758        | 2               | 3.41097   |
| O35094        | TEMSEVLTEILR                                                                   | 0.828731908        | 2               | 2.5011    |
| O35094        | VTDLLGLGFSK                                                                    | 0.946562465        | 2               | 3.51297   |
| <b>O35142</b> | <b>COPB2 Coatomer subunit beta_</b>                                            | <b>1.27844565</b>  | <b>6.28E-10</b> | <b>5</b>  |
| O35142        | AAESLADPTEYENLFPGLK                                                            | 1.356263519        | 2               | 4.13002   |
| O35142        | FELALQLGELK                                                                    | 1.282627315        | 2               | 2.9522    |
| O35142        | GSNNVALGYDEGSIIVK                                                              | 1.077242617        | 2               | 3.46858   |
| O35142        | HSEVQQANLK                                                                     | 0.943374949        | 2               | 3.72563   |
| O35142        | TFEVCDLPVR                                                                     | 1.01489142         | 2               | 2.62204   |
| <b>O35180</b> | <b>SH3G3 Endophilin_A3</b>                                                     | <b>1.128107588</b> | <b>0.360376</b> | <b>2</b>  |
| O35180        | AVAEILSK                                                                       | 1.172720146        | 1               | 1.94413   |
| O35180        | QSTEILQELQNK                                                                   | 0.968680301        | 1               | 2.02915   |
| <b>O35244</b> | <b>PRDX6 Peroxiredoxin_6</b>                                                   | <b>0.828357404</b> | <b>1.99E-05</b> | <b>9</b>  |
| O35244        | DINAYNGAAPTEK                                                                  | 0.950564734        | 2               | 3.9689    |
| O35244        | DLAILLGMLDPAEKDEK                                                              | 1.042538337        | 2               | 3.54871   |
| O35244        | GESVMVLPTLPEEEAK                                                               | 0.902066352        | 2               | 3.06817   |
| O35244        | KGESVMVLPTLPEEEAK                                                              | 1.063373626        | 2               | 5.04885   |
| O35244        | LIALSIDSVEDHFAWSK                                                              | 1.294370035        | 2               | 4.41776   |
| O35244        | LSILYPATTGR                                                                    | 1.449435245        | 2               | 3.00651   |
| O35244        | NFDEILR                                                                        | 1.080960584        | 1               | 2.37729   |
| O35244        | VVDSLQLTASNVPATVPDVK                                                           | 1.117653933        | 2               | 6.05171   |
| O35244        | VVFIFGPDKK                                                                     | 1.438479967        | 2               | 2.49274   |
| <b>O35469</b> | <b>3BHS6 3 beta_ hydroxysteroid dehydrogenase/Delta 5__4_ isomerase type 6</b> | <b>0.803731252</b> | <b>0.057416</b> | <b>2</b>  |
| O35469        | DLGYEPLVSWEEAK                                                                 | 0.81279166         | 2               | 4.26753   |
| O35469        | TSEWIGTLVEQHR                                                                  | 0.804859809        | 2               | 3.51988   |
| <b>O35509</b> | <b>RB11B Ras_ related protein Rab_11B</b>                                      | <b>1.245616764</b> | <b>0.687516</b> | <b>5</b>  |
| O35509        | AQIWDTAGQER                                                                    | 0.984338971        | 2               | 2.34214   |
| O35509        | GAVGALLVYDIAK                                                                  | 1.060832406        | 2               | 3.51587   |
| O35509        | HLTYENVER                                                                      | 1.245656744        | 2               | 2.54362   |
| O35509        | NEFNLESK                                                                       | 1.031186983        | 1               | 2.10164   |

|               |                                                                                          |                    |                 |          |
|---------------|------------------------------------------------------------------------------------------|--------------------|-----------------|----------|
| O35509        | VVLIGDSGVGK                                                                              | 1.23911658         | 2               | 2.6032   |
| <b>O35567</b> | <b>PUR9 Bifunctional purine biosynthesis protein PURH</b>                                | <b>1.131440657</b> | <b>0.095449</b> | <b>7</b> |
| O35567        | ALFEEVPELLTEAEK                                                                          | 1.235790963        | 2               | 2.83425  |
| O35567        | DGQVIGIGAGQQSR                                                                           | 1.0317981          | 2               | 3.00033  |
| O35567        | EVSDGIVAPGYEEALK                                                                         | 1.102501821        | 2               | 3.5939   |
| O35567        | HVSPAGAAVGVPLSEDEAR                                                                      | 1.320231987        | 2               | 5.43879  |
| O35567        | MSSFQDFVALSDVCDVPTAK                                                                     | 1.196446244        | 2               | 3.93519  |
| O35567        | VTVVCEPEDYGAVAAEMQSGNK                                                                   | 1.168933932        | 2               | 5.37996  |
| O35567        | YTQNSVVCYAK                                                                              | 1.283079634        | 2               | 2.80593  |
| <b>O35660</b> | <b>GSTM6 Glutathione S_transferase Mu 6</b>                                              | <b>1.181664813</b> | <b>0.364163</b> | <b>2</b> |
| O35660        | RYAMGDAPDYDR                                                                             | 0.919564086        | 2               | 3.90649  |
| O35660        | YAMGDAPDYDR+Oxidation(3)                                                                 | 1.186890126        | 2               | 2.82366  |
| <b>O35760</b> | <b>IDI1 Isopentenyl_diphosphate Delta_isomerase 1</b>                                    | <b>0.468619625</b> | <b>0.132329</b> | <b>4</b> |
| O35760        | AELGIPLLEVDLNMNYLTR                                                                      | 1.063236989        | 2               | 3.84639  |
| O35760        | ITFPGCFTNSCCSHPLNPNNGELEENDAMGVK                                                         | 0.627778819        | 3               | 5.49925  |
| O35760        | NCHLNENIDK                                                                               | 0.566069168        | 2               | 2.99966  |
| O35760        | NVTLNPDPNEIK                                                                             | 0.493867411        | 2               | 2.82228  |
| <b>O35763</b> | <b>MOES Moesin</b>                                                                       | <b>1.005238784</b> | <b>0.120123</b> | <b>5</b> |
| O35763        | ALTSELANAR                                                                               | 1.0751182          | 2               | 2.60171  |
| O35763        | AQMVQEDLEK                                                                               | 0.786846182        | 2               | 2.36089  |
| O35763        | AQQELEEQTR                                                                               | 0.735033322        | 2               | 3.20108  |
| O35763        | IQVWHEEHR                                                                                | 0.940943515        | 2               | 2.40821  |
| O35763        | TQEQLASEMAELTAR                                                                          | 1.014065629        | 2               | 3.23258  |
| <b>O35783</b> | <b>CALU Calumenin</b>                                                                    | <b>0.807914845</b> | <b>0.568126</b> | <b>2</b> |
| O35783        | HLVYESDQDKDGK                                                                            | 0.792423231        | 2               | 4.47547  |
| O35783        | VHNDAAQNFDYDHDAFLGAEAAK                                                                  | 1.195094782        | 3               | 4.94551  |
| <b>O35796</b> | <b>C1QBP Complement component 1 Q subcomponent_binding protein_mitochondrial</b>         | <b>0.851717057</b> | <b>0.427431</b> | <b>3</b> |
| O35796        | AEEQEPELTSTPNFVVEVTK                                                                     | 1.042837661        | 2               | 4.66994  |
| O35796        | AFVEFLTDEIKEEK                                                                           | 0.756026138        | 2               | 2.83054  |
| O35796        | TLVLDCHYPEDEIGHHEDEAESDIFSİK                                                             | 1.305942001        | 3               | 5.09128  |
| <b>O35814</b> | <b>STIP1 Stress_induced_phosphoprotein 1</b>                                             | <b>1.143686516</b> | <b>0.924955</b> | <b>8</b> |
| O35814        | ALDLSSCK                                                                                 | 1.021789536        | 1               | 2.11371  |
| O35814        | ALSAGNIDDALQCYSIAIK                                                                      | 1.140487013        | 2               | 5.03347  |
| O35814        | AMADPEVQQIMSDPAMR                                                                        | 0.92141934         | 2               | 4.23991  |
| O35814        | DCEECIQLEPTFIK                                                                           | 1.204178123        | 2               | 3.94963  |
| O35814        | ELIEQLQNKPSDLGTK                                                                         | 0.988801255        | 2               | 4.10532  |
| O35814        | LDPQNHVLYSNR                                                                             | 3.614292973        | 2               | 3.12389  |
| O35814        | LMDVGLIAIR                                                                               | 1.032237332        | 2               | 3.37223  |
| O35814        | TVDLKPDWGWK                                                                              | 1.00209521         | 2               | 2.44819  |
| <b>O35826</b> | <b>GLCNE Bifunctional UDP_N_acetylglucosamine 2_epimerase/N_acetylmannosamine kinase</b> | <b>1.707828836</b> | <b>0.00077</b>  | <b>9</b> |
| O35826        | EVGAFGTPVINLGTR                                                                          | 1.123043762        | 2               | 2.7563   |
| O35826        | ILHIEGGEVSGTIDDSIR                                                                       | 1.793015803        | 3               | 4.06421  |
| O35826        | ILLAGCPSYDK                                                                              | 1.894333453        | 2               | 2.40214  |
| O35826        | LIQEWNSVDLR                                                                              | 1.273879792        | 2               | 2.36923  |
| O35826        | MIEQDDFDINTR                                                                             | 1.477519281        | 2               | 2.47229  |
| O35826        | SIDLQEPLQK                                                                               | 1.540637551        | 2               | 2.53538  |
| O35826        | TLVLFPNIDAGSK                                                                            | 1.529571078        | 2               | 2.31387  |
| O35826        | TPLSDTLHLPVWVDNDGNCAAMAER                                                                | 1.701395139        | 3               | 5.79537  |
| O35826        | VNPQEGVVLHSTK                                                                            | 1.602685429        | 2               | 2.34341  |
| <b>O35867</b> | <b>NEB1 Neurabin 1</b>                                                                   | <b>1.03316697</b>  | <b>0.55088</b>  | <b>2</b> |
| O35867        | DSNSRPSSNKQATDTEEPEK                                                                     | 1.079822161        | 2               | 2.36552  |
| O35867        | EKAGEAEPQDEWGGSKSNR                                                                      | 0.708469233        | 2               | 2.34105  |
| <b>O35913</b> | <b>SO1A4 Solute carrier organic anion transporter family member 1A4</b>                  | <b>0.912065686</b> | <b>3.5E-08</b>  | <b>6</b> |

|               |                                                                                           |                    |                 |          |
|---------------|-------------------------------------------------------------------------------------------|--------------------|-----------------|----------|
| O35913        | EGLQENVDTENAK                                                                             | 0.760322776        | 2               | 3.44464  |
| O35913        | ILAGIPAPIYFGALIDR                                                                         | 1.222543885        | 2               | 2.42764  |
| O35913        | LYLGLPAALR                                                                                | 1.255355825        | 2               | 2.63687  |
| O35913        | SLSGYMNSMLTQIER                                                                           | 0.721377195        | 2               | 4.21564  |
| O35913        | SQTLNPTQDPSECVK                                                                           | 0.820444838        | 2               | 4.29559  |
| O35913        | TFQFPGDIESSK                                                                              | 0.832555085        | 2               | 2.49811  |
| <b>O35952</b> | <b>GLO2 Hydroxyacylglutathione hydrolase_mitochondrial</b>                                | <b>1.06963209</b>  | <b>0.695456</b> | <b>6</b> |
| O35952        | ALLEVLGR                                                                                  | 1.118127271        | 2               | 2.84435  |
| O35952        | FYEGTADAMYK                                                                               | 1.033623002        | 2               | 2.75655  |
| O35952        | HVEPGNTAVQEK                                                                              | 1.051600351        | 1               | 3.95781  |
| O35952        | LTTVLTHHHWDHAGGNEK                                                                        | 1.504913632        | 3               | 3.72285  |
| O35952        | NAIGEPTVPSTLAEFTYNPFMR                                                                    | 1.007441511        | 2               | 4.05803  |
| O35952        | TVQQHAGETDPVTMTR                                                                          | 1.073075752        | 2               | 5.5941   |
| <b>O35987</b> | <b>NSF1C NSF1 cofactor p47</b>                                                            | <b>1.00826086</b>  | <b>0.462413</b> | <b>5</b> |
| O35987        | ASSSILINEAEPPTNIQIR                                                                       | 1.057634481        | 2               | 5.06304  |
| O35987        | LGAAPPEESAYVAGER                                                                          | 0.887584306        | 2               | 4.04073  |
| O35987        | LGSTAPQVLNTSSPAQQAENEAK                                                                   | 1.549359046        | 2               | 3.86802  |
| O35987        | SYQDPSNAQFLESIR                                                                           | 1.007636755        | 2               | 4.74721  |
| O35987        | TGFSLDNGDLR                                                                               | 1.09446029         | 2               | 2.70392  |
| <b>O54975</b> | <b>XPP1 Xaa_Pro aminopeptidase 1</b>                                                      | <b>1.334627818</b> | <b>3.6E-07</b>  | <b>2</b> |
| O54975        | GSLTFEPLTLVPIQTK                                                                          | 1.388048431        | 2               | 3.94155  |
| O54975        | IENVVLVVPAK                                                                               | 1.126296468        | 2               | 3.24469  |
| <b>O55012</b> | <b>PICA Phosphatidylinositol_binding clathrin assembly protein</b>                        | <b>1.163337146</b> | <b>1.36E-13</b> | <b>3</b> |
| O55012        | ATTLSNAVSSLASTGLSLTK                                                                      | 1.483890552        | 2               | 4.14585  |
| O55012        | ITAAQHSVTSASVSK                                                                           | 1.478269305        | 2               | 4.28246  |
| O55012        | STNVAVDSGGGLLKPTVASQNLSPVAK                                                               | 0.955667097        | 3               | 4.63671  |
| <b>O55096</b> | <b>DPP3 Dipeptidyl peptidase 3</b>                                                        | <b>1.15491581</b>  | <b>0.000137</b> | <b>4</b> |
| O55096        | AGLLALEFYTPETANWR                                                                         | 1.179853286        | 2               | 4.28604  |
| O55096        | LASVLNTEPALDSELSK                                                                         | 2.220370699        | 2               | 3.78065  |
| O55096        | SYEFQGNHFQVTR                                                                             | 1.108113848        | 2               | 3.82397  |
| O55096        | VLLEAGEGLVTPTTGS DGRPDAR                                                                  | 1.075710959        | 3               | 4.27226  |
| <b>O55125</b> | <b>NIPS1 Protein NipSnap homolog 1</b>                                                    | <b>0.924514203</b> | <b>0.114815</b> | <b>4</b> |
| O55125        | AGPNIIYELR                                                                                | 0.899954203        | 2               | 3.01884  |
| O55125        | FSGGYPALMDCMNK                                                                            | 0.824239504        | 2               | 2.97802  |
| O55125        | GWDENVYYTVPLVR                                                                            | 0.761006711        | 2               | 3.47509  |
| O55125        | IQFHNKPECLDAYNSLTEAVLPK                                                                   | 1.35110978         | 3               | 4.73203  |
| <b>O55171</b> | <b>ACOT2 Acyl_coenzyme A thioesterase 2_mitochondrial</b>                                 | <b>1.02933734</b>  | <b>0.995959</b> | <b>6</b> |
| O55171        | ADAGGELDLAR                                                                               | 0.810769718        | 2               | 2.94982  |
| O55171        | DGLLDVVEALQSPLVDKK                                                                        | 0.905769193        | 2               | 4.5478   |
| O55171        | DVQKPYYVELEVLDGHEPDGGQR                                                                   | 0.966679104        | 3               | 4.01087  |
| O55171        | GGELGLAMASFLK                                                                             | 0.947890901        | 2               | 3.55439  |
| O55171        | IEYFEEAVNYLR                                                                              | 1.099206583        | 2               | 3.31513  |
| O55171        | SCWDEPLSITVR                                                                              | 0.973368597        | 2               | 3.91044  |
| <b>O70127</b> | <b>ABCBB Bile salt export pump</b>                                                        | <b>0.993918338</b> | <b>0.975544</b> | <b>4</b> |
| O70127        | AGQITSEALS NIR                                                                            | 1.298820519        | 2               | 3.34918  |
| O70127        | ILDNLMSVIKPGETTALVGSSGAGK                                                                 | 1.208853838        | 3               | 3.5062   |
| O70127        | ILLDEATSALDTESEK                                                                          | 1.040220176        | 2               | 4.49362  |
| O70127        | ILLDMATSALDNESEAR                                                                         | 1.122101343        | 2               | 3.97948  |
| <b>O70133</b> | <b>DHX9 ATP_dependent RNA helicase A</b>                                                  | <b>1.198048048</b> | <b>0.070659</b> | <b>3</b> |
| O70133        | ELDALDANDELTP LGR                                                                         | 0.814161434        | 2               | 2.48132  |
| O70133        | KMTPAYEIRAVGNK                                                                            | 0.659912669        | 2               | 2.40652  |
| O70133        | TTQVPQYILDDFIQ NDR                                                                        | 1.242050573        | 2               | 3.37985  |
| <b>O70173</b> | <b>P3C2G Phosphatidylinositol_4_phosphate 3_kinase C2 domain_containing subunit gamma</b> | <b>1.687783803</b> | <b>0.19712</b>  | <b>2</b> |

|               |                                                                            |                    |                 |           |
|---------------|----------------------------------------------------------------------------|--------------------|-----------------|-----------|
| O70173        | FLGHAQTFGGIKR                                                              | 1.280692475        | 1               | 1.99036   |
| O70173        | WTFSHPLEALGLLTSR                                                           | 1.688146377        | 2               | 2.34898   |
| <b>O70196</b> | <b>PPCE Prolyl endopeptidase</b>                                           | <b>1.214104105</b> | <b>0.006323</b> | <b>2</b>  |
| O70196        | SDGTETSTNLHQK                                                              | 1.210131981        | 2               | 3.22895   |
| O70196        | VFLDPNTLSDDGTVALR                                                          | 1.29608107         | 2               | 3.71759   |
| <b>O70199</b> | <b>UGDH UDP_glucose 6_dehydrogenase</b>                                    | <b>1.11232583</b>  | <b>9.9E-20</b>  | <b>14</b> |
| O70199        | EADLVFISVNTPTK                                                             | 1.461736457        | 2               | 3.17672   |
| O70199        | EQIVVDLSHPGVSADDQVSR                                                       | 1.202889148        | 2               | 5.84453   |
| O70199        | FSLQDPPNKKPK                                                               | 1.109335923        | 2               | 2.46698   |
| O70199        | IFDANTKPNLNLQVLSNPEFLAEGTAIK                                               | 1.536147816        | 3               | 6.6232    |
| O70199        | IIDSLFNTVTDK                                                               | 2.091469359        | 2               | 2.55909   |
| O70199        | IIDSLFNTVTDKK                                                              | 1.491963975        | 2               | 3.17564   |
| O70199        | ILTTNTWSSELSK                                                              | 1.546250117        | 2               | 3.21782   |
| O70199        | INAWNSPTLPIYEPGLK                                                          | 1.628065391        | 2               | 4.28786   |
| O70199        | NLFFSTNIDDAIR                                                              | 1.178522209        | 2               | 3.17404   |
| O70199        | VLDGLHNELQTIGFQIETIGK                                                      | 1.144287437        | 2               | 5.1841    |
| O70199        | VLDGLHNELQTIGFQIETIGKK                                                     | 0.865412273        | 3               | 3.36432   |
| O70199        | VLIGGDETPEGQR                                                              | 1.299531491        | 2               | 3.84175   |
| O70199        | VTVDVNEAR                                                                  | 1.091876125        | 2               | 3.44674   |
| O70199        | YWQQVIDMNDYQR                                                              | 1.102569645        | 2               | 4.49955   |
| <b>O70251</b> | <b>EF1B Elongation factor 1_beta</b>                                       | <b>1.059983972</b> | <b>2.27E-07</b> | <b>4</b>  |
| O70251        | SIQADGLVWGSSK                                                              | 1.277614555        | 2               | 4.07827   |
| O70251        | SSILLDVKPWDDDETDMTK                                                        | 0.963561862        | 2               | 4.49177   |
| O70251        | SSILLDVKPWDDDETDMTKLEECVR                                                  | 1.123444185        | 3               | 5.00593   |
| O70251        | TPAGLQVLNDYLADK                                                            | 1.228611876        | 2               | 4.13592   |
| <b>O70351</b> | <b>HCD2 3_hydroxyacyl_CoA dehydrogenase type_2</b>                         | <b>1.006474048</b> | <b>0.342985</b> | <b>16</b> |
| O70351        | GGIVGMTLPIAR                                                               | 0.865900136        | 2               | 3.58605   |
| O70351        | GLVAVITGGASGLSTAK                                                          | 0.946751393        | 2               | 4.46935   |
| O70351        | GVIINTASVAAFEGQVQQAAYSASK                                                  | 0.855984169        | 3               | 3.99726   |
| O70351        | IDVAVNCAGIAVAIK                                                            | 1.020663278        | 2               | 4.58041   |
| O70351        | KLGGNCIFAPANVTSEK                                                          | 1.124776001        | 2               | 4.97633   |
| O70351        | KNQVHTLEDFQR                                                               | 1.045568929        | 2               | 4.03367   |
| O70351        | LGDPAEYAHLVQMVIENPFLNGEVIR                                                 | 1.096832952        | 3               | 5.53707   |
| O70351        | LGGNCIFAPANVTSEK                                                           | 1.193625469        | 2               | 3.37986   |
| O70351        | LVAGVMGQNEPDQGGQR                                                          | 1.117161063        | 2               | 5.50302   |
| O70351        | LVGQGATAVLLDVPNSEGETEAK                                                    | 1.304227819        | 2               | 5.30071   |
| O70351        | LVGQGATAVLLDVPNSEGETEAKK                                                   | 1.194793089        | 3               | 3.66577   |
| O70351        | NFLASQVPPPSR                                                               | 0.964220551        | 2               | 4.51179   |
| O70351        | NQVHTLEDFQR                                                                | 0.947088335        | 2               | 3.66258   |
| O70351        | RLVGQGATAVLLDVPNSEGETEAK                                                   | 0.976090001        | 2               | 6.08973   |
| O70351        | VINVNLIGTFNVIR                                                             | 1.148367325        | 2               | 4.14212   |
| O70351        | VVTIAPGLFATPLLTLPDK                                                        | 0.99268964         | 2               | 4.87359   |
| <b>O70456</b> | <b>1433S 14_3_3 protein sigma</b>                                          | <b>1.403913647</b> | <b>6.93E-06</b> | <b>3</b>  |
| O70456        | DSTLIMQLLR                                                                 | 1.438785617        | 2               | 3.6972    |
| O70456        | NLLSVAYK                                                                   | 1.129108002        | 2               | 2.30989   |
| O70456        | VLSSIEQK                                                                   | 1.295756669        | 1               | 2.19641   |
| <b>O88428</b> | <b>PAPS2 Bifunctional 3__phosphoadenosine 5__phosphosulfate synthase 2</b> | <b>1.387466453</b> | <b>9.9E-20</b>  | <b>8</b>  |
| O88428        | GCTVWLTGLSGAGK                                                             | 1.612284832        | 2               | 3.52944   |
| O88428        | GFTGIDSDYEKPEPECVLK                                                        | 1.274570183        | 2               | 4.95374   |
| O88428        | GIHELFPENK                                                                 | 1.332267882        | 2               | 3.03652   |
| O88428        | IHESAGLPFFEIFVDAPLNICESR                                                   | 1.543464068        | 3               | 4.0419    |
| O88428        | KDLYEPHGGK                                                                 | 1.308410539        | 2               | 2.65148   |
| O88428        | NLGFSAGDREENIR                                                             | 1.246342793        | 2               | 3.35032   |
| O88428        | STNVVYQAHHVSR                                                              | 1.114590056        | 2               | 2.90453   |
| O88428        | VLSMAPGLTSVEIIPFR                                                          | 1.381668308        | 2               | 3.41237   |
| <b>O88600</b> | <b>HSP74 Heat shock 70 kDa protein 4</b>                                   | <b>1.14042576</b>  | <b>1.07E-07</b> | <b>17</b> |

|               |                                                                                   |                    |                 |           |
|---------------|-----------------------------------------------------------------------------------|--------------------|-----------------|-----------|
| O88600        | AESEEMETSQAGSK                                                                    | 0.898264724        | 2               | 4.37268   |
| O88600        | AFSDPFVVEAK                                                                       | 1.094178349        | 2               | 2.85603   |
| O88600        | AGGIETIANEYSDR                                                                    | 1.336350387        | 2               | 3.28324   |
| O88600        | FQESEERPK                                                                         | 1.29878695         | 2               | 2.7109    |
| O88600        | FVSEDRNFTLK                                                                       | 1.451743091        | 2               | 2.87899   |
| O88600        | GCALQCAILSPAFK                                                                    | 1.151684372        | 2               | 3.70981   |
| O88600        | HAEQNGPVDGQGNPGTQAAEHGADTAVPSDGDK                                                 | 0.857796193        | 3               | 5.96834   |
| O88600        | LEDTENWLYEDGEDQPK                                                                 | 1.388489957        | 2               | 4.36524   |
| O88600        | MIMQDKLEK+Oxidation(1)                                                            | 1.106301379        | 2               | 2.36333   |
| O88600        | MQVDQEEPHTEEQPQTPAENK                                                             | 1.056748074        | 3               | 5.13844   |
| O88600        | NFTTEQVTAMLLSK                                                                    | 1.205770822        | 2               | 3.31585   |
| O88600        | NKEDQYEHLDAAADMTK                                                                 | 1.076993659        | 3               | 3.99026   |
| O88600        | SNLAYDIVQLPTGLTGIK                                                                | 1.419390575        | 2               | 4.91644   |
| O88600        | SVMDATQIAGLNCLR                                                                   | 1.07614954         | 2               | 2.59881   |
| O88600        | TSTVDLPIESQLLWQLDR                                                                | 1.116022743        | 2               | 3.86276   |
| O88600        | VLATAFDITLGGV                                                                     | 1.149402432        | 2               | 3.78618   |
| O88600        | WNSPAEEGSSDCEVFPK                                                                 | 1.223635338        | 2               | 4.04349   |
| <b>O88618</b> | <b>FTCD Formimidoyltransferase_cyclodeaminase</b>                                 | <b>1.355374849</b> | <b>9.9E-20</b>  | <b>21</b> |
| O88618        | AFAACLGAIK                                                                        | 1.265713708        | 2               | 2.51437   |
| O88618        | AGEYEALPEK                                                                        | 1.091914509        | 2               | 2.58049   |
| O88618        | ALLDAAAFYCDK                                                                      | 1.674282169        | 2               | 3.88864   |
| O88618        | ALLDAAAFYCDKEK                                                                    | 1.357846848        | 2               | 3.69185   |
| O88618        | EAQELNLPVVGSQLVGLVPLK                                                             | 1.14056064         | 3               | 4.43131   |
| O88618        | GVSMDECVLCAK                                                                      | 1.140961688        | 2               | 3.87452   |
| O88618        | IIEYLVPSDGPESQLLDASLR                                                             | 1.469804858        | 2               | 5.58039   |
| O88618        | ISSLLQEAK                                                                         | 1.57914231         | 2               | 2.54189   |
| O88618        | KVQGIGWYLEEK                                                                      | 1.21565137         | 2               | 2.78741   |
| O88618        | LAEELNVPVYLYGEEAQMPSR                                                             | 1.647370419        | 2               | 4.73711   |
| O88618        | LFVLEEEHR                                                                         | 1.414824722        | 2               | 2.92693   |
| O88618        | LGLDSLAPFDPK                                                                      | 1.36503627         | 2               | 3.60929   |
| O88618        | LIPPFHAASAQLTSLVDADAR                                                             | 1.170171995        | 2               | 3.82477   |
| O88618        | MGALDVCFPIVPR                                                                     | 1.177157155        | 2               | 4.07854   |
| O88618        | MGALDVCFPIVPR+Oxidation(1)                                                        | 1.013859644        | 2               | 2.80726   |
| O88618        | NLAQVSTNLLDFEVTALHTVYEEAR                                                         | 1.720729095        | 3               | 4.03405   |
| O88618        | QAEWVPDFGPFSSFPVPSWGATVTGAR                                                       | 1.166748392        | 2               | 3.70219   |
| O88618        | TCALQEGLR                                                                         | 1.281683149        | 2               | 3.17626   |
| O88618        | TQAALVLGSLEAR                                                                     | 1.201509817        | 2               | 4.78253   |
| O88618        | TVYTFVQGPECVVEGALSAAR                                                             | 2.177933076        | 2               | 4.35053   |
| O88618        | VQGIGWYLEEK                                                                       | 1.335941362        | 2               | 3.24014   |
| <b>O88637</b> | <b>PCY2 Ethanolamine_phosphate cytidyltransferase</b>                             | <b>1.726117425</b> | <b>0.002834</b> | <b>5</b>  |
| O88637        | AHSSQEMSSEYR                                                                      | 1.716696603        | 3               | 3.39945   |
| O88637        | HKGPPVFTQEER                                                                      | 1.044171858        | 2               | 2.99806   |
| O88637        | HNCDFCVHGNDITLTVDGR                                                               | 1.158058858        | 3               | 4.30518   |
| O88637        | TEIVPDRDGSDPYEEPK                                                                 | 1.068873007        | 2               | 2.94459   |
| O88637        | TQGVSTTDLVGR                                                                      | 1.145654579        | 2               | 3.27736   |
| <b>O88656</b> | <b>ARC1B Actin_related protein 2/3 complex subunit 1B</b>                         | <b>1.038514625</b> | <b>0.786629</b> | <b>2</b>  |
| O88656        | ASSEGGAATGAGLDSLHK                                                                | 1.038236736        | 2               | 4.15294   |
| O88656        | NSVSQISVLGGK                                                                      | 1.591706052        | 2               | 2.92236   |
| <b>O88696</b> | <b>CLPP Putative ATP_dependent Clp protease proteolytic subunit_mitochondrial</b> | <b>0.930316903</b> | <b>0.791421</b> | <b>2</b>  |
| O88696        | GQATDIAIQAEIIMK                                                                   | 0.939685778        | 2               | 2.55342   |
| O88696        | VLVHPPQDGEDEPELVQK                                                                | 0.873900712        | 3               | 3.97231   |
| <b>O88735</b> | <b>MAP7 Ensconsin</b>                                                             | <b>0.957941733</b> | <b>0.992187</b> | <b>2</b>  |
| O88735        | KTTEQRNGDIAK                                                                      | 0.955958936        | 2               | 2.50798   |
| O88735        | TSAGTTDPEEATR                                                                     | 0.976907685        | 2               | 2.38506   |

|               |                                                                    |                    |                 |           |
|---------------|--------------------------------------------------------------------|--------------------|-----------------|-----------|
| <b>O88761</b> | <b>PSMD1 26S proteasome non_ATPase regulatory subunit 1</b>        | <b>1.124672068</b> | <b>0.996037</b> | <b>2</b>  |
| O88761        | DTSEDIEELVEPVAAHGPK                                                | 1.011646841        | 2               | 5.09873   |
| O88761        | TVGTPIASVPGSTNTGTVPGEK                                             | 1.130618651        | 2               | 3.75775   |
| <b>O88767</b> | <b>PARK7 Protein DJ_1</b>                                          | <b>1.096680263</b> | <b>0.999752</b> | <b>8</b>  |
| O88767        | ALVILAK                                                            | 1.023112512        | 2               | 2.30556   |
| O88767        | DVVICPDTSLEEAK                                                     | 1.090988786        | 2               | 3.66428   |
| O88767        | GAEEMETVIPVDIMR                                                    | 1.116217556        | 2               | 3.48173   |
| O88767        | GLIAAICAGPTALLAHEVGFCK                                             | 1.128258826        | 2               | 4.35935   |
| O88767        | KGLIAAICAGPTALLAHEVGFCK                                            | 1.095095474        | 3               | 5.50269   |
| O88767        | TQGPYDVVVLPGNGLGAQNLSESALVK                                        | 1.025421668        | 3               | 5.62287   |
| O88767        | VEKDGILTSR                                                         | 1.216241238        | 2               | 2.33836   |
| O88767        | VTVAGLAGKDPVQCSR                                                   | 1.083129182        | 2               | 4.36281   |
| <b>O88794</b> | <b>PNPO Pyridoxine_5_phosphate oxidase</b>                         | <b>1.025213913</b> | <b>0.273878</b> | <b>3</b>  |
| O88794        | GLATGDSPLGPMTHHGEEEDWVYER                                          | 0.891246559        | 3               | 3.56477   |
| O88794        | KKNEELGQLYR                                                        | 1.184357061        | 2               | 2.37603   |
| O88794        | SSQIGAVVSR                                                         | 0.953398383        | 2               | 2.4858    |
| <b>O88813</b> | <b>ACSL5 Long_chain_fatty_acid_CoA ligase 5</b>                    | <b>0.939891264</b> | <b>9.9E-20</b>  | <b>16</b> |
| O88813        | ADISVVICDTPQK                                                      | 0.928032004        | 2               | 3.11121   |
| O88813        | AEYLGSCLLHK                                                        | 1.037763647        | 2               | 2.49996   |
| O88813        | AILEDLQK                                                           | 1.267342468        | 1               | 2.20877   |
| O88813        | FFQTQIK                                                            | 1.098356641        | 1               | 1.93311   |
| O88813        | FLLNLAISK                                                          | 1.362524777        | 2               | 2.98696   |
| O88813        | GAMLTHQNIIVSNMAAFK                                                 | 1.097034865        | 3               | 3.64349   |
| O88813        | GLAVSDNGPCLGYR                                                     | 1.077622063        | 2               | 2.52831   |
| O88813        | GSFEELCQNQCVK                                                      | 1.101745356        | 2               | 4.73289   |
| O88813        | IGFFQGDIDR                                                         | 1.551550284        | 2               | 3.33189   |
| O88813        | LMITGAAPISTPVLTFRR                                                 | 1.341609388        | 2               | 3.05185   |
| O88813        | LVQGVIFSCGK                                                        | 1.053384804        | 2               | 2.88852   |
| O88813        | SFLIGVVVPDPELPSFAAK                                                | 1.082324841        | 2               | 3.6053    |
| O88813        | SIFVHPEPFSIENLLTPTLK                                               | 1.558259474        | 2               | 2.85231   |
| O88813        | SRPILQVHVHGESLR                                                    | 0.805118132        | 3               | 3.53498   |
| O88813        | TQEVLDKDGWLHTGDIGR                                                 | 1.115210111        | 3               | 3.79106   |
| O88813        | TVILMDPFDDDLMK                                                     | 1.397016966        | 2               | 3.28881   |
| <b>O88867</b> | <b>KMO Kynurenine_3_monooxygenase</b>                              | <b>1.048732455</b> | <b>0.952836</b> | <b>5</b>  |
| O88867        | AVGLEDQIVSK                                                        | 0.953440583        | 2               | 2.30779   |
| O88867        | DFLLPAQPMISVK                                                      | 1.219058362        | 2               | 2.51076   |
| O88867        | DITCDLIVGCDGAYSTVR                                                 | 1.119006587        | 2               | 2.57408   |
| O88867        | FNNDLSVCLPEFSR                                                     | 1.016907589        | 2               | 3.96234   |
| O88867        | NFPDAIPLMGEQALMR                                                   | 1.123385055        | 2               | 3.57839   |
| <b>O88941</b> | <b>MOGS Mannosyl_oligosaccharide glucosidase</b>                   | <b>1.103097262</b> | <b>0.973766</b> | <b>2</b>  |
| O88941        | ALESHAAAFK                                                         | 0.952367661        | 2               | 2.45485   |
| O88941        | MDPSLFPPVPLFSGVPSR                                                 | 1.109925633        | 2               | 3.09274   |
| <b>O88986</b> | <b>KBL 2_ amino_3_ketobutyrate coenzyme A ligase_mitochondrial</b> | <b>1.19596194</b>  | <b>0.34264</b>  | <b>4</b>  |
| O88986        | ALDLLMESNAIQSMAAK+Oxidation(6)                                     | 1.914607336        | 2               | 2.52248   |
| O88986        | GTDELLGVMDQVTIINSTLGK                                              | 0.89689579         | 2               | 2.61682   |
| O88986        | MEAAGFTVSGADHPICPVMLGDAR+Oxidation(1)                              | 0.839535766        | 2               | 2.623     |
| O88986        | VQISAVHSEEDIDR                                                     | 1.022688253        | 2               | 4.03855   |
| <b>O88989</b> | <b>MDHC Malate dehydrogenase_cytoplasmic</b>                       | <b>1.196267641</b> | <b>9.9E-20</b>  | <b>9</b>  |
| O88989        | DLDVAVLVGSMR                                                       | 0.951303783        | 3               | 3.85424   |
| O88989        | EKMDLTAKELTEEK+Oxidation(3)                                        | 0.878860012        | 2               | 2.38556   |
| O88989        | ELTEEKETAFLSSA                                                     | 1.630020714        | 2               | 3.73205   |
| O88989        | EVGVYEALKDDSWLK                                                    | 1.026746468        | 2               | 3.82936   |
| O88989        | FVEGLPINDFSR                                                       | 1.16822396         | 2               | 3.44062   |
| O88989        | GEFITTVQQR                                                         | 1.157571224        | 2               | 3.87404   |
| O88989        | LGVTADDVK                                                          | 1.243899825        | 2               | 2.84299   |

|               |                                                             |                    |                 |          |
|---------------|-------------------------------------------------------------|--------------------|-----------------|----------|
| O88989        | NVIIWGNHSSTQYPDVNHAK                                        | 1.21558085         | 2               | 5.66649  |
| O88989        | VIVVGNPANTNCLTASK                                           | 1.198382817        | 2               | 5.56551  |
| <b>O88990</b> | <b>ACTN3 Alpha_actinin_3</b>                                | <b>1.290816921</b> | <b>0.045743</b> | <b>4</b> |
| O88990        | ALDFIASK                                                    | 1.213698441        | 2               | 2.62221  |
| O88990        | CQLEINFNTLQTK                                               | 1.450146621        | 2               | 3.58275  |
| O88990        | FAIQDISVEETSAK                                              | 1.415083048        | 2               | 3.9193   |
| O88990        | HEAFESDLAAHQDR                                              | 0.868776171        | 3               | 3.9578   |
| <b>O88994</b> | <b>MOSC2 MOSC domain_containing protein 2_mitochondrial</b> | <b>0.894028728</b> | <b>0.944242</b> | <b>6</b> |
| O88994        | CVLTTVDPDTGIIDR                                             | 0.803659425        | 2               | 4.19552  |
| O88994        | GVSVCETECTDMGLR                                             | 0.901758713        | 2               | 3.42889  |
| O88994        | LYPSESYLQNYEVAYPDCSPIHLISEASLVDLNR                          | 1.098532465        | 3               | 3.74332  |
| O88994        | QLQQVGTVSK                                                  | 0.857627921        | 1               | 2.28458  |
| O88994        | RQLQQVGTVSK                                                 | 0.801678769        | 2               | 3.2819   |
| O88994        | SLYQSSPLFGMYFSVEK                                           | 1.221345039        | 2               | 3.72633  |
| <b>O89000</b> | <b>DPYD Dihydropyrimidine dehydrogenase [NADP_]</b>         | <b>1.246955021</b> | <b>0.082374</b> | <b>7</b> |
| O89000        | EGGADGVTATNTVSGLMGLK                                        | 0.886014906        | 2               | 3.34767  |
| O89000        | GAVIVLGAGDTAFDCATSALR                                       | 1.167368339        | 2               | 4.8197   |
| O89000        | GMGLACGQDPELVR                                              | 1.083461836        | 2               | 3.31039  |
| O89000        | LENNFDDIK                                                   | 1.049936479        | 2               | 2.65525  |
| O89000        | QEYVGGSTSEIPQFR                                             | 1.247340134        | 2               | 3.57408  |
| O89000        | TEQDETGNWVEDEEQIVR                                          | 1.146804948        | 2               | 5.07896  |
| O89000        | TFSLDKDIVTNVSPR                                             | 0.950139357        | 2               | 2.83104  |
| <b>O89032</b> | <b>SPD2A SH3 and PX domain_containing protein 2A</b>        | <b>1.021453563</b> | <b>0.784803</b> | <b>2</b> |
| O89032        | DDSDINTSKTGEVSKR                                            | 1.1563994          | 2               | 2.51543  |
| O89032        | FPIEGGQKDPK                                                 | 0.94559231         | 2               | 2.34545  |
| <b>O89046</b> | <b>COR1B Coronin_1B</b>                                     | <b>0.93059835</b>  | <b>0.97566</b>  | <b>4</b> |
| O89046        | KCEPIVMTVPR                                                 | 0.819408773        | 2               | 2.60178  |
| O89046        | NDQCYEDIR                                                   | 1.13195624         | 2               | 2.82482  |
| O89046        | NVLSDSKPAGYSR                                               | 0.952025496        | 2               | 2.92792  |
| O89046        | SGVSTATAITDIPSGNLAGSGEAGK                                   | 0.929760316        | 2               | 4.23224  |
| <b>O89049</b> | <b>TRXR1 Thioredoxin reductase 1_cytoplasmic</b>            | <b>1.503181873</b> | <b>0.387975</b> | <b>7</b> |
| O89049        | IEQIEAGTPGR                                                 | 1.368491553        | 2               | 2.98417  |
| O89049        | IEQIEAGTPGRLK                                               | 2.096338832        | 2               | 2.36151  |
| O89049        | LELTPVAIQAGR                                                | 1.087647058        | 2               | 2.81114  |
| O89049        | STNSEETIEDEFNTVLLAVGR                                       | 1.138640712        | 2               | 2.32379  |
| O89049        | VMVLDFVTPPLGTR                                              | 1.22928449         | 2               | 2.78592  |
| O89049        | VVGFHVLGPNAGEVTVQGFAAALK                                    | 0.628768722        | 2               | 2.40564  |
| O89049        | WGLGGTCVNVGCIPK                                             | 1.074096446        | 2               | 3.56522  |
| <b>P00173</b> | <b>CYB5 Cytochrome b5</b>                                   | <b>1.027520099</b> | <b>0.999977</b> | <b>6</b> |
| P00173        | EQAGGDATENFEDVGHSTDAR                                       | 1.032101522        | 2               | 5.44611  |
| P00173        | FLEEHPGGEEVLR                                               | 0.925678673        | 2               | 4.16635  |
| P00173        | STWVILHHK                                                   | 0.837418372        | 2               | 2.9134   |
| P00173        | TYIIGELHPDDR                                                | 0.957281457        | 2               | 4.06268  |
| P00173        | VYDLTK                                                      | 0.96918874         | 1               | 1.96988  |
| P00173        | YTTLEEIQK                                                   | 0.962558801        | 2               | 2.88754  |
| <b>P00388</b> | <b>N CPR NADPH_cytochrome P450 reductase</b>                | <b>1.182065794</b> | <b>3.55E-05</b> | <b>7</b> |
| P00388        | DVQNTFYDIVAEFGPMEHTQAVDYVK                                  | 1.046990916        | 3               | 4.30546  |
| P00388        | GMSADPEEYDLADLSSLPEIDK                                      | 1.427576281        | 2               | 5.09565  |
| P00388        | LIHEGGAHIYVCGDAR                                            | 1.350290303        | 3               | 3.84453  |
| P00388        | RSDEDLYR                                                    | 0.915650857        | 2               | 2.84327  |
| P00388        | SYENQKPPFDAK                                                | 1.025342576        | 2               | 3.20513  |
| P00388        | TNVLYELAQYASEPSEQEHLHK                                      | 1.462231165        | 3               | 3.6142   |
| P00388        | VHPNSVHICAVAVEYEA                                           | 1.183835337        | 3               | 3.56947  |
| <b>P00406</b> | <b>COX2 Cytochrome c oxidase subunit 2</b>                  | <b>1.029501487</b> | <b>0.867575</b> | <b>3</b> |
| P00406        | ILYMMDEINNPVLTVK                                            | 0.893664363        | 2               | 3.60132  |
| P00406        | LLEVDNR                                                     | 1.133411795        | 2               | 2.52832  |

|               |                                                         |                    |                 |           |
|---------------|---------------------------------------------------------|--------------------|-----------------|-----------|
| P00406        | VVLPMEPIR                                               | 1.029397671        | 2               | 2.51784   |
| <b>P00481</b> | <b>OTC Ornithine carbamoyltransferase_mitochondrial</b> | <b>1.220464972</b> | <b>5.53E-06</b> | <b>19</b> |
| P00481        | FGMHLQAATPK                                             | 0.964128049        | 3               | 3.64667   |
| P00481        | GEYLLQGGK                                               | 0.931389163        | 2               | 3.08116   |
| P00481        | GGNVLITDTWISMGQEDEK                                     | 1.188591335        | 2               | 5.54827   |
| P00481        | GGNVLITDTWISMGQEDEK                                     | 1.132289368        | 2               | 4.82242   |
| P00481        | GLTSLWIGDGNLHLSIMMSAAK                                  | 1.220890484        | 3               | 4.47372   |
| P00481        | GYEPDPNIVK                                              | 1.023719045        | 2               | 2.58242   |
| P00481        | LQAFQGYQVTMK                                            | 1.412746258        | 2               | 4.24665   |
| P00481        | LQAFQGYQVTMK+Oxidation(11)                              | 1.435446073        | 2               | 2.32245   |
| P00481        | LSMTNDPLEAAR                                            | 1.200741821        | 2               | 2.91025   |
| P00481        | LSTETGFALLGGHPSFLTQDIHLGVNESLDTAR                       | 1.326609411        | 3               | 7.25227   |
| P00481        | QKGEYLLQGGK                                             | 0.88090116         | 2               | 3.66631   |
| P00481        | QSDLILAK                                                | 0.975827729        | 1               | 1.96445   |
| P00481        | SLGMIFEK                                                | 0.99511493         | 2               | 2.39179   |
| P00481        | SLGMIFEK+Oxidation(4)                                   | 0.983160036        | 2               | 2.39704   |
| P00481        | SLVFPEAENR                                              | 0.97314371         | 2               | 2.6746    |
| P00481        | SLVFPEAENRK                                             | 1.184650293        | 2               | 2.88315   |
| P00481        | VLSSMTDAVLAR                                            | 1.093882193        | 2               | 3.83373   |
| P00481        | VLSSMTDAVLAR+Oxidation(5)                               | 1.170935078        | 2               | 2.68697   |
| P00481        | YGKPVQSQQLK                                             | 0.552621747        | 2               | 2.79485   |
| <b>P00502</b> | <b>GSTA1 Glutathione S_transferase alpha_1</b>          | <b>0.502530053</b> | <b>1.24E-14</b> | <b>2</b>  |
| P00502        | FIQSPEDLEK                                              | 0.430920142        | 2               | 2.77003   |
| P00502        | WLLAAAGVEFDEK                                           | 0.432136632        | 2               | 4.53077   |
| <b>P00507</b> | <b>AATM Aspartate aminotransferase_mitochondrial</b>    | <b>0.947829047</b> | <b>0.041639</b> | <b>19</b> |
| P00507        | ASAELALGENSEVLK                                         | 1.064543268        | 2               | 4.63686   |
| P00507        | DAGMQLQGYR                                              | 0.813845786        | 2               | 2.80958   |
| P00507        | DDNGKPYVLPVSR                                           | 0.866998119        | 2               | 3.283     |
| P00507        | EGSSHNVQHITDQIGMFCFTGLKPEQVER                           | 1.371295114        | 3               | 5.26699   |
| P00507        | EYLPIGGLADFCK                                           | 1.098190402        | 2               | 2.6195    |
| P00507        | FVTVQTISGTGALR                                          | 1.034174327        | 2               | 4.80374   |
| P00507        | HFIEQGINVCLCQSYAK                                       | 1.11226786         | 3               | 5.26313   |
| P00507        | ILIRPLYSNPPLNGAR                                        | 1.622240886        | 3               | 3.35326   |
| P00507        | IPEQSVLLLHACAHNPTGVDPPEQWK                              | 1.412191019        | 3               | 4.52359   |
| P00507        | ISVAGVTSNGVGYLAHAIHQVTK                                 | 1.430673798        | 2               | 2.67593   |
| P00507        | KMNLGVGAYR                                              | 0.999784503        | 2               | 2.54552   |
| P00507        | KWLQEVK                                                 | 0.941441346        | 1               | 2.39431   |
| P00507        | MNLGVGAYR                                               | 0.99105887         | 2               | 3.01042   |
| P00507        | NLDKEYLPIGGLADFCK                                       | 0.959292222        | 2               | 5.87115   |
| P00507        | NMGLYGER                                                | 1.030861913        | 2               | 2.63611   |
| P00507        | QWLQEVK                                                 | 1.02844094         | 1               | 2.06183   |
| P00507        | TCGFDFSGALEDISK                                         | 1.049603253        | 2               | 5.02232   |
| P00507        | VGAFTVCK                                                | 1.059914368        | 2               | 3.34583   |
| P00507        | VGASFLQR                                                | 1.336992421        | 2               | 3.112     |
| <b>P00564</b> | <b>KCRM Creatine kinase M_type</b>                      | <b>1.271241482</b> | <b>1</b>        | <b>7</b>  |
| P00564        | GGDDLDPNYVLSSR                                          | 0.865582809        | 2               | 4.649     |
| P00564        | GQSIDDMIPAQK                                            | 1.446373666        | 2               | 2.9639    |
| P00564        | GTGGVDTAAVAVFDISNADR                                    | 1.144352801        | 2               | 5.90553   |
| P00564        | LGSSEVEQVQLVVDGVK                                       | 1.424679978        | 2               | 4.61334   |
| P00564        | LSVEALNSLTGEFK                                          | 1.345680707        | 2               | 4.1635    |
| P00564        | RGTGGVDTAAVAVFDISNADR                                   | 1.012700278        | 2               | 4.3304    |
| P00564        | SMTEQEQQLIDHFLFDKVPSPLLASGMAR                           | 1.378728361        | 3               | 6.31407   |
| <b>P00787</b> | <b>CATB Cathepsin B</b>                                 | <b>1.220954338</b> | <b>1.06E-05</b> | <b>3</b>  |
| P00787        | GENHCGIESEIVAGIPR                                       | 1.222432687        | 2               | 4.86004   |
| P00787        | HEAGDVMGGHAIR                                           | 1.069558243        | 3               | 3.96512   |
| P00787        | MCEAGYSTSYKEDK                                          | 1.087911363        | 2               | 3.92349   |



|               |                                               |                    |                 |           |
|---------------|-----------------------------------------------|--------------------|-----------------|-----------|
| <b>P00884</b> | <b>ALDOB Fructose_bisphosphate aldolase B</b> | <b>1.231845338</b> | <b>9.9E-20</b>  | <b>18</b> |
| P00884        | ALQASALAAWGGK                                 | 1.40475021         | 2               | 4.77195   |
| P00884        | ATQEAFMK                                      | 1.237831893        | 2               | 2.68463   |
| P00884        | ELSEIAQR                                      | 1.184706951        | 1               | 1.93518   |
| P00884        | ETTIQGLDGLSER                                 | 1.20008377         | 2               | 3.89206   |
| P00884        | FPALTSEQK                                     | 1.201154657        | 2               | 2.36419   |
| P00884        | GILAADESVGTMGNR                               | 1.222376295        | 2               | 5.66892   |
| P00884        | GILAADESVGTMGNR+Oxidation(12)                 | 1.391236226        | 2               | 5.02538   |
| P00884        | GIVVGIK                                       | 1.308058781        | 1               | 1.91353   |
| P00884        | IKVENTEENR                                    | 1.241998737        | 2               | 2.68951   |
| P00884        | IKVENTEENRR                                   | 1.502701228        | 2               | 2.77796   |
| P00884        | ISDQCPSLAIQENANALAR                           | 1.323586851        | 2               | 6.61945   |
| P00884        | KELSEIAQR                                     | 1.218263347        | 2               | 2.61509   |
| P00884        | KYTPEQVAMATVTALHR                             | 1.149322546        | 3               | 6.19899   |
| P00884        | KYTPEQVAMATVTALHR+Oxidation(9)                | 1.364711648        | 3               | 3.54451   |
| P00884        | LDQGGAPLAGTNK                                 | 1.27949238         | 2               | 4.57885   |
| P00884        | YASICQQNGLVPIVEVLPDGDHDLHCQYVSEK              | 2.043583505        | 3               | 5.1496    |
| P00884        | YTPEQVAMATVTALHR                              | 1.155092514        | 2               | 4.81394   |
| P00884        | YTPEQVAMATVTALHR+Oxidation(8)                 | 1.205056616        | 2               | 3.66617   |
| <b>P01026</b> | <b>CO3 Complement C3</b>                      | <b>1.237910089</b> | <b>1.42E-05</b> | <b>17</b> |
| P01026        | ACEPGVDYVYK                                   | 1.151207812        | 2               | 2.94465   |
| P01026        | ADIGCTPGSGK                                   | 1.236919052        | 2               | 2.79223   |
| P01026        | AFYEHAPK                                      | 1.051904146        | 2               | 2.35664   |
| P01026        | EYVLPSEFVLVEPTEK                              | 1.05267            | 2               | 3.43416   |
| P01026        | IFTVDNLLPVGK                                  | 1.345097742        | 2               | 3.38856   |
| P01026        | IGLQEVVVK                                     | 1.227118772        | 2               | 2.5906    |
| P01026        | NEQVEIRAVLFNYR                                | 0.749442394        | 2               | 2.31445   |
| P01026        | QNEGFSLTAK                                    | 1.035391108        | 2               | 2.38396   |
| P01026        | RVPVVTQGSDAQALTQDDGVAK                        | 1.299826907        | 3               | 5.30394   |
| P01026        | SDVDEDIPEEDIISR                               | 1.091641454        | 2               | 4.57199   |
| P01026        | SGSDEVQAGQER                                  | 1.229888322        | 2               | 4.13042   |
| P01026        | TNQGLQTDQR                                    | 1.08420318         | 2               | 2.85435   |
| P01026        | TNQGLQTDQREDPECAKPAAR                         | 1.124687601        | 3               | 4.07191   |
| P01026        | TVLTGATGHLNR                                  | 1.2363546          | 2               | 2.9512    |
| P01026        | TVVIVIETPDGVPIKR                              | 1.206868353        | 2               | 3.00017   |
| P01026        | VELKPGDNLNVNFHLR                              | 1.194446218        | 3               | 4.00815   |
| P01026        | VLIEDGSGEAVLSR                                | 1.349361239        | 2               | 3.82754   |
| <b>P01946</b> | <b>HBA Hemoglobin subunit alpha_1/2</b>       | <b>0.961586204</b> | <b>1</b>        | <b>9</b>  |
| P01946        | AADHVEDLPGALSTLSDLHAHK                        | 0.766307435        | 3               | 7.67335   |
| P01946        | FLASVSTVLTSK                                  | 0.770135602        | 2               | 4.05184   |
| P01946        | FLSHCLLVTLACHHPGDFTPAMHASLDK                  | 0.750046248        | 4               | 5.80858   |
| P01946        | FLSHCLLVTLACHHPGDFTPAMHASLDKFLASVSTVLTSK      | 0.826969426        | 4               | 6.22904   |
| P01946        | IGGHGGEYGEEALQR                               | 0.821303731        | 2               | 4.97788   |
| P01946        | LRVDPVNFK                                     | 1.086977552        | 2               | 2.53865   |
| P01946        | MFAAFPTTK                                     | 0.742734566        | 2               | 3.09331   |
| P01946        | MFAAFPTTK+Oxidation(1)                        | 0.786213092        | 2               | 2.65487   |
| P01946        | TYFSHIDVSPGSAQVK                              | 1.006392371        | 2               | 5.21598   |
| <b>P02089</b> | <b>HBB2 Hemoglobin subunit beta_2</b>         | <b>0.811670834</b> | <b>0.998238</b> | <b>4</b>  |
| P02089        | GTFASLSELHCDK                                 | 0.662157245        | 2               | 3.68864   |
| P02089        | LHVDPENFR                                     | 0.792187743        | 2               | 2.75853   |
| P02089        | YFDSFGDLSSASAIMGNPK                           | 0.682078356        | 2               | 6.61532   |
| P02089        | YFDSFGDLSSASAIMGNPK+Oxidation(15)             | 0.597221356        | 2               | 4.95761   |
| <b>P02091</b> | <b>HBB1 Hemoglobin subunit beta_1</b>         | <b>1.001246505</b> | <b>0.998047</b> | <b>9</b>  |
| P02091        | EFTPCAQAAFQK                                  | 0.752680276        | 2               | 3.12624   |
| P02091        | GTFASLSELHCDK                                 | 0.835659036        | 2               | 4.47313   |
| P02091        | GTFASLSELHCDKLHVDPENFR                        | 0.705545072        | 3               | 4.59281   |
| P02091        | KVINAFNDGLK                                   | 0.771653794        | 2               | 3.70175   |

|               |                                                            |                    |                 |           |
|---------------|------------------------------------------------------------|--------------------|-----------------|-----------|
| P02091        | LLGNMIVIVLGHHLGK                                           | 0.822821326        | 2               | 3.3464    |
| P02091        | LLGNMIVIVLGHHLGKKEFTPCAQAQAFQK                             | 0.543549912        | 3               | 5.41545   |
| P02091        | VINAFNDGLK                                                 | 0.783191583        | 2               | 3.00209   |
| P02091        | VNPDDVGGEALGR                                              | 0.704082878        | 2               | 4.29396   |
| P02091        | VVAGVASALAHK                                               | 0.819297881        | 2               | 3.82275   |
| <b>P02401</b> | <b>RLA2 60S acidic ribosomal protein P2</b>                | <b>1.075021674</b> | <b>9.9E-20</b>  | <b>7</b>  |
| P02401        | ILDSVGIEADDER                                              | 1.13050418         | 2               | 4.60929   |
| P02401        | ILDSVGIEADDERLNK                                           | 1.222440672        | 2               | 3.19666   |
| P02401        | KILDSVGIEADDER                                             | 0.687710113        | 2               | 3.94242   |
| P02401        | LASVPAGGAVAVSAAPGSAAPAAGSAPAAAEK                           | 1.330263212        | 3               | 6.55818   |
| P02401        | NIEDVIAQGVGK                                               | 1.063440615        | 2               | 4.77232   |
| P02401        | VISELNGK                                                   | 1.284009091        | 1               | 2.06401   |
| P02401        | YVASYLLAALGGNSNPSAK                                        | 1.244933119        | 2               | 5.79399   |
| <b>P02564</b> | <b>MYH7 Myosin_7</b>                                       | <b>0.864494444</b> | <b>0.119923</b> | <b>25</b> |
| P02564        | ALQEAHQALDDLQAEEDKVNTLK                                    | 0.466962578        | 3               | 5.48508   |
| P02564        | ANDDLKENIAIVER                                             | 0.563867733        | 2               | 3.363     |
| P02564        | DLEEATLQHEATAAALR                                          | 1.072296305        | 2               | 5.40242   |
| P02564        | EQYEEETEAQ                                                 | 0.774611143        | 2               | 2.5041    |
| P02564        | GTLEDQIIQANPALEAFGNAK                                      | 0.931226386        | 2               | 5.17065   |
| P02564        | IEDEQALGSQQLK                                              | 0.517375471        | 2               | 4.07348   |
| P02564        | IEEEEELEAER                                                | 0.801005113        | 2               | 4.11159   |
| P02564        | ILNPAAIPEGQFIDSR                                           | 0.691302682        | 2               | 3.35457   |
| P02564        | KLAEQELIETSER                                              | 0.797493597        | 2               | 3.97693   |
| P02564        | KMEGDLNEMEIQLSHANR+Oxidation(2)                            | 1.605467446        | 2               | 2.50108   |
| P02564        | KVQHELDEAEER                                               | 1.086938742        | 2               | 2.79147   |
| P02564        | LDEAEQIALK                                                 | 0.94057071         | 2               | 3.36966   |
| P02564        | LELDDVTSNMEQIIK                                            | 1.114220085        | 2               | 3.49343   |
| P02564        | LQDAEEAVEAVNAK                                             | 0.552274539        | 2               | 4.711     |
| P02564        | LQNEIEDLMVDVER                                             | 0.918592641        | 2               | 3.44506   |
| P02564        | MDADLSQLQTEVEEAVQEQR                                       | 0.761572776        | 2               | 4.80526   |
| P02564        | NLQEEISDLTEQLGSTGK                                         | 0.739727286        | 2               | 5.67313   |
| P02564        | NLTEEMAGLDEIIVK                                            | 1.365564585        | 2               | 3.13954   |
| P02564        | NNLLQAELEELR                                               | 0.714671817        | 2               | 2.86152   |
| P02564        | QAEEAEEQANTNLSK                                            | 0.852529938        | 2               | 4.78076   |
| P02564        | QKYEESQSELESSQK                                            | 0.856123567        | 2               | 2.95824   |
| P02564        | QLEAEKLELQSALEEAESLEHEEGK                                  | 0.64283911         | 3               | 4.50393   |
| P02564        | TLEDQMNEHR                                                 | 0.752520327        | 2               | 2.59306   |
| P02564        | VQLLHSQNTSLINQK                                            | 0.545170104        | 2               | 3.8472    |
| P02564        | VVDSLQTSLEAETR                                             | 0.693986334        | 2               | 2.72791   |
| <b>P02600</b> | <b>MYL1 Myosin light chain 1/3_skeletal muscle isoform</b> | <b>1.057068693</b> | <b>0.996846</b> | <b>8</b>  |
| P02600        | ALGTNPTNAEVK                                               | 1.03784286         | 2               | 3.22463   |
| P02600        | ALGTNPTNAEVKK                                              | 0.928906689        | 2               | 2.72002   |
| P02600        | DQGGYEDFVEGLR                                              | 0.54152741         | 2               | 3.58792   |
| P02600        | IEFEQFLPMMQAISNNK                                          | 0.68336755         | 2               | 2.73675   |
| P02600        | ITLSQVGDVLR                                                | 1.0690889          | 2               | 3.08934   |
| P02600        | KIEFEQFLPMMQAISNNK                                         | 1.098751563        | 2               | 5.4581    |
| P02600        | VLGNPSNEEMNAK                                              | 1.02899738         | 2               | 3.84938   |
| P02600        | VLGNPSNEEMNAK+Oxidation(10)                                | 1.122107116        | 2               | 2.57315   |
| <b>P02625</b> | <b>PRVA Parvalbumin alpha</b>                              | <b>0.947142237</b> | <b>0.95131</b>  | <b>4</b>  |
| P02625        | AIGAFTAADSFHKK                                             | 0.589067644        | 2               | 3.9116    |
| P02625        | SGFIEDELGSILK                                              | 1.135166616        | 2               | 2.85177   |
| P02625        | TLMAAGDKDGDGK                                              | 0.941644955        | 2               | 3.17967   |
| P02625        | TLMAAGDKDGDGK+Oxidation(3)                                 | 0.569829545        | 2               | 3.3596    |
| <b>P02650</b> | <b>APOE Apolipoprotein E</b>                               | <b>1.141705239</b> | <b>0.10625</b>  | <b>13</b> |
| P02650        | ELEEQLGPVAEETR                                             | 1.175427268        | 2               | 4.33142   |
| P02650        | GRLEEVGNQAR                                                | 1.010962392        | 2               | 3.70095   |

|               |                                               |                    |                 |           |
|---------------|-----------------------------------------------|--------------------|-----------------|-----------|
| P02650        | GWFEPLVEDMQR                                  | 1.264061342        | 2               | 3.23934   |
| P02650        | LEEVGNQAR                                     | 0.993818474        | 2               | 2.56682   |
| P02650        | LGADMEDLR                                     | 1.113262426        | 2               | 3.03111   |
| P02650        | LGPLVEQGR                                     | 1.274468558        | 2               | 2.30945   |
| P02650        | LQAEIFQAR                                     | 1.586139652        | 2               | 2.71116   |
| P02650        | MEEQTQQIR                                     | 1.048936481        | 2               | 3.23887   |
| P02650        | MEEQTQQIR+Oxidation(1)                        | 1.008599282        | 2               | 2.87699   |
| P02650        | NEVNTMLGQSTEELR                               | 1.096315482        | 2               | 4.49017   |
| P02650        | SKMEEQTQQIR                                   | 1.017322505        | 2               | 3.2988    |
| P02650        | SKMEEQTQQIR+Oxidation(3)                      | 1.463579884        | 2               | 3.56091   |
| P02650        | TANLGAGAAQPLR                                 | 0.977976604        | 2               | 2.37244   |
| <b>P02680</b> | <b>FIBG Fibrinogen gamma chain</b>            | <b>1.154387806</b> | <b>0.721419</b> | <b>3</b>  |
| P02680        | VGPESDKYR                                     | 1.083773858        | 2               | 2.59289   |
| P02680        | YEALLTHESSIR                                  | 1.300682545        | 2               | 3.71655   |
| P02680        | YLQDIYTSNK                                    | 1.207203104        | 2               | 2.78518   |
| <b>P02692</b> | <b>FABPL Fatty acid binding protein_liver</b> | <b>1.408518169</b> | <b>9.9E-20</b>  | <b>13</b> |
| P02692        | AMGLPEDLIQK                                   | 1.114488825        | 2               | 3.63358   |
| P02692        | AMGLPEDLIQK+Oxidation(2)                      | 1.201357732        | 2               | 3.3736    |
| P02692        | GVSEIVHEGK                                    | 1.059342419        | 2               | 3.49282   |
| P02692        | GVSEIVHEGKK                                   | 1.076976046        | 2               | 3.32757   |
| P02692        | MVTTFK                                        | 1.038339826        | 1               | 1.91304   |
| P02692        | MVTTFK+Oxidation(1)                           | 1.254752833        | 1               | 2.02285   |
| P02692        | SVTEFNGDTITNTMTLGDIVYK                        | 1.239257558        | 2               | 5.65352   |
| P02692        | SVTEFNGDTITNTMTLGDIVYK+Oxidation(14)          | 1.100010135        | 2               | 5.64295   |
| P02692        | SVTEFNGDTITNTMTLGDIVYKR                       | 1.287133915        | 2               | 3.73548   |
| P02692        | VIHNEFTLGEECELETMTGEK                         | 1.145824734        | 3               | 6.30642   |
| P02692        | VIHNEFTLGEECELETMTGEK+Oxidation(17)           | 1.206553565        | 3               | 5.51018   |
| P02692        | YQVQSQENFEPFMK                                | 1.156955           | 2               | 6.0539    |
| P02692        | YQVQSQENFEPFMK+Oxidation(13)                  | 1.254040312        | 2               | 5.28081   |
| <b>P02696</b> | <b>RET1 Retinol binding protein 1</b>         | <b>1.362827484</b> | <b>8.99E-06</b> | <b>8</b>  |
| P02696        | ALDVNVALR                                     | 1.26451667         | 2               | 3.2775    |
| P02696        | CMTTVSWDGDKLQCVQK                             | 1.562716526        | 2               | 4.54339   |
| P02696        | EFEEDLTGIDDR                                  | 1.218962272        | 2               | 2.3439    |
| P02696        | EFEEDLTGIDDRK                                 | 1.217305256        | 2               | 2.75299   |
| P02696        | GWTDQWIEGDELHLEMR                             | 1.221365629        | 2               | 4.30948   |
| P02696        | MLSNENFEEYLR                                  | 1.371217896        | 2               | 3.63052   |
| P02696        | MLSNENFEEYLR+Oxidation(1)                     | 1.509677312        | 2               | 2.96996   |
| P02696        | NYIMDFVQGEFEEDLTGIDDRK                        | 1.344949726        | 3               | 3.46512   |
| <b>P02706</b> | <b>ASGR1 Asialoglycoprotein receptor 1</b>    | <b>1.176413796</b> | <b>0.217159</b> | <b>6</b>  |
| P02706        | DYQDFQHLDNENDHHQLQR                           | 1.249414481        | 3               | 3.41407   |
| P02706        | LVESQLEK                                      | 1.19534563         | 1               | 2.06711   |
| P02706        | QLVSDVR                                       | 0.459636424        | 1               | 2.0709    |
| P02706        | SLSCQMAALR                                    | 1.069903471        | 2               | 3.05188   |
| P02706        | WVCETELGK                                     | 1.164801177        | 2               | 2.36258   |
| P02706        | WVDGTDYETGFK                                  | 1.238982658        | 2               | 3.46497   |
| <b>P02770</b> | <b>ALBU Serum albumin</b>                     | <b>1.178601003</b> | <b>0.922055</b> | <b>27</b> |
| P02770        | AADKDNCFATEGPNLVAR                            | 0.852279136        | 2               | 4.92819   |
| P02770        | AETFTFHSIDIPLDKEK                             | 1.97297749         | 2               | 3.74581   |
| P02770        | CCAEGDPPACYGTVLAEFQPLVEEPK                    | 1.686514837        | 3               | 5.3224    |
| P02770        | CCSGSLVER                                     | 0.877306734        | 2               | 3.2315    |
| P02770        | CCTLPEAQR                                     | 1.069820413        | 2               | 2.77338   |
| P02770        | DLGEQHFK                                      | 1.235843992        | 2               | 2.30994   |
| P02770        | DNCFATEGPNLVAR                                | 0.895724927        | 2               | 3.36333   |
| P02770        | DNYGELADCCA                                   | 0.218066021        | 2               | 3.36679   |
| P02770        | ECCHGDLLCADDR                                 | 1.253977864        | 2               | 3.93696   |
| P02770        | ECCHGDLLCADDRAELAK                            | 1.278380238        | 2               | 5.32863   |
| P02770        | FKDLGEQHFK                                    | 1.221216568        | 3               | 4.18032   |

|               |                                                     |                    |                 |           |
|---------------|-----------------------------------------------------|--------------------|-----------------|-----------|
| P02770        | GLVLIAFSQYLQK                                       | 1.347446768        | 2               | 4.08361   |
| P02770        | INKECCHGDLLECADDRAELAK                              | 1.229000279        | 3               | 5.44417   |
| P02770        | KQTALAEVLK                                          | 1.149526432        | 3               | 4.12606   |
| P02770        | KYEATLEK                                            | 1.206043956        | 2               | 2.69375   |
| P02770        | LQACCDKPVVLQK                                       | 1.380289493        | 2               | 4.2771    |
| P02770        | LRDNYGELADCCAK                                      | 0.341201           | 2               | 3.34416   |
| P02770        | LVQEVTFDAK                                          | 1.309490286        | 2               | 3.7089    |
| P02770        | QEPERNECFLQHK                                       | 0.373330287        | 2               | 2.35511   |
| P02770        | RHPDYSVSLLR                                         | 1.264239547        | 3               | 4.80933   |
| P02770        | SIHTLFGDK                                           | 0.535791601        | 1               | 2.28392   |
| P02770        | TCVADENAENCDK                                       | 0.974418854        | 2               | 4.646     |
| P02770        | TNCELYEK                                            | 1.049481581        | 2               | 2.82172   |
| P02770        | TVMGDFFAQFVDK                                       | 0.789931748        | 2               | 4.27193   |
| P02770        | YMCENQATISSK                                        | 1.19759097         | 2               | 4.4145    |
| P02770        | YMCENQATISSK+Oxidation(2)                           | 1.077262192        | 2               | 3.68944   |
| P02770        | YNEVLTQCCTESDK                                      | 1.055433253        | 2               | 5.73419   |
| <b>P02803</b> | <b>MT1 Metallothionein_1</b>                        | <b>1.227282968</b> | <b>0.167304</b> | <b>2</b>  |
| <b>P04041</b> | <b>GPX1 Glutathione peroxidase 1</b>                | <b>1.07571009</b>  | <b>0.931005</b> | <b>10</b> |
| P04041        | FLVGPDGVPVR                                         | 1.067959304        | 2               | 3.24681   |
| P04041        | FLVGPDGVPVRR                                        | 1.069965003        | 2               | 2.31987   |
| P04041        | GLVVLGFPCNQFGHQENGK                                 | 1.128727029        | 2               | 4.28568   |
| P04041        | GLVVLGFPCNQFGHQENGNEEILNSLK                         | 0.963179449        | 3               | 4.32976   |
| P04041        | NALPAPSDPTALMTDPK                                   | 1.00739837         | 2               | 3.47492   |
| P04041        | NDISWNFEK                                           | 1.059093103        | 2               | 2.90445   |
| P04041        | NEEILNSLK                                           | 1.103401583        | 2               | 2.54155   |
| P04041        | TIDIEPDIEALLSK                                      | 1.220690286        | 3               | 4.27959   |
| P04041        | YIIWSPVCR                                           | 1.041827611        | 2               | 2.93639   |
| P04041        | YVRPGGGFEPNFTLFK                                    | 1.201470354        | 2               | 4.58119   |
| <b>P04167</b> | <b>CP2B2 Cytochrome P450 2B2</b>                    | <b>0.686534934</b> | <b>0.123749</b> | <b>2</b>  |
| P04167        | GTIAVIEPIFK                                         | 0.761735326        | 2               | 2.5601    |
| P04167        | NLQEILDYIGHIVEK                                     | 0.684815842        | 2               | 4.22887   |
| <b>P04176</b> | <b>PH4H Phenylalanine_4_hydroxylase</b>             | <b>0.928374849</b> | <b>1.27E-14</b> | <b>16</b> |
| P04176        | AYGAGLLSSFGEQYCLSDKPK                               | 1.296790324        | 2               | 4.1409    |
| P04176        | EDNIPQLEDVSQLQTCTGFR                                | 0.982879331        | 3               | 4.72707   |
| P04176        | FANQILSYGAELDADHPGFK                                | 1.739137822        | 3               | 3.97933   |
| P04176        | FANQILSYGAELDADHPGFKDPVYR                           | 1.221502243        | 3               | 5.3623    |
| P04176        | ILADINSINSEVGILCNAQK                                | 1.076842947        | 3               | 6.60825   |
| P04176        | LNKDEYEFFTYLDKR                                     | 4.096047861        | 3               | 3.6054    |
| P04176        | LRPVAGLLSSR                                         | 2.053183348        | 2               | 2.7117    |
| P04176        | NDIGATVHELRS                                        | 0.958969534        | 2               | 3.75593   |
| P04176        | QFADIAYNYR                                          | 0.895669155        | 2               | 2.8157    |
| P04176        | SFAQFSQEIGLASLGAPDEYIEK                             | 1.436440874        | 2               | 4.82568   |
| P04176        | TACQEYSVTEFQPLYVAESFSDAK                            | 3.838723176        | 3               | 3.69209   |
| P04176        | THACYEHNHIFPILLEK                                   | 1.008471754        | 3               | 4.73001   |
| P04176        | VEVDNTQQLK                                          | 0.941109468        | 2               | 3.84534   |
| P04176        | VEYTEEEK                                            | 0.858312729        | 2               | 2.69658   |
| P04176        | VEYTEEEKQTWGTVFR                                    | 1.032077407        | 2               | 4.33639   |
| P04176        | YCGFREDNIPQLEDVSQLQTCTGFR                           | 1.005353642        | 3               | 5.30153   |
| <b>P04182</b> | <b>OAT Ornithine aminotransferase_mitochondrial</b> | <b>0.939526821</b> | <b>0.999999</b> | <b>9</b>  |
| P04182        | AFYNNVLGEYEEYITK                                    | 0.935363515        | 2               | 4.48598   |
| P04182        | GIYMWDVEGR                                          | 0.974579702        | 2               | 2.71821   |
| P04182        | GLLNIAIVIR                                          | 0.984984372        | 2               | 3.1417    |
| P04182        | HQVLFIADEIQTGLAR                                    | 1.858480961        | 2               | 4.04962   |
| P04182        | IIEAMKSQVDK                                         | 0.940246391        | 2               | 2.33297   |
| P04182        | KTEQGPPSSEYIFER                                     | 1.094373768        | 2               | 3.92263   |
| P04182        | TEQGPPSSEYIFER                                      | 0.903312683        | 2               | 4.12178   |
| P04182        | VLPMTGVEAGETACK                                     | 1.012400113        | 2               | 3.98494   |

|               |                                                                     |                    |                 |           |
|---------------|---------------------------------------------------------------------|--------------------|-----------------|-----------|
| P04182        | WLAVDHENVRPDIIVLLGK                                                 | 0.837243137        | 2               | 4.9355    |
| <b>P04256</b> | <b>ROA1 Heterogeneous nuclear ribonucleoprotein A1</b>              | <b>1.065175666</b> | <b>0.984128</b> | <b>4</b>  |
| P04256        | EDSQRPGAHLTVK                                                       | 1.044066097        | 2               | 3.22086   |
| P04256        | IEVIEIMTDR                                                          | 1.231626711        | 2               | 3.13553   |
| P04256        | NQGGYGGSSSSSYGSGR                                                   | 1.098208639        | 2               | 4.73156   |
| P04256        | YHTVNGHNCEVR                                                        | 1.304317528        | 2               | 3.31723   |
| <b>P04276</b> | <b>VTDB Vitamin D binding protein</b>                               | <b>1.34593568</b>  | <b>8.47E-06</b> | <b>2</b>  |
| P04276        | SCESDAPFPVHPGTSECCTK                                                | 1.352378876        | 2               | 4.741     |
| P04276        | YCSSLQDAEMR                                                         | 1.345818995        | 2               | 2.87571   |
| <b>P04355</b> | <b>MT2 Metallothionein_2</b>                                        | <b>1.4480128</b>   | <b>0.862239</b> | <b>2</b>  |
| <b>P04462</b> | <b>MYH8 Myosin_8 (Fragment)</b>                                     | <b>0.84705101</b>  | <b>0.890911</b> | <b>3</b>  |
| P04462        | KLQHELEEAER                                                         | 0.865634967        | 3               | 3.89384   |
| P04462        | LQHELEEAER                                                          | 0.781304514        | 2               | 3.64902   |
| P04462        | RAALQAEIEELR                                                        | 1.898386546        | 2               | 3.87579   |
| <b>P04466</b> | <b>MLRS Myosin regulatory light chain 2_skeletal muscle isoform</b> | <b>1.632448384</b> | <b>0.980103</b> | <b>7</b>  |
| P04466        | AAAEGSSNVFSMFDQTQIQEFK                                              | 1.420467631        | 2               | 4.49378   |
| P04466        | GADPEDVITGAFK                                                       | 1.597904487        | 2               | 3.84988   |
| P04466        | KQFLEELLTQCDR                                                       | 1.195462824        | 2               | 4.10782   |
| P04466        | LKGADPEDVITGAFK                                                     | 2.7010209          | 3               | 4.46266   |
| P04466        | NICYVITHGDAKDQE                                                     | 1.646934929        | 2               | 4.70353   |
| P04466        | NMWAAFPPDVGGNVVDYK                                                  | 1.507513449        | 2               | 3.09584   |
| P04466        | QFLEELLTQCDR                                                        | 1.58781194         | 2               | 3.77732   |
| <b>P04550</b> | <b>PTMS Parathyrosin</b>                                            | <b>0.909857573</b> | <b>0.664846</b> | <b>4</b>  |
| P04550        | RTAEEDEADPKR                                                        | 1.100919908        | 3               | 4.03406   |
| P04550        | SVEAAAELSAK                                                         | 1.05549823         | 2               | 3.64451   |
| P04550        | TAEDEADPK                                                           | 0.834475338        | 2               | 3.32468   |
| P04550        | TAEDEADPKR                                                          | 1.123120466        | 2               | 3.70036   |
| <b>P04636</b> | <b>MDHM Malate dehydrogenase_mitochondrial</b>                      | <b>1.000297581</b> | <b>1.67E-09</b> | <b>16</b> |
| P04636        | AGAGSATLSMAYAGAR                                                    | 0.955376695        | 2               | 4.65713   |
| P04636        | ANTFVAELK                                                           | 1.068516378        | 2               | 2.77811   |
| P04636        | EGVIECSFVQSK                                                        | 0.954341578        | 1               | 3.03652   |
| P04636        | ETECTYFSTPLLLGK                                                     | 1.162172861        | 2               | 3.50346   |
| P04636        | FVFLVDAMNGK                                                         | 1.210606805        | 2               | 4.4267    |
| P04636        | GCDVVVIPAGVPR                                                       | 1.005916474        | 2               | 4.37047   |
| P04636        | GYLGPQLPDCLK                                                        | 0.999930167        | 2               | 4.1261    |
| P04636        | IFGVTTLDIVR                                                         | 1.420965115        | 2               | 3.60158   |
| P04636        | IQEAGTEVVK                                                          | 1.030258746        | 2               | 2.88075   |
| P04636        | LTYLDIAHTPGVAADLSHIETR                                              | 1.151746996        | 3               | 7.01877   |
| P04636        | MIAEAIPELK                                                          | 0.992801511        | 2               | 3.21102   |
| P04636        | MIAEAIPELK+Oxidation(1)                                             | 1.288009297        | 2               | 2.53998   |
| P04636        | TIIP LISQCTPK                                                       | 1.047023292        | 2               | 3.51166   |
| P04636        | VAVLGASGGIGQPLSLLLK                                                 | 0.439838652        | 2               | 6.11811   |
| P04636        | VDFPQDQLATLTGR                                                      | 0.917256738        | 2               | 4.86953   |
| P04636        | VNVPVIGGHAGK                                                        | 0.96459857         | 2               | 3.21043   |
| <b>P04639</b> | <b>APOA1 Apolipoprotein A_I</b>                                     | <b>1.294178302</b> | <b>0.99889</b>  | <b>6</b>  |
| P04639        | AKPALDDLGGQLMPVLEAWK                                                | 0.972566985        | 2               | 3.74204   |
| P04639        | LQEQLGPVTQEFWANLEK                                                  | 1.295150755        | 2               | 4.89843   |
| P04639        | NEMNKDLENVK                                                         | 1.083073184        | 2               | 3.43498   |
| P04639        | QLNLNLLDNWDTLGSTVGR                                                 | 1.03428993         | 2               | 4.50274   |
| P04639        | VKDFATVYVDVAVK                                                      | 1.154826394        | 2               | 3.11123   |
| P04639        | WNEEVEAYR                                                           | 0.919882746        | 2               | 2.37081   |
| <b>P04642</b> | <b>LDHA L lactate dehydrogenase A chain</b>                         | <b>1.343158025</b> | <b>9.9E-20</b>  | <b>22</b> |
| P04642        | DLADELALVDVIEDK                                                     | 1.33304895         | 2               | 5.47931   |
| P04642        | DLADELALVDVIEDKLNK                                                  | 1.39399826         | 2               | 4.61524   |
| P04642        | DQLIVNLLK                                                           | 1.169480231        | 2               | 2.9457    |

|               |                                            |                    |                 |           |
|---------------|--------------------------------------------|--------------------|-----------------|-----------|
| P04642        | DQLIVNLLKEEQVPQNK                          | 1.309845398        | 2               | 4.86708   |
| P04642        | EDVFLSVPCILGQNGISDVVK                      | 1.281442953        | 2               | 4.7985    |
| P04642        | FIIPNVVK                                   | 1.009623606        | 2               | 2.39425   |
| P04642        | GEMMDLQHGSFLK                              | 1.390190636        | 2               | 3.85543   |
| P04642        | GEMMDLQHGSFLK+Oxidation(3)                 | 1.525203123        | 2               | 3.45283   |
| P04642        | GEMMDLQHGSFLK+Oxidation(4)                 | 1.485163054        | 2               | 3.14732   |
| P04642        | GLYGIKEDVFLSVPCILGQNGISDVVK                | 1.284985958        | 3               | 3.35449   |
| P04642        | KSADTLWGIQK                                | 1.318220032        | 2               | 3.0957    |
| P04642        | LGVHPLSCHGWVLGEHGSSVPVWSGVNVAGVSLK         | 1.217841751        | 3               | 5.72764   |
| P04642        | LKGEMMDLQHGSFLK                            | 1.286958455        | 2               | 3.99952   |
| P04642        | LLIVSNPVDILTYVAWK                          | 1.804345953        | 2               | 4.87618   |
| P04642        | NVNIFK                                     | 1.112451779        | 1               | 2.08794   |
| P04642        | QVVD SAYEVIK                               | 1.168226448        | 2               | 3.11902   |
| P04642        | RVHPITMIK                                  | 1.029299894        | 2               | 2.37254   |
| P04642        | SADTLWGIQK                                 | 1.13594217         | 2               | 3.94079   |
| P04642        | SLNPQLGTDADK                               | 1.046452566        | 2               | 2.67487   |
| P04642        | SLNPQLGTDADKEQWK                           | 1.117503921        | 2               | 4.84054   |
| P04642        | SLNPQLGTDADKEQWKDVHK                       | 1.185160528        | 2               | 4.68056   |
| P04642        | VTLTPDEEAR                                 | 1.111305738        | 2               | 2.92852   |
| <b>P04644</b> | <b>RS17 40S ribosomal protein S17</b>      | <b>1.118232736</b> | <b>0.319967</b> | <b>4</b>  |
| P04644        | DNYVPEVSALDQEIEVDPDK                       | 1.127318597        | 2               | 4.33567   |
| P04644        | LGNDFHTNK                                  | 1.131695788        | 2               | 2.92388   |
| P04644        | LLDFGSLNQLVQTQPTVGMNFK                     | 1.238951528        | 2               | 4.11985   |
| P04644        | VCEEIAIIPSK                                | 1.065763074        | 2               | 3.11422   |
| <b>P04692</b> | <b>TPM1 Tropomyosin alpha_1 chain</b>      | <b>1.366284916</b> | <b>0.987756</b> | <b>10</b> |
| P04692        | AISELDHALNDMTSI                            | 2.53392642         | 2               | 2.62786   |
| P04692        | AQKDEEKMEIQEIQLK                           | 0.983120866        | 2               | 3.85121   |
| P04692        | GTEDELDKYSEALK                             | 1.059887502        | 2               | 2.30806   |
| P04692        | KLVIIESDLER                                | 1.438893648        | 2               | 3.65358   |
| P04692        | LDKENALDR                                  | 0.950975587        | 2               | 2.38913   |
| P04692        | LKGTEDELDK                                 | 1.85086703         | 2               | 2.62147   |
| P04692        | LVIIESDLER                                 | 1.426628438        | 2               | 3.23372   |
| P04692        | MEIQEIQLK                                  | 1.049842476        | 2               | 2.8502    |
| P04692        | QLEDELVSLQK                                | 2.061745395        | 2               | 2.48718   |
| P04692        | SIDDELELYAQK                               | 3.093717782        | 2               | 3.7025    |
| <b>P04694</b> | <b>ATTY Tyrosine aminotransferase</b>      | <b>1.132647915</b> | <b>0.752136</b> | <b>2</b>  |
| <b>P04762</b> | <b>CATA Catalase</b>                       | <b>0.974430306</b> | <b>9.9E-20</b>  | <b>30</b> |
| P04762        | DAMLFPSFIHSQK                              | 0.928431996        | 2               | 2.3545    |
| P04762        | DAQLFIQR                                   | 1.003262807        | 2               | 3.08925   |
| P04762        | DGPMCMHDNQGGAPNYYPNSFSAPEQQGSALEHHSQCSADVK | 1.132920125        | 4               | 5.1708    |
| P04762        | DYPLIPVGK                                  | 0.963993426        | 1               | 2.52997   |
| P04762        | EAETFPFNPFDLTK                             | 1.184017505        | 2               | 4.34902   |
| P04762        | FNSANEDNVTQVR                              | 0.899260739        | 2               | 4.70977   |
| P04762        | FSTVAGESGSADTVR                            | 0.94969414         | 2               | 5.1901    |
| P04762        | FSTVAGESGSADTVRDPDPR                       | 0.93918022         | 2               | 2.96696   |
| P04762        | FYTEDGNWDLVGNNTPIFFIR                      | 1.917539817        | 3               | 6.2746    |
| P04762        | GAGAFGYFEVTHDITR                           | 1.036650073        | 2               | 5.11822   |
| P04762        | GPLLVDVFTDEMAHFDR                          | 1.606374914        | 2               | 5.71143   |
| P04762        | HMNGYGSHTFK                                | 0.941324298        | 3               | 4.20013   |
| P04762        | HMNGYGSHTFK+Oxidation(2)                   | 1.126275373        | 2               | 2.76323   |
| P04762        | LAQEDPDYGLR                                | 1.20942667         | 2               | 2.6399    |
| P04762        | LCENIANHLK                                 | 1.126024911        | 3               | 4.0514    |
| P04762        | LFAYPDTHR                                  | 1.282347991        | 2               | 2.87643   |
| P04762        | LGPNYLQIPVNCYPYR                           | 1.232832747        | 2               | 4.39548   |
| P04762        | LNIMTAGPR                                  | 1.094999347        | 2               | 3.16048   |
| P04762        | LVNANGEAVYCK                               | 1.254724819        | 2               | 4.05068   |

|               |                                                     |                    |                 |           |
|---------------|-----------------------------------------------------|--------------------|-----------------|-----------|
| P04762        | NAIHTYVQAGSHIAAK                                    | 1.015021682        | 2               | 5.33796   |
| P04762        | NFTDVHPDYGAR                                        | 0.945867364        | 2               | 4.08325   |
| P04762        | NLPVEEAGR                                           | 0.953218416        | 2               | 2.38316   |
| P04762        | NPANYFAEVEQMAFDPSNMPPGIEPSPDK                       | 1.774642415        | 3               | 6.38897   |
| P04762        | NPANYFAEVEQMAFDPSNMPPGIEPSPDK+Oxidation(19)         | 1.564012586        | 3               | 3.91779   |
| P04762        | RFNSANEDNVTQVR                                      | 0.978139512        | 2               | 5.18095   |
| P04762        | VFEHIGK                                             | 0.966757615        | 2               | 2.44354   |
| P04762        | VFEHIGKR                                            | 0.805903609        | 2               | 2.39118   |
| P04762        | VLNEEER                                             | 1.0257644          | 2               | 2.86369   |
| P04762        | VQALLDQYNSQPK                                       | 0.98591059         | 2               | 5.12044   |
| P04762        | VWPHKDYPLIPVGK                                      | 1.014954549        | 2               | 3.8528    |
| <b>P04764</b> | <b>ENOA Alpha_enolase</b>                           | <b>1.112265578</b> | <b>8.56E-11</b> | <b>17</b> |
| P04764        | AGYTDQVVIGMDVAASEFYR                                | 1.181663693        | 2               | 5.54611   |
| P04764        | DATNVGDEGGFAPNILENK                                 | 1.190026027        | 2               | 5.44258   |
| P04764        | DYPVVSIEDPFDQDDWDAWQK                               | 1.170242555        | 2               | 4.74107   |
| P04764        | FTATAGIQVVGDDLTVTNPK                                | 1.252641966        | 2               | 5.17542   |
| P04764        | GNPTVEVDLYTAK                                       | 1.521784345        | 2               | 4.05858   |
| P04764        | HIADLAGNPEVILPVPAFNVINGGSHAGNK                      | 1.2702819          | 3               | 6.57123   |
| P04764        | IDQLMIEMDGTENK                                      | 1.139021417        | 2               | 4.64171   |
| P04764        | IEEELGSK                                            | 1.168223574        | 2               | 2.4       |
| P04764        | IGAEVYHNLK                                          | 1.978295618        | 2               | 3.32185   |
| P04764        | KLNVEQEK                                            | 1.049824478        | 2               | 2.35383   |
| P04764        | KLNVEQEKIDQLMIEMDGTENK                              | 1.23618464         | 3               | 6.04055   |
| P04764        | LNVEQEK                                             | 1.136675937        | 2               | 2.7331    |
| P04764        | LNVEQEKIDQLMIEMDGTENK                               | 0.990851792        | 3               | 4.59626   |
| P04764        | SCNCLLLK                                            | 1.306540152        | 2               | 3.05788   |
| P04764        | SFIKDYVVSIEDPFDQDDWDAWQK                            | 1.187248484        | 3               | 4.35412   |
| P04764        | VNQIGSVTESLQACK                                     | 1.149277108        | 2               | 5.18293   |
| P04764        | YITPDQLADLYK                                        | 1.164474496        | 2               | 3.31954   |
| <b>P04785</b> | <b>PDIA1 Protein disulfide_isomerase</b>            | <b>1.190832153</b> | <b>2.01E-08</b> | <b>24</b> |
| P04785        | DHENIVIAK                                           | 1.031048413        | 2               | 2.91656   |
| P04785        | HNQLPLVIEFTEQTAPK                                   | 1.141242876        | 2               | 5.61345   |
| P04785        | IKPHLMSQELPEDWDKQPVK                                | 1.362376379        | 4               | 5.60349   |
| P04785        | IKPHLMSQELPEDWDKQPVK+Oxidation(6)                   | 1.647378171        | 3               | 3.87365   |
| P04785        | ILEFFGLK                                            | 1.387022093        | 2               | 3.14433   |
| P04785        | ILFIFIDSDHTDNQR                                     | 1.055307068        | 2               | 3.84045   |
| P04785        | ITQFCHHFLEK                                         | 0.991107694        | 2               | 3.08999   |
| P04785        | LGETYKDHENIVIAK                                     | 1.087416622        | 3               | 5.08227   |
| P04785        | LITLEEEMTK                                          | 1.083787584        | 2               | 3.71076   |
| P04785        | LKAEGSEIR                                           | 1.212310926        | 2               | 2.4265    |
| P04785        | LLDFIK                                              | 1.18766573         | 2               | 2.41324   |
| P04785        | MDSTANEVEAVK                                        | 1.012030241        | 2               | 4.23443   |
| P04785        | MDSTANEVEAVK+Oxidation(1)                           | 1.131186527        | 2               | 3.73089   |
| P04785        | NFEVAFDEK                                           | 1.090830757        | 2               | 3.20094   |
| P04785        | NFEVAFDEKK                                          | 1.127394311        | 2               | 4.04738   |
| P04785        | NNFEGEITK                                           | 1.087882074        | 2               | 2.55672   |
| P04785        | QFLAAEAVDDIPFGITSNSDVFSK                            | 1.201222385        | 3               | 6.29355   |
| P04785        | SVSDYDGK                                            | 1.138198033        | 1               | 2.25965   |
| P04785        | TGPAATTLSDTAAAESLVSSEVTIGFFK                        | 1.010033172        | 3               | 6.73323   |
| P04785        | THILLFLPK                                           | 0.82304329         | 2               | 2.9829    |
| P04785        | TVIDYNGER                                           | 1.155422178        | 2               | 2.66857   |
| P04785        | VDATEESDLAQQYGVGR                                   | 1.075579396        | 2               | 5.42969   |
| P04785        | YKPESDELTAEK                                        | 1.087258405        | 3               | 4.45352   |
| P04785        | YQLDKDGVVLFK                                        | 1.068974122        | 2               | 3.83921   |
| <b>P04797</b> | <b>G3P Glyceraldehyde_3_phosphate dehydrogenase</b> | <b>1.442047286</b> | <b>9.9E-20</b>  | <b>13</b> |
| P04797        | GAAQNIIPASTGAAK                                     | 1.309430564        | 2               | 4.13877   |

|               |                                                |                    |                 |           |
|---------------|------------------------------------------------|--------------------|-----------------|-----------|
| P04797        | IVSNASCTTNCLAPLAK                              | 1.418137602        | 2               | 4.96508   |
| P04797        | LISWYDNEYGYSNR                                 | 2.221039739        | 2               | 4.33705   |
| P04797        | LVINGKPITIFQER                                 | 1.438850489        | 3               | 3.5696    |
| P04797        | RVIISAPSADAPMFVMGVNHEK                         | 1.158416401        | 3               | 5.46903   |
| P04797        | VIHDNFGIVEGLMTTVHAITATQK                       | 1.245552219        | 3               | 7.70527   |
| P04797        | VIHDNFGIVEGLMTTVHAITATQK+Oxidation(13)         | 1.547360528        | 4               | 4.66488   |
| P04797        | VIISAPSADAPMFVMGVNHEK                          | 1.204360087        | 2               | 4.29491   |
| P04797        | VIISAPSADAPMFVMGVNHEK+Oxidation(12)            | 1.414461085        | 2               | 3.85012   |
| P04797        | VIISAPSADAPMFVMGVNHEK+Oxidation(15)            | 1.414461085        | 2               | 3.52447   |
| P04797        | VPTPNVSVVDLTCR                                 | 1.235124258        | 2               | 2.60855   |
| P04797        | VVDLMAYMASK                                    | 3.433572018        | 2               | 4.43379   |
| P04797        | WGDAGAEYVVESTGVFTTMEK                          | 1.422723184        | 2               | 5.23757   |
| <b>P04799</b> | <b>CP1A2 Cytochrome P450 1A2</b>               | <b>1.094187767</b> | <b>0.019639</b> | <b>6</b>  |
| P04799        | DFVENVTSGNAVDFFPVLR                            | 1.018016922        | 2               | 3.21748   |
| P04799        | FLTNDNTAIDK                                    | 1.148851107        | 2               | 3.06793   |
| P04799        | IGSTPVVLSGLNTIK                                | 2.097141447        | 2               | 2.41735   |
| P04799        | NSIQDITGALFK                                   | 0.996241155        | 2               | 3.12713   |
| P04799        | SMTFNPDSGPVWAAR                                | 1.631931885        | 2               | 3.31002   |
| P04799        | TVQEHYQDFNK                                    | 1.0938811          | 2               | 3.42642   |
| <b>P04903</b> | <b>GSTA2 Glutathione S_transferase alpha_2</b> | <b>0.741838096</b> | <b>9.9E-20</b>  | <b>10</b> |
| P04903        | DGNLMFDQVPMVEIDGMK                             | 0.68974409         | 2               | 4.88465   |
| P04903        | DGNLMFDQVPMVEIDGMK+Oxidation(11)               | 0.768644682        | 2               | 4.61167   |
| P04903        | DGNLMFDQVPMVEIDGMK+Oxidation(17)               | 0.760610232        | 2               | 3.44534   |
| P04903        | DGNLMFDQVPMVEIDGMK+Oxidation(5)                | 0.77639773         | 2               | 4.23336   |
| P04903        | KDGNLMFDQVPMVEIDGMK                            | 0.707982859        | 2               | 4.92166   |
| P04903        | LIQSPEDLEK                                     | 1.326901321        | 2               | 3.06853   |
| P04903        | LKKDGNLMFDQVPMVEIDGMK                          | 1.512811991        | 2               | 3.18791   |
| P04903        | WLLAAAGVEFEEK                                  | 1.025950692        | 2               | 4.38871   |
| P04903        | YDLYGK                                         | 0.677792925        | 1               | 2.01027   |
| P04903        | YLPAFEK                                        | 0.682785147        | 1               | 2.03891   |
| <b>P04904</b> | <b>GSTA3 Glutathione S_transferase alpha_3</b> | <b>1.197573778</b> | <b>9.99E-16</b> | <b>8</b>  |
| P04904        | ALIDMYAEGVADLDEIVLHYPYIPPEK                    | 1.628211863        | 4               | 6.98789   |
| P04904        | LRNDGSLMFQQVPMVEIDGMK                          | 1.491581511        | 2               | 4.66516   |
| P04904        | NDGSLMFQQVPMVEIDGMK                            | 1.23258754         | 2               | 5.37416   |
| P04904        | NDGSLMFQQVPMVEIDGMK+Oxidation(12)              | 1.144775313        | 2               | 4.44113   |
| P04904        | NDGSLMFQQVPMVEIDGMK+Oxidation(18)              | 1.141817074        | 2               | 4.10636   |
| P04904        | NDGSLMFQQVPMVEIDGMK+Oxidation(6)               | 1.144452478        | 2               | 4.02234   |
| P04904        | SHGQDYLVGNR                                    | 0.873852945        | 2               | 3.92286   |
| P04904        | WLLAAAGVEFEEQFLK                               | 1.272722784        | 2               | 6.15348   |
| <b>P04905</b> | <b>GSTM1 Glutathione S_transferase Mu 1</b>    | <b>0.813179341</b> | <b>1.52E-05</b> | <b>15</b> |
| P04905        | ADIVENQVMDNR                                   | 0.945380144        | 2               | 4.18138   |
| P04905        | ADIVENQVMDNR+Oxidation(9)                      | 1.044505122        | 2               | 3.73887   |
| P04905        | CLDAFPNLKDFLAR                                 | 1.066248388        | 2               | 3.24973   |
| P04905        | FKLGLDFPNLPYLIDGSR                             | 1.115894994        | 2               | 4.55341   |
| P04905        | HHLCGETEEER                                    | 1.136226113        | 3               | 3.78284   |
| P04905        | IRADIVENQVMDNR                                 | 1.145544567        | 2               | 3.98237   |
| P04905        | ITQSNAIMR                                      | 1.080841802        | 2               | 3.10697   |
| P04905        | ITQSNAIMR+Oxidation(8)                         | 1.237876392        | 2               | 2.83082   |
| P04905        | KHHLCGETEEER                                   | 0.815038571        | 3               | 4.45783   |
| P04905        | KITQSNAIMR                                     | 0.940697104        | 3               | 3.82731   |
| P04905        | KITQSNAIMR+Oxidation(9)                        | 1.011887542        | 3               | 3.4476    |
| P04905        | LGLDFPNLPYLIDGSR                               | 1.127211868        | 2               | 4.74617   |
| P04905        | MQLIMLCYNPDFEK                                 | 1.84347163         | 2               | 4.40887   |
| P04905        | VTYVDFLAYDILDQYHIFEPK                          | 7.55167032         | 3               | 3.63315   |
| P04905        | YLSTPIFSK                                      | 1.028524752        | 2               | 2.59889   |
| <b>P04906</b> | <b>GSTP1 Glutathione S_transferase P</b>       | <b>0.981497795</b> | <b>0.995216</b> | <b>2</b>  |
| P04906        | EAALVDMVNDGVEDLR                               | 0.985662122        | 2               | 4.65612   |



|               |                                               |                    |                 |           |
|---------------|-----------------------------------------------|--------------------|-----------------|-----------|
| P04906        | STCLYGQLPK                                    | 0.990731007        | 1               | 1.92194   |
| <b>P04937</b> | <b>FINC Fibronectin</b>                       | <b>1.121359262</b> | <b>0.827198</b> | <b>4</b>  |
| P04937        | FTQVSPTTLTAQWTAPSVK                           | 1.124493186        | 2               | 4.75677   |
| P04937        | SSPVVIDASTAIDAPSNLR                           | 1.134231385        | 2               | 4.49476   |
| P04937        | SYTITGLQPGTDYK                                | 0.897654784        | 2               | 2.57777   |
| P04937        | VVTPSPPTNLHLEANPDTGVLTVSWER                   | 1.16790544         | 3               | 4.16289   |
| <b>P05065</b> | <b>ALDOA Fructose_bisphosphate aldolase A</b> | <b>1.048357394</b> | <b>0.914228</b> | <b>8</b>  |
| P05065        | ALANSLACQ GK                                  | 1.310248896        | 2               | 2.44216   |
| P05065        | FSNEEIAMATVTALR                               | 1.471199407        | 2               | 3.89658   |
| P05065        | FSNEEIAMATVTALRR                              | 0.771986703        | 2               | 2.38743   |
| P05065        | GILAADESTGSIK                                 | 1.138001572        | 2               | 3.96917   |
| P05065        | GVVPLAGTNGETTTQGLDGLSER                       | 1.433699622        | 2               | 5.52687   |
| P05065        | IGEHTPSSLAIMENANVLAR                          | 0.833430783        | 2               | 4.82098   |
| P05065        | LQSIGTENTEENR                                 | 0.703812414        | 2               | 3.61236   |
| P05065        | RLQSIGTENTEENR                                | 1.268913376        | 2               | 2.78457   |
| <b>P05178</b> | <b>CP2C6 Cytochrome P450 2C6</b>              | <b>0.775797436</b> | <b>6.4E-07</b>  | <b>8</b>  |
| P05178        | EALIDHGEEFAER                                 | 0.779754675        | 2               | 2.9718    |
| P05178        | FDYKDQDFLNLM EK                               | 0.913751924        | 3               | 4.92489   |
| P05178        | FIDLPTNLPHAVTCDIK                             | 0.646456164        | 2               | 3.99672   |
| P05178        | GTTIITSLSSVLHDSK                              | 0.713283308        | 2               | 3.67573   |
| P05178        | GTTIITSLSSVLHDSKEFPDPEIFDPGHFLDGNGK           | 0.355057485        | 4               | 4.7788    |
| P05178        | MCAGEGLAR                                     | 0.698374928        | 2               | 2.61582   |
| P05178        | NITQSLTSFSK                                   | 0.721685296        | 2               | 3.07943   |
| P05178        | TNGSPCDPTFILGCAPCNVICSIIFQNR                  | 1.519181973        | 2               | 2.54662   |
| <b>P05179</b> | <b>CP2C7 Cytochrome P450 2C7</b>              | <b>2.053227957</b> | <b>1.11E-16</b> | <b>8</b>  |
| P05179        | ACVGEGLAR                                     | 2.051785252        | 2               | 3.0197    |
| P05179        | FINFVPTNLPHAVTCDIK                            | 3.234510989        | 3               | 3.53319   |
| P05179        | HMPYTDAMIHEVQR                                | 2.114077691        | 2               | 4.15509   |
| P05179        | IEEHQESLDVTNPR                                | 2.407054825        | 2               | 4.84871   |
| P05179        | KIEEHQESLDVTNPR                               | 3.143809333        | 2               | 4.98047   |
| P05179        | KLPPGPTPLPIIGNFLQIDVK                         | 3.378903293        | 3               | 5.9842    |
| P05179        | TYGPVFTLYLGSQPTVILHGYEAIK                     | 2.760659229        | 3               | 3.44446   |
| P05179        | VLTSLTSLVHDSK                                 | 4.341975384        | 2               | 3.40421   |
| <b>P05182</b> | <b>CP2E1 Cytochrome P450 2E1</b>              | <b>0.904475732</b> | <b>0.832559</b> | <b>12</b> |
| P05182        | AKEHLQSLDINCAR                                | 1.03289419         | 2               | 4.48989   |
| P05182        | DIDLSPVTVGFGSIPPQFK                           | 0.859816551        | 2               | 3.34056   |
| P05182        | DTVFQGYVIPK                                   | 1.55907574         | 2               | 2.35703   |
| P05182        | DVTDCLLIEMEKEK                                | 1.015543416        | 2               | 3.29563   |
| P05182        | EHLQSLDINCAR                                  | 1.145600512        | 2               | 2.48395   |
| P05182        | FGPVFTLHLGSR                                  | 1.04411169         | 2               | 2.50973   |
| P05182        | FINLVPSNLPHEATR                               | 1.008430456        | 2               | 3.88068   |
| P05182        | FKPEHFLNEN GK                                 | 1.140229568        | 2               | 3.24539   |
| P05182        | FSLSILR                                       | 1.041921419        | 2               | 2.38702   |
| P05182        | GTVVIP TLD SLLYDSHEFPDPEK                     | 1.067482204        | 2               | 4.70707   |
| P05182        | LDMPYMDAVVHEIQR                               | 1.244780817        | 2               | 3.1218    |
| P05182        | YGLLLIMK                                      | 0.895505284        | 2               | 3.16124   |
| <b>P05183</b> | <b>CP3A2 Cytochrome P450 3A2</b>              | <b>1.032902139</b> | <b>0.665769</b> | <b>12</b> |
| P05183        | DIELDGLFIPK                                   | 0.931925592        | 2               | 3.56375   |
| P05183        | EMFPIIEQYGDILVK                               | 1.176492396        | 2               | 3.76385   |
| P05183        | KDIELDGLFIPK                                  | 0.919091829        | 3               | 3.73984   |
| P05183        | KLQEEIDGALPSK                                 | 1.004440207        | 2               | 3.57044   |
| P05183        | LKEMFPIIEQYGDILVK                             | 1.22278288         | 2               | 3.26608   |
| P05183        | LQEEIDGALPSK                                  | 1.061035658        | 2               | 4.09485   |
| P05183        | QAILEPEKPIVLK                                 | 0.883623221        | 2               | 3.29447   |
| P05183        | QEAETGKPVMTK                                  | 0.740144422        | 2               | 3.42799   |
| P05183        | QEAETGKPVMTK+Oxidation(11)                    | 1.320694517        | 2               | 3.18337   |
| P05183        | VDFLQLMLNAHNNSK                               | 0.950079224        | 2               | 4.09449   |

|               |                                             |                    |                 |           |
|---------------|---------------------------------------------|--------------------|-----------------|-----------|
| P05183        | VDFLQLMLNAHNSKDEVSHK                        | 1.029713777        | 3               | 3.49189   |
| P05183        | YLKQEAETGKPVTMK                             | 1.208068131        | 2               | 3.78929   |
| <b>P05197</b> | <b>EF2 Elongation factor 2</b>              | <b>1.244156579</b> | <b>9.9E-20</b>  | <b>27</b> |
| P05197        | ALLELQLEPEELYQTFQR                          | 1.597304764        | 2               | 5.2837    |
| P05197        | ARPPFDGLAEDIDKGEVSAR                        | 1.192425142        | 3               | 5.69104   |
| P05197        | AYLPVNESFGFTADLR                            | 1.108455217        | 2               | 4.52151   |
| P05197        | CELLYEGPPDDEAAMGIK                          | 1.765460288        | 2               | 4.25247   |
| P05197        | CLYASVLTAPQR                                | 1.455664899        | 2               | 2.6169    |
| P05197        | DLEEDHACIPIKK                               | 1.047489969        | 2               | 3.38523   |
| P05197        | EGIPALDNFLDKL                               | 1.669894953        | 2               | 3.43691   |
| P05197        | ETVSEESNVLCLSK                              | 1.180839795        | 2               | 4.32698   |
| P05197        | GEGQLGAAER                                  | 1.163490744        | 2               | 3.65948   |
| P05197        | GHVFEEQVAGTPMFVVK                           | 1.119954508        | 2               | 6.09164   |
| P05197        | IWCFCGPDGTGPNILTDITK                        | 1.585940504        | 2               | 5.13238   |
| P05197        | KIWCFCGPDGTGPNILTDITK                       | 1.194728996        | 2               | 4.75246   |
| P05197        | KVEDMMK+Oxidation(5)Oxidation(6)            | 1.282806591        | 2               | 2.31008   |
| P05197        | KVEDMMK+Oxidation(6)                        | 1.255073541        | 2               | 2.39029   |
| P05197        | LDSSEKDKKEGKPLLK                            | 1.157507319        | 3               | 3.96853   |
| P05197        | LMEPIYLVEIQCEQVVGGIYGLNR                    | 1.277904858        | 3               | 5.06686   |
| P05197        | NMSVIAHVDHGK                                | 1.06243128         | 2               | 3.8751    |
| P05197        | NMSVIAHVDHGK+Oxidation(2)                   | 1.249813305        | 2               | 3.52429   |
| P05197        | STLTDSLCK                                   | 1.144528644        | 2               | 3.12681   |
| P05197        | TFCQLDPIFK                                  | 1.438083525        | 2               | 4.19781   |
| P05197        | TGTITTFEHAHNMR                              | 1.071926902        | 2               | 3.98463   |
| P05197        | VFDAIMNFR                                   | 1.444202336        | 2               | 2.68276   |
| P05197        | VFSGVVSTGLK                                 | 1.242697949        | 2               | 2.99687   |
| P05197        | WLPAGDALLQMITIHLSPVTAQK                     | 1.035829345        | 3               | 3.56221   |
| P05197        | YEWVVAEAR                                   | 1.113572739        | 2               | 2.97706   |
| P05197        | YFDPANGK                                    | 1.232662457        | 1               | 2.04613   |
| P05197        | YVEPIEDVPCGNIVLGVVDQFLVK                    | 1.439323839        | 3               | 5.75766   |
| <b>P05369</b> | <b>FPPS Farnesyl pyrophosphate synthase</b> | <b>0.92231133</b>  | <b>0.999992</b> | <b>11</b> |
| P05369        | ALYEELDLR                                   | 1.001153681        | 2               | 3.11064   |
| P05369        | EVLEYNTVGGK                                 | 1.49565723         | 2               | 3.00225   |
| P05369        | GLTVVQTFQELVEPR                             | 0.979914795        | 2               | 4         |
| P05369        | IKEVLEYNTVGGK                               | 1.002993537        | 2               | 4.47266   |
| P05369        | QILEENYGQK                                  | 0.729880199        | 2               | 2.42217   |
| P05369        | QILEENYGQKDPEK                              | 0.832199926        | 2               | 3.62431   |
| P05369        | QNFIQHFSQIVK                                | 1.077531776        | 2               | 2.48319   |
| P05369        | SLIEQCSAPLPPSIFLELANK                       | 0.835956747        | 2               | 5.19918   |
| P05369        | VGTDIQDNK                                   | 0.812442172        | 2               | 3.76754   |
| P05369        | VLTEDELGHPEK                                | 0.759768655        | 2               | 2.52155   |
| P05369        | VLTEDELGHPEKGDATR                           | 0.795395391        | 2               | 4.73789   |
| <b>P05426</b> | <b>RL7 60S ribosomal protein L7</b>         | <b>1.286657149</b> | <b>8.65E-09</b> | <b>6</b>  |
| P05426        | AGNFYVPAEPK                                 | 1.21975564         | 2               | 2.9899    |
| P05426        | FGIICMEDLIHEIYTVGK                          | 1.336675019        | 3               | 4.35268   |
| P05426        | IVEPYIAWGYPNLK                              | 1.820641611        | 2               | 3.63153   |
| P05426        | KKVPAVPETLK                                 | 0.92095805         | 2               | 3.00032   |
| P05426        | TTHFVEGGDAGNR                               | 1.042683598        | 2               | 2.74841   |
| P05426        | TTHFVEGGDAGNREDQINR                         | 1.249574154        | 2               | 4.43541   |
| <b>P05544</b> | <b>SPA3L Serine protease inhibitor A3L</b>  | <b>1.361157042</b> | <b>0.000186</b> | <b>6</b>  |
| P05544        | AVLDVDETGTEATAATGVATVIR                     | 1.365427341        | 2               | 2.81076   |
| P05544        | DSTMEEILEGLK                                | 1.334599692        | 2               | 2.88743   |
| P05544        | IAELFSDLEER                                 | 1.518022997        | 2               | 2.55349   |
| P05544        | MQQVESSLQPETLK                              | 1.223550851        | 2               | 4.15357   |
| P05544        | MQQVESSLQPETLKK                             | 1.306742921        | 2               | 3.3047    |
| P05544        | VFSQQADLSR                                  | 1.858792942        | 2               | 2.93313   |
| <b>P05545</b> | <b>SPA3K Serine protease inhibitor A3K</b>  | <b>1.69892585</b>  | <b>0.000361</b> | <b>5</b>  |

|               |                                                                   |                    |                 |           |
|---------------|-------------------------------------------------------------------|--------------------|-----------------|-----------|
| P05545        | AVLDVDETGTEGAAATAVTAALK                                           | 1.189058102        | 2               | 6.17477   |
| P05545        | FSISTDYNLEEVLPGLGR                                                | 1.193467019        | 2               | 3.91086   |
| P05545        | IAELFSELDER                                                       | 1.224807077        | 2               | 3.01314   |
| P05545        | IFSQQADLSR                                                        | 1.814460561        | 2               | 2.48122   |
| P05545        | NLHVSQVVHK                                                        | 1.398884401        | 2               | 2.61949   |
| <b>P05765</b> | <b>RS21 40S ribosomal protein S21</b>                             | <b>1.129985056</b> | <b>0.882488</b> | <b>3</b>  |
| P05765        | DHASIQMNVAEVDR                                                    | 1.00868828         | 2               | 3.68728   |
| P05765        | MGESDDSLR                                                         | 1.061019955        | 2               | 3.0099    |
| P05765        | TYGICGAIR                                                         | 1.136159579        | 2               | 2.44031   |
| <b>P06214</b> | <b>HEM2 Delta_aminolevulinic acid dehydratase</b>                 | <b>0.967142954</b> | <b>0.443014</b> | <b>9</b>  |
| P06214        | AGADIIITYFAPQLLK                                                  | 2.086275171        | 2               | 4.47023   |
| P06214        | AGAFDLR                                                           | 0.935311659        | 2               | 2.57732   |
| P06214        | AGCQVVAPSDMMDGR                                                   | 0.967155328        | 2               | 3.91226   |
| P06214        | CVLIFGVPSR                                                        | 0.953149101        | 2               | 2.48259   |
| P06214        | DEQGSAADESDSPTIEAVR                                               | 0.708644646        | 2               | 5.91718   |
| P06214        | DIQEGADILMVKGPLPYLDMVQEVK                                         | 1.0547132          | 2               | 3.90059   |
| P06214        | TAVLESMTAFR                                                       | 0.931182314        | 2               | 3.21358   |
| P06214        | VPKDEQGSAADESDSPTIEAVR                                            | 0.827006622        | 2               | 5.98397   |
| P06214        | YGVNQLEEMLRPLVEAGLR                                               | 0.883622213        | 3               | 4.29485   |
| <b>P06302</b> | <b>PTMA Prothymosin alpha</b>                                     | <b>1.427571584</b> | <b>6.66E-15</b> | <b>3</b>  |
| P06302        | RVAEDEDDEDDVETKK                                                  | 1.436640912        | 3               | 5.83299   |
| P06302        | VAEDEDDEDDVETK                                                    | 1.216427815        | 2               | 4.31676   |
| P06302        | VAEDEDDEDDVETKK                                                   | 1.383970818        | 2               | 4.58151   |
| <b>P06399</b> | <b>FIBA Fibrinogen alpha chain</b>                                | <b>1.047766215</b> | <b>0.993504</b> | <b>9</b>  |
| P06399        | AQQIQVLQK                                                         | 0.88149784         | 1               | 2.08349   |
| P06399        | EVVTSDDGSDCGDGMGLTHSFSGR                                          | 0.939229903        | 3               | 4.41502   |
| P06399        | GDFANANNFDNTFGQVSEDLR                                             | 1.143096403        | 2               | 4.9979    |
| P06399        | GDFANANNFDNTFGQVSEDLRR                                            | 1.043216368        | 3               | 3.41493   |
| P06399        | GDKELLIGNEK                                                       | 0.91000343         | 2               | 2.77591   |
| P06399        | GLIDEANQDFTNR                                                     | 0.935050617        | 2               | 3.0309    |
| P06399        | MADEAASEAHQEGDTR                                                  | 0.804880775        | 2               | 3.84673   |
| P06399        | SQLQEGPPEWK                                                       | 1.334323449        | 2               | 2.9083    |
| P06399        | TSDSDIFTDIENPSSHVPEFSSSK                                          | 0.973164698        | 3               | 3.48072   |
| <b>P06685</b> | <b>AT1A1 Sodium/potassium_transporting ATPase subunit alpha_1</b> | <b>0.888826487</b> | <b>0.182864</b> | <b>6</b>  |
| P06685        | AVAGDASESALLK                                                     | 0.961060306        | 2               | 3.6304    |
| P06685        | AVFQANQENLPILK                                                    | 1.188670568        | 2               | 2.68111   |
| P06685        | EQPLDEELKDAFQNAYLELGLGER                                          | 1.336171539        | 3               | 3.35173   |
| P06685        | LNIPVNQVNPR                                                       | 1.158340243        | 2               | 3.13796   |
| P06685        | MSINAEDVVVGDLEVEK                                                 | 0.708702534        | 2               | 3.51073   |
| P06685        | YEPAAVSEHGDKK                                                     | 0.812458057        | 2               | 3.36373   |
| <b>P06687</b> | <b>AT1A3 Sodium/potassium_transporting ATPase subunit alpha_3</b> | <b>1.042605025</b> | <b>1</b>        | <b>3</b>  |
| P06687        | DGPNALPPPTTPEVVK                                                  | 1.032910077        | 2               | 2.97099   |
| P06687        | GVGIISEGNETVEDIAR                                                 | 1.064075195        | 2               | 4.4671    |
| P06687        | QGAIIVAVTGDGVNDSPALK                                              | 1.050338803        | 2               | 5.04536   |
| <b>P06757</b> | <b>ADH1 Alcohol dehydrogenase 1</b>                               | <b>0.703205225</b> | <b>0.651316</b> | <b>19</b> |
| P06757        | AAVLWEPHKPFTIEDIEVAPPK                                            | 0.877184121        | 3               | 5.60937   |
| P06757        | FPLEPLITHVLPFEK                                                   | 0.955878452        | 3               | 4.68245   |
| P06757        | GAIFGGFK                                                          | 0.843944319        | 2               | 2.69598   |
| P06757        | GALLDGTSR                                                         | 0.921062183        | 2               | 2.7968    |
| P06757        | GKPIHHFISTSTFSQYTVVDDIAVAK                                        | 0.932001859        | 3               | 5.40372   |
| P06757        | HPESNLCCQTK                                                       | 0.879831355        | 2               | 3.24434   |
| P06757        | ICKHPESNLCCQTK                                                    | 0.631638957        | 3               | 3.88414   |
| P06757        | IDAAAPLDK                                                         | 0.843167401        | 2               | 2.9743    |
| P06757        | IDAAAPLDKVCLIGCGFSTGYGSAVQVAK                                     | 0.839756721        | 3               | 3.31762   |
| P06757        | IIAVDINKDK                                                        | 0.888748962        | 2               | 2.89638   |

|               |                                                                                      |                    |                 |           |
|---------------|--------------------------------------------------------------------------------------|--------------------|-----------------|-----------|
| P06757        | INEAFDLLR                                                                            | 0.893019986        | 2               | 3.71134   |
| P06757        | KFPLEPLITHVLPFEK                                                                     | 0.800394025        | 3               | 4.52611   |
| P06757        | LVADFMAK                                                                             | 0.997706522        | 2               | 2.40362   |
| P06757        | MVATGVCR                                                                             | 0.895740704        | 2               | 2.60799   |
| P06757        | MVATGVCR+Oxidation(1)                                                                | 0.96021776         | 2               | 2.52663   |
| P06757        | SDDHAVSGSLFTPLPAVLGHEGAGIVESIGEGVTCVKPGDK                                            | 0.964251595        | 4               | 7.90093   |
| P06757        | VCLIGCGFSTGYGSAVQVAK                                                                 | 0.863443574        | 2               | 6.47761   |
| P06757        | VIPLFSPQCGK                                                                          | 0.950908432        | 2               | 2.5981    |
| P06757        | VTPGSTCAVFLGGVGLSVVIGCK                                                              | 0.723709239        | 3               | 5.26164   |
| <b>P06761</b> | <b>GRP78 78 kDa glucose_regulated protein</b>                                        | <b>1.257946493</b> | <b>9.9E-20</b>  | <b>28</b> |
| P06761        | AKFEELNMDLFR                                                                         | 1.222036697        | 3               | 4.63941   |
| P06761        | DAGTIAGLNVMR                                                                         | 1.062624353        | 2               | 3.32872   |
| P06761        | DNHLLGTFDLTGIPPAPR                                                                   | 0.804628158        | 2               | 4.77969   |
| P06761        | ELEEIVQPIISK                                                                         | 1.094681661        | 2               | 4.04532   |
| P06761        | FEELNMDLFR                                                                           | 1.071348644        | 2               | 3.53864   |
| P06761        | IEIESFFEGEDFSETLTR                                                                   | 1.048023569        | 2               | 5.73044   |
| P06761        | IEWLESHQDADIEDFK                                                                     | 1.155459255        | 2               | 5.68103   |
| P06761        | IEWLESHQDADIEDFKAK                                                                   | 1.060922974        | 3               | 4.597     |
| P06761        | IINEPTAAAIAYGLDKR                                                                    | 1.087203261        | 2               | 4.42889   |
| P06761        | ITITNDQNR                                                                            | 1.214202815        | 2               | 2.67602   |
| P06761        | ITPSYVAFTPEGER                                                                       | 1.260880316        | 2               | 4.056     |
| P06761        | KKELEEIVQPIISK                                                                       | 1.120378627        | 2               | 5.42359   |
| P06761        | KSDIDEIVLVGGSTR                                                                      | 1.177142876        | 2               | 5.16769   |
| P06761        | KSQIFSTASDNQPTVTIK                                                                   | 1.385579972        | 2               | 5.32825   |
| P06761        | LYGSGGPPPTGEEDTSEKDEL                                                                | 1.461442961        | 2               | 5.49744   |
| P06761        | MKETAEAYLGK                                                                          | 0.979700221        | 2               | 3.37592   |
| P06761        | MKETAEAYLGK+Oxidation(1)                                                             | 1.022690026        | 2               | 2.93121   |
| P06761        | NELESYAYSLK                                                                          | 1.542937735        | 2               | 3.59103   |
| P06761        | NQLTSNPENTVFDAK                                                                      | 1.035711083        | 2               | 5.28985   |
| P06761        | SDIDEIVLVGGSTR                                                                       | 1.091728471        | 2               | 3.45071   |
| P06761        | SQIFSTASDNQPTVTIK                                                                    | 1.17394791         | 2               | 5.44658   |
| P06761        | TFAPEEISAMVLTK                                                                       | 1.126422748        | 2               | 4.75674   |
| P06761        | TKPYIQVDIGGGQTK                                                                      | 1.176770253        | 2               | 4.35147   |
| P06761        | TWNDPSVQQDIK                                                                         | 1.088908914        | 2               | 4.16569   |
| P06761        | VLEDSLK                                                                              | 1.09370678         | 2               | 2.34691   |
| P06761        | VLEDSLKK                                                                             | 1.128872882        | 2               | 2.45508   |
| P06761        | VTHAVVTVPAYFNDAQR                                                                    | 1.359317584        | 2               | 5.04996   |
| P06761        | VYEGERPLTK                                                                           | 1.058000492        | 2               | 2.90831   |
| <b>P06766</b> | <b>DPOLB DNA polymerase beta</b>                                                     | <b>1.308844857</b> | <b>0.066424</b> | <b>2</b>  |
| P06766        | EEMLMQMDIVLNEVKK+Oxidation(6)                                                        | 1.311700401        | 2               | 2.32777   |
| P06766        | QDDTSSSINFLTR                                                                        | 0.876027387        | 2               | 2.39808   |
| <b>P06866</b> | <b>HPT Haptoglobin</b>                                                               | <b>1.031898633</b> | <b>0.869259</b> | <b>6</b>  |
| P06866        | ATDLKDWVQETMAK                                                                       | 1.058909854        | 2               | 2.70925   |
| P06866        | GAVSPVGVPILNK                                                                        | 1.109250437        | 2               | 3.59388   |
| P06866        | LQTEGDGIYTLNSEK                                                                      | 1.187545502        | 2               | 4.37835   |
| P06866        | NQLVEIEK                                                                             | 1.143838795        | 1               | 2.25103   |
| P06866        | SVVDIGLIK                                                                            | 1.1079143          | 1               | 1.92094   |
| P06866        | YVMLPVADQEK                                                                          | 0.842687014        | 2               | 2.59646   |
| <b>P07150</b> | <b>ANXA1 Annexin A1</b>                                                              | <b>1.732682695</b> | <b>1.28E-05</b> | <b>2</b>  |
| P07150        | GPGSAVSPYPSFNPSSDVAALHK                                                              | 1.546827496        | 3               | 3.94074   |
| P07150        | GLGTDEDLIEILTTR                                                                      | 1.814066214        | 2               | 4.49953   |
| <b>P07153</b> | <b>RPN1 Dolichyl_diphosphooligosaccharide__protein glycosyltransferase subunit 1</b> | <b>1.050928711</b> | <b>2.31E-12</b> | <b>14</b> |
| P07153        | ASSFVLALEPELESR                                                                      | 1.426416563        | 2               | 3.95918   |
| P07153        | AVTSEIAVLQSR                                                                         | 1.335049992        | 2               | 3.69425   |
| P07153        | FVDHVFDEQVIDSLTVK                                                                    | 1.1711137          | 2               | 4.49552   |

|               |                                                                  |                    |                 |           |
|---------------|------------------------------------------------------------------|--------------------|-----------------|-----------|
| P07153        | GEDEEDNNLEVR                                                     | 1.062303047        | 2               | 3.77747   |
| P07153        | HFDETVNR                                                         | 1.045468012        | 2               | 2.79006   |
| P07153        | ISIVVETVYTHVLHPYPTQITQSEK                                        | 1.062368216        | 3               | 4.67397   |
| P07153        | LKTEGSDLCDR                                                      | 1.269092662        | 2               | 2.95955   |
| P07153        | NIQVDSPYDISR                                                     | 1.214074125        | 2               | 3.65396   |
| P07153        | NLVEQHIQDIVVHYTFNK                                               | 1.372443535        | 3               | 4.46588   |
| P07153        | SEDILDYGPFK                                                      | 1.051315406        | 2               | 3.62312   |
| P07153        | TEGSDLCDR                                                        | 1.010913183        | 2               | 2.41408   |
| P07153        | TVDLSSHLAK                                                       | 1.171356174        | 2               | 2.40982   |
| P07153        | VHYENNSPFLTITSMTR                                                | 1.529700386        | 2               | 3.34127   |
| P07153        | VTAEVVLAHPGGGSTAR                                                | 1.1120882          | 2               | 4.48087   |
| <b>P07323</b> | <b>ENOG Gamma_enolase</b>                                        | <b>1.323222568</b> | <b>0.081912</b> | <b>4</b>  |
| P07323        | AAVPSGASTGIYEALER                                                | 1.35290335         | 2               | 5.22353   |
| P07323        | FGANAILGVSLAVCK                                                  | 0.986078299        | 2               | 3.77125   |
| P07323        | GNPTVEVDLHTAK                                                    | 1.065440437        | 2               | 2.95232   |
| P07323        | SGETEDTFIADLVVGLCTGQIK                                           | 1.190377286        | 2               | 4.97772   |
| <b>P07335</b> | <b>KCRB Creatine kinase B_type</b>                               | <b>1.104718455</b> | <b>0.525342</b> | <b>3</b>  |
| P07335        | FCTGLTQIETLFK                                                    | 1.256070631        | 2               | 3.01651   |
| P07335        | LGFSEVELVQMVVDGVK                                                | 1.104528666        | 2               | 2.68243   |
| P07335        | TDLNPDNLQGGDDLDPNVLSR                                            | 0.839535766        | 2               | 2.89053   |
| <b>P07340</b> | <b>AT1B1 Sodium/potassium_transporting ATPase subunit beta_1</b> | <b>0.848075054</b> | <b>0.517306</b> | <b>3</b>  |
| P07340        | AYGENIGYSEK                                                      | 1.002270567        | 2               | 2.53259   |
| P07340        | VAPPLTQIPQIQK                                                    | 0.913326746        | 2               | 2.69217   |
| P07340        | YNPNVLPVQCTGK                                                    | 0.806774955        | 2               | 2.48489   |
| <b>P07379</b> | <b>PCKGC Phosphoenolpyruvate carboxykinase_cytosolic [GTP]</b>   | <b>1.085228021</b> | <b>3.23E-05</b> | <b>12</b> |
| P07379        | AINPENGGFVAPGTSVK                                                | 1.292083794        | 2               | 4.27741   |
| P07379        | EEGWLAEHMLILGITNPEGK                                             | 1.253258589        | 3               | 3.77389   |
| P07379        | FLWPGFGENSR                                                      | 1.223478411        | 2               | 2.5467    |
| P07379        | FVEGNAQLCQPEYIHCDSGSEEEYGR                                       | 1.083392008        | 3               | 4.27469   |
| P07379        | GLGDVNVEELFGISK                                                  | 1.599785303        | 2               | 3.70542   |
| P07379        | IGIELTDSPIYVASMRR                                                | 1.447187995        | 2               | 4.205     |
| P07379        | MGTSVLEALGDGEFIK                                                 | 1.344887339        | 2               | 3.86516   |
| P07379        | TVIITQEQR                                                        | 1.279052581        | 1               | 1.91313   |
| P07379        | VECVGDDIAWMK                                                     | 1.20842313         | 2               | 3.51016   |
| P07379        | VIQGSLSLDPQEVRR                                                  | 1.534924349        | 2               | 3.71121   |
| P07379        | YLAAPFSACGK                                                      | 1.081642761        | 2               | 2.9414    |
| P07379        | YLEDQVNADLPYEIER                                                 | 1.03931527         | 2               | 4.78999   |
| <b>P07632</b> | <b>SODC Superoxide dismutase [Cu_Zn]</b>                         | <b>1.046117789</b> | <b>0.495738</b> | <b>5</b>  |
| P07632        | DGVANVSIEDR                                                      | 0.912210274        | 2               | 2.83056   |
| P07632        | GDGPVQGVIFHEQK                                                   | 1.03448115         | 2               | 3.88724   |
| P07632        | HVGD LGNVAAGK                                                    | 1.039290933        | 2               | 3.98021   |
| P07632        | QDDLKGGNEESTK                                                    | 1.666703973        | 2               | 3.61191   |
| P07632        | VISLSGEHSIIGR                                                    | 1.071141628        | 2               | 3.12157   |
| <b>P07633</b> | <b>PCCB Propionyl_CoA carboxylase beta chain_mitochondrial</b>   | <b>0.923696325</b> | <b>0.413826</b> | <b>10</b> |
| P07633        | AFDNDVDALCNLR                                                    | 1.049548964        | 2               | 3.6481    |
| P07633        | AYNMLDIIHAVIDER                                                  | 1.05977444         | 2               | 4.19116   |
| P07633        | GFVDDIIQPSSTR                                                    | 0.933208673        | 2               | 3.09149   |
| P07633        | HLLGDTNYAWPTAEIAVMGAK                                            | 0.784302866        | 2               | 5.72322   |
| P07633        | ICCDLEVLASK                                                      | 1.107045993        | 2               | 3.53913   |
| P07633        | IMDQAITVGAPVIGLNDSGGAR                                           | 1.028245795        | 2               | 5.03862   |
| P07633        | IQEGVESLAGYADIFLR                                                | 0.854833661        | 2               | 4.42356   |
| P07633        | LVPELDTVVPLESSK                                                  | 0.844145082        | 2               | 3.57366   |
| P07633        | SVTNEDVTQEQLGGAK                                                 | 0.85955901         | 2               | 5.23346   |
| P07633        | TVGIVGNQPNVASGCLDINSSVK                                          | 0.929927159        | 2               | 5.04974   |

| <b>P07687</b> | <b>HYEP Epoxide hydrolase 1</b>                                   | <b>1.181975341</b> | <b>1.28E-13</b> | <b>25</b> |
|---------------|-------------------------------------------------------------------|--------------------|-----------------|-----------|
| P07687        | DIELLYPYK                                                         | 0.987171507        | 2               | 3.03296   |
| P07687        | DKEETLPLGDGWWGPGSKPSAK                                            | 1.281094131        | 3               | 4.93078   |
| P07687        | EDESIRPFK                                                         | 1.036909135        | 2               | 2.7139    |
| P07687        | EDESIRPFKVETSDEEIKDLHQR                                           | 1.068459131        | 3               | 6.37014   |
| P07687        | ENLGQGIMVHK                                                       | 1.025697875        | 2               | 2.96174   |
| P07687        | ESGYLHIQATKPDTVGICALNDSPVGLAAYILEK                                | 1.673291984        | 3               | 6.12823   |
| P07687        | FHYGFNSNYMK                                                       | 0.942732605        | 2               | 2.65489   |
| P07687        | FLGYTEKDIELLYPYK                                                  | 1.22119846         | 2               | 4.86715   |
| P07687        | FVSLAELQ                                                          | 1.12109885         | 2               | 2.45544   |
| P07687        | FYIQGGDWGSLICTNMAQMVPHVK                                          | 1.28489906         | 3               | 4.07029   |
| P07687        | GGHFAAFEEPK                                                       | 0.973645684        | 2               | 3.32515   |
| P07687        | GLHLNMAFISR                                                       | 1.182081635        | 2               | 2.88135   |
| P07687        | GLNSVATAR                                                         | 1.019844696        | 2               | 2.45427   |
| P07687        | IEGLDIHFHVKPPQLPSGR                                               | 1.725057152        | 3               | 4.30951   |
| P07687        | IPLLTPDK                                                          | 1.203909054        | 1               | 1.97014   |
| P07687        | KFVSLAELQ                                                         | 1.308100151        | 2               | 2.44891   |
| P07687        | KQVEILNQYPHFK                                                     | 1.099760936        | 3               | 5.45283   |
| P07687        | LLAQDIR                                                           | 1.283798581        | 2               | 2.43886   |
| P07687        | QVEILNQYPHFK                                                      | 1.156424484        | 2               | 3.5567    |
| P07687        | SHGLSDEHVFEVICPSIPGYGYSEASSK                                      | 1.075057583        | 3               | 6.29373   |
| P07687        | SHGLSDEHVFEVICPSIPGYGYSEASSKK                                     | 1.153341161        | 3               | 5.16756   |
| P07687        | TKIEGLDIHFHVKPPQLPSGR                                             | 1.243058102        | 3               | 4.19964   |
| P07687        | VETSDEEIK                                                         | 0.996514524        | 2               | 2.4884    |
| P07687        | VETSDEEIKDLHQR                                                    | 1.038547186        | 2               | 4.86286   |
| P07687        | VFVPTGFSAFPSELLHAPEK                                              | 1.577085332        | 2               | 5.12231   |
| <b>P07756</b> | <b>CPSM Carbamoyl_phosphate synthase [ammonia]_ mitochondrial</b> | <b>0.99428984</b>  | <b>9.9E-20</b>  | <b>98</b> |
| P07756        | AADTIGYPVMIR                                                      | 1.003427206        | 2               | 3.93268   |
| P07756        | AADTIGYPVMIR+Oxidation(10)                                        | 1.201864388        | 2               | 3.36531   |
| P07756        | AERPDGLILGMGGQTALNCGVELFK                                         | 1.002001164        | 3               | 6.72636   |
| P07756        | AERPDGLILGMGGQTALNCGVELFK+Oxidation(11)                           | 0.85250502         | 3               | 6.18484   |
| P07756        | AFAISGPFNVQFLVK                                                   | 0.799499755        | 2               | 5.02126   |
| P07756        | AFAMTNQILVER                                                      | 1.040251164        | 2               | 4.37868   |
| P07756        | AFAMTNQILVER+Oxidation(4)                                         | 1.066744252        | 2               | 3.79376   |
| P07756        | ALENNMSLDEIVK                                                     | 0.969163652        | 2               | 4.75844   |
| P07756        | ALENNMSLDEIVK+Oxidation(6)                                        | 1.064158329        | 2               | 3.96259   |
| P07756        | AMLSTGFK                                                          | 0.896852357        | 2               | 2.53151   |
| P07756        | AQTAHIVLEDGTK                                                     | 0.730440287        | 2               | 4.47667   |
| P07756        | ATGYPLAFIAAK                                                      | 1.365475777        | 2               | 3.10471   |
| P07756        | CEMASTGEVACFGEGIHAFALK                                            | 0.921560693        | 3               | 4.78442   |
| P07756        | CEMASTGEVACFGEGIHAFALK+Oxidation(3)                               | 0.987592806        | 3               | 4.70272   |
| P07756        | CLGLTEAQR                                                         | 1.009919531        | 2               | 3.60478   |
| P07756        | DADDNCVTVCMENVDAMGVHTGDSVVVAPAQTLNAEFQMLR                         | 1.097410393        | 3               | 6.44616   |
| P07756        | DELGLNK                                                           | 1.051901204        | 1               | 2.24374   |
| P07756        | DGSIDLVINLPNNNTK                                                  | 0.887675101        | 2               | 5.5392    |
| P07756        | DILNMDK                                                           | 0.902143629        | 1               | 1.9277    |
| P07756        | EIEYEVVR                                                          | 0.995586504        | 1               | 2.06334   |
| P07756        | EPLFGISTGNIITGLAAGAK                                              | 1.07594382         | 2               | 5.32425   |
| P07756        | ETLMDLGTK                                                         | 0.949154037        | 1               | 2.35909   |
| P07756        | EVEMDAVGK                                                         | 0.658062688        | 1               | 2.22284   |
| P07756        | FLEEATR                                                           | 0.985296659        | 2               | 2.47715   |
| P07756        | FLGVAEQLHNEGFK                                                    | 1.022327482        | 2               | 4.88484   |
| P07756        | FVHDNYVIR                                                         | 1.146661811        | 3               | 3.52994   |
| P07756        | GAEVHLPWNHDFQMDYDGLLIAGGPGNPALAQPLIQNVK                           | 1.049886794        | 3               | 6.11426   |

|        |                                                       |             |   |         |
|--------|-------------------------------------------------------|-------------|---|---------|
| P07756 | GAEVHLPWNHDFQMDYDGLLIAGGPGNPALAQPLIQNVK+Oxidation(16) | 1.078450941 | 3 | 5.7507  |
| P07756 | GILIGIQSFRPR                                          | 0.903802488 | 2 | 2.47721 |
| P07756 | GLNSESVTEETLR                                         | 0.960834866 | 2 | 4.86832 |
| P07756 | GNDVLVIECNLR                                          | 1.02931232  | 2 | 4.34951 |
| P07756 | GQILTMANPIIGNGGAPDPTAR                                | 0.874616018 | 2 | 6.45638 |
| P07756 | GQILTMANPIIGNGGAPDPTAR+Oxidation(6)                   | 0.858213908 | 2 | 4.89327 |
| P07756 | GQILTMANPIIGNGGAPDPTARDELGLNK                         | 0.880672019 | 3 | 4.84355 |
| P07756 | GQILTMANPIIGNGGAPDPTARDELGLNK+Oxidation(6)            | 0.836310688 | 3 | 3.43243 |
| P07756 | GQNQPVLNITNR                                          | 0.955486493 | 2 | 4.3     |
| P07756 | GTTITSVLPKALVASR                                      | 0.869665449 | 2 | 3.65169 |
| P07756 | GYSFGHPSSVAGEVVFNTGLGGYSEALDTPAYK                     | 1.47585438  | 3 | 6.45143 |
| P07756 | HLGIVGECNIQFALHPTSMEYCIIEVNAR                         | 1.083978848 | 3 | 4.84957 |
| P07756 | HLPTLEQPIIPSDYVAIK                                    | 1.006101578 | 2 | 5.15389 |
| P07756 | IALGIPLPEIK                                           | 1.187386188 | 2 | 2.97526 |
| P07756 | IAPSFAVESMEDALK                                       | 1.299032886 | 2 | 5.28411 |
| P07756 | IAPSFAVESMEDALK+Oxidation(10)                         | 1.224024995 | 2 | 3.45537 |
| P07756 | IEFEGQSVDFVDPNK                                       | 0.934737921 | 2 | 5.55707 |
| P07756 | IEFEGQSVDFVDPNKQNLIAEVSTK                             | 0.965804615 | 3 | 5.14901 |
| P07756 | ILDYHQEACNGCIISVGGQIPNNLAVPLYK                        | 1.078503554 | 3 | 6.07404 |
| P07756 | ILESDRKEPLFGISTGNIITGLAAGAK                           | 0.917659952 | 3 | 3.78496 |
| P07756 | IMGTSPLQIDR                                           | 1.492827983 | 2 | 3.05486 |
| P07756 | IMGTSPLQIDR+Oxidation(2)                              | 1.661117377 | 2 | 3.09319 |
| P07756 | IMGTSPLQIDRAEDR                                       | 0.896341565 | 2 | 2.44208 |
| P07756 | KELSEPSSTR                                            | 0.953259633 | 2 | 2.73998 |
| P07756 | KEPLFGISTGNIITGLAAGAK                                 | 0.880050441 | 2 | 5.4687  |
| P07756 | KTVVVNCPETVSTDFDECDK                                  | 0.264383409 | 2 | 5.12186 |
| P07756 | LFAEAVQK                                              | 1.000933436 | 2 | 3.42457 |
| P07756 | LFATEATSDWLNANNVPATPVAWPSQEGQNPSSLSSIR                | 1.229847932 | 3 | 5.12715 |
| P07756 | LRDADPILR                                             | 1.135226626 | 3 | 3.51488 |
| P07756 | LTSIDKWFLYK                                           | 1.134557889 | 2 | 2.48092 |
| P07756 | LYFEELSLR                                             | 1.842949776 | 2 | 3.46032 |
| P07756 | MCHPSVDGFTPR                                          | 0.937122629 | 3 | 5.04831 |
| P07756 | MCHPSVDGFTPR+Oxidation(1)                             | 1.053653446 | 3 | 4.33157 |
| P07756 | MRDILNMDK                                             | 0.936923937 | 2 | 3.03703 |
| P07756 | MRDILNMDK+Oxidation(1)                                | 1.146136654 | 2 | 2.7488  |
| P07756 | QADAVYFLPITPQFVTEVIK                                  | 0.846413929 | 3 | 4.41162 |
| P07756 | QIDTLAAEYPSVTNYLVTYNGQEHDIK                           | 3.837226156 | 3 | 3.35902 |
| P07756 | QLFSDKLEINEK                                          | 1.0966031   | 2 | 3.85145 |
| P07756 | QNLIAEVSTK                                            | 1.030400428 | 1 | 2.53412 |
| P07756 | RFL EEATR                                             | 1.093087515 | 2 | 2.99433 |
| P07756 | RTAVDSGIALLTNFQVTK                                    | 1.029765967 | 2 | 4.7543  |
| P07756 | SAYALGGLGSGICPNK                                      | 1.073380777 | 2 | 4.95855 |
| P07756 | SAYALGGLGSGICPNKETLMDLGTK                             | 0.944460377 | 3 | 4.97137 |
| P07756 | SFPFVSK                                               | 0.985145882 | 1 | 1.91606 |
| P07756 | SIFSAVLDELK                                           | 0.971631852 | 2 | 3.92822 |
| P07756 | SIFSAVLDELKVAQAPWK                                    | 0.683253481 | 3 | 3.44439 |
| P07756 | SLGQWLQEEK                                            | 0.99578817  | 2 | 4.18665 |
| P07756 | SLGQWLQEEKVPAIYGV DTR                                 | 0.942098942 | 2 | 3.93729 |
| P07756 | SVGEVMAIGR                                            | 0.928242534 | 2 | 3.59055 |
| P07756 | SVGEVMAIGR+Oxidation(6)                               | 0.973191126 | 2 | 3.09822 |
| P07756 | TAVDSGIALLTNFQVTK                                     | 1.16285482  | 3 | 6.38665 |
| P07756 | TFEESFQK                                              | 0.920982573 | 2 | 2.54036 |
| P07756 | TLGVDFIDVATK                                          | 0.967908841 | 2 | 4.1811  |
| P07756 | TSACFEP SLDYMVTK                                      | 0.799677953 | 2 | 4.72637 |
| P07756 | TSACFEP SLDYMVTK+Oxidation(12)                        | 0.750920714 | 2 | 3.56095 |
| P07756 | TSINVV R                                              | 0.98915405  | 2 | 2.43944 |

|               |                                                    |                    |                 |           |
|---------------|----------------------------------------------------|--------------------|-----------------|-----------|
| P07756        | TVLMNPNIASVQTNEVGLK                                | 0.892485507        | 2               | 6.62683   |
| P07756        | TVLMNPNIASVQTNEVGLK+Oxidation(4)                   | 0.885412697        | 2               | 5.9577    |
| P07756        | TVVVNCNPETVSTDFDECDK                               | 0.405320464        | 2               | 5.62523   |
| P07756        | TVVVNCNPETVSTDFDECDKLYFEELSLE                      | 1.806699496        | 3               | 6.00611   |
| P07756        | VISHAISEHVEDAGVHSGDATLMLPTQTISQGAIEK               | 0.998850567        | 3               | 7.59069   |
| P07756        | VISHAISEHVEDAGVHSGDATLMLPTQTISQGAIEK+Oxidation(23) | 1.01570932         | 3               | 7.04062   |
| P07756        | VLGTSVESIMATEDR                                    | 1.037047863        | 2               | 4.90152   |
| P07756        | VLGTSVESIMATEDR+Oxidation(10)                      | 1.109129808        | 2               | 4.22199   |
| P07756        | VLILGSGGLSIGQAGEFDYSGSQAVK                         | 1.041637179        | 2               | 5.81464   |
| P07756        | VMIGESVDEK                                         | 0.826821475        | 2               | 3.56979   |
| P07756        | VMIGESVDEK+Oxidation(2)                            | 0.94106722         | 2               | 3.00907   |
| P07756        | VSQEHVVLTK                                         | 0.9164362          | 2               | 3.98256   |
| P07756        | VVAVDCGIK                                          | 0.929213788        | 2               | 2.59215   |
| P07756        | YMESDGIK                                           | 0.920981201        | 1               | 2.14819   |
| P07756        | YMESDGIK+Oxidation(2)                              | 1.030056076        | 1               | 2.30052   |
| <b>P07824</b> | <b>ARGI1 Arginase_1</b>                            | <b>1.204737467</b> | <b>4.31E-09</b> | <b>15</b> |
| P07824        | ANEQLAAVVAETQK                                     | 1.20622791         | 2               | 5.35928   |
| P07824        | DHGDALFVDVNDSPFQIVK                                | 1.306130504        | 2               | 6.23971   |
| P07824        | DIVYIGLR                                           | 0.859080758        | 2               | 2.71065   |
| P07824        | DVDPGEHYIK                                         | 1.354667514        | 2               | 3.29396   |
| P07824        | EGNHKPETDYLKPPK                                    | 1.235906293        | 2               | 2.70798   |
| P07824        | GKFPDVPGFVWTPCISAK                                 | 1.354158335        | 3               | 4.6574    |
| P07824        | LKETEYNVR                                          | 1.343817297        | 3               | 3.71044   |
| P07824        | NGTISVVLGGDHSMAIGSISGHAR                           | 1.18806855         | 3               | 4.50948   |
| P07824        | TGLLSGLDIMEVNP TLGK                                | 1.392066253        | 2               | 5.72696   |
| P07824        | TGLLSGLDIMEVNP TLGK+Oxidation(10)                  | 0.779739589        | 2               | 2.67137   |
| P07824        | TVNTAVALT LSCFGTK                                  | 0.989421621        | 2               | 4.25559   |
| P07824        | VHPDLCVIWVDAHTDINTPLTSSGNLHGQPVAFLK                | 1.52941877         | 4               | 4.62349   |
| P07824        | VMEETF SYLLGR                                      | 2.502128127        | 2               | 3.82766   |
| P07824        | YFSMTEVDK                                          | 1.384320996        | 1               | 2.24889   |
| P07824        | YFSMTEVDKLGIGK+Oxidation(4)                        | 1.12206557         | 2               | 2.58895   |
| <b>P07871</b> | <b>THIKB 3_ketoacyl_CoA thiolase B_peroxisomal</b> | <b>0.887639207</b> | <b>0.00445</b>  | <b>16</b> |
| P07871        | AEELGLPILGVLR                                      | 0.91667472         | 2               | 4.41575   |
| P07871        | AEIVPVTTTVLDDK                                     | 0.857980407        | 2               | 4.62577   |
| P07871        | AEIVPVTTTVLDDKGDGR                                 | 0.820423716        | 2               | 3.94678   |
| P07871        | AEIVPVTTTVLDDKGDGRK                                | 0.827464538        | 2               | 4.3806    |
| P07871        | DCLIPMGITSENVAER                                   | 0.846474189        | 2               | 3.77188   |
| P07871        | DGGSTTAGNSSQVSDGAAAVLLAR                           | 0.957472249        | 2               | 6.22092   |
| P07871        | IAQFLSGIPETVPLSAVNR                                | 1.875302153        | 2               | 4.10562   |
| P07871        | LKPECLGDISVGNVLQPGAGAAMAR                          | 0.701684559        | 3               | 5.14952   |
| P07871        | QCSSGLQAVANIAGGIR                                  | 0.896341565        | 2               | 4.9075    |
| P07871        | QDAFALASQK                                         | 0.862759413        | 2               | 3.93966   |
| P07871        | QKQDAFALASQK                                       | 0.850644106        | 2               | 3.97105   |
| P07871        | QVVTLLNELK                                         | 1.162155857        | 2               | 2.47945   |
| P07871        | SKAEELGLPILGVLR                                    | 0.828386871        | 2               | 4.03905   |
| P07871        | SYAVVGVPPDIMGIGPAYAIPAALQK                         | 0.847767405        | 3               | 4.82023   |
| P07871        | TITVSQDEGVRPSTTMEGLAK                              | 0.90467869         | 2               | 4.34834   |
| P07871        | VNPLGGAIALGHPLGCTGAR                               | 0.899817558        | 2               | 5.2034    |
| <b>P07872</b> | <b>ACOX1 Peroxisomal acyl_coenzyme A oxidase 1</b> | <b>0.991616946</b> | <b>0.73088</b>  | <b>20</b> |
| P07872        | AFTTWTANAGIEECR                                    | 0.958755009        | 2               | 4.05767   |
| P07872        | ASATFNPELITHILDGSPENTR                             | 0.888106769        | 3               | 4.57832   |
| P07872        | ASEAHCHYVVVK                                       | 0.91893664         | 3               | 4.01504   |
| P07872        | EIENLILNDPDFQHEDYNFLTR                             | 1.55805084         | 2               | 4.40059   |
| P07872        | EIGTHKPLGITVGDIGPK                                 | 0.958866051        | 2               | 4.04599   |
| P07872        | EVAWNLTSDLVLR                                      | 0.923210174        | 2               | 2.8687    |
| P07872        | EYGISDPEEIMWFK                                     | 1.064373596        | 2               | 3.57359   |



|               |                                                      |                    |                 |           |
|---------------|------------------------------------------------------|--------------------|-----------------|-----------|
| P07872        | FGYEEMDNGYLK                                         | 0.887312535        | 2               | 3.0206    |
| P07872        | GGDFLEGSITGAQLSQVNAR                                 | 0.891049157        | 2               | 5.99548   |
| P07872        | GLETTATYDPK                                          | 0.834249586        | 2               | 3.50253   |
| P07872        | INESIGQGDLSPELHALTAGLK                               | 0.986592587        | 3               | 5.2958    |
| P07872        | IYDQVR                                               | 0.93048712         | 1               | 1.99424   |
| P07872        | LVEIAAK                                              | 0.923436641        | 1               | 2.08026   |
| P07872        | NLCLLYSLYGISQK                                       | 1.376216272        | 2               | 3.24789   |
| P07872        | QSEPEPQILDFQTQQYK                                    | 1.036867899        | 2               | 4.86847   |
| P07872        | SFLVGNAAQSLK                                         | 0.925702041        | 2               | 3.7684    |
| P07872        | SKEVAWNLTSDVLR                                       | 0.872689796        | 2               | 3.37664   |
| P07872        | TQEFILNSPTVTSIK                                      | 0.87176166         | 2               | 4.34284   |
| P07872        | TSNHAIVLAQLITQGECYGLHAFVPIR                          | 0.710951312        | 4               | 4.97246   |
| P07872        | YDGNVYENLFEWAK                                       | 1.422917812        | 2               | 5.44157   |
| <b>P07895</b> | <b>SODM Superoxide dismutase [Mn]_ mitochondrial</b> | <b>0.842337858</b> | <b>1.02E-09</b> | <b>4</b>  |
| P07895        | AIWNVINWENVSQR                                       | 1.058589983        | 2               | 3.76619   |
| P07895        | GDVTTQVALQPALK                                       | 0.751379906        | 2               | 3.37852   |
| P07895        | HHATVYVNNLNVTTEEK                                    | 1.006580957        | 2               | 4.733     |
| P07895        | NVRPDYLK                                             | 0.726666482        | 2               | 2.4372    |
| <b>P07896</b> | <b>ECHP Peroxisomal bifunctional enzyme</b>          | <b>0.920031476</b> | <b>0.020074</b> | <b>21</b> |
| P07896        | GGPMFYAASVGLPTVLEK                                   | 1.56801815         | 2               | 3.98751   |
| P07896        | GQGLTGPSLPPGTPVR                                     | 0.781246961        | 2               | 4.23902   |
| P07896        | GWYQYDKPLGR                                          | 0.734871902        | 2               | 3.07989   |
| P07896        | IFNKPVPSPNMDSVFAEIAIK                                | 1.335848595        | 3               | 3.99487   |
| P07896        | IGVVVGNCYGFVGNR                                      | 1.20085691         | 2               | 3.29422   |
| P07896        | IIDKPIEPR                                            | 0.931610928        | 2               | 2.5843    |
| P07896        | KGQGLTGPSLPPGTPVR                                    | 0.825305823        | 2               | 4.66443   |
| P07896        | KQYPGVLAPETCVR                                       | 0.843854304        | 2               | 4.0639    |
| P07896        | LCNPPVNAVSPTVIR                                      | 1.240996179        | 2               | 4.77269   |
| P07896        | LGILDAVVK                                            | 1.034682041        | 2               | 2.91279   |
| P07896        | LLEVIPSR                                             | 0.937041273        | 2               | 2.41053   |
| P07896        | QNPDIQLEPSDYLR                                       | 0.827414549        | 2               | 3.96344   |
| P07896        | QYPGVLAPETCVR                                        | 0.833128665        | 2               | 2.97039   |
| P07896        | TASAQPVSSVGLGLTMGR                                   | 0.910532158        | 2               | 5.14168   |
| P07896        | TISKEEILER                                           | 0.894502809        | 2               | 2.96462   |
| P07896        | VGISVVAVESDPK                                        | 0.914350684        | 2               | 4.19718   |
| P07896        | VGLPEVTLGILPGAR                                      | 1.002496722        | 2               | 3.44504   |
| P07896        | VSDLAGLDVGVK                                         | 0.902474775        | 2               | 4.50071   |
| P07896        | YLSADEALR                                            | 0.960383655        | 2               | 3.11686   |
| P07896        | YSPLGDMCEAGR                                         | 0.828381454        | 2               | 3.86108   |
| P07896        | YSSPTTIATVMMSLSK                                     | 0.967552365        | 2               | 3.23047   |
| <b>P07943</b> | <b>ALDR Aldose reductase</b>                         | <b>1.481355575</b> | <b>0.111881</b> | <b>2</b>  |
| P07943        | AIGVSNFNPLQIER                                       | 1.100284098        | 2               | 3.07544   |
| P07943        | HIDCAQVYQNEK                                         | 1.481984382        | 2               | 3.92855   |
| <b>P08009</b> | <b>GSTM4 Glutathione S_transferase Yb_3</b>          | <b>1.220440273</b> | <b>9.9E-20</b>  | <b>6</b>  |
| P08009        | LCYNPDFEK                                            | 1.654565834        | 1               | 2.26744   |
| P08009        | LLLEYTDSSYEK                                         | 1.163605321        | 2               | 4.91758   |
| P08009        | LLLEYTDSSYEKR                                        | 1.227899305        | 2               | 4.13249   |
| P08009        | NQVFEATCLDAFPNLK                                     | 0.726858325        | 2               | 4.25437   |
| P08009        | SQWLNEK                                              | 1.044240911        | 2               | 2.68484   |
| P08009        | YTMGDAPDFDR                                          | 0.704924972        | 2               | 2.37195   |
| <b>P08010</b> | <b>GSTM2 Glutathione S_transferase Mu_2</b>          | <b>1.083881592</b> | <b>9.9E-20</b>  | <b>14</b> |
| P08010        | FLSKPIFAK                                            | 1.232084934        | 1               | 2.19353   |
| P08010        | IRVDVLENQAMDTR                                       | 1.238469524        | 3               | 4.54802   |
| P08010        | ITYVDFLVYDVLQHR                                      | 2.452180594        | 2               | 5.22445   |
| P08010        | KKPEYLEGLPEK                                         | 1.005553172        | 3               | 4.3409    |
| P08010        | KPEYLEGLPEK                                          | 0.908000821        | 2               | 3.19716   |
| P08010        | KYSMGDAPDYDR                                         | 1.137906866        | 2               | 3.43757   |

|               |                                                                                                                      |                    |                 |           |
|---------------|----------------------------------------------------------------------------------------------------------------------|--------------------|-----------------|-----------|
| P08010        | LFLEYDTSYEDK                                                                                                         | 1.167519175        | 2               | 5.49056   |
| P08010        | LFLEYDTSYEDKK                                                                                                        | 1.199771574        | 2               | 4.78417   |
| P08010        | LQLAMVCYSPDFER                                                                                                       | 1.603434525        | 2               | 4.15587   |
| P08010        | LQLAMVCYSPDFER+Oxidation(5)                                                                                          | 1.604648508        | 2               | 3.64397   |
| P08010        | VDVLENQAMDTR                                                                                                         | 1.020298526        | 2               | 4.63296   |
| P08010        | VDVLENQAMDTR+Oxidation(9)                                                                                            | 1.164967928        | 2               | 3.74138   |
| P08010        | YSMGDAPDYDR                                                                                                          | 1.186154711        | 2               | 3.54563   |
| P08010        | YSMGDAPDYDR+Oxidation(3)                                                                                             | 1.517186386        | 2               | 2.65854   |
| <b>P08011</b> | <b>MGST1 Microsomal glutathione S_transferase 1</b>                                                                  | <b>1.282941541</b> | <b>0.946611</b> | <b>6</b>  |
| P08011        | IYHTIAYLTPLPQPNR                                                                                                     | 0.873921167        | 2               | 5.11389   |
| P08011        | MMFLSSATAFQR                                                                                                         | 1.308873722        | 2               | 4.0299    |
| P08011        | MMFLSSATAFQR+Oxidation(1)                                                                                            | 1.204993385        | 2               | 3.09909   |
| P08011        | MMFLSSATAFQR+Oxidation(2)                                                                                            | 1.216161281        | 2               | 3.45806   |
| P08011        | VFANPEDCAGFGK                                                                                                        | 1.050803498        | 2               | 4.78926   |
| P08011        | VFANPEDCAGFGKGENAK                                                                                                   | 0.974522323        | 2               | 4.78191   |
| <b>P08032</b> | <b>SPTA1 Spectrin alpha chain_ erythrocyte</b>                                                                       | <b>1.229303934</b> | <b>0.592876</b> | <b>2</b>  |
| P08032        | ADVVESWIGEK                                                                                                          | 1.04632376         | 2               | 3.0612    |
| P08032        | IEDLGDSMEEALILDIK                                                                                                    | 1.499479668        | 2               | 2.49549   |
| <b>P08081</b> | <b>CLCA Clathrin light chain A</b>                                                                                   | <b>1.068869561</b> | <b>0.842006</b> | <b>2</b>  |
| P08081        | LEALDANSR                                                                                                            | 1.070550875        | 2               | 2.47868   |
| P08081        | WREEQTER                                                                                                             | 1.055585206        | 2               | 2.36604   |
| <b>P08461</b> | <b>ODP2 Dihydroliopyllysine_residue acetyltransferase component of pyruvate dehydrogenase complex_ mitochondrial</b> | <b>1.34579878</b>  | <b>0.000809</b> | <b>4</b>  |
| P08461        | DVPLGTPLCIIVEK                                                                                                       | 1.252627779        | 2               | 3.87591   |
| P08461        | DVPVGSIICTVEKPDIEAFK                                                                                                 | 1.01856551         | 2               | 3.45957   |
| P08461        | GLETIASDVVSLASK                                                                                                      | 1.224349802        | 2               | 4.11202   |
| P08461        | VAPTPAGVFIDIPISNIR                                                                                                   | 1.347475422        | 2               | 4.59976   |
| <b>P08503</b> | <b>ACADM Medium_chain specific acyl_CoA dehydrogenase_ mitochondrial</b>                                             | <b>1.016028097</b> | <b>0.999998</b> | <b>8</b>  |
| P08503        | AFTGFIVEADTPGIHIGK                                                                                                   | 1.05599226         | 2               | 4.24483   |
| P08503        | EEIIPVAPDYDK                                                                                                         | 0.988954181        | 2               | 3.55248   |
| P08503        | IYQIYEGTAQIQR                                                                                                        | 1.08506269         | 2               | 4.51321   |
| P08503        | KGDEYVINGQK                                                                                                          | 1.037321475        | 2               | 4.2261    |
| P08503        | MTEQPMMCAYCVTEPSAGSDVAGIK                                                                                            | 1.762898374        | 2               | 4.60365   |
| P08503        | QEPGLGFSFELTEQQK                                                                                                     | 0.829307881        | 2               | 3.73421   |
| P08503        | SGEYFPPLIK                                                                                                           | 0.976423067        | 2               | 2.6539    |
| P08503        | TRPTVAAGAVGLAQR                                                                                                      | 1.049218537        | 2               | 4.21372   |
| <b>P08541</b> | <b>UD2B2 UDP_glucuronosyltransferase 2B2</b>                                                                         | <b>1.594482051</b> | <b>0.01629</b>  | <b>10</b> |
| P08541        | DELQNHFIK                                                                                                            | 1.326480628        | 2               | 2.78999   |
| P08541        | FEIFSTSISKDELQNHFIK                                                                                                  | 1.322068374        | 3               | 3.5024    |
| P08541        | FILPPSYVPVILSGLAGK                                                                                                   | 1.239113126        | 3               | 5.59      |
| P08541        | GHEVTVLKPSAYFFLDPK                                                                                                   | 2.02509448         | 3               | 4.69409   |
| P08541        | HKEWDTFYSEILGRPTTVEDEMSK                                                                                             | 0.840112805        | 3               | 4.32695   |
| P08541        | LLDVWTYELPR                                                                                                          | 1.911605497        | 2               | 3.64571   |
| P08541        | NVMLLSTIHHDQPMKPLDR                                                                                                  | 1.329451534        | 2               | 4.15739   |
| P08541        | NVMLLSTIHHDQPMKPLDR+Oxidation(3)                                                                                     | 1.799198927        | 3               | 3.39138   |
| P08541        | VEIWLIR                                                                                                              | 1.189846777        | 2               | 2.89277   |
| P08541        | VLVWPMDFSHWMNIK                                                                                                      | 1.285546322        | 2               | 3.50561   |
| <b>P08542</b> | <b>UDB17 UDP_glucuronosyltransferase 2B17</b>                                                                        | <b>1.17745292</b>  | <b>1.74E-08</b> | <b>6</b>  |
| P08542        | EIINNPYK                                                                                                             | 1.085314537        | 1               | 2.21338   |
| P08542        | FETFPTSIVSKDELENYFIK                                                                                                 | 1.19553236         | 2               | 4.17269   |
| P08542        | KWDPFYSEILGRPTTTLAETMGK                                                                                              | 0.99325708         | 2               | 4.49744   |
| P08542        | LVDVWTYELQR                                                                                                          | 1.629741765        | 2               | 3.257     |
| P08542        | NAVWLSTIHHDQPMKPLDK                                                                                                  | 1.079135015        | 3               | 3.71615   |
| P08542        | WDPFYSEILGRPTTTLAETMGK                                                                                               | 1.459733763        | 2               | 4.00836   |
| <b>P08683</b> | <b>CP2CB Cytochrome P450 2C11</b>                                                                                    | <b>1.213745728</b> | <b>1.35E-13</b> | <b>16</b> |

|               |                                                                           |                    |                 |           |
|---------------|---------------------------------------------------------------------------|--------------------|-----------------|-----------|
| P08683        | DIDTTPAISGFGHLPPFYEACFIPVQR                                               | 0.994472445        | 3               | 5.47464   |
| P08683        | EALVDLGEEFSGR                                                             | 1.2682406          | 2               | 3.62031   |
| P08683        | EHQESLDKDNPR                                                              | 1.291531           | 2               | 4.2196    |
| P08683        | FDPGHFLDER                                                                | 1.231081848        | 2               | 2.66495   |
| P08683        | FDYKDPTFLNLMHR                                                            | 1.394662291        | 3               | 4.90861   |
| P08683        | FNENFR                                                                    | 1.050223798        | 1               | 2.01842   |
| P08683        | GTNVIVSLSSILHDDKEFPNPEK                                                   | 1.204159888        | 3               | 5.43308   |
| P08683        | ICAGEALAR                                                                 | 1.15490238         | 2               | 2.78252   |
| P08683        | LFSSPWLQVCNTFPAIIDYFPGSHNQVLK                                             | 1.165275943        | 3               | 4.23712   |
| P08683        | LPPGPTPLPIIGNTLQIYMK                                                      | 1.107005169        | 2               | 3.81854   |
| P08683        | NYVLEK                                                                    | 1.15539448         | 1               | 1.93896   |
| P08683        | SQMPYTDVAVVHEIQR                                                          | 1.005498061        | 2               | 4.65857   |
| P08683        | VKEHQESLDKDNPR                                                            | 1.24250335         | 3               | 4.93812   |
| P08683        | VQEEIER                                                                   | 1.057434331        | 2               | 2.64258   |
| P08683        | YGLLLLLK                                                                  | 1.424409074        | 2               | 3.45475   |
| P08683        | YIDLVPNTLPHLVTR                                                           | 1.093457463        | 2               | 3.55833   |
| <b>P09006</b> | <b>SPA3N Serine protease inhibitor A3N</b>                                | <b>1.119346359</b> | <b>0.773565</b> | <b>2</b>  |
| <b>P09034</b> | <b>ASSY Argininosuccinate synthase</b>                                    | <b>4.095018612</b> | <b>9.99E-16</b> | <b>14</b> |
| P09034        | APNTPDVLEIEFK                                                             | 1.060417952        | 2               | 2.77283   |
| P09034        | DGTTHTSLDLFMYLNEVAGK                                                      | 4.580979682        | 2               | 5.0558    |
| P09034        | EFVEEFIWPAVQSSALYEDR                                                      | 1.905078624        | 2               | 5.67458   |
| P09034        | EQGYDVIAYLANIGQK                                                          | 2.780531008        | 3               | 3.76273   |
| P09034        | FAELVYTGFWHSPECFVR                                                        | 2.875374126        | 2               | 4.37003   |
| P09034        | FELTCYSLAPQIK                                                             | 1.655997839        | 2               | 4.23613   |
| P09034        | GRNDLMEYAK                                                                | 1.121095593        | 2               | 2.9358    |
| P09034        | IDIVENR                                                                   | 0.9857408          | 2               | 2.55108   |
| P09034        | KVFIEDVSK                                                                 | 1.077154679        | 2               | 2.76432   |
| P09034        | NDLMEYAK                                                                  | 0.982749854        | 2               | 2.66349   |
| P09034        | SPWSMDENLMHISYEAGILENPK                                                   | 1.759567401        | 3               | 4.85495   |
| P09034        | TQDPAKAPNTPDVLEIEFK                                                       | 1.02200164         | 2               | 4.80145   |
| P09034        | TQDPAKAPNTPDVLEIEFKK                                                      | 0.968091861        | 3               | 4.20837   |
| P09034        | VFIEDVSK                                                                  | 1.044288535        | 2               | 2.58213   |
| <b>P09041</b> | <b>PGK2 Phosphoglycerate kinase 2</b>                                     | <b>1.122658285</b> | <b>0.317862</b> | <b>5</b>  |
| P09041        | FHVEEEGK                                                                  | 1.040936009        | 2               | 2.68632   |
| P09041        | FHVEEEGK GK                                                               | 1.224961302        | 2               | 2.82      |
| P09041        | LGDVYVNDAFGTAHR                                                           | 1.138979495        | 2               | 4.00368   |
| P09041        | VDFNVPMK                                                                  | 0.949125091        | 1               | 2.21267   |
| P09041        | VSHVSTGGGASLELLEGGK                                                       | 1.16865732         | 2               | 5.29532   |
| <b>P09117</b> | <b>ALDOC Fructose_bisphosphate aldolase C</b>                             | <b>1.312811711</b> | <b>1.09E-05</b> | <b>3</b>  |
| P09117        | VLAAYVK                                                                   | 1.354185521        | 2               | 2.67524   |
| P09117        | YASICQQNGIVPIVEPEILPDGDHDLK                                               | 1.220490571        | 3               | 5.82094   |
| P09117        | YASICQQNGIVPIVEPEILPDGDHDLKR                                              | 1.176337597        | 3               | 5.0208    |
| <b>P09139</b> | <b>SPYA Serine__pyruvate aminotransferase_mitochondrial</b>               | <b>1.435769783</b> | <b>0.009398</b> | <b>2</b>  |
| P09139        | LLLGPGPSNLAPR                                                             | 1.338983178        | 2               | 2.55336   |
| P09139        | VLNAPPGISLISFNDK                                                          | 1.47297227         | 2               | 2.63741   |
| <b>P09367</b> | <b>SDHL L_serine dehydratase/L_threonine deaminase</b>                    | <b>1.772647449</b> | <b>0.000323</b> | <b>2</b>  |
| <b>P09456</b> | <b>KAP0 cAMP_dependent protein kinase type I_alpha regulatory subunit</b> | <b>1.25489374</b>  | <b>0.025993</b> | <b>2</b>  |
| P09456        | LTVADALEPVQFEDGQK                                                         | 1.266299214        | 2               | 4.17752   |
| P09456        | SENEEFVEVGR                                                               | 1.184382994        | 2               | 2.31845   |
| <b>P09495</b> | <b>TPM4 Tropomyosin alpha_4 chain</b>                                     | <b>1.087726835</b> | <b>1.03E-13</b> | <b>11</b> |
| P09495        | EDKYEIEIK                                                                 | 1.198100603        | 1               | 2.21057   |
| P09495        | EENVGLHQTLDQTLNELNCI                                                      | 2.402627383        | 2               | 4.83634   |
| P09495        | IQALQQQADDAEDR                                                            | 1.309034083        | 2               | 4.66009   |
| P09495        | IQLVEEELDR                                                                | 1.257377761        | 2               | 3.43025   |

|               |                                                          |                    |                 |           |
|---------------|----------------------------------------------------------|--------------------|-----------------|-----------|
| P09495        | IQLVEEELDRAQER                                           | 1.259291951        | 2               | 3.11903   |
| P09495        | KLVILEGELER                                              | 1.517525701        | 2               | 2.9582    |
| P09495        | LEEAEKAADESER                                            | 0.964888111        | 2               | 4.06153   |
| P09495        | LVILEGELER                                               | 1.516773671        | 2               | 3.33694   |
| P09495        | MEIQEMQLK                                                | 1.049538992        | 2               | 2.51859   |
| P09495        | RIQLVEEELDR                                              | 1.17476042         | 2               | 2.71273   |
| P09495        | YSEKEDKYEEI                                              | 1.228785209        | 2               | 4.54402   |
| <b>P09527</b> | <b>RAB7A Ras_related protein Rab_7a</b>                  | <b>1.183750886</b> | <b>0.886396</b> | <b>7</b>  |
| P09527        | ATIGADFLTK                                               | 1.275381233        | 2               | 2.35433   |
| P09527        | DPENFPFVVLGNK                                            | 1.259787766        | 2               | 3.26418   |
| P09527        | GADCCVLVFDVTAPNTFK                                       | 1.143982662        | 2               | 4.19411   |
| P09527        | TLDSWRDEFLLIQASPR                                        | 1.085482185        | 3               | 3.83415   |
| P09527        | TSLMNQYVVK                                               | 1.006614876        | 2               | 2.63843   |
| P09527        | TSLMNQYVVKK                                              | 1.032328952        | 2               | 2.32634   |
| P09527        | VIIIGDSGVGK                                              | 1.112530973        | 2               | 2.36214   |
| <b>P09605</b> | <b>KCRS Creatine kinase S_type_mitochondrial</b>         | <b>1.027971077</b> | <b>0.996997</b> | <b>2</b>  |
| P09605        | GTGGVDTAAVADVYDISNDR                                     | 1.024672311        | 2               | 3.58599   |
| P09605        | LSEMTEQDQQR                                              | 1.057171818        | 2               | 3.34913   |
| <b>P09606</b> | <b>GLNA Glutamine synthetase</b>                         | <b>0.909863959</b> | <b>0.002968</b> | <b>8</b>  |
| P09606        | CIEEAIK                                                  | 1.235731355        | 2               | 2.32264   |
| P09606        | ITGTNAEVMPAQWFEQIGPCEGIR                                 | 1.1969853          | 3               | 4.98232   |
| P09606        | LTGFHETSNINDFSAGVANR                                     | 1.283534417        | 2               | 5.87789   |
| P09606        | MGDHLWVAR                                                | 0.908719169        | 2               | 3.00116   |
| P09606        | QMYMNLQGEK                                               | 1.161864199        | 2               | 2.54901   |
| P09606        | RLTGFHETSNINDFSAGVANR                                    | 1.050322826        | 3               | 5.43988   |
| P09606        | TCLLNETGDEPFQYK                                          | 1.150805224        | 2               | 5.43661   |
| P09606        | TCLLNETGDEPFQYKN                                         | 1.914004088        | 2               | 5.1992    |
| <b>P09626</b> | <b>ATP4A Potassium_transporting ATPase alpha chain 1</b> | <b>1.001228427</b> | <b>0.401947</b> | <b>2</b>  |
| P09626        | VDNSSLTGESEPQTR                                          | 0.932250658        | 2               | 4.37604   |
| P09626        | VIMVTGDHPITAK                                            | 1.179104108        | 2               | 2.92793   |
| <b>P09739</b> | <b>TNNT3 Troponin T_fast skeletal muscle</b>             | <b>1.007206331</b> | <b>0.934966</b> | <b>3</b>  |
| P09739        | ELWDTLYQLETDKFEFGEK                                      | 1.591301863        | 2               | 3.99912   |
| P09739        | KEEEEIALK                                                | 0.988988907        | 2               | 2.3293    |
| P09739        | KKEEEEEIALK                                              | 1.320065995        | 3               | 3.67429   |
| <b>P09811</b> | <b>PYGL Glycogen phosphorylase_liver form</b>            | <b>1.390313118</b> | <b>2.33E-14</b> | <b>23</b> |
| P09811        | DFSELEPKFQNK                                             | 1.228756591        | 2               | 3.32888   |
| P09811        | DGVGTVFDAFPDQVAIQLNDTHPALAIPELMR                         | 1.27667154         | 3               | 5.5899    |
| P09811        | DLSQLTK                                                  | 1.233957958        | 1               | 2.04361   |
| P09811        | EGWQVEEADDWLR                                            | 1.261810782        | 2               | 3.56958   |
| P09811        | GIVGVENVAELK                                             | 1.011275188        | 2               | 3.22881   |
| P09811        | GIVGVENVAELKK                                            | 1.612641062        | 2               | 3.40125   |
| P09811        | HLQIYEINQK                                               | 1.113989723        | 2               | 3.87062   |
| P09811        | IFVDIEK                                                  | 1.285022221        | 1               | 1.95681   |
| P09811        | INMAHLICIVGCHAVNGVAK                                     | 1.437462938        | 3               | 4.17993   |
| P09811        | LHSFVGDDIFLR                                             | 2.544386585        | 3               | 3.32169   |
| P09811        | LVIDQIDNGFFSPNQPDFK                                      | 1.462257496        | 2               | 4.90286   |
| P09811        | LVTVAEIVVNDPMVGSK                                        | 1.270396574        | 2               | 4.28175   |
| P09811        | MSLIEEKGK                                                | 1.103277908        | 2               | 2.79366   |
| P09811        | TFAYTNHTVLPALER                                          | 1.285112028        | 2               | 4.4488    |
| P09811        | VDDVAALDK                                                | 1.098706868        | 1               | 1.95899   |
| P09811        | VDDVAALDKK                                               | 1.175992292        | 3               | 3.30303   |
| P09811        | VFADYEAYVK                                               | 1.385222157        | 2               | 2.75036   |
| P09811        | VIPATDLSEQISTAGTEASGTGNMK                                | 1.101363694        | 2               | 6.0785    |
| P09811        | VLYPNDNFFEGK                                             | 1.187370297        | 2               | 2.90743   |
| P09811        | VSQLYMNQK                                                | 0.805134636        | 2               | 2.60198   |
| P09811        | WLLLCNPLADLIAEK                                          | 1.371330397        | 2               | 4.71089   |

|               |                                                                           |                    |                 |           |
|---------------|---------------------------------------------------------------------------|--------------------|-----------------|-----------|
| P09811        | WVDTQVVLALPYDTPVPGYMNNTVNTMR                                              | 0.635788998        | 2               | 2.92584   |
| P09811        | YEYGFNQK                                                                  | 1.167791657        | 2               | 2.32645   |
| <b>P09812</b> | <b>PYGM Glycogen phosphorylase_ muscle form</b>                           | <b>1.154549465</b> | <b>0.136266</b> | <b>2</b>  |
| P09812        | NLAENISR                                                                  | 1.154142808        | 1               | 2.75395   |
| P09812        | VIFLENYR                                                                  | 1.369504666        | 2               | 2.45721   |
| <b>P09838</b> | <b>TDT DNA nucleotidylexotransferase</b>                                  | <b>1.201232983</b> | <b>0.067304</b> | <b>2</b>  |
| P09838        | KMMLDNHALYDRTK+Oxidation(2)                                               | 1.201232983        | 2               | 2.34814   |
| P09838        | KMMLDNHALYDRTK+Oxidation(3)                                               | 1.201232983        | 2               | 2.40023   |
| <b>P09875</b> | <b>UD2B1 UDP_glucuronosyltransferase 2B1</b>                              | <b>1.107794072</b> | <b>0.770479</b> | <b>8</b>  |
| P09875        | ANVVASALAQIPQK                                                            | 1.137644675        | 3               | 4.33477   |
| P09875        | FDGKKPDTLGSNTR                                                            | 1.044292017        | 2               | 2.70761   |
| P09875        | FSGGLPLPPSYVPPVLSSELSDR                                                   | 1.222950672        | 2               | 3.89719   |
| P09875        | IILNELAQR                                                                 | 1.677390179        | 2               | 2.4089    |
| P09875        | SDLEYSFAK                                                                 | 1.369764313        | 2               | 2.64837   |
| P09875        | SWSQFYSDVLRPTTLTEMMGK                                                     | 1.508658734        | 2               | 3.8716    |
| P09875        | VDFSILSTTGLLTALK                                                          | 1.167498918        | 2               | 4.37087   |
| P09875        | VFNEYSDVVENLCK                                                            | 0.942540646        | 2               | 2.88512   |
| <b>P09895</b> | <b>RL5 60S ribosomal protein L5</b>                                       | <b>1.050908887</b> | <b>2.64E-05</b> | <b>6</b>  |
| P09895        | GAVDGGSLIPHSTK                                                            | 1.187253045        | 2               | 4.97729   |
| P09895        | HIMGQNVADYMR                                                              | 1.043408674        | 2               | 3.22738   |
| P09895        | IEGDMIVCAAYAHELPK                                                         | 1.409426079        | 3               | 3.38705   |
| P09895        | NNVTPDMMMEEMYK                                                            | 1.121020011        | 2               | 3.03598   |
| P09895        | RFPGYDSESK                                                                | 1.165389118        | 2               | 2.60747   |
| P09895        | YLMEEDEDAYKK                                                              | 1.144282284        | 2               | 3.47312   |
| <b>POC0S7</b> | <b>H2AZ Histone H2A.Z</b>                                                 | <b>0.983542254</b> | <b>1</b>        | <b>2</b>  |
| POC0S7        | ATIAGGGVIPHIHK                                                            | 0.977473594        | 2               | 3.7042    |
| POC0S7        | GDEELDSLK                                                                 | 1.047758561        | 1               | 2.19694   |
| <b>POC2X9</b> | <b>AL4A1 Delta_1_pyrraline_5_carboxylate dehydrogenase_ mitochondrial</b> | <b>1.270828592</b> | <b>6.67E-11</b> | <b>20</b> |
| POC2X9        | AIEAAVLAR                                                                 | 0.948265404        | 2               | 2.93307   |
| POC2X9        | ALNDLKDQTEAIPCVVGDEEVWTS DVR                                              | 0.938055535        | 2               | 5.25703   |
| POC2X9        | DPQEPIMKEEIFGPVLT VYVYPDEK                                                | 1.907103556        | 2               | 2.97438   |
| POC2X9        | DQTEAIPCVVGDEEVWTS DVR                                                    | 0.69789277         | 2               | 5.22126   |
| POC2X9        | EAGLPNVIQFVPADGPTFGDVTSS EHLGGINFTG VSVPTFK                               | 1.146743877        | 3               | 3.72387   |
| POC2X9        | EEIFGPVLT VYVYPDEK                                                        | 1.819020445        | 2               | 4.39357   |
| POC2X9        | ETLQLVDSTTSYGLTGAVFAQDK                                                   | 0.874087329        | 2               | 4.44516   |
| POC2X9        | KEWDLKPVADR                                                               | 0.806936811        | 2               | 3.59353   |
| POC2X9        | LLEEHSR                                                                   | 0.898749612        | 2               | 2.37166   |
| POC2X9        | LYVPQSLWPQIK                                                              | 1.609067406        | 2               | 3.56974   |
| POC2X9        | NAAGNFYINDK                                                               | 1.264987744        | 2               | 2.4688    |
| POC2X9        | NHFVHSSADVDSVSGTLR                                                        | 1.140498811        | 2               | 5.69213   |
| POC2X9        | SAFEYGGQK                                                                 | 0.813240492        | 2               | 2.90376   |
| POC2X9        | SSPSLSILAGGQCNE SVGYFVEPCIIESK                                            | 0.978407689        | 3               | 5.9793    |
| POC2X9        | STGSVVGQQPFGGAR                                                           | 0.940902277        | 2               | 4.22978   |
| POC2X9        | TIVQEATR                                                                  | 0.986604639        | 2               | 2.54322   |
| POC2X9        | VANEPILAFQTGSPER                                                          | 1.048676935        | 2               | 5.33602   |
| POC2X9        | VGNPAEDFGTFFSAVIDAK                                                       | 2.477559258        | 2               | 4.82831   |
| POC2X9        | YQLSPFNHGK                                                                | 1.198529068        | 2               | 2.94011   |
| POC2X9        | YRETLQLVDSTTSYGLTGAVFAQDK                                                 | 0.962714625        | 3               | 3.37823   |
| <b>POC5H9</b> | <b>MANF Mesencephalic astrocyte_ derived neurotrophic factor</b>          | <b>1.265994888</b> | <b>9.9E-20</b>  | <b>4</b>  |
| POC5H9        | DRDVTFS PATIEELIK                                                         | 1.300525067        | 2               | 4.97223   |
| POC5H9        | DVTFS PATIEELIK                                                           | 1.043619088        | 2               | 2.98942   |
| POC5H9        | IINEVSKPLAHHIPVEK                                                         | 1.257670799        | 3               | 4.25929   |
| POC5H9        | ILDDWGEMCK                                                                | 1.245780152        | 2               | 3.16062   |
| <b>POC6F1</b> | <b>DYH2 Dynein heavy chain 2_ axonemal</b>                                | <b>1.138156113</b> | <b>0.517801</b> | <b>2</b>  |

|               |                                                     |                    |                 |           |
|---------------|-----------------------------------------------------|--------------------|-----------------|-----------|
| P0C6F1        | EKVEVMSLELEDAK+Oxidation(6)                         | 0.92206192         | 2               | 2.68746   |
| P0C6F1        | TMPLISDLR+Oxidation(2)                              | 1.138216003        | 2               | 2.30624   |
| <b>P10111</b> | <b>PPIA Peptidyl_prolyl cis_trans isomerase A</b>   | <b>1.164607259</b> | <b>9.9E-20</b>  | <b>10</b> |
| P10111        | EGMSIVEAMER                                         | 1.208874728        | 2               | 3.19519   |
| P10111        | FEDENFILK                                           | 1.17663584         | 2               | 3.21705   |
| P10111        | HTGPGILSMANAGPNTNGSQFFICTAK                         | 1.120389381        | 3               | 6.275     |
| P10111        | IIPGFMCQGGDFTR                                      | 1.351201082        | 2               | 2.88638   |
| P10111        | KITISDCGQL                                          | 1.359634343        | 2               | 3.48373   |
| P10111        | SIYGEKFEDEFILK                                      | 1.122821719        | 2               | 4.67458   |
| P10111        | TEWLDGK                                             | 1.051912833        | 2               | 2.38307   |
| P10111        | VCFELFADK                                           | 1.500393026        | 2               | 3.36484   |
| P10111        | VCFELFADKVPK                                        | 1.233588286        | 3               | 3.71704   |
| P10111        | VKEGMSIVEAMER                                       | 1.17338221         | 3               | 3.44387   |
| <b>P10536</b> | <b>RAB1B Ras_related protein Rab_1B</b>             | <b>1.29319239</b>  | <b>0.461467</b> | <b>3</b>  |
| P10536        | MGPGAASGGERPNLK                                     | 1.104234816        | 2               | 3.89442   |
| P10536        | NATNVEQAFMTMAAEIK+Oxidation(10)                     | 1.298100202        | 2               | 4.16044   |
| P10536        | NATNVEQAFMTMAAEIK+Oxidation(12)                     | 1.298208196        | 2               | 3.80131   |
| <b>P10633</b> | <b>CP2D1 Cytochrome P450 2D1</b>                    | <b>1.144260829</b> | <b>0.072812</b> | <b>4</b>  |
| P10633        | GTTLIINLSSVLKDETVWEKPHR                             | 0.838473528        | 3               | 3.95992   |
| P10633        | SQGVILASYGPEWR                                      | 0.767098564        | 2               | 3.99493   |
| P10633        | TFMALLDNLLAENR                                      | 1.392944061        | 2               | 3.6914    |
| P10633        | YGDVFSLQK                                           | 0.794718642        | 2               | 2.52256   |
| <b>P10634</b> | <b>CP2DQ Cytochrome P450 2D26</b>                   | <b>1.173390233</b> | <b>0.000131</b> | <b>20</b> |
| P10634        | ACLGEPLAR                                           | 0.86260135         | 2               | 2.75156   |
| P10634        | AVSNVIASLVYAR                                       | 1.068980381        | 3               | 4.3895    |
| P10634        | DMTDAFLAEMQK                                        | 1.284977643        | 2               | 2.54412   |
| P10634        | EAEHPFNPSILLSK                                      | 1.238245761        | 2               | 2.48578   |
| P10634        | ELLVTYGEDTADRPLLPINHLYGYNK                          | 1.22636549         | 3               | 5.41121   |
| P10634        | FADIVPTNIPHMSTR                                     | 1.465218645        | 2               | 2.59451   |
| P10634        | FADIVPTNIPHMSTRDIK                                  | 0.872682537        | 2               | 2.4106    |
| P10634        | FEYEDPFFNR                                          | 1.133207085        | 2               | 2.38053   |
| P10634        | FHPEHFLDAQGNFVK                                     | 1.096275004        | 2               | 4.68751   |
| P10634        | FQGFLIPK                                            | 1.147515195        | 2               | 2.48025   |
| P10634        | GNPESSFNDENLR                                       | 1.120584873        | 2               | 4.35324   |
| P10634        | GTTLIPNLSSVLK                                       | 0.997816327        | 2               | 2.52225   |
| P10634        | GTTLIPNLSSVLKDETVWEKPLR                             | 0.978131663        | 2               | 4.66049   |
| P10634        | GVLAPYGPEWR                                         | 0.937468123        | 2               | 3.27629   |
| P10634        | LNSFIALVDK                                          | 1.996783021        | 2               | 2.82102   |
| P10634        | RFEYEDPFFNR                                         | 1.367922594        | 2               | 3.53558   |
| P10634        | RVHEEIDEVIGQVR                                      | 1.205543158        | 2               | 4.15089   |
| P10634        | SLEQWVTEEAGHLCDTFAK                                 | 1.296061085        | 2               | 5.27867   |
| P10634        | SWDPAQPPR                                           | 1.104158468        | 2               | 2.65276   |
| P10634        | VHEEIDEVIGQVR                                       | 1.174044823        | 2               | 4.94059   |
| <b>P10719</b> | <b>ATPB ATP synthase subunit beta_mitochondrial</b> | <b>1.167803064</b> | <b>9.9E-20</b>  | <b>28</b> |
| P10719        | AHGGYSVFAGVGER                                      | 1.077582786        | 2               | 3.98884   |
| P10719        | AIAELGIYPAVDPLDSTR                                  | 0.980061351        | 2               | 4.9289    |
| P10719        | EGNDLYHEMIESGVINLK                                  | 0.935396193        | 2               | 5.36817   |
| P10719        | FLSQPFQVAEVFTGHMGK                                  | 0.929959637        | 2               | 4.75824   |
| P10719        | FTQAGSEVSALLGR                                      | 0.989489502        | 2               | 4.79803   |
| P10719        | GFQQILAGDYDHLPEQAFYMGPIEEAVAK                       | 2.058885407        | 3               | 4.98423   |
| P10719        | GSITSVQAIYVPADDLTDPAPATTF AHL DATTVLSR              | 4.301852115        | 3               | 3.71986   |
| P10719        | IGLFGGAGVGK                                         | 1.324805604        | 2               | 3.32465   |
| P10719        | ILQDYK                                              | 1.159012919        | 1               | 2.08543   |
| P10719        | IMDPNIVGSEHYDVAR                                    | 1.071793329        | 2               | 4.6414    |
| P10719        | IMDPNIVGSEHYDVAR+Oxidation(2)                       | 1.165608647        | 2               | 3.97584   |
| P10719        | IMNVIGEPIDER                                        | 1.460047185        | 2               | 4.03774   |
| P10719        | IMNVIGEPIDER+Oxidation(2)                           | 1.497661253        | 2               | 3.33594   |

|               |                                                             |                    |                 |           |
|---------------|-------------------------------------------------------------|--------------------|-----------------|-----------|
| P10719        | IPSAVGYQPTLATDMGMTQER                                       | 1.338270924        | 2               | 4.88906   |
| P10719        | LVLEVAQHLGESTVR                                             | 1.141445299        | 2               | 4.84487   |
| P10719        | QFAPIHAEAPEFIEMSVEQEILVTGIK                                 | 1.223204621        | 3               | 4.87573   |
| P10719        | SLQDIIAILGMDELSEEDKLTVSR                                    | 1.133579352        | 3               | 5.34199   |
| P10719        | SLQDIIAILGMDELSEEDKLTVSR+Oxidation(11)                      | 0.973815574        | 3               | 3.78144   |
| P10719        | TIAMDGTEGLVR                                                | 0.979342383        | 2               | 3.64242   |
| P10719        | TIAMDGTEGLVR+Oxidation(4)                                   | 1.042295821        | 2               | 2.71136   |
| P10719        | TREGNDLYHEMIESGVINLK                                        | 1.01337871         | 2               | 6.04042   |
| P10719        | TVLIMELINNVAK                                               | 1.098315064        | 2               | 5.06354   |
| P10719        | TVLIMELINNVAK+Oxidation(5)                                  | 1.106188044        | 2               | 2.7877    |
| P10719        | VALTGLTVAEYFR                                               | 1.444368338        | 2               | 4.10604   |
| P10719        | VALVYQGMNEPPGAR                                             | 1.049916072        | 2               | 3.55009   |
| P10719        | VLDSGAPIK                                                   | 0.990368303        | 2               | 3.03202   |
| P10719        | VLDSGAPIKIPVGPETLGR                                         | 0.950619572        | 3               | 4.4546    |
| P10719        | VVDLLAPYAK                                                  | 1.050617489        | 2               | 3.23477   |
| <b>P10760</b> | <b>SAHH Adenosylhomocysteinase</b>                          | <b>1.20213685</b>  | <b>9.9E-20</b>  | <b>16</b> |
| P10760        | AGIPVFAWK                                                   | 1.167622215        | 2               | 2.72345   |
| P10760        | ALDIAENEMPGLMR                                              | 1.185579958        | 2               | 3.18983   |
| P10760        | ATDVMIA GK                                                  | 1.058593385        | 2               | 2.77702   |
| P10760        | DGPLNMILDDGGDLNLIHTK                                        | 1.293208253        | 2               | 5.57009   |
| P10760        | DGPLNMILDDGGDLNLIHTK+Oxidation(6)                           | 1.176595135        | 3               | 3.36888   |
| P10760        | FDNLYGCR                                                    | 1.186283657        | 2               | 2.76461   |
| P10760        | GETDEEYLWCIEQLTHFK                                          | 1.564559835        | 2               | 4.33036   |
| P10760        | GISEETTTGVHNLYK                                             | 1.095774873        | 2               | 4.26059   |
| P10760        | IILLAAGR                                                    | 1.496772014        | 2               | 2.7174    |
| P10760        | KLDEAVAEHLGK                                                | 1.19074247         | 2               | 4.7821    |
| P10760        | LDEAVAEHLGK                                                 | 1.022319006        | 2               | 3.35552   |
| P10760        | SKFDNLYGCR                                                  | 1.196605039        | 1               | 3.19708   |
| P10760        | VAVVAGYGDVVK                                                | 1.371933671        | 2               | 4.15893   |
| P10760        | VNIKPQVDR                                                   | 1.247096638        | 2               | 2.81547   |
| P10760        | WLNENAVEK                                                   | 1.213858269        | 2               | 2.72362   |
| P10760        | WSSCNIFSTQDHAAAAIAK                                         | 1.275458181        | 2               | 5.01764   |
| <b>P10818</b> | <b>CX6A1 Cytochrome c oxidase subunit 6A1_mitochondrial</b> | <b>0.976694562</b> | <b>0.708805</b> | <b>2</b>  |
| P10818        | HEEHERPEFVAYPHLR                                            | 0.977074845        | 3               | 3.82553   |
| P10818        | SRHEEHERPEFVAYPHLR                                          | 1.133789727        | 3               | 3.953     |
| <b>P10860</b> | <b>DHE3 Glutamate dehydrogenase 1_mitochondrial</b>         | <b>0.971500865</b> | <b>0.004711</b> | <b>26</b> |
| P10860        | ALASLMTYK                                                   | 1.031089696        | 2               | 3.45408   |
| P10860        | CAVVDVPFGGAK                                                | 1.056188059        | 2               | 3.28822   |
| P10860        | CVGVGESDGSIWNPDGIDPK                                        | 0.936331537        | 2               | 5.30528   |
| P10860        | DDGSWEVIEGYR                                                | 0.697329728        | 2               | 3.95036   |
| P10860        | DIVHSGLAYTMER                                               | 0.909897606        | 2               | 3.38171   |
| P10860        | DSNYHLLMSVQESLER                                            | 1.049969698        | 2               | 4.17323   |
| P10860        | GASIVEDKLVEDLK                                              | 1.089194171        | 2               | 3.6835    |
| P10860        | GFIGPGIDVPAPDMSTGER                                         | 0.872869564        | 2               | 5.17165   |
| P10860        | GFIGPGIDVPAPDMSTGER+Oxidation(14)                           | 0.926056454        | 2               | 4.54874   |
| P10860        | HGGTIPVVPTAEFQDR                                            | 1.008918227        | 2               | 4.67503   |
| P10860        | IIEGANGPTTPEADK                                             | 0.903900325        | 2               | 5.36735   |
| P10860        | IIEGANGPTTPEADKIFLER                                        | 0.949223025        | 2               | 4.97597   |
| P10860        | IIKPCNHVLSLSPFIR                                            | 1.055958906        | 3               | 3.51761   |
| P10860        | KGFIGPGIDVPAPDMSTGER                                        | 0.7674536          | 2               | 5.03565   |
| P10860        | LQHGSILGFPK                                                 | 1.109783198        | 3               | 3.39093   |
| P10860        | MVEGFFDR                                                    | 0.968533696        | 2               | 3.02818   |
| P10860        | MVEGFFDR+Oxidation(1)                                       | 1.049835157        | 2               | 2.47005   |
| P10860        | NLNHVSYGR                                                   | 1.069657979        | 2               | 2.36983   |
| P10860        | NYTDNELEK                                                   | 0.897055927        | 2               | 2.49681   |
| P10860        | RDDGSWEVIEGYR                                               | 0.939018511        | 2               | 3.6161    |

|               |                                                                      |                    |                 |           |
|---------------|----------------------------------------------------------------------|--------------------|-----------------|-----------|
| P10860        | RFTMELAK                                                             | 0.904828709        | 2               | 2.47153   |
| P10860        | TAAYVNAIEK                                                           | 0.998521771        | 2               | 3.41414   |
| P10860        | TFVVQGFNGVGLHSMR                                                     | 0.879264771        | 2               | 4.5275    |
| P10860        | VYEGSILEADCDILIPAAASEK                                               | 0.906280888        | 3               | 5.83882   |
| P10860        | YNLGLDLR                                                             | 0.95889661         | 2               | 3.25063   |
| P10860        | YSTDVSVEVK                                                           | 1.094117159        | 2               | 3.37362   |
| <b>P10867</b> | <b>GGLO L_gulonolactone oxidase</b>                                  | <b>1.055702023</b> | <b>0.997429</b> | <b>5</b>  |
| P10867        | GDDILLSPCFQR                                                         | 0.92647118         | 2               | 3.10758   |
| P10867        | LDPTGMFLNSYLEK                                                       | 0.954210418        | 2               | 4.13465   |
| P10867        | LDYWLAYETIMK                                                         | 1.428056973        | 2               | 4.06806   |
| P10867        | TYGCSPEVYYQPTSVEEVR                                                  | 0.875620926        | 2               | 4.98796   |
| P10867        | VVAHYVPEVR                                                           | 1.061501792        | 2               | 2.4866    |
| <b>P10868</b> | <b>GAMT Guanidinoacetate N_methyltransferase</b>                     | <b>1.511827776</b> | <b>8.23E-05</b> | <b>6</b>  |
| P10868        | EHWIECNDGVFQR                                                        | 1.441829094        | 3               | 3.37183   |
| P10868        | ENICTEVMALVPPADCR                                                    | 1.525340254        | 2               | 3.07542   |
| P10868        | LQNWALK                                                              | 0.953230613        | 2               | 2.45149   |
| P10868        | WETPYMHSLAAAAASR                                                     | 1.338560942        | 2               | 2.88761   |
| P10868        | YTDITAMFEETQVPALLEAGFQR                                              | 1.430160116        | 3               | 6.8984    |
| P10868        | YYAFPQMITPLVTK                                                       | 2.531859313        | 2               | 3.85131   |
| <b>P10888</b> | <b>COX41 Cytochrome c oxidase subunit 4 isoform 1_ mitochondrial</b> | <b>1.302534547</b> | <b>5.8E-05</b>  | <b>4</b>  |
| P10888        | DYPLPDVAHVK                                                          | 0.995222745        | 2               | 2.70571   |
| P10888        | IQFNESFAEMNK                                                         | 1.281495553        | 2               | 3.896     |
| P10888        | SEDYALPSYVDR                                                         | 1.120239216        | 2               | 3.98      |
| P10888        | VNPIQGFSAK                                                           | 1.29319766         | 2               | 2.31828   |
| <b>P10959</b> | <b>EST2 Liver carboxylesterase 1</b>                                 | <b>1.002106424</b> | <b>0.176116</b> | <b>2</b>  |
| P10959        | AISESGVLTNNLDKK                                                      | 0.732268522        | 2               | 3.52785   |
| P10959        | EGASEEETNLSKLVMK                                                     | 1.37137847         | 2               | 2.32609   |
| <b>P11030</b> | <b>ACBP Acyl_CoA_binding protein</b>                                 | <b>1.124231909</b> | <b>0.032639</b> | <b>4</b>  |
| P11030        | QATVGDVNTDRPGLLDLK                                                   | 1.398075254        | 2               | 3.3909    |
| P11030        | TQPTDEEMLFYSHFK                                                      | 4.490522182        | 2               | 4.34255   |
| P11030        | TYVEKVEELK                                                           | 1.107078324        | 2               | 2.83102   |
| P11030        | WDSWVK                                                               | 1.045561468        | 1               | 1.94679   |
| <b>P11232</b> | <b>THIO Thioredoxin</b>                                              | <b>1.024395182</b> | <b>1</b>        | <b>2</b>  |
| P11232        | EAFQEALAAAGDK                                                        | 1.040325725        | 2               | 4.8004    |
| P11232        | VGEFSGANK                                                            | 1.017792218        | 2               | 3.07378   |
| <b>P11240</b> | <b>COX5A Cytochrome c oxidase subunit 5A_ mitochondrial</b>          | <b>1.082187877</b> | <b>0.00614</b>  | <b>6</b>  |
| P11240        | EIYPYVIQELRPTLNELGISTPEELGLDK                                        | 0.302103661        | 3               | 6.86356   |
| P11240        | EIYPYVIQELRPTLNELGISTPEELGLDKV                                       | 1.569066923        | 3               | 7.04673   |
| P11240        | GMNTLVGYDLVPEPK                                                      | 1.051544362        | 2               | 4.4104    |
| P11240        | IIDAALR                                                              | 1.159982529        | 2               | 2.33258   |
| P11240        | LNDFASAVR                                                            | 1.118834531        | 2               | 3.33629   |
| P11240        | RLNDFASAVR                                                           | 1.122655408        | 2               | 2.42068   |
| <b>P11348</b> | <b>DHPR Dihydropteridine reductase</b>                               | <b>1.199814159</b> | <b>0.444508</b> | <b>10</b> |
| P11348        | AALDGTPMIGYMAK                                                       | 1.18125442         | 2               | 3.79635   |
| P11348        | EGLLTLGAK                                                            | 1.09638281         | 2               | 2.76708   |
| P11348        | GAVHQLCQSLAGK                                                        | 1.204749146        | 2               | 3.83977   |
| P11348        | MTDSFTEQADQVTAEVGK                                                   | 1.022802299        | 2               | 5.76946   |
| P11348        | MTDSFTEQADQVTAEVGK+Oxidation(1)                                      | 1.14655302         | 2               | 4.85342   |
| P11348        | NCDLMWK                                                              | 1.000900129        | 1               | 2.31527   |
| P11348        | NSGMPSGAAAIAVLPVTLDTPMNR                                             | 1.106698033        | 2               | 5.29961   |
| P11348        | QSIWTSTISSHLATK                                                      | 1.150892598        | 2               | 3.60625   |
| P11348        | RPNSGLIQVVTTDGK                                                      | 0.587665891        | 2               | 3.7657    |
| P11348        | VDAILCVAGGWAGGNAK                                                    | 1.068598387        | 2               | 4.2004    |
| <b>P11442</b> | <b>CLH Clathrin heavy chain 1</b>                                    | <b>1.12655846</b>  | <b>7.23E-13</b> | <b>40</b> |
| P11442        | ADDPSSYMEVVQAANTSGNWHEELVK                                           | 0.999391554        | 2               | 5.46655   |



|               |                                                                  |                    |                 |           |
|---------------|------------------------------------------------------------------|--------------------|-----------------|-----------|
| P11442        | AFMTADLPNELIELLEK                                                | 1.210604588        | 2               | 4.17259   |
| P11442        | AHIAQLCEK                                                        | 1.449852166        | 2               | 2.58871   |
| P11442        | ALEHFTDLYDIK                                                     | 1.281914712        | 2               | 3.36915   |
| P11442        | CNEPAVWSQLAK                                                     | 1.188058834        | 2               | 2.67206   |
| P11442        | EDKLECEELGDLVK                                                   | 0.983663202        | 2               | 2.98284   |
| P11442        | FNALFAQGNYSEAAK                                                  | 0.992763291        | 2               | 4.27857   |
| P11442        | GQCDLELINVCNENSLFK                                               | 1.159369173        | 2               | 4.90441   |
| P11442        | GQFSTDELVAEVEK                                                   | 1.077797589        | 2               | 3.8517    |
| P11442        | GQFSTDELVAEVEKR                                                  | 1.022836722        | 2               | 3.52163   |
| P11442        | HELIEFR                                                          | 0.982811467        | 2               | 2.62971   |
| P11442        | HSSLAGCQIINYR                                                    | 1.152420707        | 2               | 3.14358   |
| P11442        | IHEGCEEPATHNALAK                                                 | 1.055545856        | 2               | 5.16033   |
| P11442        | ISGETIFVTAPHEATAGIIGVNR                                          | 1.307483352        | 2               | 5.49984   |
| P11442        | IVLDNSVFSEHR                                                     | 1.202663858        | 2               | 2.81375   |
| P11442        | IYIDSNNNPER                                                      | 1.067474272        | 2               | 3.07195   |
| P11442        | KDPELWGSVLLESNPYR                                                | 1.132766665        | 3               | 3.48486   |
| P11442        | KFDVNTSAVQVLIHIGNLDR                                             | 1.162368841        | 3               | 5.9055    |
| P11442        | KFNALFAQGNYSEAAK                                                 | 1.145643467        | 2               | 3.62979   |
| P11442        | LAELEEFINGPNNNAHIQQVGDR                                          | 0.984333772        | 2               | 5.22303   |
| P11442        | LECSEELGDLVK                                                     | 1.052001944        | 2               | 3.01325   |
| P11442        | LHIIIEVGTPTGNQPPFK                                               | 1.122614675        | 2               | 4.1285    |
| P11442        | LLEMNLMHAPQVADAILGNQMFTHYDR                                      | 0.87647524         | 3               | 3.95718   |
| P11442        | LLYNNVSNFGR                                                      | 1.925179063        | 2               | 2.77709   |
| P11442        | LPVVIGGLLDVDCSEDEVK                                              | 0.978336968        | 2               | 5.11355   |
| P11442        | LTDQLPLIIVCDR                                                    | 1.138231635        | 2               | 3.22977   |
| P11442        | NLQNLILTAIK                                                      | 1.246606744        | 2               | 4.3432    |
| P11442        | NNLAGAEELFAR                                                     | 1.134357069        | 2               | 3.78268   |
| P11442        | NNRPSEGPLQTR                                                     | 1.104545717        | 3               | 3.93325   |
| P11442        | RPLIDQVVQTALSETQDPEEVSVTVK                                       | 1.00963042         | 3               | 5.8421    |
| P11442        | SVDPTLALSYYLR                                                    | 0.991487027        | 2               | 2.64978   |
| P11442        | SVNESLNNLFITEEDYQALR                                             | 1.493632838        | 2               | 4.64444   |
| P11442        | TLQIFNIEMK                                                       | 1.053164301        | 2               | 2.79662   |
| P11442        | TSIDAYDNFDNISLAQR                                                | 1.21545435         | 2               | 4.98764   |
| P11442        | VDKLDASESLR                                                      | 1.35556071         | 2               | 2.53371   |
| P11442        | VGEQAQVVIIDMNDPSNPIR                                             | 0.893567783        | 2               | 5.29602   |
| P11442        | VIQFAETGQVQK                                                     | 1.031827176        | 2               | 4.75095   |
| P11442        | VSQPIEGHAASFAQFK                                                 | 1.257396418        | 2               | 4.13619   |
| P11442        | WLLLTGISAQQNR                                                    | 1.161162891        | 2               | 2.634     |
| P11442        | YESLELCRPVLQQGR                                                  | 0.769451279        | 2               | 3.21056   |
| <b>P11497</b> | <b>ACACA Acetyl_CoA carboxylase 1</b>                            | <b>1.104317619</b> | <b>0.18165</b>  | <b>3</b>  |
| P11497        | ECSQPVMVYIPPAELR+Oxidation(7)                                    | 0.864932924        | 2               | 2.43948   |
| P11497        | LPELLLK                                                          | 1.148858604        | 2               | 2.49256   |
| P11497        | TLRDPSLPLELQDIMTSVSGR                                            | 1.455229538        | 3               | 3.96937   |
| <b>P11507</b> | <b>AT2A2 Sarcoplasmic/endoplasmic reticulum calcium ATPase 2</b> | <b>1.185348226</b> | <b>0.816198</b> | <b>5</b>  |
| P11507        | DIVPGDIVEIAVGDKVPADIR                                            | 1.172064622        | 2               | 3.68584   |
| P11507        | IRDEMVAEQER                                                      | 0.961871005        | 2               | 3.19373   |
| P11507        | KSEIGIAMSGTAVAK                                                  | 0.953851447        | 2               | 3.18642   |
| P11507        | TASEMVLADDNFSTIVAAVEEGR                                          | 1.331364319        | 2               | 2.86987   |
| P11507        | VDQSILTGESVSVIK                                                  | 1.012293768        | 2               | 4.11119   |
| <b>P11598</b> | <b>PDIA3 Protein disulfide isomerase A3</b>                      | <b>1.043587995</b> | <b>1.11E-16</b> | <b>25</b> |
| P11598        | DGEEAGAYDGPR                                                     | 0.896941967        | 2               | 3.44587   |
| P11598        | DLLTAYYDVVYEK                                                    | 1.01735807         | 2               | 3.66812   |
| P11598        | DPNIVIAK                                                         | 1.268619006        | 2               | 2.37715   |
| P11598        | EATNPPIIQEKP                                                     | 1.024985671        | 2               | 3.6481    |
| P11598        | EYDDNGEGITIFRPLHLANK                                             | 1.039781244        | 2               | 3.98753   |
| P11598        | EYDDNGEGITIFRPLHLANKFEDK                                         | 1.013367915        | 3               | 3.80969   |

|               |                                                   |                    |                 |           |
|---------------|---------------------------------------------------|--------------------|-----------------|-----------|
| P11598        | FIQESIFGLCPHMTEDNKDLIQGK                          | 1.024357135        | 3               | 5.28138   |
| P11598        | FISDKDASVVGFFR                                    | 1.296690769        | 2               | 4.55881   |
| P11598        | FLQEYFDGNLK                                       | 0.971833706        | 2               | 3.72904   |
| P11598        | FLQEYFDGNLKR                                      | 1.245771965        | 2               | 3.70746   |
| P11598        | FVMQEFSR                                          | 1.249415545        | 2               | 2.98946   |
| P11598        | GFPTIYFSPANK                                      | 1.17876248         | 2               | 2.79799   |
| P11598        | IFRDGEEAGAYDGPR                                   | 0.994245628        | 2               | 4.13939   |
| P11598        | KQAGPASVPLR                                       | 1.177320794        | 2               | 2.41262   |
| P11598        | KTFSHELSDFGLESTTGEIPVVAIR                         | 1.176390885        | 3               | 4.45157   |
| P11598        | LAPEYAAAATR                                       | 1.03903225         | 2               | 2.87524   |
| P11598        | LNFAVASR                                          | 1.587838329        | 2               | 2.66738   |
| P11598        | LSKDPNIVIAK                                       | 1.195530978        | 3               | 4.33374   |
| P11598        | MDATANDVPSPYEVK                                   | 1.065221441        | 2               | 4.33031   |
| P11598        | MDATANDVPSPYEVK+Oxidation(1)                      | 1.088481113        | 2               | 3.98828   |
| P11598        | RLAPEYAAAATR                                      | 0.62018506         | 2               | 3.35092   |
| P11598        | SEPIPETNEGPVK                                     | 1.126163734        | 2               | 2.9548    |
| P11598        | TFSHELSDFGLESTTGEIPVVAIR                          | 1.291646876        | 2               | 5.97534   |
| P11598        | VDCTANTNTCNK                                      | 1.119309793        | 2               | 4.46086   |
| P11598        | YGVSGYPTLK                                        | 1.094384035        | 2               | 2.89312   |
| <b>P11608</b> | <b>ATP8 ATP synthase protein 8</b>                | <b>1.111775945</b> | <b>0.397764</b> | <b>2</b>  |
| P11608        | ISSQTFPAPPSPK                                     | 1.238037211        | 2               | 2.37563   |
| P11608        | TNNPWESK                                          | 0.98183638         | 2               | 2.3595    |
| <b>P11711</b> | <b>CP2A1 Cytochrome P450 2A1</b>                  | <b>1.085102134</b> | <b>0.81603</b>  | <b>5</b>  |
| P11711        | GEQATYNTLFK                                       | 1.015062213        | 2               | 3.12863   |
| P11711        | GTDVFPILGSLMTDPK                                  | 1.125042409        | 2               | 3.47377   |
| P11711        | ILEEAGYLIK                                        | 1.272264029        | 2               | 2.78408   |
| P11711        | TVSNVISSIVFGER                                    | 1.033948326        | 2               | 3.17099   |
| P11711        | VHEEIEQVIGR                                       | 1.156559868        | 2               | 3.42091   |
| <b>P11714</b> | <b>CP2D9 Cytochrome P450 2D9</b>                  | <b>0.972930936</b> | <b>0.996451</b> | <b>2</b>  |
| P11714        | GNPESSFNDENLLMVVR                                 | 1.024392767        | 2               | 2.57972   |
| P11714        | VQQEIDEVIGQVR                                     | 1.001944798        | 2               | 4.62161   |
| <b>P11862</b> | <b>GAS2 Growth arrest specific protein 2</b>      | <b>1.138301114</b> | <b>0.558323</b> | <b>3</b>  |
| P11862        | EIEQEETLSAPSPSPSSK                                | 1.439603129        | 2               | 3.90967   |
| P11862        | LDNGALLCQLAATVQEK                                 | 1.088317556        | 2               | 3.9023    |
| P11862        | YGVPEPGLIK                                        | 1.126949131        | 2               | 2.52339   |
| <b>P11884</b> | <b>ALDH2 Aldehyde dehydrogenase_mitochondrial</b> | <b>1.050254248</b> | <b>9.9E-20</b>  | <b>24</b> |
| P11884        | DGMTIAKEEIFGPVMQILK                               | 1.037051639        | 2               | 3.82396   |
| P11884        | EAGFPPGVVNVPGFGPTAGAAIASHEDVVK                    | 0.596327025        | 3               | 4.20656   |
| P11884        | EEIFGPVMQILK                                      | 0.956251256        | 2               | 3.91035   |
| P11884        | ELGEYGLQAYTEVK                                    | 1.020091576        | 2               | 4.57057   |
| P11884        | GYFIQPTVFGDVK                                     | 1.007771872        | 2               | 3.9246    |
| P11884        | KTFPTVNPSTGEVICQVAEGNKEDVVK                       | 1.017817429        | 3               | 4.13168   |
| P11884        | LGPALATGNVVVMK                                    | 1.134145174        | 2               | 4.06756   |
| P11884        | LGPALATGNVVVMK+Oxidation(13)                      | 1.423711363        | 2               | 3.59059   |
| P11884        | LLCGGAAADR                                        | 1.403084886        | 2               | 3.78498   |
| P11884        | RVTLELGGK                                         | 0.921098007        | 2               | 2.78405   |
| P11884        | TEQGPQVDETQFK                                     | 0.934047951        | 2               | 4.54317   |
| P11884        | TEQGPQVDETQFKK                                    | 0.961738705        | 2               | 3.85082   |
| P11884        | TFPTVNPSTGEVICQVAEGNK                             | 0.719178138        | 2               | 5.29962   |
| P11884        | TFPTVNPSTGEVICQVAEGNKEDVVK                        | 0.904821601        | 2               | 4.29091   |
| P11884        | TFVQEDVYDEFVER                                    | 1.139095043        | 2               | 5.23867   |
| P11884        | TIEEVVGR                                          | 0.936842595        | 2               | 3.02427   |
| P11884        | TIPIDGDFFSYTR                                     | 1.357649158        | 2               | 2.51171   |
| P11884        | VAEQTPLTALYVANLIK                                 | 1.9821413          | 2               | 5.49067   |
| P11884        | VAFTGSTEVGHLIQVAAGSSNLK                           | 1.041731706        | 2               | 5.78532   |
| P11884        | VAFTGSTEVGHLIQVAAGSSNLKR                          | 1.021062051        | 3               | 3.80315   |
| P11884        | VTLELGGK                                          | 0.93961821         | 2               | 2.30482   |

|               |                                                                                   |                    |                 |           |
|---------------|-----------------------------------------------------------------------------------|--------------------|-----------------|-----------|
| P11884        | VVGNPFDSR                                                                         | 1.026955481        | 2               | 3.04284   |
| P11884        | YGLAAAVFTK                                                                        | 0.995951334        | 2               | 3.87276   |
| P11884        | YYAGWADK                                                                          | 0.967510433        | 2               | 2.5501    |
| <b>P11915</b> | <b>NLTP Non_specific lipid_transfer protein</b>                                   | <b>1.07301436</b>  | <b>1.3E-09</b>  | <b>22</b> |
| P11915        | ADCTITMADSDLLALMTGK                                                               | 1.297631824        | 2               | 5.33583   |
| P11915        | ADCTITMADSDLLALMTGK+Oxidation(7)                                                  | 0.839858338        | 2               | 3.6261    |
| P11915        | ANLIFK                                                                            | 1.048444801        | 2               | 2.39247   |
| P11915        | AVEIVAQEMVTMPSTFEEK                                                               | 1.349414033        | 2               | 4.33973   |
| P11915        | GSVLPDSDKK                                                                        | 1.02809161         | 2               | 2.78184   |
| P11915        | HGLQSKAVEIVAQEMVTMPSTFEEKSVIK+Oxidation(15)Oxidation(19)                          | 1.106086662        | 3               | 3.38459   |
| P11915        | HIDVLINK                                                                          | 1.08169896         | 2               | 2.8688    |
| P11915        | HSVNNPYSQFQDEYSLEIMK                                                              | 1.097398765        | 3               | 5.66458   |
| P11915        | IGGIFAFK                                                                          | 1.517305165        | 2               | 2.42884   |
| P11915        | KADCTITMADSDLLALMTGK                                                              | 1.159811431        | 2               | 4.25928   |
| P11915        | KLEEEGEEFVK                                                                       | 0.982576965        | 2               | 4.3243    |
| P11915        | KLEEEGEEFVKK                                                                      | 1.020938417        | 3               | 4.74898   |
| P11915        | LEEEGEEFVK                                                                        | 0.932807253        | 2               | 3.02936   |
| P11915        | LEEEGEEFVKK                                                                       | 1.034490545        | 2               | 3.68711   |
| P11915        | LQSLQLQPK                                                                         | 1.430237782        | 2               | 3.29805   |
| P11915        | MGFPEAASSFR                                                                       | 1.087049478        | 2               | 2.92022   |
| P11915        | MNPQSAFFQGK                                                                       | 1.108738661        | 2               | 3.19331   |
| P11915        | MNPQSAFFQGK+Oxidation(1)                                                          | 0.73562861         | 2               | 2.57664   |
| P11915        | SRPVDFLTVLQCCPTSDGAAAAIVSSEEFVQK                                                  | 1.362627458        | 3               | 5.53068   |
| P11915        | THQISAAPTSSAGDGFK                                                                 | 1.0825754          | 2               | 4.49084   |
| P11915        | WVINPSGGLISK                                                                      | 1.111290702        | 2               | 2.89103   |
| P11915        | YGMSACPFAPQLFGSAGK                                                                | 1.297535523        | 2               | 4.38473   |
| <b>P11960</b> | <b>ODBA 2_oxoisovalerate dehydrogenase subunit alpha_mitochondrial (Fragment)</b> | <b>0.894917966</b> | <b>3.99E-14</b> | <b>10</b> |
| P11960        | AVAENQPFLIEAMTYR                                                                  | 0.812040529        | 2               | 3.79173   |
| P11960        | HFVTISSPLATQIPQAVGAAYAAK                                                          | 0.7050185          | 2               | 4.13117   |
| P11960        | HLQTYGEHYPLDHFDK                                                                  | 0.654228653        | 3               | 3.41532   |
| P11960        | IGHHSTSDSSAYR                                                                     | 0.723915404        | 3               | 4.05605   |
| P11960        | NNGYAISTPTSEQYR                                                                   | 0.623322454        | 2               | 3.97769   |
| P11960        | QGQIINPSEDPHLPQEEVLK                                                              | 0.42234274         | 2               | 2.52068   |
| P11960        | QYLLNQGWWDDEEQEK                                                                  | 0.840286114        | 2               | 3.59311   |
| P11960        | SVDEVNYWDK                                                                        | 0.798294173        | 2               | 2.46588   |
| P11960        | TDLVFGQYR                                                                         | 0.56699344         | 1               | 1.98226   |
| P11960        | VMEAFEQAER                                                                        | 0.619638051        | 2               | 3.61821   |
| <b>P11980</b> | <b>KPYM Pyruvate kinase isozymes M1/M2</b>                                        | <b>1.297678234</b> | <b>0.426951</b> | <b>3</b>  |
| P11980        | AEGSDVANAVLDGADCIMLSGETAK                                                         | 1.465809848        | 3               | 3.6481    |
| P11980        | GVNLPGAAVDLPAVSEK                                                                 | 1.288788053        | 2               | 3.85647   |
| P11980        | NTGIICTIGPASR                                                                     | 1.279430508        | 2               | 3.63049   |
| <b>P12001</b> | <b>RL18 60S ribosomal protein L18</b>                                             | <b>1.146432502</b> | <b>9.9E-20</b>  | <b>5</b>  |
| P12001        | GTVLLSGPR                                                                         | 1.298472476        | 2               | 2.69755   |
| P12001        | ILTFDQLALESPK                                                                     | 1.471101335        | 2               | 4.89776   |
| P12001        | TAVVVGITITDDVR                                                                    | 1.169283043        | 2               | 4.05836   |
| P12001        | TNRPPLSLR                                                                         | 1.125022717        | 3               | 3.37642   |
| P12001        | TNSTFNQVVLK                                                                       | 1.02914174         | 2               | 3.06424   |
| <b>P12007</b> | <b>IVD Isovaleryl_CoA dehydrogenase_mitochondrial</b>                             | <b>1.017500516</b> | <b>0.722722</b> | <b>9</b>  |
| P12007        | AQEIDQSNDFK                                                                       | 0.516840131        | 2               | 3.55779   |
| P12007        | FVQENLAPK                                                                         | 1.013359356        | 2               | 2.84988   |
| P12007        | FWITNGPDADVLVVYAK                                                                 | 1.349984145        | 2               | 4.60994   |
| P12007        | GSNTCELVFEDCK                                                                     | 1.05160531         | 2               | 4.24366   |
| P12007        | GSNTCELVFEDCKVPAANILSQESK                                                         | 1.10123343         | 3               | 5.39857   |
| P12007        | GVYVLMGDLER                                                                       | 1.060533007        | 2               | 3.72927   |
| P12007        | IGQFQLMQGK                                                                        | 1.215526109        | 2               | 2.66859   |

|               |                                                                            |                    |                 |           |
|---------------|----------------------------------------------------------------------------|--------------------|-----------------|-----------|
| P12007        | LYEIGGGTSEVR                                                               | 1.01112837         | 2               | 2.8305    |
| P12007        | TDLTAVPASR                                                                 | 0.985650752        | 2               | 2.8517    |
| <b>P12346</b> | <b>TRFE Serotransferrin</b>                                                | <b>0.924605527</b> | <b>1</b>        | <b>19</b> |
| P12346        | ADRDQYELLCLDNTR                                                            | 1.070590672        | 2               | 4.33615   |
| P12346        | ASDSSINWNNLK                                                               | 1.027322557        | 2               | 3.18748   |
| P12346        | DFQLFGSPLGK                                                                | 1.020129535        | 2               | 2.98268   |
| P12346        | DLKQEDFQLLCPDGTK                                                           | 0.820136882        | 2               | 5.02448   |
| P12346        | EGVCPEGSIDSAPVK                                                            | 0.818634651        | 2               | 3.84822   |
| P12346        | FDEFFSQGCAPGYK                                                             | 0.863792724        | 2               | 4.54084   |
| P12346        | GDKDCTGNFCLFR                                                              | 0.921228111        | 2               | 3.44034   |
| P12346        | GTDFQLNQLQGK                                                               | 0.922872492        | 2               | 3.19349   |
| P12346        | GYAVAVVK                                                                   | 0.90293136         | 2               | 2.3885    |
| P12346        | HQTVLENTNGK                                                                | 0.832610186        | 2               | 3.04289   |
| P12346        | HTTIFEVLQPK                                                                | 0.986242631        | 2               | 3.47262   |
| P12346        | KGTFQLNQLQGK                                                               | 0.908884871        | 2               | 4.15424   |
| P12346        | LPEGTTYEYLGAEYLQAVGNIR                                                     | 1.188651907        | 2               | 4.73369   |
| P12346        | NGDGKEDLIWEILK                                                             | 1.054378213        | 3               | 3.52064   |
| P12346        | QEDFQLLCPDGTK                                                              | 0.855711779        | 2               | 3.61021   |
| P12346        | SKDFQLFGSPLGK                                                              | 1.200790169        | 2               | 3.31852   |
| P12346        | VSTVLTAAK                                                                  | 1.037921378        | 2               | 2.76658   |
| P12346        | WCALSHQER                                                                  | 1.361782154        | 2               | 3.1468    |
| P12346        | WCAVSEHENTK                                                                | 0.96840353         | 2               | 3.79166   |
| <b>P12368</b> | <b>KAP2 cAMP_dependent protein kinase type II_alpha regulatory subunit</b> | <b>1.245976343</b> | <b>0.81012</b>  | <b>2</b>  |
| P12368        | NLDQEQLSQVLDAMFEK                                                          | 1.202720556        | 2               | 4.76198   |
| P12368        | SVGQYDNRGSFGEALMYNTPR                                                      | 1.08317274         | 2               | 2.38977   |
| <b>P12711</b> | <b>ADHX Alcohol dehydrogenase class_3</b>                                  | <b>1.098021165</b> | <b>0.756383</b> | <b>10</b> |
| P12711        | AAVAWEAGKPLSIEIEVAPPQAHEVR                                                 | 1.084700954        | 3               | 5.93079   |
| P12711        | AFDLMHSGNSIR                                                               | 1.574768122        | 2               | 3.11885   |
| P12711        | AGDTVIPLYIPQCGECK                                                          | 1.056373247        | 2               | 3.06447   |
| P12711        | AKEFGATECINPQDFSK                                                          | 1.025584061        | 2               | 4.76747   |
| P12711        | EFGATECINPQDFSK                                                            | 1.125672894        | 2               | 4.62905   |
| P12711        | IIGIDINK                                                                   | 0.906098273        | 2               | 2.42186   |
| P12711        | IIGIDINKDK                                                                 | 0.873737204        | 2               | 2.41653   |
| P12711        | VCLLGGISTGYGAAVNTAK                                                        | 1.484400125        | 2               | 5.67691   |
| P12711        | VDEFVTGNLSFDQINK                                                           | 0.953927381        | 2               | 4.95512   |
| P12711        | VEPGSTCAVFLGGVGLAVIMGCK                                                    | 0.978465608        | 2               | 4.09179   |
| <b>P12749</b> | <b>RL26 60S ribosomal protein L26</b>                                      | <b>1.041996072</b> | <b>0.013826</b> | <b>5</b>  |
| P12749        | FNPFVTSR                                                                   | 1.019920543        | 2               | 2.60034   |
| P12749        | HFNAPSHIR                                                                  | 0.981078037        | 3               | 3.97273   |
| P12749        | KDDEVQVVR                                                                  | 1.182298382        | 2               | 3.16013   |
| P12749        | KIMSSPLSKELR+Oxidation(3)                                                  | 2.0503358          | 2               | 2.47379   |
| P12749        | YKEETIEK                                                                   | 1.05354692         | 2               | 2.89575   |
| <b>P12785</b> | <b>FAS Fatty acid synthase</b>                                             | <b>1.564895524</b> | <b>9.9E-20</b>  | <b>41</b> |
| P12785        | ACIDTALENLSTLK                                                             | 2.233086997        | 2               | 3.92881   |
| P12785        | AGSDTELAAPK                                                                | 1.769345877        | 2               | 3.48882   |
| P12785        | ALIAEATK                                                                   | 1.784017816        | 2               | 2.31491   |
| P12785        | CPPGVVPACHNSEDTVITISGPQAAVNEFVEQLK                                         | 2.107099141        | 3               | 3.44213   |
| P12785        | DANLPAGSMAAVGLSWECK                                                        | 0.917929513        | 2               | 4.29367   |
| P12785        | DGGFLLMHTVLK                                                               | 1.061234522        | 2               | 2.54676   |
| P12785        | DHKDNLEFFLTNLGK                                                            | 1.480112952        | 2               | 2.36826   |
| P12785        | EEPEAMLPGAQPTLISAISK                                                       | 1.651624538        | 2               | 4.04902   |
| P12785        | EQGVTFPSGEAQEQLIR                                                          | 1.930521446        | 2               | 4.39829   |
| P12785        | FDASFFGVHPK                                                                | 1.734692356        | 2               | 3.40544   |
| P12785        | FVFTPHVEPECLSESAILQK                                                       | 2.118505777        | 2               | 4.36911   |
| P12785        | GHALGETLACLPEVQPGPSFSLSQEEWESLFSR                                          | 2.036316769        | 3               | 5.90406   |
| P12785        | GLESIINIIHSSLAEPK                                                          | 1.887839552        | 2               | 4.62436   |

|               |                                          |                    |                 |           |
|---------------|------------------------------------------|--------------------|-----------------|-----------|
| P12785        | GNAGQSNYGFANSTMER                        | 1.893258345        | 2               | 4.4859    |
| P12785        | GVDLVLNSLAEEK                            | 1.877070529        | 2               | 3.34051   |
| P12785        | LFDHPEVPIPAESVSR                         | 1.455214029        | 2               | 4.39326   |
| P12785        | LLLPEDPLISGLLSQALK                       | 2.506845909        | 3               | 5.12507   |
| P12785        | LSPQDKPIFLPVEDTSFQWVDSLK                 | 1.146295525        | 3               | 3.91366   |
| P12785        | LTPGCEAEAEAEICFFIK                       | 2.200118527        | 2               | 4.66609   |
| P12785        | MTVPGLEDLPQHGLPR                         | 1.527824526        | 2               | 3.49596   |
| P12785        | QAQLNLSILLVNPEGPTLTR                     | 2.118659039        | 2               | 4.35831   |
| P12785        | QQEQLVPTLEK                              | 1.796770964        | 2               | 2.62549   |
| P12785        | RQEQQLVPTLEK                             | 2.00140561         | 2               | 2.98771   |
| P12785        | SDEALKPLGVK                              | 1.425942777        | 2               | 2.99114   |
| P12785        | SFDDSGNGYCR                              | 3.045507206        | 2               | 3.0345    |
| P12785        | SLSLSLEETPVVFENVTFHQATILPR               | 1.646374292        | 3               | 4.13178   |
| P12785        | SLYQPGGVAPESLEYIEAHGTGTK                 | 1.692911983        | 2               | 5.56219   |
| P12785        | SNMGHPEPASGLAALTK                        | 1.460826893        | 2               | 3.19168   |
| P12785        | TGGTYGEDLGADYNLSQVCDGK                   | 1.259651305        | 2               | 4.86522   |
| P12785        | TMEAVQGLLEQGR                            | 1.494546938        | 2               | 3.56896   |
| P12785        | VGDPQELNGITR                             | 0.958508456        | 2               | 2.73798   |
| P12785        | VHLTGDINPNALFPPVEFPVPR                   | 1.695770953        | 2               | 5.23268   |
| P12785        | VLEALLPLK                                | 2.128970349        | 2               | 2.62529   |
| P12785        | VLESDLVMNVYR                             | 1.687312878        | 2               | 3.0438    |
| P12785        | VSVHIIEGDHR                              | 1.947550838        | 3               | 3.47407   |
| P12785        | VTAIYIDPATHLQK                           | 1.64953546         | 2               | 3.55834   |
| P12785        | VYATILNAGTNTDGCK                         | 1.542948531        | 2               | 4.89874   |
| P12785        | VYMLEGDTQVADVTTSR                        | 1.659762464        | 2               | 4.83996   |
| P12785        | VYQWEDPDSK                               | 2.048414505        | 2               | 3.31726   |
| P12785        | WLSTSIPEAQWQSSLAR                        | 0.793038707        | 2               | 3.53579   |
| P12785        | YNGTLNLDR                                | 1.3698894          | 2               | 2.58314   |
| <b>P12791</b> | <b>CP2BA Cytochrome P450 2B10</b>        | <b>1.192887263</b> | <b>0.949612</b> | <b>2</b>  |
| P12791        | IQEEAQCLVEELR                            | 0.956653637        | 2               | 4.58143   |
| P12791        | IQEEAQCLVEELRK                           | 1.198029909        | 2               | 3.8245    |
| <b>P12847</b> | <b>MYH3 Myosin_3</b>                     | <b>1.568623719</b> | <b>0.825362</b> | <b>6</b>  |
| P12847        | EQYEEEQEGK                               | 10.59383857        | 2               | 3.06912   |
| P12847        | GQEDLKEQLAIVER                           | 19.10183819        | 2               | 3.98333   |
| P12847        | GTLEDQIISANPLLEAFGNAK                    | 0.868573723        | 2               | 3.28741   |
| P12847        | IEAQNQPFDAK                              | 4.199196945        | 2               | 2.37853   |
| P12847        | MKGTLEDQIISANPLLEAFGNAK                  | 1.667624723        | 3               | 6.98021   |
| P12847        | MKGTLEDQIISANPLLEAFGNAK+Oxidation(1)     | 1.139247244        | 2               | 4.39973   |
| <b>P12928</b> | <b>KPYR Pyruvate kinase isozymes R/L</b> | <b>1.687139553</b> | <b>9.9E-20</b>  | <b>19</b> |
| P12928        | AETSDVANAVLDGADCIMLSGETAK                | 1.818724423        | 2               | 5.5178    |
| P12928        | CCAAAIIVLTK                              | 1.092945084        | 2               | 2.86566   |
| P12928        | CNLAGKPVVCATQMLESMTIK                    | 1.682522431        | 3               | 4.8382    |
| P12928        | EATESFATSPLSYRPVAIALDTK                  | 1.737813014        | 2               | 3.88861   |
| P12928        | EPPEAIWADDVDR                            | 1.685742811        | 2               | 2.46401   |
| P12928        | GDLGIEIPAEK                              | 1.605303871        | 2               | 3.13498   |
| P12928        | GSFPVEAVMMQHAIAIR                        | 1.466684892        | 2               | 3.23673   |
| P12928        | GSQVLVTVDPK                              | 1.673745378        | 2               | 2.86614   |
| P12928        | GVNLPNTEVDLPGLSEQDLLDLR                  | 1.764234683        | 2               | 5.2502    |
| P12928        | IGPEGLVTEVEHGGILGSR                      | 1.724567833        | 2               | 5.28459   |
| P12928        | IYIDDGLISLVVQK                           | 2.66755444         | 2               | 4.51928   |
| P12928        | KFDEILEVSDGIMVAR                         | 0.12032842         | 3               | 4.17247   |
| P12928        | KGVNLPNTEVDLPGLSEQDLLDLR                 | 1.771712703        | 3               | 4.8035    |
| P12928        | LNFSHGSHEYHAESIANIR                      | 3.420302713        | 3               | 5.13894   |
| P12928        | RVQFGIESGK                               | 0.820821618        | 2               | 2.46175   |
| P12928        | STSIIATIGPASR                            | 1.334504836        | 2               | 3.32449   |
| P12928        | TGVLQGGPESEVEIVK                         | 1.655144691        | 2               | 4.45715   |
| P12928        | TVWVDYHNITR                              | 1.953686506        | 2               | 2.33038   |

|               |                                                                               |                    |                 |           |
|---------------|-------------------------------------------------------------------------------|--------------------|-----------------|-----------|
| P12928        | VQFGIESGK                                                                     | 1.944966282        | 2               | 2.83367   |
| <b>P12938</b> | <b>CP2D3 Cytochrome P450 2D3</b>                                              | <b>0.880835411</b> | <b>0.458045</b> | <b>7</b>  |
| P12938        | AVQELLVTCGEDTADRPPEMIFQHIGYGHK                                                | 0.712397665        | 3               | 3.73077   |
| P12938        | DLTDAFLAEIEK                                                                  | 1.190179465        | 2               | 3.86209   |
| P12938        | FDYGDPDFIK                                                                    | 0.839124829        | 2               | 2.92157   |
| P12938        | GNPESSFNDANLR                                                                 | 0.811051162        | 2               | 3.9357    |
| P12938        | RFDYGDPDFIK                                                                   | 1.009064768        | 2               | 3.12023   |
| P12938        | TFLTMVDNLVTEHK                                                                | 0.957233282        | 2               | 3.09592   |
| P12938        | TWDPDQPPRDLTDAFLAEIEK                                                         | 1.09308747         | 3               | 4.04132   |
| <b>P12939</b> | <b>CP2DA Cytochrome P450 2D10</b>                                             | <b>1.142392727</b> | <b>0.997969</b> | <b>9</b>  |
| P12939        | ALCNVIASLIFAR                                                                 | 1.060569327        | 2               | 2.54402   |
| P12939        | AVQEVLVTHGEDTADRPVPIFK                                                        | 1.153669949        | 3               | 5.33133   |
| P12939        | FEYEDPYLIR                                                                    | 0.964318931        | 2               | 2.84812   |
| P12939        | FGDIAPLNLR                                                                    | 1.173113284        | 2               | 3.44733   |
| P12939        | ITSCDIEVQDFVIPK                                                               | 1.161761746        | 2               | 4.18802   |
| P12939        | NLTDAFLAEVEK                                                                  | 1.175764556        | 2               | 4.04659   |
| P12939        | RFEYEDPYLIR                                                                   | 1.269615328        | 2               | 2.97872   |
| P12939        | TFMAFLDNLLAENR                                                                | 1.218741984        | 2               | 3.0689    |
| P12939        | TTWDPAQPPR                                                                    | 0.982404874        | 2               | 2.36779   |
| <b>P13084</b> | <b>NPM Nucleophosmin</b>                                                      | <b>1.367417158</b> | <b>0.018722</b> | <b>2</b>  |
| P13084        | MTDQEAIQDLWQWR                                                                | 1.329760722        | 2               | 2.84166   |
| P13084        | VDNDENEHQLSLR                                                                 | 1.369198356        | 2               | 3.88759   |
| <b>P13086</b> | <b>SUCA Succinyl_CoA ligase [ADP/GDP_forming] subunit alpha_mitochondrial</b> | <b>1.031540976</b> | <b>5.28E-09</b> | <b>5</b>  |
| P13086        | HLGLPVFNTVK                                                                   | 1.070893648        | 2               | 2.37726   |
| P13086        | LIGPNCPGIINPGECK                                                              | 1.363532774        | 2               | 4.8771    |
| P13086        | MGHAGAIAGGK                                                                   | 0.900751932        | 1               | 2.84076   |
| P13086        | NIYIDK                                                                        | 0.980952892        | 1               | 1.98727   |
| P13086        | QGTFFHSQQALEYGTK                                                              | 0.911805077        | 2               | 2.78468   |
| <b>P13107</b> | <b>CP2B3 Cytochrome P450 2B3</b>                                              | <b>1.349488469</b> | <b>9.9E-20</b>  | <b>7</b>  |
| P13107        | ATLDPNAPR                                                                     | 1.32967306         | 2               | 2.63043   |
| P13107        | EVLIDYIDHSVENHR                                                               | 1.329654002        | 2               | 4.07885   |
| P13107        | FSDVSPMGLPCR                                                                  | 1.487950866        | 2               | 3.29325   |
| P13107        | GIIAVLQPIMQEYGVSVNEER                                                         | 2.119255666        | 3               | 6.34087   |
| P13107        | MCLGEGIAR                                                                     | 1.393131393        | 2               | 2.82669   |
| P13107        | QSVEDQIKKEAK                                                                  | 1.420344506        | 2               | 2.58597   |
| P13107        | SFIQLQEK                                                                      | 1.581323809        | 1               | 2.35375   |
| <b>P13221</b> | <b>AATC Aspartate aminotransferase_cytoplasmic</b>                            | <b>1.192426855</b> | <b>0.988038</b> | <b>4</b>  |
| P13221        | ITWSNPPAQGAR                                                                  | 1.040761549        | 2               | 3.19635   |
| P13221        | NLDYVATSINEAVTK                                                               | 1.01373208         | 2               | 3.99998   |
| P13221        | SCASQLVLGDNSPALR                                                              | 1.230715287        | 2               | 4.52124   |
| P13221        | TDDSQPWVLPVVR                                                                 | 0.750603461        | 2               | 2.88664   |
| <b>P13255</b> | <b>GNMT Glycine N_methyltransferase</b>                                       | <b>0.919610532</b> | <b>0.999979</b> | <b>6</b>  |
| P13255        | AHMVTLDYTVQVPGAGR                                                             | 0.966322317        | 2               | 5.19588   |
| P13255        | AWLLGLLR                                                                      | 1.00973            | 2               | 2.78412   |
| P13255        | DITTSVLTVNNK                                                                  | 0.92465194         | 2               | 3.51604   |
| P13255        | NYDYILSTGCAPPK                                                                | 0.897829647        | 2               | 4.80592   |
| P13255        | SDLTKDITTSVLTVNNK                                                             | 1.232156217        | 2               | 2.74667   |
| P13255        | SLGVAAEGIPDQYADGEAAR                                                          | 0.884787486        | 2               | 5.51116   |
| <b>P13383</b> | <b>NUCL Nucleolin</b>                                                         | <b>1.159170435</b> | <b>0.006909</b> | <b>6</b>  |
| P13383        | GFGVDFNSEEDAK                                                                 | 0.623016569        | 2               | 3.34404   |
| P13383        | GSPNARSQPSKTLFVK                                                              | 1.075464201        | 2               | 2.36211   |
| P13383        | NDLAAVDVR                                                                     | 1.128062307        | 1               | 1.90576   |
| P13383        | NLSFNITEDELKEVFEDAVER                                                         | 0.519616922        | 3               | 3.43661   |
| P13383        | SEADAENLEEK                                                                   | 1.264578643        | 2               | 2.56821   |
| P13383        | TLVLSNLSYSATEETLQEVFEK                                                        | 1.598709348        | 2               | 2.76637   |
| <b>P13437</b> | <b>THIM 3_ketoacyl_CoA thiolase_mitochondrial</b>                             | <b>0.90943922</b>  | <b>3.74E-06</b> | <b>22</b> |

|               |                                                           |                    |                 |           |
|---------------|-----------------------------------------------------------|--------------------|-----------------|-----------|
| P13437        | AANEAGYFNEEMAPIEVK                                        | 0.554562138        | 2               | 5.13626   |
| P13437        | AANEAGYFNEEMAPIEVK+Oxidation(12)                          | 0.848942543        | 2               | 4.87477   |
| P13437        | DAEVVLCGGTESMSQSPYSVR                                     | 0.848411425        | 2               | 4.56606   |
| P13437        | DFTATDLTEFAAR                                             | 1.056733405        | 2               | 3.46766   |
| P13437        | DMDLIDVNEAFAPQLAVQK                                       | 1.20097724         | 3               | 6.96981   |
| P13437        | DMDLIDVNEAFAPQLAVQK+Oxidation(2)                          | 1.113709014        | 2               | 3.43099   |
| P13437        | EGTVTASNAGMSDAGVVIASEDAVK                                 | 0.695814833        | 2               | 5.77764   |
| P13437        | EGTVTASNAGMSDAGVVIASEDAVKK                                | 0.808501118        | 3               | 4.98343   |
| P13437        | FGLDLK                                                    | 0.880438028        | 2               | 2.33606   |
| P13437        | GVFIVAANK                                                 | 0.878667039        | 2               | 2.5214    |
| P13437        | HNFTPLAR                                                  | 0.896165842        | 2               | 2.33062   |
| P13437        | ITAHLVHELK                                                | 1.289253497        | 2               | 3.30606   |
| P13437        | LCGSGFQSVSGCQEICK                                         | 1.352780829        | 2               | 5.54742   |
| P13437        | LEDTLWAGLTDQHVK                                           | 0.833500047        | 2               | 5.24708   |
| P13437        | RTPFGAYGGLK                                               | 0.813573946        | 2               | 3.03588   |
| P13437        | SLDLPSK                                                   | 0.845300015        | 2               | 2.62023   |
| P13437        | TNVSGGAIAGHPLGGSGSR                                       | 0.850643591        | 2               | 5.85489   |
| P13437        | VGVPTETGALTNR                                             | 0.847987276        | 2               | 3.68322   |
| P13437        | VPPETIDSVIVGNVMQSSSDAAYLAR                                | 1.036795267        | 3               | 6.66265   |
| P13437        | VVGYFVSGCDPAIMGIPVPAITGALK                                | 0.812685605        | 3               | 5.07818   |
| P13437        | VVGYFVSGCDPAIMGIPVPAITGALKK                               | 0.916844187        | 3               | 4.20877   |
| P13437        | YAVGSACIGGGQGISLIQNTA                                     | 0.818809687        | 2               | 4.30879   |
| <b>P13444</b> | <b>METK1 S_adenosylmethionine synthase isoform type_1</b> | <b>1.136763731</b> | <b>4.76E-12</b> | <b>8</b>  |
| P13444        | FVIGGPQGDAGVTGR                                           | 1.093250665        | 2               | 4.56533   |
| P13444        | HIGYDDSAK                                                 | 0.97692865         | 2               | 2.79779   |
| P13444        | ICDQISDAVLDAHLK                                           | 1.217281964        | 3               | 5.63317   |
| P13444        | NEEDVGAGDQGLMFGYATDETEECMPLTIVLAHK                        | 1.335409197        | 3               | 6.75333   |
| P13444        | SEFPWEVPK                                                 | 1.052008427        | 2               | 2.31906   |
| P13444        | SGVLPWLRPDSK                                              | 1.062035749        | 2               | 2.96991   |
| P13444        | TCNVLVALEQQSPDIAQCVLHLDK                                  | 1.414975469        | 3               | 5.49374   |
| P13444        | TQVTQYVQDNGAVIPVR                                         | 1.268963587        | 2               | 4.34239   |
| <b>P13471</b> | <b>RS14 40S ribosomal protein S14</b>                     | <b>1.08559835</b>  | <b>0.364846</b> | <b>2</b>  |
| P13471        | ADRDESSPYAAMLAAQDVAQR                                     | 1.229919068        | 2               | 5.43666   |
| P13471        | IEDVTPIPSDSTR                                             | 1.062377019        | 2               | 3.9363    |
| <b>P13601</b> | <b>AL1A7 Aldehyde dehydrogenase_ cytosolic 1</b>          | <b>0.886484193</b> | <b>0.848953</b> | <b>20</b> |
| P13601        | ANNTPYGLAAGVFTK                                           | 0.636735769        | 2               | 3.93742   |
| P13601        | EAGFPPGVVNVVPGYGSTAGAAISSHMDIDK                           | 1.061665193        | 3               | 3.78904   |
| P13601        | EEIFGPVQQIMK                                              | 0.825637814        | 2               | 3.52968   |
| P13601        | EMGEQGVYEYTELK                                            | 0.953406925        | 2               | 3.67808   |
| P13601        | FPVINPATEEVICHVEEGDK                                      | 0.762110893        | 3               | 3.74934   |
| P13601        | FPVINPATEEVICHVEEGDKADVDK                                 | 0.929480434        | 4               | 5.19338   |
| P13601        | GFFVQPTVFSNVTDEMRR                                        | 2.089383578        | 2               | 4.17947   |
| P13601        | IAKEEIFGPVQQIMK                                           | 0.565040384        | 3               | 3.47258   |
| P13601        | IFINNEWHNSLNGK                                            | 0.971166731        | 2               | 4.03271   |
| P13601        | IHGQTIPSDGDVFTYTR                                         | 0.977029833        | 3               | 4.46231   |
| P13601        | ILDIESGK                                                  | 0.792687635        | 2               | 3.22034   |
| P13601        | ILDIESGKK                                                 | 0.708666048        | 2               | 2.95169   |
| P13601        | KFPVINPATEEVICHVEEGDK                                     | 0.817609937        | 3               | 3.36825   |
| P13601        | KFPVINPATEEVICHVEEGDKADVDK                                | 0.909179354        | 4               | 4.82623   |
| P13601        | KYVLGNPLDSGISQGPQIDKEQHAK                                 | 0.550002187        | 3               | 5.27702   |
| P13601        | LFVEESIYDEFVR                                             | 1.04422606         | 2               | 4.186     |
| P13601        | VLLATMESMNAGK                                             | 0.981970436        | 2               | 4.07469   |
| P13601        | VSFTGSTEVGK                                               | 0.783879465        | 2               | 3.1863    |
| P13601        | YVLGNPLDSGISQGPQIDK                                       | 0.868405231        | 2               | 4.61068   |
| P13601        | YVLGNPLDSGISQGPQIDKEQHAK                                  | 0.548183983        | 2               | 4.24573   |
| <b>P13697</b> | <b>MAOX NADP_dependent malic enzyme</b>                   | <b>1.60916911</b>  | <b>2.19E-07</b> | <b>5</b>  |

|               |                                                                         |                    |                 |           |
|---------------|-------------------------------------------------------------------------|--------------------|-----------------|-----------|
| P13697        | AECSAEECYK                                                              | 1.667974394        | 2               | 3.05234   |
| P13697        | AIFASGSPFDPVTLPDGR                                                      | 1.639385113        | 2               | 4.80434   |
| P13697        | GHIASVLNAWPEDVVK                                                        | 1.404332857        | 2               | 4.05756   |
| P13697        | HINDSVFLTTAEVISQQVSDK                                                   | 1.992880375        | 2               | 5.88625   |
| P13697        | ILGLGDLGCNGMGIPVVK                                                      | 1.492239217        | 2               | 2.68314   |
| <b>P13803</b> | <b>ETFA Electron transfer flavoprotein subunit alpha_ mitochondrial</b> | <b>1.025609099</b> | <b>4.55E-11</b> | <b>13</b> |
| P13803        | AAVDAGFVPNDMQVGQTGK                                                     | 0.951021107        | 2               | 4.54286   |
| P13803        | AAVDAGFVPNDMQVGQTGK+Oxidation(12)                                       | 0.949850462        | 2               | 3.71437   |
| P13803        | GLLPEELTPLILETQK                                                        | 1.085106404        | 2               | 4.89317   |
| P13803        | GTSFEAAAASGGSASSEK                                                      | 0.930891837        | 2               | 5.16012   |
| P13803        | LGGEVSCLVAGTK                                                           | 1.005885487        | 2               | 4.74948   |
| P13803        | LLYDLADQLHAAVVGASR                                                      | 1.090631039        | 2               | 4.93302   |
| P13803        | LNVAPVSDIIEIK                                                           | 1.463590259        | 2               | 4.12743   |
| P13803        | QFSYTHICAGASAFGK                                                        | 1.0177972          | 2               | 3.12935   |
| P13803        | SDRPELTGAK                                                              | 0.947675944        | 3               | 3.44825   |
| P13803        | TIVAINKDPEAPIFQVADYGVADLFK                                              | 0.845536153        | 3               | 6.95137   |
| P13803        | TIYAGNALCTVK                                                            | 1.002490224        | 2               | 3.70496   |
| P13803        | VLVAQHDAYK                                                              | 0.957226283        | 2               | 3.32049   |
| P13803        | VVQDLCK                                                                 | 1.015838965        | 2               | 2.80105   |
| <b>P13832</b> | <b>MRLCA Myosin regulatory light chain RLC_A</b>                        | <b>1.153984945</b> | <b>0.002971</b> | <b>3</b>  |
| P13832        | ATSNVFMFDQSQIQEFK                                                       | 1.696754776        | 2               | 5.13584   |
| P13832        | FTDEEVDELYR                                                             | 0.90678314         | 2               | 3.44253   |
| P13832        | GNFNIEFTR                                                               | 1.276673975        | 2               | 2.71945   |
| <b>P14046</b> | <b>A1I3 Alpha_1_inhibitor 3</b>                                         | <b>0.995892411</b> | <b>0.668977</b> | <b>6</b>  |
| P14046        | FSIDTNGISDYSLNK                                                         | 1.048892327        | 2               | 2.45867   |
| P14046        | GMYESLPVVAVK                                                            | 0.82640547         | 2               | 3.28905   |
| P14046        | ISLCHGNPTFSSEK                                                          | 1.868700864        | 2               | 3.86171   |
| P14046        | LVDIKGDPIPNEQVLIK                                                       | 1.133072175        | 2               | 3.41586   |
| P14046        | QQNSYGGFSSTQDTVVVALDALSK                                                | 1.267905517        | 2               | 4.39455   |
| P14046        | QSPGPGSEVATVPETGR                                                       | 0.763082188        | 2               | 3.35082   |
| <b>P14141</b> | <b>CAH3 Carbonic anhydrase 3</b>                                        | <b>0.914124698</b> | <b>0.016296</b> | <b>16</b> |
| P14141        | EAPFNHFDPSCLFPACR                                                       | 0.947841338        | 2               | 4.42455   |
| P14141        | EKGEFQILLDALDK                                                          | 1.016366795        | 2               | 4.52234   |
| P14141        | EKGEFQILLDALDKIK                                                        | 0.912528499        | 2               | 3.57461   |
| P14141        | EPMTVSSDQMAK                                                            | 1.084889237        | 1               | 2.97442   |
| P14141        | EWGYASHNGPEHWHELYPIAK                                                   | 0.918536613        | 3               | 5.03209   |
| P14141        | GDNQSPIELHTK                                                            | 0.935017135        | 2               | 3.64875   |
| P14141        | GEFQILLDALDK                                                            | 1.135629151        | 2               | 4.75841   |
| P14141        | GEFQILLDALDKIK                                                          | 1.076817918        | 2               | 3.67206   |
| P14141        | GGPLSGPYR                                                               | 0.974999861        | 2               | 2.80025   |
| P14141        | GKEAPFNHFDPSCLFPACR                                                     | 0.870110261        | 3               | 4.45203   |
| P14141        | HDPSLQPWSVSYDPGSAK                                                      | 1.068390659        | 3               | 4.8394    |
| P14141        | QFHLHWGSSDDHGSEHTVDGVK                                                  | 0.975352415        | 2               | 4.72917   |
| P14141        | SLFASAENEPVPLVGNWRPPQPIK                                                | 0.7391713          | 3               | 6.01684   |
| P14141        | VVFDDTFDR                                                               | 0.961621047        | 2               | 3.43085   |
| P14141        | YAAELHLVHWNPK                                                           | 1.135404247        | 2               | 4.41928   |
| P14141        | YNTFGEALKQPDGI AVVGIFLK                                                 | 0.961744971        | 3               | 5.93579   |
| <b>P14173</b> | <b>DDC Aromatic_L_amino_acid decarboxylase</b>                          | <b>1.182255019</b> | <b>6.82E-10</b> | <b>8</b>  |
| P14173        | AGEGGGVIQGSASEATLVALLAAR                                                | 1.468823994        | 2               | 4.98902   |
| P14173        | ALIPTTAPQEPETYEDIIR                                                     | 1.036030828        | 2               | 3.83261   |
| P14173        | GSNQLNETLLQR                                                            | 1.398454865        | 2               | 3.05221   |
| P14173        | HSHQDSGLITDYR                                                           | 1.178559515        | 2               | 3.465     |
| P14173        | LVAYTSDQAHSSEVER                                                        | 1.366874224        | 2               | 4.51651   |
| P14173        | MLELPEAFLAGR                                                            | 1.303208907        | 2               | 2.62132   |
| P14173        | TDLTEAFNMDPVYLR                                                         | 1.113730249        | 2               | 3.70706   |
| P14173        | TVESAHVQLAWEHIR                                                         | 1.154020566        | 3               | 4.5057    |



|               |                                                             |                    |                 |           |
|---------------|-------------------------------------------------------------|--------------------|-----------------|-----------|
| <b>P14408</b> | <b>FUMH Fumarate hydratase_ mitochondrial</b>               | <b>1.002640667</b> | <b>0.926875</b> | <b>15</b> |
| P14408        | AAAEVNQEYGLDPK                                              | 1.063781815        | 2               | 4.01442   |
| P14408        | AIEMLGELGSK                                                 | 1.011765487        | 2               | 3.92009   |
| P14408        | IEYDTFGELK                                                  | 1.020440081        | 2               | 3.15611   |
| P14408        | IEYDTFGELKVPTDK                                             | 0.882721884        | 2               | 3.47807   |
| P14408        | IYELAAGGTAVGTGLNTR                                          | 1.08744894         | 2               | 5.473     |
| P14408        | KTAIELGYLTAEQFDEWVKPK                                       | 0.973278183        | 3               | 4.73544   |
| P14408        | LMNESLMLVTALNPHIGYDK                                        | 1.342752459        | 3               | 5.38368   |
| P14408        | LNDHFPLVVWQTGSGTQTNMNVNEVISNR                               | 0.971160833        | 3               | 6.58869   |
| P14408        | SGLGELILPENEPGSSIMPGK                                       | 0.943260321        | 2               | 4.79838   |
| P14408        | SGLGELILPENEPGSSIMPGK+Oxidation(18)                         | 1.07362176         | 2               | 3.27853   |
| P14408        | SKEFAQVIK                                                   | 1.005662719        | 2               | 2.32305   |
| P14408        | SQSSNDTFPTAMHIAAALEVHQVLLPGLQK                              | 1.031556666        | 3               | 5.03337   |
| P14408        | TAIELGYLTAEQFDEWVKPK                                        | 1.193080054        | 2               | 4.89939   |
| P14408        | THTQDAVPLTLGQEFSGYVQVQYAMER                                 | 1.151030446        | 3               | 6.40895   |
| P14408        | YYGAQTVR                                                    | 1.093459861        | 1               | 1.92302   |
| <b>P14480</b> | <b>FIBB Fibrinogen beta chain</b>                           | <b>0.983236773</b> | <b>0.880504</b> | <b>7</b>  |
| P14480        | DNENVINEYSSILEDQK                                           | 1.136532265        | 2               | 3.27135   |
| P14480        | GFGNIATNEDTK                                                | 1.168956193        | 2               | 3.03719   |
| P14480        | GFGNIATNEDTKK                                               | 1.174338023        | 2               | 3.16514   |
| P14480        | LESDISAQTEYCHTPTCVNCPVVSQK                                  | 1.226813309        | 3               | 4.99039   |
| P14480        | LYIDETVNDNIPLNLR                                            | 1.275860907        | 2               | 3.26582   |
| P14480        | TENGGWTVIQNR                                                | 0.768955723        | 2               | 2.78627   |
| P14480        | YCGLPGEYWLGNCK                                              | 1.176047132        | 2               | 3.27332   |
| <b>P14604</b> | <b>ECHM Enoyl_CoA hydratase_ mitochondrial</b>              | <b>0.941146273</b> | <b>0.864793</b> | <b>10</b> |
| P14604        | AFAAGADIK                                                   | 0.933280053        | 2               | 3.04592   |
| P14604        | AQFGQPEILLGTIPGAGGTQR                                       | 0.904685734        | 2               | 5.69514   |
| P14604        | ESVNAAFEMTLTEGNKLEK                                         | 0.728243461        | 2               | 3.73587   |
| P14604        | FLSHWDHITR                                                  | 0.927178706        | 2               | 3.13519   |
| P14604        | IFPVETLVEEAIQCAEK                                           | 1.039454704        | 2               | 5.53261   |
| P14604        | LFYSTFATDDR                                                 | 1.553616561        | 2               | 2.52043   |
| P14604        | NSSVGLIQLNRPK                                               | 0.936309343        | 2               | 3.45264   |
| P14604        | SLAMEMVLTGDR                                                | 0.94238713         | 2               | 3.65417   |
| P14604        | SLAMEMVLTGDRISAQDAK+Oxidation(4)Oxidation(6)                | 1.334380175        | 2               | 2.35727   |
| P14604        | TFQDCYSGK                                                   | 0.975910335        | 2               | 2.56481   |
| <b>P14668</b> | <b>ANXA5 Annexin A5</b>                                     | <b>1.337731551</b> | <b>0.00025</b>  | <b>3</b>  |
| P14668        | ETSGNLELLAVVK                                               | 1.121697574        | 2               | 2.51548   |
| P14668        | GLGTDEDSILNLLTAR                                            | 1.545167058        | 2               | 4.53051   |
| P14668        | GTVTDFSGFDGR                                                | 1.247529572        | 2               | 2.95483   |
| <b>P14669</b> | <b>ANXA3 Annexin A3</b>                                     | <b>1.371029009</b> | <b>0.109566</b> | <b>8</b>  |
| P14669        | GMGTDEDTLIEILTTR                                            | 1.353476894        | 2               | 4.28976   |
| P14669        | GTINNYPGFNPSVDAAEIR                                         | 0.921663452        | 2               | 3.62609   |
| P14669        | KDAQTYDAGEK                                                 | 1.1037486          | 2               | 2.94383   |
| P14669        | KDAQTYDAGEKK                                                | 1.196414683        | 2               | 3.33122   |
| P14669        | QYQEAYEQALK                                                 | 1.120358735        | 2               | 3.01873   |
| P14669        | SEIDLLDIR                                                   | 1.111004816        | 2               | 2.68485   |
| P14669        | TLINILTER                                                   | 1.359368378        | 2               | 2.94431   |
| P14669        | WGTDEDKFEILCLR                                              | 1.444692593        | 2               | 3.55997   |
| <b>P14685</b> | <b>PSMD3 26S proteasome non_ATPase regulatory subunit 3</b> | <b>1.097606304</b> | <b>0.459545</b> | <b>3</b>  |
| P14685        | AIQLEYSEAR                                                  | 1.095229501        | 2               | 2.71695   |
| P14685        | LQLDSPEDAEIFAK                                              | 1.094341363        | 2               | 3.89312   |
| P14685        | SVFPEQANNNEWAR                                              | 1.085154827        | 2               | 2.53044   |
| <b>P14740</b> | <b>DPP4 Dipeptidyl peptidase 4</b>                          | <b>1.213529161</b> | <b>0.236323</b> | <b>3</b>  |
| P14740        | LGTLEVEDQIEAAR                                              | 1.238144156        | 2               | 3.94057   |
| P14740        | VLEDNSALDK                                                  | 1.104447735        | 2               | 3.04243   |
| P14740        | YMGLPTPEDNLDHYR                                             | 1.160400838        | 2               | 2.46709   |

|               |                                                                        |                    |                 |           |
|---------------|------------------------------------------------------------------------|--------------------|-----------------|-----------|
| <b>P14882</b> | <b>PCCA Propionyl_CoA carboxylase alpha chain_ mitochondrial</b>       | <b>0.862183601</b> | <b>0.962886</b> | <b>11</b> |
| P14882        | FLSDVYPDGFK                                                            | 1.012168997        | 2               | 3.00752   |
| P14882        | FSSQEAASSFGDDR                                                         | 1.039224136        | 2               | 3.7955    |
| P14882        | HGNALWLNLR                                                             | 0.976269039        | 2               | 2.93596   |
| P14882        | HIEIQLGDK                                                              | 0.854393891        | 2               | 2.36394   |
| P14882        | LHDEDHTVVASNNNGPTFNVEVDGSK                                             | 1.227109669        | 3               | 5.78129   |
| P14882        | LQVEHPVTECITGLDLVQEMILVAK                                              | 1.03313156         | 3               | 4.07088   |
| P14882        | MADEAVCVGPAPTSK                                                        | 0.87179283         | 2               | 4.18365   |
| P14882        | SYLNMDAIMEAIKK                                                         | 1.054320825        | 2               | 2.41744   |
| P14882        | TGAQAVHPGYGFLSENK                                                      | 0.998147367        | 2               | 3.52734   |
| P14882        | TVAIHSDVDASSVHVK                                                       | 0.756897989        | 2               | 3.48252   |
| P14882        | VVEEAPSIFLDPETR                                                        | 0.857261385        | 2               | 4.09325   |
| <b>P14942</b> | <b>GSTA4 Glutathione S_transferase alpha_4</b>                         | <b>0.957972705</b> | <b>0.270721</b> | <b>2</b>  |
| P14942        | KPPPDGHYVDVVR                                                          | 0.944568889        | 2               | 2.90515   |
| P14942        | YFPVFEK                                                                | 1.132277174        | 1               | 1.91209   |
| <b>P15083</b> | <b>PIGR Polymeric immunoglobulin receptor</b>                          | <b>1.140481271</b> | <b>0.114559</b> | <b>4</b>  |
| P15083        | EIQNAGDQQAENR                                                          | 1.116582434        | 2               | 3.86892   |
| P15083        | FSVLITGLR                                                              | 1.166598269        | 2               | 2.61457   |
| P15083        | GVTGGSVVAICPYNPK                                                       | 1.288882566        | 2               | 4.06948   |
| P15083        | SSVTFECDLGR                                                            | 1.198282374        | 2               | 2.63518   |
| <b>P15149</b> | <b>CP2A2 Cytochrome P450 2A2</b>                                       | <b>0.957158632</b> | <b>0.869626</b> | <b>11</b> |
| P15149        | DVQECILEEAGYLIK                                                        | 0.968456395        | 3               | 3.62181   |
| P15149        | DVYSSITQLSER                                                           | 1.158683959        | 2               | 2.9051    |
| P15149        | FKFPMNLEDINEYPSPIGFTR                                                  | 0.881663013        | 3               | 4.65108   |
| P15149        | FSNLAPLGIPR                                                            | 1.176922252        | 2               | 3.21053   |
| P15149        | GELPTFNILFK                                                            | 1.08078295         | 2               | 2.39236   |
| P15149        | GTDVFPPIIGSLMTEPK                                                      | 0.883170966        | 2               | 4.16204   |
| P15149        | GYGFSLSNVEQAK                                                          | 1.064366858        | 2               | 3.40367   |
| P15149        | IVVLYGYDAVK                                                            | 2.050164836        | 2               | 2.67363   |
| P15149        | NFIDSFLIR                                                              | 1.322790981        | 2               | 2.96417   |
| P15149        | TLQGTGAPIDPSIYLSK                                                      | 0.977082351        | 2               | 4.67706   |
| P15149        | TVSNVINSIVFGNR                                                         | 1.001621465        | 2               | 3.09106   |
| <b>P15178</b> | <b>SYDC Aspartyl_tRNA synthetase_ cytoplasmic</b>                      | <b>1.156574255</b> | <b>8.22E-06</b> | <b>2</b>  |
| P15178        | FQTEIQTVVK                                                             | 1.055323444        | 2               | 2.55636   |
| P15178        | QMVKFAANINK+Oxidation(2)                                               | 1.213868982        | 2               | 2.80452   |
| <b>P15429</b> | <b>ENOB Beta_enolase</b>                                               | <b>1.220030526</b> | <b>0.997173</b> | <b>5</b>  |
| P15429        | DATNVGDEGGFAPNILENNEALELLK                                             | 1.087096297        | 3               | 5.52921   |
| P15429        | HIADLAGNPDVLPVPAPFNVINGGSHAGNK                                         | 1.421073234        | 3               | 4.7667    |
| P15429        | IEEALGDK                                                               | 1.235829163        | 1               | 2.31643   |
| P15429        | TAIQAAAGYDPK                                                           | 1.404320073        | 2               | 2.4404    |
| P15429        | VNQIGSVTESIQACK                                                        | 1.149277108        | 2               | 5.18293   |
| <b>P15650</b> | <b>ACADL Long_chain specific acyl_CoA dehydrogenase_ mitochondrial</b> | <b>1.080835371</b> | <b>3.33E-16</b> | <b>22</b> |
| P15650        | AFVDSCLQLHETK                                                          | 1.12467112         | 2               | 4.08966   |
| P15650        | AQDTAELFFEDVR                                                          | 1.328579698        | 2               | 4.87645   |
| P15650        | AQDTAELFFEDVRLPASALLGEENK                                              | 1.103863925        | 3               | 5.30536   |
| P15650        | CIGAIAMTEPGAGSDLQGVV                                                   | 0.979896297        | 2               | 5.27547   |
| P15650        | CIGAIAMTEPGAGSDLQGVV+Oxidation(7)                                      | 1.546452435        | 2               | 5.18064   |
| P15650        | EQIEQFIPQMTAGK                                                         | 0.92450639         | 2               | 4.39787   |
| P15650        | FFQEEVIPYHEEWEK                                                        | 1.962186733        | 2               | 4.99067   |
| P15650        | GFYYLMQELPQER                                                          | 1.73308401         | 2               | 4.28756   |
| P15650        | IFSSEHDIFR                                                             | 1.263730277        | 2               | 2.93399   |
| P15650        | KFFQEEVIPYHEEWEK                                                       | 1.912839568        | 2               | 5.19708   |
| P15650        | KLTDIGIR                                                               | 1.02392241         | 2               | 2.43016   |
| P15650        | LDSASASMAK                                                             | 0.921079017        | 1               | 2.33148   |
| P15650        | LDSASASMAK+Oxidation(8)                                                | 1.203411841        | 2               | 2.52865   |

|               |                                                                        |                    |                 |           |
|---------------|------------------------------------------------------------------------|--------------------|-----------------|-----------|
| P15650        | LPASALLGEENK                                                           | 0.908808674        | 2               | 2.6773    |
| P15650        | LTDIGIR                                                                | 1.047508407        | 2               | 2.34465   |
| P15650        | QGLLGINIAEK                                                            | 0.996869777        | 2               | 3.25371   |
| P15650        | RLDSASASMAK                                                            | 1.04115629         | 2               | 3.5289    |
| P15650        | RLDSASASMAK+Oxidation(9)                                               | 1.131080517        | 2               | 3.0767    |
| P15650        | SGSDWILNGSK                                                            | 1.141688923        | 1               | 2.27566   |
| P15650        | TNICVTR                                                                | 1.057636857        | 2               | 2.50199   |
| P15650        | VQPIYGGTNEIMK                                                          | 1.012430677        | 2               | 3.42762   |
| P15650        | VQPIYGGTNEIMK+Oxidation(12)                                            | 1.157875777        | 2               | 2.70031   |
| <b>P15651</b> | <b>ACADS Short_chain specific acyl_CoA dehydrogenase_mitochondrial</b> | <b>1.016343427</b> | <b>2.31E-06</b> | <b>9</b>  |
| P15651        | ASSTANLIFEDCR                                                          | 1.072648363        | 2               | 3.20799   |
| P15651        | EEGDSWVLNGTK                                                           | 0.980106986        | 2               | 2.96378   |
| P15651        | ELVPIAAQLDK                                                            | 0.852726427        | 2               | 2.47645   |
| P15651        | ELVPIAAQLDKHEHLFPTSQVK                                                 | 0.54530154         | 2               | 4.68818   |
| P15651        | GISAFVPMPTPGLTLGK                                                      | 0.289569386        | 2               | 3.05398   |
| P15651        | IGCFALSEPGNGSDAGAATTAR                                                 | 1.324931167        | 2               | 5.86138   |
| P15651        | IGIASQALGIAQASLDCAVK                                                   | 1.289914653        | 3               | 4.72015   |
| P15651        | ITEIYEGTSEIQR                                                          | 0.891344134        | 2               | 4.9782    |
| P15651        | LAASEAATAISHQAIQLGGMGYVTEMPAER                                         | 1.003841315        | 3               | 3.34039   |
| <b>P15684</b> | <b>AMPN Aminopeptidase N</b>                                           | <b>0.945074833</b> | <b>0.050884</b> | <b>4</b>  |
| P15684        | ALGDTPAPNIDTTELVVER                                                    | 1.264308441        | 2               | 4.17774   |
| P15684        | AQIHDSFNLASAGK                                                         | 0.962745979        | 2               | 3.28821   |
| P15684        | LRSALACSNVWILNR                                                        | 1.275860907        | 2               | 2.34926   |
| P15684        | VVATTQMQAADAR                                                          | 1.177765807        | 2               | 3.78635   |
| <b>P15709</b> | <b>ST2A1 Bile salt sulfotransferase</b>                                | <b>2.334999371</b> | <b>0.107577</b> | <b>2</b>  |
| P15709        | NHFTVSQAEAFDK                                                          | 2.271592746        | 2               | 4.03877   |
| P15709        | SIFTGIGLMR                                                             | 1.603207633        | 2               | 2.69509   |
| <b>P15919</b> | <b>RAG1 V(D)J recombination_activating protein 1</b>                   | <b>0.832831026</b> | <b>0.176212</b> | <b>2</b>  |
| P15919        | EEGGDVKAVCLTLFLALR                                                     | 0.980094201        | 2               | 2.56061   |
| P15919        | SQDLDDYLNPGPFTVVVK                                                     | 0.624281959        | 2               | 2.57284   |
| <b>P15978</b> | <b>HA11 Class I histocompatibility antigen_Non_RT1.A alpha_1 chain</b> | <b>1.71251795</b>  | <b>0.1852</b>   | <b>3</b>  |
| P15978        | GYEQHAYDGR                                                             | 1.26938655         | 2               | 2.81142   |
| P15978        | VEHEGLPEPLSQR                                                          | 0.924511703        | 2               | 3.12613   |
| P15978        | YSDAENPR                                                               | 1.516002321        | 2               | 2.4716    |
| <b>P15999</b> | <b>ATPA ATP synthase subunit alpha_mitochondrial</b>                   | <b>1.050755437</b> | <b>0.004058</b> | <b>24</b> |
| P15999        | AVDSLVPGR                                                              | 1.0332997          | 2               | 3.62852   |
| P15999        | EVAFAQFGSDLDAATQQLSR                                                   | 1.08688551         | 2               | 6.79081   |
| P15999        | FESAFLSHVVSQHQSLLGNIR                                                  | 1.263968801        | 3               | 6.09595   |
| P15999        | GIRPAINVGLSVSR                                                         | 0.930258037        | 3               | 3.86254   |
| P15999        | GMSLNLEPDNVGVVFGNDK                                                    | 1.166372758        | 2               | 5.74031   |
| P15999        | GMSLNLEPDNVGVVFGNDK+Oxidation(2)                                       | 0.974623932        | 2               | 4.28828   |
| P15999        | GYLDKLEPSK                                                             | 1.009539919        | 1               | 3.0064    |
| P15999        | ILGADTSVDLEETGR                                                        | 1.067380122        | 2               | 5.06284   |
| P15999        | LELAQYR                                                                | 1.061281602        | 2               | 2.72566   |
| P15999        | LKEIVTNFLAGFEP                                                         | 3.603040381        | 2               | 3.05903   |
| P15999        | LTDADAMK                                                               | 0.897320545        | 2               | 2.55351   |
| P15999        | LYCIYVAIGQK                                                            | 1.194131916        | 2               | 2.71271   |
| P15999        | NVQAEEMVEFSSGLK                                                        | 1.421646922        | 2               | 4.3384    |
| P15999        | QGQYSPMAIEEQVAVIYAGVR                                                  | 1.559884406        | 3               | 5.25368   |
| P15999        | RLTDADAMK                                                              | 0.958698526        | 2               | 2.60093   |
| P15999        | RLTDADAMK+Oxidation(8)                                                 | 1.056225505        | 2               | 2.32621   |
| P15999        | RTGAIVDVPVGDELLGR                                                      | 0.927845401        | 2               | 3.91426   |
| P15999        | STVAQLVK                                                               | 1.004364574        | 2               | 2.39534   |
| P15999        | TGAIVDVPVGDELLGR                                                       | 0.984245704        | 2               | 4.7202    |
| P15999        | TGTAEMSSILEER                                                          | 0.835837521        | 2               | 4.4868    |

|               |                                                            |                    |                 |           |
|---------------|------------------------------------------------------------|--------------------|-----------------|-----------|
| P15999        | TGTAEMSSILEER+Oxidation(6)                                 | 0.869909097        | 2               | 3.15479   |
| P15999        | TSIAIDTIINQK                                               | 0.899767592        | 2               | 4.67326   |
| P15999        | VLSIGDGIAR                                                 | 0.953175679        | 2               | 3.16104   |
| P15999        | VVDALGNAIDGK                                               | 0.97393117         | 2               | 4.48119   |
| <b>P16036</b> | <b>MPCP Phosphate carrier protein_mitochondrial</b>        | <b>1.016540731</b> | <b>0.998089</b> | <b>8</b>  |
| P16036        | ALYSNILGEENTYLWR                                           | 1.149157322        | 2               | 3.17017   |
| P16036        | EEGLNAFYK                                                  | 0.99255653         | 1               | 2.40452   |
| P16036        | FGFYEVFK                                                   | 1.032556763        | 1               | 2.25842   |
| P16036        | GIFNGFSITLK                                                | 1.005967945        | 2               | 3.33595   |
| P16036        | GSTASQVLQR                                                 | 1.127699949        | 2               | 3.3011    |
| P16036        | GWAPTIGYSMQGLCK                                            | 0.884674697        | 2               | 2.95809   |
| P16036        | IQTQPGYANTLR                                               | 1.116787614        | 2               | 3.77362   |
| P16036        | MYKEEGLNAFYK                                               | 0.967638201        | 3               | 3.46724   |
| <b>P16086</b> | <b>SPTA2 Spectrin alpha chain_brain</b>                    | <b>1.044803042</b> | <b>2.19E-13</b> | <b>28</b> |
| P16086        | ALINADELANDVAGAEALLDR                                      | 1.066003693        | 2               | 4.86379   |
| P16086        | ALSSEGKPYVTK                                               | 1.250075278        | 2               | 2.92091   |
| P16086        | DLASVQALLR                                                 | 1.03617726         | 2               | 2.95859   |
| P16086        | DLSSVQTLTK                                                 | 1.168517014        | 2               | 2.53705   |
| P16086        | GVIDMGNSLIER                                               | 0.96547818         | 2               | 2.95604   |
| P16086        | HQAFAEELSANQSR                                             | 0.779244029        | 2               | 4.12361   |
| P16086        | HQALQAEIAGHEPR                                             | 1.14714261         | 3               | 4.14896   |
| P16086        | HQLLEADISAHEDR                                             | 1.090541564        | 3               | 3.78848   |
| P16086        | KFEFQTDLAAHEER                                             | 1.055966805        | 3               | 5.31669   |
| P16086        | LFGAAEVQR                                                  | 1.146957575        | 2               | 2.51153   |
| P16086        | LGDSHDLQR                                                  | 1.283388031        | 2               | 3.15705   |
| P16086        | LGESQTLQQFSR                                               | 1.095679486        | 2               | 3.43417   |
| P16086        | LIQEQHPPEELIK                                              | 1.217725973        | 2               | 3.55483   |
| P16086        | LQQSHPLSANQIQVK                                            | 1.242167217        | 2               | 4.24201   |
| P16086        | LQTASDESYKDPTNIQSK                                         | 1.142150224        | 2               | 4.51118   |
| P16086        | LQVASDENYKDPTNLQGK                                         | 1.116473611        | 2               | 5.53262   |
| P16086        | LSDDNTIGQEEIQQR                                            | 0.946951778        | 2               | 3.27773   |
| P16086        | MTLVASEDYGDTLAAIQGLLK                                      | 0.729711812        | 2               | 4.37015   |
| P16086        | NQALNTDNYGHDLASVQALQR                                      | 1.370804657        | 2               | 5.75369   |
| P16086        | QFQDAGHFDAENIKK                                            | 1.090777618        | 2               | 2.55648   |
| P16086        | REELITNWEQIR                                               | 1.250606495        | 2               | 4.11876   |
| P16086        | SQLLGSAHEVQR                                               | 0.588804428        | 2               | 3.22964   |
| P16086        | SSLSSAQADFNQLAELDR                                         | 1.036178508        | 2               | 5.20955   |
| P16086        | TATDEAYKDPSNLQGK                                           | 1.012063696        | 2               | 3.67737   |
| P16086        | TKQEEVNAAWQR                                               | 1.380289493        | 2               | 2.93573   |
| P16086        | VLETAEDIQER                                                | 1.006642793        | 2               | 3.48985   |
| P16086        | VNDVCTNGQDLIK                                              | 1.067779281        | 2               | 3.2018    |
| P16086        | VNSLGETAQR                                                 | 1.182768135        | 2               | 2.68814   |
| <b>P16232</b> | <b>DHI1 Corticosteroid 11_beta_dehydrogenase isozyme 1</b> | <b>0.84787986</b>  | <b>0.004281</b> | <b>9</b>  |
| P16232        | EECALEIHK                                                  | 1.161693457        | 1               | 2.01329   |
| P16232        | ETSGIILSQAAPK                                              | 0.921769145        | 2               | 3.50504   |
| P16232        | FALDGFSTIR                                                 | 1.032897826        | 2               | 2.43072   |
| P16232        | FVVEAGK                                                    | 0.63076368         | 1               | 1.91983   |
| P16232        | IMEFSLR                                                    | 2.170267573        | 2               | 2.51041   |
| P16232        | KDEVYYDK                                                   | 0.730576843        | 1               | 2.73099   |
| P16232        | MGAHVVLTAR                                                 | 0.971662105        | 2               | 2.8789    |
| P16232        | MTQPLIASYSASK                                              | 1.040374409        | 2               | 3.39693   |
| P16232        | SSWTPLLLGNPGR                                              | 0.70866861         | 2               | 3.65145   |
| <b>P16290</b> | <b>PGAM2 Phosphoglycerate mutase 2</b>                     | <b>1.194005809</b> | <b>0.257207</b> | <b>5</b>  |
| P16290        | AMEAVAAQGK                                                 | 1.141478081        | 2               | 2.5932    |
| P16290        | AMEAVAAQGK+Oxidation(2)                                    | 1.22032487         | 2               | 2.43676   |
| P16290        | HGESSWNQENR                                                | 1.03849052         | 2               | 3.62318   |

|               |                                                     |                    |                 |           |
|---------------|-----------------------------------------------------|--------------------|-----------------|-----------|
| P16290        | HYGGLTGLNK                                          | 1.157351842        | 1               | 3.13769   |
| P16290        | VLIAAHGNSLR                                         | 1.110246292        | 2               | 2.67363   |
| <b>P16303</b> | <b>CES3 Carboxylesterase 3</b>                      | <b>0.823630715</b> | <b>1.55E-05</b> | <b>18</b> |
| P16303        | AISESGVVLTSALITTDSPKIANLIATLSGCK                    | 1.008133331        | 3               | 5.55848   |
| P16303        | AKEAAEESHVK                                         | 0.813207563        | 2               | 4.02404   |
| P16303        | DGASEEETNLSK                                        | 0.876747877        | 2               | 4.11285   |
| P16303        | EAAEESHVK                                           | 0.955367105        | 2               | 2.78459   |
| P16303        | ENIPLQFSEDCLYNVYTPADLTK                             | 1.845826886        | 2               | 4.28307   |
| P16303        | ESYPFLPTVIDGVVLPK                                   | 0.819059429        | 3               | 4.11074   |
| P16303        | FAPPQPAEPWNFVK                                      | 0.996592616        | 1               | 2.4704    |
| P16303        | IGASTQAAQR                                          | 0.714762403        | 2               | 3.30163   |
| P16303        | LDLLGNPK                                            | 0.819439045        | 2               | 2.33394   |
| P16303        | MIPVVAEK                                            | 0.709885309        | 1               | 1.95025   |
| P16303        | QFEGWIIPTLMGYLSEK                                   | 1.12007126         | 3               | 4.09105   |
| P16303        | QKTEDELLETSK                                        | 0.829639471        | 2               | 3.60318   |
| P16303        | SFNTVPYIVGINK                                       | 0.587218524        | 2               | 2.89777   |
| P16303        | TEDELLETSK                                          | 0.782844439        | 2               | 3.59171   |
| P16303        | TTTSAVMVHCLR                                        | 0.731651771        | 2               | 3.06242   |
| P16303        | TVIGDHGDELFSVFGSPFLK                                | 1.230864544        | 2               | 5.3946    |
| P16303        | YFGGTDDPAK                                          | 0.780375592        | 2               | 3.24636   |
| P16303        | YVNLEGFAQPVAVFLGIPFAKPLGLSLR                        | 1.040224666        | 3               | 3.74506   |
| <b>P16332</b> | <b>MUTA Methylmalonyl_CoA mutase_ mitochondrial</b> | <b>0.965232077</b> | <b>0.999986</b> | <b>5</b>  |
| P16332        | EVAQQAVDADVHAVGVSTLAAGHK                            | 0.996088022        | 3               | 3.41284   |
| P16332        | GDVGMAGVAIDTVEDTK                                   | 1.036172572        | 2               | 3.46349   |
| P16332        | IDSGSEVIVGVNK                                       | 0.950878179        | 2               | 4.01988   |
| P16332        | NTQIIIQEEESGIPK                                     | 1.128121037        | 2               | 3.02319   |
| P16332        | TGLQAGLTIDEFAPR                                     | 1.006584629        | 2               | 3.65999   |
| <b>P16409</b> | <b>MYL3 Myosin light chain 3</b>                    | <b>1.152779354</b> | <b>0.259713</b> | <b>10</b> |
| P16409        | AAPAPAAAAPAAPEPERPK                                 | 3.903099296        | 2               | 4.03206   |
| P16409        | ALGQNPTQAEVLR                                       | 0.701551965        | 2               | 4.40129   |
| P16409        | DTGTIEDFVEGLR                                       | 2.174029038        | 2               | 2.98157   |
| P16409        | EGNGTVMGAELR                                        | 1.215834104        | 2               | 2.53006   |
| P16409        | IEFTPEQIEEFK                                        | 1.567641569        | 2               | 2.33253   |
| P16409        | LMAGQEDSNGCINYEAFVK                                 | 2.71238204         | 2               | 4.92694   |
| P16409        | LTEDEVEK                                            | 3.041803335        | 1               | 2.19697   |
| P16409        | MMDFETFLPMLQHISK                                    | 1.790716229        | 3               | 4.02227   |
| P16409        | NKDTGTIEDFVEGLR                                     | 3.0801705          | 2               | 4.18895   |
| P16409        | VFDKEGNGTVMGAELR                                    | 1.37563337         | 2               | 3.97205   |
| <b>P16617</b> | <b>PGK1 Phosphoglycerate kinase 1</b>               | <b>1.303181238</b> | <b>9.9E-20</b>  | <b>18</b> |
| P16617        | AHSSMVGVNLPQK                                       | 1.040658603        | 3               | 3.77739   |
| P16617        | AHSSMVGVNLPQK+Oxidation(5)                          | 1.0388283          | 2               | 2.46347   |
| P16617        | ALESPERFLAILGGAK                                    | 1.714689434        | 3               | 4.59707   |
| P16617        | DCVGSEVENACANPAAGTVILLENLR                          | 1.284576018        | 3               | 6.36409   |
| P16617        | GCITIIGGGDTATCCAK                                   | 1.112670575        | 2               | 5.53714   |
| P16617        | IQLINNMLDK                                          | 1.070942067        | 2               | 2.79485   |
| P16617        | IQLINNMLDK+Oxidation(7)                             | 2.06649008         | 1               | 2.02735   |
| P16617        | ITLPVDFVTADK                                        | 1.21297777         | 2               | 2.3301    |
| P16617        | ITLPVDFVTADKFDENAK                                  | 1.801516904        | 2               | 5.18403   |
| P16617        | QIVWNGPVGVFWEAFAR                                   | 1.182416091        | 2               | 4.12494   |
| P16617        | SLMDEVVK                                            | 1.029434179        | 2               | 2.31344   |
| P16617        | SVVLMSHLGRPDGVPMPDKYSLEPVAAELK                      | 1.295923304        | 4               | 5.28195   |
| P16617        | TGQATVASGIPAGWMLDCGTESSK                            | 0.991662178        | 2               | 4.70331   |
| P16617        | TGQATVASGIPAGWMLDCGTESSK                            | 1.282665563        | 3               | 4.21772   |
| P16617        | VLNNMEIGTSLYDEEGAK                                  | 1.295249891        | 2               | 5.21041   |
| P16617        | VLPGVDALSNV                                         | 1.462440186        | 2               | 2.75884   |
| P16617        | WNTEDKVSHVSTGGGASLELLEK                             | 1.024019114        | 3               | 4.66127   |
| P16617        | YSLEPVAAELK                                         | 1.098135757        | 2               | 3.14562   |

|               |                                                             |                    |                 |           |
|---------------|-------------------------------------------------------------|--------------------|-----------------|-----------|
| <b>P16638</b> | <b>ACLY ATP_citrate synthase</b>                            | <b>1.385769592</b> | <b>9.9E-20</b>  | <b>21</b> |
| P16638        | AFDSGIIPMEFVNK                                              | 1.667262441        | 2               | 4.11086   |
| P16638        | DEPSVAAMVYPFTGDHK                                           | 0.965646998        | 2               | 2.63843   |
| P16638        | DLVSSLTSGLLTIGDR                                            | 1.14856387         | 3               | 3.92299   |
| P16638        | EAYPEEAYIADLDAK                                             | 1.184025678        | 2               | 3.06508   |
| P16638        | EEADEYVDIGALNGVFLGR                                         | 1.124574014        | 2               | 4.19979   |
| P16638        | FGGALDAAK                                                   | 1.400141867        | 2               | 2.8616    |
| P16638        | GAIVPAQEVPPPTVPMDSWAR                                       | 1.495693935        | 2               | 3.81025   |
| P16638        | GVTIIGPATVGGIKPGCFK                                         | 1.317677634        | 2               | 3.62889   |
| P16638        | HLLVHAPEDKK                                                 | 1.60704062         | 2               | 3.36346   |
| P16638        | IGNTGGMLDNILASK                                             | 1.841396759        | 2               | 3.20622   |
| P16638        | LGLVGVNLSLDGVK                                              | 2.320396199        | 2               | 2.31625   |
| P16638        | QHFPATPLLDYALEVEK                                           | 1.190059939        | 3               | 4.24256   |
| P16638        | RGGPNYQEGLR                                                 | 1.536139002        | 2               | 3.21843   |
| P16638        | SAYDSTMETMNYAQIR                                            | 1.57364734         | 2               | 4.11715   |
| P16638        | SGGMSNELNIIISR                                              | 1.230659525        | 2               | 3.7458    |
| P16638        | TIAIIAEGIPEALTR                                             | 1.574554539        | 2               | 4.06754   |
| P16638        | TTDGVYEGVAIGGDR                                             | 1.225813114        | 2               | 2.87143   |
| P16638        | TTDGVYEGVAIGGDRYPGSTFMDHVLR                                 | 1.407907983        | 3               | 3.6203    |
| P16638        | VDATADYICK                                                  | 1.731062077        | 2               | 2.55014   |
| P16638        | WGDIEFPPPFGR                                                | 1.514377809        | 2               | 3.83236   |
| P16638        | YICTTSAIQNR                                                 | 1.423743263        | 2               | 2.88397   |
| <b>P16970</b> | <b>ABCD3 ATP_binding cassette sub_family D member 3</b>     | <b>1.043639908</b> | <b>0.851121</b> | <b>9</b>  |
| P16970        | DQVIYPDGKEDQK                                               | 1.342898218        | 2               | 3.24385   |
| P16970        | EGGWDSVQDWMVDVLSGGEK                                        | 1.131763107        | 2               | 4.38296   |
| P16970        | FDHVPLATPNGDILIQDLSFEVR                                     | 1.23511958         | 3               | 3.85699   |
| P16970        | GIEGAQASPLIPGAGEIINADNIIK                                   | 0.788836038        | 3               | 5.15104   |
| P16970        | GYLDNVQLGHILER                                              | 0.986504928        | 2               | 3.42316   |
| P16970        | HLHSTHSELLEDYYSQGR                                          | 1.032292329        | 3               | 5.33032   |
| P16970        | ITEDTVEFGS                                                  | 0.892857081        | 1               | 1.90238   |
| P16970        | ITELMQVLK                                                   | 1.01641464         | 2               | 2.52298   |
| P16970        | SGANVLICGPNCGCK                                             | 1.055244848        | 2               | 3.30384   |
| <b>P17077</b> | <b>RL9 60S ribosomal protein L9</b>                         | <b>1.101335518</b> | <b>0.001355</b> | <b>7</b>  |
| P17077        | DFNHINVELSLLGK                                              | 1.095716201        | 3               | 3.51506   |
| P17077        | FLDGIYVSEK                                                  | 1.055108291        | 2               | 3.05949   |
| P17077        | GTVQQPDE                                                    | 1.275017061        | 1               | 2.18254   |
| P17077        | KFLDGIYVSEK                                                 | 1.21880082         | 2               | 2.97119   |
| P17077        | TGVACSVSQAQK                                                | 1.117633779        | 2               | 3.25953   |
| P17077        | TICSHVQNMIK                                                 | 1.073529954        | 2               | 3.68726   |
| P17077        | TILSNQTVDIPENVDTLTK                                         | 0.919482718        | 2               | 4.83641   |
| <b>P17078</b> | <b>RL35 60S ribosomal protein L35</b>                       | <b>1.174907466</b> | <b>0.08436</b>  | <b>2</b>  |
| P17078        | QLDDLKVELSCLR                                               | 1.179341965        | 2               | 2.49378   |
| P17078        | VLTVINQTQK                                                  | 1.161704453        | 2               | 3.02413   |
| <b>P17178</b> | <b>CP27A Sterol 26_hydroxylase_mitochondrial</b>            | <b>1.022395225</b> | <b>0.941126</b> | <b>4</b>  |
| P17178        | DHESTEGPGTGQDRPR                                            | 1.014132487        | 2               | 2.73442   |
| P17178        | TNVNLSAPLLEQVMR                                             | 1.08758239         | 2               | 4.19874   |
| P17178        | VGCLEPSIPEDTATFIR                                           | 1.260260165        | 2               | 3.42055   |
| P17178        | YEVVLSPGMGEVK                                               | 0.895225757        | 2               | 3.26356   |
| <b>P17209</b> | <b>MYL4 Myosin light chain 4</b>                            | <b>1.08264697</b>  | <b>0.731998</b> | <b>2</b>  |
| P17209        | HVLATLGEK                                                   | 1.060568458        | 1               | 2.56997   |
| P17209        | ITYQCQGDVLR                                                 | 3.404074621        | 2               | 2.47547   |
| <b>P17425</b> | <b>HMCS1 Hydroxymethylglutaryl_CoA synthase_cytoplasmic</b> | <b>0.853688212</b> | <b>0.999999</b> | <b>11</b> |
| P17425        | ASAELFNQK                                                   | 0.674177614        | 2               | 2.56948   |
| P17425        | GTHMQHAYDFYKPDMLSEYPVVDGK                                   | 0.854042803        | 3               | 5.31104   |
| P17425        | ITASLCDLK                                                   | 0.885066272        | 1               | 1.95508   |

|               |                                                        |                    |                 |           |
|---------------|--------------------------------------------------------|--------------------|-----------------|-----------|
| P17425        | LEDTYFDRDVEK                                           | 0.583261431        | 2               | 2.99576   |
| P17425        | MFLNDFLNDQNR                                           | 0.924852761        | 2               | 2.86577   |
| P17425        | MGFCTDREDINSLCLTVVQK                                   | 0.798939111        | 2               | 4.54835   |
| P17425        | NSIYSGLEAFGDVK                                         | 0.871408326        | 2               | 2.7762    |
| P17425        | NLSYDCIGR                                              | 0.716867031        | 2               | 2.8602    |
| P17425        | TCVAPDVFAENMK                                          | 0.814455242        | 2               | 3.61637   |
| P17425        | VTQDATPGSALDK                                          | 0.971977406        | 2               | 3.61848   |
| P17425        | YTIGLGQAR                                              | 0.75759377         | 2               | 2.78529   |
| <b>P17426</b> | <b>AP2A1 AP_2 complex subunit alpha_1</b>              | <b>1.237693765</b> | <b>0.253717</b> | <b>3</b>  |
| P17426        | FFQPTEMAAQDFQR+Oxidation(7)                            | 1.321969734        | 2               | 3.55283   |
| P17426        | NADVQLQR                                               | 1.230170108        | 2               | 2.50568   |
| P17426        | VGGYILGEFNLGIAGDPR                                     | 1.281372728        | 2               | 4.16958   |
| <b>P17475</b> | <b>A1AT Alpha_1_antiproteinase</b>                     | <b>1.568804136</b> | <b>0.000145</b> | <b>4</b>  |
| P17475        | MQHLEQLTK                                              | 1.28640829         | 2               | 2.68607   |
| P17475        | TLLSSLGITR                                             | 1.559601011        | 2               | 2.90335   |
| P17475        | VFNNADLSGITDAPLK                                       | 1.650559426        | 2               | 5.21224   |
| P17475        | VINDYVEK                                               | 1.407517927        | 1               | 2.29083   |
| <b>P17764</b> | <b>THIL Acetyl_CoA acetyltransferase_mitochondrial</b> | <b>1.098670074</b> | <b>9.9E-20</b>  | <b>15</b> |
| P17764        | EEQDKYAIGSYTR                                          | 0.96982164         | 2               | 3.39493   |
| P17764        | ENGTVTAANASTLNDGAAAVLMTAEAAQR                          | 1.629551681        | 2               | 4.53055   |
| P17764        | EYMGNVIQGGEGQAPTR                                      | 0.978069635        | 2               | 5.24778   |
| P17764        | FANEITPITISVK                                          | 1.076454165        | 2               | 3.97755   |
| P17764        | GKPDVVVKEDEEYK                                         | 0.920586541        | 2               | 3.68399   |
| P17764        | GKPDVVVKEDEEYKR                                        | 0.953860711        | 2               | 4.61252   |
| P17764        | IAAFADAAVDPIDFLAPAYAVPK                                | 1.58773076         | 2               | 5.23468   |
| P17764        | IHMGNCAENTAK                                           | 1.3745133          | 2               | 3.40438   |
| P17764        | IHMGNCAENTAK+Oxidation(3)                              | 1.163271944        | 2               | 3.49588   |
| P17764        | LEDLIVK                                                | 1.00011171         | 2               | 2.42947   |
| P17764        | LGTIAIQGAIEK                                           | 1.449122125        | 2               | 3.30409   |
| P17764        | QATLGAGLPIATPCTTVNK                                    | 1.064756503        | 2               | 5.10219   |
| P17764        | QGEFGLASICNGGGGASAVLIEK                                | 1.007065039        | 2               | 4.73484   |
| P17764        | TPIGSFLGSLASQPATK                                      | 1.137021858        | 2               | 4.21094   |
| P17764        | VNVHGGAVSLGHPIGMSGAR                                   | 1.075086596        | 2               | 5.73296   |
| <b>P17879</b> | <b>HS71B Heat shock 70 kDa protein 1B</b>              | <b>1.169993446</b> | <b>0.037118</b> | <b>3</b>  |
| P17879        | QTQFTTYSNDQPGVLIQVYEGER                                | 1.301962205        | 3               | 5.33365   |
| P17879        | TTPSYVAFTDTER                                          | 1.246504959        | 2               | 3.59817   |
| P17879        | VEIANDQGNR                                             | 1.123877182        | 2               | 3.6672    |
| <b>P17988</b> | <b>ST1A1 Sulfotransferase 1A1</b>                      | <b>1.26763088</b>  | <b>3.17E-11</b> | <b>6</b>  |
| P17988        | CPGVPSGLETLEETPAPR                                     | 1.343423329        | 2               | 4.49533   |
| P17988        | FDAHYAK                                                | 1.201450923        | 2               | 2.35627   |
| P17988        | NTFTVAQNER                                             | 1.134566867        | 2               | 2.98804   |
| P17988        | SLPEETVDSIVHHTSFK                                      | 1.26763752         | 2               | 4.5226    |
| P17988        | THLPLSLLPQSLLDQK                                       | 1.552140423        | 2               | 5.00766   |
| P17988        | YFAETIGLQNFATAWPDLLISTYPK                              | 1.207197318        | 3               | 4.15288   |
| <b>P18163</b> | <b>ACSL1 Long_chain_fatty_acid_CoA ligase 1</b>        | <b>1.060852815</b> | <b>9.9E-20</b>  | <b>27</b> |
| P18163        | AELSVIFADKPEK                                          | 1.37751982         | 2               | 3.56585   |
| P18163        | AILEDNVK                                               | 1.083596723        | 2               | 2.47225   |
| P18163        | ALEDLGR                                                | 1.095493925        | 2               | 2.46128   |
| P18163        | ALKPPCDLSMQSVEVTGTTEGVR                                | 1.080373598        | 2               | 4.55493   |
| P18163        | CGVEIIGLK                                              | 1.204612029        | 2               | 2.70455   |
| P18163        | GAMVTHQNIMNDCSGFIK                                     | 1.39830126         | 2               | 5.333     |
| P18163        | GFQGSFEELCR                                            | 1.253860701        | 2               | 3.39265   |
| P18163        | GIAVHPELFSIDNGLLTPTLK                                  | 1.081346868        | 2               | 5.72728   |
| P18163        | GIQVSNDGPCLGSR                                         | 1.058105971        | 2               | 4.48571   |
| P18163        | IENIYLR                                                | 1.15866191         | 2               | 2.96436   |
| P18163        | IFGQANTSVK                                             | 1.167162364        | 2               | 2.60531   |
| P18163        | IIVIMDSYDNDLVER                                        | 1.377708392        | 2               | 4.92926   |

|               |                                                           |                    |                 |           |
|---------------|-----------------------------------------------------------|--------------------|-----------------|-----------|
| P18163        | LLLEGVENK                                                 | 1.264591099        | 2               | 3.18362   |
| P18163        | LLMDDLK                                                   | 1.157354336        | 2               | 2.42593   |
| P18163        | LMITGAAPVSATVLTFLR                                        | 1.812740946        | 3               | 4.14488   |
| P18163        | LVDVEDMNYQAAK                                             | 1.413191479        | 2               | 4.57779   |
| P18163        | LVDVEDMNYQAAK+Oxidation(7)                                | 1.283393868        | 2               | 2.76249   |
| P18163        | NAGLKPFEQVK                                               | 1.070711834        | 2               | 4.00469   |
| P18163        | QVAEMAECIGSALIQQ                                          | 1.075502896        | 2               | 5.25267   |
| P18163        | SAVLEDDKLLYYDDVDR                                         | 4.286920545        | 2               | 4.23434   |
| P18163        | SQIDELYSTIK                                               | 1.190071869        | 2               | 3.7666    |
| P18163        | SQIDELYSTIKI                                              | 1.378595527        | 2               | 3.11642   |
| P18163        | TAEALDKDGLWHTGDIGK                                        | 1.259143993        | 2               | 5.35417   |
| P18163        | TKPKPPEPEDLAICFTSGTTGNPK                                  | 4.371043352        | 3               | 6.18746   |
| P18163        | TMYDGFQR                                                  | 1.08158009         | 1               | 1.91347   |
| P18163        | VLQPTIFPVVPR                                              | 1.168442047        | 2               | 3.67696   |
| P18163        | WLLDFASK                                                  | 1.200015112        | 2               | 2.61246   |
| <b>P18297</b> | <b>SPRE Sepiapterin reductase</b>                         | <b>1.178112206</b> | <b>0.000295</b> | <b>5</b>  |
| P18297        | ALAPQLAGLLSPGSVLLLSAR                                     | 0.971859419        | 3               | 3.93682   |
| P18297        | LLLINNAGTLGDVSK                                           | 1.805998263        | 2               | 3.02938   |
| P18297        | LNSEGELVDCGTSAAK                                          | 1.181105753        | 2               | 4.95214   |
| P18297        | TVVNISSLCALQPFK                                           | 1.096406503        | 2               | 3.13125   |
| P18297        | VLSYAPGPLDTNMQQLAR                                        | 1.250696278        | 2               | 2.74434   |
| <b>P18298</b> | <b>METK2 S_adenosylmethionine synthase isoform type_2</b> | <b>1.216259225</b> | <b>0.19591</b>  | <b>3</b>  |
| P18298        | IIVDTYGGWGAHGGGAFSGK                                      | 1.250252492        | 2               | 5.64405   |
| P18298        | KIIVDTYGGWGAHGGGAFSGK                                     | 0.965949803        | 3               | 3.42374   |
| P18298        | YLDEDTIYHLQPSGR                                           | 1.128314946        | 2               | 4.38983   |
| <b>P18418</b> | <b>CALR Calreticulin</b>                                  | <b>1.355658869</b> | <b>9.9E-20</b>  | <b>17</b> |
| P18418        | AKIDDPDTSKPEDWDKPEHIPDPAK                                 | 1.224504499        | 3               | 6.03649   |
| P18418        | CKDDEFTHLYTLIVRPDNTYEVK                                   | 1.351473871        | 3               | 5.4123    |
| P18418        | DMHGDSEYNIMFGPDICGPGTK                                    | 1.218428713        | 2               | 6.19507   |
| P18418        | FYALSAR                                                   | 1.55684408         | 2               | 2.32824   |
| P18418        | FYGDQEK                                                   | 1.111919594        | 1               | 2.02837   |
| P18418        | FYGDQEKDK                                                 | 0.847802066        | 1               | 2.81995   |
| P18418        | GQTLVVQFTVK                                               | 1.043682055        | 2               | 3.81691   |
| P18418        | HEQNIDCGGGYVK                                             | 1.157994599        | 2               | 4.37352   |
| P18418        | IDDPTDTSKPEDWDKPEHIPDPAK                                  | 1.004713415        | 4               | 4.66522   |
| P18418        | IDNSQVESGSLEDDWDFLPPK                                     | 1.380034249        | 2               | 5.5175    |
| P18418        | IDNSQVESGSLEDDWDFLPPKK                                    | 1.471870816        | 2               | 5.04996   |
| P18418        | IKDPDAAKPEDWDER                                           | 1.101860672        | 2               | 4.36884   |
| P18418        | KPEDWDEEMDGEWEPVVIQNPEYK                                  | 1.03552376         | 3               | 5.70029   |
| P18418        | LFPGLDQK                                                  | 1.390930372        | 2               | 2.33984   |
| P18418        | QIDNPDYK                                                  | 1.137515878        | 1               | 1.95238   |
| P18418        | SGTIFDNFLITNDEAYAEFGNETWGVTK                              | 1.354100195        | 3               | 5.49448   |
| P18418        | VHVIFNYK                                                  | 1.435558901        | 1               | 2.34414   |
| <b>P18420</b> | <b>PSA1 Proteasome subunit alpha type_1</b>               | <b>0.90875513</b>  | <b>0.957337</b> | <b>2</b>  |
| P18420        | AQPSQAADEPAEK                                             | 0.899235593        | 2               | 3.6064    |
| P18420        | IHQIEYAMEAVK                                              | 1.063696489        | 2               | 2.30031   |
| <b>P18421</b> | <b>PSB1 Proteasome subunit beta type_1</b>                | <b>1.291019215</b> | <b>9.12E-09</b> | <b>2</b>  |
| P18421        | AGGSASAMLQPLLDNQVGFK                                      | 1.408811805        | 2               | 4.796     |
| P18421        | NMQNVEHVPLTLDR                                            | 1.11223377         | 2               | 3.78137   |
| <b>P18422</b> | <b>PSA3 Proteasome subunit alpha type_3</b>               | <b>1.295094132</b> | <b>0.011165</b> | <b>3</b>  |
| P18422        | AVENSSTAIGIR                                              | 1.302955658        | 2               | 3.31066   |
| P18422        | DGVVFGVEKLVLSK                                            | 1.393145067        | 1               | 1.94563   |
| P18422        | HVGMAVAGLLADAR                                            | 1.144418152        | 3               | 3.60947   |
| <b>P18437</b> | <b>HMG2 Non_histone chromosomal protein HMG_17</b>        | <b>1.25512643</b>  | <b>0.007593</b> | <b>2</b>  |
| P18437        | DANNPAAEDGDAK                                             | 1.446957788        | 2               | 3.327     |



|               |                                                                  |                    |                 |           |
|---------------|------------------------------------------------------------------|--------------------|-----------------|-----------|
| P18437        | DANNPAEDGDAKTDAQK                                                | 0.916667584        | 2               | 4.88795   |
| <b>P18445</b> | <b>RL27A 60S ribosomal protein L27a</b>                          | <b>1.105537248</b> | <b>0.481881</b> | <b>3</b>  |
| P18445        | NGVAPIIDVVR                                                      | 1.171328069        | 1               | 2.50706   |
| P18445        | NQSFCPTVNLDK                                                     | 1.106132472        | 2               | 3.20334   |
| P18445        | RNQSFCPTVNLDK                                                    | 0.882123799        | 2               | 3.12376   |
| <b>P18484</b> | <b>AP2A2 AP_2 complex subunit alpha_2</b>                        | <b>1.356288305</b> | <b>0.036086</b> | <b>5</b>  |
| P18484        | FFQPTEMASQDFFQR                                                  | 1.321969734        | 2               | 3.98642   |
| P18484        | IIGFGSALLEEVDNPNANFVVGAGIIHTK                                    | 1.20251873         | 3               | 3.3996    |
| P18484        | ILVAGDTMDSVK                                                     | 1.376392191        | 2               | 2.43865   |
| P18484        | NNGVLFENQLLQIGLK                                                 | 1.126075678        | 2               | 2.55224   |
| P18484        | YGGTFQNVSVK                                                      | 0.937768992        | 2               | 2.48537   |
| <b>P18596</b> | <b>AT2A3 Sarcoplasmic/endoplasmic reticulum calcium ATPase 3</b> | <b>1.139313775</b> | <b>0.178735</b> | <b>4</b>  |
| P18596        | DIVPGDIVEVAVGDKVPADLR                                            | 2.134966868        | 2               | 3.32976   |
| P18596        | SLPSVETLGCTSVICS DK                                              | 1.099681938        | 2               | 4.27738   |
| P18596        | TGTLTTNQMSVCR                                                    | 1.180692172        | 2               | 2.86472   |
| P18596        | VGEATETALTCLVEK                                                  | 1.059024417        | 2               | 4.97203   |
| <b>P18757</b> | <b>CGL Cystathionine gamma_lyase</b>                             | <b>0.991296539</b> | <b>0.00071</b>  | <b>15</b> |
| P18757        | AGDEVICMDEVYGGTNR                                                | 0.925817058        | 2               | 5.77259   |
| P18757        | ATLGISDTLIR                                                      | 0.924763218        | 2               | 3.56973   |
| P18757        | AVAALDGAK                                                        | 0.900916875        | 2               | 2.44511   |
| P18757        | AVVLPISLATTFK                                                    | 0.993710352        | 3               | 4.98793   |
| P18757        | FLQNSLGA VSPFDCYLCCR                                             | 1.609343287        | 2               | 3.61933   |
| P18757        | GTLQHAQVFLK                                                      | 0.886809505        | 3               | 3.31622   |
| P18757        | LFALAESLGGYESLAELPAIMTHASVPEK                                    | 1.410692409        | 3               | 3.79888   |
| P18757        | LFALAESLGGYESLAELPAIMTHASVPEKDR                                  | 1.782075217        | 4               | 5.75637   |
| P18757        | LLEAAITPQTK                                                      | 0.954632245        | 2               | 3.61353   |
| P18757        | LSVGLDEKDLLEDLQALK                                               | 1.017719529        | 3               | 6.6441    |
| P18757        | LVWIETPTNPTLK                                                    | 1.085792286        | 2               | 3.8029    |
| P18757        | QCTGCPGMVSFYIK                                                   | 1.021683653        | 2               | 3.82768   |
| P18757        | QDSPGQSSGFVYSR                                                   | 0.825204597        | 2               | 3.89639   |
| P18757        | RVASEFGLK                                                        | 0.98314571         | 2               | 2.6509    |
| P18757        | VYVPLPSHPQHELAK                                                  | 1.028394711        | 2               | 4.18863   |
| <b>P18886</b> | <b>CPT2 Carnitine O_palmitoyltransferase 2_mitochondrial</b>     | <b>1.103533315</b> | <b>0.166741</b> | <b>10</b> |
| P18886        | ATNLTVSAVR                                                       | 1.136118659        | 2               | 3.51471   |
| P18886        | ELHAHLLAQDK                                                      | 1.056454346        | 2               | 3.46718   |
| P18886        | LIFDGN EETLK                                                     | 1.261391995        | 2               | 3.24994   |
| P18886        | QYGQTVATYESCSTA AFK                                              | 1.183769195        | 2               | 4.03331   |
| P18886        | SEYNDQLTR                                                        | 2.01733312         | 2               | 2.48281   |
| P18886        | TETIRPASIFTK                                                     | 0.973673319        | 2               | 3.07115   |
| P18886        | TLQAGLLEPEVFH LNP SK                                             | 0.68214162         | 2               | 4.05955   |
| P18886        | TLSIDSIQFQR                                                      | 1.027870788        | 2               | 3.39839   |
| P18886        | YILSDSSPVPEFPVAYLTSEN R                                          | 1.443649789        | 2               | 5.21133   |
| P18886        | YLN AQKPLLD DSQFR                                                | 1.096019787        | 2               | 4.7108    |
| <b>P19112</b> | <b>F16P1 Fructose_1_6_bisphosphatase 1</b>                       | <b>1.096674399</b> | <b>0.00014</b>  | <b>16</b> |
| P19112        | AGGLATTGNEDILDIVPTEIHQK                                          | 0.925465125        | 3               | 6.21517   |
| P19112        | AGGTGEMTQLLNSLCTAIK                                              | 1.132311551        | 2               | 5.39664   |
| P19112        | APVIMGSTEDVQEFLEIYNK                                             | 1.528710298        | 2               | 4.33775   |
| P19112        | APVIMGSTEDVQEFLEIYNKDK                                           | 1.317879356        | 3               | 3.44544   |
| P19112        | DFDPAIN EYIQR                                                    | 0.9218092          | 2               | 3.57267   |
| P19112        | GNIYSINEGYAK                                                     | 0.916148676        | 2               | 3.94263   |
| P19112        | KGNIYSINEGYAK                                                    | 0.84880973         | 2               | 4.21584   |
| P19112        | KLDILSNDLVINMLK                                                  | 1.115793682        | 2               | 5.06066   |
| P19112        | KTSANEPSEKDALQPGR                                                | 1.063689517        | 3               | 3.87502   |
| P19112        | LDILSNDLVINMLK                                                   | 1.040645419        | 2               | 4.85248   |
| P19112        | LLYECNPIAYVMEK                                                   | 1.980151685        | 2               | 4.36435   |

|               |                                                                            |                    |                 |           |
|---------------|----------------------------------------------------------------------------|--------------------|-----------------|-----------|
| P19112        | QAGIAQLYGIAGSTNVTGDQVK                                                     | 1.11854155         | 2               | 5.89982   |
| P19112        | SRPSLPLQSR                                                                 | 0.847142827        | 2               | 3.30219   |
| P19112        | SSYATCVLVSEEDTHAIIIPEKR                                                    | 1.089206604        | 3               | 6.00394   |
| P19112        | TLVYGGIFLYPANK                                                             | 0.66482492         | 2               | 3.98304   |
| P19112        | TSANEPSEKDALQPGR                                                           | 0.975158472        | 2               | 4.45571   |
| <b>P19225</b> | <b>CP270 Cytochrome P450 2C70</b>                                          | <b>1.023937319</b> | <b>0.431074</b> | <b>12</b> |
| P19225        | ASLNLSNPQDFIDYFLIK                                                         | 1.10912343         | 3               | 4.09929   |
| P19225        | EALIDRGEFSDK                                                               | 1.210772017        | 2               | 2.49848   |
| P19225        | FDPGHFLDEK                                                                 | 1.099883154        | 2               | 2.66665   |
| P19225        | FILMEINR                                                                   | 1.254032241        | 2               | 2.3786    |
| P19225        | FSLMVLRSMGMGK+Oxidation(4)                                                 | 1.576066173        | 1               | 1.97209   |
| P19225        | GTSVMACLTSALHDDKEFPNPEK                                                    | 0.945169574        | 3               | 4.18647   |
| P19225        | IQEEITR                                                                    | 1.026942367        | 1               | 2.11767   |
| P19225        | IQEEVVYLLEALR                                                              | 2.73363859         | 2               | 3.85904   |
| P19225        | KLPPGPTPLPIFGNILQVGVK                                                      | 1.28194972         | 2               | 2.42875   |
| P19225        | LPPGPTPLPIFGNILQVGVK                                                       | 0.968864346        | 2               | 4.15151   |
| P19225        | TNGSPCDPSFLLACVPCNVISSVIFQHR                                               | 1.113482107        | 3               | 3.46234   |
| P19225        | YIDFVPIPLPR                                                                | 0.987285706        | 2               | 3.11071   |
| <b>P19234</b> | <b>NDUV2 NADH dehydrogenase [ubiquinone] flavoprotein 2_ mitochondrial</b> | <b>1.142296214</b> | <b>0.041904</b> | <b>5</b>  |
| P19234        | DIEEIIDELR                                                                 | 1.352991102        | 2               | 3.63921   |
| P19234        | DTPENNPDPDFDTPENYER                                                        | 1.074222814        | 2               | 4.87634   |
| P19234        | FCCEPAGGLTSLTEPPK                                                          | 1.021639816        | 2               | 3.2944    |
| P19234        | FCCEPAGGLTSLTEPPKPGFGVQAGL                                                 | 1.275016321        | 2               | 3.01447   |
| P19234        | YHIQVCTTTPCMLR                                                             | 1.148397679        | 2               | 3.32462   |
| <b>P19468</b> | <b>GSH1 Glutamate__cysteine ligase catalytic subunit</b>                   | <b>1.078179783</b> | <b>0.999727</b> | <b>8</b>  |
| P19468        | ASGELMTVAR                                                                 | 1.03112372         | 2               | 2.33746   |
| P19468        | CNQIANELCEPELLGSGFR                                                        | 1.122792607        | 2               | 5.08468   |
| P19468        | DKNTSPFVETFPEDDEASK                                                        | 0.877733185        | 2               | 3.58982   |
| P19468        | NTPSPFVETFPEDDEASK                                                         | 1.056170684        | 2               | 4.22959   |
| P19468        | SLFFPDEAINK                                                                | 1.083219262        | 2               | 2.47759   |
| P19468        | SRYDSIDSYLSK                                                               | 0.933177355        | 2               | 2.92589   |
| P19468        | VQLLLNGGDVLETLEK                                                           | 1.221304015        | 2               | 4.99001   |
| P19468        | WGVISASVDDR                                                                | 1.116550686        | 2               | 3.06722   |
| <b>P19488</b> | <b>UDB37 UDP__glucuronosyltransferase 2B37</b>                             | <b>1.143000742</b> | <b>0.1296</b>   | <b>8</b>  |
| P19488        | AEMWLIR                                                                    | 1.1982088          | 2               | 2.89595   |
| P19488        | ANAIAWALAQIPQK                                                             | 1.16997522         | 3               | 6.59136   |
| P19488        | FETFPTSFSKDELEK                                                            | 1.016324379        | 2               | 4.03111   |
| P19488        | GAAVTLNIR                                                                  | 1.173120834        | 2               | 2.59784   |
| P19488        | GHEVTVLKPSAYVLDPK                                                          | 1.229285787        | 2               | 4.44325   |
| P19488        | NWDPFYTEILGRPTTAEATMGK                                                     | 0.99325708         | 2               | 5.31978   |
| P19488        | SDLFNALK                                                                   | 1.303190272        | 2               | 2.94599   |
| P19488        | TILDELVQR                                                                  | 1.015556973        | 2               | 3.53007   |
| <b>P19511</b> | <b>AT5F1 ATP synthase subunit b_ mitochondrial</b>                         | <b>1.084841558</b> | <b>0.000873</b> | <b>6</b>  |
| P19511        | HVIQSISAQKEK                                                               | 1.028687607        | 2               | 4.0016    |
| P19511        | HVIQSISAQKEKETIAK                                                          | 0.915726094        | 3               | 4.50184   |
| P19511        | HLYFDVQR                                                                   | 1.012387089        | 2               | 2.69566   |
| P19511        | LDYHISVQDMMR                                                               | 1.113892545        | 3               | 3.86915   |
| P19511        | LNEEKIAQLEEIK                                                              | 0.940251516        | 2               | 2.58547   |
| P19511        | YGASIGEFIDKLNEEK                                                           | 1.271812247        | 3               | 3.60071   |
| <b>P19643</b> | <b>AOFB Amine oxidase [flavin__containing] B</b>                           | <b>1.099992694</b> | <b>0.342321</b> | <b>13</b> |
| P19643        | FIGGSGQVSR                                                                 | 1.160041629        | 2               | 3.46307   |
| P19643        | IISTTNGGQER                                                                | 1.31090087         | 2               | 2.86233   |
| P19643        | IPEDIWQPEPESVDVPARPITNTFLER                                                | 0.8482076          | 3               | 4.80676   |
| P19643        | KFIGGSGQVSR                                                                | 0.775992746        | 2               | 3.2656    |
| P19643        | KLCELYAK                                                                   | 0.908925496        | 2               | 2.35028   |
| P19643        | LERPVIHIDQTGENVVVK                                                         | 1.128246078        | 3               | 5.53296   |

|               |                                                                                     |                    |                 |           |
|---------------|-------------------------------------------------------------------------------------|--------------------|-----------------|-----------|
| P19643        | LLHDCGLSVVLEAR                                                                      | 1.477873315        | 2               | 3.76398   |
| P19643        | TLNHEIYEAK                                                                          | 0.972338876        | 2               | 2.5507    |
| P19643        | TMDEMGEI PSDAPWK                                                                    | 0.824903005        | 2               | 4.5252    |
| P19643        | TYTIRNKNVK                                                                          | 0.835463171        | 2               | 2.41103   |
| P19643        | VLNSQEALQPVHYEEK                                                                    | 1.049601563        | 2               | 4.52995   |
| P19643        | YVDLGGSYVGP TQNR                                                                    | 1.163299899        | 2               | 5.03237   |
| P19643        | YVISAIPPVLGMK                                                                       | 1.086140649        | 1               | 2.85453   |
| <b>P19804</b> | <b>NDKB Nucleoside diphosphate kinase B</b>                                         | <b>1.143494327</b> | <b>1.11E-16</b> | <b>9</b>  |
| P19804        | DRPFFPGLVK                                                                          | 1.027310863        | 2               | 2.37981   |
| P19804        | EIGLWFKPEELIDYK                                                                     | 1.284569217        | 2               | 4.23384   |
| P19804        | GDFCIQVGR                                                                           | 1.179937908        | 2               | 3.28501   |
| P19804        | NIIHGSDSVESA EK                                                                     | 1.101136274        | 2               | 4.03956   |
| P19804        | NIIHGSDSVESA KEI GLWFKPEELIDYK                                                      | 1.323159403        | 4               | 5.65198   |
| P19804        | TFIAIKPDGVQR                                                                        | 1.136842214        | 2               | 2.98067   |
| P19804        | VMLGETNPADSKPGTIR                                                                   | 1.06228647         | 2               | 4.47067   |
| P19804        | VMLGETNPADSKPGTIR+Oxidation(2)                                                      | 1.236897673        | 2               | 4.25246   |
| P19804        | YMNSGPPVAMVWEGLNVVK                                                                 | 1.284064564        | 2               | 5.27287   |
| <b>P19944</b> | <b>RLA1 60S acidic ribosomal protein P1</b>                                         | <b>1.154816566</b> | <b>0.509037</b> | <b>2</b>  |
| P19944        | ALANVNI GLICNVGAGGPAPAAGA APAGGPAPSAAA PAEEK                                        | 1.069648081        | 4               | 5.80814   |
| P19944        | INALIK                                                                              | 1.156800712        | 2               | 2.42157   |
| <b>P19945</b> | <b>RLA0 60S acidic ribosomal protein P0</b>                                         | <b>1.143641611</b> | <b>9.9E-20</b>  | <b>9</b>  |
| P19945        | AFLADPSAFAAAA PVAAATTAAPAAAAA PAK                                                   | 1.387314855        | 2               | 5.89606   |
| P19945        | AGAIAPCEVTVPAQNTGLGPEK                                                              | 1.103240884        | 3               | 5.12157   |
| P19945        | CFIVGADNVGSK                                                                        | 1.192284868        | 2               | 3.65941   |
| P19945        | GHLENNPALEK                                                                         | 1.134318631        | 2               | 3.63395   |
| P19945        | GTIEILSDVQLIK                                                                       | 1.321976583        | 2               | 3.11062   |
| P19945        | IIQLLDY PK                                                                          | 1.948049738        | 2               | 3.46304   |
| P19945        | NVASVCLQIGYPTVASVPHSIINGYK                                                          | 1.123993165        | 3               | 3.64302   |
| P19945        | TSFFQALGITTK                                                                        | 1.316521204        | 2               | 4.03437   |
| P19945        | VLALSVDYTFPLAEK                                                                     | 1.411274888        | 2               | 4.49478   |
| <b>P20059</b> | <b>HEMO Hemopexin</b>                                                               | <b>1.176036986</b> | <b>0.998821</b> | <b>6</b>  |
| P20059        | ELGSPPGISLDTIDAAFSCPGSSK                                                            | 1.125900794        | 2               | 4.75245   |
| P20059        | FNPVTGEVPPR                                                                         | 1.054505166        | 2               | 2.551     |
| P20059        | GECQSEGLVFFQGNR                                                                     | 1.282998731        | 2               | 3.92552   |
| P20059        | LFQEEFPGIPYPPDAAVECHR                                                               | 1.138467416        | 3               | 4.46655   |
| P20059        | SGAQTWAELSWPHEK                                                                     | 0.896617153        | 2               | 3.41883   |
| P20059        | VDGALCLEK                                                                           | 1.124044677        | 2               | 2.43399   |
| <b>P20070</b> | <b>NB5R3 NADH_cytochrome b5 reductase 3</b>                                         | <b>1.005137631</b> | <b>0.999996</b> | <b>8</b>  |
| P20070        | DILLRPELEER                                                                         | 1.094490048        | 2               | 2.52696   |
| P20070        | IDGNLVIRPYTPVSSDDDKGFVDLVVK                                                         | 0.966046564        | 3               | 5.68783   |
| P20070        | LIDKEIISHDTR                                                                        | 1.035225784        | 3               | 3.7502    |
| P20070        | MSQYLENMNIGDTIEFR                                                                   | 0.983833229        | 2               | 5.30685   |
| P20070        | SSPAITLENPDIK                                                                       | 0.989005257        | 2               | 3.59606   |
| P20070        | SSPAITLENPDIKYPLR                                                                   | 0.896662747        | 2               | 3.96101   |
| P20070        | SVGMIAGGTGITPMLQVIR                                                                 | 0.963150433        | 2               | 4.63218   |
| P20070        | SVGMIAGGTGITPMLQVIR+Oxidation(14)                                                   | 1.070590633        | 2               | 2.32267   |
| <b>P20280</b> | <b>RL21 60S ribosomal protein L21</b>                                               | <b>1.286734925</b> | <b>2.22E-16</b> | <b>4</b>  |
| P20280        | HGVVPLATYMR                                                                         | 1.157898919        | 2               | 2.50099   |
| P20280        | KGDIVDIK                                                                            | 1.214001449        | 1               | 2.09018   |
| P20280        | TNGKEPELLEPIPYEFMA                                                                  | 0.935460387        | 2               | 3.42742   |
| P20280        | VYNTQHAVGIIVNK                                                                      | 1.28072883         | 2               | 4.1394    |
| <b>P20651</b> | <b>PP2BB Serine/threonine_protein phosphatase 2B catalytic subunit beta isoform</b> | <b>1.33626745</b>  | <b>0.180169</b> | <b>2</b>  |
| P20651        | GLTPTGMLPSGVLGGR                                                                    | 1.296749136        | 2               | 2.42514   |
| P20651        | VVKAVFPPTH R                                                                        | 2.030781692        | 1               | 1.95371   |
| <b>P20673</b> | <b>ARLY Argininosuccinate lyase</b>                                                 | <b>0.989245698</b> | <b>5.84E-05</b> | <b>16</b> |

|               |                                                                  |                    |                 |           |
|---------------|------------------------------------------------------------------|--------------------|-----------------|-----------|
| P20673        | AEAECEVLFPGYTHLQR                                                | 1.11071097         | 2               | 4.16232   |
| P20673        | AEMQQILQGLDK                                                     | 0.879721758        | 2               | 4.46989   |
| P20673        | EFNFVQLSDAYSTGSSLMPPQK                                           | 1.203821139        | 2               | 5.13317   |
| P20673        | FNSSIAYDR                                                        | 0.773240277        | 2               | 2.43725   |
| P20673        | HLWNVDLQGSK                                                      | 0.847953177        | 1               | 3.37502   |
| P20673        | INVPLPGSGAIGNPLGVDR                                              | 0.819741804        | 2               | 5.65649   |
| P20673        | KNPDSLELIR                                                       | 1.069781446        | 2               | 2.38016   |
| P20673        | LKELIGEAAAGK                                                     | 0.930816974        | 2               | 3.19137   |
| P20673        | LYPNDEDIHTANER                                                   | 0.844798088        | 2               | 3.87367   |
| P20673        | MAEDLILYGTK                                                      | 1.054171585        | 2               | 3.94538   |
| P20673        | MAEDLILYGTK+Oxidation(1)                                         | 1.064324012        | 2               | 2.36843   |
| P20673        | NDQVVVDLR                                                        | 0.956999613        | 2               | 3.14768   |
| P20673        | SRNDQVVVDLR                                                      | 1.131742778        | 2               | 3.06093   |
| P20673        | VAAEWAQGIK                                                       | 1.023430296        | 2               | 3.44797   |
| P20673        | VLIEAMVDR                                                        | 1.018873152        | 2               | 2.59114   |
| P20673        | VLIEAMVDRAEAECEVLFPGYTHLQR                                       | 1.164426333        | 3               | 4.70819   |
| <b>P20788</b> | <b>UCRI Cytochrome b_c1 complex subunit Rieske_mitochondrial</b> | <b>0.955091401</b> | <b>0.097037</b> | <b>5</b>  |
| P20788        | EIDQEAAVEVSQLR                                                   | 1.148066265        | 2               | 3.54303   |
| P20788        | EIDQEAAVEVSQLRDPQHDLR                                            | 1.094464396        | 3               | 3.43463   |
| P20788        | ESLSGQAATRPLVATVGLNVPASVR                                        | 0.606539451        | 2               | 2.77134   |
| P20788        | GVAGALRPLLSAVPATSEPPVLDVK                                        | 1.095242686        | 3               | 5.11257   |
| P20788        | SGPFAPVLSATSR                                                    | 0.955487866        | 2               | 2.87932   |
| <b>P20801</b> | <b>TNNC2 Troponin C_skeletal muscle</b>                          | <b>1.419111959</b> | <b>0.678844</b> | <b>3</b>  |
| P20801        | GKSEELAECFR                                                      | 1.702841009        | 2               | 3.39104   |
| P20801        | NADGYIDAEELAEIFR                                                 | 1.705748415        | 2               | 4.78359   |
| P20801        | SEELAECFR                                                        | 0.983922524        | 2               | 3.26345   |
| <b>P20812</b> | <b>CP2A3 Cytochrome P450 2A3</b>                                 | <b>0.891924835</b> | <b>0.085464</b> | <b>2</b>  |
| P20812        | ELQGLEDFITKKVEQNQR                                               | 1.441370307        | 2               | 2.47118   |
| P20812        | YGPVFTIHLGPR                                                     | 0.883419027        | 2               | 3.04289   |
| <b>P20814</b> | <b>CP2CD Cytochrome P450 2C13_male_specific</b>                  | <b>1.083679247</b> | <b>0.948663</b> | <b>3</b>  |
| P20814        | FDYEDKDFLNLIK                                                    | 1.172678656        | 2               | 2.32459   |
| P20814        | GTAVLTSLSVLHDSK                                                  | 1.009600166        | 2               | 3.26994   |
| P20814        | IKEHEESLDVSNPR                                                   | 1.07966042         | 3               | 3.59262   |
| <b>P20817</b> | <b>CP4AE Cytochrome P450 4A14</b>                                | <b>0.958141312</b> | <b>0.76382</b>  | <b>6</b>  |
| P20817        | ACQIAHEHTDGVIK                                                   | 0.717813246        | 2               | 4.26543   |
| P20817        | AQLQNEEELQK                                                      | 0.797283791        | 2               | 3.31386   |
| P20817        | AVEDLNNTFFR                                                      | 0.968438786        | 2               | 3.60823   |
| P20817        | HLDLFDILLFAK                                                     | 1.446816876        | 2               | 4.20902   |
| P20817        | MRKAQLQNEEELQK+Oxidation(1)                                      | 1.212702438        | 2               | 3.08846   |
| P20817        | VLLYDPDYVK                                                       | 0.843909952        | 2               | 2.52886   |
| <b>P20852</b> | <b>CP2A5 Cytochrome P450 2A5</b>                                 | <b>1.165906787</b> | <b>0.043113</b> | <b>2</b>  |
| P20852        | DFIDSFLIR                                                        | 1.289461043        | 2               | 2.94004   |
| P20852        | EALVDQAEFFSGR                                                    | 1.165618056        | 2               | 2.86856   |
| <b>P21213</b> | <b>HUTH Histidine ammonia_lyase</b>                              | <b>1.156803189</b> | <b>0.151618</b> | <b>15</b> |
| P21213        | ALDYLAIGVHELAAISER                                               | 1.470763187        | 2               | 4.52009   |
| P21213        | DIITTELNSATDNPMVFASR                                             | 1.706014123        | 2               | 4.47528   |
| P21213        | EGLALINGTQMITSLGCEAVER                                           | 1.185114612        | 2               | 3.2451    |
| P21213        | GETISGGNFHGEYPAK                                                 | 0.795125973        | 2               | 4.02725   |
| P21213        | GEWLAVPCQDGK                                                     | 1.122409082        | 2               | 3.04414   |
| P21213        | GYSGISLETLK                                                      | 1.003267357        | 2               | 2.35629   |
| P21213        | LQELQVNLVR                                                       | 1.114895279        | 2               | 3.27976   |
| P21213        | NKPDNGGFTSVDEV                                                   | 1.075827473        | 2               | 3.70955   |
| P21213        | NSATIPESDDL                                                      | 0.961520371        | 1               | 1.96156   |
| P21213        | SHSSGVGKPLSPER                                                   | 1.074546036        | 2               | 4.06823   |
| P21213        | SLLDSDHHPSEIAESHR                                                | 0.96034423         | 3               | 4.60831   |
| P21213        | TVVYGITTFGK                                                      | 1.026232224        | 2               | 3.62126   |

|               |                                                                                    |                    |                 |           |
|---------------|------------------------------------------------------------------------------------|--------------------|-----------------|-----------|
| P21213        | VQDAYTLR                                                                           | 0.796691645        | 2               | 2.57219   |
| P21213        | VWEVAAPYIEK                                                                        | 1.016642074        | 2               | 2.58399   |
| P21213        | YIALDGDLSLSTEDLVNLGK                                                               | 0.951558605        | 2               | 5.30282   |
| <b>P21396</b> | <b>AOFA Amine oxidase [flavin_containing] A</b>                                    | <b>0.980947238</b> | <b>0.992073</b> | <b>10</b> |
| P21396        | DVPAIEIHTFLER                                                                      | 1.072477957        | 2               | 3.57749   |
| P21396        | FVGGSGQVSEQIMGLLGDK                                                                | 1.059410067        | 2               | 3.11795   |
| P21396        | IFSVTNGGQER                                                                        | 1.144991928        | 2               | 2.48631   |
| P21396        | INVLVLEAR                                                                          | 1.205756224        | 2               | 3.1376    |
| P21396        | KDIWVEEPESK                                                                        | 0.989589606        | 2               | 3.85962   |
| P21396        | KICELYAK                                                                           | 0.908925496        | 2               | 2.35028   |
| P21396        | NLPSVPGLLK                                                                         | 0.901139677        | 1               | 1.92531   |
| P21396        | VLGSQEALYPVHYEEK                                                                   | 0.951875128        | 2               | 3.6092    |
| P21396        | WVDVGGAYVGPQNR                                                                     | 1.091476099        | 2               | 4.34358   |
| P21396        | YVISAIPPILTAK                                                                      | 1.138353744        | 2               | 3.12156   |
| <b>P21531</b> | <b>RL3 60S ribosomal protein L3</b>                                                | <b>1.17989249</b>  | <b>0.974419</b> | <b>8</b>  |
| P21531        | AHLMEIQVNGGTVAEK                                                                   | 1.053158613        | 2               | 5.25109   |
| P21531        | ERLEQQVPVNQVFGQDEMIDVIGVTK                                                         | 0.859674269        | 3               | 5.40651   |
| P21531        | FIDTTSK                                                                            | 1.023517518        | 1               | 2.02766   |
| P21531        | HGSLGFLPR                                                                          | 1.013945343        | 2               | 3.0335    |
| P21531        | LEQQVPVNQVFGQDEMIDVIGVTK                                                           | 1.051343097        | 2               | 5.0679    |
| P21531        | NNASTDYDLSDK                                                                       | 1.186167019        | 2               | 3.37726   |
| P21531        | SINPLGGFVHYGEVTNDFIMLK                                                             | 1.157508641        | 3               | 3.38349   |
| P21531        | TVFAEHISDECK                                                                       | 1.053156201        | 2               | 3.78217   |
| <b>P21533</b> | <b>RL6 60S ribosomal protein L6</b>                                                | <b>0.943490133</b> | <b>5.14E-11</b> | <b>9</b>  |
| P21533        | AVDSQILPK                                                                          | 1.140563083        | 2               | 2.46888   |
| P21533        | FVIATSTK                                                                           | 1.304568336        | 1               | 2.22689   |
| P21533        | HLTDAYFK                                                                           | 1.077346345        | 2               | 2.38372   |
| P21533        | HQEGEIFDTEK                                                                        | 0.922881795        | 2               | 3.29647   |
| P21533        | HQEGEIFDTEKEK                                                                      | 1.005613474        | 2               | 4.12737   |
| P21533        | HQEGEIFDTEKEKYEITEQR                                                               | 0.981382906        | 3               | 4.7345    |
| P21533        | QLGSGLLLVTPALALNR                                                                  | 1.548806319        | 2               | 5.17467   |
| P21533        | SSITPGTVLIILTGR                                                                    | 1.262210959        | 2               | 4.20423   |
| P21533        | YYPTEDVPR                                                                          | 1.110278998        | 1               | 1.9665    |
| <b>P21571</b> | <b>ATP5J ATP synthase_coupling factor 6_mitochondrial</b>                          | <b>1.116110889</b> | <b>9.9E-20</b>  | <b>5</b>  |
| P21571        | FEVLDPKQS                                                                          | 0.794876536        | 1               | 2.00869   |
| P21571        | GEMDKFPTFNFDPK                                                                     | 1.063860032        | 3               | 3.48659   |
| P21571        | GEMDKFPTFNFDPKFEVLDPKQS                                                            | 1.026206034        | 3               | 3.96893   |
| P21571        | LASGGPVDTGPEYQQEVDR                                                                | 1.603719617        | 2               | 5.28884   |
| P21571        | LASGGPVDTGPEYQQEVDRLEFK                                                            | 2.027274844        | 3               | 3.44619   |
| <b>P21643</b> | <b>T230 Tryptophan 2_3_dioxygenase</b>                                             | <b>1.422917812</b> | <b>0.848326</b> | <b>2</b>  |
| P21643        | YNHVCMVHRMLGSK+Oxidation(10)                                                       | 1.422917812        | 2               | 2.46292   |
| P21643        | YNHVCMVHRMLGSK+Oxidation(6)                                                        | 1.422917812        | 2               | 2.30255   |
| <b>P21670</b> | <b>PSA4 Proteasome subunit alpha type_4</b>                                        | <b>1.694021412</b> | <b>1.97E-05</b> | <b>4</b>  |
| P21670        | ATCIGNNSAAAVSMLK                                                                   | 1.487513005        | 2               | 3.31096   |
| P21670        | LLDEVFFSEK                                                                         | 1.696451849        | 2               | 3.1237    |
| P21670        | LNEDMACSVAGITSDANVLTNELR                                                           | 1.804898133        | 2               | 5.07701   |
| P21670        | YLLQYQEPICEQLVTALCDIK                                                              | 1.074725883        | 2               | 4.04111   |
| <b>P21775</b> | <b>THIKA 3_ketoacyl_CoA thiolase A_peroxisomal</b>                                 | <b>1.092137857</b> | <b>1</b>        | <b>2</b>  |
| P21775        | LKPECLGDISVGNVLEPGAGAVMAR                                                          | 1.022335699        | 3               | 5.45812   |
| P21775        | LKPECLGDISVGNVLEPGAGAVMAR+Oxidation(23)                                            | 0.990387058        | 3               | 4.44981   |
| <b>P21913</b> | <b>DHSB Succinate dehydrogenase [ubiquinone] iron_sulfur subunit_mitochondrial</b> | <b>1.09457821</b>  | <b>0.6504</b>   | <b>5</b>  |
| P21913        | CGPMVLDALIK                                                                        | 1.140059174        | 2               | 2.72806   |
| P21913        | CGPMVLDALIKIK                                                                      | 1.068527098        | 2               | 2.44257   |
| P21913        | CHTIMNCTQTCPK                                                                      | 0.90650171         | 2               | 3.99482   |
| P21913        | IKNEIDSTLTFR                                                                       | 1.250383766        | 2               | 3.4166    |

|               |                                                               |                    |                 |           |
|---------------|---------------------------------------------------------------|--------------------|-----------------|-----------|
| P21913        | RIDTDLGK                                                      | 1.140393435        | 2               | 2.56856   |
| <b>P21981</b> | <b>TGM2 Protein_glutamine gamma_glutamyltransferase 2</b>     | <b>0.931376213</b> | <b>0.999774</b> | <b>5</b>  |
| P21981        | CDLEIQANGR                                                    | 0.953415876        | 2               | 2.92094   |
| P21981        | DHHTADLCQEK                                                   | 0.608853303        | 2               | 2.84356   |
| P21981        | SEGTYCCGPVSVR                                                 | 0.919707599        | 2               | 3.71942   |
| P21981        | VDLFPTDIGLHK                                                  | 0.996917681        | 2               | 2.73094   |
| P21981        | YSGCLTESNLK                                                   | 0.948667759        | 2               | 2.69664   |
| <b>P22734</b> | <b>COMT Catechol O_methyltransferase</b>                      | <b>1.395167636</b> | <b>0.001012</b> | <b>12</b> |
| P22734        | AIYQGPSSPKS                                                   | 1.115666365        | 2               | 3.35011   |
| P22734        | EWAMNVGDAK                                                    | 0.883856845        | 1               | 2.50438   |
| P22734        | GQIMDAVIR                                                     | 1.00759069         | 2               | 3.37809   |
| P22734        | GSSSFECTHYSSYLEYMK                                            | 24.48319211        | 2               | 4.33118   |
| P22734        | GTVLLADNVIVPGTPDFLAYVR                                        | 1.647130554        | 3               | 5.05449   |
| P22734        | KGTVLLADNVIVPGTPDFLAYVR                                       | 1.405702981        | 2               | 4.54399   |
| P22734        | KYDVDTLDMVFLDHWK                                              | 1.456110063        | 2               | 4.99781   |
| P22734        | LLTMMEMNPDYAAITQQMLNFAGLQDK                                   | 1.667496939        | 3               | 3.86768   |
| P22734        | VTILNGASQDLIPQLK                                              | 1.025630721        | 2               | 4.41672   |
| P22734        | YDVDTLDMVFLDHWK                                               | 1.946737641        | 2               | 4.05515   |
| P22734        | YLPDTLLLEK                                                    | 1.073074564        | 2               | 3.09454   |
| P22734        | YVQQNAKPGDPQSVLEAIDTYCTQK                                     | 1.2198883          | 3               | 6.63069   |
| <b>P22789</b> | <b>ST2A2 Alcohol sulfotransferase A</b>                       | <b>2.09529096</b>  | <b>0.293592</b> | <b>4</b>  |
| P22789        | ETLQNVCK                                                      | 2.266819324        | 2               | 2.34416   |
| P22789        | KLEPDELVLK                                                    | 1.429578611        | 2               | 3.72884   |
| P22789        | LEPDELVLK                                                     | 1.831123085        | 2               | 2.33869   |
| P22789        | NHFTVAQAEAFDK                                                 | 2.05150087         | 2               | 3.39492   |
| <b>P22791</b> | <b>HMCS2 Hydroxymethylglutaryl_CoA synthase_mitochondrial</b> | <b>1.047633384</b> | <b>9.9E-20</b>  | <b>23</b> |
| P22791        | ASLDMFNK                                                      | 0.96037337         | 2               | 2.75229   |
| P22791        | ASLDMFNKK                                                     | 0.974135643        | 2               | 2.93101   |
| P22791        | DVGILALEVYFPAQYVDQTDLEK                                       | 1.270209185        | 3               | 6.24635   |
| P22791        | GLKLEETYTNK                                                   | 1.386180517        | 2               | 2.76196   |
| P22791        | GTHMENAYDFYKPNLASEYPLVDGK                                     | 0.922911922        | 3               | 6.92935   |
| P22791        | GTHMENAYDFYKPNLASEYPLVDGK+Oxidation(4)                        | 0.965277187        | 3               | 5.63186   |
| P22791        | IGAFSYGSLAASFSSFR                                             | 1.260767776        | 2               | 4.38738   |
| P22791        | LEETYTNK                                                      | 1.008989683        | 2               | 3.40885   |
| P22791        | LEETYTNKDVDK                                                  | 1.048710056        | 2               | 4.27428   |
| P22791        | LEVGTETIIDK                                                   | 0.972460773        | 2               | 3.80029   |
| P22791        | LMFNDFLSSSSDK                                                 | 1.776146697        | 2               | 3.79475   |
| P22791        | LMFNDFLSSSSDK+Oxidation(2)                                    | 1.858885441        | 2               | 4.06644   |
| P22791        | LMFNDFLSSSSDKQNNLYK                                           | 1.573219506        | 2               | 4.73257   |
| P22791        | LSIQCYLR                                                      | 1.831071645        | 2               | 2.45497   |
| P22791        | LVSSVSDLPK                                                    | 1.268226923        | 2               | 3.71169   |
| P22791        | MGFCSVQEDINSLCLTVVQR                                          | 1.224923027        | 2               | 4.26833   |
| P22791        | MSPEEFTEIMNQR                                                 | 0.998095127        | 2               | 4.77399   |
| P22791        | MSPEEFTEIMNQR+Oxidation(1)                                    | 1.052092728        | 2               | 3.8493    |
| P22791        | MSPEEFTEIMNQR+Oxidation(10)                                   | 1.184768163        | 2               | 3.52905   |
| P22791        | TDTWPK                                                        | 0.94595402         | 1               | 1.92958   |
| P22791        | TKLPWDAVGR                                                    | 1.003838177        | 3               | 4.03189   |
| P22791        | VNFSPPGDTSNLFPGTWYLER                                         | 1.376969799        | 2               | 4.87764   |
| P22791        | YTVGLGQTR                                                     | 1.001631002        | 2               | 3.41611   |
| <b>P22985</b> | <b>XDH Xanthine dehydrogenase/oxidase</b>                     | <b>1.182040384</b> | <b>0.905345</b> | <b>9</b>  |
| P22985        | DEVTCVGHIIGAVVADTPEHAQR                                       | 0.883256889        | 3               | 4.50747   |
| P22985        | DPPANVQLFQEVPK                                                | 1.070427599        | 2               | 3.6626    |
| P22985        | LDPTFASATLLFQK                                                | 1.341998531        | 2               | 3.79352   |
| P22985        | NQPEPTVEEIIENAFQGNLCR                                         | 1.044538964        | 2               | 4.85716   |
| P22985        | QLFQLDSPATPEK                                                 | 1.182417688        | 2               | 3.22698   |

|               |                                                       |                    |                 |          |
|---------------|-------------------------------------------------------|--------------------|-----------------|----------|
| P22985        | SVASIGGNIITASPIDLNPVFMASGAK                           | 1.07024561         | 3               | 5.89271  |
| P22985        | TGTVVALEVAHFSNGGNTEDLSR                               | 1.169213926        | 3               | 4.83397  |
| P22985        | TLLRPEEILLSIEIPYSK                                    | 1.090142162        | 2               | 2.7273   |
| P22985        | TNLPSENTAFR                                           | 1.182876452        | 1               | 2.18131  |
| <b>P23358</b> | <b>RL12 60S ribosomal protein L12</b>                 | <b>1.11625442</b>  | <b>1.43E-06</b> | <b>5</b> |
| P23358        | CTGGEV GATSALAPK                                      | 1.332706306        | 2               | 4.30365  |
| P23358        | EILGTAQSVGCNVDGR                                      | 0.98964304         | 2               | 4.31234  |
| P23358        | HNGNITFDEIVNIAR                                       | 1.099364586        | 2               | 3.9444   |
| P23358        | HPHDIIDINS GAVECPAS                                   | 1.325580824        | 2               | 4.50222  |
| P23358        | QAQIEV VPSASALIHK                                     | 1.410551595        | 2               | 3.61733  |
| <b>P23457</b> | <b>DIDH 3_alpha_hydroxysteroid dehydrogenase</b>      | <b>1.284407255</b> | <b>9.9E-20</b>  | <b>9</b> |
| P23457        | ELTQVFEFQLASEDMK                                      | 1.538880918        | 2               | 4.59379  |
| P23457        | HFDSAYLYVEVEEVGQAIR                                   | 3.382759607        | 2               | 6.11295  |
| P23457        | LLFETVDICDTWEAMEK                                     | 2.116501079        | 2               | 4.61392  |
| P23457        | MLDYCK                                                | 1.384950269        | 1               | 1.98556  |
| P23457        | SIGVSNFNCR                                            | 1.243291523        | 2               | 3.18867  |
| P23457        | SKDIILVSYCTLGSSR                                      | 2.886608331        | 2               | 4.45343  |
| P23457        | VALNDGNFIPVLGFGTTVPEK                                 | 1.596463437        | 2               | 4.725    |
| P23457        | YFDDHPNH PFTDE                                        | 1.76946568         | 2               | 3.73255  |
| P23457        | YKPVCNQVECHLYLNQSK                                    | 2.127994833        | 2               | 4.6328   |
| <b>P23514</b> | <b>COPB Coatomer subunit beta</b>                     | <b>1.214993651</b> | <b>0.004836</b> | <b>6</b> |
| P23514        | EAGELKPEEEITVGPVQK                                    | 1.258063353        | 2               | 3.673    |
| P23514        | NFENLIPDAPELIHDFLVNEK                                 | 1.226963196        | 3               | 4.22673  |
| P23514        | TNNVSEHEDTDKYR                                        | 1.011098946        | 2               | 4.59897  |
| P23514        | VLQDLVMDILR                                           | 1.128730038        | 2               | 3.20704  |
| P23514        | VLSECSPLMNDIFNK                                       | 1.356721508        | 2               | 2.60931  |
| P23514        | YEAAGTLVTLSSAPTAIK                                    | 1.295638873        | 2               | 4.52289  |
| <b>P23965</b> | <b>EC11 Enoyl_CoA delta isomerase 1_mitochondrial</b> | <b>0.892428238</b> | <b>1.8E-08</b>  | <b>8</b> |
| P23965        | ALQLGTLFPPAEALK                                       | 0.902825449        | 2               | 5.43687  |
| P23965        | ATADNLK                                               | 0.961229792        | 2               | 2.68971  |
| P23965        | DNYVNTIGHR                                            | 0.983769248        | 2               | 2.78456  |
| P23965        | GVILTSE RPIFSAGLDLMEMYGR                              | 1.059282687        | 3               | 5.42028  |
| P23965        | QREADIQNFTSFISR                                       | 1.163941938        | 2               | 2.91376  |
| P23965        | SLHVYLEK                                              | 1.047082488        | 2               | 2.37051  |
| P23965        | VGLVDEVVPEDQVHSK                                      | 0.782213231        | 2               | 4.8818   |
| P23965        | WFTIPDHSR                                             | 0.730920528        | 2               | 2.633    |
| <b>P24049</b> | <b>RL17 60S ribosomal protein L17</b>                 | <b>1.072515731</b> | <b>0.555138</b> | <b>3</b> |
| P24049        | EQIVPKPEEEVAQK                                        | 1.099919969        | 2               | 3.79196  |
| P24049        | GLDVDSLVIHQV NK                                       | 1.062097819        | 2               | 4.90415  |
| P24049        | YSLDPENPTK                                            | 0.931729322        | 1               | 2.73885  |
| <b>P24050</b> | <b>RS5 40S ribosomal protein S5</b>                   | <b>1.38614635</b>  | <b>0.016379</b> | <b>2</b> |
| P24050        | VNQAIWLLCTGAR                                         | 1.375227547        | 2               | 2.90943  |
| P24050        | WSTDDVQINDISLQDYIAVK                                  | 1.379502585        | 2               | 4.33325  |
| <b>P24063</b> | <b>ITAL Integrin alpha_L</b>                          | <b>1.076957739</b> | <b>0.654213</b> | <b>2</b> |
| P24063        | ASEAQVLVKVDLIHEK                                      | 1.054721549        | 2               | 2.32082  |
| P24063        | DFEKILEFMK                                            | 1.086853823        | 3               | 3.68148  |
| <b>P24090</b> | <b>FETUA Alpha_2_HS glycoprotein</b>                  | <b>1.027995718</b> | <b>0.159215</b> | <b>5</b> |
| P24090        | ELACDDPETEHVALIADV LNK                                | 1.840592918        | 3               | 4.16775  |
| P24090        | HAFSPVASVESASGEVLHSPK                                 | 1.12569042         | 3               | 5.92042  |
| P24090        | LGGEVSVACK                                            | 1.007606251        | 2               | 3.4567   |
| P24090        | VGQPGDAGAAAGPVAPLCPGR                                 | 1.073042381        | 2               | 5.1261   |
| P24090        | VLHAQCHSTPDSAEDVRK                                    | 1.09377059         | 3               | 3.74913  |
| <b>P24268</b> | <b>CATD Cathepsin D</b>                               | <b>1.149261761</b> | <b>0.002107</b> | <b>4</b> |
| P24268        | AIGAVPLIQGEYMIPCEK                                    | 1.265394325        | 2               | 3.36531  |
| P24268        | DPTGQPGGELMLGGTDSR                                    | 1.143726158        | 2               | 4.5752   |
| P24268        | GGCEAIVDTGTSLLVGPVDEVK                                | 1.117966064        | 2               | 3.22386  |
| P24268        | LGGQNYELHPEK                                          | 1.812755383        | 2               | 2.47498  |

|               |                                                   |                    |                 |           |
|---------------|---------------------------------------------------|--------------------|-----------------|-----------|
| <b>P24329</b> | <b>THTR Thiosulfate sulfurtransferase</b>         | <b>1.043411644</b> | <b>0.999993</b> | <b>11</b> |
| P24329        | EGHPVTSEPSRPEPAVK                                 | 0.925043531        | 2               | 4.87168   |
| P24329        | FQLVDSR                                           | 1.030275106        | 2               | 2.30478   |
| P24329        | GSVNVPFMNFLETEDGF EK                              | 3.025992261        | 2               | 3.49929   |
| P24329        | HVPGASFFDIEECR                                    | 1.095526061        | 2               | 4.05663   |
| P24329        | KVDLSQPLIATCR                                     | 1.070982939        | 2               | 4.63171   |
| P24329        | RFQLVDSR                                          | 0.995612524        | 2               | 2.33597   |
| P24329        | TVSVLNGGFR                                        | 0.986787003        | 2               | 3.10426   |
| P24329        | TYEQVLENLQSK                                      | 0.992351177        | 2               | 4.99873   |
| P24329        | VDLSQPLIATCR                                      | 1.06019654         | 2               | 4.00229   |
| P24329        | VLDASWYSPGTR                                      | 1.071444331        | 2               | 3.77804   |
| P24329        | YLGTOPEPDAVGLDSGHIR                               | 1.031344893        | 2               | 4.75607   |
| <b>P24368</b> | <b>PPIB Peptidyl prolyl cis_trans isomerase B</b> | <b>1.077174071</b> | <b>0.702405</b> | <b>9</b>  |
| P24368        | DKPLKDVIIVDCGK                                    | 1.101465957        | 2               | 3.90701   |
| P24368        | DTNGSQFFITTVK                                     | 1.145872567        | 2               | 3.90366   |
| P24368        | DVIIVDCGK                                         | 1.025126159        | 1               | 1.94534   |
| P24368        | HYGPGWVSMANAGK                                    | 0.822498659        | 2               | 3.98903   |
| P24368        | IEVEKPFAIAK                                       | 1.08186435         | 2               | 3.209     |
| P24368        | IEVEKPFAIAKE                                      | 1.157522231        | 2               | 3.53175   |
| P24368        | TVDNFVALATGEK                                     | 1.185783963        | 2               | 3.36154   |
| P24368        | VLEGMDVVR                                         | 1.131614878        | 2               | 2.9106    |
| P24368        | VYFDFQIGDEPVGR                                    | 1.127625293        | 2               | 3.96812   |
| <b>P24457</b> | <b>CP2DB Cytochrome P450 2D11</b>                 | <b>0.969260374</b> | <b>0.911197</b> | <b>2</b>  |
| P24457        | RFSVSTLR                                          | 1.203750813        | 2               | 2.55274   |
| P24457        | SLEEVVTK                                          | 0.966268811        | 2               | 2.43729   |
| <b>P24470</b> | <b>CP2CN Cytochrome P450 2C23</b>                 | <b>1.059556939</b> | <b>0.000281</b> | <b>11</b> |
| P24470        | ACVGESLAR                                         | 1.078108985        | 2               | 2.4564    |
| P24470        | DLDIKPITGIIINLPPPYK                               | 1.02615065         | 3               | 4.33192   |
| P24470        | EALLQQGDEFLLGR                                    | 1.042408135        | 2               | 2.46663   |
| P24470        | FGLLLLMK                                          | 1.346038025        | 2               | 3.15316   |
| P24470        | GTTVLPMLSSVMLDQK                                  | 0.906300807        | 2               | 3.8417    |
| P24470        | GYGLIFSNGER                                       | 1.041051474        | 2               | 3.52636   |
| P24470        | IEEEKDNLK                                         | 1.054451953        | 2               | 2.81746   |
| P24470        | LPPGPTPLPIIGNLLQLNLK                              | 1.164853546        | 2               | 4.21538   |
| P24470        | SEFHLENLAVCGSNLFTAGTETTSTTLR                      | 0.907842           | 3               | 4.28827   |
| P24470        | TFLNLMDLLNK                                       | 1.145714852        | 2               | 3.80478   |
| P24470        | YITLLPSSLPHAVVQDTK                                | 0.680916852        | 2               | 3.94427   |
| <b>P24473</b> | <b>GSTK1 Glutathione S_transferase kappa 1</b>    | <b>0.884673846</b> | <b>1.13E-11</b> | <b>8</b>  |
| P24473        | AGMATAQAQHLLNK                                    | 0.79881956         | 2               | 4.15159   |
| P24473        | DEDITESQNILSAAEK                                  | 0.867590876        | 2               | 5.0969    |
| P24473        | DSGNQPPAMVPHK                                     | 0.859174678        | 2               | 2.60118   |
| P24473        | FLTAVSMEQPEMLEK                                   | 0.851313115        | 2               | 5.05287   |
| P24473        | IWSRDEDITESQNILSAAEK                              | 1.123443493        | 3               | 3.69667   |
| P24473        | MELLAYLLGEK                                       | 1.523814547        | 2               | 3.98391   |
| P24473        | QLFQVPMSVPK                                       | 0.832968478        | 2               | 2.66434   |
| P24473        | YGAFGLPTTVAHVDGK                                  | 1.092910878        | 2               | 3.90811   |
| <b>P25093</b> | <b>FAAA Fumarylacetoacetase</b>                   | <b>1.118760554</b> | <b>3.27E-10</b> | <b>15</b> |
| P25093        | AIDVGQGQTR                                        | 1.041175805        | 2               | 3.3942    |
| P25093        | AQEHIFGMVLMNDWSAR                                 | 1.185888178        | 2               | 3.62967   |
| P25093        | ASLQNLLSASQAQLR                                   | 1.011435113        | 2               | 4.88337   |
| P25093        | ASLQNLLSASQAQLRDDK                                | 1.066504278        | 2               | 3.94544   |
| P25093        | ASSVVVSGTPIR                                      | 1.063658594        | 2               | 3.66929   |
| P25093        | DIQQWEYVPLGPFLGK                                  | 0.96856476         | 2               | 4.59629   |
| P25093        | FGPEPIISK                                         | 0.971461654        | 2               | 2.82064   |
| P25093        | GEGMSQAATICR                                      | 1.069995136        | 2               | 3.64031   |
| P25093        | GEGMSQAATICR+Oxidation(4)                         | 1.687545155        | 2               | 3.11484   |
| P25093        | GKENALLPNWLHLPVGYHGR                              | 1.505174827        | 3               | 4.55268   |



|               |                                                                                      |                    |                 |           |
|---------------|--------------------------------------------------------------------------------------|--------------------|-----------------|-----------|
| P25093        | HLFTGPVLSK                                                                           | 1.006841861        | 1               | 2.76545   |
| P25093        | HQHVFDETTLNSFMGLGQAAWK                                                               | 1.251357641        | 2               | 5.36989   |
| P25093        | IGVAIGDQILDLSVIK                                                                     | 1.723321103        | 2               | 5.24051   |
| P25093        | TFLLDGDEVIITGHCCQGDGYR                                                               | 1.036209392        | 2               | 5.22349   |
| P25093        | VGFGQCAGK                                                                            | 1.143053479        | 2               | 2.715     |
| <b>P25113</b> | <b>PGAM1 Phosphoglycerate mutase 1</b>                                               | <b>1.11217112</b>  | <b>0.365367</b> | <b>7</b>  |
| P25113        | ALPFWNEEIVPQIK                                                                       | 1.539732219        | 2               | 3.50454   |
| P25113        | FSGWYDADLSPAGHEEAK                                                                   | 1.0254575          | 2               | 5.05019   |
| P25113        | HGESAWNLENR                                                                          | 1.077083318        | 2               | 4.10778   |
| P25113        | HLEGLSEEAIMELNLPTGIPIVYELDK                                                          | 1.257728226        | 3               | 4.06496   |
| P25113        | SYDVPPPPMEPDHPFYSNISK                                                                | 1.097061041        | 2               | 4.43328   |
| P25113        | YADLTEDQLPSCESLK                                                                     | 1.069501979        | 2               | 5.59835   |
| P25113        | YADLTEDQLPSCESLKD TIAR                                                               | 1.138651932        | 2               | 5.37597   |
| <b>P25235</b> | <b>RPN2 Dolichyl_diphosphooligosaccharide__protein glycosyltransferase subunit 2</b> | <b>1.238428235</b> | <b>9.9E-20</b>  | <b>13</b> |
| P25235        | EDQVIQLMNTIFSK                                                                       | 1.076124184        | 2               | 3.43398   |
| P25235        | EETVLATVQALHTASHLSQQADLR                                                             | 1.181757553        | 3               | 4.82969   |
| P25235        | FPEEEAPSTVLSQNLFTPK                                                                  | 0.975265313        | 2               | 4.20804   |
| P25235        | ISTEVGITNVDLSTVDKQSIAPK                                                              | 1.205589996        | 2               | 4.76077   |
| P25235        | KNFESLSEAFSVASAAAALSQNR                                                              | 1.18322229         | 2               | 5.5998    |
| P25235        | LMDHVGTEPSIKEDQVIQLMNTIFSK                                                           | 1.298674313        | 3               | 4.44065   |
| P25235        | LQVSSVLSQPLAQAAVK                                                                    | 1.326186515        | 2               | 5.72862   |
| P25235        | LSKEETVLATVQALHTASHLSQQADLR                                                          | 1.473048431        | 3               | 5.58885   |
| P25235        | NFESLSEAFSVASAAAALSQNR                                                               | 1.086247906        | 2               | 3.12973   |
| P25235        | NIVEEIEDLVAR                                                                         | 1.260430729        | 3               | 4.3255    |
| P25235        | TGQEVVFAEPDNK                                                                        | 2.376220175        | 2               | 3.85896   |
| P25235        | YHVPVVVPEGSASDTQEQAIRL                                                               | 1.233020803        | 3               | 5.76707   |
| P25235        | YIANTVELR                                                                            | 1.149635498        | 2               | 2.65824   |
| <b>P25318</b> | <b>CO8A2 Collagen alpha_2(VIII) chain</b>                                            | <b>1.033684822</b> | <b>0.696752</b> | <b>2</b>  |
| P25318        | GQYLEMPLPMLPMDLKGEPPGPKGPR+Oxidation(6)Oxidation(10)                                 | 1.022751422        | 2               | 2.381     |
| P25318        | GQYLEMPLPMLPMDLKGEPPGPKGPR+Oxidation(6)Oxidation(13)                                 | 0.917507233        | 2               | 2.4913    |
| <b>P25977</b> | <b>UBF1 Nucleolar transcription factor 1</b>                                         | <b>1.300585292</b> | <b>0.551922</b> | <b>2</b>  |
| P25977        | AKYAKLHPEMSNDLTK                                                                     | 1.066547889        | 2               | 2.55417   |
| P25977        | ALKAMEMTWNNMEKK+Oxidation(12)                                                        | 1.331408682        | 2               | 2.3269    |
| <b>P26039</b> | <b>TLN1 Talin_1</b>                                                                  | <b>1.106721399</b> | <b>1.36E-11</b> | <b>23</b> |
| P26039        | ADAEGESDLENSRK                                                                       | 0.923213288        | 2               | 3.60975   |
| P26039        | AGALQCSPSDVYTK                                                                       | 1.267529002        | 2               | 2.82982   |
| P26039        | AQEACGPLEMDSLVVQNLEK                                                                 | 1.293538836        | 2               | 4.08805   |
| P26039        | ASAGPQPLLVSCK                                                                        | 0.982937813        | 2               | 2.37012   |
| P26039        | AVAEQIPLLQGVV                                                                        | 1.091378094        | 2               | 2.92139   |
| P26039        | EAAEGLRMATNAAAQNAIKK                                                                 | 1.139834045        | 2               | 2.44339   |
| P26039        | EADESLNFEEQILEAAK                                                                    | 0.88878493         | 2               | 4.33717   |
| P26039        | GLAGAVSELLR                                                                          | 1.139385956        | 2               | 3.24957   |
| P26039        | GVGAAATAVTQALNELLQHVK                                                                | 1.194855766        | 2               | 3.83766   |
| P26039        | ILAQATSDLVNAIK                                                                       | 2.119304546        | 2               | 3.53115   |
| P26039        | LGAASLGAEDPETQVVLINAVK                                                               | 1.919659092        | 2               | 4.70475   |
| P26039        | LLGEIAQGNENYAGIAAR                                                                   | 1.122373966        | 2               | 4.40817   |
| P26039        | LNEAAAGLNQAATELVQASR                                                                 | 1.08458351         | 2               | 5.41368   |
| P26039        | MVAAATNNLCEAANAAVQGHASQEK                                                            | 1.319180263        | 3               | 3.66054   |
| P26039        | NCGQMSEIEAK                                                                          | 1.054888555        | 2               | 3.07369   |
| P26039        | SNTSPEELGPLANQLTSDYGR                                                                | 1.157286           | 2               | 3.71516   |
| P26039        | TEDSGLQTQVIAAATQCALSTSQLVACTK                                                        | 1.103721998        | 3               | 4.32484   |
| P26039        | TMLESAGGLIQTAR                                                                       | 1.148768416        | 2               | 2.51641   |
| P26039        | VGAIPANALDDGQWSQGLISAAR                                                              | 1.256667027        | 2               | 4.73827   |
| P26039        | VLGEAMTGISQNAK                                                                       | 1.301431894        | 2               | 3.27197   |

|               |                                                                                          |                    |                 |           |
|---------------|------------------------------------------------------------------------------------------|--------------------|-----------------|-----------|
| P26039        | VLVQNAAGSQEK                                                                             | 1.180877892        | 2               | 3.16465   |
| P26039        | VSQMAQYFEPLTAAVGAASK                                                                     | 1.93157248         | 2               | 3.11283   |
| P26039        | VVAPTISSPVCQEQLVEAGR                                                                     | 1.196352148        | 2               | 5.15014   |
| <b>P26043</b> | <b>RADI Radixin</b>                                                                      | <b>1.294747285</b> | <b>4.63E-13</b> | <b>13</b> |
| P26043        | AFAAQEDLEK                                                                               | 1.328623817        | 2               | 3.21736   |
| P26043        | ALELEQER                                                                                 | 1.129826236        | 2               | 2.52335   |
| P26043        | AQKELEEQTR                                                                               | 0.735033322        | 2               | 2.63937   |
| P26043        | FFPEDVSEELIQEITQR                                                                        | 1.260815532        | 3               | 4.28458   |
| P26043        | GTELWLGVDALGLNIYEHDDKLTTPK                                                               | 1.390762447        | 3               | 3.46647   |
| P26043        | IQNWHEEHR                                                                                | 1.227471263        | 2               | 2.78738   |
| P26043        | KEEEATEWQHK                                                                              | 1.058854256        | 2               | 2.92482   |
| P26043        | KKEEATEWQHK                                                                              | 1.436587765        | 2               | 4.34168   |
| P26043        | KTQNDVLHAENVK                                                                            | 1.106391967        | 2               | 5.1543    |
| P26043        | NQEQLAAELAEFTAK                                                                          | 1.229884389        | 2               | 5.27631   |
| P26043        | QLQALSSELAQAR                                                                            | 1.177147905        | 2               | 4.36229   |
| P26043        | RKPDITIEVQQMK                                                                            | 1.087476416        | 2               | 3.40313   |
| P26043        | TQNDVLHAENVK                                                                             | 1.044197825        | 2               | 3.90224   |
| <b>P26231</b> | <b>CTNA1 Catenin alpha_1</b>                                                             | <b>1.135800272</b> | <b>0.168002</b> | <b>5</b>  |
| P26231        | LIEVANLACSISNNEEGVK                                                                      | 1.032080851        | 2               | 5.87932   |
| P26231        | LLEPLVTQVTTLVNTNSK                                                                       | 1.156930324        | 2               | 4.15872   |
| P26231        | QIIVDPLSFSEER                                                                            | 1.234977795        | 2               | 2.36794   |
| P26231        | SAAGEFADDPCCSSVK                                                                         | 1.622701016        | 2               | 2.96272   |
| P26231        | TIADHCPDSACK                                                                             | 1.222500477        | 2               | 3.30973   |
| <b>P26284</b> | <b>ODPA Pyruvate dehydrogenase E1 component subunit alpha_somatic form_mitochondrial</b> | <b>1.048478996</b> | <b>0.79973</b>  | <b>8</b>  |
| P26284        | AILAELTGR                                                                                | 1.069534564        | 2               | 2.62276   |
| P26284        | GFCHLCDGQEACCVGLEAGINPTDHLITAYR                                                          | 1.159747038        | 3               | 7.26027   |
| P26284        | LEEGPPVTTVLTR                                                                            | 1.059547554        | 2               | 3.55914   |
| P26284        | MVNSNLASVEELKEIDVEVR                                                                     | 1.161173933        | 2               | 4.34429   |
| P26284        | NFYGGNGIVGAQVPLGAGIALACK                                                                 | 1.35877264         | 2               | 3.74019   |
| P26284        | RGDFIPGLR                                                                                | 1.321909572        | 2               | 2.38787   |
| P26284        | TREEIQEVR                                                                                | 0.93920753         | 2               | 3.06142   |
| P26284        | VDGMDILCVR                                                                               | 0.915117334        | 2               | 2.5749    |
| <b>P26453</b> | <b>BASI Basigin</b>                                                                      | <b>1.217489888</b> | <b>0.355267</b> | <b>8</b>  |
| P26453        | GNINVEGPPR                                                                               | 1.097521755        | 2               | 3.35906   |
| P26453        | KSEHASEGEFVK                                                                             | 1.128967377        | 2               | 3.3469    |
| P26453        | RKPDQTLDEDDPGAAPLK                                                                       | 1.280281014        | 3               | 4.2692    |
| P26453        | SEASHPPVDEWVWFK                                                                          | 1.113980444        | 3               | 3.36936   |
| P26453        | SEHASEGEFVK                                                                              | 1.14413303         | 3               | 3.6051    |
| P26453        | SGEYSCIFLPEPVGVR                                                                         | 1.003171821        | 2               | 3.93466   |
| P26453        | VLQEDTLPDLQMK                                                                            | 0.992214583        | 2               | 4.01197   |
| P26453        | YTVDADDR                                                                                 | 1.084308539        | 2               | 2.41511   |
| <b>P26516</b> | <b>PSD7 26S proteasome non_ATPase regulatory subunit 7</b>                               | <b>1.104210354</b> | <b>0.096704</b> | <b>2</b>  |
| P26516        | SVVALHNLINNK                                                                             | 1.238384991        | 2               | 2.80003   |
| P26516        | TFEHTVSEIGAEAEVGVHLLR                                                                    | 0.882283011        | 3               | 3.71416   |
| <b>P26772</b> | <b>CH10 10 kDa heat shock protein_mitochondrial</b>                                      | <b>0.929433244</b> | <b>0.999998</b> | <b>8</b>  |
| P26772        | GGEIQPVSVK                                                                               | 0.90548943         | 2               | 3.60591   |
| P26772        | GGIMLPEK                                                                                 | 0.907313904        | 2               | 2.53272   |
| P26772        | GGIMLPEK+Oxidation(4)                                                                    | 0.976735307        | 2               | 2.70833   |
| P26772        | GKGGEIQPVSVK                                                                             | 0.947454691        | 2               | 3.53918   |
| P26772        | KFLPLFDR                                                                                 | 0.947723892        | 2               | 2.37656   |
| P26772        | VLLPEYGGTK                                                                               | 0.996386625        | 1               | 2.01096   |
| P26772        | VLQATVVAVGSGGK                                                                           | 0.918057975        | 2               | 5.2829    |
| P26772        | VVLDDKDYFLFR                                                                             | 0.997355075        | 2               | 3.47409   |
| <b>P27139</b> | <b>CAH2 Carbonic anhydrase 2</b>                                                         | <b>0.983671599</b> | <b>0.962341</b> | <b>4</b>  |
| P27139        | AVQHDPDGLAVLGFILK                                                                        | 0.974492669        | 2               | 3.81361   |

|               |                                                            |                    |                 |           |
|---------------|------------------------------------------------------------|--------------------|-----------------|-----------|
| P27139        | IGPASQGLQK                                                 | 0.972056772        | 2               | 3.40212   |
| P27139        | ITEALHSIK                                                  | 0.832915562        | 2               | 2.3529    |
| P27139        | QSPVDIDTGTAAQHDPSLQPLLCYDK                                 | 1.219311253        | 3               | 3.60375   |
| <b>P27321</b> | <b>ICAL Calpastatin</b>                                    | <b>1.217054955</b> | <b>0.700167</b> | <b>3</b>  |
| P27321        | FQDAPSADGESVAGGVTVATASDK                                   | 1.256329976        | 2               | 5.30797   |
| P27321        | KGSDEVTASSAATGTSR                                          | 1.22102683         | 2               | 4.72272   |
| P27321        | SQSSEPPVIHEK                                               | 0.843370318        | 2               | 2.64183   |
| <b>P27364</b> | <b>3BHS5 3 beta_hydroxysteroid dehydrogenase type 5</b>    | <b>0.962164115</b> | <b>1.04E-06</b> | <b>7</b>  |
| P27364        | AVLAANGSILK                                                | 0.748612022        | 2               | 2.93446   |
| P27364        | ETILNDREEEHR                                               | 0.768627214        | 2               | 2.96289   |
| P27364        | GDIVDAQFLR                                                 | 0.839915773        | 2               | 3.35188   |
| P27364        | IVQMLVQEK                                                  | 1.022284956        | 2               | 3.13219   |
| P27364        | NGGTFHTCALR                                                | 0.864131016        | 2               | 2.55422   |
| P27364        | QTILDVNVK                                                  | 0.77931018         | 1               | 2.21038   |
| P27364        | SQSIQQGFYYISDDTPHQSYDDLNYTSLK                              | 2.140075198        | 3               | 4.17898   |
| <b>P27605</b> | <b>HPRT Hypoxanthine_guanine phosphoribosyltransferase</b> | <b>1.057288442</b> | <b>0.000107</b> | <b>6</b>  |
| P27605        | DLNHVCVISESGK                                              | 1.105747211        | 2               | 3.48921   |
| P27605        | FFADLLDIK                                                  | 1.638364993        | 2               | 3.37062   |
| P27605        | NVLIVEDIIDTGK                                              | 1.103106637        | 2               | 3.91342   |
| P27605        | SVGYRPFVGFPEIPDK                                           | 0.902868895        | 3               | 3.59112   |
| P27605        | SYCNDQSTGDIK                                               | 1.049109952        | 2               | 3.90384   |
| P27605        | VIGGDDLSTLTGK                                              | 0.950143286        | 2               | 3.99524   |
| <b>P27653</b> | <b>C1TC C_1_tetrahydrofolate synthase_cytoplasmic</b>      | <b>1.086143758</b> | <b>0.033336</b> | <b>16</b> |
| P27653        | ASQAPSSFQLLYDLK                                            | 1.370154632        | 2               | 4.29894   |
| P27653        | AYTEEDLDLVEK                                               | 1.018201079        | 2               | 3.34346   |
| P27653        | CTHWAEGGQALALAAQAVQR                                       | 1.088284786        | 3               | 3.66164   |
| P27653        | GEWIKPGAVVIDCGINYPDDTKPNGR                                 | 1.095863747        | 3               | 4.27814   |
| P27653        | IFHELTQTDK                                                 | 1.192095611        | 2               | 2.66097   |
| P27653        | IYGADDIELLPEAQNK                                           | 1.167668934        | 2               | 5.27295   |
| P27653        | KITIGQAPTEK                                                | 0.633845988        | 2               | 3.12744   |
| P27653        | KVVDVAYDEAK                                                | 1.286168993        | 2               | 3.7432    |
| P27653        | LDIDPETITWQR                                               | 1.068005525        | 2               | 3.8433    |
| P27653        | MHGGGPTVTAGLPLPK                                           | 1.295374576        | 2               | 2.68929   |
| P27653        | QGFGNLPICMAK                                               | 1.059541327        | 2               | 3.62173   |
| P27653        | TADLDKEVKNKGDIILVVATGQPEMVK                                | 1.116772209        | 3               | 4.7468    |
| P27653        | TDPAALTDDEINR                                              | 1.08809052         | 2               | 4.36747   |
| P27653        | THLSLSHNPEQK                                               | 1.074607288        | 2               | 3.83451   |
| P27653        | VVDVAYDEAK                                                 | 0.971723098        | 2               | 3.6761    |
| P27653        | YVVVTGITPTPLGEGK                                           | 1.183800807        | 2               | 4.84132   |
| <b>P27661</b> | <b>H2AX Histone H2A.x</b>                                  | <b>1.110775535</b> | <b>0.952833</b> | <b>3</b>  |
| P27661        | AGLQFPVGR                                                  | 1.06600857         | 2               | 3.04313   |
| P27661        | HLQLAIR                                                    | 1.019469961        | 2               | 2.73042   |
| P27661        | LLGGVTIAQGGVLPNIQAVLLPK                                    | 1.118431371        | 2               | 5.25097   |
| <b>P27867</b> | <b>DHSO Sorbitol dehydrogenase</b>                         | <b>1.184819172</b> | <b>2.36E-14</b> | <b>15</b> |
| P27867        | AKEVGADFTIQVAK                                             | 1.144167969        | 2               | 2.82136   |
| P27867        | AMGASQVVVIDLSASR                                           | 1.108943776        | 2               | 4.74385   |
| P27867        | EVGADFTIQVAK                                               | 1.11252434         | 2               | 3.14212   |
| P27867        | GENLSLVVHGPGDIR                                            | 1.130306139        | 2               | 3.75617   |
| P27867        | HSADFCYK                                                   | 1.168923058        | 1               | 2.8912    |
| P27867        | IGDFVVK                                                    | 0.862837947        | 2               | 2.63384   |
| P27867        | LENYPIPELGPNDVLLK                                          | 1.125904527        | 2               | 4.99932   |
| P27867        | LPDSVTFEEGALIEPLSVGIYACR                                   | 1.662314716        | 2               | 4.73684   |
| P27867        | MHSVGICGSDVHYWEHGR+Oxidation(1)                            | 1.372444978        | 3               | 4.05406   |
| P27867        | TLNVKPLVTHR                                                | 1.117079509        | 2               | 3.08312   |
| P27867        | VAIEPGVPR                                                  | 1.275042753        | 2               | 2.3142    |

|               |                                                                |                    |                 |           |
|---------------|----------------------------------------------------------------|--------------------|-----------------|-----------|
| P27867        | VAIEPGVPREIDEFCKIGR                                            | 0.616705312        | 2               | 2.49435   |
| P27867        | VLVCGAGPIGIVTLLVAK                                             | 1.667152542        | 3               | 5.479     |
| P27867        | YCNTWPMAMVSMMLASK                                              | 1.301194573        | 2               | 3.39667   |
| P27867        | YNLTPSIFFCATPPDDGNLCR                                          | 16.42296732        | 2               | 4.07654   |
| <b>P27952</b> | <b>RS2 40S ribosomal protein S2</b>                            | <b>1.193369009</b> | <b>0.400296</b> | <b>5</b>  |
| P27952        | AEDKEWIPVTK                                                    | 1.08081333         | 2               | 3.55363   |
| P27952        | AFVAIGDYNGHVGLGVK                                              | 1.168966064        | 2               | 3.70254   |
| P27952        | GCTATLGNFAK                                                    | 1.174448787        | 2               | 2.79851   |
| P27952        | GTGIVSAPVPK                                                    | 1.157172356        | 2               | 2.84961   |
| P27952        | TYSYLTDLWK                                                     | 1.188439242        | 2               | 2.45185   |
| <b>P28037</b> | <b>AL111 Cytosolic 10_formyltetrahydrofolate dehydrogenase</b> | <b>0.952190347</b> | <b>0.659477</b> | <b>27</b> |
| P28037        | ADPLGLEAEK                                                     | 0.990109854        | 1               | 1.92859   |
| P28037        | ANATEFGLASGVFTR                                                | 0.994421494        | 2               | 4.5381    |
| P28037        | AVQMGMSSVFFNK                                                  | 1.116804844        | 2               | 4.07859   |
| P28037        | DLGEAALNEYLR                                                   | 0.876723775        | 2               | 3.67135   |
| P28037        | DTNHGPNHEAHLR                                                  | 1.269901066        | 2               | 3.62912   |
| P28037        | ECEVLDDTVSTLYNR                                                | 1.389718758        | 2               | 3.81771   |
| P28037        | EESFGPIMIISR                                                   | 0.996909501        | 2               | 2.8348    |
| P28037        | EGHEVVGVTIPDKDGK                                               | 1.076477982        | 2               | 4.63908   |
| P28037        | GNDKVPGAWTEACGQK                                               | 0.872970369        | 2               | 4.01048   |
| P28037        | GQALPEVVAK                                                     | 0.997034433        | 2               | 2.62661   |
| P28037        | GSASSDLELTAELATAEAVR                                           | 0.852195796        | 2               | 6.67671   |
| P28037        | GVVNILPGSGSLVQQR                                               | 0.999057155        | 2               | 4.78888   |
| P28037        | IGFTGSTEVGK                                                    | 1.179011335        | 2               | 2.58235   |
| P28037        | ILPNVPEVEDSTDFK                                                | 1.305674878        | 2               | 3.40534   |
| P28037        | INWDQPAEAIHNWIR                                                | 1.102565558        | 2               | 3.83355   |
| P28037        | KEGHEVVGVTIPDKDGK                                              | 1.025005391        | 3               | 4.4941    |
| P28037        | KIGFTGSTEVGK                                                   | 0.949456232        | 2               | 2.73175   |
| P28037        | KLVEYCQR                                                       | 1.389053879        | 2               | 2.66768   |
| P28037        | LFVEESIHNFVQK                                                  | 1.044389187        | 2               | 4.79647   |
| P28037        | LIAEGTAPR                                                      | 1.099878392        | 2               | 3.63498   |
| P28037        | LSDHPDVR                                                       | 1.034317009        | 2               | 2.38056   |
| P28037        | NIQLEDGK                                                       | 1.026387137        | 1               | 2.24484   |
| P28037        | TAACLAAGNTVVIKPAQVPTLALK                                       | 1.202899723        | 2               | 4.16      |
| P28037        | TDVAAPFGGFK                                                    | 1.068185264        | 1               | 2.04759   |
| P28037        | THVGMSIQTFR                                                    | 1.098553987        | 2               | 2.92777   |
| P28037        | TYNTINPTDGSVICQVSLAQVSDVDK                                     | 0.983397086        | 2               | 5.12296   |
| P28037        | VVEEVEK                                                        | 0.921917151        | 2               | 2.43771   |
| <b>P28480</b> | <b>TCPA T_complex protein 1 subunit alpha</b>                  | <b>1.160253858</b> | <b>0.034793</b> | <b>11</b> |
| P28480        | AFHNEAQVNPER                                                   | 1.25004615         | 2               | 3.41552   |
| P28480        | FATEAAITILR                                                    | 1.213146068        | 2               | 3.10114   |
| P28480        | HGGYENAVHSGALDD                                                | 1.264565985        | 2               | 4.17791   |
| P28480        | ICDDELILIK                                                     | 1.143456831        | 2               | 3.46937   |
| P28480        | LLEVEHPAAK                                                     | 1.113353655        | 2               | 2.68248   |
| P28480        | MLVDDIGDVTITNDGATILK                                           | 1.175301033        | 2               | 3.56536   |
| P28480        | NADELVK                                                        | 1.264350851        | 1               | 1.93357   |
| P28480        | SLLVIPNTLAVNAAQDSTDLVAK                                        | 1.368963407        | 2               | 4.56928   |
| P28480        | SQNVMAAASIANIVK                                                | 1.146691443        | 2               | 4.77346   |
| P28480        | SSLGPVGLDK                                                     | 1.141630846        | 2               | 2.77135   |
| P28480        | YINENLIINTDELGR                                                | 1.153136765        | 2               | 4.64245   |
| <b>P28492</b> | <b>GLSL Glutaminase liver isoform_mitochondrial</b>            | <b>1.179795783</b> | <b>0.080946</b> | <b>3</b>  |
| P28492        | ATGLQTS DPR                                                    | 0.666968101        | 2               | 2.47316   |
| P28492        | FVIPDFEFTGHVDR                                                 | 0.905695849        | 2               | 2.99466   |
| P28492        | SNPDLWGVSLCTVDGQR                                              | 1.224938113        | 2               | 3.63274   |
| <b>P28650</b> | <b>PURA1 Adenylosuccinate synthetase isozyme 1</b>             | <b>0.884113938</b> | <b>0.830117</b> | <b>2</b>  |
| P28650        | LDILDVLEIK                                                     | 1.070732993        | 2               | 3.12947   |

|               |                                                                 |                    |                 |           |
|---------------|-----------------------------------------------------------------|--------------------|-----------------|-----------|
| P28650        | VVDLLATDADIVSR                                                  | 0.859942082        | 2               | 2.67344   |
| <b>P29117</b> | <b>PPIF Peptidyl_prolyl cis_trans isomerase F_mitochondrial</b> | <b>1.136284138</b> | <b>0.197546</b> | <b>2</b>  |
| P29117        | GANSSSQNPLVYLDVGADGQLGR                                         | 1.269857556        | 2               | 4.01959   |
| P29117        | KIVITDCGQLS                                                     | 1.068935579        | 2               | 2.48964   |
| <b>P29147</b> | <b>BDH D_beta_hydroxybutyrate dehydrogenase_mitochondrial</b>   | <b>0.999745606</b> | <b>0.41139</b>  | <b>15</b> |
| P29147        | AVLVTGCDSGFGFSLAK                                               | 0.841979272        | 2               | 5.88232   |
| P29147        | FGVEAFSDCLR                                                     | 1.161458967        | 2               | 3.72578   |
| P29147        | GFLVFAGCLLK                                                     | 0.964623795        | 2               | 2.97683   |
| P29147        | KMWDELPEVVR                                                     | 1.033319508        | 2               | 3.39926   |
| P29147        | METYCNSGSTDSSVINAVTHALTAATPYTR                                  | 1.623867726        | 3               | 6.25766   |
| P29147        | METYCNSGSTDSSVINAVTHALTAATPYTR+Oxidation(1)                     | 1.265334679        | 3               | 4.50835   |
| P29147        | MQVMTHFPGAISDK                                                  | 1.05496428         | 2               | 4.51242   |
| P29147        | MQVMTHFPGAISDK+Oxidation(1)                                     | 1.401627479        | 2               | 3.43265   |
| P29147        | MQVMTHFPGAISDK+Oxidation(4)                                     | 1.336716556        | 2               | 3.71535   |
| P29147        | MWDELPEVVR                                                      | 0.872674265        | 2               | 3.26073   |
| P29147        | MWDELPEVVR+Oxidation(1)                                         | 1.041214525        | 2               | 3.50851   |
| P29147        | TIQLNVCNSEEVEK                                                  | 0.994625526        | 2               | 4.40609   |
| P29147        | VSVVEPGNFIAATSLYSER                                             | 0.89296567         | 2               | 6.01062   |
| P29147        | VVNISMLGR                                                       | 1.082809066        | 2               | 3.87024   |
| P29147        | YEMHPLGVK                                                       | 1.006928928        | 1               | 2.41276   |
| <b>P29266</b> | <b>3HIDH 3_hydroxyisobutyrate dehydrogenase_mitochondrial</b>   | <b>0.902407138</b> | <b>0.995713</b> | <b>6</b>  |
| P29266        | DLGLAQDSATSK                                                    | 0.880380224        | 2               | 3.94511   |
| P29266        | EAGEQVASSPADVAEK                                                | 0.933472529        | 2               | 4.80768   |
| P29266        | GSLIDSSTIDPSVSK                                                 | 0.912767041        | 2               | 4.64854   |
| P29266        | HGYPLILYDVFPDVCK                                                | 1.174008874        | 2               | 4.87458   |
| P29266        | KGSLIDSSTIDPSVSK                                                | 1.022233547        | 2               | 4.04668   |
| P29266        | MGAVFMDAPVSGGVGAAR                                              | 1.082359593        | 2               | 5.02401   |
| <b>P29314</b> | <b>RS9 40S ribosomal protein S9</b>                             | <b>1.197033181</b> | <b>4.47E-06</b> | <b>8</b>  |
| P29314        | IGVLDEGK                                                        | 1.208225678        | 2               | 2.31013   |
| P29314        | KGQGGAGAGDDEEED                                                 | 1.104108336        | 2               | 4.33377   |
| P29314        | KQVVNIPSFIVR                                                    | 1.165136024        | 2               | 2.51484   |
| P29314        | LDYILGLK                                                        | 1.18166546         | 2               | 2.74567   |
| P29314        | LFEGNALLR                                                       | 1.422845096        | 2               | 2.65637   |
| P29314        | QVVNIPSFIVR                                                     | 1.227516535        | 2               | 3.01961   |
| P29314        | RLQTQVFK                                                        | 1.215745515        | 2               | 2.31075   |
| P29314        | SRLDQELK                                                        | 1.172030286        | 3               | 3.38815   |
| <b>P29315</b> | <b>RINI Ribonuclease inhibitor</b>                              | <b>1.12266354</b>  | <b>0.007218</b> | <b>8</b>  |
| P29315        | ASLQELDLGSNK                                                    | 1.007856956        | 2               | 2.96929   |
| P29315        | LDDCGLTEVR                                                      | 1.073067829        | 2               | 3.18241   |
| P29315        | LENGGITSANCK                                                    | 1.149045211        | 2               | 3.32413   |
| P29315        | LGNTGIAALCSGLLPSCR                                              | 1.266133026        | 2               | 2.7256    |
| P29315        | LSLQNCSTEAGCGVLPDVL                                             | 1.107813763        | 2               | 2.91281   |
| P29315        | SAIQANPALTELSLR                                                 | 1.296749136        | 2               | 4.49671   |
| P29315        | TCSLTAASCPHFCSVLTK                                              | 1.143663787        | 2               | 2.9278    |
| P29315        | TNELGDAGVGLVQLQNPTCK                                            | 1.193454308        | 2               | 5.29196   |
| <b>P29410</b> | <b>KAD2 Adenylate kinase 2_mitochondrial</b>                    | <b>1.119296811</b> | <b>0.786285</b> | <b>11</b> |
| P29410        | AMVASGSELGK                                                     | 1.0265753          | 2               | 2.81291   |
| P29410        | AMVASGSELGKK                                                    | 1.036872137        | 2               | 2.84881   |
| P29410        | AVLLGPPGAGK                                                     | 0.934185125        | 2               | 2.85463   |
| P29410        | EAMKDDITGEPLIR                                                  | 1.100911001        | 2               | 2.3223    |
| P29410        | GIHCAIDASQTPDVVFASILAFAFSK                                      | 1.416434127        | 3               | 4.6903    |
| P29410        | LEAYHTQTTPLEYYR                                                 | 1.16640908         | 2               | 5.38048   |
| P29410        | LVSDVMVELIEK                                                    | 1.197225163        | 2               | 4.14955   |

|               |                                                            |                    |                 |          |
|---------------|------------------------------------------------------------|--------------------|-----------------|----------|
| P29410        | NGFLLDGFPR                                                 | 0.924418109        | 2               | 2.64347  |
| P29410        | NLETPSCK                                                   | 1.018679276        | 2               | 2.3656   |
| P29410        | SYHEEFNPPK                                                 | 0.959836958        | 3               | 3.51733  |
| P29410        | TRLEAYHTQTTPLVEYYR                                         | 1.090007664        | 3               | 3.46213  |
| <b>P29411</b> | <b>KAD3 GTP:AMP phosphotransferase_mitochondrial</b>       | <b>1.134021626</b> | <b>0.031084</b> | <b>6</b> |
| P29411        | AYEAQTEPVLQYYQK                                            | 1.132713442        | 2               | 3.61743  |
| P29411        | EDDKPETVIK                                                 | 0.927211415        | 2               | 2.51937  |
| P29411        | NLTQCSWLLDGFPR                                             | 1.030844338        | 2               | 2.64467  |
| P29411        | TVGIDDLTGEPLIQR                                            | 0.794017297        | 2               | 3.96664  |
| P29411        | VYNIEFNPPK                                                 | 1.218578821        | 2               | 2.80315  |
| P29411        | VYQIDTVINLNVPFVEIK                                         | 0.951338769        | 2               | 4.40461  |
| <b>P29419</b> | <b>ATP5I ATP synthase subunit e_mitochondrial</b>          | <b>0.982232002</b> | <b>2.47E-07</b> | <b>2</b> |
| P29419        | ELAEAEDVSIFK                                               | 0.887560999        | 1               | 3.0554   |
| P29419        | YSALILGMAYGAK                                              | 1.044322341        | 2               | 3.89404  |
| <b>P29994</b> | <b>ITPR1 Inositol 1_4_5_trisphosphate receptor type 1</b>  | <b>0.923595419</b> | <b>0.070258</b> | <b>3</b> |
| P29994        | AKDDLEMSAVITIMQPILR+Oxidation(7)Oxidation(14)              | 1.404027945        | 2               | 2.68091  |
| P29994        | CVVQPEAGDLNPPK                                             | 0.810286927        | 2               | 2.33749  |
| P29994        | EGASNLVIDLIMNASSDR                                         | 1.11209638         | 2               | 2.43064  |
| <b>P30009</b> | <b>MARCS Myristoylated alanine_rich C_kinase substrate</b> | <b>1.371734523</b> | <b>0.538062</b> | <b>3</b> |
| P30009        | AEDGAAPSPSETPK                                             | 1.393721032        | 2               | 3.6741   |
| P30009        | EAEAAPEPEQPEQPAEEPR                                        | 1.241400213        | 2               | 3.86377  |
| P30009        | GEAAAERPGAAVASSPSK                                         | 1.263302316        | 2               | 3.48872  |
| <b>P30349</b> | <b>LKHA4 Leukotriene A_4 hydrolase</b>                     | <b>1.098241146</b> | <b>0.811484</b> | <b>3</b> |
| P30349        | GSPMEISLPIALSK                                             | 1.254658452        | 2               | 2.44499  |
| P30349        | SLSNVIAHEISHSWTGNLVTNK                                     | 1.007789545        | 3               | 3.51168  |
| P30349        | SSALQWLTPPEQTSKG                                           | 1.093450628        | 2               | 3.37807  |
| <b>P30427</b> | <b>PLEC Plectin</b>                                        | <b>0.940512363</b> | <b>0.893235</b> | <b>4</b> |
| P30427        | LLDPEDVDVPQPDEK                                            | 0.929918234        | 2               | 3.59102  |
| P30427        | MSAAQALKKGWLYEAGQR+Oxidation(1)                            | 1.154557864        | 2               | 2.42074  |
| P30427        | REEAAVDAQQK                                                | 1.109584556        | 2               | 3.53455  |
| P30427        | VLALPEPSPAAPTLR                                            | 0.8204653          | 2               | 2.43395  |
| <b>P30713</b> | <b>GSTT2 Glutathione S transferase theta_2</b>             | <b>0.999613597</b> | <b>0.983011</b> | <b>8</b> |
| P30713        | AQVHEYLGHADNIR                                             | 1.109451146        | 2               | 5.10801  |
| P30713        | ERVEAFLGAELCQEAHNPIMSVLGQAAK                               | 0.964528262        | 3               | 4.81485  |
| P30713        | GQHLSEQFSQVNCLK                                            | 1.021983083        | 2               | 4.87796  |
| P30713        | GTFGVLLWTK                                                 | 1.306097821        | 2               | 2.50197  |
| P30713        | NSMVLALQR                                                  | 0.98224987         | 2               | 2.78121  |
| P30713        | VEAFLGAELCQEAHNPIMSVLGQAAK                                 | 0.87501011         | 3               | 4.59753  |
| P30713        | VLGPLIGVQVPEEK                                             | 1.0427943          | 2               | 3.93238  |
| P30713        | YQVADHWYPADLQAR                                            | 1.125286443        | 2               | 5.11325  |
| <b>P30835</b> | <b>K6PL 6_phosphofructokinase_liver type</b>               | <b>1.054458391</b> | <b>0.552856</b> | <b>2</b> |
| P30835        | NEWGSLLEELVK                                               | 1.054506811        | 2               | 2.56703  |
| P30835        | VFANAPDSACVIGLR                                            | 0.594281007        | 2               | 2.77419  |
| <b>P30839</b> | <b>AL3A2 Fatty aldehyde dehydrogenase</b>                  | <b>1.011509113</b> | <b>0.999037</b> | <b>8</b> |
| P30839        | EKDILAAIAADLSK                                             | 0.974809943        | 2               | 4.25476  |
| P30839        | FDHILYTGNTAVGK                                             | 1.232713034        | 2               | 4.19345  |
| P30839        | HLTPVTLELGGK                                               | 1.061938636        | 3               | 3.76892  |
| P30839        | LQQLEALR                                                   | 1.158471143        | 2               | 2.58554  |
| P30839        | NVEEAINFINDR                                               | 1.449812824        | 2               | 3.80779  |
| P30839        | VMQEIEIFGPIPIVSVK                                          | 0.972747729        | 2               | 4.64674  |
| P30839        | VMQEIEIFGPIPIVSVK+Oxidation(2)                             | 1.010905994        | 2               | 4.13492  |
| P30839        | YIAPTILTDVDPNSK                                            | 1.110980315        | 2               | 4.14758  |
| <b>P30904</b> | <b>MIF Macrophage migration inhibitory factor</b>          | <b>1.247487259</b> | <b>7.3E-06</b>  | <b>2</b> |
| P30904        | LHISPD                                                     | 0.999701479        | 1               | 1.97335  |
| P30904        | LLCGLLSDR                                                  | 1.504034713        | 2               | 2.79832  |

|               |                                                                                    |                    |                 |           |
|---------------|------------------------------------------------------------------------------------|--------------------|-----------------|-----------|
| <b>P31000</b> | <b>VIME Vimentin</b>                                                               | <b>1.048200052</b> | <b>0.987634</b> | <b>13</b> |
| P31000        | DGQVINETSQHDDLE                                                                    | 1.071998725        | 2               | 3.23385   |
| P31000        | KLEGEESR                                                                           | 0.976422965        | 2               | 2.80094   |
| P31000        | KVESLQEEIAFLK                                                                      | 1.260322672        | 2               | 3.86192   |
| P31000        | LGDLYEEEMR                                                                         | 1.324857107        | 2               | 3.09224   |
| P31000        | LHDEEIQLQAQIQEQHVQIDVDVSKPDLTAALR                                                  | 1.366874845        | 4               | 5.03947   |
| P31000        | LLEGEESR                                                                           | 0.918880525        | 2               | 2.81075   |
| P31000        | LQDEIQNMKEEMAR                                                                     | 1.069939716        | 2               | 3.827     |
| P31000        | NLQEAEEWYK                                                                         | 1.236030945        | 2               | 3.09701   |
| P31000        | QDVDNASLAR                                                                         | 1.39257148         | 2               | 2.91217   |
| P31000        | QVQSLTCEVDALK                                                                      | 1.09402611         | 2               | 3.41939   |
| P31000        | RQVDQLTNDK                                                                         | 1.152089878        | 2               | 3.13207   |
| P31000        | TNEKVELQELNDR                                                                      | 1.001450013        | 2               | 3.62885   |
| P31000        | VELQELNDR                                                                          | 1.021139215        | 2               | 2.65614   |
| <b>P31044</b> | <b>PEBP1 Phosphatidylethanolamine_binding protein 1</b>                            | <b>1.901101197</b> | <b>7.29E-13</b> | <b>6</b>  |
| P31044        | GNDISSGTVLSEYVSGPPK                                                                | 1.163719232        | 2               | 6.29438   |
| P31044        | LYTLVLTPDAPSR                                                                      | 1.433173235        | 2               | 4.42933   |
| P31044        | VDYGGVTVDELGK                                                                      | 1.032619533        | 2               | 5.04155   |
| P31044        | VLTPQVMNRPSSISWDGLDPGK                                                             | 0.932371712        | 3               | 5.12668   |
| P31044        | YHLGAPVAGTCFQAEWDDSVPK                                                             | 1.82488528         | 2               | 5.39111   |
| P31044        | YVWLVYEQEQPLNCDPILSNK                                                              | 1.853890769        | 2               | 5.25711   |
| <b>P31210</b> | <b>AK1D1 3_oxo_5_beta_steroid 4_dehydrogenase</b>                                  | <b>1.229133425</b> | <b>0.059062</b> | <b>21</b> |
| P31210        | DELLTSLGK                                                                          | 1.181828727        | 2               | 2.7158    |
| P31210        | DIEALNK                                                                            | 1.106977948        | 1               | 2.46311   |
| P31210        | EEMKDIEALNK                                                                        | 1.145504612        | 2               | 3.6799    |
| P31210        | ENFQIFDFSLTK                                                                       | 1.526464836        | 2               | 2.85029   |
| P31210        | FVEMLMWSDHPEYPFHDEY                                                                | 1.894709958        | 3               | 3.87278   |
| P31210        | GLVVIPK                                                                            | 1.10264745         | 2               | 2.38893   |
| P31210        | HIDGAYVYR                                                                          | 1.197025726        | 2               | 2.90797   |
| P31210        | IKENFQIFDFSLTK                                                                     | 2.067097632        | 3               | 4.1217    |
| P31210        | LWSTDHDPEMVRPALER                                                                  | 1.285321474        | 2               | 2.35625   |
| P31210        | NEHEVGEAIR                                                                         | 1.038085696        | 2               | 3.07635   |
| P31210        | NPLWVNVSSPPLLK                                                                     | 1.197233607        | 2               | 4.12897   |
| P31210        | NPLWVNVSSPPLKDELLTSLGK                                                             | 1.257447696        | 3               | 5.82048   |
| P31210        | QLEVILNKPLGK                                                                       | 1.239672826        | 2               | 3.5932    |
| P31210        | REEIFYCGK                                                                          | 1.909994315        | 2               | 2.79212   |
| P31210        | RQLEVILNKPLGK                                                                      | 1.28538045         | 3               | 4.24928   |
| P31210        | SLGVSFNFR                                                                          | 1.286125533        | 2               | 2.39868   |
| P31210        | SNLCATWEALEACK                                                                     | 1.155557557        | 2               | 4.60709   |
| P31210        | SNLCATWEALEACKDAGLVK                                                               | 1.126568192        | 2               | 4.80441   |
| P31210        | TAIDEGYR                                                                           | 1.085372684        | 2               | 2.89833   |
| P31210        | TQAQIVLR                                                                           | 1.082831328        | 2               | 2.91229   |
| P31210        | YKPVTNQVECHPYFTQTK                                                                 | 1.191871895        | 2               | 5.61473   |
| <b>P31230</b> | <b>AIMP1 Aminoacyl tRNA synthase complex_interacting multifunctional protein 1</b> | <b>1.026837915</b> | <b>0.962251</b> | <b>2</b>  |
| P31230        | KEIEELK                                                                            | 1.026942367        | 1               | 1.94919   |
| P31230        | TVVSGLVNHPLEQMQR                                                                   | 0.985996765        | 3               | 3.44867   |
| <b>P31232</b> | <b>TAGL Transgelin</b>                                                             | <b>1.560898377</b> | <b>0.386224</b> | <b>2</b>  |
| P31232        | KYDEELEER                                                                          | 1.558431405        | 2               | 2.58695   |
| P31232        | TVMALGSLAVTK                                                                       | 1.612856015        | 2               | 2.81939   |
| <b>P31254</b> | <b>UBA1Y Ubiquitin_like modifier_activating enzyme 1 Y</b>                         | <b>1.133080585</b> | <b>0.237979</b> | <b>2</b>  |
| P31254        | YDQQVAVFGSDLQEK                                                                    | 1.113745453        | 2               | 4.52429   |
| P31254        | YFLVGAGAIGCELLK                                                                    | 1.238254497        | 2               | 2.76566   |
| <b>P31399</b> | <b>ATP5H ATP synthase subunit d_mitochondrial</b>                                  | <b>1.161687642</b> | <b>0.013017</b> | <b>9</b>  |
| P31399        | ANVDKPLVDDFK                                                                       | 1.079069519        | 2               | 3.90879   |

|               |                                                                |                    |                 |           |
|---------------|----------------------------------------------------------------|--------------------|-----------------|-----------|
| P31399        | KYPYWPHQPIENL                                                  | 1.156825226        | 2               | 2.84699   |
| P31399        | NCAQFVTGSQAR                                                   | 1.016157855        | 2               | 3.86671   |
| P31399        | NMIPFDQMTIDDLNEVFPETK                                          | 1.106472346        | 2               | 5.28887   |
| P31399        | NMIPFDQMTIDDLNEVFPETK+Oxidation(2)                             | 1.166776116        | 2               | 3.13339   |
| P31399        | NMIPFDQMTIDDLNEVFPETK+Oxidation(8)                             | 1.166776116        | 2               | 2.31156   |
| P31399        | SWNETFHTR                                                      | 1.000419655        | 2               | 2.71763   |
| P31399        | TIDWVSFVEIMPQNQK                                               | 1.607067813        | 2               | 3.28401   |
| P31399        | YTALVDAEEKEDVK                                                 | 1.118476016        | 2               | 3.5653    |
| <b>P32089</b> | <b>TXTP Tricarboxylate transport protein_ mitochondrial</b>    | <b>1.066928651</b> | <b>1</b>        | <b>4</b>  |
| P32089        | FIHDQTSNPK                                                     | 1.068975859        | 1               | 3.7498    |
| P32089        | GLSLLYGSIPK                                                    | 1.07289964         | 2               | 3.82235   |
| P32089        | NLDCGVQILK                                                     | 1.092265389        | 2               | 3.79969   |
| P32089        | TQLQLDER                                                       | 1.024210192        | 2               | 2.60979   |
| <b>P32198</b> | <b>CPT1A Carnitine O_palmitoyltransferase 1_ liver isoform</b> | <b>1.004158086</b> | <b>0.793359</b> | <b>3</b>  |
| P32198        | ELEQQMQQILDDPSEPQGEAK                                          | 1.048372691        | 2               | 4.06369   |
| P32198        | LLGSTIPLCSAQWER                                                | 0.784255291        | 2               | 3.01007   |
| P32198        | MTALAQDFAVNLGPK                                                | 0.999862073        | 2               | 4.23592   |
| <b>P32232</b> | <b>CBS Cystathionine beta_synthase</b>                         | <b>1.320107064</b> | <b>9.9E-20</b>  | <b>8</b>  |
| P32232        | AGTLKPGDTIIEPTSGNTGIGLALAAVK                                   | 1.268514549        | 3               | 5.32512   |
| P32232        | FDSPESHVGVAWR                                                  | 1.043222565        | 2               | 3.2914    |
| P32232        | LKNEIPNSHILDQYR                                                | 2.011330809        | 3               | 3.55126   |
| P32232        | NASNPLAHYDDTAEEILQQCDGK                                        | 1.403221599        | 2               | 5.5608    |
| P32232        | SNDDDSFAFAR                                                    | 1.229233655        | 2               | 3.05613   |
| P32232        | VDMLVASAGTGGTITGIAR                                            | 1.076316308        | 2               | 4.60531   |
| P32232        | VQELSLSAPLTVLPTVTCHEHTAILR                                     | 1.417797359        | 3               | 4.19968   |
| P32232        | VRPSDEVCK                                                      | 1.274585217        | 3               | 3.60828   |
| <b>P32551</b> | <b>QCR2 Cytochrome b_c1 complex subunit 2_ mitochondrial</b>   | <b>1.049865339</b> | <b>0.007699</b> | <b>11</b> |
| P32551        | AVAFQNPQTR                                                     | 0.945050276        | 2               | 3.43255   |
| P32551        | AVAQGNLSSADVQAAK                                               | 0.992937225        | 2               | 5.08211   |
| P32551        | GNNTTSLLSQSVAK                                                 | 0.977282257        | 2               | 3.97255   |
| P32551        | IENLHDVAYK                                                     | 1.099350088        | 2               | 4.04631   |
| P32551        | ITSEELHYFVQNHFTSAR                                             | 1.154587269        | 3               | 3.47333   |
| P32551        | NALANPLYCPDYR                                                  | 1.254068718        | 2               | 3.37334   |
| P32551        | RGNNTTSLLSQSVAK                                                | 0.76233774         | 2               | 2.78732   |
| P32551        | RWEVAALR                                                       | 1.107691727        | 2               | 2.76017   |
| P32551        | SMTASGNLGHTPFLDEL                                              | 1.251637965        | 2               | 3.14723   |
| P32551        | TSAPGGVPLQPQELEFTK                                             | 1.004549423        | 2               | 3.82602   |
| P32551        | YENYNLGTSHLLR                                                  | 1.901395593        | 2               | 4.0698    |
| <b>P32755</b> | <b>HPPD 4_hydroxyphenylpyruvate dioxygenase</b>                | <b>1.13762729</b>  | <b>9.9E-20</b>  | <b>19</b> |
| P32755        | AFEEEEQALR                                                     | 1.122593093        | 2               | 3.37573   |
| P32755        | DIAFEVEDCEHIVQK                                                | 1.372644734        | 2               | 3.99897   |
| P32755        | ENMDVLEELK                                                     | 1.234452701        | 2               | 2.66902   |
| P32755        | FAVLQTYGDTTHTLVEK                                              | 1.32582934         | 2               | 5.1436    |
| P32755        | FLHFHSVTFVWGNK                                                 | 1.042716398        | 3               | 3.46638   |
| P32755        | FLPGFEAPTYK                                                    | 1.10387954         | 2               | 2.56265   |
| P32755        | FWSVDDTQVHTEYSSLR                                              | 1.725432779        | 2               | 5.67879   |
| P32755        | GMEFLAVPSSYYR                                                  | 1.15333486         | 2               | 2.62821   |
| P32755        | GNLTDLETNGYR                                                   | 1.225959586        | 2               | 3.67673   |
| P32755        | HGDGVKDIAFEVEDCEHIVQK                                          | 1.113773845        | 3               | 4.85014   |
| P32755        | HNHQGFGAGNFNSLFK                                               | 1.021575018        | 3               | 4.6907    |
| P32755        | ILVDYDEK                                                       | 1.243653703        | 1               | 1.98626   |
| P32755        | IVFVLCALNPWNK                                                  | 1.567285982        | 2               | 2.53189   |
| P32755        | IVREPWVEEDKFGK                                                 | 1.249062708        | 3               | 4.35377   |
| P32755        | LPSCNLEIIDHIVGNQPDQEMESASEWYLK                                 | 1.480409031        | 3               | 7.42219   |



|               |                                                             |                    |                 |           |
|---------------|-------------------------------------------------------------|--------------------|-----------------|-----------|
| P32755        | MGFEPLAYK                                                   | 1.786935271        | 2               | 2.60223   |
| P32755        | SIVVANYEESIK                                                | 1.097686518        | 2               | 4.06788   |
| P32755        | SQIQEYVDYNGGAGVQHIALR                                       | 1.246716925        | 2               | 5.59296   |
| P32755        | TEDIITIR                                                    | 1.162157869        | 2               | 3.34272   |
| <b>P33124</b> | <b>ACSL6 Long_chain_fatty_acid_CoA ligase 6</b>             | <b>1.139967057</b> | <b>0.305325</b> | <b>2</b>  |
| P33124        | ALRPTIFPVVPR                                                | 1.153799648        | 2               | 3.25879   |
| P33124        | IENIYIR                                                     | 1.15866191         | 2               | 2.96436   |
| <b>P34058</b> | <b>HS90B Heat shock protein HSP 90_beta</b>                 | <b>1.12561883</b>  | <b>9.9E-20</b>  | <b>27</b> |
| P34058        | ADLNNLGTIAK                                                 | 1.059977448        | 2               | 4.22333   |
| P34058        | EDQTEYLEER                                                  | 1.187735784        | 2               | 3.49202   |
| P34058        | EGLLEPEDEEEK                                                | 1.110040209        | 2               | 2.46027   |
| P34058        | EGLLEPEDEEEKK                                               | 1.208407202        | 2               | 3.14997   |
| P34058        | ELISNASDALDK                                                | 1.029255379        | 2               | 3.70609   |
| P34058        | GEKEEEDKEDEEKPK                                             | 0.797563511        | 3               | 4.10484   |
| P34058        | GFEVVMTEPIDEYCVQQLK                                         | 3.369092589        | 2               | 3.42509   |
| P34058        | GVVDESDLPLNISR                                              | 1.112294501        | 2               | 4.86952   |
| P34058        | HFSVEGQLEFR                                                 | 1.193507821        | 2               | 2.94331   |
| P34058        | HLEINPDHPIVETLR                                             | 1.100042118        | 2               | 4.45711   |
| P34058        | HSQFIGYPITLYLEK                                             | 4.348358069        | 2               | 3.94776   |
| P34058        | IDIIPNPQER                                                  | 1.05147043         | 2               | 2.91907   |
| P34058        | KHLEINPDHPIVETLR                                            | 1.075336896        | 2               | 4.89144   |
| P34058        | LGIHEDSTNR                                                  | 1.079247499        | 2               | 3.04115   |
| P34058        | LGLGIDEDEVTAEEPSAAVPDEIPPLEGDEDASR                          | 1.196902138        | 2               | 4.51237   |
| P34058        | NPDDITQEEYGEFYK                                             | 1.376400983        | 2               | 4.60877   |
| P34058        | RAPFDLFENK                                                  | 1.350127356        | 2               | 3.02492   |
| P34058        | SIYYITGESK                                                  | 1.389487978        | 2               | 2.62993   |
| P34058        | SLTNDWEDHLAVK                                               | 1.223014481        | 2               | 4.3259    |
| P34058        | TLTLVDTGIGMTK                                               | 1.060784717        | 2               | 4.34295   |
| P34058        | TLTLVDTGIGMTK+Oxidation(11)                                 | 1.226849138        | 2               | 3.38947   |
| P34058        | VFIMDSCDELIPEYLNFR                                          | 1.428340435        | 2               | 2.48167   |
| P34058        | VILHLKEDQTEYLEER                                            | 1.342514073        | 3               | 4.54448   |
| P34058        | YESLTDPSK                                                   | 1.097710889        | 2               | 2.91835   |
| P34058        | YESLTDPSKLDGSK                                              | 1.092076408        | 2               | 3.45804   |
| P34058        | YHTSQSGDEMTSLSEYVSR                                         | 1.252039013        | 2               | 5.49948   |
| P34058        | YIDQEELNK                                                   | 1.10344812         | 2               | 3.48987   |
| <b>P34064</b> | <b>PSA5 Proteasome subunit alpha type_5</b>                 | <b>1.208980299</b> | <b>1.77E-06</b> | <b>2</b>  |
| P34064        | AIGSASEGAQSSLQEVYHK                                         | 1.208893451        | 2               | 4.51252   |
| P34064        | LNATNIELATVQPGQNFHMFTK                                      | 1.535763653        | 3               | 3.39202   |
| <b>P34067</b> | <b>PSB4 Proteasome subunit beta type_4</b>                  | <b>1.321849176</b> | <b>0.001897</b> | <b>4</b>  |
| P34067        | FDCGVVIAADMLGSYGSLAR                                        | 0.93487765         | 2               | 3.93523   |
| P34067        | GVEIEGPLSAQTNWDIAHMISGFE                                    | 1.171486425        | 2               | 4.03093   |
| P34067        | TQNPMVTGTSVLGVK                                             | 1.186934548        | 2               | 2.36665   |
| P34067        | VNDSTMLGASGDYADFQYLK                                        | 1.467166852        | 2               | 5.34589   |
| <b>P35171</b> | <b>CX7A2 Cytochrome c oxidase subunit 7A2_mitochondrial</b> | <b>1.291646566</b> | <b>8.77E-10</b> | <b>2</b>  |
| P35171        | GGTSDALLYR                                                  | 1.290075124        | 2               | 3.24496   |
| P35171        | LFQEDNGMPVHLK                                               | 1.1334142          | 2               | 3.6959    |
| <b>P35213</b> | <b>1433B 14_3_3 protein beta/alpha</b>                      | <b>1.107816073</b> | <b>2.27E-06</b> | <b>7</b>  |
| P35213        | AVTEQGHELSNEER                                              | 1.085356869        | 2               | 4.48384   |
| P35213        | EKIEAELQDICSVDLELLDK                                        | 1.294138429        | 3               | 5.31282   |
| P35213        | QTTVSNQQAYQEAFEISK                                          | 1.177903881        | 2               | 5.43528   |
| P35213        | TAFDEAIAELDTLNEESYK                                         | 1.682647742        | 2               | 4.91193   |
| P35213        | YDDMAAAMK                                                   | 1.080012007        | 2               | 2.65987   |
| P35213        | YLILNATHAESK                                                | 1.10583294         | 2               | 3.53921   |
| P35213        | YLSEVASGDNK                                                 | 1.156549196        | 2               | 3.14286   |
| <b>P35278</b> | <b>RAB5C Ras_related protein Rab_5C</b>                     | <b>1.042228436</b> | <b>0.592481</b> | <b>3</b>  |
| P35278        | FEIWDTAGQER                                                 | 0.680897353        | 2               | 2.83413   |

|               |                                                                        |                    |                 |          |
|---------------|------------------------------------------------------------------------|--------------------|-----------------|----------|
| P35278        | GVDLQESNPASR                                                           | 1.041332114        | 2               | 3.20818  |
| P35278        | NEPQNAAGAPGR                                                           | 1.07873062         | 2               | 3.10611  |
| <b>P35427</b> | <b>RL13A 60S ribosomal protein L13a</b>                                | <b>1.168513771</b> | <b>0.531058</b> | <b>3</b> |
| P35427        | CEGINISGNFYR                                                           | 1.215086642        | 2               | 2.96016  |
| P35427        | VLGIPPPYDK                                                             | 1.160498443        | 2               | 2.66178  |
| P35427        | YQAVTATLEEK                                                            | 1.139071219        | 2               | 3.20234  |
| <b>P35434</b> | <b>ATPD ATP synthase subunit delta_ mitochondrial</b>                  | <b>0.996433441</b> | <b>0.979475</b> | <b>2</b> |
| P35434        | AQSELSGAADEAAR                                                         | 0.998048866        | 2               | 4.66133  |
| P35434        | IEANEALVK                                                              | 0.945102025        | 2               | 2.54005  |
| <b>P35435</b> | <b>ATPG ATP synthase subunit gamma_ mitochondrial</b>                  | <b>1.050181388</b> | <b>0.416758</b> | <b>6</b> |
| P35435        | GLCGAIHSSVAK                                                           | 1.070613361        | 2               | 3.6061   |
| P35435        | HLIIGVSSDR                                                             | 1.015994435        | 2               | 3.23442  |
| P35435        | NASDMIDK                                                               | 0.83239539         | 1               | 2.12466  |
| P35435        | NDMAALTAAGK                                                            | 1.012502461        | 2               | 3.76902  |
| P35435        | THSDQFLVSFK                                                            | 1.051712186        | 1               | 2.87242  |
| P35435        | VYGTGSLALYEK                                                           | 1.384041976        | 2               | 3.45409  |
| <b>P35559</b> | <b>IDÉ Insulin_degrading enzyme</b>                                    | <b>1.247750448</b> | <b>0.228362</b> | <b>2</b> |
| P35559        | SNPGHYLGHLIGHEGPGSLLSELK                                               | 1.24728621         | 3               | 3.76113  |
| P35559        | YTLETRPNQEGIDVR                                                        | 1.270294442        | 2               | 2.51383  |
| <b>P35565</b> | <b>CALX Calnexin</b>                                                   | <b>1.047069005</b> | <b>0.999623</b> | <b>9</b> |
| P35565        | GSLSGWILSK                                                             | 0.798197324        | 2               | 2.35778  |
| P35565        | KIPNPDFFEDLEPFR                                                        | 1.099340296        | 3               | 4.96265  |
| P35565        | NKGDEEEEEKLEEK                                                         | 0.979006842        | 2               | 5.18369  |
| P35565        | SDTSTPPSPK                                                             | 0.901793572        | 2               | 2.88045  |
| P35565        | TDAPQPDVKDEEGKEEEK                                                     | 0.974369826        | 3               | 4.06679  |
| P35565        | TSELNLDQFHDK                                                           | 1.058283242        | 2               | 3.78415  |
| P35565        | VVDDWANDGWGLK                                                          | 0.96802207         | 2               | 3.71041  |
| P35565        | VVDDWANDGWGLKK                                                         | 0.748735374        | 2               | 3.29199  |
| P35565        | WEVDEMKETK                                                             | 1.049524448        | 2               | 2.55896  |
| <b>P35704</b> | <b>PRDX2 Peroxiredoxin_2</b>                                           | <b>1.13825684</b>  | <b>0.219209</b> | <b>4</b> |
| P35704        | EGGLGPLNIPLADVTK                                                       | 1.12763325         | 2               | 3.49647  |
| P35704        | KEGGLGPLNIPLADVTK                                                      | 1.230877086        | 2               | 4.73941  |
| P35704        | QITVNDLPVGR                                                            | 1.125967324        | 2               | 3.23353  |
| P35704        | SLSQNYGVLK                                                             | 1.076087283        | 2               | 2.55636  |
| <b>P35738</b> | <b>ODBB 2_oxoisovalerate dehydrogenase subunit beta_ mitochondrial</b> | <b>0.835332098</b> | <b>0.034537</b> | <b>4</b> |
| P35738        | GLLLSKIEDKNPCIFFEPK                                                    | 0.776246499        | 3               | 4.01304  |
| P35738        | IPLSQAEVIQEGSDVTLVAWGTQVHVIR                                           | 0.649389039        | 3               | 5.8539   |
| P35738        | MNLFSQITSALDNSLAK                                                      | 1.021392326        | 2               | 3.3925   |
| P35738        | SGDLFNCGLTIR                                                           | 0.77875937         | 2               | 3.53806  |
| <b>P35815</b> | <b>PPM1B Protein phosphatase 1B</b>                                    | <b>0.863523064</b> | <b>0.638463</b> | <b>3</b> |
| P35815        | ILSAENIPNLPPGGGLAGK                                                    | 1.11093538         | 2               | 2.50838  |
| P35815        | IQNAGGSVMIQR                                                           | 0.770927424        | 2               | 2.32354  |
| P35815        | SGFALEPSVENVK                                                          | 1.036178907        | 2               | 2.30695  |
| <b>P36201</b> | <b>CRIP2 Cysteine_rich protein 2</b>                                   | <b>1.096026387</b> | <b>0.917698</b> | <b>3</b> |
| P36201        | ASSVTFTGEPNMCPR                                                        | 1.710411444        | 2               | 3.65802  |
| P36201        | GVNIGGAGSYIYEKPPTEAPQVTGPIEVPVVR                                       | 0.986171469        | 3               | 5.91944  |
| P36201        | GVNTGAVGSYIYKDPPEGTVPQ                                                 | 1.139865254        | 2               | 4.87248  |
| <b>P36365</b> | <b>FMO1 Dimethylaniline monooxygenase [N_oxide_forming] 1</b>          | <b>0.908625341</b> | <b>0.997163</b> | <b>9</b> |
| P36365        | AILTQWDR                                                               | 0.994495936        | 1               | 2.03087  |
| P36365        | ALQSDYITYIDDLTINSINAKPDLR                                              | 1.333576521        | 3               | 3.98252  |
| P36365        | FTEHVEEGR                                                              | 0.920071716        | 2               | 3.38251  |
| P36365        | NLLPTPVVSWLISK                                                         | 1.083330766        | 2               | 2.58113  |
| P36365        | SCDLGGLWR                                                              | 1.000798122        | 2               | 2.69657  |
| P36365        | TQLREPVLNDELPGR                                                        | 0.879586501        | 3               | 4.01191  |
| P36365        | VAIVGAGVSGLASIK                                                        | 0.99635904         | 2               | 3.07229  |

|               |                                                 |                    |                 |           |
|---------------|-------------------------------------------------|--------------------|-----------------|-----------|
| P36365        | VEDGQASLYK                                      | 0.907124791        | 2               | 3.18402   |
| P36365        | VLVVGMGNSGTDIAVEASHLAK                          | 0.996286014        | 2               | 5.21891   |
| <b>P36511</b> | <b>UDB15 UDP-glucuronosyltransferase 2B15</b>   | <b>1.540478859</b> | <b>9.9E-20</b>  | <b>8</b>  |
| P36511        | ANIIAWALAIQIPQK                                 | 1.324104614        | 3               | 5.92539   |
| P36511        | FVTFPTSFSHDLENFFTR                              | 2.248836837        | 2               | 4.57459   |
| P36511        | GHEVTVLRPSAFVFLDPK                              | 1.77626965         | 3               | 3.64633   |
| P36511        | IILEELVQK                                       | 1.316128501        | 2               | 3.36893   |
| P36511        | NAMWLSTIHHDQPTKPLDR                             | 1.41951113         | 3               | 3.44583   |
| P36511        | NAMWLSTIHHDQPTKPLDR+Oxidation(3)                | 2.053808934        | 3               | 3.30852   |
| P36511        | SDLLNALEEVIDNPFYK                               | 1.223848894        | 3               | 5.30269   |
| P36511        | TLGRPTTLAEIMGK                                  | 1.625938416        | 3               | 3.58085   |
| <b>P36972</b> | <b>APT Adenine phosphoribosyltransferase</b>    | <b>1.04517023</b>  | <b>0.999589</b> | <b>3</b>  |
| P36972        | GFLFGPSLAQELGVGCVLIR                            | 1.082400923        | 2               | 4.20348   |
| P36972        | IDYIAGLDSR                                      | 0.989305626        | 2               | 2.47272   |
| P36972        | SFPDFPIPGVLFRR                                  | 1.03815513         | 2               | 3.07301   |
| <b>P37397</b> | <b>CNN3 Calponin_3</b>                          | <b>0.960040584</b> | <b>0.035678</b> | <b>4</b>  |
| P37397        | AGQSVIGLQMGNTK                                  | 0.956248476        | 2               | 2.72514   |
| P37397        | LTLQPVDNSTISLQMGNTK                             | 1.251672937        | 2               | 3.42462   |
| P37397        | VNESSLNWPQLENIGNFIK                             | 0.752871435        | 2               | 3.90163   |
| P37397        | YDQQAEDLR                                       | 0.834953537        | 2               | 2.8974    |
| <b>P38650</b> | <b>DYHC1 Cytoplasmic dynein 1 heavy chain 1</b> | <b>0.928907009</b> | <b>0.982604</b> | <b>5</b>  |
| P38650        | FGNPLLQDVESYDPVLPVNLNR                          | 1.001671843        | 2               | 3.56201   |
| P38650        | ILDDDTIITLLENLK                                 | 1.064300662        | 2               | 2.61655   |
| P38650        | VLRPQVTAQAQQNQGEAPEPQDMK                        | 0.832317045        | 3               | 5.07112   |
| P38650        | VQGLTVEQAEAVAR                                  | 0.983149985        | 2               | 2.96991   |
| P38650        | VTDFGDKVEDPTFLNQLQSGVNR                         | 0.911067246        | 3               | 3.66515   |
| <b>P38652</b> | <b>PGM1 Phosphoglucomutase_1</b>                | <b>0.966252508</b> | <b>0.054188</b> | <b>18</b> |
| P38652        | ADNFEYSDPVDGSISK                                | 1.079542715        | 2               | 4.92617   |
| P38652        | AIGGIILTASHNPGGPNDFGIK                          | 1.071453551        | 2               | 5.63218   |
| P38652        | FFGNLMDASK                                      | 1.141201982        | 2               | 2.59143   |
| P38652        | FNISNGGPAPEAITDK                                | 1.231523242        | 2               | 4.26755   |
| P38652        | IDAMHGVVGPYVK                                   | 0.831798849        | 2               | 2.96655   |
| P38652        | ILCEELGAPANSANVCVPLEDFGGHHPDNLTYAADLVETMK       | 1.987647566        | 3               | 3.37028   |
| P38652        | INQDPQVMLAPLISIALK                              | 1.165015488        | 2               | 3.58568   |
| P38652        | KQRVEDILK                                       | 0.866592948        | 1               | 2.01895   |
| P38652        | LSGTGSAGATIR                                    | 1.320363772        | 2               | 3.47282   |
| P38652        | LVIGQNGILSTPAVSCIIR                             | 1.561955896        | 2               | 4.77011   |
| P38652        | NIFDFNALK                                       | 1.063866398        | 2               | 2.48346   |
| P38652        | QEATLVVGGDGR                                    | 1.079671464        | 2               | 3.7008    |
| P38652        | QQFDLENK                                        | 1.021154098        | 1               | 2.09597   |
| P38652        | SFVGKQFSANDK                                    | 0.769082315        | 1               | 1.92402   |
| P38652        | SGEHDFGAADFDDGDR                                | 0.963261924        | 2               | 4.36454   |
| P38652        | TIEEYAIKDLK                                     | 1.124505908        | 2               | 3.7556    |
| P38652        | TQAYPDQKPGTSGLR                                 | 1.129261354        | 2               | 3.45616   |
| P38652        | YDYEEVEAEGANK                                   | 1.008000811        | 2               | 5.31785   |
| <b>P38656</b> | <b>LA Lupus La protein homolog</b>              | <b>1.156313616</b> | <b>0.016722</b> | <b>2</b>  |
| P38656        | ITDDQQESLNK                                     | 1.1549451          | 2               | 4.1279    |
| P38656        | LDEGWVPLEMIK                                    | 1.280910544        | 2               | 2.78254   |
| <b>P38659</b> | <b>PDIA4 Protein disulfide isomerase A4</b>     | <b>1.090207736</b> | <b>0.203048</b> | <b>20</b> |
| P38659        | DLGLSESGEDVNAAILDESGKK                          | 1.276244163        | 2               | 5.14518   |
| P38659        | DNDPPIAVAK                                      | 1.18118985         | 2               | 2.55454   |
| P38659        | EVSQPDWTPPPPEVTLTLTK                            | 1.088158429        | 2               | 3.57532   |
| P38659        | FDVSGYPTIK                                      | 1.110877033        | 2               | 2.96998   |
| P38659        | FDVSGYPTLK                                      | 1.110877033        | 2               | 2.96998   |
| P38659        | FIDEHATK                                        | 0.989633972        | 2               | 2.77238   |
| P38659        | GQAVDYDGSR                                      | 1.262133494        | 2               | 2.48268   |

|               |                                                                      |                    |                 |          |
|---------------|----------------------------------------------------------------------|--------------------|-----------------|----------|
| P38659        | GRPFDYNGPR                                                           | 1.110368984        | 2               | 2.64129  |
| P38659        | IDATSASMLASK                                                         | 1.225456884        | 2               | 4.09037  |
| P38659        | KGQAVDYDGSR                                                          | 1.197453943        | 2               | 2.96801  |
| P38659        | MDATANDITNDR                                                         | 1.086564326        | 2               | 3.63708  |
| P38659        | MHVMDVQGSTASAIK                                                      | 1.116383042        | 2               | 4.43626  |
| P38659        | MHVMDVQGSTASAIKDYYVK                                                 | 1.071912789        | 3               | 3.88319  |
| P38659        | RFDVSGYPTLK                                                          | 1.158239072        | 2               | 3.18527  |
| P38659        | RSPPIPLAK                                                            | 1.244280898        | 2               | 2.88553  |
| P38659        | TFDAIVMDPK                                                           | 1.060504257        | 1               | 2.00869  |
| P38659        | TQEEIVAK                                                             | 1.146271415        | 2               | 2.32662  |
| P38659        | VDATEQTDLAK                                                          | 1.084911806        | 2               | 3.58465  |
| P38659        | VEGFPTIYFAPSGDK                                                      | 2.506574048        | 2               | 3.25415  |
| P38659        | YGIVDYMVEQSGPPSK                                                     | 1.647161736        | 2               | 3.45641  |
| <b>P38718</b> | <b>BR44 Brain protein 44</b>                                         | <b>1.053122084</b> | <b>0.131369</b> | <b>3</b> |
| P38718        | LMDKVELLPK                                                           | 0.530963264        | 2               | 2.72155  |
| P38718        | LRPLYNHDPAGPR                                                        | 1.8380866          | 2               | 2.46548  |
| P38718        | YSLVIIPK                                                             | 1.196756284        | 2               | 2.35093  |
| <b>P38918</b> | <b>ARK73 Aflatoxin B1 aldehyde reductase member 3</b>                | <b>0.913368607</b> | <b>0.988576</b> | <b>7</b> |
| P38918        | FFGNPFSQLYMDR                                                        | 1.47906177         | 2               | 2.52821  |
| P38918        | FYAFNPLAGLLTGR                                                       | 1.388774743        | 2               | 4.75345  |
| P38918        | GHTEIDTAFVYANGQSETILGDLGLGLGR                                        | 0.994391996        | 3               | 4.96225  |
| P38918        | MDVTSSASVR                                                           | 0.808603833        | 2               | 3.77662  |
| P38918        | QVETELFPCLR                                                          | 0.940094281        | 2               | 2.55931  |
| P38918        | RMDVTSSASVR                                                          | 0.834293955        | 2               | 3.75681  |
| P38918        | TTYGPTAPSMISAAVR                                                     | 0.972903027        | 2               | 3.75915  |
| <b>P38983</b> | <b>RSSA 40S ribosomal protein SA</b>                                 | <b>1.129730975</b> | <b>2.22E-16</b> | <b>6</b> |
| P38983        | ADHQLPLEASYVNLPTIALCNTDSPLR                                          | 1.469577647        | 3               | 6.09168  |
| P38983        | AIVAIENPADVSVISSR                                                    | 1.130121496        | 2               | 4.77605  |
| P38983        | FLAAGTHLGGTNLDFQMEQYIYK                                              | 1.712489202        | 3               | 4.05691  |
| P38983        | FTPGFTNQIQAADR                                                       | 1.057523787        | 2               | 4.52958  |
| P38983        | SDGIYIINLK                                                           | 1.011665396        | 1               | 2.1205   |
| P38983        | YVDIAIPCNNK                                                          | 1.16803336         | 2               | 3.15111  |
| <b>P39032</b> | <b>RL36 60S ribosomal protein L36</b>                                | <b>1.125284475</b> | <b>0.386177</b> | <b>2</b> |
| P39032        | EELSNVLAAMRKAALK+Oxidation(10)                                       | 0.591320404        | 2               | 2.32587  |
| P39032        | KREELSNVLAAMR                                                        | 1.044232792        | 3               | 3.30133  |
| <b>P40112</b> | <b>PSB3 Proteasome subunit beta type_3</b>                           | <b>1.221023386</b> | <b>0.463869</b> | <b>2</b> |
| P40112        | FGIQAQMVTTDFQK                                                       | 1.028441008        | 2               | 3.98683  |
| P40112        | FGPYYTEPVIAGLDPK                                                     | 1.290668061        | 2               | 3.05282  |
| <b>P40307</b> | <b>PSB2 Proteasome subunit beta type_2</b>                           | <b>1.648974328</b> | <b>2.43E-08</b> | <b>3</b> |
| P40307        | FILNLPTFSVR                                                          | 1.721046027        | 2               | 2.85654  |
| P40307        | NGYELSPTAAANFTR                                                      | 1.274508465        | 2               | 4.03725  |
| P40307        | VIDKDGHNLENITFTK                                                     | 1.23440175         | 2               | 4.0365   |
| <b>P41034</b> | <b>TTPA Alpha_tocopherol transfer protein</b>                        | <b>1.402117141</b> | <b>2.98E-07</b> | <b>5</b> |
| P41034        | AECPELSADLHPR                                                        | 1.124577239        | 2               | 3.09518  |
| P41034        | AIFDLEGWQISHAFQITPSVAK                                               | 0.935923768        | 2               | 4.32278  |
| P41034        | AQEEGVPETPQPLTDAFLLR                                                 | 1.639396818        | 2               | 4.18517  |
| P41034        | GIHLINPEVIFHAVFSMIKPFLEK                                             | 1.144254256        | 4               | 4.89597  |
| P41034        | QLNEQPDHSPLVQPLAELR                                                  | 1.277213337        | 3               | 3.64149  |
| <b>P41123</b> | <b>RL13 60S ribosomal protein L13</b>                                | <b>1.178706502</b> | <b>0.289511</b> | <b>5</b> |
| P41123        | AITEEKNFK                                                            | 1.22700905         | 2               | 2.45519  |
| P41123        | LATQLTGPVMPPIR                                                       | 1.139934836        | 2               | 2.77896  |
| P41123        | STESLQANVQR                                                          | 1.103606027        | 2               | 4.00396  |
| P41123        | TIGISVDPR                                                            | 1.131628444        | 2               | 2.30872  |
| P41123        | VDTWFNQPAR                                                           | 1.155896928        | 2               | 3.15199  |
| <b>P41498</b> | <b>PPAC Low molecular weight phosphotyrosine protein phosphatase</b> | <b>1.124595043</b> | <b>0.002214</b> | <b>3</b> |
| P41498        | IDSAATSTYEVGNPPDYR                                                   | 1.046634526        | 2               | 4.65872  |

|               |                                                         |                    |                 |           |
|---------------|---------------------------------------------------------|--------------------|-----------------|-----------|
| P41498        | IELLGSYDPQK                                             | 1.324193365        | 2               | 3.66245   |
| P41498        | LVTDENVSDNWR                                            | 1.062039059        | 2               | 3.6891    |
| <b>P41542</b> | <b>USO1 General vesicular transport factor p115</b>     | <b>1.13269771</b>  | <b>0.013518</b> | <b>11</b> |
| P41542        | AETLAKSVPVEGESELVTAAK                                   | 0.843646452        | 3               | 3.32376   |
| P41542        | AWFEVGDENPGWSAQK                                        | 0.858354592        | 2               | 4.02573   |
| P41542        | CQNEQLQTAVTQQASQIQQHK                                   | 1.179306498        | 3               | 3.84782   |
| P41542        | IVAFENAFER                                              | 1.113805326        | 2               | 2.64204   |
| P41542        | LQTENSELQQR                                             | 1.191094951        | 2               | 3.05572   |
| P41542        | LREEIEELR                                               | 1.137524644        | 2               | 2.62176   |
| P41542        | QLGPPVQQIILVSPMGVSK                                     | 1.130147064        | 2               | 4.26816   |
| P41542        | SQLCSQSLEITR                                            | 1.142978949        | 2               | 2.94369   |
| P41542        | SVPVEGESELVTAAK                                         | 1.065153325        | 2               | 3.37481   |
| P41542        | TLEQHDNIVTHYK                                           | 1.072938004        | 2               | 3.80628   |
| P41542        | VLVSPTNPPGATSSCQK                                       | 1.184473128        | 2               | 3.872     |
| <b>P41562</b> | <b>IDHC Isocitrate dehydrogenase [NADP] cytoplasmic</b> | <b>1.450189819</b> | <b>9.9E-20</b>  | <b>18</b> |
| P41562        | ATDFVVPGPQK                                             | 1.183521371        | 2               | 3.38304   |
| P41562        | CATITPDEK                                               | 1.246564171        | 2               | 2.92148   |
| P41562        | CATITPDEKR                                              | 1.270988794        | 2               | 2.5026    |
| P41562        | FKDIFQEYDK                                              | 1.12356282         | 3               | 4.60652   |
| P41562        | GQETSTNPIASIFAWSR                                       | 1.545091827        | 2               | 5.30958   |
| P41562        | GWPLYLSTK                                               | 2.83231715         | 1               | 1.90683   |
| P41562        | IHGGSVEMQGDDEMTR                                        | 1.216227081        | 2               | 5.18174   |
| P41562        | IHWELIK                                                 | 1.248128873        | 2               | 2.3452    |
| P41562        | KIHGGSVEMQGDDEMTR                                       | 1.079270498        | 3               | 3.31821   |
| P41562        | LIDDMVAQAMK                                             | 1.126177407        | 2               | 4.4941    |
| P41562        | LILPYVELDLHSYDLGIENR                                    | 2.316265713        | 2               | 5.19776   |
| P41562        | LVTGWVKPIIIGR                                           | 1.441590065        | 2               | 3.35175   |
| P41562        | SDYLNTFFEMDK                                            | 1.449745484        | 2               | 4.43712   |
| P41562        | SEGGFIWACK                                              | 1.11998112         | 2               | 3.51202   |
| P41562        | SIEDFAHSSFQMALSK                                        | 1.08007681         | 2               | 4.9398    |
| P41562        | TVEAEAAHGTVTR                                           | 1.105122214        | 2               | 3.942     |
| P41562        | VEITYTPK                                                | 1.117901153        | 2               | 2.73946   |
| P41562        | VTYLVHDFEEGGVAMGMYNQDK                                  | 0.932865839        | 3               | 3.61574   |
| <b>P42123</b> | <b>LDHB L_lactate dehydrogenase B chain</b>             | <b>1.381035383</b> | <b>0.000167</b> | <b>5</b>  |
| P42123        | DYSVTANSK                                               | 1.113983785        | 2               | 2.82196   |
| P42123        | IVADKDYSVTANSK                                          | 3.81017732         | 2               | 2.78346   |
| P42123        | LIAPVADDEAVPNNK                                         | 1.294103212        | 2               | 2.58465   |
| P42123        | SLADELALVDVLEDK                                         | 1.262795241        | 2               | 2.9504    |
| P42123        | VIGSGCNLDSAR                                            | 1.233691782        | 2               | 3.80428   |
| <b>P42930</b> | <b>HSPB1 Heat shock protein beta_1</b>                  | <b>3.79087099</b>  | <b>0.330704</b> | <b>2</b>  |
| P42930        | AQIGGPESEQSGAK                                          | 5.477589883        | 2               | 3.89039   |
| P42930        | VSLDVNHFAPEELTVK                                        | 2.166285108        | 2               | 3.43202   |
| <b>P42932</b> | <b>TCPQ T_complex protein 1 subunit theta</b>           | <b>1.261589722</b> | <b>2.22E-16</b> | <b>9</b>  |
| P42932        | AIAGTGANVIVTGGK                                         | 1.287349431        | 2               | 3.83306   |
| P42932        | ELEVQHPAAK                                              | 1.264275885        | 2               | 2.98429   |
| P42932        | GEENLMDAQVK                                             | 1.219035455        | 2               | 3.56911   |
| P42932        | GSTDNLMDDIER                                            | 1.12574128         | 2               | 2.92618   |
| P42932        | HEKEDGAISTIVLR                                          | 1.077010358        | 2               | 2.78816   |
| P42932        | LFVTNDAATILR                                            | 1.569234919        | 2               | 2.99851   |
| P42932        | LYSVHQEGNK                                              | 1.486665551        | 2               | 2.67767   |
| P42932        | NVGLDIEAEVPAVK                                          | 1.016198924        | 2               | 3.68756   |
| P42932        | QITSYGETCPGLEQYAIK                                      | 1.459038203        | 2               | 4.84416   |
| <b>P43244</b> | <b>MATR3 Matrin_3</b>                                   | <b>1.304250156</b> | <b>1.28E-06</b> | <b>3</b>  |
| P43244        | ITPENLPQILLQK                                           | 1.177513333        | 2               | 3.57897   |
| P43244        | TENPAEGKEQEEK                                           | 1.360982223        | 2               | 3.31458   |
| P43244        | YQLLQLVEPFGVISNHLILNK                                   | 1.436330553        | 3               | 4.06101   |
| <b>P43274</b> | <b>H14 Histone H1.4</b>                                 | <b>1.024262216</b> | <b>0.999788</b> | <b>3</b>  |

|               |                                                                            |                    |                 |           |
|---------------|----------------------------------------------------------------------------|--------------------|-----------------|-----------|
| P43274        | ALAAAGYDVEK                                                                | 1.074103722        | 2               | 3.69207   |
| P43274        | SGVSLAALK                                                                  | 0.991671714        | 2               | 3.14036   |
| P43274        | SGVSLAALKK                                                                 | 0.95018192         | 2               | 2.47759   |
| <b>P43276</b> | <b>H15 Histone H1.5</b>                                                    | <b>1.411106086</b> | <b>2.37E-09</b> | <b>2</b>  |
| P43276        | ALAAGGYDVEK                                                                | 1.584236977        | 2               | 2.77406   |
| P43276        | ATGPPVSELITK                                                               | 1.409558703        | 2               | 2.96775   |
| <b>P43278</b> | <b>H10 Histone H1.0</b>                                                    | <b>0.843543286</b> | <b>0.98779</b>  | <b>2</b>  |
| P43278        | VGENADSQIK                                                                 | 1.029870753        | 2               | 3.4313    |
| P43278        | YSDMIVAAIQAEK                                                              | 0.847225669        | 2               | 4.26101   |
| <b>P43424</b> | <b>GALT Galactose_1_phosphate uridylyltransferase</b>                      | <b>1.021582879</b> | <b>0.12031</b>  | <b>2</b>  |
| P43424        | HDPLNPLCPGATR                                                              | 1.150609782        | 2               | 2.87984   |
| P43424        | YNPLQDEWLVLSAHR                                                            | 0.925651795        | 2               | 2.43934   |
| <b>P45591</b> | <b>COF2 Cofilin_2</b>                                                      | <b>1.279771715</b> | <b>0.244608</b> | <b>4</b>  |
| P45591        | HEWQVNGLDDIKDR                                                             | 1.327851318        | 3               | 4.20629   |
| P45591        | KEDLVFIFWAPESAPLK                                                          | 1.163764985        | 2               | 3.91105   |
| P45591        | MASGVTVNDEVIK                                                              | 0.999891602        | 2               | 2.48342   |
| P45591        | QILVGDIGDTPVDFPYTSFVK                                                      | 1.292381511        | 2               | 5.17449   |
| <b>P45592</b> | <b>COF1 Cofilin_1</b>                                                      | <b>1.202865106</b> | <b>0.000298</b> | <b>4</b>  |
| P45592        | HELQANCYEEVK                                                               | 0.957427181        | 2               | 3.31926   |
| P45592        | HELQANCYEEVKDR                                                             | 1.121687523        | 3               | 5.49316   |
| P45592        | LGGSAVISLEGKPL                                                             | 1.726483799        | 2               | 2.43126   |
| P45592        | NIILEEGKEILVGDVGGTVDPPYTTFFVK                                              | 1.30026914         | 2               | 5.01927   |
| <b>P45878</b> | <b>FKBP2 Peptidyl_prolyl_cis_trans isomerase FKBP2</b>                     | <b>1.216298675</b> | <b>0.006582</b> | <b>3</b>  |
| P45878        | GWDQGLLMCEGEK                                                              | 1.015859792        | 2               | 2.83241   |
| P45878        | LEDGTEFDSSLPQNPVFSLGTGQVIK                                                 | 1.301883072        | 2               | 3.70519   |
| P45878        | LVIPSELGYGER                                                               | 1.42814268         | 2               | 2.40152   |
| <b>P45953</b> | <b>ACADV Very long_chain specific acyl_CoA dehydrogenase_mitochondrial</b> | <b>1.032003725</b> | <b>5.16E-07</b> | <b>20</b> |
| P45953        | AMVENGLVTSNPLR                                                             | 1.027254517        | 2               | 2.74011   |
| P45953        | AMVENGLVTSNPLRV                                                            | 1.340316302        | 2               | 4.14083   |
| P45953        | ASNTSEVYFDGVK                                                              | 1.147543263        | 2               | 3.50923   |
| P45953        | ELGAFGLQVPSELGGLSNTQYAR                                                    | 1.01720508         | 2               | 4.65542   |
| P45953        | ENMASLQSNPQQQLFR                                                           | 1.286082562        | 2               | 3.89206   |
| P45953        | FFEEVNDPAK                                                                 | 0.769799451        | 2               | 2.70845   |
| P45953        | FFEEVNDPAKNDSLEKVEEDTLQGLK                                                 | 1.13733046         | 3               | 4.56346   |
| P45953        | GIVNEQFLQQR                                                                | 1.255444515        | 2               | 3.21919   |
| P45953        | IFEGTNDILR                                                                 | 1.312130581        | 2               | 3.00359   |
| P45953        | IFGSEAAWK                                                                  | 1.107553809        | 2               | 2.6545    |
| P45953        | IHNFGVIQEK                                                                 | 1.372945117        | 2               | 2.31413   |
| P45953        | LFVALQGCMDK                                                                | 1.142690286        | 2               | 2.48386   |
| P45953        | NDSLEKVEEDTLQGLK                                                           | 1.170160275        | 2               | 3.59415   |
| P45953        | NPLGNVGLLIGEASK                                                            | 1.232732113        | 2               | 2.68241   |
| P45953        | SFGGVTHGLPEK                                                               | 1.060419235        | 2               | 2.71757   |
| P45953        | SFGGVTHGLPEKK                                                              | 1.083680187        | 2               | 2.3846    |
| P45953        | SGELAVQALEQFATVVEAK                                                        | 1.064464546        | 3               | 4.95509   |
| P45953        | SLSEGYPTAQHEK                                                              | 1.147795081        | 2               | 3.34773   |
| P45953        | TGIGSGLSLGIVHPELSR                                                         | 1.015677808        | 2               | 4.32117   |
| P45953        | VEEDTLQGLK                                                                 | 0.909740091        | 2               | 2.58883   |
| <b>P46418</b> | <b>GSTA5 Glutathione S_transferase alpha_5</b>                             | <b>1.071431814</b> | <b>0.996887</b> | <b>4</b>  |
| P46418        | AILNYIATK                                                                  | 1.263236283        | 2               | 3.37272   |
| P46418        | SDGSLMFEQVPMVEIDGMK                                                        | 0.915975579        | 2               | 3.54575   |
| P46418        | SHGQDYLVGNK                                                                | 0.863890854        | 2               | 3.56964   |
| P46418        | VSNLPTVK                                                                   | 1.072934676        | 2               | 2.85972   |
| <b>P46425</b> | <b>GSTP2 Glutathione S_transferase P 2</b>                                 | <b>1.10187575</b>  | <b>0.979315</b> | <b>2</b>  |
| P46425        | ALPGHLKPFETLLSQNQGGK                                                       | 0.994014616        | 2               | 4.46159   |
| P46425        | FEDGDLTLYQSNAILR                                                           | 1.206706013        | 2               | 4.53766   |
| <b>P46462</b> | <b>TERA Transitional endoplasmic reticulum ATPase</b>                      | <b>1.105566967</b> | <b>9.53E-06</b> | <b>25</b> |

|               |                                                                                           |                    |                 |          |
|---------------|-------------------------------------------------------------------------------------------|--------------------|-----------------|----------|
| P46462        | AIANECQANFISIK                                                                            | 1.761188736        | 2               | 2.49413  |
| P46462        | EAVCIVLSDDTCSDEK                                                                          | 1.182180059        | 2               | 3.74773  |
| P46462        | EDEEESLNEVGYYDDGGCR                                                                       | 0.895691127        | 2               | 4.84905  |
| P46462        | ELQELVQYPVEHPDK                                                                           | 1.092989236        | 2               | 4.626    |
| P46462        | ETVVEVPQVTWEDIGLEDVK                                                                      | 0.970099156        | 2               | 3.10006  |
| P46462        | ETVVEVPQVTWEDIGLEDVVK                                                                     | 1.035909319        | 2               | 4.12254  |
| P46462        | EVDIGIPDATGR                                                                              | 0.989441704        | 2               | 3.14481  |
| P46462        | GDDLSTAILK                                                                                | 0.898679053        | 2               | 2.97287  |
| P46462        | GGNIGDGGGAADR                                                                             | 1.084517849        | 2               | 3.20127  |
| P46462        | GILLYGPPGTGK                                                                              | 1.037136516        | 2               | 3.57533  |
| P46462        | IVSQLLTLMDGLK                                                                             | 1.953935842        | 2               | 4.22018  |
| P46462        | KYEMFAQTLQQSR                                                                             | 0.854241507        | 2               | 3.0458   |
| P46462        | LADDVDLEQVANETHGHVGADLAALCSEALQAIR                                                        | 1.462983526        | 3               | 6.79241  |
| P46462        | LAGESESNLKAFEEAEK                                                                         | 0.880107187        | 2               | 2.42502  |
| P46462        | LDQLIYIPLPEK                                                                              | 1.052699143        | 2               | 4.84703  |
| P46462        | LEILQIHTK                                                                                 | 1.058703503        | 2               | 2.91263  |
| P46462        | LGDVISIQPCPDVK                                                                            | 1.111101521        | 2               | 4.46849  |
| P46462        | LIVDEAINEDNSVVSLSQPK                                                                      | 1.096221331        | 2               | 5.3288   |
| P46462        | MDELQLFR                                                                                  | 0.945110319        | 2               | 3.19999  |
| P46462        | MTNGFSGADLTEICQR                                                                          | 1.070006945        | 2               | 4.51709  |
| P46462        | NAPAIIFIDELDAIPK                                                                          | 1.426913956        | 3               | 5.10948  |
| P46462        | NVFIIGATNRPDIIDPAILRPGR                                                                   | 1.093268539        | 3               | 4.19927  |
| P46462        | QTNPSAMEVEEDDPVPEIR                                                                       | 1.038882832        | 2               | 4.61157  |
| P46462        | RSVSDNDIR                                                                                 | 1.374885484        | 2               | 2.65865  |
| P46462        | WALSQSNPSALR                                                                              | 1.243161434        | 2               | 2.59913  |
| <b>P46664</b> | <b>PURA2 Adenylosuccinate synthetase isozyme 2</b>                                        | <b>1.363669927</b> | <b>0.005292</b> | <b>3</b> |
| P46664        | FIEDELQIPVK                                                                               | 1.32216959         | 2               | 3.16551  |
| P46664        | VGIGAFPTEQDNEIGELLQTR                                                                     | 1.335479484        | 2               | 4.3044   |
| P46664        | VVDLLAQDADIVCR                                                                            | 1.26833541         | 2               | 3.09316  |
| <b>P46720</b> | <b>SO1A1 Solute carrier organic anion transporter family member 1A1</b>                   | <b>1.228806111</b> | <b>0.000986</b> | <b>3</b> |
| P46720        | GIGETPIVPLGISYIEDFAK                                                                      | 1.231105923        | 2               | 3.58987  |
| P46720        | GVQHQLHVESK                                                                               | 1.073438477        | 2               | 3.23878  |
| P46720        | SENSPLYIGILEMGK                                                                           | 1.372188817        | 2               | 3.21857  |
| <b>P46844</b> | <b>BIEA Biliverdin reductase A</b>                                                        | <b>0.926606819</b> | <b>0.994165</b> | <b>3</b> |
| P46844        | FGVVVGVGR                                                                                 | 0.949917285        | 2               | 2.4756   |
| P46844        | LLDQVSAEDLAAEK                                                                            | 1.077122868        | 2               | 3.80795  |
| P46844        | MTVQLETQNK                                                                                | 0.924911263        | 2               | 2.81446  |
| <b>P46953</b> | <b>3HAO 3_hydroxyanthranilate 3_4_dioxygenase</b>                                         | <b>1.071228191</b> | <b>0.750885</b> | <b>6</b> |
| P46953        | AQGSVALSVTQDPACK                                                                          | 1.015110019        | 2               | 4.41112  |
| P46953        | ASFQPPVCNK                                                                                | 1.029195422        | 2               | 2.67398  |
| P46953        | DLGTQLAPIIQEFFHSEQYR                                                                      | 0.965962576        | 2               | 3.16549  |
| P46953        | QDQDVWLWQLEGSSK                                                                           | 1.672210857        | 2               | 3.30927  |
| P46953        | TGKPNPDQLLK                                                                               | 1.087543424        | 3               | 3.5937   |
| P46953        | YYVGDTEDVLFVK                                                                             | 1.280365579        | 2               | 4.0523   |
| <b>P46978</b> | <b>STT3A Dolichyl_diphosphooligosaccharide__protein glycosyltransferase subunit STT3A</b> | <b>1.230597537</b> | <b>0.065247</b> | <b>4</b> |
| P46978        | FGQVYTEAK                                                                                 | 1.363201926        | 2               | 2.60228  |
| P46978        | FYSLLDPSYAK                                                                               | 1.153388634        | 2               | 3.09393  |
| P46978        | VGQAMASTEEL                                                                               | 1.142046366        | 2               | 3.20413  |
| P46978        | VGQAMASTEEL+Oxidation(5)                                                                  | 1.462556936        | 2               | 2.62265  |
| <b>P47198</b> | <b>RL22 60S ribosomal protein L22</b>                                                     | <b>1.159443976</b> | <b>3.15E-05</b> | <b>2</b> |
| P47198        | AGNLGGGVVTIER                                                                             | 1.146687771        | 2               | 3.16188  |
| P47198        | FTLDCTHPVEDGIMDAANFEQLQER                                                                 | 1.849801734        | 3               | 4.8724   |
| <b>P47875</b> | <b>CSRP1 Cysteine and glycine_rich protein 1</b>                                          | <b>1.422017722</b> | <b>1.11E-16</b> | <b>4</b> |
| P47875        | GFGFGQGAGALVHSE                                                                           | 1.362264351        | 2               | 3.07969  |

|               |                                                          |                    |                 |           |
|---------------|----------------------------------------------------------|--------------------|-----------------|-----------|
| P47875        | GLESTTLADKDG EIYCK                                       | 1.552707816        | 2               | 4.98059   |
| P47875        | HEEAPGHRPTTNP NASK                                       | 1.69472066         | 3               | 3.49772   |
| P47875        | NLDSTTVAVHGEEIYCK                                        | 1.069385876        | 2               | 4.35392   |
| <b>P47942</b> | <b>DPYL2 Dihydropyrimidinase_related protein 2</b>       | <b>1.126775801</b> | <b>0.658484</b> | <b>3</b>  |
| P47942        | GLYDGPVCEVSVTPK                                          | 1.12063894         | 2               | 3.58165   |
| P47942        | QIGENLIVPGGVK                                            | 1.092854365        | 2               | 2.43901   |
| P47942        | SITIANQTNCLYVTK                                          | 1.34610421         | 2               | 3.28904   |
| <b>P48004</b> | <b>PSA7 Proteasome subunit alpha type_7</b>              | <b>1.114350285</b> | <b>0.818701</b> | <b>2</b>  |
| P48004        | NYTDDAIETDDLTIK                                          | 1.159398301        | 2               | 4.70678   |
| P48004        | YVAEIEKEKEENEK                                           | 0.934128561        | 2               | 4.02836   |
| <b>P48037</b> | <b>ANXA6 Annexin A6</b>                                  | <b>1.051931738</b> | <b>9.6E-05</b>  | <b>17</b> |
| P48037        | AANDFNPDAK                                               | 1.04707511         | 2               | 2.90519   |
| P48037        | AINEAYKEDYHK                                             | 1.086318671        | 2               | 3.38411   |
| P48037        | ALIEILATR                                                | 1.10047556         | 2               | 3.49588   |
| P48037        | ALLALCGGED                                               | 1.219051353        | 1               | 2.19062   |
| P48037        | DLESDIIGDTSGHFQK                                         | 0.972745149        | 2               | 4.26092   |
| P48037        | ENDDVVSEDLVQQDVQDLYEAGELK                                | 1.074108991        | 3               | 5.08962   |
| P48037        | GELSGDFEK                                                | 0.951477838        | 1               | 2.06956   |
| P48037        | GFGSDKESILELITSR                                         | 0.993670182        | 2               | 4.13214   |
| P48037        | GIGTDEATIIDIITQR                                         | 1.022256433        | 3               | 4.10299   |
| P48037        | GSVHDFADFANQDAEALYTAMK                                   | 1.525833253        | 2               | 6.12828   |
| P48037        | QRQEICQSYK                                               | 1.288731952        | 2               | 3.27695   |
| P48037        | SEIDLLNIR                                                | 1.341204774        | 2               | 3.11228   |
| P48037        | SLEDALSSDTSGHFK                                          | 0.975432003        | 2               | 3.28851   |
| P48037        | TNEQIHQLVAAYK                                            | 0.982182195        | 2               | 3.87286   |
| P48037        | TNYDIEHVIK                                               | 0.929398712        | 2               | 3.23861   |
| P48037        | TTGKPIEASIR                                              | 1.010115617        | 2               | 2.50303   |
| P48037        | WGTDEAQFIYILGNR                                          | 1.933834206        | 2               | 2.34777   |
| <b>P48500</b> | <b>TPIS Triosephosphate isomerase</b>                    | <b>1.079260508</b> | <b>3.87E-13</b> | <b>12</b> |
| P48500        | CNVSEGVAQCTR                                             | 1.167271714        | 2               | 3.83233   |
| P48500        | DLGATWVVLGHSER                                           | 1.10010673         | 2               | 4.00604   |
| P48500        | ELASQPDVDGFLVGGASLKPEFVDIINAK                            | 1.070368312        | 4               | 5.37006   |
| P48500        | FFVGGNWK                                                 | 1.259955806        | 1               | 1.99296   |
| P48500        | HIFGESDELIGQK                                            | 1.171804257        | 2               | 4.00285   |
| P48500        | IYGGSVTGATCK                                             | 1.515991275        | 2               | 4.168     |
| P48500        | KFFVGGNWKMNGR                                            | 0.962372103        | 2               | 2.31023   |
| P48500        | LPADTEVVCAPPTAYIDFAR                                     | 0.216473857        | 2               | 4.47262   |
| P48500        | RHIFGESDELIGQK                                           | 1.115909265        | 2               | 4.29209   |
| P48500        | TATPQQAQEVHEK                                            | 1.073214599        | 2               | 3.6331    |
| P48500        | VNHALSEGLGVIACIGEK                                       | 1.146797189        | 2               | 5.17903   |
| P48500        | VVLAYEPVWAIGTGK                                          | 1.119101843        | 2               | 4.13484   |
| <b>P48508</b> | <b>GSH0 Glutamate_cysteine ligase regulatory subunit</b> | <b>0.820948169</b> | <b>0.000393</b> | <b>6</b>  |
| P48508        | ASTLHLQTNLLNWGR                                          | 1.093168447        | 3               | 3.83891   |
| P48508        | EFPDVLECTMSHAVEK                                         | 0.906715037        | 2               | 3.76887   |
| P48508        | INPDEREEMK                                               | 0.965694165        | 2               | 2.47253   |
| P48508        | LFIVGSN SSSSTR                                           | 0.832431224        | 2               | 3.511     |
| P48508        | QFDIQLLTHNDPK                                            | 1.288239968        | 2               | 2.61266   |
| P48508        | TLNEWSSQISPDLVR                                          | 0.665100417        | 2               | 4.62907   |
| <b>P48675</b> | <b>DESM Desmin</b>                                       | <b>1.776051528</b> | <b>0.454755</b> | <b>3</b>  |
| P48675        | FLEQQNAALAAEVNR                                          | 1.685506394        | 2               | 4.23189   |
| P48675        | HQIQSYTCEIDALK                                           | 1.898552324        | 2               | 3.55277   |
| P48675        | VSDLTQAANK                                               | 2.054639829        | 2               | 2.85098   |
| <b>P48679</b> | <b>LMNA Prelamin_A/C</b>                                 | <b>1.048240862</b> | <b>0.998623</b> | <b>14</b> |
| P48679        | AQHEDQVEQYK                                              | 0.935216435        | 2               | 2.69916   |
| P48679        | AQHEDQVEQYKK                                             | 1.096297624        | 2               | 4.38035   |
| P48679        | IDSLSAQLSQLQK                                            | 0.874460851        | 2               | 3.04106   |



|               |                                              |                    |                 |           |
|---------------|----------------------------------------------|--------------------|-----------------|-----------|
| P48679        | ITESEEVSR                                    | 0.999726201        | 2               | 2.83299   |
| P48679        | LQEKEDLQELNDR                                | 1.105227957        | 2               | 4.02747   |
| P48679        | MQQQLDEYQELLDIK                              | 1.392297797        | 2               | 4.88483   |
| P48679        | NSNLVGAACHEELQQSR                            | 0.932373445        | 2               | 4.60954   |
| P48679        | SGAASSTPLSPTR                                | 1.028044021        | 2               | 3.62306   |
| P48679        | SLETENAGLR                                   | 2.013119893        | 2               | 2.62883   |
| P48679        | SVGGSGGGSGFDNLVTR                            | 1.075858862        | 2               | 3.43242   |
| P48679        | TALINATGEEVAMR                               | 1.017325844        | 2               | 2.84751   |
| P48679        | TVLCGTCGQPADK                                | 1.050194833        | 2               | 2.83458   |
| P48679        | VAVEEVDEEGK                                  | 0.936666184        | 2               | 3.03741   |
| P48679        | VAVEEVDEEGKFVR                               | 1.133161829        | 2               | 2.94026   |
| <b>P48721</b> | <b>GRP75 Stress_70 protein_mitochondrial</b> | <b>1.042849175</b> | <b>0.037949</b> | <b>27</b> |
| P48721        | AQFEGIVTDLIK                                 | 0.979425478        | 2               | 3.83907   |
| P48721        | ASNGDAWVEAHGK                                | 0.989642835        | 2               | 3.65995   |
| P48721        | DAGQISGLNVLR                                 | 1.07820811         | 2               | 3.50306   |
| P48721        | EEISKMRELLAR                                 | 1.176035907        | 2               | 2.4372    |
| P48721        | EQQIVIQSSGGLSK                               | 0.921334725        | 2               | 3.71297   |
| P48721        | EQQIVIQSSGGLSKDDIENMVK                       | 0.898482759        | 2               | 4.76849   |
| P48721        | ERVEAVNMAEGIIHDTETK                          | 0.995778637        | 3               | 5.58763   |
| P48721        | GAVVGIDLGTTNSCVAVMEGK                        | 0.928999913        | 2               | 5.06986   |
| P48721        | LFEMAYK                                      | 1.225466505        | 2               | 2.35284   |
| P48721        | LLGQFTLIGIPPAPR                              | 1.6531627          | 2               | 3.36812   |
| P48721        | MEEFKDQLPADECNK                              | 0.943636124        | 2               | 4.55342   |
| P48721        | MEEFKDQLPADECNK+Oxidation(1)                 | 1.014197441        | 2               | 3.96765   |
| P48721        | MKETAENYLGHATAK                              | 0.98061141         | 2               | 4.21688   |
| P48721        | MKETAENYLGHATAK+Oxidation(1)                 | 1.09645264         | 3               | 3.37378   |
| P48721        | NAVITVPAYFNDSQR                              | 1.120636313        | 2               | 3.15721   |
| P48721        | QAVTNPNTFYATK                                | 1.299405193        | 2               | 3.41806   |
| P48721        | RYDDPEVQK                                    | 1.008442742        | 2               | 2.9515    |
| P48721        | RYDDPEVQKDTK                                 | 1.082144586        | 2               | 3.75635   |
| P48721        | SDIGEVILVGGMTR                               | 1.014211633        | 2               | 4.03548   |
| P48721        | SQVFSTAADGQTQVEIK                            | 2.37641911         | 2               | 5.31332   |
| P48721        | STNGDFTLGGEDFDQALLR                          | 1.163289247        | 2               | 5.31988   |
| P48721        | TTPSVVAFTPDGER                               | 0.974561599        | 2               | 3.55076   |
| P48721        | VEAVNMAEGIIHDTETK                            | 1.04151695         | 2               | 4.38138   |
| P48721        | VINEPTAAALAYGLDK                             | 1.196545557        | 1               | 3.38124   |
| P48721        | VLENAEGAR                                    | 1.058116679        | 2               | 3.13885   |
| P48721        | VQQTVDLDFGR                                  | 1.025987081        | 2               | 3.49026   |
| P48721        | YDDPEVQKDTK                                  | 0.940855478        | 2               | 2.92733   |
| <b>P48998</b> | <b>INVO Involucrin</b>                       | <b>1.109163632</b> | <b>0.490648</b> | <b>2</b>  |
| P48998        | ELLDQRDLQELVNK                               | 1.136001189        | 2               | 2.42077   |
| P48998        | HKLENLTQKEK                                  | 0.908783418        | 1               | 1.96573   |
| <b>P49025</b> | <b>CTRO Citron Rho_interacting kinase</b>    | <b>1.053780778</b> | <b>0.683856</b> | <b>2</b>  |
| P49025        | LLMIAGEERALCLVDVK+Oxidation(3)               | 1.230506416        | 2               | 2.32518   |
| P49025        | LMMNQLEEDLVSARR+Oxidation(2)                 | 0.962945792        | 2               | 2.35252   |
| <b>P49134</b> | <b>ITB1 Integrin beta_1</b>                  | <b>0.961776005</b> | <b>0.784662</b> | <b>4</b>  |
| P49134        | CNCQSHGIPASPK                                | 1.292915496        | 2               | 3.20407   |
| P49134        | FCECDNFNCDR                                  | 0.894874655        | 2               | 3.45995   |
| P49134        | GICECGACK                                    | 0.816123606        | 2               | 2.31819   |
| P49134        | WDTGENPIYK                                   | 1.007944778        | 2               | 2.38471   |
| <b>P49242</b> | <b>RS3A 40S ribosomal protein S3a</b>        | <b>1.219890922</b> | <b>4.1E-10</b>  | <b>10</b> |
| P49242        | ACQSIYPLHDVFR                                | 1.222422735        | 2               | 3.77887   |
| P49242        | ADGYEPPVQESV                                 | 1.079672017        | 1               | 2.00973   |
| P49242        | EVQTNDLKEVVNK                                | 1.30942242         | 2               | 2.33177   |
| P49242        | LIPDSIGKDIEK                                 | 1.19025642         | 2               | 2.90762   |
| P49242        | LITEDVQGK                                    | 1.216174382        | 2               | 2.3583    |
| P49242        | LMELHGEVGGSSGK                               | 1.01707088         | 2               | 3.23415   |

|               |                                                                             |                    |                 |           |
|---------------|-----------------------------------------------------------------------------|--------------------|-----------------|-----------|
| P49242        | LMELHGEGSSGK+Oxidation(2)                                                   | 1.008665468        | 2               | 3.10339   |
| P49242        | NCLTNFHGMDLTR                                                               | 1.325370353        | 2               | 4.15799   |
| P49242        | TTDGYLLR                                                                    | 1.228991896        | 2               | 2.99135   |
| P49242        | VFEVSLADLQNDEVAFR                                                           | 1.366023424        | 2               | 4.78931   |
| <b>P49432</b> | <b>ODPB Pyruvate dehydrogenase E1 component subunit beta_ mitochondrial</b> | <b>1.070016592</b> | <b>0.93644</b>  | <b>5</b>  |
| P49432        | EAINQGMDEELERDEK                                                            | 0.976218532        | 2               | 2.84862   |
| P49432        | ILEDNSIPQVK                                                                 | 1.048397595        | 2               | 3.46109   |
| P49432        | IMEGPAFNFLDAPAVR                                                            | 1.115252616        | 2               | 4.55876   |
| P49432        | TIRPMDIEAIEASVMK                                                            | 1.301271422        | 2               | 3.42691   |
| P49432        | VFLLGEEVAQYDGAYK                                                            | 0.905302756        | 2               | 3.50198   |
| <b>P49889</b> | <b>ST1E3 Estrogen sulfotransferase_ isoform 3</b>                           | <b>1.17913074</b>  | <b>0.54655</b>  | <b>10</b> |
| P49889        | CKEDALFNR                                                                   | 2.569094029        | 2               | 2.37593   |
| P49889        | FEEHYQQQMK                                                                  | 0.966520938        | 2               | 2.95486   |
| P49889        | FMEGQVPYGSWYDHVK                                                            | 1.31997834         | 2               | 4.33529   |
| P49889        | IIQHTSFQEMK                                                                 | 0.84371706         | 2               | 3.21638   |
| P49889        | LIEFLERDPSAELVDR                                                            | 1.134138533        | 3               | 4.73022   |
| P49889        | NEDLINGIK                                                                   | 1.064621139        | 2               | 2.91521   |
| P49889        | NNPCTNYSMLPETMIDLK                                                          | 1.394971301        | 2               | 4.36493   |
| P49889        | NNPCTNYSMLPETMIDLK+Oxidation(14)                                            | 1.01747146         | 2               | 3.11272   |
| P49889        | NNPCTNYSMLPETMIDLK+Oxidation(9)                                             | 1.01747146         | 2               | 4.14632   |
| P49889        | SGSTWISEIVDMIYK                                                             | 1.547226949        | 2               | 4.7541    |
| <b>P50137</b> | <b>TKT Transketolase</b>                                                    | <b>1.21621634</b>  | <b>0.001149</b> | <b>20</b> |
| P50137        | AVELAANTK                                                                   | 1.136536121        | 1               | 1.97168   |
| P50137        | GITGIEDK                                                                    | 1.029816485        | 1               | 2.42631   |
| P50137        | HQPTAIIAK                                                                   | 1.000689858        | 2               | 2.51309   |
| P50137        | IIALDGDTK                                                                   | 1.181541914        | 2               | 2.66882   |
| P50137        | ILATPPQEDAPSVDIANIR                                                         | 1.312181505        | 3               | 4.9233    |
| P50137        | ILTVEDHYEYEGGIGEAUSAVVVGEPGVTVTR                                            | 2.245600914        | 3               | 3.82125   |
| P50137        | ISSDLDGHPVPK                                                                | 1.117083775        | 2               | 3.3523    |
| P50137        | KISSDLDGHPVPK                                                               | 1.194747716        | 2               | 4.05001   |
| P50137        | LDNLVAIFDINR                                                                | 1.185623134        | 2               | 4.75331   |
| P50137        | LGQSDPAPLQHQQVDVYQK                                                         | 1.374081149        | 2               | 3.74267   |
| P50137        | MFGIDKDAIVQAVK                                                              | 1.068608833        | 2               | 4.38169   |
| P50137        | NMAEQIIQEIYSQVQSK                                                           | 1.081004545        | 3               | 6.51389   |
| P50137        | NSTFSELFK                                                                   | 1.059803709        | 2               | 2.45201   |
| P50137        | SGKPAELLK                                                                   | 1.0280605          | 3               | 3.42726   |
| P50137        | SKDDQVTVIGAGVTLHEALAAAEMLK                                                  | 1.102163429        | 3               | 5.44611   |
| P50137        | SKDDQVTVIGAGVTLHEALAAAEMLKK                                                 | 1.070818635        | 4               | 5.5505    |
| P50137        | SVPMSTVFYPSDGVATEK                                                          | 1.060472574        | 2               | 4.6903    |
| P50137        | TSRPENAIIYSNNEDFQVGGQAK                                                     | 1.24610672         | 3               | 5.59637   |
| P50137        | VLDPFTIKPLDK                                                                | 1.222851318        | 2               | 3.49277   |
| P50137        | VLDPFTIKPLDKK                                                               | 1.06271276         | 2               | 2.4389    |
| <b>P50169</b> | <b>RDH3 Retinol dehydrogenase 3</b>                                         | <b>1.190547151</b> | <b>5.88E-14</b> | <b>9</b>  |
| P50169        | AMESLVNTCSGDLSLVTDCEHALTSCHPR                                               | 1.253757098        | 3               | 5.48329   |
| P50169        | AMESLVNTCSGDLSLVTDCEHALTSCHPR+Oxidation(2)                                  | 1.035099471        | 3               | 4.30811   |
| P50169        | FQDSYMK                                                                     | 1.073195868        | 1               | 1.93559   |
| P50169        | GLWGLVNNAGISVVPGPNEWMR                                                      | 0.792196508        | 2               | 3.56431   |
| P50169        | KLWDQTTEEVK                                                                 | 1.085152797        | 2               | 2.55769   |
| P50169        | KLWDQTTEEVKEIYGEK                                                           | 1.085012147        | 3               | 4.30182   |
| P50169        | LWDQTTEEVK                                                                  | 1.085541082        | 2               | 3.59995   |
| P50169        | LWDQTTEEVKEIYGEK                                                            | 1.150031039        | 2               | 4.99324   |
| P50169        | MSLVGGGYCISK                                                                | 1.227398069        | 2               | 3.90994   |
| <b>P50237</b> | <b>ST1C1 Sulfotransferase 1C1</b>                                           | <b>0.939262532</b> | <b>0.491228</b> | <b>9</b>  |
| P50237        | AGTTWTQEIVDMIQNDGDVQK                                                       | 0.921208762        | 2               | 5.65092   |
| P50237        | DISEEVLNK                                                                   | 0.824846029        | 2               | 2.6277    |

|               |                                                        |                    |                 |           |
|---------------|--------------------------------------------------------|--------------------|-----------------|-----------|
| P50237        | DLHLGEQDLQPETR                                         | 0.948326378        | 2               | 3.95352   |
| P50237        | FLEKDISEEVLNK                                          | 1.022532576        | 2               | 3.40933   |
| P50237        | IWNFQAKPDDLLIATYAK                                     | 0.731070496        | 2               | 4.46575   |
| P50237        | MKDLHLGEQDLQPETR                                       | 0.898492056        | 2               | 4.92069   |
| P50237        | MLPDPGTLGEYIEQFK                                       | 1.080371511        | 3               | 4.67583   |
| P50237        | MLPDPGTLGEYIEQFK+Oxidation(1)                          | 1.202708971        | 2               | 3.0702    |
| P50237        | VLWGSWYDHVK                                            | 1.101868941        | 2               | 3.18314   |
| <b>P50289</b> | <b>ASPX Acrosomal protein SP_10</b>                    | <b>0.943588027</b> | <b>0.356133</b> | <b>2</b>  |
| P50289        | MQIMCCRNEPLCNK                                         | 0.943376149        | 2               | 2.34881   |
| P50289        | MQIMCCRNEPLCNK+Oxidation(1)                            | 1.270043832        | 2               | 2.39186   |
| <b>P50398</b> | <b>GDIA Rab GDP dissociation inhibitor alpha</b>       | <b>1.114458513</b> | <b>0.106608</b> | <b>7</b>  |
| P50398        | FDLGQDVIDFTGHALALYR                                    | 0.725356134        | 2               | 2.74445   |
| P50398        | FQLLEGPPESMGR                                          | 1.085782192        | 2               | 3.68437   |
| P50398        | KQNDVFGIADQ                                            | 1.062267471        | 2               | 3.31253   |
| P50398        | NPYYGGESSITPLEELYK                                     | 1.299333761        | 2               | 5.89067   |
| P50398        | QLICDPYIPDR                                            | 1.21242557         | 2               | 2.8949    |
| P50398        | TDDYLDQPCLETINR                                        | 1.045397631        | 2               | 4.67556   |
| P50398        | TFEGVDPQTSMR                                           | 0.982630795        | 2               | 3.22318   |
| <b>P50399</b> | <b>GDIB Rab GDP dissociation inhibitor beta</b>        | <b>1.221445015</b> | <b>0.001871</b> | <b>10</b> |
| P50399        | AYDATTHFETTCDDIKDIYK                                   | 1.117689046        | 3               | 5.15125   |
| P50399        | DWNVDLIPK                                              | 1.368448346        | 2               | 2.35384   |
| P50399        | EIRPALELLEPIEQK                                        | 1.191017373        | 2               | 3.49896   |
| P50399        | FDLGQDVIDFTGHSLALYR                                    | 1.229625658        | 2               | 4.41658   |
| P50399        | FVSISDLFVPK                                            | 1.557075118        | 2               | 3.51024   |
| P50399        | MTGSEFDPEEMKR                                          | 1.204595356        | 2               | 2.7324    |
| P50399        | NTNDANSCQIIPQNVNR                                      | 1.255415767        | 2               | 4.0286    |
| P50399        | TDDYLDQPCETINR                                         | 1.179174019        | 2               | 4.68168   |
| P50399        | VICILSHPIK                                             | 1.087475806        | 2               | 2.51089   |
| P50399        | VLHMDQNPYYGGESASITPLEDLYK                              | 1.167624494        | 3               | 4.65373   |
| <b>P50431</b> | <b>GLYC Serine hydroxymethyltransferase_ cytosolic</b> | <b>1.200239998</b> | <b>9.56E-07</b> | <b>8</b>  |
| P50431        | ALSDALTELGK                                            | 1.310856724        | 2               | 4.36287   |
| P50431        | AVLEALGSLNNK                                           | 1.28200668         | 2               | 4.13997   |
| P50431        | GLLEEDFQK                                              | 1.181231555        | 1               | 2.30078   |
| P50431        | IMGLDLPDGGHLTHGFMTDK                                   | 0.866632889        | 2               | 2.84562   |
| P50431        | IYQLQVLANCR                                            | 1.166321133        | 2               | 2.57163   |
| P50431        | LIAGTSCYSR                                             | 1.597009904        | 2               | 2.36342   |
| P50431        | VLEACSIACNK                                            | 1.209208591        | 2               | 3.99935   |
| P50431        | YSEGYPGQR                                              | 1.211644447        | 2               | 2.4414    |
| <b>P50475</b> | <b>SYAC Alanyl_tRNA synthetase_ cytoplasmic</b>        | <b>1.060099847</b> | <b>0.140542</b> | <b>14</b> |
| P50475        | ASEWVQVSGLMDGK                                         | 0.97340874         | 2               | 4.04264   |
| P50475        | AVFDEYDPVPR                                            | 1.139942894        | 2               | 2.99602   |
| P50475        | EIADLGEVLATAVIPQWQK                                    | 1.083284284        | 2               | 3.14857   |
| P50475        | GLEATDDSPK                                             | 1.100912583        | 2               | 2.67142   |
| P50475        | ITCLCQVPQNAANR                                         | 1.182778062        | 2               | 4.13067   |
| P50475        | IVAVTGAEAQK                                            | 1.340183098        | 2               | 2.45565   |
| P50475        | MSNYDSDLFVYFEAIQK                                      | 1.534702515        | 2               | 3.44388   |
| P50475        | NSSHAGAFVIVTEEAIK                                      | 1.197996864        | 2               | 3.78294   |
| P50475        | QIWQNLGLDEAK                                           | 1.310553239        | 2               | 2.8255    |
| P50475        | RIVAVTGAEAQK                                           | 0.979133487        | 2               | 3.12261   |
| P50475        | SVLGDADQK                                              | 1.167179381        | 1               | 2.28206   |
| P50475        | TITVALADGGRPDNTGR                                      | 1.072694733        | 2               | 2.76058   |
| P50475        | VDDSSSEDKTEFTVK                                        | 1.083185746        | 2               | 4.01343   |
| P50475        | VGAEDTDGIDMAYR                                         | 0.913557195        | 2               | 3.33247   |
| <b>P50503</b> | <b>F10A1 Hsc70_interacting protein</b>                 | <b>1.271280987</b> | <b>3.34E-12</b> | <b>5</b>  |
| P50503        | AIDLFTDAIK                                             | 1.247615327        | 2               | 2.53333   |
| P50503        | AIEINPDSAQPYK                                          | 1.373241538        | 2               | 2.80493   |
| P50503        | GAAIDALNDGELQK                                         | 1.275908021        | 2               | 3.31189   |

|               |                                                             |                    |                 |           |
|---------------|-------------------------------------------------------------|--------------------|-----------------|-----------|
| P50503        | KGAAIDALNDGELQK                                             | 1.473571542        | 2               | 4.76771   |
| P50503        | LDYDEDasAMLR                                                | 1.257198621        | 2               | 3.28234   |
| <b>P50554</b> | <b>GABT 4_aminobutyrate aminotransferase_ mitochondrial</b> | <b>0.990859937</b> | <b>0.997383</b> | <b>10</b> |
| P50554        | GTFCsFDTpDEAIR                                              | 0.888412829        | 2               | 3.18334   |
| P50554        | IDIPsFDWPIAPFPR                                             | 1.00786199         | 2               | 3.65127   |
| P50554        | IFNTWLGDPsK                                                 | 1.022111289        | 2               | 2.33691   |
| P50554        | LVQQPQNASTFINRPALGILPPENFVdK                                | 1.327666849        | 3               | 4.9971    |
| P50554        | MLdLYsQISSVPIGYNHpALAK                                      | 1.202327633        | 3               | 3.48197   |
| P50554        | NLLLAeVINIIK                                                | 0.916087258        | 3               | 5.31015   |
| P50554        | REdLLNNVAHAGK                                               | 0.927950462        | 3               | 3.76154   |
| P50554        | TLLTGLLdLQAQYPQFVSR                                         | 1.139975679        | 2               | 4.23587   |
| P50554        | TVAGIIVePIQsEGGNHAsDDFFR                                    | 0.778400285        | 2               | 4.27077   |
| P50554        | VdFEFDYdGpLMK                                               | 0.98842347         | 2               | 3.72233   |
| <b>P50580</b> | <b>PA2G4 Proliferation_ associated protein 2G4</b>          | <b>1.03597755</b>  | <b>0.337576</b> | <b>2</b>  |
| P50580        | HELLQPFNVLYEK                                               | 1.522589345        | 2               | 2.40991   |
| P50580        | TIIQNPTDQqK                                                 | 1.031852024        | 2               | 2.75792   |
| <b>P50878</b> | <b>RL4 60S ribosomal protein L4</b>                         | <b>0.923040232</b> | <b>0.000286</b> | <b>10</b> |
| P50878        | FCIWTEsAFR                                                  | 1.123973605        | 2               | 2.45339   |
| P50878        | KLdELyGTWR                                                  | 1.189289683        | 2               | 3.0943    |
| P50878        | KLEAAAAALAAK                                                | 1.194023895        | 3               | 3.78634   |
| P50878        | LEAAAAALAAK                                                 | 1.325967155        | 2               | 2.34503   |
| P50878        | NIPGITLLNVsK                                                | 1.256597785        | 1               | 2.37537   |
| P50878        | NVTLPAVFK                                                   | 0.819274238        | 1               | 2.22502   |
| P50878        | RGPCIIYNEDNGIIK                                             | 1.441309998        | 2               | 2.95616   |
| P50878        | SGQGAFGNMCR                                                 | 1.08429465         | 2               | 2.77636   |
| P50878        | SNYNLPMHK                                                   | 0.977093125        | 2               | 2.41885   |
| P50878        | YAICsALAAALPALVMSK                                          | 1.526827204        | 2               | 3.68182   |
| <b>P50904</b> | <b>RASA1 Ras GTPase_ activating protein 1</b>               | <b>0.808251849</b> | <b>0.531877</b> | <b>3</b>  |
| P50904        | IMESKQsCELSPSK+Oxidation(2)                                 | 0.675376035        | 2               | 2.50134   |
| P50904        | LESLLLCTLNDR                                                | 1.031191491        | 1               | 1.90232   |
| P50904        | YYNSIGDIIDHYRK                                              | 1.053950361        | 2               | 2.42933   |
| <b>P51538</b> | <b>CP3A9 Cytochrome P450 3A9</b>                            | <b>1.141124193</b> | <b>0.715977</b> | <b>2</b>  |
| P51538        | EMFPiINQYTDMLVR                                             | 1.215534215        | 2               | 2.53037   |
| P51538        | GFWEFDKYCHK                                                 | 1.002987422        | 1               | 2.23013   |
| <b>P51635</b> | <b>AK1A1 Alcohol dehydrogenase [NADP_]</b>                  | <b>0.975190116</b> | <b>2.28E-13</b> | <b>8</b>  |
| P51635        | ALEALVAK                                                    | 1.152390248        | 2               | 2.85837   |
| P51635        | GLEVTAYsPLGSSDR                                             | 0.995000925        | 2               | 4.15009   |
| P51635        | HHPEdVEPAVR                                                 | 0.982338622        | 3               | 3.76303   |
| P51635        | HIDCASVYGNETeIGEALK                                         | 0.973083883        | 2               | 5.87205   |
| P51635        | HIDCASVYGNETeIGeALKESVGAkK                                  | 0.890176088        | 3               | 6.80341   |
| P51635        | HPDEPVLLeEPVVLALAEK                                         | 1.969280623        | 3               | 5.66854   |
| P51635        | ILQNIQVFDFTFSPEEMK                                          | 2.502722481        | 2               | 4.52325   |
| P51635        | QLDALNK                                                     | 1.198542194        | 1               | 1.9899    |
| <b>P51647</b> | <b>AL1A1 Retinal dehydrogenase 1</b>                        | <b>0.845609929</b> | <b>3.49E-11</b> | <b>17</b> |
| P51647        | ANNTTYGLAAGVFTK                                             | 0.60191679         | 2               | 4.53141   |
| P51647        | EAGFPpGVVNIvPGYPTAGAAISSHMdVdK                              | 0.983893606        | 3               | 3.56138   |
| P51647        | ELGEHGLYeYTELK                                              | 0.972651148        | 2               | 3.45617   |
| P51647        | FPVLNPATeEVICHVeeGDkK                                       | 0.762110893        | 3               | 3.74934   |
| P51647        | FPVLNPATeEVICHVeeGDkADVdK                                   | 0.929480434        | 4               | 5.19338   |
| P51647        | IFINNEWHDSVSGK                                              | 1.178024598        | 2               | 4.59818   |
| P51647        | IFVEESVYDEfVR                                               | 0.823231084        | 2               | 4.4965    |
| P51647        | IGPALsCGNTVVVkpAEQTPLTALHMASLIK                             | 1.170127131        | 3               | 4.74916   |
| P51647        | IHGQTIPsDGDIFTFTR                                           | 1.220020771        | 2               | 4.35677   |
| P51647        | KFPVLNPATeEVICHVeeGDkK                                      | 0.817609937        | 3               | 3.36825   |
| P51647        | KFPVLNPATeEVICHVeeGDkADVdK                                  | 0.909179354        | 4               | 4.82623   |
| P51647        | KYVLGNPLTQGINQGPQIDKEQHDkK                                  | 0.876499191        | 3               | 3.83854   |

|               |                                                                                  |                    |                 |          |
|---------------|----------------------------------------------------------------------------------|--------------------|-----------------|----------|
| P51647        | LLLATIEAINGGK                                                                    | 6.081524994        | 2               | 4.731    |
| P51647        | VFANAYLSDLGGSIK                                                                  | 1.142595274        | 2               | 4.64449  |
| P51647        | YCAGWADK                                                                         | 0.877233175        | 1               | 2.24851  |
| P51647        | YVLGNPLTQGINQGPDIDK                                                              | 0.857530954        | 2               | 5.0602   |
| P51647        | YVLGNPLTQGINQGPDIDKEQHDK                                                         | 1.23419724         | 2               | 3.76648  |
| <b>P51650</b> | <b>SSDH Succinate semialdehyde dehydrogenase mitochondrial</b>                   | <b>0.895038227</b> | <b>0.631761</b> | <b>9</b> |
| P51650        | EVGEVLCTDPLVSK                                                                   | 1.421003518        | 2               | 4.14315  |
| P51650        | GIHDSFVTK                                                                        | 0.93020969         | 2               | 2.30189  |
| P51650        | HQSGGNFFPEPTLLSNVTR                                                              | 0.980202161        | 2               | 3.93688  |
| P51650        | IITAESGKPLK                                                                      | 0.863121393        | 2               | 2.61857  |
| P51650        | ILLHHAANSVK                                                                      | 1.02962984         | 2               | 2.42831  |
| P51650        | LGTVADCGVPEAR                                                                    | 0.666275702        | 2               | 3.26943  |
| P51650        | VGNGFEEGTTQGPIINEK                                                               | 0.830550513        | 2               | 4.88169  |
| P51650        | WLPTPATFPVYDPASGAK                                                               | 0.81162408         | 2               | 3.03883  |
| P51650        | YGIDEYLEVK                                                                       | 0.972131611        | 2               | 2.5932   |
| <b>P51863</b> | <b>VA0D1 V_type proton ATPase subunit d 1</b>                                    | <b>1.062370687</b> | <b>0.532304</b> | <b>3</b> |
| P51863        | ADDYEQVK                                                                         | 1.245463991        | 2               | 2.38586  |
| P51863        | LHLQSTDYGNFLANEASPLTVSVIDDK                                                      | 1.110865105        | 3               | 3.60692  |
| P51863        | LYPEGLAQLAR                                                                      | 1.062226968        | 1               | 1.90186  |
| <b>P51869</b> | <b>CP4F4 Cytochrome P450 4F4</b>                                                 | <b>1.230112532</b> | <b>9.96E-07</b> | <b>4</b> |
| P51869        | ALPSQHEDDILK                                                                     | 1.17732208         | 2               | 2.87851  |
| P51869        | NISLMTLDSLQK                                                                     | 1.235036297        | 2               | 3.65096  |
| P51869        | TLDFIDVLLLT                                                                      | 1.767047221        | 2               | 3.80018  |
| P51869        | WQDLASGGSAR                                                                      | 1.061757347        | 2               | 2.49713  |
| <b>P51886</b> | <b>LUM Lumican</b>                                                               | <b>1.179336581</b> | <b>0.06038</b>  | <b>4</b> |
| P51886        | LDGNPLTQSSLPPDMYECLR                                                             | 2.014385921        | 2               | 2.64406  |
| P51886        | NNQIDHIDEK                                                                       | 1.644061953        | 2               | 3.33049  |
| P51886        | SIPTVNENLENYYLEVNK                                                               | 1.862543554        | 2               | 4.13155  |
| P51886        | SLQDLQLANNK                                                                      | 1.176777295        | 2               | 2.96361  |
| <b>P52296</b> | <b>IMB1 Importin subunit beta_1</b>                                              | <b>1.133318645</b> | <b>0.01513</b>  | <b>4</b> |
| P52296        | AAVENLPTFLVELSR                                                                  | 1.23368004         | 2               | 3.26081  |
| P52296        | TVSPDRLELEAAQK                                                                   | 1.081754797        | 2               | 3.32492  |
| P52296        | VLANPGNSQVAR                                                                     | 1.132976023        | 2               | 3.51639  |
| P52296        | VQHQDALQSDVVMASLLR                                                               | 1.556095992        | 2               | 2.47332  |
| <b>P52303</b> | <b>AP1B1 AP_1 complex subunit beta_1</b>                                         | <b>0.969318779</b> | <b>0.929297</b> | <b>2</b> |
| P52303        | NINLIVQK                                                                         | 0.948019757        | 1               | 2.02665  |
| P52303        | NSFGLAAPLQVHAPLSPNQTVESLPLNTVGSVMK                                               | 1.049718368        | 3               | 4.77533  |
| <b>P52504</b> | <b>NDUS6 NADH dehydrogenase [ubiquinone] iron_sulfur protein 6 mitochondrial</b> | <b>1.11545096</b>  | <b>5.04E-05</b> | <b>2</b> |
| P52504        | IIACDGGGGALGHPK                                                                  | 1.11429268         | 2               | 3.52181  |
| P52504        | VYINLDKETK                                                                       | 1.354274773        | 2               | 2.98061  |
| <b>P52555</b> | <b>ERP29 Endoplasmic reticulum resident protein 29</b>                           | <b>1.098001752</b> | <b>0.712091</b> | <b>5</b> |
| P52555        | FDTQYPYGEK                                                                       | 1.085719236        | 2               | 2.54589  |
| P52555        | GQGVYLGMPGCLPAYDALAGQFIEASSR                                                     | 1.646707626        | 3               | 4.14171  |
| P52555        | ILDQGEDFPASELAR                                                                  | 1.001296035        | 2               | 4.63856  |
| P52555        | QGQDGLSGVK                                                                       | 1.027292493        | 2               | 2.66139  |
| P52555        | SLNILTAFR                                                                        | 1.150466385        | 2               | 2.5294   |
| <b>P52631</b> | <b>STAT3 Signal transducer and activator of transcription 3</b>                  | <b>1.089492616</b> | <b>0.950226</b> | <b>2</b> |
| <b>P52759</b> | <b>UK114 Ribonuclease UK114</b>                                                  | <b>1.560203723</b> | <b>0.000705</b> | <b>6</b> |
| P52759        | AAGCDFTNVVK                                                                      | 1.744910462        | 2               | 3.3426   |
| P52759        | AAYQVAALPK                                                                       | 1.143788332        | 2               | 2.46538  |
| P52759        | IEIEAIVQGPFTTAGL                                                                 | 1.24561615         | 1               | 3.55228  |
| P52759        | TIYVSGQIGMDPSSGQLVPGGVAEEAK                                                      | 1.084745543        | 2               | 4.43367  |
| P52759        | TTVLLADINDFGTVNEIYK                                                              | 1.448766055        | 2               | 5.15948  |
| P52759        | TYFQGNLPAR                                                                       | 1.204623978        | 2               | 2.5948   |

|               |                                                            |                    |                 |           |
|---------------|------------------------------------------------------------|--------------------|-----------------|-----------|
| <b>P52845</b> | <b>ST1E2 Estrogen sulfotransferase_ isoform 2</b>          | <b>1.706261865</b> | <b>0.079545</b> | <b>2</b>  |
| P52845        | CKEDAIFNR                                                  | 2.569094029        | 2               | 2.37593   |
| P52845        | SGSTWIGEIVDMIYK                                            | 1.659208164        | 2               | 2.93212   |
| <b>P52847</b> | <b>ST1B1 Sulfotransferase family cytosolic 1B member 1</b> | <b>1.018569429</b> | <b>0.575056</b> | <b>8</b>  |
| P52847        | DNPLVNYTHLPTeimDHSK                                        | 1.246837537        | 2               | 4.06027   |
| P52847        | FLAGNVAYGSwFDHVK                                           | 0.460343877        | 2               | 3.63776   |
| P52847        | IEEFQSRPCDIVIPTYK                                          | 1.068465386        | 3               | 4.5211    |
| P52847        | IVHHTSFEVMK                                                | 1.693200774        | 2               | 2.87246   |
| P52847        | NYFTMTQSEK                                                 | 1.006674129        | 1               | 2.76809   |
| P52847        | SGVELLKK                                                   | 1.02175685         | 2               | 2.36282   |
| P52847        | THLPIDLLPK                                                 | 1.002183596        | 3               | 3.62489   |
| P52847        | TLDEHTLER                                                  | 1.099446925        | 2               | 2.86383   |
| <b>P52873</b> | <b>PYC Pyruvate carboxylase_ mitochondrial</b>             | <b>1.245830645</b> | <b>1.18E-05</b> | <b>38</b> |
| P52873        | ADEAYLIGR                                                  | 0.967407328        | 1               | 2.10108   |
| P52873        | ADFAQACQDAGVR                                              | 1.078098812        | 2               | 4.6432    |
| P52873        | AEAEAQAeELSFPR                                             | 1.114773914        | 2               | 4.69179   |
| P52873        | AGTHILCIK                                                  | 1.564535396        | 2               | 2.84564   |
| P52873        | ALAVSDLNR                                                  | 1.242772721        | 2               | 2.75418   |
| P52873        | AYSEALAAFGNGALFVEK                                         | 1.459750815        | 2               | 3.7143    |
| P52873        | AYVEANQMLGDLIK                                             | 0.893953926        | 2               | 4.6872    |
| P52873        | DAHQSLLATR                                                 | 1.112453261        | 1               | 3.27197   |
| P52873        | DFTATFGPLDSLNR                                             | 1.169582946        | 2               | 3.75268   |
| P52873        | DMAGLLKPAACTMLVSSLR                                        | 0.994865715        | 2               | 3.68988   |
| P52873        | ENGVDVAVHPGYGFLSER                                         | 1.228836694        | 2               | 3.15566   |
| P52873        | FIGPSPEVVR                                                 | 1.326114603        | 2               | 2.32274   |
| P52873        | FLYECVWR                                                   | 1.073809723        | 1               | 2.14025   |
| P52873        | GANAVGYTNYPDNVVFK                                          | 1.847685415        | 2               | 4.46346   |
| P52873        | GLAPVQAYLHIPDIK                                            | 2.251974025        | 2               | 3.15772   |
| P52873        | GQIGAPMPGK                                                 | 0.871337679        | 2               | 2.43331   |
| P52873        | GTPLDTEVPLER                                               | 1.095003377        | 2               | 3.71453   |
| P52873        | HGEEVTPEDVLSAAMYPDVFAQFK                                   | 1.516042147        | 2               | 5.68067   |
| P52873        | HIEVQILGDQYGNIHLHYER                                       | 1.390178427        | 3               | 6.67321   |
| P52873        | HYFIEVNSR                                                  | 1.312918606        | 2               | 2.4884    |
| P52873        | IAEEFEVELER                                                | 1.009872314        | 2               | 3.19223   |
| P52873        | IEGRPGASLPLNLK                                             | 1.153965648        | 2               | 3.53596   |
| P52873        | INGCAIQCR                                                  | 1.452020066        | 2               | 2.95774   |
| P52873        | IVGDLAQFMVQNGLSR                                           | 1.509185281        | 2               | 2.88003   |
| P52873        | LDNASAFQGAvisPHYDSLlVK                                     | 1.006794935        | 2               | 5.77653   |
| P52873        | LQVEHTVTEEITDvDLVHAQIHVSEGR                                | 1.107179029        | 4               | 6.34764   |
| P52873        | NHQGLLLMDTTFR                                              | 1.200634139        | 2               | 2.90681   |
| P52873        | QKADEAYLIGR                                                | 0.888381311        | 2               | 2.34316   |
| P52873        | QVFFELNGQLR                                                | 1.172995673        | 2               | 3.04774   |
| P52873        | QVGYENAGTVEFLVDK                                           | 1.303437364        | 2               | 3.91465   |
| P52873        | SGEGMGIR                                                   | 0.894081481        | 2               | 2.6148    |
| P52873        | SVVEFLQGYIGIPHGgFPEPFR                                     | 1.21361838         | 2               | 4.56607   |
| P52873        | TVAVYSEQDTGQMHR                                            | 1.237779999        | 2               | 4.56306   |
| P52873        | VFDYSEYWEGAR                                               | 1.245823005        | 2               | 4.31099   |
| P52873        | VSPSPVDPIVPVPIgPPAgFR                                      | 1.161435521        | 2               | 4.31387   |
| P52873        | VVEIAPATHLDPQLR                                            | 1.118366956        | 2               | 4.47271   |
| P52873        | VVHSYEELEENYTR                                             | 1.174804476        | 2               | 5.24916   |
| P52873        | YSLEYMGLAEELVR                                             | 1.495372081        | 3               | 4.91748   |
| <b>P52925</b> | <b>HMGB2 High mobility group protein B2</b>                | <b>1.127820873</b> | <b>0.815631</b> | <b>2</b>  |
| P52925        | KHPDSSVnFAEFSK                                             | 1.155447783        | 2               | 2.84178   |
| P52925        | SEHPGLSIGDTAK                                              | 1.102188987        | 2               | 3.07004   |

|               |                                                                                                                       |                    |                 |           |
|---------------|-----------------------------------------------------------------------------------------------------------------------|--------------------|-----------------|-----------|
| <b>P53395</b> | <b>ODB2 Lipoamide acyltransferase component of branched_chain alpha_keto acid dehydrogenase complex_mitochondrial</b> | <b>1.163052924</b> | <b>0.228195</b> | <b>4</b>  |
| P53395        | LREELKPVALAR                                                                                                          | 1.162501586        | 2               | 2.68558   |
| P53395        | LSDIGEGIR                                                                                                             | 1.086393604        | 2               | 2.47306   |
| P53395        | LSEVVGS GK                                                                                                            | 0.947089967        | 1               | 1.92983   |
| P53395        | SYLENPAFMLLDLK                                                                                                        | 1.579491829        | 2               | 4.33456   |
| <b>P53987</b> | <b>MOT1 Monocarboxylate transporter 1</b>                                                                             | <b>1.080524103</b> | <b>0.733581</b> | <b>4</b>  |
| P53987        | DGKEDETSTDVDEKPK                                                                                                      | 1.172180775        | 2               | 5.04282   |
| P53987        | DGKEDETSTDVDEKPKK                                                                                                     | 1.288181611        | 3               | 4.94259   |
| P53987        | ETQSPAPLQNSSGDPAAEEESPV                                                                                               | 1.095401766        | 2               | 5.2926    |
| P53987        | SDANTDLIGGSPK                                                                                                         | 1.086377562        | 2               | 3.90023   |
| <b>P54313</b> | <b>GBB2 Guanine nucleotide_binding protein G(I)/G(S)/G(T) subunit beta_2</b>                                          | <b>0.894658122</b> | <b>0.015306</b> | <b>2</b>  |
| P54313        | ACGDSTLTQITAGLDPVGR                                                                                                   | 0.881211127        | 2               | 4.45687   |
| P54313        | TFVSGACDASIK                                                                                                          | 1.004602833        | 2               | 3.03761   |
| <b>P54319</b> | <b>PLAP Phospholipase A_2 activating protein</b>                                                                      | <b>0.930655159</b> | <b>0.979862</b> | <b>3</b>  |
| P54319        | IGDVVGSSGANQQTSGK                                                                                                     | 0.984532993        | 2               | 4.4971    |
| P54319        | TGDLGDINAELPGR                                                                                                        | 0.899975415        | 2               | 3.3545    |
| P54319        | YVPGTSGPSNTVQTADPFTGAGR                                                                                               | 0.912008556        | 2               | 3.92414   |
| <b>P54822</b> | <b>PUR8 Adenylosuccinate lyase</b>                                                                                    | <b>1.040290284</b> | <b>0.80961</b>  | <b>2</b>  |
| P54822        | KVDIEVLSVLASLGASVHK                                                                                                   | 1.112974684        | 3               | 3.85755   |
| P54822        | VLSQQA AAVVK                                                                                                          | 1.074877585        | 2               | 2.83836   |
| <b>P54921</b> | <b>SNAA Alpha_soluble NSF attachment protein</b>                                                                      | <b>0.955771837</b> | <b>0.780611</b> | <b>5</b>  |
| P54921        | AIDIYEQVGT SAMDSPLLK                                                                                                  | 1.015428591        | 2               | 4.51538   |
| P54921        | HDAATCFVDAGNAFK                                                                                                       | 0.884443951        | 2               | 2.9943    |
| P54921        | IEEACEIYAR                                                                                                            | 0.869174269        | 2               | 2.46345   |
| P54921        | NSQSFFSGLFGGSSK                                                                                                       | 1.07918802         | 2               | 3.14579   |
| P54921        | TIQGDEEDLR                                                                                                            | 1.206395242        | 2               | 2.40758   |
| <b>P55006</b> | <b>RDH7 Retinol dehydrogenase 7</b>                                                                                   | <b>1.068711967</b> | <b>6.98E-06</b> | <b>11</b> |
| P55006        | LETVILDVTK                                                                                                            | 1.014925035        | 2               | 3.66221   |
| P55006        | TESIVAATQWVK                                                                                                          | 1.053988335        | 2               | 3.97609   |
| P55006        | TNVTNMER                                                                                                              | 1.072460262        | 2               | 2.76205   |
| P55006        | TNVTNMER+Oxidation(6)                                                                                                 | 1.315208737        | 2               | 2.50395   |
| P55006        | TSDRLETVILDVTK                                                                                                        | 1.073352136        | 3               | 4.58541   |
| P55006        | VAIIPEGGFK                                                                                                            | 1.508880417        | 2               | 2.30173   |
| P55006        | VLAACLTEK                                                                                                             | 1.211459593        | 2               | 3.14019   |
| P55006        | VVNIASTMGR                                                                                                            | 1.179720719        | 2               | 3.48985   |
| P55006        | VVNIASTMGR+Oxidation(8)                                                                                               | 1.027416774        | 2               | 2.73595   |
| P55006        | YGVEAFSDSLR                                                                                                           | 1.279837084        | 2               | 3.75634   |
| P55006        | YVFITGCDSGFGNLLAR                                                                                                     | 1.450670867        | 2               | 4.42019   |
| <b>P55007</b> | <b>BART1 Protein BART_1</b>                                                                                           | <b>1.173343085</b> | <b>0.629609</b> | <b>2</b>  |
| P55007        | MILMYEKNKNT+Oxidation(1)                                                                                              | 0.971166731        | 2               | 2.36338   |
| P55007        | YNSDEDLQSKLESSR                                                                                                       | 1.361904368        | 2               | 2.5442    |
| <b>P55051</b> | <b>FABP7 Fatty acid_binding protein_brain</b>                                                                         | <b>1.197697427</b> | <b>0.99996</b>  | <b>3</b>  |
| P55051        | LTDSQNFDEYMK                                                                                                          | 1.204769277        | 2               | 3.9236    |
| P55051        | QVGNVTKPTVIISQEGGK                                                                                                    | 1.197666624        | 2               | 3.44548   |
| P55051        | WDGKETNCVR                                                                                                            | 1.014019382        | 2               | 2.56056   |
| <b>P55053</b> | <b>FABP5 Fatty acid_binding protein_epidermal</b>                                                                     | <b>1.278070308</b> | <b>0.027071</b> | <b>6</b>  |
| P55053        | FDETTADGR                                                                                                             | 1.332049824        | 2               | 2.58997   |
| P55053        | KTETVCTFTD GALVQH QK                                                                                                  | 1.335432723        | 3               | 5.67551   |
| P55053        | LVESHG FEDYMK                                                                                                         | 1.718486495        | 2               | 3.3589    |
| P55053        | MGAMAKPDCIITLDGNNLTVK                                                                                                 | 1.381411824        | 3               | 3.66505   |
| P55053        | MVVECVMNNAICTR                                                                                                        | 1.345319002        | 2               | 3.36587   |
| P55053        | TETVCTFTD GALVQH QK                                                                                                   | 1.285716153        | 2               | 4.53327   |
| <b>P55159</b> | <b>PON1 Serum paraoxonase/arylesterase 1</b>                                                                          | <b>1.155437589</b> | <b>3.81E-12</b> | <b>7</b>  |
| P55159        | GIEAGAEDLEILP NGLTFFSTGLK                                                                                             | 1.360593701        | 2               | 3.72414   |

|               |                                                           |                    |                 |           |
|---------------|-----------------------------------------------------------|--------------------|-----------------|-----------|
| P55159        | IFFYDSENPPEGSEVLR                                         | 1.211749659        | 2               | 5.99508   |
| P55159        | IQSILSEDPK                                                | 1.257176433        | 2               | 3.13426   |
| P55159        | TITHELLPSINDIAAVGPESFYATNDHYFADPYLR                       | 1.984619258        | 3               | 4.45583   |
| P55159        | VLSFDTLVDNISVDPVTGDLWVGCHPNGMR                            | 1.19364276         | 3               | 6.1741    |
| P55159        | VVADGDFDFANGIGISLDGK                                      | 1.036575014        | 2               | 4.81075   |
| P55159        | YVYIAELLAHK                                               | 1.478831019        | 2               | 2.96611   |
| <b>P55260</b> | <b>ANXA4 Annexin A4</b>                                   | <b>0.901347726</b> | <b>0.786193</b> | <b>3</b>  |
| P55260        | AEIDMLDIPANFK                                             | 0.936512583        | 1               | 2.3181    |
| P55260        | GAGTDEGLIEILASR                                           | 1.258290508        | 2               | 3.73858   |
| P55260        | GLGTDEDAIIGVLACR                                          | 0.867940295        | 2               | 3.90806   |
| <b>P55770</b> | <b>NH2L1 NHP2_like protein 1</b>                          | <b>1.139932323</b> | <b>0.259907</b> | <b>2</b>  |
| P55770        | LLDLVQQSCNYK                                              | 1.24740717         | 2               | 3.80253   |
| P55770        | QQIQSIQQSIER                                              | 1.063744361        | 2               | 2.89532   |
| <b>P56399</b> | <b>UBP5 Ubiquitin carboxyl terminal hydrolase 5</b>       | <b>1.254737088</b> | <b>0.015279</b> | <b>3</b>  |
| P56399        | GTGLQPGEELPDIAPLVTPDEPK                                   | 1.109843496        | 2               | 4.33185   |
| P56399        | IFQNAPTDPTQDFSTQVAK                                       | 1.395674945        | 2               | 4.50408   |
| P56399        | IGEWELIQESGVPLKPLFGPGYTGIR                                | 1.233819481        | 3               | 4.41896   |
| <b>P56522</b> | <b>ADRO NADPH:adenodoxin oxidoreductase_mitochondrial</b> | <b>1.100287766</b> | <b>0.670527</b> | <b>4</b>  |
| P56522        | AVPTGDVEDLPCGLLSVGYK                                      | 3.077366824        | 2               | 2.93449   |
| P56522        | NVINTFTQTAR                                               | 1.00533446         | 2               | 2.85066   |
| P56522        | TATEKPGVEEAAR                                             | 0.84088898         | 2               | 3.07751   |
| P56522        | TDITEVALGVLR                                              | 1.09778408         | 2               | 3.43547   |
| <b>P56574</b> | <b>IDHP Isocitrate dehydrogenase [NADP]_mitochondrial</b> | <b>1.074109058</b> | <b>0.000129</b> | <b>13</b> |
| P56574        | ATDFVVDVDR                                                | 1.061696305        | 2               | 2.39117   |
| P56574        | DLAGCIHGLSNVK                                             | 1.05100758         | 2               | 3.73679   |
| P56574        | DQTNDQVTIDSALATQK                                         | 1.097150914        | 2               | 3.91933   |
| P56574        | FKDIFQEIFDK                                               | 1.001544082        | 2               | 3.51402   |
| P56574        | GKLDGNQDLIR                                               | 0.990916295        | 2               | 3.35162   |
| P56574        | IKVEKPVVEMDGDENR                                          | 1.299252287        | 3               | 3.41823   |
| P56574        | LDGNQDLIR                                                 | 1.001082121        | 2               | 2.44947   |
| P56574        | LIDDMVAQVLK                                               | 1.112275191        | 2               | 4.12578   |
| P56574        | LNEHFLNTTDFLDTIK                                          | 1.33089563         | 2               | 4.42799   |
| P56574        | NILGGTVFR                                                 | 1.080769968        | 2               | 2.70595   |
| P56574        | SSGGFVWACK                                                | 1.299021923        | 2               | 2.85796   |
| P56574        | TIEAAAHGTVTR                                              | 0.888255333        | 2               | 3.87385   |
| P56574        | VCVQTVESGAMTK                                             | 1.07402331         | 2               | 3.69246   |
| <b>P56593</b> | <b>CP2AC Cytochrome P450 2A12</b>                         | <b>1.186955438</b> | <b>0.729897</b> | <b>3</b>  |
| P56593        | MLQGTGAPIDPTIYLSK                                         | 1.08154909         | 2               | 4.73341   |
| P56593        | NRQPQYEDHMK                                               | 1.268254912        | 3               | 3.45868   |
| P56593        | NRQPQYEDHMK+Oxidation(10)                                 | 1.072016172        | 3               | 3.41899   |
| <b>P56656</b> | <b>CP239 Cytochrome P450 2C39</b>                         | <b>1.023106071</b> | <b>2.28E-08</b> | <b>5</b>  |
| P56656        | EHQESLDVTNPR                                              | 0.71710032         | 2               | 3.6983    |
| P56656        | IKEHQESLDVTNPR                                            | 0.809818255        | 2               | 5.02222   |
| P56656        | NYLIPK                                                    | 1.749488261        | 1               | 2.04485   |
| P56656        | VCAGEGLAR                                                 | 2.051785252        | 2               | 2.36139   |
| P56656        | VQEEIDHVIGR                                               | 1.252274258        | 2               | 3.4338    |
| <b>P56812</b> | <b>PDCD5 Programmed cell death protein 5</b>              | <b>0.951000552</b> | <b>0.996398</b> | <b>3</b>  |
| P56812        | HGDPGDAAQQAQK                                             | 0.942528855        | 2               | 4.20271   |
| P56812        | NSILAQVLDQASAR                                            | 0.982883805        | 2               | 3.11237   |
| P56812        | VSEQGLIEIEK                                               | 1.024425546        | 2               | 3.07542   |
| <b>P57093</b> | <b>PAHX Phytanoyl_CoA dioxygenase_peroxisomal</b>         | <b>0.916050535</b> | <b>0.002329</b> | <b>7</b>  |
| P57093        | AISCHYGSSDCK                                              | 0.682124727        | 2               | 3.47799   |
| P57093        | EVKPPGMTVMKDVAIAKQGYAPSER                                 | 1.112711381        | 2               | 2.37746   |
| P57093        | IQDFQQNEELFR                                              | 1.348592636        | 2               | 3.23459   |
| P57093        | KFYEENGFLVIK                                              | 0.846941712        | 2               | 3.15119   |



|               |                                                               |                    |                 |           |
|---------------|---------------------------------------------------------------|--------------------|-----------------|-----------|
| P57093        | NLVSDDDIQR                                                    | 0.795585263        | 1               | 2.5296    |
| P57093        | NNGCLVVLPGTHK                                                 | 0.859955877        | 2               | 2.41784   |
| P57093        | YCALPQIVK                                                     | 0.996415961        | 1               | 2.06917   |
| <b>P57113</b> | <b>MAAI Maleylacetoacetate isomerase</b>                      | <b>1.150727564</b> | <b>0.015028</b> | <b>11</b> |
| P57113        | AITSGFNALEK                                                   | 1.234526125        | 2               | 2.85969   |
| P57113        | ALLALEAFQVSHPCR                                               | 1.038989739        | 2               | 4.33204   |
| P57113        | DGGQQFSEEFQTLNPMK                                             | 1.079859011        | 2               | 5.02971   |
| P57113        | FKVDLSPYPTISHINK                                              | 1.096983959        | 2               | 4.82362   |
| P57113        | GIDYEIVPINLIK                                                 | 1.18791267         | 2               | 4.10924   |
| P57113        | IDGITIGQSLAILEYLEETRPIPR                                      | 1.228429521        | 4               | 4.8791    |
| P57113        | MISDLIASGIQLQNLSVLK                                           | 1.227480244        | 2               | 5.59833   |
| P57113        | MISDLIASGIQLQNLSVLK+Oxidation(1)                              | 1.153472021        | 2               | 5.42267   |
| P57113        | QVGQENQMPWAQK                                                 | 1.111077343        | 2               | 3.94233   |
| P57113        | VDLSPYPTISHINK                                                | 1.088207979        | 2               | 3.74631   |
| P57113        | YCVGDEVSMADVCLAPQVANAER                                       | 1.002545713        | 3               | 5.9415    |
| <b>P57722</b> | <b>PCBP3 Poly(rC)_binding protein 3</b>                       | <b>1.17660421</b>  | <b>0.000919</b> | <b>2</b>  |
| P57722        | ESTGAQVQVAGDMLPNSTER                                          | 1.134003035        | 2               | 5.43032   |
| P57722        | INISEGNCPER                                                   | 1.192671464        | 2               | 3.443     |
| <b>P58321</b> | <b>UCHL4 Ubiquitin carboxyl_terminal hydrolase isozyme L4</b> | <b>1.185646582</b> | <b>0.853522</b> | <b>2</b>  |
| P58321        | VTHETSAHEGQTEAPSIDEK                                          | 1.092274447        | 3               | 5.06339   |
| P58321        | WLPLEANPEVTNQFLK                                              | 1.186486568        | 2               | 4.06193   |
| <b>P58751</b> | <b>RELN Reelin</b>                                            | <b>1.15192527</b>  | <b>0.819837</b> | <b>2</b>  |
| <b>P58775</b> | <b>TPM2 Tropomyosin beta chain</b>                            | <b>1.743105882</b> | <b>0.996316</b> | <b>11</b> |
| P58775        | AISEELDNALNDITSL                                              | 0.783593768        | 2               | 3.54075   |
| P58775        | ATDAEADVASLNR                                                 | 1.399936132        | 2               | 3.65627   |
| P58775        | DAQEKLEQAEK                                                   | 1.148628223        | 2               | 2.84916   |
| P58775        | KATDAEADVASLNR                                                | 1.480578713        | 2               | 3.3756    |
| P58775        | LDKENAIDR                                                     | 0.950975587        | 2               | 2.38913   |
| P58775        | LKGTEDVEVEK                                                   | 1.85086703         | 2               | 2.75253   |
| P58775        | MELQEMQLK                                                     | 1.049538992        | 2               | 2.51859   |
| P58775        | QLEEEQALQK                                                    | 1.677489653        | 2               | 3.31009   |
| P58775        | SLEAQADKYSTK                                                  | 1.072770064        | 2               | 2.87267   |
| P58775        | TIDDLEDEVYAQK                                                 | 1.437838079        | 2               | 3.95779   |
| P58775        | YESVKDAQEK                                                    | 0.438685272        | 2               | 3.01028   |
| <b>P59242</b> | <b>CING Cingulin</b>                                          | <b>1.140522335</b> | <b>0.007402</b> | <b>2</b>  |
| P59242        | LGQEQQALNR                                                    | 1.325543609        | 2               | 2.51633   |
| P59242        | LQGLEQEAENK                                                   | 1.060283926        | 2               | 2.9783    |
| <b>P59470</b> | <b>RPC2 DNA_directed RNA polymerase III subunit RPC2</b>      | <b>1.119728678</b> | <b>0.755683</b> | <b>2</b>  |
| P59470        | MPIMLRSSNCVLTGK+Oxidation(1)                                  | 1.563047623        | 2               | 2.53702   |
| P59470        | NAKCTLKR                                                      | 1.032671742        | 2               | 2.32696   |
| <b>P59759</b> | <b>MKL2 MKL/myocardin_like protein 2</b>                      | <b>1.154984542</b> | <b>0.989156</b> | <b>2</b>  |
| P59759        | LVEVLK                                                        | 0.990257028        | 1               | 2.01763   |
| P59759        | QIEELK                                                        | 1.167248682        | 1               | 2.06212   |
| <b>P59999</b> | <b>ARPC4 Actin_related protein 2/3 complex subunit 4</b>      | <b>1.11761962</b>  | <b>0.793089</b> | <b>3</b>  |
| P59999        | ELLLQPVTISR                                                   | 0.922450798        | 2               | 2.45138   |
| P59999        | HNKPEVEVR                                                     | 1.09965595         | 2               | 2.52479   |
| P59999        | VLIEGSINSVR                                                   | 1.129358973        | 2               | 2.94309   |
| <b>P60335</b> | <b>PCBP1 Poly(rC)_binding protein 1</b>                       | <b>1.304172926</b> | <b>7.08E-07</b> | <b>6</b>  |
| P60335        | AITIAGVPQSVTECVK                                              | 1.110899246        | 2               | 3.28747   |
| P60335        | CSDAAGYPHATHDLEGPPLDAYSIQGQHTISPLDLAK                         | 1.42427747         | 4               | 5.64442   |
| P60335        | IITLTGPTNAIFK                                                 | 1.649717671        | 2               | 2.96063   |
| P60335        | LVVPATQCGSLIGK                                                | 1.618756438        | 2               | 3.03553   |
| P60335        | QICLVMLETLSQSPQGR                                             | 1.911883366        | 2               | 2.43015   |
| P60335        | VMTIPYQMPASSPVICAGGQDR                                        | 1.269822961        | 2               | 4.05455   |

|               |                                                                                         |                    |                 |          |
|---------------|-----------------------------------------------------------------------------------------|--------------------|-----------------|----------|
| <b>P60843</b> | <b>IF4A1 Eukaryotic initiation factor 4A_I</b>                                          | <b>1.226951231</b> | <b>7.55E-10</b> | <b>5</b> |
| P60843        | ATQALVLAPTR                                                                             | 1.232721889        | 1               | 2.16775  |
| P60843        | GFKDQYDIFQK                                                                             | 0.991764989        | 2               | 3.4422   |
| P60843        | KEELTLEGIR                                                                              | 1.24862504         | 2               | 2.36739  |
| P60843        | KGVAINMVTEEDKR                                                                          | 1.162431859        | 3               | 3.94227  |
| P60843        | LQMEAPHIIVGTPGR                                                                         | 1.345873944        | 2               | 3.49597  |
| <b>P60868</b> | <b>RS20 40S ribosomal protein S20</b>                                                   | <b>1.44964412</b>  | <b>9.9E-20</b>  | <b>2</b> |
| P60868        | DTGKTPVEPEVAIHR                                                                         | 1.018350737        | 3               | 3.93648  |
| P60868        | LIDLHSPSEIVK                                                                            | 1.500510698        | 2               | 2.90735  |
| <b>P60892</b> | <b>PRPS1 Ribose_phosphate pyrophosphokinase 1</b>                                       | <b>1.090852743</b> | <b>0.762323</b> | <b>2</b> |
| P60892        | FSNQETCVEIGESVR                                                                         | 1.051212936        | 2               | 2.77476  |
| P60892        | NCTIVSPDAGGAK                                                                           | 1.299914558        | 2               | 2.31358  |
| <b>P60901</b> | <b>PSA6 Proteasome subunit alpha type_6</b>                                             | <b>1.38873042</b>  | <b>3.91E-05</b> | <b>4</b> |
| P60901        | AINQGGLTSVAVR                                                                           | 1.311731251        | 2               | 3.95305  |
| P60901        | GKDCAVIVTQK                                                                             | 1.495242579        | 2               | 3.16313  |
| P60901        | ITENIGCVMTGMTADSR                                                                       | 1.153117747        | 2               | 4.38729  |
| P60901        | LLDSSTVTHLFK                                                                            | 1.445434456        | 2               | 2.92343  |
| <b>P61087</b> | <b>UBE2K Ubiquitin_conjugating enzyme E2 K</b>                                          | <b>1.144672276</b> | <b>0.547106</b> | <b>2</b> |
| P61087        | GEIAGPPDTPYEGGR                                                                         | 1.136494541        | 2               | 2.98856  |
| P61087        | VDLVDENFTELR                                                                            | 1.168797082        | 2               | 2.57296  |
| <b>P61107</b> | <b>RAB14 Ras_related protein Rab_14</b>                                                 | <b>1.195959154</b> | <b>0.855763</b> | <b>4</b> |
| P61107        | IYQNIQDGSLDLNAAESGVQHKPSAPQGGR                                                          | 0.90029141         | 3               | 3.80429  |
| P61107        | NLTNPNTVILIGNK                                                                          | 1.060028135        | 2               | 3.78422  |
| P61107        | SCLLHQFTEK                                                                              | 1.070724777        | 2               | 3.0617   |
| P61107        | TGENVEDAFLEAAKK                                                                         | 1.232786313        | 3               | 3.69372  |
| <b>P61222</b> | <b>ABCE1 ATP_binding cassette sub_family E member 1</b>                                 | <b>1.193918806</b> | <b>0.514217</b> | <b>2</b> |
| P61222        | NTVANSQPQLLAGMNK                                                                        | 1.208011555        | 2               | 2.90489  |
| P61222        | NVEDLSGGELQR                                                                            | 0.984173629        | 2               | 2.62572  |
| <b>P61314</b> | <b>RL15 60S ribosomal protein L15</b>                                                   | <b>1.40922782</b>  | <b>3.65E-07</b> | <b>5</b> |
| P61314        | FFEVLIDPFHK                                                                             | 1.403431522        | 3               | 3.86743  |
| P61314        | GATYGKPVHHGVNQLK                                                                        | 0.821490051        | 2               | 4.46501  |
| P61314        | SLQSVAEER                                                                               | 1.194156021        | 2               | 2.88704  |
| P61314        | VLNSYWVGEDSTYK                                                                          | 1.300887094        | 2               | 4.03847  |
| P61314        | YIQELWR                                                                                 | 1.230926949        | 2               | 2.48252  |
| <b>P61459</b> | <b>PHS Pterin_4_alpha_carbinolamine dehydratase</b>                                     | <b>1.198657944</b> | <b>9.9E-20</b>  | <b>4</b> |
| P61459        | AVGWNELEGR                                                                              | 1.098957389        | 2               | 2.99745  |
| P61459        | LDHHPWFVFNVYNK                                                                          | 1.336964439        | 3               | 5.12408  |
| P61459        | LSAEERDQLLPNLR                                                                          | 1.256042697        | 3               | 4.09913  |
| P61459        | VHITLSTHECAGLSER                                                                        | 1.761297821        | 2               | 3.74244  |
| <b>P61589</b> | <b>RHOA Transforming protein RhoA</b>                                                   | <b>1.188595338</b> | <b>0.004902</b> | <b>6</b> |
| P61589        | HFCPNVPILVGNK                                                                           | 1.494180619        | 2               | 3.16407  |
| P61589        | HFCPNVPILVGNNK                                                                          | 1.007793951        | 3               | 3.94051  |
| P61589        | IGAFGYMECSAK                                                                            | 1.711926818        | 2               | 3.00264  |
| P61589        | KKLIVVGDGACGK                                                                           | 0.913190729        | 2               | 2.42884  |
| P61589        | MKQEPVKPEEGR                                                                            | 1.072321819        | 3               | 3.50169  |
| P61589        | MKQEPVKPEEGR+Oxidation(1)                                                               | 1.250555462        | 2               | 3.5013   |
| <b>P61751</b> | <b>ARF4 ADP_ribosylation factor 4</b>                                                   | <b>1.323102591</b> | <b>4.64E-05</b> | <b>5</b> |
| P61751        | ILMVGLDAAGK                                                                             | 1.451154536        | 2               | 2.45967  |
| P61751        | IQEGA AVLQK                                                                             | 1.153077681        | 2               | 2.56254  |
| P61751        | LGEIVTTIPTIGFNVETVEYK                                                                   | 1.26199487         | 3               | 4.57534  |
| P61751        | NICFTVWDVGGQDK                                                                          | 1.267192308        | 2               | 4.03191  |
| P61751        | QDLPNAMAISEMTDK                                                                         | 1.423695394        | 2               | 3.46289  |
| <b>P61805</b> | <b>DAD1 Dolichyl_diphosphooligosaccharide__protein glycosyltransferase subunit DAD1</b> | <b>1.278534666</b> | <b>0.332947</b> | <b>2</b> |
| P61805        | ADFQGISPER                                                                              | 1.144428955        | 1               | 1.95331  |

|               |                                                                             |                    |                 |           |
|---------------|-----------------------------------------------------------------------------|--------------------|-----------------|-----------|
| P61805        | FLEEYLSSTPQR                                                                | 1.283207537        | 2               | 3.74085   |
| <b>P61924</b> | <b>COPZ1 Coatomer subunit zeta_1</b>                                        | <b>1.188762445</b> | <b>0.720955</b> | <b>3</b>  |
| P61924        | AILILDNDGDR                                                                 | 1.276433485        | 2               | 2.90143   |
| P61924        | GEDVPLTEQTVSQVLQSAK                                                         | 1.142049977        | 2               | 5.13934   |
| P61924        | YYDDTYPSVK                                                                  | 1.055492855        | 2               | 2.47498   |
| <b>P61972</b> | <b>NTF2 Nuclear transport factor 2</b>                                      | <b>1.10108893</b>  | <b>0.762261</b> | <b>2</b>  |
| P61972        | IQHSITAQDHQPTPDCIISMVVGQLK                                                  | 1.029963196        | 3               | 5.41942   |
| P61972        | NINDAWVCTNDMFR                                                              | 1.074919325        | 2               | 3.04277   |
| <b>P61980</b> | <b>HNRPK Heterogeneous nuclear ribonucleoprotein K</b>                      | <b>1.231026884</b> | <b>9.9E-20</b>  | <b>11</b> |
| P61980        | GSDFDCELR                                                                   | 1.231574626        | 2               | 2.46057   |
| P61980        | GSYGD LGGPIITQVTIPK                                                         | 0.914268853        | 2               | 4.68076   |
| P61980        | IDEPLEGSEDR                                                                 | 1.082432237        | 2               | 3.37288   |
| P61980        | IILD L ISESPIK                                                              | 1.477957295        | 2               | 3.92742   |
| P61980        | IITITGTQDQIQNAQYLLQNSVK                                                     | 1.25194091         | 3               | 6.68484   |
| P61980        | LFQECCPHSTDR                                                                | 1.244304382        | 2               | 3.55997   |
| P61980        | LLIHQSLAGGIIGVK                                                             | 1.932746676        | 2               | 2.58792   |
| P61980        | NTDEMVELR                                                                   | 0.994642055        | 2               | 2.4274    |
| P61980        | RSRNTDEMVELR                                                                | 0.987053629        | 2               | 2.32522   |
| P61980        | TDYNASVSPDSSGPER                                                            | 1.183496821        | 2               | 4.65239   |
| P61980        | VVLIGGK PDR                                                                 | 1.25015108         | 2               | 2.53567   |
| <b>P61983</b> | <b>1433G 14_3_3 protein gamma</b>                                           | <b>1.081423293</b> | <b>0.999963</b> | <b>4</b>  |
| P61983        | AYSEAHEISK                                                                  | 1.008211178        | 2               | 3.35271   |
| P61983        | NVTELNPLSNEER                                                               | 1.086434677        | 2               | 4.76019   |
| P61983        | TAFDDAIAELDTLNEDSYK                                                         | 1.140280268        | 2               | 5.55698   |
| P61983        | YLAEVATGEK                                                                  | 0.908052763        | 2               | 2.73108   |
| <b>P62076</b> | <b>TIM13 Mitochondrial import inner membrane translocase subunit Tim13</b>  | <b>0.998499687</b> | <b>0.877702</b> | <b>4</b>  |
| P62076        | CIGKPGGSLDNSEQK                                                             | 1.027100582        | 2               | 4.23589   |
| P62076        | KCIGKPGGSLDNSEQK                                                            | 0.846882485        | 2               | 4.30504   |
| P62076        | VQIAVANAEQLLQR                                                              | 1.00566425         | 2               | 4.40919   |
| P62076        | YMDAWNTVSR                                                                  | 0.945732864        | 2               | 3.09854   |
| <b>P62078</b> | <b>TIM8B Mitochondrial import inner membrane translocase subunit Tim8 B</b> | <b>1.043967197</b> | <b>0.932233</b> | <b>2</b>  |
| P62078        | FIDTTLAITGR                                                                 | 1.044583408        | 2               | 2.56581   |
| P62078        | TENCLSSCVDR                                                                 | 0.921172667        | 2               | 2.32365   |
| <b>P62083</b> | <b>RS7 40S ribosomal protein S7</b>                                         | <b>1.264499812</b> | <b>4.98E-06</b> | <b>5</b>  |
| P62083        | AIIIFVPVPQLK                                                                | 1.155915996        | 2               | 3.7496    |
| P62083        | IVKPNGEKPDEFESGISQALLELEMNSDLK                                              | 1.553335741        | 3               | 5.02312   |
| P62083        | KAIIFVPVPQLK                                                                | 1.103170556        | 2               | 3.62648   |
| P62083        | LDGSRLIK                                                                    | 1.096142838        | 2               | 2.33299   |
| P62083        | TLTAVHDAILEDLVFPSEIVGK                                                      | 1.242569944        | 2               | 5.05687   |
| <b>P62161</b> | <b>CALM Calmodulin</b>                                                      | <b>1.109222801</b> | <b>0.102832</b> | <b>4</b>  |
| P62161        | DGNNGYISAAELR                                                               | 0.990496021        | 2               | 2.66647   |
| P62161        | EADIDGGQVNYEEFVQMMTAK                                                       | 2.324412192        | 2               | 4.89699   |
| P62161        | EAFSLFDKDGDTITTK                                                            | 1.200938999        | 2               | 4.33368   |
| P62161        | VFDKDGNGYISAAELR                                                            | 1.119689785        | 2               | 4.35631   |
| <b>P62193</b> | <b>PRS4 26S protease regulatory subunit 4</b>                               | <b>1.002389643</b> | <b>0.872601</b> | <b>4</b>  |
| P62193        | APQETYADIGGLDNQIQEIK                                                        | 1.254397914        | 2               | 4.97512   |
| P62193        | AVANQTSATFLR                                                                | 1.097010623        | 2               | 2.60223   |
| P62193        | NQEQMKPLEEK                                                                 | 1.143267648        | 2               | 2.91342   |
| P62193        | TMLELLNQLDGFDSR                                                             | 1.023261278        | 2               | 3.9991    |
| <b>P62198</b> | <b>PRS8 26S protease regulatory subunit 8</b>                               | <b>1.141238794</b> | <b>0.051416</b> | <b>4</b>  |
| P62198        | EVIELPVKHPPEALGIAQPK                                                        | 1.261196664        | 3               | 3.90312   |
| P62198        | LEGGSGGDSEVQR                                                               | 1.120943275        | 2               | 3.53385   |
| P62198        | TMLELLNQLDGFATK                                                             | 1.428342677        | 2               | 3.3689    |
| P62198        | VPDSTYEMIGGLDKQIK                                                           | 1.392297797        | 2               | 2.33641   |

|               |                                                  |                    |                 |           |
|---------------|--------------------------------------------------|--------------------|-----------------|-----------|
| <b>P62243</b> | <b>RS8 40S ribosomal protein S8</b>              | <b>1.292916573</b> | <b>0.00509</b>  | <b>8</b>  |
| P62243        | ADGYVLEGK                                        | 1.090594687        | 2               | 2.38085   |
| P62243        | IIDVVYNASNNEVLR                                  | 1.674584143        | 2               | 4.16359   |
| P62243        | ISSLLEEQFQQGK                                    | 1.475495169        | 2               | 3.99094   |
| P62243        | KYELGRPAANTK                                     | 0.968831744        | 2               | 3.75241   |
| P62243        | LDVGNFWSWGSECCTR                                 | 1.213731224        | 2               | 3.90814   |
| P62243        | LTPEEEELNK                                       | 1.08506936         | 2               | 3.24813   |
| P62243        | NCIVLIDSTPYR                                     | 0.995219355        | 2               | 3.33268   |
| P62243        | YELGRPAANTK                                      | 0.938155268        | 2               | 3.22821   |
| <b>P62246</b> | <b>RS15A 40S ribosomal protein S15a</b>          | <b>1.269291064</b> | <b>9.9E-20</b>  | <b>3</b>  |
| P62246        | HGYIGFEFIIDHR                                    | 1.284412784        | 2               | 4.23928   |
| P62246        | MNVLADALK                                        | 1.242158234        | 2               | 2.78002   |
| P62246        | WQNNLLPSR                                        | 1.471527881        | 2               | 2.67224   |
| <b>P62250</b> | <b>RS16 40S ribosomal protein S16</b>            | <b>1.251099536</b> | <b>0.007246</b> | <b>5</b>  |
| P62250        | ALVAYYQK                                         | 1.164214978        | 1               | 2.38891   |
| P62250        | GGGHVAQIYAIR                                     | 1.178417795        | 2               | 2.64336   |
| P62250        | LLEPVLLLGK                                       | 1.408049399        | 2               | 2.72394   |
| P62250        | TLLVADPR                                         | 1.200120764        | 2               | 2.45276   |
| P62250        | VNGRPLEMIEPR                                     | 1.090139134        | 2               | 2.6091    |
| <b>P62260</b> | <b>1433E 14_3_3 protein epsilon</b>              | <b>1.134610967</b> | <b>9.9E-20</b>  | <b>7</b>  |
| P62260        | AAFDDAIAELDTLSEESYK                              | 1.623120826        | 2               | 6.16081   |
| P62260        | HLIPAANTGESK                                     | 1.145309952        | 2               | 3.50657   |
| P62260        | IISSIEQK                                         | 1.285494094        | 2               | 2.79423   |
| P62260        | LICCDILDVLDK                                     | 2.271232589        | 2               | 4.06261   |
| P62260        | YDEMVESMK                                        | 1.097080038        | 2               | 2.48494   |
| P62260        | YLAEFATGNDR                                      | 0.909293327        | 2               | 2.79643   |
| P62260        | YLAEFATGNDRK                                     | 1.101495019        | 2               | 2.72085   |
| <b>P62271</b> | <b>RS18 40S ribosomal protein S18</b>            | <b>1.239812847</b> | <b>8.8E-11</b>  | <b>4</b>  |
| P62271        | AGELTEDEVER                                      | 1.1071151          | 2               | 3.48363   |
| P62271        | LREDLER                                          | 1.215057988        | 1               | 2.00539   |
| P62271        | VLNTNIDGR                                        | 1.162484904        | 2               | 3.03602   |
| P62271        | YSQVLANGLDNK                                     | 1.352414544        | 2               | 3.77434   |
| <b>P62278</b> | <b>RS13 40S ribosomal protein S13</b>            | <b>1.139439807</b> | <b>1.01E-13</b> | <b>4</b>  |
| P62278        | GLAPDLPEDLYHLIK                                  | 1.475189316        | 2               | 2.97082   |
| P62278        | GLTPSQIGVILR                                     | 1.008858738        | 2               | 2.76058   |
| P62278        | KGLTPSQIGVILR                                    | 1.038968358        | 3               | 3.67167   |
| P62278        | LILIESR                                          | 1.256133132        | 1               | 1.93599   |
| <b>P62329</b> | <b>TYB4 Thymosin beta_4</b>                      | <b>1.085150973</b> | <b>0.886836</b> | <b>4</b>  |
| P62329        | ETIEQEKQAGES                                     | 0.916048857        | 2               | 3.08089   |
| P62329        | KTETQEKNPSPK                                     | 1.147034322        | 2               | 3.45988   |
| P62329        | NPLPSKETIEQEK                                    | 1.087122797        | 2               | 3.00775   |
| P62329        | TETQEKNPSPK                                      | 1.122146742        | 2               | 3.79581   |
| <b>P62332</b> | <b>ARF6 ADP_ribosylation factor 6</b>            | <b>0.64178788</b>  | <b>0.060369</b> | <b>2</b>  |
| P62332        | FNVWDVGGQDK                                      | 0.578386904        | 2               | 3.00287   |
| P62332        | LGQSVTTIPTVGFNVETVYK                             | 0.89699575         | 2               | 2.40965   |
| <b>P62334</b> | <b>PRS10 26S protease regulatory subunit 10B</b> | <b>1.072377032</b> | <b>0.233548</b> | <b>6</b>  |
| P62334        | ALQSVGQIVGEVLK                                   | 1.039406477        | 2               | 2.41709   |
| P62334        | AVASQLDCNFLK                                     | 1.010212713        | 2               | 2.44078   |
| P62334        | EVIELPTNPELFQR                                   | 0.994804747        | 2               | 3.20723   |
| P62334        | GCLLYGPPGTGK                                     | 0.653119398        | 2               | 2.51297   |
| P62334        | HGEIDYEAIVK                                      | 1.060981281        | 2               | 3.75245   |
| P62334        | IHIDLPEQAR                                       | 1.217841823        | 2               | 2.35397   |
| <b>P62425</b> | <b>RL7A 60S ribosomal protein L7a</b>            | <b>1.148143864</b> | <b>1.08E-12</b> | <b>10</b> |
| P62425        | AGVNTVTTLVENK                                    | 1.214745437        | 2               | 3.85845   |
| P62425        | AGVNTVTTLVENKK                                   | 1.082027678        | 2               | 2.84303   |
| P62425        | HWGGNVLGPK                                       | 1.323940178        | 1               | 2.68437   |
| P62425        | KVVNPLFEK                                        | 1.366919166        | 2               | 2.3428    |

|               |                                                   |                    |                 |           |
|---------------|---------------------------------------------------|--------------------|-----------------|-----------|
| P62425        | LKVPPAINQFTQALDR                                  | 1.377062122        | 3               | 4.65488   |
| P62425        | NFGIGQDIQPK                                       | 1.076715531        | 2               | 3.1646    |
| P62425        | TCTTVAFTQVNSEDK                                   | 1.08922659         | 2               | 3.73615   |
| P62425        | TCTTVAFTQVNSEDKGALAK                              | 1.005263856        | 2               | 4.0672    |
| P62425        | VAPAPAVVK                                         | 1.128421957        | 1               | 1.97231   |
| P62425        | VPPAINQFTQALDR                                    | 1.050502551        | 2               | 3.40768   |
| <b>P62630</b> | <b>EF1A1 Elongation factor 1_alpha 1</b>          | <b>1.087496545</b> | <b>9.9E-20</b>  | <b>15</b> |
| P62630        | DGSASGTTLLEALDCILPPTKPLR                          | 1.339930975        | 3               | 5.22158   |
| P62630        | GNVAGDSKNDPPMEAGFTAQVIILNHPGQISAGYAPVLDCHTAHIACK  | 1.251468233        | 6               | 4.52624   |
| P62630        | KDGSASGTTLLEALDCILPPTKPLR                         | 1.346710763        | 4               | 5.93897   |
| P62630        | MDSTEPPYSQK                                       | 1.028422141        | 2               | 3.66552   |
| P62630        | MDSTEPPYSQK+Oxidation(1)                          | 1.101839411        | 2               | 3.27101   |
| P62630        | NDPPMEAGFTAQVIILNHPGQISAGYAPVLDCHTAHIACK          | 1.226963507        | 3               | 6.27146   |
| P62630        | RGNVAGDSKNDPPMEAGFTAQVIILNHPGQISAGYAPVLDCHTAHIACK | 0.993890982        | 5               | 4.6393    |
| P62630        | RYEEIVK                                           | 1.081660194        | 2               | 2.662     |
| P62630        | SGDAAIVDMVPGKPMCVESFSDYPPLGR                      | 1.262084886        | 3               | 5.21196   |
| P62630        | SGDAAIVDMVPGKPMCVESFSDYPPLGR+Oxidation(15)        | 1.200747015        | 3               | 3.79164   |
| P62630        | SGDAAIVDMVPGKPMCVESFSDYPPLGR+Oxidation(9)         | 1.146035204        | 3               | 3.4255    |
| P62630        | VETGVLKPGMVVTFAPVNVVTEVK                          | 1.107436708        | 2               | 5.60172   |
| P62630        | VETGVLKPGMVVTFAPVNVVTEVK+Oxidation(10)            | 1.058767119        | 3               | 4.63998   |
| P62630        | YEEIVK                                            | 1.188068267        | 1               | 1.98885   |
| P62630        | YYVTIIDAPGHR                                      | 1.240509573        | 2               | 3.51139   |
| <b>P62632</b> | <b>EF1A2 Elongation factor 1_alpha 2</b>          | <b>1.101387595</b> | <b>9.9E-20</b>  | <b>6</b>  |
| P62632        | EHALLAYTLGVK                                      | 1.183785097        | 1               | 3.59036   |
| P62632        | IGGIGTVPVGR                                       | 1.362429721        | 2               | 3.63587   |
| P62632        | NMITGTSQADCAVLIVAAGVGEFEAGISK                     | 1.131337645        | 3               | 5.85823   |
| P62632        | QLIVGVNK                                          | 1.325664414        | 1               | 2.52067   |
| P62632        | STTTGHLYK                                         | 1.15419542         | 2               | 3.14524   |
| P62632        | THINIVVIGHVDSGK                                   | 1.154448294        | 2               | 5.64054   |
| <b>P62634</b> | <b>CNBP Cellular nucleic acid_binding protein</b> | <b>1.168558776</b> | <b>0.366846</b> | <b>2</b>  |
| P62634        | CGETGHVAINCSK                                     | 1.091380797        | 2               | 4.47594   |
| P62634        | CYSCGEFGHIQK                                      | 1.203499705        | 2               | 3.11587   |
| <b>P62703</b> | <b>RS4X 40S ribosomal protein S4_X isoform</b>    | <b>1.263593265</b> | <b>1.74E-12</b> | <b>5</b>  |
| P62703        | FDTGNLCMVTGGANLGR                                 | 1.102579482        | 2               | 5.07237   |
| P62703        | GIPHLVTHDAR                                       | 1.12233511         | 2               | 2.35906   |
| P62703        | LSNIFVIGK                                         | 1.621643379        | 2               | 3.2098    |
| P62703        | TDITYPAGFMDVISIDK                                 | 1.377099127        | 2               | 5.14676   |
| P62703        | VNDTIQIDLETGK                                     | 1.112648182        | 2               | 4.45045   |
| <b>P62752</b> | <b>RL23A 60S ribosomal protein L23a</b>           | <b>1.049670511</b> | <b>0.091111</b> | <b>6</b>  |
| P62752        | LAPDYDALDVANK                                     | 1.145809112        | 2               | 3.74788   |
| P62752        | LDHYAIK                                           | 1.015879132        | 2               | 2.64494   |
| P62752        | LYDIDVAK                                          | 1.011369477        | 1               | 1.97206   |
| P62752        | NKLDHYAIK                                         | 1.085906448        | 2               | 2.76412   |
| P62752        | VNTLIRPDGEK                                       | 1.089092522        | 2               | 3.23206   |
| P62752        | VNTLIRPDGEKK                                      | 1.306898218        | 2               | 2.913     |
| <b>P62755</b> | <b>RS6 40S ribosomal protein S6</b>               | <b>1.165955183</b> | <b>2.77E-05</b> | <b>4</b>  |
| P62755        | DIPGLTDTTVPR                                      | 1.101855312        | 2               | 2.66052   |
| P62755        | LIEVDDER                                          | 1.150027224        | 2               | 2.76439   |
| P62755        | LNISFPATGCQK                                      | 1.370203882        | 2               | 3.24553   |
| P62755        | NKEEAAEYAK                                        | 1.125466411        | 2               | 2.51117   |
| <b>P62775</b> | <b>MTPN Myotrophin</b>                            | <b>0.996175864</b> | <b>0.943257</b> | <b>2</b>  |
| P62775        | GADINAPDKHHITPLLSAVYEGHVSCVK                      | 1.086578024        | 4               | 5.22523   |
| P62775        | NGDLDEVKDYVAK                                     | 0.944180786        | 2               | 3.24045   |

|               |                                                             |                    |                 |           |
|---------------|-------------------------------------------------------------|--------------------|-----------------|-----------|
| <b>P62804</b> | <b>H4 Histone H4</b>                                        | <b>1.13550279</b>  | <b>0.000646</b> | <b>8</b>  |
| P62804        | DAVTYTEHAK                                                  | 0.983268971        | 2               | 2.881     |
| P62804        | DNIQGITKPAIR                                                | 0.987722122        | 2               | 3.41559   |
| P62804        | ISGLIYEETR                                                  | 1.368226453        | 2               | 3.64493   |
| P62804        | KVTAMDVVYALK                                                | 0.955286571        | 2               | 2.49926   |
| P62804        | RISGLIYEETR                                                 | 1.266294247        | 2               | 2.30632   |
| P62804        | TVTAMDVVYALK                                                | 1.019023277        | 2               | 4.04482   |
| P62804        | TVTAMDVVYALK+Oxidation(5)                                   | 1.051349677        | 2               | 2.85351   |
| P62804        | VFLENVIR                                                    | 1.081386845        | 2               | 3.26538   |
| <b>P62815</b> | <b>VATB2 V_type proton ATPase subunit B_ brain isoform</b>  | <b>1.081658268</b> | <b>0.766056</b> | <b>2</b>  |
| P62815        | AVVQVFEGTSGIDAK                                             | 1.132171828        | 2               | 3.28215   |
| P62815        | NFITQGPYENR                                                 | 1.073003399        | 2               | 2.48013   |
| <b>P62832</b> | <b>RL23 60S ribosomal protein L23</b>                       | <b>2.096169999</b> | <b>1.39E-13</b> | <b>2</b>  |
| P62832        | GSAITGPVAK                                                  | 1.16606787         | 2               | 2.78882   |
| P62832        | ISLGLPVGAVINCADNTGAK                                        | 1.268262484        | 2               | 4.77714   |
| <b>P62845</b> | <b>RS15 40S ribosomal protein S15</b>                       | <b>1.020462808</b> | <b>0.942106</b> | <b>2</b>  |
| P62845        | DMIILPEMVGSMVGVYNGK                                         | 1.172282941        | 2               | 3.10961   |
| P62845        | TFNQVEIKPEMIGHYLGESITYKPKV                                  | 0.977405839        | 4               | 5.10098   |
| <b>P62853</b> | <b>RS25 40S ribosomal protein S25</b>                       | <b>1.818399769</b> | <b>9.36E-08</b> | <b>2</b>  |
| P62853        | GGDAPAAGEDA                                                 | 1.872550294        | 1               | 2.20181   |
| P62853        | LNNLVLFDK                                                   | 1.433059727        | 2               | 2.86726   |
| <b>P62856</b> | <b>RS26 40S ribosomal protein S26</b>                       | <b>1.142690172</b> | <b>0.180557</b> | <b>2</b>  |
| P62856        | DISEASVFDAYVLPK                                             | 1.308890413        | 2               | 3.0337    |
| P62856        | NIVEAAAVR                                                   | 1.149804551        | 2               | 3.04834   |
| <b>P62859</b> | <b>RS28 40S ribosomal protein S28</b>                       | <b>1.088170249</b> | <b>0.788351</b> | <b>2</b>  |
| P62859        | EGDVLTLLESER                                                | 1.066003652        | 2               | 3.79795   |
| P62859        | VEFMDDTSR                                                   | 1.240135072        | 2               | 2.32801   |
| <b>P62870</b> | <b>ELOB Transcription elongation factor B polypeptide 2</b> | <b>1.523530614</b> | <b>0.118736</b> | <b>2</b>  |
| P62870        | ADDTFEALR                                                   | 1.344330706        | 2               | 2.62043   |
| P62870        | TLGECGFTSQARTAPATVGLAFR                                     | 1.194557141        | 3               | 4.40892   |
| <b>P62890</b> | <b>RL30 60S ribosomal protein L30</b>                       | <b>1.17778425</b>  | <b>6.97E-05</b> | <b>3</b>  |
| P62890        | LVILANNCPALR                                                | 1.094240972        | 2               | 3.06709   |
| P62890        | TGVHHYSGNNIELGTACGK                                         | 1.169233173        | 2               | 5.70948   |
| P62890        | VCTLAIIDPGDSDIIR                                            | 1.472098429        | 2               | 4.13172   |
| <b>P62898</b> | <b>CYC Cytochrome c_somatic</b>                             | <b>1.018072626</b> | <b>0.001417</b> | <b>6</b>  |
| P62898        | ADLIAYLK                                                    | 1.025432132        | 2               | 2.88971   |
| P62898        | GITWGEDTLMEYLENPK                                           | 1.143014099        | 2               | 5.22775   |
| P62898        | GITWGEDTLMEYLENPKK                                          | 1.345721562        | 2               | 4.65435   |
| P62898        | KTGQAAGFSYTDANK                                             | 1.201129356        | 2               | 3.94792   |
| P62898        | TGPNLHGLFGR                                                 | 1.030933805        | 2               | 3.38054   |
| P62898        | TGQAAGFSYTDANK                                              | 1.046034351        | 2               | 4.324     |
| <b>P62902</b> | <b>RL31 60S ribosomal protein L31</b>                       | <b>1.047049098</b> | <b>0.947743</b> | <b>3</b>  |
| P62902        | LYTLVTVVPVTTFK                                              | 1.9673063          | 2               | 3.19989   |
| P62902        | NLQTVNVDEN                                                  | 1.298147336        | 1               | 2.42117   |
| P62902        | SAINEVVTR                                                   | 1.04370109         | 2               | 2.56226   |
| <b>P62907</b> | <b>RL10A 60S ribosomal protein L10a</b>                     | <b>1.17523922</b>  | <b>0.00081</b>  | <b>6</b>  |
| P62907        | AVDIPHMDIEALK                                               | 1.144889771        | 2               | 2.69013   |
| P62907        | FSVCVLGDQQHCDEAK                                            | 1.243098606        | 2               | 4.40269   |
| P62907        | ILGPGLNK                                                    | 1.755329981        | 1               | 1.93241   |
| P62907        | KYDAFLASESLIK                                               | 1.11284461         | 2               | 3.3166    |
| P62907        | VLCLAVAVGHVK                                                | 1.337946882        | 2               | 3.22506   |
| P62907        | YDAFLASESLIK                                                | 1.06484194         | 2               | 3.11461   |
| <b>P62909</b> | <b>RS3 40S ribosomal protein S3</b>                         | <b>1.187802578</b> | <b>1.43E-11</b> | <b>10</b> |
| P62909        | AELNEFLTR                                                   | 1.146986814        | 2               | 2.62324   |
| P62909        | DEILPTTPISEQK                                               | 1.260858373        | 2               | 3.05828   |

|               |                                                           |                    |                 |           |
|---------------|-----------------------------------------------------------|--------------------|-----------------|-----------|
| P62909        | ELAEDGYSGVEVR                                             | 1.124940162        | 2               | 3.32631   |
| P62909        | ELTAVVQK                                                  | 1.141901872        | 1               | 2.0989    |
| P62909        | FGFPEGSVELYAEK                                            | 1.99582163         | 2               | 3.93104   |
| P62909        | FVDGLMIHSGDPVNYVDTAVR                                     | 1.360003024        | 3               | 5.17329   |
| P62909        | GCEVVVSGK                                                 | 1.248417768        | 2               | 2.5813    |
| P62909        | GGKPEPPAMPQPVPTA                                          | 1.25154697         | 2               | 4.04796   |
| P62909        | GLCAIAQAESLR                                              | 1.287999168        | 2               | 3.24721   |
| P62909        | TEIILATR                                                  | 1.534277899        | 2               | 3.15364   |
| <b>P62912</b> | <b>RL32 60S ribosomal protein L32</b>                     | <b>1.064152542</b> | <b>0.000166</b> | <b>2</b>  |
| P62912        | GQILMPNIGYGSNK                                            | 1.026068306        | 2               | 2.66458   |
| P62912        | SYCAEIAHNVSSK                                             | 1.209930164        | 2               | 4.27846   |
| <b>P62914</b> | <b>RL11 60S ribosomal protein L11</b>                     | <b>1.107543904</b> | <b>0.716028</b> | <b>2</b>  |
| P62914        | VLEQLTGQTPVFSK                                            | 0.967011101        | 2               | 4.05695   |
| P62914        | YDGIIIPGK                                                 | 1.14534697         | 2               | 3.27068   |
| <b>P62919</b> | <b>RL8 60S ribosomal protein L8</b>                       | <b>1.140159509</b> | <b>0.085278</b> | <b>3</b>  |
| P62919        | ASGNYATVISHNPETK                                          | 1.12050236         | 2               | 4.49217   |
| P62919        | AVVGVVAGGGR                                               | 1.143948635        | 2               | 3.34793   |
| P62919        | KAQLNIGNVLPVGTMPGEGTIVCCLEEKPGDR                          | 1.074281845        | 3               | 5.4397    |
| <b>P62944</b> | <b>AP2B1 AP_2 complex subunit beta</b>                    | <b>1.244719313</b> | <b>0.11097</b>  | <b>2</b>  |
| P62944        | KPSETQELVQQVLSLATQSDNPDLR                                 | 1.3803475          | 3               | 3.64916   |
| P62944        | LQNNNVYTIK                                                | 1.190604086        | 2               | 3.00048   |
| <b>P62959</b> | <b>HINT1 Histidine triad nucleotide_binding protein 1</b> | <b>1.13479056</b>  | <b>0.591353</b> | <b>7</b>  |
| P62959        | AQVAQPGGDTIFGK                                            | 1.037946973        | 2               | 4.96864   |
| P62959        | CAADLGLK                                                  | 1.131286902        | 2               | 2.50777   |
| P62959        | CLAFHDISPQAPTHFLVIPK                                      | 1.208425802        | 3               | 3.70877   |
| P62959        | HISQISVADDDDESLLGHLMIVGK                                  | 0.932663091        | 3               | 7.64522   |
| P62959        | IIFEDDR                                                   | 1.22948185         | 2               | 2.65055   |
| P62959        | KHISQISVADDDDESLLGHLMIVGK                                 | 1.041302617        | 3               | 5.09073   |
| P62959        | MVVNEGADGGQSVYHIHLHLVGGGR                                 | 0.867062136        | 3               | 4.08594   |
| <b>P62961</b> | <b>YBOX1 Nuclease_sensitive element_binding protein 1</b> | <b>1.041537075</b> | <b>0.97376</b>  | <b>4</b>  |
| P62961        | EDGNEEDKENQGDETQQGQPPQR                                   | 1.010768446        | 3               | 5.00482   |
| P62961        | GAEAAVNTGPGGVPVQGSK                                       | 0.980621037        | 2               | 4.98974   |
| P62961        | NEGSESAPEGQAQQR                                           | 0.783837194        | 2               | 5.12952   |
| P62961        | RPQYSNPPVQGEVMEGADNQGAGEQGRPVR                            | 1.052122649        | 4               | 5.46954   |
| <b>P62963</b> | <b>PROF1 Profilin_1</b>                                   | <b>1.264183337</b> | <b>0.001926</b> | <b>5</b>  |
| P62963        | DSLLQDGFTMDLR                                             | 1.140735102        | 2               | 3.8876    |
| P62963        | DSPSVWAAVPGK                                              | 1.261975992        | 2               | 2.93246   |
| P62963        | SSFFVNGLTGGQK                                             | 1.179567349        | 2               | 3.92799   |
| P62963        | STGGAPTFFNVVTMTAK                                         | 1.033580564        | 2               | 3.29581   |
| P62963        | TFVSITPAEVGLVVGK                                          | 1.207374263        | 2               | 5.09994   |
| <b>P63018</b> | <b>HSP7C Heat shock cognate 71 kDa protein</b>            | <b>1.292777316</b> | <b>9.9E-20</b>  | <b>22</b> |
| P63018        | ARFEELNADLFR                                              | 1.239604697        | 3               | 3.88953   |
| P63018        | DAGTIAGLNVLR                                              | 1.084284241        | 2               | 3.42501   |
| P63018        | FDDAVVQSDMK                                               | 1.035864233        | 2               | 3.26835   |
| P63018        | FEELNADLFR                                                | 1.07086376         | 2               | 3.15154   |
| P63018        | FELTGIPPAPR                                               | 1.051517182        | 2               | 2.71697   |
| P63018        | IINEPTAAAIAYGLDK                                          | 1.235243827        | 2               | 5.5324    |
| P63018        | IINEPTAAAIAYGLDKK                                         | 1.312997254        | 2               | 4.17167   |
| P63018        | LLQDFNGK                                                  | 1.553909131        | 2               | 2.7076    |
| P63018        | MKEIAEAYLGK                                               | 1.084178283        | 2               | 3.44085   |
| P63018        | MVNHFAIEFK                                                | 1.544669665        | 2               | 3.17906   |
| P63018        | NQTAEKEEFEHQK                                             | 1.200530238        | 2               | 5.24846   |
| P63018        | NQVAMNPTNTVFDK                                            | 1.110696976        | 2               | 5.07526   |
| P63018        | NQVAMNPTNTVFDK+Oxidation(5)                               | 1.22058331         | 2               | 4.23191   |
| P63018        | NSLESYAFNMK                                               | 1.788788457        | 2               | 3.93485   |
| P63018        | RFDDAVVQSDMK                                              | 1.154985692        | 2               | 3.43635   |

|               |                                                      |                    |                 |           |
|---------------|------------------------------------------------------|--------------------|-----------------|-----------|
| P63018        | SFYPEEVSSMVLTK                                       | 1.105329188        | 2               | 5.20395   |
| P63018        | SINPDEAVAYGAAVQAAILSGDK                              | 1.599315288        | 2               | 6.26236   |
| P63018        | SQIHDIVLVGGSTR                                       | 1.104937277        | 2               | 4.86824   |
| P63018        | STAGDTHLGGEDFDNR                                     | 1.115040316        | 2               | 4.31051   |
| P63018        | TVTNAVVTVPAYFNDSQR                                   | 1.196359173        | 3               | 4.39499   |
| P63018        | VCNPIITK                                             | 1.219271195        | 2               | 2.43427   |
| P63018        | VQVEYKGETK                                           | 1.188153134        | 2               | 2.47466   |
| <b>P63025</b> | <b>VAMP3 Vesicle_associated membrane protein 3</b>   | <b>0.86023494</b>  | <b>0.018388</b> | <b>2</b>  |
| P63025        | ADALQAGASQFETSAAK                                    | 0.724792315        | 2               | 4.67919   |
| P63025        | LQQTQNVDEVDIMR                                       | 1.445518723        | 2               | 3.61105   |
| <b>P63029</b> | <b>TCTP Translationally_controlled tumor protein</b> | <b>1.15587109</b>  | <b>0.942116</b> | <b>4</b>  |
| P63029        | DLISHDELFSDIYK                                       | 1.171793473        | 2               | 3.97676   |
| P63029        | EIADGLCLEVEGK                                        | 1.03620065         | 2               | 2.82903   |
| P63029        | GKLEEQKPER                                           | 1.159897128        | 2               | 3.41297   |
| P63029        | VKPFMTGAAEQIK                                        | 1.163390671        | 2               | 2.51388   |
| <b>P63036</b> | <b>DNJA1 Dnaj homolog subfamily A member 1</b>       | <b>1.299251995</b> | <b>0.002892</b> | <b>5</b>  |
| P63036        | HYNGEAYEDEHHPR                                       | 1.190696045        | 3               | 4.96742   |
| P63036        | ITFHGEGDQEPGLEPGDIIIVLDQK                            | 1.480205301        | 3               | 4.16789   |
| P63036        | QISQAYEVLADSK                                        | 1.281771505        | 2               | 2.57959   |
| P63036        | TIVITSHPGQIVK                                        | 1.089774094        | 2               | 3.48523   |
| P63036        | VNFPENGLSPDK                                         | 1.182719006        | 2               | 3.14111   |
| <b>P63039</b> | <b>CH60 60 kDa heat shock protein_mitochondrial</b>  | <b>1.014189967</b> | <b>3.98E-09</b> | <b>35</b> |
| P63039        | AAVEEGIVLGGCCALLR                                    | 0.980184367        | 2               | 5.70849   |
| P63039        | ALMLQGVDLLADAVAVTMGPK+Oxidation(18)                  | 0.906371252        | 3               | 4.40693   |
| P63039        | ALMLQGVDLLADAVAVTMGPK+Oxidation(3)                   | 0.984114953        | 3               | 3.75402   |
| P63039        | CEFQDAYVLLSEK                                        | 1.808521718        | 2               | 4.53654   |
| P63039        | CIPALDSLKPANEDQK                                     | 1.037176414        | 2               | 3.92477   |
| P63039        | DDAMLLKGGK                                           | 0.99497997         | 1               | 1.92187   |
| P63039        | DDAMLLKGGK+Oxidation(4)                              | 1.160537366        | 2               | 2.33184   |
| P63039        | DIGNIISDAMK                                          | 0.999733049        | 1               | 2.05108   |
| P63039        | DMAIATGGAVFGEEGLNLEDVQAHDLGK                         | 0.963325595        | 3               | 4.10706   |
| P63039        | GIIDPTK                                              | 0.946060249        | 1               | 1.9477    |
| P63039        | GVMLAVDAVIAELK                                       | 0.928305267        | 2               | 2.36294   |
| P63039        | GVMLAVDAVIAELKK                                      | 1.032506639        | 2               | 4.57021   |
| P63039        | GYISPYFINTSK                                         | 0.733243688        | 2               | 2.74261   |
| P63039        | IGIEIIK                                              | 1.041552429        | 2               | 2.81454   |
| P63039        | ILQSSSEVGYDAMLGDFVNMVEK                              | 2.084712302        | 3               | 6.14647   |
| P63039        | IQEITEQLDITTSEYEK                                    | 0.88599804         | 2               | 6.08754   |
| P63039        | IQEITEQLDITTSEYEK                                    | 0.987772488        | 2               | 5.13392   |
| P63039        | ISSVQSIVPALEIANAHR                                   | 1.214599013        | 2               | 4.47265   |
| P63039        | KISSVQSIVPALEIANAHR                                  | 1.648547144        | 3               | 3.92401   |
| P63039        | KPLVIAEDVDGEALSTLVLR                                 | 1.262377291        | 2               | 6.09902   |
| P63039        | LSDGVAVLK                                            | 1.091861095        | 2               | 2.99421   |
| P63039        | LVQDVANNTNEEAGDGTATVLR                               | 1.063397353        | 2               | 6.49695   |
| P63039        | NAGVEGSLIVEK                                         | 1.036632074        | 2               | 3.50932   |
| P63039        | QSKPVTTPEEIAQVATISANGDK                              | 0.931305502        | 2               | 3.55075   |
| P63039        | QSKPVTTPEEIAQVATISANGDKDIGNIISDAMK                   | 1.087982733        | 3               | 4.93625   |
| P63039        | RGVMLAVDAVIAELKK                                     | 0.800289521        | 3               | 5.89633   |
| P63039        | TLNDELEIIEGMK                                        | 0.942492846        | 2               | 4.84894   |
| P63039        | TLNDELEIIEGMK+Oxidation(12)                          | 0.920627044        | 2               | 2.74719   |
| P63039        | TVIIEQSWGSPK                                         | 0.95808114         | 2               | 4.28129   |
| P63039        | VGEVIVTK                                             | 0.992464431        | 2               | 3.09495   |
| P63039        | VGEVIVTKDDAMLLK                                      | 1.005649106        | 2               | 3.788     |
| P63039        | VGGTSDVEVNEK                                         | 0.968079594        | 2               | 3.91842   |
| P63039        | VGGTSDVEVNEKK                                        | 0.915696453        | 2               | 3.73441   |
| P63039        | VGLQVVAVK                                            | 1.02100758         | 2               | 3.26118   |
| P63039        | VTDALNATR                                            | 1.043102693        | 2               | 3.52256   |



|               |                                                                                      |                    |                 |           |
|---------------|--------------------------------------------------------------------------------------|--------------------|-----------------|-----------|
| <b>P63102</b> | <b>1433Z 14_3_3 protein zeta/delta</b>                                               | <b>1.078899002</b> | <b>9.9E-20</b>  | <b>8</b>  |
| P63102        | DICNDVLSLLEK                                                                         | 1.670939652        | 2               | 3.92897   |
| P63102        | FLIPNASQPESK                                                                         | 1.09724876         | 2               | 3.47434   |
| P63102        | GIVDQSQQAYQEAFEISK                                                                   | 1.042808923        | 2               | 5.74524   |
| P63102        | KGIVDQSQQAYQEAFEISK                                                                  | 1.113734743        | 2               | 5.04028   |
| P63102        | SVTEQGAELSNEER                                                                       | 1.076288077        | 2               | 5.10069   |
| P63102        | TAFDEAIAELDTLSEESYK                                                                  | 1.4819149          | 2               | 5.83761   |
| P63102        | YDDMAACMK                                                                            | 1.099821154        | 2               | 2.59623   |
| P63102        | YLAEVAAGDDKK                                                                         | 1.213868982        | 2               | 3.72432   |
| <b>P63159</b> | <b>HMGB1 High mobility group protein B1</b>                                          | <b>1.108535664</b> | <b>0.00249</b>  | <b>5</b>  |
| P63159        | GEHPGLSIGDVAK                                                                        | 1.071227514        | 2               | 3.1564    |
| P63159        | IKGEHPGLSIGDVAK                                                                      | 1.397412339        | 2               | 3.87183   |
| P63159        | KHPDASVNFSEFSK                                                                       | 1.195579692        | 3               | 4.1092    |
| P63159        | KLGEMWNNTAADDKQPYEK                                                                  | 1.168940735        | 3               | 4.31448   |
| P63159        | LGEMWNNTAADDKQPYEK                                                                   | 1.134281755        | 3               | 3.59677   |
| <b>P63174</b> | <b>RL38 60S ribosomal protein L38</b>                                                | <b>1.102407391</b> | <b>0.154518</b> | <b>3</b>  |
| P63174        | IEEIKDFLLTAR                                                                         | 0.999630044        | 2               | 3.03955   |
| P63174        | KIEEIKDFLLTAR                                                                        | 1.175684281        | 2               | 4.59237   |
| P63174        | YLYTLVITDKEK                                                                         | 1.013828591        | 2               | 2.70794   |
| <b>P63245</b> | <b>GBLP Guanine nucleotide_binding protein subunit beta_2_like 1</b>                 | <b>1.286121324</b> | <b>2.16E-14</b> | <b>13</b> |
| P63245        | DETNYGIPQR                                                                           | 1.166968968        | 2               | 3.00876   |
| P63245        | DGQAMLWDLNEGK                                                                        | 1.031634267        | 2               | 3.36682   |
| P63245        | FSPNSSNPIIVSCGWDK                                                                    | 1.274061894        | 2               | 4.26935   |
| P63245        | GHNGWVTQIATTPQFDMILSASR                                                              | 0.930016695        | 3               | 4.2884    |
| P63245        | HLYTLGGDIINALCFSPNR                                                                  | 1.500829343        | 2               | 5.60687   |
| P63245        | IIVDELKQEVISTSSK                                                                     | 1.296106459        | 2               | 4.12914   |
| P63245        | LWDLTTGTTTR                                                                          | 1.131429265        | 2               | 2.95552   |
| P63245        | LWNTLGVCK                                                                            | 1.461016493        | 2               | 2.32805   |
| P63245        | TNHIGHTGYLNTVTVSPDGLCASGGK                                                           | 1.072393083        | 2               | 4.72456   |
| P63245        | VWNLANCK                                                                             | 1.024143625        | 2               | 2.67768   |
| P63245        | VWQVTIGTR                                                                            | 0.803828522        | 2               | 2.90551   |
| P63245        | YTVQDESHSEWVSCVR                                                                     | 1.164975358        | 2               | 3.30949   |
| P63245        | YWLCAATGPSIK                                                                         | 1.025239602        | 2               | 3.15877   |
| <b>P63259</b> | <b>ACTG Actin_cytoplasmic 2</b>                                                      | <b>1.348284527</b> | <b>9.99E-16</b> | <b>8</b>  |
| P63259        | CPEALFQPSFLGMESCGIHETTFNSIMK                                                         | 2.588596178        | 3               | 5.74178   |
| P63259        | DLYANTVLSGGTTMYPGIADR                                                                | 1.009314044        | 2               | 5.76902   |
| P63259        | DLYANTVLSGGTTMYPGIADR+Oxidation(14)                                                  | 0.871195797        | 2               | 4.35081   |
| P63259        | GYSFTTTER                                                                            | 1.112440022        | 2               | 3.37033   |
| P63259        | KDLYANTVLSGGTTMYPGIADR                                                               | 1.009398878        | 2               | 6.16232   |
| P63259        | LCYVALDFEQEMATAASSSLEK                                                               | 2.912073643        | 2               | 5.20947   |
| P63259        | QEYDESGPSIVHR                                                                        | 1.163665           | 3               | 3.51731   |
| P63259        | VAPEEHPVLLTEAPLNPK                                                                   | 1.250043641        | 2               | 4.64207   |
| <b>P63269</b> | <b>ACTH Actin_gamma_enteric smooth muscle</b>                                        | <b>1.681045233</b> | <b>0.56855</b>  | <b>2</b>  |
| P63269        | DLYANNVLSGGTTMYPGIADR                                                                | 1.547293669        | 2               | 3.43609   |
| P63269        | KDLYANNVLSGGTTMYPGIADR                                                               | 4.254378059        | 2               | 5.08026   |
| <b>P63324</b> | <b>RS12 40S ribosomal protein S12</b>                                                | <b>1.219347446</b> | <b>4.72E-12</b> | <b>3</b>  |
| P63324        | KVVGCSVVVK                                                                           | 1.069644379        | 2               | 2.62901   |
| P63324        | LGEWVGLCK                                                                            | 1.293679374        | 2               | 3.14661   |
| P63324        | VVGCSVVVK                                                                            | 1.139658641        | 2               | 3.03185   |
| <b>P63331</b> | <b>PP2AA Serine/threonine_protein phosphatase 2A catalytic subunit alpha isoform</b> | <b>1.29482299</b>  | <b>0.058553</b> | <b>2</b>  |
| P63331        | GAGYTFGQDISETFNHANGTLVSR                                                             | 1.035450174        | 3               | 3.33239   |
| P63331        | YSFLQFDPAPR                                                                          | 1.311650151        | 2               | 3.26145   |
| <b>P67779</b> | <b>PHB Prohibitin</b>                                                                | <b>0.976641492</b> | <b>0.078012</b> | <b>10</b> |
| P67779        | AAELIANSLATAGDGLIELR                                                                 | 0.990530748        | 2               | 5.3507    |
| P67779        | AAIISAEGDSK                                                                          | 1.134286787        | 2               | 2.40312   |

|               |                                                                  |                    |                 |           |
|---------------|------------------------------------------------------------------|--------------------|-----------------|-----------|
| P67779        | DLQNVNITLR                                                       | 0.978849663        | 2               | 3.78424   |
| P67779        | FDAGELITQR                                                       | 1.030185457        | 2               | 3.74664   |
| P67779        | GVQDIVVGGEGTHFLIPWVQKPIIFDCR                                     | 0.63588999         | 3               | 5.32669   |
| P67779        | IYTSIGEDYDER                                                     | 1.603037869        | 2               | 3.40909   |
| P67779        | KLEAAEDIAYQLSR                                                   | 0.95982364         | 2               | 4.91233   |
| P67779        | NVPVITGSK                                                        | 0.904689643        | 1               | 2.47045   |
| P67779        | QVSDDLTER                                                        | 1.006376888        | 2               | 2.63175   |
| P67779        | VLPSITTEILK                                                      | 0.979693742        | 2               | 2.51978   |
| <b>P68037</b> | <b>UB2L3 Ubiquitin_conjugating enzyme E2 L3</b>                  | <b>1.275542366</b> | <b>6.66E-16</b> | <b>4</b>  |
| P68037        | ADLAEEYSK                                                        | 0.849307103        | 2               | 2.58318   |
| P68037        | GQVCLPVISAENWKPKATK                                              | 0.971509239        | 2               | 3.26639   |
| P68037        | IEINFPAEYFPKPPK                                                  | 1.301251089        | 2               | 3.69446   |
| P68037        | TDQVIQSLIALVNDPQPEHLR                                            | 1.463081394        | 2               | 4.87003   |
| <b>P68101</b> | <b>IF2A Eukaryotic translation initiation factor 2 subunit 1</b> | <b>1.095541325</b> | <b>0.059498</b> | <b>5</b>  |
| P68101        | AGLNCSTETMPIK                                                    | 1.095730814        | 2               | 2.8608    |
| P68101        | HAVSDPSILDSLNLNEDEREVLINNINR                                     | 0.935478596        | 3               | 4.20617   |
| P68101        | HVAEVLEYTKDEQLSELFQR                                             | 1.066688909        | 3               | 3.53982   |
| P68101        | TEGLSVLNQAMAVIK                                                  | 1.197505916        | 2               | 3.80156   |
| P68101        | VVTDTDETELAR                                                     | 1.169005223        | 2               | 3.16541   |
| <b>P68136</b> | <b>ACTS Actin_alpha skeletal muscle</b>                          | <b>1.24140935</b>  | <b>0.913535</b> | <b>16</b> |
| P68136        | AGFAGDDAPR                                                       | 1.242805371        | 2               | 3.36338   |
| P68136        | AVFPSIVGRPR                                                      | 1.038482416        | 2               | 2.95198   |
| P68136        | CPETLFQPSFIGMESAGIHETTYNSIMK                                     | 3.652996704        | 3               | 4.20481   |
| P68136        | DLYANNVMSGGTTMYPGIADR                                            | 1.062939755        | 2               | 3.72637   |
| P68136        | DSYVGDEAQSK                                                      | 0.882674458        | 2               | 3.05564   |
| P68136        | DSYVGDEAQSKR                                                     | 1.520891358        | 2               | 2.46655   |
| P68136        | EITALAPSTMK                                                      | 1.080296774        | 1               | 2.94913   |
| P68136        | EITALAPSTMK+Oxidation(10)                                        | 1.05511408         | 2               | 2.76623   |
| P68136        | GYSFVTTAER                                                       | 1.570524614        | 2               | 3.8015    |
| P68136        | IWHHTFYNELR                                                      | 1.428699153        | 3               | 3.71267   |
| P68136        | KDLYANNVMSGGTTMYPGIADR                                           | 1.470899509        | 2               | 5.20123   |
| P68136        | QEYDEAGPSIVHR                                                    | 1.559867972        | 2               | 3.14832   |
| P68136        | TTGIVLDSGDGVTHNVPIYEGYALPHAIMR                                   | 1.664286338        | 3               | 6.71917   |
| P68136        | TTGIVLDSGDGVTHNVPIYEGYALPHAIMR+Oxidation(29)                     | 1.412080063        | 3               | 5.51312   |
| P68136        | VAPEEHPTLLTEAPLNPK                                               | 1.580132064        | 2               | 4.53606   |
| P68136        | YPIEHGIITNWDDMEK                                                 | 1.295332082        | 2               | 4.54583   |
| <b>P68255</b> | <b>1433T 14_3_3 protein theta</b>                                | <b>1.342402485</b> | <b>0.000619</b> | <b>5</b>  |
| P68255        | AVTEQGAELSNEER                                                   | 1.074259236        | 2               | 4.62849   |
| P68255        | SICTTVLELLDK                                                     | 1.236762899        | 2               | 2.77049   |
| P68255        | TAFDEAIAELDTLNEDSYK                                              | 1.381516915        | 2               | 4.52114   |
| P68255        | VISSIEQK                                                         | 1.295756669        | 1               | 2.19641   |
| P68255        | YLIANATNPESK                                                     | 1.096085031        | 2               | 3.57448   |
| <b>P68511</b> | <b>1433F 14_3_3 protein eta</b>                                  | <b>1.337109288</b> | <b>0.00017</b>  | <b>2</b>  |
| P68511        | AVTELNEPLSNEDR                                                   | 1.335098049        | 2               | 4.84622   |
| P68511        | NSVVEASEAAYK                                                     | 1.149887883        | 2               | 3.17393   |
| <b>P69527</b> | <b>AMPO Aminopeptidase O</b>                                     | <b>1.143342398</b> | <b>0.207514</b> | <b>2</b>  |
| P69527        | LQQLAHRFCFELVK                                                   | 1.655144691        | 2               | 2.36537   |
| P69527        | WHRLQDELQNSPEGMQVLRPNK                                           | 1.109452532        | 2               | 2.49344   |
| <b>P69897</b> | <b>TBB5 Tubulin beta_5 chain</b>                                 | <b>1.47311081</b>  | <b>1.53E-12</b> | <b>4</b>  |
| P69897        | ALTVELTQQVFDK                                                    | 1.545658394        | 2               | 3.4195    |
| P69897        | FWEVISDEHGIDPTGYHGDSDLQLDR                                       | 1.241927399        | 3               | 5.77748   |
| P69897        | ISVYYNEATGGK                                                     | 1.372895216        | 2               | 2.88842   |
| P69897        | LTTPTYGDLNHLVSATMSGVTTCLR                                        | 1.499369408        | 2               | 5.22498   |
| <b>P70372</b> | <b>ELAV1 ELAV_like protein 1</b>                                 | <b>1.169085895</b> | <b>0.067698</b> | <b>3</b>  |
| P70372        | SLFSSIGEVESAK                                                    | 1.095173825        | 2               | 3.4156    |

|               |                                                                                 |                    |                 |           |
|---------------|---------------------------------------------------------------------------------|--------------------|-----------------|-----------|
| P70372        | TNLIVNYLPQNMTQEELR                                                              | 1.186701621        | 2               | 4.15986   |
| P70372        | VLVDQTTGLSR                                                                     | 1.102775956        | 2               | 2.56212   |
| <b>P70470</b> | <b>LYPA1 Acyl_protein thioesterase 1</b>                                        | <b>1.443668885</b> | <b>0.010873</b> | <b>2</b>  |
| P70470        | ASFSQGPINSANR                                                                   | 1.464008556        | 2               | 2.8958    |
| P70470        | DISVLQCHGDCDPLVPLMFGSLTVER                                                      | 1.440609875        | 3               | 3.97376   |
| <b>P70473</b> | <b>AMACR Alpha_methylacyl_CoA racemase</b>                                      | <b>0.909301401</b> | <b>1.87E-13</b> | <b>12</b> |
| P70473        | ADVLLLEPFR                                                                      | 0.880947273        | 2               | 3.54112   |
| P70473        | AEWCQIFDGTDACVTPVLTLEEALHHQHNR                                                  | 0.991278378        | 3               | 5.55535   |
| P70473        | DYGFSQEEIHLHSDR                                                                 | 0.95717537         | 2               | 5.00696   |
| P70473        | GLGLESEELPSQMSIEDWPEMK                                                          | 1.007578865        | 3               | 4.66227   |
| P70473        | GQNLLDGGAPFYTTYK                                                                | 0.647672989        | 2               | 5.22007   |
| P70473        | GSFITDEEQHACPRPAPQLSR                                                           | 0.864073082        | 3               | 3.62445   |
| P70473        | LGSVNHPSHLAR                                                                    | 1.498139843        | 2               | 2.91458   |
| P70473        | LQLGPETLR                                                                       | 0.890725056        | 2               | 2.41605   |
| P70473        | LSGFGQSGIFSK                                                                    | 1.34896407         | 2               | 2.7786    |
| P70473        | RDPSVGEHTVEVLK                                                                  | 0.814164279        | 3               | 4.36536   |
| P70473        | RDPSVGEHTVEVLKDYGFSQEEIHLHSDR                                                   | 0.92092394         | 4               | 5.75804   |
| P70473        | TQAMGLWAQPR                                                                     | 0.793575029        | 2               | 3.51256   |
| <b>P70552</b> | <b>GFRP GTP cyclohydrolase 1 feedback regulatory protein</b>                    | <b>1.110811917</b> | <b>0.039889</b> | <b>2</b>  |
| P70552        | MEVGPTMVGDEHSDPELMQQLGASK                                                       | 0.954371453        | 3               | 4.7964    |
| P70552        | VLGNNFYEYYVNDPPR                                                                | 1.490080571        | 2               | 3.96972   |
| <b>P70580</b> | <b>PGRC1 Membrane_associated progesterone receptor component 1</b>              | <b>1.096271286</b> | <b>0.426095</b> | <b>9</b>  |
| P70580        | EALKDEYDDLSDLTPAQQLTNDWDSQFTFK                                                  | 1.36327259         | 3               | 5.46233   |
| P70580        | EGEPTVYSDDEEPKDEAAR                                                             | 0.901615891        | 2               | 4.38536   |
| P70580        | FYGPEGPYGVFAGR                                                                  | 1.011109506        | 2               | 4.09912   |
| P70580        | GDQPGASGDNDDEPPPLPR                                                             | 1.167261414        | 2               | 5.14438   |
| P70580        | IVRGDQPGASGDNDDEPPPLPR                                                          | 0.70825792         | 3               | 5.17675   |
| P70580        | KFYGPEGPYGVFAGR                                                                 | 0.959807381        | 2               | 3.81775   |
| P70580        | LLKEGEEPTVYSDDEEPKDEAAR                                                         | 1.124795209        | 3               | 5.17035   |
| P70580        | RYDGVQDPR                                                                       | 0.991465857        | 1               | 2.18152   |
| P70580        | YDGVQDPR                                                                        | 1.004704877        | 2               | 3.01956   |
| <b>P70584</b> | <b>ACDSB Short/branched chain specific acyl_CoA dehydrogenase_mitochondrial</b> | <b>0.815405903</b> | <b>2.72E-07</b> | <b>10</b> |
| P70584        | ASSTCQLTFENVK                                                                   | 0.843033959        | 2               | 2.87212   |
| P70584        | ASSTCQLTFENVKVPETSVLGK                                                          | 0.793816325        | 3               | 3.6126    |
| P70584        | FAQEQAIPLVSTMDENSK                                                              | 0.880107187        | 2               | 4.30519   |
| P70584        | IFDFQGLQHQAHVATQLEAAR                                                           | 0.903619379        | 3               | 6.06909   |
| P70584        | IGTIYEGTSNIQLNTIAK                                                              | 0.785161546        | 2               | 4.55361   |
| P70584        | KFAQEQAIPLVSTMDENSK                                                             | 0.773900478        | 2               | 5.42675   |
| P70584        | SGNYVINGSK                                                                      | 0.823098437        | 2               | 2.61805   |
| P70584        | SVIQGLFQQGMMGIEVEAK                                                             | 0.797376692        | 2               | 4.48708   |
| P70584        | VDASVALLCDIQNTVINK                                                              | 1.053848493        | 2               | 4.91373   |
| P70584        | YYASEVAGLTTSK                                                                   | 0.841894006        | 2               | 4.06038   |
| <b>P70615</b> | <b>LMNB1 Lamin_B1</b>                                                           | <b>1.088173913</b> | <b>0.272114</b> | <b>3</b>  |
| P70615        | ALYETELADAR                                                                     | 1.061837805        | 2               | 3.24198   |
| P70615        | LSSEMNTSTVNSAR                                                                  | 1.132144672        | 2               | 2.98943   |
| P70615        | SLEGDLEDLKDQIAQLEASLSAAK                                                        | 1.188234263        | 3               | 3.79617   |
| <b>P70619</b> | <b>GSHR Glutathione reductase (Fragment)</b>                                    | <b>1.068753165</b> | <b>0.609431</b> | <b>2</b>  |
| P70619        | ALLTPVAIAAGR                                                                    | 0.8561289          | 2               | 2.72661   |
| P70619        | LNNIYQNNLTK                                                                     | 1.069549377        | 2               | 3.05393   |
| <b>P70694</b> | <b>DHB5 Estradiol 17 beta_dehydrogenase 5</b>                                   | <b>1.319756031</b> | <b>0.033937</b> | <b>2</b>  |
| P70694        | REDIFYTSK                                                                       | 1.34396894         | 2               | 3.06036   |
| P70694        | SIGVSNFNR                                                                       | 1.286125533        | 2               | 2.39868   |
| <b>P70712</b> | <b>KYNU Kynureninase</b>                                                        | <b>1.505685207</b> | <b>9.9E-20</b>  | <b>8</b>  |
| P70712        | IATELNCDPTDER                                                                   | 1.536037109        | 2               | 3.63125   |

|               |                                                                  |                    |                 |           |
|---------------|------------------------------------------------------------------|--------------------|-----------------|-----------|
| P70712        | IGAYGHEVGK                                                       | 1.623803317        | 2               | 2.84166   |
| P70712        | LLTAILDSTERN                                                     | 1.959681951        | 2               | 3.5405    |
| P70712        | MEDILEVIEK                                                       | 1.462477117        | 2               | 2.61886   |
| P70712        | SILLTGYLEYLLK                                                    | 1.540309673        | 2               | 3.10648   |
| P70712        | TYLEEELDKWAK                                                     | 0.753829609        | 2               | 2.95422   |
| P70712        | VAPVPLYNSFHDVYK                                                  | 0.692188444        | 2               | 3.42088   |
| P70712        | YLNAGGAGLAGAFIHEK                                                | 1.508059677        | 2               | 4.45412   |
| <b>P80067</b> | <b>CATC Dipeptidyl peptidase 1</b>                               | <b>1.307691016</b> | <b>0.00495</b>  | <b>5</b>  |
| P80067        | GTDECAIESIAMAIIPIK                                               | 1.069719483        | 3               | 4.69789   |
| P80067        | NQESCGSCYSFASLGMLEAR                                             | 1.34873644         | 2               | 4.87714   |
| P80067        | NSWGSQWGESGYFR                                                   | 1.127531807        | 2               | 3.03162   |
| P80067        | RGTDECAIESIAMAIIPIK                                              | 1.101193352        | 2               | 4.46006   |
| P80067        | YAQDFGVVEENCFPYTATDAPCKPK                                        | 1.362031005        | 3               | 5.56244   |
| <b>P80254</b> | <b>DOPD D_dopachrome decarboxylase</b>                           | <b>1.106874751</b> | <b>0.085902</b> | <b>4</b>  |
| P80254        | FFLEPWQIGK                                                       | 0.919048694        | 2               | 3.02736   |
| P80254        | FLTEELSLDQDR                                                     | 0.943269501        | 2               | 3.73073   |
| P80254        | LCAATATILDKPEDR                                                  | 1.699942998        | 2               | 4.23315   |
| P80254        | STEPCAHLLISSIGVVGTAEQNR                                          | 0.925501783        | 2               | 5.40058   |
| <b>P80299</b> | <b>HYES Epoxide hydrolase 2</b>                                  | <b>1.306461711</b> | <b>0.195518</b> | <b>2</b>  |
| P80299        | ATEMGGILVGTPEDPK                                                 | 1.353385655        | 2               | 3.02936   |
| P80299        | TEIQNPSVTSK                                                      | 1.096748728        | 2               | 2.926     |
| <b>P80313</b> | <b>TCPH T_complex protein 1 subunit eta</b>                      | <b>1.026756137</b> | <b>2.85E-05</b> | <b>4</b>  |
| P80313        | ATISNDGATILK                                                     | 1.099830758        | 2               | 2.83752   |
| P80313        | GGAEQFMEETER                                                     | 1.238575971        | 2               | 2.50413   |
| P80313        | QLCDNAGFDATNIIK                                                  | 0.861787052        | 2               | 3.52348   |
| P80313        | SQDAEVGDGTTSVTLAAEFLK                                            | 1.346597044        | 2               | 5.06999   |
| <b>P80317</b> | <b>TCPZ T_complex protein 1 subunit zeta</b>                     | <b>1.125873727</b> | <b>0.092055</b> | <b>9</b>  |
| P80317        | ALQFLEQVK                                                        | 1.411263716        | 2               | 2.51102   |
| P80317        | AQAALAVNISAAR                                                    | 1.050391325        | 2               | 3.07079   |
| P80317        | DGNVLLHEMQIQHTASLIAK                                             | 1.214432801        | 3               | 4.78113   |
| P80317        | GIDPFSLDALAK                                                     | 1.279168453        | 2               | 2.79711   |
| P80317        | HKSETDTSLIR                                                      | 1.082563184        | 2               | 2.67614   |
| P80317        | NAIDDGCVVPGAGAVEVALAEALIK                                        | 1.120029101        | 3               | 5.03851   |
| P80317        | TEVNSGFFYK                                                       | 1.232087044        | 2               | 2.52216   |
| P80317        | VATAQDDITGDGTTSNVLIIGELLK                                        | 1.126056457        | 2               | 4.9627    |
| P80317        | VLAQNSGFDLQETLVK                                                 | 1.052970059        | 2               | 3.465     |
| <b>P81155</b> | <b>VDAC2 Voltage_dependent anion_selective channel protein 2</b> | <b>0.990988623</b> | <b>0.006942</b> | <b>5</b>  |
| P81155        | LTFDITTFSPNTGK                                                   | 1.525785068        | 2               | 2.61093   |
| P81155        | LTFDITTFSPNTGKK                                                  | 1.049283477        | 2               | 2.86808   |
| P81155        | SCSGVEFSTSGSNTDTGK                                               | 0.959788762        | 2               | 2.417     |
| P81155        | VNSSLIGVGYTQLRPGVK                                               | 0.51269105         | 2               | 3.61388   |
| P81155        | YQLDPTASISAK                                                     | 1.047270349        | 2               | 2.94893   |
| <b>P82995</b> | <b>HS90A Heat shock protein HSP 90_alpha</b>                     | <b>1.31028658</b>  | <b>3.92E-10</b> | <b>14</b> |
| P82995        | ELHINLIPNKQDR                                                    | 1.125676385        | 2               | 2.97738   |
| P82995        | ELISNSSDALDK                                                     | 0.968128477        | 2               | 2.70518   |
| P82995        | FYEQFSK                                                          | 1.115200205        | 1               | 2.04671   |
| P82995        | HGLEVIYMIPIDEYCVQQLK                                             | 1.304589381        | 3               | 5.55117   |
| P82995        | HIYFITGETK                                                       | 1.424258787        | 2               | 2.9629    |
| P82995        | HLEINPDHSIIETLR                                                  | 1.186474933        | 3               | 4.28892   |
| P82995        | HSQFIGYPITLFVEK                                                  | 6.576263055        | 2               | 3.71054   |
| P82995        | LGIHEDSQNR                                                       | 1.205612254        | 3               | 3.47133   |
| P82995        | NPDDITNEEYGEFYK                                                  | 1.385077591        | 2               | 5.07323   |
| P82995        | RAPFDLFENR                                                       | 1.243552163        | 2               | 2.36484   |
| P82995        | SLTNDWEEHLAVK                                                    | 1.15840938         | 2               | 4.16434   |
| P82995        | TLTIVDTGIGMTK                                                    | 1.060784717        | 2               | 4.34295   |
| P82995        | TLTIVDTGIGMTK+Oxidation(11)                                      | 1.226849138        | 2               | 3.38947   |

|               |                                                              |                    |                 |           |
|---------------|--------------------------------------------------------------|--------------------|-----------------|-----------|
| P82995        | YYTSASGDEMVS LK                                              | 1.235977006        | 2               | 3.42435   |
| <b>P83732</b> | <b>RL24 60S ribosomal protein L24</b>                        | <b>1.150890999</b> | <b>0.565838</b> | <b>2</b>  |
| P83732        | AITGASLADIMAK                                                | 1.115178459        | 2               | 4.67364   |
| P83732        | VELCSFSGYK                                                   | 1.46194541         | 2               | 2.37083   |
| <b>P83868</b> | <b>TEBP Prostaglandin E synthase 3</b>                       | <b>1.55202093</b>  | <b>0.002387</b> | <b>2</b>  |
| P83868        | HLNEIDL FHCIDPNDSK                                           | 1.992741176        | 3               | 3.30478   |
| P83868        | LTFSLGGS DNFK                                                | 1.550877494        | 2               | 2.76856   |
| <b>P83883</b> | <b>RL36A 60S ribosomal protein L36a</b>                      | <b>1.220190219</b> | <b>0.097475</b> | <b>2</b>  |
| P83883        | HFELGGDK                                                     | 1.220078366        | 1               | 2.38358   |
| P83883        | LECVENCR                                                     | 1.218358346        | 2               | 2.34021   |
| <b>P83941</b> | <b>ELOC Transcription elongation factor B polypeptide 1</b>  | <b>1.310350362</b> | <b>0.010048</b> | <b>2</b>  |
| P83941        | AMLSGPGQFAENETNEVNFR                                         | 1.292798268        | 2               | 5.01853   |
| P83941        | TYGGCEGPDAMYVK                                               | 1.320785331        | 2               | 3.78876   |
| <b>P84082</b> | <b>ARF2 ADP_ribosylation factor 2</b>                        | <b>1.050778992</b> | <b>0.543992</b> | <b>2</b>  |
| P84082        | NISFTVWDVGGQDK                                               | 1.019000883        | 2               | 4.5258    |
| P84082        | QDLPNAMNAAEITDK                                              | 1.32569207         | 2               | 3.8614    |
| <b>P84083</b> | <b>ARF5 ADP_ribosylation factor 5</b>                        | <b>0.978880028</b> | <b>0.381391</b> | <b>2</b>  |
| P84083        | DAVLLVFANK                                                   | 1.336713794        | 2               | 2.48759   |
| P84083        | VQESADELQK                                                   | 1.031343806        | 2               | 2.93744   |
| <b>P84100</b> | <b>RL19 60S ribosomal protein L19</b>                        | <b>1.098608576</b> | <b>2.67E-07</b> | <b>2</b>  |
| P84100        | LLADQAEAR                                                    | 1.316714096        | 2               | 3.44129   |
| P84100        | VWLDPNETNEIANANSR                                            | 1.150823186        | 2               | 5.81395   |
| <b>P84245</b> | <b>H33 Histone H3.3</b>                                      | <b>1.062288841</b> | <b>0.127</b>    | <b>4</b>  |
| P84245        | FQSAAGALQEASEAYLVGLFEDTNLCAIHAK                              | 1.23728817         | 3               | 5.96708   |
| P84245        | RVTIMPKDIQLAR+Oxidation(5)                                   | 1.273090943        | 2               | 2.92103   |
| P84245        | STELLIR                                                      | 1.05564038         | 2               | 2.5132    |
| P84245        | YRPGTVVALR                                                   | 1.019942844        | 2               | 2.36002   |
| <b>P84817</b> | <b>FIS1 Mitochondrial fission 1 protein</b>                  | <b>1.037701499</b> | <b>0.546541</b> | <b>4</b>  |
| P84817        | FQSEQAAGSVSK                                                 | 0.95717053         | 2               | 2.97679   |
| P84817        | GIVLLELLPK                                                   | 1.102986446        | 2               | 2.31727   |
| P84817        | GLLQTEPQNNQAK                                                | 1.151145883        | 2               | 3.58586   |
| P84817        | KFQSEQAAGSVSK                                                | 1.009569914        | 2               | 4.05567   |
| <b>P85834</b> | <b>EFTU Elongation factor Tu_mitochondrial</b>               | <b>1.086314067</b> | <b>0.183886</b> | <b>16</b> |
| P85834        | AEAGDNLGALVR                                                 | 0.929281213        | 2               | 3.74795   |
| P85834        | DKPHVNVGTIGHVDHGK                                            | 0.836110982        | 3               | 3.48063   |
| P85834        | DLEKPFLLPVESVYIPGR                                           | 1.379011271        | 2               | 3.91832   |
| P85834        | GDECELLGHNK                                                  | 0.916041143        | 2               | 2.59071   |
| P85834        | GEETPVIVGSALCALEQR                                           | 1.089765147        | 2               | 4.59334   |
| P85834        | GITINAAHVVEYSTAAR                                            | 3.554069861        | 2               | 3.01322   |
| P85834        | GTVVTGTLER                                                   | 0.879532789        | 2               | 2.87445   |
| P85834        | HYAHTDCPGHADYVK                                              | 1.163321337        | 2               | 4.19635   |
| P85834        | KGDECELLGHNK                                                 | 0.839190448        | 3               | 3.93868   |
| P85834        | KYEEIDNAPEER                                                 | 0.920398912        | 2               | 3.57919   |
| P85834        | LLDAVDTYIPVPTR                                               | 0.891699467        | 2               | 3.92356   |
| P85834        | QIGVEHV VVYV NK                                              | 0.934615389        | 2               | 2.85807   |
| P85834        | TIGTGLVTDVPAMTEEDK                                           | 0.844162722        | 2               | 4.12678   |
| P85834        | TIGTGLVTDVPAMTEEDKNIK                                        | 0.8568085          | 2               | 4.70657   |
| P85834        | TVVTGIEMFHK                                                  | 0.774539122        | 2               | 2.45144   |
| P85834        | YEEIDNAPEER                                                  | 0.885030941        | 2               | 3.18513   |
| <b>P85968</b> | <b>6PGD 6_phosphogluconate dehydrogenase_decarboxylating</b> | <b>1.303573281</b> | <b>9.9E-20</b>  | <b>10</b> |
| P85968        | AGQAVDDFIEK                                                  | 1.345572387        | 2               | 2.92663   |
| P85968        | CLSSLKEER                                                    | 1.482497581        | 2               | 2.4036    |
| P85968        | FQDTDGKELLPK                                                 | 1.381392113        | 2               | 3.13064   |
| P85968        | GILFVGSVSGGEEGAR                                             | 1.607728797        | 2               | 5.04915   |
| P85968        | HEMLPANLIQAQR                                                | 1.196038883        | 2               | 3.25458   |

|               |                                                                     |                    |                 |           |
|---------------|---------------------------------------------------------------------|--------------------|-----------------|-----------|
| P85968        | LVPLDGTGDIIDGGNSEYR                                                 | 2.097067677        | 2               | 5.5579    |
| P85968        | NPELQNLDDDFK                                                        | 1.530559836        | 2               | 4.76573   |
| P85968        | SAVDDCQDSWR                                                         | 1.063870137        | 2               | 2.94792   |
| P85968        | VGTGEPCCDWVDEGAGHFVK                                                | 1.315587122        | 3               | 4.54917   |
| P85968        | YGPSLMPGGNK                                                         | 1.463108789        | 1               | 2.20074   |
| <b>P85971</b> | <b>6PGL 6_phosphogluconolactonase</b>                               | <b>1.312321844</b> | <b>0.088767</b> | <b>5</b>  |
| P85971        | DLPAATAPAGPASFAR                                                    | 1.171262307        | 2               | 2.41429   |
| P85971        | ILEDQESALPAMVQPR                                                    | 1.249841245        | 2               | 4.16853   |
| P85971        | LIPDSQVLTIDPALVEDAAEDYAR                                            | 1.190271055        | 2               | 4.99045   |
| P85971        | TGALCWFLDEAAAR                                                      | 1.43179125         | 2               | 3.79618   |
| P85971        | WTLGFCDER                                                           | 1.209580773        | 2               | 2.30716   |
| <b>P85972</b> | <b>VINC Vinculin</b>                                                | <b>1.018688896</b> | <b>0.846143</b> | <b>12</b> |
| P85972        | AIPDLTAPVAAVQAASNLVR                                                | 1.082769948        | 2               | 3.35209   |
| P85972        | AQQVSQGLDVLTAQ                                                      | 0.99145778         | 2               | 4.46733   |
| P85972        | AVAGNISDPGLQK                                                       | 0.995537311        | 2               | 3.38288   |
| P85972        | GQGASPVAMQK                                                         | 0.864445548        | 2               | 3.00086   |
| P85972        | MLGQMTDQVADLR                                                       | 1.225323582        | 2               | 2.51366   |
| P85972        | NRNFTVGKMSAEINEIIR+Oxidation(9)                                     | 1.051592845        | 2               | 2.73024   |
| P85972        | QVATALQNLQTK                                                        | 1.150134593        | 2               | 3.72169   |
| P85972        | SLLDASEEAIKK                                                        | 1.187504989        | 2               | 2.63371   |
| P85972        | STVEGIQASVK                                                         | 1.083014328        | 2               | 2.30356   |
| P85972        | TNISDEESEQATEMLVHNAQNLMSVK                                          | 1.11953256         | 3               | 4.04425   |
| P85972        | VLQLTSWDEDAWASK                                                     | 1.515151213        | 2               | 3.66822   |
| P85972        | WIDNPTVDDR                                                          | 1.026108221        | 2               | 3.18012   |
| <b>P85973</b> | <b>PNPH Purine nucleoside phosphorylase</b>                         | <b>1.144303855</b> | <b>0.000776</b> | <b>12</b> |
| P85973        | ASHQEVELEAGK                                                        | 1.115420699        | 2               | 3.42104   |
| P85973        | DHINLPGFCGQNPLR                                                     | 1.122081328        | 2               | 4.10377   |
| P85973        | ELQEGTYIMSAGPTFETVAESCLLR                                           | 1.077567495        | 2               | 5.05427   |
| P85973        | FEVGDIMLIR                                                          | 1.141268281        | 2               | 3.60984   |
| P85973        | HRPQVAVICGSLGLLTAQ                                                  | 1.058358401        | 3               | 6.29754   |
| P85973        | LTQPQAFDYNEIPNPQSTVQGHAGR                                           | 1.980524268        | 3               | 4.73753   |
| P85973        | MLGADAVGMSTVPEVIVAR                                                 | 1.253131877        | 2               | 6.07086   |
| P85973        | MLGADAVGMSTVPEVIVAR+Oxidation(1)                                    | 1.146393971        | 2               | 5.11842   |
| P85973        | MLGADAVGMSTVPEVIVAR+Oxidation(9)                                    | 1.114778452        | 2               | 3.74454   |
| P85973        | VFGFSLITNK                                                          | 1.215174183        | 2               | 2.81672   |
| P85973        | VFHLLGVDTLVVTAAGGLNPK                                               | 1.268987475        | 2               | 5.83555   |
| P85973        | VVMDYNNLEK                                                          | 1.100355531        | 2               | 2.6068    |
| <b>P86048</b> | <b>RL10L 60S ribosomal protein L10_like</b>                         | <b>1.638591192</b> | <b>0.172223</b> | <b>4</b>  |
| P86048        | AKVDEFPLCGHMVSDEYEQLSSEALEAAR                                       | 1.3982182          | 3               | 5.03798   |
| P86048        | GAFGKPGQTVAR                                                        | 1.165786482        | 2               | 3.04352   |
| P86048        | VDEFPLCGHMVSDEYEQLSSEALEAAR                                         | 1.193688465        | 3               | 5.80326   |
| P86048        | VHIGQVIMSIR                                                         | 1.244869943        | 2               | 2.82452   |
| <b>P86252</b> | <b>PURA Transcriptional activator protein Pur_alpha (Fragments)</b> | <b>1.064327304</b> | <b>0.407195</b> | <b>2</b>  |
| P86252        | LIDDYGVEEPAELPEGSLTVDNK                                             | 0.949489728        | 2               | 4.17132   |
| P86252        | LIDDYGVEEPAELPEGSLTVDNKR                                            | 1.20979872         | 3               | 5.06658   |
| <b>P97310</b> | <b>MCM2 DNA replication licensing factor MCM2</b>                   | <b>0.720266133</b> | <b>0.117518</b> | <b>4</b>  |
| P97310        | EAGRGLGRMR                                                          | 1.112631018        | 2               | 2.54775   |
| P97310        | HIESMIRMAEAHARMHLR                                                  | 0.713814812        | 2               | 2.66758   |
| P97310        | LNQMDQDKVAR+Oxidation(4)                                            | 0.544119491        | 2               | 2.57704   |
| P97310        | MITGLSKDQIQIGEK+Oxidation(1)                                        | 1.272184904        | 2               | 2.46068   |
| <b>P97323</b> | <b>F16P3 Fructose_1_6_bisphosphatase isozyme 3 (Fragment)</b>       | <b>0.887026076</b> | <b>0.188026</b> | <b>2</b>  |
| P97323        | GNIYSLNEGYAK                                                        | 0.916148676        | 2               | 3.94263   |
| P97323        | KGNIYSLNEGYAK                                                       | 0.84880973         | 2               | 4.21584   |
| <b>P97384</b> | <b>ANX11 Annexin A11</b>                                            | <b>1.023429215</b> | <b>0.950379</b> | <b>2</b>  |
| P97384        | GFGTDEQAIDCLGSR                                                     | 0.96192064         | 2               | 4.24228   |

|               |                                                                   |                    |                 |           |
|---------------|-------------------------------------------------------------------|--------------------|-----------------|-----------|
| P97384        | SELDLLDIR                                                         | 1.111004816        | 2               | 2.68485   |
| <b>P97519</b> | <b>HMGCL Hydroxymethylglutaryl_ CoA lyase_ mitochondrial</b>      | <b>0.890604226</b> | <b>0.367783</b> | <b>8</b>  |
| P97519        | GASGNLATELVYMLTGLGIHTGVNLQK                                       | 0.995949174        | 3               | 3.89209   |
| P97519        | GFEEAVAAGAK                                                       | 0.994985468        | 2               | 3.20173   |
| P97519        | GYVSCALGCPYEGK                                                    | 0.983084254        | 2               | 3.72652   |
| P97519        | KNVNCSEIESFQR                                                     | 0.884719103        | 2               | 3.56165   |
| P97519        | LIDMLSEAGLPVIEATSFVSPK                                            | 1.372651424        | 2               | 4.85896   |
| P97519        | LLEAGDFICQALNR                                                    | 1.218944485        | 2               | 4.50007   |
| P97519        | NVNCSEIESFQR                                                      | 0.929285593        | 2               | 3.44686   |
| P97519        | WVPQMADHSDVLC                                                     | 1.035851298        | 2               | 3.01394   |
| <b>P97521</b> | <b>MCAT Mitochondrial carnitine/acylcarnitine carrier protein</b> | <b>1.098827119</b> | <b>0.999359</b> | <b>5</b>  |
| P97521        | CLLQIQASSGK                                                       | 1.096962303        | 2               | 3.10504   |
| P97521        | LQTQPPSLPGQPPMYSGTIDCFR                                           | 1.013244767        | 2               | 3.79185   |
| P97521        | LYQEFQIR                                                          | 1.12660541         | 2               | 2.35567   |
| P97521        | SVHDLVPR                                                          | 1.004643949        | 2               | 2.5423    |
| P97521        | YSGTLDCAK                                                         | 1.000295694        | 2               | 2.51792   |
| <b>P97524</b> | <b>S27A2 Very long_chain acyl_ CoA synthetase</b>                 | <b>1.248810609</b> | <b>0.01028</b>  | <b>15</b> |
| P97524        | ALHDHLGLR                                                         | 0.933122619        | 2               | 2.41639   |
| P97524        | GEVGLLICK                                                         | 1.21878741         | 2               | 2.618     |
| P97524        | IQDTIEITGTFK                                                      | 1.088805458        | 2               | 2.50409   |
| P97524        | ITELTPFFGYAGGK                                                    | 0.429302341        | 2               | 2.30854   |
| P97524        | MKENYEFNGK                                                        | 1.143504348        | 2               | 3.25668   |
| P97524        | SEVFTTTPAVYIYTSGTTGLPK                                            | 0.89408515         | 2               | 2.65069   |
| P97524        | SLLHCFQCCGAK                                                      | 1.143439105        | 2               | 3.29537   |
| P97524        | TILHVFLQAR                                                        | 1.025619633        | 2               | 2.96387   |
| P97524        | TSNTNGVDTVLDKVDGVSADPIPESWR                                       | 1.07822962         | 3               | 5.78916   |
| P97524        | TYVPMTEIYNAIIDK                                                   | 1.149095806        | 2               | 4.04602   |
| P97524        | VLLASPELHEAVEEVLPTLK                                              | 1.363769309        | 2               | 3.86732   |
| P97524        | VTLMEEGFNPSVIK                                                    | 1.205111716        | 2               | 3.67689   |
| P97524        | YDVEKDEPVR                                                        | 1.262617733        | 2               | 2.83595   |
| P97524        | YLCNTPQKPNDR                                                      | 1.219104714        | 2               | 3.04033   |
| P97524        | YNATVIQYIGELLR                                                    | 1.671242004        | 2               | 2.75376   |
| <b>P97532</b> | <b>THTM 3_mercaptopyruvate sulfurtransferase</b>                  | <b>1.062246027</b> | <b>0.001896</b> | <b>8</b>  |
| P97532        | AFGHHSVSLLDGGFR                                                   | 1.357132157        | 2               | 3.44993   |
| P97532        | ALVSAQWVAEALK                                                     | 0.981871436        | 2               | 3.78603   |
| P97532        | AQPEHVISQGR                                                       | 0.944364658        | 2               | 2.79149   |
| P97532        | DGIEPGHIPGSVNIPFTEFLTSEGLEK                                       | 1.456681247        | 3               | 6.76656   |
| P97532        | FQGTQPEPR                                                         | 0.966581971        | 2               | 2.94384   |
| P97532        | LLDASWYLPK                                                        | 1.235971978        | 2               | 3.91231   |
| P97532        | THEDILENLDR                                                       | 1.046491596        | 2               | 3.37557   |
| P97532        | YWLSQNLPISSGK                                                     | 1.010469387        | 2               | 3.60341   |
| <b>P97536</b> | <b>CAND1 Cullin_associated NEDD8_dissociated protein 1</b>        | <b>1.34399522</b>  | <b>0.000123</b> | <b>5</b>  |
| P97536        | EGPAVVGQFIQDVK                                                    | 0.994303748        | 2               | 2.75803   |
| P97536        | ITSEALLVTQQLVK                                                    | 1.21543026         | 2               | 2.34775   |
| P97536        | LGTLALDILIK                                                       | 1.689866082        | 2               | 2.53432   |
| P97536        | LTLIDPETLLPR                                                      | 1.494342221        | 2               | 2.68069   |
| P97536        | TYIQCIAAIR                                                        | 1.240046045        | 2               | 2.98582   |
| <b>P97562</b> | <b>ACOX2 Peroxisomal acyl_coenzyme A oxidase 2</b>                | <b>1.278314753</b> | <b>8.83E-09</b> | <b>18</b> |
| P97562        | ATASCTYEGENTVLYLQVAR                                              | 2.422090207        | 2               | 4.60551   |
| P97562        | ATFADFCAQGAEICR                                                   | 1.329711393        | 2               | 5.03724   |
| P97562        | CSAQTAAEFR                                                        | 0.927807716        | 2               | 2.43799   |
| P97562        | DAILLTDAFDFSDHCLNSALGCYDGHVYER                                    | 1.298931227        | 3               | 4.04509   |
| P97562        | DFSLLPELHALSTGMK                                                  | 0.960878045        | 2               | 2.60809   |
| P97562        | EAFLDLLPLIR                                                       | 0.922923632        | 2               | 2.71118   |

|               |                                                                 |                    |                 |           |
|---------------|-----------------------------------------------------------------|--------------------|-----------------|-----------|
| P97562        | ILEYQTQQQK                                                      | 1.082562462        | 2               | 3.9169    |
| P97562        | KVESIIQSDPVFNLK                                                 | 1.07139612         | 2               | 4.94923   |
| P97562        | LCDLYALHGVLTNISGDFLHDGFLSGAQVDMAR                               | 1.79285437         | 3               | 5.69826   |
| P97562        | LDKEPEIQR                                                       | 1.107034019        | 3               | 3.54922   |
| P97562        | LGTPQSNYLGMLVTR                                                 | 1.535763653        | 2               | 3.51534   |
| P97562        | LTNILDGGLPNTVLR                                                 | 1.32920945         | 2               | 4.25074   |
| P97562        | MGLEHIDNGFLQLNHVR                                               | 1.359124671        | 2               | 4.42319   |
| P97562        | SGVDQHDAWNQTTVIHLQAAK                                           | 1.070821145        | 3               | 6.26692   |
| P97562        | SLEDHTPLPGITVGDIGPK                                             | 1.074539188        | 2               | 4.55118   |
| P97562        | SLGSDEQIAK                                                      | 1.148009336        | 2               | 2.8494    |
| P97562        | VESIIQSDPVFNLK                                                  | 0.979673213        | 2               | 4.57151   |
| P97562        | VLDGNVNLSLHGVMNAIR                                              | 0.895550169        | 2               | 5.00814   |
| <b>P97576</b> | <b>GRPE1 GrpE protein homolog 1_ mitochondrial</b>              | <b>1.026386765</b> | <b>0.230743</b> | <b>3</b>  |
| P97576        | ALADTENLR                                                       | 1.024210192        | 2               | 2.30619   |
| P97576        | DLLEVADILEK                                                     | 1.166491288        | 2               | 2.43203   |
| P97576        | EEVSNNNPHLK                                                     | 0.971843338        | 2               | 3.2841    |
| <b>P97584</b> | <b>PTGR1 Prostaglandin reductase 1</b>                          | <b>1.264016851</b> | <b>0.722514</b> | <b>5</b>  |
| P97584        | ALTDLMNWVSEK                                                    | 1.208178662        | 2               | 3.67279   |
| P97584        | GGETVLVNAAAGAVGSVVGQIAK                                         | 1.1688476          | 2               | 4.74165   |
| P97584        | HFEFGPTDSNFELR                                                  | 0.849938919        | 2               | 3.89915   |
| P97584        | TGPCPPGPSPEVIYQQLR                                              | 1.10123974         | 2               | 4.04415   |
| P97584        | YHEYITEGF EK                                                    | 0.966945386        | 2               | 2.928     |
| <b>P97608</b> | <b>OPLA 5_oxoprolinase</b>                                      | <b>1.119915153</b> | <b>0.733694</b> | <b>4</b>  |
| P97608        | AGDFGAAFVER                                                     | 1.085058713        | 2               | 2.43718   |
| P97608        | GSILDPSPEAAVVGGNVLTQR                                           | 0.827954723        | 2               | 5.04682   |
| P97608        | LLSEDPANYADAPTEGIR                                              | 1.340113352        | 2               | 3.84463   |
| P97608        | TGDLLIQPV DLEALR                                                | 1.197281741        | 2               | 4.88974   |
| <b>P97612</b> | <b>FAAH1 Fatty acid amide hydrolase 1</b>                       | <b>1.197418278</b> | <b>0.002194</b> | <b>8</b>  |
| P97612        | EVEQLMTPQK                                                      | 1.073183442        | 2               | 2.32355   |
| P97612        | GHDSTLGLSLNEGMPSESDCVVQVLK                                      | 1.111460763        | 3               | 4.69134   |
| P97612        | GTNCVTSYLTDCETQLSQAPR                                           | 1.229931236        | 2               | 4.56798   |
| P97612        | GYFGDIWDIILK                                                    | 1.593645187        | 2               | 3.40174   |
| P97612        | LQHEIEM YR                                                      | 1.062842666        | 2               | 2.37678   |
| P97612        | LQSGELSPEAVFFTYL GK                                             | 3.054078693        | 2               | 4.52379   |
| P97612        | NSVGLPVAVQCVALPWQEELCLR                                         | 1.318903821        | 2               | 4.15512   |
| P97612        | QGLLYGVPVSLK                                                    | 0.960962687        | 2               | 2.74481   |
| <b>P97700</b> | <b>M2OM Mitochondrial 2_oxoglutarate/malate carrier protein</b> | <b>1.099278062</b> | <b>0.00355</b>  | <b>3</b>  |
| P97700        | AVVVNAAQLASYSQSK                                                | 0.930024664        | 2               | 4.73854   |
| P97700        | LGIYTVL FER                                                     | 1.897286694        | 2               | 3.05843   |
| P97700        | LTGADGTPPGFLLK                                                  | 1.126928432        | 2               | 2.82073   |
| <b>P97852</b> | <b>DHB4 Peroxisomal multifunctional enzyme type 2</b>           | <b>0.964076782</b> | <b>0.997041</b> | <b>24</b> |
| P97852        | AAVAVPSRPPDAVLR                                                 | 1.0067777          | 2               | 2.32785   |
| P97852        | AVANYDSVEAGEK                                                   | 1.035092721        | 2               | 3.8566    |
| P97852        | AYALFAER                                                        | 1.274104801        | 2               | 3.06397   |
| P97852        | DTTSLNQAAL YR                                                   | 0.92533796         | 2               | 2.65827   |
| P97852        | FVYEGSADF SCLPTFGVIVAQK                                         | 0.971376174        | 2               | 4.82592   |
| P97852        | GALVVVNDLGGDFK                                                  | 1.096902954        | 2               | 3.65864   |
| P97852        | GNIMLSQKLQ MILK+Oxidation(4)Oxidation(11)                       | 0.94544163         | 2               | 2.33971   |
| P97852        | GSSAADKVVEEIR                                                   | 0.910762824        | 2               | 3.15108   |
| P97852        | HVLQQFADNDVSR                                                   | 0.959904296        | 2               | 4.61594   |
| P97852        | ICDFSNASKPK                                                     | 1.148078814        | 3               | 3.79105   |
| P97852        | IDSEGISQNHTGQVASADASGFAGVVGHK                                   | 1.080785136        | 3               | 6.13575   |
| P97852        | IDVVVNNAGILR                                                    | 0.980837255        | 2               | 3.6548    |
| P97852        | ISDEDWDIIQR                                                     | 0.937190125        | 2               | 3.37681   |
| P97852        | KNNIHCNTIAPNAGSR                                                | 0.943019746        | 2               | 4.78276   |
| P97852        | LGLLGLANTLVIEGR                                                 | 1.401589741        | 2               | 3.40736   |



|               |                                                                                                                            |                    |                 |           |
|---------------|----------------------------------------------------------------------------------------------------------------------------|--------------------|-----------------|-----------|
| P97852        | LNPQNAFFSGR                                                                                                                | 1.228006294        | 2               | 2.8304    |
| P97852        | NGSGEVYQGPAAK                                                                                                              | 0.964636198        | 2               | 3.51503   |
| P97852        | NNIHCNTIAPNAGSR                                                                                                            | 0.904188243        | 2               | 4.62699   |
| P97852        | SIQESTGGIIEVLHK                                                                                                            | 1.035454979        | 2               | 4.16776   |
| P97852        | SLMSGGLAEVPLSINFAK                                                                                                         | 0.961792984        | 2               | 4.59738   |
| P97852        | SLMSGGLAEVPLSINFAK+Oxidation(3)                                                                                            | 1.051974025        | 2               | 3.52569   |
| P97852        | VLHGEQYLELYKPLPR                                                                                                           | 1.005300904        | 2               | 4.91713   |
| P97852        | VNAVFEWHITK                                                                                                                | 1.106342051        | 2               | 3.19355   |
| P97852        | VVLVTGAGGGLGR                                                                                                              | 0.981221499        | 2               | 4.55496   |
| <b>Q00438</b> | <b>PTBP1 Polypyrimidine tract binding protein 1</b>                                                                        | <b>1.437355798</b> | <b>7.33E-13</b> | <b>3</b>  |
| Q00438        | KLP5DVTGEVISLGLPFGK                                                                                                        | 0.965589642        | 2               | 2.6573    |
| Q00438        | NFQNIFFPSATLHLSNIPPSVSEDDLK                                                                                                | 1.503894146        | 3               | 3.81612   |
| Q00438        | NNQFQALLQYADPVSAQHAK                                                                                                       | 1.446792467        | 2               | 5.14271   |
| <b>Q00PI9</b> | <b>HNRL2 Heterogeneous nuclear ribonucleoprotein U like protein 2</b>                                                      | <b>1.124020388</b> | <b>0.823789</b> | <b>4</b>  |
| Q00PI9        | AVEEQGDDQDSEK                                                                                                              | 1.124152951        | 2               | 3.80095   |
| Q00PI9        | DLLVQQASQCLSK                                                                                                              | 1.370865497        | 2               | 2.37083   |
| Q00PI9        | EEAQPIVTKYK                                                                                                                | 1.101789655        | 1               | 1.94921   |
| Q00PI9        | SGDETPGSEAPGDK                                                                                                             | 0.912839876        | 2               | 2.68727   |
| <b>Q01177</b> | <b>PLMN Plasminogen</b>                                                                                                    | <b>1.239758984</b> | <b>0.056086</b> | <b>3</b>  |
| Q01177        | ILGSDVQQIAVTK                                                                                                              | 1.246919757        | 2               | 3.40008   |
| Q01177        | LVLEPNDADIALLK                                                                                                             | 1.370122322        | 2               | 2.64997   |
| Q01177        | STELCAGHLAGGIDSCQGDGSGPLVCFEK                                                                                              | 1.102711478        | 3               | 4.9773    |
| <b>Q01205</b> | <b>ODO2 Dihydrolipoylysine residue succinyltransferase component of 2-oxoglutarate dehydrogenase complex_mitochondrial</b> | <b>1.068936361</b> | <b>0.640327</b> | <b>4</b>  |
| Q01205        | ASAFALQEQPVVNAVIDDATK                                                                                                      | 1.122598985        | 2               | 6.39429   |
| Q01205        | NDVITVQTPAFAESVTEGDVR                                                                                                      | 1.035407122        | 2               | 5.4971    |
| Q01205        | NVETMNYADIAR                                                                                                               | 1.425411147        | 2               | 3.51927   |
| Q01205        | VEGGTPLFTLR                                                                                                                | 1.022076132        | 2               | 3.30794   |
| <b>Q01405</b> | <b>SC23A Protein transport protein Sec23A</b>                                                                              | <b>1.274380708</b> | <b>4.85E-08</b> | <b>4</b>  |
| Q01405        | AETEEGPDVLR                                                                                                                | 1.142286933        | 2               | 3.17017   |
| Q01405        | AVLNPLCQVDYR                                                                                                               | 1.261131587        | 2               | 2.80127   |
| Q01405        | HLLQAPVDDAQEILHSR                                                                                                          | 1.188129975        | 3               | 4.53486   |
| Q01405        | YIDTEHGGSQAR                                                                                                               | 1.291803682        | 2               | 3.42438   |
| <b>Q02253</b> | <b>MMSA Methylmalonate semialdehyde dehydrogenase [acylating]_mitochondrial</b>                                            | <b>0.917821521</b> | <b>0.998338</b> | <b>29</b> |
| Q02253        | AEMEAAVAACK                                                                                                                | 0.899892116        | 2               | 3.90512   |
| Q02253        | AEMEAAVAACK+Oxidation(3)                                                                                                   | 1.306769006        | 2               | 2.86343   |
| Q02253        | AEMEAAVAACKR                                                                                                               | 0.976929006        | 2               | 3.21696   |
| Q02253        | AFPAWADTSILSR                                                                                                              | 1.099390114        | 2               | 4.20238   |
| Q02253        | AISFVGSNQAGEYIFER                                                                                                          | 1.065919793        | 2               | 5.48477   |
| Q02253        | CMALSTAVLVGEAK                                                                                                             | 0.928303847        | 2               | 4.5636    |
| Q02253        | CMALSTAVLVGEAK+Oxidation(2)                                                                                                | 1.003751517        | 2               | 2.77389   |
| Q02253        | EEDATLSSPAVVMPTMGR                                                                                                         | 0.823612229        | 2               | 4.90848   |
| Q02253        | ENTLNQLVGAAFGAAGQR                                                                                                         | 0.924334191        | 2               | 5.01796   |
| Q02253        | GDTNFGYK                                                                                                                   | 1.027717638        | 2               | 2.39529   |
| Q02253        | GLQVVEHACSVTSLMLGETMPSITK                                                                                                  | 1.14239377         | 2               | 5.90708   |
| Q02253        | GYENGNFVGPTIISNVKPSMTCYK                                                                                                   | 0.913631412        | 2               | 3.42933   |
| Q02253        | IVNDNPYGNGTAFITNGAIAR                                                                                                      | 1.051046553        | 2               | 5.57311   |
| Q02253        | KWLPELVER                                                                                                                  | 0.968931328        | 2               | 2.32475   |
| Q02253        | LITLQGGK                                                                                                                   | 1.041204264        | 2               | 2.89832   |
| Q02253        | LLQDSGAPDGLTNIHGHQHEAVNFICDHPDIK                                                                                           | 1.859133865        | 3               | 4.82179   |
| Q02253        | NHGVVMPDANK                                                                                                                | 0.841412378        | 1               | 3.28066   |
| Q02253        | NHGVVMPDANK+Oxidation(6)                                                                                                   | 1.008137022        | 2               | 3.11345   |
| Q02253        | NHGVVMPDANKENTLNQLVGAAFGAAGQR                                                                                              | 0.916663192        | 3               | 6.38117   |

|               |                                            |                    |                 |           |
|---------------|--------------------------------------------|--------------------|-----------------|-----------|
| Q02253        | NHGVMMPDANKENTLNQLVGAAFGAAGQR+Oxidation(6) | 0.934651913        | 3               | 4.81733   |
| Q02253        | QGIQFYTLK                                  | 1.185223085        | 2               | 2.85421   |
| Q02253        | SDKWIDIHNPATNEVVGR                         | 0.985375594        | 2               | 5.59219   |
| Q02253        | TITSQWKEEDATLSSPAVVMPTMGR                  | 0.829527221        | 2               | 5.41685   |
| Q02253        | TLADAEGDVFR                                | 0.969726247        | 2               | 3.57084   |
| Q02253        | VCNLIDSGAK                                 | 0.944986271        | 2               | 3.47107   |
| Q02253        | VNAGDQPGADLGPLITPQAK                       | 0.870734917        | 2               | 5.99965   |
| Q02253        | WIDIHNPATNEVVGR                            | 0.974486194        | 2               | 5.1088    |
| Q02253        | WLPELVER                                   | 0.814182187        | 2               | 2.31465   |
| Q02253        | YAHMVDVGQGVNVPIVPLPMFSFTGSR                | 0.94284401         | 3               | 4.63799   |
| <b>Q02769</b> | <b>FDFT Squalene synthase</b>              | <b>0.82427831</b>  | <b>0.885526</b> | <b>3</b>  |
| Q02769        | KLEDFVKPENVDVAVK                           | 0.777162463        | 3               | 4.24853   |
| Q02769        | TQSLPNCQLISR                               | 0.576777814        | 2               | 2.59707   |
| Q02769        | VVLEDFPTISLEFR                             | 1.099770839        | 2               | 3.91082   |
| <b>Q02974</b> | <b>KHK Ketohekoxinase</b>                  | <b>1.222238724</b> | <b>0.99842</b>  | <b>9</b>  |
| Q02974        | FGCQVAGK                                   | 1.118551257        | 2               | 2.87889   |
| Q02974        | GATLICAWAEEGADALPGDQLLHSDAFPPPR            | 1.228597699        | 3               | 5.86309   |
| Q02974        | GGNASNSCTVLSLLGAR                          | 1.05010419         | 2               | 4.6608    |
| Q02974        | GNSMQEALR                                  | 1.056653598        | 2               | 3.18398   |
| Q02974        | GVDVSQVAWQSQGDTPCSCCIVNNSNGSR              | 1.165457092        | 3               | 5.30718   |
| Q02974        | IEQYNATQPLQK                               | 1.235998558        | 2               | 4.77127   |
| Q02974        | RGVDVSQVAWQSQGDTPCSCCIVNNSNGSR             | 1.209361523        | 3               | 6.36503   |
| Q02974        | TIILYDTNLPDVSAK                            | 1.085993515        | 2               | 4.82295   |
| Q02974        | VSVEIEKPR                                  | 1.164280738        | 2               | 2.41058   |
| <b>Q03248</b> | <b>BUP1 Beta_ureidopropionase</b>          | <b>1.040013534</b> | <b>9.9E-20</b>  | <b>13</b> |
| Q03248        | AHHDLGIFYGSSYVAAPDGSR                      | 1.242826802        | 2               | 6.29926   |
| Q03248        | EKLPTWTEFAESAEDGLTTR                       | 1.104459768        | 3               | 5.0119    |
| Q03248        | ELAEAVKPNYSPNIVK                           | 1.172925231        | 2               | 4.32856   |
| Q03248        | ELAEAVKPNYSPNIVKEDLVLPSSG                  | 1.020401854        | 3               | 3.43546   |
| Q03248        | HLPDDLQVVK                                 | 1.084087606        | 2               | 2.3069    |
| Q03248        | HNMMVVISPILER                              | 1.129128236        | 3               | 3.43704   |
| Q03248        | IPLPTSAPVAEQVSALHK                         | 1.484631768        | 3               | 5.06646   |
| Q03248        | KHNMMVVISPILER                             | 0.972175668        | 3               | 3.52502   |
| Q03248        | KHNMMVVISPILER+Oxidation(4)                | 1.034496247        | 2               | 2.78252   |
| Q03248        | NAAIANHCFTCALNR                            | 1.260299986        | 2               | 4.71798   |
| Q03248        | VGDFNESTYYMEGNLGHVPVFTQFGR                 | 1.615499205        | 3               | 4.80641   |
| Q03248        | VGQEHYPNEFTSGDGK                           | 1.038158587        | 2               | 4.40506   |
| Q03248        | VGQEHYPNEFTSGDGK                           | 1.157505493        | 3               | 5.19038   |
| <b>Q03336</b> | <b>RGN Regucalcin</b>                      | <b>1.142269931</b> | <b>9.9E-20</b>  | <b>19</b> |
| Q03336        | CGESPVWEEASK                               | 1.261213827        | 2               | 4.56697   |
| Q03336        | CLLFVDIPSK                                 | 1.753792218        | 2               | 3.26826   |
| Q03336        | DEQIPDGMCIDVEGK                            | 1.050977382        | 2               | 4.63492   |
| Q03336        | DYSEMYVTCAR                                | 0.958673561        | 2               | 2.50193   |
| Q03336        | FCALNWEDQSVFILAMVDEDKK                     | 3.172601391        | 3               | 4.19366   |
| Q03336        | FNDGKVDPAGR                                | 1.026870124        | 2               | 2.71623   |
| Q03336        | GIAPYSYAG                                  | 2.583440778        | 2               | 2.53849   |
| Q03336        | HQGSLSLFPDHSVK                             | 1.162601126        | 2               | 4.5976    |
| Q03336        | IECVLR                                     | 1.078603424        | 2               | 2.41857   |
| Q03336        | KYFDQVDISNGLDWSLDHK                        | 1.022286566        | 3               | 5.20567   |
| Q03336        | LWVACYNGGR                                 | 1.207721909        | 2               | 3.1025    |
| Q03336        | MEKDEQIPDGMCIDVEGK                         | 1.298671562        | 2               | 5.29706   |
| Q03336        | MEKDEQIPDGMCIDVEGK+Oxidation(1)            | 1.363390866        | 2               | 4.62258   |
| Q03336        | MEKDEQIPDGMCIDVEGK+Oxidation(11)           | 1.36194456         | 2               | 2.71571   |
| Q03336        | QSGGYVATIGTK                               | 1.067706843        | 2               | 2.77604   |
| Q03336        | VGVDAPVSSVALR                              | 1.224693814        | 2               | 3.71552   |
| Q03336        | YFAGTMAEETAPAVLER                          | 1.108122448        | 2               | 5.82589   |

|               |                                                        |                    |                 |           |
|---------------|--------------------------------------------------------|--------------------|-----------------|-----------|
| Q03336        | YFAGTMAEETAPAVLER+Oxidation(6)                         | 1.143651675        | 2               | 5.42033   |
| Q03336        | YFDQVDISNGLDWSLDHK                                     | 1.050902002        | 2               | 4.52851   |
| <b>Q03410</b> | <b>SYCP1 Synaptonemal complex protein 1</b>            | <b>0.947214224</b> | <b>0.601665</b> | <b>4</b>  |
| Q03410        | ATVDEAVKLQKEIDLR                                       | 1.688146377        | 2               | 2.36649   |
| Q03410        | ISEEKLLGEVEK                                           | 0.9119632          | 2               | 2.30882   |
| Q03410        | LQDENLK                                                | 0.946805521        | 1               | 1.98866   |
| Q03410        | NIEELHQENKALK                                          | 1.058122015        | 1               | 1.90885   |
| <b>Q03626</b> | <b>MUG1 Murinoglobulin_1</b>                           | <b>1.060301636</b> | <b>0.00537</b>  | <b>7</b>  |
| Q03626        | EESSCIHSSCTAER                                         | 0.959648316        | 2               | 4.14567   |
| Q03626        | ESVVFVQTDKPVYKPGQSVK                                   | 1.210172819        | 3               | 3.46967   |
| Q03626        | GGEFEMMPLGVNKK                                         | 0.798316317        | 2               | 3.15      |
| Q03626        | LTAQPAPSPEDLALSMGTIK                                   | 1.17533976         | 3               | 3.9513    |
| Q03626        | NLHPLNELFLAYIEDPK                                      | 1.815815009        | 3               | 4.11475   |
| Q03626        | VQTVPLTCNNPK                                           | 1.048498822        | 2               | 2.77076   |
| Q03626        | VYHKEESSCIHSSCTAER                                     | 0.963923395        | 2               | 5.46548   |
| <b>Q04462</b> | <b>SYVC Valyl_tRNA synthetase</b>                      | <b>1.037163732</b> | <b>0.333948</b> | <b>3</b>  |
| Q04462        | ADFPAGIPEGTDALR                                        | 0.927729334        | 2               | 2.40421   |
| Q04462        | ALNPLEEWLR                                             | 1.268512372        | 2               | 2.30183   |
| Q04462        | SVTQQPGSEITAPQK                                        | 1.040648516        | 2               | 3.8939    |
| <b>Q05144</b> | <b>RAC2 Ras_related C3 botulinum toxin substrate 2</b> | <b>1.125193134</b> | <b>0.388616</b> | <b>2</b>  |
| Q05144        | MQAICVVDGAVGK+Oxidation(1)                             | 1.210174266        | 2               | 2.60815   |
| Q05144        | YLECSALTQR                                             | 1.10128853         | 2               | 3.0004    |
| <b>Q06647</b> | <b>ATPO ATP synthase subunit O_mitochondrial</b>       | <b>1.03855345</b>  | <b>0.97864</b>  | <b>8</b>  |
| Q06647        | FSPLTANLMNLLAENGR                                      | 1.29801048         | 2               | 3.96458   |
| Q06647        | GEVPTVTTAFPLDEAVLSELK                                  | 1.003120102        | 2               | 5.33163   |
| Q06647        | GQILNLEVK                                              | 1.109987483        | 2               | 2.66492   |
| Q06647        | LGNTQGVISAFSTIMSVHR                                    | 0.973459453        | 3               | 4.71923   |
| Q06647        | TDPSIMGGMIVR                                           | 0.979133484        | 2               | 3.26981   |
| Q06647        | TVLNSFLSK                                              | 1.067771879        | 2               | 2.75498   |
| Q06647        | VSLAVLNPIYIK                                           | 1.037233233        | 2               | 3.67134   |
| Q06647        | YATALYSAASK                                            | 3.202639317        | 1               | 2.12035   |
| <b>Q07071</b> | <b>GCKR Glucokinase regulatory protein</b>             | <b>1.360419356</b> | <b>9.9E-20</b>  | <b>12</b> |
| Q07071        | AAPISCHVQVAHEK                                         | 1.344535366        | 2               | 4.80357   |
| Q07071        | CQNIQALVHSTVQSLPAPLKK                                  | 1.642399093        | 3               | 4.85911   |
| Q07071        | GFLIGDHSDFMNFQK                                        | 1.418831564        | 2               | 2.56757   |
| Q07071        | GLGQKPLYTYLIAGGDR                                      | 1.986030767        | 2               | 2.60859   |
| Q07071        | LLGQCDAEIFQEEQIVPTYQR                                  | 2.462624061        | 2               | 4.95636   |
| Q07071        | LYSESVLTTMLQVAGK                                       | 1.484213214        | 2               | 3.29731   |
| Q07071        | QEAFLNPAIGPEGLSGSSR                                    | 1.145395565        | 2               | 4.24942   |
| Q07071        | TVDQGVVSSQR                                            | 1.42680731         | 2               | 3.65498   |
| Q07071        | VIPTALLSLLLR                                           | 1.440262733        | 2               | 3.40905   |
| Q07071        | VQEVLEKPDGGLVVLSSGGTSGR                                | 1.382732044        | 2               | 5.23642   |
| Q07071        | WVLNTVSTGAHVLLGK                                       | 1.497048131        | 2               | 3.43793   |
| Q07071        | YQHVIETPEPGEWELSGYEAAPITEK                             | 1.723214738        | 3               | 4.0109    |
| <b>Q07116</b> | <b>SUOX Sulfite oxidase_mitochondrial</b>              | <b>0.949793569</b> | <b>0.823725</b> | <b>8</b>  |
| Q07116        | AVDDSYNVQPDTVAPIWNLR                                   | 0.863302709        | 2               | 5.17386   |
| Q07116        | ETEAHVCFEGLDSDPTGTAYGASIPLAR                           | 1.027874792        | 3               | 4.50545   |
| Q07116        | HEVTVTLQCAGNR                                          | 1.034758226        | 2               | 3.09599   |
| Q07116        | INSQRPFNAEPPPELLTESYITPNPIFFTR                         | 1.502264643        | 3               | 4.47717   |
| Q07116        | MSPPLEASDPYSNDPMR                                      | 0.646160001        | 2               | 3.93834   |
| Q07116        | NHLPVPNLDPDPTQR                                        | 0.983688073        | 2               | 2.79804   |
| Q07116        | VSVSEESYSHWQR                                          | 0.955455852        | 2               | 4.03651   |
| Q07116        | VVVPGVVGAR                                             | 0.878519074        | 2               | 2.74687   |
| <b>Q07205</b> | <b>IF5 Eukaryotic translation initiation factor 5</b>  | <b>1.085347071</b> | <b>0.625744</b> | <b>2</b>  |
| Q07205        | AMGPLVLTEVLFDEK                                        | 1.113823814        | 2               | 3.54943   |
| Q07205        | TVIVNMVDVAK                                            | 1.064403564        | 2               | 2.35066   |
| <b>Q07523</b> | <b>HAOX2 Hydroxyacid oxidase 2</b>                     | <b>1.070865594</b> | <b>0.086142</b> | <b>14</b> |

|               |                                                                  |                    |                 |          |
|---------------|------------------------------------------------------------------|--------------------|-----------------|----------|
| Q07523        | ALKEEKPTQSVVPSFPK                                                | 0.986666525        | 2               | 4.62328  |
| Q07523        | ALVITIDTPVLGNR                                                   | 1.001347779        | 2               | 4.00972  |
| Q07523        | ASFQWNDLSLLQSITR                                                 | 1.498814083        | 2               | 4.5891   |
| Q07523        | CMTLSGCQSVAEISPDLIQFSR                                           | 1.134144102        | 2               | 3.54834  |
| Q07523        | EDAELAMK                                                         | 1.022748673        | 1               | 1.94181  |
| Q07523        | E EKPTQSVVPSFPK                                                  | 0.891248387        | 2               | 2.94464  |
| Q07523        | EVLDTLTAELHR                                                     | 1.157331237        | 2               | 3.17391  |
| Q07523        | GEDGVKEVLDILTAELHR                                               | 1.105865598        | 3               | 5.54539  |
| Q07523        | HNVQGIVVSNHGGR                                                   | 0.97574736         | 3               | 6.22272  |
| Q07523        | NQLNLEANILLK                                                     | 0.93019877         | 2               | 3.61938  |
| Q07523        | QLDEVASASIDALR                                                   | 0.983921345        | 2               | 3.11902  |
| Q07523        | TGTDVLK                                                          | 0.911926349        | 2               | 2.31739  |
| Q07523        | TSWDFIEGEADDGITYSENIAAFK                                         | 0.984352194        | 2               | 4.45108  |
| Q07523        | TTIQGQEISAPICISPTAFHSIAWPDGEK                                    | 1.684397747        | 3               | 3.771    |
| <b>Q07936</b> | <b>ANXA2 Annexin A2</b>                                          | <b>1.341397539</b> | <b>0.726133</b> | <b>4</b> |
| Q07936        | AEDGSVIDYELIDQDAR                                                | 1.274199391        | 2               | 3.90109  |
| Q07936        | GLGTDEDSLIEIICSR                                                 | 1.511412179        | 2               | 3.97558  |
| Q07936        | GVDEVTVINILTNR                                                   | 1.341686268        | 2               | 3.82579  |
| Q07936        | TNQELQEINR                                                       | 1.255290012        | 2               | 3.10784  |
| <b>Q07984</b> | <b>SSRD Translocon_associated protein subunit delta</b>          | <b>1.228748652</b> | <b>1.66E-09</b> | <b>2</b> |
| Q07984        | FFDEESYSLLR                                                      | 1.400769471        | 2               | 3.12843  |
| Q07984        | NNEDVSIIPPLFTVSDHR                                               | 1.213374216        | 2               | 4.27674  |
| <b>Q08163</b> | <b>CAP1 Adenylyl cyclase_associated protein 1</b>                | <b>0.995785524</b> | <b>0.410485</b> | <b>9</b> |
| Q08163        | ALLVTASQCQPAGNK                                                  | 0.946171984        | 2               | 4.22459  |
| Q08163        | AYLSIWTELQAYIK                                                   | 0.589671131        | 2               | 2.30138  |
| Q08163        | ELSGLPSGSPVSGPPPPPPGPPPPVPTSSGSDSASR                             | 1.141260654        | 3               | 4.70657  |
| Q08163        | LEAVSHTSDMHCGYGDSPSK                                             | 0.966839366        | 3               | 5.01526  |
| Q08163        | LSDLLAPISEQIEVITFR                                               | 1.111498949        | 2               | 4.00408  |
| Q08163        | NSLDCEIVSAK                                                      | 1.099894931        | 2               | 2.3519   |
| Q08163        | SALFAQINQGESITHALK                                               | 1.128997417        | 2               | 4.56494  |
| Q08163        | SSEMNVLIPTEGGDFNEFPVPEQFK                                        | 1.142407332        | 2               | 4.07185  |
| Q08163        | VENQENVSNLVIDDTELK                                               | 1.226754092        | 2               | 5.12975  |
| <b>Q08415</b> | <b>KAT1 Kynurenine_oxoglutarate transaminase 1_mitochondrial</b> | <b>1.109979322</b> | <b>0.026563</b> | <b>3</b> |
| Q08415        | EQQHFGQPSSYFLQLPQAMELNR                                          | 0.918978818        | 3               | 4.84861  |
| Q08415        | ILVLNTPNNPLGK                                                    | 1.673656358        | 2               | 3.38612  |
| Q08415        | LGASNDWQLDPAELASK                                                | 1.2393656          | 2               | 3.98091  |
| <b>Q09073</b> | <b>ADT2 ADP/ATP translocase 2</b>                                | <b>1.102840099</b> | <b>0.000835</b> | <b>7</b> |
| Q09073        | DFLAGGVAAAIK                                                     | 0.929050349        | 2               | 5.01008  |
| Q09073        | GLGDCLVK                                                         | 1.133653925        | 2               | 2.87509  |
| Q09073        | GMGGAFVLVLYDEIKK                                                 | 1.180613782        | 2               | 3.6151   |
| Q09073        | GTDIMYTGLDCWR                                                    | 0.986008037        | 2               | 3.55933  |
| Q09073        | KGTDIMYTGLDCWR                                                   | 0.896410899        | 2               | 4.03166  |
| Q09073        | LLLQVQHASK                                                       | 1.683789208        | 2               | 2.74101  |
| Q09073        | QIFLGGVDKR                                                       | 1.284235604        | 2               | 2.37893  |
| <b>Q0D2L3</b> | <b>SPEB Agmatinase_mitochondrial</b>                             | <b>0.862549125</b> | <b>0.438372</b> | <b>9</b> |
| Q0D2L3        | EAYQNILATGCIPLTLGGDHTITYPIQAVAK                                  | 1.347152771        | 3               | 3.39527  |
| Q0D2L3        | EESLMLGTVNPSTGALPFQSLR                                           | 0.809066864        | 2               | 3.89368  |
| Q0D2L3        | EHGPVGLVHVGHAHSNTSDKPLEDK                                        | 0.859766671        | 3               | 3.47475  |
| Q0D2L3        | IREESLMLGTVNPSTGALPFQSLR                                         | 0.888642651        | 3               | 4.77152  |
| Q0D2L3        | SVDEGLLDSK                                                       | 0.794876536        | 1               | 1.92674  |
| Q0D2L3        | SVDEGLLDSKR                                                      | 0.87891953         | 2               | 3.07954  |
| Q0D2L3        | VADLGNVNVNLYNLQDSCR                                              | 1.179182674        | 2               | 5.17821  |
| Q0D2L3        | VCSMMHLPLQSSPEGLDAAFVGVPLDTGTSNRPGAR                             | 1.150567123        | 3               | 5.75946  |
| Q0D2L3        | VVLAEDCWMK                                                       | 1.316266499        | 2               | 2.4059   |
| <b>Q0VAV2</b> | <b>EXPH5 Exophilin_5</b>                                         | <b>1.188523724</b> | <b>0.137239</b> | <b>2</b> |
| Q0VAV2        | DMDVSVSKDEQLNK+Oxidation(2)                                      | 1.143699605        | 2               | 2.52883  |

|                |                                                                            |                    |                 |           |
|----------------|----------------------------------------------------------------------------|--------------------|-----------------|-----------|
| Q0VAV2         | SLSDDQDPGQEQREEK                                                           | 1.207732509        | 2               | 2.30453   |
| <b>Q0VVGK3</b> | <b>GLCK Glycerate kinase</b>                                               | <b>1.035388253</b> | <b>0.980714</b> | <b>6</b>  |
| Q0VVGK3        | ADSDPHGPHTCGHVNLNVIIGSNLALAEAR                                             | 0.964896144        | 3               | 4.82085   |
| Q0VVGK3        | AVLGMAAADELQGHVQGVISVPK                                                    | 0.87967809         | 2               | 4.84972   |
| Q0VVGK3        | GATIQELNTR                                                                 | 1.096213499        | 2               | 2.86822   |
| Q0VVGK3        | LHQLAAELQLPDLQLEEALEAVAK                                                   | 1.272324586        | 3               | 3.61009   |
| Q0VVGK3        | QLFDSAVGAVQPGPMLQR                                                         | 1.102860749        | 2               | 4.8058    |
| Q0VVGK3        | VAAACLSSTAERPLEEEAK                                                        | 1.141584471        | 2               | 3.20186   |
| <b>Q0ZHH6</b>  | <b>ATLA3 Atlantin_3</b>                                                    | <b>1.107823414</b> | <b>0.001715</b> | <b>8</b>  |
| Q0ZHH6         | ALASVLLQDHIR                                                               | 1.255442956        | 2               | 2.65546   |
| Q0ZHH6         | EHQHEEIQNVR                                                                | 1.069699755        | 2               | 3.60591   |
| Q0ZHH6         | EQLQTLIPYVNLNPSK                                                           | 1.229959766        | 2               | 3.26649   |
| Q0ZHH6         | GGSDPETTGIIQWSEVFTVK                                                       | 1.279894575        | 2               | 2.3586    |
| Q0ZHH6         | IYQGEDLPHPK                                                                | 1.01154482         | 2               | 2.78858   |
| Q0ZHH6         | LAMDEIFQKPFQTLMLVR+Oxidation(3)                                            | 1.187411191        | 2               | 2.48999   |
| Q0ZHH6         | YQLEEEITELYENFCK                                                           | 1.711352417        | 2               | 5.3272    |
| Q0ZHH6         | YSGQYLELGGIDSQAAYVLEQASSHIGNSTQAAVR                                        | 1.361278266        | 3               | 3.36516   |
| <b>Q10728</b>  | <b>MYPT1 Protein phosphatase 1 regulatory subunit 12A</b>                  | <b>1.089675134</b> | <b>0.963437</b> | <b>2</b>  |
| Q10728         | QEKKKESEVSR                                                                | 1.134036498        | 2               | 2.33906   |
| Q10728         | SLLEMEKRER+Oxidation(5)                                                    | 1.05130407         | 2               | 2.40044   |
| <b>Q10758</b>  | <b>K2C8 Keratin_type II cytoskeletal 8</b>                                 | <b>0.927993704</b> | <b>1.03E-12</b> | <b>25</b> |
| Q10758         | AEAETMYQIK                                                                 | 0.864517843        | 2               | 3.1227    |
| Q10758         | AQYEEIANR                                                                  | 0.877075669        | 2               | 3.16601   |
| Q10758         | ATLEAAIADAEQR                                                              | 0.871592726        | 2               | 4.70691   |
| Q10758         | DVDEAYMNVKLEESR                                                            | 2.093787396        | 2               | 3.56387   |
| Q10758         | ELQSQISDTSVLSMDNSR                                                         | 0.983803497        | 2               | 5.96616   |
| Q10758         | GSLGGFGGAGVGGITAVTVNQSLNPLK                                                | 0.766360867        | 2               | 4.74809   |
| Q10758         | KDVDEAYMVK                                                                 | 0.850583854        | 2               | 2.57674   |
| Q10758         | LEGLTDEINFLR                                                               | 0.960331625        | 2               | 4.0512    |
| Q10758         | LESGMQNMSIHTK                                                              | 0.960729976        | 2               | 4.18187   |
| Q10758         | LEVDPNIQAVR                                                                | 0.878114371        | 2               | 3.83027   |
| Q10758         | LEVELGNMQGLVEDFK                                                           | 1.064935082        | 2               | 4.96885   |
| Q10758         | LQAEIDALK                                                                  | 1.007317805        | 2               | 2.97531   |
| Q10758         | LVSESSDIMSK                                                                | 0.927044969        | 2               | 3.33232   |
| Q10758         | QHHEEIR                                                                    | 0.827501016        | 1               | 2.31627   |
| Q10758         | QLEALGQEK                                                                  | 0.824027995        | 1               | 2.1502    |
| Q10758         | SKTEISEMNR                                                                 | 0.795662335        | 2               | 3.08398   |
| Q10758         | SKTEISEMNR+Oxidation(8)                                                    | 1.077565876        | 2               | 3.09394   |
| Q10758         | SLDMDSIIAEVR                                                               | 0.851369195        | 2               | 4.93946   |
| Q10758         | SNMDNMFESYINNLN                                                            | 1.527726696        | 2               | 4.05594   |
| Q10758         | SRAEAETMYQIK                                                               | 0.681752683        | 2               | 3.44173   |
| Q10758         | TEISEMNR                                                                   | 0.792804471        | 2               | 2.44474   |
| Q10758         | TEMENEFVLK                                                                 | 0.955641039        | 2               | 3.65187   |
| Q10758         | TEMENEFVLK+Oxidation(3)                                                    | 1.018117476        | 2               | 2.40871   |
| Q10758         | WSLLQQQK                                                                   | 0.892020132        | 2               | 2.93414   |
| Q10758         | YEELQTLGK                                                                  | 0.900993599        | 2               | 3.56226   |
| <b>Q14DH7</b>  | <b>ACSS3 Acyl_CoA synthetase short_chain family member 3_mitochondrial</b> | <b>0.905792012</b> | <b>0.295588</b> | <b>6</b>  |
| Q14DH7         | CVPGYNVMILDDNMQK                                                           | 1.5566812          | 2               | 2.63263   |
| Q14DH7         | STLSALVNGKPYK                                                              | 1.04221587         | 2               | 2.45021   |
| Q14DH7         | THFAASVADPER                                                               | 1.097296186        | 2               | 3.67423   |
| Q14DH7         | VDDVINVAGHR                                                                | 0.855808207        | 2               | 3.74527   |
| Q14DH7         | VLAHEGVAALFTAPTAR                                                          | 0.958809097        | 2               | 4.45122   |
| Q14DH7         | VTPTIEDPSIFGHIEEVLK                                                        | 0.987926021        | 2               | 2.9121    |
| <b>Q1HCL7</b>  | <b>NAKD1 NAD kinase domain_containing protein 1</b>                        | <b>0.928886565</b> | <b>2.29E-07</b> | <b>10</b> |
| Q1HCL7         | ASYEISVDDGPWEK                                                             | 0.776157459        | 2               | 2.52739   |

|               |                                                                     |                    |                 |           |
|---------------|---------------------------------------------------------------------|--------------------|-----------------|-----------|
| Q1HCL7        | LKPVIGVNTDPER                                                       | 1.229573241        | 2               | 2.88496   |
| Q1HCL7        | LYLEGTGINPSPVDLHEQQLSLNQHSR                                         | 0.78656244         | 3               | 4.71002   |
| Q1HCL7        | NVEHIIDSLRDEGIEVR                                                   | 0.911886489        | 2               | 3.45552   |
| Q1HCL7        | QGNLTLPLNK                                                          | 0.866622627        | 2               | 2.33824   |
| Q1HCL7        | REYDEETVR                                                           | 0.898270062        | 2               | 2.44806   |
| Q1HCL7        | SEASGPQLLPVR                                                        | 0.869714162        | 2               | 2.9511    |
| Q1HCL7        | SSGLNLCTGTGSK                                                       | 0.812872462        | 2               | 3.8542    |
| Q1HCL7        | VTNEYNESLLYSPEEPK                                                   | 0.956535663        | 2               | 4.46385   |
| Q1HCL7        | YTHSFPEALQK                                                         | 1.094997253        | 2               | 2.59832   |
| <b>Q1JU68</b> | <b>EIF3A Eukaryotic translation initiation factor 3 subunit A</b>   | <b>1.122761746</b> | <b>0.424962</b> | <b>3</b>  |
| Q1JU68        | EQPEKEPELQYVPLQNNTILR                                               | 1.093859888        | 3               | 3.44214   |
| Q1JU68        | LLDMDGIIIVEK                                                        | 1.114972371        | 2               | 2.55574   |
| Q1JU68        | NQLTAMSSVLAK                                                        | 1.153211806        | 2               | 2.65007   |
| <b>Q29RW1</b> | <b>MYH4 Myosin_4</b>                                                | <b>0.856152063</b> | <b>0.974105</b> | <b>14</b> |
| Q29RW1        | ANLMQAEIEELR                                                        | 1.05597971         | 2               | 3.01068   |
| Q29RW1        | ELENEVENEQKR                                                        | 1.065463119        | 2               | 2.98762   |
| Q29RW1        | LAQESTMDIENDKQQLDEK                                                 | 40.63178742        | 2               | 4.94088   |
| Q29RW1        | LQDAEEHVEAVNSK                                                      | 1.19989154         | 2               | 4.56202   |
| Q29RW1        | LQDLVDKLQTK                                                         | 1.051810331        | 1               | 1.93891   |
| Q29RW1        | MEGDLNEMEIQLNHANR                                                   | 2.582484512        | 2               | 4.34168   |
| Q29RW1        | NAYEESLDQLETLK                                                      | 0.843532304        | 2               | 4.57888   |
| Q29RW1        | NAYEESLDQLETLKR                                                     | 0.771986703        | 2               | 4.05422   |
| Q29RW1        | SELQASLEEAASLEHEEGK                                                 | 0.712085006        | 2               | 5.28726   |
| Q29RW1        | SNAACAALDKK                                                         | 0.799706941        | 2               | 2.45146   |
| Q29RW1        | TEGGATVTVK                                                          | 0.878440995        | 2               | 2.69189   |
| Q29RW1        | TKLEQQVDDLEGSLEQEK                                                  | 10.04324226        | 2               | 5.65531   |
| Q29RW1        | TKLEQQVDDLEGSLEQEKK                                                 | 13.06683639        | 3               | 5.10829   |
| Q29RW1        | VRELENEVENEQKR                                                      | 0.715722818        | 3               | 3.70753   |
| <b>Q2EMV9</b> | <b>PAR14 Poly [ADP_ribose] polymerase 14</b>                        | <b>1.027189051</b> | <b>0.443188</b> | <b>3</b>  |
| Q2EMV9        | LIISEVLK                                                            | 1.248128873        | 2               | 2.5172    |
| Q2EMV9        | LQEELTR                                                             | 1.026942367        | 1               | 2.11767   |
| Q2EMV9        | VLVEFEKESLNIAGK                                                     | 1.302738956        | 2               | 2.58699   |
| <b>Q2V057</b> | <b>PROD2 Probable proline dehydrogenase 2</b>                       | <b>1.235409754</b> | <b>3.56E-07</b> | <b>8</b>  |
| Q2V057        | ASİYQGFVAGETAEEVR                                                   | 1.211666704        | 2               | 4.22115   |
| Q2V057        | EDCTQPDYEATSR                                                       | 1.164322114        | 2               | 3.54251   |
| Q2V057        | GCVQQLQAIGLQPLLA VPT EEPD SAAK                                      | 1.430313142        | 2               | 4.8077    |
| Q2V057        | NLQLSCLSTEQNQH LQASLSR                                              | 1.326354163        | 2               | 5.75996   |
| Q2V057        | REQALLSQELWR                                                        | 1.215482702        | 2               | 3.09522   |
| Q2V057        | SIPYGCLEEVIPYLIR                                                    | 1.678044521        | 2               | 4.11554   |
| Q2V057        | SVTQLHGKEDCTQPDYEATSR                                               | 0.890410736        | 3               | 4.61041   |
| Q2V057        | TSEAWYEGNLSAMLHCV DLSR                                              | 1.209931082        | 2               | 2.62975   |
| <b>Q32LZ8</b> | <b>PLPL5 Patatin_like phospholipase domain_containing protein 5</b> | <b>0.965747187</b> | <b>0.64608</b>  | <b>2</b>  |
| Q32LZ8        | FYGSSSGALNAMAIVFGK                                                  | 1.032910077        | 2               | 2.41137   |
| Q32LZ8        | NFIVTDFATR                                                          | 0.849985397        | 1               | 1.90153   |
| <b>Q3B7D0</b> | <b>HEM6 Coproporphyrinogen_III oxidase_mitochondrial</b>            | <b>1.052397907</b> | <b>0.996988</b> | <b>2</b>  |
| Q3B7D0        | HCDDSYTPQDK                                                         | 1.069057756        | 2               | 3.40693   |
| Q3B7D0        | TCAEAVVPSYVPIVK                                                     | 1.036018145        | 2               | 2.68496   |
| <b>Q3B7U9</b> | <b>FKBP8 Peptidyl_prolyl cis_trans isomerase FKBP8</b>              | <b>1.053701606</b> | <b>0.999987</b> | <b>4</b>  |
| Q3B7U9        | SCSQVLEHQPDNIK                                                      | 0.930437634        | 2               | 4.17635   |
| Q3B7U9        | TAEDGPDLEMLSGQER                                                    | 0.951742137        | 2               | 4.12316   |
| Q3B7U9        | VDMTCEEEELLQLK                                                      | 1.097810024        | 2               | 4.14      |
| Q3B7U9        | VLAQQGEYSEAIPILR                                                    | 1.079315258        | 2               | 3.77666   |
| <b>Q3B8Q2</b> | <b>IF4A3 Eukaryotic initiation factor 4A_III</b>                    | <b>1.113660006</b> | <b>0.661553</b> | <b>2</b>  |
| Q3B8Q2        | GIYAYGFEKPSAIQQR                                                    | 1.180822897        | 2               | 4.66736   |

|               |                                                                             |                    |                 |          |
|---------------|-----------------------------------------------------------------------------|--------------------|-----------------|----------|
| Q3B8Q2        | GIYAYGF EKPSAIQRAIK                                                         | 1.116959684        | 2               | 2.40852  |
| <b>Q3KR86</b> | <b>IMMT Mitochondrial inner membrane protein (Fragment)</b>                 | <b>1.155280719</b> | <b>0.900507</b> | <b>9</b> |
| Q3KR86        | AVDEAADALLK                                                                 | 1.29650876         | 2               | 2.54265  |
| Q3KR86        | EIAGATPYITAAEEK                                                             | 0.907110211        | 2               | 3.04443  |
| Q3KR86        | GIEQAVQSHAVAE EEAR                                                          | 1.105373323        | 2               | 4.86501  |
| Q3KR86        | QTITAQNAAVQAVK                                                              | 1.167412423        | 2               | 4.23704  |
| Q3KR86        | SEIQAEQDR                                                                   | 1.109798785        | 2               | 2.79942  |
| Q3KR86        | SLEDALNQTATVTR                                                              | 1.132834516        | 2               | 3.98457  |
| Q3KR86        | TSSAEMPTIPLGSAVEAIR                                                         | 1.086359423        | 2               | 3.84538  |
| Q3KR86        | VVSQYHELVVQAR                                                               | 1.226032522        | 2               | 3.56387  |
| Q3KR86        | YSTSSSGVTAGK                                                                | 0.845910749        | 2               | 2.775    |
| <b>Q3KRD8</b> | <b>IF6 Eukaryotic translation initiation factor 6</b>                       | <b>1.300672301</b> | <b>0.08275</b>  | <b>2</b> |
| Q3KRD8        | HGLLVPNNTTDQELQHIR                                                          | 1.141590653        | 3               | 5.10276  |
| Q3KRD8        | TSIEDQDELSSLQVPLVAGTVNR                                                     | 1.208616595        | 3               | 4.40258  |
| <b>Q3KRE0</b> | <b>ATAD3 ATPase family AAA domain_containing protein 3</b>                  | <b>1.766331068</b> | <b>0.404409</b> | <b>2</b> |
| Q3KRE0        | GEGTGPPLPPAQPGAESGGDR                                                       | 1.236473215        | 2               | 2.66433  |
| Q3KRE0        | ISVLEALR                                                                    | 1.79071844         | 2               | 2.62628  |
| <b>Q3KRE8</b> | <b>TBB2B Tubulin beta_2B chain</b>                                          | <b>1.22243734</b>  | <b>0.457166</b> | <b>3</b> |
| Q3KRE8        | ALTVP ELTQQMFDSK                                                            | 1.289151045        | 2               | 2.75209  |
| Q3KRE8        | ESESCDCLQGFQLTHSLGGGTGSGMGTLLISK                                            | 0.877260235        | 3               | 4.38386  |
| Q3KRE8        | FWEVISDEHGIDPTGSYHGSDSLQLER                                                 | 1.208145546        | 3               | 3.37131  |
| <b>Q3MIB4</b> | <b>LONP2 Lon protease homolog 2_ peroxisomal</b>                            | <b>0.950376612</b> | <b>0.857371</b> | <b>3</b> |
| Q3MIB4        | GTSLQSTILGVIPNTPDPASDSQDLPLHR                                               | 1.094395161        | 3               | 3.59311  |
| Q3MIB4        | MEIIQVPGYTQEEK                                                              | 0.98483631         | 2               | 2.49918  |
| Q3MIB4        | TVGVNPNVFLLDDEV DK                                                          | 0.839698242        | 2               | 2.61687  |
| <b>Q3MIE0</b> | <b>ECHD3 Enoyl_CoA hydratase domain_containing protein 3_ mitochondrial</b> | <b>0.828582492</b> | <b>0.047497</b> | <b>7</b> |
| Q3MIE0        | DGQEGIEAFIQK                                                                | 0.652877486        | 2               | 3.41772  |
| Q3MIE0        | SDILHEAESEDLK                                                               | 0.881062567        | 2               | 3.46327  |
| Q3MIE0        | SDILHEAESEDLKVIISAE GPVFSSGHDLK                                             | 0.822475591        | 4               | 5.7589   |
| Q3MIE0        | SSFATPGVNVGLFCSTPAVALGR                                                     | 1.043540704        | 2               | 4.17181  |
| Q3MIE0        | VALEMLFTGEPISAEALR                                                          | 1.396524262        | 2               | 4.06232  |
| Q3MIE0        | VIIISAE GPVFSSGHDLK                                                         | 0.950309409        | 2               | 4.33473  |
| Q3MIE0        | VVPEEQLEEEATR                                                               | 0.870537258        | 2               | 3.7635   |
| <b>Q3MIF4</b> | <b>XYLB Xylulose kinase</b>                                                 | <b>1.268591769</b> | <b>0.173359</b> | <b>6</b> |
| Q3MIF4        | FNADNMEVSAFPGDVEIR                                                          | 1.127472791        | 2               | 4.33761  |
| Q3MIF4        | IRDESASCSWNK                                                                | 1.15488004         | 2               | 4.0871   |
| Q3MIF4        | LGSPVPSCSVVGAISSYVQR                                                        | 1.466676773        | 2               | 3.25717  |
| Q3MIF4        | SAPQP SLAATPNPGASQVYAALLPR                                                  | 1.883982251        | 2               | 4.22762  |
| Q3MIF4        | VVAFTGDNPASLAGMR                                                            | 1.375902208        | 2               | 3.91311  |
| Q3MIF4        | YSPIDYSDGSGMNL LQIQEK                                                       | 1.322313465        | 2               | 5.15854  |
| <b>Q3T1J1</b> | <b>IF5A1 Eukaryotic translation initiation factor 5A_1</b>                  | <b>1.16378253</b>  | <b>1.07E-06</b> | <b>4</b> |
| Q3T1J1        | EDLRLPEGDLGK                                                                | 1.143741731        | 2               | 2.82148  |
| Q3T1J1        | EDLRLPEGDLGKEIQK                                                            | 1.19814935         | 2               | 4.51725  |
| Q3T1J1        | NDFQLIGIQDGYLSLLQDSG EVR                                                    | 1.334078888        | 2               | 5.08492  |
| Q3T1J1        | RNDFQLIGIQDGYLSLLQDSG EVR                                                   | 1.454168056        | 3               | 3.63431  |
| <b>Q3T1K5</b> | <b>CAZA2 F_actin_capping protein subunit alpha_2</b>                        | <b>1.170477455</b> | <b>2.74E-06</b> | <b>3</b> |
| Q3T1K5        | FIIHAPPGEFNEVFNDVR                                                          | 1.214601806        | 3               | 3.98936  |
| Q3T1K5        | FTVTPSTTQVVGILK                                                             | 1.222113341        | 2               | 3.82737  |
| Q3T1K5        | LLLNN DNL LR                                                                | 1.092354147        | 2               | 2.63586  |
| <b>Q3TVW5</b> | <b>TCHP Trichoplein keratin filament_binding protein</b>                    | <b>1.427516945</b> | <b>0.00047</b>  | <b>2</b> |
| Q3TVW5        | RTQEIQEELEVDGRILQALLEK                                                      | 1.790037613        | 2               | 2.68399  |
| Q3TVW5        | TELGRFLKHQYNAQLNR                                                           | 1.420795486        | 2               | 2.91406  |
| <b>Q3U0J8</b> | <b>TBD2B TBC1 domain family member 2B</b>                                   | <b>1.185020898</b> | <b>0.318496</b> | <b>2</b> |
| Q3U0J8        | DTTDIISQHPNPSAEK                                                            | 0.851313115        | 2               | 2.44428  |

|               |                                                                |                    |                 |           |
|---------------|----------------------------------------------------------------|--------------------|-----------------|-----------|
| Q3U0J8        | QIELDLLRTPNNK                                                  | 1.250348167        | 2               | 2.75838   |
| <b>Q3UHR0</b> | <b>BAHC1 BAH and coiled_coil domain_containing protein 1</b>   | <b>1.055232354</b> | <b>0.10196</b>  | <b>2</b>  |
| Q3UHR0        | ACEERLGLPGRELLQDNK                                             | 1.650320609        | 2               | 2.40867   |
| Q3UHR0        | IESLWESWGSNMVVKVK                                              | 0.988959153        | 2               | 2.35468   |
| <b>Q3ULJ0</b> | <b>GPD1L Glycerol_3_phosphate dehydrogenase 1_like protein</b> | <b>1.137356415</b> | <b>0.000271</b> | <b>3</b>  |
| Q3ULJ0        | GIDEGPDGLK                                                     | 1.132504159        | 2               | 2.50615   |
| Q3ULJ0        | LGLMEMIAFAK                                                    | 1.999230175        | 2               | 3.94737   |
| Q3ULJ0        | LTDIINNDHENVKYLPGHK                                            | 0.707932502        | 2               | 2.45564   |
| <b>Q3UQ44</b> | <b>IQGA2 Ras GTPase_activating_like protein IQGAP2</b>         | <b>1.448481837</b> | <b>1.06E-06</b> | <b>16</b> |
| Q3UQ44        | ALVGSNPPLTVIR                                                  | 1.170837281        | 2               | 3.89533   |
| Q3UQ44        | AWVNVQLETQTGEASK                                               | 1.083604317        | 2               | 4.79106   |
| Q3UQ44        | GVLLGIDDLQTNQFK                                                | 1.095721857        | 2               | 4.58939   |
| Q3UQ44        | HTDNTVQWLR                                                     | 1.133627713        | 2               | 3.33221   |
| Q3UQ44        | LFEGENEHLSSMNNYLSEYQEFR                                        | 2.099468381        | 3               | 4.69412   |
| Q3UQ44        | LGIAPQIQDLLGK                                                  | 1.843958462        | 2               | 2.94543   |
| Q3UQ44        | LPYDVTTEQALTYPEVK                                              | 1.448541011        | 2               | 4.57003   |
| Q3UQ44        | LPYDVTTEQALTYPEVKNK                                            | 1.204478122        | 2               | 2.41397   |
| Q3UQ44        | LSAEEMDER                                                      | 1.01661403         | 2               | 2.90148   |
| Q3UQ44        | NPNAVLTCVDDSLSQEYQK                                            | 1.1332485          | 2               | 5.31218   |
| Q3UQ44        | SKVDQVQDIVTGNPTVIK                                             | 1.351537237        | 2               | 5.10662   |
| Q3UQ44        | TLDTLLLPTANIR                                                  | 1.224029038        | 2               | 2.59649   |
| Q3UQ44        | TLEQTGHVSSK                                                    | 0.91973545         | 2               | 3.10001   |
| Q3UQ44        | VDFTEEEISNMR                                                   | 1.126808442        | 2               | 2.92122   |
| Q3UQ44        | VDQVQDIVTGNPTVIK                                               | 0.980742204        | 2               | 5.24741   |
| Q3UQ44        | YQDILNEIAK                                                     | 1.014049026        | 2               | 2.43158   |
| <b>Q3UVR3</b> | <b>TTBK2 Tau_tubulin kinase 2</b>                              | <b>0.926612437</b> | <b>0.875996</b> | <b>2</b>  |
| Q3UVR3        | NLADLR                                                         | 0.913755364        | 1               | 1.90261   |
| Q3UVR3        | YKVLGSSNSDSLFSR                                                | 1.096638106        | 2               | 2.52645   |
| <b>Q3V0K9</b> | <b>PLSI Plastin_1</b>                                          | <b>1.0845842</b>   | <b>0.991998</b> | <b>3</b>  |
| Q3V0K9        | AYFHLLNQIAPK                                                   | 1.154038707        | 2               | 2.84785   |
| Q3V0K9        | KIENCNYAVELGK                                                  | 1.093554592        | 2               | 3.67427   |
| Q3V0K9        | QFVTPADVVSIGNPK                                                | 1.023842777        | 2               | 3.32523   |
| <b>Q3V132</b> | <b>ADT4 ADP/ATP translocase 4</b>                              | <b>1.055589816</b> | <b>0.994613</b> | <b>2</b>  |
| Q3V132        | GNLANVIR                                                       | 1.052505563        | 2               | 2.66675   |
| Q3V132        | YFPTQALNFAFK                                                   | 1.22307579         | 2               | 3.39648   |
| <b>Q497B0</b> | <b>NIT2 Omega_amidase NIT2</b>                                 | <b>1.143463654</b> | <b>7E-07</b>    | <b>17</b> |
| Q497B0        | ADLYSVESK                                                      | 1.299756715        | 2               | 2.91508   |
| Q497B0        | AGTEETILYSIDIDLK                                               | 2.230201493        | 2               | 3.96397   |
| Q497B0        | AGTEETILYSIDIDLK                                               | 1.386312633        | 2               | 3.5246    |
| Q497B0        | ASYVAWGHSTVVDPWGQVLT                                           | 0.937052568        | 3               | 5.48963   |
| Q497B0        | AVDNQVYVATASPAR                                                | 1.441734529        | 2               | 4.8728    |
| Q497B0        | AVDNQVYVATASPARDEK                                             | 1.222533593        | 2               | 3.64772   |
| Q497B0        | ENSIYLIGGSIPEDDGK                                              | 0.848379136        | 2               | 3.63883   |
| Q497B0        | ENSIYLIGGSIPEDDGKLYNTCAVFGPDGNLLVK                             | 1.36029747         | 3               | 5.17079   |
| Q497B0        | FAELAQIYAR                                                     | 1.182636669        | 2               | 3.51833   |
| Q497B0        | GCQLLVYPGAFNMTTGAHWELLQR                                       | 1.256206274        | 3               | 3.53585   |
| Q497B0        | IHLFDIDVPGK                                                    | 0.896942137        | 2               | 2.79053   |
| Q497B0        | KIHLFDIDVPGK                                                   | 1.193351682        | 3               | 4.54998   |
| Q497B0        | LALIQLQVSSIK                                                   | 1.546472976        | 2               | 3.06848   |
| Q497B0        | LYNTCAVFGPDGNLLVK                                              | 1.066269881        | 2               | 3.97244   |
| Q497B0        | QGANIVSLPECFNSPYGTNYFPEYAEK                                    | 1.125033025        | 3               | 5.2818    |
| Q497B0        | TLSPGDSFSTFDTPYCR                                              | 1.143268072        | 2               | 4.52127   |
| Q497B0        | VGLGICYDMR                                                     | 1.134818167        | 2               | 2.55746   |
| <b>Q498D5</b> | <b>RMD2 Regulator of microtubule dynamics protein 2</b>        | <b>0.955334298</b> | <b>0.804846</b> | <b>5</b>  |



|               |                                                                                      |                    |                 |           |
|---------------|--------------------------------------------------------------------------------------|--------------------|-----------------|-----------|
| Q498D5        | ALNTHIEDLKLVDLLQK                                                                    | 0.805060311        | 3               | 3.44088   |
| Q498D5        | AYGDMYDLSTNTQEK                                                                      | 0.834938363        | 2               | 3.50828   |
| Q498D5        | FCNLALLLPVTK                                                                         | 0.976913138        | 2               | 2.72642   |
| Q498D5        | GQLQILEK                                                                             | 1.016368094        | 1               | 1.9462    |
| Q498D5        | LNELLTNVEELKEEIK                                                                     | 1.150722338        | 2               | 3.09807   |
| <b>Q499N5</b> | <b>ACSF2 Acyl_CoA synthetase family member 2_mitochondrial</b>                       | <b>1.367246049</b> | <b>0.000144</b> | <b>8</b>  |
| Q499N5        | GATLSHHNIVNNSNLIGQR                                                                  | 1.269313892        | 2               | 4.61136   |
| Q499N5        | GGENIYPAELEDFHFK                                                                     | 1.385648532        | 2               | 3.32275   |
| Q499N5        | GGVIAGSLAPPELIR                                                                      | 1.323929469        | 2               | 2.89038   |
| Q499N5        | GYCVMQGYWGEPQK                                                                       | 0.973213089        | 2               | 2.88785   |
| Q499N5        | TFETVGQDR                                                                            | 1.264665361        | 2               | 2.65098   |
| Q499N5        | TGDIASMDEQGFRC                                                                       | 1.235946389        | 2               | 3.74616   |
| Q499N5        | TVGECLDATAQR                                                                         | 1.330382345        | 2               | 2.99422   |
| Q499N5        | YIVFVEGYPLTVSGK                                                                      | 1.494819442        | 2               | 4.52271   |
| <b>Q4AEF8</b> | <b>COPG Coatomer subunit gamma</b>                                                   | <b>1.330954991</b> | <b>0.053547</b> | <b>5</b>  |
| Q4AEF8        | ALQQYTLEPSEKPFDLK                                                                    | 0.956999924        | 2               | 3.34661   |
| Q4AEF8        | FGAQNEEMLPSILVLLK                                                                    | 1.349722224        | 2               | 3.96884   |
| Q4AEF8        | SSPEPVALTESETEYVIR                                                                   | 1.06055918         | 2               | 4.71236   |
| Q4AEF8        | TLEEAVGNIVK                                                                          | 1.15553002         | 2               | 2.34603   |
| Q4AEF8        | VVLEHEEVR                                                                            | 1.434926594        | 2               | 2.30605   |
| <b>Q4FZT0</b> | <b>STML2 Stomatin_like protein 2</b>                                                 | <b>1.153223513</b> | <b>0.753627</b> | <b>5</b>  |
| Q4FZT0        | AEQINQAAGEASAVLAK                                                                    | 1.109258866        | 2               | 4.79054   |
| Q4FZT0        | ASYGVEDPEYAVTQLAQTMR                                                                 | 1.226234642        | 2               | 4.83772   |
| Q4FZT0        | ATVLESEGTR                                                                           | 1.15055898         | 2               | 2.65689   |
| Q4FZT0        | ILEPGLNVLIPVLDR                                                                      | 1.099631448        | 2               | 2.8801    |
| Q4FZT0        | SELGKLSLDKVFRR                                                                       | 0.474547727        | 1               | 2.06635   |
| <b>Q4FZT9</b> | <b>PSMD2 26S proteasome non_ATPase regulatory subunit 2</b>                          | <b>1.134492566</b> | <b>0.085329</b> | <b>5</b>  |
| Q4FZT9        | DKTPVQSQPSATAPSGADEK                                                                 | 0.95829993         | 3               | 4.4829    |
| Q4FZT9        | FGSGSQVDSAR                                                                          | 1.210084261        | 2               | 3.62925   |
| Q4FZT9        | SETELKDTYAR                                                                          | 0.897727256        | 2               | 2.71079   |
| Q4FZT9        | SSTSMTSVPKPLK                                                                        | 0.980827951        | 2               | 2.9059    |
| Q4FZT9        | TPVQSQPSATAPSGADEK                                                                   | 1.156694202        | 2               | 4.44435   |
| <b>Q4FZX7</b> | <b>SRPRB Signal recognition particle receptor subunit beta</b>                       | <b>1.482448199</b> | <b>7.97E-06</b> | <b>4</b>  |
| Q4FZX7        | GDAGSADVQDLEK                                                                        | 1.107509099        | 2               | 3.49764   |
| Q4FZX7        | GNSLTLIDLPGHESLR                                                                     | 1.356111851        | 2               | 2.96285   |
| Q4FZX7        | SAAPSTLSSSTAPAQLGK                                                                   | 1.512587766        | 2               | 4.96008   |
| Q4FZX7        | VGDGAGGAFQPYLDSLR                                                                    | 1.451229309        | 2               | 2.40724   |
| <b>Q4G061</b> | <b>EIF3B Eukaryotic translation initiation factor 3 subunit B</b>                    | <b>1.090051397</b> | <b>0.887008</b> | <b>3</b>  |
| Q4G061        | AEEEGSDGSAEAEPR                                                                      | 1.078365158        | 2               | 4.54329   |
| Q4G061        | AKPAAQSEEETAASPAASPTPQSAQEPSAPGK                                                     | 1.59406999         | 3               | 4.58991   |
| Q4G061        | GTQGVVTNFEIFR                                                                        | 1.052001047        | 2               | 2.33003   |
| <b>Q4KLF8</b> | <b>ARPC5 Actin_related protein 2/3 complex subunit 5</b>                             | <b>1.038801764</b> | <b>0.08774</b>  | <b>2</b>  |
| Q4KLF8        | ALAAGGVGSIVR                                                                         | 1.256083946        | 2               | 2.31701   |
| Q4KLF8        | QGNMTAALQAALK                                                                        | 1.015982515        | 2               | 2.51974   |
| <b>Q4KLP0</b> | <b>DHTK1 Probable 2_oxoglutarate dehydrogenase E1 component DHKTD1_mitochondrial</b> | <b>0.986670282</b> | <b>0.043755</b> | <b>16</b> |
| Q4KLP0        | ARPSVDHGLAR                                                                          | 0.946651421        | 2               | 2.52058   |
| Q4KLP0        | HAMVVCQNTDDVYIPLNHMDPNQK                                                             | 1.341335646        | 3               | 3.67462   |
| Q4KLP0        | KSIPDTYAEHLIASGLMTQEEVSDIK                                                           | 1.099319382        | 3               | 4.30595   |
| Q4KLP0        | LEELCPFPLDSLQEQEMGK                                                                  | 1.214841506        | 2               | 5.12253   |
| Q4KLP0        | LLLESQEFDHFLATK                                                                      | 1.281548632        | 2               | 3.83539   |
| Q4KLP0        | LSAYGGITDIIGMPHR                                                                     | 1.444231268        | 3               | 3.53302   |

|               |                                                                                          |                    |                 |           |
|---------------|------------------------------------------------------------------------------------------|--------------------|-----------------|-----------|
| Q4KLP0        | LVTVYCEHGHK                                                                              | 1.118316861        | 2               | 2.83118   |
| Q4KLP0        | QQSQEDGDYSPNGSAQPGDK                                                                     | 1.487911668        | 2               | 3.01662   |
| Q4KLP0        | QWGHNELDEPFFTNPVMYK                                                                      | 1.259198386        | 3               | 3.5156    |
| Q4KLP0        | SIPDTYAEHLIASGLMTQEEVSDIK                                                                | 1.131753224        | 3               | 4.9984    |
| Q4KLP0        | SSLYSSDIGK                                                                               | 1.111056013        | 1               | 2.09598   |
| Q4KLP0        | SVEVPEELQLHSHLLK                                                                         | 1.081627937        | 2               | 2.70326   |
| Q4KLP0        | WLLQSGLVILLPHGYDGAGPDHSSCR                                                               | 1.060307087        | 3               | 3.83142   |
| Q4KLP0        | WQGLVQPAACVTTWDTGVPLELLR                                                                 | 1.038754819        | 2               | 4.99135   |
| Q4KLP0        | YGGEGAESMMGFFHELLK                                                                       | 0.952436933        | 3               | 4.24372   |
| Q4KLP0        | YPVAVSTLEEMAPGTAFKPVIGDSSVDPK                                                            | 1.155581861        | 3               | 4.33769   |
| <b>Q4KLZ6</b> | <b>DHAK Bifunctional ATP_dependent dihydroxyacetone kinase/FAD_AMP lyase (cyclizing)</b> | <b>1.047376455</b> | <b>1.44E-05</b> | <b>13</b> |
| Q4KLZ6        | AAPTEPAEAEATAAGGVASK                                                                     | 1.157437401        | 2               | 4.60541   |
| Q4KLZ6        | AILEVLQTK                                                                                | 1.467350606        | 2               | 2.87646   |
| Q4KLZ6        | ANTDLPAWSAAMDAGLK                                                                        | 1.30510744         | 2               | 3.26028   |
| Q4KLZ6        | AVAQAGTAGTLIVK                                                                           | 1.498470729        | 2               | 4.42436   |
| Q4KLZ6        | EGPTPASPAQVLSK                                                                           | 1.32003216         | 2               | 3.30315   |
| Q4KLZ6        | ISTTLIGLEEHLNALDR                                                                        | 2.550057917        | 2               | 4.15475   |
| Q4KLZ6        | LIDAETNAK                                                                                | 1.285826016        | 2               | 3.05643   |
| Q4KLZ6        | LSVLLLEK                                                                                 | 1.8680245          | 2               | 2.68335   |
| Q4KLZ6        | MGGSSGALYGLFLTAAQPLK                                                                     | 0.846482295        | 2               | 4.59637   |
| Q4KLZ6        | MVNSVEGCAGDALAGFVACNPDLQLLQGYR                                                           | 1.296672574        | 3               | 5.09696   |
| Q4KLZ6        | RGLCGTILHK                                                                               | 1.249949621        | 3               | 3.40777   |
| Q4KLZ6        | TMLDSLWAAQELQAWK                                                                         | 1.049692175        | 2               | 4.30566   |
| Q4KLZ6        | VAGALAEEMGLLEEITK                                                                        | 1.180462135        | 2               | 3.65722   |
| <b>Q4KM35</b> | <b>PSB10 Proteasome subunit beta type_10</b>                                             | <b>1.355321956</b> | <b>0.012185</b> | <b>2</b>  |
| Q4KM35        | ALSSPIEPVQR                                                                              | 1.269814084        | 2               | 2.37313   |
| Q4KM35        | FAPGTTPVQTQEVRR                                                                          | 1.357678332        | 2               | 2.84358   |
| <b>Q4KM49</b> | <b>SYYC Tyrosyl_tRNA synthetase_cytoplasmic</b>                                          | <b>1.178221559</b> | <b>0.15452</b>  | <b>3</b>  |
| Q4KM49        | QVEPLDPPAGSAPGER                                                                         | 1.220474669        | 2               | 2.57824   |
| Q4KM49        | TVVSGLVQFVPK                                                                             | 1.143937673        | 2               | 3.2938    |
| Q4KM49        | VDAQFGGIDQR                                                                              | 1.177841596        | 2               | 3.3616    |
| <b>Q4KM62</b> | <b>PALMD Palmelphin</b>                                                                  | <b>1.013523484</b> | <b>0.162922</b> | <b>2</b>  |
| Q4KM62        | TGESVVLSSIPLPSDDFK                                                                       | 1.005677759        | 2               | 3.40199   |
| Q4KM62        | VEKEEIPESIEDIYANIPDLPSSYIPSR                                                             | 1.282093072        | 3               | 3.42693   |
| <b>Q4KM73</b> | <b>KCY UMP_CMP kinase</b>                                                                | <b>1.090058162</b> | <b>0.043077</b> | <b>6</b>  |
| Q4KM73        | IQTYLESTKPIIDLYEEMGK                                                                     | 1.377573001        | 2               | 4.92602   |
| Q4KM73        | IVPVEITISLLK                                                                             | 1.025044822        | 2               | 3.04166   |
| Q4KM73        | KNPDSQYGELIEK                                                                            | 1.100570925        | 2               | 4.29381   |
| Q4KM73        | NQDNLQGWNK                                                                               | 1.08722252         | 2               | 2.94024   |
| Q4KM73        | SVDEVFGDVMK                                                                              | 1.082959126        | 2               | 3.16602   |
| Q4KM73        | YGYTHLSAGELLR                                                                            | 1.323470592        | 3               | 3.61471   |
| <b>Q4KM74</b> | <b>SC22B Vesicle_trafficking protein SEC22b</b>                                          | <b>1.056767813</b> | <b>0.877716</b> | <b>4</b>  |
| Q4KM74        | DLQQYQSQAK                                                                               | 1.045788605        | 2               | 3.39268   |
| Q4KM74        | GEALSALDSK                                                                               | 1.08511414         | 2               | 2.41655   |
| Q4KM74        | IMVANIEEVLQR                                                                             | 1.198622678        | 2               | 2.70567   |
| Q4KM74        | NLGSINTELQDVQR                                                                           | 1.068699399        | 2               | 4.16598   |
| <b>Q4KMA2</b> | <b>RD23B UV excision repair protein RAD23 homolog B</b>                                  | <b>1.062602296</b> | <b>0.991619</b> | <b>4</b>  |
| Q4KMA2        | ESQAVVDPPPQAVSTGTPQSPAVAAAAATTTATTTTTSGGHLEFLR                                           | 1.039495945        | 3               | 3.94658   |
| Q4KMA2        | IDIDPEETVK                                                                               | 1.106684257        | 1               | 2.63361   |
| Q4KMA2        | NFVVVMVTKPK                                                                              | 0.937797438        | 2               | 3.4606    |
| Q4KMA2        | QIIQQNPSSLPALQIQGR                                                                       | 1.082906334        | 2               | 3.84761   |
| <b>Q4QQV3</b> | <b>F162A Protein FAM162A</b>                                                             | <b>0.949056936</b> | <b>0.595904</b> | <b>2</b>  |
| Q4QQV3        | EEEIPETISFEMLDAAK                                                                        | 1.15058062         | 2               | 3.452     |

|               |                                                                                           |                    |                 |           |
|---------------|-------------------------------------------------------------------------------------------|--------------------|-----------------|-----------|
| Q4QQV3        | RHESLTSNLER                                                                               | 0.948045894        | 2               | 2.75914   |
| <b>Q4QQW3</b> | <b>HOT Hydroxyacid_oxoacid transhydrogenase_ mitochondrial</b>                            | <b>1.134482748</b> | <b>0.893199</b> | <b>2</b>  |
| Q4QQW3        | HLETAEILGANIR                                                                             | 1.134496288        | 2               | 3.27848   |
| Q4QQW3        | IQDAGPVLADALR                                                                             | 0.997229246        | 2               | 2.48978   |
| <b>Q4QRB4</b> | <b>TBB3 Tubulin beta_3 chain</b>                                                          | <b>1.149560031</b> | <b>0.258105</b> | <b>5</b>  |
| Q4QRB4        | AILVDLEPGTMDSVR                                                                           | 1.160728086        | 2               | 4.56145   |
| Q4QRB4        | AILVDLEPGTMDSVR+Oxidation(11)                                                             | 1.174096056        | 2               | 2.63352   |
| Q4QRB4        | EIVHIQAGQCGNQIGAK                                                                         | 0.933240136        | 2               | 5.10746   |
| Q4QRB4        | IMNTFSVVPSPK                                                                              | 1.188284401        | 2               | 3.44655   |
| Q4QRB4        | ISEQFTAMFR                                                                                | 1.36496831         | 2               | 3.35927   |
| <b>Q4V7C7</b> | <b>ARP3 Actin_related protein 3</b>                                                       | <b>1.065469519</b> | <b>0.458249</b> | <b>6</b>  |
| Q4V7C7        | GVDDLDFFIGDEAIEKPTYATK                                                                    | 0.897194188        | 2               | 4.82802   |
| Q4V7C7        | KDYEEIGPSICR                                                                              | 0.992991031        | 2               | 3.90396   |
| Q4V7C7        | LGYAGNTEPQFIIPSCIAIK                                                                      | 1.158180751        | 2               | 3.45658   |
| Q4V7C7        | LSEELSGGR                                                                                 | 1.185985316        | 2               | 2.77865   |
| Q4V7C7        | NIVLSGGSTMFR                                                                              | 1.113980511        | 2               | 2.66494   |
| Q4V7C7        | TLTGTVIDSGDGVTHVIPVAEGYVIGSCK                                                             | 1.265779939        | 2               | 4.59779   |
| <b>Q4V8K1</b> | <b>STE4 Metalloredutase STEAP4</b>                                                        | <b>1.075075491</b> | <b>0.935515</b> | <b>5</b>  |
| Q4V8K1        | MNQYPESNAEYLAQLVPGAHVVK                                                                   | 1.097660417        | 3               | 3.30935   |
| Q4V8K1        | QVFVCGNDSK                                                                                | 1.083831931        | 2               | 2.55861   |
| Q4V8K1        | TCADFPLTVDSSEK                                                                            | 1.054341854        | 2               | 4.46588   |
| Q4V8K1        | TLGLTPLDQGSLSAAK                                                                          | 1.184959229        | 2               | 3.37577   |
| Q4V8K1        | VLIDVSNNQK                                                                                | 1.020718867        | 2               | 2.31477   |
| <b>Q501J6</b> | <b>DDX17 Probable ATP_dependent RNA helicase DDX17</b>                                    | <b>0.986458664</b> | <b>0.928971</b> | <b>2</b>  |
| Q501J6        | ELAQVQVQVADDYGK                                                                           | 1.108090565        | 2               | 2.67791   |
| Q501J6        | VLEEQAINPK                                                                                | 0.980354788        | 2               | 2.71136   |
| <b>Q505J8</b> | <b>SYFA Phenylalanyl_tRNA synthetase alpha chain</b>                                      | <b>1.163747658</b> | <b>0.619517</b> | <b>5</b>  |
| Q505J8        | LQQVQAGQAEK                                                                               | 1.167488459        | 2               | 2.95215   |
| Q505J8        | RLEVADGGLDSAELATQLGVEHQAVVGAVK                                                            | 1.082742986        | 3               | 5.14907   |
| Q505J8        | SIPLEGLVQSELMQLPSGK                                                                       | 0.894586105        | 2               | 2.76619   |
| Q505J8        | SLQALGEVIEAELR                                                                            | 0.909282777        | 2               | 3.89352   |
| Q505J8        | VVDSIEDEVQR                                                                               | 1.101680934        | 2               | 2.84474   |
| <b>Q561R9</b> | <b>LACB2 Beta_lactamase_like protein 2</b>                                                | <b>1.13372386</b>  | <b>0.755551</b> | <b>4</b>  |
| Q561R9        | ANIIYPGHGPIVHNAEAK                                                                        | 1.070605393        | 2               | 4.08022   |
| Q561R9        | ILIDTGEPSVPEYISCLK                                                                        | 1.169322008        | 2               | 3.52172   |
| Q561R9        | NISNDATYCIK                                                                               | 1.132092343        | 2               | 2.72478   |
| Q561R9        | NNREEQIITVFR                                                                              | 1.032272018        | 2               | 2.77938   |
| <b>Q561S0</b> | <b>NDUAA NADH dehydrogenase [ubiquinone] 1 alpha subcomplex subunit 10_ mitochondrial</b> | <b>1.248286468</b> | <b>0.011863</b> | <b>5</b>  |
| Q561S0        | LTLPEYLPPHAVIYIDVPVSEIQSR                                                                 | 1.835637225        | 3               | 3.69861   |
| Q561S0        | VITVDGNICSGK                                                                              | 0.963721377        | 2               | 3.12895   |
| Q561S0        | VVEDIEYLNYNK                                                                              | 1.818210373        | 2               | 3.56664   |
| Q561S0        | YAPGYNADVGDK                                                                              | 1.21419111         | 2               | 2.75046   |
| Q561S0        | YGLLASILGDK                                                                               | 0.962959252        | 2               | 2.95731   |
| <b>Q562C4</b> | <b>MET7B Methyltransferase_like protein 7B</b>                                            | <b>0.667220715</b> | <b>0.000866</b> | <b>7</b>  |
| Q562C4        | AQFSEVQLEWQPPPFK                                                                          | 0.689393815        | 2               | 4.814     |
| Q562C4        | FIVAYGENMK                                                                                | 0.666952881        | 2               | 2.34813   |
| Q562C4        | GTSNEVTLLELGCCTGANFQFYPPGCK                                                               | 0.823794494        | 2               | 4.04489   |
| Q562C4        | HIGDGCHLTR                                                                                | 0.655539566        | 2               | 2.75764   |
| Q562C4        | KVLQEVQR                                                                                  | 0.741846851        | 2               | 2.52379   |
| Q562C4        | VLQEVQR                                                                                   | 0.639214219        | 1               | 2.01597   |
| Q562C4        | VTCVDPNPNFEK                                                                              | 0.662951409        | 2               | 3.72058   |
| <b>Q58FK9</b> | <b>KAT3 Kynurenine_oxoglutarate transaminase 3</b>                                        | <b>1.131255395</b> | <b>0.871139</b> | <b>10</b> |
| Q58FK9        | AIILNTPHNPIGK                                                                             | 1.104503717        | 2               | 3.29665   |
| Q58FK9        | DSTLDAEEIFR                                                                               | 1.11692175         | 2               | 2.99879   |

|               |                                                                                         |                    |                 |           |
|---------------|-----------------------------------------------------------------------------------------|--------------------|-----------------|-----------|
| Q58FK9        | IEGLDQNVWVEFTK                                                                          | 1.258077015        | 2               | 4.55002   |
| Q58FK9        | LAADPSVVNLGGQFPDITLPSYVQEELSK                                                           | 1.349266797        | 3               | 5.67257   |
| Q58FK9        | LGWSIGPGHLIK                                                                            | 1.481196486        | 2               | 2.43539   |
| Q58FK9        | MDDPECYFNSLPK                                                                           | 0.971899572        | 2               | 4.11775   |
| Q58FK9        | RIEGLDQNVWVEFTK                                                                         | 1.062231912        | 2               | 3.91777   |
| Q58FK9        | RMDDPECYFNSLPK                                                                          | 1.074779536        | 2               | 2.35252   |
| Q58FK9        | SDEPYDYK                                                                                | 1.124947268        | 2               | 2.48159   |
| Q58FK9        | WTSSDWTFNQPELESK                                                                        | 1.23300502         | 2               | 5.18317   |
| <b>Q5BJQ0</b> | <b>ADCK3 Chaperone activity of bc1 complex_like_mitochondrial</b>                       | <b>1.181418848</b> | <b>0.037284</b> | <b>2</b>  |
| Q5BJQ0        | AVLDSSPFLSEANAER                                                                        | 1.144477005        | 2               | 4.58798   |
| Q5BJQ0        | TLNNDLGPVHR                                                                             | 1.34981723         | 2               | 3.01234   |
| <b>Q5BJY9</b> | <b>K1C18 Keratin_type I cytoskeletal 18</b>                                             | <b>0.912583532</b> | <b>0.014525</b> | <b>23</b> |
| Q5BJY9        | AQIFANSVDNAR                                                                            | 0.873036089        | 2               | 3.81773   |
| Q5BJY9        | AQYEQLAQK                                                                               | 0.909587172        | 2               | 3.29735   |
| Q5BJY9        | IREYLEK                                                                                 | 0.933184423        | 2               | 2.36522   |
| Q5BJY9        | KNHEEEVQGLEAQIASSGLTVEVDAPK                                                             | 0.805621959        | 3               | 4.30185   |
| Q5BJY9        | KVDDTNITR                                                                               | 0.910515676        | 2               | 2.94017   |
| Q5BJY9        | LEAEIATYR                                                                               | 0.817487516        | 2               | 3.23044   |
| Q5BJY9        | LLEDGDDFSLNDALDSSNSMQTVQR                                                               | 0.763933193        | 2               | 5.30069   |
| Q5BJY9        | LQLETEIEALKEELFMK                                                                       | 1.682212256        | 2               | 4.95708   |
| Q5BJY9        | NHEEEVQGLEAQIASSGLTVEVDAPK                                                              | 0.809412994        | 2               | 6.53034   |
| Q5BJY9        | NQNINLENNLGEVEAR                                                                        | 0.920556231        | 2               | 5.60284   |
| Q5BJY9        | NREELDKYWSQJIEESTTVVTTK                                                                 | 1.043308637        | 3               | 5.70482   |
| Q5BJY9        | QSVESDIHGLR                                                                             | 0.895216306        | 2               | 3.31574   |
| Q5BJY9        | QSVESDIHGLRK                                                                            | 0.979129517        | 2               | 2.69091   |
| Q5BJY9        | QTQEYEALLNIK                                                                            | 1.031013435        | 2               | 3.53506   |
| Q5BJY9        | SVWGGSVGSAGLAGMGGVQTEK                                                                  | 0.921663452        | 2               | 5.72965   |
| Q5BJY9        | SVWGGSVGSAGLAGMGGVQTEKTMQDLNDR                                                          | 0.866884368        | 3               | 4.8253    |
| Q5BJY9        | TLQTLEIDLDSMK                                                                           | 0.948818795        | 2               | 4.22611   |
| Q5BJY9        | VKLEAEIATYR                                                                             | 0.824709546        | 2               | 2.60385   |
| Q5BJY9        | VKYETELAMR                                                                              | 0.842582893        | 2               | 2.63077   |
| Q5BJY9        | VQMEQLNGVLLHLESELAQTR                                                                   | 1.030094843        | 3               | 5.25934   |
| Q5BJY9        | VRPASSAASVYAGAGGSGSR                                                                    | 0.629188806        | 2               | 5.60526   |
| Q5BJY9        | VVDDTNITR                                                                               | 0.928555154        | 2               | 3.35909   |
| Q5BJY9        | YWSQQIEESTTVVTTK                                                                        | 1.051962148        | 2               | 4.32523   |
| <b>Q5BK17</b> | <b>IYD1 Iodotyrosine dehalogenase 1</b>                                                 | <b>1.263723455</b> | <b>0.250101</b> | <b>2</b>  |
| Q5BK17        | FISSEVPMEVIDNVIK                                                                        | 1.120754541        | 2               | 3.26504   |
| Q5BK17        | LLVLLPVGYPSR                                                                            | 1.697855157        | 2               | 2.63438   |
| <b>Q5BK63</b> | <b>NDUA9 NADH dehydrogenase [ubiquinone] 1 alpha subcomplex subunit 9_mitochondrial</b> | <b>1.159559815</b> | <b>1.08E-10</b> | <b>5</b>  |
| Q5BK63        | AVQHSNVVINLIGR                                                                          | 1.065014429        | 2               | 2.54821   |
| Q5BK63        | IHISDVMATDLPGLGDLGVQPTPLELK                                                             | 1.515063763        | 3               | 5.3588    |
| Q5BK63        | LFGLSPFEPWTTK                                                                           | 1.607312191        | 2               | 2.58651   |
| Q5BK63        | NDFEDVFNIPR                                                                             | 1.362915644        | 2               | 3.95419   |
| Q5BK63        | WLSSEIETKPAK                                                                            | 1.742699214        | 2               | 3.10595   |
| <b>Q5BK81</b> | <b>PTGR2 Prostaglandin reductase 2</b>                                                  | <b>0.99412822</b>  | <b>0.913733</b> | <b>3</b>  |
| Q5BK81        | DVPYPPPLPPAVEAIQK                                                                       | 0.993451835        | 2               | 3.24391   |
| Q5BK81        | TGNVAEQLR                                                                               | 1.725062985        | 2               | 2.33426   |
| Q5BK81        | VEEVSLPDTINEGQVR                                                                        | 1.039756886        | 2               | 3.80446   |
| <b>Q5BQE6</b> | <b>DHC24 Delta(24)_sterol reductase</b>                                                 | <b>0.961770808</b> | <b>0.788512</b> | <b>2</b>  |
| Q5BQE6        | NIMINLMDILEVDTKK+Oxidation(3)Oxidation(7)                                               | 1.228205158        | 2               | 2.41347   |
| Q5BQE6        | QLGCQDAFPEVYDK                                                                          | 0.9615727          | 2               | 3.76183   |
| <b>Q5DU56</b> | <b>NLRC3 Protein NLRC3</b>                                                              | <b>1.309358598</b> | <b>0.017387</b> | <b>2</b>  |
| Q5DU56        | LTGLALGHLR                                                                              | 1.449122125        | 2               | 2.40239   |
| Q5DU56        | TLEILDLR                                                                                | 1.096691887        | 2               | 2.33441   |
| <b>Q5EB77</b> | <b>RAB18 Ras_related protein Rab_18</b>                                                 | <b>1.249626333</b> | <b>0.760449</b> | <b>2</b>  |

|               |                                                                                |                    |                 |          |
|---------------|--------------------------------------------------------------------------------|--------------------|-----------------|----------|
| Q5EB77        | NDIVNMLVGNK                                                                    | 1.180430084        | 2               | 3.27729  |
| Q5EB77        | TCDGVQCAFEELVEK                                                                | 1.279688245        | 2               | 3.73839  |
| <b>Q5FVM4</b> | <b>NONO Non_POU domain_containing octamer_binding protein</b>                  | <b>1.026199426</b> | <b>0.985374</b> | <b>2</b> |
| Q5FVM4        | MEELHNQEVQK                                                                    | 1.021602411        | 2               | 3.26203  |
| Q5FVM4        | RMEELHNQEVQK                                                                   | 1.028157058        | 3               | 4.00319  |
| <b>Q5FVQ4</b> | <b>MLEC Malectin</b>                                                           | <b>1.15966361</b>  | <b>0.071019</b> | <b>2</b> |
| Q5FVQ4        | KEEEEEEEYDEGSNLKR                                                              | 1.234187716        | 3               | 6.08198  |
| Q5FVQ4        | STPEDQILYQTER                                                                  | 1.144488496        | 2               | 3.97752  |
| <b>Q5FVR2</b> | <b>TYPH Thymidine phosphorylase</b>                                            | <b>0.980770506</b> | <b>0.313517</b> | <b>4</b> |
| Q5FVR2        | AQDTQIGAMLMAIR+Oxidation(11)                                                   | 0.90284578         | 2               | 2.60546  |
| Q5FVR2        | DVTATVDSVPLITASILSK                                                            | 1.196277483        | 2               | 3.63913  |
| Q5FVR2        | KQEELSPADGIVECVR                                                               | 1.177930529        | 2               | 4.5288   |
| Q5FVR2        | VHLDGPALSSQQR                                                                  | 1.054288578        | 2               | 2.40065  |
| <b>Q5FVR5</b> | <b>ACNT2 Acyl_coenzyme A amino acid N_acyltransferase 2</b>                    | <b>1.782647732</b> | <b>6.29E-12</b> | <b>4</b> |
| Q5FVR5        | DEKENLFQSK                                                                     | 1.0851031          | 2               | 2.79955  |
| Q5FVR5        | ILFIVGENDQCLASK                                                                | 1.90658897         | 2               | 3.74678  |
| Q5FVR5        | IQQPGIGVISVSK                                                                  | 1.781180814        | 2               | 2.76119  |
| Q5FVR5        | VLLEEDLDYFEEAANFLAHPK                                                          | 1.581318175        | 3               | 3.8095   |
| <b>Q5FW57</b> | <b>GLYAL Glycine N_acyltransferase_like protein</b>                            | <b>0.988434853</b> | <b>0.990522</b> | <b>2</b> |
| Q5FW57        | AIDQEMFK                                                                       | 0.923183858        | 2               | 2.705    |
| Q5FW57        | SSQMLQMLESSLR                                                                  | 1.030574188        | 2               | 3.87969  |
| <b>Q5HZV9</b> | <b>PP1R7 Protein phosphatase 1 regulatory subunit 7</b>                        | <b>1.047950765</b> | <b>0.683144</b> | <b>2</b> |
| Q5HZV9        | AIENIDTLTNLESFLGK                                                              | 0.944721526        | 2               | 3.13882  |
| Q5HZV9        | ELDLYDNQIKK                                                                    | 1.714694809        | 2               | 2.37862  |
| <b>Q5HZY2</b> | <b>SAR1B GTP_binding protein SAR1b</b>                                         | <b>1.068925079</b> | <b>0.984419</b> | <b>2</b> |
| Q5HZY2        | IDRPEAISEER                                                                    | 1.068849743        | 2               | 2.92637  |
| Q5HZY2        | LLESKEELDLSMTDETIANVPILILGNK                                                   | 1.060489794        | 3               | 4.26351  |
| <b>Q5I0C3</b> | <b>MCCA Methylcrotonoyl_CoA carboxylase subunit alpha_mitochondrial</b>        | <b>1.022674816</b> | <b>0.580527</b> | <b>6</b> |
| Q5I0C3        | HAPLVEFEVEEV                                                                   | 0.870963168        | 2               | 2.873    |
| Q5I0C3        | IIEEAPAPGIDPEVR                                                                | 0.890387172        | 2               | 3.6949   |
| Q5I0C3        | IYAEDPDNNFMPGAGPLVHLSTPPDMSTR                                                  | 0.906061272        | 3               | 6.01803  |
| Q5I0C3        | SEKEFQEQLESAR                                                                  | 0.860543221        | 2               | 3.55326  |
| Q5I0C3        | VFFSEGAQANR                                                                    | 1.146103174        | 2               | 2.52508  |
| Q5I0C3        | YLSPVSAEGTQGGTIAPMTGTIEK                                                       | 0.899322401        | 2               | 5.09386  |
| <b>Q5I0D1</b> | <b>GLOD4 Glyoxalase domain_containing protein 4</b>                            | <b>0.944207148</b> | <b>0.999977</b> | <b>2</b> |
| Q5I0D1        | ESQSILTPLVSLDTPGK                                                              | 1.025641063        | 2               | 3.50574  |
| Q5I0D1        | HEEFEEGCK                                                                      | 0.909758067        | 2               | 2.6484   |
| <b>Q5I0D5</b> | <b>LHPP Phospholysine phosphohistidine inorganic pyrophosphate phosphatase</b> | <b>1.298335502</b> | <b>0.04871</b>  | <b>2</b> |
| Q5I0D5        | AFQVLMELNPVLISLKG                                                              | 0.968161672        | 2               | 2.65226  |
| Q5I0D5        | LGFDISEGEVTAPAPATCQLK                                                          | 1.28642761         | 2               | 3.79594  |
| <b>Q5I0D7</b> | <b>PEPD Xaa_Pro dipeptidase</b>                                                | <b>1.134482799</b> | <b>0.375356</b> | <b>2</b> |
| Q5I0D7        | GVNTDSGNVCR                                                                    | 1.135754282        | 2               | 2.72188  |
| Q5I0D7        | YAVDDVQYADEIASVLTSR                                                            | 1.040942209        | 2               | 4.20835  |
| <b>Q5I0E7</b> | <b>TMED9 Transmembrane emp24 domain_containing protein 9</b>                   | <b>1.128857629</b> | <b>0.964871</b> | <b>2</b> |
| Q5I0E7        | QLVEQVEQIQK                                                                    | 1.040735269        | 2               | 4.04512  |
| Q5I0E7        | QREEYQPATPGLGMFVEVKDPEDK                                                       | 1.15933545         | 3               | 3.60774  |
| <b>Q5I0G4</b> | <b>SYG Glycyl_tRNA synthetase (Fragment)</b>                                   | <b>1.098148134</b> | <b>0.781432</b> | <b>5</b> |
| Q5I0G4        | AEVSELPVVR                                                                     | 1.10608895         | 2               | 3.23682  |
| Q5I0G4        | LGDAVEQGVINNSVLGYFIGR                                                          | 1.22843659         | 2               | 3.0463   |
| Q5I0G4        | TLHVEEVVPSVIEPSFGLGR                                                           | 0.965804111        | 2               | 4.12337  |
| Q5I0G4        | TVNVVQFEPNK                                                                    | 1.104529119        | 2               | 2.47861  |
| Q5I0G4        | VDDSSGSIGR                                                                     | 1.090812022        | 2               | 2.61867  |

|               |                                                                         |                    |                 |           |
|---------------|-------------------------------------------------------------------------|--------------------|-----------------|-----------|
| <b>Q5I0H9</b> | <b>PDIA5 Protein disulfide_isomerase A5</b>                             | <b>1.000147546</b> | <b>0.879722</b> | <b>7</b>  |
| Q5I0H9        | DKNQDLCQQESVK                                                           | 0.966058923        | 2               | 4.20716   |
| Q5I0H9        | GHTVLAGMNVYPPEFENIKEEYNVR                                               | 1.655176597        | 3               | 4.96225   |
| Q5I0H9        | GPPLWEEDPGAK                                                            | 0.974982528        | 2               | 2.82964   |
| Q5I0H9        | GQGTICWVDCGDAESR                                                        | 1.022871315        | 2               | 4.20567   |
| Q5I0H9        | NGEQQAVPALR                                                             | 0.984554505        | 2               | 2.81754   |
| Q5I0H9        | NPQPPQPQVPETPWADEGGSVYHLTDEDQFVK                                        | 1.725807622        | 3               | 4.51512   |
| Q5I0H9        | NQDLCQQESVK                                                             | 0.931491656        | 2               | 2.64287   |
| <b>Q5I0J9</b> | <b>ASPD Putative L_aspartate dehydrogenase</b>                          | <b>1.40260161</b>  | <b>0.00056</b>  | <b>5</b>  |
| Q5I0J9        | HANLLVGSPSALADQTTTER                                                    | 1.15108331         | 3               | 5.10083   |
| Q5I0J9        | IIHESGVQILR                                                             | 1.188235314        | 2               | 2.63115   |
| Q5I0J9        | LDAAGGLQSLR                                                             | 1.228061416        | 2               | 3.74192   |
| Q5I0J9        | LEGPLAAAHSSGPR                                                          | 1.172794038        | 2               | 3.58267   |
| Q5I0J9        | MAGSVPPALQLEDLTTLEER                                                    | 1.699630059        | 2               | 3.88619   |
| <b>Q5I0M2</b> | <b>NADC Nicotinate_nucleotide pyrophosphorylase [carboxylating]</b>     | <b>1.379636764</b> | <b>1.66E-06</b> | <b>3</b>  |
| Q5I0M2        | DNHVVAAGSMEK                                                            | 1.268766067        | 2               | 2.93793   |
| Q5I0M2        | EALQAAEAGADLVMLDNFKPEELHPTAATLK                                         | 1.340214436        | 3               | 5.67099   |
| Q5I0M2        | LYAEGDIPVPHAR                                                           | 1.354447643        | 2               | 3.32243   |
| <b>Q5M7U6</b> | <b>ARP2 Actin_related protein 2</b>                                     | <b>1.050751619</b> | <b>0.925942</b> | <b>6</b>  |
| Q5M7U6        | GYAFNHSADFETVR                                                          | 1.200351146        | 2               | 3.59305   |
| Q5M7U6        | HLWDYTFGPEK                                                             | 1.190112906        | 2               | 3.39156   |
| Q5M7U6        | ILLTEPPMNPTK                                                            | 0.879311399        | 2               | 3.05973   |
| Q5M7U6        | LCYVGYNIEQEQQ                                                           | 0.967831925        | 2               | 3.31253   |
| Q5M7U6        | SMLEVNYPMENGIVR                                                         | 0.986478327        | 2               | 4.46402   |
| Q5M7U6        | VVVCNNGTGFVK                                                            | 0.994975591        | 2               | 2.95176   |
| <b>Q5M7W5</b> | <b>MAP4 Microtubule_associated protein 4</b>                            | <b>1.005850684</b> | <b>0.935995</b> | <b>9</b>  |
| Q5M7W5        | AAVGLTGNDIATPPNK                                                        | 1.14434722         | 2               | 3.33307   |
| Q5M7W5        | ATSPSTLVSTGSSSR                                                         | 0.923540827        | 2               | 3.38791   |
| Q5M7W5        | EAETALPIEMDLAPPEDEVLPK                                                  | 1.198705425        | 2               | 2.48335   |
| Q5M7W5        | ESEGPSPTDAAPGPDVTLTK                                                    | 0.844873958        | 2               | 4.32502   |
| Q5M7W5        | NTAPPEEETVPGK                                                           | 0.973941646        | 2               | 2.52502   |
| Q5M7W5        | NTTPTGATPPAGMASTR                                                       | 1.02852307         | 2               | 2.40906   |
| Q5M7W5        | STLPVDEGSPEK                                                            | 0.939537628        | 2               | 2.35076   |
| Q5M7W5        | VGSLDNVGHLPAGGTVK                                                       | 0.961334145        | 2               | 2.80324   |
| Q5M7W5        | VTEFNNVTPLEEEVASIK                                                      | 1.26940213         | 2               | 4.66742   |
| <b>Q5M875</b> | <b>DHB13 17_beta_hydroxysteroid dehydrogenase 13</b>                    | <b>1.310370216</b> | <b>6.06E-07</b> | <b>6</b>  |
| Q5M875        | ALTAELDTLTK                                                             | 1.301966833        | 2               | 3.51396   |
| Q5M875        | IQNIQFEAIVGHR                                                           | 1.866883416        | 2               | 3.68321   |
| Q5M875        | NSGHIVTVASVCGHR                                                         | 1.316627053        | 2               | 4.21154   |
| Q5M875        | SLIDGILTNK                                                              | 1.284409609        | 2               | 2.97723   |
| Q5M875        | SVAGQTVLITGAGHGIGR                                                      | 1.357084204        | 2               | 3.98535   |
| Q5M875        | TSCLCPVFNVTGFTK                                                         | 1.275179758        | 2               | 4.1508    |
| <b>Q5M9G3</b> | <b>CAPR1 Caprin_1</b>                                                   | <b>1.271292108</b> | <b>2.24E-12</b> | <b>3</b>  |
| Q5M9G3        | LNQDQLDAVSK                                                             | 1.271598216        | 2               | 3.15094   |
| Q5M9G3        | SSGPPPPSGSSGSEAAAGAAAPASQHPATGTGAVQTEAMK                                | 0.849266727        | 3               | 4.98973   |
| Q5M9G3        | YQEVTTNNLEFAK                                                           | 1.156520981        | 2               | 2.59118   |
| <b>Q5M9I5</b> | <b>QCR6 Cytochrome b_c1 complex subunit 6_mitochondrial</b>             | <b>1.06660963</b>  | <b>5.25E-06</b> | <b>2</b>  |
| Q5M9I5        | EEEEELVDPLTTVR                                                          | 0.941510405        | 2               | 3.33268   |
| Q5M9I5        | SQTEEDCTEELDFDLHAR                                                      | 2.56491061         | 2               | 5.02061   |
| <b>Q5PPL3</b> | <b>NSDHL Sterol_4_alpha_carboxylate 3_dehydrogenase_decarboxylating</b> | <b>1.034581939</b> | <b>0.00399</b>  | <b>10</b> |
| Q5PPL3        | AVLDANDPK                                                               | 0.971911948        | 1               | 1.97669   |
| Q5PPL3        | AVLDANDPKK                                                              | 1.028489197        | 2               | 2.478     |
| Q5PPL3        | CTVIGGSGFLGQHMVEQLLSR                                                   | 1.262944657        | 2               | 4.34649   |

|               |                                                                      |                    |                 |           |
|---------------|----------------------------------------------------------------------|--------------------|-----------------|-----------|
| Q5PPL3        | GQVTGTDLINEVSK                                                       | 0.948071742        | 2               | 4.07318   |
| Q5PPL3        | GVSTVFHCASPPSNSNNK                                                   | 1.038548282        | 2               | 4.78043   |
| Q5PPL3        | GYAVNVFDVR                                                           | 1.070172562        | 1               | 2.03043   |
| Q5PPL3        | ILTGLNVEAPK                                                          | 1.381732698        | 2               | 3.42088   |
| Q5PPL3        | KGQVTGTDLINEVSK                                                      | 1.02726207         | 2               | 4.50861   |
| Q5PPL3        | NLVDFTFVENVVHGHLAAEHLRSR                                             | 1.260336763        | 3               | 3.88233   |
| Q5PPL3        | VQFFIGDLCNQDLYPALK                                                   | 1.427576977        | 2               | 4.71045   |
| <b>Q5PQT3</b> | <b>GLYAT Glycine N_acyltransferase</b>                               | <b>0.827152225</b> | <b>5.71E-05</b> | <b>5</b>  |
| Q5PQT3        | AIQNLASIHSLQVK                                                       | 1.236372283        | 2               | 3.95813   |
| Q5PQT3        | KLFPSLLDTK                                                           | 1.426925028        | 2               | 2.46771   |
| Q5PQT3        | LSSLDVTHAALVNK                                                       | 1.820184317        | 2               | 3.46708   |
| Q5PQT3        | NFPSSCVLGPETPASWTLMQDGTGEMR                                          | 0.706955901        | 3               | 4.03695   |
| Q5PQT3        | QHLQIQSSQSHLNK                                                       | 1.092718232        | 2               | 3.50531   |
| <b>Q5QNV8</b> | <b>CQ066 Uncharacterized protein C17orf66 homolog</b>                | <b>1.023708498</b> | <b>0.159523</b> | <b>2</b>  |
| Q5QNV8        | LEAPAFSIFYFSKPK                                                      | 0.986563652        | 2               | 2.36911   |
| Q5QNV8        | YFKDSAQMPNLHVSISK+Oxidation(8)                                       | 1.334696344        | 2               | 2.41269   |
| <b>Q5RJR8</b> | <b>LRC59 Leucine rich repeat containing protein 59</b>               | <b>1.06534346</b>  | <b>0.761061</b> | <b>5</b>  |
| Q5RJR8        | ATVLDLSCNK                                                           | 1.04446932         | 2               | 2.39624   |
| Q5RJR8        | DKLDGNELDLSLSDLNEVPVK                                                | 1.092366084        | 2               | 5.82688   |
| Q5RJR8        | HHEILQWVLQTDSSQ                                                      | 1.123493187        | 2               | 3.4419    |
| Q5RJR8        | LDGNELDLSLSDLNEVPVK                                                  | 0.996965154        | 2               | 4.32948   |
| Q5RJR8        | LQQLPADFGR                                                           | 1.600709163        | 2               | 2.32067   |
| <b>Q5RKI0</b> | <b>WDR1 WD repeat containing protein 1</b>                           | <b>1.054181506</b> | <b>0.645451</b> | <b>3</b>  |
| Q5RKI0        | AHDGGIYAISWSPDSTHLLSASGDK                                            | 1.0377569          | 3               | 5.2743    |
| Q5RKI0        | CFSIDNPGYEPEVVAVHPGGDTVAVGGSDGNVR                                    | 0.719178138        | 3               | 3.73757   |
| Q5RKI0        | YAPSGFYIASGDISGK                                                     | 1.078922535        | 2               | 4.16016   |
| <b>Q5RKI1</b> | <b>IF4A2 Eukaryotic initiation factor 4A_II</b>                      | <b>1.210034099</b> | <b>1.37E-13</b> | <b>5</b>  |
| Q5RKI1        | ELAQQIQK                                                             | 1.264794739        | 1               | 2.17479   |
| Q5RKI1        | GIDVQQVSLVINYLPTNR                                                   | 1.311598889        | 2               | 4.73852   |
| Q5RKI1        | GYDVIAQAQSGTGK                                                       | 1.098410211        | 2               | 5.20871   |
| Q5RKI1        | MFVLDEADEMLSR                                                        | 1.252012443        | 2               | 4.72453   |
| Q5RKI1        | VLITDILLAR                                                           | 1.40294292         | 2               | 2.41693   |
| <b>Q5SGE0</b> | <b>LPPRC Leucine rich PPR motif containing protein_mitochondrial</b> | <b>1.025866193</b> | <b>0.892854</b> | <b>11</b> |
| Q5SGE0        | AALDLEQVPSELAVTR                                                     | 0.910208368        | 2               | 3.87397   |
| Q5SGE0        | CIANNQVETLEK                                                         | 1.312666936        | 2               | 3.06236   |
| Q5SGE0        | HCVTMDTPAEK                                                          | 1.066008137        | 2               | 3.19139   |
| Q5SGE0        | HDNAEDALNLK                                                          | 1.198564795        | 2               | 3.73799   |
| Q5SGE0        | LKAEGHPVGDPLK                                                        | 1.258082235        | 2               | 2.43481   |
| Q5SGE0        | MEGANIQPNR                                                           | 0.875662601        | 2               | 2.59649   |
| Q5SGE0        | SCGSLLPELSLAER                                                       | 0.996140215        | 2               | 2.49516   |
| Q5SGE0        | SSLSSSPSAGDTVTEK                                                     | 0.985441677        | 2               | 4.36528   |
| Q5SGE0        | SYVADKDVASAK                                                         | 0.95688676         | 2               | 3.38758   |
| Q5SGE0        | TLLELIPELR                                                           | 1.175688068        | 2               | 2.49479   |
| Q5SGE0        | VQDAINILK                                                            | 0.915056724        | 2               | 2.30506   |
| <b>Q5SVT3</b> | <b>ETAA1 Ewing_s tumor associated antigen 1 homolog</b>              | <b>0.916638259</b> | <b>0.484698</b> | <b>2</b>  |
| Q5SVT3        | ELMKLAQQFDK+Oxidation(3)                                             | 0.913958572        | 2               | 2.50835   |
| Q5SVT3        | NHDFIQMTSKMGHLDNHK+Oxidation(7)Oxidation(11)                         | 1.688695593        | 2               | 2.48525   |
| <b>Q5SX40</b> | <b>MYH1 Myosin_1</b>                                                 | <b>0.836448589</b> | <b>1</b>        | <b>75</b> |
| Q5SX40        | AAYLQNLNSADLLK                                                       | 0.711246643        | 2               | 3.60001   |
| Q5SX40        | ADIAESQVNK                                                           | 1.408214784        | 2               | 3.39813   |
| Q5SX40        | AEDEEEINAELTAK                                                       | 2.280340627        | 2               | 3.95358   |
| Q5SX40        | AGLLGLEEMR                                                           | 1.651767094        | 2               | 3.88847   |
| Q5SX40        | AGLLGLEEMRDDK                                                        | 1.023405665        | 2               | 3.38122   |
| Q5SX40        | ALQEAHQQLDLDLQAEEDKVNTLTK                                            | 1.146311523        | 3               | 6.55991   |

|        |                                      |             |   |         |
|--------|--------------------------------------|-------------|---|---------|
| Q5SX40 | ANLLQAEIEELR                         | 1.939298888 | 2 | 4.00924 |
| Q5SX40 | ANSEVAQWR                            | 0.917714133 | 2 | 2.32342 |
| Q5SX40 | DLEEATLQHEATAATLR                    | 0.693071745 | 2 | 4.93654 |
| Q5SX40 | DTQLHLDDALR                          | 1.617976421 | 2 | 2.93072 |
| Q5SX40 | EEQAEPDGTVEADK                       | 1.649747327 | 2 | 3.14657 |
| Q5SX40 | ELEGEVENEQK                          | 2.168244147 | 2 | 2.96373 |
| Q5SX40 | ELEGEVENEQKR                         | 2.270603158 | 2 | 3.18359 |
| Q5SX40 | ELTYQTEEDRK                          | 1.25004615  | 2 | 3.14257 |
| Q5SX40 | ENQSILITGESGAGK                      | 1.77516107  | 2 | 3.67875 |
| Q5SX40 | EQYEEEQEAK                           | 0.678113855 | 1 | 3.02317 |
| Q5SX40 | GQEDLKEQLAMVER                       | 0.935921229 | 2 | 4.08175 |
| Q5SX40 | GQTVQQVYNSVGALAK                     | 1.435301976 | 2 | 3.01571 |
| Q5SX40 | GSSFQTVSALFR                         | 0.799951293 | 2 | 2.54517 |
| Q5SX40 | HADSVaelGEQIDNLR                     | 0.758418792 | 2 | 5.88924 |
| Q5SX40 | IAEKDEEIDQLKR                        | 1.250606495 | 2 | 2.43508 |
| Q5SX40 | IAEQELLDASER                         | 2.055654352 | 2 | 3.60841 |
| Q5SX40 | IEAQNKPFDAK                          | 4.338622873 | 2 | 2.79034 |
| Q5SX40 | IEDEQALGMQLQK                        | 0.702499409 | 2 | 4.42924 |
| Q5SX40 | IEEEEEIEAER                          | 0.801005113 | 2 | 4.11159 |
| Q5SX40 | IKLEQQVDDLEGSLEQEK                   | 0.729034292 | 2 | 5.07903 |
| Q5SX40 | IKLEQQVDDLEGSLEQEKK                  | 1.030014871 | 3 | 5.0071  |
| Q5SX40 | INQLDTK                              | 1.235558849 | 2 | 2.36049 |
| Q5SX40 | IQHELEEAER                           | 0.781304514 | 2 | 3.64902 |
| Q5SX40 | IQLELNQVK                            | 1.542408598 | 2 | 2.90868 |
| Q5SX40 | KALQEAHQQLDDLQAEEDKVNTLTK            | 2.301269798 | 3 | 4.19087 |
| Q5SX40 | KIAEQELLDASER                        | 2.124726496 | 2 | 4.15224 |
| Q5SX40 | KIQHELEEAER                          | 0.865634967 | 3 | 3.89384 |
| Q5SX40 | KKLETDISIQGEMEDIVQEAR                | 0.928891217 | 3 | 5.14356 |
| Q5SX40 | KLEDECSSELK                          | 0.90643082  | 2 | 2.95433 |
| Q5SX40 | KLEDECSSELKK                         | 1.695889906 | 3 | 4.05267 |
| Q5SX40 | KLETDISIQGEMEDIVQEAR                 | 0.994611505 | 2 | 5.37809 |
| Q5SX40 | LAQESTMDVENDKQQLDEK                  | 0.580210377 | 2 | 4.56763 |
| Q5SX40 | LDEAEQLALK                           | 0.94057071  | 2 | 3.36966 |
| Q5SX40 | LEDECSSELKK                          | 1.463559221 | 2 | 3.10058 |
| Q5SX40 | LEEAGGATSAQIEMNK                     | 1.030646404 | 2 | 4.74455 |
| Q5SX40 | LEQQVDDLEGSLEQEK                     | 0.959151576 | 2 | 5.57827 |
| Q5SX40 | LEQQVDDLEGSLEQEKK                    | 1.418556611 | 2 | 4.82303 |
| Q5SX40 | LETDISIQGEMEDIVQEAR                  | 0.816584304 | 2 | 5.12172 |
| Q5SX40 | LINELTAQR                            | 2.619134008 | 2 | 2.95327 |
| Q5SX40 | LQDAEEHVAVNAK                        | 0.571033726 | 2 | 4.57714 |
| Q5SX40 | LQDLVDK                              | 1.494976822 | 2 | 2.36141 |
| Q5SX40 | LQNEVEDLMIDVER                       | 0.999052985 | 2 | 4.47235 |
| Q5SX40 | LQTESGEYSR                           | 0.678369889 | 2 | 2.66723 |
| Q5SX40 | MEIDDLASNMEVISK                      | 0.859754077 | 2 | 4.39459 |
| Q5SX40 | MEIDDLASNMEVISKSGNLEK                | 0.99883164  | 2 | 2.4305  |
| Q5SX40 | MQGTLEDQIISANPLLEAFGNAK              | 1.666653753 | 3 | 6.60424 |
| Q5SX40 | MQGTLEDQIISANPLLEAFGNAK+Oxidation(1) | 1.139247244 | 2 | 4.39973 |
| Q5SX40 | NDLQLQVQSEADSLADAEER                 | 0.980995351 | 2 | 5.57926 |
| Q5SX40 | NKDPLNETVVGLYQK                      | 0.640314361 | 2 | 4.54413 |
| Q5SX40 | NLQQEISDLTEQIAEGGK                   | 1.341509435 | 2 | 5.91699 |
| Q5SX40 | NLQQEISDLTEQIAEGGKR                  | 0.827761989 | 2 | 4.43235 |
| Q5SX40 | NLTEEMAGLDETIK                       | 2.306820853 | 2 | 5.15459 |
| Q5SX40 | QAEEAEQSNVNLAK                       | 2.065174711 | 2 | 4.42775 |
| Q5SX40 | QKYEETHAELEASQK                      | 0.782010552 | 2 | 4.03925 |
| Q5SX40 | QLDEKDSLVSQLSR                       | 1.09788632  | 2 | 2.8136  |
| Q5SX40 | QLEEEIK                              | 1.026942367 | 1 | 2.0756  |
| Q5SX40 | QREEQAEPDGTVEADK                     | 2.025607234 | 2 | 4.33739 |



|               |                                                                                    |                    |                 |           |
|---------------|------------------------------------------------------------------------------------|--------------------|-----------------|-----------|
| Q5SX40        | SELQAALEEEAEASLEHEEGK                                                              | 0.689744901        | 2               | 5.43335   |
| Q5SX40        | SSVFVVDK                                                                           | 0.792959817        | 1               | 2.31475   |
| Q5SX40        | TKYETDAIQR                                                                         | 1.306776418        | 2               | 3.31543   |
| Q5SX40        | TLEDQVSELK                                                                         | 1.115147111        | 2               | 3.17909   |
| Q5SX40        | TNAACAALDK                                                                         | 1.908359996        | 1               | 1.93056   |
| Q5SX40        | TNAACAALDKK                                                                        | 1.930261918        | 3               | 3.43113   |
| Q5SX40        | VKELTYQTEEDRK                                                                      | 0.939542462        | 2               | 2.62993   |
| Q5SX40        | VLNASAIPEGQFIDSK                                                                   | 2.880104132        | 2               | 4.48824   |
| Q5SX40        | VQLLHTQNTSLINTK                                                                    | 1.883273789        | 2               | 4.89928   |
| Q5SX40        | VRELEGEVENEQKR                                                                     | 1.909509978        | 3               | 3.66252   |
| Q5SX40        | YEETHAELEASQK                                                                      | 0.716752139        | 2               | 4.43775   |
| Q5SX40        | YETDAIQR                                                                           | 0.96044056         | 1               | 2.08863   |
| <b>Q5TKR9</b> | <b>KAT6A Histone acetyltransferase KAT6A</b>                                       | <b>1.68986921</b>  | <b>0.095008</b> | <b>2</b>  |
| Q5TKR9        | ENKDKDSSSLIESEKKPEVK                                                               | 1.257371096        | 2               | 2.38685   |
| Q5TKR9        | KGYGRFLIDFSYLLSK                                                                   | 1.900900882        | 2               | 2.30156   |
| <b>Q5U206</b> | <b>CALL3 Calmodulin_like protein 3</b>                                             | <b>1.092249942</b> | <b>2.67E-05</b> | <b>5</b>  |
| Q5U206        | DTDSEEEIR                                                                          | 1.153875174        | 2               | 2.41691   |
| Q5U206        | KMKDSEEEIR                                                                         | 1.201324688        | 2               | 2.62596   |
| Q5U206        | KMKDSEEEIR+Oxidation(2)                                                            | 1.139492246        | 2               | 2.48202   |
| Q5U206        | MKDSEEEIR                                                                          | 1.019693407        | 3               | 4.1694    |
| Q5U206        | MKDSEEEIR+Oxidation(1)                                                             | 1.132899561        | 2               | 3.44098   |
| <b>Q5U211</b> | <b>SNX3 Sorting nexin_3</b>                                                        | <b>1.248693484</b> | <b>0.224391</b> | <b>2</b>  |
| Q5U211        | GDDGIFDDNFIEER                                                                     | 1.489916208        | 2               | 2.86986   |
| Q5U211        | YSDFEWLR                                                                           | 1.111057733        | 2               | 2.54064   |
| <b>Q5U2Q7</b> | <b>ERF1 Eukaryotic peptide chain release factor subunit 1</b>                      | <b>1.157202479</b> | <b>0.374185</b> | <b>4</b>  |
| Q5U2Q7        | GFGGIGGILR                                                                         | 1.10658852         | 2               | 2.97356   |
| Q5U2Q7        | LSVLGAITSVQQR                                                                      | 1.634234053        | 2               | 2.44114   |
| Q5U2Q7        | YFDEISQDTGK                                                                        | 1.195899032        | 2               | 2.78848   |
| Q5U2Q7        | YVLHCQGTSEEK                                                                       | 1.141090501        | 2               | 3.96404   |
| <b>Q5U2U0</b> | <b>CLPX ATP_dependent Clp protease ATP_binding subunit clpX_like_mitochondrial</b> | <b>0.931025922</b> | <b>0.983936</b> | <b>2</b>  |
| Q5U2U0        | QQAEEVK                                                                            | 0.907587278        | 1               | 2.01952   |
| Q5U2U0        | SGESNTHQDIEEKDR                                                                    | 0.752322261        | 3               | 3.68988   |
| <b>Q5U300</b> | <b>UBA1 Ubiquitin_like modifier_activating enzyme 1</b>                            | <b>1.132581691</b> | <b>9.41E-05</b> | <b>12</b> |
| Q5U300        | AAVASLLQSVQVPEFTP                                                                  | 1.142039345        | 3               | 3.42289   |
| Q5U300        | AENYDISPADR                                                                        | 0.978636341        | 2               | 2.44475   |
| Q5U300        | DNPGVVTCLDEAR                                                                      | 0.850836472        | 2               | 2.3507    |
| Q5U300        | FEVQGLQPNGEEMTLK                                                                   | 0.982568068        | 2               | 2.79583   |
| Q5U300        | FEVQGLQPNGEEMTLK+Oxidation(13)                                                     | 1.18030153         | 2               | 2.43823   |
| Q5U300        | IYDDFFQNLDGVANALDNVDAR                                                             | 1.254619112        | 2               | 5.60859   |
| Q5U300        | LDQPMTEIVSR                                                                        | 1.02481345         | 2               | 3.12491   |
| Q5U300        | NEEDATELVTLAQAVNAR                                                                 | 0.935603078        | 2               | 5.29321   |
| Q5U300        | NFPNAIEHTLQWAR                                                                     | 0.983620108        | 2               | 3.56025   |
| Q5U300        | SLPASLAEPDFVMTDFAK                                                                 | 1.105303189        | 2               | 4.06931   |
| Q5U300        | SPPAVQQDNVDEDLIR                                                                   | 1.079848953        | 2               | 4.87026   |
| Q5U300        | VVQGHQQLDSYK                                                                       | 1.170501969        | 2               | 3.31053   |
| <b>Q5U312</b> | <b>RAI14 Ankyrin</b>                                                               | <b>1.214020984</b> | <b>0.256479</b> | <b>2</b>  |
| Q5U312        | MHLLYAVQGMDEDVQKVLK                                                                | 1.00577835         | 2               | 2.3404    |
| Q5U312        | QDLQRALEESK                                                                        | 1.215137396        | 2               | 2.43996   |
| <b>Q5U4E6</b> | <b>GOGA4 Golgin subfamily A member 4</b>                                           | <b>0.958767776</b> | <b>0.794084</b> | <b>2</b>  |
| Q5U4E6        | EFNTQLAQK                                                                          | 0.937333929        | 2               | 2.34814   |
| Q5U4E6        | EQAQQILTEKENVILQMR+Oxidation(17)                                                   | 1.038456436        | 2               | 2.41344   |
| <b>Q5XFW8</b> | <b>SEC13 Protein SEC13 homolog</b>                                                 | <b>1.076201038</b> | <b>0.956125</b> | <b>2</b>  |
| Q5XFW8        | DVAWAPSIGLPTSTIASCSQDGR                                                            | 1.018128789        | 2               | 3.58343   |
| Q5XFW8        | LEAHSWVVR                                                                          | 1.062418127        | 2               | 2.69645   |
| <b>Q5XFX0</b> | <b>TAGL2 Transgelin_2</b>                                                          | <b>0.913674828</b> | <b>0.987104</b> | <b>5</b>  |

|               |                                                                        |                    |                 |           |
|---------------|------------------------------------------------------------------------|--------------------|-----------------|-----------|
| Q5XFX0        | DDGLFSGDPNWFPPK                                                        | 1.036816209        | 2               | 3.42796   |
| Q5XFX0        | NFSDNQLQEGK                                                            | 1.000127838        | 2               | 3.24954   |
| Q5XFX0        | NVIGLQMGNTNR                                                           | 1.134226705        | 2               | 2.77554   |
| Q5XFX0        | TLMNLGGLAVAR                                                           | 1.010226778        | 2               | 3.40698   |
| Q5XFX0        | YGINTTDFQTVDLWEGK                                                      | 1.18548695         | 2               | 5.07018   |
| <b>Q5XH5</b>  | <b>SYTC Threonyl_tRNA synthetase_cytoplasmic</b>                       | <b>1.284822</b>    | <b>1.31E-07</b> | <b>11</b> |
| Q5XH5         | AEHDSILAEK                                                             | 1.540620479        | 2               | 2.65637   |
| Q5XH5         | FLGDIEIWNQAEK                                                          | 1.390042           | 2               | 3.461     |
| Q5XH5         | FMVDIDLDPGCTLNK                                                        | 1.588012641        | 2               | 2.45842   |
| Q5XH5         | FNLTYVSHDGGDK                                                          | 1.186966052        | 2               | 2.67757   |
| Q5XH5         | GFQEVVTPNIFNSR                                                         | 1.660273574        | 2               | 3.55672   |
| Q5XH5         | LKAEHDSILAEK                                                           | 1.015577852        | 2               | 3.36677   |
| Q5XH5         | QLENSLNEFGEK                                                           | 1.237548085        | 2               | 2.90107   |
| Q5XH5         | QVMVVPVGPCTCDEYAQK                                                     | 1.39259927         | 2               | 3.09612   |
| Q5XH5         | TTPYQIACGISQGLADNTVVAK                                                 | 1.306119211        | 2               | 4.00699   |
| Q5XH5         | VVWDLDRPLETDCTLELLK                                                    | 2.322892827        | 2               | 3.97202   |
| Q5XH5         | WELNPGDGAIFYGPK                                                        | 1.202839215        | 2               | 3.72463   |
| <b>Q5XH20</b> | <b>TRAP1 Heat shock protein 75 kDa_mitochondrial</b>                   | <b>1.014582165</b> | <b>0.21207</b>  | <b>13</b> |
| Q5XH20        | AFLEALQHQAEISSR                                                        | 1.106959718        | 2               | 4.50468   |
| Q5XH20        | AQLLQPTLEINPR                                                          | 1.226214572        | 2               | 3.07929   |
| Q5XH20        | EGIVTTAEQDIKEDIAK                                                      | 0.591598219        | 2               | 2.39974   |
| Q5XH20        | ELISNASDALEK                                                           | 1.054469118        | 2               | 2.95389   |
| Q5XH20        | FEDTSPAGER                                                             | 1.080496788        | 2               | 2.8952    |
| Q5XH20        | GTITIQDTGIGMTK                                                         | 1.027183656        | 2               | 2.8838    |
| Q5XH20        | GVVDESDIPLNSR                                                          | 1.112294501        | 2               | 4.86952   |
| Q5XH20        | HLAEHSPYIEAMK                                                          | 1.110539085        | 2               | 3.0082    |
| Q5XH20        | LDTHPAMVTVLEMGAAR                                                      | 1.075567432        | 3               | 4.04025   |
| Q5XH20        | SDCKDFANESR                                                            | 0.870103232        | 2               | 2.89791   |
| Q5XH20        | VCEGQVLPMEIHLQTDIAEK                                                   | 0.999408849        | 3               | 4.30871   |
| Q5XH20        | YESSALPAGQLTSLSDYASR                                                   | 1.118153779        | 2               | 5.45386   |
| Q5XH20        | YIAQAYDKPR                                                             | 1.253977942        | 2               | 2.80653   |
| <b>Q5XI22</b> | <b>THIC Acetyl_CoA acetyltransferase_cytosolic</b>                     | <b>1.206932508</b> | <b>0.927139</b> | <b>9</b>  |
| Q5XI22        | AGHFDKEIVPVHVSSR                                                       | 0.911890189        | 2               | 4.77651   |
| Q5XI22        | HGSNLEAMSK                                                             | 1.154449421        | 2               | 2.44494   |
| Q5XI22        | HGSNLEAMSK+Oxidation(8)                                                | 0.833455422        | 2               | 3.26951   |
| Q5XI22        | LKPYFLTDGTGTVPANASGMNDGAAAVVLMK                                        | 1.281305629        | 3               | 5.15884   |
| Q5XI22        | MGEVPLADSILCDGLTDAFHNYHMGITAENVAK                                      | 1.062004334        | 3               | 3.88294   |
| Q5XI22        | MLKPLAQVVSWSQAGVEPSVMGVGPIPAIK                                         | 0.873394596        | 3               | 4.65328   |
| Q5XI22        | TAIGSFNGALSTVPVHNLGTTVIK                                               | 0.923916368        | 2               | 5.24932   |
| Q5XI22        | VAPEEVSEVIFGHVLTAGCGQNPTR                                              | 1.337511474        | 2               | 5.3595    |
| Q5XI22        | VNIDGGAIALGHPLGASGCR                                                   | 1.065481437        | 2               | 5.38773   |
| <b>Q5XI29</b> | <b>CPSF7 Cleavage and polyadenylation specificity factor subunit 7</b> | <b>0.96799803</b>  | <b>0.961288</b> | <b>2</b>  |
| Q5XI29        | QNLSQFEAQR                                                             | 0.96029482         | 2               | 2.37299   |
| Q5XI29        | SIGVYDVVELK                                                            | 0.968058379        | 2               | 2.58266   |
| <b>Q5XI32</b> | <b>CAPZB F_actin_capping protein subunit beta</b>                      | <b>1.099053924</b> | <b>0.598185</b> | <b>6</b>  |
| Q5XI32        | GCWDSIHVVEVQEK                                                         | 1.476898131        | 2               | 3.20919   |
| Q5XI32        | KLEVEANNAFDQYR                                                         | 1.054021588        | 2               | 4.14047   |
| Q5XI32        | LEVEANNAFDQYR                                                          | 0.900292988        | 2               | 3.57624   |
| Q5XI32        | LVEDMENK                                                               | 1.266910618        | 2               | 2.75603   |
| Q5XI32        | NDLVEALK                                                               | 1.052434236        | 2               | 2.57597   |
| Q5XI32        | SGSGTMNLGGSLTR                                                         | 1.03368903         | 2               | 3.25594   |
| <b>Q5XI41</b> | <b>TRAM1 Translocating chain_associated membrane protein 1</b>         | <b>1.047975565</b> | <b>0.975463</b> | <b>2</b>  |
| Q5XI41        | EHSAFQAPPVK                                                            | 1.07471524         | 2               | 2.35044   |
| Q5XI41        | LDFSTGNFNLAVR                                                          | 1.036490282        | 2               | 3.06603   |
| <b>Q5XI60</b> | <b>REEP6 Receptor expression_enhancing protein 6</b>                   | <b>1.176265138</b> | <b>0.82202</b>  | <b>3</b>  |

|               |                                                              |                    |                 |           |
|---------------|--------------------------------------------------------------|--------------------|-----------------|-----------|
| Q5XI60        | ALDIAAGITR                                                   | 0.947360364        | 2               | 2.5647    |
| Q5XI60        | HHVALDSAASQLSGR                                              | 1.28251504         | 2               | 4.51929   |
| Q5XI60        | NVATDALGALEAR                                                | 1.067372197        | 2               | 4.04572   |
| <b>Q5XI72</b> | <b>IF4H Eukaryotic translation initiation factor 4H</b>      | <b>1.035685869</b> | <b>0.020228</b> | <b>2</b>  |
| Q5XI72        | EALTYDGALLGDRSLR                                             | 0.722011074        | 2               | 2.60126   |
| Q5XI72        | SLRVDIAEGRK                                                  | 1.054383808        | 2               | 2.43685   |
| <b>Q5XI73</b> | <b>GDIR1 Rho GDP_dissociation inhibitor 1</b>                | <b>1.071821568</b> | <b>0.889072</b> | <b>6</b>  |
| Q5XI73        | AEEYEFILPMEEAPK                                              | 1.247551585        | 2               | 4.11674   |
| Q5XI73        | IDKTDYMGVSYGPR                                               | 1.030986209        | 2               | 4.00631   |
| Q5XI73        | LTLVCSTAPGLELDLTGDLESFKK                                     | 1.491716162        | 3               | 3.4509    |
| Q5XI73        | SIQEIQELDKDDESLR                                             | 1.046847973        | 2               | 5.291     |
| Q5XI73        | SIQEIQELDKDDESLRK                                            | 1.12173864         | 2               | 4.15125   |
| Q5XI73        | VAVSADPNVNVIVTR                                              | 1.108523652        | 2               | 4.10819   |
| <b>Q5XI78</b> | <b>ODO1 2_oxoglutarate dehydrogenase_mitochondrial</b>       | <b>1.168886384</b> | <b>0.140049</b> | <b>13</b> |
| Q5XI78        | FGLEGCEVLIPALK                                               | 1.361403929        | 2               | 2.96438   |
| Q5XI78        | GHHVAQLDPLGILDADLDSSVPADIISSTDK                              | 1.33354975         | 3               | 5.04087   |
| Q5XI78        | HHVLHDQNVDK                                                  | 0.896687153        | 3               | 3.37294   |
| Q5XI78        | ICEEAFTR                                                     | 1.02963838         | 2               | 2.41024   |
| Q5XI78        | IEQLSPFPDLLLLK                                               | 1.121499539        | 2               | 3.37631   |
| Q5XI78        | LEAADEGSGDMK                                                 | 1.112119982        | 2               | 2.89348   |
| Q5XI78        | LNVLNVIR                                                     | 1.454274788        | 2               | 2.53142   |
| Q5XI78        | NITLSLVANPSHLEAADPVVMGK                                      | 1.247505223        | 2               | 4.91159   |
| Q5XI78        | NTNAGAPPGTAYQSPLSLR                                          | 1.321969198        | 2               | 3.81319   |
| Q5XI78        | SSLATMAHAQSLVEAQPNDVK                                        | 1.303340902        | 3               | 3.90604   |
| Q5XI78        | SWDIFFR                                                      | 1.285934178        | 2               | 2.33741   |
| Q5XI78        | VIPEDGPAAQNPDK                                               | 1.202373647        | 2               | 2.70224   |
| Q5XI78        | YAELLVSQGVVNQPEYEEISKYDK                                     | 0.933188832        | 3               | 4.37032   |
| <b>Q5XI95</b> | <b>ADH6 Alcohol dehydrogenase 6</b>                          | <b>0.945548094</b> | <b>0.881787</b> | <b>5</b>  |
| Q5XI95        | ATVLWKPGLAIEIEVAPPK                                          | 0.856288005        | 2               | 3.64727   |
| Q5XI95        | IIAVDINK                                                     | 0.900291726        | 2               | 2.78801   |
| Q5XI95        | MVATGVCGTDIK                                                 | 0.83175473         | 2               | 2.68459   |
| Q5XI95        | NNICTEIR                                                     | 1.024860371        | 2               | 2.40972   |
| Q5XI95        | TVGATDCV DPR                                                 | 0.841280683        | 2               | 2.9722    |
| <b>Q5XIA0</b> | <b>DZ11L Zinc finger protein DZIP1L</b>                      | <b>1.165116514</b> | <b>0.403226</b> | <b>2</b>  |
| Q5XIA0        | EVCNHRQPVPDPVLLK                                             | 1.139368701        | 2               | 2.36898   |
| Q5XIA0        | GQQELGRQADELK                                                | 1.166429424        | 2               | 2.44355   |
| <b>Q5XIC0</b> | <b>ECI2 Enoyl_CoA delta isomerase 2_mitochondrial</b>        | <b>0.999057661</b> | <b>0.847367</b> | <b>6</b>  |
| Q5XIC0        | ATQQDFENAMNQVK                                               | 0.88986526         | 2               | 4.52331   |
| Q5XIC0        | GILVTSEGGITK                                                 | 0.996306522        | 2               | 3.42509   |
| Q5XIC0        | LHAVNEEECTTLR                                                | 1.003982251        | 2               | 4.13692   |
| Q5XIC0        | QNYVDLVSSLSSSEASSQ GK                                        | 0.930871096        | 2               | 5.11412   |
| Q5XIC0        | WDAWNALGSLPK                                                 | 1.238934784        | 2               | 3.43616   |
| Q5XIC0        | WLSEECINAIMSFVTR                                             | 0.778850788        | 2               | 2.36072   |
| <b>Q5XIC1</b> | <b>GMPPA Mannose_1_phosphate guanyltransferase alpha</b>     | <b>1.240668125</b> | <b>0.232471</b> | <b>2</b>  |
| Q5XIC1        | VAPSAVLGPNVSIGK                                              | 1.261882818        | 2               | 2.6175    |
| Q5XIC1        | VEGTPNDPNPNDR                                                | 0.732574263        | 2               | 2.60297   |
| <b>Q5XIE6</b> | <b>HIBCH 3_hydroxyisobutyryl_CoA hydrolase_mitochondrial</b> | <b>1.058950521</b> | <b>0.372671</b> | <b>7</b>  |
| Q5XIE6        | AGIATHFVDSEK                                                 | 0.6170223          | 2               | 3.23856   |
| Q5XIE6        | AVLIDKDQTPK                                                  | 0.943163894        | 2               | 2.97289   |
| Q5XIE6        | GCAGVITLNRPK                                                 | 0.701926353        | 2               | 2.68651   |
| Q5XIE6        | HTETAEVLLER                                                  | 0.945289736        | 2               | 2.57552   |
| Q5XIE6        | INSCFSANTVEQILENLR                                           | 1.051592845        | 2               | 4.72736   |
| Q5XIE6        | LHVLEELLALK                                                  | 1.182024715        | 3               | 4.61975   |
| Q5XIE6        | QDGSPFAMEQIK                                                 | 1.106675235        | 2               | 2.56451   |

|               |                                                                                   |                    |                 |           |
|---------------|-----------------------------------------------------------------------------------|--------------------|-----------------|-----------|
| <b>Q5XIF3</b> | <b>NDUS4 NADH dehydrogenase [ubiquinone] iron_sulfur protein 4_ mitochondrial</b> | <b>1.126222425</b> | <b>0.064564</b> | <b>2</b>  |
| Q5XIF3        | HGWSYDVEGR                                                                        | 1.125717942        | 2               | 2.69967   |
| Q5XIF3        | LDVPTLTVPEEHIK                                                                    | 1.352308936        | 2               | 3.45411   |
| <b>Q5XIF6</b> | <b>TBA4A Tubulin alpha_4A chain</b>                                               | <b>1.162384994</b> | <b>0.000285</b> | <b>5</b>  |
| Q5XIF6        | AVFVDLEPTVIDEIR                                                                   | 0.8917064          | 2               | 4.1406    |
| Q5XIF6        | AYHEQLSVAEITNACFEPANQMVK                                                          | 1.221343141        | 2               | 5.47256   |
| Q5XIF6        | DVNAAIAAIK                                                                        | 0.993509466        | 2               | 2.90436   |
| Q5XIF6        | SIQFVDWCPTGFK                                                                     | 1.169407399        | 2               | 4.45196   |
| Q5XIF6        | TIGGGDDSFITFCETGAGK                                                               | 5.365519689        | 2               | 4.26084   |
| <b>Q5XIG4</b> | <b>OCAD1 OCIA domain_containing protein 1</b>                                     | <b>1.037671093</b> | <b>0.999803</b> | <b>2</b>  |
| Q5XIG4        | SVPLAATSMLITQGLISK                                                                | 1.089653294        | 2               | 3.76681   |
| Q5XIG4        | YDSNVSGQSSFQSPAADNIEK                                                             | 0.961436966        | 2               | 5.1551    |
| <b>Q5XIH7</b> | <b>PHB2 Prohibitin_2</b>                                                          | <b>1.057925456</b> | <b>2.39E-05</b> | <b>10</b> |
| Q5XIH7        | AQVLLIR                                                                           | 1.070483801        | 2               | 2.34243   |
| Q5XIH7        | DLQMVNISR                                                                         | 0.866902989        | 2               | 3.08946   |
| Q5XIH7        | FNASQLITQR                                                                        | 0.993892878        | 2               | 3.76105   |
| Q5XIH7        | IGGVQQDTILAEGLHFR                                                                 | 1.151676214        | 3               | 4.20195   |
| Q5XIH7        | IVQAEGEAEAAK                                                                      | 0.926902335        | 2               | 3.8714    |
| Q5XIH7        | IYLTADNLVNLQDESFTTR                                                               | 1.673138049        | 2               | 4.73665   |
| Q5XIH7        | LGLDYEER                                                                          | 0.979904672        | 2               | 2.30404   |
| Q5XIH7        | LLLGAAGAVYGVV                                                                     | 2.160009074        | 2               | 3.4734    |
| Q5XIH7        | VLPISVNEVLK                                                                       | 1.079281196        | 2               | 2.73041   |
| Q5XIH7        | VLSRPNAQELPSMYQR                                                                  | 0.921848553        | 2               | 4.58348   |
| <b>Q5XIM9</b> | <b>TCPB T_complex protein 1 subunit beta</b>                                      | <b>1.28758131</b>  | <b>3.61E-07</b> | <b>9</b>  |
| Q5XIM9        | EALLSSAVDHGSDEVK                                                                  | 1.239787763        | 2               | 4.20659   |
| Q5XIM9        | GATQQILDEAER                                                                      | 1.246356945        | 2               | 3.96892   |
| Q5XIM9        | GSGNLEAIHVIK                                                                      | 1.013651807        | 2               | 2.64897   |
| Q5XIM9        | HGINCFINR                                                                         | 0.892075564        | 2               | 2.61714   |
| Q5XIM9        | LGGSLADSYLDEGFLLDK                                                                | 1.207948442        | 2               | 4.14761   |
| Q5XIM9        | LGGSLADSYLDEGFLLDKK                                                               | 1.023919663        | 3               | 3.31337   |
| Q5XIM9        | SLHDALCVLAQTVK                                                                    | 1.221955211        | 2               | 3.5714    |
| Q5XIM9        | VAEIEHAEKEK                                                                       | 1.440373444        | 2               | 2.44861   |
| Q5XIM9        | VQDDEVGDGTTSVTLAAELLR                                                             | 1.237700449        | 2               | 4.74543   |
| <b>Q5XIN6</b> | <b>LETM1 LETM1 and EF_hand domain_containing protein 1_ mitochondrial</b>         | <b>1.130643042</b> | <b>0.919621</b> | <b>10</b> |
| Q5XIN6        | AAEVEGEQVDNK                                                                      | 1.145530007        | 2               | 4.09014   |
| Q5XIN6        | AMYLPTLSPADQLK                                                                    | 0.902422747        | 2               | 2.31511   |
| Q5XIN6        | DIQPEVAEATVPRPGAELQPK                                                             | 1.074519253        | 2               | 4.61258   |
| Q5XIN6        | FLQDTIEEMALK                                                                      | 1.162644569        | 2               | 2.91009   |
| Q5XIN6        | KLEEGGPVYSPPAQVVVK                                                                | 1.093101132        | 2               | 3.95568   |
| Q5XIN6        | LDPAASSPTGESVISVDELISAMK                                                          | 0.978350264        | 3               | 4.75929   |
| Q5XIN6        | LEEGGPVYSPPAQVVVK                                                                 | 1.040120576        | 2               | 2.78187   |
| Q5XIN6        | LFEDLTLNLRPQLVALCK                                                                | 1.32905149         | 3               | 4.83728   |
| Q5XIN6        | LLELQSIGTNNFLR                                                                    | 1.106546938        | 2               | 3.35297   |
| Q5XIN6        | STLQTLPEIVAK                                                                      | 1.077021549        | 2               | 2.38534   |
| <b>Q5XIT9</b> | <b>MCCB Methylcrotonyl_CoA carboxylase beta chain_ mitochondrial</b>              | <b>0.884843025</b> | <b>0.837511</b> | <b>7</b>  |
| Q5XIT9        | AATGEEVSAEDLGGADLHCR                                                              | 0.946339615        | 2               | 5.00718   |
| Q5XIT9        | ALYGDTLVTGFAR                                                                     | 0.92769216         | 2               | 3.11136   |
| Q5XIT9        | AQEIALQNR                                                                         | 0.703133868        | 2               | 2.56658   |
| Q5XIT9        | KLDVTVEPSEELFPADELYGIVGANLK                                                       | 1.082599515        | 3               | 4.91038   |
| Q5XIT9        | LGTQPDGSGSSTYQENYEQMK                                                             | 0.835774701        | 2               | 4.94006   |
| Q5XIT9        | LWDDGIIIDPVDTR                                                                    | 1.003430624        | 2               | 3.15926   |
| Q5XIT9        | LYGEEVPPAGGIITGIGR                                                                | 0.914502513        | 2               | 4.55325   |
| <b>Q5XIU9</b> | <b>PGRC2 Membrane_associated progesterone receptor component 2</b>                | <b>1.046603794</b> | <b>0.90409</b>  | <b>5</b>  |

|               |                                                                                  |                    |                 |           |
|---------------|----------------------------------------------------------------------------------|--------------------|-----------------|-----------|
| Q5XIU9        | FYGPAGPYGIFAGR                                                                   | 1.205352087        | 2               | 2.88886   |
| Q5XIU9        | GGDGSPGGAGATAAR                                                                  | 0.923031488        | 2               | 3.20926   |
| Q5XIU9        | GLATFCLDK                                                                        | 1.332899874        | 1               | 1.95778   |
| Q5XIU9        | GLCSGPGAGEESPAATLPR                                                              | 1.0152424          | 2               | 4.803     |
| Q5XIU9        | VFDVTK                                                                           | 1.080452877        | 1               | 2.00256   |
| <b>Q60587</b> | <b>ECHB Trifunctional enzyme subunit beta_ mitochondrial</b>                     | <b>0.916272607</b> | <b>0.991123</b> | <b>6</b>  |
| Q60587        | AMDSDFWFAQNYMGR                                                                  | 1.047074627        | 2               | 3.21432   |
| Q60587        | AQDEGHLSDIVPFK                                                                   | 0.799921968        | 2               | 3.32946   |
| Q60587        | DGGQYALVAACAAGGQGHAMIVEAYPK                                                      | 0.906066703        | 2               | 5.26839   |
| Q60587        | DNGIRPSSLEQMAK                                                                   | 0.877370613        | 2               | 3.6151    |
| Q60587        | DQLLLGPTYATPK                                                                    | 0.971753819        | 2               | 3.72707   |
| Q60587        | NIVVVEGVR                                                                        | 0.95784383         | 2               | 3.00955   |
| <b>Q60759</b> | <b>GCDH Glutaryl_ CoA dehydrogenase_ mitochondrial</b>                           | <b>0.979086367</b> | <b>0.302821</b> | <b>5</b>  |
| Q60759        | DILGGNGISDEYHVIR                                                                 | 0.817190812        | 2               | 3.22401   |
| Q60759        | DIVYEMGELGVLGPSTIK                                                               | 0.987472804        | 2               | 3.02907   |
| Q60759        | GYGCAGVSSVAYGLLTR                                                                | 0.784255291        | 2               | 3.98121   |
| Q60759        | HAMNLEAVNTYEGTHDIHALILGR                                                         | 0.998924023        | 4               | 5.46458   |
| Q60759        | SMMSVQSSLMHPIYTYGSEEQR                                                           | 1.145164928        | 3               | 3.83938   |
| <b>Q60817</b> | <b>NACA Nascent polypeptide_ associated complex subunit alpha</b>                | <b>1.121556311</b> | <b>0.994534</b> | <b>2</b>  |
| Q60817        | IEDLSQQAQLAAAEK                                                                  | 1.145369145        | 2               | 4.55298   |
| Q60817        | NILFVITKPDVYK                                                                    | 1.048760534        | 2               | 3.54738   |
| <b>Q61029</b> | <b>LAP2B Lamina_ associated polypeptide 2_ isoforms beta/delta/epsilon/gamma</b> | <b>1.076390483</b> | <b>0.573944</b> | <b>3</b>  |
| Q61029        | SELVANNVTLPAGEQR                                                                 | 1.182376843        | 2               | 4.07969   |
| Q61029        | SSTPLPTVSSAENTR                                                                  | 1.059259653        | 2               | 2.90608   |
| Q61029        | YGVNPGPIVGTTR                                                                    | 1.115041876        | 2               | 3.07916   |
| <b>Q61043</b> | <b>NIN Ninein</b>                                                                | <b>1.102877941</b> | <b>0.786701</b> | <b>2</b>  |
| Q61043        | ERATAAAMKQEILER                                                                  | 1.111655231        | 2               | 2.335     |
| Q61043        | LQEENSILR                                                                        | 0.718327998        | 2               | 2.40396   |
| <b>Q61233</b> | <b>PLSL Plastin_ 2</b>                                                           | <b>1.059364007</b> | <b>0.985421</b> | <b>2</b>  |
| Q61233        | ALENDPCR                                                                         | 1.048098032        | 2               | 2.51922   |
| Q61233        | MINLSVPTIDER                                                                     | 1.060031582        | 2               | 3.58169   |
| <b>Q61301</b> | <b>CTNA2 Catenin alpha_ 2</b>                                                    | <b>1.084549376</b> | <b>0.51265</b>  | <b>2</b>  |
| Q61301        | LLEPLVTQVTTLVNTSNK                                                               | 1.156930324        | 2               | 4.04376   |
| Q61301        | TSVQTEDDQLIAGQSAR                                                                | 1.025739036        | 2               | 4.62116   |
| <b>Q61335</b> | <b>BAP31 B_ cell receptor_ associated protein 31</b>                             | <b>1.109021278</b> | <b>0.956247</b> | <b>5</b>  |
| Q61335        | AENEALAMQK                                                                       | 1.045085725        | 2               | 3.05559   |
| Q61335        | KYMEENDQLKK+Oxidation(3)                                                         | 1.12208871         | 3               | 3.36525   |
| Q61335        | LKDELASTK                                                                        | 0.811028565        | 2               | 2.6221    |
| Q61335        | YMEENDQLK                                                                        | 1.021713312        | 2               | 2.41034   |
| Q61335        | YMEENDQLKK                                                                       | 1.004176823        | 2               | 2.56596   |
| <b>Q61599</b> | <b>GDIR2 Rho GDP_ dissociation inhibitor 2</b>                                   | <b>0.972666825</b> | <b>0.991636</b> | <b>2</b>  |
| Q61599        | ATFMVGSYGRPEEYFLTPVEEAPK                                                         | 1.080274794        | 3               | 3.62484   |
| Q61599        | TLLGDVPVADPTVPNVTVTR                                                             | 0.972202883        | 2               | 4.63873   |
| <b>Q61656</b> | <b>DDX5 Probable ATP_ dependent RNA helicase DDX5</b>                            | <b>0.905787578</b> | <b>0.788335</b> | <b>3</b>  |
| Q61656        | ELAQVQVAAEYCR                                                                    | 0.795367328        | 2               | 2.66336   |
| Q61656        | GDGPICLVLAPTR                                                                    | 1.116038234        | 2               | 3.42589   |
| Q61656        | MLDMGFEPQIR                                                                      | 1.060579554        | 2               | 3.3809    |
| <b>Q61830</b> | <b>MRC1 Macrophage mannose receptor 1</b>                                        | <b>1.158039931</b> | <b>0.429759</b> | <b>3</b>  |
| Q61830        | KMDPQPK+Oxidation(2)                                                             | 0.946805521        | 1               | 1.91597   |
| Q61830        | LKLPWHEAETYCK                                                                    | 1.09039277         | 2               | 2.30288   |
| Q61830        | TGVAGGLWDVLSCEEK                                                                 | 1.257500218        | 2               | 3.1643    |
| <b>Q61941</b> | <b>NNTM NAD(P) transhydrogenase_ mitochondrial</b>                               | <b>1.087243698</b> | <b>0.824549</b> | <b>11</b> |
| Q61941        | EANSIVITPGYLCAAK                                                                 | 0.866338489        | 2               | 3.64021   |

|               |                                                                           |                    |                 |           |
|---------------|---------------------------------------------------------------------------|--------------------|-----------------|-----------|
| Q61941        | FFTGQITAAGK                                                               | 1.150828966        | 2               | 2.43206   |
| Q61941        | GITHIGYTDLPSR                                                             | 1.036368254        | 2               | 3.55381   |
| Q61941        | ILIVGGGVAGLASAGAAK                                                        | 1.40216175         | 2               | 4.57793   |
| Q61941        | KTTVLAMDQVPR                                                              | 0.931738705        | 2               | 3.49848   |
| Q61941        | MATQASTLYSNNITK                                                           | 0.984144191        | 2               | 4.33093   |
| Q61941        | QGFNVVVEGAGEASK                                                           | 1.037223125        | 2               | 3.86511   |
| Q61941        | SAPLLLPGR                                                                 | 1.424206093        | 2               | 2.34673   |
| Q61941        | SLGAEPLEVDLK                                                              | 1.092138553        | 2               | 3.06029   |
| Q61941        | TTVLAMDQVPR                                                               | 1.22993389         | 2               | 2.75583   |
| Q61941        | VTIAQGYDALSSMANISGYK                                                      | 1.124859926        | 2               | 5.38063   |
| <b>Q61990</b> | <b>PCBP2 Poly(rC)_binding protein 2</b>                                   | <b>1.501746211</b> | <b>0.053291</b> | <b>2</b>  |
| Q61990        | AITIAGIPQSIIECVK                                                          | 1.216613056        | 2               | 2.33273   |
| Q61990        | IITLAGPTNAIFK                                                             | 1.570360692        | 2               | 2.73056   |
| <b>Q62095</b> | <b>DDX3Y ATP_dependent RNA helicase DDX3Y</b>                             | <b>1.109420811</b> | <b>9.36E-07</b> | <b>4</b>  |
| Q62095        | HVINFDLPSDIEEYVHR                                                         | 1.50076933         | 3               | 4.26027   |
| Q62095        | SFLDLLLNATGK                                                              | 1.247297658        | 2               | 3.9003    |
| Q62095        | VGNLGLATSEFFNER                                                           | 1.118621524        | 2               | 2.77429   |
| Q62095        | VGSTSENIQK                                                                | 1.188043928        | 2               | 2.93577   |
| <b>Q62261</b> | <b>SPTB2 Spectrin beta chain_brain 1</b>                                  | <b>1.109899702</b> | <b>4.26E-07</b> | <b>17</b> |
| Q62261        | ALVADSHPESEK                                                              | 1.086250873        | 2               | 3.27549   |
| Q62261        | EGMQLISEKPETEAVVK                                                         | 1.080075176        | 2               | 2.82315   |
| Q62261        | EGMQLISEKPETEAVVKEK                                                       | 1.30647549         | 2               | 2.38893   |
| Q62261        | EIEELQSQQAQALSQEGK                                                        | 1.485810116        | 2               | 2.82133   |
| Q62261        | FESLEPEMNNQASR                                                            | 1.140749985        | 2               | 3.53977   |
| Q62261        | HDTASASTQSTPASSR                                                          | 0.848559674        | 2               | 2.79602   |
| Q62261        | HQILEQAVEDYAETVHQLSK                                                      | 1.109720692        | 3               | 6.18847   |
| Q62261        | LEDLEVIQHR                                                                | 0.987892702        | 3               | 3.35863   |
| Q62261        | LISDINK                                                                   | 1.000790567        | 1               | 1.9508    |
| Q62261        | LLDPEDISVDHPDEK                                                           | 0.874510985        | 2               | 3.35689   |
| Q62261        | LTTLELLEVR                                                                | 1.618008751        | 2               | 2.5658    |
| Q62261        | LVSQDNFGDLPAVEAATK                                                        | 1.228006676        | 2               | 2.82439   |
| Q62261        | LVSQDNFGDLPAVEAATK                                                        | 0.995289062        | 2               | 3.90771   |
| Q62261        | SQNIITDSSSLNAEAIR                                                         | 1.164973289        | 2               | 4.99061   |
| Q62261        | TLETPAAQMEGFLNR                                                           | 1.445812001        | 2               | 2.65264   |
| Q62261        | TQTAIASEDMPNTLTAEEK                                                       | 1.136919833        | 2               | 5.53988   |
| Q62261        | VIESTQDLGNDLAGVMALQR                                                      | 0.161399031        | 2               | 3.83431   |
| <b>Q62425</b> | <b>NDUA4 NADH dehydrogenase [ubiquinone] 1 alpha subcomplex subunit 4</b> | <b>1.311917017</b> | <b>0.940621</b> | <b>3</b>  |
| Q62425        | FYSVNVVDYSK                                                               | 1.373785264        | 1               | 2.60274   |
| Q62425        | KNNPEPWNK                                                                 | 1.123156235        | 2               | 2.56668   |
| Q62425        | LGPNEQYK                                                                  | 1.105712927        | 2               | 2.34442   |
| <b>Q62452</b> | <b>UD19 UDP_glucuronosyltransferase 1_9</b>                               | <b>0.868698594</b> | <b>0.000192</b> | <b>5</b>  |
| Q62452        | AMEIAEALGR                                                                | 0.802144136        | 2               | 3.62419   |
| Q62452        | GAGVTLNVLEMTADDLENALK                                                     | 0.827977631        | 3               | 5.88941   |
| Q62452        | GAGVTLNVLEMTADDLENALK+Oxidation(11)                                       | 1.141868852        | 2               | 3.56971   |
| Q62452        | WLPQNDLLGHPK                                                              | 1.023054132        | 2               | 3.34986   |
| Q62452        | YTGTRPSNLAK                                                               | 0.714934682        | 2               | 2.98125   |
| <b>Q62465</b> | <b>VAT1 Synaptic vesicle membrane protein VAT_1 homolog</b>               | <b>1.078262133</b> | <b>0.999638</b> | <b>6</b>  |
| Q62465        | ACGLNFADLMGR                                                              | 1.11228089         | 2               | 2.80413   |
| Q62465        | GVDIVMDPLGGSDTAK                                                          | 0.956109147        | 2               | 4.18264   |
| Q62465        | IDSVWPFEK                                                                 | 0.970763776        | 2               | 2.35945   |
| Q62465        | TVENVTVFGTASASK                                                           | 1.107383614        | 2               | 3.25393   |
| Q62465        | VLLVPGPEKET                                                               | 0.873659488        | 2               | 2.70514   |
| Q62465        | VVTYGMANLLTGPK                                                            | 0.962108984        | 2               | 2.53913   |
| <b>Q62636</b> | <b>RAP1B Ras_related protein Rap_1b</b>                                   | <b>1.071781536</b> | <b>0.134838</b> | <b>2</b>  |
| Q62636        | INVNEIFYDLVR                                                              | 2.028692108        | 2               | 3.97448   |

|               |                                                                       |                    |                 |           |
|---------------|-----------------------------------------------------------------------|--------------------|-----------------|-----------|
| Q62636        | LVVLGSGGVGK                                                           | 1.009320554        | 2               | 2.55185   |
| <b>Q62651</b> | <b>ECH1 Delta(3_5)_Delta(2_4)_dienoyl_CoA isomerase_mitochondrial</b> | <b>0.865066595</b> | <b>0.774785</b> | <b>6</b>  |
| Q62651        | EVDVGLAADVGTLQR                                                       | 0.913746201        | 2               | 3.36038   |
| Q62651        | HVLHVQLNRPEK                                                          | 0.850143141        | 2               | 3.43017   |
| Q62651        | MMADEALDSGLVSR                                                        | 0.973924011        | 2               | 3.35133   |
| Q62651        | RIPEEVSDHNYESIQTSAQK                                                  | 0.796098431        | 3               | 6.44994   |
| Q62651        | SLVNELTFTAR                                                           | 0.880528099        | 2               | 3.50636   |
| Q62651        | YCTQDAFFQVK                                                           | 1.060305709        | 2               | 2.71495   |
| <b>Q62730</b> | <b>DHB2 Estradiol 17_beta_dehydrogenase 2</b>                         | <b>1.424662034</b> | <b>0.024528</b> | <b>5</b>  |
| Q62730        | AVLVTGADSGFGHALAK                                                     | 1.50175399         | 2               | 4.18922   |
| Q62730        | EIQENYQQEYVHTQK                                                       | 1.436274794        | 2               | 4.52055   |
| Q62730        | LSVLQMDVTKPEQIK                                                       | 2.004891786        | 2               | 3.63567   |
| Q62730        | LSVLQMDVTKPEQIKDVHSEVAEK                                              | 1.209575735        | 3               | 4.22712   |
| Q62730        | VVTIHPGGFQTNIVGSQDSWDK                                                | 1.440258141        | 2               | 5.58635   |
| <b>Q62736</b> | <b>CALD1 Non_muscle caldesmon</b>                                     | <b>1.054785866</b> | <b>8.17E-10</b> | <b>11</b> |
| Q62736        | ASGDKEAEGAPQVEAGK                                                     | 1.220943273        | 2               | 4.61705   |
| Q62736        | ASGDKEAEGAPQVEAGKR                                                    | 1.145212142        | 3               | 3.8013    |
| Q62736        | EEIERR                                                                | 0.833906239        | 1               | 1.90369   |
| Q62736        | EFDPTITDGSLSVPSR                                                      | 1.102551426        | 2               | 3.18845   |
| Q62736        | GGNLGENQIKDEK                                                         | 1.063329906        | 2               | 3.31488   |
| Q62736        | LEQYTNAIEGTK                                                          | 1.046998397        | 2               | 3.59194   |
| Q62736        | MQNNSAENETAEGEEKGESR                                                  | 1.030935942        | 3               | 4.6093    |
| Q62736        | NDDDEEEAAR                                                            | 2.776727367        | 2               | 2.71467   |
| Q62736        | RGETESEEFK                                                            | 1.065386265        | 2               | 2.93517   |
| Q62736        | RRGETESEEFK                                                           | 1.512610382        | 2               | 3.2274    |
| Q62736        | VLEEEEQR                                                              | 1.197190489        | 2               | 2.49488   |
| <b>Q62745</b> | <b>CD81 CD81 antigen</b>                                              | <b>1.098814995</b> | <b>0.999966</b> | <b>2</b>  |
| Q62745        | NSLCPSSNSFTQLLK                                                       | 1.100282768        | 2               | 2.90088   |
| Q62745        | QFYDQALQQAVMDDDANNAK                                                  | 1.057337748        | 2               | 4.60367   |
| <b>Q62769</b> | <b>UN13B Protein unc_13 homolog B</b>                                 | <b>1.04392894</b>  | <b>0.92165</b>  | <b>2</b>  |
| Q62769        | DHMVREETRNLTPK                                                        | 0.841130121        | 2               | 2.52553   |
| Q62769        | SNDEVAREFVK                                                           | 1.04804619         | 1               | 2.04054   |
| <b>Q62785</b> | <b>HAP28 28 kDa heat_and acid_stable phosphoprotein</b>               | <b>1.05797514</b>  | <b>0.267337</b> | <b>5</b>  |
| Q62785        | ANEEDEQEEGDGASGDPK                                                    | 0.974720161        | 2               | 4.61853   |
| Q62785        | ANEEDEQEEGDGASGDPK                                                    | 1.315318098        | 3               | 3.30644   |
| Q62785        | GVEGLIDIENPNR                                                         | 1.058384562        | 2               | 2.34918   |
| Q62785        | KVTQLDLDPK                                                            | 0.590530807        | 2               | 2.46848   |
| Q62785        | YMKMHLAQTQAK                                                          | 0.92206192         | 2               | 2.43774   |
| <b>Q62789</b> | <b>UD2B7 UDP_glucuronosyltransferase 2B7</b>                          | <b>1.059979984</b> | <b>0.130176</b> | <b>2</b>  |
| Q62789        | IILDELVQR                                                             | 1.249289831        | 2               | 3.63259   |
| Q62789        | WIPQNDLLGHPK                                                          | 1.023054132        | 2               | 3.34986   |
| <b>Q62812</b> | <b>MYH9 Myosin_9</b>                                                  | <b>1.167059968</b> | <b>9.9E-20</b>  | <b>61</b> |
| Q62812        | ADFCIIHYAGK                                                           | 1.510474082        | 2               | 2.69724   |
| Q62812        | ALEEAMEQK                                                             | 1.134101527        | 2               | 2.72602   |
| Q62812        | ALELDSNLYR                                                            | 1.182725495        | 2               | 3.55494   |
| Q62812        | ALEQQVEEMK                                                            | 1.113382196        | 2               | 3.01225   |
| Q62812        | ANLQIDQINTDLNLER                                                      | 1.251710691        | 2               | 4.7973    |
| Q62812        | ASIAALEAK                                                             | 1.257427132        | 2               | 2.33633   |
| Q62812        | ASREEILAQAK                                                           | 1.006912462        | 2               | 3.12159   |
| Q62812        | CQYLQAEK                                                              | 1.486478684        | 1               | 1.93044   |
| Q62812        | DFSALESQLQDTQELLQEENR                                                 | 1.221171394        | 3               | 6.35346   |
| Q62812        | DLEAHIDTANK                                                           | 0.9697551          | 2               | 3.63865   |
| Q62812        | DLQGRDEQSEK                                                           | 1.138787124        | 2               | 3.21507   |
| Q62812        | EEILAQAK                                                              | 1.155072974        | 1               | 2.2352    |
| Q62812        | ELEDATETADAMNR                                                        | 0.966503151        | 2               | 4.23962   |

|               |                                                        |                    |                 |          |
|---------------|--------------------------------------------------------|--------------------|-----------------|----------|
| Q62812        | ELETQISELQEDLESER                                      | 1.11955758         | 2               | 4.97377  |
| Q62812        | HEAMITDLEER                                            | 1.182268289        | 2               | 3.43458  |
| Q62812        | HEDELLAK                                               | 1.213095124        | 2               | 3.22554  |
| Q62812        | HSQAVEELAEQLEQTK                                       | 1.091025972        | 2               | 4.91044  |
| Q62812        | HSQAVEELAEQLEQTKR                                      | 1.243008749        | 3               | 5.7173   |
| Q62812        | IIGLDQVAGMSETALPGAFK                                   | 1.301943857        | 2               | 5.89155  |
| Q62812        | IRELETQISELQEDLESER                                    | 1.262898959        | 2               | 5.16426  |
| Q62812        | KEEELQAALAR                                            | 1.219736206        | 2               | 3.2768   |
| Q62812        | KKVEAQLQELQVK                                          | 1.197477006        | 2               | 4.7232   |
| Q62812        | KLEEDQIIMEDQNCK                                        | 1.108127491        | 2               | 5.68567  |
| Q62812        | KLEGDSTDLSQIAELQAQIAELK                                | 1.170717096        | 2               | 5.74698  |
| Q62812        | KQELEEICHLEAR                                          | 1.146423403        | 2               | 4.5442   |
| Q62812        | KVEAQLQELQVK                                           | 1.219983964        | 2               | 3.94372  |
| Q62812        | LDPHLVLDQLR                                            | 1.151080668        | 3               | 3.4101   |
| Q62812        | LEEDQIIMEDQNCK                                         | 0.937315621        | 2               | 3.32872  |
| Q62812        | LEGDSTDLSQIAELQAQIAELK                                 | 0.907777136        | 2               | 4.97164  |
| Q62812        | LEVNQAMK                                               | 1.155625547        | 2               | 2.67756  |
| Q62812        | LQEMESAVK                                              | 1.158857587        | 2               | 2.41776  |
| Q62812        | LQQELDDLVDLDHQR                                        | 0.847973524        | 2               | 4.71319  |
| Q62812        | LQVELDSVTGLLNQSDSK                                     | 1.189426437        | 2               | 5.70638  |
| Q62812        | LTEMETMQSQLMAEK                                        | 1.224806574        | 2               | 4.40506  |
| Q62812        | MEDGVGCLETAEEAK                                        | 0.873353007        | 2               | 4.59492  |
| Q62812        | MQQNIQELEEQLSEESAR                                     | 0.95928041         | 2               | 5.9409   |
| Q62812        | NAEQFKDQADK                                            | 1.328315768        | 2               | 3.64393  |
| Q62812        | NKHEAMITDLEER                                          | 1.134726157        | 3               | 3.66858  |
| Q62812        | NLPIYSEEIVDMYK                                         | 1.540729873        | 2               | 3.28055  |
| Q62812        | NMDPLNDNIATLLHQSSDK                                    | 1.180061839        | 2               | 5.05924  |
| Q62812        | NTDQASMPDNATAAQK                                       | 1.167304736        | 2               | 5.31372  |
| Q62812        | NTDQASMPDNATAAQK+Oxidation(7)                          | 1.286492758        | 2               | 4.89612  |
| Q62812        | QAQQRDELADEIANSSGK                                     | 1.090700989        | 3               | 4.1532   |
| Q62812        | QIATLHAQVTDMK                                          | 0.707167431        | 2               | 2.36221  |
| Q62812        | QLEEAEEEAQR                                            | 1.324841813        | 2               | 3.49508  |
| Q62812        | QSVSNLEK                                               | 1.050968624        | 2               | 2.40169  |
| Q62812        | QTLENERGELANEVK                                        | 1.082457321        | 2               | 3.40491  |
| Q62812        | RGDMPFVVTR                                             | 1.054447258        | 2               | 2.63033  |
| Q62812        | RKLEGDSTDLSQIAELQAQIAELK                               | 1.151810378        | 3               | 5.66457  |
| Q62812        | RQLEEAEEEAQR                                           | 1.158529272        | 2               | 4.2632   |
| Q62812        | SMEAEMIQLEELAAER                                       | 1.069104703        | 2               | 4.52412  |
| Q62812        | TDLLLEPYNK                                             | 1.236564841        | 2               | 2.68106  |
| Q62812        | TELEDTLNSTAAQQLR                                       | 0.846000934        | 2               | 5.48875  |
| Q62812        | THEAQIQEMR                                             | 1.140561158        | 2               | 3.47574  |
| Q62812        | TQLEEELEDELQATEDAK                                     | 1.211772276        | 2               | 6.67947  |
| Q62812        | VAEFTTDLMEEEEK                                         | 1.315186455        | 2               | 4.222    |
| Q62812        | VEAQLQELQVK                                            | 1.111964434        | 2               | 3.67549  |
| Q62812        | VEDMAELTCLNEASVLHNLK                                   | 1.324162434        | 2               | 4.31749  |
| Q62812        | VISGVLQGNIVFK                                          | 1.122469533        | 2               | 3.65389  |
| Q62812        | VSHLLGINVDFTR                                          | 1.296805675        | 2               | 3.69235  |
| Q62812        | YEILTPNSIPK                                            | 1.049870182        | 2               | 3.24805  |
| <b>Q62826</b> | <b>HNRPM Heterogeneous nuclear ribonucleoprotein M</b> | <b>1.112869511</b> | <b>0.864335</b> | <b>8</b> |
| Q62826        | ADILEDKDGK                                             | 1.016800761        | 2               | 2.67777  |
| Q62826        | AFITNIPFDVK                                            | 0.770180951        | 2               | 3.13633  |
| Q62826        | GIGMGNLGPAGMGMEGIGFGINK                                | 1.162936395        | 2               | 4.88095  |
| Q62826        | GNFGGSFAGSFGGAGGHAPGVAR                                | 1.137627626        | 2               | 4.88984  |
| Q62826        | INEILSNALK                                             | 1.229178857        | 2               | 2.34599  |
| Q62826        | MGANNLERMGLERMGANSLER                                  | 0.924631215        | 2               | 2.40319  |



|               |                                                        |                    |                 |           |
|---------------|--------------------------------------------------------|--------------------|-----------------|-----------|
| Q62826        | MGPVMDRMTGLER+Oxidation(1)Oxidation(5)Oxidation(8)     | 0.991231757        | 2               | 2.57658   |
| Q62826        | VGSEIER                                                | 0.873569993        | 1               | 1.96376   |
| <b>Q62871</b> | <b>DC112 Cytoplasmic dynein 1 intermediate chain 2</b> | <b>1.214366385</b> | <b>0.136295</b> | <b>2</b>  |
| Q62871        | ADAEAAAATR                                             | 1.221634734        | 2               | 2.63024   |
| Q62871        | SVSTPSEAGSQDSDGDGAVGSR                                 | 0.816363178        | 2               | 5.35132   |
| <b>Q62902</b> | <b>LMAN1 Protein ERGIC_53</b>                          | <b>1.200564932</b> | <b>1.16E-12</b> | <b>5</b>  |
| Q62902        | GAGTPGQPQVVSQQELDTVVR                                  | 1.181617965        | 2               | 4.28386   |
| Q62902        | GHPDLQGQPADDIFESIGDR                                   | 1.102534553        | 2               | 5.22151   |
| Q62902        | NNPAIVVVGNNQINQYDHDQNDGATQALASCQR                      | 1.571472653        | 3               | 4.13723   |
| Q62902        | YQEEFEHFQQLDK                                          | 1.270043832        | 2               | 5.12994   |
| Q62902        | YVSSLTEEISR                                            | 1.329124526        | 2               | 2.65161   |
| <b>Q62910</b> | <b>SYNJ1 Synaptojanin_1</b>                            | <b>0.243229394</b> | <b>0.077296</b> | <b>2</b>  |
| Q62910        | MLIQLPSASQSK+Oxidation(1)                              | 0.339157313        | 2               | 2.31642   |
| Q62910        | NQTLTDWLLDAPK                                          | 0.239642235        | 2               | 2.48953   |
| <b>Q62967</b> | <b>MVD1 Diphosphomevalonate decarboxylase</b>          | <b>0.97988915</b>  | <b>0.999983</b> | <b>2</b>  |
| Q62967        | GLQVAPVLLSDELK                                         | 0.990213833        | 2               | 3.37021   |
| Q62967        | VYGVEDLSEVAR                                           | 0.951498113        | 2               | 3.28714   |
| <b>Q63041</b> | <b>A1M Alpha_1_macroglobulin</b>                       | <b>0.999790558</b> | <b>0.992165</b> | <b>13</b> |
| Q63041        | AEDITHNGIVYTPK                                         | 0.960462889        | 2               | 3.35107   |
| Q63041        | AEQGAYLGPLPYK                                          | 0.980821071        | 2               | 3.04495   |
| Q63041        | DLSSDLTTASK                                            | 0.708364112        | 2               | 2.51308   |
| Q63041        | DTVVKPVIVEPEGIEK                                       | 0.959546667        | 2               | 3.03229   |
| Q63041        | GSIFNSGSHVLPLEQGK                                      | 1.130443532        | 2               | 4.03633   |
| Q63041        | HSQGNWTLTAFLVK                                         | 1.020135251        | 2               | 2.35644   |
| Q63041        | IKEDGTGIELGTGSCIEANTLSK                                | 0.975985986        | 2               | 3.89411   |
| Q63041        | KLQDQSNQR                                              | 1.076713087        | 2               | 2.47675   |
| Q63041        | LIVYTILPNEELIADVQK                                     | 1.402207934        | 2               | 4.53025   |
| Q63041        | LQDQSNQR                                               | 0.887786982        | 2               | 2.79954   |
| Q63041        | QDLNDNDAYSVFQSIGLK                                     | 1.322689105        | 2               | 2.66362   |
| Q63041        | YNILPEAEGEAPFTLK                                       | 0.983219736        | 2               | 4.22737   |
| Q63041        | YVVLVPSELYAGVPEK                                       | 0.904672101        | 2               | 3.21272   |
| <b>Q63060</b> | <b>GLPK Glycerol kinase</b>                            | <b>1.446832469</b> | <b>7.01E-09</b> | <b>11</b> |
| Q63060        | AGALEGVPISGCLGDQSAALVGMCFQDQAK                         | 1.29257821         | 3               | 4.29988   |
| Q63060        | AVLGPLVGAVDQGTSSSTR                                    | 1.127439232        | 2               | 5.48632   |
| Q63060        | CVFSEHGLLTTVAYK                                        | 1.385088406        | 2               | 4.27959   |
| Q63060        | DCGIPLSHLQVDGGMTSNK                                    | 1.553963396        | 2               | 4.20494   |
| Q63060        | EILQSVYECIEK                                           | 1.1960342          | 2               | 3.84936   |
| Q63060        | FEPQINAESEIR                                           | 1.080160207        | 2               | 3.58185   |
| Q63060        | KVQEAVERN                                              | 1.463941842        | 2               | 3.56052   |
| Q63060        | LGQLNIDISNIK                                           | 1.663963834        | 2               | 3.32731   |
| Q63060        | NTYGTGCFLLCNTGHK                                       | 1.327273834        | 2               | 3.93996   |
| Q63060        | TAELLSHHQVEIK                                          | 1.462971269        | 3               | 3.76969   |
| Q63060        | VQEAVERN                                               | 1.154449421        | 2               | 3.37337   |
| <b>Q63081</b> | <b>PDIA6 Protein disulfide_isomerase A6</b>            | <b>1.139378243</b> | <b>0.002265</b> | <b>10</b> |
| Q63081        | ALDLFSDNAPPELLEIINEDIAK                                | 1.353721201        | 3               | 6.05411   |
| Q63081        | GESPVDYDGGR                                            | 1.111609371        | 2               | 2.91693   |
| Q63081        | GSFSEQGINEFLR                                          | 1.086604081        | 2               | 4.10811   |
| Q63081        | GSTAPVGGGSPFNITPR                                      | 1.119325889        | 2               | 4.82685   |
| Q63081        | HQSLGGQYGVQGFPTIK                                      | 1.092772664        | 2               | 5.03094   |
| Q63081        | KTCEEHQLCVVAVLPHILDTGATGR                              | 0.799277192        | 3               | 5.39329   |
| Q63081        | NLEPEWAAAATEVK                                         | 1.037195399        | 2               | 4.19714   |
| Q63081        | NSYLEVLLK                                              | 1.096993683        | 2               | 2.98258   |
| Q63081        | TCEEHQLCVVAVLPHILDTGATGR                               | 1.175856941        | 2               | 5.07342   |
| Q63081        | TGEAIVDAALSALR                                         | 1.060903049        | 3               | 4.71751   |
| <b>Q63108</b> | <b>EST3 Liver carboxylesterase 3</b>                   | <b>1.040618233</b> | <b>0.043417</b> | <b>4</b>  |
| Q63108        | GGTSKEEINLSK                                           | 1.091420469        | 2               | 3.72701   |

|               |                                                                   |                    |                 |           |
|---------------|-------------------------------------------------------------------|--------------------|-----------------|-----------|
| Q63108        | LDPMTATSLK                                                        | 0.900283891        | 2               | 2.44359   |
| Q63108        | QKTEEELETTLK                                                      | 0.979968267        | 2               | 3.44575   |
| Q63108        | SSFLLNLPEEAIPVAVEK                                                | 1.174147679        | 2               | 4.76672   |
| <b>Q63120</b> | <b>MRP2 Canalicular multispecific organic anion transporter 1</b> | <b>1.299674574</b> | <b>0.041467</b> | <b>4</b>  |
| Q63120        | ACALLPDLEILPGGDMAEIGEK                                            | 1.176526229        | 2               | 4.24684   |
| Q63120        | NIQVQNMKNK                                                        | 1.060370863        | 1               | 1.90164   |
| Q63120        | YFAWEPSFQEQVQGIR                                                  | 1.342477939        | 2               | 4.45456   |
| Q63120        | YLGDDLDLTSAIR                                                     | 0.542953416        | 2               | 2.5683    |
| <b>Q63150</b> | <b>DPYS Dihydropyrimidinase</b>                                   | <b>1.091044419</b> | <b>3.34E-10</b> | <b>9</b>  |
| Q63150        | ALGKDDFTK                                                         | 1.144344506        | 2               | 2.64277   |
| Q63150        | DQTCTPIPVKR                                                       | 1.013196389        | 2               | 2.49629   |
| Q63150        | EIGAIAQVHAENGDLIAEGAK                                             | 1.191147628        | 2               | 5.15317   |
| Q63150        | FVAVTSTNAAK                                                       | 1.04509995         | 2               | 2.9791    |
| Q63150        | GSSLIEAFETWR                                                      | 1.382931882        | 2               | 3.18403   |
| Q63150        | MLALGITGPEGHELCPAEVAEATLR                                         | 1.021757013        | 3               | 3.71777   |
| Q63150        | VVNDDFSQVADVLVEDGVVR                                              | 1.428864442        | 2               | 5.93712   |
| Q63150        | VVYEAGVFDVTAGHGK                                                  | 1.230779019        | 2               | 4.23502   |
| Q63150        | VVYGEPIAAGLGTGTQYWNK                                              | 1.123679465        | 2               | 5.36651   |
| <b>Q63270</b> | <b>ACOC Cytoplasmic aconitate hydratase</b>                       | <b>1.070377073</b> | <b>2.22E-16</b> | <b>18</b> |
| Q63270        | AVEAGLNVKPYVK                                                     | 1.084767175        | 2               | 2.67434   |
| Q63270        | DFSDDSQDPDFTQVVELDLK                                              | 2.05206261         | 2               | 4.95407   |
| Q63270        | FVEFFGPGVAQLSIADR                                                 | 1.830669396        | 2               | 5.33671   |
| Q63270        | GFQVAPDHNDHK                                                      | 1.299770599        | 2               | 3.44893   |
| Q63270        | IDFEKEPLGVNAQQQVFLK                                               | 1.041908934        | 3               | 4.99404   |
| Q63270        | IIPPGSGIIHQVNLEYLAR                                               | 1.567212039        | 2               | 3.46688   |
| Q63270        | KNDIENILNWSIMQHK                                                  | 1.161177125        | 3               | 4.08769   |
| Q63270        | NCDEFLVK                                                          | 1.311828032        | 1               | 2.23932   |
| Q63270        | NDIENILNWSIMQHK                                                   | 1.149924593        | 2               | 3.17456   |
| Q63270        | NQDLEFER                                                          | 1.02688587         | 1               | 2.65835   |
| Q63270        | QAPQTVHLPSGETLDVFDAAER                                            | 0.987446709        | 3               | 3.65511   |
| Q63270        | SIEVPFKPAR                                                        | 1.132809384        | 2               | 2.50058   |
| Q63270        | SIVDAYVLLNLGDSVTTDHISPAGNIAR                                      | 1.444969421        | 3               | 4.96809   |
| Q63270        | SPPFFESLTLDLQPPK                                                  | 1.120538298        | 3               | 3.59335   |
| Q63270        | SWNALAAPSEK                                                       | 1.05930122         | 1               | 2.30064   |
| Q63270        | TSLSPGSGVVYYLR                                                    | 1.423628759        | 2               | 3.13569   |
| Q63270        | VILQDFTGVPVAVVFAAMR                                               | 1.643194277        | 2               | 4.65124   |
| Q63270        | YQQAGLPLIVLAGK                                                    | 0.969212376        | 2               | 3.75712   |
| <b>Q63276</b> | <b>BAAT Bile acid_CoA:amino acid N_acyltransferase</b>            | <b>1.025789484</b> | <b>0.118628</b> | <b>17</b> |
| Q63276        | AHGHFLFVVGEDDKNLNSK                                               | 1.474132701        | 2               | 6.10148   |
| Q63276        | ASEVGEVDLER                                                       | 0.95464642         | 2               | 3.94026   |
| Q63276        | DDKGNLFNSQAFYR                                                    | 1.176253096        | 2               | 3.53085   |
| Q63276        | GNLFNSQAFYR                                                       | 0.961925443        | 2               | 3.18833   |
| Q63276        | LCHPYFPVEGK                                                       | 1.366554965        | 3               | 3.46631   |
| Q63276        | LTAVPLSALVDEPVHIR                                                 | 2.930202007        | 2               | 3.87243   |
| Q63276        | MPFVIPSINWGGEVIPHAAAQEHSWK                                        | 0.781539956        | 3               | 4.2309    |
| Q63276        | NWTLLSYPGAGHLIEPPYSPLCSASR                                        | 1.151260839        | 2               | 4.64777   |
| Q63276        | QHLNPGFNSQL                                                       | 1.195488981        | 2               | 3.52628   |
| Q63276        | QITATVLINGPNFVSSNPHVYR                                            | 1.022224313        | 3               | 4.94346   |
| Q63276        | TFEETADKDSK                                                       | 0.849880424        | 2               | 3.75055   |
| Q63276        | VDLEYFEEGVFLLR                                                    | 1.141347015        | 2               | 4.40441   |
| Q63276        | VFQPTPCSEEFVTNALGLVEFYR                                           | 1.29052234         | 2               | 5.60354   |
| Q63276        | VISSLDSLILR                                                       | 1.262179607        | 2               | 4.40301   |
| Q63276        | VTGLTPFQVVLQASLK                                                  | 1.206274944        | 3               | 4.14586   |
| Q63276        | WYVAPGVTR                                                         | 0.944258445        | 2               | 2.64707   |
| Q63276        | YCFPIEK                                                           | 0.96059157         | 2               | 2.63184   |

|               |                                                                           |                    |                 |           |
|---------------|---------------------------------------------------------------------------|--------------------|-----------------|-----------|
| <b>Q63342</b> | <b>M2GD Dimethylglycine dehydrogenase_mitochondrial</b>                   | <b>0.987692123</b> | <b>1</b>        | <b>28</b> |
| Q63342        | ADIINIVNGPITYSPDILPMVGP HQGVR                                             | 1.075829411        | 3               | 4.58571   |
| Q63342        | AWGSEMNCDTNPLEAGLDYFIK                                                    | 1.085500102        | 3               | 4.58204   |
| Q63342        | DGLLFGPYEQEK                                                              | 0.845286905        | 2               | 2.60613   |
| Q63342        | EGQESPPSPPEWK                                                             | 0.851278972        | 2               | 2.49578   |
| Q63342        | ELFESDLDRITHEVVEAAMEMVPVLK                                                | 1.072520626        | 3               | 4.64751   |
| Q63342        | GGYDVEIR                                                                  | 0.983068281        | 2               | 2.43576   |
| Q63342        | GQDSTQLLDHLCANVIPK                                                        | 1.027194027        | 2               | 4.15152   |
| Q63342        | IHELFP LLNMDK                                                             | 1.006272671        | 2               | 2.5913    |
| Q63342        | IHYDSIK                                                                   | 0.815492511        | 1               | 2.10464   |
| Q63342        | IMNAGQEEGIDNFGTYALNALR                                                    | 0.922250513        | 2               | 4.84763   |
| Q63342        | ISDIPVTAIR                                                                | 1.037892971        | 2               | 2.75728   |
| Q63342        | ITEHVEAAMEMVPVLK                                                          | 0.832236821        | 2               | 4.02582   |
| Q63342        | KADIINIVNGPITYSPDILPMVGP HQGVR                                            | 1.064452193        | 3               | 7.51488   |
| Q63342        | LEETGQVVG F HQPGSIR                                                       | 0.942630384        | 2               | 4.96647   |
| Q63342        | LNKPADFTGK                                                                | 1.311359637        | 2               | 2.65562   |
| Q63342        | LTSEDLSDDFVK                                                              | 1.006732728        | 2               | 3.83761   |
| Q63342        | LVCLTLATDDVDPEGNESVWYK                                                    | 1.775253452        | 2               | 2.87227   |
| Q63342        | NITDELGLVGVAGPYAR                                                         | 1.135928426        | 2               | 5.0044    |
| Q63342        | NYPATIIQEPLVLEPTR                                                         | 1.064657627        | 3               | 4.92776   |
| Q63342        | REDSAALYER                                                                | 0.781739947        | 2               | 3.0355    |
| Q63342        | TNWHATEQYIEPEK                                                            | 0.960731119        | 2               | 4.16554   |
| Q63342        | VGFTNISHMLTPR                                                             | 0.995091069        | 2               | 3.22311   |
| Q63342        | VGVIDLSPFGK                                                               | 0.946968956        | 2               | 3.22758   |
| Q63342        | VIGNTTSGSYSYIQK                                                           | 0.98070681         | 2               | 4.54792   |
| Q63342        | VYAELTVSHQSPGELLITGSGSELHDLR                                              | 1.127943911        | 3               | 5.88108   |
| Q63342        | WIEEA AVR                                                                 | 1.063955551        | 2               | 2.60343   |
| Q63342        | WTTTQYTEAK                                                                | 0.99188516         | 2               | 2.89812   |
| Q63342        | YLSDWILHGEPFDLIEDPNR                                                      | 1.179218292        | 3               | 4.70601   |
| <b>Q63347</b> | <b>PRS7 26S protease regulatory subunit 7</b>                             | <b>1.190634186</b> | <b>0.940462</b> | <b>8</b>  |
| Q63347        | ALDEGDIALLK                                                               | 1.105308407        | 2               | 2.79319   |
| Q63347        | ESDTGLAPPALWDLAADK                                                        | 0.965810826        | 2               | 2.47637   |
| Q63347        | FDDGAGGDNEVQR                                                             | 1.103785344        | 2               | 4.21043   |
| Q63347        | FVVDLSQVAPTDIEEGMR                                                        | 0.928854757        | 2               | 3.37763   |
| Q63347        | IINADSEDPK                                                                | 1.272899835        | 2               | 2.83582   |
| Q63347        | QTLQSEQPLQVAR                                                             | 0.987441643        | 2               | 4.12984   |
| Q63347        | QVEDDIQQLLK                                                               | 1.022133508        | 2               | 2.74523   |
| Q63347        | TMLELINQLDGF DPR                                                          | 1.166524028        | 2               | 3.1821    |
| <b>Q63362</b> | <b>NDUA5 NADH dehydrogenase [ubiquinone] 1 alpha subcomplex subunit 5</b> | <b>1.088469739</b> | <b>0.401895</b> | <b>4</b>  |
| Q63362        | KLENLLQGGVEEVILQAEK                                                       | 1.204518854        | 2               | 6.27248   |
| Q63362        | LENLLQGGVEEVILQAEK                                                        | 1.032404456        | 2               | 2.57621   |
| Q63362        | TTGLVGLAVCDTPHER                                                          | 1.074081537        | 2               | 4.14911   |
| Q63362        | YTEQITSEK                                                                 | 1.345595938        | 1               | 2.14431   |
| <b>Q63377</b> | <b>AT1B3 Sodium/potassium_transporting ATPase subunit beta_3</b>          | <b>1.197701727</b> | <b>0.366387</b> | <b>2</b>  |
| Q63377        | EENIANIVTYPDDGLIDLK                                                       | 1.195565529        | 2               | 4.44562   |
| Q63377        | LFIYNPTSGEFLGR                                                            | 1.268337087        | 2               | 2.52184   |
| <b>Q63413</b> | <b>DX39B Spliceosome RNA helicase Ddx39b</b>                              | <b>0.953424788</b> | <b>0.972935</b> | <b>2</b>  |
| Q63413        | GLAITFVSDENDAK                                                            | 1.044768312        | 2               | 2.77757   |
| Q63413        | NCPHIVVGTPGR                                                              | 0.953386604        | 2               | 2.84334   |
| <b>Q63429</b> | <b>UBC Polyubiquitin_C</b>                                                | <b>1.073549407</b> | <b>0.99964</b>  | <b>2</b>  |
| Q63429        | TITLEVPSDTIENVK                                                           | 1.090148044        | 2               | 4.81926   |
| Q63429        | TLSDYNIQK                                                                 | 1.064963205        | 2               | 2.85842   |
| <b>Q63448</b> | <b>ACOX3 Peroxisomal acyl_coenzyme A oxidase 3</b>                        | <b>1.179551217</b> | <b>5.7E-05</b>  | <b>12</b> |
| Q63448        | ADWLDSEAPLAAYR                                                            | 1.078245246        | 2               | 4.19765   |

|               |                                                               |                    |                 |           |
|---------------|---------------------------------------------------------------|--------------------|-----------------|-----------|
| Q63448        | EIHALASAGKPLASWTAQR                                           | 1.101114496        | 2               | 4.54274   |
| Q63448        | FHEHTHSSVPPSLR                                                | 0.946805521        | 2               | 2.73763   |
| Q63448        | GGYISGEQTKG                                                   | 1.11152126         | 2               | 3.06133   |
| Q63448        | LGASLGLSSGR                                                   | 1.225869455        | 2               | 2.56484   |
| Q63448        | NLWAAVLQQSGVLER                                               | 1.17878425         | 2               | 4.01965   |
| Q63448        | QFGPTDKEEIPVLEYPLQQWR                                         | 0.651407114        | 3               | 4.07205   |
| Q63448        | RDSVLWSDIPK                                                   | 1.380573111        | 2               | 2.30129   |
| Q63448        | TIFLDLIELQR                                                   | 1.823850061        | 2               | 3.55359   |
| Q63448        | TIFSTLENDPLFARPFADLPLEK                                       | 1.241211374        | 3               | 4.74619   |
| Q63448        | TTAHYDPATQEFILHSPDFEAAK                                       | 1.203361611        | 3               | 4.77526   |
| Q63448        | TVNFLEAYPGILGQK                                               | 1.381402952        | 2               | 5.40154   |
| <b>Q63507</b> | <b>RL14 60S ribosomal protein L14</b>                         | <b>1.726873185</b> | <b>3.95E-08</b> | <b>2</b>  |
| Q63507        | CMQLTDFILK                                                    | 1.73371349         | 2               | 2.3912    |
| Q63507        | LVAIVDVIDQNR                                                  | 1.536656383        | 2               | 4.49138   |
| <b>Q63520</b> | <b>SYCP3 Synaptonemal complex protein 3</b>                   | <b>0.931269569</b> | <b>0.830941</b> | <b>2</b>  |
| Q63520        | KVMMETQQQEMANVR                                               | 0.931269569        | 2               | 2.68622   |
| Q63520        | VMMETQQQEMANVRK                                               | 0.931269569        | 2               | 2.54219   |
| <b>Q63524</b> | <b>TMED2 Transmembrane emp24 domain-containing protein 2</b>  | <b>1.157630201</b> | <b>0.523747</b> | <b>3</b>  |
| Q63524        | GQDMETEAHQNKLEEMINELAVAMTAVK                                  | 1.128111643        | 3               | 4.96017   |
| Q63524        | HEQEYMEVR                                                     | 1.295483812        | 2               | 3.39291   |
| Q63524        | HEQEYMEVR+Oxidation(6)                                        | 1.0114934          | 2               | 2.49631   |
| <b>Q63525</b> | <b>NUDC Nuclear migration protein nudC</b>                    | <b>1.301963239</b> | <b>6.83E-05</b> | <b>4</b>  |
| Q63525        | GQAPVIDGELYNEVK                                               | 1.346683832        | 2               | 3.24092   |
| Q63525        | LSDLDSETR                                                     | 1.043597146        | 2               | 2.32304   |
| Q63525        | LVTSDPEINTK                                                   | 1.335792722        | 2               | 2.90033   |
| Q63525        | WTQTLSELDAVPPFR                                               | 1.043291961        | 2               | 2.61491   |
| <b>Q63556</b> | <b>SPA3M Serine protease inhibitor A3M (Fragment)</b>         | <b>1.292728419</b> | <b>0.341379</b> | <b>2</b>  |
| Q63556        | MQQVEASLQPETLK+Oxidation(1)                                   | 1.223550851        | 2               | 3.40679   |
| Q63556        | MQQVEASLQPETLKK+Oxidation(1)                                  | 1.311035645        | 2               | 2.81684   |
| <b>Q63569</b> | <b>PRS6A 26S protease regulatory subunit 6A</b>               | <b>1.178630856</b> | <b>0.245856</b> | <b>7</b>  |
| Q63569        | AMEVDERPTEQYSDIGGLDK                                          | 1.022837943        | 3               | 4.71746   |
| Q63569        | CTDDFNGAQCK                                                   | 1.459436753        | 2               | 3.48599   |
| Q63569        | DSYLILETLPTDYDSR                                              | 1.197397536        | 2               | 2.46691   |
| Q63569        | MATVWDEAEQDGIGEEVLK                                           | 1.007356465        | 2               | 3.19526   |
| Q63569        | MNVSPDVNYEELAR                                                | 1.100091159        | 2               | 3.37971   |
| Q63569        | QTYFLPVIGLVDAEK                                               | 1.143435113        | 2               | 2.42653   |
| Q63569        | TMLELLNQLDGFQNPQVK                                            | 0.733560134        | 2               | 3.7142    |
| <b>Q63570</b> | <b>PRS6B 26S protease regulatory subunit 6B</b>               | <b>1.025605139</b> | <b>0.201551</b> | <b>4</b>  |
| Q63570        | FDAQTGADR                                                     | 0.964662051        | 2               | 2.51372   |
| Q63570        | IQDEIPALSVSRPQTGLSFLGPEPEDLEDLYSR                             | 1.69139322         | 3               | 5.84851   |
| Q63570        | KDEQEHEFYK                                                    | 0.942931895        | 2               | 3.0981    |
| Q63570        | RFDAQTGADR                                                    | 1.025636265        | 2               | 2.65011   |
| <b>Q63584</b> | <b>TMEDA Transmembrane emp24 domain-containing protein 10</b> | <b>1.34196458</b>  | <b>2.29E-11</b> | <b>4</b>  |
| Q63584        | ITDSAGHILYAK                                                  | 1.347738148        | 2               | 3.67308   |
| Q63584        | LEDLSESIVNDFAYMK                                              | 1.372970455        | 2               | 4.58995   |
| Q63584        | NYEEIAK                                                       | 1.141903181        | 1               | 2.17153   |
| Q63584        | RLEDLSESIVNDFAYMK                                             | 1.160419378        | 2               | 4.3022    |
| <b>Q63598</b> | <b>PLST Plastin_3</b>                                         | <b>1.180068351</b> | <b>0.081169</b> | <b>12</b> |
| Q63598        | AESMLQQADK                                                    | 1.109757716        | 2               | 3.14399   |
| Q63598        | ATDDIIVNWVNGTLSEAGK                                           | 1.126803526        | 2               | 5.04518   |
| Q63598        | EGICALGGTSELSEGTQHSYSEEEK                                     | 1.135810486        | 3               | 3.4888    |
| Q63598        | HVIPMNPNTDDLK                                                 | 1.066240679        | 2               | 3.01918   |
| Q63598        | IDINMSGFNETDDLKR                                              | 1.18466828         | 2               | 4.2491    |
| Q63598        | INNFADIK                                                      | 1.265348965        | 2               | 2.4944    |
| Q63598        | KLENCNYAVELGK                                                 | 1.093554592        | 2               | 3.67427   |

|               |                                                     |                    |                 |           |
|---------------|-----------------------------------------------------|--------------------|-----------------|-----------|
| Q63598        | NEALAALLR                                           | 1.208324885        | 2               | 2.6013    |
| Q63598        | VDLNSNGFICDYELHELK                                  | 1.247376229        | 2               | 4.11337   |
| Q63598        | VYALPEDLVEVKPK                                      | 1.146782354        | 2               | 2.74369   |
| Q63598        | YPALTKPENQDIDWTLLEGETR                              | 0.936243043        | 3               | 5.23825   |
| Q63598        | YTLNVMEDLGEGQK                                      | 1.158212447        | 2               | 3.88188   |
| <b>Q63610</b> | <b>TPM3 Tropomyosin alpha_3 chain</b>               | <b>1.102601102</b> | <b>0.240753</b> | <b>8</b>  |
| Q63610        | AREQAEEVSLNR                                        | 1.482468594        | 2               | 2.89741   |
| Q63610        | EQAAEAVSLNR                                         | 1.013248476        | 2               | 2.5772    |
| Q63610        | IQVLQQADDAEER                                       | 1.216782993        | 2               | 5.08659   |
| Q63610        | KIQVLQQADDAEER                                      | 1.074089436        | 2               | 4.86434   |
| Q63610        | KLVIIEGDLER                                         | 1.042022071        | 3               | 3.84739   |
| Q63610        | LVIIIEGDLER                                         | 1.013835005        | 2               | 2.7554    |
| Q63610        | MELQEIQLK                                           | 1.049842476        | 2               | 2.8502    |
| Q63610        | YSQKEDKYEEIK                                        | 1.219290154        | 2               | 4.63917   |
| <b>Q63617</b> | <b>HYOU1 Hypoxia up_regulated protein 1</b>         | <b>1.234505595</b> | <b>7.64E-05</b> | <b>11</b> |
| Q63617        | EGETPDEKESGDKSEAQKPNK                               | 1.424925688        | 3               | 3.54576   |
| Q63617        | GQAGPEGVPPAPEEEKK                                   | 0.819732188        | 2               | 3.5048    |
| Q63617        | LIPEMDQIFTDVEMTTLEK                                 | 1.228253951        | 2               | 4.67586   |
| Q63617        | LYQPEYQEVSTEEQR                                     | 1.199954046        | 2               | 4.93016   |
| Q63617        | NINADEAAAMGAVYQAAALSK                               | 1.321853931        | 2               | 5.19487   |
| Q63617        | SLAEDFAEQPIKDAVITVPAFFNQAER                         | 1.179275763        | 2               | 3.86914   |
| Q63617        | TLGGLEMLER                                          | 1.181635996        | 2               | 2.59578   |
| Q63617        | VAIVKPGVPMIEIVLNK                                   | 1.05175819         | 2               | 2.65795   |
| Q63617        | VEFEELCADLFDK                                       | 1.787403166        | 2               | 3.59044   |
| Q63617        | VESVFETLVEDSPEEESTLTK                               | 1.055132544        | 2               | 3.814     |
| Q63617        | VLQLINDNTATALSYGVFR                                 | 1.422054717        | 2               | 5.27578   |
| <b>Q63716</b> | <b>PRDX1 Peroxiredoxin_1</b>                        | <b>1.090924142</b> | <b>4.44E-16</b> | <b>15</b> |
| Q63716        | ADEGISFR                                            | 1.077865998        | 2               | 3.15033   |
| Q63716        | ATAVMPDGQFK                                         | 1.104561977        | 2               | 2.85      |
| Q63716        | ATAVMPDGQFK+Oxidation(5)                            | 1.249121986        | 2               | 2.33723   |
| Q63716        | DISLSDYK                                            | 0.964414712        | 1               | 1.93697   |
| Q63716        | HGEVCPAGWKPGSDTIKPDVKNK                             | 1.048372446        | 3               | 6.32962   |
| Q63716        | KQGGLGPMNIPLVSDPK                                   | 1.104013783        | 2               | 3.9838    |
| Q63716        | KQGGLGPMNIPLVSDPKR                                  | 1.064944809        | 3               | 4.04265   |
| Q63716        | LNCQVIGASVDSHFCHLAWINTPK                            | 1.834717607        | 3               | 3.91788   |
| Q63716        | LVQAFQFTDK                                          | 2.543427821        | 2               | 3.37246   |
| Q63716        | QGGLGPMNIPLVSDPK                                    | 0.720144914        | 2               | 3.17191   |
| Q63716        | QGGLGPMNIPLVSDPK+Oxidation(7)                       | 1.270033615        | 2               | 2.78335   |
| Q63716        | QITINDLPVGR                                         | 1.157600433        | 2               | 3.33904   |
| Q63716        | RTIAQDYGVLK                                         | 1.092513072        | 2               | 2.69778   |
| Q63716        | SVDEILR                                             | 1.099925735        | 2               | 2.48987   |
| Q63716        | TIAQDYGVLK                                          | 1.100896018        | 2               | 3.46053   |
| <b>Q63755</b> | <b>PRDM2 PR domain zinc finger protein 2</b>        | <b>0.762346848</b> | <b>0.258059</b> | <b>2</b>  |
| Q63755        | LSFNVELGKMSPNK                                      | 1.272184904        | 2               | 2.42309   |
| Q63755        | VKAAAATPFQGPFLKE                                    | 0.726127455        | 2               | 2.30196   |
| <b>Q63768</b> | <b>CRK Adapter molecule crk</b>                     | <b>1.109904688</b> | <b>0.017862</b> | <b>2</b>  |
| Q63768        | IGDQEFDSLPALEFYK                                    | 1.0227344          | 2               | 3.6277    |
| Q63768        | VPNAYDKTALALEVGELVK                                 | 1.452517783        | 2               | 2.90853   |
| <b>Q63797</b> | <b>PSME1 Proteasome activator complex subunit 1</b> | <b>0.958482119</b> | <b>0.59173</b>  | <b>8</b>  |
| Q63797        | ISELDAFLKEPALNEANLSNLK                              | 0.936647056        | 2               | 5.26967   |
| Q63797        | KGDEDDKGPVNCNEK                                     | 0.917379289        | 3               | 5.03654   |
| Q63797        | KISELDAFLKEPALNEANLSNLK                             | 1.119827779        | 3               | 6.28886   |
| Q63797        | LEGFQTQISK                                          | 1.117520158        | 2               | 2.62213   |
| Q63797        | QLVHELDEAEYQEIR                                     | 1.172843695        | 2               | 4.38577   |
| Q63797        | TENLLGSYFPK                                         | 1.063884069        | 2               | 3.33546   |
| Q63797        | VDVFREDLCSK                                         | 1.062743029        | 2               | 2.76591   |
| Q63797        | VFELMTSLHTK                                         | 0.962100219        | 2               | 2.52489   |

|               |                                                           |                    |                 |           |
|---------------|-----------------------------------------------------------|--------------------|-----------------|-----------|
| <b>Q63798</b> | <b>PSME2 Proteasome activator complex subunit 2</b>       | <b>1.185581646</b> | <b>0.030083</b> | <b>4</b>  |
| Q63798        | AFYAELHHIISNLEK                                           | 1.123705462        | 2               | 3.72507   |
| Q63798        | IEDGNDFGVAIQEK                                            | 1.185780714        | 2               | 4.52676   |
| Q63798        | KIISLSQLLQEDSLNVADLSSLR                                   | 1.631749813        | 2               | 4.52137   |
| Q63798        | TKVEAFQTAISK                                              | 0.961693738        | 2               | 3.44745   |
| <b>Q63836</b> | <b>SBP2 Selenium_binding protein 2</b>                    | <b>0.905258598</b> | <b>0.236429</b> | <b>4</b>  |
| Q63836        | EGSVMLQVDVDTVNGGLK                                        | 0.949526661        | 2               | 2.56205   |
| Q63836        | GGSVQVLEDQELTCQPEPLVVK                                    | 0.935223264        | 2               | 5.19062   |
| Q63836        | IYVVDVGSEPR                                               | 0.793460548        | 2               | 3.77395   |
| Q63836        | LNPNFLVDFGKEPLPALAHELK                                    | 0.939391027        | 3               | 4.19023   |
| <b>Q63862</b> | <b>MYH11 Myosin_11 (Fragments)</b>                        | <b>1.193669189</b> | <b>0.51251</b>  | <b>2</b>  |
| Q63862        | LQQELDDLVDLDNQR                                           | 0.9493348          | 2               | 4.29203   |
| Q63862        | SLEAELMQLQEDLAAER                                         | 1.193739903        | 2               | 2.92231   |
| <b>Q63945</b> | <b>SET Protein SET</b>                                    | <b>1.365670338</b> | <b>3.12E-05</b> | <b>2</b>  |
| Q63945        | IDFYFDENPYFENK                                            | 1.492517898        | 2               | 3.59469   |
| Q63945        | VEVTEFEDIK                                                | 1.135218751        | 2               | 2.6153    |
| <b>Q63965</b> | <b>SFXN1 Sideroflexin_1</b>                               | <b>1.015271787</b> | <b>0.999956</b> | <b>4</b>  |
| Q63965        | NILLTNEQLENAR                                             | 0.999591032        | 2               | 4.50193   |
| Q63965        | QGIVPAGLTENELWR                                           | 1.009574571        | 2               | 2.69622   |
| Q63965        | WDQSTFIGR                                                 | 1.082508801        | 2               | 2.36495   |
| Q63965        | YAYDSAFHPDTGEK                                            | 1.109812849        | 2               | 4.29827   |
| <b>Q64057</b> | <b>AL7A1 Alpha_aminoadipic semialdehyde dehydrogenase</b> | <b>1.131526788</b> | <b>2.21E-07</b> | <b>17</b> |
| Q64057        | AWNIVADIPAPK                                              | 1.065907174        | 2               | 3.79783   |
| Q64057        | DYEETIGK                                                  | 0.912621611        | 1               | 2.05589   |
| Q64057        | EDNEGVFNGSWGGR                                            | 0.802938443        | 2               | 3.48623   |
| Q64057        | FKNEEEVFEWNNEVK                                           | 1.128552367        | 2               | 5.80244   |
| Q64057        | GAPTTSLVSIATK                                             | 1.035823665        | 2               | 4.9187    |
| Q64057        | GEVITYCPANNEPIAR                                          | 0.975229118        | 2               | 5.39925   |
| Q64057        | GSDCGIVNVNIPITSGAEIGGAFGGEK                               | 0.914653172        | 2               | 5.85717   |
| Q64057        | LFLHESIHEVVDR                                             | 1.319473259        | 2               | 3.96686   |
| Q64057        | NEEEVFEWNNEVK                                             | 0.884205527        | 2               | 4.56077   |
| Q64057        | QAVSMFVQAVEEAK                                            | 0.934900717        | 2               | 2.80875   |
| Q64057        | QGLSSSIFTK                                                | 1.058004629        | 2               | 2.37496   |
| Q64057        | QVALMVQER                                                 | 1.033321972        | 2               | 2.42743   |
| Q64057        | STCTINYSTALPLAQGIK                                        | 1.655176597        | 2               | 4.96593   |
| Q64057        | VGNPWDPNILYGPLHTK                                         | 1.431580835        | 3               | 3.68468   |
| Q64057        | VMDHPGNYVEPTIVTGLVHDAPIVHK                                | 1.00764355         | 3               | 6.06578   |
| Q64057        | VMDHPGNYVEPTIVTGLVHDAPIVHK+Oxidation(2)                   | 1.133976701        | 3               | 6.03889   |
| Q64057        | VNLLSFTGSTQVQK                                            | 1.649237005        | 2               | 4.75102   |
| <b>Q640L5</b> | <b>CCD18 Coiled_coil domain_containing protein 18</b>     | <b>0.927099163</b> | <b>0.624749</b> | <b>2</b>  |
| Q640L5        | NEKIRSLESNINTEHEK                                         | 0.92649315         | 2               | 2.37839   |
| Q640L5        | TELEKTTNSVKELER                                           | 1.153136765        | 2               | 2.33332   |
| <b>Q64119</b> | <b>MYL6 Myosin light polypeptide 6</b>                    | <b>1.194887216</b> | <b>8.77E-15</b> | <b>7</b>  |
| Q64119        | DQGTIEDYVEGLR                                             | 0.797928497        | 2               | 3.21852   |
| Q64119        | EGNGTVMGAEIR                                              | 1.215834104        | 2               | 2.53006   |
| Q64119        | HVLVTLGEK                                                 | 1.179987791        | 2               | 2.5633    |
| Q64119        | ILYSQCGDVMR                                               | 1.806312569        | 2               | 3.13966   |
| Q64119        | NKDQGTIEDYVEGLR                                           | 1.1723039          | 2               | 4.28274   |
| Q64119        | VFDKEGNGTVMGAEIR                                          | 1.37563337         | 2               | 3.97205   |
| Q64119        | VLDFEHFLPMLQTVAK                                          | 1.108040082        | 2               | 4.96608   |
| <b>Q64122</b> | <b>MYL9 Myosin regulatory light polypeptide 9</b>         | <b>1.481169635</b> | <b>6.28E-07</b> | <b>2</b>  |
| Q64122        | DGFIDKEDLHDMLASLGK                                        | 1.481197506        | 2               | 5.24888   |
| Q64122        | LNGTDPEDVIR                                               | 1.346048965        | 2               | 2.78411   |
| <b>Q64176</b> | <b>EST22 Liver carboxylesterase 22</b>                    | <b>1.071253479</b> | <b>0.847076</b> | <b>4</b>  |
| Q64176        | AISESGVALTAGLVK                                           | 0.97923455         | 2               | 4.87588   |
| Q64176        | EGYLQIGATTQQAQK                                           | 0.92206192         | 2               | 4.29608   |

|               |                                                                                            |                    |                 |           |
|---------------|--------------------------------------------------------------------------------------------|--------------------|-----------------|-----------|
| Q64176        | LGIWGFSTGDEHSR                                                                             | 1.505540379        | 2               | 3.13147   |
| Q64176        | NFNTVPYIVGINK                                                                              | 0.82666446         | 2               | 3.44473   |
| <b>Q641Y0</b> | <b>OST48 Dolichyl_diphosphooligosaccharide__protein glycosyltransferase 48 kDa subunit</b> | <b>1.325153981</b> | <b>0.000286</b> | <b>7</b>  |
| Q641Y0        | ELGSECGIEFDEEK                                                                             | 1.284306105        | 2               | 3.69434   |
| Q641Y0        | GVGMVADPDNPLVLDILTSSTYSFFDPKPITQYPHAVGR                                                    | 1.570678586        | 4               | 5.12069   |
| Q641Y0        | NLLIAGLQAR                                                                                 | 1.167787338        | 2               | 3.79718   |
| Q641Y0        | TADDPSSLIK                                                                                 | 1.066133407        | 2               | 2.33634   |
| Q641Y0        | TAVIDHHNYDVSDLGQHTLIVADTENLLK                                                              | 1.271054969        | 3               | 6.1378    |
| Q641Y0        | TLVLLDNLNVR                                                                                | 1.152481443        | 2               | 3.93534   |
| Q641Y0        | WVPFDGDDIQLEFVR                                                                            | 1.585701299        | 2               | 3.33673   |
| <b>Q641Y2</b> | <b>NDUS2 NADH dehydrogenase [ubiquinone] iron_sulfur protein 2_ mitochondrial</b>          | <b>1.217171417</b> | <b>0.001529</b> | <b>5</b>  |
| Q641Y2        | GSGIQWDLR                                                                                  | 1.190120346        | 2               | 2.71025   |
| Q641Y2        | IDEVEEMLTNNR                                                                               | 1.215956869        | 2               | 3.49956   |
| Q641Y2        | IIEQCLNK                                                                                   | 1.460221863        | 2               | 2.89628   |
| Q641Y2        | LYTEGYQVPPGATYTAIEAPK                                                                      | 1.710641882        | 2               | 2.75665   |
| Q641Y2        | TQPYDVYDQVEFDVPIGSR                                                                        | 1.200592659        | 2               | 4.24984   |
| <b>Q64232</b> | <b>TECR Trans_2_3_ enoyl_CoA reductase</b>                                                 | <b>1.060899052</b> | <b>0.643501</b> | <b>3</b>  |
| Q64232        | HYEVEIR                                                                                    | 0.875319876        | 2               | 2.32871   |
| Q64232        | LCFLDKVEPQATISEIK                                                                          | 1.184732652        | 2               | 4.5418    |
| Q64232        | SLKDEDVLQK                                                                                 | 1.069057693        | 2               | 3.004     |
| <b>Q64240</b> | <b>AMBP Protein AMBP</b>                                                                   | <b>0.968781357</b> | <b>0.964126</b> | <b>3</b>  |
| Q64240        | AFAELWAFDAAQ GK                                                                            | 1.262990611        | 2               | 2.77097   |
| Q64240        | AVLPQENEGSGSEPLITGTLK                                                                      | 0.938767936        | 2               | 4.79511   |
| Q64240        | TIAACNLPIVQGPCR                                                                            | 0.993787782        | 2               | 3.96866   |
| <b>Q64380</b> | <b>SARDH Sarcosine dehydrogenase_ mitochondrial</b>                                        | <b>0.878563878</b> | <b>3.36E-06</b> | <b>17</b> |
| Q64380        | AIDSLSIEK                                                                                  | 0.871430907        | 2               | 2.55526   |
| Q64380        | AYGIESHVLSPAETK                                                                            | 0.853509176        | 2               | 4.29303   |
| Q64380        | DGTMDPAGTCTTLTR                                                                            | 0.678166072        | 2               | 4.04702   |
| Q64380        | DILQDVLADLSNEAFFSTHQLVLR                                                                   | 1.191190383        | 3               | 5.02633   |
| Q64380        | DLYPLMNVDLYGTYLVPR                                                                         | 1.172891832        | 2               | 3.49597   |
| Q64380        | FHHSLTDHPR                                                                                 | 0.913708949        | 2               | 2.55454   |
| Q64380        | FYLLGADAR                                                                                  | 0.928566191        | 2               | 2.54531   |
| Q64380        | HGLVNAGYR                                                                                  | 0.856117593        | 2               | 2.35253   |
| Q64380        | IEGIQNMPNVR                                                                                | 0.848891619        | 2               | 2.83996   |
| Q64380        | LGVGGVLLER                                                                                 | 1.594289247        | 2               | 3.15175   |
| Q64380        | LQGDALSVGGYEANPIFWDEVSDK                                                                   | 0.948994957        | 2               | 4.28136   |
| Q64380        | NYSVVFPHDEPLAGR                                                                            | 0.865818727        | 2               | 3.87929   |
| Q64380        | QVVSHDLEETGLHTGWIQNGGLFIASNQQR                                                             | 0.976770411        | 3               | 4.5125    |
| Q64380        | RDPLHEELLGQGCVFQER                                                                         | 0.945619922        | 3               | 5.26517   |
| Q64380        | SDDSPLEAGLAFTCK                                                                            | 0.797757555        | 2               | 4.65996   |
| Q64380        | STVCGPESFTPDKPLMGEAPELR                                                                    | 0.943372662        | 3               | 4.86508   |
| Q64380        | VTAVETQHGSIQTPCVVNCAGVWASSVGR                                                              | 0.86388327         | 3               | 5.11728   |
| <b>Q64428</b> | <b>ECHA Trifunctional enzyme subunit alpha_ mitochondrial</b>                              | <b>1.26769233</b>  | <b>0.306128</b> | <b>25</b> |
| Q64428        | ADMVIEAVFEDLAVK                                                                            | 1.013578579        | 3               | 4.75858   |
| Q64428        | ALMGLYNGQVLCK                                                                              | 0.897036113        | 2               | 3.27779   |
| Q64428        | DSIFSNLIGQLDYK                                                                             | 0.913141037        | 2               | 2.54023   |
| Q64428        | DTTASAVAVGLK                                                                               | 0.961415539        | 2               | 3.77173   |
| Q64428        | EVESVTPHECIFASNTSALPINQIAAVSQRPEK                                                          | 0.892508235        | 3               | 6.84906   |
| Q64428        | EVQSEFVEVMNEIWANDQIR                                                                       | 1.080318222        | 3               | 3.3227    |
| Q64428        | FGELALTK                                                                                   | 0.960562221        | 2               | 2.68671   |
| Q64428        | FGGGSVELLK                                                                                 | 0.965687448        | 2               | 3.29621   |
| Q64428        | FVDLYGAQK                                                                                  | 1.039318308        | 2               | 3.17823   |

|               |                                                                 |                    |                 |           |
|---------------|-----------------------------------------------------------------|--------------------|-----------------|-----------|
| Q64428        | GFYIYQSGSK                                                      | 1.287855981        | 2               | 3.0351    |
| Q64428        | ILQEGVDPK                                                       | 0.980207224        | 2               | 3.15066   |
| Q64428        | KLDALTTGFGFPVGAATLADEVGIDVAQHV AEDLGK                           | 0.94742294         | 4               | 5.03726   |
| Q64428        | KTVLGVPEVLLGILPGAGGTQR                                          | 1.2381174          | 2               | 4.28001   |
| Q64428        | KYESAYGTQFTPCQLLR                                               | 0.708533169        | 2               | 4.43325   |
| Q64428        | LPAKPEVSSDEDIQYR                                                | 1.235352232        | 3               | 3.84805   |
| Q64428        | MGLVDQLVDPLGPGIK                                                | 0.996337755        | 2               | 4.82547   |
| Q64428        | MGLVDQLVDPLGPGIK+Oxidation(1)                                   | 1.017454258        | 2               | 2.45139   |
| Q64428        | MQLLEIITDK                                                      | 0.994929817        | 2               | 4.02075   |
| Q64428        | MVGVPAAAFDMMMLTGR                                               | 0.990750518        | 2               | 3.236     |
| Q64428        | NLNSEIDNILVNLR                                                  | 1.187256475        | 2               | 4.78831   |
| Q64428        | TGLEQGNDAGYLAESEK                                               | 0.912283122        | 2               | 5.13667   |
| Q64428        | TIEYLEEVAVNFAK                                                  | 1.108561506        | 3               | 4.14897   |
| Q64428        | TVLGVPEVLLGILPGAGGTQR                                           | 0.972426233        | 3               | 5.0028    |
| Q64428        | TVQQLAILGAGLMGAGIAQVSVDK                                        | 0.834038559        | 3               | 5.99101   |
| Q64428        | YESAYGTQFTPCQLLR                                                | 0.774153769        | 2               | 4.41325   |
| <b>Q64458</b> | <b>CP2CT Cytochrome P450 2C29</b>                               | <b>0.985165236</b> | <b>9.33E-13</b> | <b>5</b>  |
| Q64458        | IKEHKESLDVTNPR                                                  | 0.69871013         | 2               | 5.02222   |
| Q64458        | LPPGPTPLPIIGNFLQIDVK                                            | 1.472961902        | 3               | 4.37134   |
| Q64458        | VQEEAQCLVEELR                                                   | 1.72506598         | 2               | 4.27546   |
| Q64458        | VQEEAQCLVEELRK                                                  | 3.423111916        | 2               | 3.72657   |
| Q64458        | VQEEIDR                                                         | 1.136308954        | 2               | 2.49553   |
| <b>Q64481</b> | <b>CP3AG Cytochrome P450 3A16</b>                               | <b>1.03440943</b>  | <b>0.965128</b> | <b>2</b>  |
| Q64481        | GSIDPVYVLPFGNGPR                                                | 0.930016695        | 2               | 3.94389   |
| Q64481        | VLQNFSPQCK                                                      | 1.302115136        | 2               | 2.60907   |
| <b>Q64550</b> | <b>UD11 UDP-glucuronosyltransferase 1_1</b>                     | <b>0.610950369</b> | <b>1.72E-11</b> | <b>4</b>  |
| Q64550        | GHEVVIAPEASIIHK                                                 | 0.592107707        | 2               | 4.66451   |
| Q64550        | NMIIALTENFLCR                                                   | 0.924001199        | 2               | 4.65969   |
| Q64550        | SVFDQDPFLR                                                      | 0.8533145          | 2               | 3.4108    |
| Q64550        | VVYSPYGLATEILQK                                                 | 0.759736922        | 2               | 4.55075   |
| <b>Q64563</b> | <b>ADH4 Alcohol dehydrogenase 4</b>                             | <b>1.362732654</b> | <b>0.066256</b> | <b>16</b> |
| Q64563        | AAVDCTVVGWGSCTVVGAK                                             | 1.006340928        | 2               | 4.1815    |
| Q64563        | ALFPVVLGHECAGIVESVGPVTFNFKPGDK                                  | 1.038928869        | 3               | 5.84071   |
| Q64563        | ALGATDCLNPR                                                     | 1.18229378         | 2               | 3.00825   |
| Q64563        | DLDKPVQDVITELTGGGVDFSLDCAGTAQTLK                                | 1.113352785        | 3               | 5.56097   |
| Q64563        | FDLDLLVTHALPFDK                                                 | 1.289063435        | 3               | 3.32062   |
| Q64563        | IIAIDINSEKFPK                                                   | 1.022543602        | 2               | 2.65022   |
| Q64563        | INDAIDL MNQ GK                                                  | 1.279679467        | 2               | 4.34909   |
| Q64563        | KFDL DLLVTHALPFDK                                               | 1.350550509        | 3               | 5.69193   |
| Q64563        | KFDL DLLVTHALPFDKINDAIDL MNQ GK                                 | 0.999380427        | 3               | 4.68295   |
| Q64563        | LCLSPLTNL CGK                                                   | 1.759506322        | 2               | 2.31932   |
| Q64563        | SVDSV PNLVTDYK                                                  | 1.236893111        | 2               | 3.2592    |
| Q64563        | TDSPLCIEIEVSPPK                                                 | 1.132891258        | 2               | 4.23241   |
| Q64563        | VCLIGCGFTSGYGAAINTAK                                            | 1.452003729        | 2               | 5.57483   |
| Q64563        | VDDEANLER                                                       | 2.523468509        | 2               | 2.67538   |
| Q64563        | VDEMNI STVDMILGR                                                | 1.270716506        | 2               | 3.38787   |
| Q64563        | VIATCVCP TDINATNPK                                              | 1.384880922        | 2               | 4.22202   |
| <b>Q64565</b> | <b>AGT2 Alanine glyoxylate aminotransferase 2_mitochondrial</b> | <b>1.077635836</b> | <b>0.002749</b> | <b>15</b> |
| Q64565        | AYSNHTDIISFR                                                    | 1.132080097        | 2               | 3.35456   |
| Q64565        | GGNFSQTFR                                                       | 0.928915527        | 2               | 2.4122    |
| Q64565        | GGVCI ADEVQTGFGR                                                | 0.841301156        | 2               | 4.31466   |
| Q64565        | GIGNGF PMAAVVTTP EIASLAK                                        | 1.07697394         | 2               | 3.19656   |
| Q64565        | GLMVG IEMVQDK                                                   | 1.107685239        | 2               | 3.76253   |
| Q64565        | HNMP PCD FSPEK                                                  | 0.833375145        | 2               | 3.32051   |
| Q64565        | LRDEF DIVGDVR                                                   | 1.044708567        | 2               | 2.63533   |
| Q64565        | LSALLPEPLK                                                      | 1.593660465        | 2               | 2.58472   |



|               |                                                                           |                    |                 |           |
|---------------|---------------------------------------------------------------------------|--------------------|-----------------|-----------|
| Q64565        | NSQEVGTYMLLK                                                              | 1.187006544        | 2               | 2.37536   |
| Q64565        | SALTQHMER                                                                 | 1.07767837         | 2               | 2.71466   |
| Q64565        | TEVNQIHEDCK                                                               | 0.824567177        | 2               | 3.26911   |
| Q64565        | TEVNQIHEDCKDMGLLVGR                                                       | 0.779135308        | 2               | 5.22338   |
| Q64565        | VIFLVNSGSEANDLAMVMAR                                                      | 1.268931986        | 2               | 5.691     |
| Q64565        | YIEQFK                                                                    | 0.990308969        | 1               | 2.05094   |
| Q64565        | YLDFSGIVTVGVGHCHPK                                                        | 0.938695012        | 2               | 2.78255   |
| <b>Q64578</b> | <b>AT2A1 Sarcoplasmic/endoplasmic reticulum calcium ATPase 1</b>          | <b>1.079234761</b> | <b>0.749501</b> | <b>4</b>  |
| Q64578        | DIVPGDIVEVAVGDKVPADIR                                                     | 2.134966868        | 2               | 3.32976   |
| Q64578        | IGIFSENEEVADR                                                             | 1.121628728        | 2               | 2.8996    |
| Q64578        | VGEATETALTTLVEK                                                           | 0.995794547        | 2               | 4.03255   |
| Q64578        | YGPNELPAEEGK                                                              | 1.014386201        | 2               | 2.54283   |
| <b>Q64581</b> | <b>CP3A1 Cytochrome P450 3A18</b>                                         | <b>0.720758905</b> | <b>0.000275</b> | <b>3</b>  |
| Q64581        | KLQNEIDR                                                                  | 0.629683142        | 2               | 2.35801   |
| Q64581        | LAVIGVLQNFNIQPCCK                                                         | 1.084222949        | 2               | 4.04989   |
| Q64581        | NPEYWLEPEEFNPER                                                           | 0.548440335        | 2               | 4.24809   |
| <b>Q64591</b> | <b>DECR 2_4_dienoyl_CoA reductase_mitochondrial</b>                       | <b>0.79668725</b>  | <b>0.002109</b> | <b>9</b>  |
| Q64591        | ATAEEITSK                                                                 | 1.094223799        | 2               | 2.93847   |
| Q64591        | CDVRDPDMVHNTVLELIK                                                        | 0.867228566        | 4               | 4.55172   |
| Q64591        | DPDMVHNTVLELIK                                                            | 0.594781007        | 3               | 4.29253   |
| Q64591        | EEWDVIEGLIR                                                               | 0.690556976        | 2               | 3.72404   |
| Q64591        | FFPPILKPLPPNAFQGK                                                         | 1.014446826        | 2               | 3.90599   |
| Q64591        | FNIIQPGPIK                                                                | 0.7863246          | 2               | 3.11513   |
| Q64591        | NIDVLK                                                                    | 0.677844256        | 1               | 2.05703   |
| Q64591        | VAFITGGGTGLGK                                                             | 1.009804829        | 2               | 2.91139   |
| Q64591        | VTKEEWDVIEGLIR                                                            | 0.711441048        | 3               | 5.01698   |
| <b>Q64602</b> | <b>AADAT Kynurenine/alpha_aminoadipate aminotransferase_mitochondrial</b> | <b>1.036648211</b> | <b>0.992218</b> | <b>7</b>  |
| Q64602        | ASFSQVTPAQMDLVFQR                                                         | 1.065942959        | 2               | 5.28833   |
| Q64602        | DIISLAPGSPNPK                                                             | 1.035930742        | 2               | 3.07953   |
| Q64602        | EILLVPGNSFFVDNSAPSSFFR                                                    | 0.90385007         | 2               | 2.32145   |
| Q64602        | FLYTIPNGNPTGNSLTGDR                                                       | 1.095855194        | 2               | 4.14295   |
| Q64602        | LHNPPTVNYSPNEGQMDLCITSGCQDGLCK                                            | 1.142938216        | 3               | 6.37397   |
| Q64602        | SAVFTVENGSTIR                                                             | 0.958923209        | 2               | 3.86083   |
| Q64602        | VLSQWKPEDSKDPTKR                                                          | 3.071538956        | 3               | 3.946     |
| <b>Q64611</b> | <b>CSAD Cysteine sulfinic acid decarboxylase</b>                          | <b>1.073882064</b> | <b>0.786997</b> | <b>11</b> |
| Q64611        | AQGGQGLEWR                                                                | 1.19798501         | 2               | 3.03095   |
| Q64611        | CHGSQASYLFQQDK                                                            | 1.419959336        | 2               | 5.26131   |
| Q64611        | FFNQLFSGLDPHALAGR                                                         | 1.097079945        | 2               | 4.70159   |
| Q64611        | FYNVALDTGDK                                                               | 1.145863924        | 2               | 3.08874   |
| Q64611        | GAAFLGLGTDSVR                                                             | 1.159685522        | 2               | 3.44897   |
| Q64611        | IDQAFALTR                                                                 | 1.064361155        | 2               | 3.1894    |
| Q64611        | LLAAGLQCSALLR                                                             | 2.433187772        | 2               | 3.30395   |
| Q64611        | QLLDLELQSQGESR                                                            | 0.92685328         | 2               | 4.09417   |
| Q64611        | TLDGDPVAVEALLR                                                            | 1.036631042        | 2               | 5.03921   |
| Q64611        | VCEWKEPEELK                                                               | 1.035547859        | 3               | 3.80184   |
| Q64611        | YLVEEIK                                                                   | 1.007480971        | 1               | 2.29702   |
| <b>Q64633</b> | <b>UD17 UDP_glucuronosyltransferase 1_7</b>                               | <b>0.645455775</b> | <b>0.18862</b>  | <b>2</b>  |
| Q64633        | QSSFDAVFLDPFDVCGLTVAK                                                     | 0.897182666        | 2               | 2.38349   |
| Q64633        | TYSVSHQEDLNR                                                              | 0.613042904        | 2               | 3.27238   |
| <b>Q64638</b> | <b>UD15 UDP_glucuronosyltransferase 1_5</b>                               | <b>2.262849008</b> | <b>0.222239</b> | <b>2</b>  |
| Q64638        | TFLETSEILK                                                                | 2.350808308        | 2               | 2.40635   |
| Q64638        | VVFETGNYVK                                                                | 0.787846246        | 1               | 1.9622    |
| <b>Q64640</b> | <b>ADK Adenosine kinase</b>                                               | <b>0.896233019</b> | <b>0.000193</b> | <b>11</b> |
| Q64640        | AADAHVDAHYYEQNEQPTGTCAACITGGNR                                            | 1.305958338        | 3               | 7.14884   |
| Q64640        | AATFFGCIGIDK                                                              | 0.802933127        | 2               | 3.08279   |

|               |                                                                           |                    |                 |           |
|---------------|---------------------------------------------------------------------------|--------------------|-----------------|-----------|
| Q64640        | AGHYAASVIIR                                                               | 1.104588892        | 3               | 3.32216   |
| Q64640        | FGEILK                                                                    | 1.09759978         | 2               | 2.38353   |
| Q64640        | FKVEYHAGGSTQNSMK                                                          | 1.071676099        | 3               | 3.44435   |
| Q64640        | HKELFDELVK                                                                | 0.90021917         | 2               | 2.75071   |
| Q64640        | HLDLENNWMLVEK                                                             | 1.362832128        | 2               | 3.59592   |
| Q64640        | SLVANLAAANCYK                                                             | 1.14464245         | 2               | 4.35412   |
| Q64640        | VEYHAGGSTQNSMK                                                            | 0.909806597        | 2               | 3.81909   |
| Q64640        | VEYHAGGSTQNSMK+Oxidation(13)                                              | 0.925110288        | 2               | 3.61826   |
| Q64640        | YSLKPNQILAEDK                                                             | 1.205336917        | 3               | 4.23429   |
| <b>Q64654</b> | <b>CP51A Lanosterol 14_alpha demethylase</b>                              | <b>0.935209795</b> | <b>0.999625</b> | <b>8</b>  |
| Q64654        | EPAEDILQTLDDSTYK                                                          | 1.085359702        | 2               | 3.46768   |
| Q64654        | GVAYDVPNAVFLQK                                                            | 1.094435019        | 2               | 4.03403   |
| Q64654        | NEDLNAAEEVYGR                                                             | 0.927804004        | 2               | 3.82225   |
| Q64654        | SGLNIAHFK                                                                 | 0.709081428        | 2               | 2.8667    |
| Q64654        | TFTYLLGSDAAALLFNSK                                                        | 0.956902609        | 2               | 2.9327    |
| Q64654        | TVCGEDLPPLTYEQLK                                                          | 0.769528856        | 2               | 4.12636   |
| Q64654        | YGPVFSFTMVGK                                                              | 0.818658055        | 2               | 2.72998   |
| Q64654        | YLQDNPASGEK                                                               | 0.829129042        | 2               | 2.84735   |
| <b>Q64737</b> | <b>PUR2 Trifunctional purine biosynthetic protein adenosine_3</b>         | <b>1.267761086</b> | <b>0.115635</b> | <b>2</b>  |
| Q64737        | DSGVDAAGNMLVKK+Oxidation(11)                                              | 1.461736457        | 2               | 2.30757   |
| Q64737        | FGDPECQVILPLLK                                                            | 1.219311704        | 2               | 2.45315   |
| <b>Q65CL1</b> | <b>CTNA3 Catenin alpha_3</b>                                              | <b>1.224558309</b> | <b>0.173473</b> | <b>2</b>  |
| Q65CL1        | MISESGSRMDVLAR+Oxidation(1)                                               | 1.667262441        | 2               | 2.60014   |
| Q65CL1        | NLMNAVVTQTVK                                                              | 1.184267221        | 2               | 3.15576   |
| <b>Q65Z40</b> | <b>WAPL Wings apart_like protein homolog</b>                              | <b>1.168816964</b> | <b>0.034009</b> | <b>3</b>  |
| Q65Z40        | EKSISRIPEDNANK                                                            | 1.106677321        | 2               | 2.67828   |
| Q65Z40        | LGQKRPNFKPDIQIIPK                                                         | 1.346747621        | 2               | 2.9131    |
| Q65Z40        | TESPSESCPVKGSVR                                                           | 1.029185007        | 2               | 2.52443   |
| <b>Q66H12</b> | <b>NAGAB Alpha_N_acetylglactosaminidase</b>                               | <b>1.156681893</b> | <b>0.454305</b> | <b>3</b>  |
| Q66H12        | CNINCEEDPK                                                                | 0.58342634         | 2               | 2.40185   |
| Q66H12        | INQDPLGIQGR                                                               | 1.082088734        | 2               | 2.45129   |
| Q66H12        | TISPQNIDILQNPLLIK                                                         | 1.171887469        | 2               | 3.88138   |
| <b>Q66H15</b> | <b>RMD3 Regulator of microtubule dynamics protein 3</b>                   | <b>1.097575326</b> | <b>0.872223</b> | <b>2</b>  |
| Q66H15        | AIPGEAGDAAMLSSLPQEGQEK                                                    | 1.15148846         | 2               | 4.19845   |
| Q66H15        | AYSDMTELTEEESEKK                                                          | 1.097135379        | 2               | 2.53358   |
| <b>Q66H45</b> | <b>TTC36 Tetratricopeptide repeat protein 36</b>                          | <b>1.063839969</b> | <b>0.806661</b> | <b>2</b>  |
| Q66H45        | LQGDVAGALEDLER                                                            | 1.033255334        | 2               | 3.65898   |
| Q66H45        | RDFEQAAR                                                                  | 0.901114394        | 2               | 2.30456   |
| <b>Q66H71</b> | <b>CPPED Calcineurin_like phosphoesterase domain_containing protein 1</b> | <b>1.209868167</b> | <b>0.022722</b> | <b>2</b>  |
| Q66H71        | LTEQAVEAINK                                                               | 1.20986793         | 2               | 3.69101   |
| Q66H71        | SIDEDDDYFNLTk                                                             | 1.467157536        | 2               | 2.83518   |
| <b>Q66H80</b> | <b>COPD Coatomer subunit delta</b>                                        | <b>1.143351464</b> | <b>0.00013</b>  | <b>5</b>  |
| Q66H80        | GVQLQTHPNVDKK                                                             | 1.143391504        | 2               | 3.16658   |
| Q66H80        | LFTAESLIGLK                                                               | 1.440021772        | 2               | 2.90407   |
| Q66H80        | NSNILEDLETLR                                                              | 1.283754045        | 2               | 2.90668   |
| Q66H80        | NTLEWCLPVIDAK                                                             | 1.066421836        | 2               | 3.29903   |
| Q66H80        | VAPAPARPSGSPK                                                             | 1.121344051        | 2               | 2.49859   |
| <b>Q66HA8</b> | <b>HS105 Heat shock protein 105 kDa</b>                                   | <b>1.059915783</b> | <b>0.986254</b> | <b>5</b>  |
| Q66HA8        | AGGIETIANEFSDR                                                            | 1.022200328        | 2               | 2.84213   |
| Q66HA8        | FVVQNVSAQK                                                                | 1.024029977        | 2               | 2.68389   |
| Q66HA8        | LKETAENNLK                                                                | 1.197125624        | 2               | 2.39828   |
| Q66HA8        | NQQITHANNTVSSFK                                                           | 1.078416682        | 2               | 4.48275   |
| Q66HA8        | SVLDAAQIVGLNCLR                                                           | 1.077500933        | 2               | 2.71907   |
| <b>Q66HD0</b> | <b>ENPL Endoplasmic</b>                                                   | <b>1.135074184</b> | <b>9.9E-20</b>  | <b>32</b> |

|               |                                                                           |                    |                 |           |
|---------------|---------------------------------------------------------------------------|--------------------|-----------------|-----------|
| Q66HD0        | DISTNYYASQK                                                               | 2.228775759        | 2               | 3.0676    |
| Q66HD0        | EATEKEFEP LLNWMK                                                          | 1.140824117        | 2               | 3.13851   |
| Q66HD0        | EEASDYLELDTIK                                                             | 1.169813257        | 2               | 4.28092   |
| Q66HD0        | EEEAIQLDGLNASQIR                                                          | 1.344150011        | 2               | 4.54701   |
| Q66HD0        | EFEP LLNWMK                                                               | 1.312385516        | 2               | 2.31512   |
| Q66HD0        | EVEEDEYK                                                                  | 1.053260923        | 1               | 2.38898   |
| Q66HD0        | FQSSHSTDTISLDQYVER                                                        | 1.197422081        | 3               | 6.20579   |
| Q66HD0        | GLFDEYGSK                                                                 | 1.105533449        | 2               | 2.3448    |
| Q66HD0        | GVVDSDDLPLNVSR                                                            | 1.067018809        | 2               | 4.81291   |
| Q66HD0        | GYEVIYLTEPVDEYCIQALPEFDGK                                                 | 1.707635422        | 2               | 3.72106   |
| Q66HD0        | GYEVIYLTEPVDEYCIQALPEFDGKR                                                | 2.416418822        | 3               | 4.02401   |
| Q66HD0        | KEAESSPFVER                                                               | 1.104567503        | 2               | 3.60572   |
| Q66HD0        | KGYEVIYLTEPVDEYCIQALPEFDGKR                                               | 2.459263275        | 3               | 4.41953   |
| Q66HD0        | LGVIEDHSNR                                                                | 1.273955905        | 2               | 3.33103   |
| Q66HD0        | LIINSLYK                                                                  | 1.562988864        | 2               | 2.42603   |
| Q66HD0        | LISLTDENALAGNEELTVK                                                       | 1.452517783        | 2               | 5.85154   |
| Q66HD0        | LTESPCALVASQYGWSGNMER                                                     | 1.079837336        | 2               | 5.56655   |
| Q66HD0        | MKEKQDK                                                                   | 0.963227493        | 2               | 2.3302    |
| Q66HD0        | NLLHVTD TGVMTR                                                            | 1.197556245        | 3               | 4.03424   |
| Q66HD0        | NLLHVTD TGVMTR+Oxidation(12)                                              | 1.28151323         | 2               | 2.98762   |
| Q66HD0        | RVFITDDFHDMMPK                                                            | 1.195833705        | 3               | 3.33555   |
| Q66HD0        | SGTSEFLNK                                                                 | 1.175950457        | 2               | 3.10226   |
| Q66HD0        | SGYLLPDTK                                                                 | 1.08955093         | 2               | 3.16932   |
| Q66HD0        | SILFVPTSAPR                                                               | 1.080824571        | 2               | 3.47421   |
| Q66HD0        | TDDEVVQR                                                                  | 1.016042051        | 2               | 2.94708   |
| Q66HD0        | TDDEVVQREEEAIQLDGLNASQIR                                                  | 1.112143118        | 3               | 5.35128   |
| Q66HD0        | TETVEEPLEETAQEEK                                                          | 0.715523872        | 2               | 5.18552   |
| Q66HD0        | TETVEEPLEETAQEEKEADDEAAVEEEEEKKPK                                         | 0.459653995        | 5               | 6.45001   |
| Q66HD0        | TFEINPR                                                                   | 1.106583886        | 2               | 2.72526   |
| Q66HD0        | TVWDWELMNDIKPIWQRPSK                                                      | 1.296404283        | 3               | 4.0271    |
| Q66HD0        | VFITDDFHDMMPK                                                             | 1.019659472        | 2               | 4.02559   |
| Q66HD0        | YNDTFWK                                                                   | 1.11509685         | 1               | 2.19324   |
| <b>Q66HF1</b> | <b>NDU51 NADH_ubiquinone oxidoreductase 75 kDa subunit_ mitochondrial</b> | <b>1.198276039</b> | <b>4.13E-05</b> | <b>12</b> |
| Q66HF1        | ALSEIAGITLPYDTLDQVR                                                       | 1.353873308        | 2               | 3.97914   |
| Q66HF1        | DCFIVYQGHGHDVGIADVILPGAAYTEK                                              | 1.283979189        | 3               | 4.19905   |
| Q66HF1        | DDGAAILAAVSSIAQK                                                          | 1.192855156        | 2               | 4.33777   |
| Q66HF1        | DLLNKVDSDTLCTEEIFPNEGAGTDLR                                               | 1.207265438        | 3               | 4.51977   |
| Q66HF1        | FASEIAGVDDLGTGR                                                           | 1.418831564        | 2               | 3.47735   |
| Q66HF1        | GLLTYTSWEDLSR                                                             | 1.155125262        | 2               | 3.38385   |
| Q66HF1        | GWNILTNSEK                                                                | 1.281430136        | 1               | 2.14628   |
| Q66HF1        | ILQDIASGNHEFSK                                                            | 1.253221091        | 2               | 4.15575   |
| Q66HF1        | LGEVSPNLVR                                                                | 1.218368549        | 2               | 3.16047   |
| Q66HF1        | LVDQEFLADPLVPPQLTIK                                                       | 1.160475925        | 2               | 3.28564   |
| Q66HF1        | VSDTLCTEEIFPNEGAGTDLR                                                     | 0.878316845        | 2               | 4.63769   |
| Q66HF1        | YDHLGDSPK                                                                 | 1.122354026        | 2               | 2.55566   |
| <b>Q66HF8</b> | <b>AL1B1 Aldehyde dehydrogenase X_ mitochondrial</b>                      | <b>1.182951471</b> | <b>9.9E-20</b>  | <b>11</b> |
| Q66HF8        | ADVDLAVR                                                                  | 0.911252761        | 2               | 2.35765   |
| Q66HF8        | EAGFPPGVVNIITGYPTAGAAIAQHMDVDK                                            | 1.37616016         | 3               | 3.854     |
| Q66HF8        | EEIFGPVQPLFK                                                              | 0.957442688        | 2               | 3.21924   |
| Q66HF8        | KVGNPFELDTQQGPQVDKEQFEK                                                   | 1.521974934        | 3               | 4.50441   |
| Q66HF8        | LAPALATGNTVVMK                                                            | 1.543909633        | 2               | 3.2874    |
| Q66HF8        | TFPTVNPPTTGEVIGHVAEGDR                                                    | 1.284418695        | 2               | 4.63639   |
| Q66HF8        | TFVEESYHEFLER                                                             | 1.187908744        | 2               | 3.81673   |
| Q66HF8        | VAEQTPLSALYLASLIK                                                         | 1.898317047        | 2               | 3.17824   |
| Q66HF8        | VGNPFELDTQQGPQVDK                                                         | 1.163619859        | 2               | 3.04173   |
| Q66HF8        | VGNPFELDTQQGPQVDKEQFEK                                                    | 1.495456102        | 2               | 4.47183   |

|               |                                                                 |                    |                 |           |
|---------------|-----------------------------------------------------------------|--------------------|-----------------|-----------|
| Q66HF8        | YGLAAAVFTR                                                      | 1.118047822        | 2               | 3.8565    |
| <b>Q66HG4</b> | <b>GALM Aldose 1_epimerase</b>                                  | <b>0.89787147</b>  | <b>0.000597</b> | <b>3</b>  |
| Q66HG4        | ASDVVLGFAELEGYLQK                                               | 1.002028075        | 2               | 4.70677   |
| Q66HG4        | TVFGELPSGGGAVEK                                                 | 0.898317446        | 2               | 3.66841   |
| Q66HG4        | VSPDGEEGYPGELK                                                  | 0.865519246        | 2               | 3.78502   |
| <b>Q66X93</b> | <b>SND1 Staphylococcal nuclease domain_containing protein 1</b> | <b>1.032161827</b> | <b>0.001224</b> | <b>21</b> |
| Q66X93        | ADDADEFGYSR                                                     | 1.346105417        | 2               | 2.78396   |
| Q66X93        | ALLLPDHYLVTVMLSGIK                                              | 0.911131673        | 2               | 3.32896   |
| Q66X93        | DIQNTQCLLNVEHLSASCPHVTLQFADSK                                   | 1.473043588        | 3               | 5.5625    |
| Q66X93        | DTNGENIAESLVAEGLASR                                             | 0.989155269        | 2               | 5.02366   |
| Q66X93        | ETDGSETPEPFAAEAK                                                | 1.298999391        | 2               | 3.69383   |
| Q66X93        | FVDGEWYR                                                        | 1.137539664        | 2               | 2.3191    |
| Q66X93        | GDVGLGLVK                                                       | 1.110414549        | 2               | 2.70777   |
| Q66X93        | HFVDSHHQKPVNAIIEHVR                                             | 1.093815757        | 3               | 4.8688    |
| Q66X93        | LEGDNIQDK                                                       | 1.136390142        | 2               | 2.70892   |
| Q66X93        | LSECEEQAK                                                       | 2.117961589        | 2               | 2.60734   |
| Q66X93        | MVLSGCAIIVR                                                     | 1.047381403        | 2               | 2.37148   |
| Q66X93        | NLPGLVQEGEPFSEATLFTK                                            | 1.154917572        | 2               | 5.4278    |
| Q66X93        | SAYYKPLLSAEAAK                                                  | 1.197840027        | 2               | 2.52288   |
| Q66X93        | SDISSHPPVEGAYAPR                                                | 1.011235327        | 3               | 4.61381   |
| Q66X93        | SSHYDELLAAEAR                                                   | 1.19725499         | 2               | 3.74548   |
| Q66X93        | TCATVTIGGINIAEALVSK                                             | 1.17031249         | 2               | 3.9263    |
| Q66X93        | TDAVDSVVR                                                       | 1.098297439        | 2               | 2.6558    |
| Q66X93        | VITEYLNAQESAK                                                   | 1.51764491         | 2               | 3.78605   |
| Q66X93        | VMQVLNADAIVVK                                                   | 1.387131948        | 2               | 3.98234   |
| Q66X93        | VSVTVDYIRPASPAETVPAFSEK                                         | 1.092251128        | 3               | 5.06376   |
| Q66X93        | VVAHYEEQPVVEVMPVLEEK                                            | 0.903403877        | 3               | 4.57779   |
| <b>Q67FY2</b> | <b>BCL9L B_cell CLL/lymphoma 9_like protein</b>                 | <b>0.743075126</b> | <b>0.027143</b> | <b>2</b>  |
| Q67FY2        | EAGTPSLDSEAKEVAPR                                               | 1.835169663        | 2               | 2.45155   |
| Q67FY2        | NLVGSEGLSKEQLEHRER                                              | 0.64557721         | 2               | 2.35388   |
| <b>Q68FP2</b> | <b>PON3 Serum paraoxonase/lactonase 3</b>                       | <b>1.128212762</b> | <b>1.12E-10</b> | <b>8</b>  |
| Q68FP2        | HNNWDLTPVK                                                      | 0.986071989        | 2               | 3.30807   |
| Q68FP2        | IFLMDLNEPYPK                                                    | 1.210692983        | 2               | 3.0599    |
| Q68FP2        | IQDPLSDNPR                                                      | 1.03906167         | 2               | 2.87889   |
| Q68FP2        | LLIYNPEDPPGSEVLR                                                | 1.446858621        | 2               | 4.30688   |
| Q68FP2        | LVALTVLGASLALLGER                                               | 1.050469674        | 3               | 4.01535   |
| Q68FP2        | VIQLGTLVDNLTVDPATGDILAGCHPNPMK                                  | 1.238067055        | 2               | 4.95435   |
| Q68FP2        | VVAQGFSSANGITVSLDQK                                             | 0.975865022        | 2               | 4.17667   |
| Q68FP2        | YVYVADVAK                                                       | 1.106458008        | 1               | 2.89207   |
| <b>Q68FQ0</b> | <b>TCPE T_complex protein 1 subunit epsilon</b>                 | <b>1.133686644</b> | <b>4.28E-06</b> | <b>5</b>  |
| Q68FQ0        | ETGANLAICQWGFDDANHLLQLNGLPAVR                                   | 0.953654687        | 3               | 3.70901   |
| Q68FQ0        | GSNDMQYQHVIETLIGK                                               | 0.838159793        | 2               | 3.55981   |
| Q68FQ0        | HKLDVTSVEDYK                                                    | 1.042763637        | 2               | 3.15753   |
| Q68FQ0        | SLHDALCVIR                                                      | 1.334826046        | 2               | 2.99006   |
| Q68FQ0        | WVGGPEIELIAIATGGR                                               | 1.645975957        | 2               | 3.88525   |
| <b>Q68FR6</b> | <b>EF1G Elongation factor 1_gamma</b>                           | <b>1.142857387</b> | <b>1.25E-06</b> | <b>8</b>  |
| Q68FR6        | AAAPAPEEEMDECEQALAAEPK                                          | 1.081146901        | 2               | 5.33845   |
| Q68FR6        | ALIAAQYSGAQR                                                    | 1.089630416        | 2               | 4.23001   |
| Q68FR6        | GQDLAFPLSPDWQVDYESYTWK                                          | 2.193656763        | 2               | 3.76303   |
| Q68FR6        | ILGLLDTHLK                                                      | 1.626379202        | 2               | 2.64118   |
| Q68FR6        | KAAAPAPEEEMDECEQALAAEPK                                         | 1.161888143        | 2               | 4.26509   |
| Q68FR6        | KLDPGSEETQLVLR                                                  | 1.173743435        | 2               | 3.91244   |
| Q68FR6        | LDPGSEETQLVLR                                                   | 0.962619772        | 2               | 2.93884   |
| Q68FR6        | STFVLDEFKR                                                      | 1.047663043        | 2               | 2.712     |
| <b>Q68FR9</b> | <b>EF1D Elongation factor 1_delta</b>                           | <b>1.12703827</b>  | <b>1.98E-06</b> | <b>6</b>  |
| Q68FR9        | ATAPQTQHVSPMR                                                   | 1.056244719        | 2               | 3.05547   |

|               |                                                                                       |                    |                 |           |
|---------------|---------------------------------------------------------------------------------------|--------------------|-----------------|-----------|
| Q68FR9        | FYEQMNGPVTAGSR                                                                        | 1.017513483        | 2               | 4.21964   |
| Q68FR9        | GVVQDLQQAISK                                                                          | 1.17167155         | 2               | 3.42603   |
| Q68FR9        | SIQLDGLVWGASK                                                                         | 1.028004158        | 2               | 2.7883    |
| Q68FR9        | SLAGSSGPGASSGPGGDHSDLIVR                                                              | 1.219862542        | 2               | 5.31664   |
| Q68FR9        | SSILLDVKPWDETDMAQLETQVCR                                                              | 1.32155892         | 3               | 3.34009   |
| <b>Q68FS4</b> | <b>AMPL Cytosol aminopeptidase</b>                                                    | <b>1.060303318</b> | <b>1.45E-13</b> | <b>18</b> |
| Q68FS4        | ADMGGAATCSAIVSAAK                                                                     | 1.068336417        | 2               | 5.38822   |
| Q68FS4        | DKDDDVPQFTSAGENFNK                                                                    | 0.993270715        | 2               | 5.0991    |
| Q68FS4        | GITFDSGGISIK                                                                          | 1.075927704        | 2               | 3.24256   |
| Q68FS4        | GLVLGIYSK                                                                             | 1.01428413         | 1               | 2.03481   |
| Q68FS4        | GSEEPVFLIHYTGSPNATEAPLVFVGK                                                           | 1.981814412        | 3               | 5.98961   |
| Q68FS4        | GVLFASGQNLAR                                                                          | 1.339802043        | 2               | 3.61575   |
| Q68FS4        | LFEASVETGDR                                                                           | 1.116278256        | 2               | 3.50531   |
| Q68FS4        | LHGSGDLEAWEK                                                                          | 1.347078225        | 2               | 3.57463   |
| Q68FS4        | LNLPINIIGLAPLACENMPSPGK                                                               | 2.357138971        | 2               | 4.82862   |
| Q68FS4        | QLMESPANEMTPTR                                                                        | 0.980911849        | 2               | 3.38778   |
| Q68FS4        | QVIDCQLADVNNLNGK                                                                      | 1.100637996        | 2               | 4.93342   |
| Q68FS4        | SAGACTAAAFRL                                                                          | 1.401405904        | 2               | 3.69069   |
| Q68FS4        | SAGVDDQENWHEGK                                                                        | 1.036766913        | 2               | 3.92773   |
| Q68FS4        | SWIEEQEMGSFLSVAK                                                                      | 1.327727153        | 2               | 5.50891   |
| Q68FS4        | TFYGLHQDFPSVVVVGK                                                                     | 0.985564158        | 2               | 4.90294   |
| Q68FS4        | TIQVDNTDAEGR                                                                          | 1.007545091        | 2               | 4.19492   |
| Q68FS4        | TLIEFLLR                                                                              | 1.139358251        | 2               | 2.69652   |
| Q68FS4        | WAHLDIAGVMTNKDEIPYLR                                                                  | 1.200348783        | 3               | 3.45658   |
| <b>Q68FT1</b> | <b>COQ9 Ubiquinone biosynthesis protein COQ9_mitochondrial</b>                        | <b>1.147018345</b> | <b>0.001555</b> | <b>3</b>  |
| Q68FT1        | INDAMNMGHTAK+Oxidation(5)Oxidation(7)                                                 | 1.354389235        | 2               | 2.79564   |
| Q68FT1        | LNHVLEEEQK                                                                            | 1.147585661        | 3               | 3.33539   |
| Q68FT1        | YTDQSGEEEEDEYSEEQIQHR                                                                 | 0.936095244        | 3               | 4.67617   |
| <b>Q68FT3</b> | <b>PYRD2 Pyridine nucleotide_disulfide oxidoreductase domain_containing protein 2</b> | <b>1.064516053</b> | <b>0.994661</b> | <b>7</b>  |
| Q68FT3        | HVIGGAAVTEIIPGFK                                                                      | 1.036649721        | 2               | 3.65136   |
| Q68FT3        | ISQLDTQSPVTK                                                                          | 1.126826039        | 2               | 3.54838   |
| Q68FT3        | SLLLTGTVDAENQK                                                                        | 0.963499439        | 2               | 2.88343   |
| Q68FT3        | TLGAQLPQYEVLTAPISK                                                                    | 1.349448259        | 2               | 4.77135   |
| Q68FT3        | VFDCIEAYAPGFK                                                                         | 0.864178017        | 2               | 2.33233   |
| Q68FT3        | VLDQWFSEPLK                                                                           | 1.05883049         | 2               | 3.20256   |
| Q68FT3        | VQGVVLQGGEEVR                                                                         | 1.03314845         | 2               | 3.37083   |
| <b>Q68FT5</b> | <b>BHMT2 Betaine_homocysteine S_methyltransferase 2</b>                               | <b>1.215588794</b> | <b>7.11E-11</b> | <b>11</b> |
| Q68FT5        | AGADVLQTFTFSAEDR                                                                      | 2.125432931        | 2               | 3.84324   |
| Q68FT5        | AGANIIGVNCR                                                                           | 1.257029176        | 2               | 3.22084   |
| Q68FT5        | AGLWTPEAVVEYPSAVR                                                                     | 1.131083413        | 3               | 3.75279   |
| Q68FT5        | AIAEELAPER                                                                            | 1.224186994        | 2               | 3.81642   |
| Q68FT5        | DAGLQAHLMVQCLGFHTPDCGK                                                                | 1.107755787        | 3               | 4.68161   |
| Q68FT5        | EVGAPVAVTMCIGPEGDMHGVTPGEC AVR                                                        | 1.29335714         | 2               | 3.89958   |
| Q68FT5        | FGPWTSLQTMK                                                                           | 0.951941299        | 2               | 3.08842   |
| Q68FT5        | GGFVDLPEYFPGLEPR                                                                      | 1.215882309        | 2               | 4.0726    |
| Q68FT5        | LDSGEVVVDGGFLFLEK                                                                     | 1.227838133        | 2               | 5.36092   |
| Q68FT5        | REYWETLLPASGRPFPCPSLKPDA                                                              | 2.202037531        | 3               | 3.47218   |
| Q68FT5        | YIGGCCGFEPYHIR                                                                        | 2.601755052        | 2               | 4.62477   |
| <b>Q68FT9</b> | <b>SCLY Selenocysteine lyase</b>                                                      | <b>0.995641362</b> | <b>5.6E-05</b>  | <b>5</b>  |
| Q68FT9        | AEVDLIVQDLK                                                                           | 1.001490579        | 2               | 3.72334   |
| Q68FT9        | CFHEQQTQGR                                                                            | 1.130775087        | 2               | 2.7595    |
| Q68FT9        | RVDVEDLGVDLTIIVGHK                                                                    | 1.933709823        | 3               | 5.92553   |
| Q68FT9        | TVDQISPEEGTRPHFITCTVEHDSIR                                                            | 1.15099637         | 3               | 3.61384   |
| Q68FT9        | VLVHTDAAQALGK                                                                         | 0.967730015        | 2               | 3.03696   |

|               |                                                                    |                    |                 |           |
|---------------|--------------------------------------------------------------------|--------------------|-----------------|-----------|
| <b>Q68FU3</b> | <b>ETFB Electron transfer flavoprotein subunit beta</b>            | <b>0.990572692</b> | <b>0.666626</b> | <b>12</b> |
| Q68FU3        | AGDLGVDLTSK                                                        | 0.961530504        | 2               | 3.72701   |
| Q68FU3        | EIIAVSCGPPQCQETIR                                                  | 0.993958743        | 2               | 4.86182   |
| Q68FU3        | GIHVEVPGAAENLGPLQVAR                                               | 0.612697713        | 2               | 5.73982   |
| Q68FU3        | HSMNPFCEIAVEEAVR                                                   | 1.055047167        | 2               | 5.69442   |
| Q68FU3        | HSMNPFCEIAVEEAVR+Oxidation(3)                                      | 1.255211844        | 2               | 4.28979   |
| Q68FU3        | QAIDDDCNQTGQMTAGLLDWPQGTAFASQVTLEGDKVK                             | 1.045985992        | 3               | 6.30781   |
| Q68FU3        | RVIDFAVK                                                           | 1.098896879        | 2               | 2.38276   |
| Q68FU3        | SGVVTGQVK                                                          | 0.914742882        | 2               | 2.88864   |
| Q68FU3        | VDLLFLGK                                                           | 1.177745383        | 2               | 2.98201   |
| Q68FU3        | VETTEDLVAK                                                         | 0.901694582        | 2               | 3.33574   |
| Q68FU3        | VIDFAVK                                                            | 0.962287666        | 2               | 2.35314   |
| Q68FU3        | VSVISVEEPPQR                                                       | 0.968081519        | 3               | 3.41222   |
| <b>Q68FY0</b> | <b>QCR1 Cytochrome b_c1 complex subunit 1_ mitochondrial</b>       | <b>1.15353752</b>  | <b>0.999691</b> | <b>9</b>  |
| Q68FY0        | HQQLDLAQDHFSSVSQVYEEDAVPSITPCR                                     | 1.042081298        | 3               | 5.88093   |
| Q68FY0        | IEEVDAQMVR                                                         | 0.959821525        | 2               | 3.68747   |
| Q68FY0        | LCTSATESEVTR                                                       | 1.126610529        | 2               | 3.17305   |
| Q68FY0        | NALISHLDGTTTPCEDIGR                                                | 1.093047149        | 2               | 4.70271   |
| Q68FY0        | NNGAGYFLEHLAFK                                                     | 1.138837404        | 2               | 3.42525   |
| Q68FY0        | RIPLAEWESR                                                         | 1.094128519        | 2               | 2.78093   |
| Q68FY0        | TDLTDYLSR                                                          | 1.107767366        | 2               | 2.6651    |
| Q68FY0        | VVELLADIVQNISLEDSQIEK                                              | 1.075461094        | 3               | 5.73479   |
| Q68FY0        | YFYDQCPAVAGYGPQIEQLSDYNR                                           | 1.181194769        | 2               | 5.11664   |
| <b>Q68G31</b> | <b>PBLD Phenazine biosynthesis_like domain_containing protein</b>  | <b>1.324782939</b> | <b>0.22661</b>  | <b>7</b>  |
| Q68G31        | AAIGDTTVQDIQYSPDTR                                                 | 0.946901056        | 2               | 4.6822    |
| Q68G31        | AEDGIVLDFPLYPTFPQDFHEVK                                            | 0.822849462        | 3               | 3.69798   |
| Q68G31        | GESGGQTPPYDFYSR                                                    | 1.255507873        | 2               | 4.27822   |
| Q68G31        | LQPTDSFSQSSCFGLR                                                   | 0.962240077        | 2               | 3.48853   |
| Q68G31        | NVNSTLTFVTLGELK                                                    | 1.060629042        | 2               | 3.7908    |
| Q68G31        | RAEDGIVLDFPLYPTFPQDFHEVK                                           | 1.109194655        | 3               | 5.73998   |
| Q68G31        | VNTEPLPGIEK                                                        | 0.908129321        | 2               | 3.03141   |
| <b>Q69Z23</b> | <b>DYH17 Dynein heavy chain 17_ axonemal</b>                       | <b>1.685513138</b> | <b>0.031803</b> | <b>2</b>  |
| Q69Z23        | GDPTRAEDQVLMRALR                                                   | 1.688146377        | 2               | 2.33209   |
| Q69Z23        | YFIDLLMEK                                                          | 1.390867616        | 1               | 2.15303   |
| <b>Q6A0A9</b> | <b>F120A Constitutive coactivator of PPAR_gamma_like protein 1</b> | <b>1.082047342</b> | <b>0.05887</b>  | <b>2</b>  |
| Q6A0A9        | SQGGVQPIPSQGGK                                                     | 1.19265329         | 2               | 3.14161   |
| Q6A0A9        | VEGSSTASSGSQLAEGK                                                  | 1.07359686         | 2               | 4.29981   |
| <b>Q6AXM8</b> | <b>PON2 Serum paraoxonase/arylesterase 2</b>                       | <b>1.212252038</b> | <b>0.810262</b> | <b>4</b>  |
| Q6AXM8        | FQEEENSLHLK                                                        | 1.120312321        | 2               | 3.43416   |
| Q6AXM8        | LFVYDPNHPPSSEVLR                                                   | 1.187187451        | 2               | 2.50171   |
| Q6AXM8        | LVAEGFDSANGINISPDKK                                                | 0.98757699         | 2               | 3.6571    |
| Q6AXM8        | VLQLGTLVDNLSIDPSSGDIWVGCHPNGQK                                     | 1.348461596        | 3               | 4.42927   |
| <b>Q6AXS5</b> | <b>PAIRB Plasminogen activator inhibitor 1 RNA_binding protein</b> | <b>0.990200403</b> | <b>0.816599</b> | <b>3</b>  |
| Q6AXS5        | EETQPPVALKK                                                        | 0.975360648        | 2               | 2.74207   |
| Q6AXS5        | FDQLFDESDPFVCLK                                                    | 1.207121146        | 2               | 5.20506   |
| Q6AXS5        | SAAQAAAQTNNAAGK                                                    | 0.953943038        | 2               | 5.09851   |
| <b>Q6AXY0</b> | <b>GSTA6 Glutathione S_transferase A6</b>                          | <b>0.984600653</b> | <b>0.746686</b> | <b>2</b>  |
| Q6AXY0        | FLQPGSQR                                                           | 0.876159064        | 2               | 2.51271   |
| Q6AXY0        | YFPAFEK                                                            | 1.070245365        | 1               | 1.91107   |
| <b>Q6AY09</b> | <b>HNRH2 Heterogeneous nuclear ribonucleoprotein H2</b>            | <b>0.943297937</b> | <b>0.351562</b> | <b>5</b>  |
| Q6AY09        | ATENDIYNFFSPLNPMR                                                  | 1.324499871        | 2               | 4.01809   |
| Q6AY09        | GLPWSCSAEEVMR                                                      | 1.036506304        | 2               | 3.10273   |

|               |                                                               |                    |                 |          |
|---------------|---------------------------------------------------------------|--------------------|-----------------|----------|
| Q6AY09        | HTGPNSPDTANDGFVR                                              | 0.927249979        | 2               | 4.19408  |
| Q6AY09        | STGEAFVQFASQEIAEK                                             | 1.818049715        | 2               | 4.29085  |
| Q6AY09        | STGEAFVQFASQEIAEKALKK                                         | 0.917193968        | 2               | 2.54601  |
| <b>Q6AY20</b> | <b>MPRD Cation_dependent mannose_6_phosphate receptor</b>     | <b>0.90971946</b>  | <b>0.884165</b> | <b>2</b> |
| Q6AY20        | HTLAGNFNPVSEER                                                | 0.904461151        | 2               | 4.30022  |
| Q6AY20        | SCDLVGEKDKEK                                                  | 1.055095644        | 2               | 3.72064  |
| <b>Q6AY30</b> | <b>SCPDH Probable saccharopine dehydrogenase</b>              | <b>1.049073125</b> | <b>0.33886</b>  | <b>6</b> |
| Q6AY30        | ACIENGTSCIDICGEPQFLELMHVK                                     | 1.374974458        | 3               | 5.31295  |
| Q6AY30        | ATLVLNCGVPYR                                                  | 1.041928803        | 2               | 2.56127  |
| Q6AY30        | GGGVFTPGAAFSR                                                 | 0.877711634        | 2               | 2.36426  |
| Q6AY30        | GVYIIGSSGFDSIPADLVLYTR                                        | 1.119280424        | 2               | 3.25374  |
| Q6AY30        | LQQVLEK                                                       | 1.181637585        | 1               | 2.06796  |
| Q6AY30        | SVSNLKPVPVIGSK                                                | 0.934164161        | 2               | 3.61388  |
| <b>Q6AY56</b> | <b>TBA8 Tubulin alpha_8 chain</b>                             | <b>1.137287934</b> | <b>9.9E-20</b>  | <b>9</b> |
| Q6AY56        | AFVHWYVYVGEEMEEGFSEAR                                         | 1.595366195        | 2               | 4.60202  |
| Q6AY56        | AVCMLSNTTAIAEAWAR                                             | 1.150271639        | 2               | 4.62518  |
| Q6AY56        | EDAANNYAR                                                     | 0.997011704        | 1               | 2.07345  |
| Q6AY56        | FDGALNVDLTFQTNLVPPYR                                          | 1.155588068        | 2               | 5.41057  |
| Q6AY56        | LISQIVSSITASLR                                                | 1.699078584        | 2               | 3.66662  |
| Q6AY56        | NLDIERPTYTNLNR                                                | 1.228738573        | 2               | 3.58131  |
| Q6AY56        | QLFHPEQLITGK                                                  | 1.288764761        | 2               | 2.85151  |
| Q6AY56        | TIQFVDWCPTGFK                                                 | 1.30126118         | 2               | 3.88179  |
| Q6AY56        | VGINYQPPTVPPGGDLAK                                            | 1.135028322        | 2               | 4.84352  |
| <b>Q6AY80</b> | <b>NQO2 Ribosyldihyronicotinamide dehydrogenase [quinone]</b> | <b>1.124339045</b> | <b>0.387277</b> | <b>2</b> |
| Q6AY80        | NDVTGALSNEPVFK                                                | 1.10387346         | 2               | 3.41516  |
| Q6AY80        | VLAPQISFGPEVSSEQR                                             | 0.924182996        | 2               | 3.37897  |
| <b>Q6AYH5</b> | <b>DCTN2 Dynactin subunit 2</b>                               | <b>1.471793156</b> | <b>0.038289</b> | <b>3</b> |
| Q6AYH5        | ASVEDADTQNK                                                   | 1.521265332        | 2               | 3.22234  |
| Q6AYH5        | LLGPDAAINLADPDGALAK                                           | 1.816692162        | 2               | 2.92557  |
| Q6AYH5        | WSPVASTLPELVQR                                                | 1.232754664        | 2               | 2.57043  |
| <b>Q6AYQ8</b> | <b>FAHD1 Acylpyruvase FAHD1_mitochondrial</b>                 | <b>0.908281496</b> | <b>0.997567</b> | <b>3</b> |
| Q6AYQ8        | IITLEEGDLITGTPK                                               | 0.907204982        | 2               | 4.39808  |
| Q6AYQ8        | NLHHEVELGVLLGR                                                | 0.91890911         | 3               | 4.43868  |
| Q6AYQ8        | SFTSSCPVSAFVPK                                                | 0.942997944        | 2               | 4.08594  |
| <b>Q6AYR8</b> | <b>SCRN2 Secernin_2</b>                                       | <b>1.134836232</b> | <b>0.567716</b> | <b>3</b> |
| Q6AYR8        | GHQAALGLMDEQEQAQLR                                            | 1.1083716          | 2               | 3.87286  |
| Q6AYR8        | QEQQSLEQEGLEALR                                               | 1.244350201        | 2               | 4.02417  |
| Q6AYR8        | TTASMVSVLPQDPTKPCVHFLTATPDPSPR                                | 1.488232984        | 3               | 3.57176  |
| <b>Q6AYS7</b> | <b>ACY1A Aminoacylase_1A</b>                                  | <b>2.079495186</b> | <b>0.000326</b> | <b>2</b> |
| Q6AYS7        | EMNLTLEPEIFPAATDSR                                            | 1.125278033        | 2               | 3.45931  |
| Q6AYS7        | ICTVQPNPDYGSVTFLEER                                           | 2.256309428        | 2               | 4.42598  |
| <b>Q6AYS8</b> | <b>DHB11 Estradiol 17_beta_dehydrogenase 11</b>               | <b>0.983311722</b> | <b>0.916643</b> | <b>3</b> |
| Q6AYS8        | ALTDELAALGCTGVR                                               | 0.789401246        | 2               | 2.36128  |
| Q6AYS8        | NPSTNLGPTLEPEEVVEHLMHGILTQK                                   | 1.069246207        | 3               | 3.66436  |
| Q6AYS8        | SVAGEIVLITGAGHGIGR                                            | 0.95827391         | 2               | 4.27673  |
| <b>Q6AYT9</b> | <b>ACSM5 Acyl_coenzyme A synthetase ACSM5_mitochondrial</b>   | <b>1.038013804</b> | <b>0.999987</b> | <b>3</b> |
| Q6AYT9        | AFIVLSPAYVSHDPEALTR                                           | 1.103947491        | 2               | 4.69183  |
| Q6AYT9        | ASPPYDVQIVDEEGNVLPPEGK                                        | 0.965816656        | 2               | 3.37848  |
| Q6AYT9        | NDDVINSSSYR                                                   | 1.001350894        | 2               | 3.3059   |
| <b>Q6AYZ1</b> | <b>TBA1C Tubulin alpha_1C chain</b>                           | <b>1.387095251</b> | <b>9.9E-20</b>  | <b>6</b> |
| Q6AYZ1        | AVFVDLEPTVIDEVR                                               | 0.881793072        | 2               | 5.30174  |
| Q6AYZ1        | AYHEQLTVAEITNACFEPANQMVK                                      | 1.056608282        | 3               | 4.25554  |
| Q6AYZ1        | DVNAAIATIK                                                    | 1.104848809        | 2               | 3.29598  |
| Q6AYZ1        | IHFPLATYAPVISAIEK                                             | 1.425793797        | 2               | 3.90109  |

|               |                                                          |                    |                 |           |
|---------------|----------------------------------------------------------|--------------------|-----------------|-----------|
| Q6AYZ1        | TIGGGDDSFNTFFSETGAGK                                     | 2.451827541        | 2               | 5.56145   |
| Q6AYZ1        | VGINYQPPTVPPGGDLAR                                       | 1.166168732        | 2               | 4.752     |
| <b>Q6DGG1</b> | <b>ABHEB Abhydrolase domain_containing protein 14B</b>   | <b>0.962941296</b> | <b>0.95583</b>  | <b>7</b>  |
| Q6DGG1        | AVAILPGLGR                                               | 1.002768917        | 2               | 3.47876   |
| Q6DGG1        | FSSETWQNLGTLHR                                           | 1.184630728        | 2               | 3.57171   |
| Q6DGG1        | FSVLLHGIR                                                | 1.064462707        | 2               | 3.01433   |
| Q6DGG1        | GYVPVAPICTDK                                             | 0.959279098        | 2               | 2.54214   |
| Q6DGG1        | INAADYAR                                                 | 1.059004439        | 2               | 2.4013    |
| Q6DGG1        | TPTLVYGDQDPMGSSSFQHLK                                    | 1.008876741        | 2               | 4.96604   |
| Q6DGG1        | VLVMEGAGHPCYLDKPDWHTGLLDFLQELA                           | 1.383854785        | 3               | 3.89168   |
| <b>Q6EDY6</b> | <b>LR16A Leucine_rich repeat_containing protein 16A</b>  | <b>0.998416365</b> | <b>0.806131</b> | <b>2</b>  |
| Q6EDY6        | ELMESIK+Oxidation(3)                                     | 0.99770099         | 1               | 2.19212   |
| Q6EDY6        | IENYLLR                                                  | 1.15866191         | 2               | 2.50396   |
| <b>Q6GQT9</b> | <b>NOMO1 Nodal modulator 1</b>                           | <b>1.17421398</b>  | <b>0.61297</b>  | <b>2</b>  |
| Q6GQT9        | SSIDSEPALVLGPLK                                          | 1.140647501        | 2               | 2.69781   |
| Q6GQT9        | VQVVVPEAETR                                              | 1.127477368        | 2               | 2.84382   |
| <b>Q6I7R3</b> | <b>ISOC1 Isochorismatase domain_containing protein 1</b> | <b>0.966246854</b> | <b>0.014739</b> | <b>2</b>  |
| Q6I7R3        | GLGSTVQEIDLTGVK                                          | 0.940201559        | 2               | 3.85579   |
| Q6I7R3        | ILGIPVIITEQYPK                                           | 1.449758082        | 2               | 3.27251   |
| <b>Q6IE52</b> | <b>MUG2 Murinoglobulin_2</b>                             | <b>1.122792256</b> | <b>0.708017</b> | <b>13</b> |
| Q6IE52        | AHFSVMGDILSSAIK                                          | 1.006579205        | 2               | 3.64351   |
| Q6IE52        | HGIPFFVK                                                 | 1.710416761        | 2               | 2.81411   |
| Q6IE52        | HTSSWLVTPEK                                              | 1.01101333         | 2               | 2.62551   |
| Q6IE52        | LPSSEEEESLDINIEGAK                                       | 1.151605201        | 2               | 5.40219   |
| Q6IE52        | MLIYITILPDGEVIADSVK                                      | 1.142873671        | 2               | 4.31631   |
| Q6IE52        | MLSGFIPLKPTVK                                            | 0.984731877        | 2               | 2.85549   |
| Q6IE52        | NLYPLKELVQDPK                                            | 1.032487309        | 1               | 2.14943   |
| Q6IE52        | QLSFSLSAEPIQGPK                                          | 1.043862409        | 2               | 4.32059   |
| Q6IE52        | VHLSFSPSLSLPASQTHMR                                      | 1.021276366        | 3               | 3.55956   |
| Q6IE52        | VKTVP LTCNNPK                                            | 1.036803523        | 2               | 2.77076   |
| Q6IE52        | VLIVEPEGIKK                                              | 1.068088278        | 2               | 2.37251   |
| Q6IE52        | VTASPSQLCGLR                                             | 1.237187349        | 2               | 2.59525   |
| Q6IE52        | YMLVLPVSQLYTETPEK                                        | 0.989073984        | 2               | 4.06017   |
| <b>Q6IFW6</b> | <b>K1C10 Keratin_type I cytoskeletal 10</b>              | <b>1.062406693</b> | <b>0.039886</b> | <b>2</b>  |
| <b>Q6IFX1</b> | <b>K1C24 Keratin_type I cytoskeletal 24</b>              | <b>1.103799004</b> | <b>0.301175</b> | <b>2</b>  |
| Q6IFX1        | LLNDRM                                                   | 0.822415995        | 1               | 1.9204    |
| Q6IFX1        | QEAEKQFNER                                               | 1.104567503        | 2               | 2.56289   |
| <b>Q6IG00</b> | <b>K2C4 Keratin_type II cytoskeletal 4</b>               | <b>1.116941548</b> | <b>0.762148</b> | <b>3</b>  |
| Q6IG00        | LMQDSVEDFK+Oxidation(2)                                  | 1.122193678        | 1               | 2.07506   |
| Q6IG00        | NLDLDGIIAEVR                                             | 1.00E+00           | 2               | 3.26766   |
| Q6IG00        | WNLLQQTTTTSPR                                            | 2.895853372        | 2               | 4.36292   |
| <b>Q6IRK9</b> | <b>PGCP Plasma glutamate carboxypeptidase</b>            | <b>0.922188944</b> | <b>1</b>        | <b>4</b>  |
| Q6IRK9        | AIQIMYQNLQQDGLNVHLEQVR                                   | 0.839888055        | 3               | 5.61614   |
| Q6IRK9        | IVVYNQPYTDYVK                                            | 1.010016639        | 2               | 2.40676   |
| Q6IRK9        | TYPDTDSFNTVAEITGSK                                       | 0.929066603        | 2               | 4.46419   |
| Q6IRK9        | VGAVASLIR                                                | 0.978097803        | 2               | 2.45549   |
| <b>Q6MGB5</b> | <b>DHB8 Estradiol_17_beta_dehydrogenase 8</b>            | <b>0.960732153</b> | <b>0.997466</b> | <b>4</b>  |
| Q6MGB5        | AGVIGLTQTAAR                                             | 0.948157996        | 2               | 3.02583   |
| Q6MGB5        | GSIINISSIVGK                                             | 1.314795611        | 2               | 2.79226   |
| Q6MGB5        | LAAEGAAVAACDLGAAQDQTVR                                   | 0.978945164        | 2               | 3.85238   |
| Q6MGB5        | VGNIGQNTYASSK                                            | 1.120258842        | 2               | 2.85543   |
| <b>Q6NSR8</b> | <b>PEPL1 Probable aminopeptidase NPEPL1</b>              | <b>1.025730791</b> | <b>0.438726</b> | <b>2</b>  |
| Q6NSR8        | HNSPSAAHFITR                                             | 1.071121           | 3               | 4.13622   |
| Q6NSR8        | TVEINNTDAEGR                                             | 0.997316589        | 2               | 3.02421   |



|               |                                                                           |                    |                 |           |
|---------------|---------------------------------------------------------------------------|--------------------|-----------------|-----------|
| <b>Q6NYB7</b> | <b>RAB1A Ras_related protein Rab_1A</b>                                   | <b>1.269876936</b> | <b>0.165437</b> | <b>4</b>  |
| Q6NYB7        | EFADSLGIPFLETSAK                                                          | 1.312179069        | 2               | 3.03324   |
| Q6NYB7        | MGPATAGGAEK                                                               | 1.017340687        | 2               | 3.54527   |
| Q6NYB7        | MGPATAGGAEK+Oxidation(1)                                                  | 1.261769849        | 2               | 2.44288   |
| Q6NYB7        | NATNVEQSFMTMAAEIK                                                         | 1.298100202        | 2               | 4.54432   |
| <b>Q6NZJ6</b> | <b>IF4G1 Eukaryotic translation initiation factor 4 gamma 1</b>           | <b>1.061965632</b> | <b>0.711851</b> | <b>6</b>  |
| Q6NZJ6        | GLPLVDDGGWNTVPISK                                                         | 1.034784361        | 2               | 3.38518   |
| Q6NZJ6        | GSSGGSGAKPSDTASEATRPATLNR                                                 | 1.048240381        | 3               | 3.35686   |
| Q6NZJ6        | IHNAENIQPGEQK                                                             | 1.027137945        | 2               | 4.04524   |
| Q6NZJ6        | KVEYTLGEESEAPGQR                                                          | 0.944411241        | 2               | 4.60225   |
| Q6NZJ6        | LKEELEEAR                                                                 | 1.086734614        | 2               | 2.67297   |
| Q6NZJ6        | TASTPTPPQTGGSLPQPNGESPQVAVIIRPDDR                                         | 1.057112449        | 3               | 5.34378   |
| <b>Q6P0K8</b> | <b>PLAK Junction plakoglobin</b>                                          | <b>1.0779692</b>   | <b>0.872187</b> | <b>4</b>  |
| Q6P0K8        | LLNDEDPVVVK                                                               | 0.969712949        | 2               | 2.74524   |
| Q6P0K8        | MEEIVEGCTGALHILAR                                                         | 1.346102155        | 3               | 3.30865   |
| Q6P0K8        | NLALCPANHAPLQEAAVIPR                                                      | 0.966632817        | 3               | 3.95562   |
| Q6P0K8        | TMQNTSDLDTAR                                                              | 1.121913457        | 2               | 2.95566   |
| <b>Q6P2K6</b> | <b>P4R3A Serine/threonine_protein phosphatase 4 regulatory subunit 3A</b> | <b>0.886098149</b> | <b>0.61574</b>  | <b>3</b>  |
| Q6P2K6        | ESEEKEVLLK                                                                | 0.708836151        | 1               | 2.02612   |
| Q6P2K6        | FKEVIPISDPELK                                                             | 1.134021275        | 1               | 2.01321   |
| Q6P2K6        | LDSMRSILR                                                                 | 0.837504349        | 1               | 2.025     |
| <b>Q6P502</b> | <b>TCPG T_complex protein 1 subunit gamma</b>                             | <b>1.199211032</b> | <b>2.15E-08</b> | <b>12</b> |
| Q6P502        | AMTGVEQWPYR                                                               | 1.184063402        | 2               | 2.57014   |
| Q6P502        | AVAQALEVIPR                                                               | 1.162858016        | 2               | 2.85293   |
| Q6P502        | DMMLNIINSSITTK                                                            | 0.819523672        | 2               | 2.34828   |
| Q6P502        | EIQVQHPPAK                                                                | 0.978490797        | 2               | 3.12741   |
| Q6P502        | IVLLDSSLEYK                                                               | 1.490069502        | 2               | 2.46059   |
| Q6P502        | IVSRPEELREDDVGTGAGLLEIK                                                   | 1.623834502        | 3               | 4.28636   |
| Q6P502        | KGESQTDIEITR                                                              | 1.199169242        | 2               | 2.90251   |
| Q6P502        | NLQDAMQVCR                                                                | 1.198678323        | 2               | 3.17285   |
| Q6P502        | NVLLDPQLVPGGASEMAVAHALTEK                                                 | 1.481026854        | 2               | 4.08847   |
| Q6P502        | TAVETAVLLLR                                                               | 1.352366234        | 2               | 2.80806   |
| Q6P502        | TLIQNCGASTIR                                                              | 1.245315117        | 2               | 3.09467   |
| Q6P502        | WSSLACNIALDAVK                                                            | 1.260487916        | 2               | 3.63207   |
| <b>Q6P6M7</b> | <b>SPCS O_phosphoseryl_tRNA(Sec) selenium transferase</b>                 | <b>1.203919807</b> | <b>0.059756</b> | <b>4</b>  |
| Q6P6M7        | EMFVYLSTQLKK+Oxidation(2)                                                 | 0.732634288        | 2               | 2.95783   |
| Q6P6M7        | KEMFVYLSTQLKK                                                             | 1.105832724        | 2               | 2.54667   |
| Q6P6M7        | SGDISAVQPK                                                                | 1.293702726        | 2               | 2.59318   |
| Q6P6M7        | SMVTAGFEPVVIENVLEGDELR                                                    | 0.847070099        | 2               | 3.66175   |
| <b>Q6P6R2</b> | <b>DLDH Dihydroliopoyl dehydrogenase_mitochondrial</b>                    | <b>1.106637045</b> | <b>5.46E-05</b> | <b>10</b> |
| Q6P6R2        | ALTGGIAHLFK                                                               | 1.167955758        | 2               | 2.35699   |
| Q6P6R2        | IDVSVEAASGGK                                                              | 1.008624844        | 2               | 3.2161    |
| Q6P6R2        | ILGAHILGPGAGEMVNEAALALEYGASCEDVAR                                         | 1.416369971        | 3               | 4.43588   |
| Q6P6R2        | NETLGGTCLNVGCIPIK                                                         | 1.052886014        | 2               | 5.2592    |
| Q6P6R2        | NQVTATTADGSTQVIGTK                                                        | 0.992286236        | 2               | 5.37436   |
| Q6P6R2        | RPFTQNLGLEELGIELDPK                                                       | 1.170010103        | 3               | 3.74095   |
| Q6P6R2        | SEEQLKEEGVEFK                                                             | 0.893576505        | 3               | 3.89455   |
| Q6P6R2        | TNADTDGMVK                                                                | 0.978556998        | 2               | 2.87228   |
| Q6P6R2        | TNADTDGMVK+Oxidation(8)                                                   | 1.355221425        | 2               | 2.68824   |
| Q6P6R2        | VCHAHPTLSEAFR                                                             | 1.151792139        | 3               | 3.78727   |
| <b>Q6P6S9</b> | <b>ENTP5 Ectonucleoside triphosphate diphosphohydrolase 5</b>             | <b>1.162394034</b> | <b>0.935635</b> | <b>4</b>  |
| Q6P6S9        | AQTLLEVEEIFK                                                              | 1.182582599        | 2               | 2.98593   |

|               |                                                 |                    |                 |           |
|---------------|-------------------------------------------------|--------------------|-----------------|-----------|
| Q6P6S9        | GQETVGTLDLGASTQITFLPQLEK                        | 1.148447486        | 2               | 4.11729   |
| Q6P6S9        | QGAETVQELLEVAK                                  | 1.157094366        | 2               | 3.08266   |
| Q6P6S9        | TSGQLPFLEGEIFDSVKPGLSAFVDQPK                    | 1.155553154        | 3               | 4.70138   |
| <b>Q6P6V0</b> | <b>G6PI Glucose_6_phosphate isomerase</b>       | <b>1.359056317</b> | <b>4.31E-11</b> | <b>9</b>  |
| Q6P6V0        | AITDIINIGIGGSDLGPLMVTEALKPYSK                   | 1.054495473        | 3               | 3.80874   |
| Q6P6V0        | DVMPEVNKVLDK+Oxidation(3)                       | 0.869877075        | 2               | 2.36973   |
| Q6P6V0        | HFVALSTNTDK                                     | 1.388472532        | 2               | 3.16772   |
| Q6P6V0        | ILLANFLAQTEALMK                                 | 1.177220343        | 2               | 3.13455   |
| Q6P6V0        | KIEPELDGSSAVTSHDSSTNGLIGFIK                     | 1.086960627        | 3               | 4.83518   |
| Q6P6V0        | TFTTQETITNAETAK                                 | 1.236007995        | 2               | 5.13306   |
| Q6P6V0        | TLANLNPESSLIASK                                 | 1.519647316        | 3               | 5.02116   |
| Q6P6V0        | VFEGNRPTSIVFTK                                  | 1.390288221        | 2               | 3.25581   |
| Q6P6V0        | VWVFSNIDGTHIAK                                  | 0.233304622        | 2               | 3.58876   |
| <b>Q6P7Q4</b> | <b>LGUL Lactoylglutathione lyase</b>            | <b>1.114980165</b> | <b>0.551049</b> | <b>5</b>  |
| Q6P7Q4        | DFLLQQTMLR                                      | 1.040926827        | 2               | 3.25858   |
| Q6P7Q4        | FEELGVK                                         | 1.114183732        | 1               | 1.94432   |
| Q6P7Q4        | GFGHIGIAVPDVEACK                                | 1.20877647         | 2               | 3.71538   |
| Q6P7Q4        | GLAFVQDPDGYWIEILPNK                             | 1.260338691        | 2               | 5.80451   |
| Q6P7Q4        | VLGLTLLQK                                       | 1.286783265        | 2               | 2.72294   |
| <b>Q6P7R8</b> | <b>DHB12 Estradiol 17_beta_dehydrogenase 12</b> | <b>1.184905347</b> | <b>0.07136</b>  | <b>3</b>  |
| Q6P7R8        | LGEWAVVTGGTDGIGK                                | 1.166431534        | 2               | 4.12365   |
| Q6P7R8        | LININVLSICK                                     | 2.955655987        | 2               | 2.6447    |
| Q6P7R8        | TIAVDFSLDDIYDK                                  | 1.314077791        | 2               | 2.96944   |
| <b>Q6P9T8</b> | <b>TBB2C Tubulin beta_2C chain</b>              | <b>1.146415967</b> | <b>3.41E-14</b> | <b>13</b> |
| Q6P9T8        | AVLVDLEPGTMDSVR                                 | 1.007304362        | 2               | 4.73195   |
| Q6P9T8        | AVLVDLEPGTMDSVR+Oxidation(11)                   | 1.110202196        | 2               | 2.51861   |
| Q6P9T8        | EAESCDCLQGFLTHSLGGTGSGMGTLISK                   | 1.120906607        | 3               | 5.55761   |
| Q6P9T8        | EIVHLQAGQCGNQIGAK                               | 0.933240136        | 2               | 5.10746   |
| Q6P9T8        | EVDEQMLNVQNK                                    | 1.209734854        | 2               | 4.19869   |
| Q6P9T8        | FWEVISDEHGIDPTGTYHGSDQLER                       | 1.00204308         | 3               | 5.46878   |
| Q6P9T8        | INVYYNEATGGK                                    | 1.140703865        | 2               | 3.65263   |
| Q6P9T8        | KEAESCDCLQGFLTHSLGGTGSGMGTLISK                  | 1.286750313        | 3               | 5.75968   |
| Q6P9T8        | LHFFMPGFAPLTSR                                  | 2.825336839        | 2               | 2.98835   |
| Q6P9T8        | MSATFIGNSTAIQELFK                               | 1.740835256        | 2               | 4.36637   |
| Q6P9T8        | SGPFGQIFRPDNFVFGQSGAGNNWAK                      | 0.830347987        | 3               | 3.94202   |
| Q6P9T8        | TAVCDIPPR                                       | 0.457076319        | 2               | 2.38873   |
| Q6P9T8        | YLTVAAVFR                                       | 1.073729747        | 2               | 2.71098   |
| <b>Q6PA06</b> | <b>ATLA2 Atlastin_2</b>                         | <b>1.082171246</b> | <b>0.351992</b> | <b>4</b>  |
| Q6PA06        | AGLTDQVSHHAR                                    | 1.278390079        | 2               | 3.08449   |
| Q6PA06        | NLVPLLLAPENLVEK                                 | 1.138583218        | 2               | 2.82035   |
| Q6PA06        | QNQHEELQNVK                                     | 0.947676918        | 2               | 2.86737   |
| Q6PA06        | SMLQATAEANNLAAVAGAR                             | 1.294191357        | 2               | 3.21715   |
| <b>Q6PCM2</b> | <b>INT6 Integrator complex subunit 6</b>        | <b>1.217243809</b> | <b>0.002908</b> | <b>2</b>  |
| Q6PCM2        | MLIEQLENFLDEIHRR+Oxidation(1)                   | 0.510272645        | 2               | 2.50845   |
| Q6PCM2        | NPFLEPAIIITTDGSK                                | 1.348800885        | 2               | 2.34954   |
| <b>Q6PDV7</b> | <b>RL10 60S ribosomal protein L10</b>           | <b>1.38624645</b>  | <b>0.335177</b> | <b>2</b>  |
| Q6PDV7        | FNADEFEDMVAEK                                   | 1.365712327        | 2               | 3.73322   |
| Q6PDV7        | FNADEFEDMVAEKR                                  | 0.874074394        | 2               | 2.65021   |
| <b>Q6PEC1</b> | <b>TBCA Tubulin_specific chaperone A</b>        | <b>1.074020676</b> | <b>0.436104</b> | <b>4</b>  |
| Q6PEC1        | AEDGENYAIKK                                     | 1.196765867        | 2               | 2.57396   |
| Q6PEC1        | LEAAYTDLR                                       | 1.025577137        | 2               | 2.84698   |
| Q6PEC1        | QILESEKDLLEEAEYKEAR                             | 1.120208698        | 3               | 4.09831   |
| Q6PEC1        | RLEAAYTDLR                                      | 1.147014148        | 2               | 2.47207   |
| <b>Q6PEC4</b> | <b>SKP1 S_phase kinase associated protein 1</b> | <b>1.195958811</b> | <b>0.461655</b> | <b>3</b>  |
| Q6PEC4        | NDFTEEEEAQVR                                    | 0.979631458        | 2               | 3.18561   |
| Q6PEC4        | RTDDIPVWDQEFK                                   | 1.173730801        | 2               | 3.10357   |
| Q6PEC4        | TDDIPVWDQEFK                                    | 1.316794906        | 2               | 2.70944   |

|               |                                                                                    |                    |                 |           |
|---------------|------------------------------------------------------------------------------------|--------------------|-----------------|-----------|
| <b>Q6PGB8</b> | <b>SMCA1 Probable global transcription activator SNF2L1</b>                        | <b>1.011000496</b> | <b>0.99494</b>  | <b>2</b>  |
| Q6PGB8        | EMDPEYEEKMVNMPLK+Oxidation(13)                                                     | 0.993862677        | 2               | 2.41012   |
| Q6PGB8        | IKTDVEKSLPPK                                                                       | 1.027655532        | 2               | 2.32029   |
| <b>Q6Q0N1</b> | <b>CNDP2 Cytosolic non_specific dipeptidase</b>                                    | <b>1.015271219</b> | <b>0.00242</b>  | <b>6</b>  |
| Q6Q0N1        | AVFQYIDENQDR                                                                       | 1.804731538        | 2               | 3.25158   |
| Q6Q0N1        | EGGSIPVTLTFQEATGK                                                                  | 1.06993685         | 2               | 2.75371   |
| Q6Q0N1        | LGGSVELVDIGK                                                                       | 1.430317184        | 2               | 2.38908   |
| Q6Q0N1        | LVPDMIPEVVSEQVSSYLSK                                                               | 0.304759499        | 2               | 3.42259   |
| Q6Q0N1        | MTEAAAADVQR                                                                        | 1.14280874         | 2               | 2.58719   |
| Q6Q0N1        | TGQEIPVNLK                                                                         | 1.174668422        | 2               | 2.49549   |
| <b>Q6RT24</b> | <b>CENPE Centromere_associated protein E</b>                                       | <b>1.102587737</b> | <b>0.649249</b> | <b>2</b>  |
| Q6RT24        | DLLQKVQDEK                                                                         | 1.036015362        | 2               | 2.38172   |
| Q6RT24        | MELENVNMKLQEK                                                                      | 1.133161829        | 2               | 2.40345   |
| <b>Q6RUV5</b> | <b>RAC1 Ras_related C3 botulinum toxin substrate 1</b>                             | <b>1.11457505</b>  | <b>0.909999</b> | <b>2</b>  |
| Q6RUV5        | HHCNTPPIILVGTK                                                                     | 1.113533011        | 2               | 3.11598   |
| Q6RUV5        | LTPITYPQGLAMAK                                                                     | 1.132419676        | 2               | 2.98528   |
| <b>Q6SKG1</b> | <b>ACSM3 Acyl_coenzyme A synthetase ACSM3_mitochondrial</b>                        | <b>0.632371639</b> | <b>0.008947</b> | <b>2</b>  |
| Q6SKG1        | FDSTSILQTLTK                                                                       | 0.632394793        | 2               | 3.14342   |
| Q6SKG1        | TGTVLIPGTTQLTQK                                                                    | 0.609096185        | 2               | 2.52363   |
| <b>Q6TUG0</b> | <b>DJB11 DnaJ homolog subfamily B member 11</b>                                    | <b>1.260703397</b> | <b>2.22E-16</b> | <b>4</b>  |
| Q6TUG0        | FQDLGAAAYEVLSDSEK                                                                  | 1.227307836        | 2               | 4.73987   |
| Q6TUG0        | FQMTQEVVCECPNVK                                                                    | 1.258081373        | 2               | 5.05019   |
| Q6TUG0        | KGEGLPNFDNNDIK                                                                     | 1.283188644        | 2               | 3.31929   |
| Q6TUG0        | TLEVEIEPGVR                                                                        | 1.237088562        | 2               | 3.03392   |
| <b>Q6UPE1</b> | <b>ETFD Electron transfer flavoprotein_ubiquinone oxidoreductase_mitochondrial</b> | <b>1.058517272</b> | <b>0.999994</b> | <b>17</b> |
| Q6UPE1        | AAQIGAHTLSGACLDPAAFK                                                               | 1.075271577        | 2               | 4.5006    |
| Q6UPE1        | ALNEGGLQSIK                                                                        | 0.952177294        | 2               | 3.48033   |
| Q6UPE1        | ASCDATYIGLTK                                                                       | 0.77366349         | 2               | 3.82602   |
| Q6UPE1        | FAEEADVIVGAGPAGLSAAIR                                                              | 0.900803652        | 2               | 4.65717   |
| Q6UPE1        | FCPAGVYEFVPLEQGDGFR                                                                | 1.010312783        | 2               | 4.88455   |
| Q6UPE1        | GAPLNTPVTEDR                                                                       | 0.961253453        | 2               | 3.47627   |
| Q6UPE1        | GIATNDVGIQK                                                                        | 0.877400345        | 2               | 3.56135   |
| Q6UPE1        | HHPSIRPTLEGGK                                                                      | 0.751661433        | 2               | 2.31777   |
| Q6UPE1        | LQINAQNCVHCK                                                                       | 1.090628483        | 2               | 3.50742   |
| Q6UPE1        | LTFPGGLLIGCSPGFMNVPK                                                               | 1.17063028         | 2               | 3.4681    |
| Q6UPE1        | NLSIYDGPEQR                                                                        | 0.944285259        | 2               | 2.62894   |
| Q6UPE1        | QLTSENLSK                                                                          | 0.896986757        | 2               | 2.32219   |
| Q6UPE1        | SGSLAAEAIK                                                                         | 0.938633285        | 2               | 3.29109   |
| Q6UPE1        | TAGLHVTEYEDNLK                                                                     | 0.85312694         | 2               | 3.69487   |
| Q6UPE1        | TCDIKDPNQINWVVEGGGGPAYNGM                                                          | 1.109424083        | 2               | 4.52092   |
| Q6UPE1        | VDHTVGWPLDR                                                                        | 0.89146099         | 2               | 2.49189   |
| Q6UPE1        | VTIFAEGCHGLAK                                                                      | 1.00801814         | 2               | 3.79271   |
| <b>Q6URK4</b> | <b>ROA3 Heterogeneous nuclear ribonucleoprotein A3</b>                             | <b>0.941693671</b> | <b>1.27E-10</b> | <b>7</b>  |
| Q6URK4        | EDSVKPGAHLTVK                                                                      | 1.068603035        | 2               | 3.69733   |
| Q6URK4        | GFAFVTFDDHDTVDK                                                                    | 1.090547348        | 2               | 3.84779   |
| Q6URK4        | IETIEVMEDR                                                                         | 1.028580688        | 2               | 3.36211   |
| Q6URK4        | IFVGGIKEDTEYNLR                                                                    | 1.747646865        | 2               | 4.26382   |
| Q6URK4        | SSGSPYGGGYSGGGSGGYGSR                                                              | 0.823646213        | 2               | 4.6206    |
| Q6URK4        | WGTLTDCVVMR                                                                        | 1.021716863        | 2               | 3.02056   |
| Q6URK4        | YHTINGHNCEVK                                                                       | 1.304993142        | 2               | 3.57486   |
| <b>Q6URW6</b> | <b>MYH14 Myosin_14</b>                                                             | <b>1.276351004</b> | <b>9.19E-10</b> | <b>4</b>  |
| Q6URW6        | EDQSILCTGESGAGK                                                                    | 1.358852902        | 2               | 4.61132   |
| Q6URW6        | FDQLLAEEK                                                                          | 1.067216772        | 1               | 2.01955   |

|               |                                                                                               |                    |                 |          |
|---------------|-----------------------------------------------------------------------------------------------|--------------------|-----------------|----------|
| Q6URW6        | KFDQLLAEEK                                                                                    | 1.208048453        | 2               | 3.16765  |
| Q6URW6        | QLLQANPILEAFGNAK                                                                              | 1.424907459        | 2               | 4.59195  |
| <b>Q6XQN1</b> | <b>PNCB Nicotinate phosphoribosyltransferase</b>                                              | <b>1.086408226</b> | <b>0.797447</b> | <b>4</b> |
| Q6XQN1        | GSEVNVIGIGTNVVTCPK                                                                            | 0.700547011        | 2               | 3.83103  |
| Q6XQN1        | LDSGDLQQAQ                                                                                    | 1.211526552        | 2               | 3.6439   |
| Q6XQN1        | LYLQQGPYEPPLSLEESR                                                                            | 1.281609347        | 2               | 5.46786  |
| Q6XQN1        | QLQNPAVYQVASEK                                                                                | 1.11971347         | 2               | 3.15361  |
| <b>Q6ZPJ3</b> | <b>UBE2O Ubiquitin_conjugating enzyme E2 O</b>                                                | <b>0.81405919</b>  | <b>0.001017</b> | <b>2</b> |
| Q6ZPJ3        | FRTTDIVIR                                                                                     | 0.804684344        | 2               | 2.52438  |
| Q6ZPJ3        | NCAQGEESMAKKVK                                                                                | 0.987669669        | 2               | 2.90382  |
| <b>Q70FJ1</b> | <b>AKAP9 A_kinase anchor protein 9</b>                                                        | <b>1.190836182</b> | <b>0.608597</b> | <b>2</b> |
| Q70FJ1        | EDGGQPPPALPSEDLLK                                                                             | 1.191825638        | 2               | 2.73531  |
| Q70FJ1        | HEAEITNYKIKLEMLEK+Oxidation(14)                                                               | 1.152297619        | 2               | 2.51713  |
| <b>Q711G3</b> | <b>IAH1 Isoamyl acetate_hydrolyzing esterase 1 homolog</b>                                    | <b>1.128620014</b> | <b>0.14711</b>  | <b>4</b> |
| Q711G3        | DCGTDVLDLWTLMQK                                                                               | 1.245162339        | 2               | 4.2189   |
| Q711G3        | DVEETKPELSLLGDGDH                                                                             | 1.012304998        | 2               | 3.64127  |
| Q711G3        | LNVAVGEYAK                                                                                    | 1.142707335        | 2               | 2.55703  |
| Q711G3        | VILITPPLCEAAWEK                                                                               | 1.283981137        | 2               | 2.83088  |
| <b>Q71LX4</b> | <b>TLN2 Talin_2</b>                                                                           | <b>1.113697023</b> | <b>0.700605</b> | <b>4</b> |
| Q71LX4        | NCGEMSEIEAK                                                                                   | 0.921185063        | 2               | 2.42786  |
| Q71LX4        | QEDVIATANLSR                                                                                  | 0.90322424         | 2               | 3.11656  |
| Q71LX4        | QELTVFQSKDIPEK                                                                                | 1.427577589        | 2               | 2.32515  |
| Q71LX4        | QVAASTAQLLVACK                                                                                | 1.165355021        | 2               | 3.26186  |
| <b>Q71TY3</b> | <b>RS27 40S ribosomal protein S27</b>                                                         | <b>1.196536382</b> | <b>0.279449</b> | <b>3</b> |
| Q71TY3        | DLLHPSPEEEK                                                                                   | 1.05045594         | 2               | 2.799    |
| Q71TY3        | LTEGCSFR                                                                                      | 1.301341076        | 2               | 2.31795  |
| Q71TY3        | LVQSPNSYFMDVK                                                                                 | 1.193267236        | 2               | 2.88016  |
| <b>Q75Q39</b> | <b>TOM70 Mitochondrial import receptor subunit TOM70</b>                                      | <b>1.108570741</b> | <b>0.446057</b> | <b>6</b> |
| Q75Q39        | GLELISKAIEIDNK                                                                                | 1.299138256        | 2               | 2.33277  |
| Q75Q39        | NADLSTFYQNR                                                                                   | 1.261386413        | 2               | 2.89764  |
| Q75Q39        | NREPLMPSPQFIK                                                                                 | 0.940251516        | 2               | 2.32094  |
| Q75Q39        | SDEKDKKEGEALEVK                                                                               | 1.153194543        | 2               | 3.90736  |
| Q75Q39        | SYFSSFTDDIISQPMLK                                                                             | 1.010389684        | 2               | 2.9393   |
| Q75Q39        | YEQAIQCYTEAISLCPTEK                                                                           | 0.989283946        | 2               | 3.67149  |
| <b>Q76MZ3</b> | <b>2AAA Serine/threonine_protein phosphatase 2A 65 kDa regulatory subunit A alpha isoform</b> | <b>1.245863683</b> | <b>1.18E-10</b> | <b>7</b> |
| Q76MZ3        | AISHEHSPDLEAHFVPLVK                                                                           | 1.211611174        | 3               | 5.72103  |
| Q76MZ3        | DNTIEHLLPLFLAQLKDECPVVR                                                                       | 1.102727779        | 3               | 5.08079  |
| Q76MZ3        | IGPILDNSTLQSEVKPILEK                                                                          | 1.009177022        | 2               | 4.67477  |
| Q76MZ3        | LNIIISNLDCVNEVIGIR                                                                            | 1.018675516        | 2               | 3.94119  |
| Q76MZ3        | LTQDQDQDVK                                                                                    | 1.217236088        | 2               | 3.17939  |
| Q76MZ3        | NLCSDDTPMVR                                                                                   | 1.178557138        | 2               | 2.44692  |
| Q76MZ3        | QLSQSLLPAIVELAEDAQ                                                                            | 1.345767875        | 3               | 4.24492  |
| <b>Q78P75</b> | <b>DYL2 Dynein light chain 2_cytoplasmic</b>                                                  | <b>1.017738942</b> | <b>0.81985</b>  | <b>3</b> |
| Q78P75        | NADMSEDMQQDAVDCATQAMEK                                                                        | 0.776505096        | 2               | 5.52695  |
| Q78P75        | NFGSYVTHETK                                                                                   | 0.98189507         | 2               | 2.4998   |
| Q78P75        | YNPTWHCIVGR                                                                                   | 1.167820499        | 2               | 2.94418  |
| <b>Q791V5</b> | <b>MTCH2 Mitochondrial carrier homolog 2</b>                                                  | <b>1.499317404</b> | <b>8.36E-12</b> | <b>5</b> |
| Q791V5        | EEGIVFFAGLIPR                                                                                 | 1.486758188        | 2               | 3.32573  |
| Q791V5        | GLFTGLTPR                                                                                     | 1.072315795        | 2               | 2.57159  |
| Q791V5        | LCSGVLGTVVHGK                                                                                 | 1.605060484        | 2               | 3.09438  |
| Q791V5        | VLIQVGYEPLPPTIGR                                                                              | 1.128372294        | 2               | 4.3327   |
| Q791V5        | YCGLCDSIVTIYR                                                                                 | 1.321734003        | 2               | 2.84627  |
| <b>Q794E4</b> | <b>HNRPF Heterogeneous nuclear ribonucleoprotein F</b>                                        | <b>1.545861324</b> | <b>0.012192</b> | <b>3</b> |

|               |                                                            |                    |                 |          |
|---------------|------------------------------------------------------------|--------------------|-----------------|----------|
| Q794E4        | ATENDIYNFFSPLNPVR                                          | 1.442453179        | 2               | 4.22032  |
| Q794E4        | HSGPNSADSANDGFVR                                           | 1.031805275        | 2               | 3.75325  |
| Q794E4        | VHIEIGPDGR                                                 | 1.073915723        | 2               | 2.95532  |
| <b>Q7M0E3</b> | <b>DEST Dextrin</b>                                        | <b>1.181682102</b> | <b>0.125886</b> | <b>3</b> |
| Q7M0E3        | HEYQANGPEDLNR                                              | 1.203024829        | 2               | 4.63478  |
| Q7M0E3        | HFBGMLPEK                                                  | 1.078680462        | 2               | 2.40532  |
| Q7M0E3        | HFBGMLPEKDCR                                               | 1.130649116        | 2               | 2.64655  |
| <b>Q7TMA5</b> | <b>APOB Apolipoprotein B_100</b>                           | <b>0.984464853</b> | <b>0.718866</b> | <b>8</b> |
| Q7TMA5        | GFEPTLEALFGK                                               | 1.120775677        | 2               | 2.36318  |
| Q7TMA5        | GIISLLEAMK                                                 | 0.866707595        | 2               | 2.43707  |
| Q7TMA5        | IEGNLVFDPSSYLPK                                            | 1.194973735        | 2               | 3.41922  |
| Q7TMA5        | IEIDIPLPGGK                                                | 0.904453723        | 2               | 2.82363  |
| Q7TMA5        | ITDNDVLIALDSAK                                             | 0.885280762        | 2               | 2.79383  |
| Q7TMA5        | LSISEQNAQR                                                 | 1.169790009        | 2               | 2.40176  |
| Q7TMA5        | NFVASHIANILNSEEYVQDLK                                      | 1.026071839        | 3               | 3.41706  |
| Q7TMA5        | TILFDTFVNDVAPVEK                                           | 1.053354809        | 2               | 2.72205  |
| <b>Q7TNG8</b> | <b>LDHD Probable D_lactate dehydrogenase_mitochondrial</b> | <b>0.9459624</b>   | <b>0.999897</b> | <b>4</b> |
| Q7TNG8        | AVVGSPhVSTASAVR                                            | 0.901086138        | 2               | 3.14608  |
| Q7TNG8        | AYSTDVCPISR                                                | 0.956807393        | 2               | 3.79115  |
| Q7TNG8        | GSQGGLSQDFVEALK                                            | 0.994192945        | 2               | 3.0836   |
| Q7TNG8        | QLLQEEVGPVGVETMR                                           | 0.934536515        | 2               | 3.4754   |
| <b>Q7TP47</b> | <b>HNRPQ Heterogeneous nuclear ribonucleoprotein Q</b>     | <b>1.213211089</b> | <b>0.140267</b> | <b>3</b> |
| Q7TP47        | AGPIWDLR                                                   | 1.251744179        | 2               | 2.40813  |
| Q7TP47        | DLFEDELVPFEK                                               | 1.639094701        | 2               | 2.78842  |
| Q7TP47        | NLANTVTEEILEK                                              | 0.940337758        | 2               | 2.81012  |
| <b>Q7TP48</b> | <b>APMAP Adipocyte plasma membrane_associated protein</b>  | <b>1.26516941</b>  | <b>1.33E-07</b> | <b>4</b> |
| Q7TP48        | ANPGFSLDFLSDKPFK                                           | 1.572077869        | 2               | 3.27708  |
| Q7TP48        | LENGEIETIAR                                                | 1.167093887        | 2               | 3.23254  |
| Q7TP48        | LFENQLNGPESIVNIGDVLFTGTADGR                                | 1.208234399        | 3               | 4.21407  |
| Q7TP48        | LLLSSETPIEGK                                               | 1.659159633        | 2               | 3.0569   |
| <b>Q7TP52</b> | <b>CMBL Carboxymethylenebutenolidase homolog</b>           | <b>1.167174154</b> | <b>4.97E-05</b> | <b>7</b> |
| Q7TP52        | AGVSVYGIIR                                                 | 1.429269974        | 2               | 2.79577  |
| Q7TP52        | EDCSPADKPYIEEAR                                            | 1.06351238         | 2               | 3.50807  |
| Q7TP52        | KREDCSPADKPYIEEAR                                          | 1.066342009        | 3               | 3.78095  |
| Q7TP52        | LDYGGMGQEVQVEHIK                                           | 1.170647427        | 2               | 4.5555   |
| Q7TP52        | LKEHCIVNYQVK                                               | 1.329885712        | 2               | 4.14853  |
| Q7TP52        | NLIEWLNK                                                   | 1.146200412        | 1               | 2.29394  |
| Q7TP52        | TFSGQTHGFVHR                                               | 1.187077555        | 2               | 3.41243  |
| <b>Q7TPB1</b> | <b>TCPD T_complex protein 1 subunit delta</b>              | <b>1.141020077</b> | <b>3.23E-05</b> | <b>7</b> |
| Q7TPB1        | ALIAGGGAPEIELALR                                           | 1.244999346        | 2               | 3.73124  |
| Q7TPB1        | AQDIEAGDGTSSVIIAGSLDSCSTK                                  | 0.714086298        | 2               | 4.78887  |
| Q7TPB1        | GDVTITNDGATILK                                             | 0.99687744         | 2               | 2.89459  |
| Q7TPB1        | GLEILTDMSRPVQLSDR                                          | 1.018321512        | 2               | 2.50612  |
| Q7TPB1        | LVIEEAER                                                   | 1.342029641        | 2               | 2.35699  |
| Q7TPB1        | SIHDALCVIR                                                 | 1.334826046        | 2               | 2.99006  |
| Q7TPB1        | VIDPATATSVDLR                                              | 1.154223448        | 2               | 4.01699  |
| <b>Q7TPJ0</b> | <b>SSRA Translocon_associated protein subunit alpha</b>    | <b>1.247767376</b> | <b>0.003546</b> | <b>2</b> |
| Q7TPJ0        | GEDFPANNIVK                                                | 1.148895155        | 2               | 2.93958  |
| Q7TPJ0        | GTEDFIVESLDASFR                                            | 1.277187912        | 2               | 4.09007  |
| <b>Q7TQ20</b> | <b>DNJC2 Dnaj homolog subfamily C member 2</b>             | <b>0.792097154</b> | <b>0.241866</b> | <b>2</b> |
| Q7TQ20        | MMEEVEKLCDR+Oxidation(1)                                   | 0.792097154        | 2               | 2.50376  |
| Q7TQ20        | MMEEVEKLCDR+Oxidation(2)                                   | 0.792097154        | 2               | 2.40629  |
| <b>Q7TQ94</b> | <b>NIT1 Nitrilase homolog 1</b>                            | <b>1.063426232</b> | <b>0.475495</b> | <b>2</b> |
| Q7TQ94        | GQDWEQTQK                                                  | 1.011884597        | 2               | 2.38114  |

|               |                                                                          |                    |                 |           |
|---------------|--------------------------------------------------------------------------|--------------------|-----------------|-----------|
| Q7TQ94        | NPAETLLLSEPLDGDLLGQYSQLAR                                                | 1.269094996        | 3               | 3.54657   |
| <b>Q7TQM4</b> | <b>SOAT2 Sterol O_acyltransferase 2</b>                                  | <b>1.115436135</b> | <b>0.818595</b> | <b>3</b>  |
| Q7TQM4        | AIWEAVQAYPK                                                              | 0.923145881        | 2               | 2.96329   |
| Q7TQM4        | QDRPLPSTASDSTR                                                           | 1.197164662        | 2               | 3.42218   |
| Q7TQM4        | TQCLEQAQR                                                                | 1.091083704        | 2               | 2.95239   |
| <b>Q7TSI0</b> | <b>ZNF12 Zinc finger protein 12</b>                                      | <b>0.48011493</b>  | <b>0.526904</b> | <b>2</b>  |
| Q7TSI0        | HMSRLMEEDQGGREENQSSSAVFSYR+Oxidation(2)                                  | 0.352261693        | 3               | 3.61374   |
| Q7TSI0        | HMSRLMEEDQGGREENQSSSAVFSYR+Oxidation(6)                                  | 0.286159436        | 3               | 3.52766   |
| <b>Q7TSQ1</b> | <b>CL18A C_type lectin domain family 18 member A</b>                     | <b>1.18455367</b>  | <b>0.349032</b> | <b>2</b>  |
| Q7TSQ1        | MKCQGGVLAQIESQK                                                          | 1.320231987        | 2               | 2.32263   |
| Q7TSQ1        | QANDSAGALPVAGKPEPMAR+Oxidation(18)                                       | 1.182990228        | 2               | 2.77812   |
| <b>Q80SY4</b> | <b>MIB1 E3 ubiquitin_protein ligase MIB1</b>                             | <b>1.194738645</b> | <b>0.663004</b> | <b>2</b>  |
| Q80SY4        | LDIQDKDGDTPHLEAR                                                         | 1.041384296        | 2               | 2.40636   |
| Q80SY4        | NLIMGLGTQGAEEK                                                           | 1.229646833        | 2               | 2.5059    |
| <b>Q80W21</b> | <b>GSTM7 Glutathione S_transferase Mu 7</b>                              | <b>1.249739871</b> | <b>9.9E-20</b>  | <b>13</b> |
| Q80W21        | CLDAFPNLK                                                                | 1.159901771        | 2               | 3.11254   |
| Q80W21        | CLDAFPNLKDFIAR                                                           | 1.066248388        | 2               | 3.24973   |
| Q80W21        | FKLGLDFPNLPYLIDGSHK                                                      | 1.107395931        | 3               | 4.90866   |
| Q80W21        | HNLCGETEER                                                               | 0.938306102        | 2               | 3.94603   |
| Q80W21        | IRVDILENQLMDNR                                                           | 0.999700029        | 2               | 2.93852   |
| Q80W21        | ITQSNAILR                                                                | 1.253629882        | 2               | 3.07773   |
| Q80W21        | KHNLCGETEER                                                              | 1.119517705        | 3               | 4.11671   |
| Q80W21        | KISDYMK                                                                  | 0.97619847         | 1               | 1.95468   |
| Q80W21        | LFLEYDSSYEK                                                              | 1.164431826        | 2               | 3.99566   |
| Q80W21        | LGLDFPNLPYLIDGSHK                                                        | 1.269616573        | 3               | 4.79142   |
| Q80W21        | LKPGYLEQLPGMMR                                                           | 0.929610493        | 2               | 3.29407   |
| Q80W21        | LYSEFLGK                                                                 | 1.145743459        | 2               | 2.4607    |
| Q80W21        | VDILENQLMDNR                                                             | 0.730551787        | 2               | 3.50565   |
| <b>Q80WE4</b> | <b>KI20B Kinesin_like protein KIF20B</b>                                 | <b>1.599902187</b> | <b>0.794221</b> | <b>2</b>  |
| Q80WE4        | IKDLEVIVETQKDECK                                                         | 1.024603647        | 2               | 2.39936   |
| Q80WE4        | KEEDCAELKEK                                                              | 1.714694809        | 2               | 2.34652   |
| <b>Q80WS3</b> | <b>FBLL1 rRNA/trNA 2_O_methyltransferase fibrillar_in_like protein 1</b> | <b>0.926286834</b> | <b>0.943396</b> | <b>2</b>  |
| Q80WS3        | DHAVVGVYRPPPK                                                            | 0.954461917        | 3               | 3.40789   |
| Q80WS3        | TNIIPVLEDAAR                                                             | 0.920057695        | 2               | 2.42308   |
| <b>Q80X90</b> | <b>FLNB Filamin_B</b>                                                    | <b>1.080814436</b> | <b>0.411324</b> | <b>6</b>  |
| Q80X90        | GAGIGGLGITVEGPSESK                                                       | 1.12063774         | 2               | 3.62259   |
| Q80X90        | IEYDDQNDGSCDVK                                                           | 0.836103289        | 2               | 4.03061   |
| Q80X90        | IGNLQTDLSDGLR                                                            | 1.282343709        | 2               | 2.66318   |
| Q80X90        | VDIQTEDLEDGTCK                                                           | 1.022119443        | 2               | 3.97526   |
| Q80X90        | VGEPGILCVCSEAGPTLGLAVSDSGAK                                              | 0.825531272        | 2               | 4.93366   |
| Q80X90        | VTASGPGLSAYGVPASLPVEFAIDAR                                               | 1.276754598        | 2               | 3.09653   |
| <b>Q80XB4</b> | <b>NRAP Nebulin_related_anchoring protein</b>                            | <b>1.27572209</b>  | <b>0.081122</b> | <b>2</b>  |
| Q80XB4        | EAFERMKGQMLGSR+Oxidation(10)                                             | 1.221443055        | 2               | 2.37604   |
| Q80XB4        | GRSQFHSRADQPGLQAK                                                        | 1.452517783        | 2               | 2.64978   |
| <b>Q80XC3</b> | <b>US6NL USP6_N_terminal_like protein</b>                                | <b>1.090305904</b> | <b>0.746494</b> | <b>2</b>  |
| Q80XC3        | HYNHAAANQNSNAISNVRK                                                      | 1.191273348        | 2               | 2.54277   |
| Q80XC3        | SVDEGSKNLK                                                               | 0.948296951        | 2               | 2.38083   |
| <b>Q80XI3</b> | <b>IF4G3 Eukaryotic translation initiation factor 4 gamma 3</b>          | <b>1.334508834</b> | <b>0.04469</b>  | <b>2</b>  |
| Q80XI3        | EFEKDKADDDVFEK                                                           | 1.922516573        | 2               | 2.60051   |
| Q80XI3        | NHDEESLELCR                                                              | 1.292838117        | 2               | 3.17286   |
| <b>Q80Y84</b> | <b>KDM5B Lysine_specific demethylase 5B</b>                              | <b>0.909827125</b> | <b>0.861282</b> | <b>2</b>  |
| Q80Y84        | CDIGLLGLK                                                                | 1.126537439        | 2               | 2.30576   |
| Q80Y84        | ETAAAMATLGEARLR                                                          | 0.790516178        | 2               | 2.41049   |
| <b>Q80Z25</b> | <b>OFD1 Oral_facial_digital syndrome 1 protein homolog</b>               | <b>1.00E+00</b>    | <b>0.902384</b> | <b>3</b>  |

|               |                                                                       |                    |                 |           |
|---------------|-----------------------------------------------------------------------|--------------------|-----------------|-----------|
| Q80Z25        | ELEQEAERLEK                                                           | 1.143267648        | 2               | 2.55917   |
| Q80Z25        | MIEESLK+Oxidation(1)                                                  | 0.999136417        | 1               | 1.95163   |
| Q80Z25        | RMIEESLK+Oxidation(2)                                                 | 1.082413803        | 2               | 2.3862    |
| <b>Q80Z29</b> | <b>NAMPT Nicotinamide phosphoribosyltransferase</b>                   | <b>0.961025295</b> | <b>3.37E-05</b> | <b>4</b>  |
| Q80Z29        | STEAPLIIRPDSGNPLDVLK                                                  | 1.1984158          | 2               | 3.87711   |
| Q80Z29        | TPAGTFVTLEEGKGDLEEYGHDLLHTVFK                                         | 1.798979676        | 5               | 4.65457   |
| Q80Z29        | VIQGDGVDINTLQEIVEGMK                                                  | 1.329058255        | 2               | 4.48782   |
| Q80Z29        | YLLETSGNLDGLEYK                                                       | 1.007989286        | 2               | 4.0702    |
| <b>Q811D2</b> | <b>ANR26 Ankyrin repeat domain_containing protein 26</b>              | <b>1.068454132</b> | <b>0.25076</b>  | <b>3</b>  |
| Q811D2        | AQEDFDK                                                               | 1.067400244        | 1               | 1.94187   |
| Q811D2        | RSADQLSEKTMEQLR+Oxidation(11)                                         | 1.261773988        | 2               | 2.31818   |
| Q811D2        | SNLEEEARDLK                                                           | 1.738682809        | 1               | 1.92413   |
| <b>Q811L6</b> | <b>MAST4 Microtubule_associated serine/threonine_protein kinase 4</b> | <b>0.945047791</b> | <b>0.605461</b> | <b>2</b>  |
| Q811L6        | FPKATAQMEERLK+Oxidation(8)                                            | 0.893953926        | 2               | 2.33865   |
| Q811L6        | SGHFENTSALPVSGLLK                                                     | 3.106715908        | 2               | 2.39822   |
| <b>Q811Q2</b> | <b>CLIC6 Chloride intracellular channel protein 6</b>                 | <b>1.171470584</b> | <b>0.693371</b> | <b>2</b>  |
| Q811Q2        | AGSDGESIGNCPFSQR                                                      | 1.183208846        | 2               | 3.72863   |
| Q811Q2        | FLDGDELTLADCNLLPK                                                     | 0.888847093        | 2               | 2.31015   |
| <b>Q811X6</b> | <b>CRYL1 Lambda_crystallin homolog</b>                                | <b>1.079954407</b> | <b>0.858706</b> | <b>5</b>  |
| Q811X6        | EMKSLEQSGSLK+Oxidation(2)                                             | 0.95643703         | 1               | 1.96783   |
| Q811X6        | IVDDQVILSSSSCLLPK                                                     | 1.088445435        | 2               | 4.5418    |
| Q811X6        | LVEEGIVSPNDLDLVMSDGLGMR                                               | 0.812835047        | 2               | 3.44668   |
| Q811X6        | LYDIEQQQITNALESIR                                                     | 1.251835008        | 2               | 4.84075   |
| Q811X6        | TFGPVPEFSGDVEK                                                        | 2.688614906        | 2               | 3.02316   |
| <b>Q8BFZ3</b> | <b>ACTBL Beta_actin_like protein 2</b>                                | <b>1.01133388</b>  | <b>6.55E-15</b> | <b>10</b> |
| Q8BFZ3        | CDVDIRK                                                               | 1.137014841        | 2               | 2.49921   |
| Q8BFZ3        | DLTDYLMK                                                              | 1.250446142        | 1               | 2.30002   |
| Q8BFZ3        | HQGVMMVGMGQK                                                          | 1.100628017        | 3               | 3.94666   |
| Q8BFZ3        | HQGVMMVGMGQK+Oxidation(5)                                             | 1.089506891        | 3               | 3.87484   |
| Q8BFZ3        | HQGVMMVGMGQK+Oxidation(5)Oxidation(8)                                 | 1.228213723        | 3               | 3.58551   |
| Q8BFZ3        | HQGVMMVGMGQK+Oxidation(8)                                             | 1.081017411        | 2               | 2.82784   |
| Q8BFZ3        | SYELPDGQVITIGNER                                                      | 1.101904987        | 2               | 5.14862   |
| Q8BFZ3        | TTGIVMDSGDGVTHTVPIYEGYALPHAILR                                        | 1.012337857        | 3               | 6.91821   |
| Q8BFZ3        | TTGIVMDSGDGVTHTVPIYEGYALPHAILR+Oxidation(6)                           | 0.926674899        | 3               | 5.71843   |
| Q8BFZ3        | VAPDEHPILLTEAPLNPK                                                    | 1.246957636        | 3               | 3.99302   |
| <b>Q8BG32</b> | <b>PSD11 26S proteasome non_ATPase regulatory subunit 11</b>          | <b>1.132261536</b> | <b>0.990984</b> | <b>3</b>  |
| Q8BG32        | LYDNLLEQNLR                                                           | 1.117249124        | 2               | 2.85247   |
| Q8BG32        | TTANAIYCPPK                                                           | 1.145316061        | 2               | 3.14203   |
| Q8BG32        | VQIEHISSLIK                                                           | 1.13854376         | 2               | 2.85161   |
| <b>Q8BGT5</b> | <b>ALAT2 Alanine aminotransferase 2</b>                               | <b>1.241427835</b> | <b>0.122786</b> | <b>2</b>  |
| Q8BGT5        | LLEETGICVVPGSFGQR                                                     | 0.715010529        | 2               | 3.16391   |
| Q8BGT5        | VLCIINPGNPTGQVQSR                                                     | 1.243556823        | 2               | 4.74887   |
| <b>Q8BGY2</b> | <b>IF5A2 Eukaryotic translation initiation factor 5A_2</b>            | <b>1.14586494</b>  | <b>1.24E-09</b> | <b>4</b>  |
| Q8BGY2        | EDLKLPEGELGK                                                          | 1.099679554        | 2               | 2.42868   |
| Q8BGY2        | KYEDICPSTHNMDVPNIK                                                    | 1.097495882        | 3               | 4.73108   |
| Q8BGY2        | VHLVGIDIFTGK                                                          | 1.313771311        | 3               | 3.65827   |
| Q8BGY2        | YEDICPSTHNMDVPNIK                                                     | 1.041640421        | 2               | 4.09466   |
| <b>Q8BH00</b> | <b>AL8A1 Aldehyde dehydrogenase family 8 member A1</b>                | <b>1.019022173</b> | <b>9.07E-06</b> | <b>9</b>  |
| Q8BH00        | ELLMLENFIGGK                                                          | 1.224496141        | 2               | 3.91383   |
| Q8BH00        | ELNLPFGGMK                                                            | 1.123092695        | 1               | 2.37774   |
| Q8BH00        | FLPCNSYIDYDPSTGEVYCK                                                  | 1.009708581        | 3               | 5.11245   |
| Q8BH00        | ILCGEGVDQLSLPLR                                                       | 1.090902428        | 2               | 4.68505   |
| Q8BH00        | ITQLSAPHCK                                                            | 1.496361468        | 2               | 3.11784   |

|               |                                                                   |                    |                 |          |
|---------------|-------------------------------------------------------------------|--------------------|-----------------|----------|
| Q8BH00        | KLSLELGGK                                                         | 1.250031627        | 2               | 2.40492  |
| Q8BH00        | LSLELGGK                                                          | 0.939239657        | 1               | 1.91146  |
| Q8BH00        | NPAAIFEDANLEECIPATVR                                              | 1.196414833        | 2               | 4.44977  |
| Q8BH00        | SSFANQGEICLCTSR                                                   | 1.178382713        | 2               | 4.16226  |
| <b>Q8BHN3</b> | <b>GANAB Neutral alpha_glucosidase AB</b>                         | <b>1.066829191</b> | <b>0.980827</b> | <b>7</b> |
| Q8BHN3        | AEKDEPGAWEEETFK                                                   | 1.11586451         | 2               | 4.24326  |
| Q8BHN3        | MLDYLQGSGETPQTDIR                                                 | 1.142331543        | 2               | 5.49508  |
| Q8BHN3        | REPWLLASQYQDAIR                                                   | 1.065494316        | 2               | 2.88296  |
| Q8BHN3        | SGGIERPFVLSR                                                      | 1.096945582        | 2               | 2.58723  |
| Q8BHN3        | THSDSKPYGPTSVGLDFSLPGMEHVYGIPEHADSLR                              | 1.055887526        | 4               | 5.02082  |
| Q8BHN3        | VTEGGEPYR                                                         | 0.704020186        | 2               | 2.3704   |
| Q8BHN3        | VVIMGAGKPAAVVLQTK                                                 | 1.101070083        | 3               | 3.32274  |
| <b>Q8BIJ6</b> | <b>SYIM Isoleucyl_tRNA synthetase_mitochondrial</b>               | <b>0.824055459</b> | <b>0.480111</b> | <b>2</b> |
| Q8BIJ6        | DTVLLPQTSFPMK                                                     | 0.936512583        | 1               | 2.15259  |
| Q8BIJ6        | SCQTALAEILDVLR                                                    | 0.853089319        | 3               | 3.82016  |
| <b>Q8BJ64</b> | <b>CHDH Choline dehydrogenase_mitochondrial</b>                   | <b>0.839921702</b> | <b>0.630066</b> | <b>9</b> |
| Q8BJ64        | ADSAYHPSTCK                                                       | 0.999001921        | 2               | 3.80893  |
| Q8BJ64        | AEVQTLVSR                                                         | 1.105887527        | 2               | 2.75608  |
| Q8BJ64        | ELQPGSHVQSDK                                                      | 0.785973477        | 2               | 3.15401  |
| Q8BJ64        | ELQPGSHVQSDKEIDAFVR                                               | 0.946431685        | 2               | 3.96966  |
| Q8BJ64        | GGDGPLHVS                                                         | 0.862299715        | 2               | 2.45329  |
| Q8BJ64        | SRPGVPHPDIQFHFLPSQVIDHGR                                          | 1.334871197        | 5               | 5.50551  |
| Q8BJ64        | TNHPLHQAFLOAAR                                                    | 0.818795052        | 3               | 4.56059  |
| Q8BJ64        | VIGVENLR                                                          | 0.976844182        | 2               | 2.72603  |
| Q8BJ64        | VLLLEAGPK                                                         | 1.013524188        | 2               | 2.66874  |
| <b>Q8BL66</b> | <b>EEA1 Early endosome antigen 1</b>                              | <b>1.067410941</b> | <b>0.346841</b> | <b>2</b> |
| Q8BL66        | AAVLDLEK                                                          | 1.113579377        | 1               | 1.98371  |
| Q8BL66        | IQAGEGETAVLNQLQEK                                                 | 0.843026893        | 2               | 3.32089  |
| <b>Q8BP47</b> | <b>SYNC AsparaginyI_tRNA synthetase_cytoplasmic</b>               | <b>1.091887388</b> | <b>0.95868</b>  | <b>3</b> |
| Q8BP47        | KEDGTFYEFGDDIPEAPER                                               | 1.082221089        | 2               | 3.95499  |
| Q8BP47        | LMTDTINEPILCR                                                     | 1.140957355        | 2               | 3.18834  |
| Q8BP47        | LTESVDVLPNVEIVGGSMR                                               | 1.066163549        | 2               | 2.6979   |
| <b>Q8BTM8</b> | <b>FLNA Filamin_A</b>                                             | <b>0.960102775</b> | <b>0.96651</b>  | <b>5</b> |
| Q8BTM8        | AFGPGQLGGNAGSPAR                                                  | 1.159236139        | 2               | 3.07458  |
| Q8BTM8        | ALGALVDSCAPGLCPDWDSDASKPVNNAR                                     | 0.93453121         | 3               | 4.89505  |
| Q8BTM8        | ANLPQSFQVDTSK                                                     | 1.08017026         | 2               | 2.57392  |
| Q8BTM8        | GAGTGGGLGLAVEGPSEAK                                               | 1.303036765        | 2               | 3.53013  |
| Q8BTM8        | GLVEPVDVVDNADGTQTVNYVPSR                                          | 1.144814328        | 2               | 5.51661  |
| <b>Q8BTZ7</b> | <b>GMPPB Mannose_1_phosphate guanyltransferase beta</b>           | <b>1.106826711</b> | <b>0.039652</b> | <b>2</b> |
| Q8BTZ7        | HHGQEGSILVTK                                                      | 1.176583187        | 3               | 3.57086  |
| Q8BTZ7        | IGQNCSIGPNVSLGPGVVVEDGVCIR                                        | 0.82687618         | 2               | 2.74102  |
| <b>Q8BU33</b> | <b>ILVBL Acetolactate synthase_like protein</b>                   | <b>1.10669346</b>  | <b>0.286157</b> | <b>4</b> |
| Q8BU33        | AAVETLGVPCFLGGMSR                                                 | 0.675726733        | 2               | 3.28772  |
| Q8BU33        | LPNSLMGR+Oxidation(6)                                             | 0.97604353         | 2               | 2.34866  |
| Q8BU33        | LTGTVGVAAVTAGPGLTNTVTAVK                                          | 1.126678579        | 2               | 3.15855  |
| Q8BU33        | NAQVAQSPVLLLGGAASLLQK                                             | 0.900865801        | 2               | 4.93042  |
| <b>Q8BWQ1</b> | <b>UD2A3 UDP_glucuronosyltransferase 2A3</b>                      | <b>1.084113513</b> | <b>0.958135</b> | <b>2</b> |
| Q8BWQ1        | ADIWLIR                                                           | 1.071627598        | 1               | 1.95712  |
| Q8BWQ1        | IHHDQPVKPLDR                                                      | 1.09342255         | 3               | 3.75865  |
| <b>Q8BX70</b> | <b>VP13C Vacuolar protein sorting_associated protein 13C</b>      | <b>0.979422702</b> | <b>0.906983</b> | <b>2</b> |
| Q8BX70        | ENALSELDVPPFKVK                                                   | 0.979673213        | 2               | 3.04153  |
| Q8BX70        | TVLQADSPQHDEILKPVNMLLCIQR+Oxidation(20)                           | 1.000213979        | 2               | 2.4807   |
| <b>Q8BZ81</b> | <b>LRRT3 Leucine_rich repeat transmembrane neuronal protein 3</b> | <b>0.943211689</b> | <b>0.142094</b> | <b>2</b> |
| Q8BZ81        | GLRENTIICASPK                                                     | 0.649900936        | 1               | 1.94364  |



|               |                                                             |                    |                 |          |
|---------------|-------------------------------------------------------------|--------------------|-----------------|----------|
| Q8BZ81        | YPASMKQLQQR+Oxidation(5)                                    | 1.012950043        | 2               | 2.5831   |
| <b>Q8BZN6</b> | <b>DOC10 Dedicator of cytokinesis protein 10</b>            | <b>1.056212928</b> | <b>0.650416</b> | <b>2</b> |
| Q8BZN6        | IIQDSNKVNP                                                  | 1.050391325        | 2               | 2.58512  |
| Q8BZN6        | LTQMEASALLYFFMRK+Oxidation(14)                              | 1.145919278        | 2               | 2.38238  |
| <b>Q8C547</b> | <b>HTR5B HEAT repeat_containing protein 5B</b>              | <b>1.148212687</b> | <b>0.174875</b> | <b>2</b> |
| Q8C547        | MVVVIAEDLLR+Oxidation(1)                                    | 1.504822425        | 2               | 2.30935  |
| Q8C547        | SAESQGRSEILMSLQK                                            | 1.08744894         | 2               | 2.33024  |
| <b>Q8C7R4</b> | <b>UBA6 Ubiquitin_like modifier_activating enzyme 6</b>     | <b>1.094705057</b> | <b>0.910349</b> | <b>2</b> |
| Q8C7R4        | GMVTVTDPDLIEK+Oxidation(2)                                  | 1.143770279        | 1               | 1.99184  |
| Q8C7R4        | NFALLGVGTGREK                                               | 1.089856325        | 2               | 2.41899  |
| <b>Q8C7X2</b> | <b>K0090 Uncharacterized protein KIAA0090</b>               | <b>1.523688234</b> | <b>0.008073</b> | <b>2</b> |
| Q8C7X2        | FNVEDGEIVQQR                                                | 1.269586601        | 2               | 4.06656  |
| Q8C7X2        | VMGDRSVLYK+Oxidation(2)                                     | 1.595896173        | 2               | 2.53927  |
| <b>Q8CC88</b> | <b>K0564 Uncharacterized protein KIAA0564 homolog</b>       | <b>1.053338305</b> | <b>0.964763</b> | <b>4</b> |
| Q8CC88        | FLPSLAQSALEK                                                | 0.923263094        | 2               | 2.51206  |
| Q8CC88        | HQATGELDDAK                                                 | 1.06118187         | 2               | 3.08075  |
| Q8CC88        | LQLTDEQLQNR                                                 | 1.140279865        | 2               | 2.38746  |
| Q8CC88        | VSSDQLSSENLTSAVGQK                                          | 1.057116313        | 2               | 3.70536  |
| <b>Q8CCF0</b> | <b>PRP31 U4/U6 small nuclear ribonucleoprotein Prp31</b>    | <b>1.003239246</b> | <b>0.989135</b> | <b>2</b> |
| Q8CCF0        | ERLGLTEIR                                                   | 1.022676688        | 2               | 2.47975  |
| Q8CCF0        | YFSSMAEFLKVK                                                | 0.947553111        | 1               | 2.05222  |
| <b>Q8CDI6</b> | <b>CD158 Coiled_coil domain_containing protein 158</b>      | <b>0.989024968</b> | <b>0.001411</b> | <b>2</b> |
| Q8CDI6        | EKVANMEVALDK+Oxidation(6)                                   | 0.999891602        | 2               | 2.61887  |
| Q8CDI6        | ELDDRNMEVQRLEALLK                                           | 0.510272645        | 2               | 2.35915  |
| <b>Q8CDI7</b> | <b>CC150 Coiled_coil domain_containing protein 150</b>      | <b>1.151605908</b> | <b>0.904723</b> | <b>2</b> |
| Q8CDI7        | EDNRKLAMSLEQALQTNGHLQSK                                     | 99999.89988        | 2               | 2.34775  |
| Q8CDI7        | MNIFHLQTEKESNPQK+Oxidation(1)                               | 1.151605201        | 2               | 2.58958  |
| <b>Q8CDM4</b> | <b>CCD73 Coiled_coil domain_containing protein 73</b>       | <b>1.141593223</b> | <b>0.881961</b> | <b>2</b> |
| Q8CDM4        | MEEESIDLIK                                                  | 1.145504612        | 2               | 2.30983  |
| Q8CDM4        | VTCQHKMEEESIDLIK                                            | 1.10944955         | 2               | 2.51266  |
| <b>Q8CFN2</b> | <b>CDC42 Cell division control protein 42 homolog</b>       | <b>1.01416479</b>  | <b>0.632454</b> | <b>3</b> |
| Q8CFN2        | DDPSTIEK                                                    | 1.198700897        | 1               | 2.09002  |
| Q8CFN2        | NVFDEAIIAALEPPEPK                                           | 1.172139201        | 3               | 4.85586  |
| Q8CFN2        | YVECSALTQK                                                  | 1.111583469        | 2               | 3.1282   |
| <b>Q8CG45</b> | <b>ARK72 Aflatoxin B1 aldehyde reductase member 2</b>       | <b>1.109117464</b> | <b>0.001392</b> | <b>9</b> |
| Q8CG45        | AVSGAPLRPGTVLGTMEMGR                                        | 0.901854987        | 3               | 3.4997   |
| Q8CG45        | EHHFEAIALVEK                                                | 0.936305941        | 2               | 2.93758  |
| Q8CG45        | FFGNSWSETYR                                                 | 1.159377255        | 2               | 2.6263   |
| Q8CG45        | FYAYNPLAGLLTGK                                              | 1.657838478        | 2               | 4.11308  |
| Q8CG45        | MDASASAATVR                                                 | 1.010952824        | 2               | 3.43906  |
| Q8CG45        | RMDASASAATVR                                                | 1.117633779        | 2               | 2.90672  |
| Q8CG45        | TTYGTSAPSMTSAALR                                            | 1.160644218        | 2               | 3.98997  |
| Q8CG45        | VDLFYHLHAPDHGTPIVETLQACQQLHQEGK                             | 1.812787114        | 3               | 5.48296  |
| Q8CG45        | WMYHHSQLQGTR                                                | 1.001802955        | 2               | 3.1312   |
| <b>Q8CG48</b> | <b>SMC2 Structural maintenance of chromosomes protein 2</b> | <b>1.031723226</b> | <b>0.655053</b> | <b>2</b> |
| Q8CG48        | EELKLEK                                                     | 1.026942367        | 1               | 1.98204  |
| Q8CG48        | KIKALNCEIEELER                                              | 1.233451168        | 2               | 2.40289  |
| <b>Q8CGC7</b> | <b>SYEP Bifunctional aminoacyl_tRNA synthetase</b>          | <b>1.083419461</b> | <b>0.018883</b> | <b>8</b> |
| Q8CGC7        | AIQGATSHHLGQNF                                              | 1.026258215        | 2               | 4.54087  |
| Q8CGC7        | DQDVEPGAPSMGAK                                              | 0.790481631        | 2               | 2.98626  |
| Q8CGC7        | GDVSVSVEEGKENLLR                                            | 1.148386422        | 2               | 3.49164  |
| Q8CGC7        | GSQFGQSCCLR                                                 | 1.206836682        | 2               | 2.79695  |
| Q8CGC7        | KEENLAEWYSQVITK                                             | 0.97824799         | 2               | 3.83882  |
| Q8CGC7        | SLCIPFNPLCELQPGAMCVCGK                                      | 1.241631832        | 2               | 4.33003  |

|               |                                                                    |                    |                 |           |
|---------------|--------------------------------------------------------------------|--------------------|-----------------|-----------|
| Q8CGC7        | SQGSGLSSGGAGEGQGPK                                                 | 1.073388803        | 2               | 4.68017   |
| Q8CGC7        | TELAEP AI RPTSETVMYPAYAK                                           | 0.818626209        | 2               | 3.19316   |
| <b>Q8CGN4</b> | <b>BCOR BCL_6 corepressor</b>                                      | <b>1.186920335</b> | <b>0.498261</b> | <b>2</b>  |
| Q8CGN4        | FLTDYLN DLQGR                                                      | 1.210039173        | 1               | 2.1677    |
| Q8CGN4        | KQTQP SCTPASRLPAK                                                  | 1.130443532        | 2               | 2.32961   |
| <b>Q8CHB8</b> | <b>TTL5 Tubulin polyglutamylase TTL5</b>                           | <b>1.398138069</b> | <b>0.106518</b> | <b>2</b>  |
| Q8CHB8        | ASSNLQHSLRMVLP SR+Oxidation(11)                                    | 1.166244311        | 2               | 2.62178   |
| Q8CHB8        | ISSATTGGQKPNTLPQK                                                  | 1.402420256        | 2               | 2.32895   |
| <b>Q8CHM7</b> | <b>HACL1 2_hydroxyacyl_CoA lyase 1</b>                             | <b>1.188746917</b> | <b>0.103211</b> | <b>7</b>  |
| Q8CHM7        | DTSKPCLINIMIEPQSTR                                                 | 0.267451206        | 2               | 3.2152    |
| Q8CHM7        | GVVPDNHPNCVGAAR                                                    | 1.078494539        | 2               | 3.4418    |
| Q8CHM7        | GYFVQTPEELQDSL R                                                   | 1.150611643        | 2               | 3.48138   |
| Q8CHM7        | LVELCNLPFLPTPMGK                                                   | 1.425731283        | 2               | 4.40297   |
| Q8CHM7        | NCFIVSEGANTMDIGR                                                   | 1.383539922        | 2               | 4.69925   |
| Q8CHM7        | NQEAMGAFQEFPPQVEACR                                                | 1.056527888        | 2               | 6.0686    |
| Q8CHM7        | SSIYGRPGACYIDVPADLVTLQESTTSIK                                      | 0.803800859        | 3               | 4.66683   |
| <b>Q8CIB5</b> | <b>FERM2 Fermitin family homolog 2</b>                             | <b>1.031895867</b> | <b>0.483489</b> | <b>2</b>  |
| Q8CIB5        | GCEVTPDVNISGQK                                                     | 1.031885541        | 2               | 2.92657   |
| Q8CIB5        | TSTILGDITSPELADYIK                                                 | 1.083830175        | 2               | 3.63723   |
| <b>Q8CIE6</b> | <b>COPA Coatomer subunit alpha</b>                                 | <b>1.124192971</b> | <b>0.554462</b> | <b>11</b> |
| Q8CIE6        | ASNLENSTYDLYTI PK                                                  | 1.444333425        | 2               | 3.15713   |
| Q8CIE6        | DADSQNPDAPEGK                                                      | 0.953339364        | 2               | 3.84997   |
| Q8CIE6        | GITGVDFGTTDAVVK                                                    | 1.151469418        | 2               | 3.81543   |
| Q8CIE6        | GTSPTQIWCNNSQLPVDHILAGSFETAMR                                      | 1.312306928        | 3               | 3.89174   |
| Q8CIE6        | GVNWA AFHPTMPLIVSGADDR                                             | 1.183025565        | 3               | 3.65358   |
| Q8CIE6        | KKNLSPGAVESDVR                                                     | 1.186693216        | 2               | 2.34388   |
| Q8CIE6        | LLELGPKEVAQQTR                                                     | 1.188140046        | 2               | 2.57984   |
| Q8CIE6        | QQPLFVSGGDDYK                                                      | 1.191391085        | 2               | 2.39633   |
| Q8CIE6        | SILLSVPLLVDNK                                                      | 1.321510275        | 2               | 3.04838   |
| Q8CIE6        | SSGLTAVVVAR                                                        | 1.038200448        | 2               | 2.66434   |
| Q8CIE6        | TLDLPYVTR                                                          | 1.066507617        | 2               | 2.40063   |
| <b>Q8CJF7</b> | <b>ELYS Protein ELYS</b>                                           | <b>1.120213933</b> | <b>0.399109</b> | <b>2</b>  |
| Q8CJF7        | QNSNRVNIEELLK                                                      | 0.940251516        | 2               | 2.66119   |
| Q8CJF7        | SVENGOSTEILDDLK                                                    | 1.210174266        | 2               | 2.63588   |
| <b>Q8JZN5</b> | <b>ACAD9 Acyl_CoA dehydrogenase family member 9_mitochondrial</b>  | <b>1.105486175</b> | <b>0.731046</b> | <b>3</b>  |
| Q8JZN5        | GIILVGNEEQK                                                        | 1.058114844        | 2               | 2.71718   |
| Q8JZN5        | GSNTCEVHFENTR                                                      | 1.152384685        | 2               | 4.03122   |
| Q8JZN5        | SGNVTTVMETIGR                                                      | 1.13266549         | 2               | 3.40542   |
| <b>Q8K009</b> | <b>AL1L2 Mitochondrial 10_formyltetrahydrofolate dehydrogenase</b> | <b>1.132033786</b> | <b>0.999994</b> | <b>16</b> |
| Q8K009        | AGFSVFWADDGLDTGPILLQR                                              | 0.973627499        | 2               | 4.64112   |
| Q8K009        | AMVEAVQLIADGK                                                      | 1.13799661         | 2               | 3.95633   |
| Q8K009        | ANNTEYGLASGVFTR                                                    | 0.994130817        | 2               | 4.43284   |
| Q8K009        | DLGEEALNEYLK                                                       | 1.262963841        | 2               | 3.65147   |
| Q8K009        | EESFGPIMVISK                                                       | 1.055407727        | 2               | 2.831     |
| Q8K009        | FLFPEGIK                                                           | 0.93238531         | 2               | 2.31671   |
| Q8K009        | FQNGDIDGVLQR                                                       | 0.986126416        | 2               | 2.85882   |
| Q8K009        | GVINIIPGSGGVAGQR                                                   | 1.052678616        | 2               | 3.81227   |
| Q8K009        | HGSIIYHPSLLPR                                                      | 1.009913208        | 2               | 4.39677   |
| Q8K009        | KLGFTGSTSVGK                                                       | 0.794417281        | 2               | 2.43473   |
| Q8K009        | KVSLELGGK                                                          | 1.193310087        | 1               | 2.13021   |
| Q8K009        | NLQFEDGK                                                           | 1.077773994        | 1               | 2.04405   |
| Q8K009        | SAACLAAGNTLVLPKPAQVPTL TALK                                        | 1.104619711        | 2               | 4.03637   |
| Q8K009        | SCDVKPN DTVDSL YNR                                                 | 1.120850724        | 2               | 3.91773   |
| Q8K009        | VVG VFTVPDKDGK                                                     | 1.114791031        | 2               | 3.32507   |
| Q8K009        | YFAGWCDK                                                           | 1.163649367        | 1               | 2.0913    |

|               |                                                                     |                    |                 |           |
|---------------|---------------------------------------------------------------------|--------------------|-----------------|-----------|
| <b>Q8K442</b> | <b>ABC8A ATP_binding cassette sub_family A member 8_A</b>           | <b>1.094987431</b> | <b>0.950534</b> | <b>5</b>  |
| Q8K442        | GQITAILGHSGAGK                                                      | 1.146682955        | 2               | 3.44241   |
| Q8K442        | IDDFIHSLEQQNIALEVDAFGTR                                             | 1.11128311         | 3               | 4.26047   |
| Q8K442        | LTGVCPQCNVQDFDLTVR                                                  | 1.032118564        | 2               | 3.27415   |
| Q8K442        | NTQNILVQNLGGGQK                                                     | 1.105832724        | 2               | 2.94326   |
| Q8K442        | STLLNVLSGLCVPTK                                                     | 1.142336964        | 2               | 3.23935   |
| <b>Q8K4C0</b> | <b>FM05 Dimethylaniline monooxygenase [N_oxide_forming] 5</b>       | <b>0.939278013</b> | <b>9.9E-20</b>  | <b>10</b> |
| Q8K4C0        | CCLEEGLEPVCFER                                                      | 1.067044329        | 2               | 4.23112   |
| Q8K4C0        | EYKNPVEFTGK                                                         | 0.718189883        | 2               | 2.37341   |
| Q8K4C0        | FDHEMFGLKPK                                                         | 0.715660624        | 2               | 3.18568   |
| Q8K4C0        | GYPIDILLSSR                                                         | 0.93377032         | 2               | 3.05808   |
| Q8K4C0        | HSALGQHPTINDLPLNR                                                   | 0.772962398        | 2               | 4.50408   |
| Q8K4C0        | IAVIGSGASGLTCIK                                                     | 1.301315035        | 2               | 3.71171   |
| Q8K4C0        | KLPSQSEMMAEINK                                                      | 0.788201746        | 2               | 4.17043   |
| Q8K4C0        | KQPDFSTSGQWQVTEHEGK                                                 | 0.858856085        | 3               | 4.59094   |
| Q8K4C0        | KTILTTEDR                                                           | 0.740008997        | 2               | 2.7001    |
| Q8K4C0        | SDDIGGLWR                                                           | 0.817478989        | 2               | 2.92857   |
| <b>Q8K4G6</b> | <b>MACD1 MACRO domain_containing protein 1 (Fragment)</b>           | <b>1.043203832</b> | <b>0.971937</b> | <b>3</b>  |
| Q8K4G6        | AAGSLLTDECR                                                         | 0.927236008        | 2               | 3.06968   |
| Q8K4G6        | HVIHTVGPIAVGQPTASQAAELR                                             | 0.889286189        | 3               | 5.09617   |
| Q8K4G6        | SCYLSLDDLLEHR                                                       | 1.022213553        | 2               | 3.06497   |
| <b>Q8K4T4</b> | <b>FLIP1 Filamin_A_interacting protein 1</b>                        | <b>1.229842035</b> | <b>0.118905</b> | <b>3</b>  |
| Q8K4T4        | EVLNLTK                                                             | 1.223197088        | 1               | 2.05644   |
| Q8K4T4        | IEELEETNKSLOK                                                       | 1.229646833        | 2               | 2.40912   |
| Q8K4T4        | SSIISSDGGKGPSEDAKK                                                  | 1.307338806        | 2               | 2.4481    |
| <b>Q8K4Z3</b> | <b>AIBP Apolipoprotein A_I_binding protein</b>                      | <b>1.05879213</b>  | <b>0.596392</b> | <b>3</b>  |
| Q8K4Z3        | GNPSGIQPDLLISLTPAK                                                  | 1.103139665        | 2               | 3.73116   |
| Q8K4Z3        | LFGYQPTIYYPK                                                        | 1.368646765        | 2               | 2.39133   |
| Q8K4Z3        | SPPTVLVICGPGNNGDGLVCAR                                              | 1.056920163        | 2               | 5.52377   |
| <b>Q8K586</b> | <b>RANT GTP_binding nuclear protein Ran_testis_specific isoform</b> | <b>1.326323554</b> | <b>0.008961</b> | <b>4</b>  |
| Q8K586        | FNVWDTAGQEK                                                         | 1.216946934        | 2               | 3.26701   |
| Q8K586        | LVLVGDGGTGK                                                         | 1.295253398        | 2               | 2.37527   |
| Q8K586        | NLQYYDISAK                                                          | 1.303469226        | 2               | 2.77255   |
| Q8K586        | VCENIPIVLCGNK                                                       | 1.30942242         | 2               | 4.06486   |
| <b>Q8QZY1</b> | <b>EIF3L Eukaryotic translation initiation factor 3 subunit L</b>   | <b>0.909563689</b> | <b>0.58448</b>  | <b>2</b>  |
| Q8QZY1        | VFSDEVQQAQLSTIR                                                     | 0.969990992        | 2               | 4.13691   |
| Q8QZY1        | VYEIQDIYENSWTK                                                      | 0.882283011        | 2               | 3.81218   |
| <b>Q8R081</b> | <b>HNRPL Heterogeneous nuclear ribonucleoprotein L</b>              | <b>1.23912714</b>  | <b>0.968995</b> | <b>4</b>  |
| Q8R081        | NDQDTWDYTNPNLSGQDGPSPNPKR                                           | 0.965590967        | 3               | 4.67325   |
| Q8R081        | SDALETLGFLNHQMK                                                     | 1.239136864        | 2               | 3.64547   |
| Q8R081        | SSSGLLEWDSK                                                         | 0.951547115        | 2               | 2.73648   |
| Q8R081        | TENAGDQHGGGGGGGSAAGGGGGENYDDPHK                                     | 0.815154546        | 3               | 7.07663   |
| <b>Q8R0F9</b> | <b>S14L4 SEC14_like protein 4</b>                                   | <b>1.057228989</b> | <b>0.96698</b>  | <b>5</b>  |
| Q8R0F9        | FDNTYSLHTK                                                          | 1.073003399        | 2               | 3.20181   |
| Q8R0F9        | GSSHQVENEILFPGCVLR                                                  | 0.988935513        | 2               | 5.20031   |
| Q8R0F9        | VCEMLLHECELQSQK                                                     | 1.165112646        | 2               | 4.9357    |
| Q8R0F9        | VGYTAEVLLPKD                                                        | 0.813853529        | 2               | 2.59644   |
| Q8R0F9        | VGYTAEVLLPKACEEK                                                    | 1.228205158        | 2               | 2.41134   |
| <b>Q8R164</b> | <b>BPHL Valacyclovir hydrolase</b>                                  | <b>1.30876278</b>  | <b>0.984863</b> | <b>3</b>  |
| Q8R164        | FTLVAWDPR                                                           | 1.135546891        | 2               | 2.51417   |
| Q8R164        | QVSLLGWSDGGITALIAAAK                                                | 1.091638494        | 2               | 3.9416    |

|               |                                                                     |                    |                 |           |
|---------------|---------------------------------------------------------------------|--------------------|-----------------|-----------|
| Q8R164        | TDFAPQLQSLNK                                                        | 0.891028844        | 2               | 3.80318   |
| <b>Q8R1V4</b> | <b>TMED4 Transmembrane emp24 domain_containing protein 4</b>        | <b>1.286428794</b> | <b>0.924815</b> | <b>2</b>  |
| Q8R1V4        | CFIEEIPDETMVIGNYR                                                   | 1.189947464        | 2               | 3.58074   |
| Q8R1V4        | QLLDQVEQIQK                                                         | 1.040735269        | 2               | 3.4058    |
| <b>Q8R2H4</b> | <b>KLH12 Kelch_like protein 12</b>                                  | <b>0.381762101</b> | <b>0.020069</b> | <b>2</b>  |
| Q8R2H4        | DIMTNTHAKSILNSMNSLR+Oxidation(15)                                   | 0.381762101        | 2               | 2.39592   |
| Q8R2H4        | DIMTNTHAKSILNSMNSLR+Oxidation(3)                                    | 0.381762101        | 2               | 2.65506   |
| <b>Q8R3Q6</b> | <b>CCD58 Coiled_coil domain_containing protein 58</b>               | <b>0.869432826</b> | <b>0.110656</b> | <b>2</b>  |
| Q8R3Q6        | IVHELNTTVPTASFAGK                                                   | 0.938205296        | 2               | 3.69291   |
| Q8R3Q6        | NCIAQTSAVVK                                                         | 0.862246717        | 2               | 3.00387   |
| <b>Q8R491</b> | <b>EHD3 EH domain_containing protein 3</b>                          | <b>1.246003779</b> | <b>0.207381</b> | <b>3</b>  |
| Q8R491        | ADQIETQQLMR                                                         | 1.261342529        | 2               | 3.08198   |
| Q8R491        | LFEAEEQDLFK                                                         | 0.969576593        | 2               | 3.37225   |
| Q8R491        | MQDQLQAQDFSK                                                        | 1.247621729        | 2               | 3.64173   |
| <b>Q8R508</b> | <b>FAT3 Protocadherin Fat 3</b>                                     | <b>0.728687534</b> | <b>0.000242</b> | <b>2</b>  |
| Q8R508        | FFIDPK                                                              | 0.999802349        | 2               | 2.33149   |
| Q8R508        | QVSYHITGGNPR                                                        | 0.708670828        | 2               | 2.58299   |
| <b>Q8R5M4</b> | <b>OPTN Optineurin</b>                                              | <b>0.832818373</b> | <b>0.522305</b> | <b>2</b>  |
| Q8R5M4        | LELQVESMRSEIK+Oxidation(8)                                          | 1.14247934         | 2               | 2.41691   |
| Q8R5M4        | NSATPSELNEK                                                         | 0.739359459        | 1               | 2.18711   |
| <b>Q8VBU2</b> | <b>NDRG2 Protein NDRG2</b>                                          | <b>1.280400607</b> | <b>0.020076</b> | <b>3</b>  |
| Q8VBU2        | CPVMLVVGDAQPHEDAVVECNSK                                             | 1.220243137        | 2               | 5.83564   |
| Q8VBU2        | TLSQSSESGTLPSPGPPGHTMEVSC                                           | 0.683917539        | 2               | 4.72307   |
| Q8VBU2        | YALNHPDTVEGLVLINIDPNAK                                              | 1.385233929        | 2               | 4.63743   |
| <b>Q8VC12</b> | <b>HUTU Urocanate hydratase</b>                                     | <b>1.29185474</b>  | <b>3.35E-14</b> | <b>6</b>  |
| Q8VC12        | HQLVVGSQLR                                                          | 1.089866539        | 2               | 2.91621   |
| Q8VC12        | LLALEFAQELR                                                         | 1.709196834        | 2               | 4.30324   |
| Q8VC12        | LVITNGMVIPNYSSR                                                     | 1.199284826        | 2               | 3.59922   |
| Q8VC12        | MMLSWDVSNGVAR                                                       | 1.101433794        | 2               | 2.46804   |
| Q8VC12        | VAIAVAINQAIASGK                                                     | 1.172627697        | 2               | 2.6671    |
| Q8VC12        | VFVTSLGLGMSGAAK                                                     | 1.093259542        | 2               | 4.46392   |
| <b>Q8VC28</b> | <b>AK1CD Aldo_keto reductase family 1 member C13</b>                | <b>0.960524547</b> | <b>0.03477</b>  | <b>2</b>  |
| Q8VC28        | ILNKPLK                                                             | 2.350424184        | 1               | 2.03048   |
| Q8VC28        | YKEWVDQNSPVLNDPVLCDVAK                                              | 0.829637269        | 3               | 4.41749   |
| <b>Q8VCD5</b> | <b>MED17 Mediator of RNA polymerase II transcription subunit 17</b> | <b>0.806473577</b> | <b>0.081277</b> | <b>2</b>  |
| Q8VCD5        | EIFAQLSREAVQIK                                                      | 0.866122213        | 1               | 2.09659   |
| Q8VCD5        | MELLSALSPELL+Oxidation(1)Oxidation(5)                               | 0.785281416        | 2               | 2.55652   |
| <b>Q8VDC1</b> | <b>FYCO1 FYVE and coiled_coil domain_containing protein 1</b>       | <b>0.982539556</b> | <b>0.661397</b> | <b>3</b>  |
| Q8VDC1        | GLELQVMQLQQEK                                                       | 0.973598194        | 2               | 2.39601   |
| Q8VDC1        | MEEALASLAQELQDSK                                                    | 1.307338806        | 2               | 2.40751   |
| Q8VDC1        | MLVSRQGGQLQVEK+Oxidation(1)                                         | 1.045683539        | 2               | 2.35048   |
| <b>Q8VDD9</b> | <b>PHIP PH_interacting protein</b>                                  | <b>0.5598275</b>   | <b>0.222914</b> | <b>2</b>  |
| Q8VDD9        | EDLLQK                                                              | 0.585204301        | 1               | 1.96389   |
| Q8VDD9        | MELREQELMKIVGIK                                                     | 0.525021322        | 2               | 2.44431   |
| <b>Q8VE11</b> | <b>MTMR6 Myotubularin_related protein 6</b>                         | <b>1.057991604</b> | <b>0.926424</b> | <b>2</b>  |
| <b>Q8VED5</b> | <b>K2C79 Keratin_type II cytoskeletal 79</b>                        | <b>0.834310915</b> | <b>0.026704</b> | <b>3</b>  |
| Q8VED5        | NKYEDEINK                                                           | 0.83234323         | 2               | 2.38147   |
| Q8VED5        | NKYEDEINKR                                                          | 0.813776402        | 3               | 3.44299   |
| Q8VED5        | YEDEINK                                                             | 1.160687538        | 1               | 2.17815   |
| <b>Q8VEK3</b> | <b>HNRPU Heterogeneous nuclear ribonucleoprotein U</b>              | <b>1.38750459</b>  | <b>0.001079</b> | <b>10</b> |
| Q8VEK3        | EKPYPFIPEDCTFIQNVPLEDR                                              | 1.370105444        | 3               | 4.94857   |
| Q8VEK3        | GGYSNRGNYNRGGMPNR                                                   | 1.11689595         | 2               | 2.35311   |
| Q8VEK3        | LLEQYKEESK                                                          | 0.83593905         | 2               | 3.07445   |

|               |                                                             |                    |                 |           |
|---------------|-------------------------------------------------------------|--------------------|-----------------|-----------|
| Q8VEK3        | LLEQYKEESKK                                                 | 1.081902353        | 2               | 3.73612   |
| Q8VEK3        | LQAALDNEAGGRPAMEPGNGSLDLGGDAAGR                             | 1.116998507        | 3               | 5.04553   |
| Q8VEK3        | NFILDQTNVSAQAQR                                             | 1.210174266        | 2               | 5.0719    |
| Q8VEK3        | TCNCETEDYGEK                                                | 1.217646849        | 2               | 3.35139   |
| Q8VEK3        | VSELKEELK                                                   | 1.307922667        | 2               | 2.65716   |
| Q8VEK3        | VSELKEELKK                                                  | 1.229382567        | 2               | 2.54108   |
| Q8VEK3        | YNILGTNTIMDK                                                | 1.130017045        | 2               | 3.31433   |
| <b>Q8VHE9</b> | <b>RETST All_trans_retinol_13_14_reductase</b>              | <b>0.982425624</b> | <b>0.884543</b> | <b>9</b>  |
| Q8VHE9        | ATVQSVLLDSAGR                                               | 1.035184301        | 2               | 3.01075   |
| Q8VHE9        | FLPLPLTQLLNK                                                | 1.393667744        | 2               | 2.66105   |
| Q8VHE9        | GATYGADHDLAR                                                | 0.982292411        | 2               | 3.11181   |
| Q8VHE9        | NLYSDLQALGSK                                                | 1.037953974        | 2               | 3.70148   |
| Q8VHE9        | RPPEPLVTDK                                                  | 0.963606444        | 2               | 3.01343   |
| Q8VHE9        | RPPEPLVTDKEAR                                               | 0.921386165        | 3               | 3.89332   |
| Q8VHE9        | VESVTGGSPLTNQYYLAAHR                                        | 1.546675978        | 2               | 4.07711   |
| Q8VHE9        | VLVLEQHTK                                                   | 0.995772934        | 2               | 2.30949   |
| Q8VHE9        | VVAHGVSHAILLK                                               | 1.096056382        | 2               | 2.82372   |
| <b>Q8VHF5</b> | <b>CISY Citrate synthase_mitochondrial</b>                  | <b>1.181068013</b> | <b>0.870809</b> | <b>4</b>  |
| Q8VHF5        | ALGVLAQLIWSR                                                | 0.99316745         | 2               | 2.74879   |
| Q8VHF5        | GLVYETSVLDPDEGIR                                            | 1.191825638        | 2               | 3.50769   |
| Q8VHF5        | GYSIPECQK                                                   | 1.147831065        | 2               | 2.50748   |
| Q8VHF5        | IVPNILLEQ GK                                                | 1.157384587        | 2               | 2.56162   |
| <b>Q8VHN7</b> | <b>GPR98 G_protein_coupled_receptor_98</b>                  | <b>1.019361359</b> | <b>0.970235</b> | <b>2</b>  |
| Q8VHN7        | FIVEEPEFNSVR                                                | 1.04679432         | 2               | 2.3042    |
| Q8VHN7        | ITMVASDAPYGR                                                | 1.016970947        | 2               | 2.64076   |
| <b>Q8VHT6</b> | <b>AS3MT Arsenite methyltransferase</b>                     | <b>1.397446042</b> | <b>4.8E-05</b>  | <b>2</b>  |
| Q8VHT6        | SLQNVHEEVISR                                                | 1.37439924         | 2               | 3.29829   |
| Q8VHT6        | TSADLQTNACVTPAK                                             | 1.407778191        | 2               | 3.97772   |
| <b>Q8VHX6</b> | <b>FLNC Filamin_C</b>                                       | <b>1.179816252</b> | <b>0.348553</b> | <b>2</b>  |
| Q8VHX6        | GAGTGGLGLTVEGPCEAK                                          | 1.180036397        | 2               | 3.8768    |
| Q8VHX6        | IECDDKGDGSCDVR                                              | 0.925081513        | 2               | 3.60212   |
| <b>Q8VI04</b> | <b>ASGL1 L_asparaginase</b>                                 | <b>1.094986155</b> | <b>0.704232</b> | <b>3</b>  |
| Q8VI04        | GLGGLILINK                                                  | 1.133866011        | 2               | 2.43291   |
| Q8VI04        | GNLAYATSTGGIVNK                                             | 0.976031039        | 2               | 4.06886   |
| Q8VI04        | TVDEAATLALDYMK                                              | 1.223076239        | 2               | 2.60955   |
| <b>Q8VID1</b> | <b>DHRS4 Dehydrogenase/reductase SDR family member 4</b>    | <b>1.020439192</b> | <b>0.99624</b>  | <b>4</b>  |
| Q8VID1        | AVATLQGEGLSVTVVCHVGK                                        | 1.047529586        | 2               | 4.57314   |
| Q8VID1        | LAEDGAHVVISSR                                               | 1.103350518        | 2               | 3.7078    |
| Q8VID1        | NFAAELAPK                                                   | 0.96884886         | 2               | 2.32608   |
| Q8VID1        | VNCLAPGLIK                                                  | 1.448152929        | 2               | 2.48954   |
| <b>Q8VIF7</b> | <b>SBP1 Selenium_binding_protein_1</b>                      | <b>0.753098139</b> | <b>0.002802</b> | <b>10</b> |
| Q8VIF7        | CGPGYATPLEAMK                                               | 0.746290247        | 2               | 3.12463   |
| Q8VIF7        | FLHDPDATQGFVGCALSSNIQR                                      | 0.782810759        | 2               | 4.82655   |
| Q8VIF7        | GGFVLLDGETFEVK                                              | 0.896048539        | 2               | 4.27773   |
| Q8VIF7        | GTWEKPGGEAPMGYDFWYQPR                                       | 0.881649902        | 2               | 3.90073   |
| Q8VIF7        | HEIIQTLQMK                                                  | 0.791301955        | 2               | 2.71416   |
| Q8VIF7        | HNIMVSTEWAAPNVFK                                            | 0.682024488        | 2               | 4.73441   |
| Q8VIF7        | LTGQIFLGGSIK                                                | 1.047738222        | 2               | 3.47141   |
| Q8VIF7        | NEGGTWSVEK                                                  | 0.725997421        | 2               | 2.53446   |
| Q8VIF7        | NTGIEAPDYLATVDVDPK                                          | 0.757657506        | 2               | 4.62925   |
| Q8VIF7        | QYDISNPK                                                    | 0.748600595        | 1               | 1.9925    |
| <b>Q8VIJ6</b> | <b>SFPQ Splicing_factor_proline_and_glutamine_rich</b>      | <b>0.975632896</b> | <b>0.924106</b> | <b>2</b>  |
| Q8VIJ6        | FGQGGAGPVGQGGPR                                             | 0.972168957        | 2               | 3.31355   |
| Q8VIJ6        | YGEPGEVFINK                                                 | 1.09704397         | 2               | 2.32841   |
| <b>Q91VA0</b> | <b>ACSM1 Acyl_coenzyme_A_synthetase_ACSM1_mitochondrial</b> | <b>1.185939601</b> | <b>0.099353</b> | <b>5</b>  |

|               |                                                                            |                    |                 |           |
|---------------|----------------------------------------------------------------------------|--------------------|-----------------|-----------|
| Q91VA0        | AFIVLNPEFLSHDQEQLIK                                                        | 1.296776425        | 2               | 5.45789   |
| Q91VA0        | AILPFDLQIIDEK                                                              | 1.164478279        | 2               | 4.20049   |
| Q91VA0        | GNILPPNTEGYIGIR                                                            | 1.12761814         | 2               | 3.1621    |
| Q91VA0        | HNQGLAFR                                                                   | 1.071634315        | 2               | 2.53382   |
| Q91VA0        | KVEFVSELPK                                                                 | 1.173632611        | 3               | 3.40725   |
| <b>Q91VM9</b> | <b>IPYR2 Inorganic pyrophosphatase 2_ mitochondrial</b>                    | <b>0.86430122</b>  | <b>0.966944</b> | <b>2</b>  |
| Q91VM9        | IIAINVNDPEAEK                                                              | 0.896025691        | 2               | 2.9748    |
| Q91VM9        | MEIATEEPLNPIK                                                              | 0.853692134        | 2               | 4.08789   |
| <b>Q91W43</b> | <b>GCSP Glycine dehydrogenase [decarboxylating]_ mitochondrial</b>         | <b>0.892991098</b> | <b>0.736015</b> | <b>3</b>  |
| Q91W43        | EMLQALGLASIDELIEK                                                          | 0.762339844        | 2               | 2.48427   |
| Q91W43        | NLLENSGWVTQYTPYQPEVSQGR                                                    | 1.03615494         | 2               | 4.24452   |
| Q91W43        | VSFQPNSGAQGEYAGLATIR                                                       | 0.880525629        | 2               | 5.06191   |
| <b>Q91W90</b> | <b>TXND5 Thioredoxin domain_ containing protein 5</b>                      | <b>1.021838093</b> | <b>0.994474</b> | <b>2</b>  |
| Q91W90        | SFEDTIAQGITFVK                                                             | 1.053051664        | 2               | 2.66716   |
| Q91W90        | VDCTQHYAVCSEHQVR                                                           | 0.999351564        | 3               | 4.73594   |
| <b>Q91X77</b> | <b>CY250 Cytochrome P450 2C50</b>                                          | <b>1.020080194</b> | <b>0.596948</b> | <b>4</b>  |
| Q91X77        | EHEESLDVTIPR                                                               | 0.71710032         | 2               | 2.46047   |
| Q91X77        | IKEHEESLDVTIPR                                                             | 0.999862284        | 2               | 3.75103   |
| Q91X77        | NFLLEK                                                                     | 0.928652326        | 1               | 2.08655   |
| Q91X77        | YALLLLLK                                                                   | 0.841795089        | 2               | 2.68429   |
| <b>Q91X78</b> | <b>ERLN1 Erlin_ 1</b>                                                      | <b>1.056062427</b> | <b>0.698986</b> | <b>2</b>  |
| Q91X78        | ISEIEDAAFLAR                                                               | 1.024161876        | 2               | 2.7968    |
| Q91X78        | SVQTTLQTDEVK                                                               | 1.273252068        | 2               | 2.93127   |
| <b>Q91Y81</b> | <b>SEPT2 Septin_ 2</b>                                                     | <b>1.053593241</b> | <b>0.426722</b> | <b>4</b>  |
| Q91Y81        | ASIPFSVVGSNQLIEAK                                                          | 0.804032751        | 2               | 3.16139   |
| Q91Y81        | ILDEIEHSIK                                                                 | 0.682355601        | 2               | 2.89625   |
| Q91Y81        | LTVVDTPGYGDAINSR                                                           | 1.18464785         | 2               | 3.92305   |
| Q91Y81        | STLINSFLTDLYPER                                                            | 0.975737005        | 2               | 2.75811   |
| <b>Q91YT0</b> | <b>NDUV1 NADH dehydrogenase [ubiquinone] flavoprotein 1_ mitochondrial</b> | <b>1.159812903</b> | <b>0.002493</b> | <b>8</b>  |
| Q91YT0        | GAGAYICGEETALIESIEGK                                                       | 1.355171874        | 2               | 4.39689   |
| Q91YT0        | GDARPAEIDSLWEISK                                                           | 1.012423777        | 3               | 3.70816   |
| Q91YT0        | GEFYNEASNQLQVAIR                                                           | 1.156522401        | 2               | 3.40461   |
| Q91YT0        | GGAGFPTGLK                                                                 | 1.19530992         | 2               | 2.3387    |
| Q91YT0        | KTSFGSLKDEDR                                                               | 1.400552111        | 2               | 2.84831   |
| Q91YT0        | LKPPFPADVGVFGCPTTVANVETVAVSPTICR                                           | 1.404814246        | 3               | 4.73246   |
| Q91YT0        | LVEGCLVGGR                                                                 | 1.122693976        | 2               | 2.79641   |
| Q91YT0        | YLVVNADEGEPGTCK                                                            | 1.188589834        | 2               | 5.21125   |
| <b>Q91Z53</b> | <b>GRHPR Glyoxylate reductase/hydroxypyruvate reductase</b>                | <b>1.117803992</b> | <b>0.488991</b> | <b>6</b>  |
| Q91Z53        | GDVVNQEDLYQALASGQIAAAGLDVTTPELPPSHPLTLK                                    | 1.083638055        | 3               | 6.91365   |
| Q91Z53        | LLDAAGANLR                                                                 | 1.141410386        | 2               | 2.51596   |
| Q91Z53        | NCVILPHIGSATYK                                                             | 1.130086946        | 2               | 3.58343   |
| Q91Z53        | NTMSLLAANNLLAGLR                                                           | 0.963567665        | 2               | 4.77229   |
| Q91Z53        | RLPEAIEEVK                                                                 | 1.013511773        | 2               | 2.78499   |
| Q91Z53        | VISTLSVGDHLALDEIK                                                          | 1.27001151         | 2               | 4.13073   |
| <b>Q91ZJ5</b> | <b>UGPA UTP_ glucose_ 1_ phosphate uridylyltransferase</b>                 | <b>0.990917266</b> | <b>0.999999</b> | <b>16</b> |
| Q91ZJ5        | AMSQDGASQFQEVILQELESVK                                                     | 0.937693876        | 3               | 4.97656   |
| Q91ZJ5        | EFPTVPLVK                                                                  | 0.925175748        | 1               | 2.04294   |
| Q91ZJ5        | FVQDLSK                                                                    | 0.972067159        | 1               | 1.9363    |
| Q91ZJ5        | GGTLTQYEGK                                                                 | 0.96493448         | 2               | 2.67015   |
| Q91ZJ5        | GLPDNISSVLNK                                                               | 0.923171605        | 2               | 3.30691   |
| Q91ZJ5        | GTVIIIANHGDR                                                               | 0.860168386        | 2               | 3.09703   |
| Q91ZJ5        | IDIPPGAVLENK                                                               | 0.967671543        | 2               | 3.02958   |

|               |                                                                                     |                    |                 |           |
|---------------|-------------------------------------------------------------------------------------|--------------------|-----------------|-----------|
| Q91ZJ5        | IQRPPEDSIQPYEK                                                                      | 0.967867574        | 3               | 4.58762   |
| Q91ZJ5        | LNGGLGTSMGCK                                                                        | 1.015767873        | 2               | 3.25159   |
| Q91ZJ5        | LQEQNAIDMEIIVNPK                                                                    | 0.904775638        | 2               | 4.19279   |
| Q91ZJ5        | LVEIAQVPK                                                                           | 1.06144251         | 2               | 2.46132   |
| Q91ZJ5        | NENTFLDLTVQQIEHLNK                                                                  | 1.140347454        | 2               | 5.08602   |
| Q91ZJ5        | RFESIPDMELDHLTVSGDVTFGK                                                             | 0.96150978         | 3               | 4.56663   |
| Q91ZJ5        | SFENSLGINVPR                                                                        | 1.028463219        | 2               | 3.45933   |
| Q91ZJ5        | TLDGGLNVIQLETAVGAAIK                                                                | 0.895095842        | 2               | 5.4115    |
| Q91ZJ5        | TYNTDVPLVLMNSFNTDEDTKK                                                              | 1.017960114        | 2               | 4.53734   |
| <b>Q91ZU6</b> | <b>DYST Dystonin</b>                                                                | <b>1.141450873</b> | <b>0.464328</b> | <b>4</b>  |
| Q91ZU6        | LQVEQNK                                                                             | 1.225948415        | 1               | 1.92515   |
| Q91ZU6        | MMLATEETSPDLIGVKR+Oxidation(1)                                                      | 1.198624525        | 2               | 2.51303   |
| Q91ZU6        | MMLATEETSPDLIGVKR+Oxidation(2)                                                      | 1.198624525        | 2               | 2.5131    |
| Q91ZU6        | SAETNIDQDITNLK                                                                      | 1.080160207        | 2               | 2.43294   |
| <b>Q91ZV0</b> | <b>MIA2 Melanoma inhibitory activity protein 2</b>                                  | <b>1.141314384</b> | <b>0.497616</b> | <b>2</b>  |
| Q91ZV0        | CGDLECETLISRVLALR                                                                   | 1.047397182        | 2               | 2.46943   |
| Q91ZV0        | KMLDQDDIVENDK+Oxidation(2)                                                          | 1.3240339          | 2               | 2.41912   |
| <b>Q91ZX7</b> | <b>LRP1 Prolow_density lipoprotein receptor_related protein 1</b>                   | <b>1.115613916</b> | <b>0.544026</b> | <b>3</b>  |
| Q91ZX7        | GCHVNECLSR                                                                          | 0.854851363        | 2               | 2.67998   |
| Q91ZX7        | MYDAQQQVGTNK                                                                        | 1.180681794        | 2               | 4.09434   |
| Q91ZX7        | VFFTDYGGQIPK                                                                        | 1.110660351        | 2               | 2.67292   |
| <b>Q920A6</b> | <b>RISC Retinoid_inducible serine carboxypeptidase</b>                              | <b>1.156320124</b> | <b>0.748574</b> | <b>2</b>  |
| Q920A6        | DLDTVASDMMVLLK                                                                      | 1.183646856        | 2               | 2.38946   |
| Q920A6        | GLAEVSDIAEQVLNAVNK                                                                  | 1.051850619        | 3               | 5.8611    |
| <b>Q920B9</b> | <b>SP16H FACT complex subunit SPT16</b>                                             | <b>1.100777708</b> | <b>0.406636</b> | <b>2</b>  |
| Q920B9        | EMKIYDK+Oxidation(2)                                                                | 1.080794782        | 1               | 1.91105   |
| Q920B9        | ICDVYNSVMDVVKK                                                                      | 1.237130633        | 2               | 2.32906   |
| <b>Q920D2</b> | <b>DYR Dihydrofolate reductase</b>                                                  | <b>1.241945995</b> | <b>3.02E-07</b> | <b>4</b>  |
| Q920D2        | IMQEFESDTFFPEIDLEK                                                                  | 1.562007959        | 2               | 5.0294    |
| Q920D2        | LIEQPELASK                                                                          | 1.113310475        | 1               | 2.02803   |
| Q920D2        | LLPEYPGVLSEIQEEK                                                                    | 1.417218417        | 2               | 3.77679   |
| Q920D2        | NGDLPWPLLR                                                                          | 1.241941084        | 2               | 2.82504   |
| <b>Q920F5</b> | <b>DCMC Malonyl_CoA decarboxylase_mitochondrial</b>                                 | <b>0.904170456</b> | <b>0.000861</b> | <b>3</b>  |
| Q920F5        | EIAEVTGDPVHESLK                                                                     | 1.201328578        | 2               | 2.98233   |
| Q920F5        | ISECEAVHPVK                                                                         | 0.567474277        | 2               | 3.23478   |
| Q920F5        | WLLGLLNVQGK                                                                         | 1.756391006        | 2               | 2.3666    |
| <b>Q920J4</b> | <b>TXNL1 Thioredoxin_like protein 1</b>                                             | <b>1.102063025</b> | <b>0.485727</b> | <b>2</b>  |
| Q920J4        | AGCECLNESDEHGFNDCLR                                                                 | 1.2266848          | 3               | 3.79469   |
| Q920J4        | IDQYQGADAVGLEEK                                                                     | 0.929552152        | 2               | 4.54866   |
| <b>Q920L2</b> | <b>DHSA Succinate dehydrogenase [ubiquinone] flavoprotein subunit_mitochondrial</b> | <b>1.100626617</b> | <b>0.413628</b> | <b>20</b> |
| Q920L2        | ACALSIAESCRPGDK                                                                     | 0.768158285        | 2               | 2.35442   |
| Q920L2        | ACALSIAESCRPGDKVPIIK                                                                | 1.11219817         | 3               | 3.34425   |
| Q920L2        | AGLPCQDLEFVQFHPTGIYGAGCLITEGCR                                                      | 1.180252369        | 3               | 4.66975   |
| Q920L2        | ANAGEESVMNLDK                                                                       | 1.03825223         | 2               | 3.65202   |
| Q920L2        | GEGGILINSQGER                                                                       | 1.037661927        | 2               | 3.50224   |
| Q920L2        | GVIALCIEDGSIHR                                                                      | 0.77567276         | 2               | 4.02464   |
| Q920L2        | HTLSYVDTK                                                                           | 1.163683708        | 2               | 2.74252   |
| Q920L2        | HVNGQDQIVPGLYACGEAACASVHGANR                                                        | 1.113135848        | 3               | 6.50988   |
| Q920L2        | IDEYDYSKPIEGQQK                                                                     | 0.947213249        | 2               | 4.46356   |
| Q920L2        | KHTLSYVDTK                                                                          | 1.38182649         | 2               | 2.32885   |
| Q920L2        | LGANSLDLVVFGR                                                                       | 1.398234623        | 2               | 2.36158   |
| Q920L2        | NTIIATGGYGR                                                                         | 0.997846477        | 2               | 2.43823   |
| Q920L2        | SMQSHAAVFR                                                                          | 1.033280903        | 2               | 2.30207   |
| Q920L2        | TGHSLHTLYGR                                                                         | 1.248698222        | 2               | 3.0068    |
| Q920L2        | TLNEADCATVPPAIR                                                                     | 1.027056732        | 2               | 3.93699   |

|               |                                                                               |                    |                 |          |
|---------------|-------------------------------------------------------------------------------|--------------------|-----------------|----------|
| Q920L2        | TYFSCTSAHTSTGDGTAMVTR                                                         | 1.289162964        | 2               | 5.82082  |
| Q920L2        | VGSVLQEGCEK                                                                   | 1.008386422        | 2               | 3.67884  |
| Q920L2        | VSDAISTQYPVVDHEFDVAVVVGAGGAGLR                                                | 0.966264061        | 3               | 4.42785  |
| Q920L2        | VSQLYGDLQHLK                                                                  | 1.144235501        | 2               | 3.48149  |
| Q920L2        | VTLDYRPPVIDK                                                                  | 0.950586854        | 2               | 3.13311  |
| <b>Q920P0</b> | <b>DCXR L_xylulose reductase</b>                                              | <b>1.008101897</b> | <b>0.980808</b> | <b>7</b> |
| Q920P0        | ALTNHTVYCSTK                                                                  | 1.877698002        | 2               | 3.54928  |
| Q920P0        | AVVQVSQIVAR                                                                   | 1.022896821        | 1               | 2.4604   |
| Q920P0        | GVPGAIVNVSSQASQR                                                              | 1.003763049        | 2               | 5.61999  |
| Q920P0        | SSMTTGSALPVDGGFLAT                                                            | 0.954447633        | 1               | 2.55567  |
| Q920P0        | STVLALQAAGAQQVAVSR                                                            | 0.764013793        | 2               | 3.79053  |
| Q920P0        | TREDLDSLVR                                                                    | 1.014423903        | 2               | 2.93862  |
| Q920P0        | VNAVNPVTVMTPMGR                                                               | 0.704748722        | 2               | 3.28802  |
| <b>Q920P6</b> | <b>ADA Adenosine deaminase</b>                                                | <b>2.810402718</b> | <b>0.310368</b> | <b>2</b> |
| Q920P6        | FKDDQANYSLNSDDPLIFK                                                           | 1.29063584         | 2               | 2.66037  |
| Q920P6        | TVHAGEVGSAAEVVR                                                               | 7.389252167        | 2               | 3.45677  |
| <b>Q921F2</b> | <b>TADBP TAR DNA_binding protein 43</b>                                       | <b>1.117032606</b> | <b>0.562107</b> | <b>4</b> |
| Q921F2        | FGGNPGGFGNQGGFNSR                                                             | 1.122058973        | 2               | 4.17893  |
| Q921F2        | GISVHISNAEPK                                                                  | 1.087351173        | 2               | 2.5219   |
| Q921F2        | KDLKTGHSK                                                                     | 0.905511754        | 2               | 2.47245  |
| Q921F2        | TSDLIVLGLPWK                                                                  | 0.977848798        | 2               | 2.81391  |
| <b>Q922F4</b> | <b>TBB6 Tubulin beta_6 chain</b>                                              | <b>1.066690694</b> | <b>2.44E-15</b> | <b>7</b> |
| Q922F4        | ALTVPELTQQMFDK                                                                | 1.419420597        | 2               | 4.04999  |
| Q922F4        | GHYTEGAELVDSVLDVVR                                                            | 1.115634973        | 2               | 6.77488  |
| Q922F4        | IREEYPDR                                                                      | 0.866225132        | 2               | 2.85394  |
| Q922F4        | MASTFIGNSTAIQELFK                                                             | 1.740835256        | 2               | 4.43886  |
| Q922F4        | NMMAACDPR                                                                     | 1.084267588        | 2               | 2.51437  |
| Q922F4        | NSSYFVEWIPNNVK                                                                | 1.103098           | 2               | 4.7016   |
| Q922F4        | YLTVATVFRGPMSSMK+Oxidation(14)                                                | 0.722264282        | 2               | 2.31305  |
| <b>Q922J3</b> | <b>CLIP1 CAP_Gly domain_containing linker protein 1</b>                       | <b>1.12425689</b>  | <b>0.195452</b> | <b>2</b> |
| Q922J3        | EMETMQAKLMK+Oxidation(5)                                                      | 1.132581606        | 2               | 2.63983  |
| Q922J3        | HEEILQNLQKMLADTEDK                                                            | 0.946431685        | 2               | 2.41927  |
| <b>Q923D2</b> | <b>BLVRB Flavin reductase (NADPH)</b>                                         | <b>1.062802195</b> | <b>0.998171</b> | <b>3</b> |
| Q923D2        | LQDVTDDHIR                                                                    | 1.067235543        | 2               | 3.30509  |
| Q923D2        | TGLTTLAQAVQAGYEVTVLVR                                                         | 0.970836386        | 3               | 4.01171  |
| Q923D2        | YVAVMPPHIGDQPLTGAYTVTLDGR                                                     | 0.997344878        | 3               | 4.08565  |
| <b>Q923J6</b> | <b>DYH12 Dynein heavy chain 12_axonemal</b>                                   | <b>1.082304934</b> | <b>0.835202</b> | <b>2</b> |
| Q923J6        | LEFLTNLDIK                                                                    | 1.060617778        | 1               | 2.01331  |
| Q923J6        | MSDPNKTAITAEKEALNLK                                                           | 1.093301038        | 2               | 2.466    |
| <b>Q923K9</b> | <b>A1CF APOBEC1 complementation factor</b>                                    | <b>1.406247197</b> | <b>0.007988</b> | <b>2</b> |
| Q923K9        | LAPQILEEICQK                                                                  | 1.457625316        | 2               | 2.42998  |
| Q923K9        | TGYSLVQENGQR                                                                  | 1.244792162        | 2               | 2.77172  |
| <b>Q923V8</b> | <b>SEP15 15 kDa selenoprotein</b>                                             | <b>1.003943066</b> | <b>0.233121</b> | <b>2</b> |
| Q923V8        | GCCQEEAQFETK                                                                  | 0.935193791        | 2               | 4.15206  |
| Q923V8        | LLDDNGNIAEELSILK                                                              | 1.336157335        | 2               | 3.65501  |
| <b>Q924C3</b> | <b>ENPP1 Ectonucleotide pyrophosphatase/phosphodiesterase family member 1</b> | <b>1.107887122</b> | <b>0.897508</b> | <b>4</b> |
| Q924C3        | AEYLHTWGGLLPVISK                                                              | 1.057629836        | 3               | 3.6935   |
| Q924C3        | ELESPAAASLLAPMDLGEEPLEK                                                       | 1.073029668        | 2               | 3.41619  |
| Q924C3        | SGTYFWPGSDVEIDGILPDIYK                                                        | 0.947757332        | 2               | 3.6986   |
| Q924C3        | SVSSDLGCTCDPSIVPIMDFEK                                                        | 1.298302427        | 2               | 3.25038  |
| <b>Q924S5</b> | <b>LONM Lon protease homolog_mitochondrial</b>                                | <b>1.036742638</b> | <b>0.999978</b> | <b>7</b> |
| Q924S5        | AQSVLEEDHYGMEDVK                                                              | 0.959517098        | 2               | 3.97115  |
| Q924S5        | FSVGGMTDVAEIK                                                                 | 1.092012884        | 2               | 2.87572  |
| Q924S5        | HVMDVVEELSK                                                                   | 1.012950241        | 2               | 3.82484  |
| Q924S5        | IVSGEAQTVHVTPENLQDFVGKPVFTVER                                                 | 1.04306185         | 3               | 6.39342  |



|               |                                                              |                    |                 |          |
|---------------|--------------------------------------------------------------|--------------------|-----------------|----------|
| Q924S5        | MEMINVSGYVAQEK                                               | 1.191885331        | 2               | 3.77971  |
| Q924S5        | QLEVEPEGLEPEAENK                                             | 1.065090352        | 2               | 4.16326  |
| Q924S5        | TENPLVLIDEVDK                                                | 1.124021765        | 2               | 2.4758   |
| <b>Q924W5</b> | <b>SMC6 Structural maintenance of chromosomes protein 6</b>  | <b>1.140460783</b> | <b>0.272832</b> | <b>3</b> |
| Q924W5        | ELDMKEKELQEK                                                 | 1.145146983        | 2               | 2.60381  |
| Q924W5        | MEEQQVRLNDAEKK                                               | 0.961177339        | 2               | 2.38744  |
| Q924W5        | TKEQINQGEERLTELK                                             | 1.206891259        | 2               | 2.56168  |
| <b>Q99020</b> | <b>ROAA Heterogeneous nuclear ribonucleoprotein A/B</b>      | <b>1.389756104</b> | <b>9.9E-20</b>  | <b>3</b> |
| Q99020        | EYFGQFGEIEAIELPIDPK                                          | 1.34752267         | 2               | 4.11878  |
| Q99020        | FGEVVDCTIK                                                   | 1.106891079        | 2               | 2.50071  |
| Q99020        | IFVGGLNPEATEEK                                               | 1.798696235        | 2               | 3.75335  |
| <b>Q99J14</b> | <b>PSMD6 26S proteasome non_ATPase regulatory subunit 6</b>  | <b>1.157806341</b> | <b>0.002152</b> | <b>3</b> |
| Q99J14        | GAEILEVLHSLPAVR                                              | 1.621723855        | 2               | 3.0218   |
| Q99J14        | RLDEELEDAEK                                                  | 1.210587488        | 2               | 2.91875  |
| Q99J14        | VNEIVETNRPDSK                                                | 1.114468126        | 2               | 3.3329   |
| <b>Q99JW2</b> | <b>ACY1 Aminoacylase_1</b>                                   | <b>1.341270654</b> | <b>0.518126</b> | <b>2</b> |
| Q99JW2        | FIEDTAAEK                                                    | 1.101861816        | 2               | 2.63079  |
| Q99JW2        | SVSIQYLEAVR                                                  | 1.272492202        | 2               | 2.39546  |
| <b>Q99K43</b> | <b>PRC1 Protein regulator of cytokinesis 1</b>               | <b>1.56665385</b>  | <b>0.042074</b> | <b>2</b> |
| Q99K43        | MNTTTMSSATPNSSIRPVFGGSVYR+Oxidation(1)                       | 1.56665385         | 2               | 2.36815  |
| Q99K43        | MNTTTMSSATPNSSIRPVFGGSVYR+Oxidation(6)                       | 1.56665385         | 2               | 2.36833  |
| <b>Q99KK9</b> | <b>SYHM Probable histidyl_tRNA synthetase_mitochondrial</b>  | <b>1.231539412</b> | <b>0.033161</b> | <b>2</b> |
| Q99KK9        | IIAELWDAGIKAEMLYK+Oxidation(14)                              | 1.227229049        | 2               | 2.51741  |
| Q99KK9        | YDLTVPFARYLAMNKLK+Oxidation(13)                              | 1.232580329        | 2               | 2.59656  |
| <b>Q99KW3</b> | <b>TARA TRIO and F_actin_binding protein</b>                 | <b>0.907232127</b> | <b>0.75284</b>  | <b>2</b> |
| Q99KW3        | AYQEELSRELSK                                                 | 0.907160621        | 1               | 2.03069  |
| Q99KW3        | SEREIEQLK                                                    | 1.064803125        | 1               | 1.9717   |
| <b>Q99L04</b> | <b>DHRS1 Dehydrogenase/reductase SDR family member 1</b>     | <b>0.85151738</b>  | <b>0.938253</b> | <b>2</b> |
| Q99L04        | ATAQEAQSLGGR                                                 | 0.886083263        | 2               | 3.34086  |
| Q99L04        | CVPVCDSSQESEVK                                               | 0.747583965        | 2               | 4.44641  |
| <b>Q99LF4</b> | <b>RTCB tRNA_splicing ligase RtcB homolog</b>                | <b>1.107608186</b> | <b>0.886768</b> | <b>4</b> |
| Q99LF4        | GLGHQVATDALVAMEK                                             | 0.945728089        | 2               | 2.30945  |
| Q99LF4        | NLDFQDVLDK                                                   | 0.882308202        | 2               | 2.88339  |
| Q99LF4        | NVTDVVNTCHDAGISK                                             | 1.114514755        | 2               | 4.27631  |
| Q99LF4        | TNLDESVDQPVK                                                 | 1.108133961        | 2               | 3.692    |
| <b>Q99LH1</b> | <b>NOG2 Nucleolar GTP_binding protein 2</b>                  | <b>1.037043011</b> | <b>0.939337</b> | <b>2</b> |
| Q99LH1        | GGEPDMLTVSKMVLNDWQR+Oxidation(12)                            | 1.037043011        | 2               | 2.33004  |
| Q99LH1        | GGEPDMLTVSKMVLNDWQR+Oxidation(6)                             | 1.037043011        | 2               | 2.3173   |
| <b>Q99M87</b> | <b>DNJA3 Dnaj homolog subfamily A member 3_mitochondrial</b> | <b>1.074851641</b> | <b>0.805208</b> | <b>2</b> |
| Q99M87        | AQGLYETINVTIPAGIQTQDK                                        | 1.081129814        | 2               | 2.41028  |
| Q99M87        | GSIIITNPCVVCVR                                               | 1.070234314        | 2               | 2.59823  |
| <b>Q99ML9</b> | <b>RN111 E3 ubiquitin_protein ligase Arkadia</b>             | <b>1.21886127</b>  | <b>0.361014</b> | <b>2</b> |
| Q99ML9        | DMTGNQQEQEKSGVVRK                                            | 1.232598318        | 3               | 3.62336  |
| Q99ML9        | LHPHEVMQRMEVQR+Oxidation(7)                                  | 1.200633529        | 2               | 2.41263  |
| <b>Q99MN1</b> | <b>SYK Lysyl_tRNA synthetase</b>                             | <b>1.078947966</b> | <b>0.017455</b> | <b>4</b> |
| Q99MN1        | MATLQESEVKVDGEQKLSK+Oxidation(1)                             | 0.773900478        | 2               | 2.33832  |
| Q99MN1        | RGDIIGVEGNPGK                                                | 1.249387475        | 2               | 3.32669  |
| Q99MN1        | SEEEFVHINNK                                                  | 0.946039795        | 2               | 3.51425  |
| Q99MN1        | YLDLILNDFVR                                                  | 1.481529604        | 2               | 2.69184  |
| <b>Q99MQ1</b> | <b>BICC1 Protein bicaudal C homolog 1</b>                    | <b>1.182844983</b> | <b>0.610559</b> | <b>2</b> |
| Q99MQ1        | EAKEMIMSVLDTK                                                | 1.055095644        | 2               | 2.39835  |

|               |                                                                                            |                    |                 |           |
|---------------|--------------------------------------------------------------------------------------------|--------------------|-----------------|-----------|
| Q99MQ1        | QYLMGCLPLVLMFDMK+Oxidation(15)                                                             | 1.230136765        | 2               | 2.30176   |
| <b>Q99MS0</b> | <b>S14L2 SEC14 like protein 2</b>                                                          | <b>1.087787776</b> | <b>0.331548</b> | <b>4</b>  |
| Q99MS0        | AGEMTEVLPNQR                                                                               | 1.043114649        | 2               | 3.82698   |
| Q99MS0        | CGYDLGCPVWYDIIGPLDAK                                                                       | 1.804657268        | 2               | 3.86068   |
| Q99MS0        | DQVKQQYEHSVQISR                                                                            | 1.091051022        | 2               | 2.38432   |
| Q99MS0        | HISPDQLPVEYGGTMTDPDGNPK                                                                    | 1.239975593        | 2               | 4.78036   |
| <b>Q99MZ8</b> | <b>LASP1 LIM and SH3 domain protein 1</b>                                                  | <b>1.000575364</b> | <b>0.503684</b> | <b>5</b>  |
| Q99MZ8        | GFSVVADTPELQR                                                                              | 0.970524696        | 2               | 3.58895   |
| Q99MZ8        | QQSELQSQVR                                                                                 | 0.987049209        | 2               | 2.52025   |
| Q99MZ8        | QSFTMVADTPENLR                                                                             | 0.99535769         | 2               | 3.17551   |
| Q99MZ8        | TGDTGMLPANYVEAI                                                                            | 2.02203028         | 1               | 2.43065   |
| Q99MZ8        | TQDQISNIK                                                                                  | 0.965051016        | 2               | 2.86952   |
| <b>Q99PF5</b> | <b>FUBP2 Far upstream element binding protein 2</b>                                        | <b>1.149074393</b> | <b>0.004958</b> | <b>5</b>  |
| Q99PF5        | GGGGPGGGGPGGGGASGGPSQPPGGGGPGIR                                                            | 1.024021004        | 2               | 6.94237   |
| Q99PF5        | IGGDAATTNNNTPDFGFGGQK                                                                      | 1.197756056        | 2               | 4.84822   |
| Q99PF5        | IGQQPQQPGAPPQQDYTK                                                                         | 0.862039199        | 2               | 4.05436   |
| Q99PF5        | IINDLLQSLR                                                                                 | 1.349026413        | 2               | 2.57295   |
| Q99PF5        | SVSLTGAPESVQK                                                                              | 1.131293501        | 2               | 2.55032   |
| <b>Q99PL5</b> | <b>RRBP1 Ribosome binding protein 1</b>                                                    | <b>1.199738797</b> | <b>0.000597</b> | <b>18</b> |
| Q99PL5        | AENSQLTER                                                                                  | 1.04432472         | 2               | 2.38333   |
| Q99PL5        | DALNQATSQVESK                                                                              | 0.959803618        | 2               | 3.31479   |
| Q99PL5        | EAEETQNSLQAECQYR                                                                           | 1.056766026        | 2               | 5.64166   |
| Q99PL5        | EHTSHLEAELEK                                                                               | 1.086665567        | 2               | 3.35902   |
| Q99PL5        | GELESSDQVR                                                                                 | 1.072142117        | 2               | 3.19865   |
| Q99PL5        | HMAAASAECQNYAK                                                                             | 1.052178288        | 2               | 4.30908   |
| Q99PL5        | HMAAASAECQNYAK+Oxidation(2)                                                                | 1.284645512        | 2               | 3.95844   |
| Q99PL5        | IQEELK                                                                                     | 1.026942367        | 1               | 2.31276   |
| Q99PL5        | LKELESQVSCLEK                                                                              | 1.23455631         | 2               | 4.08      |
| Q99PL5        | LLATEQEEDAIVAK                                                                             | 1.402176983        | 2               | 3.99225   |
| Q99PL5        | LQQENSILR                                                                                  | 0.921224779        | 2               | 2.61145   |
| Q99PL5        | QLHLAEAQTK                                                                                 | 1.037652815        | 2               | 2.35193   |
| Q99PL5        | RLEEVTR                                                                                    | 1.024637078        | 2               | 2.44303   |
| Q99PL5        | TGVIQDTWHK                                                                                 | 1.021395062        | 2               | 2.31916   |
| Q99PL5        | TILAETEGMLK                                                                                | 1.115767669        | 2               | 3.16586   |
| Q99PL5        | TLQEQLENGPNTQLAR                                                                           | 1.164702979        | 2               | 5.04458   |
| Q99PL5        | TLVSTVGSMVFSEGEAQR                                                                         | 1.217191069        | 2               | 4.28399   |
| Q99PL5        | VEPAVSSIVNSIQVLASK                                                                         | 1.285201717        | 2               | 4.01119   |
| <b>Q99PV0</b> | <b>PRP8 Pre mRNA processing splicing factor 8</b>                                          | <b>1.170647427</b> | <b>0.27073</b>  | <b>2</b>  |
| Q99PV0        | AAVMHDILDMMPGEGIK+Oxidation(4)Oxidation(10)                                                | 1.170647427        | 2               | 2.69381   |
| Q99PV0        | AAVMHDILDMMPGEGIK+Oxidation(4)Oxidation(11)                                                | 1.170647427        | 2               | 2.6509    |
| <b>Q9CPQ1</b> | <b>COX6C Cytochrome c oxidase subunit 6C</b>                                               | <b>1.056531929</b> | <b>0.997035</b> | <b>2</b>  |
| Q9CPQ1        | FGVAEPR                                                                                    | 1.107011778        | 2               | 2.4323    |
| Q9CPQ1        | NYDSMKDFEEMR                                                                               | 1.047681815        | 2               | 3.79654   |
| <b>Q9CRB9</b> | <b>CHCH3 Coiled coil helix coiled coil helix domain containing protein 3 mitochondrial</b> | <b>0.886675299</b> | <b>0.28416</b>  | <b>2</b>  |
| Q9CRB9        | VAEELALEQAK                                                                                | 0.886525475        | 2               | 3.43956   |
| Q9CRB9        | YEYHPVCADLQTK                                                                              | 1.054831165        | 2               | 3.67846   |
| <b>Q9CTN4</b> | <b>RHBT3 Rho related BTB domain containing protein 3</b>                                   | <b>1.21978938</b>  | <b>0.001019</b> | <b>2</b>  |
| Q9CTN4        | ELASMNLDIVDLLK                                                                             | 1.197505916        | 2               | 2.66744   |
| Q9CTN4        | LKDSGDVSDIIEK                                                                              | 1.671921296        | 2               | 2.47877   |
| <b>Q9CW42</b> | <b>MOSC1 MOSC domain containing protein 1 mitochondrial</b>                                | <b>0.962661482</b> | <b>0.999634</b> | <b>3</b>  |
| Q9CW42        | DLLLPIPPATNPLLQCR                                                                          | 1.059437403        | 2               | 4.37884   |
| Q9CW42        | GLSVSEAECTAMGLR                                                                            | 1.027456998        | 2               | 3.17982   |
| Q9CW42        | LQQVGTVAQLWIYPIK                                                                           | 0.883749242        | 2               | 3.33923   |
| <b>Q9CWH6</b> | <b>PSA7L Proteasome subunit alpha type 7 like</b>                                          | <b>1.597931233</b> | <b>0.011063</b> | <b>3</b>  |

|               |                                                                               |                    |                 |           |
|---------------|-------------------------------------------------------------------------------|--------------------|-----------------|-----------|
| Q9CWH6        | AITVFSPDGHFLQVEYAQEAVK                                                        | 1.408254138        | 2               | 4.26136   |
| Q9CWH6        | ALLEVVQSGGK                                                                   | 1.456034486        | 2               | 2.94526   |
| Q9CWH6        | LTVEDPVTVEYITR                                                                | 1.391380285        | 2               | 4.00701   |
| <b>Q9CWK8</b> | <b>SNX2 Sorting nexin_2</b>                                                   | <b>0.901910374</b> | <b>0.998921</b> | <b>3</b>  |
| Q9CWK8        | ALSQLAEVEEK                                                                   | 0.97933912         | 2               | 2.37241   |
| Q9CWK8        | AVNTQALSGAGILR                                                                | 1.070812837        | 2               | 3.51749   |
| Q9CWK8        | QQQFENLDQQLR                                                                  | 0.901515793        | 2               | 2.51388   |
| <b>Q9CXD6</b> | <b>CC90A Coiled_coil domain_containing protein 90A_mitochondrial</b>          | <b>1.391253363</b> | <b>0.189025</b> | <b>2</b>  |
| Q9CXD6        | MLELRTEIVSLHAQQDR                                                             | 1.427178659        | 2               | 2.68345   |
| Q9CXD6        | VRTDTKLNFNLEK                                                                 | 1.14247934         | 2               | 2.48492   |
| <b>Q9CYW4</b> | <b>HDHD3 Haloacid dehalogenase_like hydrolase domain_containing protein 3</b> | <b>0.894013177</b> | <b>0.411168</b> | <b>2</b>  |
| Q9CYW4        | LEDILTGLGLR                                                                   | 0.89256629         | 2               | 3.74447   |
| Q9CYW4        | RLEDILTGLGLR                                                                  | 1.030546137        | 2               | 3.28896   |
| <b>Q9CZY3</b> | <b>UB2V1 Ubiquitin_conjugating enzyme E2 variant 1</b>                        | <b>1.152871741</b> | <b>0.00191</b>  | <b>2</b>  |
| Q9CZY3        | LLEELEEGQK                                                                    | 1.066979188        | 2               | 2.8116    |
| Q9CZY3        | VNMSGVSSNGVVDPDR                                                              | 1.394295874        | 2               | 3.01999   |
| <b>Q9D024</b> | <b>CC47 Coiled_coil domain_containing protein 47</b>                          | <b>1.127527143</b> | <b>0.004853</b> | <b>3</b>  |
| Q9D024        | ERIMNEEDPEKQR                                                                 | 1.723769322        | 2               | 2.58587   |
| Q9D024        | IMQEEGQPLKLPDTK                                                               | 0.899090866        | 2               | 2.89921   |
| Q9D024        | RLEEAALR                                                                      | 1.215189571        | 2               | 2.61883   |
| <b>Q9D0M3</b> | <b>CY1 Cytochrome c1_heme protein_mitochondrial</b>                           | <b>1.576274003</b> | <b>2.91E-13</b> | <b>5</b>  |
| Q9D0M3        | ALAEVEVQDGPNDGEMFMRPGK                                                        | 1.079755721        | 3               | 4.27414   |
| Q9D0M3        | GLLSSLDHTSIR                                                                  | 1.135117606        | 2               | 2.77649   |
| Q9D0M3        | HGGEDYVFSLLTGYCEPPTGVSLR                                                      | 1.683155671        | 2               | 5.2655    |
| Q9D0M3        | HLVGVCYTEEAAK                                                                 | 1.276018515        | 2               | 3.93588   |
| Q9D0M3        | LSDYFPKYPNPEAAR                                                               | 1.217770342        | 3               | 3.41362   |
| <b>Q9D0S9</b> | <b>HINT2 Histidine triad nucleotide_binding protein 2_mitochondrial</b>       | <b>0.994340545</b> | <b>0.033157</b> | <b>3</b>  |
| Q9D0S9        | DVAPQAPVHFLVIPR                                                               | 0.948060907        | 2               | 2.94449   |
| Q9D0S9        | ISQAEDDQQLLGHLLLVAK                                                           | 1.254733734        | 2               | 5.23579   |
| Q9D0S9        | SLPADILYEDQQCLVFR                                                             | 1.270476997        | 2               | 4.47977   |
| <b>Q9D172</b> | <b>ES1 ES1 protein homolog_mitochondrial</b>                                  | <b>0.980836583</b> | <b>0.843108</b> | <b>5</b>  |
| Q9D172        | GVEVTVGHEQEEGGK                                                               | 0.944464997        | 2               | 3.79367   |
| Q9D172        | GVTEAHVDQK                                                                    | 0.60128217         | 2               | 2.82717   |
| Q9D172        | ITSLAQLNAANHDAIFPGGFGAAK                                                      | 1.17865089         | 2               | 4.33208   |
| Q9D172        | NLSTFAVDGK                                                                    | 0.933242648        | 1               | 2.92095   |
| Q9D172        | NVLAESAR                                                                      | 1.463110105        | 1               | 2.00769   |
| <b>Q9D1Q6</b> | <b>ERP44 Endoplasmic reticulum resident protein 44</b>                        | <b>1.052571787</b> | <b>0.899757</b> | <b>4</b>  |
| Q9D1Q6        | MNPAVFLSLADLR+Oxidation(1)                                                    | 1.001384735        | 2               | 2.36971   |
| Q9D1Q6        | NIIGYFEQK                                                                     | 1.071116115        | 1               | 2.47428   |
| Q9D1Q6        | SNPVHEIQSLDEVTNLDR                                                            | 1.136211833        | 2               | 5.43729   |
| Q9D1Q6        | VDCDQHS DIAQR                                                                 | 1.050450238        | 2               | 3.5449    |
| <b>Q9D2U9</b> | <b>H2B3A Histone H2B type 3_A</b>                                             | <b>1.23529587</b>  | <b>9.9E-20</b>  | <b>5</b>  |
| Q9D2U9        | AMGIMNSFVNDIFER                                                               | 1.307656985        | 2               | 5.17726   |
| Q9D2U9        | AMGIMNSFVNDIFER+Oxidation(2)                                                  | 1.424942513        | 2               | 4.3576    |
| Q9D2U9        | AMGIMNSFVNDIFER+Oxidation(2)Oxidation(5)                                      | 1.147561064        | 2               | 3.08808   |
| Q9D2U9        | AMGIMNSFVNDIFER+Oxidation(5)                                                  | 1.430524942        | 2               | 3.88732   |
| Q9D2U9        | LLLPGELAK                                                                     | 1.275075985        | 2               | 2.41735   |
| <b>Q9D6M3</b> | <b>GHC1 Mitochondrial glutamate carrier 1</b>                                 | <b>1.062160803</b> | <b>0.999349</b> | <b>2</b>  |
| Q9D6M3        | GAAVNLTLVTPK                                                                  | 1.068446233        | 2               | 2.77061   |
| Q9D6M3        | GVNEDTYSGLDCAR                                                                | 0.973213089        | 2               | 4.65099   |
| <b>Q9D6Y9</b> | <b>GLGB 1_4_alpha_glucan branching enzyme</b>                                 | <b>1.272489462</b> | <b>9.22E-06</b> | <b>10</b> |
| Q9D6Y9        | CVAYAESHDAQLVGDK                                                              | 1.329753577        | 2               | 4.95768   |
| Q9D6Y9        | EFKDEDWNMGIVYTLTNR                                                            | 1.727805867        | 3               | 3.91194   |
| Q9D6Y9        | GTHDLWDSR                                                                     | 1.351109859        | 2               | 2.364     |

|               |                                                                            |                    |                 |          |
|---------------|----------------------------------------------------------------------------|--------------------|-----------------|----------|
| Q9D6Y9        | HFTSNVLP                                                                   | 1.282805517        | 2               | 2.45332  |
| Q9D6Y9        | IVLDSDAAEYGGHQR                                                            | 1.375065712        | 2               | 4.49128  |
| Q9D6Y9        | IYESHVGISSHEGK                                                             | 1.21617286         | 2               | 4.53139  |
| Q9D6Y9        | NSEDGLNMFDTDSCYFHSGPR                                                      | 2.478133876        | 2               | 3.80441  |
| Q9D6Y9        | QFNLTDDDLLR                                                                | 1.218132141        | 2               | 2.75404  |
| Q9D6Y9        | RQFNLTDDDLLR                                                               | 1.140608262        | 2               | 2.86486  |
| Q9D6Y9        | WELYIPPK                                                                   | 1.368519198        | 2               | 2.38575  |
| <b>Q9D6Z1</b> | <b>NOP56 Nucleolar protein 56</b>                                          | <b>1.126956319</b> | <b>0.971574</b> | <b>2</b> |
| Q9D6Z1        | ELNEEKLEK                                                                  | 0.945050276        | 2               | 2.46431  |
| Q9D6Z1        | IDCFSEVPTSVFGEK                                                            | 1.130297756        | 2               | 2.75281  |
| <b>Q9D7B6</b> | <b>ACAD8 Isobutyryl-CoA dehydrogenase_mitochondrial</b>                    | <b>1.288178037</b> | <b>0.456676</b> | <b>4</b> |
| Q9D7B6        | AVIFEDCAVPVANR                                                             | 0.908930153        | 2               | 3.36135  |
| Q9D7B6        | FASYCLTEPGSGSDAASLLTSAK                                                    | 2.241874378        | 2               | 4.92601  |
| Q9D7B6        | IGTEGQGFLIAMK                                                              | 1.064603134        | 2               | 2.98046  |
| Q9D7B6        | VHQILEGSNEVMR                                                              | 1.332155419        | 2               | 2.91191  |
| <b>Q9D7X8</b> | <b>GGCT Gamma-glutamylcyclotransferase</b>                                 | <b>1.158098457</b> | <b>0.320956</b> | <b>2</b> |
| Q9D7X8        | ISDEMEDIK                                                                  | 1.100666682        | 2               | 2.735    |
| Q9D7X8        | SNISLDEQEGVK                                                               | 1.167490072        | 2               | 3.74323  |
| <b>Q9D819</b> | <b>IPYR Inorganic pyrophosphatase</b>                                      | <b>1.370201079</b> | <b>1.77E-10</b> | <b>5</b> |
| Q9D819        | GISCMTTVSESPFK                                                             | 1.067841851        | 2               | 4.74466  |
| Q9D819        | GQYISPFHDVPIYADK                                                           | 1.45291359         | 2               | 3.94182  |
| Q9D819        | GQYISPFHDVPIYADKDVFMVVEVPR                                                 | 1.311617816        | 3               | 4.98183  |
| Q9D819        | VLGILAMIDEGETDVK                                                           | 1.761023502        | 2               | 4.29686  |
| Q9D819        | YVANLFPYK                                                                  | 1.196337237        | 1               | 2.13105  |
| <b>Q9D855</b> | <b>QCR7 Cytochrome b_c1 complex subunit 7</b>                              | <b>1.117479426</b> | <b>0.991845</b> | <b>2</b> |
| Q9D855        | RLPEDLYNDR                                                                 | 1.014460695        | 2               | 2.54444  |
| Q9D855        | YEEDKFYLEPYLK                                                              | 1.092965601        | 2               | 4.62457  |
| <b>Q9D880</b> | <b>TIM50 Mitochondrial import inner membrane translocase subunit TIM50</b> | <b>1.127357913</b> | <b>0.998539</b> | <b>3</b> |
| Q9D880        | TIALNQVEDVR                                                                | 0.960979891        | 2               | 3.12731  |
| Q9D880        | TVLEHYALEDDPLEAFK                                                          | 1.139746175        | 2               | 4.92595  |
| Q9D880        | VLLDLSAFLK                                                                 | 0.9658427          | 2               | 2.55341  |
| <b>Q9D8W5</b> | <b>PSD12 26S proteasome non-ATPase regulatory subunit 12</b>               | <b>1.274430999</b> | <b>0.425394</b> | <b>2</b> |
| Q9D8W5        | MVQCCTVVEITDLPVK                                                           | 1.394035388        | 2               | 4.88962  |
| Q9D8W5        | WSTLVEDYGVLELR                                                             | 1.097754141        | 2               | 3.08287  |
| <b>Q9DB15</b> | <b>RM12 39S ribosomal protein L12_mitochondrial</b>                        | <b>1.130032234</b> | <b>0.963378</b> | <b>2</b> |
| Q9DB15        | NYVQGINLVQAK                                                               | 1.130669377        | 2               | 2.78114  |
| Q9DB15        | SEALAGAPLDNAPK                                                             | 0.976882634        | 2               | 3.1921   |
| <b>Q9DBH5</b> | <b>LMAN2 Vesicular integral-membrane protein VIP36</b>                     | <b>1.211549351</b> | <b>0.297546</b> | <b>2</b> |
| Q9DBH5        | LPTGYFGASAGTGLSDNHDIISIK                                                   | 1.338646988        | 3               | 3.84182  |
| Q9DBH5        | WSELGCTADFR                                                                | 1.105002724        | 2               | 3.2839   |
| <b>Q9DCJ5</b> | <b>NDUA8 NADH dehydrogenase [ubiquinone] 1 alpha subcomplex subunit 8</b>  | <b>1.039390139</b> | <b>0.899061</b> | <b>2</b> |
| Q9DCJ5        | ARPEPNVIEGDLKPAK                                                           | 1.035574919        | 3               | 4.66534  |
| Q9DCJ5        | TDRPLPENPYHSR                                                              | 0.992184073        | 3               | 3.89404  |
| <b>Q9DCM0</b> | <b>ETHE1 Protein ETHE1_mitochondrial</b>                                   | <b>0.857514677</b> | <b>0.990777</b> | <b>3</b> |
| Q9DCM0        | IFTLPGNCLIYPAHDYHGLTVSTVEEER                                               | 1.120199483        | 3               | 4.18709  |
| Q9DCM0        | SLLPGCQSVISR                                                               | 0.887029202        | 2               | 3.07383  |
| Q9DCM0        | TDFQQCAK                                                                   | 0.855291699        | 2               | 2.91068  |
| <b>Q9DCS9</b> | <b>NDUBA NADH dehydrogenase [ubiquinone] 1 beta subcomplex subunit 10</b>  | <b>1.291652176</b> | <b>0.000427</b> | <b>3</b> |
| Q9DCS9        | AYDLVVDWPVTLVR                                                             | 1.286801957        | 2               | 4.4035   |
| Q9DCS9        | RVPDITECK                                                                  | 1.28764091         | 2               | 2.32679  |
| Q9DCS9        | TPAPSPQTSLPNPITYLTK                                                        | 1.997028297        | 2               | 2.97317  |

|               |                                                                                  |                    |                 |           |
|---------------|----------------------------------------------------------------------------------|--------------------|-----------------|-----------|
| <b>Q9DCT2</b> | <b>NDUS3 NADH dehydrogenase [ubiquinone] iron_sulfur protein 3_mitochondrial</b> | <b>1.209952266</b> | <b>0.000949</b> | <b>5</b>  |
| Q9DCT2        | FDLNSPWEAFPAYR                                                                   | 1.453768671        | 2               | 2.83333   |
| Q9DCT2        | ILTDYGFEGHPFR                                                                    | 0.790008244        | 2               | 2.89228   |
| Q9DCT2        | KFDLNSPWEAFPAYR                                                                  | 1.220230915        | 2               | 3.6585    |
| Q9DCT2        | SLADLTAVDVPTR                                                                    | 1.250938327        | 2               | 2.73654   |
| Q9DCT2        | VVAEPVELAQEFR                                                                    | 1.118611215        | 2               | 3.64921   |
| <b>Q9DCU9</b> | <b>HOGA1 Probable 4_hydroxy_2_oxoglutarate aldolase_mitochondrial</b>            | <b>1.063683374</b> | <b>0.999993</b> | <b>3</b>  |
| Q9DCU9        | GFVVQGSGTEFPFLTSR                                                                | 1.058731133        | 2               | 5.44603   |
| Q9DCU9        | LIEPNTAVTR                                                                       | 1.046172928        | 2               | 3.19021   |
| Q9DCU9        | TMDWFGYGGPCR                                                                     | 1.197346864        | 2               | 3.53649   |
| <b>Q9EP89</b> | <b>LACTB Serine beta_lactamase_like protein LACTB_mitochondrial</b>              | <b>1.11692618</b>  | <b>0.971663</b> | <b>9</b>  |
| Q9EP89        | EVWSEGLYADVENR                                                                   | 0.85959861         | 2               | 3.02035   |
| Q9EP89        | FENSIESLR                                                                        | 0.7944652          | 2               | 2.97218   |
| Q9EP89        | IFHDLMLTTVQEENEPVIYNR                                                            | 1.136248026        | 2               | 5.52239   |
| Q9EP89        | IKDEVGAPGIVVGVSDGK                                                               | 0.836464386        | 2               | 4.16343   |
| Q9EP89        | KNDFEQGELYLK                                                                     | 0.876027387        | 2               | 4.19493   |
| Q9EP89        | LDLDPVQHYVPEFPEK                                                                 | 1.093147542        | 3               | 3.68893   |
| Q9EP89        | LDLDPVQHYVPEFPEKEYEGEK                                                           | 1.120088096        | 3               | 3.80164   |
| Q9EP89        | LVNTPYVDNSYK                                                                     | 1.075351137        | 2               | 2.57741   |
| Q9EP89        | WAGGGFLSTVGDLLK                                                                  | 0.940281796        | 2               | 4.63273   |
| <b>Q9EPH2</b> | <b>MRP MARCKS_related protein</b>                                                | <b>1.040470228</b> | <b>0.257552</b> | <b>2</b>  |
| Q9EPH2        | AAATPESQEPQAK                                                                    | 1.074441415        | 2               | 2.66748   |
| Q9EPH2        | GDVTAEAAAGASPAK                                                                  | 0.881678885        | 2               | 3.05032   |
| <b>Q9EPH8</b> | <b>PABP1 Polyadenylate_binding protein 1</b>                                     | <b>1.203618679</b> | <b>0.00299</b>  | <b>7</b>  |
| Q9EPH8        | ALDTMNFVVK                                                                       | 1.218838862        | 2               | 3.10565   |
| Q9EPH8        | GFGFVCFSSPEEATK                                                                  | 1.121477269        | 2               | 2.65519   |
| Q9EPH8        | GFGFVSFER                                                                        | 1.269578262        | 2               | 2.50765   |
| Q9EPH8        | ITGMLEIDNSELLHMLSPESLR                                                           | 1.052877037        | 3               | 4.73361   |
| Q9EPH8        | KEFSPFGTITSAK                                                                    | 0.959507294        | 2               | 3.18879   |
| Q9EPH8        | SKVDEAVAVLQAHQAK                                                                 | 1.175304262        | 3               | 4.31496   |
| Q9EPH8        | SLGYAYVNFQPPADAER                                                                | 1.50998896         | 2               | 3.3638    |
| <b>Q9EQ76</b> | <b>FMO3 Dimethylaniline monooxygenase [N_oxide_forming] 3</b>                    | <b>1.124614596</b> | <b>9.9E-20</b>  | <b>13</b> |
| Q9EQ76        | ASIQSVFTNSSK                                                                     | 1.234300149        | 2               | 2.78421   |
| Q9EQ76        | GTCILPSVNDMMDDIDEK                                                               | 1.603440567        | 2               | 3.92551   |
| Q9EQ76        | ILCGTVSIKPNVK                                                                    | 1.122881177        | 2               | 2.91494   |
| Q9EQ76        | KEPVFNDELPAR                                                                     | 0.990833334        | 2               | 3.04971   |
| Q9EQ76        | LQEYITSFATEK                                                                     | 1.773811172        | 2               | 3.32958   |
| Q9EQ76        | NNEVTLYK                                                                         | 1.59306687         | 1               | 2.00318   |
| Q9EQ76        | NNLPTAISDWWYMK                                                                   | 1.504690343        | 2               | 3.01581   |
| Q9EQ76        | SCLEEGLEPTCFER                                                                   | 0.987380574        | 2               | 4.38774   |
| Q9EQ76        | SDDVGGLWK                                                                        | 1.440649933        | 2               | 2.83504   |
| Q9EQ76        | VAVIGAGVSGLAAIR                                                                  | 0.697170296        | 2               | 3.93654   |
| Q9EQ76        | VLVIGLNSGCDIAAELSHVAQQVIISR                                                      | 1.461532528        | 3               | 4.00112   |
| Q9EQ76        | VWVDGYPWDMVVITR                                                                  | 1.514425088        | 2               | 3.86116   |
| Q9EQ76        | YIQFETLVTR                                                                       | 2.051096198        | 2               | 2.85477   |
| <b>Q9EQH3</b> | <b>VPS35 Vacuolar protein sorting_associated protein 35</b>                      | <b>1.234354877</b> | <b>1.17E-06</b> | <b>3</b>  |
| Q9EQH3        | IREDLPNLESSEETEJINK                                                              | 1.239525928        | 2               | 5.09948   |
| Q9EQH3        | LNLEHIATSSAVSK                                                                   | 1.354349708        | 2               | 4.03579   |
| Q9EQH3        | VLETTVEIFNK                                                                      | 1.143609168        | 2               | 2.95944   |
| <b>Q9EQS0</b> | <b>TALDO Transaldolase</b>                                                       | <b>1.103906713</b> | <b>2.6E-09</b>  | <b>7</b>  |
| Q9EQS0        | ALAGCDFLTISPK                                                                    | 1.413862315        | 2               | 2.93502   |
| Q9EQS0        | ILDWHVANTDKK                                                                     | 1.268872772        | 2               | 3.25017   |

|               |                                                                            |                    |                 |           |
|---------------|----------------------------------------------------------------------------|--------------------|-----------------|-----------|
| Q9EQS0        | LGPPQEEQIK                                                                 | 1.350552703        | 2               | 2.67903   |
| Q9EQS0        | LSSTWEGIQAGK                                                               | 1.042707691        | 2               | 2.71459   |
| Q9EQS0        | SYEPQEDPGVK                                                                | 1.053033895        | 2               | 2.9091    |
| Q9EQS0        | VSTEVDAR                                                                   | 1.062604217        | 1               | 1.98173   |
| Q9EQS0        | WLHNEDQMAVEK                                                               | 1.067058372        | 2               | 3.69067   |
| <b>Q9EQW7</b> | <b>KI13A Kinesin_like protein KIF13A</b>                                   | <b>0.86963369</b>  | <b>0.510061</b> | <b>2</b>  |
| Q9EQW7        | DETIIVPLEENSALPK                                                           | 0.841130121        | 2               | 2.66329   |
| Q9EQW7        | VTQWAEER                                                                   | 1.194156021        | 2               | 2.45283   |
| <b>Q9EQX9</b> | <b>UBE2N Ubiquitin_conjugating enzyme E2 N</b>                             | <b>1.211730271</b> | <b>1.88E-07</b> | <b>3</b>  |
| Q9EQX9        | LELFLPEEYPMAAPK                                                            | 1.080904617        | 2               | 3.85704   |
| Q9EQX9        | SNEAQAIETAR                                                                | 1.242027977        | 2               | 3.27673   |
| Q9EQX9        | YFHVVIAGPQDSPFEGGTFK                                                       | 1.011387765        | 3               | 3.99659   |
| <b>Q9ER34</b> | <b>ACON Aconitate hydratase_mitochondrial</b>                              | <b>0.950209507</b> | <b>0.00047</b>  | <b>17</b> |
| Q9ER34        | ADIANLAEFEK                                                                | 0.964459462        | 2               | 2.43871   |
| Q9ER34        | CTTDHISAAGPWLK                                                             | 1.057444683        | 2               | 3.90674   |
| Q9ER34        | DINQEVYNFLATAGAK                                                           | 0.920686507        | 2               | 4.1542    |
| Q9ER34        | FKLEAPDADELPR                                                              | 1.128678484        | 2               | 3.69694   |
| Q9ER34        | FNPETDFLTGK                                                                | 1.002557765        | 1               | 2.28887   |
| Q9ER34        | GHLDNISNLLIGAINIENGK                                                       | 0.978061996        | 2               | 5.61296   |
| Q9ER34        | IVYGHLDLDPANQEIER                                                          | 1.283361004        | 2               | 4.73193   |
| Q9ER34        | LQLLEPFDKWDGKDLEDLQILIK                                                    | 1.189122414        | 3               | 4.09753   |
| Q9ER34        | LTGTLSGWTSFK                                                               | 1.242921439        | 2               | 3.11681   |
| Q9ER34        | NAVTFEFGVPVPTAR                                                            | 0.853106029        | 2               | 4.1567    |
| Q9ER34        | NDANPETHAFVTSPEIVTALAIAGTLK                                                | 1.133139442        | 3               | 4.21467   |
| Q9ER34        | QGLLPLTFADPSDYNK                                                           | 0.980885325        | 2               | 3.57098   |
| Q9ER34        | SDFDPGQDQTYQHPPK                                                           | 0.913847608        | 2               | 2.91355   |
| Q9ER34        | SQFTITPGSEQIR                                                              | 0.954944042        | 2               | 3.56567   |
| Q9ER34        | VDVSPTSQR                                                                  | 1.027292493        | 2               | 2.52144   |
| Q9ER34        | VGLIGSCTNSSYEDMGR                                                          | 1.077944989        | 2               | 4.2311    |
| Q9ER34        | WVVIKDENVYEGESSR                                                           | 1.036281827        | 2               | 4.2024    |
| <b>Q9ER72</b> | <b>SYCC CysteinyI_tRNA synthetase_cytoplasmic</b>                          | <b>0.934148842</b> | <b>0.651247</b> | <b>2</b>  |
| Q9ER72        | LSETTDPDKR                                                                 | 0.911281791        | 2               | 2.43009   |
| Q9ER72        | QMLERIQNSVK+Oxidation(2)                                                   | 1.115261473        | 2               | 2.46966   |
| <b>Q9ERK4</b> | <b>XPO2 Exportin_2</b>                                                     | <b>1.361823392</b> | <b>0.12242</b>  | <b>3</b>  |
| Q9ERK4        | IIPEIQK                                                                    | 1.275075985        | 2               | 2.39852   |
| Q9ERK4        | LLQTDDEEEAGLLELLK                                                          | 1.042888783        | 2               | 2.38439   |
| Q9ERK4        | SNNVNEFPVLK                                                                | 1.379636716        | 2               | 2.49929   |
| <b>Q9ES21</b> | <b>SAC1 Phosphatidylinositide phosphatase SAC1</b>                         | <b>0.871946832</b> | <b>0.165972</b> | <b>3</b>  |
| Q9ES21        | HFDSQVIYVK                                                                 | 0.864616488        | 2               | 2.45565   |
| Q9ES21        | LSNTSPEFQEMSLLER                                                           | 1.790550529        | 2               | 3.60019   |
| Q9ES21        | TQLGLVMDGFNSLLR                                                            | 0.866675559        | 2               | 3.98379   |
| <b>Q9ES38</b> | <b>S27A5 Bile acyl_CoA synthetase</b>                                      | <b>1.079957744</b> | <b>0.935809</b> | <b>12</b> |
| Q9ES38        | ACQAAWALK                                                                  | 1.104542306        | 2               | 2.73196   |
| Q9ES38        | ADVWENFQQR                                                                 | 1.119973319        | 2               | 3.06449   |
| Q9ES38        | EGFDVGVIAADPLYILDNK                                                        | 1.15133673         | 2               | 4.91263   |
| Q9ES38        | GATAILVLPK                                                                 | 1.151139496        | 2               | 2.92919   |
| Q9ES38        | IQDSLEITNTYK                                                               | 1.189054233        | 2               | 3.65027   |
| Q9ES38        | LKEATIQEDK                                                                 | 1.299219231        | 2               | 2.80611   |
| Q9ES38        | MLTPELVQFDIETAEVPRDK                                                       | 1.024181279        | 2               | 4.22972   |
| Q9ES38        | QGFCIPVETGKPGLLTK                                                          | 0.95067952         | 3               | 3.66282   |
| Q9ES38        | SISALSFLGLAK                                                               | 1.353484356        | 2               | 3.1983    |
| Q9ES38        | SLMPDVYQAVCEGTWK                                                           | 1.378255948        | 2               | 3.91605   |
| Q9ES38        | YLCNVPGQPEDK                                                               | 1.029479304        | 2               | 3.48668   |
| Q9ES38        | YLCNVPGQPEDKK                                                              | 1.184929135        | 2               | 3.75664   |
| <b>Q9EST6</b> | <b>AN32B Acidic leucine_rich nuclear phosphoprotein 32 family member B</b> | <b>0.973107838</b> | <b>0.879175</b> | <b>2</b>  |
| Q9EST6        | LAEELPSLTHLNLSGNNLK                                                        | 0.972998423        | 2               | 3.79005   |

|               |                                                                                   |                    |                 |          |
|---------------|-----------------------------------------------------------------------------------|--------------------|-----------------|----------|
| Q9EST6        | SLDLFGCEVTNR                                                                      | 1.137005472        | 2               | 2.74477  |
| <b>Q9ESW0</b> | <b>DDB1 DNA damage binding protein 1</b>                                          | <b>1.151647289</b> | <b>0.956564</b> | <b>3</b> |
| Q9ESW0        | IEVQDTSGGTTALRPSASTQALSSSVSSSK                                                    | 1.127187055        | 3               | 5.728    |
| Q9ESW0        | KTEPATGFIDGDLIESFLDISRPK                                                          | 1.120606265        | 3               | 5.98673  |
| Q9ESW0        | QGQGQLVTCGAFK                                                                     | 1.062305642        | 2               | 2.35976  |
| <b>Q9HB97</b> | <b>PARVA Alpha_parvin</b>                                                         | <b>1.21083487</b>  | <b>0.054457</b> | <b>4</b> |
| Q9HB97        | DLAEDLYDGQVLQK                                                                    | 1.660273574        | 2               | 2.35984  |
| Q9HB97        | LNVAEVTQSEIAQK                                                                    | 1.092054747        | 2               | 3.14655  |
| Q9HB97        | QIQEEITGNTEALSGR                                                                  | 1.230768673        | 2               | 3.16743  |
| Q9HB97        | VLIDWINDVLVGER                                                                    | 1.245931195        | 2               | 3.23792  |
| <b>Q9JHL4</b> | <b>DBNL Drebrin_like protein</b>                                                  | <b>1.097792272</b> | <b>0.51209</b>  | <b>2</b> |
| <b>Q9JHZ9</b> | <b>S38A3 Sodium_coupled neutral amino acid transporter 3</b>                      | <b>1.610589317</b> | <b>0.079732</b> | <b>2</b> |
| Q9JHZ9        | AYEQLGYR                                                                          | 1.495714202        | 2               | 2.55003  |
| Q9JHZ9        | HLEGLLPVGMPTADTQR                                                                 | 1.626222609        | 2               | 3.79439  |
| <b>Q9JI57</b> | <b>GT2D1 General transcription factor II_I repeat domain_containing protein 1</b> | <b>1.163071274</b> | <b>0.561226</b> | <b>2</b> |
| Q9JI57        | EMEDINTLRECVQILFNSR                                                               | 1.124098209        | 2               | 2.32258  |
| Q9JI57        | GTQPTTEGQAHLVLPTR                                                                 | 1.330399803        | 2               | 2.37982  |
| <b>Q9JI85</b> | <b>NUCB2 Nucleobindin_2</b>                                                       | <b>1.074918512</b> | <b>0.943288</b> | <b>5</b> |
| Q9JI85        | FQQGIAPSGPAGELK                                                                   | 1.256256543        | 2               | 2.66386  |
| Q9JI85        | LSQELDLVSHK                                                                       | 1.052138068        | 2               | 2.75849  |
| Q9JI85        | QEYQQAVQQLLEQK                                                                    | 1.089066765        | 2               | 4.3007   |
| Q9JI85        | TRLDELK                                                                           | 0.791869565        | 1               | 2.02823  |
| Q9JI85        | VHNVEPVESAR                                                                       | 1.093550206        | 2               | 2.89633  |
| <b>Q9JI91</b> | <b>ACTN2 Alpha_actinin_2</b>                                                      | <b>1.107017682</b> | <b>0.020506</b> | <b>8</b> |
| Q9JI91        | ACLISMGYDLGAEAFAR                                                                 | 1.195181647        | 2               | 4.42063  |
| Q9JI91        | GYEEWLLNEIR                                                                       | 1.924795817        | 2               | 2.85053  |
| Q9JI91        | HRPDLIDYSK                                                                        | 1.51647003         | 2               | 2.41712  |
| Q9JI91        | HTNYTMEHIR                                                                        | 1.077747733        | 2               | 2.80665  |
| Q9JI91        | KHEAFESDLAAHQDR                                                                   | 1.096219798        | 2               | 5.29776  |
| Q9JI91        | MLDAEDIVNTPKPDER                                                                  | 0.964654173        | 2               | 3.08899  |
| Q9JI91        | QSILAIQNEVEK                                                                      | 1.840385637        | 2               | 2.843    |
| Q9JI91        | TINEVETQILTR                                                                      | 1.776661086        | 2               | 3.16435  |
| <b>Q9JJ19</b> | <b>NHRF1 Na( )/H( ) exchange regulatory cofactor NHE_RF1</b>                      | <b>1.188269485</b> | <b>1.02E-08</b> | <b>9</b> |
| Q9JJ19        | AVDPDSPAEEASGLR                                                                   | 1.130666941        | 2               | 3.24841  |
| Q9JJ19        | IVEVNGVCMEGK                                                                      | 1.210227178        | 2               | 3.67466  |
| Q9JJ19        | LLVVDPETDEQLK                                                                     | 1.202690429        | 2               | 2.68992  |
| Q9JJ19        | LLVVDPETDEQLKK                                                                    | 1.580924402        | 2               | 2.86783  |
| Q9JJ19        | LVEPGSPA EK                                                                       | 1.135240189        | 2               | 2.56204  |
| Q9JJ19        | LVEVNGENVEK                                                                       | 1.21672718         | 2               | 2.88286  |
| Q9JJ19        | SEHTEPPAAADTK                                                                     | 0.800670067        | 2               | 3.20641  |
| Q9JJ19        | SEHTEPPAAADTKK                                                                    | 1.130555961        | 3               | 4.61147  |
| Q9JJ19        | VTPSQEHLDGPLPEPFSNGEIQK                                                           | 1.245808393        | 3               | 3.91459  |
| <b>Q9JJ54</b> | <b>HNRPD Heterogeneous nuclear ribonucleoprotein D0</b>                           | <b>1.328480185</b> | <b>3.41E-12</b> | <b>3</b> |
| Q9JJ54        | FGDVVDCTLK                                                                        | 1.051059407        | 2               | 2.72291  |
| Q9JJ54        | IDASKNEEDEGHSSNSPR                                                                | 1.335889744        | 3               | 3.89747  |
| Q9JJ54        | IFVGGLSPDTPEEK                                                                    | 1.344856229        | 2               | 3.914    |
| <b>Q9JJ79</b> | <b>DYHC2 Cytoplasmic dynein 2 heavy chain 1</b>                                   | <b>0.877835992</b> | <b>0.56181</b>  | <b>3</b> |
| Q9JJ79        | ASDLKDLNSR                                                                        | 1.117493337        | 2               | 2.35293  |
| Q9JJ79        | DQIEVMKGNVKS R                                                                    | 0.790134226        | 2               | 2.36657  |
| Q9JJ79        | NCLEEWTKAAGLEK                                                                    | 0.868682791        | 2               | 2.37231  |
| <b>Q9JJM9</b> | <b>SEPT5 Septin_5</b>                                                             | <b>1.681458263</b> | <b>0.03561</b>  | <b>2</b> |
| Q9JJM9        | LIRMKDEELR                                                                        | 1.709196834        | 2               | 2.48162  |
| Q9JJM9        | MQEMLQKMK+Oxidation(4)                                                            | 1.249072991        | 2               | 2.41791  |

|               |                                                                 |                    |                 |           |
|---------------|-----------------------------------------------------------------|--------------------|-----------------|-----------|
| <b>Q9JU8</b>  | <b>SH3L1 SH3 domain_binding glutamic acid_rich_like protein</b> | <b>1.295040654</b> | <b>0.097869</b> | <b>2</b>  |
| Q9JU8         | GDYDAFFEAR                                                      | 1.368742874        | 2               | 2.54491   |
| Q9JU8         | QQDVLCFLEANK                                                    | 1.273573541        | 2               | 2.88103   |
| <b>Q9JK38</b> | <b>GNA1 Glucosamine 6_phosphate N_acetyltransferase</b>         | <b>1.222992376</b> | <b>5.48E-06</b> | <b>4</b>  |
| Q9JK38        | GRVEDVVVSDECR                                                   | 1.214534339        | 2               | 3.45982   |
| Q9JK38        | ITLECLPQNVGFYK                                                  | 1.434890506        | 2               | 3.74769   |
| Q9JK38        | VEDVVVSDECR                                                     | 1.131334734        | 2               | 3.7012    |
| Q9JK38        | VLGQLTETGVVSPEQFMK                                              | 1.351211735        | 2               | 4.53933   |
| <b>Q9JLA3</b> | <b>UGGG1 UDP_glucose:glycoprotein glucosyltransferase 1</b>     | <b>1.144605803</b> | <b>0.808881</b> | <b>8</b>  |
| Q9JLA3        | AYNYVQVEVDGYHAFQTLTQIYNK                                        | 0.739896353        | 3               | 3.9182    |
| Q9JLA3        | EGETYDVVAVVDPVTR                                                | 0.871868249        | 2               | 2.60989   |
| Q9JLA3        | GQYQGLSQDPNSLNLDDQLPNNMIIHQVPIK                                 | 1.167317587        | 3               | 6.13379   |
| Q9JLA3        | IVPEWQDYDQEIK                                                   | 1.160189703        | 2               | 3.56258   |
| Q9JLA3        | LGIEGLSLHNILK                                                   | 1.682328746        | 3               | 3.88656   |
| Q9JLA3        | LNIQPSETDYAVDIR                                                 | 1.21696611         | 2               | 4.13305   |
| Q9JLA3        | VEEDVASDLVMK                                                    | 1.063505796        | 2               | 3.25843   |
| Q9JLA3        | YVLEPEISFTADNSFAK                                               | 1.121705587        | 2               | 3.72228   |
| <b>Q9JLJ3</b> | <b>AL9A1 4_trimethylaminobutyraldehyde dehydrogenase</b>        | <b>1.154045423</b> | <b>0.002028</b> | <b>17</b> |
| Q9JLJ3        | AGAPNGLFNVVQGAATGQFLCQHR                                        | 1.148560176        | 2               | 4.44175   |
| Q9JLJ3        | ANDTTFLAAGVFTR                                                  | 0.974711046        | 2               | 4.90164   |
| Q9JLJ3        | CQVLEAAR                                                        | 1.260333549        | 2               | 3.03792   |
| Q9JLJ3        | EQGATVLCGGEPYAPEDPK                                             | 1.17586735         | 2               | 4.69072   |
| Q9JLJ3        | EQGATVLCGGEPYAPEDPKLK                                           | 1.133181358        | 2               | 4.65404   |
| Q9JLJ3        | EVNLAVENAK                                                      | 1.160512012        | 2               | 2.97666   |
| Q9JLJ3        | GALLANFLTQGVCCNGTR                                              | 0.920089569        | 2               | 5.34989   |
| Q9JLJ3        | GIKPITLELGGK                                                    | 1.018472494        | 3               | 3.9211    |
| Q9JLJ3        | HGYMTPCILNCTDDMTVCVK                                            | 1.197854832        | 2               | 4.58321   |
| Q9JLJ3        | IGDPLLEDTR                                                      | 1.175186238        | 2               | 3.92716   |
| Q9JLJ3        | MGPLINAPHLER                                                    | 1.16606593         | 2               | 3.49509   |
| Q9JLJ3        | MGPLINAPHLER+Oxidation(1)                                       | 1.208283253        | 2               | 3.01605   |
| Q9JLJ3        | RDEIAIMETINNGK                                                  | 1.123720915        | 2               | 5.45677   |
| Q9JLJ3        | VEPVDASGTEK                                                     | 1.152246341        | 2               | 2.32398   |
| Q9JLJ3        | VSFTGSVPTGMK                                                    | 1.180242959        | 2               | 3.36805   |
| Q9JLJ3        | VSFTGSVPTGMK+Oxidation(11)                                      | 1.432832814        | 2               | 2.81419   |
| Q9JLJ3        | VTIEYSYQLK                                                      | 1.848021047        | 2               | 3.19293   |
| <b>Q9JLTO</b> | <b>MYH10 Myosin_10</b>                                          | <b>1.305167321</b> | <b>5.91E-12</b> | <b>3</b>  |
| Q9JLTO        | AGVLAHLEER                                                      | 1.306023419        | 2               | 3.5163    |
| Q9JLTO        | DAAGLESQQLDQTELLQEETR                                           | 0.749422347        | 2               | 3.74688   |
| Q9JLTO        | DEELLKVKKEK                                                     | 1.062226968        | 1               | 2.1485    |
| <b>Q9JLZ3</b> | <b>AUHM Methylglutaconyl_CoA hydratase_mitochondrial</b>        | <b>0.981775661</b> | <b>0.999999</b> | <b>3</b>  |
| Q9JLZ3        | AVGLISHVLEQNQEGDAAYR                                            | 0.991177034        | 2               | 5.8055    |
| Q9JLZ3        | AVGLISHVLEQNQEGDAAYRK                                           | 0.922143967        | 3               | 4.58183   |
| Q9JLZ3        | SEVPGIFCAGADLK                                                  | 0.934114564        | 2               | 3.2591    |
| <b>Q9JM53</b> | <b>AIFM1 Apoptosis_inducing factor_1_mitochondrial</b>          | <b>0.823422132</b> | <b>0.947252</b> | <b>13</b> |
| Q9JM53        | DGEQHEDLNEVAK                                                   | 0.994819727        | 2               | 3.92656   |
| Q9JM53        | ILPEYLSNWTMEK                                                   | 1.149202748        | 2               | 2.61018   |
| Q9JM53        | KSQASGIEVIQLFPEK                                                | 1.213392004        | 2               | 3.6479    |
| Q9JM53        | KVETDHIVTAVGLEPNVELAK                                           | 1.119080407        | 2               | 6.32523   |
| Q9JM53        | LNDGSQITFEK                                                     | 1.148851107        | 2               | 3.57878   |
| Q9JM53        | SATEQSGTGIR                                                     | 0.811742519        | 2               | 3.85415   |
| Q9JM53        | SITVIGGGFLGSELACALGR                                            | 0.894468239        | 2               | 3.41395   |
| Q9JM53        | SQASGIEVIQLFPEK                                                 | 0.916960094        | 2               | 4.25662   |



|               |                                                             |                    |                 |           |
|---------------|-------------------------------------------------------------|--------------------|-----------------|-----------|
| Q9JM53        | TGGLEIDSDFGGFR                                              | 1.062949616        | 2               | 3.81632   |
| Q9JM53        | VETDHIVTAVGLEPNVELAK                                        | 0.943908443        | 2               | 6.01878   |
| Q9JM53        | VLIVSEDPPELYMRPPLSK                                         | 1.074214444        | 3               | 3.70633   |
| Q9JM53        | VMPNAIVQSVGVSGGK                                            | 1.167500639        | 2               | 4.52316   |
| Q9JM53        | VNAELQAR                                                    | 0.957720548        | 2               | 2.37445   |
| <b>Q9JMA1</b> | <b>UBP14 Ubiquitin carboxyl_terminal hydrolase 14</b>       | <b>1.208822892</b> | <b>0.886909</b> | <b>2</b>  |
| Q9JMA1        | CTESEEEVTK                                                  | 1.209676409        | 2               | 3.64424   |
| Q9JMA1        | EKESVNAKVLK                                                 | 1.112275191        | 2               | 2.55952   |
| <b>Q9JMB7</b> | <b>PIWL1 Piwi_like protein 1</b>                            | <b>1.230019418</b> | <b>0.417732</b> | <b>2</b>  |
| Q9JMB7        | ELIGLIVLTKYNNK                                              | 1.333312773        | 2               | 2.42495   |
| Q9JMB7        | SQELQISAGFQELSLAERGRR                                       | 1.028925024        | 2               | 2.34077   |
| <b>Q9JMD3</b> | <b>PCTL PCTP_like protein</b>                               | <b>1.365124442</b> | <b>6.26E-11</b> | <b>6</b>  |
| Q9JMD3        | AVSIQTGYLIQSTGPK                                            | 1.19348891         | 2               | 4.54436   |
| Q9JMD3        | ESVQVPDDQDFR                                                | 1.141758363        | 2               | 2.67156   |
| Q9JMD3        | MECCDVPAETLYDVLHDIEYR                                       | 1.48803895         | 3               | 4.43348   |
| Q9JMD3        | MECCDVPAETLYDVLHDIEYR+Oxidation(1)                          | 1.33631202         | 3               | 3.57085   |
| Q9JMD3        | SSQFLAPK                                                    | 1.184313766        | 2               | 2.3466    |
| Q9JMD3        | WDSNVIETDIAR                                                | 1.458810138        | 2               | 4.12259   |
| <b>Q9JMK8</b> | <b>VPS54 Vacuolar protein sorting_associated protein 54</b> | <b>0.890993484</b> | <b>0.839355</b> | <b>2</b>  |
| Q9JMK8        | DKIAQIDK                                                    | 1.02844094         | 1               | 1.9337    |
| Q9JMK8        | STSLGALQSQANK                                               | 0.875464496        | 2               | 2.35325   |
| <b>Q9QVC8</b> | <b>FKBP4 Peptidyl_prolyl cis_trans isomerase FKBP4</b>      | <b>1.160572289</b> | <b>0.003009</b> | <b>5</b>  |
| Q9QVC8        | ALELDSNNEK                                                  | 1.073573207        | 2               | 2.41537   |
| Q9QVC8        | GEPNNVAGNQAQVK                                              | 1.127028989        | 2               | 3.89297   |
| Q9QVC8        | VAENGAQSAPLPLEGVDISPK                                       | 1.160780029        | 2               | 3.30028   |
| Q9QVC8        | VGEVCHITCKPEYAYGSAGSPPK                                     | 1.119112863        | 3               | 6.1951    |
| Q9QVC8        | VLQLYPSNK                                                   | 1.251496172        | 2               | 2.5176    |
| <b>Q9QWN8</b> | <b>SPTN2 Spectrin beta chain_brain 2</b>                    | <b>0.90900344</b>  | <b>0.020586</b> | <b>2</b>  |
| Q9QWN8        | IIGTQEQLNQR                                                 | 1.549741948        | 2               | 2.45961   |
| Q9QWN8        | VGELTQEANALAAGHPAQAPAINTR                                   | 0.871110616        | 3               | 3.96011   |
| <b>Q9QX79</b> | <b>FETUB Fetuin_B</b>                                       | <b>0.987984222</b> | <b>0.76307</b>  | <b>3</b>  |
| Q9QX79        | GSIQHLPEQEPEDESKGK                                          | 1.116980911        | 3               | 3.92163   |
| Q9QX79        | IFYETVHGQCK                                                 | 1.254067521        | 2               | 2.88449   |
| Q9QX79        | NTAPTSSPSITAPR                                              | 1.081745805        | 2               | 3.30721   |
| <b>Q9QXG4</b> | <b>ACSA Acetyl_coenzyme A synthetase_cytoplasmic</b>        | <b>1.19954136</b>  | <b>0.282089</b> | <b>2</b>  |
| Q9QXG4        | AELGMNDSPSQSPPVK                                            | 1.013528723        | 2               | 3.75332   |
| Q9QXG4        | IGPIATPDYIQNAPGLPK                                          | 1.292028672        | 2               | 2.87866   |
| <b>Q9QXK2</b> | <b>RAD18 E3 ubiquitin_protein ligase RAD18</b>              | <b>1.022624919</b> | <b>0.405384</b> | <b>2</b>  |
| Q9QXK2        | SAAEIVQEIESMEK                                              | 1.058122015        | 1               | 2.09077   |
| Q9QXK2        | TVYNLLSDR                                                   | 0.414593785        | 2               | 2.34184   |
| <b>Q9QXK3</b> | <b>COPG2 Coatomer subunit gamma_2</b>                       | <b>1.039968382</b> | <b>0.743432</b> | <b>2</b>  |
| Q9QXK3        | SIATLAITLLK                                                 | 1.210126832        | 2               | 3.02534   |
| Q9QXK3        | SSEPVLTEAETEFVR                                             | 0.967552855        | 2               | 3.84455   |
| <b>Q9QXQ0</b> | <b>ACTN4 Alpha_actinin_4</b>                                | <b>1.267559565</b> | <b>9.9E-20</b>  | <b>28</b> |
| Q9QXQ0        | ACLISLGYDVENDR                                              | 1.383858206        | 2               | 3.96035   |
| Q9QXQ0        | ACLISLGYDVENDRQGDAEFNR                                      | 1.178523205        | 3               | 3.31328   |
| Q9QXQ0        | AGTQIENIDEDFR                                               | 1.000613546        | 2               | 2.83635   |
| Q9QXQ0        | AGTQIENIDEDFRDGLK                                           | 1.142321695        | 2               | 4.47269   |
| Q9QXQ0        | ASFNFHFDKDHGGALGPEEFK                                       | 1.243539652        | 3               | 3.70906   |
| Q9QXQ0        | DDPVTNLNNAFEVAEK                                            | 2.009692818        | 2               | 3.63947   |
| Q9QXQ0        | ETTDTDADQVIASFK                                             | 1.189401534        | 2               | 4.88499   |
| Q9QXQ0        | HRDYETATLSDIK                                               | 1.424852281        | 2               | 4.04131   |
| Q9QXQ0        | HRPELIEYDK                                                  | 1.065045707        | 3               | 4.72497   |
| Q9QXQ0        | HTNYTMEHLR                                                  | 1.077747733        | 2               | 2.80665   |
| Q9QXQ0        | ICDQWDNLGSLTHSR                                             | 1.295119804        | 2               | 4.03313   |
| Q9QXQ0        | ISIEMNGTLEDQLSHLK                                           | 0.9790242          | 2               | 2.83471   |

|               |                                                                   |                    |                 |           |
|---------------|-------------------------------------------------------------------|--------------------|-----------------|-----------|
| Q9QXQ0        | KDDPVTNLNNAFEVAEK                                                 | 1.071527441        | 3               | 4.9324    |
| Q9QXQ0        | LSGSNPYTSVTPQIINSK                                                | 1.765425553        | 2               | 4.47107   |
| Q9QXQ0        | LVSIGAEIIVDGNAK                                                   | 1.546451702        | 2               | 3.68215   |
| Q9QXQ0        | MAPYQGPDAAPGALDYK                                                 | 1.296722509        | 2               | 4.32053   |
| Q9QXQ0        | MAPYQGPDAAPGALDYK+Oxidation(1)                                    | 1.314656887        | 2               | 3.09388   |
| Q9QXQ0        | MLDAEDIVNTARPDEK                                                  | 1.268845102        | 2               | 4.05036   |
| Q9QXQ0        | MLDAEDIVNTARPDEK+Oxidation(1)                                     | 0.973204561        | 2               | 2.64012   |
| Q9QXQ0        | NFITAEELR                                                         | 1.136623228        | 1               | 2.14241   |
| Q9QXQ0        | QLETIDQLHLEYAK                                                    | 1.338426336        | 2               | 3.10192   |
| Q9QXQ0        | RDHALLEEQSK                                                       | 1.088322074        | 3               | 4.18005   |
| Q9QXQ0        | SIVDYKPNLDLLEQQHQLIQEALIFDNK                                      | 1.459888754        | 3               | 3.6489    |
| Q9QXQ0        | TINEVENQILTR                                                      | 1.156402553        | 2               | 3.3661    |
| Q9QXQ0        | VEQIAAIAQELNELDYDSSHVNTR                                          | 1.906545312        | 2               | 5.00096   |
| Q9QXQ0        | VGWEQLLTIAR                                                       | 1.388101799        | 2               | 4.24064   |
| Q9QXQ0        | VLAGDKNFITAEELR                                                   | 0.984612678        | 2               | 3.77479   |
| Q9QXQ0        | VLAVNQENEHLMEDYER                                                 | 1.177871689        | 2               | 5.55292   |
| <b>Q9QXT0</b> | <b>CNPY2 Protein canopy homolog 2</b>                             | <b>1.135049735</b> | <b>0.002037</b> | <b>4</b>  |
| Q9QXT0        | ALVDELEWEIAR                                                      | 0.913926983        | 2               | 3.77627   |
| Q9QXT0        | INPDGSQSVVEVPYAR                                                  | 1.502807735        | 2               | 3.7483    |
| Q9QXT0        | RTDLCDHALHR                                                       | 1.07180691         | 3               | 3.35456   |
| Q9QXT0        | TDLCDHALHR                                                        | 1.1171241          | 2               | 3.06739   |
| <b>Q9QXX4</b> | <b>CMC2 Calcium_binding mitochondrial carrier protein Aralar2</b> | <b>1.087891219</b> | <b>1.72E-05</b> | <b>18</b> |
| Q9QXX4        | ASGDAARPFLLQLAESAYR                                               | 0.853721314        | 3               | 3.32019   |
| Q9QXX4        | DIMVTIRPHVLTFFVEECLVAAAGGTR                                       | 1.000436619        | 3               | 6.07012   |
| Q9QXX4        | DVEVTKEEFALAAQK                                                   | 1.095364341        | 2               | 4.08506   |
| Q9QXX4        | FGLGSIAGAVGATAVYPIDLVK                                            | 0.968974395        | 2               | 6.55393   |
| Q9QXX4        | FGLYLPLFKPSASTSK                                                  | 0.964922328        | 2               | 2.60592   |
| Q9QXX4        | GLLPQLLGVAPAK                                                     | 1.197255398        | 2               | 3.18195   |
| Q9QXX4        | IAPLEEGMLPFNLAEAR                                                 | 1.416366104        | 2               | 5.39013   |
| Q9QXX4        | ILREEGPK                                                          | 1.060384126        | 2               | 2.40582   |
| Q9QXX4        | ITLPAPNPDHVGQYK                                                   | 1.248074219        | 2               | 2.41677   |
| Q9QXX4        | KDVEVTKEEFALAAQK                                                  | 0.934300456        | 2               | 5.51586   |
| Q9QXX4        | LQVAGEITTGPR                                                      | 1.075470828        | 2               | 3.70581   |
| Q9QXX4        | LTVNDFVR                                                          | 1.3035718          | 2               | 2.56114   |
| Q9QXX4        | NGEFFMSPHDFVTR                                                    | 1.134629626        | 2               | 4.00643   |
| Q9QXX4        | SSPQFGVTLTYELLQR                                                  | 1.583730397        | 2               | 4.5386    |
| Q9QXX4        | STGSFVGELMYK                                                      | 1.072265468        | 2               | 3.0857    |
| Q9QXX4        | TVELLSGVVDQTK                                                     | 1.291439447        | 2               | 3.96633   |
| Q9QXX4        | YEGFFGLYR                                                         | 1.039299368        | 2               | 2.71993   |
| Q9QXX4        | YLNIFGESQPNPK                                                     | 1.016458496        | 2               | 4.32992   |
| <b>Q9QXY2</b> | <b>SRCN1 SRC kinase signaling inhibitor 1</b>                     | <b>1.320897559</b> | <b>0.217513</b> | <b>2</b>  |
| Q9QXY2        | DINRLEETQAELLK                                                    | 1.777579425        | 2               | 2.41382   |
| Q9QXY2        | IIAELESGGGSVPPMK                                                  | 0.981542842        | 2               | 2.4363    |
| <b>Q9QYU4</b> | <b>CRYM Thiomorpholine_carboxylate dehydrogenase</b>              | <b>0.831444892</b> | <b>0.5117</b>   | <b>4</b>  |
| Q9QYU4        | GFLGVMPAYSAAEDALTTK                                               | 1.146927846        | 2               | 4.05964   |
| Q9QYU4        | RAPAFLSADEVQDHLR                                                  | 1.064107109        | 3               | 5.0788    |
| Q9QYU4        | SLGMAVEDLVAAK                                                     | 0.869794935        | 2               | 3.62316   |
| Q9QYU4        | SSLLIPPLEAALANFSK                                                 | 0.751861135        | 2               | 3.13794   |
| <b>Q9QZ76</b> | <b>MYG Myoglobin</b>                                              | <b>1.157594571</b> | <b>0.984147</b> | <b>7</b>  |
| Q9QZ76        | GQHAAEIQLAQSHATK                                                  | 1.121253498        | 2               | 4.56899   |
| Q9QZ76        | HGCTVLTALGTILK                                                    | 1.154817171        | 2               | 3.51214   |
| Q9QZ76        | HGCTVLTALGTILKK                                                   | 1.532862211        | 3               | 3.70129   |
| Q9QZ76        | KGQHAAEIQLAQSHATK                                                 | 0.992257316        | 3               | 4.78344   |
| Q9QZ76        | KKGQHAAEIQLAQSHATK                                                | 1.615037259        | 3               | 4.59734   |
| Q9QZ76        | VEGDLAGHGQEVLSLFK                                                 | 2.020697425        | 3               | 4.34595   |

|               |                                                          |                    |                 |           |
|---------------|----------------------------------------------------------|--------------------|-----------------|-----------|
| Q9QZ76        | YSGDFGADAQGAMSK                                          | 1.763666719        | 2               | 4.03224   |
| <b>Q9QZA2</b> | <b>PDC6I Programmed cell death 6_interacting protein</b> | <b>1.075256143</b> | <b>0.225109</b> | <b>8</b>  |
| Q9QZA2        | ATLVKPTPVNVPISQK                                         | 0.8893907          | 2               | 3.46915   |
| Q9QZA2        | DTIALCKPEPELNAAIPSANPAK                                  | 1.196169826        | 2               | 2.5066    |
| Q9QZA2        | FYNELTEILVR                                              | 1.044531653        | 2               | 2.70603   |
| Q9QZA2        | LLDEEEATDNDLR                                            | 1.029139577        | 2               | 3.67423   |
| Q9QZA2        | NIQVSHQEFSK                                              | 1.215137396        | 2               | 3.37834   |
| Q9QZA2        | NLATAYDNFVELVANLK                                        | 1.030495542        | 2               | 4.43371   |
| Q9QZA2        | STAVVEQGGIQTVDQLIK                                       | 1.007951397        | 2               | 4.4462    |
| Q9QZA2        | TMQGSEVVNVLK                                             | 0.856462267        | 2               | 3.34316   |
| <b>Q9QZD8</b> | <b>DIC Mitochondrial dicarboxylate carrier</b>           | <b>1.030422696</b> | <b>0.99997</b>  | <b>7</b>  |
| Q9QZD8        | GALVTVQQLSCYDQAK                                         | 1.018425435        | 2               | 4.95224   |
| Q9QZD8        | LFSGATMASSR                                              | 0.513703198        | 2               | 2.63167   |
| Q9QZD8        | MTGMALQVVR                                               | 1.028289368        | 2               | 2.66777   |
| Q9QZD8        | NYSHALDGLYR                                              | 1.051169775        | 2               | 2.92306   |
| Q9QZD8        | VHLQTQQEVK                                               | 1.030459271        | 2               | 2.85231   |
| Q9QZD8        | VLLGGISGLTGGFVGTADLVNVR                                  | 1.033367917        | 2               | 5.69168   |
| Q9QZD8        | WYFGLASCGAACCTHPLDLLK                                    | 1.061721638        | 3               | 3.80411   |
| <b>Q9QZH8</b> | <b>AAAD Arylacetamide deacetylase</b>                    | <b>1.211730781</b> | <b>0.608996</b> | <b>2</b>  |
| Q9QZH8        | LDAVVVSTDYGLAPK                                          | 1.148167228        | 2               | 4.18367   |
| Q9QZH8        | WFLQEDILEK                                               | 1.3346763          | 2               | 3.32079   |
| <b>Q9QZU7</b> | <b>BODG Gamma_butyrobetaine dioxygenase</b>              | <b>1.438864893</b> | <b>5.22E-11</b> | <b>5</b>  |
| Q9QZU7        | IDANNVAYTTGK                                             | 1.484619149        | 2               | 3.30852   |
| Q9QZU7        | IIELEDDKGQVVR                                            | 1.155982023        | 2               | 2.536     |
| Q9QZU7        | LLLEALDVNIR                                              | 1.862884916        | 2               | 2.83693   |
| Q9QZU7        | MNPGDVITFDNWR                                            | 1.46933693         | 2               | 2.72872   |
| Q9QZU7        | QTVTGGDSEIVDGFNVQCQK                                     | 1.263118957        | 2               | 4.476     |
| <b>Q9R063</b> | <b>PRDX5 Peroxiredoxin_5_mitochondrial</b>               | <b>0.962982915</b> | <b>0.398996</b> | <b>10</b> |
| Q9R063        | ALNVEPDGTGLTCSLAPNILSQL                                  | 1.442493487        | 3               | 4.35747   |
| Q9R063        | ETDLLLDDSLVSLFGNR                                        | 1.19755018         | 2               | 4.48853   |
| Q9R063        | GVLFGVPGAFTPGCSK                                         | 0.880029713        | 2               | 4.53883   |
| Q9R063        | KGVLFVPGAFTPGCSK                                         | 0.877167832        | 2               | 3.5012    |
| Q9R063        | KVNLAELFK                                                | 0.865558873        | 2               | 2.3048    |
| Q9R063        | THLPGFVEQAGALK                                           | 0.970817459        | 3               | 4.34332   |
| Q9R063        | VGDTIPSVEVFEGEPGK                                        | 0.937709068        | 2               | 4.47727   |
| Q9R063        | VGDTIPSVEVFEGEPGKK                                       | 0.991388446        | 2               | 3.90015   |
| Q9R063        | VNLAELFK                                                 | 0.851842162        | 2               | 2.72246   |
| Q9R063        | VQLLADPTGAFGK                                            | 1.069495641        | 2               | 3.71058   |
| <b>Q9R064</b> | <b>GORS2 Golgi reassembly_stacking protein 2</b>         | <b>1.118923323</b> | <b>0.918424</b> | <b>2</b>  |
| Q9R064        | ADTSSLTVDMSPASK                                          | 1.013426913        | 2               | 3.47929   |
| Q9R064        | LYVYNTDNDNCR                                             | 1.536037109        | 2               | 2.79704   |
| <b>Q9R0N0</b> | <b>GALK1 Galactokinase</b>                               | <b>1.122436738</b> | <b>0.760739</b> | <b>4</b>  |
| Q9R0N0        | RQCEEVAQALGK                                             | 1.052875374        | 2               | 2.85715   |
| Q9R0N0        | SLETSLVPLSDPK                                            | 1.132589583        | 2               | 3.35619   |
| Q9R0N0        | TDGLVSLTTSK                                              | 1.305296399        | 2               | 3.43189   |
| Q9R0N0        | VEELLAEAR                                                | 1.082342884        | 2               | 3.04239   |
| <b>Q9R0T3</b> | <b>DNJC3 Dnaj homolog subfamily C member 3</b>           | <b>1.085997398</b> | <b>0.092493</b> | <b>6</b>  |
| Q9R0T3        | AEPSVAEYTVR                                              | 1.016907029        | 2               | 2.82909   |
| Q9R0T3        | ICSEVLQLEPDNVNALK                                        | 1.359448215        | 2               | 5.56284   |
| Q9R0T3        | KFDDGEDPLDAETQQGGGSPNFHR                                 | 0.915109963        | 3               | 5.40821   |
| Q9R0T3        | LIGSAEELIR                                               | 1.349942174        | 2               | 2.86087   |
| Q9R0T3        | LKNDNTEAFYK                                              | 1.386536814        | 2               | 2.81941   |
| Q9R0T3        | SNPSENEEKEAQSQLVK                                        | 1.004857916        | 2               | 5.09155   |
| <b>Q9R112</b> | <b>SQRD Sulfide:quinone oxidoreductase_mitochondrial</b> | <b>0.934521964</b> | <b>0.973439</b> | <b>3</b>  |
| Q9R112        | EGNALFTFPNTPVK                                           | 0.935004492        | 2               | 3.04641   |

|               |                                                                    |                    |                 |          |
|---------------|--------------------------------------------------------------------|--------------------|-----------------|----------|
| Q9R112        | STLSVIPSGVQWIQDR                                                   | 0.905492618        | 2               | 2.79513  |
| Q9R112        | VGAENVAIVEPSE                                                      | 0.918742622        | 2               | 2.84465  |
| <b>Q9R1M5</b> | <b>NALP5 NACHT_ LRR and PYD domains_ containing protein 5</b>      | <b>1.089300444</b> | <b>0.617603</b> | <b>2</b> |
| Q9R1M5        | KMTSPENDSKSIQK                                                     | 1.179426439        | 2               | 2.39211  |
| Q9R1M5        | SLDLGNNALGDK                                                       | 1.08107345         | 1               | 1.91907  |
| <b>Q9R1T3</b> | <b>CATZ Cathepsin Z</b>                                            | <b>1.064603554</b> | <b>0.997049</b> | <b>2</b> |
| Q9R1T3        | HGIPDETCNNYQAK                                                     | 1.065799963        | 2               | 4.19178  |
| Q9R1T3        | VGDYGSLSGR                                                         | 0.990905712        | 2               | 2.4542   |
| <b>Q9R1T4</b> | <b>SEPT6 Septin_6</b>                                              | <b>0.851423637</b> | <b>0.402716</b> | <b>2</b> |
| Q9R1T4        | QMFVQRVKEK+Oxidation(2)                                            | 1.053536159        | 1               | 1.99794  |
| Q9R1T4        | STLMDTLFNTK                                                        | 0.798903786        | 2               | 2.44218  |
| <b>Q9R1Z0</b> | <b>VDAC3 Voltage_ dependent anion_ selective channel protein 3</b> | <b>0.88009035</b>  | <b>0.012247</b> | <b>4</b> |
| Q9R1Z0        | LCQNNFALGYK                                                        | 0.867602187        | 2               | 2.83575  |
| Q9R1Z0        | LTVDTIFVPNTGK                                                      | 1.085755593        | 2               | 2.58844  |
| Q9R1Z0        | VNNASLIGLYTQSLRPGVK                                                | 0.74317061         | 2               | 4.1521   |
| Q9R1Z0        | WNTDNTLGTETISWENK                                                  | 0.925444275        | 2               | 3.08431  |
| <b>Q9R257</b> | <b>HEBP1 Heme_ binding protein 1</b>                               | <b>1.47978291</b>  | <b>0.044458</b> | <b>2</b> |
| Q9R257        | EAMPKIMKYVGGTNDK+Oxidation(3)                                      | 1.064862767        | 2               | 2.32317  |
| Q9R257        | NSLFGSVETWPWQVLSTGGK                                               | 1.997397847        | 2               | 2.47443  |
| <b>Q9WTT6</b> | <b>GUAD Guanine deaminase</b>                                      | <b>0.917560761</b> | <b>5.96E-12</b> | <b>9</b> |
| Q9WTT6        | AVMVSNVLLINK                                                       | 1.143521886        | 2               | 2.85306  |
| Q9WTT6        | EIGNFEVKGKDFDALLINPR                                               | 1.351498863        | 2               | 4.54572  |
| Q9WTT6        | ETTEESVKETER                                                       | 0.885228421        | 2               | 3.41488  |
| Q9WTT6        | FQSTDVAEEVYTR                                                      | 0.872081385        | 2               | 3.48267  |
| Q9WTT6        | FSLSCTETLMSELGNIAK                                                 | 1.411604419        | 2               | 4.78656  |
| Q9WTT6        | IVFLEESSQKEK                                                       | 1.169171442        | 2               | 4.16365  |
| Q9WTT6        | NYTDVYDKNNLLTNTK                                                   | 1.119489942        | 2               | 4.50372  |
| Q9WTT6        | THDLYIQSHISENREEIEAVK                                              | 1.391395569        | 3               | 4.0667   |
| Q9WTT6        | VCMDLNNTVPEYK                                                      | 0.983761298        | 2               | 3.1372   |
| <b>Q9WU19</b> | <b>HAOX1 Hydroxyacid oxidase 1</b>                                 | <b>1.158155762</b> | <b>0.259267</b> | <b>9</b> |
| Q9WU19        | AIFVTVDTPYLGNR                                                     | 1.254047726        | 2               | 3.74136  |
| Q9WU19        | AVFVGRPIIWGLAFQGEK                                                 | 1.139930468        | 3               | 4.126    |
| Q9WU19        | GVQDVLEILK                                                         | 1.05692797         | 2               | 3.60973  |
| Q9WU19        | GVQDVLEILKEEFR                                                     | 1.233322083        | 2               | 4.38095  |
| Q9WU19        | HGVDGILVSNHGAR                                                     | 1.063700885        | 3               | 4.84014  |
| Q9WU19        | MKNFETNDLAFSPK+Oxidation(1)                                        | 1.067841851        | 2               | 2.67536  |
| Q9WU19        | NFETNDLAFSPK                                                       | 1.147553664        | 2               | 3.40445  |
| Q9WU19        | NVADIDLSTSVLGQR                                                    | 1.008545283        | 2               | 5.09121  |
| Q9WU19        | VEVFLDGGVR                                                         | 0.988008638        | 2               | 2.64355  |
| <b>Q9WU49</b> | <b>CHSP1 Calcium_ regulated heat stable protein 1</b>              | <b>1.316010021</b> | <b>2.59E-05</b> | <b>2</b> |
| Q9WU49        | HETWSGHVISS                                                        | 1.425311769        | 2               | 2.95887  |
| Q9WU49        | LQAVEVVITHLAPGTK                                                   | 1.302399794        | 2               | 4.45315  |
| <b>Q9WU65</b> | <b>GLPK2 Glycerol kinase 2</b>                                     | <b>1.117942922</b> | <b>0.483317</b> | <b>2</b> |
| Q9WU65        | GIICGLTQFTNK                                                       | 1.112363136        | 2               | 3.5649   |
| Q9WU65        | LAEVNIDISNIK                                                       | 1.490290764        | 2               | 2.33875  |
| <b>Q9WU82</b> | <b>CTNB1 Catenin beta_1</b>                                        | <b>1.135092927</b> | <b>5.27E-05</b> | <b>3</b> |
| Q9WU82        | HQEAEMAQNAVR                                                       | 1.210847841        | 2               | 3.34762  |
| Q9WU82        | LLNDEDQVVVVK                                                       | 0.562301745        | 2               | 3.11464  |
| Q9WU82        | TMQNTNDVETAR                                                       | 1.163222214        | 2               | 3.57758  |
| <b>Q9WUC4</b> | <b>ATOX1 Copper transport protein ATOX1</b>                        | <b>1.075729569</b> | <b>0.987526</b> | <b>2</b> |
| Q9WUC4        | LGGVEFNIDLPNKK                                                     | 1.074788346        | 2               | 3.78846  |
| Q9WUC4        | VCIESEHSSDILLATLNK                                                 | 1.100110365        | 2               | 5.88067  |
| <b>Q9WUH4</b> | <b>FHL1 Four and a half LIM domains protein 1</b>                  | <b>3.03716079</b>  | <b>0.376539</b> | <b>2</b> |
| Q9WUH4        | AIVAGDQNVVEYK                                                      | 2.370015427        | 2               | 2.39277  |
| Q9WUH4        | FCANTCVECR                                                         | 3.754266212        | 2               | 2.78071  |

|               |                                                                             |                    |                 |           |
|---------------|-----------------------------------------------------------------------------|--------------------|-----------------|-----------|
| <b>Q9WUJ8</b> | <b>ORC6 Origin recognition complex subunit 6</b>                            | <b>1.218445674</b> | <b>0.430222</b> | <b>2</b>  |
| Q9WUJ8        | LSGLNKMMYQSKL+Oxidation(7)                                                  | 1.218445674        | 2               | 2.30964   |
| Q9WUJ8        | LSGLNKMMYQSKL+Oxidation(8)                                                  | 1.218445674        | 2               | 2.36096   |
| <b>Q9WUS0</b> | <b>KAD4 Adenylate kinase isoenzyme 4_ mitochondrial</b>                     | <b>0.884227164</b> | <b>0.168735</b> | <b>4</b>  |
| Q9WUS0        | GVLHQFSGTETNR                                                               | 0.82419052         | 2               | 3.45654   |
| Q9WUS0        | TLVQAEALDR                                                                  | 0.863423983        | 2               | 2.63613   |
| Q9WUS0        | VYNLDFNPPQVLGVDDITGELVQQEDDKPEALAAR                                         | 1.415596361        | 3               | 5.46836   |
| Q9WUS0        | YKDAAKPVIELYK                                                               | 0.914193546        | 2               | 3.92473   |
| <b>Q9WVA1</b> | <b>TIM8A Mitochondrial import inner membrane translocase subunit Tim8 A</b> | <b>1.252118227</b> | <b>0.187808</b> | <b>2</b>  |
| Q9WVA1        | AEACFVNCVER                                                                 | 1.022829813        | 2               | 2.46091   |
| Q9WVA1        | SKPVFSESLD                                                                  | 1.252204107        | 2               | 2.91137   |
| <b>Q9WVF7</b> | <b>DPOE1 DNA polymerase epsilon catalytic subunit A</b>                     | <b>0.716771364</b> | <b>0.284294</b> | <b>2</b>  |
| Q9WVF7        | AANMPDSELFELISENR                                                           | 0.683280398        | 2               | 2.43255   |
| Q9WVF7        | MAWQWRGEFMPASR+Oxidation(1)Oxidation(10)                                    | 1.609933845        | 2               | 2.37328   |
| <b>Q9WVK3</b> | <b>PECR Peroxisomal trans_2_ enoyl_ CoA reductase</b>                       | <b>0.956618448</b> | <b>0.015864</b> | <b>13</b> |
| Q9WVK3        | AGVYNLTK                                                                    | 0.962958175        | 2               | 2.72289   |
| Q9WVK3        | ASQPPSSSTQVTAIQCNIR                                                         | 1.057358341        | 2               | 5.52789   |
| Q9WVK3        | DHGGSVNIIILLNNGFPTAAHSGAAR                                                  | 1.04558809         | 3               | 7.0826    |
| Q9WVK3        | ELLHLGCNVVIASR                                                              | 1.023156541        | 2               | 4.05062   |
| Q9WVK3        | INFLVNNAGGQFMAPAEDITAK                                                      | 1.453015915        | 2               | 5.45964   |
| Q9WVK3        | INFLVNNAGGQFMAPAEDITAK+Oxidation(13)                                        | 1.327109322        | 2               | 3.55702   |
| Q9WVK3        | KEEEVNNLVK                                                                  | 0.990912739        | 3               | 3.92621   |
| Q9WVK3        | LTAAVDELRL                                                                  | 1.27606982         | 2               | 2.78931   |
| Q9WVK3        | NFTIPDHDNWPVGAGDSSFIK                                                       | 0.828882395        | 2               | 5.07459   |
| Q9WVK3        | NFTIPDHDNWPVGAGDSSFIK                                                       | 0.893359677        | 3               | 4.06704   |
| Q9WVK3        | SGQSYLAAGLLQNQVAVVTGGATGIGK                                                 | 0.99692787         | 2               | 5.95371   |
| Q9WVK3        | TMALTWASSGVR                                                                | 1.024333904        | 2               | 3.74431   |
| Q9WVK3        | TMALTWASSGVR+Oxidation(2)                                                   | 0.974982528        | 2               | 2.30108   |
| <b>Q9WVK7</b> | <b>HCDH Hydroxyacyl_ coenzyme A dehydrogenase_ mitochondrial</b>            | <b>1.321270782</b> | <b>0.41349</b>  | <b>14</b> |
| Q9WVK7        | AADEFVEK                                                                    | 1.044023637        | 2               | 3.02559   |
| Q9WVK7        | FAAEHTIFASNTSSLQITNIANATTR                                                  | 1.086171573        | 2               | 5.71637   |
| Q9WVK7        | FILDGWHEMDPENPLFQPSMNNLVAQK                                                 | 0.974543069        | 3               | 5.60531   |
| Q9WVK7        | FILDGWHEMDPENPLFQPSMNNLVAQK+Oxidation(22)                                   | 0.939529971        | 3               | 3.71528   |
| Q9WVK7        | FILDGWHEMDPENPLFQPSMNNLVAQK+Oxidation(9)                                    | 0.939529971        | 3               | 3.98668   |
| Q9WVK7        | GDASKEDIDTAMK                                                               | 0.9951074          | 2               | 3.92682   |
| Q9WVK7        | GDASKEDIDTAMK+Oxidation(12)                                                 | 1.109774973        | 2               | 3.18833   |
| Q9WVK7        | HVTVIGGGLMGAGIAQVAAATGHTVVLVDQTEDILAK                                       | 0.886210466        | 3               | 7.79915   |
| Q9WVK7        | KGIEESLK                                                                    | 1.010565072        | 2               | 2.54448   |
| Q9WVK7        | LKNELFQR                                                                    | 1.271977027        | 2               | 2.54428   |
| Q9WVK7        | LLVPYLIEAIR                                                                 | 1.675530972        | 2               | 2.67133   |
| Q9WVK7        | LVEVIK                                                                      | 0.990257028        | 1               | 2.01763   |
| Q9WVK7        | TFESLVDLCK                                                                  | 1.045594654        | 2               | 3.58949   |
| Q9WVK7        | TLSSLSTSTDAASVVHSTDLVVEAIVENLK                                              | 1.09100473         | 3               | 6.46444   |
| <b>Q9WVL6</b> | <b>EXTL3 Exostosin_ like 3</b>                                              | <b>1.135948297</b> | <b>0.844638</b> | <b>2</b>  |
| Q9WVL6        | QDLLQLK                                                                     | 0.977671409        | 1               | 2.15504   |
| Q9WVL6        | QELNSEIAKLNLK                                                               | 1.151344088        | 2               | 2.57189   |
| <b>Q9Z0N2</b> | <b>IF2H Eukaryotic translation initiation factor 2 subunit 3_ Y_ linked</b> | <b>1.048527973</b> | <b>0.012549</b> | <b>2</b>  |
| Q9Z0N2        | IVLTNPVCTEVEGEK                                                             | 1.41003751         | 2               | 2.45389   |
| Q9Z0N2        | VGQIEVRRPGIVSK                                                              | 1.046417918        | 2               | 3.56281   |
| <b>Q9Z0U5</b> | <b>ADO Aldehyde oxidase</b>                                                 | <b>1.347555159</b> | <b>0.085391</b> | <b>16</b> |
| Q9Z0U5        | DLEPLILTIEEAIQHK                                                            | 1.093586907        | 2               | 3.00563   |

|               |                                                                     |                    |                 |           |
|---------------|---------------------------------------------------------------------|--------------------|-----------------|-----------|
| Q9Z0U5        | EFQPLDPTQELIFPELMR                                                  | 1.422636959        | 2               | 3.0715    |
| Q9Z0U5        | ELSILYGGVGPPTIGAK                                                   | 1.302738956        | 2               | 3.81327   |
| Q9Z0U5        | GTSTETVPNTNASGGSVVADLNGLAVK                                         | 1.402671515        | 2               | 4.80896   |
| Q9Z0U5        | GYESNINWEK                                                          | 1.19387159         | 2               | 2.96313   |
| Q9Z0U5        | HIQDIVAATLK                                                         | 1.356064168        | 2               | 2.60526   |
| Q9Z0U5        | HLSDSLNPLLAVGNCTLNLLSK                                              | 1.218452747        | 3               | 5.11972   |
| Q9Z0U5        | KCPDSDLKPQEVLVSVNIPCSR                                              | 1.265926139        | 3               | 3.98226   |
| Q9Z0U5        | KLECGNVDEAFK                                                        | 1.129622242        | 2               | 3.60063   |
| Q9Z0U5        | LVLDEVTLGASAPGGK                                                    | 1.40428512         | 2               | 4.28152   |
| Q9Z0U5        | MTWISPVTLEELVEAK                                                    | 1.450974766        | 2               | 3.71056   |
| Q9Z0U5        | NHPEPSLDQLTDALGGNLCR                                                | 0.945729102        | 2               | 4.05961   |
| Q9Z0U5        | NMASLGGHIVSR                                                        | 1.01646172         | 2               | 3.28819   |
| Q9Z0U5        | QQNALAIVNSGMR                                                       | 1.436040721        | 2               | 2.58247   |
| Q9Z0U5        | RLEPIISK                                                            | 1.155952055        | 2               | 2.35957   |
| Q9Z0U5        | VVENNVDPPEMMLLPYLR                                                  | 1.907145827        | 2               | 3.46685   |
| <b>Q9Z0V5</b> | <b>PRDX4 Peroxiredoxin_4</b>                                        | <b>1.039964171</b> | <b>0.499073</b> | <b>5</b>  |
| Q9Z0V5        | ENECHFYAGGQVYPGEVSR                                                 | 1.706736464        | 3               | 4.24427   |
| Q9Z0V5        | GLFIIDDK                                                            | 1.071247128        | 2               | 3.05216   |
| Q9Z0V5        | HGEVCPAGWKPGSETIIPDPAGK                                             | 0.899754809        | 3               | 3.82161   |
| Q9Z0V5        | QITLNDLPVGR                                                         | 1.157600433        | 2               | 3.33904   |
| Q9Z0V5        | TRENECHFYAGGQVYPGEVSR                                               | 1.222860211        | 3               | 6.41208   |
| <b>Q9Z0V6</b> | <b>PRDX3 Thioredoxin_dependent peroxide reductase_mitochondrial</b> | <b>1.061182246</b> | <b>0.999985</b> | <b>5</b>  |
| Q9Z0V6        | AFQFVETHGEVCPANWTPESPTIKPSPTASK                                     | 1.040689264        | 3               | 6.42745   |
| Q9Z0V6        | ANEFHDVNCVAVSVDSHFSHLAWINTPR                                        | 0.963929791        | 4               | 4.53227   |
| Q9Z0V6        | GLFIIDPNGVIK                                                        | 1.072717741        | 2               | 3.40608   |
| Q9Z0V6        | GTAVVNGEFK                                                          | 1.065199729        | 2               | 2.61022   |
| Q9Z0V6        | NGGLGHMNITLLSDLTK                                                   | 0.906445664        | 2               | 2.59387   |
| <b>Q9Z0W7</b> | <b>CLIC4 Chloride intracellular channel protein 4</b>               | <b>1.094468669</b> | <b>0.092712</b> | <b>2</b>  |
| Q9Z0W7        | FLDGDEMTLADCNLLPK                                                   | 0.955265946        | 2               | 4.16415   |
| Q9Z0W7        | NSRPEANEALER                                                        | 1.134669999        | 3               | 3.48992   |
| <b>Q9Z122</b> | <b>FADS2 Fatty acid desaturase 2</b>                                | <b>0.865382061</b> | <b>0.544801</b> | <b>2</b>  |
| Q9Z122        | AFHLDLDFVGK                                                         | 0.869671851        | 3               | 3.76755   |
| Q9Z122        | HGIEYQEKPLLR                                                        | 0.635483936        | 2               | 3.53407   |
| <b>Q9Z1A6</b> | <b>VIGLN Vigilin</b>                                                | <b>1.077719523</b> | <b>0.094338</b> | <b>21</b> |
| Q9Z1A6        | ANSFTVSSVSAPSWLHR                                                   | 1.058961487        | 2               | 3.25595   |
| Q9Z1A6        | ASVITQVFHVPLEER                                                     | 0.928517851        | 2               | 3.42711   |
| Q9Z1A6        | EALEALVPVTIEVEVPFDLHR                                               | 1.242954649        | 2               | 3.32147   |
| Q9Z1A6        | ELQAEQEDR                                                           | 0.813072104        | 2               | 2.37505   |
| Q9Z1A6        | GNSLQEILER                                                          | 1.161335269        | 2               | 2.65138   |
| Q9Z1A6        | HEVLLISAEQDKR                                                       | 1.305306417        | 3               | 4.39568   |
| Q9Z1A6        | IDLPAENSNSETIVITGK                                                  | 1.090137517        | 2               | 5.22981   |
| Q9Z1A6        | IEGDPQGVQQAQ                                                        | 1.139505609        | 2               | 3.70458   |
| Q9Z1A6        | IIFPAAEDKDQDLITIIGK                                                 | 1.024911825        | 2               | 2.98157   |
| Q9Z1A6        | IVGELEQMVSEDPVLDHR                                                  | 1.065502185        | 2               | 4.56491   |
| Q9Z1A6        | LGQALTEVYAK                                                         | 1.200878495        | 2               | 3.36128   |
| Q9Z1A6        | LQDLELK                                                             | 1.225948415        | 1               | 2.45152   |
| Q9Z1A6        | LQTQASATVPIPK                                                       | 0.926891144        | 2               | 3.6283    |
| Q9Z1A6        | LVGEIMQETGTR                                                        | 1.301712195        | 2               | 3.69458   |
| Q9Z1A6        | MDYVEINIDHK                                                         | 1.060643341        | 2               | 2.91016   |
| Q9Z1A6        | MVADLVENSYSISVPIFK                                                  | 0.97913848         | 2               | 3.7739    |
| Q9Z1A6        | RCDIIVISGR                                                          | 1.073294363        | 2               | 3.22153   |
| Q9Z1A6        | TEIVFTGEKEQLAQAVAR                                                  | 1.443430155        | 2               | 4.40461   |
| Q9Z1A6        | TGAHLELSLAK                                                         | 1.150733056        | 3               | 3.39367   |
| Q9Z1A6        | TKDLIEQR                                                            | 0.934423723        | 2               | 2.7909    |
| Q9Z1A6        | VKELQAEQEDR                                                         | 1.163681135        | 3               | 4.04412   |
| <b>Q9Z1J8</b> | <b>S14L3 SEC14_like protein 3</b>                                   | <b>1.150911182</b> | <b>0.631998</b> | <b>3</b>  |

|               |                                                                           |                    |                 |          |
|---------------|---------------------------------------------------------------------------|--------------------|-----------------|----------|
| Q9Z1J8        | ENVQDVLPALPNPDDYFLLR                                                      | 1.213579976        | 2               | 2.84877  |
| Q9Z1J8        | FRENVQDVLPALPNPDDYFLLR                                                    | 1.34228502         | 2               | 4.34956  |
| Q9Z1J8        | GSSHQVEYEIFPGCVLR                                                         | 1.040585229        | 2               | 4.86018  |
| <b>Q9Z1P2</b> | <b>ACTN1 Alpha_actinin_1</b>                                              | <b>1.191771313</b> | <b>0.517362</b> | <b>5</b> |
| Q9Z1P2        | DYETATLSEIK                                                               | 1.105323153        | 1               | 2.01517  |
| Q9Z1P2        | GISQEQMNEFR                                                               | 1.192768486        | 2               | 2.58896  |
| Q9Z1P2        | ICDQWDNLGALTQK                                                            | 1.024993435        | 2               | 3.45856  |
| Q9Z1P2        | IDQLEGDHQLIQEALIFDNK                                                      | 1.061060018        | 2               | 4.60047  |
| Q9Z1P2        | MVSDINNAWGCLEQAEK                                                         | 0.386827356        | 2               | 4.02755  |
| <b>Q9Z1W6</b> | <b>LYRIC Protein LYRIC</b>                                                | <b>0.968688255</b> | <b>0.999975</b> | <b>4</b> |
| Q9Z1W6        | KREEVTPPTAPEDPAQLK                                                        | 0.993668656        | 3               | 3.90182  |
| Q9Z1W6        | SWQDELAQQAEEGSAR                                                          | 0.986634568        | 2               | 5.55355  |
| Q9Z1W6        | TEGLDLGLEPK                                                               | 1.074454971        | 2               | 3.32661  |
| Q9Z1W6        | TLPPAISAEPVTLSK                                                           | 0.959579942        | 2               | 3.16591  |
| <b>Q9Z1Y3</b> | <b>CADH2 Cadherin_2</b>                                                   | <b>1.156163267</b> | <b>0.425245</b> | <b>5</b> |
| Q9Z1Y3        | FAILDPNSNDGLVTVVKPIDFETNR                                                 | 1.168276914        | 3               | 4.27371  |
| Q9Z1Y3        | FLEAGIYEVPIVITDSGNPPK                                                     | 1.380325394        | 2               | 3.72393  |
| Q9Z1Y3        | IDPVNGQITIAVLDR                                                           | 0.98575457         | 2               | 3.49788  |
| Q9Z1Y3        | YDEEGGGEEDQDYDLSLQQLQPPDTPVEPAIKPVGIR                                     | 0.965669983        | 3               | 5.94742  |
| Q9Z1Y3        | YSVTGPGADQPPTGIFIINPISGQLSVTKPLDR                                         | 1.073127926        | 3               | 3.82607  |
| <b>Q9Z221</b> | <b>PMFBP Polyamine_modulated factor 1_binding protein 1</b>               | <b>0.920322825</b> | <b>0.674136</b> | <b>2</b> |
| Q9Z221        | DHLHNVMAHLQQENK+Oxidation(7)                                              | 0.9114212          | 2               | 2.53716  |
| Q9Z221        | ELTNSLSKLQDELAETK                                                         | 1.024129336        | 2               | 2.31656  |
| <b>Q9Z269</b> | <b>VAPB Vesicle_associated membrane protein_associated protein B</b>      | <b>1.081809837</b> | <b>0.826174</b> | <b>2</b> |
| Q9Z269        | TEAPVAAKPLTSPLDDAEVKK                                                     | 1.021218229        | 3               | 3.40028  |
| Q9Z269        | VEQVLSLEPQHELK                                                            | 1.099484268        | 2               | 3.81399  |
| <b>Q9Z270</b> | <b>VAPA Vesicle_associated membrane protein_associated protein A</b>      | <b>0.977903029</b> | <b>0.982723</b> | <b>3</b> |
| Q9Z270        | FKGPFTDVVTTNLK                                                            | 0.961949846        | 2               | 2.99242  |
| Q9Z270        | HEQILVLDPPSDLK                                                            | 1.05497212         | 2               | 3.92357  |
| Q9Z270        | QDGPLPKPHSVSLNDTETR                                                       | 1.070168425        | 3               | 3.79417  |
| <b>Q9Z277</b> | <b>BAZ1B Tyrosine_protein kinase BAZ1B</b>                                | <b>1.076871686</b> | <b>0.852553</b> | <b>2</b> |
| Q9Z277        | IHPLEKVDEEAVEK                                                            | 0.92206192         | 2               | 2.45424  |
| Q9Z277        | IHPLEKVDEEAVEKK                                                           | 1.08744894         | 2               | 2.46699  |
| <b>Q9Z218</b> | <b>SUCB2 Succinyl_CoA ligase [GDP_forming] subunit beta_mitochondrial</b> | <b>0.970274221</b> | <b>0.583492</b> | <b>9</b> |
| Q9Z218        | DIFAMDDKSENEPIEAAAR                                                       | 0.999445421        | 3               | 4.33226  |
| Q9Z218        | IDATQVEVNPFGETPEGQVVCFDAK                                                 | 1.372403337        | 2               | 4.81045  |
| Q9Z218        | INFDDNAEFR                                                                | 0.987587064        | 2               | 3.2198   |
| Q9Z218        | LEGTNVQEAQNILK                                                            | 0.940251516        | 2               | 4.87169  |
| Q9Z218        | SENEPIEAAAR                                                               | 0.738227967        | 2               | 4.08061  |
| Q9Z218        | SHNGPVIVGSPQGGVDIEEVAASSPELIFK                                            | 0.976395216        | 2               | 6.24589  |
| Q9Z218        | SSGLPITSAVDLEDAAK                                                         | 0.922805304        | 2               | 4.83936  |
| Q9Z218        | SSGLPITSAVDLEDAAKK                                                        | 0.902060915        | 2               | 3.12094  |
| Q9Z218        | VMVAEALDISR                                                               | 0.966243668        | 2               | 3.22079  |
| <b>Q9Z219</b> | <b>SUCB1 Succinyl_CoA ligase [ADP_forming] subunit beta_mitochondrial</b> | <b>1.111133598</b> | <b>2.69E-05</b> | <b>7</b> |
| Q9Z219        | AVSSQMIGQK                                                                | 1.028966873        | 2               | 2.49486  |
| Q9Z219        | ICNQVLVCR                                                                 | 1.460576518        | 2               | 2.88812  |
| Q9Z219        | ILACDDLDEAAK                                                              | 0.983237152        | 2               | 2.95316  |
| Q9Z219        | INFDSNSAYR                                                                | 1.223536149        | 2               | 3.09646  |
| Q9Z219        | MGFPSNIVDSAAENMIK                                                         | 1.056607046        | 2               | 3.88361  |
| Q9Z219        | SSDEAYAIK                                                                 | 1.100008801        | 2               | 3.45449  |
| Q9Z219        | VQAILVNIFFGIMR                                                            | 1.106029421        | 2               | 4.22782  |

|               |                                                                  |                    |                 |           |
|---------------|------------------------------------------------------------------|--------------------|-----------------|-----------|
| <b>Q9Z2L0</b> | <b>VDAC1 Voltage_dependent anion_selective channel protein 1</b> | <b>1.016688527</b> | <b>0.003159</b> | <b>13</b> |
| Q9Z2L0        | EHINLGCDVDFDIAGPSIR                                              | 1.117355891        | 2               | 4.25033   |
| Q9Z2L0        | KLETAVNLAWTAGNSNTR                                               | 0.947724292        | 2               | 5.8982    |
| Q9Z2L0        | LETAVNLAWTAGNSNTR                                                | 0.783786387        | 2               | 2.65625   |
| Q9Z2L0        | LTFDSSFSPNTGK                                                    | 1.127295564        | 2               | 3.89905   |
| Q9Z2L0        | LTFDSSFSPNTGKK                                                   | 1.119460285        | 2               | 3.21654   |
| Q9Z2L0        | LTLSALLDGK                                                       | 1.732206998        | 2               | 2.35034   |
| Q9Z2L0        | SENGLEFTSSGSANTETTK                                              | 1.02654729         | 2               | 4.55913   |
| Q9Z2L0        | TDEFQLHTNVNDGTEFGGSIYQK                                          | 1.070831353        | 2               | 5.31369   |
| Q9Z2L0        | VNNSLIGLGYTQLKPGIK                                               | 0.680717809        | 2               | 4.37721   |
| Q9Z2L0        | VTQSNFAVGK                                                       | 1.130885442        | 2               | 3.17937   |
| Q9Z2L0        | WNTDNTLGTTEITVEDQLAR                                             | 1.019526096        | 2               | 4.84815   |
| Q9Z2L0        | WTEYGLTFTEK                                                      | 1.045306706        | 2               | 2.68121   |
| Q9Z2L0        | YQVDPDACFSAK                                                     | 1.09483036         | 2               | 3.31243   |
| <b>Q9Z2M4</b> | <b>DECR2 Peroxisomal 2_4_dienoyl_CoA reductase</b>               | <b>0.883174128</b> | <b>0.722271</b> | <b>4</b>  |
| Q9Z2M4        | GQVLQLHAGAAK                                                     | 1.0247534          | 2               | 3.42596   |
| Q9Z2M4        | HLAVEWGPQNIR                                                     | 0.912502338        | 2               | 3.11425   |
| Q9Z2M4        | TVVDIDLGTGFNVSR                                                  | 0.834130128        | 2               | 2.83939   |
| Q9Z2M4        | VNSLAPGAISGTEGLR                                                 | 0.891274069        | 2               | 2.94762   |
| <b>Q9Z2Q1</b> | <b>SC31A Protein transport protein Sec31A</b>                    | <b>1.140562672</b> | <b>2.47E-05</b> | <b>14</b> |
| Q9Z2Q1        | AQDGSNPLSLQDLIEK                                                 | 0.822501163        | 2               | 3.56581   |
| Q9Z2Q1        | AVQLTQALDNTVIGALLAEK                                             | 1.129417944        | 2               | 5.50129   |
| Q9Z2Q1        | CLSSATDPQTK                                                      | 1.232227886        | 2               | 2.88988   |
| Q9Z2Q1        | DQTLSPTIISGLHSIAR                                                | 1.198267866        | 2               | 3.75317   |
| Q9Z2Q1        | IIAGDKVVIAQK                                                     | 1.260859755        | 2               | 2.46917   |
| Q9Z2Q1        | LVTFENVGTGQPQGAEQPR                                              | 1.481566136        | 2               | 5.13376   |
| Q9Z2Q1        | QVQHILASASPSGR                                                   | 1.17410317         | 2               | 2.4283    |
| Q9Z2Q1        | RQPVFISQVVTEK                                                    | 1.334767073        | 2               | 2.539     |
| Q9Z2Q1        | RQPVFISQVVTEKDFLSR                                               | 0.854802599        | 3               | 3.53821   |
| Q9Z2Q1        | SSYEGQPLPK                                                       | 1.078663126        | 2               | 2.35385   |
| Q9Z2Q1        | TQPPEDISCIAWNR                                                   | 1.136602308        | 2               | 3.58542   |
| Q9Z2Q1        | TTFEDLIQR                                                        | 1.082796001        | 2               | 2.6834    |
| Q9Z2Q1        | VNFEEDSR                                                         | 1.205522065        | 2               | 2.56008   |
| Q9Z2Q1        | VYSIMGGSIDGLR                                                    | 1.041764734        | 2               | 2.37226   |
| <b>Q9Z2U2</b> | <b>ZN292 Zinc finger protein 292</b>                             | <b>1.199323973</b> | <b>0.769201</b> | <b>3</b>  |
| Q9Z2U2        | KGQKSNLNTPNHGK                                                   | 1.012614028        | 2               | 2.57928   |
| Q9Z2U2        | KLEVLNNPDRTVLK                                                   | 0.986343972        | 2               | 2.40011   |
| Q9Z2U2        | LINEDSTNAENQGNTTLK                                               | 1.209038597        | 2               | 2.96563   |
| <b>Q9Z2Z8</b> | <b>DHCR7 7_dehydrocholesterol reductase</b>                      | <b>1.085197374</b> | <b>0.999987</b> | <b>2</b>  |
| Q9Z2Z8        | AIECSYTSADGLK                                                    | 1.091638342        | 2               | 3.62828   |
| Q9Z2Z8        | FLPGYVGGVQEGAITPAGIVNK                                           | 1.042008446        | 2               | 5.31211   |
| <b>Q9Z311</b> | <b>MECR Trans_2_enoyl_CoA reductase_mitochondrial</b>            | <b>0.999004486</b> | <b>0.043613</b> | <b>2</b>  |
| Q9Z311        | DIPLQSAATLGVNPCTAYR                                              | 1.392861865        | 2               | 2.4319    |
| Q9Z311        | LKDLGADYVLTTEEELR                                                | 0.577477637        | 2               | 2.61178   |
| <b>Q9Z339</b> | <b>GSTO1 Glutathione S_transferase omega_1</b>                   | <b>1.072436423</b> | <b>0.369076</b> | <b>5</b>  |
| Q9Z339        | GSAPPGPVPEGQIR                                                   | 1.078350551        | 2               | 3.62903   |
| Q9Z339        | LEALELNECIDHTPK                                                  | 1.060472149        | 2               | 4.22667   |
| Q9Z339        | LEEAMANKR                                                        | 1.07237628         | 2               | 2.61762   |
| Q9Z339        | LEEAMANKR+Oxidation(5)                                           | 1.421769067        | 2               | 2.53372   |
| Q9Z339        | NPFGLVPVLENTQGHILITESVITCEYLDEAYPEKK                             | 1.176080084        | 3               | 4.78282   |



*Time point 4.0 hours*

| Accession number | Protein DESCRIPTION                                                   | Protein Ratio (4 h) | P-value (4 h)  | Peptide number (4 h) |
|------------------|-----------------------------------------------------------------------|---------------------|----------------|----------------------|
| Accession number | Peptide sequence                                                      | Peptide Ratio (4 h) | Charge state   | Xcorr                |
| <b>A0JPJ7</b>    | <b>OLA1 Obg_like ATPase 1</b>                                         | <b>2.229060353</b>  | <b>0.90061</b> | <b>2</b>             |
| A0JPJ7           | IGIVGLPNVGK                                                           | 1.293125652         | 2              | 2.54238              |
| A0JPJ7           | YLEANMTQSALPK                                                         | 1.105286331         | 2              | 2.67676              |
| <b>A1L108</b>    | <b>ARP5L Actin_related protein 2/3 complex subunit 5_like protein</b> | <b>2.207777029</b>  | <b>0.93169</b> | <b>2</b>             |
| A1L108           | ALAVGGGLSIIIR                                                         | 1.283539466         | 2              | 2.75621              |
| A1L108           | SSEIEQAVQSLDR                                                         | 1.140555463         | 2              | 2.73853              |
| <b>A1L1L2</b>    | <b>TM214 Transmembrane protein 214</b>                                | <b>2.058503376</b>  | <b>0.64793</b> | <b>2</b>             |
| A1L1L2           | KGSGSNEHVVTCDTACK                                                     | 0.879831794         | 3              | 3.52669              |
| A1L1L2           | YDLSSPIQPTSTLYER                                                      | 1.124520587         | 2              | 3.33895              |
| <b>A2A6A1</b>    | <b>GPTC8 G patch domain_containing protein 8</b>                      | <b>1.919914225</b>  | <b>0.26561</b> | <b>2</b>             |
| A2A6A1           | RVLEVEKEDTEELR                                                        | 0.941123193         | 2              | 2.54085              |
| A2A6A1           | YKDYYVDEK                                                             | 0.766404498         | 1              | 1.93375              |
| <b>A2AAE1</b>    | <b>K1109 Uncharacterized protein KIAA1109</b>                         | <b>2.021293781</b>  | <b>0.62408</b> | <b>3</b>             |
| A2AAE1           | FQTNYASTTHLMTGK+Oxidation(11                                          | 1.102222383         |                |                      |
| A2AAE1           | LHYNSKTLKTESPNASR                                                     | 0.797467882         | 2              | 2.55056              |
| A2AAE1           | QGTSSSQPGELRGRK                                                       | 1.066751049         | 2              | 2.52225              |
| <b>A2ADY9</b>    | <b>DDI2 Protein DDI1 homolog 2</b>                                    | <b>2.327441866</b>  | <b>0.77602</b> | <b>3</b>             |
| A2ADY9           | IDFSSIAVPGTSPNPQQR                                                    | 1.743833325         | 2              | 2.65825              |
| A2ADY9           | NPPLAEALLSGDLEK                                                       | 1.229717106         | 2              | 2.84212              |
| A2ADY9           | VLVEQQQDR                                                             | 1.013677922         | 2              | 2.88109              |
| <b>A2AF47</b>    | <b>DOC11 Dedicator of cytokinesis protein 11</b>                      | <b>2.052397712</b>  | <b>0.848</b>   | <b>3</b>             |
| A2AF47           | LCSSVDVDMIQQLK                                                        | 1.343034013         | 2              | 2.50386              |
| A2AF47           | LTGLSEISLR                                                            | 1.01938375          | 2              | 2.35212              |
| A2AF47           | MPFAWAARPIFKDVQGSLLDGR+Oxidation(0                                    | 1.178299797         |                |                      |
| <b>A2AGT5</b>    | <b>CKAP5 Cytoskeleton_associated protein 5</b>                        | <b>1.75856765</b>   | <b>0.93266</b> | <b>2</b>             |
| A2AGT5           | DQVLAMLEKAKANMPKPAAPAK+Oxidation(13                                   | 0.618168055         |                |                      |
| A2AGT5           | GESVQEELLK                                                            | 1.075194617         | 1              | 1.93865              |
| <b>A2APB8</b>    | <b>TPX2 Targeting protein for Xklp2</b>                               | <b>1.979039371</b>  | <b>0.8003</b>  | <b>2</b>             |
| A2APB8           | GIGEPFQGNLSLR                                                         | 1.203975586         | 2              | 2.3504               |
| A2APB8           | NKKDESLLPSK                                                           | 0.984306542         | 2              | 2.48351              |
| <b>A2AQP0</b>    | <b>MYH7B Myosin_7B</b>                                                | <b>2.116763646</b>  | <b>0.99445</b> | <b>7</b>             |
| A2AQP0           | AITDAAMMAEELKK                                                        | 1.374673533         | 2              | 3.33736              |
| A2AQP0           | DIDDLELTLAK                                                           | 1.007040066         | 2              | 3.61918              |
| A2AQP0           | EQDTSÄHLER                                                            | 1.21684194          | 2              | 2.84886              |
| A2AQP0           | HDCDLLR                                                               | 1.414630253         | 1              | 2.05437              |
| A2AQP0           | KAITDAAMMAEELKK                                                       | 1.85760228          | 3              | 3.62427              |
| A2AQP0           | VEDEQLVGVQLQK                                                         | 1.817419259         | 2              | 2.41987              |
| A2AQP0           | VGNEYVTK                                                              | 0.739264571         | 2              | 2.41493              |
| <b>A2ASS6</b>    | <b>TITIN Titin</b>                                                    | <b>2.076191224</b>  | <b>0.99425</b> | <b>13</b>            |
| A2ASS6           | AENRFGIGPPAETIQRRTAR                                                  | 1.447423417         | 2              | 2.51301              |
| A2ASS6           | ATNEVGSCTCACTVK                                                       | 2.748871799         | 2              | 3.82115              |
| A2ASS6           | ETAMLSWDVPENDGGAPVK+Oxidation(3                                       | 1.198599078         |                |                      |
| A2ASS6           | KDLNMVVSÄARISCGGÄIR                                                   | 1.001804703         | 2              | 2.36533              |
| A2ASS6           | RRTEEGYÄEITÄVELK                                                      | 1.05338869          | 2              | 2.57674              |
| A2ASS6           | TCEIÄIGQLK                                                            | 0.730229295         | 2              | 2.31167              |
| A2ASS6           | TDSGÄYILTÄTNPGGÄÄK                                                    | 1.103660325         | 2              | 2.39487              |
| A2ASS6           | TFLQDQLVSLQLK                                                         | 1.296532545         | 1              | 1.9207               |
| A2ASS6           | VGDDÄWIKDÄTGTÄLR                                                      | 1.105788448         | 2              | 2.37483              |
| A2ASS6           | VLDÄRPGPPEGLÄVSDVÄTSEK                                                | 1.718033364         | 3              | 4.42801              |

|               |                                                                   |                    |                |           |
|---------------|-------------------------------------------------------------------|--------------------|----------------|-----------|
| A2ASS6        | VLDTGPPQNLAVK                                                     | 1.693731399        | 2              | 2.31419   |
| A2ASS6        | YDGGHKLTYGIVEK                                                    | 1.241177677        | 2              | 2.30845   |
| A2ASS6        | YGIGEPLDSEPETAR                                                   | 1.003125435        | 2              | 2.99747   |
| <b>A2AU72</b> | <b>ARMC3 Armadillo repeat_containing protein 3</b>                | <b>1.898308325</b> | <b>0.31148</b> | <b>2</b>  |
| A2AU72        | HASWAVMVCAGDEPMAVELCR+Oxidation(14)                               | 1.861646015        |                |           |
| A2AU72        | TLGVITCDKEARTMLK+Oxidation(13)                                    | 0.843904758        |                |           |
| <b>A2AWL7</b> | <b>MGAP MAX gene_associated protein</b>                           | <b>2.001023726</b> | <b>0.69848</b> | <b>2</b>  |
| A2AWL7        | ADVSLTLLTAQASLK                                                   | 0.98574184         | 2              | 2.46015   |
| A2AWL7        | TDQGILVTNRDARALLSR                                                | 1.942045056        | 3              | 3.32281   |
| <b>A2VCW9</b> | <b>AASS Alpha_aminoadipic semialdehyde synthase_mitochondrial</b> | <b>2.232342023</b> | <b>0.99095</b> | <b>11</b> |
| A2VCW9        | AEGIVFNTQSTIK                                                     | 0.99727303         | 2              | 2.48735   |
| A2VCW9        | AQEANMSLLDEVLK                                                    | 1.327490933        | 2              | 3.46036   |
| A2VCW9        | GAQEVFNELPCEYVEPHELK                                              | 1.46893699         | 2              | 4.46829   |
| A2VCW9        | KTDGVYDPVEYKYPYER                                                 | 1.098107081        | 3              | 3.61581   |
| A2VCW9        | KYDINTVNVTVGK                                                     | 1.286975636        | 2              | 3.95365   |
| A2VCW9        | LQSLVESQDLVISLLPYVLPVVAK                                          | 0.985723322        | 3              | 4.1841    |
| A2VCW9        | QDAQSLLVPAK                                                       | 0.942094216        | 2              | 2.55596   |
| A2VCW9        | REDVNAWER                                                         | 1.419187083        | 2              | 2.975     |
| A2VCW9        | SSVVPVEGCPPELPHK                                                  | 0.772998621        | 2              | 2.7061    |
| A2VCW9        | VNMVTASYITPAMK                                                    | 1.19349964         | 2              | 2.50333   |
| A2VCW9        | YDINTVNVTVGK                                                      | 1.107161793        | 2              | 2.34604   |
| <b>A4Q9F4</b> | <b>TTL11 Tubulin polyglutamylase TTL11</b>                        | <b>2.077991822</b> | <b>0.80379</b> | <b>2</b>  |
| A4Q9F4        | ALRIMQNLFPEEYNYFYPR+Oxidation(4)                                  | 1.073166186        |                |           |
| A4Q9F4        | NLKPMLEVNANPSMR                                                   | 0.962814943        | 2              | 2.4453    |
| <b>A7VJC2</b> | <b>ROA2 Heterogeneous nuclear ribonucleoproteins A2/B1</b>        | <b>4107.471849</b> | <b>1</b>       | <b>12</b> |
| A7VJC2        | EESGKPGAHVTVK                                                     | 0.804819861        | 2              | 3.13958   |
| A7VJC2        | GFGFVTDDHDPVDK                                                    | 1.164585879        | 2              | 4.34796   |
| A7VJC2        | GGGGNFGPGGNSFR                                                    | 0.928419848        | 2              | 3.18919   |
| A7VJC2        | GGNFGFGDSR                                                        | 1.110176589        | 2              | 2.90223   |
| A7VJC2        | IDTIEIITDR                                                        | 1.047275097        | 2              | 3.98512   |
| A7VJC2        | LFIGGLSFETTEESLR                                                  | 2.501562479        | 2              | 3.64109   |
| A7VJC2        | LTDCVVMR                                                          | 1.146842095        | 2              | 2.61326   |
| A7VJC2        | NMGGPYGGNYGPGSGSGGYGGR                                            | 12.00403497        | 2              | 6.06358   |
| A7VJC2        | NYYEQWGK                                                          | 1.085719662        | 2              | 2.40653   |
| A7VJC2        | QEMQEVQSSR                                                        | 0.827789812        | 2              | 3.02865   |
| A7VJC2        | QEMQEVQSSR+Oxidation(2)                                           | 1.173458134        |                |           |
| A7VJC2        | YHTINGHNAEVR                                                      | 0.981685332        | 2              | 3.37763   |
| <b>B0BN93</b> | <b>PSD13 26S proteasome non_ATPase regulatory subunit 13</b>      | <b>2.176012126</b> | <b>0.67528</b> | <b>3</b>  |
| B0BN93        | GSIDEVDKR                                                         | 1.038748248        | 2              | 2.47745   |
| B0BN93        | LNIGDLQATK                                                        | 0.642888828        | 2              | 2.31404   |
| B0BN93        | SAWGQQPDLAANEALLR                                                 | 1.840888698        | 2              | 2.81676   |
| <b>B0BNA7</b> | <b>EIF3I Eukaryotic translation initiation factor 3 subunit I</b> | <b>2.085318416</b> | <b>0.96161</b> | <b>2</b>  |
| B0BNA7        | HVLTGSADNSCR                                                      | 1.059463058        | 2              | 3.48495   |
| B0BNA7        | LFDSTSLEHQB                                                       | 1.210134318        | 2              | 2.37482   |
| <b>B0BNE5</b> | <b>ESTD S_formylglutathione hydrolase</b>                         | <b>2.020369168</b> | <b>0.897</b>   | <b>7</b>  |
| B0BNE5        | AFNGYLGPDQSK                                                      | 1.108510588        | 2              | 3.17033   |
| B0BNE5        | FAIYLPPQAESAK                                                     | 1.324540086        | 2              | 2.67297   |
| B0BNE5        | MYSYVTEELPQLINANFPVDPQR                                           | 0.902819062        | 3              | 5.57758   |
| B0BNE5        | SGCQQAASEHGLVVIAPDTSR                                             | 1.0198507          | 2              | 5.77284   |
| B0BNE5        | SVSAFAPICNPVLCVWGK                                                | 1.189215816        | 3              | 4.20303   |
| B0BNE5        | SYSQPQIDILIDQKDFEFLSNGQLLPDNFIACTEK                               | 1.023563159        | 3              | 4.88916   |
| B0BNE5        | VFEHSSVELK                                                        | 1.046519008        | 2              | 2.81127   |
| <b>B0BNN3</b> | <b>CAH1 Carbonic anhydrase 1</b>                                  | <b>1.558806947</b> | <b>0.0189</b>  | <b>2</b>  |

|               |                                                                        |                    |                |          |
|---------------|------------------------------------------------------------------------|--------------------|----------------|----------|
| B0BNN3        | ADGLAIGVLMK                                                            | 0.783975424        | 2              | 3.30061  |
| B0BNN3        | HDSSLKPVSVSYNPATAK                                                     | 0.633912531        | 3              | 5.06419  |
| <b>B0K020</b> | <b>CISD1 CDGSH iron_sulfur domain_containing protein 1</b>             | <b>1.861154876</b> | <b>0.07181</b> | <b>3</b> |
| B0K020        | AMVNLQIQK                                                              | 0.847558258        | 2              | 2.62225  |
| B0K020        | HNEETGDNVGPLLIK                                                        | 0.76499113         | 2              | 5.15707  |
| B0K020        | VVHAFDMEDLGDK                                                          | 0.971005386        | 3              | 3.93878  |
| <b>B1H267</b> | <b>SNX5 Sorting nexin_5</b>                                            | <b>2.159613103</b> | <b>0.75998</b> | <b>2</b> |
| B1H267        | NNVSLQSCIDLFK                                                          | 1.144108775        | 2              | 3.13254  |
| B1H267        | TTLPTFQSPEFSVTR                                                        | 1.094931965        | 2              | 3.59221  |
| <b>B2GUV7</b> | <b>IF2P Eukaryotic translation initiation factor 5B</b>                | <b>2.259128892</b> | <b>0.73008</b> | <b>2</b> |
| B2GUV7        | HLQAQGVVEVPSK                                                          | 1.015593801        | 2              | 2.76141  |
| B2GUV7        | LKEGDTIIVPGVEGPIVTQIR                                                  | 1.20666641         | 3              | 3.36647  |
| <b>B2GUZ5</b> | <b>CAZA1 F_actin_capping protein subunit alpha_1</b>                   | <b>2.216279196</b> | <b>0.64962</b> | <b>3</b> |
| B2GUZ5        | EASDPQPEDVDGGLK                                                        | 0.581121221        | 2              | 2.51639  |
| B2GUZ5        | FITHAPPGEFNEVFNDVR                                                     | 1.148071586        | 3              | 3.70062  |
| B2GUZ5        | FTITPPTAQVVGVLK                                                        | 1.195653185        | 2              | 2.94658  |
| <b>B2GV24</b> | <b>UFL1 E3 UFM1_protein ligase 1</b>                                   | <b>2.286456951</b> | <b>0.34373</b> | <b>3</b> |
| B2GV24        | NNPVHLITEEDLK                                                          | 1.084994538        | 2              | 2.54554  |
| B2GV24        | TYDLPGDFLTQALTQR                                                       | 1.260999511        | 2              | 3.2333   |
| B2GV24        | VNIVDLQQVINVDLTHIENR                                                   | 1.440945772        | 3              | 3.62073  |
| <b>B2RYW9</b> | <b>FAHD2 Fumarylacetoacetate hydrolase domain_containing protein 2</b> | <b>2.087106102</b> | <b>0.99998</b> | <b>6</b> |
| B2RYW9        | ALAAQLPLIPR                                                            | 0.8892743          | 2              | 2.85767  |
| B2RYW9        | GETALSVAR                                                              | 0.913572211        | 2              | 3.07367  |
| B2RYW9        | KGDEVQCEIEELGVIINK                                                     | 1.124279733        | 2              | 4.81224  |
| B2RYW9        | TFDTFCPLGPALVTK                                                        | 1.063615074        | 2              | 4.97568  |
| B2RYW9        | VICVGLNYADHCQEQNVR                                                     | 1.089916663        | 2              | 2.97759  |
| B2RYW9        | VNGEIVQSSNTNQMVFK                                                      | 0.991353828        | 2              | 4.78679  |
| <b>B2RZ78</b> | <b>VPS29 Vacuolar protein sorting_associated protein 29</b>            | <b>2.081940616</b> | <b>0.80685</b> | <b>2</b> |
| B2RZ78        | GDFDESLNYPEQK                                                          | 1.046743553        | 2              | 3.63955  |
| B2RZ78        | IQHILCTGNLCTK                                                          | 1.16002291         | 2              | 3.03615  |
| <b>B3DMA2</b> | <b>ACD11 Acyl_CoA dehydrogenase family member 11</b>                   | <b>2.075987225</b> | <b>0.95853</b> | <b>6</b> |
| B3DMA2        | AVLTVTQYR                                                              | 0.969067769        | 2              | 2.48295  |
| B3DMA2        | GSHIQENTGIPLMEELISYCR                                                  | 0.534580171        | 2              | 2.32737  |
| B3DMA2        | LYEHEVVAHWIAK                                                          | 0.909882804        | 3              | 3.70689  |
| B3DMA2        | MELQDQAR                                                               | 1.072542164        | 2              | 2.47929  |
| B3DMA2        | NLPDSDNEECLVHGDFK                                                      | 0.911710692        | 2              | 3.46237  |
| B3DMA2        | SGQSNPTFFLQK                                                           | 0.998932416        | 2              | 2.58689  |
| <b>B5DFC8</b> | <b>EIF3C Eukaryotic translation initiation factor 3 subunit C</b>      | <b>2.346990994</b> | <b>0.82899</b> | <b>4</b> |
| B5DFC8        | FEELTNLIR                                                              | 1.468927279        | 2              | 2.43461  |
| B5DFC8        | GTEITHAVVIK                                                            | 1.181831647        | 2              | 2.89775  |
| B5DFC8        | LGSLVENNER                                                             | 1.13508505         | 2              | 2.66618  |
| B5DFC8        | TEPTAQQLALQLAEK                                                        | 1.180030708        | 2              | 4.84914  |
| <b>B7ZNG0</b> | <b>KIF7 Kinesin_like protein KIF7</b>                                  | <b>1.90506092</b>  | <b>0.01211</b> | <b>2</b> |
| B7ZNG0        | ELGRHMWINQELK+Oxidation(5                                              | 0.683527529        |                |          |
| B7ZNG0        | KEALMQEK                                                               | 1.254178653        | 2              | 2.72165  |
| <b>D3ZTX0</b> | <b>TMED7 Transmembrane emp24 domain_containing protein 7</b>           | <b>2.220159037</b> | <b>0.9973</b>  | <b>2</b> |
| D3ZTX0        | QCFYEDITQGTK                                                           | 0.972135667        | 2              | 2.74209  |
| D3ZTX0        | SVIDYQTHFR                                                             | 1.198502527        | 2              | 2.83794  |
| <b>D3ZW55</b> | <b>ITPA Inosine triphosphate pyrophosphatase</b>                       | <b>2.399345893</b> | <b>0.70458</b> | <b>5</b> |
| D3ZW55        | DFGWPCFQPDGYEQTYAEMPK                                                  | 0.417715052        | 2              | 3.30029  |
| D3ZW55        | IDLPEYQGEPEISIQK                                                       | 1.143899311        | 2              | 4.34766  |

|               |                                                                     |                    |                |           |
|---------------|---------------------------------------------------------------------|--------------------|----------------|-----------|
| D3ZW55        | KLEEVILGDKFPCTLVAQK                                                 | 1.25806754         | 3              | 4.41666   |
| D3ZW55        | LKPEGLYQLLAGFEDK                                                    | 1.975312753        | 3              | 3.58711   |
| D3ZW55        | LQEYFGVTDGAGDH                                                      | 1.298005211        | 2              | 3.41133   |
| <b>D3ZZL9</b> | <b>GCC2 GRIP and coiled_coil domain_containing protein 2</b>        | <b>2.008880562</b> | <b>0.99722</b> | <b>2</b>  |
| D3ZZL9        | EKSQNDQNIMVQMK+Oxidation(12)                                        | 1.006391791        |                |           |
| D3ZZL9        | EKSQNDQNIMVQMK+Oxidation(9)                                         | 1.006391791        |                |           |
| <b>D4A4T9</b> | <b>CHR1 Cysteine and histidine_rich domain_containing protein 1</b> | <b>2.24326346</b>  | <b>0.86221</b> | <b>4</b>  |
| D4A4T9        | FDPEANADDACTYHPGVVFDALK                                             | 1.159239941        | 3              | 3.53312   |
| D4A4T9        | HNSEKPPPEVKPEVK                                                     | 0.949861085        | 3              | 3.65847   |
| D4A4T9        | KEEDSDEIKIGTSCK                                                     | 1.10384439         | 2              | 2.53985   |
| D4A4T9        | LSSGNEEDKKEEDSDEIK                                                  | 1.32661095         | 3              | 4.2974    |
| <b>D4A666</b> | <b>UBN2 Ubinuclein_2</b>                                            | <b>2.537061967</b> | <b>0.65252</b> | <b>2</b>  |
| D4A666        | GWMQARMLFK+Oxidation(2)Oxidation(6)                                 | 1.626525763        |                |           |
| D4A666        | KEEGEKEK                                                            | 1.263311278        | 1              | 1.9093    |
| <b>E9Q557</b> | <b>DESP Desmoplakin</b>                                             | <b>1.864549662</b> | <b>0.80946</b> | <b>2</b>  |
| E9Q557        | KQVQTSQKNLTR                                                        | 1.039024246        | 2              | 2.31847   |
| E9Q557        | SQCTQVVQER                                                          | 0.845556661        | 2              | 2.45344   |
| F6YLP3        | EMFVYLSTQLKK+Oxidation(1)                                           | 2.986815336        |                |           |
| F6YLP3        | KEMFVYLSTQLKK                                                       | 0.998668312        | 2              | 2.53663   |
| F6YLP3        | SGDISAVQPK                                                          | 0.854966055        | 2              | 3.07669   |
| F6YLP3        | SMVTAGFEPVVIENVLEGDLELR                                             | 0.888264922        | 2              | 3.59956   |
| <b>O08550</b> | <b>MLL4 Histone_lysine N_methyltransferase MLL4</b>                 | <b>2.601528896</b> | <b>0.11334</b> | <b>2</b>  |
| O08550        | HAAVALGQARAMVPEDVPR                                                 | 1.368879383        | 2              | 2.34271   |
| O08550        | MVQALTELLR+Oxidation(0)                                             | 1.589926776        |                |           |
| <b>O08557</b> | <b>DDAH1 N(G)_N(G)_dimethylarginine dimethylaminohydrolase 1</b>    | <b>2.308263985</b> | <b>0.02657</b> | <b>11</b> |
| O08557        | DENATLDGGDVLFTGR                                                    | 1.190259574        | 2              | 2.4135    |
| O08557        | DHLLIPVSNSEMEK                                                      | 1.469602832        | 2              | 2.49321   |
| O08557        | DYAVSTVPVADSLHLK                                                    | 1.23991509         | 2              | 3.67323   |
| O08557        | GAEILADTFK                                                          | 0.985915013        | 1              | 2.09651   |
| O08557        | KEVDMMK                                                             | 1.107220535        | 2              | 2.32322   |
| O08557        | LKDHLIPVSNSEMEK                                                     | 1.119127741        | 2              | 3.81113   |
| O08557        | LTVPDDMAANCIYLNIPSK                                                 | 1.261574443        | 2              | 3.26704   |
| O08557        | SFCSMAGPNLIAIGSSESAQK                                               | 1.245090868        | 2              | 4.77321   |
| O08557        | SQGEEVDFAR                                                          | 1.002213132        | 2              | 2.82443   |
| O08557        | TPEEYPESAK                                                          | 1.623805616        | 2              | 2.36629   |
| O08557        | VDGLLTCCSVFINK                                                      | 1.293290769        | 2              | 3.51176   |
| <b>O08583</b> | <b>THOC4 THO complex subunit 4</b>                                  | <b>1.978920549</b> | <b>0.95759</b> | <b>3</b>  |
| O08583        | MDMSLDDIIK                                                          | 1.753084506        | 2              | 2.66865   |
| O08583        | QQLSAEELDAQLDAYNAR                                                  | 0.926305889        | 2              | 3.40117   |
| O08583        | SLGTADVHFER                                                         | 1.401814514        | 2              | 2.74813   |
| <b>O08601</b> | <b>MTP Microsomal triglyceride transfer protein large subunit</b>   | <b>2.180450755</b> | <b>0.28737</b> | <b>15</b> |
| O08601        | EDTTMYLLALK                                                         | 0.996751129        | 2              | 2.53186   |
| O08601        | EFYSYENEPVGIENLK                                                    | 1.378121022        | 2              | 4.23238   |
| O08601        | GCPSLAEHWKSIR                                                       | 1.029143475        | 2              | 3.84246   |
| O08601        | GHTTGLSLNNER                                                        | 0.873764986        | 2              | 2.54587   |
| O08601        | GSFASNDIR                                                           | 1.289064584        | 2              | 2.71859   |
| O08601        | LILGGLEKPEK                                                         | 1.152368344        | 2              | 2.44707   |
| O08601        | MLSASGDPVSVVK                                                       | 1.073588516        | 2              | 3.57881   |
| O08601        | NALLPEGIPLLLK                                                       | 1.402239154        | 3              | 3.58331   |
| O08601        | NILLSIGELPK                                                         | 1.51980217         | 2              | 3.74861   |
| O08601        | REEILQILK                                                           | 2.238350966        | 3              | 3.47206   |
| O08601        | SDSSIILQER                                                          | 1.172029989        | 2              | 3.10638   |
| O08601        | SGSSSAYTYGVER                                                       | 0.881102003        | 2              | 3.67906   |

|               |                                                                    |                    |                |           |
|---------------|--------------------------------------------------------------------|--------------------|----------------|-----------|
| O08601        | SNLNIFQYIGK                                                        | 1.374898715        | 2              | 3.18284   |
| O08601        | TTAAAVILK                                                          | 0.807051529        | 2              | 2.31374   |
| O08601        | VKEFYSYENEPVGIENLK                                                 | 1.058200069        | 2              | 3.58374   |
| <b>O08629</b> | <b>TIF1B Transcription intermediary factor 1_beta</b>              | <b>1.986006374</b> | <b>0.99996</b> | <b>2</b>  |
| O08629        | IVAERPGTNSTGPGPMAPPR                                               | 1.045638134        | 3              | 3.91025   |
| O08629        | LDLTLTSDSQPPVFK                                                    | 0.989799521        | 2              | 4.25639   |
| <b>O08795</b> | <b>GLU2B Glucosidase 2 subunit beta</b>                            | <b>2.293993213</b> | <b>0.99995</b> | <b>6</b>  |
| O08795        | ETVVTSTTEPSR                                                       | 1.188164645        | 2              | 3.10225   |
| O08795        | KLWEEQAAAK                                                         | 1.20121765         | 2              | 3.41721   |
| O08795        | LWEEQAAAK                                                          | 1.097539508        | 2              | 2.98051   |
| O08795        | MPPYDEETQAIIDAAQEAR                                                | 1.149710102        | 2              | 5.1853    |
| O08795        | SLEDQVETLR                                                         | 0.810997134        | 2              | 3.15339   |
| O08795        | YEQGTGCWQGPNR                                                      | 1.302775132        | 2              | 3.77679   |
| <b>O09158</b> | <b>CP3AP Cytochrome P450 3A25</b>                                  | <b>1.504861501</b> | <b>0.48368</b> | <b>2</b>  |
| O09158        | DVEINGVFIPK                                                        | 0.444422728        | 2              | 3.14244   |
| O09158        | VDFLQLMMNTQNSK                                                     | 0.718880498        | 2              | 3.1092    |
| <b>O09171</b> | <b>BHMT1 Betaine__homocysteine S_methyltransferase 1</b>           | <b>1.977243754</b> | <b>9.9E-20</b> | <b>14</b> |
| O09171        | AGAAIVGVNCHFDPSTSLQTIK                                             | 1.347881837        | 2              | 6.13019   |
| O09171        | AGPWTPEAAVEHPEAVR                                                  | 1.123334581        | 2              | 5.0058    |
| O09171        | GAAELMQQK                                                          | 1.153128373        | 2              | 3.64947   |
| O09171        | GAAELMQQK+Oxidation(5                                              | 1.253217073        |                |           |
| O09171        | HGSWGSGLDMHTKPWIR                                                  | 2.027465118        | 3              | 4.70597   |
| O09171        | IFHQQLLEVFMK                                                       | 0.983459493        | 2              | 3.5635    |
| O09171        | ISGQKVNEAACDIAR                                                    | 1.021302608        | 2              | 4.44903   |
| O09171        | KEYWQNLN                                                           | 1.359312933        | 3              | 3.44041   |
| O09171        | LNAGEVVIGDGGFVFALEK                                                | 0.946474974        | 3              | 5.9219    |
| O09171        | QGFIDLPEFPFGLPR                                                    | 1.369559401        | 2              | 5.0369    |
| O09171        | QVADEGDALVAGGVSTPSYLSCK                                            | 3.03125431         | 2              | 6.10976   |
| O09171        | TSGKPIAATMCIGPEGDLHGVSPEGCAVR                                      | 1.363549387        | 3              | 6.19249   |
| O09171        | TSGKPIAATMCIGPEGDLHGVSPEGCAVR+Oxidation(9                          | 1.400295872        |                |           |
| O09171        | VNEAACDIAR                                                         | 1.15495872         | 2              | 4.03534   |
| <b>O09173</b> | <b>HGD Homogentisate 1_2_dioxygenase</b>                           | <b>2.343931258</b> | <b>0.99999</b> | <b>9</b>  |
| O09173        | CFYNSDGDFLIVPQK                                                    | 0.855483705        | 2              | 3.09427   |
| O09173        | FSVDVFEETR                                                         | 1.256928077        | 2              | 3.60658   |
| O09173        | GYILEVYGVHFEPLDLPDLPIGANLANPR                                      | 1.109774056        | 3              | 3.74208   |
| O09173        | NCMSEFMGLIK                                                        | 1.364460569        | 2              | 3.20137   |
| O09173        | QDVSPFNVAWHGNYTPYK                                                 | 1.492712675        | 2              | 3.75095   |
| O09173        | QGGFLPGGSLHSAMTPHGPDADCFEK                                         | 0.917275548        | 3              | 3.88122   |
| O09173        | SLRPGVAIADFVIFPPR                                                  | 1.157916091        | 2              | 3.71214   |
| O09173        | TFRPPYYHR                                                          | 0.894844619        | 3              | 3.49392   |
| O09173        | YISGFGNECASEDPR                                                    | 1.482453557        | 2              | 3.92119   |
| <b>O35077</b> | <b>GPDA Glycerol_3_phosphate dehydrogenase [NAD_]_ cytoplasmic</b> | <b>2.036935436</b> | <b>0.99986</b> | <b>17</b> |
| O35077        | ANTIGISLIK                                                         | 1.312094894        | 2              | 3.07506   |
| O35077        | DPAQGQLLK                                                          | 1.116470317        | 2              | 2.38969   |
| O35077        | ELHSILQHK                                                          | 1.088076132        | 2              | 2.56608   |
| O35077        | FCETTIGCK                                                          | 0.9928411          | 2              | 2.66385   |
| O35077        | FCETTIGCKDPAQGQLLK                                                 | 0.934925486        | 2              | 5.33586   |
| O35077        | GIDEGPNGLK                                                         | 0.890517707        | 2              | 2.92108   |
| O35077        | GLVDKFLPLFAVYK                                                     | 1.336529437        | 3              | 3.72259   |
| O35077        | ICDQLKGHLK                                                         | 0.946501761        | 3              | 3.7979    |
| O35077        | ITVVQEVDTEICGALK                                                   | 1.796278791        | 2              | 3.1124    |
| O35077        | IVGSNASQLAHFDPR                                                    | 1.540551772        | 2              | 3.11567   |
| O35077        | KLTEIINTQHENVK                                                     | 1.109178813        | 2              | 5.27307   |
| O35077        | LTEIINTQHENVK                                                      | 1.05878422         | 2              | 4.41608   |
| O35077        | NIVAVGAGFCDGLGFGDNTK                                               | 1.502692931        | 2              | 5.57218   |

|               |                                                                                 |                    |                |          |
|---------------|---------------------------------------------------------------------------------|--------------------|----------------|----------|
| O35077        | SIEQLEK                                                                         | 1.016545114        | 2              | 2.38229  |
| O35077        | VCIVGSGNWGSAIAK                                                                 | 1.212052754        | 2              | 4.35355  |
| O35077        | VCYEGQPVGEFICCLQNHPHEHM                                                         | 1.319582555        | 2              | 4.13189  |
| O35077        | VTMWVFEEDIGGR                                                                   | 1.199412519        | 2              | 3.39004  |
| <b>O35078</b> | <b>OXDA D_amino_acid oxidase</b>                                                | <b>1.852780339</b> | <b>0.99965</b> | <b>2</b> |
| O35078        | GQIIQVEAPWIK                                                                    | 0.867041979        | 2              | 3.09514  |
| O35078        | SCCQLEPTLK                                                                      | 1.299893233        | 2              | 2.64774  |
| <b>O35094</b> | <b>TIM44 Mitochondrial import inner membrane translocase subunit TIM44</b>      | <b>2.058075118</b> | <b>0.70506</b> | <b>4</b> |
| O35094        | AISQGVESVKK                                                                     | 0.654618253        | 2              | 2.37212  |
| O35094        | KLEESDALQEAR                                                                    | 1.017011362        | 2              | 3.59226  |
| O35094        | TEMSEVLTEILR                                                                    | 1.107710834        | 2              | 3.27418  |
| O35094        | VTDLLGGLFSK                                                                     | 1.047307635        | 2              | 2.58215  |
| <b>O35142</b> | <b>COPB2 Coatomer subunit beta_</b>                                             | <b>2.805922988</b> | <b>0.00089</b> | <b>5</b> |
| O35142        | AAESLADPTEYENLFPGLK                                                             | 1.86016312         | 2              | 3.88585  |
| O35142        | EPPAMSMDDANGKIIWAK                                                              | 1.266551987        | 2              | 2.53063  |
| O35142        | FELALQLGELK                                                                     | 1.488839973        | 2              | 3.05484  |
| O35142        | GSNNVALGYDEGSIIVK                                                               | 1.129254016        | 2              | 3.55879  |
| O35142        | TFEVCDLPVR                                                                      | 1.186813304        | 2              | 2.9816   |
| <b>O35244</b> | <b>PRDX6 Peroxiredoxin_6</b>                                                    | <b>2.207877128</b> | <b>0.99366</b> | <b>8</b> |
| O35244        | DINAYNGAAPTEK                                                                   | 0.708595403        | 2              | 3.95067  |
| O35244        | DLAILLGMLDPAEKDEK                                                               | 1.213818017        | 2              | 3.95115  |
| O35244        | GESVMVLPTLPEEEAK                                                                | 1.666326794        | 2              | 3.25513  |
| O35244        | KGESVMVLPTLPEEEAK                                                               | 0.967146703        | 2              | 5.33237  |
| O35244        | LSILYPATTGR                                                                     | 1.237467246        | 2              | 3.14751  |
| O35244        | NFDEILR                                                                         | 0.966237846        | 1              | 2.27184  |
| O35244        | VVDSLQLTASNVPVATPDWK                                                            | 1.058771276        | 3              | 5.52461  |
| O35244        | VVFIFGPKK                                                                       | 0.85027013         | 2              | 2.89644  |
| <b>O35286</b> | <b>DHX15 Putative pre_mRNA_splicing factor ATP_dependent RNA helicase DHX15</b> | <b>2.04035978</b>  | <b>0.23945</b> | <b>2</b> |
| O35286        | TCTDIKPEWLVK                                                                    | 0.696201399        | 2              | 2.41357  |
| O35286        | TLATDILMGVLK                                                                    | 1.199864984        | 2              | 3.72182  |
| <b>O35331</b> | <b>PDXK Pyridoxal kinase</b>                                                    | <b>1.946551018</b> | <b>0.63901</b> | <b>2</b> |
| O35331        | AEAGEGQKPSPAQLELR                                                               | 0.634462942        | 3              | 3.84535  |
| O35331        | MGPDTVVITSSDLPSPK                                                               | 1.006104456        | 2              | 3.6926   |
| <b>O35469</b> | <b>3BHS6 3 beta_hydroxysteroid dehydrogenase/Delta 5__4 isomerase type 6</b>    | <b>1.800506122</b> | <b>0.99589</b> | <b>2</b> |
| O35469        | DLGYEPLVSWEAK                                                                   | 1.398198147        | 2              | 4.34285  |
| O35469        | TSEWIGTLVEQHR                                                                   | 0.808134831        | 2              | 3.40918  |
| <b>O35509</b> | <b>RB11B Ras_related protein Rab_11B</b>                                        | <b>2.02475229</b>  | <b>0.99975</b> | <b>5</b> |
| O35509        | AQIWDTAGQER                                                                     | 1.112409352        | 2              | 3.23688  |
| O35509        | GAVGALLVYDIAK                                                                   | 1.135851892        | 2              | 3.98611  |
| O35509        | HLTYENVER                                                                       | 1.252048758        | 2              | 2.46795  |
| O35509        | NEFNLESK                                                                        | 0.972526549        | 1              | 2.14578  |
| O35509        | VVLIGDSGVGK                                                                     | 1.017376614        | 2              | 2.47453  |
| <b>O35547</b> | <b>ACSL4 Long_chain_fatty_acid__CoA ligase 4</b>                                | <b>1.822108781</b> | <b>0.8699</b>  | <b>2</b> |
| O35547        | LERFEIPIK                                                                       | 1.039174719        | 2              | 2.53965  |
| O35547        | TAEDYSVDENGQR                                                                   | 0.794490729        | 2              | 3.23898  |
| <b>O35567</b> | <b>PUR9 Bifunctional purine biosynthesis protein PURH</b>                       | <b>1.941349949</b> | <b>0.01813</b> | <b>7</b> |
| O35567        | ALFEEVPELLTEAEK                                                                 | 1.677389978        | 2              | 3.50382  |
| O35567        | DGQVIGIGAGQQSR                                                                  | 1.677233959        | 2              | 3.89758  |
| O35567        | EVSDGIVAPGYEEAEK                                                                | 0.750775923        | 2              | 3.80849  |
| O35567        | HVSPAGAAVGVPLSEDEAR                                                             | 1.054818783        | 2              | 5.15093  |
| O35567        | SGVAYIVAPSGSTADK                                                                | 1.119004359        | 2              | 2.86537  |
| O35567        | VTVCEPEDYGAVAAEMQSGGNK                                                          | 1.188001408        | 2              | 5.41396  |
| O35567        | YTQNSVCIYAK                                                                     | 1.047498418        | 2              | 3.13696  |

|               |                                                                                          |                    |                |          |
|---------------|------------------------------------------------------------------------------------------|--------------------|----------------|----------|
| <b>O35593</b> | <b>PSDE 26S proteasome non_ATPase regulatory subunit 14</b>                              | <b>2.115197511</b> | <b>0.91471</b> | <b>3</b> |
| O35593        | AVAVVVDPIQSVK                                                                            | 1.03996036         | 2              | 3.078    |
| O35593        | AVEEEDKMTPEQLAIK                                                                         | 0.981225482        | 2              | 4.72041  |
| O35593        | EMLELAKNYNK+Oxidation(1                                                                  | 1.198783572        |                |          |
| <b>O35660</b> | <b>GSTM6 Glutathione S_transferase Mu 6</b>                                              | <b>1.945836829</b> | <b>0.97475</b> | <b>3</b> |
| O35660        | RYAMGDAPDYDR                                                                             | 0.900864561        | 2              | 3.37863  |
| O35660        | YAMGDAPDYDR                                                                              | 1.592004406        | 2              | 2.43877  |
| O35660        | YAMGDAPDYDR+Oxidation(2                                                                  | 2.783650688        |                |          |
| <b>O35760</b> | <b>IDI1 Isopentenyl_diphosphate Delta_isomerase 1</b>                                    | <b>1.440541191</b> | <b>0.00178</b> | <b>4</b> |
| O35760        | AELGIPLLEVDLNEMNYLTR                                                                     | 0.824451241        | 2              | 4.21381  |
| O35760        | ITFPGCFTNSCCSHPLNPNGELEENDAMGVK                                                          | 0.509117082        | 3              | 3.41562  |
| O35760        | NCHLNENIDK                                                                               | 0.27606925         | 3              | 3.33813  |
| O35760        | NVTLNPDNEIK                                                                              | 0.427480492        | 2              | 3.14002  |
| <b>O35763</b> | <b>MOES Moesin</b>                                                                       | <b>1.843383261</b> | <b>0.94546</b> | <b>5</b> |
| O35763        | ALTSELANAR                                                                               | 0.875009213        | 2              | 2.52082  |
| O35763        | AQMVEDLEK                                                                                | 0.929972508        | 2              | 2.49221  |
| O35763        | AQQELEEQTR                                                                               | 1.011421236        | 2              | 2.81598  |
| O35763        | FYPEDVSEELIQDITQR                                                                        | 1.099249575        | 3              | 3.34265  |
| O35763        | TQEQLASEMAELTAR                                                                          | 1.342572338        | 2              | 4.01775  |
| <b>O35783</b> | <b>CALU Calumenin</b>                                                                    | <b>1.897666677</b> | <b>0.90612</b> | <b>2</b> |
| O35783        | HLVYESDQDKDGK                                                                            | 0.776377065        | 2              | 3.9685   |
| O35783        | VHNDANQNFYDHDHDAFLGAEAK                                                                  | 1.087004898        | 3              | 5.23784  |
| <b>O35796</b> | <b>C1QBP Complement component 1 Q subcomponent_binding protein_mitochondrial</b>         | <b>2.12433481</b>  | <b>0.70809</b> | <b>4</b> |
| O35796        | AEEQEPELTSTPNFVVEVTK                                                                     | 1.114471784        | 2              | 4.78567  |
| O35796        | AFVEFLTDEIK                                                                              | 1.354258333        | 2              | 3.25357  |
| O35796        | AFVEFLTDEIKEEK                                                                           | 0.78027014         | 2              | 3.79041  |
| O35796        | TLVLDCHYPEDEIGHDEAESEDFSIK                                                               | 1.490521212        | 3              | 5.68488  |
| <b>O35814</b> | <b>STIP1 Stress_induced_phosphoprotein 1</b>                                             | <b>1.975464336</b> | <b>0.49145</b> | <b>7</b> |
| O35814        | ALDLSSCK                                                                                 | 1.103183707        | 1              | 2.44694  |
| O35814        | ALSAGNIDDALQCYSEAIK                                                                      | 1.186559602        | 2              | 5.76436  |
| O35814        | AMADPEVQQIMSDPAMR                                                                        | 1.613522457        | 2              | 3.9249   |
| O35814        | CQQAELKILK                                                                               | 0.794629793        | 1              | 2.02042  |
| O35814        | DCEECIQLEPTFIK                                                                           | 1.919838275        | 2              | 4.42249  |
| O35814        | ELIEQLQNKPSDLGTK                                                                         | 1.126134795        | 2              | 4.02601  |
| O35814        | TVDLKPDWVK                                                                               | 1.163823834        | 2              | 2.68325  |
| <b>O35824</b> | <b>DNJA2 Dnaj homolog subfamily A member 2</b>                                           | <b>2.079346027</b> | <b>0.94107</b> | <b>2</b> |
| O35824        | NVLSACSGQGGK                                                                             | 1.04494678         | 2              | 3.26328  |
| O35824        | VSLEDLYNGK                                                                               | 1.245342396        | 2              | 2.33159  |
| <b>O35826</b> | <b>GLCNE Bifunctional UDP_N_acetylglucosamine 2_epimerase/N_acetylmannosamine kinase</b> | <b>2.374087675</b> | <b>0.71615</b> | <b>8</b> |
| O35826        | DEAVGALHLIQAAC                                                                           | 1.249995664        | 2              | 3.50699  |
| O35826        | EVGAFGTPVINLGTR                                                                          | 1.145230186        | 2              | 3.20231  |
| O35826        | ILGVGISTGGR                                                                              | 1.423829019        | 2              | 2.84115  |
| O35826        | IYGDGNAVPR                                                                               | 1.123471534        | 2              | 2.46368  |
| O35826        | SIDLQEPLQK                                                                               | 1.06242741         | 2              | 2.41405  |
| O35826        | TLVLFNIDAGSK                                                                             | 1.372712834        | 2              | 2.66769  |
| O35826        | TPLSDTLHLPVWVDNDGNCAAMAER                                                                | 1.289523199        | 3              | 5.11907  |
| O35826        | VNPQEGVVLHSTK                                                                            | 1.290233237        | 2              | 2.53932  |
| <b>O35913</b> | <b>SO1A4 Solute carrier organic anion transporter family member 1A4</b>                  | <b>1.715627922</b> | <b>0.95105</b> | <b>5</b> |
| O35913        | EGLQENVDTENAK                                                                            | 0.756913242        | 2              | 3.75747  |
| O35913        | GASFVPAFFILR                                                                             | 0.850694362        | 2              | 2.63569  |
| O35913        | SLSGTYMNSMLTQIER                                                                         | 0.780310719        | 2              | 4.57415  |
| O35913        | SQTLNPTQDPSECVK                                                                          | 0.749425912        | 2              | 4.14458  |
| O35913        | TFQFPGDIESSK                                                                             | 0.754533332        | 2              | 2.40918  |

|               |                                                                    |                    |                |          |
|---------------|--------------------------------------------------------------------|--------------------|----------------|----------|
| <b>O35952</b> | <b>GLO2 Hydroxyacylglutathione hydrolase_ mitochondrial</b>        | <b>1.950507266</b> | <b>0.99773</b> | <b>7</b> |
| O35952        | ALLEVLGR                                                           | 1.027724363        | 2              | 2.98591  |
| O35952        | FYEGTADMYK                                                         | 1.086584381        | 2              | 3.10067  |
| O35952        | HVEPGNTAVQEK                                                       | 0.671541436        | 2              | 4.01675  |
| O35952        | LTTVLTHHHWDHAGGNEK                                                 | 1.252267878        | 3              | 3.5804   |
| O35952        | NAIGEPTVPSTLAEFTYNPFMR                                             | 1.261343592        | 3              | 4.34602  |
| O35952        | TVQQHAGETDPVTTMR                                                   | 0.988608075        | 2              | 4.74553  |
| O35952        | TVQQHAGETDPVTTMR+Oxidation(14                                      | 1.030225666        |                |          |
| <b>O35987</b> | <b>NSF1C NSF1 cofactor p47</b>                                     | <b>2.228028702</b> | <b>0.98997</b> | <b>5</b> |
| O35987        | ASSSILINEAEPPTNIQIR                                                | 1.065225994        | 2              | 4.47322  |
| O35987        | EANLLNAVIVQR                                                       | 1.350872443        | 2              | 3.06276  |
| O35987        | LGAAPPEESAYVAGER                                                   | 0.911423633        | 2              | 4.29335  |
| O35987        | SYQDPSNAQFLESIR                                                    | 1.177419592        | 2              | 4.18961  |
| O35987        | TGFSLDNGDLR                                                        | 0.782770418        | 2              | 2.91945  |
| <b>O54753</b> | <b>H17B6 17_beta_hydroxysteroid dehydrogenase type 6</b>           | <b>2.434189998</b> | <b>0.4203</b>  | <b>3</b> |
| O54753        | IVNVSSVLGR                                                         | 1.545257993        | 2              | 2.57722  |
| O54753        | TWEATPEHIR                                                         | 1.170181329        | 2              | 2.4014   |
| O54753        | YGVEAFSDVLR                                                        | 1.609751537        | 2              | 3.29152  |
| <b>O54975</b> | <b>XPP1 Xaa_Pro aminopeptidase 1</b>                               | <b>2.35767021</b>  | <b>0.03006</b> | <b>3</b> |
| O54975        | GSLTFEPLTLVPIQTK                                                   | 1.252713414        | 2              | 4.09856  |
| O54975        | IENVVLVVPAK                                                        | 1.040384504        | 2              | 2.6684   |
| O54975        | QQADFVDSFPTISSTGPNGAIHYAPIPETNR                                    | 1.408706967        | 3              | 3.71705  |
| <b>O55012</b> | <b>PICA Phosphatidylinositol_binding clathrin assembly protein</b> | <b>1.982852164</b> | <b>0.7792</b>  | <b>4</b> |
| O55012        | ATTLSNAVSSLASTGLSLTK                                               | 1.767030373        | 2              | 4.23092  |
| O55012        | ITAAQHSVTGSAVSK                                                    | 1.11085011         | 2              | 4.63342  |
| O55012        | SGLQGYDMSTFIR                                                      | 1.340498213        | 2              | 3.74714  |
| O55012        | STNVAVDSGGGLLKPTVASQNQLPVAK                                        | 0.901208883        | 3              | 5.7464   |
| <b>O55096</b> | <b>DPP3 Dipeptidyl peptidase 3</b>                                 | <b>2.299321252</b> | <b>0.11801</b> | <b>7</b> |
| O55096        | AGLLALEFYTPETANWR                                                  | 1.547706386        | 2              | 3.61981  |
| O55096        | GEFEGFVAMVNK                                                       | 1.083703503        | 2              | 2.68955  |
| O55096        | LASVLNTEPALDSELTSK                                                 | 1.450825076        | 2              | 2.9879   |
| O55096        | LEGSEVQLVEYEASAAGLIR                                               | 1.741740589        | 2              | 3.91228  |
| O55096        | NVSLGNVLAVAYATK                                                    | 1.062502798        | 2              | 2.68389  |
| O55096        | SYEFQGNHFQVTR                                                      | 1.007009727        | 2              | 4.03311  |
| O55096        | VLLEAGEGLVTVPPTTGSDRPDAR                                           | 1.233923754        | 3              | 3.94689  |
| <b>O55125</b> | <b>NIP51 Protein NipSnap homolog 1</b>                             | <b>2.144034879</b> | <b>0.0002</b>  | <b>4</b> |
| O55125        | AGPNIYELR                                                          | 0.936665357        | 2              | 2.99004  |
| O55125        | FSGGYPALMDCMNK                                                     | 1.317733431        | 2              | 2.99941  |
| O55125        | GWDENVYYTVPLVR                                                     | 0.75771287         | 2              | 3.60117  |
| O55125        | IQFHNVKPECLDAYNSLTEAVLPK                                           | 1.424457694        | 3              | 5.09872  |
| <b>O55171</b> | <b>ACOT2 Acyl_coenzyme A thioesterase 2_ mitochondrial</b>         | <b>2.207693869</b> | <b>1</b>       | <b>6</b> |
| O55171        | ADAGGELDLAR                                                        | 0.905885541        | 2              | 2.80929  |
| O55171        | DGLLDVVEALQSPLVDKK                                                 | 0.906460069        | 2              | 4.92443  |
| O55171        | DVQKPYVVELEVLGHEPDGGQR                                             | 1.125131038        | 3              | 4.40854  |
| O55171        | GGELGLAMASFLK                                                      | 1.262111749        | 2              | 4.03292  |
| O55171        | IEYFEEAVNYLR                                                       | 1.157153165        | 2              | 4.04899  |
| O55171        | SCWDEPLSITVR                                                       | 1.026939982        | 2              | 3.99257  |
| <b>O70127</b> | <b>ABCBB Bile salt export pump</b>                                 | <b>2.351425921</b> | <b>0.77425</b> | <b>7</b> |
| O70127        | AGQITSEALS NIR                                                     | 1.000151189        | 2              | 3.17384  |
| O70127        | AGSIADVLSSIR                                                       | 1.389946965        | 2              | 2.9629   |
| O70127        | ILDNLMSVIKPGETTALVGSSGAGK                                          | 1.359427594        | 3              | 4.35131  |
| O70127        | ILLLDEATSALDTESEK                                                  | 1.400242687        | 2              | 4.27576  |
| O70127        | ILLDMATSALDNESEAR                                                  | 4.607190327        | 2              | 2.31426  |



|               |                                                                                           |                    |                |           |
|---------------|-------------------------------------------------------------------------------------------|--------------------|----------------|-----------|
| O70127        | KFGEENHAFESDGSNNDDKK                                                                      | 0.977532136        | 3              | 4.49019   |
| O70127        | STALQLIQR                                                                                 | 1.278729577        | 2              | 2.70162   |
| <b>O70133</b> | <b>DHX9 ATP_dependent RNA helicase A</b>                                                  | <b>2.137469119</b> | <b>0.96945</b> | <b>3</b>  |
| O70133        | ELDALDANDELTPLR                                                                           | 0.911103893        | 2              | 2.50678   |
| O70133        | KMTPAYEIRAVGNK                                                                            | 1.245051317        | 2              | 2.44311   |
| O70133        | YSPFFVFGKIR                                                                               | 0.924270176        | 2              | 2.38157   |
| <b>O70173</b> | <b>P3C2G Phosphatidylinositol_4_phosphate 3_kinase C2 domain_containing subunit gamma</b> | <b>1.894448702</b> | <b>0.84525</b> | <b>2</b>  |
| O70173        | LLGDIGEKVK                                                                                | 1.116932295        | 2              | 2.31537   |
| O70173        | WTFSHPLEALGLLTSR                                                                          | 0.877317124        | 2              | 2.4256    |
| <b>O70199</b> | <b>UGDH UDP_glucose 6_dehydrogenase</b>                                                   | <b>2.389639769</b> | <b>3E-05</b>   | <b>14</b> |
| O70199        | EADLVFISVNTPTK                                                                            | 1.022126514        | 2              | 2.35235   |
| O70199        | EQIVVDLSHPGVSADDQVSR                                                                      | 1.503552053        | 2              | 5.61749   |
| O70199        | FSLQDPPNKKPK                                                                              | 1.743382235        | 2              | 2.38953   |
| O70199        | IFDANTKPNLNLQVLSNPEFLAEGTAIK                                                              | 1.37716425         | 3              | 6.6251    |
| O70199        | IIDSLFNTVTDK                                                                              | 1.008292386        | 2              | 2.38015   |
| O70199        | IIDSLFNTVTDKK                                                                             | 0.986560558        | 2              | 3.73759   |
| O70199        | ILTTNTWSSELSK                                                                             | 1.085542182        | 2              | 3.84071   |
| O70199        | INAWNSPTLPIYEPGLK                                                                         | 1.263297945        | 2              | 4.20048   |
| O70199        | MLKPAFIFDGR                                                                               | 1.577454885        | 2              | 2.44935   |
| O70199        | NLFFSTNIDDAIR                                                                             | 1.08257483         | 2              | 3.42067   |
| O70199        | VLDGLHNELQTIGFQIETIGK                                                                     | 1.246190024        | 2              | 5.42973   |
| O70199        | VLIGGDETPEGQR                                                                             | 1.115088799        | 2              | 3.52231   |
| O70199        | VTVVDVNEAR                                                                                | 0.953780498        | 2              | 3.17918   |
| O70199        | YWQQVIDMNDYQR                                                                             | 1.637580095        | 2              | 4.28493   |
| <b>O70251</b> | <b>EF1B Elongation factor 1_beta</b>                                                      | <b>2.784182592</b> | <b>0.9989</b>  | <b>4</b>  |
| O70251        | SIQADGLVWGSSK                                                                             | 1.045609209        | 2              | 3.31493   |
| O70251        | SSILLDVKPWDEETDMTK                                                                        | 1.188416704        | 2              | 4.27211   |
| O70251        | SSILLDVKPWDEETDMTKLEECVR                                                                  | 1.494449037        | 3              | 5.22435   |
| O70251        | TPAGLQVLNDYLADK                                                                           | 1.111164956        | 2              | 3.97247   |
| <b>O70351</b> | <b>HCD2 3_hydroxyacyl_CoA dehydrogenase type_2</b>                                        | <b>1.989446886</b> | <b>0.00166</b> | <b>17</b> |
| O70351        | EVQAALTAK                                                                                 | 1.032527787        | 2              | 2.62171   |
| O70351        | GGIVGMTLPIAR                                                                              | 0.972488587        | 2              | 3.74667   |
| O70351        | GLVAVITGGASGLGLSTAK                                                                       | 0.965285771        | 2              | 4.84912   |
| O70351        | GVIINTASVAAFEGQVGQAAYSASK                                                                 | 1.035365507        | 3              | 4.83826   |
| O70351        | IDVAVNCAGIAVAIK                                                                           | 1.275439918        | 2              | 4.43783   |
| O70351        | KLGGNCIFAPANVTSEK                                                                         | 0.907975719        | 2              | 4.85623   |
| O70351        | KNQVHTLEDFQR                                                                              | 0.813066032        | 2              | 3.95542   |
| O70351        | LGDPAEYAHLVQMVIENPFLNGEVIR                                                                | 0.998400004        | 3              | 5.28533   |
| O70351        | LGGNCIFAPANVTSEK                                                                          | 1.11784569         | 2              | 3.42071   |
| O70351        | LVAGVMGQNEPDQGGQR                                                                         | 1.238237564        | 2              | 5.6786    |
| O70351        | LVGQGATAVLLDVPNSEGETEAK                                                                   | 1.51428719         | 2              | 5.41745   |
| O70351        | LVGQGATAVLLDVPNSEGETEAKK                                                                  | 0.817293498        | 3              | 4.28588   |
| O70351        | NFLASQVPFPSR                                                                              | 0.978039535        | 2              | 4.62477   |
| O70351        | NQVHTLEDFQR                                                                               | 1.061563889        | 2              | 3.33301   |
| O70351        | RLVQGATAVLLDVPNSEGETEAK                                                                   | 0.905844361        | 2              | 5.55966   |
| O70351        | VINVNLIGTFNVIR                                                                            | 1.226304969        | 2              | 4.60512   |
| O70351        | VVTIAPGLFATPLLTLPDK                                                                       | 0.952325472        | 2              | 5.04859   |
| <b>O70456</b> | <b>1433S 14_3_3 protein sigma</b>                                                         | <b>1.831385026</b> | <b>9.6E-10</b> | <b>3</b>  |
| O70456        | DSTLIMQLLR                                                                                | 1.581626166        | 2              | 3.74881   |
| O70456        | NLLSVAYK                                                                                  | 0.843148364        | 2              | 2.4321    |
| O70456        | VLSSIEQK                                                                                  | 0.842274801        | 2              | 2.60992   |
| <b>O88202</b> | <b>LPP60 60 kDa lysophospholipase</b>                                                     | <b>2.479531863</b> | <b>0.4869</b>  | <b>4</b>  |
| O88202        | AAGAHLSPQLELDVGTCLCR                                                                      | 1.204417646        | 3              | 3.89796   |
| O88202        | GEMTLPTDDLGLDDMLGCR                                                                       | 3.157239721        | 2              | 3.82205   |
| O88202        | GVDVDACNEDGQSPLLLAVR                                                                      | 1.310068719        | 2              | 5.09815   |
| O88202        | SEGGVLVPGR                                                                                | 1.510070868        | 2              | 2.54307   |

|               |                                                                                        |                    |                |           |
|---------------|----------------------------------------------------------------------------------------|--------------------|----------------|-----------|
| <b>O88379</b> | <b>BAZ1A Bromodomain adjacent to zinc finger domain protein 1A</b>                     | <b>2.791510833</b> | <b>0.00076</b> | <b>2</b>  |
| O88379        | ERDKLLK                                                                                | 1.033796878        | 2              | 2.34406   |
| O88379        | NTAKSASKNLR                                                                            | 1.60273559         | 2              | 2.79429   |
| <b>O88397</b> | <b>SO1A5 Solute carrier organic anion transporter family member 1A5</b>                | <b>1.742771178</b> | <b>0.85836</b> | <b>2</b>  |
| O88397        | TCLHWGTLK                                                                              | 0.837890492        | 2              | 2.32256   |
| O88397        | YLEQQYGK                                                                               | 0.799256044        | 2              | 2.76794   |
| <b>O88428</b> | <b>PAPS2 Bifunctional 3__phosphoadenosine 5__phosphosulfate synthase 2</b>             | <b>2.17538225</b>  | <b>0.14848</b> | <b>6</b>  |
| O88428        | GCTVWLTGLSGAGK                                                                         | 1.669511878        | 2              | 3.26724   |
| O88428        | GFTGIDSDYEKPETPECVLK                                                                   | 1.098859659        | 2              | 4.96753   |
| O88428        | GIHELFPENK                                                                             | 1.297588023        | 2              | 2.75745   |
| O88428        | NLGFSAAGREENIR                                                                         | 0.990517451        | 2              | 3.30825   |
| O88428        | STNVVYQAHVSR                                                                           | 0.724590567        | 2              | 4.25577   |
| O88428        | VLSMAPGLTSVEIIPFR                                                                      | 1.141247067        | 2              | 3.63824   |
| <b>O88491</b> | <b>NSD1 Histone_lysine N_methyltransferase_ H3 lysine_36 and H4 lysine_20 specific</b> | <b>2.24433259</b>  | <b>0.86832</b> | <b>3</b>  |
| O88491        | ENSEGAFGVLLPADAVQKAR                                                                   | 0.958114371        | 2              | 2.36579   |
| O88491        | ETGIPSLMPQTK                                                                           | 1.11927511         | 2              | 2.32075   |
| O88491        | SGKGEGLKLLNNMHEK                                                                       | 1.180030708        | 2              | 2.75928   |
| <b>O88600</b> | <b>HSP74 Heat shock 70 kDa protein 4</b>                                               | <b>2.202536665</b> | <b>0.99126</b> | <b>18</b> |
| O88600        | AESEEMETSQAGSK                                                                         | 1.096284404        | 2              | 4.662     |
| O88600        | AFSDPFVEAEK                                                                            | 1.075716665        | 2              | 3.02864   |
| O88600        | AGGIETIANEYSDR                                                                         | 1.139182948        | 2              | 3.41349   |
| O88600        | FLEMCDLLAR                                                                             | 0.942563021        | 2              | 2.50302   |
| O88600        | FQESEERPK                                                                              | 0.885531416        | 2              | 2.76374   |
| O88600        | FVSEDRNFTLK                                                                            | 1.46568883         | 2              | 2.78235   |
| O88600        | GCALQCAILSPAFK                                                                         | 1.067253617        | 2              | 3.80004   |
| O88600        | HAEQNGPVDGQGDNPQTAAEHGADTAVPSDGDK                                                      | 0.7361185          | 3              | 5.11052   |
| O88600        | LKETAESVLK                                                                             | 1.357779704        | 2              | 2.53628   |
| O88600        | MIMQDKLEK+Oxidation(0                                                                  | 1.000054114        |                |           |
| O88600        | MQVDQEEPHTTEEQPQTPAENK                                                                 | 1.288948582        | 3              | 5.32193   |
| O88600        | NFTTEQVTAMLLSK                                                                         | 1.255368606        | 2              | 4.11704   |
| O88600        | NKEDQYEHLDAAADMTK                                                                      | 1.100934781        | 3              | 3.74273   |
| O88600        | SNLAYDIVQLPTGLTGK                                                                      | 1.35943495         | 2              | 4.08276   |
| O88600        | SVMDATQIAGLNCLR                                                                        | 1.652282547        | 2              | 3.59303   |
| O88600        | TSTVDLPIESQLLWQLDR                                                                     | 1.01650146         | 2              | 3.70737   |
| O88600        | VLATAFDITLGGK                                                                          | 1.413345789        | 2              | 3.79454   |
| O88600        | WNSPAEEGSSDCEVFPK                                                                      | 1.14338479         | 2              | 3.82314   |
| <b>O88618</b> | <b>FTCD Formimidoyltransferase_cyclodeaminase</b>                                      | <b>2.259729906</b> | <b>0.00046</b> | <b>21</b> |
| O88618        | AFAACLGAIK                                                                             | 1.077937739        | 2              | 3.13147   |
| O88618        | AGEYEALPEK                                                                             | 1.175177663        | 2              | 2.79113   |
| O88618        | ALLDAAAFYCDK                                                                           | 1.626569831        | 2              | 3.5       |
| O88618        | ALLDAAAFYCKEK                                                                          | 1.434908011        | 2              | 3.41544   |
| O88618        | EAQELNLPVVGSQLVGLVPLK                                                                  | 1.184182068        | 3              | 4.27521   |
| O88618        | GVSMDECVLCAK                                                                           | 1.348461539        | 2              | 3.70068   |
| O88618        | IIEYLVPDSGPEQSLLDASLR                                                                  | 0.894966991        | 2              | 4.86891   |
| O88618        | ISSLLQEAQ                                                                              | 1.636547878        | 2              | 2.38561   |
| O88618        | KVQGIGWYLEEK                                                                           | 0.989406206        | 2              | 3.27075   |
| O88618        | LAEELNVPVLYGEEAQMPSR                                                                   | 1.523964996        | 2              | 4.91619   |
| O88618        | LFVLEEEHR                                                                              | 1.203382576        | 2              | 2.84273   |
| O88618        | LGLDSLAPFDPK                                                                           | 2.023538941        | 2              | 3.84132   |
| O88618        | MGALDVCFPIVPR                                                                          | 1.440172535        | 2              | 3.93709   |
| O88618        | MGALDVCFPIVPR+Oxidation(0                                                              | 0.620476599        |                |           |
| O88618        | NLAQVSTNLLDFEVTALHTVYEEAR                                                              | 1.71064453         | 3              | 4.10469   |
| O88618        | QAEWVPDFGPSSFVPSWGATVTGAR                                                              | 1.328751042        | 2              | 3.93634   |

|               |                                                                                   |                    |                |           |
|---------------|-----------------------------------------------------------------------------------|--------------------|----------------|-----------|
| O88618        | TASQLIDMR                                                                         | 1.248425445        | 2              | 2.36918   |
| O88618        | TCALQEGLR                                                                         | 1.361759256        | 2              | 2.81015   |
| O88618        | TQAALVLSLEAR                                                                      | 1.725236755        | 2              | 5.09415   |
| O88618        | TVYTFVGQPECVVEGALSAAR                                                             | 1.157717217        | 2              | 4.75826   |
| O88618        | VQGIGWYLEEK                                                                       | 1.499680487        | 2              | 3.07695   |
| <b>O88637</b> | <b>PCY2 Ethanolamine_phosphate cytidyltransferase</b>                             | <b>2.094275065</b> | <b>0.99373</b> | <b>9</b>  |
| O88637        | AHSSQEMSSEYR                                                                      | 1.104058568        | 3              | 3.78689   |
| O88637        | GPPVFTQEER                                                                        | 1.066141633        | 2              | 2.70262   |
| O88637        | HKGPPVFTQEER                                                                      | 1.052553611        | 2              | 3.10687   |
| O88637        | HNCDFCVHGNDITLTVDGR                                                               | 1.061541148        | 3              | 3.88288   |
| O88637        | NRLEYEAR                                                                          | 1.171422683        | 2              | 2.40918   |
| O88637        | TEIVPDRDGDSPYEEP                                                                  | 0.558574288        | 2              | 2.86998   |
| O88637        | TQGVSTTDLVGR                                                                      | 1.299458062        | 2              | 3.16976   |
| O88637        | WVDEVVPAAPYVTTLETLDK                                                              | 1.541683582        | 2              | 2.62211   |
| O88637        | YVSEVVIGAPYSVTAELLNHF                                                             | 1.387130854        | 3              | 3.76594   |
| <b>O88656</b> | <b>ARC1B Actin_related protein 2/3 complex subunit 1B</b>                         | <b>1.981416424</b> | <b>0.99916</b> | <b>2</b>  |
| O88656        | ASSEGAATGAGLDSLHK                                                                 | 0.918677174        | 2              | 4.29018   |
| O88656        | NSVSQISVLSGGK                                                                     | 0.992080668        | 2              | 2.53192   |
| <b>O88696</b> | <b>CLPP Putative ATP_dependent Clp protease proteolytic subunit_mitochondrial</b> | <b>2.171758788</b> | <b>0.74618</b> | <b>2</b>  |
| O88696        | GQATDIAIAEEIMK                                                                    | 1.66303088         | 2              | 4.27359   |
| O88696        | VLVHPPQDGEDEPELVQK                                                                | 1.00965736         | 3              | 3.95258   |
| <b>O88735</b> | <b>MAP7 Ensconsin</b>                                                             | <b>1.77206325</b>  | <b>0.00204</b> | <b>2</b>  |
| O88735        | KTTEQRNGDIAK                                                                      | 0.824194789        | 2              | 2.57664   |
| O88735        | TSAGTDPPEATR                                                                      | 1.17983048         | 2              | 2.6675    |
| <b>O88746</b> | <b>TOM1 Target of Myb protein 1</b>                                               | <b>1.78484308</b>  | <b>0.93597</b> | <b>3</b>  |
| O88746        | GDLSQHATPLPTPAVLPGDSPITPTPEIQIGK                                                  | 1.080654315        | 3              | 5.52596   |
| O88746        | QQSTGAIPATQAR                                                                     | 0.795613067        | 2              | 2.70142   |
| O88746        | YEAPQTTDGLAGALDAR                                                                 | 1.059949058        | 2              | 3.89056   |
| <b>O88761</b> | <b>PSMD1 26S proteasome non_ATPase regulatory subunit 1</b>                       | <b>2.199981638</b> | <b>0.86671</b> | <b>3</b>  |
| O88761        | DTSEDIIEELVPEVAHGP                                                                | 1.306651562        | 2              | 4.1809    |
| O88761        | QGALIASALIMIQQTEITCPK                                                             | 1.584432973        | 2              | 2.41419   |
| O88761        | TVGTPIASVPGSTNTGTVP                                                               | 1.078048477        | 2              | 3.69429   |
| <b>O88767</b> | <b>PARK7 Protein DJ_1</b>                                                         | <b>2.699830654</b> | <b>0.97809</b> | <b>8</b>  |
| O88767        | ALVILAK                                                                           | 1.246715698        | 2              | 2.37563   |
| O88767        | DVVICPDTSLLEAK                                                                    | 1.049749393        | 2              | 3.41998   |
| O88767        | GAEEMETVIPVDIMR                                                                   | 1.186599234        | 2              | 4.19968   |
| O88767        | GAEEMETVIPVDIMR+Oxidation(4                                                       | 1.492554863        |                |           |
| O88767        | GLIAAICAGPTALLAHEVGF                                                              | 1.484833635        | 2              | 4.45687   |
| O88767        | KGLIAAICAGPTALLAHEVGF                                                             | 1.392631764        | 3              | 3.99545   |
| O88767        | TQGPYDVVVLPGGNLGAQNL                                                              | 1.13170596         | 3              | 4.69795   |
| O88767        | VTVAGLAGKDPVQCSR                                                                  | 0.956976256        | 2              | 4.25168   |
| <b>O88794</b> | <b>PNPO Pyridoxine_5__phosphate oxidase</b>                                       | <b>2.094600251</b> | <b>0.99305</b> | <b>3</b>  |
| O88794        | FFTNYESR                                                                          | 1.043445214        | 2              | 2.32863   |
| O88794        | KKNEELGQLYR                                                                       | 0.917876377        | 2              | 2.98328   |
| O88794        | SSQIGAVVSR                                                                        | 1.568134414        | 2              | 2.81686   |
| <b>O88813</b> | <b>ACSL5 Long_chain_fatty_acid_CoA ligase 5</b>                                   | <b>1.778393414</b> | <b>0.14057</b> | <b>14</b> |
| O88813        | AEYLGSCLLHK                                                                       | 0.867397141        | 2              | 2.72412   |
| O88813        | AILEDLQK                                                                          | 0.79057226         | 1              | 2.23086   |
| O88813        | ATMLIENVEK                                                                        | 1.103176807        | 2              | 2.34114   |
| O88813        | FFQTQIK                                                                           | 0.90736412         | 1              | 2.02618   |
| O88813        | GAMLTHQNIIVSNMAAFLK                                                               | 1.225821874        | 3              | 3.59441   |
| O88813        | GLAVSDNGPCLGYR                                                                    | 0.88228811         | 2              | 3.43258   |
| O88813        | GSFEELCQNQCVK                                                                     | 0.789392114        | 2              | 4.42662   |

|               |                                                                     |                    |                |           |
|---------------|---------------------------------------------------------------------|--------------------|----------------|-----------|
| O88813        | GYLKDPEK                                                            | 0.689766836        | 2              | 2.3939    |
| O88813        | IGFFQGDIR                                                           | 1.21895117         | 2              | 3.22653   |
| O88813        | SFLIGVVVPDPESLPSFAAK                                                | 0.852045841        | 2              | 4.35065   |
| O88813        | SIFVHPEPFSIENLLTPTLK                                                | 1.338255997        | 2              | 3.63588   |
| O88813        | SRPILQVVFHGESLR                                                     | 1.059467768        | 3              | 3.76821   |
| O88813        | TQEVLDKDGWLHTGDIGR                                                  | 0.810037561        | 3              | 3.7425    |
| O88813        | TVILMDPFDDDLMK                                                      | 0.751333812        | 2              | 3.51655   |
| <b>O88867</b> | <b>KMO Kynurenine 3_monooxygenase</b>                               | <b>2.128543228</b> | <b>0.00034</b> | <b>7</b>  |
| O88867        | AVGLEDQIVSK                                                         | 0.922935           | 2              | 2.49406   |
| O88867        | DFFLLPAQPMISVK                                                      | 0.915355441        | 2              | 2.7583    |
| O88867        | DLLTAVESYPNAK                                                       | 0.966103156        | 2              | 2.39351   |
| O88867        | FNNDLSVCLPEFSR                                                      | 1.190601588        | 2              | 4.06053   |
| O88867        | NFPDAIPLMGEQALMR                                                    | 1.155058165        | 2              | 3.27576   |
| O88867        | SINLALSIR                                                           | 1.274707343        | 2              | 2.38707   |
| O88867        | SQYILSISR                                                           | 0.834408506        | 2              | 2.41832   |
| <b>O88941</b> | <b>MOGS Mannosyl_oligosaccharide glucosidase</b>                    | <b>2.04587407</b>  | <b>0.94882</b> | <b>3</b>  |
| O88941        | ALESHAAAFK                                                          | 0.865443431        | 2              | 2.46837   |
| O88941        | DLALPTLLNPK                                                         | 1.064538423        | 2              | 2.77078   |
| O88941        | MDPSLFPPVPLFSGVPSR                                                  | 0.963180082        | 2              | 2.74233   |
| <b>O88986</b> | <b>KBL 2_ amino_3_ketobutyrate coenzyme A ligase_ mitochondrial</b> | <b>2.01921755</b>  | <b>0.96941</b> | <b>3</b>  |
| O88986        | GTDELLGVMDQVTIINSTLGK                                               | 1.011918634        | 2              | 3.99463   |
| O88986        | HLDMADLEAK                                                          | 0.963990873        | 2              | 2.44538   |
| O88986        | VQISAVHSEEDIDR                                                      | 1.116060585        | 2              | 3.96126   |
| <b>O88989</b> | <b>MDHC Malate dehydrogenase_ cytoplasmic</b>                       | <b>2.187511065</b> | <b>0.92647</b> | <b>9</b>  |
| O88989        | DLDVAVLVGSMR                                                        | 1.265436581        | 3              | 4.18611   |
| O88989        | EKMDLTAKELTEEK+Oxidation(2                                          | 1.350779509        |                |           |
| O88989        | ELTEEKETAFFLSSA                                                     | 3.448559256        | 2              | 3.47368   |
| O88989        | EVGVYEALKDDSWLK                                                     | 2.323127476        | 2              | 4.40612   |
| O88989        | FVEGLPINDFSR                                                        | 1.65815639         | 2              | 3.41743   |
| O88989        | GEFITTVQQR                                                          | 1.085953448        | 2              | 3.98075   |
| O88989        | LGVTADDVK                                                           | 1.209678368        | 2              | 2.92232   |
| O88989        | NVIIWGNHSSTQYPDVNHAK                                                | 0.922820486        | 2              | 5.81141   |
| O88989        | VIVVGNPANTNCLTASK                                                   | 1.139568052        | 2              | 5.24321   |
| <b>O88990</b> | <b>ACTN3 Alpha_actinin_3</b>                                        | <b>1.865524664</b> | <b>0.99999</b> | <b>10</b> |
| O88990        | AGTQIENIEEDFR                                                       | 0.933770123        | 2              | 3.56462   |
| O88990        | ALDFIASK                                                            | 1.110112762        | 2              | 2.67111   |
| O88990        | CQLEINFNTLQTK                                                       | 1.099234267        | 2              | 3.84887   |
| O88990        | FAIQDISVEETSAK                                                      | 0.86557412         | 2              | 4.344     |
| O88990        | GAILGIQGEIQK                                                        | 2.176749084        | 2              | 3.07425   |
| O88990        | GLSQEQLNEFR                                                         | 1.234843642        | 2              | 2.71471   |
| O88990        | HEAFESDLAAHQDR                                                      | 1.190236569        | 3              | 4.45058   |
| O88990        | TINEVENQVLTR                                                        | 1.162451427        | 2              | 3.21732   |
| O88990        | VGWEQLLSIAR                                                         | 1.042063262        | 2              | 2.71509   |
| O88990        | VLAVNQENEK                                                          | 1.392091552        | 2              | 2.32277   |
| <b>O88994</b> | <b>MOSC2 MOSC domain_containing protein 2_ mitochondrial</b>        | <b>2.078392732</b> | <b>2.2E-06</b> | <b>4</b>  |
| O88994        | CVLTTVDPDTGIIDR                                                     | 1.057461114        | 2              | 4.32217   |
| O88994        | GVSVCETECTDMGLR                                                     | 1.131814649        | 2              | 3.36238   |
| O88994        | QLQQVGTVSK                                                          | 0.724849305        | 1              | 2.1798    |
| O88994        | RQLQQVGTVSK                                                         | 0.655024138        | 2              | 3.08204   |
| <b>O89000</b> | <b>DPYD Dihydropyrimidine dehydrogenase [NADP_]</b>                 | <b>1.994044868</b> | <b>0.96662</b> | <b>4</b>  |
| O89000        | GMGLACQDPELVR                                                       | 0.967802622        | 2              | 3.48695   |
| O89000        | LENNFDDIK                                                           | 1.201096015        | 2              | 2.46471   |
| O89000        | QEYVGGSTSEIPQFR                                                     | 0.926964912        | 2              | 3.3358    |
| O89000        | TEQDETGNWVEDEEQIVR                                                  | 2.870783463        | 2              | 4.66486   |
| <b>O89032</b> | <b>SPD2A SH3 and PX domain_containing protein 2A</b>                | <b>2.155819942</b> | <b>0.97429</b> | <b>2</b>  |

|               |                                                         |                    |                |           |
|---------------|---------------------------------------------------------|--------------------|----------------|-----------|
| O89032        | DDSDINTSKTGEVSKR                                        | 1.109043178        | 2              | 2.59507   |
| O89032        | FPIEGGQKDPK                                             | 1.103539561        | 2              | 2.37496   |
| <b>O89046</b> | <b>COR1B Coronin_1B</b>                                 | <b>1.97643163</b>  | <b>0.30025</b> | <b>3</b>  |
| O89046        | NDQCYEDIR                                               | 1.18908132         | 2              | 3.17609   |
| O89046        | NVLSDSKPAGYSR                                           | 1.022015872        | 2              | 3.25174   |
| O89046        | SGVSTATAITDIPSGNLAGSGEAGK                               | 0.726695109        | 2              | 3.86418   |
| <b>O89049</b> | <b>TRXR1 Thioredoxin reductase 1_cytoplasmic</b>        | <b>1.976545212</b> | <b>0.99709</b> | <b>5</b>  |
| O89049        | GFDQDMANK                                               | 0.66825452         | 2              | 2.45263   |
| O89049        | IEQIEAGTPGR                                             | 1.122139883        | 2              | 3.34847   |
| O89049        | IEQIEAGTPGRLK                                           | 1.368324233        | 2              | 2.63139   |
| O89049        | VVGFHVLGPNAGEVTQGFAAALK                                 | 0.979547449        | 3              | 4.42204   |
| O89049        | WGLGGTCVNVGCIPK                                         | 0.83607682         | 2              | 3.63223   |
| <b>O89079</b> | <b>COPE Coatomer subunit epsilon</b>                    | <b>2.314964026</b> | <b>0.90648</b> | <b>2</b>  |
| O89079        | NAFYIGSYQQCINEAQR                                       | 1.046476279        | 2              | 2.78795   |
| O89079        | YGVVLDEIKPSSAPELQAVR                                    | 1.21290728         | 3              | 4.07226   |
| <b>P00173</b> | <b>CYB5 Cytochrome b5</b>                               | <b>1.737714735</b> | <b>6.7E-16</b> | <b>6</b>  |
| P00173        | EQAGGDATENFEDVGHSTDR                                    | 84.46146563        | 2              | 5.41112   |
| P00173        | FLEEHPGGEEVLR                                           | 0.842697368        | 2              | 4.13475   |
| P00173        | STWVILHHK                                               | 1.017785016        | 2              | 2.94549   |
| P00173        | TYIIGELHPDDR                                            | 0.843931877        | 2              | 4.08594   |
| P00173        | VYDLTK                                                  | 0.847709192        | 1              | 2.04902   |
| P00173        | YTTLEEIQK                                               | 0.812209548        | 2              | 2.96554   |
| <b>P00388</b> | <b>NCPR NADPH__cytochrome P450 reductase</b>            | <b>1.904716097</b> | <b>0.99994</b> | <b>10</b> |
| P00388        | DVQNTFYDIVAEFGPMEHTQAVDVVK                              | 1.22189358         | 3              | 4.78158   |
| P00388        | GMSADPEEYDLADLSSLPEIDK                                  | 1.938118543        | 2              | 4.98285   |
| P00388        | HILAILQDYPSLRPPIDHLCCELLPR                              | 1.105179659        | 4              | 4.96519   |
| P00388        | KKEEIPFSK                                               | 0.682836696        | 2              | 2.73618   |
| P00388        | LEQLGAQR                                                | 0.897110315        | 2              | 2.53135   |
| P00388        | LIHEGGAHIYVCGDAR                                        | 1.260047652        | 3              | 3.63829   |
| P00388        | RSDEDLYR                                                | 0.928004895        | 2              | 2.80988   |
| P00388        | SYENQKPPFDAK                                            | 1.133771487        | 2              | 3.32394   |
| P00388        | TYEHFNAMGK                                              | 1.268371869        | 2              | 2.61355   |
| P00388        | VHPNSVHICAVEYEAK                                        | 0.970039967        | 2              | 4.69648   |
| <b>P00406</b> | <b>COX2 Cytochrome c oxidase subunit 2</b>              | <b>2.526231735</b> | <b>0.91115</b> | <b>4</b>  |
| P00406        | ILYMMDEINNPVLTVK                                        | 1.110666524        | 2              | 4.45263   |
| P00406        | LLEVDNR                                                 | 1.310715011        | 2              | 2.40901   |
| P00406        | VVLPMEPIR                                               | 1.395220034        | 2              | 2.44059   |
| P00406        | VVLPMEPIR+Oxidation(4                                   | 1.296346235        |                |           |
| <b>P00481</b> | <b>OTC Ornithine carbamoyltransferase_mitochondrial</b> | <b>2.158326517</b> | <b>0.00058</b> | <b>18</b> |
| P00481        | EATIPVINGLSLYHPILADYLTQEHYGLK                           | 1.122923853        | 3              | 5.48309   |
| P00481        | FGMHLQAATPK                                             | 1.153241944        | 3              | 3.94349   |
| P00481        | GEYLPLQGK                                               | 1.173200874        | 2              | 3.09492   |
| P00481        | GGNVLITDTWISMGQEDEK                                     | 1.334617587        | 2              | 5.21338   |
| P00481        | GGNVLITDTWISMGQEDEKK                                    | 1.210933417        | 2              | 4.61875   |
| P00481        | GLTLSWIGDGNLHLSIMMSAAK                                  | 1.030760654        | 2              | 4.17853   |
| P00481        | GYEPDPNIVK                                              | 0.93233524         | 2              | 2.61914   |
| P00481        | LQAFQGYQVTMK                                            | 1.352094474        | 2              | 4.04133   |
| P00481        | LSMTNDPLEAAR                                            | 1.097302884        | 2              | 2.92172   |
| P00481        | LSTETGFALLGGHPSFLTQDIHLGVNESLTDAR                       | 1.780580585        | 3              | 6.03413   |
| P00481        | QKGEYLPLQGK                                             | 0.807105195        | 2              | 3.43646   |
| P00481        | QSDLDILAK                                               | 0.98752258         | 1              | 2.06386   |
| P00481        | SLGMIFEK                                                | 1.08318725         | 2              | 2.81479   |
| P00481        | SLVFPEAENR                                              | 1.055729956        | 2              | 2.67016   |
| P00481        | SLVFPEAENRK                                             | 0.948922992        | 2              | 2.93898   |
| P00481        | VLSSMTDAVLAR                                            | 1.109580013        | 2              | 3.93124   |
| P00481        | VLSSMTDAVLAR+Oxidation(4                                | 1.329652009        |                |           |

|               |                                                      |                    |                |           |
|---------------|------------------------------------------------------|--------------------|----------------|-----------|
| P00481        | YGKPVQSQVQLK                                         | 0.507927755        | 2              | 3.06799   |
| <b>P00502</b> | <b>GSTA1 Glutathione S transferase alpha_1</b>       | <b>1.586579125</b> | <b>1.2E-06</b> | <b>2</b>  |
| P00502        | FIQSPEDLEK                                           | 0.322387153        | 2              | 2.77343   |
| P00502        | WLLAAAGVEFDEK                                        | 0.676559249        | 2              | 4.37535   |
| <b>P00507</b> | <b>AATM Aspartate aminotransferase_mitochondrial</b> | <b>2.24460983</b>  | <b>1</b>       | <b>19</b> |
| P00507        | ASAELALGENSEVLK                                      | 0.946964685        | 2              | 4.71201   |
| P00507        | DAGMQLQGYR                                           | 1.260905601        | 2              | 2.72527   |
| P00507        | DDNGKPYVLPVSR                                        | 1.167402372        | 2              | 3.55012   |
| P00507        | EGSSHNWQHITDQIGMFCFTGLKPEQVER                        | 1.228744836        | 3              | 5.22551   |
| P00507        | EYLPIGGLADFC                                         | 1.281860595        | 2              | 2.88965   |
| P00507        | FVTVQTISGTGALR                                       | 1.025244855        | 2              | 5.16658   |
| P00507        | HFIEQGINVCLCQSYAK                                    | 1.078710357        | 2              | 4.88872   |
| P00507        | IAATILTSPDLR                                         | 1.731622536        | 2              | 3.05655   |
| P00507        | IPEQSVLLHACAHNPTGVDPPEQWK                            | 1.082627343        | 3              | 4.7361    |
| P00507        | ISVAGVTSGNVGYLAHAIHQVTK                              | 1.395648256        | 2              | 4.42345   |
| P00507        | KMNLGVGAYR                                           | 0.937313436        | 2              | 2.65839   |
| P00507        | KQWLQEVK                                             | 0.698739427        | 1              | 2.16169   |
| P00507        | MNLGVGAYR                                            | 1.008999544        | 2              | 2.93945   |
| P00507        | NLDKEYLPIGGLADFC                                     | 1.087257128        | 2              | 5.54931   |
| P00507        | NMGLYGER                                             | 1.022314627        | 2              | 2.66784   |
| P00507        | TCGFDFSGALEDISK                                      | 3.738197279        | 2              | 5.01904   |
| P00507        | TQLVSNLK                                             | 0.928305945        | 2              | 2.91855   |
| P00507        | VGAFVTVCK                                            | 1.090221947        | 2              | 3.23156   |
| P00507        | VGASFLQR                                             | 1.474534688        | 2              | 3.11008   |
| <b>P00564</b> | <b>KCRM Creatine kinase M_type</b>                   | <b>7.684387075</b> | <b>0.99857</b> | <b>9</b>  |
| P00564        | DLFDPIIQDR                                           | 4.162904766        | 2              | 2.78149   |
| P00564        | FEEILTR                                              | 1.959158142        | 2              | 2.49143   |
| P00564        | GGDDLDPNYVLSSR                                       | 1.152529582        | 2              | 4.60846   |
| P00564        | GQSIDDMIPAQK                                         | 4.875989157        | 2              | 3.6771    |
| P00564        | GTGGVDTAAVAVFDISNADR                                 | 4.886971108        | 2              | 5.34519   |
| P00564        | LGSSEVEQVQLVVDGVK                                    | 3.959086938        | 2              | 5.08929   |
| P00564        | LSVEALNSLTGEFK                                       | 1.631737025        | 2              | 4.29879   |
| P00564        | RGTGGVDTAAVAVFDISNADR                                | 5.507576186        | 2              | 4.14748   |
| P00564        | SMTEQEQQQLIDHFLFDKPVSPLLASGMAR                       | 2.071404886        | 3              | 5.79625   |
| <b>P00787</b> | <b>CATB Cathepsin B</b>                              | <b>2.108762816</b> | <b>0.98219</b> | <b>5</b>  |
| P00787        | EQWSNCPTIAQIR                                        | 1.346812551        | 2              | 2.63425   |
| P00787        | GENHCGIESEIVAGIPR                                    | 1.128827357        | 2              | 4.91291   |
| P00787        | HEAGDVMGGHAIR                                        | 1.071888213        | 3              | 3.86374   |
| P00787        | HEAGDVMGGHAIR+Oxidation(6                            | 0.927556976        |                |           |
| P00787        | MCEAGYSTSYKEDK                                       | 1.135667307        | 2              | 4.40045   |
| <b>P00884</b> | <b>ALDOB Fructose_bisphosphate aldolase B</b>        | <b>2.086479994</b> | <b>0.99969</b> | <b>21</b> |
| P00884        | ALQASALAAWGGK                                        | 1.248378689        | 2              | 4.98375   |
| P00884        | ATQEAFMK                                             | 1.170919766        | 2              | 2.75294   |
| P00884        | ATQEAFMK+Oxidation(6                                 | 0.991889346        |                |           |
| P00884        | ELSEIAQR                                             | 1.98315971         | 1              | 2.19026   |
| P00884        | ETTIQGLDGLSER                                        | 1.199196812        | 2              | 3.87477   |
| P00884        | FPALTSEQK                                            | 1.196481324        | 2              | 2.35079   |
| P00884        | GILAADESVGTMGNR                                      | 1.12703401         | 2              | 5.41142   |
| P00884        | GILAADESVGTMGNR+Oxidation(11                         | 2.595077598        |                |           |
| P00884        | GIVVGIKLDQGGAPLAGTNK                                 | 1.92908536         | 2              | 4.37209   |
| P00884        | GIVVGIKLDQGGAPLAGTNKETTIIQGLDGLSER                   | 0.270391759        | 3              | 5.41877   |
| P00884        | IKVENTEENR                                           | 1.035490151        | 2              | 3.1908    |
| P00884        | IKVENTEENRR                                          | 0.829728025        | 2              | 3.15911   |
| P00884        | ISDQCPSLAIQENANALAR                                  | 1.062579485        | 2              | 6.10385   |
| P00884        | KELSEIAQR                                            | 1.19981728         | 3              | 3.36062   |
| P00884        | KYTPEQVAMATVTALHR                                    | 1.045801223        | 3              | 6.03221   |
| P00884        | KYTPEQVAMATVTALHR+Oxidation(8                        | 1.82898746         |                |           |

|               |                                          |                    |                |           |
|---------------|------------------------------------------|--------------------|----------------|-----------|
| P00884        | LDQGGAPLAGTNK                            | 1.171584904        | 2              | 4.65249   |
| P00884        | LDQGGAPLAGTNKETTIGLDGLSER                | 0.242446997        | 3              | 4.3063    |
| P00884        | YASICQQNGLVIVEPEVLPGDHDLEHCQYVSEK        | 1.376709732        | 3              | 4.75731   |
| P00884        | YTPEQVAMATVTALHR                         | 1.394003419        | 2              | 4.63929   |
| P00884        | YTPEQVAMATVTALHR+Oxidation(7             | 1.202874791        |                |           |
| <b>P01015</b> | <b>ANGT Angiotensinogen</b>              | <b>4.129814911</b> | <b>9.9E-09</b> | <b>3</b>  |
| P01015        | GSYNLQDLLAQAK                            | 2.266154826        | 2              | 3.1402    |
| P01015        | SLDLSTDPVLAQAK                           | 2.044688079        | 2              | 3.32871   |
| P01015        | STCAQLENPSVETLPEPTFEPVPIQAK              | 2.432730536        | 2              | 3.90488   |
| <b>P01026</b> | <b>CO3 Complement C3</b>                 | <b>2.041845571</b> | <b>0.94565</b> | <b>21</b> |
| P01026        | ACEPGVDYVYK                              | 1.2827815          | 2              | 2.48401   |
| P01026        | ADIGCTPGSGK                              | 1.045655462        | 2              | 3.02188   |
| P01026        | AFYEHAPK                                 | 0.962554134        | 2              | 2.44777   |
| P01026        | DSCVGLTVVKGDPDR                          | 1.073112651        | 2              | 2.58669   |
| P01026        | EYVLPSEFVLVEPTEK                         | 1.023174619        | 2              | 3.70341   |
| P01026        | IFTVDNLLPVGK                             | 1.532376517        | 2              | 3.58548   |
| P01026        | IGLQEVEVK                                | 1.007254986        | 2              | 2.6463    |
| P01026        | LPYSVVRNEQVEIR                           | 1.43214375         | 2              | 2.3282    |
| P01026        | QNEGFSLTAK                               | 0.905975239        | 2              | 2.45793   |
| P01026        | RVPVVTQGSQAQALTQDDGVAK                   | 1.078847037        | 3              | 5.65816   |
| P01026        | SDVDEDIPEEDIISR                          | 1.303478886        | 2              | 4.50376   |
| P01026        | SGIPIVTSPIYQIHFTK                        | 1.021651435        | 2              | 2.94932   |
| P01026        | SGSDEVQAGQER                             | 1.11816859         | 2              | 3.87248   |
| P01026        | SSVAVPYVIVPLK                            | 1.472084929        | 2              | 2.97736   |
| P01026        | TNQLGLQTDQREDPECAKPAAR                   | 1.21641325         | 3              | 3.66002   |
| P01026        | TVLTGATGHLNR                             | 1.342261254        | 2              | 2.84118   |
| P01026        | TVVIVIETPDGVPIKR                         | 1.531109181        | 2              | 2.73759   |
| P01026        | VELKPGDNLNVNHLR                          | 1.368447154        | 3              | 3.91398   |
| P01026        | VHQFFNVGLIQPGSVK                         | 1.179596525        | 3              | 4.15348   |
| P01026        | VLIEDGSGEAVLSR                           | 1.309767872        | 2              | 3.98511   |
| P01026        | VPVVTQGSQAQALTQDDGVAK                    | 0.83008758         | 2              | 5.56998   |
| <b>P01048</b> | <b>KNT1 T_kininogen 1</b>                | <b>2.045413471</b> | <b>0.92182</b> | <b>3</b>  |
| P01048        | FSVATQICNITPGK                           | 0.830538701        | 2              | 3.33431   |
| P01048        | KTEEDLCVGCQPIPMSSDLKPVK                  | 1.03516003         | 4              | 4.65972   |
| P01048        | TELTADCETK                               | 0.824693541        | 2              | 2.34715   |
| <b>P01946</b> | <b>HBA Hemoglobin subunit alpha_1/2</b>  | <b>1.68656922</b>  | <b>1</b>       | <b>9</b>  |
| P01946        | AADHVEDLPGALSTLSLHAHK                    | 0.978324021        | 3              | 7.45363   |
| P01946        | FLASVSTVLTSK                             | 1.028534822        | 2              | 4.01308   |
| P01946        | FLSHCLLVTLACHHPGDFTPAMHASLDK             | 0.842598           | 4              | 5.44757   |
| P01946        | FLSHCLLVTLACHHPGDFTPAMHASLDKFLASVSTVLTSK | 0.781426593        | 5              | 6.35712   |
| P01946        | IGGHGGEYGEEALQR                          | 0.747221175        | 3              | 5.093     |
| P01946        | LRVDPVNFK                                | 0.820353056        | 2              | 2.572     |
| P01946        | MFAAFPTTK                                | 0.621390437        | 2              | 2.76803   |
| P01946        | MFAAFPTTK+Oxidation(0                    | 0.62903522         |                |           |
| P01946        | TYFSHIDVSPGSAQVK                         | 0.667055396        | 2              | 5.03779   |
| <b>P02089</b> | <b>HBB2 Hemoglobin subunit beta_2</b>    | <b>2.209905629</b> | <b>1</b>       | <b>4</b>  |
| P02089        | GTFASLSELHCDK                            | 0.605215831        | 2              | 3.76467   |
| P02089        | LHVDPENFR                                | 0.714438538        | 2              | 2.51555   |
| P02089        | YFDSFGDLSSASAIMGNPK                      | 0.890892959        | 2              | 6.51648   |
| P02089        | YFDSFGDLSSASAIMGNPK+Oxidation(14         | 1.145699641        |                |           |
| <b>P02091</b> | <b>HBB1 Hemoglobin subunit beta_1</b>    | <b>1.635397241</b> | <b>1</b>       | <b>10</b> |
| P02091        | AAVNLWGK                                 | 1.014781544        | 2              | 2.7712    |
| P02091        | AAVNLWGKVNPPDVGGEALGR                    | 0.893884139        | 3              | 3.61442   |
| P02091        | EFTPCAQAAFQK                             | 0.771130926        | 2              | 3.17506   |
| P02091        | GTFASLSELHCDK                            | 0.714771983        | 2              | 4.40014   |
| P02091        | GTFASLSELHCDKLHVDPENFR                   | 0.558372573        | 3              | 3.95259   |
| P02091        | KVINAFNDGLK                              | 0.593521523        | 2              | 3.60008   |

|               |                                                             |                    |                |           |
|---------------|-------------------------------------------------------------|--------------------|----------------|-----------|
| P02091        | LLGNMIVIVLGHHLGK                                            | 0.888626298        | 4              | 4.61855   |
| P02091        | VINAFNDGLK                                                  | 0.607812725        | 2              | 2.98589   |
| P02091        | VNPDDVGGEALGR                                               | 0.463675517        | 2              | 4.03006   |
| P02091        | VVAGVASALAHK                                                | 0.780503003        | 2              | 3.74172   |
| <b>P02401</b> | <b>RLA2 60S acidic ribosomal protein P2</b>                 | <b>2.298360675</b> | <b>0.99485</b> | <b>6</b>  |
| P02401        | ILDSVGIEADDER                                               | 1.227721045        | 2              | 4.85031   |
| P02401        | KILDSVGIEADDER                                              | 0.603687478        | 2              | 4.00956   |
| P02401        | LASVPAGGAVAVSAAPGSAAPAAGSAPAAAAEEK                          | 1.193163187        | 3              | 5.90573   |
| P02401        | NIEDVIAQGVGK                                                | 1.185277775        | 2              | 4.72825   |
| P02401        | VISELNGK                                                    | 1.067472938        | 1              | 2.08877   |
| P02401        | YVASYLLAALGGNSNPSAK                                         | 1.184181912        | 2              | 5.22184   |
| <b>P02564</b> | <b>MYH7 Myosin_7</b>                                        | <b>2.061300309</b> | <b>0.99998</b> | <b>38</b> |
| P02564        | ALQEAHQALDDLQAEEDKVNTLTK                                    | 1.009216856        | 3              | 5.81066   |
| P02564        | ANDDLKENIAIVER                                              | 1.520810948        | 3              | 3.49      |
| P02564        | DLEEATLQHEATAAALR                                           | 1.059178306        | 2              | 4.96562   |
| P02564        | DVFPDDKEEFVK                                                | 1.80735479         | 2              | 2.44454   |
| P02564        | EDQVMQQNPPK                                                 | 1.284722711        | 2              | 3.04702   |
| P02564        | EEQAEPDGTTEADK                                              | 2.003549519        | 2              | 3.06285   |
| P02564        | ELENELEAEQK                                                 | 0.898368432        | 2              | 2.37769   |
| P02564        | GQNVQQVAYAIGALAK                                            | 2.027185767        | 2              | 4.06569   |
| P02564        | GTLEDQIIQANPALEAFGNAK                                       | 0.767370109        | 3              | 5.69473   |
| P02564        | IEDEQALGSQLQK                                               | 1.890316945        | 2              | 5.09519   |
| P02564        | IEEEEELEAER                                                 | 2.106753183        | 2              | 4.34576   |
| P02564        | IKELTYQTEEDRK                                               | 1.740836833        | 2              | 2.62685   |
| P02564        | ILNPAAIPEGQFIDSR                                            | 2.715933758        | 2              | 2.76913   |
| P02564        | KLAEKDEEMEQAK                                               | 1.339988824        | 3              | 3.65182   |
| P02564        | KLAEQELIETSER                                               | 0.9479432          | 2              | 3.50072   |
| P02564        | KLEDECSLKR                                                  | 1.264183362        | 3              | 3.81971   |
| P02564        | KVQHELDEAEER                                                | 0.961768691        | 2              | 3.72532   |
| P02564        | LAEQELIETSER                                                | 1.015224201        | 2              | 3.39427   |
| P02564        | LDEAEQIALK                                                  | 0.80316436         | 2              | 3.23504   |
| P02564        | LELDDVTSNMEQIHK                                             | 1.198290747        | 2              | 4.47015   |
| P02564        | LQDAEEAVEAVNAK                                              | 1.669268754        | 2              | 4.68299   |
| P02564        | LQNEIEDLMVDVER                                              | 1.391945416        | 2              | 3.89151   |
| P02564        | LTQESIMDLENDKQQLDER                                         | 2.187407097        | 3              | 3.82173   |
| P02564        | MDADLSQLQTEVEEAVQECR                                        | 1.653844086        | 2              | 4.98524   |
| P02564        | NALAHALQSAR                                                 | 1.041467042        | 2              | 2.36926   |
| P02564        | NAYEESLEHLETFK                                              | 1.264260147        | 2              | 3.41042   |
| P02564        | NLQEEISDLTEQLGSTGK                                          | 1.741148435        | 2              | 5.07216   |
| P02564        | NLTEEMAGLDEIIVK                                             | 1.439204591        | 2              | 3.65398   |
| P02564        | NNLLQAELEELR                                                | 1.776229859        | 2              | 3.59633   |
| P02564        | QAEEAEEQANTNLSK                                             | 2.15485117         | 2              | 5.2352    |
| P02564        | QKYEESQSELESSQK                                             | 1.136515403        | 2              | 3.78316   |
| P02564        | QLEAEKLELQSALEEAASLEHEEGK                                   | 2.196319512        | 3              | 3.60724   |
| P02564        | QREEQAEPDGTTEADK                                            | 1.387854604        | 2              | 3.76492   |
| P02564        | TLEDQMNEHR                                                  | 1.333229231        | 2              | 2.53192   |
| P02564        | VQHELDEAEER                                                 | 0.583805957        | 2              | 3.46862   |
| P02564        | VQLLHSQNTSLINQK                                             | 1.826031652        | 2              | 4.09822   |
| P02564        | VVDSLQTSLDAETR                                              | 1.035256417        | 2              | 4.1174    |
| P02564        | YEEESQSELESSQK                                              | 2.669801614        | 2              | 4.32505   |
| <b>P02600</b> | <b>MYL1 Myosin light chain 1/3_ skeletal muscle isoform</b> | <b>2.311003443</b> | <b>0.9988</b>  | <b>12</b> |
| P02600        | ALGTNPTNAEVK                                                | 1.474216736        | 2              | 3.33677   |
| P02600        | ALGTNPTNAEVKK                                               | 2.489988183        | 2              | 2.94539   |
| P02600        | DQGGYEDFVEGLR                                               | 1.434768048        | 2              | 3.81599   |
| P02600        | IEFEQFLPMMQAISNNK                                           | 1.261041866        | 3              | 3.91506   |
| P02600        | ITLSQVGDVLR                                                 | 3.237315032        | 2              | 3.5886    |



|               |                                               |                    |                |           |
|---------------|-----------------------------------------------|--------------------|----------------|-----------|
| P02600        | KIEFEQFLPMMQAISNNK                            | 0.672061692        | 2              | 4.90061   |
| P02600        | KIEFEQFLPMMQAISNNKQGGYEDFVEGLR                | 1.624259573        | 3              | 5.51342   |
| P02600        | KPAAAAPAPAPAPAPAKPK                           | 2.280393976        | 3              | 3.70325   |
| P02600        | KPAAAAPAPAPAPAPAKPKEEK                        | 2.774544483        | 3              | 5.2377    |
| P02600        | KVLGNPSNEEMNAK                                | 2.620890816        | 2              | 3.65182   |
| P02600        | VLGNPSNEEMNAK                                 | 3.112670719        | 2              | 3.91882   |
| P02600        | VLGNPSNEEMNAK+Oxidation(9                     | 1.314023753        |                |           |
| <b>P02625</b> | <b>PRVA Parvalbumin alpha</b>                 | <b>2.122717728</b> | <b>0.99944</b> | <b>5</b>  |
| P02625        | AIGAFTAADSFHDK                                | 1.55083042         | 2              | 2.4556    |
| P02625        | AIGAFTAADSFHDKK                               | 1.794490768        | 2              | 3.85334   |
| P02625        | SGFIEDELGSILK                                 | 1.19865887         | 2              | 4.03336   |
| P02625        | TLMAAGDKDGDGK                                 | 0.921595392        | 2              | 3.38868   |
| P02625        | TLMAAGDKDGDGK+Oxidation(2                     | 0.463398816        |                |           |
| <b>P02650</b> | <b>APOE Apolipoprotein E</b>                  | <b>1.848433717</b> | <b>0.95919</b> | <b>12</b> |
| P02650        | ELEEQLGPVAEETR                                | 1.598112922        | 2              | 4.21141   |
| P02650        | GRLEEVGNQAR                                   | 0.773814337        | 2              | 3.39432   |
| P02650        | GWFEPLVEDMQR                                  | 1.064122488        | 2              | 3.04135   |
| P02650        | LEEVGNQAR                                     | 0.778665059        | 2              | 2.44534   |
| P02650        | LGADMEDLR                                     | 0.975325714        | 2              | 3.16475   |
| P02650        | LGPLVEQGR                                     | 0.882826832        | 2              | 2.99943   |
| P02650        | LQAEIFQAR                                     | 0.930971605        | 2              | 2.53109   |
| P02650        | MEEQTQQR                                      | 0.975059557        | 2              | 3.37692   |
| P02650        | NEVNTMLGQSTEELR                               | 0.796176997        | 2              | 4.64819   |
| P02650        | SKMEEQTQQR                                    | 0.801676962        | 2              | 3.338     |
| P02650        | SKMEEQTQQR+Oxidation(2                        | 0.889012495        |                |           |
| P02650        | TANLGAGAAQPLR                                 | 0.863725044        | 2              | 4.00139   |
| <b>P02680</b> | <b>FIBG Fibrinogen gamma chain</b>            | <b>2.002211841</b> | <b>1</b>       | <b>4</b>  |
| P02680        | LSIGDGQQHHMGGSK                               | 1.17191596         | 2              | 3.40696   |
| P02680        | VGPESDKYR                                     | 0.935805994        | 2              | 2.7223    |
| P02680        | YEALLLTHESSIR                                 | 1.308956144        | 2              | 3.72808   |
| P02680        | YLQDIYTSNK                                    | 1.001219594        | 2              | 2.86956   |
| <b>P02692</b> | <b>FABPL Fatty acid binding protein_liver</b> | <b>2.261343459</b> | <b>4.1E-10</b> | <b>14</b> |
| P02692        | AMGLPEDLIQK                                   | 1.143733793        | 2              | 3.48702   |
| P02692        | AMGLPEDLIQK+Oxidation(1                       | 0.980893667        |                |           |
| P02692        | GVSEIVHEGK                                    | 1.00645933         | 2              | 3.45281   |
| P02692        | GVSEIVHEGKK                                   | 0.723904619        | 2              | 3.29625   |
| P02692        | MEGDNKMVTTFKGIK+Oxidation(6                   | 0.888327962        |                |           |
| P02692        | SVTEFNGDTITNTMTLGDIVYK                        | 1.162314969        | 3              | 5.76839   |
| P02692        | SVTEFNGDTITNTMTLGDIVYK+Oxidation(13           | 1.356546991        |                |           |
| P02692        | SVTEFNGDTITNTMTLGDIVYKR                       | 0.908259377        | 2              | 3.72356   |
| P02692        | VIHNEFTLGEECELETMTGEK                         | 1.17741513         | 3              | 6.02258   |
| P02692        | VIHNEFTLGEECELETMTGEK+Oxidation(16            | 1.231466283        |                |           |
| P02692        | VIHNEFTLGEECELETMTGEKVK                       | 1.175939024        | 3              | 4.9054    |
| P02692        | VKLTITYGSK                                    | 1.174040995        | 1              | 2.02662   |
| P02692        | YQVQSQENFEPFMK                                | 1.021831656        | 2              | 5.78362   |
| P02692        | YQVQSQENFEPFMK+Oxidation(12                   | 0.937969601        |                |           |
| <b>P02696</b> | <b>RET1 Retinol binding protein 1</b>         | <b>2.246930517</b> | <b>0.99325</b> | <b>6</b>  |
| P02696        | ALDVNVALR                                     | 1.463778831        | 2              | 2.97428   |
| P02696        | CMTTVSWDGDKLQCVQK                             | 0.881481212        | 2              | 4.23034   |
| P02696        | EFEEDLTGIDDR                                  | 1.087152988        | 2              | 3.24756   |
| P02696        | EFEEDLTGIDDRK                                 | 1.160790871        | 2              | 3.49205   |
| P02696        | MLSNNFEEYLR                                   | 1.144841255        | 2              | 3.86972   |
| P02696        | MLSNNFEEYLR+Oxidation(0                       | 1.463184295        |                |           |
| <b>P02706</b> | <b>ASGR1 Asialoglycoprotein receptor 1</b>    | <b>1.963913255</b> | <b>1</b>       | <b>5</b>  |
| P02706        | DYQDFQHLDNENDHHQLQR                           | 0.944295575        | 3              | 4.12294   |
| P02706        | LVESQLEK                                      | 0.953771489        | 2              | 2.77993   |
| P02706        | SLSCQMAALR                                    | 0.939005542        | 2              | 2.80293   |

|               |                                         |                    |                |           |
|---------------|-----------------------------------------|--------------------|----------------|-----------|
| P02706        | WVCETELGK                               | 0.95577782         | 2              | 2.46677   |
| P02706        | WVDGTDYETGFK                            | 1.044017446        | 2              | 3.1856    |
| <b>P02770</b> | <b>ALBU Serum albumin</b>               | <b>2.424517009</b> | <b>1</b>       | <b>25</b> |
| P02770        | AADKDNCFATEGPNLVAR                      | 1.375822552        | 2              | 4.44865   |
| P02770        | AETFFHSDICTLPDKEK                       | 1.359659873        | 3              | 3.36995   |
| P02770        | CCAEGDPPACYGTVLAEFQPLVEEPK              | 1.265456641        | 2              | 5.04219   |
| P02770        | CCSGSLVER                               | 1.014320302        | 2              | 2.88549   |
| P02770        | CCTLPEAQR                               | 1.003808216        | 2              | 3.06953   |
| P02770        | DLGEQHFH                                | 0.911105727        | 1              | 2.1346    |
| P02770        | ECCHGDLLCADDR                           | 0.99443002         | 2              | 3.68599   |
| P02770        | ECCHGDLLCADDRRAELAK                     | 0.976181958        | 2              | 5.55439   |
| P02770        | FKDLGEQHFH                              | 0.943926426        | 3              | 4.18445   |
| P02770        | GLVLIAFSQYLQK                           | 0.77272413         | 2              | 4.12847   |
| P02770        | INKECCHGDLLCADDRRAELAK                  | 0.880262473        | 3              | 4.81183   |
| P02770        | KQTALAEVVK                              | 2.817663916        | 3              | 4.04055   |
| P02770        | KYEATLEK                                | 0.805179118        | 1              | 2.61506   |
| P02770        | LGEYGFQNAVLVR                           | 1.190471639        | 2              | 3.77918   |
| P02770        | LQACCDKPVLQK                            | 1.135990697        | 2              | 4.0486    |
| P02770        | LVQEVTDFAK                              | 1.200800691        | 2              | 3.51271   |
| P02770        | RHPDYSVSLLR                             | 2.391576436        | 3              | 5.36587   |
| P02770        | SIHTLFGDK                               | 1.216752062        | 1              | 2.59696   |
| P02770        | TCVADENAENCDK                           | 1.008945           | 2              | 4.58551   |
| P02770        | TNCELYEK                                | 1.07898825         | 2              | 2.86214   |
| P02770        | TVMGDFFAQFVDK                           | 1.365562278        | 2              | 3.88801   |
| P02770        | YEATLEK                                 | 1.362758486        | 1              | 1.96369   |
| P02770        | YMCENQATISSK                            | 1.097553157        | 2              | 4.14408   |
| P02770        | YMCENQATISSK+Oxidation(1                | 1.298382908        |                |           |
| P02770        | YNEVLTQCCTESDK                          | 1.169832588        | 2              | 5.52498   |
| <b>P02803</b> | <b>MT1 Metallothionein_1</b>            | <b>486.1581332</b> | <b>9.9E-20</b> | <b>2</b>  |
| P02803        | MDPNCSCSTGGSCSCSSCGCK                   | 10.681939          | 3              | 6.52961   |
| P02803        | SCCSCCPVGCSK                            | 4.199462124        | 2              | 4.11442   |
| <b>P04041</b> | <b>GPX1 Glutathione peroxidase 1</b>    | <b>2.541628458</b> | <b>0.73</b>    | <b>11</b> |
| P04041        | DYTEMNDLQK                              | 37.00103438        | 2              | 2.41201   |
| P04041        | FLVGPDGVVPR                             | 1.071008828        | 2              | 3.21799   |
| P04041        | GLVVLGFPCNQFGHQENK                      | 2.102102311        | 2              | 4.06915   |
| P04041        | GLVVLGFPCNQFGHQENKNEEILNSLK             | 0.964955892        | 3              | 4.20041   |
| P04041        | NALPAPSDPTALMTDPK                       | 2.959553718        | 2              | 3.17598   |
| P04041        | NALPAPSDPTALMTDPK+Oxidation(13          | 0.75697058         |                |           |
| P04041        | NDISWNFEK                               | 1.104466761        | 2              | 3.02235   |
| P04041        | NEEILNSLK                               | 1.169338305        | 2              | 2.48231   |
| P04041        | TIDIEPDIEALLSK                          | 1.430817021        | 3              | 5.43006   |
| P04041        | YIIWSPVCR                               | 1.250047793        | 2              | 2.80239   |
| P04041        | YVRPGGFEPNFTLFEK                        | 1.043662735        | 3              | 4.70879   |
| <b>P04167</b> | <b>CP2B2 Cytochrome P450 2B2</b>        | <b>1.785009588</b> | <b>0.44751</b> | <b>2</b>  |
| P04167        | GTIAVIEPIFK                             | 0.863482167        | 2              | 2.91433   |
| P04167        | NLQEILDYIGHIVEK                         | 0.7551573          | 2              | 4.33955   |
| <b>P04176</b> | <b>PH4H Phenylalanine_4_hydroxylase</b> | <b>2.177665801</b> | <b>0.63047</b> | <b>16</b> |
| P04176        | AYGAGLLSFGELQYCLSDPKK                   | 1.367493152        | 3              | 3.50529   |
| P04176        | EDNIPQLEDVSQLTCTGFR                     | 1.085872848        | 3              | 5.16658   |
| P04176        | FANQILSYGAELADHPGFKDPVYR                | 1.26812339         | 3              | 3.98974   |
| P04176        | HGSKPMYTPEPDICHELLGHVPLFSDR             | 1.219177303        | 3              | 3.93199   |
| P04176        | ILADSINSEVGILCNALQK                     | 1.271816432        | 3              | 6.47502   |
| P04176        | LNKDEYEFFTYLDK                          | 3.339140209        | 2              | 3.57632   |
| P04176        | LNKDEYEFFTYLDKR                         | 1.797700055        | 3              | 3.53333   |
| P04176        | LRPVAGLLSSR                             | 1.479623174        | 2              | 2.69481   |
| P04176        | NDIGATVHELRS                            | 1.184122363        | 2              | 3.75022   |
| P04176        | QFADIAYNYR                              | 0.832258551        | 2              | 2.41491   |

|               |                                                                     |                    |                |           |
|---------------|---------------------------------------------------------------------|--------------------|----------------|-----------|
| P04176        | SFAQFSQEIGLASLGAPDEYIEK                                             | 1.407775525        | 2              | 4.93304   |
| P04176        | THACYEHNHIFP LLEK                                                   | 1.398096826        | 4              | 4.98313   |
| P04176        | VEVLDNTQQ LK                                                        | 1.070777523        | 2              | 3.83769   |
| P04176        | VEYTEEEK                                                            | 1.045092112        | 2              | 2.74199   |
| P04176        | VEYTEEEKQ TWGTVFR                                                   | 1.00946981         | 2              | 3.89734   |
| P04176        | YCGFREDNIPQLEDV SQFLQTCTGFR                                         | 1.120627102        | 3              | 5.12928   |
| <b>P04182</b> | <b>OAT Ornithine aminotransferase_ mitochondrial</b>                | <b>2.308027211</b> | <b>0.54493</b> | <b>8</b>  |
| P04182        | AFYNNVLGEYEEYITK                                                    | 1.318824162        | 2              | 4.60059   |
| P04182        | GIYMWDVEGR                                                          | 0.974168624        | 2              | 3.12071   |
| P04182        | GLLNAIVIR                                                           | 1.917277639        | 2              | 3.26114   |
| P04182        | KTEQGPPSSEYIFER                                                     | 1.958272944        | 2              | 4.15833   |
| P04182        | TEQGPPSSEYIFER                                                      | 1.181857797        | 2              | 3.9498    |
| P04182        | VLPMTGVEAGETACK                                                     | 1.408502477        | 2              | 4.1541    |
| P04182        | WLAVDHENVRPDIVLLGK                                                  | 1.945278167        | 2              | 5.27923   |
| P04182        | YGAHNYHPLPVALER                                                     | 1.668863848        | 2              | 4.21891   |
| <b>P04256</b> | <b>ROA1 Heterogeneous nuclear ribonucleoprotein A1</b>              | <b>2.17263465</b>  | <b>0.40767</b> | <b>4</b>  |
| P04256        | EDSQRPGAHLTVK                                                       | 1.124880659        | 2              | 3.1967    |
| P04256        | IEVIEIMTDR                                                          | 1.374226437        | 2              | 3.42468   |
| P04256        | NQGGYGGSSSSSYGSGR                                                   | 0.809427509        | 2              | 5.16704   |
| P04256        | YHTVNGHNCEVR                                                        | 0.962443518        | 2              | 3.38097   |
| <b>P04276</b> | <b>VTDB Vitamin D_binding protein</b>                               | <b>2.514453067</b> | <b>0.377</b>   | <b>3</b>  |
| P04276        | CCSINSPPR                                                           | 0.579425144        | 2              | 2.52545   |
| P04276        | SCESDAPFPVHPGTSECTK                                                 | 1.572187598        | 2              | 4.6312    |
| P04276        | YCSSQIDAEMR                                                         | 1.709047485        | 2              | 3.21518   |
| <b>P04355</b> | <b>MT2 Metallothionein_2</b>                                        | <b>18030.30858</b> | <b>9.9E-20</b> | <b>2</b>  |
| P04355        | MDPNCSCATDGSCSCAGSCK                                                | 33.72861861        | 2              | 6.24475   |
| P04355        | SCCSCCPVGCAK                                                        | 4.961920984        | 2              | 4.25339   |
| <b>P04466</b> | <b>MLR5 Myosin regulatory light chain 2_skeletal muscle isoform</b> | <b>5.098200435</b> | <b>0.99622</b> | <b>8</b>  |
| P04466        | AAAEGSSNVFSMFDQTIQIEFK                                              | 1.233098574        | 3              | 5.25676   |
| P04466        | GADPEDVITGAFK                                                       | 1.657526014        | 2              | 4.19398   |
| P04466        | LKGADPEDVITGAFK                                                     | 1.971576247        | 3              | 3.47748   |
| P04466        | NEELDAMMK                                                           | 3.276992844        | 1              | 2.2033    |
| P04466        | NICYVITHGDAK                                                        | 4.150837938        | 2              | 2.84465   |
| P04466        | NICYVITHGDAKDQE                                                     | 2.259897944        | 2              | 4.43959   |
| P04466        | NMWAAFPDPVGGNV DYK                                                  | 2.221927659        | 2              | 3.07871   |
| P04466        | QFLELLTQC DR                                                        | 2.178144497        | 2              | 3.99813   |
| <b>P04550</b> | <b>PTMS Parathymsin</b>                                             | <b>1.95276871</b>  | <b>0.98219</b> | <b>4</b>  |
| P04550        | RTAEEDEADPKR                                                        | 0.746436461        | 3              | 4.10261   |
| P04550        | SVEAAAELSAK                                                         | 0.884512469        | 2              | 3.86464   |
| P04550        | TAEEDEADPK                                                          | 1.701255028        | 2              | 3.33814   |
| P04550        | TAEEDEADPKR                                                         | 1.094016872        | 2              | 3.77786   |
| <b>P04636</b> | <b>MDHM Malate dehydrogenase_ mitochondrial</b>                     | <b>1.936779316</b> | <b>0.14634</b> | <b>19</b> |
| P04636        | AGAGSATLSMAYAGAR                                                    | 0.908935575        | 2              | 4.54798   |
| P04636        | AGAGSATLSMAYAGAR+Oxidation(9                                        | 1.106268447        |                |           |
| P04636        | ANTFVAELK                                                           | 0.913693088        | 2              | 3.36116   |
| P04636        | EGVIECSFVQSK                                                        | 1.132761445        | 2              | 3.18595   |
| P04636        | ETECTYFSTPLLLGK                                                     | 0.948953292        | 2              | 3.74073   |
| P04636        | FVFSLDAMNGK                                                         | 1.160561223        | 2              | 4.46147   |
| P04636        | GCDVVVIPAGVPR                                                       | 0.918492485        | 2              | 4.35481   |
| P04636        | GYLGPEQLPDCLK                                                       | 1.00970757         | 2              | 4.25715   |
| P04636        | IFGVTTLDIVR                                                         | 0.957173116        | 2              | 3.35587   |
| P04636        | IQEAGTEVVK                                                          | 0.865755566        | 2              | 2.76192   |
| P04636        | IQEAGTEVVKAK                                                        | 0.410801717        | 2              | 2.8792    |
| P04636        | ITPFEEK                                                             | 1.031866759        | 1              | 1.94166   |
| P04636        | LTLYDIAHTPGVAADLSHIETR                                              | 1.127050139        | 3              | 6.8526    |

|               |                                             |                    |                |           |
|---------------|---------------------------------------------|--------------------|----------------|-----------|
| P04636        | MIAEAIPELK                                  | 0.839115299        | 2              | 3.46179   |
| P04636        | MIAEAIPELK+Oxidation(0                      | 0.986087346        |                |           |
| P04636        | TIIP LISQCTPK                               | 0.88198723         | 2              | 3.55599   |
| P04636        | VAVLGASGGIGQPLSLLK                          | 0.799050504        | 2              | 6.29371   |
| P04636        | VDFPQDQLATLTGR                              | 1.403776155        | 2              | 4.72404   |
| P04636        | VNVPVIGGHAGK                                | 0.953943524        | 2              | 3.77754   |
| <b>P04638</b> | <b>APOA2 Apolipoprotein A_II</b>            | <b>1.706043068</b> | <b>0.42898</b> | <b>2</b>  |
| P04638        | AQPSEIQNQAK                                 | 0.787032308        | 2              | 2.74153   |
| P04638        | TGTNLMDFLSR                                 | 0.762983183        | 2              | 2.72502   |
| <b>P04639</b> | <b>APOA1 Apolipoprotein A_I</b>             | <b>1.817216312</b> | <b>0.9367</b>  | <b>5</b>  |
| P04639        | LQEQLGPVTQEFWANLEK                          | 1.172692018        | 2              | 3.51349   |
| P04639        | NEMNKDLENVK                                 | 0.74941289         | 2              | 3.59204   |
| P04639        | NHPTLIEYHTK                                 | 1.007954341        | 3              | 3.83728   |
| P04639        | QLNLNLLDNWDTLGSTVGR                         | 1.12923655         | 2              | 4.19133   |
| P04639        | WNEEVEAYR                                   | 0.968352441        | 2              | 2.8765    |
| <b>P04642</b> | <b>LDHA L_lactate dehydrogenase A chain</b> | <b>1.849733173</b> | <b>0.54773</b> | <b>21</b> |
| P04642        | DLADELALVDVIEDK                             | 0.637170139        | 2              | 5.3144    |
| P04642        | DLADELALVDVIEDK LK                          | 1.019650629        | 2              | 3.94485   |
| P04642        | DQLIVNLLK                                   | 1.302359198        | 2              | 3.0364    |
| P04642        | DQLIVNLLKEEQVPQNK                           | 1.162861155        | 2              | 4.34529   |
| P04642        | EDVFLSVPCILGQNGISDVVK                       | 1.161523311        | 2              | 4.86267   |
| P04642        | GEMMDLQHGSFLK                               | 1.487340727        | 2              | 4.11821   |
| P04642        | GEMMDLQHGSFLK+Oxidation(2                   | 1.097956275        |                |           |
| P04642        | GEMMDLQHGSFLK+Oxidation(3                   | 1.34554317         |                |           |
| P04642        | GYT SWAIGLSVADLAESIMK                       | 0.841035264        | 2              | 4.88495   |
| P04642        | IVSSKDYSVTANSK                              | 0.161438078        | 2              | 3.63953   |
| P04642        | KSADTLWGIQK                                 | 1.219351822        | 2              | 3.15057   |
| P04642        | LGVHPLSCHGWVLGEHGDSSVPVWSGVNVVAGVSLK        | 1.129335857        | 3              | 5.72876   |
| P04642        | LKGEMMDLQHGSFLK                             | 1.398502705        | 2              | 3.99007   |
| P04642        | NVNIFK                                      | 1.34726852         | 1              | 2.07206   |
| P04642        | QVVD SAYEVIK                                | 1.036671699        | 2              | 3.25565   |
| P04642        | RVHPITMIK                                   | 0.909434654        | 2              | 2.55841   |
| P04642        | SADTLWGIQK                                  | 1.017759778        | 2              | 3.92659   |
| P04642        | SLNPQLGTDADK                                | 1.060699635        | 2              | 2.77051   |
| P04642        | SLNPQLGTDADKEQWK                            | 1.094143913        | 2              | 4.74541   |
| P04642        | SLNPQLGTDADKEQWKDVHK                        | 1.097811047        | 3              | 3.43593   |
| P04642        | VTLTPDEEAR                                  | 1.104572223        | 2              | 3.01289   |
| <b>P04644</b> | <b>RS17 40S ribosomal protein S17</b>       | <b>2.083049763</b> | <b>0.92611</b> | <b>3</b>  |
| P04644        | DNYVPEVSALDQEIIIVDPDTK                      | 5.290639476        | 2              | 4.27681   |
| P04644        | LLDFGSLSNLQVTQPTVGMNFK                      | 1.156379602        | 2              | 4.72342   |
| P04644        | VCEEIAIIPSK                                 | 0.979773903        | 2              | 3.09423   |
| <b>P04692</b> | <b>TPM1 Tropomyosin alpha_1 chain</b>       | <b>2.152976545</b> | <b>0.96702</b> | <b>10</b> |
| P04692        | AISELDHALNDMTSI                             | 1.201084514        | 2              | 2.56342   |
| P04692        | GTEDEL DKYSEALK                             | 1.330805083        | 2              | 3.24046   |
| P04692        | KLVIIESDLER                                 | 1.336300532        | 2              | 3.30136   |
| P04692        | LDKENALDR                                   | 0.959619784        | 2              | 3.08951   |
| P04692        | LKGT EDEL DK                                | 0.436407836        | 2              | 2.49803   |
| P04692        | LVIIESDLER                                  | 0.950813494        | 2              | 3.13081   |
| P04692        | MEIQEIQLK                                   | 1.016179377        | 2              | 3.1234    |
| P04692        | QLEDEL VSLQK                                | 2.177924179        | 2              | 2.40528   |
| P04692        | SIDDELELYAQK                                | 4.807074888        | 2              | 4.38194   |
| P04692        | SKQLEDEL VSLQK                              | 0.677417471        | 2              | 3.05108   |
| <b>P04694</b> | <b>ATTY Tyrosine aminotransferase</b>       | <b>5.253431749</b> | <b>9.9E-20</b> | <b>6</b>  |
| P04694        | ILGPCTIVQGALK                               | 2.698146233        | 2              | 2.93723   |
| P04694        | IQEFCEQHYHCAEGSQEEDCK                       | #NUM!              | 3              | 4.92323   |
| P04694        | LIAEQAVHCLPATCFEYPNFFR                      | 1.617477184        | 3              | 3.98137   |
| P04694        | TACLVVNNPSNPCGVSFSK                         | 4.752233702        | 2              | 4.96927   |

|               |                                             |                    |                |           |
|---------------|---------------------------------------------|--------------------|----------------|-----------|
| P04694        | TVISLSIGDPTVFGNLPDPEVTQAMK                  | 2.753757492        | 2              | 3.11028   |
| P04694        | YEPLANLSTNVPIILSCGGLAK                      | 6.352278643        | 2              | 3.60447   |
| <b>P04762</b> | <b>CATA Catalase</b>                        | <b>1.905414167</b> | <b>3.6E-09</b> | <b>32</b> |
| P04762        | APQKPDVLTGGGNPIGDK                          | 2.430161588        | 2              | 4.3417    |
| P04762        | DAMLFPSFIHSQK+Oxidation(2                   | 1.018840348        |                |           |
| P04762        | DAQLFIQR                                    | 0.990082067        | 2              | 2.96241   |
| P04762        | DGPMCMHDNQGGAPNYYPNSFSAPEQQGSALEHHSQCSADVK  | 1.072148718        | 4              | 4.76379   |
| P04762        | DGPMCMHDNQGGAPNYYPNSFSAPEQQGSALEHHSQCSADVKR | 1.005304092        | 4              | 5.30929   |
| P04762        | DPASDQMK                                    | 1.000201014        | 1              | 2.55677   |
| P04762        | DPASDQMK+Oxidation(6                        | 1.316168108        |                |           |
| P04762        | DYPLIPVGK                                   | 1.308442104        | 1              | 2.26444   |
| P04762        | EAETFPFNPFDLTK                              | 1.196070977        | 2              | 3.96457   |
| P04762        | FNSANEDNVTQVR                               | 0.83428701         | 2              | 4.57475   |
| P04762        | FSTVAGESGSADTVR                             | 0.962948745        | 2              | 5.07742   |
| P04762        | FSTVAGESGSADTVRDP                           | 0.841019181        | 2              | 2.65521   |
| P04762        | FYTEDGNWDLVGNNTPIFFIR                       | 0.985250643        | 3              | 6.13444   |
| P04762        | GAGAFGYFEVTHDITR                            | 0.86032136         | 2              | 4.89049   |
| P04762        | GPLLQDVVFTDEMAHFDR                          | 1.296894669        | 2              | 5.50944   |
| P04762        | HMNGYGSHTFK                                 | 0.920024033        | 3              | 4.30958   |
| P04762        | HMNGYGSHTFK+Oxidation(1                     | 0.795908829        |                |           |
| P04762        | LAQEDPDYGLR                                 | 1.413644019        | 2              | 2.92098   |
| P04762        | LCENIANHLK                                  | 0.949598739        | 3              | 4.04224   |
| P04762        | LFAYPDTHR                                   | 1.069308988        | 2              | 2.97332   |
| P04762        | LGPNYLQIPVNCYPYR                            | 1.286073545        | 2              | 4.02765   |
| P04762        | LNIMTAGPR                                   | 1.099934436        | 2              | 3.14891   |
| P04762        | LVNANGEAVYCK                                | 1.340354463        | 2              | 3.90932   |
| P04762        | NAIHTYVQAGSHIAAK                            | 2.042523731        | 3              | 5.6258    |
| P04762        | NFTDVHPDYGAR                                | 1.155874502        | 2              | 4.02292   |
| P04762        | NLPVEEAGR                                   | 0.882031422        | 2              | 2.34334   |
| P04762        | NPANYFAEVEQMAFDPSNMPPGIEPSPDK               | 0.920461992        | 3              | 5.57231   |
| P04762        | RFNSANEDNVTQVR                              | 0.68747634         | 2              | 5.28592   |
| P04762        | VFEHIGK                                     | 0.934914593        | 2              | 2.44287   |
| P04762        | VFEHIGKR                                    | 0.597764067        | 2              | 2.71282   |
| P04762        | VQALLDQYNSQKPK                              | 0.882281739        | 2              | 4.86796   |
| P04762        | VWPHKDYPLIPVGK                              | 1.117259629        | 2              | 3.96364   |
| <b>P04764</b> | <b>ENOA Alpha_enolase</b>                   | <b>1.81101491</b>  | <b>0.97339</b> | <b>16</b> |
| P04764        | AGYTDQVVIGMDVAASEFYR                        | 2.148733972        | 2              | 4.85387   |
| P04764        | DATNVGDEGGFAPNILENK                         | 1.644550082        | 2              | 5.63743   |
| P04764        | DYPVVSIEDPFDQDDWDAWQK                       | 0.76431216         | 2              | 4.30796   |
| P04764        | FTATAGIQVVGDDLTVTNPK                        | 1.388950878        | 2              | 4.72111   |
| P04764        | GNPTVEVDLYTAK                               | 1.250887717        | 2              | 4.07359   |
| P04764        | HIADLAGNPEVILPVPFNVINGGSHAGNK               | 1.327335597        | 3              | 6.15986   |
| P04764        | IDQLMIEMDGTENK                              | 0.939106685        | 2              | 4.87195   |
| P04764        | IEEELGSK                                    | 0.996482737        | 2              | 2.54216   |
| P04764        | IGAEVYHNLK                                  | 1.11950454         | 2              | 3.30834   |
| P04764        | KLNVEQEK                                    | 0.460398062        | 2              | 2.54152   |
| P04764        | KLNVEQEKIDQLMIEMDGTENK                      | 1.238541012        | 3              | 5.9754    |
| P04764        | LNVEQEK                                     | 1.069473551        | 2              | 3.0934    |
| P04764        | LNVEQEKIDQLMIEMDGTENK                       | 1.080137987        | 3              | 5.2948    |
| P04764        | SCNCLLLK                                    | 1.062128629        | 2              | 2.79394   |
| P04764        | VNQIGSVTESLQACK                             | 1.048952023        | 2              | 4.95931   |
| P04764        | YITPDQLADLYK                                | 2.053805738        | 2              | 3.61877   |
| <b>P04785</b> | <b>PDIA1 Protein disulfide_isomerase</b>    | <b>1.868235585</b> | <b>0.00333</b> | <b>25</b> |
| P04785        | DHENIVIAK                                   | 0.858919189        | 2              | 2.74915   |
| P04785        | EADDIVNWLK                                  | 1.324723048        | 2              | 2.51986   |

|               |                                                     |                    |                |           |
|---------------|-----------------------------------------------------|--------------------|----------------|-----------|
| P04785        | HNQLPLVIEFTEQTAPK                                   | 1.01890819         | 3              | 5.45981   |
| P04785        | IFGGEIK                                             | 1.154138165        | 1              | 1.96317   |
| P04785        | IKPHLMSQELPEDWDKQPVK                                | 0.887340881        | 3              | 4.95468   |
| P04785        | IKPHLMSQELPEDWDKQPVK+Oxidation(5                    | 1.195834717        |                |           |
| P04785        | ILEFFGLK                                            | 1.349914606        | 2              | 2.95026   |
| P04785        | ILFIFIDSDHTDNQR                                     | 0.978200148        | 2              | 2.63651   |
| P04785        | LGETYKDHENIVIAK                                     | 1.076511708        | 3              | 5.50444   |
| P04785        | LITLEEEMTK                                          | 1.018513759        | 2              | 3.5772    |
| P04785        | LITLEEEMTK+Oxidation(7                              | 1.118069562        |                |           |
| P04785        | LKAEGSEIR                                           | 0.398612792        | 2              | 2.44262   |
| P04785        | LLDFIK                                              | 1.180378453        | 2              | 2.43801   |
| P04785        | MDSTANEVEAVK                                        | 0.892276166        | 2              | 4.26409   |
| P04785        | MDSTANEVEAVK+Oxidation(0                            | 0.870034968        |                |           |
| P04785        | NFEEVAFDEK                                          | 1.033313172        | 1              | 3.19827   |
| P04785        | NFEEVAFDEKK                                         | 1.009779108        | 2              | 3.97768   |
| P04785        | NNFEGEITK                                           | 0.964284539        | 2              | 2.59229   |
| P04785        | QFLLAEEAVDDIPFGITSNSDVFSK                           | 0.905702765        | 3              | 6.30544   |
| P04785        | TGPAATLSDTAAAEVLSVDSSEVTVIGFFK                      | 1.042833348        | 3              | 6.16215   |
| P04785        | THILLFLPK                                           | 5.87942304         | 2              | 3.09429   |
| P04785        | TVIDYNGER                                           | 0.923140968        | 2              | 2.97578   |
| P04785        | VDATEESDLAQQYGVR                                    | 2.31673503         | 2              | 5.46142   |
| P04785        | YKPESDELTAEK                                        | 0.986085783        | 3              | 4.50905   |
| P04785        | YQLDKDGVVLFK                                        | 0.899359504        | 2              | 3.79384   |
| <b>P04797</b> | <b>G3P Glyceraldehyde_3_phosphate dehydrogenase</b> | <b>2.439628388</b> | <b>2.3E-15</b> | <b>16</b> |
| P04797        | GAAQNIIPASTGAAK                                     | 1.214908087        | 2              | 4.14523   |
| P04797        | GILGYTEDQVVSDFNSNSHSSTFDAGAGIALNDNFVK               | 2.200178511        | 3              | 4.71846   |
| P04797        | IVSNASCTTNCLAPLAK                                   | 1.326046213        | 2              | 4.96471   |
| P04797        | LISWYDNEYGYSNR                                      | 2.199079359        | 2              | 4.3046    |
| P04797        | LVINGKPITIFQER                                      | 1.693753253        | 3              | 4.37649   |
| P04797        | RVIISAPSADAPMFVMGVNHEK                              | 1.958995707        | 3              | 5.95905   |
| P04797        | VGVNGFGR                                            | 1.61349548         | 2              | 2.34018   |
| P04797        | VIHDNFGIVEGLMTTVHAIATQK                             | 1.501569215        | 3              | 7.57061   |
| P04797        | VIHDNFGIVEGLMTTVHAIATQK+Oxidation(12                | 1.520456539        |                |           |
| P04797        | VIISAPSADAPMFVMGVNHEK                               | 1.447836476        | 2              | 4.62497   |
| P04797        | VIISAPSADAPMFVMGVNHEK+Oxidation(11                  | 1.569054009        |                |           |
| P04797        | VIISAPSADAPMFVMGVNHEK+Oxidation(14                  | 1.567854066        |                |           |
| P04797        | VPTPNVSVVDLTCR                                      | 2.600892288        | 2              | 3.18092   |
| P04797        | VVDLMAYMASK                                         | 1.295014733        | 2              | 3.8111    |
| P04797        | VVDLMAYMASKE                                        | 0.948642281        | 2              | 2.41447   |
| P04797        | WGDAGAIEYVVESTGVFTMEK                               | 1.630475162        | 2              | 5.5687    |
| <b>P04799</b> | <b>CP1A2 Cytochrome P450 1A2</b>                    | <b>2.257357501</b> | <b>4.4E-07</b> | <b>8</b>  |
| P04799        | FLTNDNTAIDK                                         | 1.075152766        | 2              | 2.62703   |
| P04799        | IGSTPVVLSGLNTIK                                     | 1.400739654        | 2              | 3.36481   |
| P04799        | IHEELDTVIGR                                         | 1.168122453        | 2              | 2.92841   |
| P04799        | KSEEMLNLVK                                          | 1.011509468        | 2              | 2.50428   |
| P04799        | NSIQDITGALFK                                        | 1.246253451        | 2              | 3.77559   |
| P04799        | SMTFNPDSGPVWAAR                                     | 1.220979941        | 2              | 3.42265   |
| P04799        | TCEHVQAWPR                                          | 1.33488131         | 2              | 2.5527    |
| P04799        | TVQEHYQDFNK                                         | 1.219839459        | 2              | 3.72857   |
| <b>P04903</b> | <b>GSTA2 Glutathione S_transferase alpha_2</b>      | <b>1.910487066</b> | <b>8.2E-06</b> | <b>10</b> |
| P04903        | DGNLMFDQVPMVEIDGMK                                  | 0.764500998        | 2              | 5.28943   |
| P04903        | DGNLMFDQVPMVEIDGMK+Oxidation(10                     | 0.744681708        |                |           |
| P04903        | DGNLMFDQVPMVEIDGMK+Oxidation(16                     | 0.719897605        |                |           |
| P04903        | DGNLMFDQVPMVEIDGMK+Oxidation(4                      | 0.75032215         |                |           |
| P04903        | KDGNLMFDQVPMVEIDGMK                                 | 0.962008682        | 2              | 5.05617   |
| P04903        | LIQSPEDLEK                                          | 1.022966475        | 2              | 3.17113   |
| P04903        | LKKGDNLMFDQVPMVEIDGMK                               | 1.588801223        | 3              | 3.43062   |

|               |                                                |                    |                |           |
|---------------|------------------------------------------------|--------------------|----------------|-----------|
| P04903        | WLLAAAGVEFEEK                                  | 1.24157261         | 2              | 3.68958   |
| P04903        | YDLYGK                                         | 0.701221981        | 1              | 1.97605   |
| P04903        | YLPAFEK                                        | 0.657461365        | 1              | 2.04342   |
| <b>P04904</b> | <b>GSTA3 Glutathione S_transferase alpha_3</b> | <b>2.223846807</b> | <b>9.9E-20</b> | <b>10</b> |
| P04904        | ADVYLVQVLYHVEELDPSALANFPLLK                    | 1.751011807        | 3              | 5.41861   |
| P04904        | ALIDMYAEGVADLDEIVLHYPYIPPGEK                   | 0.99578384         | 4              | 7.75469   |
| P04904        | KPLEDEKCVESAVK                                 | 0.635132684        | 2              | 3.67708   |
| P04904        | LRNDGSLMFQQVPMVEIDGMK                          | 1.336257942        | 2              | 4.82442   |
| P04904        | NDGSLMFQQVPMVEIDGMK                            | 1.226631295        | 2              | 4.92645   |
| P04904        | NDGSLMFQQVPMVEIDGMK+Oxidation(11               | 1.135754687        |                |           |
| P04904        | NDGSLMFQQVPMVEIDGMK+Oxidation(17               | 1.114947282        |                |           |
| P04904        | NDGSLMFQQVPMVEIDGMK+Oxidation(5                | 1.126763099        |                |           |
| P04904        | SHGQDYLVGNR                                    | 0.960566293        | 2              | 3.93402   |
| P04904        | WLLAAAGVEFEEQFLK                               | 0.942912075        | 2              | 5.70406   |
| <b>P04905</b> | <b>GSTM1 Glutathione S_transferase Mu 1</b>    | <b>1.988647111</b> | <b>2.2E-16</b> | <b>14</b> |
| P04905        | ADIVENQVMDNR                                   | 0.872385298        | 2              | 4.1382    |
| P04905        | ADIVENQVMDNR+Oxidation(8                       | 0.952013981        |                |           |
| P04905        | CLDAFPNLKDFLAR                                 | 1.11729632         | 2              | 3.11884   |
| P04905        | FKLGLDFPNLPYLIDGSR                             | 1.203963126        | 3              | 5.37654   |
| P04905        | HHLCGETEER                                     | 0.805879196        | 3              | 3.85558   |
| P04905        | IRADIVENQVMDNR                                 | 0.913324584        | 2              | 4.05557   |
| P04905        | ITQSNAIMR                                      | 1.061937635        | 2              | 3.10246   |
| P04905        | ITQSNAIMR+Oxidation(7                          | 0.92979183         |                |           |
| P04905        | KHHLCGETEER                                    | 0.600531423        | 3              | 4.08363   |
| P04905        | KITQSNAIMR                                     | 0.750449222        | 3              | 4.16256   |
| P04905        | KITQSNAIMR+Oxidation(8                         | 0.651262182        |                |           |
| P04905        | LGLDFPNLPYLIDGSR                               | 1.086654992        | 2              | 4.71755   |
| P04905        | MQLIMLCYNPDFEK                                 | 1.392974774        | 2              | 4.30947   |
| P04905        | YLSTPIFSK                                      | 0.93803571         | 2              | 2.79507   |
| <b>P04906</b> | <b>GSTP1 Glutathione S_transferase P</b>       | <b>2.082961346</b> | <b>0.9829</b>  | <b>2</b>  |
| P04906        | EAALVDMVNDGVEDLR                               | 1.059534796        | 2              | 5.01928   |
| P04906        | STCLYGQLPK                                     | 1.04391608         | 2              | 2.57489   |
| <b>P04937</b> | <b>FINC Fibronectin</b>                        | <b>1.957427437</b> | <b>0.42808</b> | <b>7</b>  |
| P04937        | ATGVFTTLQPLR                                   | 1.283274735        | 2              | 2.39039   |
| P04937        | FTQVSPPTLTAQWTAPSVK                            | 1.360569316        | 2              | 4.39166   |
| P04937        | HYQINQQWER                                     | 1.466539099        | 2              | 2.55867   |
| P04937        | ITYGETGGNSPVQEFTVPGSK                          | 1.111060248        | 2              | 2.39202   |
| P04937        | SSPVVIDASTAIDAPSNLR                            | 0.827708248        | 2              | 3.26054   |
| P04937        | SYTITGLQPGTDYK                                 | 0.778786976        | 2              | 3.01772   |
| P04937        | YIVNVYQISEEGK                                  | 1.059012183        | 2              | 2.84667   |
| <b>P05065</b> | <b>ALDOA Fructose_bisphosphate aldolase A</b>  | <b>2.726298719</b> | <b>1</b>       | <b>8</b>  |
| P05065        | ADDGRPFQVIK                                    | 1.798948058        | 2              | 2.33158   |
| P05065        | ALANSLACQ GK                                   | 1.093542852        | 2              | 2.87116   |
| P05065        | ALSDHHVYLEGTLKPNMVTGACTQK                      |                    | 1              | 3         |
| P05065        | FSNEEIAMATVTALR                                | 1.558243874        | 2              | 4.15722   |
| P05065        | GILAADESTGSIK                                  | 1.348726842        | 2              | 3.85415   |
| P05065        | GVVPLAGTNGETTTQGLDGLSER                        | 1.263697607        | 2              | 5.19452   |
| P05065        | IGEHTPSSLAIMENANVLR                            | 1.022773743        | 2              | 4.4112    |
| P05065        | LQSIGTENTEENR                                  | 3.740250002        | 2              | 4.02651   |
| P05065        | RLQSIGTENTEENR                                 | 1.720646297        | 2              | 3.64054   |
| <b>P05178</b> | <b>CP2C6 Cytochrome P450 2C6</b>               | <b>1.530047939</b> | <b>4.8E-11</b> | <b>8</b>  |
| P05178        | DLGIVFSHG NR                                   | 0.743269894        | 2              | 2.38239   |
| P05178        | EALIDHGEEFAER                                  | 0.628349163        | 2              | 3.45801   |
| P05178        | EFPDPEIFDPGHFLDGN GK                           | 0.994493989        | 2              | 2.91887   |
| P05178        | FDYKDQDFLNLMEK                                 | 0.60913491         | 3              | 4.91352   |
| P05178        | FIDLIPTNLPHAVTCDIK                             | 0.702093207        | 2              | 3.5973    |
| P05178        | GTTIITLSSVLHDSK                                | 0.963847916        | 2              | 3.68069   |

|               |                                  |                    |                |           |
|---------------|----------------------------------|--------------------|----------------|-----------|
| P05178        | MCAGEGLAR                        | 0.664323562        | 2              | 2.73944   |
| P05178        | NITQSLTSFSK                      | 0.571422259        | 2              | 2.68473   |
| <b>P05179</b> | <b>CP2C7 Cytochrome P450 2C7</b> | <b>2.743336914</b> | <b>0.65164</b> | <b>7</b>  |
| P05179        | ACVGEGLAR                        | 1.365854089        | 2              | 3.08125   |
| P05179        | FINFVPTNLPHAVTCDIK               | 2.398982489        | 3              | 3.34391   |
| P05179        | HMPYTDAMIHEVQR                   | 1.60772687         | 3              | 3.96349   |
| P05179        | IEEHQESLDVTNPR                   | 2.516104261        | 2              | 4.79203   |
| P05179        | KIEEHQESLDVTNPR                  | 1.60928842         | 2              | 4.875     |
| P05179        | KLPPGPTPLPIIGNFLQIDVK            | 1.18998941         | 3              | 5.74599   |
| P05179        | VLTSLSVLHDSK                     | 2.26579046         | 2              | 2.86089   |
| <b>P05182</b> | <b>CP2E1 Cytochrome P450 2E1</b> | <b>1.79865709</b>  | <b>0.9996</b>  | <b>16</b> |
| P05182        | AKEHLQSLDINCAR                   | 0.930440155        | 3              | 4.68477   |
| P05182        | DIDLSPVTVFGSIPPQFK               | 0.812121287        | 2              | 2.75925   |
| P05182        | DRLDMPYMDAVVHEIQR                | 0.829759832        | 3              | 3.35647   |
| P05182        | DTVFQGYVIPK                      | 0.69361358         | 2              | 2.62918   |
| P05182        | DVTDCLLIEMEK                     | 0.85561368         | 2              | 2.65073   |
| P05182        | DVTDCLLIEMEKEK                   | 1.483090945        | 2              | 3.09422   |
| P05182        | DVTDCLLIEMEKEK+Oxidation(9       | 0.797676045        |                |           |
| P05182        | EHLQSLDINCAR                     | 0.913981269        | 2              | 3.47016   |
| P05182        | FINLVPSNLPHEATR                  | 0.843411276        | 2              | 3.66087   |
| P05182        | FKPEHFLNENGK                     | 0.972108192        | 2              | 3.36973   |
| P05182        | GDIPVFQEYK                       | 0.886009356        | 2              | 2.59419   |
| P05182        | GIIFNNGPTWK                      | 0.76326664         | 2              | 2.75793   |
| P05182        | GTVVIPTLDSLLYDSHEFPDPEK          | 1.077077059        | 2              | 5.07511   |
| P05182        | LDMPYMDAVVHEIQR                  | 0.959158465        | 2              | 3.11696   |
| P05182        | RVCVGEGLAR                       | 0.985407958        | 2              | 2.35621   |
| P05182        | YGLLILMK                         | 0.892342124        | 2              | 3.00967   |
| <b>P05183</b> | <b>CP3A2 Cytochrome P450 3A2</b> | <b>2.115987744</b> | <b>0.99943</b> | <b>12</b> |
| P05183        | DFGPVGMGK                        | 2.433236994        | 2              | 2.86713   |
| P05183        | DIELDGLFIPK                      | 2.019040228        | 2              | 3.585     |
| P05183        | EMFPIIEQYGDLVK                   | 1.363741823        | 2              | 3.93193   |
| P05183        | KDIELDGLFIPK                     | 1.557913316        | 2              | 2.87139   |
| P05183        | KLQEEIDGALPSK                    | 1.204320674        | 2              | 4.02133   |
| P05183        | LQEEIDGALPSK                     | 0.977026377        | 2              | 4.09189   |
| P05183        | QAILEPEKPIVLK                    | 1.008548734        | 2              | 3.41415   |
| P05183        | QEAETGKPVMTK                     | 0.787726526        | 2              | 3.44976   |
| P05183        | QEAETGKPVMTK+Oxidation(10        | 1.131053906        |                |           |
| P05183        | RDFGPVGMGK                       | 1.088063452        | 2              | 2.39059   |
| P05183        | VDFLQLMLNAHNNSK                  | 0.855654868        | 2              | 3.371     |
| P05183        | YLKQEAETGKPVMTK                  | 1.091280223        | 3              | 3.31601   |
| <b>P05197</b> | <b>EF2 Elongation factor 2</b>   | <b>2.040621696</b> | <b>0.09172</b> | <b>30</b> |
| P05197        | ALLELQLEPEELYQTFQR               | 1.43206491         | 3              | 5.23297   |
| P05197        | ARPPFDGLAEDIDKGEVSAR             | 1.004221813        | 3              | 6.45462   |
| P05197        | AYLPVNESFGFTADLR                 | 1.20608472         | 2              | 3.78199   |
| P05197        | CELLYEGPPDDEAAMGIK               | 1.0797102          | 2              | 3.65729   |
| P05197        | DLEEDHACIPIK                     | 0.957859369        | 2              | 3.77374   |
| P05197        | DLEEDHACIPIK                     | 1.178462342        | 2              | 3.71966   |
| P05197        | EGIPALDNFLDK                     | 0.577468498        | 2              | 2.67665   |
| P05197        | EGIPALDNFLDKL                    | 1.725864581        | 2              | 3.4492    |
| P05197        | ETVSEESNVLCLSK                   | 1.178300556        | 2              | 4.45299   |
| P05197        | GEGQLGAAER                       | 1.354233298        | 2              | 3.04751   |
| P05197        | GHVFEESQVAGTPMFVVK               | 1.245521741        | 2              | 5.90146   |
| P05197        | IWCFGPDGTGPNILTDITK              | 1.506589954        | 2              | 5.20761   |
| P05197        | KEDLYLKPIQR                      | 0.818361179        | 2              | 3.37276   |
| P05197        | KIWCFGPDGTGPNILTDITK             | 1.267231346        | 2              | 5.02003   |
| P05197        | KVEDMMK                          | 0.870248572        | 2              | 2.574     |
| P05197        | KVEDMMK+Oxidation(4              | 1.058385041        |                |           |



|               |                                                   |                    |                |           |
|---------------|---------------------------------------------------|--------------------|----------------|-----------|
| P05197        | KVEDMMK+Oxidation(5                               | 1.058385041        |                |           |
| P05197        | LDSEDKKKEGKPLLK                                   | 0.907987788        | 2              | 4.06098   |
| P05197        | NMSVIAHVDHGK                                      | 0.513453749        | 2              | 3.65338   |
| P05197        | NMSVIAHVDHGK+Oxidation(1                          | 1.032999867        |                |           |
| P05197        | SDPVVSYR                                          | 1.096600744        | 2              | 2.30352   |
| P05197        | STLTDSLCK                                         | 1.453624882        | 2              | 3.18135   |
| P05197        | TFCQLILDPIFK                                      | 1.319531279        | 2              | 4.19923   |
| P05197        | TGTITTFEHAHNMR                                    | 1.113003091        | 2              | 4.00219   |
| P05197        | VFDAIMNFR                                         | 1.793674642        | 2              | 3.31539   |
| P05197        | VFSGVVSTGLK                                       | 1.137919728        | 2              | 3.09305   |
| P05197        | WLPAGDALLQMITIHLSPVTAQK                           | 1.431000126        | 3              | 3.5946    |
| P05197        | YEWVVAEAR                                         | 1.153574175        | 2              | 3.14639   |
| P05197        | YFDPANGK                                          | 1.066078718        | 1              | 2.21181   |
| P05197        | YVEPIEDVPCGNIVGLVGDQFLVK                          | 1.265051811        | 3              | 5.96445   |
| <b>P05369</b> | <b>FPPS Farnesyl pyrophosphate synthase</b>       | <b>2.814975694</b> | <b>0.03631</b> | <b>11</b> |
| P05369        | ALYEELDLR                                         | 1.596410005        | 2              | 3.19343   |
| P05369        | EVLEYNTVGGK                                       | 0.627254688        | 2              | 3.00185   |
| P05369        | GLTVVQTFQELVEPR                                   | 0.624416534        | 3              | 4.21982   |
| P05369        | IKEVLEYNTVGGK                                     | 0.572860043        | 3              | 4.2431    |
| P05369        | QILEENYGQK                                        | 0.698033345        | 2              | 2.61646   |
| P05369        | QILEENYGQKDPEK                                    | 0.461227754        | 2              | 3.60068   |
| P05369        | SLIEQCSAPLPPSIFLELANK                             | 0.586071827        | 2              | 4.8517    |
| P05369        | VGTDIQDNK                                         | 0.697128406        | 2              | 3.79731   |
| P05369        | VLTEDELGHPEK                                      | 0.780918903        | 2              | 2.77619   |
| P05369        | VLTEDELGHPEKGDATR                                 | 0.524849778        | 2              | 4.68737   |
| P05369        | YEEDSYNR                                          | 1.250797181        | 2              | 2.4574    |
| <b>P05426</b> | <b>RL7 60S ribosomal protein L7</b>               | <b>2.565031432</b> | <b>0.94449</b> | <b>7</b>  |
| P05426        | AGNFYVPAEPK                                       | 1.011278543        | 2              | 3.06486   |
| P05426        | FGIICMEDLIHEIYTVGK                                | 1.404303314        | 3              | 4.80491   |
| P05426        | KKVPAVPETLK                                       | 0.825579778        | 2              | 2.70811   |
| P05426        | NFAELK                                            | 1.017251823        | 1              | 1.90921   |
| P05426        | SVNELIYK                                          | 1.00215407         | 2              | 2.32386   |
| P05426        | TTHFVEGGDAGNR                                     | 1.227475632        | 3              | 3.75081   |
| P05426        | TTHFVEGGDAGNREDQINR                               | 0.993995049        | 2              | 4.54414   |
| <b>P05544</b> | <b>SPA3L Serine protease inhibitor A3L</b>        | <b>3.329045764</b> | <b>0.0305</b>  | <b>6</b>  |
| P05544        | AVLDVDETGTEATAATGVATVIR                           | 4.82147592         | 2              | 4.37677   |
| P05544        | DSTMEEILEGLK                                      | 2.008965571        | 2              | 3.11908   |
| P05544        | IAELFSDLER                                        | 1.877213936        | 2              | 2.95923   |
| P05544        | MQQVESSLQPETLK                                    | 1.44089127         | 2              | 4.1842    |
| P05544        | MQQVESSLQPETLKK                                   | 1.852116423        | 2              | 3.91799   |
| P05544        | VFSQQADLSR                                        | 1.712140402        | 2              | 3.04575   |
| <b>P05545</b> | <b>SPA3K Serine protease inhibitor A3K</b>        | <b>3.077695196</b> | <b>0.00237</b> | <b>6</b>  |
| P05545        | AVLDVDETGTEGAAATAVTAALK                           | 1.597441786        | 2              | 5.86145   |
| P05545        | IAELFSELDER                                       | 1.877549887        | 2              | 2.82554   |
| P05545        | IFSQQADLSR                                        | 1.394456715        | 2              | 2.55678   |
| P05545        | KIFSQQADLSR                                       | 1.563075444        | 2              | 2.39508   |
| P05545        | LSQPEDQAEINTGSALFIDKEQPILSEFQEK                   | 1.648917488        | 3              | 3.69476   |
| P05545        | NLHVSQVVHK                                        | 1.033409674        | 2              | 2.47458   |
| <b>P05712</b> | <b>RAB2A Ras_related protein Rab_2A</b>           | <b>2.060164382</b> | <b>0.99995</b> | <b>2</b>  |
| P05712        | IQEGVFDINNEANGIK                                  | 1.045517849        | 2              | 4.56114   |
| P05712        | TASNVEEAFINTAK                                    | 0.968988464        | 2              | 2.97454   |
| <b>P05765</b> | <b>RS21 40S ribosomal protein S21</b>             | <b>2.437623377</b> | <b>0.99994</b> | <b>3</b>  |
| P05765        | DHASIQMNVAEVDR                                    | 1.289438336        | 2              | 3.93561   |
| P05765        | MGESDDSILR                                        | 1.028607777        | 2              | 3.27114   |
| P05765        | TYGICGAIR                                         | 1.015554843        | 2              | 3.31347   |
| <b>P06214</b> | <b>HEM2 Delta_aminolevulinic acid dehydratase</b> | <b>1.814431127</b> | <b>0.14954</b> | <b>9</b>  |
| P06214        | AGADIIITYFAPQLLK                                  | 0.782277874        | 2              | 3.66608   |

|               |                                                                   |                    |                |           |
|---------------|-------------------------------------------------------------------|--------------------|----------------|-----------|
| P06214        | AGAFDLR                                                           | 0.857253005        | 2              | 2.50458   |
| P06214        | AGCQVVAPSDMMDGR                                                   | 1.020084635        | 2              | 3.6028    |
| P06214        | CVLIFGVPSR                                                        | 1.102954336        | 2              | 2.85991   |
| P06214        | DEQGSAADESDSPTIEAVR                                               | 0.703345679        | 2              | 5.82811   |
| P06214        | DIQEGADILMVKGPLPYLDMVQEVK                                         | 0.863227749        | 3              | 4.63134   |
| P06214        | TAVLESMTAFR                                                       | 1.077642048        | 2              | 3.53858   |
| P06214        | VPKDEQGSAADESDSPTIEAVR                                            | 0.832647697        | 3              | 5.806     |
| P06214        | YGVNQLLEMLRPLVEAGLR                                               | 0.859525277        | 3              | 4.66805   |
| <b>P06302</b> | <b>PTMA Prothymosin alpha</b>                                     | <b>1.649912167</b> | <b>0.00016</b> | <b>3</b>  |
| P06302        | RVAEDEDDEDDVETKK                                                  | 0.662878351        | 3              | 5.75299   |
| P06302        | VAEDEDDEDDVETK                                                    | 1.93442655         | 2              | 4.37964   |
| P06302        | VAEDEDDEDDVETKK                                                   | 0.902755021        | 2              | 4.80353   |
| <b>P06399</b> | <b>FIBA Fibrinogen alpha chain</b>                                | <b>2.230074624</b> | <b>0.99498</b> | <b>9</b>  |
| P06399        | AQQIQVLQK                                                         | 0.907654868        | 2              | 2.56098   |
| P06399        | EVVTSDDGSDCGDGMGLTHSFSGR                                          | 1.658183239        | 3              | 3.61527   |
| P06399        | GDFANANNFDNTFGQVSEDLR                                             | 1.581845162        | 2              | 5.32089   |
| P06399        | GDFANANNFDNTFGQVSEDLR                                             | 1.098097888        | 3              | 3.34685   |
| P06399        | GDKELLIGNEK                                                       | 1.059165449        | 2              | 2.56571   |
| P06399        | GLIDEANQDFTNR                                                     | 1.117374208        | 2              | 3.4943    |
| P06399        | MADEAASEAHQEGDTR                                                  | 0.92323508         | 2              | 4.44889   |
| P06399        | SQLQEGPPEWK                                                       | 1.196401031        | 2              | 2.88732   |
| P06399        | TSDSDIFTDIENPSSHVPEFSSSSK                                         | 2.923525791        | 3              | 3.86129   |
| <b>P06685</b> | <b>AT1A1 Sodium/potassium_transporting ATPase subunit alpha_1</b> | <b>2.026377591</b> | <b>0.97579</b> | <b>7</b>  |
| P06685        | AVAGDASESALLK                                                     | 1.056773009        | 2              | 3.52351   |
| P06685        | AVFQANQENLPILK                                                    | 1.023252727        | 2              | 3.18331   |
| P06685        | DKYEPAVSEHGDKK                                                    | 0.952610011        | 3              | 3.74223   |
| P06685        | DMTSEELDDILR                                                      | 0.825324024        | 2              | 2.97013   |
| P06685        | LNIPVNQVNPR                                                       | 1.071433356        | 2              | 3.00185   |
| P06685        | MSINAEDVVVGDLEVEK                                                 | 2.115485581        | 2              | 2.95446   |
| P06685        | YEPAAVSEHGDKK                                                     | 0.994697433        | 2              | 3.29365   |
| <b>P06687</b> | <b>AT1A3 Sodium/potassium_transporting ATPase subunit alpha_3</b> | <b>2.01666998</b>  | <b>0.98514</b> | <b>3</b>  |
| P06687        | DGNALTPPPTTPEVVK                                                  | 1.013091207        | 2              | 3.36608   |
| P06687        | GVGIISEGNETVEDIAAR                                                | 1.231582203        | 2              | 4.6752    |
| P06687        | QGAIVAVTGDGVNDSPALK                                               | 0.884685677        | 2              | 4.62584   |
| <b>P06757</b> | <b>ADH1 Alcohol dehydrogenase 1</b>                               | <b>2.362734195</b> | <b>0.78681</b> | <b>16</b> |
| P06757        | AAVLWEPHKPFTIEDIEVAPPK                                            | 1.236804955        | 3              | 5.76734   |
| P06757        | FPLEPLITHVLPFEK                                                   | 1.60761924         | 3              | 4.69981   |
| P06757        | GAIFGGFK                                                          | 0.940948461        | 2              | 2.75724   |
| P06757        | GALLDGTSR                                                         | 1.088824016        | 2              | 2.9695    |
| P06757        | GKPIHHFISTSTFSQYTVVDDIAVAK                                        | 0.689148427        | 3              | 5.34264   |
| P06757        | HPESNLCCQTK                                                       | 1.15875709         | 2              | 3.24545   |
| P06757        | ICKHPESNLCCQTK                                                    | 0.195543155        | 3              | 4.1981    |
| P06757        | IDAAAPLDK                                                         | 7.699575955        | 2              | 2.91263   |
| P06757        | IIVDINKDK                                                         | 1.157567354        | 2              | 2.95461   |
| P06757        | INEAFDLLR                                                         | 1.231256136        | 2              | 3.63854   |
| P06757        | KFPLEPLITHVLPFEK                                                  | 1.748595852        | 3              | 4.64681   |
| P06757        | MVATGVCR                                                          | 0.709800722        | 2              | 2.49079   |
| P06757        | SDDHAVSGSLFTPLPAVLGHGEGAVESIGEGVTCVKPGDK                          | 1.256066295        | 4              | 7.54586   |
| P06757        | VCLIGCGFSTGYGSVAVQAK                                              | 1.098617832        | 2              | 6.31846   |
| P06757        | VIPLFSPQCGK                                                       | 0.952666271        | 2              | 3.03683   |
| P06757        | VTPGSTCAVFLGGVGLSVVIGCK                                           | 1.244185755        | 2              | 5.06988   |
| <b>P06761</b> | <b>GRP78 78 kDa glucose_regulated protein</b>                     | <b>2.14175353</b>  | <b>1</b>       | <b>31</b> |
| P06761        | AKFEELNMDLFR                                                      | 0.930347633        | 3              | 4.66838   |
| P06761        | DAGTIAGLNVMR                                                      | 1.413744154        | 2              | 3.652     |

|               |                                                                                      |                    |                |           |
|---------------|--------------------------------------------------------------------------------------|--------------------|----------------|-----------|
| P06761        | DNHLLGTFDLTGIPPAPR                                                                   | 1.214183389        | 2              | 4.32849   |
| P06761        | ELEEIVQPIISK                                                                         | 1.379282535        | 2              | 4.3178    |
| P06761        | ETAEAYLGK                                                                            | 1.093040854        | 1              | 2.07649   |
| P06761        | FEELNMDLFR                                                                           | 1.13487065         | 2              | 3.67616   |
| P06761        | IEIESFFEGEDFSETLTR                                                                   | 1.552261581        | 2              | 4.74762   |
| P06761        | IEWLESHQDADIEDFK                                                                     | 1.078116493        | 2              | 5.65328   |
| P06761        | IEWLESHQDADIEDFKAK                                                                   | 0.910783427        | 3              | 4.34794   |
| P06761        | IINEPTAAAIAYGLDKR                                                                    | 1.032294649        | 2              | 4.56116   |
| P06761        | ITITNDQNR                                                                            | 1.089143065        | 2              | 2.7296    |
| P06761        | ITPSYVAFTPEGER                                                                       | 1.079415823        | 2              | 4.08301   |
| P06761        | KKELEEIVQPIISK                                                                       | 0.928905144        | 2              | 5.24619   |
| P06761        | KSDIDEIVLVGGSTR                                                                      | 1.07774951         | 2              | 5.01469   |
| P06761        | KSQIFSTASDNQPTVTIK                                                                   | 0.983241479        | 2              | 5.27532   |
| P06761        | LYGSGGPPPTGEEDTSEKDEL                                                                | 2.19593456         | 2              | 5.34628   |
| P06761        | MKETAEAYLGK                                                                          | 1.200728121        | 2              | 3.44756   |
| P06761        | MKETAEAYLGK+Oxidation(0                                                              | 0.90476958         |                |           |
| P06761        | MKETAEAYLGK                                                                          | 0.775041107        | 2              | 2.85694   |
| P06761        | NELESYAYSLK                                                                          | 1.14897602         | 2              | 3.37148   |
| P06761        | NQLTSNPENTVFDAK                                                                      | 0.971121191        | 2              | 4.76765   |
| P06761        | SDIDEIVLVGGSTR                                                                       | 1.29299045         | 2              | 3.80536   |
| P06761        | SQIFSTASDNQPTVTIK                                                                    | 1.021502567        | 2              | 5.36966   |
| P06761        | TFAPEEISAMVLTK                                                                       | 1.124820604        | 3              | 4.75106   |
| P06761        | TFAPEEISAMVLTK+Oxidation(9                                                           | 1.305234862        |                |           |
| P06761        | TKPYIQVDIGGGQTK                                                                      | 1.097262314        | 3              | 4.71136   |
| P06761        | TWNDPSVQQDIK                                                                         | 1.049259982        | 2              | 3.9831    |
| P06761        | VLEDSLK                                                                              | 1.172103353        | 2              | 2.47726   |
| P06761        | VLEDSLKK                                                                             | 1.085577652        | 2              | 2.51852   |
| P06761        | VTHAVVTVPAYFNDAQR                                                                    | 1.02204777         | 2              | 5.06552   |
| P06761        | VYEGERPLTK                                                                           | 1.068300119        | 2              | 2.94021   |
| <b>P06866</b> | <b>HPT Haptoglobin</b>                                                               | <b>5.25639317</b>  | <b>2.2E-12</b> | <b>8</b>  |
| P06866        | ATDLKDWVQETMAK                                                                       | 1.649875055        | 2              | 3.63808   |
| P06866        | GAVSPVGVQPILNK                                                                       | 2.092683235        | 2              | 4.45439   |
| P06866        | HTFCAGLTK                                                                            | 2.47921369         | 1              | 2.4074    |
| P06866        | LQTEGDGIYTLNSEK                                                                      | 2.217332245        | 2              | 4.43493   |
| P06866        | NQLVEIEK                                                                             | 1.723225561        | 1              | 2.33215   |
| P06866        | SCAVAIEYGVYVR                                                                        | 2.214516319        | 2              | 3.45217   |
| P06866        | SVVDIGLIK                                                                            | 2.379321063        | 1              | 2.0186    |
| P06866        | YVMLPVADQEK                                                                          | 2.054751249        | 2              | 2.5149    |
| <b>P07150</b> | <b>ANXA1 Annexin A1</b>                                                              | <b>2.178614428</b> | <b>0.87341</b> | <b>2</b>  |
| P07150        | GLGTDEDTLIEILTTR                                                                     | 1.135055256        | 2              | 3.79267   |
| P07150        | GVDEATIIDLTK                                                                         | 1.115165442        | 3              | 4.0629    |
| <b>P07153</b> | <b>RPN1 Dolichyl_diphosphooligosaccharide__protein glycosyltransferase subunit 1</b> | <b>2.161846344</b> | <b>0.93126</b> | <b>16</b> |
| P07153        | ASSFVLALEPELESR                                                                      | 1.318190302        | 2              | 4.2464    |
| P07153        | AVTSEIAVLQSR                                                                         | 1.247337599        | 2              | 3.89807   |
| P07153        | FVDHVFDEQVIDSLTVK                                                                    | 0.983967702        | 2              | 4.64806   |
| P07153        | GEDEEDNNLEVR                                                                         | 1.046750309        | 2              | 3.85473   |
| P07153        | HFDETVNR                                                                             | 0.933682572        | 1              | 2.71197   |
| P07153        | IDHILDAL                                                                             | 1.549915311        | 2              | 2.40005   |
| P07153        | ISIVVETVYTHVLHPYPTQITQSEK                                                            | 1.331871629        | 3              | 4.91024   |
| P07153        | LKTEGSDLCR                                                                           | 1.027740264        | 3              | 3.43198   |
| P07153        | NIQVDSPYDISR                                                                         | 0.890767174        | 2              | 3.50743   |
| P07153        | NLVEQHIQDIVVHYTFNK                                                                   | 1.541773948        | 3              | 4.90029   |
| P07153        | SEDILDYGPFK                                                                          | 1.148512705        | 2              | 3.48043   |
| P07153        | TEGSDLCR                                                                             | 1.429097851        | 2              | 2.69471   |
| P07153        | TILPAAQDVVYR                                                                         | 1.144833169        | 2              | 2.88432   |

|               |                                                                  |                    |                |           |
|---------------|------------------------------------------------------------------|--------------------|----------------|-----------|
| P07153        | TVDLSSHLAK                                                       | 1.168353512        | 2              | 2.58741   |
| P07153        | VHYENNSPFLTITSMTR                                                | 1.470576389        | 2              | 4.03744   |
| P07153        | VTAEVVLAHPGGGSTAR                                                | 1.12968017         | 2              | 4.87007   |
| <b>P07323</b> | <b>ENOG Gamma_enolase</b>                                        | <b>2.473157684</b> | <b>0.97719</b> | <b>3</b>  |
| P07323        | AAVPSGASTGIYEALELR                                               | 1.309130805        | 2              | 5.28674   |
| P07323        | GNPTVEVDLHTAK                                                    | 2.076532656        | 2              | 3.17231   |
| P07323        | SGETEDTFIADLVVGLCTGQIK                                           | 0.884732604        | 3              | 4.94792   |
| <b>P07335</b> | <b>KCRB Creatine kinase B_type</b>                               | <b>2.279688977</b> | <b>0.96712</b> | <b>3</b>  |
| P07335        | FCTGLTQIETLFK                                                    | 1.237583878        | 2              | 2.80903   |
| P07335        | LEQQQPIDDLMQAQK                                                  | 0.989832596        | 2              | 2.72387   |
| P07335        | TDLNPDNLQGGDDLPNYVLSR                                            | 0.993786583        | 2              | 3.57291   |
| <b>P07340</b> | <b>AT1B1 Sodium/potassium_transporting ATPase subunit beta_1</b> | <b>1.812070005</b> | <b>0.58733</b> | <b>3</b>  |
| P07340        | AYGENIGYSEK                                                      | 1.170143523        | 2              | 2.72504   |
| P07340        | VAPPGLTQIPQIQK                                                   | 0.836177455        | 2              | 2.58273   |
| P07340        | YNPNVLPVQCTGK                                                    | 0.946778745        | 2              | 2.61205   |
| <b>P07379</b> | <b>PCKGC Phosphoenolpyruvate carboxykinase_cytosolic [GTP]</b>   | <b>4.802477771</b> | <b>9.9E-20</b> | <b>18</b> |
| P07379        | AINPENGGFVAPGTSVK                                                | 2.137642555        | 2              | 4.44334   |
| P07379        | EEGWLAEHMLLIGITNPEGK                                             | 2.427759536        | 2              | 5.14535   |
| P07379        | EIISFGSGYGGNSLLGK                                                | 2.43055177         | 2              | 2.55412   |
| P07379        | EVEEIDKYLEQVNADLPYEIER                                           | 1.858607344        | 2              | 4.87224   |
| P07379        | FVEGNAQLCQPEYIHCDCGSEEEYGR                                       | 1.764992924        | 3              | 5.19227   |
| P07379        | GLGDVNVVEELFGISK                                                 | 2.158081302        | 2              | 3.77223   |
| P07379        | IGIELTDSPIYVVASMR                                                | 2.046923286        | 2              | 4.24743   |
| P07379        | MGTSVLEALGDGEFIK                                                 | 2.236465809        | 2              | 4.75779   |
| P07379        | MGTSVLEALGDGEFIK+Oxidation(0                                     | 1.818106575        |                |           |
| P07379        | TNLAMMNPTLPGWK                                                   | 1.949388245        | 2              | 3.13418   |
| P07379        | TVIITQEQR                                                        | 1.95187694         | 2              | 2.46263   |
| P07379        | VECVGDDIAWMK                                                     | 2.363103868        | 2              | 3.83109   |
| P07379        | VIQGSLSLDPQEV                                                    | 2.47965013         | 2              | 3.90576   |
| P07379        | VLEWMFGR                                                         | 2.418475027        | 2              | 2.53086   |
| P07379        | WMSEDFEK                                                         | 1.774853165        | 2              | 2.37451   |
| P07379        | YDNCWLALTDPR                                                     | 2.110166414        | 2              | 2.51999   |
| P07379        | YLAAAFPSACGK                                                     | 1.295877745        | 2              | 2.72062   |
| P07379        | YLEDQVNADLPYEIER                                                 | 1.831989576        | 2              | 5.05747   |
| <b>P07483</b> | <b>FABPH Fatty acid binding protein_heart</b>                    | <b>2.686600126</b> | <b>0.94103</b> | <b>2</b>  |
| P07483        | QVAMTKPTTIEK                                                     | 1.136862426        | 2              | 3.26915   |
| P07483        | WDGQETTLTR                                                       | 1.433459422        | 2              | 2.53159   |
| <b>P07632</b> | <b>SODC Superoxide dismutase [Cu_Zn]</b>                         | <b>2.017979189</b> | <b>0.99998</b> | <b>4</b>  |
| P07632        | DGVANVSIEDR                                                      | 1.962844832        | 2              | 2.73234   |
| P07632        | GDGPVQGVVHFEQK                                                   | 1.134775581        | 2              | 3.79552   |
| P07632        | HVGDLGNVAAGK                                                     | 1.031780048        | 2              | 4.04199   |
| P07632        | VISLSGEHSIIGR                                                    | 1.043849803        | 2              | 3.02934   |
| <b>P07633</b> | <b>PCCB Propionyl_CoA carboxylase beta chain_mitochondrial</b>   | <b>1.98168426</b>  | <b>0.99983</b> | <b>10</b> |
| P07633        | AFDNDVDALCNLR                                                    | 1.141735193        | 2              | 4.07653   |
| P07633        | AYNMLDIIHAVIDER                                                  | 0.971892245        | 2              | 3.88651   |
| P07633        | GFVDDIIQPSSTR                                                    | 1.130745745        | 2              | 3.23984   |
| P07633        | HLLGDTNYAWPTAEIAVMGAK                                            | 1.219270957        | 2              | 5.75789   |
| P07633        | ICCDLEVLASK                                                      | 0.952182277        | 2              | 3.49778   |
| P07633        | IMDQAITVVGAPVIGLNDSSGAR                                          | 0.988487493        | 3              | 5.02559   |
| P07633        | LPPELDTVVPLESSK                                                  | 1.236201056        | 2              | 3.70332   |
| P07633        | NKFPGDSVVTGR                                                     | 0.957225556        | 2              | 2.40977   |
| P07633        | SVTNEDVTQEQLGGAK                                                 | 0.652968527        | 2              | 5.2441    |
| P07633        | TVGIVGNQPNVASGCLDINSSVK                                          | 1.757093446        | 2              | 4.91488   |
| <b>P07687</b> | <b>HYEP Epoxide hydrolase 1</b>                                  | <b>1.927171582</b> | <b>0.99822</b> | <b>26</b> |

|               |                                                                   |                    |                |           |
|---------------|-------------------------------------------------------------------|--------------------|----------------|-----------|
| P07687        | DIELLYPYK                                                         | 0.898226995        | 1              | 2.30278   |
| P07687        | DKEETLPLGDGWVWPGSKPSAK                                            | 1.252076367        | 3              | 5.65544   |
| P07687        | EDESIRPFK                                                         | 0.915286942        | 2              | 2.95196   |
| P07687        | EDESIRPFKVETSDEEIKDLHQR                                           | 0.722207256        | 3              | 5.9852    |
| P07687        | ELEDGGLER                                                         | 1.070190326        | 2              | 2.34874   |
| P07687        | ENLGQGIMVHK                                                       | 0.939492083        | 2              | 3.20023   |
| P07687        | ENLGQGIMVHK+Oxidation(7                                           | 1.475995082        |                |           |
| P07687        | ESGYLHIQATKPDTVGCALNDSPVGLAAYILEK                                 | 1.185843892        | 3              | 5.66983   |
| P07687        | FHYGFNSNYMK                                                       | 1.022346417        | 2              | 2.62501   |
| P07687        | FLGYTEKDIELLYPYK                                                  | 0.962693815        | 3              | 4.74074   |
| P07687        | FYIQGGDWGSLICTNMAQMVPNHVK                                         | 1.009931285        | 3              | 3.3837    |
| P07687        | GGHFAAFEEPK                                                       | 0.992830732        | 2              | 3.46158   |
| P07687        | GLHLNMAFISR                                                       | 1.266841412        | 2              | 2.79208   |
| P07687        | IEGLDIHFHVKPPQLPSGR                                               | 0.877814914        | 3              | 4.26091   |
| P07687        | IIPLLTDPK                                                         | 1.098426914        | 1              | 1.9007    |
| P07687        | KFVSLAELQ                                                         | 0.914606666        | 2              | 2.80163   |
| P07687        | KQVEILNQYPHFK                                                     | 0.751977426        | 3              | 5.21234   |
| P07687        | LLAQDIR                                                           | 0.92792704         | 2              | 2.50907   |
| P07687        | QVEILNQYPHFK                                                      | 0.733810677        | 2              | 3.5948    |
| P07687        | SEYRELEDGGLER                                                     | 0.911243673        | 3              | 3.66431   |
| P07687        | SFYTMTPLLGQR                                                      | 1.16172092         | 2              | 3.78076   |
| P07687        | SHGLSDEHVFEVICPSIPGYGYSEASSK                                      | 0.991842266        | 3              | 6.59517   |
| P07687        | TKIEGLDIHFHVKPPQLPSGR                                             | 0.689300165        | 3              | 4.03182   |
| P07687        | VETSDEEIK                                                         | 0.911693251        | 2              | 2.62877   |
| P07687        | VETSDEEIKDLHQR                                                    | 0.792377132        | 2              | 4.72047   |
| P07687        | VFVPTGFSAFPSELLHAPEK                                              | 1.134499424        | 2              | 4.54154   |
| <b>P07756</b> | <b>CPSM Carbamoyl_phosphate synthase [ammonia]_ mitochondrial</b> | <b>2.051685945</b> | <b>9.9E-20</b> | <b>99</b> |
| P07756        | AADTIGYPVMIR                                                      | 1.460917039        | 2              | 3.87525   |
| P07756        | AADTIGYPVMIR+Oxidation(9                                          | 1.590441099        |                |           |
| P07756        | AERPDGLILGMGGQTALNCGVELFK                                         | 1.22957067         | 3              | 6.91184   |
| P07756        | AERPDGLILGMGGQTALNCGVELFK+Oxidation(10                            | 1.312073811        |                |           |
| P07756        | AFAISGPFNVQFLVK                                                   | 0.842740673        | 2              | 4.95617   |
| P07756        | AFAMTNQILVER                                                      | 1.224571907        | 2              | 4.58938   |
| P07756        | AFAMTNQILVER+Oxidation(3                                          | 0.850648854        |                |           |
| P07756        | ALENNMSLDEIVK                                                     | 0.988616501        | 2              | 4.81389   |
| P07756        | ALENNMSLDEIVK+Oxidation(5                                         | 0.876210027        |                |           |
| P07756        | AMLSTGFK                                                          | 1.064111713        | 2              | 2.49318   |
| P07756        | AQTAHIVLEDGTK                                                     | 0.982439703        | 2              | 4.47708   |
| P07756        | ATGYPLAFIAAK                                                      | 1.065977327        | 2              | 3.18313   |
| P07756        | CEMASTGEVACFGEGIHAFALK                                            | 1.082618482        | 3              | 5.4082    |
| P07756        | CEMASTGEVACFGEGIHAFALK+Oxidation(2                                | 1.152245647        |                |           |
| P07756        | CLGLTEAQTR                                                        | 0.9160607          | 2              | 3.61715   |
| P07756        | DADDNCVTVCNMENVNDAMGVHTGDSVVVAPAQTLNAEFQMLR                       | 2.478637366        | 3              | 5.16436   |
| P07756        | DELGLNK                                                           | 0.701149308        | 1              | 2.34751   |
| P07756        | DGSIDLVINLPNNNTK                                                  | 0.801587217        | 2              | 5.31511   |
| P07756        | DILNMDK                                                           | 1.722462738        | 1              | 2.03257   |
| P07756        | EIEYEVVR                                                          | 1.041036393        | 1              | 2.09313   |
| P07756        | EIGFSDKQISK                                                       | 0.929942782        | 2              | 3.1471    |
| P07756        | EPLFGISTGNIITGLAAGAK                                              | 1.053050282        | 3              | 5.65663   |
| P07756        | ETLMDLGTK                                                         | 1.289216725        | 1              | 2.33659   |
| P07756        | EVEMDAVGK                                                         | 1.419828529        | 1              | 2.1106    |
| P07756        | FIEGAREVEMDAVGKEGR                                                | 0.508893819        | 3              | 3.6484    |
| P07756        | FLEEATR                                                           | 1.397173942        | 2              | 2.46326   |
| P07756        | FLGVAEQLHNEGFK                                                    | 1.068501264        | 2              | 4.80351   |
| P07756        | FVHDNYVIR                                                         | 1.178942654        | 3              | 3.35219   |

|        |                                                       |             |   |         |
|--------|-------------------------------------------------------|-------------|---|---------|
| P07756 | GAEVHLPWNHDFMQMDYDGLLIAGGPGNPALAQPLIQNVK              | 1.302844147 | 3 | 6.06903 |
| P07756 | GAEVHLPWNHDFMQMDYDGLLIAGGPGNPALAQPLIQNVK+Oxidation(15 | 1.653122366 |   |         |
| P07756 | GILIGIQSFRPR                                          | 1.101300627 | 2 | 2.46131 |
| P07756 | GLNSESVTEETLR                                         | 0.942983288 | 2 | 4.84807 |
| P07756 | GNDVLVIECNLR                                          | 0.932562235 | 2 | 4.45974 |
| P07756 | GQILTMANPIIGNGGAPDPTAR                                | 0.896016675 | 2 | 6.00427 |
| P07756 | GQILTMANPIIGNGGAPDPTAR+Oxidation(5                    | 1.098700727 |   |         |
| P07756 | GQILTMANPIIGNGGAPDPTARDELGLNK                         | 0.876890836 | 3 | 4.91201 |
| P07756 | GQNPVNLNITNR                                          | 0.978585373 | 2 | 4.38972 |
| P07756 | GTTITSVLKPKALVASR                                     | 1.142615857 | 2 | 3.35451 |
| P07756 | GYSFGHPSSVAGEVVFNTGLGGYSEALDTPAYK                     | 1.061515022 | 3 | 5.98097 |
| P07756 | HLPTLEQPIIPSDYVAIK                                    | 1.016613845 | 2 | 5.58522 |
| P07756 | IALGIPLPEIK                                           | 1.401315328 | 2 | 2.82732 |
| P07756 | IAPSFAVESMEDALK                                       | 1.409667774 | 2 | 5.25688 |
| P07756 | IAPSFAVESMEDALK+Oxidation(9                           | 1.18239329  |   |         |
| P07756 | IAPSFAVESMEDALKAADTIGYPVMIR                           | 0.923611883 | 3 | 4.13075 |
| P07756 | IEFEGQSVDFVDPNK                                       | 0.985252171 | 2 | 5.29866 |
| P07756 | IEFEGQSVDFVDPNKQNLIAEVSTK                             | 0.980456276 | 3 | 5.55141 |
| P07756 | ILDYHQEACNGCIISVGGQIPNNLAVPLYK                        | 1.395988068 | 3 | 5.62339 |
| P07756 | ILESDRKEPLFGISTGNIITGLAAGAK                           | 0.884848031 | 3 | 4.69763 |
| P07756 | IMGTSPLQIDR                                           | 1.352177068 | 2 | 3.26957 |
| P07756 | IMGTSPLQIDR+Oxidation(1                               | 1.724128068 |   |         |
| P07756 | IMGTSPLQIDRAEDR                                       | 0.609485449 | 2 | 2.517   |
| P07756 | KEPLFGISTGNIITGLAAGAK                                 | 1.161991385 | 2 | 5.10797 |
| P07756 | KTVVVNCNPETVSTDFDECCK                                 | 1.077656539 | 2 | 4.98109 |
| P07756 | LFAEAVQK                                              | 0.998453635 | 2 | 3.44823 |
| P07756 | LFATEATSDWLNANNVPATPVAWPSQEQNPSSLSSIR                 | 1.162729518 | 4 | 4.71588 |
| P07756 | LRDADPILR                                             | 1.044408398 | 2 | 3.21114 |
| P07756 | LTSIDKWFLYK                                           | 0.667647853 | 2 | 2.76499 |
| P07756 | LYFEELSLER                                            | 1.353015351 | 2 | 3.67267 |
| P07756 | MCHPSVDGFTPR                                          | 1.35496864  | 3 | 4.89757 |
| P07756 | MCHPSVDGFTPR+Oxidation(0                              | 0.922782651 |   |         |
| P07756 | MRDILNMDK                                             | 1.064284974 | 2 | 3.14774 |
| P07756 | MRDILNMDK+Oxidation(0                                 | 1.090806804 |   |         |
| P07756 | QADAVYFLPITPQFVTEVIK                                  | 0.80481445  | 3 | 4.19449 |
| P07756 | QLFSDKLEINEIK                                         | 1.012798697 | 2 | 3.82525 |
| P07756 | QNLIAEVSTK                                            | 0.959002653 | 1 | 2.63927 |
| P07756 | RFLEEATR                                              | 0.957187164 | 2 | 2.68996 |
| P07756 | RGAEVHLPWNHDFMQMDYDGLLIAGGPGNPALAQPLIQNVK             | 1.482589849 | 4 | 4.62964 |
| P07756 | RTAVDSGIALLTNFQVTK                                    | 1.013326318 | 2 | 5.16508 |
| P07756 | RTSINVVR                                              | 0.675935438 | 2 | 2.33993 |
| P07756 | SAYALGGLGSGICPNK                                      | 1.111180135 | 2 | 4.94947 |
| P07756 | SAYALGGLGSGICPNKETLMDLGTK                             | 0.984265375 | 3 | 4.69494 |
| P07756 | SIFSAVLDELK                                           | 0.998687568 | 2 | 3.83489 |
| P07756 | SIFSAVLDELKVAQAPWK                                    | 0.694642119 | 3 | 4.29703 |
| P07756 | SLGQWLQEEK                                            | 1.01078093  | 2 | 4.06453 |
| P07756 | SLGQWLQEEKVPAIYGVDR                                   | 1.443657581 | 2 | 3.7954  |
| P07756 | SVGEVMAIGR                                            | 0.931274444 | 2 | 3.51829 |
| P07756 | SVGEVMAIGR+Oxidation(5                                | 0.856915334 |   |         |
| P07756 | TAVDSGIALLTNFQVTK                                     | 1.05176325  | 3 | 6.50634 |
| P07756 | TAVDSGIALLTNFQVTKLFAEAVQK                             | 1.019231747 | 3 | 5.41638 |
| P07756 | TFEESFQK                                              | 1.020940417 | 2 | 2.50366 |
| P07756 | TLGVDFIDVATK                                          | 1.02615311  | 2 | 4.28344 |
| P07756 | TSACFEPGLDYMVTK                                       | 0.833126312 | 2 | 4.55608 |

|               |                                                    |                    |                |           |
|---------------|----------------------------------------------------|--------------------|----------------|-----------|
| P07756        | TSACFEPPLDYMVTK+Oxidation(11                       | 0.6866705          |                |           |
| P07756        | TVLMNPNIASVQTNEVGLK                                | 1.015030517        | 2              | 6.11632   |
| P07756        | TVLMNPNIASVQTNEVGLK+Oxidation(3                    | 1.078241886        |                |           |
| P07756        | TVVVNCPETVSTDFDECDK                                | 0.649627852        | 2              | 5.61548   |
| P07756        | TVVVNCPETVSTDFDECDKLYFEELSLE                       | 1.15392564         | 3              | 5.56397   |
| P07756        | VISHAISEHVEDAGVHSGDATLMLPTQTISQGAIEK               | 0.845772235        | 3              | 7.42585   |
| P07756        | VISHAISEHVEDAGVHSGDATLMLPTQTISQGAIEK+Oxidation(22  | 1.111410938        |                |           |
| P07756        | VLGTSVESIMATEDR                                    | 1.235949594        | 2              | 4.70256   |
| P07756        | VLGTSVESIMATEDR+Oxidation(9                        | 1.055296642        |                |           |
| P07756        | VLILGSGGLSIGQAGFDYSGSQAVK                          | 1.457895514        | 2              | 5.82353   |
| P07756        | VMIGESVDEK                                         | 0.984425356        | 2              | 3.68868   |
| P07756        | VMIGESVDEK+Oxidation(1                             | 0.920692131        |                |           |
| P07756        | VSQEHVPLTK                                         | 0.915586925        | 2              | 3.84969   |
| P07756        | VVAVDCGIK                                          | 0.992081781        | 2              | 2.52538   |
| P07756        | VVAVDCGIKNNVIR                                     | 0.275330816        | 2              | 3.80094   |
| P07756        | YMESDGIK                                           | 0.862674923        | 2              | 2.61315   |
| P07756        | YMESDGIK+Oxidation(1                               | 1.122046555        |                |           |
| <b>P07824</b> | <b>ARGI1 Arginase_1</b>                            | <b>2.550511089</b> | <b>0.38824</b> | <b>16</b> |
| P07824        | ANEQLAAVVAETQK                                     | 1.217159596        | 2              | 5.20274   |
| P07824        | DHGDLAFVDVPPNDSPFQIVK                              | 1.863477836        | 2              | 6.21711   |
| P07824        | DIVYIGLR                                           | 1.066416971        | 2              | 2.3264    |
| P07824        | DVDPEHYIHK                                         | 4.119667749        | 2              | 3.41139   |
| P07824        | EGNHKPEVDYKPPK                                     | 1.506957577        | 2              | 2.76863   |
| P07824        | GKFPDVPGFVWTPCISAK                                 | 1.278799119        | 3              | 4.96103   |
| P07824        | LKETEYNVR                                          | 1.306325454        | 3              | 3.33979   |
| P07824        | NGTISVVLGGDHSMAIGSISGHAR                           | 1.332185953        | 3              | 4.34269   |
| P07824        | RPIHLSFDVDGLDPVFTPATGTPVVGGLSYR                    | 2.285025207        | 3              | 5.75482   |
| P07824        | TGLLSGLDIMEVNPPLTKG                                | 1.764667679        | 2              | 5.64583   |
| P07824        | TGLLSGLDIMEVNPPLTKG+Oxidation(9                    | 1.187973694        |                |           |
| P07824        | TVNTAVALTLSCFGTK                                   | 1.321175461        | 2              | 5.03746   |
| P07824        | VHPDLCVIWVDAHTDINTPLTSSGNLHGQPVAFLK                | 1.741234244        | 4              | 5.50347   |
| P07824        | VMEETFVYLLGR                                       | 1.752820953        | 2              | 3.70997   |
| P07824        | YFSMTEVDK                                          | 1.333415016        | 1              | 2.3222    |
| P07824        | YFSMTEVDKLGIGK+Oxidation(3                         | 1.04758221         |                |           |
| <b>P07871</b> | <b>THIKB 3_ketoacyl_CoA thiolase B_peroxisomal</b> | <b>1.706645095</b> | <b>2.2E-16</b> | <b>17</b> |
| P07871        | AEELGLPILGVLR                                      | 0.843902199        | 2              | 4.30189   |
| P07871        | AEIVPVTTTVLDDK                                     | 0.859236974        | 2              | 4.7357    |
| P07871        | AEIVPVTTTVLDDKGDGR                                 | 0.951768664        | 2              | 3.68683   |
| P07871        | AEIVPVTTTVLDDKGDGRK                                | 0.844030007        | 2              | 4.36588   |
| P07871        | DCLIPMGITSENVAER                                   | 0.641702907        | 2              | 3.91008   |
| P07871        | DGGSTTAGNSSQVSDGAAAVLLAR                           | 2.770280921        | 2              | 6.3436    |
| P07871        | IAQFLSGIPETVPLSAVNR                                | 1.332338128        | 2              | 3.21586   |
| P07871        | KTITVSQDEGVRPSTTMEGLAK                             | 0.793528715        | 3              | 3.7047    |
| P07871        | LKPECLGDISVGNVLQPGAGAAMAR                          | 0.59821009         | 3              | 5.14145   |
| P07871        | QCSSGLQAVANIAGGIR                                  | 0.720960407        | 2              | 4.69981   |
| P07871        | QDAFALASQQK                                        | 0.925390616        | 2              | 3.75977   |
| P07871        | QKQDAFALASQQK                                      | 0.771089226        | 2              | 4.15368   |
| P07871        | QVVTLLNELK                                         | 2.135415497        | 2              | 2.38165   |
| P07871        | SKAEELGLPILGVLR                                    | 1.320832341        | 3              | 4.83084   |
| P07871        | SYAVVGVPPDIMGIGPAYAIPAALQK                         | 0.920708307        | 3              | 4.74667   |
| P07871        | TITVSQDEGVRPSTTMEGLAK                              | 0.727808005        | 2              | 4.3676    |
| P07871        | VNPLGGAIALGHPLGCTGAR                               | 0.841077094        | 2              | 4.99562   |
| <b>P07872</b> | <b>ACOX1 Peroxisomal acyl_coenzyme A oxidase 1</b> | <b>1.819381963</b> | <b>0.72525</b> | <b>21</b> |
| P07872        | AFTTWTANAGIEEGR                                    | 1.77293218         | 2              | 3.81496   |
| P07872        | ASATFNPELITHILDGSPENTR                             | 0.882277163        | 2              | 4.77986   |
| P07872        | ASEAHCHYVVVK                                       | 0.825449741        | 3              | 4.14354   |

|               |                                                                   |                    |                |           |
|---------------|-------------------------------------------------------------------|--------------------|----------------|-----------|
| P07872        | EIENLILNDPDFQHEDYNFLTR                                            | 2.547453323        | 2              | 4.54409   |
| P07872        | EIGTHKPLPGITVGDIGPK                                               | 0.820636432        | 3              | 4.12068   |
| P07872        | EVAWNLTSDVLR                                                      | 1.098100825        | 2              | 3.14678   |
| P07872        | EYGISDPEEIMWFK                                                    | 0.851557472        | 2              | 3.43568   |
| P07872        | FGYEEMDNGYLK                                                      | 0.831208486        | 2              | 3.87587   |
| P07872        | GGDFLEGSIIITGAQLSQVNAR                                            | 1.010823585        | 2              | 5.24332   |
| P07872        | GLETTATYDPK                                                       | 0.787308352        | 2              | 3.67608   |
| P07872        | INESIGQGDLSLPELHALTAGLK                                           | 0.961330998        | 3              | 5.51523   |
| P07872        | LVEIAAK                                                           | 0.869456711        | 1              | 2.20189   |
| P07872        | LVGGMVSYLNDLPSQR                                                  | 1.689077721        | 2              | 3.23561   |
| P07872        | NLCLLSLYGISQK                                                     | 1.317238666        | 2              | 3.26243   |
| P07872        | QSEPEPQLDFQTQQYK                                                  | 1.010551866        | 2              | 4.78958   |
| P07872        | SFLVGNAAQSLSK                                                     | 0.847614713        | 2              | 4.29144   |
| P07872        | SKEVAWNLTSDVLR                                                    | 0.982212144        | 3              | 3.82654   |
| P07872        | TQEFILNSPTVSIK                                                    | 0.830548023        | 2              | 4.57435   |
| P07872        | TSNHAIVLAQLITQGECYGLHAFVPIR                                       | 1.102040075        | 4              | 4.92351   |
| P07872        | YAQVKPDGTYVKPLSNK                                                 | 1.353117214        | 3              | 3.749     |
| P07872        | YDGNVYENLFEWAK                                                    | 1.120135287        | 2              | 4.82144   |
| <b>P07895</b> | <b>SODM Superoxide dismutase [Mn]_ mitochondrial</b>              | <b>1.799743771</b> | <b>0.99859</b> | <b>5</b>  |
| P07895        | AIWNVINWENVSQR                                                    | 0.935996292        | 2              | 3.87497   |
| P07895        | GDVTTQVALQPALK                                                    | 0.846705735        | 2              | 3.98569   |
| P07895        | GELLEAIKR                                                         | 0.916101105        | 2              | 2.33723   |
| P07895        | HHATVYNNLNVTEEK                                                   | 0.883984634        | 2              | 4.82983   |
| P07895        | NVRPDYLK                                                          | 0.870909014        | 2              | 2.30242   |
| <b>P07896</b> | <b>ECHP Peroxisomal bifunctional enzyme</b>                       | <b>1.589294943</b> | <b>9.9E-20</b> | <b>24</b> |
| P07896        | EWQSLAGPHGSK                                                      | 0.406465505        | 2              | 2.48304   |
| P07896        | GGPMFYAASVGLPTVLEK                                                | 1.342889167        | 2              | 3.88934   |
| P07896        | GQGLTGPSLPPGTPVR                                                  | 0.762669576        | 2              | 3.92712   |
| P07896        | GWYQYDKPLGR                                                       | 0.674663088        | 2              | 2.90122   |
| P07896        | IFNKPVPSLPMDSVFAEIAIK                                             | 1.379297171        | 3              | 4.74482   |
| P07896        | IGVVVGNCYGFVGNR                                                   | 1.652103371        | 2              | 3.44347   |
| P07896        | IIDKPIEPR                                                         | 0.849892821        | 2              | 2.4274    |
| P07896        | KGQGLTGPSLPPGTPVR                                                 | 0.661808644        | 2              | 4.26845   |
| P07896        | KQYPGVLAPETCVR                                                    | 0.715628517        | 2              | 4.34685   |
| P07896        | LCNPPVNAVSPVIR                                                    | 0.891644119        | 2              | 4.2708    |
| P07896        | LGILDAVVK                                                         | 0.938537674        | 2              | 2.81922   |
| P07896        | LLEVIPSR                                                          | 0.796061142        | 2              | 2.82499   |
| P07896        | LVAQGSPLK                                                         | 0.846820135        | 2              | 2.54035   |
| P07896        | QNPDIQLEPSDYLR                                                    | 1.004017576        | 2              | 3.95562   |
| P07896        | QYPGVLAPETCVR                                                     | 0.623768739        | 2              | 3.07371   |
| P07896        | RLVAQGSPLK                                                        | 0.56799686         | 2              | 2.33736   |
| P07896        | TASAPVSSVGLGLTMR                                                  | 0.918717767        | 2              | 5.88839   |
| P07896        | TISKEILER                                                         | 0.765943183        | 2              | 2.65437   |
| P07896        | VGISVVAVESDPK                                                     | 0.846981151        | 2              | 3.90225   |
| P07896        | VGLPEVTLGILPGAR                                                   | 0.997964904        | 2              | 3.62223   |
| P07896        | VSDLAGLDVGWK                                                      | 0.821531225        | 2              | 4.27189   |
| P07896        | YLSADEALR                                                         | 1.127760135        | 2              | 2.97647   |
| P07896        | YSPLGDMLEAGR                                                      | 0.786805245        | 2              | 4.33706   |
| P07896        | YSSPTTIATVMSLSK                                                   | 1.078377044        | 2              | 3.49345   |
| <b>P07943</b> | <b>ALDR Aldose reductase</b>                                      | <b>1.876499926</b> | <b>0.67361</b> | <b>2</b>  |
| P07943        | AIGVSNFNPLQIER                                                    | 1.332338159        | 2              | 3.06443   |
| P07943        | HIDCAQVYQNEK                                                      | 0.83570275         | 2              | 4.45897   |
| <b>P07953</b> | <b>F261 6_phosphofructo_2_kinase/fructose_2_6_biphosphatase 1</b> | <b>2.478303068</b> | <b>0.05109</b> | <b>5</b>  |
| P07953        | HGESELNLR                                                         | 1.09223569         | 2              | 2.59769   |
| P07953        | IGGDSGLSAR                                                        | 0.653948678        | 2              | 2.77474   |



|               |                                                                                                                     |                    |                |           |
|---------------|---------------------------------------------------------------------------------------------------------------------|--------------------|----------------|-----------|
| P07953        | NYEFFRPDNTAQLIR                                                                                                     | 3.358832667        | 2              | 3.39267   |
| P07953        | TIQTAEALGVPEQWK                                                                                                     | 2.670337307        | 2              | 3.06574   |
| P07953        | YLNWIGTPTK                                                                                                          | 1.497803488        | 2              | 2.95927   |
| <b>P08009</b> | <b>GSTM4 Glutathione S_transferase Yb_3</b>                                                                         | <b>2.094817561</b> | <b>0.87466</b> | <b>6</b>  |
| P08009        | LCYNPDFEK                                                                                                           | 1.379792708        | 2              | 3.04941   |
| P08009        | LLLEYTDSSYEK                                                                                                        | 1.069184879        | 2              | 4.83114   |
| P08009        | LLLEYTDSSYEKR                                                                                                       | 0.945890746        | 2              | 4.00991   |
| P08009        | NQVFEATCLDAFPNLK                                                                                                    | 0.89066946         | 2              | 4.56452   |
| P08009        | SQWLNEK                                                                                                             | 0.905139419        | 2              | 2.70843   |
| P08009        | YTMGDAPDFDR                                                                                                         | 1.235033478        | 2              | 2.81479   |
| <b>P08010</b> | <b>GSTM2 Glutathione S_transferase Mu_2</b>                                                                         | <b>1.839699325</b> | <b>0.00773</b> | <b>15</b> |
| P08010        | FLSKPIFAK                                                                                                           | 1.21143718         | 2              | 2.33711   |
| P08010        | IRVDVLENQAMDTR                                                                                                      | 1.174631425        | 3              | 4.2239    |
| P08010        | ITYVDFLVYDVLQHR                                                                                                     | 0.961761992        | 2              | 5.01125   |
| P08010        | KKPEYLEGLPEK                                                                                                        | 0.975220398        | 3              | 4.16745   |
| P08010        | KPEYLEGLPEK                                                                                                         | 1.336054084        | 2              | 3.42906   |
| P08010        | KYSMGDAPDYDR                                                                                                        | 1.410438426        | 2              | 3.8264    |
| P08010        | LFLEYDTSYEDK                                                                                                        | 0.975601381        | 2              | 5.54148   |
| P08010        | LFLEYDTSYEDKK                                                                                                       | 0.965203725        | 2              | 4.36844   |
| P08010        | LQLAMVCYSPDFER                                                                                                      | 1.396372658        | 2              | 4.32852   |
| P08010        | LQLAMVCYSPDFER+Oxidation(4                                                                                          | 1.780988811        |                |           |
| P08010        | SQWLSEK                                                                                                             | 1.075780294        | 2              | 2.46407   |
| P08010        | VDVLENQAMDTR                                                                                                        | 1.11977028         | 2              | 4.69443   |
| P08010        | VDVLENQAMDTR+Oxidation(8                                                                                            | 0.879364688        |                |           |
| P08010        | YSMGDAPDYDR                                                                                                         | 2.610047645        | 2              | 3.3708    |
| P08010        | YSMGDAPDYDR+Oxidation(2                                                                                             | 1.344057347        |                |           |
| <b>P08011</b> | <b>MGST1 Microsomal glutathione S_transferase 1</b>                                                                 | <b>1.981364286</b> | <b>0.90841</b> | <b>6</b>  |
| P08011        | IYHTIAYLTLPLQPNR                                                                                                    | 0.602365143        | 2              | 5.3202    |
| P08011        | MMFLSSATAFQR                                                                                                        | 1.215321604        | 2              | 3.60354   |
| P08011        | MMFLSSATAFQR+Oxidation(0                                                                                            | 1.312847065        |                |           |
| P08011        | MMFLSSATAFQR+Oxidation(1                                                                                            | 1.312847065        |                |           |
| P08011        | VFANPEDCAGFGK                                                                                                       | 0.929937377        | 2              | 4.67898   |
| P08011        | VFANPEDCAGFGKGENAK                                                                                                  | 0.908156152        | 2              | 4.62132   |
| <b>P08032</b> | <b>SPTA1 Spectrin alpha chain_ erythrocyte</b>                                                                      | <b>2.096569162</b> | <b>0.79493</b> | <b>4</b>  |
| P08032        | ADVVESWIGEK                                                                                                         | 0.964369615        | 2              | 2.63621   |
| P08032        | DLVAAKNLLNR                                                                                                         | 1.344459652        | 2              | 2.43823   |
| P08032        | DQARDLTSAGNLLK                                                                                                      | 0.960267769        | 2              | 2.43349   |
| P08032        | QELNTRWNSLK                                                                                                         | 1.41263065         | 2              | 2.30182   |
| <b>P08081</b> | <b>CLCA Clathrin light chain A</b>                                                                                  | <b>2.000821939</b> | <b>0.99048</b> | <b>2</b>  |
| P08081        | LEALDANSR                                                                                                           | 1.303999851        | 2              | 2.74592   |
| P08081        | WREEQTER                                                                                                            | 0.895039288        | 2              | 2.47819   |
| <b>P08290</b> | <b>ASGR2 Asialoglycoprotein receptor 2</b>                                                                          | <b>2.294469935</b> | <b>0.97439</b> | <b>3</b>  |
| P08290        | DFQDIQLDSEENDHQLIGDEEQGSHVQNLN                                                                                      | 2.014271932        | 3              | 6.50026   |
| P08290        | EEQEFVVK                                                                                                            | 1.009087088        | 1              | 2.06398   |
| P08290        | WVDGTEYR                                                                                                            | 1.533366082        | 2              | 2.32283   |
| <b>P08430</b> | <b>UD16 UDP_glucuronosyltransferase 1_6</b>                                                                         | <b>2.128168044</b> | <b>0.81163</b> | <b>2</b>  |
| P08430        | GHDIVVLVPEVNLGKESK                                                                                                  | 1.080997801        | 3              | 3.81951   |
| P08430        | YEILASDLLK                                                                                                          | 1.22749281         | 2              | 2.47489   |
| <b>P08461</b> | <b>ODP2 Dihydroliopollysine_residue acetyltransferase component of pyruvate dehydrogenase complex_mitochondrial</b> | <b>2.702165039</b> | <b>0.92477</b> | <b>5</b>  |
| P08461        | AAPAAAAAPPGR                                                                                                        | 0.840987255        | 2              | 2.32012   |
| P08461        | DVPLGTPLCIIVEK                                                                                                      | 1.425567036        | 2              | 3.42531   |
| P08461        | DVPVGSIICTVEKPDIEAFK                                                                                                | 1.89734158         | 2              | 3.90108   |
| P08461        | GLETIASDVVSLASK                                                                                                     | 1.471058247        | 2              | 4.49826   |
| P08461        | VAPTPAGVFIDIPISNIR                                                                                                  | 2.045918378        | 2              | 4.57957   |

|               |                                                                                |                    |                |           |
|---------------|--------------------------------------------------------------------------------|--------------------|----------------|-----------|
| <b>P08503</b> | <b>ACADM Medium_chain specific acyl_CoA dehydrogenase_mitochondrial</b>        | <b>2.141661902</b> | <b>1</b>       | <b>9</b>  |
| P08503        | AFAGDIANQLATDAVQIFGGYGFNTEYPVEK                                                | 1.216585054        | 3              | 5.1906    |
| P08503        | AFTGFIVEADTPGIHIGK                                                             | 1.052984252        | 2              | 4.44266   |
| P08503        | EEIIPVAPDYDK                                                                   | 1.044634673        | 2              | 3.57535   |
| P08503        | GITFEDVR                                                                       | 1.0144978          | 2              | 2.42656   |
| P08503        | IYQIYEGTAQIQR                                                                  | 1.072180366        | 2              | 4.73162   |
| P08503        | KGDEYVINGQK                                                                    | 0.978393346        | 2              | 4.12428   |
| P08503        | MTEQPMMCAYCVTEPSAGSDVAGIK                                                      | 0.858536332        | 2              | 4.4693    |
| P08503        | SGEYPPFLIK                                                                     | 1.07195122         | 2              | 2.79131   |
| P08503        | TRPTVAAGAVGLAQR                                                                | 0.989032801        | 2              | 4.41669   |
| <b>P08541</b> | <b>UD2B2 UDP_glucuronosyltransferase 2B2</b>                                   | <b>2.664756475</b> | <b>0.00033</b> | <b>11</b> |
| P08541        | DELQNHFIK                                                                      | 1.583886595        | 2              | 2.59063   |
| P08541        | FEIFSTSISKDELQNHFIK                                                            | 1.424982446        | 3              | 4.89458   |
| P08541        | FILPPSYVPVILSGLAGK                                                             | 3.368630779        | 3              | 6.12973   |
| P08541        | GAAVSLNIR                                                                      | 1.446797352        | 2              | 2.919     |
| P08541        | GHEVTVLKPSAYFFLDPK                                                             | 1.404629714        | 2              | 4.34859   |
| P08541        | HKEWDTFYSEILGRPTTVDETMSK                                                       | 0.917503702        | 3              | 4.43988   |
| P08541        | LLDVWTYELPR                                                                    | 2.066624525        | 2              | 4.05144   |
| P08541        | NVMLLSTIHHDQPMKPLDR                                                            | 1.06987725         | 3              | 3.78731   |
| P08541        | NVMLLSTIHHDQPMKPLDR+Oxidation(2                                                | 2.25459351         |                |           |
| P08541        | VEIWLIR                                                                        | 1.532033586        | 2              | 3.025     |
| P08541        | VLVWPMDFSHWMNIK                                                                | 1.20354079         | 2              | 2.48399   |
| <b>P08542</b> | <b>UDB17 UDP_glucuronosyltransferase 2B17</b>                                  | <b>2.237450259</b> | <b>0.00399</b> | <b>6</b>  |
| P08542        | EIINNPYK                                                                       | 1.062420113        | 1              | 2.07174   |
| P08542        | FETFPTSIVSKDELENYFIK                                                           | 1.138924232        | 2              | 4.18042   |
| P08542        | KWDPFYSEILGRPTTLAETMGK                                                         | 2.027539018        | 2              | 4.06018   |
| P08542        | LVDVWTYELQR                                                                    | 1.336118663        | 2              | 3.5694    |
| P08542        | NAVWLSTIHHDQPMKPLDK                                                            | 0.968076258        | 3              | 4.16042   |
| P08542        | WDPFYSEILGRPTTLAETMGK                                                          | 1.411679001        | 2              | 3.7438    |
| <b>P08649</b> | <b>CO4 Complement C4</b>                                                       | <b>2.29449925</b>  | <b>0.64141</b> | <b>2</b>  |
| P08649        | SLEIPGSSDPNVIPDGFSSFVR                                                         | 1.115692617        | 2              | 2.86038   |
| P08649        | VTASEPLETLGSEGALSPGGVASLLR                                                     | 1.561673224        | 2              | 2.87177   |
| <b>P08661</b> | <b>MBL2 Mannose_binding protein C</b>                                          | <b>1.85270413</b>  | <b>0.09152</b> | <b>2</b>  |
| P08661        | ALCSELQGTVAATPR                                                                | 0.609017469        | 2              | 3.34046   |
| P08661        | TENVFEDLTGNR                                                                   | 1.03629126         | 2              | 2.85044   |
| <b>P08683</b> | <b>CP2CB Cytochrome P450 2C11</b>                                              | <b>2.453498007</b> | <b>0.99583</b> | <b>18</b> |
| P08683        | DIDTTPAISGFGHLPFFYACFIPVQR                                                     | 1.18392871         | 3              | 4.89658   |
| P08683        | EALVDLGEFFSGR                                                                  | 1.29385323         | 2              | 3.91402   |
| P08683        | EHQESLDKDNPR                                                                   | 0.898906117        | 2              | 3.97237   |
| P08683        | FDPGHFLDER                                                                     | 1.176857582        | 2              | 2.63743   |
| P08683        | FDYKDPTFLNLMHR                                                                 | 1.424185375        | 3              | 4.84963   |
| P08683        | FNENFR                                                                         | 1.119728363        | 1              | 2.09618   |
| P08683        | GAPFDPTFILGCAPCNVICSIIFQNR                                                     | 0.828389504        | 3              | 6.02482   |
| P08683        | GTNVIVSLSSILHDDKEFPNPEK                                                        | 1.737963884        | 2              | 4.99096   |
| P08683        | HNPQSEFTLESIVATVTDMFGAGTETTSTTLR                                               | 0.773795711        |                |           |
| P08683        | ICAGEALAR                                                                      | 1.146916042        | 2              | 3.02145   |
| P08683        | LPPGPTPLPIIGNTLQIYMK                                                           | 0.843633819        | 3              | 3.97036   |
| P08683        | NFFYIK                                                                         | 1.487895236        | 1              | 1.91941   |
| P08683        | NYVLEK                                                                         | 0.773549955        | 1              | 2.03016   |
| P08683        | SQMPYTDVVHEIQR                                                                 | 1.187129951        | 2              | 4.43892   |
| P08683        | VKEHQESLDKDNPR                                                                 | 1.170520788        | 3              | 5.26034   |
| P08683        | VQEEIER                                                                        | 0.969363192        | 2              | 2.46213   |
| P08683        | YGLLLLLK                                                                       | 1.362681683        | 2              | 3.19947   |
| P08683        | YIDLVPNTLPHLVTR                                                                | 0.833637988        | 2              | 4.23395   |
| <b>P08733</b> | <b>MLRV Myosin regulatory light chain 2_ventricular/cardiac muscle isoform</b> | <b>2.445762004</b> | <b>0.53786</b> | <b>3</b>  |

|               |                                                            |                    |                |           |
|---------------|------------------------------------------------------------|--------------------|----------------|-----------|
| P08733        | GADPEETILNAFK                                              | 1.211668327        | 2              | 2.32703   |
| P08733        | NEEIDEMIK                                                  | 1.336317658        | 1              | 2.63221   |
| P08733        | NLVHIITHGEEKD                                              | 2.018249285        | 2              | 2.91725   |
| <b>P09006</b> | <b>SPA3N Serine protease inhibitor A3N</b>                 | <b>16.61345481</b> | <b>0.04042</b> | <b>2</b>  |
| P09006        | AVLDVAETGTEAAAATGVK                                        | 2.322178546        | 2              | 4.87133   |
| P09006        | GNSMEEILEGLK                                               | 4.054283221        | 2              | 3.14438   |
| <b>P09034</b> | <b>ASSY Argininosuccinate synthase</b>                     | <b>2.261999761</b> | <b>0.00823</b> | <b>17</b> |
| P09034        | APNTPDVLEIEFK                                              | 1.664517165        | 2              | 3.66081   |
| P09034        | DGTTHTSLDLFMYLNEVAGK                                       | 1.785958802        | 2              | 4.82449   |
| P09034        | EFVEEVIWPAVQSSALYEDR                                       | 1.779076297        | 3              | 5.72916   |
| P09034        | EQGYDVIAYLANIGQK                                           | 2.188101548        | 2              | 4.70463   |
| P09034        | FAELVYTGFWHSPECFVR                                         | 1.288076604        | 2              | 4.59087   |
| P09034        | FELTCYSLAPQIK                                              | 1.420428948        | 2              | 4.46314   |
| P09034        | GRNDLMEYAK                                                 | 1.495587387        | 2              | 3.33498   |
| P09034        | IDIVENR                                                    | 1.208868191        | 2              | 2.37392   |
| P09034        | KVFIEDVSK                                                  | 1.146291848        | 3              | 3.62154   |
| P09034        | NDLMEYAK                                                   | 3.417604331        | 2              | 2.63173   |
| P09034        | NDLMEYAK+Oxidation(3                                       | 1.239897621        |                |           |
| P09034        | NQAPPGLYTK                                                 | 1.113393192        | 2              | 2.3122    |
| P09034        | SPWSMDENLMHISYEAGILENPK                                    | 1.849127857        | 3              | 5.63126   |
| P09034        | TQDPAKAPNTPDVLEIEFK                                        | 0.997167548        | 2              | 5.06488   |
| P09034        | TQDPAKAPNTPDVLEIEFKK                                       | 0.77069349         | 3              | 5.39563   |
| P09034        | VFIEDVSK                                                   | 1.351469377        | 2              | 2.35657   |
| P09034        | VQVSVFK                                                    | 1.10817925         | 2              | 2.4449    |
| <b>P09041</b> | <b>PGK2 Phosphoglycerate kinase 2</b>                      | <b>1.809505759</b> | <b>0.07806</b> | <b>5</b>  |
| P09041        | FHVEEEGK                                                   | 0.826266596        | 2              | 2.6503    |
| P09041        | FHVEEEGK GK                                                | 0.696647139        | 2              | 2.52993   |
| P09041        | LGDVYVNDAFGTAHR                                            | 0.999534017        | 3              | 4.21655   |
| P09041        | VDFNVPMK                                                   | 0.996880796        | 2              | 2.33805   |
| P09041        | VSHVSTGGGASLELLEGGK                                        | 0.916128433        | 2              | 5.82734   |
| <b>P09117</b> | <b>ALDOC Fructose_bisphosphate aldolase C</b>              | <b>2.312548534</b> | <b>0.64358</b> | <b>3</b>  |
| P09117        | VLAAYK                                                     | 1.202762632        | 2              | 2.68449   |
| P09117        | YASICQQNGIVPIVEPEILPDGDHDLK                                | 3.223216631        | 3              | 3.59953   |
| P09117        | YASICQQNGIVPIVEPEILPDGDHDLKR                               | 1.365037186        | 3              | 5.11891   |
| <b>P09139</b> | <b>SPYA Serine_pyruvate aminotransferase_mitochondrial</b> | <b>1.995360795</b> | <b>0.31108</b> | <b>3</b>  |
| P09139        | IGLLGYNATTENADR                                            | 0.996055792        | 2              | 3.11332   |
| P09139        | LLLGPGPSNLAPR                                              | 0.983976418        | 2              | 2.51964   |
| P09139        | VLNAPPGISLISFNDK                                           | 1.599071124        | 2              | 2.39283   |
| <b>P09367</b> | <b>SDHL L_serine dehydratase/L_threonine deaminase</b>     | <b>8.077086357</b> | <b>6.4E-06</b> | <b>4</b>  |
| P09367        | ALGVNTVGAQTLK                                              | 3.244486916        | 2              | 3.54529   |
| P09367        | AQLGLNELLK                                                 | 1.734683263        | 1              | 2.19022   |
| P09367        | LGLPATIVVPSTTPALTIER                                       | 4.635130123        | 2              | 2.70583   |
| P09367        | LKNEGATVEVGEMLDEAIQLAK                                     | 2.261565613        | 3              | 3.97793   |
| <b>P09495</b> | <b>TPM4 Tropomyosin alpha_4 chain</b>                      | <b>2.005680775</b> | <b>0.99995</b> | <b>12</b> |
| P09495        | AEGDAAALNR                                                 | 1.115300714        | 2              | 2.55131   |
| P09495        | EDKYEEEIK                                                  | 1.43862109         | 1              | 2.69296   |
| P09495        | EENVGLHQTLDTLNLNCI                                         | 1.99013129         | 2              | 5.23139   |
| P09495        | IQALQQQADDAEDR                                             | 1.584419588        | 2              | 4.46353   |
| P09495        | IQLVEEELDR                                                 | 1.014542729        | 2              | 3.48684   |
| P09495        | IQLVEEELDRAQER                                             | 0.846908315        | 2              | 3.01552   |
| P09495        | KLVILEGELER                                                | 1.905860879        | 3              | 4.05098   |
| P09495        | LEEAEKAADESER                                              | 0.899345348        | 2              | 4.1334    |
| P09495        | LVILEGELER                                                 | 1.899211405        | 2              | 3.14805   |
| P09495        | MEIQEMQLK                                                  | 1.162224026        | 2              | 2.98138   |
| P09495        | RIQLVEEELDR                                                | 1.014409235        | 2              | 2.79499   |

|               |                                                          |                    |                |           |
|---------------|----------------------------------------------------------|--------------------|----------------|-----------|
| P09495        | YSEKEDKYEEIK                                             | 0.992640953        | 2              | 4.535     |
| <b>P09527</b> | <b>RAB7A Ras_related protein Rab_7a</b>                  | <b>2.054327542</b> | <b>0.81218</b> | <b>6</b>  |
| P09527        | ATIGADFLTK                                               | 0.853900554        | 2              | 2.61116   |
| P09527        | DPENFPFVVLGNK                                            | 1.709945055        | 2              | 3.79691   |
| P09527        | GADCCVLVFDVTAPNTFK                                       | 1.171019068        | 2              | 3.39603   |
| P09527        | TLDSWRDEFLIQASPR                                         | 1.126694829        | 3              | 3.50582   |
| P09527        | TSLMNQYVVK                                               | 0.921310787        | 2              | 2.83383   |
| P09527        | VIIIGDSGVGK                                              | 1.035769005        | 2              | 2.42567   |
| <b>P09605</b> | <b>KCRS Creatine kinase S_type_mitochondrial</b>         | <b>9.634761823</b> | <b>0.76563</b> | <b>2</b>  |
| P09605        | GTGGVDTAADVVDISNDR                                       | 2.64475024         | 2              | 3.8282    |
| P09605        | LSEMTEQDQQR                                              | 3.440345722        | 2              | 3.36361   |
| <b>P09606</b> | <b>GLNA Glutamine synthetase</b>                         | <b>2.946014853</b> | <b>0.00232</b> | <b>8</b>  |
| P09606        | CIEEAIDK                                                 | 1.677879963        | 2              | 2.34831   |
| P09606        | ITGTNAEVMPAQWEFQIGPCEGIR                                 | 1.565155582        | 3              | 5.46739   |
| P09606        | LTGFHETSNINDFSAGVANR                                     | 1.270281325        | 2              | 6.01703   |
| P09606        | MGDHLWVAR                                                | 0.891275568        | 2              | 3.03217   |
| P09606        | QMYMNL PQEK                                              | 1.132263104        | 2              | 2.38968   |
| P09606        | RLTGFHETSNINDFSAGVANR                                    | 1.12996352         | 3              | 5.51941   |
| P09606        | TCLLNETGDEPFQYK                                          | 1.738762606        | 2              | 5.30161   |
| P09606        | TCLLNETGDEPFQYKN                                         | 1.601531253        | 2              | 5.46664   |
| <b>P09626</b> | <b>ATP4A Potassium_transporting ATPase alpha chain 1</b> | <b>2.06621406</b>  | <b>0.97755</b> | <b>2</b>  |
| P09626        | VDNSSLTGESEPQTR                                          | 0.834124783        | 2              | 4.20254   |
| P09626        | VIMVTGDHPITAK                                            | 1.171964985        | 2              | 3.28713   |
| <b>P09811</b> | <b>PYGL Glycogen phosphorylase_liver form</b>            | <b>2.257548842</b> | <b>1</b>       | <b>27</b> |
| P09811        | AWNTMVLRL                                                | 1.377309652        | 2              | 2.39321   |
| P09811        | DFSELEPDKFQNK                                            | 1.036622341        | 2              | 3.48768   |
| P09811        | DGVGTVDFDAFPDQVAIQLNDTHPALAIPELMR                        | 1.15434403         | 4              | 5.47697   |
| P09811        | DLSQLTK                                                  | 1.165657331        | 1              | 2.1468    |
| P09811        | EGWQVEEADDWLR                                            | 0.992940115        | 2              | 3.71017   |
| P09811        | FSQFLEK                                                  | 1.239521834        | 1              | 2.0447    |
| P09811        | GIVGVENVAELK                                             | 1.120819435        | 2              | 3.01163   |
| P09811        | GIVGVENVAELKK                                            | 1.013246499        | 2              | 3.33362   |
| P09811        | HLQIIEINQK                                               | 1.002927868        | 2              | 3.79598   |
| P09811        | IFVDIEK                                                  | 1.231631721        | 1              | 2.05413   |
| P09811        | INMAHLCIVGCHAVNGVAK                                      | 1.024629184        | 3              | 5.01629   |
| P09811        | INPSSMFDVHVK                                             | 1.209016807        | 2              | 3.1747    |
| P09811        | LVIDQIDNGFFSPNPDLFK                                      | 1.695791944        | 2              | 5.27898   |
| P09811        | LVTSAEVVNNDPMVGSK                                        | 1.512973749        | 2              | 4.67995   |
| P09811        | MSLIEEEGGK                                               | 1.055572039        | 2              | 2.42289   |
| P09811        | MSLIEEEGGKR                                              | 0.973306272        | 2              | 2.72165   |
| P09811        | RWLLCNPLGLADLIAEK                                        | 1.388894375        | 3              | 5.04234   |
| P09811        | TFAYTNHTVLPALER                                          | 0.972680857        | 2              | 4.9232    |
| P09811        | VDDVAALDK                                                | 1.38979345         | 2              | 2.70679   |
| P09811        | VDDVAALDKK                                               | 1.053590562        | 3              | 3.77455   |
| P09811        | VFADYEAYVK                                               | 0.921423849        | 2              | 2.64659   |
| P09811        | VIPATDLSEQISTAGTEASGTGNMK                                | 1.342875966        | 2              | 5.96223   |
| P09811        | VLYPNDNFFEGK                                             | 1.222023809        | 2              | 2.64317   |
| P09811        | VSQLYMNQK                                                | 1.542676737        | 2              | 3.03173   |
| P09811        | WLLLCNPLGLADLIAEK                                        | 0.980305063        | 2              | 4.83604   |
| P09811        | WVDTQVVLALPYDTPVPGYMNNTVNTMR                             | 1.112962363        | 3              | 4.28154   |
| P09811        | YEYGFNQK                                                 | 1.03730374         | 2              | 2.63368   |
| <b>P09812</b> | <b>PYGM Glycogen phosphorylase_muscle form</b>           | <b>2.317113639</b> | <b>0.82859</b> | <b>9</b>  |
| P09812        | GYNAQEYYDR                                               | 1.113160716        | 2              | 2.3255    |
| P09812        | HLQIIEINQR                                               | 1.31714279         | 2              | 2.33396   |
| P09812        | LITAIGDVVNHDPAVGDR                                       | 1.461413846        | 2              | 3.2642    |
| P09812        | NLAENISR                                                 | 1.066882336        | 2              | 2.72201   |

|               |                                                                          |                    |                |           |
|---------------|--------------------------------------------------------------------------|--------------------|----------------|-----------|
| P09812        | QIIEQLSSGFFSPK                                                           | 1.844335364        | 2              | 3.66077   |
| P09812        | VIFLENYR                                                                 | 1.05945807         | 2              | 2.5118    |
| P09812        | VIPAADLSEQISTAGTEASGTGNMK                                                | 7.73780294         | 2              | 4.78652   |
| P09812        | WLVLCNPGLAEVIAER                                                         | 1.566747128        | 2              | 3.8157    |
| P09812        | YEFGIFNQK                                                                | 1.720823757        | 2              | 2.44447   |
| <b>P09875</b> | <b>UD2B1 UDP-glucuronosyltransferase 2B1</b>                             | <b>1.632593667</b> | <b>0.00199</b> | <b>6</b>  |
| P09875        | ANVVASALAQIPQK                                                           | 0.809228682        | 3              | 3.61551   |
| P09875        | FSGGLPLPPSYVPVLSLSDR                                                     | 0.887911018        | 3              | 3.61704   |
| P09875        | IILNELAQR                                                                | 0.789544255        | 2              | 3.00327   |
| P09875        | SDLEYSFAK                                                                | 0.571595012        | 2              | 2.35784   |
| P09875        | VDFSILSTTGLLTALK                                                         | 0.786235313        | 2              | 4.55381   |
| P09875        | WIDEWTR                                                                  | 0.490534102        | 2              | 2.60036   |
| <b>P09895</b> | <b>RL5 60S ribosomal protein L5</b>                                      | <b>2.163562458</b> | <b>1</b>       | <b>5</b>  |
| P09895        | GAVDGGLSIPHSTK                                                           | 1.160871468        | 2              | 4.37423   |
| P09895        | HIMGQNVADYMR                                                             | 0.970637764        | 2              | 3.54644   |
| P09895        | NNVTPDMMMEEMYK                                                           | 1.200738714        | 2              | 3.39451   |
| P09895        | RFPGYDSESK                                                               | 1.009540488        | 2              | 2.84887   |
| P09895        | YLMEEDEDAYKK                                                             | 1.09205018         | 2              | 3.54788   |
| <b>P0C0S7</b> | <b>H2AZ Histone H2A.Z</b>                                                | <b>1.82717042</b>  | <b>1</b>       | <b>2</b>  |
| P0C0S7        | ATIAGGGVIPHIHK                                                           | 0.860001792        | 2              | 3.51307   |
| P0C0S7        | GDEELDSLK                                                                | 0.90723595         | 2              | 3.40999   |
| <b>P0C2X9</b> | <b>AL4A1 Delta_1_pyrroline_5_carboxylate dehydrogenase_mitochondrial</b> | <b>2.003983974</b> | <b>0.80429</b> | <b>20</b> |
| P0C2X9        | AIEAAVLAR                                                                | 1.033039896        | 2              | 2.90877   |
| P0C2X9        | ALNDLKDQTEAIPCVVGDEEVWTS DVR                                             | 1.152668871        | 2              | 5.13168   |
| P0C2X9        | AQIFLK                                                                   | 1.016493409        | 2              | 2.31133   |
| P0C2X9        | DPQEPIMKEEIFGPVLT VYVYPDEK                                               | 0.905841735        | 3              | 3.58991   |
| P0C2X9        | DQTEAIPCVVGDEEVWTS DVR                                                   | 33.38982202        | 2              | 5.29363   |
| P0C2X9        | EAGLPPNVIQFVPADGPTFGDVT SSEHLGGINFTGSVPTFK                               | 1.160231378        | 3              | 3.6695    |
| P0C2X9        | EEIFGPVLT VYVYPDEK                                                       | 1.226483117        | 2              | 3.83408   |
| P0C2X9        | ETLQLVDSTTSYGLTGAVFAQDK                                                  | 1.818232664        | 2              | 5.51257   |
| P0C2X9        | KEWDLKPVADR                                                              | 0.951815883        | 2              | 3.5834    |
| P0C2X9        | LYVPQSLWPQIK                                                             | 1.393444345        | 2              | 3.20898   |
| P0C2X9        | NAAGNFYINDK                                                              | 1.246542734        | 2              | 3.60515   |
| P0C2X9        | NHFVHSSADVDSVSGTLR                                                       | 1.11343778         | 2              | 5.73886   |
| P0C2X9        | SAFEYGGQK                                                                | 0.846703398        | 1              | 2.43333   |
| P0C2X9        | SSPSLSILAGGQCNE SVGYFVEPCIIESK                                           | 1.183572283        | 3              | 5.74857   |
| P0C2X9        | STGSVVGQQPFGGAR                                                          | 2.526715159        | 2              | 4.39369   |
| P0C2X9        | TIVQEATR                                                                 | 0.875849891        | 2              | 2.92718   |
| P0C2X9        | VANEPILAFTQGSPER                                                         | 1.149339423        | 2              | 5.214     |
| P0C2X9        | WKHASSLKVANEPILAFTQGSPER                                                 | 2.396968111        | 2              | 2.50873   |
| P0C2X9        | YQLSPFNHGK                                                               | 0.716815062        | 2              | 2.98252   |
| P0C2X9        | YRETLQLVDSTTSYGLTGAVFAQDK                                                | 1.409829586        | 3              | 4.0534    |
| <b>P0C5H9</b> | <b>MANF Mesencephalic astrocyte_derived neurotrophic factor</b>          | <b>2.192545107</b> | <b>0.96611</b> | <b>5</b>  |
| P0C5H9        | DRDVTFS PATIEEELIK                                                       | 1.055419065        | 2              | 4.92631   |
| P0C5H9        | DVTFSPATIEEELIK                                                          | 1.139370691        | 2              | 3.21595   |
| P0C5H9        | IINEVSKPLAHHIPVEK                                                        | 1.14296673         | 3              | 4.04905   |
| P0C5H9        | ILDDWGEMCK                                                               | 1.199907439        | 2              | 3.03043   |
| P0C5H9        | INELMPK                                                                  | 0.789941897        | 2              | 2.48919   |
| <b>P0C6F1</b> | <b>DYH2 Dynein heavy chain 2_axonemal</b>                                | <b>1.70937344</b>  | <b>0.4357</b>  | <b>2</b>  |
| P0C6F1        | AMLPGEWENACNEMQRMLIVR+Oxidation(16                                       | 1.272074138        |                |           |
| P0C6F1        | EKVEVMSLELEDAK+Oxidation(5                                               | 0.761325233        |                |           |
| <b>P10111</b> | <b>PPIA Peptidyl_prolyl cis_trans isomerase A</b>                        | <b>2.141522816</b> | <b>0.9864</b>  | <b>11</b> |
| P10111        | EGMSIVEAMER                                                              | 1.217363924        | 1              | 2.80427   |
| P10111        | FEDEFILK                                                                 | 0.947513541        | 2              | 3.42604   |

|               |                                                     |                    |                |           |
|---------------|-----------------------------------------------------|--------------------|----------------|-----------|
| P10111        | HTGPGILSMANAGPNTNGSQFFICTAK                         | 1.161859265        | 3              | 6.09178   |
| P10111        | IIPGFMCQGGDFTR                                      | 1.157253224        | 2              | 3.41568   |
| P10111        | IIPGFMCQGGDFTR+Oxidation(5)                         | 1.312562141        |                |           |
| P10111        | KITISDCGQL                                          | 1.530955964        | 2              | 3.51117   |
| P10111        | SIYGEKFEDENFILK                                     | 0.883480547        | 2              | 4.54036   |
| P10111        | TEWLDGK                                             | 1.155778493        | 2              | 2.30247   |
| P10111        | VCFELFADK                                           | 1.14623283         | 2              | 3.24606   |
| P10111        | VCFELFADKVPK                                        | 0.892092287        | 2              | 3.89845   |
| P10111        | VKEGMSIVEAMER                                       | 1.039701634        | 3              | 3.6379    |
| <b>P10536</b> | <b>RAB1B Ras_related protein Rab_1B</b>             | <b>2.274452798</b> | <b>0.99979</b> | <b>3</b>  |
| P10536        | MGPGAASGGERPNLK                                     | 0.939137483        | 2              | 4.09043   |
| P10536        | NATNVEQAFMTMAAEIK+Oxidation(11)                     | 1.214270416        |                |           |
| P10536        | NATNVEQAFMTMAAEIK+Oxidation(9)                      | 1.215031048        |                |           |
| <b>P10633</b> | <b>CP2D1 Cytochrome P450 2D1</b>                    | <b>1.936770041</b> | <b>5.3E-11</b> | <b>3</b>  |
| P10633        | SQGVILASYGPEWR                                      | 0.953654175        | 2              | 4.08668   |
| P10633        | TFMALLDNLLAENR                                      | 0.821951575        | 2              | 3.71049   |
| P10633        | YGDVFLQK                                            | 0.706847719        | 2              | 2.71123   |
| <b>P10634</b> | <b>CP2DQ Cytochrome P450 2D26</b>                   | <b>2.293334343</b> | <b>0.02547</b> | <b>21</b> |
| P10634        | ACLGEPLAR                                           | 0.885673853        | 2              | 2.74757   |
| P10634        | AKGNPESSFNDENLR                                     | 0.965964841        | 2              | 3.44884   |
| P10634        | AVSNVIASLVYAR                                       | 1.203149757        | 2              | 4.24841   |
| P10634        | DETVWEKPLR                                          | 1.003350962        | 2              | 2.34993   |
| P10634        | DMTDAFLAEMQK                                        | 1.144525928        | 2              | 3.51868   |
| P10634        | EAEHPFNPSILLSK                                      | 1.199772432        | 2              | 2.66698   |
| P10634        | ELLVTYGEDTADRPLLIYNHLGYGNK                          | 1.083009797        | 3              | 5.71514   |
| P10634        | FADIVPTNIPHMTR                                      | 1.54191127         | 3              | 3.68723   |
| P10634        | FEYEDPFFNR                                          | 1.215847395        | 2              | 2.82611   |
| P10634        | FHPEHFLDAQGNFVK                                     | 1.070698518        | 3              | 4.70054   |
| P10634        | FQGFLLIPK                                           | 0.746735293        | 2              | 2.32181   |
| P10634        | GNPESSFNDENLR                                       | 1.21027054         | 2              | 4.42134   |
| P10634        | GTTLIPNLSSVLK                                       | 0.947310097        | 2              | 2.40056   |
| P10634        | GTTLIPNLSSVLKDETVWEKPLR                             | 1.436301669        | 2              | 4.72424   |
| P10634        | GVVLPAPYGPWEWR                                      | 0.943966709        | 2              | 3.20211   |
| P10634        | LNSFIALVDK                                          | 1.441457383        | 2              | 3.26995   |
| P10634        | RFEYEDPFFNR                                         | 0.956318416        | 2              | 4.02844   |
| P10634        | RVHEEIDEVIGQVR                                      | 0.983925088        | 2              | 4.26971   |
| P10634        | SLEQWVTEEAGHLCDTFAK                                 | 1.115774654        | 2              | 4.79247   |
| P10634        | SWDPAQPPR                                           | 0.984563638        | 2              | 2.85481   |
| P10634        | VHEEIDEVIGQVR                                       | 0.978038256        | 2              | 4.8402    |
| <b>P10719</b> | <b>ATPB ATP synthase subunit beta_mitochondrial</b> | <b>2.323622315</b> | <b>0.99982</b> | <b>32</b> |
| P10719        | AHGGYSVFAGVGER                                      | 0.982018368        | 2              | 4.25433   |
| P10719        | AIAELGIYPAVDPLDSTR                                  | 1.189443826        | 2              | 5.5855    |
| P10719        | EGNDLYHEMIESGVINLK                                  | 1.474436564        | 2              | 5.20792   |
| P10719        | EGNDLYHEMIESGVINLK+Oxidation(8)                     | 1.316255914        |                |           |
| P10719        | FLSQPFQVAEVFTGHMGK                                  | 0.963474496        | 2              | 4.46316   |
| P10719        | FTQAGSEVSALLGR                                      | 1.073597858        | 2              | 4.85767   |
| P10719        | GFQQILAGDYDHLPEQAFYMGPIEEAVAK                       | 1.201581459        | 4              | 4.5936    |
| P10719        | IGLFGGAGVGK                                         | 1.14153567         | 2              | 3.29063   |
| P10719        | IGLFGGAGVGKTVLIMELINNVAK                            | 0.717211245        | 3              | 3.51369   |
| P10719        | ILQDYK                                              | 1.004776441        | 1              | 2.03284   |
| P10719        | IMDPNIVGSEHYDVAR                                    | 1.019979662        | 2              | 4.96367   |
| P10719        | IMDPNIVGSEHYDVAR+Oxidation(1)                       | 1.040229777        |                |           |
| P10719        | IMNVIGEPIDER                                        | 1.248308695        | 2              | 4.07792   |
| P10719        | IMNVIGEPIDER+Oxidation(1)                           | 1.228163558        |                |           |
| P10719        | IPSAVGYQPTLATDMGMTQER                               | 1.689850277        | 2              | 4.77871   |
| P10719        | IPSAVGYQPTLATDMGMTQER+Oxidation(14)                 | 2.020928384        |                |           |
| P10719        | IPSAVGYQPTLATDMGMTQER+Oxidation(17)                 | 2.020928384        |                |           |

|               |                                                              |                    |                |           |
|---------------|--------------------------------------------------------------|--------------------|----------------|-----------|
| P10719        | KGSITSVQAIYVPADDLTPAPATTFHAHLDTTVLSR                         | 2.630331741        | 3              | 6.44076   |
| P10719        | LVLEVAQHLGESTVR                                              | 1.125270139        | 2              | 4.80138   |
| P10719        | QFAPIHAEAPEFIEMSVEQEILVTGIK                                  | 0.793158665        | 3              | 4.91654   |
| P10719        | SLQDIIAILGMDELSEEDKLTVSR                                     | 1.346288362        | 3              | 4.90977   |
| P10719        | SLQDIIAILGMDELSEEDKLTVSR+Oxidation(10                        | 1.291579398        |                |           |
| P10719        | TIAMDGTEGLVR                                                 | 0.920397389        | 2              | 3.80455   |
| P10719        | TIAMDGTEGLVR+Oxidation(3                                     | 0.896463851        |                |           |
| P10719        | TREGNDLYHEMIESGVINLK                                         | 0.85870376         | 2              | 6.03984   |
| P10719        | TVLIMELINNVAK                                                | 0.809535095        | 2              | 5.11593   |
| P10719        | TVLIMELINNVAK+Oxidation(4                                    | 0.990271867        |                |           |
| P10719        | VALTGLTVAEYFR                                                | 1.671302615        | 2              | 4.06678   |
| P10719        | VALVYQGMNEPPGAR                                              | 1.336655086        | 2              | 4.02356   |
| P10719        | VLDSGAPIK                                                    | 1.684783424        | 2              | 3.37277   |
| P10719        | VLDSGAPIKIPVGPETLGR                                          | 0.93947851         | 3              | 5.00241   |
| P10719        | VVDLLAPYAK                                                   | 1.113769471        | 2              | 3.23735   |
| <b>P10760</b> | <b>SAHH Adenosylhomocysteinase</b>                           | <b>2.143062676</b> | <b>3.6E-05</b> | <b>20</b> |
| P10760        | AGIPVFAWK                                                    | 1.327725657        | 2              | 2.84386   |
| P10760        | ALDIAENEMPGLMR                                               | 1.241130413        | 2              | 3.77382   |
| P10760        | ALDIAENEMPGLMR+Oxidation(12                                  | 2.168129416        |                |           |
| P10760        | ATDVMIA GK                                                   | 1.050176651        | 2              | 2.9032    |
| P10760        | DGPLNMILDDGGDLTNIHTK                                         | 1.393984988        | 2              | 5.57914   |
| P10760        | DGPLNMILDDGGDLTNIHTK+Oxidation(5                             | 1.212519596        |                |           |
| P10760        | EMYSASKPLK                                                   | 1.3017793          | 2              | 2.36064   |
| P10760        | FDNLYGCR                                                     | 0.889662495        | 2              | 2.8435    |
| P10760        | GETDEEYLWCIEQTLHFK                                           | 1.592867569        | 2              | 4.46233   |
| P10760        | GISEETTTGVHNLK                                               | 1.10748455         | 2              | 4.23768   |
| P10760        | IILLAEGR                                                     | 1.387432545        | 2              | 2.92536   |
| P10760        | KLDEAVAEHLGK                                                 | 1.116141755        | 3              | 5.05049   |
| P10760        | LDEAVAEHLGK                                                  | 1.218800273        | 2              | 3.67498   |
| P10760        | RATDVMIA GK                                                  | 1.013796536        | 2              | 2.52628   |
| P10760        | SKFDNLYGCR                                                   | 1.217595699        | 2              | 3.10014   |
| P10760        | VAVVAGYGDVGK                                                 | 1.099143345        | 2              | 4.14517   |
| P10760        | VIITEIDPINALQAAMEGYEVTMDEACK                                 | 0.947255069        | 3              | 6.54741   |
| P10760        | VNIKPQVDR                                                    | 1.086297357        | 2              | 2.7501    |
| P10760        | WLNENAVEK                                                    | 1.058800721        | 2              | 2.81673   |
| P10760        | WSSCNIFSTQDHAAAAIAK                                          | 0.869268175        | 2              | 5.17942   |
| <b>P10818</b> | <b>CX6A1 Cytochrome c oxidase subunit 6A1_ mitochondrial</b> | <b>1.861765551</b> | <b>0.9993</b>  | <b>2</b>  |
| P10818        | HEEHERPEFVAYPHLR                                             | 0.895884815        | 3              | 3.67167   |
| P10818        | SRHEEHERPEFVAYPHLR                                           | 0.91868651         | 3              | 4.10219   |
| <b>P10860</b> | <b>DHE3 Glutamate dehydrogenase 1_ mitochondrial</b>         | <b>2.011080005</b> | <b>1</b>       | <b>29</b> |
| P10860        | ALASLMTYK                                                    | 1.009935149        | 2              | 3.62211   |
| P10860        | CAVVDVPFGGAK                                                 | 0.66427994         | 2              | 3.07172   |
| P10860        | CVGVGESDGSIWNPDGIDPK                                         | 1.653658856        | 2              | 5.09498   |
| P10860        | DDGSWEVIEGYR                                                 | 0.934924229        | 2              | 3.97291   |
| P10860        | DIVHSGLAYTMER                                                | 1.054453422        | 2              | 3.36619   |
| P10860        | DIVHSGLAYTMER+Oxidation(10                                   | 1.217644333        |                |           |
| P10860        | DSNYHLLMSVQESLER                                             | 1.128717767        | 2              | 4.23282   |
| P10860        | EDDPNFFK                                                     | 0.93548835         | 1              | 2.15232   |
| P10860        | FTMELAK                                                      | 1.159668054        | 2              | 2.39471   |
| P10860        | GASIVEDKLVEDLK                                               | 0.92647761         | 2              | 3.58532   |
| P10860        | GFIGPGIDVPAPDMSTGER                                          | 1.087725219        | 2              | 4.99593   |
| P10860        | GFIGPGIDVPAPDMSTGER+Oxidation(13                             | 1.395774356        |                |           |
| P10860        | HGGTIPVVPTAEFQDR                                             | 0.975619627        | 2              | 4.72888   |
| P10860        | IIEGANGPTTPEADK                                              | 1.041707682        | 2              | 5.38195   |
| P10860        | IIEGANGPTTPEADKIFLER                                         | 0.952917927        | 2              | 4.84898   |
| P10860        | ISGASEKDIVHSGLAYTMER                                         | 0.636226032        | 3              | 3.59329   |

|               |                                                                      |                    |                |           |
|---------------|----------------------------------------------------------------------|--------------------|----------------|-----------|
| P10860        | KGFIGPGIDVPAPDMSTGER                                                 | 0.923439667        | 2              | 5.13157   |
| P10860        | LQHGSILGFPK                                                          | 0.961634688        | 1              | 3.08417   |
| P10860        | MVEGFFDR                                                             | 1.000466778        | 2              | 2.89927   |
| P10860        | MVEGFFDR+Oxidation(0                                                 | 1.106889272        |                |           |
| P10860        | NLNHVSYGR                                                            | 0.722881974        | 1              | 2.86818   |
| P10860        | NYTDNELEK                                                            | 0.851182291        | 2              | 2.48609   |
| P10860        | RDDGSWEVIEGYR                                                        | 0.938608598        | 2              | 4.43619   |
| P10860        | RFTMELAK                                                             | 0.911723586        | 2              | 2.49237   |
| P10860        | TAAYVNAIEK                                                           | 1.020300926        | 2              | 3.6314    |
| P10860        | TFVVQGFQGNVGLHSMR                                                    | 1.199036565        | 2              | 4.53745   |
| P10860        | VYEGSILEADCILIPAAASEK                                                | 0.979236531        | 3              | 6.00546   |
| P10860        | YNLGLDLR                                                             | 1.007538093        | 2              | 3.16748   |
| P10860        | YSTDVSDEVK                                                           | 0.882143052        | 2              | 3.39863   |
| <b>P10867</b> | <b>GGLO L_gulonolactone oxidase</b>                                  | <b>2.277550637</b> | <b>1</b>       | <b>7</b>  |
| P10867        | EKLDPTGMFLNSYLEK                                                     | 1.391124391        | 3              | 3.53458   |
| P10867        | GDDILLSPCFQR                                                         | 1.153646251        | 2              | 3.22715   |
| P10867        | LDPTGMFLNSYLEK                                                       | 1.505389568        | 2              | 4.12281   |
| P10867        | LDYWLAYETIMK                                                         | 1.064442757        | 2              | 4.0198    |
| P10867        | NADVFAAR                                                             | 1.187512333        | 2              | 2.86951   |
| P10867        | TYGCSPEVYYQPTSVEEVR                                                  | 1.003469405        | 2              | 4.8395    |
| P10867        | VVAHYPVEVR                                                           | 1.085513873        | 2              | 2.75673   |
| <b>P10868</b> | <b>GAMT Guanidinoacetate N_methyltransferase</b>                     | <b>2.41167307</b>  | <b>0.03579</b> | <b>3</b>  |
| P10868        | EHWIECNDGVFQR                                                        | 1.167451066        | 3              | 3.80169   |
| P10868        | YTDITAMFEETQVPALLEAGFQR                                              | 1.01301348         | 3              | 4.58187   |
| P10868        | YYAFPQMITPLVTK                                                       | 1.48196838         | 2              | 3.78      |
| <b>P10888</b> | <b>COX41 Cytochrome c oxidase subunit 4 isoform 1_ mitochondrial</b> | <b>2.026171113</b> | <b>0.99845</b> | <b>7</b>  |
| P10888        | ADWSSLSR                                                             | 1.313332316        | 2              | 2.34799   |
| P10888        | DYPLPDVAHVK                                                          | 1.484456811        | 2              | 2.7672    |
| P10888        | IQFNESFAEMNK                                                         | 1.060076485        | 2              | 4.04551   |
| P10888        | RDYPLPDVAHVK                                                         | 0.775865512        | 2              | 2.30233   |
| P10888        | SEDYALPSYVDR                                                         | 1.018349788        | 2              | 3.86736   |
| P10888        | VNPIQGFSAK                                                           | 1.003980392        | 1              | 2.13487   |
| P10888        | WDYNKNEWK                                                            | 0.950528181        | 2              | 2.39344   |
| <b>P10959</b> | <b>EST2 Liver carboxylesterase 1</b>                                 | <b>1.724220422</b> | <b>0.0661</b>  | <b>3</b>  |
| P10959        | AISESGVLTNTLDDK                                                      | 0.560476455        | 2              | 3.41963   |
| P10959        | EGASEEETNLSKLVMMK                                                    | 1.064638401        | 2              | 2.66072   |
| P10959        | GNWAHLDQLAALR                                                        | 1.212494338        | 2              | 3.01174   |
| <b>P11030</b> | <b>ACBP Acyl_CoA_binding protein</b>                                 | <b>1.962510874</b> | <b>0.99792</b> | <b>5</b>  |
| P11030        | AKWDSWVK                                                             | 0.825021342        | 2              | 2.40659   |
| P11030        | QATVGDVNTDRPGLLDLK                                                   | 1.205654877        | 2              | 3.65335   |
| P11030        | TQPTDEEMLFYSHFK                                                      | 1.111836308        | 2              | 3.91036   |
| P11030        | TYVEKVEELK                                                           | 0.833099933        | 2              | 2.34317   |
| P11030        | WDSWVK                                                               | 0.951132919        | 1              | 2.08017   |
| <b>P11232</b> | <b>THIO Thioredoxin</b>                                              | <b>1.982486509</b> | <b>0.99993</b> | <b>2</b>  |
| P11232        | EAFQEALAAAGDK                                                        | 0.993181424        | 2              | 4.51578   |
| P11232        | VGEFSGANK                                                            | 0.684933433        | 2              | 2.7038    |
| <b>P11240</b> | <b>COX5A Cytochrome c oxidase subunit 5A_ mitochondrial</b>          | <b>2.200265735</b> | <b>0.1843</b>  | <b>6</b>  |
| P11240        | EIYPYVIQELRPTLNELGISTPEELGLDK                                        | 0.863800179        | 3              | 5.93058   |
| P11240        | EIYPYVIQELRPTLNELGISTPEELGLDKV                                       | 1.632662295        | 3              | 6.98547   |
| P11240        | GMNLTLVGYDLVPEPK                                                     | 1.46500034         | 2              | 4.01758   |
| P11240        | IIDAALR                                                              | 1.150829043        | 1              | 2.1019    |
| P11240        | LNDFASAVR                                                            | 1.022524747        | 2              | 3.27435   |
| P11240        | RLNDFASAVR                                                           | 1.055677817        | 2              | 2.48269   |
| <b>P11348</b> | <b>DHPR Dihydropteridine reductase</b>                               | <b>2.608815348</b> | <b>0.92892</b> | <b>12</b> |
| P11348        | AALDGTGMIGYMAK                                                       | 1.317780654        | 2              | 3.86588   |



|               |                                       |                   |                |           |
|---------------|---------------------------------------|-------------------|----------------|-----------|
| P11348        | EGLLTLGAK                             | 0.953578544       | 2              | 2.92322   |
| P11348        | GAVHQLCQSLAGK                         | 1.197307306       | 3              | 4.29872   |
| P11348        | MTDSFTEQADQVTAEVGK                    | 1.043601663       | 2              | 5.82575   |
| P11348        | MTDSFTEQADQVTAEVGK+Oxidation(0        | 0.873090663       |                |           |
| P11348        | NCDLMWK                               | 0.990013671       | 2              | 2.35414   |
| P11348        | NSGMPSGAAAIAVLPVTLDTPMNR              | 1.186096984       | 2              | 5.39483   |
| P11348        | NSGMPSGAAAIAVLPVTLDTPMNR+Oxidation(3  | 1.565346978       |                |           |
| P11348        | QSIWTSTISSHLATK                       | 1.072521463       | 2              | 3.81882   |
| P11348        | RPNSGSLIQVTTDQK                       | 1.01001563        | 2              | 3.71702   |
| P11348        | TELTAYF                               | 2.490972803       | 1              | 2.01746   |
| P11348        | VDAILCVAGGWAGNAK                      | 1.952108326       | 2              | 3.92479   |
| <b>P11442</b> | <b>CLH Clathrin heavy chain 1</b>     | <b>2.19003625</b> | <b>2.7E-06</b> | <b>39</b> |
| P11442        | ADDPSSYMEVVQAANTSQGNWHEELVK           | 1.742843839       | 3              | 4.05348   |
| P11442        | AFMTADLPNELIELLEK                     | 0.892577833       | 3              | 4.69238   |
| P11442        | AHIAQLCEK                             | 0.848505849       | 2              | 2.3787    |
| P11442        | AHTMTDDVTFWK                          | 1.247923175       | 2              | 2.52308   |
| P11442        | ALEHFTDLYDIK                          | 1.266468015       | 3              | 3.96542   |
| P11442        | CNEPAVWSQLAK                          | 0.983137773       | 2              | 3.43146   |
| P11442        | FDVNTSAVQVLIHIGNLDR                   | 1.350861804       | 3              | 4.17424   |
| P11442        | FNALFAQGNYSAAK                        | 1.039294586       | 2              | 5.04448   |
| P11442        | GQCDLELINCENSLFK                      | 1.18431895        | 2              | 5.56819   |
| P11442        | GQFSTDELVAEVEK                        | 1.121708334       | 2              | 4.04968   |
| P11442        | GQFSTDELVAEVEKR                       | 1.053149719       | 2              | 3.67921   |
| P11442        | HELIEFR                               | 0.963868429       | 2              | 2.50616   |
| P11442        | HSSLAGCQIINYR                         | 1.454735991       | 2              | 3.78654   |
| P11442        | IHEGCEEPATHNALAK                      | 1.040477071       | 2              | 5.39535   |
| P11442        | ISGETIFVTAPHEATAGIIGVNR               | 1.287986999       | 2              | 5.21436   |
| P11442        | IVLDNSVFSEHR                          | 1.103996007       | 2              | 2.94672   |
| P11442        | IYDSNNNPER                            | 2.435859552       | 2              | 3.02607   |
| P11442        | KDPELWGSVLLSNPYR                      | 1.202754445       | 3              | 3.63699   |
| P11442        | KFDVNTSAVQVLIHIGNLDR                  | 1.172066415       | 3              | 6.13883   |
| P11442        | KFNALFAQGNYSAAK                       | 0.823500448       | 2              | 4.89737   |
| P11442        | LAELEEFINGPNNAHIQQVGDR                | 1.091302986       | 2              | 5.41117   |
| P11442        | LECSEELGDLVK                          | 1.116504573       | 2              | 2.9125    |
| P11442        | LHIEVGTPTGNQPFK                       | 0.946790018       | 2              | 4.42141   |
| P11442        | LPVIGGLLDVDCSEVVK                     | 1.342371881       | 2              | 4.81917   |
| P11442        | LTDQLPLIIVCDR                         | 1.306179333       | 2              | 3.31382   |
| P11442        | NLQNLILTAIK                           | 1.172624629       | 3              | 4.23416   |
| P11442        | NNLAGAEELFAR                          | 1.055342139       | 2              | 3.79278   |
| P11442        | NNRPSEGPLQTR                          | 0.986040706       | 3              | 4.13976   |
| P11442        | RPLIDQVVQTALSETQDPEEVSVTVK            | 1.208856422       | 3              | 6.30522   |
| P11442        | SVDPTLALSIVLR                         | 1.149603112       | 2              | 2.60965   |
| P11442        | SVNESLNNLFITEEDYQALR                  | 1.062167208       | 2              | 5.16167   |
| P11442        | TLQIFNIEMK                            | 0.958133752       | 2              | 3.02098   |
| P11442        | TSIDAYDNFDNISLAQR                     | 1.113858552       | 2              | 3.62563   |
| P11442        | VGEQAQVVIIDMNDPSNPIR                  | 1.801094805       | 2              | 5.05414   |
| P11442        | VIQFAETGQVQK                          | 1.01871012        | 2              | 4.79582   |
| P11442        | VSQPIEGHAASFAQFK                      | 0.850559487       | 2              | 4.38184   |
| P11442        | WLLLTGISAQQNR                         | 1.094074954       | 2              | 3.64063   |
| P11442        | YESLELCRPVLQQGR                       | 0.990582396       | 2              | 2.80687   |
| P11442        | YIEIVVQK                              | 1.058131954       | 1              | 1.95379   |
| <b>P11497</b> | <b>ACACA Acetyl_CoA carboxylase 1</b> | <b>2.22648386</b> | <b>0.12869</b> | <b>8</b>  |
| P11497        | DEPIHILNVAIK                          | 1.387623419       | 2              | 2.56064   |
| P11497        | GGSWVVIDPTINPR                        | 1.987989719       | 2              | 2.9903    |
| P11497        | LLETESFQLNR                           | 0.72280333        | 2              | 2.42497   |
| P11497        | LLLEDLVK                              | 1.787215368       | 2              | 2.37114   |
| P11497        | LPELLK                                | 3.519044863       | 2              | 2.37799   |

|               |                                                                  |                    |                |           |
|---------------|------------------------------------------------------------------|--------------------|----------------|-----------|
| P11497        | TLRDPSLPLELQDIMTSVSGR                                            | 1.03098455         | 3              | 3.48147   |
| P11497        | TVELSPADPANLDSEAK                                                | 0.913591357        | 2              | 2.53261   |
| P11497        | VQQAELHTGSLPQIQSTALR                                             | 0.528153285        | 3              | 3.53639   |
| <b>P11507</b> | <b>AT2A2 Sarcoplasmic/endoplasmic reticulum calcium ATPase 2</b> | <b>2.16472199</b>  | <b>0.99969</b> | <b>8</b>  |
| P11507        | DIVPGDIVEIAVGDKVPADIR                                            | 1.437477309        | 2              | 2.86545   |
| P11507        | IGIFGQDEDVTSK                                                    | 0.855143101        | 2              | 3.55969   |
| P11507        | IRDEMVAEQER                                                      | 0.993844963        | 2              | 3.35055   |
| P11507        | KSEIGIAMGSGTAVAK                                                 | 0.942989684        | 2              | 3.87256   |
| P11507        | LDFEGEQLSK                                                       | 1.392493443        | 2              | 2.77234   |
| P11507        | NAENAIEALKEYEPEMGK                                               | 1.149732788        | 2              | 3.46581   |
| P11507        | SEIGIAMGSGTAVAK                                                  | 0.998384951        | 2              | 3.37901   |
| P11507        | VDQSILTGESVSVIK                                                  | 3.917948997        | 2              | 4.44379   |
| <b>P11598</b> | <b>PDIA3 Protein disulfide_isomerase A3</b>                      | <b>2.050975523</b> | <b>1.4E-06</b> | <b>28</b> |
| P11598        | DASVVGFFR                                                        | 1.084746545        | 2              | 2.51231   |
| P11598        | DGEEAGAYDGPR                                                     | 3.463120612        | 2              | 3.42295   |
| P11598        | DLFSDGHSEFLK                                                     | 1.545965403        | 2              | 3.08118   |
| P11598        | DLLTAYYDVVYEK                                                    | 1.622973283        | 2              | 3.58615   |
| P11598        | DPNIVIAK                                                         | 1.082158513        | 2              | 2.45673   |
| P11598        | EATNPPIIQEEKPK                                                   | 1.259153809        | 2              | 3.56968   |
| P11598        | ELNDFISYLQR                                                      | 1.225120433        | 2              | 3.11032   |
| P11598        | EYDDNGEGITIFRPLHLANK                                             | 1.479291973        | 2              | 4.18492   |
| P11598        | FAHTNVESLVK                                                      | 1.650616402        | 3              | 3.38123   |
| P11598        | FIQESIFGLCPHMTEDNKDLIQGK                                         | 1.182935484        | 3              | 4.99491   |
| P11598        | FISDKDASVVGFFR                                                   | 1.075827732        | 2              | 4.36724   |
| P11598        | FLQEYFDGNLK                                                      | 1.040304059        | 2              | 3.72212   |
| P11598        | FLQEYFDGNLKR                                                     | 0.855551789        | 2              | 3.53128   |
| P11598        | FVMQEEFSR                                                        | 1.103849306        | 2              | 2.92936   |
| P11598        | IFRDGEEAGAYDGPR                                                  | 0.988171797        | 2              | 3.95445   |
| P11598        | KTFSHELSDFGLESTTGEIPVVAIR                                        | 1.391216403        | 3              | 4.38281   |
| P11598        | LAPEYAAAATR                                                      | 1.052630194        | 2              | 2.89025   |
| P11598        | LNFAVASR                                                         | 1.38793163         | 2              | 2.53544   |
| P11598        | LSKDPNIVIAK                                                      | 1.103808532        | 3              | 4.0293    |
| P11598        | MDATANDVPSPYEVK                                                  | 1.025470092        | 2              | 4.37502   |
| P11598        | MDATANDVPSPYEVK+Oxidation(0                                      | 1.006908963        |                |           |
| P11598        | RLAPEYAAAATR                                                     | 0.906163326        | 2              | 3.66656   |
| P11598        | SEPIPETNEGPVK                                                    | 1.010858409        | 2              | 2.88446   |
| P11598        | TADGIVSHLK                                                       | 1.653277841        | 2              | 2.7983    |
| P11598        | TFLDAGHK                                                         | 0.755842967        | 1              | 1.90221   |
| P11598        | TFSHELSDFGLESTTGEIPVVAIR                                         | 1.393133116        | 2              | 6.03875   |
| P11598        | VDCTANTNTCNK                                                     | 0.842737478        | 2              | 3.88552   |
| P11598        | YGVSGYPTLK                                                       | 0.903180177        | 2              | 3.21822   |
| <b>P11711</b> | <b>CP2A1 Cytochrome P450 2A1</b>                                 | <b>2.293012616</b> | <b>0.31606</b> | <b>6</b>  |
| P11711        | GEQATYNTLFK                                                      | 0.922963495        | 2              | 2.56123   |
| P11711        | GTDVFPILGSLMTDPK                                                 | 1.067888201        | 2              | 3.46086   |
| P11711        | ILEEAGYLIK                                                       | 1.167198346        | 2              | 3.40363   |
| P11711        | LEDINESPKLGFTR                                                   | 0.748673583        | 2              | 3.42735   |
| P11711        | TVSNVISSIVFGER                                                   | 1.337448899        | 2              | 3.6523    |
| P11711        | VHEEIEQVIGR                                                      | 1.207051644        | 2              | 3.06757   |
| <b>P11714</b> | <b>CP2D9 Cytochrome P450 2D9</b>                                 | <b>2.02443333</b>  | <b>0.66115</b> | <b>2</b>  |
| P11714        | GNPESSFNDENLLMVVR                                                | 1.096872558        | 2              | 2.44001   |
| P11714        | VQQEIDEVIGQVR                                                    | 1.008882564        | 2              | 4.70771   |
| <b>P11862</b> | <b>GAS2 Growth arrest_specific protein 2</b>                     | <b>2.509694014</b> | <b>0.71268</b> | <b>3</b>  |
| P11862        | EIEQEETLSAPSPSPSSK                                               | 1.235659243        | 2              | 4.11684   |
| P11862        | LDNGALLCQLAATVQEK                                                | 1.327532034        | 2              | 3.8059    |
| P11862        | YGVPEPGLIK                                                       | 1.045195982        | 2              | 2.32449   |
| <b>P11884</b> | <b>ALDH2 Aldehyde dehydrogenase_mitochondrial</b>                | <b>2.347821088</b> | <b>0.9844</b>  | <b>27</b> |

|               |                                                 |                    |                |           |
|---------------|-------------------------------------------------|--------------------|----------------|-----------|
| P11884        | AAQAAFQLGSPWR                                   | 1.367218928        | 2              | 2.91178   |
| P11884        | DGMTIAKEEIFGPVMQILK                             | 1.985308026        | 3              | 4.01103   |
| P11884        | EAGFPPGVVNIIVPGFGPTAGAAIASHEDVDK                | 0.456284168        | 3              | 4.45642   |
| P11884        | EEIFGPVMQILK                                    | 1.244560579        | 2              | 4.06304   |
| P11884        | EEIFGPVMQILK+Oxidation(7                        | 0.989101479        |                |           |
| P11884        | ELGEYGLQAYTEVK                                  | 1.516609743        | 2              | 4.38967   |
| P11884        | GYFIQPTVFGDVK                                   | 1.070878711        | 2              | 4.28528   |
| P11884        | HEPVGVCQIIPWNFPLMQAWK                           | 0.997807757        | 3              | 4.24194   |
| P11884        | KTFPTVNPSTGEVICQVAEGNKEDVDK                     | 0.844452607        | 3              | 6.48146   |
| P11884        | LGPALATGNVVVMK                                  | 1.081534542        | 2              | 3.81526   |
| P11884        | LGPALATGNVVVMK+Oxidation(12                     | 1.270149215        |                |           |
| P11884        | LLCGGGAADR                                      | 1.212754024        | 2              | 3.38588   |
| P11884        | RVTLELGGK                                       | 0.989023717        | 2              | 2.92244   |
| P11884        | TEQGPQVDETQFK                                   | 0.879773161        | 2              | 4.56965   |
| P11884        | TEQGPQVDETQFKK                                  | 0.989104946        | 2              | 3.56918   |
| P11884        | TFPTVNPSTGEVICQVAEGNK                           | 1.029970167        | 2              | 5.29401   |
| P11884        | TFPTVNPSTGEVICQVAEGNKEDVDK                      | 1.048080491        | 2              | 4.30225   |
| P11884        | TFVQEDVYDEFVER                                  | 1.356139281        | 2              | 5.11162   |
| P11884        | TIEEVVGR                                        | 0.886426122        | 2              | 2.98471   |
| P11884        | TIPIDGFFSYTR                                    | 1.200769583        | 2              | 2.81701   |
| P11884        | VAEQTPLTALYVANLIK                               | 0.95727922         | 2              | 5.49268   |
| P11884        | VAFTGSTEVGHLIQVAAGSSNLK                         | 1.432819763        | 2              | 6.53716   |
| P11884        | VAFTGSTEVGHLIQVAAGSSNLKR                        | 1.537103911        | 3              | 3.99173   |
| P11884        | VTLELGGK                                        | 0.922923189        | 1              | 2.05357   |
| P11884        | VVGNPFDNR                                       | 1.042888247        | 2              | 2.95273   |
| P11884        | YGLAAAVFTK                                      | 0.963541404        | 2              | 4.04562   |
| P11884        | YYAGWADK                                        | 0.943413803        | 2              | 2.54063   |
| <b>P11915</b> | <b>NLTP Non-specific lipid transfer protein</b> | <b>1.965497845</b> | <b>0.96726</b> | <b>21</b> |
| P11915        | ADCTITMADSDLLALMTGK                             | 1.522320481        | 2              | 5.40223   |
| P11915        | ANLIFK                                          | 1.209005714        | 2              | 2.32691   |
| P11915        | AVEIVAQEMVTDMPTSFEEK                            | 1.725458383        | 2              | 5.30567   |
| P11915        | GHPLGATGLAQCAELCWQLR                            | 1.229935413        | 3              | 3.58373   |
| P11915        | GSVLPDSDK                                       | 0.763914951        | 1              | 2.08974   |
| P11915        | GSVLPDSDKK                                      | 0.61093527         | 2              | 2.60047   |
| P11915        | HIDVLINK                                        | 0.895310179        | 2              | 2.9382    |
| P11915        | HSVNNPYSQFQDEYSLDEIMK                           | 0.974959274        | 3              | 6.17153   |
| P11915        | KADCTITMADSDLLALMTGK                            | 1.388109022        | 3              | 3.48586   |
| P11915        | KLEEEGEEFVK                                     | 0.934196211        | 3              | 4.24514   |
| P11915        | KLEEEGEEFVKK                                    | 0.922210407        | 3              | 4.85396   |
| P11915        | LEEEGEEFVK                                      | 0.747255492        | 2              | 2.81904   |
| P11915        | LEEEGEEFVKK                                     | 0.963416           | 2              | 3.58774   |
| P11915        | LQSLQLQPK                                       | 1.15341954         | 2              | 3.16929   |
| P11915        | MGFPEAASSFR                                     | 0.96187785         | 2              | 2.61485   |
| P11915        | MNPQSAFFQGK                                     | 0.877560297        | 2              | 3.22935   |
| P11915        | SRPVFDLTLVLCQPTSDGAAAAIVSSEEFVQK                | 1.035539797        | 3              | 4.37054   |
| P11915        | THQJSAAPTSSAGDGFK                               | 0.939208168        | 2              | 4.64028   |
| P11915        | VFVVGVMGTMK                                     | 0.853900554        | 2              | 2.67829   |
| P11915        | WVINPSGGLISK                                    | 1.263832977        | 2              | 3.11443   |
| P11915        | YGMSACPFAPQLFGSAGK                              | 1.076116951        | 2              | 4.0614    |
| <b>P11980</b> | <b>KPYM Pyruvate kinase isozymes M1/M2</b>      | <b>2.140057521</b> | <b>0.93842</b> | <b>4</b>  |
| P11980        | GADYLVTEVENGGSLSGK                              | 1.909695243        | 2              | 4.76206   |
| P11980        | GVNLPGAAVDLPVASEK                               | 1.361119138        | 2              | 4.06188   |
| P11980        | IYVDDGLISLQVK                                   | 1.508891921        | 2              | 2.44236   |
| P11980        | NTGIICTIGPASR                                   | 1.004670034        | 2              | 3.29981   |
| <b>P12001</b> | <b>RL18 60S ribosomal protein L18</b>           | <b>2.175987499</b> | <b>1.5E-05</b> | <b>5</b>  |
| P12001        | GTVLLSGPR                                       | 0.934334055        | 2              | 3.1428    |
| P12001        | ILTFDQLALESPK                                   | 1.262974178        | 2              | 4.85503   |

|               |                                                                              |                    |                |           |
|---------------|------------------------------------------------------------------------------|--------------------|----------------|-----------|
| P12001        | TAVVVGITDDVR                                                                 | 1.124341954        | 2              | 4.33315   |
| P12001        | TNRPPLSLR                                                                    | 1.033199658        | 3              | 3.66187   |
| P12001        | TNSTFNQVVVK                                                                  | 0.841081515        | 2              | 2.99677   |
| <b>P12007</b> | <b>IVD Isovaleryl_CoA dehydrogenase_mitochondrial</b>                        | <b>1.923101679</b> | <b>0.97342</b> | <b>9</b>  |
| P12007        | AQEIDQSNDFK                                                                  | 2.15101854         | 2              | 3.43611   |
| P12007        | FVQENLAPK                                                                    | 0.93144915         | 2              | 2.94552   |
| P12007        | FWITNGPDADVLVVYAK                                                            | 1.46083674         | 2              | 3.58472   |
| P12007        | GSNTCELVFEDCK                                                                | 1.09449304         | 2              | 4.55817   |
| P12007        | GSNTCELVFEDCKVPAANILSQESK                                                    | 1.191717443        | 3              | 5.22953   |
| P12007        | GVYVLMGLDLER                                                                 | 1.109360062        | 2              | 2.95199   |
| P12007        | IGQFQLMQGK                                                                   | 1.256765758        | 2              | 2.76344   |
| P12007        | LYEIGGGTSEVR                                                                 | 1.080414746        | 2              | 2.8232    |
| P12007        | TDLTAVPASR                                                                   | 1.111065781        | 2              | 3.09366   |
| <b>P12075</b> | <b>COX5B Cytochrome c oxidase subunit 5B_mitochondrial</b>                   | <b>1.853897414</b> | <b>0.86905</b> | <b>2</b>  |
| P12075        | EDPNLVPSVSNK                                                                 | 0.890436316        | 2              | 3.22824   |
| P12075        | GLDPYNMLPPK                                                                  | 1.201207332        | 2              | 2.31776   |
| <b>P12336</b> | <b>GTR2 Solute carrier family 2_facilitated glucose transporter member 2</b> | <b>2.16548227</b>  | <b>0.87482</b> | <b>3</b>  |
| P12336        | HVLGVPLDDR                                                                   | 1.506497697        | 2              | 2.33126   |
| P12336        | HVLGVPLDDR                                                                   | 0.9277263          | 3              | 3.3095    |
| P12336        | SFDEIAAEFR                                                                   | 1.368411006        | 2              | 3.34138   |
| <b>P12346</b> | <b>TRFE Serotransferrin</b>                                                  | <b>1.877735063</b> | <b>0.77823</b> | <b>23</b> |
| P12346        | ADRDQYELLCLDNTR                                                              | 0.774009281        | 2              | 4.31865   |
| P12346        | ASDSSINWNNLK                                                                 | 0.850619876        | 2              | 3.07084   |
| P12346        | DFQLFGSPLGK                                                                  | 2.068675318        | 2              | 3.59528   |
| P12346        | DGGGDVAVFK                                                                   | 0.948579336        | 2              | 2.46836   |
| P12346        | DLKQEDFQLLCPDGTK                                                             | 0.692615704        | 2              | 4.57533   |
| P12346        | EGVCPGSDSAPVK                                                                | 0.736568369        | 2              | 3.47231   |
| P12346        | EGYNGYTGAFAQCLVEK                                                            | 0.868933295        | 2              | 3.25762   |
| P12346        | FDEFFSQGCAPGYK                                                               | 0.766522558        | 2              | 4.06314   |
| P12346        | GDKDCTGNFCLFR                                                                | 0.82716252         | 2              | 3.58545   |
| P12346        | GTDFQLNQLQGK                                                                 | 0.827203294        | 2              | 3.51885   |
| P12346        | GYAVAVVK                                                                     | 0.928959611        | 2              | 2.95011   |
| P12346        | HQTVLENTNGK                                                                  | 6.561540628        | 2              | 2.47251   |
| P12346        | HTTIFEVLQPK                                                                  | 0.676300131        | 3              | 4.01045   |
| P12346        | KGDFQLNQLQGK                                                                 | 0.787636308        | 2              | 4.58998   |
| P12346        | KTSYQDCIK                                                                    | 0.753553945        | 2              | 2.64941   |
| P12346        | LPEGTTYEYLGAEYLQAVGNIR                                                       | 1.52994414         | 2              | 4.58329   |
| P12346        | NGDGKEDLIWEILK                                                               | 1.068280901        | 2              | 3.69213   |
| P12346        | QEDFQLLCPDGTK                                                                | 0.459583605        | 2              | 3.22916   |
| P12346        | SKDFQLFGSPLGK                                                                | 0.731524915        | 2              | 3.14005   |
| P12346        | TSYQDCIK                                                                     | 0.760684926        | 2              | 2.46459   |
| P12346        | VSTVLTAQK                                                                    | 0.694531007        | 2              | 2.72709   |
| P12346        | WCALSHQER                                                                    | 0.665514704        | 2              | 3.18049   |
| P12346        | WCAVSEHENTK                                                                  | 0.784584219        | 2              | 3.61857   |
| <b>P12368</b> | <b>KAP2 cAMP_dependent protein kinase type II_alpha regulatory subunit</b>   | <b>1.84792771</b>  | <b>0.69231</b> | <b>3</b>  |
| P12368        | MFESFIESVPLFK                                                                | 0.842614102        | 2              | 3.44172   |
| P12368        | NISHYEEQLVK                                                                  | 0.902932315        | 2              | 2.53913   |
| P12368        | NLDQEQLSQVLDAMFEK                                                            | 0.931543319        | 3              | 3.89886   |
| <b>P12711</b> | <b>ADHX Alcohol dehydrogenase class_3</b>                                    | <b>2.236624782</b> | <b>2.4E-06</b> | <b>10</b> |
| P12711        | AAVAWEAGKPLSIEIEVAPPQAHEVR                                                   | 1.128259137        | 3              | 6.70961   |
| P12711        | AFDLMHSGNSIR                                                                 | 0.792283499        | 2              | 3.28735   |
| P12711        | AGDVIPLYIPQCGECK                                                             | 1.144362884        | 2              | 3.7181    |
| P12711        | AKEFGATECINPQDFSK                                                            | 0.838642554        | 2              | 4.76371   |
| P12711        | EFGATECINPQDFSK                                                              | 1.080807505        | 2              | 4.35277   |

|               |                                       |                    |                |           |
|---------------|---------------------------------------|--------------------|----------------|-----------|
| P12711        | IDPSAPLDK                             | 1.385811655        | 1              | 2.17802   |
| P12711        | IIGIDINK                              | 1.181023583        | 1              | 2.03836   |
| P12711        | IIGIDINKDK                            | 1.159877363        | 2              | 2.43535   |
| P12711        | VCLLGCISTGYGAAVNTAK                   | 1.443797597        | 2              | 6.07831   |
| P12711        | VDEFVTGNLSFDQINK                      | 1.038256084        | 2              | 4.99031   |
| <b>P12749</b> | <b>RL26 60S ribosomal protein L26</b> | <b>2.101397838</b> | <b>0.99997</b> | <b>5</b>  |
| P12749        | DDEVQVVR                              | 1.240998335        | 2              | 2.94547   |
| P12749        | FNPFVTSR                              | 0.983977974        | 2              | 2.75645   |
| P12749        | HFNAPSHIR                             | 1.029493371        | 3              | 3.88091   |
| P12749        | KDDEVQVVR                             | 1.071504206        | 2              | 3.26208   |
| P12749        | YVIYIER                               | 0.961952337        | 1              | 1.97401   |
| <b>P12785</b> | <b>FAS Fatty acid synthase</b>        | <b>1.7215555</b>   | <b>0.99057</b> | <b>45</b> |
| P12785        | ACIDTALENLSTLK                        | 1.439647573        | 2              | 4.47468   |
| P12785        | AEAVVAVLLTK                           | 1.4824218          | 2              | 3.83213   |
| P12785        | AGSDTELAAPK                           | 0.970927903        | 2              | 3.4142    |
| P12785        | CPPGVVPACHNSEDTVTISGPQAAVNEFVEQLK     | 1.593493766        | 3              | 5.52807   |
| P12785        | DAMLENQTPELFQDVNPKK                   | 1.249800518        | 2              | 4.17341   |
| P12785        | DANLPAGSMAAVGLSWEECK                  | 0.765230269        | 2              | 3.08915   |
| P12785        | DGGFLLMHTVLK                          | 1.059030468        | 2              | 3.33915   |
| P12785        | DPETLLGYSMVGCQR                       | 1.258318784        | 2              | 3.93981   |
| P12785        | DTSFEQHVLHTGGK                        | 1.416318688        | 2              | 2.99097   |
| P12785        | EEEEPEAMLPGAQPTLISAISK                | 1.590879829        | 2              | 3.94726   |
| P12785        | EQGVTFPSGEAQEQLIR                     | 0.842408159        | 2              | 4.29349   |
| P12785        | FDASFFGVHPK                           | 1.157544909        | 2              | 3.4069    |
| P12785        | FDLSNNHPLGMAIFLK                      | 1.575358859        | 2              | 3.43606   |
| P12785        | FVFTPHVEPECLSESAILQK                  | 1.432664238        | 3              | 5.07461   |
| P12785        | GLESIIIIHSSLAEPK                      | 1.380139725        | 2              | 4.416     |
| P12785        | GNAGQSNYGFANSTMER                     | 1.573016286        | 2              | 4.70319   |
| P12785        | GVDLVLNSLAEEK                         | 1.2136563          | 2              | 3.48034   |
| P12785        | HFQLEQDKPEEQTAHAFVNLTR                | 1.296705346        | 3              | 3.40921   |
| P12785        | LFDHPEVPIPAESVSR                      | 0.734067738        | 2              | 4.26387   |
| P12785        | LLLPEDPLISGLLSQALK                    | 1.126418643        | 3              | 4.7815    |
| P12785        | LTPGCEAEAEAEICFFIK                    | 2.516207803        | 2              | 3.76223   |
| P12785        | MTVPGLLEDLPQHGLPR                     | 1.300625537        | 2              | 3.59142   |
| P12785        | QAQLNLSILLVNPGLTR                     | 1.292106689        | 2              | 3.08443   |
| P12785        | RQQEQLVPTLEK                          | 0.658027906        | 2              | 3.12097   |
| P12785        | SDEALKPLGVK                           | 1.01292474         | 2              | 2.97413   |
| P12785        | SFDDSGNGYCR                           | 1.795260376        | 2              | 3.05912   |
| P12785        | SGECPAAIVGINLLKPNSTVQFMK              | 0.635926476        | 3              | 3.96689   |
| P12785        | SLYQPGGVAPESLEYIAHGTGK                | 1.449279692        | 2              | 5.23347   |
| P12785        | SNMGHPEPASGLAALTK                     | 1.222507421        | 3              | 4.17648   |
| P12785        | SNMGHPEPASGLAALTK+Oxidation(2         | 0.741260721        |                |           |
| P12785        | TGGTYGEDLGADYNLSQVCDGK                | 1.203943123        | 2              | 5.04823   |
| P12785        | TGTVPLEVR                             | 0.956122127        | 2              | 2.46229   |
| P12785        | TMEAVQGLLEQGR                         | 1.305675315        | 2              | 3.88832   |
| P12785        | VFTTVGSAEK                            | 1.189210745        | 2              | 2.3602    |
| P12785        | VGDPQELNGITR                          | 0.71991192         | 2              | 3.15346   |
| P12785        | VHLTGIDINPNALFPPVEFPVPR               | 1.145110152        | 2              | 4.90093   |
| P12785        | VLEALLPLK                             | 1.372285819        | 2              | 3.3012    |
| P12785        | VLESDLVMNVYR                          | 1.289282564        | 2              | 3.40659   |
| P12785        | VSVHIEGDHR                            | 1.675417183        | 2              | 2.81774   |
| P12785        | VTAIYIDPATHLQK                        | 1.319371101        | 2              | 3.80096   |
| P12785        | VYATILNAGTNTDGCK                      | 1.209832505        | 2              | 4.98002   |
| P12785        | VYMLEGDTQVADVTTSR                     | 1.842476262        | 2              | 3.58574   |
| P12785        | VYQWEDPDSK                            | 0.909300615        | 2              | 3.2511    |
| P12785        | WLSTSIPEAQWQSSLAR                     | 0.736311105        | 2              | 2.67496   |
| P12785        | YNGTLNLDR                             | 1.169319135        | 1              | 2.10228   |

|               |                                                                               |                    |                |           |
|---------------|-------------------------------------------------------------------------------|--------------------|----------------|-----------|
| <b>P12791</b> | <b>CP2BA Cytochrome P450 2B10</b>                                             | <b>2.181662167</b> | <b>0.99998</b> | <b>2</b>  |
| P12791        | IQEEAQLVEELR                                                                  | 1.137358074        | 2              | 4.58548   |
| P12791        | IQEEAQLVEELRK                                                                 | 1.112050098        | 2              | 3.76327   |
| <b>P12847</b> | <b>MYH3 Myosin_3</b>                                                          | <b>2.203467043</b> | <b>0.91945</b> | <b>5</b>  |
| P12847        | GTLEDQIISANPLLEAFGNAK                                                         | 0.574879494        | 2              | 3.11892   |
| P12847        | IEAQNQPFDAK                                                                   | 0.661909115        | 2              | 3.03745   |
| P12847        | KELEEKLVTLVQEK                                                                | 0.828579852        | 2              | 2.76737   |
| P12847        | MKGTLEDQIISANPLLEAFGNAK                                                       | 1.331275612        | 3              | 6.70384   |
| P12847        | MKGTLEDQIISANPLLEAFGNAK+Oxidation(0                                           | 1.318618613        |                |           |
| <b>P12928</b> | <b>KPYR Pyruvate kinase isozymes R/L</b>                                      | <b>2.632892409</b> | <b>0.0452</b>  | <b>20</b> |
| P12928        | AAVIAVTR                                                                      | 1.384018748        | 2              | 2.62289   |
| P12928        | AETSDVANAVLDGADCIMLSGETAK                                                     | 1.453317648        | 2              | 5.97997   |
| P12928        | CCAAAIIVLTK                                                                   | 1.260592077        | 2              | 3.08597   |
| P12928        | CNLAGKPVVCATQMLESMTK                                                          | 1.404479533        | 3              | 4.86376   |
| P12928        | EATESFATSPLSYRPAIALDTK                                                        | 2.026247034        | 2              | 4.02342   |
| P12928        | EPPEAIWADDVDR                                                                 | 3.156592423        | 2              | 2.64996   |
| P12928        | GDLGIEIPAEK                                                                   | 1.174139306        | 2              | 3.147     |
| P12928        | GSFPVEAVMMQHAIR                                                               | 1.21946981         | 2              | 3.91374   |
| P12928        | GSQVLVTVDPK                                                                   | 1.613683412        | 2              | 2.93878   |
| P12928        | GVNLPNTEVDLPLGLEQDLLDLR                                                       | 1.830840857        | 2              | 4.90819   |
| P12928        | IGPEGLVTEVEHGILGSR                                                            | 1.938394246        | 2              | 5.04771   |
| P12928        | IYIDGLISLVVQK                                                                 | 2.648991421        | 2              | 4.41485   |
| P12928        | KFDEILEVSDGIMVAR                                                              | 1.580758349        | 2              | 4.93118   |
| P12928        | KGVNLNTEVDLPLGLEQDLLDLR                                                       | 2.392729747        | 3              | 4.66172   |
| P12928        | LNFSHGSHEYHAESIANIR                                                           | 2.581583083        | 2              | 5.72094   |
| P12928        | RVQFGIESGK                                                                    | 1.104741113        | 2              | 2.55405   |
| P12928        | STSIIATIGPASR                                                                 | 1.246786912        | 2              | 3.39026   |
| P12928        | TGVLQGGPESEIVEK                                                               | 1.522046864        | 2              | 5.06898   |
| P12928        | TVWVDYHNITR                                                                   | 1.537436212        | 2              | 2.68411   |
| P12928        | VQFGIESGK                                                                     | 1.740467672        | 2              | 2.46101   |
| <b>P12938</b> | <b>CP2D3 Cytochrome P450 2D3</b>                                              | <b>1.809945132</b> | <b>0.91698</b> | <b>7</b>  |
| P12938        | DLTDAFLAEIEK                                                                  | 0.847976262        | 2              | 4.42482   |
| P12938        | FDYGDPDFIK                                                                    | 1.444104135        | 2              | 2.76539   |
| P12938        | GNPESSFNDANLR                                                                 | 0.874391998        | 2              | 4.00462   |
| P12938        | RFDYGDPDFIK                                                                   | 0.740893774        | 2              | 3.0478    |
| P12938        | TFLTMVDNLVTEHK                                                                | 1.518641569        | 2              | 3.33964   |
| P12938        | TWDPDQPPR                                                                     | 0.796774473        | 2              | 2.45075   |
| P12938        | TWDPDQPPRDLTDAFLAEIEK                                                         | 0.831431221        | 3              | 3.67225   |
| <b>P12939</b> | <b>CP2DA Cytochrome P450 2D10</b>                                             | <b>3.657456454</b> | <b>0.26342</b> | <b>8</b>  |
| P12939        | ALCNVIASLIFAR                                                                 | 1.311185254        | 2              | 3.50722   |
| P12939        | AVQEVLVTHGEDTADRPVPIFK                                                        | 1.516713184        | 3              | 5.59872   |
| P12939        | FEYEDPYLIR                                                                    | 1.742265342        | 2              | 2.45893   |
| P12939        | FGDIAPLNLPR                                                                   | 1.40911648         | 2              | 3.1325    |
| P12939        | ITSCDIEVQDFVIPK                                                               | 2.447642612        | 2              | 4.36936   |
| P12939        | NLTDAFLAEVEK                                                                  | 1.890219115        | 2              | 4.16064   |
| P12939        | RFEYEDPYLIR                                                                   | 1.385062676        | 3              | 3.46783   |
| P12939        | TTWDPAQPPR                                                                    | 2.422858795        | 2              | 2.59151   |
| <b>P13084</b> | <b>NPM Nucleophosmin</b>                                                      | <b>2.638356604</b> | <b>0.99746</b> | <b>2</b>  |
| P13084        | MTDQEAIQDLWQWR                                                                | 1.091776322        | 2              | 3.27561   |
| P13084        | VDNDENEHQLSLR                                                                 | 1.445425746        | 2              | 4.12753   |
| <b>P13086</b> | <b>SUCA Succinyl_CoA ligase [ADP/GDP_forming] subunit alpha_mitochondrial</b> | <b>2.037261162</b> | <b>1</b>       | <b>5</b>  |
| P13086        | HLGLPVFNTVK                                                                   | 1.09953044         | 2              | 2.33359   |
| P13086        | LIGNPCGIINPGECK                                                               | 1.146427423        | 2              | 4.43545   |
| P13086        | MGHAGAIAGGK                                                                   | 0.998220233        | 3              | 3.46659   |
| P13086        | NIYIDK                                                                        | 0.92435848         | 1              | 2.1293    |
| P13086        | QGTFFHSQQALEYGTK                                                              | 1.034966182        | 2              | 2.72825   |

|               |                                                     |                    |                |           |
|---------------|-----------------------------------------------------|--------------------|----------------|-----------|
| <b>P13107</b> | <b>CP2B3 Cytochrome P450 2B3</b>                    | <b>2.2510323</b>   | <b>0.99981</b> | <b>8</b>  |
| P13107        | ATLDPNAPR                                           | 1.040603214        | 2              | 2.63511   |
| P13107        | EIDQVIGSQR                                          | 0.852062196        | 2              | 2.66546   |
| P13107        | EVLDYIDHSVENHR                                      | 1.095520039        | 2              | 4.08286   |
| P13107        | FSDVSPMGLPCR                                        | 1.149428812        | 2              | 3.44387   |
| P13107        | GIIAVLQPIMQEYGVSVNEER                               | 1.483498351        | 3              | 5.76416   |
| P13107        | MCLGEGIAR                                           | 1.204625608        | 2              | 2.69242   |
| P13107        | QSVEDQIKEEAK                                        | 1.184175406        | 2              | 2.91521   |
| P13107        | SFIQLQEK                                            | 0.854156207        | 2              | 2.43396   |
| <b>P13221</b> | <b>AATC Aspartate aminotransferase_ cytoplasmic</b> | <b>2.402419946</b> | <b>0.00291</b> | <b>7</b>  |
| P13221        | IGADFLGR                                            | 1.706526026        | 2              | 2.38995   |
| P13221        | ITWSNPPAQGAR                                        | 1.250520085        | 2              | 3.00608   |
| P13221        | IVATTLNPELFK                                        | 1.585361331        | 2              | 3.78562   |
| P13221        | NLDYVATSINEAVTK                                     | 1.541585894        | 2              | 5.09798   |
| P13221        | SCASQLVLGDNSPALR                                    | 1.033197503        | 2              | 5.11447   |
| P13221        | TDDSQPWVLPVVR                                       | 1.041453405        | 2              | 3.26695   |
| P13221        | VGGVQLSGGTGALR                                      | 1.079878062        | 2              | 3.00787   |
| <b>P13255</b> | <b>GNMT Glycine N_methyltransferase</b>             | <b>1.923274458</b> | <b>0.99999</b> | <b>8</b>  |
| P13255        | AHMTLTDYTVQVPGAGR                                   | 0.932424965        | 2              | 5.07364   |
| P13255        | AWLLGLLR                                            | 1.09743395         | 2              | 2.57165   |
| P13255        | DITTSVLTVNNK                                        | 0.982760782        | 2              | 3.82661   |
| P13255        | LSYYPHCLASFTLVQEAFFGGR                              | 0.927370236        | 3              | 3.64388   |
| P13255        | NIASMVRPGLLVIDHR                                    | 1.555064713        | 3              | 3.74856   |
| P13255        | NYDYILSTGCAPP GK                                    | 1.102492499        | 2              | 4.65123   |
| P13255        | SDLTKDITTSVLTVNNK                                   | 1.099888716        | 2              | 2.89718   |
| P13255        | SLGVAAEGIPDQYADGEAAR                                | 0.916266528        | 2              | 5.25813   |
| <b>P13383</b> | <b>NUCL Nucleolin</b>                               | <b>1.811411015</b> | <b>0.98956</b> | <b>8</b>  |
| P13383        | EAMEDGEIDGNK                                        | 1.576522956        | 2              | 2.93201   |
| P13383        | GFGFVDFNSEEDAK                                      | 1.277410603        | 2              | 2.87702   |
| P13383        | GLSEDTTEETLK                                        | 0.89221919         | 2              | 3.24166   |
| P13383        | GSPNARSQSKTLFVK                                     | 1.191989829        | 2              | 2.33221   |
| P13383        | IEGSEPTTFFNLFIGNLNP NK                              | 0.753517613        | 2              | 3.75733   |
| P13383        | NDLAAVDVR                                           | 0.989042938        | 2              | 2.56311   |
| P13383        | NLSFNITEDELK                                        | 1.086649257        | 2              | 2.6226    |
| P13383        | SEADAENLEEK                                         | 0.829213901        | 2              | 2.9488    |
| <b>P13437</b> | <b>THIM 3_ketoacyl_CoA thiolase_mitochondrial</b>   | <b>1.98175926</b>  | <b>0.99974</b> | <b>21</b> |
| P13437        | AANEAGYFNEEMAPIEVK                                  | 1.171095922        | 2              | 5.1397    |
| P13437        | AANEAGYFNEEMAPIEVK+Oxidation(11                     | 1.552025103        |                |           |
| P13437        | DAEVVLCGGTESMSQSPYSVR                               | 1.145869109        | 3              | 5.0537    |
| P13437        | DFTATDLTEFAAR                                       | 0.84221934         | 2              | 4.0434    |
| P13437        | DMDLIDVNEAFAPQFLAVQK                                | 1.867791061        | 3              | 6.51918   |
| P13437        | DMDLIDVNEAFAPQFLAVQK+Oxidation(1                    | 1.654593236        |                |           |
| P13437        | EGTVTAGNASGMSDGAGVVIASEDAVK                         | 2.73042678         | 3              | 5.77951   |
| P13437        | EGTVTAGNASGMSDGAGVVIASEDAVKK                        | 1.128347032        | 3              | 4.88921   |
| P13437        | GVFIVA AK                                           | 1.044798329        | 2              | 2.47247   |
| P13437        | HNFTPLAR                                            | 1.04880178         | 2              | 2.36927   |
| P13437        | ITAHLVHEL R                                         | 1.062971791        | 2              | 3.51449   |
| P13437        | LCCSGFQSVISGCQEICK                                  | 1.434919934        | 2              | 5.64092   |
| P13437        | LEDTLWAGLTDQHVK                                     | 0.979860041        | 2              | 5.06277   |
| P13437        | RTPFGAYGGLLK                                        | 0.558009571        | 3              | 3.38314   |
| P13437        | SLDLPSK                                             | 0.825419257        | 2              | 2.72636   |
| P13437        | TNVSGGAIALGHPLGSGSR                                 | 0.912615779        | 2              | 5.99104   |
| P13437        | VGVPTETGALT LNR                                     | 0.932088289        | 2              | 3.63579   |
| P13437        | VPPETIDSVIVGNVMQSSDAAYLAR                           | 1.063731189        | 2              | 5.91279   |
| P13437        | VPPETIDSVIVGNVMQSSDAAYLAR+Oxidation(14              | 1.373823392        |                |           |
| P13437        | VVGYFVSGCDPAIMGIGVPAITGALK                          | 1.00035228         | 3              | 5.02973   |
| P13437        | VVGYFVSGCDPAIMGIGVPAITGALKK                         | 0.84023202         | 3              | 4.51412   |

|               |                                                                         |                    |                |           |
|---------------|-------------------------------------------------------------------------|--------------------|----------------|-----------|
| <b>P13439</b> | <b>UMPS Uridine 5__monophosphate synthase</b>                           | <b>2.25928978</b>  | <b>0.38092</b> | <b>2</b>  |
| P13439        | SGLSSPVYIDLK                                                            | 1.418621002        | 2              | 2.42861   |
| P13439        | VTDAIVLLDR                                                              | 1.13947905         | 2              | 2.36203   |
| <b>P13444</b> | <b>METK1 S_adenosylmethionine synthase isoform type_1</b>               | <b>2.328517047</b> | <b>6.2E-15</b> | <b>9</b>  |
| P13444        | FVIGGPQGDAGVTGR                                                         | 1.034512236        | 2              | 4.51991   |
| P13444        | HIGYDDSAK                                                               | 0.86099746         | 2              | 2.74085   |
| P13444        | ICDQISDAVLDAHLK                                                         | 0.988049226        | 3              | 5.26489   |
| P13444        | NEEDVGAGDQGLMFGYATDETEECMPLTIVLAHK                                      | 2.115180309        | 3              | 6.92725   |
| P13444        | SEFPWEVPK                                                               | 1.227558763        | 2              | 2.37817   |
| P13444        | SGVLPWLRPDSK                                                            | 0.981323061        | 2              | 2.94306   |
| P13444        | TCNVLVALEQQSPDIAQCVHLDR                                                 | 1.679312495        | 3              | 5.99758   |
| P13444        | TQVTVQYVQDNGAVIPVR                                                      | 1.278221291        | 2              | 5.43374   |
| P13444        | VHTIVISVQHNEIDLEAMR                                                     | 1.298264783        | 3              | 4.07736   |
| <b>P13471</b> | <b>RS14 40S ribosomal protein S14</b>                                   | <b>2.039506532</b> | <b>0.95734</b> | <b>3</b>  |
| P13471        | ADRESSPYAAMLAQDVAQR                                                     | 1.045061067        | 2              | 5.42994   |
| P13471        | ELGITALHIK                                                              | 1.446870204        | 2              | 2.49773   |
| P13471        | IEDVTPIPSDSTR                                                           | 0.807531822        | 2              | 3.9123    |
| <b>P13601</b> | <b>AL1A7 Aldehyde dehydrogenase__cytosolic 1</b>                        | <b>1.584619142</b> | <b>0.00139</b> | <b>20</b> |
| P13601        | ANNTPYGLAAGVFTK                                                         | 0.394431466        | 2              | 4.37942   |
| P13601        | EEIFGPVQIMK                                                             | 0.685174136        | 2              | 3.60608   |
| P13601        | EMGEQGVVEYTELK                                                          | 0.660227711        | 2              | 3.53665   |
| P13601        | FPVINPATEEVICHVEEGDK                                                    | 1.161021829        | 3              | 3.82828   |
| P13601        | FPVINPATEEVICHVEEGDKADVDK                                               | 0.948315664        | 4              | 5.05052   |
| P13601        | GFFVQPTVFSNVTDENR                                                       | 1.110789979        | 2              | 2.45955   |
| P13601        | IAKEEIFGPVQIMK                                                          | 0.872005187        | 2              | 3.72034   |
| P13601        | IFINNEWHNSLNGK                                                          | 0.931784773        | 2              | 3.90821   |
| P13601        | IHGQTIPSDGDVFTYTR                                                       | 0.833514732        | 3              | 3.89745   |
| P13601        | ILDLESCK                                                                | 0.984829278        | 2              | 3.19051   |
| P13601        | ILDLESCKK                                                               | 0.646708445        | 2              | 2.85552   |
| P13601        | KFPVINPATEEVICHVEEGDK                                                   | 0.916448336        | 3              | 3.56804   |
| P13601        | KFPVINPATEEVICHVEEGDKADVDK                                              | 0.953781397        | 4              | 4.87731   |
| P13601        | LFVEESYDEFVR                                                            | 0.602356465        | 2              | 3.60477   |
| P13601        | SIDEVIK                                                                 | 0.636110816        | 2              | 2.49596   |
| P13601        | VLLATMESMNAGK                                                           | 0.66456969         | 2              | 4.44039   |
| P13601        | VSFTGSTEVGK                                                             | 0.549800459        | 2              | 2.74865   |
| P13601        | YFAGWADK                                                                | 0.637965152        | 2              | 2.31775   |
| P13601        | YVLGNPLDSGISQGPQIDK                                                     | 0.757576035        | 2              | 4.75492   |
| P13601        | YVLGNPLDSGISQGPQIDKEQHAK                                                | 0.458991194        | 2              | 4.21713   |
| <b>P13697</b> | <b>MAOX NADP__dependent malic enzyme</b>                                | <b>1.875954205</b> | <b>0.72278</b> | <b>6</b>  |
| P13697        | AECSAEECYK                                                              | 0.974589793        | 2              | 3.12663   |
| P13697        | AIFASGSPFDPVTLPDGR                                                      | 2.714553278        | 2              | 4.49689   |
| P13697        | GHIASVLNAWPEDEVK                                                        | 2.640019564        | 2              | 3.59331   |
| P13697        | HINDSVFLTTAEVISQVSDK                                                    | 1.100765707        | 3              | 4.59759   |
| P13697        | ILGLDLGCGMGIPIVVK                                                       | 1.760161516        | 2              | 2.8062    |
| P13697        | NLEAIVQK                                                                | 0.876750014        | 1              | 2.40288   |
| <b>P13803</b> | <b>ETFA Electron transfer flavoprotein subunit alpha__mitochondrial</b> | <b>1.86632326</b>  | <b>0.15121</b> | <b>15</b> |
| P13803        | AAVDAGFVPNDMQVGQTGK                                                     | 3.430531           | 2              | 4.94719   |
| P13803        | AAVDAGFVPNDMQVGQTGK+Oxidation(11                                        | 1.067497982        |                |           |
| P13803        | DPEAPIFQVADYGIVADLFK                                                    | 1.053403407        | 2              | 4.98397   |
| P13803        | GLLPEELTPLILETQK                                                        | 1.063264306        | 2              | 4.48045   |
| P13803        | GTSFEAAAASGGSASSEK                                                      | 1.012365516        | 2              | 5.1968    |
| P13803        | LGGEVSLVAGTK                                                            | 0.914008295        | 2              | 4.59815   |
| P13803        | LLYDLADQLHAAVVGASR                                                      | 1.223959312        | 2              | 5.04928   |
| P13803        | LNVAPVSDIIEIK                                                           | 1.772069003        | 3              | 4.03899   |
| P13803        | QFSYTHICAGASAFGK                                                        | 0.798907736        | 2              | 3.23217   |



|               |                                                  |                    |                |           |
|---------------|--------------------------------------------------|--------------------|----------------|-----------|
| P13803        | SDRPELTGAK                                       | 0.804669633        | 3              | 3.54489   |
| P13803        | TIVAINKDPEAPIFQVADYGVADLFK                       | 0.87705406         | 3              | 6.62075   |
| P13803        | TIYAGNALCTVK                                     | 0.790323884        | 2              | 3.70433   |
| P13803        | VLVAQHDAYK                                       | 0.859431339        | 2              | 3.56115   |
| P13803        | VVPEMTEILK                                       | 0.98079001         | 1              | 1.92887   |
| P13803        | VVQDLCK                                          | 0.853593529        | 2              | 2.63306   |
| <b>P13832</b> | <b>MRLCA Myosin regulatory light chain RLC_A</b> | <b>2.521893491</b> | <b>0.16249</b> | <b>3</b>  |
| P13832        | ATSNVFMFDQSQIQEFK                                | 1.338053884        | 2              | 5.08349   |
| P13832        | FTDEEVDELYR                                      | 0.789201364        | 2              | 3.78271   |
| P13832        | GNFNIEFTR                                        | 1.057577515        | 2              | 3.193     |
| <b>P14046</b> | <b>A1I3 Alpha_1 inhibitor 3</b>                  | <b>2.262297849</b> | <b>0.99334</b> | <b>5</b>  |
| P14046        | ETGLMAFTNLK                                      | 1.317549189        | 2              | 2.62673   |
| P14046        | GDPIPNEQVLK                                      | 1.077589171        | 2              | 2.88023   |
| P14046        | GMYESLPVAVK                                      | 1.073215298        | 2              | 3.34773   |
| P14046        | QQNSYGGFSSTQDTVVALDALS                           | 1.181685867        | 2              | 3.49092   |
| P14046        | QSPGPCGSEVATVPETGR                               | 0.975327045        | 2              | 3.43119   |
| <b>P14141</b> | <b>CAH3 Carbonic anhydrase 3</b>                 | <b>1.790151761</b> | <b>1</b>       | <b>20</b> |
| P14141        | DIRHPSLQPWSVSYDPGSAK                             | 0.246187423        | 3              | 3.86232   |
| P14141        | EAPFNHFDPSCLFPACR                                | 1.148336045        | 2              | 4.23334   |
| P14141        | EKGEFQILLDALDK                                   | 1.215352992        | 2              | 4.67005   |
| P14141        | EKGEFQILLDALDKIK                                 | 0.787903947        | 2              | 3.70368   |
| P14141        | EPMTVSSDQMAK                                     | 1.731731518        | 1              | 3.24039   |
| P14141        | EWGYASHNGPEHWHELYPIAK                            | 1.004364054        | 3              | 4.82179   |
| P14141        | GDNQSPIELHTK                                     | 1.065130697        | 2              | 3.23947   |
| P14141        | GEFQILLDALDK                                     | 1.067554791        | 2              | 4.56922   |
| P14141        | GEFQILLDALDKIK                                   | 1.176836755        | 2              | 3.59343   |
| P14141        | GGPLSGPYR                                        | 0.998529028        | 2              | 2.75937   |
| P14141        | GKEAPFNHFDPSCLFPACR                              | 0.88057891         | 2              | 4.19625   |
| P14141        | HDPSLQPWSVSYDPGSAK                               | 0.937580159        | 3              | 5.58667   |
| P14141        | QFHLHWGSSDDHGSEHTVDGVK                           | 0.992418183        | 2              | 4.77049   |
| P14141        | QPDGIAVVGIFLK                                    | 1.494384065        | 3              | 3.54867   |
| P14141        | SLFASAENEPVPLVGNWRPPQPIK                         | 0.965142307        | 3              | 5.703     |
| P14141        | SLFASAENEPVPLVGNWRPPQPIKGR                       | 0.619294267        | 3              | 4.37209   |
| P14141        | VVFDDTFDR                                        | 0.850590196        | 2              | 3.3251    |
| P14141        | YAAELHLVHWNPK                                    | 1.048560145        | 2              | 4.23882   |
| P14141        | YNTFGEALK                                        | 1.124725836        | 2              | 2.55988   |
| P14141        | YNTFGEALKQPDGIAVVGIFLK                           | 1.084600306        | 3              | 6.11241   |
| <b>P14173</b> | <b>DDC Aromatic_L_amino_acid decarboxylase</b>   | <b>2.25942905</b>  | <b>4.4E-16</b> | <b>8</b>  |
| P14173        | AGEGGGVIQGSASEATLVALLAAR                         | 2.217143606        | 2              | 3.26032   |
| P14173        | ALIPTTAPQEPETYEDIIR                              | 1.300133995        | 2              | 3.85561   |
| P14173        | GSNQLNETLLQR                                     | 1.294681815        | 2              | 2.98679   |
| P14173        | HSHQDSGLITDYR                                    | 1.077057594        | 3              | 3.77432   |
| P14173        | MLELPEAFLAGR                                     | 1.64772969         | 2              | 3.45539   |
| P14173        | QLQAASPELTQAALMEK                                | 1.205411035        | 2              | 4.098     |
| P14173        | TDLTEAFNMDPVYLR                                  | 0.922317523        | 2              | 3.84325   |
| P14173        | TVESAHVQLAWEHIR                                  | 1.210229616        | 3              | 3.64039   |
| <b>P14408</b> | <b>FUMH Fumarate hydratase_mitochondrial</b>     | <b>2.102462137</b> | <b>0.97623</b> | <b>15</b> |
| P14408        | AAAEVNQEYGLDPK                                   | 1.04267216         | 2              | 4.36643   |
| P14408        | AIEMLGELGSK                                      | 0.940238175        | 2              | 3.95858   |
| P14408        | EFAQVIK                                          | 0.949862098        | 1              | 1.92098   |
| P14408        | IEYDTFGELK                                       | 0.893677629        | 3              | 3.25935   |
| P14408        | IEYDTFGELKVPTDK                                  | 0.916520666        | 2              | 3.73064   |
| P14408        | IYELAAGGTAVGTGLNTR                               | 1.064187159        | 2              | 5.36743   |
| P14408        | LMNESLMLVTALNPHIGYDK                             | 1.207920939        | 3              | 5.51642   |
| P14408        | LNDHFPLVWVWQTGSGTQTNMNVNEVISNR                   | 1.09962424         | 3              | 6.87714   |
| P14408        | SGLGELILPENEPGSSIMPGK                            | 0.938534627        | 2              | 4.63581   |
| P14408        | SGLGELILPENEPGSSIMPGK+Oxidation(17               | 1.348560256        |                |           |

|               |                                                                 |                    |                |           |
|---------------|-----------------------------------------------------------------|--------------------|----------------|-----------|
| P14408        | SKEFAQVIK                                                       | 0.871799082        | 2              | 2.66651   |
| P14408        | SQSSNDTFPTAMHIAAALEVHQVLLPGLQK                                  | 1.312491388        | 3              | 4.78378   |
| P14408        | TAIELGYLTAEQFDEWVVKPK                                           | 1.169845916        | 2              | 4.87841   |
| P14408        | THTQDAVPLTLGQEFSGYVQVQYAMER                                     | 0.921878088        | 3              | 5.89325   |
| P14408        | YYGAQTVR                                                        | 0.881700343        | 2              | 2.4916    |
| <b>P14480</b> | <b>FIBB Fibrinogen beta chain</b>                               | <b>1.821463553</b> | <b>0.85486</b> | <b>8</b>  |
| P14480        | AHYGGFTVQTEANK                                                  | 1.263075435        | 2              | 3.46356   |
| P14480        | DNENVINEYSSILEQK                                                | 1.098753764        | 2              | 3.93521   |
| P14480        | GFGNIATNEDTK                                                    | 1.353726931        | 2              | 3.08932   |
| P14480        | GFGNIATNEDTKK                                                   | 1.161892263        | 2              | 3.58305   |
| P14480        | LESDISAQTEYCHTPCTVNCNIPVVS GK                                   | 1.195682886        | 3              | 4.97951   |
| P14480        | LYIDETVNDNIPLNLR                                                | 1.960356467        | 2              | 2.93289   |
| P14480        | TENGGWTVIQNR                                                    | 0.783031665        | 2              | 3.20598   |
| P14480        | YCGLPGEYWLGN DK                                                 | 1.241157219        | 2              | 3.15456   |
| <b>P14604</b> | <b>ECHM Enoyl_CoA hydratase_mitochondrial</b>                   | <b>1.758432869</b> | <b>1</b>       | <b>10</b> |
| P14604        | AFAAGADIK                                                       | 0.855672836        | 2              | 3.08522   |
| P14604        | AQFGQPEILLGTIPGAGGTQR                                           | 0.96458753         | 2              | 5.68471   |
| P14604        | ESVNAAFEMTLTEGNKLEK                                             | 1.348848321        | 2              | 2.68186   |
| P14604        | FLSHWDHITR                                                      | 0.963099862        | 2              | 3.46626   |
| P14604        | IFPVETLVEEAIQCAEK                                               | 0.802423559        | 3              | 5.88413   |
| P14604        | NSSVGLIQLNRPK                                                   | 0.992382983        | 2              | 3.57694   |
| P14604        | SLAMEMVLTGDR                                                    | 1.08760125         | 2              | 3.80519   |
| P14604        | SLAMEMVLTGDR+Oxidation(3)                                       | 1.046653643        |                |           |
| P14604        | SLAMEMVLTGDR+Oxidation(5)                                       | 1.046653643        |                |           |
| P14604        | TFQDCYSGK                                                       | 0.926485424        | 2              | 2.89127   |
| <b>P14668</b> | <b>ANXA5 Annexin A5</b>                                         | <b>1.843811641</b> | <b>0.99757</b> | <b>5</b>  |
| P14668        | EFRKNFATSLYSMIK                                                 | 0.856631698        | 2              | 2.33736   |
| P14668        | ETSGNLENNLLAVVK                                                 | 1.073623051        | 2              | 3.24921   |
| P14668        | GAGTDDHTLIR                                                     | 0.913828328        | 2              | 2.75949   |
| P14668        | GLGTDEDSILNLLTAR                                                | 1.154298567        | 2              | 5.11611   |
| P14668        | GTVTDFSGFDGR                                                    | 1.186940081        | 2              | 3.00392   |
| <b>P14669</b> | <b>ANXA3 Annexin A3</b>                                         | <b>2.099199263</b> | <b>0.99711</b> | <b>9</b>  |
| P14669        | GAGTDEFTLNR                                                     | 0.961662842        | 2              | 2.66357   |
| P14669        | GMGTDEDTLIEILTTR                                                | 1.14153722         | 2              | 4.38738   |
| P14669        | GTINNYPGFNPSVDAEAIR                                             | 1.034128212        | 2              | 4.96496   |
| P14669        | KDAQTLYDAGEK                                                    | 0.984772573        | 2              | 3.26496   |
| P14669        | KDAQTLYDAGEKK                                                   | 1.021673894        | 3              | 3.88508   |
| P14669        | QYQEAYEQALK                                                     | 0.848464854        | 2              | 2.9069    |
| P14669        | SEIDLLDIR                                                       | 1.707699323        | 2              | 2.54409   |
| P14669        | TLINILTER                                                       | 1.103346625        | 2              | 2.73803   |
| P14669        | WGTDEDKFTEILCLR                                                 | 1.434961596        | 3              | 3.38065   |
| <b>P14685</b> | <b>PSMD3 26S proteasome non_ATPase regulatory subunit 3</b>     | <b>2.031954873</b> | <b>0.87055</b> | <b>4</b>  |
| P14685        | AIQLEYSEAR                                                      | 1.162685053        | 2              | 3.01918   |
| P14685        | HDADGQATLLNLLLR                                                 | 1.39832564         | 2              | 3.79246   |
| P14685        | LQLDSPEDAEIFIVAK                                                | 1.201319429        | 2              | 3.86703   |
| P14685        | SVFPEQANNNEWAR                                                  | 1.011029429        | 2              | 3.28049   |
| <b>P14740</b> | <b>DPP4 Dipeptidyl peptidase 4</b>                              | <b>1.807538468</b> | <b>0.96122</b> | <b>5</b>  |
| P14740        | FRPAEPHFTSDGSSFYK                                               | 0.919779159        | 2              | 3.47716   |
| P14740        | HSYTASYSIYDLNKR                                                 | 1.16922897         | 3              | 3.78152   |
| P14740        | LGTLEVEDQIEAAR                                                  | 1.187005694        | 2              | 4.08775   |
| P14740        | VLEDNSALDK                                                      | 0.817859628        | 2              | 2.61836   |
| P14740        | WEYYDSVYTER                                                     | 0.744334622        | 2              | 2.5283    |
| <b>P14882</b> | <b>PCCA Propionyl_CoA carboxylase alpha chain_mitochondrial</b> | <b>1.864927164</b> | <b>0.99185</b> | <b>15</b> |
| P14882        | FLSDVYPDGFK                                                     | 1.232381204        | 2              | 2.80381   |
| P14882        | FSSQEAASSFGDDR                                                  | 1.220147544        | 2              | 3.92838   |

|               |                                                                        |                    |                |           |
|---------------|------------------------------------------------------------------------|--------------------|----------------|-----------|
| P14882        | GVTHNIPLLR                                                             | 1.113619135        | 2              | 2.39832   |
| P14882        | HGNALWLNER                                                             | 1.115731239        | 2              | 3.31556   |
| P14882        | HIEIQVLGDK                                                             | 1.105459815        | 2              | 2.41751   |
| P14882        | HKQEDIPISGWAVECR                                                       | 0.945101455        | 2              | 2.44155   |
| P14882        | LHDEDHTVVASNNNGPTFNVEVDGSK                                             | 0.892062636        | 3              | 6.74303   |
| P14882        | LQVEHPVTECITGLDLVQEMILVAK                                              | 0.725113625        | 3              | 3.8112    |
| P14882        | MADEAVCVGPAPTSK                                                        | 0.845903293        | 2              | 4.25564   |
| P14882        | MEDALDSYVIR                                                            | 1.027538737        | 2              | 3.50691   |
| P14882        | SYLNMDAIMEAIK                                                          | 1.344739526        | 2              | 3.28723   |
| P14882        | SYLNMDAIMEAIKK                                                         | 1.571574608        | 2              | 3.13295   |
| P14882        | TGAQAVHPGYGFLENK                                                       | 0.984217608        | 2              | 4.01556   |
| P14882        | TVAIHSVDVASSVHVK                                                       | 1.055094141        | 3              | 4.04437   |
| P14882        | VVEEAPSIFLDPETR                                                        | 1.03060366         | 2              | 3.99447   |
| <b>P14942</b> | <b>GSTA4 Glutathione S transferase alpha_4</b>                         | <b>2.198371822</b> | <b>0.84973</b> | <b>3</b>  |
| P14942        | DGCLLFGQVPLVEIDGMLLTQTR                                                | 1.955092445        | 3              | 4.15424   |
| P14942        | KPPPDGHYVDVVR                                                          | 1.014956153        | 2              | 3.27493   |
| P14942        | YFPVFEK                                                                | 0.848502061        | 1              | 1.99856   |
| <b>P15083</b> | <b>PIGR Polymeric immunoglobulin receptor</b>                          | <b>1.896145562</b> | <b>0.9999</b>  | <b>4</b>  |
| P15083        | EIQNAGDQAQENR                                                          | 0.738739613        | 2              | 4.02449   |
| P15083        | FSVLITGLR                                                              | 1.217840048        | 2              | 2.79705   |
| P15083        | GSPHINPTDANAR                                                          | 1.001112649        | 2              | 2.34721   |
| P15083        | GVTGGSVAIVCPYNPK                                                       | 0.981724609        | 2              | 4.03122   |
| <b>P15149</b> | <b>CP2A2 Cytochrome P450 2A2</b>                                       | <b>2.453906882</b> | <b>0.98863</b> | <b>13</b> |
| P15149        | DVQECILEEAGYLIK                                                        | 0.858393681        | 3              | 3.94304   |
| P15149        | DVYSSITQLSER                                                           | 2.244424637        | 2              | 3.11845   |
| P15149        | FKFPMNLEDINEYPSPIGFTR                                                  | 0.982386094        | 3              | 3.74839   |
| P15149        | FSNLAPLGIPR                                                            | 1.146568628        | 2              | 3.32725   |
| P15149        | GELPTFNILFK                                                            | 0.705274188        | 2              | 2.69453   |
| P15149        | GTDVFPPIIGSLMTEPK                                                      | 0.841599598        | 2              | 4.13446   |
| P15149        | GYGFSLSNVEQAK                                                          | 0.93859611         | 2              | 3.43163   |
| P15149        | IVVLYGYDAVK                                                            | 1.658928465        | 2              | 2.60158   |
| P15149        | LEDFMIEK                                                               | 0.971735152        | 1              | 1.9668    |
| P15149        | NFIDSFLIR                                                              | 0.879486162        | 2              | 2.42815   |
| P15149        | QNHSTLDPNSPR                                                           | 0.801082437        | 2              | 2.66313   |
| P15149        | TLQGTTCGAPIDPSIYLSK                                                    | 0.694992034        | 2              | 4.60939   |
| P15149        | TVSNVINSIVFGNR                                                         | 1.420979832        | 2              | 3.2365    |
| <b>P15178</b> | <b>SYDC Aspartyl_tRNA synthetase_ cytoplasmic</b>                      | <b>2.237173625</b> | <b>0.67851</b> | <b>3</b>  |
| P15178        | ALHHGIDLEK                                                             | 1.120109071        | 3              | 3.30517   |
| P15178        | LEYCEALAMLR                                                            | 1.684023601        | 2              | 2.95031   |
| P15178        | QMVKFAANINK+Oxidation(1                                                | 1.102517366        |                |           |
| <b>P15429</b> | <b>ENOB Beta_enolase</b>                                               | <b>2.276570773</b> | <b>0.99853</b> | <b>6</b>  |
| P15429        | DATNVGDEGGFAPNILENNEALELLK                                             | 0.929514514        | 2              | 5.12995   |
| P15429        | FMIELDGTENK                                                            | 1.762431787        | 2              | 3.28281   |
| P15429        | HIADLAGNPDVLPVPAPFNVINGGSHAGNK                                         | 1.983412317        | 3              | 5.6371    |
| P15429        | IEEALGDK                                                               | 3.887415404        | 1              | 2.41668   |
| P15429        | TAIQAAGYPDK                                                            | 2.776644152        | 2              | 2.97379   |
| P15429        | VNQIGSVTESIQACK                                                        | 1.048952023        | 2              | 4.95931   |
| <b>P15650</b> | <b>ACADL Long_chain specific acyl_CoA dehydrogenase_ mitochondrial</b> | <b>2.09765178</b>  | <b>1</b>       | <b>20</b> |
| P15650        | AFVDSCLQLHETK                                                          | 1.049578332        | 2              | 4.01376   |
| P15650        | AQDTAELFFEDVVR                                                         | 1.202211745        | 2              | 4.80286   |
| P15650        | AQDTAELFFEDVRLPASALLGEENK                                              | 1.212210851        | 3              | 5.32631   |
| P15650        | CIGAIAMTEPGAGSDLQGVR                                                   | 1.252353157        | 2              | 6.35955   |
| P15650        | CIGAIAMTEPGAGSDLQGVR+Oxidation(6                                       | 1.070152764        |                |           |
| P15650        | EQIEQFIPQMTAGK                                                         | 1.81358136         | 2              | 4.98789   |
| P15650        | FFQEEVIPYHEWEK                                                         | 1.508297224        | 2              | 5.21064   |
| P15650        | GFYYLMQELPQER                                                          | 1.005191861        | 2              | 4.14586   |

|               |                                                                        |                    |                |           |
|---------------|------------------------------------------------------------------------|--------------------|----------------|-----------|
| P15650        | IFSSEHDIFR                                                             | 1.119987233        | 2              | 3.04391   |
| P15650        | KFFQEEVIPYHEWEK                                                        | 1.14742715         | 2              | 5.14368   |
| P15650        | LDSASASMAK                                                             | 0.787149778        | 2              | 2.50517   |
| P15650        | LDSASASMAK+Oxidation(7                                                 | 1.038391296        |                |           |
| P15650        | QGLLGINIAEK                                                            | 1.106775024        | 2              | 3.28884   |
| P15650        | RLDSASASMAK                                                            | 0.893649612        | 2              | 3.38134   |
| P15650        | RLDSASASMAK+Oxidation(8                                                | 0.925291826        |                |           |
| P15650        | SGSDWILNGSK                                                            | 1.057088089        | 2              | 2.69857   |
| P15650        | TNICVTR                                                                | 0.972160778        | 2              | 2.35139   |
| P15650        | TVAHIQTVQHK                                                            | 0.76502216         | 2              | 2.91804   |
| P15650        | VQPIYGGTNEIMK                                                          | 0.962892503        | 2              | 3.20376   |
| P15650        | VQPIYGGTNEIMK+Oxidation(11                                             | 1.240412193        |                |           |
| <b>P15651</b> | <b>ACADS Short_chain specific acyl_CoA dehydrogenase_mitochondrial</b> | <b>2.442415691</b> | <b>0.96331</b> | <b>9</b>  |
| P15651        | ASSTANLIFEDCR                                                          | 0.983620227        | 2              | 3.35461   |
| P15651        | EEGDSWVLNGTK                                                           | 1.167699679        | 2              | 2.76697   |
| P15651        | ELVPIAAQLDK                                                            | 1.098078356        | 2              | 2.9567    |
| P15651        | ELVPIAAQLDKHEHLFPTSQVK                                                 | 1.209145259        | 2              | 4.48841   |
| P15651        | GISAFLVPMPTPGLTLGK                                                     | 0.800727119        | 2              | 3.62999   |
| P15651        | IGCFALSEPGNGSDAGAASTTAR                                                | 1.10115648         | 2              | 6.30175   |
| P15651        | IGIASQALGIAQASLDCAVK                                                   | 1.646430457        | 3              | 4.96987   |
| P15651        | ITEIYEGTSEIQR                                                          | 1.038894048        | 2              | 4.42685   |
| P15651        | LAASEAATAISHQAIQILGGMGYVTEMPAER                                        | 1.182924629        | 4              | 4.96333   |
| <b>P15684</b> | <b>AMPN Aminopeptidase N</b>                                           | <b>1.925316559</b> | <b>0.47678</b> | <b>5</b>  |
| P15684        | ALGDTAPNIDTTELVER                                                      | 1.080837431        | 2              | 4.32479   |
| P15684        | AQIIHDSFNLASAGK                                                        | 0.944400922        | 2              | 3.7072    |
| P15684        | LRSALACSNVWILNR                                                        | 1.648151861        | 2              | 2.30839   |
| P15684        | VVATTQMQAADAR                                                          | 0.935215959        | 2              | 3.71342   |
| P15684        | YVEAVSPNR                                                              | 0.720379851        | 2              | 2.46438   |
| <b>P15709</b> | <b>ST2A1 Bile salt sulfotransferase</b>                                | <b>2.397764094</b> | <b>0.63791</b> | <b>2</b>  |
| P15709        | GNVLYGSWFHIR                                                           | 1.194809962        | 2              | 2.60428   |
| P15709        | NHFTVSQAEAFDK                                                          | 1.319987626        | 1              | 3.75484   |
| <b>P15978</b> | <b>HA11 Class I histocompatibility antigen_Non_RT1.A alpha_1 chain</b> | <b>2.62864233</b>  | <b>0.13783</b> | <b>3</b>  |
| P15978        | GYEQHAYDGR                                                             | 1.48323068         | 2              | 2.4385    |
| P15978        | VEHEGLPEPLSR                                                           | 0.862277001        | 2              | 3.09697   |
| P15978        | YSDAENPR                                                               | 2.266390651        | 2              | 2.83425   |
| <b>P15999</b> | <b>ATPA ATP synthase subunit alpha_mitochondrial</b>                   | <b>1.987220381</b> | <b>0.7097</b>  | <b>26</b> |
| P15999        | AVDSLPIGR                                                              | 0.995245279        | 2              | 3.57164   |
| P15999        | EIVTNFLAGFEP                                                           | 1.355447029        | 2              | 2.43216   |
| P15999        | EVAFAQFGSDLAATQQLLSR                                                   | 1.226930283        | 2              | 6.61768   |
| P15999        | FESAFLSHVVSQHQSLGNIR                                                   | 1.25700867         | 2              | 6.0138    |
| P15999        | GIRPAINVGLSVSR                                                         | 0.928049505        | 3              | 3.93396   |
| P15999        | GMSLNLEPDNVGVVFGNDK                                                    | 1.126605731        | 2              | 5.63109   |
| P15999        | GMSLNLEPDNVGVVFGNDK+Oxidation(1                                        | 1.24134837         |                |           |
| P15999        | GYLDKLEPSK                                                             | 1.256972152        | 1              | 2.82773   |
| P15999        | HALIYDDLK                                                              | 1.947953026        | 2              | 2.7812    |
| P15999        | ILGADTSVDLEETGR                                                        | 1.121788395        | 2              | 4.89381   |
| P15999        | LELAQYR                                                                | 0.971723552        | 2              | 2.48399   |
| P15999        | LKEIVTNFLAGFEP                                                         | 1.85961891         | 2              | 3.03922   |
| P15999        | LTDADAMK                                                               | 0.905488089        | 2              | 2.66313   |
| P15999        | NVQAEMVEFSSGLK                                                         | 0.994555096        | 2              | 4.34027   |
| P15999        | QGQYSPMAIEEQVAVIYAGVR                                                  | 1.018211419        | 3              | 5.25586   |
| P15999        | RLTDADAMK                                                              | 0.895240041        | 2              | 2.92997   |
| P15999        | RSTVAQLVK                                                              | 0.259382426        | 2              | 2.43216   |
| P15999        | RTGAIVDVPVGDPELLGR                                                     | 0.892162023        | 2              | 3.09896   |
| P15999        | STVAQLVK                                                               | 0.852644504        | 2              | 2.52357   |

|               |                                                            |                    |                |           |
|---------------|------------------------------------------------------------|--------------------|----------------|-----------|
| P15999        | TGAIVDVPVGDPELLGR                                          | 0.969960599        | 2              | 4.82722   |
| P15999        | TGTAEMSSILEER                                              | 0.814780117        | 2              | 4.37411   |
| P15999        | TGTAEMSSILEER+Oxidation(5                                  | 0.939595977        |                |           |
| P15999        | TSIAIDTIINQK                                               | 1.093366955        | 2              | 4.61757   |
| P15999        | VLSIGDGIAR                                                 | 0.840668518        | 2              | 2.91216   |
| P15999        | VVDALGNAIDGK                                               | 0.948997466        | 2              | 4.42404   |
| P15999        | VVDALGNAIDGKGPVGSK                                         | 0.962508935        | 2              | 3.72534   |
| <b>P16036</b> | <b>MPCP Phosphate carrier protein_mitochondrial</b>        | <b>2.050606733</b> | <b>0.99854</b> | <b>9</b>  |
| P16036        | ALYSNILGEENTYLWR                                           | 0.899337024        | 2              | 3.14802   |
| P16036        | EEGLNAFYK                                                  | 0.906175889        | 1              | 2.61662   |
| P16036        | EKGSTASQVLQR                                               | 0.951860823        | 2              | 3.08548   |
| P16036        | FGFYEVFK                                                   | 1.506858533        | 2              | 2.32737   |
| P16036        | GIFNGFSITLK                                                | 1.288239452        | 2              | 3.04245   |
| P16036        | GSTASQVLQR                                                 | 0.973866728        | 2              | 3.07759   |
| P16036        | GWAPTLIGYSMQGLCK                                           | 0.955174736        | 2              | 2.79063   |
| P16036        | IQTQPGYANTLR                                               | 1.005218426        | 2              | 3.7901    |
| P16036        | MYKEEGLNAFYK                                               | 0.928855953        | 3              | 3.67296   |
| <b>P16086</b> | <b>SPTA2 Spectrin alpha chain_brain</b>                    | <b>1.955135923</b> | <b>1</b>       | <b>36</b> |
| P16086        | ALINADELANDVAGAEALLDR                                      | 1.262400088        | 2              | 5.44427   |
| P16086        | ALSSEGKPYVTK                                               | 1.016083897        | 2              | 3.45721   |
| P16086        | DLASVQALLR                                                 | 1.454749172        | 2              | 2.36186   |
| P16086        | DLSSVQTLTK                                                 | 0.967710881        | 2              | 3.14961   |
| P16086        | GNAMVEEGHFAAEDVK                                           | 1.202573741        | 2              | 4.10589   |
| P16086        | GVIDMGNSLIER                                               | 1.258833725        | 2              | 3.07557   |
| P16086        | HQAFAELHANADR                                              | 1.23426672         | 2              | 2.91677   |
| P16086        | HQAFAELSANSQR                                              | 0.702715014        | 2              | 4.25052   |
| P16086        | HQALQAEIAGHEPR                                             | 0.899782546        | 3              | 4.75946   |
| P16086        | HQEHKGEIDAHEDSFK                                           | 0.873277532        | 3              | 4.37673   |
| P16086        | HQLLEADISAHEDR                                             | 0.967931174        | 3              | 3.67163   |
| P16086        | KFEFQTDLAAHEER                                             | 1.203899552        | 3              | 4.31921   |
| P16086        | LGDSHDLQR                                                  | 1.07267336         | 2              | 3.20129   |
| P16086        | LGESQTLQQFSR                                               | 0.750021963        | 2              | 3.10756   |
| P16086        | LIQEQHPPEELIK                                              | 0.93733804         | 2              | 4.08782   |
| P16086        | LQSSHPLSANQIQVK                                            | 0.986227294        | 2              | 4.40617   |
| P16086        | LQTASDESYKDPTNIQSK                                         | 1.333196288        | 2              | 5.09226   |
| P16086        | LQVASDENYKDPTNLQGK                                         | 0.959060858        | 2              | 5.1868    |
| P16086        | LSDDNTIGQEEIQQR                                            | 0.953736404        | 2              | 4.07653   |
| P16086        | MQHNLEQQIQAR                                               | 1.355382543        | 2              | 3.36507   |
| P16086        | MQHNLEQQIQAR+Oxidation(0                                   | 0.771910019        |                |           |
| P16086        | MTLVASEDYGDTLAAIQGLLK                                      | 1.071927266        | 2              | 3.79658   |
| P16086        | NQALNTDNYGHDLASVQALQR                                      | 0.883872764        | 2              | 6.16928   |
| P16086        | QFQDAGHFDAENIKK                                            | 1.086791819        | 2              | 2.84578   |
| P16086        | REELITNWEQIR                                               | 0.885259587        | 2              | 4.38016   |
| P16086        | SADESGQALLAAGHYASDEV                                       | 1.287878701        | 2              | 4.57911   |
| P16086        | SLQLLAEER                                                  | 0.960464859        | 2              | 2.86877   |
| P16086        | SQLLGSAHEVQR                                               | 0.581962966        | 2              | 3.29539   |
| P16086        | SSEEIESAFR                                                 | 1.257407188        | 2              | 2.59749   |
| P16086        | SSLSSAQADFNQLAELDR                                         | 1.232855762        | 2              | 4.74207   |
| P16086        | TATDEAYKDPSNLQGK                                           | 1.131535607        | 2              | 4.35716   |
| P16086        | TKQEEVNAAWQR                                               | 1.611657701        | 2              | 3.4483    |
| P16086        | VLETAEDIQER                                                | 0.855944119        | 2              | 3.77127   |
| P16086        | VNDVCTNGQDLIK                                              | 1.09521896         | 2              | 3.16657   |
| P16086        | VNEVNQFAAK                                                 | 0.932568581        | 2              | 2.56828   |
| P16086        | VNSLGETAQR                                                 | 0.974307881        | 2              | 3.17674   |
| <b>P16232</b> | <b>DHI1 Corticosteroid 11_beta_dehydrogenase isozyme 1</b> | <b>1.782752319</b> | <b>0.94501</b> | <b>9</b>  |
| P16232        | EECALEIK                                                   | 0.802673576        | 1              | 2.06642   |

|               |                                                     |                    |                |           |
|---------------|-----------------------------------------------------|--------------------|----------------|-----------|
| P16232        | EMAYHLSKMGAHVVLTAR+Oxidation(8                      | 1.725741617        |                |           |
| P16232        | ETSGIILSQAAPK                                       | 0.889177952        | 2              | 3.13336   |
| P16232        | FALDGGFFSTIR                                        | 1.182645404        | 2              | 2.99853   |
| P16232        | FVVEAGK                                             | 0.791853209        | 1              | 1.92354   |
| P16232        | KDEVYYDK                                            | 0.92680514         | 2              | 2.32476   |
| P16232        | MGAHVVLTR                                           | 1.853522382        | 1              | 1.94936   |
| P16232        | MTQPLIASYSASK                                       | 0.913059858        | 2              | 3.41385   |
| P16232        | SSWTPLLLGNPGR                                       | 0.896650864        | 2              | 3.74862   |
| <b>P16290</b> | <b>PGAM2 Phosphoglycerate mutase 2</b>              | <b>1.730644564</b> | <b>0.79629</b> | <b>9</b>  |
| P16290        | ALPFWNEEIAPK                                        | 1.734468893        | 2              | 2.85574   |
| P16290        | AMEAVAAQ GK                                         | 0.776250995        | 2              | 2.58411   |
| P16290        | AMEAVAAQ GK+Oxidation(1                             | 0.940594154        |                |           |
| P16290        | HGESSWNQENR                                         | 1.707674704        | 2              | 3.95107   |
| P16290        | HNYIASISK                                           | 1.952773599        | 2              | 2.52029   |
| P16290        | HYGGLTGLNK                                          | 0.754347496        | 1              | 3.19366   |
| P16290        | SFDTPPPMDEK                                         | 2.005753256        | 2              | 2.60675   |
| P16290        | TLWTILDVTDQMWPVVR+Oxidation(11                      | 1.929849665        |                |           |
| P16290        | VLIAAHGNSLR                                         | 0.872303764        | 2              | 2.94739   |
| <b>P16303</b> | <b>CES3 Carboxylesterase 3</b>                      | <b>1.943356252</b> | <b>0.89159</b> | <b>16</b> |
| P16303        | AKEAAEESHWK                                         | 0.83398572         | 2              | 4.06837   |
| P16303        | DGASEEETNLSK                                        | 1.074961918        | 2              | 4.18626   |
| P16303        | EAAEESHWK                                           | 1.026903421        | 2              | 2.86087   |
| P16303        | ESYPFLPTVIDGVVLPK                                   | 0.876949857        | 2              | 4.15355   |
| P16303        | FAPPQPAEPWNFVK                                      | 1.161399996        | 1              | 2.33905   |
| P16303        | IGASTQAAQR                                          | 0.814453382        | 2              | 2.80827   |
| P16303        | LDLLGNPK                                            | 0.955067714        | 2              | 2.56699   |
| P16303        | MIPVVAEK                                            | 1.026728899        | 1              | 1.98532   |
| P16303        | QFEGWIIPTLMGYPLSEK                                  | 0.938511917        | 2              | 2.57027   |
| P16303        | QKTEDELLETSLK                                       | 0.939424334        | 2              | 3.51366   |
| P16303        | SFNTVPYIVGINK                                       | 0.795184041        | 2              | 3.32145   |
| P16303        | TEDELLETSLK                                         | 0.923257224        | 2              | 3.86506   |
| P16303        | TPEEILAEK                                           | 1.175666988        | 2              | 2.64664   |
| P16303        | TTTSAVMVHCLR                                        | 1.06756891         | 2              | 3.07174   |
| P16303        | TVIGDHGDELFSVFGSPFLK                                | 1.068969964        | 2              | 5.47958   |
| P16303        | YFGGTDDPAK                                          | 0.951279084        | 2              | 2.87755   |
| <b>P16332</b> | <b>MUTA Methylmalonyl_CoA mutase_ mitochondrial</b> | <b>1.852456187</b> | <b>0.98797</b> | <b>4</b>  |
| P16332        | GDVGMAGVAIDTVEDTK                                   | 1.342572338        | 2              | 4.29565   |
| P16332        | IDSGSEVIVGVNK                                       | 0.914827225        | 2              | 3.77944   |
| P16332        | NTQIIIQEESGIPK                                      | 0.888964413        | 2              | 3.59562   |
| P16332        | TGLQAGLTIDEFAPR                                     | 1.31885878         | 2              | 3.40072   |
| <b>P16409</b> | <b>MYL3 Myosin light chain 3</b>                    | <b>2.019015814</b> | <b>0.99962</b> | <b>8</b>  |
| P16409        | AAPAPAAAPAAPEPERPK                                  | 3.073033983        | 2              | 4.46803   |
| P16409        | ALGQNPTQAEVLR                                       | 1.830489984        | 2              | 3.74313   |
| P16409        | EGNGTVMGAELR                                        | 1.221218621        | 2              | 2.73079   |
| P16409        | IEFTPEQIEEFK                                        | 1.619982754        | 2              | 3.01994   |
| P16409        | LTEDEVEK                                            | 1.354557373        | 1              | 2.14643   |
| P16409        | MMDFETFLPMLQHISK                                    | 0.903308115        | 3              | 3.83165   |
| P16409        | NKDTGTYYDFVEGLR                                     | 1.124633827        | 2              | 3.451     |
| P16409        | VFDKEGNGTVMGAELR                                    | 1.009596676        | 2              | 4.11548   |
| <b>P16617</b> | <b>PGK1 Phosphoglycerate kinase 1</b>               | <b>2.186081183</b> | <b>1.6E-12</b> | <b>18</b> |
| P16617        | AHSSMVGVNLPQK                                       | 0.992218156        | 3              | 4.06088   |
| P16617        | AHSSMVGVNLPQK+Oxidation(4                           | 1.010936033        |                |           |
| P16617        | ALESPERPFLLAILGGAK                                  | 1.098970845        | 3              | 4.75942   |
| P16617        | DCVGSEVENACANPAAGTVILLENLR                          | 1.283399215        | 3              | 6.49956   |
| P16617        | FCLDNGAK                                            | 0.97881587         | 1              | 1.96106   |
| P16617        | GCITIIIGGGDTATCCAK                                  | 0.985528093        | 2              | 5.55183   |
| P16617        | IQLINNM LDK                                         | 1.315481804        | 2              | 3.03563   |

|               |                                                         |                    |                |           |
|---------------|---------------------------------------------------------|--------------------|----------------|-----------|
| P16617        | IQLINMLDK+Oxidation(6                                   | 1.718627662        |                |           |
| P16617        | ITLPVDFVTADK                                            | 1.531450029        | 2              | 2.74657   |
| P16617        | ITLPVDFVTADKFDENAK                                      | 1.592098648        | 2              | 4.78655   |
| P16617        | SVVLMSHLGRPDGVPMPDK                                     | 1.087617556        | 3              | 3.74741   |
| P16617        | SVVLMSHLGRPDGVPMPDKYSLEPVAAELK                          | 1.194854735        | 4              | 4.76504   |
| P16617        | TGQATVASGIPAGWMGLDCGTESSK                               | 1.22057902         | 2              | 5.03905   |
| P16617        | TGQATVASGIPAGWMGLDCGTESSK                               | 0.941768102        | 3              | 4.07681   |
| P16617        | VLNNMEIGTSLYDEEGAK                                      | 1.765070443        | 2              | 5.24542   |
| P16617        | VLPGVDALSNV                                             | 1.850870471        | 2              | 3.28639   |
| P16617        | WNTEDKVSHVSTGGASLELLEK                                  | 0.797220376        | 3              | 4.835     |
| P16617        | YSLEPVAAELK                                             | 1.068057758        | 2              | 3.49632   |
| <b>P16638</b> | <b>ACLY ATP_citrate synthase</b>                        | <b>2.419887418</b> | <b>0.09812</b> | <b>25</b> |
| P16638        | AFDSGIIPMEFVNK                                          | 1.418809142        | 2              | 3.65403   |
| P16638        | AKPAMPQDSVPSPR                                          | 1.394347309        | 2              | 2.7421    |
| P16638        | DEPSVAAMVYPFTGDHK                                       | 0.963105874        | 2              | 2.95481   |
| P16638        | DLVSLTSGLLTIGDR                                         | 0.809098507        | 2              | 3.70077   |
| P16638        | EAYPEEAYIADLDAK                                         | 1.277972949        | 2              | 3.62656   |
| P16638        | FGGALDAAK                                               | 1.127355308        | 2              | 3.02035   |
| P16638        | GAIVPAQEVPPPTVPMDYSWAR                                  | 1.328371616        | 2              | 4.09636   |
| P16638        | GGPNYQEGLR                                              | 1.575377498        | 2              | 2.95829   |
| P16638        | GVTIIGPATVGGIKPGCFK                                     | 1.771198493        | 2              | 3.70465   |
| P16638        | HLLVHAPEDK                                              | 0.878156892        | 2              | 2.68079   |
| P16638        | HLLVHAPEDKK                                             | 1.29375438         | 2              | 3.46117   |
| P16638        | IGNTGGMLDNILASK                                         | 1.504853541        | 2              | 4.10394   |
| P16638        | LGLVGVNLSLDGVK                                          | 2.395940411        | 2              | 2.49956   |
| P16638        | LNAEDIK                                                 | 1.116690265        | 1              | 1.94409   |
| P16638        | QHFPATPLLDYALEVEK                                       | 1.160301405        | 3              | 3.84036   |
| P16638        | RGGPNYQEGLR                                             | 1.227352355        | 2              | 3.3       |
| P16638        | SAYDSTMETMNYAQIR                                        | 1.461415806        | 2              | 2.93082   |
| P16638        | SGGMSNELNNIISR                                          | 0.928754294        | 2              | 3.65613   |
| P16638        | SMGFIGHYLDQK                                            | 1.092025591        | 2              | 2.91414   |
| P16638        | TIAIIAEGIPEALTR                                         | 1.265799757        | 2              | 4.98087   |
| P16638        | TTDGVYEGVAIGGDR                                         | 1.010094059        | 2              | 3.3363    |
| P16638        | TTDGVYEGVAIGGDRYPGSTFMDHVLR                             | 1.446929851        | 3              | 3.45261   |
| P16638        | VDATADYICK                                              | 1.114244995        | 2              | 2.63092   |
| P16638        | WGDIEFPPPFGR                                            | 1.162728365        | 2              | 3.90479   |
| P16638        | YICTTSAIQNR                                             | 1.25466303         | 2              | 3.1424    |
| <b>P16970</b> | <b>ABCD3 ATP_binding cassette sub_family D member 3</b> | <b>1.778338241</b> | <b>0.94556</b> | <b>10</b> |
| P16970        | DQVIYPDGKEDQK                                           | 0.982856843        | 2              | 2.82678   |
| P16970        | EGGWDSVQDWMMDVLSGGEK                                    | 1.077697456        | 2              | 2.89161   |
| P16970        | FDHVPLATPNGDILIQDLSFEVR                                 | 1.088281568        | 3              | 4.14856   |
| P16970        | GIEGAQASPLIPGAGEIINADNIK                                | 0.822734887        | 3              | 5.36746   |
| P16970        | GISDQVLK                                                | 1.462282304        | 1              | 1.94651   |
| P16970        | GYLDNVQLGHILER                                          | 1.214585498        | 2              | 3.56445   |
| P16970        | HLHSTHSELLEDYQSGR                                       | 0.899861292        | 3              | 5.85202   |
| P16970        | ITELMQVLK                                               | 1.641483087        | 2              | 2.83461   |
| P16970        | KGISDQVLK                                               | 0.781641101        | 2              | 2.51888   |
| P16970        | SGANVLICGPNCGCK                                         | 0.9412867          | 2              | 3.2054    |
| <b>P17074</b> | <b>RS19 40S ribosomal protein S19</b>                   | <b>1.956814993</b> | <b>0.98973</b> | <b>5</b>  |
| P17074        | ELAPYDENWFYTR                                           | 1.135855309        | 2              | 2.95906   |
| P17074        | HKELAPYDENWFYTR                                         | 0.958111617        | 3              | 4.61017   |
| P17074        | LKVPEWVDTVK                                             | 1.299977318        | 3              | 3.3472    |
| P17074        | RVLQALEGLK                                              | 1.656033702        | 3              | 3.81539   |
| P17074        | VLQALEGLK                                               | 1.140315897        | 2              | 2.70721   |
| <b>P17077</b> | <b>RL9 60S ribosomal protein L9</b>                     | <b>2.05370521</b>  | <b>0.50811</b> | <b>8</b>  |
| P17077        | DFNHINVELSLLGK                                          | 1.372757364        | 2              | 3.0464    |

|               |                                                             |                    |                |           |
|---------------|-------------------------------------------------------------|--------------------|----------------|-----------|
| P17077        | FLDGIYVSEK                                                  | 1.214710255        | 2              | 3.12915   |
| P17077        | GTVQQPDE                                                    | 17.80671636        | 1              | 2.03732   |
| P17077        | KFLDGIYVSEK                                                 | 0.916889857        | 2              | 2.94164   |
| P17077        | SVYAHFPINVVIIQENGLSVEIR                                     | 1.504038121        | 3              | 3.82579   |
| P17077        | TGVACSVSQAQK                                                | 1.026456145        | 2              | 3.50443   |
| P17077        | TICSHVQNMNIK                                                | 1.145093701        | 2              | 3.17312   |
| P17077        | TILSNQTVDIPENVDTLTK                                         | 1.353164109        | 2              | 4.8665    |
| <b>P17078</b> | <b>RL35 60S ribosomal protein L35</b>                       | <b>2.001088569</b> | <b>0.99331</b> | <b>2</b>  |
| P17078        | QLDDLKVELSCLR                                               | 1.151119712        | 2              | 2.97702   |
| P17078        | VLTVINQTQK                                                  | 1.000119526        | 2              | 2.92333   |
| <b>P17178</b> | <b>CP27A Sterol 26_hydroxylase_mitochondrial</b>            | <b>2.230931099</b> | <b>0.96619</b> | <b>5</b>  |
| P17178        | DHESTEGPGTGQDRPR                                            | 0.92483995         | 2              | 3.35757   |
| P17178        | SLAELPGPTLR                                                 | 1.227970763        | 2              | 2.61094   |
| P17178        | TNVNLASAPLLEQVMR                                            | 1.114752069        | 2              | 3.65578   |
| P17178        | VGCLEPSIPEDTATFIR                                           | 1.253840014        | 2              | 3.21551   |
| P17178        | YEVVLSPGMGEVK                                               | 1.118253867        | 2              | 3.42202   |
| <b>P17209</b> | <b>MYL4 Myosin light chain 4</b>                            | <b>2.117170667</b> | <b>0.98177</b> | <b>2</b>  |
| P17209        | HVLATLGEK                                                   | 1.790134421        | 1              | 2.64427   |
| P17209        | ITYGQCQGDVLR                                                | 1.079627136        | 2              | 2.3725    |
| <b>P17425</b> | <b>HMCS1 Hydroxymethylglutaryl_CoA synthase_cytoplasmic</b> | <b>1.90389968</b>  | <b>0.00109</b> | <b>10</b> |
| P17425        | ASAELFNQK                                                   | 0.419197586        | 2              | 3.51042   |
| P17425        | GTHMQHAYDFYKPDMLSEYPVVDGK                                   | 0.378653102        | 3              | 5.27687   |
| P17425        | ITASLCDLK                                                   | 0.512472022        | 2              | 2.53664   |
| P17425        | LEDTYFDRDVEK                                                | 0.580571098        | 2              | 2.96751   |
| P17425        | MFLNDFLNDQNR                                                | 0.801786613        | 2              | 3.48395   |
| P17425        | NSIYSGLEAFGDVK                                              | 0.858463788        | 2              | 3.22585   |
| P17425        | NSLSYDCIGR                                                  | 0.187908382        | 1              | 2.08573   |
| P17425        | TCVAPDVFAENMK                                               | 0.464205438        | 2              | 3.25146   |
| P17425        | VTQDATPGSALDK                                               | 1.04301072         | 2              | 3.6139    |
| P17425        | YTIGLGQAR                                                   | 0.488242588        | 2              | 2.76626   |
| <b>P17426</b> | <b>AP2A1 AP_2 complex subunit alpha_1</b>                   | <b>2.143545591</b> | <b>0.99966</b> | <b>3</b>  |
| P17426        | FFQPTEMAAQDFQR+Oxidation(6                                  | 1.149740117        |                |           |
| P17426        | NADVELQQR                                                   | 1.084578564        | 2              | 2.64205   |
| P17426        | VGGYILGEFGNLIAGDPR                                          | 1.106118962        | 2              | 3.94523   |
| <b>P17475</b> | <b>A1AT Alpha_1_antiproteinase</b>                          | <b>3.377760174</b> | <b>0.06395</b> | <b>9</b>  |
| P17475        | AFHLLQLTLNRPDSELQNTGNLGFVNK                                 | 0.747177563        | 3              | 4.54079   |
| P17475        | GTEAAGATVVEAVPMSLPPQVK                                      | 1.064299481        | 2              | 2.61991   |
| P17475        | MQHLEQTLTK                                                  | 1.956270524        | 1              | 3.1274    |
| P17475        | MQHLEQTLTK+Oxidation(0                                      | 1.67367113         |                |           |
| P17475        | NNYHSEAFSVNFADSEEAkk                                        | 1.543504056        | 3              | 5.07493   |
| P17475        | SAILYFPK                                                    | 1.962004422        | 2              | 2.39516   |
| P17475        | TLLSSLGITR                                                  | 2.056406533        | 2              | 2.98003   |
| P17475        | VFNNDADLSGITEDAPLK                                          | 2.331958435        | 2              | 5.83886   |
| P17475        | VINDYVEK                                                    | 1.715113104        | 2              | 2.65176   |
| <b>P17702</b> | <b>RL28 60S ribosomal protein L28</b>                       | <b>2.258025683</b> | <b>0.80142</b> | <b>2</b>  |
| P17702        | NCSSFLIK                                                    | 1.508764932        | 2              | 2.42029   |
| P17702        | QTYSTEPNNLK                                                 | 1.127527603        | 2              | 2.77923   |
| <b>P17712</b> | <b>HXK4 Glucokinase</b>                                     | <b>2.156337762</b> | <b>0.164</b>   | <b>2</b>  |
| P17712        | ASGAEGNNIVGLLR                                              | 0.902264061        | 2              | 2.30268   |
| P17712        | STPEGSEVGDFLSLDLGGTNFR                                      | 1.956825435        | 2              | 3.17647   |
| <b>P17764</b> | <b>THIL Acetyl_CoA acetyltransferase_mitochondrial</b>      | <b>2.082831478</b> | <b>0.91948</b> | <b>15</b> |
| P17764        | EEQDKYAIGSYTR                                               | 1.204051238        | 2              | 3.48772   |
| P17764        | ENGTVTAANASTLNDGAAAVLMTAEAAQR                               | 1.296401311        | 3              | 3.96508   |
| P17764        | EVYMGNVIIQGGEGQAPTR                                         | 0.855771179        | 2              | 5.06654   |
| P17764        | FANEITPITISVK                                               | 1.303869463        | 2              | 4.12178   |
| P17764        | GKPDVVVKEDEEYK                                              | 1.078687144        | 2              | 3.72773   |



|               |                                                           |                    |                |           |
|---------------|-----------------------------------------------------------|--------------------|----------------|-----------|
| P17764        | GKPDVVVKEDEEYKR                                           | 0.93616044         | 2              | 5.17298   |
| P17764        | IAAFADAAVDPIDFPLAPAYAVPK                                  | 1.550694784        | 2              | 4.96492   |
| P17764        | IHMGNCAENTAK                                              | 1.165373559        | 3              | 3.55753   |
| P17764        | IHMGNCAENTAK+Oxidation(2                                  | 1.163885101        |                |           |
| P17764        | LEDLIVK                                                   | 0.98435829         | 2              | 2.40383   |
| P17764        | LGTIAIQGAIEK                                              | 1.331115757        | 2              | 3.37283   |
| P17764        | QATLGAGLPIATPCTTVNK                                       | 1.029457797        | 2              | 4.63856   |
| P17764        | QGEFGLASICNGGGASAVLIEK                                    | 1.131605347        | 2              | 5.11913   |
| P17764        | TPIGSFLGSLASQPATK                                         | 1.67834301         | 2              | 4.31948   |
| P17764        | VNVHGGAVSLGHPIGMSGAR                                      | 0.945090011        | 2              | 5.8808    |
| <b>P17879</b> | <b>HS71B Heat shock 70 kDa protein 1B</b>                 | <b>2.284362857</b> | <b>0.0239</b>  | <b>3</b>  |
| P17879        | QTQTFTTYSDNQPGVLIQVYEGER                                  | 1.137997252        | 3              | 5.54856   |
| P17879        | TTPSYVAFTDTER                                             | 0.987259635        | 2              | 3.62278   |
| P17879        | VEIANDQGNR                                                | 4.461596363        | 2              | 3.76421   |
| <b>P17988</b> | <b>ST1A1 Sulfotransferase 1A1</b>                         | <b>2.743200927</b> | <b>0.07122</b> | <b>4</b>  |
| P17988        | CPGVPSGLETLEETPAPR                                        | 1.402396963        | 2              | 4.23585   |
| P17988        | NTFTVAQNER                                                | 1.089785964        | 2              | 3.56406   |
| P17988        | SLPEETVDSIVHHTSFK                                         | 1.423437546        | 2              | 4.40445   |
| P17988        | THLPLSLLPQSLLDQK                                          | 1.683046047        | 2              | 4.71143   |
| <b>P18163</b> | <b>ACSL1 Long_chain_fatty_acid_CoA ligase 1</b>           | <b>2.048427509</b> | <b>1</b>       | <b>29</b> |
| P18163        | AELSVIFADKPEK                                             | 0.918001127        | 2              | 3.35532   |
| P18163        | ALEDLGR                                                   | 0.723973128        | 2              | 2.33962   |
| P18163        | ALKPPCDLSMQSVEVTGTTEGVR                                   | 0.928382418        | 2              | 4.30022   |
| P18163        | ALKPPCDLSMQSVEVTGTTEGVR+Oxidation(9                       | 1.154242786        |                |           |
| P18163        | CGVEIIGLK                                                 | 0.907984774        | 2              | 2.87604   |
| P18163        | DGWLHTGDIGK                                               | 1.011086147        | 2              | 2.7965    |
| P18163        | GAMVTHQNMNDCSGFIK                                         | 1.183115692        | 2              | 5.14771   |
| P18163        | GAMVTHQNMNDCSGFIK+Oxidation(2                             | 0.887397957        |                |           |
| P18163        | GFQGSFEELCR                                               | 1.005114117        | 2              | 3.64198   |
| P18163        | GIAVHPELFSIDNGLLTPTLK                                     | 1.30860479         | 2              | 5.30351   |
| P18163        | GIQVSNDGPCLGSR                                            | 0.906255681        | 2              | 4.54336   |
| P18163        | IENIYLR                                                   | 1.043882263        | 2              | 2.80915   |
| P18163        | IFGQANTSVK                                                | 0.899890704        | 2              | 2.8254    |
| P18163        | IIVIMDSYDNDLVER                                           | 1.229122799        | 2              | 5.06847   |
| P18163        | LLLEGVENK                                                 | 1.004602338        | 2              | 3.34425   |
| P18163        | LLMDDLK                                                   | 0.968226992        | 2              | 2.50697   |
| P18163        | LIMITGAAPVSATVLTFLR                                       | 0.723638768        | 3              | 4.11402   |
| P18163        | LVDVEDMNYQAAK                                             | 0.927702897        | 2              | 4.64933   |
| P18163        | NAGLKPFEQVK                                               | 0.922288355        | 2              | 3.77725   |
| P18163        | NNSLWDK                                                   | 0.85366675         | 2              | 2.49225   |
| P18163        | QVAEMAECIGSALIQK                                          | 1.000150847        | 2              | 5.53411   |
| P18163        | SAVLEDDKLLYYDDVDR                                         | 1.151298783        | 3              | 3.61841   |
| P18163        | SQIDELYSTIK                                               | 0.785156782        | 2              | 3.61558   |
| P18163        | SQIDELYSTIKI                                              | 1.151830118        | 2              | 3.94699   |
| P18163        | TAEALDKDGWLHTGDIGK                                        | 1.106509704        | 2              | 5.25147   |
| P18163        | TKPKPPEPEDLAICFTSGTTGNPK                                  | 0.772858284        | 3              | 5.15537   |
| P18163        | TMYDGFQR                                                  | 1.581021925        | 1              | 1.94556   |
| P18163        | VLQPTIFPVVPR                                              | 1.47172545         | 2              | 3.59794   |
| P18163        | WLLDFASK                                                  | 0.987827645        | 2              | 2.56555   |
| <b>P18297</b> | <b>SPRE Sepiapterin reductase</b>                         | <b>2.50590386</b>  | <b>0.54756</b> | <b>5</b>  |
| P18297        | LGCACVCLTGASR                                             | 0.986549511        | 2              | 3.03202   |
| P18297        | LLLINNAGTLGDVSK                                           | 1.737399236        | 2              | 3.89844   |
| P18297        | LNSEGELVDCGTSQAQK                                         | 1.055422232        | 2              | 4.89868   |
| P18297        | TVVNISSCALQPFK                                            | 1.2137963          | 2              | 3.27479   |
| P18297        | VLSYAPGPLDTNMQQLAR                                        | 1.090161697        | 2              | 3.44383   |
| <b>P18298</b> | <b>METK2 S_adenosylmethionine synthase isoform type_2</b> | <b>2.076719812</b> | <b>0.99998</b> | <b>3</b>  |

|               |                                                                  |                    |                |           |
|---------------|------------------------------------------------------------------|--------------------|----------------|-----------|
| P18298        | IIVDTYGGWGAHGGGAFSGK                                             | 1.076806622        | 2              | 5.49793   |
| P18298        | KIIVDTYGGWGAHGGGAFSGK                                            | 1.085129818        | 3              | 4.14974   |
| P18298        | YLDEDTIYHLQPSGR                                                  | 0.965591332        | 2              | 4.7805    |
| <b>P18418</b> | <b>CALR Calreticulin</b>                                         | <b>2.074326911</b> | <b>1</b>       | <b>20</b> |
| P18418        | AKIDPTDVKPEDWDKPEHIPDPAK                                         | 0.944534801        | 3              | 5.83845   |
| P18418        | CKDDEFTHLYTLVLRPDNTYEVK                                          | 0.99661853         | 3              | 4.92148   |
| P18418        | DMHGDSEYNIMFGPDICGPGTK                                           | 1.12736047         | 2              | 6.22996   |
| P18418        | DMHGDSEYNIMFGPDICGPGTK+Oxidation(1                               | 1.076920809        |                |           |
| P18418        | EQFLDGDWATNR                                                     | 1.819706243        | 2              | 3.17007   |
| P18418        | FYALSAR                                                          | 1.264733228        | 2              | 2.38506   |
| P18418        | FYGDQEK                                                          | 1.091022382        | 1              | 2.11905   |
| P18418        | FYGDQEKDK                                                        | 0.96199355         | 1              | 2.92285   |
| P18418        | GQTLVVQFTVK                                                      | 1.069825874        | 2              | 2.93733   |
| P18418        | HEQNIDCGGGYVK                                                    | 1.029163593        | 2              | 4.4037    |
| P18418        | IDDPTDVKPEDWDKPEHIPDPAK                                          | 1.824603904        | 3              | 4.30204   |
| P18418        | IDNSQVESGSLEDDWDFLPPK                                            | 1.126138925        | 2              | 5.36384   |
| P18418        | IDNSQVESGSLEDDWDFLPPK                                            | 1.388762922        | 3              | 4.88656   |
| P18418        | IKDPDAAKPEDWDER                                                  | 1.339144737        | 2              | 4.368     |
| P18418        | KPEDWDEEMDGEWEPVVIQNPEYK                                         | 1.192917213        | 3              | 5.51373   |
| P18418        | KVHVIFNYK                                                        | 1.072343976        | 2              | 2.33979   |
| P18418        | LPPGGLDQK                                                        | 1.019041335        | 2              | 2.37105   |
| P18418        | QIDNPDYK                                                         | 0.978090108        | 1              | 2.09044   |
| P18418        | SGTIFDNFLITNDEAYAEFGNETWGVTK                                     | 0.861335578        | 3              | 4.7888    |
| P18418        | VHVIFNYK                                                         | 1.093100195        | 1              | 2.55527   |
| <b>P18420</b> | <b>PSA1 Proteasome subunit alpha type_1</b>                      | <b>2.273265915</b> | <b>0.98935</b> | <b>3</b>  |
| P18420        | AQPSQAADEPAEK                                                    | 1.162526293        | 2              | 3.8529    |
| P18420        | IHQIEYAMEAVK                                                     | 1.510987413        | 2              | 2.82726   |
| P18420        | NQYDNDVTWVSPQGR                                                  | 1.407622376        | 2              | 2.99556   |
| <b>P18421</b> | <b>PSB1 Proteasome subunit beta type_1</b>                       | <b>1.951594554</b> | <b>0.46474</b> | <b>4</b>  |
| P18421        | AGGSASAMLQPLLDNQVGFK                                             | 0.964244253        | 2              | 4.99356   |
| P18421        | AGGSASAMLQPLLDNQVGFK+Oxidation(7                                 | 3.979757702        |                |           |
| P18421        | GAVYSFDPVGSYQR                                                   | 1.112837971        | 2              | 3.00408   |
| P18421        | NMQNVEHVPLTLDR                                                   | 1.141350623        | 2              | 3.64801   |
| <b>P18422</b> | <b>PSA3 Proteasome subunit alpha type_3</b>                      | <b>2.249715833</b> | <b>0.33656</b> | <b>2</b>  |
| P18422        | AVENSSTAIGIR                                                     | 1.169690564        | 2              | 3.23243   |
| P18422        | TEIEKLQMKEMTCR+Oxidation(10                                      | 1.571377703        |                |           |
| <b>P18445</b> | <b>RL27A 60S ribosomal protein L27a</b>                          | <b>1.996207526</b> | <b>0.99662</b> | <b>4</b>  |
| P18445        | LWTLVSEQTR                                                       | 0.966500013        | 1              | 1.91416   |
| P18445        | NGVAPIIDVVR                                                      | 1.099194196        | 1              | 2.15358   |
| P18445        | NQSFCTVNLDK                                                      | 0.995683029        | 2              | 3.29904   |
| P18445        | RNQSFCTVNLDK                                                     | 0.867253078        | 2              | 2.94568   |
| <b>P18484</b> | <b>AP2A2 AP_2 complex subunit alpha_2</b>                        | <b>2.548226286</b> | <b>0.41291</b> | <b>6</b>  |
| P18484        | FFQPTEMASQDFFQR                                                  | 1.150123699        | 2              | 4.02479   |
| P18484        | FVNLFPVK                                                         | 1.44299264         | 2              | 2.83444   |
| P18484        | ILVAGDTMDSVK                                                     | 1.059761161        | 2              | 2.74705   |
| P18484        | LTECLETILNK                                                      | 1.315433576        | 2              | 2.42357   |
| P18484        | NNGVLFENQLLQIGLK                                                 | 1.840726439        | 2              | 3.37997   |
| P18484        | THIETVINALK                                                      | 0.763872162        | 2              | 2.8117    |
| <b>P18596</b> | <b>AT2A3 Sarcoplasmic/endoplasmic reticulum calcium ATPase 3</b> | <b>2.813916006</b> | <b>0.99176</b> | <b>4</b>  |
| P18596        | DIVPGDIVEVAVGDKVPADLR                                            | 4.081699191        | 2              | 3.38495   |
| P18596        | SLPSVETLGCTSVICSDK                                               | 2.036715102        | 2              | 4.61028   |
| P18596        | TGTLTTNQMSVCR                                                    | 1.045915354        | 2              | 3.22655   |
| P18596        | VGEATETALTCLVEK                                                  | 1.903138329        | 2              | 4.62514   |
| <b>P18757</b> | <b>CGL Cystathionine gamma_lyase</b>                             | <b>2.025200396</b> | <b>0.00788</b> | <b>15</b> |
| P18757        | AGDEVICMDEVYGGTNR                                                | 0.896215471        | 2              | 5.60928   |
| P18757        | ATLGISDTLIR                                                      | 1.108629702        | 2              | 3.74076   |

|               |                                                              |                    |                |           |
|---------------|--------------------------------------------------------------|--------------------|----------------|-----------|
| P18757        | AVVLPISLATTFK                                                | 1.339953887        | 3              | 4.28377   |
| P18757        | DLLEDLGQALK                                                  | 1.189031472        | 2              | 3.35707   |
| P18757        | FLQNSLGAVPSPFDCYLCCR                                         | 1.489063512        | 2              | 3.91112   |
| P18757        | GTLQHAQVFLK                                                  | 0.929407726        | 2              | 3.35526   |
| P18757        | LFALAESLGGYESLAELPAIMTHASVPEK                                | 1.44206739         | 3              | 4.42194   |
| P18757        | LFALAESLGGYESLAELPAIMTHASVPEKDR                              | 1.524534101        | 4              | 5.6156    |
| P18757        | LLEAAITPQTK                                                  | 1.009135251        | 2              | 4.01647   |
| P18757        | LSVGLEDEKDLLEDLGQALK                                         | 1.291587557        | 3              | 6.35427   |
| P18757        | LVWIETPTNPTLK                                                | 1.187058109        | 2              | 3.88094   |
| P18757        | QCTGCPGMVSVFIK                                               | 1.116299498        | 2              | 3.72762   |
| P18757        | QDSPGQSSGFVYSR                                               | 1.084544754        | 2              | 3.85368   |
| P18757        | RVASEFGLK                                                    | 1.017630899        | 2              | 2.49904   |
| P18757        | VIYPGLSPHPQHELAK                                             | 1.099396297        | 2              | 4.2341    |
| <b>P18886</b> | <b>CPT2 Carnitine O_palmitoyltransferase 2_mitochondrial</b> | <b>2.337164507</b> | <b>0.99996</b> | <b>12</b> |
| P18886        | ATNLTVSAVR                                                   | 1.005785965        | 2              | 3.49467   |
| P18886        | ELHAHLAQDK                                                   | 1.271504981        | 2              | 3.65249   |
| P18886        | HSVGEHQHMMAECSK                                              | 0.78918275         | 2              | 3.89476   |
| P18886        | LIFDNEETLK                                                   | 0.952599903        | 2              | 3.08487   |
| P18886        | QKLIFDNEETLKK                                                | 1.226678105        | 2              | 2.33468   |
| P18886        | QYGQTVATYESCSTAAFK                                           | 1.136986029        | 2              | 3.69833   |
| P18886        | SEYNDQLTR                                                    | 1.074603457        | 2              | 3.07104   |
| P18886        | TETIRPASIFTK                                                 | 0.979533727        | 2              | 2.60541   |
| P18886        | TLQAGLLEPEVFHNLPSK                                           | 3.622616055        | 2              | 3.44897   |
| P18886        | TLSIDSIQFQR                                                  | 1.118045536        | 2              | 3.0746    |
| P18886        | YILSDSSPVPEFPVAYLTSENK                                       | 1.229030164        | 2              | 5.31136   |
| P18886        | YLNAQKPLLDSDQFR                                              | 0.924898954        | 2              | 4.65914   |
| <b>P19112</b> | <b>F16P1 Fructose 1_6_bisphosphatase 1</b>                   | <b>2.372369317</b> | <b>0.0089</b>  | <b>19</b> |
| P19112        | AGGLATTGNEDILDIVPTEIHQK                                      | 1.101268102        | 3              | 6.45402   |
| P19112        | AGGTGEMTQLLNSLCTAIK                                          | 1.024738           | 3              | 5.55676   |
| P19112        | APVIMGSTEDVQEFLEIYNK                                         | 1.614547864        | 2              | 4.97642   |
| P19112        | APVIMGSTEDVQEFLEIYNKDK                                       | 1.34438614         | 3              | 3.55884   |
| P19112        | DFDPAINIYIQR                                                 | 1.428105142        | 2              | 4.02159   |
| P19112        | ESPVHSICDELK                                                 | 1.732444804        | 2              | 2.35021   |
| P19112        | FPPDNSAPYGAR                                                 | 1.136485664        | 2              | 2.77043   |
| P19112        | GNIYSINEGYAK                                                 | 1.050529805        | 2              | 3.99729   |
| P19112        | KGNIYSINEGYAK                                                | 0.699093339        | 2              | 4.48673   |
| P19112        | KLDILSNDLVINMLK                                              | 1.54247508         | 2              | 4.76317   |
| P19112        | KTSANEPSEKDALQPGR                                            | 1.093811225        | 3              | 4.17629   |
| P19112        | LDILSNDLVINMLK                                               | 1.173808911        | 2              | 5.10375   |
| P19112        | LLYECNPIAYVMEK                                               | 1.364872534        | 2              | 4.45432   |
| P19112        | QAGIAQLYGIAGSTNVTGDQVK                                       | 1.245378701        | 3              | 5.78643   |
| P19112        | SRPSLPLPQSR                                                  | 0.988500833        | 2              | 3.35377   |
| P19112        | SSYATCVLVSEEDTHAIIIEPEKR                                     | 1.269697078        | 3              | 5.16979   |
| P19112        | TLVYGGIFLYPANK                                               | 0.788843824        | 2              | 3.8419    |
| P19112        | TLVYGGIFLYPANKK                                              | 0.713737718        | 2              | 2.9054    |
| P19112        | TSANEPSEKDALQPGR                                             | 0.954460223        | 2              | 4.4773    |
| <b>P19123</b> | <b>TNNC1 Troponin C_slow skeletal and cardiac muscles</b>    | <b>2.126803689</b> | <b>0.69895</b> | <b>3</b>  |
| P19123        | AAVEQLTEEQKNEFK                                              | 2.162802708        | 2              | 2.55913   |
| P19123        | GKSEEELSDLFR                                                 | 1.055273175        | 2              | 2.58643   |
| P19123        | SEEELSDLFR                                                   | 3.754369679        | 2              | 2.8364    |
| <b>P19132</b> | <b>FRIH Ferritin heavy chain</b>                             | <b>2.126883566</b> | <b>0.70573</b> | <b>2</b>  |
| P19132        | QNYHQDSEAAINR                                                | 1.577375589        | 2              | 2.88734   |
| P19132        | YFLHQSHEER                                                   | 1.085414524        | 2              | 2.55777   |
| <b>P19225</b> | <b>CP270 Cytochrome P450 2C70</b>                            | <b>2.170117872</b> | <b>0.99479</b> | <b>15</b> |
| P19225        | ACIGEGLAR                                                    | 0.991000997        | 2              | 2.64995   |

|               |                                                                            |                    |                |           |
|---------------|----------------------------------------------------------------------------|--------------------|----------------|-----------|
| P19225        | ASLNLSNPQDFIDYFLIK                                                         | 1.069898335        | 2              | 3.1344    |
| P19225        | EALIDRGEFSDK                                                               | 1.33847834         | 2              | 3.25692   |
| P19225        | FDPGHFLDEK                                                                 | 1.305680135        | 2              | 2.46362   |
| P19225        | FILMEINR                                                                   | 1.226572158        | 2              | 2.63737   |
| P19225        | GTSVMACLTSALHDDKEFPNPEK                                                    | 1.134201228        | 3              | 3.57707   |
| P19225        | IQEEITR                                                                    | 0.952292923        | 2              | 2.31765   |
| P19225        | IQEEVYVLEALR                                                               | 0.586753592        | 2              | 3.9269    |
| P19225        | KLPPGPTPLPIFGNILQVGVK                                                      | 0.833045221        | 3              | 4.03319   |
| P19225        | KTTQDVEFR                                                                  | 0.748630594        | 2              | 2.30194   |
| P19225        | LPPGPTPLPIFGNILQVGVK                                                       | 0.953384028        | 2              | 4.41558   |
| P19225        | NHMPYTDVLAHEIQR                                                            | 1.004084648        | 3              | 3.82308   |
| P19225        | SDYFMAFSAGRR+Oxidation(4                                                   | 0.734799552        |                |           |
| P19225        | TTQDVEFR                                                                   | 0.813167263        | 2              | 2.43859   |
| P19225        | YIDFVPIPLPR                                                                | 0.955607435        | 2              | 3.12531   |
| <b>P19234</b> | <b>NDUV2 NADH dehydrogenase [ubiquinone] flavoprotein 2_ mitochondrial</b> | <b>2.15965838</b>  | <b>0.99384</b> | <b>3</b>  |
| P19234        | DIEIIDELR                                                                  | 1.868195347        | 2              | 3.61188   |
| P19234        | DTPENNPDPDFDPENYER                                                         | 0.891257029        | 2              | 4.62126   |
| P19234        | FCCEPAGGLTSLTEPPK                                                          | 1.143942696        | 2              | 3.13799   |
| <b>P19468</b> | <b>GSH1 Glutamate__cysteine ligase catalytic subunit</b>                   | <b>2.162630249</b> | <b>0.64937</b> | <b>9</b>  |
| P19468        | ASGELMTVAR                                                                 | 0.975395662        | 2              | 2.94006   |
| P19468        | CNQIANELCEPELLGSGFR                                                        | 1.09736361         | 2              | 5.33809   |
| P19468        | IHLDDANESDHFENIQSTNWQTMR                                                   | 0.970990909        | 3              | 5.0486    |
| P19468        | NTPSPFVETFPDEEASK                                                          | 1.253734824        | 2              | 4.59331   |
| P19468        | SLFFPDEAINK                                                                | 1.251949282        | 2              | 2.60786   |
| P19468        | SRYSIDSYLSK                                                                | 1.095180724        | 2              | 2.70342   |
| P19468        | VQLLLNGGDVLETLEK                                                           | 1.312976476        | 2              | 4.6747    |
| P19468        | VVINVPFIK                                                                  | 1.558201978        | 2              | 2.69334   |
| P19468        | WGVISASVDDR                                                                | 1.469991887        | 2              | 3.13825   |
| <b>P19488</b> | <b>UDB37 UDP__glucuronosyltransferase 2B37</b>                             | <b>2.301227885</b> | <b>0.86152</b> | <b>9</b>  |
| P19488        | AEMWLIR                                                                    | 1.397034366        | 2              | 2.89249   |
| P19488        | ANAIAWALAIQIPQK                                                            | 1.227196206        | 3              | 6.45927   |
| P19488        | FETFPTSISK                                                                 | 1.048363052        | 1              | 1.90668   |
| P19488        | FETFPTSISKDELEK                                                            | 0.940117885        | 2              | 4.31848   |
| P19488        | GAAVTLNIR                                                                  | 1.201997819        | 2              | 2.56193   |
| P19488        | GHEVTVLKPSAYVLDPK                                                          | 0.891609145        | 2              | 4.53022   |
| P19488        | NWDPFYTEILGRPTTLAETMGK                                                     | 2.027539018        | 2              | 4.86697   |
| P19488        | SDLFNALK                                                                   | 0.949186885        | 2              | 2.55647   |
| P19488        | TILDELVQR                                                                  | 1.065185554        | 2              | 3.39544   |
| <b>P19511</b> | <b>AT5F1 ATP synthase subunit b_ mitochondrial</b>                         | <b>1.887536793</b> | <b>0.0205</b>  | <b>10</b> |
| P19511        | EGEHMINWVEK                                                                | 1.122934926        | 2              | 2.32933   |
| P19511        | HVIQSISAQQEK                                                               | 0.917216646        | 2              | 3.97659   |
| P19511        | HVIQSISAQQEKETIAK                                                          | 0.679704853        | 3              | 4.75691   |
| P19511        | HLYFDVQR                                                                   | 0.9268356          | 2              | 2.68848   |
| P19511        | KEGEHMINWVEK                                                               | 1.149223446        | 2              | 2.30447   |
| P19511        | LDYHISVQDMMR                                                               | 1.534866269        | 3              | 4.55136   |
| P19511        | LNEEKIAQLEEIK                                                              | 0.928408267        | 2              | 2.53071   |
| P19511        | NNIALALEVTYR                                                               | 1.422770848        | 2              | 2.62271   |
| P19511        | YGASIGEFIDK                                                                | 1.166019679        | 2              | 2.8361    |
| P19511        | YGASIGEFIDKLNEEK                                                           | 1.451226111        | 2              | 3.47583   |
| <b>P19643</b> | <b>AOFB Amine oxidase [flavin__containing] B</b>                           | <b>2.207606895</b> | <b>0.98344</b> | <b>13</b> |
| P19643        | FIGGSGQVSR                                                                 | 1.277429581        | 2              | 3.31743   |
| P19643        | IISTTNGGQER                                                                | 0.78449429         | 2              | 2.73166   |
| P19643        | IPEDIWQPEPESVDVPPARPITNFTLER                                               | 1.499119789        | 3              | 4.63586   |
| P19643        | KFIGGSGQVSR                                                                | 0.649368524        | 2              | 3.04442   |
| P19643        | KLCELYAK                                                                   | 0.849319837        | 2              | 2.52401   |
| P19643        | LERPVIHIDQTGENVVVK                                                         | 1.00694245         | 2              | 5.29637   |

|               |                                                                  |                    |                |           |
|---------------|------------------------------------------------------------------|--------------------|----------------|-----------|
| P19643        | LLHDCGLSVVLEAR                                                   | 1.745262935        | 2              | 3.56399   |
| P19643        | TLNHEIYEAK                                                       | 1.051014998        | 2              | 3.05249   |
| P19643        | TMDEMGEIIPSDAPWK                                                 | 1.50669492         | 2              | 4.41484   |
| P19643        | VKLERPVIHIDQTGENVVVK                                             | 1.484774155        | 3              | 4.44664   |
| P19643        | VLNSQEALQPVHYEEK                                                 | 1.149435582        | 2              | 4.6807    |
| P19643        | YVDLGGSYVGPQNR                                                   | 0.9836876          | 2              | 5.30995   |
| P19643        | YVISAIPVVGMMK                                                    | 1.290188696        | 2              | 3.2598    |
| <b>P19804</b> | <b>NDKB Nucleoside diphosphate kinase B</b>                      | <b>2.053479087</b> | <b>0.99962</b> | <b>9</b>  |
| P19804        | DRPFFPGLVK                                                       | 1.217871239        | 2              | 2.51363   |
| P19804        | EIGLWFKPEELIDYK                                                  | 1.144368929        | 2              | 3.83056   |
| P19804        | GDFCIQVGR                                                        | 0.985828104        | 2              | 3.31658   |
| P19804        | NIIHGSDSVESA EK                                                  | 1.090450369        | 3              | 4.01611   |
| P19804        | NIIHGSDSVESA KEIGLWFKPEELIDYK                                    | 1.14901313         | 4              | 4.8357    |
| P19804        | TFIAIKPDGVQR                                                     | 1.125060163        | 2              | 2.94786   |
| P19804        | VMLGETNPADSKPGTIR                                                | 1.322253631        | 2              | 4.49908   |
| P19804        | VMLGETNPADSKPGTIR+Oxidation(1                                    | 1.146315825        |                |           |
| P19804        | YMNSGPVVAMVWEGLNVVK                                              | 1.061585363        | 2              | 5.32369   |
| <b>P19814</b> | <b>TGON3 Trans_Golgi network integral membrane protein TGN38</b> | <b>6.621491021</b> | <b>0.0001</b>  | <b>2</b>  |
| P19814        | DSGSPTGGSDNTTGGDSNK                                              | 2.3243501          | 2              | 4.74314   |
| P19814        | TSGGDSNKPTGSDNDKPTGGDSNKPTSK                                     | 2.736222478        | 4              | 4.65954   |
| <b>P19944</b> | <b>RLA1 60S acidic ribosomal protein P1</b>                      | <b>2.209873709</b> | <b>0.03279</b> | <b>2</b>  |
| P19944        | AAGVNVFVWPGVFAK                                                  | 1.31721954         | 2              | 2.94979   |
| P19944        | ALANVNI GSLICNVGAGGPAPAAGA APAGGPAPSAAAAPAE EK                   | 1.105413961        | 4              | 6.26471   |
| <b>P19945</b> | <b>RLA0 60S acidic ribosomal protein P0</b>                      | <b>2.596970415</b> | <b>9.9E-20</b> | <b>10</b> |
| P19945        | AFLADPSAFAAAA PVA AATTAAPAAAAAPAK                                | 1.106057772        | 2              | 6.14348   |
| P19945        | AGAIAPCEVTVPAQNTGLGPEK                                           | 1.525988211        | 3              | 4.84083   |
| P19945        | CFIVGADNVGSK                                                     | 1.067593993        | 2              | 3.4121    |
| P19945        | GHLENNPALEK                                                      | 0.975684271        | 2              | 3.68968   |
| P19945        | GNVGFVFTK                                                        | 1.004152187        | 2              | 2.77154   |
| P19945        | GTIEILSDVQLIK                                                    | 1.318373315        | 2              | 3.62435   |
| P19945        | IIQLLDYDPK                                                       | 1.722887514        | 2              | 3.74527   |
| P19945        | NVASVCLQIGYPTVASVPHSIINGYK                                       | 1.213638301        | 3              | 4.19996   |
| P19945        | TSFFQALGITTK                                                     | 1.622569443        | 2              | 4.16189   |
| P19945        | VLALSVETDYTFPLAEK                                                | 1.414236252        | 2              | 3.38682   |
| <b>P20059</b> | <b>HEMO Hemopexin</b>                                            | <b>2.234596898</b> | <b>0.1168</b>  | <b>5</b>  |
| P20059        | ELGSPPGISLDTIDAAFSCPGSSK                                         | 1.18260895         | 2              | 5.17846   |
| P20059        | FNPVTGEVPPR                                                      | 1.034471172        | 2              | 2.65569   |
| P20059        | LFQEEFPGIPYPPDAAVECHR                                            | 1.434443159        | 3              | 4.34402   |
| P20059        | SGAQATWAELSWPHEK                                                 | 0.941645105        | 2              | 3.12737   |
| P20059        | VDGALCLEK                                                        | 0.893367693        | 2              | 2.54823   |
| <b>P20070</b> | <b>NB5R3 NADH_cytochrome b5 reductase 3</b>                      | <b>1.924760825</b> | <b>1</b>       | <b>6</b>  |
| P20070        | IDGNLVIRPYTPVSSDDDKGFVDLVVK                                      | 1.071446438        | 3              | 5.06436   |
| P20070        | LIDKEIISHDTR                                                     | 0.926397572        | 3              | 4.14048   |
| P20070        | MSQYLENMIGDTIEFR                                                 | 0.785531883        | 2              | 4.42285   |
| P20070        | SSPAITLENPDIK                                                    | 0.905792213        | 2              | 3.99659   |
| P20070        | SSPAITLENPDIKYPLR                                                | 0.9762439          | 2              | 3.88838   |
| P20070        | SVGMIAGGTGITPMLQVIR                                              | 1.025973198        | 2              | 4.46415   |
| <b>P20280</b> | <b>RL21 60S ribosomal protein L21</b>                            | <b>2.025793625</b> | <b>0.99991</b> | <b>4</b>  |
| P20280        | HGVVPLATYMR                                                      | 1.120261748        | 2              | 2.56905   |
| P20280        | KGDIVDIK                                                         | 1.029402482        | 1              | 2.25277   |
| P20280        | TNGKEPELLEPIPYEFMA                                               | 0.974678862        | 2              | 3.6158    |
| P20280        | VYNTQHAVGIIVNK                                                   | 1.010786912        | 2              | 4.42374   |
| <b>P20673</b> | <b>ARLY Argininosuccinate lyase</b>                              | <b>1.955401946</b> | <b>0.15174</b> | <b>16</b> |
| P20673        | AEAECEVLFPGYTHLQR                                                | 0.892645663        | 2              | 4.92073   |
| P20673        | AEMQQLQLGLDK                                                     | 1.090162333        | 2              | 4.53292   |

|               |                                                                   |                    |                |           |
|---------------|-------------------------------------------------------------------|--------------------|----------------|-----------|
| P20673        | AVVVAEMK                                                          | 1.11002252         | 1              | 1.94993   |
| P20673        | EFNFVQLSDAYSTGSSLMPQK                                             | 1.246058482        | 2              | 5.80344   |
| P20673        | FNSSIAADR                                                         | 0.827028869        | 2              | 2.54475   |
| P20673        | HLWNVDLQGSK                                                       | 1.002847821        | 1              | 3.30696   |
| P20673        | INVPLGSGAIAGNPLGVDR                                               | 1.511633739        | 2              | 5.48454   |
| P20673        | KNPDSLELIR                                                        | 0.962948084        | 2              | 2.61251   |
| P20673        | LKELIGEAAAGK                                                      | 0.954028346        | 2              | 3.19458   |
| P20673        | LYPNDEDIHTANER                                                    | 1.365264733        | 2              | 3.91401   |
| P20673        | MAEDLILYGTK                                                       | 0.782407059        | 2              | 3.70237   |
| P20673        | MAEDLILYGTK+Oxidation(0                                           | 0.917362462        |                |           |
| P20673        | NDQVVTDLR                                                         | 1.059450784        | 2              | 3.21711   |
| P20673        | SRNDQVVTDLR                                                       | 1.051780439        | 2              | 2.88317   |
| P20673        | VAEEWAQGFIFK                                                      | 1.42964841         | 2              | 3.5697    |
| P20673        | VLIEAMVDR                                                         | 1.183730629        | 2              | 2.75694   |
| <b>P20788</b> | <b>UCRI Cytochrome b_c1 complex subunit Rieske_ mitochondrial</b> | <b>1.872529097</b> | <b>0.81985</b> | <b>6</b>  |
| P20788        | EIDQEAAVEVSQLR                                                    | 0.731561682        | 2              | 4.2458    |
| P20788        | EIDQEAAVEVSQLRDPQHDLER                                            | 0.560434899        | 3              | 3.37509   |
| P20788        | ESLSGQAATRLVATVGLNVPASVR                                          | 1.316050075        | 2              | 2.50068   |
| P20788        | GVAGALRPLLQSAVPATSEPPVLDVK                                        | 0.895191113        | 3              | 4.80667   |
| P20788        | LSDIPEGK                                                          | 0.965061166        | 1              | 2.02734   |
| P20788        | SGPFAPVLSATSR                                                     | 0.945637312        | 2              | 2.8626    |
| <b>P20801</b> | <b>TNNC2 Troponin C_ skeletal muscle</b>                          | <b>2.223818288</b> | <b>0.92173</b> | <b>4</b>  |
| P20801        | GKSEELAECFR                                                       | 2.3401461          | 2              | 3.24512   |
| P20801        | NADGYIDAEELAEIFR                                                  | 1.105566324        | 2              | 4.82179   |
| P20801        | SEELAECFR                                                         | 1.940561819        | 2              | 3.2848    |
| P20801        | SYLSEEMIAEFK                                                      | 2.433478306        | 2              | 2.67499   |
| <b>P20814</b> | <b>CP2CD Cytochrome P450 2C13_ male_specific</b>                  | <b>4.138460644</b> | <b>3.7E-11</b> | <b>3</b>  |
| P20814        | FDYEDKDFLNLIK                                                     | 1.92622561         | 3              | 3.99428   |
| P20814        | GTAVLTSLSVLHDSK                                                   | 2.143657215        | 2              | 3.73484   |
| P20814        | IKEHEESLDVSNPR                                                    | 1.624955161        | 2              | 4.69764   |
| <b>P20817</b> | <b>CP4AE Cytochrome P450 4A14</b>                                 | <b>1.604100254</b> | <b>0.0003</b>  | <b>6</b>  |
| P20817        | ACQIAHEHTDGVK                                                     | 0.641585619        | 2              | 4.26931   |
| P20817        | AQLQNEEELQK                                                       | 0.654358907        | 2              | 3.20137   |
| P20817        | AVEDLNNLTFFR                                                      | 0.808281517        | 2              | 3.3195    |
| P20817        | HLDFLDILLFAK                                                      | 0.66787219         | 2              | 3.81993   |
| P20817        | MRKAQLQNEEELQK+Oxidation(0                                        | 0.979821406        |                |           |
| P20817        | VLLYDPDYVK                                                        | 0.452201511        | 2              | 2.71002   |
| <b>P20852</b> | <b>CP2A5 Cytochrome P450 2A5</b>                                  | <b>2.400029085</b> | <b>0.99747</b> | <b>3</b>  |
| P20852        | DFIDSFLIR                                                         | 1.12391155         | 2              | 2.31995   |
| P20852        | DPKFFSNPKDFNPK                                                    | 1.359803004        | 2              | 2.538     |
| P20852        | EALVDQAEFEFSGR                                                    | 0.802721463        | 2              | 3.36968   |
| <b>P21213</b> | <b>HUTH Histidine ammonia_lyase</b>                               | <b>2.359352082</b> | <b>0.63198</b> | <b>12</b> |
| P21213        | ALDYLAIGVHELAAISER                                                | 1.790157377        | 3              | 4.06758   |
| P21213        | DIITTELNSATDNPMVFASR                                              | 1.74841109         | 2              | 4.21956   |
| P21213        | GETISGNGNFHGEYPAK                                                 | 1.141451799        | 2              | 4.13415   |
| P21213        | GEWLAVPCQDGK                                                      | 1.125453928        | 2              | 2.46894   |
| P21213        | GYSGISLETLK                                                       | 1.258709188        | 2              | 2.74128   |
| P21213        | LQELQVNLVR                                                        | 1.348936224        | 2              | 3.17782   |
| P21213        | NKPDNGGFTSVDEVR                                                   | 1.219593945        | 2              | 3.9932    |
| P21213        | SHSSGVGKPLSPER                                                    | 1.151061475        | 2              | 4.37341   |
| P21213        | SLLSDHHPSEIAESHR                                                  | 1.4312172          | 3              | 4.82797   |
| P21213        | TVVYGITTFGFK                                                      | 1.259289701        | 2              | 3.29553   |
| P21213        | VWEVAAPYIEK                                                       | 1.413374845        | 2              | 2.41887   |
| P21213        | YIALDGDLSLSTEDLVNLGK                                              | 1.172778615        | 2              | 5.15879   |
| <b>P21396</b> | <b>AOFA Amine oxidase [flavin_containing] A</b>                   | <b>1.862599268</b> | <b>0.90897</b> | <b>9</b>  |
| P21396        | DVPAIEITHFLER                                                     | 1.237319143        | 2              | 3.37243   |

|               |                                                                                    |                    |                |           |
|---------------|------------------------------------------------------------------------------------|--------------------|----------------|-----------|
| P21396        | FVGGSGQVSEQIMGLLDGK                                                                | 1.022229973        | 2              | 3.14002   |
| P21396        | IFSVTNGGQER                                                                        | 0.732307418        | 2              | 2.6415    |
| P21396        | INVLVLEAR                                                                          | 1.135168176        | 2              | 3.18034   |
| P21396        | KDIWVEEPESK                                                                        | 0.902932315        | 2              | 3.30015   |
| P21396        | KICELYAK                                                                           | 0.849319837        | 2              | 2.52401   |
| P21396        | VLGSQEALYPVHYEEK                                                                   | 1.022510834        | 2              | 4.45402   |
| P21396        | WVDVGGAYVGPTQNR                                                                    | 0.812706989        | 2              | 4.50637   |
| P21396        | YVISAIPPILTAK                                                                      | 1.158262624        | 2              | 2.94856   |
| <b>P21531</b> | <b>RL3 60S ribosomal protein L3</b>                                                | <b>2.378512027</b> | <b>0.99691</b> | <b>7</b>  |
| P21531        | AHLMEIQVNGGTVAEK                                                                   | 0.914164869        | 2              | 5.38146   |
| P21531        | ERLEQQVPVNQVFGQDEMIDVIGVTK                                                         | 1.249984757        | 3              | 5.28547   |
| P21531        | HGSLGFLPR                                                                          | 1.009279075        | 2              | 2.92632   |
| P21531        | LEQQVPVNQVFGQDEMIDVIGVTK                                                           | 1.335725664        | 2              | 5.13959   |
| P21531        | NNASTDYDLSDK                                                                       | 1.055259879        | 2              | 3.70017   |
| P21531        | SINPLGGFVHYGEVTNDFIMLK                                                             | 1.507362039        | 2              | 3.63843   |
| P21531        | TVFAEHISDECK                                                                       | 1.144074842        | 2              | 3.99984   |
| <b>P21533</b> | <b>RL6 60S ribosomal protein L6</b>                                                | <b>2.170412399</b> | <b>0.29246</b> | <b>10</b> |
| P21533        | AVDSQILPK                                                                          | 0.999563093        | 2              | 2.78786   |
| P21533        | FVIATSTK                                                                           | 1.044574849        | 1              | 2.22856   |
| P21533        | HLTDAYFK                                                                           | 1.152558772        | 2              | 2.56802   |
| P21533        | HQEGEIFDTEK                                                                        | 1.087683477        | 2              | 3.36501   |
| P21533        | HQEGEIFDTEKEK                                                                      | 0.946150424        | 2              | 4.19414   |
| P21533        | HQEGEIFDTEKEKYEITEQR                                                               | 0.857329379        | 3              | 4.55576   |
| P21533        | QLGSGLLLVGTGPLALNR                                                                 | 1.127806489        | 2              | 5.19689   |
| P21533        | SQFSLTNGMYPHK                                                                      | 0.900606767        | 2              | 3.3313    |
| P21533        | SSITPGTVLIILTGR                                                                    | 0.992074454        | 2              | 4.13516   |
| P21533        | YYPTEDVPR                                                                          | 1.821082492        | 1              | 1.99562   |
| <b>P21571</b> | <b>ATP5J ATP synthase_coupling factor 6_mitochondrial</b>                          | <b>1.981757265</b> | <b>0.73061</b> | <b>6</b>  |
| P21571        | FEVLDPKQS                                                                          | 0.920177787        | 2              | 2.89692   |
| P21571        | FPTFNFEDEPKFEVLDPKQS                                                               | 1.18314247         | 3              | 3.32777   |
| P21571        | GEMDKFPTFNFEDEPK                                                                   | 0.965923331        | 3              | 3.96244   |
| P21571        | GEMDKFPTFNFEDEPKFEVLDPKQS                                                          | 1.161996459        | 3              | 3.83114   |
| P21571        | LASGGPVDTGPEYQQEVDR                                                                | 2.125300686        | 2              | 5.31505   |
| P21571        | LASGGPVDTGPEYQQEVDRELFK                                                            | 2.156964026        | 2              | 2.94897   |
| <b>P21643</b> | <b>T23O Tryptophan 2_3_dioxygenase</b>                                             | <b>7.506576616</b> | <b>9.9E-20</b> | <b>9</b>  |
| P21643        | AGTGGSSGYYLR                                                                       | 2.713488895        | 2              | 2.93286   |
| P21643        | DNFEGDYNELLLK                                                                      | 1.256125245        | 2              | 3.59625   |
| P21643        | GGLIYGDYLQLEK                                                                      | 5.378081207        | 2              | 3.62728   |
| P21643        | GLEEEFLK                                                                           | 2.557293825        | 1              | 2.24592   |
| P21643        | ILNAQELQSEIK                                                                       | 3.166716771        | 2              | 3.83426   |
| P21643        | KDSEEKEEQMAEFR                                                                     | 7.366499601        | 2              | 3.85829   |
| P21643        | NLSMEDNEEDGAQTGVNR                                                                 | 11.4514673         | 2              | 6.06042   |
| P21643        | YNHVCMVHRMLGSK+Oxidation(5                                                         | 1.104754516        |                |           |
| P21643        | YNHVCMVHRMLGSK+Oxidation(9                                                         | 1.075453932        |                |           |
| <b>P21670</b> | <b>PSA4 Proteasome subunit alpha type_4</b>                                        | <b>2.274178197</b> | <b>0.75664</b> | <b>2</b>  |
| P21670        | ATCIGNNSAAAVSMLK                                                                   | 0.949719654        | 2              | 3.41535   |
| P21670        | LLDEVFFSEK                                                                         | 1.544402885        | 2              | 3.375     |
| <b>P21775</b> | <b>THIKA 3_ketoacyl_CoA thiolase A_peroxisomal</b>                                 | <b>1.885311003</b> | <b>0.07798</b> | <b>2</b>  |
| P21775        | LKPECLGDISVGNVLEPGAGAVMAR                                                          | 0.907292209        | 2              | 5.0123    |
| P21775        | LKPECLGDISVGNVLEPGAGAVMAR+Oxidation(22                                             | 1.266089441        |                |           |
| <b>P21913</b> | <b>DHSB Succinate dehydrogenase [ubiquinone] iron_sulfur subunit_mitochondrial</b> | <b>2.326050349</b> | <b>0.21709</b> | <b>7</b>  |
| P21913        | CGPMVLDALIK                                                                        | 1.21863533         | 2              | 3.13622   |
| P21913        | CGPMVLDALIKIK                                                                      | 0.65078992         | 2              | 2.61755   |
| P21913        | CHTIMNCTQTCPK                                                                      | 0.94142518         | 2              | 4.48155   |
| P21913        | IDTDLGK                                                                            | 1.039342361        | 1              | 1.91315   |

|               |                                                               |                    |                |           |
|---------------|---------------------------------------------------------------|--------------------|----------------|-----------|
| P21913        | IKNEIDSTLFR                                                   | 1.197063973        | 2              | 2.89163   |
| P21913        | LQDPFSLYR                                                     | 1.376778133        | 2              | 2.76369   |
| P21913        | RIDTDLGK                                                      | 1.001887172        | 2              | 2.58595   |
| <b>P21981</b> | <b>TGM2 Protein glutamine gamma glutamyltransferase 2</b>     | <b>2.050515564</b> | <b>0.85557</b> | <b>6</b>  |
| P21981        | CDLEIQANGR                                                    | 1.054279073        | 2              | 2.85641   |
| P21981        | DHHTADLCQEK                                                   | 1.66521924         | 2              | 2.70764   |
| P21981        | KLVAEVSJK                                                     | 1.023387651        | 2              | 2.45455   |
| P21981        | SEGTGCCGPVSVR                                                 | 1.030962389        | 2              | 3.69216   |
| P21981        | VDLFPTDIGLHK                                                  | 0.642185398        | 2              | 2.65927   |
| P21981        | YSGCLTESNLK                                                   | 1.064183258        | 2              | 3.55971   |
| <b>P22734</b> | <b>COMT Catechol O methyltransferase</b>                      | <b>2.105708454</b> | <b>0.99955</b> | <b>12</b> |
| P22734        | AIYQGPSSPKS                                                   | 0.75303839         | 2              | 3.34702   |
| P22734        | EWAMNVGDAK                                                    | 0.847318971        | 1              | 2.88443   |
| P22734        | GQIMDAVIR                                                     | 0.880813748        | 2              | 2.9894    |
| P22734        | GQIMDAVIR+Oxidation(3                                         | 0.920112031        |                |           |
| P22734        | GSSSFECTHYSSYLEYMK                                            | 0.652917909        | 2              | 4.43602   |
| P22734        | GTVLLADNVIVPGTPDFLAYVR                                        | 1.574256286        | 3              | 5.04401   |
| P22734        | KGTVLLADNVIVPGTPDFLAYVR                                       | 1.698164898        | 3              | 5.19426   |
| P22734        | KYDVDTLDMVFLDHWK                                              | 1.044353515        | 3              | 5.28126   |
| P22734        | VTILNGASQDLIPQLK                                              | 1.056054945        | 2              | 4.47632   |
| P22734        | YDVDTLDMVFLDHWK                                               | 1.182106444        | 2              | 4.49006   |
| P22734        | YLPDTLLEK                                                     | 1.052464361        | 2              | 3.00144   |
| P22734        | YVQQNAKPGDPQSVLEAIDTYCTQK                                     | 1.073470612        | 3              | 6.4661    |
| <b>P22789</b> | <b>ST2A2 Alcohol sulfotransferase A</b>                       | <b>1.906969518</b> | <b>0.99006</b> | <b>6</b>  |
| P22789        | EEDLILLYPK                                                    | 1.253267993        | 2              | 2.99747   |
| P22789        | ETLQNVCK                                                      | 1.665813747        | 2              | 2.35427   |
| P22789        | FVVKEDLILLYPK                                                 | 1.430082668        | 3              | 3.4317    |
| P22789        | KLEPDELVLK                                                    | 1.378276887        | 2              | 3.76198   |
| P22789        | LEPDELVLK                                                     | 1.562444827        | 2              | 2.3574    |
| P22789        | NHFTVAQAEAFDK                                                 | 0.918431401        | 2              | 3.44297   |
| <b>P22791</b> | <b>HMCS2 Hydroxymethylglutaryl CoA synthase mitochondrial</b> | <b>1.995051821</b> | <b>0.93719</b> | <b>23</b> |
| P22791        | ASLDMFNK                                                      | 0.98676173         | 2              | 2.79578   |
| P22791        | ASLDMFNKK                                                     | 0.949697046        | 2              | 2.83551   |
| P22791        | DVGILALEVYFPAQYVDQTDLEK                                       | 1.037569808        | 3              | 5.66205   |
| P22791        | GLKLEETYTNK                                                   | 1.416858766        | 2              | 2.84651   |
| P22791        | GLKLEETYTNKDVDK                                               | 0.863266128        | 3              | 3.37082   |
| P22791        | GTHMENAYDFYKPNLASEYPLVDGK                                     | 1.07176026         | 3              | 6.96637   |
| P22791        | GTHMENAYDFYKPNLASEYPLVDGK+Oxidation(3                         | 1.119210236        |                |           |
| P22791        | IGAFSYGSGLAASFFSFR                                            | 1.221335182        | 2              | 3.2888    |
| P22791        | LEETYTNK                                                      | 0.928920311        | 2              | 3.15436   |
| P22791        | LEETYTNKDVDK                                                  | 0.794441275        | 2              | 4.12729   |
| P22791        | LEVGTETIIDK                                                   | 0.69801173         | 2              | 3.78082   |
| P22791        | LMFNDFLSSSSDK                                                 | 1.529454397        | 2              | 4.32502   |
| P22791        | LMFNDFLSSSSDK+Oxidation(1                                     | 1.567076241        |                |           |
| P22791        | LMFNDFLSSSSDKQNNLYK                                           | 1.420564874        | 2              | 4.78452   |
| P22791        | LSIQCYLR                                                      | 1.313798884        | 2              | 2.44313   |
| P22791        | LVSSVSDLPK                                                    | 1.124229756        | 2              | 3.45192   |
| P22791        | MGFCSVQEDINSLCLTVVQR                                          | 1.295008682        | 2              | 4.1632    |
| P22791        | MSPEEFTEIMNQR                                                 | 1.368898729        | 2              | 4.89085   |
| P22791        | MSPEEFTEIMNQR+Oxidation(0                                     | 0.938916849        |                |           |
| P22791        | MSPEEFTEIMNQR+Oxidation(9                                     | 1.484566122        |                |           |
| P22791        | TKLPWDAVGR                                                    | 0.988845544        | 3              | 4.01192   |
| P22791        | VNFSPPGDTSNLFPGTWYLER                                         | 1.191770901        | 2              | 4.45927   |
| P22791        | YTVGLGQTR                                                     | 0.997122357        | 2              | 3.44634   |
| <b>P22985</b> | <b>XDH Xanthine dehydrogenase/oxidase</b>                     | <b>2.267283012</b> | <b>0.55346</b> | <b>10</b> |



|               |                                                       |                    |                |           |
|---------------|-------------------------------------------------------|--------------------|----------------|-----------|
| P22985        | DEVTCVGHIGAVVADTPEHAQR                                | 1.084520685        | 3              | 3.8216    |
| P22985        | DGGCCGGSGNNPNCCMNQTK                                  | 1.034968653        | 2              | 5.7519    |
| P22985        | DPPANVQLFQEVPK                                        | 1.319299061        | 2              | 2.88138   |
| P22985        | LDPTFASATLLFQK                                        | 1.176867598        | 2              | 3.80933   |
| P22985        | NQPEPTVEEIEAFQGNLCR                                   | 1.485039202        | 2              | 5.0843    |
| P22985        | QLFQLDSPATPEK                                         | 1.18303025         | 2              | 3.4268    |
| P22985        | SVASIGGNIITASPIDLNPVFMASGAK                           | 1.114420241        | 3              | 5.2065    |
| P22985        | TGTVVALEVAHFSNGGNTEDLSR                               | 1.441830002        | 3              | 5.30885   |
| P22985        | TLLRPEEILLSIEIPYSK                                    | 0.879749669        | 3              | 4.46445   |
| P22985        | TNLPSENTAFR                                           | 0.917110279        | 1              | 2.046     |
| <b>P23358</b> | <b>RL12 60S ribosomal protein L12</b>                 | <b>2.309885543</b> | <b>1</b>       | <b>5</b>  |
| P23358        | CTGGEVGATSALAPK                                       | 0.952405689        | 2              | 4.13048   |
| P23358        | EILGTAQSVGCNVDR                                       | 1.365785971        | 2              | 4.50077   |
| P23358        | HNGNITFDEIVNIAR                                       | 1.257398732        | 2              | 3.85397   |
| P23358        | HPHDIIDDINGAVECPAS                                    | 5.463528591        | 2              | 4.55591   |
| P23358        | QAQIEVVPASALIHK                                       | 1.321444631        | 2              | 3.84584   |
| <b>P23457</b> | <b>DIDH 3_alpha_hydroxysteroid dehydrogenase</b>      | <b>2.557057169</b> | <b>0.7049</b>  | <b>10</b> |
| P23457        | ALDGLNR                                               | 0.996566439        | 2              | 2.39259   |
| P23457        | ELTQVFEFLASEDMK                                       | 1.083844128        | 2              | 4.13405   |
| P23457        | HFDSAYLYEVEEVEGQAIR                                   | 1.46915856         | 2              | 5.99956   |
| P23457        | MLDYCK                                                | 1.173933294        | 1              | 2.14713   |
| P23457        | SIGVSNFNCR                                            | 1.109939044        | 2              | 3.40528   |
| P23457        | SKDIILVSYCTLGSSR                                      | 0.975298174        | 2              | 4.44201   |
| P23457        | SPVLLDDPVLCAIAK                                       | 1.342612065        | 2              | 4.21325   |
| P23457        | VALNDGNFIPVLGFGTTVPEK                                 | 1.99200044         | 2              | 4.86066   |
| P23457        | YFDDHPNHPFTDE                                         | 1.224235821        | 2              | 4.19011   |
| P23457        | YKPCVNQVECHLYLNQSK                                    | 0.955357607        | 2              | 4.63768   |
| <b>P23514</b> | <b>COPB Coatomer subunit beta</b>                     | <b>2.041649245</b> | <b>0.6114</b>  | <b>8</b>  |
| P23514        | EAGELKPEEITVGPVQK                                     | 0.900695632        | 2              | 4.08284   |
| P23514        | LVEKPSPLTLAPHDFANIK                                   | 1.161376262        | 3              | 3.72948   |
| P23514        | NFENLIPDAPELIHDFLVNEK                                 | 1.216017268        | 3              | 4.80343   |
| P23514        | TLQLALDLVSSR                                          | 1.15739111         | 2              | 3.4115    |
| P23514        | TNNVSEHEDTDKYR                                        | 1.119083445        | 2              | 3.81448   |
| P23514        | VLQDLVMDILR                                           | 1.027824645        | 2              | 3.52052   |
| P23514        | VLSECSPLMNDIFNK                                       | 1.205750122        | 2              | 2.86366   |
| P23514        | YEAAGTLVTLSSAPTAIK                                    | 1.158593212        | 2              | 5.29004   |
| <b>P23739</b> | <b>SUIS Sucrase_isomaltase_intestinal</b>             | <b>1.951855997</b> | <b>0.98686</b> | <b>2</b>  |
| P23739        | LPGFGFNDQFIQISTR                                      | 0.964833751        | 2              | 2.4404    |
| P23739        | RMMTLNYPVFSPELR+Oxidation(1                           | 1.013654417        |                |           |
| <b>P23965</b> | <b>EC11 Enoyl_CoA delta isomerase 1_mitochondrial</b> | <b>2.200119289</b> | <b>1</b>       | <b>10</b> |
| P23965        | ALQLGTLFPPAEALK                                       | 1.358658355        | 2              | 5.296     |
| P23965        | ATADNLIK                                              | 1.00615779         | 2              | 2.76712   |
| P23965        | AVQELWLR                                              | 1.552876346        | 2              | 2.72062   |
| P23965        | DNYVNTIGHR                                            | 1.34417159         | 2              | 2.67969   |
| P23965        | EGEAGIAVMK                                            | 0.957553949        | 1              | 2.00261   |
| P23965        | GVILTSEKPGIFSAGLDLMEYGR                               | 1.096642742        | 3              | 5.49936   |
| P23965        | QREADIQNFTSFISR                                       | 1.022699518        | 2              | 3.04774   |
| P23965        | SLHVYLEK                                              | 0.836738843        | 1              | 2.1486    |
| P23965        | VGLVDEVVPEDQVHSK                                      | 0.979395714        | 2              | 4.8673    |
| P23965        | WFTIPDHSR                                             | 0.943725166        | 1              | 1.9616    |
| <b>P24049</b> | <b>RL17 60S ribosomal protein L17</b>                 | <b>2.370944433</b> | <b>0.33284</b> | <b>4</b>  |
| P24049        | EQJVPKPEEEVAQK                                        | 1.029139851        | 2              | 3.8174    |
| P24049        | GLDVDSLVIHQVVK                                        | 1.293805604        | 2              | 4.39192   |
| P24049        | SAEFLHMLK                                             | 2.62924295         | 2              | 2.84709   |
| P24049        | YSLDPENPTK                                            | 0.819316705        | 2              | 2.60598   |
| <b>P24050</b> | <b>RS5 40S ribosomal protein S5</b>                   | <b>2.531559541</b> | <b>0.00971</b> | <b>5</b>  |
| P24050        | AQCPIVER                                              | 1.105157682        | 2              | 2.31387   |

|               |                                                   |                    |                |           |
|---------------|---------------------------------------------------|--------------------|----------------|-----------|
| P24050        | QAVDVSPLR                                         | 2.459788181        | 2              | 2.31656   |
| P24050        | RQAVDVSPLR                                        | 1.139518962        | 2              | 2.33084   |
| P24050        | VNQAIWLLCTGAR                                     | 1.518695188        | 2              | 4.2079    |
| P24050        | WSTDDVQINDISLQDYIAVK                              | 1.904243781        | 2              | 4.82144   |
| <b>P24090</b> | <b>FETUA Alpha_2_HS_glycoprotein</b>              | <b>2.103570175</b> | <b>0.89084</b> | <b>6</b>  |
| P24090        | ELACDDPETEHVALIAVDYLNK                            | 1.185294918        | 2              | 4.2808    |
| P24090        | HAFSPVASVESASGEVLHSPK                             | 1.114436812        | 3              | 6.05787   |
| P24090        | LGGEESVACK                                        | 1.478139552        | 2              | 3.71209   |
| P24090        | VGQPGDAGAAGPVAPLCPGR                              | 0.909032844        | 2              | 5.20985   |
| P24090        | VLHAQCHSTPDSAEDVR                                 | 1.137567735        | 3              | 3.42023   |
| P24090        | VLHAQCHSTPDSAEDVRK                                | 1.303210119        | 3              | 4.01869   |
| <b>P24268</b> | <b>CATD Cathepsin D</b>                           | <b>2.861234336</b> | <b>0.04196</b> | <b>4</b>  |
| P24268        | AIGAVPLIQGEYMIPCEK                                | 1.131917588        | 2              | 3.31334   |
| P24268        | DPTGQPGGELMLGGTDSR                                | 1.662506319        | 2              | 4.73885   |
| P24268        | GGCEAIVDTGTSLLVGPVDEVK                            | 0.971423986        | 3              | 3.50207   |
| P24268        | LGQQNYELHPEK                                      | 1.647128634        | 2              | 3.24573   |
| <b>P24329</b> | <b>THTR Thiosulfate sulfurtransferase</b>         | <b>1.928062419</b> | <b>0.99999</b> | <b>12</b> |
| P24329        | EGHPVTSEPSRPEPAVFK                                | 0.976976779        | 2              | 4.57323   |
| P24329        | FQLVDSR                                           | 0.868217764        | 2              | 2.38934   |
| P24329        | GSVNVPFMFLTEDGFCEK                                | 1.122598441        | 2              | 3.25753   |
| P24329        | HVPGASFFDIEECR                                    | 1.307076806        | 2              | 4.10465   |
| P24329        | KVDLSQPLIATCR                                     | 0.937973328        | 2              | 4.65795   |
| P24329        | RFQLVDSR                                          | 0.777156376        | 2              | 2.49611   |
| P24329        | TVSVLNGGFR                                        | 1.098349965        | 2              | 2.91548   |
| P24329        | TYEQVLENLQSK                                      | 0.929150874        | 2              | 5.07622   |
| P24329        | VDLSQPLIATCR                                      | 1.082613431        | 2              | 3.73126   |
| P24329        | VLDAWYSPGTR                                       | 1.780195605        | 2              | 3.63676   |
| P24329        | WLAESIR                                           | 1.010714617        | 2              | 2.37692   |
| P24329        | YLGTOPEPDAVGLDSGHIR                               | 0.963774114        | 3              | 4.79824   |
| <b>P24368</b> | <b>PPIB Peptidyl_prolyl_cis_trans isomerase B</b> | <b>2.094067756</b> | <b>0.57367</b> | <b>9</b>  |
| P24368        | DKPLKDVIIVDCGK                                    | 1.071867256        | 3              | 3.82458   |
| P24368        | DTNGSQFFITTVK                                     | 1.076389145        | 2              | 3.83181   |
| P24368        | DVIIVDCGK                                         | 0.852698113        | 1              | 1.98992   |
| P24368        | HYGPGWVSMANAGK                                    | 0.994964054        | 2              | 4.00704   |
| P24368        | IEVEKPFAIAK                                       | 1.058923987        | 2              | 3.09217   |
| P24368        | IEVEKPFAIAKE                                      | 1.004852851        | 2              | 3.61651   |
| P24368        | TVDNFVALATGEK                                     | 1.198583095        | 2              | 4.10025   |
| P24368        | VLEGMDVVR                                         | 1.159999163        | 2              | 3.04046   |
| P24368        | VYFDFQIGDEPVGR                                    | 1.366107339        | 2              | 4.10535   |
| <b>P24457</b> | <b>CP2DB Cytochrome P450 2D11</b>                 | <b>2.027338351</b> | <b>0.90472</b> | <b>2</b>  |
| P24457        | RFSVSTLR                                          | 0.80401156         | 2              | 2.564     |
| P24457        | SLEEWVTK                                          | 1.159374548        | 2              | 2.46066   |
| <b>P24470</b> | <b>CP2CN Cytochrome P450 2C23</b>                 | <b>1.74983934</b>  | <b>0.99687</b> | <b>12</b> |
| P24470        | ACVGESLAR                                         | 0.967209645        | 2              | 2.75607   |
| P24470        | DLDIKPITGTIINLPPPYK                               | 1.264296165        | 2              | 3.869     |
| P24470        | EALLQQGDEFLGR                                     | 0.727951016        | 2              | 2.69954   |
| P24470        | FGLLLMK                                           | 0.984061907        | 2              | 3.08701   |
| P24470        | GTTVLPMLSSVMLDQK                                  | 1.280669072        | 2              | 3.98112   |
| P24470        | GYGLIFSNGER                                       | 0.86645909         | 2              | 3.7939    |
| P24470        | IEEEKDNLK                                         | 0.794923117        | 2              | 3.01472   |
| P24470        | LPPGPTPLPIIGNLLQLNLK                              | 1.193011465        | 3              | 5.05692   |
| P24470        | RSLEERVQEEAR                                      | 0.977704406        | 2              | 2.49198   |
| P24470        | SEFHLENLAVCGSNLFTAGTETTSTTLR                      | 1.150235943        | 3              | 3.78411   |
| P24470        | TFLNLMDLLNK                                       | 1.082024766        | 2              | 3.9953    |
| P24470        | YITLLPSSLPHAVVQDTK                                | 0.980084863        | 2              | 4.58589   |
| <b>P24473</b> | <b>GSTK1 Glutathione S_transferase kappa 1</b>    | <b>1.981994798</b> | <b>0.98803</b> | <b>8</b>  |
| P24473        | AGMATAQAQHLLNK                                    | 1.009155509        | 2              | 4.19168   |

|               |                                                                                      |                    |                |           |
|---------------|--------------------------------------------------------------------------------------|--------------------|----------------|-----------|
| P24473        | DEDITESQNILSAAEK                                                                     | 1.152419804        | 2              | 5.84502   |
| P24473        | DSGNQPPAMVPHK                                                                        | 1.132597558        | 2              | 2.75497   |
| P24473        | FLTAVSMEQPEMLEK                                                                      | 0.963638845        | 2              | 4.87768   |
| P24473        | IWSRDEDITESQNILSAAEK                                                                 | 1.478085166        | 3              | 3.67963   |
| P24473        | MELLAYLLGEK                                                                          | 1.270121102        | 2              | 3.85944   |
| P24473        | QLFQVPMSVPK                                                                          | 0.787331616        | 2              | 2.55549   |
| P24473        | YGAFGLPTTVAHVDGK                                                                     | 0.761303847        | 2              | 4.04841   |
| <b>P25093</b> | <b>FAAA Fumarylacetoacetase</b>                                                      | <b>2.349047865</b> | <b>0.99807</b> | <b>16</b> |
| P25093        | AIDVGQQQTR                                                                           | 0.962351622        | 2              | 3.46433   |
| P25093        | AQEHIHGMVLMNDWSAR                                                                    | 1.372642979        | 2              | 3.85305   |
| P25093        | ASLQNLISASQAQLR                                                                      | 1.273603666        | 2              | 4.88459   |
| P25093        | ASLQNLISASQAQLRDDK                                                                   | 1.268316733        | 2              | 3.58822   |
| P25093        | ASSVVVSGTPIR                                                                         | 1.167594563        | 2              | 3.83348   |
| P25093        | DIQQWEYVPLGPFLGK                                                                     | 0.996328481        | 2              | 4.99227   |
| P25093        | FGPEPIPSK                                                                            | 1.022065496        | 2              | 2.89393   |
| P25093        | GEGMSQAATICR                                                                         | 1.103392232        | 2              | 3.74885   |
| P25093        | GEGMSQAATICR+Oxidation(3                                                             | 0.962456433        |                |           |
| P25093        | GKENALLPNWLHLPVGYHGR                                                                 | 0.921236235        | 4              | 4.53415   |
| P25093        | HLFTGPVLSK                                                                           | 1.135459756        | 1              | 2.73185   |
| P25093        | HQHVFDETTLNSFMGLGQAAWK                                                               | 1.230439143        | 2              | 5.42357   |
| P25093        | IGVAIGDQILDLSVIK                                                                     | 1.322955561        | 2              | 5.40393   |
| P25093        | SFGTTISPWVVPMDALMPFVVPNPK                                                            | 1.142443788        |                |           |
| P25093        | TFLLDGDEVIITGHCCQGDGYR                                                               | 1.366204929        | 2              | 5.0738    |
| P25093        | VGFGQCAGK                                                                            | 0.664257621        | 2              | 2.35363   |
| <b>P25113</b> | <b>PGAM1 Phosphoglycerate mutase 1</b>                                               | <b>2.051391287</b> | <b>0.99151</b> | <b>7</b>  |
| P25113        | ALPFWNEEIVPQIK                                                                       | 1.205830502        | 2              | 3.509     |
| P25113        | FSGWYDADLSPAGHEEAK                                                                   | 1.076510014        | 2              | 5.07037   |
| P25113        | FSGWYDADLSPAGHEEAKR                                                                  | 1.160189215        | 2              | 4.2297    |
| P25113        | HGESAWNLENR                                                                          | 0.957103394        | 2              | 3.78706   |
| P25113        | SYDVPPPPMEPDHPFYSNISK                                                                | 1.483647371        | 2              | 3.80281   |
| P25113        | YADLTEDQLPSCESLK                                                                     | 0.849308586        | 2              | 5.3641    |
| P25113        | YADLTEDQLPSCESLKDTIAR                                                                | 1.405021427        | 2              | 5.06723   |
| <b>P25235</b> | <b>RPN2 Dolichyl_diphosphooligosaccharide__protein glycosyltransferase subunit 2</b> | <b>2.511857728</b> | <b>1.1E-08</b> | <b>15</b> |
| P25235        | EDQVIQLMNTIFSK                                                                       | 0.921145579        | 2              | 3.88383   |
| P25235        | EETVLATVQALHTASHLSQQADLR                                                             | 1.451615769        | 3              | 5.07798   |
| P25235        | FELDTSER                                                                             | 0.851118622        | 1              | 2.39473   |
| P25235        | FPEEEAPSTVLSQNLFTPK                                                                  | 1.088192475        | 2              | 3.8375    |
| P25235        | ISTEVGITNVDLSTVDKQSIAPK                                                              | 1.208878375        | 2              | 4.68701   |
| P25235        | KNFESLSEAFSVASAAAALSQNR                                                              | 1.544182001        | 2              | 5.44087   |
| P25235        | LMDHVGTEPSIKEDQVIQLMNTIFSK                                                           | 1.314586709        | 3              | 5.14101   |
| P25235        | LQVSSVLSQPLAQAQAVK                                                                   | 1.339272938        | 2              | 5.8478    |
| P25235        | LSKEETVLATVQALHTASHLSQQADLR                                                          | 1.965057665        | 3              | 5.56416   |
| P25235        | NFESLSEAFSVASAAAALSQNR                                                               | 1.345317604        | 3              | 4.90533   |
| P25235        | NIVEEIEDLVAR                                                                         | 1.002267362        | 3              | 4.6323    |
| P25235        | NPILWNVADVVIK                                                                        | 1.226249546        | 2              | 3.25738   |
| P25235        | TGQEVVFAEPDNK                                                                        | 0.981312177        | 2              | 4.32545   |
| P25235        | YHVPVVVPEGSASDTQEAILR                                                                | 1.12269797         | 3              | 6.39832   |
| P25235        | YIANTVELR                                                                            | 1.212066124        | 2              | 2.82702   |
| <b>P25318</b> | <b>chain</b>                                                                         | <b>2.150014889</b> | <b>0.95635</b> | <b>3</b>  |
| P25318        | GEKGFMPGLPGLK+Oxidation(6                                                            | 1.09185945         |                |           |
| P25318        | GQYLEMPLPMLPMDLKGEPGPPGKPGPR+Oxidation(5)Oxidation(12                                | 1.105279288        |                |           |
| P25318        | GQYLEMPLPMLPMDLKGEPGPPGKPGPR+Oxidation(5)Oxidation(9                                 | 1.105279288        |                |           |
| <b>P25409</b> | <b>ALAT1 Alanine aminotransferase 1</b>                                              | <b>2.111086171</b> | <b>0.9253</b>  | <b>3</b>  |

|               |                                                                                          |                    |                |           |
|---------------|------------------------------------------------------------------------------------------|--------------------|----------------|-----------|
| P25409        | LTEQVFNEAPGIR                                                                            | 1.216172732        | 2              | 2.91472   |
| P25409        | VLCVINPGNPTGQVQTR                                                                        | 0.851020751        | 2              | 4.50118   |
| P25409        | VLTLDTMNPCVR                                                                             | 0.828170724        | 2              | 2.50242   |
| <b>P26039</b> | <b>TLN1 Talin_1</b>                                                                      | <b>2.020574757</b> | <b>0.59601</b> | <b>24</b> |
| P26039        | ADAEGESDLENSR                                                                            | 1.296924551        | 2              | 3.62632   |
| P26039        | ADAEGESDLENSRK                                                                           | 1.226663015        | 2              | 3.20415   |
| P26039        | AGALQCSPSDVYTK                                                                           | 1.080300995        | 2              | 2.68833   |
| P26039        | ALEATTEHIR                                                                               | 1.028712907        | 2              | 2.36505   |
| P26039        | AQEACGPLEMDSALSVVQNLEK                                                                   | 1.221643403        | 2              | 4.49146   |
| P26039        | ASAGPQPLLVSCK                                                                            | 1.10582598         | 2              | 2.87108   |
| P26039        | ASVPTIQDQASAMQLSQCAK                                                                     | 0.81416234         | 2              | 3.36574   |
| P26039        | AVAEQIPLLQGVGR                                                                           | 1.428967391        | 2              | 3.06253   |
| P26039        | EAAEGLRMATNAAAQNAIKK                                                                     | 1.134297232        | 2              | 2.65497   |
| P26039        | ILAQATSDLVNAIK                                                                           | 1.709452202        | 2              | 3.29756   |
| P26039        | LGAASLGAEDPETQVVLINAVK                                                                   | 1.238532539        | 2              | 4.27235   |
| P26039        | LLGEIAQGNENYAGIAAR                                                                       | 1.02012497         | 2              | 4.21337   |
| P26039        | LNEAAAGLNQAATELVQASR                                                                     | 1.234607194        | 2              | 5.11374   |
| P26039        | MATNAAAQNAIK                                                                             | 0.956025361        | 2              | 2.71029   |
| P26039        | NCGQMSEIEAK                                                                              | 1.216070756        | 2              | 2.94028   |
| P26039        | QFVQSAKEVANSTANLVK                                                                       | 1.000220385        | 2              | 2.39528   |
| P26039        | SNTSPEELGPLANQLTSDYGR                                                                    | 1.229615928        | 2              | 4.05546   |
| P26039        | TLAESALQLLYTAK                                                                           | 1.371521843        | 2              | 2.70907   |
| P26039        | TMLESAGGLIQTAR                                                                           | 1.230367029        | 2              | 2.61826   |
| P26039        | VGAIPANALDDGQWSQGLISAAR                                                                  | 1.400836094        | 2              | 5.05663   |
| P26039        | VGDDPAVWQLK                                                                              | 1.004173905        | 2              | 3.2794    |
| P26039        | VLGEAMTGISQNAK                                                                           | 0.923551994        | 2              | 3.32931   |
| P26039        | VLVQNAAGSQEK                                                                             | 0.991475722        | 2              | 3.15086   |
| P26039        | VVAPTISPVQCQQLVEAGR                                                                      | 0.917537482        | 2              | 4.60903   |
| <b>P26043</b> | <b>RADI Radixin</b>                                                                      | <b>1.958495523</b> | <b>0.72745</b> | <b>11</b> |
| P26043        | AFAAQEDLEK                                                                               | 0.895195458        | 2              | 3.02097   |
| P26043        | ALELEQER                                                                                 | 0.945513143        | 2              | 2.47008   |
| P26043        | EIHKPGYLANDR                                                                             | 1.245637004        | 2              | 2.40559   |
| P26043        | FFPEDVSEELIQEITQR                                                                        | 1.034256544        | 3              | 4.0962    |
| P26043        | IQNWHEEHR                                                                                | 0.783188111        | 2              | 2.48059   |
| P26043        | KKEEEATEWQHKK                                                                            | 0.447623938        | 3              | 4.19243   |
| P26043        | KTQNDVLHAENVK                                                                            | 0.951596969        | 2              | 5.06086   |
| P26043        | NQEQLAAELAEFTAK                                                                          | 1.434215457        | 2              | 5.10067   |
| P26043        | QLQALSSELAQAR                                                                            | 0.866291313        | 2              | 4.04214   |
| P26043        | RKPDITIEVQQMK                                                                            | 0.950683315        | 2              | 3.74671   |
| P26043        | TQNDVLHAENVK                                                                             | 1.066351551        | 2              | 4.11405   |
| <b>P26231</b> | <b>CTNA1 Catenin alpha_1</b>                                                             | <b>2.567558023</b> | <b>0.36944</b> | <b>8</b>  |
| P26231        | LIEVANLACSISNNEEGVK                                                                      | 1.393145432        | 2              | 5.26296   |
| P26231        | LLEPLVTQVTTLVNTNSK                                                                       | 1.297935536        | 2              | 4.12106   |
| P26231        | NTSDVISAAC                                                                               | 0.957812345        | 2              | 2.39305   |
| P26231        | QIIVDPLSFSEER                                                                            | 1.450469253        | 2              | 2.88287   |
| P26231        | SAAGEFADDPCCSSVK                                                                         | 1.085002061        | 2              | 4.39154   |
| P26231        | SDALNSAIDK                                                                               | 0.963117052        | 2              | 2.87703   |
| P26231        | TIADHCPDSACK                                                                             | 0.600527003        | 2              | 3.51977   |
| P26231        | VIHVVTSEMDNYEPGVYTEK                                                                     | 1.142737835        | 3              | 4.17196   |
| <b>P26284</b> | <b>ODPA Pyruvate dehydrogenase E1 component subunit alpha_somatic form_mitochondrial</b> | <b>1.803519465</b> | <b>0.25154</b> | <b>10</b> |
| P26284        | AILAELTGR                                                                                | 1.029377148        | 2              | 2.6912    |
| P26284        | EEIQEVRSK                                                                                | 0.794629793        | 1              | 1.93804   |
| P26284        | GFCHLCDGQEACCVGLEAGINPTDHLITAYR                                                          | 1.142642136        | 3              | 6.51304   |
| P26284        | LEEGPPVTTVLTR                                                                            | 0.996309785        | 2              | 3.51335   |
| P26284        | MVNSNLASVEELK                                                                            | 1.006851087        | 2              | 2.91926   |
| P26284        | MVNSNLASVEELKEIDVEVR                                                                     | 1.304495222        | 2              | 4.36405   |

|               |                                                            |                    |                |           |
|---------------|------------------------------------------------------------|--------------------|----------------|-----------|
| P26284        | NFYGGNGIVGAQVPLGAGIALACK                                   | 1.652338786        | 2              | 4.20054   |
| P26284        | RGDFIPGLR                                                  | 0.941577264        | 2              | 2.35812   |
| P26284        | TREEIQEVR                                                  | 0.84228098         | 3              | 3.55589   |
| P26284        | VDGMDILCVR                                                 | 1.099710986        | 2              | 3.43546   |
| <b>P26376</b> | <b>IFM3 Interferon_induced transmembrane protein 3</b>     | <b>1.851116542</b> | <b>0.90852</b> | <b>2</b>  |
| P26376        | IKEEYEVSELGAPHGASVR                                        | 0.883549039        | 3              | 4.08259   |
| P26376        | KMVGDMTGAQAYASTAK+Oxidation(5                              | 1.0458113          |                |           |
| <b>P26453</b> | <b>BASI Basigin</b>                                        | <b>2.043137719</b> | <b>0.97887</b> | <b>7</b>  |
| P26453        | GNINVEGPPR                                                 | 1.018650837        | 2              | 3.4814    |
| P26453        | KSEHASEGEFVK                                               | 0.826311789        | 3              | 3.40795   |
| P26453        | RKPDQTLDEDDPGAAPLK                                         | 1.120831427        | 3              | 4.00201   |
| P26453        | SEASHPPVDEWVWFK                                            | 1.229336769        | 2              | 3.28807   |
| P26453        | SEHASEGEFVK                                                | 1.096642841        | 3              | 3.74149   |
| P26453        | SGEYSCIFLPEPVGR                                            | 1.266914534        | 2              | 3.61876   |
| P26453        | VLQEDTLPDLQMK                                              | 1.146919019        | 2              | 4.11576   |
| <b>P26516</b> | <b>PSD7 26S proteasome non_ATPase regulatory subunit 7</b> | <b>2.304681337</b> | <b>0.95829</b> | <b>2</b>  |
| P26516        | SVVALHNLINNK                                               | 1.213746594        | 2              | 2.76135   |
| P26516        | TFEHTVSEIGAEAEVEVGEHLLR                                    | 1.199045991        | 3              | 4.49596   |
| <b>P26772</b> | <b>CH10 10 kDa heat shock protein_mitochondrial</b>        | <b>1.942364246</b> | <b>0.99942</b> | <b>7</b>  |
| P26772        | GGEIQPVSVK                                                 | 0.94637738         | 2              | 3.46954   |
| P26772        | GGIMLPEK                                                   | 1.00605317         | 2              | 2.66682   |
| P26772        | GGIMLPEK+Oxidation(3                                       | 0.9000442          |                |           |
| P26772        | GKGGEIQPVSVK                                               | 0.767619761        | 2              | 3.41747   |
| P26772        | VLLPEYGGTK                                                 | 0.928213662        | 2              | 2.37234   |
| P26772        | VLQATVVAVGSGGK                                             | 0.931550121        | 2              | 5.39118   |
| P26772        | VVLDDKDYFLFR                                               | 1.178288064        | 3              | 3.69212   |
| <b>P27139</b> | <b>CAH2 Carbonic anhydrase 2</b>                           | <b>1.921869739</b> | <b>0.97898</b> | <b>4</b>  |
| P27139        | AVQHPDGLAVLGIFLK                                           | 1.710615623        | 2              | 3.98462   |
| P27139        | IGPASQGLQK                                                 | 0.874999263        | 2              | 3.5178    |
| P27139        | ITEALHSIK                                                  | 1.097038477        | 2              | 2.45669   |
| P27139        | QSPVDIDGTQAQHDPSLQPLLCYDK                                  | 2.341851822        | 3              | 3.40572   |
| <b>P27321</b> | <b>ICAL Calpastatin</b>                                    | <b>1.970240587</b> | <b>0.62143</b> | <b>5</b>  |
| P27321        | GSDEVTASSAATGTSPR                                          | 1.395743521        | 2              | 4.2688    |
| P27321        | KGSDEVTASSAATGTSPR                                         | 1.117634216        | 2              | 5.21008   |
| P27321        | KVEEEVMNDQALQALSDSLGR                                      | 1.663700295        | 3              | 3.67625   |
| P27321        | LSAAVSETVQVPAPSNTAAPPGTER                                  | 0.910859625        | 3              | 4.64595   |
| P27321        | SQSSEPPVIHEK                                               | 0.863337359        | 2              | 3.50463   |
| <b>P27364</b> | <b>3BHS5 3 beta_hydroxysteroid dehydrogenase type 5</b>    | <b>1.930074214</b> | <b>0.96067</b> | <b>6</b>  |
| P27364        | AVLAANGSILK                                                | 0.912043437        | 2              | 2.99302   |
| P27364        | ETILNDREEEHR                                               | 0.926372817        | 2              | 2.92913   |
| P27364        | GDIVDAQFLR                                                 | 0.859197922        | 2              | 3.05994   |
| P27364        | IVQMLVQEK                                                  | 1.235427211        | 2              | 2.61716   |
| P27364        | NGGTFHTCALR                                                | 0.574894542        | 2              | 2.6045    |
| P27364        | QTILDVNVK                                                  | 0.991333747        | 2              | 2.38779   |
| <b>P27605</b> | <b>HPRT Hypoxanthine_guanine phosphoribosyltransferase</b> | <b>1.83168265</b>  | <b>0.99183</b> | <b>6</b>  |
| P27605        | DLNHVCVISESGK                                              | 0.962473031        | 2              | 3.43581   |
| P27605        | FFADLLDIK                                                  | 1.352151179        | 2              | 3.54966   |
| P27605        | NVLIVEDIIDTGG                                              | 0.803849318        | 2              | 3.86119   |
| P27605        | SVGYRPFVGFPEIPDK                                           | 1.155197921        | 3              | 4.03102   |
| P27605        | SYCNDQSTGDIK                                               | 1.144994232        | 2              | 4.00832   |
| P27605        | VIGDDLSTLTGK                                               | 0.800689982        | 2              | 4.36202   |
| <b>P27653</b> | <b>C1TC_1 tetrahydrofolate synthase_cytoplasmic</b>        | <b>2.008659894</b> | <b>0.99047</b> | <b>17</b> |
| P27653        | ASQAPSSFQLLYDLK                                            | 1.030910121        | 2              | 3.97226   |

|               |                                                                 |                    |                |           |
|---------------|-----------------------------------------------------------------|--------------------|----------------|-----------|
| P27653        | AYTEEDLDLVEK                                                    | 0.794349757        | 2              | 3.19383   |
| P27653        | GDILVVATGQPPEMVK                                                | 2.600892288        | 2              | 2.5026    |
| P27653        | GEWIKPGAVVIDCGINYVPDDTKPNGR                                     | 0.883804206        | 3              | 4.79251   |
| P27653        | IFHELTQTDK                                                      | 1.024070789        | 3              | 3.47881   |
| P27653        | ITIGQAPTEK                                                      | 1.040083141        | 2              | 2.43887   |
| P27653        | IYGADDIELLPEAQNK                                                | 0.840967533        | 2              | 4.99348   |
| P27653        | KITIGQAPTEK                                                     | 0.720017516        | 2              | 2.86934   |
| P27653        | KVVGDVAYDEAK                                                    | 0.878554945        | 2              | 3.70243   |
| P27653        | LDIDPETITWQR                                                    | 1.011782658        | 2              | 3.82933   |
| P27653        | MHGGGPTVTAGLPLPK                                                | 0.6469252          | 2              | 3.81227   |
| P27653        | QGFGNLPICMAK                                                    | 1.115150853        | 2              | 2.78848   |
| P27653        | TADLDKEVKNKGDILVVATGQPPEMVK                                     | 1.259050495        | 3              | 5.59788   |
| P27653        | TDPAALTDDEINR                                                   | 1.050592542        | 2              | 4.09686   |
| P27653        | THLSLSHNPEQK                                                    | 0.869945297        | 2              | 3.85035   |
| P27653        | VVGDVAYDEAK                                                     | 1.169550235        | 2              | 3.40638   |
| P27653        | YVVVTGITPTPLGEGK                                                | 1.012871718        | 2              | 4.82229   |
| <b>P27657</b> | <b>LIPP Pancreatic triacylglycerol lipase</b>                   | <b>2.013182856</b> | <b>0.93128</b> | <b>2</b>  |
| P27657        | ATYTQATQNVNR                                                    | 0.984614633        | 2              | 2.96299   |
| P27657        | NILSQIVDIDGIWEGTR                                               | 1.075877017        | 2              | 2.93919   |
| <b>P27661</b> | <b>H2AX Histone H2A.x</b>                                       | <b>2.224800258</b> | <b>0.27013</b> | <b>3</b>  |
| P27661        | AGLQFPVGR                                                       | 0.922089044        | 2              | 3.22539   |
| P27661        | HLQLAIR                                                         | 1.032653612        | 2              | 2.71001   |
| P27661        | LLGGVTIAQGGVLPNIQAVLLPK                                         | 1.184639816        | 2              | 4.39413   |
| <b>P27768</b> | <b>TNNI2 Troponin I _fast skeletal muscle</b>                   | <b>3.904685008</b> | <b>0.8286</b>  | <b>4</b>  |
| P27768        | ELEDMNQK                                                        | 2.108947646        | 2              | 2.30775   |
| P27768        | IDAAEEKYDMEVK                                                   | 2.180026196        | 2              | 3.25216   |
| P27768        | SVMLQIAATELEK                                                   | 1.52715622         | 2              | 2.92447   |
| P27768        | SVMLQIAATELEKEESR                                               | 1.736840576        | 2              | 3.68925   |
| <b>P27867</b> | <b>DHSO Sorbitol dehydrogenase</b>                              | <b>2.116566405</b> | <b>0.94869</b> | <b>14</b> |
| P27867        | AMGASQVVVIDLSASR                                                | 1.411782126        | 2              | 4.07644   |
| P27867        | AVEAFETAK                                                       | 1.090335975        | 1              | 1.94922   |
| P27867        | EVGADFTIQVAK                                                    | 1.302896324        | 2              | 3.15665   |
| P27867        | GENLSLVVHGPDIR                                                  | 1.0728036          | 2              | 3.81485   |
| P27867        | HSADFCYK                                                        | 1.058434646        | 2              | 2.90614   |
| P27867        | IGDFVVK                                                         | 1.144533847        | 2              | 2.47232   |
| P27867        | LENYPIPELGPNDVLLK                                               | 1.013684503        | 2              | 4.88393   |
| P27867        | LPDSVTFEEGALIEPLSVGIYACR                                        | 0.976528651        | 3              | 4.1149    |
| P27867        | MHSVIGCGSDVHYWEHGR                                              | 1.30165053         | 2              | 6.04524   |
| P27867        | MHSVIGCGSDVHYWEHGR+Oxidation(0                                  | 1.167216426        |                |           |
| P27867        | TLNVKPLVTHR                                                     | 1.251959729        | 2              | 3.23657   |
| P27867        | VAIEPGVPR                                                       | 1.474722076        | 1              | 2.18025   |
| P27867        | VLVCGAGPIGIVTLLVAK                                              | 1.228666183        | 3              | 5.74355   |
| P27867        | YCNTWPMAMVSLASK                                                 | 0.678852045        | 2              | 3.3753    |
| <b>P27952</b> | <b>RS2 40S ribosomal protein S2</b>                             | <b>2.10652943</b>  | <b>0.17608</b> | <b>6</b>  |
| P27952        | AEDKEWIPVTK                                                     | 1.482990814        | 2              | 3.39259   |
| P27952        | AFVAIGDYNGHVGLGK                                                | 1.417516873        | 2              | 3.3435    |
| P27952        | GCTATLGNFAK                                                     | 1.069453216        | 2              | 3.20058   |
| P27952        | GTGIVSAPVPK                                                     | 1.042124109        | 2              | 2.4959    |
| P27952        | SLEEIYLFSLPIK                                                   | 0.477314367        | 2              | 3.49273   |
| P27952        | TYSYLTPLDLWK                                                    | 1.155362631        | 2              | 3.26723   |
| <b>P28037</b> | <b>AL1L1 Cytosolic 10 _formyltetrahydrofolate dehydrogenase</b> | <b>1.895582998</b> | <b>0.27789</b> | <b>26</b> |
| P28037        | ADPLGLEAEK                                                      | 1.039096482        | 2              | 2.42663   |
| P28037        | ANATEFGLASGVFTR                                                 | 0.966222292        | 2              | 4.85761   |
| P28037        | AVQMGMSSVFFNK                                                   | 1.137029609        | 2              | 3.35546   |
| P28037        | DLGEAALNEYLR                                                    | 0.881485949        | 2              | 3.47982   |
| P28037        | ECEVLDDTVSTLYNR                                                 | 1.314935331        | 2              | 4.36165   |

|               |                                                               |                    |                |           |
|---------------|---------------------------------------------------------------|--------------------|----------------|-----------|
| P28037        | EESFGPIMIISR                                                  | 1.068322353        | 2              | 3.07562   |
| P28037        | EGHEVVGVTIPDKDGK                                              | 0.899128978        | 2              | 4.56391   |
| P28037        | GNDKVPGAWTEACGQK                                              | 0.824255127        | 2              | 3.83084   |
| P28037        | GQALPEVVAK                                                    | 1.042675087        | 2              | 2.96649   |
| P28037        | GSASSDLELAEALATAEAVR                                          | 0.903861042        | 2              | 6.31158   |
| P28037        | GVVNILPGSGSLVGQR                                              | 0.934517373        | 2              | 4.82736   |
| P28037        | IGFTGSTEVGK                                                   | 0.938431071        | 2              | 2.78719   |
| P28037        | ILPNVPEVEDSTDFFK                                              | 1.387223445        | 2              | 3.59059   |
| P28037        | INWDQPAEAIHNWIR                                               | 1.036200986        | 2              | 4.25018   |
| P28037        | IQGATIPINQARPNR                                               | 0.927604553        | 2              | 2.34545   |
| P28037        | KEGHEVVGVTIPDKDGK                                             | 0.938490035        | 3              | 4.18843   |
| P28037        | KIGFTGSTEVGK                                                  | 0.974256313        | 2              | 3.13217   |
| P28037        | KLVEYCQR                                                      | 0.88233474         | 2              | 2.41092   |
| P28037        | LFVEESIHNFVQK                                                 | 0.936434159        | 2              | 4.45707   |
| P28037        | LIAEGTAPR                                                     | 0.852940745        | 2              | 3.52205   |
| P28037        | LSDHPDVR                                                      | 0.701358168        | 1              | 2.10967   |
| P28037        | NIQLEDGK                                                      | 0.857884445        | 1              | 2.3031    |
| P28037        | TAACLAAGNTVIKPAQVPTLTALK                                      | 1.098015669        | 3              | 4.4148    |
| P28037        | TDVAAPFGFK                                                    | 0.926630968        | 2              | 3.11586   |
| P28037        | TYNTINPTDGSVICQVSLAQVSDVDK                                    | 2.061793077        | 3              | 5.27368   |
| P28037        | VVEEVEK                                                       | 1.408378675        | 1              | 2.07731   |
| <b>P28064</b> | <b>PSB8 Proteasome subunit beta type_8</b>                    | <b>2.041824898</b> | <b>0.99558</b> | <b>3</b>  |
| P28064        | ASAGSYIATIR                                                   | 1.31324355         | 2              | 2.77245   |
| P28064        | KGPGLYVDDNGTR                                                 | 0.904315802        | 2              | 2.84732   |
| P28064        | QDLSPEEAYDLAR                                                 | 1.05859517         | 2              | 3.1804    |
| <b>P28480</b> | <b>TCPA T_complex protein 1 subunit alpha</b>                 | <b>2.122256922</b> | <b>0.61887</b> | <b>10</b> |
| P28480        | AFHNEAQVNPER                                                  | 1.122298705        | 2              | 3.61945   |
| P28480        | FATEAAITLR                                                    | 1.287170858        | 2              | 3.22714   |
| P28480        | HGGYENAVHSGALDD                                               | 1.035116457        | 2              | 3.34447   |
| P28480        | ICDELILIK                                                     | 1.167766595        | 2              | 3.19386   |
| P28480        | LLEVEHPAAK                                                    | 1.410389064        | 2              | 2.77535   |
| P28480        | MLVDDIGDVTITNDGATILK                                          | 1.127181831        | 2              | 2.34524   |
| P28480        | SLLVIPNTLAVNAAQDSTDLVAK                                       | 1.027570693        | 2              | 4.93783   |
| P28480        | SQNVMAAASIANIVK                                               | 1.340367465        | 2              | 4.6017    |
| P28480        | SSLGPVGLDK                                                    | 1.255056836        | 2              | 2.41221   |
| P28480        | YINENLIINTDELGR                                               | 2.035999684        | 2              | 4.56631   |
| <b>P28492</b> | <b>GLSL Glutaminase liver isoform_mitochondrial</b>           | <b>2.015977585</b> | <b>0.99397</b> | <b>5</b>  |
| P28492        | ATGLQTS DPR                                                   | 1.008021047        | 2              | 2.7969    |
| P28492        | GTPHSHQPQHSDDHASNSGMLPR                                       | 1.102730712        | 3              | 3.73105   |
| P28492        | MVQESSSGLLDR                                                  | 0.958787856        | 2              | 3.62209   |
| P28492        | SNPDLWGVSLCTVDGQR                                             | 1.186276223        | 2              | 4.07981   |
| P28492        | TALHVAAAEGHIDVVK                                              | 0.993429502        | 3              | 3.58745   |
| <b>P28650</b> | <b>PURA1 Adenylosuccinate synthetase isozyme 1</b>            | <b>2.071039166</b> | <b>0.80934</b> | <b>2</b>  |
| P28650        | LDILDVLSEIK                                                   | 0.750168752        | 2              | 3.20016   |
| P28650        | VVDLLATDADIVSR                                                | 1.057024648        | 2              | 2.47061   |
| <b>P29147</b> | <b>BDH D_beta_hydroxybutyrate dehydrogenase_mitochondrial</b> | <b>1.961252223</b> | <b>0.99821</b> | <b>19</b> |
| P29147        | AVLVTGCDSGFGFLAK                                              | 1.014783673        | 2              | 5.64348   |
| P29147        | EVAEVLWGTVR                                                   | 1.311762596        | 2              | 2.42346   |
| P29147        | FGVEAFSDCLR                                                   | 1.033675779        | 2              | 3.66929   |
| P29147        | GFLVFAGCLLK                                                   | 0.747200639        | 2              | 3.7283    |
| P29147        | KMWDELPEVVR                                                   | 0.970053299        | 2              | 3.34313   |
| P29147        | KMWDELPEVVR+Oxidation(1                                       | 1.183773551        |                |           |
| P29147        | MANPARSPYCITK+Oxidation(0                                     | 1.393019137        |                |           |
| P29147        | METYCNSGSDTSSVINAVTHALTAATPYTR                                | 1.433745585        | 3              | 5.65484   |
| P29147        | METYCNSGSDTSSVINAVTHALTAATPYTR+Oxidation(0                    | 1.557035542        |                |           |

|               |                                                                |                    |                |           |
|---------------|----------------------------------------------------------------|--------------------|----------------|-----------|
| P29147        | MQVMTHFPGAISDK                                                 | 0.858698005        | 2              | 4.82906   |
| P29147        | MQVMTHFPGAISDK+Oxidation(0                                     | 1.0682468          |                |           |
| P29147        | MQVMTHFPGAISDK+Oxidation(3                                     | 1.0682468          |                |           |
| P29147        | MWDELPEVVR                                                     | 0.96621926         | 2              | 3.41854   |
| P29147        | MWDELPEVVR+Oxidation(0                                         | 1.014276071        |                |           |
| P29147        | TIQLNVCNSEEVEK                                                 | 0.80938423         | 2              | 4.33444   |
| P29147        | VSVVEPGNFIAATSLYSER                                            | 0.944070433        | 2              | 5.99969   |
| P29147        | VVNISMLGR                                                      | 0.92970133         | 2              | 3.92976   |
| P29147        | YEMHPLGVK                                                      | 0.955206429        | 1              | 2.55044   |
| P29147        | YEMHPLGVK+Oxidation(2                                          | 1.063395503        |                |           |
| <b>P29266</b> | <b>3HIDH 3_hydroxyisobutyrate dehydrogenase_ mitochondrial</b> | <b>1.843119463</b> | <b>0.99999</b> | <b>9</b>  |
| P29266        | DLGLAQDSATSK                                                   | 0.801348056        | 2              | 3.74448   |
| P29266        | EAGEQVASSPADVAEK                                               | 0.819063628        | 2              | 4.98183   |
| P29266        | GSLLDSSSTIDPSVSK                                               | 1.371624318        | 2              | 5.07553   |
| P29266        | HGYPLILYDVFPDVCK                                               | 1.099010842        | 2              | 5.13612   |
| P29266        | KGSLLDSSSTIDPSVSK                                              | 0.85313753         | 2              | 4.08563   |
| P29266        | MGAVFMDAPVSGGVGAAR                                             | 1.050214028        | 2              | 5.32116   |
| P29266        | MGAVFMDAPVSGGVGAAR+Oxidation(0                                 | 0.939337783        |                |           |
| P29266        | MGAVFMDAPVSGGVGAAR+Oxidation(5                                 | 0.939337783        |                |           |
| P29266        | TPILLGSVAHQIYR                                                 | 1.093390981        | 3              | 3.84981   |
| <b>P29314</b> | <b>RS9 40S ribosomal protein S9</b>                            | <b>2.08617862</b>  | <b>0.93372</b> | <b>9</b>  |
| P29314        | IEDFLER                                                        | 1.013997126        | 2              | 2.65748   |
| P29314        | IGVLDEGK                                                       | 0.705311655        | 2              | 2.62025   |
| P29314        | KGQGGAGAGDDEEED                                                | 0.771224526        | 2              | 3.23612   |
| P29314        | KQVFNIPSFIVR                                                   | 0.879066257        | 2              | 2.53673   |
| P29314        | LDYILGLK                                                       | 1.233991633        | 2              | 3.04203   |
| P29314        | LFEGNALLR                                                      | 1.137101759        | 2              | 3.00147   |
| P29314        | LIGEYGLR                                                       | 1.224109395        | 2              | 2.56291   |
| P29314        | QVFNIPSFIVR                                                    | 1.11711352         | 2              | 2.66039   |
| P29314        | SRLDQELK                                                       | 1.015088218        | 3              | 3.49595   |
| <b>P29315</b> | <b>RINI Ribonuclease inhibitor</b>                             | <b>2.167988824</b> | <b>0.99585</b> | <b>7</b>  |
| P29315        | ASLQELDLGSNK                                                   | 0.874195191        | 2              | 2.43099   |
| P29315        | ELVLSNDFHEAGIHTLCQGLK                                          | 1.175222413        | 3              | 3.50612   |
| P29315        | LDDCGLTEVR                                                     | 1.113869836        | 2              | 3.14918   |
| P29315        | LENCGITSANCK                                                   | 0.907011189        | 2              | 3.61645   |
| P29315        | LSLQNCSLTEAGCGVLPDVLR                                          | 1.091020495        | 2              | 3.14955   |
| P29315        | SAIQANPALTELSLR                                                | 1.182733372        | 2              | 4.43585   |
| P29315        | TNELGDAGVGLVLQGLQNPTCK                                         | 1.305659296        | 2              | 5.34337   |
| <b>P29410</b> | <b>KAD2 Adenylate kinase 2_ mitochondrial</b>                  | <b>1.887082804</b> | <b>1</b>       | <b>11</b> |
| P29410        | AMVASGSELGK                                                    | 0.967726007        | 2              | 3.11276   |
| P29410        | AMVASGSELGK+Oxidation(1                                        | 0.955378139        |                |           |
| P29410        | AMVASGSELGKK                                                   | 1.223243234        | 2              | 2.89378   |
| P29410        | AVLLGPPGAGK                                                    | 0.89196511         | 2              | 2.60096   |
| P29410        | EAMKDDITGEPLIR                                                 | 1.326895203        | 2              | 3.13877   |
| P29410        | LEAYHTQTTPLVEYYR                                               | 1.025457804        | 2              | 5.00483   |
| P29410        | LVSDEMVELIEK                                                   | 1.124597508        | 2              | 4.1976    |
| P29410        | NGFLLDGFPR                                                     | 0.980733698        | 2              | 2.87766   |
| P29410        | NLETPSCK                                                       | 0.842172747        | 2              | 2.33067   |
| P29410        | SYHEEFNPPK                                                     | 0.901720438        | 3              | 3.44782   |
| P29410        | TRLEAYHTQTTPLVEYYR                                             | 1.002670087        | 3              | 3.52619   |
| <b>P29411</b> | <b>KAD3 GTP:AMP phosphotransferase_ mitochondrial</b>          | <b>2.020410861</b> | <b>0.92499</b> | <b>6</b>  |
| P29411        | AYEAQTEPVLQYYQK                                                | 1.007996104        | 2              | 4.58133   |
| P29411        | GVLETFSGTETNK                                                  | 1.068461621        | 2              | 2.87436   |
| P29411        | NLTQCSWLLDGFPR                                                 | 1.319202379        | 2              | 3.82705   |
| P29411        | TVGIDDLTGEPLIQR                                                | 1.064330064        | 2              | 3.71508   |



|               |                                                            |                    |                |           |
|---------------|------------------------------------------------------------|--------------------|----------------|-----------|
| P29411        | VYNIEFNPPK                                                 | 0.922880169        | 2              | 2.6067    |
| P29411        | VYQIDTVINLNVPEVIK                                          | 0.73341542         | 2              | 3.29517   |
| <b>P29419</b> | <b>ATP5I ATP synthase subunit e_mitochondrial</b>          | <b>2.525364574</b> | <b>0.25009</b> | <b>2</b>  |
| P29419        | ELAEAEVSIK                                                 | 1.341401968        | 2              | 3.43257   |
| P29419        | YSALILGMAYGAK                                              | 1.325984587        | 2              | 4.09777   |
| <b>P29457</b> | <b>SERP_H1 Serpin H1</b>                                   | <b>1.920824088</b> | <b>0.67499</b> | <b>2</b>  |
| P29457        | GVVEVTHDLQK                                                | 0.935853861        | 2              | 3.15294   |
| P29457        | SALQSINEWASQTTDQK                                          | 1.845605988        | 2              | 2.5135    |
| <b>P30009</b> | <b>MARCS Myristoylated alanine_rich C_kinase substrate</b> | <b>1.740722852</b> | <b>0.98323</b> | <b>4</b>  |
| P30009        | AEDGAAPSPSETPK                                             | 0.991053221        | 2              | 3.65815   |
| P30009        | EAEAAPEQPEQPEQPAEEPR                                       | 0.579422134        | 2              | 3.92005   |
| P30009        | EAGGAEAEATADGAK                                            | 1.050366302        | 2              | 4.31611   |
| P30009        | GEAAAERPGEAAVASSPSK                                        | 0.787819348        | 2              | 4.56594   |
| <b>P30349</b> | <b>LKHA4 Leukotriene A_4 hydrolase</b>                     | <b>1.697802368</b> | <b>0.81009</b> | <b>3</b>  |
| P30349        | GSPMEISLPALSK                                              | 0.984674988        | 2              | 3.05245   |
| P30349        | SLSNVIAHEISHSWTGNLVTNK                                     | 0.376561105        | 3              | 3.86572   |
| P30349        | SSALQWLTPQTSQK                                             | 1.231154028        | 2              | 3.83139   |
| <b>P30427</b> | <b>PLEC Plectin</b>                                        | <b>2.054761791</b> | <b>0.81645</b> | <b>5</b>  |
| P30427        | LLEAAAQSSK                                                 | 0.867073471        | 2              | 2.43488   |
| P30427        | MSAAQALKKGWLYEAGQR+Oxidation(0                             | 1.114345473        |                |           |
| P30427        | SDQLTGLSLLPLSEK                                            | 1.581528248        | 2              | 2.51199   |
| P30427        | SKELAEQEAAR                                                | 1.037876995        | 2              | 2.92077   |
| P30427        | VLALPEPSPAAPTLR                                            | 1.121757786        | 2              | 2.9817    |
| <b>P30713</b> | <b>GSTT2 Glutathione S_transferase theta_2</b>             | <b>1.926721471</b> | <b>0.99376</b> | <b>7</b>  |
| P30713        | AQVHEYLGHADNIR                                             | 0.944858949        | 2              | 4.9227    |
| P30713        | GQHLSEQFSQVNLCK                                            | 0.871103176        | 2              | 5.01445   |
| P30713        | NSMVLALQR                                                  | 0.875529178        | 2              | 3.29761   |
| P30713        | TLPVPPPEAHASMMMLR                                          | 1.002700515        | 2              | 2.59385   |
| P30713        | VEAFLGAELCQEAHNPIMSVLGQAAK                                 | 1.093087697        | 3              | 4.0839    |
| P30713        | VLGPLIGVQVPEEK                                             | 1.103645027        | 2              | 4.0583    |
| P30713        | YQVADHWYPADLQAR                                            | 0.969913078        | 2              | 4.66661   |
| <b>P30835</b> | <b>K6PL_6_phosphofruktokinase_liver type</b>               | <b>2.280829824</b> | <b>0.07477</b> | <b>2</b>  |
| P30835        | NEWGSLLEELVK                                               | 1.403538645        | 2              | 2.83908   |
| P30835        | VFANAPDSACVIGLR                                            | 0.425081647        | 2              | 2.56271   |
| <b>P30839</b> | <b>AL3A2 Fatty aldehyde dehydrogenase</b>                  | <b>2.122148571</b> | <b>0.49499</b> | <b>9</b>  |
| P30839        | DILAAIAADLSK                                               | 1.135026527        | 2              | 3.05435   |
| P30839        | EKDILAAIAADLSK                                             | 1.593890621        | 2              | 4.26661   |
| P30839        | FDHILYTGNTAVGK                                             | 0.864708201        | 2              | 4.05788   |
| P30839        | HLTPVTLELGGK                                               | 1.420381126        | 3              | 3.42677   |
| P30839        | LQQLEALR                                                   | 1.152238519        | 1              | 2.07449   |
| P30839        | NVEEAINFINDR                                               | 1.104645972        | 2              | 4.2853    |
| P30839        | VMQEEIFGPILPIVSVK                                          | 1.003874033        | 2              | 4.88933   |
| P30839        | VMQEEIFGPILPIVSVK+Oxidation(1                              | 1.228796877        |                |           |
| P30839        | YIAPTILTDVDPNSK                                            | 1.105993781        | 2              | 4.07383   |
| <b>P30904</b> | <b>MIF Macrophage migration inhibitory factor</b>          | <b>2.539199149</b> | <b>4.2E-15</b> | <b>2</b>  |
| P30904        | LHISDR                                                     | 0.968891273        | 1              | 2.0557    |
| P30904        | LLCGLLSDR                                                  | 1.718034005        | 2              | 2.92955   |
| <b>P30999</b> | <b>CTND1 Catenin delta_1</b>                               | <b>2.203221296</b> | <b>0.9858</b>  | <b>3</b>  |
| P30999        | GYELLFQPEVVR                                               | 0.966361949        | 2              | 2.5908    |
| P30999        | HIEWESVLTNTAGCLR                                           | 1.141544863        | 2              | 2.80348   |
| P30999        | SLDNNYSTLNER                                               | 1.089868249        | 2              | 2.46552   |
| <b>P31000</b> | <b>VIME Vimentin</b>                                       | <b>2.425244355</b> | <b>0.00059</b> | <b>17</b> |
| P31000        | DGQVINETSQHHDDLE                                           | 1.485566616        | 2              | 3.04076   |
| P31000        | ETNLESLPLVDTHSK                                            | 0.879988892        | 2              | 2.37687   |
| P31000        | FADLSEANR                                                  | 0.92266946         | 2              | 2.89052   |
| P31000        | ILLAELEQLK                                                 | 1.254465396        | 2              | 2.8724    |

|               |                                                                                    |                    |                |           |
|---------------|------------------------------------------------------------------------------------|--------------------|----------------|-----------|
| P31000        | KLEGEESR                                                                           | 0.881008146        | 2              | 3.06194   |
| P31000        | KVESLQEEIAFLK                                                                      | 1.395538917        | 2              | 3.96662   |
| P31000        | KVESLQEEIAFLKK                                                                     | 0.72298344         | 2              | 2.33484   |
| P31000        | LGDLYEEEMR                                                                         | 0.897318319        | 2              | 2.78672   |
| P31000        | LLEGEESR                                                                           | 1.232812367        | 2              | 2.80147   |
| P31000        | LQDEIQNMKEEMAR                                                                     | 0.836993704        | 2              | 3.66286   |
| P31000        | NLQEAEEWYK                                                                         | 1.001539167        | 2              | 2.88632   |
| P31000        | QDVDNAFLAR                                                                         | 0.790591865        | 2              | 2.96533   |
| P31000        | QVQSLTCEVDALK                                                                      | 0.878940309        | 2              | 3.30043   |
| P31000        | RQVDQLTNDK                                                                         | 0.717736062        | 2              | 3.02392   |
| P31000        | SLYSSPPGGAYVTR                                                                     | 0.973609045        | 2              | 2.86248   |
| P31000        | TNEKVELQELNDR                                                                      | 0.730525812        | 2              | 3.34615   |
| P31000        | VELQELNDR                                                                          | 0.843025595        | 2              | 2.99457   |
| <b>P31044</b> | <b>PEBP1 Phosphatidylethanolamine_binding protein 1</b>                            | <b>2.240997217</b> | <b>1</b>       | <b>6</b>  |
| P31044        | GNDISSGTVLSEYVGSPPK                                                                | 0.980138881        | 2              | 5.95288   |
| P31044        | LYTLVLTDPDAPSR                                                                     | 1.188429305        | 2              | 4.93028   |
| P31044        | VDYGGVTVDLGLK                                                                      | 1.577052348        | 2              | 4.82221   |
| P31044        | VLTPTQVMNRPSSISWDGLDPGK                                                            | 1.036845203        | 3              | 4.78184   |
| P31044        | YHLGAPVAGTCFQAEWDDSVPK                                                             | 1.155724123        | 2              | 5.12574   |
| P31044        | YVWLVYEQEQPLNCDEPILSNK                                                             | 1.212201341        | 2              | 5.61372   |
| <b>P31210</b> | <b>AK1D1 3_oxo_5_beta_steroid 4_dehydrogenase</b>                                  | <b>1.890221039</b> | <b>1</b>       | <b>18</b> |
| P31210        | DELLTSLGK                                                                          | 1.183856947        | 2              | 2.79549   |
| P31210        | DIEALNK                                                                            | 0.744643124        | 1              | 2.55823   |
| P31210        | EEMKDIEALNK                                                                        | 0.734111886        | 2              | 3.31761   |
| P31210        | ENFQIFDFSLTK                                                                       | 1.045632428        | 2              | 3.34563   |
| P31210        | HIDGAYVYR                                                                          | 0.898352299        | 2              | 2.71516   |
| P31210        | IKENFQIFDFSLTK                                                                     | 1.009823092        | 2              | 4.35307   |
| P31210        | LWSTDHDPPEMVRPALER                                                                 | 1.007269482        | 2              | 2.4929    |
| P31210        | NEHEVGEAIR                                                                         | 0.849229235        | 1              | 2.908     |
| P31210        | NPLWVNVSSPPLLK                                                                     | 1.108833579        | 2              | 4.37356   |
| P31210        | NPLWVNVSSPPLLKDELLTSLGK                                                            | 1.176829303        | 3              | 4.9156    |
| P31210        | QLEVILNKPLGK                                                                       | 0.722677714        | 2              | 3.41556   |
| P31210        | REEIFYCGK                                                                          | 0.673604811        | 2              | 3.14858   |
| P31210        | RQLEVILNKPLGK                                                                      | 0.763440875        | 3              | 4.26637   |
| P31210        | SNLCATWEALEACK                                                                     | 0.944182018        | 2              | 4.40664   |
| P31210        | SNLCATWEALEACKDAGLVK                                                               | 0.732155992        | 2              | 5.079     |
| P31210        | TAIDEGYR                                                                           | 0.826936645        | 2              | 2.57374   |
| P31210        | TQAQIVLR                                                                           | 0.840881308        | 2              | 3.02636   |
| P31210        | YKPVTNQVECHPYFTQTK                                                                 | 0.96283762         | 2              | 5.72203   |
| <b>P31230</b> | <b>AIMP1 Aminoacyl tRNA synthase complex_interacting multifunctional protein 1</b> | <b>2.170384995</b> | <b>0.07812</b> | <b>2</b>  |
| P31230        | GAEADQIIEYLK                                                                       | 1.742603769        | 2              | 2.98636   |
| P31230        | TVVSGLVNHVPLEQMQR                                                                  | 1.050525724        | 3              | 3.53475   |
| <b>P31399</b> | <b>ATP5H ATP synthase subunit d_mitochondrial</b>                                  | <b>1.99931411</b>  | <b>0.99889</b> | <b>6</b>  |
| P31399        | ANVDKPLVDDFK                                                                       | 1.043451425        | 2              | 3.80185   |
| P31399        | IPVPEDKYTALVDAEEKEDVK                                                              | 0.856739407        | 3              | 3.32943   |
| P31399        | NCAQFVTGSQAR                                                                       | 1.056891           | 2              | 4.26891   |
| P31399        | NMIPFDQMTIDDLNEVPETK                                                               | 0.938047213        | 2              | 5.45486   |
| P31399        | SWNETFHTR                                                                          | 1.135952057        | 2              | 2.75927   |
| P31399        | YTALVDAEEKEDVK                                                                     | 0.962488974        | 2              | 3.77698   |
| <b>P32089</b> | <b>TXTP Tricarboxylate transport protein_mitochondrial</b>                         | <b>1.923913628</b> | <b>0.99756</b> | <b>5</b>  |
| P32089        | FIHDQTSSNPK                                                                        | 0.80989458         | 1              | 3.4529    |
| P32089        | GLSSLLYGSIPK                                                                       | 1.010302563        | 2              | 3.39515   |
| P32089        | NTLDCGVQILK                                                                        | 0.943224142        | 2              | 2.39629   |
| P32089        | SHGVLGLYR                                                                          | 1.051168705        | 1              | 2.02628   |

|               |                                                                |                    |                |           |
|---------------|----------------------------------------------------------------|--------------------|----------------|-----------|
| P32089        | TQLQLDER                                                       | 0.974909163        | 2              | 2.47254   |
| <b>P32198</b> | <b>CPT1A Carnitine O_palmitoyltransferase 1_ liver isoform</b> | <b>1.985284696</b> | <b>0.99603</b> | <b>6</b>  |
| P32198        | ELEQQMQQILDDPSEPQGEAK                                          | 0.962602729        | 3              | 4.55885   |
| P32198        | GDTNPNIPKPTR                                                   | 1.041735958        | 2              | 2.40292   |
| P32198        | MTALAQDFAVNLGPK                                                | 1.151684248        | 2              | 4.18235   |
| P32198        | SCTMESC�FVQAMMDPK                                              | 1.425233459        | 2              | 2.77267   |
| P32198        | TSPDAFIQLALQLAHYK                                              | 1.057577823        | 2              | 3.49923   |
| P32198        | YLESVRPLMK                                                     | 1.063271481        | 2              | 2.32333   |
| <b>P32232</b> | <b>CBS Cystathionine beta_synthase</b>                         | <b>2.303573497</b> | <b>0.0003</b>  | <b>9</b>  |
| P32232        | AGTLKPGDTIIEPTSGNTGIGLALAAVK                                   | 1.191871563        | 3              | 5.95485   |
| P32232        | ALGAEIVR                                                       | 1.115586699        | 1              | 2.04501   |
| P32232        | CIIVMPEK                                                       | 1.255847206        | 2              | 2.51768   |
| P32232        | FDSPESHVGVAVWR                                                 | 1.036596775        | 2              | 3.50131   |
| P32232        | NASNPLAHYDDTAEILQQCDGK                                         | 1.376619348        | 2              | 5.66158   |
| P32232        | SNDDDSFAFAR                                                    | 1.033860825        | 2              | 3.30077   |
| P32232        | VDMLVASAGTGGTITGIAR                                            | 1.56550235         | 2              | 4.62982   |
| P32232        | VQELSLSAPLTVLPTVTCEHTIAILR                                     | 1.484694768        | 3              | 4.23577   |
| P32232        | VRPSDEVCK                                                      | 0.762410088        | 3              | 3.75438   |
| <b>P32551</b> | <b>QCR2 Cytochrome b_c1 complex subunit 2_ mitochondrial</b>   | <b>2.008825773</b> | <b>0.42523</b> | <b>11</b> |
| P32551        | AVAFQNPQTR                                                     | 0.737093433        | 2              | 3.35116   |
| P32551        | AVAQGNLSSADVQAAK                                               | 2.622816131        | 2              | 5.3487    |
| P32551        | GNNTTSLLSQSVAK                                                 | 0.961966985        | 2              | 4.15908   |
| P32551        | IENLHDVAYK                                                     | 1.062216891        | 2              | 3.83772   |
| P32551        | ITSEELHYFVQNHFTSAR                                             | 1.029509496        | 3              | 4.04292   |
| P32551        | NALANPLYCPDYR                                                  | 1.351730265        | 2              | 3.74444   |
| P32551        | RGNNTTSLLSQSVAK                                                | 0.686163326        | 2              | 3.30487   |
| P32551        | RWEVAALR                                                       | 0.91707565         | 2              | 2.73014   |
| P32551        | SMTASGNLGHPTFLDEL                                              | 1.016609611        | 2              | 3.38016   |
| P32551        | TSAPGGVPLQPQELEFTK                                             | 0.987532234        | 2              | 4.04214   |
| P32551        | YENYNLGTSHLLR                                                  | 1.174803913        | 2              | 4.42947   |
| <b>P32755</b> | <b>HPPD 4_hydroxyphenylpyruvate dioxygenase</b>                | <b>2.040281738</b> | <b>3.8E-11</b> | <b>20</b> |
| P32755        | AFEEEEQALR                                                     | 1.247678805        | 2              | 3.34721   |
| P32755        | DIAFEVEDCEHIVQK                                                | 1.27068667         | 2              | 4.08188   |
| P32755        | ENMDVLEELK                                                     | 1.017494795        | 2              | 3.05278   |
| P32755        | EVVSHVIK                                                       | 1.062492885        | 2              | 2.32575   |
| P32755        | FAVLQTYGDTTHTLVEK                                              | 1.358228183        | 2              | 5.25672   |
| P32755        | FLHFHSVTFVWVGNK                                                | 1.130631423        | 3              | 3.73515   |
| P32755        | FLPGFEPTYK                                                     | 1.224677125        | 2              | 2.7075    |
| P32755        | FWSVDDTQVHTEYSSLR                                              | 0.902597832        | 2              | 5.84082   |
| P32755        | GMEFLAVPSSYYR                                                  | 1.562065007        | 2              | 3.28155   |
| P32755        | GNLTDLETNGVR                                                   | 1.021503445        | 2              | 3.83297   |
| P32755        | HNHQGFGAGNFNSLFK                                               | 0.981836998        | 3              | 4.91846   |
| P32755        | ILVDYDEK                                                       | 1.484148948        | 2              | 2.32865   |
| P32755        | IVFVLCALNPWNK                                                  | 1.26460403         | 2              | 2.96899   |
| P32755        | IVREPWVEEDKFGK                                                 | 1.343982195        | 3              | 4.96986   |
| P32755        | LPSCNLEIIDHIVGNQPDQEMESASEWYLK                                 | 1.294918124        | 3              | 7.34228   |
| P32755        | LPSCNLEIIDHIVGNQPDQEMESASEWYLK+Oxidation(20                    | 1.672114928        |                |           |
| P32755        | MGFEPLAYK                                                      | 1.681772136        | 2              | 2.64896   |
| P32755        | SIVVANYEESIK                                                   | 1.056278133        | 2              | 4.23279   |
| P32755        | SQIQEYVDYNGGAGVQHIALR                                          | 1.367214613        | 2              | 5.81498   |
| P32755        | TEDIITTIR                                                      | 1.13578288         | 2              | 3.30782   |
| <b>P33124</b> | <b>ACSL6 Long_chain_fatty_acid_CoA ligase 6</b>                | <b>1.924300722</b> | <b>1</b>       | <b>2</b>  |
| P33124        | ALRPTIFPVVPR                                                   | 1.471716117        | 2              | 3.02346   |
| P33124        | IENIYIR                                                        | 1.043882263        | 2              | 2.80915   |

|               |                                                             |                    |                |           |
|---------------|-------------------------------------------------------------|--------------------|----------------|-----------|
| <b>P33273</b> | <b>CP255 Cytochrome P450 2C55</b>                           | <b>1.921410351</b> | <b>0.97087</b> | <b>2</b>  |
| P33273        | FDYKDENFLNLMEK                                              | 0.609518878        | 3              | 4.88464   |
| P33273        | NFAEIK                                                      | 1.017251823        | 1              | 1.90921   |
| <b>P34058</b> | <b>HS90B Heat shock protein HSP 90_beta</b>                 | <b>1.994707173</b> | <b>1</b>       | <b>26</b> |
| P34058        | ADLINNLGTIAK                                                | 1.017830718        | 2              | 4.08765   |
| P34058        | EDQTEYLEER                                                  | 1.818204503        | 2              | 3.55983   |
| P34058        | EGLELPEDEEEK                                                | 0.874330352        | 2              | 2.51252   |
| P34058        | EGLELPEDEEEKK                                               | 1.314773056        | 2              | 2.56271   |
| P34058        | EGLELPEDEEEKKK                                              | 1.011836505        | 2              | 3.1537    |
| P34058        | ELISNASDALDK                                                | 1.054328653        | 2              | 3.6059    |
| P34058        | FYEAFSK                                                     | 0.912809443        | 1              | 1.95922   |
| P34058        | GVVDSDELPLNISR                                              | 1.09153469         | 2              | 4.80619   |
| P34058        | HFSVEGQLEFR                                                 | 1.017171317        | 2              | 2.66939   |
| P34058        | HLEINPDHPIVETLR                                             | 1.05223597         | 2              | 4.58497   |
| P34058        | HSQFIGYPITLYLEK                                             | 1.840772268        | 2              | 3.66626   |
| P34058        | IDIIPNPQER                                                  | 0.901382973        | 2              | 3.05708   |
| P34058        | KHLEINPDHPIVETLR                                            | 1.12710057         | 2              | 4.83644   |
| P34058        | LGIHEDSTNR                                                  | 0.976685664        | 2              | 2.90844   |
| P34058        | NPDDITQEEYGEFYK                                             | 0.799469154        | 2              | 4.96354   |
| P34058        | RAPFDLFENK                                                  | 1.055384016        | 2              | 3.04066   |
| P34058        | RAPFDLFENKK                                                 | 0.347111152        | 2              | 2.52583   |
| P34058        | SIYYITGESK                                                  | 0.97209393         | 2              | 3.19449   |
| P34058        | SLTNDWEDHLAVK                                               | 1.120382684        | 2              | 4.32713   |
| P34058        | TLTLVDTGIGMTK                                               | 1.171868971        | 2              | 4.27911   |
| P34058        | TLTLVDTGIGMTK+Oxidation(10                                  | 1.578458894        |                |           |
| P34058        | VILHLKEDQTEYLEER                                            | 1.034816498        | 3              | 4.04589   |
| P34058        | YESLTDPSK                                                   | 0.996438629        | 1              | 2.70948   |
| P34058        | YESLTDPSKLDSGK                                              | 0.944583389        | 2              | 3.88405   |
| P34058        | YHTSQSGDEMTSLSEYVSR                                         | 1.145528258        | 2              | 5.48955   |
| P34058        | YIDQEELNK                                                   | 1.167008135        | 2              | 3.48696   |
| <b>P34064</b> | <b>PSA5 Proteasome subunit alpha type_5</b>                 | <b>2.327220372</b> | <b>0.53528</b> | <b>7</b>  |
| P34064        | AIGSASEGAQSSLQEVYHK                                         | 1.102717065        | 2              | 4.51446   |
| P34064        | EELEEVIKDI                                                  | 1.218630176        | 2              | 2.5477    |
| P34064        | GVNTFSPEGR                                                  | 1.196000741        | 2              | 3.08947   |
| P34064        | ITSPLMEPSSIEK                                               | 0.91177178         | 2              | 2.61133   |
| P34064        | LNATNIELATVQPGQNFHMFTK                                      | 1.477672284        | 3              | 3.44823   |
| P34064        | SSLILK                                                      | 1.70833272         | 2              | 2.39765   |
| P34064        | STTLKEAIKSSLILK                                             | 0.860552549        | 2              | 2.3154    |
| <b>P34067</b> | <b>PSB4 Proteasome subunit beta type_4</b>                  | <b>2.031161546</b> | <b>0.96621</b> | <b>3</b>  |
| P34067        | GVEIEGPLSAQTNWDIAHMISGFE                                    | 0.973980775        | 2              | 3.13328   |
| P34067        | TQNPMVTGTSVLGVK                                             | 1.010980923        | 2              | 3.35656   |
| P34067        | VNDSTMLGASGDYADFQYLK                                        | 1.189089949        | 2              | 4.49448   |
| <b>P35171</b> | <b>CX7A2 Cytochrome c oxidase subunit 7A2_mitochondrial</b> | <b>2.028992596</b> | <b>1</b>       | <b>2</b>  |
| P35171        | GGTSDALLYR                                                  | 1.065012216        | 2              | 3.41543   |
| P35171        | LFQEDNGMPVHLK                                               | 1.020040938        | 2              | 4.38558   |
| <b>P35213</b> | <b>1433B 14_3_3 protein beta/alpha</b>                      | <b>1.750609873</b> | <b>0.27994</b> | <b>7</b>  |
| P35213        | AVTEQGHLSNEER                                               | 0.793264636        | 2              | 4.48909   |
| P35213        | EKIEAELQDICS DVLELLDK                                       | 1.373015105        | 3              | 4.98565   |
| P35213        | QTTVSNSSQQAQYQEA FEISK                                      | 0.818506329        | 2              | 5.46302   |
| P35213        | TAFDEAIAELDTLNEESYK                                         | 1.193236924        | 2              | 4.81657   |
| P35213        | YDDMAAAMK                                                   | 1.840471959        | 2              | 3.09257   |
| P35213        | YLILNATHAESK                                                | 1.362197122        | 2              | 3.58558   |
| P35213        | YLSEVASGDNK                                                 | 1.003214532        | 2              | 3.04129   |
| <b>P35278</b> | <b>RAB5C Ras_related protein Rab_5C</b>                     | <b>1.678517535</b> | <b>0.60305</b> | <b>4</b>  |
| P35278        | FEIWDTAGQER                                                 | 0.733459702        | 2              | 3.16344   |
| P35278        | GVDLQESNPASR                                                | 1.008608643        | 2              | 2.70709   |

|               |                                                                        |                    |                |           |
|---------------|------------------------------------------------------------------------|--------------------|----------------|-----------|
| P35278        | LVLLGESAVGK                                                            | 1.120175233        | 2              | 2.75      |
| P35278        | NEPQNAAGAPGR                                                           | 0.731007498        | 2              | 2.99653   |
| <b>P35427</b> | <b>RL13A 60S ribosomal protein L13a</b>                                | <b>2.154963809</b> | <b>0.99551</b> | <b>2</b>  |
| P35427        | CEGINISGNFYR                                                           | 1.094956668        | 2              | 3.14189   |
| P35427        | YQAVTATLEEK                                                            | 1.189865035        | 2              | 3.1429    |
| <b>P35434</b> | <b>ATPD ATP synthase subunit delta_ mitochondrial</b>                  | <b>2.01507503</b>  | <b>0.99197</b> | <b>2</b>  |
| P35434        | AQSELSGAADEAAR                                                         | 1.010945389        | 2              | 4.66613   |
| P35434        | IEANEALVK                                                              | 0.899418682        | 2              | 2.84138   |
| <b>P35435</b> | <b>ATPG ATP synthase subunit gamma_ mitochondrial</b>                  | <b>1.943855195</b> | <b>1</b>       | <b>7</b>  |
| P35435        | GLCGAIHSSVAK                                                           | 0.842498525        | 2              | 3.69161   |
| P35435        | HLIIGVSSDR                                                             | 0.960651575        | 2              | 3.0661    |
| P35435        | NASDMIDK                                                               | 1.095318033        | 2              | 2.35038   |
| P35435        | NDMAALTAAGK                                                            | 1.024180425        | 2              | 3.94464   |
| P35435        | NDMAALTAAGK+Oxidation(2                                                | 1.228037878        |                |           |
| P35435        | THSDQFLVSFK                                                            | 0.937624734        | 1              | 3.03538   |
| P35435        | VYGTGLALYEK                                                            | 1.160240444        | 2              | 3.10062   |
| <b>P35559</b> | <b>IDÉ Insulin_ degrading enzyme</b>                                   | <b>2.037173415</b> | <b>0.52789</b> | <b>4</b>  |
| P35559        | AIEDMTEEAFQK                                                           | 0.941406532        | 2              | 3.13722   |
| P35559        | DREVNAVDSEHEK                                                          | 1.029262971        | 3              | 3.57133   |
| P35559        | SNPGHYLGHLIGHEGPGSLLSELK                                               | 0.791208681        | 3              | 3.30114   |
| P35559        | YTLETRPNQEGIDVR                                                        | 1.390433905        | 2              | 2.53031   |
| <b>P35565</b> | <b>CALX Calnexin</b>                                                   | <b>1.923667327</b> | <b>0.99973</b> | <b>11</b> |
| P35565        | AEDEILNR                                                               | 1.104066953        | 2              | 2.69464   |
| P35565        | EIEDPEDRKPEDWDERPK                                                     | 1.18139667         | 3              | 3.33168   |
| P35565        | GSLSGWILSK                                                             | 1.666885109        | 2              | 2.50193   |
| P35565        | KIPNPdffEDLEPFR                                                        | 0.972365663        | 3              | 4.29534   |
| P35565        | NGDEEEEEKLEEK                                                          | 0.961736486        | 3              | 5.05456   |
| P35565        | TDAPQPDK                                                               | 1.167633764        | 2              | 2.38776   |
| P35565        | TDAPQPDKDEEGKEEEK                                                      | 0.762658292        | 3              | 4.36467   |
| P35565        | TSELNLDQFHDK                                                           | 1.144303025        | 2              | 3.6907    |
| P35565        | VVDDWANDGWGLK                                                          | 0.864850781        | 2              | 4.23063   |
| P35565        | VVDDWANDGWGLKK                                                         | 0.646225661        | 2              | 2.80435   |
| P35565        | WEVDEMKETK                                                             | 0.968253686        | 2              | 2.8193    |
| <b>P35571</b> | <b>GPDM Glycerol_3_phosphate dehydrogenase_ mitochondrial</b>          | <b>1.860334886</b> | <b>0.84517</b> | <b>2</b>  |
| P35571        | AITNLDVEQYR                                                            | 0.761490016        | 2              | 2.71551   |
| P35571        | KQEELETATR                                                             | 0.901247013        | 2              | 2.33559   |
| <b>P35704</b> | <b>PRDX2 Peroxiredoxin_2</b>                                           | <b>2.004292785</b> | <b>1</b>       | <b>5</b>  |
| P35704        | EGGLGPLNIPLADVTK                                                       | 1.067791972        | 2              | 3.47604   |
| P35704        | KEGGLGPLNIPLADVTK                                                      | 1.030381589        | 2              | 4.86094   |
| P35704        | NDEGIAYR                                                               | 0.982932572        | 1              | 1.95971   |
| P35704        | QITVNDLPVGR                                                            | 0.927601331        | 2              | 3.03412   |
| P35704        | SLSQNYGVVK                                                             | 0.964024917        | 2              | 2.47037   |
| <b>P35738</b> | <b>ODDB 2_oxoisovalerate dehydrogenase subunit beta_ mitochondrial</b> | <b>2.026434196</b> | <b>0.73593</b> | <b>5</b>  |
| P35738        | AAVEQVPVEPYK                                                           | 0.795626381        | 2              | 2.42939   |
| P35738        | GLLSCIEDKNPCIFFEPK                                                     | 1.537790248        | 2              | 3.66665   |
| P35738        | MNLFQSITSALDNSLAK                                                      | 1.332384782        | 2              | 3.59215   |
| P35738        | SGDLFNCGSLTIR                                                          | 1.133966391        | 2              | 3.01778   |
| P35738        | VCGYDTPFPHIFEPYIPDK                                                    | 1.187400996        | 3              | 3.49018   |
| <b>P35815</b> | <b>PPM1B Protein phosphatase 1B</b>                                    | <b>2.070265315</b> | <b>0.99995</b> | <b>2</b>  |
| P35815        | IQNAGGSVMQIR                                                           | 1.052177002        | 2              | 2.82335   |
| P35815        | SGFALEPSVENVK                                                          | 1.041303345        | 2              | 3.62746   |
| <b>P36201</b> | <b>CRIP2 Cysteine_rich protein 2</b>                                   | <b>1.864509457</b> | <b>0.85526</b> | <b>3</b>  |
| P36201        | ASSVTTFTGEPNMCPR                                                       | 0.664047574        | 2              | 3.68081   |
| P36201        | GVNIGGAGSYIEKPPTEAPQVTGPIEVPVVR                                        | 1.01404436         | 3              | 6.47508   |
| P36201        | GVNTGAVGSYIYDKDPEGTVPQ                                                 | 0.872176414        | 2              | 4.31891   |

|               |                                                                         |                    |                |           |
|---------------|-------------------------------------------------------------------------|--------------------|----------------|-----------|
| <b>P36365</b> | <b>FMO1 Dimethylaniline monooxygenase [N_oxide_forming] 1</b>           | <b>1.875811615</b> | <b>0.98256</b> | <b>11</b> |
| P36365        | ALQSDYITYIDLLTSINAKPDLR                                                 | 1.228965722        | 3              | 3.61061   |
| P36365        | ASLYNSVVSNSK                                                            | 0.949989548        | 2              | 2.92251   |
| P36365        | CLEEGLEPTCFER                                                           | 0.734536736        | 2              | 4.28105   |
| P36365        | FTEHVEEGR                                                               | 0.934623994        | 2              | 3.02412   |
| P36365        | HSGFGLCYCK                                                              | 1.123285107        | 2              | 3.24699   |
| P36365        | NLLPTPVVSWLISK                                                          | 1.313731885        | 2              | 2.49186   |
| P36365        | SCDLGGLWR                                                               | 1.166360378        | 2              | 2.76923   |
| P36365        | TQLREPVLNDELPGR                                                         | 0.805978809        | 3              | 4.57949   |
| P36365        | VAIVGAGVSLASIK                                                          | 2.147715296        | 2              | 2.82332   |
| P36365        | VEDGQASLYK                                                              | 0.905645212        | 2              | 3.46588   |
| P36365        | VLVVGMGNSGTDAIVEASHLAK                                                  | 1.0161328          | 2              | 4.55916   |
| <b>P36506</b> | <b>MP2K2 Dual specificity mitogen_activated protein kinase kinase 2</b> | <b>1.994565821</b> | <b>0.64203</b> | <b>2</b>  |
| P36506        | ISELGAGNGGVVTK                                                          | 1.492049372        | 2              | 2.36098   |
| P36506        | KLEELDLDEQQR                                                            | 0.94946143         | 2              | 3.03969   |
| <b>P36511</b> | <b>UDB15 UDP_glucuronosyltransferase 2B15</b>                           | <b>1.904410301</b> | <b>0.99643</b> | <b>8</b>  |
| P36511        | ANIIAWALAQIPQK                                                          | 0.87538753         | 3              | 5.48749   |
| P36511        | FVNVWTYELPR                                                             | 1.202113976        | 2              | 3.6615    |
| P36511        | FVTFPTSFSHDLNFFTR                                                       | 1.178228222        | 2              | 4.44904   |
| P36511        | GHEVTVLRPSAFVFLDPK                                                      | 1.263346364        | 3              | 3.96885   |
| P36511        | IILEELVQK                                                               | 1.057153427        | 2              | 3.53459   |
| P36511        | NAMWLSTIHHDQPTKPLDR                                                     | 1.056784319        | 3              | 3.41859   |
| P36511        | SDLLNALEEVIDNPFYK                                                       | 0.113747312        | 3              | 5.33736   |
| P36511        | TLGRPTTLAEIMGK                                                          | 1.100886225        | 2              | 3.1035    |
| <b>P36536</b> | <b>SAR1A GTP_binding protein SAR1a</b>                                  | <b>1.961183815</b> | <b>0.97372</b> | <b>2</b>  |
| P36536        | IDRTDAISEEK                                                             | 0.892671991        | 2              | 2.4917    |
| P36536        | VELNALMTDETISNVPILILGNK                                                 | 0.978615457        | 3              | 5.66942   |
| <b>P36953</b> | <b>AFAM Afamin</b>                                                      | <b>1.937971668</b> | <b>0.91978</b> | <b>2</b>  |
| P36953        | FTDSENVQER                                                              | 0.948111553        | 2              | 2.99725   |
| P36953        | SLAMVQCECK                                                              | 1.200842674        | 2              | 2.75056   |
| <b>P36972</b> | <b>APT Adenine phosphoribosyltransferase</b>                            | <b>1.960350036</b> | <b>1</b>       | <b>2</b>  |
| P36972        | IDYIAGLDSR                                                              | 0.867388611        | 2              | 3.04337   |
| P36972        | SFPDFPIPGVLFRR                                                          | 1.042614933        | 2              | 3.25029   |
| <b>P37397</b> | <b>CNN3 Calponin_3</b>                                                  | <b>1.931934446</b> | <b>0.53349</b> | <b>5</b>  |
| P37397        | AGQSVIGLQMGNTNK                                                         | 0.939862059        | 2              | 3.37461   |
| P37397        | LTLQPVNDSTISLQMGNTNK                                                    | 1.26081746         | 2              | 2.95356   |
| P37397        | MQTDKPFQTTISLQMGNTNK                                                    | 1.074141911        | 3              | 3.55222   |
| P37397        | VNESSLNWPQLENIGNFIK                                                     | 1.021619954        | 2              | 3.15147   |
| P37397        | YDQQAEEEDLR                                                             | 1.208969309        | 2              | 3.15414   |
| <b>P38650</b> | <b>DYHC1 Cytoplasmic dynein 1 heavy chain 1</b>                         | <b>1.888137087</b> | <b>0.29354</b> | <b>8</b>  |
| P38650        | DFPLNDLLSATELDKIR                                                       | 1.147407247        | 2              | 2.38742   |
| P38650        | ILDDDTIITLLENLK                                                         | 1.205261845        | 2              | 2.50648   |
| P38650        | QLQNISQAAAAGGAK                                                         | 0.948869322        | 2              | 3.37664   |
| P38650        | VLLTTQGVDMISK                                                           | 1.658008143        | 2              | 2.663     |
| P38650        | VLRPQVTAVAQQNQGEAPEPQDMK                                                | 0.761970545        | 3              | 5.4378    |
| P38650        | VQGLTVEQAEAVAR                                                          | 0.944262427        | 2              | 3.27985   |
| P38650        | VQVALEELQDLK                                                            | 1.029848923        | 2              | 3.02736   |
| P38650        | VTDGDKVEDPTFLNQLQSGVNR                                                  | 1.145011183        | 3              | 4.16205   |
| <b>P38652</b> | <b>PGM1 Phosphoglucomutase_1</b>                                        | <b>1.991225876</b> | <b>0.0202</b>  | <b>17</b> |
| P38652        | ADNFEYSDPVDGSIK                                                         | 1.045359503        | 2              | 4.82459   |
| P38652        | AIGGIILTASHNPGGPNDFGIK                                                  | 1.077933774        | 2              | 5.7588    |
| P38652        | FFGNLMDASK                                                              | 1.178678433        | 2              | 2.51639   |
| P38652        | FNISNGGPAPEAITDK                                                        | 1.181026774        | 2              | 4.30233   |
| P38652        | INQDPQVMLAPLISIALK                                                      | 1.142190501        | 3              | 4.60659   |
| P38652        | KQRVEDILK                                                               | 1.160151147        | 1              | 2.02672   |

|               |                                                       |                    |                |           |
|---------------|-------------------------------------------------------|--------------------|----------------|-----------|
| P38652        | LSGTGSAGATIR                                          | 1.462339733        | 2              | 3.48021   |
| P38652        | LVIGQNGILSTPAVSCIIR                                   | 1.439841848        | 2              | 4.08125   |
| P38652        | NIFDFNALK                                             | 1.215898071        | 2              | 2.92314   |
| P38652        | QEATLVVGGDGR                                          | 1.061278237        | 2              | 3.20018   |
| P38652        | QQFDLENK                                              | 0.75840935         | 1              | 2.12824   |
| P38652        | SGEHDFGAAFDGDGDR                                      | 0.873234868        | 2              | 4.4598    |
| P38652        | SGEHDFGAAFDGDGRNMILGK                                 | 0.972304016        | 3              | 3.7608    |
| P38652        | TIEEYAICPDLK                                          | 0.89525074         | 2              | 4.43188   |
| P38652        | TQAYPDQKPGTSGLR                                       | 1.075276592        | 2              | 3.4881    |
| P38652        | VFQGNANYAENFIQSIIVSTVEPALR                            | 1.449611343        |                |           |
| P38652        | YDYEEVEAEGANK                                         | 4.582605311        | 2              | 5.18105   |
| <b>P38656</b> | <b>LA Lupus La protein homolog</b>                    | <b>2.471605457</b> | <b>0.71177</b> | <b>2</b>  |
| P38656        | ITDDQQESLNK                                           | 1.30584694         | 2              | 4.19315   |
| P38656        | LDEGWVPLETMIK                                         | 1.203975586        | 2              | 2.99039   |
| <b>P38659</b> | <b>PDIA4 Protein disulfide_isomerase A4</b>           | <b>2.283577144</b> | <b>0.98845</b> | <b>22</b> |
| P38659        | DLGLSESGEDVNAAILDESGKK                                | 2.649793393        | 2              | 5.15013   |
| P38659        | DNDPPIAVAK                                            | 0.879415534        | 2              | 2.40049   |
| P38659        | EVSQPDWTPPPPEVTLTLTK                                  | 0.780411901        | 2              | 3.55213   |
| P38659        | FDVSGYPTIK                                            | 1.27296548         | 2              | 3.49007   |
| P38659        | FDVSGYPTLK                                            | 1.27296548         | 2              | 3.49007   |
| P38659        | FHHTFSTEIAK                                           | 1.127814394        | 3              | 3.50149   |
| P38659        | FIDEHATK                                              | 0.785513364        | 2              | 2.46554   |
| P38659        | FIDEHATKR                                             | 0.558052006        | 2              | 2.55172   |
| P38659        | GQAVDYDGSR                                            | 0.774157849        | 2              | 2.66653   |
| P38659        | GRPFDYNGPR                                            | 1.079134661        | 2              | 2.87645   |
| P38659        | IDATSASMLASK                                          | 0.943118028        | 2              | 3.97559   |
| P38659        | IDATSASMLASK+Oxidation(7                              | 0.835302015        |                |           |
| P38659        | KGQAVDYDGSR                                           | 2.093188761        | 2              | 2.93026   |
| P38659        | MDATANDITNDR                                          | 0.702839097        | 2              | 3.95544   |
| P38659        | MHVMDVQGSTESAIAK                                      | 1.168537616        | 2              | 4.62288   |
| P38659        | MHVMDVQGSTESAIAKDYYVK                                 | 0.811462944        | 3              | 4.59957   |
| P38659        | RFDVSGYPTLK                                           | 0.972281538        | 2              | 3.28803   |
| P38659        | RSPPIPLAK                                             | 1.071995227        | 2              | 2.40611   |
| P38659        | TFDAIVMDPK                                            | 0.914338637        | 2              | 3.53451   |
| P38659        | VDATEQTDLAK                                           | 1.114541265        | 2              | 4.12692   |
| P38659        | VEGFPTIYFAPSGDK                                       | 1.609255023        | 2              | 3.44627   |
| P38659        | YGIVDYMVEQSGPPSK                                      | 0.839305575        | 2              | 5.10871   |
| <b>P38718</b> | <b>BR44 Brain protein 44</b>                          | <b>2.040973299</b> | <b>0.99691</b> | <b>2</b>  |
| P38718        | LRPLYNHPAGPR                                          | 1.031401876        | 2              | 2.82985   |
| P38718        | VELLLPK                                               | 0.906193582        | 1              | 2.22143   |
| <b>P38918</b> | <b>ARK73 Aflatoxin B1 aldehyde reductase member 3</b> | <b>1.922718903</b> | <b>0.99991</b> | <b>5</b>  |
| P38918        | EEHFNGIALVEK                                          | 1.043919849        | 2              | 2.53456   |
| P38918        | FYAFNPLAGLLTGR                                        | 1.154086243        | 2              | 4.63171   |
| P38918        | MDVTSSSASVR                                           | 0.801067095        | 2              | 3.58634   |
| P38918        | RMDVTSSSASVR                                          | 0.776866416        | 2              | 3.85364   |
| P38918        | TTYGPTAPSMISAAVR                                      | 0.946322507        | 2              | 3.96068   |
| <b>P38983</b> | <b>RSSA 40S ribosomal protein SA</b>                  | <b>2.157482477</b> | <b>0.00752</b> | <b>8</b>  |
| P38983        | ADHQLTEASYVNLPTIALCNTDSPLR                            | 1.262021724        | 3              | 5.86294   |
| P38983        | AIVAIENPADVSVISSR                                     | 1.115505386        | 2              | 4.80864   |
| P38983        | FAAATGATPIAGR                                         | 0.643020045        | 2              | 3.16064   |
| P38983        | FLAAGTHLGGTNLDFQMEQYIYK                               | 1.409500362        | 3              | 3.62384   |
| P38983        | FTPGFTFNQIQAAFR                                       | 0.95863579         | 2              | 4.63599   |
| P38983        | KSDGIYIINLK                                           | 2.556995177        | 2              | 3.52242   |
| P38983        | SDGIYIINLK                                            | 1.150229705        | 2              | 3.02165   |
| P38983        | YVDIAIPCNNK                                           | 1.085229377        | 2              | 3.55075   |
| <b>P39032</b> | <b>RL36 60S ribosomal protein L36</b>                 | <b>2.325916115</b> | <b>0.97466</b> | <b>2</b>  |
| P39032        | EELSNVLAAMR                                           | 1.132160166        | 2              | 2.40552   |

|               |                                                                      |                    |                |           |
|---------------|----------------------------------------------------------------------|--------------------|----------------|-----------|
| P39032        | KREELSNVLAAMR                                                        | 1.218228344        | 3              | 3.50914   |
| <b>P39052</b> | <b>DYN2 Dynamin_2</b>                                                | <b>2.198232124</b> | <b>0.79393</b> | <b>2</b>  |
| P39052        | ESSLILAVTPANMDLANSALK                                                | 1.24193904         | 2              | 2.36734   |
| P39052        | NLVDSYVAIINK                                                         | 1.118094129        | 2              | 3.11987   |
| <b>P40112</b> | <b>PSB3 Proteasome subunit beta type_3</b>                           | <b>2.416839753</b> | <b>0.00798</b> | <b>2</b>  |
| P40112        | FGIQAQMVTTFQK                                                        | 1.759378369        | 2              | 3.43311   |
| P40112        | FGPYYTEPVIAGLDPK                                                     | 1.251445486        | 2              | 3.09585   |
| <b>P40307</b> | <b>PSB2 Proteasome subunit beta type_2</b>                           | <b>2.173846398</b> | <b>0.53674</b> | <b>3</b>  |
| P40307        | FILNLPFSVR                                                           | 1.72124111         | 2              | 3.28235   |
| P40307        | NGYELSPTAAANFTR                                                      | 1.031806002        | 2              | 4.02458   |
| P40307        | VIDKDGIIHNLENITFTK                                                   | 1.027788814        | 2              | 4.03379   |
| <b>P41034</b> | <b>TTPA Alpha_tocopherol transfer protein</b>                        | <b>2.440403066</b> | <b>0.68378</b> | <b>4</b>  |
| P41034        | AECPELSADLHPR                                                        | 1.57529684         | 2              | 2.98702   |
| P41034        | AQEEGVPETPQPLTDAFLLR                                                 | 1.370253507        | 2              | 3.71279   |
| P41034        | QLNEQPDHSPLVQPGLAELR                                                 | 1.169502203        | 3              | 4.05484   |
| P41034        | VSLITSELIVQEVEVETQR                                                  | 1.363549893        | 2              | 2.9696    |
| <b>P41123</b> | <b>RL13 60S ribosomal protein L13</b>                                | <b>2.009512953</b> | <b>0.68711</b> | <b>3</b>  |
| P41123        | LATQLTGPVMPPIR                                                       | 1.946181436        | 2              | 3.12273   |
| P41123        | STESLQANVQR                                                          | 0.962094177        | 2              | 3.88965   |
| P41123        | VDTWVFNQPAR                                                          | 1.010304868        | 2              | 3.46971   |
| <b>P41498</b> | <b>PPAC Low molecular weight phosphotyrosine protein phosphatase</b> | <b>2.279977417</b> | <b>0.97404</b> | <b>3</b>  |
| P41498        | IDSAATSTYEVGNPPDYR                                                   | 1.257318831        | 2              | 4.24839   |
| P41498        | IELLSYDQPK                                                           | 1.045630253        | 2              | 3.22101   |
| P41498        | LVTDENVSDNWR                                                         | 0.761226413        | 2              | 3.76149   |
| <b>P41542</b> | <b>USO1 General vesicular transport factor p115</b>                  | <b>1.95748113</b>  | <b>0.74206</b> | <b>14</b> |
| P41542        | AWFEVGDENPGWSAQK                                                     | 1.96337591         | 2              | 4.66609   |
| P41542        | CQNEQLQTAVTQQASQIQHK                                                 | 0.83893862         | 3              | 5.30596   |
| P41542        | EQDDLVLADQDQK                                                        | 1.364651161        | 2              | 2.53703   |
| P41542        | GVMGGQSAGPQHTEAETIQK                                                 | 1.01823574         | 2              | 4.35896   |
| P41542        | IVAFENAFER                                                           | 0.996958716        | 2              | 3.05438   |
| P41542        | LQTENSELQQR                                                          | 1.005284044        | 2              | 3.13897   |
| P41542        | LREEIEELR                                                            | 0.915928569        | 2              | 2.72273   |
| P41542        | NNNSNQNFFK                                                           | 0.847444691        | 2              | 2.71611   |
| P41542        | QLGPPVQQLVSPMGVSK                                                    | 1.556395203        | 2              | 4.0115    |
| P41542        | SHQVLLQSLAEK                                                         | 0.673797305        | 2              | 2.95188   |
| P41542        | SQLCSQSLEITR                                                         | 1.132449975        | 2              | 3.36524   |
| P41542        | SVPVEGESELVTAAK                                                      | 0.906920867        | 2              | 4.15425   |
| P41542        | TLEQHDNIVTHYK                                                        | 0.758148755        | 2              | 3.904     |
| P41542        | VLVSPTNPPGATSSCQK                                                    | 0.957204509        | 2              | 3.92053   |
| <b>P41562</b> | <b>IDHC Isocitrate dehydrogenase [NADP] cytoplasmic</b>              | <b>2.219118913</b> | <b>0.99899</b> | <b>20</b> |
| P41562        | ATDFVVPQPGK                                                          | 1.006450532        | 2              | 3.63243   |
| P41562        | CATITPDEK                                                            | 1.11073172         | 2              | 2.72004   |
| P41562        | DIFQEYDK                                                             | 0.94560455         | 1              | 2.39727   |
| P41562        | DLAACIK                                                              | 0.625043637        | 1              | 1.90825   |
| P41562        | FKDIFQEYDK                                                           | 0.960187323        | 3              | 4.39488   |
| P41562        | GQETSTNPIASIFAWSR                                                    | 1.041284586        | 2              | 4.79303   |
| P41562        | IHGGSVVEMQGDDEMTR                                                    | 1.293921954        | 2              | 5.30362   |
| P41562        | KIHGGSVVEMQGDDEMTR                                                   | 1.070605266        | 2              | 3.69044   |
| P41562        | LIDDMVAQAMK                                                          | 1.323281985        | 2              | 4.45949   |
| P41562        | LIDDMVAQAMK+Oxidation(4                                              | 1.274103306        |                |           |
| P41562        | LIDDMVAQAMK+Oxidation(9                                              | 0.863510186        |                |           |
| P41562        | LILPYVELDLHSYDLGIENR                                                 | 1.935974447        | 2              | 4.86949   |
| P41562        | LVTGWVKPIIIGR                                                        | 1.218478436        | 2              | 3.24898   |
| P41562        | SDYLNTFEFMDK                                                         | 1.531893144        | 2              | 4.46038   |
| P41562        | SDYLNTFEFMDK+Oxidation(9                                             | 2.754497174        |                |           |



|               |                                                                 |                    |                |           |
|---------------|-----------------------------------------------------------------|--------------------|----------------|-----------|
| P41562        | SEGGFIWACK                                                      | 0.928274325        | 2              | 3.30598   |
| P41562        | SIEDFAHSSFQMALSK                                                | 1.170217696        | 2              | 5.08409   |
| P41562        | TVEAEAAHGTVTR                                                   | 1.145599916        | 2              | 3.81893   |
| P41562        | VEITYTPK                                                        | 0.971718048        | 2              | 2.45448   |
| P41562        | VTYLVHDFEEGGGVAMGMYNQDK                                         | 1.469550715        | 3              | 3.82442   |
| <b>P42123</b> | <b>LDHB L_lactate dehydrogenase B chain</b>                     | <b>1.97739108</b>  | <b>0.99999</b> | <b>4</b>  |
| P42123        | DYSVTANSK                                                       | 3.359474894        | 2              | 2.54543   |
| P42123        | IVADKDYSVTANSK                                                  | 1.275720146        | 2              | 3.62665   |
| P42123        | SLADELALVDVLEDK                                                 | 0.841204652        | 2              | 3.6337    |
| P42123        | VIGSGCNLDSAR                                                    | 1.176655718        | 2              | 3.80732   |
| <b>P42228</b> | <b>STAT4 Signal transducer and activator of transcription 4</b> | <b>2.035595732</b> | <b>0.65814</b> | <b>2</b>  |
| P42228        | FHSVEPYNK                                                       | 1.336317658        | 1              | 1.91816   |
| P42228        | GDKGYVPSVFIPISTIR                                               | 0.918146027        | 2              | 2.73883   |
| <b>P42667</b> | <b>SC11A Signal peptidase complex catalytic subunit SEC11A</b>  | <b>2.151715972</b> | <b>0.91492</b> | <b>3</b>  |
| P42667        | GDLLFLTNR                                                       | 1.12892939         | 2              | 2.43788   |
| P42667        | MLSLDFLDDVR                                                     | 1.037201965        | 2              | 3.34428   |
| P42667        | VGEIVVFR                                                        | 1.104747892        | 2              | 3.27065   |
| <b>P42676</b> | <b>NEUL Neurolysin_mitochondrial</b>                            | <b>1.930824423</b> | <b>0.5276</b>  | <b>3</b>  |
| P42676        | AELGALPDDFIDSLEK                                                | 1.288366642        | 2              | 3.32762   |
| P42676        | NLILKPGSLDGMMLQNFLQR                                            | 1.309099788        | 3              | 4.1433    |
| P42676        | NLNEDDTSLVFSK                                                   | 0.921608858        | 2              | 3.38772   |
| <b>P42930</b> | <b>HSPB1 Heat shock protein beta_1</b>                          | <b>2.674402841</b> | <b>0.77938</b> | <b>2</b>  |
| P42930        | AQIGGPESEQSGAK                                                  | 1.296397769        | 2              | 3.39337   |
| P42930        | VSLDVNHFAPEELTVK                                                | 2.441228306        | 2              | 2.58121   |
| <b>P42932</b> | <b>TCPQ T_complex protein 1 subunit theta</b>                   | <b>1.938804403</b> | <b>0.62342</b> | <b>10</b> |
| P42932        | AIAGTGANVIVTGGK                                                 | 1.196124178        | 2              | 2.75237   |
| P42932        | AVDDGVNTEK                                                      | 1.218734962        | 2              | 2.51088   |
| P42932        | ELEVQHAAK                                                       | 1.341373028        | 2              | 2.85769   |
| P42932        | GEENLMDAQVK                                                     | 0.957311924        | 2              | 3.58777   |
| P42932        | GSTDNLMDDIER                                                    | 1.316549207        | 2              | 2.76197   |
| P42932        | HEKEDGAISTIVLR                                                  | 2.301559748        | 2              | 2.92369   |
| P42932        | HFSGLEEAVYR                                                     | 1.218901036        | 2              | 2.65739   |
| P42932        | NVGLDIEAEVPAVK                                                  | 1.288860621        | 2              | 4.01113   |
| P42932        | QITSYGETCPGLEQYAIK                                              | 0.871454805        | 2              | 4.87195   |
| P42932        | TAEELMNFSK                                                      | 1.048492883        | 2              | 2.58773   |
| <b>P43244</b> | <b>MATR3 Matrin_3</b>                                           | <b>2.373032728</b> | <b>0.99158</b> | <b>5</b>  |
| P43244        | ITPENLPQILLQLK                                                  | 1.255816849        | 2              | 3.42861   |
| P43244        | NTHCSSLPHYQK                                                    | 1.079918295        | 2              | 2.31662   |
| P43244        | TEEGPTLSYGR                                                     | 1.077426264        | 2              | 2.55898   |
| P43244        | TENPAEGKEQEEK                                                   | 0.83422403         | 2              | 3.38239   |
| P43244        | YQLQLVEPFGVISNHLINL                                             | 1.506596799        | 3              | 3.76019   |
| <b>P43274</b> | <b>H14 Histone H1.4</b>                                         | <b>1.866374518</b> | <b>0.97133</b> | <b>4</b>  |
| P43274        | ALAAAGYDVEK                                                     | 0.987606748        | 2              | 3.86132   |
| P43274        | ALAAAGYDVEKNNSR                                                 | 0.184918916        | 2              | 3.29513   |
| P43274        | SGVSLAALK                                                       | 0.806259883        | 2              | 2.99182   |
| P43274        | SGVSLAALKK                                                      | 0.638005769        | 2              | 2.68434   |
| <b>P43278</b> | <b>H10 Histone H1.0</b>                                         | <b>2.181589432</b> | <b>0.9971</b>  | <b>2</b>  |
| P43278        | VGENADSQIK                                                      | 0.839416632        | 2              | 3.4397    |
| P43278        | YSDMIVAAIQAEK                                                   | 1.125713812        | 2              | 4.47286   |
| <b>P43883</b> | <b>PLIN2 Perilipin_2</b>                                        | <b>2.650935718</b> | <b>0.49572</b> | <b>2</b>  |
| P43883        | DSVASTVSGVVDK                                                   | 1.35829778         | 2              | 2.35521   |
| P43883        | LEPQIAVANTYACK                                                  | 1.796530246        | 2              | 3.94471   |
| <b>P45591</b> | <b>COF2 Cofilin_2</b>                                           | <b>3.101857652</b> | <b>0.99822</b> | <b>2</b>  |
| P45591        | HEWQVNGLDDIKDR                                                  | 1.254766773        | 3              | 4.85484   |
| P45591        | QLVGDIGDTEDEPYTSFVK                                             | 1.724993643        | 2              | 3.86046   |

|               |                                                                            |                    |                |           |
|---------------|----------------------------------------------------------------------------|--------------------|----------------|-----------|
| <b>P45592</b> | <b>COF1 Cofilin_1</b>                                                      | <b>2.227887464</b> | <b>0.99256</b> | <b>5</b>  |
| P45592        | EILVGDVGTVDPPYTFVK                                                         | 1.165150831        | 2              | 5.11072   |
| P45592        | HELQANCYEEVK                                                               | 0.980045065        | 2              | 3.83019   |
| P45592        | HELQANCYEEVKDR                                                             | 1.070725984        | 3              | 5.62793   |
| P45592        | MLPKDCR                                                                    | 1.029276909        | 2              | 2.33667   |
| P45592        | NIILEEGKEILVGDVGTVDPPYTFVK                                                 | 1.315587668        | 3              | 4.80309   |
| <b>P45878</b> | <b>FKBP2 Peptidyl_prolyl cis_trans isomerase FKBP2</b>                     | <b>1.79384965</b>  | <b>0.45039</b> | <b>4</b>  |
| P45878        | GWDQGLLMCEGEK                                                              | 1.279108059        | 2              | 4.3016    |
| P45878        | KGDVLHMHYTK                                                                | 0.710558771        | 2              | 3.8757    |
| P45878        | KLVIPSELGYGER                                                              | 1.216154915        | 2              | 2.74943   |
| P45878        | LVIPSELGYGER                                                               | 1.254679901        | 2              | 2.79427   |
| <b>P45953</b> | <b>ACADV Very long_chain specific acyl_CoA dehydrogenase_mitochondrial</b> | <b>2.138136053</b> | <b>1</b>       | <b>17</b> |
| P45953        | AMVENGLVTSNPLR                                                             | 0.909988569        | 2              | 4.05193   |
| P45953        | AMVENGLVTSNPLRV                                                            | 1.13925577         | 2              | 4.19659   |
| P45953        | ASNTSEVYFDGVK                                                              | 1.004692504        | 2              | 3.60534   |
| P45953        | ELGAFGLQVPSELGGLSNTQYAR                                                    | 1.393458293        | 3              | 5.12188   |
| P45953        | ENMASLQSNPQQQLFR                                                           | 1.089486481        | 2              | 4.24987   |
| P45953        | FFEEVNDPAK                                                                 | 0.876684608        | 2              | 3.02512   |
| P45953        | FFEEVNDPAKNDSLEKVEEDTLQGLK                                                 | 1.071945017        | 3              | 5.58398   |
| P45953        | GIVNEQFLQR                                                                 | 1.091879575        | 2              | 3.14125   |
| P45953        | IFEGTNDILR                                                                 | 1.57008727         | 2              | 3.14642   |
| P45953        | NDSLEKVEEDTLQGLK                                                           | 1.160966854        | 2              | 3.64011   |
| P45953        | NPLGNVGLLIGEASK                                                            | 1.381726592        | 2              | 3.70709   |
| P45953        | SFGGVTHGLPEK                                                               | 1.070187694        | 2              | 2.60605   |
| P45953        | SFGGVTHGLPEKK                                                              | 1.080748431        | 2              | 2.95757   |
| P45953        | SGELAVQALEQFATVVEAK                                                        | 0.926618212        | 3              | 4.12116   |
| P45953        | SLSEGYPTAQHEK                                                              | 1.015019809        | 2              | 3.42979   |
| P45953        | TGIGSGLSLSGIVHPELSR                                                        | 1.179120715        | 3              | 4.60682   |
| P45953        | VEEDTLQGLK                                                                 | 1.011828701        | 2              | 2.76958   |
| <b>P46061</b> | <b>RAGP1 Ran GTPase_activating protein 1</b>                               | <b>3.462360972</b> | <b>0.03954</b> | <b>2</b>  |
| P46061        | TAVLDAIDALMK                                                               | 1.792719961        | 2              | 3.1766    |
| P46061        | VINLNDNTFTEK                                                               | 1.188754466        | 2              | 2.51227   |
| <b>P46418</b> | <b>GSTA5 Glutathione S_transferase alpha_5</b>                             | <b>1.902499701</b> | <b>0.02017</b> | <b>4</b>  |
| P46418        | AILNYIATK                                                                  | 0.466079285        | 2              | 3.29148   |
| P46418        | SDGSLMFEQVPMVEIDGMK                                                        | 0.814507443        | 2              | 4.38341   |
| P46418        | SHGQDYLGVNK                                                                | 0.40407002         | 2              | 3.63771   |
| P46418        | VSNLPTVK                                                                   | 0.931605704        | 2              | 2.76883   |
| <b>P46425</b> | <b>GSTP2 Glutathione S_transferase P 2</b>                                 | <b>1.963574659</b> | <b>0.55245</b> | <b>3</b>  |
| P46425        | ALPGHLKPFETLLSQNQGGK                                                       | 0.673303923        | 2              | 4.16265   |
| P46425        | FEDGDLTYQSNAILR                                                            | 0.686396842        | 2              | 4.53322   |
| P46425        | MLLADQGSWK                                                                 | 1.128491091        | 2              | 2.50915   |
| <b>P46462</b> | <b>TERA Transitional endoplasmic reticulum ATPase</b>                      | <b>1.883461665</b> | <b>0.49124</b> | <b>24</b> |
| P46462        | AIANECQANFISIK                                                             | 1.183652544        | 2              | 3.70608   |
| P46462        | EDEEESLNEVGYDDIGGCR                                                        | 5.136175153        | 2              | 5.30883   |
| P46462        | ELQELVQYPVEHPDK                                                            | 1.004380929        | 2              | 4.56693   |
| P46462        | ETVVEVPQVTWEDIGGLEDVK                                                      | 1.062705231        | 2              | 4.47217   |
| P46462        | ETVVEVPQVTWEDIGGLEDVKR                                                     | 1.583789366        | 2              | 4.11236   |
| P46462        | EVDIGIPDATGR                                                               | 0.870655317        | 2              | 2.73949   |
| P46462        | GDDLSTAILK                                                                 | 1.250349165        | 2              | 3.06045   |
| P46462        | GGNIGDGGGAADR                                                              | 2.092964966        | 2              | 3.05514   |
| P46462        | GILLYGPPGTGK                                                               | 0.879195768        | 2              | 2.85287   |
| P46462        | IVSQLLTLMDGLK                                                              | 1.473445333        | 2              | 3.5126    |
| P46462        | KYEMFAQTLQQR                                                               | 0.921982107        | 2              | 4.05685   |
| P46462        | LADDVDLEQVANETHGHVGADLAALCSEALQAIR                                         | 1.600895414        | 3              | 6.14338   |
| P46462        | LAGESESNLRKAFEEAEK                                                         | 0.901863356        | 2              | 2.57452   |
| P46462        | LDQLIYIPLPEK                                                               | 1.1634543          | 2              | 4.50735   |

|               |                                                                                           |                    |                |           |
|---------------|-------------------------------------------------------------------------------------------|--------------------|----------------|-----------|
| P46462        | LEILQHTK                                                                                  | 1.121254625        | 2              | 2.82824   |
| P46462        | LGDVISIQPCPDVK                                                                            | 0.945819773        | 2              | 3.96911   |
| P46462        | LIVDEAINEDNSVVLSQPK                                                                       | 1.216883063        | 2              | 5.45228   |
| P46462        | MDELQLFR                                                                                  | 1.289132162        | 2              | 3.19064   |
| P46462        | MTNGFSGADLTEICQR                                                                          | 0.797919503        | 2              | 4.46241   |
| P46462        | NAPAIIFIDELDAIPK                                                                          | 0.735422994        | 2              | 4.93198   |
| P46462        | QTNPSAMEVEEDDPVPEIR                                                                       | 0.840633959        | 2              | 4.39636   |
| P46462        | RSVSDNDIR                                                                                 | 0.790762206        | 2              | 2.60967   |
| P46462        | VINQLTEMDGMSTK                                                                            | 2.455609784        | 2              | 4.59131   |
| P46462        | WALSQSNPSALR                                                                              | 1.478237184        | 2              | 3.45111   |
| <b>P46664</b> | <b>PURA2 Adenylosuccinate synthetase isozyme 2</b>                                        | <b>2.272156194</b> | <b>0.41646</b> | <b>5</b>  |
| P46664        | FIEDELQIPVK                                                                               | 0.980454856        | 2              | 3.15279   |
| P46664        | LDILDMFTEIK                                                                               | 0.985161395        | 2              | 3.26603   |
| P46664        | MCDLVSDFDGFSEK                                                                            | 1.951685661        | 2              | 3.66236   |
| P46664        | VGIGAFPTEQDNEIGELLQTR                                                                     | 1.646454265        | 2              | 4.38233   |
| P46664        | VVDLLAQDADIVCR                                                                            | 2.071132931        | 2              | 3.51888   |
| <b>P46720</b> | <b>SO1A1 Solute carrier organic anion transporter family member 1A1</b>                   | <b>1.844639827</b> | <b>0.06391</b> | <b>4</b>  |
| P46720        | ESEHTDVHGSPQVENDGELK                                                                      | 0.951752509        | 3              | 3.74553   |
| P46720        | GIGETPIVPLGISYIEDFAK                                                                      | 1.02811801         | 2              | 3.80164   |
| P46720        | GVQHQLHVESK                                                                               | 0.764610136        | 2              | 3.02143   |
| P46720        | SENSPLYIGILEMGK                                                                           | 1.267250495        | 2              | 3.43931   |
| <b>P46844</b> | <b>BIEA Biliverdin reductase A</b>                                                        | <b>1.894491455</b> | <b>0.94715</b> | <b>4</b>  |
| P46844        | FGVVVGVGR                                                                                 | 0.974602933        | 2              | 2.83465   |
| P46844        | GLLSWIEEK                                                                                 | 1.477192048        | 2              | 2.5176    |
| P46844        | LLDQVSAEDLAAEK                                                                            | 0.987900144        | 2              | 4.65823   |
| P46844        | MTVQLETQNK                                                                                | 0.921760614        | 2              | 2.49603   |
| <b>P46953</b> | <b>3HAO 3_hydroxyanthranilate 3_4_dioxygenase</b>                                         | <b>2.199023451</b> | <b>0.55313</b> | <b>10</b> |
| P46953        | AQGSVALSVTQDPACK                                                                          | 0.926625204        | 2              | 4.52156   |
| P46953        | ASFQPPVCNK                                                                                | 1.123558644        | 2              | 2.55939   |
| P46953        | DLGTQLAPIIQEFFHSEQYR                                                                      | 1.063382561        | 2              | 3.54777   |
| P46953        | FANTMGLVIER                                                                               | 1.120921596        | 2              | 3.56083   |
| P46953        | METELDGLR                                                                                 | 1.061097469        | 2              | 2.74081   |
| P46953        | QDQDVVWLWQLEGSSK                                                                          | 1.374317167        | 2              | 2.34734   |
| P46953        | QGEIFLLPAR                                                                                | 0.660826691        | 2              | 2.76677   |
| P46953        | RMETELDGLR                                                                                | 1.203536807        | 2              | 2.48808   |
| P46953        | TGKPNPDQLLK                                                                               | 1.061436973        | 3              | 3.58246   |
| P46953        | YYVGDTEDEVLFK                                                                             | 1.281620238        | 2              | 3.54466   |
| <b>P46978</b> | <b>STT3A Dolichyl_diphosphooligosaccharide__protein glycosyltransferase subunit STT3A</b> | <b>1.959790417</b> | <b>0.31871</b> | <b>7</b>  |
| P46978        | FESVIHEFDYPFNYR                                                                           | 1.266661412        | 2              | 2.34324   |
| P46978        | FGQVYTEAK                                                                                 | 1.226416998        | 2              | 2.72455   |
| P46978        | FHNWFDDR                                                                                  | 1.070536935        | 2              | 2.54638   |
| P46978        | FYSLLDPSYAK                                                                               | 1.394975137        | 2              | 2.89661   |
| P46978        | NLDISRPDKK                                                                                | 1.151805233        | 2              | 2.41254   |
| P46978        | VGQAMASTEEL                                                                               | 0.917182684        | 2              | 3.17066   |
| P46978        | VGQAMASTEEL+Oxidation(4                                                                   | 1.016188904        |                |           |
| <b>P47198</b> | <b>RL22 60S ribosomal protein L22</b>                                                     | <b>2.167662114</b> | <b>0.98635</b> | <b>2</b>  |
| P47198        | AGNLGGGVVTIER                                                                             | 1.013788251        | 2              | 3.06414   |
| P47198        | FTLDCTHPVEDGIMDAANFEQLQER                                                                 | 1.421177902        | 3              | 5.5319    |
| <b>P47875</b> | <b>CSRP1 Cysteine and glycine_rich protein 1</b>                                          | <b>2.079356138</b> | <b>0.69795</b> | <b>4</b>  |
| P47875        | GFGFGQGAGALVHSE                                                                           | 1.276225829        | 2              | 3.15801   |
| P47875        | GLESTTLADKDGEIYCK                                                                         | 1.292497406        | 2              | 5.25659   |
| P47875        | HEEAPGHRPTTNPASK                                                                          | 0.816499857        | 2              | 3.63392   |
| P47875        | NLDSTTVAVHGEEIYCK                                                                         | 1.025996626        | 2              | 4.72147   |
| <b>P47942</b> | <b>DPYL2 Dihydropyrimidinase__related protein 2</b>                                       | <b>1.981364404</b> | <b>0.99674</b> | <b>3</b>  |

|               |                                                           |                    |                |           |
|---------------|-----------------------------------------------------------|--------------------|----------------|-----------|
| P47942        | FQMPDQGMTSADDFQGTK                                        | 0.991741081        | 2              | 4.07667   |
| P47942        | GLYDGPVCEVSVTPK                                           | 0.975762129        | 2              | 3.56534   |
| P47942        | SITIANQTNCPYVTK                                           | 0.915247753        | 2              | 3.4281    |
| <b>P48004</b> | <b>PSA7 Proteasome subunit alpha type_7</b>               | <b>1.829438796</b> | <b>0.99998</b> | <b>2</b>  |
| P48004        | NYTDDAIETDDLTIK                                           | 0.841534806        | 2              | 4.54366   |
| P48004        | YVAEIEKEKEENEK                                            | 1.001433003        | 2              | 5.43228   |
| <b>P48024</b> | <b>EIF1 Eukaryotic translation initiation factor 1</b>    | <b>2.36128198</b>  | <b>0.84727</b> | <b>2</b>  |
| P48024        | FACNGTVIEHPEYGEVIQLQGDQR                                  | 1.295045659        | 3              | 5.67617   |
| P48024        | TLTTVQGIADDYDK                                            | 1.161768639        | 2              | 3.66818   |
| <b>P48037</b> | <b>ANXA6 Annexin A6</b>                                   | <b>2.015495054</b> | <b>0.72637</b> | <b>20</b> |
| P48037        | AANDFNPDADAK                                              | 0.822956055        | 2              | 3.55206   |
| P48037        | AINEAYKEDYHK                                              | 1.072650777        | 2              | 3.39675   |
| P48037        | ALIEILATR                                                 | 1.143287468        | 2              | 3.21706   |
| P48037        | ALLALCGGED                                                | 1.28679005         | 1              | 2.15071   |
| P48037        | CLIEILASR                                                 | 0.689243618        | 2              | 2.65755   |
| P48037        | DAFVAIVQSVK                                               | 2.532499918        | 2              | 3.82655   |
| P48037        | DLESDIIGDTSGHFQK                                          | 1.582224787        | 2              | 4.43676   |
| P48037        | ENDDVVSEDLVQDQVDLYEAGELK                                  | 1.593013684        | 2              | 5.15064   |
| P48037        | GELSGDFEK                                                 | 1.033076359        | 1              | 2.18069   |
| P48037        | GFGSDKESILELITSR                                          | 0.996717624        | 2              | 4.27583   |
| P48037        | GIGTDEATIIDIITQR                                          | 1.095291967        | 2              | 4.26473   |
| P48037        | GSVHDFADFANQDAEALYTAMK                                    | 1.003609363        | 3              | 4.13674   |
| P48037        | QRQEICQSYK                                                | 0.754704779        | 2              | 3.19726   |
| P48037        | SEIDLLNIR                                                 | 1.46944127         | 2              | 3.07096   |
| P48037        | SEISGLAR                                                  | 1.018080035        | 2              | 2.34455   |
| P48037        | SELDMLDIR                                                 | 0.954499708        | 2              | 2.96092   |
| P48037        | SLEDALSSDTSGHFK                                           | 1.105218444        | 2              | 3.67535   |
| P48037        | TNEQIHQLVAAYK                                             | 0.884435136        | 2              | 4.02279   |
| P48037        | TNYDIEHVIK                                                | 0.959965154        | 2              | 3.0886    |
| P48037        | TTGKPIEASIR                                               | 1.172057098        | 2              | 2.53742   |
| <b>P48500</b> | <b>TPIS Triosephosphate isomerase</b>                     | <b>2.111194207</b> | <b>0.99966</b> | <b>15</b> |
| P48500        | CLGELICTLNAAK                                             | 1.524861048        | 2              | 3.56666   |
| P48500        | CNVSEGVACQCTR                                             | 0.964605948        | 2              | 3.95579   |
| P48500        | DLGATWVVVLGHSER                                           | 1.575369291        | 2              | 4.1648    |
| P48500        | ELASQPDVDGFLVGGASLKPEFVDIINAK                             | 1.178715319        | 4              | 5.94006   |
| P48500        | HIFGESDELIGQK                                             | 0.985425366        | 2              | 4.68053   |
| P48500        | IAVAAQNCYK                                                | 1.293315427        | 2              | 2.7012    |
| P48500        | IYGGSVTGATCK                                              | 1.242627294        | 2              | 4.33989   |
| P48500        | LPADTEVVCAPPTAYIDFAR                                      | 2.102584955        | 2              | 4.41963   |
| P48500        | RHIFGESDELIGQK                                            | 1.063172348        | 2              | 4.41649   |
| P48500        | TATPQQAQEVHEK                                             | 0.95887848         | 2              | 3.63929   |
| P48500        | TATPQQAQEVHEKLR                                           | 0.739405492        | 2              | 2.39976   |
| P48500        | VNHALSEGLGVIACIGEK                                        | 1.348030539        | 2              | 5.67491   |
| P48500        | VTNGAFTGEISPGMIK                                          | 1.154699517        | 2              | 4.8655    |
| P48500        | VVFEQTK                                                   | 0.939916768        | 1              | 1.93335   |
| P48500        | VVLAYEPVWAIGTGK                                           | 1.1058765          | 2              | 4.53242   |
| <b>P48508</b> | <b>GSH0 Glutamate__cysteine ligase regulatory subunit</b> | <b>1.659731584</b> | <b>1E-15</b>   | <b>4</b>  |
| P48508        | ASTLHLQGTGNLLNWGR                                         | 1.196758421        | 3              | 4.01161   |
| P48508        | FFPDVLECTMSHAVEK                                          | 0.959804865        | 2              | 3.59297   |
| P48508        | INPDEREEMK                                                | 0.835651671        | 2              | 2.64371   |
| P48508        | TLNEWSSQSPDLVR                                            | 0.623068069        | 2              | 4.68486   |
| <b>P48675</b> | <b>DESM Desmin</b>                                        | <b>2.714491982</b> | <b>0.99003</b> | <b>3</b>  |
| P48675        | NISEAEEWYKSK                                              | 1.145420689        | 2              | 2.32562   |
| P48675        | TSGGAGGLGSLR                                              | 1.146254896        | 2              | 2.70108   |
| P48675        | VSDLTQAANK                                                | 1.65522531         | 2              | 2.983     |
| <b>P48679</b> | <b>LMNA Prelamin_A/C</b>                                  | <b>1.796651211</b> | <b>0.41429</b> | <b>19</b> |

|               |                                              |                    |                |           |
|---------------|----------------------------------------------|--------------------|----------------|-----------|
| P48679        | AAYEAE LGDAR                                 | 1.290187356        | 2              | 2.36502   |
| P48679        | AQHEDQVEQYK                                  | 0.87531877         | 2              | 3.04657   |
| P48679        | AQHEDQVEQYKK                                 | 0.998565241        | 2              | 4.33551   |
| P48679        | GSHCSSSGDPAEYNLR                             | 0.892050111        | 2              | 3.95042   |
| P48679        | IDSLSAQLSQLQK                                | 1.036532148        | 2              | 3.16959   |
| P48679        | ITESEEVVSR                                   | 0.849790917        | 2              | 3.1554    |
| P48679        | LEAALGEAK                                    | 0.889433764        | 2              | 2.31631   |
| P48679        | LKDLEALLNSK                                  | 0.918614204        | 2              | 2.86412   |
| P48679        | LQEKEDLQELNDR                                | 1.00880205         | 2              | 4.2282    |
| P48679        | MQQQLDEYQELLDIK                              | 1.107592846        | 2              | 4.55441   |
| P48679        | NIYSEELR                                     | 0.975154429        | 1              | 2.05941   |
| P48679        | NSNLVGAAHEELQQSR                             | 0.897804974        | 2              | 4.71077   |
| P48679        | SGAQASSTPLSPTR                               | 0.816078134        | 2              | 3.79115   |
| P48679        | SLETENAGLR                                   | 0.934062512        | 2              | 2.86808   |
| P48679        | SVGGSGGSGFGDNLVTR                            | 0.92872988         | 2              | 3.58402   |
| P48679        | TALINATGEEVAMR                               | 0.989192099        | 2              | 3.57683   |
| P48679        | TLEGELHDLR                                   | 1.360904122        | 2              | 2.4925    |
| P48679        | TVLCGTCGQPADK                                | 0.86939906         | 2              | 3.44474   |
| P48679        | VAVEEVDEEGK                                  | 0.990612272        | 2              | 3.1088    |
| <b>P48721</b> | <b>GRP75 Stress_70 protein_mitochondrial</b> | <b>2.110508041</b> | <b>1</b>       | <b>30</b> |
| P48721        | AQFEGIVTDLIK                                 | 1.097844791        | 2              | 3.72062   |
| P48721        | ASNGDAWVEAHGK                                | 1.082285185        | 2              | 3.81592   |
| P48721        | DAGQISGLNVLR                                 | 1.909012404        | 2              | 2.75738   |
| P48721        | DDIENMVK                                     | 1.282333945        | 1              | 2.02243   |
| P48721        | EQQIVIQSSGGLSK                               | 1.163103639        | 2              | 3.86301   |
| P48721        | EQQIVIQSSGGLSKDDIENMVK                       | 1.214370508        | 2              | 4.52976   |
| P48721        | ERVEAVNMAEGIIHDTETK                          | 0.885857105        | 3              | 5.56512   |
| P48721        | ETAENYLGH TAK                                | 1.057134407        | 2              | 3.1378    |
| P48721        | GAVVGIDLGT TNSCVAVMEGK                       | 1.424107488        | 2              | 5.38531   |
| P48721        | LFEMAYK                                      | 0.888089717        | 2              | 2.30513   |
| P48721        | LLGQFTLIGIPPAPR                              | 1.252894903        | 2              | 3.73202   |
| P48721        | MEEFKDQLPADECNK                              | 10.87167784        | 2              | 4.60724   |
| P48721        | MEEFKDQLPADECNK+Oxidation(0                  | 1.229187029        |                |           |
| P48721        | MKETAENYLGH TAK                              | 0.917340048        | 2              | 4.30801   |
| P48721        | MKETAENYLGH TAK+Oxidation(0                  | 0.89792347         |                |           |
| P48721        | NAVITVPAYFNDSQR                              | 1.011909291        | 2              | 3.46472   |
| P48721        | QAVTNPNTFYATK                                | 1.003254006        | 2              | 3.80291   |
| P48721        | RETVGDLTK                                    | 0.730365404        | 2              | 2.32814   |
| P48721        | RYDDPEVQK                                    | 0.982247865        | 2              | 3.23068   |
| P48721        | RYDDPEVQKDTK                                 | 0.729276973        | 2              | 3.78626   |
| P48721        | SDIGEVILVGGMTR                               | 1.085581849        | 2              | 3.98357   |
| P48721        | SQVFSTAADGQTQVEIK                            | 0.713004591        | 2              | 4.60531   |
| P48721        | STNGDTFLGGEDFDQALLR                          | 0.97484974         | 2              | 6.07848   |
| P48721        | TTPSVVAFTPDGER                               | 0.809546607        | 2              | 3.39462   |
| P48721        | VEAVNMAEGIIHDTETK                            | 1.223073815        | 2              | 4.57309   |
| P48721        | VINEPTAAALAYGLDK                             | 1.536960506        | 2              | 3.88297   |
| P48721        | VLENAEGAR                                    | 0.876708098        | 2              | 3.09374   |
| P48721        | VQQTVDLDFGR                                  | 0.941199397        | 2              | 3.72915   |
| P48721        | YDDPEVQK                                     | 0.998655265        | 2              | 2.35081   |
| P48721        | YDDPEVQKDTK                                  | 0.741029602        | 2              | 2.74901   |
| <b>P48998</b> | <b>INVO Involucrin</b>                       | <b>1.834642584</b> | <b>0.37509</b> | <b>2</b>  |
| P48998        | ELLDQRDLQELV NK                              | 0.92461003         | 2              | 2.32528   |
| P48998        | HKLENLTQKEK                                  | 0.800395405        | 1              | 1.93864   |
| <b>P49025</b> | <b>CTRO Citron Rho_interacting kinase</b>    | <b>1.987593666</b> | <b>0.7586</b>  | <b>2</b>  |
| P49025        | LEEQLEK                                      | 0.914217935        | 1              | 2.01041   |
| P49025        | LMMNQLEEDLVSARR+Oxidation(1                  | 1.117389967        |                |           |
| <b>P49134</b> | <b>ITB1 Integrin beta_1</b>                  | <b>1.783461778</b> | <b>0.96137</b> | <b>3</b>  |

|               |                                                                             |                    |                |           |
|---------------|-----------------------------------------------------------------------------|--------------------|----------------|-----------|
| P49134        | CNCQSHGIPASPK                                                               | 0.833031072        | 2              | 3.34812   |
| P49134        | FCECDNFNCDR                                                                 | 0.783868409        | 2              | 3.36757   |
| P49134        | GEFFNELVGQQR                                                                | 0.8656778          | 2              | 2.88348   |
| <b>P49186</b> | <b>MK09 Mitogen_activated protein kinase 9</b>                              | <b>2.00185753</b>  | <b>0.87378</b> | <b>2</b>  |
| P49186        | DLLSKMLVIDPDK                                                               | 0.719659369        | 1              | 1.97777   |
| P49186        | VIEQLGTPSAEFMK                                                              | 1.004942396        | 2              | 2.60854   |
| <b>P49242</b> | <b>RS3A 40S ribosomal protein S3a</b>                                       | <b>2.073647044</b> | <b>1</b>       | <b>9</b>  |
| P49242        | ACQSIYPLHDFVFR                                                              | 1.178036674        | 2              | 4.31543   |
| P49242        | ADGYEPPVQESV                                                                | 0.851420825        | 1              | 2.08067   |
| P49242        | LIPDSIGKDIEK                                                                | 1.063942504        | 2              | 2.51284   |
| P49242        | LITEDVQ GK                                                                  | 0.950942322        | 2              | 2.56336   |
| P49242        | LMELHGEGSSGK                                                                | 1.065408322        | 2              | 3.5162    |
| P49242        | LMELHGEGSSGK+Oxidation(1                                                    | 0.967639254        |                |           |
| P49242        | NCLTNFHGMDLTR                                                               | 1.122493682        | 2              | 3.9812    |
| P49242        | TTDGYLLR                                                                    | 0.763913255        | 2              | 2.71638   |
| P49242        | VFEVSLADLQNDEVAFR                                                           | 1.194382561        | 2              | 4.54017   |
| <b>P49432</b> | <b>ODPB Pyruvate dehydrogenase E1 component subunit beta_ mitochondrial</b> | <b>2.364575796</b> | <b>0.99669</b> | <b>7</b>  |
| P49432        | EAINQGMDEELERDEK                                                            | 1.80158714         | 2              | 3.71386   |
| P49432        | ILEDNSIPQVK                                                                 | 0.937282463        | 2              | 3.38225   |
| P49432        | IMEGPAFNFLDAPAVR                                                            | 1.199249401        | 2              | 4.53161   |
| P49432        | IMEGPAFNFLDAPAVR+Oxidation(1                                                | 1.086249386        |                |           |
| P49432        | TIRPMDIEAIEASVMK                                                            | 1.491162461        | 3              | 4.4636    |
| P49432        | VLLGEEVAQYDGAYK                                                             | 1.105901049        | 2              | 4.2258    |
| P49432        | VTGADVPMPIYAK                                                               | 0.933681426        | 2              | 2.55439   |
| <b>P49889</b> | <b>ST1E3 Estrogen sulfotransferase_ isoform 3</b>                           | <b>2.002259115</b> | <b>0.99423</b> | <b>12</b> |
| P49889        | CKEDALFNR                                                                   | 1.101086878        | 2              | 2.50345   |
| P49889        | FEEHYQQQMK                                                                  | 1.082120529        | 2              | 2.98775   |
| P49889        | FEEHYQQQMK+Oxidation(8                                                      | 0.954266375        |                |           |
| P49889        | FMEGQVPYGSWYDHVK                                                            | 1.03717345         | 2              | 4.12992   |
| P49889        | IIQHTSFQEMK                                                                 | 0.773796668        | 2              | 2.88298   |
| P49889        | LIEFLER                                                                     | 1.099359055        | 2              | 2.47141   |
| P49889        | LIEFLERDPSAELVDR                                                            | 1.660486681        | 3              | 5.17127   |
| P49889        | NEDLINGIK                                                                   | 0.963748278        | 2              | 3.08119   |
| P49889        | NNPCTNYSMLPETMIDLK                                                          | 0.915140352        | 2              | 5.26169   |
| P49889        | NNPCTNYSMLPETMIDLK+Oxidation(13                                             | 1.21455247         |                |           |
| P49889        | NNPCTNYSMLPETMIDLK+Oxidation(8                                              | 1.21455247         |                |           |
| P49889        | SGSTWISEIVDMIYK                                                             | 0.812062333        | 2              | 4.06547   |
| <b>P50137</b> | <b>TKT Transketolase</b>                                                    | <b>1.969360722</b> | <b>0.02864</b> | <b>24</b> |
| P50137        | AVELAANTK                                                                   | 0.792941375        | 1              | 2.09332   |
| P50137        | GITGIEDK                                                                    | 0.929232714        | 1              | 2.56275   |
| P50137        | GITGIEDKEAWHGKPLPK                                                          | 0.967920201        | 3              | 3.60674   |
| P50137        | HQPTAIIAK                                                                   | 0.476956091        | 2              | 2.33053   |
| P50137        | IIALDGDTK                                                                   | 1.842629459        | 2              | 2.67016   |
| P50137        | ILATPPQEDAPSVDIANIR                                                         | 1.305798207        | 2              | 4.80141   |
| P50137        | ISSDLDGHPVPK                                                                | 1.088981225        | 2              | 3.37287   |
| P50137        | KISSDLDGHPVPK                                                               | 1.011624621        | 2              | 3.84016   |
| P50137        | LAVSQVPR                                                                    | 1.234563179        | 2              | 2.36242   |
| P50137        | LAVSQVPRSGKPAELLK                                                           | 0.787058141        | 2              | 2.58743   |
| P50137        | LDNLVAIFDINR                                                                | 0.971516095        | 2              | 4.52468   |
| P50137        | LGQSDPAPLQHQVDVYQK                                                          | 1.302375252        | 2              | 3.86      |
| P50137        | MFGIDKDAIVQAVK                                                              | 1.19592359         | 2              | 4.85396   |
| P50137        | MFGIDKDAIVQAVK+Oxidation(0                                                  | 1.049423164        |                |           |
| P50137        | NMAEQIIQEIYSQVQSK                                                           | 0.993378594        | 3              | 6.02296   |
| P50137        | NSTFSELFK                                                                   | 1.279401586        | 2              | 2.41564   |
| P50137        | QAFTDVATGSLGQGLGAACGMAYTGK                                                  | 1.814281267        | 3              | 4.37783   |
| P50137        | SGKPAELLK                                                                   | 0.478288612        | 3              | 3.30089   |

|               |                                                        |                    |                |           |
|---------------|--------------------------------------------------------|--------------------|----------------|-----------|
| P50137        | SKDDQVTVIGAGVTLHEALAAEMLK                              | 1.46788487         | 3              | 4.59071   |
| P50137        | SVPMSTVFYPSDGVATEK                                     | 1.149023571        | 2              | 4.50025   |
| P50137        | SVPMSTVFYPSDGVATEK+Oxidation(3                         | 1.336395931        |                |           |
| P50137        | TSRPENAIISNNEDFQVGGQAK                                 | 0.977285848        | 3              | 5.89408   |
| P50137        | VLDPFITIKPLDK                                          | 1.293891142        | 2              | 3.24046   |
| P50137        | VLDPFITIKPLDKK                                         | 1.107734143        | 2              | 2.53447   |
| <b>P50169</b> | <b>RDH3 Retinol dehydrogenase 3</b>                    | <b>1.973626317</b> | <b>0.97191</b> | <b>9</b>  |
| P50169        | AMESLVNTCSGDSLVTDCMEHALTSCHPR                          | 1.085677581        | 3              | 5.03017   |
| P50169        | AMESLVNTCSGDSLVTDCMEHALTSCHPR+Oxidation(1              | 1.105591807        |                |           |
| P50169        | FQDSYMK                                                | 0.987369987        | 1              | 1.98619   |
| P50169        | GLWGLVNNAGISVPGPNEWMR                                  | 1.047911484        | 3              | 3.36717   |
| P50169        | KLWDQTTEEVK                                            | 1.063310679        | 2              | 3.05005   |
| P50169        | KLWDQTTEEVKEIYGK                                       | 0.838879183        | 3              | 4.97876   |
| P50169        | LWDQTTEEVK                                             | 0.876233065        | 2              | 3.17013   |
| P50169        | LWDQTTEEVKEIYGK                                        | 0.717253265        | 2              | 4.8106    |
| P50169        | MSLVGGGYCISK                                           | 1.010407316        | 2              | 4.05312   |
| <b>P50237</b> | <b>ST1C1 Sulfotransferase 1C1</b>                      | <b>1.881639221</b> | <b>0.94639</b> | <b>12</b> |
| P50237        | AGTTWTQEIVDMIQNDGDVQK                                  | 0.888726238        | 3              | 5.27929   |
| P50237        | DISEEVLNK                                              | 0.571923157        | 1              | 2.4687    |
| P50237        | DLHLGEQDLQPETR                                         | 1.041696983        | 2              | 4.62826   |
| P50237        | EVNGILMSK                                              | 0.801236161        | 1              | 1.91602   |
| P50237        | FLEKDISEEVLNK                                          | 0.722393165        | 2              | 2.88934   |
| P50237        | HPFIEWTLPSPNSGLDLANK                                   | 1.541412512        | 3              | 4.03658   |
| P50237        | IWNFQAKPDDLLIATYAK                                     | 1.398030883        | 3              | 3.67837   |
| P50237        | MKDLHLGEQDLQPETR                                       | 0.912564462        | 2              | 5.18946   |
| P50237        | MLPDPGTLGEYIEQFK                                       | 0.940094477        | 3              | 4.94631   |
| P50237        | MLPDPGTLGEYIEQFK+Oxidation(0                           | 1.110195929        |                |           |
| P50237        | THLPVHMLPPSFWK                                         | 1.771775419        | 3              | 3.71863   |
| P50237        | VLWGSWYDHVK                                            | 0.99702346         | 2              | 2.97803   |
| <b>P50398</b> | <b>GDIA Rab GDP dissociation inhibitor alpha</b>       | <b>2.022285866</b> | <b>0.65025</b> | <b>7</b>  |
| P50398        | FDLGQDVIDFTGHALALYR                                    | 1.341061025        | 3              | 4.61777   |
| P50398        | FQLLEGPPEMGR                                           | 1.171546585        | 2              | 3.95243   |
| P50398        | KQNDVFGIADQ                                            | 1.08071009         | 2              | 3.28881   |
| P50398        | NPYYGGESSITPLEELYK                                     | 1.307726007        | 2              | 5.90962   |
| P50398        | QLICDPSYIPDR                                           | 0.775771086        | 2              | 3.01483   |
| P50398        | TDDYLDQPCLETINR                                        | 0.757723362        | 2              | 4.96161   |
| P50398        | TFEGVDPQTSMR                                           | 1.027314137        | 2              | 3.38432   |
| <b>P50399</b> | <b>GDIB Rab GDP dissociation inhibitor beta</b>        | <b>2.090244435</b> | <b>1.1E-05</b> | <b>15</b> |
| P50399        | AYDATTHFETTCDDIK                                       | 0.96915387         | 2              | 4.12015   |
| P50399        | AYDATTHFETTCDDIKDIYK                                   | 1.327997415        | 3              | 6.22026   |
| P50399        | EIRPALELLEPIEQK                                        | 1.2617012          | 3              | 3.8109    |
| P50399        | EPEKEIRPALELLEPIEQK                                    | 1.155064633        | 3              | 3.42173   |
| P50399        | FDLGQDVIDFTGHSLALYR                                    | 0.963148087        | 3              | 4.04024   |
| P50399        | FKLPGQPASMR                                            | 1.173198533        | 2              | 2.6021    |
| P50399        | FVSISDLFVPK                                            | 1.266544745        | 2              | 3.26845   |
| P50399        | LSAIYGGTYMLNKPIEIIQNGK                                 | 1.960497814        | 3              | 4.58014   |
| P50399        | MLLFTEVTR                                              | 1.065257532        | 2              | 2.35783   |
| P50399        | MTGSEDFEEMKR                                           | 1.04814712         | 2              | 3.63453   |
| P50399        | NTNDANSCQIIPQNVNR                                      | 0.971920001        | 2              | 4.37439   |
| P50399        | TDDYLDQPCLETINR                                        | 2.153949082        | 2              | 4.85099   |
| P50399        | TFEGVDPK                                               | 2.084198838        | 2              | 2.40487   |
| P50399        | VIEGSFVYK                                              | 0.951266155        | 2              | 2.33051   |
| P50399        | VLHMDQNPYYGGESASITPLEDLYK                              | 1.194816603        | 2              | 5.5172    |
| <b>P50431</b> | <b>GLYC Serine hydroxymethyltransferase_ cytosolic</b> | <b>2.030121011</b> | <b>0.99999</b> | <b>7</b>  |
| P50431        | ALSDALTELYK                                            | 1.682803781        | 2              | 4.08037   |
| P50431        | AVLEALGSLNNK                                           | 1.063109567        | 2              | 4.27225   |

|               |                                                            |                    |                |           |
|---------------|------------------------------------------------------------|--------------------|----------------|-----------|
| P50431        | GLLEEDFQK                                                  | 1.168406145        | 1              | 2.09667   |
| P50431        | IMGLDLPDGGHLTHGFMTDK                                       | 1.067238561        | 2              | 2.80099   |
| P50431        | IYQLQVLANCR                                                | 0.97766184         | 2              | 2.82082   |
| P50431        | VLEACSIACNK                                                | 1.021585883        | 2              | 4.01854   |
| P50431        | YSEGYPGQR                                                  | 1.072678178        | 2              | 2.81589   |
| <b>P50475</b> | <b>SYAC Alanyl_tRNA synthetase_cytoplasmic</b>             | <b>2.109805591</b> | <b>1</b>       | <b>16</b> |
| P50475        | ASEWVQVSGLMDGK                                             | 1.062196648        | 2              | 4.47846   |
| P50475        | AVFDEYDPDVR                                                | 0.994766672        | 2              | 3.273     |
| P50475        | DIINEEVQFLK                                                | 1.171326838        | 2              | 2.7119    |
| P50475        | ESDGVLKPLPK                                                | 1.092209879        | 2              | 2.379     |
| P50475        | GLEATDDSPK                                                 | 1.085682658        | 2              | 2.70135   |
| P50475        | HNDLDDVGK                                                  | 1.064152366        | 2              | 2.55703   |
| P50475        | ITCLCQVPQNAANR                                             | 0.997808721        | 2              | 3.826     |
| P50475        | IVAVTGAEAQK                                                | 1.077201725        | 2              | 2.57376   |
| P50475        | NVGCLQEALQLATSFAQLR                                        | 0.997902777        | 3              | 3.9414    |
| P50475        | QIWQNLGLDEAK                                               | 1.209170485        | 2              | 3.04844   |
| P50475        | RIVAVTGAEAQK                                               | 1.082386631        | 2              | 2.77359   |
| P50475        | SVLGDADQK                                                  | 0.919873494        | 1              | 2.2071    |
| P50475        | TEEIVNGMIEAAKPVYTLDCPLAAAK                                 | 1.30135703         | 3              | 3.67529   |
| P50475        | TITVALADGGRPDNTGR                                          | 1.03744033         | 2              | 3.03316   |
| P50475        | VDDSSSEDKTEFTVK                                            | 0.891469139        | 2              | 4.06605   |
| P50475        | VGAEDTDGIDMAYR                                             | 0.906669834        | 2              | 3.87138   |
| <b>P50503</b> | <b>F10A1 Hsc70_interacting protein</b>                     | <b>2.4834456</b>   | <b>0.00294</b> | <b>6</b>  |
| P50503        | AIDLFTDAIK                                                 | 1.634825806        | 2              | 2.74328   |
| P50503        | AIEINPDSAQPYK                                              | 1.387782795        | 2              | 3.53018   |
| P50503        | GAAIDALNDGELQK                                             | 1.153123484        | 2              | 3.71006   |
| P50503        | KGAAIDALNDGELQK                                            | 1.294451165        | 2              | 4.68558   |
| P50503        | LDYDEDASAMLR                                               | 1.192813004        | 2              | 3.3433    |
| P50503        | QDPSVLHTEEMR                                               | 1.073397617        | 2              | 2.31945   |
| <b>P50516</b> | <b>VATA V_type proton ATPase catalytic subunit A</b>       | <b>2.141533605</b> | <b>0.47445</b> | <b>2</b>  |
| P50516        | TALVANTSNMPVAAR                                            | 0.881558219        | 2              | 3.19536   |
| P50516        | VLDALFPCVQGGTTAIPGAFGCGK                                   | 1.525493642        | 2              | 3.31272   |
| <b>P50554</b> | <b>GABT 4_aminobutyrate aminotransferase_mitochondrial</b> | <b>2.076679161</b> | <b>0.89108</b> | <b>14</b> |
| P50554        | GMCQLITMACGSCSNENAFK                                       | 1.198555774        | 2              | 4.55672   |
| P50554        | GNYLVDVDGNR                                                | 0.739674791        | 2              | 2.64162   |
| P50554        | GTFCSFDTPDEAIR                                             | 3.236171673        | 2              | 3.22422   |
| P50554        | HGCAFLVDEVQTGGGCTGK                                        | 0.909194811        | 2              | 6.11325   |
| P50554        | IDIPSFDWPIAPFPR                                            | 2.586369197        | 2              | 3.80431   |
| P50554        | IFNTWLGDPK                                                 | 1.417453941        | 2              | 3.00985   |
| P50554        | KHGCAFLVDEVQTGGGCTGK                                       | 0.928349179        | 2              | 5.03661   |
| P50554        | LVQQPQNASTFINRPALGILPPENFVDK                               | 1.194492611        | 3              | 3.30369   |
| P50554        | MLDLYSQISSVPIGYNHPALAK                                     | 1.035037393        | 3              | 3.40676   |
| P50554        | NLLLAEVINIIK                                               | 1.061004535        | 3              | 5.32395   |
| P50554        | REDLLNNVAHAGK                                              | 1.062783567        | 3              | 3.6202    |
| P50554        | TLLTGLLDLQAQYPQFVSR                                        | 1.153774438        | 2              | 3.16171   |
| P50554        | TVAGIIVEPIQSEGDNHASDDFFR                                   | 1.529006423        | 2              | 4.021     |
| P50554        | VDFEFDYDGPLMK                                              | 1.307180216        | 2              | 4.04879   |
| <b>P50580</b> | <b>PA2G4 Proliferation_associated protein 2G4</b>          | <b>1.935635419</b> | <b>0.92135</b> | <b>2</b>  |
| P50580        | GDAMIMEETGK                                                | 0.915500841        | 2              | 2.66411   |
| P50580        | TIIQNPTDQK                                                 | 1.044705071        | 2              | 3.15499   |
| <b>P50878</b> | <b>RL4 60S ribosomal protein L4</b>                        | <b>2.293198105</b> | <b>0.78797</b> | <b>11</b> |
| P50878        | FCIWTESAFR                                                 | 1.276688           | 2              | 2.56805   |
| P50878        | KLDELYGTWR                                                 | 1.044257143        | 2              | 2.97075   |
| P50878        | KLEAAAAALAAK                                               | 1.037160995        | 3              | 4.94121   |
| P50878        | LDELYGTWR                                                  | 0.983446789        | 2              | 2.57116   |
| P50878        | LEAAAAALAAK                                                | 1.619972509        | 2              | 3.61069   |



|               |                                                                 |                    |                |           |
|---------------|-----------------------------------------------------------------|--------------------|----------------|-----------|
| P50878        | NIPGITLLNVSK                                                    | 1.260170318        | 1              | 2.69627   |
| P50878        | NVTLPVAVFK                                                      | 1.177458148        | 1              | 2.24195   |
| P50878        | RGPCIIYNEDNGIIK                                                 | 0.71394291         | 2              | 2.99068   |
| P50878        | SGQGAFGNMCR                                                     | 1.250685282        | 2              | 2.83619   |
| P50878        | SNYNLPMHK                                                       | 1.047482522        | 2              | 2.63791   |
| P50878        | YAICSALAASALPALVMSK                                             | 1.33764739         | 2              | 2.54864   |
| <b>P51583</b> | <b>PUR6 Multifunctional protein ADE2</b>                        | <b>1.879819329</b> | <b>0.78366</b> | <b>3</b>  |
| P51583        | ACGNFGIPCELR                                                    | 0.857507145        | 2              | 2.60087   |
| P51583        | SWLPQNCTLVDMK                                                   | 0.842054118        | 2              | 2.7441    |
| P51583        | VVVLMGSTDLGHCEK                                                 | 1.297057716        | 2              | 3.03931   |
| <b>P51635</b> | <b>AK1A1 Alcohol dehydrogenase [NADP_]</b>                      | <b>1.940461215</b> | <b>0.99985</b> | <b>7</b>  |
| P51635        | ALEALVAK                                                        | 1.160731662        | 2              | 2.82697   |
| P51635        | GLEVTAYSPLGSSDR                                                 | 1.066689931        | 2              | 4.1147    |
| P51635        | HHPEDVEPAVR                                                     | 0.914964091        | 3              | 3.58958   |
| P51635        | HIDCASVYGNETEIGEALK                                             | 1.00721499         | 2              | 6.04121   |
| P51635        | HIDCASVYGNETEIGEALKESVGAGK                                      | 0.955209397        | 3              | 6.26134   |
| P51635        | HPDEPVLLLEPPVVLALAEK                                            | 1.445848895        | 3              | 6.06106   |
| P51635        | YIVPMITVDGK                                                     | 1.246907717        | 2              | 2.32848   |
| <b>P51647</b> | <b>AL1A1 Retinal dehydrogenase 1</b>                            | <b>1.723343258</b> | <b>1.3E-10</b> | <b>17</b> |
| P51647        | ANNTTYGLAAGVFTK                                                 | 0.594632385        | 2              | 4.60145   |
| P51647        | EAGFPPGVVNVIPGYGPTAGAAISSHMDVDK                                 | 1.031983109        | 3              | 3.66767   |
| P51647        | FPVLNPATEEVICHVEEGDK                                            | 1.161021829        | 3              | 3.82828   |
| P51647        | FPVLNPATEEVICHVEEGDKADVDK                                       | 0.948315664        | 4              | 5.05052   |
| P51647        | IFINNEWHDSVSGK                                                  | 1.062924671        | 2              | 4.28061   |
| P51647        | IFVEESVYDEFVR                                                   | 0.719593569        | 2              | 4.22951   |
| P51647        | IGPALSCGNTVVVKPAEQTPLTALHMASLIK                                 | 1.037942372        | 3              | 5.61166   |
| P51647        | IHGQTIPSDGDIPTFR                                                | 0.967543875        | 3              | 4.28068   |
| P51647        | KFPVLNPATEEVICHVEEGDK                                           | 0.916448336        | 3              | 3.56804   |
| P51647        | KFPVLNPATEEVICHVEEGDKADVDK                                      | 0.953781397        | 4              | 4.87731   |
| P51647        | KYVLGNPLTQGINQGPQIDKEQHDK                                       | 0.782535136        | 3              | 5.52338   |
| P51647        | LLLATIEAINGGK                                                   | 3.510487334        | 2              | 4.19882   |
| P51647        | VAFTGSTQVVK                                                     | 1.32330905         | 2              | 2.51871   |
| P51647        | VFANAYLSDLGGSIK                                                 | 1.209071615        | 2              | 4.44487   |
| P51647        | YCAGWADK                                                        | 0.90045276         | 2              | 2.48925   |
| P51647        | YVLGNPLTQGINQGPQIDK                                             | 0.879833997        | 2              | 5.22237   |
| P51647        | YVLGNPLTQGINQGPQIDKEQHDK                                        | 0.836579279        | 2              | 3.88679   |
| <b>P51650</b> | <b>SSDH Succinate semialdehyde dehydrogenase_ mitochondrial</b> | <b>2.202839101</b> | <b>0.99986</b> | <b>9</b>  |
| P51650        | EVGEVLCTDPLVSK                                                  | 1.534279926        | 2              | 3.77634   |
| P51650        | GIHDSFVTK                                                       | 0.852781119        | 2              | 2.40437   |
| P51650        | HQSGGNFFPEPTLLSNVTR                                             | 1.038528803        | 2              | 3.784     |
| P51650        | IITAESGKPLK                                                     | 1.049060755        | 2              | 2.82229   |
| P51650        | ILLHHAANSVK                                                     | 1.212447411        | 2              | 2.61054   |
| P51650        | LGTVADCGVPEAR                                                   | 0.754816619        | 2              | 3.66227   |
| P51650        | VGNNGFEETTQGPLINEK                                              | 0.88046241         | 2              | 4.61066   |
| P51650        | WLPTPATFPVYDPASGAK                                              | 1.101746477        | 2              | 3.54446   |
| P51650        | YGIDEYLEVK                                                      | 1.290310562        | 2              | 2.90843   |
| <b>P51863</b> | <b>VA0D1 V_type proton ATPase subunit d 1</b>                   | <b>2.184166056</b> | <b>0.91159</b> | <b>2</b>  |
| P51863        | ADDYEQVK                                                        | 1.173533204        | 2              | 2.48969   |
| P51863        | LLFEGAGSNPGDK                                                   | 1.093314931        | 2              | 3.05388   |
| <b>P51869</b> | <b>CP4F4 Cytochrome P450 4F4</b>                                | <b>2.087847113</b> | <b>0.99758</b> | <b>4</b>  |
| P51869        | ALPSQHEDDILK                                                    | 1.240066054        | 2              | 2.59484   |
| P51869        | NISLMTLDSLQK                                                    | 1.184671976        | 2              | 3.52323   |
| P51869        | TLDFIDVLLLTK                                                    | 1.173510885        | 2              | 3.61385   |
| P51869        | WQDLASGGSAR                                                     | 1.02441401         | 2              | 3.17791   |
| <b>P51886</b> | <b>LUM Lumican</b>                                              | <b>2.113426429</b> | <b>0.4151</b>  | <b>2</b>  |
| P51886        | NNQIDHIDEK                                                      | 0.760125454        | 2              | 3.20646   |

|               |                                                                                  |                    |                |           |
|---------------|----------------------------------------------------------------------------------|--------------------|----------------|-----------|
| P51886        | SLQDLQLANNK                                                                      | 1.230202733        | 2              | 2.49798   |
| <b>P52296</b> | <b>IMB1 Importin subunit beta_1</b>                                              | <b>2.472035262</b> | <b>0.66139</b> | <b>7</b>  |
| P52296        | AAVENLPTFLVELSR                                                                  | 1.287234893        | 2              | 3.67735   |
| P52296        | GALQYLVPILTQTLTK                                                                 | 1.018123256        | 2              | 3.30453   |
| P52296        | GDQENVHPDVMLVQPR                                                                 | 1.070424621        | 2              | 2.9799    |
| P52296        | SNEILTAIIQGMR                                                                    | 1.58051566         | 2              | 2.9366    |
| P52296        | TVSPDRLELEAAQK                                                                   | 0.962480787        | 2              | 3.15176   |
| P52296        | VLANPGNSQVAR                                                                     | 0.990746579        | 2              | 3.05508   |
| P52296        | VQHQDALQISDVVMASLLR                                                              | 1.820366481        | 2              | 2.88516   |
| <b>P52303</b> | <b>AP1B1 AP_1 complex subunit beta_1</b>                                         | <b>1.885790859</b> | <b>0.29419</b> | <b>5</b>  |
| P52303        | KPTETQELVQQVLSLATQDSDNPDLR                                                       | 1.655678046        | 3              | 3.34658   |
| P52303        | MEPLNNLQVAVK                                                                     | 1.210413164        | 2              | 2.53966   |
| P52303        | NINLIVQK                                                                         | 0.795856603        | 1              | 2.40891   |
| P52303        | NSFGLAAPLQVHAPLSPNQTVVEISLPLNTVGSVMK                                             | 1.326270455        | 3              | 3.69346   |
| P52303        | SQPDMAIMAVNTFVK                                                                  | 1.151812145        | 2              | 3.3392    |
| <b>P52504</b> | <b>NDUS6 NADH dehydrogenase [ubiquinone] iron_sulfur protein 6_mitochondrial</b> | <b>2.076238267</b> | <b>1</b>       | <b>2</b>  |
| P52504        | IIACDGGGGALGHPK                                                                  | 1.100456705        | 2              | 4.12379   |
| P52504        | VYINLDKETK                                                                       | 1.011783882        | 2              | 2.61759   |
| <b>P52555</b> | <b>ERP29 Endoplasmic reticulum resident protein 29</b>                           | <b>2.162938249</b> | <b>0.96002</b> | <b>3</b>  |
| P52555        | FDTQYPYGEK                                                                       | 1.346942312        | 2              | 2.6502    |
| P52555        | ILDQGEDFPASELAR                                                                  | 1.068991718        | 2              | 5.05383   |
| P52555        | SLNILTAFR                                                                        | 1.637028918        | 2              | 2.34129   |
| <b>P52631</b> | <b>STAT3 Signal transducer and activator of transcription 3</b>                  | <b>3.016881847</b> | <b>0.00216</b> | <b>3</b>  |
| P52631        | GLSIEQLTTLAEK                                                                    | 1.528283705        | 2              | 2.39859   |
| P52631        | LLQTAATAAQGGQANHTAAVVTEK                                                         | 1.642902846        | 3              | 4.60514   |
| P52631        | MQQLEQMLTALDQMR                                                                  | 1.073973841        | 2              | 2.44068   |
| <b>P52759</b> | <b>UK114 Ribonuclease UK114</b>                                                  | <b>2.506909744</b> | <b>6.4E-06</b> | <b>7</b>  |
| P52759        | AAGCDFTNVVK                                                                      | 1.528464457        | 2              | 3.06297   |
| P52759        | AAYQVAALPK                                                                       | 1.089086591        | 2              | 2.67974   |
| P52759        | IEIEAIAVQGPFTTAGL                                                                | 1.34755947         | 2              | 3.24048   |
| P52759        | NLGEILK                                                                          | 1.293288571        | 1              | 2.28774   |
| P52759        | TIYVSGQIGMDPSSGQLVPGGVAEEAK                                                      | 1.379895429        | 2              | 4.52571   |
| P52759        | TTVLLADINDFGTVNEIYK                                                              | 1.738122151        | 2              | 5.66671   |
| P52759        | TYFQGNLPAR                                                                       | 1.166843451        | 2              | 2.5079    |
| <b>P52845</b> | <b>ST1E2 Estrogen sulfotransferase_ isoform 2</b>                                | <b>2.38248127</b>  | <b>0.88809</b> | <b>2</b>  |
| P52845        | CKEDAIFNR                                                                        | 1.101086878        | 2              | 2.50345   |
| P52845        | SGSTWIGEIVDMIYK                                                                  | 1.312855503        | 2              | 3.36445   |
| <b>P52847</b> | <b>ST1B1 Sulfotransferase family cytosolic 1B member 1</b>                       | <b>2.218161693</b> | <b>0.94018</b> | <b>8</b>  |
| P52847        | DNPLVNYTHLPTEIMDHSK                                                              | 1.41420305         | 2              | 4.46841   |
| P52847        | FLAGNVAYGSWFDHVK                                                                 | 0.882085613        | 2              | 3.85498   |
| P52847        | IEEFQSRPCDIVIPTYK                                                                | 1.057135277        | 3              | 5.26857   |
| P52847        | IVHHTSFVEMK                                                                      | 1.198366257        | 2              | 3.05329   |
| P52847        | NYFTMTQSEK                                                                       | 0.92395796         | 2              | 2.92485   |
| P52847        | SGVELLK                                                                          | 1.084493104        | 2              | 2.33994   |
| P52847        | THLPIDLLPK                                                                       | 1.293735581        | 3              | 3.55572   |
| P52847        | TLDEHTLER                                                                        | 1.055717115        | 2              | 3.09245   |
| <b>P52873</b> | <b>PYC Pyruvate carboxylase_mitochondrial</b>                                    | <b>2.318240142</b> | <b>0.41454</b> | <b>39</b> |
| P52873        | ADEAYLIGR                                                                        | 0.839103255        | 2              | 2.80685   |
| P52873        | ADFAQACQDAGVR                                                                    | 0.863532799        | 2              | 4.47163   |
| P52873        | AEAEAAEELSFPFR                                                                   | 0.964008758        | 2              | 4.704     |
| P52873        | AGTHILCIK                                                                        | 1.358213829        | 2              | 2.71725   |
| P52873        | ALAVSDLNR                                                                        | 0.98167514         | 2              | 2.58356   |
| P52873        | AYSEALAAFNGALFVEK                                                                | 1.633198665        | 2              | 3.68999   |
| P52873        | AYVEANQMLGDLIK                                                                   | 1.354510744        | 2              | 4.70824   |

|               |                                                                                                                      |                    |                |          |
|---------------|----------------------------------------------------------------------------------------------------------------------|--------------------|----------------|----------|
| P52873        | DAHQSLATR                                                                                                            | 1.160567064        | 1              | 3.17389  |
| P52873        | DFTATFGPLDSLNR                                                                                                       | 1.253580032        | 2              | 3.75664  |
| P52873        | DMAGLLKPAACTMLVSSLR                                                                                                  | 1.373210441        | 3              | 3.38815  |
| P52873        | ELIPNIPFQMLLR                                                                                                        | 0.78366989         | 2              | 2.84916  |
| P52873        | ENGVDAVHPGYGFLSER                                                                                                    | 0.953920476        | 2              | 2.96989  |
| P52873        | FIGPSPEVVR                                                                                                           | 1.059577684        | 2              | 2.43668  |
| P52873        | FLYECVWR                                                                                                             | 0.920009882        | 2              | 2.60596  |
| P52873        | GANAVGYTNYPDNVVFK                                                                                                    | 1.212329537        | 2              | 4.57553  |
| P52873        | GLAPVQAYLHIPDIK                                                                                                      | 1.592762482        | 2              | 2.98051  |
| P52873        | GQIGAPMPGK                                                                                                           | 1.006227097        | 2              | 2.42727  |
| P52873        | GTPLDTEVPLER                                                                                                         | 0.819188056        | 2              | 3.65032  |
| P52873        | HGEEVTPEDVLSAAMYPDVFAQFK                                                                                             | 1.644319024        | 3              | 5.41622  |
| P52873        | HIEVQILGDQYGNILHLYER                                                                                                 | 1.471744258        | 3              | 7.00833  |
| P52873        | HYFIEVNSR                                                                                                            | 0.926631865        | 2              | 2.33898  |
| P52873        | IAEEFEVELER                                                                                                          | 1.253307826        | 2              | 3.24429  |
| P52873        | IEGRPGASLPPLNLK                                                                                                      | 0.784954681        | 2              | 3.4374   |
| P52873        | INGCAIQCR                                                                                                            | 1.138954747        | 2              | 3.25095  |
| P52873        | IVGDLAQFMVQNGLSR                                                                                                     | 1.378638709        | 2              | 4.84208  |
| P52873        | LDNASAFQGAVISPHYDSSLVK                                                                                               | 0.978115917        | 3              | 5.77047  |
| P52873        | LLHYLGHVMMVNGPTTPIPVK                                                                                                | 1.012822097        | 3              | 3.67751  |
| P52873        | LQVEHTVTEEITDVDLVHAQIHVSEGR                                                                                          | 1.278076993        | 4              | 6.50313  |
| P52873        | NHQGLLLMDTTFR                                                                                                        | 1.355553087        | 3              | 3.32054  |
| P52873        | QKADEAYLIGR                                                                                                          | 1.020300743        | 2              | 2.49514  |
| P52873        | QVGYENAGTVEFLVDK                                                                                                     | 1.312282603        | 2              | 3.77663  |
| P52873        | SSTAPVASPNVR                                                                                                         | 0.838041737        | 2              | 2.346    |
| P52873        | SVVEFLQGYIGIPHGGFPEPFR                                                                                               | 1.172336422        | 2              | 4.80542  |
| P52873        | TVAVYSEQDTGQMHR                                                                                                      | 1.285969126        | 2              | 4.56916  |
| P52873        | VFDYSEYWEGAR                                                                                                         | 1.117495409        | 2              | 4.53713  |
| P52873        | VSPSPVDPIVPVPIGPPAGFR                                                                                                | 1.22208948         | 2              | 4.12303  |
| P52873        | VVEIAPATHLDPQLR                                                                                                      | 1.255194584        | 2              | 4.23659  |
| P52873        | VVHSYEELEENYTR                                                                                                       | 1.140042435        | 2              | 5.23838  |
| P52873        | YSLEYMGLAEELVR                                                                                                       | 1.161930856        | 3              | 4.51031  |
| <b>P52925</b> | <b>HMGB2 High mobility group protein B2</b>                                                                          | <b>2.063034234</b> | <b>0.99978</b> | <b>2</b> |
| P52925        | KHPDSSVNFAEFSK                                                                                                       | 1.04727526         | 2              | 2.74042  |
| P52925        | SEHPGLSIGDTAK                                                                                                        | 1.044767714        | 2              | 2.84615  |
| <b>P52944</b> | <b>PDL1 PDZ and LIM domain protein 1</b>                                                                             | <b>2.189152307</b> | <b>0.05607</b> | <b>5</b> |
| P52944        | CGTGIVGVFVK                                                                                                          | 1.077127785        | 2              | 2.43476  |
| P52944        | GHHFVGDQIYCEK                                                                                                        | 1.378534383        | 2              | 3.78768  |
| P52944        | TSASGEEANSRPSAQPHPSGGLIIDK                                                                                           | 0.88235236         | 3              | 4.49917  |
| P52944        | TSASGEEANSRPSAQPHPSGGLIIDKSEVYK                                                                                      | 0.737071439        | 3              | 5.01539  |
| P52944        | VTPPEGYDVVTVFVK                                                                                                      | 1.116668126        | 2              | 2.71025  |
| <b>P53395</b> | <b>ODB2 Lipamide acyltransferase component of branched_chain alpha_keto acid dehydrogenase complex_mitochondrial</b> | <b>2.112245644</b> | <b>0.99217</b> | <b>4</b> |
| P53395        | LREELKPVALAR                                                                                                         | 1.193707127        | 2              | 2.6741   |
| P53395        | LSDIGEGIR                                                                                                            | 1.070323256        | 2              | 3.02368  |
| P53395        | RLAMENNIK                                                                                                            | 1.456175372        | 2              | 2.37853  |
| P53395        | SYLENPAFMLLDLK                                                                                                       | 1.279432534        | 2              | 4.60672  |
| <b>P53987</b> | <b>MOT1 Monocarboxylate transporter 1</b>                                                                            | <b>1.965538249</b> | <b>1</b>       | <b>5</b> |
| P53987        | DGKEDETSTDVDEKPK                                                                                                     | 0.9884129          | 3              | 5.4891   |
| P53987        | DGKEDETSTDVDEKPKK                                                                                                    | 0.943688686        | 3              | 4.0479   |
| P53987        | EDETSTDVDEKPK                                                                                                        | 1.045310024        | 2              | 3.97638  |
| P53987        | ETQSPAPLQNSSGDPAAEEESPV                                                                                              | 0.705396385        | 2              | 5.04942  |
| P53987        | SDANTDLIGGSPK                                                                                                        | 1.13463653         | 2              | 4.13569  |
| <b>P54313</b> | <b>GBB2 Guanine nucleotide_binding protein G(I)/G(S)/G(T) subunit beta_2</b>                                         | <b>2.193962185</b> | <b>0.81272</b> | <b>2</b> |
| P54313        | ACGDSTLTQJTAGLDPVGR                                                                                                  | 1.231641871        | 2              | 3.99717  |

|               |                                                            |                    |                |           |
|---------------|------------------------------------------------------------|--------------------|----------------|-----------|
| P54313        | TFVSGACDASIK                                               | 0.902441754        | 2              | 2.7241    |
| <b>P54319</b> | <b>PLAP Phospholipase A<sub>2</sub> activating protein</b> | <b>2.007541129</b> | <b>0.99962</b> | <b>3</b>  |
| P54319        | IGDVVGSSGANQQTSGK                                          | 0.979019848        | 2              | 4.65864   |
| P54319        | TGDLGDINAEQLPGR                                            | 1.021206692        | 2              | 4.13088   |
| P54319        | YVPGTSGPSNTVQTADPFTGAGR                                    | 0.877300235        | 2              | 3.39071   |
| <b>P54822</b> | <b>PUR8 Adenylosuccinate lyase</b>                         | <b>2.075074759</b> | <b>0.95295</b> | <b>2</b>  |
| P54822        | KVDIEVLSVLASLGASVHK                                        | 1.541831733        | 3              | 4.41643   |
| P54822        | VLSQQAADVVK                                                | 0.984213046        | 2              | 2.85438   |
| <b>P54921</b> | <b>SNAA Alpha_soluble NSF attachment protein</b>           | <b>1.664591039</b> | <b>0.86592</b> | <b>5</b>  |
| P54921        | AIAHYEQSADYYKGEESNSSANK                                    | 0.70511649         | 3              | 4.89156   |
| P54921        | AIDIYEQVGTSMDSPLLK                                         | 1.317594047        | 2              | 3.79316   |
| P54921        | IEEACEIYAR                                                 | 0.719790426        | 2              | 2.75739   |
| P54921        | NSQFFSGLFGGSSK                                             | 0.913373861        | 2              | 3.79222   |
| P54921        | YEELFPAFSDSR                                               | 1.392317685        | 2              | 2.62031   |
| <b>P55006</b> | <b>RDH7 Retinol dehydrogenase 7</b>                        | <b>2.00122389</b>  | <b>0.96787</b> | <b>11</b> |
| P55006        | LETVILDVTK                                                 | 1.154843293        | 2              | 3.51737   |
| P55006        | TESIVAATQWVK                                               | 1.049613549        | 2              | 4.08185   |
| P55006        | TNVTNMER                                                   | 0.704912259        | 2              | 2.74532   |
| P55006        | TNVTNMER+Oxidation(5                                       | 0.868975992        |                |           |
| P55006        | TSDRLETVILDVTK                                             | 1.370453506        | 3              | 4.58467   |
| P55006        | VAIIEPGGFK                                                 | 0.949401566        | 2              | 2.38588   |
| P55006        | VLAACLEK                                                   | 1.053828326        | 2              | 3.07459   |
| P55006        | VVNIASTMGR                                                 | 0.995755768        | 2              | 3.78917   |
| P55006        | VVNIASTMGR+Oxidation(7                                     | 0.989718722        |                |           |
| P55006        | YGVEAFSDSLR                                                | 1.184505417        | 2              | 3.86489   |
| P55006        | YVFITGCDSGFGNLLAR                                          | 1.323749375        | 2              | 3.6655    |
| <b>P55051</b> | <b>FABP7 Fatty acid binding protein_brain</b>              | <b>1.608999954</b> | <b>0.00346</b> | <b>4</b>  |
| P55051        | ALGVGFATR                                                  | 0.839609957        | 2              | 2.64514   |
| P55051        | LTDSQNFDEYMK                                               | 0.939915651        | 2              | 4.04984   |
| P55051        | QVGNVTKPTVIISQEGGK                                         | 0.652305888        | 3              | 4.12915   |
| P55051        | WDGKETNCVR                                                 | 0.954269547        | 2              | 2.88639   |
| <b>P55053</b> | <b>FABP5 Fatty acid binding protein_epidermal</b>          | <b>1.848107436</b> | <b>0.9999</b>  | <b>6</b>  |
| P55053        | FDETTADGR                                                  | 1.067895776        | 2              | 3.20589   |
| P55053        | KTETVCTFTDGALVQHQQ                                         | 0.807274499        | 3              | 5.30947   |
| P55053        | LVESHGFEDYMK                                               | 0.870499406        | 2              | 3.42733   |
| P55053        | MGAMAKPDCIITLDGNNLTVK                                      | 1.122619304        | 2              | 4.1249    |
| P55053        | MVVECVMNNAICTR                                             | 1.096096997        | 2              | 3.84754   |
| P55053        | TETVCTFTDGALVQHQQ                                          | 0.9264584          | 2              | 4.68317   |
| <b>P55159</b> | <b>PON1 Serum paraoxonase/arylesterase 1</b>               | <b>1.880646383</b> | <b>0.9952</b>  | <b>7</b>  |
| P55159        | GIEAGAEDLEILPNGLTFSTGLK                                    | 1.349784383        | 3              | 5.8671    |
| P55159        | IFFYDSENPFGSEVLR                                           | 0.875860987        | 2              | 6.21527   |
| P55159        | IQSILSEDPK                                                 | 0.99990261         | 2              | 3.25976   |
| P55159        | TITHELLPSINDIAAVGPESFYATNDHYFADPYLR                        | 0.897548865        | 3              | 4.07499   |
| P55159        | VLSFDTLVDNISVDPVTGDLWVGCHPNGMR                             | 0.840849638        | 3              | 5.40814   |
| P55159        | VVADGDFDFANGIGISLDGK                                       | 0.901145811        | 2              | 4.4463    |
| P55159        | YVYIAELLAHK                                                | 1.237036065        | 2              | 2.67735   |
| <b>P55260</b> | <b>ANXA4 Annexin A4</b>                                    | <b>2.25229569</b>  | <b>0.80751</b> | <b>4</b>  |
| P55260        | AEIDMLDIPANFK                                              | 1.185019692        | 1              | 2.17768   |
| P55260        | GAGTDEGCLIEILASR                                           | 1.141744462        | 2              | 3.78345   |
| P55260        | GLGTDEDAIIGVLACR                                           | 1.121530292        | 2              | 3.90833   |
| P55260        | INQTYQQQYGR                                                | 0.566081075        | 2              | 3.61678   |
| <b>P55770</b> | <b>NH2L1 NHP2_like protein 1</b>                           | <b>2.074532678</b> | <b>0.99998</b> | <b>2</b>  |
| P55770        | LLDLVQQSCNYK                                               | 1.142988326        | 2              | 3.89196   |
| P55770        | QQIQSIQSIER                                                | 1.037814119        | 2              | 2.92991   |
| <b>P55937</b> | <b>GOGA3 Golgin subfamily A member 3</b>                   | <b>2.245570249</b> | <b>0.64192</b> | <b>2</b>  |
| P55937        | LDSEMKELRQELIK+Oxidation(4                                 | 1.293390396        |                |           |
| P55937        | QWYQQQLTLAQEAR                                             | 1.14018981         | 2              | 2.44317   |

|               |                                                            |                    |                |           |
|---------------|------------------------------------------------------------|--------------------|----------------|-----------|
| <b>P56399</b> | <b>UBP5 Ubiquitin carboxyl terminal hydrolase 5</b>        | <b>2.257063915</b> | <b>0.98799</b> | <b>5</b>  |
| P56399        | GTGLQPGEELPDIAPPLVTPDEPK                                   | 1.335975667        | 2              | 4.52467   |
| P56399        | IFQNAPTDPTQDFSTQVAK                                        | 1.177036502        | 2              | 4.19167   |
| P56399        | IGEWELIQESGVPLKPLFGPGYTGIR                                 | 1.053002889        | 3              | 3.85841   |
| P56399        | KQEVQAWDGEVR                                               | 0.776081576        | 2              | 3.35561   |
| P56399        | SSENPNEVFR                                                 | 1.165425474        | 2              | 2.45697   |
| <b>P56522</b> | <b>ADRO NADPH:adrenodoxin oxidoreductase_mitochondrial</b> | <b>1.981398248</b> | <b>0.99128</b> | <b>4</b>  |
| P56522        | AGLLPSGPRPGYTAIQALLSDR                                     | 1.469695908        | 3              | 3.46841   |
| P56522        | LEGVGESTR                                                  | 1.170420324        | 2              | 2.30893   |
| P56522        | TATEKPGVEEAR                                               | 0.925969737        | 2              | 3.25808   |
| P56522        | TDITEVALGVLR                                               | 1.011741215        | 2              | 3.92462   |
| <b>P56574</b> | <b>IDHP Isocitrate dehydrogenase [NADP]_mitochondrial</b>  | <b>2.249255102</b> | <b>0.99916</b> | <b>17</b> |
| P56574        | ATDFVDR                                                    | 1.151279758        | 2              | 2.46367   |
| P56574        | CATITPDEAR                                                 | 1.294153849        | 2              | 2.30452   |
| P56574        | DLAGCIHGLSNVK                                              | 1.109017434        | 2              | 2.50456   |
| P56574        | DQTNDQVTIDSALATQK                                          | 0.907248398        | 2              | 5.42566   |
| P56574        | FKDIFQEIFDK                                                | 1.240885601        | 2              | 3.43291   |
| P56574        | GKLDGNQDLIR                                                | 1.108881191        | 2              | 2.96892   |
| P56574        | IKVEKPVVEMDGDDEMTR                                         | 1.257362493        | 3              | 3.47514   |
| P56574        | LDGNQDLIR                                                  | 1.370254971        | 2              | 2.44979   |
| P56574        | LIDDMVAQVLK                                                | 2.051528493        | 2              | 4.05706   |
| P56574        | LNEHFLNTDFLDTIK                                            | 1.121122905        | 2              | 4.56007   |
| P56574        | NILGGTVFR                                                  | 1.009149961        | 2              | 2.78008   |
| P56574        | NILGGTVFREPIICK                                            | 3.458026153        | 2              | 3.00083   |
| P56574        | SSGGFVWACK                                                 | 0.824056428        | 2              | 2.44972   |
| P56574        | TIEAEEAHGTVTR                                              | 1.117275675        | 2              | 3.92742   |
| P56574        | VCVQTVESGAMTK                                              | 1.022737644        | 2              | 3.86064   |
| P56574        | VEKPVVEMDGDDEMTR                                           | 1.103883411        | 3              | 4.01855   |
| P56574        | YFDLGLPNR                                                  | 1.279189006        | 2              | 2.52253   |
| <b>P56593</b> | <b>CP2AC Cytochrome P450 2A12</b>                          | <b>2.043451458</b> | <b>0.58464</b> | <b>3</b>  |
| P56593        | MLQGTGAPIDPTIYLSK                                          | 1.13575544         | 2              | 4.70444   |
| P56593        | NRQPQYEDHMK                                                | 0.83388802         | 3              | 4.13185   |
| P56593        | NRQPQYEDHMK+Oxidation(9                                    | 0.605193822        |                |           |
| <b>P56656</b> | <b>CP239 Cytochrome P450 2C39</b>                          | <b>1.820664943</b> | <b>0.00585</b> | <b>4</b>  |
| P56656        | EHQESLDVTNPR                                               | 0.73436731         | 2              | 3.68047   |
| P56656        | IKEHQESLDVTNPR                                             | 0.853419633        | 3              | 4.87248   |
| P56656        | NYLIPK                                                     | 1.426222677        | 1              | 2.1687    |
| P56656        | VQEEIDHVIGR                                                | 1.32167443         | 2              | 3.6951    |
| <b>P56812</b> | <b>PDCD5 Programmed cell death protein 5</b>               | <b>1.667053539</b> | <b>0.97537</b> | <b>3</b>  |
| P56812        | HGDPGDAAQQAQ                                               | 0.6725385          | 2              | 4.39695   |
| P56812        | NSILAQVLDQSAR                                              | 1.167135099        | 2              | 3.84585   |
| P56812        | VSEQGLIEIEK                                                | 0.776272893        | 2              | 3.3304    |
| <b>P57093</b> | <b>PAHX Phytanoyl CoA dioxygenase_peroxisomal</b>          | <b>1.926911781</b> | <b>0.86501</b> | <b>8</b>  |
| P57093        | AISCHYGSSDCK                                               | 0.716719292        | 2              | 3.22801   |
| P57093        | IQDFQNEELFR                                                | 1.048899906        | 2              | 3.57945   |
| P57093        | KFYEENGFLVIK                                               | 1.033563812        | 2              | 2.67677   |
| P57093        | MDYTRAGAR                                                  | 0.610555363        | 2              | 2.5605    |
| P57093        | MYHGIQDYDPDPSR                                             | 1.199614184        | 2              | 2.98107   |
| P57093        | NLVSDDDIQR                                                 | 0.84055025         | 2              | 2.42821   |
| P57093        | NNGCLVVLPGTHK                                              | 1.326031628        | 2              | 2.92034   |
| P57093        | YCALPQIVK                                                  | 0.868078656        | 1              | 2.07252   |
| <b>P57113</b> | <b>MAAI Maleylacetoacetate isomerase</b>                   | <b>2.185340327</b> | <b>0.11403</b> | <b>11</b> |
| P57113        | AITSGFNALEK                                                | 0.997991117        | 2              | 3.41554   |
| P57113        | ALLALEAFQVSHPCR                                            | 1.159936894        | 2              | 4.12713   |
| P57113        | DGGQQFSEEFQTLNPMK                                          | 1.101475549        | 2              | 4.92675   |

|               |                                                                |                    |                |           |
|---------------|----------------------------------------------------------------|--------------------|----------------|-----------|
| P57113        | FKVDLSPYPTISHINK                                               | 0.993095881        | 2              | 4.90249   |
| P57113        | GIDYEIVPINLIK                                                  | 1.205087611        | 2              | 4.40449   |
| P57113        | IDGITIGQSLAILEYLEETRPIPR                                       | 1.22734025         | 3              | 4.18634   |
| P57113        | MISDLIASGIQPLQNLSVLK                                           | 1.136328605        | 2              | 5.43574   |
| P57113        | MISDLIASGIQPLQNLSVLK+Oxidation(0                               | 1.054280741        |                |           |
| P57113        | QVGQENQMPWAQK                                                  | 0.94337297         | 2              | 3.8213    |
| P57113        | VDLSPYPTISHINK                                                 | 1.145170744        | 2              | 3.78273   |
| P57113        | YCVGDEVSMADVCLAPQVANAER                                        | 1.311676815        | 3              | 6.55903   |
| <b>P57722</b> | <b>PCBP3 Poly(rC)_binding protein 3</b>                        | <b>2.305305306</b> | <b>0.9983</b>  | <b>3</b>  |
| P57722        | ESTGAQVQVAGDMLPNSTER                                           | 1.280846705        | 2              | 5.28909   |
| P57722        | INISEGNCPER                                                    | 1.069793202        | 2              | 3.5385    |
| P57722        | LVVPASQCGSLIGK                                                 | 1.151343078        | 2              | 2.59727   |
| <b>P58321</b> | <b>UCLH4 Ubiquitin carboxyl_ terminal hydrolase isozyme L4</b> | <b>2.193144271</b> | <b>0.9966</b>  | <b>2</b>  |
| P58321        | VTHETSAHEGQTEAPSIDEK                                           | 1.109178171        | 3              | 4.67889   |
| P58321        | WLPLEANPEVTNQFLK                                               | 1.135442952        | 2              | 3.01776   |
| <b>P58389</b> | <b>PTPA Serine/threonine_protein phosphatase 2A activator</b>  | <b>1.883817171</b> | <b>0.77163</b> | <b>3</b>  |
| P58389        | FGSLLPIHPVTSG                                                  | 1.195068262        | 2              | 2.40448   |
| P58389        | KEIHTVPDMGK                                                    | 0.889415268        | 2              | 2.42018   |
| P58389        | WIDETPPVDQPSR                                                  | 0.881541558        | 2              | 3.47848   |
| <b>P58751</b> | <b>RELN Reelin</b>                                             | <b>1.626505906</b> | <b>0.35048</b> | <b>2</b>  |
| P58751        | CGILSSGNNLFFNEDGLR                                             | 0.690347115        | 2              | 2.32494   |
| P58751        | QNYMMNFSRQHGLR                                                 | 0.791318088        | 2              | 2.42773   |
| <b>P58775</b> | <b>TPM2 Tropomyosin beta chain</b>                             | <b>2.234936979</b> | <b>0.72266</b> | <b>11</b> |
| P58775        | AISEELDNALNDITSL                                               | 0.756088061        | 2              | 4.39084   |
| P58775        | ATDAEADVASLNR                                                  | 2.866391631        | 2              | 4.23221   |
| P58775        | DAQEKLEQAEK                                                    | 0.986255809        | 2              | 2.9043    |
| P58775        | KATDAEADVASLNR                                                 | 1.416888502        | 2              | 4.0868    |
| P58775        | LDKENAIDR                                                      | 0.959619784        | 2              | 3.08951   |
| P58775        | LKGTEDEVEK                                                     | 0.436407836        | 2              | 2.85641   |
| P58775        | MELQEMQLK                                                      | 1.162224026        | 2              | 2.98138   |
| P58775        | QLEEEQQALQK                                                    | 2.530110046        | 2              | 3.55414   |
| P58775        | SLEAQADKYSTK                                                   | 1.0688813          | 2              | 3.75664   |
| P58775        | TIDDLEDEVYAQK                                                  | 3.312027158        | 2              | 3.9504    |
| P58775        | YSESVKDAQEK                                                    | 0.38844056         | 2              | 3.09924   |
| <b>P59242</b> | <b>CING Cingulin</b>                                           | <b>2.201882381</b> | <b>0.92531</b> | <b>2</b>  |
| P59242        | LGQEQQALNR                                                     | 1.281021328        | 2              | 2.79354   |
| P59242        | LQGLEQEAENK                                                    | 1.087834986        | 2              | 2.96285   |
| <b>P59999</b> | <b>ARPC4 Actin_related protein 2/3 complex subunit 4</b>       | <b>2.430776929</b> | <b>0.33588</b> | <b>2</b>  |
| P59999        | ELLQPVTISR                                                     | 1.218555238        | 2              | 3.02599   |
| P59999        | FMRFMMMR+Oxidation(4)Oxidation(5                               | 2.180002786        |                |           |
| <b>P60335</b> | <b>PCBP1 Poly(rC)_binding protein 1</b>                        | <b>2.351791522</b> | <b>0.49743</b> | <b>4</b>  |
| P60335        | AITIAGVPQSVTECVK                                               | 1.106186308        | 2              | 3.52901   |
| P60335        | IITLTGPTNAIFK                                                  | 1.193534964        | 2              | 2.90487   |
| P60335        | LVVPATQCGSLIGK                                                 | 1.256040883        | 2              | 2.98914   |
| P60335        | VMTIPYQMPASSPVICAGGQDR                                         | 1.56500536         | 3              | 4.4385    |
| <b>P60843</b> | <b>IF4A1 Eukaryotic initiation factor 4A_1</b>                 | <b>2.278393495</b> | <b>0.64092</b> | <b>6</b>  |
| P60843        | ATQALVLA PTR                                                   | 0.946430919        | 1              | 1.95849   |
| P60843        | GFKDQIYDIFQK                                                   | 1.17086119         | 3              | 3.88621   |
| P60843        | GVAINMVTEEDKR                                                  | 1.102624183        | 2              | 3.22981   |
| P60843        | KEELTLEGIR                                                     | 1.363603151        | 2              | 2.35313   |
| P60843        | KGVA INMVTEEDKR                                                | 1.16505438         | 3              | 4.67023   |
| P60843        | LQMEAPHIIVGTPGR                                                | 1.259858897        | 3              | 3.87773   |
| <b>P60868</b> | <b>RS20 40S ribosomal protein S20</b>                          | <b>2.114362751</b> | <b>0.89223</b> | <b>3</b>  |
| P60868        | DTGKTPVEPEVAIHR                                                | 1.039939762        | 3              | 4.41989   |

|               |                                                                                         |                    |                |          |
|---------------|-----------------------------------------------------------------------------------------|--------------------|----------------|----------|
| P60868        | LIDLHSPSEIVK                                                                            | 1.11467137         | 2              | 3.13459  |
| P60868        | TPVEPEVAIHR                                                                             | 1.478668047        | 2              | 2.45865  |
| <b>P60901</b> | <b>PSA6 Proteasome subunit alpha type_6</b>                                             | <b>2.263826063</b> | <b>0.06672</b> | <b>2</b> |
| P60901        | AINQGGLTSVAVR                                                                           | 1.178155943        | 2              | 3.41184  |
| P60901        | LLDSSTVTHLFK                                                                            | 1.480539905        | 2              | 3.00812  |
| <b>P61087</b> | <b>UBE2K Ubiquitin_conjugating enzyme E2 K</b>                                          | <b>1.919394674</b> | <b>0.97739</b> | <b>2</b> |
| P61087        | GEIAGPPDTPYEGGR                                                                         | 1.445038732        | 2              | 3.20526  |
| P61087        | VDLVDENFTELR                                                                            | 0.897825162        | 2              | 3.50466  |
| <b>P61107</b> | <b>RAB14 Ras_related protein Rab_14</b>                                                 | <b>2.287281941</b> | <b>0.97077</b> | <b>5</b> |
| P61107        | IYQNIQDGSLDLNAAESGVQHKPSAPQGGR                                                          | 1.090174693        | 3              | 3.72783  |
| P61107        | NLTNPNTVILIGNK                                                                          | 0.906228137        | 2              | 3.98962  |
| P61107        | SCLLHQFTEK                                                                              | 1.116603574        | 2              | 3.08708  |
| P61107        | STYNHLSSWLT DAR                                                                         | 1.032355329        | 2              | 3.31572  |
| P61107        | TGENVEDAFLEAAK                                                                          | 1.210845298        | 2              | 3.69374  |
| <b>P61222</b> | <b>ABCE1 ATP_binding cassette sub_family E member 1</b>                                 | <b>2.208366707</b> | <b>0.6456</b>  | <b>3</b> |
| P61222        | GSELQNYFTK                                                                              | 1.680363161        | 2              | 2.34013  |
| P61222        | NTVANSPQTL LAGM NK                                                                      | 1.147306668        | 2              | 4.09023  |
| P61222        | VAETANEEEVKK                                                                            | 0.83764061         | 2              | 2.96918  |
| <b>P61314</b> | <b>RL15 60S ribosomal protein L15</b>                                                   | <b>1.992032412</b> | <b>1</b>       | <b>5</b> |
| P61314        | FFEVLIDPFHK                                                                             | 1.1470394          | 3              | 3.42168  |
| P61314        | GATYGKPVH HGVNQLK                                                                       | 0.894444149        | 2              | 4.38604  |
| P61314        | SLQ SVAEER                                                                              | 0.982688382        | 2              | 2.79345  |
| P61314        | VLNSYWVGEDSTYK                                                                          | 1.200248868        | 2              | 4.08355  |
| P61314        | YIQELWR                                                                                 | 1.172898685        | 2              | 2.61205  |
| <b>P61354</b> | <b>RL27 60S ribosomal protein L27</b>                                                   | <b>1.874974058</b> | <b>0.97771</b> | <b>2</b> |
| P61354        | NIDDGTS DRPYSHALVAGIDR                                                                  | 0.902334407        | 3              | 4.93704  |
| P61354        | VYNYNHLMPTR                                                                             | 1.089965163        | 2              | 3.01933  |
| <b>P61459</b> | <b>PHS Pterin_4_alpha_carbinolamine dehydratase</b>                                     | <b>2.060539017</b> | <b>0.99991</b> | <b>3</b> |
| P61459        | AVGWNELEGR                                                                              | 1.027757403        | 2              | 3.19697  |
| P61459        | LDHHPEWFNVY NK                                                                          | 1.118547821        | 3              | 4.97846  |
| P61459        | LSAEERDQLLPNLR                                                                          | 1.18883892         | 3              | 4.32026  |
| <b>P61589</b> | <b>RHOA Transforming protein RhoA</b>                                                   | <b>1.823876483</b> | <b>0.95982</b> | <b>4</b> |
| P61589        | HFCPNVPIILVGNK                                                                          | 1.857336056        | 2              | 3.29609  |
| P61589        | HFCPNVPIILVGNKK                                                                         | 0.963770155        | 3              | 4.5125   |
| P61589        | MKQEPVKPEEGR                                                                            | 0.8779464          | 3              | 4.12111  |
| P61589        | MKQEPVKPEEGR+Oxidation(0                                                                | 0.780893522        |                |          |
| <b>P61751</b> | <b>ARF4 ADP_ribosylation factor 4</b>                                                   | <b>2.424603791</b> | <b>0.02467</b> | <b>6</b> |
| P61751        | ILMVGLDAAGK                                                                             | 1.640764084        | 2              | 2.89038  |
| P61751        | IQEGA AVLQK                                                                             | 0.878487563        | 2              | 2.94305  |
| P61751        | KQMRILMVGLDAAGK                                                                         | 1.366902547        | 2              | 2.37147  |
| P61751        | LGEIVTTIPTIGFNVETVEYK                                                                   | 1.01412004         | 3              | 4.25597  |
| P61751        | NICFTVWDVGGQDK                                                                          | 1.242231201        | 2              | 4.21744  |
| P61751        | QDLPNAMAISEMTDK                                                                         | 1.570450916        | 2              | 3.60782  |
| <b>P61805</b> | <b>DAD1 Dolichyl_diphosphooligosaccharide__protein glycosyltransferase subunit DAD1</b> | <b>1.957047624</b> | <b>0.99999</b> | <b>2</b> |
| P61805        | ADFQGISPER                                                                              | 1.019763046        | 2              | 3.11042  |
| P61805        | FLEEYLSSTPQR                                                                            | 0.937868508        | 2              | 3.78181  |
| <b>P61924</b> | <b>COPZ1 Coatomer subunit zeta_1</b>                                                    | <b>2.512685403</b> | <b>0.00195</b> | <b>2</b> |
| P61924        | GEDVPLTEQTVSQVLQSAK                                                                     | 1.351975029        | 2              | 4.62344  |
| P61924        | YYDDTYPSVK                                                                              | 1.047125442        | 2              | 2.4936   |
| <b>P61972</b> | <b>NTF2 Nuclear transport factor 2</b>                                                  | <b>3.711833681</b> | <b>0.95368</b> | <b>2</b> |
| P61972        | IQHSITAQDHQPTDSCIISMVVGQLK                                                              | 1.893438278        | 3              | 4.2965   |
| P61972        | NINDAWVCTNDMFR                                                                          | 1.182072313        | 2              | 3.77299  |
| <b>P61980</b> | <b>HNRPK Heterogeneous nuclear ribonucleoprotein K</b>                                  | <b>2.098561666</b> | <b>0.06521</b> | <b>9</b> |

|               |                                                                            |                    |                |          |
|---------------|----------------------------------------------------------------------------|--------------------|----------------|----------|
| P61980        | GSDFDCELR                                                                  | 1.056998792        | 2              | 2.76896  |
| P61980        | GSYGD LGGPIITQVTIPK                                                        | 0.977538117        | 2              | 5.16481  |
| P61980        | IDEPLEGSEDR                                                                | 1.831630157        | 2              | 3.67701  |
| P61980        | IILD L IESPIK                                                              | 1.084137331        | 2              | 4.09562  |
| P61980        | IITITGTQDQIQNAQYLLQNSVK                                                    | 1.178410192        | 3              | 7.09349  |
| P61980        | LFQECCPHSTDR                                                               | 1.078326329        | 2              | 3.90689  |
| P61980        | NTDEMVELR                                                                  | 1.588722969        | 2              | 2.66511  |
| P61980        | RSRNTDEMVELR                                                               | 1.00515016         | 2              | 2.50928  |
| P61980        | TDYNASVSPDSSGPER                                                           | 1.029913908        | 2              | 4.56336  |
| <b>P61983</b> | <b>1433G 14_3_3 protein gamma</b>                                          | <b>2.086843171</b> | <b>0.62559</b> | <b>4</b> |
| P61983        | AYSEAHEISK                                                                 | 0.759664036        | 2              | 3.53049  |
| P61983        | NVTE L NEPLSNEER                                                           | 1.094772581        | 2              | 4.65729  |
| P61983        | TAFDDAIAELDTLNEDSYK                                                        | 1.715364922        | 2              | 4.77342  |
| P61983        | YLAEVATGEK                                                                 | 0.955732464        | 2              | 3.08096  |
| <b>P62076</b> | <b>TIM13 Mitochondrial import inner membrane translocase subunit Tim13</b> | <b>1.880184355</b> | <b>0.68076</b> | <b>5</b> |
| P62076        | CIGKPGGSLDNSEQK                                                            | 0.766100379        | 2              | 4.0928   |
| P62076        | KCIGKPGGSLDNSEQK                                                           | 0.82286267         | 3              | 3.97799  |
| P62076        | LDPGAIMEQVK                                                                | 0.846466408        | 2              | 2.94983  |
| P62076        | VQIAVANAQELLQR                                                             | 1.093899565        | 2              | 5.01919  |
| P62076        | YMDAWNTVSR                                                                 | 0.91649778         | 2              | 3.08328  |
| <b>P62083</b> | <b>RS7 40S ribosomal protein S7</b>                                        | <b>2.565154656</b> | <b>0.89403</b> | <b>5</b> |
| P62083        | AIIIFVVPQLK                                                                | 1.344175614        | 2              | 3.75935  |
| P62083        | IVKPNGEKPDFESGISQALLELEMNSDLK                                              | 1.361396013        | 3              | 5.18262  |
| P62083        | KAIIFVVPQLK                                                                | 1.639642492        | 2              | 3.6696   |
| P62083        | TLTAVHDAILEDLVFPSEIVGK                                                     | 1.052078252        | 2              | 5.1634   |
| P62083        | VETFSGVYK                                                                  | 0.692315066        | 2              | 2.32131  |
| <b>P62161</b> | <b>CALM Calmodulin</b>                                                     | <b>2.187110532</b> | <b>1</b>       | <b>4</b> |
| P62161        | DNGYISAAELR                                                                | 0.991694277        | 2              | 2.97082  |
| P62161        | EADIDGDGQVNYEEFVQMMTAK                                                     | 1.427667189        | 2              | 5.22869  |
| P62161        | EAFSLFDKGDGTITTK                                                           | 0.977689478        | 2              | 4.71599  |
| P62161        | VFDKDGNGYISAAELR                                                           | 0.981311446        | 2              | 4.96889  |
| <b>P62193</b> | <b>PRS4 26S protease regulatory subunit 4</b>                              | <b>1.92684323</b>  | <b>0.97598</b> | <b>4</b> |
| P62193        | AICTEAGLMALRERR+Oxidation(8                                                | 3.035976084        |                |          |
| P62193        | AVANQTSATFLR                                                               | 1.063977594        | 2              | 3.0933   |
| P62193        | NQE QMKPLEEK                                                               | 0.945299838        | 2              | 3.54506  |
| P62193        | TMLELLNQLDGFDSR                                                            | 1.039393408        | 2              | 4.13625  |
| <b>P62198</b> | <b>PRS8 26S protease regulatory subunit 8</b>                              | <b>2.003142064</b> | <b>0.98878</b> | <b>6</b> |
| P62198        | EVIELPVKHPELF EALGIAQPK                                                    | 0.983418488        | 3              | 4.38787  |
| P62198        | IAELMPGASGAEVK                                                             | 0.935542755        | 2              | 3.16113  |
| P62198        | LEGGSGDSEVQR                                                               | 1.167810088        | 2              | 3.70943  |
| P62198        | LLREELQLLQE QGSYVGEVVR                                                     | 1.35036557         | 3              | 3.99668  |
| P62198        | TMLELLNQLDGF EATK                                                          | 1.161854533        | 2              | 3.71609  |
| P62198        | VHVTQEDFEMAVAK                                                             | 0.923286904        | 2              | 3.13595  |
| <b>P62243</b> | <b>RS8 40S ribosomal protein S8</b>                                        | <b>2.081449055</b> | <b>0.91989</b> | <b>9</b> |
| P62243        | ADGYVLEK                                                                   | 1.403027157        | 2              | 3.16979  |
| P62243        | IIDVVYNASNNE LVR                                                           | 1.354086001        | 2              | 4.22857  |
| P62243        | ISSLLEEQFQQGK                                                              | 1.34458109         | 2              | 4.23977  |
| P62243        | KYELGRPAANTK                                                               | 0.902864469        | 2              | 3.58783  |
| P62243        | LDVGNFWSWGSECTR                                                            | 1.36664832         | 2              | 3.96338  |
| P62243        | LTPEEEI LNK                                                                | 1.044421506        | 2              | 3.0717   |
| P62243        | NCIVLIDSTPYR                                                               | 1.165781233        | 2              | 3.47589  |
| P62243        | QWYESHYALPLGR                                                              | 0.968721308        | 2              | 2.92363  |
| P62243        | YELGRPAANTK                                                                | 0.79624056         | 2              | 2.9545   |
| <b>P62246</b> | <b>RS15A 40S ribosomal protein S15a</b>                                    | <b>2.19458628</b>  | <b>0.75066</b> | <b>4</b> |
| P62246        | HGYIGFEFIID DHR                                                            | 1.134371535        | 3              | 4.92148  |
| P62246        | IVVNL TGR                                                                  | 1.449311801        | 2              | 2.32918  |



|               |                                                  |                    |                |           |
|---------------|--------------------------------------------------|--------------------|----------------|-----------|
| P62246        | MNVLADALK                                        | 1.132764954        | 2              | 2.73914   |
| P62246        | WQNNLLPSR                                        | 1.055210771        | 2              | 3.11739   |
| <b>P62250</b> | <b>RS16 40S ribosomal protein S16</b>            | <b>2.210332568</b> | <b>0.97856</b> | <b>6</b>  |
| P62250        | ALVAYYQK                                         | 2.37003802         | 1              | 2.23972   |
| P62250        | EIKDILIQYDR                                      | 1.029399629        | 2              | 2.61425   |
| P62250        | GGGHVAQIYAIR                                     | 0.946710672        | 2              | 3.07535   |
| P62250        | LLEPVLLLGK                                       | 1.451125281        | 2              | 2.80302   |
| P62250        | TLLVADPR                                         | 1.077941327        | 2              | 2.6086    |
| P62250        | VNGRPLEMIEPR                                     | 1.151016168        | 2              | 2.69585   |
| <b>P62260</b> | <b>1433E 14_3_3 protein epsilon</b>              | <b>2.081838402</b> | <b>1.8E-05</b> | <b>9</b>  |
| P62260        | AAFDDAIAELDTLSEESYK                              | 1.389908037        | 2              | 6.03811   |
| P62260        | EENKGGEDKLK                                      | 1.310982521        | 2              | 2.70242   |
| P62260        | HLIPAANTGESK                                     | 1.040385596        | 2              | 3.1987    |
| P62260        | IISIEQK                                          | 1.089404738        | 2              | 2.60819   |
| P62260        | LICCDILDVLDK                                     | 2.055795812        | 2              | 4.0564    |
| P62260        | YDEMVESMK                                        | 1.299608281        | 2              | 2.71077   |
| P62260        | YDEMVESMCK                                       | 1.324707462        | 2              | 2.67483   |
| P62260        | YLAEFATGNDR                                      | 0.852703414        | 2              | 2.94223   |
| P62260        | YLAEFATGNDRK                                     | 1.125644341        | 2              | 2.73987   |
| <b>P62268</b> | <b>RS23 40S ribosomal protein S23</b>            | <b>2.155034727</b> | <b>0.9557</b>  | <b>2</b>  |
| P62268        | GHAVGDIPGVR                                      | 1.109058447        | 2              | 2.74766   |
| P62268        | KGHAVGDIPGVR                                     | 1.034606428        | 2              | 2.82558   |
| <b>P62271</b> | <b>RS18 40S ribosomal protein S18</b>            | <b>2.318773467</b> | <b>0.9994</b>  | <b>6</b>  |
| P62271        | AGELTEDEVER                                      | 1.089429319        | 2              | 3.69618   |
| P62271        | LREDLER                                          | 1.001323514        | 1              | 2.21055   |
| P62271        | RAGELTEDEVER                                     | 1.977734436        | 2              | 3.10514   |
| P62271        | VITIMQNPR                                        | 1.011799345        | 2              | 2.83899   |
| P62271        | VLNTNIDGR                                        | 1.492955352        | 2              | 3.12737   |
| P62271        | YSQVLANGLDNK                                     | 1.211363898        | 2              | 4.04299   |
| <b>P62278</b> | <b>RS13 40S ribosomal protein S13</b>            | <b>2.705238937</b> | <b>0.09157</b> | <b>5</b>  |
| P62278        | GLAPDLPEDLYHLIK                                  | 1.220378846        | 2              | 3.09192   |
| P62278        | GLSQSALPYR                                       | 0.934565539        | 2              | 2.47847   |
| P62278        | GLTPSQIGVILR                                     | 1.478106615        | 2              | 2.98124   |
| P62278        | KGLTPSQIGVILR                                    | 1.526466138        | 3              | 3.89147   |
| P62278        | LILIESR                                          | 1.320279555        | 1              | 2.0731    |
| <b>P62329</b> | <b>TYB4 Thymosin beta_4</b>                      | <b>1.896276794</b> | <b>0.99949</b> | <b>3</b>  |
| P62329        | ETIEQEKQAGES                                     | 0.948695482        | 2              | 2.44625   |
| P62329        | NPLPSKETIEQEK                                    | 0.90301894         | 2              | 2.73218   |
| P62329        | TETQEKNPSPK                                      | 0.944306183        | 2              | 3.73931   |
| <b>P62332</b> | <b>ARF6 ADP_ribosylation factor 6</b>            | <b>2.173325355</b> | <b>0.97455</b> | <b>2</b>  |
| P62332        | FNVWDVGGQDK                                      | 1.109718204        | 2              | 3.02465   |
| P62332        | LGQSVTTIPTVGFNVETVYK                             | 1.180392547        | 2              | 2.67368   |
| <b>P62334</b> | <b>PRS10 26S protease regulatory subunit 10B</b> | <b>2.060785118</b> | <b>0.02822</b> | <b>5</b>  |
| P62334        | ADHDFVVQEDFMK                                    | 0.982510201        | 2              | 2.32383   |
| P62334        | ALQSVGQIVGEVLK                                   | 1.19827287         | 2              | 3.615     |
| P62334        | EVIELPLTNPELFQR                                  | 1.224500916        | 2              | 3.03575   |
| P62334        | HGEIDYEAIVK                                      | 0.558292527        | 2              | 3.53083   |
| P62334        | NVCTEAGMFAIR                                     | 0.940073118        | 2              | 2.76719   |
| <b>P62425</b> | <b>RL7A 60S ribosomal protein L7a</b>            | <b>2.068550345</b> | <b>0.88239</b> | <b>11</b> |
| P62425        | AGVNTVTTLVENK                                    | 1.117555617        | 2              | 4.02915   |
| P62425        | AGVNTVTTLVENKK                                   | 1.470512485        | 2              | 3.33457   |
| P62425        | HWGGNVLGPK                                       | 1.009418689        | 1              | 2.91587   |
| P62425        | KVVNPLFEK                                        | 0.939180799        | 2              | 2.36608   |
| P62425        | LKVPPAINQFTQALDR                                 | 1.556838357        | 3              | 4.29622   |
| P62425        | NFGIGQDIQPK                                      | 0.962539927        | 2              | 3.36864   |
| P62425        | TCTTVAFTQVNSEDK                                  | 0.955435691        | 2              | 3.35062   |
| P62425        | TCTTVAFTQVNSEDKGALAK                             | 1.075749239        | 2              | 4.68271   |

|               |                                                   |                    |                |           |
|---------------|---------------------------------------------------|--------------------|----------------|-----------|
| P62425        | TNYNDRYDEIR                                       | 1.124575021        | 2              | 2.35689   |
| P62425        | VAPAPAVVK                                         | 0.979073998        | 1              | 2.15337   |
| P62425        | VPPAINQFTQALDR                                    | 1.155655062        | 2              | 3.69734   |
| <b>P62630</b> | <b>EF1A1 Elongation factor 1_alpha 1</b>          | <b>2.455128075</b> | <b>1.2E-14</b> | <b>13</b> |
| P62630        | DGSASGTTLLEALDCILPPTTRPTDKPLR                     | 1.270256492        | 3              | 4.9869    |
| P62630        | KDGSASGTTLLEALDCILPPTTRPTDKPLR                    | 1.598868052        | 4              | 5.25064   |
| P62630        | MDSTEPPYSQK                                       | 1.184636987        | 2              | 3.74136   |
| P62630        | MDSTEPPYSQK+Oxidation(0                           | 1.446732889        |                |           |
| P62630        | NDPPMEAAGFTAQVIILNHPGQISAGYAPVLDCHTAHIACK         | 1.242638523        | 5              | 5.93441   |
| P62630        | RYEEIVK                                           | 1.023857319        | 2              | 2.7394    |
| P62630        | SGDAAIVDMVPGKPMCVEFSFDYPPLGR                      | 1.237933996        | 3              | 5.20747   |
| P62630        | SGDAAIVDMVPGKPMCVEFSFDYPPLGR+Oxidation(14         | 1.202936843        |                |           |
| P62630        | SGDAAIVDMVPGKPMCVEFSFDYPPLGR+Oxidation(8          | 1.450166314        |                |           |
| P62630        | VETGVLPGMVVTFAPVNVVTEVK                           | 1.393400154        | 3              | 5.63393   |
| P62630        | VETGVLPGMVVTFAPVNVVTEVK+Oxidation(9               | 1.25335048         |                |           |
| P62630        | YEEIVK                                            | 1.085430005        | 2              | 2.34163   |
| P62630        | YYVTIIDAPGHR                                      | 1.013095189        | 3              | 4.104     |
| <b>P62632</b> | <b>EF1A2 Elongation factor 1_alpha 2</b>          | <b>2.156358015</b> | <b>0.01249</b> | <b>7</b>  |
| P62632        | EHALLAYTLGVK                                      | 1.120542395        | 3              | 3.70318   |
| P62632        | IGGIGTVPVGR                                       | 1.285827334        | 2              | 3.54856   |
| P62632        | NMITGTSQADCAVLIVAAGVGEFEGISK                      | 1.231252116        | 3              | 4.56564   |
| P62632        | QLIVGVNK                                          | 1.078227781        | 1              | 2.43109   |
| P62632        | STTTGHLYK                                         | 1.343594107        | 2              | 3.06981   |
| P62632        | THINIVIGHVDSGK                                    | 1.000586413        | 2              | 5.39768   |
| P62632        | VETGILRPGMVVTFAPVNVITTEVK                         | 1.73774648         | 3              | 3.94433   |
| <b>P62634</b> | <b>CNBP Cellular nucleic acid_binding protein</b> | <b>1.93322098</b>  | <b>0.99993</b> | <b>2</b>  |
| P62634        | CGETGHVAINCCK                                     | 0.890445457        | 2              | 4.45352   |
| P62634        | CYSCGEFGHIQK                                      | 1.037428695        | 2              | 3.37999   |
| <b>P62703</b> | <b>RS4X 40S ribosomal protein S4_X isoform</b>    | <b>2.290182648</b> | <b>0.94226</b> | <b>5</b>  |
| P62703        | FDTGNLCMVTGGANLGR                                 | 1.219807356        | 2              | 4.77984   |
| P62703        | GIPHLVTHDAR                                       | 1.21149281         | 2              | 2.74673   |
| P62703        | LSNIFVIGK                                         | 1.483605019        | 2              | 3.12328   |
| P62703        | TDITYPAGFMDVISIDK                                 | 1.009678862        | 2              | 4.94691   |
| P62703        | VNDTIQIDLETGK                                     | 1.371479559        | 2              | 4.548     |
| <b>P62718</b> | <b>RL18A 60S ribosomal protein L18a</b>           | <b>2.152928023</b> | <b>0.9838</b>  | <b>2</b>  |
| P62718        | DLTTAGAVTQCYR                                     | 0.790673895        | 2              | 3.16364   |
| P62718        | SSGEIVYCGQVFEKSPLR                                | 1.639506596        | 2              | 2.50862   |
| <b>P62752</b> | <b>RL23A 60S ribosomal protein L23a</b>           | <b>2.072967484</b> | <b>1</b>       | <b>7</b>  |
| P62752        | KLYDIDVAK                                         | 1.026027817        | 2              | 2.39104   |
| P62752        | LAPDYDALDVANK                                     | 1.120517627        | 2              | 3.71814   |
| P62752        | LDHYAIK                                           | 1.110563361        | 2              | 2.52263   |
| P62752        | LYDIDVAK                                          | 1.025039926        | 1              | 1.98575   |
| P62752        | NKLDHYAIK                                         | 1.036502536        | 3              | 3.39016   |
| P62752        | VNTLIRPDGEK                                       | 1.052579036        | 2              | 3.34056   |
| P62752        | VNTLIRPDGEKK                                      | 1.05111189         | 2              | 2.93046   |
| <b>P62755</b> | <b>RS6 40S ribosomal protein S6</b>               | <b>2.407133302</b> | <b>0.29877</b> | <b>4</b>  |
| P62755        | LIEVDDER                                          | 1.225507439        | 2              | 3.07724   |
| P62755        | LNISFPATGCQK                                      | 1.288707907        | 2              | 2.85092   |
| P62755        | MATEVAADALGEEWK                                   | 1.365399766        | 2              | 4.78582   |
| P62755        | MATEVAADALGEEWK+Oxidation(0                       | 0.968172631        |                |           |
| <b>P62775</b> | <b>MTPN Myotrophin</b>                            | <b>1.817916711</b> | <b>0.94979</b> | <b>3</b>  |
| P62775        | GPDGLTALEATDNQAIK                                 | 1.478539371        | 2              | 3.90549   |
| P62775        | HHITPLLSAVYEGHVSCVK                               | 1.09822199         | 3              | 3.94215   |
| P62775        | NGDLDEVKDYVAK                                     | 0.860990036        | 2              | 3.19191   |
| <b>P62804</b> | <b>H4 Histone H4</b>                              | <b>2.109193245</b> | <b>1.1E-08</b> | <b>9</b>  |

|               |                                                             |                    |                |           |
|---------------|-------------------------------------------------------------|--------------------|----------------|-----------|
| P62804        | DAVITYTEHAK                                                 | 1.029669218        | 2              | 3.01126   |
| P62804        | DNIQGITKPAIR                                                | 0.97542667         | 2              | 3.14164   |
| P62804        | ISGLIYEETR                                                  | 1.62932014         | 2              | 3.97264   |
| P62804        | KTVTAMDVVYALK                                               | 0.861933474        | 3              | 4.77401   |
| P62804        | RISGLIYEETR                                                 | 1.133873243        | 2              | 2.40331   |
| P62804        | TVTAMDVVYALK                                                | 1.137985489        | 2              | 3.90066   |
| P62804        | TVTAMDVVYALK+Oxidation(4                                    | 1.130958917        |                |           |
| P62804        | VFLENVIR                                                    | 1.076112319        | 2              | 3.26437   |
| P62804        | VFLENVIRDAVITYTEHAK                                         | 1.208600974        | 3              | 3.87555   |
| <b>P62815</b> | <b>VATB2 V_type proton ATPase subunit B_ brain isoform</b>  | <b>1.97136495</b>  | <b>0.54842</b> | <b>3</b>  |
| P62815        | AVVQVFEGTSGIDAK                                             | 0.752903842        | 2              | 3.64331   |
| P62815        | IYPEEMIQTGSAIDGMNSIAR                                       | 1.240243586        | 3              | 3.44089   |
| P62815        | SGQVLEVSGSK                                                 | 1.009273969        | 2              | 2.81217   |
| <b>P62845</b> | <b>RS15 40S ribosomal protein S15</b>                       | <b>1.971399434</b> | <b>0.89562</b> | <b>2</b>  |
| P62845        | DMIILPEMVGSMVGVYNGK                                         | 1.102273393        | 2              | 3.15847   |
| P62845        | KEAPPMEKPEVVK                                               | 0.94330569         | 3              | 4.03212   |
| <b>P62850</b> | <b>RS24 40S ribosomal protein S24</b>                       | <b>2.189556447</b> | <b>0.99172</b> | <b>2</b>  |
| P62850        | KQMVIDVLHPGK                                                | 1.192456281        | 3              | 3.67591   |
| P62850        | TTGFGMIYDSLIDYAK                                            | 1.127981314        | 2              | 4.00406   |
| <b>P62856</b> | <b>RS26 40S ribosomal protein S26</b>                       | <b>2.063002885</b> | <b>0.99997</b> | <b>4</b>  |
| P62856        | DISEASVFDAYVLPK                                             | 1.276810958        | 2              | 3.11      |
| P62856        | FRPAGAAPRPPPKPM                                             | 0.970440347        | 2              | 2.73655   |
| P62856        | LHYCVSCAIHSK                                                | 0.995693104        | 3              | 3.33788   |
| P62856        | NIVEAAAVR                                                   | 1.043490631        | 2              | 3.01359   |
| <b>P62859</b> | <b>RS28 40S ribosomal protein S28</b>                       | <b>2.513223659</b> | <b>0.93216</b> | <b>2</b>  |
| P62859        | EGDVLTLLLESER                                               | 1.400431588        | 2              | 3.53634   |
| P62859        | VEFMDDTSR                                                   | 1.213511857        | 2              | 2.70491   |
| <b>P62870</b> | <b>ELOB Transcription elongation factor B polypeptide 2</b> | <b>2.223596347</b> | <b>0.67885</b> | <b>3</b>  |
| P62870        | ADDTFEALR                                                   | 1.059494482        | 2              | 2.5475    |
| P62870        | LYKDDQLLDDGK                                                | 1.074520334        | 2              | 2.9807    |
| P62870        | TLGECGFTSQTRPQAPATVGLAFR                                    | 1.416390438        | 3              | 4.52014   |
| <b>P62890</b> | <b>RL30 60S ribosomal protein L30</b>                       | <b>2.214316152</b> | <b>2.1E-05</b> | <b>3</b>  |
| P62890        | LVILANNCALR                                                 | 1.100915459        | 2              | 3.06541   |
| P62890        | TGVHHYSGNIELGTACGK                                          | 1.13340943         | 2              | 5.68993   |
| P62890        | VCTLAIIDPGDSDIIR                                            | 2.46128668         | 2              | 4.24025   |
| <b>P62898</b> | <b>CYC Cytochrome c_somatic</b>                             | <b>2.036859995</b> | <b>0.99991</b> | <b>7</b>  |
| P62898        | ADLIAYLK                                                    | 1.026326464        | 2              | 3.12513   |
| P62898        | ADLIAYLKKATNE                                               | 0.747027649        | 2              | 2.46253   |
| P62898        | GITWGEDTLMEYLENPK                                           | 1.200851442        | 2              | 4.98805   |
| P62898        | GITWGEDTLMEYLENPKK                                          | 1.044305649        | 2              | 4.31643   |
| P62898        | KTGQAAGFSYTDANK                                             | 0.781368817        | 2              | 5.1925    |
| P62898        | TGPNLHGLFGR                                                 | 0.828097482        | 2              | 3.37204   |
| P62898        | TGQAAGFSYTDANK                                              | 1.018656278        | 2              | 4.18944   |
| <b>P62902</b> | <b>RL31 60S ribosomal protein L31</b>                       | <b>2.703915121</b> | <b>0.95806</b> | <b>2</b>  |
| P62902        | NLQTVNVN DEN                                                | 1.903428262        | 1              | 2.41981   |
| P62902        | SAINEVVTR                                                   | 1.371777692        | 2              | 3.05434   |
| <b>P62907</b> | <b>RL10A 60S ribosomal protein L10a</b>                     | <b>2.265049168</b> | <b>0.01137</b> | <b>6</b>  |
| P62907        | AVDIPHMDIEALK                                               | 1.232232492        | 2              | 3.03815   |
| P62907        | AVDIPHMDIEALKK                                              | 0.980474997        | 2              | 3.07241   |
| P62907        | FSVCVLGDQQHCDEAK                                            | 1.205111302        | 2              | 4.12317   |
| P62907        | KYDAFLASESLIK                                               | 1.026995126        | 2              | 3.84331   |
| P62907        | VLCLAVAVGHVK                                                | 0.940018639        | 2              | 3.23442   |
| P62907        | YDAFLASESLIK                                                | 1.209711395        | 2              | 3.306     |
| <b>P62909</b> | <b>RS3 40S ribosomal protein S3</b>                         | <b>2.165917588</b> | <b>0.0101</b>  | <b>10</b> |
| P62909        | AELNEFLTR                                                   | 1.088197694        | 2              | 3.19437   |

|               |                                                           |                    |                |           |
|---------------|-----------------------------------------------------------|--------------------|----------------|-----------|
| P62909        | DEILPTTPISEQK                                             | 1.175419354        | 2              | 3.3224    |
| P62909        | ELAEDGYSGVEVR                                             | 1.022646755        | 2              | 3.83229   |
| P62909        | ELTAVVQK                                                  | 1.139681856        | 1              | 2.05135   |
| P62909        | FGFPEGSVELYAEK                                            | 2.376280254        | 2              | 3.56604   |
| P62909        | FVDGLMIHSGDPVNYVDTAVR                                     | 1.396793749        | 3              | 4.76127   |
| P62909        | GCEVVVSGK                                                 | 0.912736481        | 2              | 2.41689   |
| P62909        | GGKPEPPAMPQPVPTA                                          | 1.259957617        | 2              | 4.07126   |
| P62909        | GLCAIAQAESLR                                              | 0.933901297        | 2              | 3.36026   |
| P62909        | TEIIILATR                                                 | 1.248626113        | 2              | 3.28158   |
| <b>P62912</b> | <b>RL32 60S ribosomal protein L32</b>                     | <b>2.053072305</b> | <b>0.54668</b> | <b>3</b>  |
| P62912        | ELEVLLMCNK                                                | 0.921533489        | 2              | 3.29667   |
| P62912        | GQLMPNIGYGSNK                                             | 1.037717907        | 2              | 3.15751   |
| P62912        | SYCAEIAHNVSSK                                             | 1.200523908        | 2              | 4.41383   |
| <b>P62914</b> | <b>RL11 60S ribosomal protein L11</b>                     | <b>2.124381381</b> | <b>0.96621</b> | <b>2</b>  |
| P62914        | VLEQLTGQTPVFSK                                            | 1.164848785        | 2              | 4.42675   |
| P62914        | YDGIILPGK                                                 | 1.061956393        | 2              | 3.05924   |
| <b>P62919</b> | <b>RL8 60S ribosomal protein L8</b>                       | <b>2.096781376</b> | <b>0.75958</b> | <b>4</b>  |
| P62919        | ASGNATVISHNPETK                                           | 1.065127805        | 2              | 4.43514   |
| P62919        | AVDFAER                                                   | 1.233475587        | 1              | 1.97741   |
| P62919        | AVVGVVAGGGR                                               | 1.068240596        | 2              | 3.61877   |
| P62919        | KAQLNIGNVLPVGTMEPTIVCCLEEKPGDR                            | 1.422405743        | 3              | 5.37276   |
| <b>P62944</b> | <b>AP2B1 AP_2 complex subunit beta</b>                    | <b>2.024732682</b> | <b>0.58764</b> | <b>3</b>  |
| P62944        | KPSETQELVQQVLSLATQDSDNPDLR                                | 1.637927561        | 3              | 3.30468   |
| P62944        | LQNNNVYTIK                                                | 1.014934802        | 2              | 2.40778   |
| P62944        | SQPDMAIMAVNSFK                                            | 0.966038105        | 2              | 2.97341   |
| <b>P62959</b> | <b>HINT1 Histidine triad nucleotide binding protein 1</b> | <b>1.92424488</b>  | <b>0.99943</b> | <b>7</b>  |
| P62959        | AQVAQPGGDTIFGK                                            | 0.939688555        | 2              | 4.75212   |
| P62959        | CAADLGLK                                                  | 1.09496691         | 2              | 2.52929   |
| P62959        | CLAFHDISPQAPTHFLVIPK                                      | 1.313182261        | 3              | 4.29055   |
| P62959        | HISQISVADDDDESLLGHLMIVGK                                  | 1.147154836        | 3              | 6.72587   |
| P62959        | IIFEDDR                                                   | 1.610012144        | 2              | 2.59956   |
| P62959        | KHISQISVADDDDESLLGHLMIVGK                                 | 1.143875169        | 3              | 5.49068   |
| P62959        | MVVNEGADGGQSVYHIHLHVLGGR                                  | 0.749697491        | 3              | 4.37994   |
| <b>P62961</b> | <b>YBOX1 Nuclease sensitive element binding protein 1</b> | <b>1.646339079</b> | <b>0.53273</b> | <b>6</b>  |
| P62961        | EDGNEEDKENQGDETQGGQPPQR                                   | 0.799735726        | 3              | 5.12613   |
| P62961        | GAEAAANVTGPGGVPVQGSK                                      | 0.784240453        | 2              | 4.97392   |
| P62961        | NEGSESAPEGQAQQR                                           | 0.656587146        | 2              | 5.21107   |
| P62961        | NYQQNYQNSSESKE                                            | 1.199976424        | 2              | 4.82381   |
| P62961        | NYQQNYQNSSESKEGNEGSESAPEGQAQQR                            | 0.790664997        | 3              | 5.12922   |
| P62961        | RPQYSNPPVQGEVMEGADNQGAGEQGRPVR                            | 1.088459095        | 3              | 5.12013   |
| <b>P62963</b> | <b>PROF1 Profilin_1</b>                                   | <b>2.20474096</b>  | <b>0.43267</b> | <b>6</b>  |
| P62963        | CYEMASHLR                                                 | 1.36069087         | 2              | 2.39401   |
| P62963        | DSLLQDGEFTMDLR                                            | 1.274456773        | 2              | 3.40966   |
| P62963        | DSPSVWAAVPGK                                              | 0.760496715        | 2              | 2.74058   |
| P62963        | SSFFVNGTLGGQK                                             | 1.153275728        | 2              | 4.35779   |
| P62963        | STGGAPTFTVNTMTAK                                          | 1.291974658        | 2              | 3.43468   |
| P62963        | TFVSITPAEVLVVGK                                           | 1.124387436        | 2              | 4.63715   |
| <b>P63018</b> | <b>HSP7C Heat shock cognate 71 kDa protein</b>            | <b>2.194061074</b> | <b>5E-07</b>   | <b>25</b> |
| P63018        | ARFEELNADLFR                                              | 1.029696483        | 3              | 3.73955   |
| P63018        | CNEIISWLDK                                                | 1.001575458        | 2              | 3.17904   |
| P63018        | DAGTIAGLNVLNR                                             | 1.830510331        | 2              | 3.69132   |
| P63018        | FDDAVVQSDMK                                               | 1.162349111        | 2              | 3.871     |
| P63018        | FEELNADLFR                                                | 1.114359551        | 2              | 3.28983   |
| P63018        | FELTGIPPAPR                                               | 1.078337459        | 2              | 3.13579   |
| P63018        | HWPFMVVNDAGRPK                                            | 2.153661393        | 3              | 3.51047   |
| P63018        | IINEPTAAAIAYGLDK                                          | 1.198045218        | 2              | 5.42855   |

|               |                                                      |                    |                |           |
|---------------|------------------------------------------------------|--------------------|----------------|-----------|
| P63018        | IINEPTAAAIAYGLDKK                                    | 1.078290835        | 2              | 4.27956   |
| P63018        | LLQDFFNKG                                            | 1.560304334        | 2              | 2.69215   |
| P63018        | MKEIAEAYLGK                                          | 1.022769677        | 2              | 3.4522    |
| P63018        | MVNHFAIEFK                                           | 0.903214042        | 2              | 2.86187   |
| P63018        | NQTAEKEEFEHQK                                        | 0.928603285        | 2              | 5.26832   |
| P63018        | NQVAMNPTNTVFDAK                                      | 0.953888819        | 2              | 4.97062   |
| P63018        | NQVAMNPTNTVFDAK+Oxidation(4                          | 1.01361321         |                |           |
| P63018        | NSLESYAFNMK                                          | 1.059216981        | 2              | 3.50634   |
| P63018        | RFDDAVVQSDMK                                         | 1.060831215        | 2              | 3.62859   |
| P63018        | SFYPEEVSSMVLTK                                       | 1.179666355        | 2              | 4.95721   |
| P63018        | SFYPEEVSSMVLTK+Oxidation(9                           | 1.320149462        |                |           |
| P63018        | SINPDEAVAYGAAVQAAILSGDK                              | 1.366280917        | 2              | 5.93176   |
| P63018        | SQIHDIVLVGGSTR                                       | 1.03183522         | 2              | 4.46678   |
| P63018        | STAGDTHLGGEDFDNR                                     | 0.945656017        | 2              | 4.72993   |
| P63018        | TVTNAVVTVPAYFNDSQR                                   | 1.226794095        | 3              | 4.90088   |
| P63018        | VCNPIITK                                             | 1.131756887        | 2              | 2.53822   |
| P63018        | VQVEYKGETK                                           | 0.737087617        | 2              | 2.54376   |
| <b>P63029</b> | <b>TCTP Translationally controlled tumor protein</b> | <b>2.597147313</b> | <b>0.96677</b> | <b>3</b>  |
| P63029        | DLISHDELFSDIYK                                       | 1.405158256        | 2              | 3.90017   |
| P63029        | EIADGLCLEVEGK                                        | 1.025145904        | 2              | 3.26732   |
| P63029        | VKPFMTGAAEQIK                                        | 1.220658722        | 3              | 3.34117   |
| <b>P63036</b> | <b>DNJA1 Dnaj homolog subfamily A member 1</b>       | <b>1.889343166</b> | <b>1</b>       | <b>7</b>  |
| P63036        | ETTYDVLGVKPNATQEELKK                                 | 0.904418259        | 3              | 3.56827   |
| P63036        | HYNGEAYEDDEHHPR                                      | 0.845629697        | 3              | 4.9599    |
| P63036        | ITFHGEGDQEPGLEPGDIIIVLDQK                            | 1.246877229        | 3              | 4.00024   |
| P63036        | NVVHQLSVTLEDLYNGATR                                  | 1.106660211        | 2              | 4.05001   |
| P63036        | QISQAYEVLADSK                                        | 0.939712054        | 2              | 3.17226   |
| P63036        | TIVITSHPGQIVK                                        | 0.918627729        | 2              | 3.62617   |
| P63036        | VNFPENGFLSPDK                                        | 0.893884139        | 2              | 3.42163   |
| <b>P63039</b> | <b>CH60 60 kDa heat shock protein_mitochondrial</b>  | <b>1.987759806</b> | <b>1</b>       | <b>36</b> |
| P63039        | AAVEEGIVLGGGCALLR                                    | 1.108006837        | 2              | 5.38005   |
| P63039        | ALMLQGVDLLADAVAVTMGPK                                | 1.166292263        | 3              | 6.58248   |
| P63039        | ALMLQGVDLLADAVAVTMGPK+Oxidation(17                   | 1.030449265        |                |           |
| P63039        | CEFQDAYVLLSEK                                        | 1.292650224        | 2              | 4.4081    |
| P63039        | CIPALDSLKPANEDQK                                     | 0.920243919        | 2              | 3.53513   |
| P63039        | DDAMLLK                                              | 1.327159794        | 1              | 1.99997   |
| P63039        | DIGNIISDAMK                                          | 2.196546618        | 2              | 3.37775   |
| P63039        | GIIDPTK                                              | 1.216855392        | 1              | 1.93064   |
| P63039        | GVMLAVDAVIAELK                                       | 1.086317494        | 2              | 4.53891   |
| P63039        | GVMLAVDAVIAELKK                                      | 1.467265855        | 2              | 4.63125   |
| P63039        | GYISPYFINTSK                                         | 0.963583554        | 2              | 3.09148   |
| P63039        | IGIEIHK                                              | 0.920779047        | 2              | 2.67976   |
| P63039        | IGIEIHKR                                             | 1.421767867        | 2              | 2.41996   |
| P63039        | ILQSSSEVGYDAMLGDFVNMVEK                              | 1.199562927        | 3              | 5.09175   |
| P63039        | IQEITEQLDITTSEYEK                                    | 1.172619233        | 2              | 5.62386   |
| P63039        | IQEITEQLDITTSEYEKEK                                  | 0.97271233         | 2              | 5.26961   |
| P63039        | ISSVQSIVPALEIANAHR                                   | 1.285896277        | 2              | 4.32679   |
| P63039        | KISSVQSIVPALEIANAHR                                  | 1.148136358        | 3              | 4.38552   |
| P63039        | KPLVIAEDVDGEALSTLVLNR                                | 1.3224901          | 2              | 6.01495   |
| P63039        | LSDGVAVLK                                            | 1.086483422        | 2              | 2.96864   |
| P63039        | LVQDVANNTNEEAGDGTATVLAR                              | 1.482867411        | 2              | 6.51714   |
| P63039        | NAGVEGSLIVEK                                         | 1.059425004        | 2              | 3.4122    |
| P63039        | QSKPVTTPPEEIAQVATISANGDK                             | 1.039865471        | 2              | 3.41524   |
| P63039        | QSKPVTTPPEEIAQVATISANGDKDIGNIISDAMK                  | 0.909892825        | 3              | 4.84935   |
| P63039        | RGVMLAVDAVIAELKK                                     | 0.919084659        | 3              | 5.93169   |
| P63039        | TALLDAAGVASLLTAEAVVTEIPKEEK                          | 2.125279028        | 3              | 5.14673   |
| P63039        | TLNDELEIIEGMK                                        | 1.128688556        | 2              | 4.79828   |

|               |                                                                      |                    |                |           |
|---------------|----------------------------------------------------------------------|--------------------|----------------|-----------|
| P63039        | TLNDELEIIIEGMK+Oxidation(11                                          | 1.969601291        |                |           |
| P63039        | TVIIIEQSWGSPK                                                        | 0.913988551        | 2              | 4.42764   |
| P63039        | VGEVIVTK                                                             | 0.983285552        | 2              | 3.24175   |
| P63039        | VGEVIVTKDDAMLLK                                                      | 0.636469821        | 2              | 3.60917   |
| P63039        | VGGTSDVEVNEK                                                         | 2.205573154        | 2              | 3.80371   |
| P63039        | VGGTSDVEVNEKK                                                        | 0.936265432        | 2              | 3.73601   |
| P63039        | VGGTSDVEVNEKKDR                                                      | 0.322039305        | 2              | 3.41717   |
| P63039        | VGLQVVAVK                                                            | 0.973939225        | 2              | 3.09865   |
| P63039        | VTDALNATR                                                            | 0.947962918        | 2              | 3.44299   |
| <b>P63092</b> | <b>subunit alpha isoforms short</b>                                  | <b>2.632397751</b> | <b>1.5E-05</b> | <b>2</b>  |
| P63092        | AFEPFYDEIKSKGALVK                                                    | 1.435398962        |                |           |
| P63092        | YTPPEDATPEPGEDPR                                                     | 0.92692358         |                |           |
| <b>P63102</b> | <b>1433Z 14_3_3 protein zeta/delta</b>                               | <b>2.336009888</b> | <b>0.99979</b> | <b>10</b> |
| P63102        | DICNDVLSLLEK                                                         | 1.29478561         | 3              | 3.8173    |
| P63102        | EMQPTHPIR                                                            | 1.375126618        | 2              | 2.32383   |
| P63102        | FLIPNASQPESK                                                         | 1.024312921        | 2              | 2.90948   |
| P63102        | GIVDQSQQAYQEAFEISK                                                   | 1.021321459        | 2              | 5.67016   |
| P63102        | KGIVDQSQQAYQEAFEISK                                                  | 0.902027623        | 2              | 5.2667    |
| P63102        | SVTEQGAELSNEER                                                       | 0.701846165        | 2              | 5.17422   |
| P63102        | TAFDEAIAELDTLSEESYK                                                  | 1.224198767        | 3              | 4.63565   |
| P63102        | YDDMAACMK                                                            | 1.877684718        | 2              | 2.52387   |
| P63102        | YLAEVAAGDDK                                                          | 1.006086503        | 2              | 2.36058   |
| P63102        | YLAEVAAGDDKK                                                         | 1.092097937        | 2              | 3.5155    |
| <b>P63159</b> | <b>HMGB1 High mobility group protein B1</b>                          | <b>2.085267484</b> | <b>0.99893</b> | <b>6</b>  |
| P63159        | GEHPGLSIGDVAK                                                        | 1.093255708        | 2              | 2.97856   |
| P63159        | GKFEDMAK                                                             | 0.812749071        | 1              | 2.01504   |
| P63159        | IKGEHPGLSIGDVAK                                                      | 1.284163634        | 2              | 4.02613   |
| P63159        | KHPDASVNFSEFSK                                                       | 1.032758467        | 3              | 4.19383   |
| P63159        | KLGEMWNNNTAADDKQPYEK                                                 | 0.912104866        | 3              | 4.61693   |
| P63159        | LGEMWNNNTAADDKQPYEK                                                  | 1.059553778        | 2              | 4.93213   |
| <b>P63174</b> | <b>RL38 60S ribosomal protein L38</b>                                | <b>2.353267968</b> | <b>0.1422</b>  | <b>2</b>  |
| P63174        | IEEIKDFLLTAR                                                         | 1.297742225        | 2              | 3.03256   |
| P63174        | KIEEIKDFLLTAR                                                        | 1.234474497        | 2              | 4.6024    |
| <b>P63245</b> | <b>GBLP Guanine nucleotide_binding protein subunit beta_2_like 1</b> | <b>2.354125223</b> | <b>0.95802</b> | <b>13</b> |
| P63245        | DETNYGIPQR                                                           | 1.113028313        | 2              | 2.52143   |
| P63245        | DGQAMLWDLNEGK                                                        | 1.15764962         | 2              | 3.3529    |
| P63245        | FSPNSSNPIIVSCGWDK                                                    | 1.206295485        | 2              | 4.22051   |
| P63245        | GHNWVVTQIATTPQFDMILSASR                                              | 1.047041948        | 3              | 4.1962    |
| P63245        | HLYTLDDGGDIINALCFSPNR                                                | 1.269134525        | 2              | 6.13431   |
| P63245        | IIVDELK                                                              | 1.264752931        | 2              | 2.49785   |
| P63245        | IIVDELKQEVISTSSK                                                     | 1.241822345        | 3              | 4.08416   |
| P63245        | IWDLEGK                                                              | 1.098798319        | 2              | 2.36423   |
| P63245        | LWDLTTGTTR                                                           | 0.8563463          | 1              | 1.95773   |
| P63245        | TNHIGHTGYLNTVTVSPDGSLCASGGK                                          | 1.012129466        | 3              | 5.39473   |
| P63245        | VWNLANCK                                                             | 0.999928234        | 2              | 2.58687   |
| P63245        | VWQVTIGTR                                                            | 1.120538484        | 2              | 2.86244   |
| P63245        | YWLCAATGPSIK                                                         | 0.875728839        | 2              | 3.53412   |
| <b>P63259</b> | <b>ACTG Actin_cytoplasmic 2</b>                                      | <b>2.020414376</b> | <b>0.47319</b> | <b>8</b>  |
| P63259        | CPEALFQPSFLGMESCGIHETTFNSIMK                                         | 1.665817444        | 3              | 5.68872   |
| P63259        | DLYANTVLSGGTTMYPGIADR                                                | 1.000574072        | 2              | 6.0936    |
| P63259        | DLYANTVLSGGTTMYPGIADR+Oxidation(13                                   | 1.361802548        |                |           |
| P63259        | GYSFTTTAER                                                           | 0.94698717         | 2              | 3.51666   |
| P63259        | KDLYANTVLSGGTTMYPGIADR                                               | 1.116368148        | 2              | 6.30012   |
| P63259        | KDLYANTVLSGGTTMYPGIADR+Oxidation(14                                  | 1.101549978        |                |           |
| P63259        | QEYDESGPSIVHR                                                        | 2.995332991        | 3              | 3.50643   |
| P63259        | VAPEEHPVLLTEAPLNPK                                                   | 1.104558104        | 2              | 4.68066   |

|               |                                                                  |                    |                |           |
|---------------|------------------------------------------------------------------|--------------------|----------------|-----------|
| <b>P63324</b> | <b>RS12 40S ribosomal protein S12</b>                            | <b>2.134789053</b> | <b>0.98762</b> | <b>4</b>  |
| P63324        | KVVGCSVVVK                                                       | 0.868846351        | 2              | 3.27817   |
| P63324        | LGEWVGLCK                                                        | 1.236379221        | 2              | 3.16608   |
| P63324        | QAHLCVLASNCDEPMYVK                                               | 1.144278997        | 3              | 3.98918   |
| P63324        | VVGCSCVVVK                                                       | 1.107759555        | 2              | 3.23924   |
| <b>P67779</b> | <b>PHB Prohibitin</b>                                            | <b>1.761571931</b> | <b>0.97672</b> | <b>11</b> |
| P67779        | AAELIANSLATAGDGLIELR                                             | 1.060840926        | 3              | 5.0684    |
| P67779        | AAIISAEGDSK                                                      | 1.028678691        | 2              | 2.57841   |
| P67779        | DLQNVNITLR                                                       | 0.745066787        | 2              | 3.24295   |
| P67779        | FDAGELITQR                                                       | 0.907407873        | 2              | 3.72557   |
| P67779        | FGLALAVAGGVNSALYNVDAGHR                                          | 1.252766051        | 3              | 3.37601   |
| P67779        | GVQDIVVGEGTHFLIPWVQKPIIFDCR                                      | 0.945090614        | 3              | 4.43454   |
| P67779        | IYTSIGEDYDER                                                     | 1.193269248        | 2              | 3.50215   |
| P67779        | KLEAAEDIAYQLSR                                                   | 0.814446835        | 2              | 4.64327   |
| P67779        | NVPVITGSK                                                        | 0.817004973        | 1              | 2.28696   |
| P67779        | QVSDDLTER                                                        | 0.636526049        | 2              | 2.45334   |
| P67779        | VLPSITTEILK                                                      | 1.391047697        | 2              | 2.4025    |
| <b>P68037</b> | <b>UB2L3 Ubiquitin_conjugating enzyme E2 L3</b>                  | <b>2.132330815</b> | <b>0.74242</b> | <b>4</b>  |
| P68037        | ADLAEESYK                                                        | 2.430420051        | 2              | 2.38827   |
| P68037        | GQVCLPVIENWKPATK                                                 | 0.856074347        | 2              | 4.40799   |
| P68037        | IEINFPAEYPFKPPK                                                  | 1.155367245        | 2              | 3.33293   |
| P68037        | TDQVIQSLIALVNDPQPEHPLR                                           | 1.31500757         | 2              | 5.28861   |
| <b>P68101</b> | <b>IF2A Eukaryotic translation initiation factor 2 subunit 1</b> | <b>1.951152901</b> | <b>0.54423</b> | <b>5</b>  |
| P68101        | AGLNCSTETMPIK                                                    | 1.222616174        | 2              | 3.12973   |
| P68101        | HAVSDPSILDSLNLNEDEREVLINNINR                                     | 0.890352793        | 3              | 4.07829   |
| P68101        | HVAEVLEYTKDEQLESFQR                                              | 0.904532273        | 3              | 4.00685   |
| P68101        | TEGLSVLNQAMAVIK                                                  | 1.425572269        | 2              | 4.13596   |
| P68101        | VVTDTEDELAR                                                      | 1.026169425        | 2              | 3.77996   |
| <b>P68136</b> | <b>ACTS Actin_alpha skeletal muscle</b>                          | <b>1.982641946</b> | <b>0.98528</b> | <b>18</b> |
| P68136        | AGFAGDDAPR                                                       | 1.281845333        | 2              | 3.46492   |
| P68136        | AVFPSIVGRPR                                                      | 0.907298303        | 2              | 2.42247   |
| P68136        | DLYANNVMSGGTTMYPGIADR                                            | 1.091358203        | 2              | 4.72348   |
| P68136        | DSYVGDEAQSK                                                      | 0.962795837        | 2              | 3.46228   |
| P68136        | DSYVGDEAQSKR                                                     | 0.491525028        | 2              | 2.57108   |
| P68136        | EITALAPSTMK                                                      | 1.270185702        | 2              | 2.98434   |
| P68136        | EITALAPSTMK+Oxidation(9)                                         | 0.964077467        |                |           |
| P68136        | GYSFVTTAER                                                       | 1.235425393        | 2              | 3.72485   |
| P68136        | IWHHTFYNELR                                                      | 1.936753501        | 2              | 2.96148   |
| P68136        | KDLYANNVMSGGTTMYPGIADR                                           | 3.632425841        | 2              | 5.14151   |
| P68136        | KDLYANNVMSGGTTMYPGIADR+Oxidation(14)                             | 1.230719014        |                |           |
| P68136        | MQKEITALAPSTMK                                                   | 1.004361659        | 2              | 3.51916   |
| P68136        | QEYDEAGPSIVHR                                                    | 2.557387953        | 3              | 3.30013   |
| P68136        | TTGIVLDSGDGVTHNVPIYEGYALPHAIMR                                   | 1.449532849        | 3              | 6.09084   |
| P68136        | TTGIVLDSGDGVTHNVPIYEGYALPHAIMR+Oxidation(28)                     | 2.120780207        |                |           |
| P68136        | VAPEEHPTLLTEAPLNPK                                               | 1.285041636        | 2              | 4.24267   |
| P68136        | YPIEHGIITNWDDMEK                                                 | 1.403128176        | 2              | 4.75753   |
| P68136        | YPIEHGIITNWDDMEK+Oxidation(13)                                   | 1.529722354        |                |           |
| <b>P68255</b> | <b>1433T 14_3_3 protein theta</b>                                | <b>1.787562998</b> | <b>0.9897</b>  | <b>7</b>  |
| P68255        | AVTEQGAELSNEER                                                   | 0.710596124        | 2              | 4.6872    |
| P68255        | SICTTVLELLDK                                                     | 1.139590803        | 2              | 3.22655   |
| P68255        | TAFDEAIAELDTLNEDSYK                                              | 1.155598745        | 2              | 3.28603   |
| P68255        | VISSIEQK                                                         | 0.842274801        | 2              | 2.60992   |
| P68255        | YLAEVACGDDR                                                      | 0.83824036         | 2              | 2.35311   |
| P68255        | YLAEVACGDDRK                                                     | 0.90166136         | 2              | 3.1614    |
| P68255        | YLIANATNPESK                                                     | 0.968230682        | 2              | 3.17227   |

|               |                                                                                 |                    |                |           |
|---------------|---------------------------------------------------------------------------------|--------------------|----------------|-----------|
| <b>P68511</b> | <b>1433F 14_3_3 protein eta</b>                                                 | <b>2.255270635</b> | <b>0.97888</b> | <b>5</b>  |
| P68511        | AVTELNEPLSNEDR                                                                  | 1.135815864        | 2              | 4.9965    |
| P68511        | ELETVCNDVLALLDK                                                                 | 1.245363974        | 2              | 3.5725    |
| P68511        | NCNDFQYESK                                                                      | 1.214102644        | 2              | 2.61677   |
| P68511        | NSVVEASEAAYK                                                                    | 1.081608149        | 2              | 2.8063    |
| P68511        | YLAEVASGEK                                                                      | 1.340038954        | 2              | 2.54534   |
| <b>P69897</b> | <b>TBB5 Tubulin beta_5 chain</b>                                                | <b>2.404742756</b> | <b>3E-08</b>   | <b>4</b>  |
| P69897        | ALTVPELTQQVFDK                                                                  | 1.162995015        | 2              | 3.27548   |
| P69897        | FWEVISDEHGIDPTGTYHGSDQLQDR                                                      | 1.506132019        | 3              | 4.5293    |
| P69897        | ISVYYNEATGGK                                                                    | 1.831925028        | 2              | 2.87951   |
| P69897        | LTTPTYGDLNHLVSATMSGVTTCLR                                                       | 1.987568133        | 2              | 5.17076   |
| <b>P70191</b> | <b>TRAF5 TNF receptor_associated factor 5</b>                                   | <b>1.895587951</b> | <b>0.86279</b> | <b>2</b>  |
| P70191        | SLRELNSVPICPVDK                                                                 | 0.746462548        | 2              | 2.34286   |
| P70191        | VTLMLLDQSGK                                                                     | 0.945199941        | 2              | 2.45972   |
| <b>P70372</b> | <b>ELAV1 ELAV_like protein 1</b>                                                | <b>2.432003388</b> | <b>0.34307</b> | <b>3</b>  |
| P70372        | SLFSSIGEVEK                                                                     | 1.283230643        | 2              | 3.22271   |
| P70372        | TNLIVNYLPQNMTEELR                                                               | 1.077291348        | 2              | 3.54844   |
| P70372        | VLVDQTTGLSR                                                                     | 2.600338124        | 2              | 2.79901   |
| <b>P70470</b> | <b>LYPA1 Acyl_protein thioesterase 1</b>                                        | <b>2.395814145</b> | <b>0.89141</b> | <b>4</b>  |
| P70470        | ASFSQGPINSANR                                                                   | 1.465289911        | 2              | 3.09308   |
| P70470        | DISVLQCHGDCDPLVPLMFGSLTVER                                                      | 1.205444928        | 3              | 3.70286   |
| P70470        | GLVNPANVTFK                                                                     | 1.355110066        | 2              | 2.45555   |
| P70470        | VYEGMMHSSCQEQEMMDVK                                                             | 1.055142949        | 3              | 3.35158   |
| <b>P70473</b> | <b>AMACR Alpha_methylacyl_CoA racemase</b>                                      | <b>1.72338892</b>  | <b>9.8E-15</b> | <b>11</b> |
| P70473        | ADVLLPEFR                                                                       | 0.870836337        | 2              | 3.33956   |
| P70473        | AEWCQIFDGTDACVTPVLTLEEALHHQHNR                                                  | 1.109326468        | 4              | 4.72753   |
| P70473        | DYGFSQEEIHQLHSDR                                                                | 0.943708099        | 2              | 4.80469   |
| P70473        | GLGLESEELPSQMSIEDWPEMK                                                          | 1.219773761        | 3              | 4.50279   |
| P70473        | GQNLLDGGAPFYTTYK                                                                | 0.623816655        | 2              | 4.8595    |
| P70473        | GSFITDEEQHACPRPAPQLSR                                                           | 0.530046989        | 3              | 4.29839   |
| P70473        | LGSVNHPHSLAR                                                                    | 0.824594675        | 2              | 3.31241   |
| P70473        | LQLGPETLR                                                                       | 0.777558565        | 2              | 2.40522   |
| P70473        | RDPSVGEHTVEVLK                                                                  | 0.80802851         | 3              | 4.24251   |
| P70473        | RDPSVGEHTVEVLKDYGFSQEEIHQLHSDR                                                  | 0.551459321        | 4              | 5.42512   |
| P70473        | TQAMGLWAQPR                                                                     | 0.899515893        | 2              | 3.47042   |
| <b>P70550</b> | <b>RAB8B Ras_related protein Rab_8B</b>                                         | <b>2.621896758</b> | <b>0.00629</b> | <b>2</b>  |
| P70550        | LLIGDSGVGK                                                                      | 1.391992649        | 2              | 2.91201   |
| P70550        | NIEEHASSDVER                                                                    | 1.203963945        | 2              | 2.98077   |
| <b>P70552</b> | <b>GFRP GTP cyclohydrolase 1 feedback regulatory protein</b>                    | <b>2.04427831</b>  | <b>0.99995</b> | <b>2</b>  |
| P70552        | MEVGPTMVGDEHSDPELMQQLGASK                                                       | 1.348926536        | 3              | 5.17034   |
| P70552        | VLGNNFYEYVNDPPR                                                                 | 0.829589496        | 2              | 4.28155   |
| <b>P70580</b> | <b>PGRC1 Membrane_associated progesterone receptor component 1</b>              | <b>1.875243782</b> | <b>0.98763</b> | <b>9</b>  |
| P70580        | EALKDEYDDLSDLTPAQQETLNDWDSQFTFK                                                 | 1.568416242        | 3              | 5.38445   |
| P70580        | EGEPTVYSDDEEPKDEAAR                                                             | 0.651629447        | 2              | 4.59574   |
| P70580        | FYGPEGPYGVFAGR                                                                  | 0.950167166        | 2              | 4.53776   |
| P70580        | GDQPGASGDNDDEPPPLPR                                                             | 70.20216428        | 2              | 4.99778   |
| P70580        | IVRGDQPGASGDNDDEPPPLPR                                                          | 1.139053651        | 3              | 5.5517    |
| P70580        | KFYGPEGPYGVFAGR                                                                 | 0.640299126        | 2              | 3.9042    |
| P70580        | LLKEGEEPTVYSDDEEPKDEAAR                                                         | 1.088244336        | 3              | 4.28539   |
| P70580        | RYDGVQDPR                                                                       | 0.965418749        | 1              | 2.08088   |
| P70580        | YDGVQDPR                                                                        | 0.844461085        | 2              | 2.87635   |
| <b>P70584</b> | <b>ACDSB Short/branched chain specific acyl_CoA dehydrogenase_mitochondrial</b> | <b>1.867980874</b> | <b>0.18894</b> | <b>9</b>  |
| P70584        | ASSTCQLTFENVK                                                                   | 0.790305122        | 2              | 2.89981   |
| P70584        | FAQEQAPLVSTMDENSK                                                               | 0.901863356        | 2              | 4.61998   |



|               |                                              |                    |                |           |
|---------------|----------------------------------------------|--------------------|----------------|-----------|
| P70584        | IFDFQGLQHVAHVATQLEAAR                        | 1.223647966        | 3              | 6.06027   |
| P70584        | IGTIYEGTSNIQLNTIAK                           | 0.92766796         | 2              | 4.50766   |
| P70584        | KFAQEQIAPLVSTMDENSK                          | 0.751435563        | 2              | 6.00841   |
| P70584        | SGNYVINGSK                                   | 1.054996439        | 2              | 3.36215   |
| P70584        | SVIQGLFQQGMMGIEVEAK                          | 1.227804586        | 2              | 4.49709   |
| P70584        | VDASVALLCDIQNTVINK                           | 1.131859708        | 2              | 4.87087   |
| P70584        | YYASEVAGLTTSK                                | 0.988143685        | 2              | 4.22422   |
| <b>P70615</b> | <b>LMNB1 Lamin_B1</b>                        | <b>1.865089622</b> | <b>0.59397</b> | <b>5</b>  |
| P70615        | ALYETELADAR                                  | 1.399434366        | 2              | 3.11991   |
| P70615        | KESDLSGAQIK                                  | 0.938110956        | 2              | 2.45197   |
| P70615        | LSSEMNTSTVNSAR                               | 1.167229542        | 2              | 3.93546   |
| P70615        | NQNSWGTGEDVK                                 | 0.856958501        | 2              | 3.36962   |
| P70615        | SLEGDLEDLKDQIAQLEASLSAAK                     | 1.558734758        | 3              | 3.62123   |
| <b>P70712</b> | <b>KYNU Kynureninase</b>                     | <b>2.027590433</b> | <b>0.51087</b> | <b>11</b> |
| P70712        | FKDCFYIPK                                    | 1.192826984        | 2              | 2.65154   |
| P70712        | IATELNCDPTDER                                | 1.481891029        | 2              | 3.81566   |
| P70712        | IGAYGHEVGK                                   | 2.027567461        | 2              | 2.83386   |
| P70712        | LDEEDKLK                                     | 0.581437024        | 2              | 2.33185   |
| P70712        | LDEEDKLKR                                    | 1.30806982         | 2              | 2.68761   |
| P70712        | LLTAILDSTERN                                 | 1.501937285        | 2              | 3.30672   |
| P70712        | MEDILEVIEK                                   | 1.830426337        | 2              | 3.05429   |
| P70712        | TYLEEELDK                                    | 1.60308893         | 1              | 2.10386   |
| P70712        | TYLEEELDKWAK                                 | 0.747064751        | 2              | 2.73616   |
| P70712        | VAPVPLYNSFHDVYK                              | 1.447772558        | 2              | 3.42916   |
| P70712        | YLNAGGAGLAGAFIHEK                            | 1.727323226        | 2              | 4.45625   |
| <b>P80067</b> | <b>CATC Dipeptidyl peptidase 1</b>           | <b>2.274160126</b> | <b>0.00859</b> | <b>5</b>  |
| P80067        | GINFVSPVR                                    | 1.007887587        | 2              | 3.00439   |
| P80067        | GTDECAIESIAMAIIPIK                           | 1.202462217        | 2              | 5.13728   |
| P80067        | NSWGSQWGESGYFR                               | 1.377440762        | 2              | 3.41384   |
| P80067        | RGTDECAIESIAMAIIPIK                          | 1.362950834        | 2              | 4.1065    |
| P80067        | YAQDFGVVEENCFFYPYATDAPCKPK                   | 1.215531588        | 3              | 5.78283   |
| <b>P80254</b> | <b>DOPD D_dopachrome decarboxylase</b>       | <b>1.907111178</b> | <b>0.95448</b> | <b>4</b>  |
| P80254        | FFPLEPWQIGK                                  | 0.809946907        | 2              | 2.78907   |
| P80254        | FLTEELSLDQDR                                 | 1.045481625        | 2              | 3.73394   |
| P80254        | LCAATATILDKPEDR                              | 1.253002778        | 2              | 4.48946   |
| P80254        | STEPCAHLLISSIGVVGTAEQNR                      | 0.646273599        | 2              | 5.49589   |
| <b>P80299</b> | <b>HYES Epoxide hydrolase 2</b>              | <b>1.916846174</b> | <b>0.99834</b> | <b>4</b>  |
| P80299        | ATEMGGILVGTPEDPK                             | 1.382671523        | 2              | 3.47082   |
| P80299        | GHIEDCGHWQIEKPAEVNQILIK                      | 0.904866163        | 3              | 4.25433   |
| P80299        | TEIQNPSVTSK                                  | 0.956025361        | 2              | 2.65669   |
| P80299        | TSDDMGLLTVNK                                 | 0.913375645        | 2              | 3.20538   |
| <b>P80313</b> | <b>TCPH T_complex protein 1 subunit eta</b>  | <b>2.365505989</b> | <b>0.63268</b> | <b>6</b>  |
| P80313        | ATISNDGATILK                                 | 1.2076955          | 2              | 2.63486   |
| P80313        | EGTDSSQGIPQLVSNISACQVIAEAVR                  | 3.366113372        | 3              | 4.1569    |
| P80313        | GGAEQFMEETER                                 | 1.066389972        | 2              | 3.14914   |
| P80313        | LLDVVHPAAK                                   | 1.2122837          | 2              | 2.54936   |
| P80313        | QLCDNAGFDATNILNK                             | 1.302154375        | 2              | 3.84561   |
| P80313        | SQDAEVGDGTTSVTLAAEFLK                        | 1.339565276        | 2              | 3.45923   |
| <b>P80317</b> | <b>TCPZ T_complex protein 1 subunit zeta</b> | <b>2.21822158</b>  | <b>0.77837</b> | <b>10</b> |
| P80317        | ALQFLEQVK                                    | 1.33513531         | 2              | 2.70419   |
| P80317        | DGNVLLHEMQIQHPTASLIAK                        | 1.176759067        | 3              | 4.66417   |
| P80317        | GIDPFSLDALAK                                 | 1.818478846        | 2              | 2.82951   |
| P80317        | HKSETDTSLIR                                  | 1.096946457        | 2              | 3.14319   |
| P80317        | IITEGFEEAK                                   | 1.212066124        | 2              | 2.53183   |
| P80317        | MLVSGAGDIK                                   | 1.295214672        | 2              | 2.34865   |
| P80317        | NAIDDGCVVPGAGAVEVALAEALIK                    | 1.049636452        | 3              | 3.73285   |
| P80317        | TEVNSGFFYK                                   | 1.090615149        | 2              | 2.66682   |

|               |                                                                   |                    |                |           |
|---------------|-------------------------------------------------------------------|--------------------|----------------|-----------|
| P80317        | VATAQDDITGDGTTSNVLIIGELLK                                         | 1.145082616        | 2              | 4.71373   |
| P80317        | VLAQNSGFDLQETLVK                                                  | 1.124987516        | 2              | 3.73282   |
| <b>P81155</b> | <b>VDAC2 Voltage_dependent anion_selective channel protein 2</b>  | <b>1.690406961</b> | <b>0.83893</b> | <b>4</b>  |
| P81155        | LTFDTTFSPNTGK                                                     | 1.194977665        | 2              | 3.5944    |
| P81155        | TGDFQLHTNVNNGTEFGGSIYQK                                           | 1.105696271        | 3              | 3.98552   |
| P81155        | VNNSLIGVGYTQTLRPGVK                                               | 0.47170818         | 2              | 3.58643   |
| P81155        | YQLDPTASISAK                                                      | 0.90660844         | 2              | 2.94988   |
| <b>P82198</b> | <b>BGH3 Transforming growth factor_beta_induced protein ig_h3</b> | <b>2.032104137</b> | <b>0.56748</b> | <b>2</b>  |
| P82198        | MLTPPMGTVM DVLK+Oxidation(0)Oxidation(5)                          | 1.488294146        |                |           |
| P82198        | SLQGDKLEVSSK                                                      | 0.999092917        | 2              | 3.09666   |
| <b>P82995</b> | <b>HS90A Heat shock protein HSP 90_alpha</b>                      | <b>1.99982331</b>  | <b>0.52023</b> | <b>14</b> |
| P82995        | DQVANSAFVER                                                       | 0.939946714        | 2              | 2.6804    |
| P82995        | ELHINLIPNKQDR                                                     | 0.751685253        | 2              | 2.8195    |
| P82995        | ELISNSSDALDK                                                      | 1.160347827        | 2              | 2.92874   |
| P82995        | FYEQFSK                                                           | 0.99822882         | 1              | 2.10674   |
| P82995        | HIYFITGETK                                                        | 1.104534177        | 2              | 3.13323   |
| P82995        | HLEINPDHSIETLR                                                    | 1.034215961        | 2              | 4.68653   |
| P82995        | HSQFIGYPITLFVEK                                                   | 1.598642281        | 3              | 3.72292   |
| P82995        | KHGLEVIYMIEPIDEYCVQQLK                                            | 1.301645216        | 3              | 3.33036   |
| P82995        | LGIHEDSQNR                                                        | 0.888556526        | 1              | 3.11124   |
| P82995        | NPDDITNEEYGEFYK                                                   | 0.843183798        | 2              | 5.08747   |
| P82995        | SLTNDWEEHLAVK                                                     | 1.120329938        | 2              | 4.05766   |
| P82995        | TLTIVDTGIGMTK                                                     | 1.171868971        | 2              | 4.27911   |
| P82995        | TLTIVDTGIGMTK+Oxidation(10)                                       | 1.578458894        |                |           |
| P82995        | YYTSASGDEMVS LK                                                   | 1.263802327        | 2              | 3.13773   |
| <b>P83732</b> | <b>RL24 60S ribosomal protein L24</b>                             | <b>2.263492235</b> | <b>0.99264</b> | <b>5</b>  |
| P83732        | AITGASLADIMAK                                                     | 1.178337639        | 2              | 4.61999   |
| P83732        | CESAF LSK                                                         | 1.156471848        | 2              | 2.36607   |
| P83732        | QINWTVLYR                                                         | 1.207067495        | 2              | 2.59706   |
| P83732        | VELCSFSGYK                                                        | 1.009451734        | 2              | 2.34048   |
| P83732        | VFQFLNAK                                                          | 1.484895701        | 2              | 2.34652   |
| <b>P83868</b> | <b>TEBP Prostaglandin E synthase 3</b>                            | <b>3.442527972</b> | <b>0.00113</b> | <b>2</b>  |
| P83868        | HLNEIDL FHCIDPNDSK                                                | 1.785484074        | 3              | 4.05379   |
| P83868        | LTFSLGGSDNFK                                                      | 1.729298861        | 2              | 2.75563   |
| <b>P83883</b> | <b>RL36A 60S ribosomal protein L36a</b>                           | <b>1.933974308</b> | <b>0.94488</b> | <b>2</b>  |
| P83883        | HFELGGDK                                                          | 0.921954942        | 1              | 2.37839   |
| P83883        | LECVENCR                                                          | 1.012594041        | 2              | 2.52478   |
| <b>P83941</b> | <b>ELOC Transcription elongation factor B polypeptide 1</b>       | <b>2.260775514</b> | <b>0.91184</b> | <b>3</b>  |
| P83941        | AMLSGPGQFAENETNEVNFR                                              | 1.239476509        | 2              | 4.9483    |
| P83941        | LISSDGHEFIVK                                                      | 1.074258889        | 2              | 2.40548   |
| P83941        | TYGGCEGPDAMYVK                                                    | 1.167612138        | 2              | 3.82124   |
| <b>P84082</b> | <b>ARF2 ADP_ribosylation factor 2</b>                             | <b>2.377076705</b> | <b>0.98076</b> | <b>4</b>  |
| P84082        | EELTRMLAEDEL R+Oxidation(5)                                       | 1.260223616        |                |           |
| P84082        | MLAEDEL R                                                         | 0.904692647        | 2              | 2.60286   |
| P84082        | NISFTVWDVGGQDK                                                    | 1.330993745        | 2              | 4.32412   |
| P84082        | QDLPNAMNAAEITDK                                                   | 0.732320211        | 2              | 4.20599   |
| <b>P84083</b> | <b>ARF5 ADP_ribosylation factor 5</b>                             | <b>2.099992209</b> | <b>0.87191</b> | <b>4</b>  |
| P84083        | DAVLLVFANK                                                        | 1.253240071        | 2              | 4.12166   |
| P84083        | MLQEDEL R                                                         | 1.320996585        | 2              | 2.47275   |
| P84083        | QDMPNAMPVSELTDK                                                   | 0.958255199        | 2              | 3.3521    |
| P84083        | VQESADELQK                                                        | 0.979266306        | 2              | 3.07039   |
| <b>P84089</b> | <b>ERH Enhancer of rudimentary homolog</b>                        | <b>2.090813942</b> | <b>0.99982</b> | <b>2</b>  |
| P84089        | ADTQTYQPYNK                                                       | 0.99286975         | 2              | 2.60988   |
| P84089        | TYADYESVNECMEGVCK                                                 | 1.098464308        | 2              | 4.88009   |

|               |                                                               |                    |                |           |
|---------------|---------------------------------------------------------------|--------------------|----------------|-----------|
| <b>P84092</b> | <b>AP2M1 AP_2 complex subunit mu</b>                          | <b>2.149178395</b> | <b>0.81281</b> | <b>3</b>  |
| P84092        | ISEENIK                                                       | 0.871361055        | 1              | 1.94984   |
| P84092        | SNFKPSLLAQK                                                   | 1.307945643        | 2              | 2.61487   |
| P84092        | VFEPKLNYSDDHVIK                                               | 0.974728429        | 2              | 2.74565   |
| <b>P84100</b> | <b>RL19 60S ribosomal protein L19</b>                         | <b>2.045997001</b> | <b>0.98041</b> | <b>3</b>  |
| P84100        | ILMEHIHK                                                      | 1.256186855        | 2              | 2.32009   |
| P84100        | LLADQAEAR                                                     | 1.105614882        | 2              | 3.31571   |
| P84100        | VWLDPNETNEIANANSR                                             | 1.002419736        | 2              | 5.6317    |
| <b>P84104</b> | <b>SRSF3 Serine/arginine_rich splicing factor 3</b>           | <b>2.151655</b>    | <b>0.94291</b> | <b>2</b>  |
| P84104        | NPPGFAFVEFEDPRDAADAVR                                         | 1.123775402        | 2              | 2.57823   |
| P84104        | VYVGNLGNNGNK                                                  | 0.96400364         | 2              | 2.43126   |
| <b>P84245</b> | <b>H33 Histone H3.3</b>                                       | <b>1.969475954</b> | <b>0.99717</b> | <b>6</b>  |
| P84245        | DIQLAR                                                        | 174.0398298        | 1              | 2.10984   |
| P84245        | EIAQDFK                                                       | 1.01918362         | 1              | 2.04089   |
| P84245        | FQSAAGALQEASEAYLVGLFEDTNLCAIHAK                               | 1.05083441         | 4              | 4.91517   |
| P84245        | RVTIMPKDIQLAR+Oxidation(4                                     | 1.026797065        |                |           |
| P84245        | STELLIR                                                       | 0.975530146        | 2              | 2.60949   |
| P84245        | YRPGTVALR                                                     | 0.943791712        | 2              | 2.38365   |
| <b>P84817</b> | <b>FIS1 Mitochondrial fission 1 protein</b>                   | <b>1.955232156</b> | <b>0.99939</b> | <b>4</b>  |
| P84817        | FQSEQAAGSVSK                                                  | 0.954961982        | 2              | 3.05102   |
| P84817        | GIVLLELLPK                                                    | 1.137224768        | 2              | 2.95042   |
| P84817        | GLLQTEPQNNQAK                                                 | 1.04031874         | 2              | 3.69501   |
| P84817        | KFQSEQAAGSVSK                                                 | 0.873745567        | 2              | 4.47906   |
| <b>P85834</b> | <b>EFTU Elongation factor Tu_ mitochondrial</b>               | <b>1.829701287</b> | <b>0.9851</b>  | <b>16</b> |
| P85834        | AEAGDNLGALVR                                                  | 0.978408792        | 2              | 3.70053   |
| P85834        | DKPHVNVGTIGHVDHGK                                             | 1.187316234        | 2              | 3.84595   |
| P85834        | DLEKPFLLPVESVYSIPGR                                           | 1.190859458        | 2              | 4.22639   |
| P85834        | GDECELLGHNK                                                   | 0.86106045         | 2              | 2.87543   |
| P85834        | GEETPVIVGSALCALEQR                                            | 1.284179818        | 2              | 4.40429   |
| P85834        | GITINAAHVEYSTAAR                                              | 0.847465346        | 2              | 2.84616   |
| P85834        | GTVVTGTLER                                                    | 0.895035186        | 2              | 2.84794   |
| P85834        | HYAHTDCPGHADYVK                                               | 0.902494118        | 3              | 5.00971   |
| P85834        | KGDECELLGHNK                                                  | 0.829947523        | 3              | 4.43353   |
| P85834        | KYEEIDNAPEER                                                  | 0.848874667        | 2              | 3.79296   |
| P85834        | LLDAVDYIPVPTR                                                 | 1.299413085        | 2              | 3.68734   |
| P85834        | QIGVEHVVVYVVK                                                 | 0.957700911        | 2              | 2.96328   |
| P85834        | TIGTGLVTDVPAMTEEDK                                            | 1.11827909         | 2              | 4.34158   |
| P85834        | TIGTGLVTDVPAMTEEDKNIK                                         | 1.064954523        | 2              | 4.45657   |
| P85834        | TVVTGIEMFHK                                                   | 0.714039953        | 2              | 2.34417   |
| P85834        | YEEIDNAPEER                                                   | 0.757678913        | 2              | 3.34903   |
| <b>P85968</b> | <b>6PGD 6_phosphogluconate dehydrogenase_ decarboxylating</b> | <b>2.304862434</b> | <b>0.99131</b> | <b>11</b> |
| P85968        | AGQAVDDFIEK                                                   | 1.035020057        | 2              | 3.25126   |
| P85968        | CLSSLKEER                                                     | 0.989259751        | 2              | 2.59507   |
| P85968        | FQDTDGKELLPK                                                  | 0.946275679        | 2              | 3.43098   |
| P85968        | GILFVGSVSGGEEGAR                                              | 1.008968291        | 2              | 4.65492   |
| P85968        | HEMLPANLIQAQR                                                 | 1.126426992        | 2              | 3.19334   |
| P85968        | LVPLLDTGDIIDGGNSEYR                                           | 1.731089278        | 2              | 5.25314   |
| P85968        | NPQLQNLLDDFFK                                                 | 1.255166576        | 2              | 4.43964   |
| P85968        | SAVDCCQDSWR                                                   | 1.089984557        | 2              | 2.88359   |
| P85968        | TIFQAIK                                                       | 0.737748865        | 2              | 2.69486   |
| P85968        | VGTGEPCCDWVGEAGHFVK                                           | 1.038311665        | 2              | 4.34917   |
| P85968        | YGPSLMPGGNK                                                   | 1.048155019        | 2              | 2.48159   |
| <b>P85971</b> | <b>6PGL 6_phosphogluconolactonase</b>                         | <b>2.052506383</b> | <b>0.88272</b> | <b>5</b>  |
| P85971        | DLPAATAPAGPASFAR                                              | 2.617731314        | 2              | 2.44906   |
| P85971        | ILEDQESALPAAMVQPR                                             | 0.825753593        | 2              | 4.80588   |
| P85971        | LPIPSQVLTIDPALPVEDAAEDYAR                                     | 1.31137877         | 2              | 4.51289   |

|               |                                                             |                    |                |           |
|---------------|-------------------------------------------------------------|--------------------|----------------|-----------|
| P85971        | TGALCWFLDEAAAR                                              | 0.471331959        | 2              | 3.57978   |
| P85971        | WTLGFCDER                                                   | 1.175811817        | 2              | 2.58393   |
| <b>P85972</b> | <b>VINC Vinculin</b>                                        | <b>2.051459498</b> | <b>0.01732</b> | <b>15</b> |
| P85972        | ALASQLQDSLK                                                 | 1.050079171        | 2              | 2.60335   |
| P85972        | AQQVSQGLDLTAK                                               | 1.007044988        | 2              | 4.30009   |
| P85972        | AVAGNISDPGLQK                                               | 0.864483468        | 2              | 3.35269   |
| P85972        | DPNASPGDAGEQAIR                                             | 1.02543246         | 2              | 2.36029   |
| P85972        | GNDIIAAK                                                    | 1.074205769        | 2              | 2.43386   |
| P85972        | KIDAAQNWLADPNNGGPEGEEQIR                                    | 0.68694846         | 3              | 5.11621   |
| P85972        | MLGQMTDQVADLR                                               | 1.013107616        | 2              | 3.52398   |
| P85972        | MSAEINEIIR                                                  | 1.048281228        | 2              | 2.43627   |
| P85972        | MTGLVDEAIDTK                                                | 0.793759838        | 2              | 2.84285   |
| P85972        | QVATALQNLQTK                                                | 1.074983849        | 2              | 3.38661   |
| P85972        | SLLDASEEAIK                                                 | 1.156578354        | 2              | 2.73273   |
| P85972        | STVEGIQASVK                                                 | 0.95853471         | 2              | 2.6099    |
| P85972        | VDQLAAQLADLAAR                                              | 1.333030107        | 2              | 3.26841   |
| P85972        | VLQLTSWDEDAWASK                                             | 1.292116798        | 2              | 3.26238   |
| P85972        | WIDNPTVDDR                                                  | 1.655638119        | 2              | 2.97304   |
| <b>P85973</b> | <b>PNPH Purine nucleoside phosphorylase</b>                 | <b>2.181235971</b> | <b>3E-06</b>   | <b>13</b> |
| P85973        | ASHQEVELEAGK                                                | 0.821042593        | 2              | 3.59789   |
| P85973        | DHINLPGFCGQNPLR                                             | 1.086712069        | 3              | 4.05178   |
| P85973        | ELQEGTYIMSAGPTFETVAESCLLR                                   | 1.114271641        | 2              | 5.21222   |
| P85973        | FEVGDIMLIR                                                  | 1.183578614        | 2              | 3.79963   |
| P85973        | FHMYEGYLSK                                                  | 1.304362712        | 2              | 2.33016   |
| P85973        | HRPQVAVICGSLGGLTAK                                          | 0.995519171        | 3              | 6.00344   |
| P85973        | LTQPQAFDYNEIPNFPQSTVQGHAGR                                  | 1.565542486        | 3              | 3.77808   |
| P85973        | MLGADAVGMSTVPEVIVAR                                         | 1.205131438        | 2              | 5.9071    |
| P85973        | MLGADAVGMSTVPEVIVAR+Oxidation(0                             | 1.590248056        |                |           |
| P85973        | MLGADAVGMSTVPEVIVAR+Oxidation(8                             | 1.722157622        |                |           |
| P85973        | VFGFSLITNK                                                  | 1.139555229        | 2              | 3.13525   |
| P85973        | VFHLLGVDLTVTNAAGGLNPK                                       | 1.613764058        | 2              | 5.39375   |
| P85973        | VVMDYNNLEK                                                  | 1.142946838        | 2              | 2.4631    |
| <b>P86048</b> | <b>RL10L 60S ribosomal protein L10_like</b>                 | <b>2.128881673</b> | <b>0.9745</b>  | <b>6</b>  |
| P86048        | AKVDFEPLCGHMSVDEYEQLSSEALEAAR                               | 1.328718326        | 3              | 6.04248   |
| P86048        | GAFGKPQGTVAR                                                | 1.006528249        | 2              | 2.82714   |
| P86048        | MLSCAGADR                                                   | 0.95843807         | 2              | 2.36663   |
| P86048        | RLIPDGCGVK                                                  | 0.756693855        | 2              | 2.31498   |
| P86048        | VDFEPLCGHMSVDEYEQLSSEALEAAR                                 | 1.148233573        | 3              | 5.43705   |
| P86048        | VHIGQVIMSIR                                                 | 2.03969836         | 2              | 3.01557   |
| <b>P86252</b> |                                                             | <b>1.967255278</b> | <b>0.9735</b>  | <b>7</b>  |
| P86252        | ALELDPNLYR                                                  | 1.024327761        |                |           |
| P86252        | ANGFAELIPNAQLLQK                                            | 0.793750826        |                |           |
| P86252        | CTSLGVNQGIYEPEK                                             | 0.913266571        |                |           |
| P86252        | LGFQGAQDLANMFRFYALKPDR                                      | 1.664063887        |                |           |
| P86252        | LIDDYGVEEPAELPEGSLTVDNK                                     | 1.519512863        | 2              | 4.02937   |
| P86252        | LIDDYGVEEPAELPEGSLTVDNKR                                    | 2.884229341        | 3              | 4.51811   |
| P86252        | VASDAQLELDKLDGELKK                                          | 1.088526115        |                |           |
| <b>P97313</b> | <b>PRKDC DNA_dependent protein kinase catalytic subunit</b> | <b>2.346977218</b> | <b>0.51349</b> | <b>3</b>  |
| P97313        | FHGVMKTLCLEVLLCR+Oxidation(4                                | 0.889348072        |                |           |
| P97313        | LCHDAFTENMVGESQLLEK                                         | 3.045631857        | 2              | 2.53486   |
| P97313        | QLFSSLFSGILKEMNK+Oxidation(13                               | 1.541877031        |                |           |
| <b>P97384</b> | <b>ANX11 Annexin A11</b>                                    | <b>2.658838805</b> | <b>0.65767</b> | <b>2</b>  |
| P97384        | GFGTDEQAIIDCLGSR                                            | 1.226083555        | 2              | 3.95441   |
| P97384        | SELDLLDIR                                                   | 1.707699323        | 2              | 2.54409   |
| <b>P97519</b> | <b>HMGCL Hydroxymethylglutaryl_CoA lyase_mitochondrial</b>  | <b>2.333942035</b> | <b>0.09686</b> | <b>8</b>  |

|               |                                                                   |                    |                |           |
|---------------|-------------------------------------------------------------------|--------------------|----------------|-----------|
| P97519        | FDGVMQAAR                                                         | 1.202115331        | 2              | 2.83092   |
| P97519        | GFEEAQAAGAK                                                       | 1.060645555        | 2              | 3.3043    |
| P97519        | GYVSCALGCPYEGK                                                    | 0.892910414        | 2              | 3.86554   |
| P97519        | KNVNCSIEESFQR                                                     | 1.061949862        | 2              | 3.74566   |
| P97519        | LIDMLSEAGLPVIEATSFVSPK                                            | 1.194951221        | 2              | 3.10489   |
| P97519        | LLEAGDFICQALNR                                                    | 1.258085062        | 2              | 4.5365    |
| P97519        | NVNCSIEESFQR                                                      | 0.800035622        | 2              | 3.39504   |
| P97519        | WVPQMADHSDVLK                                                     | 0.935118166        | 2              | 2.95169   |
| <b>P97521</b> | <b>MCAT Mitochondrial carnitine/acylcarnitine carrier protein</b> | <b>2.152464799</b> | <b>7.5E-06</b> | <b>7</b>  |
| P97521        | CLLQIQASSGK                                                       | 0.892793841        | 2              | 2.60499   |
| P97521        | EEGVTSLYK                                                         | 0.851937036        | 1              | 2.03939   |
| P97521        | KLYQEFQIR                                                         | 1.067233215        | 2              | 2.32925   |
| P97521        | LQTQPPSLPGQPPMYSGTIDCFR                                           | 1.244787433        | 2              | 3.84684   |
| P97521        | LYQEFQIR                                                          | 1.171642353        | 2              | 2.76219   |
| P97521        | SVHDLVPR                                                          | 0.937282339        | 3              | 3.55046   |
| P97521        | YSGTLDCAK                                                         | 1.008091505        | 2              | 2.35282   |
| <b>P97524</b> | <b>S27A2 Very long chain acyl_CoA synthetase</b>                  | <b>2.067463663</b> | <b>0.79582</b> | <b>13</b> |
| P97524        | ALHDHLGLR                                                         | 0.641668602        | 2              | 2.33459   |
| P97524        | GEVGLLICK                                                         | 1.047144638        | 2              | 2.33828   |
| P97524        | MKENYEFNGK                                                        | 0.967238967        | 2              | 2.80226   |
| P97524        | SLLHCFQCCGAK                                                      | 0.931396967        | 2              | 2.95297   |
| P97524        | TILHVFLQAR                                                        | 0.846384672        | 2              | 3.18124   |
| P97524        | TSNTNGVDTVLDKVDGVSADPIPESWR                                       | 1.034554106        | 3              | 5.69118   |
| P97524        | TYVPMTEDIYNAIIDK                                                  | 1.019525548        | 3              | 4.79446   |
| P97524        | VDGVSADPIPESWR                                                    | 1.109629344        | 2              | 2.8722    |
| P97524        | VLLASPELHEAVEEVLPTLK                                              | 1.242540432        | 3              | 4.92837   |
| P97524        | VTLMEEGFNPSVIK                                                    | 1.637186649        | 2              | 4.18738   |
| P97524        | YDVEKDEPVR                                                        | 1.017091037        | 2              | 2.89871   |
| P97524        | YLCNTPQKPNDR                                                      | 1.239331722        | 2              | 3.21542   |
| P97524        | YNATVIQYIGELLR                                                    | 1.07522171         | 2              | 3.48417   |
| <b>P97532</b> | <b>THTM 3_mercaptopyruvate sulfurtransferase</b>                  | <b>2.225485321</b> | <b>9.9E-20</b> | <b>10</b> |
| P97532        | AFGHHSVSLDGGFR                                                    | 0.966803438        | 3              | 3.68447   |
| P97532        | ALVSAQWVAEALK                                                     | 1.180765409        | 2              | 3.89037   |
| P97532        | AQPEHVISQGR                                                       | 0.662084619        | 2              | 3.20836   |
| P97532        | DGIEPGHIPGSVNIPFTEFLTSEGLEK                                       | 1.052564995        | 3              | 6.45815   |
| P97532        | FQGTQPEPR                                                         | 0.897545765        | 2              | 3.61153   |
| P97532        | HIPGAFFDIDR                                                       | 1.22633043         | 2              | 2.55749   |
| P97532        | LLDASWYLPK                                                        | 1.375950902        | 2              | 3.73522   |
| P97532        | SPSEPAEFCAQLDPSFIK                                                | 0.870199035        | 2              | 2.95029   |
| P97532        | THEDILENDAR                                                       | 0.995345157        | 2              | 3.8751    |
| P97532        | YWLSQNLPISSGK                                                     | 1.154731281        | 2              | 3.95519   |
| <b>P97536</b> | <b>CAND1 Cullin associated NEDD8_dissociated protein 1</b>        | <b>2.441957958</b> | <b>0.00017</b> | <b>7</b>  |
| P97536        | AADIDQEVK                                                         | 0.822288472        | 2              | 2.4843    |
| P97536        | EGPAVVGQFIQDVK                                                    | 1.761984258        | 2              | 2.72115   |
| P97536        | FTISDHPQPIDPLK                                                    | 1.279323076        | 2              | 2.59571   |
| P97536        | ITSEALLVTQQLVK                                                    | 1.466123319        | 2              | 3.15254   |
| P97536        | LGTLSALDILIK                                                      | 1.96891405         | 2              | 2.45544   |
| P97536        | SVILEAFSSPSEEVK                                                   | 1.065519117        | 2              | 2.88589   |
| P97536        | TYIQCIAAISR                                                       | 1.14169368         | 2              | 3.45873   |
| <b>P97562</b> | <b>ACOX2 Peroxisomal acyl_coenzyme A oxidase 2</b>                | <b>1.970645228</b> | <b>0.98678</b> | <b>16</b> |
| P97562        | ATFADFCAQGAEICR                                                   | 0.923173961        | 2              | 4.74954   |
| P97562        | CSAQTAAEFR                                                        | 0.908432842        | 2              | 2.93616   |
| P97562        | DFSLLPELHALSTGMK                                                  | 0.813149515        | 2              | 2.82399   |
| P97562        | EAFDLLPLIR                                                        | 0.673916333        | 2              | 2.86014   |
| P97562        | ILEYQTQQQK                                                        | 0.896043379        | 2              | 3.73719   |

|               |                                                                 |                    |                |           |
|---------------|-----------------------------------------------------------------|--------------------|----------------|-----------|
| P97562        | KVESIIQSDPVFNLK                                                 | 1.199450668        | 2              | 5.03614   |
| P97562        | LDKEPEIQR                                                       | 0.93415706         | 3              | 3.40215   |
| P97562        | LEWAQK                                                          | 0.971932407        | 2              | 2.52092   |
| P97562        | LGTPQSNYLGMLVTR                                                 | 1.374576489        | 2              | 3.37665   |
| P97562        | LSGLPTLVAR                                                      | 1.136643254        | 2              | 2.52578   |
| P97562        | LTNILDGGLPNTVLR                                                 | 1.125744712        | 2              | 4.49674   |
| P97562        | SGVDQHDAWNQTTVIHLQAAK                                           | 1.074520491        | 3              | 6.02312   |
| P97562        | SLEDHTPLPGITVGDIGPK                                             | 1.12584411         | 3              | 4.34066   |
| P97562        | SLGSDEQIAK                                                      | 0.932266007        | 2              | 3.00689   |
| P97562        | VESIIQSDPVFNLK                                                  | 0.96898714         | 2              | 4.26298   |
| P97562        | VLDGNVNLSLHGVMNAIR                                              | 0.873875829        | 2              | 4.33949   |
| <b>P97576</b> | <b>GRPE1 GrpE protein homolog 1_ mitochondrial</b>              | <b>1.973527353</b> | <b>0.98602</b> | <b>4</b>  |
| P97576        | ALADTENLR                                                       | 1.292120389        | 2              | 2.58873   |
| P97576        | DLLEVADILEK                                                     | 0.951893963        | 2              | 3.68469   |
| P97576        | EEVSNNNPHLK                                                     | 0.997549433        | 2              | 3.04738   |
| P97576        | TLRPALVGVK                                                      | 0.647008203        | 3              | 3.54107   |
| <b>P97584</b> | <b>PTGR1 Prostaglandin reductase 1</b>                          | <b>2.052491992</b> | <b>0.97944</b> | <b>6</b>  |
| P97584        | ALTDLMNWVSEK                                                    | 1.308971598        | 2              | 4.18498   |
| P97584        | GGETVLVNAAAGAVGSVVGQIAK                                         | 1.158268894        | 2              | 4.19693   |
| P97584        | HFEFGPTDSNFELR                                                  | 1.025492223        | 2              | 3.78283   |
| P97584        | LKEGDSMMGEQVAR                                                  | 0.685483906        | 2              | 3.77997   |
| P97584        | TGPCPPGPSPEVIYQQLR                                              | 1.238850196        | 2              | 4.12981   |
| P97584        | YHEYITEGFEK                                                     | 1.054010052        | 2              | 2.9319    |
| <b>P97608</b> | <b>OPLA 5_oxoprolinase</b>                                      | <b>1.988897157</b> | <b>0.99978</b> | <b>8</b>  |
| P97608        | AGDFGAAFVER                                                     | 0.949668967        | 2              | 2.93049   |
| P97608        | GHTACADAYLTPTIQR                                                | 0.968794983        | 2              | 4.58662   |
| P97608        | GSILDPSPEAAVVGGNVLTSQR                                          | 1.27877125         | 2              | 4.96314   |
| P97608        | ISVGAEGPSMADTR+Oxidation(9                                      | 0.855655347        |                |           |
| P97608        | ITDPEILESR                                                      | 1.220196436        | 2              | 2.37036   |
| P97608        | LLSEDPANYADAPTEGIR                                              | 1.195519695        | 2              | 4.94868   |
| P97608        | SGLQLEDTPK                                                      | 0.996679264        | 2              | 2.62954   |
| P97608        | TGDLLIEIQQPVDLEALR                                              | 1.22867996         | 2              | 4.63633   |
| <b>P97612</b> | <b>FAAH1 Fatty_acid amide hydrolase 1</b>                       | <b>2.127031065</b> | <b>0.69956</b> | <b>7</b>  |
| P97612        | GHDSTLGLSLNEGMPSESDCVVQVLK                                      | 1.487729475        | 3              | 3.97085   |
| P97612        | GTNCVTSYLTDCETQLSQAPR                                           | 1.181734858        | 2              | 4.94526   |
| P97612        | GYFGDIWDIILK                                                    | 1.253238537        | 2              | 3.8686    |
| P97612        | NSVGLPVAVQCVALPWQEELCLR                                         | 1.6287528          | 3              | 3.81573   |
| P97612        | QGLLYGVPVSLK                                                    | 1.010854884        | 2              | 2.85252   |
| P97612        | SPGSSGGEGALIGSGSPLGLGTDIGGSIR                                   | 2.215490206        | 2              | 4.75659   |
| P97612        | VGYETDNYTMPSPAMR                                                | 0.926715821        | 2              | 4.02943   |
| <b>P97690</b> | <b>SMC3 Structural maintenance of chromosomes protein 3</b>     | <b>2.174212757</b> | <b>0.87746</b> | <b>2</b>  |
| P97690        | KMVTKNDVMNLLSAGFSR+Oxidation(1                                  | 1.123017518        |                |           |
| P97690        | NLEQYNKLDQDLNEVK                                                | 0.975321821        | 2              | 2.59066   |
| <b>P97697</b> | <b>IMPA1 Inositol monophosphatase 1</b>                         | <b>1.958603469</b> | <b>0.99941</b> | <b>2</b>  |
| P97697        | SSPADLVTVDQK                                                    | 1.068399147        | 2              | 2.85215   |
| P97697        | VSQQEDITK                                                       | 0.96937489         | 2              | 2.80689   |
| <b>P97700</b> | <b>M2OM Mitochondrial 2_oxoglutarate/malate carrier protein</b> | <b>2.264891703</b> | <b>0.12344</b> | <b>3</b>  |
| P97700        | AVVVNAAQLASYSQSK                                                | 0.977351224        | 2              | 4.98374   |
| P97700        | GIYTGLSAGLLR                                                    | 1.618401808        | 2              | 2.9893    |
| P97700        | LTGADGTPPGFLLK                                                  | 1.370744176        | 2              | 3.86219   |
| <b>P97834</b> | <b>CSN1 COP9 signalosome complex subunit 1</b>                  | <b>2.18448912</b>  | <b>0.95654</b> | <b>3</b>  |
| P97834        | EGSQGELTPANSQSR                                                 | 1.12861742         | 2              | 2.88486   |
| P97834        | MLDEMKNLLLDMYLAPHVR+Oxidation(0                                 | 0.767831869        |                |           |
| P97834        | MLDEMKNLLLDMYLAPHVR+Oxidation(4                                 | 0.767831869        |                |           |
| <b>P97852</b> | <b>DHB4 Peroxisomal multifunctional enzyme type 2</b>           | <b>1.870624982</b> | <b>1.4E-09</b> | <b>25</b> |

|               |                                                                                                                             |                    |                |          |
|---------------|-----------------------------------------------------------------------------------------------------------------------------|--------------------|----------------|----------|
| P97852        | AAVAVPSRPPDAVLR                                                                                                             | 0.895442022        | 2              | 2.30481  |
| P97852        | AVANYDSVEAGEK                                                                                                               | 1.43912665         | 2              | 3.81081  |
| P97852        | AYALAFER                                                                                                                    | 1.051826193        | 2              | 3.41125  |
| P97852        | CEAVIADILDK                                                                                                                 | 1.094947093        | 2              | 2.56768  |
| P97852        | DTTSLNQAAALYR                                                                                                               | 0.674664239        | 2              | 2.89049  |
| P97852        | FVYEGSADFSLPTFGVIVAQK                                                                                                       | 0.932172068        | 2              | 3.68289  |
| P97852        | GALVVVNDLGGDFK                                                                                                              | 1.355353198        | 2              | 3.86066  |
| P97852        | GSSAADKVVEEIR                                                                                                               | 0.768947389        | 2              | 3.45239  |
| P97852        | HVLQQFADNDVSR                                                                                                               | 0.847627448        | 2              | 4.7001   |
| P97852        | ICDFSNASKPK                                                                                                                 | 1.150443874        | 3              | 3.90532  |
| P97852        | IDSEGISQNHGTGQVASADASGFAGVVGHK                                                                                              | 0.935107533        | 3              | 5.6722   |
| P97852        | IDVVVNNAGILR                                                                                                                | 0.93133921         | 2              | 4.07432  |
| P97852        | ISDEDWDIIQR                                                                                                                 | 2.67733802         | 2              | 3.69188  |
| P97852        | KNNIHCNTIAPNAGSR                                                                                                            | 0.74288232         | 2              | 5.0497   |
| P97852        | LGLLGLANTLVIEGR                                                                                                             | 1.232281996        | 2              | 3.62375  |
| P97852        | LNPQNAFFSGR                                                                                                                 | 0.862019385        | 2              | 2.83874  |
| P97852        | NGSGEVYQGPAAK                                                                                                               | 0.745426752        | 2              | 3.49526  |
| P97852        | NNIHCNTIAPNAGSR                                                                                                             | 0.830136594        | 2              | 4.6499   |
| P97852        | NQPMTPEAVR                                                                                                                  | 0.875793932        | 2              | 2.35201  |
| P97852        | SIQESTGGIIEVLHK                                                                                                             | 0.897780448        | 2              | 4.16707  |
| P97852        | SLMSGGLAEVPGLSINFAK                                                                                                         | 1.045613153        | 2              | 4.57451  |
| P97852        | TALDTFGR                                                                                                                    | 1.184900216        | 2              | 2.33081  |
| P97852        | VLHGQYLYELKPLPR                                                                                                             | 1.037308093        | 2              | 5.01675  |
| P97852        | VNAVFEWHITK                                                                                                                 | 1.040158165        | 2              | 3.16815  |
| P97852        | VVLVTGAGGGLGR                                                                                                               | 0.927519725        | 2              | 4.37584  |
| <b>P97874</b> | <b>GAK Cyclin_G associated kinase</b>                                                                                       | <b>1.967755513</b> | <b>0.78474</b> | <b>2</b> |
| P97874        | AMVEEITRNTTPMYR+Oxidation(13                                                                                                | 2.289681314        |                |          |
| P97874        | QELARDDPFKLLK                                                                                                               | 0.941427128        | 2              | 2.40881  |
| <b>Q00238</b> | <b>ICAM1 Intercellular adhesion molecule 1</b>                                                                              | <b>2.324424403</b> | <b>0.72082</b> | <b>2</b> |
| Q00238        | LDTPDLLEVGTQQK                                                                                                              | 1.216682075        | 2              | 3.51144  |
| Q00238        | VELDPLPAWQQVQK                                                                                                              | 1.225488974        | 2              | 2.48009  |
| <b>Q00438</b> | <b>PTBP1 Polypyrimidine tract binding protein 1</b>                                                                         | <b>2.130202105</b> | <b>0.99032</b> | <b>4</b> |
| Q00438        | IAIPGLAGAGNSVLLVSNLNP                                                                                                       | 1.305902047        | 2              | 4.6329   |
| Q00438        | IIVENLFYPTLDVLHQIFSK                                                                                                        | 0.940806179        | 3              | 4.3289   |
| Q00438        | KLPDVTGEGVISLGLPFGK                                                                                                         | 1.154751524        | 2              | 4.36934  |
| Q00438        | NNQFQALLQYADPVSQAQAK                                                                                                        | 1.090096589        | 2              | 5.46689  |
| <b>Q00981</b> | <b>UCHL1 Ubiquitin carboxyl terminal hydrolase isozyme L1</b>                                                               | <b>1.889067458</b> | <b>0.77082</b> | <b>2</b> |
| Q00981        | KQIEELK                                                                                                                     | 0.929339691        | 2              | 2.35295  |
| Q00981        | MQLKPMIENPEMLNK+Oxidation(0                                                                                                 | 0.883480547        |                |          |
| <b>Q00P19</b> | <b>HNRL2 Heterogeneous nuclear ribonucleoprotein U like protein 2</b>                                                       | <b>2.528459182</b> | <b>0.54371</b> | <b>3</b> |
| Q00P19        | AVEEQGDDQDSEK                                                                                                               | 1.739745736        | 2              | 3.98971  |
| Q00P19        | EEAQPIVTKYK                                                                                                                 | 1.365747113        | 1              | 1.97118  |
| Q00P19        | SGDETPGSEAPGDK                                                                                                              | 0.962888929        | 2              | 3.24144  |
| <b>Q01177</b> | <b>PLMN Plasminogen</b>                                                                                                     | <b>1.922685278</b> | <b>0.99749</b> | <b>3</b> |
| Q01177        | ILGSDVQQIAVTK                                                                                                               | 0.933672251        | 2              | 3.79419  |
| Q01177        | LVLEPNADIALLK                                                                                                               | 0.985442469        | 2              | 2.81975  |
| Q01177        | STELCAGHLAGGIDSCQGDGGPLVCFEK                                                                                                | 0.943582209        | 3              | 4.06154  |
| <b>Q01205</b> | <b>ODO2 Dihydrolypoyllysine residue succinyltransferase component of 2 oxoglutarate dehydrogenase complex mitochondrial</b> | <b>1.938321767</b> | <b>1</b>       | <b>4</b> |
| Q01205        | ASAFALQEPPVNAVIDDATK                                                                                                        | 1.009243237        | 2              | 6.16508  |
| Q01205        | NDVITVQTPAFAESVTEGDVR                                                                                                       | 0.914483652        | 2              | 5.40729  |
| Q01205        | NVETMNYADIER                                                                                                                | 1.019618184        | 2              | 3.76866  |
| Q01205        | VEGGTPLFTLR                                                                                                                 | 0.872819299        | 2              | 3.43586  |
| <b>Q01279</b> | <b>EGFR Epidermal growth factor receptor</b>                                                                                | <b>2.663930419</b> | <b>0.36013</b> | <b>2</b> |

|               |                                                                                 |                    |                |           |
|---------------|---------------------------------------------------------------------------------|--------------------|----------------|-----------|
| Q01279        | NLQEILIGAVR                                                                     | 1.742111234        | 2              | 3.96008   |
| Q01279        | NYVVTDHGSCVR                                                                    | 0.834337869        | 2              | 2.69813   |
| <b>Q01405</b> | <b>SC23A Protein transport protein Sec23A</b>                                   | <b>2.2802157</b>   | <b>0.18318</b> | <b>8</b>  |
| Q01405        | AETEEGPDVLR                                                                     | 1.198416697        | 2              | 3.22714   |
| Q01405        | AVLNPLCQVDYR                                                                    | 1.478795218        | 2              | 2.71889   |
| Q01405        | HFEALANR                                                                        | 0.86877013         | 1              | 2.021     |
| Q01405        | HLLQAPVDDAQEILHSR                                                               | 0.990381841        | 3              | 5.49159   |
| Q01405        | MVVPVAALFTPLK                                                                   | 1.44676279         | 2              | 2.62188   |
| Q01405        | SGYQDMPEYENFR                                                                   | 0.387362879        | 2              | 3.09491   |
| Q01405        | SWHDIEKDNAK                                                                     | 1.137772857        | 2              | 3.13193   |
| Q01405        | YIDTEHGGSQAR                                                                    | 0.964244602        | 2              | 3.4385    |
| <b>Q02253</b> | <b>MMSA Methylmalonate semialdehyde dehydrogenase [acylating]_mitochondrial</b> | <b>2.216832064</b> | <b>0.99999</b> | <b>33</b> |
| Q02253        | AEMEAAVAACK                                                                     | 1.054881198        | 2              | 4.01936   |
| Q02253        | AEMEAAVAACK+Oxidation(2)                                                        | 0.970004677        |                |           |
| Q02253        | AEMEAAVAACKR                                                                    | 0.539172128        | 2              | 3.11029   |
| Q02253        | AFPAWADTSILSR                                                                   | 1.122165271        | 2              | 4.13204   |
| Q02253        | AISFVGSNQAGEYIFER                                                               | 0.872365967        | 2              | 5.27586   |
| Q02253        | CMALSTAVLVGEAK                                                                  | 0.91031148         | 2              | 4.49299   |
| Q02253        | CMALSTAVLVGEAK+Oxidation(1)                                                     | 0.85561786         |                |           |
| Q02253        | EEDATLSPAVVMPTMGR                                                               | 1.689299331        | 2              | 4.73156   |
| Q02253        | EEDATLSPAVVMPTMGR+Oxidation(12)                                                 | 5.574012622        |                |           |
| Q02253        | EEDATLSPAVVMPTMGR+Oxidation(15)                                                 | 5.574012622        |                |           |
| Q02253        | EEIFGPVLVLETETLDEAIK                                                            | 0.773691379        | 2              | 3.30997   |
| Q02253        | ENTLNQLVGAAFGAAGQR                                                              | 1.053908969        | 2              | 5.14734   |
| Q02253        | GDTNFGYK                                                                        | 0.963742128        | 2              | 2.61748   |
| Q02253        | GLQVVEHACSVTSLMLGETMPSITK                                                       | 1.410166567        | 2              | 5.64712   |
| Q02253        | GYENGFVGPPTIISNVKPSMTCYK                                                        | 1.020490925        | 3              | 3.85656   |
| Q02253        | IVNDNPYGNGTAFITTNNGAIAR                                                         | 1.137658015        | 2              | 5.39841   |
| Q02253        | KWLPELVER                                                                       | 1.451014543        | 3              | 3.3318    |
| Q02253        | LFIDGK                                                                          | 1.295730328        | 1              | 2.01425   |
| Q02253        | LITLEQ GK                                                                       | 1.114348891        | 2              | 2.82319   |
| Q02253        | LLQDSGAPDGTLLNIHQHEAVNFICDHPDIK                                                 | 1.380772108        | 3              | 4.35551   |
| Q02253        | NHGVMMPDANK                                                                     | 0.985808276        | 2              | 3.56681   |
| Q02253        | NHGVMMPDANK+Oxidation(5)                                                        | 1.092864948        |                |           |
| Q02253        | NHGVMMPDANKENTLNQLVGAAFGAAGQR                                                   | 1.282124627        | 3              | 6.13728   |
| Q02253        | NHGVMMPDANKENTLNQLVGAAFGAAGQR+Oxidation(5)                                      | 1.24720877         |                |           |
| Q02253        | QGIQFYTLK                                                                       | 0.779655202        | 2              | 2.79436   |
| Q02253        | SDKWIDIHNPATNEVVGR                                                              | 0.900373218        | 2              | 5.26877   |
| Q02253        | TITSQWKEEDATLSPAVVMPTMGR                                                        | 1.0234193          | 2              | 5.47582   |
| Q02253        | TLADAEGDVFR                                                                     | 0.899694497        | 2              | 3.67223   |
| Q02253        | VCNLIDSGAK                                                                      | 0.944048205        | 2              | 3.39308   |
| Q02253        | VNAGDQPGADLGPLITPQAK                                                            | 1.166693535        | 2              | 5.87971   |
| Q02253        | WIDIHNPATNEVVGR                                                                 | 1.047070081        | 2              | 4.89131   |
| Q02253        | WLPELVER                                                                        | 0.913276214        | 2              | 2.40156   |
| Q02253        | YAHMVDVGVQVGNVPIVPLPMFSFTGSR                                                    | 1.269719539        | 3              | 3.527     |
| <b>Q02769</b> | <b>FDFT Squalene synthase</b>                                                   | <b>1.825566203</b> | <b>0.06734</b> | <b>4</b>  |
| Q02769        | KLEDFVKPENVDVAVK                                                                | 0.510925964        | 2              | 4.03598   |
| Q02769        | SFAAVIQALDGDIR                                                                  | 0.857054478        | 2              | 3.66306   |
| Q02769        | TQSLPNCQLISR                                                                    | 0.426124017        | 2              | 2.91068   |
| Q02769        | VVLEDFPTISLEFR                                                                  | 0.932908331        | 2              | 3.28107   |
| <b>Q02874</b> | <b>H2AY Core histone macro_H2A.1</b>                                            | <b>2.441860245</b> | <b>0.75981</b> | <b>4</b>  |
| Q02874        | AASADSTTEGAPTDGFTVLSTK                                                          | 1.140768312        | 2              | 4.1946    |
| Q02874        | GVTIASGGVLPNIHPELLAK                                                            | 1.373371766        | 2              | 4.20125   |
| Q02874        | NCLALADDR                                                                       | 1.051412388        | 2              | 2.47509   |
| Q02874        | NGPLEVAGAAVSAGHGLPAK                                                            | 0.848299619        | 2              | 2.81014   |



|               |                                             |                    |                |           |
|---------------|---------------------------------------------|--------------------|----------------|-----------|
| <b>Q02974</b> | <b>KHK Ketohekinase</b>                     | <b>2.320086636</b> | <b>0.99654</b> | <b>8</b>  |
| Q02974        | GATLICAWAEEGADALGPDGQLLHSDAFPPPR            | 1.526535763        | 3              | 5.58082   |
| Q02974        | GGNASNSCTVLSLLGAR                           | 0.916279613        | 2              | 4.72008   |
| Q02974        | GNSMQEALR                                   | 1.043841635        | 2              | 3.00488   |
| Q02974        | GVDVSQVAWQSQGDTPCSCCIVNNSNGSR               | 0.867166577        | 3              | 5.85364   |
| Q02974        | IEQYNATQPLQKQ                               | 0.996967655        | 2              | 4.81642   |
| Q02974        | RGVDVSQVAWQSQGDTPCSCCIVNNSNGSR              | 0.833124024        | 3              | 6.50053   |
| Q02974        | TIILYDTNLPDVSAK                             | 1.036983687        | 2              | 5.15103   |
| Q02974        | VSVEIEKPR                                   | 1.227518514        | 2              | 2.51895   |
| <b>Q03248</b> | <b>BUP1 Beta_ureidopropionase</b>           | <b>2.231595445</b> | <b>0.79649</b> | <b>15</b> |
| Q03248        | AHHDLYFYFYSSYVAAPDGSR                       | 1.153683569        | 2              | 6.14191   |
| Q03248        | EDLVLAPSSG                                  | 0.661659562        | 1              | 2.23347   |
| Q03248        | EKLPWTEFAESAEDGLTTR                         | 0.854752041        | 2              | 4.72128   |
| Q03248        | ELAEAVKPNYSPIVVK                            | 1.032602019        | 2              | 4.65263   |
| Q03248        | ELAEAVKPNYSPIVVKEDLVLAPSSG                  | 2.45268141         | 3              | 3.49001   |
| Q03248        | HLPDDLQVVK                                  | 0.947495246        | 2              | 2.52937   |
| Q03248        | HNMVVISPILER                                | 1.194326783        | 2              | 3.08294   |
| Q03248        | HNMVVISPILER+Oxidation(2                    | 1.167905718        |                |           |
| Q03248        | IPLPTSAPVAEQVSALHK                          | 1.520627168        | 3              | 4.87513   |
| Q03248        | KHNMVVISPILER                               | 2.26354197         | 3              | 3.55404   |
| Q03248        | KHNMVVISPILER+Oxidation(3                   | 0.791628541        |                |           |
| Q03248        | NAAIANHCFTCALNR                             | 1.245514814        | 2              | 4.68958   |
| Q03248        | VGDFNESTYYMEGNLGHVPFQTQFGR                  | 1.240327566        | 3              | 5.1116    |
| Q03248        | VGQEHYPNEFTSGDGK                            | 1.224312663        | 2              | 4.35579   |
| Q03248        | VGQEHYPNEFTSGDGK                            | 1.085867768        | 3              | 4.79651   |
| <b>Q03336</b> | <b>RGN Regucalcin</b>                       | <b>1.967235482</b> | <b>1</b>       | <b>16</b> |
| Q03336        | CGESPVWEEASK                                | 1.025016493        | 2              | 4.66944   |
| Q03336        | CLLFVDIPSK                                  | 1.007522414        | 2              | 3.42409   |
| Q03336        | DEQIPDGMCIDVEGK                             | 1.14425682         | 2              | 4.44365   |
| Q03336        | DYSEMYVTCAR                                 | 0.780152607        | 2              | 3.2685    |
| Q03336        | FNDGKVPDAGR                                 | 0.584940906        | 2              | 3.0518    |
| Q03336        | HQGSLSLFPDHSVK                              | 0.995578114        | 3              | 4.89784   |
| Q03336        | KYFDQVDISNGLDWSLDHK                         | 1.09889657         | 3              | 4.96737   |
| Q03336        | LWVACYNGGR                                  | 1.344225598        | 2              | 2.76679   |
| Q03336        | MEKDEQIPDGMCIDVEGK                          | 1.035585048        | 2              | 5.0652    |
| Q03336        | MEKDEQIPDGMCIDVEGK+Oxidation(0              | 0.895600156        |                |           |
| Q03336        | MEKDEQIPDGMCIDVEGK+Oxidation(10             | 1.150183055        |                |           |
| Q03336        | QSGGYVATIGTK                                | 0.997169766        | 2              | 2.78621   |
| Q03336        | VGVDAPVSSVALR                               | 0.923463045        | 2              | 3.56801   |
| Q03336        | YFAGTMAEETAPAVLER                           | 1.093839637        | 2              | 5.67048   |
| Q03336        | YFAGTMAEETAPAVLER+Oxidation(5               | 3.049891263        |                |           |
| Q03336        | YFDQVDISNGLDWSLDHK                          | 1.223689627        | 2              | 4.6959    |
| <b>Q03410</b> | <b>SYCP1 Synaptonemal complex protein 1</b> | <b>2.013704647</b> | <b>0.70792</b> | <b>2</b>  |
| Q03410        | ATVDEAVKLQKEIDLR                            | 0.877317124        | 2              | 2.46675   |
| Q03410        | LKMEQENTAILTDK                              | 1.11128584         | 2              | 2.36828   |
| <b>Q03626</b> | <b>MUG1 Murinoglobulin_1</b>                | <b>2.293654256</b> | <b>0.02026</b> | <b>7</b>  |
| Q03626        | EDNSIHWERPQKPTK                             | 1.002380808        | 2              | 2.6232    |
| Q03626        | EESSCIHSSCTAER                              | 1.116859271        | 2              | 4.23187   |
| Q03626        | GGEFEMMPLGVNK                               | 0.934335134        | 2              | 3.47751   |
| Q03626        | LTAQPAPSPEDLALSMGTIK                        | 1.653315194        | 3              | 4.12259   |
| Q03626        | NLHPLNELFLAYIEDPK                           | 1.777866786        | 3              | 4.11805   |
| Q03626        | VQTVPLTCNNPK                                | 1.096566812        | 2              | 2.96447   |
| Q03626        | VYHKEESSCIHSSCTAER                          | 1.191877105        | 2              | 5.81911   |
| <b>Q04462</b> | <b>SYVC Valyl_tRNA synthetase</b>           | <b>1.887453871</b> | <b>0.88533</b> | <b>4</b>  |
| Q04462        | ALNPLEEWLR                                  | 0.927752715        | 2              | 2.33317   |
| Q04462        | ITPAHDQNDYEVGQR                             | 1.0074488          | 2              | 3.68737   |
| Q04462        | LQQTEAELR                                   | 0.815780906        | 2              | 2.34132   |

|               |                                                       |                    |                |           |
|---------------|-------------------------------------------------------|--------------------|----------------|-----------|
| Q04462        | SVTQQPGSEITAPQK                                       | 0.910866614        | 2              | 3.54637   |
| <b>Q05982</b> | <b>NDKA Nucleoside diphosphate kinase A</b>           | <b>2.208193607</b> | <b>0.64885</b> | <b>2</b>  |
| Q05982        | EISLWFQPEELVDYK                                       | 1.235632932        | 2              | 2.85258   |
| Q05982        | FIQASEDLLK                                            | 1.142814308        | 2              | 2.36531   |
| <b>Q06647</b> | <b>ATPO ATP synthase subunit O_ mitochondrial</b>     | <b>2.283799355</b> | <b>0.96123</b> | <b>8</b>  |
| Q06647        | FSPLTANLMNLLAENGR                                     | 1.308840812        | 2              | 4.31037   |
| Q06647        | GEVPCTVTTAFPLDEAVLSELK                                | 1.100269174        | 3              | 6.04703   |
| Q06647        | GQILNLEVK                                             | 0.834218679        | 2              | 2.73665   |
| Q06647        | LGNTQGVISAFSTIMSVHR                                   | 1.165450913        | 3              | 3.64138   |
| Q06647        | TDPSIMGGMIVR                                          | 1.084050284        | 2              | 3.32039   |
| Q06647        | TVLNSFLSK                                             | 0.950109804        | 2              | 2.72552   |
| Q06647        | VGQLLKDPK                                             | 0.803846562        | 1              | 2.1613    |
| Q06647        | VSLAVLNPIYK                                           | 1.314237736        | 2              | 3.58112   |
| <b>Q07071</b> | <b>GCKR Glucokinase regulatory protein</b>            | <b>2.691402974</b> | <b>0.00417</b> | <b>13</b> |
| Q07071        | AAPISCHVQVAHEK                                        | 1.064497923        | 2              | 4.90169   |
| Q07071        | CIESLLQAIHFPQPLSDDVR                                  | 1.470486024        | 3              | 4.44121   |
| Q07071        | CLLEILR                                               | 1.576650555        | 2              | 2.52696   |
| Q07071        | GFLIGDHSDMFNQK                                        | 1.250110364        | 2              | 3.83192   |
| Q07071        | LLGQCDAEIFQEEGQIVPTYQR                                | 2.720252806        | 2              | 5.03187   |
| Q07071        | LSAASSVCEVVR                                          | 1.074417588        | 2              | 2.792     |
| Q07071        | LYSESVLTTMLQVAGK                                      | 1.424304014        | 2              | 3.83555   |
| Q07071        | QEAFLNPAIGPEGLSGSSR                                   | 1.34527982         | 2              | 4.86258   |
| Q07071        | TVDQGVVSSQR                                           | 1.340534783        | 2              | 3.56929   |
| Q07071        | VIPTALLSLLLR                                          | 0.842285816        | 2              | 2.96802   |
| Q07071        | VQEVLEKPEDGGLVVLVSGGGTSGR                             | 1.256085916        | 2              | 5.05545   |
| Q07071        | WVLNTVSTGAHVLLGK                                      | 2.005772885        | 2              | 3.4445    |
| Q07071        | YQHVIETPEPGEWELSGYEAAPITEK                            | 1.560512225        | 3              | 6.07007   |
| <b>Q07116</b> | <b>SUOX Sulfite oxidase_ mitochondrial</b>            | <b>1.992433434</b> | <b>0.98541</b> | <b>9</b>  |
| Q07116        | AVDDSYNVQPDVTVAPIWNLR                                 | 0.851753586        | 2              | 4.61876   |
| Q07116        | ETEAHVCFEGLSDPTGTAYGASIPLAR                           | 1.837024547        | 3              | 3.93677   |
| Q07116        | FVDLHPGGQSK                                           | 1.216861808        | 2              | 2.67693   |
| Q07116        | IGELNPEDR                                             | 2.373852262        | 2              | 2.4432    |
| Q07116        | LCDVLAQAGHR                                           | 0.770850596        | 2              | 3.24045   |
| Q07116        | LHVVGAPGGQSLSLDLHLK                                   | 1.480034734        | 3              | 3.70607   |
| Q07116        | MSPPLEASDPYSNDPMR                                     | 2.231617531        | 2              | 3.82777   |
| Q07116        | NHLPVPNLDPTYR                                         | 1.006326631        | 2              | 2.66884   |
| Q07116        | VSEVESESYSHWQR                                        | 0.797491636        | 2              | 4.12602   |
| <b>Q07205</b> | <b>IF5 Eukaryotic translation initiation factor 5</b> | <b>1.998975771</b> | <b>0.97566</b> | <b>3</b>  |
| Q07205        | AMGPLVLTEVLFDEK                                       | 0.851964006        | 2              | 3.67745   |
| Q07205        | LQDMLDGFJK                                            | 1.126308429        | 2              | 2.31177   |
| Q07205        | TVIVNMVDVAK                                           | 1.022900184        | 2              | 2.85976   |
| <b>Q07523</b> | <b>HAOX2 Hydroxyacid oxidase 2</b>                    | <b>1.74660106</b>  | <b>0.99383</b> | <b>12</b> |
| Q07523        | ALKEEKPTQSVVSPFK                                      | 0.825505308        | 2              | 4.81859   |
| Q07523        | ALVITIDTPVLGNR                                        | 0.859008185        | 2              | 3.96141   |
| Q07523        | ASFQWNDLSLLQSITR                                      | 0.984649204        | 2              | 4.07296   |
| Q07523        | EDAELAMK                                              | 1.366628506        | 1              | 2.01864   |
| Q07523        | EKPTQSVVSPFK                                          | 0.985464063        | 2              | 3.76491   |
| Q07523        | EVLDTLAEHR                                            | 1.058750383        | 2              | 3.27532   |
| Q07523        | GEDGVKEVLDILAEHR                                      | 0.934796122        | 3              | 5.12781   |
| Q07523        | HNVQGIVVSNHGGR                                        | 0.782392003        | 3              | 6.36064   |
| Q07523        | NQLNLEANILK                                           | 1.058687255        | 2              | 3.88023   |
| Q07523        | QLDEVASIDALR                                          | 1.065514521        | 2              | 3.11643   |
| Q07523        | TSWDFIEGEADDGITYSENIAAFK                              | 0.887042384        | 3              | 3.30194   |
| Q07523        | TTIQQEISAPICISPTAFHSIAWPDGK                           | 0.976800369        | 3              | 4.73957   |
| <b>Q07803</b> | <b>EFGM Elongation factor G_ mitochondrial</b>        | <b>2.31710555</b>  | <b>0.64235</b> | <b>4</b>  |
| Q07803        | GIIDLIEER                                             | 1.368282475        | 2              | 2.86931   |
| Q07803        | LEFSDFTGANVPK                                         | 1.327076557        | 2              | 2.85278   |

|                |                                                                   |                    |                |          |
|----------------|-------------------------------------------------------------------|--------------------|----------------|----------|
| Q07803         | NYQGELKK                                                          | 0.74403744         | 1              | 2.08622  |
| Q07803         | YQPCSPSTQEELVNK                                                   | 1.756354408        | 2              | 3.09254  |
| <b>Q07936</b>  | <b>ANXA2 Annexin A2</b>                                           | <b>2.037153516</b> | <b>0.99919</b> | <b>3</b> |
| Q07936         | GLGTDEDSLIEIICSR                                                  | 1.160568884        | 2              | 3.37049  |
| Q07936         | GVDEVTIVNILTNR                                                    | 1.042573381        | 2              | 3.10122  |
| Q07936         | TNQLQEINR                                                         | 0.959383942        | 2              | 2.95204  |
| <b>Q07984</b>  | <b>SSRD Translocon_associated protein subunit delta</b>           | <b>2.429212607</b> | <b>0.00665</b> | <b>3</b> |
| Q07984         | FFDEESYSLLR                                                       | 1.316710104        | 2              | 3.67008  |
| Q07984         | NNEDVSIIPPLFTVSDHR                                                | 1.280482425        | 2              | 4.33862  |
| Q07984         | VQNMALYADVSGK                                                     | 1.008312517        | 2              | 3.69997  |
| <b>Q08163</b>  | <b>CAP1 Adenylyl cyclase_associated protein 1</b>                 | <b>2.548541854</b> | <b>0.9938</b>  | <b>7</b> |
| Q08163         | ALLVTASQCQPAGNK                                                   | 0.890803445        | 2              | 4.09057  |
| Q08163         | KEPALLELEGK                                                       | 1.177171095        | 2              | 2.34322  |
| Q08163         | LEAVSHTSDMHCGYGDSPSK                                              | 1.064124383        | 3              | 5.07489  |
| Q08163         | NSLDCEIVSAK                                                       | 1.123662445        | 2              | 3.07278  |
| Q08163         | SALFAQINQGESITHALK                                                | 1.340931071        | 2              | 4.18021  |
| Q08163         | SSEMNVLIPTEGGDFNEFPVPEQFK                                         | 1.767975338        | 2              | 4.26463  |
| Q08163         | VENQENVSNLVIDDTLTK                                                | 1.404249817        | 2              | 5.36006  |
| <b>Q08201</b>  | <b>MDR2 Multidrug resistance protein 2</b>                        | <b>2.131870995</b> | <b>0.73589</b> | <b>2</b> |
| Q08201         | AKLSAAYLFLFERQPLIDSYSR                                            | 1.067236778        | 2              | 2.5521   |
| Q08201         | FDTLVGDRGAQLSGGQK                                                 | 1.343034013        | 2              | 2.53732  |
| <b>Q08415</b>  | <b>KAT1 Kynurenine__oxoglutarate transaminase 1_mitochondrial</b> | <b>3.13038061</b>  | <b>0.50464</b> | <b>6</b> |
| Q08415         | ATLQAMDER                                                         | 0.933543861        | 2              | 2.43284  |
| Q08415         | EQQHFGQPSSYFLQLPQAMELNR                                           | 1.006127022        | 3              | 5.71025  |
| Q08415         | ILVLNTPNNPLGK                                                     | 1.645555292        | 2              | 3.26915  |
| Q08415         | LGASNDWQLDPAELASK                                                 | 2.256135772        | 2              | 4.25427  |
| Q08415         | RLDGIDQNLWVEFGK                                                   | 0.827789213        | 2              | 2.36245  |
| Q08415         | VGWVMGPDNIMK                                                      | 1.121186723        | 2              | 2.45041  |
| <b>Q09073</b>  | <b>ADT2 ADP/ATP translocase 2</b>                                 | <b>1.861812939</b> | <b>0.99953</b> | <b>7</b> |
| Q09073         | AAVFGIYDTAK                                                       | 1.095496982        | 2              | 2.42624  |
| Q09073         | DFLAGGVAAAIK                                                      | 4.602802468        | 2              | 4.93099  |
| Q09073         | GLGDCLVK                                                          | 0.977017702        | 2              | 2.80029  |
| Q09073         | GTDIMYGTLDWCWR                                                    | 1.173013268        | 2              | 3.61974  |
| Q09073         | KGTDIMYGTLDWCWR                                                   | 0.799677703        | 3              | 3.78966  |
| Q09073         | LLLQVQHASK                                                        | 0.933145388        | 2              | 2.77317  |
| Q09073         | QIFLGGVDKR                                                        | 0.849168637        | 2              | 2.39185  |
| <b>Q0D2L3</b>  | <b>SPEB Agmatinase_mitochondrial</b>                              | <b>2.12831709</b>  | <b>0.90576</b> | <b>9</b> |
| Q0D2L3         | EAYQNILATGCIPLTLGGDHTITYPILQAVAK                                  | 1.174848495        | 3              | 4.13204  |
| Q0D2L3         | EESLMLGTVPNPSTGALPFQSLR                                           | 1.176155644        | 2              | 3.57721  |
| Q0D2L3         | EHGPVGLVHVGAHSNTSDKPLEDK                                          | 0.819785745        | 3              | 3.53353  |
| Q0D2L3         | IREESLMLGTVPNPSTGALPFQSLR                                         | 1.038994569        | 3              | 4.45837  |
| Q0D2L3         | SVDEGLLDSK                                                        | 0.853401851        | 2              | 2.74482  |
| Q0D2L3         | SVDEGLLDSKR                                                       | 0.746283599        | 2              | 3.14827  |
| Q0D2L3         | VADLGNVNVNLYNLQDSCR                                               | 1.385388871        | 2              | 5.29579  |
| Q0D2L3         | VCSMMHLPLQSSPEGLDAAAFVGVPLDTGTNSRPGAR                             | 1.637000319        | 3              | 5.56457  |
| Q0D2L3         | VVLAEDCWMK                                                        | 1.042012015        | 2              | 2.52312  |
| <b>Q0VAV2</b>  | <b>EXPH5 Exophilin_5</b>                                          | <b>1.956768656</b> | <b>0.93779</b> | <b>4</b> |
| Q0VAV2         | DMDVSVSKDEQLNK                                                    | 0.964185974        | 2              | 2.32847  |
| Q0VAV2         | DMDVSVSKDEQLNK+Oxidation(1)                                       | 0.969580416        |                |          |
| Q0VAV2         | GMAKNPMEQLQTPR+Oxidation(1)Oxidation(7)                           | 0.679926025        |                |          |
| Q0VAV2         | SLSDDPQGQEQREEK                                                   | 0.925042863        | 2              | 2.48273  |
| <b>Q0VVGK3</b> | <b>GLCTK Glycerate kinase</b>                                     | <b>2.012706234</b> | <b>0.29951</b> | <b>3</b> |
| Q0VVGK3        | AVLGMAAAADELLGQHLVQGVISVPK                                        | 1.033401039        | 2              | 5.17847  |
| Q0VVGK3        | GATIQLNTIR                                                        | 0.988148825        | 2              | 2.80106  |
| Q0VVGK3        | QLFDSAVGAVQPGPMLQR                                                | 0.935853889        | 2              | 3.58777  |
| <b>Q0ZHH6</b>  | <b>ATLA3 Atlatin_3</b>                                            | <b>2.619283348</b> | <b>0.86306</b> | <b>7</b> |

|               |                                                                             |                    |                |           |
|---------------|-----------------------------------------------------------------------------|--------------------|----------------|-----------|
| Q0ZHH6        | ALASVLLQDHIR                                                                | 1.231563617        | 2              | 2.61704   |
| Q0ZHH6        | EHQHEEIQNVR                                                                 | 1.292277303        | 2              | 3.39878   |
| Q0ZHH6        | EQLQTLIPYVLNPSK                                                             | 1.093997279        | 2              | 2.76003   |
| Q0ZHH6        | GGSDPETTGIIQWSEVFTVK                                                        | 0.835624673        | 2              | 4.5233    |
| Q0ZHH6        | IYQGEDLPHPK                                                                 | 1.049704594        | 2              | 2.52423   |
| Q0ZHH6        | LAMDEIFQKPFQTLMFLVR+Oxidation(2                                             | 1.434962353        |                |           |
| Q0ZHH6        | YQQELEEEITELYENFCK                                                          | 1.117461868        | 2              | 5.27601   |
| <b>Q10728</b> | <b>MYPT1 Protein phosphatase 1 regulatory subunit 12A</b>                   | <b>1.831576769</b> | <b>0.72397</b> | <b>2</b>  |
| Q10728        | EQENEKDKEEK                                                                 | 1.039844375        | 2              | 2.32477   |
| Q10728        | SLLEMEKRER+Oxidation(4                                                      | 0.864258133        |                |           |
| <b>Q10758</b> | <b>K2C8 Keratin_ type II cytoskeletal 8</b>                                 | <b>2.014022828</b> | <b>0.0005</b>  | <b>27</b> |
| Q10758        | AEAETMYQIK                                                                  | 0.996105582        | 2              | 3.32209   |
| Q10758        | AQYEEIANR                                                                   | 0.928542566        | 2              | 3.13165   |
| Q10758        | ATLEAAIADAEQR                                                               | 0.945139052        | 2              | 4.70628   |
| Q10758        | DVDEAYMKNKVELESR                                                            | 1.050456618        | 2              | 3.44792   |
| Q10758        | ELQSQISDTSVVLMSMDNSR                                                        | 4.311153608        | 2              | 6.24015   |
| Q10758        | GSLGGFGGAGVGGITAVTVNQSLLNPLK                                                | 1.020528076        | 2              | 4.99104   |
| Q10758        | KDVDEAYMKNK                                                                 | 1.047308721        | 2              | 3.31882   |
| Q10758        | LEGLTDEINFLR                                                                | 1.160235486        | 2              | 4.39292   |
| Q10758        | LESGMQNMSIHTK                                                               | 1.117331541        | 2              | 3.87926   |
| Q10758        | LEVDPNIQAVR                                                                 | 0.97669807         | 2              | 3.69396   |
| Q10758        | LEVELGNMQGLVEDFK                                                            | 1.375747443        | 2              | 5.05751   |
| Q10758        | LKLEVELGNMQGLVEDFK                                                          | 1.396235443        | 3              | 3.52064   |
| Q10758        | LQAEIDALK                                                                   | 0.960876998        | 2              | 2.97322   |
| Q10758        | LVSESSDIMSK                                                                 | 1.006907201        | 2              | 3.49612   |
| Q10758        | QIHEEEIR                                                                    | 0.831076245        | 1              | 2.19595   |
| Q10758        | QLEALGQEK                                                                   | 0.892315206        | 1              | 2.16785   |
| Q10758        | RQLEALGQEK                                                                  | 0.836510103        | 2              | 2.57175   |
| Q10758        | SKTEISEMNR                                                                  | 0.809521022        | 3              | 3.76008   |
| Q10758        | SKTEISEMNR+Oxidation(7                                                      | 0.942088368        |                |           |
| Q10758        | SLDMSIIAEVR                                                                 | 0.994438023        | 2              | 4.67944   |
| Q10758        | SNMDNMFESYINNLR                                                             | 1.350740174        | 2              | 4.2057    |
| Q10758        | SRAEAETMYQIK                                                                | 0.976504481        | 2              | 3.67364   |
| Q10758        | TEISEMNR                                                                    | 1.276308413        | 2              | 2.32093   |
| Q10758        | TEMENEFVLK                                                                  | 0.883368435        | 2              | 3.60466   |
| Q10758        | TEMENEFVLK+Oxidation(2                                                      | 0.924483133        |                |           |
| Q10758        | WSLLQQQK                                                                    | 0.856889089        | 2              | 3.00572   |
| Q10758        | YEELQTLGK                                                                   | 0.986508551        | 2              | 3.60237   |
| <b>Q148W0</b> | <b>AT8B1 Probable phospholipid_transporting ATPase IC</b>                   | <b>1.846122789</b> | <b>0.99228</b> | <b>2</b>  |
| Q148W0        | LGQSHFINWDLQMYAEK+Oxidation(12                                              | 0.984622958        |                |           |
| Q148W0        | TCEVIKDRFK                                                                  | 0.868338955        | 1              | 2.296     |
| <b>Q14DH7</b> | <b>ACSS3 Acyl_CoA synthetase short_chain family member 3_ mitochondrial</b> | <b>1.885971326</b> | <b>0.99999</b> | <b>7</b>  |
| Q14DH7        | CVPGYNVMILDDNMQK                                                            | 1.375854814        | 2              | 2.97358   |
| Q14DH7        | IAIYDSPVTDTK                                                                | 0.969452908        | 2              | 2.93041   |
| Q14DH7        | STLSALVNGKPYK                                                               | 0.721599164        | 2              | 2.78172   |
| Q14DH7        | THFAASVADPER                                                                | 0.989000004        | 2              | 3.66633   |
| Q14DH7        | VDDVINVAGHR                                                                 | 0.907844307        | 2              | 3.61651   |
| Q14DH7        | VLAEHGVAALFTAPTAIR                                                          | 0.960864203        | 2              | 4.42953   |
| Q14DH7        | VTPTIEDPSIFGHIEEVK                                                          | 1.052751108        | 2              | 3.42567   |
| <b>Q1H5H1</b> | <b>SELT Selenoprotein T</b>                                                 | <b>1.965414132</b> | <b>0.85192</b> | <b>2</b>  |
| Q1H5H1        | IEGENYLPQPIYR                                                               | 1.342133396        | 2              | 2.83603   |
| Q1H5H1        | LESGHLPSMQQLVQILDNEMK                                                       | 0.973394009        | 3              | 3.98488   |
| <b>Q1HCL7</b> | <b>NAKD1 NAD kinase domain_containing protein 1</b>                         | <b>1.986022235</b> | <b>0.99997</b> | <b>11</b> |
| Q1HCL7        | GSSYSGLLER                                                                  | 0.973725137        | 2              | 2.43481   |

|               |                                                                   |                    |                |           |
|---------------|-------------------------------------------------------------------|--------------------|----------------|-----------|
| Q1HCL7        | LKPVIGVNTDPER                                                     | 1.168596667        | 3              | 3.4647    |
| Q1HCL7        | LYLEGTGINPSPVDLHEQQLSLNQHSR                                       | 1.195669734        | 3              | 5.23048   |
| Q1HCL7        | NVEHIIDSLRDEGIEVR                                                 | 1.026305648        | 2              | 3.5436    |
| Q1HCL7        | QGNLTLPLNK                                                        | 1.127104866        | 2              | 2.48926   |
| Q1HCL7        | SEASGPQLLPVR                                                      | 1.025759033        | 2              | 3.10753   |
| Q1HCL7        | SEGLHCLPVR                                                        | 0.931733577        | 2              | 2.77451   |
| Q1HCL7        | SSGLNLCTGTGSK                                                     | 0.933204286        | 2              | 3.61795   |
| Q1HCL7        | VTNEYNESLLYSPEEPK                                                 | 1.137631654        | 2              | 4.72269   |
| Q1HCL7        | YAELSEEDLK                                                        | 1.149802042        | 2              | 2.77213   |
| Q1HCL7        | YTHSFPEALQK                                                       | 1.081994068        | 2              | 2.49373   |
| <b>Q1JU68</b> | <b>EIF3A Eukaryotic translation initiation factor 3 subunit A</b> | <b>2.299508614</b> | <b>0.94976</b> | <b>7</b>  |
| Q1JU68        | AVEDIHGLFSLSK                                                     | 2.228317049        | 2              | 3.19418   |
| Q1JU68        | EEEEQRRAEEQMLK                                                    | 1.12208579         | 2              | 2.4563    |
| Q1JU68        | FNVLQYVVPEVK                                                      | 1.201881848        | 2              | 3.40989   |
| Q1JU68        | ILQEHEQIK                                                         | 0.996209359        | 2              | 2.3826    |
| Q1JU68        | KGPEADSEWR                                                        | 0.778527962        | 2              | 2.61071   |
| Q1JU68        | LLDMDGIIVEK                                                       | 0.985912306        | 2              | 3.01552   |
| Q1JU68        | NQLTAMSSVLAK                                                      | 0.873349168        | 2              | 2.77784   |
| <b>Q29RW1</b> | <b>MYH4 Myosin_4</b>                                              | <b>2.467396368</b> | <b>0.96734</b> | <b>13</b> |
| Q29RW1        | ANLMQAEIEELR                                                      | 2.798841858        | 2              | 2.94908   |
| Q29RW1        | ELENEVENEQKR                                                      | 1.427805218        | 2              | 3.10978   |
| Q29RW1        | GQDDLKEQLAMVER                                                    | 1.335246368        | 2              | 2.87192   |
| Q29RW1        | LQDAEEHVEAVNSK                                                    | 0.972714893        | 2              | 4.84159   |
| Q29RW1        | LQDLVDKLQTK                                                       | 1.426563204        | 1              | 1.94186   |
| Q29RW1        | MEGDLNEMEIQLNHANR                                                 | 1.185114996        | 2              | 4.04416   |
| Q29RW1        | MEIDDLASNMETVSK                                                   | 4.443828263        | 2              | 4.33588   |
| Q29RW1        | NAYEESLDQLETLKR                                                   | 1.919251566        | 2              | 4.01644   |
| Q29RW1        | SAETEKEMATMK                                                      | 1.282492564        | 2              | 2.77454   |
| Q29RW1        | SELQASLEEAASLEHEEGK                                               | 1.227672932        | 2              | 4.85812   |
| Q29RW1        | TEGGATVTVK                                                        | 1.354855291        | 2              | 2.91739   |
| Q29RW1        | TKLEQQVDDLEGSLEQEK                                                | 2.084453975        | 2              | 4.93899   |
| Q29RW1        | TKLEQQVDDLEGSLEQEKK                                               | 0.904096089        | 3              | 4.62526   |
| <b>Q2PQA9</b> | <b>KINH Kinesin_1 heavy chain</b>                                 | <b>2.359718341</b> | <b>0.98966</b> | <b>4</b>  |
| Q2PQA9        | HVAVTNMNEHSSR                                                     | 1.960271794        | 3              | 4.04124   |
| Q2PQA9        | MEENEKELAACQLR                                                    | 1.130874123        | 2              | 2.35641   |
| Q2PQA9        | SAEVSDDTGGSAAQK                                                   | 1.091667769        | 2              | 5.21531   |
| Q2PQA9        | TGAEGAVLDEAK                                                      | 0.998302328        | 2              | 2.42435   |
| <b>Q2TA68</b> | <b>OPA1 Dynamin_like 120 kDa protein_mitochondrial</b>            | <b>1.844083377</b> | <b>0.46368</b> | <b>6</b>  |
| Q2TA68        | AKNEILDEVISLSQVTPK                                                | 1.700444404        | 2              | 3.96823   |
| Q2TA68        | AVEVAWETLQDEFSR                                                   | 1.297885297        | 2              | 2.3639    |
| Q2TA68        | GKEHDDIFDK                                                        | 0.998259838        | 2              | 2.40361   |
| Q2TA68        | IDQLQEELLHTQLK                                                    | 0.843287163        | 2              | 2.64901   |
| Q2TA68        | TSVLEMIAQAR                                                       | 1.296438447        | 2              | 3.29925   |
| Q2TA68        | VVVVGDQSAGK                                                       | 0.912257408        | 2              | 2.54199   |
| <b>Q2V057</b> | <b>PROD2 Probable proline dehydrogenase 2</b>                     | <b>1.872480904</b> | <b>0.66557</b> | <b>7</b>  |
| Q2V057        | ASIYQGFVAGETAEEVR                                                 | 1.737496701        | 2              | 3.18024   |
| Q2V057        | EDCTQPDYEATSR                                                     | 0.967456666        | 2              | 3.92341   |
| Q2V057        | GCVQQLQAIGLQPLLAIVPTTEEPDSSAAK                                    | 1.102473529        | 3              | 3.60321   |
| Q2V057        | NLQLSCLSTEQNQHLOASLSR                                             | 1.090875398        | 2              | 5.4459    |
| Q2V057        | SIPYGCLEEVIPYLIR                                                  | 1.675001638        | 2              | 2.53174   |
| Q2V057        | SVTQLHGKEDCTQPDYEATSR                                             | 0.837781896        | 3              | 5.44921   |
| Q2V057        | TSEAWYEGNLSAMLHCVDLSR                                             | 1.240516497        | 2              | 3.45397   |
| <b>Q3B7D0</b> | <b>HEM6 Coproporphyrinogen_III oxidase_mitochondrial</b>          | <b>2.29670865</b>  | <b>0.98943</b> | <b>4</b>  |
| Q3B7D0        | AGVNISVVHGNLSEEAANQMR                                             | 1.041472619        | 3              | 4.74095   |

|               |                                                                            |                    |                |          |
|---------------|----------------------------------------------------------------------------|--------------------|----------------|----------|
| Q3B7D0        | FGLFTPGSR                                                                  | 1.059771712        | 2              | 2.33909  |
| Q3B7D0        | HCDDSYTPQDK                                                                | 1.232424239        | 2              | 3.78569  |
| Q3B7D0        | LEEDGDELAR                                                                 | 1.614418583        | 2              | 2.82395  |
| <b>Q3B7U9</b> | <b>FKBP8 Peptidyl_prolyl cis_trans isomerase FKBP8</b>                     | <b>2.645762002</b> | <b>0.99963</b> | <b>4</b> |
| Q3B7U9        | SCSQVLEHQPDNIK                                                             | 1.076985863        | 2              | 4.13734  |
| Q3B7U9        | TAEDGPDEMLSGQER                                                            | 0.957204118        | 2              | 4.21666  |
| Q3B7U9        | VDMTCEEEEEELLQK                                                            | 1.454716042        | 2              | 4.14715  |
| Q3B7U9        | VLAQQGEYSEAIPILR                                                           | 1.086563222        | 2              | 3.4743   |
| <b>Q3B8Q2</b> | <b>IF4A3 Eukaryotic initiation factor 4A_III</b>                           | <b>1.959432298</b> | <b>0.66727</b> | <b>2</b> |
| Q3B8Q2        | GIYAYGFEKPSAIQQR                                                           | 0.971363296        | 2              | 4.58426  |
| Q3B8Q2        | GRDVIAQSQSGTGK                                                             | 0.870015002        | 2              | 3.88809  |
| <b>Q3KRD8</b> | <b>IF6 Eukaryotic translation initiation factor 6</b>                      | <b>2.192412273</b> | <b>0.95868</b> | <b>3</b> |
| Q3KRD8        | ASFENNCEVGCFAK                                                             | 1.111930621        | 2              | 2.43011  |
| Q3KRD8        | HGLLVPNNTTDQELQHIR                                                         | 1.157060352        | 3              | 4.83218  |
| Q3KRD8        | TSIEDQDELSSLLQVPLVAGTVNR                                                   | 1.165455117        | 3              | 3.90298  |
| <b>Q3KRE0</b> | <b>ATAD3 ATPase family AAA domain_containing protein 3</b>                 | <b>2.017201628</b> | <b>0.97218</b> | <b>3</b> |
| Q3KRE0        | GEGTGPPLPLPPAQPGAESGGDR                                                    | 1.0225967          | 2              | 3.66028  |
| Q3KRE0        | ISVLEALR                                                                   | 1.813843765        | 2              | 2.41864  |
| Q3KRE0        | QQQLLNEENLR                                                                | 0.960687288        | 2              | 2.36425  |
| <b>Q3KRE8</b> | <b>TBB2B Tubulin beta_2B chain</b>                                         | <b>2.151491617</b> | <b>0.382</b>   | <b>2</b> |
| Q3KRE8        | ALTVPQLTQQMFDSK                                                            | 1.104935258        | 2              | 3.22134  |
| Q3KRE8        | ESESCDCLQGFQLTHSLGGGTGSGMGTLLISK                                           | 1.132364161        | 3              | 5.05137  |
| <b>Q3MIB4</b> | <b>LONP2 Lon protease homolog 2_peroxisomal</b>                            | <b>2.024912813</b> | <b>0.96225</b> | <b>2</b> |
| Q3MIB4        | MEIIQVPGYTQEEK                                                             | 1.019895436        | 2              | 3.72723  |
| Q3MIB4        | TVGVNPNVFLLEVDVK                                                           | 0.911383723        | 2              | 2.44436  |
| <b>Q3MIE0</b> | <b>ECHD3 Enoyl_CoA hydratase domain_containing protein 3_mitochondrial</b> | <b>2.010955722</b> | <b>0.79996</b> | <b>6</b> |
| Q3MIE0        | DGQEGIEAFIQK                                                               | 1.130206758        | 2              | 2.76709  |
| Q3MIE0        | SDILHEAESEDLK                                                              | 1.019564867        | 3              | 3.66626  |
| Q3MIE0        | SSFATPGVNVGLFCSTPAVALGR                                                    | 1.359277729        | 2              | 4.73243  |
| Q3MIE0        | VALEMLFTGEPISAEALR                                                         | 0.990721869        | 2              | 3.66328  |
| Q3MIE0        | VIIISAEGPVFSSGHDLK                                                         | 0.901845432        | 2              | 4.47785  |
| Q3MIE0        | VVPEEQLEEEATR                                                              | 0.848469202        | 2              | 3.97194  |
| <b>Q3MIF4</b> | <b>XYLB Xylulose kinase</b>                                                | <b>2.224184027</b> | <b>0.63166</b> | <b>8</b> |
| Q3MIF4        | CCLGWDFSTQQVK                                                              | 1.550680898        | 2              | 3.20523  |
| Q3MIF4        | DLPEFGTQGGVHVHK                                                            | 0.957490269        | 2              | 2.75126  |
| Q3MIF4        | FNADNMEVSAFPQDVEIR                                                         | 1.399997676        | 2              | 4.45379  |
| Q3MIF4        | IHAEGLYR                                                                   | 1.168213725        | 2              | 2.34742  |
| Q3MIF4        | IRDESASCSWNK                                                               | 1.129962731        | 2              | 4.17306  |
| Q3MIF4        | VVAFTGDNPASLAGMR                                                           | 1.216261178        | 2              | 3.87135  |
| Q3MIF4        | VWSQAQLDACAPHLK                                                            | 1.41035353         | 2              | 3.81145  |
| Q3MIF4        | YSPIDYSDGSGMNLQIQEK                                                        | 1.927097101        | 2              | 5.27579  |
| <b>Q3SWS9</b> | <b>JKIP1 Janus kinase and microtubule_interacting protein 1</b>            | <b>2.186429912</b> | <b>0.75809</b> | <b>2</b> |
| Q3SWS9        | LEMEENQLK+Oxidation(2                                                      | 0.749535615        |                |          |
| Q3SWS9        | VKTALLADAREEAR                                                             | 1.146475491        | 2              | 2.38817  |
| <b>Q3T1I4</b> | <b>PRRC1 Protein PRRC1</b>                                                 | <b>2.328466942</b> | <b>0.67488</b> | <b>2</b> |
| Q3T1I4        | GQDDAPAGGIWGFJK                                                            | 1.209586568        | 2              | 3.68292  |
| Q3T1I4        | WSGLLVTVGEVLEK                                                             | 1.288671136        | 2              | 2.7461   |
| <b>Q3T1J1</b> | <b>IF5A1 Eukaryotic translation initiation factor 5A_1</b>                 | <b>2.082152831</b> | <b>0.99029</b> | <b>4</b> |
| Q3T1J1        | EDLRLPEGDLGK                                                               | 0.983278397        | 2              | 2.96803  |
| Q3T1J1        | EDLRLPEGDLGKEIEQK                                                          | 1.200271569        | 2              | 4.25702  |
| Q3T1J1        | NDFQLIGIQDGYLSLLQDSGEVR                                                    | 1.177342586        | 2              | 5.07142  |
| Q3T1J1        | RNDFQLIGIQDGYLSLLQDSGEVR                                                   | 1.55230011         | 3              | 4.24045  |
| <b>Q3T1K5</b> | <b>CAZA2 F_actin_capping protein subunit alpha_2</b>                       | <b>2.325909231</b> | <b>0.99978</b> | <b>3</b> |
| Q3T1K5        | FIHAPPGEFNEVFNDVR                                                          | 1.047704394        | 3              | 4.02543  |

|               |                                                                                           |                    |                |           |
|---------------|-------------------------------------------------------------------------------------------|--------------------|----------------|-----------|
| Q3T1K5        | FTVTPSTTQVVGLK                                                                            | 1.238163779        | 2              | 4.08574   |
| Q3T1K5        | KVDGQQTIACIESHQFQAK                                                                       | 1.002663324        | 3              | 3.77062   |
| <b>Q3TDQ1</b> | <b>STT3B Dolichyl_diphosphooligosaccharide__protein glycosyltransferase subunit STT3B</b> | <b>2.203381464</b> | <b>0.5822</b>  | <b>2</b>  |
| Q3TDQ1        | FGEMQLDFR                                                                                 | 1.358518719        | 2              | 2.33488   |
| Q3TDQ1        | HLEEAFTSEHWLVR                                                                            | 1.130963332        | 3              | 4.07701   |
| <b>Q3U0D9</b> | <b>HACE1 E3 ubiquitin_protein ligase HACE1</b>                                            | <b>1.888437568</b> | <b>0.67168</b> | <b>2</b>  |
| Q3U0D9        | DSIFRSCEIVSKANCAK                                                                         | 0.834756987        | 2              | 2.3169    |
| Q3U0D9        | MERAMEQLNRLTR                                                                             | 1.416606342        | 2              | 2.32771   |
| <b>Q3U0J8</b> | <b>TBD2B TBC1 domain family member 2B</b>                                                 | <b>2.151532863</b> | <b>0.98649</b> | <b>2</b>  |
| Q3U0J8        | DTTDIISQHPNPSAEK                                                                          | 1.042066029        | 2              | 2.52619   |
| Q3U0J8        | QIELDLLRTLNNK                                                                             | 1.116334701        | 2              | 2.5996    |
| <b>Q3UHR0</b> | <b>BAHC1 BAH and coiled_coil domain_containing protein 1</b>                              | <b>1.993993988</b> | <b>0.94167</b> | <b>2</b>  |
| Q3UHR0        | MQILQRKDTWAPK+Oxidation(0)                                                                | 1.275354295        |                |           |
| Q3UHR0        | NLEEPGLSR                                                                                 | 0.968981217        | 2              | 2.36867   |
| <b>Q3ULJ0</b> | <b>GPD1L Glycerol_3_phosphate dehydrogenase 1_like protein</b>                            | <b>2.258650907</b> | <b>0.42891</b> | <b>3</b>  |
| Q3ULJ0        | GIDEGPDGLK                                                                                | 0.978659807        | 2              | 2.82018   |
| Q3ULJ0        | LGLMEMIAFAK                                                                               | 1.403851473        | 2              | 3.81507   |
| Q3ULJ0        | LTDIINNDHENVKYLPGHK                                                                       | 1.873847235        | 2              | 2.40201   |
| <b>Q3UMF0</b> | <b>COBL1 Cordon_bleu protein_like 1</b>                                                   | <b>1.696986715</b> | <b>0.20181</b> | <b>2</b>  |
| Q3UMF0        | RAPLPPMPTSQGAAQGGQERR+Oxidation(6)                                                        | 1.257885835        |                |           |
| Q3UMF0        | SQGTSTYVQDR                                                                               | 0.759288889        | 2              | 2.39346   |
| <b>Q3UQ44</b> | <b>IQGA2 Ras GTPase_activating_like protein IQGAP2</b>                                    | <b>2.313154929</b> | <b>0.01858</b> | <b>18</b> |
| Q3UQ44        | ALVGSNPPLTVIR                                                                             | 1.158121123        | 2              | 3.85569   |
| Q3UQ44        | AWVNLQLETQTGEASK                                                                          | 1.008391182        | 2              | 5.20005   |
| Q3UQ44        | GVLLGIDDLQTNQFK                                                                           | 1.231525352        | 2              | 4.29391   |
| Q3UQ44        | HTDNTVQWLR                                                                                | 1.067416639        | 2              | 3.00362   |
| Q3UQ44        | KKGGEIEILNNTDNK                                                                           | 1.027822165        | 2              | 2.37617   |
| Q3UQ44        | LFEGENEHLSSMNNYLSEYQEFR                                                                   | 1.925231716        | 3              | 4.71034   |
| Q3UQ44        | LGIAPQIQDLLGK                                                                             | 1.850874585        | 2              | 2.9931    |
| Q3UQ44        | LPYDVTTEQALTYPEVK                                                                         | 1.495292609        | 2              | 4.10466   |
| Q3UQ44        | LPYDVTTEQALTYPEVKNK                                                                       | 1.370278987        | 2              | 2.37227   |
| Q3UQ44        | LSAEEMDER                                                                                 | 1.233329034        | 2              | 3.09178   |
| Q3UQ44        | NPNAVLTVCVDDSLSQEYQK                                                                      | 1.194441655        | 2              | 5.23168   |
| Q3UQ44        | SKVDQVQDIVTGNPTVIK                                                                        | 1.012066316        | 2              | 4.99026   |
| Q3UQ44        | TALEEEIK                                                                                  | 1.071817702        | 2              | 2.40717   |
| Q3UQ44        | TLDTLLLPTANIR                                                                             | 1.02086671         | 2              | 3.57865   |
| Q3UQ44        | VDFTEEEISNMR                                                                              | 1.241127132        | 2              | 3.95305   |
| Q3UQ44        | VDQVQDIVTGNPTVIK                                                                          | 1.001159676        | 2              | 5.09797   |
| Q3UQ44        | YGSIVDDER                                                                                 | 0.656848384        | 2              | 2.45914   |
| Q3UQ44        | YQDILNEIAK                                                                                | 1.13060558         | 2              | 3.06104   |
| <b>Q3UV17</b> | <b>K22O Keratin_type II cytoskeletal 2 oral</b>                                           | <b>2.374208819</b> | <b>0.97065</b> | <b>2</b>  |
| Q3UV17        | AQYEDIAQK                                                                                 | 0.794032269        | 1              | 2.12442   |
| Q3UV17        | KQNTNMQTSIAEAEQR+Oxidation(5)                                                             | 1.254187375        |                |           |
| <b>Q3V0K9</b> | <b>PLSI Plastin_1</b>                                                                     | <b>1.873670897</b> | <b>0.32073</b> | <b>3</b>  |
| Q3V0K9        | AYFHLLNQIAPK                                                                              | 0.886933723        | 2              | 3.05478   |
| Q3V0K9        | KIENCNYAVELGK                                                                             | 0.797978314        | 2              | 3.73083   |
| Q3V0K9        | QFVTPADVVSIGNPK                                                                           | 1.038114434        | 2              | 3.30249   |
| <b>Q3V132</b> | <b>ADT4 ADP/ATP translocase 4</b>                                                         | <b>2.180571234</b> | <b>0.99997</b> | <b>2</b>  |
| Q3V132        | GNLANVIR                                                                                  | 1.107806721        | 2              | 2.75501   |
| Q3V132        | YFPTQALNFAFK                                                                              | 1.167265371        | 2              | 3.40525   |
| <b>Q3ZAV8</b> | <b>EDC4 Enhancer of mRNA_decapping protein 4</b>                                          | <b>1.816982413</b> | <b>0.83394</b> | <b>2</b>  |
| Q3ZAV8        | SSHSTWPDVVSQIK                                                                            | 1.305042983        | 2              | 2.33053   |
| Q3ZAV8        | VISVSTERTLLK                                                                              | 0.85400341         | 2              | 2.57487   |

|               |                                                                |                    |                |           |
|---------------|----------------------------------------------------------------|--------------------|----------------|-----------|
| <b>Q497B0</b> | <b>NIT2 Omega_amidase NIT2</b>                                 | <b>2.041079936</b> | <b>0.98823</b> | <b>15</b> |
| Q497B0        | ADLYSVESK                                                      | 1.085245427        | 2              | 3.06079   |
| Q497B0        | AGTEETILYSDIDLK                                                | 1.228527524        | 2              | 3.73211   |
| Q497B0        | ASYVAWGHSTVVDPWGQVLT                                           | 1.221880942        | 3              | 5.85666   |
| Q497B0        | AVDNQVYVATASPAR                                                | 0.917227042        | 2              | 4.68021   |
| Q497B0        | AVDNQVYVATASPARDEK                                             | 0.931587848        | 2              | 3.58641   |
| Q497B0        | ENSIYLIGGSIPEDDGK                                              | 0.827053953        | 2              | 3.46068   |
| Q497B0        | ENSIYLIGGSIPEDDGKLYNTCAVFGPDGNLLVK                             | 1.073185617        | 3              | 4.96519   |
| Q497B0        | FAELAQIYAR                                                     | 1.471182707        | 2              | 3.92586   |
| Q497B0        | IHLFDIDVPGK                                                    | 1.208631869        | 3              | 3.4871    |
| Q497B0        | KIHLFDIDVPGK                                                   | 1.134185917        | 3              | 4.73521   |
| Q497B0        | LALIQLQVSSIK                                                   | 2.057330412        | 2              | 3.06932   |
| Q497B0        | LYNTCAVFGPDGNLLVK                                              | 1.061992351        | 2              | 4.1224    |
| Q497B0        | QGANIVSLPECFNSPYGTNYFPEYAEK                                    | 1.005943079        | 3              | 4.97485   |
| Q497B0        | TLSPGDSFSTFDTPYCR                                              | 1.082990164        | 2              | 4.7758    |
| Q497B0        | VGLGICYDMR                                                     | 1.407729958        | 2              | 2.86102   |
| <b>Q498D5</b> | <b>RMD2 Regulator of microtubule dynamics protein 2</b>        | <b>1.825644228</b> | <b>0.99696</b> | <b>4</b>  |
| Q498D5        | AYGDMYDLSTNTQEK                                                | 0.855089312        | 2              | 4.56128   |
| Q498D5        | FCNLALLPIVTK                                                   | 1.088389045        | 2              | 3.2297    |
| Q498D5        | GQLQILEK                                                       | 1.127806872        | 1              | 2.059     |
| Q498D5        | LNELLTNVEELKEEIK                                               | 1.040124115        | 2              | 2.87154   |
| <b>Q498U4</b> | <b>SARNP SAP domain_containing ribonucleoprotein</b>           | <b>1.863959312</b> | <b>0.84697</b> | <b>2</b>  |
| Q498U4        | EEEEPEKVVDMASEK                                                | 0.833507726        | 2              | 2.3657    |
| Q498U4        | FGIVTSSAGTGTEDTEAK                                             | 0.898370511        | 2              | 3.34286   |
| <b>Q499N5</b> | <b>ACSF2 Acyl_CoA synthetase family member 2_mitochondrial</b> | <b>2.035522832</b> | <b>1</b>       | <b>7</b>  |
| Q499N5        | GATLSHHNIVNNSNLIGQR                                            | 0.891302787        | 2              | 5.32955   |
| Q499N5        | GGENIYPAELEDFHFK                                               | 0.85625719         | 2              | 2.9767    |
| Q499N5        | SGETTTEEEIK                                                    | 0.991633794        | 2              | 3.16073   |
| Q499N5        | TFETVGQDR                                                      | 1.036117993        | 2              | 2.67236   |
| Q499N5        | TGDIASMDEQGFCR                                                 | 1.051764305        | 2              | 3.72499   |
| Q499N5        | TVGECLDATAQR                                                   | 1.06127718         | 2              | 2.90951   |
| Q499N5        | YIVFVEGYPLTVSGK                                                | 1.021510092        | 2              | 4.37984   |
| <b>Q4AEF8</b> | <b>COPG Coatomer subunit gamma</b>                             | <b>1.979001387</b> | <b>0.93211</b> | <b>6</b>  |
| Q4AEF8        | FGAQNEEMLPSILVLLK                                              | 1.004529573        | 2              | 3.50185   |
| Q4AEF8        | SLPYNQPGTCYTLVALPK                                             | 1.137645733        | 2              | 2.44093   |
| Q4AEF8        | SSPEPVALTESETEYVIR                                             | 0.961533252        | 2              | 3.61256   |
| Q4AEF8        | TLEEAVGNIVK                                                    | 0.928769796        | 2              | 2.64028   |
| Q4AEF8        | VVLEHEEVR                                                      | 1.036915447        | 2              | 2.4354    |
| Q4AEF8        | VVVVQAISALCQK                                                  | 2.053050953        | 2              | 2.46967   |
| <b>Q4FZT0</b> | <b>STML2 Stomatin_like protein 2</b>                           | <b>2.418547351</b> | <b>0.4151</b>  | <b>5</b>  |
| Q4FZT0        | AEQINQAAGEASAVLAK                                              | 0.944920089        | 2              | 4.7049    |
| Q4FZT0        | ASYGVEDPEYAVTQLAQTMR                                           | 1.340021624        | 2              | 5.54852   |
| Q4FZT0        | ATVLESEGTR                                                     | 0.8747872          | 2              | 2.80368   |
| Q4FZT0        | DVQTTDTSIEELGR                                                 | 1.260989193        | 2              | 2.9225    |
| Q4FZT0        | ILEPGLNVLIPVLDL                                                | 0.988397152        | 2              | 3.01991   |
| <b>Q4FZT9</b> | <b>PSMD2 26S proteasome non_ATPase regulatory subunit 2</b>    | <b>1.857389115</b> | <b>1</b>       | <b>8</b>  |
| Q4FZT9        | DKTPVQSQPSATAPSGADEK                                           | 0.801972312        | 3              | 4.8805    |
| Q4FZT9        | FGGSGSQVDSAR                                                   | 1.073000133        | 2              | 3.39619   |
| Q4FZT9        | SETELKDTYAR                                                    | 1.016825686        | 2              | 3.04089   |
| Q4FZT9        | SGALLACGIVNSGVR                                                | 1.003290729        | 2              | 3.36753   |
| Q4FZT9        | SSTSMTSVPKPLK                                                  | 0.78526119         | 2              | 3.49787   |
| Q4FZT9        | TITGFQTHHTPVLLAHGER                                            | 0.887854702        | 3              | 3.92593   |
| Q4FZT9        | TPVQSQPSATAPSGADEK                                             | 0.974194999        | 2              | 4.87975   |
| Q4FZT9        | VGQAVDVVGQAGKPK                                                | 0.887815735        | 2              | 3.46212   |



|               |                                                                                      |                    |                |           |
|---------------|--------------------------------------------------------------------------------------|--------------------|----------------|-----------|
| <b>Q4FZX7</b> | <b>SRPRB Signal recognition particle receptor subunit beta</b>                       | <b>3.916006191</b> | <b>0.17416</b> | <b>4</b>  |
| Q4FZX7        | GDAGSADVQDLEK                                                                        | 1.538589392        | 2              | 3.4692    |
| Q4FZX7        | GNSLTLIDLPGHESLR                                                                     | 1.262227562        | 2              | 2.80888   |
| Q4FZX7        | SAAPSTLDSSTAPAQLGK                                                                   | 1.978085455        | 2              | 4.84289   |
| Q4FZX7        | VGDGAGGAFQPYLDSLR                                                                    | 1.299265865        | 2              | 3.1283    |
| <b>Q4FZY0</b> | <b>EFHD2 EF_hand domain_containing protein D2</b>                                    | <b>2.874766687</b> | <b>0.66023</b> | <b>2</b>  |
| Q4FZY0        | KQAEEVK                                                                              | 1.408378675        | 1              | 1.94405   |
| Q4FZY0        | LSEIDVSTEGVK                                                                         | 1.533336923        | 2              | 2.59805   |
| <b>Q4G061</b> | <b>EIF3B Eukaryotic translation initiation factor 3 subunit B</b>                    | <b>2.415483983</b> | <b>0.98444</b> | <b>6</b>  |
| Q4G061        | AEEEGSDGSAAEAEP                                                                      | 0.740525284        | 2              | 4.95918   |
| Q4G061        | AKPAAQSEETAASPAASPTQSAQEPSAPGK                                                       | 4.177650666        | 3              | 5.01134   |
| Q4G061        | DRPQEADGIDSVVVDNVPQVGPDR                                                             | 1.817989987        | 3              | 3.5612    |
| Q4G061        | GTQGVVTNFEIFR                                                                        | 1.022307486        | 2              | 3.00808   |
| Q4G061        | IINDYYPEEDGK                                                                         | 1.883945084        | 2              | 2.86532   |
| Q4G061        | TEDAEEAEARPEPEVR                                                                     | 0.766646149        | 3              | 3.61913   |
| <b>Q4G063</b> | <b>CREL2 Cysteine_rich with EGF_like domain protein 2</b>                            | <b>2.384163852</b> | <b>0.75172</b> | <b>2</b>  |
| Q4G063        | ACCLPGTYGPDCK                                                                        | 1.201643486        | 2              | 3.03808   |
| Q4G063        | FNQGMANTAR                                                                           | 1.840561727        | 2              | 2.4181    |
| <b>Q4KLF8</b> | <b>ARPCS Actin_related protein 2/3 complex subunit 5</b>                             | <b>1.846030526</b> | <b>0.96381</b> | <b>2</b>  |
| Q4KLF8        | ALAAGGVGSIVR                                                                         | 0.819335311        | 2              | 2.84465   |
| Q4KLF8        | QGNMTAALQAALK                                                                        | 1.048548511        | 2              | 2.3489    |
| <b>Q4KLP0</b> | <b>DHTK1 Probable 2_oxoglutarate dehydrogenase E1 component DHKTD1_mitochondrial</b> | <b>2.574498837</b> | <b>0.00232</b> | <b>16</b> |
| Q4KLP0        | ARPSVDHGLAR                                                                          | 0.733882314        | 2              | 3.06238   |
| Q4KLP0        | HAMVVQCNTDDVYIPLNHMDPNQK                                                             | 1.319412404        | 3              | 5.71346   |
| Q4KLP0        | KSIPDTYAEHLIASGLMTQEEVSDIK                                                           | 1.231946223        | 3              | 4.68575   |
| Q4KLP0        | LEELCPFPLDSLQQEMGK                                                                   | 1.364296654        | 3              | 5.42125   |
| Q4KLP0        | LLLESQEFDFHFLATK                                                                     | 1.506767885        | 2              | 3.95675   |
| Q4KLP0        | LSAYGGITDIIIGMPHR                                                                    | 1.338984           | 3              | 4.44434   |
| Q4KLP0        | LVTVYCEHGK                                                                           | 1.58331486         | 2              | 2.36789   |
| Q4KLP0        | QQSQEDGDYSPNGSAQPGDK                                                                 | 1.49363949         | 2              | 2.63099   |
| Q4KLP0        | QWGHNELDEPFFNPVMYK                                                                   | 1.156080041        | 3              | 3.99712   |
| Q4KLP0        | SIPDTYAEHLIASGLMTQEEVSDIK                                                            | 1.088552256        | 3              | 5.02157   |
| Q4KLP0        | SSLYSSDIGK                                                                           | 0.938855046        | 2              | 2.83784   |
| Q4KLP0        | SVEVPEELQLHSHLLK                                                                     | 1.118393597        | 2              | 3.31004   |
| Q4KLP0        | WLLQSGLVILLPHGYDGAGPDHSSCR                                                           | 1.36101638         | 3              | 3.36754   |
| Q4KLP0        | WQGLVQPAACVTTWDTGVPLELLR                                                             | 1.112748852        | 2              | 4.9568    |
| Q4KLP0        | YGGEGAESMMGFFHELLK                                                                   | 1.257584977        | 2              | 4.43611   |
| Q4KLP0        | YPVAVSTLEEMAPGTAFKPVIGDSSVDPK                                                        | 1.27091477         | 3              | 4.56909   |
| <b>Q4KLZ6</b> |                                                                                      | <b>2.052826437</b> | <b>0.97496</b> | <b>16</b> |
| Q4KLZ6        | AAPTEPAEPEATAAGGVASK                                                                 | 1.392208416        | 2              | 4.91548   |
| Q4KLZ6        | AILEVLQTK                                                                            | 1.024038107        | 2              | 2.89094   |
| Q4KLZ6        | ANTDLPAWSAAMDAGLK                                                                    | 1.436342966        | 2              | 3.61269   |
| Q4KLZ6        | ASYISSAQLDQPDGAVAAAAIFR                                                              | 1.097961552        | 2              | 4.96248   |
| Q4KLZ6        | AVAQAGTAGTLLIVK                                                                      | 1.433823131        | 2              | 4.36264   |
| Q4KLZ6        | EGTPASPAQVLSK                                                                        | 1.219270544        | 2              | 3.38581   |
| Q4KLZ6        | GLCGTILHK                                                                            | 1.588625957        | 2              | 2.40148   |
| Q4KLZ6        | GVSLTLMMLVDEPLLK                                                                     | 1.317356329        | 2              | 3.0735    |
| Q4KLZ6        | ISTTLIGLEEHLNALDR                                                                    | 2.482957453        | 2              | 3.60906   |
| Q4KLZ6        | LIDAETNAK                                                                            | 1.873557248        | 2              | 2.37296   |
| Q4KLZ6        | LNFGAMEQAK                                                                           | 1.08299501         | 2              | 2.40456   |
| Q4KLZ6        | LSVLLLEK                                                                             | 1.989032837        | 2              | 2.60548   |
| Q4KLZ6        | MGSSGALYGLFLTAAQPLK                                                                  | 1.196950697        | 2              | 3.56324   |

|               |                                                               |                    |                |          |
|---------------|---------------------------------------------------------------|--------------------|----------------|----------|
| Q4KLZ6        | MVNSVEGCAGDALAGFVACNPDLQLLQGYR                                | 1.377727604        | 3              | 5.90822  |
| Q4KLZ6        | VAGALAEEMGLEEITK                                              | 1.866194984        | 2              | 4.53581  |
| Q4KLZ6        | VALLSGGGSGHEPAHAGFIGK                                         | 1.20891877         | 2              | 5.35237  |
| <b>Q4KM49</b> | <b>SYYC Tyrosyl_tRNA synthetase_cytoplasmic</b>               | <b>1.843792088</b> | <b>0.91924</b> | <b>5</b> |
| Q4KM49        | AFCEPGNVENNGVLSFVK                                            | 0.776150667        | 2              | 2.47295  |
| Q4KM49        | IDVGAEPR                                                      | 0.801885941        | 2              | 2.35082  |
| Q4KM49        | QVEPLDPPAGSAPGER                                              | 0.875011296        | 2              | 2.59556  |
| Q4KM49        | TVVSGLVQFVPK                                                  | 1.163225082        | 2              | 3.06702  |
| Q4KM49        | VDAQFGGIDQR                                                   | 0.706836593        | 2              | 3.12845  |
| <b>Q4KM73</b> | <b>KCY UMP_CMP kinase</b>                                     | <b>2.2769724</b>   | <b>0.82619</b> | <b>7</b> |
| Q4KM73        | EMDQMTMAANAQK                                                 | 1.236250547        | 2              | 3.18346  |
| Q4KM73        | IQTYLESTKPIIDLVEEMGK                                          | 1.280939013        | 3              | 4.59218  |
| Q4KM73        | IVPVEITISLLK                                                  | 1.313691995        | 2              | 2.4975   |
| Q4KM73        | KNPDSQYGELIEK                                                 | 1.017344749        | 2              | 3.80017  |
| Q4KM73        | NQDNLQGWNK                                                    | 1.293867024        | 2              | 2.84177  |
| Q4KM73        | SVDEVFGDVMK                                                   | 1.319078557        | 2              | 3.45938  |
| Q4KM73        | YGYTHLSAGELLR                                                 | 0.891531793        | 3              | 4.27906  |
| <b>Q4KM74</b> | <b>SC22B Vesicle_trafficking protein SEC22b</b>               | <b>1.900331391</b> | <b>0.8999</b>  | <b>5</b> |
| Q4KM74        | DLQQYQSQAK                                                    | 1.121166793        | 2              | 3.55237  |
| Q4KM74        | GEALSALDSK                                                    | 1.196068456        | 2              | 2.85129  |
| Q4KM74        | IMVANIEEVLR                                                   | 1.194261698        | 2              | 2.78913  |
| Q4KM74        | NLGSINTELQDVQR                                                | 0.922156304        | 2              | 4.38384  |
| Q4KM74        | VADGLPLAASMQEEOQSGR                                           | 1.020162691        | 2              | 4.36481  |
| <b>Q4KMA2</b> | <b>RD23B UV excision repair protein RAD23 homolog B</b>       | <b>1.901617948</b> | <b>0.99716</b> | <b>3</b> |
| Q4KMA2        | IDIDPEETVK                                                    | 0.949923738        | 2              | 2.75957  |
| Q4KMA2        | NFVVVMVTKPK                                                   | 0.743071713        | 2              | 2.97463  |
| Q4KMA2        | QIIQQNPSLLPALLQQIGR                                           | 1.118164855        | 2              | 4.24825  |
| <b>Q4QQW3</b> | <b>HOT Hydroxyacid_oxoacid transhydrogenase_mitochondrial</b> | <b>2.191803843</b> | <b>0.48817</b> | <b>6</b> |
| Q4QQW3        | AANLYACSPHSEFLDYVNAPIGK                                       | 1.513743877        | 3              | 3.56918  |
| Q4QQW3        | FLFDLNVDDGLAALGYSK                                            | 1.16242107         | 2              | 2.43737  |
| Q4QQW3        | HLETAEILGANIR                                                 | 1.14694327         | 2              | 3.45891  |
| Q4QQW3        | IQDAGPVLADALR                                                 | 0.606369518        | 2              | 2.9916   |
| Q4QQW3        | NLSQLPPVQIVMDSLK                                              | 1.11942102         | 2              | 2.96438  |
| Q4QQW3        | TTDYAFEMAVSNIR                                                | 0.59379107         | 2              | 3.70436  |
| <b>Q4QRB4</b> | <b>TBB3 Tubulin beta_3 chain</b>                              | <b>2.690815158</b> | <b>0.00341</b> | <b>5</b> |
| Q4QRB4        | AILVDLEPGTMDSVR                                               | 1.293511711        | 2              | 4.56213  |
| Q4QRB4        | AILVDLEPGTMDSVR+Oxidation(10                                  | 1.380586076        |                |          |
| Q4QRB4        | EIVHIQAGQCNGIQGAK                                             | 2.05452639         | 2              | 4.93126  |
| Q4QRB4        | IMNTFSVVPSPK                                                  | 1.177908158        | 2              | 4.1015   |
| Q4QRB4        | ISEQFTAMFR                                                    | 1.317440619        | 2              | 3.37924  |
| <b>Q4V7C7</b> | <b>ARP3 Actin_related protein 3</b>                           | <b>2.150296681</b> | <b>0.48857</b> | <b>6</b> |
| Q4V7C7        | GVDDLDFFIGDEAIEKPTYATK                                        | 1.861014138        | 2              | 4.38781  |
| Q4V7C7        | KDYEEIGPSICR                                                  | 0.961963835        | 2              | 3.66302  |
| Q4V7C7        | LGYAGNTEPQFIIPSCIAIK                                          | 1.549951198        | 2              | 3.34781  |
| Q4V7C7        | LSEELSGGR                                                     | 1.089142032        | 2              | 2.56612  |
| Q4V7C7        | NIVLSGGSTMFR                                                  | 1.082325297        | 2              | 3.0931   |
| Q4V7C7        | TLTGTVIDSGDGVTHVIPVAEGYVIGSCK                                 | 1.042195939        | 3              | 5.24268  |
| <b>Q4V8K1</b> | <b>STE4 Metalloreductase STEAP4</b>                           | <b>2.178498233</b> | <b>0.00238</b> | <b>6</b> |
| Q4V8K1        | MNQYPESNAEYLAQLVPGAHVVK                                       | 1.082884542        | 3              | 3.73339  |
| Q4V8K1        | QVFVCGNSDK                                                    | 0.880747361        | 2              | 2.38265  |
| Q4V8K1        | SDVIVLAVHR                                                    | 1.108483016        | 2              | 2.82238  |
| Q4V8K1        | TCADEFPLTVDSSEK                                               | 1.142945508        | 2              | 4.48802  |
| Q4V8K1        | TLGLTPLDQGSVAAK                                               | 1.210080034        | 2              | 3.81118  |
| Q4V8K1        | VLIDVSNQK                                                     | 0.908005862        | 2              | 2.53512  |

|               |                                                                                          |                    |                |           |
|---------------|------------------------------------------------------------------------------------------|--------------------|----------------|-----------|
| <b>Q501J6</b> | <b>DDX17 Probable ATP_dependent RNA helicase DDX17</b>                                   | <b>2.304681071</b> | <b>0.87622</b> | <b>2</b>  |
| Q501J6        | ELAQQVQVADDY GK                                                                          | 0.788885895        | 2              | 3.12204   |
| Q501J6        | VLEEQAINPK                                                                               | 1.266429387        | 2              | 2.62331   |
| <b>Q505J8</b> | <b>SYFA Phenylalanyl_tRNA synthetase alpha chain</b>                                     | <b>1.911362141</b> | <b>0.51945</b> | <b>4</b>  |
| Q505J8        | LQQVQAGQAEK                                                                              | 0.742944826        | 2              | 2.6754    |
| Q505J8        | RLEVADGGLDSAELATQLGVEHQAVVGAVK                                                           | 1.454253382        | 3              | 4.59039   |
| Q505J8        | SLQALGEVIEAELR                                                                           | 1.619192695        | 2              | 3.7452    |
| Q505J8        | VVDSIEDEVQR                                                                              | 1.353749362        | 2              | 2.93538   |
| <b>Q561R9</b> | <b>LACB2 Beta_lactamase_like protein 2</b>                                               | <b>2.042654002</b> | <b>0.41747</b> | <b>4</b>  |
| Q561R9        | ANIIYPGHGPIVHNAAEK                                                                       | 0.588761418        | 2              | 4.09343   |
| Q561R9        | ILIDTGEPVPEYISCLK                                                                        | 1.061088864        | 2              | 3.79122   |
| Q561R9        | NISNDATYCIK                                                                              | 0.901488239        | 2              | 2.95141   |
| Q561R9        | NNREEQIITVFR                                                                             | 0.707585815        | 2              | 2.69148   |
| <b>Q561S0</b> | <b>NDUAA NADH dehydrogenase [ubiquinone] 1 alpha subcomplex subunit 10_mitochondrial</b> | <b>2.163922845</b> | <b>0.22356</b> | <b>6</b>  |
| Q561S0        | LLQYSDALEHLLSTGQGVVLER                                                                   | 1.70461181         | 3              | 3.76304   |
| Q561S0        | LTLPEYLPPhAVIYIDVPVSEIQSR                                                                | 1.994018239        | 3              | 4.18579   |
| Q561S0        | VITVDGNICSGK                                                                             | 0.813062611        | 2              | 2.45809   |
| Q561S0        | VVEDIEYLNYNK                                                                             | 0.900479758        | 2              | 3.90041   |
| Q561S0        | YAPGYNADVGDK                                                                             | 0.776297476        | 2              | 2.66096   |
| Q561S0        | YGLLASILGDK                                                                              | 1.667178367        | 2              | 3.14905   |
| <b>Q562C4</b> | <b>MET7B Methyltransferase_like protein 7B</b>                                           | <b>2.029725267</b> | <b>1</b>       | <b>5</b>  |
| Q562C4        | AQFSEVQLEWQPPPFK                                                                         | 1.037653791        | 2              | 4.51697   |
| Q562C4        | FIVAYGENMK                                                                               | 0.967209858        | 1              | 2.53391   |
| Q562C4        | HIGDGCHLTR                                                                               | 0.976167999        | 3              | 3.31753   |
| Q562C4        | VLQEVQR                                                                                  | 0.855217044        | 2              | 2.54877   |
| Q562C4        | VTCVDPNPNFEK                                                                             | 0.743435823        | 2              | 3.60413   |
| <b>Q562C9</b> | <b>MTND 1_2_dihydroxy_3_keto_5_methylthiopentene dioxygenase</b>                         | <b>2.324116333</b> | <b>0.92628</b> | <b>3</b>  |
| Q562C9        | GDMITLPAGIYHR                                                                            | 1.095127086        | 2              | 2.31988   |
| Q562C9        | LDADKYENDEPELQIR                                                                         | 1.239912866        | 2              | 4.20084   |
| Q562C9        | MFFEEHLHLDEEIR                                                                           | 2.880291371        | 2              | 2.4286    |
| <b>Q58FK9</b> | <b>KAT3 Kynurenine__oxoglutarate transaminase 3</b>                                      | <b>2.259662936</b> | <b>0.96602</b> | <b>11</b> |
| Q58FK9        | AIILNTPHNPIGK                                                                            | 0.817504003        | 2              | 3.38963   |
| Q58FK9        | DSTLDAEEIFR                                                                              | 1.197191132        | 2              | 3.19889   |
| Q58FK9        | DSTLDAEEIFRTWNSR                                                                         | 1.439515121        | 2              | 2.3612    |
| Q58FK9        | IEGLDQNVWVEFTK                                                                           | 1.18629078         | 2              | 4.5557    |
| Q58FK9        | LAADPSVNLGQGFDPITLPSYVQEELSK                                                             | 1.252513174        | 3              | 4.48794   |
| Q58FK9        | MAGAVPVFIPLR                                                                             | 2.384303116        | 2              | 2.49665   |
| Q58FK9        | MDDPECYFNLSLK                                                                            | 1.307967105        | 2              | 4.18505   |
| Q58FK9        | RIEGLDQNVWVEFTK                                                                          | 1.171515313        | 2              | 3.72454   |
| Q58FK9        | RMDDPECYFNLSLK                                                                           | 1.099355181        | 2              | 2.76982   |
| Q58FK9        | SDEPYDYK                                                                                 | 2.333006018        | 2              | 2.44851   |
| Q58FK9        | WTSSDWTFNPELESK                                                                          | 1.206366327        | 2              | 5.06261   |
| <b>Q5BJQ0</b> | <b>ADCK3 Chaperone activity of bc1 complex_like_mitochondrial</b>                        | <b>2.148896735</b> | <b>0.97969</b> | <b>3</b>  |
| Q5BJQ0        | AVLDSSPFLSEANAER                                                                         | 1.091426772        | 2              | 4.61341   |
| Q5BJQ0        | KMGGSFLICKSLK+Oxidation(1                                                                | 1.232062967        |                |           |
| Q5BJQ0        | TLNNDLGPVHR                                                                              | 1.133452978        | 2              | 2.5618    |
| <b>Q5BJY9</b> | <b>K1C18 Keratin_type I cytoskeletal 18</b>                                              | <b>1.869444239</b> | <b>0.99599</b> | <b>25</b> |
| Q5BJY9        | AQIFANSVDNAR                                                                             | 0.867464444        | 2              | 3.95999   |
| Q5BJY9        | AQYEQLAQK                                                                                | 0.890433373        | 2              | 3.47068   |
| Q5BJY9        | DAETTLLELR                                                                               | 2.688966882        | 2              | 2.94159   |
| Q5BJY9        | IREYLEK                                                                                  | 0.901799297        | 2              | 2.40246   |
| Q5BJY9        | KNHEEEVQGLEAQIASSGLTVEVDAPK                                                              | 1.207443752        | 3              | 4.90783   |

|               |                                                                                         |                    |                |          |
|---------------|-----------------------------------------------------------------------------------------|--------------------|----------------|----------|
| Q5BJY9        | KVDDTNITR                                                                               | 0.820121328        | 2              | 3.07228  |
| Q5BJY9        | LEAEIATYR                                                                               | 1.009976336        | 2              | 3.28052  |
| Q5BJY9        | LLEDGDDFSLNDALDSSNSMQTVQR                                                               | 1.059729421        | 3              | 5.54595  |
| Q5BJY9        | LQLETEIEALKEELFMK                                                                       | 1.419830309        | 2              | 5.04445  |
| Q5BJY9        | NHEEEVQGLEAQIASSGLTVEVDAPK                                                              | 1.185378626        | 2              | 6.30482  |
| Q5BJY9        | NQNINLENNLGEVEAR                                                                        | 0.982061657        | 2              | 5.56496  |
| Q5BJY9        | NREELDKYWSQQIEESTTVVTTK                                                                 | 0.989946455        | 3              | 5.18546  |
| Q5BJY9        | QSVESDIHGLR                                                                             | 0.941287315        | 2              | 2.85054  |
| Q5BJY9        | QSVESDIHGLRK                                                                            | 1.395294835        | 2              | 2.67645  |
| Q5BJY9        | QTQEYEALLNIK                                                                            | 1.057006425        | 2              | 3.52249  |
| Q5BJY9        | SVWGGSVGSAGLAGMGGVQTEK                                                                  | 1.03389433         | 2              | 5.8958   |
| Q5BJY9        | SVWGGSVGSAGLAGMGGVQTEKETMQDLNDR                                                         | 0.847308892        | 3              | 4.34872  |
| Q5BJY9        | TLQTLLEIDLDSMK                                                                          | 1.007468022        | 2              | 4.52038  |
| Q5BJY9        | VKLEAEIATYR                                                                             | 1.040696236        | 2              | 3.28103  |
| Q5BJY9        | VKYETELAMR                                                                              | 0.915831316        | 3              | 3.42398  |
| Q5BJY9        | VQMEQLNGVLLHLESELAQTR                                                                   | 0.881821084        | 2              | 5.27106  |
| Q5BJY9        | VRPASSAASVYAGAGGSGSR                                                                    | 0.545981171        | 2              | 5.0705   |
| Q5BJY9        | VVDDTNITR                                                                               | 0.891065601        | 2              | 3.44837  |
| Q5BJY9        | YETELAMR                                                                                | 1.108842256        | 2              | 2.6174   |
| Q5BJY9        | YWSQQIEESTTVVTTK                                                                        | 0.973562891        | 2              | 3.89621  |
| <b>Q5BK63</b> | <b>NDUA9 NADH dehydrogenase [ubiquinone] 1 alpha subcomplex subunit 9_mitochondrial</b> | <b>2.426539444</b> | <b>0.1817</b>  | <b>4</b> |
| Q5BK63        | AVQHSNVVINLIGR                                                                          | 0.839166484        | 2              | 3.65763  |
| Q5BK63        | IHISDVMATDLPGLLEDLGVQPTPLELK                                                            | 1.28164036         | 3              | 6.06694  |
| Q5BK63        | NDFDFEDVFNIPR                                                                           | 1.644496941        | 2              | 3.85634  |
| Q5BK63        | WLSSEIETKPAK                                                                            | 1.278716584        | 2              | 3.29303  |
| <b>Q5BK81</b> | <b>PTGR2 Prostaglandin reductase 2</b>                                                  | <b>2.006023804</b> | <b>0.94954</b> | <b>3</b> |
| Q5BK81        | DVPYPPPLPAAVEAIQK                                                                       | 2.126398014        | 2              | 2.66155  |
| Q5BK81        | TGNVAEQLR                                                                               | 1.456190199        | 2              | 2.93323  |
| Q5BK81        | VEEVSLPDTINEGQVR                                                                        | 0.921016678        | 2              | 4.07436  |
| <b>Q5BQE6</b> | <b>DHC24 Delta(24)_sterol reductase</b>                                                 | <b>2.103493815</b> | <b>0.85421</b> | <b>3</b> |
| Q5BQE6        | LYEQHHVVQDMLVPMK                                                                        | 0.844661189        | 3              | 3.58048  |
| Q5BQE6        | QLGCCDAFPEVYDK                                                                          | 1.072021434        | 2              | 4.21588  |
| Q5BQE6        | YLFGWVPPK                                                                               | 1.983689634        | 2              | 2.69534  |
| <b>Q5DTN8</b> | <b>JKIP3 Janus kinase and microtubule_interacting protein 3</b>                         | <b>1.876091256</b> | <b>0.97205</b> | <b>2</b> |
| Q5DTN8        | MKELQAVREALLR                                                                           | 1.347720596        | 2              | 2.32857  |
| Q5DTN8        | TREQLQAEIQRAQTR                                                                         | 0.877317124        | 2              | 2.98134  |
| <b>Q5DU56</b> | <b>NLRC3 Protein NLRC3</b>                                                              | <b>2.029806467</b> | <b>0.59811</b> | <b>2</b> |
| Q5DU56        | LTGLALGHLR                                                                              | 1.258572182        | 2              | 2.36599  |
| Q5DU56        | TLEILDLR                                                                                | 1.019962587        | 2              | 2.50515  |
| <b>Q5EB77</b> | <b>RAB18 Ras_related protein Rab_18</b>                                                 | <b>2.772033334</b> | <b>0.02453</b> | <b>2</b> |
| Q5EB77        | NDIVNMLVGNK                                                                             | 1.573752019        | 2              | 3.46229  |
| Q5EB77        | TCDGVQCAFEELVEK                                                                         | 1.225902108        | 2              | 3.86545  |
| <b>Q5FVM4</b> | <b>NONO Non_POU domain_containing octamer_binding protein</b>                           | <b>2.190618152</b> | <b>0.71727</b> | <b>2</b> |
| Q5FVM4        | MEELHNQEVQK                                                                             | 1.275221647        | 2              | 3.90704  |
| Q5FVM4        | RMEELHNQEVQK                                                                            | 1.005215572        | 3              | 4.28857  |
| <b>Q5FVQ4</b> | <b>MLEC Malectin</b>                                                                    | <b>1.910841043</b> | <b>0.99992</b> | <b>3</b> |
| Q5FVQ4        | KEEEEEEEYDEGSNLKR                                                                       | 1.031706933        | 3              | 5.58868  |
| Q5FVQ4        | LSVQGEVSTFTGK                                                                           | 0.933794407        | 2              | 3.36708  |
| Q5FVQ4        | STPEDQILYQTER                                                                           | 0.931803222        | 2              | 4.69178  |
| <b>Q5FVR2</b> | <b>TYPH Thymidine phosphorylase</b>                                                     | <b>2.482260193</b> | <b>0.91633</b> | <b>5</b> |
| Q5FVR2        | AQDTQIGAMLMAIR+Oxidation(10                                                             | 1.3440327          |                |          |
| Q5FVR2        | AQDTQIGAMLMAIR+Oxidation(8                                                              | 0.954658186        |                |          |
| Q5FVR2        | FGGAAVFPDQEK                                                                            | 1.125816116        | 2              | 2.59456  |
| Q5FVR2        | KQEELSPADGIVECVR                                                                        | 1.013384232        | 2              | 4.07112  |

|               |                                                                                |                    |                |          |
|---------------|--------------------------------------------------------------------------------|--------------------|----------------|----------|
| Q5FVR2        | VSLVLAPALAACGCK                                                                | 1.326460481        | 2              | 3.05512  |
| <b>Q5FVR5</b> | <b>ACNT2 Acyl_coenzyme A amino acid N_acyltransferase 2</b>                    | <b>2.613578796</b> | <b>0.00835</b> | <b>3</b> |
| Q5FVR5        | DEKENLFQSK                                                                     | 0.9644733          | 2              | 2.46325  |
| Q5FVR5        | ILFIVGENDQCLASK                                                                | 1.382314843        | 2              | 3.73669  |
| Q5FVR5        | IQQPGIGVISVSK                                                                  | 1.472478916        | 2              | 3.35566  |
| <b>Q5FW57</b> | <b>GLYAL Glycine N_acyltransferase_like protein</b>                            | <b>2.087108137</b> | <b>0.96895</b> | <b>3</b> |
| Q5FW57        | AIDQEMFK                                                                       | 0.984569083        | 2              | 2.71364  |
| Q5FW57        | SSQMLQMLESLR                                                                   | 1.154907011        | 2              | 4.10177  |
| Q5FW57        | VYGTVFHMNQGNPFK                                                                | 0.421549263        | 2              | 3.73513  |
| <b>Q5I0C3</b> | <b>MCCA Methylcrotonoyl_CoA carboxylase subunit alpha_mitochondrial</b>        | <b>2.233908131</b> | <b>0.97637</b> | <b>8</b> |
| Q5I0C3        | AGDALMVMIAMK                                                                   | 0.702678223        | 1              | 1.95855  |
| Q5I0C3        | HAPLVEFEEEEV                                                                   | 1.109486025        | 2              | 2.96482  |
| Q5I0C3        | IIEEAPAPGIDPEVR                                                                | 0.854332941        | 2              | 3.86378  |
| Q5I0C3        | IYAEDPDNNFMPGAGPLVHLSTPPDMSTR                                                  | 1.369053773        | 3              | 4.65818  |
| Q5I0C3        | QEGIIFIGPPSTAIR                                                                | 0.78278797         | 2              | 2.49792  |
| Q5I0C3        | SEKEFQEQLESAR                                                                  | 0.860034763        | 2              | 3.47032  |
| Q5I0C3        | VFFSEGAQANR                                                                    | 1.158765587        | 2              | 2.44464  |
| Q5I0C3        | YLSPVSAEGTQGGTIAPMTGTIEK                                                       | 1.146866118        | 2              | 5.14113  |
| <b>Q5I0D1</b> | <b>GLOD4 Glyoxalase domain_containing protein 4</b>                            | <b>2.174827991</b> | <b>0.47261</b> | <b>3</b> |
| Q5I0D1        | ESQSILTPLVSLDTPGK                                                              | 1.135897243        | 2              | 3.70615  |
| Q5I0D1        | HEEFEEGCK                                                                      | 0.778199008        | 2              | 2.87806  |
| Q5I0D1        | VTLAVSDLQK                                                                     | 0.929595842        | 2              | 2.49429  |
| <b>Q5I0D5</b> | <b>LHPP Phospholysine phosphohistidine inorganic pyrophosphate phosphatase</b> | <b>2.169374445</b> | <b>0.89276</b> | <b>2</b> |
| Q5I0D5        | FRPGDEHHPEVR                                                                   | 1.116208402        | 3              | 3.65802  |
| Q5I0D5        | LGFDISEGEVTAPATCQILK                                                           | 1.218396721        | 2              | 4.36325  |
| <b>Q5I0D7</b> | <b>PEPD Xaa_Pro dipeptidase</b>                                                | <b>2.4257531</b>   | <b>0.80143</b> | <b>2</b> |
| Q5I0D7        | GVNTDSGNVCR                                                                    | 1.275851422        | 2              | 3.1664   |
| Q5I0D7        | YAVDDVQYADEIASVLTSR                                                            | 1.383386356        | 2              | 2.73932  |
| <b>Q5I0E7</b> | <b>TMED9 Transmembrane emp24 domain_containing protein 9</b>                   | <b>1.951738161</b> | <b>0.94183</b> | <b>2</b> |
| Q5I0E7        | QLVEQVEQIQK                                                                    | 0.96419575         | 2              | 3.5686   |
| Q5I0E7        | QREEYQPATPGLGMFVEVKDPEDK                                                       | 1.213652716        | 3              | 3.39444  |
| <b>Q5I0H9</b> | <b>PDIA5 Protein disulfide_isomerase A5</b>                                    | <b>2.374377708</b> | <b>0.98962</b> | <b>9</b> |
| Q5I0H9        | DKNQDLCQESVK                                                                   | 1.031252948        | 2              | 4.28053  |
| Q5I0H9        | FIEWMQNPEAPPPPEPTWEEQQTSLVHLVGDNFR                                             | 1.826425423        | 3              | 4.1226   |
| Q5I0H9        | GHTVLAGMNVYPPEFENIKEEYNVR                                                      | 1.078148445        | 3              | 3.64914  |
| Q5I0H9        | GPPLWEEDPGAK                                                                   | 1.081694617        | 2              | 3.37593  |
| Q5I0H9        | GQGTICWVDCGDAESR                                                               | 1.492938102        | 2              | 4.1044   |
| Q5I0H9        | NGEQQAVPALR                                                                    | 0.992368454        | 2              | 2.55593  |
| Q5I0H9        | NPQPPQPQVPETPWADEGGSVYHLTDEDQDFVK                                              | 1.885575698        | 3              | 4.12575  |
| Q5I0H9        | NQDLCQESVK                                                                     | 0.946739866        | 2              | 3.42543  |
| Q5I0H9        | TELGFTSFIR                                                                     | 1.090272943        | 2              | 2.44762  |
| <b>Q5I0J9</b> | <b>ASPD Putative L_aspartate dehydrogenase</b>                                 | <b>2.16772864</b>  | <b>0.22858</b> | <b>7</b> |
| Q5I0J9        | HANLLVGSPSALADQTTTER                                                           | 1.0680345          | 2              | 5.78434  |
| Q5I0J9        | LDAAGGLQSLR                                                                    | 1.101344352        | 2              | 3.99282  |
| Q5I0J9        | LEGPLAAAHSSGPR                                                                 | 1.018965399        | 2              | 3.75329  |
| Q5I0J9        | LGQSLVSR                                                                       | 1.142737975        | 2              | 2.31063  |
| Q5I0J9        | MAGSVPPALQLEDLTTLEER                                                           | 1.404466134        | 2              | 3.38819  |
| Q5I0J9        | NSNTMAAAALAAPSLGFDR                                                            | 1.258637581        | 2              | 4.63596  |
| Q5I0J9        | TVLYEGPVR                                                                      | 1.029347834        | 2              | 2.62407  |
| <b>Q5I0M2</b> | <b>NADC Nicotinate_nucleotide pyrophosphorylase [carboxylating]</b>            | <b>2.624766119</b> | <b>0.01917</b> | <b>6</b> |
| Q5I0M2        | CSGIASAAATAVEVATSTGWAGHVAGTR                                                   | 1.750668218        | 3              | 3.37932  |
| Q5I0M2        | DNHVVAAGSMEK                                                                   | 1.119021461        | 2              | 2.65586  |

|               |                                                                         |                    |                |           |
|---------------|-------------------------------------------------------------------------|--------------------|----------------|-----------|
| Q5I0M2        | EALQAAEAGADLVMLDNFKPEELHPTAATLK                                         | 1.771290831        | 3              | 4.80135   |
| Q5I0M2        | LYAEGDIPVPHAR                                                           | 1.123765989        | 2              | 3.55439   |
| Q5I0M2        | VEVECSSLK                                                               | 1.450728741        | 2              | 2.50724   |
| Q5I0M2        | YDLGGLVMVK                                                              | 1.699886621        | 2              | 2.52426   |
| <b>Q5M7T9</b> | <b>THNS2 Threonine synthase_like 2</b>                                  | <b>2.410112592</b> | <b>0.08813</b> | <b>2</b>  |
| Q5M7T9        | FPEAVQAAGLTPETPAEILALEHK                                                | 1.273403578        | 3              | 5.58988   |
| Q5M7T9        | LSEAVTSESVSDEAITQTMGR                                                   | 0.636269867        | 2              | 4.48084   |
| <b>Q5M7U6</b> | <b>ARP2 Actin_related protein 2</b>                                     | <b>1.933985843</b> | <b>0.95261</b> | <b>5</b>  |
| Q5M7U6        | GYAFNHSADFETVR                                                          | 0.917862978        | 2              | 4.00171   |
| Q5M7U6        | HLWDYTFGPEK                                                             | 0.941268172        | 2              | 3.19684   |
| Q5M7U6        | ILLTEPPMNPTK                                                            | 0.702661031        | 2              | 2.85151   |
| Q5M7U6        | SMLEVNYPMENGIVR                                                         | 1.367183404        | 2              | 4.09419   |
| Q5M7U6        | VVVCNNGTGFVK                                                            | 0.985551711        | 2              | 2.70943   |
| <b>Q5M7W5</b> | <b>MAP4 Microtubule_associated protein 4</b>                            | <b>1.923813517</b> | <b>1</b>       | <b>10</b> |
| Q5M7W5        | AAVGLTGNDIATPPNK                                                        | 0.88955551         | 2              | 3.48093   |
| Q5M7W5        | ATSPSTLVSTGSSSR                                                         | 0.940807016        | 2              | 3.8683    |
| Q5M7W5        | EAETALPIEMDLAPPEDEVLPK                                                  | 0.990542815        | 2              | 3.08068   |
| Q5M7W5        | ESEGSPDTDAAPGPDVDVTLTK                                                  | 1.39768007         | 2              | 4.18592   |
| Q5M7W5        | ETSGSQPPELCSGVSR                                                        | 1.280886361        | 2              | 3.34701   |
| Q5M7W5        | NTAPTEEETVPGK                                                           | 1.104494714        | 2              | 2.58157   |
| Q5M7W5        | NTTPTGATPPAGMASTR                                                       | 1.07013306         | 2              | 3.568     |
| Q5M7W5        | STLPVDEGSPLEK                                                           | 1.045831204        | 2              | 2.47697   |
| Q5M7W5        | VGSLDNVGHLPAGGTVK                                                       | 0.949608747        | 2              | 3.71376   |
| Q5M7W5        | VTEFNNVTPLSEEEVASIK                                                     | 1.044617287        | 2              | 3.14494   |
| <b>Q5M875</b> | <b>DHB13 17_beta_hydroxysteroid dehydrogenase 13</b>                    | <b>2.710812704</b> | <b>0.52635</b> | <b>7</b>  |
| Q5M875        | ALTAELDTLTK                                                             | 1.325914102        | 2              | 3.07804   |
| Q5M875        | IQNIQFEAIVGHR                                                           | 1.228497589        | 3              | 4.2412    |
| Q5M875        | LWPVLEPDEVAR                                                            | 1.319190389        | 2              | 2.49488   |
| Q5M875        | NSGHIVTVASVCGHR                                                         | 1.395131088        | 2              | 4.50165   |
| Q5M875        | SLIDGILTNIK                                                             | 1.43909606         | 2              | 3.31113   |
| Q5M875        | SVAGQTVLITGAGHGIGR                                                      | 1.26990395         | 2              | 4.09628   |
| Q5M875        | TSCLCPVFNVTGFTK                                                         | 1.289884238        | 2              | 3.94863   |
| <b>Q5M9G3</b> | <b>CAPR1 Caprin_1</b>                                                   | <b>1.918331395</b> | <b>0.99989</b> | <b>2</b>  |
| Q5M9G3        | LNQDQLDAVSK                                                             | 1.121621017        | 2              | 3.17975   |
| Q5M9G3        | YQEVNTNNLEFAK                                                           | 0.934368897        | 2              | 3.03739   |
| <b>Q5M9I5</b> | <b>QCR6 Cytochrome_b_c1 complex subunit 6_mitochondrial</b>             | <b>2.572564988</b> | <b>0.83313</b> | <b>2</b>  |
| Q5M9I5        | EEEEELVDPLTTVR                                                          | 1.404361253        | 2              | 4.23759   |
| Q5M9I5        | SQTEEDCTEELDFLHAR                                                       | 1.321228989        | 2              | 4.83109   |
| <b>Q5PPL3</b> | <b>NSDHL Sterol_4_alpha_carboxylate 3_dehydrogenase_decarboxylating</b> | <b>1.921273346</b> | <b>0.90225</b> | <b>10</b> |
| Q5PPL3        | CTVIGGSGFLGQHMVEQLLSR                                                   | 0.855779962        | 2              | 4.99629   |
| Q5PPL3        | DPQLVPVLIDAAAR                                                          | 1.067709206        | 2              | 2.42473   |
| Q5PPL3        | GQVTGTDLINEVSK                                                          | 0.658652689        | 2              | 4.0784    |
| Q5PPL3        | GVSTVFHCASPPSNNK                                                        | 0.691979822        | 2              | 4.30668   |
| Q5PPL3        | GYAVNVFVDR                                                              | 1.084516524        | 2              | 3.56783   |
| Q5PPL3        | ILTGLNIEAPK                                                             | 0.871110344        | 2              | 3.58762   |
| Q5PPL3        | KGQVTGTDLINEVSK                                                         | 0.977538872        | 2              | 4.41052   |
| Q5PPL3        | NGTEDLPYAMKPIDYYTETK                                                    | 0.799036965        | 2              | 3.93677   |
| Q5PPL3        | NLVDFTFVENVVHGHILAAEHLR                                                 | 1.160936573        | 3              | 3.52041   |
| Q5PPL3        | VQFFIGDLCNQDLYPALK                                                      | 0.896988089        | 2              | 5.41096   |
| <b>Q5PQT3</b> | <b>GLYAT Glycine_N_acyltransferase</b>                                  | <b>2.488537729</b> | <b>0.98967</b> | <b>7</b>  |
| Q5PQT3        | AINQEMFK                                                                | 0.891258821        | 1              | 1.9529    |
| Q5PQT3        | AIQNLASIHSLQVK                                                          | 1.003265266        | 2              | 4.04558   |
| Q5PQT3        | DPENCQEFLGSSEVINWK                                                      | 1.215153942        | 2              | 5.29151   |
| Q5PQT3        | KLFPSLLDTK                                                              | 1.343434543        | 2              | 2.71433   |
| Q5PQT3        | LSSLDVTHAALVNK                                                          | 1.2121176          | 2              | 3.61602   |

|               |                                                                                 |                    |                |           |
|---------------|---------------------------------------------------------------------------------|--------------------|----------------|-----------|
| Q5PQT3        | MGGTVPQYR                                                                       | 0.997798603        | 2              | 2.56175   |
| Q5PQT3        | QHLQIQSSQSHLNK                                                                  | 1.227630084        | 2              | 3.39338   |
| <b>Q5PQX1</b> | <b>TOIP1 Torsin_1A_interacting protein 1</b>                                    | <b>2.008622925</b> | <b>1</b>       | <b>2</b>  |
| Q5PQX1        | LEQHSQQAQQQLSPATSGR                                                             | 1.007017423        | 3              | 4.66536   |
| Q5PQX1        | SDFGNQSPSTSR                                                                    | 1.006205712        | 2              | 2.62768   |
| <b>Q5RJR2</b> | <b>TWF1 Twinfilin_1</b>                                                         | <b>2.165164522</b> | <b>0.15912</b> | <b>2</b>  |
| Q5RJR2        | HQTLQGVAFPISR                                                                   | 0.994744892        | 2              | 3.02011   |
| Q5RJR2        | YLLSQSSPAPLTAEEEEELR                                                            | 1.748571588        | 2              | 4.32294   |
| <b>Q5RJR8</b> | <b>LRC59 Leucine_rich repeat_containing protein 59</b>                          | <b>1.942916741</b> | <b>0.99946</b> | <b>5</b>  |
| Q5RJR8        | ATVLDLSCNK                                                                      | 0.928342478        | 2              | 2.81952   |
| Q5RJR8        | DKLDGNELDLSDLENEVPVK                                                            | 1.810323993        | 2              | 6.21131   |
| Q5RJR8        | LDGNELDLSDLENEVPVK                                                              | 0.935660161        | 2              | 4.05641   |
| Q5RJR8        | LQQLPADFGR                                                                      | 1.182280134        | 1              | 1.92139   |
| Q5RJR8        | WLDLKDNPLDPVLAK                                                                 | 1.004758265        | 2              | 2.67182   |
| <b>Q5RKI0</b> | <b>WDR1 WD repeat_containing protein 1</b>                                      | <b>2.323950125</b> | <b>0.52036</b> | <b>3</b>  |
| Q5RKI0        | AHDGGIYAIWSPDSTHLLSASGDK                                                        | 1.22344804         | 3              | 4.753     |
| Q5RKI0        | CFSIDNPGYEPVVAVHPGGDTVAVGGSDGNVR                                                | 1.052281774        | 3              | 4.76568   |
| Q5RKI0        | YAPSGFYIASGDISGK                                                                | 1.237682425        | 2              | 4.53409   |
| <b>Q5RKI1</b> | <b>IF4A2 Eukaryotic initiation factor 4A_II</b>                                 | <b>2.306272935</b> | <b>0.06027</b> | <b>5</b>  |
| Q5RKI1        | ELAQQIQK                                                                        | 1.100530108        | 1              | 2.28296   |
| Q5RKI1        | GIDVQQVSLVINYLPTNR                                                              | 1.597598579        | 2              | 3.61907   |
| Q5RKI1        | GYDVIAQAQSGTGK                                                                  | 1.920877571        | 2              | 5.13797   |
| Q5RKI1        | MFVLDEADEMLSR                                                                   | 1.439861919        | 2              | 4.4924    |
| Q5RKI1        | VLITDDLAR                                                                       | 1.326732392        | 2              | 3.06854   |
| <b>Q5S6T3</b> | <b>ISPD 2_C_methyl_D_erythritol_4_phosphate cytidyltransferase_like protein</b> | <b>2.425745855</b> | <b>0.47832</b> | <b>2</b>  |
| Q5S6T3        | ISLAEAGATR                                                                      | 3.284652112        | 2              | 2.34198   |
| Q5S6T3        | MENLVWIRELAK                                                                    | 0.960267769        | 2              | 2.34806   |
| <b>Q5SGE0</b> | <b>LPPRC Leucine_rich PPR motif_containing protein_mitochondrial</b>            | <b>2.168075534</b> | <b>0.86623</b> | <b>15</b> |
| Q5SGE0        | AALDLEQVPSELAVTR                                                                | 1.419385191        | 2              | 4.10799   |
| Q5SGE0        | CIANNQVETLEK                                                                    | 0.880891935        | 2              | 3.01274   |
| Q5SGE0        | GLDAIELSR                                                                       | 0.705198066        | 2              | 2.52148   |
| Q5SGE0        | HCVTMDTPAEK                                                                     | 0.811240916        | 2              | 2.96809   |
| Q5SGE0        | HDNAEDALNLK                                                                     | 1.343594157        | 2              | 3.64453   |
| Q5SGE0        | LIDYCK                                                                          | 1.530336669        | 1              | 1.93197   |
| Q5SGE0        | MEGANIQPNR                                                                      | 0.954161975        | 2              | 2.97081   |
| Q5SGE0        | SCGSLLPELSLAER                                                                  | 1.077333003        | 2              | 2.77297   |
| Q5SGE0        | SGSPGSNQALLLLR                                                                  | 1.021265419        | 2              | 2.88408   |
| Q5SGE0        | SGSQFDWALMR                                                                     | 1.341970328        | 2              | 2.39482   |
| Q5SGE0        | SSLSSSSPSAGDTVTEK                                                               | 1.186593569        | 2              | 3.88544   |
| Q5SGE0        | SYVADKDVASAK                                                                    | 0.837679339        | 2              | 3.16469   |
| Q5SGE0        | TLLELPELR                                                                       | 0.858836898        | 2              | 3.10069   |
| Q5SGE0        | TSQFTSSDLESTLEK                                                                 | 1.02041316         | 2              | 4.18987   |
| Q5SGE0        | VIEEQMEPALEK                                                                    | 1.050409213        | 2              | 3.11152   |
| <b>Q5SW19</b> | <b>K0664 Protein KIAA0664</b>                                                   | <b>2.032155277</b> | <b>0.83935</b> | <b>3</b>  |
| Q5SW19        | GLEMDPIDCTPPEYILPGSR                                                            | 0.908798278        | 2              | 3.38476   |
| Q5SW19        | IGIGELITR                                                                       | 1.52243114         | 2              | 2.40003   |
| Q5SW19        | SVEGLQEGSVLR                                                                    | 0.998278734        | 2              | 2.73793   |
| <b>Q5SX40</b> | <b>MYH1 Myosin_1</b>                                                            | <b>2.928381671</b> | <b>1</b>       | <b>86</b> |
| Q5SX40        | AAYLQNLNSADLLK                                                                  | 2.510523193        | 2              | 3.44502   |
| Q5SX40        | ADIAESQVNK                                                                      | 3.482994561        | 2              | 3.70484   |
| Q5SX40        | AEDEEEINAELTAK                                                                  | 2.72708403         | 2              | 4.21949   |
| Q5SX40        | AGLLGILLEMR                                                                     | 2.906276232        | 2              | 4.26557   |
| Q5SX40        | AGLLGILLEMRDDK                                                                  | 1.93721157         | 2              | 3.38575   |
| Q5SX40        | ALQEAHQQLDLDLQAEEDK                                                             | 2.496791073        | 3              | 4.51196   |
| Q5SX40        | ALQEAHQQLDLDLQAEEDKVNLTAK                                                       | 3.033895456        | 3              | 6.77841   |

|        |                                                   |             |   |         |
|--------|---------------------------------------------------|-------------|---|---------|
| Q5SX40 | ANLLQAEIEELR                                      | 4.757268944 | 2 | 3.71783 |
| Q5SX40 | ANSEVAQWR                                         | 0.867362033 | 2 | 2.87563 |
| Q5SX40 | DDKLAQLITR                                        | 2.148314109 | 2 | 2.35281 |
| Q5SX40 | DLEEATLQHEATAATLR                                 | 1.815563564 | 2 | 5.08514 |
| Q5SX40 | DTQLHLDDALR                                       | 0.595905573 | 2 | 2.8452  |
| Q5SX40 | EEQAEPDGTVEADK                                    | 0.348673098 | 2 | 3.38988 |
| Q5SX40 | EFEMSNLQSK                                        | 2.0936304   | 1 | 2.63379 |
| Q5SX40 | ELEGEVENEQK                                       | 0.686943452 | 2 | 2.88145 |
| Q5SX40 | ELEGEVENEQKR                                      | 2.186985072 | 2 | 3.02863 |
| Q5SX40 | ELTYQTEEDRK                                       | 1.707382178 | 2 | 3.1274  |
| Q5SX40 | EMANMKKEFEK                                       | 1.622219496 | 2 | 2.82398 |
| Q5SX40 | ENQSILITGESGAGK                                   | 4.234506766 | 2 | 4.10837 |
| Q5SX40 | EQYEEEQEAK                                        | 1.399382132 | 1 | 3.21304 |
| Q5SX40 | GQEDLKEQLAMVER                                    | 1.3181802   | 2 | 4.41943 |
| Q5SX40 | GSSFQTVSALFR                                      | 1.016291941 | 2 | 3.06736 |
| Q5SX40 | HADSVAEELGEQIDNLQR                                | 1.433734159 | 2 | 6.01742 |
| Q5SX40 | IAEQELLDASER                                      | 2.339958791 | 2 | 3.23326 |
| Q5SX40 | IEAQNKPFDAK                                       | 1.058665639 | 2 | 3.03745 |
| Q5SX40 | IEDEQALGMQLQK                                     | 2.986666965 | 2 | 4.60505 |
| Q5SX40 | IEDEQALGMQLQK+Oxidation(8                         | 2.528310654 |   |         |
| Q5SX40 | IEDMAMMTHLHEPAVLYNLK                              | 1.6097168   | 3 | 4.30286 |
| Q5SX40 | IEEEEEIEAER                                       | 2.106753183 | 2 | 4.34576 |
| Q5SX40 | IKLEQQVDDLEGSLEQEK                                | 2.273490212 | 2 | 5.11645 |
| Q5SX40 | IKLEQQVDDLEGSLEQEKK                               | 1.13462376  | 3 | 4.10119 |
| Q5SX40 | IQHELEEAER                                        | 1.471771077 | 2 | 3.69329 |
| Q5SX40 | IQHELEEAERADIAESQVNK                              | 1.605468171 | 3 | 3.88024 |
| Q5SX40 | IQLELNQVK                                         | 1.103325901 | 2 | 2.70493 |
| Q5SX40 | KIAEQELLDASER                                     | 1.839690359 | 2 | 3.82823 |
| Q5SX40 | KIQHELEEAER                                       | 1.350743079 | 3 | 4.11516 |
| Q5SX40 | KKEFEMSNLQSK                                      | 1.633034174 | 2 | 3.86205 |
| Q5SX40 | KKLETDISIQGEMEDIVQEAR                             | 1.578930178 | 3 | 6.08285 |
| Q5SX40 | KLEDECSSELK                                       | 1.408530209 | 2 | 2.91871 |
| Q5SX40 | KLEDECSSELKK                                      | 0.782929873 | 2 | 4.02704 |
| Q5SX40 | KLETDISIQGEMEDIVQEAR                              | 2.020218421 | 2 | 5.64785 |
| Q5SX40 | KMEGDLNEMEIQLNHSNR                                | 1.140695049 | 3 | 4.61326 |
| Q5SX40 | LAQESTMDVENDKQQLDEK                               | 3.043493087 | 2 | 4.86328 |
| Q5SX40 | LDEAEQLALK                                        | 0.80316436  | 2 | 3.23504 |
| Q5SX40 | LEDECSSELKK                                       | 1.684811658 | 2 | 3.32472 |
| Q5SX40 | LEEAGGATSAQIEMNK                                  | 2.479744194 | 2 | 5.15375 |
| Q5SX40 | LEQQVDDLEGSLEQEK                                  | 1.422193909 | 2 | 5.46536 |
| Q5SX40 | LEQQVDDLEGSLEQEKK                                 | 0.980549179 | 2 | 4.1631  |
| Q5SX40 | LETDISIQGEMEDIVQEAR                               | 1.00198165  | 2 | 5.19096 |
| Q5SX40 | LINELTAQR                                         | 1.25917252  | 2 | 3.14717 |
| Q5SX40 | LQDAEEHVAVNAK                                     | 1.737891887 | 2 | 4.81502 |
| Q5SX40 | LQDLVDK                                           | 2.179805106 | 2 | 2.44684 |
| Q5SX40 | LQDLVDKQLQSK                                      | 1.425887982 | 2 | 2.55319 |
| Q5SX40 | LQNEVEDLMIDVER                                    | 1.650226117 | 2 | 4.46346 |
| Q5SX40 | LQTESGEYSR                                        | 1.162530002 | 2 | 2.51991 |
| Q5SX40 | LTGAVMHYGNMK                                      | 1.249169715 | 2 | 2.67692 |
| Q5SX40 | MEGDLNEMEIQLNHSNR                                 | 1.263620482 | 2 | 4.73322 |
| Q5SX40 | MEGDLNEMEIQLNHSNRMAAEALR+Oxidation(0)Oxidation(17 | 1.048428932 |   |         |
| Q5SX40 | MEIDDLASNMEVISK                                   | 3.11778733  | 2 | 4.95757 |
| Q5SX40 | MQGTLEDQIISANPLLEAFGNAK                           | 1.314302307 | 3 | 6.37659 |
| Q5SX40 | MQGTLEDQIISANPLLEAFGNAK+Oxidation(0               | 1.318618613 |   |         |
| Q5SX40 | NDLQLQVQSEADSLADAER                               | 8.191257777 | 2 | 6.30669 |
| Q5SX40 | NKDPLNETVVGLYQK                                   | 2.362430494 | 2 | 4.69152 |



|               |                                                                                    |                    |                |           |
|---------------|------------------------------------------------------------------------------------|--------------------|----------------|-----------|
| Q5SX40        | NLQQEISDLTEQIAEGGK                                                                 | 1.838206234        | 2              | 6.02876   |
| Q5SX40        | NLQQEISDLTEQIAEGGKR                                                                | 1.870236532        | 2              | 4.27337   |
| Q5SX40        | NLTEEMAGLDETIAK                                                                    | 2.658329106        | 2              | 4.78848   |
| Q5SX40        | QAEAEQSNVNLAK                                                                      | 3.464182049        | 2              | 4.41122   |
| Q5SX40        | QKYEETHAELEASQK                                                                    | 1.546336714        | 2              | 3.91191   |
| Q5SX40        | QLDEKDSLVSQLSR                                                                     | 1.840468602        | 2              | 3.19078   |
| Q5SX40        | QLEEEIK                                                                            | 0.914217935        | 1              | 2.20342   |
| Q5SX40        | QREEQAEPDGTVEADK                                                                   | 2.266503107        | 2              | 4.12469   |
| Q5SX40        | RDLEEATLQHEATAATLR                                                                 | 1.142363536        | 3              | 3.62924   |
| Q5SX40        | SAETEKEMANMKEEFEK                                                                  | 0.749886146        | 3              | 4.01588   |
| Q5SX40        | SELQAALAEAEASLEHEEGK                                                               | 1.717721789        | 2              | 5.74997   |
| Q5SX40        | SSVFDVDAK                                                                          | 2.015268005        | 2              | 2.52796   |
| Q5SX40        | TKYETDAIQR                                                                         | 1.142220324        | 3              | 3.45201   |
| Q5SX40        | TLEDQVSELK                                                                         | 2.167941329        | 2              | 2.94919   |
| Q5SX40        | TNAACAALDK                                                                         | 1.30195907         | 1              | 1.98446   |
| Q5SX40        | TNAACAALDKK                                                                        | 0.369007212        | 2              | 2.98051   |
| Q5SX40        | VLNASAIPEGQFIDSK                                                                   | 1.942310396        | 2              | 4.29797   |
| Q5SX40        | VQLLHTQNTSLINTK                                                                    | 0.498767895        | 2              | 4.71032   |
| Q5SX40        | VRELEGEVENEQK                                                                      | 0.522960736        | 2              | 3.85636   |
| Q5SX40        | VRELEGEVENEQKR                                                                     | 0.850319927        | 3              | 4.14079   |
| Q5SX40        | VVESMQSTLDAEIR                                                                     | 1.033389161        | 2              | 3.74154   |
| Q5SX40        | YEETHAELEASQK                                                                      | 1.793714168        | 2              | 4.73862   |
| Q5SX40        | YETDAIQR                                                                           | 1.479666738        | 2              | 2.62035   |
| <b>Q5U206</b> | <b>CALL3 Calmodulin_like protein 3</b>                                             | <b>1.97869718</b>  | <b>0.99987</b> | <b>5</b>  |
| Q5U206        | DTDSEEEIR                                                                          | 1.246571515        | 2              | 2.83205   |
| Q5U206        | KMKDTSDEEEIR                                                                       | 0.956971343        | 3              | 3.41088   |
| Q5U206        | KMKDTSDEEEIR+Oxidation(1                                                           | 1.27227203         |                |           |
| Q5U206        | MKDTSDEEEIR                                                                        | 0.935115057        | 3              | 4.32711   |
| Q5U206        | MKDTSDEEEIR+Oxidation(0                                                            | 0.978519079        |                |           |
| <b>Q5U2Q7</b> | <b>ERF1 Eukaryotic peptide chain release factor subunit 1</b>                      | <b>2.309193563</b> | <b>0.56613</b> | <b>4</b>  |
| Q5U2Q7        | GFGGIGGILR                                                                         | 1.23004351         | 2              | 2.75822   |
| Q5U2Q7        | LSVLGAITSVQQR                                                                      | 1.251542595        | 2              | 2.93988   |
| Q5U2Q7        | YFDEISQDTGK                                                                        | 1.747202272        | 2              | 2.53487   |
| Q5U2Q7        | YVLHCQGTSEEK                                                                       | 1.140654234        | 2              | 3.68392   |
| <b>Q5U2S3</b> | <b>ZUFSP Zinc finger with UFM1_specific peptidase domain protein</b>               | <b>2.349747579</b> | <b>0.03503</b> | <b>2</b>  |
| Q5U2S3        | QYGLDNSGGYKQQQLR                                                                   | 1.229571913        | 2              | 2.67702   |
| Q5U2S3        | TLCLLIFDPGCPSPREMQKLLK+Oxidation(15                                                | 7.399265822        |                |           |
| <b>Q5U2U0</b> | <b>CLPX ATP_dependent Clp protease ATP_binding subunit clpX_like_mitochondrial</b> | <b>1.739814432</b> | <b>0.33904</b> | <b>5</b>  |
| Q5U2U0        | LLEGTIVNVPEK                                                                       | 1.638523124        | 2              | 2.62449   |
| Q5U2U0        | QQAEVEK                                                                            | 1.408378675        | 1              | 1.91779   |
| Q5U2U0        | SGESNTHQDIEEK                                                                      | 1.581099418        | 2              | 3.60002   |
| Q5U2U0        | SGESNTHQDIEEKDR                                                                    | 0.705355144        | 3              | 4.32588   |
| Q5U2U0        | SNILLGPTGSGK                                                                       | 1.361469599        | 2              | 2.37762   |
| <b>Q5U2V4</b> | <b>PLBL1 Phospholipase B_like 1</b>                                                | <b>2.456186516</b> | <b>0.3845</b>  | <b>2</b>  |
| Q5U2V4        | IWEMGHCSALIK+Oxidation(3                                                           | 9.186260725        |                |           |
| Q5U2V4        | LGLDYSYDLAPR                                                                       | 1.29636342         | 2              | 2.51104   |
| <b>Q5U2Z7</b> | <b>RHG24 Rho GTPase_activating protein 24</b>                                      | <b>2.206781662</b> | <b>0.83457</b> | <b>2</b>  |
| Q5U2Z7        | EEEAGVKELTKQVK                                                                     | 1.018947424        | 2              | 2.3874    |
| Q5U2Z7        | FTMIEIKMRNAER+Oxidation(7                                                          | 1.605673084        |                |           |
| <b>Q5U300</b> | <b>UBA1 Ubiquitin_like modifier_activating enzyme 1</b>                            | <b>2.580241263</b> | <b>0.12765</b> | <b>14</b> |
| Q5U300        | AAVASLLQSVQVPEFTP                                                                  | 1.219573889        | 3              | 3.67161   |
| Q5U300        | AENYDISPADR                                                                        | 1.05340128         | 2              | 3.19107   |
| Q5U300        | DNPGVVTCLEEAR                                                                      | 0.948295855        | 2              | 3.39997   |
| Q5U300        | FEVQLQPNGEEMTLK                                                                    | 1.335138829        | 2              | 4.01965   |

|               |                                                       |                    |                |           |
|---------------|-------------------------------------------------------|--------------------|----------------|-----------|
| Q5U300        | IHVSDQELQSANASVDDSR                                   | 1.748759887        | 3              | 3.48724   |
| Q5U300        | IYDDDFQNLGDGVANALDNVDAR                               | 1.888081606        | 2              | 4.71172   |
| Q5U300        | LDQPMTEIVSR                                           | 1.382448507        | 2              | 3.39489   |
| Q5U300        | LKSDTAAAAVR                                           | 1.003649379        | 2              | 2.82246   |
| Q5U300        | NEEDATELVTLAQAVNAR                                    | 2.152713355        | 3              | 4.68795   |
| Q5U300        | NFPNAIEHTLQWAR                                        | 1.048996787        | 2              | 3.40726   |
| Q5U300        | SLPASLAEPDFVMTDFAK                                    | 0.83541819         | 2              | 4.05759   |
| Q5U300        | SPPAVQQDNVDEDLIR                                      | 1.037565699        | 2              | 4.76979   |
| Q5U300        | SPPAVQQDNVDEDLIRK                                     | 1.039510607        | 3              | 3.32207   |
| Q5U300        | VVQGHQQLDSYK                                          | 1.222223607        | 2              | 3.42621   |
| <b>Q5U4E6</b> | <b>GOGA4 Golgin subfamily A member 4</b>              | <b>1.878151707</b> | <b>0.76783</b> | <b>3</b>  |
| Q5U4E6        | EFNTQLAQK                                             | 0.895749024        | 2              | 2.34942   |
| Q5U4E6        | EQAQQILTEKENVILQMR+Oxidation(16                       | 0.943979129        |                |           |
| Q5U4E6        | VQCAKDTESQLSELR                                       | 4.762932562        | 2              | 2.31087   |
| <b>Q5XFW8</b> | <b>SEC13 Protein SEC13 homolog</b>                    | <b>1.947564284</b> | <b>0.99983</b> | <b>4</b>  |
| Q5XFW8        | DVAWAPSIGLPTSTIASCSQDGR                               | 0.904167686        | 2              | 3.45853   |
| Q5XFW8        | EEEDGQWKEEQK                                          | 1.039844375        | 2              | 2.75701   |
| Q5XFW8        | LEAHSWVVR                                             | 0.974579273        | 2              | 2.36868   |
| Q5XFW8        | NGGQILIADLR                                           | 1.113132361        | 2              | 2.48169   |
| <b>Q5XFX0</b> | <b>TAGL2 Transgelin_2</b>                             | <b>1.826237646</b> | <b>0.8733</b>  | <b>6</b>  |
| Q5XFX0        | DDGLFSGDPNWFPK                                        | 2.278732494        | 2              | 3.66492   |
| Q5XFX0        | NFSDNQLQEGK                                           | 1.173029321        | 2              | 3.15758   |
| Q5XFX0        | NVIGLQMGTR                                            | 0.827126067        | 2              | 3.02612   |
| Q5XFX0        | QMEQISQFLQAAER                                        | 1.076766717        | 2              | 2.80307   |
| Q5XFX0        | TLMNLGGLAVAR                                          | 1.091536567        | 2              | 3.3582    |
| Q5XFX0        | YGINTTDFQTVDLWEGK                                     | 0.890422788        | 2              | 4.73927   |
| <b>Q5XHYS</b> | <b>SYTC Threonyl_tRNA synthetase_ cytoplasmic</b>     | <b>2.084276831</b> | <b>0.97532</b> | <b>11</b> |
| Q5XHYS        | AEHDSILA EK                                           | 0.97593258         | 2              | 2.83885   |
| Q5XHYS        | FLGDIEIWNQAEK                                         | 1.348023702        | 2              | 3.76226   |
| Q5XHYS        | FMVDIDLDPGCTLNK                                       | 1.115944251        | 2              | 3.7564    |
| Q5XHYS        | GFQEVVTPNIFNSR                                        | 1.920404518        | 2              | 3.90931   |
| Q5XHYS        | LKAEHDSILA EK                                         | 0.821545117        | 2              | 3.34697   |
| Q5XHYS        | NELSGALTGLTR                                          | 1.059981047        | 2              | 3.20448   |
| Q5XHYS        | QLENSLNEFGEK                                          | 1.158489321        | 2              | 3.15633   |
| Q5XHYS        | QVMVVPVGPCTDEYA QK                                    | 1.078257124        | 2              | 3.66822   |
| Q5XHYS        | TTPYQIACGISQGLADNTVVAK                                | 1.090318462        | 2              | 4.1517    |
| Q5XHYS        | VVWDLDRPLETDCTLELLK                                   | 2.417558009        | 2              | 3.88131   |
| Q5XHYS        | WELNPGDGAFYGP K                                       | 1.333602233        | 2              | 3.96393   |
| <b>Q5XHZ0</b> | <b>TRAP1 Heat shock protein 75 kDa_ mitochondrial</b> | <b>2.257963723</b> | <b>0.31114</b> | <b>14</b> |
| Q5XHZ0        | AFLEALQHQAE TSSR                                      | 1.240188456        | 2              | 4.68455   |
| Q5XHZ0        | AQLLQPTLEINPR                                         | 0.990460549        | 2              | 3.72326   |
| Q5XHZ0        | EGIVTTAEQDIKEDIA K                                    | 0.789628365        | 2              | 2.32675   |
| Q5XHZ0        | ELISNASDALEK                                          | 0.802792008        | 2              | 2.70663   |
| Q5XHZ0        | FEDTSPAGER                                            | 0.981756184        | 2              | 2.49638   |
| Q5XHZ0        | GTITIQDTGIGMTK                                        | 1.030508409        | 2              | 3.56485   |
| Q5XHZ0        | GVVDESDIPLNSR                                         | 1.09153469         | 2              | 4.80619   |
| Q5XHZ0        | HLAEHSPYYEAMK                                         | 1.043725047        | 2              | 3.72621   |
| Q5XHZ0        | LDTHPAMVTVLEMGAAR                                     | 1.120893426        | 3              | 4.05658   |
| Q5XHZ0        | NIYYLCAPNR                                            | 1.034521664        | 2              | 2.41473   |
| Q5XHZ0        | SDCKDFANESR                                           | 1.007504911        | 2              | 2.70157   |
| Q5XHZ0        | VCEGQVLPMEIHLQ TDAEK                                  | 1.228661367        | 3              | 3.64968   |
| Q5XHZ0        | YESSALPAGQLTSLSDYASR                                  | 2.154632249        | 2              | 5.63993   |
| Q5XHZ0        | YIAQAYDKPR                                            | 1.256119189        | 2              | 2.66106   |
| <b>Q5XI22</b> | <b>THIC Acetyl_CoA acetyltransferase_ cytosolic</b>   | <b>1.84138826</b>  | <b>0.15432</b> | <b>9</b>  |
| Q5XI22        | AGHFDKEIVPVHVSSR                                      | 0.843519756        | 2              | 4.99351   |
| Q5XI22        | ELGLSPEK                                              | 0.679806938        | 1              | 1.95042   |
| Q5XI22        | HGSNLEAMSK                                            | 1.835714025        | 2              | 2.68347   |

|               |                                                                        |                    |                |           |
|---------------|------------------------------------------------------------------------|--------------------|----------------|-----------|
| Q5XI22        | LKPYFLTDGTGTVTPANASGMNDGAAAVVLMK                                       | 0.916286434        | 3              | 5.21921   |
| Q5XI22        | MGEVPLADSLCDGLTDAFHNYHMGITAENVAK                                       | 0.984645821        | 3              | 4.07326   |
| Q5XI22        | MLKPLAQVVSWSQAGVEPSVMGVGPIPAIK                                         | 0.927783537        | 3              | 4.53659   |
| Q5XI22        | TAIGSFNGALSTVPVHNLGTTVIK                                               | 0.959871692        | 2              | 5.42234   |
| Q5XI22        | VAPEEVSEVIFGHVLTAGCGQNPTK                                              | 0.751396853        | 2              | 5.18503   |
| Q5XI22        | VNIDGGAIALGHPLGASGCR                                                   | 0.638083739        | 2              | 5.44328   |
| <b>Q5XI29</b> | <b>CPSF7 Cleavage and polyadenylation specificity factor subunit 7</b> | <b>2.020396325</b> | <b>0.89226</b> | <b>2</b>  |
| Q5XI29        | QNLQFEAQR                                                              | 1.184678608        | 2              | 2.41633   |
| Q5XI29        | SIGVYDVVELK                                                            | 1.014498244        | 2              | 2.36714   |
| <b>Q5XI32</b> | <b>CAPZB F_actin_capping protein subunit beta</b>                      | <b>2.070334641</b> | <b>0.97807</b> | <b>8</b>  |
| Q5XI32        | GCWDSIHVVEVQEK                                                         | 0.994939483        | 2              | 3.74296   |
| Q5XI32        | KLEVEANNAFDQYR                                                         | 0.997952432        | 2              | 4.13815   |
| Q5XI32        | LEVEANNAFDQYR                                                          | 1.318831972        | 2              | 3.75904   |
| Q5XI32        | LVEDMENK                                                               | 1.311342328        | 2              | 2.66874   |
| Q5XI32        | NDLVEALK                                                               | 1.128892588        | 2              | 2.40444   |
| Q5XI32        | SGSGTMNLGGSLTR                                                         | 1.215383289        | 2              | 3.30343   |
| Q5XI32        | STLNEIYFGK                                                             | 0.829769325        | 1              | 2.05758   |
| Q5XI32        | YDPPLEDGAMPSAR                                                         | 0.911170448        | 2              | 3.58329   |
| <b>Q5XI60</b> | <b>REEP6 Receptor expression enhancing protein 6</b>                   | <b>1.786312613</b> | <b>0.78719</b> | <b>3</b>  |
| Q5XI60        | ALDIAAGITR                                                             | 0.647539424        | 2              | 3.26724   |
| Q5XI60        | HHVALDSAASQLSGR                                                        | 0.927872944        | 2              | 4.60082   |
| Q5XI60        | NVATDALGALEAR                                                          | 0.790772014        | 2              | 3.98321   |
| <b>Q5XI73</b> | <b>GDIR1 Rho GDP_dissociation inhibitor 1</b>                          | <b>1.845423168</b> | <b>0.99996</b> | <b>6</b>  |
| Q5XI73        | AEEYFLTPMEEAPK                                                         | 1.169040588        | 2              | 4.40899   |
| Q5XI73        | IDKTDYMGVSYGPR                                                         | 1.076369454        | 2              | 3.98928   |
| Q5XI73        | SIQEIQELDKDDESLR                                                       | 0.732877792        | 2              | 5.28958   |
| Q5XI73        | SIQEIQELDKDDESLRK                                                      | 0.883883087        | 2              | 4.65383   |
| Q5XI73        | TDYMGVSYGPR                                                            | 1.053258803        | 2              | 2.41423   |
| Q5XI73        | VAVSADPNVNVIVTR                                                        | 0.940966186        | 2              | 3.97865   |
| <b>Q5XI78</b> | <b>ODO1 2_oxoglutarate dehydrogenase_mitochondrial</b>                 | <b>2.167148275</b> | <b>0.98656</b> | <b>18</b> |
| Q5XI78        | FGLEGCEVLIPALK                                                         | 1.181851352        | 2              | 3.587     |
| Q5XI78        | FLDTAFDLDAFK                                                           | 1.70178026         | 2              | 2.66043   |
| Q5XI78        | FLDTAFDLDAFKK                                                          | 1.115723391        | 2              | 2.93743   |
| Q5XI78        | GHHVAQLDPLGILDADLDSSVPADIISSTDK                                        | 1.230483817        | 3              | 5.9103    |
| Q5XI78        | ICEEAFTR                                                               | 0.981201141        | 2              | 2.34013   |
| Q5XI78        | IEQLSPFPDLLLL                                                          | 0.80164646         | 2              | 3.32549   |
| Q5XI78        | LEAADEGSQDMK                                                           | 0.881182868        | 2              | 3.51647   |
| Q5XI78        | LNVLNVIR                                                               | 1.361159888        | 2              | 2.32154   |
| Q5XI78        | LVEDHLAVQSLIR                                                          | 1.186921887        | 2              | 2.90109   |
| Q5XI78        | NITLSLVANPSHLEAADPVVMGK                                                | 1.517775562        | 2              | 5.5507    |
| Q5XI78        | NQGYDYVKPR                                                             | 1.009710246        | 2              | 2.37889   |
| Q5XI78        | NTNAGAPPGTAYQSPLSLR                                                    | 0.223482704        | 2              | 2.85357   |
| Q5XI78        | SSLATMAHAQSLVEAQPNDK                                                   | 1.071320922        | 3              | 4.4054    |
| Q5XI78        | TSFDEMLPGTHFQR                                                         | 1.031060805        | 2              | 2.30849   |
| Q5XI78        | VIPEDGPAAQNPDK                                                         | 1.206237489        | 2              | 2.94482   |
| Q5XI78        | VVNAPIFHVNSDDPEAVMYVCK                                                 | 1.398311959        | 3              | 4.24681   |
| Q5XI78        | YAELLVSQGVVNQPEYEEIISK                                                 | 1.019197668        | 2              | 4.07064   |
| Q5XI78        | YAELLVSQGVVNQPEYEEISKYDK                                               | 1.988663064        | 3              | 3.93237   |
| <b>Q5XI95</b> | <b>ADH6 Alcohol dehydrogenase 6</b>                                    | <b>2.23671589</b>  | <b>0.99602</b> | <b>6</b>  |
| Q5XI95        | ATVLWKPGAPLAIEIEVAPPK                                                  | 0.793067625        | 2              | 3.94193   |
| Q5XI95        | FNIDPLITHLTLSEANEAVQLMK                                                | 1.14192365         | 3              | 4.98578   |
| Q5XI95        | IIAVDINK                                                               | 1.174302744        | 2              | 2.73793   |
| Q5XI95        | MVATGVCQTDIK                                                           | 0.74452002         | 2              | 3.02144   |
| Q5XI95        | NNICTEIR                                                               | 0.805824979        | 2              | 2.47322   |
| Q5XI95        | TVGATDCVDPK                                                            | 0.790975867        | 2              | 2.82778   |

|               |                                                                                   |                    |                |           |
|---------------|-----------------------------------------------------------------------------------|--------------------|----------------|-----------|
| <b>Q5XIC0</b> | <b>ECI2 Enoyl_CoA delta isomerase 2_ mitochondrial</b>                            | <b>2.02957519</b>  | <b>0.99724</b> | <b>6</b>  |
| Q5XIC0        | AAEMLLFGK                                                                         | 1.837098967        | 2              | 2.45247   |
| Q5XIC0        | ATQQDFENAMNQVK                                                                    | 0.899224155        | 2              | 4.27289   |
| Q5XIC0        | GILVTSEGGITK                                                                      | 0.938987155        | 2              | 3.45074   |
| Q5XIC0        | LHAVNEEECTTLR                                                                     | 1.09311156         | 2              | 3.85118   |
| Q5XIC0        | QNYVDLVSSLSSSEASSQ GK                                                             | 0.889935918        | 2              | 5.40824   |
| Q5XIC0        | WDAWNALGSLPK                                                                      | 1.046603914        | 2              | 3.69137   |
| <b>Q5XIC1</b> | <b>GMPPA Mannose_1_phosphate guanyltransferase alpha</b>                          | <b>1.925122082</b> | <b>0.86915</b> | <b>2</b>  |
| Q5XIC1        | VAPSAVLGPNVSIGK                                                                   | 0.807947781        | 2              | 2.62822   |
| Q5XIC1        | VEGTPNDPNPNDPR                                                                    | 1.296843332        | 2              | 3.18967   |
| <b>Q5XIE6</b> | <b>HIBCH 3_hydroxyisobutyryl_CoA hydrolase_ mitochondrial</b>                     | <b>2.228197585</b> | <b>0.99958</b> | <b>7</b>  |
| Q5XIE6        | AGIATHFVDSEK                                                                      | 0.933017103        | 2              | 3.11277   |
| Q5XIE6        | AVLIDKDQTPK                                                                       | 0.908892413        | 2              | 2.83667   |
| Q5XIE6        | GCAGVITLNRPK                                                                      | 1.014752173        | 2              | 2.91632   |
| Q5XIE6        | HTETAEVLLER                                                                       | 1.206862681        | 2              | 2.87884   |
| Q5XIE6        | INSCFSANTVEQILENLR                                                                | 1.007213642        | 2              | 3.16181   |
| Q5XIE6        | LHVLEEELLALK                                                                      | 1.157149002        | 3              | 4.10167   |
| Q5XIE6        | WKPADLKDVTDEDLNSYFK                                                               | 1.391028386        | 2              | 2.31577   |
| <b>Q5XIF3</b> | <b>NDUS4 NADH dehydrogenase [ubiquinone] iron_sulfur protein 4_ mitochondrial</b> | <b>1.808715804</b> | <b>0.31307</b> | <b>3</b>  |
| Q5XIF3        | DTQLITVDEK                                                                        | 0.69909342         | 2              | 2.48431   |
| Q5XIF3        | HGWSYDVEGR                                                                        | 0.986551154        | 2              | 2.88439   |
| Q5XIF3        | LDVPTLTGVPEEHK                                                                    | 0.82130834         | 3              | 3.66129   |
| <b>Q5XIF6</b> | <b>TBA4A Tubulin alpha_4A chain</b>                                               | <b>2.313270975</b> | <b>0.21953</b> | <b>5</b>  |
| Q5XIF6        | AVFVDLEPTVIDEIR                                                                   | 0.953398941        | 2              | 3.8446    |
| Q5XIF6        | AYHEQLSVAEITNACFEPANQMVK                                                          | 1.210387649        | 2              | 5.22033   |
| Q5XIF6        | DVNAIAIAIK                                                                        | 1.359213867        | 2              | 3.10819   |
| Q5XIF6        | SIQFVDWCPTGFK                                                                     | 0.949942066        | 2              | 4.13838   |
| Q5XIF6        | TIGGGDDSFSTFFCETGAGK                                                              | 1.373843163        | 2              | 2.78316   |
| <b>Q5XIG4</b> | <b>OCAD1 OCIA domain_containing protein 1</b>                                     | <b>2.455960034</b> | <b>0.99955</b> | <b>2</b>  |
| Q5XIG4        | SVPLAATSMLITQGLISK                                                                | 1.313704788        | 2              | 4.39852   |
| Q5XIG4        | YDSNVSGQSSFGTSPAADNIEK                                                            | 1.06075673         | 2              | 5.66521   |
| <b>Q5XIH7</b> | <b>PHB2 Prohibitin_2</b>                                                          | <b>2.382305847</b> | <b>0.99946</b> | <b>10</b> |
| Q5XIH7        | DLQMVNISLR                                                                        | 2.198085056        | 2              | 2.73049   |
| Q5XIH7        | FNASQLITQR                                                                        | 0.860399832        | 2              | 3.78161   |
| Q5XIH7        | IGGVQQDTILAEGLHFR                                                                 | 0.8085842          | 3              | 4.92463   |
| Q5XIH7        | IPWFQYPIIYDIR                                                                     | 1.162409815        | 2              | 2.4702    |
| Q5XIH7        | IVQAEGEAEAAK                                                                      | 0.918084504        | 2              | 4.05741   |
| Q5XIH7        | IYLTADNLVNLQDESFTFR                                                               | 1.425048672        | 2              | 4.04246   |
| Q5XIH7        | LGLDYEER                                                                          | 0.847074819        | 2              | 2.46778   |
| Q5XIH7        | LLLGAAGAVAYGVR                                                                    | 2.06621386         | 2              | 3.78403   |
| Q5XIH7        | VLPSIVNEVLK                                                                       | 0.607829167        | 1              | 2.29777   |
| Q5XIH7        | VLSRPNAQELPSMYQR                                                                  | 1.067686661        | 2              | 4.76181   |
| <b>Q5XIM9</b> | <b>TCPB T_complex protein 1 subunit beta</b>                                      | <b>1.889101786</b> | <b>0.03204</b> | <b>12</b> |
| Q5XIM9        | DASLMVTNDGATILK                                                                   | 4.3149731          | 2              | 2.99152   |
| Q5XIM9        | EALLSSAVDHGSDEVK                                                                  | 1.411689196        | 2              | 4.25345   |
| Q5XIM9        | FWQDLMNIAAGTTLSSK                                                                 | 1.526500596        | 2              | 3.4773    |
| Q5XIM9        | GATQQILDEAER                                                                      | 1.371725325        | 2              | 3.87399   |
| Q5XIM9        | GSGNLEAIHVIK                                                                      | 1.27385507         | 2              | 2.56925   |
| Q5XIM9        | HGINCFINR                                                                         | 0.783666295        | 2              | 2.65158   |
| Q5XIM9        | LIEEVMIGEDK                                                                       | 1.423316962        | 2              | 3.15561   |
| Q5XIM9        | MLPTIIADNAGYDSADLVAQLR                                                            | 1.640703874        | 3              | 3.31328   |
| Q5XIM9        | NIGVDNPAAK                                                                        | 0.8892733          | 1              | 1.95384   |
| Q5XIM9        | SLHDALCVLAQTVK                                                                    | 1.209071615        | 2              | 3.89941   |
| Q5XIM9        | VAEIEHAEKEK                                                                       | 1.052140635        | 2              | 2.7948    |

|               |                                                                          |                    |                |           |
|---------------|--------------------------------------------------------------------------|--------------------|----------------|-----------|
| Q5XIM9        | VQDDEVGDGTTSVTLAAELLR                                                    | 1.511076347        | 2              | 4.35294   |
| <b>Q5XIN6</b> | <b>LETM1 LETM1 and EF_hand domain_containing protein 1_mitochondrial</b> | <b>2.181426012</b> | <b>0.38318</b> | <b>10</b> |
| Q5XIN6        | AAEVEGEQVDNK                                                             | 1.068061034        | 2              | 3.87772   |
| Q5XIN6        | AMYLPTLSPADQLK                                                           | 0.864295907        | 2              | 2.46615   |
| Q5XIN6        | DIQPEVAEATVPGRPGAELQPK                                                   | 0.800310803        | 2              | 4.54462   |
| Q5XIN6        | FLQDTIEEMALK                                                             | 0.958140735        | 2              | 3.03683   |
| Q5XIN6        | KLEEGGPVYSPPAQVVVK                                                       | 1.001003534        | 2              | 3.72942   |
| Q5XIN6        | LDPAAASSPTGESVISVDELISAMK                                                | 1.271127878        | 2              | 5.30412   |
| Q5XIN6        | LEEGGPVYSPPAQVVVK                                                        | 1.002668746        | 2              | 3.39234   |
| Q5XIN6        | LFEDLTLNLRPQLVALCK                                                       | 1.456547109        | 3              | 3.98203   |
| Q5XIN6        | LLELQSIGTNNFLR                                                           | 1.313197774        | 2              | 3.46601   |
| Q5XIN6        | STLQTLPEIVAK                                                             | 1.205736537        | 2              | 2.57672   |
| <b>Q5XIT9</b> | <b>MCCB Methylcrotonyl_CoA carboxylase beta chain_mitochondrial</b>      | <b>2.035127631</b> | <b>1</b>       | <b>9</b>  |
| Q5XIT9        | AATGEEVSAEDLGGADLHCR                                                     | 0.937260934        | 2              | 5.22438   |
| Q5XIT9        | ALVNQLHER                                                                | 1.169435154        | 2              | 2.68444   |
| Q5XIT9        | ALYGDTLVTGFAR                                                            | 1.085612205        | 2              | 3.5122    |
| Q5XIT9        | AQEIALQNR                                                                | 0.938205984        | 2              | 2.57048   |
| Q5XIT9        | LGTQPDGSGSSTYQENYEQMK                                                    | 0.92373189         | 2              | 5.25139   |
| Q5XIT9        | LWDDGIIDPVDR                                                             | 1.027445884        | 2              | 3.53647   |
| Q5XIT9        | LYGEEVPAGGIITGIGR                                                        | 1.35849434         | 2              | 4.76527   |
| Q5XIT9        | RFEEEGNPYSSAR                                                            | 0.783967197        | 2              | 4.25401   |
| Q5XIT9        | VSGVECMIVANDATVK                                                         | 1.090791411        | 2              | 3.39354   |
| <b>Q5XIU5</b> | <b>PSMF1 Proteasome inhibitor PI31 subunit</b>                           | <b>1.80790496</b>  | <b>0.59886</b> | <b>2</b>  |
| Q5XIU5        | ALIDPSSGLPNR                                                             | 0.898250353        | 2              | 2.7933    |
| Q5XIU5        | SGIITPIHEQWEK                                                            | 0.795255544        | 2              | 3.03607   |
| <b>Q5XIU9</b> | <b>PGRC2 Membrane_associated progesterone receptor component 2</b>       | <b>1.876139848</b> | <b>0.99999</b> | <b>3</b>  |
| Q5XIU9        | GLATFCLDK                                                                | 0.922614303        | 2              | 2.80292   |
| Q5XIU9        | GLCSGPGAGEESPAATLPR                                                      | 0.903847445        | 2              | 4.83923   |
| Q5XIU9        | VFDVTK                                                                   | 1.02453028         | 1              | 1.98739   |
| <b>Q60587</b> | <b>ECHB Trifunctional enzyme subunit beta_mitochondrial</b>              | <b>2.199445719</b> | <b>0.96529</b> | <b>9</b>  |
| Q60587        | ALAMGYKPK                                                                | 0.686283974        | 2              | 2.40505   |
| Q60587        | AMDSDFWFAQNYMGR                                                          | 1.103988429        | 2              | 3.15826   |
| Q60587        | AQDEGHLSDIVPFK                                                           | 0.819839843        | 2              | 2.48664   |
| Q60587        | DFIYVSQDPK                                                               | 1.164428896        | 2              | 2.79556   |
| Q60587        | DGGQYALVAACAAGGQGHAMIVEAYPK                                              | 1.492217415        | 3              | 4.6773    |
| Q60587        | DNGIRPSSLEQMAK                                                           | 0.821986423        | 2              | 3.64398   |
| Q60587        | DQLLLGPTYATPK                                                            | 1.265593173        | 2              | 3.75995   |
| Q60587        | MMLDLNK                                                                  | 0.888388502        | 1              | 2.12756   |
| Q60587        | NIVVVEGVR                                                                | 0.971080903        | 2              | 3.06333   |
| <b>Q60598</b> | <b>SRC8 Src substrate cortactin</b>                                      | <b>1.727165256</b> | <b>0.69428</b> | <b>3</b>  |
| Q60598        | NASTFEEVVQVPSAYQK                                                        | 1.06264318         | 2              | 3.54738   |
| Q60598        | TVQGSQGHQEHINIHK                                                         | 0.713368119        | 2              | 3.47368   |
| Q60598        | VDQSAVGFEYQGK                                                            | 1.033682054        | 2              | 3.34599   |
| <b>Q60759</b> | <b>GCDH Glutaryl_CoA dehydrogenase_mitochondrial</b>                     | <b>2.222613566</b> | <b>0.60734</b> | <b>4</b>  |
| Q60759        | DILGGNGISDEYHVIR                                                         | 1.348022653        | 2              | 3.86019   |
| Q60759        | DIVYEMGELGLPTIK                                                          | 1.399568289        | 2              | 3.89685   |
| Q60759        | GYGCAGVSSVAYGLLTR                                                        | 1.12951991         | 2              | 3.32187   |
| Q60759        | HAMNLEAVNTYEGTHDIHALILGR                                                 | 1.395873361        | 3              | 5.09824   |
| <b>Q60817</b> | <b>NACA Nascent polypeptide_associated complex subunit alpha</b>         | <b>1.968835207</b> | <b>0.98081</b> | <b>3</b>  |
| Q60817        | DIELVMSQANVSR                                                            | 1.568527663        | 2              | 3.41899   |
| Q60817        | IEDLSQQAQLAAAEK                                                          | 0.952905341        | 2              | 4.676     |

|               |                                                                                 |                    |                |           |
|---------------|---------------------------------------------------------------------------------|--------------------|----------------|-----------|
| Q60817        | NILFVITKPDVYK                                                                   | 0.695568619        | 2              | 3.66666   |
| <b>Q60952</b> | <b>CP250 Centrosome_associated protein CEP250</b>                               | <b>1.721853214</b> | <b>0.10047</b> | <b>2</b>  |
| Q60952        | GQIQDLKK                                                                        | 0.79057226         | 1              | 1.9552    |
| Q60952        | QQIDELQK                                                                        | 0.299575032        | 1              | 2.03522   |
| <b>Q61029</b> | <b>LAP2B Lamina_associated polypeptide 2_ isoforms beta/delta/epsilon/gamma</b> | <b>2.042387545</b> | <b>0.519</b>   | <b>2</b>  |
| Q61029        | SELVANNVTLPAGEQR                                                                | 1.104362988        | 2              | 4.56692   |
| Q61029        | YGVNPGPIVGTRR                                                                   | 0.862674448        | 2              | 2.71646   |
| <b>Q61035</b> | <b>SYHC Histidyl_tRNA synthetase_ cytoplasmic</b>                               | <b>2.427252939</b> | <b>0.86231</b> | <b>2</b>  |
| Q61035        | ASAEQIEEVTK                                                                     | 1.3104346          | 2              | 2.77658   |
| Q61035        | REDLVEEIR                                                                       | 1.191641788        | 2              | 2.46645   |
| <b>Q61043</b> | <b>NIN Ninein</b>                                                               | <b>1.909714234</b> | <b>0.97824</b> | <b>3</b>  |
| Q61043        | NEITTLNEEDSISNLK                                                                | 0.770029676        | 2              | 2.47405   |
| Q61043        | RQLQMAFDEEKAQLQEELR+Oxidation(4                                                 | 0.983131719        |                |           |
| Q61043        | SLENVLAEK                                                                       | 0.98935418         | 1              | 2.02442   |
| <b>Q61301</b> | <b>CTNA2 Catenin alpha_2</b>                                                    | <b>2.147168316</b> | <b>0.9846</b>  | <b>3</b>  |
| Q61301        | LLEPLVTQVTLVNTSNK                                                               | 1.284921638        | 2              | 3.82697   |
| Q61301        | TSVQTEDDQLIAGQSAR                                                               | 1.020942635        | 2              | 5.00155   |
| Q61301        | WDDSGNDIIVLAK                                                                   | 1.238403244        | 2              | 3.0363    |
| <b>Q61335</b> | <b>BAP31 B_cell receptor_associated protein 31</b>                              | <b>1.99434983</b>  | <b>0.99958</b> | <b>5</b>  |
| Q61335        | AENEALAMQK                                                                      | 0.840820584        | 2              | 3.41615   |
| Q61335        | KYMEENDQLK                                                                      | 1.223085865        | 2              | 2.63751   |
| Q61335        | KYMEENDQLKK                                                                     | 0.859153041        | 3              | 3.96824   |
| Q61335        | YMEENDQLK                                                                       | 1.077312321        | 2              | 2.74282   |
| Q61335        | YMEENDQLKK                                                                      | 0.859250794        | 2              | 2.90167   |
| <b>Q61545</b> | <b>EWS RNA_binding protein EWS</b>                                              | <b>2.113130379</b> | <b>0.99961</b> | <b>2</b>  |
| Q61545        | GDATVSYEDPPTAK                                                                  | 1.055464221        | 2              | 3.41173   |
| Q61545        | GGPGGPGGPGGPMGR                                                                 | 1.187823969        | 2              | 2.86395   |
| <b>Q61595</b> | <b>KTN1 Kinectin</b>                                                            | <b>1.826703035</b> | <b>0.96881</b> | <b>2</b>  |
| Q61595        | TAEHEAAQQDLQSK                                                                  | 0.900455316        | 2              | 4.37952   |
| Q61595        | VEPVLVTK                                                                        | 0.705774327        | 2              | 2.35715   |
| <b>Q61655</b> | <b>DD19A ATP_dependent RNA helicase DDX19A</b>                                  | <b>2.044718379</b> | <b>0.99999</b> | <b>2</b>  |
| Q61655        | SNLVDNTNQVEVLQR                                                                 | 0.874810605        | 2              | 4.18284   |
| Q61655        | TSTTAEKTEEEEKEDR                                                                | 1.177233951        | 3              | 3.98546   |
| <b>Q61656</b> | <b>DDX5 Probable ATP_dependent RNA helicase DDX5</b>                            | <b>2.408380864</b> | <b>5.4E-06</b> | <b>6</b>  |
| Q61656        | ELAQVQVAAEYCR                                                                   | 0.824016906        | 2              | 2.8823    |
| Q61656        | GDGPICLVLAPTR                                                                   | 1.358272794        | 2              | 2.95587   |
| Q61656        | MLDMGFEPQIR                                                                     | 1.381004069        | 2              | 3.34645   |
| Q61656        | NFYQEHPDLAR                                                                     | 1.477776131        | 2              | 3.30726   |
| Q61656        | STCIYGGAPK                                                                      | 0.964453547        | 2              | 2.47578   |
| Q61656        | TAQEVDTYR                                                                       | 1.04696994         | 2              | 2.31755   |
| <b>Q61830</b> | <b>MRC1 Macrophage mannose receptor 1</b>                                       | <b>2.082555144</b> | <b>0.81231</b> | <b>3</b>  |
| Q61830        | LKLPWHEAETYCK                                                                   | 0.928923041        | 2              | 2.35084   |
| Q61830        | WTVDEQVQFTHWNADMPGR+Oxidation(15                                                | 1.623462835        |                |           |
| Q61830        | YLNWLPGPSSEPGK                                                                  | 1.310565582        | 2              | 2.62816   |
| <b>Q61941</b> | <b>transhydrogenase_mitochondrial</b>                                           | <b>2.192280237</b> | <b>0.0001</b>  | <b>13</b> |
| Q61941        | AQYPIADLVK                                                                      | 1.123654957        | 2              | 2.47929   |
| Q61941        | DDDFGTMSHVIR                                                                    | 1.358189585        | 2              | 2.52687   |
| Q61941        | EANSIVITPGYGLCAAK                                                               | 1.172698092        | 2              | 3.83934   |
| Q61941        | FFTQITAAGK                                                                      | 1.163990793        | 2              | 2.74212   |
| Q61941        | GITHIGYTDLPSR                                                                   | 0.811236884        | 2              | 3.74714   |
| Q61941        | ILIVGGGVAGLASAGAAK                                                              | 1.948684206        | 2              | 3.90539   |
| Q61941        | KTTVLAMDQVPR                                                                    | 0.990193408        | 2              | 3.28874   |
| Q61941        | MATQASTLYSNNITK                                                                 | 0.869290276        | 2              | 4.72669   |
| Q61941        | QGFNVVVEGAGEASK                                                                 | 1.129767537        | 2              | 4.14883   |
| Q61941        | SLGAEPLEVDLK                                                                    | 1.206129868        | 2              | 3.51381   |

|               |                                                                           |                    |                |           |
|---------------|---------------------------------------------------------------------------|--------------------|----------------|-----------|
| Q61941        | TTVLAMDQVPR                                                               | 0.999007456        | 2              | 2.57553   |
| Q61941        | TVAELEAEK                                                                 | 0.941299149        | 2              | 2.98057   |
| Q61941        | VTIAQGYDALSSMANISGYK                                                      | 1.350663552        | 2              | 5.33168   |
| <b>Q61990</b> | <b>PCBP2 Poly(rC)_binding protein 2</b>                                   | <b>3.231814221</b> | <b>0.43595</b> | <b>2</b>  |
| Q61990        | AITIAGIPQSIIECVK                                                          | 1.616744619        | 2              | 2.33291   |
| Q61990        | IITLAGPTNAIFK                                                             | 1.79838002         | 2              | 2.54473   |
| <b>Q62009</b> | <b>POSTN Periostin</b>                                                    | <b>2.451438447</b> | <b>0.59209</b> | <b>2</b>  |
| Q62009        | ISTGGGETGETLQKFLQK                                                        | 1.091140996        | 2              | 2.52124   |
| Q62009        | TEGPAMTKIQIEGDPDFR                                                        | 1.665719833        | 2              | 2.30993   |
| <b>Q62095</b> | <b>DDX3Y ATP_dependent RNA helicase DDX3Y</b>                             | <b>2.702389325</b> | <b>0.19503</b> | <b>4</b>  |
| Q62095        | HVINFDLPSDIEEYVHR                                                         | 1.435546349        | 3              | 4.44574   |
| Q62095        | SFLDLLLNATGK                                                              | 1.301767081        | 2              | 4.17301   |
| Q62095        | VGNLGLATSFNER                                                             | 1.407762851        | 2              | 3.11215   |
| Q62095        | VGSTSENITQK                                                               | 0.799682483        | 2              | 2.86075   |
| <b>Q62261</b> | <b>SPTB2 Spectrin beta chain_brain 1</b>                                  | <b>2.037336584</b> | <b>0.8391</b>  | <b>20</b> |
| Q62261        | AKDEQSAVSMK                                                               | 0.983360669        | 2              | 2.47299   |
| Q62261        | ALVADSHPESEK                                                              | 1.18762505         | 2              | 3.19084   |
| Q62261        | DQNTVETLQR                                                                | 0.942739928        | 2              | 2.99977   |
| Q62261        | EAEKLESEHPDQAQAILS                                                        | 2.471676258        | 3              | 3.84367   |
| Q62261        | EGMQLISEKPEAVEVKEK                                                        | 1.380105175        | 2              | 2.34095   |
| Q62261        | EIEELQSQAQALSQEGK                                                         | 0.845174027        | 2              | 3.78378   |
| Q62261        | FESLEPEMNNQASR                                                            | 0.956032518        | 2              | 3.90479   |
| Q62261        | HLLGVEDLLQK                                                               | 1.149382479        | 2              | 3.40903   |
| Q62261        | HQILEQAVEDYAETVHQLSK                                                      | 1.21230831         | 3              | 5.53489   |
| Q62261        | ITDLYTDLR                                                                 | 0.993035375        | 2              | 2.43914   |
| Q62261        | LTTLELLEVR                                                                | 1.634455455        | 2              | 2.91883   |
| Q62261        | LVSDGNINSDR                                                               | 1.045564514        | 2              | 3.32429   |
| Q62261        | LVSQDNFGFDLPAVEAATK                                                       | 1.729532727        | 2              | 3.17874   |
| Q62261        | SNAHYNLQNAFNLAEQHLGLTK                                                    | 0.732929365        | 3              | 3.89783   |
| Q62261        | SQNIITDSSSLNAEAIR                                                         | 0.844357128        | 2              | 5.24351   |
| Q62261        | TLETAAQMEGFLNR                                                            | 1.539236376        | 2              | 3.22523   |
| Q62261        | TQILAASYELHK                                                              | 1.746165169        | 2              | 2.57199   |
| Q62261        | TQTAIASEDMPNTLTEAEK                                                       | 1.035471953        | 2              | 5.21925   |
| Q62261        | VIESTQDLGNDLAGVMALQR                                                      | 0.290198843        | 2              | 4.45921   |
| Q62261        | VLDNAIETEK                                                                | 0.87752716         | 2              | 2.47117   |
| <b>Q62376</b> | <b>RU17 U1 small nuclear ribonucleoprotein 70 kDa</b>                     | <b>1.8143047</b>   | <b>0.87975</b> | <b>2</b>  |
| Q62376        | IERRQQEVETELK                                                             | 0.858564838        | 2              | 2.30479   |
| Q62376        | RQQEVETELK                                                                | 0.859458897        | 2              | 2.4842    |
| <b>Q62425</b> | <b>NDUA4 NADH dehydrogenase [ubiquinone] 1 alpha subcomplex subunit 4</b> | <b>2.003773832</b> | <b>0.31381</b> | <b>3</b>  |
| Q62425        | FYSVNVVDSK                                                                | 1.009433768        | 2              | 2.84338   |
| Q62425        | KNNPEPWNK                                                                 | 0.509842603        | 2              | 2.54775   |
| Q62425        | LGPNEQYK                                                                  | 0.80304154         | 1              | 2.02545   |
| <b>Q62446</b> | <b>FKBP3 Peptidyl_prolyl cis_trans isomerase FKBP3</b>                    | <b>2.277516142</b> | <b>0.85647</b> | <b>2</b>  |
| Q62446        | GWDEALLTMSK                                                               | 1.289243876        | 2              | 2.47995   |
| Q62446        | SEETLDEGPPK                                                               | 1.184437876        | 2              | 3.0409    |
| <b>Q62452</b> | <b>UD19 UDP_glucuronosyltransferase 1_9</b>                               | <b>1.618310859</b> | <b>9.9E-20</b> | <b>4</b>  |
| Q62452        | AMEIAEALGR                                                                | 0.686913356        | 2              | 4.1044    |
| Q62452        | GAGVTLNVLEMTADDLENALK                                                     | 0.853070699        | 2              | 5.39017   |
| Q62452        | WLPQNDLLGHPK                                                              | 0.934496824        | 2              | 3.29481   |
| Q62452        | YTGTRPSNLAK                                                               | 0.395560471        | 2              | 2.72087   |
| <b>Q62465</b> | <b>VAT1 Synaptic vesicle membrane protein VAT_1 homolog</b>               | <b>2.043618348</b> | <b>0.99214</b> | <b>8</b>  |
| Q62465        | ACGLNFADLMGR                                                              | 0.920633349        | 2              | 2.90657   |
| Q62465        | CLVLTGFGGYDK                                                              | 1.701237443        | 2              | 2.92495   |
| Q62465        | ENGVTHPIDYHTTDYVDEIKK                                                     | 1.069851635        | 3              | 3.54473   |
| Q62465        | GVDIVMDPLGGSDTAK                                                          | 0.831837145        | 2              | 4.37029   |

|               |                                                                       |                    |                |           |
|---------------|-----------------------------------------------------------------------|--------------------|----------------|-----------|
| Q62465        | IDSVWPFKEK                                                            | 0.927178431        | 2              | 2.77437   |
| Q62465        | TVENVTVFGTASASK                                                       | 0.893757118        | 2              | 3.5227    |
| Q62465        | VLLVPGPEKET                                                           | 0.880512176        | 2              | 2.79258   |
| Q62465        | VVTYGMANLLTGPK                                                        | 1.406950433        | 2              | 3.48565   |
| <b>Q62636</b> | <b>RAP1B Ras_related protein Rap_1b</b>                               | <b>1.884467831</b> | <b>0.959</b>   | <b>4</b>  |
| Q62636        | INVNEIFYDLVR                                                          | 1.407036673        | 2              | 4.0262    |
| Q62636        | LVVLGSGGVGK                                                           | 1.071696406        | 2              | 2.63694   |
| Q62636        | QWSNCAFLESSAK                                                         | 0.922398781        | 2              | 2.54085   |
| Q62636        | VKDTDDVPMILVGNK                                                       | 0.912307854        | 2              | 2.78135   |
| <b>Q62651</b> | <b>ECH1 Delta(3_5)_Delta(2_4)_dienoyl_CoA isomerase_mitochondrial</b> | <b>1.875447284</b> | <b>0.94349</b> | <b>4</b>  |
| Q62651        | HVLHVQLNRPEK                                                          | 0.849116844        | 2              | 3.79476   |
| Q62651        | MMADEALDGLVSR                                                         | 0.96396126         | 2              | 4.37672   |
| Q62651        | RIPEEVSDHNYESIQVTSAQK                                                 | 0.710687731        | 3              | 5.60781   |
| Q62651        | SLVNELTFTAR                                                           | 0.912675943        | 2              | 3.1926    |
| <b>Q62730</b> | <b>DHB2 Estradiol 17_beta_dehydrogenase 2</b>                         | <b>3.067693589</b> | <b>0.00637</b> | <b>7</b>  |
| Q62730        | AVLVTGADSGFGHALAK                                                     | 1.592851381        | 2              | 4.34994   |
| Q62730        | DIQHAICAK                                                             | 1.630642422        | 2              | 2.39238   |
| Q62730        | EIQENYQGQEVHTQK                                                       | 1.505317743        | 2              | 4.50491   |
| Q62730        | EMSNPDITPVLR                                                          | 1.929520449        | 2              | 2.66544   |
| Q62730        | LSVLQMDVTKPEQIK                                                       | 2.662815572        | 2              | 3.69452   |
| Q62730        | LSVLQMDVTKPEQIKDVHSEVAEK                                              | 0.848299619        | 3              | 4.60785   |
| Q62730        | VVTIHPGGFQTNIVGSDSWDK                                                 | 2.253530397        | 2              | 5.81526   |
| <b>Q62736</b> | <b>CALD1 Non_muscle caldesmon</b>                                     | <b>1.880482459</b> | <b>0.99965</b> | <b>14</b> |
| Q62736        | ASGDKEAEGAPQVEAGK                                                     | 1.005235329        | 2              | 4.85141   |
| Q62736        | ASGDKEAEGAPQVEAGKR                                                    | 1.039834176        | 3              | 3.97246   |
| Q62736        | EEIERR                                                                | 1.12384808         | 1              | 1.90469   |
| Q62736        | EFDPITDGSLSVPSR                                                       | 0.947294736        | 2              | 3.67397   |
| Q62736        | GGNLGENQIKDEK                                                         | 0.985113947        | 2              | 3.47579   |
| Q62736        | GSVFSSPSASGTPNK                                                       | 0.910587355        | 2              | 2.30513   |
| Q62736        | KVLEEEEQR                                                             | 0.802032132        | 2              | 2.74377   |
| Q62736        | LEQYTNAIEGTK                                                          | 1.08254647         | 2              | 3.37348   |
| Q62736        | MQNNSAENETAEGEEK                                                      | 0.86798966         | 2              | 4.88519   |
| Q62736        | MQNNSAENETAEGEEKGESR                                                  | 0.698046522        | 3              | 4.62822   |
| Q62736        | MQNNSAENETAEGEEKGESR+Oxidation(0                                      | 0.744400284        |                |           |
| Q62736        | RGETESEEFK                                                            | 1.067033558        | 2              | 3.31606   |
| Q62736        | RRGETESEEFK                                                           | 1.173274678        | 2              | 2.89916   |
| Q62736        | VLEEEEQR                                                              | 0.97808711         | 2              | 2.59837   |
| <b>Q62745</b> | <b>CD81 CD81 antigen</b>                                              | <b>2.960115346</b> | <b>0.99307</b> | <b>2</b>  |
| Q62745        | NSLCPSSNSFTQLLK                                                       | 2.265794189        | 2              | 3.17297   |
| Q62745        | QFYDQALQQAVMDDDANNAK                                                  | 1.515208665        | 2              | 5.03561   |
| <b>Q62769</b> | <b>UN13B Protein unc_13 homolog B</b>                                 | <b>1.913563885</b> | <b>0.6304</b>  | <b>3</b>  |
| Q62769        | DHVMREETRNLTPK                                                        | 0.967827203        | 2              | 2.58778   |
| Q62769        | ILSQRSNDEVAR                                                          | 2.435358166        | 2              | 2.35181   |
| Q62769        | SNDEVAREFVK                                                           | 0.737589231        | 1              | 1.93655   |
| <b>Q62770</b> | <b>UN13C Protein unc_13 homolog C</b>                                 | <b>2.19002236</b>  | <b>0.85094</b> | <b>2</b>  |
| Q62770        | ENFPASNSERLQDLK                                                       | 1.038416748        | 2              | 2.37452   |
| Q62770        | NLSMDETGLTILR                                                         | 5.255989308        | 2              | 2.3763    |
| <b>Q62785</b> | <b>HAP28 28 kDa heat_and acid_stable phosphoprotein</b>               | <b>2.577452436</b> | <b>0.8698</b>  | <b>6</b>  |
| Q62785        | ANEEDQEEGDGASGDPK                                                     | 1.622738806        | 2              | 5.57385   |
| Q62785        | ANEEDQEEGDGASGDPKK                                                    | 0.873612046        | 3              | 3.51232   |
| Q62785        | GVEGLIDIENPNR                                                         | 1.378886574        | 2              | 2.92045   |
| Q62785        | QKANEEDQEEGDGASGDPK                                                   | 0.770050332        | 3              | 4.35504   |
| Q62785        | QKANEEDQEEGDGASGDPKK                                                  | 0.736490674        | 3              | 3.43019   |
| Q62785        | YMKMHLAGKTEQAK                                                        | 0.761325233        | 2              | 2.30757   |
| <b>Q62789</b> | <b>UD2B7 UDP_glucuronosyltransferase 2B7</b>                          | <b>2.16565629</b>  | <b>0.9976</b>  | <b>2</b>  |



|               |                              |                    |          |           |
|---------------|------------------------------|--------------------|----------|-----------|
| Q62789        | IILDELVQR                    | 1.276729119        | 2        | 3.54343   |
| Q62789        | WIPQNDLLGHPK                 | 0.934496824        | 2        | 3.29481   |
| <b>Q62812</b> | <b>MYH9 Myosin_9</b>         | <b>1.994873711</b> | <b>1</b> | <b>68</b> |
| Q62812        | ALEEAMEQK                    | 0.989193116        | 2        | 3.29544   |
| Q62812        | ALELDSNLYR                   | 0.988002441        | 2        | 3.28462   |
| Q62812        | ALEQQVEEMK                   | 1.282773762        | 2        | 3.3023    |
| Q62812        | ALEQQVEEMKTQLEEEDELQATEDAK   | 0.912483908        | 3        | 3.39235   |
| Q62812        | ANLQIDQINTDLNLER             | 2.8392583          | 2        | 5.43453   |
| Q62812        | ASIAALEAK                    | 0.947596252        | 2        | 2.68672   |
| Q62812        | ASREEILAQAK                  | 1.581475288        | 2        | 2.98513   |
| Q62812        | CQYLQAEK                     | 0.807723957        | 1        | 2.33016   |
| Q62812        | DFSALSQLQDTQELLEENR          | 5.731819498        | 3        | 6.72677   |
| Q62812        | DLEAHIDTANK                  | 0.827314007        | 2        | 3.46763   |
| Q62812        | DLGEELEALKTELEDLTDSTAAQQELR  | 0.762772587        | 3        | 4.49373   |
| Q62812        | DLQGRDEQSEEK                 | 0.77269226         | 2        | 2.92571   |
| Q62812        | EEILAQAK                     | 0.913502321        | 1        | 2.37493   |
| Q62812        | EEILAQAKENEK                 | 0.985113947        | 2        | 2.34371   |
| Q62812        | ELEDATETADAMNR               | 0.85183878         | 2        | 4.42332   |
| Q62812        | ELETQISELQEDLESER            | 1.199786267        | 2        | 4.86494   |
| Q62812        | EMEALEDERK                   | 0.743144998        | 2        | 3.32527   |
| Q62812        | HEAMITDLEER                  | 0.770227912        | 2        | 3.27159   |
| Q62812        | HEDELLAK                     | 0.96739347         | 2        | 3.04689   |
| Q62812        | HSQAVEELAEQLEQTK             | 0.917868263        | 2        | 5.02092   |
| Q62812        | HSQAVEELAEQLEQTKR            | 1.191979704        | 3        | 5.65885   |
| Q62812        | IIGLDQVAGMSETALPGAFK         | 1.754958971        | 2        | 5.39499   |
| Q62812        | IMGIPEDQMGLLR                | 1.085134879        | 2        | 2.61722   |
| Q62812        | IRELETQISELQEDLESER          | 1.221215265        | 2        | 5.4351    |
| Q62812        | KEEELQAALAR                  | 1.020120829        | 3        | 3.3629    |
| Q62812        | KKVEAQLQELQVK                | 0.773909096        | 2        | 4.62047   |
| Q62812        | KLEEDQIIMEDQNCK              | 1.059497971        | 2        | 6.00955   |
| Q62812        | KLEGDSTDLSQIAELQAQIAELK      | 1.078900272        | 2        | 5.57834   |
| Q62812        | KQELEEEICHDLER               | 0.981950249        | 2        | 4.73266   |
| Q62812        | KVEAQLQELQVK                 | 1.099964693        | 2        | 4.55015   |
| Q62812        | LDPHLVLDQLR                  | 1.126280217        | 3        | 3.42147   |
| Q62812        | LEEDQIIMEDQNCK               | 0.968003321        | 2        | 4.99045   |
| Q62812        | LEGDSTDLSQIAELQAQIAELK       | 1.139521233        | 3        | 5.22578   |
| Q62812        | LEVNLQAMK                    | 0.887340554        | 2        | 2.63661   |
| Q62812        | LQEMESAVK                    | 1.021655137        | 2        | 2.75338   |
| Q62812        | LQQELDDLLVDLDHQR             | 0.989984035        | 2        | 4.81848   |
| Q62812        | LQVELDSVTGLLNQSDSK           | 1.190839539        | 2        | 5.48712   |
| Q62812        | LTEMETMQSQLMAEK              | 1.267088577        | 2        | 4.97254   |
| Q62812        | MEDGVGCLETAEEAK              | 0.993915268        | 2        | 4.37249   |
| Q62812        | MQQNIQEELEEEESAR             | 1.061920743        | 2        | 6.32211   |
| Q62812        | NAEQFKDQADK                  | 1.050127876        | 2        | 3.45815   |
| Q62812        | NKHEAMITDLEER                | 1.034741567        | 3        | 4.10279   |
| Q62812        | NLPIYSEEIVDMYK               | 1.231791091        | 2        | 3.79672   |
| Q62812        | NMDPLNDNIATLLHQSSDK          | 1.330181768        | 2        | 4.94688   |
| Q62812        | NTDQASMPDNATAAQK             | 4.566497037        | 2        | 5.31293   |
| Q62812        | NTDQASMPDNATAAQK+Oxidation(6 | 1.238752571        |          |           |
| Q62812        | QAQQRDELADEIANSSGK           | 0.977738302        | 3        | 4.19502   |
| Q62812        | QIATLHAQVTDMMK               | 0.587916358        | 2        | 2.38453   |
| Q62812        | QLEEAEEEAQR                  | 1.000527556        | 2        | 3.8772    |
| Q62812        | QSVSNLEK                     | 0.924305753        | 2        | 2.47082   |
| Q62812        | QTLENERGELANEVK              | 0.977381671        | 2        | 3.38568   |
| Q62812        | RGDMPFVVTR                   | 0.964542803        | 2        | 2.96735   |
| Q62812        | RKLEGDSTDLSQIAELQAQIAELK     | 1.0110923          | 3        | 5.75843   |
| Q62812        | RQLEEAEEEAQR                 | 0.811600234        | 2        | 4.60045   |

|               |                                                        |                    |                |           |
|---------------|--------------------------------------------------------|--------------------|----------------|-----------|
| Q62812        | SMEAEMIQLEELAAER                                       | 1.060594444        | 3              | 4.33539   |
| Q62812        | SMEAEMIQLEELAAERAKR+Oxidation(1)                       | 1.461435341        |                |           |
| Q62812        | SMEAEMIQLEELAAERAKR+Oxidation(1)Oxidation(5)           | 1.087249242        |                |           |
| Q62812        | TDLLEPYNK                                              | 1.175258398        | 2              | 3.41927   |
| Q62812        | TELEDTLSTAAQQELR                                       | 1.007197758        | 2              | 5.33869   |
| Q62812        | TEMEDLMSSK                                             | 1.187421297        | 2              | 2.58969   |
| Q62812        | THEAQIQEMR                                             | 0.985723044        | 3              | 3.43686   |
| Q62812        | TQLEEELEDELQATEDAK                                     | 1.068359843        | 2              | 6.59084   |
| Q62812        | VAEFTTDLMEEEEK                                         | 1.182722775        | 2              | 4.48055   |
| Q62812        | VEAQLQELQVK                                            | 0.910721456        | 2              | 3.48367   |
| Q62812        | VEDMAELTCLNEASVLHNLK                                   | 1.183293416        | 2              | 4.49972   |
| Q62812        | VISGVQLGNVFK                                           | 1.414078416        | 2              | 3.75795   |
| Q62812        | VSHLLGINVDFTR                                          | 1.521942866        | 2              | 3.8123    |
| Q62812        | YEILTPNSIPK                                            | 0.873363609        | 2              | 3.13421   |
| <b>Q62824</b> | <b>EXOC4 Exocyst complex component 4</b>               | <b>1.764829338</b> | <b>0.44752</b> | <b>2</b>  |
| Q62824        | EDLDCDPEENSTLFMGILIQGLAR                               | 1.257125426        | 2              | 2.31916   |
| Q62824        | SQTGVGDQTTQNTR                                         | 0.773059286        | 2              | 3.11758   |
| <b>Q62826</b> | <b>HNRPM Heterogeneous nuclear ribonucleoprotein M</b> | <b>2.088616119</b> | <b>0.11595</b> | <b>7</b>  |
| Q62826        | ADILEDKDGK                                             | 1.09752484         | 2              | 2.79058   |
| Q62826        | AFITNIPFDVK                                            | 1.245961453        | 2              | 3.24089   |
| Q62826        | GIGMGNLGPAGMGMEGIGFGINK                                | 1.95892273         | 2              | 3.91876   |
| Q62826        | GNFGGSFAGSFGGAGGHAPGVAR                                | 1.120550374        | 2              | 5.02905   |
| Q62826        | INEILSNALK                                             | 1.412722369        | 2              | 2.61269   |
| Q62826        | MGPAMGPALGAGIER                                        | 1.009852263        | 2              | 2.75543   |
| Q62826        | MGPVMDRMTGLER+Oxidation(0)Oxidation(4)Oxidation(7)     | 1.648351881        |                |           |
| <b>Q62868</b> | <b>ROCK2 Rho-associated protein kinase 2</b>           | <b>1.912592905</b> | <b>0.60287</b> | <b>2</b>  |
| Q62868        | DEEISAAIK                                              | 2.561736724        | 1              | 1.90037   |
| Q62868        | QENHLMEMKMNLEK+Oxidation(6)                            | 0.896899839        |                |           |
| <b>Q62871</b> | <b>DC112 Cytoplasmic dynein 1 intermediate chain 2</b> | <b>2.160540222</b> | <b>0.48642</b> | <b>2</b>  |
| Q62871        | ADAEAAAATR                                             | 1.404627666        | 2              | 3.17089   |
| Q62871        | SVSTPSEAGSQDSGDGAVGSR                                  | 0.671966099        | 2              | 5.21896   |
| <b>Q62902</b> | <b>LMAN1 Protein ERGIC_53</b>                          | <b>2.153325302</b> | <b>1</b>       | <b>7</b>  |
| Q62902        | GAGTPGQPQVSSQQLDVTVVR                                  | 0.977337285        | 2              | 4.15028   |
| Q62902        | GHPDLQGQPADDIFESIGDR                                   | 1.121558726        | 2              | 5.01564   |
| Q62902        | LVSGVQHPGSAGVYETTQHFMDIK                               | 1.119285221        | 3              | 3.42386   |
| Q62902        | NNPAIVVVGNNQINVDHQNDGATQALASCQR                        | 1.677012865        | 3              | 6.36976   |
| Q62902        | RGAGTPGQPQVSSQQLDVTVVR                                 | 0.951364962        | 3              | 4.45438   |
| Q62902        | YQEEFEHFQQLDK                                          | 1.102088763        | 2              | 5.31401   |
| Q62902        | YVSSLTEEISR                                            | 1.037189593        | 2              | 3.04648   |
| <b>Q62904</b> | <b>DHB7 3_keto_steroid reductase</b>                   | <b>2.053374634</b> | <b>0.9843</b>  | <b>3</b>  |
| Q62904        | MDVDEDTAEK                                             | 1.935753572        | 2              | 2.38957   |
| Q62904        | YATDLLNVALNR                                           | 0.983949831        | 2              | 2.57317   |
| Q62904        | YLSGTTGLGTNYVK                                         | 1.012864262        | 2              | 2.98828   |
| <b>Q62967</b> | <b>MVD1 Diphosphomevalonate decarboxylase</b>          | <b>1.867929935</b> | <b>0.59295</b> | <b>2</b>  |
| Q62967        | GLQVAPVLLSDELK                                         | 0.94135554         | 2              | 3.74149   |
| Q62967        | VYGVEDLSEVAR                                           | 0.694944735        | 2              | 3.42081   |
| <b>Q62991</b> | <b>SCFD1 Sec1 family domain-containing protein 1</b>   | <b>2.76044977</b>  | <b>0.09945</b> | <b>3</b>  |
| Q62991        | ALTDAGCNLSPLQYIK                                       | 2.568882017        | 2              | 2.90419   |
| Q62991        | FGQDIISPLSVK                                           | 1.4816759          | 2              | 2.36116   |
| Q62991        | SLLDVISDPDAGTPEDK                                      | 1.378847654        | 2              | 2.86206   |
| <b>Q63041</b> | <b>A1M Alpha_1_macroglobulin</b>                       | <b>2.40015939</b>  | <b>0.99964</b> | <b>12</b> |
| Q63041        | AEDITHNGIVYTPK                                         | 0.979912588        | 2              | 3.66851   |
| Q63041        | AEQGAYLGPLPYK                                          | 0.834197494        | 2              | 3.23818   |
| Q63041        | AESPVFVQTDKPIYKPGQTVK                                  | 0.929469767        | 3              | 4.01247   |

|               |                                                                   |                    |                |           |
|---------------|-------------------------------------------------------------------|--------------------|----------------|-----------|
| Q63041        | DTVVKPVIVEPEGIEK                                                  | 1.005208923        | 2              | 3.75448   |
| Q63041        | GSIFNSGSHVLPLEQGK                                                 | 0.894015108        | 2              | 4.07549   |
| Q63041        | KLQDQSNIQR                                                        | 0.911716734        | 2              | 2.57123   |
| Q63041        | LIVYTILPNEELIADVQK                                                | 1.298831988        | 2              | 2.99863   |
| Q63041        | LQDQSNIQR                                                         | 0.883704273        | 2              | 2.9837    |
| Q63041        | QDLNDNDAYSVFQSIGLK                                                | 1.479655311        | 2              | 2.6273    |
| Q63041        | VNTLPLNFDK                                                        | 0.923838994        | 2              | 2.74901   |
| Q63041        | YNILPEAEGEAPFTLK                                                  | 1.125733537        | 2              | 4.90899   |
| Q63041        | YVVLVPSELYAGVPEK                                                  | 1.156371963        | 2              | 3.00918   |
| <b>Q63060</b> | <b>GLPK Glycerol kinase</b>                                       | <b>2.857250147</b> | <b>3.7E-08</b> | <b>12</b> |
| Q63060        | AGALEGVPISGCLGDQSAALVGMCFQDQAK                                    | 1.547635139        | 3              | 4.5678    |
| Q63060        | AVLGPLVGAVDQGTSSSTR                                               | 1.516277974        | 2              | 5.19401   |
| Q63060        | CVFSEHLLTTVAYK                                                    | 1.010448524        | 2              | 4.28195   |
| Q63060        | DCGIPLSHLQVDGGMTSNK                                               | 1.214675689        | 2              | 4.43673   |
| Q63060        | EILQSVYECIEK                                                      | 1.094233711        | 2              | 3.41925   |
| Q63060        | FEPQINAESEIR                                                      | 1.213658527        | 2              | 3.64244   |
| Q63060        | KVQEAveenr                                                        | 1.001745986        | 2              | 3.35223   |
| Q63060        | LGQLNIDISNIK                                                      | 1.923197141        | 2              | 3.23066   |
| Q63060        | NTYGTGCFLLCNTGHK                                                  | 0.9631205          | 2              | 3.81262   |
| Q63060        | SSSEIYGLMK                                                        | 1.381369423        | 2              | 2.51534   |
| Q63060        | TAELLSHHQVEIK                                                     | 1.468547941        | 2              | 3.45738   |
| Q63060        | VQEAveenr                                                         | 1.687592409        | 2              | 3.24487   |
| <b>Q63081</b> | <b>PDIA6 Protein disulfide_isomerase A6</b>                       | <b>2.268764598</b> | <b>1</b>       | <b>11</b> |
| Q63081        | ALDLFSDNAPPELLEIINEDIAK                                           | 1.113831323        | 3              | 5.12988   |
| Q63081        | GESPVDYDGGR                                                       | 2.169532188        | 2              | 2.85702   |
| Q63081        | GSFSEQGINEFLR                                                     | 0.916245659        | 2              | 4.19658   |
| Q63081        | GSTAPVGGGSPFNITPR                                                 | 0.979659608        | 2              | 4.87822   |
| Q63081        | HQSLGGQYGVQGFPTIK                                                 | 1.291268352        | 2              | 5.07805   |
| Q63081        | KTCEEHQLCVVAVLPHILDTGATGR                                         | 0.992541569        | 3              | 5.23477   |
| Q63081        | NLEPEWAAAATEVK                                                    | 1.076174544        | 2              | 4.02494   |
| Q63081        | NSYLEVLLK                                                         | 1.233320588        | 2              | 2.97378   |
| Q63081        | TCEEHQLCVVAVLPHILDTGATGR                                          | 1.006889871        | 3              | 5.02229   |
| Q63081        | TGEAIVDAALSALR                                                    | 1.08656067         | 3              | 4.87508   |
| Q63081        | VGAVNADKHQSLGGQYGVQGFPTIK                                         | 0.762758045        | 3              | 4.60694   |
| <b>Q63083</b> | <b>NUCB1 Nucleobindin_1</b>                                       | <b>2.023387524</b> | <b>0.82712</b> | <b>3</b>  |
| Q63083        | LSQETEALGR                                                        | 1.082452234        | 2              | 2.81855   |
| Q63083        | VNVPGSQAQLK                                                       | 0.920734748        | 2              | 2.44025   |
| Q63083        | YLQEVINVLETGDHFR                                                  | 1.109248858        | 3              | 4.11414   |
| <b>Q63108</b> | <b>EST3 Liver carboxylesterase 3</b>                              | <b>1.985654492</b> | <b>0.77409</b> | <b>4</b>  |
| Q63108        | GGTSKEEINLSK                                                      | 0.65335184         | 2              | 3.42736   |
| Q63108        | LDPMTATSLK                                                        | 1.099866339        | 2              | 2.50753   |
| Q63108        | QKTEEELETTLK                                                      | 0.959231264        | 2              | 3.50025   |
| Q63108        | SSFLLNLPEEAIPVAVEK                                                | 1.236193253        | 2              | 4.83555   |
| <b>Q63120</b> | <b>MRP2 Canalicular multispecific organic anion transporter 1</b> | <b>2.142372553</b> | <b>0.3711</b>  | <b>7</b>  |
| Q63120        | ACALLPDLEILPGGDMAEIGEK                                            | 1.67805807         | 2              | 4.82756   |
| Q63120        | HGEIQFNYYQVR                                                      | 1.407499725        | 2              | 2.72902   |
| Q63120        | IVEYGSPEELLSNR                                                    | 1.541317943        | 2              | 3.31796   |
| Q63120        | QSQSQDVLVLEAK                                                     | 1.276114324        | 2              | 2.56377   |
| Q63120        | YFAWEPSFQEQVQGIR                                                  | 1.412294536        | 2              | 3.93459   |
| Q63120        | YLGDDLDTSAIR                                                      | 0.333032868        | 2              | 2.36148   |
| Q63120        | YRPELDLVLK                                                        | 1.248383069        | 3              | 3.66308   |
| <b>Q63150</b> | <b>DPYS Dihydropyrimidinase</b>                                   | <b>2.067841988</b> | <b>0.9835</b>  | <b>10</b> |
| Q63150        | ALGKDDFTK                                                         | 0.972508326        | 2              | 2.55283   |
| Q63150        | DQTCTPIPVKR                                                       | 1.545377451        | 2              | 2.49283   |
| Q63150        | EIGAIAQVHAENGDLIAEGAK                                             | 1.357285824        | 2              | 4.999     |
| Q63150        | FVAVTSTNAAK                                                       | 1.0205137          | 2              | 3.17668   |

|               |                                                           |                    |                |           |
|---------------|-----------------------------------------------------------|--------------------|----------------|-----------|
| Q63150        | GSSLIEAFETWR                                              | 1.143238801        | 2              | 3.5411    |
| Q63150        | IavgSDADIVWDPeATR                                         | 1.684892336        | 2              | 3.26214   |
| Q63150        | MLALGITGPEGHELCPeAVEAEATLR                                | 1.164430759        | 3              | 3.74974   |
| Q63150        | VVNDDFSQVADVLVEDGVVR                                      | 1.049433896        | 2              | 5.95564   |
| Q63150        | VVYEAGVFDVTAGHGK                                          | 1.192754549        | 2              | 4.20199   |
| Q63150        | VVYGEPIAAGLGTDTQYWNK                                      | 1.042261866        | 2              | 5.8231    |
| <b>Q63228</b> | <b>GMFB Glia maturation factor beta</b>                   | <b>3.134895284</b> | <b>0.37209</b> | <b>2</b>  |
| Q63228        | LVVLDEELEGVSPDELKDELPER                                   | 1.649165044        | 3              | 3.70804   |
| Q63228        | NTEDLTEEWR                                                | 1.588419151        | 2              | 2.59946   |
| <b>Q63269</b> | <b>ITPR3 Inositol 1_4_5_trisphosphate receptor type 3</b> | <b>1.727629457</b> | <b>5.5E-05</b> | <b>2</b>  |
| Q63269        | LLDGGNTEIQK                                               | 0.766404498        | 1              | 2.45957   |
| Q63269        | QKLMRDENILK+Oxidation(3                                   | 1.09185945         |                |           |
| <b>Q63270</b> | <b>ACOC Cytoplasmic aconitate hydratase</b>               | <b>2.184991269</b> | <b>0.79162</b> | <b>19</b> |
| Q63270        | AVEAGLNKPYVK                                              | 1.044087098        | 2              | 2.96859   |
| Q63270        | AVLAESYER                                                 | 0.894544737        | 2              | 2.6416    |
| Q63270        | DFSDSSQDPDFTQVVLDLK                                       | 1.596364282        | 2              | 3.66532   |
| Q63270        | FVEFFGPGVAQLSIADR                                         | 1.442125438        | 2              | 5.29679   |
| Q63270        | GFQVAPDHHNDHK                                             | 0.721915343        | 2              | 3.41537   |
| Q63270        | IDFEKEPLGVNAQQQVFLK                                       | 1.122178626        | 3              | 6.12805   |
| Q63270        | IIPPGSGIIHQVNLEYLAR                                       | 1.221034535        | 2              | 2.52067   |
| Q63270        | KNDIENILNWSIMQHK                                          | 1.149186879        | 3              | 4.5379    |
| Q63270        | NCDEFLVK                                                  | 1.033148118        | 2              | 2.32397   |
| Q63270        | NDIENILNWSIMQHK                                           | 1.169607598        | 2              | 2.51395   |
| Q63270        | NQDLEFER                                                  | 0.885481301        | 1              | 2.69866   |
| Q63270        | QAPQTVHLPSGETLDVFAAER                                     | 0.985761118        | 3              | 3.62427   |
| Q63270        | SIEVFPKPAR                                                | 1.032470637        | 2              | 2.54092   |
| Q63270        | SIVDAYVLLNLGDSVTTDHISPAgnIAR                              | 1.431711792        | 3              | 4.67185   |
| Q63270        | SPPFFESLTLDLQPPK                                          | 1.181863882        | 3              | 4.47541   |
| Q63270        | SWNALAAPSEK                                               | 0.990276178        | 2              | 2.60667   |
| Q63270        | TSLSPGSGVVYYLR                                            | 1.478823756        | 2              | 3.54827   |
| Q63270        | VILQDFTGVPavVDFAAMR                                       | 0.935414851        | 2              | 4.77858   |
| Q63270        | YQQAGLPLIVLAGK                                            | 1.099290303        | 2              | 3.55306   |
| <b>Q63276</b> | <b>BAAT Bile acid_CoA:amino acid N_acyltransferase</b>    | <b>1.888916281</b> | <b>0.06159</b> | <b>18</b> |
| Q63276        | AHGHLFVVGEDDKNLNSK                                        | 1.287830918        | 2              | 6.07864   |
| Q63276        | ASEVGEVDLER                                               | 0.993709788        | 2              | 4.03287   |
| Q63276        | DDKGNLFNSQAFYR                                            | 0.905164232        | 2              | 3.3099    |
| Q63276        | GNLFNsqAFYR                                               | 0.889119072        | 2              | 2.67858   |
| Q63276        | LCHPYFPVEGK                                               | 1.176082798        | 3              | 3.5189    |
| Q63276        | LTAVPLSALVDEPVHIR                                         | 1.064203352        | 2              | 3.94814   |
| Q63276        | MPFVIPSINWGGEVIPHAAAQEHswK                                | 1.150839416        | 4              | 4.63693   |
| Q63276        | NWTLLSYPGAGHLIEPPYPLCSASR                                 | 1.35538607         | 3              | 4.23705   |
| Q63276        | QHLNPGFNSQL                                               | 0.968958416        | 2              | 3.50833   |
| Q63276        | QITATVLINGPNFVSSNPHVYR                                    | 1.342583944        | 3              | 4.77909   |
| Q63276        | TFEETADK                                                  | 1.380879552        | 1              | 1.92101   |
| Q63276        | TFEETADKDSK                                               | 0.832712347        | 2              | 3.79436   |
| Q63276        | VDLEYFEEGVEFLLR                                           | 0.866373668        | 2              | 4.3345    |
| Q63276        | VFQPTPCSEEFVTTNALGLVEFYR                                  | 1.212840947        | 3              | 5.15794   |
| Q63276        | VISSLSLILER                                               | 0.638362309        | 2              | 4.49398   |
| Q63276        | VTGLTPFQVVCCLQASLK                                        | 1.113791869        | 3              | 5.2183    |
| Q63276        | WYVAPGVTR                                                 | 0.953921223        | 1              | 2.12347   |
| Q63276        | YCFPIEK                                                   | 1.034139153        | 2              | 2.57902   |
| <b>Q63342</b> | <b>M2GD Dimethylglycine dehydrogenase_mitochondrial</b>   | <b>2.294041079</b> | <b>9.9E-20</b> | <b>26</b> |
| Q63342        | ADIINIVNGPITySPDILPMVGP HQGVR                             | 1.264348375        | 3              | 6.02255   |
| Q63342        | AWGSEMNCDTNPLEAGLDYFIK                                    | 1.176767435        | 2              | 4.73007   |
| Q63342        | DGLLFGPYESQEK                                             | 1.169244636        | 2              | 2.71546   |

|               |                                                                           |                    |                |           |
|---------------|---------------------------------------------------------------------------|--------------------|----------------|-----------|
| Q63342        | EGQESPPSPPEWK                                                             | 1.457708629        | 2              | 2.68183   |
| Q63342        | GGYDVEIR                                                                  | 1.13834398         | 2              | 2.63564   |
| Q63342        | GQDSTQLLDHLCANVIPK                                                        | 1.269877768        | 2              | 4.10056   |
| Q63342        | IHELFPLLNMDK                                                              | 1.316473875        | 2              | 2.75267   |
| Q63342        | IHYDSIK                                                                   | 1.058375529        | 1              | 2.36116   |
| Q63342        | IMNAGQEEGIDNFGTYALNALR                                                    | 0.682561131        | 2              | 4.48295   |
| Q63342        | ISDIPVTAIR                                                                | 1.148630268        | 2              | 3.336     |
| Q63342        | ITEHVEAAMEMVPVLK                                                          | 1.382941657        | 2              | 4.64274   |
| Q63342        | KADIINIVNGPITYSPDILPMVGP HQGVR                                            | 1.314796469        | 3              | 5.93332   |
| Q63342        | LEEETGQVVGFGHQPGSIR                                                       | 1.087183623        | 2              | 4.83796   |
| Q63342        | LNKPADFTGK                                                                | 1.382520307        | 2              | 3.01995   |
| Q63342        | LTSEDLSDDVFK                                                              | 1.321848851        | 2              | 4.03729   |
| Q63342        | NITDELGVLGVAGPYAR                                                         | 1.402620492        | 2              | 4.77046   |
| Q63342        | NYPATIIQEPLVLEPTR                                                         | 1.378842974        | 2              | 4.47272   |
| Q63342        | REDSAALYER                                                                | 0.170099614        | 2              | 2.65566   |
| Q63342        | TNWHATEQYIIIEPEK                                                          | 0.98007806         | 2              | 3.71256   |
| Q63342        | VGFTNISHMLTPR                                                             | 1.066938636        | 2              | 3.11369   |
| Q63342        | VGVIDLSPFGK                                                               | 1.182603622        | 2              | 3.52946   |
| Q63342        | VIGNTTSGSYSYSIQK                                                          | 1.197946515        | 2              | 4.33565   |
| Q63342        | VYAELTVSHQSPGEFLITGSGSELHDLR                                              | 1.72406648         | 3              | 4.30877   |
| Q63342        | WIEEA AVR                                                                 | 1.46642413         | 2              | 2.8172    |
| Q63342        | WTTTQYTEAK                                                                | 1.097134636        | 2              | 2.72726   |
| Q63342        | YLSDWILHGEPFDLIELDPNR                                                     | 1.10599143         | 2              | 4.49836   |
| <b>Q63347</b> | <b>PRS7 26S protease regulatory subunit 7</b>                             | <b>2.424593116</b> | <b>0.37966</b> | <b>7</b>  |
| Q63347        | ALDEGDIALLK                                                               | 1.358652689        | 2              | 2.819     |
| Q63347        | FDDGAGGDNEVQR                                                             | 1.102579304        | 2              | 4.28376   |
| Q63347        | FVVDLSQVAPTDIIEGMR                                                        | 1.099272255        | 2              | 3.72301   |
| Q63347        | IINADSEDPK                                                                | 0.885593354        | 2              | 3.20563   |
| Q63347        | QTLQSEQPLQVAR                                                             | 1.314560965        | 2              | 3.67158   |
| Q63347        | QVEDDIQQLLK                                                               | 1.317008673        | 2              | 2.98864   |
| Q63347        | TMLELINQLDGF DPR                                                          | 1.123029671        | 2              | 3.01654   |
| <b>Q63362</b> | <b>NDUA5 NADH dehydrogenase [ubiquinone] 1 alpha subcomplex subunit 5</b> | <b>2.000948407</b> | <b>0.99964</b> | <b>4</b>  |
| Q63362        | KLENLLQGGEVEEVILQAEK                                                      | 1.121007499        | 2              | 5.70241   |
| Q63362        | KYTEQITSEK                                                                | 0.94686162         | 2              | 2.72064   |
| Q63362        | TTGLVGLAVCDTPHER                                                          | 1.005228036        | 2              | 4.25738   |
| Q63362        | YTEQITSEK                                                                 | 0.830475674        | 1              | 2.32351   |
| <b>Q63413</b> | <b>DX39B Spliceosome RNA helicase Ddx39b</b>                              | <b>2.437055129</b> | <b>0.54636</b> | <b>2</b>  |
| Q63413        | CIALAQLLVEQNFP AIAHR                                                      | 1.426728723        | 3              | 3.39219   |
| Q63413        | NCPHIVGTPGR                                                               | 1.206066885        | 2              | 2.98147   |
| <b>Q63429</b> | <b>UBC Polyubiquitin_C</b>                                                | <b>2.053307173</b> | <b>0.99646</b> | <b>3</b>  |
| Q63429        | ESTLHLVLR                                                                 | 0.919688195        | 2              | 2.50406   |
| Q63429        | TITLEVPSDTIENVK                                                           | 1.039521865        | 2              | 4.85392   |
| Q63429        | TLSDYNIQK                                                                 | 0.904528467        | 2              | 2.68568   |
| <b>Q63448</b> | <b>ACOX3 Peroxisomal acyl_coenzyme A oxidase 3</b>                        | <b>2.178977941</b> | <b>0.36583</b> | <b>10</b> |
| Q63448        | ADWLDSEAPLAAYR                                                            | 1.625841358        | 2              | 4.32425   |
| Q63448        | EIHALASAGKPLASWTAQR                                                       | 0.990243869        | 2              | 4.57415   |
| Q63448        | GGYISGEQTGK                                                               | 0.837845291        | 2              | 3.01199   |
| Q63448        | LGASLGSLSGR                                                               | 1.014798029        | 2              | 2.7108    |
| Q63448        | NLWAAVLQQSGVLER                                                           | 1.08151395         | 2              | 4.51784   |
| Q63448        | QFGPTDKKEIPVLEYP LQQWR                                                    | 0.975103342        | 3              | 4.51586   |
| Q63448        | TIFLDLIELQR                                                               | 1.165922303        | 2              | 2.51954   |
| Q63448        | TIFSTLENDPLFARPF GADLPLEK                                                 | 0.927124164        | 3              | 4.50697   |
| Q63448        | TTAHYDPATQEFILHSPDFEAAK                                                   | 0.840228188        | 3              | 4.46822   |
| Q63448        | TVNFLEAYPGILGQK                                                           | 1.164498541        | 2              | 5.11667   |
| <b>Q63507</b> | <b>RL14 60S ribosomal protein L14</b>                                     | <b>2.129411753</b> | <b>0.00094</b> | <b>3</b>  |
| Q63507        | CMQLTDFILK                                                                | 0.800727679        | 2              | 2.75616   |

|               |                                                               |                    |                |           |
|---------------|---------------------------------------------------------------|--------------------|----------------|-----------|
| Q63507        | LVAIVDVIDQNR                                                  | 1.533289871        | 2              | 4.12323   |
| Q63507        | RFVEVGR                                                       | 0.965553681        | 2              | 2.35885   |
| <b>Q63524</b> | <b>TMED2 Transmembrane emp24 domain_containing protein 2</b>  | <b>1.941178988</b> | <b>0.99735</b> | <b>4</b>  |
| Q63524        | GQDMETEAHQNKLEEMINELAVAMTAVK                                  | 0.912441204        | 3              | 4.56427   |
| Q63524        | HEQEYMEVR                                                     | 1.23432433         | 2              | 3.43714   |
| Q63524        | HEQEYMEVR+Oxidation(5                                         | 1.043695214        |                |           |
| Q63524        | LEEMINELAVAMTAVK                                              | 0.942743418        | 2              | 3.54257   |
| <b>Q63525</b> | <b>NUDC Nuclear migration protein nudC</b>                    | <b>2.087871966</b> | <b>0.61046</b> | <b>4</b>  |
| Q63525        | GQAPVIDGELYNEVK                                               | 0.958191918        | 2              | 3.61122   |
| Q63525        | LVTSDPEINTK                                                   | 1.066501884        | 2              | 2.43712   |
| Q63525        | VEESSWLIEDGK                                                  | 1.282107543        | 2              | 2.41713   |
| Q63525        | WTQTLSELDLAVPFR                                               | 1.296684256        | 2              | 2.8311    |
| <b>Q63569</b> | <b>PRS6A 26S protease regulatory subunit 6A</b>               | <b>2.015476502</b> | <b>0.98018</b> | <b>6</b>  |
| Q63569        | AMEVDERPTEQYSIDIGGLDK                                         | 1.045921641        | 3              | 5.32753   |
| Q63569        | CTDDFNGAQCK                                                   | 1.189765396        | 2              | 3.26109   |
| Q63569        | MNVSPDVNYEELAR                                                | 1.046377863        | 2              | 3.57539   |
| Q63569        | QTYFLPVIGLVDAEK                                               | 1.13263591         | 2              | 2.46088   |
| Q63569        | TMLELLNQLDGFQPNQVK                                            | 0.844463591        | 2              | 3.92939   |
| Q63569        | VDILDPALLR                                                    | 1.19959476         | 2              | 2.91082   |
| <b>Q63570</b> | <b>PRS6B 26S protease regulatory subunit 6B</b>               | <b>1.80379254</b>  | <b>0.81521</b> | <b>4</b>  |
| Q63570        | FDAQTGADR                                                     | 0.929926406        | 2              | 2.73814   |
| Q63570        | IQDEIPALSVSRPQTGLSFLGPEPEDLEDLYSR                             | 0.965465237        | 3              | 5.80839   |
| Q63570        | KDEQEHEFYK                                                    | 1.179455149        | 2              | 3.42068   |
| Q63570        | RFDAQTGADR                                                    | 0.783923056        | 2              | 3.01869   |
| <b>Q63584</b> | <b>TMEDA Transmembrane emp24 domain_containing protein 10</b> | <b>1.964659799</b> | <b>0.89222</b> | <b>4</b>  |
| Q63584        | ITDSAGHILYAK                                                  | 1.250637533        | 2              | 3.73348   |
| Q63584        | LEDLSESIVNDFAYMK                                              | 1.225859345        | 2              | 3.58185   |
| Q63584        | NYEEIAK                                                       | 0.971646157        | 1              | 2.40973   |
| Q63584        | RLEDLSESIVNDFAYMK                                             | 1.065733433        | 2              | 3.66917   |
| <b>Q63598</b> | <b>PLST Plastin_3</b>                                         | <b>1.890785655</b> | <b>0.9905</b>  | <b>13</b> |
| Q63598        | AESMLQQADK                                                    | 1.053961484        | 2              | 3.42438   |
| Q63598        | ATDDIIVNWVNGTLSEAGK                                           | 0.973709932        | 2              | 5.11268   |
| Q63598        | AVGDGIVLCK                                                    | 1.550252208        | 2              | 2.44519   |
| Q63598        | EGICALGGTSELSEGTQHSYSEEEK                                     | 0.930456723        | 3              | 3.47384   |
| Q63598        | HVIPMNPNTDDLK                                                 | 0.911445702        | 2              | 3.03868   |
| Q63598        | IDINMSGFNETDDLKR                                              | 0.838104395        | 2              | 4.46001   |
| Q63598        | INNFSADIK                                                     | 1.196481324        | 2              | 2.39374   |
| Q63598        | KLENCNYAVELGK                                                 | 0.797978314        | 2              | 3.73083   |
| Q63598        | NEALAALLR                                                     | 1.271829875        | 2              | 2.61155   |
| Q63598        | TISSSLAVVDLIDAIQPGCINYLK                                      | 0.854465786        | 3              | 3.56522   |
| Q63598        | VYALPEDLVEVKPK                                                | 1.060417719        | 2              | 3.09043   |
| Q63598        | YPALTKPENQDIDWTLLEGETR                                        | 1.083956644        | 3              | 5.3709    |
| Q63598        | YTLNVMEDLGEGQK                                                | 1.055751791        | 2              | 3.6831    |
| <b>Q63610</b> | <b>TPM3 Tropomyosin alpha_3 chain</b>                         | <b>1.924973522</b> | <b>1</b>       | <b>8</b>  |
| Q63610        | IQVLQQADDAEER                                                 | 0.976962227        | 2              | 5.12508   |
| Q63610        | KIQVLQQADDAEER                                                | 0.944833203        | 2              | 5.43538   |
| Q63610        | KLVIIEGDLER                                                   | 1.010294163        | 2              | 3.22849   |
| Q63610        | LEKTIDLEDKLK                                                  | 2.700794785        | 2              | 2.71825   |
| Q63610        | LVIIIEGDLER                                                   | 1.128821291        | 2              | 2.94764   |
| Q63610        | MELQEIQLK                                                     | 1.016179377        | 2              | 3.1234    |
| Q63610        | TIDLEDKLK                                                     | 0.944939887        | 2              | 2.6964    |
| Q63610        | YSQKEDKYEEIK                                                  | 0.928405693        | 2              | 4.94989   |
| <b>Q63617</b> | <b>HYOU1 Hypoxia up_regulated protein 1</b>                   | <b>2.130744038</b> | <b>0.99949</b> | <b>15</b> |
| Q63617        | AANSLEAFIFETQDK                                               | 1.454181154        | 2              | 2.56057   |
| Q63617        | DAVITVPAFFNQAER                                               | 0.8734798          | 2              | 2.80569   |

|               |                                                     |                    |                |           |
|---------------|-----------------------------------------------------|--------------------|----------------|-----------|
| Q63617        | EGETPDEKESGDKSEAQKPNEK                              | 0.826976703        | 3              | 3.99105   |
| Q63617        | FLGD5AAGMAIK                                        | 1.135098069        | 2              | 2.52277   |
| Q63617        | GQAGPEGVPPAPEEEKK                                   | 1.014176592        | 2              | 3.41887   |
| Q63617        | LIPEMDQIFTDVEMTTLEK                                 | 0.954895951        | 2              | 3.35289   |
| Q63617        | LYQPEYQEVSTEEQR                                     | 1.034320786        | 2              | 5.26585   |
| Q63617        | NINADEAAAMGAVYQAAALSK                               | 1.199334871        | 2              | 5.32702   |
| Q63617        | SLAEDFAEQPIK                                        | 0.859807065        | 2              | 2.98217   |
| Q63617        | SLAEDFAEQPIKDAVITVPAFFNQAER                         | 1.454889147        | 3              | 3.43942   |
| Q63617        | TLGGLEMEELR                                         | 1.201491571        | 2              | 2.9743    |
| Q63617        | TVLSANADHMAQIEGLMDDVDFK                             | 1.249519767        | 3              | 3.88961   |
| Q63617        | VEFEELCADLDFR                                       | 1.324829248        | 2              | 3.42113   |
| Q63617        | VESVFETLVEDSPPEESTLTK                               | 0.98815533         | 2              | 4.01553   |
| Q63617        | VLQLINDNTATALSYGVFR                                 | 1.187075904        | 2              | 4.68982   |
| <b>Q63692</b> | <b>CDC37 Hsp90 co_chaperone Cdc37</b>               | <b>2.28795011</b>  | <b>0.33288</b> | <b>2</b>  |
| Q63692        | EGEEAGPGDPLLEAVPK                                   | 1.187057452        | 2              | 3.32555   |
| Q63692        | LPGGLDPVEVYESLPEELQK                                | 1.388680275        | 2              | 3.00766   |
| <b>Q63716</b> | <b>PRDX1 Peroxiredoxin_1</b>                        | <b>2.094391253</b> | <b>0.2725</b>  | <b>15</b> |
| Q63716        | ADEGISFR                                            | 0.910491813        | 2              | 3.07918   |
| Q63716        | ATAVMPDGQFK                                         | 1.055812041        | 2              | 2.87378   |
| Q63716        | GLFIIDDKGILR                                        | 1.164359011        | 2              | 2.86201   |
| Q63716        | HGEVCPAGWKPGSDTIKPDVVK                              | 1.004990345        | 4              | 5.82243   |
| Q63716        | IGHPAPSK                                            | 1.495097415        | 1              | 1.91633   |
| Q63716        | KQGGLGPMNIPLVSDPK                                   | 0.850493571        | 2              | 4.07012   |
| Q63716        | KQGGLGPMNIPLVSDPKR                                  | 0.689716469        | 3              | 3.81001   |
| Q63716        | LNCQVIGASVDSHFCHLAWINTPK                            | 1.528350737        | 3              | 3.39142   |
| Q63716        | LVQAFQFTDK                                          | 1.653346563        | 2              | 3.29712   |
| Q63716        | QGGLGPMNIPLVSDPK                                    | 1.067482379        | 2              | 3.13924   |
| Q63716        | QGGLGPMNIPLVSDPK+Oxidation(6                        | 1.232833897        |                |           |
| Q63716        | QITINDLPVGR                                         | 1.053916138        | 2              | 3.15417   |
| Q63716        | RTIAQDYGVVK                                         | 1.21796732         | 2              | 2.48117   |
| Q63716        | SVDEILR                                             | 1.087291403        | 2              | 2.48281   |
| Q63716        | TIAQDYGVVK                                          | 1.088015803        | 2              | 3.21053   |
| <b>Q63797</b> | <b>PSME1 Proteasome activator complex subunit 1</b> | <b>2.020807103</b> | <b>0.99715</b> | <b>10</b> |
| Q63797        | ISELDAFLK                                           | 1.225618582        | 2              | 2.36917   |
| Q63797        | ISELDAFLKEPALNEANLSNLK                              | 1.167386309        | 2              | 5.35168   |
| Q63797        | KGDEDDKGPCCGPVNCNEK                                 | 1.200223418        | 3              | 4.81628   |
| Q63797        | KISELDAFLKEPALNEANLSNLK                             | 1.090354631        | 3              | 5.88134   |
| Q63797        | LEGFQTQISK                                          | 1.004137915        | 2              | 2.71279   |
| Q63797        | NAYAVLYDIILK                                        | 1.247324741        | 2              | 3.55742   |
| Q63797        | QLVHELDEAEYQEIR                                     | 0.994569574        | 2              | 4.18508   |
| Q63797        | TENLLGSYFPK                                         | 1.014847975        | 2              | 3.49483   |
| Q63797        | VDVFREDLCSK                                         | 0.879562093        | 2              | 2.5216    |
| Q63797        | VFELMTSLHTK                                         | 1.009969438        | 2              | 3.04794   |
| <b>Q63798</b> | <b>PSME2 Proteasome activator complex subunit 2</b> | <b>2.078279975</b> | <b>0.97678</b> | <b>4</b>  |
| Q63798        | AFYAELHHIISNLEK                                     | 1.028314737        | 2              | 3.91519   |
| Q63798        | IEDGNDFGVAIQEK                                      | 1.24250109         | 2              | 4.04959   |
| Q63798        | KIISLQLLQEDSLNVADLSSLR                              | 1.121911891        | 3              | 3.63328   |
| Q63798        | TKVEAFQTAISK                                        | 0.797483267        | 2              | 3.56125   |
| <b>Q63836</b> | <b>SBP2 Selenium_binding protein 2</b>              | <b>2.200436601</b> | <b>0.38163</b> | <b>3</b>  |
| Q63836        | GGSVQVLEDELTQCEPLVVK                                | 1.420041653        | 2              | 5.34098   |
| Q63836        | IYVVDVGSEPR                                         | 0.968391886        | 2              | 3.82812   |
| Q63836        | LNPNFLVDFGKEPLGPAHELK                               | 1.202952804        | 3              | 3.84383   |
| <b>Q63945</b> | <b>SET Protein SET</b>                              | <b>1.882409601</b> | <b>0.9886</b>  | <b>2</b>  |
| Q63945        | IDFYFDENPYFENK                                      | 1.286883282        | 2              | 4.27991   |
| Q63945        | LNEQASEEILK                                         | 0.91256039         | 2              | 3.16709   |
| <b>Q63965</b> | <b>SFXN1 Sideroflexin_1</b>                         | <b>2.295010924</b> | <b>0.71789</b> | <b>5</b>  |
| Q63965        | NILLTNEQLNAR                                        | 1.099922801        | 2              | 4.38984   |

|               |                                                                                            |                    |                |           |
|---------------|--------------------------------------------------------------------------------------------|--------------------|----------------|-----------|
| Q63965        | QAITQVVISR                                                                                 | 1.327214964        | 2              | 2.33622   |
| Q63965        | QGIVPAGLTENELWR                                                                            | 1.283377964        | 2              | 3.17632   |
| Q63965        | WDQSTFIGR                                                                                  | 0.993769508        | 2              | 2.79195   |
| Q63965        | YAYDSAFHPDTGEK                                                                             | 6.171564952        | 2              | 4.28447   |
| <b>Q64012</b> | <b>RALY RNA_binding protein Raly</b>                                                       | <b>2.212377372</b> | <b>0.89747</b> | <b>2</b>  |
| Q64012        | LEQIAEEQK                                                                                  | 1.115806259        | 2              | 2.5215    |
| Q64012        | SNIDALLGR                                                                                  | 1.151472037        | 2              | 2.35616   |
| <b>Q64057</b> | <b>AL7A1 Alpha_aminoadipic semialdehyde dehydrogenase</b>                                  | <b>2.429487815</b> | <b>0.01481</b> | <b>19</b> |
| Q64057        | AWNIWADIPAPK                                                                               | 1.379570004        | 2              | 3.80585   |
| Q64057        | DYEETIGK                                                                                   | 1.881365666        | 1              | 1.92867   |
| Q64057        | EDNEGVFNQSWGGRR                                                                            | 1.292892128        | 2              | 3.68846   |
| Q64057        | FKNEEEVFEWNNNEVK                                                                           | 0.958510603        | 2              | 5.75616   |
| Q64057        | GAPTTSLVSIIVTK                                                                             | 0.912213552        | 2              | 5.00509   |
| Q64057        | GEVITTYCPANNEPIAR                                                                          | 1.017753276        | 2              | 5.00784   |
| Q64057        | GSDCGIVNVNIPTSGAIEGGAFFGGEK                                                                | 4.06248898         | 2              | 5.6004    |
| Q64057        | LFLHESIHDEVVDR                                                                             | 1.274770957        | 2              | 4.37684   |
| Q64057        | LVSLEMGK                                                                                   | 1.270263529        | 2              | 2.44717   |
| Q64057        | NEEEVFEWNNNEVK                                                                             | 1.042078278        | 2              | 4.5694    |
| Q64057        | QAVSMFVQAVEEAK                                                                             | 1.523044846        | 2              | 3.39187   |
| Q64057        | QAVSMFVQAVEEAKK                                                                            | 1.123692852        | 2              | 2.83807   |
| Q64057        | QGLSSSIFTK                                                                                 | 1.357153713        | 2              | 2.75333   |
| Q64057        | QVALMVQER                                                                                  | 0.985519527        | 2              | 2.51664   |
| Q64057        | STCTINYSTALPLAQGIK                                                                         | 1.010793528        | 2              | 4.87192   |
| Q64057        | VGNPWDPNIIYGLPLHTK                                                                         | 1.503054636        | 3              | 4.39954   |
| Q64057        | VMDHPGNYVEPTIVTGLVHDAPIVHK                                                                 | 1.304011413        | 3              | 6.07284   |
| Q64057        | VMDHPGNYVEPTIVTGLVHDAPIVHK+Oxidation(1                                                     | 1.391085726        |                |           |
| Q64057        | VNLLSFTGSTQVQVK                                                                            | 1.516742974        | 2              | 4.68843   |
| <b>Q64112</b> | <b>IFIT2 Interferon_induced protein with tetratricopeptide repeats 2</b>                   | <b>2.14316152</b>  | <b>0.9614</b>  | <b>2</b>  |
| Q64112        | DPSAIDTLR                                                                                  | 1.098514128        | 2              | 2.55843   |
| Q64112        | NQAMALVEEALK                                                                               | 1.311988272        | 2              | 2.31053   |
| <b>Q64119</b> | <b>MYL6 Myosin light polypeptide 6</b>                                                     | <b>1.973917793</b> | <b>1</b>       | <b>7</b>  |
| Q64119        | DQGTIEDYVEGLR                                                                              | 0.81935114         | 2              | 3.3784    |
| Q64119        | EGNGTVMGAEIR                                                                               | 1.221218621        | 2              | 2.73079   |
| Q64119        | HVLVTLGEK                                                                                  | 0.948543329        | 2              | 2.57018   |
| Q64119        | ILYSQCGDVMR                                                                                | 1.120090606        | 2              | 2.91864   |
| Q64119        | NKDQGTIEDYVEGLR                                                                            | 0.994340908        | 2              | 4.14723   |
| Q64119        | VFDKEGNGTVMGAEIR                                                                           | 1.009596676        | 2              | 4.11548   |
| Q64119        | VLDFEHFLPMLQTVAK                                                                           | 1.014987111        | 2              | 4.78163   |
| <b>Q64122</b> | <b>MYL9 Myosin regulatory light polypeptide 9</b>                                          | <b>2.295702543</b> | <b>0.93984</b> | <b>2</b>  |
| Q64122        | DGFIDKEDLHDMLASLGK                                                                         | 1.281346673        | 2              | 5.23074   |
| Q64122        | LNGTDPEDVIR                                                                                | 1.032724229        | 2              | 2.60885   |
| <b>Q64176</b> | <b>EST22 Liver carboxylesterase 22</b>                                                     | <b>1.942925423</b> | <b>0.0015</b>  | <b>3</b>  |
| Q64176        | AISESGVALTAGLVK                                                                            | 0.982371146        | 2              | 4.58866   |
| Q64176        | EGYLQIGATTQQAQK                                                                            | 0.761325233        | 2              | 4.66931   |
| Q64176        | NFNTVPYIVGINK                                                                              | 0.627637076        | 2              | 3.46973   |
| <b>Q641Y0</b> | <b>OST48 Dolichyl_diphosphooligosaccharide__protein glycosyltransferase 48 kDa subunit</b> | <b>2.278651339</b> | <b>0.07069</b> | <b>7</b>  |
| Q641Y0        | ELGSECGIEFDEEK                                                                             | 1.131851027        | 2              | 4.04094   |
| Q641Y0        | NLLIAGLQAR                                                                                 | 1.598610638        | 2              | 3.42616   |
| Q641Y0        | SSLNPILFR                                                                                  | 2.256416174        | 2              | 2.46711   |
| Q641Y0        | TADDPSSLIK                                                                                 | 1.004472866        | 2              | 2.57711   |
| Q641Y0        | TAVIDHHNYDVSDLGQHTLIVADTENLLK                                                              | 1.3283922          | 3              | 6.69727   |
| Q641Y0        | TLVLLDNLNVR                                                                                | 1.241017218        | 2              | 4.12485   |
| Q641Y0        | WVFPDGDIIQLEFVR                                                                            | 1.230893601        | 2              | 3.07863   |



|               |                                                                                   |                    |                |           |
|---------------|-----------------------------------------------------------------------------------|--------------------|----------------|-----------|
| <b>Q641Y2</b> | <b>NDUS2 NADH dehydrogenase [ubiquinone] iron_sulfur protein 2_ mitochondrial</b> | <b>1.924317806</b> | <b>0.89595</b> | <b>4</b>  |
| Q641Y2        | GSGIQWDLR                                                                         | 0.976519315        | 2              | 2.52462   |
| Q641Y2        | IDEVEEMLTNNR                                                                      | 0.88322446         | 2              | 3.86051   |
| Q641Y2        | IIEQCLNK                                                                          | 0.850866952        | 2              | 2.74819   |
| Q641Y2        | TQPYDVYDQVEFDVPIGSR                                                               | 1.35657405         | 2              | 4.36947   |
| <b>Q641Z6</b> | <b>EHD1 EH domain_containing protein 1</b>                                        | <b>2.352084665</b> | <b>0.78677</b> | <b>2</b>  |
| Q641Z6        | LLDTVDDMLANDIAR                                                                   | 1.231614104        | 2              | 3.93503   |
| Q641Z6        | MQELLQTQDFSK                                                                      | 1.365043492        | 2              | 2.6241    |
| <b>Q64232</b> | <b>TECR Trans_2_3_enoyl_CoA reductase</b>                                         | <b>1.993617218</b> | <b>0.9885</b>  | <b>3</b>  |
| Q64232        | HYEVEIR                                                                           | 0.808233169        | 2              | 2.49738   |
| Q64232        | LCFLDKVEPQATISEIK                                                                 | 1.102060684        | 2              | 3.60549   |
| Q64232        | SLKDEDVLQK                                                                        | 0.99067873         | 2              | 3.56263   |
| <b>Q64240</b> | <b>AMBP Protein AMBP</b>                                                          | <b>1.751823916</b> | <b>3.5E-05</b> | <b>2</b>  |
| Q64240        | AVLPQENEGSGSEPLITGLK                                                              | 0.84326109         | 2              | 4.17435   |
| Q64240        | TIAACNLPIVQGPCR                                                                   | 0.683527529        | 2              | 3.83851   |
| <b>Q642G4</b> | <b>PEX14 Peroxisomal membrane protein PEX14</b>                                   | <b>2.163639885</b> | <b>0.969</b>   | <b>2</b>  |
| Q642G4        | GGDGQINEQVEK                                                                      | 1.124640387        | 2              | 2.88597   |
| Q642G4        | LLGPQEEGEGVVDVK                                                                   | 0.955697263        | 2              | 2.78095   |
| <b>Q64380</b> | <b>SARDH Sarcosine dehydrogenase_ mitochondrial</b>                               | <b>1.877494457</b> | <b>0.99521</b> | <b>20</b> |
| Q64380        | AIDSLSEK                                                                          | 0.96129589         | 2              | 3.00798   |
| Q64380        | AYGIESHVLSPAETK                                                                   | 1.053496007        | 2              | 4.94827   |
| Q64380        | DGTMDPAGTCTTLTR                                                                   | 1.244058775        | 2              | 3.8829    |
| Q64380        | DILQDVLADALSNEAFPSTHQLVR                                                          | 1.258813959        | 3              | 5.3948    |
| Q64380        | DLYPLMNVDDLYGTYLVPR                                                               | 0.827491609        | 2              | 3.87208   |
| Q64380        | FHSLTDHPR                                                                         | 0.91623432         | 2              | 2.64953   |
| Q64380        | FYLLGADAR                                                                         | 1.003580731        | 2              | 2.64328   |
| Q64380        | GAQVIENCAVTGIR                                                                    | 1.04259961         | 2              | 3.78505   |
| Q64380        | HGLVNAGYR                                                                         | 0.657958           | 2              | 2.68138   |
| Q64380        | IEGIQNMPNVR                                                                       | 0.89318546         | 2              | 3.19354   |
| Q64380        | LGVGGVLLER                                                                        | 1.763897126        | 2              | 3.27762   |
| Q64380        | LQGDALSVGGYEANPIFWDEVSDK                                                          | 2.867139223        | 2              | 4.20257   |
| Q64380        | NGDYALER                                                                          | 0.932741527        | 2              | 2.43571   |
| Q64380        | NYSVVFPHDEPLAGR                                                                   | 0.831458533        | 2              | 4.20826   |
| Q64380        | QVSHDLEETGLHTGWIQNGGLFIASNQQR                                                     | 1.257878103        | 3              | 4.07024   |
| Q64380        | RDPLHEELLGQGCVFQER                                                                | 1.208209289        | 3              | 5.80591   |
| Q64380        | SDDSPLEAGLAFTCK                                                                   | 1.206794826        | 2              | 4.5192    |
| Q64380        | STVCGPESFTPDKPLMGEAPELR                                                           | 0.914363713        | 3              | 4.86359   |
| Q64380        | STVCGPESFTPDKPLMGEAPELR+Oxidation(16                                              | 1.028140053        |                |           |
| Q64380        | VTAVETQHGSIQTPCVVNCAGVWASSVGR                                                     | 1.039199944        | 3              | 5.76771   |
| <b>Q64428</b> | <b>ECHA Trifunctional enzyme subunit alpha_ mitochondrial</b>                     | <b>2.001207277</b> | <b>0.99597</b> | <b>29</b> |
| Q64428        | ADMVIEAVFEDLAVK                                                                   | 0.786491614        | 3              | 4.11034   |
| Q64428        | ALMGLYNGQVLCK                                                                     | 1.209587442        | 2              | 3.45997   |
| Q64428        | CLAPMMSEVIR                                                                       | 1.838428161        | 2              | 2.49765   |
| Q64428        | DGPGFYTTR                                                                         | 2.321323384        | 2              | 2.31759   |
| Q64428        | DSIFSNLIGQLDYK                                                                    | 1.244500152        | 2              | 3.05077   |
| Q64428        | DTTASAVAVGLK                                                                      | 2.317230409        | 2              | 3.7994    |
| Q64428        | EVESVTPHECFIFANTSALPINQIAAVSQRPEK                                                 | 0.811923698        | 3              | 6.31415   |
| Q64428        | EVQSEFVEVMNEIWANDQIR                                                              | 0.851295647        | 3              | 4.20686   |
| Q64428        | FGELALTK                                                                          | 0.964143471        | 2              | 3.02917   |
| Q64428        | FGGGSVELLK                                                                        | 0.904131336        | 2              | 3.18877   |
| Q64428        | FVDLYGAQK                                                                         | 0.860270597        | 2              | 3.02356   |
| Q64428        | GFYIYQSGSK                                                                        | 0.83573576         | 2              | 3.05216   |
| Q64428        | ILQEGVDPK                                                                         | 1.165639017        | 2              | 3.18369   |
| Q64428        | KLDALTTGFGFPVGAATLADEVGIDVAQHV AEDLGK                                             | 0.920270782        | 4              | 5.43653   |
| Q64428        | KTVLGVPEVLLGILPGAGGTQR                                                            | 1.052724413        | 3              | 4.15068   |

|               |                                                                 |                    |                |           |
|---------------|-----------------------------------------------------------------|--------------------|----------------|-----------|
| Q64428        | KYESAYGTQFTPCQLLR                                               | 1.039333556        | 2              | 4.70469   |
| Q64428        | LPAKPEVSSDEDIQYR                                                | 1.287556118        | 3              | 4.46949   |
| Q64428        | MGLVDQLVDPLGPGIK                                                | 0.976545991        | 2              | 5.08455   |
| Q64428        | MGLVDQLVDPLGPGIK+Oxidation(0                                    | 0.996701707        |                |           |
| Q64428        | MQLLEIITTDK                                                     | 1.013741243        | 2              | 3.82033   |
| Q64428        | MQLLEIITTDK+Oxidation(0                                         | 1.141554018        |                |           |
| Q64428        | MVGVPAAFDMMMLTGR                                                | 1.024112115        | 2              | 3.3376    |
| Q64428        | NLNSEIDNILVNLR                                                  | 0.880468017        | 2              | 4.41511   |
| Q64428        | SAVLISSKPGCFVAGADINMLASCTTPQEAAAR                               | 1.169348662        | 3              | 3.88604   |
| Q64428        | TGLEQGNDAGYLAESEK                                               | 0.960431643        | 2              | 5.10275   |
| Q64428        | TIEYLEEVAVNFAK                                                  | 1.03588912         | 2              | 3.80416   |
| Q64428        | TVLGVPEVLLGILPGAGGTQR                                           | 0.829477545        | 3              | 4.7512    |
| Q64428        | TVQQLAILGAGLMGAGIAQVSVDK                                        | 1.003641035        | 3              | 6.03005   |
| Q64428        | YESAYGTQFTPCQLLR                                                | 1.201091767        | 2              | 4.00735   |
| <b>Q64458</b> | <b>CP2CT Cytochrome P450 2C29</b>                               | <b>1.970350744</b> | <b>3.4E-05</b> | <b>6</b>  |
| Q64458        | EHKESLDVTNPR                                                    | 0.73436731         | 2              | 3.40956   |
| Q64458        | IKEHKESLDVTNPR                                                  | 0.822293186        | 3              | 5.20486   |
| Q64458        | LPPGPTPLPIIGNFLQJDVK                                            | 1.453168156        | 3              | 4.98668   |
| Q64458        | VQEEAQCLVEELR                                                   | 2.137972853        | 2              | 4.2021    |
| Q64458        | VQEEAQCLVEELRK                                                  | 1.420056325        | 2              | 3.80194   |
| Q64458        | VQEEIDR                                                         | 1.020715092        | 2              | 2.53091   |
| <b>Q64464</b> | <b>CP3AD Cytochrome P450 3A13</b>                               | <b>1.998388729</b> | <b>0.34345</b> | <b>2</b>  |
| Q64464        | ALLSPTFTSGR                                                     | 1.003307558        | 2              | 2.89316   |
| Q64464        | LQDEIDAALPNK                                                    | 0.644199391        | 2              | 2.41455   |
| <b>Q64481</b> | <b>CP3AG Cytochrome P450 3A16</b>                               | <b>2.376182908</b> | <b>0.45954</b> | <b>3</b>  |
| Q64481        | EMFPVIEQYGDILVK                                                 | 1.471280595        | 2              | 2.40379   |
| Q64481        | GSIDPYVYLPFGNGPR                                                | 0.996616905        | 2              | 4.04317   |
| Q64481        | VLQNFQFQPK                                                      | 1.39465618         | 2              | 2.78413   |
| <b>Q64550</b> | <b>UD11 UDP-glucuronosyltransferase 1_1</b>                     | <b>1.754553513</b> | <b>0.70655</b> | <b>4</b>  |
| Q64550        | GHEVVVIAPEASIIHK                                                | 0.614336307        | 2              | 4.61325   |
| Q64550        | NMIIALTENFLCR                                                   | 0.749218554        | 2              | 4.50404   |
| Q64550        | SVFDQDPFLR                                                      | 1.04237333         | 2              | 3.46737   |
| Q64550        | VVYSPYGLATEILQK                                                 | 0.895185758        | 2              | 4.9668    |
| <b>Q64560</b> | <b>TPP2 Tripeptidyl-peptidase 2</b>                             | <b>1.947538247</b> | <b>0.9989</b>  | <b>3</b>  |
| Q64560        | ACVDSNENGDGK                                                    | 0.850268368        | 2              | 3.48793   |
| Q64560        | GTLIEAFPVLGGK                                                   | 0.903953243        | 2              | 3.17228   |
| Q64560        | HEQISDLDR                                                       | 1.272115429        | 2              | 2.59638   |
| <b>Q64563</b> | <b>ADH4 Alcohol dehydrogenase 4</b>                             | <b>2.291889728</b> | <b>0.99999</b> | <b>15</b> |
| Q64563        | AAVDCTVVGWGSCVTVGAK                                             | 1.726144982        | 2              | 2.595     |
| Q64563        | ALFPVVLGHECAGIVESVGPVGNFKPGDK                                   | 1.340615743        | 3              | 5.72197   |
| Q64563        | ALGATDCLNPR                                                     | 1.770464701        | 2              | 3.23274   |
| Q64563        | DLDKPVQDVITELTGGGVDFSLDCAGTAQTLK                                | 1.327222542        | 3              | 6.05482   |
| Q64563        | FDLDLLVTHALPFDK                                                 | 1.118112411        | 3              | 4.3007    |
| Q64563        | IIAIDINSEKFPK                                                   | 1.034809775        | 2              | 3.06966   |
| Q64563        | INDAIDL MNQ GK                                                  | 1.198445657        | 2              | 4.1661    |
| Q64563        | KFDLDLLVTHALPFDK                                                | 1.015330673        | 3              | 5.28022   |
| Q64563        | LCLSPLTNLCGK                                                    | 1.091044402        | 2              | 2.46615   |
| Q64563        | SVDSVPLNLT DYK                                                  | 1.151835509        | 2              | 3.49291   |
| Q64563        | TDSPLCIEIEVSPPK                                                 | 1.265485036        | 2              | 4.11312   |
| Q64563        | VCLIGCGFTSGYGAAINTAK                                            | 1.150221261        | 2              | 4.88096   |
| Q64563        | VDDEANLER                                                       | 1.094166978        | 2              | 3.09107   |
| Q64563        | VDEMNISTVDMILGR                                                 | 0.927287585        | 2              | 4.06999   |
| Q64563        | VIATCVCPDTINATNPK                                               | 1.594778993        | 2              | 4.70127   |
| <b>Q64565</b> | <b>AGT2 Alanine-glyoxylate aminotransferase 2_mitochondrial</b> | <b>2.360701478</b> | <b>0.92014</b> | <b>15</b> |
| Q64565        | AYSNHTDIISFR                                                    | 1.02937445         | 2              | 3.48409   |
| Q64565        | GGNFQQTFR                                                       | 0.941121873        | 2              | 2.59794   |

|               |                                                                           |                    |                |           |
|---------------|---------------------------------------------------------------------------|--------------------|----------------|-----------|
| Q64565        | GGVCIADDEVQTGFGR                                                          | 0.869065634        | 2              | 4.04195   |
| Q64565        | GIGNGFPMAAVVTTPEIASLAK                                                    | 1.276827513        | 2              | 4.32601   |
| Q64565        | GLMVGIEMVQDK                                                              | 1.390307914        | 2              | 3.37818   |
| Q64565        | HNMPPCDFSPEK                                                              | 1.117399265        | 2              | 3.2347    |
| Q64565        | LSALLPEPLK                                                                | 2.244602249        | 2              | 2.75202   |
| Q64565        | NSQEVGTYMLLK                                                              | 0.882874259        | 2              | 3.31882   |
| Q64565        | SALTQHMER                                                                 | 1.205756008        | 2              | 2.52906   |
| Q64565        | SALTQHMER+Oxidation(6                                                     | 1.208473613        |                |           |
| Q64565        | TEVNQIHEDCK                                                               | 1.065886317        | 2              | 3.29699   |
| Q64565        | TEVNQIHEDCKDMLLVGR                                                        | 1.083441914        | 2              | 5.24897   |
| Q64565        | VIFLVNSGSEANDLAMVMAR                                                      | 1.647572313        | 2              | 3.16691   |
| Q64565        | YIEQFK                                                                    | 1.07997107         | 1              | 2.2579    |
| Q64565        | YQSLAYNHVLEIHK                                                            | 0.631769205        | 2              | 3.95398   |
| <b>Q64578</b> | <b>AT2A1 Sarcoplasmic/endoplasmic reticulum calcium ATPase 1</b>          | <b>4.248029897</b> | <b>0.99858</b> | <b>9</b>  |
| Q64578        | AVGIVATTGVSTEIGK                                                          | 3.686307879        | 2              | 3.42593   |
| Q64578        | DIVPGDIVEVAVGDKVPADIR                                                     | 4.081699191        | 2              | 3.38495   |
| Q64578        | IGIFSENEEVADR                                                             | 1.537764027        | 2              | 3.40337   |
| Q64578        | IRDQMAATEQDKTPLQKQK                                                       | 1.6453676          | 3              | 4.39291   |
| Q64578        | MNVFNTEVR                                                                 | 1.435011913        | 2              | 2.78718   |
| Q64578        | REEMVLDDSAK                                                               | 1.617013821        | 2              | 2.76877   |
| Q64578        | TGTLTTNQMSVCK                                                             | 2.161343166        | 2              | 3.44584   |
| Q64578        | VGEATETALTTLVEK                                                           | 2.68171235         | 2              | 4.49547   |
| Q64578        | YGPNELPAEEGK                                                              | 1.734513938        | 2              | 3.01092   |
| <b>Q64581</b> | <b>CP3AI Cytochrome P450 3A18</b>                                         | <b>1.583543135</b> | <b>7.3E-06</b> | <b>3</b>  |
| Q64581        | AITMSEDEEWKR                                                              | 0.494010925        | 2              | 2.31719   |
| Q64581        | LAVIGVLQNFNIQCEK                                                          | 0.784510923        | 2              | 3.20531   |
| Q64581        | NPEYWLEPEEFNPER                                                           | 0.668588067        | 2              | 3.86108   |
| <b>Q64591</b> | <b>DECR 2_4_dienoyl_CoA reductase_mitochondrial</b>                       | <b>1.764251965</b> | <b>0.88934</b> | <b>10</b> |
| Q64591        | ATAEEITSK                                                                 | 0.938349074        | 2              | 3.01701   |
| Q64591        | CDVRDPDMVHNTVLELIK                                                        | 0.783789296        | 4              | 5.05214   |
| Q64591        | DPDMVHNTVLELIK                                                            | 1.016180815        | 3              | 4.14183   |
| Q64591        | EEWDVIEGLIR                                                               | 1.011628611        | 2              | 3.54377   |
| Q64591        | FFPPILKPLPPNAFQGK                                                         | 0.880523105        | 2              | 3.25908   |
| Q64591        | FNIIQPGPIK                                                                | 0.729377599        | 2              | 2.89204   |
| Q64591        | NIDVLK                                                                    | 0.76737823         | 1              | 2.28936   |
| Q64591        | SLAAEWGR                                                                  | 0.872399952        | 2              | 2.37682   |
| Q64591        | VAFITGGGTGLGK                                                             | 1.104724966        | 2              | 2.69071   |
| Q64591        | VTKEEWDVIEGLIR                                                            | 0.662053963        | 3              | 4.9013    |
| <b>Q64602</b> | <b>AADAT Kynurenine/alpha_aminoadipate aminotransferase_mitochondrial</b> | <b>1.90285502</b>  | <b>0.99298</b> | <b>7</b>  |
| Q64602        | ASFSQVTPAQMDLVFQR                                                         | 0.916720315        | 2              | 4.48882   |
| Q64602        | DIISLAPGSPNPK                                                             | 0.695778816        | 2              | 3.218     |
| Q64602        | EILLVPGNSFFVDNSAPSSFFR                                                    | 0.970854345        | 2              | 3.48101   |
| Q64602        | FLYTIPNGNPTGNSLTGDR                                                       | 0.989337165        | 2              | 3.98845   |
| Q64602        | LHNPTVNYSPNEGQMDLCITSGCQDGLCK                                             | 1.915404529        | 3              | 6.46759   |
| Q64602        | SAVFTVENGSTIR                                                             | 0.880508874        | 2              | 4.10521   |
| Q64602        | VLSQWKPEDSKDPTKR                                                          | 1.059975576        | 3              | 4.14068   |
| <b>Q64611</b> | <b>CSAD Cysteine sulfinic acid decarboxylase</b>                          | <b>2.07380742</b>  | <b>0.99729</b> | <b>14</b> |
| Q64611        | AQGGQGLEWR                                                                | 1.116866393        | 2              | 2.93961   |
| Q64611        | CHGSQASYLFQQDK                                                            | 0.99029518         | 2              | 4.96056   |
| Q64611        | DVFGIVVDEAIR                                                              | 1.258839568        | 2              | 3.07635   |
| Q64611        | FFNQLFSGLDPHALAGR                                                         | 1.558943284        | 3              | 3.85355   |
| Q64611        | FYNVALDTGDK                                                               | 1.034452476        | 2              | 3.10677   |
| Q64611        | GAAFLGLGTDSVR                                                             | 1.367678703        | 2              | 3.24536   |
| Q64611        | GTMMIGYQPHGTR                                                             | 1.202181995        | 2              | 2.87285   |
| Q64611        | IDQAFALTR                                                                 | 0.914235636        | 2              | 3.46272   |

|               |                                                                           |                    |                |           |
|---------------|---------------------------------------------------------------------------|--------------------|----------------|-----------|
| Q64611        | KGTMIMIGYQPHGTR                                                           | 1.231995897        | 3              | 3.97922   |
| Q64611        | LSQVAPVLK                                                                 | 1.103739609        | 2              | 2.30197   |
| Q64611        | QLLDLELQSQGESR                                                            | 1.069447585        | 2              | 4.51638   |
| Q64611        | TLDGDPVAVEALLR                                                            | 0.506343053        | 2              | 4.6021    |
| Q64611        | VCEWKEPEELK                                                               | 1.070866697        | 3              | 3.7241    |
| Q64611        | YLVEEIK                                                                   | 1.066192398        | 1              | 2.40722   |
| <b>Q64638</b> | <b>UD15 UDP-glucuronosyltransferase 1_5</b>                               | <b>2.081089122</b> | <b>0.65488</b> | <b>2</b>  |
| Q64638        | VVFETGNYVK                                                                | 0.752950519        | 1              | 2.05845   |
| Q64638        | YESLASELLQR                                                               | 1.062759972        | 2              | 3.03348   |
| <b>Q64640</b> | <b>ADK Adenosine kinase</b>                                               | <b>2.178730682</b> | <b>0.99999</b> | <b>11</b> |
| Q64640        | AADAHVDAHYYEQNEQPTGTCAACITGGNR                                            | 1.308552022        | 3              | 7.1419    |
| Q64640        | AATFFGCIGIDK                                                              | 1.272876423        | 2              | 3.33019   |
| Q64640        | AGHYAASVIIR                                                               | 1.099637068        | 3              | 3.63438   |
| Q64640        | FGEILK                                                                    | 0.928293911        | 2              | 2.3522    |
| Q64640        | FKVEYHAGGSTQNSMK                                                          | 1.004075011        | 2              | 4.10609   |
| Q64640        | HKELFDELVK                                                                | 1.187493576        | 3              | 4.05358   |
| Q64640        | SLVANLAAANCYK                                                             | 1.097918162        | 2              | 4.33123   |
| Q64640        | TGCTFPEKPDFH                                                              | 1.34865543         | 2              | 2.74294   |
| Q64640        | VEYHAGGSTQNSMK                                                            | 1.299260239        | 2              | 4.06014   |
| Q64640        | VEYHAGGSTQNSMK+Oxidation(12                                               | 1.127876875        |                |           |
| Q64640        | YSLKPNQILAEDK                                                             | 1.039114214        | 3              | 4.25991   |
| <b>Q64654</b> | <b>CP51A Lanosterol 14_alpha demethylase</b>                              | <b>1.724114524</b> | <b>0.00119</b> | <b>8</b>  |
| Q64654        | EPAEDILQTLDDSTYK                                                          | 0.971160691        | 2              | 3.82401   |
| Q64654        | GVAYDVPNAVFLQK                                                            | 0.742005872        | 2              | 4.32519   |
| Q64654        | NEDLNAAEEVYGR                                                             | 0.54160538         | 2              | 3.72399   |
| Q64654        | SGLNIAHFK                                                                 | 1.107525301        | 2              | 2.99592   |
| Q64654        | TFTYLLGSDAAALLFNSK                                                        | 0.618001881        | 3              | 3.90519   |
| Q64654        | TVCGEDLPPLTYEQLK                                                          | 0.491566295        | 2              | 4.42687   |
| Q64654        | YGPVFSFTMVGK                                                              | 0.775479642        | 2              | 2.8097    |
| Q64654        | YLQDNPASGEK                                                               | 0.498626798        | 2              | 2.79391   |
| <b>Q65Z40</b> | <b>WAPL Wings apart_like protein homolog</b>                              | <b>2.179405645</b> | <b>0.38171</b> | <b>2</b>  |
| Q65Z40        | EKSISRIPEDNANK                                                            | 1.090064553        | 2              | 2.58514   |
| Q65Z40        | LGQKRPNFKPDIQIPIK                                                         | 1.15156591         | 2              | 2.39477   |
| <b>Q66H12</b> | <b>NAGAB Alpha_N_acetylgalactosaminidase</b>                              | <b>2.264009449</b> | <b>0.39441</b> | <b>5</b>  |
| Q66H12        | CNINCEEDPK                                                                | 1.158630225        | 2              | 2.34034   |
| Q66H12        | INQDPLGIQGR                                                               | 1.019566412        | 2              | 2.87806   |
| Q66H12        | MTCMGYPGTTLDKVELDAATFAEWK+Oxidation(0                                     | 1.444707383        |                |           |
| Q66H12        | MTCMGYPGTTLDKVELDAATFAEWK+Oxidation(3                                     | 1.444707383        |                |           |
| Q66H12        | TISPQNIDILQNPLLIK                                                         | 1.32503784         | 2              | 3.43576   |
| <b>Q66H15</b> | <b>RMD3 Regulator of microtubule dynamics protein 3</b>                   | <b>1.875350536</b> | <b>0.4152</b>  | <b>2</b>  |
| Q66H15        | SLQGLAGEIVGEVR                                                            | 0.908238322        | 2              | 3.3903    |
| Q66H15        | SQSLPNSLDYAQTSER                                                          | 0.771689853        | 2              | 3.0147    |
| <b>Q66H45</b> | <b>TTC36 Tetratricopeptide repeat protein 36</b>                          | <b>2.062407123</b> | <b>0.53249</b> | <b>2</b>  |
| Q66H45        | ALELQGV                                                                   | 0.579620506        | 2              | 2.47311   |
| Q66H45        | LQGDVAGALEDLER                                                            | 1.050458284        | 2              | 3.75276   |
| <b>Q66H71</b> | <b>CPPED Calcineurin_like phosphoesterase domain_containing protein 1</b> | <b>2.077032656</b> | <b>0.9704</b>  | <b>2</b>  |
| Q66H71        | LTEQAVEAINK                                                               | 1.113153669        | 2              | 3.51174   |
| Q66H71        | SIDEDDDYFNLTK                                                             | 0.921298596        | 2              | 2.98046   |
| <b>Q66H80</b> | <b>COPD Coatomer subunit delta</b>                                        | <b>2.098078565</b> | <b>0.99993</b> | <b>8</b>  |
| Q66H80        | GVQLQTHPNVDKK                                                             | 0.908644614        | 2              | 3.51672   |
| Q66H80        | LFTAESLIGLK                                                               | 1.058150274        | 2              | 3.02111   |
| Q66H80        | NSNILEDLETLR                                                              | 1.075257964        | 2              | 3.51258   |
| Q66H80        | NTLEWCLPVIDAK                                                             | 1.068532496        | 2              | 2.72746   |
| Q66H80        | SEGETIMSSNMGK                                                             | 1.990759149        | 2              | 2.76797   |
| Q66H80        | TFTEMDSHEEK                                                               | 0.762445632        | 2              | 2.65535   |

|               |                                                                           |                    |                |           |
|---------------|---------------------------------------------------------------------------|--------------------|----------------|-----------|
| Q66H80        | VAPAPARPSGSPK                                                             | 1.079014917        | 2              | 2.54033   |
| Q66H80        | VTQVDGNSPVR                                                               | 1.1912537          | 2              | 3.01899   |
| <b>Q66HA8</b> | <b>HS105 Heat shock protein 105 kDa</b>                                   | <b>2.197817291</b> | <b>0.66868</b> | <b>10</b> |
| Q66HA8        | AGGIETIANEFSDR                                                            | 1.225538438        | 2              | 2.94507   |
| Q66HA8        | FQEAEERPR                                                                 | 0.845439           | 2              | 2.45946   |
| Q66HA8        | FVVQNVSAQK                                                                | 0.971537463        | 2              | 2.68755   |
| Q66HA8        | LKETAENNLK                                                                | 0.922173169        | 2              | 2.58799   |
| Q66HA8        | NQQITHANNTVSSFK                                                           | 1.05451811         | 2              | 4.7172    |
| Q66HA8        | RGPFLEAFYSDPQAVPYPEAK                                                     | 1.38932283         | 3              | 3.78733   |
| Q66HA8        | SQFEELCAELLQK                                                             | 1.126612589        | 2              | 2.60517   |
| Q66HA8        | SVLDAAQIVGLNCLR                                                           | 1.499580406        | 2              | 3.70739   |
| Q66HA8        | VLGTAFDPFLGGK                                                             | 1.153711074        | 2              | 2.98288   |
| Q66HA8        | YNHIDSEMK                                                                 | 1.931163396        | 2              | 2.50624   |
| <b>Q66HD0</b> | <b>ENPL Endoplasmic</b>                                                   | <b>2.009882284</b> | <b>1</b>       | <b>27</b> |
| Q66HD0        | DISTNYYASQK                                                               | 2.664425595        | 2              | 3.16239   |
| Q66HD0        | EATEKEFEP LLNWMK                                                          | 1.257249362        | 2              | 3.5056    |
| Q66HD0        | EEASDYLELDTIK                                                             | 0.838811276        | 2              | 4.25037   |
| Q66HD0        | EEEAIQLDGLNASQIR                                                          | 1.218272962        | 2              | 4.60118   |
| Q66HD0        | EFEPLLNWMK                                                                | 1.254131254        | 2              | 2.90662   |
| Q66HD0        | EVEEDEYK                                                                  | 0.98057786         | 1              | 2.44448   |
| Q66HD0        | FQSSHSTDITSLDQYVER                                                        | 1.052819965        | 3              | 6.63283   |
| Q66HD0        | GLFDEYGSK                                                                 | 1.353579547        | 2              | 2.44932   |
| Q66HD0        | GVVDSDDLPLNVSR                                                            | 1.086486887        | 2              | 5.15077   |
| Q66HD0        | KEAESSPFVER                                                               | 0.991369749        | 2              | 3.50719   |
| Q66HD0        | KGYEVIYLTEPVDEYCIQALPEFDGKR                                               | 0.820847204        | 3              | 3.59155   |
| Q66HD0        | LGVIEDHSNR                                                                | 0.995438486        | 2              | 3.11669   |
| Q66HD0        | LISLTDENALAGNEELTVK                                                       | 1.727189983        | 2              | 5.42867   |
| Q66HD0        | LTESPCALVASQYGWSGNMER                                                     | 1.768108646        | 2              | 5.48347   |
| Q66HD0        | MKEKQDK                                                                   | 0.674216266        | 1              | 1.92505   |
| Q66HD0        | NLLHVTDGTGVMTR                                                            | 1.01616953         | 3              | 4.14452   |
| Q66HD0        | NLLHVTDGTGVMTR+Oxidation(11                                               | 1.120937224        |                |           |
| Q66HD0        | RVFITDDFHDMMPK                                                            | 1.103606272        | 3              | 3.72948   |
| Q66HD0        | SGTSEFLNK                                                                 | 1.05483623         | 2              | 3.05282   |
| Q66HD0        | SGYLLPDTK                                                                 | 0.988620587        | 2              | 3.44509   |
| Q66HD0        | SILFVPTSAPR                                                               | 1.360980048        | 2              | 3.5311    |
| Q66HD0        | TDDEVVQREEEAIQLDGLNASQIR                                                  | 4.844415632        | 3              | 5.15407   |
| Q66HD0        | TETVEEPLLEETAQEEK                                                         | 0.973436158        | 2              | 5.27976   |
| Q66HD0        | TETVEEPLLEETAQEEKEADDEAAVEEEEEKKPK                                        | 1.058762111        | 5              | 6.24007   |
| Q66HD0        | TFEINPR                                                                   | 1.036367938        | 2              | 2.73857   |
| Q66HD0        | VFITDDFHDMMPK                                                             | 1.339015997        | 2              | 4.01099   |
| Q66HD0        | YNDTFWK                                                                   | 1.048404153        | 2              | 2.38363   |
| <b>Q66HF1</b> | <b>NDUS1 NADH_ubiquinone oxidoreductase 75 kDa subunit_ mitochondrial</b> | <b>2.08767232</b>  | <b>0.99929</b> | <b>15</b> |
| Q66HF1        | ALSEIAGITLPYDTLDQVR                                                       | 1.307363094        | 3              | 3.93748   |
| Q66HF1        | AVTEGAQAVEEPSIC                                                           | 0.916413693        | 2              | 2.80403   |
| Q66HF1        | DDGAAILAAVSSIAQK                                                          | 0.948610856        | 2              | 4.35422   |
| Q66HF1        | DLLNKVDSDTLCTEEIFPNEGAGTDLR                                               | 2.307019414        | 3              | 4.26097   |
| Q66HF1        | FASEIAGVDDLGTGR                                                           | 1.217172736        | 2              | 4.58834   |
| Q66HF1        | GLLTYTSWEDALSR                                                            | 1.076886921        | 2              | 3.6706    |
| Q66HF1        | GNDMQVGTIIEK                                                              | 0.778941767        | 2              | 2.81418   |
| Q66HF1        | GWNILTNSEK                                                                | 0.71582843         | 1              | 2.26339   |
| Q66HF1        | ILQDIASGNHEFSK                                                            | 1.192171968        | 2              | 4.17614   |
| Q66HF1        | LGEVSPNLVR                                                                | 0.866416942        | 2              | 3.00797   |
| Q66HF1        | LVDQEFLADPLVPPQLTIK                                                       | 1.167719185        | 2              | 3.96118   |
| Q66HF1        | SATYVNTEGR                                                                | 0.934862788        | 2              | 2.31744   |
| Q66HF1        | VAVTPPGLAR                                                                | 0.802950394        | 2              | 2.53812   |
| Q66HF1        | VSDTLCTEEIFPNEGAGTDLR                                                     | 1.13202007         | 2              | 4.7317    |

|               |                                                                 |                    |                |           |
|---------------|-----------------------------------------------------------------|--------------------|----------------|-----------|
| Q66HF1        | YDHLGDSPK                                                       | 1.383929538        | 2              | 2.4766    |
| <b>Q66HF8</b> | <b>AL1B1 Aldehyde dehydrogenase X_mitochondrial</b>             | <b>2.455241177</b> | <b>0.01838</b> | <b>13</b> |
| Q66HF8        | ADVDLAVR                                                        | 1.131853802        | 2              | 2.36548   |
| Q66HF8        | EAGFPPGVVNIITGYGPTAGAAIAQHMDVDK                                 | 1.812725384        | 3              | 4.19254   |
| Q66HF8        | EEIFGPVQPLFK                                                    | 1.247418021        | 2              | 3.2598    |
| Q66HF8        | IEEVIQR                                                         | 2.364148172        | 2              | 2.30519   |
| Q66HF8        | KTFPTVNPPTTGEVIGHVAEGDR                                         | 1.154936064        | 3              | 3.91188   |
| Q66HF8        | KVGNPFELDTQQGPQVDKEQFEK                                         | 1.148124283        | 3              | 4.16142   |
| Q66HF8        | LAPALATGNTVVMK                                                  | 1.201666205        | 2              | 3.39251   |
| Q66HF8        | TFPTVNPPTTGEVIGHVAEGDR                                          | 1.482659624        | 2              | 4.88567   |
| Q66HF8        | TFVEESYHFEFLER                                                  | 1.133599542        | 2              | 4.46208   |
| Q66HF8        | VAEQTPLSALYLASLIK                                               | 1.028914676        | 2              | 3.00276   |
| Q66HF8        | VGNPFELDTQQGPQVDK                                               | 1.013429194        | 2              | 4.40022   |
| Q66HF8        | VGNPFELDTQQGPQVDKEQFEK                                          | 1.322595866        | 2              | 4.49705   |
| Q66HF8        | YGLAAAVFTR                                                      | 1.133895598        | 2              | 3.29539   |
| <b>Q66HG4</b> | <b>GALM Aldose 1_epimerase</b>                                  | <b>1.970737036</b> | <b>0.34147</b> | <b>3</b>  |
| Q66HG4        | ASDVVLGFAELEGYLQK                                               | 1.36257156         | 2              | 4.50189   |
| Q66HG4        | TVFGELPSGGGAVEK                                                 | 0.850926802        | 2              | 3.84872   |
| Q66HG4        | VSPDGEEGYPGELK                                                  | 0.878096494        | 2              | 4.07073   |
| <b>Q66HG9</b> | <b>MAVS Mitochondrial antiviral_signaling protein</b>           | <b>2.253138754</b> | <b>0.98159</b> | <b>3</b>  |
| Q66HG9        | ICELPGLAEQVTR                                                   | 1.262413243        | 2              | 2.76479   |
| Q66HG9        | STAATPSTVPTNIAPSK                                               | 1.128504807        | 2              | 3.17831   |
| Q66HG9        | TTLSSSTGSFAFK                                                   | 0.883933816        | 2              | 2.34491   |
| <b>Q66X93</b> | <b>SND1 Staphylococcal nuclease domain_containing protein 1</b> | <b>2.167614998</b> | <b>1</b>       | <b>19</b> |
| Q66X93        | ADDADEFGYSR                                                     | 1.856570511        | 2              | 2.61315   |
| Q66X93        | ALLLPDHYLVTVMLSGIK                                              | 1.489420089        | 3              | 4.25504   |
| Q66X93        | DIQNTQCLLNVEHLSASCPhVTLQFADSK                                   | 1.244532779        | 3              | 6.06477   |
| Q66X93        | DTNGENIAESLVAEGLASR                                             | 1.006298544        | 2              | 4.34433   |
| Q66X93        | ETDGSETPEPFAAEAK                                                | 0.956442957        | 2              | 3.78974   |
| Q66X93        | FVDGEWYR                                                        | 1.282471209        | 2              | 2.7819    |
| Q66X93        | GDVGLGLVK                                                       | 1.000274308        | 2              | 2.57965   |
| Q66X93        | HFVDSHHQKPVNAIIHVR                                              | 1.099406059        | 3              | 5.015     |
| Q66X93        | LEGDNIQDK                                                       | 1.044233109        | 2              | 2.99266   |
| Q66X93        | NLPGLVQEGEPFSEATLFTK                                            | 1.130457677        | 2              | 5.73209   |
| Q66X93        | SAYYKPLLSAEAAK                                                  | 1.032636133        | 2              | 3.11338   |
| Q66X93        | SDISSHPPVEGAYAPR                                                | 1.009533135        | 3              | 4.41655   |
| Q66X93        | SSHYDELLAAEAR                                                   | 1.095062363        | 2              | 4.0311    |
| Q66X93        | TCATVTIGGINIAEALVSK                                             | 1.048624166        | 2              | 3.49455   |
| Q66X93        | TDAVDSVVR                                                       | 1.85004849         | 2              | 2.71306   |
| Q66X93        | VITEYLNAQESAK                                                   | 1.126994234        | 2              | 3.92646   |
| Q66X93        | VMQVLNADAIVVK                                                   | 1.48516124         | 2              | 4.10818   |
| Q66X93        | VSVTVDYIRPASPATETVPAFSEK                                        | 1.147786959        | 3              | 5.14646   |
| Q66X93        | VVAHYEEQPVEEVMPLVEEK                                            | 1.197153014        | 3              | 4.53355   |
| <b>Q68FL6</b> | <b>SYMC Methionyl_tRNA synthetase_cytoplasmic</b>               | <b>2.044965634</b> | <b>0.98984</b> | <b>3</b>  |
| Q68FL6        | ADKNQVAEEVAK                                                    | 1.092119926        | 2              | 3.05545   |
| Q68FL6        | LENDQIENLR                                                      | 1.028223212        | 2              | 2.6913    |
| Q68FL6        | NSELLNNLGNFINR                                                  | 0.985472086        | 2              | 2.81915   |
| <b>Q68FP2</b> | <b>PON3 Serum paraoxonase/lactonase 3</b>                       | <b>2.208287213</b> | <b>0.65184</b> | <b>8</b>  |
| Q68FP2        | HELFESVNDIVVLGPEQFYATR                                          | 1.242538621        | 3              | 3.90271   |
| Q68FP2        | HNNWDLTPVK                                                      | 1.06691168         | 2              | 3.2078    |
| Q68FP2        | IFLMDLNEPYPK                                                    | 1.165983343        | 2              | 4.05185   |
| Q68FP2        | IQDPLSDNPR                                                      | 1.020848316        | 2              | 3.0143    |
| Q68FP2        | KHNNWDLTPVK                                                     | 0.603321507        | 2              | 2.49789   |
| Q68FP2        | LLIYNPEDPPGSEVLR                                                | 1.3275942          | 2              | 4.3891    |
| Q68FP2        | VIQLGTLVDNLTVPATGDILAGCHPNPMK                                   | 1.081850281        | 3              | 4.59446   |
| Q68FP2        | YVYVADVAK                                                       | 1.037089786        | 1              | 2.99083   |

|               |                                                                                       |                    |                |           |
|---------------|---------------------------------------------------------------------------------------|--------------------|----------------|-----------|
| <b>Q68FQ0</b> | <b>TCPE T_complex protein 1 subunit epsilon</b>                                       | <b>2.100028145</b> | <b>0.99907</b> | <b>7</b>  |
| Q68FQ0        | GSNDMQYQHVIETLIGK                                                                     | 0.999385169        | 2              | 2.82305   |
| Q68FQ0        | GVIVDKDFSHPMQMPK                                                                      | 1.164248653        | 2              | 2.80795   |
| Q68FQ0        | HKLDVTSVEDYK                                                                          | 1.18449228         | 2              | 3.63161   |
| Q68FQ0        | ISDNVLVDINNPELIQTAK                                                                   | 1.293160854        | 2              | 5.01982   |
| Q68FQ0        | LDVTSVEDYK                                                                            | 0.939138599        | 2              | 2.94363   |
| Q68FQ0        | SLHDALCVIR                                                                            | 1.154440145        | 2              | 2.69392   |
| Q68FQ0        | WVGGPEIEIAIATGGR                                                                      | 0.86292864         | 2              | 3.82036   |
| <b>Q68FR6</b> | <b>EF1G Elongation factor 1_gamma</b>                                                 | <b>2.075024934</b> | <b>0.99982</b> | <b>8</b>  |
| Q68FR6        | AAAPAPEEEMDECEQALAAEPK                                                                | 1.005587027        | 2              | 4.98693   |
| Q68FR6        | ALIAAQYSGAQIR                                                                         | 1.043028316        | 2              | 4.33745   |
| Q68FR6        | ILGLDTHLK                                                                             | 1.415925954        | 2              | 2.51264   |
| Q68FR6        | KAAAPAPEEEMDECEQALAAEPK                                                               | 1.060079612        | 2              | 4.21749   |
| Q68FR6        | KLDPGSEETQLVLR                                                                        | 0.981686316        | 2              | 4.10036   |
| Q68FR6        | LDPGSEETQLVLR                                                                         | 1.124888861        | 2              | 3.54414   |
| Q68FR6        | STFVLDEFKR                                                                            | 1.040820775        | 2              | 2.52096   |
| Q68FR6        | WFLTCINQPQFR                                                                          | 1.032880656        | 2              | 3.35302   |
| <b>Q68FR9</b> | <b>EF1D Elongation factor 1_delta</b>                                                 | <b>2.282516655</b> | <b>0.10976</b> | <b>6</b>  |
| Q68FR9        | ATAPQQTQHVSPMR                                                                        | 1.066308847        | 2              | 3.30142   |
| Q68FR9        | ATAPQQTQHVSPMR+Oxidation(11                                                           | 0.869284914        |                |           |
| Q68FR9        | FYEQMNGPVTAGSR                                                                        | 1.263804556        | 2              | 4.52624   |
| Q68FR9        | GVVQDLQQAISK                                                                          | 1.211405688        | 2              | 3.43811   |
| Q68FR9        | SIQLDGLVWGASK                                                                         | 1.293727314        | 2              | 3.25988   |
| Q68FR9        | SLAGSSGPGASSGPGGDHSDLIVR                                                              | 1.115410737        | 2              | 5.38088   |
| <b>Q68FS2</b> | <b>CSN4 COP9 signalosome complex subunit 4</b>                                        | <b>2.730294542</b> | <b>0.44978</b> | <b>3</b>  |
| Q68FS2        | ATTADGSSILDR                                                                          | 1.433459422        | 2              | 2.32801   |
| Q68FS2        | NAAQVLVGIPLGTGQK                                                                      | 1.346234132        | 2              | 2.98284   |
| Q68FS2        | QIQLCLFQVNNLLEK                                                                       | 2.042048739        | 2              | 2.40834   |
| <b>Q68FS4</b> | <b>AMPL Cytosol aminopeptidase</b>                                                    | <b>1.925611337</b> | <b>7.4E-09</b> | <b>17</b> |
| Q68FS4        | ADMGGAATICSIVSAAK                                                                     | 1.229183961        | 2              | 5.1015    |
| Q68FS4        | ADMGGAATICSIVSAAK+Oxidation(2                                                         | 1.264260147        |                |           |
| Q68FS4        | DKDDDVPQFTSAGENFNK                                                                    | 1.078524564        | 2              | 5.38146   |
| Q68FS4        | GITFDSGGISIK                                                                          | 0.992563951        | 2              | 3.18221   |
| Q68FS4        | GSEEPVFLIEHYTGSPNATEAPLVFVGK                                                          | 1.399979948        | 3              | 6.16995   |
| Q68FS4        | GVLFASGQNLAR                                                                          | 0.770451413        | 2              | 3.43383   |
| Q68FS4        | LFEASVETGDR                                                                           | 1.001255354        | 2              | 3.58747   |
| Q68FS4        | LHGSGDLEAWEK                                                                          | 1.264799897        | 2              | 2.95171   |
| Q68FS4        | LNLPIIIGLAPLCEMMPGK                                                                   | 1.687769245        | 2              | 5.04497   |
| Q68FS4        | QLMESPANEMTPTR                                                                        | 0.928206037        | 2              | 3.65393   |
| Q68FS4        | QVIDCQLADVNNLGGK                                                                      | 1.287546931        | 2              | 4.72913   |
| Q68FS4        | SAGACTAAAFRL                                                                          | 1.331225134        | 2              | 3.88623   |
| Q68FS4        | SAGVDDQENWHEGK                                                                        | 0.920294415        | 2              | 3.97118   |
| Q68FS4        | SWIEEQEMGSFLSAK                                                                       | 1.192042346        | 2              | 5.14901   |
| Q68FS4        | TFYGLHQDFPSVVVVLGK                                                                    | 1.277625161        | 2              | 4.70411   |
| Q68FS4        | TIQVDNTDAEGR                                                                          | 0.935819522        | 2              | 4.1452    |
| Q68FS4        | TLIEFLLR                                                                              | 1.068631959        | 2              | 2.78993   |
| <b>Q68FT1</b> | <b>COQ9 Ubiquinone biosynthesis protein COQ9_mitochondrial</b>                        | <b>2.2388577</b>   | <b>0.99821</b> | <b>4</b>  |
| Q68FT1        | INDAMNMGHTAK                                                                          | 0.923505654        | 2              | 3.10169   |
| Q68FT1        | LNHVLEEEQK                                                                            | 1.163591258        | 2              | 3.40032   |
| Q68FT1        | STGEALVQGLMGAAVTLK                                                                    | 1.145568445        | 2              | 3.76337   |
| Q68FT1        | YTDQSGEEEDYESEEQIQR                                                                   | 0.846496295        | 3              | 4.68254   |
| <b>Q68FT3</b> | <b>PYRD2 Pyridine nucleotide_disulfide oxidoreductase domain_containing protein 2</b> | <b>2.189140917</b> | <b>1</b>       | <b>7</b>  |
| Q68FT3        | HVIGGAAVTEEIIPGFK                                                                     | 1.089421418        | 2              | 3.80329   |
| Q68FT3        | ISQLDTQSPVTK                                                                          | 1.360506667        | 2              | 3.50086   |
| Q68FT3        | SLLLGTDVAENQK                                                                         | 0.96030336         | 2              | 3.4011    |

|               |                                                                   |                    |                |           |
|---------------|-------------------------------------------------------------------|--------------------|----------------|-----------|
| Q68FT3        | TLGAQLPQYYEVLTAPIK                                                | 1.078167333        | 2              | 4.06975   |
| Q68FT3        | VFDCIEAYAPGFK                                                     | 1.011621686        | 2              | 2.82351   |
| Q68FT3        | VLDQWFSEPLK                                                       | 1.611824606        | 2              | 3.59083   |
| Q68FT3        | VQGVVLQGGEEVR                                                     | 0.931181803        | 2              | 3.26104   |
| <b>Q68FT5</b> | <b>BHMT2 Betaine__homocysteine S_methyltransferase 2</b>          | <b>2.189476439</b> | <b>9.9E-20</b> | <b>10</b> |
| Q68FT5        | AGANIIGVNCR                                                       | 1.187700003        | 2              | 3.62363   |
| Q68FT5        | AGLWTPEAVVEYPSAVR                                                 | 1.058954308        | 3              | 4.09577   |
| Q68FT5        | AIAEELAPER                                                        | 1.282899403        | 2              | 3.79623   |
| Q68FT5        | DAGLQAHLMVQCLGFHTPCGK                                             | 1.449253235        | 3              | 4.69201   |
| Q68FT5        | EVGAPVAVTMCIGPEGDMHGVTPGEC AVR                                    | 1.899235374        | 3              | 4.66815   |
| Q68FT5        | FGPWTSLQTMK                                                       | 1.018182111        | 2              | 2.51008   |
| Q68FT5        | GGFVDLPEYFPGLEPR                                                  | 1.243889716        | 2              | 4.21859   |
| Q68FT5        | LDSGEVVVGDGGFLFTLEK                                               | 1.479310031        | 2              | 2.67014   |
| Q68FT5        | REYWETLLPASGRPFPCPSLSKPDA                                         | 1.367979962        | 3              | 3.66162   |
| Q68FT5        | YIGGCCGFEPYHIR                                                    | 1.913798851        | 2              | 4.65506   |
| <b>Q68FT9</b> | <b>SCLY Selenocysteine lyase</b>                                  | <b>2.038007033</b> | <b>0.84957</b> | <b>6</b>  |
| Q68FT9        | AEVDLIVQDLK                                                       | 1.161321049        | 2              | 3.90052   |
| Q68FT9        | CFHEQQTQGR                                                        | 1.048146092        | 2              | 2.76003   |
| Q68FT9        | NFRPGTENTPMIAGLGK                                                 | 0.976605886        | 2              | 4.30324   |
| Q68FT9        | RVDVEDLGVDLTI VGHK                                                | 1.222084453        | 3              | 5.33191   |
| Q68FT9        | TVDQISPEEGTRPHFITCTVEHDSIR                                        | 0.87358025         | 3              | 4.65663   |
| Q68FT9        | VLVHTDAAQALGK                                                     | 0.845582193        | 3              | 3.31445   |
| <b>Q68FU3</b> | <b>ETFB Electron transfer flavoprotein subunit beta</b>           | <b>1.807176592</b> | <b>0.99995</b> | <b>13</b> |
| Q68FU3        | AGDLGVDLTSK                                                       | 0.809206645        | 2              | 3.49051   |
| Q68FU3        | EIDGGLETIR                                                        | 1.332113099        | 2              | 2.33737   |
| Q68FU3        | EIIAVSCGPPQCQETIR                                                 | 1.074169945        | 2              | 5.31334   |
| Q68FU3        | GIHVEVPGAEAEENLGPLQVAR                                            | 1.226989324        | 2              | 5.84644   |
| Q68FU3        | HSMNPFCEIAVEEAVR                                                  | 1.147573036        | 2              | 5.59787   |
| Q68FU3        | HSMNPFCEIAVEEAVR+Oxidation(2)                                     | 0.989103813        |                |           |
| Q68FU3        | LKLPAVVTADLR                                                      | 1.829335664        | 2              | 2.36035   |
| Q68FU3        | QAIDDDCNQTGQMTAGLLDWPQGTAFASQVTLEGDKVK                            | 2.574474205        | 3              | 5.73208   |
| Q68FU3        | RVIDFAVK                                                          | 0.930528681        | 2              | 2.63964   |
| Q68FU3        | VDLLFLGK                                                          | 0.946578286        | 2              | 2.73127   |
| Q68FU3        | VETTEDLVAK                                                        | 0.848230797        | 2              | 3.56437   |
| Q68FU3        | VIDFAVK                                                           | 0.776168471        | 2              | 2.42857   |
| Q68FU3        | VSVISVEEPPQR                                                      | 0.91328214         | 2              | 3.56365   |
| <b>Q68FY0</b> | <b>QCR1 Cytochrome b_c1 complex subunit 1_mitochondrial</b>       | <b>1.804183679</b> | <b>1</b>       | <b>10</b> |
| Q68FY0        | HQQLDLAQDHFSSVSQVYEEDAVPSITPCR                                    | 1.344644219        | 3              | 6.01256   |
| Q68FY0        | IEEVDAQMVR                                                        | 0.980984952        | 2              | 3.84492   |
| Q68FY0        | LCTSATESEVTR                                                      | 1.152633794        | 2              | 2.85525   |
| Q68FY0        | NALISHLDGTT PVCEDIGR                                              | 0.845361189        | 2              | 4.56618   |
| Q68FY0        | NNGAGYFLEHLAFK                                                    | 1.111062964        | 2              | 3.52426   |
| Q68FY0        | RIPLAEWESR                                                        | 0.763569956        | 2              | 2.67835   |
| Q68FY0        | SGMFWLR                                                           | 1.017562395        | 2              | 2.39729   |
| Q68FY0        | TDLTDYLSR                                                         | 0.821100249        | 2              | 2.9454    |
| Q68FY0        | VVELLADIVQNISLEDSQIEK                                             | 1.058721361        | 3              | 5.36858   |
| Q68FY0        | YFYDQCPAVAGYGPIEQLSDYNR                                           | 2.157285204        | 3              | 5.23737   |
| <b>Q68G31</b> | <b>PBLD Phenazine biosynthesis_like domain_containing protein</b> | <b>2.662806191</b> | <b>0.97688</b> | <b>7</b>  |
| Q68G31        | AAIGDTTVQDIQYSPDTR                                                | 1.66587922         | 2              | 4.72678   |
| Q68G31        | AEDGIVLDFPLYPTFPQDFHEVK                                           | 1.324061624        | 3              | 4.0088    |
| Q68G31        | GESGGQTPYDFYSR                                                    | 1.03553819         | 2              | 3.96294   |
| Q68G31        | LQPTDSFSQSSCFGLR                                                  | 1.417800105        | 2              | 3.55103   |
| Q68G31        | NVNSTLTFVTLSGELK                                                  | 0.986512473        | 2              | 4.2573    |
| Q68G31        | RAEDGIVLDFPLYPTFPQDFHEVK                                          | 1.17691397         | 3              | 5.774     |



|               |                                                                    |                    |                |          |
|---------------|--------------------------------------------------------------------|--------------------|----------------|----------|
| Q68G31        | VNTEPLPGIEK                                                        | 0.88013789         | 2              | 2.64245  |
| <b>Q69Z23</b> | <b>DYH17 Dynein heavy chain 17_axonemal</b>                        | <b>1.893561526</b> | <b>0.76781</b> | <b>2</b> |
| Q69Z23        | GDPTRAEDQVLMRALR                                                   | 0.877317124        | 2              | 2.41662  |
| Q69Z23        | YFIDLLMEK                                                          | 5.348430882        | 1              | 2.0173   |
| <b>Q6A028</b> | <b>SWP70 Switch_associated protein 70</b>                          | <b>4.305293488</b> | <b>0.06594</b> | <b>2</b> |
| Q6A028        | FILEKVQDNFDK                                                       | 2.107552838        | 1              | 1.91264  |
| Q6A028        | KGDILLDENCCVESLPDKDGK                                              | 1.861646015        | 2              | 2.3398   |
| <b>Q6A0A9</b> | <b>F120A Constitutive coactivator of PPAR_gamma_like protein 1</b> | <b>1.835766712</b> | <b>0.97219</b> | <b>3</b> |
| Q6A0A9        | LYEPDQLQELK                                                        | 1.092974322        | 2              | 2.3939   |
| Q6A0A9        | SQGGVQPIPSQGGK                                                     | 0.870792948        | 2              | 3.34622  |
| Q6A0A9        | VEGSSTASSGSQLAEGK                                                  | 1.171081927        | 2              | 4.23287  |
| <b>Q6AW69</b> | <b>CGNL1 Cingulin_like protein 1</b>                               | <b>2.302229293</b> | <b>0.98756</b> | <b>2</b> |
| Q6AW69        | NRRELAEMQTLK+Oxidation(7                                           | 1.041657398        |                |          |
| Q6AW69        | QDSAGPILDGAR                                                       | 1.28820032         | 2              | 2.50615  |
| <b>Q6AXM8</b> | <b>PON2 Serum paraoxonase/arylesterase 2</b>                       | <b>1.859903205</b> | <b>0.5044</b>  | <b>3</b> |
| Q6AXM8        | FQEEENSLHLK                                                        | 0.895451458        | 2              | 3.70879  |
| Q6AXM8        | LFVYDPNHPPSSEVLR                                                   | 0.875569402        | 2              | 2.46719  |
| Q6AXM8        | LVAEGFDSANGINISPDKK                                                | 1.429135002        | 2              | 3.53868  |
| <b>Q6AXS5</b> | <b>PAIRB Plasminogen activator inhibitor 1 RNA_binding protein</b> | <b>1.627597015</b> | <b>0.42976</b> | <b>4</b> |
| Q6AXS5        | EETQPPVALKK                                                        | 0.444456257        | 2              | 2.42261  |
| Q6AXS5        | FDQLFDESDFEVLK                                                     | 0.825691669        | 2              | 5.29557  |
| Q6AXS5        | RFEKPLEEK                                                          | 1.060957391        | 2              | 2.42124  |
| Q6AXS5        | SAAQAAAQTNSNAAGK                                                   | 0.442105322        | 2              | 4.54963  |
| <b>Q6AXY0</b> | <b>GSTA6 Glutathione S_transferase A6</b>                          | <b>1.836272284</b> | <b>0.12175</b> | <b>2</b> |
| Q6AXY0        | FLQPGSQR                                                           | 0.737172685        | 2              | 2.5621   |
| Q6AXY0        | YFPAFEK                                                            | 0.89637505         | 1              | 2.00928  |
| <b>Q6AY09</b> | <b>HNRH2 Heterogeneous nuclear ribonucleoprotein H2</b>            | <b>1.994265078</b> | <b>0.97429</b> | <b>4</b> |
| Q6AY09        | ATENDIYNFFSPLNPMR                                                  | 1.407078345        | 2              | 2.784    |
| Q6AY09        | GLPWSCSAEEVMR                                                      | 1.508370797        | 2              | 2.94583  |
| Q6AY09        | HTGPNSPDTANDGFVR                                                   | 0.994491136        | 2              | 4.17416  |
| Q6AY09        | STGEAFVQFASQEIAEK                                                  | 0.967105425        | 2              | 3.92796  |
| <b>Q6AY20</b> | <b>MPRD Cation_dependent mannose_6_phosphate receptor</b>          | <b>2.032878458</b> | <b>0.99989</b> | <b>2</b> |
| Q6AY20        | HTLAGNFNVPSEER                                                     | 1.047685949        | 2              | 4.17523  |
| Q6AY20        | SCDLVGEKDKESK                                                      | 0.877896026        | 2              | 3.68552  |
| <b>Q6AY30</b> | <b>SCPDH Probable saccharopine dehydrogenase</b>                   | <b>1.918379936</b> | <b>0.95705</b> | <b>6</b> |
| Q6AY30        | ACIENGTSICIDICGEPQFLELMHVK                                         | 1.54329451         | 3              | 4.01057  |
| Q6AY30        | ATLVNLCVGPYR                                                       | 1.031938805        | 2              | 2.82379  |
| Q6AY30        | GGGVFTPGAAFSR                                                      | 1.10605729         | 2              | 2.36506  |
| Q6AY30        | GVYIIGSSGFDSIPADLGVLYTR                                            | 1.185090878        | 2              | 2.92966  |
| Q6AY30        | LQQVLEK                                                            | 0.903452153        | 1              | 2.32071  |
| Q6AY30        | SVSNLKPVPVIGSK                                                     | 0.939124691        | 2              | 3.79931  |
| <b>Q6AY56</b> | <b>TBA8 Tubulin alpha_8 chain</b>                                  | <b>2.247196332</b> | <b>0.64932</b> | <b>7</b> |
| Q6AY56        | AVCMLSNTTAAEAWAR                                                   | 1.250401434        | 2              | 4.55811  |
| Q6AY56        | FDGALNVDLTFEQTNLVPYPR                                              | 1.105433229        | 2              | 5.10541  |
| Q6AY56        | LISQIVSSITASLR                                                     | 1.725356125        | 2              | 3.7551   |
| Q6AY56        | NLDIERPTYTNLNR                                                     | 1.112344855        | 2              | 3.3133   |
| Q6AY56        | QLFHPEQLITGK                                                       | 1.061854869        | 2              | 3.09159  |
| Q6AY56        | TIQFVDWCPTGFK                                                      | 1.11096468         | 2              | 3.70063  |
| Q6AY56        | VGINYQPPTVPPGGDLAK                                                 | 1.064901142        | 2              | 4.39579  |
| <b>Q6AY80</b> | <b>NQO2 Ribosyldihyronicotinamide dehydrogenase [quinone]</b>      | <b>2.609300207</b> | <b>0.99763</b> | <b>5</b> |
| Q6AY80        | ALTSDILEEQR                                                        | 1.127907399        | 2              | 3.24238  |
| Q6AY80        | EEPIHCTPSWYFQG                                                     | 1.385808331        | 2              | 2.69827  |

|               |                                                              |                    |                |          |
|---------------|--------------------------------------------------------------|--------------------|----------------|----------|
| Q6AY80        | NDVTGALSNPVEFK                                               | 1.856684325        | 2              | 3.93004  |
| Q6AY80        | VLAPQISFGPEVSSEQR                                            | 1.246426663        | 2              | 4.34197  |
| Q6AY80        | VLCQGAFDVPGFYDSGFLK                                          | 1.061538903        | 2              | 2.80055  |
| <b>Q6AYG5</b> | <b>ECHD1 Enoyl_CoA hydratase domain_containing protein 1</b> | <b>1.934439971</b> | <b>0.72857</b> | <b>3</b> |
| Q6AYG5        | DVLETLWGGPANLEIAIK                                           | 0.955637043        | 2              | 4.05122  |
| Q6AYG5        | ILEQFPGGSIDLQK                                               | 0.821313946        | 2              | 3.41098  |
| Q6AYG5        | NTFCSGSDLNAVK                                                | 0.790433095        | 2              | 2.48237  |
| <b>Q6AYH5</b> | <b>DCTN2 Dynactin subunit 2</b>                              | <b>2.093739009</b> | <b>0.89038</b> | <b>3</b> |
| Q6AYH5        | ASVEDADTQNK                                                  | 0.788863532        | 2              | 2.80982  |
| Q6AYH5        | VNALDLAVLDQVEAR                                              | 1.173339608        | 2              | 3.41295  |
| Q6AYH5        | WSPVASTLPELVQR                                               | 1.082260739        | 2              | 2.90362  |
| <b>Q6AYK6</b> | <b>CYBP Calcyclin_binding protein</b>                        | <b>2.779762061</b> | <b>0.60744</b> | <b>2</b> |
| Q6AYK6        | IYEDGDDMKR                                                   | 1.616827885        | 2              | 2.40685  |
| Q6AYK6        | WDYLTQVEK                                                    | 2.533590978        | 2              | 2.60189  |
| <b>Q6AYQ8</b> | <b>FAHD1 Acylpyruvase FAHD1_mitochondrial</b>                | <b>2.09967027</b>  | <b>1</b>       | <b>4</b> |
| Q6AYQ8        | IITLEEGDLILTGP                                               | 1.311112345        | 2              | 5.17019  |
| Q6AYQ8        | NLHHEVELGVLLGR                                               | 0.754491343        | 3              | 4.70732  |
| Q6AYQ8        | SFTSSCPVSAFVPK                                               | 1.031648558        | 2              | 3.98761  |
| Q6AYQ8        | STVLSEPVLFKLPSTAYAPEGSPVLMPAYCR                              | 1.019868204        | 3              | 3.72354  |
| <b>Q6AYR8</b> | <b>SCRN2 Secernin_2</b>                                      | <b>2.144989702</b> | <b>0.94188</b> | <b>2</b> |
| Q6AYR8        | GHQAALGLMDEQEQAQLR                                           | 0.981272401        | 3              | 4.30184  |
| Q6AYR8        | QEQQSLEQEGLEALR                                              | 1.151939891        | 2              | 3.88558  |
| <b>Q6AYS7</b> | <b>ACY1A Aminoacylase_1A</b>                                 | <b>2.147384458</b> | <b>0.02723</b> | <b>2</b> |
| Q6AYS7        | EMNLTLEPEIFPAATDSR                                           | 1.069620725        | 2              | 3.81153  |
| Q6AYS7        | ICTVQPNPDYGSVTFLEER                                          | 3.021378636        | 2              | 4.57627  |
| <b>Q6AYS8</b> | <b>DHB11 Estradiol 17_beta_dehydrogenase 11</b>              | <b>2.145839804</b> | <b>0.88801</b> | <b>3</b> |
| Q6AYS8        | ALTDELAALGCTGVR                                              | 0.845753149        | 2              | 4.05791  |
| Q6AYS8        | FDAVVGYK                                                     | 1.54381551         | 1              | 2.2866   |
| Q6AYS8        | SVAGEIVLITGAGHGIGR                                           | 0.900147753        | 2              | 4.02995  |
| <b>Q6AYT9</b> | <b>ACSM5 Acyl_coenzyme A synthetase ACSM5_mitochondrial</b>  | <b>2.072081347</b> | <b>0.90964</b> | <b>4</b> |
| Q6AYT9        | AFIVLSPAYVSHDPEALTR                                          | 1.185424969        | 2              | 3.43435  |
| Q6AYT9        | ASPPYDVQIVDEEGNVLPPGK                                        | 1.064002637        | 2              | 3.20889  |
| Q6AYT9        | NDDVINSSSYR                                                  | 2.224682875        | 2              | 3.34475  |
| Q6AYT9        | TGVVMIPGISLQTK                                               | 1.296814225        | 2              | 3.14431  |
| <b>Q6AYZ1</b> | <b>TBA1C Tubulin alpha_1C chain</b>                          | <b>2.061462703</b> | <b>0.72533</b> | <b>6</b> |
| Q6AYZ1        | AVFVDLEPTVIDEVR                                              | 1.004500805        | 2              | 5.40966  |
| Q6AYZ1        | AYHEQLTVAEITNACFEPANQMVK                                     | 1.169054431        | 3              | 4.14551  |
| Q6AYZ1        | DVNAAIATIK                                                   | 1.055984342        | 2              | 3.17294  |
| Q6AYZ1        | IHFPLATYAPVISA EK                                            | 1.396444758        | 2              | 3.79999  |
| Q6AYZ1        | TIGGGDDSFNTFFSETGAGK                                         | 1.566403268        | 2              | 5.46006  |
| Q6AYZ1        | VGINYQPPTVPGDLAR                                             | 1.262010385        | 2              | 4.70229  |
| <b>Q6DGG0</b> | <b>PPID Peptidyl_prolyl cis_trans isomerase D</b>            | <b>2.189487329</b> | <b>0.79857</b> | <b>4</b> |
| Q6DGG0        | GTGPTTGKPLHFK                                                | 0.794422098        | 2              | 2.35666  |
| Q6DGG0        | IVLELFADIVPK                                                 | 1.810262789        | 2              | 2.31037  |
| Q6DGG0        | MLENVEVNGEKPAK                                               | 1.007466768        | 2              | 3.70808  |
| Q6DGG0        | VFFDVIDIGGER                                                 | 1.258934917        | 2              | 2.83679  |
| <b>Q6DGG1</b> | <b>ABHEB Abhydrolase domain_containing protein 14B</b>       | <b>1.939007615</b> | <b>1.8E-06</b> | <b>6</b> |
| Q6DGG1        | AVAILPLGLGR                                                  | 1.003331792        | 2              | 3.56435  |
| Q6DGG1        | FSSETWQNLGLTLHR                                              | 1.219473962        | 2              | 3.63614  |
| Q6DGG1        | FSVLLHGIR                                                    | 0.92387346         | 2              | 3.08848  |
| Q6DGG1        | GYVPVAPICTDK                                                 | 0.904388087        | 1              | 2.65398  |
| Q6DGG1        | INAADYAR                                                     | 0.979450916        | 2              | 2.46774  |
| Q6DGG1        | TPTLIVYGDQDPMGSSSFQHLK                                       | 1.433546104        | 2              | 5.38226  |

|               |                                                          |                    |                |           |
|---------------|----------------------------------------------------------|--------------------|----------------|-----------|
| <b>Q6EDY6</b> | <b>LR16A Leucine_rich repeat_containing protein 16A</b>  | <b>2.104625134</b> | <b>0.96586</b> | <b>2</b>  |
| Q6EDY6        | ELMESIK+Oxidation(2                                      | 1.260025131        |                |           |
| Q6EDY6        | IENYLLR                                                  | 1.066030741        | 2              | 2.45561   |
| <b>Q6GQP4</b> | <b>RAB31 Ras_related protein Rab_31</b>                  | <b>1.802396034</b> | <b>0.33633</b> | <b>2</b>  |
| Q6GQP4        | CDLSDIREVPLK                                             | 0.875987766        | 2              | 2.5344    |
| Q6GQP4        | CDLSDIREVPLKDAK                                          | 0.798995169        | 2              | 2.91608   |
| <b>Q6GQT1</b> | <b>A2MP Alpha_2_macrolobulin_P</b>                       | <b>2.677985344</b> | <b>0.4913</b>  | <b>3</b>  |
| Q6GQT1        | ASVTVLGDILGSAMQNTQDLLK                                   | 0.994690163        | 2              | 2.35133   |
| Q6GQT1        | IQEEGTGVEETGK                                            | 5.318852562        | 2              | 3.72267   |
| Q6GQT1        | SSGSLNNAMK                                               | 1.085811673        | 2              | 3.09788   |
| <b>Q6I7R3</b> | <b>ISOC1 Isochorismatase domain_containing protein 1</b> | <b>2.49333929</b>  | <b>0.34737</b> | <b>3</b>  |
| Q6I7R3        | GLGSTVQEIDLTGVK                                          | 1.132363047        | 2              | 3.87937   |
| Q6I7R3        | ILGIPVIITEQYPK                                           | 1.70191464         | 2              | 3.00799   |
| Q6I7R3        | YFGDIISVGQR                                              | 1.338736821        | 2              | 2.57839   |
| <b>Q6IE52</b> | <b>MUG2 Murinoglobulin_2</b>                             | <b>2.185272876</b> | <b>0.04816</b> | <b>14</b> |
| Q6IE52        | AHFSVMGDILSSAIK                                          | 1.192206798        | 2              | 3.67194   |
| Q6IE52        | HGIPFFVK                                                 | 1.190197778        | 2              | 2.74722   |
| Q6IE52        | HTSSWLVPK                                                | 1.125207409        | 2              | 2.80894   |
| Q6IE52        | LPSSEEEESLDINIEGAK                                       | 1.588842536        | 2              | 2.88293   |
| Q6IE52        | MLIYTILPDGEVIADSVK                                       | 1.260634926        | 2              | 3.83604   |
| Q6IE52        | MLSGFIPLKPTVK                                            | 4.441628766        | 2              | 3.15561   |
| Q6IE52        | MLSGFIPLKPTVK+Oxidation(0                                | 0.867859087        |                |           |
| Q6IE52        | NLYPLKELVQDPK                                            | 1.240955726        | 1              | 2.04411   |
| Q6IE52        | QLSFSLSAEPIQGPK                                          | 1.406788815        | 2              | 4.2773    |
| Q6IE52        | QQNSHGGFSSTQDVTVALDALS                                   | 1.180760239        | 3              | 3.65907   |
| Q6IE52        | VHLSFSPSQLPASQTHMR                                       | 0.826953307        | 3              | 3.93723   |
| Q6IE52        | VKTVP LTCNNPK                                            | 1.102777139        | 2              | 2.96447   |
| Q6IE52        | VTASPSQLCGLR                                             | 1.638455246        | 2              | 2.50736   |
| Q6IE52        | YMLVPSQLYTETPEK                                          | 1.187384171        | 2              | 3.72556   |
| <b>Q6IFW6</b> | <b>K1C10 Keratin_type I cytoskeletal 10</b>              | <b>1.801225248</b> | <b>0.91956</b> | <b>2</b>  |
| Q6IFW6        | LENEIQTYR                                                | 0.849940413        | 2              | 2.34899   |
| Q6IFW6        | QSLEASLAETGR                                             | 0.80892472         | 2              | 3.44501   |
| <b>Q6IFZ9</b> | <b>K2C74 Keratin_type II cytoskeletal 74</b>             | <b>1.702833521</b> | <b>0.37247</b> | <b>2</b>  |
| Q6IFZ9        | FLEQQNQVLQTK                                             | 0.299535596        | 2              | 4.16948   |
| Q6IFZ9        | GDSALKDAWAKLDELEGALQQA                                   | 2.261565613        | 3              | 3.60364   |
| <b>Q6IMF3</b> | <b>K2C1 Keratin_type II cytoskeletal 1</b>               | <b>1.9788259</b>   | <b>0.55942</b> | <b>4</b>  |
| Q6IMF3        | TNAENEFVTIK                                              | 0.491208242        | 2              | 2.75133   |
| Q6IMF3        | TNAENEFVTIKK                                             | 0.17497166         | 2              | 2.93977   |
| Q6IMF3        | WELLQQVDTSTR                                             | 0.766360267        | 2              | 3.61795   |
| Q6IMF3        | YEELQITAGK                                               | 0.986512696        | 2              | 3.46776   |
| <b>Q6IRK9</b> | <b>PGCP Plasma glutamate carboxypeptidase</b>            | <b>2.226247713</b> | <b>0.29171</b> | <b>7</b>  |
| Q6IRK9        | AIQIMYQNLQQDGLNVHLEQVR                                   | 1.113318595        | 3              | 5.46347   |
| Q6IRK9        | GEESAVMVVPR                                              | 1.050710096        | 2              | 2.82703   |
| Q6IRK9        | IVVYNQPYTDYK                                             | 0.85834979         | 2              | 2.91765   |
| Q6IRK9        | LGLLVDTVGPR                                              | 1.482312952        | 2              | 2.98361   |
| Q6IRK9        | SVASFSIYSPHTGHQGYQDGVPK                                  | 1.200277083        | 3              | 3.45847   |
| Q6IRK9        | TYPDTDSFNTVAEITGSK                                       | 1.370511981        | 2              | 3.73194   |
| Q6IRK9        | VGAVASLIR                                                | 1.568660768        | 2              | 2.52945   |
| <b>Q6MGB5</b> | <b>DHB8 Estradiol_17_beta_dehydrogenase 8</b>            | <b>2.184779462</b> | <b>0.99533</b> | <b>4</b>  |
| Q6MGB5        | AGVIGLTQTAAR                                             | 1.128133182        | 2              | 3.19555   |
| Q6MGB5        | CNSVLPGFATPMTQK                                          | 1.373394241        | 2              | 2.34861   |
| Q6MGB5        | GSIIINISSIVGK                                            | 1.743631505        | 2              | 2.7751    |
| Q6MGB5        | VGNIGQNTYASSK                                            | 0.993804163        | 2              | 2.76001   |
| <b>Q6NSR8</b> | <b>PEPL1 Probable aminopeptidase NPEPL1</b>              | <b>2.020403288</b> | <b>0.99997</b> | <b>3</b>  |
| Q6NSR8        | GIVYDTGGLSIK                                             | 1.015195587        | 2              | 2.36454   |

|               |                                                                 |                    |                |           |
|---------------|-----------------------------------------------------------------|--------------------|----------------|-----------|
| Q6NSR8        | HNSPSAAHFITR                                                    | 0.98316476         | 3              | 3.95459   |
| Q6NSR8        | TVEINNTDAEGR                                                    | 0.892684353        | 2              | 2.9926    |
| <b>Q6NYB7</b> | <b>RAB1A Ras_related protein Rab_1A</b>                         | <b>2.261820975</b> | <b>0.9922</b>  | <b>3</b>  |
| Q6NYB7        | EFADSLGIPFLETSK                                                 | 0.944659543        | 2              | 3.79188   |
| Q6NYB7        | NATNVEQSFMTMAAEIK                                               | 1.188828667        | 2              | 5.09252   |
| Q6NYB7        | TITSSYYR                                                        | 0.969142608        | 1              | 1.97861   |
| <b>Q6NZJ6</b> | <b>IF4G1 Eukaryotic translation initiation factor 4 gamma 1</b> | <b>2.354727356</b> | <b>0.89355</b> | <b>9</b>  |
| Q6NZJ6        | FMLQDVLDLR                                                      | 1.371813546        | 2              | 2.79625   |
| Q6NZJ6        | GLPLVDDGGWNTVPISK                                               | 1.075868922        | 2              | 2.87266   |
| Q6NZJ6        | GSSGGSGAKPSDTASEATRPATLNR                                       | 0.974503233        | 3              | 3.35313   |
| Q6NZJ6        | IHNAENIQPGEQK                                                   | 1.123065277        | 2              | 3.95514   |
| Q6NZJ6        | ITKPGSIDSNNQLFAPGGR                                             | 1.152159026        | 3              | 3.56169   |
| Q6NZJ6        | KVEYTLGEESEAPGQR                                                | 0.932260669        | 2              | 4.75058   |
| Q6NZJ6        | LGIESTLER                                                       | 1.168343199        | 2              | 2.4185    |
| Q6NZJ6        | LKEELEEAR                                                       | 1.069288785        | 2              | 2.70229   |
| Q6NZJ6        | TASTPTPPQTGGSLPEQPNGESPQVAVIIRPDDR                              | 0.810730943        | 3              | 4.99129   |
| <b>Q6P0K8</b> | <b>PLAK Junction plakoglobin</b>                                | <b>2.121881707</b> | <b>0.98829</b> | <b>3</b>  |
| Q6P0K8        | LLNDEDPVVVTK                                                    | 0.854064759        | 2              | 3.22565   |
| Q6P0K8        | NLALCPANHAPLQEEAAVIPR                                           | 1.109080491        | 3              | 3.62823   |
| Q6P0K8        | TMQNTSDLDTAR                                                    | 1.023515587        | 2              | 3.25989   |
| <b>Q6P502</b> | <b>TCPG T_complex protein 1 subunit gamma</b>                   | <b>2.670871465</b> | <b>0.00282</b> | <b>14</b> |
| Q6P502        | AMTGVEQWPYR                                                     | 1.095098808        | 2              | 2.70722   |
| Q6P502        | AVAQALEVIPR                                                     | 1.218581386        | 2              | 2.4506    |
| Q6P502        | DMMLNIINSITTK                                                   | 0.927991812        | 2              | 3.97657   |
| Q6P502        | EIQVQHPAK                                                       | 1.029808397        | 2              | 3.30226   |
| Q6P502        | GISDLAQHYLMR                                                    | 1.506684159        | 2              | 3.04806   |
| Q6P502        | IVLLDSSLEYK                                                     | 1.613729771        | 2              | 2.55909   |
| Q6P502        | IVSRPEELREDDVGTGAGLLEIK                                         | 2.064360358        | 3              | 4.09411   |
| Q6P502        | KGESQTDIEITR                                                    | 1.073806436        | 2              | 3.27758   |
| Q6P502        | MLLDPMGGIVMTNDGNAILR                                            | 1.765974039        | 2              | 3.88515   |
| Q6P502        | NLQDAMQVCR                                                      | 1.098008969        | 2              | 3.31944   |
| Q6P502        | NVLLDPQLVPGGASEMAVAHALTEK                                       | 2.164888833        | 2              | 3.87082   |
| Q6P502        | TAVETAVLLLR                                                     | 1.378199912        | 2              | 3.73921   |
| Q6P502        | TLIQNCGASTIR                                                    | 1.065680526        | 2              | 3.34592   |
| Q6P502        | WSSLACNIALDAVK                                                  | 1.341776597        | 2              | 3.7964    |
| <b>Q6P6M7</b> | <b>selenium transferase</b>                                     | <b>1.845340407</b> | <b>0.90545</b> | <b>4</b>  |
| <b>Q6P6R2</b> | <b>DLDH Dihydrolipoyl dehydrogenase_mitochondrial</b>           | <b>1.878210434</b> | <b>0.99925</b> | <b>14</b> |
| Q6P6R2        | ALLNNSHYHLAHGK                                                  | 0.774878933        | 2              | 3.3111    |
| Q6P6R2        | ALTGGIAHLFK                                                     | 1.022937269        | 2              | 2.63245   |
| Q6P6R2        | EANLAASFGKPINF                                                  | 1.18460319         | 1              | 1.92902   |
| Q6P6R2        | IDVSVEAASGGK                                                    | 0.889570674        | 2              | 3.03946   |
| Q6P6R2        | ILGAHILPGAGEMVNEAALALEYGASCEDVAR                                | 1.071184924        | 3              | 3.99356   |
| Q6P6R2        | IPNIFAIGDVVAGPMLAHK                                             | 1.436560461        | 3              | 3.50005   |
| Q6P6R2        | NETLGGTCLNVGCIPSK                                               | 0.881470556        | 2              | 5.16718   |
| Q6P6R2        | NQVTATTADGSTQVIGTK                                              | 0.856160451        | 2              | 5.63074   |
| Q6P6R2        | RPFTQNLGLEELGIELDPK                                             | 1.066034947        | 3              | 4.60339   |
| Q6P6R2        | SEEQLKEEGVEFK                                                   | 0.804818794        | 2              | 3.53124   |
| Q6P6R2        | TNADTDGMVK                                                      | 0.787769384        | 2              | 2.82534   |
| Q6P6R2        | TNADTDGMVK+Oxidation(7                                          | 1.237439449        |                |           |
| Q6P6R2        | VCHAHPTLSEAFR                                                   | 1.109275285        | 3              | 3.78274   |
| Q6P6R2        | VVHVNGFGK                                                       | 1.033375763        | 3              | 3.45103   |
| <b>Q6P6S9</b> | <b>ENTP5 Ectonucleoside triphosphate diphosphohydrolase 5</b>   | <b>1.796105599</b> | <b>0.65456</b> | <b>6</b>  |
| Q6P6S9        | AAETHLIDYEK                                                     | 0.901288659        | 2              | 2.66759   |
| Q6P6S9        | AQTLLEVEEIFK                                                    | 0.947885585        | 2              | 3.27033   |

|               |                                                                   |                    |                |           |
|---------------|-------------------------------------------------------------------|--------------------|----------------|-----------|
| Q6P6S9        | GQETVGTLDLGASTQITFLPQLEK                                          | 0.936243497        | 2              | 4.39739   |
| Q6P6S9        | QGAETVQELLEVAK                                                    | 0.806250694        | 2              | 3.14373   |
| Q6P6S9        | TSGQLPFLEGEIFDSVKPGLSAFVDQPK                                      | 0.847427304        | 3              | 3.62794   |
| Q6P6S9        | WLEAEWIFGGVK                                                      | 1.422180098        | 2              | 2.77027   |
| <b>Q6P6V0</b> | <b>G6PI Glucose_6_phosphate isomerase</b>                         | <b>2.248127696</b> | <b>0.7622</b>  | <b>9</b>  |
| Q6P6V0        | DVMPEVNVKVLDK+Oxidation(2)                                        | 1.066770608        |                |           |
| Q6P6V0        | HFVALSTNTDK                                                       | 1.203542567        | 1              | 3.25527   |
| Q6P6V0        | KIEPELDGSSAVTSHDSSTNGLIGFIK                                       | 1.306231053        | 3              | 6.00124   |
| Q6P6V0        | MIPCDFLIPVQTQHPIR                                                 | 2.35895579         | 2              | 2.42619   |
| Q6P6V0        | TFTTQETITNAETAK                                                   | 1.400782205        | 2              | 4.75683   |
| Q6P6V0        | TLANLNPESSLFIIASK                                                 | 0.974083616        | 3              | 5.20596   |
| Q6P6V0        | VDYQTGPVWGPPTNGQHAFYQLIHQGTK                                      | 1.276203838        | 3              | 4.02225   |
| Q6P6V0        | VFEGNRPTNSIVFTK                                                   | 1.153755524        | 2              | 3.38279   |
| Q6P6V0        | VWVFSNIDGTHIAK                                                    | 0.940928115        | 2              | 3.63236   |
| <b>Q6P7Q4</b> | <b>LGUL Lactoylglutathione lyase</b>                              | <b>2.376761901</b> | <b>0.71717</b> | <b>6</b>  |
| Q6P7Q4        | DFLLQQTMLR                                                        | 1.298221124        | 2              | 3.38238   |
| Q6P7Q4        | FEELGVK                                                           | 1.079920818        | 1              | 1.93778   |
| Q6P7Q4        | GFGHIGIAVPDVEACK                                                  | 1.442901567        | 2              | 4.0001    |
| Q6P7Q4        | GLAFVQDPDGYWIEILNPKN                                              | 1.248570997        | 2              | 5.7382    |
| Q6P7Q4        | RFEELGVK                                                          | 0.973801025        | 2              | 2.32368   |
| Q6P7Q4        | VLGLTLLQK                                                         | 1.712470628        | 2              | 2.48099   |
| <b>Q6P7R8</b> | <b>DHB12 Estradiol 17_beta_dehydrogenase 12</b>                   | <b>2.287247234</b> | <b>0.90978</b> | <b>2</b>  |
| Q6P7R8        | GIFVQSVLPFFVATK                                                   | 0.986845428        | 2              | 3.46805   |
| Q6P7R8        | LGEWAVVTGGTDGIGK                                                  | 1.22637863         | 2              | 4.23867   |
| <b>Q6P9T8</b> | <b>TBB2C Tubulin beta_2C chain</b>                                | <b>1.974782542</b> | <b>0.76166</b> | <b>13</b> |
| Q6P9T8        | AVLVDLEPGTMSVR                                                    | 1.082022198        | 2              | 4.50998   |
| Q6P9T8        | AVLVDLEPGTMSVR+Oxidation(10)                                      | 0.972950916        |                |           |
| Q6P9T8        | EAESCDCLQGFLTHSLGGGTGSGMGTLISK                                    | 2.056931867        | 3              | 5.65801   |
| Q6P9T8        | EIVHLQAGQCQNGQIGAK                                                | 2.05452639         | 2              | 4.93126   |
| Q6P9T8        | EVDEQMLNVQNK                                                      | 0.919422629        | 2              | 4.47394   |
| Q6P9T8        | FWEVISDEHGIDPTGYHGSDQLQLER                                        | 2.409177925        | 3              | 4.85032   |
| Q6P9T8        | INVYYNEATGGK                                                      | 1.160105747        | 2              | 3.07603   |
| Q6P9T8        | KEAESCDCLQGFLTHSLGGGTGSGMGTLISK                                   | 1.327136971        | 3              | 6.60577   |
| Q6P9T8        | LHFFMPGFAPLTSR                                                    | 1.266207873        | 2              | 3.26907   |
| Q6P9T8        | MSATFIGNSTAIQELFK                                                 | 1.413119484        | 2              | 4.3316    |
| Q6P9T8        | SGPFGQIFRPDNFVFGQSGAGNNWAK                                        | 1.314511039        | 3              | 5.80361   |
| Q6P9T8        | TAVCDIPPR                                                         | 1.149230779        | 2              | 2.5009    |
| Q6P9T8        | YLTVAAVFR                                                         | 1.77513541         | 2              | 2.68381   |
| <b>Q6P9U8</b> | <b>EIF3H Eukaryotic translation initiation factor 3 subunit H</b> | <b>1.933486213</b> | <b>0.99706</b> | <b>2</b>  |
| Q6P9U8        | ANITFEHMFEEVPIVIK                                                 | 0.979991558        | 3              | 3.73125   |
| Q6P9U8        | EGTGSTATSSSTGGAVGK                                                | 0.935473213        | 2              | 4.27067   |
| <b>Q6PA06</b> | <b>ATLA2 Atlastin_2</b>                                           | <b>1.971585614</b> | <b>0.34827</b> | <b>5</b>  |
| Q6PA06        | AGLTDQVSHHAR                                                      | 0.942499441        | 2              | 3.18057   |
| Q6PA06        | NLVPLLLAPENLVEK                                                   | 1.207252133        | 2              | 3.02297   |
| Q6PA06        | QNQHEELQNVN                                                       | 0.972446015        | 2              | 2.92974   |
| Q6PA06        | SMEQVCGGDKPYIAPSDLER                                              | 1.305729088        | 3              | 3.80321   |
| Q6PA06        | SMLQATAEANNLAAVAGAR                                               | 1.558049797        | 2              | 4.50093   |
| <b>Q6PCL9</b> | <b>polymerase gamma</b>                                           | <b>2.268841897</b> | <b>0.64703</b> | <b>2</b>  |
| Q6PCL9        | LTEILK                                                            | 0.987632803        |                |           |
| Q6PCL9        | QANNINMLKDGMK                                                     | 1.18460319         |                |           |
| <b>Q6PCU2</b> | <b>VATE1 V_type proton ATPase subunit E 1</b>                     | <b>2.485599539</b> | <b>0.21702</b> | <b>2</b>  |
| Q6PCU2        | ARDDLITDLLNEAK                                                    | 1.357831026        | 2              | 2.97243   |
| Q6PCU2        | LDLIAQQMMPEVR                                                     | 1.243835613        | 2              | 2.56513   |
| <b>Q6PDM2</b> | <b>SRSF1 Serine/arginine_rich splicing factor 1</b>               | <b>1.968853464</b> | <b>0.99977</b> | <b>2</b>  |
| Q6PDM2        | SHEGETAYIR                                                        | 0.975059557        | 2              | 2.40953   |
| Q6PDM2        | TKDIEDVFIK                                                        | 0.99427984         | 2              | 2.75332   |

|               |                                                                                    |                    |                |           |
|---------------|------------------------------------------------------------------------------------|--------------------|----------------|-----------|
| <b>Q6PDV7</b> | <b>RL10 60S ribosomal protein L10</b>                                              | <b>2.542427121</b> | <b>0.34217</b> | <b>2</b>  |
| Q6PDV7        | FNADEFEDMVAEK                                                                      | 1.262161294        | 2              | 3.81246   |
| Q6PDV7        | FNADEFEDMVAEKR                                                                     | 1.376498914        | 2              | 3.30423   |
| <b>Q6PEC1</b> | <b>TBCA Tubulin_specific chaperone A</b>                                           | <b>2.048456939</b> | <b>0.94846</b> | <b>6</b>  |
| Q6PEC1        | AEDGENYAIK                                                                         | 1.028803355        | 2              | 2.6904    |
| Q6PEC1        | AEDGENYAIKK                                                                        | 0.965181948        | 2              | 2.47524   |
| Q6PEC1        | LEAAYTDLR                                                                          | 1.18329366         | 2              | 2.81162   |
| Q6PEC1        | MKAEDGENYAIK                                                                       | 0.226014161        | 2              | 2.79379   |
| Q6PEC1        | QAEILQESR                                                                          | 0.880940467        | 2              | 2.58364   |
| Q6PEC1        | QILESEKDLEEAEEYKEAR                                                                | 1.105550482        | 3              | 4.09466   |
| <b>Q6PEC4</b> | <b>SKP1 S_phase kinase_associated protein 1</b>                                    | <b>2.497963765</b> | <b>0.27764</b> | <b>3</b>  |
| Q6PEC4        | NDFTEEEAQVR                                                                        | 1.515583436        | 2              | 3.45187   |
| Q6PEC4        | RTDDIPVWDQEFK                                                                      | 0.88621266         | 2              | 3.02802   |
| Q6PEC4        | TDDIPVWDQEFK                                                                       | 1.320311504        | 2              | 3.18925   |
| <b>Q6Q0N1</b> | <b>CNDP2 Cytosolic non_specific dipeptidase</b>                                    | <b>2.366532821</b> | <b>0.9205</b>  | <b>6</b>  |
| Q6Q0N1        | AVFQYIDENQDR                                                                       | 0.837198499        | 2              | 3.02616   |
| Q6Q0N1        | EGGSIPVTLTFQEATGK                                                                  | 1.252606136        | 2              | 2.76204   |
| Q6Q0N1        | LGGSVELVDIGK                                                                       | 1.017705065        | 2              | 3.58265   |
| Q6Q0N1        | MTEAAAADVQR                                                                        | 1.208026753        | 2              | 3.14374   |
| Q6Q0N1        | TGQEIPVNLN                                                                         | 1.25320623         | 2              | 2.57481   |
| Q6Q0N1        | TVFGVEPDLTR                                                                        | 1.305376058        | 2              | 2.39771   |
| <b>Q6RT24</b> | <b>CENPE Centromere_associated protein E</b>                                       | <b>1.937575392</b> | <b>0.93941</b> | <b>3</b>  |
| Q6RT24        | ENEDLKLK                                                                           | 1.012519186        | 2              | 2.32973   |
| Q6RT24        | MELENVNMKLQEK                                                                      | 0.848857709        | 2              | 2.55944   |
| Q6RT24        | NLQEYIDAQSEKMK                                                                     | 0.888862211        | 2              | 2.40604   |
| <b>Q6SKG1</b> | <b>ACSM3 Acyl_coenzyme A synthetase ACSM3_mitochondrial</b>                        | <b>1.843311094</b> | <b>0.12837</b> | <b>2</b>  |
| Q6SKG1        | FDSTSILQTLK                                                                        | 1.45434998         | 2              | 3.75613   |
| Q6SKG1        | TGTVLIPGTTQLTQK                                                                    | 0.797726602        | 2              | 2.85918   |
| <b>Q6TUG0</b> | <b>DJB11 DnaJ homolog subfamily B member 11</b>                                    | <b>2.24754111</b>  | <b>0.99576</b> | <b>4</b>  |
| Q6TUG0        | FQDLGAAYEVLSDSEK                                                                   | 1.368184479        | 2              | 4.64675   |
| Q6TUG0        | FQMTQEVVCECPNVK                                                                    | 1.12218904         | 2              | 5.57842   |
| Q6TUG0        | KGGLPNFDNNNIK                                                                      | 1.150335567        | 2              | 3.64917   |
| Q6TUG0        | TLEVEIEPGVR                                                                        | 1.355129762        | 2              | 3.1555    |
| <b>Q6UPE1</b> | <b>ETFD Electron transfer flavoprotein_ubiquinone oxidoreductase_mitochondrial</b> | <b>1.748319677</b> | <b>0.99264</b> | <b>19</b> |
| Q6UPE1        | AAQIGAHTLSGACLDPAAFK                                                               | 0.949523808        | 2              | 5.09539   |
| Q6UPE1        | ALNEGGLQSIK                                                                        | 0.852086469        | 2              | 3.36423   |
| Q6UPE1        | ASCDATYIGLK                                                                        | 0.731380515        | 2              | 4.05393   |
| Q6UPE1        | DCTPIEYKPDGQISFDLLSSVALSGTNHEHDQPAHLTLK                                            | 0.941596491        | 4              | 4.62569   |
| Q6UPE1        | FAEEADVIVGAGPAGLSAAIR                                                              | 1.573361081        | 2              | 3.08612   |
| Q6UPE1        | FCPAGVYEFVPLEQGDGFR                                                                | 1.106936977        | 2              | 4.5225    |
| Q6UPE1        | GAPLNTPVTEDR                                                                       | 0.916862001        | 2              | 3.48264   |
| Q6UPE1        | GIATNDVGIQK                                                                        | 0.939156942        | 2              | 3.78917   |
| Q6UPE1        | HHPSIRPTLEGGK                                                                      | 0.734752842        | 2              | 2.4202    |
| Q6UPE1        | HHPSIRPTLEGGKR                                                                     | 0.993708457        | 2              | 2.82038   |
| Q6UPE1        | LQINAQNCVHCK                                                                       | 1.151179335        | 2              | 3.72339   |
| Q6UPE1        | NLSYDGPEQR                                                                         | 1.16481114         | 2              | 3.14372   |
| Q6UPE1        | QLAAEQEKDIR                                                                        | 0.753028401        | 2              | 2.70154   |
| Q6UPE1        | QLTSENLSK                                                                          | 0.756958783        | 2              | 2.46372   |
| Q6UPE1        | SGSLAAEAIFK                                                                        | 0.923555932        | 2              | 3.14082   |
| Q6UPE1        | TAGLHVTEYEDNLK                                                                     | 1.230529225        | 2              | 3.97349   |
| Q6UPE1        | TCDIKDPSQINWVWPEGGGPAYNGM                                                          | 1.62331693         | 2              | 4.39      |
| Q6UPE1        | VDHTVGWPLDR                                                                        | 0.892483682        | 2              | 2.47605   |
| Q6UPE1        | VTIFAEGCHGLAK                                                                      | 1.016151614        | 2              | 3.67792   |
| <b>Q6URK4</b> | <b>ROA3 Heterogeneous nuclear ribonucleoprotein A3</b>                             | <b>2.173693572</b> | <b>0.99225</b> | <b>8</b>  |

|               |                                                            |                    |                |          |
|---------------|------------------------------------------------------------|--------------------|----------------|----------|
| Q6URK4        | EDSVKPGAHLTVK                                              | 1.061372205        | 2              | 3.48456  |
| Q6URK4        | EDTEEYNLR                                                  | 0.989390621        | 2              | 2.45323  |
| Q6URK4        | GFAFVTFDDHDTVDK                                            | 1.12016866         | 2              | 4.09519  |
| Q6URK4        | IETIEVMEDR                                                 | 1.077213953        | 2              | 3.4034   |
| Q6URK4        | IFVGGIKEDTEEYNLR                                           | 1.442253495        | 2              | 4.2578   |
| Q6URK4        | SSGSPYGGGYSGGGSGGYGSR                                      | 0.78950854         | 2              | 5.22703  |
| Q6URK4        | WGTLTDCVVMR                                                | 1.168532261        | 2              | 3.2414   |
| Q6URK4        | YHTINGHNCEVK                                               | 0.994120878        | 2              | 3.50797  |
| <b>Q6URW6</b> | <b>MYH14 Myosin_14</b>                                     | <b>2.114347322</b> | <b>1</b>       | <b>4</b> |
| Q6URW6        | EDQSILCTGESGAGK                                            | 0.889819561        | 2              | 4.39641  |
| Q6URW6        | FDQLLAEEK                                                  | 1.013477295        | 1              | 2.04082  |
| Q6URW6        | KFDQLLAEEK                                                 | 0.96582528         | 2              | 2.83733  |
| Q6URW6        | QLLQANPILEAFGNAK                                           | 1.206595313        | 2              | 4.49156  |
| <b>Q6XQN1</b> | <b>PNCB Nicotinate phosphoribosyltransferase</b>           | <b>1.649451756</b> | <b>0.50764</b> | <b>5</b> |
| Q6XQN1        | AFAQQSLSR                                                  | 1.108618117        | 2              | 2.49352  |
| Q6XQN1        | GSEVNVIGIGTNNVTCPK                                         | 0.709814315        | 2              | 4.22268  |
| Q6XQN1        | LDSGDLQQAQK                                                | 0.78573567         | 2              | 3.06168  |
| Q6XQN1        | LYLQQGQPYEPLPSLEESR                                        | 1.235134789        | 2              | 5.03625  |
| Q6XQN1        | QLQNPAVYQVASEK                                             | 0.991110601        | 2              | 3.83193  |
| <b>Q6ZPJ3</b> | <b>UBE2O Ubiquitin_conjugating enzyme E2 O</b>             | <b>1.997209796</b> | <b>0.99998</b> | <b>2</b> |
| Q6ZPJ3        | FRTTDIVIR                                                  | 0.996867679        | 2              | 2.60035  |
| Q6ZPJ3        | NCAQGEESMAKKVK                                             | 1.028361339        | 2              | 2.8212   |
| <b>Q6ZPV2</b> | <b>INO80 DNA helicase INO80</b>                            | <b>2.119191889</b> | <b>0.60985</b> | <b>2</b> |
| Q6ZPV2        | FIDVSPAEMANMLQGLLAR+Oxidation(12                           | 0.690974776        |                |          |
| Q6ZPV2        | KLDEEMREAK+Oxidation(5                                     | 1.083721668        |                |          |
| <b>Q6ZWR6</b> | <b>SYNE1 Nesprin_1</b>                                     | <b>2.02200858</b>  | <b>0.99852</b> | <b>4</b> |
| Q6ZWR6        | FGSITNQLLK                                                 | 0.999104369        | 2              | 2.39879  |
| Q6ZWR6        | KDEIEGWSNSSLPK                                             | 0.832254998        | 2              | 2.52539  |
| Q6ZWR6        | LETILK                                                     | 0.987632803        | 1              | 1.90074  |
| Q6ZWR6        | LKAKTDDLHVAK                                               | 1.03834865         | 2              | 2.31459  |
| <b>Q70FJ1</b> | <b>AKAP9 A_kinase anchor protein 9</b>                     | <b>1.752097959</b> | <b>0.11488</b> | <b>2</b> |
| Q70FJ1        | EDGGQPPPALPSEDLLK                                          | 0.799067904        | 2              | 2.74204  |
| Q70FJ1        | MDQITQSLCNLNK+Oxidation(0                                  | 1.993114391        |                |          |
| <b>Q711G3</b> | <b>IAH1 Isoamyl acetate_hydrolyzing esterase 1 homolog</b> | <b>2.177621219</b> | <b>0.27248</b> | <b>5</b> |
| Q711G3        | DCGTDVLDLWTLMQK                                            | 0.578109941        | 2              | 4.40866  |
| Q711G3        | DVEETKPELSLLGDGDH                                          | 2.089735425        | 2              | 4.13121  |
| Q711G3        | LNVAVGEYAK                                                 | 0.914237757        | 2              | 2.76331  |
| Q711G3        | QHVPLDEYSANLR                                              | 1.762562694        | 2              | 2.63208  |
| Q711G3        | VILITPPPLCEAAWEK                                           | 1.43486888         | 2              | 2.73393  |
| <b>Q71LX4</b> | <b>TLN2 Talin_2</b>                                        | <b>2.236499186</b> | <b>0.96816</b> | <b>3</b> |
| Q71LX4        | QEDVIATANLSR                                               | 1.023712383        | 1              | 1.97032  |
| Q71LX4        | QVAASTAQLLVACK                                             | 1.164908571        | 2              | 3.18949  |
| Q71LX4        | VMVTNVTSLLK                                                | 1.018209128        | 2              | 2.37738  |
| <b>Q71TY3</b> | <b>RS27 40S ribosomal protein S27</b>                      | <b>2.193234005</b> | <b>0.93061</b> | <b>3</b> |
| Q71TY3        | DLLHPSPEEEK                                                | 1.43891478         | 2              | 2.91667  |
| Q71TY3        | LTEGCSFR                                                   | 1.135457404        | 2              | 2.38761  |
| Q71TY3        | LVQSPNSYFMDVK                                              | 1.132616852        | 2              | 2.80042  |
| <b>Q75N33</b> | <b>SC16B Protein transport protein Sec16B</b>              | <b>2.864706356</b> | <b>0.36001</b> | <b>2</b> |
| Q75N33        | NLLTGEIPLNVDTPAQIVEK                                       | 1.301538364        | 2              | 3.67124  |
| Q75N33        | VLEPDWLVLQLR                                               | 1.520374931        | 2              | 2.80606  |
| <b>Q75Q39</b> | <b>TOM70 Mitochondrial import receptor subunit TOM70</b>   | <b>2.143129731</b> | <b>0.97737</b> | <b>6</b> |
| Q75Q39        | NADLSTFYQNR                                                | 1.093984118        | 2              | 2.95816  |
| Q75Q39        | NREPLMPSPQFIK                                              | 0.928408267        | 2              | 2.82192  |
| Q75Q39        | QYMEEENYDK                                                 | #NUM!              | 1              | 1.94862  |
| Q75Q39        | SDEDKDKEGEALEVK                                            | 1.076847619        | 2              | 4.22832  |

|               |                                                                                               |                    |                |           |
|---------------|-----------------------------------------------------------------------------------------------|--------------------|----------------|-----------|
| Q75Q39        | WKEVAQDCTK                                                                                    | 0.954269547        | 2              | 2.33949   |
| Q75Q39        | YEQAIQCYTEAISLCPTEK                                                                           | 1.296171808        | 2              | 2.49781   |
| <b>Q76MZ3</b> | <b>2AAA Serine/threonine_protein phosphatase 2A 65 kDa regulatory subunit A alpha isoform</b> | <b>2.154636085</b> | <b>0.98343</b> | <b>8</b>  |
| Q76MZ3        | AISHEHSPSDLEAHFVPLVK                                                                          | 1.215463888        | 3              | 5.1377    |
| Q76MZ3        | IGPILDNSTLQSEVKPILEK                                                                          | 1.265173602        | 2              | 4.99636   |
| Q76MZ3        | LSTIALALGVER                                                                                  | 1.131417785        | 2              | 2.36096   |
| Q76MZ3        | LTQDQDVVDK                                                                                    | 1.229564285        | 2              | 2.97982   |
| Q76MZ3        | QLSQSLLPAIVELAEDAK                                                                            | 0.844671785        | 3              | 4.13773   |
| Q76MZ3        | SALASVIMGLSPILGK                                                                              | 1.167543763        | 2              | 2.89103   |
| Q76MZ3        | SEIIPMFSNLASDEQDSVR                                                                           | 1.103943812        | 2              | 3.96919   |
| Q76MZ3        | VLELDNVK                                                                                      | 1.107680891        | 2              | 2.5149    |
| <b>Q78IK4</b> | <b>APOOL Apolipoprotein O_like</b>                                                            | <b>2.262365821</b> | <b>0.79585</b> | <b>2</b>  |
| Q78IK4        | EEEPKK                                                                                        | 3.703498615        | 1              | 1.96138   |
| Q78IK4        | SESTSGTTQFIPDPK                                                                               | 1.044585641        | 2              | 2.42113   |
| <b>Q78P75</b> | <b>DYL2 Dynein light chain 2_ cytoplasmic</b>                                                 | <b>2.181560694</b> | <b>0.98734</b> | <b>3</b>  |
| Q78P75        | NADMSEDMQDAVDCATQAMEK                                                                         | 3.257745141        | 3              | 5.66937   |
| Q78P75        | NFGSYVTHETK                                                                                   | 1.377687914        | 2              | 2.92278   |
| Q78P75        | YNPTWHCIVGR                                                                                   | 0.800292538        | 2              | 2.86639   |
| <b>Q791V5</b> | <b>MTCH2 Mitochondrial carrier homolog 2</b>                                                  | <b>2.23784742</b>  | <b>0.07331</b> | <b>6</b>  |
| Q791V5        | EEGIVGFFAGLIPR                                                                                | 1.240462279        | 2              | 3.42882   |
| Q791V5        | GLFTGLTPR                                                                                     | 1.043665649        | 2              | 2.58243   |
| Q791V5        | LCSGVLGTVVHGK                                                                                 | 1.250895407        | 2              | 2.99564   |
| Q791V5        | SAATLITHPFHVITLR                                                                              | 1.009186382        | 3              | 3.56618   |
| Q791V5        | VLIQVGYEPLPPTIGR                                                                              | 1.093224146        | 2              | 4.18477   |
| Q791V5        | YCGLCDSIVTIYR                                                                                 | 1.402748272        | 2              | 2.91509   |
| <b>Q794E4</b> | <b>HNRPF Heterogeneous nuclear ribonucleoprotein F</b>                                        | <b>2.143400895</b> | <b>0.98032</b> | <b>4</b>  |
| Q794E4        | ATENDIYNFFSPLNPVR                                                                             | 1.02909255         | 3              | 4.09186   |
| Q794E4        | HSGPNSADSANDGFVR                                                                              | 1.112745353        | 2              | 3.9465    |
| Q794E4        | ITGEAFVQFASQELAEK                                                                             | 1.198281246        | 2              | 2.71371   |
| Q794E4        | VHIEIGPDGR                                                                                    | 1.152611022        | 2              | 2.7901    |
| <b>Q7M0E3</b> | <b>DEST Dextrin</b>                                                                           | <b>2.40486061</b>  | <b>0.8357</b>  | <b>2</b>  |
| Q7M0E3        | HEYQANGPEDLNR                                                                                 | 1.265541034        | 2              | 4.76629   |
| Q7M0E3        | HFVGMLPEKDCCR                                                                                 | 1.299334571        | 2              | 3.48551   |
| <b>Q7TMA5</b> | <b>APOB Apolipoprotein B_100</b>                                                              | <b>1.871171418</b> | <b>0.39408</b> | <b>12</b> |
| Q7TMA5        | ALEGKSDTVARLHTEK                                                                              | 1.180030708        | 2              | 2.41776   |
| Q7TMA5        | GFEPTLEALFGK                                                                                  | 0.746420946        | 2              | 2.91823   |
| Q7TMA5        | IEGNLVFDPSSYLPK                                                                               | 1.051617287        | 2              | 2.99779   |
| Q7TMA5        | IEIDIPLPLGGK                                                                                  | 0.470284855        | 2              | 2.77812   |
| Q7TMA5        | ITDNDVLIALDSAK                                                                                | 1.041677848        | 2              | 3.32554   |
| Q7TMA5        | KGTVATEMSTER                                                                                  | 0.817848676        | 2              | 2.84147   |
| Q7TMA5        | LSISEQNAQR                                                                                    | 0.567736272        | 2              | 2.74273   |
| Q7TMA5        | LSTSPFALNLTMLPK                                                                               | 1.098560118        | 1              | 1.90173   |
| Q7TMA5        | NFVASHIANILNSEELYVQDLK                                                                        | 0.804186975        | 3              | 3.84929   |
| Q7TMA5        | NLQHCDGFQPISTSVSPLALIK                                                                        | 0.611767694        | 3              | 3.79325   |
| Q7TMA5        | TILFDTFVNDVAPVEK                                                                              | 0.990087089        | 2              | 3.13251   |
| Q7TMA5        | VRSFTIDLLEIKAK                                                                                | 1.098560118        | 1              | 1.99944   |
| <b>Q7TNG8</b> | <b>LDHD Probable D_lactate dehydrogenase_ mitochondrial</b>                                   | <b>1.92964143</b>  | <b>1</b>       | <b>4</b>  |
| Q7TNG8        | AVVGSPhVSTASAVR                                                                               | 0.849141836        | 2              | 2.93918   |
| Q7TNG8        | AYSTDVCPISR                                                                                   | 0.950106494        | 2              | 3.38022   |
| Q7TNG8        | GSQGGLSQDFVEALK                                                                               | 1.14433993         | 2              | 3.6321    |
| Q7TNG8        | QLLQEEVGPVGVETMR                                                                              | 1.157429157        | 2              | 3.22962   |
| <b>Q7TP47</b> | <b>HNRPQ Heterogeneous nuclear ribonucleoprotein Q</b>                                        | <b>2.047566603</b> | <b>0.98345</b> | <b>2</b>  |
| Q7TP47        | DLFEDELVPLFEK                                                                                 | 1.009669312        | 2              | 3.27966   |



|               |                                                           |                    |                |           |
|---------------|-----------------------------------------------------------|--------------------|----------------|-----------|
| Q7TP47        | NLANTVTEEILEK                                             | 1.062857075        | 2              | 3.68663   |
| <b>Q7TP48</b> | <b>APMAP Adipocyte plasma membrane_associated protein</b> | <b>2.182286383</b> | <b>0.19048</b> | <b>4</b>  |
| Q7TP48        | ANPGFSMLDFLSDKPFIK                                        | 1.564363705        | 2              | 3.00243   |
| Q7TP48        | LENGEIETIAR                                               | 1.149220254        | 2              | 3.52103   |
| Q7TP48        | LLEYDTVTK                                                 | 1.091515778        | 2              | 2.49107   |
| Q7TP48        | LLSSETPIEGK                                               | 1.635976459        | 2              | 2.91197   |
| <b>Q7TP52</b> | <b>CMBL Carboxymethylenebutenolidase homolog</b>          | <b>2.065734562</b> | <b>0.99995</b> | <b>8</b>  |
| Q7TP52        | AGVSVYGIIR                                                | 0.915636858        | 2              | 2.74656   |
| Q7TP52        | EDCSPADKPYIEEAR                                           | 1.133364699        | 2              | 3.71484   |
| Q7TP52        | KREDCSPADKPYIEEAR                                         | 1.089971835        | 3              | 4.21316   |
| Q7TP52        | LDYGGMGQEVQVEHIK                                          | 1.293846496        | 2              | 4.61124   |
| Q7TP52        | LKEHCIVNYQVK                                              | 0.980676297        | 2              | 4.07233   |
| Q7TP52        | NLIEWLNK                                                  | 1.297736988        | 2              | 2.3561    |
| Q7TP52        | REDCSPADKPYIEEAR                                          | 1.123074706        | 3              | 3.69844   |
| Q7TP52        | TFSGQTHGFVHR                                              | 1.080512739        | 2              | 3.66039   |
| <b>Q7TPB1</b> | <b>TCPD T_complex protein 1 subunit delta</b>             | <b>2.099600781</b> | <b>1</b>       | <b>6</b>  |
| Q7TPB1        | ALIAGGGAPEIELALR                                          | 1.163007636        | 2              | 3.88185   |
| Q7TPB1        | ETLLNSATTSLNSK                                            | 1.131134261        | 2              | 3.31296   |
| Q7TPB1        | GDVTITNDGATILK                                            | 1.10030066         | 2              | 3.51737   |
| Q7TPB1        | SIHDALCVIR                                                | 1.154440145        | 2              | 2.69392   |
| Q7TPB1        | TGCNVLLIQK                                                | 0.928057374        | 2              | 2.60797   |
| Q7TPB1        | VIDPATATSVDLR                                             | 1.022277916        | 2              | 3.84164   |
| <b>Q7TPJ0</b> | <b>SSRA Translocon_associated protein subunit alpha</b>   | <b>2.125733299</b> | <b>0.99937</b> | <b>3</b>  |
| Q7TPJ0        | FLVGFTNK                                                  | 1.435305973        | 2              | 2.48813   |
| Q7TPJ0        | GEDFPANNIVK                                               | 1.104449925        | 2              | 3.20333   |
| Q7TPJ0        | GTEDFIVESLDASFR                                           | 1.084663234        | 2              | 4.3717    |
| <b>Q7TQ20</b> | <b>DNJC2 Dnal homolog subfamily C member 2</b>            | <b>2.0923617</b>   | <b>0.99195</b> | <b>2</b>  |
| Q7TQ20        | MMEVEKLCADR+Oxidation(0                                   | 1.130631929        |                |           |
| Q7TQ20        | QIEEVNELMRK+Oxidation(8                                   | 1.032112727        |                |           |
| <b>Q7TQ94</b> | <b>NIT1 Nitrilase homolog 1</b>                           | <b>2.53037884</b>  | <b>0.4902</b>  | <b>2</b>  |
| Q7TQ94        | GQDWEQTQK                                                 | 1.340651543        | 2              | 2.46455   |
| Q7TQ94        | NPAETLLLSEPLDGLLGQYSQLAR                                  | 1.317975483        | 3              | 4.21868   |
| <b>Q7TQM4</b> | <b>SOAT2 Sterol O_acyltransferase 2</b>                   | <b>1.76406376</b>  | <b>0.09171</b> | <b>3</b>  |
| Q7TQM4        | AIWEAVQAYPK                                               | 0.831461177        | 2              | 2.56319   |
| Q7TQM4        | QDRPLPSTASDSTR                                            | 0.759094116        | 2              | 2.84504   |
| Q7TQM4        | TQCLEQAQR                                                 | 0.920808966        | 2              | 2.88386   |
| <b>Q7TSI0</b> | <b>ZNF12 Zinc finger protein 12</b>                       | <b>1.871068749</b> | <b>0.99905</b> | <b>2</b>  |
| Q7TSI0        | HMSRLMEEDQGGEEHQSSSAVFSYR+Oxidation(1                     | 2.989184769        |                |           |
| Q7TSI0        | HMSRLMEEDQGGEEHQSSSAVFSYR+Oxidation(5                     | 0.898506784        |                |           |
| <b>Q80V31</b> | <b>CE104 Centrosomal protein of 104 kDa</b>               | <b>2.053665074</b> | <b>0.96431</b> | <b>2</b>  |
| Q80V31        | IDGSVLPTEAEVRAQK                                          | 0.943683598        | 2              | 2.55886   |
| Q80V31        | KLMEMPVGTQK+Oxidation(2)Oxidation(4                       | 1.039516348        |                |           |
| <b>Q80VM7</b> | <b>ANR24 Ankyrin repeat domain_containing protein 24</b>  | <b>1.666502765</b> | <b>0.5174</b>  | <b>2</b>  |
| Q80VM7        | ADEVDLAQAAGLTGTVIR                                        | 0.877317124        | 2              | 2.68819   |
| Q80VM7        | QNQELLEK                                                  | 0.299575032        | 1              | 2.01925   |
| <b>Q80W21</b> | <b>GSTM7 Glutathione S_transferase Mu 7</b>               | <b>1.848185752</b> | <b>1.7E-05</b> | <b>13</b> |
| Q80W21        | CLDAFPNLK                                                 | 0.938544488        | 2              | 3.2003    |
| Q80W21        | CLDAFPNLKDFIAR                                            | 1.11729632         | 2              | 3.11884   |
| Q80W21        | FKLGLDFPNLPYLIDGSHK                                       | 0.85012551         | 3              | 5.07351   |
| Q80W21        | HNLCGETEEER                                               | 0.879030078        | 2              | 3.89162   |
| Q80W21        | IRVDILENQLMDNR                                            | 1.16529926         | 2              | 3.04944   |
| Q80W21        | ITQSNAILR                                                 | 1.139771023        | 2              | 3.07713   |
| Q80W21        | KHNLCGETEEER                                              | 0.888331121        | 2              | 3.9986    |
| Q80W21        | KISDYMK                                                   | 0.831375311        | 1              | 2.00136   |
| Q80W21        | LFLEYTDSSYEK                                              | 0.971695086        | 2              | 4.04387   |

|               |                                                                           |                    |                |           |
|---------------|---------------------------------------------------------------------------|--------------------|----------------|-----------|
| Q80W21        | LGLDFPNLPYLIDGSHK                                                         | 1.377071423        | 3              | 4.67577   |
| Q80W21        | LKPGYLEQLPGMMR                                                            | 1.168679862        | 2              | 3.18071   |
| Q80W21        | LYSEFLGK                                                                  | 1.068416044        | 2              | 2.35592   |
| Q80W21        | VDILENQLMDNR                                                              | 1.304925437        | 2              | 3.71466   |
| <b>Q80W93</b> | <b>HYDIN Hydrocephalus_inducing protein</b>                               | <b>2.712721503</b> | <b>0.54635</b> | <b>3</b>  |
| Q80W93        | ELERLAKEMQEK+Oxidation(8)                                                 | 1.949297095        |                |           |
| Q80W93        | LAKEMQEK                                                                  | 1.263311278        | 1              | 1.93259   |
| Q80W93        | LQTLDEDEYDALTAEEK                                                         | 1.481691958        | 2              | 2.30161   |
| <b>Q80WS3</b> | <b>FBLL1 rRNA/tRNA 2__O_methyltransferase fibrillar_in_like protein 1</b> | <b>1.648985344</b> | <b>0.26768</b> | <b>3</b>  |
| Q80WS3        | DHAVVVGVYRPPPK                                                            | 0.603871755        | 3              | 3.74093   |
| Q80WS3        | MKPAGGRGGWGWGGGK+Oxidation(0)                                             | 1.191414649        |                |           |
| Q80WS3        | TNIIPVLEDAR                                                               | 1.097753654        | 2              | 2.40161   |
| <b>Q80X50</b> | <b>UBP2L Ubiquitin_associated protein 2_like</b>                          | <b>2.046012672</b> | <b>0.8574</b>  | <b>2</b>  |
| Q80X50        | IDLAVLLGK                                                                 | 1.00792636         | 2              | 3.14239   |
| Q80X50        | QRPQATAEQIR                                                               | 1.176363273        | 2              | 2.51887   |
| <b>Q80X90</b> | <b>FLNB Filamin_B</b>                                                     | <b>2.038672574</b> | <b>0.54482</b> | <b>11</b> |
| Q80X90        | ADIEMPFDPK                                                                | 1.378057288        | 2              | 2.37343   |
| Q80X90        | FNDEHIPDSPYLVPVIAPSDAR                                                    | 1.583646717        | 3              | 3.64952   |
| Q80X90        | GAGIGGLGIVVEGPSESK                                                        | 1.312150843        | 2              | 3.8366    |
| Q80X90        | GEAGIPAEFISWTR                                                            | 1.139942026        | 2              | 2.31444   |
| Q80X90        | IGNLQTDLSGDLR                                                             | 1.123320014        | 2              | 2.45996   |
| Q80X90        | ILAQDGEQPIDIQMK                                                           | 0.900625107        | 2              | 3.3675    |
| Q80X90        | TFEMSDFIVDTR                                                              | 1.271637664        | 2              | 2.3016    |
| Q80X90        | VDIQTEDLEDGTCK                                                            | 1.914613282        | 2              | 3.796     |
| Q80X90        | VGEPGILCVDCSEAGPGLGLEAVSDSGAK                                             | 2.113934692        | 3              | 4.11054   |
| Q80X90        | VTASGPGLSAYGVASLPVEFAIDAR                                                 | 0.993252114        | 3              | 3.47551   |
| Q80X90        | VVASGPGLEHGK                                                              | 1.045107462        | 2              | 2.37975   |
| <b>Q80XC3</b> | <b>US6NL USP6_N_terminal_like protein</b>                                 | <b>2.066888471</b> | <b>0.96945</b> | <b>2</b>  |
| Q80XC3        | HYNHAAANQNSNAISNVRK                                                       | 2.023500423        | 2              | 2.37964   |
| Q80XC3        | SVDEGSKNLK                                                                | 1.013269132        | 2              | 2.41046   |
| <b>Q80XI3</b> | <b>IF4G3 Eukaryotic translation initiation factor 4 gamma 3</b>           | <b>2.510852358</b> | <b>0.27633</b> | <b>3</b>  |
| Q80XI3        | FLKITKPTIDEK                                                              | 0.85400341         | 2              | 2.60857   |
| Q80XI3        | FMLQDVIDLR                                                                | 1.371813546        | 2              | 2.79625   |
| Q80XI3        | NHDEESLECLR                                                               | 1.258972351        | 2              | 3.36872   |
| <b>Q80Y84</b> | <b>KDM5B Lysine_specific demethylase 5B</b>                               | <b>1.883930357</b> | <b>0.86313</b> | <b>2</b>  |
| Q80Y84        | CDIGLLGLK                                                                 | 0.914835179        | 1              | 2.0753    |
| Q80Y84        | SSSEKNDCLRGK                                                              | 0.847678254        | 1              | 1.93582   |
| <b>Q80YR7</b> | <b>CLSPN Claspin</b>                                                      | <b>2.02128273</b>  | <b>0.99109</b> | <b>2</b>  |
| Q80YR7        | GASFLPTAGFRSPSPGLFR                                                       | 1.011362559        | 2              | 2.41257   |
| Q80YR7        | LEGASHAKPGEKQLMLK+Oxidation(14)                                           | 1.024590467        |                |           |
| <b>Q80Z25</b> | <b>OFD1 Oral_facial_digital syndrome 1 protein homolog</b>                | <b>1.925712747</b> | <b>0.99998</b> | <b>2</b>  |
| Q80Z25        | ELEQEERLEK                                                                | 0.945299838        | 2              | 2.93997   |
| Q80Z25        | MIEESLK+Oxidation(0)                                                      | 1.137296526        |                |           |
| <b>Q80Z29</b> | <b>NAMPT Nicotinamide phosphoribosyltransferase</b>                       | <b>2.51816591</b>  | <b>0.39553</b> | <b>4</b>  |
| Q80Z29        | NAQLNMEQDVAPH                                                             | 0.792450584        | 2              | 2.53487   |
| Q80Z29        | STEAPLIIRPDSGNPLDTVLK                                                     | 1.257325509        | 2              | 3.78835   |
| Q80Z29        | VIQGDGVDINTLQEIVEGMK                                                      | 1.248865871        | 2              | 5.37929   |
| Q80Z29        | YLLETSGNLDGLEYK                                                           | 1.35103065         | 2              | 4.55266   |
| <b>Q80Z36</b> | <b>ZHX3 Zinc fingers and homeobox protein 3</b>                           | <b>2.030351329</b> | <b>0.26832</b> | <b>2</b>  |
| Q80Z36        | FPYPTKAELCYLTVVTK                                                         | 1.721366524        | 2              | 2.62699   |
| Q80Z36        | YPPEQLK                                                                   | 0.674216266        | 1              | 2.09197   |
| <b>Q811D2</b> | <b>ANR26 Ankyrin repeat domain_containing protein 26</b>                  | <b>2.063409013</b> | <b>0.65856</b> | <b>5</b>  |
| Q811D2        | AQEDFDK                                                                   | 0.674042407        | 1              | 1.91143   |

|               |                                                                   |                    |                |           |
|---------------|-------------------------------------------------------------------|--------------------|----------------|-----------|
| Q811D2        | LSGSEDSQKVEEK                                                     | 1.615189836        | 2              | 2.3696    |
| Q811D2        | NKDDLTPMLLAVK                                                     | 1.189127279        | 2              | 2.4119    |
| Q811D2        | SADQLSEK                                                          | 1.075780294        | 2              | 2.3079    |
| Q811D2        | SNLEEEARDLK                                                       | 1.04563849         | 1              | 1.99484   |
| <b>Q811X6</b> | <b>CRYL1 Lambda_crystallin homolog</b>                            | <b>2.17990179</b>  | <b>0.99589</b> | <b>4</b>  |
| Q811X6        | EMKSLEQSGSLK+Oxidation(1)                                         | 0.868338955        |                |           |
| Q811X6        | IVDDQVILSSSSCLLPK                                                 | 1.124278348        | 2              | 3.9303    |
| Q811X6        | LYDIEQQQITNALESIR                                                 | 1.053508867        | 2              | 4.27153   |
| Q811X6        | TFGPVPEFSGDTVEK                                                   | 1.273350586        | 2              | 2.8986    |
| <b>Q8BFZ3</b> | <b>ACTBL Beta_actin_like protein 2</b>                            | <b>1.833716091</b> | <b>1.2E-05</b> | <b>10</b> |
| Q8BFZ3        | CDVDIR                                                            | 1.566630551        | 2              | 2.32686   |
| Q8BFZ3        | DLTDYLMK                                                          | 1.0706717          | 1              | 2.21593   |
| Q8BFZ3        | HQGVMVGMGQK                                                       | 1.057583961        | 3              | 3.63664   |
| Q8BFZ3        | HQGVMVGMGQK+Oxidation(4)                                          | 0.814391722        |                |           |
| Q8BFZ3        | HQGVMVGMGQK+Oxidation(4)Oxidation(7)                              | 0.79769413         |                |           |
| Q8BFZ3        | HQGVMVGMGQK+Oxidation(7)                                          | 0.86784045         |                |           |
| Q8BFZ3        | SYELPDGQVITIGNER                                                  | 4.193885167        | 3              | 5.23031   |
| Q8BFZ3        | TTGIVMDSGDGVTHTVPIYEGYALPHAILR                                    | 0.951406077        | 3              | 6.64004   |
| Q8BFZ3        | TTGIVMDSGDGVTHTVPIYEGYALPHAILR+Oxidation(5)                       | 1.035074052        |                |           |
| Q8BFZ3        | VAPDEHPILLTEAPLNPK                                                | 1.104573582        | 3              | 4.32967   |
| <b>Q8BG32</b> | <b>PSD11 26S proteasome non_ATPase regulatory subunit 11</b>      | <b>2.236916602</b> | <b>0.67877</b> | <b>6</b>  |
| Q8BG32        | LYDNLLEQNLR                                                       | 1.256112563        | 2              | 3.3939    |
| Q8BG32        | TGQAAELGGLK                                                       | 1.131998951        | 2              | 3.1513    |
| Q8BG32        | TTANAICYPPK                                                       | 3.550358491        | 2              | 2.64396   |
| Q8BG32        | TYEAALETIQNMSK                                                    | 1.157265878        | 2              | 2.37357   |
| Q8BG32        | VQIEHISLIK                                                        | 1.614679579        | 2              | 2.70242   |
| Q8BG32        | YQEALHLGSQLLR                                                     | 1.115558946        | 2              | 2.50007   |
| <b>Q8BGD9</b> | <b>IF4B Eukaryotic translation initiation factor 4B</b>           | <b>1.710496818</b> | <b>0.97065</b> | <b>2</b>  |
| Q8BGD9        | SQSSDTEQPSTSGGGK                                                  | 0.774414307        | 2              | 5.37759   |
| Q8BGD9        | VDVADQAQDKDRDDR                                                   | 1.274019092        | 2              | 2.37885   |
| <b>Q8BGT5</b> | <b>ALAT2 Alanine aminotransferase 2</b>                           | <b>2.188468979</b> | <b>0.63067</b> | <b>2</b>  |
| Q8BGT5        | LLEETGICVVPGSFGQR                                                 | 0.665192367        | 2              | 3.8384    |
| Q8BGT5        | VLCIINPGNPTGQVQSR                                                 | 1.178116996        | 2              | 5.07928   |
| <b>Q8BGY2</b> | <b>IF5A2 Eukaryotic translation initiation factor 5A_2</b>        | <b>2.167776996</b> | <b>0.99894</b> | <b>3</b>  |
| Q8BGY2        | KYEDICPSTHNMDVPNIK                                                | 1.001619772        | 3              | 4.79291   |
| Q8BGY2        | VHLVGIDIFTGK                                                      | 1.129524241        | 3              | 3.74122   |
| Q8BGY2        | YEDICPSTHNMDVPNIK                                                 | 1.067569005        | 2              | 3.88257   |
| <b>Q8BH00</b> | <b>AL8A1 Aldehyde dehydrogenase family 8 member A1</b>            | <b>2.560897242</b> | <b>2E-12</b>   | <b>8</b>  |
| Q8BH00        | ELLMLENFIGGK                                                      | 1.186150314        | 2              | 3.59371   |
| Q8BH00        | ELNLPFGGMK                                                        | 1.348303207        | 1              | 2.49095   |
| Q8BH00        | FLPCNSYIDSYDPSTGEVYCK                                             | 2.621613661        | 3              | 5.3076    |
| Q8BH00        | ILCGEGVDQLSLPLR                                                   | 1.241132207        | 3              | 4.95457   |
| Q8BH00        | ITQLSAPHCK                                                        | 1.15693356         | 2              | 3.12905   |
| Q8BH00        | KLSLELGGK                                                         | 1.046432307        | 1              | 2.25505   |
| Q8BH00        | NPAlIFEDANLEECIPATVR                                              | 1.074699962        | 2              | 5.0365    |
| Q8BH00        | SSFANQGEICLCTSR                                                   | 1.174788138        | 2              | 3.90093   |
| <b>Q8BH18</b> | <b>TM117 Transmembrane protein 117</b>                            | <b>3.276496852</b> | <b>0.4331</b>  | <b>2</b>  |
| Q8BH18        | FLKNEQGMENQDK                                                     | 1.993114391        | 2              | 2.34406   |
| Q8BH18        | FLKNEQGMENQDK+Oxidation(7)                                        | 1.687737088        |                |           |
| <b>Q8BH59</b> | <b>CMC1 Calcium_binding mitochondrial carrier protein Aralar1</b> | <b>2.120544756</b> | <b>0.70844</b> | <b>3</b>  |
| Q8BH59        | GLIPQLIGVAPEK                                                     | 1.14777837         | 1              | 3.07248   |
| Q8BH59        | IAPLAEGALPYNLAELQR                                                | 1.482706032        | 2              | 2.85188   |
| Q8BH59        | YLGlyNDPNSNPK                                                     | 0.941305253        | 2              | 3.11152   |
| <b>Q8BHN3</b> | <b>GANAB Neutral alpha_glucosidase AB</b>                         | <b>2.293157326</b> | <b>0.99415</b> | <b>11</b> |

|               |                                                                      |                    |                |           |
|---------------|----------------------------------------------------------------------|--------------------|----------------|-----------|
| Q8BHN3        | AEKDEPGAWEEFK                                                        | 0.837077546        | 2              | 3.06362   |
| Q8BHN3        | DDNSVELTVAEGPYK                                                      | 0.968172631        | 2              | 3.41011   |
| Q8BHN3        | LVAIVDPHIK                                                           | 1.891416425        | 2              | 2.34349   |
| Q8BHN3        | MLDYLQGSGETPQTDIR                                                    | 0.783634027        | 2              | 5.34461   |
| Q8BHN3        | REPWLLASQYQDAIR                                                      | 1.200324909        | 3              | 4.33095   |
| Q8BHN3        | SGGIERPFVLSR                                                         | 1.031630183        | 2              | 2.4538    |
| Q8BHN3        | SIRPGLSPYR                                                           | 0.885033994        | 2              | 2.3565    |
| Q8BHN3        | SLLLSVNAR                                                            | 0.923102606        | 2              | 2.48766   |
| Q8BHN3        | VDSGYRVHEELRNHGLYVK                                                  | 0.766532318        | 2              | 2.33052   |
| Q8BHN3        | VTEGGEPYR                                                            | 1.035939051        | 2              | 2.40752   |
| Q8BHN3        | VVIMGAGKPAAVLQTK                                                     | 1.661977357        | 3              | 3.8582    |
| <b>Q8BI84</b> | <b>MIA3 Melanoma inhibitory activity protein 3</b>                   | <b>2.064281394</b> | <b>0.98593</b> | <b>2</b>  |
| Q8BI84        | DDNISALTNICITQLNR                                                    | 1.043772317        | 2              | 2.32124   |
| Q8BI84        | TQTAVSIVEEDLK                                                        | 1.04621925         | 2              | 2.43565   |
| <b>Q8BIJ6</b> | <b>SYIM Isoleucyl_tRNA synthetase_mitochondrial</b>                  | <b>2.271805806</b> | <b>0.65956</b> | <b>2</b>  |
| Q8BIJ6        | DTVLLPQTSFPMK                                                        | 1.18460319         | 1              | 2.19315   |
| Q8BIJ6        | SCQTALAEILDVLR                                                       | 0.995494754        | 2              | 3.51358   |
| <b>Q8BJ64</b> | <b>CHDH Choline dehydrogenase_mitochondrial</b>                      | <b>1.950622367</b> | <b>0.99987</b> | <b>10</b> |
| Q8BJ64        | ADSAYHPSTCK                                                          | 0.573252659        | 2              | 3.18561   |
| Q8BJ64        | AEVQTLVSR                                                            | 1.195356249        | 2              | 2.88709   |
| Q8BJ64        | ELQPGSHVQSDK                                                         | 1.022812315        | 2              | 3.07472   |
| Q8BJ64        | ELQPGSHVQSDKEIDAFVR                                                  | 0.961841644        | 2              | 4.24555   |
| Q8BJ64        | GGDGPLHVSR                                                           | 0.854682586        | 2              | 2.34865   |
| Q8BJ64        | HELGANMYR                                                            | 0.850396288        | 2              | 2.34865   |
| Q8BJ64        | SRPGVPHPDQFHLPSQVIDHGR                                               | 1.886617691        | 5              | 5.01656   |
| Q8BJ64        | TNHPLHQAFQAAR                                                        | 0.784178996        | 3              | 4.00004   |
| Q8BJ64        | VIGVENLR                                                             | 0.986017278        | 2              | 2.74613   |
| Q8BJ64        | VLLLEAGPK                                                            | 1.191672442        | 2              | 2.62868   |
| <b>Q8BJY1</b> | <b>PSMD5 26S proteasome non_ATPase regulatory subunit 5</b>          | <b>2.23504915</b>  | <b>0.01196</b> | <b>2</b>  |
| Q8BJY1        | GLTHPDDSVK                                                           | 0.832015918        | 2              | 2.45672   |
| Q8BJY1        | TVAEIFGNSNYLR                                                        | 1.915118346        | 2              | 2.48391   |
| <b>Q8BK5</b>  | <b>IPO5 Importin_5</b>                                               | <b>2.124365295</b> | <b>0.32099</b> | <b>2</b>  |
| Q8BK5         | IFSIIAEGEMHEAIK                                                      | 1.253783848        | 2              | 2.3325    |
| Q8BK5         | VAAAESMPLLLLCARVR+Oxidation(6                                        | 0.738829001        |                |           |
| <b>Q8BKZ9</b> | <b>ODPX Pyruvate dehydrogenase protein X component_mitochondrial</b> | <b>1.927850726</b> | <b>0.93536</b> | <b>2</b>  |
| Q8BKZ9        | HSLDASQGTATGPR                                                       | 0.945599412        | 2              | 3.94335   |
| Q8BKZ9        | VSVNDFIR                                                             | 1.540061287        | 2              | 3.05482   |
| <b>Q8BL66</b> | <b>EEA1 Early endosome antigen 1</b>                                 | <b>1.811650975</b> | <b>0.96442</b> | <b>2</b>  |
| Q8BL66        | MQAAVTELTAVKAQK                                                      | 0.844571647        | 2              | 2.44298   |
| Q8BL66        | QESIKEITNLKDAK                                                       | 1.089161248        | 2              | 2.30593   |
| <b>Q8BL97</b> | <b>SRSF7 Serine/arginine_rich splicing factor 7</b>                  | <b>2.258846341</b> | <b>0.99747</b> | <b>2</b>  |
| Q8BL97        | NPPGFVFEFEDPR                                                        | 1.195991958        | 2              | 2.81618   |
| Q8BL97        | VYVGNLGTGAGK                                                         | 1.021255152        | 2              | 2.56947   |
| <b>Q8BMA5</b> | <b>NPAT Protein NPAT</b>                                             | <b>1.88687369</b>  | <b>0.99891</b> | <b>2</b>  |
| Q8BMA5        | AKETSNDVPTIMSSLWKK+Oxidation(11                                      | 0.895618707        |                |           |
| Q8BMA5        | KKLPSSFAGMDVDK+Oxidation(10                                          | 0.975637115        |                |           |
| <b>Q8BP47</b> | <b>SYNC AsparaginyI_tRNA synthetase_cytoplasmic</b>                  | <b>2.308290509</b> | <b>0.66478</b> | <b>5</b>  |
| Q8BP47        | KEDGTFYEFGDDIPEAPER                                                  | 0.684644818        | 2              | 4.40305   |
| Q8BP47        | LEDLVCDVVDR                                                          | 0.905585406        | 2              | 2.81699   |
| Q8BP47        | LMTDTINEPILLCR                                                       | 2.799640975        | 2              | 3.34017   |
| Q8BP47        | LTESVDVLPNVGEIVGGSMR                                                 | 1.25819378         | 2              | 2.9164    |
| Q8BP47        | YGTCPHGGYGLGLER                                                      | 1.190720209        | 2              | 3.16098   |
| <b>Q8BTM8</b> | <b>FLNA Filamin_A</b>                                                | <b>2.140185155</b> | <b>0.99683</b> | <b>6</b>  |
| Q8BTM8        | AFGPGLQGGNAGSPAR                                                     | 1.037895887        | 2              | 3.56198   |
| Q8BTM8        | ALGALVDSCAPGLCPDWDSWDASKPVNNAR                                       | 1.246346893        | 3              | 3.62483   |

|               |                                                              |                    |                |           |
|---------------|--------------------------------------------------------------|--------------------|----------------|-----------|
| Q8BTM8        | ANLPQSFQVDTSK                                                | 1.022894091        | 2              | 2.44741   |
| Q8BTM8        | GAGTGGGLGLAVEGPSEAK                                          | 1.076776158        | 2              | 3.72377   |
| Q8BTM8        | IVSPSGAAVPCK                                                 | 0.966367276        | 2              | 2.41114   |
| Q8BTM8        | VEPGLGADNSVVR                                                | 1.151504478        | 2              | 2.86012   |
| <b>Q8BU33</b> | <b>ILVBL Acetolactate synthase_like protein</b>              | <b>1.995362092</b> | <b>0.99974</b> | <b>3</b>  |
| Q8BU33        | AAVETLGVPCFLGGMSR                                            | 1.020386958        | 2              | 3.13355   |
| Q8BU33        | LPNSLMGR+Oxidation(5                                         | 0.997894215        |                |           |
| Q8BU33        | NAQVAQSPVLLGGAASTLLQK                                        | 0.93770838         | 3              | 3.95851   |
| <b>Q8BWM0</b> | <b>PGES2 Prostaglandin E synthase 2</b>                      | <b>2.15965788</b>  | <b>0.63401</b> | <b>2</b>  |
| Q8BWM0        | AFLDFHSLPYQVVEVNPVR                                          | 1.411992817        | 3              | 3.52985   |
| Q8BWM0        | KVPILVAQEGDSLQLNDSSVIISALK                                   | 1.066455892        | 3              | 4.62097   |
| <b>Q8BWQ1</b> | <b>UD2A3 UDP_glucuronosyltransferase 2A3</b>                 | <b>1.878356301</b> | <b>0.01702</b> | <b>2</b>  |
| Q8BWQ1        | ADIWLIR                                                      | 0.917735975        | 2              | 2.4481    |
| Q8BWQ1        | IHHDPVVKPLDR                                                 | 0.784921501        | 3              | 3.51418   |
| <b>Q8BWR8</b> | <b>RHPN2 Rhophilin_2</b>                                     | <b>2.406520689</b> | <b>0.68334</b> | <b>2</b>  |
| Q8BWR8        | ETKEVDFSIVFK                                                 | 1.056505526        | 2              | 2.53472   |
| Q8BWR8        | TGAENLLKVATNQK                                               | 1.32482534         | 2              | 2.48585   |
| <b>Q8BX70</b> | <b>VP13C Vacuolar protein sorting_associated protein 13C</b> | <b>2.028339361</b> | <b>0.99971</b> | <b>2</b>  |
| Q8BX70        | ENALSELDVVPFKVK                                              | 0.96898714         | 2              | 2.62614   |
| Q8BX70        | TVLQADSPQHDEILKPVNMLLCIQR+Oxidation(19                       | 1.058392397        |                |           |
| <b>Q8BY87</b> | <b>UBP47 Ubiquitin carboxyl_terminal hydrolase 47</b>        | <b>1.942203742</b> | <b>1</b>       | <b>2</b>  |
| Q8BY87        | AGGDSGNVDDDCER                                               | 0.951590402        | 2              | 3.49961   |
| Q8BY87        | QNIFFEMKK                                                    | 0.957863102        | 2              | 2.43066   |
| <b>Q8BZ10</b> | <b>AF1L1 Actin filament_associated protein 1_like 1</b>      | <b>1.850831664</b> | <b>0.81387</b> | <b>2</b>  |
| Q8BZ10        | IYDEVPEYK                                                    | 0.87587369         | 1              | 2.0261    |
| Q8BZ10        | LSQEKQNSDSDSLGMNDSGSLGRR                                     | 0.892971156        | 3              | 3.59391   |
| <b>Q8BZQ7</b> | <b>ANC2 Anaphase_promoting complex subunit 2</b>             | <b>2.323899369</b> | <b>0.70685</b> | <b>2</b>  |
| Q8BZQ7        | EIRNVELLK                                                    | 1.245847251        | 2              | 2.41527   |
| Q8BZQ7        | QALEQFNQLSQVLHR                                              | 0.866513395        | 2              | 2.75226   |
| <b>Q8C6K9</b> | <b>chain</b>                                                 | <b>2.145913924</b> | <b>0.99535</b> | <b>3</b>  |
| Q8C6K9        | NEHSFQVVGIVQR                                                | 1.150368973        |                |           |
| Q8C6K9        | TMNPAFMGLDRATR+Oxidation(1)Oxidation(6                       | 1.007009727        |                |           |
| Q8C6K9        | YLIVVTDGHPLEGYKEPCGGLEDAVNEAK                                | 1.103400941        |                |           |
| <b>Q8C7X2</b> | <b>K0090 Uncharacterized protein KIAA0090</b>                | <b>2.297231059</b> | <b>0.76792</b> | <b>2</b>  |
| Q8C7X2        | FNVEDGEIVQQVR                                                | 0.948573926        | 2              | 3.98422   |
| Q8C7X2        | VMGDRSVLYK+Oxidation(1                                       | 1.291836181        |                |           |
| <b>Q8CC88</b> | <b>K0564 Uncharacterized protein KIAA0564 homolog</b>        | <b>2.156163762</b> | <b>0.23919</b> | <b>3</b>  |
| Q8CC88        | FLPSLAQSALEK                                                 | 1.283274735        | 2              | 2.44075   |
| Q8CC88        | HQATGELDDAK                                                  | 0.759749961        | 2              | 3.4104    |
| Q8CC88        | VSSDQLSSENLTSAVGQK                                           | 1.39297175         | 2              | 3.20769   |
| <b>Q8CDI6</b> | <b>CD158 Coiled_coil domain_containing protein 158</b>       | <b>2.01429079</b>  | <b>0.86252</b> | <b>3</b>  |
| Q8CDI6        | EKELSLEKEQNK                                                 | 1.292986131        | 2              | 2.35146   |
| Q8CDI6        | EKVANMEVALDK+Oxidation(5                                     | 0.992653776        |                |           |
| Q8CDI6        | ELDDRNMEVQRLEALLK                                            | 0.911074378        | 2              | 2.32278   |
| <b>Q8CFN2</b> | <b>CDC42 Cell division control protein 42 homolog</b>        | <b>1.916917513</b> | <b>0.79501</b> | <b>3</b>  |
| Q8CFN2        | NVFDEAILAALEPPPEPK                                           | 1.038988925        | 3              | 4.68694   |
| Q8CFN2        | WVPEITHHCPK                                                  | 0.398816979        | 2              | 2.50773   |
| Q8CFN2        | YVECSALTQK                                                   | 1.042093939        | 1              | 2.70188   |
| <b>Q8CG45</b> | <b>ARK72 Aflatoxin B1 aldehyde reductase member 2</b>        | <b>2.257183843</b> | <b>0.03179</b> | <b>10</b> |
| Q8CG45        | AVSGAPLRPGTVLGTMEMGR                                         | 1.120436865        | 3              | 3.74259   |
| Q8CG45        | EHHFEAIALVEK                                                 | 1.144609276        | 2              | 2.98795   |
| Q8CG45        | FFGNSWSETYR                                                  | 0.883815122        | 2              | 3.00953   |
| Q8CG45        | FYAYNPLAGLLTGK                                               | 1.252079578        | 2              | 4.36607   |
| Q8CG45        | MDASASAATVR                                                  | 1.079434291        | 2              | 3.83804   |
| Q8CG45        | QVETELLPLCLR                                                 | 1.395946245        | 2              | 3.03559   |

|               |                                                                           |                    |                |           |
|---------------|---------------------------------------------------------------------------|--------------------|----------------|-----------|
| Q8CG45        | RMDASASAATVR                                                              | 1.026456145        | 2              | 3.31487   |
| Q8CG45        | TTYGTSAPSM TSAALR                                                         | 1.065856084        | 2              | 4.45599   |
| Q8CG45        | VDLFYLHAPDHGTPIVETLQACQQLHQEGK                                            | 1.233808898        | 3              | 5.4736    |
| Q8CG45        | WMYHHSQLQGTR                                                              | 1.144680132        | 3              | 3.74459   |
| <b>Q8CG48</b> | <b>SMC2 Structural maintenance of chromosomes protein 2</b>               | <b>1.921418834</b> | <b>0.96989</b> | <b>3</b>  |
| Q8CG48        | EEKLLEK                                                                   | 0.914217935        | 1              | 1.92741   |
| Q8CG48        | IKALNCEIEELER                                                             | 1.137358074        | 2              | 2.43912   |
| Q8CG48        | KIKALNCEIEELER                                                            | 0.941461084        | 2              | 2.64722   |
| <b>Q8CGC7</b> | <b>SYEP Bifunctional aminoacyl_tRNA synthetase</b>                        | <b>2.140679711</b> | <b>0.72563</b> | <b>11</b> |
| Q8CGC7        | AIQGATSHHLGQNF SK                                                         | 1.069961115        | 2              | 4.59959   |
| Q8CGC7        | DQDVEPGAPSMGAK                                                            | 0.822355302        | 2              | 3.35812   |
| Q8CGC7        | DQVDSAVQELLQK                                                             | 1.28151198         | 2              | 4.15179   |
| Q8CGC7        | FVELPGAEMGK                                                               | 1.703436085        | 2              | 2.5284    |
| Q8CGC7        | GDVSISVEEGKENLLR                                                          | 1.074950137        | 2              | 4.00271   |
| Q8CGC7        | GSQFGQSCCLR                                                               | 1.131042813        | 2              | 2.86139   |
| Q8CGC7        | KEENLAEWYSQVITK                                                           | 0.988344379        | 2              | 4.46688   |
| Q8CGC7        | SLCIPFNPLCELQPGAMCVCGK                                                    | 1.5223868          | 2              | 4.36456   |
| Q8CGC7        | SQGSGLSSGGAGEGQGPK                                                        | 1.100012121        | 2              | 4.86416   |
| Q8CGC7        | TELAEP AIRPTSETVMYPAYAK                                                   | 1.058460914        | 3              | 3.47052   |
| Q8CGC7        | VYEELLAIPVVR                                                              | 1.168552844        | 2              | 3.42992   |
| <b>Q8CGN4</b> | <b>BCOR BCL_6 corepressor</b>                                             | <b>1.991784551</b> | <b>0.53783</b> | <b>3</b>  |
| Q8CGN4        | FLTDYLN DLQGR                                                             | 0.885531859        | 1              | 1.94041   |
| Q8CGN4        | NWLLLS DVLK                                                               | 3.054794509        | 2              | 2.52787   |
| Q8CGN4        | VCIELTGLHPKK                                                              | 1.055143786        | 2              | 2.34277   |
| <b>Q8CHB8</b> | <b>TTL5 Tubulin polyglutamylase TTL5</b>                                  | <b>2.040778032</b> | <b>0.99934</b> | <b>2</b>  |
| Q8CHB8        | ASSNLQHSLRMV LPSR+Oxidation(10                                            | 1.010897496        |                |           |
| Q8CHB8        | DSGGQTLSPSWAAK                                                            | 1.231861592        | 1              | 2.13864   |
| <b>Q8CHM7</b> | <b>HACL1 2_hydroxyacyl_CoA lyase 1</b>                                    | <b>2.590955602</b> | <b>0.24124</b> | <b>8</b>  |
| Q8CHM7        | DTSKPCLINIMIEPQSTR                                                        | 1.336884172        | 3              | 4.75379   |
| Q8CHM7        | GAAYSHAEDSIR                                                              | 1.79489671         | 2              | 3.37647   |
| Q8CHM7        | GVVPDNHPNCVGAAR                                                           | 1.175236888        | 2              | 3.24663   |
| Q8CHM7        | GYFVQTPEELQDSL R                                                          | 1.905401526        | 2              | 3.83254   |
| Q8CHM7        | LVELCNLPFLPTPMGK                                                          | 1.222773906        | 2              | 4.48063   |
| Q8CHM7        | NCFIVSEGANTMDIGR                                                          | 1.050032921        | 2              | 4.69397   |
| Q8CHM7        | NQEAMGAFQEFPPQVEACR                                                       | 1.356491472        | 2              | 6.43392   |
| Q8CHM7        | SSYGRPGACYIDVPADLVTLQESTTSIK                                              | 1.351494079        | 3              | 4.01666   |
| <b>Q8CIB5</b> | <b>FERM2 Fermitin family homolog 2</b>                                    | <b>1.931131193</b> | <b>0.9616</b>  | <b>2</b>  |
| Q8CIB5        | GCEVTPDVNISGQK                                                            | 0.924489525        | 2              | 3.51374   |
| Q8CIB5        | TSTILGDITSIPELADYIK                                                       | 1.06083052         | 2              | 2.72138   |
| <b>Q8CIE6</b> | <b>COPA Coatamer subunit alpha</b>                                        | <b>2.256390881</b> | <b>0.36188</b> | <b>10</b> |
| Q8CIE6        | ASNLENSTYDLYTIPK                                                          | 1.104909415        | 2              | 4.13394   |
| Q8CIE6        | DADSQNPDAPEGK                                                             | 1.217394445        | 2              | 4.01827   |
| Q8CIE6        | GITGVDLFGTTDAVVK                                                          | 1.599107284        | 2              | 3.716     |
| Q8CIE6        | GVNWAAFHPTMPLIVSGADDR                                                     | 1.361232234        | 3              | 3.78069   |
| Q8CIE6        | LLELGPKEVAQQTR                                                            | 1.053851292        | 2              | 3.15225   |
| Q8CIE6        | QELILNSSEDK                                                               | 1.247152264        | 2              | 2.62028   |
| Q8CIE6        | QQPLFVSGGDDYK                                                             | 1.032946111        | 2              | 2.7117    |
| Q8CIE6        | SILLSVPLLVDNK                                                             | 1.1034266          | 2              | 4.00956   |
| Q8CIE6        | SSGLTAVWVAR                                                               | 0.88019886         | 2              | 2.44891   |
| Q8CIE6        | TLDLPIYVTR                                                                | 1.135772523        | 2              | 2.82687   |
| <b>Q8CJ27</b> | <b>ASPM Abnormal spindle_like microcephaly_associated protein homolog</b> | <b>1.634978914</b> | <b>0.43092</b> | <b>2</b>  |
| Q8CJ27        | ALHLLTYKHLSAILDALK                                                        | 0.877190054        | 2              | 2.36556   |
| Q8CJ27        | FLSLRKTAIWIQR                                                             | 0.709213596        | 2              | 2.63605   |
| <b>Q8CJ40</b> | <b>CROCC Rootletin</b>                                                    | <b>2.445860451</b> | <b>0.50525</b> | <b>4</b>  |
| Q8CJ40        | DLLQLGGELVTRTSR                                                           | 1.026797065        | 2              | 2.42963   |

|               |                                                                                  |                    |                |           |
|---------------|----------------------------------------------------------------------------------|--------------------|----------------|-----------|
| Q8CJ40        | ELEERTGNLGRQR                                                                    | 1.146447788        | 2              | 2.40207   |
| Q8CJ40        | LRDQTAASAQAQEDAQR                                                                | 1.558049797        | 2              | 2.3698    |
| Q8CJ40        | QQQAEHATTMAVEK+Oxidation(9)                                                      | 1.44635256         |                |           |
| <b>Q8JZN5</b> | <b>ACAD9 Acyl_CoA dehydrogenase family member 9_mitochondrial</b>                | <b>1.816885028</b> | <b>0.93747</b> | <b>4</b>  |
| Q8JZN5        | GIILVGNEEQK                                                                      | 0.91519183         | 2              | 2.41553   |
| Q8JZN5        | GSNTCEVHFENTR                                                                    | 0.910636085        | 2              | 4.52701   |
| Q8JZN5        | NLSEFGLIQEK                                                                      | 1.213911679        | 2              | 2.4622    |
| Q8JZN5        | SGNVTTVMETIGR                                                                    | 0.756076393        | 2              | 2.96583   |
| <b>Q8K009</b> | <b>AL112 Mitochondrial 10_formyltetrahydrofolate dehydrogenase</b>               | <b>1.912214553</b> | <b>1</b>       | <b>19</b> |
| Q8K009        | AMVEAVQLIADGK                                                                    | 1.120923231        | 2              | 4.19427   |
| Q8K009        | ANNTEYGLASGVFTR                                                                  | 0.945932013        | 2              | 4.62549   |
| Q8K009        | DLGEEALNEYLK                                                                     | 1.171391385        | 2              | 3.77958   |
| Q8K009        | EESFGPIMVISK                                                                     | 1.411680007        | 2              | 3.05086   |
| Q8K009        | FLFPEGIK                                                                         | 0.882400124        | 2              | 2.45559   |
| Q8K009        | FQNGDIDGVLQR                                                                     | 0.832169438        | 2              | 3.21425   |
| Q8K009        | GVINIIPGSGGVAGQR                                                                 | 0.993516184        | 2              | 3.87897   |
| Q8K009        | HGSIYHPSSLPR                                                                     | 0.815457105        | 2              | 4.36967   |
| Q8K009        | KLGFSTGTSVKG                                                                     | 0.851676777        | 2              | 2.49719   |
| Q8K009        | KVSLELGGK                                                                        | 0.489001741        | 1              | 2.03903   |
| Q8K009        | NGLVLFNDGK                                                                       | 1.021024014        | 2              | 2.42723   |
| Q8K009        | NLQFEDGK                                                                         | 0.93937579         | 1              | 2.18625   |
| Q8K009        | SAACLAAGNTLVLPKPAQVPTLTK                                                         | 1.062340077        | 3              | 4.02749   |
| Q8K009        | SCDVKPNDTVDSLNR                                                                  | 1.226294823        | 2              | 4.48119   |
| Q8K009        | TDVAAPFGGMK+Oxidation(9)                                                         | 1.209489314        |                |           |
| Q8K009        | TPQPEGATYEGIQK                                                                   | 1.33105209         | 2              | 2.58287   |
| Q8K009        | VSYASLADVDR                                                                      | 1.007751263        | 2              | 2.91656   |
| Q8K009        | VVGVFVTPDKDGK                                                                    | 1.115015752        | 2              | 3.26216   |
| Q8K009        | YFAGWCDK                                                                         | 0.896164439        | 1              | 2.1003    |
| <b>Q8K1N2</b> | <b>PHLB2 Pleckstrin homology_like domain family B member 2</b>                   | <b>1.613903559</b> | <b>0.72556</b> | <b>2</b>  |
| Q8K1N2        | EKENLCNLEKK                                                                      | 0.597754114        | 2              | 2.41911   |
| Q8K1N2        | LQEETSQRQKLIK                                                                    | 1.060831072        | 2              | 2.38009   |
| <b>Q8K1Q0</b> | <b>NMT1 Glycylpeptide N_tetradecanoyltransferase 1</b>                           | <b>2.050884307</b> | <b>0.73217</b> | <b>2</b>  |
| Q8K1Q0        | GNDMDSTQDQPVK                                                                    | 1.203887291        | 2              | 2.53111   |
| Q8K1Q0        | LGEVNTHTGVPEDKDNIR                                                               | 0.764855384        | 3              | 3.44455   |
| <b>Q8K1S6</b> | <b>SPIR2 Protein spire homolog 2</b>                                             | <b>2.799342075</b> | <b>0.02111</b> | <b>3</b>  |
| Q8K1S6        | ALFVETLELR                                                                       | 1.649358477        | 2              | 2.50528   |
| Q8K1S6        | DTADILLRR                                                                        | 1.46944127         | 2              | 2.31496   |
| Q8K1S6        | RDAFQSLQGPKWR                                                                    | 1.285889797        | 2              | 2.30447   |
| <b>Q8K2H2</b> | <b>OTU6B OTU domain_containing protein 6B</b>                                    | <b>1.946916294</b> | <b>0.96741</b> | <b>2</b>  |
| Q8K2H2        | EELEQLK                                                                          | 0.914217935        | 1              | 2.08084   |
| Q8K2H2        | EERIAEAEIENLSGAR                                                                 | 1.059186104        | 2              | 2.46803   |
| <b>Q8K2Z4</b> | <b>CND1 Condensin complex subunit 1</b>                                          | <b>2.125354979</b> | <b>0.47087</b> | <b>2</b>  |
| Q8K2Z4        | AIIDEFEQKLR                                                                      | 1.043028316        | 2              | 2.36961   |
| Q8K2Z4        | LLESFENMTSQTSLIDLIGGK                                                            | 1.472903406        | 2              | 2.44545   |
| <b>Q8K3J1</b> | <b>NDUS8 NADH dehydrogenase [ubiquinone] iron_sulfur protein 8_mitochondrial</b> | <b>2.293977914</b> | <b>0.10131</b> | <b>2</b>  |
| Q8K3J1        | ILMWTELIR+Oxidation(2)                                                           | 1.649358477        |                |           |
| Q8K3J1        | LCEAICPAQAITIEAEPK                                                               | 1.193049653        | 3              | 4.90856   |
| <b>Q8K442</b> | <b>ABC8A ATP_binding cassette sub_family A member 8_A</b>                        | <b>2.356928023</b> | <b>0.43139</b> | <b>6</b>  |
| Q8K442        | EDVQPLSQAFFK                                                                     | 1.397274148        | 2              | 2.89183   |
| Q8K442        | GQITAILGHSGAGK                                                                   | 1.11410552         | 2              | 3.74836   |
| Q8K442        | IDDFIHSLEQQNIALEVDVAFGTR                                                         | 1.04680654         | 3              | 4.09428   |
| Q8K442        | LTGVCPQCNVQDFDLTVR                                                               | 1.268340706        | 2              | 2.83254   |

|               |                                                                       |                    |                |           |
|---------------|-----------------------------------------------------------------------|--------------------|----------------|-----------|
| Q8K442        | NTQNILVQNLSGGQK                                                       | 1.215133318        | 2              | 2.96951   |
| Q8K442        | STLLNVLSGLCVPTK                                                       | 1.237061134        | 2              | 3.79413   |
| <b>Q8K4C0</b> | <b>FMO5 Dimethylaniline monooxygenase [N_oxide_forming] 5</b>         | <b>1.946650912</b> | <b>3.3E-13</b> | <b>12</b> |
| Q8K4C0        | CCEEGLEPVCFER                                                         | 0.831617282        | 2              | 4.39759   |
| Q8K4C0        | FDHEMFGLKPK                                                           | 0.765222691        | 2              | 3.32328   |
| Q8K4C0        | GYPIDILLSSR                                                           | 0.91098796         | 2              | 3.27162   |
| Q8K4C0        | HSALGQHPTINDDLPNR                                                     | 0.73234559         | 2              | 4.99735   |
| Q8K4C0        | IAVIGSGASGLTCIK                                                       | 0.968511662        | 2              | 4.19835   |
| Q8K4C0        | KLPSQSEMMAEINK                                                        | 0.825451221        | 2              | 3.8894    |
| Q8K4C0        | KQPDFSTSGQWQVTEHEGK                                                   | 0.714127124        | 3              | 4.74939   |
| Q8K4C0        | KTILTTEDR                                                             | 0.562500434        | 2              | 2.80174   |
| Q8K4C0        | QQVDVFDGVLVCTGHHTDPHPLDSEFPGIEK                                       | 1.153157668        | 3              | 3.77859   |
| Q8K4C0        | SDDIGGLWR                                                             | 0.758233302        | 2              | 3.02784   |
| Q8K4C0        | VFPPNLEKPTLAIIGLIQLGAIMPISELQGR                                       | 0.917731778        | 4              | 5.0199    |
| Q8K4C0        | WATQVFK                                                               | 0.813195081        | 1              | 1.9542    |
| <b>Q8K4T4</b> | <b>FLIP1 Filamin A interacting protein 1</b>                          | <b>2.232712568</b> | <b>0.99708</b> | <b>3</b>  |
| Q8K4T4        | EVLNLTK                                                               | 1.179393902        | 1              | 2.1182    |
| Q8K4T4        | IEELETNKSLQK                                                          | 1.372540445        | 2              | 2.558     |
| Q8K4T4        | IHELMNK                                                               | 1.007335878        | 1              | 2.09297   |
| <b>Q8K4Z3</b> | <b>AIBP Apolipoprotein A_I binding protein</b>                        | <b>1.997848177</b> | <b>0.86509</b> | <b>2</b>  |
| Q8K4Z3        | GNPSGIQPDLLISLTAPK                                                    | 0.996572243        | 2              | 3.83324   |
| Q8K4Z3        | SPPTVLVICGPGNNGDGLVCAR                                                | 1.165460419        | 2              | 5.80955   |
| <b>Q8K4Z5</b> | <b>SF3A1 Splicing factor 3A subunit 1</b>                             | <b>2.393298747</b> | <b>0.73962</b> | <b>2</b>  |
| Q8K4Z5        | HKVSEFKEGK                                                            | 1.093108645        | 2              | 2.30061   |
| Q8K4Z5        | IGEEEIQKPEEK                                                          | 1.259178451        | 2              | 2.60164   |
| <b>Q8K586</b> | <b>RANT GTP_binding nuclear protein Ran_testis_specific isoform</b>   | <b>2.072466986</b> | <b>0.98227</b> | <b>5</b>  |
| Q8K586        | FNVWDTAGQEK                                                           | 1.106884981        | 2              | 3.31169   |
| Q8K586        | HLTGEFEK                                                              | 0.949767411        | 1              | 2.04382   |
| Q8K586        | LVLVGDGGTGK                                                           | 0.829091641        | 2              | 2.37278   |
| Q8K586        | NLQYYDISAK                                                            | 1.05161221         | 1              | 2.13557   |
| Q8K586        | VCENIPIVLCGNK                                                         | 0.899124351        | 2              | 3.72718   |
| <b>Q8K5B3</b> | <b>MCFD2 Multiple coagulation factor deficiency protein 2 homolog</b> | <b>1.714721261</b> | <b>0.60535</b> | <b>2</b>  |
| Q8K5B3        | DDDKNNDDGYIDYAEFAK                                                    | 0.775127219        | 2              | 4.35357   |
| Q8K5B3        | STVHDQEHIMEHLEGVINQPEAEMSPQELQLHYFK                                   | 1.514385055        | 4              | 5.87028   |
| <b>Q8QZY1</b> | <b>EIF3L Eukaryotic translation initiation factor 3 subunit L</b>     | <b>2.321088556</b> | <b>0.86739</b> | <b>3</b>  |
| Q8QZY1        | VFSDEVQQQAQLSTIR                                                      | 0.878447969        | 2              | 3.85333   |
| Q8QZY1        | VSGGPSLEQR                                                            | 1.106878202        | 2              | 2.62712   |
| Q8QZY1        | VYEQDIYENSWTK                                                         | 1.336603629        | 2              | 3.92647   |
| <b>Q8R081</b> | <b>HNRPL Heterogeneous nuclear ribonucleoprotein L</b>                | <b>1.686199971</b> | <b>0.75357</b> | <b>6</b>  |
| Q8R081        | ASLNGADIYSGCCTLK                                                      | 1.519289569        | 2              | 2.95599   |
| Q8R081        | NDQDTWDYTNPNLSGGDPSNPKNR                                              | 1.01785961         | 3              | 5.0295    |
| Q8R081        | SDALETGLFLNHYQMK                                                      | 1.191366785        | 2              | 3.68698   |
| Q8R081        | SKPGAAMVEMADGYAVDR                                                    | 0.624699152        | 2              | 3.89393   |
| Q8R081        | SSSGLLEWDSK                                                           | 0.866370727        | 2              | 2.32781   |
| Q8R081        | TENAGDQHGGGGGGSGAAGGGGGENYDDPHK                                       | 0.795737651        | 3              | 7.14297   |
| <b>Q8R0F9</b> | <b>S14L4 SEC14_like protein 4</b>                                     | <b>1.758492179</b> | <b>0.67177</b> | <b>5</b>  |
| Q8R0F9        | FDNTYSLLHTK                                                           | 0.854233654        | 2              | 3.13002   |
| Q8R0F9        | GSSHQVENEILFPGCVLR                                                    | 0.749343744        | 2              | 4.7551    |
| Q8R0F9        | VCEMLLHECELQSQK                                                       | 0.885272009        | 2              | 4.97628   |
| Q8R0F9        | VGYTAEVLLPDK                                                          | 0.789582575        | 2              | 2.95609   |
| Q8R0F9        | VGYTAEVLLPDKACEK                                                      | 0.862515076        | 2              | 2.44847   |
| <b>Q8R0K2</b> | <b>TRI31 E3 ubiquitin_protein ligase TRIM31</b>                       | <b>2.118164139</b> | <b>0.63618</b> | <b>2</b>  |



|               |                                                               |                    |                |          |
|---------------|---------------------------------------------------------------|--------------------|----------------|----------|
| Q8R0K2        | LQSSMELLKDIKDALS                                              | 1.053508867        | 2              | 2.552    |
| Q8R0K2        | QRLDEEESFLLSR                                                 | 1.907414241        | 2              | 2.43184  |
| <b>Q8R164</b> | <b>BPHL Valacyclovir hydrolase</b>                            | <b>2.109038693</b> | <b>0.97306</b> | <b>3</b> |
| Q8R164        | FADEFNR                                                       | 1.025610978        | 2              | 2.36687  |
| Q8R164        | FTLVAWDPR                                                     | 1.110954118        | 2              | 2.98209  |
| Q8R164        | TDFAPQLQSLNK                                                  | 1.04545287         | 2              | 3.728    |
| <b>Q8R1F5</b> | <b>HYI Putative hydroxypruvate isomerase</b>                  | <b>2.184727653</b> | <b>0.86175</b> | <b>2</b> |
| Q8R1F5        | GDTVEGLSWLR                                                   | 1.12716687         | 2              | 3.14266  |
| Q8R1F5        | GEMGLGAVPGR                                                   | 1.571375188        | 2              | 2.53749  |
| <b>Q8R1V4</b> | <b>TMED4 Transmembrane emp24 domain_containing protein 4</b>  | <b>2.383886283</b> | <b>0.95449</b> | <b>2</b> |
| Q8R1V4        | CFIEEIPDETMVIGNYR                                             | 2.055071827        | 2              | 4.48738  |
| Q8R1V4        | QLLDQVEQIQK                                                   | 0.96419575         | 2              | 2.89605  |
| <b>Q8R3Q6</b> | <b>CCD58 Coiled_coil domain_containing protein 58</b>         | <b>1.883037716</b> | <b>0.92363</b> | <b>2</b> |
| Q8R3Q6        | IVHELNTTPTASFAGK                                              | 0.790327747        | 2              | 3.94613  |
| Q8R3Q6        | NCIAQTSAVVK                                                   | 0.929726703        | 2              | 2.79186  |
| <b>Q8R491</b> | <b>EHD3 EH domain_containing protein 3</b>                    | <b>2.391137186</b> | <b>0.95948</b> | <b>6</b> |
| Q8R491        | ADQJETQQLMR                                                   | 1.244132322        | 2              | 2.61221  |
| Q8R491        | GGAFEGTLQGPFGHGYGEGAGEGIDDAEWWVAR                             | 21.69746844        | 3              | 4.333    |
| Q8R491        | LDISDEFSEVIK                                                  | 1.195050261        | 2              | 3.63764  |
| Q8R491        | LFEAEEQDLFK                                                   | 1.33546405         | 2              | 3.49502  |
| Q8R491        | MQDQLQAQDFSK                                                  | 1.039959641        | 2              | 3.83833  |
| Q8R491        | QEETQRPVQMVK                                                  | 1.031418588        | 2              | 2.7539   |
| <b>Q8VBU2</b> | <b>NDRG2 Protein NDRG2</b>                                    | <b>1.89457342</b>  | <b>0.12451</b> | <b>6</b> |
| Q8VBU2        | CPVMLVVGDAQPHEDAVVECNK                                        | 0.865536773        | 3              | 5.11384  |
| Q8VBU2        | LDPTQTSFLK                                                    | 0.933720492        | 1              | 2.08861  |
| Q8VBU2        | MADSGGQPQLTQPGK                                               | 1.204023636        | 2              | 3.1336   |
| Q8VBU2        | SLITHAPNLENIELYWNSYNNR                                        | 1.160872658        | 3              | 4.667    |
| Q8VBU2        | TLSQSSESGTLPSPGPPGHTMEVSC                                     | 0.459486712        | 2              | 4.517    |
| Q8VBU2        | YALNHPDTEGLVLIINIDPNAK                                        | 1.306273602        | 2              | 4.74081  |
| <b>Q8VC12</b> | <b>HUTU Urocanate hydratase</b>                               | <b>1.878674478</b> | <b>0.00048</b> | <b>9</b> |
| Q8VC12        | DHHDVSGTDSPFR                                                 | 1.62619754         | 2              | 2.68359  |
| Q8VC12        | HQLVGSQAR                                                     | 0.88602683         | 2              | 2.91315  |
| Q8VC12        | LLALEFAQELR                                                   | 2.121059373        | 2              | 3.96146  |
| Q8VC12        | LQYMDNIR                                                      | 1.571427567        | 2              | 2.42834  |
| Q8VC12        | LVITNGMVIPNYSSR                                               | 1.363563394        | 2              | 3.82513  |
| Q8VC12        | MMLSWDVSNQVAR                                                 | 1.337603463        | 2              | 3.17367  |
| Q8VC12        | VAIAVAINQAIASGK                                               | 2.775964139        | 2              | 4.00164  |
| Q8VC12        | VFVTSGLGGMSGAAQAK                                             | 1.313532418        | 2              | 4.54127  |
| Q8VC12        | VFVTSGLGGMSGAAQAK+Oxidation(9                                 | 0.875883643        |                |          |
| <b>Q8VDC1</b> | <b>FYCO1 FYVE and coiled_coil domain_containing protein 1</b> | <b>2.022489318</b> | <b>0.65419</b> | <b>2</b> |
| Q8VDC1        | GLELQVMQLQKEK                                                 | 1.016947325        | 2              | 2.39016  |
| Q8VDC1        | MLVSRQGGQLQVEK+Oxidation(0                                    | 0.799875388        |                |          |
| <b>Q8VDG5</b> | <b>PPCS Phosphopantothenate__cysteine ligase</b>              | <b>2.035198257</b> | <b>0.81822</b> | <b>2</b> |
| Q8VDG5        | FLDNFSSGR                                                     | 1.234170331        | 2              | 2.45637  |
| Q8VDG5        | LETDPDIISR                                                    | 1.021769745        | 2              | 2.58724  |
| <b>Q8VE11</b> | <b>MTMR6 Myotubularin_related protein 6</b>                   | <b>1.370240786</b> | <b>0.02607</b> | <b>2</b> |
| Q8VE11        | TMKGFMLIEK+Oxidation(1                                        | 0.454429434        |                |          |
| Q8VE11        | TMKGFMLIEK+Oxidation(5                                        | 0.454429434        |                |          |
| <b>Q8VED5</b> | <b>K2C79 Keratin_type II cytoskeletal 79</b>                  | <b>1.831922955</b> | <b>0.25184</b> | <b>5</b> |
| Q8VED5        | FLEQQNKVLETK                                                  | 0.200390318        | 2              | 3.66851  |
| Q8VED5        | NKYEDEINK                                                     | 0.957863102        | 2              | 2.95454  |
| Q8VED5        | NKYEDEINKR                                                    | 0.836993633        | 3              | 3.33708  |
| Q8VED5        | NLDLDSIAEVK                                                   | 0.689825097        | 2              | 3.541    |
| Q8VED5        | YEDEINK                                                       | 1.323075862        | 1              | 2.34168  |

|               |                                                          |                    |                |           |
|---------------|----------------------------------------------------------|--------------------|----------------|-----------|
| <b>Q8VEK3</b> | <b>HNRPU Heterogeneous nuclear ribonucleoprotein U</b>   | <b>2.244136379</b> | <b>0.99993</b> | <b>12</b> |
| Q8VEK3        | EKPYFPIPEDCTFIQNVPLEDR                                   | 1.287840832        | 3              | 4.77499   |
| Q8VEK3        | FIEIAAR                                                  | 1.335169347        | 1              | 1.90702   |
| Q8VEK3        | GYFEYIEENK                                               | 0.833432783        | 2              | 3.37234   |
| Q8VEK3        | LLEQYKEESK                                               | 1.158761474        | 2              | 3.26815   |
| Q8VEK3        | LLEQYKEESK                                               | 1.055143786        | 2              | 3.66877   |
| Q8VEK3        | LQAALDNEAGGRPAMEPGNGSLDLGGDAAGR                          | 0.984655162        | 3              | 4.75506   |
| Q8VEK3        | NFILDQTNVSAQAQR                                          | 1.115860294        | 2              | 4.89524   |
| Q8VEK3        | NGQDLGVAFK                                               | 1.027039295        | 2              | 2.40092   |
| Q8VEK3        | TCNCETEDYGEK                                             | 1.27909427         | 2              | 3.57562   |
| Q8VEK3        | VSELKEELK                                                | 1.22421583         | 2              | 2.89193   |
| Q8VEK3        | VSELKEELK                                                | 1.07186603         | 2              | 2.68919   |
| Q8VEK3        | YNILGTNTIMDK                                             | 1.138231382        | 2              | 3.656     |
| <b>Q8VHE9</b> | <b>RETST All_trans_retinol_13_14_reductase</b>           | <b>1.958984923</b> | <b>0.99996</b> | <b>8</b>  |
| Q8VHE9        | ATVQSVLLDSAGR                                            | 0.97989863         | 2              | 3.86813   |
| Q8VHE9        | FLPLPLTQLLNK                                             | 0.946378424        | 2              | 3.22782   |
| Q8VHE9        | GATYGADHDLAR                                             | 0.945055986        | 2              | 3.26791   |
| Q8VHE9        | NLYSDLQALGSK                                             | 1.007355348        | 2              | 3.6197    |
| Q8VHE9        | RPPEPLVTDK                                               | 0.902793707        | 2              | 2.95453   |
| Q8VHE9        | RPPEPLVTDKEAR                                            | 0.777937289        | 3              | 4.20689   |
| Q8VHE9        | VESVTGGSPLTNQYYLAAHR                                     | 1.053741096        | 2              | 3.9792    |
| Q8VHE9        | VVAHGVSHAILLK                                            | 1.21532669         | 2              | 2.87402   |
| <b>Q8VHF5</b> | <b>CISY Citrate synthase_mitochondrial</b>               | <b>2.13306499</b>  | <b>0.78842</b> | <b>4</b>  |
| Q8VHF5        | AYAEGINR                                                 | 0.916508554        | 2              | 2.51807   |
| Q8VHF5        | EGSSIGAIDSK                                              | 1.034564731        | 2              | 2.35077   |
| Q8VHF5        | GLVYETSVLDPDEGIR                                         | 1.045069017        | 2              | 4.34381   |
| Q8VHF5        | GYSIPECQK                                                | 1.103509296        | 2              | 2.80161   |
| <b>Q8VHK7</b> | <b>HDGF Hepatoma_derived growth factor</b>               | <b>1.898556647</b> | <b>0.99413</b> | <b>3</b>  |
| Q8VHK7        | GFSEGLWEIENNPVK                                          | 0.793524162        | 2              | 3.70253   |
| Q8VHK7        | NSTPSEPDSGQPPPEEEEEEEEEAAKEEAQAQGV                       | 0.694535549        | 3              | 6.10673   |
| Q8VHK7        | SCAEPEVEPEAHEGDGDKK                                      | 1.036218732        | 3              | 3.9406    |
| <b>Q8VHT6</b> | <b>AS3MT Arsenite methyltransferase</b>                  | <b>2.437864614</b> | <b>0.73562</b> | <b>4</b>  |
| Q8VHT6        | FAHDFLFTPVEASLLAPQTK                                     | 2.603408166        | 2              | 4.36773   |
| Q8VHT6        | ILDGSGSGR                                                | 0.998525256        | 2              | 2.90833   |
| Q8VHT6        | SLQNVHEEVISR                                             | 1.682933523        | 2              | 3.20885   |
| Q8VHT6        | TSADLQTNACVTPAK                                          | 1.386593692        | 2              | 3.87555   |
| <b>Q8VHX6</b> | <b>FLNC Filamin_C</b>                                    | <b>2.213999264</b> | <b>0.98842</b> | <b>3</b>  |
| Q8VHX6        | GAGTGGLGLTVEGPCEAK                                       | 1.048600558        | 2              | 3.97345   |
| Q8VHX6        | IECDDKGDGSCDVR                                           | 1.083946184        | 2              | 3.44393   |
| Q8VHX6        | LIALLEVLQK                                               | 1.648610748        | 2              | 2.62857   |
| <b>Q8VI04</b> | <b>ASGL1 L_asparaginase</b>                              | <b>1.979638342</b> | <b>0.99961</b> | <b>5</b>  |
| Q8VI04        | DLSAGAVSAVRCIANPVK                                       | 0.877317124        | 2              | 2.35339   |
| Q8VI04        | FAADMGIPQTPAEK                                           | 0.986347431        | 2              | 3.44424   |
| Q8VI04        | GNLAYATSTGGIVNK                                          | 0.876237491        | 2              | 4.35895   |
| Q8VI04        | NSGTVGAVALDCK                                            | 0.940830172        | 2              | 3.29069   |
| Q8VI04        | TVDEAATLALDYMK                                           | 1.073157886        | 2              | 3.57368   |
| <b>Q8VID1</b> | <b>DHRS4 Dehydrogenase/reductase SDR family member 4</b> | <b>1.954812496</b> | <b>0.9998</b>  | <b>5</b>  |
| Q8VID1        | AVATLQGEGLSVTVGVCHVGK                                    | 1.271453831        | 2              | 4.01386   |
| Q8VID1        | LAEDGAHVVISSR                                            | 2.059847917        | 2              | 3.70507   |
| Q8VID1        | NFAAELAPK                                                | 0.838853821        | 2              | 2.45876   |
| Q8VID1        | TALLGLTK                                                 | 1.056301413        | 2              | 2.41564   |
| Q8VID1        | VNCLAPGLIK                                               | 1.104826657        | 2              | 2.51608   |
| <b>Q8VIF7</b> | <b>SBP1 Selenium_binding protein 1</b>                   | <b>1.894530454</b> | <b>0.99982</b> | <b>11</b> |
| Q8VIF7        | CGPGYATPLEAMK                                            | 0.614239249        | 2              | 3.10767   |
| Q8VIF7        | FLHDPDATQGFVGCALSSNIQR                                   | 1.077586612        | 2              | 5.42326   |

|               |                                                                    |                    |                |          |
|---------------|--------------------------------------------------------------------|--------------------|----------------|----------|
| Q8VIF7        | GGFVLLDGETFEVK                                                     | 1.442855314        | 2              | 3.90905  |
| Q8VIF7        | GTWEKPGGEAPMGYDFWYQPR                                              | 0.934564096        | 2              | 3.77977  |
| Q8VIF7        | HEIIQTLQMK                                                         | 0.957547208        | 2              | 2.84595  |
| Q8VIF7        | HNIMVSTEWAAPNVFK                                                   | 1.130980223        | 2              | 4.60945  |
| Q8VIF7        | LTGQIFLGGSIK                                                       | 0.860624376        | 2              | 3.01877  |
| Q8VIF7        | NEGGTWSVEK                                                         | 0.837487299        | 2              | 3.16176  |
| Q8VIF7        | NTGIEAPDYLATVDVDPK                                                 | 1.006638839        | 2              | 4.16405  |
| Q8VIF7        | QYDISNPK                                                           | 0.77467208         | 1              | 2.11613  |
| Q8VIF7        | VIEPNEIHAK                                                         | 1.056433467        | 2              | 2.96786  |
| <b>Q8VIJ6</b> | <b>SFPQ Splicing factor_ proline_ and glutamine_rich</b>           | <b>1.805044319</b> | <b>0.81196</b> | <b>3</b> |
| Q8VIJ6        | FGQGGAGPVGQGP                                                      | 0.852173341        | 2              | 3.2066   |
| Q8VIJ6        | MEELHSQEMQK                                                        | 0.855329577        | 2              | 3.7953   |
| Q8VIJ6        | RMEELHSQEMQK                                                       | 0.689444297        | 2              | 3.90017  |
| <b>Q91VA0</b> | <b>ACSM1 Acyl_coenzyme A synthetase ACSM1_ mitochondrial</b>       | <b>2.158702082</b> | <b>0.06944</b> | <b>5</b> |
| Q91VA0        | AFIVLNPEFLSHDQEQLIK                                                | 1.419834097        | 2              | 5.40929  |
| Q91VA0        | AILPFDLQIIDEK                                                      | 1.110347201        | 2              | 3.85738  |
| Q91VA0        | GNILPPNTEGYIGIR                                                    | 1.040819175        | 2              | 2.90914  |
| Q91VA0        | KVEFVSELPK                                                         | 0.964432635        | 2              | 2.90151  |
| Q91VA0        | NKEFGQL                                                            | 1.086406822        | 1              | 2.1487   |
| <b>Q91VA6</b> | <b>PDIP2 Polymerase delta_interacting protein 2</b>                | <b>2.870112171</b> | <b>0.07357</b> | <b>2</b> |
| Q91VA6        | VLETVGVEVFPK                                                       | 1.600436933        | 2              | 3.40001  |
| Q91VA6        | VTVIPFYMGM+Oxidation(9                                             | 1.148716329        |                |          |
| <b>Q91VM5</b> | <b>RBMXL Heterogeneous nuclear ribonucleoprotein G_like 1</b>      | <b>1.879886554</b> | <b>0.99997</b> | <b>2</b> |
| Q91VM5        | LFIGLNTETNEK                                                       | 0.936781439        | 2              | 2.79149  |
| Q91VM5        | VEQATKPSFESGR                                                      | 0.900704918        | 2              | 3.93891  |
| <b>Q91VM9</b> | <b>IPYR2 Inorganic pyrophosphatase 2_ mitochondrial</b>            | <b>2.034027694</b> | <b>1</b>       | <b>2</b> |
| Q91VM9        | IIAINVNDPEAEK                                                      | 0.904263428        | 2              | 3.21823  |
| Q91VM9        | MEIATEEPLNPIK                                                      | 1.024789233        | 2              | 4.43456  |
| <b>Q91W43</b> | <b>GCSP Glycine dehydrogenase [decarboxylating]_ mitochondrial</b> | <b>1.977543156</b> | <b>0.47224</b> | <b>6</b> |
| Q91W43        | AGHQLQHDLFFDTLK                                                    | 1.257683226        | 2              | 3.02957  |
| Q91W43        | DISLVHSMIPLGSCTMK                                                  | 1.018187701        | 2              | 2.72649  |
| Q91W43        | EMLQALGLASIDELIEK                                                  | 0.970963922        | 2              | 2.54451  |
| Q91W43        | IDDIYGDQHLVCTCPPMEVYESPFSEK                                        | 1.344657833        | 3              | 4.43025  |
| Q91W43        | NLLENSGWVQYTPYQPEVSQGR                                             | 1.876245952        | 3              | 4.64839  |
| Q91W43        | VSFQPNSGAQGEYAGLATIR                                               | 1.448201992        | 2              | 5.20353  |
| <b>Q91W90</b> | <b>TXND5 Thioredoxin domain_containing protein 5</b>               | <b>2.086797466</b> | <b>0.9866</b>  | <b>3</b> |
| Q91W90        | GTVLALTEK                                                          | 1.152408943        | 2              | 2.39144  |
| Q91W90        | SFEDTIAQGITVFK                                                     | 1.06225087         | 2              | 4.02806  |
| Q91W90        | VDCTQHYAVCSEHQVR                                                   | 1.03176748         | 3              | 4.48855  |
| <b>Q91WL5</b> | <b>CP4CA Cytochrome P450 4A12A</b>                                 | <b>1.925633831</b> | <b>0.98785</b> | <b>2</b> |
| Q91WL5        | FELLDPDTR                                                          | 1.077707421        | 2              | 2.66626  |
| Q91WL5        | IQLQDEEELEK                                                        | 0.945299838        | 2              | 2.48758  |
| <b>Q91X77</b> | <b>CY250 Cytochrome P450 2C50</b>                                  | <b>1.90934966</b>  | <b>0.57504</b> | <b>5</b> |
| Q91X77        | EHEESLDVTIPR                                                       | 0.73436731         | 2              | 2.30784  |
| Q91X77        | IKEHEESLDVTIPR                                                     | 0.875796746        | 3              | 3.66349  |
| Q91X77        | NFLEK                                                              | 0.947047027        | 1              | 2.10253  |
| Q91X77        | NYFIPK                                                             | 0.873072084        | 1              | 1.92056  |
| Q91X77        | YALLLLLK                                                           | 0.71815008         | 2              | 2.92146  |
| <b>Q91X78</b> | <b>ERLN1 Erlin_1</b>                                               | <b>1.925497734</b> | <b>0.4194</b>  | <b>4</b> |
| Q91X78        | DLNTMAPGLTIQAVR                                                    | 0.622078963        | 2              | 3.44246  |
| Q91X78        | ISEIEDAAFLAR                                                       | 1.132855984        | 2              | 2.9784   |
| Q91X78        | RISEIEDAAFLAREK                                                    | 1.183888547        | 2              | 2.30733  |
| Q91X78        | SVQTTLQDTEVK                                                       | 0.845516555        | 2              | 3.09624  |

|               |                                                                           |                    |                |           |
|---------------|---------------------------------------------------------------------------|--------------------|----------------|-----------|
| <b>Q91Y78</b> | <b>UCHL3 Ubiquitin carboxyl-terminal hydrolase isozyme L3</b>             | <b>1.854737376</b> | <b>0.86869</b> | <b>2</b>  |
| Q91Y78        | FLEESVAMSPEER                                                             | 1.015120091        | 2              | 3.26073   |
| Q91Y78        | HLENYDAIR                                                                 | 0.859249338        | 2              | 2.58245   |
| <b>Q91Y81</b> | <b>SEPT2 Septin_2</b>                                                     | <b>2.055458259</b> | <b>0.8622</b>  | <b>4</b>  |
| Q91Y81        | ASIPFSVVGSNQLIEAK                                                         | 1.094967275        | 2              | 2.66018   |
| Q91Y81        | ILDEIEEHSIK                                                               | 0.978766945        | 2              | 2.65335   |
| Q91Y81        | KVENEDMNKDQILLEK                                                          | 0.945108821        | 3              | 3.69238   |
| Q91Y81        | LTVVDTPGYGDAINSR                                                          | 0.882667718        | 2              | 4.37815   |
| <b>Q91YP0</b> | <b>L2HDH L_2_hydroxyglutarate dehydrogenase_mitochondrial</b>             | <b>1.831777899</b> | <b>0.99851</b> | <b>3</b>  |
| Q91YP0        | LIQVEDIK                                                                  | 0.99777923         | 2              | 2.40078   |
| Q91YP0        | LIVAVEQEIEPR                                                              | 0.873664922        | 2              | 2.80304   |
| Q91YP0        | NAPSPAATSSLAISR                                                           | 0.835158225        | 2              | 3.29706   |
| <b>Q91YT0</b> | <b>NDUV1 NADH dehydrogenase [ubiquinone] flavoprotein 1_mitochondrial</b> | <b>2.058374695</b> | <b>0.70978</b> | <b>10</b> |
| Q91YT0        | GAGAYICGEETALIESIEGK                                                      | 1.421434934        | 2              | 2.57513   |
| Q91YT0        | GDARPAEIDSLWEISK                                                          | 1.244161491        | 2              | 2.87714   |
| Q91YT0        | GEFYNEASNQVAIR                                                            | 1.195654129        | 2              | 3.55235   |
| Q91YT0        | GGAGFPTGLK                                                                | 0.970640013        | 2              | 2.37067   |
| Q91YT0        | HFRPELEDR                                                                 | 1.147476526        | 2              | 2.33197   |
| Q91YT0        | KTSFGSLKDEDR                                                              | 0.895791671        | 2              | 3.48027   |
| Q91YT0        | LKPPFPADVGVFGCPTTVANVETVAVSPTICR                                          | 1.543241272        | 3              | 4.19768   |
| Q91YT0        | LVEGCLVGGR                                                                | 1.125777019        | 2              | 2.7434    |
| Q91YT0        | TSFGSLKDEDR                                                               | 1.010834882        | 2              | 2.49589   |
| Q91YT0        | YLVVNADEGEPGTCK                                                           | 1.036647609        | 2              | 4.94173   |
| <b>Q91Z53</b> | <b>GRHPR Glyoxylate reductase/hydroxypyruvate reductase</b>               | <b>1.884071251</b> | <b>1.1E-12</b> | <b>6</b>  |
| Q91Z53        | GDVVNQEDLYQALASGQIAAAGLDVTTPELPPSHPLTLK                                   | 1.18308848         | 3              | 6.77683   |
| Q91Z53        | LLDAAGANLR                                                                | 1.033693021        | 2              | 3.26251   |
| Q91Z53        | NCVILPHIGSATYK                                                            | 0.910788202        | 2              | 3.70573   |
| Q91Z53        | NTMSLLAANNLLAGLR                                                          | 1.760654156        | 2              | 4.73976   |
| Q91Z53        | RLPEAIEEVK                                                                | 0.81083095         | 3              | 3.30049   |
| Q91Z53        | VISTLSVGVVDHLALDEIK                                                       | 1.487747014        | 2              | 4.75026   |
| <b>Q91ZJ5</b> | <b>UGPA UTP-glucose_1-phosphate uridylyltransferase</b>                   | <b>2.189321145</b> | <b>0.99937</b> | <b>14</b> |
| Q91ZJ5        | AMSQDGASQFQEVILQELELSVK                                                   | 1.107560209        | 2              | 4.69947   |
| Q91ZJ5        | GGTLTQYEGK                                                                | 0.985101852        | 2              | 2.37103   |
| Q91ZJ5        | GLPDNISSVLNK                                                              | 1.309570053        | 2              | 3.37689   |
| Q91ZJ5        | GTVIIIANHGDR                                                              | 1.115887061        | 2              | 3.00819   |
| Q91ZJ5        | IDIPPGAVLENK                                                              | 1.219258082        | 2              | 2.87701   |
| Q91ZJ5        | IQRPPEDSIQPYEK                                                            | 1.072222347        | 3              | 5.17817   |
| Q91ZJ5        | LNGGLGTSMGCK                                                              | 1.385151222        | 2              | 2.96923   |
| Q91ZJ5        | LVEIAQVPK                                                                 | 1.132441055        | 2              | 3.45131   |
| Q91ZJ5        | NENTFLDLTVQQIEHLNK                                                        | 1.116524389        | 2              | 5.0521    |
| Q91ZJ5        | RCEFVMEVTNK                                                               | 0.790433095        | 2              | 2.37589   |
| Q91ZJ5        | RFESIPDMLELDHLTVSGDVTFGK                                                  | 1.575734482        | 3              | 3.33507   |
| Q91ZJ5        | SFENSLGINVPR                                                              | 1.114820997        | 2              | 3.44256   |
| Q91ZJ5        | TLDGGLNVIQLETAVGAAIK                                                      | 0.911157379        | 2              | 5.31327   |
| Q91ZJ5        | TYNTDVPLVLMNSFNTDEDTKK                                                    | 0.950998656        | 2              | 4.49399   |
| <b>Q91ZU6</b> | <b>DYST Dystonin</b>                                                      | <b>1.827731333</b> | <b>0.71416</b> | <b>2</b>  |
| Q91ZU6        | LDMLQQIATR+Oxidation(2                                                    | 1.240910348        |                |           |
| Q91ZU6        | SAETNIDQDITNLK                                                            | 0.85438917         | 2              | 2.37363   |
| <b>Q91ZV0</b> | <b>MIA2 Melanoma inhibitory activity protein 2</b>                        | <b>2.82512393</b>  | <b>0.7103</b>  | <b>2</b>  |
| Q91ZV0        | CGDLECETLISRVLALR                                                         | 2.120710582        | 2              | 2.41905   |
| Q91ZV0        | KMLDQDDIVENDK+Oxidation(1                                                 | 1.19489481         |                |           |

|               |                                                                                        |                    |                |           |
|---------------|----------------------------------------------------------------------------------------|--------------------|----------------|-----------|
| <b>Q91ZX7</b> | <b>LRP1 Prolow_density lipoprotein receptor_related protein 1</b>                      | <b>1.77331028</b>  | <b>0.00241</b> | <b>6</b>  |
| Q91ZX7        | CLQGACVVNK                                                                             | 1.177157852        | 2              | 2.43256   |
| Q91ZX7        | GCHVNECLSR                                                                             | 0.814219528        | 2              | 2.70352   |
| Q91ZX7        | ILQEDFTCR                                                                              | 0.904822597        | 2              | 2.4945    |
| Q91ZX7        | MYDAQQQVGTNK                                                                           | 1.019043836        | 2              | 4.43759   |
| Q91ZX7        | TVLWPNGLSLDIPAGR                                                                       | 0.634765957        | 2              | 2.49056   |
| Q91ZX7        | VFFTDYGQIPK                                                                            | 0.997486177        | 2              | 3.27737   |
| <b>Q920A6</b> | <b>RISC Retinoid_inducible serine carboxypeptidase</b>                                 | <b>2.155180734</b> | <b>0.88204</b> | <b>2</b>  |
| Q920A6        | GLAEVSDIAEQVLNAVNK                                                                     | 1.077439804        | 3              | 5.64574   |
| Q920A6        | NTDGVNFYNILTK                                                                          | 1.143698571        | 2              | 2.91284   |
| <b>Q920D2</b> | <b>DYR Dihydrofolate reductase</b>                                                     | <b>2.397440796</b> | <b>6.4E-11</b> | <b>4</b>  |
| Q920D2        | IMQEFESDTFFPEIDLEK                                                                     | 1.283077095        | 2              | 4.6773    |
| Q920D2        | LIEQPELASK                                                                             | 0.904145115        | 2              | 3.00358   |
| Q920D2        | LLPEYPGVLSEIQEEK                                                                       | 1.320335813        | 2              | 3.70405   |
| Q920D2        | NGDLPWPLLR                                                                             | 1.259760484        | 2              | 3.2312    |
| <b>Q920F3</b> | <b>KHDR2 KH domain_containing_RNA_binding_signal transduction_associated protein 2</b> | <b>1.973713532</b> | <b>0.8809</b>  | <b>2</b>  |
| Q920F3        | LQEETGAKMSILGKSMR+Oxidation(8                                                          | 1.192632374        |                |           |
| Q920F3        | MSHALEEIKK                                                                             | 0.980857318        | 1              | 2.2597    |
| <b>Q920F5</b> | <b>DCMC Malonyl_CoA decarboxylase_mitochondrial</b>                                    | <b>1.845024281</b> | <b>0.98393</b> | <b>5</b>  |
| Q920F5        | ADLLEAQALK                                                                             | 0.911310925        | 2              | 2.33896   |
| Q920F5        | EIAEVTGDPVHESLK                                                                        | 0.879680903        | 2              | 3.43761   |
| Q920F5        | ISECEAVHPVK                                                                            | 0.870095159        | 2              | 3.35816   |
| Q920F5        | LCSGLTASAMDELLR                                                                        | 0.956119846        | 2              | 2.30838   |
| Q920F5        | WLLGLLNVQGK                                                                            | 1.015387547        | 2              | 3.38123   |
| <b>Q920J4</b> | <b>TXNL1 Thioredoxin_like protein 1</b>                                                | <b>1.960328479</b> | <b>0.85772</b> | <b>4</b>  |
| Q920J4        | AGCECLNESDEHGFNCLR                                                                     | 1.115572013        | 3              | 4.03823   |
| Q920J4        | IDQYQGADAVGLEEK                                                                        | 0.939053178        | 2              | 4.82367   |
| Q920J4        | QHLENDPGSNEDTDIPK                                                                      | 1.432037057        | 2              | 2.38512   |
| Q920J4        | SEPTQALELTEDDIKEDGIVPLR                                                                | 1.866237104        | 2              | 3.40548   |
| <b>Q920L2</b> | <b>DHSA Succinate dehydrogenase [ubiquinone] flavoprotein subunit_mitochondrial</b>    | <b>2.194763142</b> | <b>0.8206</b>  | <b>18</b> |
| Q920L2        | ACALSIAESCRPGDK                                                                        | 0.599482215        | 2              | 2.87019   |
| Q920L2        | AGLPCQDLEFVQFHPTGIYGAGCLITEGCR                                                         | 1.119230998        | 3              | 4.5069    |
| Q920L2        | ANAGEESVMNLDK                                                                          | 1.148837732        | 2              | 3.64589   |
| Q920L2        | GEGGILINSQGER                                                                          | 0.817390175        | 2              | 4.06212   |
| Q920L2        | GVIALCIEDGSIHR                                                                         | 0.961724053        | 2              | 3.35516   |
| Q920L2        | HTLSYVDTK                                                                              | 1.139321747        | 2              | 2.4893    |
| Q920L2        | HVNGQDQIVPGLYACGEAACASVHGANKR                                                          | 1.027415179        | 3              | 6.76002   |
| Q920L2        | IDEYDYSKPIEGQQK                                                                        | 5.220100643        | 2              | 4.47603   |
| Q920L2        | KHTLSYVDTK                                                                             | 0.77768731         | 2              | 2.76582   |
| Q920L2        | NTIIATGGYGR                                                                            | 1.010273039        | 2              | 2.78549   |
| Q920L2        | SMQSHAAVFR                                                                             | 1.088875461        | 2              | 2.69007   |
| Q920L2        | TGHSLHHTLYGR                                                                           | 0.546399645        | 2              | 2.95551   |
| Q920L2        | TLNEADCATVPPAIR                                                                        | 0.941068965        | 2              | 3.69084   |
| Q920L2        | TYFSCTSAHTSTGDGTAMVTR                                                                  | 0.93448824         | 2              | 5.69867   |
| Q920L2        | VGSVLQEGCEK                                                                            | 0.985087869        | 2              | 3.54096   |
| Q920L2        | VSDAISTQYPVVDHEFDVAVVVGAGGAGLR                                                         | 1.056453817        | 3              | 4.92184   |
| Q920L2        | VSQLYGDLQHLK                                                                           | 1.079716196        | 2              | 3.49626   |
| Q920L2        | VTLDYRVIDK                                                                             | 0.877720068        | 2              | 2.97589   |
| <b>Q920P0</b> | <b>DCXR L_xylulose reductase</b>                                                       | <b>2.106724768</b> | <b>0.73817</b> | <b>7</b>  |
| Q920P0        | ALTNHTVYCSTK                                                                           | 1.157000522        | 2              | 3.15117   |
| Q920P0        | AVVQVSQIVAR                                                                            | 1.105834976        | 2              | 3.16954   |
| Q920P0        | GVPGAIVNVSSQASQR                                                                       | 1.009813178        | 2              | 5.78407   |
| Q920P0        | SSMTTGSALPVDGGFLAT                                                                     | 1.199896025        | 2              | 2.85738   |
| Q920P0        | STVLALQAAGAQQVAVSR                                                                     | 1.130964839        | 2              | 3.9189    |

|               |                                                                               |                    |                |           |
|---------------|-------------------------------------------------------------------------------|--------------------|----------------|-----------|
| Q920P0        | TREDLDSLVR                                                                    | 0.929280289        | 2              | 2.96284   |
| Q920P0        | VNAVNPVTVMTPMGR                                                               | 1.389103759        | 2              | 3.44197   |
| <b>Q921F2</b> | <b>TADBP TAR DNA_binding protein 43</b>                                       | <b>1.934527309</b> | <b>0.59295</b> | <b>5</b>  |
| Q921F2        | FGGNPGGFGNQGGFGNSR                                                            | 0.97899336         | 2              | 4.41305   |
| Q921F2        | FTEYETQVK                                                                     | 1.120014109        | 2              | 2.63626   |
| Q921F2        | GISVHISNAEPK                                                                  | 0.777740771        | 2              | 2.52892   |
| Q921F2        | KDLKTGHSK                                                                     | 0.94637738         | 2              | 2.4425    |
| Q921F2        | TSDLIVLGLPWK                                                                  | 1.166352112        | 2              | 3.27269   |
| <b>Q921M3</b> | <b>SF3B3 Splicing factor 3B subunit 3</b>                                     | <b>1.964025418</b> | <b>0.5724</b>  | <b>3</b>  |
| Q921M3        | FLAVGLVDNTR                                                                   | 1.331123069        | 2              | 2.83468   |
| Q921M3        | LPPNTNDEVDEPTGNK                                                              | 0.721226976        | 2              | 2.6862    |
| Q921M3        | TVLDPVTGDLSDTR                                                                | 1.116584313        | 2              | 2.66564   |
| <b>Q922F4</b> | <b>TBB6 Tubulin beta_6 chain</b>                                              | <b>2.206101613</b> | <b>0.00446</b> | <b>7</b>  |
| Q922F4        | ALTVELTQQMFDAK                                                                | 1.220573873        | 2              | 3.98424   |
| Q922F4        | ALTVELTQQMFDAK+Oxidation(10)                                                  | 1.104458109        |                |           |
| Q922F4        | GHYTEGAELVSDLVDR                                                              | 1.209190885        | 2              | 6.63607   |
| Q922F4        | IREEYPDR                                                                      | 1.054968123        | 2              | 2.97651   |
| Q922F4        | MASTFIGNSTAIQELFK                                                             | 1.413119484        | 2              | 4.34616   |
| Q922F4        | NMMAACDPR                                                                     | 1.141170884        | 2              | 2.75148   |
| Q922F4        | NSSYFVEWIPNNVK                                                                | 1.200855616        | 2              | 4.74812   |
| <b>Q922J3</b> | <b>CLIP1 CAP_Gly domain_containing linker protein 1</b>                       | <b>2.005310409</b> | <b>0.99945</b> | <b>2</b>  |
| Q922J3        | EMETMQAKLMK+Oxidation(4)                                                      | 1.009543158        |                |           |
| Q922J3        | HEEILQNLQKMLADTEK                                                             | 0.965533486        | 2              | 2.33487   |
| <b>Q923D2</b> |                                                                               | <b>2.159651233</b> | <b>0.99961</b> | <b>4</b>  |
| Q923D2        | HDLGHFMLR                                                                     | 1.039486221        | 3              | 3.3618    |
| Q923D2        | LQDVTDDHIR                                                                    | 1.116442591        | 2              | 3.16677   |
| Q923D2        | TGLTTLAQAVQAGYEVTVLVR                                                         | 1.029439801        | 3              | 4.15661   |
| Q923D2        | YVAVMPPHIGDQPLTGAYTVLDGR                                                      | 1.070200401        | 3              | 4.19365   |
| <b>Q923K9</b> | <b>A1CF APOBEC1 complementation factor</b>                                    | <b>2.466575063</b> | <b>0.05776</b> | <b>3</b>  |
| Q923K9        | LAPQILEEICQK                                                                  | 1.713349904        | 2              | 2.90155   |
| Q923K9        | TGYSLVQENGQR                                                                  | 0.899075142        | 2              | 2.51915   |
| Q923K9        | VTEGVVDVIVYPSAADK                                                             | 1.124987516        | 2              | 3.78576   |
| <b>Q923M1</b> | <b>MSRA Mitochondrial peptide methionine sulfoxide reductase</b>              | <b>2.19721649</b>  | <b>0.607</b>   | <b>2</b>  |
| Q923M1        | SAVYPTSAVQMEAAK                                                               | 1.487182017        | 2              | 4.21521   |
| Q923M1        | VISAEALPGR                                                                    | 0.980526204        | 2              | 2.91798   |
| <b>Q923V8</b> | <b>SEP15 15 kDa selenoprotein</b>                                             | <b>2.311170702</b> | <b>0.88568</b> | <b>3</b>  |
| Q923V8        | GCCQEEAQFETK                                                                  | 0.999312378        | 2              | 4.15683   |
| Q923V8        | LLDDNGNIAEELSILK                                                              | 1.31802887         | 2              | 4.0781    |
| Q923V8        | WNTDSVEEFLSEK                                                                 | 1.410470172        | 2              | 2.76854   |
| <b>Q924C3</b> | <b>ENPP1 Ectonucleotide pyrophosphatase/phosphodiesterase family member 1</b> | <b>3.367971597</b> | <b>0.69757</b> | <b>5</b>  |
| Q924C3        | AEYLHTWGGLLPVISK                                                              | 1.335555628        | 3              | 3.91723   |
| Q924C3        | ELESPAAASLLAPMDLGEPELEK                                                       | 2.044514562        | 2              | 4.40713   |
| Q924C3        | GQPIWVTANHQEVR                                                                | 0.857962266        | 2              | 3.3361    |
| Q924C3        | SGTYFWPGSDVEIDGILPDIYK                                                        | 1.192359055        | 2              | 2.51833   |
| Q924C3        | SVSSDLGCTCDPSIVPIMDFEK                                                        | 1.569167471        | 2              | 3.87963   |
| <b>Q924S5</b> | <b>LONM Lon protease homolog_mitochondrial</b>                                | <b>1.964443652</b> | <b>0.98806</b> | <b>14</b> |
| Q924S5        | AGVTCIILPAENR                                                                 | 0.865936233        | 2              | 2.31455   |
| Q924S5        | AQLSATVLTLLIK                                                                 | 0.68046262         | 2              | 3.45383   |
| Q924S5        | AQSVLEEDHYGMEDVK                                                              | 0.874594179        | 2              | 4.26816   |
| Q924S5        | EHQEALAVR                                                                     | 0.989444175        | 2              | 2.51945   |
| Q924S5        | ELGLEKDDKDAIEEK                                                               | 0.849035933        | 2              | 3.74027   |
| Q924S5        | FSVGGMTDVAEIK                                                                 | 1.064426296        | 2              | 3.07037   |
| Q924S5        | GYQGDPSALLELLDPEQANFLDHYLDVPVDSLK                                             | 1.219521041        | 3              | 5.09929   |
| Q924S5        | HVMDVVDEELSK                                                                  | 0.779795379        | 2              | 3.62586   |

|               |                                                               |                    |                |          |
|---------------|---------------------------------------------------------------|--------------------|----------------|----------|
| Q924S5        | IVSGEAQTVHVTPENLQDFVGKPVFTVER                                 | 1.185920117        | 3              | 5.92571  |
| Q924S5        | MEMINVSQYVAQEK                                                | 3.345947945        | 2              | 2.66099  |
| Q924S5        | QLEVEPEGLEPEAENK                                              | 0.964926757        | 2              | 4.35001  |
| Q924S5        | QSDENLDLAR                                                    | 1.004985646        | 2              | 2.46775  |
| Q924S5        | TENPLVLIDEVDK                                                 | 1.209781391        | 2              | 2.99689  |
| Q924S5        | VLEFIAVSQLR                                                   | 1.264958154        | 2              | 2.77648  |
| <b>Q924W5</b> | <b>SMC6 Structural maintenance of chromosomes protein 6</b>   | <b>2.18178765</b>  | <b>0.81996</b> | <b>2</b> |
| Q924W5        | ELDMKEKELQEK                                                  | 1.949297095        | 2              | 2.373    |
| Q924W5        | TKEQINQGEERLTELK                                              | 1.055981233        | 2              | 2.55773  |
| <b>Q99020</b> | <b>ROAA Heterogeneous nuclear ribonucleoprotein A/B</b>       | <b>2.398209795</b> | <b>0.01399</b> | <b>4</b> |
| Q99020        | EYFGQFGEIEAIELPIDPK                                           | 1.409269299        | 2              | 3.56033  |
| Q99020        | FGEVVDCTIK                                                    | 0.50079546         | 2              | 3.20895  |
| Q99020        | IFVGGLNPEATEEK                                                | 1.370627222        | 2              | 4.17422  |
| Q99020        | MFVGGLSWDTSK                                                  | 1.505849967        | 2              | 2.55725  |
| <b>Q99068</b> | <b>AMRP Alpha_2_macroglobulin receptor_associated protein</b> | <b>1.868753322</b> | <b>0.98437</b> | <b>2</b> |
| Q99068        | EELKHFEAKIEK                                                  | 0.89106006         | 2              | 2.43955  |
| Q99068        | HVESIGDPEHISR                                                 | 0.903539649        | 3              | 4.12023  |
| <b>Q99J14</b> | <b>PSMD6 26S proteasome non_ATPase regulatory subunit 6</b>   | <b>2.499997352</b> | <b>0.70662</b> | <b>3</b> |
| Q99J14        | GAEILEVLHSLPAVR                                               | 1.731186247        | 2              | 2.98469  |
| Q99J14        | RLDEELEDAAK                                                   | 1.23919305         | 2              | 3.18615  |
| Q99J14        | VNEIVETNRPDSK                                                 | 1.321589295        | 2              | 3.70418  |
| <b>Q99JW2</b> | <b>ACY1 Aminoacylase_1</b>                                    | <b>2.009088286</b> | <b>0.92066</b> | <b>3</b> |
| Q99JW2        | FIEDTAAEK                                                     | 1.014903284        | 2              | 2.69077  |
| Q99JW2        | SVSIQYLEAVR                                                   | 1.538802516        | 2              | 2.56252  |
| Q99JW2        | TIHMTFVPDEEVGGHK                                              | 0.95748372         | 3              | 3.91934  |
| <b>Q99KK9</b> | <b>SYHM Probable histidyl_tRNA synthetase_mitochondrial</b>   | <b>2.015366327</b> | <b>0.55589</b> | <b>2</b> |
| Q99KK9        | IIAELWDAGIKAEMLYK+Oxidation(13                                | 0.992052401        |                |          |
| Q99KK9        | YDLTVPFAR                                                     | 1.249749834        | 2              | 2.36435  |
| <b>Q99KN9</b> | <b>EPN4 Clathrin interactor 1</b>                             | <b>1.894675232</b> | <b>0.98708</b> | <b>3</b> |
| Q99KN9        | GEFKDEEETVTTK                                                 | 0.993513813        | 2              | 3.58409  |
| Q99KN9        | HIHITQATETTTTR                                                | 0.853094485        | 2              | 3.35389  |
| Q99KN9        | IGSTIDDTISK                                                   | 1.029543092        | 2              | 2.55054  |
| <b>Q99L04</b> | <b>DHRS1 Dehydrogenase/reductase SDR family member 1</b>      | <b>1.737789049</b> | <b>0.99038</b> | <b>3</b> |
| Q99L04        | ATAQEAQSLGGR                                                  | 0.77417407         | 2              | 3.32304  |
| Q99L04        | CVPVCDSSQSEVK                                                 | 0.796887125        | 2              | 4.30699  |
| Q99L04        | GQVCVVTGASR                                                   | 1.025440705        | 2              | 2.812    |
| <b>Q99LF4</b> | <b>RTCB tRNA_splicing ligase RtcB homolog</b>                 | <b>2.055804846</b> | <b>0.97542</b> | <b>5</b> |
| Q99LF4        | GLGHQVATDALVAMEK                                              | 1.001391846        | 2              | 3.69262  |
| Q99LF4        | NLDFQDVLDK                                                    | 1.319113761        | 2              | 3.08327  |
| Q99LF4        | NVTDVVNTCHDAGISK                                              | 1.009654205        | 2              | 4.33442  |
| Q99LF4        | NYNDELQFLDK                                                   | 1.777773225        | 2              | 3.18358  |
| Q99LF4        | TNLDESVDQPVK                                                  | 1.495709781        | 2              | 3.46662  |
| <b>Q99LH1</b> | <b>NOG2 Nucleolar GTP_binding protein 2</b>                   | <b>2.046357765</b> | <b>0.98865</b> | <b>2</b> |
| Q99LH1        | GGEPDMLTVSKMVLNDWQR+Oxidation(11                              | 1.033058394        |                |          |
| Q99LH1        | GGEPDMLTVSKMVLNDWQR+Oxidation(5                               | 1.033058394        |                |          |
| <b>Q99M73</b> | <b>KRT84 Keratin_type II cuticular Hb4</b>                    | <b>1.854633709</b> | <b>0.99787</b> | <b>2</b> |
| Q99M73        | CKLADLEGALQQAQDMAR                                            | 1.111092117        | 2              | 2.67274  |
| Q99M73        | EYQELMNVK                                                     | 0.889372308        | 1              | 2.09333  |
| <b>Q99M87</b> | <b>DNJA3 Dnaj homolog subfamily A member 3_mitochondrial</b>  | <b>1.92926274</b>  | <b>0.69217</b> | <b>2</b> |
| Q99M87        | GGPSVDPEELFR                                                  | 1.119223094        | 2              | 2.3512   |

|               |                                                                         |                    |                |           |
|---------------|-------------------------------------------------------------------------|--------------------|----------------|-----------|
| Q99M87        | GSITNPCVVC                                                              | 0.946495102        | 2              | 2.97703   |
| <b>Q99ML5</b> | <b>PCYOX Prenylcysteine oxidase</b>                                     | <b>1.984976353</b> | <b>0.46042</b> | <b>2</b>  |
| Q99ML5        | ELGLSSVPASGGLVGVYNGK                                                    | 1.709338006        | 2              | 2.97188   |
| Q99ML5        | NFDPPIEEFNDPYQLVTTLIK                                                   | 0.926300092        | 3              | 4.82437   |
| <b>Q99MS0</b> | <b>S14L2 SEC14_like protein 2</b>                                       | <b>2.124515485</b> | <b>0.68641</b> | <b>6</b>  |
| Q99MS0        | AGEMTEVLPNQR                                                            | 1.087206178        | 2              | 3.56896   |
| Q99MS0        | AGEMTEVLPNQR+Oxidation(3                                                | 0.908907874        |                |           |
| Q99MS0        | HISPDQLPVEYGGTMTDPDGNPK                                                 | 0.966749147        | 3              | 4.96753   |
| Q99MS0        | INYGGDIPK                                                               | 0.879549613        | 2              | 2.41994   |
| Q99MS0        | QQYEHSVQISR                                                             | 0.911452153        | 2              | 2.39323   |
| Q99MS0        | YNSHMVPEDGTLTLCSEPGIYVLR                                                | 1.370897464        | 3              | 3.57075   |
| <b>Q99MZ8</b> | <b>LASP1 LIM and SH3 domain protein 1</b>                               | <b>2.398294741</b> | <b>0.90603</b> | <b>8</b>  |
| Q99MZ8        | GFSVVADTPELQR                                                           | 0.875525474        | 2              | 3.64757   |
| Q99MZ8        | MGPSGGEGIEPER                                                           | 0.909917248        | 2              | 3.35693   |
| Q99MZ8        | MGPSGGEGIEPERR                                                          | 0.886333079        | 2              | 2.42232   |
| Q99MZ8        | QQSELQSQVR                                                              | 0.868234792        | 2              | 2.98442   |
| Q99MZ8        | QSFTMVADTPENLR                                                          | 0.854990253        | 2              | 3.56272   |
| Q99MZ8        | TGDTGMLPANYVEAI                                                         | 1.631994422        | 1              | 2.20438   |
| Q99MZ8        | TQDQISNIK                                                               | 0.850148419        | 2              | 2.70913   |
| Q99MZ8        | YHEEFEK                                                                 | 0.765314572        | 2              | 2.41015   |
| <b>Q99N27</b> | <b>SNX1 Sorting nexin_1</b>                                             | <b>1.886084773</b> | <b>0.55824</b> | <b>2</b>  |
| Q99N27        | LQEVECEEQR                                                              | 0.867873721        | 2              | 2.49566   |
| Q99N27        | SLAMLGSSDNTALSR                                                         | 1.292889986        | 2              | 3.11309   |
| <b>Q99NA5</b> | <b>IDH3A Isocitrate dehydrogenase [NAD] subunit alpha_mitochondrial</b> | <b>2.412416441</b> | <b>0.85288</b> | <b>4</b>  |
| Q99NA5        | ENTEGEYSGIEHVIVDGVVQSIK                                                 | 1.14511104         | 3              | 3.34318   |
| Q99NA5        | HMGLFDHAAK                                                              | 1.271392665        | 3              | 3.41      |
| Q99NA5        | IEAACFATIK                                                              | 1.54858222         | 2              | 2.61438   |
| Q99NA5        | NVTAIQGPGGK                                                             | 1.038947262        | 2              | 2.54209   |
| <b>Q99NB7</b> | <b>ACO12 Acyl_coenzyme A thioesterase 12</b>                            | <b>1.821899921</b> | <b>0.82175</b> | <b>2</b>  |
| Q99NB7        | GSISNTNVEALK                                                            | 0.953641314        | 2              | 2.56565   |
| Q99NB7        | KGSISNTNVEALK                                                           | 0.763783783        | 2              | 3.25764   |
| <b>Q99NB9</b> | <b>SF3B1 Splicing factor 3B subunit 1</b>                               | <b>2.101604723</b> | <b>0.75491</b> | <b>3</b>  |
| Q99NB9        | EWMRICFELLELLK+Oxidation(2                                              | 1.072037216        |                |           |
| Q99NB9        | GDTPGHATPGHGGATSSAR                                                     | 0.681815566        | 3              | 3.77355   |
| Q99NB9        | WDQTADQTPGATPK                                                          | 0.551724683        | 2              | 2.515     |
| <b>Q99P39</b> | <b>NFS1 Cysteine desulfurase_mitochondrial</b>                          | <b>1.933276166</b> | <b>0.24527</b> | <b>2</b>  |
| Q99P39        | AIGTDEDLAHSIR                                                           | 0.541303923        | 2              | 2.71838   |
| Q99P39        | VEALQSGGQER                                                             | 0.995110245        | 2              | 2.99854   |
| <b>Q99PF5</b> | <b>FUBP2 Far upstream element_binding protein 2</b>                     | <b>2.277594165</b> | <b>0.36441</b> | <b>9</b>  |
| Q99PF5        | AINQQTGAFVEISR                                                          | 1.157745228        | 2              | 3.49093   |
| Q99PF5        | GGGGPGGGGPGGGGASGGPSQPPGGGGPGIR                                         | 1.132692676        | 2              | 6.94084   |
| Q99PF5        | IGGDAATTVNNNTPDFGFGGQK                                                  | 1.269397395        | 2              | 4.96503   |
| Q99PF5        | IGQQPQQPGAPPQQDYTK                                                      | 1.187511302        | 2              | 4.04874   |
| Q99PF5        | IINDLLQSLR                                                              | 1.49690986         | 2              | 3.1882    |
| Q99PF5        | SVSLTGAPESVQK                                                           | 0.84901691         | 2              | 2.56959   |
| Q99PF5        | VGGGIDVPVPR                                                             | 0.848628728        | 2              | 3.21116   |
| Q99PF5        | VQISPDGGLPER                                                            | 0.798733561        | 2              | 2.48671   |
| Q99PF5        | VQQACEMVMDILR                                                           | 1.006325395        | 2              | 2.34838   |
| <b>Q99PL5</b> | <b>RRBP1 Ribosome_binding protein 1</b>                                 | <b>2.178078001</b> | <b>0.81816</b> | <b>20</b> |
| Q99PL5        | AMEALALAER                                                              | 1.156122136        | 2              | 2.93254   |
| Q99PL5        | DALNQATSQVESK                                                           | 0.945220471        | 2              | 3.6129    |
| Q99PL5        | EAEETQNSLQAECDDQYR                                                      | 0.978272911        | 2              | 5.36002   |
| Q99PL5        | EHTSHLEAELEK                                                            | 0.993737017        | 2              | 3.49551   |
| Q99PL5        | EQEIAAVQAR                                                              | 1.602355736        | 2              | 2.48333   |
| Q99PL5        | GELESSDQVR                                                              | 1.11918286         | 2              | 3.13698   |
| Q99PL5        | HLEDIVEK                                                                | 1.236141824        | 2              | 2.38287   |



|               |                                        |                    |          |           |
|---------------|----------------------------------------|--------------------|----------|-----------|
| Q99PL5        | HMAAASAECQNYAK                         | 1.055037822        | 2        | 4.47872   |
| Q99PL5        | HMAAASAECQNYAK+Oxidation(1             | 1.149230375        |          |           |
| Q99PL5        | IQEELEK                                | 0.914217935        | 1        | 2.33836   |
| Q99PL5        | LIEILSEK                               | 1.314921918        | 1        | 2.15009   |
| Q99PL5        | LKELESQVSCLEK                          | 1.023250959        | 2        | 4.27782   |
| Q99PL5        | LLATEQEDAAVAK                          | 1.032342852        | 2        | 3.70648   |
| Q99PL5        | LQQENSILR                              | 0.78510728         | 2        | 2.67997   |
| Q99PL5        | LQSSEVEVK                              | 1.197661269        | 2        | 2.73472   |
| Q99PL5        | QLLLESQSQLDEAK                         | 0.850778174        | 2        | 2.3343    |
| Q99PL5        | TILAELEGMLK                            | 1.898563361        | 2        | 2.78465   |
| Q99PL5        | TLQEQLENGPNQLAR                        | 1.025752933        | 2        | 5.0442    |
| Q99PL5        | TLVSTVGSMVFSEGEAQR                     | 1.615554571        | 3        | 4.52774   |
| Q99PL5        | VEPAVSSIVNSIQVLASK                     | 1.233595912        | 2        | 4.42531   |
| <b>Q99PP2</b> |                                        | <b>1.882427473</b> | <b>1</b> | <b>69</b> |
| Q99PP2        | AAGSLLTDECR                            | 0.90607651         | 2        | 2.99542   |
| Q99PP2        | ADSAEYSVMTTGGQSSAK                     | 1.732306741        |          |           |
| Q99PP2        | AEVSELPSVVR                            | 0.965862456        | 2        | 3.11991   |
| Q99PP2        | ALLTPVAIAAGR                           | 1.534453079        |          |           |
| Q99PP2        | ASMMGQRASLLTAR+Oxidation(2)Oxidation(3 | 0.959166528        |          |           |
| Q99PP2        | AVAENQPFLIEAMTYR                       | 0.858059879        | 2        | 3.5909    |
| Q99PP2        | AVDEAADALLK                            | 1.19812902         | 2        | 2.59679   |
| Q99PP2        | DQMVKNNHFTLK+Oxidation(2               | 1.010687098        |          |           |
| Q99PP2        | EKIEKK                                 | 0.842680964        |          |           |
| Q99PP2        | ELEKMK                                 | 0.674216266        | 1        | 1.93655   |
| Q99PP2        | EIAGATPYITAAEEK                        | 1.583130621        | 2        | 3.12933   |
| Q99PP2        | EKMNKPELFNGGEKK                        | 1.343034013        |          |           |
| Q99PP2        | ELDSITPDITPGWK                         | 1.237262606        | 2        | 2.938     |
| Q99PP2        | EQVIESRRQMQUAVK                        | 1.911151226        |          |           |
| Q99PP2        | FEFEQDLSEK                             | 1.020674388        | 2        | 2.6752    |
| Q99PP2        | FFRPHFLQAPGDLTVQEGK                    | 1.113479642        |          |           |
| Q99PP2        | FKLINSTNIR                             | 1.486749505        |          |           |
| Q99PP2        | GIEQAVQSHAVAEPEAR                      | 1.155115636        | 2        | 4.97611   |
| Q99PP2        | GNIYSLNEGYAK                           | 1.050529805        | 2        | 3.99729   |
| Q99PP2        | GSAAAAATTSTREAEGAERR                   | 0.975321821        |          |           |
| Q99PP2        | GVYSEETLR                              | 0.928875611        | 2        | 2.46495   |
| Q99PP2        | HFVTISSPLATQIPQAVGAAYAAK               | 1.152202489        | 2        | 4.91951   |
| Q99PP2        | HLQTYGEHYPLDHFDK                       | 0.886011177        | 3        | 3.69136   |
| Q99PP2        | HVIHTVGPIAVGQPTASQAAELR                | 0.919366863        | 3        | 5.34375   |
| Q99PP2        | IENWPFSIKPTLR                          | 1.621520901        |          |           |
| Q99PP2        | IGHHSTSDSSAYR                          | 1.31071369         | 3        | 4.53531   |
| Q99PP2        | INLSNNK                                | 1.116690265        |          |           |
| Q99PP2        | KAMQEINYGSPDNSIKLVR                    | 1.228111187        |          |           |
| Q99PP2        | KGNIYSLNEGYAK                          | 0.699093339        | 2        | 4.48673   |
| Q99PP2        | KLQHELEEAER                            | 1.350743079        | 3        | 4.11516   |
| Q99PP2        | LEFIQPNVISGIPIYR                       | 1.040860393        | 2        | 2.43712   |
| Q99PP2        | LFDDRLESIIQK                           | 0.200390318        |          |           |
| Q99PP2        | LGDAVEQGVINNSVLGYFIGR                  | 0.900092977        | 2        | 3.79255   |
| Q99PP2        | LIEVEGPNLSLK                           | 1.107557079        |          |           |
| Q99PP2        | LKLVMMNNFIYQTK                         | 1.060687079        |          |           |
| Q99PP2        | LMQVNDTLTSEDAGLR                       | 0.799067904        |          |           |
| Q99PP2        | LQHELEEAER                             | 1.471771077        | 2        | 3.69329   |
| Q99PP2        | LQHELEEAERADIAESQVNK                   | 1.605468171        | 3        | 3.88024   |
| Q99PP2        | MKKNMEQTVK+Oxidation(4                 | 1.024922046        |          |           |
| Q99PP2        | MNLQDELDELK                            | 0.936910973        | 2        | 2.3215    |
| Q99PP2        | MNLQDELDELK+Oxidation(0                | 0.896004363        |          |           |
| Q99PP2        | MQQVEASLQPETLK+Oxidation(0             | 1.44089127         |          |           |
| Q99PP2        | MQQVEASLQPETLKK+Oxidation(0            | 1.852116423        |          |           |

|               |                                                                                            |                    |                |          |
|---------------|--------------------------------------------------------------------------------------------|--------------------|----------------|----------|
| Q99PP2        | NESGLDSGRSQR                                                                               | 1.083716226        |                |          |
| Q99PP2        | NNGYAISTPTSEQYR                                                                            | 0.873481212        | 2              | 3.81349  |
| Q99PP2        | QGQIINPSEDPHLPQEEVLK                                                                       | 0.617565919        | 2              | 2.64279  |
| Q99PP2        | QRAEQETKLK                                                                                 | 1.152180771        |                |          |
| Q99PP2        | QTCLKTVVLLTDNK                                                                             | 1.098560118        |                |          |
| Q99PP2        | QTITAQNAAVQAVK                                                                             | 1.06432632         | 2              | 3.96323  |
| Q99PP2        | QYLLNQGWWDDEEQEK                                                                           | 1.091270248        | 2              | 3.43724  |
| Q99PP2        | RAALQAEIEELR                                                                               | 4.757268944        | 2              | 3.75052  |
| Q99PP2        | RFSTEVGSDCVSDNDR                                                                           | 2.001121619        |                |          |
| Q99PP2        | SCYDLSCHAR                                                                                 | 1.007228885        | 2              | 2.33992  |
| Q99PP2        | SCYLSLDDLLLEHR                                                                             | 1.307216265        | 2              | 2.63077  |
| Q99PP2        | SLEDALNQTATVTR                                                                             | 1.064917138        | 2              | 4.42391  |
| Q99PP2        | SMTLLNTMDR                                                                                 | 1.119721931        | 2              | 2.75019  |
| Q99PP2        | SVDEVNYWDK                                                                                 | 1.061279138        | 2              | 2.56256  |
| Q99PP2        | TAMDNSEIAGEK                                                                               | 0.995312723        | 2              | 2.41014  |
| Q99PP2        | TAMDNSEIAGEKK                                                                              | 1.12074282         | 2              | 2.50219  |
| Q99PP2        | TLHVEEVVPSVIEPSFGLGR                                                                       | 1.069046131        | 3              | 3.68518  |
| Q99PP2        | TSSAEMPTIPLGSAVEAIR                                                                        | 0.895563236        | 2              | 3.88487  |
| Q99PP2        | TWTAADMAAQITR+Oxidation(6                                                                  | 1.233732556        |                |          |
| Q99PP2        | VDDSSGSIGR                                                                                 | 0.912661008        | 2              | 2.86711  |
| Q99PP2        | VDGNDVFAVYNATK                                                                             | 0.716467695        | 2              | 2.85901  |
| Q99PP2        | VMEAFEQAER                                                                                 | 0.851462141        | 2              | 3.28826  |
| Q99PP2        | VTMQNKISEATQEEDRL+Oxidation(2                                                              | 0.901863356        |                |          |
| Q99PP2        | VVSQYHELIVQAR                                                                              | 1.768434694        | 2              | 3.52323  |
| Q99PP2        | YNENHQHGK                                                                                  | 0.631615992        |                |          |
| Q99PP2        | YSTSSSGVTAGK                                                                               | 0.788994072        | 2              | 2.89248  |
| <b>Q99PV0</b> | <b>PRP8 Pre_mRNA_processing_splicing factor 8</b>                                          | <b>2.454808313</b> | <b>0.99502</b> | <b>2</b> |
| Q99PV0        | AAVMHDILDMMPGEGIK+Oxidation(3)Oxidation(10                                                 | 1.295610374        |                |          |
| Q99PV0        | AAVMHDILDMMPGEGIK+Oxidation(3)Oxidation(9                                                  | 1.295610374        |                |          |
| <b>Q9CPQ1</b> | <b>COX6C Cytochrome c oxidase subunit 6C</b>                                               | <b>2.010622568</b> | <b>1</b>       | <b>2</b> |
| Q9CPQ1        | FGVAEPR                                                                                    | 1.0465407          | 2              | 2.45255  |
| Q9CPQ1        | NYDSMKDFEEMR                                                                               | 0.955211772        | 2              | 3.76256  |
| <b>Q9CQ75</b> | <b>NDUA2 NADH dehydrogenase [ubiquinone] 1 alpha subcomplex subunit 2</b>                  | <b>2.128954452</b> | <b>0.95252</b> | <b>2</b> |
| Q9CQ75        | EIRVHLCQRSPGSQGV                                                                           | 1.11980199         | 2              | 2.33404  |
| Q9CQ75        | TVSLNNSADEVTR                                                                              | 1.036802424        | 2              | 2.41194  |
| <b>Q9CQS8</b> | <b>SC61B Protein transport protein Sec61 subunit beta</b>                                  | <b>2.026808375</b> | <b>0.99988</b> | <b>2</b> |
| Q9CQS8        | FYTEDSPGLK                                                                                 | 1.024040899        | 2              | 2.43288  |
| Q9CQS8        | TTSAGTGMWR                                                                                 | 0.998485385        | 2              | 2.34406  |
| <b>Q9CQZ5</b> | <b>NDUA6 NADH dehydrogenase [ubiquinone] 1 alpha subcomplex subunit 6</b>                  | <b>2.489265231</b> | <b>0.94279</b> | <b>3</b> |
| Q9CQZ5        | EVNPTVHLMQLDITVK                                                                           | 1.111140493        | 2              | 2.49098  |
| Q9CQZ5        | FFHETETPRPK                                                                                | 1.108814904        | 2              | 2.90883  |
| Q9CQZ5        | VVDLLVIK                                                                                   | 1.345469339        | 2              | 2.93884  |
| <b>Q9CRB9</b> | <b>CHCH3 Coiled_coil_helix_coiled_coil_helix domain_containing protein 3_mitochondrial</b> | <b>1.898062359</b> | <b>0.99527</b> | <b>2</b> |
| Q9CRB9        | VAEELALEQAK                                                                                | 0.923596432        | 2              | 3.64654  |
| Q9CRB9        | YEYHPVCADLQTK                                                                              | 0.930924747        | 2              | 3.78162  |
| <b>Q9CTN4</b> | <b>RHBT3 Rho_related BTB domain_containing protein 3</b>                                   | <b>2.322159364</b> | <b>0.84564</b> | <b>2</b> |
| Q9CTN4        | ELASMNLDIVDLLK                                                                             | 1.475759639        | 2              | 2.5715   |
| Q9CTN4        | LKDSGDVSDIIEK                                                                              | 0.878888569        | 2              | 2.46851  |
| <b>Q9CW42</b> | <b>MOSC1 MOSC domain_containing protein 1_mitochondrial</b>                                | <b>1.987247319</b> | <b>0.83473</b> | <b>2</b> |
| Q9CW42        | DLLLPIPPATNPLLQCR                                                                          | 0.775365614        | 3              | 3.51864  |
| Q9CW42        | GLSVSEAECTAMGLR                                                                            | 1.002596495        | 2              | 3.90406  |

|               |                                                                               |                    |                |          |
|---------------|-------------------------------------------------------------------------------|--------------------|----------------|----------|
| <b>Q9CWH6</b> | <b>PSA7L Proteasome subunit alpha type_7_like</b>                             | <b>2.26970248</b>  | <b>0.00563</b> | <b>4</b> |
| Q9CWH6        | AITVFSPDGHFLQVEYAEAVK                                                         | 0.987553606        | 2              | 4.46849  |
| Q9CWH6        | ALLEVVQSGGK                                                                   | 1.018631949        | 2              | 3.03472  |
| Q9CWH6        | LTVEDPVTVEYITR                                                                | 1.20328278         | 2              | 4.0456   |
| Q9CWH6        | LYQTDPSGTYHAWK                                                                | 1.101270044        | 2              | 2.89263  |
| <b>Q9CWK8</b> | <b>SNX2 Sorting nexin_2</b>                                                   | <b>2.15035902</b>  | <b>0.67923</b> | <b>4</b> |
| Q9CWK8        | AVNTQALSGAGILR                                                                | 1.058836086        | 2              | 3.21274  |
| Q9CWK8        | QQQFENLDQQLR                                                                  | 1.041661681        | 2              | 2.51612  |
| Q9CWK8        | WEDAQITLLK                                                                    | 1.115762849        | 2              | 2.47912  |
| Q9CWK8        | YLESLVQTQQQLK                                                                 | 1.231529669        | 2              | 4.00882  |
| <b>Q9CWL2</b> | <b>CASZ1 Zinc finger protein castor homolog 1</b>                             | <b>2.273008674</b> | <b>0.32845</b> | <b>2</b> |
| Q9CWL2        | ISASKGLISPMMAR+Oxidation(10                                                   | 1.18460319         |                |          |
| Q9CWL2        | ISASKGLISPMMAR+Oxidation(11                                                   | 1.18460319         |                |          |
| <b>Q9CXS4</b> | <b>CENPV Centromere protein V</b>                                             | <b>2.534751761</b> | <b>0.92025</b> | <b>2</b> |
| Q9CXS4        | LLDTEFYQGLVK                                                                  | 1.35395709         | 2              | 3.90584  |
| Q9CXS4        | SNPGGFIAPHCLDEGTVR                                                            | 1.078012581        | 2              | 2.56592  |
| <b>Q9CYN2</b> | <b>SPCS2 Signal peptidase complex subunit 2</b>                               | <b>2.074794624</b> | <b>0.24771</b> | <b>2</b> |
| Q9CYN2        | LHDSLATER                                                                     | 0.660080535        | 2              | 2.6823   |
| Q9CYN2        | YVENFGLIDGR                                                                   | 1.474370196        | 2              | 2.8862   |
| <b>Q9CYW4</b> | <b>HDHD3 Haloacid dehalogenase_like hydrolase domain_containing protein 3</b> | <b>2.551798048</b> | <b>0.98722</b> | <b>2</b> |
| Q9CYW4        | LEDILTGLGLR                                                                   | 1.140203268        | 2              | 4.38331  |
| Q9CYW4        | RLEDILTGLGLR                                                                  | 1.351748426        | 3              | 3.53366  |
| <b>Q9CZY3</b> | <b>UB2V1 Ubiquitin_conjugating enzyme E2 variant 1</b>                        | <b>2.225569927</b> | <b>0.94235</b> | <b>3</b> |
| Q9CZY3        | LLEEEEGQK                                                                     | 0.785758081        | 1              | 2.98371  |
| Q9CZY3        | VNMSGVSSNGVVDPR                                                               | 1.187576443        | 2              | 3.10704  |
| Q9CZY3        | WTGMIIGPPR                                                                    | 1.021463509        | 2              | 2.86174  |
| <b>Q9D024</b> | <b>CC47 Coiled_coil domain_containing protein 47</b>                          | <b>1.739182317</b> | <b>0.99977</b> | <b>3</b> |
| Q9D024        | ERIMNEEDPEKQR                                                                 | 0.96065774         | 2              | 2.45902  |
| Q9D024        | IMQEEGQPLKLPDTK                                                               | 0.794490902        | 2              | 3.19694  |
| Q9D024        | RLEEAALR                                                                      | 1.186581183        | 2              | 2.60542  |
| <b>Q9D0M3</b> | <b>CY1 Cytochrome c1_heme protein_mitochondrial</b>                           | <b>2.097422715</b> | <b>0.98967</b> | <b>5</b> |
| Q9D0M3        | ALAEVEVQDGPNDGEMFMRPGK                                                        | 1.535781838        | 3              | 4.23743  |
| Q9D0M3        | GLLSSLDHTSIR                                                                  | 3.571821349        | 2              | 3.02922  |
| Q9D0M3        | HGGEDYVFSLLTGYCEPPTGVSLR                                                      | 1.200785516        | 3              | 5.55728  |
| Q9D0M3        | HLVGVCYTEEEAK                                                                 | 1.070310402        | 2              | 3.83048  |
| Q9D0M3        | LSDYFPKYPNPEAAR                                                               | 0.975913926        | 3              | 3.89529  |
| <b>Q9D0S9</b> | <b>HINT2 Histidine triad nucleotide_binding protein 2_mitochondrial</b>       | <b>2.226674194</b> | <b>0.00237</b> | <b>3</b> |
| Q9D0S9        | DVAPQAPVHFLVIPR                                                               | 0.922782977        | 2              | 2.94313  |
| Q9D0S9        | ISQAEEDDQQLLGHLLLVAK                                                          | 1.504192069        | 2              | 4.73959  |
| Q9D0S9        | SLPADILYEDQQLVFR                                                              | 1.294390886        | 2              | 3.54147  |
| <b>Q9D172</b> | <b>ES1 ES1 protein homolog_mitochondrial</b>                                  | <b>2.19455889</b>  | <b>0.00026</b> | <b>3</b> |
| Q9D172        | GVEVTVGHEQEEGK                                                                | 0.968805456        | 2              | 4.07892  |
| Q9D172        | ITSLAQLNAAANHDAIFPGGFGAAK                                                     | 1.393031769        | 3              | 4.59366  |
| Q9D172        | NLSTFAVDGK                                                                    | 0.970950462        | 1              | 2.44705  |
| <b>Q9D180</b> | <b>WDR65 WD repeat_containing protein 65</b>                                  | <b>1.860628963</b> | <b>0.66583</b> | <b>2</b> |
| Q9D180        | ERDLEALVR                                                                     | 0.87615363         | 2              | 2.56195  |
| Q9D180        | KNQELEK                                                                       | 0.914217935        | 1              | 2.17912  |
| <b>Q9D1M7</b> | <b>FKB11 Peptidyl_prolyl cis_trans isomerase FKBP11</b>                       | <b>2.231805811</b> | <b>0.83424</b> | <b>2</b> |
| Q9D1M7        | IIDTSLTRDPLVIELGQK                                                            | 0.981679156        | 3              | 3.42869  |
| Q9D1M7        | QVIPGLEQSLLDMCVGEK                                                            | 1.170082036        | 2              | 3.19027  |
| <b>Q9D1Q6</b> | <b>ERP44 Endoplasmic reticulum resident protein 44</b>                        | <b>1.905306982</b> | <b>0.83485</b> | <b>4</b> |
| Q9D1Q6        | MNPAVFLSLADLR+Oxidation(0                                                     | 1.350790002        |                |          |
| Q9D1Q6        | NIIGYFEQK                                                                     | 1.049636958        | 1              | 2.37718  |
| Q9D1Q6        | SNPVHEIQSLDEVNTLDR                                                            | 1.142725667        | 2              | 5.56591  |
| Q9D1Q6        | VDCDQHSIDIAQR                                                                 | 0.924470707        | 2              | 3.62531  |

|               |                                                                            |                    |                |           |
|---------------|----------------------------------------------------------------------------|--------------------|----------------|-----------|
| <b>Q9D2U9</b> | <b>H2B3A Histone H2B type 3_A</b>                                          | <b>2.237433521</b> | <b>0.99999</b> | <b>5</b>  |
| Q9D2U9        | AMGIMNSFVNDIFER                                                            | 1.088660375        | 2              | 5.12262   |
| Q9D2U9        | AMGIMNSFVNDIFER+Oxidation(1)                                               | 1.219696127        |                |           |
| Q9D2U9        | AMGIMNSFVNDIFER+Oxidation(1)Oxidation(4)                                   | 0.876539625        |                |           |
| Q9D2U9        | AMGIMNSFVNDIFER+Oxidation(4)                                               | 1.127707393        |                |           |
| Q9D2U9        | LLPGELAK                                                                   | 1.149133889        | 2              | 2.5265    |
| <b>Q9D417</b> | <b>FBX24 F_box only protein 24</b>                                         | <b>2.053924536</b> | <b>0.82643</b> | <b>2</b>  |
| Q9D417        | MKEIVGWMPLMAAQK+Oxidation(7)                                               | 1.343034013        |                |           |
| Q9D417        | RSCPSCGLEAGSEKK                                                            | 1.031060805        | 2              | 2.4098    |
| <b>Q9D662</b> | <b>SC23B Protein transport protein Sec23B</b>                              | <b>2.687407105</b> | <b>0.33732</b> | <b>2</b>  |
| Q9D662        | HLLQAPLDDAQEILQAR                                                          | 1.441616818        | 3              | 3.98888   |
| Q9D662        | IDMNLTDLLGELQR                                                             | 1.425208545        | 2              | 4.12283   |
| <b>Q9D6M3</b> | <b>GHC1 Mitochondrial glutamate carrier 1</b>                              | <b>2.185685716</b> | <b>0.96733</b> | <b>3</b>  |
| Q9D6M3        | GAAVNLTLVTPK                                                               | 1.242274955        | 2              | 3.3446    |
| Q9D6M3        | GVNEDTYSGFDCAR                                                             | 1.048430792        | 2              | 4.71079   |
| Q9D6M3        | NHGIAGLYK                                                                  | 0.982430606        | 1              | 2.21762   |
| <b>Q9D6Y9</b> | <b>GLGB 1_4_alpha_glucan_branching enzyme</b>                              | <b>2.017959693</b> | <b>0.92295</b> | <b>11</b> |
| Q9D6Y9        | CVAYAESHDAQLVGDK                                                           | 1.50759783         | 2              | 5.01181   |
| Q9D6Y9        | EKDEDWNMGNIIVYLTNR                                                         | 0.952148377        | 3              | 3.30356   |
| Q9D6Y9        | FLNNFDR                                                                    | 1.321413913        | 2              | 2.40365   |
| Q9D6Y9        | GTHDLWDSR                                                                  | 1.389500851        | 2              | 2.74207   |
| Q9D6Y9        | GYESFGIHR                                                                  | 1.310370602        | 2              | 2.37497   |
| Q9D6Y9        | IVLSDAAEYGGHQR                                                             | 0.934826233        | 2              | 4.55543   |
| Q9D6Y9        | IYESHVGISSHEGK                                                             | 1.306456303        | 2              | 4.5919    |
| Q9D6Y9        | NSEDGLNMFDTGDCYFHSQPR                                                      | 1.366638778        | 3              | 3.46496   |
| Q9D6Y9        | QFNLTDDDLLR                                                                | 1.540725009        | 2              | 2.73187   |
| Q9D6Y9        | RQFNLTDDDLLR                                                               | 1.00515016         | 2              | 3.20689   |
| Q9D6Y9        | WELYIPPK                                                                   | 1.560495924        | 2              | 2.5054    |
| <b>Q9D6Z1</b> | <b>NOP56 Nucleolar protein 56</b>                                          | <b>1.699880051</b> | <b>0.17767</b> | <b>2</b>  |
| Q9D6Z1        | ELNEEKLEK                                                                  | 0.737093433        | 2              | 2.44064   |
| Q9D6Z1        | IDCFSEVPTSVFGEK                                                            | 1.551826079        | 2              | 2.53695   |
| <b>Q9D7B6</b> | <b>ACAD8 Isobutyryl-CoA dehydrogenase_mitochondrial</b>                    | <b>1.903119185</b> | <b>0.9532</b>  | <b>6</b>  |
| Q9D7B6        | AVIFEDCAVPVANR                                                             | 0.931332612        | 2              | 3.80757   |
| Q9D7B6        | FASYCLTEPGSGSDAASLLTSAK                                                    | 1.490484657        | 2              | 4.50287   |
| Q9D7B6        | IGTEGQGFLIAMK                                                              | 0.912881015        | 2              | 3.01147   |
| Q9D7B6        | TAAVALQEER                                                                 | 0.889564164        | 2              | 3.19025   |
| Q9D7B6        | TDVGGGSLSR                                                                 | 0.872116798        | 2              | 2.50662   |
| Q9D7B6        | VHQILEGSNEVMR                                                              | 1.458647406        | 2              | 3.39504   |
| <b>Q9D7P6</b> | <b>ISCU Iron_sulfur cluster assembly enzyme ISCU_mitochondrial</b>         | <b>1.854549703</b> | <b>0.79417</b> | <b>2</b>  |
| Q9D7P6        | NVGTGLVGAPACGDVMK                                                          | 0.892019605        | 2              | 3.61298   |
| Q9D7P6        | VVDHYENPR                                                                  | 0.763453806        | 2              | 2.51709   |
| <b>Q9D7X8</b> | <b>GGCT Gamma_glutamylcyclotransferase</b>                                 | <b>2.060946711</b> | <b>0.97807</b> | <b>2</b>  |
| Q9D7X8        | ISDEMEDIK                                                                  | 1.274858958        | 2              | 2.74569   |
| Q9D7X8        | SNISLDEQEGVK                                                               | 1.040109035        | 2              | 3.43341   |
| <b>Q9D819</b> | <b>IPYR Inorganic pyrophosphatase</b>                                      | <b>2.159662357</b> | <b>0.86664</b> | <b>5</b>  |
| Q9D819        | GISCMNTTVSESPFK                                                            | 1.137339776        | 2              | 5.1814    |
| Q9D819        | GQYISPFHDVPIYADK                                                           | 1.477634382        | 2              | 3.20145   |
| Q9D819        | GQYISPFHDVPIYADKDFHMMVVEVPR                                                | 1.124857462        | 3              | 5.18851   |
| Q9D819        | VLGILAMIDEGETDVK                                                           | 1.020391196        | 2              | 4.11798   |
| Q9D819        | YVANLFPYK                                                                  | 1.022033232        | 1              | 2.05646   |
| <b>Q9D880</b> | <b>TIM50 Mitochondrial import inner membrane translocase subunit TIM50</b> | <b>2.279904149</b> | <b>0.70456</b> | <b>3</b>  |
| Q9D880        | TIALNQVEDVR                                                                | 0.890823809        | 2              | 2.95796   |
| Q9D880        | TVLEHYALEDPPLEAFK                                                          | 1.168730671        | 2              | 4.70519   |
| Q9D880        | VLLDLSAFLK                                                                 | 1.277099018        | 2              | 2.34876   |

|               |                                                                                  |                    |                |           |
|---------------|----------------------------------------------------------------------------------|--------------------|----------------|-----------|
| <b>Q9D8W5</b> | <b>PSD12 26S proteasome non_ATPase regulatory subunit 12</b>                     | <b>2.506617051</b> | <b>0.87449</b> | <b>3</b>  |
| Q9D8W5        | LQEVITLLSLEK                                                                     | 1.082077331        | 2              | 3.79144   |
| Q9D8W5        | TASDMVSTR                                                                        | 1.325582741        | 2              | 2.34834   |
| Q9D8W5        | WSTLVEDYGVLELR                                                                   | 2.61125504         | 2              | 3.12653   |
| <b>Q9DB15</b> | <b>RM12 39S ribosomal protein L12_mitochondrial</b>                              | <b>1.82480316</b>  | <b>0.58538</b> | <b>3</b>  |
| Q9DB15        | KLVESLPQEIK                                                                      | 0.867295643        | 2              | 3.00219   |
| Q9DB15        | NYVQGINLVQAK                                                                     | 1.14178388         | 2              | 2.49881   |
| Q9DB15        | SEALAGAPLDNAPK                                                                   | 0.667509892        | 2              | 2.3292    |
| <b>Q9DBC0</b> | <b>SELO Selenoprotein O</b>                                                      | <b>1.917270297</b> | <b>0.79022</b> | <b>2</b>  |
| Q9DBC0        | LGLIRVEK                                                                         | 0.938537674        | 2              | 2.30264   |
| Q9DBC0        | LLESPYHSEEEATGPEAVAR                                                             | 1.076991136        | 3              | 3.36063   |
| <b>Q9DBG7</b> | <b>SRPR Signal recognition particle receptor subunit alpha</b>                   | <b>2.12832805</b>  | <b>0.7792</b>  | <b>2</b>  |
| Q9DBG7        | GLVGSKSLSREDMESVLDK+Oxidation(12                                                 | 1.083778611        |                |           |
| Q9DBG7        | NQGFVVLDVDTAGR                                                                   | 1.127004027        | 2              | 2.91026   |
| <b>Q9DBH5</b> | <b>LMAN2 Vesicular integral_membrane protein VIP36</b>                           | <b>2.079621361</b> | <b>0.93534</b> | <b>2</b>  |
| Q9DBH5        | TPEEESIDWTK                                                                      | 1.60540957         | 2              | 2.47024   |
| Q9DBH5        | WSELAGCTADFR                                                                     | 1.056276276        | 2              | 3.36558   |
| <b>Q9DC70</b> | <b>NDU57 NADH dehydrogenase [ubiquinone] iron_sulfur protein 7_mitochondrial</b> | <b>2.4308883</b>   | <b>0.43786</b> | <b>4</b>  |
| Q9DC70        | LDDLINWAR                                                                        | 1.227316477        | 2              | 3.04387   |
| Q9DC70        | MAPALRKVYDQMPEPR+Oxidation(0)Oxidation(11                                        | 1.143775741        |                |           |
| Q9DC70        | QADVMIVAGTLTNK                                                                   | 1.425997394        | 2              | 3.52124   |
| Q9DC70        | VYDQMPEPR                                                                        | 1.922250622        | 2              | 2.45812   |
| <b>Q9DCH4</b> | <b>EIF3F Eukaryotic translation initiation factor 3 subunit F</b>                | <b>2.036476199</b> | <b>0.41653</b> | <b>2</b>  |
| Q9DCH4        | FLMSLVNQVPK                                                                      | 1.445451138        | 2              | 2.76412   |
| Q9DCH4        | VIGLSSDLQQVGGASAR                                                                | 1.008723754        | 2              | 4.69164   |
| <b>Q9DCM0</b> | <b>ETHE1 Protein ETHE1_mitochondrial</b>                                         | <b>1.826615962</b> | <b>0.01559</b> | <b>2</b>  |
| Q9DCM0        | IFTLPGNCLIYPAHDYHGLTVSTVEER                                                      | 1.758108989        | 3              | 4.31114   |
| Q9DCM0        | SLLPGCQSVISR                                                                     | 0.802385827        | 2              | 2.98589   |
| <b>Q9DCS9</b> | <b>NDUBA NADH dehydrogenase [ubiquinone] 1 beta subcomplex subunit 10</b>        | <b>2.161550587</b> | <b>0.66607</b> | <b>2</b>  |
| Q9DCS9        | AYDLVVDWVPTLVR                                                                   | 1.101789616        | 2              | 4.657     |
| Q9DCS9        | TPAPSPQTSLPNPITYLTK                                                              | 1.328355436        | 2              | 3.44819   |
| <b>Q9DCT2</b> | <b>NDU3 NADH dehydrogenase [ubiquinone] iron_sulfur protein 3_mitochondrial</b>  | <b>2.751420752</b> | <b>0.85819</b> | <b>5</b>  |
| Q9DCT2        | FDLNSPWEAFPAYR                                                                   | 1.594459142        | 2              | 3.22539   |
| Q9DCT2        | ILTDYGFEGHPFR                                                                    | 1.150267186        | 2              | 2.80008   |
| Q9DCT2        | KFDLNSPWEAFPAYR                                                                  | 1.417676549        | 2              | 3.55867   |
| Q9DCT2        | SLADLTAVDVPTR                                                                    | 1.271377256        | 2              | 3.4189    |
| Q9DCT2        | VVAEPVELAQEFR                                                                    | 0.961540955        | 2              | 3.78415   |
| <b>Q9DCU9</b> | <b>HOGA1 Probable 4_hydroxy_2_oxoglutarate aldolase_mitochondrial</b>            | <b>2.022658349</b> | <b>0.76129</b> | <b>3</b>  |
| Q9DCU9        | GFVVQGSGTEFPFLTSLR                                                               | 1.097380435        | 2              | 5.34437   |
| Q9DCU9        | LIEPNTAVTR                                                                       | 1.011316237        | 2              | 3.35929   |
| Q9DCU9        | TMDWFGYGGPCR                                                                     | 1.173803951        | 2              | 3.6921    |
| <b>Q9EP75</b> | <b>CP4FE Leukotriene_B4 omega_hydroxylase 3</b>                                  | <b>2.807371314</b> | <b>0.07754</b> | <b>2</b>  |
| Q9EP75        | DEDGKELSDIEDIR                                                                   | 2.017688855        | 2              | 3.02796   |
| Q9EP75        | IFNDSTNIMHAK                                                                     | 1.46392297         | 2              | 3.67793   |
| <b>Q9EP89</b> | <b>LACTB Serine beta_lactamase_like protein LACTB_mitochondrial</b>              | <b>2.055175638</b> | <b>0.00236</b> | <b>10</b> |
| Q9EP89        | EVWSEGLGYADVENR                                                                  | 1.033886565        | 2              | 3.83023   |
| Q9EP89        | FENSIESLR                                                                        | 0.856942493        | 2              | 2.75824   |
| Q9EP89        | GIIVSIICNMQSVGLNSTALK                                                            | 1.017117919        | 3              | 3.96068   |

|               |                                                                               |                    |                |           |
|---------------|-------------------------------------------------------------------------------|--------------------|----------------|-----------|
| Q9EP89        | IFHDLMLTTVQEENEPVIYNR                                                         | 2.087665645        | 2              | 5.67587   |
| Q9EP89        | IKDEVGAPGIVVGVSDGK                                                            | 1.067502415        | 2              | 4.54509   |
| Q9EP89        | KNDFEQGELYLK                                                                  | 0.641782605        | 2              | 3.99431   |
| Q9EP89        | LDLDPVQHYVPEFPEK                                                              | 1.622522007        | 3              | 3.7387    |
| Q9EP89        | LDLDPVQHYVPEFPEKEYEGEK                                                        | 1.386334862        | 3              | 3.98909   |
| Q9EP89        | LVNTPYVDNSYK                                                                  | 0.882961367        | 2              | 3.16289   |
| Q9EP89        | WAGGGFLSTVGDLLK                                                               | 1.433511783        | 2              | 4.43359   |
| <b>Q9EPH2</b> | <b>MRP MARCKS_related protein</b>                                             | <b>1.895354249</b> | <b>0.99865</b> | <b>2</b>  |
| Q9EPH2        | AAATPESQEPQAK                                                                 | 1.032351997        | 2              | 2.44346   |
| Q9EPH2        | GDVTAEAAAGASPAK                                                               | 0.88368669         | 2              | 3.30681   |
| <b>Q9EPH8</b> | <b>PABP1 Polyadenylate_binding protein 1</b>                                  | <b>2.357222569</b> | <b>0.79229</b> | <b>10</b> |
| Q9EPH8        | ALDTMNFDFVIK                                                                  | 1.111019141        | 2              | 3.28561   |
| Q9EPH8        | GFGFVSFER                                                                     | 1.588296638        | 2              | 2.73177   |
| Q9EPH8        | GYGFVHFETQEAER                                                                | 1.08002424         | 2              | 3.29591   |
| Q9EPH8        | ITGMILLEIDNSELLHMLSPESLR                                                      | 1.681891006        | 3              | 3.81052   |
| Q9EPH8        | KEFSPFGTITSAK                                                                 | 1.165500108        | 2              | 3.36882   |
| Q9EPH8        | NFGEDMDDER                                                                    | 10.11003413        | 2              | 2.56251   |
| Q9EPH8        | NLDDGIDDER                                                                    | 0.997470399        | 2              | 2.36495   |
| Q9EPH8        | SGVGNIFIK                                                                     | 1.084125338        | 2              | 2.76801   |
| Q9EPH8        | SKVDEAVAVLQAQAK                                                               | 1.141553924        | 2              | 5.10185   |
| Q9EPH8        | VDEAVAVLQAQAK                                                                 | 1.499773081        | 2              | 2.85554   |
| <b>Q9EPJ0</b> | <b>NUCKS Nuclear ubiquitous casein and cyclin_dependent kinases substrate</b> | <b>1.652286323</b> | <b>0.61695</b> | <b>2</b>  |
| Q9EPJ0        | NSQEDSEDESEKDVK                                                               | 0.719524659        | 2              | 3.54184   |
| Q9EPJ0        | TPSPKEEDEEAESPPEK                                                             | 1.595678677        | 2              | 2.31661   |
| <b>Q9EQ76</b> | <b>FMO3 Dimethylaniline monooxygenase [N_oxide_forming] 3</b>                 | <b>3.714049274</b> | <b>9.9E-20</b> | <b>13</b> |
| Q9EQ76        | ASIQSVFTNSSK                                                                  | 1.656929132        | 2              | 3.1403    |
| Q9EQ76        | GTCILPSVNDMMDDIDEK                                                            | 3.199947162        | 2              | 3.93977   |
| Q9EQ76        | ILCGTVSIKPNVK                                                                 | 1.074409706        | 2              | 3.00218   |
| Q9EQ76        | KEPVFNDELPAR                                                                  | 2.708798103        | 3              | 3.60438   |
| Q9EQ76        | LQEYITSFATEK                                                                  | 3.153143634        | 2              | 3.54957   |
| Q9EQ76        | NNEVTLYK                                                                      | 2.939844473        | 2              | 2.49475   |
| Q9EQ76        | NNLPTAISDWWYMK                                                                | 2.240727606        | 2              | 2.50337   |
| Q9EQ76        | SCLEEGLEPTCFER                                                                | 1.626487287        | 2              | 4.31256   |
| Q9EQ76        | SDDVGGLWK                                                                     | 2.927984759        | 2              | 2.92234   |
| Q9EQ76        | VAVIGAGVSGLAIR                                                                | 6.77279499         | 2              | 4.19912   |
| Q9EQ76        | VLVIGLNGSGCDIAAELSHVAQQVIISR                                                  | 1.611591556        | 3              | 3.69841   |
| Q9EQ76        | VWNDGYPWDMVVITR                                                               | 2.08415939         | 2              | 3.88801   |
| Q9EQ76        | YIQFETLVTR                                                                    | 3.905728603        | 2              | 3.18684   |
| <b>Q9EQG6</b> | <b>KDIS Kinase D_interacting substrate of 220 kDa</b>                         | <b>2.686220255</b> | <b>0.40444</b> | <b>2</b>  |
| Q9EQG6        | HLLAMGADVQEGANSMTALIVAVK+Oxidation(4                                          | 1.661766194        |                |           |
| Q9EQG6        | SSERPSLFQTDLKLK                                                               | 1.251488521        | 2              | 2.32997   |
| <b>Q9EQH3</b> | <b>VPS35 Vacuolar protein sorting_associated protein 35</b>                   | <b>2.245234485</b> | <b>0.9776</b>  | <b>8</b>  |
| Q9EQH3        | HFHNTLEHLR                                                                    | 1.435975879        | 3              | 3.43914   |
| Q9EQH3        | IREDLPNLESSEETEIQINK                                                          | 1.115977446        | 2              | 5.51478   |
| Q9EQH3        | LFDFISQQVATVIQSR                                                              | 1.659086127        | 3              | 3.32909   |
| Q9EQH3        | LLDEAIQAVK                                                                    | 0.89126097         | 2              | 2.5808    |
| Q9EQH3        | LNLEHIATSSAVSK                                                                | 1.249596333        | 2              | 4.2774    |
| Q9EQH3        | LSQLEGVNVER                                                                   | 1.145285411        | 2              | 3.01868   |
| Q9EQH3        | NIIIALIDR                                                                     | 1.501957305        | 2              | 2.41171   |
| Q9EQH3        | VLETTVEIFNK                                                                   | 1.164165546        | 2              | 2.87067   |
| <b>Q9EQS0</b> | <b>TALDO Transaldolase</b>                                                    | <b>1.989785812</b> | <b>0.97785</b> | <b>6</b>  |
| Q9EQS0        | ALAGCDFLTISPK                                                                 | 1.08188567         | 2              | 3.30839   |
| Q9EQS0        | ILDWHVANTDKK                                                                  | 1.121669358        | 2              | 3.47564   |
| Q9EQS0        | LGPPQEEQIK                                                                    | 1.199113409        | 2              | 3.3097    |

|               |                                                    |                    |                |           |
|---------------|----------------------------------------------------|--------------------|----------------|-----------|
| Q9EQS0        | LSSTWEGIQAGK                                       | 1.524504354        | 2              | 2.71191   |
| Q9EQS0        | SYEPQEDPGVK                                        | 0.899356055        | 2              | 2.82443   |
| Q9EQS0        | WLHNEDQMAVEK                                       | 0.988811159        | 2              | 3.75689   |
| <b>Q9EQS3</b> | <b>MYCBP_C_Myc_binding protein</b>                 | <b>2.150676433</b> | <b>0.60967</b> | <b>2</b>  |
| Q9EQS3        | LVQYEPQEEK                                         | 1.06431865         | 2              | 2.47627   |
| Q9EQS3        | VLVALYEEPEKPTSALDFLK                               | 1.155672773        | 3              | 3.44915   |
| <b>Q9EQW7</b> | <b>KI13A Kinesin_like protein KIF13A</b>           | <b>2.015953284</b> | <b>0.97435</b> | <b>3</b>  |
| Q9EQW7        | ADLTDSRALEKAVSR                                    | 1.058755794        | 3              | 3.3419    |
| Q9EQW7        | DETIAPLEENSALPK                                    | 0.967827203        | 2              | 2.59086   |
| Q9EQW7        | VTQWAEER                                           | 1.013084893        | 2              | 2.43305   |
| <b>Q9EQX9</b> | <b>UBE2N Ubiquitin_conjugating enzyme E2 N</b>     | <b>2.373932875</b> | <b>0.98407</b> | <b>3</b>  |
| Q9EQX9        | LELFLPEEYPMAAPK                                    | 1.107320199        | 2              | 4.34295   |
| Q9EQX9        | SNEAQAIETAR                                        | 1.011856824        | 2              | 3.37589   |
| Q9EQX9        | YFHVVIAGPQDSPFEGGTFK                               | 1.263049705        | 3              | 4.48138   |
| <b>Q9ER34</b> | <b>ACON Aconitate hydratase_mitochondrial</b>      | <b>1.920504474</b> | <b>1</b>       | <b>19</b> |
| Q9ER34        | ADIANLAEFEK                                        | 1.279964029        | 2              | 3.56502   |
| Q9ER34        | CTTDHISAAGPWLK                                     | 1.114097737        | 2              | 4.01984   |
| Q9ER34        | DINQEVYNFLATAGAK                                   | 1.20411634         | 2              | 3.3442    |
| Q9ER34        | DLEDLQILIK                                         | 1.671485966        | 2              | 2.47384   |
| Q9ER34        | FKLEAPDADELPR                                      | 1.018336337        | 3              | 4.16928   |
| Q9ER34        | FNPETDFLTGK                                        | 1.494436164        | 1              | 2.48704   |
| Q9ER34        | GHLDNISNLLIGAINIENGK                               | 1.175184166        | 2              | 5.80545   |
| Q9ER34        | IVYGHLDDPANQEIER                                   | 1.150351668        | 2              | 4.60139   |
| Q9ER34        | LNRPLTLEK                                          | 1.789716616        | 2              | 2.4509    |
| Q9ER34        | LTGTLGWTSPK                                        | 0.940451964        | 2              | 2.99456   |
| Q9ER34        | NAVTFEGFPVPDPTAR                                   | 0.932937082        | 2              | 4.43713   |
| Q9ER34        | NTIVTSYNR                                          | 0.983451685        | 1              | 1.94905   |
| Q9ER34        | QGLLPLTFADPSDYNK                                   | 1.015256542        | 2              | 3.35535   |
| Q9ER34        | SDFDPGQDTYQHPPK                                    | 1.225512101        | 2              | 2.87933   |
| Q9ER34        | SQFTITPGSEQIR                                      | 0.941389479        | 2              | 3.91078   |
| Q9ER34        | VAVPSTIHCDHLIEAQLGGEK                              | 1.365359022        | 2              | 4.78304   |
| Q9ER34        | VDVSPTSQR                                          | 0.881095987        | 2              | 2.44661   |
| Q9ER34        | VGLIGSCTNSSYEDMGR                                  | 1.000440862        | 2              | 4.20039   |
| Q9ER34        | WVIGDENYEGESSR                                     | 0.988282288        | 2              | 4.41423   |
| <b>Q9ERU9</b> | <b>RBP2 E3 SUMO_protein ligase RanBP2</b>          | <b>2.039298103</b> | <b>0.96187</b> | <b>2</b>  |
| Q9ERU9        | EINSLRGQEK                                         | 1.149395643        | 2              | 2.61337   |
| Q9ERU9        | NLFRFGESTTGFNFSEK                                  | 1.020751439        | 2              | 2.32362   |
| <b>Q9ES21</b> | <b>SAC1 Phosphatidylinositide phosphatase SAC1</b> | <b>1.873812102</b> | <b>0.98955</b> | <b>5</b>  |
| Q9ES21        | HFDSQVIYVK                                         | 0.857562461        | 2              | 2.79587   |
| Q9ES21        | LEEQDEFEK                                          | 2.298585267        | 2              | 2.75949   |
| Q9ES21        | TNVIQSLAR                                          | 2.681032935        | 2              | 2.3946    |
| Q9ES21        | TQLGLVMDGFNSLLR                                    | 1.042951422        | 2              | 3.947     |
| Q9ES21        | VVTNQEGVFR                                         | 0.904332343        | 2              | 2.81056   |
| <b>Q9ES38</b> | <b>S27A5 Bile acyl_CoA synthetase</b>              | <b>2.01247195</b>  | <b>1</b>       | <b>14</b> |
| Q9ES38        | ACQAAWALK                                          | 1.11554672         | 2              | 2.57269   |
| Q9ES38        | ADVWENFQQR                                         | 0.893668999        | 2              | 2.95416   |
| Q9ES38        | EGFDVGVIAADPLYILDNK                                | 0.8998875          | 2              | 5.37182   |
| Q9ES38        | GATAILVLPK                                         | 1.032186695        | 2              | 3.20712   |
| Q9ES38        | HPPELFVDALEQQAQRPDQVALVCTGSEGCSTNR                 | 1.045271361        | 4              | 4.54622   |
| Q9ES38        | IQDSLEITNTYK                                       | 1.233441371        | 2              | 3.81516   |
| Q9ES38        | LKEATIQEDK                                         | 0.94821185         | 2              | 2.83381   |
| Q9ES38        | LLAENIR                                            | 0.92792704         | 2              | 2.46671   |
| Q9ES38        | MLTPLELVQFDIETAEPVRDK                              | 1.219353064        | 2              | 4.20163   |
| Q9ES38        | QGFCIPVETGKPGLLTK                                  | 1.040313772        | 3              | 3.88201   |
| Q9ES38        | SISALSVFLGLAK                                      | 1.541801308        | 2              | 3.32014   |
| Q9ES38        | SLMPDVYQAVCEGTWK                                   | 0.966231157        | 2              | 3.90565   |
| Q9ES38        | YLCNVPGQPEDK                                       | 0.963796707        | 2              | 3.37767   |

|               |                                                                            |                    |                |          |
|---------------|----------------------------------------------------------------------------|--------------------|----------------|----------|
| Q9ES38        | YLCNVPGQPEDKK                                                              | 1.099582252        | 2              | 3.76698  |
| <b>Q9ESP1</b> | <b>SDF2L Stromal cell_derived factor 2_like protein 1</b>                  | <b>2.164153125</b> | <b>0.99442</b> | <b>2</b> |
| Q9ESP1        | ASAGLVTCGSVLK                                                              | 1.156528658        | 2              | 3.59286  |
| Q9ESP1        | GQHEVHGMPSANAHTWK                                                          | 0.947774646        | 3              | 3.81913  |
| <b>Q9ESR9</b> | <b>ABCA2 ATP_binding cassette sub_family A member 2</b>                    | <b>2.247918226</b> | <b>0.00468</b> | <b>2</b> |
| Q9ESR9        | KEMDKMIEDLELSNK+Oxidation(2)Oxidation(5)                                   | 1.234353356        |                |          |
| Q9ESR9        | RHSLVQTLSGGMKR                                                             | 1.009813178        | 2              | 2.36262  |
| <b>Q9EST6</b> | <b>AN32B Acidic leucine_rich nuclear phosphoprotein 32 family member B</b> | <b>1.709275731</b> | <b>0.14024</b> | <b>2</b> |
| Q9EST6        | LAEELPSLTHLNLSGNNLK                                                        | 0.57729661         | 2              | 4.14051  |
| Q9EST6        | SLDLFGCEVTNR                                                               | 1.174074177        | 2              | 2.97743  |
| <b>Q9ESW0</b> | <b>DDB1 DNA damage_binding protein 1</b>                                   | <b>2.424191617</b> | <b>0.49798</b> | <b>3</b> |
| Q9ESW0        | IEVQDTSGGTTALRPSASTQALSSSVSSK                                              | 1.331080465        | 3              | 5.82827  |
| Q9ESW0        | KTEPATGFIDGDLIESFLDISRPK                                                   | 1.294755163        | 3              | 4.50159  |
| Q9ESW0        | QGQGQLVTCGAFK                                                              | 1.074442035        | 2              | 2.36767  |
| <b>Q9HB97</b> | <b>PARVA Alpha_parvin</b>                                                  | <b>2.528042425</b> | <b>0.78468</b> | <b>3</b> |
| Q9HB97        | LNVAEVTQSEIAQK                                                             | 0.964591815        | 2              | 4.31417  |
| Q9HB97        | QIQEITGNTEALSGR                                                            | 1.10589212         | 2              | 3.70708  |
| Q9HB97        | VLIDWINDVLVGER                                                             | 1.442109749        | 2              | 2.3004   |
| <b>Q9JHL4</b> | <b>DBNL Drebrin_like protein</b>                                           | <b>1.753347185</b> | <b>0.33424</b> | <b>3</b> |
| Q9JHL4        | AMSTTSVSSSQPGK                                                             | 0.828562263        | 2              | 2.55232  |
| Q9JHL4        | ERAMSTTSVSSSQPKLR+Oxidation(3)                                             | 0.460421113        |                |          |
| Q9JHL4        | TGELEQEVVSR                                                                | 0.783085977        | 2              | 3.26564  |
| <b>Q9JHW0</b> | <b>PSB7 Proteasome subunit beta type_7</b>                                 | <b>2.114571378</b> | <b>0.99826</b> | <b>2</b> |
| Q9JHW0        | ATEGMVVADK                                                                 | 0.978752538        | 2              | 2.57047  |
| Q9JHW0        | FRPDMEEEEAKK                                                               | 1.089235957        | 3              | 3.81746  |
| <b>Q9JHZ9</b> | <b>S38A3 Sodium_coupled neutral amino acid transporter 3</b>               | <b>3.530538195</b> | <b>6.8E-06</b> | <b>3</b> |
| Q9JHZ9        | AYEQLGYR                                                                   | 1.441463108        | 2              | 2.39203  |
| Q9JHZ9        | HLEGLLPVGMPTADTQR                                                          | 1.87240985         | 2              | 3.9868   |
| Q9JHZ9        | MEIPRQTEMVELVPNGK+Oxidation(0)Oxidation(8)                                 | 1.224682209        |                |          |
| <b>Q9JI85</b> | <b>NUCB2 Nucleobindin_2</b>                                                | <b>1.925093946</b> | <b>0.99773</b> | <b>8</b> |
| Q9JI85        | FQQGIAPSGPAGELK                                                            | 0.941769235        | 2              | 3.1531   |
| Q9JI85        | HEEFKYEEMMK+Oxidation(8)                                                   | 0.784493282        |                |          |
| Q9JI85        | HEEFKYEEMMK+Oxidation(9)                                                   | 0.784493282        |                |          |
| Q9JI85        | LSQELDLVSHK                                                                | 1.168754861        | 2              | 2.62893  |
| Q9JI85        | QEYQQAVQQLQEK                                                              | 0.914539285        | 2              | 4.59552  |
| Q9JI85        | TRLDELK                                                                    | 1.13242612         | 1              | 2.01113  |
| Q9JI85        | VHNVEPVESAR                                                                | 0.938311968        | 2              | 3.08007  |
| Q9JI85        | VYNPQNAEDDMIEMEEER                                                         | 1.204291289        | 2              | 3.972    |
| <b>Q9JI91</b> | <b>ACTN2 Alpha_actinin_2</b>                                               | <b>2.589029197</b> | <b>0.92219</b> | <b>8</b> |
| Q9JI91        | ETADTDTAEQVIASFR                                                           | 1.527658217        | 2              | 3.06421  |
| Q9JI91        | GYEEWLLNEIR                                                                | 1.389998986        | 2              | 3.4865   |
| Q9JI91        | HTNYTMEHIR                                                                 | 1.021036684        | 3              | 3.5452   |
| Q9JI91        | KHEAFESDLAAHQDR                                                            | 1.262720369        | 2              | 5.36311  |
| Q9JI91        | MLDAEDIVNTPKPDER                                                           | 0.98497486         | 2              | 3.2126   |
| Q9JI91        | QSILAIQNEVEK                                                               | 1.612628963        | 2              | 2.72277  |
| Q9JI91        | SSIQITGALEDQMNQLK                                                          | 1.441028085        | 2              | 3.08532  |
| Q9JI91        | TINEVETQILTR                                                               | 1.368111447        | 2              | 3.14469  |
| <b>Q9JJ19</b> | <b>NHRF1 Na(_)/H(_) exchange regulatory cofactor NHE_RF1</b>               | <b>1.994615933</b> | <b>0.91113</b> | <b>7</b> |
| Q9JJ19        | AVDPDSPAEEASGLR                                                            | 0.837210251        | 2              | 3.45978  |
| Q9JJ19        | IVEVNGVCMGK                                                                | 0.982380957        | 2              | 3.72394  |
| Q9JJ19        | LLVDPETDEQLKK                                                              | 1.028293516        | 2              | 2.85416  |
| Q9JJ19        | LVEPGSPA EK                                                                | 0.780599981        | 2              | 2.7024   |
| Q9JJ19        | LVEVNGENVEK                                                                | 1.091746233        | 2              | 3.04663  |



|               |                                                                   |                    |                |           |
|---------------|-------------------------------------------------------------------|--------------------|----------------|-----------|
| Q9JJ19        | SEHTEPPAAADTK                                                     | 0.988245859        | 2              | 3.32679   |
| Q9JJ19        | VTPSQEHLDGPLPEPFSNGEIQK                                           | 1.270056566        | 3              | 3.55325   |
| <b>Q9JJ40</b> | <b>NHRF3 Na( )/H( ) exchange regulatory cofactor NHE_RF3</b>      | <b>2.138021907</b> | <b>0.78008</b> | <b>5</b>  |
| Q9JJ40        | AGVLADDHLIEVNGENVENASHEEVVEK                                      | 1.763261773        | 3              | 5.38256   |
| Q9JJ40        | GVFLTDITPQGAVAMK                                                  | 1.078636591        | 2              | 3.37839   |
| Q9JJ40        | IEKDTDGHLVR                                                       | 0.940250876        | 2              | 3.19373   |
| Q9JJ40        | SGNSVTLVLVDGDSYEK                                                 | 1.942268009        | 2              | 3.79667   |
| Q9JJ40        | VIEEGSPA EK                                                       | 0.953532744        | 2              | 2.41843   |
| <b>Q9JJ46</b> | <b>EBP 3_beta_hydroxysteroid_Delta(8)_Delta(7)_isomerase</b>      | <b>1.783854606</b> | <b>0.36731</b> | <b>2</b>  |
| Q9JJ46        | HLTNAQSMLDNK                                                      | 0.897604263        | 2              | 3.75976   |
| Q9JJ46        | VSVVPLGTGR                                                        | 0.720595904        | 2              | 2.45105   |
| <b>Q9JJ54</b> | <b>HNRPD Heterogeneous nuclear ribonucleoprotein D0</b>           | <b>1.904098971</b> | <b>0.57293</b> | <b>4</b>  |
| Q9JJ54        | FGDVVDCTLK                                                        | 0.904842015        | 2              | 2.80834   |
| Q9JJ54        | IDASKNEEDEGHSNSSPR                                                | 1.21193401         | 3              | 4.66094   |
| Q9JJ54        | IFVGGLSPDTPEEK                                                    | 1.356772254        | 2              | 4.03937   |
| Q9JJ54        | IFVGGLSPDTPEEKIR                                                  | 2.46128668         | 2              | 2.40501   |
| <b>Q9JJ79</b> | <b>DYHC2 Cytoplasmic dynein 2 heavy chain 1</b>                   | <b>2.253094172</b> | <b>0.07498</b> | <b>4</b>  |
| Q9JJ79        | NCLEEWTKAAGLEK                                                    | 0.860872179        | 2              | 2.65048   |
| Q9JJ79        | RASTAAAPLAAWVK                                                    | 1.09133173         | 2              | 2.53825   |
| Q9JJ79        | TVLRGSGNLLR                                                       | 1.430679285        | 2              | 2.46618   |
| Q9JJ79        | YVVQIGDK                                                          | 1.239525392        | 1              | 2.30272   |
| <b>Q9JJU8</b> | <b>SH3L1 SH3 domain_binding glutamic acid_rich_like protein</b>   | <b>2.082069855</b> | <b>0.54791</b> | <b>2</b>  |
| Q9JJU8        | GDYDAFFEAR                                                        | 1.055885635        | 2              | 3.18598   |
| Q9JJU8        | QQDVLCFLEANK                                                      | 1.220122982        | 2              | 3.21735   |
| <b>Q9JJW3</b> | <b>USMG5 Up_regulated during skeletal muscle growth protein 5</b> | <b>2.018718207</b> | <b>0.83854</b> | <b>2</b>  |
| Q9JJW3        | MAGPESDGQFQFTGIKK+Oxidation(0                                     | 2.253299495        |                |           |
| Q9JJW3        | YFNSYTLTGR                                                        | 1.013237506        | 2              | 2.80612   |
| <b>Q9JK38</b> | <b>GNA1 Glucosamine 6_phosphate N_acetyltransferase</b>           | <b>2.680840481</b> | <b>1.3E-09</b> | <b>4</b>  |
| Q9JK38        | GRVEDVVVSDECR                                                     | 1.282232905        | 2              | 2.51818   |
| Q9JK38        | ITLECLPQNVGFYK                                                    | 1.566378659        | 2              | 3.47628   |
| Q9JK38        | VEDVVVSDECR                                                       | 2.426957532        | 2              | 3.36651   |
| Q9JK38        | VLGQLTETGVVSPQFMK                                                 | 1.33926397         | 2              | 4.63243   |
| <b>Q9JK72</b> | <b>CCS Copper chaperone for superoxide dismutase</b>              | <b>2.080738339</b> | <b>0.91627</b> | <b>2</b>  |
| Q9JK72        | GDLGNVHAEASGR                                                     | 1.172459506        | 2              | 3.22151   |
| Q9JK72        | SLVVDEGEDDLGR                                                     | 1.021988092        | 2              | 3.02231   |
| <b>Q9JKJ9</b> | <b>CP39A 24_hydroxycholesterol 7_alpha_hydroxylase</b>            | <b>2.553083713</b> | <b>0.14252</b> | <b>2</b>  |
| Q9JKJ9        | TVLESISSVFGTAGK                                                   | 1.19334401         | 2              | 3.33597   |
| Q9JKJ9        | TYDEGFYGSQLPPEWLLR                                                | 1.550944391        | 2              | 3.20149   |
| <b>Q9JKS4</b> | <b>LDB3 LIM domain_binding protein 3</b>                          | <b>2.084337488</b> | <b>0.95604</b> | <b>4</b>  |
| Q9JKS4        | DFNMPLTISR                                                        | 1.158999777        | 2              | 2.34284   |
| Q9JKS4        | DLAVDSASPVYQAVIK                                                  | 1.014019803        | 2              | 3.59309   |
| Q9JKS4        | GAPAYNPTGPQVTPLAR                                                 | 1.303460753        | 2              | 3.12809   |
| Q9JKS4        | TQSKPEDEADEWAR                                                    | 2.105567574        | 2              | 3.81607   |
| <b>Q9JLA3</b> | <b>UGGG1 UDP_glucose:glycoprotein glucosyltransferase 1</b>       | <b>2.960608308</b> | <b>0.86431</b> | <b>11</b> |
| Q9JLA3        | AYNYVGQEVVDGYHAFQTLTQIYNK                                         | 1.397807067        | 3              | 3.31771   |
| Q9JLA3        | FLFVDADQIVR                                                       | 1.634037751        | 2              | 2.62032   |
| Q9JLA3        | GQYQGLSQDPNSLSNLDQDLPNMNIHQVPIK                                   | 1.140771955        | 3              | 6.0139    |
| Q9JLA3        | IEYQFFEDK                                                         | 1.12011231         | 2              | 2.34456   |

|               |                                                                      |                    |                |           |
|---------------|----------------------------------------------------------------------|--------------------|----------------|-----------|
| Q9JLA3        | IETTTFFQR                                                            | 1.396010633        | 2              | 2.8417    |
| Q9JLA3        | IVPEWQDYDQEI                                                         | 1.063911697        | 2              | 3.31969   |
| Q9JLA3        | LNIQPSETDYAVDIR                                                      | 1.74870995         | 2              | 4.11147   |
| Q9JLA3        | TAAIANSMNYLTK                                                        | 1.250143596        | 2              | 2.5771    |
| Q9JLA3        | VDALLSAQPK                                                           | 1.224521011        | 2              | 2.7415    |
| Q9JLA3        | VEEDVASDLVMK                                                         | 1.654534783        | 2              | 3.82461   |
| Q9JLA3        | VWQLQDLSFQTAAR                                                       | 1.156779078        | 2              | 4.65391   |
| <b>Q9JLH7</b> | <b>CK5P3 CDK5 regulatory subunit_associated protein 3</b>            | <b>1.799344665</b> | <b>0.96474</b> | <b>2</b>  |
| Q9JLH7        | GSDALTLLLEYPETR                                                      | 0.975437381        | 2              | 2.90587   |
| Q9JLH7        | KEEEQGAGAAEMR                                                        | 0.846748841        | 2              | 3.70517   |
| <b>Q9JLJ3</b> | <b>AL9A1 4_trimethylaminobutyraldehyde dehydrogenase</b>             | <b>2.073501939</b> | <b>0.99843</b> | <b>18</b> |
| Q9JLJ3        | AGAPNGLFNVVQGGAAATGQFLCQHR                                           | 1.661567116        | 2              | 4.75727   |
| Q9JLJ3        | ANDTTFLAAGVFTR                                                       | 1.095372167        | 2              | 4.92879   |
| Q9JLJ3        | CQVLLAAR                                                             | 1.068619591        | 2              | 3.30374   |
| Q9JLJ3        | EQGATVLCGGEPYAPEDPK                                                  | 0.988739458        | 2              | 4.95438   |
| Q9JLJ3        | EQGATVLCGGEPYAPEDPKLK                                                | 0.948998505        | 3              | 3.39479   |
| Q9JLJ3        | EVNLAVENAK                                                           | 1.112055125        | 2              | 3.15041   |
| Q9JLJ3        | GALLANFLTQGGVCCNGTR                                                  | 1.128864111        | 2              | 5.57225   |
| Q9JLJ3        | GIKPITLLEGGK                                                         | 0.905092474        | 3              | 3.96727   |
| Q9JLJ3        | HGYMTPCILTNTCTDDMTCVK                                                | 1.230353366        | 3              | 4.23865   |
| Q9JLJ3        | IGDPLLEDTR                                                           | 1.135262608        | 2              | 3.7055    |
| Q9JLJ3        | MGPLINAPHLER                                                         | 0.993572378        | 2              | 3.26442   |
| Q9JLJ3        | MGPLINAPHLER+Oxidation(0                                             | 0.942413097        |                |           |
| Q9JLJ3        | RDEIAIMETINNGK                                                       | 1.063211289        | 2              | 5.29883   |
| Q9JLJ3        | SPLIIFSDCNMK                                                         | 1.511407739        | 2              | 2.60824   |
| Q9JLJ3        | VEPVDASGTEK                                                          | 1.008105462        | 2              | 2.41424   |
| Q9JLJ3        | VSFTGSVPTGMK                                                         | 1.056803096        | 2              | 3.10514   |
| Q9JLJ3        | VSFTGSVPTGMK+Oxidation(10                                            | 1.184858501        |                |           |
| Q9JLJ3        | VTIEYYSQK                                                            | 1.214009878        | 2              | 3.08449   |
| <b>Q9JLR1</b> | <b>S61A2 Protein transport protein Sec61 subunit alpha isoform 2</b> | <b>2.134403728</b> | <b>0.38529</b> | <b>2</b>  |
| Q9JLR1        | IIEVGDTPK                                                            | 1.055618745        | 2              | 2.66552   |
| Q9JLR1        | TWIEVSGSSAK                                                          | 1.284449549        | 2              | 2.7547    |
| <b>Q9JLT0</b> | <b>MYH10 Myosin_10</b>                                               | <b>2.455809007</b> | <b>0.75751</b> | <b>2</b>  |
| Q9JLT0        | AGVLAHLEER                                                           | 1.195279347        | 2              | 3.4286    |
| Q9JLT0        | DAAGLESQLQDTQELLQEETR                                                | 1.392469837        | 2              | 3.18175   |
| <b>Q9JLZ1</b> | <b>GLRX3 Glutaredoxin_3</b>                                          | <b>2.378251465</b> | <b>0.3446</b>  | <b>2</b>  |
| Q9JLZ1        | LEAEAVPEVSEK                                                         | 0.615105782        | 2              | 2.31979   |
| Q9JLZ1        | YEISSVPTFLFFK                                                        | 1.901370202        | 2              | 2.58476   |
| <b>Q9JLZ3</b> | <b>AUHM Methylglutaconyl_CoA hydratase_mitochondrial</b>             | <b>2.085250366</b> | <b>0.34625</b> | <b>3</b>  |
| Q9JLZ3        | AVGLISHVLEQNQEGDAAYR                                                 | 1.271963105        | 2              | 5.61671   |
| Q9JLZ3        | AVGLISHVLEQNQEGDAAYRK                                                | 0.631607409        | 3              | 4.47002   |
| Q9JLZ3        | SEVPGIFCAGADLK                                                       | 0.949548432        | 2              | 2.95344   |
| <b>Q9JM53</b> | <b>AIFM1 Apoptosis_inducing factor 1_mitochondrial</b>               | <b>2.097631466</b> | <b>0.99999</b> | <b>15</b> |
| Q9JM53        | AIASAAEGSVPPIR                                                       | 0.970080332        | 2              | 2.76764   |
| Q9JM53        | CLIATGGTPR                                                           | 0.964780241        | 2              | 2.4216    |
| Q9JM53        | DGEQHEDLNEVAK                                                        | 0.831194213        | 2              | 3.82964   |
| Q9JM53        | ILPEYLSNWTMEK                                                        | 1.169359976        | 2              | 3.49459   |
| Q9JM53        | IMGLGLSPEEK                                                          | 1.14512706         | 2              | 2.80551   |
| Q9JM53        | KSQASGIEVIQLFPEK                                                     | 1.27928527         | 2              | 3.70989   |
| Q9JM53        | KVETDHIVTAVGLEPNVELAK                                                | 0.980038424        | 2              | 6.17864   |
| Q9JM53        | LNDGSQITFEK                                                          | 1.031860183        | 2              | 3.50826   |
| Q9JM53        | SITVIGGGFLGSELACALGR                                                 | 0.780158168        | 2              | 2.65708   |
| Q9JM53        | SQASGIEVIQLFPEK                                                      | 1.328613541        | 2              | 4.13179   |

|               |                                                        |                    |                |           |
|---------------|--------------------------------------------------------|--------------------|----------------|-----------|
| Q9JM53        | TGGLEIDSDFGGFR                                         | 0.986806419        | 2              | 4.18675   |
| Q9JM53        | VETDHIVTAVGLEPNVELAK                                   | 1.20333813         | 2              | 5.18247   |
| Q9JM53        | VLIVSEDPPELYMRPPLSK                                    | 0.794346265        | 3              | 3.93852   |
| Q9JM53        | VMPNAIVQSVGVSGGK                                       | 1.090405991        | 2              | 4.28328   |
| Q9JM53        | VNAELQAR                                               | 0.889594733        | 2              | 2.60174   |
| <b>Q9JMA1</b> | <b>UBP14 Ubiquitin carboxyl_terminal hydrolase 14</b>  | <b>2.881822704</b> | <b>0.73254</b> | <b>2</b>  |
| Q9JMA1        | CTESEEVEVTK                                            | 1.305652081        | 2              | 3.69407   |
| Q9JMA1        | EKESVNAKVLK                                            | 2.147032032        | 2              | 2.37533   |
| <b>Q9JMD3</b> | <b>PCTL PCTL_like protein</b>                          | <b>2.340354919</b> | <b>3.3E-10</b> | <b>6</b>  |
| Q9JMD3        | AVSIQTGYLIQSTGPK                                       | 1.226678105        | 2              | 4.66817   |
| Q9JMD3        | ESVQVPDDQDFR                                           | 1.536038193        | 2              | 2.83565   |
| Q9JMD3        | MECCDVPAETLYDVLHDIYR                                   | 1.592559159        | 3              | 4.40511   |
| Q9JMD3        | MECCDVPAETLYDVLHDIYR+Oxidation(0                       | 1.255469202        |                |           |
| Q9JMD3        | SSQFLAPK                                               | 0.730375273        | 2              | 2.35623   |
| Q9JMD3        | WDSNVIETFDIAR                                          | 1.109880182        | 2              | 4.53405   |
| <b>Q9JME5</b> | <b>AP3B2 AP_3 complex subunit beta_2</b>               | <b>2.11770654</b>  | <b>0.65561</b> | <b>2</b>  |
| Q9JME5        | DELVVVAESVVIK                                          | 1.575110428        | 2              | 2.51605   |
| Q9JME5        | LLQMMPAQHGIIK                                          | 0.948210021        | 2              | 2.55969   |
| <b>Q9QVC8</b> | <b>FKBP4 Peptidyl_prolyl cis_trans isomerase FKBP4</b> | <b>1.966066699</b> | <b>0.99996</b> | <b>7</b>  |
| Q9QVC8        | ALELDSNNEK                                             | 1.007875724        | 2              | 2.63056   |
| Q9QVC8        | GEPNNVAGNQAVK                                          | 0.984532697        | 2              | 3.85957   |
| Q9QVC8        | TEVAAGDHPPTDAEMK                                       | 1.129667155        | 2              | 3.66787   |
| Q9QVC8        | TQLAVCQQR                                              | 0.874439004        | 2              | 2.72842   |
| Q9QVC8        | VAENGAQSAPLPLEGVDISPK                                  | 1.033301296        | 2              | 3.92937   |
| Q9QVC8        | VGEVCHITCKPEYAYGSAGSPPK                                | 0.945168554        | 3              | 5.9155    |
| Q9QVC8        | VLQLYPSNK                                              | 0.939560155        | 2              | 2.33325   |
| <b>Q9QWN8</b> | <b>SPTN2 Spectrin beta chain_brain 2</b>               | <b>1.994288091</b> | <b>0.1999</b>  | <b>3</b>  |
| Q9QWN8        | ALAQEDQSAGEVER                                         | 0.814195459        | 2              | 3.77066   |
| Q9QWN8        | FETLEPEMNALAAR                                         | 1.569519504        | 2              | 2.72911   |
| Q9QWN8        | VGELTQEANALAAGHPAQAPAINTR                              | 0.906031603        | 3              | 4.22452   |
| <b>Q9QX79</b> | <b>FETUB Fetuin_B</b>                                  | <b>1.864221225</b> | <b>0.99024</b> | <b>3</b>  |
| Q9QX79        | GSIQHLPEQEPEPDSKGG                                     | 0.845928113        | 3              | 3.83006   |
| Q9QX79        | IFYETVHGQCK                                            | 0.967032549        | 2              | 2.38993   |
| Q9QX79        | NTAPTSSPSITAPR                                         | 1.385625903        | 2              | 3.15038   |
| <b>Q9QXG4</b> | <b>ACSA Acetyl_coenzyme A synthetase_cytoplasmic</b>   | <b>2.21956419</b>  | <b>0.94802</b> | <b>2</b>  |
| Q9QXG4        | AELGMNDSPSQSPPVK                                       | 0.722504978        | 2              | 3.67931   |
| Q9QXG4        | IGPIATPDYIQNAPGLPK                                     | 1.243212337        | 2              | 3.2977    |
| <b>Q9QXQ0</b> | <b>ACTN4 Alpha_actinin_4</b>                           | <b>1.935384792</b> | <b>0.99559</b> | <b>32</b> |
| Q9QXQ0        | ACLISLGYDVENDR                                         | 1.303028624        | 2              | 4.02405   |
| Q9QXQ0        | ACLISLGYDVENDRQGDADFNR                                 | 1.308343839        | 3              | 3.85267   |
| Q9QXQ0        | AGTQIENIDEDFR                                          | 1.142566948        | 2              | 3.56221   |
| Q9QXQ0        | AGTQIENIDEDFRDGLK                                      | 1.122133272        | 2              | 4.2579    |
| Q9QXQ0        | ASFNFHFDKDHGGALGPEEFK                                  | 1.261862842        | 3              | 3.36847   |
| Q9QXQ0        | ASIHEAWTDGK                                            | 0.600922637        | 2              | 2.45294   |
| Q9QXQ0        | DDPVTNLNNAFEVAEK                                       | 1.079378662        | 2              | 3.60693   |
| Q9QXQ0        | ETTDTDADQVIASFK                                        | 0.835871538        | 2              | 4.71037   |
| Q9QXQ0        | HRDYETATLSDIK                                          | 1.197627085        | 2              | 3.88742   |
| Q9QXQ0        | HRPELIEYDK                                             | 0.956756761        | 3              | 4.40283   |
| Q9QXQ0        | HTNYTMEHLR                                             | 1.021036684        | 3              | 3.5452    |
| Q9QXQ0        | ICDQWDNLGSLTHSR                                        | 1.000973399        | 2              | 4.59372   |
| Q9QXQ0        | INNVNKALDFIASK                                         | 0.993168629        | 2              | 2.30311   |
| Q9QXQ0        | KDDPVTNLNNAFEVAEK                                      | 0.964394712        | 2              | 4.73469   |
| Q9QXQ0        | LSGSNPYTSVTPQIINSK                                     | 1.224300483        | 2              | 4.42651   |
| Q9QXQ0        | LVSIGAEIIVDGNK                                         | 1.359410931        | 2              | 3.15663   |
| Q9QXQ0        | MAPYQGPDAAPGALDYK                                      | 1.008198357        | 2              | 4.98175   |
| Q9QXQ0        | MAPYQGPDAAPGALDYK+Oxidation(0                          | 0.889723395        |                |           |
| Q9QXQ0        | MLDAEDIVNTARPDEK                                       | 0.958960111        | 2              | 3.8771    |

|               |                                                                   |                    |                |           |
|---------------|-------------------------------------------------------------------|--------------------|----------------|-----------|
| Q9QXQ0        | MLDAEDIVNTARPDEK+Oxidation(0                                      | 0.877347644        |                |           |
| Q9QXQ0        | MVSDINNGWQHLEQAEK                                                 | 1.076213313        | 2              | 4.71801   |
| Q9QXQ0        | NFITAEELR                                                         | 1.110664128        | 1              | 2.125     |
| Q9QXQ0        | NVNVQNFHISWK                                                      | 0.419558845        | 2              | 2.34403   |
| Q9QXQ0        | QFASQANMVGWPWIQTK                                                 | 0.970809236        | 2              | 3.63946   |
| Q9QXQ0        | QLETIDQLHLEYAK                                                    | 0.954902562        | 2              | 3.28057   |
| Q9QXQ0        | RDHALLEEQSK                                                       | 0.921585794        | 3              | 3.88131   |
| Q9QXQ0        | SIVDYKPNLDLLEQQHQLIQEALIFDNK                                      | 1.817858955        | 3              | 4.69341   |
| Q9QXQ0        | TINEVENQILTR                                                      | 0.955797932        | 2              | 3.67342   |
| Q9QXQ0        | VEQIAAIAQELNELDYDSSHNVNTR                                         | 1.478437181        | 3              | 5.40346   |
| Q9QXQ0        | VGWEQLLTIAR                                                       | 1.240210855        | 2              | 4.10189   |
| Q9QXQ0        | VLGDKNFITAEELR                                                    | 0.798206536        | 2              | 3.23279   |
| Q9QXQ0        | VLAVNQENEHLMEDYER                                                 | 1.071497451        | 2              | 5.72971   |
| <b>Q9QXT0</b> | <b>CNPY2 Protein canopy homolog 2</b>                             | <b>1.87224045</b>  | <b>1</b>       | <b>5</b>  |
| Q9QXT0        | ALVDELEWEIAR                                                      | 0.990456705        | 2              | 3.58611   |
| Q9QXT0        | IDSDISGTLK                                                        | 1.085159104        | 2              | 2.62545   |
| Q9QXT0        | INPDGSQSVVEVPYAR                                                  | 1.076208557        | 2              | 3.66256   |
| Q9QXT0        | RTDLCDHALHR                                                       | 0.800161057        | 3              | 3.92513   |
| Q9QXT0        | TDLCDHALHR                                                        | 0.978317921        | 2              | 3.20789   |
| <b>Q9QXX4</b> | <b>CMC2 Calcium_binding mitochondrial carrier protein Aralar2</b> | <b>2.301481022</b> | <b>0.0041</b>  | <b>18</b> |
| Q9QXX4        | DIMVTIRPHVLTPFVEECLVAAAGGTR                                       | 1.287823328        | 3              | 5.82647   |
| Q9QXX4        | DVEVTKEEFALAAQK                                                   | 0.922454163        | 2              | 4.47879   |
| Q9QXX4        | FGLGSIAGAVGATAVYPIDLVK                                            | 1.072762344        | 2              | 5.96835   |
| Q9QXX4        | FGLYLPFKPSASTSK                                                   | 1.541021713        | 2              | 2.75989   |
| Q9QXX4        | GLLPQLLGVAPEK                                                     | 1.14777837         | 1              | 3.07248   |
| Q9QXX4        | IAPLEEGMLPFNLAEAQK                                                | 1.31061119         | 2              | 5.23561   |
| Q9QXX4        | ITLPAPNPDHVGQYK                                                   | 1.226326145        | 2              | 3.00412   |
| Q9QXX4        | KDVEVTKEEFALAAQK                                                  | 0.929729643        | 2              | 5.62031   |
| Q9QXX4        | LQVAGEITGPR                                                       | 1.167170531        | 2              | 3.7317    |
| Q9QXX4        | LTVNDFVR                                                          | 1.28508065         | 2              | 2.31738   |
| Q9QXX4        | NGEFFMSPHDFVTR                                                    | 0.980279818        | 2              | 4.20744   |
| Q9QXX4        | NSFDFCK                                                           | 1.122905572        | 1              | 1.9736    |
| Q9QXX4        | SSPQFGVTLTYELLQR                                                  | 1.537177422        | 2              | 3.8108    |
| Q9QXX4        | STGSFVGELMYK                                                      | 1.461200877        | 2              | 3.43736   |
| Q9QXX4        | TVELLSGVVDQTK                                                     | 1.261687256        | 2              | 4.51176   |
| Q9QXX4        | VSALSVVR                                                          | 1.345465542        | 2              | 2.3056    |
| Q9QXX4        | YEGFFGLYR                                                         | 1.19973757         | 2              | 2.74486   |
| Q9QXX4        | YLNIFGESQPNPK                                                     | 0.928138495        | 2              | 4.43402   |
| <b>Q9QYU4</b> | <b>CRYM Thiomorpholine_carboxylate dehydrogenase</b>              | <b>1.972636021</b> | <b>0.99936</b> | <b>4</b>  |
| Q9QYU4        | GFLGVMPAYSAAEDALTTK                                               | 0.980208099        | 2              | 4.57612   |
| Q9QYU4        | RAPAFLSADEVQDHLR                                                  | 1.151928154        | 3              | 3.84162   |
| Q9QYU4        | SLGMAVEDLVAAK                                                     | 0.927132122        | 2              | 3.76128   |
| Q9QYU4        | SSSLIPPLEAALANFSK                                                 | 0.971533566        | 2              | 2.89721   |
| <b>Q9QZ76</b> | <b>MYG Myoglobin</b>                                              | <b>2.590312497</b> | <b>0.99512</b> | <b>6</b>  |
| Q9QZ76        | GQHAAEIQLAQSHATK                                                  | 0.780759538        | 2              | 4.91335   |
| Q9QZ76        | HGCTVLTALGTILK                                                    | 1.363710305        | 2              | 3.66195   |
| Q9QZ76        | KGQHAAEIQLAQSHATK                                                 | 3.563263603        | 3              | 5.45922   |
| Q9QZ76        | KKGQHAAEIQLAQSHATK                                                | 1.519887049        | 3              | 4.50123   |
| Q9QZ76        | VEGDLAGHGQEVLSLFK                                                 | 0.263157912        | 3              | 4.11227   |
| Q9QZ76        | YSGDFGADAQGAMSK                                                   | 6.060934741        | 2              | 3.92959   |
| <b>Q9QZA2</b> | <b>PDC6I Programmed cell death 6_interacting protein</b>          | <b>2.064120863</b> | <b>0.91069</b> | <b>8</b>  |
| Q9QZA2        | ATLVKPTPVNVPISQK                                                  | 0.909277216        | 2              | 3.26783   |
| Q9QZA2        | DTIALLCKPEPELNAAIPSANPAK                                          | 1.23639601         | 2              | 3.39303   |
| Q9QZA2        | HEGALETLLR                                                        | 0.952608692        | 2              | 2.32565   |

|               |                                                                         |                    |                |          |
|---------------|-------------------------------------------------------------------------|--------------------|----------------|----------|
| Q9QZA2        | LLDEEEATDNDLR                                                           | 0.999328101        | 2              | 4.05015  |
| Q9QZA2        | MVPVSVQQSLAVFSQR                                                        | 1.205093282        | 2              | 3.13145  |
| Q9QZA2        | NIQVSHQEFSK                                                             | 1.013981997        | 2              | 3.35185  |
| Q9QZA2        | STAVVEQGGIQTVDQLIK                                                      | 1.225634829        | 2              | 4.29954  |
| Q9QZA2        | TMQGSEVVNVLK                                                            | 0.848992282        | 2              | 3.2771   |
| <b>Q9QZD8</b> | <b>DIC Mitochondrial dicarboxylate carrier</b>                          | <b>1.958297598</b> | <b>0.99953</b> | <b>7</b> |
| Q9QZD8        | GALVTVGQLSCYDQAK                                                        | 0.964983538        | 2              | 5.08236  |
| Q9QZD8        | LFSGATMASSR                                                             | 0.74709972         | 2              | 2.51429  |
| Q9QZD8        | MTGMALQVVR                                                              | 1.101512281        | 2              | 2.78806  |
| Q9QZD8        | NYSHALDGLYR                                                             | 1.005135755        | 2              | 2.83243  |
| Q9QZD8        | VHLQTQQEVK                                                              | 1.07734799         | 2              | 3.04864  |
| Q9QZD8        | VLLGGISGLTGGFVGTADLVNVR                                                 | 1.110568688        | 2              | 5.68047  |
| Q9QZD8        | WYFGGLASCGAACCTHPLDLLK                                                  | 1.155618418        | 3              | 3.5388   |
| <b>Q9QZH8</b> | <b>AAAD Arylacetamide deacetylase</b>                                   | <b>2.729130206</b> | <b>0.9901</b>  | <b>2</b> |
| Q9QZH8        | LDVVVSTDYGLAPK                                                          | 1.58517315         | 2              | 4.11496  |
| Q9QZH8        | WFLQEDILEK                                                              | 1.1722733          | 2              | 2.94973  |
| <b>Q9QZR9</b> | <b>chain</b>                                                            | <b>2.006730489</b> | <b>0.74034</b> | <b>2</b> |
| Q9QZR9        | EGPSGPFALGQDQKDGPR                                                      | 16.88433779        |                |          |
| Q9QZR9        | GASGLLEMGPMPGMPGQK                                                      | 0.981266293        |                |          |
| <b>Q9QZU7</b> | <b>BODG Gamma_butyrobetaine dioxygenase</b>                             | <b>2.504144155</b> | <b>0.5204</b>  | <b>5</b> |
| Q9QZU7        | IDANNVAYTTGK                                                            | 1.667509827        | 2              | 3.07129  |
| Q9QZU7        | MDDLTFDQK                                                               | 2.518101613        | 2              | 2.55431  |
| Q9QZU7        | MNPGDVITFDNWR                                                           | 1.330927999        | 2              | 2.80838  |
| Q9QZU7        | QTVTGGDSEIVDGFNVCCQK                                                    | 1.046500531        | 2              | 4.7948   |
| Q9QZU7        | SYEAGTEISR                                                              | 1.235213589        | 2              | 2.75401  |
| <b>Q9QZX8</b> | <b>SO1B2 Solute carrier organic anion transporter family member 1B2</b> | <b>2.405994596</b> | <b>0.30769</b> | <b>2</b> |
| Q9QZX8        | GIGETPIVPLGISYLDLDFAK                                                   | 1.322541398        | 2              | 3.48901  |
| Q9QZX8        | QFTDEGNPDSVNK                                                           | 1.043644899        | 2              | 3.58281  |
| <b>Q9R063</b> | <b>PRDX5 Peroxiredoxin_5_mitochondrial</b>                              | <b>1.933073078</b> | <b>0.99946</b> | <b>8</b> |
| Q9R063        | ALNVEPDGTGLTCSLAPNILSQL                                                 | 0.893283196        | 3              | 4.80459  |
| Q9R063        | ETDLLLDDSLVSLFGNR                                                       | 0.901121406        | 2              | 4.02467  |
| Q9R063        | GVLFVPGAFTPGCSK                                                         | 1.006464659        | 2              | 4.19188  |
| Q9R063        | THLPGFVEQAGALK                                                          | 0.902863055        | 3              | 4.48427  |
| Q9R063        | VGDTIPSVEVFEGEPGK                                                       | 0.98315245         | 2              | 4.23487  |
| Q9R063        | VGDTIPSVEVFEGEPGK                                                       | 0.852146775        | 2              | 4.17005  |
| Q9R063        | VNLAELFK                                                                | 0.96575364         | 2              | 2.56489  |
| Q9R063        | VQLLADPTGAFGK                                                           | 1.022828364        | 2              | 3.55715  |
| <b>Q9R064</b> | <b>GORS2 Golgi reassembly_stacking protein 2</b>                        | <b>2.775696158</b> | <b>0.61958</b> | <b>2</b> |
| Q9R064        | ADTSSLTVDVMSPASK                                                        | 1.391276832        | 2              | 4.27413  |
| Q9R064        | LYVYNTDTDNCR                                                            | 1.488176374        | 2              | 2.53103  |
| <b>Q9R099</b> | <b>TBL2 Transducin beta_like protein 2</b>                              | <b>2.184826708</b> | <b>0.98701</b> | <b>4</b> |
| Q9R099        | ANVELDHATLVR                                                            | 1.206423597        | 2              | 2.42379  |
| Q9R099        | FEEASTMPCR                                                              | 0.952669805        | 2              | 2.66621  |
| Q9R099        | FLASCGDR                                                                | 0.916546031        | 2              | 2.33993  |
| Q9R099        | LQQQLTQAQEAALK                                                          | 1.224727308        | 2              | 4.10972  |
| <b>Q9R0N0</b> | <b>GALK1 Galactokinase</b>                                              | <b>2.233794217</b> | <b>0.93055</b> | <b>6</b> |
| Q9R0N0        | AEHSFAGVPCGIMDQLIALLGQK                                                 | 0.961779063        | 3              | 4.46415  |
| Q9R0N0        | MEELEAGR                                                                | 0.966398404        | 2              | 2.45974  |
| Q9R0N0        | RQCEEVAQALGK                                                            | 0.935389584        | 2              | 3.20385  |
| Q9R0N0        | SLETSLVPLSDPK                                                           | 1.336540292        | 2              | 3.28885  |
| Q9R0N0        | TDGLVSLTTSK                                                             | 1.183735167        | 2              | 3.80247  |
| Q9R0N0        | VEELLAEAR                                                               | 0.997163592        | 2              | 3.11637  |
| <b>Q9R0T3</b> | <b>DNJC3 Dnaj homolog subfamily C member 3</b>                          | <b>2.000090616</b> | <b>2.8E-07</b> | <b>6</b> |
| Q9R0T3        | AEPSVAEYTVR                                                             | 0.976410785        | 2              | 2.4658   |
| Q9R0T3        | ICSEVLQLEPDNVNALK                                                       | 1.435398962        | 2              | 4.75959  |
| Q9R0T3        | KFDDGEDPLDAETQQGGSNPFHR                                                 | 0.95493041         | 3              | 5.65813  |

|               |                                                                     |                    |                |           |
|---------------|---------------------------------------------------------------------|--------------------|----------------|-----------|
| Q9R0T3        | LIGSAEELIR                                                          | 1.155201953        | 2              | 2.61684   |
| Q9R0T3        | LKNDNTEAFYK                                                         | 1.347553543        | 2              | 2.6493    |
| Q9R0T3        | SNPSENEEKEAQSQVLK                                                   | 0.93297309         | 2              | 5.15766   |
| <b>Q9R112</b> | <b>SQRD Sulfide:quinone oxidoreductase_ mitochondrial</b>           | <b>2.003909416</b> | <b>0.89551</b> | <b>4</b>  |
| Q9R112        | EGNALFTFPNTPVK                                                      | 1.580320644        | 2              | 3.0399    |
| Q9R112        | STLSVIPSGVQWIQDR                                                    | 1.475777661        | 2              | 2.79017   |
| Q9R112        | TAAAVAAQSGILDR                                                      | 0.925753546        | 2              | 3.32618   |
| Q9R112        | VGAENVAIVEPSEK                                                      | 0.900170236        | 2              | 2.86908   |
| <b>Q9R172</b> | <b>NOTC3 Neurogenic locus notch homolog protein 3</b>               | <b>2.114019923</b> | <b>0.9706</b>  | <b>2</b>  |
| Q9R172        | CTHQQPSREAAACCLPGWVGER                                              | 1.243587755        | 3              | 3.39699   |
| Q9R172        | YGGKCLDLVDK                                                         | 1.029803486        | 1              | 1.98789   |
| <b>Q9R1T3</b> | <b>CATZ Cathepsin Z</b>                                             | <b>2.065182318</b> | <b>1</b>       | <b>2</b>  |
| Q9R1T3        | HGIPDETCNNYQAK                                                      | 1.100595773        | 2              | 3.86547   |
| Q9R1T3        | VGDYGSLSGR                                                          | 1.045519206        | 2              | 2.82876   |
| <b>Q9R1T4</b> | <b>SEPT6 Septin_6</b>                                               | <b>2.338744402</b> | <b>0.38266</b> | <b>2</b>  |
| Q9R1T4        | QMFVQRVKEK+Oxidation(1                                              | 0.625705463        |                |           |
| Q9R1T4        | STLMDTLFNTK                                                         | 1.456607574        | 2              | 2.87976   |
| <b>Q9R1T5</b> | <b>ACY2 Aspartoacylase</b>                                          | <b>2.715532775</b> | <b>0.49908</b> | <b>2</b>  |
| Q9R1T5        | EFAKTTKLTNAK                                                        | 23.52166577        | 2              | 2.52017   |
| Q9R1T5        | VIPLGGDCTVYPVFVNEAAYEK                                              | 1.4318785          | 3              | 3.58684   |
| <b>Q9R1T9</b> | <b>KCNH4 Potassium voltage_gated channel subfamily H member 4</b>   | <b>1.795535831</b> | <b>0.61513</b> | <b>2</b>  |
| Q9R1T9        | DGSAFWCLLDMMPIK+Oxidation(10                                        | 1.410610206        |                |           |
| Q9R1T9        | KDGAFAWCLLDMMPIK+Oxidation(11)Oxidation(12                          | 0.8188369          |                |           |
| <b>Q9R1Z0</b> | <b>VDAC3 Voltage_dependent anion_selective channel protein 3</b>    | <b>2.156063887</b> | <b>0.00038</b> | <b>4</b>  |
| Q9R1Z0        | LCQNNFALGYK                                                         | 1.231521813        | 2              | 2.40341   |
| Q9R1Z0        | LTLALVDGK                                                           | 1.725089086        | 2              | 2.30016   |
| Q9R1Z0        | LTVDTIFVPNTGK                                                       | 1.236958324        | 2              | 2.96183   |
| Q9R1Z0        | VNNASLIGLGYTQSLRPGVK                                                | 0.854095583        | 2              | 4.29561   |
| <b>Q9WTR8</b> | <b>PHLP1 PH domain leucine_rich repeat protein phosphatase 1</b>    | <b>2.00441328</b>  | <b>0.98865</b> | <b>2</b>  |
| Q9WTR8        | LEEELEIDISGNK                                                       | 1.273089019        | 2              | 2.72164   |
| Q9WTR8        | LEEELEIDISGNKLK                                                     | 0.997147677        | 2              | 2.39603   |
| <b>Q9WTT6</b> | <b>GUAD Guanine deaminase</b>                                       | <b>1.886639348</b> | <b>0.99523</b> | <b>10</b> |
| Q9WTT6        | EIGNFEVGKDFDALLINPR                                                 | 1.363814612        | 2              | 4.08246   |
| Q9WTT6        | ETTEESVKETER                                                        | 0.859346647        | 2              | 3.16279   |
| Q9WTT6        | FQSTDVAEEVYTR                                                       | 1.034049497        | 2              | 3.7186    |
| Q9WTT6        | FSLSCTETLMSELGNIK                                                   | 1.382046154        | 2              | 3.6433    |
| Q9WTT6        | GTFVHSTWTCPMVLR                                                     | 1.147338962        | 2              | 3.15965   |
| Q9WTT6        | IVFLEESSQEK                                                         | 1.022725196        | 2              | 4.25337   |
| Q9WTT6        | NIEEVYVGGK                                                          | 0.875282987        | 1              | 2.69527   |
| Q9WTT6        | NYTDVYDKNNLLTNK                                                     | 0.693385296        | 2              | 4.41706   |
| Q9WTT6        | THDLYIQSHISENREEIEAVK                                               | 1.239584276        | 3              | 4.47567   |
| Q9WTT6        | VCMDLNNTVPEYK                                                       | 1.214661039        | 2              | 3.61848   |
| <b>Q9WTT7</b> | <b>BZW2 Basic leucine zipper and W2 domain_containing protein 2</b> | <b>2.052329154</b> | <b>0.63951</b> | <b>2</b>  |
| Q9WTT7        | AWMAEKDANSVTSSLR+Oxidation(2                                        | 1.494118791        |                |           |
| Q9WTT7        | ELQERLSQECPIK                                                       | 0.97045738         | 2              | 2.55037   |
| <b>Q9WU19</b> | <b>HAOX1 Hydroxyacid oxidase 1</b>                                  | <b>2.267520641</b> | <b>1</b>       | <b>9</b>  |
| Q9WU19        | AIFVTVDTPYLGNR                                                      | 0.862163967        | 2              | 4.25409   |
| Q9WU19        | AVFVGRPIIWGLAFQGEK                                                  | 0.965417175        | 3              | 4.01176   |
| Q9WU19        | GVQDVLEILK                                                          | 1.210249414        | 2              | 3.62784   |
| Q9WU19        | GVQDVLEILKEEFR                                                      | 0.955982388        | 2              | 4.30141   |
| Q9WU19        | HGVDGILVSNHGAR                                                      | 0.987794951        | 3              | 4.53181   |
| Q9WU19        | MKNFETNDLAFSPK+Oxidation(0                                          | 1.137339776        |                |           |

|               |                                                         |                    |                |           |
|---------------|---------------------------------------------------------|--------------------|----------------|-----------|
| Q9WU19        | NFETNDLAFSPK                                            | 0.958123771        | 2              | 3.57137   |
| Q9WU19        | NVADIDLSTSVLGQR                                         | 1.093530066        | 2              | 4.94347   |
| Q9WU19        | VEVFLDGGVR                                              | 1.031304432        | 2              | 2.6852    |
| <b>Q9WU79</b> | <b>PROD Proline dehydrogenase 1_mitochondrial</b>       | <b>2.107887975</b> | <b>0.95316</b> | <b>2</b>  |
| Q9WU79        | FTEEEEQQMK                                              | 1.077077811        | 2              | 3.11878   |
| Q9WU79        | HLVVPNVQTGQLEPLLSR                                      | 1.070238592        | 2              | 2.33994   |
| <b>Q9WU82</b> | <b>CTNB1 Catenin beta_1</b>                             | <b>1.922238891</b> | <b>0.17703</b> | <b>5</b>  |
| Q9WU82        | HQEAEMAQNAVR                                            | 1.185191618        | 2              | 3.40978   |
| Q9WU82        | LLNDEDQVVVVK                                            | 1.074096619        | 2              | 3.30851   |
| Q9WU82        | TMQNTNDVETAR                                            | 0.826069762        | 2              | 3.58624   |
| Q9WU82        | TMQNTNDVETAR+Oxidation(1)                               | 1.087154588        |                |           |
| Q9WU82        | TSMGGTQQQFVEGVR                                         | 1.233395836        | 2              | 3.52761   |
| <b>Q9WUA2</b> | <b>SYFB Phenylalanyl_tRNA synthetase beta chain</b>     | <b>2.057353611</b> | <b>0.87192</b> | <b>3</b>  |
| Q9WUA2        | EMVRADLINKK                                             | 1.112322819        | 2              | 2.38823   |
| Q9WUA2        | KEMVRADLINK                                             | 1.112322819        | 2              | 2.36095   |
| Q9WUA2        | TYTIANQFPLNK                                            | 0.951250768        | 2              | 2.44837   |
| <b>Q9WUC4</b> | <b>ATOX1 Copper transport protein ATOX1</b>             | <b>2.332247136</b> | <b>0.96328</b> | <b>2</b>  |
| Q9WUC4        | LGGVEFNIDLPNKK                                          | 1.052031491        | 2              | 3.62919   |
| Q9WUC4        | VCIESEHSSDILLATLNK                                      | 1.225236767        | 2              | 5.74279   |
| <b>Q9WUH4</b> | <b>FHL1 Four and a half LIM domains protein 1</b>       | <b>4.573856495</b> | <b>0.80138</b> | <b>3</b>  |
| Q9WUH4        | AIVAGDQNVVEYK                                           | 1.823739157        | 2              | 2.67463   |
| Q9WUH4        | FCANTCVECR                                              | 1.712338079        | 2              | 2.71892   |
| Q9WUH4        | FVFHNEQVYCPDCAK                                         | 2.419049182        | 2              | 4.21178   |
| <b>Q9WUI1</b> | <b>MK11 Mitogen_activated protein kinase 11</b>         | <b>2.110881467</b> | <b>0.76987</b> | <b>2</b>  |
| Q9WUI1        | ILDFGLAR                                                | 1.058453058        | 2              | 2.73213   |
| Q9WUI1        | QELNKTVWEVPQR                                           | 1.137919241        | 2              | 2.43044   |
| <b>Q9WUJ8</b> | <b>ORC6 Origin recognition complex subunit 6</b>        | <b>1.897574015</b> | <b>1</b>       | <b>2</b>  |
| Q9WUJ8        | LSGLNKMMYQSQLK+Oxidation(6)                             | 0.923174168        |                |           |
| Q9WUJ8        | LSGLNKMMYQSQLK+Oxidation(7)                             | 0.92468407         |                |           |
| <b>Q9WUS0</b> | <b>KAD4 Adenylate kinase isoenzyme 4_mitochondrial</b>  | <b>1.961561168</b> | <b>0.60746</b> | <b>5</b>  |
| Q9WUS0        | AVILGPPGSGK                                             | 0.807354777        | 2              | 2.45807   |
| Q9WUS0        | GVLHQFSGTETNR                                           | 0.994272172        | 2              | 3.55004   |
| Q9WUS0        | TLVQAEALDR                                              | 0.806098298        | 2              | 2.82175   |
| Q9WUS0        | VYNLDFNPPQVLGVDDITGEPLVQEQEDDKPEALAAR                   | 1.43387494         | 3              | 5.10579   |
| Q9WUS0        | YKDAAKPVIELYK                                           | 0.86474178         | 2              | 3.55925   |
| <b>Q9WUU8</b> | <b>TNIP1 TNFAIP3_interacting protein 1</b>              | <b>2.182524987</b> | <b>0.68172</b> | <b>2</b>  |
| Q9WUU8        | IFEEDFQRER                                              | 1.198783572        | 2              | 2.3264    |
| Q9WUU8        | QENEALK                                                 | 1.12384808         | 1              | 2.29213   |
| <b>Q9WV85</b> | <b>NDK3 Nucleoside diphosphate kinase 3</b>             | <b>1.868726031</b> | <b>0.48407</b> | <b>3</b>  |
| Q9WV85        | LVKYMSSGPVAMVWQGLDVVHASR+Oxidation(4)Oxidation(12)      | 0.90574283         |                |           |
| Q9WV85        | LVQASELLR                                               | 1.139416847        | 2              | 2.70901   |
| Q9WV85        | TFLAVKPDGVQR                                            | 0.757060059        | 2              | 2.67797   |
| <b>Q9WVC0</b> | <b>SEPT7 Septin_7</b>                                   | <b>2.647175903</b> | <b>0.91555</b> | <b>3</b>  |
| Q9WVC0        | ADTLTPEECQQFK                                           | 0.749116602        | 2              | 2.85777   |
| Q9WVC0        | FEDYLNAESR                                              | 1.184755538        | 2              | 2.76163   |
| Q9WVC0        | NLEGYVGFANLPNQVYR                                       | 1.434680055        | 2              | 3.62276   |
| <b>Q9WVD5</b> | <b>ORNT1 Mitochondrial ornithine transporter 1</b>      | <b>3.12578256</b>  | <b>0.00782</b> | <b>3</b>  |
| Q9WVD5        | DGPLGFYHGLSSTLLR                                        | 1.743109145        | 2              | 2.92424   |
| Q9WVD5        | LQTMYEMETS GK                                           | 1.674270393        | 2              | 3.12805   |
| Q9WVD5        | NEGITALYSLKPTMIR                                        | 1.140167972        | 2              | 3.34505   |
| <b>Q9WVF7</b> | <b>DPOE1 DNA polymerase epsilon catalytic subunit A</b> | <b>2.809825248</b> | <b>0.61566</b> | <b>2</b>  |
| Q9WVF7        | AANMPDSELFELISENR                                       | 1.355490687        | 2              | 2.4759    |
| Q9WVF7        | MAWQWRGEFMPASR+Oxidation(0)Oxidation(9)                 | 3.839182159        |                |           |
| <b>Q9WVK3</b> | <b>PECR Peroxisomal trans_2_enoyl_CoA reductase</b>     | <b>1.900964967</b> | <b>0.09809</b> | <b>13</b> |
| Q9WVK3        | AGVYNLTK                                                | 0.962049401        | 2              | 2.52272   |

|               |                                                                           |                    |                |           |
|---------------|---------------------------------------------------------------------------|--------------------|----------------|-----------|
| Q9WVK3        | ASQPPSSSTQVTAIQCNIR                                                       | 0.876195903        | 2              | 5.53707   |
| Q9WVK3        | DHGGSSVNIIVLLNNGFPTAAHSGAAR                                               | 0.879776715        | 3              | 6.29974   |
| Q9WVK3        | ELLHLGCNVVIASR                                                            | 1.05827583         | 2              | 4.24377   |
| Q9WVK3        | INFLVNNAGGQFMAPAEDITAK                                                    | 1.109741513        | 2              | 5.48502   |
| Q9WVK3        | INFLVNNAGGQFMAPAEDITAK+Oxidation(12                                       | 2.152482921        |                |           |
| Q9WVK3        | KEEEVNNLVK                                                                | 0.905286154        | 3              | 4.01885   |
| Q9WVK3        | LTAAVDELR                                                                 | 1.066874929        | 2              | 3.18741   |
| Q9WVK3        | NFTIPDHDNWPVGAGDSSFIK                                                     | 0.96912264         | 2              | 5.02034   |
| Q9WVK3        | NFTIPDHDNWPVGAGDSSFIK                                                     | 0.880202116        | 3              | 3.75714   |
| Q9WVK3        | SGQSYLAAGLLQNQVAVVTGGATGIGK                                               | 1.024121036        | 2              | 6.21111   |
| Q9WVK3        | TMALTWASSGVR                                                              | 0.853009537        | 2              | 3.80029   |
| Q9WVK3        | TMALTWASSGVR+Oxidation(1                                                  | 1.08303871         |                |           |
| <b>Q9WVK7</b> | <b>HCDH Hydroxyacyl_coenzyme A dehydrogenase_mitochondrial</b>            | <b>2.178476444</b> | <b>0.99996</b> | <b>17</b> |
| Q9WVK7        | AADEFVEK                                                                  | 0.925700454        | 2              | 3.35121   |
| Q9WVK7        | DTPGFIVNR                                                                 | 1.104058288        | 2              | 2.70301   |
| Q9WVK7        | EDIDTAMK                                                                  | 0.740836711        | 1              | 2.15194   |
| Q9WVK7        | FAAEHTIFASNTSSLQITNIANATTR                                                | 1.212357254        | 3              | 4.76593   |
| Q9WVK7        | FILDGWHEMDPENLFPQSPSMNNLVAQK                                              | 1.138819982        | 3              | 5.48344   |
| Q9WVK7        | FILDGWHEMDPENLFPQSPSMNNLVAQK+Oxidation(21                                 | 1.410185245        |                |           |
| Q9WVK7        | FILDGWHEMDPENLFPQSPSMNNLVAQK+Oxidation(8                                  | 1.41386392         |                |           |
| Q9WVK7        | GDASKEDIDTAMK                                                             | 0.842528627        | 2              | 3.89158   |
| Q9WVK7        | GDASKEDIDTAMK+Oxidation(11                                                | 1.049636704        |                |           |
| Q9WVK7        | HVTVIGGGLMGAGIAQVAAATGHTVVLVDQTEDILAK                                     | 1.049126037        | 4              | 5.89555   |
| Q9WVK7        | KGIEESLK                                                                  | 1.014885845        | 2              | 2.4333    |
| Q9WVK7        | KGIEESLKR                                                                 | 0.990027197        | 2              | 2.42959   |
| Q9WVK7        | LKNELFQR                                                                  | 1.149236893        | 2              | 2.64532   |
| Q9WVK7        | LLVPYLIEAIR                                                               | 0.743300867        | 2              | 2.75832   |
| Q9WVK7        | LVEVIK                                                                    | 1.035626722        | 2              | 2.41188   |
| Q9WVK7        | TFESLVDFCK                                                                | 1.09690717         | 2              | 3.44328   |
| Q9WVK7        | TLSSLSTDAASVHSTDLVVEAIVENLK                                               | 1.020661057        | 3              | 6.05685   |
| <b>Q9Z0N2</b> | <b>IF2H Eukaryotic translation initiation factor 2 subunit 3_Y_linked</b> | <b>1.980427193</b> | <b>0.99836</b> | <b>3</b>  |
| Q9Z0N2        | IVLTNPVCTEVEGEK                                                           | 0.929263138        | 2              | 2.91434   |
| Q9Z0N2        | SFDVNKPGCEVDDLK                                                           | 1.401318487        | 2              | 3.33122   |
| Q9Z0N2        | VGQEIEVRPGIVSK                                                            | 1.000494978        | 2              | 3.25902   |
| <b>Q9Z0U5</b> | <b>ADO Aldehyde oxidase</b>                                               | <b>2.071920034</b> | <b>0.99999</b> | <b>17</b> |
| Q9Z0U5        | EFQPLDPTQELIFPPELMR                                                       | 0.952881294        | 2              | 2.62625   |
| Q9Z0U5        | ELSILYGGVGPPTIGAK                                                         | 0.764081468        | 2              | 3.54661   |
| Q9Z0U5        | GEDMLITGGR                                                                | 1.141768079        | 2              | 2.6167    |
| Q9Z0U5        | GTSTETVPNTNASGGSVVADLNGLAVK                                               | 0.9198777          | 2              | 4.60753   |
| Q9Z0U5        | GYESNINWEK                                                                | 0.978283757        | 2              | 2.6265    |
| Q9Z0U5        | HATGEAIYCDDMPAVDR                                                         | 1.355200049        | 2              | 2.70454   |
| Q9Z0U5        | HIQDIVAATLK                                                               | 0.886659994        | 2              | 2.72739   |
| Q9Z0U5        | HLDSDLNPLLA VG NCTLNLLSK                                                  | 0.970712128        | 3              | 3.68698   |
| Q9Z0U5        | KCPDSDLKPQEVLSVNIPICSR                                                    | 0.611818692        | 3              | 3.49852   |
| Q9Z0U5        | KLECGNVDEAFK                                                              | 0.792845787        | 2              | 3.65669   |
| Q9Z0U5        | LVLDEVTLGASAPGGK                                                          | 0.938750071        | 2              | 3.72604   |
| Q9Z0U5        | MTWISPVTLLEELVEAK                                                         | 0.876305904        | 2              | 3.41583   |
| Q9Z0U5        | NHPEPSLDQLTDALGGNLCR                                                      | 0.971446966        | 2              | 3.09925   |
| Q9Z0U5        | NMASLGGHIVSR                                                              | 0.930351984        | 2              | 3.17092   |
| Q9Z0U5        | QQNALAIVNSGMR                                                             | 1.098121165        | 2              | 2.47314   |
| Q9Z0U5        | RLEPIISK                                                                  | 0.636002286        | 2              | 2.32455   |
| Q9Z0U5        | VVENNVDPPEMMLLPYLR                                                        | 1.365127143        | 2              | 2.83989   |
| <b>Q9Z0V5</b> | <b>PRDX4 Peroxiredoxin_4</b>                                              | <b>2.184209984</b> | <b>1</b>       | <b>5</b>  |



|               |                                                                                            |                    |                |           |
|---------------|--------------------------------------------------------------------------------------------|--------------------|----------------|-----------|
| Q9Z0V5        | ENECHFYAGGQVYPGEVSR                                                                        | 0.904110887        | 3              | 5.18964   |
| Q9Z0V5        | GLFIIDDK                                                                                   | 1.19896251         | 2              | 3.0266    |
| Q9Z0V5        | HGEVCPAGWKPGSETIIPDPAGK                                                                    | 1.085012134        | 3              | 3.55903   |
| Q9Z0V5        | QITLNDLPVGR                                                                                | 1.053916138        | 2              | 3.15417   |
| Q9Z0V5        | TRENECHFYAGGQVYPGEVSR                                                                      | 0.934185598        | 3              | 5.6153    |
| <b>Q9Z0V6</b> | <b>PRDX3 Thioredoxin dependent peroxide reductase_mitochondrial</b>                        | <b>2.009451426</b> | <b>0.99988</b> | <b>5</b>  |
| Q9Z0V6        | AFQFVETHGEVCPANWTPESPTIKPSPTASK                                                            | 0.937111852        | 3              | 5.43629   |
| Q9Z0V6        | GLFIIDPNGVIK                                                                               | 1.096522977        | 2              | 3.06107   |
| Q9Z0V6        | GTAVVNGEFK                                                                                 | 0.978399388        | 2              | 2.72945   |
| Q9Z0V6        | HLSVNDLPVGR                                                                                | 0.985039787        | 2              | 2.58903   |
| Q9Z0V6        | NGGLGHMNTLLSDLTK                                                                           | 0.919161863        | 3              | 3.48105   |
| <b>Q9Z0W7</b> | <b>CLIC4 Chloride intracellular channel protein 4</b>                                      | <b>1.962938149</b> | <b>0.84719</b> | <b>3</b>  |
| Q9Z0W7        | DEFTNTCPSDKEVEIAYS DVAK                                                                    | 0.718033136        | 3              | 3.64276   |
| Q9Z0W7        | FLDGDEMTLADCNLLPK                                                                          | 1.228233072        | 2              | 4.24368   |
| Q9Z0W7        | NSRPEANEALER                                                                               | 0.973746803        | 3              | 4.29236   |
| <b>Q9Z142</b> | <b>TMM33 Transmembrane protein 33</b>                                                      | <b>2.767609286</b> | <b>0.44476</b> | <b>2</b>  |
| Q9Z142        | ALLANALTSALR                                                                               | 1.550033295        | 2              | 3.75411   |
| Q9Z142        | LSTNQQNILK                                                                                 | 1.235554658        | 2              | 2.43705   |
| <b>Q9Z1A6</b> | <b>VIGLN Vigilin</b>                                                                       | <b>2.021433213</b> | <b>0.96194</b> | <b>22</b> |
| Q9Z1A6        | ASVITQVFHVPLEER                                                                            | 1.265384683        | 2              | 3.28023   |
| Q9Z1A6        | DLANIAEVEVSIPAK                                                                            | 3.655316013        | 2              | 2.54246   |
| Q9Z1A6        | EALEALVPVTIEVEVPFDLHR                                                                      | 1.012427742        | 3              | 3.45362   |
| Q9Z1A6        | ELQAEQEDR                                                                                  | 1.159120656        | 2              | 2.41051   |
| Q9Z1A6        | HEVLLISAEQDKR                                                                              | 1.045647823        | 3              | 4.51871   |
| Q9Z1A6        | ICLEIMQR                                                                                   | 1.047202596        | 2              | 2.52203   |
| Q9Z1A6        | IDLPAENSNSSETIVITGK                                                                        | 0.806151732        | 2              | 4.22862   |
| Q9Z1A6        | IEGDPQGVQQAQ                                                                               | 1.002450222        | 2              | 3.46137   |
| Q9Z1A6        | IIFPAAEDKQDQLITIGK                                                                         | 1.29137226         | 2              | 4.47798   |
| Q9Z1A6        | IQIPRPDDPSNQIK                                                                             | 1.157650173        | 2              | 2.50082   |
| Q9Z1A6        | ITLEGPTEDVNVAQEIQIEGMVK                                                                    | 1.685546996        | 2              | 3.47024   |
| Q9Z1A6        | IVGELEQMVSEDPVLDHR                                                                         | 1.259865873        | 2              | 4.77892   |
| Q9Z1A6        | LGQALTEVYAK                                                                                | 1.251241495        | 2              | 3.45592   |
| Q9Z1A6        | LQDLELK                                                                                    | 1.337948756        | 1              | 2.39277   |
| Q9Z1A6        | LQTQASATVPIPK                                                                              | 0.9808635          | 2              | 3.64996   |
| Q9Z1A6        | LVGEIMQETGTR                                                                               | 1.167533001        | 2              | 3.51438   |
| Q9Z1A6        | MDYVEINIDHK                                                                                | 1.008799117        | 2              | 2.80396   |
| Q9Z1A6        | MVADLVENSYSVPIFK                                                                           | 1.044943685        | 3              | 3.4058    |
| Q9Z1A6        | RCDIIVISGR                                                                                 | 1.046991398        | 2              | 2.95816   |
| Q9Z1A6        | TGAHLELSLAK                                                                                | 1.080532139        | 3              | 3.80012   |
| Q9Z1A6        | TKDLIEQR                                                                                   | 1.048095977        | 2              | 2.67492   |
| Q9Z1A6        | VKELQAEQEDR                                                                                | 1.036783102        | 3              | 3.74886   |
| <b>Q9Z1J8</b> | <b>S14L3 SEC14_like protein 3</b>                                                          | <b>2.053175182</b> | <b>0.83971</b> | <b>3</b>  |
| Q9Z1J8        | ENVQDVLPALPNPDDYFLLR                                                                       | 0.726924226        | 2              | 2.63266   |
| Q9Z1J8        | FRENVQDVLPALPNPDDYFLLR                                                                     | 1.043361575        | 3              | 4.35021   |
| Q9Z1J8        | GSSHQVEYEIFPGCVLR                                                                          | 1.490187552        | 2              | 4.8928    |
| <b>Q9Z1L0</b> | <b>PK3CB Phosphatidylinositol_4_5_bisphosphate 3_kinase catalytic subunit beta isoform</b> | <b>2.328231841</b> | <b>0.40092</b> | <b>2</b>  |
| Q9Z1L0        | MARLCFAVYAVLDK+Oxidation(O                                                                 | 1.127146504        |                |           |
| Q9Z1L0        | QPYYPYPPFDK                                                                                | 1.220752388        | 1              | 1.94183   |
| <b>Q9Z1M9</b> | <b>SMC1A Structural maintenance of chromosomes protein 1A</b>                              | <b>2.412074604</b> | <b>0.85059</b> | <b>3</b>  |
| Q9Z1M9        | EIKEKDESELNQK                                                                              | 1.169165566        | 2              | 2.56367   |
| Q9Z1M9        | IIDETMAQLQDLK                                                                              | 1.402577765        | 2              | 2.42764   |
| Q9Z1M9        | SGVISGGASDLKAKAR                                                                           | 1.270975711        | 2              | 2.33799   |
| <b>Q9Z1N1</b> | <b>F16P2 Fructose_1_6_bisphosphatase isozyme 2</b>                                         | <b>2.183815784</b> | <b>0.88524</b> | <b>2</b>  |
| Q9Z1N1        | YVGS MVADVHR                                                                               | 1.120529835        | 2              | 2.69828   |

|               |                                                                           |                    |                |           |
|---------------|---------------------------------------------------------------------------|--------------------|----------------|-----------|
| Q9Z1N1        | YVGS MVADVHR+Oxidation(4)                                                 | 1.1272703          |                |           |
| <b>Q9Z1P2</b> | <b>ACTN1 Alpha_actinin_1</b>                                              | <b>1.935017509</b> | <b>0.413</b>   | <b>5</b>  |
| Q9Z1P2        | DYETATLSEIK                                                               | 1.231196428        | 1              | 1.97016   |
| Q9Z1P2        | GISQEQMNEFR                                                               | 0.943675674        | 2              | 2.8984    |
| Q9Z1P2        | ICDQWDNLGALTQK                                                            | 0.883836942        | 2              | 4.1241    |
| Q9Z1P2        | IDQLEGDHQLIQEALIFDNK                                                      | 1.264224051        | 3              | 3.91686   |
| Q9Z1P2        | MVSDINNAWGCLEQAEK                                                         | 0.634153299        | 2              | 2.7107    |
| <b>Q9Z1W6</b> | <b>LYRIC Protein LYRIC</b>                                                | <b>2.00468764</b>  | <b>0.99768</b> | <b>5</b>  |
| Q9Z1W6        | KREEVTPPTAPEDPAQLK                                                        | 0.914406907        | 3              | 4.56793   |
| Q9Z1W6        | SSSQVPPMLQDTPKPK                                                          | 0.997994562        | 2              | 3.41163   |
| Q9Z1W6        | SWQDELAQQAEEGSAR                                                          | 1.186493731        | 2              | 5.682     |
| Q9Z1W6        | TELGDLGLLEPK                                                              | 1.697540533        | 2              | 3.37922   |
| Q9Z1W6        | TLPPAISAEPVTLTK                                                           | 1.113729808        | 2              | 2.93514   |
| <b>Q9Z1Y3</b> | <b>CADH2 Cadherin_2</b>                                                   | <b>2.47985252</b>  | <b>0.96625</b> | <b>4</b>  |
| Q9Z1Y3        | FLEAGIYEVPIVITDSGNPPK                                                     | 1.366534031        | 2              | 3.95178   |
| Q9Z1Y3        | IDPVNGQITTIIVLDR                                                          | 1.045476804        | 2              | 3.92623   |
| Q9Z1Y3        | VCQCDSNGDCTDVDR                                                           | 1.311585386        | 2              | 5.10662   |
| Q9Z1Y3        | YSVTGPGADQPPTGIFIIINPISGQLSVTKPLDR                                        | 1.236466785        | 3              | 3.59729   |
| <b>Q9Z270</b> | <b>VAPA Vesicle_associated membrane protein_associated protein A</b>      | <b>1.896542438</b> | <b>0.99502</b> | <b>3</b>  |
| Q9Z270        | FKGPFTDVVTTNLK                                                            | 0.914547791        | 2              | 3.04318   |
| Q9Z270        | HEQILVLDPPSDLK                                                            | 0.923393461        | 2              | 3.7484    |
| Q9Z270        | QDGPLPKPHSVSLNDTETR                                                       | 1.283981012        | 3              | 3.40779   |
| <b>Q9Z2C8</b> | <b>YBOX2 Y_box_binding protein 2</b>                                      | <b>1.901073995</b> | <b>0.61088</b> | <b>2</b>  |
| Q9Z2C8        | SVGDGETVEFDVVEGK                                                          | 1.276394446        | 2              | 3.4501    |
| Q9Z2C8        | WFNVRNGYGFINRNDTK                                                         | 0.792847216        | 2              | 2.30786   |
| <b>Q9Z2I8</b> | <b>SUCB2 Succinyl_CoA ligase [GDP_forming] subunit beta_mitochondrial</b> | <b>1.949302183</b> | <b>0.99995</b> | <b>10</b> |
| Q9Z2I8        | DIFAMDDKSENEPIEENAAAR                                                     | 0.578999731        | 2              | 5.00327   |
| Q9Z2I8        | IDATQVEVNPFGETPEGQVVCFDAK                                                 | 1.06018008         | 3              | 4.67838   |
| Q9Z2I8        | INFDDNAEFR                                                                | 0.884822298        | 2              | 3.1599    |
| Q9Z2I8        | LEGTNVQEAQNILK                                                            | 0.928408267        | 2              | 5.20132   |
| Q9Z2I8        | SENEPIEENAAAR                                                             | 0.99714586         | 2              | 4.19703   |
| Q9Z2I8        | SHNGPVIVGSPQGGVDIEEVAASSPELIFK                                            | 0.940217643        | 2              | 6.15073   |
| Q9Z2I8        | SSGLPITSAVDLEDAAK                                                         | 1.082255194        | 2              | 4.96308   |
| Q9Z2I8        | SSGLPITSAVDLEDAAKK                                                        | 0.786600599        | 2              | 2.70027   |
| Q9Z2I8        | VMVAEALDISR                                                               | 1.108375618        | 2              | 3.19775   |
| Q9Z2I8        | VVGELAQQMIGYNLATK                                                         | 1.24750015         | 3              | 3.3922    |
| <b>Q9Z2I9</b> | <b>SUCB1 Succinyl_CoA ligase [ADP_forming] subunit beta_mitochondrial</b> | <b>2.040991032</b> | <b>0.97514</b> | <b>9</b>  |
| Q9Z2I9        | ALIADSGLK                                                                 | 1.11299471         | 1              | 2.15611   |
| Q9Z2I9        | AVSSQMIGQK                                                                | 0.993874411        | 2              | 2.92479   |
| Q9Z2I9        | ICNQVLVCER                                                                | 1.480461575        | 2              | 2.9847    |
| Q9Z2I9        | ILACDDLDEAAK                                                              | 1.085236262        | 2              | 3.31227   |
| Q9Z2I9        | INFDSNSAYR                                                                | 0.988774228        | 2              | 3.01595   |
| Q9Z2I9        | LSEIVTLAK                                                                 | 1.068963152        | 2              | 2.39499   |
| Q9Z2I9        | MGFPSNIVDSAAENMIK                                                         | 1.126437313        | 2              | 4.20081   |
| Q9Z2I9        | SSDEAYAIK                                                                 | 1.08526489         | 2              | 3.35545   |
| Q9Z2I9        | VQAILVNIFGGIMR                                                            | 1.179881462        | 2              | 3.83501   |
| <b>Q9Z2L0</b> | <b>VDAC1 Voltage_dependent anion_selective channel protein 1</b>          | <b>2.296654871</b> | <b>0.99313</b> | <b>13</b> |
| Q9Z2L0        | EHINLGCDVDFDIAGPSIR                                                       | 2.10950926         | 2              | 3.12806   |
| Q9Z2L0        | KLETAVNLAWTAGNSNTR                                                        | 1.077596895        | 2              | 5.44818   |
| Q9Z2L0        | LTFDSSFSPNTGK                                                             | 0.987061234        | 2              | 3.72068   |
| Q9Z2L0        | LTFDSSFSPNTGKK                                                            | 1.152672797        | 2              | 2.79907   |
| Q9Z2L0        | LTLSALLDGK                                                                | 1.949796936        | 2              | 2.6867    |
| Q9Z2L0        | SENGLEFTSSGSANTETTK                                                       | 1.029433756        | 2              | 3.76303   |

|               |                                                    |                    |                |           |
|---------------|----------------------------------------------------|--------------------|----------------|-----------|
| Q9Z2L0        | TDEFQLHTNVNDGTEFGGSIYQK                            | 1.285286283        | 2              | 4.98805   |
| Q9Z2L0        | TKSENGLEFTSSGSANTETTK                              | 0.854175676        | 3              | 3.5979    |
| Q9Z2L0        | VNSSLIGLGYTQLKPGIK                                 | 0.697030843        | 2              | 4.7374    |
| Q9Z2L0        | VTQSNFAVGYK                                        | 1.072862012        | 2              | 3.43257   |
| Q9Z2L0        | WNTDNTLGTEITVEDQLAR                                | 1.100042499        | 2              | 4.91543   |
| Q9Z2L0        | WTEYGLTFTEK                                        | 1.203691468        | 1              | 2.90325   |
| Q9Z2L0        | YQVDPDACFSAK                                       | 0.984789412        | 2              | 3.3941    |
| <b>Q9Z2M4</b> | <b>DECR2 Peroxisomal 2_4_dienoyl_CoA reductase</b> | <b>1.725112026</b> | <b>3.1E-15</b> | <b>6</b>  |
| Q9Z2M4        | AAVDAMTR                                           | 0.851982951        | 2              | 2.32431   |
| Q9Z2M4        | GQVLQLHAGAAK                                       | 1.060308585        | 2              | 3.42674   |
| Q9Z2M4        | HLAVEWGPQNIR                                       | 1.072134115        | 2              | 3.49879   |
| Q9Z2M4        | LLEFESSAK                                          | 0.791896461        | 2              | 2.30242   |
| Q9Z2M4        | VNSLAPGAISGTEGLR                                   | 0.739068374        | 2              | 3.83141   |
| Q9Z2M4        | VPPAVMAAVDQALK                                     | 1.788577323        | 2              | 3.34092   |
| <b>Q9Z2M7</b> | <b>PMM2 Phosphomannomutase 2</b>                   | <b>1.658793672</b> | <b>0.67537</b> | <b>3</b>  |
| Q9Z2M7        | IGVVGGSDFEK                                        | 1.333907928        | 2              | 2.35358   |
| Q9Z2M7        | LQEQLGNDVVEK                                       | 0.614048065        | 2              | 3.86212   |
| Q9Z2M7        | TVGYVTAPEDTR                                       | 0.874790685        | 2              | 2.659     |
| <b>Q9Z2Q1</b> | <b>SC31A Protein transport protein Sec31A</b>      | <b>2.010139641</b> | <b>0.0048</b>  | <b>17</b> |
| Q9Z2Q1        | AQDGSNPLSLQDLIEK                                   | 0.833855326        | 2              | 3.42091   |
| Q9Z2Q1        | AVQLTQALDNTVIGALLAEK                               | 1.243973325        | 2              | 4.63233   |
| Q9Z2Q1        | CLSSATDPQTK                                        | 1.208607157        | 2              | 2.85184   |
| Q9Z2Q1        | DQTLSPTIISGLHSIAR                                  | 1.443445709        | 2              | 3.4088    |
| Q9Z2Q1        | GGPGPLAGHPQVSR                                     | 0.594770731        | 2              | 3.11751   |
| Q9Z2Q1        | IDASQTDFEK                                         | 0.933846767        | 2              | 2.33075   |
| Q9Z2Q1        | IIAGDKEVVIAQK                                      | 0.958741521        | 2              | 3.03742   |
| Q9Z2Q1        | KIDASQTDFEK                                        | 0.971004649        | 2              | 2.51688   |
| Q9Z2Q1        | LVTFENVTGQPQQGAEQPR                                | 1.569552436        | 2              | 3.07342   |
| Q9Z2Q1        | QVQHILASASPSGR                                     | 1.175099468        | 2              | 3.27865   |
| Q9Z2Q1        | RQPVFISQVVTEK                                      | 0.506051721        | 2              | 3.7406    |
| Q9Z2Q1        | RQPVFISQVVTEKDFLSR                                 | 0.885856118        | 3              | 3.53808   |
| Q9Z2Q1        | TQPPEDISCIAWNR                                     | 1.039512168        | 2              | 2.96668   |
| Q9Z2Q1        | TTFEDLIQR                                          | 0.788512103        | 2              | 2.40678   |
| Q9Z2Q1        | VNFEEDSR                                           | 1.028772977        | 2              | 2.39294   |
| Q9Z2Q1        | VYSIMGGSIDGLR                                      | 1.201961742        | 2              | 2.80104   |
| Q9Z2Q1        | YLELLGYR                                           | 0.955636868        | 2              | 2.3738    |
| <b>Q9Z2Z8</b> | <b>DHCR7 7_dehydrocholesterol reductase</b>        | <b>1.898375621</b> | <b>0.99691</b> | <b>4</b>  |
| Q9Z2Z8        | AIECSYTSADGLK                                      | 0.869754151        | 2              | 3.40947   |
| Q9Z2Z8        | ASLADIWAK                                          | 1.005220753        | 2              | 2.35279   |
| Q9Z2Z8        | FLPGYVGGVQEGAITPAGIVNK                             | 0.927447716        | 2              | 5.56653   |
| Q9Z2Z8        | GYLFPTSAEDCK                                       | 0.90467565         | 2              | 2.7939    |
| <b>Q9Z339</b> | <b>GSTO1 Glutathione S_transferase omega_1</b>     | <b>1.940233804</b> | <b>0.99954</b> | <b>2</b>  |
| Q9Z339        | GSAPPGPVPEGQIR                                     | 0.956231282        | 2              | 3.15614   |
| Q9Z339        | LEALELNECIDHTPK                                    | 0.791318088        | 2              | 3.68915   |

*Time point 5.5 hours*

| Accession number | Protein DESCRIPTION                                                   | Protein Ratio (5.5 h) | P-value (5.5 h) | Peptide number (5.5 h) |
|------------------|-----------------------------------------------------------------------|-----------------------|-----------------|------------------------|
| Accession number | Peptide sequence                                                      | Peptide Ratio (5.5 h) | Charge state    | Xcorr                  |
| <b>A0JPJ7</b>    | <b>OLA1 Obg_like ATPase 1</b>                                         | <b>1.324430315</b>    | <b>0.781807</b> | <b>2</b>               |
| A0JPJ7           | IGIVGLPNVGK                                                           | 1.12064107            | 2               | 2.542382               |
| A0JPJ7           | YLEANMTQSALPK                                                         | 1.350837315           | 2               | 2.676756               |
| <b>A1L108</b>    | <b>ARP5L Actin_related protein 2/3 complex subunit 5_like protein</b> | <b>1.421934404</b>    | <b>0.230157</b> | <b>2</b>               |
| A1L108           | ALAVGGLGSIIR                                                          | 1.145335799           | 2               | 2.756212               |
| A1L108           | SSEIEQAVQSLDR                                                         | 1.452325664           | 2               | 2.738532               |
| <b>A1L1L2</b>    | <b>TM214 Transmembrane protein 214</b>                                | <b>1.057303383</b>    | <b>0.613881</b> | <b>2</b>               |
| A1L1L2           | KGSGSNEHVVTCDTACK                                                     | 2.126032127           | 3               | 3.526686               |
| A1L1L2           | YDLSSPIQPTSTLYER                                                      | 0.952614893           | 2               | 3.338955               |
| <b>A2A6A1</b>    | <b>GPTC8 G patch domain_containing protein 8</b>                      | <b>0.966286871</b>    | <b>0.992867</b> | <b>2</b>               |
| A2A6A1           | RVLEVEKEDTEELR                                                        | 0.96518967            | 2               | 2.540848               |
| A2A6A1           | YKDYYVDKEK                                                            | 0.972453043           | 1               | 1.933748               |
| <b>A2AAE1</b>    | <b>K1109 Uncharacterized protein KIAA1109</b>                         | <b>1.140764299</b>    | <b>0.613307</b> | <b>3</b>               |
| A2AAE1           | FQTNYASTTHLMTGK+Oxidation(11                                          | 1.141038937           |                 |                        |
| A2AAE1           | LHYNSKTLKTESPNASR                                                     | 1.506106979           | 2               | 2.550557               |
| A2AAE1           | QGTSSSQPGELRGRK                                                       | 1.049318578           | 2               | 2.52225                |
| <b>A2ADY9</b>    | <b>DDI2 Protein DDI1 homolog 2</b>                                    | <b>1.077485122</b>    | <b>0.678762</b> | <b>3</b>               |
| A2ADY9           | IDFSSIAVPGTSNPQQR                                                     | 2.336188907           | 2               | 2.658247               |
| A2ADY9           | NPPLAEALLSGDLEK                                                       | 1.198842683           | 2               | 2.842125               |
| A2ADY9           | VLVEQQQDR                                                             | 1.077457589           | 2               | 2.881089               |
| <b>A2AF47</b>    | <b>DOC11 Dedicator of cytokinesis protein 11</b>                      | <b>0.935704146</b>    | <b>0.641989</b> | <b>3</b>               |
| A2AF47           | LCSSVDVDMIQLQLK                                                       | 1.88899599            | 2               | 2.503863               |
| A2AF47           | LTGLSEISLR                                                            | 0.882450159           | 2               | 2.352121               |
| A2AF47           | MPFAWAARPIFKDVQGSLLDGR+Oxidation(0                                    | 0.928071539           |                 |                        |
| <b>A2AGT5</b>    | <b>CKAP5 Cytoskeleton_associated protein 5</b>                        | <b>0.626614608</b>    | <b>0.143882</b> | <b>2</b>               |
| A2AGT5           | DQVLAMLEKAKANMPKPAAPAK+Oxidation(13                                   | 0.301349599           |                 |                        |
| A2AGT5           | GESVQEELLK                                                            | 1.197906482           | 1               | 1.938651               |
| <b>A2APB8</b>    | <b>TPX2 Targeting protein for Xklp2</b>                               | <b>1.052188233</b>    | <b>0.351731</b> | <b>2</b>               |
| A2APB8           | GIGEPFQGKNSLRK                                                        | 1.680609349           | 2               | 2.350399               |
| A2APB8           | NKKDESLLPSK                                                           | 1.043172803           | 2               | 2.483507               |
| <b>A2AQP0</b>    | <b>MYH7B Myosin_7B</b>                                                | <b>1.487742761</b>    | <b>0.88586</b>  | <b>7</b>               |
| A2AQP0           | AITDAAMMAEELKK                                                        | 1.847711232           | 2               | 3.337356               |
| A2AQP0           | DIDDLELTLAK                                                           | 4.197592256           | 2               | 3.619182               |
| A2AQP0           | EQDTS AHLER                                                           | 1.461140848           | 2               | 2.848862               |
| A2AQP0           | HDCDLLR                                                               | 1.993907772           | 1               | 2.054365               |
| A2AQP0           | KAITDAAMMAEELKK                                                       | 1.859482211           | 3               | 3.624275               |
| A2AQP0           | VEDEQLVGVQLQK                                                         | 2.802171883           | 2               | 2.41987                |
| A2AQP0           | VGNEYVTK                                                              | 1.15235883            | 2               | 2.414934               |
| <b>A2ASS6</b>    | <b>TITIN Titin</b>                                                    | <b>1.148537641</b>    | <b>0.533354</b> | <b>13</b>              |
| A2ASS6           | AENRFGIGPPAETIQRRTAR                                                  | 1.993462014           | 2               | 2.513006               |
| A2ASS6           | ATNEVGS DCACTVK                                                       | 2.945630596           | 2               | 3.821153               |
| A2ASS6           | ETAMLSWDVPENDGGAPVK+Oxidation(3                                       | 1.115683744           |                 |                        |
| A2ASS6           | KDLNMVVSAAARISCGGAIK                                                  | 0.966772736           | 2               | 2.365329               |
| A2ASS6           | RRTEEGYYEAITAVELK                                                     | 1.654525272           | 2               | 2.57674                |
| A2ASS6           | TCEIEIGQLK                                                            | 1.851542992           | 2               | 2.311668               |
| A2ASS6           | TDSGAYILTATNPGGFAK                                                    | 1.645444962           | 2               | 2.394869               |
| A2ASS6           | TFLQDQLVSLQVLK                                                        | 1.388802796           | 1               | 1.920698               |
| A2ASS6           | VGDDAWIKD TTGTALR                                                     | 1.276746459           | 2               | 2.374833               |
| A2ASS6           | VLDRPGPPEGLAVSDVTSEK                                                  | 1.674495659           | 3               | 4.428012               |

|               |                                                                   |                    |                 |           |
|---------------|-------------------------------------------------------------------|--------------------|-----------------|-----------|
| A2ASS6        | VLDTGPPQNLAVK                                                     | 1.893828831        | 2               | 2.314192  |
| A2ASS6        | YDGGHKLTYGIVEK                                                    | 1.658502664        | 2               | 2.308454  |
| A2ASS6        | YGIGEPLDSEPETAR                                                   | 1.447119665        | 2               | 2.997469  |
| <b>A2AU72</b> | <b>ARMC3 Armadillo repeat_containing protein 3</b>                | <b>1.525981119</b> | <b>0.000796</b> | <b>2</b>  |
| A2AU72        | HASWAVMVCAGDEPMAVELCR+Oxidation(14                                | 1.960211218        |                 |           |
| A2AU72        | TLGVITCDKEARTMLK+Oxidation(13                                     | 1.521512231        |                 |           |
| <b>A2AWL7</b> | <b>MGAP MAX gene_associated protein</b>                           | <b>1.463051856</b> | <b>0.015135</b> | <b>2</b>  |
| A2AWL7        | ADVSLTLLTAQASLK                                                   | 1.382455136        | 2               | 2.460145  |
| A2AWL7        | TDQGILVTNRDARALLSR                                                | 2.797594712        | 3               | 3.322809  |
| <b>A2VCW9</b> | <b>AASS Alpha_aminoadipic semialdehyde synthase_mitochondrial</b> | <b>1.805822617</b> | <b>9.9E-20</b>  | <b>11</b> |
| A2VCW9        | AEGIVFNTQSTIK                                                     | 1.868072166        | 2               | 2.487345  |
| A2VCW9        | AQEANMSLLDEVLK                                                    | 1.525073192        | 2               | 3.460364  |
| A2VCW9        | GAQEVFNELPCEYVEPHELK                                              | 1.885207474        | 2               | 4.468286  |
| A2VCW9        | KTDGVYDPVEYEKYPER                                                 | 1.473652558        | 3               | 3.615807  |
| A2VCW9        | KYDINTVNVTVGK                                                     | 1.889082648        | 2               | 3.953647  |
| A2VCW9        | LQSLVESQDLVISLLPYVLPVPAK                                          | 1.280022688        | 3               | 4.184101  |
| A2VCW9        | QDAQSLLVPVK                                                       | 1.404536439        | 2               | 2.555958  |
| A2VCW9        | REDVNAWER                                                         | 1.861204269        | 2               | 2.974995  |
| A2VCW9        | SSVVPVEGCPPELPHK                                                  | 0.946818303        | 2               | 2.706103  |
| A2VCW9        | VNMVTASYITPAMK                                                    | 1.48456518         | 2               | 2.503334  |
| A2VCW9        | YDINTVNVTVGK                                                      | 1.041330453        | 2               | 2.346035  |
| <b>A4Q9F4</b> | <b>TTL11 Tubulin polyglutamylase TTL11</b>                        | <b>1.285271757</b> | <b>0.023418</b> | <b>2</b>  |
| A4Q9F4        | ALRIMQNLFPPEYNYFYPR+Oxidation(4                                   | 1.287334545        |                 |           |
| A4Q9F4        | NLKPMLEVNANPSMR                                                   | 1.171384531        | 2               | 2.445297  |
| <b>A7VJC2</b> | <b>ROA2 Heterogeneous nuclear ribonucleoproteins A2/B1</b>        | <b>1.268938975</b> | <b>0.010257</b> | <b>12</b> |
| A7VJC2        | EESGKPGAHVTVK                                                     | 1.403353724        | 2               | 3.13958   |
| A7VJC2        | GFGFVTDDHDPVDK                                                    | 1.254683473        | 2               | 4.347961  |
| A7VJC2        | GGGGNFGPGGNSFR                                                    | 1.271044642        | 2               | 3.189192  |
| A7VJC2        | GGNFGFGDSR                                                        | 1.524768466        | 2               | 2.902228  |
| A7VJC2        | IDTIEIITDR                                                        | 1.121553378        | 2               | 3.985121  |
| A7VJC2        | LFIGGLSFETTEESLR                                                  | 2.606891745        | 2               | 3.641094  |
| A7VJC2        | LTDCVVMR                                                          | 1.556819015        | 2               | 2.613261  |
| A7VJC2        | NMGGPYGGNYGPGSGSGGYGGR                                            | 1.639499471        | 2               | 6.063583  |
| A7VJC2        | NYEQWQWK                                                          | 1.308289238        | 2               | 2.406525  |
| A7VJC2        | QEMQEVQSSR                                                        | 0.875366526        | 2               | 3.028653  |
| A7VJC2        | QEMQEVQSSR+Oxidation(2                                            | 1.124895308        |                 |           |
| A7VJC2        | YHTINGHNAEVR                                                      | 1.229193833        | 2               | 3.37763   |
| <b>B0BN93</b> | <b>PSD13 26S proteasome non_ATPase regulatory subunit 13</b>      | <b>1.720019135</b> | <b>0.192628</b> | <b>3</b>  |
| B0BN93        | GSIDEVDKR                                                         | 1.464406589        | 2               | 2.47745   |
| B0BN93        | LNIGDLQATK                                                        | 0.517221376        | 2               | 2.314041  |
| B0BN93        | SAWGQQPDLAANEALLR                                                 | 2.288096992        | 2               | 2.816758  |
| <b>B0BNA7</b> | <b>EIF3I Eukaryotic translation initiation factor 3 subunit I</b> | <b>1.280418535</b> | <b>0.529934</b> | <b>2</b>  |
| B0BNA7        | HVLTGSADNSCR                                                      | 1.280418477        | 2               | 3.484948  |
| B0BNA7        | LFDSTSLEHQK                                                       | 1.294805253        | 2               | 2.374824  |
| <b>B0BNE5</b> | <b>ESTD S_formylglutathione hydrolase</b>                         | <b>1.099754257</b> | <b>0.19904</b>  | <b>7</b>  |
| B0BNE5        | AFNGYLGPDQSK                                                      | 0.970456574        | 2               | 3.17033   |
| B0BNE5        | FAIYLPPQAESAK                                                     | 1.368897171        | 2               | 2.672967  |
| B0BNE5        | MYSYVTEELPQLINANFPVDPQR                                           | 1.111386162        | 3               | 5.577575  |
| B0BNE5        | SGCQQAASEHGLVVIAPDTSR                                             | 1.036778542        | 2               | 5.772836  |
| B0BNE5        | SVSAFAPICNPVLCPWGK                                                | 1.18177701         | 3               | 4.203033  |
| B0BNE5        | SYSGPQIDILIDQKDFEFLSNGQLLPDNFIACTEK                               | 1.088898679        | 3               | 4.889162  |
| B0BNE5        | VFEHSSVELK                                                        | 1.180471545        | 2               | 2.811266  |
| <b>B0BNN3</b> | <b>CAH1 Carbonic anhydrase 1</b>                                  | <b>0.708356017</b> | <b>0.24013</b>  | <b>2</b>  |

|               |                                                                        |                    |                 |          |
|---------------|------------------------------------------------------------------------|--------------------|-----------------|----------|
| B0BNN3        | ADGLAIIGVLMK                                                           | 0.669910458        | 2               | 3.300611 |
| B0BNN3        | HDSSLKPVSVSYNPATAK                                                     | 1.49624197         | 3               | 5.064192 |
| <b>B0K020</b> | <b>CISD1 CDGSH iron_sulfur domain_containing protein 1</b>             | <b>1.007132261</b> | <b>0.936945</b> | <b>3</b> |
| B0K020        | AMVNLQIQK                                                              | 0.927481835        | 2               | 2.622246 |
| B0K020        | HNEETGDNVGPLLIK                                                        | 0.928059633        | 2               | 5.157075 |
| B0K020        | VVHAFDMEDLGDK                                                          | 1.191587793        | 3               | 3.938781 |
| <b>B1H267</b> | <b>SNX5 Sorting nexin_5</b>                                            | <b>1.340945808</b> | <b>0.065132</b> | <b>2</b> |
| B1H267        | NNVSLQSCIDLFK                                                          | 1.314732725        | 2               | 3.132536 |
| B1H267        | TTLPTFQSPEFSVTR                                                        | 1.36735318         | 2               | 3.592205 |
| <b>B2GUV7</b> | <b>IF2P Eukaryotic translation initiation factor 5B</b>                | <b>1.581354707</b> | <b>0.075027</b> | <b>2</b> |
| B2GUV7        | HLQAQGVVEVPSK                                                          | 1.2562521          | 2               | 2.761408 |
| B2GUV7        | LKEGDTIIVPGVEGPIVTQIR                                                  | 1.582196462        | 3               | 3.36647  |
| <b>B2GUZ5</b> | <b>CAZA1 F_actin_capping protein subunit alpha_1</b>                   | <b>1.044613187</b> | <b>0.352361</b> | <b>3</b> |
| B2GUZ5        | EASDPQPEDVDGGLK                                                        | 0.687551106        | 2               | 2.516387 |
| B2GUZ5        | FITHAPPGEFNEVFNDVR                                                     | 1.776338146        | 3               | 3.700615 |
| B2GUZ5        | FTITPPTAQVVGVLK                                                        | 0.812357229        | 2               | 2.946579 |
| <b>B2GV24</b> | <b>UFL1 E3 UFM1_protein ligase 1</b>                                   | <b>1.439985279</b> | <b>1.61E-05</b> | <b>3</b> |
| B2GV24        | NNPVHLITEEDLK                                                          | 1.267633925        | 2               | 2.545538 |
| B2GV24        | TYDLPDGFLTQALTQR                                                       | 2.466970491        | 2               | 3.2333   |
| B2GV24        | VNIVDLQVINVDLTHIENR                                                    | 1.483555249        | 3               | 3.620727 |
| <b>B2RYW9</b> | <b>FAHD2 Fumarylacetoacetate hydrolase domain_containing protein 2</b> | <b>1.312772077</b> | <b>0.004643</b> | <b>6</b> |
| B2RYW9        | ALAAQLPIPR                                                             | 0.777077162        | 2               | 2.857671 |
| B2RYW9        | GETALSVAR                                                              | 1.304441352        | 2               | 3.073675 |
| B2RYW9        | KGDEVQCEIEELGVIINK                                                     | 1.736948587        | 2               | 4.812235 |
| B2RYW9        | TFDTFCPLGPALVTK                                                        | 1.353753001        | 2               | 4.975682 |
| B2RYW9        | VICVGLNYADHCQEQNVR                                                     | 1.281428975        | 2               | 2.97759  |
| B2RYW9        | VNGEIVQSSNTNQMVFK                                                      | 1.17043199         | 2               | 4.786794 |
| <b>B2RZ78</b> | <b>VPS29 Vacuolar protein sorting_associated protein 29</b>            | <b>1.133295636</b> | <b>0.692454</b> | <b>2</b> |
| B2RZ78        | GDFDESLNYPEQK                                                          | 1.133278107        | 2               | 3.639549 |
| B2RZ78        | IQHILCTGNLCTK                                                          | 1.498421959        | 2               | 3.036149 |
| <b>B3DMA2</b> | <b>ACD11 Acyl_CoA dehydrogenase family member 11</b>                   | <b>1.030261277</b> | <b>0.968105</b> | <b>6</b> |
| B3DMA2        | AVLTVTQYR                                                              | 1.020494516        | 2               | 2.482949 |
| B3DMA2        | GSHIQENTGIPLMEELISYCR                                                  | 1.274621132        | 2               | 2.327374 |
| B3DMA2        | LYEHEVVAHWIAK                                                          | 1.038881318        | 3               | 3.706887 |
| B3DMA2        | MELQDQAR                                                               | 1.480965906        | 2               | 2.479287 |
| B3DMA2        | NLPDSDNEECLVHGDFK                                                      | 0.89382149         | 2               | 3.462373 |
| B3DMA2        | SGQSNPTFFLQK                                                           | 0.947261031        | 2               | 2.586889 |
| <b>B5DFC8</b> | <b>EIF3C Eukaryotic translation initiation factor 3 subunit C</b>      | <b>1.647869874</b> | <b>2.22E-07</b> | <b>4</b> |
| B5DFC8        | FEELTNLIR                                                              | 1.784466046        | 2               | 2.434606 |
| B5DFC8        | GTEITHAVVIK                                                            | 1.807878221        | 2               | 2.897748 |
| B5DFC8        | LGSLVENNER                                                             | 1.626731098        | 2               | 2.666179 |
| B5DFC8        | TEPTAQNLALQLAEK                                                        | 1.585918864        | 2               | 4.849144 |
| <b>B7ZNG0</b> | <b>KIF7 Kinesin_like protein KIF7</b>                                  | <b>0.961037475</b> | <b>0.076641</b> | <b>2</b> |
| B7ZNG0        | ELGRHMWINQELK+Oxidation(5                                              | 0.675824725        |                 |          |
| B7ZNG0        | KEALMQEK                                                               | 1.390763173        | 2               | 2.721646 |
| <b>D3ZTX0</b> | <b>TMED7 Transmembrane emp24 domain_containing protein 7</b>           | <b>1.423793881</b> | <b>0.36674</b>  | <b>2</b> |
| D3ZTX0        | QCFYEDITQGTK                                                           | 1.586009086        | 2               | 2.74209  |
| D3ZTX0        | SVIDYQTHFR                                                             | 1.421238921        | 2               | 2.837945 |
| <b>D3ZW55</b> | <b>ITPA Inosine triphosphate pyrophosphatase</b>                       | <b>1.425679397</b> | <b>0.035724</b> | <b>5</b> |
| D3ZW55        | DFGWPCFQPDGYEQTYAEMPK                                                  | 0.894172066        | 2               | 3.30029  |
| D3ZW55        | IDLPEYQGEPEISIQK                                                       | 3.138434212        | 2               | 4.347663 |

|               |                                                                     |                    |                 |           |
|---------------|---------------------------------------------------------------------|--------------------|-----------------|-----------|
| D3ZW55        | KLEEVILGDKFPCTLVAQK                                                 | 1.477955378        | 3               | 4.416661  |
| D3ZW55        | LKPEGLYQLLAGFEDK                                                    | 2.410324717        | 3               | 3.58711   |
| D3ZW55        | LQEYFGVTDGAGDH                                                      | 1.634658916        | 2               | 3.41133   |
| <b>D3ZZL9</b> | <b>GCC2 GRIP and coiled_coil domain_containing protein 2</b>        | <b>1.298128957</b> | <b>0.019299</b> | <b>2</b>  |
| D3ZZL9        | EKSQNDQNIMVQMK+Oxidation(12)                                        | 1.298128957        |                 |           |
| D3ZZL9        | EKSQNDQNIMVQMK+Oxidation(9)                                         | 1.298128957        |                 |           |
| <b>D4A4T9</b> | <b>CHR1 Cysteine and histidine_rich domain_containing protein 1</b> | <b>1.585102391</b> | <b>0.121716</b> | <b>4</b>  |
| D4A4T9        | FDPEANADDACTYHPGVVFDALK                                             | 1.567467858        | 3               | 3.533117  |
| D4A4T9        | HNSEKPPPEVKPEVK                                                     | 1.534029391        | 3               | 3.658474  |
| D4A4T9        | KEEDSDEIKIGTSCK                                                     | 0.977405565        | 2               | 2.53985   |
| D4A4T9        | LSSGNEEDKKEEDSDEIK                                                  | 1.589778646        | 3               | 4.297395  |
| <b>D4A666</b> | <b>UBN2 Ubinuclein_2</b>                                            | <b>1.573669575</b> | <b>0.161782</b> | <b>2</b>  |
| D4A666        | GWMQARMLFK+Oxidation(2)Oxidation(6)                                 | 2.358076337        |                 |           |
| D4A666        | KEEGEKEK                                                            | 1.417053259        | 1               | 1.909301  |
| <b>E9Q557</b> | <b>DESP Desmoplakin</b>                                             | <b>0.896230608</b> | <b>0.010116</b> | <b>2</b>  |
| E9Q557        | KQVQTSQKNLTR                                                        | 0.889690279        | 2               | 2.318473  |
| E9Q557        | SQCTQVVQER                                                          | 1.221518908        | 2               | 2.45344   |
| F6YLP3        | EMFVYLSTQLKK+Oxidation(1)                                           | 5.454758561        |                 |           |
| F6YLP3        | KEMFVYLSTQLKK                                                       | 1.046220669        | 2               | 2.536631  |
| F6YLP3        | SGDISAVQPK                                                          | 0.902427692        | 2               | 3.076685  |
| F6YLP3        | SMVTAGFEPVVIENVLEGDELK                                              | 2.001635645        | 2               | 3.599561  |
| <b>O08550</b> | <b>MLL4 Histone_lysine N_methyltransferase MLL4</b>                 | <b>1.940119167</b> | <b>0.00571</b>  | <b>2</b>  |
| O08550        | HAAVALGQARAMVPEDVPR                                                 | 1.711420419        | 2               | 2.342709  |
| O08550        | MVQALTELLR+Oxidation(0)                                             | 2.067490643        |                 |           |
| <b>O08557</b> | <b>DDAH1 N(G)_N(G)_dimethylarginine dimethylaminohydrolase 1</b>    | <b>1.131941183</b> | <b>0.064806</b> | <b>11</b> |
| O08557        | DENATLDGGDVLFTGR                                                    | 1.031837845        | 2               | 2.413503  |
| O08557        | DHLLIPVSNSEMEK                                                      | 1.177800785        | 2               | 2.493207  |
| O08557        | DYAVSTVPVADSLHLK                                                    | 1.383461245        | 2               | 3.67323   |
| O08557        | GAEILADTFK                                                          | 1.06221567         | 1               | 2.096512  |
| O08557        | KEVDMMK                                                             | 1.884871849        | 2               | 2.323218  |
| O08557        | LKDHLIPVSNSEMEK                                                     | 1.76358857         | 2               | 3.811135  |
| O08557        | LTVPDDMAANCIYLNIPSK                                                 | 1.251961404        | 2               | 3.267039  |
| O08557        | SFCSMAGPNLIAIGSSESAQK                                               | 1.495472121        | 2               | 4.773208  |
| O08557        | SQGEEVDFAR                                                          | 4.467610317        | 2               | 2.824431  |
| O08557        | TPEEYPEK                                                            | 1.397769809        | 2               | 2.366291  |
| O08557        | VDGLLTCVSVFINK                                                      | 1.135619187        | 2               | 3.511756  |
| <b>O08583</b> | <b>THOC4 THO complex subunit 4</b>                                  | <b>1.281675041</b> | <b>0.105259</b> | <b>3</b>  |
| O08583        | MDMSLDDIHK                                                          | 2.196702982        | 2               | 2.668649  |
| O08583        | QQLSAEELDAQLDAYNAR                                                  | 1.205498193        | 2               | 3.401165  |
| O08583        | SLGTADVHFER                                                         | 1.571584558        | 2               | 2.748129  |
| <b>O08601</b> | <b>MTP Microsomal triglyceride transfer protein large subunit</b>   | <b>1.256783687</b> | <b>0.022994</b> | <b>15</b> |
| O08601        | EDTTMYLLALK                                                         | 1.42998987         | 2               | 2.531857  |
| O08601        | EFYSYENEPVGIENLK                                                    | 1.395715928        | 2               | 4.23238   |
| O08601        | GCPSLAEHWKSIR                                                       | 1.112698058        | 2               | 3.842463  |
| O08601        | GHTTGLSLNNER                                                        | 1.119422503        | 2               | 2.545867  |
| O08601        | GSFASNDIR                                                           | 1.541325375        | 2               | 2.718593  |
| O08601        | LILGGLEKPEK                                                         | 0.987319562        | 2               | 2.447072  |
| O08601        | MLSASGDPVSVVK                                                       | 1.241878992        | 2               | 3.578808  |
| O08601        | NALLPEGIPLLLK                                                       | 2.325414423        | 3               | 3.583309  |
| O08601        | NILLSIGELPK                                                         | 1.205936517        | 2               | 3.748615  |
| O08601        | REEILQILK                                                           | 2.033685584        | 3               | 3.47206   |
| O08601        | SDSSIILQER                                                          | 1.406135828        | 2               | 3.106385  |
| O08601        | SGSSSAYTGYVER                                                       | 1.02853475         | 2               | 3.67906   |

|               |                                                                    |                    |                 |           |
|---------------|--------------------------------------------------------------------|--------------------|-----------------|-----------|
| O08601        | SNLNIFQYIGK                                                        | 0.854880801        | 2               | 3.182842  |
| O08601        | TTAAAVILK                                                          | 1.090888457        | 2               | 2.313745  |
| O08601        | VKEFYSYENEPVGIENLK                                                 | 1.009725652        | 2               | 3.583745  |
| <b>O08629</b> | <b>TIF1B Transcription intermediary factor 1_beta</b>              | <b>2.108257605</b> | <b>0.061196</b> | <b>2</b>  |
| O08629        | IVAERPGTNSTGPGMAPPR                                                | 1.564865985        | 3               | 3.910246  |
| O08629        | LDLDTSDSQPPVFK                                                     | 2.109155809        | 2               | 4.256386  |
| <b>O08795</b> | <b>GLU2B Glucosidase 2 subunit beta</b>                            | <b>1.61626179</b>  | <b>0.23029</b>  | <b>6</b>  |
| O08795        | ETVVTSTTEPSR                                                       | 1.496704158        | 2               | 3.102255  |
| O08795        | KLWEEQAAAQK                                                        | 1.281418629        | 2               | 3.417211  |
| O08795        | LWEEQAAAQK                                                         | 1.463373494        | 2               | 2.980506  |
| O08795        | MPPYDEETQAIIDAAQEAR                                                | 2.657673584        | 2               | 5.185298  |
| O08795        | SLEDQVETLR                                                         | 0.959949292        | 2               | 3.153387  |
| O08795        | YEQGTGCWQGNR                                                       | 1.332651249        | 2               | 3.776794  |
| <b>O09158</b> | <b>CP3AP Cytochrome P450 3A25</b>                                  | <b>2.625329574</b> | <b>0.343126</b> | <b>2</b>  |
| O09158        | DVEINGVFIPK                                                        | 2.703825477        | 2               | 3.142442  |
| O09158        | VDFLQLMMNTQNSK                                                     | 1.194705631        | 2               | 3.109197  |
| <b>O09171</b> | <b>BHMT1 Betaine__homocysteine S_methyltransferase 1</b>           | <b>1.580624232</b> | <b>9.9E-20</b>  | <b>14</b> |
| O09171        | AGAAIVGVNCHFDPSTSLQTIK                                             | 1.419502983        | 2               | 6.130187  |
| O09171        | AGPWTPEAAVEHPEAVR                                                  | 1.167589735        | 2               | 5.005803  |
| O09171        | GAAELMQQK                                                          | 1.294754905        | 2               | 3.649472  |
| O09171        | GAAELMQQK+Oxidation(5                                              | 1.366699737        |                 |           |
| O09171        | HGSWGSGLDMHTKPWIR                                                  | 1.107672113        | 3               | 4.705975  |
| O09171        | IFHQQLLEVFMK                                                       | 1.057228369        | 2               | 3.563496  |
| O09171        | ISGQKVNEAACDIAR                                                    | 1.440724657        | 2               | 4.449034  |
| O09171        | KEYWQNLN                                                           | 1.073000251        | 3               | 3.440414  |
| O09171        | LNAGEVVIGDGGVFVALEK                                                | 1.819302191        | 3               | 5.921896  |
| O09171        | QGFIDLPEFPFGLPR                                                    | 2.034446769        | 2               | 5.036897  |
| O09171        | QVADEGDALVAGGVSTQPSYLSCK                                           | 63.33225931        | 2               | 6.109756  |
| O09171        | TSGKPIAATMCIGPEGDLHGVSPEGCAVR                                      | 1.431180178        | 3               | 6.19249   |
| O09171        | TSGKPIAATMCIGPEGDLHGVSPEGCAVR+Oxidation(9                          | 1.825515298        |                 |           |
| O09171        | VNEAACDIAR                                                         | 1.189606721        | 2               | 4.035338  |
| <b>O09173</b> | <b>HGD Homogentisate 1_2_dioxygenase</b>                           | <b>1.112</b>       | <b>0.00296</b>  | <b>9</b>  |
| O09173        | CFYNSDGDFLIVPQK                                                    | 1.483680308        | 2               | 3.094269  |
| O09173        | FSVDVFEETR                                                         | 1.484381227        | 2               | 3.606579  |
| O09173        | GYILEVYGVHFELPDLGPIGANLANPR                                        | 1.451371215        | 3               | 3.742076  |
| O09173        | NCMSEFMGLIK                                                        | 1.157577191        | 2               | 3.201366  |
| O09173        | QDVSPFNVAWHGNYTPYK                                                 | 1.413793797        | 2               | 3.750953  |
| O09173        | QGGFLPGGSLHSAMTPHGPDADCFEK                                         | 1.156770019        | 3               | 3.881219  |
| O09173        | SLRPGVAIADFVIFPPR                                                  | 1.54289624         | 2               | 3.712141  |
| O09173        | TFRPPYYHR                                                          | 0.757887576        | 3               | 3.493924  |
| O09173        | YISGFGNECASEDPR                                                    | 1.642565297        | 2               | 3.92119   |
| <b>O35077</b> | <b>GPDA Glycerol_3_phosphate dehydrogenase [NAD_]_ cytoplasmic</b> | <b>1.160825793</b> | <b>0.000975</b> | <b>17</b> |
| O35077        | ANTIGISLIK                                                         | 1.133186618        | 2               | 3.07506   |
| O35077        | DPAQGQLLK                                                          | 1.520761423        | 2               | 2.389694  |
| O35077        | ELHSILQHK                                                          | 1.16417866         | 2               | 2.566083  |
| O35077        | FCETTIGCK                                                          | 1.114067583        | 2               | 2.663847  |
| O35077        | FCETTIGCKDPAQGQLLK                                                 | 1.094849289        | 2               | 5.335864  |
| O35077        | GIDEGPNGLK                                                         | 1.136780213        | 2               | 2.921076  |
| O35077        | GLVDKFPLFTAVYK                                                     | 1.044012095        | 3               | 3.722587  |
| O35077        | ICDQLKGHLK                                                         | 1.080730837        | 3               | 3.797898  |
| O35077        | ITVVQEVDTEICGALK                                                   | 2.680793306        | 2               | 3.1124    |
| O35077        | IVGSNASQLAHFDPR                                                    | 1.697080121        | 2               | 3.115673  |
| O35077        | KLTEIINTQHENVK                                                     | 1.182156966        | 2               | 5.273067  |
| O35077        | LTEIINTQHENVK                                                      | 1.150890591        | 2               | 4.416082  |
| O35077        | NIVAVGAGFCDGLGFGDNTK                                               | 1.417704671        | 2               | 5.572182  |



|               |                                                                                 |                    |                 |          |
|---------------|---------------------------------------------------------------------------------|--------------------|-----------------|----------|
| O35077        | SIEQLEK                                                                         | 1.107411293        | 2               | 2.382285 |
| O35077        | VCIVGSGNWGSAIAK                                                                 | 1.382248332        | 2               | 4.353549 |
| O35077        | VCYEGQPVGEFICCLQNHPHEHM                                                         | 1.445381929        | 2               | 4.131886 |
| O35077        | VTMWVFEEDIGGR                                                                   | 1.425881711        | 2               | 3.390036 |
| <b>O35078</b> | <b>OXDA D_amino_acid oxidase</b>                                                | <b>1.562609836</b> | <b>0.310687</b> | <b>2</b> |
| O35078        | GQIIQVEAPWIK                                                                    | 1.320017746        | 2               | 3.09514  |
| O35078        | SCCQLEPTLK                                                                      | 4.228099679        | 2               | 2.647738 |
| <b>O35094</b> | <b>TIM44 Mitochondrial import inner membrane translocase subunit TIM44</b>      | <b>1.1767615</b>   | <b>0.382269</b> | <b>4</b> |
| O35094        | AISQGVESVKK                                                                     | 0.937589915        | 2               | 2.372121 |
| O35094        | KLEESDALQEAR                                                                    | 1.228389314        | 2               | 3.592262 |
| O35094        | TEMSEVLTEILR                                                                    | 1.394024202        | 2               | 3.274178 |
| O35094        | VTDLLGGLFSK                                                                     | 1.144637666        | 2               | 2.582153 |
| <b>O35142</b> | <b>COPB2 Coatomer subunit beta_</b>                                             | <b>1.432302663</b> | <b>0.125739</b> | <b>5</b> |
| O35142        | AAESLADPTEYENLFPGLK                                                             | 2.281527695        | 2               | 3.885855 |
| O35142        | EEPAMSMDDANGKIIWAK                                                              | 1.609553778        | 2               | 2.530629 |
| O35142        | FELALQLGELK                                                                     | 1.46413584         | 2               | 3.054841 |
| O35142        | GSNNVALGYDEGSIIVK                                                               | 1.069204587        | 2               | 3.558794 |
| O35142        | TFEVCDLPVR                                                                      | 1.255048429        | 2               | 2.9816   |
| <b>O35244</b> | <b>PRDX6 Peroxiredoxin_6</b>                                                    | <b>1.223641773</b> | <b>5.27E-08</b> | <b>8</b> |
| O35244        | DINAYNGAAPTEK                                                                   | 1.388483156        | 2               | 3.95067  |
| O35244        | DLAILLGMLDPAEKDEK                                                               | 1.223251401        | 2               | 3.951146 |
| O35244        | GESVMVLPTLPEEEAK                                                                | 1.950874585        | 2               | 3.255132 |
| O35244        | KGESVMVLPTLPEEEAK                                                               | 1.404939885        | 2               | 5.332367 |
| O35244        | LSILYPATTGR                                                                     | 1.569409997        | 2               | 3.147505 |
| O35244        | NFDEILR                                                                         | 1.148022448        | 1               | 2.271842 |
| O35244        | VVDSLQLTASNVPVATPDWK                                                            | 1.269545356        | 3               | 5.524613 |
| O35244        | VVFIFGPKK                                                                       | 0.751761409        | 2               | 2.896443 |
| <b>O35286</b> | <b>DHX15 Putative pre_mRNA_splicing factor ATP_dependent RNA helicase DHX15</b> | <b>1.553983801</b> | <b>0.020963</b> | <b>2</b> |
| O35286        | TCTDIKPEWLVK                                                                    | 1.583166253        | 2               | 2.413568 |
| O35286        | TLATDILMGVLK                                                                    | 1.552858496        | 2               | 3.721823 |
| <b>O35331</b> | <b>PDXK Pyridoxal kinase</b>                                                    | <b>0.935086381</b> | <b>0.624261</b> | <b>2</b> |
| O35331        | AEAGEGQKPSPAQLELR                                                               | 0.673082229        | 3               | 3.845347 |
| O35331        | MGPDTVVITSSDLPSPK                                                               | 0.9403327          | 2               | 3.6926   |
| <b>O35469</b> | <b>3BH56 3 beta_hydroxysteroid dehydrogenase/Delta 5__4 isomerase type 6</b>    | <b>1.029195718</b> | <b>0.905311</b> | <b>2</b> |
| O35469        | DLGYEPLVSWEAK                                                                   | 0.906574344        | 2               | 4.342849 |
| O35469        | TSEWIGTLVEQHR                                                                   | 1.069393243        | 2               | 3.409183 |
| <b>O35509</b> | <b>RB11B Ras_related protein Rab_11B</b>                                        | <b>1.268011204</b> | <b>0.266671</b> | <b>5</b> |
| O35509        | AQIWDTAGQER                                                                     | 1.126203807        | 2               | 3.236881 |
| O35509        | GAVGALLVYDIAK                                                                   | 1.195342678        | 2               | 3.986113 |
| O35509        | HLTYENVER                                                                       | 1.621688672        | 2               | 2.467955 |
| O35509        | NEFNLESK                                                                        | 1.253280288        | 1               | 2.145783 |
| O35509        | VVLIGDSGVGK                                                                     | 1.251786557        | 2               | 2.474531 |
| <b>O35547</b> | <b>ACSL4 Long_chain_fatty_acid__CoA ligase 4</b>                                | <b>0.926839009</b> | <b>0.663114</b> | <b>2</b> |
| O35547        | LERFEIPIK                                                                       | 1.219249071        | 2               | 2.539652 |
| O35547        | TAEDYSVDENGQR                                                                   | 0.878559442        | 2               | 3.238975 |
| <b>O35567</b> | <b>PUR9 Bifunctional purine biosynthesis protein PURH</b>                       | <b>1.169075591</b> | <b>0.000108</b> | <b>7</b> |
| O35567        | ALFEEVPELLTEAEK                                                                 | 1.771260582        | 2               | 3.503824 |
| O35567        | DGQVIGIGAGQQSR                                                                  | 2.941355174        | 2               | 3.897578 |
| O35567        | EVSDGIVAPGYEEAEK                                                                | 1.016775051        | 2               | 3.80849  |
| O35567        | HVSPAGAAVGVPLSEDEAR                                                             | 1.071109867        | 2               | 5.150934 |
| O35567        | SGVAYIVAPSGSTADK                                                                | 1.101828057        | 2               | 2.86537  |
| O35567        | VTVVCPEPDYGAVAEMQSGGNK                                                          | 0.686301414        | 2               | 5.41396  |
| O35567        | YTQNSVCIYAK                                                                     | 0.977976481        | 2               | 3.136958 |

|               |                                                                                          |                    |                 |          |
|---------------|------------------------------------------------------------------------------------------|--------------------|-----------------|----------|
| <b>O35593</b> | <b>PSDE 26S proteasome non_ATPase regulatory subunit 14</b>                              | <b>1.252935731</b> | <b>0.096468</b> | <b>3</b> |
| O35593        | AVAVVVDPIQSVK                                                                            | 1.222926713        | 2               | 3.077998 |
| O35593        | AVEEEDKMTPEQLAIK                                                                         | 1.24922441         | 2               | 4.720413 |
| O35593        | EMLELAKNYNK+Oxidation(1                                                                  | 1.30951591         |                 |          |
| <b>O35660</b> | <b>GSTM6 Glutathione S_transferase Mu 6</b>                                              | <b>1.146574747</b> | <b>0.959662</b> | <b>3</b> |
| O35660        | RYAMGDAPDYDR                                                                             | 1.187775192        | 2               | 3.378629 |
| O35660        | YAMGDAPDYDR                                                                              | 1.481827871        | 2               | 2.438771 |
| O35660        | YAMGDAPDYDR+Oxidation(2                                                                  | 1.064635677        |                 |          |
| <b>O35760</b> | <b>IDI1 Isopentenyl_diphosphate Delta_isomerase 1</b>                                    | <b>2.257223451</b> | <b>0.778355</b> | <b>4</b> |
| O35760        | AELGIPLLEVDLNEMNYLTR                                                                     | 7.613905506        | 2               | 4.213808 |
| O35760        | ITFPGCFTNSCCSHPLNNPGELEENDAMGVK                                                          | 1.93174683         | 3               | 3.415622 |
| O35760        | NCHLNENIDK                                                                               | 1.016952501        | 3               | 3.338125 |
| O35760        | NVTLNPDPNEIK                                                                             | 1.295714295        | 2               | 3.140018 |
| <b>O35763</b> | <b>MOES Moesin</b>                                                                       | <b>1.139555277</b> | <b>0.17914</b>  | <b>5</b> |
| O35763        | ALTSELANAR                                                                               | 1.195293711        | 2               | 2.520818 |
| O35763        | AQMVEDLEK                                                                                | 0.999154852        | 2               | 2.492213 |
| O35763        | AQQELEEQTR                                                                               | 1.307591366        | 2               | 2.815982 |
| O35763        | FYPEDVSEELIQDITQR                                                                        | 1.019472203        | 3               | 3.342651 |
| O35763        | TQEQLASEMAELTAR                                                                          | 1.747794059        | 2               | 4.017751 |
| <b>O35783</b> | <b>CALU Calumenin</b>                                                                    | <b>0.903571666</b> | <b>0.998694</b> | <b>2</b> |
| O35783        | HLVYESDQDKDGK                                                                            | 0.902607666        | 2               | 3.968505 |
| O35783        | VHNDQNFVDYDHDAFLGAEAK                                                                    | 1.031164946        | 3               | 5.237835 |
| <b>O35796</b> | <b>C1QBP Complement component 1 Q subcomponent_binding protein_mitochondrial</b>         | <b>1.122088656</b> | <b>0.186145</b> | <b>4</b> |
| O35796        | AEEQEPELTSTPNFVVEVTK                                                                     | 1.205075581        | 2               | 4.785666 |
| O35796        | AFVEFLTDEIK                                                                              | 1.680977462        | 2               | 3.253572 |
| O35796        | AFVEFLTDEIKEEK                                                                           | 0.858141177        | 2               | 3.790412 |
| O35796        | TLVLDCHYPEDEIGHDEAEISDIFSIAK                                                             | 1.88452679         | 3               | 5.684881 |
| <b>O35814</b> | <b>STIP1 Stress_induced_phosphoprotein 1</b>                                             | <b>0.888982125</b> | <b>0.032896</b> | <b>7</b> |
| O35814        | ALDLSSCK                                                                                 | 1.275324308        | 1               | 2.446944 |
| O35814        | ALSAGNIDDALQCYSEAIK                                                                      | 1.252260651        | 2               | 5.764358 |
| O35814        | AMADPEVQQIMSDPAMR                                                                        | 5.676441728        | 2               | 3.9249   |
| O35814        | CQQAELKILK                                                                               | 0.954927935        | 1               | 2.020421 |
| O35814        | DCEECIQLEPTFIK                                                                           | 1.205269949        | 2               | 4.422485 |
| O35814        | ELIEQLQNKPSDLGTK                                                                         | 0.870336783        | 2               | 4.026013 |
| O35814        | TVDLKPDWVGK                                                                              | 1.513884912        | 2               | 2.683254 |
| <b>O35824</b> | <b>DNJA2 Dnaj homolog subfamily A member 2</b>                                           | <b>1.218163983</b> | <b>0.390709</b> | <b>2</b> |
| O35824        | NVLCASCSGQGGK                                                                            | 1.197704531        | 2               | 3.263285 |
| O35824        | VSLEDLYNGK                                                                               | 1.626340907        | 2               | 2.331587 |
| <b>O35826</b> | <b>GLCNE Bifunctional UDP_N_acetylglucosamine 2_epimerase/N_acetylmannosamine kinase</b> | <b>1.19811802</b>  | <b>0.659284</b> | <b>8</b> |
| O35826        | DEAVGALHLIQAAC                                                                           | 1.434595671        | 2               | 3.506987 |
| O35826        | EVGAFGTPVINLGTR                                                                          | 1.221659196        | 2               | 3.202315 |
| O35826        | ILGVGISTGGR                                                                              | 1.937308209        | 2               | 2.84115  |
| O35826        | IYGDGNAVPR                                                                               | 1.139233383        | 2               | 2.463682 |
| O35826        | SIDLQEPLQK                                                                               | 1.0298635          | 2               | 2.414048 |
| O35826        | TLVLFNPIDAGSK                                                                            | 1.077368848        | 2               | 2.667685 |
| O35826        | TPLSDTLHLPVWVDNDGNCAAMAER                                                                | 1.244632302        | 3               | 5.11907  |
| O35826        | VNPQEGVVLHSTK                                                                            | 1.420959933        | 2               | 2.539319 |
| <b>O35913</b> | <b>SO1A4 Solute carrier organic anion transporter family member 1A4</b>                  | <b>1.029850825</b> | <b>0.554493</b> | <b>5</b> |
| O35913        | EGLQENVDTGENAK                                                                           | 1.139986031        | 2               | 3.757473 |
| O35913        | GASFVPAFFILR                                                                             | 1.597891707        | 2               | 2.635695 |
| O35913        | SLSGTYMNSMLTQIER                                                                         | 0.971888581        | 2               | 4.574149 |
| O35913        | SQTLNPTQDPSECVK                                                                          | 0.853922984        | 2               | 4.144578 |
| O35913        | TFQFPGDIESSK                                                                             | 1.243253264        | 2               | 2.409178 |

|               |                                                                    |                    |                 |          |
|---------------|--------------------------------------------------------------------|--------------------|-----------------|----------|
| <b>O35952</b> | <b>GLO2 Hydroxyacylglutathione hydrolase_ mitochondrial</b>        | <b>1.342688651</b> | <b>0.127778</b> | <b>7</b> |
| O35952        | ALLEVLGR                                                           | 1.130660691        | 2               | 2.985906 |
| O35952        | FYEGTADMYK                                                         | 1.365347695        | 2               | 3.100673 |
| O35952        | HVEPGNTAVQEK                                                       | 1.005823645        | 2               | 4.01675  |
| O35952        | LTTVLTTHHHWDHAGGNEK                                                | 1.27233716         | 3               | 3.580404 |
| O35952        | NAIGEPTVPSTLAEFTYNPFMR                                             | 1.52492333         | 3               | 4.346018 |
| O35952        | TVQQHAGETDPVTMTR                                                   | 1.636241561        | 2               | 4.745533 |
| O35952        | TVQQHAGETDPVTMTR+Oxidation(14                                      | 1.191778721        |                 |          |
| <b>O35987</b> | <b>NSF1C NSF1 cofactor p47</b>                                     | <b>0.825774743</b> | <b>0.004274</b> | <b>5</b> |
| O35987        | ASSSILINEAEPPTNIQIR                                                | 1.341592715        | 2               | 4.473217 |
| O35987        | EANLLNAVIVQR                                                       | 1.45907816         | 2               | 3.062762 |
| O35987        | LGAAPPEESAYVAGER                                                   | 0.823112107        | 2               | 4.293351 |
| O35987        | SYQDPSNAQFLESIR                                                    | 1.486193919        | 2               | 4.189614 |
| O35987        | TGFSLDNGDLR                                                        | 0.704817848        | 2               | 2.919451 |
| <b>O54753</b> | <b>H17B6 17_beta_hydroxysteroid dehydrogenase type 6</b>           | <b>1.802417354</b> | <b>0.2235</b>   | <b>3</b> |
| O54753        | IVNVSSVLGR                                                         | 1.541481658        | 2               | 2.577216 |
| O54753        | TWEATPEHIR                                                         | 1.87233229         | 2               | 2.401402 |
| O54753        | YGVEAFSDVLR                                                        | 1.55776207         | 2               | 3.291524 |
| <b>O54975</b> | <b>XPP1 Xaa_Pro aminopeptidase 1</b>                               | <b>1.285699243</b> | <b>0.053447</b> | <b>3</b> |
| O54975        | GSLTFEPLTLVPIQTK                                                   | 1.295771839        | 2               | 4.098561 |
| O54975        | IENVVLVPAK                                                         | 1.187419705        | 2               | 2.668395 |
| O54975        | QQADFVDSFPTISSTGPNGAIHYAPIPETNR                                    | 1.51935825         | 3               | 3.717046 |
| <b>O55012</b> | <b>PICA Phosphatidylinositol_binding clathrin assembly protein</b> | <b>1.368466683</b> | <b>0.001849</b> | <b>4</b> |
| O55012        | ATTLSNAVSSLASTGLSLTK                                               | 1.457650892        | 2               | 4.230917 |
| O55012        | ITAAQHSVTGSAVSK                                                    | 1.379286576        | 2               | 4.633418 |
| O55012        | SGLQGYDMSTFIR                                                      | 1.419652062        | 2               | 3.747138 |
| O55012        | STNVAVDSGGGLLKPTVASQNQLPVAK                                        | 1.171730059        | 3               | 5.746399 |
| <b>O55096</b> | <b>DPP3 Dipeptidyl peptidase 3</b>                                 | <b>1.159546317</b> | <b>2.11E-05</b> | <b>7</b> |
| O55096        | AGLLALEFYTPETANWR                                                  | 2.058237019        | 2               | 3.619805 |
| O55096        | GEFEGFVAMVNK                                                       | 1.028422646        | 2               | 2.689551 |
| O55096        | LASVLNTEPALDSELTSK                                                 | 1.444320959        | 2               | 2.987895 |
| O55096        | LEGSEVQLVEYEASAAGLIR                                               | 1.977412043        | 2               | 3.912282 |
| O55096        | NVSLGNVLAVAYATK                                                    | 0.94613353         | 2               | 2.683892 |
| O55096        | SYEFQGNHFQVTR                                                      | 1.22669099         | 2               | 4.033111 |
| O55096        | VLLEAGEGLVTPTTGS DGRPDAR                                           | 1.121053268        | 3               | 3.946887 |
| <b>O55125</b> | <b>NIP51 Protein NipSnap homolog 1</b>                             | <b>1.336495521</b> | <b>0.013629</b> | <b>4</b> |
| O55125        | AGPNIEYLR                                                          | 1.164627683        | 2               | 2.990045 |
| O55125        | FSGGYPALMDCMKN                                                     | 1.333423914        | 2               | 2.999415 |
| O55125        | GW DENVYYTVPLVR                                                    | 0.923732869        | 2               | 3.601168 |
| O55125        | IQFHNKPECLDAYNSL TEAVLPK                                           | 1.664393644        | 3               | 5.098723 |
| <b>O55171</b> | <b>ACOT2 Acyl_coenzyme A thioesterase 2_ mitochondrial</b>         | <b>1.157611397</b> | <b>0.001692</b> | <b>6</b> |
| O55171        | ADAGGELDLAR                                                        | 0.992750723        | 2               | 2.809288 |
| O55171        | DGLLDVVEALQSPLVDKK                                                 | 0.958512374        | 2               | 4.924433 |
| O55171        | DVQKPYVVELEVL DGHDPGGQR                                            | 1.66575859         | 3               | 4.408544 |
| O55171        | GGELGLAMASFLK                                                      | 1.874759971        | 2               | 4.03292  |
| O55171        | IEYFEEAVNYLR                                                       | 1.50750298         | 2               | 4.048993 |
| O55171        | SCWDEPLSITVR                                                       | 1.333953657        | 2               | 3.99257  |
| <b>O70127</b> | <b>ABCBB Bile salt export pump</b>                                 | <b>1.319177166</b> | <b>1.61E-05</b> | <b>7</b> |
| O70127        | AGQITSEALS NIR                                                     | 1.250445308        | 2               | 3.173836 |
| O70127        | AGSIAD EVLSSIR                                                     | 1.844782851        | 2               | 2.9629   |
| O70127        | ILDNLSMVIKPGETTALVGSSGAGK                                          | 1.991430797        | 3               | 4.351305 |
| O70127        | ILLLDEATSALDTESEK                                                  | 1.640422601        | 2               | 4.275761 |
| O70127        | ILLDMATSALDNESEAR                                                  | 7.138849292        | 2               | 2.314258 |

|               |                                                                                           |                    |                 |           |
|---------------|-------------------------------------------------------------------------------------------|--------------------|-----------------|-----------|
| O70127        | KFGEENHAFESDGSNNDDKK                                                                      | 2.182432647        | 3               | 4.490193  |
| O70127        | STALQLIQR                                                                                 | 0.979242522        | 2               | 2.701622  |
| <b>O70133</b> | <b>DHX9 ATP_dependent RNA helicase A</b>                                                  | <b>1.318716911</b> | <b>0.394737</b> | <b>3</b>  |
| O70133        | ELDALDANDELTPLR                                                                           | 1.165516043        | 2               | 2.50678   |
| O70133        | KMTPAYEIRAVGNK                                                                            | 1.890758805        | 2               | 2.443112  |
| O70133        | YSPFFVFGKIR                                                                               | 0.857861833        | 2               | 2.38157   |
| <b>O70173</b> | <b>P3C2G Phosphatidylinositol_4_phosphate 3_kinase C2 domain_containing subunit gamma</b> | <b>1.310037179</b> | <b>0.255747</b> | <b>2</b>  |
| O70173        | LLGDIGEKVK                                                                                | 1.313997603        | 2               | 2.31537   |
| O70173        | WTFSHPLEALGLLTSR                                                                          | 1.279204484        | 2               | 2.425597  |
| <b>O70199</b> | <b>UGDH UDP_glucose_6_dehydrogenase</b>                                                   | <b>1.75343849</b>  | <b>9.9E-20</b>  | <b>14</b> |
| O70199        | EADLVFISVNTPTK                                                                            | 1.422915103        | 2               | 2.352349  |
| O70199        | EQIVVDLSHPGVSADDQVSR                                                                      | 1.317088886        | 2               | 5.617486  |
| O70199        | FSLQDPPNKKPK                                                                              | 2.014697551        | 2               | 2.389528  |
| O70199        | IFDANTKPNLNLQVLSNPEFLAEGTAIK                                                              | 1.906637651        | 3               | 6.625101  |
| O70199        | IIDSLFNTVTDK                                                                              | 1.928405618        | 2               | 2.38015   |
| O70199        | IIDSLFNTVTDKK                                                                             | 1.219966435        | 2               | 3.73759   |
| O70199        | ILTTNTWSSELSK                                                                             | 1.229141326        | 2               | 3.840705  |
| O70199        | INAWNSPTLPIYEPGLK                                                                         | 1.678804106        | 2               | 4.200477  |
| O70199        | MLKPAFIFDGR                                                                               | 2.157126764        | 2               | 2.449353  |
| O70199        | NLFFSTNIDDAIR                                                                             | 1.352637321        | 2               | 3.420667  |
| O70199        | VLDGLHNELQTIGFQIETIGK                                                                     | 1.726151646        | 2               | 5.429731  |
| O70199        | VLIGGETPEGQR                                                                              | 1.276407794        | 2               | 3.52231   |
| O70199        | VTVVDVNEAR                                                                                | 1.464030016        | 2               | 3.179179  |
| O70199        | YWQQVIDMNDYQR                                                                             | 2.782247925        | 2               | 4.284932  |
| <b>O70251</b> | <b>EF1B Elongation factor 1_beta</b>                                                      | <b>1.607743816</b> | <b>0.000212</b> | <b>4</b>  |
| O70251        | SIQADGLVWGSSK                                                                             | 1.189367853        | 2               | 3.314929  |
| O70251        | SSILLDVKPWDEETDMTK                                                                        | 2.010988048        | 2               | 4.272106  |
| O70251        | SSILLDVKPWDEETDMTKLEECVR                                                                  | 2.223709005        | 3               | 5.224351  |
| O70251        | TPAGLQVLNDYLADK                                                                           | 1.242280937        | 2               | 3.97247   |
| <b>O70351</b> | <b>HCD2 3_hydroxyacyl_CoA dehydrogenase type_2</b>                                        | <b>1.401591851</b> | <b>9.9E-20</b>  | <b>17</b> |
| O70351        | EVQAALTAK                                                                                 | 1.307367689        | 2               | 2.621706  |
| O70351        | GGIVGMTLPIAR                                                                              | 1.426616509        | 2               | 3.746668  |
| O70351        | GLVAVITGGASGLGLSTAK                                                                       | 1.350229678        | 2               | 4.849121  |
| O70351        | GVIINTASVAAFEGVQQAAYSASK                                                                  | 1.38102437         | 3               | 4.83826   |
| O70351        | IDVAVNCAGIAVAIK                                                                           | 1.669322342        | 2               | 4.437831  |
| O70351        | KLGGNCIFAPANVTSEK                                                                         | 1.240622138        | 2               | 4.856229  |
| O70351        | KNQVHTLEDFQR                                                                              | 1.073618584        | 2               | 3.955417  |
| O70351        | LGDPAEYAHLVQMVIENPFLNGEVIR                                                                | 1.385759977        | 3               | 5.285328  |
| O70351        | LGGNCIFAPANVTSEK                                                                          | 1.302276384        | 2               | 3.420713  |
| O70351        | LVAGVMGQNEPDQGGQR                                                                         | 4.82499947         | 2               | 5.6786    |
| O70351        | LVGQGATAVLLDVPNSEGETEAK                                                                   | 2.086197138        | 2               | 5.417454  |
| O70351        | LVGQGATAVLLDVPNSEGETEAKK                                                                  | 1.047139324        | 3               | 4.285881  |
| O70351        | NFLASQVPFPSR                                                                              | 1.212901944        | 2               | 4.624768  |
| O70351        | NQVHTLEDFQR                                                                               | 1.296181766        | 2               | 3.333013  |
| O70351        | RLVGQGATAVLLDVPNSEGETEAK                                                                  | 1.240653277        | 2               | 5.55966   |
| O70351        | VINVNLIPTFNVIR                                                                            | 1.496979054        | 2               | 4.605125  |
| O70351        | VVTIAPGLFATPLLTLPDK                                                                       | 1.247544733        | 2               | 5.048592  |
| <b>O70456</b> | <b>1433S 14_3_3 protein sigma</b>                                                         | <b>0.946223428</b> | <b>9.9E-20</b>  | <b>3</b>  |
| O70456        | DSTLIMQLLR                                                                                | 2.095973533        | 2               | 3.748806  |
| O70456        | NLLSVAYK                                                                                  | 0.791190162        | 2               | 2.432096  |
| O70456        | VLSSIEQK                                                                                  | 0.945421048        | 2               | 2.609917  |
| <b>O88202</b> | <b>LPP60 60 kDa lysophospholipase</b>                                                     | <b>1.777908584</b> | <b>0.031884</b> | <b>4</b>  |
| O88202        | AAGAHLSPQLEDVGTLCR                                                                        | 1.498775919        | 3               | 3.897959  |
| O88202        | GEMTLPTDDLLGDDMLGCR                                                                       | 4.034655227        | 2               | 3.822053  |
| O88202        | GVDVDACNEDGQSPLLLAVR                                                                      | 1.792903693        | 2               | 5.098151  |
| O88202        | SEGGVLVPGR                                                                                | 1.467892535        | 2               | 2.543075  |

|               |                                                                                        |                    |                 |           |
|---------------|----------------------------------------------------------------------------------------|--------------------|-----------------|-----------|
| <b>O88379</b> | <b>BAZ1A Bromodomain adjacent to zinc finger domain protein 1A</b>                     | <b>2.101427818</b> | <b>9.99E-10</b> | <b>2</b>  |
| O88379        | ERDKLLK                                                                                | 2.044006999        | 2               | 2.344065  |
| O88379        | NTAKSASKNLR                                                                            | 2.103564652        | 2               | 2.794291  |
| <b>O88397</b> | <b>SO1A5 Solute carrier organic anion transporter family member 1A5</b>                | <b>0.831717765</b> | <b>0.036827</b> | <b>2</b>  |
| O88397        | TCLHWGTLK                                                                              | 0.829239457        | 2               | 2.322559  |
| O88397        | YLEQQYGK                                                                               | 1.432472873        | 2               | 2.767943  |
| <b>O88428</b> | <b>PAPS2 Bifunctional 3__phosphoadenosine 5__phosphosulfate synthase 2</b>             | <b>1.297890019</b> | <b>2.01E-14</b> | <b>6</b>  |
| O88428        | GCTVWLTGLSGAGK                                                                         | 1.892448166        | 2               | 3.267237  |
| O88428        | GFTGIDSDYEKPETPECVLK                                                                   | 1.311690943        | 2               | 4.967531  |
| O88428        | GIHELFPENK                                                                             | 1.70272642         | 2               | 2.757452  |
| O88428        | NLGFSAAGREENIR                                                                         | 1.077322168        | 2               | 3.308253  |
| O88428        | STNVVYQAHVSR                                                                           | 0.787049214        | 2               | 4.255774  |
| O88428        | VLSMAPGLTSVEIIPFR                                                                      | 1.459194764        | 2               | 3.638241  |
| <b>O88491</b> | <b>NSD1 Histone lysine N_methyltransferase_ H3 lysine_36 and H4 lysine_20 specific</b> | <b>0.864318826</b> | <b>0.026267</b> | <b>3</b>  |
| O88491        | ENSEGAFGVLLPADAVQKAR                                                                   | 0.817796032        | 2               | 2.365793  |
| O88491        | ETGIPSLMPQTK                                                                           | 1.600185208        | 2               | 2.320754  |
| O88491        | SGKGEGLKLLNNMHEK                                                                       | 1.585918864        | 2               | 2.759278  |
| <b>O88600</b> | <b>HSP74 Heat shock 70 kDa protein 4</b>                                               | <b>1.131277061</b> | <b>2.24E-06</b> | <b>18</b> |
| O88600        | AESEEMETSQAGSK                                                                         | 1.486124868        | 2               | 4.662004  |
| O88600        | AFSDPFVEAEK                                                                            | 1.077576392        | 2               | 3.02864   |
| O88600        | AGGIETIANEYSDR                                                                         | 1.416873247        | 2               | 3.413489  |
| O88600        | FLEMCDLLAR                                                                             | 0.849487474        | 2               | 2.503016  |
| O88600        | FQESEERPK                                                                              | 1.067721269        | 2               | 2.763741  |
| O88600        | FVSEDRNFTLK                                                                            | 1.456621572        | 2               | 2.782351  |
| O88600        | GCALQCAILSPAFAK                                                                        | 1.043902494        | 2               | 3.800041  |
| O88600        | HAEQNGPVDGQDNPQTAAEHGADTAVPSDGDK                                                       | 0.755822278        | 3               | 5.110522  |
| O88600        | LKETAESVLK                                                                             | 2.884615961        | 2               | 2.53628   |
| O88600        | MIMQDKLEK+Oxidation(0                                                                  | 1.205458895        |                 |           |
| O88600        | MQVDQEEPHTEEQPQTPAENK                                                                  | 1.209196213        | 3               | 5.32193   |
| O88600        | NFTTEQVTAMLLSK                                                                         | 1.57975339         | 2               | 4.117039  |
| O88600        | NKEDQYEHLDAAADMTK                                                                      | 1.77617128         | 3               | 3.74273   |
| O88600        | SNLAYDIVQLPTGLTGK                                                                      | 1.150508463        | 2               | 4.082756  |
| O88600        | SVMDATQIAGLNCLR                                                                        | 2.2329974          | 2               | 3.593034  |
| O88600        | TSTVDLPIESQLLWQLDR                                                                     | 1.365052283        | 2               | 3.707368  |
| O88600        | VLATAFDTLGGR                                                                           | 1.408411117        | 2               | 3.794535  |
| O88600        | WNSPAEEGSSDCEVFPK                                                                      | 1.291490099        | 2               | 3.823145  |
| <b>O88618</b> | <b>FTCD Formimidoyltransferase_cyclodeaminase</b>                                      | <b>1.31518901</b>  | <b>9.9E-20</b>  | <b>21</b> |
| O88618        | AFAACLGAIK                                                                             | 1.172590318        | 2               | 3.131469  |
| O88618        | AGEYEALPEK                                                                             | 0.965654819        | 2               | 2.791129  |
| O88618        | ALLDAAAFYCDK                                                                           | 2.174343881        | 2               | 3.499999  |
| O88618        | ALLDAAAFYCDKEK                                                                         | 1.846303138        | 2               | 3.415438  |
| O88618        | EAQELNLPVVGSQLVGLVPLK                                                                  | 1.350700957        | 3               | 4.275215  |
| O88618        | GVSMDECVLCAK                                                                           | 1.339453602        | 2               | 3.700679  |
| O88618        | IIEYLVPSGPEQSLLDASLR                                                                   | 1.176826031        | 2               | 4.868913  |
| O88618        | ISSLLQEA                                                                               | 1.603932274        | 2               | 2.385606  |
| O88618        | KVQGIGWYLEEK                                                                           | 1.126805109        | 2               | 3.27075   |
| O88618        | LAEELNVPVLYGEAAQMPSR                                                                   | 1.48545279         | 2               | 4.916192  |
| O88618        | LFVLEEEHR                                                                              | 1.028682013        | 2               | 2.84273   |
| O88618        | LGLDSLAPFDPK                                                                           | 1.946952329        | 2               | 3.841317  |
| O88618        | MGALDVCFIPVR                                                                           | 1.326041056        | 2               | 3.937094  |
| O88618        | MGALDVCFIPVR+Oxidation(0                                                               | 0.403679326        |                 |           |
| O88618        | NLAQVSTNLLDFEVTALHTVYEEAR                                                              | 2.321956985        | 3               | 4.104687  |
| O88618        | QAEWVPDFGPSSFVPSWGATVTGAR                                                              | 1.674941144        | 2               | 3.936341  |

|               |                                                                                   |                    |                 |           |
|---------------|-----------------------------------------------------------------------------------|--------------------|-----------------|-----------|
| O88618        | TASQLIDMR                                                                         | 1.251623837        | 2               | 2.369181  |
| O88618        | TCALQEGLR                                                                         | 1.601259835        | 2               | 2.810153  |
| O88618        | TQAALVLSLEAR                                                                      | 1.42820531         | 2               | 5.094145  |
| O88618        | TVYTFVGQPECVVEGALSAAR                                                             | 0.925315805        | 2               | 4.758255  |
| O88618        | VQGIGWYLEEK                                                                       | 1.235553629        | 2               | 3.076946  |
| <b>O88637</b> | <b>PCY2 Ethanolamine_phosphate cytidyltransferase</b>                             | <b>1.231663542</b> | <b>0.113582</b> | <b>9</b>  |
| O88637        | AHSSQEMSSEYR                                                                      | 1.625142128        | 3               | 3.786894  |
| O88637        | GPPVFTQEER                                                                        | 1.345262699        | 2               | 2.70262   |
| O88637        | HKGPPVFTQEER                                                                      | 1.314278971        | 2               | 3.10687   |
| O88637        | HNCDFCVHGNDITLTVDGR                                                               | 1.419310075        | 3               | 3.882883  |
| O88637        | NRLEYEAR                                                                          | 1.571181135        | 2               | 2.409177  |
| O88637        | TEIVPDRDGDSPYEEP                                                                  | 0.93134031         | 2               | 2.869979  |
| O88637        | TQGVSTTDLVGR                                                                      | 1.219905078        | 2               | 3.16976   |
| O88637        | WVDEVVPAAPYVTTLETLDK                                                              | 1.740378021        | 2               | 2.622114  |
| O88637        | YVSEVVIGAPYSVTAELLNHF                                                             | 1.402755712        | 3               | 3.765941  |
| <b>O88656</b> | <b>ARC1B Actin_related protein 2/3 complex subunit 1B</b>                         | <b>0.990851827</b> | <b>0.616942</b> | <b>2</b>  |
| O88656        | ASSEGAATGAGLDSLHK                                                                 | 0.969652443        | 2               | 4.290176  |
| O88656        | NSVSQISVLSGGK                                                                     | 1.28337318         | 2               | 2.531919  |
| <b>O88696</b> | <b>CLPP Putative ATP_dependent Clp protease proteolytic subunit_mitochondrial</b> | <b>1.402680062</b> | <b>0.475913</b> | <b>2</b>  |
| O88696        | GQATDIAIAEEIMK                                                                    | 3.626477071        | 2               | 4.273593  |
| O88696        | VLVHPPQDGEPELVQK                                                                  | 1.277246457        | 3               | 3.952577  |
| <b>O88735</b> | <b>MAP7 Ensconsin</b>                                                             | <b>0.92588366</b>  | <b>0.382658</b> | <b>2</b>  |
| O88735        | KTTEQRNGDIAK                                                                      | 0.821858352        | 2               | 2.57664   |
| O88735        | TSAGTTPPEATR                                                                      | 1.190405468        | 2               | 2.667503  |
| <b>O88746</b> | <b>TOM1 Target of Myb protein 1</b>                                               | <b>1.28588185</b>  | <b>0.417966</b> | <b>3</b>  |
| O88746        | GDLSQHATPLPTPAVLPGDSPITPTPEIQIK                                                   | 1.380223523        | 3               | 5.525964  |
| O88746        | QQSTGAIPATQAR                                                                     | 1.266225555        | 2               | 2.701421  |
| O88746        | YEAPQTTDGLAGALDAR                                                                 | 1.41434868         | 2               | 3.890565  |
| <b>O88761</b> | <b>PSMD1 26S proteasome non_ATPase regulatory subunit 1</b>                       | <b>1.198468164</b> | <b>0.784827</b> | <b>3</b>  |
| O88761        | DTSEDIIEELVPEVAHGP                                                                | 1.156163407        | 2               | 4.180901  |
| O88761        | QGALIASALIMIQQTEITCPK                                                             | 1.381032297        | 2               | 2.414191  |
| O88761        | TVGTPIASVPGSTNTGTVP                                                               | 1.205870084        | 2               | 3.694288  |
| <b>O88767</b> | <b>PARK7 Protein DJ_1</b>                                                         | <b>1.274626408</b> | <b>7.08E-07</b> | <b>8</b>  |
| O88767        | ALVILAK                                                                           | 2.050276846        | 2               | 2.375635  |
| O88767        | DVVICPDTSLLEAK                                                                    | 0.839542931        | 2               | 3.41998   |
| O88767        | GAEEMETVIPVDIMR                                                                   | 0.941742078        | 2               | 4.199682  |
| O88767        | GAEEMETVIPVDIMR+Oxidation(4                                                       | 1.439442181        |                 |           |
| O88767        | GLIAAICAGPTALLAHEVGF                                                              | 1.41547335         | 2               | 4.456868  |
| O88767        | KGLIAAICAGPTALLAHEVGF                                                             | 0.505347947        | 3               | 3.99545   |
| O88767        | TQGPYDVVVLPGGNLGAQNL                                                              | 1.263985386        | 3               | 4.697952  |
| O88767        | VTVAGLAGKDPVQCSR                                                                  | 1.29630473         | 2               | 4.251676  |
| <b>O88794</b> | <b>PNPO Pyridoxine_5__phosphate oxidase</b>                                       | <b>1.560324222</b> | <b>0.639302</b> | <b>3</b>  |
| O88794        | FFTNYESR                                                                          | 1.699466171        | 2               | 2.328628  |
| O88794        | KKNEELGQLYR                                                                       | 1.385272766        | 2               | 2.983276  |
| O88794        | SSQIGAVVSR                                                                        | 2.241122602        | 2               | 2.816856  |
| <b>O88813</b> | <b>ACSL5 Long_chain_fatty_acid__CoA ligase 5</b>                                  | <b>1.337584117</b> | <b>0.004411</b> | <b>14</b> |
| O88813        | AEYLGSCLLHK                                                                       | 0.689582293        | 2               | 2.72412   |
| O88813        | AILEDLQK                                                                          | 1.239418489        | 1               | 2.230862  |
| O88813        | ATMLIENVEK                                                                        | 1.386837723        | 2               | 2.341135  |
| O88813        | FFQTQIK                                                                           | 1.466152213        | 1               | 2.026177  |
| O88813        | GAMLTHQIVSNMAAFLK                                                                 | 1.240126805        | 3               | 3.594405  |
| O88813        | GLAVSDNGPCLGYR                                                                    | 1.611581679        | 2               | 3.432582  |
| O88813        | GSFEELCQNQC                                                                       | 1.312315407        | 2               | 4.42662   |

|               |                                                                     |                    |                 |           |
|---------------|---------------------------------------------------------------------|--------------------|-----------------|-----------|
| O88813        | GYLKDPEK                                                            | 1.101751464        | 2               | 2.393895  |
| O88813        | IGFFQGDIDR                                                          | 1.379383067        | 2               | 3.226534  |
| O88813        | SFLIGVVVPDPESLPSFAAK                                                | 1.212210916        | 2               | 4.350648  |
| O88813        | SIFVHPEPFSIENGLLTPTLK                                               | 1.648812997        | 2               | 3.635881  |
| O88813        | SRPILQVFBHGESLR                                                     | 0.723251445        | 3               | 3.768208  |
| O88813        | TQEVLDKDGWLHTGDIGR                                                  | 1.364535091        | 3               | 3.742496  |
| O88813        | TVILMDPFDDDLMK                                                      | 2.155714858        | 2               | 3.516551  |
| <b>O88867</b> | <b>KMO Kynurenine 3_monooxygenase</b>                               | <b>1.202153566</b> | <b>0.132378</b> | <b>7</b>  |
| O88867        | AVGLEDQIVSK                                                         | 1.201335496        | 2               | 2.494055  |
| O88867        | DFFLLPAQPMISVK                                                      | 1.372694779        | 2               | 2.758301  |
| O88867        | DLLTAVESYPNAK                                                       | 0.95817993         | 2               | 2.393507  |
| O88867        | FNNDLSVCLPEFSR                                                      | 1.204305748        | 2               | 4.060529  |
| O88867        | NFPDAIPLMGEQALMR                                                    | 1.508258229        | 2               | 3.275759  |
| O88867        | SINLALSIR                                                           | 1.447274472        | 2               | 2.387067  |
| O88867        | SQYILSISR                                                           | 0.993983582        | 2               | 2.418317  |
| <b>O88941</b> | <b>MOGS Mannosyl_oligosaccharide glucosidase</b>                    | <b>1.15001843</b>  | <b>0.689736</b> | <b>3</b>  |
| O88941        | ALESHAAAFK                                                          | 0.768179199        | 2               | 2.468373  |
| O88941        | DLALPTLLNPK                                                         | 1.163920651        | 2               | 2.770781  |
| O88941        | MDPSLFPPVPLFSGVPSR                                                  | 1.235001415        | 2               | 2.742331  |
| <b>O88986</b> | <b>KBL 2_ amino_3_ketobutyrate coenzyme A ligase_ mitochondrial</b> | <b>1.618511977</b> | <b>0.242284</b> | <b>3</b>  |
| O88986        | GTDELLGVMDQVTIINSTLKG                                               | 1.620264879        | 2               | 3.994629  |
| O88986        | HLDMADLEAK                                                          | 1.272479989        | 2               | 2.445382  |
| O88986        | VQISAVHSEEDIDR                                                      | 1.332197691        | 2               | 3.961258  |
| <b>O88989</b> | <b>MDHC Malate dehydrogenase_ cytoplasmic</b>                       | <b>1.193157756</b> | <b>5.78E-12</b> | <b>9</b>  |
| O88989        | DLDVAVLVGSMPR                                                       | 2.970839246        | 3               | 4.186115  |
| O88989        | EKMDLTAKELTEEK+Oxidation(2                                          | 1.692698886        |                 |           |
| O88989        | ELTEEKETAFFLSSA                                                     | 5.377448833        | 2               | 3.473678  |
| O88989        | EVGVYEALKDDSWLK                                                     | 2.531524511        | 2               | 4.40612   |
| O88989        | FVEGLPINDFSR                                                        | 1.17498146         | 2               | 3.417434  |
| O88989        | GEFITTQQQR                                                          | 1.238375319        | 2               | 3.980754  |
| O88989        | LGVTADDVK                                                           | 1.120469941        | 2               | 2.922318  |
| O88989        | NVIIWGNHSSTQYPDVNHAK                                                | 1.231381412        | 2               | 5.81141   |
| O88989        | VIVVGNPANTNCLTASK                                                   | 1.193031278        | 2               | 5.243211  |
| <b>O88990</b> | <b>ACTN3 Alpha_actinin_3</b>                                        | <b>1.35574942</b>  | <b>0.708596</b> | <b>10</b> |
| O88990        | AGTQIENIEEDFR                                                       | 1.260993867        | 2               | 3.564615  |
| O88990        | ALDFIASK                                                            | 1.455250916        | 2               | 2.671113  |
| O88990        | CQLEINFNTLQTK                                                       | 1.253264295        | 2               | 3.848874  |
| O88990        | FAIQDISVEETSAK                                                      | 1.397411008        | 2               | 4.343997  |
| O88990        | GAILGIQGEIQK                                                        | 1.724600419        | 2               | 3.074251  |
| O88990        | GLSQEQLNEFR                                                         | 1.283936582        | 2               | 2.714711  |
| O88990        | HEAFESDLAAHQDR                                                      | 1.332086884        | 3               | 4.450583  |
| O88990        | TINEVENQVLTR                                                        | 1.204431959        | 2               | 3.217324  |
| O88990        | VGWEQLLSIAR                                                         | 1.218527627        | 2               | 2.715092  |
| O88990        | VLAVNQENEK                                                          | 2.150636974        | 2               | 2.322774  |
| <b>O88994</b> | <b>MOSC2 MOSC domain_containing protein 2_ mitochondrial</b>        | <b>0.832032733</b> | <b>2.96E-13</b> | <b>4</b>  |
| O88994        | CVLTTVDPDTGIIDR                                                     | 1.0386196          | 2               | 4.322171  |
| O88994        | GVSVCETECTDMGLR                                                     | 1.36799007         | 2               | 3.362385  |
| O88994        | QLQQVGTVSK                                                          | 0.850582693        | 1               | 2.179801  |
| O88994        | RQLQQVGTVSK                                                         | 0.517779568        | 2               | 3.082038  |
| <b>O89000</b> | <b>DPYD Dihydropyrimidine dehydrogenase [NADP_]</b>                 | <b>0.981514503</b> | <b>0.460665</b> | <b>4</b>  |
| O89000        | GMGLACGQDPELVR                                                      | 1.16207689         | 2               | 3.486953  |
| O89000        | LENNFDDIK                                                           | 1.663841832        | 2               | 2.46471   |
| O89000        | QEYVGGSTSEIPQFR                                                     | 0.948915823        | 2               | 3.335798  |
| O89000        | TEQDETGNWVEDEEQIVR                                                  | 3.333649868        | 2               | 4.664864  |
| <b>O89032</b> | <b>SPD2A SH3 and PX domain_containing protein 2A</b>                | <b>0.986584593</b> | <b>0.900729</b> | <b>2</b>  |

|               |                                                         |                    |                 |           |
|---------------|---------------------------------------------------------|--------------------|-----------------|-----------|
| O89032        | DDSDINTSKTGEVSKR                                        | 0.954769998        | 2               | 2.595072  |
| O89032        | FPIEGGQKDPK                                             | 1.172098617        | 2               | 2.374957  |
| <b>O89046</b> | <b>COR1B Coronin_1B</b>                                 | <b>1.269251681</b> | <b>6.61E-06</b> | <b>3</b>  |
| O89046        | NDQCYEDIR                                               | 1.582514475        | 2               | 3.176092  |
| O89046        | NVLSDSKPAGYSR                                           | 1.271383157        | 2               | 3.251743  |
| O89046        | SGVSTATAITDIPSGNLAGSGEAGK                               | 0.50953341         | 2               | 3.864176  |
| <b>O89049</b> | <b>TRXR1 Thioredoxin reductase 1_cytoplasmic</b>        | <b>1.044337649</b> | <b>0.629606</b> | <b>5</b>  |
| O89049        | GFDQDMANK                                               | 1.454802009        | 2               | 2.452626  |
| O89049        | IEQIEAGTPGR                                             | 0.76566776         | 2               | 3.34847   |
| O89049        | IEQIEAGTPGRLK                                           | 1.602260345        | 2               | 2.63139   |
| O89049        | VVGFHVLGPNAGEVTQGFAAALK                                 | 0.941770479        | 3               | 4.422039  |
| O89049        | WGLGGTCVNVGCIPK                                         | 1.080311955        | 2               | 3.632229  |
| <b>O89079</b> | <b>COPE Coatomer subunit epsilon</b>                    | <b>1.239314642</b> | <b>0.45929</b>  | <b>2</b>  |
| O89079        | NAFYIGSYQQCINEAQR                                       | 1.84456159         | 2               | 2.78795   |
| O89079        | YGVVLDEIKPSSAPELQAVR                                    | 1.236856105        | 3               | 4.072258  |
| <b>P00173</b> | <b>CYB5 Cytochrome b5</b>                               | <b>0.986262509</b> | <b>0.999967</b> | <b>6</b>  |
| P00173        | EQAGGDATENFEDVGHSTDR                                    | 0.947475649        | 2               | 5.411125  |
| P00173        | FLEEHPGGEEVLR                                           | 1.0329817          | 2               | 4.134752  |
| P00173        | STWVILHKK                                               | 1.069222571        | 2               | 2.945485  |
| P00173        | TYIIGELHPDDR                                            | 0.978193095        | 2               | 4.085944  |
| P00173        | VYDLTK                                                  | 1.098741739        | 1               | 2.04902   |
| P00173        | YTTLEEIQK                                               | 0.960067697        | 2               | 2.965537  |
| <b>P00388</b> | <b>NCPR NADPH__cytochrome P450 reductase</b>            | <b>1.269960332</b> | <b>8.16E-05</b> | <b>10</b> |
| P00388        | DVQNTFYDIVAEFGPMEHTQAVDVVK                              | 2.206396444        | 3               | 4.781581  |
| P00388        | GMSADPEEYDLADLSSLPEIDK                                  | 1.152665163        | 2               | 4.982845  |
| P00388        | HILAILQDYPSLRPPIDHLCCELLPR                              | 1.567721295        | 4               | 4.965195  |
| P00388        | KKEEIPFSK                                               | 0.970092856        | 2               | 2.736175  |
| P00388        | LEQLGAQR                                                | 1.431986861        | 2               | 2.531348  |
| P00388        | LIHEGGAHIYVCGDAR                                        | 1.85107119         | 3               | 3.638287  |
| P00388        | RSDEDLYR                                                | 1.249346565        | 2               | 2.809881  |
| P00388        | SYENQKPPFDAK                                            | 1.828832832        | 2               | 3.323937  |
| P00388        | TYEHFNAMGK                                              | 1.374130491        | 2               | 2.613553  |
| P00388        | VHPNSVHICAVAVEYEAK                                      | 2.572794144        | 2               | 4.696477  |
| <b>P00406</b> | <b>COX2 Cytochrome c oxidase subunit 2</b>              | <b>1.695407816</b> | <b>0.000348</b> | <b>4</b>  |
| P00406        | ILYMMDEINNPVLTVK                                        | 1.481788165        | 2               | 4.452632  |
| P00406        | LLEVDNR                                                 | 1.674955923        | 2               | 2.409011  |
| P00406        | VVLPMEPIR                                               | 1.293270023        | 2               | 2.440593  |
| P00406        | VVLPMEPIR+Oxidation(4                                   | 1.838468739        |                 |           |
| <b>P00481</b> | <b>OTC Ornithine carbamoyltransferase_mitochondrial</b> | <b>1.09580571</b>  | <b>1.15E-09</b> | <b>18</b> |
| P00481        | EATIPVINGLSLYHPILQILADYLTQEHYGLK                        | 1.333097622        | 3               | 5.483086  |
| P00481        | FGMHLQAATPK                                             | 1.191076743        | 3               | 3.94349   |
| P00481        | GEYLLQGK                                                | 1.284136667        | 2               | 3.094919  |
| P00481        | GGNVLITDTWISMGQEDEK                                     | 0.886137708        | 2               | 5.213381  |
| P00481        | GGNVLITDTWISMGQEDEKK                                    | 0.967053749        | 2               | 4.618746  |
| P00481        | GLTLSWIGDGNLHLSIMMSAAK                                  | 2.050524738        | 2               | 4.178525  |
| P00481        | GYEPDPNIVK                                              | 0.90943518         | 2               | 2.61914   |
| P00481        | LQAFQGYQVTMK                                            | 1.43828067         | 2               | 4.041335  |
| P00481        | LSMTNDPLEAAR                                            | 1.29348337         | 2               | 2.92172   |
| P00481        | LSTETGFALLGGHPSFLTTQDIHLGVNESLTDAR                      | 1.76786702         | 3               | 6.03413   |
| P00481        | QKGEYLLQGK                                              | 0.958910982        | 2               | 3.436462  |
| P00481        | QSDLILAK                                                | 1.121707961        | 1               | 2.063864  |
| P00481        | SLGMIFEK                                                | 1.170880614        | 2               | 2.814793  |
| P00481        | SLVFPEAENR                                              | 1.007871142        | 2               | 2.670156  |
| P00481        | SLVFPEAENRK                                             | 1.084576372        | 2               | 2.938981  |
| P00481        | VLSSMTDAVLAR                                            | 1.477924001        | 2               | 3.931244  |
| P00481        | VLSSMTDAVLAR+Oxidation(4                                | 1.825938664        |                 |           |



|               |                                                      |                    |                 |           |
|---------------|------------------------------------------------------|--------------------|-----------------|-----------|
| P00481        | YGKPVQSQVQLK                                         | 1.057715211        | 2               | 3.067989  |
| <b>P00502</b> | <b>GSTA1 Glutathione S transferase alpha_1</b>       | <b>0.858498391</b> | <b>1</b>        | <b>2</b>  |
| P00502        | FIQSPEDLEK                                           | 1.070525867        | 2               | 2.773433  |
| P00502        | WLLAAAGVEFDEK                                        | 0.800846337        | 2               | 4.375349  |
| <b>P00507</b> | <b>AATM Aspartate aminotransferase_mitochondrial</b> | <b>1.243263031</b> | <b>0.003731</b> | <b>19</b> |
| P00507        | ASAELALGENSEVLK                                      | 1.136780843        | 2               | 4.712006  |
| P00507        | DAGMQLQGYR                                           | 1.261379248        | 2               | 2.725268  |
| P00507        | DDNGKPYVLPVSR                                        | 1.031219168        | 2               | 3.550121  |
| P00507        | EGSSHNWQHITDQIGMFCFTGLKPEQVER                        | 1.357264657        | 3               | 5.225506  |
| P00507        | EYLPIGGLADFCK                                        | 1.514661542        | 2               | 2.889647  |
| P00507        | FVTVQTISGTGALR                                       | 1.23881748         | 2               | 5.166576  |
| P00507        | HFIEQGINVCLCQSYAK                                    | 1.577608217        | 2               | 4.888722  |
| P00507        | IAATILTSPDLR                                         | 1.45927343         | 2               | 3.056549  |
| P00507        | IPEQSVLLHACAHNPTGVDP RPPEQWK                         | 1.341169487        | 3               | 4.736098  |
| P00507        | ISVAGVTSGNVGYLAHAIHQVTK                              | 0.99672822         | 2               | 4.423451  |
| P00507        | KMNLGVGAYR                                           | 1.827048852        | 2               | 2.658391  |
| P00507        | KQWLQEVK                                             | 0.924184828        | 1               | 2.16169   |
| P00507        | MNLGVGAYR                                            | 1.172705347        | 2               | 2.93945   |
| P00507        | NLDKEYLPIGGLADFCK                                    | 1.204636774        | 2               | 5.549309  |
| P00507        | NMGLYGER                                             | 1.417560928        | 2               | 2.667841  |
| P00507        | TCGFDFSGALEDISK                                      | 1.352582844        | 2               | 5.019045  |
| P00507        | TQLVSNLK                                             | 1.141926501        | 2               | 2.918554  |
| P00507        | VGAFVTVCK                                            | 1.233498004        | 2               | 3.231564  |
| P00507        | VGASFLQR                                             | 2.276489805        | 2               | 3.110078  |
| <b>P00564</b> | <b>KCRM Creatine kinase M_type</b>                   | <b>3.090926809</b> | <b>0.990573</b> | <b>9</b>  |
| P00564        | DLFDPIIQDR                                           | 2.878492391        | 2               | 2.781486  |
| P00564        | FEEILTR                                              | 2.153419516        | 2               | 2.491427  |
| P00564        | GGDDLDPNYVLSSR                                       | 1.341757266        | 2               | 4.60846   |
| P00564        | GQSIDDMIPAQK                                         | 6.326523719        | 2               | 3.677099  |
| P00564        | GTGGVDTAAVGAVFDISNADR                                | 5.995813211        | 2               | 5.345188  |
| P00564        | LGSSEVEQVQLVVDGVK                                    | 4.123561904        | 2               | 5.089286  |
| P00564        | LSVEALNSLTGEFK                                       | 0.9851621          | 2               | 4.298793  |
| P00564        | RGTGGVDTAAVGAVFDISNADR                               | 6.111377067        | 2               | 4.147481  |
| P00564        | SMTEQEQQQLIDHFLFDKPVSPLLASGMAR                       | 3.287746138        | 3               | 5.796252  |
| <b>P00787</b> | <b>CATB Cathepsin B</b>                              | <b>1.283032814</b> | <b>0.000333</b> | <b>5</b>  |
| P00787        | EQWSNCPTIAQIR                                        | 1.594548608        | 2               | 2.634252  |
| P00787        | GENHCGIESEIVAGIPR                                    | 1.188093803        | 2               | 4.912913  |
| P00787        | HEAGDVMGGHAIR                                        | 1.316983247        | 3               | 3.86374   |
| P00787        | HEAGDVMGGHAIR+Oxidation(6)                           | 1.505955461        |                 |           |
| P00787        | MCEAGYSTSYKEDK                                       | 1.682584419        | 2               | 4.400453  |
| <b>P00884</b> | <b>ALDOB Fructose_bisphosphate aldolase B</b>        | <b>1.111920169</b> | <b>4.01E-08</b> | <b>21</b> |
| P00884        | ALQASALAAWGGK                                        | 1.510748995        | 2               | 4.983746  |
| P00884        | ATQEAFMK                                             | 1.387985014        | 2               | 2.752935  |
| P00884        | ATQEAFMK+Oxidation(6)                                | 1.314914784        |                 |           |
| P00884        | ELSEIAQR                                             | 1.389888611        | 1               | 2.190262  |
| P00884        | ETTIQGLDGLSER                                        | 1.20046862         | 2               | 3.874769  |
| P00884        | FPALTSEQK                                            | 1.477151766        | 2               | 2.350795  |
| P00884        | GILAADESVGTMGNR                                      | 0.962704354        | 2               | 5.411417  |
| P00884        | GILAADESVGTMGNR+Oxidation(11)                        | 0.968491126        |                 |           |
| P00884        | GIVVGIKLDQGGAPLAGTNK                                 | 1.704775609        | 2               | 4.372091  |
| P00884        | GIVVGIKLDQGGAPLAGTNKETTIQGLDGLSER                    | 1.229893413        | 3               | 5.418768  |
| P00884        | IKVENTEENR                                           | 0.996841886        | 2               | 3.190797  |
| P00884        | IKVENTEENRR                                          | 0.487748715        | 2               | 3.159109  |
| P00884        | ISDQCPSLAIQENANALAR                                  | 1.060216297        | 2               | 6.103848  |
| P00884        | KELSEIAQR                                            | 1.288113721        | 3               | 3.360617  |
| P00884        | KYTPEQVAMATVTALHR                                    | 2.226828809        | 3               | 6.032208  |
| P00884        | KYTPEQVAMATVTALHR+Oxidation(8)                       | 1.62446754         |                 |           |

|               |                                          |                    |                 |           |
|---------------|------------------------------------------|--------------------|-----------------|-----------|
| P00884        | LDQGGAPLAGTNK                            | 1.098319378        | 2               | 4.652489  |
| P00884        | LDQGGAPLAGTNKETTIQGLDGLSER               | 0.768491863        | 3               | 4.306296  |
| P00884        | YASICQQNGLVIVEPEVLPGDHDLEHCQYVSEK        | 1.093324844        | 3               | 4.757306  |
| P00884        | YTPEQVAMATVTALHR                         | 1.32522282         | 2               | 4.639291  |
| P00884        | YTPEQVAMATVTALHR+Oxidation(7             | 1.765303969        |                 |           |
| <b>P01015</b> | <b>ANGT Angiotensinogen</b>              | <b>2.54017702</b>  | <b>9.9E-20</b>  | <b>3</b>  |
| P01015        | GSYNLQDLLAQAK                            | 2.871784984        | 2               | 3.140197  |
| P01015        | SLDLSTDPVLAQAK                           | 2.442448093        | 2               | 3.328705  |
| P01015        | STCAQLENPSVETLPEPTFEPVPIQAK              | 2.767729509        | 2               | 3.904883  |
| <b>P01026</b> | <b>CO3 Complement C3</b>                 | <b>1.360269594</b> | <b>0.003746</b> | <b>21</b> |
| P01026        | ACEPGVDYVYK                              | 1.319157405        | 2               | 2.484009  |
| P01026        | ADIGCTPGSGK                              | 1.083886215        | 2               | 3.021878  |
| P01026        | AFYEHAPK                                 | 1.099697201        | 2               | 2.447774  |
| P01026        | DSCVGLTVVKGDPDR                          | 0.998040767        | 2               | 2.586686  |
| P01026        | EYVLPSEFVLVEPTEK                         | 1.20710663         | 2               | 3.703407  |
| P01026        | IFTVDNLLPVGK                             | 1.592963301        | 2               | 3.585476  |
| P01026        | IGLQEVEVK                                | 1.073125434        | 2               | 2.646303  |
| P01026        | LPYSVVRNEQVEIR                           | 2.166636625        | 2               | 2.328201  |
| P01026        | QNEGFSLTAK                               | 1.081088943        | 2               | 2.457929  |
| P01026        | RVPVVTQGSDAQALTQDDGVAK                   | 1.360160107        | 3               | 5.65816   |
| P01026        | SDVDEDIPEEDIISR                          | 1.408673075        | 2               | 4.503762  |
| P01026        | SGIPIVTSPIYQIHFTK                        | 1.577368601        | 2               | 2.949319  |
| P01026        | SGSDEVQAGQER                             | 1.526072899        | 2               | 3.872476  |
| P01026        | SSVAVPYVIVPLK                            | 1.145891608        | 2               | 2.97736   |
| P01026        | TNQLGLTDQREDPECAKPAAR                    | 1.573749993        | 3               | 3.660022  |
| P01026        | TVLTGATGHLNR                             | 1.882609481        | 2               | 2.841178  |
| P01026        | TVVIVIETPDGVPIKR                         | 1.683074105        | 2               | 2.737586  |
| P01026        | VELKPGDNLNVNFHLR                         | 1.443433368        | 3               | 3.913981  |
| P01026        | VHQFFNVGLIQPGSVK                         | 1.212088183        | 3               | 4.15348   |
| P01026        | VLIEDGSGEAVLSR                           | 1.296573212        | 2               | 3.985111  |
| P01026        | VPVVTQGSDAQALTQDDGVAK                    | 0.762142567        | 2               | 5.569983  |
| <b>P01048</b> | <b>KNT1 T_kininogen 1</b>                | <b>0.99594863</b>  | <b>0.943175</b> | <b>3</b>  |
| P01048        | FSVATQICNITPGK                           | 0.980681826        | 2               | 3.334308  |
| P01048        | KTEEDLCVGCQPMPDSSDLKPVLK                 | 1.228548716        | 4               | 4.659724  |
| P01048        | TELTADCETK                               | 0.951048807        | 2               | 2.347149  |
| <b>P01946</b> | <b>HBA Hemoglobin subunit alpha_1/2</b>  | <b>0.783535897</b> | <b>0.999837</b> | <b>9</b>  |
| P01946        | AADHVEDLPGALSTLSDLHAHK                   | 0.679772608        | 3               | 7.45363   |
| P01946        | FLASVSTVLTSK                             | 0.773696345        | 2               | 4.013084  |
| P01946        | FLSHCLLVTLACHHPGDFTPAMHASLDK             | 1.118030296        | 4               | 5.447568  |
| P01946        | FLSHCLLVTLACHHPGDFTPAMHASLDKFLASVSTVLTSK | 0.98149929         | 5               | 6.357115  |
| P01946        | IGGHGGEYGEEALQR                          | 0.586792246        | 3               | 5.092999  |
| P01946        | LRVDPVNFK                                | 1.386040984        | 2               | 2.572003  |
| P01946        | MFAAFPTTK                                | 0.722079957        | 2               | 2.768029  |
| P01946        | MFAAFPTTK+Oxidation(0                    | 0.775377027        |                 |           |
| P01946        | TYFSHIDVSPGSAQVK                         | 0.615123083        | 2               | 5.037786  |
| <b>P02089</b> | <b>HBB2 Hemoglobin subunit beta_2</b>    | <b>0.7075072</b>   | <b>0.312903</b> | <b>4</b>  |
| P02089        | GTFASLSELHCDK                            | 0.933027006        | 2               | 3.764668  |
| P02089        | LHVDPENFR                                | 0.748314416        | 2               | 2.515554  |
| P02089        | YFDSFGDLSSASAIMGNPK                      | 0.718135741        | 2               | 6.516482  |
| P02089        | YFDSFGDLSSASAIMGNPK+Oxidation(14         | 0.656583846        |                 |           |
| <b>P02091</b> | <b>HBB1 Hemoglobin subunit beta_1</b>    | <b>0.787660792</b> | <b>0.999595</b> | <b>10</b> |
| P02091        | AAVNLWGK                                 | 0.80102012         | 2               | 2.771197  |
| P02091        | AAVNLWGKVNPPDDVGGEALGR                   | 1.109849326        | 3               | 3.614424  |
| P02091        | EFTPCAQAQAFQK                            | 0.805023866        | 2               | 3.175062  |
| P02091        | GTFASLSELHCDK                            | 1.043609471        | 2               | 4.400136  |
| P02091        | GTFASLSELHCDKLHVDPENFR                   | 0.655697673        | 3               | 3.95259   |
| P02091        | KVINAFNDGLK                              | 0.973995569        | 2               | 3.600078  |

|               |                                                             |                    |                 |           |
|---------------|-------------------------------------------------------------|--------------------|-----------------|-----------|
| P02091        | LLGNMIVIVLGHHLGK                                            | 1.159738805        | 4               | 4.618551  |
| P02091        | VINAFNDGLK                                                  | 0.628319027        | 2               | 2.985891  |
| P02091        | VNPDDVGGREALGR                                              | 0.936480079        | 2               | 4.030057  |
| P02091        | VVAGVASALAHK                                                | 0.282382966        | 2               | 3.741721  |
| <b>P02401</b> | <b>RLA2 60S acidic ribosomal protein P2</b>                 | <b>1.357581249</b> | <b>9.9E-20</b>  | <b>6</b>  |
| P02401        | ILDSVGIEADDER                                               | 1.157377821        | 2               | 4.850311  |
| P02401        | KILDSVGIEADDER                                              | 0.601921972        | 2               | 4.009557  |
| P02401        | LASVPAGGAVAVSAAPGSAAPAAGSAPAAAAEEK                          | 1.32255225         | 3               | 5.905732  |
| P02401        | NIEDVIAQGVGK                                                | 1.087080715        | 2               | 4.728252  |
| P02401        | VISELNGK                                                    | 1.342992086        | 1               | 2.088771  |
| P02401        | YVASYLLAALGGNSNPSAK                                         | 1.384548978        | 2               | 5.22184   |
| <b>P02564</b> | <b>MYH7 Myosin_7</b>                                        | <b>0.965163305</b> | <b>0.985873</b> | <b>38</b> |
| P02564        | ALQEAHQALDDLQAEEDKVNTLTK                                    | 0.967350157        | 3               | 5.810663  |
| P02564        | ANDDLKENIAIVER                                              | 1.937599728        | 3               | 3.490001  |
| P02564        | DLEEATLQHEATAAALR                                           | 1.424418977        | 2               | 4.965621  |
| P02564        | DVFPDDKEEFVK                                                | 2.304340518        | 2               | 2.444539  |
| P02564        | EDQVMQQNPPK                                                 | 1.48989066         | 2               | 3.047023  |
| P02564        | EEQAEPDGTTEADK                                              | 2.885334337        | 2               | 3.062848  |
| P02564        | ELENELEAEQK                                                 | 0.983508716        | 2               | 2.377688  |
| P02564        | GQNVQQVAYAIGALAK                                            | 3.046350016        | 2               | 4.065691  |
| P02564        | GTLEDQIIQANPALEAFGNAK                                       | 1.12027908         | 3               | 5.694728  |
| P02564        | IEDEQALGSQLQK                                               | 3.39953928         | 2               | 5.095191  |
| P02564        | IEEEEELEAER                                                 | 2.77386642         | 2               | 4.345762  |
| P02564        | IKELTYQTEEDRK                                               | 2.39683867         | 2               | 2.626855  |
| P02564        | ILNPAAIPEGQFIDSR                                            | 4.623136485        | 2               | 2.769127  |
| P02564        | KLAEKDEEMEQAK                                               | 3.019376308        | 3               | 3.651816  |
| P02564        | KLAEQELIETSER                                               | 1.368783013        | 2               | 3.500719  |
| P02564        | KLEDECSSELKR                                                | 1.236321909        | 3               | 3.819714  |
| P02564        | KVQHELDEAEER                                                | 1.390188746        | 2               | 3.725316  |
| P02564        | LAEQELIETSER                                                | 0.85218792         | 2               | 3.394273  |
| P02564        | LDEAEQIALK                                                  | 3.263276505        | 2               | 3.235038  |
| P02564        | LELDDVTSNMEQIHK                                             | 1.424018352        | 2               | 4.470151  |
| P02564        | LQDAEEAVEAVNAK                                              | 3.270620391        | 2               | 4.68299   |
| P02564        | LQNEIEDLMVDVER                                              | 2.480710518        | 2               | 3.891513  |
| P02564        | LTQESIMDLENDKQQLDER                                         | 4.801919723        | 3               | 3.821725  |
| P02564        | MDADLSQLQTEVEEAVQECR                                        | 1.387967612        | 2               | 4.985244  |
| P02564        | NALAHALQSAR                                                 | 1.60842581         | 2               | 2.369261  |
| P02564        | NAYEESLEHLETFK                                              | 1.295587226        | 2               | 3.410417  |
| P02564        | NLQEEISDLTEQLGSTGK                                          | 2.530584529        | 2               | 5.072156  |
| P02564        | NLTEEMAGLDEIIVK                                             | 1.773530832        | 2               | 3.653981  |
| P02564        | NNLLQAELEELR                                                | 1.968238902        | 2               | 3.596327  |
| P02564        | QAEEAEEQANTNLSK                                             | 4.895013951        | 2               | 5.235196  |
| P02564        | QKYEESQSELESSQK                                             | 1.51238015         | 2               | 3.783156  |
| P02564        | QLEAEKLELQSALEEAESLEHEEGK                                   | 2.987316175        | 3               | 3.607239  |
| P02564        | QREEQAEPDGTTEADK                                            | 2.237762742        | 2               | 3.764917  |
| P02564        | TLEDQMNEHR                                                  | 2.11701936         | 2               | 2.531919  |
| P02564        | VQHELDEAEER                                                 | 0.813912296        | 2               | 3.46862   |
| P02564        | VQLLSQNTSLINQK                                              | 1.529627108        | 2               | 4.098217  |
| P02564        | VVDSLQTSLEAETR                                              | 0.783581629        | 2               | 4.117401  |
| P02564        | YEEESQSELESSQK                                              | 3.88520569         | 2               | 4.325049  |
| <b>P02600</b> | <b>MYL1 Myosin light chain 1/3_ skeletal muscle isoform</b> | <b>1.721342112</b> | <b>0.981689</b> | <b>12</b> |
| P02600        | ALGTNPTNAEVK                                                | 1.648011377        | 2               | 3.336773  |
| P02600        | ALGTNPTNAEVKK                                               | 2.657706313        | 2               | 2.945386  |
| P02600        | DQGGYEDFVEGLR                                               | 0.75563601         | 2               | 3.815994  |
| P02600        | IEFEQFLPMMQAISNNK                                           | 1.278831883        | 3               | 3.915058  |
| P02600        | ITLSQVGDVLR                                                 | 3.843480863        | 2               | 3.588605  |

|               |                                               |                    |                 |           |
|---------------|-----------------------------------------------|--------------------|-----------------|-----------|
| P02600        | KIEFEQFLPMMQAISNNK                            | 1.480198597        | 2               | 4.90061   |
| P02600        | KIEFEQFLPMMQAISNNKQQGGYEDFVEGLR               | 3.146147215        | 3               | 5.513417  |
| P02600        | KPAAAAPAPAPAPAPAPAKPK                         | 1.023549747        | 3               | 3.703246  |
| P02600        | KPAAAAPAPAPAPAPAPAKPKEEK                      | 1.716978305        | 3               | 5.237701  |
| P02600        | KVLGNPSNEEMNAK                                | 2.604845575        | 2               | 3.651822  |
| P02600        | VLGNPSNEEMNAK                                 | 2.612561359        | 2               | 3.918817  |
| P02600        | VLGNPSNEEMNAK+Oxidation(9                     | 1.800386273        |                 |           |
| <b>P02625</b> | <b>PRVA Parvalbumin alpha</b>                 | <b>1.645005904</b> | <b>0.061193</b> | <b>5</b>  |
| P02625        | AIGAFTAADSFDPHK                               | 1.803121633        | 2               | 2.455598  |
| P02625        | AIGAFTAADSFDPHKK                              | 1.93554752         | 2               | 3.85334   |
| P02625        | SGFIEDELGSILK                                 | 1.733656974        | 2               | 4.033356  |
| P02625        | TLMAAGDKDGDGK                                 | 1.338216262        | 2               | 3.388679  |
| P02625        | TLMAAGDKDGDGK+Oxidation(2                     | 1.578039662        |                 |           |
| <b>P02650</b> | <b>APOE Apolipoprotein E</b>                  | <b>1.198481565</b> | <b>0.993514</b> | <b>12</b> |
| P02650        | ELEEQLGPVAEETR                                | 0.742811785        | 2               | 4.211415  |
| P02650        | GRLEEVGNQAR                                   | 1.03824287         | 2               | 3.39432   |
| P02650        | GWFEPLVEDMQR                                  | 1.304390526        | 2               | 3.041346  |
| P02650        | LEEVGNQAR                                     | 0.995572267        | 2               | 2.445335  |
| P02650        | LGADMEDLR                                     | 1.126213742        | 2               | 3.164751  |
| P02650        | LGPLVEQGR                                     | 1.196155038        | 2               | 2.999426  |
| P02650        | LQAEIFQAR                                     | 1.138479545        | 2               | 2.531088  |
| P02650        | MEEQTQQIR                                     | 1.31100481         | 2               | 3.376917  |
| P02650        | NEVNTMLGQSTEELR                               | 1.012474802        | 2               | 4.648191  |
| P02650        | SKMEEQTQQIR                                   | 1.287326369        | 2               | 3.337996  |
| P02650        | SKMEEQTQQIR+Oxidation(2                       | 0.808155293        |                 |           |
| P02650        | TANLGAGAAQPLR                                 | 1.039753351        | 2               | 4.001391  |
| <b>P02680</b> | <b>FIBG Fibrinogen gamma chain</b>            | <b>1.200234556</b> | <b>0.81336</b>  | <b>4</b>  |
| P02680        | LSIGDGQQHHMGGSK                               | 1.521356611        | 2               | 3.406957  |
| P02680        | VGPESDKYR                                     | 1.052544423        | 2               | 2.722304  |
| P02680        | YEALLLTHESSIR                                 | 0.758112285        | 2               | 3.728083  |
| P02680        | YLQDIYSNK                                     | 1.316623294        | 2               | 2.869562  |
| <b>P02692</b> | <b>FABPL Fatty acid binding protein_liver</b> | <b>1.217442407</b> | <b>9.9E-20</b>  | <b>14</b> |
| P02692        | AMGLPEDLIQK                                   | 1.313742178        | 2               | 3.487025  |
| P02692        | AMGLPEDLIQK+Oxidation(1                       | 1.027086836        |                 |           |
| P02692        | GVSEIVHEGK                                    | 1.302523419        | 2               | 3.45281   |
| P02692        | GVSEIVHEGKK                                   | 1.105770585        | 2               | 3.296251  |
| P02692        | MEGDNKMVTTFKGIK+Oxidation(6                   | 1.055644465        |                 |           |
| P02692        | SVTEFNGDTITNTMTLGDIVYK                        | 1.262404657        | 3               | 5.768391  |
| P02692        | SVTEFNGDTITNTMTLGDIVYK+Oxidation(13           | 0.893703167        |                 |           |
| P02692        | SVTEFNGDTITNTMTLGDIVYKR                       | 1.311816315        | 2               | 3.72356   |
| P02692        | VIHNEFTLGEECELETMTGEEK                        | 1.405466221        | 3               | 6.022576  |
| P02692        | VIHNEFTLGEECELETMTGEEK+Oxidation(16           | 1.234889283        |                 |           |
| P02692        | VIHNEFTLGEECELETMTGEEKV                       | 1.487470552        | 3               | 4.905397  |
| P02692        | VKLITYGSK                                     | 1.053961842        | 1               | 2.026615  |
| P02692        | YQVQSQENFEPFMK                                | 1.15627468         | 2               | 5.783623  |
| P02692        | YQVQSQENFEPFMK+Oxidation(12                   | 0.858383118        |                 |           |
| <b>P02696</b> | <b>RET1 Retinol binding protein 1</b>         | <b>1.202414368</b> | <b>0.843886</b> | <b>6</b>  |
| P02696        | ALDVNVALR                                     | 1.503581363        | 2               | 2.974282  |
| P02696        | CMTTVSWDGDKLQCVQK                             | 0.893192911        | 2               | 4.230336  |
| P02696        | EFEEDLTGIDDR                                  | 1.328206579        | 2               | 3.247561  |
| P02696        | EFEEDLTGIDDRK                                 | 1.224643605        | 2               | 3.492052  |
| P02696        | MLSNENFEEYLR                                  | 1.153589618        | 2               | 3.869723  |
| P02696        | MLSNENFEEYLR+Oxidation(0                      | 1.797741044        |                 |           |
| <b>P02706</b> | <b>ASGR1 Asialoglycoprotein receptor 1</b>    | <b>1.260262431</b> | <b>0.636459</b> | <b>5</b>  |
| P02706        | DYQDFQHLDNENDHHQLQR                           | 1.044297782        | 3               | 4.122937  |
| P02706        | LVESQLEK                                      | 1.261835514        | 2               | 2.77993   |
| P02706        | SLSCQMAALR                                    | 1.336671007        | 2               | 2.802929  |

|               |                                         |                    |                 |           |
|---------------|-----------------------------------------|--------------------|-----------------|-----------|
| P02706        | WVCETELGK                               | 1.013692956        | 2               | 2.466769  |
| P02706        | WVDGTDYETGFK                            | 1.053778357        | 2               | 3.185601  |
| <b>P02770</b> | <b>ALBU Serum albumin</b>               | <b>1.289493568</b> | <b>0.004878</b> | <b>25</b> |
| P02770        | AADKDNCFATEGPNLVAR                      | 1.343278229        | 2               | 4.448647  |
| P02770        | AETFFHSDICTLPDKEK                       | 1.225664372        | 3               | 3.369953  |
| P02770        | CCAEGDPPACYGTVLAEFQPLVEEPK              | 2.822753195        | 2               | 5.042186  |
| P02770        | CCSGSLVER                               | 1.404161344        | 2               | 2.885491  |
| P02770        | CCTLPEAQR                               | 1.335514088        | 2               | 3.069529  |
| P02770        | DLGEQHFH                                | 1.573665167        | 1               | 2.134603  |
| P02770        | ECCHGDLLCADDR                           | 1.312230378        | 2               | 3.685987  |
| P02770        | ECCHGDLLCADDRRAELAK                     | 1.507967496        | 2               | 5.554394  |
| P02770        | FKDLGEQHFH                              | 1.1171892          | 3               | 4.184448  |
| P02770        | GLVLIAFSQYLQK                           | 1.779300383        | 2               | 4.128474  |
| P02770        | INKECCHGDLLCADDRRAELAK                  | 1.470163147        | 3               | 4.811833  |
| P02770        | KQTALAEVVK                              | 1.038725531        | 3               | 4.040548  |
| P02770        | KYEATLEK                                | 0.370276955        | 1               | 2.615062  |
| P02770        | LGEYGFQNAVLVR                           | 58.11781446        | 2               | 3.779178  |
| P02770        | LQACCDKPVVLQK                           | 1.401885002        | 2               | 4.048597  |
| P02770        | LVQEVTFDAK                              | 1.008127475        | 2               | 3.512712  |
| P02770        | RHPDYSVSLLR                             | 1.048995699        | 3               | 5.365872  |
| P02770        | SIHTLFGDK                               | 1.465074115        | 1               | 2.59696   |
| P02770        | TCVADENAENC DK                          | 1.051128003        | 2               | 4.585509  |
| P02770        | TNCELYEK                                | 1.272554985        | 2               | 2.86214   |
| P02770        | TVMGDFFAQFVDK                           | 1.292350465        | 2               | 3.88801   |
| P02770        | YEATLEK                                 | 2.040463362        | 1               | 1.963686  |
| P02770        | YMCENQATISSK                            | 1.313113686        | 2               | 4.144084  |
| P02770        | YMCENQATISSK+Oxidation(1                | 1.82144217         |                 |           |
| P02770        | YNEVLTQCCTESDK                          | 1.267980409        | 2               | 5.524978  |
| <b>P02803</b> | <b>MT1 Metallothionein_1</b>            | <b>13.76330663</b> | <b>9.9E-20</b>  | <b>2</b>  |
| P02803        | MDPNCSCSTGGSCCTSSSCGCK                  | 23.92837693        | 3               | 6.52961   |
| P02803        | SCCSCCPVGCSK                            | 8.569997423        | 2               | 4.114416  |
| <b>P04041</b> | <b>GPX1 Glutathione peroxidase 1</b>    | <b>1.153325294</b> | <b>6.75E-11</b> | <b>11</b> |
| P04041        | DYTEMNDLQK                              | 32.24002413        | 2               | 2.412008  |
| P04041        | FLVGPDPVVR                              | 1.124078371        | 2               | 3.217993  |
| P04041        | GLVVLGFPCNQFGHQENK                      | 1.835933058        | 2               | 4.069147  |
| P04041        | GLVVLGFPCNQFGHQENKNEEILNSLK             | 1.284024652        | 3               | 4.200408  |
| P04041        | NALPAPSDPTALMTDPK                       | 1.12649402         | 2               | 3.175985  |
| P04041        | NALPAPSDPTALMTDPK+Oxidation(13          | 0.720173596        |                 |           |
| P04041        | NDISWNFEK                               | 1.163465181        | 2               | 3.022348  |
| P04041        | NEEILNSLK                               | 1.316387945        | 2               | 2.482306  |
| P04041        | TIDIEPDIEALLSK                          | 1.307123949        | 3               | 5.43006   |
| P04041        | YIIWSPVCR                               | 1.247149823        | 2               | 2.802387  |
| P04041        | YVRPGGFEPNFTLFEK                        | 1.376235198        | 3               | 4.708787  |
| <b>P04167</b> | <b>CP2B2 Cytochrome P450 2B2</b>        | <b>1.26515815</b>  | <b>0.577462</b> | <b>2</b>  |
| P04167        | GTIAVIEPIFK                             | 2.36853615         | 2               | 2.914334  |
| P04167        | NLQEILDYIGHIVEK                         | 1.190366665        | 2               | 4.339555  |
| <b>P04176</b> | <b>PH4H Phenylalanine_4_hydroxylase</b> | <b>1.209171133</b> | <b>0.000129</b> | <b>16</b> |
| P04176        | AYGAGLLSFGELQYCLSDPKK                   | 1.421590132        | 3               | 3.505288  |
| P04176        | EDNIPQLEDVVSQFLQTCTGFR                  | 0.992662994        | 3               | 5.16658   |
| P04176        | FANQILSYGAELADHPGFKDPVYR                | 1.539958223        | 3               | 3.989741  |
| P04176        | HGSKPMYTPEPDICHELLGHVPLFSDR             | 1.325757385        | 3               | 3.931993  |
| P04176        | ILADSINSEVGILCNALQK                     | 1.176728149        | 3               | 6.475022  |
| P04176        | LNKDEYEFFTYLDK                          | 4.056171088        | 2               | 3.576324  |
| P04176        | LNKDEYEFFTYLDKR                         | 1.65551368         | 3               | 3.533329  |
| P04176        | LRPVAGLLSSR                             | 1.566076957        | 2               | 2.694805  |
| P04176        | NDIGATVHELRS                            | 1.416192676        | 2               | 3.75022   |
| P04176        | QFADIAYNYR                              | 0.829017785        | 2               | 2.414913  |

|               |                                                                     |                    |                 |           |
|---------------|---------------------------------------------------------------------|--------------------|-----------------|-----------|
| P04176        | SFAQFSQEIGLASLGAPDEYIEK                                             | 1.264181242        | 2               | 4.93304   |
| P04176        | THACYEHNHIFP LLEK                                                   | 1.24443939         | 4               | 4.983132  |
| P04176        | VEVLDNTQQLK                                                         | 1.14948189         | 2               | 3.837695  |
| P04176        | VEYTEEEK                                                            | 1.092029351        | 2               | 2.741987  |
| P04176        | VEYTEEEKQTWGTVFR                                                    | 1.460642624        | 2               | 3.897341  |
| P04176        | YCGFREDNIPQLEDVVSQFLQTCTGFR                                         | 0.98025975         | 3               | 5.129281  |
| <b>P04182</b> | <b>OAT Ornithine aminotransferase_ mitochondrial</b>                | <b>0.882364693</b> | <b>0.754475</b> | <b>8</b>  |
| P04182        | AFYNNVLGEYEEYITK                                                    | 1.275930945        | 2               | 4.600586  |
| P04182        | GIYMWDVEGR                                                          | 0.845999925        | 2               | 3.120709  |
| P04182        | GLLNAIVIR                                                           | 0.837774644        | 2               | 3.261144  |
| P04182        | KTEQGPPSSEYIFER                                                     | 1.748109773        | 2               | 4.158332  |
| P04182        | TEQGPPSSEYIFER                                                      | 0.66195481         | 2               | 3.949803  |
| P04182        | VLPMTGVEAGETACK                                                     | 1.272624208        | 2               | 4.154099  |
| P04182        | WLAVDHENVRPDIVLLGK                                                  | 1.429757333        | 2               | 5.279231  |
| P04182        | YGAHNYHPLVALER                                                      | 0.967119774        | 2               | 4.218908  |
| <b>P04256</b> | <b>ROA1 Heterogeneous nuclear ribonucleoprotein A1</b>              | <b>1.526628471</b> | <b>8.77E-15</b> | <b>4</b>  |
| P04256        | EDSQRPGAHLTVK                                                       | 1.600817562        | 2               | 3.196701  |
| P04256        | IEVIEIMTDR                                                          | 1.466008864        | 2               | 3.424683  |
| P04256        | NQGGYGGSSSSSYGSGR                                                   | 1.001545486        | 2               | 5.167044  |
| P04256        | YHTVNGHNCEVR                                                        | 0.670479417        | 2               | 3.380974  |
| <b>P04276</b> | <b>VTDB Vitamin D_binding protein</b>                               | <b>1.343244784</b> | <b>0.050511</b> | <b>3</b>  |
| P04276        | CCSINSPPR                                                           | 0.807529305        | 2               | 2.525448  |
| P04276        | SCESDAPFPVHPGTSECTK                                                 | 1.892683782        | 2               | 4.631196  |
| P04276        | YCSSLQIDAEMR                                                        | 1.853349353        | 2               | 3.215176  |
| <b>P04355</b> | <b>MT2 Metallothionein_2</b>                                        | <b>28.1664641</b>  | <b>9.9E-20</b>  | <b>2</b>  |
| P04355        | MDPNCSCATDGCSCAGSCK                                                 | 49.52415953        | 2               | 6.244748  |
| P04355        | SCCSCPVGCAK                                                         | 13.66557383        | 2               | 4.253392  |
| <b>P04466</b> | <b>MLRS Myosin regulatory light chain 2_skeletal muscle isoform</b> | <b>2.850042163</b> | <b>0.910385</b> | <b>8</b>  |
| P04466        | AAAEGSSNVFSMFDQTIQIEFK                                              | 1.031089929        | 3               | 5.256758  |
| P04466        | GADPEDVITGAFK                                                       | 0.611077583        | 2               | 4.193979  |
| P04466        | LKGADPEDVITGAFK                                                     | 2.143853621        | 3               | 3.477483  |
| P04466        | NEELDAMMK                                                           | 3.487693079        | 1               | 2.203295  |
| P04466        | NICYVITHGDAK                                                        | 6.311019189        | 2               | 2.844647  |
| P04466        | NICYVITHGDAKDQE                                                     | 3.48985601         | 2               | 4.439586  |
| P04466        | NMWAAFPDPVGGNVDYK                                                   | 2.53191097         | 2               | 3.078714  |
| P04466        | QFLELLTTQCDR                                                        | 2.978034602        | 2               | 3.998131  |
| <b>P04550</b> | <b>PTMS Parathymosin</b>                                            | <b>1.025461333</b> | <b>0.098117</b> | <b>4</b>  |
| P04550        | RTAEEDEADPKR                                                        | 0.863617628        | 3               | 4.10261   |
| P04550        | SVEAAAELSAK                                                         | 0.92210909         | 2               | 3.864644  |
| P04550        | TAEEDEADPK                                                          | 2.074737039        | 2               | 3.33814   |
| P04550        | TAEEDEADPKR                                                         | 1.119255427        | 2               | 3.777864  |
| <b>P04636</b> | <b>MDHM Malate dehydrogenase_ mitochondrial</b>                     | <b>1.209794009</b> | <b>9.9E-20</b>  | <b>19</b> |
| P04636        | AGAGSATLSMAYAGAR                                                    | 1.116782996        | 2               | 4.547983  |
| P04636        | AGAGSATLSMAYAGAR+Oxidation(9                                        | 1.569490289        |                 |           |
| P04636        | ANTFVAELK                                                           | 0.90674501         | 2               | 3.36116   |
| P04636        | EGVIECSFVQSK                                                        | 1.428128792        | 2               | 3.185955  |
| P04636        | ETECTYFSTPLLLGK                                                     | 1.387924485        | 2               | 3.740728  |
| P04636        | FVFSLVDAMNGK                                                        | 1.487078663        | 2               | 4.46147   |
| P04636        | GCDVVVIPAGVPR                                                       | 1.072728153        | 2               | 4.354813  |
| P04636        | GYLGPEQLPDCLK                                                       | 1.199912468        | 2               | 4.257149  |
| P04636        | IFGVTTLDIVR                                                         | 1.717400026        | 2               | 3.355865  |
| P04636        | IQEAGTEVVK                                                          | 1.068703431        | 2               | 2.761916  |
| P04636        | IQEAGTEVVKAK                                                        | 1.058492083        | 2               | 2.879199  |
| P04636        | ITPFEEK                                                             | 1.296135002        | 1               | 1.941665  |
| P04636        | LTLYDIAHTPGVAADLSHIETR                                              | 1.472691942        | 3               | 6.852603  |

|               |                                             |                    |                 |           |
|---------------|---------------------------------------------|--------------------|-----------------|-----------|
| P04636        | MIAEAIPELK                                  | 1.059041586        | 2               | 3.461792  |
| P04636        | MIAEAIPELK+Oxidation(0)                     | 1.405847839        |                 |           |
| P04636        | TIIP LISQCTPK                               | 0.891033558        | 2               | 3.555985  |
| P04636        | VAVLGASGGIGQPLSLLLK                         | 1.249785116        | 2               | 6.293713  |
| P04636        | VDFPQDQLATLTGR                              | 1.020906386        | 2               | 4.724039  |
| P04636        | VNVPVIGGHAGK                                | 1.255893726        | 2               | 3.777545  |
| <b>P04638</b> | <b>APOA2 Apolipoprotein A_II</b>            | <b>1.09551142</b>  | <b>0.99938</b>  | <b>2</b>  |
| P04638        | AQPSEIQNQAK                                 | 1.039480695        | 2               | 2.741534  |
| P04638        | TGTNLMDFLSR                                 | 1.108888134        | 2               | 2.725024  |
| <b>P04639</b> | <b>APOA1 Apolipoprotein A_I</b>             | <b>1.286691333</b> | <b>0.528212</b> | <b>5</b>  |
| P04639        | LQEQLGPVTQEFWANLEK                          | 1.594587631        | 2               | 3.513486  |
| P04639        | NEMNKDLENVK                                 | 1.091050191        | 2               | 3.592044  |
| P04639        | NHPTLIEYHTK                                 | 0.918220705        | 3               | 3.837276  |
| P04639        | QLNLNLLDNWDTLGSTVGR                         | 1.317348803        | 2               | 4.191335  |
| P04639        | WNEEVEAYR                                   | 1.309991454        | 2               | 2.876504  |
| <b>P04642</b> | <b>LDHA L_lactate dehydrogenase A chain</b> | <b>1.118275145</b> | <b>2.22E-16</b> | <b>21</b> |
| P04642        | DLADELALVDVIEDK                             | 1.356079265        | 2               | 5.314399  |
| P04642        | DLADELALVDVIEDKLLK                          | 1.200077056        | 2               | 3.944847  |
| P04642        | DQLIVNLLK                                   | 1.426683728        | 2               | 3.036397  |
| P04642        | DQLIVNLLKEEQVPQNK                           | 1.295506611        | 2               | 4.345291  |
| P04642        | EDVFLSVPCILGQNGISDVVK                       | 1.30888881         | 2               | 4.862667  |
| P04642        | GEMMDLQHGSFLK                               | 1.480512272        | 2               | 4.118213  |
| P04642        | GEMMDLQHGSFLK+Oxidation(2)                  | 1.537900459        |                 |           |
| P04642        | GEMMDLQHGSFLK+Oxidation(3)                  | 1.68960919         |                 |           |
| P04642        | GYTSAIGLSVADLAESIMK                         | 0.813939207        | 2               | 4.884945  |
| P04642        | IVSSKDYSVTANSK                              | 1.009994645        | 2               | 3.639529  |
| P04642        | KSADTLWGIQK                                 | 1.378414705        | 2               | 3.15057   |
| P04642        | LGVHPLSCHGWVLGEHGDSSVPVWSGVNVVAGVSLK        | 1.042722835        | 3               | 5.728759  |
| P04642        | LKGEMMDLQHGSFLK                             | 1.592841302        | 2               | 3.990065  |
| P04642        | NVNIFK                                      | 1.381498798        | 1               | 2.072055  |
| P04642        | QVVD SAYEVIK                                | 1.199190667        | 2               | 3.255652  |
| P04642        | RVHPITMIK                                   | 1.137584042        | 2               | 2.558411  |
| P04642        | SADTLWGIQK                                  | 1.090251038        | 2               | 3.926585  |
| P04642        | SLNPQLGTDADK                                | 0.79023373         | 2               | 2.77051   |
| P04642        | SLNPQLGTDADKEQWK                            | 1.274066871        | 2               | 4.745414  |
| P04642        | SLNPQLGTDADKEQWKDVHK                        | 1.652533497        | 3               | 3.435927  |
| P04642        | VTLTPDEEAR                                  | 0.960818622        | 2               | 3.012887  |
| <b>P04644</b> | <b>RS17 40S ribosomal protein S17</b>       | <b>1.698291145</b> | <b>0.000445</b> | <b>3</b>  |
| P04644        | DNYVPEVSALDQEIIIEVDPDTK                     | 5.561457182        | 2               | 4.276811  |
| P04644        | LLDFGSLSNLQVTQPTVGMNFK                      | 2.587893833        | 2               | 4.723415  |
| P04644        | VCEEIAIIPSK                                 | 1.064182231        | 2               | 3.094233  |
| <b>P04692</b> | <b>TPM1 Tropomyosin alpha_1 chain</b>       | <b>1.363725663</b> | <b>0.844315</b> | <b>10</b> |
| P04692        | AISELDHALNDMTSI                             | 2.581030704        | 2               | 2.563417  |
| P04692        | GTEDELDKYSEALK                              | 1.744105591        | 2               | 3.240455  |
| P04692        | KLVIIESDLER                                 | 1.536086592        | 2               | 3.301363  |
| P04692        | LDKENALDR                                   | 1.810926825        | 2               | 3.089513  |
| P04692        | LKGTEDELDK                                  | 0.452492494        | 2               | 2.498027  |
| P04692        | LVIIESDLER                                  | 1.139755055        | 2               | 3.130812  |
| P04692        | MEIQEIQLK                                   | 1.175448826        | 2               | 3.123402  |
| P04692        | QLEDELVSLQK                                 | 3.032265647        | 2               | 2.405284  |
| P04692        | SIDDELELYAQK                                | 8.422939369        | 2               | 4.381942  |
| P04692        | SKQLEDELVSLQK                               | 0.628465677        | 2               | 3.051079  |
| <b>P04694</b> | <b>ATTY Tyrosine aminotransferase</b>       | <b>4.939624475</b> | <b>9.9E-20</b>  | <b>6</b>  |
| P04694        | ILGPCTIVQGALK                               | 4.856886189        | 2               | 2.937231  |
| P04694        | IQEFCEQHYHCAEGSQEEDCK                       | #NUM!              | 3               | 4.923231  |
| P04694        | LIAEQAVHCLPATCFEYPNFFR                      | 3.160333525        | 3               | 3.981366  |
| P04694        | TACLVVNNPSNPCGVSFSK                         | 10.06198453        | 2               | 4.969268  |

|               |                                            |                    |                 |           |
|---------------|--------------------------------------------|--------------------|-----------------|-----------|
| P04694        | TVISLSIGDPTVFGNLPDPEVTQAMK                 | 4.241275132        | 2               | 3.110275  |
| P04694        | YEPLANLSTNVPIILSCGGLAK                     | 17.11084775        | 2               | 3.604469  |
| <b>P04762</b> | <b>CATA Catalase</b>                       | <b>0.84601082</b>  | <b>9.91E-06</b> | <b>32</b> |
| P04762        | APQKPDVLTGGGNPIGDK                         | 1.05895024         | 2               | 4.341702  |
| P04762        | DAMLFPSFIHSQK+Oxidation(2)                 | 1.192846631        |                 |           |
| P04762        | DAQLFIQR                                   | 1.043151587        | 2               | 2.962406  |
| P04762        | DGPMCMHDNQGGAPNYNPSFSAPEQQGSALEHHSQCSADVK  | 0.899310084        | 4               | 4.763788  |
| P04762        | DGPMCMHDNQGGAPNYNPSFSAPEQQGSALEHHSQCSADVKR | 1.04003926         | 4               | 5.309287  |
| P04762        | DPASDQMK                                   | 1.291356568        | 1               | 2.556772  |
| P04762        | DPASDQMK+Oxidation(6)                      | 1.09600663         |                 |           |
| P04762        | DYPLIPVGK                                  | 3.194275441        | 1               | 2.264439  |
| P04762        | EAETFPFNPFDLTK                             | 1.330696327        | 2               | 3.964568  |
| P04762        | FNSANEDNVTQVR                              | 1.821542432        | 2               | 4.574751  |
| P04762        | FSTVAGESGSADTVR                            | 0.782977467        | 2               | 5.077415  |
| P04762        | FSTVAGESGSADTVRDP                          | 0.962565898        | 2               | 2.655206  |
| P04762        | FYTEDGNWDLVGNNTPIFFIR                      | 1.31044547         | 3               | 6.134441  |
| P04762        | GAGAFGYFEVTHDITR                           | 1.099173995        | 2               | 4.890486  |
| P04762        | GPLLQDVVFTDEMAHFDR                         | 1.24291938         | 2               | 5.509444  |
| P04762        | HMNGYGSHTFK                                | 1.22770775         | 3               | 4.309582  |
| P04762        | HMNGYGSHTFK+Oxidation(1)                   | 0.73806574         |                 |           |
| P04762        | LAQEDPDYGLR                                | 1.031119334        | 2               | 2.920977  |
| P04762        | LCENIANHLK                                 | 1.085064352        | 3               | 4.042245  |
| P04762        | LFAYPDTHR                                  | 1.236161646        | 2               | 2.973321  |
| P04762        | LGPNYLQIPVNCYPYR                           | 1.296735996        | 2               | 4.027653  |
| P04762        | LNIMTAGPR                                  | 1.451270397        | 2               | 3.148905  |
| P04762        | LVNANGEAVYCK                               | 1.057128238        | 2               | 3.909321  |
| P04762        | NAIHTYVQAGSHIAAK                           | 1.668221766        | 3               | 5.625795  |
| P04762        | NFTDVHPDYGAR                               | 0.847266333        | 2               | 4.022915  |
| P04762        | NLPVEEAGR                                  | 0.893323298        | 2               | 2.343341  |
| P04762        | NPANYFAEVEQMAFDPSNMPPGIEPSPDK              | 2.033487956        | 3               | 5.572305  |
| P04762        | RFNSANEDNVTQVR                             | 0.921306615        | 2               | 5.285923  |
| P04762        | VFEHIGK                                    | 1.081246238        | 2               | 2.442874  |
| P04762        | VFEHIGKR                                   | 0.532726506        | 2               | 2.712823  |
| P04762        | VQALLDQYNSQKPK                             | 0.94834156         | 2               | 4.867963  |
| P04762        | VWPHKDYPLIPVGK                             | 1.14339654         | 2               | 3.963643  |
| <b>P04764</b> | <b>ENOA Alpha_enolase</b>                  | <b>1.205809141</b> | <b>4.86E-07</b> | <b>16</b> |
| P04764        | AGYTDQVVIGMDVAASEFYR                       | 2.230330682        | 2               | 4.853869  |
| P04764        | DATNVGDEGGFAPNILENK                        | 1.17712516         | 2               | 5.637426  |
| P04764        | DYPVVSIEDPFDQDDWDAWQK                      | 1.362540902        | 2               | 4.307965  |
| P04764        | FTATAGIQVVGDDTLVTNPK                       | 1.39910473         | 2               | 4.721107  |
| P04764        | GNPTVEVDLYTAK                              | 1.459585843        | 2               | 4.073594  |
| P04764        | HIADLAGNPEVILPVPFNVINGGSHAGNK              | 1.341082391        | 3               | 6.159861  |
| P04764        | IDQLMIEMDGTENK                             | 0.992827712        | 2               | 4.87195   |
| P04764        | IEEELGSK                                   | 1.159453003        | 2               | 2.542156  |
| P04764        | IGAEVYHNLK                                 | 1.111028496        | 2               | 3.308343  |
| P04764        | KLNVEQEK                                   | 0.241890614        | 2               | 2.541519  |
| P04764        | KLNVEQEKIDQLMIEMDGTENK                     | 1.222677543        | 3               | 5.975399  |
| P04764        | LNVEQEK                                    | 1.159830043        | 2               | 3.093401  |
| P04764        | LNVEQEKIDQLMIEMDGTENK                      | 2.848578294        | 3               | 5.294797  |
| P04764        | SCNCLLLK                                   | 1.2459879          | 2               | 2.793944  |
| P04764        | VNQIGSVTESLQACK                            | 1.105479116        | 2               | 4.959307  |
| P04764        | YITPDQLADLYK                               | 1.483077325        | 2               | 3.618766  |
| <b>P04785</b> | <b>PDIA1 Protein disulfide_isomerase</b>   | <b>1.169093991</b> | <b>9.9E-20</b>  | <b>25</b> |
| P04785        | DHENIVIAK                                  | 1.144426432        | 2               | 2.749153  |
| P04785        | EADDIVNWLK                                 | 1.132130803        | 2               | 2.519857  |



|               |                                                     |                    |                 |           |
|---------------|-----------------------------------------------------|--------------------|-----------------|-----------|
| P04785        | HNQLPLVIEFTEQTAPK                                   | 1.222008428        | 3               | 5.459813  |
| P04785        | IFGGEIK                                             | 1.491064969        | 1               | 1.963166  |
| P04785        | IKPHLMSQELPEDWDKQPVK                                | 1.222477373        | 3               | 4.954683  |
| P04785        | IKPHLMSQELPEDWDKQPVK+Oxidation(5                    | 2.059775619        |                 |           |
| P04785        | ILEFFGLK                                            | 1.666516454        | 2               | 2.950265  |
| P04785        | ILFIFIDSDHTDNQR                                     | 1.093004928        | 2               | 2.636509  |
| P04785        | LGETYKDHENIVIAK                                     | 1.189425478        | 3               | 5.504439  |
| P04785        | LITLEEEMTK                                          | 1.256077153        | 2               | 3.577197  |
| P04785        | LITLEEEMTK+Oxidation(7                              | 1.744337845        |                 |           |
| P04785        | LKAEGSEIR                                           | 0.153068453        | 2               | 2.44262   |
| P04785        | LLDFIK                                              | 1.397280442        | 2               | 2.438009  |
| P04785        | MDSTANEVEAVK                                        | 2.761589716        | 2               | 4.264087  |
| P04785        | MDSTANEVEAVK+Oxidation(0                            | 0.986674738        |                 |           |
| P04785        | NFEEVAFDEK                                          | 1.093354633        | 1               | 3.19827   |
| P04785        | NFEEVAFDEKK                                         | 1.318461068        | 2               | 3.977684  |
| P04785        | NNFEGEITK                                           | 1.252557444        | 2               | 2.592288  |
| P04785        | QFLLAEEAVDDIPFGITSNSDVFSK                           | 1.335912191        | 3               | 6.305442  |
| P04785        | TGPAATTLSDTAAAESLVDSSEVTVIGFFK                      | 1.388418704        | 3               | 6.16215   |
| P04785        | THILLFLPK                                           | 1.513475328        | 2               | 3.094292  |
| P04785        | TVIDYNGER                                           | 1.003766035        | 2               | 2.975783  |
| P04785        | VDATEESDLAQQYGVR                                    | 0.971469623        | 2               | 5.461422  |
| P04785        | YKPESDELTAEK                                        | 1.128738338        | 3               | 4.509046  |
| P04785        | YQLDKDGVVLFK                                        | 1.349174999        | 2               | 3.793841  |
| <b>P04797</b> | <b>G3P Glyceraldehyde_3_phosphate dehydrogenase</b> | <b>1.495740086</b> | <b>9.9E-20</b>  | <b>16</b> |
| P04797        | GAAQNIIPASTGAAK                                     | 1.584544365        | 2               | 4.145235  |
| P04797        | GILGYTEDQVVSCDFNSNSHSSTFDAGAGIALNDNFVK              | 2.676532052        | 3               | 4.718456  |
| P04797        | IVSNASCTTNCLAPLAK                                   | 1.3132259          | 2               | 4.96471   |
| P04797        | LISWYDNEYGYSNR                                      | 2.424567633        | 2               | 4.304602  |
| P04797        | LVINGKPITIFQER                                      | 1.329977084        | 3               | 4.376493  |
| P04797        | RVIIAPSADAPMFVMGVNHEK                               | 1.308087443        | 3               | 5.959051  |
| P04797        | VGVNGFGR                                            | 2.564436014        | 2               | 2.34018   |
| P04797        | VIHDNFGIVEGLMTTVHAITATQK                            | 1.495139753        | 3               | 7.570611  |
| P04797        | VIHDNFGIVEGLMTTVHAITATQK+Oxidation(12               | 1.683329006        |                 |           |
| P04797        | VIISAPSADAPMFVMGVNHEK                               | 1.486344044        | 2               | 4.624974  |
| P04797        | VIISAPSADAPMFVMGVNHEK+Oxidation(11                  | 1.628805837        |                 |           |
| P04797        | VIISAPSADAPMFVMGVNHEK+Oxidation(14                  | 1.62453679         |                 |           |
| P04797        | VPTPNVSVVDLTCR                                      | 1.588412231        | 2               | 3.180923  |
| P04797        | VVDLMAYMASK                                         | 1.34944365         | 2               | 3.8111    |
| P04797        | VVDLMAYMASKE                                        | 0.967652678        | 2               | 2.414471  |
| P04797        | WGDAGAEEYVVESTGVFTTMEK                              | 1.435635203        | 2               | 5.568699  |
| <b>P04799</b> | <b>CP1A2 Cytochrome P450 1A2</b>                    | <b>1.916559844</b> | <b>1.11E-12</b> | <b>8</b>  |
| P04799        | FLTNDNTAIDK                                         | 1.463789746        | 2               | 2.627031  |
| P04799        | IGSTPVVLSGLNTIK                                     | 1.516741831        | 2               | 3.364811  |
| P04799        | IHEELDTVIGR                                         | 1.588025119        | 2               | 2.928411  |
| P04799        | KSEEMLNLVK                                          | 0.887686724        | 2               | 2.504278  |
| P04799        | NSIQDITGALFK                                        | 2.193250863        | 2               | 3.775587  |
| P04799        | SMTFNPDSGPVWAAR                                     | 0.982858074        | 2               | 3.422653  |
| P04799        | TCEHVQAWPR                                          | 2.348907061        | 2               | 2.552703  |
| P04799        | TVQEHYQDFNK                                         | 1.779985965        | 2               | 3.728571  |
| <b>P04903</b> | <b>GSTA2 Glutathione S_transferase alpha_2</b>      | <b>1.181825124</b> | <b>0.987208</b> | <b>10</b> |
| P04903        | DGNLMFDQVPMVEIDGMK                                  | 1.741631521        | 2               | 5.289428  |
| P04903        | DGNLMFDQVPMVEIDGMK+Oxidation(10                     | 1.119984567        |                 |           |
| P04903        | DGNLMFDQVPMVEIDGMK+Oxidation(16                     | 1.045976521        |                 |           |
| P04903        | DGNLMFDQVPMVEIDGMK+Oxidation(4                      | 1.159709869        |                 |           |
| P04903        | KDGNLMFDQVPMVEIDGMK                                 | 1.414953923        | 2               | 5.05617   |
| P04903        | LIQSPEDLEK                                          | 7.560786257        | 2               | 3.171128  |

|               |                                                |                    |                 |           |
|---------------|------------------------------------------------|--------------------|-----------------|-----------|
| P04903        | LKKDGNLMFDQVPMVEIDGMK                          | 1.231112257        | 3               | 3.430617  |
| P04903        | WLLAAAGVEFEEEK                                 | 1.300384811        | 2               | 3.689583  |
| P04903        | YDLYGK                                         | 1.101034155        | 1               | 1.976047  |
| P04903        | YLPAFEK                                        | 1.097561276        | 1               | 2.043417  |
| <b>P04904</b> | <b>GSTA3 Glutathione S_transferase alpha_3</b> | <b>1.274682334</b> | <b>9.9E-20</b>  | <b>10</b> |
| P04904        | ADVYLVQVLYHVEELDPSALANFPLK                     | 1.528020109        | 3               | 5.418612  |
| P04904        | ALIDMYAEGVADLDEIVLHYPYIPGGEK                   | 1.587672389        | 4               | 7.754688  |
| P04904        | KPLEDEKCVESAVK                                 | 0.837384049        | 2               | 3.677078  |
| P04904        | LRNDGSLMFQQVPMVEIDGMK                          | 1.248541594        | 2               | 4.824424  |
| P04904        | NDGSLMFQQVPMVEIDGMK                            | 1.324546195        | 2               | 4.926454  |
| P04904        | NDGSLMFQQVPMVEIDGMK+Oxidation(11               | 1.104010166        |                 |           |
| P04904        | NDGSLMFQQVPMVEIDGMK+Oxidation(17               | 1.104643963        |                 |           |
| P04904        | NDGSLMFQQVPMVEIDGMK+Oxidation(5                | 1.096483673        |                 |           |
| P04904        | SHGQDYLVGNR                                    | 1.130991988        | 2               | 3.934017  |
| P04904        | WLLAAAGVEFEEQFLK                               | 1.505525959        | 2               | 5.704055  |
| <b>P04905</b> | <b>GSTM1 Glutathione S_transferase Mu 1</b>    | <b>1.055897756</b> | <b>9.9E-20</b>  | <b>14</b> |
| P04905        | ADIVENQVMDNR                                   | 1.039295931        | 2               | 4.138205  |
| P04905        | ADIVENQVMDNR+Oxidation(8                       | 1.132214208        |                 |           |
| P04905        | CLDAFPNLKDFLAR                                 | 1.250663046        | 2               | 3.118843  |
| P04905        | FKLGLDFPNLPYLIDGSR                             | 1.425410657        | 3               | 5.376539  |
| P04905        | HHLCGETEER                                     | 0.906597139        | 3               | 3.855581  |
| P04905        | IRADIVENQVMDNR                                 | 1.778638969        | 2               | 4.055571  |
| P04905        | ITQSNAIMR                                      | 1.550510747        | 2               | 3.102464  |
| P04905        | ITQSNAIMR+Oxidation(7                          | 1.155991495        |                 |           |
| P04905        | KHHLCGETEER                                    | 1.120740526        | 3               | 4.083635  |
| P04905        | KITQSNAIMR                                     | 0.68157709         | 3               | 4.162561  |
| P04905        | KITQSNAIMR+Oxidation(8                         | 0.487626162        |                 |           |
| P04905        | LGLDFPNLPYLIDGSR                               | 1.494051057        | 2               | 4.717553  |
| P04905        | MQLIMLCYNPDPEK                                 | 3.724823813        | 2               | 4.30947   |
| P04905        | YLSTPIFSK                                      | 0.87638078         | 2               | 2.79507   |
| <b>P04906</b> | <b>GSTP1 Glutathione S_transferase P</b>       | <b>1.046724887</b> | <b>0.796665</b> | <b>2</b>  |
| P04906        | EAALVDMVNDGVEDLR                               | 1.012063182        | 2               | 5.019281  |
| P04906        | STCLYGQLPK                                     | 1.468765107        | 2               | 2.574893  |
| <b>P04937</b> | <b>FINC Fibronectin</b>                        | <b>0.978442003</b> | <b>0.033916</b> | <b>7</b>  |
| P04937        | ATGVFTTLQPLR                                   | 1.283429889        | 2               | 2.390386  |
| P04937        | FTQVSPPTTLTAQWTAPSVK                           | 1.529034595        | 2               | 4.391664  |
| P04937        | HYQINQQWER                                     | 3.156426787        | 2               | 2.558666  |
| P04937        | ITYGETGGNSPVQEFTVPGSK                          | 1.352897407        | 2               | 2.392025  |
| P04937        | SSPVVIDASTAIDAPSNLR                            | 0.892167716        | 2               | 3.260541  |
| P04937        | SYTITGLQPGTDYK                                 | 0.902587529        | 2               | 3.01772   |
| P04937        | YIVNVYQISEEGK                                  | 0.732314666        | 2               | 2.846673  |
| <b>P05065</b> | <b>ALDOA Fructose_bisphosphate aldolase A</b>  | <b>1.547556036</b> | <b>0.9999</b>   | <b>9</b>  |
| P05065        | ADDGRPPQVIK                                    | 1.920184269        | 2               | 2.331577  |
| P05065        | ALANSLACQ GK                                   | 1.539302828        | 2               | 2.871161  |
| P05065        | ALSDHHVYLEGTLKPNMVTGPHACTQK                    | 3.967856576        | 3               | 5.008176  |
| P05065        | FSNEEIAMATVTALR                                | 1.910770858        | 2               | 4.15722   |
| P05065        | GILAADESTGSIK                                  | 1.777405651        | 2               | 3.854153  |
| P05065        | GVVPLAGTNGETTTQGLDGLSER                        | 1.466826487        | 2               | 5.194525  |
| P05065        | IGEHTPSSLAIMENANVLAR                           | 1.262063166        | 2               | 4.411204  |
| P05065        | LQSIGTENTEENR                                  | 4.437548516        | 2               | 4.026505  |
| P05065        | RLQSIGTENTEENR                                 | 2.077503136        | 2               | 3.640539  |
| <b>P05178</b> | <b>CP2C6 Cytochrome P450 2C6</b>               | <b>0.916178746</b> | <b>0.474415</b> | <b>8</b>  |
| P05178        | DLGIVFSHG NR                                   | 1.261851058        | 2               | 2.38239   |
| P05178        | EALIDHGEEFAER                                  | 0.960999738        | 2               | 3.45801   |
| P05178        | FFPDPEIFDPGHFLDGN GK                           | 0.953278321        | 2               | 2.918871  |
| P05178        | FDYKDQDFLNLMEK                                 | 1.557166823        | 3               | 4.913518  |
| P05178        | FIDLIPTNLPHAVTCDIK                             | 1.007063042        | 2               | 3.597299  |

|               |                                  |                    |                 |           |
|---------------|----------------------------------|--------------------|-----------------|-----------|
| P05178        | GTTIITSLSSVLHDSK                 | 1.167511975        | 2               | 3.680686  |
| P05178        | MCAGEGLAR                        | 1.032180182        | 2               | 2.739445  |
| P05178        | NITQSLTSFSK                      | 0.621491834        | 2               | 2.684732  |
| <b>P05179</b> | <b>CP2C7 Cytochrome P450 2C7</b> | <b>1.449434243</b> | <b>0.009221</b> | <b>7</b>  |
| P05179        | ACVGEGLAR                        | 1.331777772        | 2               | 3.081254  |
| P05179        | FINFVPTNLPHAVTCDIK               | 1.893495328        | 3               | 3.343906  |
| P05179        | HMPYTDAMIHEVQR                   | 1.392138755        | 3               | 3.963491  |
| P05179        | IEEHQESLDVTNPR                   | 3.204626667        | 2               | 4.79203   |
| P05179        | KIEEHQESLDVTNPR                  | 1.728263903        | 2               | 4.875001  |
| P05179        | KLPPGPTPLPIIGNFLQIDVK            | 1.731650828        | 3               | 5.745987  |
| P05179        | VLTSLSVLHDSK                     | 1.333479832        | 2               | 2.860887  |
| <b>P05182</b> | <b>CP2E1 Cytochrome P450 2E1</b> | <b>0.945595787</b> | <b>0.170373</b> | <b>16</b> |
| P05182        | AKEHLQSLDINCAR                   | 1.562358342        | 3               | 4.68477   |
| P05182        | DIDLSPVTVFGFSIPPQFK              | 1.869749451        | 2               | 2.759254  |
| P05182        | DRLDMPYMDAVVHEIQR                | 1.224195069        | 3               | 3.35647   |
| P05182        | DTVFQGYVIPK                      | 0.762862809        | 2               | 2.629179  |
| P05182        | DVTDCLLIEMEK                     | 1.519343367        | 2               | 2.650728  |
| P05182        | DVTDCLLIEMEKEK                   | 1.191376532        | 2               | 3.094224  |
| P05182        | DVTDCLLIEMEKEK+Oxidation(9       | 1.21654358         |                 |           |
| P05182        | EHLQSLDINCAR                     | 1.42209565         | 2               | 3.470162  |
| P05182        | FINLVPSNLPHEATR                  | 0.945559773        | 2               | 3.660868  |
| P05182        | FKPEHFLNENGG                     | 0.958792938        | 2               | 3.369728  |
| P05182        | GDIPVFQEQYK                      | 0.949901185        | 2               | 2.594187  |
| P05182        | GIIFNNGPTWK                      | 0.874642095        | 2               | 2.757926  |
| P05182        | GTVVIPTLDSLLYDSHEFPDPEK          | 2.321842035        | 2               | 5.07511   |
| P05182        | LDMPYMDAVVHEIQR                  | 1.338833205        | 2               | 3.116959  |
| P05182        | RVCVGEGLAR                       | 1.666082659        | 2               | 2.356209  |
| P05182        | YGLLILMK                         | 0.977369439        | 2               | 3.009668  |
| <b>P05183</b> | <b>CP3A2 Cytochrome P450 3A2</b> | <b>1.037092215</b> | <b>0.021741</b> | <b>12</b> |
| P05183        | DFGPVVGIMGK                      | 4.126964026        | 2               | 2.867133  |
| P05183        | DIELDGLFIPK                      | 2.626982303        | 2               | 3.584995  |
| P05183        | EMFPIIEQYGDILVK                  | 2.462624626        | 2               | 3.931931  |
| P05183        | KDIELDGLFIPK                     | 1.775799335        | 2               | 2.871392  |
| P05183        | KLQEEIDGALPSK                    | 1.540543221        | 2               | 4.021334  |
| P05183        | LQEEIDGALPSK                     | 0.887377223        | 2               | 4.091887  |
| P05183        | QAILEPEKPIVLK                    | 1.020810108        | 2               | 3.414145  |
| P05183        | QEAETGKPVMTK                     | 0.943317727        | 2               | 3.44976   |
| P05183        | QEAETGKPVMTK+Oxidation(10        | 0.867028531        |                 |           |
| P05183        | RDFGPVVGIMGK                     | 1.247759791        | 2               | 2.390586  |
| P05183        | VDFLQLMLNAHNNSK                  | 1.100075966        | 2               | 3.371002  |
| P05183        | YLKQEAETGKPVMTK                  | 1.352615687        | 3               | 3.316013  |
| <b>P05197</b> | <b>EF2 Elongation factor 2</b>   | <b>1.189822017</b> | <b>9.9E-20</b>  | <b>30</b> |
| P05197        | ALLELQLEPEELYQTFQR               | 2.124603475        | 3               | 5.232966  |
| P05197        | ARPPFDGLAEDIDKGEVSAR             | 1.22681653         | 3               | 6.454622  |
| P05197        | AYLPVNESFGFTADLR                 | 1.346724924        | 2               | 3.781986  |
| P05197        | CELLYEGPPDDEAAMGIK               | 1.263142045        | 2               | 3.657288  |
| P05197        | DLEEDHACIPIK                     | 1.367422478        | 2               | 3.773742  |
| P05197        | DLEEDHACIPIKK                    | 1.647062784        | 2               | 3.719656  |
| P05197        | EGIPALDNFLDK                     | 0.799559196        | 2               | 2.676648  |
| P05197        | EGIPALDNFLDKL                    | 2.899205895        | 2               | 3.449203  |
| P05197        | ETVSEESNVLCLSK                   | 0.893066028        | 2               | 4.452994  |
| P05197        | GEGQLGAAER                       | 0.966826395        | 2               | 3.04751   |
| P05197        | GHVFEESQVAGTPMFVVK               | 1.684419428        | 2               | 5.90146   |
| P05197        | IWCFGPDGTGPNILTDITK              | 1.673448524        | 2               | 5.207613  |
| P05197        | KEDLYLKPIQR                      | 1.424568099        | 2               | 3.372756  |
| P05197        | KIWCFGPDGTGPNILTDITK             | 1.671443903        | 2               | 5.020032  |
| P05197        | KVEDMMK                          | 1.876063084        | 2               | 2.574003  |

|               |                                                   |                    |                 |           |
|---------------|---------------------------------------------------|--------------------|-----------------|-----------|
| P05197        | KVEDMMK+Oxidation(4                               | 1.671215275        |                 |           |
| P05197        | KVEDMMK+Oxidation(5                               | 1.671215275        |                 |           |
| P05197        | LDSEDKDKEGKPLLK                                   | 1.760746676        | 2               | 4.060977  |
| P05197        | NMSVIAHVDHGK                                      | 0.622968544        | 2               | 3.653381  |
| P05197        | NMSVIAHVDHGK+Oxidation(1                          | 1.436950326        |                 |           |
| P05197        | SDPVVSYR                                          | 1.366263173        | 2               | 2.303515  |
| P05197        | STLTDSLCK                                         | 1.886167681        | 2               | 3.181352  |
| P05197        | TFCQLLDPIFK                                       | 1.631963864        | 2               | 4.19923   |
| P05197        | TGTITTFEHAHNMR                                    | 1.383637413        | 2               | 4.00219   |
| P05197        | VFDAIMNFR                                         | 2.381462988        | 2               | 3.315394  |
| P05197        | VFSGVVSTGLK                                       | 1.557752076        | 2               | 3.093052  |
| P05197        | WLPAGDALLQMITIHLPSVTAQK                           | 1.24082258         | 3               | 3.594603  |
| P05197        | YEWVVAEAR                                         | 1.238833483        | 2               | 3.146391  |
| P05197        | YFDPANGK                                          | 1.457547201        | 1               | 2.211807  |
| P05197        | YVEPIEDVPCGNIVGLVGDQFLVK                          | 2.109049996        | 3               | 5.964453  |
| <b>P05369</b> | <b>FPPS Farnesyl pyrophosphate synthase</b>       | <b>1.820415509</b> | <b>0.123118</b> | <b>11</b> |
| P05369        | ALYEELDLR                                         | 1.58565784         | 2               | 3.193428  |
| P05369        | EVLEYNTVGGK                                       | 2.869884181        | 2               | 3.001854  |
| P05369        | GLTVVQTFQELVEPR                                   | 1.442692227        | 3               | 4.219821  |
| P05369        | IKEVLEYNTVGGK                                     | 2.096686893        | 3               | 4.243099  |
| P05369        | QILEENYGQK                                        | 1.919452939        | 2               | 2.616464  |
| P05369        | QILEENYGQKDPEK                                    | 3.155848161        | 2               | 3.600684  |
| P05369        | SLIEQCSAPLPPSIFLELANK                             | 1.577634836        | 2               | 4.851699  |
| P05369        | VGTDIQDNK                                         | 1.107490869        | 2               | 3.797306  |
| P05369        | VLTEDELGHPEK                                      | 1.41842529         | 2               | 2.776193  |
| P05369        | VLTEDELGHPEKGDAITR                                | 1.80260279         | 2               | 4.68737   |
| P05369        | YEEDSYNR                                          | 3.747013354        | 2               | 2.457397  |
| <b>P05426</b> | <b>RL7 60S ribosomal protein L7</b>               | <b>1.287145839</b> | <b>2.22E-16</b> | <b>7</b>  |
| P05426        | AGNFYVPAEPK                                       | 1.417374434        | 2               | 3.064858  |
| P05426        | FGIICMEDLIHEIYTVGK                                | 1.577630894        | 3               | 4.804914  |
| P05426        | KKVPAVPETLK                                       | 1.048969855        | 2               | 2.708109  |
| P05426        | NFAELK                                            | 1.494497374        | 1               | 1.909209  |
| P05426        | SVNELIYK                                          | 1.281073784        | 2               | 2.323863  |
| P05426        | TTHFVEGGDAGNR                                     | 1.227754936        | 3               | 3.750811  |
| P05426        | TTHFVEGGDAGNREDQINR                               | 1.200264048        | 2               | 4.544138  |
| <b>P05544</b> | <b>SPA3L Serine protease inhibitor A3L</b>        | <b>2.023862473</b> | <b>1.04E-08</b> | <b>6</b>  |
| P05544        | AVLDVDETGTEATAATGVATVIR                           | 6.051883625        | 2               | 4.376772  |
| P05544        | DSTMEEILEGLK                                      | 1.680154061        | 2               | 3.119078  |
| P05544        | IAELFSDLEER                                       | 2.13989794         | 2               | 2.959225  |
| P05544        | MQQVESSLQPETLK                                    | 1.493778794        | 2               | 4.184197  |
| P05544        | MQQVESSLQPETLKK                                   | 2.238396823        | 2               | 3.917989  |
| P05544        | VFSQQADLSR                                        | 2.647129576        | 2               | 3.045752  |
| <b>P05545</b> | <b>SPA3K Serine protease inhibitor A3K</b>        | <b>1.622229763</b> | <b>2.39E-08</b> | <b>6</b>  |
| P05545        | AVLDVDETGTEGAAATAVTAALK                           | 1.573902658        | 2               | 5.861452  |
| P05545        | IAELFSELDER                                       | 2.146811422        | 2               | 2.825539  |
| P05545        | IFSQQADLSR                                        | 1.787851516        | 2               | 2.556782  |
| P05545        | KIFSQQADLSR                                       | 2.077765332        | 2               | 2.395085  |
| P05545        | LSQPEDQAEINTGSALFIDKEQPILSEFQEK                   | 1.533159602        | 3               | 3.694756  |
| P05545        | NLHVSQVVHK                                        | 1.09179822         | 2               | 2.474578  |
| <b>P05712</b> | <b>RAB2A Ras_related protein Rab_2A</b>           | <b>1.244685716</b> | <b>0.717861</b> | <b>2</b>  |
| P05712        | IQEGVFDINNEANGIK                                  | 1.310989446        | 2               | 4.561138  |
| P05712        | TASNVEEAFINTAK                                    | 0.937588965        | 2               | 2.974536  |
| <b>P05765</b> | <b>RS21 40S ribosomal protein S21</b>             | <b>1.3507678</b>   | <b>0.039526</b> | <b>3</b>  |
| P05765        | DHASIQMNVAEVDR                                    | 2.003326422        | 2               | 3.935605  |
| P05765        | MGESDDSILR                                        | 4.484693407        | 2               | 3.271136  |
| P05765        | TYGICGAIR                                         | 1.284477217        | 2               | 3.313471  |
| <b>P06214</b> | <b>HEM2 Delta_aminolevulinic acid dehydratase</b> | <b>0.756730626</b> | <b>0.116265</b> | <b>9</b>  |

|               |                                                                   |                    |                 |           |
|---------------|-------------------------------------------------------------------|--------------------|-----------------|-----------|
| P06214        | AGADIITYFAPQLLK                                                   | 1.345750417        | 2               | 3.666084  |
| P06214        | AGAFDLR                                                           | 1.374671193        | 2               | 2.504581  |
| P06214        | AGCQVVAPSDMMDGR                                                   | 1.097770954        | 2               | 3.602797  |
| P06214        | CVLIFGVPSR                                                        | 1.095038847        | 2               | 2.85991   |
| P06214        | DEQGSAADESDSPTIEAVR                                               | 0.673222272        | 2               | 5.828111  |
| P06214        | DIQEGADILMVKPGLPYLDMVQEVK                                         | 1.439497384        | 3               | 4.631339  |
| P06214        | TAVLESMTAFR                                                       | 0.920643151        | 2               | 3.538585  |
| P06214        | VPKDEQGSAADESDSPTIEAVR                                            | 0.81696336         | 3               | 5.806003  |
| P06214        | YGVNQLEEMLRPLVEAGLR                                               | 1.394027316        | 3               | 4.668053  |
| <b>P06302</b> | <b>PTMA Prothymosin alpha</b>                                     | <b>0.93754315</b>  | <b>0.987215</b> | <b>3</b>  |
| P06302        | RVAEDEDDDVETKK                                                    | 0.944077646        | 3               | 5.752995  |
| P06302        | VAEDEDDDVETK                                                      | 0.873308436        | 2               | 4.379636  |
| P06302        | VAEDEDDDVETKK                                                     | 0.916002384        | 2               | 4.803526  |
| <b>P06399</b> | <b>FIBA Fibrinogen alpha chain</b>                                | <b>1.354817145</b> | <b>0.792294</b> | <b>9</b>  |
| P06399        | AQQIQVLQK                                                         | 1.10119988         | 2               | 2.560978  |
| P06399        | EVVTSDDGSDCGDGMGLTHSFSGR                                          | 4.708863886        | 3               | 3.615273  |
| P06399        | GDFANANNFDNTFGQVSEDLR                                             | 1.680057256        | 2               | 5.320885  |
| P06399        | GDFANANNFDNTFGQVSEDLRR                                            | 1.19980289         | 3               | 3.346849  |
| P06399        | GDKELLIGNEK                                                       | 1.175355375        | 2               | 2.565715  |
| P06399        | GLIDEANQDFTNR                                                     | 1.089643966        | 2               | 3.494299  |
| P06399        | MADEAASEAHQEGDTR                                                  | 0.872313049        | 2               | 4.448887  |
| P06399        | SQLQEGPPEWK                                                       | 1.473533921        | 2               | 2.887321  |
| P06399        | TSDSDIFTDIENPSSHVPEFSSSK                                          | 4.926437433        | 3               | 3.861285  |
| <b>P06685</b> | <b>AT1A1 Sodium/potassium_transporting ATPase subunit alpha_1</b> | <b>1.277285178</b> | <b>0.033164</b> | <b>7</b>  |
| P06685        | AVAGDASESALLK                                                     | 1.416038992        | 2               | 3.523507  |
| P06685        | AVFQANQENLPILK                                                    | 1.527077531        | 2               | 3.183305  |
| P06685        | DKYEPAAVSEHGDKK                                                   | 1.711021726        | 3               | 3.742233  |
| P06685        | DMTSEELDDILR                                                      | 0.60518275         | 2               | 2.970131  |
| P06685        | LNIPVNQVNPR                                                       | 1.160948304        | 2               | 3.001853  |
| P06685        | MSINAEDVVVGDLEVEK                                                 | 3.119732564        | 2               | 2.954459  |
| P06685        | YEPAAVSEHGDKK                                                     | 1.247360604        | 2               | 3.293648  |
| <b>P06687</b> | <b>AT1A3 Sodium/potassium_transporting ATPase subunit alpha_3</b> | <b>1.467936728</b> | <b>0.131024</b> | <b>3</b>  |
| P06687        | DGNALTPPPTPEVVK                                                   | 1.359218514        | 2               | 3.36608   |
| P06687        | GVGIISEGNETVEDIAAR                                                | 1.664602841        | 2               | 4.675199  |
| P06687        | QGAIIVAVTGDGVNDSPALK                                              | 1.500852154        | 2               | 4.625836  |
| <b>P06757</b> | <b>ADH1 Alcohol dehydrogenase 1</b>                               | <b>1.101200798</b> | <b>9.68E-06</b> | <b>16</b> |
| P06757        | AAVLWEPHKPFTIEDIEVAPPK                                            | 1.475178648        | 3               | 5.767336  |
| P06757        | FPLELITHVLPFEK                                                    | 1.382981968        | 3               | 4.699811  |
| P06757        | GAIFGGFK                                                          | 0.980019871        | 2               | 2.757236  |
| P06757        | GALLDGTSR                                                         | 1.192672281        | 2               | 2.969497  |
| P06757        | GKPIHHFISTSTFSQYTVVDDIAVAK                                        | 0.901240762        | 3               | 5.342637  |
| P06757        | HPESNLCCQTK                                                       | 0.964349108        | 2               | 3.245449  |
| P06757        | ICKHPESNLCCQTK                                                    | 0.591235234        | 3               | 4.198095  |
| P06757        | IDAAAPLDK                                                         | 1.208630012        | 2               | 2.912627  |
| P06757        | IIAVDINKDK                                                        | 1.437288528        | 2               | 2.954609  |
| P06757        | INEAFDLLR                                                         | 1.226320457        | 2               | 3.638535  |
| P06757        | KFPLELITHVLPFEK                                                   | 0.736979115        | 3               | 4.646807  |
| P06757        | MVATGVCR                                                          | 0.607265458        | 2               | 2.490789  |
| P06757        | SDDHAVSGSLFTPLPAVLGHEGAGIVESIGEGVTCVKPGDK                         | 1.325084215        | 4               | 7.545864  |
| P06757        | VCLIGCFSTGYGSAVQVAK                                               | 1.369773914        | 2               | 6.318457  |
| P06757        | VIPLFSPQCGK                                                       | 1.223642486        | 2               | 3.036831  |
| P06757        | VTPGSTCAVFLGGVGLSVVIGCK                                           | 1.385493675        | 2               | 5.069885  |
| <b>P06761</b> | <b>GRP78 78 kDa glucose_regulated protein</b>                     | <b>1.176377608</b> | <b>9.9E-20</b>  | <b>31</b> |
| P06761        | AKFEELNMDLFR                                                      | 1.460923331        | 3               | 4.668384  |

|               |                                                                                      |                    |                 |           |
|---------------|--------------------------------------------------------------------------------------|--------------------|-----------------|-----------|
| P06761        | DAGTIAGLNVMR                                                                         | 1.363363292        | 2               | 3.651995  |
| P06761        | DNHLLGTFDLTGIPPAPR                                                                   | 3.518926037        | 2               | 4.328493  |
| P06761        | ELEEIVQPIISK                                                                         | 1.612227434        | 2               | 4.317802  |
| P06761        | ETAAYLGK                                                                             | 2.571891981        | 1               | 2.076486  |
| P06761        | FEELNMDLFR                                                                           | 1.315918549        | 2               | 3.676165  |
| P06761        | IEIESFFEGEDFSETLTR                                                                   | 1.685026988        | 2               | 4.74762   |
| P06761        | IEWLESHQDADIEDFK                                                                     | 1.140411831        | 2               | 5.653275  |
| P06761        | IEWLESHQDADIEDFKAK                                                                   | 1.292517455        | 3               | 4.347935  |
| P06761        | IINEPTAAAIAYGLDKR                                                                    | 1.208059009        | 2               | 4.561165  |
| P06761        | ITITNDQNR                                                                            | 1.304246455        | 2               | 2.729604  |
| P06761        | ITPSYVAFTPEGER                                                                       | 1.203267925        | 2               | 4.083008  |
| P06761        | KKELEEIVQPIISK                                                                       | 0.940037502        | 2               | 5.246193  |
| P06761        | KSDIDEIVLVGGSTR                                                                      | 1.172727727        | 2               | 5.014695  |
| P06761        | KSQIFSTASDNQPTVTIK                                                                   | 0.909766003        | 2               | 5.275321  |
| P06761        | LYGSGGPPPTGEEDTSEKDEL                                                                | 0.64614019         | 2               | 5.346279  |
| P06761        | MKETAAYLGK                                                                           | 1.711186229        | 2               | 3.44756   |
| P06761        | MKETAAYLGK+Oxidation(0                                                               | 1.483145375        |                 |           |
| P06761        | MKETAAYLGKK                                                                          | 1.341706578        | 2               | 2.85694   |
| P06761        | NELESYAYSLK                                                                          | 1.16286533         | 2               | 3.371479  |
| P06761        | NQLTSNPENTVFDKAK                                                                     | 1.140139539        | 2               | 4.767647  |
| P06761        | SDIDEIVLVGGSTR                                                                       | 1.104933162        | 2               | 3.805362  |
| P06761        | SQIFSTASDNQPTVTIK                                                                    | 0.954683265        | 2               | 5.369656  |
| P06761        | TFAPEEISAMVLTK                                                                       | 1.703909248        | 3               | 4.75106   |
| P06761        | TFAPEEISAMVLTK+Oxidation(9                                                           | 1.760503471        |                 |           |
| P06761        | TKPYIQVDIGGGQTK                                                                      | 1.309698933        | 3               | 4.711359  |
| P06761        | TWNDPSVQQDIK                                                                         | 1.091205218        | 2               | 3.983099  |
| P06761        | VLEDSLK                                                                              | 1.449853139        | 2               | 2.477257  |
| P06761        | VLEDSLKK                                                                             | 1.255681694        | 2               | 2.518519  |
| P06761        | VTHAVVTVPAYFNDAQR                                                                    | 1.233475539        | 2               | 5.065519  |
| P06761        | VYGERPLTK                                                                            | 1.215940068        | 2               | 2.940212  |
| <b>P06866</b> | <b>HPT Haptoglobin</b>                                                               | <b>1.701034165</b> | <b>9.9E-20</b>  | <b>8</b>  |
| P06866        | ATDLKDWVQETMAK                                                                       | 1.495551037        | 2               | 3.638083  |
| P06866        | GAVSPVGVQPILNK                                                                       | 1.821889189        | 2               | 4.454386  |
| P06866        | HTFCAGLTK                                                                            | 3.519790333        | 1               | 2.4074    |
| P06866        | LQTEGDGIYTLNSEK                                                                      | 2.232666392        | 2               | 4.434931  |
| P06866        | NQLVEIEK                                                                             | 1.769605499        | 1               | 2.332147  |
| P06866        | SCAVAIEGVYVR                                                                         | 2.297889867        | 2               | 3.452167  |
| P06866        | SVVDIGLIK                                                                            | 2.241075561        | 1               | 2.018603  |
| P06866        | YVMLPVADQEK                                                                          | 1.620955772        | 2               | 2.514901  |
| <b>P07150</b> | <b>ANXA1 Annexin A1</b>                                                              | <b>1.759032047</b> | <b>0.008373</b> | <b>2</b>  |
| P07150        | GLGTDEDTLIEILTTR                                                                     | 1.847891266        | 2               | 3.792672  |
| P07150        | GVDEATIIDLTK                                                                         | 1.500180415        | 3               | 4.062901  |
| <b>P07153</b> | <b>RPN1 Dolichyl_diphosphooligosaccharide__protein glycosyltransferase subunit 1</b> | <b>1.251110304</b> | <b>9.9E-20</b>  | <b>16</b> |
| P07153        | ASSFVLALEPELESR                                                                      | 1.614504006        | 2               | 4.246402  |
| P07153        | AVTSEIAVLQSR                                                                         | 0.983710773        | 2               | 3.898068  |
| P07153        | FVDHVFDEQVIDSLTVK                                                                    | 1.236537936        | 2               | 4.648064  |
| P07153        | GEDEEDNNLEVR                                                                         | 1.610049102        | 2               | 3.854733  |
| P07153        | HFDETVNR                                                                             | 1.233623911        | 1               | 2.711969  |
| P07153        | IDHILDAL                                                                             | 3.086249731        | 2               | 2.40005   |
| P07153        | ISIVVETVYTHVLHPYPTQITQSEK                                                            | 1.018519423        | 3               | 4.910236  |
| P07153        | LKTEGSDLCDR                                                                          | 1.637170754        | 3               | 3.43198   |
| P07153        | NIQVDSPYDISR                                                                         | 0.873899474        | 2               | 3.507428  |
| P07153        | NLVEQHIQDIVVHYTFNK                                                                   | 1.201143275        | 3               | 4.90029   |
| P07153        | SEDILDYGPFK                                                                          | 2.553003906        | 2               | 3.48043   |
| P07153        | TEGSDLCDR                                                                            | 2.882860503        | 2               | 2.694712  |

|               |                                                                  |                    |                 |           |
|---------------|------------------------------------------------------------------|--------------------|-----------------|-----------|
| P07153        | TILPAAAQDVVYR                                                    | 1.47725789         | 2               | 2.884317  |
| P07153        | TVDLSSHAK                                                        | 1.519192696        | 2               | 2.587414  |
| P07153        | VHYENNSPFLTITSMTR                                                | 2.770507837        | 2               | 4.037441  |
| P07153        | VTAEVVLAHPGGGSTAR                                                | 1.316822093        | 2               | 4.87007   |
| <b>P07323</b> | <b>ENOG Gamma_enolase</b>                                        | <b>1.20061526</b>  | <b>5.59E-05</b> | <b>3</b>  |
| P07323        | AAVPSGASTGIYEALER                                                | 1.198871349        | 2               | 5.286743  |
| P07323        | GNPTVEVDLHTAK                                                    | 2.48297022         | 2               | 3.172306  |
| P07323        | SGETEDTFIADLVVGLCTGQIK                                           | 1.358876996        | 3               | 4.947917  |
| <b>P07335</b> | <b>KCRB Creatine kinase B_type</b>                               | <b>1.170932452</b> | <b>0.116014</b> | <b>3</b>  |
| P07335        | FCTGLTQIETLFK                                                    | 1.501517803        | 2               | 2.809034  |
| P07335        | LEQQQPIDDLMPPAQK                                                 | 0.760372128        | 2               | 2.723867  |
| P07335        | TDLNPDNLQGGDDLDPNYLSSR                                           | 0.867031402        | 2               | 3.57291   |
| <b>P07340</b> | <b>AT1B1 Sodium/potassium_transporting ATPase subunit beta_1</b> | <b>1.120903862</b> | <b>0.906223</b> | <b>3</b>  |
| P07340        | AYGENIGYSEK                                                      | 1.168424622        | 2               | 2.725038  |
| P07340        | VAPPGLTQIPQIQK                                                   | 1.17145097         | 2               | 2.582728  |
| P07340        | YNPNVLPVQCTGK                                                    | 1.071620054        | 2               | 2.612048  |
| <b>P07379</b> | <b>PCKGC Phosphoenolpyruvate carboxykinase_cytosolic [GTP]</b>   | <b>3.165711974</b> | <b>9.9E-20</b>  | <b>18</b> |
| P07379        | AINPENGFFGVAPGTSVK                                               | 3.338916923        | 2               | 4.443338  |
| P07379        | EEGWLAEHMLILGITNPEGK                                             | 3.836574611        | 2               | 5.145349  |
| P07379        | EIISFGSGYGGNSLLGK                                                | 3.902846301        | 2               | 2.554124  |
| P07379        | EVEIDKYLEQVNADLPYEIER                                            | 1.689524321        | 2               | 4.872244  |
| P07379        | FVEGNAQLCQPEYIHCDSGSEEEYGR                                       | 2.959714443        | 3               | 5.192271  |
| P07379        | GLGDVNVVEELFGISK                                                 | 10.57274824        | 2               | 3.772233  |
| P07379        | IGIELTDSPPYVVASMR                                                | 2.872635149        | 2               | 4.247428  |
| P07379        | MGTSVLEALGDGEFIK                                                 | 3.024849917        | 2               | 4.757786  |
| P07379        | MGTSVLEALGDGEFIK+Oxidation(0                                     | 3.130995958        |                 |           |
| P07379        | TNLAMMNPTLPGWK                                                   | 2.178557326        | 2               | 3.134183  |
| P07379        | TVIITQEQR                                                        | 2.911615188        | 2               | 2.462635  |
| P07379        | VECVGDDIAWMK                                                     | 3.242601604        | 2               | 3.831092  |
| P07379        | VIQGSLSLDPQEV                                                    | 2.476831779        | 2               | 3.90576   |
| P07379        | VLEWMFGR                                                         | 3.880965946        | 2               | 2.530855  |
| P07379        | WMSEDFEK                                                         | 2.813464716        | 2               | 2.374507  |
| P07379        | YDNCWLALTDPR                                                     | 2.814349484        | 2               | 2.519993  |
| P07379        | YLAAPPSACGK                                                      | 1.844232637        | 2               | 2.720623  |
| P07379        | YLEDQVNADLPYEIER                                                 | 1.856843571        | 2               | 5.057472  |
| <b>P07483</b> | <b>FABPH Fatty acid binding protein_heart</b>                    | <b>2.109694371</b> | <b>0.625237</b> | <b>2</b>  |
| P07483        | QVAMTKPTTIEK                                                     | 1.529417142        | 2               | 3.269153  |
| P07483        | WDGQETLTR                                                        | 2.272749317        | 2               | 2.531591  |
| <b>P07632</b> | <b>SODC Superoxide dismutase [Cu_Zn]</b>                         | <b>1.227192434</b> | <b>0.863009</b> | <b>4</b>  |
| P07632        | DGVANVSIEDR                                                      | 1.022977153        | 2               | 2.732336  |
| P07632        | GDPVQGVIFHEQK                                                    | 1.21677781         | 2               | 3.795519  |
| P07632        | HVGDLGNVAAGK                                                     | 1.258763541        | 2               | 4.041987  |
| P07632        | VISLSGEHSIIGR                                                    | 1.288422297        | 2               | 3.029337  |
| <b>P07633</b> | <b>PCCB Propionyl_CoA carboxylase beta chain_mitochondrial</b>   | <b>1.056435611</b> | <b>0.160557</b> | <b>10</b> |
| P07633        | AFDNDVDALCNLR                                                    | 1.108523191        | 2               | 4.076532  |
| P07633        | AYNMLDIIHAVIDER                                                  | 1.285240163        | 2               | 3.886509  |
| P07633        | GFVDDIIQPSSTR                                                    | 1.645753276        | 2               | 3.239844  |
| P07633        | HLLGDTNYAWPTAEIAVMGAK                                            | 1.353510087        | 2               | 5.757886  |
| P07633        | ICCDLEVLASK                                                      | 1.206250397        | 2               | 3.497784  |
| P07633        | IMDQAITVGAPVIGLNDSGGAR                                           | 1.107450324        | 3               | 5.025589  |
| P07633        | LVPELDTVVPLESSK                                                  | 1.590362571        | 2               | 3.703315  |
| P07633        | NKFPGDSVVTGR                                                     | 0.629919888        | 2               | 2.409773  |
| P07633        | SVTNEDVTQEQLGGAK                                                 | 0.824389535        | 2               | 5.244103  |
| P07633        | TVGIVGNQPNVASGCLDINSSVK                                          | 2.02706746         | 2               | 4.914876  |

|               |                                                                   |                    |                |           |
|---------------|-------------------------------------------------------------------|--------------------|----------------|-----------|
| <b>P07687</b> | <b>HYEP Epoxide hydrolase 1</b>                                   | <b>1.462802439</b> | <b>9.9E-20</b> | <b>26</b> |
| P07687        | DIELLYPYK                                                         | 0.997355362        | 1              | 2.302778  |
| P07687        | DKEETLPLGDGWWGPGSKPSAK                                            | 1.779797694        | 3              | 5.655436  |
| P07687        | EDESIRPFK                                                         | 1.1393808          | 2              | 2.951956  |
| P07687        | EDESIRPFKVETSDEEIKDLHQR                                           | 1.43624103         | 3              | 5.9852    |
| P07687        | ELEDGGLER                                                         | 2.634708535        | 2              | 2.348743  |
| P07687        | ENLGQGIMVHK                                                       | 2.269607663        | 2              | 3.200235  |
| P07687        | ENLGQGIMVHK+Oxidation(7                                           | 1.177337096        |                |           |
| P07687        | ESGYLHIQATKPDTVGCALNDSPVGLAAYILEK                                 | 1.702586176        | 3              | 5.669833  |
| P07687        | FHYGFNSNYMK                                                       | 1.095742693        | 2              | 2.625009  |
| P07687        | FLGYTEKDIELLYPYK                                                  | 1.606271893        | 3              | 4.740737  |
| P07687        | FYIQGGDWGSLICTNMAQMVPNHVK                                         | 1.494227605        | 3              | 3.383703  |
| P07687        | GGHFAAFEEP                                                        | 1.531574913        | 2              | 3.461584  |
| P07687        | GLHLNMAFISR                                                       | 1.967737819        | 2              | 2.792075  |
| P07687        | IEGLDIHFHVKPPQLPSGR                                               | 1.05352536         | 3              | 4.260906  |
| P07687        | IIPLLTDPK                                                         | 2.156482793        | 1              | 1.900701  |
| P07687        | KFVSLAELQ                                                         | 1.514424765        | 2              | 2.801633  |
| P07687        | KQVEILNQYPHF                                                      | 1.51171646         | 3              | 5.212343  |
| P07687        | LLAQDIR                                                           | 1.436324566        | 2              | 2.509065  |
| P07687        | QVEILNQYPHF                                                       | 1.12395996         | 2              | 3.594804  |
| P07687        | SEYRELEDGGLER                                                     | 1.156100219        | 3              | 3.664314  |
| P07687        | SFYTMTPLLGQR                                                      | 1.674150812        | 2              | 3.780762  |
| P07687        | SHGLSDEHVFEVICPSIPGYGYSEASSK                                      | 1.883350155        | 3              | 6.595165  |
| P07687        | TKIEGLDIHFHVKPPQLPSGR                                             | 1.200754556        | 3              | 4.031816  |
| P07687        | VETSDEEIK                                                         | 1.049283924        | 2              | 2.628767  |
| P07687        | VETSDEEIKDLHQR                                                    | 1.414642787        | 2              | 4.720473  |
| P07687        | VFVPTGFSAFPSELLHAPEK                                              | 1.644047389        | 2              | 4.541538  |
| <b>P07756</b> | <b>CPSM Carbamoyl_phosphate synthase [ammonia]_ mitochondrial</b> | <b>1.204391559</b> | <b>9.9E-20</b> | <b>99</b> |
| P07756        | AADTIGYPVMIR                                                      | 1.362680119        | 2              | 3.875254  |
| P07756        | AADTIGYPVMIR+Oxidation(9                                          | 1.4707704          |                |           |
| P07756        | AERPDGLILGMGGQTALNCGVELFK                                         | 1.540776039        | 3              | 6.911839  |
| P07756        | AERPDGLILGMGGQTALNCGVELFK+Oxidation(10                            | 1.449367277        |                |           |
| P07756        | AFAISGPFNVQFLVK                                                   | 1.430018388        | 2              | 4.956167  |
| P07756        | AFAMTNQILVER                                                      | 1.394853653        | 2              | 4.58938   |
| P07756        | AFAMTNQILVER+Oxidation(3                                          | 1.493390548        |                |           |
| P07756        | ALENNMSLDEIVK                                                     | 1.20159126         | 2              | 4.813889  |
| P07756        | ALENNMSLDEIVK+Oxidation(5                                         | 1.333070767        |                |           |
| P07756        | AMLSTGFK                                                          | 1.261182033        | 2              | 2.49318   |
| P07756        | AQTAHIVLEDGTK                                                     | 1.058275041        | 2              | 4.477083  |
| P07756        | ATGYPLAFIAAK                                                      | 0.821921222        | 2              | 3.183129  |
| P07756        | CEMASTGEVACFGEGIHAF                                               | 1.163949631        | 3              | 5.408203  |
| P07756        | CEMASTGEVACFGEGIHAF+Oxidation(2                                   | 1.380899182        |                |           |
| P07756        | CLGLTEAQR                                                         | 1.109128873        | 2              | 3.61715   |
| P07756        | DADDNCVTVCNMENV DAMGVHTGDSVVVAPAQTL SNAEFQMLR                     | 3.827529453        | 3              | 5.164364  |
| P07756        | DELGLNK                                                           | 1.298965767        | 1              | 2.347505  |
| P07756        | DGSIDLVINLPNNNTK                                                  | 0.88890865         | 2              | 5.315105  |
| P07756        | DILNMDK                                                           | 1.293051745        | 1              | 2.032569  |
| P07756        | EIEYEVVR                                                          | 2.689141209        | 1              | 2.093131  |
| P07756        | EIGFSDKQISK                                                       | 1.491085931        | 2              | 3.147104  |
| P07756        | EPLFGISTGNIITGLAAGAK                                              | 1.168951348        | 3              | 5.656631  |
| P07756        | ETLMDLGTK                                                         | 1.71406816         | 1              | 2.33659   |
| P07756        | EVEMDAVGK                                                         | 2.339963785        | 1              | 2.110601  |
| P07756        | FIEGAREVEMDAVGKEGR                                                | 1.11589578         | 3              | 3.648398  |
| P07756        | FLEEATR                                                           | 249.6600141        | 2              | 2.46326   |
| P07756        | FLGVAEQLHNEGFK                                                    | 1.063857905        | 2              | 4.80351   |



|        |                                                       |             |   |          |
|--------|-------------------------------------------------------|-------------|---|----------|
| P07756 | FVHDNYVIR                                             | 1.026871561 | 3 | 3.352191 |
| P07756 | GAEVHLPWNHDFMQMDYDGLLIAGGPGNPALAQPLIQNVK              | 1.6363095   | 3 | 6.069028 |
| P07756 | GAEVHLPWNHDFMQMDYDGLLIAGGPGNPALAQPLIQNVK+Oxidation(15 | 1.588320029 |   |          |
| P07756 | GILIGIQSFRPR                                          | 1.560848789 | 2 | 2.461312 |
| P07756 | GLNSESVTEETLR                                         | 1.141494381 | 2 | 4.848074 |
| P07756 | GNDVLVIECNLR                                          | 1.102009094 | 2 | 4.459745 |
| P07756 | GQILTMANPIIGNGGAPDTTAR                                | 0.954819742 | 2 | 6.004269 |
| P07756 | GQILTMANPIIGNGGAPDTTAR+Oxidation(5                    | 1.416247985 |   |          |
| P07756 | GQILTMANPIIGNGGAPDTTARDELGLNK                         | 1.030417008 | 3 | 4.912012 |
| P07756 | GQNQPVLNITNR                                          | 1.060736671 | 2 | 4.38972  |
| P07756 | GTTITSVLKPKALVASR                                     | 1.485563234 | 2 | 3.354508 |
| P07756 | GYSFGHPSSVAGEVVFNTGLGGYSEALDTPAYK                     | 1.296666613 | 3 | 5.980975 |
| P07756 | HLPTLEQPIIPSDYVAIK                                    | 1.27098293  | 2 | 5.585216 |
| P07756 | IALGIPLPEIK                                           | 1.42052455  | 2 | 2.827316 |
| P07756 | IAPSFAVESMEDALK                                       | 1.925085562 | 2 | 5.256878 |
| P07756 | IAPSFAVESMEDALK+Oxidation(9                           | 1.400248592 |   |          |
| P07756 | IAPSFAVESMEDALKAADTIGYPVMIR                           | 1.639343725 | 3 | 4.130747 |
| P07756 | IEFEGQSVDFVDPNK                                       | 1.429143453 | 2 | 5.298659 |
| P07756 | IEFEGQSVDFVDPNKQNLIAEVSTK                             | 0.930172006 | 3 | 5.551414 |
| P07756 | ILDYHQEACNGCIISVGGQIPNNLAVPLYK                        | 1.628827804 | 3 | 5.62339  |
| P07756 | ILESDRKEPLFGISTGNIITGLAAGAK                           | 1.292223019 | 3 | 4.697627 |
| P07756 | IMGTSPLQIDR                                           | 1.678527472 | 2 | 3.269569 |
| P07756 | IMGTSPLQIDR+Oxidation(1                               | 2.914839586 |   |          |
| P07756 | IMGTSPLQIDRAEDR                                       | 1.0448469   | 2 | 2.517004 |
| P07756 | KEPLFGISTGNIITGLAAGAK                                 | 1.313767401 | 2 | 5.107969 |
| P07756 | KTVVVNCPNPETVSTDFDECDK                                | 0.34024483  | 2 | 4.981089 |
| P07756 | LFAEAVQK                                              | 1.223581332 | 2 | 3.44823  |
| P07756 | LFATEATSDWLNANNVPATPVAWPSQEGQNPSSLSSIR                | 1.502707992 | 4 | 4.715882 |
| P07756 | LRDADPILR                                             | 1.332214844 | 2 | 3.211143 |
| P07756 | LTSIDKWFLYK                                           | 0.861503281 | 2 | 2.764988 |
| P07756 | LYFEELSLER                                            | 2.783683997 | 2 | 3.672669 |
| P07756 | MCHPSVDGFTPR                                          | 1.62957446  | 3 | 4.897567 |
| P07756 | MCHPSVDGFTPR+Oxidation(0                              | 1.33975969  |   |          |
| P07756 | MRDILNMDK                                             | 1.404411704 | 2 | 3.147745 |
| P07756 | MRDILNMDK+Oxidation(0                                 | 1.586056572 |   |          |
| P07756 | QADAVYFLPITPQFVTEVIK                                  | 1.417012777 | 3 | 4.194491 |
| P07756 | QLFSDKLEINEK                                          | 1.207667913 | 2 | 3.825253 |
| P07756 | QNLIAEVSTK                                            | 1.041919132 | 1 | 2.639273 |
| P07756 | RFLEEATR                                              | 1.293479338 | 2 | 2.689963 |
| P07756 | RGAEVHLPWNHDFMQMDYDGLLIAGGPGNPALAQPLIQNVK             | 1.824804009 | 4 | 4.629644 |
| P07756 | RTAVDSGIALLTNFQVTK                                    | 1.189396673 | 2 | 5.165077 |
| P07756 | RTSINVVR                                              | 0.840383742 | 2 | 2.339925 |
| P07756 | SAYALGGLGSGICPNK                                      | 1.090737213 | 2 | 4.949467 |
| P07756 | SAYALGGLGSGICPNKETLMDLGTK                             | 1.236020637 | 3 | 4.694944 |
| P07756 | SIFSAVLDELK                                           | 1.08145144  | 2 | 3.834886 |
| P07756 | SIFSAVLDELKVAQAPWK                                    | 1.262271901 | 3 | 4.29703  |
| P07756 | SLGQWLQEEK                                            | 1.124373705 | 2 | 4.064531 |
| P07756 | SLGQWLQEEKVPAIYGVDR                                   | 1.369626065 | 2 | 3.795402 |
| P07756 | SVGEVMAIGR                                            | 1.136216573 | 2 | 3.518286 |
| P07756 | SVGEVMAIGR+Oxidation(5                                | 0.845216682 |   |          |
| P07756 | TAVDSGIALLTNFQVTK                                     | 1.370039852 | 3 | 6.506335 |
| P07756 | TAVDSGIALLTNFQVTKLFAEAVQK                             | 1.567858885 | 3 | 5.416379 |
| P07756 | TFEESFQK                                              | 1.121934336 | 2 | 2.503366 |
| P07756 | TLGVDFIDVATK                                          | 1.003628126 | 2 | 4.283441 |

|               |                                                    |                    |                 |           |
|---------------|----------------------------------------------------|--------------------|-----------------|-----------|
| P07756        | TSACFEPPLDYMVTK                                    | 1.132763365        | 2               | 4.556084  |
| P07756        | TSACFEPPLDYMVTK+Oxidation(11)                      | 0.798624598        |                 |           |
| P07756        | TVLMNPNIASVQTNEVGLK                                | 1.101426289        | 2               | 6.116317  |
| P07756        | TVLMNPNIASVQTNEVGLK+Oxidation(3)                   | 1.41914138         |                 |           |
| P07756        | TVVVNCNPETVSTDFDECDK                               | 0.568097758        | 2               | 5.61548   |
| P07756        | TVVVNCNPETVSTDFDECDKLYFEELSRLER                    | 2.671618651        | 3               | 5.563974  |
| P07756        | VISHAISEHVEDAGVHSGDATLMLPTQTISQGAIEK               | 1.26446367         | 3               | 7.425854  |
| P07756        | VISHAISEHVEDAGVHSGDATLMLPTQTISQGAIEK+Oxidation(22) | 1.498655804        |                 |           |
| P07756        | VLGTSVESIMATEDR                                    | 1.183247211        | 2               | 4.702561  |
| P07756        | VLGTSVESIMATEDR+Oxidation(9)                       | 1.032500186        |                 |           |
| P07756        | VLILGSGGLSIGQAGFDYSGSQAVK                          | 1.435490597        | 2               | 5.823526  |
| P07756        | VMIGESVDEK                                         | 1.141673771        | 2               | 3.688676  |
| P07756        | VMIGESVDEK+Oxidation(1)                            | 0.970865731        |                 |           |
| P07756        | VSQEHVPLTK                                         | 1.37248489         | 2               | 3.84969   |
| P07756        | VVAVDCGIK                                          | 1.525074745        | 2               | 2.525378  |
| P07756        | VVAVDCGIKNNVIR                                     | 1.000113056        | 2               | 3.800945  |
| P07756        | YMESDGIK                                           | 1.073039347        | 2               | 2.613149  |
| P07756        | YMESDGIK+Oxidation(1)                              | 1.288197034        |                 |           |
| <b>P07824</b> | <b>ARGI1 Arginase_1</b>                            | <b>1.281229735</b> | <b>4.72E-11</b> | <b>16</b> |
| P07824        | ANEQLAAVVAETQK                                     | 1.041108793        | 2               | 5.202744  |
| P07824        | DHGDALFVDVPPNSPFQIVK                               | 1.198559552        | 2               | 6.217107  |
| P07824        | DIVYIGLR                                           | 1.027814167        | 2               | 2.326401  |
| P07824        | DVDPGEHYIK                                         | 2.503452174        | 2               | 3.411388  |
| P07824        | EGNHKPEDYKPPK                                      | 1.702084737        | 2               | 2.768633  |
| P07824        | GKFPDVPGFVWTPCISAK                                 | 1.037214957        | 3               | 4.961032  |
| P07824        | LKETEYNVR                                          | 1.095471238        | 3               | 3.339787  |
| P07824        | NGTISVVLGGDHSMAIGSISGHAR                           | 1.327247138        | 3               | 4.342688  |
| P07824        | RPIHLSFDVDGLDPVFTPATGTPVVGGLSYR                    | 2.218188914        | 3               | 5.754816  |
| P07824        | TGLLSGLDIMEVNPTLGK                                 | 1.251639457        | 2               | 5.645827  |
| P07824        | TGLLSGLDIMEVNPTLGK+Oxidation(9)                    | 1.154748078        |                 |           |
| P07824        | TVNTAVALTLCFGTK                                    | 1.282212292        | 2               | 5.037458  |
| P07824        | VHPDLCVIWVDAHTDINTPLTSSGNLHGQPVAFLK                | 1.981031184        | 4               | 5.503472  |
| P07824        | VMEETFSYLLGR                                       | 1.251083159        | 2               | 3.709967  |
| P07824        | YFSMTEVDK                                          | 1.209386817        | 1               | 2.322202  |
| P07824        | YFSMTEVDKLGIGK+Oxidation(3)                        | 1.182060069        |                 |           |
| <b>P07871</b> | <b>THIKB 3_ketoacyl_CoA thiolase B_peroxisomal</b> | <b>0.95643673</b>  | <b>0.973638</b> | <b>17</b> |
| P07871        | AEELGLPILGVL                                       | 0.891502664        | 2               | 4.301894  |
| P07871        | AEIVPVTTLVLDK                                      | 0.959095821        | 2               | 4.735701  |
| P07871        | AEIVPVTTLVLDKGDGR                                  | 1.112801194        | 2               | 3.686832  |
| P07871        | AEIVPVTTLVLDKGDGRK                                 | 1.018436674        | 2               | 4.365884  |
| P07871        | DCLIPMGITSENAER                                    | 2.317715071        | 2               | 3.910081  |
| P07871        | DGGSTTAGNSSQVSDGAAVLLAR                            | 1.268173496        | 2               | 6.343596  |
| P07871        | IAQFLSGIPETVPLSAVNR                                | 1.330644366        | 2               | 3.215863  |
| P07871        | KTITVSQDEGVRPSTTMEGLAK                             | 1.077336899        | 3               | 3.704695  |
| P07871        | LKPECLGDISVGNVLQPGAGAAMAR                          | 1.00415076         | 3               | 5.14145   |
| P07871        | QCSSGLQAVANIAGGIR                                  | 1.051627582        | 2               | 4.699809  |
| P07871        | QDAFALASQK                                         | 1.129251646        | 2               | 3.759766  |
| P07871        | QKQDAFALASQK                                       | 1.035689015        | 2               | 4.153682  |
| P07871        | QVVTLLNELK                                         | 1.076887908        | 2               | 2.38165   |
| P07871        | SKAEELGLPILGVL                                     | 0.804392622        | 3               | 4.830839  |
| P07871        | SYAVVGVPPDIMGIGPAYAIPAALQK                         | 0.973329713        | 3               | 4.746675  |
| P07871        | TITVSQDEGVRPSTTMEGLAK                              | 0.815113654        | 2               | 4.367602  |
| P07871        | VNPLGGAIALGHPLGCTGAR                               | 0.935571634        | 2               | 4.995617  |
| <b>P07872</b> | <b>ACOX1 Peroxisomal acyl_coenzyme A oxidase 1</b> | <b>1.259039353</b> | <b>9.9E-20</b>  | <b>21</b> |
| P07872        | AFTTWTANAGIEECR                                    | 2.384821615        | 2               | 3.814965  |
| P07872        | ASATFNPELITHILDGSPENTR                             | 1.131045318        | 2               | 4.779863  |

|               |                                                                   |                    |                 |           |
|---------------|-------------------------------------------------------------------|--------------------|-----------------|-----------|
| P07872        | ASEAHCHYVVVK                                                      | 1.260938856        | 3               | 4.143539  |
| P07872        | EIENLILNDPFDQHEDYNFLTR                                            | 3.059753674        | 2               | 4.544086  |
| P07872        | EIGTHKPLPGITVGDIGPK                                               | 1.10628393         | 3               | 4.120678  |
| P07872        | EVAWNLTSDVLR                                                      | 1.444891213        | 2               | 3.14678   |
| P07872        | EYGISDPEEIMWFK                                                    | 1.128905295        | 2               | 3.435677  |
| P07872        | FGYEEMDNGYLK                                                      | 0.919731293        | 2               | 3.875867  |
| P07872        | GGDFLEGSITGAQLSQVNAR                                              | 1.998850378        | 2               | 5.243323  |
| P07872        | GLETTATYDPK                                                       | 1.183240014        | 2               | 3.676084  |
| P07872        | INESIGQGDLSPELHALTAGLK                                            | 1.306627395        | 3               | 5.515228  |
| P07872        | LVEIAAK                                                           | 1.376020943        | 1               | 2.20189   |
| P07872        | LVGGMVSYLNDLPSQR                                                  | 1.834333427        | 2               | 3.235612  |
| P07872        | NLCLLYSLYGISQK                                                    | 1.552096667        | 2               | 3.262428  |
| P07872        | QSEPEPQLDFQTQQYK                                                  | 1.259764965        | 2               | 4.789578  |
| P07872        | SFLVGNAAQSLK                                                      | 1.030478845        | 2               | 4.291443  |
| P07872        | SKEVAWNLTSDVLR                                                    | 1.751674935        | 3               | 3.826543  |
| P07872        | TQEFILNSPTVTSIK                                                   | 1.255135172        | 2               | 4.574351  |
| P07872        | TSNHAIVLAQLITQGECYGLHAFVVPPIR                                     | 1.246488192        | 4               | 4.923507  |
| P07872        | YAQVKPDGTYVKPLSNK                                                 | 1.457759378        | 3               | 3.749005  |
| P07872        | YDGNVYENLFEWAK                                                    | 2.15760853         | 2               | 4.821437  |
| <b>P07895</b> | <b>SODM Superoxide dismutase [Mn]_ mitochondrial</b>              | <b>0.924360512</b> | <b>0.916436</b> | <b>5</b>  |
| P07895        | AIWNVINWENVSQR                                                    | 1.128378015        | 2               | 3.874971  |
| P07895        | GDVTTQVALQPALK                                                    | 0.923270786        | 2               | 3.985694  |
| P07895        | GELLEAIKR                                                         | 1.157405653        | 2               | 2.337225  |
| P07895        | HHATYVNNLNVTEEK                                                   | 0.854031176        | 2               | 4.829825  |
| P07895        | NVRPDYK                                                           | 1.242556424        | 2               | 2.302418  |
| <b>P07896</b> | <b>ECHP Peroxisomal bifunctional enzyme</b>                       | <b>1.049886524</b> | <b>0.553269</b> | <b>24</b> |
| P07896        | EWQSLAGPHGSK                                                      | 1.265168988        | 2               | 2.483037  |
| P07896        | GGPMFYAASVGLPTVLEK                                                | 1.50576712         | 2               | 3.889342  |
| P07896        | GQGLTGPSLPPGTPVR                                                  | 0.891533995        | 2               | 3.927125  |
| P07896        | GWYQYDKPLGR                                                       | 1.223786837        | 2               | 2.901222  |
| P07896        | IFNKPVPSLPMDSVFAEIAIK                                             | 2.304644207        | 3               | 4.744816  |
| P07896        | IGVVVGNCYGFVGNR                                                   | 2.409781392        | 2               | 3.443466  |
| P07896        | IIDKPIEPR                                                         | 1.288630314        | 2               | 2.427397  |
| P07896        | KGQGLTGPSLPPGTPVR                                                 | 0.856859055        | 2               | 4.268447  |
| P07896        | KQYPGVLAPETCVR                                                    | 1.126565058        | 2               | 4.346848  |
| P07896        | LCNPPVNAVSPVIR                                                    | 1.158461068        | 2               | 4.270799  |
| P07896        | LGILDAVVK                                                         | 1.246666527        | 2               | 2.819221  |
| P07896        | LLEVIPSR                                                          | 0.906938296        | 2               | 2.824992  |
| P07896        | LVAQGSPLK                                                         | 1.381430235        | 2               | 2.54035   |
| P07896        | QNPDIPLQLEPSDYLR                                                  | 0.952317304        | 2               | 3.955622  |
| P07896        | QYPGVLAPETCVR                                                     | 0.899529268        | 2               | 3.073713  |
| P07896        | RLVAQGSPLK                                                        | 0.665078866        | 2               | 2.337364  |
| P07896        | TASAQPVSSVGLGLTMGR                                                | 1.199712996        | 2               | 5.888388  |
| P07896        | TISKEILER                                                         | 1.293136016        | 2               | 2.654372  |
| P07896        | VGISVVAVESDPK                                                     | 1.395157297        | 2               | 3.902246  |
| P07896        | VGLPEVTLGILPGAR                                                   | 1.340408766        | 2               | 3.622226  |
| P07896        | VSDLAGLDVGVK                                                      | 1.129871239        | 2               | 4.271889  |
| P07896        | YLSADEALR                                                         | 2.704555644        | 2               | 2.976469  |
| P07896        | YSPLGDMLEAGR                                                      | 1.111228325        | 2               | 4.337061  |
| P07896        | YSSPTTIATVMLSLK                                                   | 1.243244353        | 2               | 3.493452  |
| <b>P07943</b> | <b>ALDR Aldose reductase</b>                                      | <b>1.17802701</b>  | <b>0.269691</b> | <b>2</b>  |
| P07943        | AIGVSNFNPLQIER                                                    | 1.672817651        | 2               | 3.064428  |
| P07943        | HIDCAQVYQNEK                                                      | 1.136188242        | 2               | 4.458974  |
| <b>P07953</b> | <b>F261 6_phosphofructo_2_kinase/fructose_2_6_biphosphatase 1</b> | <b>1.507684159</b> | <b>0.022387</b> | <b>5</b>  |

|               |                                                                                                                    |                    |                 |           |
|---------------|--------------------------------------------------------------------------------------------------------------------|--------------------|-----------------|-----------|
| P07953        | HGESELNLR                                                                                                          | 1.302332549        | 2               | 2.597691  |
| P07953        | IGGDSGLSAR                                                                                                         | 0.535829593        | 2               | 2.774735  |
| P07953        | NYEFFRPDNTAEQLIR                                                                                                   | 1.744967445        | 2               | 3.392666  |
| P07953        | TIQTAEALGVPEYQWK                                                                                                   | 2.323308813        | 2               | 3.065735  |
| P07953        | YLNWIGTPTK                                                                                                         | 1.086263718        | 2               | 2.959269  |
| <b>P08009</b> | <b>GSTM4 Glutathione S_transferase Yb_3</b>                                                                        | <b>1.039764508</b> | <b>0.001572</b> | <b>6</b>  |
| P08009        | LCYNPDFEK                                                                                                          | 2.25335066         | 2               | 3.049408  |
| P08009        | LLLEYTDSSYEK                                                                                                       | 0.715619248        | 2               | 4.831135  |
| P08009        | LLLEYTDSSYEKRR                                                                                                     | 1.112437905        | 2               | 4.009915  |
| P08009        | NQVFEATCLDAFPNLK                                                                                                   | 1.009980085        | 2               | 4.564517  |
| P08009        | SQWLNEK                                                                                                            | 1.232037005        | 2               | 2.708434  |
| P08009        | YTMGDAPDFDR                                                                                                        | 0.997937519        | 2               | 2.814792  |
| <b>P08010</b> | <b>GSTM2 Glutathione S_transferase Mu_2</b>                                                                        | <b>0.823243645</b> | <b>9.9E-20</b>  | <b>15</b> |
| P08010        | FLSKPIFAK                                                                                                          | 1.847796973        | 2               | 2.337114  |
| P08010        | IRVDVLENQAMDTR                                                                                                     | 1.797117041        | 3               | 4.223902  |
| P08010        | ITYVDFLVYDVLQHR                                                                                                    | 1.431518306        | 2               | 5.011247  |
| P08010        | KKPEYLEGLPEK                                                                                                       | 1.112711437        | 3               | 4.167448  |
| P08010        | KPEYLEGLPEK                                                                                                        | 1.303882889        | 2               | 3.429055  |
| P08010        | KYSMGDAPDYDR                                                                                                       | 1.639957955        | 2               | 3.826402  |
| P08010        | LFLEYDTSYEDK                                                                                                       | 0.544422042        | 2               | 5.54148   |
| P08010        | LFLEYDTSYEDKK                                                                                                      | 1.293394397        | 2               | 4.368438  |
| P08010        | LQLAMVCYSPDFER                                                                                                     | 1.979320605        | 2               | 4.328523  |
| P08010        | LQLAMVCYSPDFER+Oxidation(4                                                                                         | 2.458859303        |                 |           |
| P08010        | SQWLSEK                                                                                                            | 1.366819755        | 2               | 2.464066  |
| P08010        | VDVLENQAMDTR                                                                                                       | 0.356150689        | 2               | 4.694429  |
| P08010        | VDVLENQAMDTR+Oxidation(8                                                                                           | 1.478054769        |                 |           |
| P08010        | YSMGDAPDYDR                                                                                                        | 1.105791152        | 2               | 3.370795  |
| P08010        | YSMGDAPDYDR+Oxidation(2                                                                                            | 1.311478859        |                 |           |
| <b>P08011</b> | <b>MGST1 Microsomal glutathione S_transferase 1</b>                                                                | <b>0.866022679</b> | <b>0.002854</b> | <b>6</b>  |
| P08011        | IYHTIAYLTPQPNR                                                                                                     | 0.666126258        | 2               | 5.320198  |
| P08011        | MMFLSSATAFQR                                                                                                       | 0.848911099        | 2               | 3.603543  |
| P08011        | MMFLSSATAFQR+Oxidation(0                                                                                           | 1.471430737        |                 |           |
| P08011        | MMFLSSATAFQR+Oxidation(1                                                                                           | 1.471430737        |                 |           |
| P08011        | VFANPEDCAGFGK                                                                                                      | 0.847497116        | 2               | 4.678979  |
| P08011        | VFANPEDCAGFGKGENAK                                                                                                 | 1.535545371        | 2               | 4.621316  |
| <b>P08032</b> | <b>SPTA1 Spectrin alpha chain_erythrocyte</b>                                                                      | <b>0.994790824</b> | <b>0.905328</b> | <b>4</b>  |
| P08032        | ADVVESWIGEK                                                                                                        | 0.989107438        | 2               | 2.636208  |
| P08032        | DLVAAKNLLNR                                                                                                        | 1.300399247        | 2               | 2.438226  |
| P08032        | DQARDLTSAGNLLK                                                                                                     | 1.028842691        | 2               | 2.433487  |
| P08032        | QELNTRWNSLK                                                                                                        | 2.05621624         | 2               | 2.301824  |
| <b>P08081</b> | <b>CLCA Clathrin light chain A</b>                                                                                 | <b>1.050426841</b> | <b>0.54441</b>  | <b>2</b>  |
| P08081        | LEALDANSR                                                                                                          | 2.012171242        | 2               | 2.745923  |
| P08081        | WREEQTER                                                                                                           | 0.986235481        | 2               | 2.478195  |
| <b>P08290</b> | <b>ASGR2 Asialoglycoprotein receptor 2</b>                                                                         | <b>1.566076596</b> | <b>0.080395</b> | <b>3</b>  |
| P08290        | DFQDIQQLDSEENDHQLIGDEEQGSHVQNLNR                                                                                   | 1.493923038        | 3               | 6.50026   |
| P08290        | EEQEFVVK                                                                                                           | 1.684482879        | 1               | 2.063976  |
| P08290        | WVDGTEYR                                                                                                           | 2.697573333        | 2               | 2.322834  |
| <b>P08430</b> | <b>UD16 UDP_glucuronosyltransferase 1_6</b>                                                                        | <b>1.537763689</b> | <b>4.47E-05</b> | <b>2</b>  |
| P08430        | GHDIVVLVPEVNLGLESK                                                                                                 | 1.490024735        | 3               | 3.819506  |
| P08430        | YEILASDLLK                                                                                                         | 1.790276754        | 2               | 2.47489   |
| <b>P08461</b> | <b>ODP2 Dihydrolipoyllsine_residue acetyltransferase component of pyruvate dehydrogenase complex_mitochondrial</b> | <b>1.190289788</b> | <b>6.92E-05</b> | <b>5</b>  |
| P08461        | AAPAAAAAPPGPR                                                                                                      | 1.029991484        | 2               | 2.320115  |
| P08461        | DVPLGTPLCIIVEK                                                                                                     | 1.045789584        | 2               | 3.425307  |
| P08461        | DVPVGSIICTVEKPDIEAFK                                                                                               | 1.530111327        | 2               | 3.90108   |
| P08461        | GLETIASDVVSLASK                                                                                                    | 1.852552319        | 2               | 4.498261  |

|               |                                                                         |                    |                 |           |
|---------------|-------------------------------------------------------------------------|--------------------|-----------------|-----------|
| P08461        | VAPTAVGVIDIPISNIR                                                       | 1.452822904        | 2               | 4.579574  |
| <b>P08503</b> | <b>ACADM Medium_chain specific acyl_CoA dehydrogenase_mitochondrial</b> | <b>1.125724128</b> | <b>0.016179</b> | <b>9</b>  |
| P08503        | AFAGDIANQLATDAVQIFGGYGFNTEYPVEK                                         | 1.25603889         | 3               | 5.190603  |
| P08503        | AFTGFIVEADTPGIHIGK                                                      | 1.248771304        | 2               | 4.442656  |
| P08503        | EEIIPVAPDYDK                                                            | 1.184184514        | 2               | 3.575352  |
| P08503        | GITFEDVR                                                                | 1.117652568        | 2               | 2.426563  |
| P08503        | IYQIYEGTAQIQR                                                           | 1.213197773        | 2               | 4.731617  |
| P08503        | KGDEYVINGQK                                                             | 1.162299424        | 2               | 4.124278  |
| P08503        | MTEQPMMCAYCVTEPSAGSDVAGIK                                               | 1.644403074        | 2               | 4.469299  |
| P08503        | SGEYFPFLIK                                                              | 1.243428544        | 2               | 2.79131   |
| P08503        | TRPTVAAGAVGLAQR                                                         | 1.353852707        | 2               | 4.416687  |
| <b>P08541</b> | <b>UD2B2 UDP_glucuronosyltransferase 2B2</b>                            | <b>1.553161607</b> | <b>5.94E-13</b> | <b>11</b> |
| P08541        | DELQNHFIK                                                               | 1.214920806        | 2               | 2.590626  |
| P08541        | FEIFSTSISKDELQNHFIK                                                     | 1.822955011        | 3               | 4.89458   |
| P08541        | FILPPSYVPVILSGLAGK                                                      | 1.645229595        | 3               | 6.129734  |
| P08541        | GAAVSLNIR                                                               | 1.405720489        | 2               | 2.918998  |
| P08541        | GHEVTVLKPSAYFFLDPK                                                      | 2.035732235        | 2               | 4.348586  |
| P08541        | HKEWDTFYSEILGRPTTVDETMSK                                                | 1.201800234        | 3               | 4.439881  |
| P08541        | LLDVWTYELPR                                                             | 1.678172133        | 2               | 4.051437  |
| P08541        | NVMLLSTIHHDQPMKPLDR                                                     | 0.766964978        | 3               | 3.78731   |
| P08541        | NVMLLSTIHHDQPMKPLDR+Oxidation(2                                         | 1.99487432         |                 |           |
| P08541        | VEIWLIR                                                                 | 1.714710872        | 2               | 3.025002  |
| P08541        | VLVWPMDFSHWMNIK                                                         | 1.872491913        | 2               | 2.483992  |
| <b>P08542</b> | <b>UDB17 UDP_glucuronosyltransferase 2B17</b>                           | <b>1.586061471</b> | <b>9.9E-20</b>  | <b>6</b>  |
| P08542        | EIINNPFYK                                                               | 1.469072097        | 1               | 2.071739  |
| P08542        | FETFPTSYSKDELENYFIK                                                     | 1.564168023        | 2               | 4.18042   |
| P08542        | KWDPFYSEILGRPTTLAETMGK                                                  | 1.841080479        | 2               | 4.060183  |
| P08542        | LVDVWTYELQR                                                             | 1.484001178        | 2               | 3.5694    |
| P08542        | NAVWLSTIHHDQPMKPLDK                                                     | 0.724892693        | 3               | 4.160419  |
| P08542        | WDPFYSEILGRPTTLAETMGK                                                   | 1.879249547        | 2               | 3.743805  |
| <b>P08649</b> | <b>CO4 Complement C4</b>                                                | <b>1.192303243</b> | <b>0.643746</b> | <b>2</b>  |
| P08649        | SLEIPGSSDPNVIPDGDSSFVR                                                  | 1.311355392        | 2               | 2.860376  |
| P08649        | VTASEPLETLGSEALSPGGVASLLR                                               | 0.772768719        | 2               | 2.871773  |
| <b>P08661</b> | <b>MBL2 Mannose_binding protein C</b>                                   | <b>0.821255896</b> | <b>0.007074</b> | <b>2</b>  |
| P08661        | ALCSELQGTVATPR                                                          | 0.495188488        | 2               | 3.340457  |
| P08661        | TENVFEDLTGNR                                                            | 1.17877014         | 2               | 2.850439  |
| <b>P08683</b> | <b>CP2CB Cytochrome P450 2C11</b>                                       | <b>0.959330726</b> | <b>0.138305</b> | <b>18</b> |
| P08683        | DIDTTPAISGFGHLPPFYACFIPVQR                                              | 1.119738883        | 3               | 4.896581  |
| P08683        | EALVDLGEEFSGR                                                           | 1.304361335        | 2               | 3.914018  |
| P08683        | EHQESLDKDNPR                                                            | 0.882303912        | 2               | 3.972373  |
| P08683        | FDPGHFLDER                                                              | 1.123835833        | 2               | 2.637429  |
| P08683        | FDYKDPTFLNLMHR                                                          | 1.435897466        | 3               | 4.849626  |
| P08683        | FNENFR                                                                  | 1.099136009        | 1               | 2.09618   |
| P08683        | GAPFDPTFILGCAPCNVICSIIFQNR                                              | 0.956193205        | 3               | 6.024824  |
| P08683        | GTNVIVLSLHDDKEFPNPEK                                                    | 1.103914733        | 2               | 4.990959  |
| P08683        | HNPQSEFTLESVATVDTMFGAGTETTSTTLR                                         | 0.746695707        |                 |           |
| P08683        | ICAGEALAR                                                               | 1.263986116        | 2               | 3.021448  |
| P08683        | LPPGPTPLPIIGNTLQIYMK                                                    | 1.186871105        | 3               | 3.970359  |
| P08683        | NFFYIK                                                                  | 1.26595338         | 1               | 1.91941   |
| P08683        | NYVLEK                                                                  | 0.562689168        | 1               | 2.030156  |
| P08683        | SQMPYTDVAVVHEIQR                                                        | 1.105256724        | 2               | 4.438921  |
| P08683        | VKEHQESLDKDNPR                                                          | 1.01058626         | 3               | 5.260345  |
| P08683        | VQEEIER                                                                 | 0.994442891        | 2               | 2.462134  |
| P08683        | YGLLLLLK                                                                | 1.543275156        | 2               | 3.199466  |
| P08683        | YIDLVPNTLPHLVTR                                                         | 1.33094377         | 2               | 4.233949  |

|               |                                                                                 |                    |                 |           |
|---------------|---------------------------------------------------------------------------------|--------------------|-----------------|-----------|
| <b>P08733</b> | <b>MLRV Myosin regulatory light chain 2_ ventricular/cardiac muscle isoform</b> | <b>1.250914557</b> | <b>0.699455</b> | <b>3</b>  |
| P08733        | GADPEETILNAFK                                                                   | 1.128235853        | 2               | 2.327029  |
| P08733        | NEEIDEMIK                                                                       | 1.228767988        | 1               | 2.632213  |
| P08733        | NLVHIITHGEEKD                                                                   | 2.392199011        | 2               | 2.917254  |
| <b>P09006</b> | <b>SPA3N Serine protease inhibitor A3N</b>                                      | <b>4.027220531</b> | <b>0.000313</b> | <b>2</b>  |
| P09006        | AVLDAETGTEAAAATGVK                                                              | 2.594523637        | 2               | 4.871326  |
| P09006        | GNSMEEILEGLK                                                                    | 5.740535835        | 2               | 3.144378  |
| <b>P09034</b> | <b>ASSY Argininosuccinate synthase</b>                                          | <b>1.345956029</b> | <b>9.9E-20</b>  | <b>17</b> |
| P09034        | APNTPDVLEIEFK                                                                   | 1.469644189        | 2               | 3.660811  |
| P09034        | DGTTHTSLDLFMYLNEVAGK                                                            | 1.629773485        | 2               | 4.824489  |
| P09034        | EFVEEFIWPAVQSSALYEDR                                                            | 2.551369567        | 3               | 5.729157  |
| P09034        | EQGYDVIAYLANIGQK                                                                | 1.77792102         | 2               | 4.704628  |
| P09034        | FAELVYTGFWHSPECFVR                                                              | 1.519538077        | 2               | 4.590873  |
| P09034        | FELTCYSLAPQIK                                                                   | 1.497835673        | 2               | 4.463135  |
| P09034        | GRNDLMEYAK                                                                      | 1.810317329        | 2               | 3.334978  |
| P09034        | IDIVENR                                                                         | 1.123284163        | 2               | 2.373924  |
| P09034        | KVFIEDVSK                                                                       | 1.336056919        | 3               | 3.621536  |
| P09034        | NDLMEYAK                                                                        | 1.821153158        | 2               | 2.631735  |
| P09034        | NDLMEYAK+Oxidation(3                                                            | 1.706931895        |                 |           |
| P09034        | NQAPPLYTK                                                                       | 1.359371723        | 2               | 2.3122    |
| P09034        | SPWSMDENLMHISYEAGILENPK                                                         | 1.664879427        | 3               | 5.631264  |
| P09034        | TQDPAKAPNTPDVLEIEFK                                                             | 1.412704406        | 2               | 5.064881  |
| P09034        | TQDPAKAPNTPDVLEIEFKK                                                            | 1.232106483        | 3               | 5.395626  |
| P09034        | VFIEDVSK                                                                        | 1.43481765         | 2               | 2.356571  |
| P09034        | VQVSVFK                                                                         | 1.19441599         | 2               | 2.444903  |
| <b>P09041</b> | <b>PGK2 Phosphoglycerate kinase 2</b>                                           | <b>0.85634855</b>  | <b>0.966419</b> | <b>5</b>  |
| P09041        | FHVEEKGK                                                                        | 0.868107373        | 2               | 2.650303  |
| P09041        | FHVEEKGK GK                                                                     | 0.944186978        | 2               | 2.529925  |
| P09041        | LGDVYVNDAFGTAHR                                                                 | 1.1625532          | 3               | 4.216554  |
| P09041        | VDFNVPMK                                                                        | 1.177799408        | 2               | 2.338053  |
| P09041        | VSHVSTGGGASLELLEGGK                                                             | 0.817769528        | 2               | 5.827338  |
| <b>P09117</b> | <b>ALDOC Fructose_bisphosphate aldolase C</b>                                   | <b>1.354281837</b> | <b>0.002977</b> | <b>3</b>  |
| P09117        | VLAAYK                                                                          | 1.332103917        | 2               | 2.684492  |
| P09117        | YASICQQNGIPIVEPEILPDGDHDLK                                                      | 4.436607344        | 3               | 3.599531  |
| P09117        | YASICQQNGIPIVEPEILPDGDHDLKR                                                     | 1.58818414         | 3               | 5.118912  |
| <b>P09139</b> | <b>SPYA Serine__pyruvate aminotransferase_ mitochondrial</b>                    | <b>1.091493349</b> | <b>0.073357</b> | <b>3</b>  |
| P09139        | IGLLGNATTENADR                                                                  | 1.029342733        | 2               | 3.11332   |
| P09139        | LLLGPGPSNLAPR                                                                   | 1.205316255        | 2               | 2.51964   |
| P09139        | VLNAPPGISLISFNCK                                                                | 2.029468242        | 2               | 2.392833  |
| <b>P09367</b> | <b>SDHL L_serine dehydratase/L_threonine deaminase</b>                          | <b>7.953534537</b> | <b>0.003381</b> | <b>4</b>  |
| P09367        | ALGVNTVGAQTLK                                                                   | 8.10928712         | 2               | 3.545291  |
| P09367        | AQLGLNELLK                                                                      | 2.623591559        | 1               | 2.190217  |
| P09367        | LGLPATIVVPSTTPALTIER                                                            | 7.797084492        | 2               | 2.705829  |
| P09367        | LKNEGATVEVVGEMLEAIQLAK                                                          | 4.795232271        | 3               | 3.977926  |
| <b>P09495</b> | <b>TPM4 Tropomyosin alpha_4 chain</b>                                           | <b>1.424631066</b> | <b>0.547202</b> | <b>12</b> |
| P09495        | AEGDAAALNR                                                                      | 0.972846894        | 2               | 2.551312  |
| P09495        | EDKYEIEIK                                                                       | 1.464631386        | 1               | 2.692958  |
| P09495        | EENVGLHQTLDTLNLNLCI                                                             | 3.166004479        | 2               | 5.231386  |
| P09495        | IQALQQQADDAEDR                                                                  | 1.648019522        | 2               | 4.463531  |
| P09495        | IQLVEEELDR                                                                      | 1.177150017        | 2               | 3.486837  |
| P09495        | IQLVEEELDRAQER                                                                  | 1.128802633        | 2               | 3.015518  |
| P09495        | KLVILEGELER                                                                     | 2.264292375        | 3               | 4.050983  |
| P09495        | LEEAEKAADESER                                                                   | 1.749633128        | 2               | 4.133396  |
| P09495        | LVILEGELER                                                                      | 2.248495732        | 2               | 3.148052  |

|               |                                                          |                    |                 |           |
|---------------|----------------------------------------------------------|--------------------|-----------------|-----------|
| P09495        | MEIQEMQLK                                                | 1.090693878        | 2               | 2.981383  |
| P09495        | RIQLVEEELDR                                              | 1.265034722        | 2               | 2.794991  |
| P09495        | YSEKEDKYEEIK                                             | 1.430774848        | 2               | 4.535002  |
| <b>P09527</b> | <b>RAB7A Ras_related protein Rab_7a</b>                  | <b>1.454898808</b> | <b>0.009927</b> | <b>6</b>  |
| P09527        | ATIGADFLTK                                               | 1.079271642        | 2               | 2.611155  |
| P09527        | DPENFPFVVLGNK                                            | 1.955246827        | 2               | 3.796908  |
| P09527        | GADCCVLVFDVTAPNTFK                                       | 1.307539894        | 2               | 3.396025  |
| P09527        | TLDSWRDEFLIQASPR                                         | 1.504643432        | 3               | 3.505819  |
| P09527        | TSLMNQYVNK                                               | 1.45400079         | 2               | 2.833833  |
| P09527        | VIIIGDSGVGK                                              | 1.225566101        | 2               | 2.425672  |
| <b>P09605</b> | <b>KCRS Creatine kinase S_type_mitochondrial</b>         | <b>2.95232038</b>  | <b>0.667979</b> | <b>2</b>  |
| P09605        | GTGGVDTAAVADVVDISNDR                                     | 3.135729729        | 2               | 3.828196  |
| P09605        | LSEMTEQDQQR                                              | 2.939557784        | 2               | 3.363609  |
| <b>P09606</b> | <b>GLNA Glutamine synthetase</b>                         | <b>1.392003898</b> | <b>0.893855</b> | <b>8</b>  |
| P09606        | CIEEAIDK                                                 | 2.101243887        | 2               | 2.348305  |
| P09606        | ITGTNAEVMPAQWFEQIGPCEGIR                                 | 1.283001181        | 3               | 5.467392  |
| P09606        | LTGFHETSNINDFSAGVANR                                     | 1.296834977        | 2               | 6.017028  |
| P09606        | MGDHLWVAR                                                | 1.078227006        | 2               | 3.032172  |
| P09606        | QMYMNLPGQEK                                              | 1.264632715        | 2               | 2.389685  |
| P09606        | RLTGFHETSNINDFSAGVANR                                    | 1.214014855        | 3               | 5.519413  |
| P09606        | TCLLNETGDEPFQYK                                          | 0.848275693        | 2               | 5.301614  |
| P09606        | TCLLNETGDEPFQYKN                                         | 1.018692222        | 2               | 5.466637  |
| <b>P09626</b> | <b>ATP4A Potassium_transporting ATPase alpha chain 1</b> | <b>1.495160828</b> | <b>0.495172</b> | <b>2</b>  |
| P09626        | VDNSSLTGESEPQTR                                          | 1.442636192        | 2               | 4.202542  |
| P09626        | VIMVTGDHPITAK                                            | 1.512805034        | 2               | 3.287132  |
| <b>P09811</b> | <b>PYGL Glycogen phosphorylase_liver form</b>            | <b>0.908971346</b> | <b>0.723908</b> | <b>27</b> |
| P09811        | AWNTMVLRL                                                | 1.809574654        | 2               | 2.39321   |
| P09811        | DFSELEPDKFQNK                                            | 1.242795938        | 2               | 3.487676  |
| P09811        | DGVGTVFDAFPQVAIQLNDTHPALAIPELMR                          | 1.88573843         | 4               | 5.476968  |
| P09811        | DLSQLTK                                                  | 0.957829089        | 1               | 2.146802  |
| P09811        | EGWQVEEADDWLR                                            | 1.014950654        | 2               | 3.710165  |
| P09811        | FSQFLEK                                                  | 1.258599112        | 1               | 2.0447    |
| P09811        | GIVGVENVAELK                                             | 1.14339414         | 2               | 3.011632  |
| P09811        | GIVGVENVAELKK                                            | 1.349904052        | 2               | 3.333617  |
| P09811        | HLQIYEINQK                                               | 0.646327349        | 2               | 3.795975  |
| P09811        | IFVDIEK                                                  | 1.081602099        | 1               | 2.05413   |
| P09811        | INMAHLCIVGCHAVNGVAK                                      | 0.660485284        | 3               | 5.016294  |
| P09811        | INPSSMFDVHVK                                             | 1.005369594        | 2               | 3.174701  |
| P09811        | LVIDQIDNGFFSPNQPDFK                                      | 1.042577734        | 2               | 5.27898   |
| P09811        | LVTSVAEVDNPMVGSK                                         | 1.59325766         | 2               | 4.679949  |
| P09811        | MSLIEEEGGK                                               | 0.977569485        | 2               | 2.422891  |
| P09811        | MSLIEEEGGKR                                              | 0.295919677        | 2               | 2.721649  |
| P09811        | RWLLLCNPGLADLIAEK                                        | 1.396460865        | 3               | 5.042345  |
| P09811        | TFAYTNHTVLPALER                                          | 1.051213029        | 2               | 4.923197  |
| P09811        | VDDVAALDK                                                | 1.004432766        | 2               | 2.70679   |
| P09811        | VDDVAALDKK                                               | 1.053836314        | 3               | 3.774551  |
| P09811        | VFADYEAYVK                                               | 1.175814207        | 2               | 2.646587  |
| P09811        | VIPATDLSEQISTAGTEASGTGNMK                                | 1.431232548        | 2               | 5.962235  |
| P09811        | VLYPNDNFFEGK                                             | 1.259873754        | 2               | 2.643168  |
| P09811        | VSQLYMNQK                                                | 0.77465877         | 2               | 3.031734  |
| P09811        | WLLLCNPGLADLIAEK                                         | 1.248680284        | 2               | 4.836044  |
| P09811        | WVDTQVVLALPYDTPVPGYMNNTVNTMR                             | 1.968262958        | 3               | 4.281541  |
| P09811        | YEYGFNQK                                                 | 0.897288003        | 2               | 2.633682  |
| <b>P09812</b> | <b>PYGM Glycogen phosphorylase_muscle form</b>           | <b>1.180038464</b> | <b>0.915992</b> | <b>9</b>  |
| P09812        | GYNAQEYYDR                                               | 0.973510756        | 2               | 2.325497  |
| P09812        | HLQIYEINQR                                               | 1.164046885        | 2               | 2.333961  |

|               |                                                                          |                    |                 |           |
|---------------|--------------------------------------------------------------------------|--------------------|-----------------|-----------|
| P09812        | LITAIGDVVNHDPVAVGDR                                                      | 1.872109563        | 2               | 3.2642    |
| P09812        | NLAENISR                                                                 | 1.179536874        | 2               | 2.722011  |
| P09812        | QIIEQLSSGFFSPK                                                           | 2.166102756        | 2               | 3.66077   |
| P09812        | VIFLENYR                                                                 | 1.147627205        | 2               | 2.511802  |
| P09812        | VIPAADLSEQISTAGTEASGTGNMK                                                | 7.144337373        | 2               | 4.78652   |
| P09812        | WLVLCNPGLAEVIAER                                                         | 1.411524922        | 2               | 3.815702  |
| P09812        | YEFGIFNQK                                                                | 1.564424888        | 2               | 2.444473  |
| <b>P09875</b> | <b>UD2B1 UDP-glucuronosyltransferase 2B1</b>                             | <b>1.20288544</b>  | <b>0.035473</b> | <b>6</b>  |
| P09875        | ANVVASALAQIPQK                                                           | 1.07007937         | 3               | 3.615512  |
| P09875        | FSGGLPLPPSYVPVLSLSDR                                                     | 1.501927621        | 3               | 3.617036  |
| P09875        | IILNELAQR                                                                | 1.359149719        | 2               | 3.003271  |
| P09875        | SDLEYSFAK                                                                | 1.12221344         | 2               | 2.357844  |
| P09875        | VDFSILSTTGLLTALK                                                         | 1.162438055        | 2               | 4.553809  |
| P09875        | WIDEWTR                                                                  | 0.658868018        | 2               | 2.600365  |
| <b>P09895</b> | <b>RL5 60S ribosomal protein L5</b>                                      | <b>1.295358049</b> | <b>6.56E-05</b> | <b>5</b>  |
| P09895        | GAVDGGLSIPHSTK                                                           | 1.401160818        | 2               | 4.374233  |
| P09895        | HIMGQNVADYMR                                                             | 1.48973154         | 2               | 3.546436  |
| P09895        | NNVTPDMMEEMKY                                                            | 1.332537625        | 2               | 3.394506  |
| P09895        | RFPGYDSESK                                                               | 1.287385998        | 2               | 2.848871  |
| P09895        | YLMEEDEDAYKK                                                             | 0.933934439        | 2               | 3.547877  |
| <b>POC057</b> | <b>H2AZ Histone H2A.Z</b>                                                | <b>0.81548685</b>  | <b>0.980432</b> | <b>2</b>  |
| POC057        | ATIAGGGVIPHIHK                                                           | 0.812823142        | 2               | 3.513066  |
| POC057        | GDEELDSLK                                                                | 1.035727857        | 2               | 3.409993  |
| <b>P0C2X9</b> | <b>AL4A1 Delta_1_pyrroline_5_carboxylate dehydrogenase_mitochondrial</b> | <b>0.979674009</b> | <b>0.368593</b> | <b>20</b> |
| P0C2X9        | AIEAAVLAR                                                                | 1.216134262        | 2               | 2.908767  |
| P0C2X9        | ALNDLKDQTEAIPCVVGDEEVWTS DVR                                             | 1.297025872        | 2               | 5.131677  |
| P0C2X9        | AQIFLK                                                                   | 1.311290055        | 2               | 2.311332  |
| P0C2X9        | DPQEPIMKEEIFGPVLT VYVYPDEK                                               | 0.689790164        | 3               | 3.58991   |
| P0C2X9        | DQTEAIPCVVGDEEVWTS DVR                                                   | 35.62558301        | 2               | 5.293629  |
| P0C2X9        | EAGLPPNVIQFVPADGPTFGDTVT SSEHLG INFTGSVPTFK                              | 1.302909009        | 3               | 3.669496  |
| P0C2X9        | EEIFGPVLT VYVYPDEK                                                       | 0.967867942        | 2               | 3.834084  |
| P0C2X9        | ETLQLVDSTTSYGLTGAVFAQDK                                                  | 2.158966273        | 2               | 5.512571  |
| P0C2X9        | KEWDLKPVADR                                                              | 1.178655424        | 2               | 3.583397  |
| P0C2X9        | LYVPQSLWPQIK                                                             | 1.637973537        | 2               | 3.208982  |
| P0C2X9        | NAAGNFYINDK                                                              | 1.269643504        | 2               | 3.60515   |
| P0C2X9        | NFH FVHSSADVDSVSGTLR                                                     | 0.946995024        | 2               | 5.738863  |
| P0C2X9        | SAFEYGGQK                                                                | 1.092751089        | 1               | 2.433331  |
| P0C2X9        | SSPSLSILAGGQCNE SVGFVEPCIIESK                                            | 0.95785813         | 3               | 5.748569  |
| P0C2X9        | STGSVVGQQPFGGAR                                                          | 1.046193318        | 2               | 4.393694  |
| P0C2X9        | TIVQEATR                                                                 | 1.085031004        | 2               | 2.927183  |
| P0C2X9        | VANEPILAFTQGSPER                                                         | 0.993627639        | 2               | 5.214002  |
| P0C2X9        | WKHASSLKVANEPILAFTQGSPER                                                 | 3.546836536        | 2               | 2.508734  |
| P0C2X9        | YQLSPFNHG HK                                                             | 0.939804034        | 2               | 2.982525  |
| P0C2X9        | YRETLQLVDSTTSYGLTGAVFAQDK                                                | 1.590798433        | 3               | 4.053402  |
| <b>P0C5H9</b> | <b>MANF Mesencephalic astrocyte-derived neurotrophic factor</b>          | <b>1.345520691</b> | <b>6.64E-06</b> | <b>5</b>  |
| P0C5H9        | DRDVT FSPATIEEELIK                                                       | 1.438370178        | 2               | 4.926311  |
| P0C5H9        | DVT FSPATIEEELIK                                                         | 1.138645593        | 2               | 3.215951  |
| P0C5H9        | IINEVSKPLAHHIPVEK                                                        | 1.96879691         | 3               | 4.049046  |
| P0C5H9        | ILDDWGEMCK                                                               | 6.546523827        | 2               | 3.030432  |
| P0C5H9        | INELMPK                                                                  | 1.08780192         | 2               | 2.489192  |
| <b>P0C6F1</b> | <b>DYH2 Dynein heavy chain 2_axonemal</b>                                | <b>0.925326479</b> | <b>0.860623</b> | <b>2</b>  |
| P0C6F1        | AMLPGEWENACNEMQRMLIVR+Oxidation(16                                       | 0.764911798        |                 |           |
| P0C6F1        | EKVEVMSLELEDAK+Oxidation(5                                               | 0.927439442        |                 |           |
| <b>P10111</b> | <b>PPIA Peptidyl-prolyl cis-trans isomerase A</b>                        | <b>1.057203255</b> | <b>2.16E-10</b> | <b>11</b> |



|               |                                                     |                    |                 |           |
|---------------|-----------------------------------------------------|--------------------|-----------------|-----------|
| P10111        | EGMSIVEAMER                                         | 1.431570141        | 1               | 2.804266  |
| P10111        | FEDENFILK                                           | 1.051274442        | 2               | 3.426039  |
| P10111        | HTGPGILSMANAGPNTNGSQFFICTAK                         | 0.948721402        | 3               | 6.091782  |
| P10111        | IIPGFMCQGGDFTR                                      | 1.6651069          | 2               | 3.415679  |
| P10111        | IIPGFMCQGGDFTR+Oxidation(5                          | 1.767235306        |                 |           |
| P10111        | KITISDCGQL                                          | 1.236939799        | 2               | 3.511175  |
| P10111        | SIYGKFEFENFILK                                      | 1.334345017        | 2               | 4.540363  |
| P10111        | TEWLDGK                                             | 1.761088991        | 2               | 2.302468  |
| P10111        | VCFELFADK                                           | 1.40053373         | 2               | 3.246058  |
| P10111        | VCFELFADKVPK                                        | 0.993862508        | 2               | 3.898452  |
| P10111        | VKEGMSIVEAMER                                       | 1.308059276        | 3               | 3.637903  |
| <b>P10536</b> | <b>RAB1B Ras_related protein Rab_1B</b>             | <b>1.553064177</b> | <b>0.477741</b> | <b>3</b>  |
| P10536        | MGPGAASGGERPNLK                                     | 1.233948489        | 2               | 4.090434  |
| P10536        | NATNVEQAFMTMAAEIK+Oxidation(11                      | 1.678060171        |                 |           |
| P10536        | NATNVEQAFMTMAAEIK+Oxidation(9                       | 1.619827426        |                 |           |
| <b>P10633</b> | <b>CP2D1 Cytochrome P450 2D1</b>                    | <b>1.063253881</b> | <b>1.47E-12</b> | <b>3</b>  |
| P10633        | SQGVILASYPWEWR                                      | 1.047130729        | 2               | 4.086678  |
| P10633        | TFMALLDNLLAENR                                      | 2.106202636        | 2               | 3.710493  |
| P10633        | YGDVFSLQK                                           | 1.251670132        | 2               | 2.711225  |
| <b>P10634</b> | <b>CP2DQ Cytochrome P450 2D26</b>                   | <b>1.105455363</b> | <b>0.010723</b> | <b>21</b> |
| P10634        | ACLGEPLAR                                           | 1.072760914        | 2               | 2.747574  |
| P10634        | AKGNPESSFNDENLR                                     | 1.957677254        | 2               | 3.448844  |
| P10634        | AVSNVIASLVYAR                                       | 0.969113532        | 2               | 4.248408  |
| P10634        | DETVWEKPLR                                          | 1.356618223        | 2               | 2.349931  |
| P10634        | DMTDAFLAEMQK                                        | 1.097196722        | 2               | 3.518677  |
| P10634        | EAEHPFNPSILLSK                                      | 1.152017719        | 2               | 2.66698   |
| P10634        | ELLVTYGEDTADRPLLIYNHLGYGNK                          | 1.149106175        | 3               | 5.715136  |
| P10634        | FADIVPTNIPHMTSR                                     | 1.170477889        | 3               | 3.687232  |
| P10634        | FEYEDPFFNR                                          | 1.087055947        | 2               | 2.826111  |
| P10634        | FHPEHFLDAQGNFVK                                     | 1.215900969        | 3               | 4.700538  |
| P10634        | FQGFLIPK                                            | 0.621787414        | 2               | 2.32181   |
| P10634        | GNPESSFNDENLR                                       | 1.37856245         | 2               | 4.421339  |
| P10634        | GTTLIPNLSSVLK                                       | 0.834530324        | 2               | 2.400562  |
| P10634        | GTTLIPNLSSVLKDETVWEKPLR                             | 1.319856541        | 2               | 4.724244  |
| P10634        | GVVLAPYGPEWR                                        | 1.114010976        | 2               | 3.202109  |
| P10634        | LNSFIALVDK                                          | 1.793946048        | 2               | 3.269951  |
| P10634        | RFEYEDPFFNR                                         | 0.911094637        | 2               | 4.028438  |
| P10634        | RVHEEIDEVIGQVR                                      | 1.368293525        | 2               | 4.269707  |
| P10634        | SLEQWVTEEAGHLCDTFAK                                 | 1.11306002         | 2               | 4.792475  |
| P10634        | SWDPAQPPR                                           | 0.974501312        | 2               | 2.854806  |
| P10634        | VHEEIDEVIGQVR                                       | 0.923760371        | 2               | 4.840197  |
| <b>P10719</b> | <b>ATPB ATP synthase subunit beta_mitochondrial</b> | <b>1.172603478</b> | <b>9.9E-20</b>  | <b>32</b> |
| P10719        | AHGGYSVFAGVGER                                      | 1.257519224        | 2               | 4.254332  |
| P10719        | AIAELGIYPAVDPLDSTSR                                 | 1.286385499        | 2               | 5.585495  |
| P10719        | EGNDLYHEMIESGVINLK                                  | 1.062848974        | 2               | 5.207921  |
| P10719        | EGNDLYHEMIESGVINLK+Oxidation(8                      | 2.571392456        |                 |           |
| P10719        | FLSQPFQVAEFTGHMGK                                   | 1.84194138         | 2               | 4.463165  |
| P10719        | FTQAGSEVSALLGR                                      | 1.281419439        | 2               | 4.857674  |
| P10719        | GFQQILAGDYDHLPEQAFYMGPIEEAVAK                       | 1.961422584        | 4               | 4.5936    |
| P10719        | IGLFGGAGVGK                                         | 1.123544702        | 2               | 3.290629  |
| P10719        | IGLFGGAGVGKTVLIMELINNVAK                            | 1.224295872        | 3               | 3.513694  |
| P10719        | ILQDYK                                              | 1.323490895        | 1               | 2.032839  |
| P10719        | IMDPNIVGSEHYDVAR                                    | 1.267749847        | 2               | 4.963674  |
| P10719        | IMDPNIVGSEHYDVAR+Oxidation(1                        | 1.589241225        |                 |           |
| P10719        | IMNVIGEPIDER                                        | 1.400032839        | 2               | 4.07792   |
| P10719        | IMNVIGEPIDER+Oxidation(1                            | 1.597540066        |                 |           |
| P10719        | IPSAVGYQPTLATDMGTMQER                               | 1.641367477        | 2               | 4.778714  |

|               |                                                              |                    |                 |           |
|---------------|--------------------------------------------------------------|--------------------|-----------------|-----------|
| P10719        | IPSAVGYQPTLATDMGMTQER+Oxidation(14                           | 1.587086538        |                 |           |
| P10719        | IPSAVGYQPTLATDMGMTQER+Oxidation(17                           | 1.587086538        |                 |           |
| P10719        | KGSITSVQAIYVPADDLTDPAATTFAHLDATTVLSR                         | 2.20257431         | 3               | 6.440765  |
| P10719        | LVLEVAQHLGESTVR                                              | 1.507110984        | 2               | 4.801384  |
| P10719        | QFAPIHAEAPEFIEMSVEQEILVTGIK                                  | 1.613093701        | 3               | 4.916537  |
| P10719        | SLQDIIAILGMDELSEEDKLTVSR                                     | 1.328639159        | 3               | 4.909769  |
| P10719        | SLQDIIAILGMDELSEEDKLTVSR+Oxidation(10                        | 1.677911977        |                 |           |
| P10719        | TIAMDGTEGLVR                                                 | 1.118591937        | 2               | 3.804547  |
| P10719        | TIAMDGTEGLVR+Oxidation(3                                     | 1.188667923        |                 |           |
| P10719        | TREGNDLYHEMIESGVINLK                                         | 1.061817984        | 2               | 6.039838  |
| P10719        | TVLIMELINNVAK                                                | 1.828650414        | 2               | 5.115932  |
| P10719        | TVLIMELINNVAK+Oxidation(4                                    | 1.070419138        |                 |           |
| P10719        | VALTGLTVAEYFR                                                | 1.249684777        | 2               | 4.066783  |
| P10719        | VALVYQGMNEPPGAR                                              | 1.433354738        | 2               | 4.02356   |
| P10719        | VLD SGAPIK                                                   | 0.966862091        | 2               | 3.372767  |
| P10719        | VLD SGAPIKIPVGPETLGR                                         | 1.216656182        | 3               | 5.002406  |
| P10719        | VVDLLAPYAK                                                   | 1.301375948        | 2               | 3.237348  |
| <b>P10760</b> | <b>SAHH Adenosylhomocysteine</b>                             | <b>1.307329558</b> | <b>9.9E-20</b>  | <b>20</b> |
| P10760        | AGIPVFAWK                                                    | 1.497992253        | 2               | 2.843862  |
| P10760        | ALDIAENEMPGLMR                                               | 1.112830317        | 2               | 3.773821  |
| P10760        | ALDIAENEMPGLMR+Oxidation(12                                  | 2.457197103        |                 |           |
| P10760        | ATDVMIA GK                                                   | 1.558810762        | 2               | 2.903197  |
| P10760        | DGPLNMILDDGGDLTNIHTK                                         | 1.556554398        | 2               | 5.579138  |
| P10760        | DGPLNMILDDGGDLTNIHTK+Oxidation(5                             | 1.308929988        |                 |           |
| P10760        | EMYSASKPLK                                                   | 1.908753941        | 2               | 2.360639  |
| P10760        | FDNLYGCR                                                     | 1.013942364        | 2               | 2.843503  |
| P10760        | GETDEEYLWCIEQTLHFK                                           | 2.318300015        | 2               | 4.462327  |
| P10760        | GISEETTTGVHNLYK                                              | 1.312893979        | 2               | 4.237678  |
| P10760        | IILLA EGR                                                    | 1.699756525        | 2               | 2.925361  |
| P10760        | KLDEAVAEHLGK                                                 | 1.496979592        | 3               | 5.050492  |
| P10760        | LDEAVAEHLGK                                                  | 1.009652431        | 2               | 3.67498   |
| P10760        | RATDVMIA GK                                                  | 1.324895005        | 2               | 2.526277  |
| P10760        | SKFDNLYGCR                                                   | 1.42275382         | 2               | 3.100143  |
| P10760        | VAVVAGYGDV GK                                                | 1.320025507        | 2               | 4.145174  |
| P10760        | VIITEIDPINALQAAMEGYEVTMDEACK                                 | 1.034769951        | 3               | 6.547412  |
| P10760        | VNIKPQVDR                                                    | 1.331588121        | 2               | 2.750098  |
| P10760        | WLNENAVEK                                                    | 1.333580818        | 2               | 2.816735  |
| P10760        | WSSCNIFSTQDHAAAAIAK                                          | 0.803723766        | 2               | 5.179422  |
| <b>P10818</b> | <b>CX6A1 Cytochrome c oxidase subunit 6A1_ mitochondrial</b> | <b>1.355012679</b> | <b>0.228656</b> | <b>2</b>  |
| P10818        | HEEHERPEFVAYPHLR                                             | 1.257393996        | 3               | 3.671675  |
| P10818        | SRHEEHERPEFVAYPHLR                                           | 1.366850929        | 3               | 4.102187  |
| <b>P10860</b> | <b>DHE3 Glutamate dehydrogenase 1_ mitochondrial</b>         | <b>1.210967709</b> | <b>7.45E-05</b> | <b>29</b> |
| P10860        | ALASLMTYK                                                    | 1.017931654        | 2               | 3.622105  |
| P10860        | CAVVDVPFGGAK                                                 | 0.648649256        | 2               | 3.071723  |
| P10860        | CVGVGESDGSIWNPDGIDPK                                         | 1.243943516        | 2               | 5.094982  |
| P10860        | DDGSWEVIEGYR                                                 | 0.915246565        | 2               | 3.972912  |
| P10860        | DIVHSGLAYTMER                                                | 1.428723076        | 2               | 3.366187  |
| P10860        | DIVHSGLAYTMER+Oxidation(10                                   | 1.464644758        |                 |           |
| P10860        | DSNYHLLMSVQESLER                                             | 1.291119498        | 2               | 4.232818  |
| P10860        | EDDPNFFK                                                     | 0.900906486        | 1               | 2.152318  |
| P10860        | FTMELAK                                                      | 1.779721294        | 2               | 2.394711  |
| P10860        | GASIVEDKLVEDLK                                               | 1.148825317        | 2               | 3.585323  |
| P10860        | GFIGPGIDVPAPDMSTGER                                          | 1.176631042        | 2               | 4.995929  |
| P10860        | GFIGPGIDVPAPDMSTGER+Oxidation(13                             | 1.471661651        |                 |           |
| P10860        | HGGTIPVVPTAEFQDR                                             | 0.928719905        | 2               | 4.728883  |
| P10860        | IIAEGANGPTTPEADK                                             | 0.808474665        | 2               | 5.381951  |

|               |                                                                     |                    |                 |          |
|---------------|---------------------------------------------------------------------|--------------------|-----------------|----------|
| P10860        | IIAEGANGPTTPEADKIFLER                                               | 1.132700258        | 2               | 4.848978 |
| P10860        | ISGASEKDIVHSGLAYTMER                                                | 0.996534067        | 3               | 3.593291 |
| P10860        | KGFIGPGIDVPAPDMSTGER                                                | 1.100807244        | 2               | 5.131566 |
| P10860        | LQHGSILGFPK                                                         | 0.863189471        | 1               | 3.084173 |
| P10860        | MVEGFFDR                                                            | 1.06822967         | 2               | 2.899273 |
| P10860        | MVEGFFDR+Oxidation(O                                                | 1.484092917        |                 |          |
| P10860        | NLNHVSYGR                                                           | 0.6125355          | 1               | 2.868178 |
| P10860        | NYTDNELEK                                                           | 1.054256603        | 2               | 2.486093 |
| P10860        | RDDGSWEVIEGYR                                                       | 0.937401515        | 2               | 4.436192 |
| P10860        | RFTMELAK                                                            | 1.096590503        | 2               | 2.492365 |
| P10860        | TAAYVNAIEK                                                          | 1.071242906        | 2               | 3.631395 |
| P10860        | TFVVQGFQGNVGLHSMR                                                   | 1.189439858        | 2               | 4.537451 |
| P10860        | VYEGSILEADCDILIPAASEK                                               | 0.895513182        | 3               | 6.005457 |
| P10860        | YNLGLDLR                                                            | 1.155739822        | 2               | 3.167477 |
| P10860        | YSTDVSVDEVK                                                         | 0.903940835        | 2               | 3.398627 |
| <b>P10867</b> | <b>GGLO L_gulonolactone oxidase</b>                                 | <b>1.113108599</b> | <b>0.089288</b> | <b>7</b> |
| P10867        | EKLDPTGMFLNSYLEK                                                    | 1.29399181         | 3               | 3.534583 |
| P10867        | GDDILLSPCFQR                                                        | 1.136370149        | 2               | 3.227153 |
| P10867        | LDPTGMFLNSYLEK                                                      | 1.230638762        | 2               | 4.122806 |
| P10867        | LDYWLAYETIMK                                                        | 1.210083229        | 2               | 4.019799 |
| P10867        | NADVFAAR                                                            | 1.233627988        | 2               | 2.869512 |
| P10867        | TYGCSPEVYYQPTSVEEVR                                                 | 0.753022002        | 2               | 4.839495 |
| P10867        | VVAHYPEVR                                                           | 1.163952238        | 2               | 2.756726 |
| <b>P10868</b> | <b>GAMT Guanidinoacetate N_methyltransferase</b>                    | <b>1.314830512</b> | <b>0.011719</b> | <b>3</b> |
| P10868        | EHWIECNDGVFQR                                                       | 1.631994225        | 3               | 3.801689 |
| P10868        | YTDITAMFEETQVPALLEAGFQR                                             | 1.313731991        | 3               | 4.581868 |
| P10868        | YYAFPQMITPLVTK                                                      | 1.492723291        | 2               | 3.78     |
| <b>P10888</b> | <b>COX41 Cytochrome c oxidase subunit 4 isoform 1_mitochondrial</b> | <b>1.138149926</b> | <b>0.039958</b> | <b>7</b> |
| P10888        | ADWSSLSR                                                            | 1.78869407         | 2               | 2.347992 |
| P10888        | DYPLPDVAHVK                                                         | 1.804762112        | 2               | 2.767204 |
| P10888        | IQFNESFAEMNK                                                        | 1.624750805        | 2               | 4.045511 |
| P10888        | RDYPLPDVAHVK                                                        | 1.178151584        | 2               | 2.302327 |
| P10888        | SEDYALPSYVDR                                                        | 1.058744717        | 2               | 3.867359 |
| P10888        | VNPIQGFSAK                                                          | 1.230920412        | 1               | 2.134869 |
| P10888        | WDYNKNEWK                                                           | 1.512578066        | 2               | 2.393436 |
| <b>P10959</b> | <b>EST2 Liver carboxylesterase 1</b>                                | <b>1.434368845</b> | <b>0.189452</b> | <b>3</b> |
| P10959        | AISESGVLTTLNLDKK                                                    | 1.099413904        | 2               | 3.419629 |
| P10959        | EGASEEETNLSKLVMK                                                    | 1.550485154        | 2               | 2.660723 |
| P10959        | GNWAHLDQLAALR                                                       | 7.634282032        | 2               | 3.011742 |
| <b>P11030</b> | <b>ACBP Acyl_CoA_binding protein</b>                                | <b>1.264923813</b> | <b>0.984428</b> | <b>5</b> |
| P11030        | AKWDSWVK                                                            | 1.060755757        | 2               | 2.406585 |
| P11030        | QATVGDVNTDRPGLLDLK                                                  | 1.070750829        | 2               | 3.653354 |
| P11030        | TQPTDEEMLFYSHFK                                                     | 1.677254311        | 2               | 3.910361 |
| P11030        | TYVEKVEELK                                                          | 1.256821852        | 2               | 2.343174 |
| P11030        | WDSWVK                                                              | 1.231201353        | 1               | 2.080174 |
| <b>P11232</b> | <b>THIO Thioredoxin</b>                                             | <b>0.670134944</b> | <b>0.118543</b> | <b>2</b> |
| P11232        | EAFQEALAAAGDK                                                       | 1.134805207        | 2               | 4.515783 |
| P11232        | VGEFSGANK                                                           | 0.346012073        | 2               | 2.7038   |
| <b>P11240</b> | <b>COX5A Cytochrome c oxidase subunit 5A_mitochondrial</b>          | <b>1.489999025</b> | <b>9.9E-20</b>  | <b>6</b> |
| P11240        | EIYPYVIQELRPTLNELGISTPEELGLDK                                       | 0.562048938        | 3               | 5.930583 |
| P11240        | EIYPYVIQELRPTLNELGISTPEELGLDKV                                      | 2.405335405        | 3               | 6.98547  |
| P11240        | GMNTLVGYDLVPEPK                                                     | 1.466838565        | 2               | 4.01758  |
| P11240        | IIDAALR                                                             | 1.580901508        | 1               | 2.101904 |
| P11240        | LNDFASAVR                                                           | 1.218499702        | 2               | 3.27435  |
| P11240        | RLNDFASAVR                                                          | 1.479743247        | 2               | 2.482695 |

|               |                                        |                    |                 |           |
|---------------|----------------------------------------|--------------------|-----------------|-----------|
| <b>P11348</b> | <b>DHPR Dihydropteridine reductase</b> | <b>1.271670893</b> | <b>0.098895</b> | <b>12</b> |
| P11348        | AALDGTPGMIGYGMAK                       | 1.234251994        | 2               | 3.86588   |
| P11348        | EGLLTLGAK                              | 1.047206435        | 2               | 2.92322   |
| P11348        | GAVHQLCQSLAGK                          | 1.170278855        | 3               | 4.298717  |
| P11348        | MTDSFTEQADQVTAEVGK                     | 1.272520045        | 2               | 5.825748  |
| P11348        | MTDSFTEQADQVTAEVGK+Oxidation(0         | 1.025875134        |                 |           |
| P11348        | NCDLMWK                                | 1.262576025        | 2               | 2.354143  |
| P11348        | NSGMPSGAAAIAVLPVTLDTPMNR               | 1.202977136        | 2               | 5.394826  |
| P11348        | NSGMPSGAAAIAVLPVTLDTPMNR+Oxidation(3   | 1.669130449        |                 |           |
| P11348        | QSIWTSTISSHLATK                        | 1.235474237        | 2               | 3.818817  |
| P11348        | RPNSGSLIQVTTDGGK                       | 0.976376522        | 2               | 3.71702   |
| P11348        | TELTAYF                                | 2.707607396        | 1               | 2.017455  |
| P11348        | VDAILCVAGGWAGGNAK                      | 2.090450766        | 2               | 3.924789  |
| <b>P11442</b> | <b>CLH Clathrin heavy chain 1</b>      | <b>1.317826266</b> | <b>9.9E-20</b>  | <b>39</b> |
| P11442        | ADDPSSYMEVVQAANTSQGNWEELVK             | 2.199164086        | 3               | 4.053478  |
| P11442        | AFMTADLPNELIELLEK                      | 1.381585079        | 3               | 4.692377  |
| P11442        | AHIAQLCEK                              | 1.312313752        | 2               | 2.378703  |
| P11442        | AHTMTDDVTFWK                           | 1.754665696        | 2               | 2.523079  |
| P11442        | ALEHFTDLYDIK                           | 1.712161457        | 3               | 3.965422  |
| P11442        | CNEPAVWSQLAK                           | 1.138589153        | 2               | 3.431461  |
| P11442        | FDVNTSAVQVLIHIGNLDR                    | 1.474055213        | 3               | 4.174235  |
| P11442        | FNALFAQGNYSAAK                         | 1.17744651         | 2               | 5.044479  |
| P11442        | GQCDELINVCNENSLEK                      | 1.196393095        | 2               | 5.568188  |
| P11442        | GQFSTDELVAEVEK                         | 1.423363785        | 2               | 4.049675  |
| P11442        | GQFSTDELVAEVEKR                        | 1.390757391        | 2               | 3.679213  |
| P11442        | HELIEFR                                | 1.266055656        | 2               | 2.506155  |
| P11442        | HSSLAGCQIINYR                          | 1.739209658        | 2               | 3.786544  |
| P11442        | IHEGCEEPATHNALAK                       | 1.509082878        | 2               | 5.39535   |
| P11442        | ISGETIFVTAPHEATAGIIGVNR                | 1.497962824        | 2               | 5.214356  |
| P11442        | IVLDNSVFSEHR                           | 1.138616662        | 2               | 2.94672   |
| P11442        | IYIDSNNNPER                            | 1.209589024        | 2               | 3.026072  |
| P11442        | KDPELWGSVLLESNPYR                      | 1.613439389        | 3               | 3.636993  |
| P11442        | KFDVNTSAVQVLIHIGNLDR                   | 1.526586023        | 3               | 6.138827  |
| P11442        | KFNALFAQGNYSAAK                        | 0.94148172         | 2               | 4.897373  |
| P11442        | LAELEEFINGPNNAHIQQVGDR                 | 1.491681937        | 2               | 5.411171  |
| P11442        | LECSEELGDLVK                           | 1.219989898        | 2               | 2.9125    |
| P11442        | LHIEVGTPTGNQPFK                        | 1.204636664        | 2               | 4.421409  |
| P11442        | LPVVIGLLDVDCSEDIK                      | 1.616601752        | 2               | 4.819174  |
| P11442        | LTDQLPLIIVCDR                          | 1.115960605        | 2               | 3.313821  |
| P11442        | NLQNLLILTAIK                           | 1.452340506        | 3               | 4.234161  |
| P11442        | NNLAGAEELFAR                           | 1.516300587        | 2               | 3.792782  |
| P11442        | NNRPSEGPLQTR                           | 1.313430942        | 3               | 4.13976   |
| P11442        | RPLIDQVVQTALSETQDPEEVSQTVK             | 1.463206364        | 3               | 6.305215  |
| P11442        | SVDPTLALSYYLR                          | 1.540194569        | 2               | 2.609646  |
| P11442        | SVNESLNNLFITEEDYQALR                   | 1.319355963        | 2               | 5.161675  |
| P11442        | TLQIFNIEMK                             | 1.73892809         | 2               | 3.020983  |
| P11442        | TSIDAYDNFDNISLAQR                      | 0.906577946        | 2               | 3.625626  |
| P11442        | VGEQAQVVIIDMNDPSNPIR                   | 1.438926557        | 2               | 5.054142  |
| P11442        | VIQCFIETGQVQK                          | 2.551557159        | 2               | 4.795819  |
| P11442        | VSQPIEGHAASFAQFK                       | 0.829455528        | 2               | 4.381845  |
| P11442        | WLLLTGISAQQNR                          | 1.772176808        | 2               | 3.640633  |
| P11442        | YESLELCRPVLQQGR                        | 1.158692325        | 2               | 2.80687   |
| P11442        | YIEIYVQK                               | 1.391506702        | 1               | 1.953786  |
| <b>P11497</b> | <b>ACACA Acetyl_CoA carboxylase 1</b>  | <b>1.064144515</b> | <b>0.038916</b> | <b>8</b>  |
| P11497        | DEPIHILNVAIK                           | 1.145524968        | 2               | 2.560642  |
| P11497        | GGSWVVIDPTINPR                         | 2.367118891        | 2               | 2.9903    |
| P11497        | LLETESFQLNR                            | 1.015388261        | 2               | 2.424971  |

|               |                                                                  |                    |                 |           |
|---------------|------------------------------------------------------------------|--------------------|-----------------|-----------|
| P11497        | LLLEDLVK                                                         | 1.735649121        | 2               | 2.371135  |
| P11497        | LPELLLK                                                          | 4.331247733        | 2               | 2.377985  |
| P11497        | TLRDPSPLELQDIMTSVSGR                                             | 1.867661807        | 3               | 3.481469  |
| P11497        | TVELSPADPANLDSEAK                                                | 0.655458223        | 2               | 2.532607  |
| P11497        | VQQAELHTGSLPQIQSTALR                                             | 0.356865163        | 3               | 3.536391  |
| <b>P11507</b> | <b>AT2A2 Sarcoplasmic/endoplasmic reticulum calcium ATPase 2</b> | <b>0.97480487</b>  | <b>0.89868</b>  | <b>8</b>  |
| P11507        | DIVPGDIVEIAVGDKVPADIR                                            | 1.185739653        | 2               | 2.865445  |
| P11507        | IGIFGQDEDVTSK                                                    | 0.859245825        | 2               | 3.55969   |
| P11507        | IRDEMVAEQER                                                      | 1.331924268        | 2               | 3.350554  |
| P11507        | KSEIGIAMGSGTAVAK                                                 | 1.135225422        | 2               | 3.872559  |
| P11507        | LDFEGEQLSK                                                       | 1.893733065        | 2               | 2.772338  |
| P11507        | NAENAIEALKEYEPEMGK                                               | 1.34223746         | 2               | 3.465812  |
| P11507        | SEIGIAMGSGTAVAK                                                  | 1.177685017        | 2               | 3.379007  |
| P11507        | VDQSILTGESVSVIK                                                  | 4.019391451        | 2               | 4.443788  |
| <b>P11598</b> | <b>PDIA3 Protein disulfide_isomerase A3</b>                      | <b>1.08464316</b>  | <b>2.22E-16</b> | <b>28</b> |
| P11598        | DASVVGFFR                                                        | 1.580703393        | 2               | 2.512311  |
| P11598        | DGEEAGAYDGPR                                                     | 1.597272823        | 2               | 3.422953  |
| P11598        | DLFSDGHSEFLK                                                     | 2.238183081        | 2               | 3.08118   |
| P11598        | DLLTAYYDVVYEK                                                    | 2.040847317        | 2               | 3.586147  |
| P11598        | DPNIVIAK                                                         | 1.102152766        | 2               | 2.456733  |
| P11598        | EATNPPIIQEELPK                                                   | 1.267106914        | 2               | 3.569679  |
| P11598        | ELNDFISYLQR                                                      | 1.445942243        | 2               | 3.110319  |
| P11598        | EYDDNGEGITIFRPLHLANK                                             | 1.485816522        | 2               | 4.184924  |
| P11598        | FAHTNVESLVK                                                      | 1.397690119        | 3               | 3.381225  |
| P11598        | FIQESIFGLCPHMTEDNKDLIQGK                                         | 2.039123154        | 3               | 4.994908  |
| P11598        | FISDKDASVVGFFR                                                   | 1.3532384          | 2               | 4.367239  |
| P11598        | FLQEYFDGNLK                                                      | 1.002097883        | 2               | 3.722122  |
| P11598        | FLQEYFDGNLKR                                                     | 1.16804705         | 2               | 3.531277  |
| P11598        | FVMQEEFSR                                                        | 1.076816496        | 2               | 2.929364  |
| P11598        | IFRDGEEAGAYDGPR                                                  | 0.94895255         | 2               | 3.954452  |
| P11598        | KTFSHELSDFGLESTTGEIPVVAIR                                        | 1.875147452        | 3               | 4.382811  |
| P11598        | LAPEYAAAATR                                                      | 1.218811741        | 2               | 2.890248  |
| P11598        | LNFVAVSR                                                         | 1.753049128        | 2               | 2.53544   |
| P11598        | LSKDPNIVIAK                                                      | 1.466320549        | 3               | 4.029299  |
| P11598        | MDATANDVPSPEYVK                                                  | 1.218386998        | 2               | 4.375015  |
| P11598        | MDATANDVPSPEYVK+Oxidation(O                                      | 1.396017507        |                 |           |
| P11598        | RLAPEYAAAATR                                                     | 1.128431773        | 2               | 3.666562  |
| P11598        | SEPIPETNEGPVK                                                    | 1.085425615        | 2               | 2.884461  |
| P11598        | TADGIVSHLK                                                       | 1.366611854        | 2               | 2.798299  |
| P11598        | TFLDAGHK                                                         | 0.963749864        | 1               | 1.902213  |
| P11598        | TFSHELSDFGLESTTGEIPVVAIR                                         | 1.182606892        | 2               | 6.038745  |
| P11598        | VDCTANTNTCNK                                                     | 0.915138059        | 2               | 3.885523  |
| P11598        | YGVSGYPTLK                                                       | 1.133680633        | 2               | 3.218223  |
| <b>P11711</b> | <b>CP2A1 Cytochrome P450 2A1</b>                                 | <b>1.327427635</b> | <b>0.127443</b> | <b>6</b>  |
| P11711        | GEQATYNTLFK                                                      | 1.118714727        | 2               | 2.561234  |
| P11711        | GTDVFPILGSLMTDPK                                                 | 1.200162931        | 2               | 3.460859  |
| P11711        | ILEEAGYLIK                                                       | 1.128897328        | 2               | 3.403633  |
| P11711        | LEDINESPKPLGFTR                                                  | 1.12267169         | 2               | 3.427345  |
| P11711        | TVSNVISSIVFGER                                                   | 1.329454139        | 2               | 3.652304  |
| P11711        | VHEEIEQVIGR                                                      | 1.79780606         | 2               | 3.067573  |
| <b>P11714</b> | <b>CP2D9 Cytochrome P450 2D9</b>                                 | <b>0.894224495</b> | <b>0.09299</b>  | <b>2</b>  |
| P11714        | GNPESSFNDENLLMVVR                                                | 1.278635249        | 2               | 2.440007  |
| P11714        | VQQEIDEVIGQVR                                                    | 0.890079782        | 2               | 4.707709  |
| <b>P11862</b> | <b>GAS2 Growth arrest_specific protein 2</b>                     | <b>1.434943381</b> | <b>0.01315</b>  | <b>3</b>  |
| P11862        | EIEQEETLSAPSPSPSSK                                               | 1.216042572        | 2               | 4.116838  |
| P11862        | LDNGALLCQLAATVQEK                                                | 1.663896847        | 2               | 3.805905  |

|               |                                                    |                    |                 |           |
|---------------|----------------------------------------------------|--------------------|-----------------|-----------|
| P11862        | YGVEPPGLIK                                         | 1.231163778        | 2               | 2.324488  |
| <b>P11884</b> | <b>ALDH2 Aldehyde dehydrogenase_ mitochondrial</b> | <b>1.012449743</b> | <b>9.9E-20</b>  | <b>27</b> |
| P11884        | AAQAAFQLGSPWR                                      | 1.481467338        | 2               | 2.911781  |
| P11884        | DGMTIAKEEIFGPVMQILK                                | 2.73756822         | 3               | 4.011028  |
| P11884        | EAGFPPGVVNVPGFGPTAGAAIASHEDVDK                     | 1.042511313        | 3               | 4.456418  |
| P11884        | EEIFGPVMQILK                                       | 1.463658364        | 2               | 4.063035  |
| P11884        | EEIFGPVMQILK+Oxidation(7                           | 1.238434891        |                 |           |
| P11884        | ELGEYGLQAYTEVK                                     | 1.862203169        | 2               | 4.38967   |
| P11884        | GYFIQPTVFGDVK                                      | 0.862728678        | 2               | 4.285276  |
| P11884        | HEPVGVCQIIPWNFPLMQAWK                              | 1.543093443        | 3               | 4.241936  |
| P11884        | KTFPTVNPSTGEVICQVAEGNKEDVDK                        | 1.041018682        | 3               | 6.481459  |
| P11884        | LGPALATGNVVVMK                                     | 1.465937442        | 2               | 3.815257  |
| P11884        | LGPALATGNVVVMK+Oxidation(12                        | 1.361650981        |                 |           |
| P11884        | LLCGGAAADR                                         | 1.791140083        | 2               | 3.385876  |
| P11884        | RVTLELGK                                           | 1.372391836        | 2               | 2.922444  |
| P11884        | TEQGPQVDETFK                                       | 0.953599042        | 2               | 4.56965   |
| P11884        | TEQGPQVDETFK                                       | 1.354365964        | 2               | 3.569177  |
| P11884        | TFPTVNPSTGEVICQVAEGNK                              | 1.026187452        | 2               | 5.294014  |
| P11884        | TFPTVNPSTGEVICQVAEGNKEDVDK                         | 1.121963656        | 2               | 4.302246  |
| P11884        | TFVQEDVYDEFVER                                     | 0.953248006        | 2               | 5.111619  |
| P11884        | TIEEVVGR                                           | 1.256630399        | 2               | 2.984706  |
| P11884        | TIPIDGFFSYTR                                       | 1.260161306        | 2               | 2.817014  |
| P11884        | VAEQTPLTALYVANLIK                                  | 1.321322607        | 2               | 5.492676  |
| P11884        | VAFTGSTEVGHLIQVAAGSSNLK                            | 1.062430467        | 2               | 6.537161  |
| P11884        | VAFTGSTEVGHLIQVAAGSSNLKR                           | 1.698833672        | 3               | 3.991735  |
| P11884        | VTLELGK                                            | 1.022094562        | 1               | 2.053567  |
| P11884        | VVGNPFDSR                                          | 16.42043727        | 2               | 2.952728  |
| P11884        | YGLAAAVFTK                                         | 1.284480617        | 2               | 4.045621  |
| P11884        | YYAGWADK                                           | 0.942402539        | 2               | 2.540632  |
| <b>P11915</b> | <b>NLTP Non_specific lipid_transfer protein</b>    | <b>1.30630824</b>  | <b>9.9E-20</b>  | <b>21</b> |
| P11915        | ADCTITMADSDLLALMTGK                                | 1.361304471        | 2               | 5.40223   |
| P11915        | ANLIFK                                             | 1.980923413        | 2               | 2.326914  |
| P11915        | AVEIVAQEMVTDMPSTFEEK                               | 2.089740647        | 2               | 5.305671  |
| P11915        | GHPLGATGLAQCAELCWQLR                               | 1.139053172        | 3               | 3.583726  |
| P11915        | GSVLPDSDK                                          | 0.819268136        | 1               | 2.089741  |
| P11915        | GSVLPDSDKK                                         | 0.37827862         | 2               | 2.600466  |
| P11915        | HIDVLINK                                           | 1.245062853        | 2               | 2.938199  |
| P11915        | HSVNNPYSQFQDEYSLDEIMK                              | 1.76189021         | 3               | 6.171529  |
| P11915        | KADCTITMADSDLLALMTGK                               | 1.786052873        | 3               | 3.485859  |
| P11915        | KLEEEGEEFVK                                        | 1.097021994        | 3               | 4.245136  |
| P11915        | KLEEEGEEFVK                                        | 1.185630207        | 3               | 4.853965  |
| P11915        | LEEEGEEFVK                                         | 0.3923907          | 2               | 2.819041  |
| P11915        | LEEEGEEFVK                                         | 0.906287979        | 2               | 3.587742  |
| P11915        | LQSLQLQPK                                          | 1.450713209        | 2               | 3.169294  |
| P11915        | MGFPEAASSFR                                        | 1.090897948        | 2               | 2.614854  |
| P11915        | MNPQSFAFFQK                                        | 0.814936905        | 2               | 3.229347  |
| P11915        | SRPVDFLTVLQCCPTSDGAAAAIVSSEEFVQK                   | 1.481814745        | 3               | 4.370543  |
| P11915        | THQISAAPTSSAGDGFK                                  | 1.62858273         | 2               | 4.640283  |
| P11915        | VFVVGVMGTMK                                        | 1.079271642        | 2               | 2.678288  |
| P11915        | WVINPSGGLISK                                       | 1.493246653        | 2               | 3.114433  |
| P11915        | YGMSACPFAPQLFGSAGK                                 | 1.572887776        | 2               | 4.061396  |
| <b>P11980</b> | <b>KPYM Pyruvate kinase isozymes M1/M2</b>         | <b>1.504982292</b> | <b>0.683115</b> | <b>4</b>  |
| P11980        | GADYLVTEVENGSLGSK                                  | 2.404192904        | 2               | 4.762059  |
| P11980        | GVNLPGAADVLPVSEK                                   | 1.486495363        | 2               | 4.061876  |
| P11980        | IYVDDGLISLQVK                                      | 2.019823824        | 2               | 2.442359  |
| P11980        | NTGICTIGPASR                                       | 1.326045182        | 2               | 3.299815  |
| <b>P12001</b> | <b>RL18 60S ribosomal protein L18</b>              | <b>1.462869037</b> | <b>9.9E-20</b>  | <b>5</b>  |

|               |                                                                              |                    |                 |           |
|---------------|------------------------------------------------------------------------------|--------------------|-----------------|-----------|
| P12001        | GTVLLSGPR                                                                    | 1.21858574         | 2               | 3.142797  |
| P12001        | ILTFDQLALESPK                                                                | 1.663890559        | 2               | 4.85503   |
| P12001        | TAVVVGITDDVR                                                                 | 1.299317504        | 2               | 4.333145  |
| P12001        | TNRPPLSLR                                                                    | 1.120234314        | 3               | 3.661873  |
| P12001        | TNSTFNQVVLK                                                                  | 1.035925504        | 2               | 2.996768  |
| <b>P12007</b> | <b>IVD Isovaleryl_CoA dehydrogenase_mitochondrial</b>                        | <b>1.138924458</b> | <b>0.03755</b>  | <b>9</b>  |
| P12007        | AQEIDQSNDFK                                                                  | 1.396630527        | 2               | 3.436113  |
| P12007        | FVQENLAPK                                                                    | 1.108067019        | 2               | 2.945521  |
| P12007        | FWITNGPDADVLVVYAK                                                            | 1.46526448         | 2               | 3.584719  |
| P12007        | GSNTCELVFEDCK                                                                | 0.938505263        | 2               | 4.558173  |
| P12007        | GSNTCELVFEDCKVPAANILSQESK                                                    | 1.005974937        | 3               | 5.229532  |
| P12007        | GVYVLMGLDLER                                                                 | 1.455711667        | 2               | 2.951986  |
| P12007        | IGQFQLMQGK                                                                   | 1.136454307        | 2               | 2.763439  |
| P12007        | LYEIGGGTSEVR                                                                 | 1.126281871        | 2               | 2.823203  |
| P12007        | TDLTAVPASR                                                                   | 0.946007824        | 2               | 3.093655  |
| <b>P12075</b> | <b>COX5B Cytochrome c oxidase subunit 5B_mitochondrial</b>                   | <b>1.485886532</b> | <b>0.304462</b> | <b>2</b>  |
| P12075        | EDPNLVPSVSNK                                                                 | 1.485680073        | 2               | 3.228238  |
| P12075        | GLDPYNMLPPK                                                                  | 1.532079542        | 2               | 2.317757  |
| <b>P12336</b> | <b>GTR2 Solute carrier family 2_facilitated glucose transporter member 2</b> | <b>1.32686118</b>  | <b>0.000402</b> | <b>3</b>  |
| P12336        | HVLGVPLDDR                                                                   | 2.162105078        | 2               | 2.331264  |
| P12336        | HVLGVPLDDRR                                                                  | 1.237119901        | 3               | 3.309498  |
| P12336        | SFDEIAAEFR                                                                   | 1.383838638        | 2               | 3.341381  |
| <b>P12346</b> | <b>TRFE Serotransferrin</b>                                                  | <b>1.050298448</b> | <b>0.003355</b> | <b>23</b> |
| P12346        | ADRDQYELLCLDNTR                                                              | 1.226657691        | 2               | 4.318649  |
| P12346        | ASDSSINWNNLK                                                                 | 0.909464363        | 2               | 3.070838  |
| P12346        | DFQLFGSPLGK                                                                  | 3.406133858        | 2               | 3.595276  |
| P12346        | DGGGDVAFVK                                                                   | 1.898451444        | 2               | 2.468362  |
| P12346        | DLKQEDFQLLCPDGTK                                                             | 1.217152205        | 2               | 4.575334  |
| P12346        | EGVCPEGSIDSAPVK                                                              | 1.594177422        | 2               | 3.47231   |
| P12346        | EGYNGYTGAFAQCLVEK                                                            | 1.044000359        | 2               | 3.25762   |
| P12346        | FDEFFSQGCAPGYK                                                               | 1.048494305        | 2               | 4.063144  |
| P12346        | GDKDCTGNFCLFR                                                                | 0.835994617        | 2               | 3.585454  |
| P12346        | GTDFQLNQLQGK                                                                 | 0.896679055        | 2               | 3.518849  |
| P12346        | GYAVAVVK                                                                     | 1.074843771        | 2               | 2.950112  |
| P12346        | HQTVLENTNGK                                                                  | 9.223189542        | 2               | 2.472506  |
| P12346        | HTTIFEVLQK                                                                   | 0.430718893        | 3               | 4.010453  |
| P12346        | KGTFQLNQLQGK                                                                 | 1.054013052        | 2               | 4.589984  |
| P12346        | KTSYQDCIK                                                                    | 1.116988207        | 2               | 2.649408  |
| P12346        | LPEGTTYEYLGAEYLQAVGNIR                                                       | 1.141993352        | 2               | 4.583292  |
| P12346        | NGDGKEDLIWEILK                                                               | 1.07266897         | 2               | 3.692132  |
| P12346        | QEDFQLLCPDGTK                                                                | 0.555116894        | 2               | 3.229157  |
| P12346        | SKDFQLFGSPLGK                                                                | 1.007189935        | 2               | 3.140049  |
| P12346        | TSYQDCIK                                                                     | 0.94663166         | 2               | 2.464587  |
| P12346        | VSTVLTAKQ                                                                    | 0.74114504         | 2               | 2.727088  |
| P12346        | WCALSHQER                                                                    | 1.299543158        | 2               | 3.180489  |
| P12346        | WCAVSEHENTK                                                                  | 0.890282059        | 2               | 3.618573  |
| <b>P12368</b> | <b>KAP2 cAMP_dependent protein kinase type II_alpha regulatory subunit</b>   | <b>1.405955117</b> | <b>0.000449</b> | <b>3</b>  |
| P12368        | MFESFIESVPLFK                                                                | 1.349461131        | 2               | 3.441716  |
| P12368        | NISHYEEQLVK                                                                  | 0.971155915        | 2               | 2.539134  |
| P12368        | NLDQEQLSQVLDAMFEK                                                            | 1.795766495        | 3               | 3.898859  |
| <b>P12711</b> | <b>ADHX Alcohol dehydrogenase class_3</b>                                    | <b>1.165299595</b> | <b>9.9E-20</b>  | <b>10</b> |
| P12711        | AAVAWEAGKPLSIEIEVAPPAHEVR                                                    | 1.604614958        | 3               | 6.70961   |
| P12711        | AFLMHSGNSIR                                                                  | 0.917081411        | 2               | 3.287355  |

|               |                                       |                    |                 |           |
|---------------|---------------------------------------|--------------------|-----------------|-----------|
| P12711        | AGDVIPLYIPQCGECK                      | 1.310105724        | 2               | 3.718103  |
| P12711        | AKEFGATECINPQDFSK                     | 1.014328342        | 2               | 4.763711  |
| P12711        | EFGATECINPQDFSK                       | 6.026188629        | 2               | 4.352767  |
| P12711        | IDPSAPLKD                             | 1.671583402        | 1               | 2.17802   |
| P12711        | IIGIDINK                              | 1.345920322        | 1               | 2.038364  |
| P12711        | IIGIDINKDK                            | 1.441832479        | 2               | 2.435354  |
| P12711        | VCLLGCGISTGYGAAVNTAK                  | 1.504785652        | 2               | 6.078312  |
| P12711        | VDEFVTGNLSFDQINK                      | 1.057778778        | 2               | 4.990308  |
| <b>P12749</b> | <b>RL26 60S ribosomal protein L26</b> | <b>1.274607161</b> | <b>4.23E-05</b> | <b>5</b>  |
| P12749        | DDEVQVVR                              | 1.431949682        | 2               | 2.945473  |
| P12749        | FNPFVTSR                              | 1.151859349        | 2               | 2.756455  |
| P12749        | HFNAPSHIR                             | 1.25010643         | 3               | 3.880914  |
| P12749        | KDDEVQVVR                             | 1.312790577        | 2               | 3.262084  |
| P12749        | YVIYIER                               | 0.904953358        | 1               | 1.974013  |
| <b>P12785</b> | <b>FAS Fatty acid synthase</b>        | <b>1.683088542</b> | <b>9.9E-20</b>  | <b>45</b> |
| P12785        | ACIDTALENLSTLK                        | 2.179822499        | 2               | 4.474679  |
| P12785        | AEAVVAVLLTK                           | 1.706906687        | 2               | 3.832134  |
| P12785        | AGSDTELAAPK                           | 1.53511506         | 2               | 3.414196  |
| P12785        | CPPGVVPACHNSEDTVITISGPQAAVNEFVEQLK    | 2.13080018         | 3               | 5.52807   |
| P12785        | DAMLENQTPELFQDVNPK                    | 1.430305327        | 2               | 4.173407  |
| P12785        | DANLPAGSMAAVGLSWEECK                  | 0.831759899        | 2               | 3.089152  |
| P12785        | DGGFLLMHTVLK                          | 1.159953001        | 2               | 3.339146  |
| P12785        | DPETLLGYSMVGCQR                       | 1.764895309        | 2               | 3.939814  |
| P12785        | DTSFEQHVLLHTGGK                       | 2.927790655        | 2               | 2.990969  |
| P12785        | EEEEPEAMLPGAQPTLISAISK                | 3.159375078        | 2               | 3.947263  |
| P12785        | EQGVTFPSGEAQQLIR                      | 1.164751396        | 2               | 4.293488  |
| P12785        | FDASFFGVHPK                           | 1.656170454        | 2               | 3.406901  |
| P12785        | FDLSNNHPLGMAIFLK                      | 2.320076201        | 2               | 3.436061  |
| P12785        | FVFTPHVEPECLSEAILQK                   | 2.342156639        | 3               | 5.07461   |
| P12785        | GLESIINIIHSSLAEPK                     | 1.749715587        | 2               | 4.415999  |
| P12785        | GNAGQSNYGFANSTMER                     | 3.168732436        | 2               | 4.703185  |
| P12785        | GVDLVLNSLAEEK                         | 2.393266081        | 2               | 3.48034   |
| P12785        | HFQLEQDKPEEQTAHAFVNLTR                | 1.616096136        | 3               | 3.409205  |
| P12785        | LFDHPEVPIPAESVSR                      | 1.252310029        | 2               | 4.263873  |
| P12785        | LLLPEDPLISGLLSQALK                    | 1.842570054        | 3               | 4.781498  |
| P12785        | LTPGCEAEAEAEICFFIK                    | 2.899794355        | 2               | 3.762229  |
| P12785        | MTVPGLEDLPQHGLPR                      | 1.671397722        | 2               | 3.591424  |
| P12785        | QAQLNLSILLVNPEGPTLTR                  | 1.902217641        | 2               | 3.084434  |
| P12785        | RQEQQLVPTLEK                          | 0.855216335        | 2               | 3.120968  |
| P12785        | SDEALKPLGVK                           | 1.383574186        | 2               | 2.974132  |
| P12785        | SFDDSGNGYCR                           | 1.339913386        | 2               | 3.059119  |
| P12785        | SGECPAAIVGGINLLKPNTSVQFMK             | 0.636307221        | 3               | 3.966894  |
| P12785        | SLYQPGGVAPESLEYIEAHGTGTK              | 1.764677632        | 2               | 5.233467  |
| P12785        | SNMGHPEPASGLAALTK                     | 1.666743874        | 3               | 4.176483  |
| P12785        | SNMGHPEPASGLAALTK+Oxidation(2         | 1.710994695        |                 |           |
| P12785        | TGGTYGEDLGADYNLSQVCDGK                | 1.16703779         | 2               | 5.048231  |
| P12785        | TGTVPLEVR                             | 1.231738664        | 2               | 2.462291  |
| P12785        | TMEAVQGLLEQGR                         | 1.684745853        | 2               | 3.88832   |
| P12785        | VFTTVGSAEK                            | 2.197817517        | 2               | 2.3602    |
| P12785        | VGDPQELNGITR                          | 0.960039434        | 2               | 3.153459  |
| P12785        | VHLTGIDINPNALFPPVEFPVPR               | 2.133692145        | 2               | 4.900929  |
| P12785        | VLEALLPLK                             | 1.849740577        | 2               | 3.301196  |
| P12785        | VLES DLVMNVYR                         | 1.806728468        | 2               | 3.406588  |
| P12785        | VSVHIEGDHR                            | 3.002911555        | 2               | 2.817744  |
| P12785        | VTAIYIDPATHLQK                        | 1.820238596        | 2               | 3.800963  |
| P12785        | VYATILNAGTNTDGCK                      | 1.664002902        | 2               | 4.980019  |
| P12785        | VYMLEGDTQVADVTTSR                     | 2.519505809        | 2               | 3.585744  |



|               |                                                                               |                    |                 |           |
|---------------|-------------------------------------------------------------------------------|--------------------|-----------------|-----------|
| P12785        | VYQWEDPDSK                                                                    | 1.900912277        | 2               | 3.251095  |
| P12785        | WLSTSIPEAQWQSSLAR                                                             | 0.746830661        | 2               | 2.674955  |
| P12785        | YNGTLNLDR                                                                     | 1.895296919        | 1               | 2.102278  |
| <b>P12791</b> | <b>CP2BA Cytochrome P450 2B10</b>                                             | <b>1.142255722</b> | <b>0.998104</b> | <b>2</b>  |
| P12791        | IQEEAQLVEELR                                                                  | 1.156942533        | 2               | 4.585475  |
| P12791        | IQEEAQLVEELRK                                                                 | 1.137651333        | 2               | 3.763267  |
| <b>P12847</b> | <b>MYH3 Myosin_3</b>                                                          | <b>0.877575457</b> | <b>0.553749</b> | <b>5</b>  |
| P12847        | GTLEDQIISANPLLEAFGNAK                                                         | 0.56925232         | 2               | 3.118917  |
| P12847        | IEAQNQPFDAK                                                                   | 0.561186862        | 2               | 3.037445  |
| P12847        | KELEEKLVTLVQEK                                                                | 0.700881192        | 2               | 2.767368  |
| P12847        | MKGTLEDQIISANPLLEAFGNAK                                                       | 3.223651381        | 3               | 6.703844  |
| P12847        | MKGTLEDQIISANPLLEAFGNAK+Oxidation(O                                           | 2.317101801        |                 |           |
| <b>P12928</b> | <b>KPYR Pyruvate kinase isozymes R/L</b>                                      | <b>1.487963595</b> | <b>2.17E-08</b> | <b>20</b> |
| P12928        | AAVIAVTR                                                                      | 1.110899844        | 2               | 2.622893  |
| P12928        | AETSDVANAVLDGADCIMLSGETAK                                                     | 2.704385494        | 2               | 5.979966  |
| P12928        | CCAAAIIVLTK                                                                   | 1.224288719        | 2               | 3.085968  |
| P12928        | CNLAGKPVVCATQMLESMTIK                                                         | 1.453528153        | 3               | 4.863765  |
| P12928        | EATESFATSPLSYRPVAIALDTK                                                       | 1.545628065        | 2               | 4.023415  |
| P12928        | EPPEAIWADDVDR                                                                 | 1.30027282         | 2               | 2.649955  |
| P12928        | GDLGIEIPA EK                                                                  | 0.839998324        | 2               | 3.147001  |
| P12928        | GSFPVEAVMMQHA IAR                                                             | 1.235009053        | 2               | 3.913738  |
| P12928        | GSQVLVTVDPK                                                                   | 1.246595624        | 2               | 2.938781  |
| P12928        | GVNLPNTEVDLPGLSEQDLLDLR                                                       | 1.541441856        | 2               | 4.908193  |
| P12928        | IGPEGLVTEVEHGILGSR                                                            | 1.447211851        | 2               | 5.047713  |
| P12928        | IYIDDLISLVVQK                                                                 | 1.914850628        | 2               | 4.41485   |
| P12928        | KFDEILEVSDGIMVAR                                                              | 1.43725151         | 2               | 4.931178  |
| P12928        | KGVNLNTEVDLPGLSEQDLLDLR                                                       | 1.53351041         | 3               | 4.661717  |
| P12928        | LNFSHGSHEYHAESIANIR                                                           | 2.139304489        | 2               | 5.720943  |
| P12928        | RVQFGIESGK                                                                    | 1.070672552        | 2               | 2.554047  |
| P12928        | STSIIATIGPASR                                                                 | 0.97941497         | 2               | 3.390264  |
| P12928        | TGVLQGGPESEVEIVK                                                              | 1.068343239        | 2               | 5.068977  |
| P12928        | TVWVDYHNITR                                                                   | 1.252952077        | 2               | 2.684114  |
| P12928        | VQFGIESGK                                                                     | 1.388668803        | 2               | 2.461007  |
| <b>P12938</b> | <b>CP2D3 Cytochrome P450 2D3</b>                                              | <b>0.898553628</b> | <b>0.713584</b> | <b>7</b>  |
| P12938        | DLTDAFLAEIEK                                                                  | 0.975094819        | 2               | 4.424824  |
| P12938        | FDYGDPDFIK                                                                    | 2.269717246        | 2               | 2.765387  |
| P12938        | GNPESSFNDANLR                                                                 | 1.491271039        | 2               | 4.004616  |
| P12938        | RFDYGDPDFIK                                                                   | 0.908358076        | 2               | 3.047796  |
| P12938        | TFLTMVDNLVTEHK                                                                | 1.564006891        | 2               | 3.339642  |
| P12938        | TWDPDQPPR                                                                     | 0.687883096        | 2               | 2.450746  |
| P12938        | TWDPDQPPRDLTDAFLAEIEK                                                         | 1.201560046        | 3               | 3.672248  |
| <b>P12939</b> | <b>CP2DA Cytochrome P450 2D10</b>                                             | <b>2.933716174</b> | <b>9.27E-11</b> | <b>8</b>  |
| P12939        | ALCNVIASLIFAR                                                                 | 2.150538622        | 2               | 3.507223  |
| P12939        | AVQEVLVTHGEDTADRPPVPIFK                                                       | 2.324457259        | 3               | 5.598721  |
| P12939        | FEYEDPYLIR                                                                    | 3.032715427        | 2               | 2.458931  |
| P12939        | FGDIAPLNLP R                                                                  | 2.099407381        | 2               | 3.132499  |
| P12939        | ITSCDIEVQDFVIPK                                                               | 2.653806761        | 2               | 4.369359  |
| P12939        | NLTDAFLAEVEK                                                                  | 2.934571206        | 2               | 4.160637  |
| P12939        | RFEYEDPYLIR                                                                   | 2.334792369        | 3               | 3.467832  |
| P12939        | TTWDPAQPPR                                                                    | 4.286982066        | 2               | 2.591508  |
| <b>P13084</b> | <b>NPM Nucleophosmin</b>                                                      | <b>1.797617451</b> | <b>6.66E-16</b> | <b>2</b>  |
| P13084        | MTDQEAIQDLWQWR                                                                | 1.55643712         | 2               | 3.275612  |
| P13084        | VNDENEHQLSLR                                                                  | 1.985115947        | 2               | 4.127531  |
| <b>P13086</b> | <b>SUCA Succinyl_CoA ligase [ADP/GDP_forming] subunit alpha_mitochondrial</b> | <b>1.28554308</b>  | <b>0.347049</b> | <b>5</b>  |
| P13086        | HLGLPVFNTVK                                                                   | 1.852095391        | 2               | 2.333587  |
| P13086        | LIGPNCPIINPGECK                                                               | 1.04888536         | 2               | 4.435453  |

|               |                                                     |                    |                 |           |
|---------------|-----------------------------------------------------|--------------------|-----------------|-----------|
| P13086        | MGHAGAIAGGK                                         | 1.355971738        | 3               | 3.466594  |
| P13086        | NIYIDK                                              | 1.125486176        | 1               | 2.129305  |
| P13086        | QGTFHSQQALEYGTK                                     | 1.449911258        | 2               | 2.728255  |
| <b>P13107</b> | <b>CP2B3 Cytochrome P450 2B3</b>                    | <b>1.173586057</b> | <b>0.545786</b> | <b>8</b>  |
| P13107        | ATLDPNAPR                                           | 1.194254176        | 2               | 2.635109  |
| P13107        | EIDQVIGSQR                                          | 1.295141848        | 2               | 2.665457  |
| P13107        | EVLDYIDHSVENHR                                      | 1.104809692        | 2               | 4.08286   |
| P13107        | FSDVSPMGLPCR                                        | 1.275970422        | 2               | 3.443871  |
| P13107        | GIIAVLQPMQEYGVSVFVNEER                              | 1.355000365        | 3               | 5.764159  |
| P13107        | MCLGEGIAR                                           | 1.359608           | 2               | 2.692423  |
| P13107        | QSVEDQIKEAK                                         | 1.23315726         | 2               | 2.91521   |
| P13107        | SFIQLQEK                                            | 0.321714516        | 2               | 2.433958  |
| <b>P13221</b> | <b>AATC Aspartate aminotransferase_ cytoplasmic</b> | <b>1.456083545</b> | <b>2.6E-09</b>  | <b>7</b>  |
| P13221        | IGADFLGR                                            | 2.281474244        | 2               | 2.389949  |
| P13221        | ITWSNPPAQGAR                                        | 1.935599708        | 2               | 3.006084  |
| P13221        | IVATTLSPNPELFK                                      | 1.774717521        | 2               | 3.785616  |
| P13221        | NLDYVATSINEAVTK                                     | 1.905307114        | 2               | 5.097983  |
| P13221        | SCASQLVLGDNSPALR                                    | 1.137850324        | 2               | 5.11447   |
| P13221        | TDDSQPWVLPVVR                                       | 1.481361046        | 2               | 3.266952  |
| P13221        | VGGVQSLGGTGALR                                      | 0.51086471         | 2               | 3.007875  |
| <b>P13255</b> | <b>GNMT Glycine N_methyltransferase</b>             | <b>1.101375325</b> | <b>0.542956</b> | <b>8</b>  |
| P13255        | AHMVTLDYTVQVPGAGR                                   | 1.043038616        | 2               | 5.07364   |
| P13255        | AWLLGLLR                                            | 1.248018154        | 2               | 2.571646  |
| P13255        | DITTSVLTVNPK                                        | 1.40059809         | 2               | 3.826614  |
| P13255        | LSYYPHCLASFTLVEAFGGGR                               | 1.769636116        | 3               | 3.643876  |
| P13255        | NIASMVRPGGLLVIDHR                                   | 1.655099596        | 3               | 3.748565  |
| P13255        | NYDYILSTGCAPP GK                                    | 1.277229955        | 2               | 4.651227  |
| P13255        | SDLTKDITTSVLTVNPK                                   | 1.201608746        | 2               | 2.897185  |
| P13255        | SLGVAAEGIPDQYADGEAAR                                | 0.820108439        | 2               | 5.258135  |
| <b>P13383</b> | <b>NUCL Nucleolin</b>                               | <b>1.217351331</b> | <b>0.11793</b>  | <b>8</b>  |
| P13383        | EAMEDGEIDGNK                                        | 2.447183142        | 2               | 2.932014  |
| P13383        | GFGFVDFNSEEDAK                                      | 2.177430456        | 2               | 2.87702   |
| P13383        | GLSEDTTEETLK                                        | 0.872531799        | 2               | 3.241655  |
| P13383        | GSPNARSQPSKTLFVK                                    | 1.019506011        | 2               | 2.332206  |
| P13383        | IEGSEPTTFFNLFIGNLNPKN                               | 0.626493045        | 2               | 3.757329  |
| P13383        | NDLAAVDVR                                           | 1.296746113        | 2               | 2.563109  |
| P13383        | NLSFNITEDELK                                        | 1.152322922        | 2               | 2.622602  |
| P13383        | SEADAENLEEK                                         | 1.157132391        | 2               | 2.948799  |
| <b>P13437</b> | <b>THIM 3_ketoacyl_CoA thiolase_ mitochondrial</b>  | <b>0.973516383</b> | <b>0.995719</b> | <b>21</b> |
| P13437        | AANEAGYFNEEMAPIEVK                                  | 0.507453805        | 2               | 5.1397    |
| P13437        | AANEAGYFNEEMAPIEVK+Oxidation(11                     | 1.148942171        |                 |           |
| P13437        | DAEVVLCGGTESMSQSPYSVR                               | 1.627539413        | 3               | 5.0537    |
| P13437        | DFTATDLTEFAAR                                       | 1.241162679        | 2               | 4.0434    |
| P13437        | DMDLIDVNEAFAPQFLAVQK                                | 1.496129468        | 3               | 6.519181  |
| P13437        | DMDLIDVNEAFAPQFLAVQK+Oxidation(1                    | 2.028209144        |                 |           |
| P13437        | EGTVTAGNASGMSDGAGVVIASEDAVK                         | 0.874960629        | 3               | 5.779508  |
| P13437        | EGTVTAGNASGMSDGAGVVIASEDAVKK                        | 1.009118623        | 3               | 4.889211  |
| P13437        | GVFIVAAK                                            | 1.428122275        | 2               | 2.472465  |
| P13437        | HNFTPLAR                                            | 1.192192031        | 2               | 2.369266  |
| P13437        | ITAHLVHELK                                          | 1.420189033        | 2               | 3.51449   |
| P13437        | LCGSGFQSVSGCQCEICK                                  | 1.355691715        | 2               | 5.640916  |
| P13437        | LEDTLWAGLTDQHVK                                     | 0.96783129         | 2               | 5.062773  |
| P13437        | RTPFGAYGGLLK                                        | 0.59621568         | 3               | 3.38314   |
| P13437        | SLDLPSK                                             | 0.73208704         | 2               | 2.726357  |
| P13437        | TNVSGGAIALGHPLGGSGSR                                | 1.043835351        | 2               | 5.991042  |
| P13437        | VGVPTETGALTNR                                       | 0.872586086        | 2               | 3.635789  |
| P13437        | VPPETIDSVIVGNVMQSSDAAYLAR                           | 0.985364355        | 2               | 5.912787  |

|               |                                                                          |                    |                 |           |
|---------------|--------------------------------------------------------------------------|--------------------|-----------------|-----------|
| P13437        | VPPETIDSVIVGNVMQSSDAAYLAR+Oxidation(14                                   | 1.053545175        |                 |           |
| P13437        | VVGYFVSGCDPAIMGIGPVPAITGALK                                              | 1.049218272        | 3               | 5.029734  |
| P13437        | VVGYFVSGCDPAIMGIGPVPAITGALKK                                             | 1.022471331        | 3               | 4.514121  |
| <b>P13439</b> | <b>UMPS Uridine 5__monophosphate synthase</b>                            | <b>1.589609827</b> | <b>0.057292</b> | <b>2</b>  |
| P13439        | SGLSSPVYIDLK                                                             | 1.602406504        | 2               | 2.428607  |
| P13439        | VTDAIVLLDR                                                               | 1.284802355        | 2               | 2.362031  |
| <b>P13444</b> | <b>METK1 S_adenosylmethionine synthase isoform type_1</b>                | <b>1.934507035</b> | <b>9.9E-20</b>  | <b>9</b>  |
| P13444        | FVIGGPQGDAGVTGR                                                          | 1.33725278         | 2               | 4.519907  |
| P13444        | HIGYDDSAK                                                                | 0.806822547        | 2               | 2.740845  |
| P13444        | ICDQISDAVLDAHLK                                                          | 1.549924957        | 3               | 5.264887  |
| P13444        | NEEDVGAGDQGLMFGYATDETEECMPLTIVLAHK                                       | 5.58675748         | 3               | 6.927251  |
| P13444        | SEFPWEVPK                                                                | 1.579937745        | 2               | 2.378173  |
| P13444        | SGVLPWLRPDSK                                                             | 1.121724408        | 2               | 2.943056  |
| P13444        | TCNVLVALEQQSPDIAQCVHLDR                                                  | 2.021876717        | 3               | 5.997582  |
| P13444        | TQVTVQYVQDNGAIVPVR                                                       | 1.662026527        | 2               | 5.433738  |
| P13444        | VHTIVISVQHNEEDITLEAMR                                                    | 2.374456061        | 3               | 4.077361  |
| <b>P13471</b> | <b>RS14 40S ribosomal protein S14</b>                                    | <b>1.19758059</b>  | <b>0.030074</b> | <b>3</b>  |
| P13471        | ADRDESSPYAAMLAQDVAQR                                                     | 1.41550782         | 2               | 5.429939  |
| P13471        | ELGITALHIK                                                               | 1.777651937        | 2               | 2.49773   |
| P13471        | IEDVTPIPSDSTR                                                            | 1.169632302        | 2               | 3.912302  |
| <b>P13601</b> | <b>AL1A7 Aldehyde dehydrogenase_ cytosolic 1</b>                         | <b>0.737135937</b> | <b>0.000554</b> | <b>20</b> |
| P13601        | ANNTPYGLAAGVFTK                                                          | 0.851459754        | 2               | 4.379419  |
| P13601        | EEIFGPVQIMK                                                              | 0.874994137        | 2               | 3.60608   |
| P13601        | EMGEQGVYETELK                                                            | 0.542066216        | 2               | 3.536651  |
| P13601        | FPVINPATEEVICHVEEGDK                                                     | 1.467741612        | 3               | 3.828281  |
| P13601        | FPVINPATEEVICHVEEGDKADVDK                                                | 1.462864771        | 4               | 5.050517  |
| P13601        | GFFVQPTVFSNVTDEMR                                                        | 1.582857386        | 2               | 2.459547  |
| P13601        | IAKEEIFGPVQIMK                                                           | 0.932520818        | 2               | 3.720336  |
| P13601        | IFINNEWHNSLNGK                                                           | 0.709941807        | 2               | 3.908209  |
| P13601        | IHGQTIPSDGDVFTYTR                                                        | 0.532920453        | 3               | 3.897451  |
| P13601        | ILDLIESGK                                                                | 0.91143956         | 2               | 3.190511  |
| P13601        | ILDLIESGKK                                                               | 0.888931979        | 2               | 2.855522  |
| P13601        | KFPVINPATEEVICHVEEGDK                                                    | 0.916797142        | 3               | 3.568044  |
| P13601        | KFPVINPATEEVICHVEEGDKADVDK                                               | 1.384229137        | 4               | 4.877313  |
| P13601        | LFVEESIYDEFVR                                                            | 0.521082782        | 2               | 3.60477   |
| P13601        | SIDEVIK                                                                  | 0.611048724        | 2               | 2.495962  |
| P13601        | VLLATMESMNAGK                                                            | 0.753846271        | 2               | 4.440385  |
| P13601        | VSFTGSTEVGK                                                              | 0.50253904         | 2               | 2.748649  |
| P13601        | YFAGWADK                                                                 | 0.723107363        | 2               | 2.317746  |
| P13601        | YVLGNPLDSGISQGPQIDK                                                      | 1.116913165        | 2               | 4.75492   |
| P13601        | YVLGNPLDSGISQGPQIDKEQHAK                                                 | 0.33560832         | 2               | 4.217129  |
| <b>P13697</b> | <b>MAOX NADP_dependent malic enzyme</b>                                  | <b>2.72537568</b>  | <b>8.38E-05</b> | <b>6</b>  |
| P13697        | AECSAEECYK                                                               | 1.807410329        | 2               | 3.126628  |
| P13697        | AIFASGSPFDPVTLDPGR                                                       | 2.047865934        | 2               | 4.496891  |
| P13697        | GHIASVLNAWPEDVVK                                                         | 4.789723097        | 2               | 3.593307  |
| P13697        | HINDSVFLTTAEVISQQVSDK                                                    | 1.809675292        | 3               | 4.597589  |
| P13697        | ILGLDGLGCNGMGIPVVGK                                                      | 2.462657052        | 2               | 2.806196  |
| P13697        | NLEAIVQK                                                                 | 1.362614939        | 1               | 2.402876  |
| <b>P13803</b> | <b>ETFFA Electron transfer flavoprotein subunit alpha_ mitochondrial</b> | <b>1.161664107</b> | <b>9.9E-20</b>  | <b>15</b> |
| P13803        | AAVDAGFVPNDMQVGQTGK                                                      | 0.854614449        | 2               | 4.947187  |
| P13803        | AAVDAGFVPNDMQVGQTGK+Oxidation(11                                         | 1.566176991        |                 |           |
| P13803        | DPEAPIFQVADYGVADLFLK                                                     | 0.766557393        | 2               | 4.983968  |
| P13803        | GLLPEELTPLILETQK                                                         | 1.318232656        | 2               | 4.480448  |
| P13803        | GTSFEAAAASGGSASSEK                                                       | 1.002753778        | 2               | 5.196799  |
| P13803        | LGGEVSCLVAGTK                                                            | 1.09029232         | 2               | 4.598153  |

|               |                                                  |                    |                 |           |
|---------------|--------------------------------------------------|--------------------|-----------------|-----------|
| P13803        | LLYDLADQLHAAVGASR                                | 1.562014793        | 2               | 5.049285  |
| P13803        | LNVPVSDIIEIK                                     | 1.476590442        | 3               | 4.03899   |
| P13803        | QFSYTHICAGASAFGK                                 | 0.712637497        | 2               | 3.232169  |
| P13803        | SDRPELTGAK                                       | 0.937623904        | 3               | 3.544892  |
| P13803        | TIVAINKDPEAPIQVADYGIVADLFK                       | 1.112352503        | 3               | 6.620749  |
| P13803        | TIYAGNALCTVK                                     | 0.960649167        | 2               | 3.704326  |
| P13803        | VLVAQHDAYK                                       | 1.286868182        | 2               | 3.561146  |
| P13803        | VVPEMTEILK                                       | 1.457850738        | 1               | 1.928873  |
| P13803        | VVQDLCK                                          | 0.97485635         | 2               | 2.633058  |
| <b>P13832</b> | <b>MRLCA Myosin regulatory light chain RLC_A</b> | <b>1.307040392</b> | <b>1.52E-12</b> | <b>3</b>  |
| P13832        | ATSNVFMFDQSQIQEFK                                | 1.763380845        | 2               | 5.083485  |
| P13832        | FTDEEVDELYR                                      | 1.038596708        | 2               | 3.782711  |
| P13832        | GNFNYIEFTR                                       | 1.145140896        | 2               | 3.193     |
| <b>P14046</b> | <b>A1I3 Alpha_1 inhibitor 3</b>                  | <b>0.996683643</b> | <b>0.901663</b> | <b>5</b>  |
| P14046        | ETGLMAFTNLK                                      | 1.295686427        | 2               | 2.626735  |
| P14046        | GDPIPNEQVLK                                      | 0.795044765        | 2               | 2.880228  |
| P14046        | GMYESLPVVAVK                                     | 0.99611894         | 2               | 3.34773   |
| P14046        | QQNSYGGFSSTQDTVVVALDALS                          | 1.204342598        | 2               | 3.490916  |
| P14046        | QSPGPCGSEVATVPETGR                               | 0.720760427        | 2               | 3.431194  |
| <b>P14141</b> | <b>CAH3 Carbonic anhydrase 3</b>                 | <b>1.189296929</b> | <b>2E-09</b>    | <b>20</b> |
| P14141        | DIRHDPSLQPWSVSYDPGSAK                            | 0.752208284        | 3               | 3.862322  |
| P14141        | EAPFNHFDPSCLFPACR                                | 1.240521334        | 2               | 4.233335  |
| P14141        | EKGFEQILLDALDK                                   | 1.544218386        | 2               | 4.67005   |
| P14141        | EKGFEQILLDALDKIK                                 | 1.211158145        | 2               | 3.703685  |
| P14141        | EPMTVSSDQMAK                                     | 1.053494681        | 1               | 3.240386  |
| P14141        | EWGYASHNGPEHWHELYPIAK                            | 1.073387747        | 3               | 4.821795  |
| P14141        | GDNQSPIELHTK                                     | 1.191034459        | 2               | 3.239465  |
| P14141        | GEFQILLDALDK                                     | 1.288957263        | 2               | 4.569219  |
| P14141        | GEFQILLDALDKIK                                   | 1.588800632        | 2               | 3.593432  |
| P14141        | GGPLSGPYR                                        | 1.11803747         | 2               | 2.759366  |
| P14141        | GKEAPFNHFDPSCLFPACR                              | 1.251937551        | 2               | 4.196252  |
| P14141        | HDPSLQPWSVSYDPGSAK                               | 0.724837158        | 3               | 5.586672  |
| P14141        | QFHLHWGSSDDHGSEHTVDGVK                           | 1.227229765        | 2               | 4.770493  |
| P14141        | QPDGIAVVGIFLK                                    | 1.364430743        | 3               | 3.548666  |
| P14141        | SLFASAENEPVPLVGNWRPPQPIK                         | 0.972272411        | 3               | 5.703003  |
| P14141        | SLFASAENEPVPLVGNWRPPQPIKGR                       | 1.472216161        | 3               | 4.372089  |
| P14141        | VVFDDTFDR                                        | 0.825527308        | 2               | 3.3251    |
| P14141        | YAAELHLVHWNPK                                    | 1.044099306        | 2               | 4.238825  |
| P14141        | YNTFGALK                                         | 1.084578162        | 2               | 2.559881  |
| P14141        | YNTFGALKQPDGIAVVGIFLK                            | 1.33319911         | 3               | 6.112409  |
| <b>P14173</b> | <b>DDC Aromatic_L_ amino_ acid decarboxylase</b> | <b>1.649381995</b> | <b>1.36E-10</b> | <b>8</b>  |
| P14173        | AGEGGGVIQGSASEATLVALLAAR                         | 2.157764885        | 2               | 3.260318  |
| P14173        | ALIPTTAPQEPETYEDIIR                              | 1.535317327        | 2               | 3.855607  |
| P14173        | GSNQLNETLLQR                                     | 1.542853181        | 2               | 2.986794  |
| P14173        | HSHQDSGLITDYR                                    | 1.072696321        | 3               | 3.77432   |
| P14173        | MLELPEAFLAGR                                     | 1.634662334        | 2               | 3.455392  |
| P14173        | QLQAASPELTQAALMEK                                | 1.25516362         | 2               | 4.097996  |
| P14173        | TDLTEAFNMDPVYLR                                  | 1.654883507        | 2               | 3.843246  |
| P14173        | TVESAHVQLAWEHIR                                  | 1.291104052        | 3               | 3.640392  |
| <b>P14408</b> | <b>FUMH Fumarate hydratase_ mitochondrial</b>    | <b>1.063572516</b> | <b>2.91E-12</b> | <b>15</b> |
| P14408        | AAAENVNQEYGLDPK                                  | 1.161599091        | 2               | 4.366432  |
| P14408        | AIEMLGGEIGSK                                     | 1.0916118          | 2               | 3.95858   |
| P14408        | EFAQVIK                                          | 1.472843941        | 1               | 1.92098   |
| P14408        | IEYDTFGELK                                       | 0.867281925        | 2               | 3.25935   |
| P14408        | IEYDTFGELKVPTDK                                  | 1.330349513        | 2               | 3.730645  |
| P14408        | IYELAAGGTAVGTGLNTR                               | 1.068559928        | 2               | 5.367426  |
| P14408        | LMNESLMLVLTALNPHIGYDK                            | 1.907530677        | 3               | 5.516424  |

|               |                                                             |                    |                 |           |
|---------------|-------------------------------------------------------------|--------------------|-----------------|-----------|
| P14408        | LNDHFPLVVWQTSGTQTNMNVNEVISNR                                | 1.335348033        | 3               | 6.87714   |
| P14408        | SGLGELILPENEPGSSIMPGK                                       | 1.422888423        | 2               | 4.63581   |
| P14408        | SGLGELILPENEPGSSIMPGK+Oxidation(17                          | 2.071452537        |                 |           |
| P14408        | SKEFAQVIK                                                   | 1.209173888        | 2               | 2.666512  |
| P14408        | SQSSNDTFPTAMHIAAALEVHQVLLPGLQK                              | 1.498940366        | 3               | 4.783782  |
| P14408        | TAIELGYLTAEQFDEWVKPK                                        | 1.651893608        | 2               | 4.878406  |
| P14408        | THTQDAVPLTLGQFSGYVQQVQYAMER                                 | 1.64665858         | 3               | 5.893252  |
| P14408        | YYGAQTVR                                                    | 1.118382417        | 2               | 2.491598  |
| <b>P14480</b> | <b>FIBB Fibrinogen beta chain</b>                           | <b>1.309856477</b> | <b>3.42E-10</b> | <b>8</b>  |
| P14480        | AHYGGFTVQTEANK                                              | 2.032250747        | 2               | 3.463562  |
| P14480        | DNENVINEYSSILEDQK                                           | 1.09797664         | 2               | 3.935209  |
| P14480        | GFGNIATNEDTK                                                | 1.597546344        | 2               | 3.089324  |
| P14480        | GFGNIATNEDTKK                                               | 1.736216563        | 2               | 3.583051  |
| P14480        | LESDISAQTEYCHTPTCVNCPVVSQK                                  | 1.588506228        | 3               | 4.979515  |
| P14480        | LYIDETVNDNIPLNLR                                            | 2.291169243        | 2               | 2.932892  |
| P14480        | TENGGWTVIQNR                                                | 1.112058031        | 2               | 3.205982  |
| P14480        | YCGLPGEYWLGNDR                                              | 1.459425998        | 2               | 3.154557  |
| <b>P14604</b> | <b>ECHM Enoyl_CoA hydratase_mitochondrial</b>               | <b>1.232785068</b> | <b>0.266231</b> | <b>10</b> |
| P14604        | AFAAGADIK                                                   | 1.286477339        | 2               | 3.085218  |
| P14604        | AQFGQPEILLGTIPGAGGTQR                                       | 1.025429564        | 2               | 5.684713  |
| P14604        | ESVNAAFEMTLTEGNKLEK                                         | 1.871030643        | 2               | 2.681858  |
| P14604        | FLSHWDHITR                                                  | 1.403496905        | 2               | 3.466257  |
| P14604        | IFPVETLVEEAIQCAEK                                           | 1.14321562         | 3               | 5.884126  |
| P14604        | NSSVGLIQLNRPK                                               | 1.219031409        | 2               | 3.576939  |
| P14604        | SLAMEMVLTGDR                                                | 1.394106324        | 2               | 3.805194  |
| P14604        | SLAMEMVLTGDR+Oxidation(3                                    | 1.282466896        |                 |           |
| P14604        | SLAMEMVLTGDR+Oxidation(5                                    | 1.282466896        |                 |           |
| P14604        | TFQDCYSGK                                                   | 1.290543055        | 2               | 2.89127   |
| <b>P14668</b> | <b>ANXA5 Annexin A5</b>                                     | <b>0.988145093</b> | <b>0.000169</b> | <b>5</b>  |
| P14668        | EFRKNFATSLYSMIK                                             | 0.949733309        | 2               | 2.337358  |
| P14668        | ETSGNLELLAVVK                                               | 1.523145385        | 2               | 3.249208  |
| P14668        | GAGTDDHTLIR                                                 | 0.878859795        | 2               | 2.759493  |
| P14668        | GLGTDEDSILNLLTAR                                            | 1.769290653        | 2               | 5.116106  |
| P14668        | GTVTDFSGFDGR                                                | 1.035770501        | 2               | 3.003924  |
| <b>P14669</b> | <b>ANXA3 Annexin A3</b>                                     | <b>1.437822715</b> | <b>0.000158</b> | <b>9</b>  |
| P14669        | GAGTDEFTLNR                                                 | 0.954918411        | 2               | 2.663575  |
| P14669        | GMGTDEDTLIEILTTR                                            | 1.522026121        | 2               | 4.38738   |
| P14669        | GTINNYPGFNPVSDAEAIR                                         | 1.422261144        | 2               | 4.964958  |
| P14669        | KDAQTLYDAGEK                                                | 1.416012286        | 2               | 3.264964  |
| P14669        | KDAQTLYDAGEKK                                               | 1.661220946        | 3               | 3.885076  |
| P14669        | QYQEAYEQALK                                                 | 1.076071243        | 2               | 2.906896  |
| P14669        | SEIDLLDIR                                                   | 2.324100761        | 2               | 2.544088  |
| P14669        | TLINILTER                                                   | 2.036362772        | 2               | 2.73803   |
| P14669        | WGTDKDFTEILCLR                                              | 2.163039895        | 3               | 3.380649  |
| <b>P14685</b> | <b>PSMD3 26S proteasome non_ATPase regulatory subunit 3</b> | <b>1.255511349</b> | <b>0.283829</b> | <b>4</b>  |
| P14685        | AIQLEYSEAR                                                  | 1.40816328         | 2               | 3.019181  |
| P14685        | HDADGQATLLNLLLR                                             | 1.748259947        | 2               | 3.79246   |
| P14685        | LQLDSPEDADEFIVAK                                            | 1.203413511        | 2               | 3.867032  |
| P14685        | SVFPEQANNNEWAR                                              | 1.138568863        | 2               | 3.28049   |
| <b>P14740</b> | <b>DPP4 Dipeptidyl peptidase 4</b>                          | <b>1.535291181</b> | <b>0.002006</b> | <b>5</b>  |
| P14740        | FRPAEPHFTSDGSSFYK                                           | 1.561737597        | 2               | 3.47716   |
| P14740        | HSYTASYSIYDLNKR                                             | 1.474210552        | 3               | 3.781524  |
| P14740        | LGTLEVEDQIEAAR                                              | 1.895554633        | 2               | 4.087747  |
| P14740        | VLEDNSALDK                                                  | 1.74711625         | 2               | 2.618365  |
| P14740        | WEYDYSVYTER                                                 | 0.944984735        | 2               | 2.528301  |

|               |                                                                       |                    |                 |           |
|---------------|-----------------------------------------------------------------------|--------------------|-----------------|-----------|
| <b>P14882</b> | <b>PCCA Propionyl_CoA carboxylase alpha chain_mitochondrial</b>       | <b>1.145949437</b> | <b>0.186528</b> | <b>15</b> |
| P14882        | FLSDVYPDGFK                                                           | 1.703373535        | 2               | 2.80381   |
| P14882        | FSSQEAAASSFGDDR                                                       | 0.77836757         | 2               | 3.928383  |
| P14882        | GVTHNIPLLR                                                            | 1.907856926        | 2               | 2.398324  |
| P14882        | HGNALWLNER                                                            | 1.916133318        | 2               | 3.315561  |
| P14882        | HIEIQVLGDK                                                            | 1.837173823        | 2               | 2.41751   |
| P14882        | HKQEDIPISGWAVECR                                                      | 0.936558312        | 2               | 2.441552  |
| P14882        | LHDEDHTVVASNNGPTFNVEVDGSK                                             | 0.607971516        | 3               | 6.743031  |
| P14882        | LQVEHPVTECITGLDLVQEMILVAK                                             | 1.925775592        | 3               | 3.8112    |
| P14882        | MADEAVCVGPAPTSK                                                       | 0.93727643         | 2               | 4.255637  |
| P14882        | MEDALDSYVIR                                                           | 1.267162933        | 2               | 3.506907  |
| P14882        | SYLNMDAIMEAIK                                                         | 1.397058581        | 2               | 3.287227  |
| P14882        | SYLNMDAIMEAIKK                                                        | 2.161910437        | 2               | 3.132951  |
| P14882        | TGAQAVHPGYGFLENK                                                      | 1.260913947        | 2               | 4.015559  |
| P14882        | TVAIHSDVDASSVHVK                                                      | 1.591916322        | 3               | 4.04437   |
| P14882        | VVEEAPSIFLDPETR                                                       | 1.120511745        | 2               | 3.994475  |
| <b>P14942</b> | <b>GSTA4 Glutathione S_transferase alpha_4</b>                        | <b>1.135413698</b> | <b>0.148646</b> | <b>3</b>  |
| P14942        | DGCLLFGQVPLVEIDGMLLTQTR                                               | 3.894791483        | 3               | 4.154245  |
| P14942        | KPPPDGHYDVVVR                                                         | 1.142461194        | 2               | 3.274932  |
| P14942        | YFPVFEK                                                               | 1.095445423        | 1               | 1.998563  |
| <b>P15083</b> | <b>PIGR Polymeric immunoglobulin receptor</b>                         | <b>0.957399614</b> | <b>0.961147</b> | <b>4</b>  |
| P15083        | EIQNAGDQAEQENR                                                        | 0.813052775        | 2               | 4.024494  |
| P15083        | FSVLITGLR                                                             | 0.940012329        | 2               | 2.797048  |
| P15083        | GSPHINPTDANAR                                                         | 0.918971418        | 2               | 2.34721   |
| P15083        | GVTGGSVAIVCYPNPK                                                      | 1.001226052        | 2               | 4.031221  |
| <b>P15149</b> | <b>CP2A2 Cytochrome P450 2A2</b>                                      | <b>0.911977062</b> | <b>0.000252</b> | <b>13</b> |
| P15149        | DVQECILEEAGYLIK                                                       | 1.512930665        | 3               | 3.943042  |
| P15149        | DVYSSITQLSER                                                          | 3.303300046        | 2               | 3.118455  |
| P15149        | FKFPMNLEDINEYPSPIGFTR                                                 | 1.479067113        | 3               | 3.74839   |
| P15149        | FSNLAPLGIPR                                                           | 1.21742892         | 2               | 3.327245  |
| P15149        | GELPTFNILFK                                                           | 0.599345049        | 2               | 2.694533  |
| P15149        | GTDVFPPIIGSLMTEPK                                                     | 0.929940414        | 2               | 4.134461  |
| P15149        | GYGFSLSNVEQAK                                                         | 0.92890326         | 2               | 3.431632  |
| P15149        | IVVLYGYDAVK                                                           | 1.823161174        | 2               | 2.601579  |
| P15149        | LEDFMIEK                                                              | 1.52986143         | 1               | 1.966799  |
| P15149        | NFIDSFLIR                                                             | 1.323238019        | 2               | 2.428145  |
| P15149        | QNHSTLDPNSPR                                                          | 0.866515155        | 2               | 2.663126  |
| P15149        | TLQGTGAPIDPSIYLSK                                                     | 0.668777555        | 2               | 4.60939   |
| P15149        | TVSNVINSIVFGNR                                                        | 1.309928271        | 2               | 3.236496  |
| <b>P15178</b> | <b>SYDC Aspartyl_tRNA synthetase_cytoplasmic</b>                      | <b>1.964573672</b> | <b>0.021733</b> | <b>3</b>  |
| P15178        | ALHHGIDLEK                                                            | 1.990711852        | 3               | 3.305166  |
| P15178        | LEYCEALAMLR                                                           | 1.977769584        | 2               | 2.950308  |
| P15178        | QMVKFAANINK+Oxidation(1                                               | 1.410851703        |                 |           |
| <b>P15429</b> | <b>ENOB Beta_enolase</b>                                              | <b>1.54210328</b>  | <b>0.995355</b> | <b>6</b>  |
| P15429        | DATNVGDEGGFAPNILENNEALELLK                                            | 1.424285222        | 2               | 5.129951  |
| P15429        | FMIELDGTENK                                                           | 2.049591372        | 2               | 3.282815  |
| P15429        | HIADLAGNPDVLPVPAFNVINGGSHAGNK                                         | 2.308098156        | 3               | 5.6371    |
| P15429        | IEEALGDK                                                              | 3.5101415          | 1               | 2.41668   |
| P15429        | TAIQAAGYPDK                                                           | 3.372428139        | 2               | 2.973786  |
| P15429        | VNQIGSVTESIQACK                                                       | 1.105479116        | 2               | 4.959307  |
| <b>P15650</b> | <b>ACADL Long_chain specific acyl_CoA dehydrogenase_mitochondrial</b> | <b>1.584626094</b> | <b>9.9E-20</b>  | <b>20</b> |
| P15650        | AFVDSCLQLHETK                                                         | 1.324620754        | 2               | 4.013764  |
| P15650        | AQDTAELFFEDVR                                                         | 1.78405946         | 2               | 4.802862  |
| P15650        | AQDTAELFFEDVRLPASALLGEENK                                             | 1.388847506        | 3               | 5.326312  |
| P15650        | CIGAIAMTEPGAGSDLQGVR                                                  | 2.085589815        | 2               | 6.359548  |

|               |                                                                        |                    |                 |           |
|---------------|------------------------------------------------------------------------|--------------------|-----------------|-----------|
| P15650        | CIGAIAMTEPGAGSDLQGVOR+Oxidation(6                                      | 1.654033053        |                 |           |
| P15650        | EQIEQFIPQMTAGK                                                         | 1.944690658        | 2               | 4.987886  |
| P15650        | FFQEEVIPYHEEWEK                                                        | 2.696591847        | 2               | 5.210644  |
| P15650        | GFYYLMQELPQER                                                          | 1.860660546        | 2               | 4.145862  |
| P15650        | IFSSEHDIFR                                                             | 1.153472822        | 2               | 3.043908  |
| P15650        | KFFQEEVIPYHEEWEK                                                       | 1.691665618        | 2               | 5.143679  |
| P15650        | LDSASASMAK                                                             | 1.236129976        | 2               | 2.505171  |
| P15650        | LDSASASMAK+Oxidation(7                                                 | 1.48281605         |                 |           |
| P15650        | QGLLGINIAEK                                                            | 1.145269618        | 2               | 3.288843  |
| P15650        | RLDSASASMAK                                                            | 1.244373362        | 2               | 3.381341  |
| P15650        | RLDSASASMAK+Oxidation(8                                                | 0.800714254        |                 |           |
| P15650        | SGSDWILNGSK                                                            | 1.238791965        | 2               | 2.698575  |
| P15650        | TNICVTR                                                                | 1.154694681        | 2               | 2.351386  |
| P15650        | TVAHIQTVQHK                                                            | 0.801044384        | 2               | 2.918038  |
| P15650        | VQPIYGGTNEIMK                                                          | 1.115907927        | 2               | 3.203755  |
| P15650        | VQPIYGGTNEIMK+Oxidation(11                                             | 1.599542128        |                 |           |
| <b>P15651</b> | <b>ACADS Short_chain specific acyl_CoA dehydrogenase_mitochondrial</b> | <b>1.22727084</b>  | <b>6.17E-07</b> | <b>9</b>  |
| P15651        | ASSTANLIFEDCR                                                          | 0.810240611        | 2               | 3.354609  |
| P15651        | EEGDSWVLNGTK                                                           | 0.916834166        | 2               | 2.766969  |
| P15651        | ELVPIAAQLDK                                                            | 1.086268513        | 2               | 2.9567    |
| P15651        | ELVPIAAQLDKEHLFPTSQVK                                                  | 0.90354279         | 2               | 4.488413  |
| P15651        | GISAFVPMPTPGLTLGK                                                      | 1.221340057        | 2               | 3.629989  |
| P15651        | IGCFALSEPNGSDAGAASTTAR                                                 | 1.406258624        | 2               | 6.301752  |
| P15651        | IGIASQALGIAQASLDCAVK                                                   | 1.74969458         | 3               | 4.969865  |
| P15651        | ITEIYEGTSEIQR                                                          | 1.265438056        | 2               | 4.426855  |
| P15651        | LAASEAATAISHQAIQILGGMGYVTEMPAER                                        | 1.461847987        | 4               | 4.96333   |
| <b>P15684</b> | <b>AMPN Aminopeptidase N</b>                                           | <b>1.200950356</b> | <b>0.008764</b> | <b>5</b>  |
| P15684        | ALGDTAPAPNIDTTELVER                                                    | 2.38056517         | 2               | 4.324793  |
| P15684        | AQIHDSFNLASAGK                                                         | 1.10802826         | 2               | 3.707201  |
| P15684        | LRSALACSNEVWILNR                                                       | 1.947454933        | 2               | 2.308394  |
| P15684        | VVATTQMQAADAR                                                          | 2.091878887        | 2               | 3.713423  |
| P15684        | YVEAVSPNR                                                              | 0.910486634        | 2               | 2.464384  |
| <b>P15709</b> | <b>ST2A1 Bile salt sulfotransferase</b>                                | <b>1.198214945</b> | <b>0.647248</b> | <b>2</b>  |
| P15709        | GNVLYGSWFHIR                                                           | 1.156705613        | 2               | 2.604277  |
| P15709        | NHFTVSQAEAFDK                                                          | 1.586534405        | 1               | 3.754843  |
| <b>P15978</b> | <b>HA11 Class I histocompatibility antigen_Non_RT1.A alpha_1 chain</b> | <b>1.521183908</b> | <b>0.080446</b> | <b>3</b>  |
| P15978        | GYEQHAYDGR                                                             | 5.585920348        | 2               | 2.438502  |
| P15978        | VEHEGLPEPLSQR                                                          | 1.036105081        | 2               | 3.096969  |
| P15978        | YSDAENPR                                                               | 2.76441865         | 2               | 2.834245  |
| <b>P15999</b> | <b>ATPA ATP synthase subunit alpha_mitochondrial</b>                   | <b>1.089902286</b> | <b>9.9E-20</b>  | <b>26</b> |
| P15999        | AVDSLPIGR                                                              | 1.243259559        | 2               | 3.571636  |
| P15999        | EIVTNFLAGFEP                                                           | 0.965285954        | 2               | 2.432156  |
| P15999        | EVAFAQFGSDLDAATQQLSR                                                   | 1.444688249        | 2               | 6.617678  |
| P15999        | FESAFLSHVVSQHQSLLGNIR                                                  | 1.785322141        | 2               | 6.013795  |
| P15999        | GIRPAINVGLSVSR                                                         | 1.025758991        | 3               | 3.933965  |
| P15999        | GMSLNLEPDNVGVVFGNDK                                                    | 1.12130867         | 2               | 5.631094  |
| P15999        | GMSLNLEPDNVGVVFGNDK+Oxidation(1                                        | 1.474926833        |                 |           |
| P15999        | GYLDKLEPSK                                                             | 1.273472087        | 1               | 2.827728  |
| P15999        | HALIYDDLK                                                              | 1.751826536        | 2               | 2.781202  |
| P15999        | ILGADTSVDLEETGR                                                        | 3.346371202        | 2               | 4.893807  |
| P15999        | LELAQYR                                                                | 1.200739909        | 2               | 2.483994  |
| P15999        | LKEIVTNFLAGFEP                                                         | 2.546214149        | 2               | 3.039215  |
| P15999        | LTDADAMK                                                               | 0.848720769        | 2               | 2.663126  |
| P15999        | NVQAEEMVEFSSGLK                                                        | 1.249864721        | 2               | 4.340268  |
| P15999        | QGQYSPMAIEEQVAVIYAGVR                                                  | 1.155590255        | 3               | 5.255859  |

|               |                                                     |                    |                 |           |
|---------------|-----------------------------------------------------|--------------------|-----------------|-----------|
| P15999        | RLTDADAMK                                           | 1.165893529        | 2               | 2.929972  |
| P15999        | RSTVAQLVK                                           | 0.054169785        | 2               | 2.432156  |
| P15999        | RTGAIVDVPVGDPELLGR                                  | 1.288592879        | 2               | 3.098962  |
| P15999        | STVAQLVK                                            | 1.293944264        | 2               | 2.523568  |
| P15999        | TGAIVDVPVGDPELLGR                                   | 1.325790278        | 2               | 4.82722   |
| P15999        | TGTAEMSSILEER                                       | 0.755721546        | 2               | 4.374113  |
| P15999        | TGTAEMSSILEER+Oxidation(5                           | 1.128520043        |                 |           |
| P15999        | TSIAIDTIINQK                                        | 1.217384338        | 2               | 4.61757   |
| P15999        | VLSIGDGIAR                                          | 0.954586707        | 2               | 2.912164  |
| P15999        | VVDALGNAIDGK                                        | 1.141849504        | 2               | 4.424037  |
| P15999        | VVDALGNAIDGKGPVGSK                                  | 1.355508592        | 2               | 3.72534   |
| <b>P16036</b> | <b>MPCP Phosphate carrier protein_mitochondrial</b> | <b>1.141736508</b> | <b>0.001344</b> | <b>9</b>  |
| P16036        | ALYSNILGEENTYLWR                                    | 1.069174939        | 2               | 3.148023  |
| P16036        | EEGLNAFYK                                           | 1.120588332        | 1               | 2.616619  |
| P16036        | EKGSTASQVLQR                                        | 1.244777666        | 2               | 3.085478  |
| P16036        | FGFYEVFK                                            | 1.949979938        | 2               | 2.327374  |
| P16036        | GIFNGFSITLK                                         | 1.421898651        | 2               | 3.042446  |
| P16036        | GSTASQVLQR                                          | 1.174889556        | 2               | 3.077588  |
| P16036        | GWAPTLIGYSMQGLCK                                    | 1.056981007        | 2               | 2.790632  |
| P16036        | IQTQPGYANTLR                                        | 1.239795121        | 2               | 3.790099  |
| P16036        | MYKEEGLNAFYK                                        | 0.930028208        | 3               | 3.672956  |
| <b>P16086</b> | <b>SPTA2 Spectrin alpha chain_brain</b>             | <b>1.137084329</b> | <b>0.000379</b> | <b>36</b> |
| P16086        | ALINADELANDVAGAEALLDR                               | 1.413359891        | 2               | 5.444268  |
| P16086        | ALSSEGKPYVTK                                        | 1.527099134        | 2               | 3.457214  |
| P16086        | DLASVQALLR                                          | 1.970110928        | 2               | 2.36186   |
| P16086        | DLSSVQTLTK                                          | 1.449147652        | 2               | 3.149606  |
| P16086        | GNAMVEEGHFAAEDVK                                    | 1.659354682        | 2               | 4.105893  |
| P16086        | GVIDMGNSLIER                                        | 1.243251157        | 2               | 3.075566  |
| P16086        | HQAFAELHANADR                                       | 1.673876264        | 2               | 2.916769  |
| P16086        | HQAFAELSANQSR                                       | 0.672204109        | 2               | 4.250525  |
| P16086        | HQALQAEIAGHEPR                                      | 0.847735763        | 3               | 4.759455  |
| P16086        | HQEHKGEIDAHEDSFK                                    | 0.981051955        | 3               | 4.376729  |
| P16086        | HQLLEADISAHEDR                                      | 1.299354152        | 3               | 3.671631  |
| P16086        | KFEFQTDLAAHEER                                      | 1.578977352        | 3               | 4.319211  |
| P16086        | LGDSHDLQR                                           | 1.61108769         | 2               | 3.201288  |
| P16086        | LGESQTLQQFSR                                        | 0.537541871        | 2               | 3.10756   |
| P16086        | LIQEQHPPEELIK                                       | 1.302274593        | 2               | 4.087823  |
| P16086        | LQQSHPLSANQIQVK                                     | 1.12548495         | 2               | 4.406167  |
| P16086        | LQTASDESYKDPTNIQSK                                  | 1.177320938        | 2               | 5.092257  |
| P16086        | LQVASDENYKDPTNLQGK                                  | 2.844285481        | 2               | 5.186798  |
| P16086        | LSDDNTIGQEEIQQR                                     | 1.889478194        | 2               | 4.076528  |
| P16086        | MQHNLEQQIQAR                                        | 2.408094396        | 2               | 3.365072  |
| P16086        | MQHNLEQQIQAR+Oxidation(0                            | 1.261725932        |                 |           |
| P16086        | MTLVASEDYGDTLAAIQGLLK                               | 1.281377146        | 2               | 3.796584  |
| P16086        | NQALNTDNYGHDLASVQALQR                               | 1.14096794         | 2               | 6.16928   |
| P16086        | QFQDAGHFDAENIKK                                     | 1.306605689        | 2               | 2.845783  |
| P16086        | REELITNWEQIR                                        | 1.409780878        | 2               | 4.380161  |
| P16086        | SADESGQALLAAGHYASDEV                                | 1.678684751        | 2               | 4.579109  |
| P16086        | SLQQLAEER                                           | 1.018733043        | 2               | 2.86877   |
| P16086        | SLLGSAHEVQR                                         | 0.620515694        | 2               | 3.29539   |
| P16086        | SSEEIESAFR                                          | 1.704203209        | 2               | 2.597491  |
| P16086        | SSLSSAQADFNQLAELDR                                  | 1.50962279         | 2               | 4.742074  |
| P16086        | TATDEAYKDPNSNLQGK                                   | 1.197638443        | 2               | 4.357157  |
| P16086        | TKQEEVNAAWQR                                        | 1.444108715        | 2               | 3.448297  |
| P16086        | VLETAEDIQER                                         | 0.97493714         | 2               | 3.771271  |
| P16086        | VNDVCTNGQDLIK                                       | 1.186292732        | 2               | 3.166574  |
| P16086        | VNEVNQFAAK                                          | 1.200102384        | 2               | 2.568281  |



|               |                                                            |                    |                 |           |
|---------------|------------------------------------------------------------|--------------------|-----------------|-----------|
| P16086        | VNSLGETAQR                                                 | 1.145159048        | 2               | 3.17674   |
| <b>P16232</b> | <b>DHI1 Corticosteroid 11_beta_dehydrogenase isozyme 1</b> | <b>1.247270703</b> | <b>0.044403</b> | <b>9</b>  |
| P16232        | EECALEIHK                                                  | 1.232134416        | 1               | 2.06642   |
| P16232        | EMAYHLSKMGAAHVLTAR+Oxidation(8                             | 2.214311198        |                 |           |
| P16232        | ETSGIILSQAAPK                                              | 1.092179918        | 2               | 3.133364  |
| P16232        | FALDGFFSTIR                                                | 1.466782074        | 2               | 2.998532  |
| P16232        | FVVEAGK                                                    | 1.192786059        | 1               | 1.923535  |
| P16232        | KDEVYYDK                                                   | 0.614113266        | 2               | 2.324755  |
| P16232        | MGAHVLTAR                                                  | 4.756385812        | 1               | 1.949364  |
| P16232        | MTQPLIASYSASK                                              | 1.003724587        | 2               | 3.413851  |
| P16232        | SSWTPLLLGNPGR                                              | 1.240622148        | 2               | 3.748619  |
| <b>P16290</b> | <b>PGAM2 Phosphoglycerate mutase 2</b>                     | <b>0.892976614</b> | <b>0.811788</b> | <b>9</b>  |
| P16290        | ALPFWNEEIAPK                                               | 1.504561144        | 2               | 2.855736  |
| P16290        | AMEAVAAQ GK                                                | 0.889816036        | 2               | 2.584114  |
| P16290        | AMEAVAAQ GK+Oxidation(1                                    | 1.001667608        |                 |           |
| P16290        | HGESSWNQENR                                                | 2.707670756        | 2               | 3.951072  |
| P16290        | HNYIASISK                                                  | 1.458786391        | 2               | 2.520293  |
| P16290        | HYGGLTGLNK                                                 | 1.029744352        | 1               | 3.193656  |
| P16290        | SFDTPPPMDEK                                                | 2.768607203        | 2               | 2.606753  |
| P16290        | TLWTILDVTDQMWWVPVR+Oxidation(11                            | 1.859915218        |                 |           |
| P16290        | VLIAAHGNSLR                                                | 1.009562815        | 2               | 2.947394  |
| <b>P16303</b> | <b>CES3 Carboxylesterase 3</b>                             | <b>1.121286633</b> | <b>4.8E-06</b>  | <b>16</b> |
| P16303        | AKEAAEPSHWK                                                | 1.117942868        | 2               | 4.068367  |
| P16303        | DGASEEETNLSK                                               | 1.219862944        | 2               | 4.186258  |
| P16303        | EAAEPSHWK                                                  | 1.407388896        | 2               | 2.860868  |
| P16303        | ESYPFLPTVIDGVVLPK                                          | 1.140232617        | 2               | 4.153554  |
| P16303        | FAPPQPAEPWNFVK                                             | 0.864617833        | 1               | 2.33905   |
| P16303        | IGASTQAAQR                                                 | 1.113947314        | 2               | 2.808269  |
| P16303        | LDLLGNPK                                                   | 1.120267192        | 2               | 2.566988  |
| P16303        | MIPVVAEK                                                   | 1.696185867        | 1               | 1.985317  |
| P16303        | QFEGWIIPTLMGYPLSEGK                                        | 1.605201346        | 2               | 2.570275  |
| P16303        | QKTEDELLETSLK                                              | 1.442173605        | 2               | 3.513659  |
| P16303        | SFNTVPYIVGINK                                              | 0.849999142        | 2               | 3.321455  |
| P16303        | TEDELLETSLK                                                | 1.282469148        | 2               | 3.865056  |
| P16303        | TPEEILAEK                                                  | 1.09527473         | 2               | 2.646644  |
| P16303        | TTTSAVMVHCLR                                               | 2.048613697        | 2               | 3.071745  |
| P16303        | TVIGDHGDELFSVFGSPFLK                                       | 1.474501361        | 2               | 5.479584  |
| P16303        | YFGGTDDPAK                                                 | 1.968762032        | 2               | 2.877553  |
| <b>P16332</b> | <b>MUTA Methylmalonyl_CoA mutase_mitochondrial</b>         | <b>1.191022686</b> | <b>0.140033</b> | <b>4</b>  |
| P16332        | GDVGMAGVAIDTVEDTK                                          | 1.747794059        | 2               | 4.295653  |
| P16332        | IDSGSEVIVGVNK                                              | 1.553947948        | 2               | 3.779443  |
| P16332        | NTQIIIQEESGIPK                                             | 1.048351405        | 2               | 3.595622  |
| P16332        | TGLQAGLTIDEFAPR                                            | 1.431465786        | 2               | 3.400716  |
| <b>P16409</b> | <b>MYL3 Myosin light chain 3</b>                           | <b>1.481335399</b> | <b>0.617654</b> | <b>8</b>  |
| P16409        | AAPAPAAAAPAAPEPERPK                                        | 2.628655032        | 2               | 4.46803   |
| P16409        | ALGQNPTQAEVLR                                              | 2.551629967        | 2               | 3.743129  |
| P16409        | EGNGTVMGAELR                                               | 1.322425976        | 2               | 2.730787  |
| P16409        | IEFTPEQIEEFK                                               | 1.936320131        | 2               | 3.019943  |
| P16409        | LTEDEVEK                                                   | 1.63291029         | 1               | 2.146427  |
| P16409        | MMDFETFLPMLQHISK                                           | 2.079257658        | 3               | 3.831653  |
| P16409        | NKDTGTYYEDFVEGLR                                           | 1.546580132        | 2               | 3.451002  |
| P16409        | VFDKEGNGTVMGAELR                                           | 1.356200473        | 2               | 4.115485  |
| <b>P16617</b> | <b>PGK1 Phosphoglycerate kinase 1</b>                      | <b>1.233445641</b> | <b>9.9E-20</b>  | <b>18</b> |
| P16617        | AHSSMVGVNLPQK                                              | 1.213774522        | 3               | 4.060881  |
| P16617        | AHSSMVGVNLPQK+Oxidation(4                                  | 1.478983546        |                 |           |

|               |                                                         |                    |                 |           |
|---------------|---------------------------------------------------------|--------------------|-----------------|-----------|
| P16617        | ALESPERFLAILGGAK                                        | 1.206240894        | 3               | 4.75942   |
| P16617        | DCVGSEVENACANPAAGTVILLENLR                              | 1.509873626        | 3               | 6.499562  |
| P16617        | FCLDNGAK                                                | 1.230821145        | 1               | 1.961058  |
| P16617        | GCITIIGGGDTATCCA                                        | 1.187040864        | 2               | 5.551831  |
| P16617        | IQLINNMLDK                                              | 1.325773992        | 2               | 3.035633  |
| P16617        | IQLINNMLDK+Oxidation(6                                  | 2.492317358        |                 |           |
| P16617        | ITLPVDFVTADK                                            | 1.536262851        | 2               | 2.746565  |
| P16617        | ITLPVDFVTADKFDENAK                                      | 2.092639548        | 2               | 4.786545  |
| P16617        | SVVLMSHLGRPDGVPMPDK                                     | 0.888007928        | 3               | 3.747412  |
| P16617        | SVVLMSHLGRPDGVPMPDKYSLEPVAELK                           | 1.641130518        | 4               | 4.765045  |
| P16617        | TGQATVASGIPAGWMLDLCGTESSK                               | 1.256394596        | 2               | 5.039053  |
| P16617        | TGQATVASGIPAGWMLDLCGTESSK                               | 1.205142392        | 3               | 4.076807  |
| P16617        | VLNNMEIGTSLYDEEGAK                                      | 2.07235266         | 2               | 5.245418  |
| P16617        | VLPGVDALSNV                                             | 1.853589892        | 2               | 3.286389  |
| P16617        | WNTEDKVSHVSTGGASLELLEGG                                 | 1.237841216        | 3               | 4.834997  |
| P16617        | YSLEPVAELK                                              | 1.215999785        | 2               | 3.49632   |
| <b>P16638</b> | <b>ACLY ATP_citrate synthase</b>                        | <b>1.747861923</b> | <b>9.9E-20</b>  | <b>25</b> |
| P16638        | AFDSGIIPMEFVNK                                          | 2.182052251        | 2               | 3.654032  |
| P16638        | AKPAMPQDSVPSR                                           | 2.008259175        | 2               | 2.742096  |
| P16638        | DEPSVAAMVYPFTGDHK                                       | 1.076331082        | 2               | 2.954812  |
| P16638        | DLVSSLTSGLLTIGDR                                        | 1.761836426        | 2               | 3.700773  |
| P16638        | EAYPEEAYIADLDAK                                         | 1.622729746        | 2               | 3.626558  |
| P16638        | FGGALDAAAK                                              | 1.745575861        | 2               | 3.020345  |
| P16638        | GAIVPAQEVPPPTVPMDSWAR                                   | 2.090698513        | 2               | 4.096361  |
| P16638        | GGPNYQEGLR                                              | 2.236612505        | 2               | 2.958294  |
| P16638        | GVTIIGPATVGGIKPGCFK                                     | 2.267526219        | 2               | 3.704646  |
| P16638        | HLLVHAPEDK                                              | 1.157729119        | 2               | 2.680789  |
| P16638        | HLLVHAPEDKK                                             | 1.685659731        | 2               | 3.461171  |
| P16638        | IGNTGGMLDNILASK                                         | 2.006790404        | 2               | 4.103945  |
| P16638        | LGLVGVNLSLDGVK                                          | 3.12108385         | 2               | 2.499557  |
| P16638        | LNAEDIK                                                 | 1.699433141        | 1               | 1.944088  |
| P16638        | QHFPATPLLDYALEVEK                                       | 1.470340091        | 3               | 3.840355  |
| P16638        | RGGPNYQEGLR                                             | 2.351812538        | 2               | 3.299999  |
| P16638        | SAYDSTMETMNYAQIR                                        | 2.957704617        | 2               | 2.930823  |
| P16638        | SGGMSNELNNISR                                           | 0.990948592        | 2               | 3.656127  |
| P16638        | SMGFIGHYLDQK                                            | 1.137056996        | 2               | 2.914143  |
| P16638        | TIAIAEGIPEALTR                                          | 1.702882727        | 2               | 4.98087   |
| P16638        | TTDGVYEGVAIGGDR                                         | 1.148481305        | 2               | 3.336302  |
| P16638        | TTDGVYEGVAIGGDRYPGSTFMDHVLR                             | 2.39414382         | 3               | 3.452608  |
| P16638        | VDATADYICK                                              | 1.268728519        | 2               | 2.630916  |
| P16638        | WGDIEFPPPFGR                                            | 1.708783862        | 2               | 3.904791  |
| P16638        | YICTTSAIQNR                                             | 1.90480472         | 2               | 3.142399  |
| <b>P16970</b> | <b>ABCD3 ATP_binding cassette sub_family D member 3</b> | <b>0.93009123</b>  | <b>0.375584</b> | <b>10</b> |
| P16970        | DQVIYPDGKEDQK                                           | 1.304952354        | 2               | 2.826781  |
| P16970        | EGGWDSVQDWMDVLSGGEK                                     | 1.736015168        | 2               | 2.891609  |
| P16970        | FDHVPLATPNGDILIQDLSFEVR                                 | 0.899570033        | 3               | 4.148556  |
| P16970        | GIEGAQASPLIPGAGEIINADNIK                                | 0.688359837        | 3               | 5.367455  |
| P16970        | GISDQVLK                                                | 1.743281995        | 1               | 1.946506  |
| P16970        | GYLDNVQLGHILER                                          | 1.302481116        | 2               | 3.564452  |
| P16970        | HLHSTHSELLEDYYQSGR                                      | 1.182845348        | 3               | 5.852018  |
| P16970        | ITELMQVLK                                               | 2.389622967        | 2               | 2.83461   |
| P16970        | KGISDQVLK                                               | 0.803819555        | 2               | 2.518878  |
| P16970        | SGANVLICGPNCGK                                          | 0.839553862        | 2               | 3.205405  |
| <b>P17074</b> | <b>RS19 40S ribosomal protein S19</b>                   | <b>1.571868347</b> | <b>3.8E-08</b>  | <b>5</b>  |
| P17074        | ELAPYDENWFYTR                                           | 1.107727023        | 2               | 2.959055  |
| P17074        | HKELAPYDENWFYTR                                         | 1.574906599        | 3               | 4.61017   |

|               |                                                             |                    |                 |           |
|---------------|-------------------------------------------------------------|--------------------|-----------------|-----------|
| P17074        | LKVPEWVDTVK                                                 | 1.685365463        | 3               | 3.347196  |
| P17074        | RVLQALEGLK                                                  | 3.081770604        | 3               | 3.815389  |
| P17074        | VLQALEGLK                                                   | 1.500785928        | 2               | 2.707209  |
| <b>P17077</b> | <b>RL9 60S ribosomal protein L9</b>                         | <b>1.445158978</b> | <b>0.015919</b> | <b>8</b>  |
| P17077        | DFNHINVELSLLGK                                              | 1.873628387        | 2               | 3.046404  |
| P17077        | FLDGIYVSEK                                                  | 1.314793984        | 2               | 3.129148  |
| P17077        | GTVQQPDE                                                    | 26.47601539        | 1               | 2.037316  |
| P17077        | KFLDGIYVSEK                                                 | 1.082693772        | 2               | 2.941645  |
| P17077        | SVYAHFPINVVIIQENGLVEIR                                      | 1.760022803        | 3               | 3.825795  |
| P17077        | TGVACSVSQAQK                                                | 1.032347398        | 2               | 3.504431  |
| P17077        | TICSHVQNMIIK                                                | 1.585042938        | 2               | 3.173116  |
| P17077        | TILSNQTVDIPENVDTLTK                                         | 1.826933311        | 2               | 4.866496  |
| <b>P17078</b> | <b>RL35 60S ribosomal protein L35</b>                       | <b>1.253794859</b> | <b>7.93E-08</b> | <b>2</b>  |
| P17078        | QLDDLKVELSCLR                                               | 1.618805269        | 2               | 2.977016  |
| P17078        | VLTVINQQTQK                                                 | 1.248847472        | 2               | 2.92333   |
| <b>P17178</b> | <b>CP27A Sterol 26_hydroxylase_mitochondrial</b>            | <b>1.516029637</b> | <b>1.29E-10</b> | <b>5</b>  |
| P17178        | DHESTEGPGTGQDRPR                                            | 1.637916211        | 2               | 3.357571  |
| P17178        | SLAELPGPGTLR                                                | 1.626747503        | 2               | 2.610941  |
| P17178        | TNVNLSAPLLEQVMR                                             | 1.606409067        | 2               | 3.655778  |
| P17178        | VGCLEPSIPEDTATFIR                                           | 1.198744791        | 2               | 3.215505  |
| P17178        | YEVVLSPGMGEVK                                               | 1.367927662        | 2               | 3.422017  |
| <b>P17209</b> | <b>MYL4 Myosin light chain 4</b>                            | <b>1.176061556</b> | <b>0.974407</b> | <b>2</b>  |
| P17209        | HVLATLGEK                                                   | 1.771656035        | 1               | 2.644267  |
| P17209        | ITYGQCQGDVLR                                                | 1.157263396        | 2               | 2.372502  |
| <b>P17425</b> | <b>HMCS1 Hydroxymethylglutaryl_CoA synthase_cytoplasmic</b> | <b>1.29589867</b>  | <b>0.479244</b> | <b>10</b> |
| P17425        | ASAELFNQK                                                   | 1.660280534        | 2               | 3.51042   |
| P17425        | GTHMQHAYDFYKPDMLSEYPVVDGK                                   | 1.232929907        | 3               | 5.276865  |
| P17425        | ITASLCDLK                                                   | 1.543840978        | 2               | 2.536643  |
| P17425        | LEDTYFDRDVEK                                                | 1.816347682        | 2               | 2.967508  |
| P17425        | MFLNDFLNDQNR                                                | 2.828345657        | 2               | 3.483951  |
| P17425        | NSIYSGLEAFGDVK                                              | 1.134697046        | 2               | 3.225848  |
| P17425        | NSLSYDCIGR                                                  | 0.779830173        | 1               | 2.085731  |
| P17425        | TCVAPDVFAENMK                                               | 1.329833857        | 2               | 3.25146   |
| P17425        | VTQDATPGSALDK                                               | 0.570209226        | 2               | 3.613897  |
| P17425        | YTIGLGQAR                                                   | 1.354405369        | 2               | 2.766264  |
| <b>P17426</b> | <b>AP2A1 AP_2 complex subunit alpha_1</b>                   | <b>1.354581023</b> | <b>0.000238</b> | <b>3</b>  |
| P17426        | FFQPTEMAAQDFFR+Oxidation(6                                  | 1.607766319        |                 |           |
| P17426        | NADVELQQR                                                   | 1.341860674        | 2               | 2.642045  |
| P17426        | VGGYILGEFGNLIAGDPR                                          | 1.406354816        | 2               | 3.945225  |
| <b>P17475</b> | <b>A1AT Alpha_1 antiproteinase</b>                          | <b>1.906117502</b> | <b>2.38E-14</b> | <b>9</b>  |
| P17475        | AFHLLQLTNRPDSELQNTGNGLFVNK                                  | 1.008819655        | 3               | 4.54079   |
| P17475        | GTEAAGATVVEAVPMSLPPQVK                                      | 1.387352855        | 2               | 2.619911  |
| P17475        | MQHLEQTLTK                                                  | 2.896329802        | 1               | 3.127402  |
| P17475        | MQHLEQTLTK+Oxidation(0                                      | 2.562796397        |                 |           |
| P17475        | NNYHSEAFSVNFADSEEAKE                                        | 2.998351065        | 3               | 5.074931  |
| P17475        | SAILYFPK                                                    | 3.218906771        | 2               | 2.395156  |
| P17475        | TLLSSLGITR                                                  | 2.718073328        | 2               | 2.98003   |
| P17475        | VFNNADLSGITEDAPLK                                           | 1.632604845        | 2               | 5.838858  |
| P17475        | VINDYVEK                                                    | 1.888771813        | 2               | 2.65176   |
| <b>P17702</b> | <b>RL28 60S ribosomal protein L28</b>                       | <b>1.684306204</b> | <b>7.79E-07</b> | <b>2</b>  |
| P17702        | NCSSFLIK                                                    | 2.107077531        | 2               | 2.420293  |
| P17702        | QTYSTEPNNLK                                                 | 1.678337865        | 2               | 2.77923   |
| <b>P17712</b> | <b>HXK4 Glucokinase</b>                                     | <b>1.094889833</b> | <b>0.21023</b>  | <b>2</b>  |
| P17712        | ASGAEGNNIVGLLR                                              | 0.912221791        | 2               | 2.302684  |
| P17712        | STPEGSEVGFSLDLGGTNFR                                        | 1.766771053        | 2               | 3.176468  |
| <b>P17764</b> | <b>THIL Acetyl_CoA acetyltransferase_mitochondrial</b>      | <b>1.087667768</b> | <b>2.22E-16</b> | <b>15</b> |

|               |                                                 |                    |                 |           |
|---------------|-------------------------------------------------|--------------------|-----------------|-----------|
| P17764        | EEQDKYAIGSYTR                                   | 1.479864213        | 2               | 3.487716  |
| P17764        | ENGTVTAANASTLNDGAAAVLMTAEAAQR                   | 1.69179389         | 3               | 3.965082  |
| P17764        | EVYMGNVIQGGEGQAPTR                              | 0.633070161        | 2               | 5.066541  |
| P17764        | FANEITPITISVK                                   | 0.950217579        | 2               | 4.121784  |
| P17764        | GKPDVVVKEDEEYK                                  | 1.309483179        | 2               | 3.72773   |
| P17764        | GKPDVVVKEDEEYKR                                 | 1.123272102        | 2               | 5.172976  |
| P17764        | IAAFADAADVPIDFLAPAYAVPK                         | 1.629076845        | 2               | 4.964918  |
| P17764        | IHMGNCAENTAK                                    | 1.323347128        | 3               | 3.55753   |
| P17764        | IHMGNCAENTAK+Oxidation(2                        | 1.07404943         |                 |           |
| P17764        | LEDLIVK                                         | 1.139081447        | 2               | 2.403829  |
| P17764        | LGTAIQGAIEK                                     | 1.438033824        | 2               | 3.372826  |
| P17764        | QATLGAGLPIATPCTTVNK                             | 1.115216074        | 2               | 4.638556  |
| P17764        | QGEFGLASICNGGGGASAVLIEK                         | 1.143379247        | 2               | 5.119126  |
| P17764        | TPIGSFLGSLASQPATK                               | 1.147666828        | 2               | 4.31948   |
| P17764        | VNVHGGAVSLGHPIGMSGAR                            | 1.262404615        | 2               | 5.880795  |
| <b>P17879</b> | <b>HS71B Heat shock 70 kDa protein 1B</b>       | <b>1.253138533</b> | <b>1.11E-16</b> | <b>3</b>  |
| P17879        | QTQFTTYSNDNQPGVLIQVYEGER                        | 1.256881993        | 3               | 5.548559  |
| P17879        | TTPSYVAFTDTER                                   | 1.017052606        | 2               | 3.622778  |
| P17879        | VEIANDQGNR                                      | 1.928741581        | 2               | 3.764211  |
| <b>P17988</b> | <b>ST1A1 Sulfotransferase 1A1</b>               | <b>1.38524952</b>  | <b>9.9E-20</b>  | <b>4</b>  |
| P17988        | CPGVPSGLETLEETPAPR                              | 1.373968891        | 2               | 4.23585   |
| P17988        | NTFTVAQNER                                      | 1.185342685        | 2               | 3.564058  |
| P17988        | SLPEETVDSIVHHTSFK                               | 1.389299792        | 2               | 4.404452  |
| P17988        | THLPLSLLPQSLLDQK                                | 1.430637233        | 2               | 4.711433  |
| <b>P18163</b> | <b>ACSL1 Long_chain_fatty_acid_CoA ligase 1</b> | <b>1.228373398</b> | <b>6.31E-07</b> | <b>29</b> |
| P18163        | AELSVIFADKPEK                                   | 1.083854646        | 2               | 3.355317  |
| P18163        | ALEDLGR                                         | 0.802981086        | 2               | 2.339623  |
| P18163        | ALKPPCDLSMQSVEVTGTTEGVR                         | 1.087349696        | 2               | 4.30022   |
| P18163        | ALKPPCDLSMQSVEVTGTTEGVR+Oxidation(9             | 1.41086326         |                 |           |
| P18163        | CGVEIIGLK                                       | 1.018457919        | 2               | 2.876044  |
| P18163        | DGWLHTGDIGK                                     | 1.240394599        | 2               | 2.796502  |
| P18163        | GAMVTHQNIMNDCSGFIK                              | 0.834809089        | 2               | 5.147714  |
| P18163        | GAMVTHQNIMNDCSGFIK+Oxidation(2                  | 1.126117864        |                 |           |
| P18163        | GFQGSFEELCR                                     | 1.020201004        | 2               | 3.64198   |
| P18163        | GIAVHPELFSIDNGLLPTLTK                           | 1.497939381        | 2               | 5.303509  |
| P18163        | GIQVSDNGPCLGSR                                  | 1.218015951        | 2               | 4.543355  |
| P18163        | IENIYLR                                         | 1.085141825        | 2               | 2.80915   |
| P18163        | IFGQANTSVK                                      | 1.121682745        | 2               | 2.825404  |
| P18163        | IIVIMDSYDNDLVER                                 | 1.363431486        | 2               | 5.068473  |
| P18163        | LLEGVENK                                        | 1.121253763        | 2               | 3.344246  |
| P18163        | LLMDDLK                                         | 1.145262813        | 2               | 2.506974  |
| P18163        | LMITGAAPVSATVLTFLR                              | 1.387852401        | 3               | 4.114018  |
| P18163        | LVDVEDMNYQAAK                                   | 0.91472041         | 2               | 4.649327  |
| P18163        | NAGLKPFEQVK                                     | 1.136558824        | 2               | 3.77725   |
| P18163        | NNSLWDK                                         | 1.061310344        | 2               | 2.492246  |
| P18163        | QVAEMAECIGSALIQK                                | 1.253171161        | 2               | 5.534113  |
| P18163        | SAVLEDDKLLYYDDVDR                               | 2.409720597        | 3               | 3.618413  |
| P18163        | SQIDELYSTIK                                     | 0.786959672        | 2               | 3.615584  |
| P18163        | SQIDELYSTIKI                                    | 1.584589581        | 2               | 3.946987  |
| P18163        | TAEALDKDGLHTGDIGK                               | 1.301623659        | 2               | 5.251466  |
| P18163        | TKPKPPEPEDLAICFTSGTTGNPK                        | 0.386498339        | 3               | 5.155368  |
| P18163        | TMYDGFQR                                        | 2.971380755        | 1               | 1.945556  |
| P18163        | VLQPTIFPVVPR                                    | 1.25717337         | 2               | 3.597943  |
| P18163        | WLLDFASK                                        | 1.233672504        | 2               | 2.565551  |
| <b>P18297</b> | <b>SPRE Sepiapterin reductase</b>               | <b>1.087059985</b> | <b>0.275996</b> | <b>5</b>  |
| P18297        | LGCAVCVLTGASR                                   | 1.272809935        | 2               | 3.032018  |
| P18297        | LLINNAGTLGDVSK                                  | 1.740294532        | 2               | 3.89844   |

|               |                                                                  |                    |                 |           |
|---------------|------------------------------------------------------------------|--------------------|-----------------|-----------|
| P18297        | LNSEGELVDCGTSAQK                                                 | 1.296369549        | 2               | 4.898677  |
| P18297        | TVVNISSCALQPFK                                                   | 1.205501239        | 2               | 3.274786  |
| P18297        | VLSYAPGPLDTNMQQLAR                                               | 0.822997638        | 2               | 3.443828  |
| <b>P18298</b> | <b>METK2 S_adenosylmethionine synthase isoform type_2</b>        | <b>1.434486881</b> | <b>0.000948</b> | <b>3</b>  |
| P18298        | IIVDTYGGWGAHGGGAFSGK                                             | 1.638460893        | 2               | 5.497928  |
| P18298        | KIIVDTYGGWGAHGGGAFSGK                                            | 1.285464612        | 3               | 4.149744  |
| P18298        | YLDEDTIYHLQPSGR                                                  | 1.419004063        | 2               | 4.7805    |
| <b>P18418</b> | <b>CALR Calreticulin</b>                                         | <b>1.132703188</b> | <b>5.55E-16</b> | <b>20</b> |
| P18418        | AKIDDPDTSKPEDWDKPEHIPDPAK                                        | 1.333590789        | 3               | 5.838455  |
| P18418        | CKDDEFTHLYTLIVRPDNTYEVK                                          | 1.060076488        | 3               | 4.921481  |
| P18418        | DMHGDSEYNIMFGPDICGPGTK                                           | 1.488142537        | 2               | 6.22996   |
| P18418        | DMHGDSEYNIMFGPDICGPGTK+Oxidation(1                               | 1.351172782        |                 |           |
| P18418        | EQFLDGDWATNR                                                     | 2.373967848        | 2               | 3.170068  |
| P18418        | FYALSAR                                                          | 1.615434185        | 2               | 2.385056  |
| P18418        | FYGDQEK                                                          | 1.091026141        | 1               | 2.119054  |
| P18418        | FYGDQEKDK                                                        | 1.211799893        | 1               | 2.922854  |
| P18418        | GQTLVVQFTVK                                                      | 0.851566063        | 2               | 2.937333  |
| P18418        | HEQNIIDCGGYYVK                                                   | 1.13115215         | 2               | 4.403697  |
| P18418        | IDDPDTSKPEDWDKPEHIPDPAK                                          | 0.887680865        | 3               | 4.302038  |
| P18418        | IDNSQVESGSLEDDWDFLPPK                                            | 2.004418847        | 2               | 5.363841  |
| P18418        | IDNSQVESGSLEDDWDFLPPK                                            | 6.179247769        | 3               | 4.886557  |
| P18418        | IKDPDAAKPEDWDER                                                  | 1.691610156        | 2               | 4.368005  |
| P18418        | KPEDWDEEMDGEWEPPIQNPEYK                                          | 1.107687827        | 3               | 5.513727  |
| P18418        | KVHVIFNYK                                                        | 0.727643615        | 2               | 2.339793  |
| P18418        | LFPGLDQK                                                         | 1.406616667        | 2               | 2.37105   |
| P18418        | QIDNPDYK                                                         | 1.099389426        | 1               | 2.090438  |
| P18418        | SGTIFDNFLITNDEAYAEFGNETWGVTK                                     | 1.308946435        | 3               | 4.7888    |
| P18418        | VHVIFNYK                                                         | 1.081496935        | 1               | 2.55527   |
| <b>P18420</b> | <b>PSA1 Proteasome subunit alpha type_1</b>                      | <b>1.283213559</b> | <b>0.241786</b> | <b>3</b>  |
| P18420        | AQPSQAADEPAEK                                                    | 1.222725766        | 2               | 3.852897  |
| P18420        | IHQIEYAMEAVK                                                     | 2.645254337        | 2               | 2.827256  |
| P18420        | NQYDNDVTWVSPQGR                                                  | 1.680240001        | 2               | 2.995564  |
| <b>P18421</b> | <b>PSB1 Proteasome subunit beta type_1</b>                       | <b>1.087985453</b> | <b>0.018208</b> | <b>4</b>  |
| P18421        | AGGSASAMLQPLLDNQVGFK                                             | 1.06472895         | 2               | 4.993559  |
| P18421        | AGGSASAMLQPLLDNQVGFK+Oxidation(7                                 | 5.72531586         |                 |           |
| P18421        | GAVYSFDPVGSYQR                                                   | 1.195339181        | 2               | 3.00408   |
| P18421        | NMQNVEHVPLTLDR                                                   | 1.19387844         | 2               | 3.648014  |
| <b>P18422</b> | <b>PSA3 Proteasome subunit alpha type_3</b>                      | <b>1.350628135</b> | <b>0.000695</b> | <b>2</b>  |
| P18422        | AVENSSTAIGIR                                                     | 1.350591692        | 2               | 3.232425  |
| P18422        | TEIEKLQMKEMTCR+Oxidation(10                                      | 2.562773123        |                 |           |
| <b>P18445</b> | <b>RL27A 60S ribosomal protein L27a</b>                          | <b>1.123398048</b> | <b>0.499749</b> | <b>4</b>  |
| P18445        | LWTLVSEQTR                                                       | 1.289279412        | 1               | 1.914163  |
| P18445        | NGVAPIIDVVR                                                      | 1.566568014        | 1               | 2.153581  |
| P18445        | NQSFCPTVNLDK                                                     | 1.146010518        | 2               | 3.299043  |
| P18445        | RNQSFCPTVNLDK                                                    | 0.937405696        | 2               | 2.94568   |
| <b>P18484</b> | <b>AP2A2 AP_2 complex subunit alpha_2</b>                        | <b>2.003743677</b> | <b>3.19E-05</b> | <b>6</b>  |
| P18484        | FFQPTEMASQDFFQR                                                  | 1.607371242        | 2               | 4.024792  |
| P18484        | FVNLFPEVK                                                        | 1.83683408         | 2               | 2.834444  |
| P18484        | ILVAGDTMDSVK                                                     | 1.386040436        | 2               | 2.747047  |
| P18484        | LTECLEILNK                                                       | 1.575045011        | 2               | 2.42357   |
| P18484        | NNGVLFENQLLQIGLK                                                 | 2.109839846        | 2               | 3.379971  |
| P18484        | THIETVINALK                                                      | 0.616039034        | 2               | 2.811701  |
| <b>P18596</b> | <b>AT2A3 Sarcoplasmic/endoplasmic reticulum calcium ATPase 3</b> | <b>1.32613687</b>  | <b>0.084339</b> | <b>4</b>  |
| P18596        | DIVPGDIVEVAVGDKVPADLR                                            | 3.829999621        | 2               | 3.384947  |
| P18596        | SLPSVETLGCTSVICSDK                                               | 2.713254403        | 2               | 4.610282  |

|               |                                                              |                    |                 |           |
|---------------|--------------------------------------------------------------|--------------------|-----------------|-----------|
| P18596        | TGTLTTNQMSVCR                                                | 1.293021551        | 2               | 3.226547  |
| P18596        | VGEATETALTCLVEK                                              | 1.636918028        | 2               | 4.625138  |
| <b>P18757</b> | <b>CGL Cystathionine gamma_lyase</b>                         | <b>0.993335518</b> | <b>9.9E-20</b>  | <b>15</b> |
| P18757        | AGDEVICMDEVYGGTNR                                            | 0.599981341        | 2               | 5.609281  |
| P18757        | ATLGISDTLIR                                                  | 1.124197627        | 2               | 3.740761  |
| P18757        | AVVLPISLATTFK                                                | 0.905710618        | 3               | 4.283768  |
| P18757        | DLLEDLGQALK                                                  | 1.288172767        | 2               | 3.357074  |
| P18757        | FLQNSLGAVPSPFDCYLCCR                                         | 2.188542242        | 2               | 3.911115  |
| P18757        | GTLQHAQVFLK                                                  | 1.157980483        | 2               | 3.355264  |
| P18757        | LFALAESLGGYESLAELPAIMTHASVPEK                                | 2.122206478        | 3               | 4.421936  |
| P18757        | LFALAESLGGYESLAELPAIMTHASVPEKDR                              | 2.540119887        | 4               | 5.615601  |
| P18757        | LLEAAITPQTK                                                  | 1.123777497        | 2               | 4.016467  |
| P18757        | LSVGLEDEKDLLEDLGQALK                                         | 1.364551786        | 3               | 6.354272  |
| P18757        | LVWIETPTNPTLK                                                | 1.264985994        | 2               | 3.88094   |
| P18757        | QCTGCPGMVSFYIK                                               | 1.627148516        | 2               | 3.727621  |
| P18757        | QDSPGQSSGFVYSR                                               | 1.033535298        | 2               | 3.853681  |
| P18757        | RVASEFGLK                                                    | 1.548226559        | 2               | 2.499044  |
| P18757        | VIYPGLPSHPQHELAK                                             | 1.021763886        | 2               | 4.234103  |
| <b>P18886</b> | <b>CPT2 Carnitine O_palmitoyltransferase 2_mitochondrial</b> | <b>1.041240166</b> | <b>0.000851</b> | <b>12</b> |
| P18886        | ATNLTVSAVR                                                   | 1.453743583        | 2               | 3.494674  |
| P18886        | ELHAHLAQDK                                                   | 2.170863238        | 2               | 3.652485  |
| P18886        | HSVGELQHMMMAECSK                                             | 0.432174275        | 2               | 3.894764  |
| P18886        | LIFDGNEETLK                                                  | 1.192468692        | 2               | 3.084874  |
| P18886        | QKLIFDGNEETLKK                                               | 1.353709701        | 2               | 2.33468   |
| P18886        | QYGQTVATYESCSTAAFK                                           | 1.130606859        | 2               | 3.698326  |
| P18886        | SEYNDQLTR                                                    | 1.655864187        | 2               | 3.071038  |
| P18886        | TETIRPASIFTK                                                 | 0.991990257        | 2               | 2.605407  |
| P18886        | TLQAGLLEPEVFHNLNPSK                                          | 0.40290636         | 2               | 3.448968  |
| P18886        | TLSIDSIQFQR                                                  | 1.602871044        | 2               | 3.074601  |
| P18886        | YILSDSSPVPEFPVAYLTSENK                                       | 1.132949325        | 2               | 5.311357  |
| P18886        | YLNAQKPLLDSDQFR                                              | 1.158329569        | 2               | 4.659139  |
| <b>P19112</b> | <b>F16P1 Fructose_1_6_bisphosphatase 1</b>                   | <b>1.21084617</b>  | <b>9.9E-20</b>  | <b>19</b> |
| P19112        | AGGLATTGNEDILDIVPTEIHQK                                      | 1.24009757         | 3               | 6.45402   |
| P19112        | AGGTGEMTQLLNSLCTAIK                                          | 1.196789673        | 3               | 5.556763  |
| P19112        | APVIMGSTEDVQEFLEIYNK                                         | 2.254520823        | 2               | 4.97642   |
| P19112        | APVIMGSTEDVQEFLEIYNKDK                                       | 1.57489786         | 3               | 3.558839  |
| P19112        | DFDPAINIYIQR                                                 | 1.29790535         | 2               | 4.021592  |
| P19112        | ESPVHSICDELK                                                 | 1.377809487        | 2               | 2.350213  |
| P19112        | FPPDNSAPYGAR                                                 | 0.944196044        | 2               | 2.770434  |
| P19112        | GNIYSINEGYAK                                                 | 1.179019525        | 2               | 3.997293  |
| P19112        | KGNIYSINEGYAK                                                | 0.847694745        | 2               | 4.48673   |
| P19112        | KLDILSNDLVINMLK                                              | 1.458909978        | 2               | 4.763169  |
| P19112        | KTSANEPSEKDALQPGR                                            | 1.237419316        | 3               | 4.176288  |
| P19112        | LDILSNDLVINMLK                                               | 1.470384848        | 2               | 5.103749  |
| P19112        | LLYECNPIAYVMEK                                               | 1.435231251        | 2               | 4.454319  |
| P19112        | QAGIAQLYGIAGSTNVTGDQVK                                       | 1.213758238        | 3               | 5.786427  |
| P19112        | SRPSLPLQSR                                                   | 0.447595629        | 2               | 3.353765  |
| P19112        | SSYATCVLVSEEDTHAIIIEPEKR                                     | 1.413665341        | 3               | 5.169792  |
| P19112        | TLVYGGIFLYPANK                                               | 0.805512597        | 2               | 3.841897  |
| P19112        | TLVYGGIFLYPANKK                                              | 0.745899127        | 2               | 2.9054    |
| P19112        | TSANEPSEKDALQPGR                                             | 1.141570112        | 2               | 4.477299  |
| <b>P19123</b> | <b>TNNC1 Troponin C_slow skeletal and cardiac muscles</b>    | <b>1.012689865</b> | <b>0.382897</b> | <b>3</b>  |
| P19123        | AAVEQLTEEQKNEFK                                              | 3.455896302        | 2               | 2.559125  |
| P19123        | GKSEELSDLFR                                                  | 0.985053876        | 2               | 2.586432  |
| P19123        | SEELSDLFR                                                    | 4.82143244         | 2               | 2.836403  |

|               |                                                                            |                    |                 |           |
|---------------|----------------------------------------------------------------------------|--------------------|-----------------|-----------|
| <b>P19132</b> | <b>FRIH Ferritin heavy chain</b>                                           | <b>1.386707887</b> | <b>0.057328</b> | <b>2</b>  |
| P19132        | QNYHQDSEAINR                                                               | 2.102741839        | 2               | 2.887335  |
| P19132        | YFLHQSHEER                                                                 | 1.386644346        | 2               | 2.557775  |
| <b>P19225</b> | <b>CP270 Cytochrome P450 2C70</b>                                          | <b>1.244124316</b> | <b>3.38E-06</b> | <b>15</b> |
| P19225        | ACIGEGLAR                                                                  | 1.702373399        | 2               | 2.649945  |
| P19225        | ASLNLSNPQDFIDYFLIK                                                         | 1.795498853        | 2               | 3.134395  |
| P19225        | EALIDRGEFSDK                                                               | 1.64219872         | 2               | 3.256918  |
| P19225        | FDPGHFLDEK                                                                 | 1.127967269        | 2               | 2.463623  |
| P19225        | FILMEINR                                                                   | 2.283496673        | 2               | 2.63737   |
| P19225        | GTSVMACLTSALHDDKEFPNPEK                                                    | 2.080004541        | 3               | 3.577065  |
| P19225        | IQEEITR                                                                    | 1.439481799        | 2               | 2.317652  |
| P19225        | IQEEVVYLLALR                                                               | 2.651108112        | 2               | 3.926897  |
| P19225        | KLPPGPTPLPIFGNILQVGVK                                                      | 0.926976315        | 3               | 4.033191  |
| P19225        | KTTQDVEFR                                                                  | 1.72499265         | 2               | 2.301944  |
| P19225        | LPPGPTPLPIFGNILQVGVK                                                       | 1.330183375        | 2               | 4.41558   |
| P19225        | NHMPYTDVLAHEIQR                                                            | 1.520454864        | 3               | 3.82308   |
| P19225        | SDYFMAFSAGRR+Oxidation(4                                                   | 0.675064608        |                 |           |
| P19225        | TTQDVEFR                                                                   | 1.333779952        | 2               | 2.438585  |
| P19225        | YIDFVPIPLPR                                                                | 1.224176036        | 2               | 3.125314  |
| <b>P19234</b> | <b>NDUV2 NADH dehydrogenase [ubiquinone] flavoprotein 2_ mitochondrial</b> | <b>1.292893832</b> | <b>0.756779</b> | <b>3</b>  |
| P19234        | DIEEIIDELR                                                                 | 7.793886155        | 2               | 3.611884  |
| P19234        | DTPENNPDPDFDTPENYER                                                        | 0.624657852        | 2               | 4.621257  |
| P19234        | FCCEPAGGLTSLTEPPK                                                          | 1.215071114        | 2               | 3.137991  |
| <b>P19468</b> | <b>GSH1 Glutamate__cysteine ligase catalytic subunit</b>                   | <b>1.195656468</b> | <b>4.24E-09</b> | <b>9</b>  |
| P19468        | ASGELMTVAR                                                                 | 1.18304717         | 2               | 2.940057  |
| P19468        | CNQIANELCEPELLGSGFR                                                        | 1.236100474        | 2               | 5.338086  |
| P19468        | IHLDDANESDHFENIQSTNWQTMR                                                   | 0.681428872        | 3               | 5.048603  |
| P19468        | NTPSPFVETPEDEEASK                                                          | 1.251665118        | 2               | 4.593307  |
| P19468        | SLFFPDEAINK                                                                | 1.398181417        | 2               | 2.607862  |
| P19468        | SRYDSIDSYLSK                                                               | 0.795281485        | 2               | 2.703424  |
| P19468        | VQLLLNGGDVLETLQEK                                                          | 1.64327319         | 2               | 4.674703  |
| P19468        | VVINVPIFK                                                                  | 2.388361853        | 2               | 2.693337  |
| P19468        | WGVISASVDDR                                                                | 1.783373893        | 2               | 3.138253  |
| <b>P19488</b> | <b>UDB37 UDP__glucuronosyltransferase 2B37</b>                             | <b>1.019823881</b> | <b>0.111132</b> | <b>9</b>  |
| P19488        | AEMWLIR                                                                    | 1.784155493        | 2               | 2.892491  |
| P19488        | ANAIAWALAIQIPQK                                                            | 1.482965394        | 3               | 6.459273  |
| P19488        | FETFPTSFSK                                                                 | 1.201479203        | 1               | 1.906678  |
| P19488        | FETFPTSFSKDELEK                                                            | 0.806775431        | 2               | 4.318477  |
| P19488        | GAAVTLNIR                                                                  | 1.419526466        | 2               | 2.561926  |
| P19488        | GHEVTVLKPSAYYVLDPK                                                         | 0.83773028         | 2               | 4.530221  |
| P19488        | NWDPFYTEILGRPTTLAETMGK                                                     | 1.841080479        | 2               | 4.866966  |
| P19488        | SDLFNALK                                                                   | 1.06685648         | 2               | 2.556469  |
| P19488        | TILDELVQR                                                                  | 1.157477086        | 2               | 3.395438  |
| <b>P19511</b> | <b>AT5F1 ATP synthase subunit b_ mitochondrial</b>                         | <b>1.182496224</b> | <b>0.112683</b> | <b>10</b> |
| P19511        | EGEHMINWVEK                                                                | 1.645498355        | 2               | 2.329333  |
| P19511        | HVIQSISAQKEK                                                               | 1.164080114        | 2               | 3.976594  |
| P19511        | HVIQSISAQKEKETIAK                                                          | 1.203109708        | 3               | 4.756908  |
| P19511        | HLYFDVQR                                                                   | 1.195144505        | 2               | 2.688479  |
| P19511        | KEGEHMINWVEK                                                               | 1.481282681        | 2               | 2.304466  |
| P19511        | LDYHISVQDMMR                                                               | 1.620345865        | 3               | 4.551365  |
| P19511        | LNEEKIAQLEEK                                                               | 1.018151276        | 2               | 2.530715  |
| P19511        | NNIALALEVTYR                                                               | 2.083912735        | 2               | 2.622712  |
| P19511        | YGASIGEFIDK                                                                | 1.29720992         | 2               | 2.836105  |
| P19511        | YGASIGEFIDKLNEEK                                                           | 1.827126944        | 2               | 3.475832  |
| <b>P19643</b> | <b>AOFB Amine oxidase [flavin__containing] B</b>                           | <b>1.099838337</b> | <b>1.73E-13</b> | <b>13</b> |
| P19643        | FIGGSGQVSR                                                                 | 1.591128106        | 2               | 3.31743   |

|               |                                                                  |                    |                 |           |
|---------------|------------------------------------------------------------------|--------------------|-----------------|-----------|
| P19643        | IISTTNGGQER                                                      | 0.335383829        | 2               | 2.731662  |
| P19643        | IPEDEIWQPEPESVDVPARPITNTFLER                                     | 1.628520856        | 3               | 4.635859  |
| P19643        | KFIGSGSQVSR                                                      | 0.742434012        | 2               | 3.044423  |
| P19643        | KLCELYAK                                                         | 0.815832467        | 2               | 2.524009  |
| P19643        | LERPVIHIDQTGENVVVK                                               | 1.248892469        | 2               | 5.296371  |
| P19643        | LLHDCGLSVVLEAR                                                   | 2.5953114          | 2               | 3.563993  |
| P19643        | TLNHEIYEAK                                                       | 1.408339717        | 2               | 3.052488  |
| P19643        | TMDEMGEIPSDAPWK                                                  | 1.763154653        | 2               | 4.414841  |
| P19643        | VKLERPVIHIDQTGENVVVK                                             | 0.523433295        | 3               | 4.446641  |
| P19643        | VLNSQEALQPVHYEEK                                                 | 1.543903632        | 2               | 4.680696  |
| P19643        | YVDLGGSYVGPQNR                                                   | 0.973957846        | 2               | 5.309948  |
| P19643        | YVISAIPPVLGMK                                                    | 1.757410647        | 2               | 3.259796  |
| <b>P19804</b> | <b>NDKB Nucleoside diphosphate kinase B</b>                      | <b>1.32119561</b>  | <b>9.9E-20</b>  | <b>9</b>  |
| P19804        | DRPFFPGLVK                                                       | 1.676465806        | 2               | 2.513633  |
| P19804        | EIGLWFKPEELIDYK                                                  | 1.705615417        | 2               | 3.830557  |
| P19804        | GDFCIQVGR                                                        | 1.247106213        | 2               | 3.316579  |
| P19804        | NIIHGSDSVESAEK                                                   | 1.313303622        | 3               | 4.016108  |
| P19804        | NIIHGSDSVESAEKEIGLWFKPEELIDYK                                    | 1.910781281        | 4               | 4.835697  |
| P19804        | TFIAIKPDGVQR                                                     | 1.624503368        | 2               | 2.947857  |
| P19804        | VMLGETNPADSKPGTIR                                                | 3.148999817        | 2               | 4.499082  |
| P19804        | VMLGETNPADSKPGTIR+Oxidation(1                                    | 1.302420665        |                 |           |
| P19804        | YMNSGPPVAMVWEGLNVVK                                              | 1.68216536         | 2               | 5.323691  |
| <b>P19814</b> | <b>TGON3 Trans_Golgi network integral membrane protein TGN38</b> | <b>3.63368442</b>  | <b>1.16E-10</b> | <b>2</b>  |
| P19814        | DSGSPTGGDSNDNTTGGDSNK                                            | 2.964404035        | 2               | 4.74314   |
| P19814        | TSGGDSNKPTGSDNDKPTGGDSNKPTSK                                     | 3.823057466        | 4               | 4.65954   |
| <b>P19944</b> | <b>RLA1 60S acidic ribosomal protein P1</b>                      | <b>1.333872179</b> | <b>0.001705</b> | <b>2</b>  |
| P19944        | AAGVNVPEFPWPLFAK                                                 | 1.33497087         | 2               | 2.94979   |
| P19944        | ALANVNISSLICNVGAGGPAPAAGAAPAGGPAPSAAAAAPAEK                      | 1.237896805        | 4               | 6.264713  |
| <b>P19945</b> | <b>RLA0 60S acidic ribosomal protein P0</b>                      | <b>1.544159108</b> | <b>9.9E-20</b>  | <b>10</b> |
| P19945        | AFLADPSAFAAAAAPVAAATTAAPAAAAAPAK                                 | 1.191630066        | 2               | 6.143483  |
| P19945        | AGAIAPCEVTVPAQNTGLGPEK                                           | 1.038594113        | 3               | 4.840834  |
| P19945        | CFIVGADNVGSK                                                     | 1.343465487        | 2               | 3.412104  |
| P19945        | GHLENNPALEK                                                      | 1.249468729        | 2               | 3.68968   |
| P19945        | GNVGFVFTK                                                        | 0.917373508        | 2               | 2.771543  |
| P19945        | GTIEILSDVLIK                                                     | 1.549128072        | 2               | 3.624354  |
| P19945        | IIQLDDYPK                                                        | 2.306266007        | 2               | 3.745273  |
| P19945        | NVASVCLQIGYPTVASVPHSIINGYK                                       | 1.223222123        | 3               | 4.199956  |
| P19945        | TSFFQALGITTK                                                     | 1.635370156        | 2               | 4.161887  |
| P19945        | VLALSVETDYTFPLAEK                                                | 1.882112698        | 2               | 3.386822  |
| <b>P20059</b> | <b>HEMO Hemopexin</b>                                            | <b>1.132881091</b> | <b>0.005345</b> | <b>5</b>  |
| P20059        | ELGSPPGISLDTIDAAFSCPGSSK                                         | 1.155228137        | 2               | 5.178461  |
| P20059        | FNPVTGEVPPR                                                      | 1.150294783        | 2               | 2.655689  |
| P20059        | LFQEEFPGIPYPPDAAVECHR                                            | 1.366082525        | 3               | 4.344021  |
| P20059        | SGAQATWAELSWPHEK                                                 | 0.558665378        | 2               | 3.127366  |
| P20059        | VDGALCLEK                                                        | 1.353335995        | 2               | 2.54823   |
| <b>P20070</b> | <b>NB5R3 NADH_cytochrome b5 reductase 3</b>                      | <b>1.559625029</b> | <b>0.055029</b> | <b>6</b>  |
| P20070        | IDGNLVRPYTPVSSDDDKGFVDLVVK                                       | 2.004703295        | 3               | 5.064362  |
| P20070        | LIDKEIISHDTR                                                     | 1.525306137        | 3               | 4.140484  |
| P20070        | MSQYLENMNIGDTIEFR                                                | 0.837307079        | 2               | 4.422855  |
| P20070        | SSPAITLENPDIK                                                    | 1.116405634        | 2               | 3.996587  |
| P20070        | SSPAITLENPDIKYPLR                                                | 1.512531969        | 2               | 3.888384  |
| P20070        | SVGMIAGGTGITPMLQVIR                                              | 1.20195332         | 2               | 4.464146  |
| <b>P20280</b> | <b>RL21 60S ribosomal protein L21</b>                            | <b>1.231791526</b> | <b>0.331215</b> | <b>4</b>  |
| P20280        | HGVVPLATYMR                                                      | 1.244795856        | 2               | 2.569047  |
| P20280        | KGDIVDIK                                                         | 1.243060877        | 1               | 2.252773  |



|               |                                                                  |                    |                 |           |
|---------------|------------------------------------------------------------------|--------------------|-----------------|-----------|
| P20280        | TNGKEPELLEPIPIYEFMA                                              | 1.171810776        | 2               | 3.615796  |
| P20280        | VYNVYQHAVGIIVNK                                                  | 1.066370926        | 2               | 4.423737  |
| <b>P20673</b> | <b>ARLY Argininosuccinate lyase</b>                              | <b>1.3499809</b>   | <b>9.9E-20</b>  | <b>16</b> |
| P20673        | AEAECEVLFPGYTHLQR                                                | 1.188596125        | 2               | 4.920734  |
| P20673        | AEMQQLQGLDK                                                      | 1.285918567        | 2               | 4.53292   |
| P20673        | AVVVAEMK                                                         | 1.675068259        | 1               | 1.949932  |
| P20673        | EFNFVQLSDAYSTGSSLMPQK                                            | 1.737212876        | 2               | 5.803443  |
| P20673        | FNSSIAADR                                                        | 1.113299772        | 2               | 2.544749  |
| P20673        | HLWNVLDQGSK                                                      | 1.226640688        | 1               | 3.306964  |
| P20673        | INVLPLGSGAIAGNPLGVDR                                             | 1.768939904        | 2               | 5.484537  |
| P20673        | KNPDSLELIR                                                       | 1.099957079        | 2               | 2.612514  |
| P20673        | LKELIGEAAAGK                                                     | 1.658715617        | 2               | 3.194577  |
| P20673        | LYPNDEDIHTANER                                                   | 12.81732442        | 2               | 3.914005  |
| P20673        | MAEDLILYGTK                                                      | 1.350759302        | 2               | 3.702366  |
| P20673        | MAEDLILYGTK+Oxidation(0                                          | 1.641985076        |                 |           |
| P20673        | NDQVVTDLR                                                        | 1.300157513        | 2               | 3.217111  |
| P20673        | SRNDQVVTDLR                                                      | 1.656047865        | 2               | 2.883168  |
| P20673        | VAEEWAQGIK                                                       | 1.75561259         | 2               | 3.569699  |
| P20673        | VLIEAMVDR                                                        | 1.664351823        | 2               | 2.756938  |
| <b>P20788</b> | <b>UCRI Cytochrome b_c1 complex subunit Rieske_mitochondrial</b> | <b>1.153764193</b> | <b>0.69985</b>  | <b>6</b>  |
| P20788        | EIDQEAAVEVSQLR                                                   | 0.923099243        | 2               | 4.245802  |
| P20788        | EIDQEAAVEVSQLRDPQHDLR                                            | 0.820521909        | 3               | 3.375093  |
| P20788        | ESLSGQAATRLVATVGLNVPASVR                                         | 2.012908853        | 2               | 2.500675  |
| P20788        | GVAGALRPLLQSAVPATSEPPVLDVK                                       | 1.152235106        | 3               | 4.806671  |
| P20788        | LSDIPEGK                                                         | 1.245155923        | 1               | 2.027337  |
| P20788        | SGPFAPVLSATSR                                                    | 1.172884232        | 2               | 2.862601  |
| <b>P20801</b> | <b>TNNC2 Troponin C_skeletal muscle</b>                          | <b>1.41471906</b>  | <b>0.770386</b> | <b>4</b>  |
| P20801        | GKSEELAECFR                                                      | 2.820957973        | 2               | 3.245115  |
| P20801        | NADGYIDAEELAEIFR                                                 | 1.248413929        | 2               | 4.821789  |
| P20801        | SEELAECFR                                                        | 2.167539111        | 2               | 3.284803  |
| P20801        | SYLSEEMIAEFK                                                     | 2.176797888        | 2               | 2.674991  |
| <b>P20814</b> | <b>CP2CD Cytochrome P450 2C13_male_specific</b>                  | <b>2.132677227</b> | <b>8.88E-15</b> | <b>3</b>  |
| P20814        | FDYEDKDFLNLIK                                                    | 2.237311757        | 3               | 3.994282  |
| P20814        | GTAVLTSVLSVLDHDSK                                                | 1.895929888        | 2               | 3.734842  |
| P20814        | IKEHEESLDVSNPR                                                   | 2.176121885        | 2               | 4.697644  |
| <b>P20817</b> | <b>CP4AE Cytochrome P450 4A14</b>                                | <b>1.053088166</b> | <b>0.801861</b> | <b>6</b>  |
| P20817        | ACQIAHEHTDGVK                                                    | 1.078674915        | 2               | 4.269307  |
| P20817        | AQLQNEELQK                                                       | 1.094047494        | 2               | 3.201374  |
| P20817        | AVEDLNNLTFFR                                                     | 1.081276127        | 2               | 3.319497  |
| P20817        | HLDLFDILLFAK                                                     | 1.548687756        | 2               | 3.819928  |
| P20817        | MRKAQLQNEELQK+Oxidation(0                                        | 1.05699261         |                 |           |
| P20817        | VLLYDPDYVK                                                       | 0.792491351        | 2               | 2.710024  |
| <b>P20852</b> | <b>CP2A5 Cytochrome P450 2A5</b>                                 | <b>1.17621285</b>  | <b>0.431328</b> | <b>3</b>  |
| P20852        | DFIDSFLIR                                                        | 1.414460889        | 2               | 2.319948  |
| P20852        | DPKFFSNPKDFNPK                                                   | 1.772660931        | 2               | 2.538004  |
| P20852        | EALVDQAEFFSGR                                                    | 0.876019109        | 2               | 3.369677  |
| <b>P21213</b> | <b>HUTH Histidine ammonia_lyase</b>                              | <b>1.292406008</b> | <b>0.84121</b>  | <b>12</b> |
| P21213        | ALDYLAIGVHELAAISER                                               | 1.605978316        | 3               | 4.067576  |
| P21213        | DIITTELNSATDNPVDFASR                                             | 1.308129954        | 2               | 4.219561  |
| P21213        | GETISGGNFHGEYPAK                                                 | 1.126127579        | 2               | 4.134145  |
| P21213        | GEWLAVPCQDGK                                                     | 1.193855691        | 2               | 2.46894   |
| P21213        | GYSGISLETLK                                                      | 1.184142227        | 2               | 2.741279  |
| P21213        | LQELQVNLVR                                                       | 1.293041926        | 2               | 3.177824  |
| P21213        | NKPDNGGFTSVDEVR                                                  | 1.192262945        | 2               | 3.9932    |
| P21213        | SHSSGVGKPLSPER                                                   | 0.8812196          | 2               | 4.37341   |
| P21213        | SLLDSDHHPSEIAESHR                                                | 1.05397726         | 3               | 4.827968  |

|               |                                                           |                    |                 |           |
|---------------|-----------------------------------------------------------|--------------------|-----------------|-----------|
| P21213        | TVVYGITGFGK                                               | 1.032356038        | 2               | 3.295527  |
| P21213        | VWEVAAPYIEK                                               | 1.312334578        | 2               | 2.418866  |
| P21213        | YIALDGDLSLSTEDLVNLGK                                      | 2.14298459         | 2               | 5.15879   |
| <b>P21396</b> | <b>AOFA Amine oxidase [flavin_containing] A</b>           | <b>1.146540613</b> | <b>0.717786</b> | <b>9</b>  |
| P21396        | DVPAIEIHTFLER                                             | 1.620549771        | 2               | 3.372434  |
| P21396        | FVGGSGQVSEQIMGLLGDK                                       | 1.380759691        | 2               | 3.140022  |
| P21396        | IFSVTNGGQER                                               | 1.000337442        | 2               | 2.641504  |
| P21396        | INVLVLEAR                                                 | 1.721419316        | 2               | 3.180335  |
| P21396        | KDIWVEEPESK                                               | 0.971155915        | 2               | 3.300155  |
| P21396        | KICELYAK                                                  | 0.815832467        | 2               | 2.524009  |
| P21396        | VLGSQEALYPVHYEEK                                          | 1.10563919         | 2               | 4.454023  |
| P21396        | WVDVGGAYVGPQNR                                            | 0.984679762        | 2               | 4.506373  |
| P21396        | YVISAIPPILTAKE                                            | 1.37993173         | 2               | 2.948556  |
| <b>P21531</b> | <b>RL3 60S ribosomal protein L3</b>                       | <b>1.834829128</b> | <b>5.68E-14</b> | <b>7</b>  |
| P21531        | AHLMEIQVNGGTVAEK                                          | 1.318852242        | 2               | 5.381459  |
| P21531        | ERLEQQVPVNQVFGQDEMIDVIGVTK                                | 1.719702184        | 3               | 5.285472  |
| P21531        | HGSLGFLPR                                                 | 0.969025845        | 2               | 2.926322  |
| P21531        | LEQQVPVNQVFGQDEMIDVIGVTK                                  | 1.843369589        | 2               | 5.13959   |
| P21531        | NNASTDYDLSDK                                              | 1.062425341        | 2               | 3.700171  |
| P21531        | SINPLGGFVHYGEVTNDFIMLK                                    | 2.179548341        | 2               | 3.638427  |
| P21531        | TVFAEHISDECK                                              | 1.634274809        | 2               | 3.999843  |
| <b>P21533</b> | <b>RL6 60S ribosomal protein L6</b>                       | <b>1.399976472</b> | <b>9.9E-20</b>  | <b>10</b> |
| P21533        | AVDSQILPK                                                 | 1.059180698        | 2               | 2.787864  |
| P21533        | FVIATSTK                                                  | 1.30022975         | 1               | 2.228564  |
| P21533        | HLTDAYFK                                                  | 1.493768682        | 2               | 2.568016  |
| P21533        | HQEGEIFDTEK                                               | 1.467329415        | 2               | 3.365013  |
| P21533        | HQEGEIFDTEKEK                                             | 1.428605006        | 2               | 4.194141  |
| P21533        | HQEGEIFDTEKEYEITEQR                                       | 1.436963381        | 3               | 4.555762  |
| P21533        | QLGSGLLLVGTGPLALNR                                        | 1.448843592        | 2               | 5.196892  |
| P21533        | SQFSLTNGMYPHK                                             | 1.00446293         | 2               | 3.331298  |
| P21533        | SSITPGTVLIILTGR                                           | 2.289232273        | 2               | 4.135162  |
| P21533        | YYPTEDVPR                                                 | 2.576952145        | 1               | 1.995616  |
| <b>P21571</b> | <b>ATP5J ATP synthase_coupling factor 6_mitochondrial</b> | <b>0.928169908</b> | <b>4.92E-05</b> | <b>6</b>  |
| P21571        | FEVLDPKQS                                                 | 0.764694661        | 2               | 2.896924  |
| P21571        | FPTFNFDPKFEVLDPKQS                                        | 1.223813945        | 3               | 3.327766  |
| P21571        | GEMDKFPTFNFDPK                                            | 0.922052658        | 3               | 3.962435  |
| P21571        | GEMDKFPTFNFDPKFEVLDPKQS                                   | 1.082129931        | 3               | 3.831141  |
| P21571        | LASGGPVDTGPEYQQEVDNR                                      | 1.234167381        | 2               | 5.31505   |
| P21571        | LASGGPVDTGPEYQQEVDRELFK                                   | 2.759044444        | 2               | 2.948967  |
| <b>P21643</b> | <b>T23O Tryptophan 2_3_dioxygenase</b>                    | <b>5.046979867</b> | <b>9.9E-20</b>  | <b>9</b>  |
| P21643        | AGTGGSSGYYLR                                              | 3.82219199         | 2               | 2.932857  |
| P21643        | DNFEGDYNELLLK                                             | 1.588882432        | 2               | 3.596245  |
| P21643        | GGLIYGDYLQLEK                                             | 14.5937292         | 2               | 3.62728   |
| P21643        | GLEEEFLK                                                  | 1.630106107        | 1               | 2.245919  |
| P21643        | ILNAQELQSEIK                                              | 6.340529656        | 2               | 3.834261  |
| P21643        | KDSEEKEEQMAEFR                                            | 17.93794383        | 2               | 3.858294  |
| P21643        | NLSMEDNEEDGAQTGVNR                                        | 36.30795981        | 2               | 6.060421  |
| P21643        | YNHVCMVHRMLGSK+Oxidation(5                                | 1.971990865        |                 |           |
| P21643        | YNHVCMVHRMLGSK+Oxidation(9                                | 1.80589622         |                 |           |
| <b>P21670</b> | <b>PSA4 Proteasome subunit alpha type_4</b>               | <b>1.9656356</b>   | <b>0.001963</b> | <b>2</b>  |
| P21670        | ATCIGNNSAAVSMMLK                                          | 1.053933386        | 2               | 3.415352  |
| P21670        | LLDEVFFSEK                                                | 2.037984202        | 2               | 3.375     |
| <b>P21775</b> | <b>THIKA 3_ketoacyl_CoA thiolase A_peroxisomal</b>        | <b>1.117690395</b> | <b>0.578345</b> | <b>2</b>  |
| P21775        | LKPECLGDISVGNVLEPGAGAVMAR                                 | 1.086833337        | 2               | 5.012298  |
| P21775        | LKPECLGDISVGNVLEPGAGAVMAR+Oxidation(22                    | 1.357647491        |                 |           |

|               |                                                                                    |                    |                 |           |
|---------------|------------------------------------------------------------------------------------|--------------------|-----------------|-----------|
| <b>P21913</b> | <b>DHSB Succinate dehydrogenase [ubiquinone] iron_sulfur subunit_mitochondrial</b> | <b>1.346444874</b> | <b>6.09E-08</b> | <b>7</b>  |
| P21913        | CGPMVLDALIK                                                                        | 1.361280585        | 2               | 3.136224  |
| P21913        | CGPMVLDALIKIK                                                                      | 0.528015234        | 2               | 2.617555  |
| P21913        | CHTIMNCTQTCPK                                                                      | 1.507912935        | 2               | 4.481551  |
| P21913        | IDTDLGK                                                                            | 1.110508401        | 1               | 1.913149  |
| P21913        | IKNEIDSTLTFR                                                                       | 1.716427258        | 2               | 2.891634  |
| P21913        | LQDPFSLYR                                                                          | 2.00081159         | 2               | 2.763685  |
| P21913        | RIDTDLGK                                                                           | 1.258225778        | 2               | 2.585951  |
| <b>P21981</b> | <b>TGM2 Protein glutamine gamma glutamyltransferase 2</b>                          | <b>1.17298546</b>  | <b>0.018914</b> | <b>6</b>  |
| P21981        | CDLEIQANGR                                                                         | 1.452710501        | 2               | 2.856411  |
| P21981        | DHHTADLCQEK                                                                        | 0.890717094        | 2               | 2.707641  |
| P21981        | KLVAEVSJK                                                                          | 2.087282077        | 2               | 2.454549  |
| P21981        | SEGTYCCGPVSVR                                                                      | 1.515464612        | 2               | 3.692155  |
| P21981        | VDFPTDIGLHK                                                                        | 0.647613299        | 2               | 2.659267  |
| P21981        | YSGCLTESLJK                                                                        | 1.172425907        | 2               | 3.559706  |
| <b>P22734</b> | <b>COMT Catechol O_methyltransferase</b>                                           | <b>1.09917022</b>  | <b>9.9E-20</b>  | <b>12</b> |
| P22734        | AIYQGPSSPKS                                                                        | 1.025994388        | 2               | 3.347022  |
| P22734        | EWAMNVGDAK                                                                         | 1.69625458         | 1               | 2.884434  |
| P22734        | GQIMDAVIR                                                                          | 1.228975217        | 2               | 2.989397  |
| P22734        | GQIMDAVIR+Oxidation(3                                                              | 1.785356123        |                 |           |
| P22734        | GSSSFECTHYSSYLEYMK                                                                 | 0.924240643        | 2               | 4.43602   |
| P22734        | GTVLLADNVIVPGTDFLAYVR                                                              | 2.330509573        | 3               | 5.044014  |
| P22734        | KGTVLLADNVIVPGTDFLAYVR                                                             | 2.398272834        | 3               | 5.194256  |
| P22734        | KYDVDTLDMVFLDHWK                                                                   | 1.788219155        | 3               | 5.281262  |
| P22734        | VTILNGASQDLIPQLK                                                                   | 1.310629297        | 2               | 4.476315  |
| P22734        | YDVDTLDMVFLDHWK                                                                    | 1.55917039         | 2               | 4.490059  |
| P22734        | YLPDTLLLEK                                                                         | 1.495391811        | 2               | 3.001435  |
| P22734        | YVQQNAKPGDPQSVLEAIDTYCTQK                                                          | 1.405526951        | 3               | 6.466105  |
| <b>P22789</b> | <b>ST2A2 Alcohol sulfotransferase A</b>                                            | <b>1.676103234</b> | <b>0.111447</b> | <b>6</b>  |
| P22789        | EEDLILLTPK                                                                         | 1.925798883        | 2               | 2.997475  |
| P22789        | ETLQNVCKN                                                                          | 2.375759248        | 2               | 2.354265  |
| P22789        | FVKKEEDLILLTPK                                                                     | 2.25087217         | 3               | 3.431701  |
| P22789        | KLEPDELVLK                                                                         | 1.605771553        | 2               | 3.761976  |
| P22789        | LEPDELVLK                                                                          | 1.806463273        | 2               | 2.357396  |
| P22789        | NHFTVAQAEAFDK                                                                      | 1.528244516        | 2               | 3.442972  |
| <b>P22791</b> | <b>HMC2 Hydroxymethylglutaryl_CoA synthase_mitochondrial</b>                       | <b>1.081610071</b> | <b>1.12E-11</b> | <b>23</b> |
| P22791        | ASLDMFNK                                                                           | 1.071818202        | 2               | 2.795781  |
| P22791        | ASLDMFNKK                                                                          | 1.176792553        | 2               | 2.835513  |
| P22791        | DVGILALEVYFPAQYVDQTDLEK                                                            | 1.053482765        | 3               | 5.662047  |
| P22791        | GLKLEETYTNK                                                                        | 3.538404403        | 2               | 2.846511  |
| P22791        | GLKLEETYTNKDVDK                                                                    | 1.182550252        | 3               | 3.370818  |
| P22791        | GTHMENAYDFYKPNLASEYPLVDGK                                                          | 1.212040065        | 3               | 6.966366  |
| P22791        | GTHMENAYDFYKPNLASEYPLVDGK+Oxidation(3                                              | 1.395147199        |                 |           |
| P22791        | IGAFSYGSLAASFFSFR                                                                  | 1.73343827         | 2               | 3.2888    |
| P22791        | LEETYTNK                                                                           | 1.002048925        | 2               | 3.154362  |
| P22791        | LEETYTNKDVDK                                                                       | 1.004340212        | 2               | 4.127285  |
| P22791        | LEVGTETIIDK                                                                        | 0.905150672        | 2               | 3.780823  |
| P22791        | LMFNDFLSSSSDK                                                                      | 1.777962456        | 2               | 4.325021  |
| P22791        | LMFNDFLSSSSDK+Oxidation(1                                                          | 1.433509547        |                 |           |
| P22791        | LMFNDFLSSSSDKQNNLYK                                                                | 1.622654805        | 2               | 4.784518  |
| P22791        | LSIQCYLR                                                                           | 1.11479487         | 2               | 2.443127  |
| P22791        | LVSSVSDLPK                                                                         | 1.335133009        | 2               | 3.451921  |
| P22791        | MGFCSVQEDINSLCLTVVQR                                                               | 1.607735521        | 2               | 4.1632    |
| P22791        | MSPEEFTEIMNQR                                                                      | 0.801013884        | 2               | 4.890848  |

|               |                                                       |                    |                 |           |
|---------------|-------------------------------------------------------|--------------------|-----------------|-----------|
| P22791        | MSPEEFTEIMNQR+Oxidation(0                             | 1.016764417        |                 |           |
| P22791        | MSPEEFTEIMNQR+Oxidation(9                             | 1.098199396        |                 |           |
| P22791        | TKLPWDAVGR                                            | 1.031087848        | 3               | 4.011916  |
| P22791        | VNFSPPGDTSNLFPGTWYLER                                 | 1.256081895        | 2               | 4.459269  |
| P22791        | YTVGLGQTR                                             | 1.131561783        | 2               | 3.446344  |
| <b>P22985</b> | <b>XDH Xanthine dehydrogenase/oxidase</b>             | <b>1.532744856</b> | <b>9.9E-20</b>  | <b>10</b> |
| P22985        | DEVTCVGHIGAVVADTPEHAQR                                | 1.283211287        | 3               | 3.821598  |
| P22985        | DGGCCGGSGNNPNCCMNQTK                                  | 1.714167025        | 2               | 5.751899  |
| P22985        | DPPANVQLFQEVPK                                        | 1.476119699        | 2               | 2.881377  |
| P22985        | LDPTFASATLLFQK                                        | 1.512733234        | 2               | 3.80933   |
| P22985        | NQPEPTVEEIEENAFQGNLCR                                 | 1.514723247        | 2               | 5.084301  |
| P22985        | QLFQLDSPATPEK                                         | 1.00720612         | 2               | 3.426797  |
| P22985        | SVASIGGNIITASPIDLNPVFMASGAK                           | 1.489951924        | 3               | 5.206497  |
| P22985        | TGTVVALEVAHFSNGGNTEDLSR                               | 1.607871365        | 3               | 5.30885   |
| P22985        | TLLRPEEILLSIEIPYSK                                    | 1.127351418        | 3               | 4.464454  |
| P22985        | TNLPSENTAFR                                           | 1.605596997        | 1               | 2.045998  |
| <b>P23358</b> | <b>RL12 60S ribosomal protein L12</b>                 | <b>1.649361351</b> | <b>1.41E-08</b> | <b>5</b>  |
| P23358        | CTGGEVGTASALAPK                                       | 1.166324517        | 2               | 4.130478  |
| P23358        | EILGTAQSVGCNVDGR                                      | 1.656965252        | 2               | 4.500772  |
| P23358        | HNGNITFDEIVNIAR                                       | 1.668350968        | 2               | 3.853965  |
| P23358        | HPHDIIDDINGAVECPAS                                    | 0.99866517         | 2               | 4.555913  |
| P23358        | QAQIEVVPASALIHK                                       | 1.878153431        | 2               | 3.845843  |
| <b>P23457</b> | <b>DIDH 3_alpha_hydroxysteroid dehydrogenase</b>      | <b>1.133218071</b> | <b>9.9E-20</b>  | <b>10</b> |
| P23457        | ALDGLNR                                               | 1.15207457         | 2               | 2.392593  |
| P23457        | ELTQVFEFLASEDMK                                       | 1.814548427        | 2               | 4.134054  |
| P23457        | HFDSAYLYEVEEVEGQAIR                                   | 1.487904915        | 2               | 5.999561  |
| P23457        | MLDYCK                                                | 1.473401461        | 1               | 2.147129  |
| P23457        | SIGVSNFNCR                                            | 1.190229672        | 2               | 3.405276  |
| P23457        | SKDIILVSYCTLGSSR                                      | 0.774607588        | 2               | 4.442013  |
| P23457        | SPVLLDDPVLCIAIK                                       | 1.092840451        | 2               | 4.213246  |
| P23457        | VALNDGNFIPVLGFGTTVPEK                                 | 1.579457643        | 2               | 4.860663  |
| P23457        | YFDDHPNHPFTDE                                         | 1.303962718        | 2               | 4.190112  |
| P23457        | YKPVCNQVECHLYLNQSK                                    | 0.529135845        | 2               | 4.63768   |
| <b>P23514</b> | <b>COPB Coatomer subunit beta</b>                     | <b>1.385753071</b> | <b>6.94E-09</b> | <b>8</b>  |
| P23514        | EAGELKPEEITVGPVQK                                     | 1.040273397        | 2               | 4.082841  |
| P23514        | LVEKPSPLTAPHDFANIK                                    | 1.493014722        | 3               | 3.729482  |
| P23514        | NFENLIPDAPELIHDFLVNEK                                 | 1.442045395        | 3               | 4.803425  |
| P23514        | TLQLALDLVSSR                                          | 1.373945492        | 2               | 3.411503  |
| P23514        | TNNVSEHEDTDKYR                                        | 1.735847001        | 2               | 3.814476  |
| P23514        | VLQDLVMDILR                                           | 1.602830703        | 2               | 3.520522  |
| P23514        | VLSECSPLMNDIFNK                                       | 1.251940885        | 2               | 2.863657  |
| P23514        | YEAAGTLVTLSSAPTAIK                                    | 1.555922211        | 2               | 5.290037  |
| <b>P23739</b> | <b>SUIS Sucrase_isomaltase_intestinal</b>             | <b>1.016075829</b> | <b>0.946391</b> | <b>2</b>  |
| P23739        | LPGFGFNDQFIQISTR                                      | 1.015961009        | 2               | 2.4404    |
| P23739        | RMMTLNYPVFSPELR+Oxidation(1                           | 1.177782368        |                 |           |
| <b>P23965</b> | <b>EC11 Enoyl_CoA delta isomerase 1_mitochondrial</b> | <b>1.132501837</b> | <b>5.41E-13</b> | <b>10</b> |
| P23965        | ALQLGTLFPPAEALK                                       | 1.372139702        | 2               | 5.296002  |
| P23965        | ATADNLK                                               | 1.074339782        | 2               | 2.767118  |
| P23965        | AVQELWLR                                              | 1.883118614        | 2               | 2.72062   |
| P23965        | DNYVNTIGHR                                            | 1.469217239        | 2               | 2.679685  |
| P23965        | EGEAGIAMK                                             | 1.234742661        | 1               | 2.002609  |
| P23965        | GVILTSEKPGIFSGLDLMMEMYGR                              | 2.015988345        | 3               | 5.499359  |
| P23965        | QREADIQNFTSFISR                                       | 1.085828841        | 2               | 3.047743  |
| P23965        | SLHVYLEK                                              | 0.81219311         | 1               | 2.1486    |
| P23965        | VGLVDEVVPEDQVHSK                                      | 1.144162843        | 2               | 4.867299  |
| P23965        | WFTIPDHSR                                             | 0.911918121        | 1               | 1.961597  |
| <b>P24049</b> | <b>RL17 60S ribosomal protein L17</b>                 | <b>1.712927409</b> | <b>5.52E-06</b> | <b>4</b>  |

|               |                                                   |                    |                 |           |
|---------------|---------------------------------------------------|--------------------|-----------------|-----------|
| P24049        | EQIVPKPEEEVAQK                                    | 1.235444183        | 2               | 3.817396  |
| P24049        | GLDVDSLVIIEHIQVNK                                 | 1.759093974        | 2               | 4.39192   |
| P24049        | SAEFLHMLK                                         | 2.573906121        | 2               | 2.847092  |
| P24049        | YSLDPENPTK                                        | 1.155352869        | 2               | 2.605978  |
| <b>P24050</b> | <b>RS5 40S ribosomal protein S5</b>               | <b>1.947803719</b> | <b>3.17E-05</b> | <b>5</b>  |
| P24050        | AQCPIVER                                          | 1.551952787        | 2               | 2.313868  |
| P24050        | QAVDVSPLR                                         | 3.609538604        | 2               | 2.316564  |
| P24050        | RQAVDVSPLR                                        | 1.74353461         | 2               | 2.330836  |
| P24050        | VNQAIWLLCTGAR                                     | 1.954340593        | 2               | 4.2079    |
| P24050        | WSTDDVQINDISLQDYIAVK                              | 3.734058704        | 2               | 4.82144   |
| <b>P24090</b> | <b>FETUA Alpha_2_HS glycoprotein</b>              | <b>0.808309012</b> | <b>0.164971</b> | <b>6</b>  |
| P24090        | ELACDDPETEHVALIAVDYLNK                            | 0.771118206        | 2               | 4.280798  |
| P24090        | HAFSPVASVESASGEVLHSPK                             | 1.103069977        | 3               | 6.057868  |
| P24090        | LGGEVSVACK                                        | 0.976783414        | 2               | 3.712094  |
| P24090        | VGQPGDAGAAGPVAPLCPGR                              | 0.948889754        | 2               | 5.209847  |
| P24090        | VLHAQCHSTPDSAEDVR                                 | 1.250100706        | 3               | 3.42023   |
| P24090        | VLHAQCHSTPDSAEDVRK                                | 1.843324762        | 3               | 4.018685  |
| <b>P24268</b> | <b>CATD Cathepsin D</b>                           | <b>1.570654972</b> | <b>1.46E-09</b> | <b>4</b>  |
| P24268        | AIGAVPLIQGEYMIPCEK                                | 1.83632536         | 2               | 3.31334   |
| P24268        | DPTGQPGGELMLGGTDSR                                | 0.776414174        | 2               | 4.738847  |
| P24268        | GGCEAIVDTGTSLLVGPVDEVK                            | 1.055119348        | 3               | 3.502074  |
| P24268        | LGGQNYELHPEK                                      | 2.264175298        | 2               | 3.245731  |
| <b>P24329</b> | <b>THTR Thiosulfate sulfurtransferase</b>         | <b>1.026391124</b> | <b>0.975397</b> | <b>12</b> |
| P24329        | EGHPVTSEPSRPEPAVFK                                | 1.138177045        | 2               | 4.573226  |
| P24329        | FQLVDSR                                           | 0.774869697        | 2               | 2.389337  |
| P24329        | GSVNVPFMFLTEDGFVK                                 | 1.45110911         | 2               | 3.257531  |
| P24329        | HVPGASFFDIEEER                                    | 1.295487763        | 2               | 4.104652  |
| P24329        | KVDLSQPLIATCR                                     | 0.866366735        | 2               | 4.65795   |
| P24329        | RFQLVDSR                                          | 0.813464658        | 2               | 2.496114  |
| P24329        | TVSVLNGGFR                                        | 1.106075342        | 2               | 2.915481  |
| P24329        | TYEQVLENLQSK                                      | 1.037515403        | 2               | 5.076224  |
| P24329        | VDLSQPLIATCR                                      | 1.160846279        | 2               | 3.731257  |
| P24329        | VLDASWYSPGTR                                      | 1.891113591        | 2               | 3.63676   |
| P24329        | WLAESIR                                           | 1.502083316        | 2               | 2.37692   |
| P24329        | YLGTOPEPDAVGLDSGHIR                               | 1.033702466        | 3               | 4.798242  |
| <b>P24368</b> | <b>PPIB Peptidyl_prolyl cis_trans isomerase B</b> | <b>1.575131225</b> | <b>0.01354</b>  | <b>9</b>  |
| P24368        | DKPLKDVIIVDCGK                                    | 1.243847114        | 3               | 3.824583  |
| P24368        | DTNGSQFFITTVK                                     | 1.24719744         | 2               | 3.831807  |
| P24368        | DVIIVDCGK                                         | 0.786486417        | 1               | 1.989922  |
| P24368        | HYGPGWVSMANAGK                                    | 9.574341006        | 2               | 4.007035  |
| P24368        | IEVEKPFAIAK                                       | 1.053068961        | 2               | 3.092169  |
| P24368        | IEVEKPFAIAKE                                      | 1.340951116        | 2               | 3.61651   |
| P24368        | TVDNFVALATGEK                                     | 1.191042378        | 2               | 4.100255  |
| P24368        | VLEGMDVVR                                         | 1.507042645        | 2               | 3.040464  |
| P24368        | VYFDFQIGDEPVGR                                    | 1.831642696        | 2               | 4.105346  |
| <b>P24457</b> | <b>CP2DB Cytochrome P450 2D11</b>                 | <b>0.957760866</b> | <b>0.196245</b> | <b>2</b>  |
| P24457        | RFSVSTLR                                          | 0.800067155        | 2               | 2.564001  |
| P24457        | SLEEWVTK                                          | 1.792620691        | 2               | 2.460664  |
| <b>P24470</b> | <b>CP2CN Cytochrome P450 2C23</b>                 | <b>1.150589919</b> | <b>1.8E-05</b>  | <b>12</b> |
| P24470        | ACVGESLAR                                         | 1.402654854        | 2               | 2.756069  |
| P24470        | DLDIKPITGGIINLPPPYK                               | 1.112228456        | 2               | 3.869002  |
| P24470        | EALLQQGDEFLGR                                     | 0.767702895        | 2               | 2.69954   |
| P24470        | FGLLLMK                                           | 1.608242385        | 2               | 3.087009  |
| P24470        | GTTVLPMLSSVMLDQK                                  | 1.442249067        | 2               | 3.981119  |
| P24470        | GYGLIFSNGER                                       | 1.208899398        | 2               | 3.793898  |
| P24470        | IEEEKDNLK                                         | 0.999742805        | 2               | 3.014717  |
| P24470        | LPPGPTPLPIIGNLLQLNLK                              | 1.227344204        | 3               | 5.056924  |

|               |                                                                                      |                    |                 |           |
|---------------|--------------------------------------------------------------------------------------|--------------------|-----------------|-----------|
| P24470        | RSLEERVQEEAR                                                                         | 1.113801038        | 2               | 2.491975  |
| P24470        | SEFHLENLAVCGSNLFTAGTETTSTTLR                                                         | 1.742923228        | 3               | 3.784114  |
| P24470        | TFLNLMDLLNK                                                                          | 1.801328901        | 2               | 3.995301  |
| P24470        | YITLLPSSLPHAVVQDTK                                                                   | 0.943406151        | 2               | 4.585886  |
| <b>P24473</b> | <b>GSTK1 Glutathione S_transferase kappa 1</b>                                       | <b>1.163610824</b> | <b>4.05E-12</b> | <b>8</b>  |
| P24473        | AGMATAQAQHLLNK                                                                       | 1.187780999        | 2               | 4.191675  |
| P24473        | DEDITESQNILSAAEK                                                                     | 1.214423238        | 2               | 5.845017  |
| P24473        | DSGNQPPAMVPHK                                                                        | 1.56574645         | 2               | 2.754972  |
| P24473        | FLTAVSMEQPEMLEK                                                                      | 1.213896081        | 2               | 4.87768   |
| P24473        | IWSRDEDITESQNILSAAEK                                                                 | 2.034084948        | 3               | 3.679632  |
| P24473        | MELLAYLLGEK                                                                          | 1.638076714        | 2               | 3.859443  |
| P24473        | QLFQVPMSVPK                                                                          | 0.838881708        | 2               | 2.55549   |
| P24473        | YGAFGLPTTVAHVDGK                                                                     | 0.8547165          | 2               | 4.048415  |
| <b>P25093</b> | <b>FAAA Fumarylacetoacetase</b>                                                      | <b>1.126723747</b> | <b>9.9E-20</b>  | <b>16</b> |
| P25093        | AIDVGGQQR                                                                            | 1.096056921        | 2               | 3.464326  |
| P25093        | AQEHIFGMVLMNDWSAR                                                                    | 2.531659687        | 2               | 3.853046  |
| P25093        | ASLQNLLSASQAQLR                                                                      | 1.098579698        | 2               | 4.884591  |
| P25093        | ASLQNLLSASQAQLRDDK                                                                   | 1.614233031        | 2               | 3.58822   |
| P25093        | ASSVVVSGTPIR                                                                         | 1.10418075         | 2               | 3.83348   |
| P25093        | DIQQWEYVPLGPFLLGK                                                                    | 1.363565748        | 2               | 4.992272  |
| P25093        | FGPEPIISK                                                                            | 1.126556088        | 2               | 2.893934  |
| P25093        | GEGMSQAATICR                                                                         | 1.358092694        | 2               | 3.748846  |
| P25093        | GEGMSQAATICR+Oxidation(3                                                             | 1.216211462        |                 |           |
| P25093        | GKENALLPNWLHLPVGYHGR                                                                 | 1.410489301        | 4               | 4.534149  |
| P25093        | HLFTGPVLSK                                                                           | 1.51082833         | 1               | 2.731852  |
| P25093        | HQHVFDETTLNSFMGLGQAAWK                                                               | 1.358159103        | 2               | 5.423573  |
| P25093        | IGVAIGDQILDLSVIK                                                                     | 1.934167256        | 2               | 5.403927  |
| P25093        | SFGTTISPWVVPMDALMPFVVPNPK                                                            | 1.179521168        |                 |           |
| P25093        | TFLLDGDEVIIIGHCQGDGYR                                                                | 1.544919652        | 2               | 5.073804  |
| P25093        | VGFGQCAGK                                                                            | 0.392166262        | 2               | 2.35363   |
| <b>P25113</b> | <b>PGAM1 Phosphoglycerate mutase 1</b>                                               | <b>1.251828111</b> | <b>0.673189</b> | <b>7</b>  |
| P25113        | ALPFWNEEIVPQIK                                                                       | 1.175892032        | 2               | 3.509002  |
| P25113        | FSGWYDADLSPAGHEEAK                                                                   | 1.144809431        | 2               | 5.070369  |
| P25113        | FSGWYDADLSPAGHEEAKR                                                                  | 1.325956789        | 2               | 4.2297    |
| P25113        | HGESAWNLENR                                                                          | 1.252152946        | 2               | 3.787056  |
| P25113        | SYDVPPPPMEPDHPFYSNISK                                                                | 1.224182906        | 2               | 3.802812  |
| P25113        | YADLTEDQLPSCESLK                                                                     | 0.99510253         | 2               | 5.364097  |
| P25113        | YADLTEDQLPSCESLKDIAR                                                                 | 1.331980226        | 2               | 5.067235  |
| <b>P25235</b> | <b>RPN2 Dolichyl_diphosphooligosaccharide__protein glycosyltransferase subunit 2</b> | <b>1.140404463</b> | <b>9.9E-20</b>  | <b>15</b> |
| P25235        | EDQVIQLMNTIFSK                                                                       | 1.302458354        | 2               | 3.883828  |
| P25235        | EETVLATVQALHTASHLSQQADLR                                                             | 1.729869242        | 3               | 5.077978  |
| P25235        | FELDTSER                                                                             | 1.090239564        | 1               | 2.394733  |
| P25235        | FPEEEAPSTVLSQNLFTPK                                                                  | 1.145711538        | 2               | 3.837504  |
| P25235        | ISTEVGITNVDLSTVDKQSIAPK                                                              | 1.37680073         | 2               | 4.687008  |
| P25235        | KNFESLSEAFSVASAAAALSQNR                                                              | 1.670694964        | 2               | 5.440873  |
| P25235        | LMDHVGTEPSIKEDQVIQLMNTIFSK                                                           | 1.315936295        | 3               | 5.14101   |
| P25235        | LQVSSVLSQPLAAAVK                                                                     | 1.791603981        | 2               | 5.847798  |
| P25235        | LSKEETVLATVQALHTASHLSQQADLR                                                          | 2.044367621        | 3               | 5.564164  |
| P25235        | NFESLSEAFSVASAAAALSQNR                                                               | 2.244605432        | 3               | 4.905325  |
| P25235        | NIVEEIEDLVAR                                                                         | 1.31065358         | 3               | 4.632297  |
| P25235        | NPILWNVADVVIK                                                                        | 0.972894759        | 2               | 3.257379  |
| P25235        | TGQEVVFAEPDNK                                                                        | 0.943110087        | 2               | 4.325447  |
| P25235        | YHVPVVVPEGSASDTQEAILR                                                                | 1.234492961        | 3               | 6.398319  |
| P25235        | YIANTVELR                                                                            | 1.501720114        | 2               | 2.827023  |
| <b>P25318</b> | <b>chain</b>                                                                         | <b>1.267835558</b> | <b>0.066486</b> | <b>3</b>  |

|               |                                                                                          |                    |                 |           |
|---------------|------------------------------------------------------------------------------------------|--------------------|-----------------|-----------|
| P25318        | GEKGFMPGLPGLK+Oxidation(6)                                                               | 1.248703226        |                 |           |
| P25318        | GQYLEMPLPMLPMDLKGEPGPPGKPGPR+Oxidation(5)Oxidation(12)                                   | 1.270090024        |                 |           |
| P25318        | GQYLEMPLPMLPMDLKGEPGPPGKPGPR+Oxidation(5)Oxidation(9)                                    | 1.270090024        |                 |           |
| <b>P25409</b> | <b>ALAT1 Alanine aminotransferase 1</b>                                                  | <b>1.080039247</b> | <b>0.940345</b> | <b>3</b>  |
| P25409        | LTEQVFNEAPGIR                                                                            | 1.083950303        | 2               | 2.914719  |
| P25409        | VLCVINPGNPTGQVQTR                                                                        | 0.906041265        | 2               | 4.501179  |
| P25409        | VLTLDTMNPVCR                                                                             | 1.268059617        | 2               | 2.502423  |
| <b>P26039</b> | <b>TLN1 Talin_1</b>                                                                      | <b>1.276359912</b> | <b>2E-08</b>    | <b>24</b> |
| P26039        | ADAEGESDLENSR                                                                            | 1.56901909         | 2               | 3.626325  |
| P26039        | ADAEGESDLENSRK                                                                           | 1.420500898        | 2               | 3.20415   |
| P26039        | AGALQCSPSDVYTK                                                                           | 1.232641558        | 2               | 2.688327  |
| P26039        | ALEATTEHIR                                                                               | 1.254415681        | 2               | 2.365054  |
| P26039        | AQEACGPLEMDSALSVVQNLEK                                                                   | 1.442517526        | 2               | 4.491464  |
| P26039        | ASAGPQPLLVSCK                                                                            | 1.229317696        | 2               | 2.871083  |
| P26039        | ASVPTIQDQASAMQLSQCAK                                                                     | 0.79353427         | 2               | 3.365744  |
| P26039        | AVAEQIPLLQGVCR                                                                           | 1.38509678         | 2               | 3.062533  |
| P26039        | EAAEGLRMATNAAAQNAIKK                                                                     | 1.150728798        | 2               | 2.654973  |
| P26039        | ILAQATSDLVNAIK                                                                           | 2.334773423        | 2               | 3.297559  |
| P26039        | LGAASLGAEDPETQVVLINAVK                                                                   | 1.713987716        | 2               | 4.272346  |
| P26039        | LLGEIAQGNENYAGIAAR                                                                       | 0.886522596        | 2               | 4.213369  |
| P26039        | LNEAAAGLNQAATELVQASR                                                                     | 1.334733344        | 2               | 5.113737  |
| P26039        | MATNAAAQNAIK                                                                             | 0.867634965        | 2               | 2.710288  |
| P26039        | NCGQMSEIEAK                                                                              | 1.389455906        | 2               | 2.940279  |
| P26039        | QFVQSAKEVANSTANLVK                                                                       | 1.181976335        | 2               | 2.395279  |
| P26039        | SNTSPEELGPLANQLTSDYGR                                                                    | 0.97128831         | 2               | 4.055459  |
| P26039        | TLAESALQLLYTAK                                                                           | 2.024672811        | 2               | 2.709065  |
| P26039        | TMLESAGGLIQTAR                                                                           | 0.978307882        | 2               | 2.618257  |
| P26039        | VGAIPANALDDGQWSQGLISAAR                                                                  | 1.325129045        | 2               | 5.05663   |
| P26039        | VGDDPAVWQLK                                                                              | 0.939839661        | 2               | 3.279398  |
| P26039        | VLGEAMTGISQNAK                                                                           | 1.071470276        | 2               | 3.329312  |
| P26039        | VLVQNAAGSQEK                                                                             | 1.377460518        | 2               | 3.150865  |
| P26039        | VVAPTISPPVCQEQLVEAGR                                                                     | 0.90612624         | 2               | 4.609031  |
| <b>P26043</b> | <b>RADI Radixin</b>                                                                      | <b>1.367866729</b> | <b>8.22E-15</b> | <b>11</b> |
| P26043        | AFAAQEDLEK                                                                               | 1.118380077        | 2               | 3.020972  |
| P26043        | ALELEQER                                                                                 | 1.137740232        | 2               | 2.470081  |
| P26043        | EIHKPGYLANDR                                                                             | 1.827377234        | 2               | 2.405591  |
| P26043        | FFPEDVSEELIQEITQR                                                                        | 1.658184245        | 3               | 4.096204  |
| P26043        | IQNWHEEHR                                                                                | 0.991245632        | 2               | 2.480586  |
| P26043        | KKEEEATEWQHK                                                                             | 0.408072874        | 3               | 4.192433  |
| P26043        | KTQNDVLHAENVK                                                                            | 1.409887252        | 2               | 5.060863  |
| P26043        | NQEQLAAELAEFTAK                                                                          | 1.67797344         | 2               | 5.100673  |
| P26043        | QLQALSSELAQAR                                                                            | 1.048349605        | 2               | 4.042141  |
| P26043        | RKPDTIEVQQMK                                                                             | 1.343822511        | 2               | 3.74671   |
| P26043        | TQNDVLHAENVK                                                                             | 1.216987294        | 2               | 4.114049  |
| <b>P26231</b> | <b>CTNA1 Catenin alpha_1</b>                                                             | <b>1.345495093</b> | <b>2.91E-10</b> | <b>8</b>  |
| P26231        | LIEVANLACSISNNEEGVK                                                                      | 2.25320098         | 2               | 5.262959  |
| P26231        | LLEPLVTQVTTLVNTNSK                                                                       | 1.427095135        | 2               | 4.121065  |
| P26231        | NTSDVISAAC                                                                               | 1.354611384        | 2               | 2.393048  |
| P26231        | QIIVDPLSFSEER                                                                            | 1.611980135        | 2               | 2.882873  |
| P26231        | SAAGEFADDPCCSSVK                                                                         | 0.991173699        | 2               | 4.39154   |
| P26231        | SDALNSAIDK                                                                               | 1.497005713        | 2               | 2.877034  |
| P26231        | TIADHCPDSACK                                                                             | 0.832289857        | 2               | 3.519769  |
| P26231        | VIHVVTSEMDNYEPGVYTEK                                                                     | 1.321922085        | 3               | 4.171963  |
| <b>P26284</b> | <b>ODPA Pyruvate dehydrogenase E1 component subunit alpha_somatic form_mitochondrial</b> | <b>1.165204058</b> | <b>0.435848</b> | <b>10</b> |

|               |                                                            |                    |                 |          |
|---------------|------------------------------------------------------------|--------------------|-----------------|----------|
| P26284        | AILAELTGR                                                  | 1.312897158        | 2               | 2.691204 |
| P26284        | EEIQEVRSK                                                  | 0.954927935        | 1               | 1.938042 |
| P26284        | GFCHLCDGQEACCVGLEAGINPTDHLITAYR                            | 1.251211498        | 3               | 6.513037 |
| P26284        | LEEGPPVTTVLTR                                              | 1.294038476        | 2               | 3.513348 |
| P26284        | MVNSNLASVEELK                                              | 1.076078172        | 2               | 2.919255 |
| P26284        | MVNSNLASVEELKEIDVEVR                                       | 1.463734745        | 2               | 4.364052 |
| P26284        | NFYGGNGIVGAQVPLGAGIALACK                                   | 1.362837492        | 2               | 4.200545 |
| P26284        | RGDFIPGLR                                                  | 1.581524015        | 2               | 2.358117 |
| P26284        | TREEIQEVR                                                  | 1.164447008        | 3               | 3.555892 |
| P26284        | VDGMDILCVR                                                 | 1.649155329        | 2               | 3.435465 |
| <b>P26376</b> | <b>IFM3 Interferon_induced transmembrane protein 3</b>     | <b>0.82465668</b>  | <b>0.48923</b>  | <b>2</b> |
| P26376        | IKEEYEVSELGAPHGSASVR                                       | 1.583942574        | 3               | 4.082586 |
| P26376        | KMVGDMTGAQYASTAK+Oxidation(5                               | 0.746527381        |                 |          |
| <b>P26453</b> | <b>BASI Basigin</b>                                        | <b>1.444059444</b> | <b>1.09E-05</b> | <b>7</b> |
| P26453        | GNINVEGPPR                                                 | 1.445068032        | 2               | 3.481402 |
| P26453        | KSEHASEGEFVK                                               | 0.698947504        | 3               | 3.40795  |
| P26453        | RKPDQTLDEDDPGAAPLK                                         | 1.347442658        | 3               | 4.00201  |
| P26453        | SEASHPPVDEWVWFK                                            | 1.62195425         | 2               | 3.288069 |
| P26453        | SEHASEGEFVK                                                | 1.398363035        | 3               | 3.741488 |
| P26453        | SGEYSCIFLPEPVGR                                            | 1.535815371        | 2               | 3.618756 |
| P26453        | VLQEDTLPDLQMK                                              | 1.500316634        | 2               | 4.115759 |
| <b>P26516</b> | <b>PSD7 26S proteasome non_ATPase regulatory subunit 7</b> | <b>1.696383588</b> | <b>0.412515</b> | <b>2</b> |
| P26516        | SVVALHNLINNK                                               | 2.213628362        | 2               | 2.76135  |
| P26516        | TFEHTVSEIGAEAEVGVHLLR                                      | 1.610696534        | 3               | 4.495963 |
| <b>P26772</b> | <b>CH10 10 kDa heat shock protein_mitochondrial</b>        | <b>0.871212795</b> | <b>0.936722</b> | <b>7</b> |
| P26772        | GGEIQPVSVK                                                 | 1.150931273        | 2               | 3.469545 |
| P26772        | GGIMLPEK                                                   | 1.137278155        | 2               | 2.666815 |
| P26772        | GGIMLPEK+Oxidation(3                                       | 1.244910061        |                 |          |
| P26772        | GKGGEIQPVSVK                                               | 1.08671342         | 2               | 3.417467 |
| P26772        | VLLPEYGGTK                                                 | 1.04995548         | 2               | 2.372341 |
| P26772        | VLQATVVAVGSGGK                                             | 1.139441081        | 2               | 5.391181 |
| P26772        | VVLDDKDYFLFR                                               | 0.772708238        | 3               | 3.692116 |
| <b>P27139</b> | <b>CAH2 Carbonic anhydrase 2</b>                           | <b>1.295894899</b> | <b>0.528945</b> | <b>4</b> |
| P27139        | AVQHPDGLAVLGIFLK                                           | 1.877261295        | 2               | 3.984617 |
| P27139        | IGPASQGLQK                                                 | 1.106687547        | 2               | 3.517799 |
| P27139        | ITEALHSIK                                                  | 1.546099889        | 2               | 2.456688 |
| P27139        | QSPVDIDTGTQAQHDPSLQPLLCYDK                                 | 2.52967372         | 3               | 3.405724 |
| <b>P27321</b> | <b>ICAL Calpastatin</b>                                    | <b>1.104780332</b> | <b>0.242289</b> | <b>5</b> |
| P27321        | GSDEVTASSAATGTSPR                                          | 2.857181774        | 2               | 4.268798 |
| P27321        | KGSDEVTASSAATGTSPR                                         | 1.334162643        | 2               | 5.210084 |
| P27321        | KVEEEVMNDQALQALSDSLGR                                      | 2.05061319         | 3               | 3.67625  |
| P27321        | LSAAVSETVSQVPAPSNTAAPPPTER                                 | 1.103947096        | 3               | 4.645947 |
| P27321        | SQSSEPPVIHEK                                               | 0.823881934        | 2               | 3.504628 |
| <b>P27364</b> | <b>3BHS5 3 beta_hydroxysteroid dehydrogenase type 5</b>    | <b>0.983930723</b> | <b>0.459697</b> | <b>6</b> |
| P27364        | AVLAANGSILK                                                | 1.168914478        | 2               | 2.993024 |
| P27364        | ETILNDREEEHR                                               | 1.161665872        | 2               | 2.929133 |
| P27364        | GDIVDAQFLR                                                 | 1.10600353         | 2               | 3.059942 |
| P27364        | IVQMLVQEK                                                  | 2.095210752        | 2               | 2.617155 |
| P27364        | NGGTFHTCALR                                                | 0.420187037        | 2               | 2.604505 |
| P27364        | QTILDVNVK                                                  | 1.077092335        | 2               | 2.387791 |
| <b>P27605</b> | <b>HPRT Hypoxanthine_guanine phosphoribosyltransferase</b> | <b>1.229302373</b> | <b>5.79E-06</b> | <b>6</b> |
| P27605        | DLNHVCVISESGK                                              | 0.979668931        | 2               | 3.435813 |
| P27605        | FFADLLDYIK                                                 | 1.980193618        | 2               | 3.549659 |



|               |                                                        |                    |                 |           |
|---------------|--------------------------------------------------------|--------------------|-----------------|-----------|
| P27605        | NVLIVEDIIDTGK                                          | 0.987113105        | 2               | 3.861195  |
| P27605        | SVGYRPFVGFPEIPDK                                       | 1.159739745        | 3               | 4.031015  |
| P27605        | SYCNDDQSTGDIK                                          | 1.244306389        | 2               | 4.008319  |
| P27605        | VIGGDDLSTLTGK                                          | 0.886694814        | 2               | 4.36202   |
| <b>P27653</b> | <b>C1TC C_1 tetrahydrofolate synthase_ cytoplasmic</b> | <b>1.042374119</b> | <b>0.006732</b> | <b>17</b> |
| P27653        | ASQAPSSFQLLYDLK                                        | 1.56711234         | 2               | 3.97226   |
| P27653        | AYTEEDLDLVEK                                           | 0.464055947        | 2               | 3.193828  |
| P27653        | GDILVVATGQPEMVK                                        | 1.588412231        | 2               | 2.502603  |
| P27653        | GEWIKPGAVVIDCGINYPDDTKPNGR                             | 1.01040294         | 3               | 4.792505  |
| P27653        | IFHELTQTDK                                             | 1.340529348        | 3               | 3.478808  |
| P27653        | ITIGQAPTEK                                             | 1.345945395        | 2               | 2.438868  |
| P27653        | YGADDIELLPEAQNK                                        | 1.491416729        | 2               | 4.993477  |
| P27653        | KITIGQAPTEK                                            | 0.959299197        | 2               | 2.869341  |
| P27653        | KVVGDVAYDEAK                                           | 1.073173458        | 2               | 3.702427  |
| P27653        | LDIDPETITWQR                                           | 1.074630545        | 2               | 3.829334  |
| P27653        | MHGGGPTVTAGLPLPK                                       | 0.93903828         | 2               | 3.812268  |
| P27653        | QGFGNLPICMAK                                           | 1.222080428        | 2               | 2.788481  |
| P27653        | TADLDKEVNKGDIILVVATGQPEMVK                             | 1.602314558        | 3               | 5.597878  |
| P27653        | TDPAALTDDEINR                                          | 1.03885615         | 2               | 4.096861  |
| P27653        | THLSLSHNPEQK                                           | 0.999393385        | 2               | 3.850346  |
| P27653        | VVGDVAYDEAK                                            | 1.332944795        | 2               | 3.40638   |
| P27653        | YVVVTGITPTPLGEGK                                       | 1.271745936        | 2               | 4.822294  |
| <b>P27657</b> | <b>LIPP Pancreatic triacylglycerol lipase</b>          | <b>1.225619604</b> | <b>0.38467</b>  | <b>2</b>  |
| P27657        | ATYQATQNVNR                                            | 1.127740794        | 2               | 2.962993  |
| P27657        | NILSQIVDIDGIWEGTR                                      | 1.709330007        | 2               | 2.93919   |
| <b>P27661</b> | <b>H2AX Histone H2A.x</b>                              | <b>1.269133072</b> | <b>0.008877</b> | <b>3</b>  |
| P27661        | AGLQFPVGR                                              | 0.967337455        | 2               | 3.225393  |
| P27661        | HLQLAIR                                                | 1.239887521        | 2               | 2.710006  |
| P27661        | LLGGVTIAQGGVLPNIQAVLLPK                                | 1.558249877        | 2               | 4.394127  |
| <b>P27768</b> | <b>TNNI2 Troponin I_ fast skeletal muscle</b>          | <b>2.143333115</b> | <b>0.705367</b> | <b>4</b>  |
| P27768        | ELEDMNQK                                               | 2.793765508        | 2               | 2.307754  |
| P27768        | IDAAEEKYDMEVK                                          | 2.456990651        | 2               | 3.252158  |
| P27768        | SVMLQIAATELEK                                          | 1.665067825        | 2               | 2.92447   |
| P27768        | SVMLQIAATELEKEESR                                      | 1.872350923        | 2               | 3.68925   |
| <b>P27867</b> | <b>DHSO Sorbitol dehydrogenase</b>                     | <b>1.306841538</b> | <b>6.87E-09</b> | <b>14</b> |
| P27867        | AMGASQVVVIDLSASR                                       | 1.469930767        | 2               | 4.07644   |
| P27867        | AVEAFETAK                                              | 1.345707657        | 1               | 1.949219  |
| P27867        | EVGADFTIQVAK                                           | 2.182807928        | 2               | 3.156653  |
| P27867        | GENLSLVVHGPGDIR                                        | 1.126008679        | 2               | 3.81485   |
| P27867        | HSADFCYK                                               | 1.222005377        | 2               | 2.906139  |
| P27867        | IGDFVVK                                                | 1.510951567        | 2               | 2.472324  |
| P27867        | LENYPIPELGPNVLLK                                       | 0.953340496        | 2               | 4.88393   |
| P27867        | LPDSVTFEEGALIEPLSVGIYACR                               | 1.399877053        | 3               | 4.1149    |
| P27867        | MHSVGICGSDVHYWEHGR                                     | 1.547935286        | 2               | 6.045235  |
| P27867        | MHSVGICGSDVHYWEHGR+Oxidation(0                         | 1.346989525        |                 |           |
| P27867        | TLNVKPLVTHR                                            | 1.393307395        | 2               | 3.236574  |
| P27867        | VAIEPGVPR                                              | 1.870838509        | 1               | 2.180248  |
| P27867        | VLVCGAGPIGIVTLLVAK                                     | 1.723157361        | 3               | 5.74355   |
| P27867        | YCNTWPMMAVSMMLASK                                      | 0.871141239        | 2               | 3.375303  |
| <b>P27952</b> | <b>RS2 40S ribosomal protein S2</b>                    | <b>1.309914514</b> | <b>9.9E-20</b>  | <b>6</b>  |
| P27952        | AEDKEWIPVTK                                            | 2.016898052        | 2               | 3.392588  |
| P27952        | AFVAIGDYNGHVGLGVK                                      | 1.977590782        | 2               | 3.343497  |
| P27952        | GCTATLGNFAK                                            | 1.268299993        | 2               | 3.200577  |
| P27952        | GTGIVSAPVPK                                            | 1.326937253        | 2               | 2.4959    |
| P27952        | SLEEIYLFSLPIK                                          | 0.773450528        | 2               | 3.492726  |
| P27952        | TYSYLTPDLWK                                            | 1.432929619        | 2               | 3.267227  |

|               |                                                                |                    |                 |           |
|---------------|----------------------------------------------------------------|--------------------|-----------------|-----------|
| <b>P28037</b> | <b>AL1L1 Cytosolic 10_formyltetrahydrofolate dehydrogenase</b> | <b>1.220736413</b> | <b>1.11E-16</b> | <b>26</b> |
| P28037        | ADPLGLEAEK                                                     | 1.325795735        | 2               | 2.426627  |
| P28037        | ANATEFGLASGVFTR                                                | 1.348374167        | 2               | 4.857612  |
| P28037        | AVQMGMSVFFNK                                                   | 1.681034425        | 2               | 3.355463  |
| P28037        | DLGEAALNEYLR                                                   | 0.885103557        | 2               | 3.479824  |
| P28037        | ECEVLDDTVSTLYNR                                                | 2.911471065        | 2               | 4.36165   |
| P28037        | EESFGPIMIISR                                                   | 1.390707033        | 2               | 3.075621  |
| P28037        | EGHEVVGVTIPDKDGK                                               | 1.20470523         | 2               | 4.563906  |
| P28037        | GNDKVPGAWTEACGQK                                               | 1.312680114        | 2               | 3.830837  |
| P28037        | GQALPEVVAK                                                     | 1.232298631        | 2               | 2.966491  |
| P28037        | GSASSDELTEAELATAEAVR                                           | 1.050504972        | 2               | 6.311581  |
| P28037        | GVVNILPGSGSLVQQR                                               | 1.200081688        | 2               | 4.82736   |
| P28037        | IGFTGSTEVGK                                                    | 1.162219548        | 2               | 2.787187  |
| P28037        | ILPNVPEVEDSTDFK                                                | 2.003743691        | 2               | 3.590592  |
| P28037        | INWDQPAEAIHNWIR                                                | 1.462213089        | 2               | 4.250182  |
| P28037        | IQGATIPINQARPNR                                                | 1.293907504        | 2               | 2.345448  |
| P28037        | KEGHEVVGVTIPDKDGK                                              | 1.406144513        | 3               | 4.188428  |
| P28037        | KIGFTGSTEVGK                                                   | 0.928747413        | 2               | 3.132167  |
| P28037        | KLVEYCQR                                                       | 1.022920734        | 2               | 2.410924  |
| P28037        | LFVEESIHNFVQK                                                  | 1.281679354        | 2               | 4.457075  |
| P28037        | LIAEGTAPR                                                      | 1.171912932        | 2               | 3.522048  |
| P28037        | LSDHPDVR                                                       | 0.780389078        | 1               | 2.109669  |
| P28037        | NIQLEDGK                                                       | 1.155432685        | 1               | 2.303102  |
| P28037        | TAACLAAGNTVVIKPAQVPLTALK                                       | 1.075683886        | 3               | 4.414799  |
| P28037        | TDVAAPFGGFK                                                    | 1.155314329        | 2               | 3.115859  |
| P28037        | TYNTINPTDGSVICQVSLAQVSDVVK                                     | 1.79405401         | 3               | 5.273676  |
| P28037        | VVEEVEK                                                        | 1.02047862         | 1               | 2.077307  |
| <b>P28064</b> | <b>PSB8 Proteasome subunit beta type_8</b>                     | <b>1.01608292</b>  | <b>0.920387</b> | <b>3</b>  |
| P28064        | ASAGSYIATIR                                                    | 1.775728199        | 2               | 2.77245   |
| P28064        | KGPGLYYVDDNGTR                                                 | 0.979314282        | 2               | 2.847317  |
| P28064        | QDLSPEEAYDLAR                                                  | 1.178169014        | 2               | 3.1804    |
| <b>P28480</b> | <b>TCPA T_complex protein 1 subunit alpha</b>                  | <b>1.374457391</b> | <b>1.27E-11</b> | <b>10</b> |
| P28480        | AFHNEAQVNPER                                                   | 1.588949864        | 2               | 3.619452  |
| P28480        | FATEAAITLR                                                     | 1.360421807        | 2               | 3.227144  |
| P28480        | HGGYENAVHSGALDD                                                | 1.273814496        | 2               | 3.344471  |
| P28480        | ICDDELILIK                                                     | 1.363112955        | 2               | 3.193856  |
| P28480        | LLEVEHPAAK                                                     | 1.500010117        | 2               | 2.775349  |
| P28480        | MLVDDIGDVTITNDGATILK                                           | 1.112275986        | 2               | 2.345243  |
| P28480        | SLLVIPNTLAVNAAQDSTDLVAK                                        | 1.390076161        | 2               | 4.937828  |
| P28480        | SQNVMAAASIANIVK                                                | 1.798556498        | 2               | 4.601695  |
| P28480        | SSLGPVGLDK                                                     | 1.619767171        | 2               | 2.412212  |
| P28480        | YINENLIINTDELGR                                                | 1.102387565        | 2               | 4.566308  |
| <b>P28492</b> | <b>GLSL Glutaminase liver isoform_mitochondrial</b>            | <b>1.078562302</b> | <b>0.98808</b>  | <b>5</b>  |
| P28492        | ATGLQTS DPR                                                    | 0.981183288        | 2               | 2.796903  |
| P28492        | GTPHSHQPQHSDHDASNSGMLPR                                        | 0.960764199        | 3               | 3.731055  |
| P28492        | MVQESSGGLLDR                                                   | 1.048797202        | 2               | 3.62209   |
| P28492        | SNPDLWGVSLCTVDGQR                                              | 1.020057124        | 2               | 4.07981   |
| P28492        | TALHVAAAEGHIDVVK                                               | 1.32104012         | 3               | 3.587453  |
| <b>P28650</b> | <b>PURA1 Adenylosuccinate synthetase isozyme 1</b>             | <b>1.244166954</b> | <b>0.722157</b> | <b>2</b>  |
| P28650        | LDILDVLS EIK                                                   | 1.524737976        | 2               | 3.200155  |
| P28650        | VVDLLATDADIVSR                                                 | 1.235017768        | 2               | 2.470608  |
| <b>P29147</b> | <b>BDH D_beta_hydroxybutyrate dehydrogenase_mitochondrial</b>  | <b>1.179126619</b> | <b>2.34E-13</b> | <b>19</b> |
| P29147        | AVLVTGCDSGFGFLAK                                               | 1.050176644        | 2               | 5.64348   |
| P29147        | EVAEVLNLWGTVR                                                  | 1.918222574        | 2               | 2.423464  |
| P29147        | FGVEAFSDCLR                                                    | 1.475832946        | 2               | 3.669291  |

|               |                                                               |                    |                 |           |
|---------------|---------------------------------------------------------------|--------------------|-----------------|-----------|
| P29147        | GFLVFAGCLK                                                    | 0.99642361         | 2               | 3.728299  |
| P29147        | KMWDELPEVVR                                                   | 1.069436022        | 2               | 3.343125  |
| P29147        | KMWDELPEVVR+Oxidation(1                                       | 1.329674868        |                 |           |
| P29147        | MANPARSPYCITK+Oxidation(0                                     | 1.018170945        |                 |           |
| P29147        | METYCNSGSDTSSVINAVTHALTAATPYTR                                | 1.067378482        | 3               | 5.654841  |
| P29147        | METYCNSGSDTSSVINAVTHALTAATPYTR+Oxidation(0                    | 1.126198753        |                 |           |
| P29147        | MQVMTHFPGAISDK                                                | 0.676674625        | 2               | 4.829058  |
| P29147        | MQVMTHFPGAISDK+Oxidation(0                                    | 1.118993846        |                 |           |
| P29147        | MQVMTHFPGAISDK+Oxidation(3                                    | 1.118993846        |                 |           |
| P29147        | MWDELPEVVR                                                    | 0.989711978        | 2               | 3.418539  |
| P29147        | MWDELPEVVR+Oxidation(0                                        | 1.105636962        |                 |           |
| P29147        | TIQLNVCNSEEVEK                                                | 0.908808004        | 2               | 4.334439  |
| P29147        | VSVVEPGNFIAATSLYSER                                           | 1.117428855        | 2               | 5.999694  |
| P29147        | VVNISMLGR                                                     | 1.217827185        | 2               | 3.929763  |
| P29147        | YEMHPLGVK                                                     | 1.274112976        | 1               | 2.550442  |
| P29147        | YEMHPLGVK+Oxidation(2                                         | 1.682581546        |                 |           |
| <b>P29266</b> | <b>3HIDH 3_hydroxyisobutyrate dehydrogenase_mitochondrial</b> | <b>0.858019441</b> | <b>0.668706</b> | <b>9</b>  |
| P29266        | DLGLAQDSATSK                                                  | 1.243806303        | 2               | 3.744483  |
| P29266        | EAGEQVASSPADVAEK                                              | 0.723653021        | 2               | 4.98183   |
| P29266        | GSLIDSSTIDPSVSK                                               | 1.59517194         | 2               | 5.07553   |
| P29266        | HGYPLILYDVFPDVCK                                              | 1.375446443        | 2               | 5.136118  |
| P29266        | KGSLIDSSTIDPSVSK                                              | 0.863748556        | 2               | 4.085631  |
| P29266        | MGAVFMDAPVSGGVGAAR                                            | 1.066808095        | 2               | 5.321157  |
| P29266        | MGAVFMDAPVSGGVGAAR+Oxidation(0                                | 1.436538296        |                 |           |
| P29266        | MGAVFMDAPVSGGVGAAR+Oxidation(5                                | 1.436538296        |                 |           |
| P29266        | TPILLGSAHQIYR                                                 | 1.043992094        | 3               | 3.849808  |
| <b>P29314</b> | <b>RS9 40S ribosomal protein S9</b>                           | <b>1.315181141</b> | <b>6.66E-08</b> | <b>9</b>  |
| P29314        | IEDFLER                                                       | 1.124709282        | 2               | 2.657478  |
| P29314        | IGVLDEGK                                                      | 0.678447406        | 2               | 2.620249  |
| P29314        | KGQGGAGAGDDEEED                                               | 1.874743304        | 2               | 3.236123  |
| P29314        | KQVVNIPSFIVR                                                  | 0.910924815        | 2               | 2.536729  |
| P29314        | LDYILGLK                                                      | 1.409920056        | 2               | 3.042031  |
| P29314        | LFEGNALLR                                                     | 1.504093725        | 2               | 3.001467  |
| P29314        | LIGEYGLR                                                      | 1.647079926        | 2               | 2.562906  |
| P29314        | QVVNIPSFIVR                                                   | 1.563045212        | 2               | 2.660387  |
| P29314        | SRLDQELK                                                      | 1.298459422        | 3               | 3.495952  |
| <b>P29315</b> | <b>RINI Ribonuclease inhibitor</b>                            | <b>1.187977808</b> | <b>0.001207</b> | <b>7</b>  |
| P29315        | ASLQELDLGSNK                                                  | 1.732993851        | 2               | 2.43099   |
| P29315        | ELVLSNDFHEAGIHTLCQGLK                                         | 1.234545301        | 3               | 3.506119  |
| P29315        | LDDCGLTEVR                                                    | 1.124568114        | 2               | 3.149182  |
| P29315        | LENCGITSANCK                                                  | 1.03822689         | 2               | 3.616455  |
| P29315        | LSLQNCSTEAGCGVLPDVL                                           | 1.217354242        | 2               | 3.149546  |
| P29315        | SAIQANPALTELSLR                                               | 1.399067432        | 2               | 4.435854  |
| P29315        | TNELGDAGVGLVLQGLQNPTCK                                        | 1.735457783        | 2               | 5.343365  |
| <b>P29410</b> | <b>KAD2 Adenylate kinase 2_mitochondrial</b>                  | <b>1.160930334</b> | <b>8.78E-14</b> | <b>11</b> |
| P29410        | AMVASGSELGK                                                   | 1.22528375         | 2               | 3.112761  |
| P29410        | AMVASGSELGK+Oxidation(1                                       | 1.172684077        |                 |           |
| P29410        | AMVASGSELGKK                                                  | 1.454156595        | 2               | 2.893778  |
| P29410        | AVLLGPPGAGK                                                   | 1.078282306        | 2               | 2.600957  |
| P29410        | EAMKDDITGEPLIR                                                | 1.556004116        | 2               | 3.138767  |
| P29410        | LEAYHTQTTPLEYYR                                               | 1.3044995          | 2               | 5.004831  |
| P29410        | LVSDEMVELIEK                                                  | 1.674042928        | 2               | 4.197601  |
| P29410        | NGFLLDGFPR                                                    | 1.084794226        | 2               | 2.877662  |
| P29410        | NLETPSCK                                                      | 0.812456392        | 2               | 2.330671  |
| P29410        | SYHEEFNPPK                                                    | 0.919186611        | 3               | 3.447819  |

|               |                                                            |                    |                 |          |
|---------------|------------------------------------------------------------|--------------------|-----------------|----------|
| P29410        | TRLEAYHTQTTPLVEYYR                                         | 1.14999534         | 3               | 3.526194 |
| <b>P29411</b> | <b>KAD3 GTP:AMP phosphotransferase_mitochondrial</b>       | <b>1.199095965</b> | <b>0.015064</b> | <b>6</b> |
| P29411        | AYEAQTEPVLQYYQK                                            | 1.120435051        | 2               | 4.581332 |
| P29411        | GVLETFSGTETNK                                              | 1.021123184        | 2               | 2.874358 |
| P29411        | NLTQCSWLLDGFPR                                             | 1.537780621        | 2               | 3.827046 |
| P29411        | TVGIDDLTGEPLIQR                                            | 1.265069579        | 2               | 3.715079 |
| P29411        | VYNIEFNPPK                                                 | 0.757109937        | 2               | 2.606701 |
| P29411        | VYQIDTVINLNVPEVIK                                          | 1.314448347        | 2               | 3.295174 |
| <b>P29419</b> | <b>ATP5I ATP synthase subunit e_mitochondrial</b>          | <b>0.750895614</b> | <b>0.012956</b> | <b>2</b> |
| P29419        | ELAEAEDVSIFK                                               | 0.728525736        | 2               | 3.432571 |
| P29419        | YSALILGMAYGAK                                              | 1.560826153        | 2               | 4.097771 |
| <b>P29457</b> | <b>SERPH Serpin H1</b>                                     | <b>1.213556656</b> | <b>0.638971</b> | <b>2</b> |
| P29457        | GVVEVTHDLQK                                                | 1.191052134        | 2               | 3.152941 |
| P29457        | SALQSINEWASQTTDGK                                          | 1.577738531        | 2               | 2.513504 |
| <b>P30009</b> | <b>MARCS Myristoylated alanine_rich C_kinase substrate</b> | <b>1.040175283</b> | <b>0.956498</b> | <b>4</b> |
| P30009        | AEDGAAPSPSETPK                                             | 1.106975026        | 2               | 3.658145 |
| P30009        | EAEAAPEQPEQPEQPAEEPR                                       | 0.546977374        | 2               | 3.92005  |
| P30009        | EAGEGAEAGATADGAK                                           | 1.37480306         | 2               | 4.31611  |
| P30009        | GEAAAERPGEAAVASSPSK                                        | 1.023635637        | 2               | 4.565935 |
| <b>P30349</b> | <b>LKHA4 Leukotriene A_4 hydrolase</b>                     | <b>1.419788347</b> | <b>0.021537</b> | <b>3</b> |
| P30349        | GSPMEISLPIALSK                                             | 1.12342008         | 2               | 3.052447 |
| P30349        | SLSNVIAHEISHSWTGNLVTNK                                     | 0.283266192        | 3               | 3.865724 |
| P30349        | SSALQWLTPQTSQK                                             | 1.548691198        | 2               | 3.831389 |
| <b>P30427</b> | <b>PLEC Plectin</b>                                        | <b>1.083153537</b> | <b>0.013306</b> | <b>5</b> |
| P30427        | LLEAAAQSSK                                                 | 1.114056771        | 2               | 2.434876 |
| P30427        | MSAAQALKKGWLYEAGQR+Oxidation(0                             | 1.339199088        |                 |          |
| P30427        | SDQLTGLSLLPLSEK                                            | 2.28267101         | 2               | 2.511992 |
| P30427        | SKELAEQEAAR                                                | 0.874994922        | 2               | 2.920767 |
| P30427        | VLALPEPSPAAPTLR                                            | 1.360345561        | 2               | 2.981697 |
| <b>P30713</b> | <b>GSTT2 Glutathione S_transferase theta_2</b>             | <b>1.086673048</b> | <b>0.049166</b> | <b>7</b> |
| P30713        | AQVHEYLGWHADNIR                                            | 1.086641652        | 2               | 4.922705 |
| P30713        | GQHLSEQFSQVNCLK                                            | 1.096584437        | 2               | 5.014446 |
| P30713        | NSMVLALQR                                                  | 1.198667703        | 2               | 3.297612 |
| P30713        | TLPVPPPEAHASMMMLR                                          | 1.474410348        | 2               | 2.593854 |
| P30713        | VEAFLGAELCQEAHNPIMSVLGQAAK                                 | 1.295760084        | 3               | 4.0839   |
| P30713        | VLGPLIGVQVPEEK                                             | 1.296182383        | 2               | 4.058301 |
| P30713        | YQVADHWYPADLQAR                                            | 1.327229828        | 2               | 4.66661  |
| <b>P30835</b> | <b>K6PL 6_phosphofruktokinase_liver type</b>               | <b>1.079536064</b> | <b>0.018635</b> | <b>2</b> |
| P30835        | NEWGSLLEELVK                                               | 1.671337961        | 2               | 2.839077 |
| P30835        | VFANAPDSACVIGLR                                            | 0.46288211         | 2               | 2.562708 |
| <b>P30839</b> | <b>AL3A2 Fatty aldehyde dehydrogenase</b>                  | <b>1.163134184</b> | <b>8.22E-05</b> | <b>9</b> |
| P30839        | DILAAIAADLSK                                               | 2.553794719        | 2               | 3.054347 |
| P30839        | EKDILAAIAADLSK                                             | 1.197196124        | 2               | 4.266608 |
| P30839        | FDHILYTGNTAVGK                                             | 1.0334983          | 2               | 4.057884 |
| P30839        | HLTPVTLELGGK                                               | 1.405745564        | 3               | 3.426769 |
| P30839        | LQQLEALR                                                   | 1.410393678        | 1               | 2.074491 |
| P30839        | NVEEAINFINDR                                               | 1.129870901        | 2               | 4.285296 |
| P30839        | VMQEEIFGPILPIVSVK                                          | 1.171737031        | 2               | 4.889335 |
| P30839        | VMQEEIFGPILPIVSVK+Oxidation(1                              | 1.362970157        |                 |          |
| P30839        | YIAPTILTDVDPNSK                                            | 1.214977373        | 2               | 4.073834 |
| <b>P30904</b> | <b>MIF Macrophage migration inhibitory factor</b>          | <b>1.745126077</b> | <b>9.9E-20</b>  | <b>2</b> |
| P30904        | LHISPDR                                                    | 0.709928167        | 1               | 2.055697 |
| P30904        | LLCGLLSDR                                                  | 1.845541823        | 2               | 2.929551 |
| <b>P30999</b> | <b>CTND1 Catenin delta_1</b>                               | <b>1.519260632</b> | <b>0.019552</b> | <b>3</b> |
| P30999        | GYELLFQPEVVR                                               | 1.370891987        | 2               | 2.590799 |

|               |                                                                                    |                    |                 |           |
|---------------|------------------------------------------------------------------------------------|--------------------|-----------------|-----------|
| P30999        | HIEWESVLTNTAGCLR                                                                   | 1.522617802        | 2               | 2.803481  |
| P30999        | SLDNNYSTLNER                                                                       | 2.05200996         | 2               | 2.465525  |
| <b>P31000</b> | <b>VIME Vimentin</b>                                                               | <b>1.043780034</b> | <b>0.965711</b> | <b>17</b> |
| P31000        | DGQVINETSQHDDLE                                                                    | 0.909590013        | 2               | 3.040758  |
| P31000        | ETNLESLPLVDTHSK                                                                    | 1.009169386        | 2               | 2.376868  |
| P31000        | FADLSEANR                                                                          | 1.215688626        | 2               | 2.89052   |
| P31000        | ILLAELEQLK                                                                         | 1.620492294        | 2               | 2.872403  |
| P31000        | KLLEGEESR                                                                          | 1.214951303        | 2               | 3.06194   |
| P31000        | KVESLQEEIAFLK                                                                      | 1.452385408        | 2               | 3.966615  |
| P31000        | KVESLQEEIAFLKK                                                                     | 1.02766168         | 2               | 2.334838  |
| P31000        | LGDLYEEEMR                                                                         | 0.590651606        | 2               | 2.786717  |
| P31000        | LLEGEESR                                                                           | 1.141796701        | 2               | 2.801466  |
| P31000        | LQDEIQNMKEEMAR                                                                     | 1.127149441        | 2               | 3.662861  |
| P31000        | NLQEAEEWYK                                                                         | 1.121663383        | 2               | 2.886325  |
| P31000        | QDVDNASLAR                                                                         | 1.097339241        | 2               | 2.965332  |
| P31000        | QVQSLTCEVDALK                                                                      | 1.062686287        | 2               | 3.300431  |
| P31000        | RQVDQLTNDK                                                                         | 0.832309998        | 2               | 3.023922  |
| P31000        | SLYSSPGGAYVTR                                                                      | 1.118941791        | 2               | 2.862483  |
| P31000        | TNEKVELQELNDR                                                                      | 0.895811485        | 2               | 3.346155  |
| P31000        | VELQELNDR                                                                          | 0.829420792        | 2               | 2.994569  |
| <b>P31044</b> | <b>PEBP1 Phosphatidylethanolamine_binding protein 1</b>                            | <b>1.235637642</b> | <b>9.9E-20</b>  | <b>6</b>  |
| P31044        | GNDISSGTVLSEYVGSPPK                                                                | 1.22193761         | 2               | 5.95288   |
| P31044        | LYTLVLTPDAPSR                                                                      | 1.554369947        | 2               | 4.930282  |
| P31044        | VDYGGVTVDELGK                                                                      | 1.264199159        | 2               | 4.822209  |
| P31044        | VLTPQVMNRPSSISWDGLDPGK                                                             | 1.540921748        | 3               | 4.781842  |
| P31044        | YHLGAPVAGTCFQAEWDDSVPK                                                             | 1.224673372        | 2               | 5.125744  |
| P31044        | YVWLVYEQEQPLNCDEPILSNK                                                             | 1.541758745        | 2               | 5.613725  |
| <b>P31210</b> | <b>AK1D1 3_oxo_5_beta_steroid 4_dehydrogenase</b>                                  | <b>1.209475717</b> | <b>8.76E-05</b> | <b>18</b> |
| P31210        | DELLTSLGK                                                                          | 1.123632176        | 2               | 2.795493  |
| P31210        | DIEALNK                                                                            | 1.558493442        | 1               | 2.558228  |
| P31210        | EEMKDIEALNK                                                                        | 2.219704013        | 2               | 3.317614  |
| P31210        | ENFQIFDFSLTK                                                                       | 1.441438406        | 2               | 3.345633  |
| P31210        | HIDGAYVYR                                                                          | 1.46561454         | 2               | 2.715158  |
| P31210        | IKENFQIFDFSLTK                                                                     | 1.707401365        | 2               | 4.353075  |
| P31210        | LWSTDHDPEMVRPALER                                                                  | 1.198654514        | 2               | 2.492904  |
| P31210        | NEHEVGEAIR                                                                         | 1.186815083        | 1               | 2.907996  |
| P31210        | NPLWVNVSSPPLLK                                                                     | 1.364897684        | 2               | 4.373562  |
| P31210        | NPLWVNVSSPPLLKDELLTSLGK                                                            | 1.737540271        | 3               | 4.9156    |
| P31210        | QLEVILNKPGLK                                                                       | 0.658820394        | 2               | 3.415557  |
| P31210        | REEIFYCGK                                                                          | 1.361106543        | 2               | 3.148578  |
| P31210        | RQLEVILNKPGLK                                                                      | 0.85587422         | 3               | 4.266369  |
| P31210        | SNLCATWEALEACK                                                                     | 1.567203711        | 2               | 4.406641  |
| P31210        | SNLCATWEALEACKDAGLVK                                                               | 1.205493953        | 2               | 5.079002  |
| P31210        | TAIDEGYR                                                                           | 0.891630067        | 2               | 2.573744  |
| P31210        | TQAQIVLR                                                                           | 1.617621046        | 2               | 3.026363  |
| P31210        | YKPVTNQVECHPYFTQTK                                                                 | 1.208983691        | 2               | 5.722028  |
| <b>P31230</b> | <b>AIMP1 Aminoacyl tRNA synthase complex_interacting multifunctional protein 1</b> | <b>1.351820023</b> | <b>0.000114</b> | <b>2</b>  |
| P31230        | GAEADQIIEYLK                                                                       | 2.068847575        | 2               | 2.986363  |
| P31230        | TVVSGLVNHVPLEQMQR                                                                  | 1.191986236        | 3               | 3.534745  |
| <b>P31399</b> | <b>ATP5H ATP synthase subunit d_mitochondrial</b>                                  | <b>1.192042152</b> | <b>0.158787</b> | <b>6</b>  |
| P31399        | ANVDKPGLVDDFK                                                                      | 1.188836105        | 2               | 3.801852  |
| P31399        | IPVPEDKYTALVDAEEKEDVK                                                              | 1.071136565        | 3               | 3.32943   |
| P31399        | NCAQFVTGSQAR                                                                       | 1.19105261         | 2               | 4.268908  |
| P31399        | NMIPFDMQMTIDLLNEVPETK                                                              | 1.793589072        | 2               | 5.454863  |
| P31399        | SWNETFHTR                                                                          | 1.30755061         | 2               | 2.759272  |

|               |                                                               |                    |                 |           |
|---------------|---------------------------------------------------------------|--------------------|-----------------|-----------|
| P31399        | YTALVDAEEKEDVK                                                | 0.949748083        | 2               | 3.776985  |
| <b>P32089</b> | <b>TXTP Tricarboxylate transport protein_mitochondrial</b>    | <b>0.943456382</b> | <b>0.657758</b> | <b>5</b>  |
| P32089        | FIHDQTSSNP                                                    | 1.083991063        | 1               | 3.452902  |
| P32089        | GLSSLLYGSIPK                                                  | 1.538868952        | 2               | 3.395151  |
| P32089        | NTLDCGVQILK                                                   | 0.933651346        | 2               | 2.396292  |
| P32089        | SHGVLGLYR                                                     | 1.099074821        | 1               | 2.026277  |
| P32089        | TQLQLDER                                                      | 1.340452512        | 2               | 2.47254   |
| <b>P32198</b> | <b>CPT1A Carnitine O_palmitoyltransferase 1_liver isoform</b> | <b>1.05037293</b>  | <b>0.529111</b> | <b>6</b>  |
| P32198        | ELEQQMQQILDDPSEPQGEAK                                         | 1.162140173        | 3               | 4.558847  |
| P32198        | GDTNPNIKPKTR                                                  | 1.443606058        | 2               | 2.402919  |
| P32198        | MTALAQDFAVNLGPK                                               | 1.049222045        | 2               | 4.182351  |
| P32198        | SCTMESCNFVQAMMDPK                                             | 1.342405262        | 2               | 2.772666  |
| P32198        | TSPDAFIQLALQLAHYK                                             | 1.241012142        | 2               | 3.49923   |
| P32198        | YLESVRPLMK                                                    | 1.493874304        | 2               | 2.323328  |
| <b>P32232</b> | <b>CBS Cystathionine beta_synthase</b>                        | <b>1.203294037</b> | <b>9.9E-20</b>  | <b>9</b>  |
| P32232        | AGTLKPGDTIIEPTSGNTGIGLALAAAVK                                 | 1.668499247        | 3               | 5.954854  |
| P32232        | ALGAEIVR                                                      | 1.141944919        | 1               | 2.04501   |
| P32232        | CIIVMPEK                                                      | 1.487115219        | 2               | 2.517678  |
| P32232        | FDSPESHVGVAVR                                                 | 0.962194805        | 2               | 3.501314  |
| P32232        | NASNPLAHYDDTAEEILQQCDGK                                       | 1.494373489        | 2               | 5.661582  |
| P32232        | SNDDDSFAFAR                                                   | 1.15992905         | 2               | 3.300774  |
| P32232        | VDMLVASAGTGGTITGIAR                                           | 1.864158557        | 2               | 4.629823  |
| P32232        | VQELSLSAPLTVLPTVTEHTIAILR                                     | 1.807345801        | 3               | 4.235768  |
| P32232        | VRPSDEVCK                                                     | 0.50937382         | 3               | 3.754385  |
| <b>P32551</b> | <b>QCR2 Cytochrome b_c1 complex subunit 2_mitochondrial</b>   | <b>1.044671371</b> | <b>0.168024</b> | <b>11</b> |
| P32551        | AVAFQNPQTR                                                    | 1.045957774        | 2               | 3.351161  |
| P32551        | AVAQGNLSSADVQAAK                                              | 1.199191129        | 2               | 5.3487    |
| P32551        | GNNNTSLLSQSVAK                                                | 1.217258892        | 2               | 4.159082  |
| P32551        | IENLHDVAYK                                                    | 1.579206522        | 2               | 3.837723  |
| P32551        | ITSEELHYFVQNHFTSAR                                            | 1.341239594        | 3               | 4.042922  |
| P32551        | NALANPLYCPDYR                                                 | 2.416420269        | 2               | 3.744445  |
| P32551        | RGNNTSLLSQSVAK                                                | 0.921798044        | 2               | 3.304866  |
| P32551        | RWEVAALR                                                      | 1.1256529          | 2               | 2.730141  |
| P32551        | SMTASGNLGHTPFLDEL                                             | 1.103914199        | 2               | 3.380163  |
| P32551        | TSAPGGVPLPQLEFTK                                              | 1.145688897        | 2               | 4.042141  |
| P32551        | YENYNLGTSHLLR                                                 | 1.085544268        | 2               | 4.429471  |
| <b>P32755</b> | <b>HPPD 4_hydroxyphenylpyruvate dioxygenase</b>               | <b>1.381411391</b> | <b>9.9E-20</b>  | <b>20</b> |
| P32755        | AFEEEEQALR                                                    | 1.319334306        | 2               | 3.347206  |
| P32755        | DIAFEVEDCEHIVQK                                               | 1.531749643        | 2               | 4.081878  |
| P32755        | ENMDVLEELK                                                    | 1.798797205        | 2               | 3.052785  |
| P32755        | EVVSHVIK                                                      | 1.095036491        | 2               | 2.325745  |
| P32755        | FAVLQTYGDTTHTLVEK                                             | 1.42239316         | 2               | 5.256718  |
| P32755        | FLHFHSVTFVWVGNK                                               | 1.1252421          | 3               | 3.735149  |
| P32755        | FLPGFEPTYK                                                    | 1.396218947        | 2               | 2.707504  |
| P32755        | FWSVDDTQVHTEYSSLR                                             | 0.901216286        | 2               | 5.840824  |
| P32755        | GMEFLAVPSSYYR                                                 | 1.810941884        | 2               | 3.281549  |
| P32755        | GNLTDLETNGVR                                                  | 1.32387174         | 2               | 3.832973  |
| P32755        | HNHQGFAGNFNSLFK                                               | 1.066887643        | 3               | 4.918463  |
| P32755        | ILVDYDEK                                                      | 1.353539106        | 2               | 2.328653  |
| P32755        | IVFVLCALNPWNK                                                 | 1.407520175        | 2               | 2.968987  |
| P32755        | IVREPWVEEDKFGK                                                | 1.852437553        | 3               | 4.969857  |
| P32755        | LPSCNLEIIDHIVGNQPDQEMESASEWYLK                                | 1.753578405        | 3               | 7.342283  |
| P32755        | LPSCNLEIIDHIVGNQPDQEMESASEWYLK+Oxidation(20                   | 2.039960957        |                 |           |

|               |                                                             |                    |                 |           |
|---------------|-------------------------------------------------------------|--------------------|-----------------|-----------|
| P32755        | MGFEPLAYK                                                   | 1.205697033        | 2               | 2.648959  |
| P32755        | SIVVANYEESIK                                                | 1.051818113        | 2               | 4.232787  |
| P32755        | SQIQEYVDYNGGAGVQHIALR                                       | 1.161433267        | 2               | 5.814981  |
| P32755        | TEDIITTR                                                    | 1.144613786        | 2               | 3.30782   |
| <b>P33124</b> | <b>ACSL6 Long_chain_fatty_acid__CoA ligase 6</b>            | <b>1.120437435</b> | <b>0.50773</b>  | <b>2</b>  |
| P33124        | ALRPITFPVVPR                                                | 1.276572572        | 2               | 3.023458  |
| P33124        | IENIYIR                                                     | 1.085141825        | 2               | 2.80915   |
| <b>P33273</b> | <b>CP255 Cytochrome P450 2C55</b>                           | <b>1.585609198</b> | <b>0.003547</b> | <b>2</b>  |
| P33273        | FDYKDENFLNLMEK                                              | 1.588897361        | 3               | 4.884644  |
| P33273        | NFAEIK                                                      | 1.494497374        | 1               | 1.909209  |
| <b>P34058</b> | <b>HS90B Heat shock protein HSP 90_beta</b>                 | <b>1.12584016</b>  | <b>3.77E-15</b> | <b>26</b> |
| P34058        | ADLNNLGTIAK                                                 | 1.018906285        | 2               | 4.087645  |
| P34058        | EDQTEYLEER                                                  | 1.827270322        | 2               | 3.559829  |
| P34058        | EGLELPEDEEEK                                                | 0.996612439        | 2               | 2.512519  |
| P34058        | EGLELPEDEEEKK                                               | 1.387490986        | 2               | 2.562706  |
| P34058        | EGLELPEDEEEKKK                                              | 1.358455602        | 2               | 3.153703  |
| P34058        | ELISNASDALDK                                                | 1.174304016        | 2               | 3.605897  |
| P34058        | FYEAFSK                                                     | 1.383003919        | 1               | 1.959222  |
| P34058        | GVVDSDELPLNISR                                              | 1.356115972        | 2               | 4.806192  |
| P34058        | HFSVEGQLEFR                                                 | 1.24374686         | 2               | 2.66939   |
| P34058        | HLEINPDHPIVETLR                                             | 1.076209556        | 2               | 4.584974  |
| P34058        | HSQFIGYPITLYLEK                                             | 1.956882749        | 2               | 3.666264  |
| P34058        | IDIIPNPQER                                                  | 1.07019832         | 2               | 3.057075  |
| P34058        | KHLEINPDHPIVETLR                                            | 1.395035543        | 2               | 4.836435  |
| P34058        | LGIHEDSTNR                                                  | 1.358586732        | 2               | 2.90844   |
| P34058        | NPDDITQEEYGEFYK                                             | 0.848393475        | 2               | 4.963541  |
| P34058        | RAPFDLFENK                                                  | 1.318144309        | 2               | 3.040661  |
| P34058        | RAPFDLFENKK                                                 | 0.827705786        | 2               | 2.525829  |
| P34058        | SIYYITGESK                                                  | 0.899595379        | 2               | 3.194491  |
| P34058        | SLTNDWEDHLAVK                                               | 1.123988593        | 2               | 4.327127  |
| P34058        | TLTLVDTGIGMTK                                               | 1.321357909        | 2               | 4.279113  |
| P34058        | TLTLVDTGIGMTK+Oxidation(10                                  | 1.877561295        |                 |           |
| P34058        | VILHLKEDQTEYLEER                                            | 1.368615311        | 3               | 4.045892  |
| P34058        | YESLTDPSK                                                   | 1.107236793        | 1               | 2.709481  |
| P34058        | YESLTDPSKLDSGK                                              | 1.212555238        | 2               | 3.88405   |
| P34058        | YHTSQSGDEMTSLSEYVSR                                         | 1.312369045        | 2               | 5.489552  |
| P34058        | YIDQEELNK                                                   | 2.732173077        | 2               | 3.486965  |
| <b>P34064</b> | <b>PSA5 Proteasome subunit alpha type_5</b>                 | <b>1.145828346</b> | <b>0.309021</b> | <b>7</b>  |
| P34064        | AIGSASEGAQSSLQEVYHK                                         | 1.105475516        | 2               | 4.514455  |
| P34064        | EELEEVIKDI                                                  | 1.370697711        | 2               | 2.547695  |
| P34064        | GVNTFSPEGR                                                  | 1.208668875        | 2               | 3.809472  |
| P34064        | ITSPLMEPSSIEK                                               | 0.86661783         | 2               | 2.611329  |
| P34064        | LNATNIELATVQPGQNFHMFTK                                      | 1.628566151        | 3               | 3.448226  |
| P34064        | SSLILK                                                      | 2.333135745        | 2               | 2.397651  |
| P34064        | STTLKEAIKSSLILK                                             | 0.997398265        | 2               | 2.315405  |
| <b>P34067</b> | <b>PSB4 Proteasome subunit beta type_4</b>                  | <b>1.174056358</b> | <b>0.466021</b> | <b>3</b>  |
| P34067        | GVEIEGPLSAQTNWDIAHMISGFE                                    | 1.590429071        | 2               | 3.133276  |
| P34067        | TQNPMVTGTSVLGVK                                             | 1.186771339        | 2               | 3.356557  |
| P34067        | VNDSTMLGASGDYADFQYLK                                        | 1.174049563        | 2               | 4.494485  |
| <b>P35171</b> | <b>CX7A2 Cytochrome c oxidase subunit 7A2_mitochondrial</b> | <b>1.184464334</b> | <b>0.719239</b> | <b>2</b>  |
| P35171        | GGTSDALLYR                                                  | 1.041665469        | 2               | 3.415427  |
| P35171        | LFQEDNGMPVHLK                                               | 1.2132571          | 2               | 4.385578  |
| <b>P35213</b> | <b>1433B 14_3_3 protein beta/alpha</b>                      | <b>1.33579555</b>  | <b>2.48E-07</b> | <b>7</b>  |
| P35213        | AVTEQGHLSNEER                                               | 0.872443712        | 2               | 4.489092  |
| P35213        | EKIEAELQDICS DVLELLDK                                       | 1.905293822        | 3               | 4.985651  |
| P35213        | QTTVSNSQQAYQEA FEISK                                        | 1.115822597        | 2               | 5.463017  |

|               |                                                                       |                    |                 |           |
|---------------|-----------------------------------------------------------------------|--------------------|-----------------|-----------|
| P35213        | TAFDEAIAELDTLNNEESYK                                                  | 1.25941324         | 2               | 4.81657   |
| P35213        | YDDMAAAMK                                                             | 3.902389276        | 2               | 3.092565  |
| P35213        | YLILNATHAESK                                                          | 1.743422103        | 2               | 3.585578  |
| P35213        | YLSEVASGDNK                                                           | 0.945573736        | 2               | 3.041293  |
| <b>P35278</b> | <b>RAB5C Ras_related protein Rab_5C</b>                               | <b>0.938249798</b> | <b>0.878745</b> | <b>4</b>  |
| P35278        | FEIWDTAGQER                                                           | 0.823677495        | 2               | 3.163441  |
| P35278        | GVDLQESNPASR                                                          | 1.116240567        | 2               | 2.707087  |
| P35278        | LVLLGESAVGK                                                           | 1.371144957        | 2               | 2.749998  |
| P35278        | NEPQNAAGAPGR                                                          | 0.936275464        | 2               | 2.996528  |
| <b>P35427</b> | <b>RL13A 60S ribosomal protein L13a</b>                               | <b>1.27149951</b>  | <b>0.165237</b> | <b>2</b>  |
| P35427        | CEGINISGNFYR                                                          | 1.326750564        | 2               | 3.141887  |
| P35427        | YQAVTATLEEK                                                           | 1.239860479        | 2               | 3.142895  |
| <b>P35434</b> | <b>ATPD ATP synthase subunit delta_mitochondrial</b>                  | <b>1.152465645</b> | <b>0.990307</b> | <b>2</b>  |
| P35434        | AQSELSGAADEAAR                                                        | 1.193776714        | 2               | 4.666125  |
| P35434        | IEANEALVK                                                             | 1.116092918        | 2               | 2.84138   |
| <b>P35435</b> | <b>ATPG ATP synthase subunit gamma_mitochondrial</b>                  | <b>1.267441325</b> | <b>7.42E-08</b> | <b>7</b>  |
| P35435        | GLCGAIHSSVAK                                                          | 1.295304777        | 2               | 3.691612  |
| P35435        | HLIIGVSSDR                                                            | 1.267435436        | 2               | 3.066098  |
| P35435        | NASDMIDK                                                              | 1.272330651        | 2               | 2.350382  |
| P35435        | NDMAALTAAGK                                                           | 1.449806713        | 2               | 3.944636  |
| P35435        | NDMAALTAAGK+Oxidation(2                                               | 1.960836429        |                 |           |
| P35435        | THSDQFLVSFK                                                           | 0.818905583        | 1               | 3.035378  |
| P35435        | VYGTGSLALYEK                                                          | 1.892039836        | 2               | 3.100615  |
| <b>P35559</b> | <b>IDE Insulin degrading enzyme</b>                                   | <b>0.980499781</b> | <b>0.555663</b> | <b>4</b>  |
| P35559        | AIEDMTEEAFQK                                                          | 1.211221579        | 2               | 3.137216  |
| P35559        | DREVNAVDESEHK                                                         | 1.500532479        | 3               | 3.571326  |
| P35559        | SNPGHYLGHLLIGHEGPGSLLSELK                                             | 0.383963141        | 3               | 3.30114   |
| P35559        | YTLETRPNQEGIDVR                                                       | 1.124513282        | 2               | 2.530306  |
| <b>P35565</b> | <b>CALX Calnexin</b>                                                  | <b>1.323196844</b> | <b>4.86E-09</b> | <b>11</b> |
| P35565        | AEDEILNR                                                              | 0.941922261        | 2               | 2.694638  |
| P35565        | EIEDPEDRKPEDWDERPK                                                    | 2.146513474        | 3               | 3.331678  |
| P35565        | GSLSGWILSK                                                            | 2.447484407        | 2               | 2.50193   |
| P35565        | KIPNPdffedLEPFR                                                       | 1.298956879        | 3               | 4.295339  |
| P35565        | NKGDEEEEEKLEEK                                                        | 1.220166099        | 3               | 5.054557  |
| P35565        | TDAPQPDVK                                                             | 1.402045736        | 2               | 2.387764  |
| P35565        | TDAPQPDVKDEEGKEEEK                                                    | 0.814746582        | 3               | 4.364666  |
| P35565        | TSELNLDQFHDK                                                          | 1.355072835        | 2               | 3.690699  |
| P35565        | VVDDWANDGWGLK                                                         | 1.367771166        | 2               | 4.230627  |
| P35565        | VVDDWANDGWGLKK                                                        | 0.974360993        | 2               | 2.804354  |
| P35565        | WEVDEMKETK                                                            | 1.34973024         | 2               | 2.819301  |
| <b>P35571</b> | <b>GPDM Glycerol_3_phosphate dehydrogenase_mitochondrial</b>          | <b>1.259529158</b> | <b>0.294591</b> | <b>2</b>  |
| P35571        | AITNLDVEQYR                                                           | 0.464079425        | 2               | 2.715509  |
| P35571        | KQEELETATR                                                            | 1.274085197        | 2               | 2.33559   |
| <b>P35704</b> | <b>PRDX2 Peroxiredoxin_2</b>                                          | <b>1.17466764</b>  | <b>0.172065</b> | <b>5</b>  |
| P35704        | EGGLGPLNIPLLDVTK                                                      | 1.200090832        | 2               | 3.476043  |
| P35704        | KEGGLGPLNIPLLDVTK                                                     | 1.306301148        | 2               | 4.860938  |
| P35704        | NDEGIAYR                                                              | 1.465295816        | 1               | 1.959707  |
| P35704        | QITVNDLPVGR                                                           | 1.05507617         | 2               | 3.034123  |
| P35704        | SLSQNYGVVK                                                            | 0.998960579        | 2               | 2.47037   |
| <b>P35738</b> | <b>ODDB 2_oxoisovalerate dehydrogenase subunit beta_mitochondrial</b> | <b>0.994940244</b> | <b>0.782841</b> | <b>5</b>  |
| P35738        | AAVEQVPVEPYK                                                          | 0.849577697        | 2               | 2.429388  |
| P35738        | GLLLSIEDKNPCIFFEPEK                                                   | 1.824750914        | 2               | 3.666654  |
| P35738        | MNLFQSITSALDNSLAK                                                     | 1.171504527        | 2               | 3.592146  |
| P35738        | SGDLFNCGLTIR                                                          | 0.970882917        | 2               | 3.017777  |



|               |                                                                         |                    |                 |           |
|---------------|-------------------------------------------------------------------------|--------------------|-----------------|-----------|
| P35738        | VCGYDTPFPHFIFEPFYIPDK                                                   | 1.156626696        | 3               | 3.49018   |
| <b>P35815</b> | <b>PPM1B Protein phosphatase 1B</b>                                     | <b>1.404184439</b> | <b>0.277679</b> | <b>2</b>  |
| P35815        | IQNAGGSVMIQR                                                            | 1.41442597         | 2               | 2.823351  |
| P35815        | SGFALEPSVENVK                                                           | 1.094853297        | 2               | 3.627459  |
| <b>P36201</b> | <b>CRIP2 Cysteine_rich protein 2</b>                                    | <b>0.943107315</b> | <b>0.74273</b>  | <b>3</b>  |
| P36201        | ASSVTTFTGEPNMCPR                                                        | 0.568144816        | 2               | 3.680811  |
| P36201        | GVNIGGAGSYIYEKPPTEAPQVTGPIEVPVVR                                        | 0.943927386        | 3               | 6.475083  |
| P36201        | GVNTGAVGSYIYDKDPEGTVQP                                                  | 0.885596486        | 2               | 4.318913  |
| <b>P36365</b> | <b>FMO1 Dimethylaniline monooxygenase [N_oxide_forming] 1</b>           | <b>1.106879813</b> | <b>0.11369</b>  | <b>11</b> |
| P36365        | ALQSDYITYIDLLTSINAKPDLR                                                 | 1.629833351        | 3               | 3.610614  |
| P36365        | ASLYNSVVSNSK                                                            | 0.824775088        | 2               | 2.922509  |
| P36365        | CCEEGLEPTCFER                                                           | 0.69946062         | 2               | 4.281052  |
| P36365        | FTEHVEEGR                                                               | 1.201582417        | 2               | 3.024117  |
| P36365        | HSGFGLCYCK                                                              | 0.798727045        | 2               | 3.246991  |
| P36365        | NLLPTPVVSWLISK                                                          | 1.354382436        | 2               | 2.491857  |
| P36365        | SCDLGGLWR                                                               | 1.09055306         | 2               | 2.769229  |
| P36365        | TQLREPLVNLDELPRG                                                        | 1.06573876         | 3               | 4.579488  |
| P36365        | VAIVGAGVSGLASIK                                                         | 2.16689187         | 2               | 2.823316  |
| P36365        | VEDGQASLYK                                                              | 1.072664436        | 2               | 3.465876  |
| P36365        | VLVGMGNSGTDIAVEASHLAK                                                   | 1.346937173        | 2               | 4.559155  |
| <b>P36506</b> | <b>MP2K2 Dual specificity mitogen_activated protein kinase kinase 2</b> | <b>2.03011485</b>  | <b>0.153072</b> | <b>2</b>  |
| P36506        | ISELGAGNGGVVTK                                                          | 2.123959296        | 2               | 2.360976  |
| P36506        | KLEELDLDEQQR                                                            | 1.939049916        | 2               | 3.039693  |
| <b>P36511</b> | <b>UDB15 UDP_glucuronosyltransferase 2B15</b>                           | <b>0.95224601</b>  | <b>0.000487</b> | <b>8</b>  |
| P36511        | ANIIAWALAIQPK                                                           | 1.942116399        | 3               | 5.487491  |
| P36511        | FVNVVWYELPR                                                             | 1.189936026        | 2               | 3.6615    |
| P36511        | FVTFPTSFSHDLLENFFTR                                                     | 1.426419402        | 2               | 4.449045  |
| P36511        | GHEVTVLRPSAFVFLDPK                                                      | 1.164903033        | 3               | 3.968846  |
| P36511        | IILEELVQK                                                               | 1.432385096        | 2               | 3.534591  |
| P36511        | NAMWLSTIHHDQPTKPLDR                                                     | 1.56293494         | 3               | 3.418586  |
| P36511        | SDLLNALEEVIDNPFYK                                                       | 0.935797788        | 3               | 5.337359  |
| P36511        | TLGRPTTLAEIMGK                                                          | 1.311039387        | 2               | 3.103503  |
| <b>P36536</b> | <b>SAR1A GTP_binding protein SAR1a</b>                                  | <b>1.72371663</b>  | <b>0.179488</b> | <b>2</b>  |
| P36536        | IDRTDAISEEK                                                             | 1.938100313        | 2               | 2.491702  |
| P36536        | VELNALMTDETISNVPILILGNK                                                 | 1.639229821        | 3               | 5.669423  |
| <b>P36953</b> | <b>AFAM Afamin</b>                                                      | <b>1.078432147</b> | <b>0.777425</b> | <b>2</b>  |
| P36953        | FTDSENVQER                                                              | 0.975309392        | 2               | 2.997247  |
| P36953        | SLAMVQCECK                                                              | 1.435915275        | 2               | 2.750564  |
| <b>P36972</b> | <b>APT Adenine phosphoribosyltransferase</b>                            | <b>1.266386408</b> | <b>0.000207</b> | <b>2</b>  |
| P36972        | IDYIAGLDSR                                                              | 1.054817037        | 2               | 3.043373  |
| P36972        | SFPDFPIPGVLFRR                                                          | 1.267105371        | 2               | 3.250291  |
| <b>P37397</b> | <b>CNN3 Calponin_3</b>                                                  | <b>1.160846995</b> | <b>0.685204</b> | <b>5</b>  |
| P37397        | AGQSVIGLQMGTKN                                                          | 1.074648701        | 2               | 3.374611  |
| P37397        | LTLQPVDNSTISLQMGTKN                                                     | 0.825752346        | 2               | 2.953562  |
| P37397        | MQTDKPFDDQTISLQMGTKN                                                    | 1.278308196        | 3               | 3.552221  |
| P37397        | VNESSLNWPQLENIGNFIK                                                     | 1.168991035        | 2               | 3.15147   |
| P37397        | YDQQAEDLR                                                               | 1.154593966        | 2               | 3.154138  |
| <b>P38650</b> | <b>DYHC1 Cytoplasmic dynein 1 heavy chain 1</b>                         | <b>1.27509694</b>  | <b>0.403864</b> | <b>8</b>  |
| P38650        | DFPLNDLLSATELDKIR                                                       | 1.520419712        | 2               | 2.387416  |
| P38650        | ILDDDTIITLLENLK                                                         | 1.040134656        | 2               | 2.506484  |
| P38650        | QLQNISQAAAAGGAK                                                         | 0.946199354        | 2               | 3.37664   |
| P38650        | VLLTTQGVDMISK                                                           | 1.41007091         | 2               | 2.663003  |
| P38650        | VLRPQVTAQAQQNGEAPQPDMK                                                  | 1.315261671        | 3               | 5.437798  |
| P38650        | VQGLTVEQAEAVAR                                                          | 1.20142059         | 2               | 3.279849  |
| P38650        | VQVALEELQDLK                                                            | 1.316978967        | 2               | 3.027358  |

|               |                                                       |                    |                 |           |
|---------------|-------------------------------------------------------|--------------------|-----------------|-----------|
| P38650        | VTDFGDKVEDPTFLNQLQSGVNR                               | 1.605844365        | 3               | 4.162052  |
| <b>P38652</b> | <b>PGM1 Phosphoglucomutase_1</b>                      | <b>1.261502899</b> | <b>0.00188</b>  | <b>17</b> |
| P38652        | ADNFEYSDPVDGSISK                                      | 0.969144945        | 2               | 4.824588  |
| P38652        | AIGGIILTASHNPGGPNDFGIK                                | 1.214551593        | 2               | 5.758801  |
| P38652        | FFGNLMDASK                                            | 1.40169764         | 2               | 2.516388  |
| P38652        | FNISNGGPAPEAITDK                                      | 1.067752541        | 2               | 4.302326  |
| P38652        | INQDPQVMLAPLISIALK                                    | 1.22271221         | 3               | 4.606595  |
| P38652        | KQRVEDILK                                             | 1.442305303        | 1               | 2.026721  |
| P38652        | LSGTGSAGATIR                                          | 1.806662425        | 2               | 3.480213  |
| P38652        | LVIGQNGILSTPAVSCIIR                                   | 1.72307067         | 2               | 4.081246  |
| P38652        | NIFDFNALK                                             | 1.152666433        | 2               | 2.923143  |
| P38652        | QEATLVVGGDGR                                          | 1.286976573        | 2               | 3.200179  |
| P38652        | QQFDLENK                                              | 0.744880988        | 1               | 2.128239  |
| P38652        | SGEHDFGAAFDGDGDR                                      | 0.861732716        | 2               | 4.459804  |
| P38652        | SGEHDFGAAFDGDGRNMILGK                                 | 1.480483684        | 3               | 3.760799  |
| P38652        | TIEEYAIKDLK                                           | 1.363412408        | 2               | 4.431875  |
| P38652        | TQAYPDQKPGTSGLR                                       | 0.751528623        | 2               | 3.488104  |
| P38652        | VFQGNANYAENFIQSIIVSTVEPALR                            | 1.146740605        |                 |           |
| P38652        | YDYEEVEAEGANK                                         | 0.850991135        | 2               | 5.181049  |
| <b>P38656</b> | <b>LA Lupus La protein homolog</b>                    | <b>1.269390164</b> | <b>0.014824</b> | <b>2</b>  |
| P38656        | ITDDQQESLNK                                           | 1.369389895        | 2               | 4.193151  |
| P38656        | LDEGWVPLETMIK                                         | 1.680609349        | 2               | 2.990392  |
| <b>P38659</b> | <b>PDIA4 Protein disulfide_isomerase A4</b>           | <b>0.969046518</b> | <b>0.23206</b>  | <b>22</b> |
| P38659        | DLGLSESGEDVNAAILDESGKK                                | 1.41553176         | 2               | 5.150129  |
| P38659        | DNDPPIAVAK                                            | 0.907823772        | 2               | 2.400485  |
| P38659        | EVSQPDWTPPEVTLTLTK                                    | 0.863609238        | 2               | 3.552126  |
| P38659        | FDVSGYPTIK                                            | 0.988659521        | 2               | 3.490073  |
| P38659        | FDVSGYPTLK                                            | 0.988659521        | 2               | 3.490073  |
| P38659        | FHHTFSTEIAK                                           | 1.057427935        | 3               | 3.501489  |
| P38659        | FIDEHATK                                              | 0.886808269        | 2               | 2.465545  |
| P38659        | FIDEHATKR                                             | 0.400643859        | 2               | 2.551716  |
| P38659        | GQAVDYDGSR                                            | 0.788927231        | 2               | 2.66653   |
| P38659        | GRPFDYNGPR                                            | 1.282605484        | 2               | 2.876454  |
| P38659        | IDATSASMLASK                                          | 1.087009706        | 2               | 3.975591  |
| P38659        | IDATSASMLASK+Oxidation(7                              | 1.103606524        |                 |           |
| P38659        | KGQAVDYDGSR                                           | 2.216664869        | 2               | 2.930255  |
| P38659        | MDATANDITNDR                                          | 0.940697487        | 2               | 3.955441  |
| P38659        | MHVMDVQGSTEASAIK                                      | 1.359146802        | 2               | 4.622877  |
| P38659        | MHVMDVQGSTEASAIKDYVVK                                 | 1.029180991        | 3               | 4.599572  |
| P38659        | RFDVSGYPTLK                                           | 1.065462954        | 2               | 3.288025  |
| P38659        | RSPPIPLAK                                             | 2.425462004        | 2               | 2.406114  |
| P38659        | TFDAIVMDPK                                            | 0.895225695        | 2               | 3.53451   |
| P38659        | VDATEQTDLAK                                           | 1.188430522        | 2               | 4.126925  |
| P38659        | VEGFPTIYFAPSGDK                                       | 1.427777243        | 2               | 3.446272  |
| P38659        | YGIVDYMVEQSGPPSK                                      | 0.843793365        | 2               | 5.10871   |
| <b>P38718</b> | <b>BR44 Brain protein 44</b>                          | <b>1.180527475</b> | <b>0.662507</b> | <b>2</b>  |
| P38718        | LRPLYNHAPGPR                                          | 1.381238848        | 2               | 2.829848  |
| P38718        | VELLLPK                                               | 0.765122701        | 1               | 2.221431  |
| <b>P38918</b> | <b>ARK73 Aflatoxin B1 aldehyde reductase member 3</b> | <b>1.252472066</b> | <b>0.006608</b> | <b>5</b>  |
| P38918        | EEHFNGIALVEK                                          | 1.440725152        | 2               | 2.534561  |
| P38918        | FYAFNPLAGLLTGR                                        | 2.02768225         | 2               | 4.631714  |
| P38918        | MDVTSSSASVR                                           | 1.261874597        | 2               | 3.586335  |
| P38918        | RMDVTSSSASVR                                          | 1.555890356        | 2               | 3.853636  |
| P38918        | TTYGPTAPSMISAAVR                                      | 1.342536901        | 2               | 3.96068   |
| <b>P38983</b> | <b>RSSA 40S ribosomal protein SA</b>                  | <b>1.39253794</b>  | <b>1.62E-13</b> | <b>8</b>  |
| P38983        | ADHQLPTEASYVNLPTIALCNTDSPLR                           | 1.543974927        | 3               | 5.862941  |

|               |                                                                      |                    |                 |           |
|---------------|----------------------------------------------------------------------|--------------------|-----------------|-----------|
| P38983        | AIVAIENPADVSVISSR                                                    | 1.227219623        | 2               | 4.808642  |
| P38983        | FAAATGATPIAGR                                                        | 0.328256301        | 2               | 3.160638  |
| P38983        | FLAAGTHLGGTNLDFQMEQYIYK                                              | 1.414445612        | 3               | 3.623837  |
| P38983        | FTPGFTTNQIQAAFR                                                      | 1.550217127        | 2               | 4.635994  |
| P38983        | KSDGIYIINLK                                                          | 2.063078046        | 2               | 3.522424  |
| P38983        | SDGIYIINLK                                                           | 1.357761292        | 2               | 3.021649  |
| P38983        | YVDIAIPCNNK                                                          | 1.039489222        | 2               | 3.550746  |
| <b>P39032</b> | <b>RL36 60S ribosomal protein L36</b>                                | <b>1.97697289</b>  | <b>0.50622</b>  | <b>2</b>  |
| P39032        | EELSNVLAAMR                                                          | 1.413095124        | 2               | 2.405522  |
| P39032        | KREELSNVLAAMR                                                        | 1.993021371        | 3               | 3.509144  |
| <b>P39052</b> | <b>DYN2 Dynamin_2</b>                                                | <b>1.241485091</b> | <b>0.440646</b> | <b>2</b>  |
| P39052        | ESSLIVAVTPANMDLANSALK                                                | 1.571597804        | 2               | 2.367339  |
| P39052        | NLVDSYVAIINK                                                         | 1.213322602        | 2               | 3.119872  |
| <b>P40112</b> | <b>PSB3 Proteasome subunit beta type_3</b>                           | <b>1.423310778</b> | <b>2.6E-10</b>  | <b>2</b>  |
| P40112        | FGIQAQMVTTDFQK                                                       | 2.341851176        | 2               | 3.433114  |
| P40112        | FGPYYTEPVIAGLDPK                                                     | 1.410406546        | 2               | 3.095845  |
| <b>P40307</b> | <b>PSB2 Proteasome subunit beta type_2</b>                           | <b>1.033698106</b> | <b>0.002239</b> | <b>3</b>  |
| P40307        | FILNLPFSVR                                                           | 1.972301499        | 2               | 3.282346  |
| P40307        | NGYELSPTAAANFTR                                                      | 1.267814787        | 2               | 4.02458   |
| P40307        | VIDKDGIHNLNITFTK                                                     | 0.900348102        | 2               | 4.03379   |
| <b>P41034</b> | <b>TTPA Alpha_tocopherol transfer protein</b>                        | <b>1.689425145</b> | <b>9.9E-20</b>  | <b>4</b>  |
| P41034        | AECPELSADLHPR                                                        | 2.026163741        | 2               | 2.987019  |
| P41034        | AQEEGVPETPQPLTDAFLLR                                                 | 2.056976363        | 2               | 3.712788  |
| P41034        | QLNEQPDHSPLVQPLAELR                                                  | 1.534998322        | 3               | 4.054836  |
| P41034        | VSLITSELIVQEVETQR                                                    | 1.615849702        | 2               | 2.969604  |
| <b>P41123</b> | <b>RL13 60S ribosomal protein L13</b>                                | <b>1.222470719</b> | <b>3.93E-06</b> | <b>3</b>  |
| P41123        | LATQLTGPMPIR                                                         | 2.411611952        | 2               | 3.122726  |
| P41123        | STESLQANVQR                                                          | 1.221095121        | 2               | 3.889652  |
| P41123        | VDTWFNQPAR                                                           | 1.209014522        | 2               | 3.46971   |
| <b>P41498</b> | <b>PPAC Low molecular weight phosphotyrosine protein phosphatase</b> | <b>1.025967115</b> | <b>0.976349</b> | <b>3</b>  |
| P41498        | IDSAATSTYEVGNPPDYR                                                   | 1.933285134        | 2               | 4.248387  |
| P41498        | IELLGSYDPQK                                                          | 1.030687463        | 2               | 3.221006  |
| P41498        | LVTDENVSDNWR                                                         | 0.863655827        | 2               | 3.761487  |
| <b>P41542</b> | <b>USO1 General vesicular transport factor p115</b>                  | <b>1.157571425</b> | <b>1.47E-05</b> | <b>14</b> |
| P41542        | AWFEVGDENPGWSAQK                                                     | 1.558298776        | 2               | 4.666094  |
| P41542        | CQNEQLQTAVTQQASQIQHK                                                 | 1.043908102        | 3               | 5.305961  |
| P41542        | EQDDLILLADQDQK                                                       | 1.357215532        | 2               | 2.537033  |
| P41542        | GVMGGQSAGPQHTAETIQK                                                  | 1.305045188        | 2               | 4.358958  |
| P41542        | IVAFENAFER                                                           | 1.221039616        | 2               | 3.054385  |
| P41542        | LQTENSELQQR                                                          | 1.26719106         | 2               | 3.13897   |
| P41542        | LREEIEELR                                                            | 1.214357449        | 2               | 2.72273   |
| P41542        | NNNSNQNFFK                                                           | 0.773496176        | 2               | 2.716114  |
| P41542        | QLGPPVQQIILVSPMGVSK                                                  | 2.109830473        | 2               | 4.011497  |
| P41542        | SHQVLLQSLAEK                                                         | 0.624868207        | 2               | 2.951881  |
| P41542        | SQLCSQSLEITR                                                         | 1.307793193        | 2               | 3.365236  |
| P41542        | SVPVEGESELVTAAK                                                      | 0.637631724        | 2               | 4.154253  |
| P41542        | TLEQHDNIVTHYK                                                        | 1.074880107        | 2               | 3.904003  |
| P41542        | VLVSPTNPPGATSSCQK                                                    | 1.331246463        | 2               | 3.920532  |
| <b>P41562</b> | <b>IDHC Isocitrate dehydrogenase [NADP] cytoplasmic</b>              | <b>1.109956023</b> | <b>9.9E-20</b>  | <b>20</b> |
| P41562        | ATDFVVPQPGK                                                          | 1.071131729        | 2               | 3.632432  |
| P41562        | CATITPDEK                                                            | 1.125088086        | 2               | 2.720041  |
| P41562        | DIFQEYDK                                                             | 0.776710869        | 1               | 2.397274  |
| P41562        | DLAACIK                                                              | 0.521939893        | 1               | 1.908251  |
| P41562        | FKDIFQEYDK                                                           | 1.281392272        | 3               | 4.394885  |
| P41562        | GQETSTNPIASIFAWSR                                                    | 1.428264555        | 2               | 4.793027  |

|               |                                                                 |                    |                 |           |
|---------------|-----------------------------------------------------------------|--------------------|-----------------|-----------|
| P41562        | IHGGSVVEMQGDDEMTR                                               | 1.936854076        | 2               | 5.303621  |
| P41562        | KIHGGSVVEMQGDDEMTR                                              | 1.204510807        | 2               | 3.690441  |
| P41562        | LIDDMVAQAMK                                                     | 0.921275457        | 2               | 4.459492  |
| P41562        | LIDDMVAQAMK+Oxidation(4                                         | 1.563386437        |                 |           |
| P41562        | LIDDMVAQAMK+Oxidation(9                                         | 0.900300468        |                 |           |
| P41562        | LILPYVELDLHSYDLGIENR                                            | 2.297401005        | 2               | 4.869486  |
| P41562        | LVTGWVKPIIIGR                                                   | 1.722882907        | 2               | 3.248983  |
| P41562        | SDYLNTFEFMDK                                                    | 1.755531975        | 2               | 4.460377  |
| P41562        | SDYLNTFEFMDK+Oxidation(9                                        | 4.091257669        |                 |           |
| P41562        | SEGGFIWACK                                                      | 1.080418297        | 2               | 3.305981  |
| P41562        | SIEDFAHSSFQMALSK                                                | 1.446460096        | 2               | 5.084091  |
| P41562        | TVEAEAAHGTVTR                                                   | 1.228588708        | 2               | 3.818926  |
| P41562        | VEITYTPK                                                        | 0.973324691        | 2               | 2.454478  |
| P41562        | VTYLVHDFEEGGVAMGMYNQDK                                          | 1.700578971        | 3               | 3.824423  |
| <b>P42123</b> | <b>LDHB L_lactate dehydrogenase B chain</b>                     | <b>1.179932955</b> | <b>0.377529</b> | <b>4</b>  |
| P42123        | DYSVTANSK                                                       | 1.317046663        | 2               | 2.545432  |
| P42123        | IVADKDYSVTANSK                                                  | 2.458106782        | 2               | 3.626652  |
| P42123        | SLADELALVDVLEDK                                                 | 0.919967216        | 2               | 3.633703  |
| P42123        | VIGSGCNLDSAR                                                    | 1.16382198         | 2               | 3.807324  |
| <b>P42228</b> | <b>STAT4 Signal transducer and activator of transcription 4</b> | <b>1.045434718</b> | <b>0.615585</b> | <b>2</b>  |
| P42228        | FHSVEPYNK                                                       | 1.228767988        | 1               | 1.918164  |
| P42228        | GDKGYVPSVFIPISTIR                                               | 0.926833703        | 2               | 2.738825  |
| <b>P42667</b> | <b>SC11A Signal peptidase complex catalytic subunit SEC11A</b>  | <b>1.162906221</b> | <b>0.041032</b> | <b>3</b>  |
| P42667        | GDLLFLTNR                                                       | 1.411291799        | 2               | 2.437879  |
| P42667        | MLSLDFLDDVR                                                     | 0.959559227        | 2               | 3.344279  |
| P42667        | VGEIVVFR                                                        | 1.253651156        | 2               | 3.270651  |
| <b>P42676</b> | <b>NEUL Neurolysin_mitochondrial</b>                            | <b>1.066341975</b> | <b>0.01296</b>  | <b>3</b>  |
| P42676        | AELGALPDDFIDSLEK                                                | 1.036273567        | 2               | 3.32762   |
| P42676        | NLILKPGGSLDGMMLQNFLQR                                           | 1.415435805        | 3               | 4.143296  |
| P42676        | NLNEDDTSLVFSK                                                   | 1.06785004         | 2               | 3.387716  |
| <b>P42930</b> | <b>HSPB1 Heat shock protein beta_1</b>                          | <b>1.366693451</b> | <b>0.705418</b> | <b>2</b>  |
| P42930        | AQIGGPESEQSGAK                                                  | 1.275377512        | 2               | 3.393374  |
| P42930        | VSLDVNHFAPEELTVK                                                | 2.676923244        | 2               | 2.581209  |
| <b>P42932</b> | <b>TCPQ T_complex protein 1 subunit theta</b>                   | <b>1.192213908</b> | <b>0.002613</b> | <b>10</b> |
| P42932        | AIAGTGANVIVTGGK                                                 | 1.482631216        | 2               | 2.752374  |
| P42932        | AVDDGVNTEFK                                                     | 1.02303088         | 2               | 2.510876  |
| P42932        | ELEVQHPPAK                                                      | 1.659905227        | 2               | 2.857693  |
| P42932        | GEENLMDAQVK                                                     | 0.926229289        | 2               | 3.587769  |
| P42932        | GSTDNLMDIER                                                     | 1.600580053        | 2               | 2.76197   |
| P42932        | HEKEDGAISTIVLR                                                  | 6.517346928        | 2               | 2.923689  |
| P42932        | HFGLEEAAYR                                                      | 1.332140818        | 2               | 2.657388  |
| P42932        | NVGLDIEAEVPAVK                                                  | 1.455581137        | 2               | 4.01113   |
| P42932        | QITSYGETCPGLEQYAIK                                              | 1.160129221        | 2               | 4.871949  |
| P42932        | TAEELMNFVK                                                      | 1.14784935         | 2               | 2.587728  |
| <b>P43244</b> | <b>MATR3 Matrin_3</b>                                           | <b>0.965055113</b> | <b>0.004155</b> | <b>5</b>  |
| P43244        | ITPENLPQILLQLK                                                  | 1.630688191        | 2               | 3.428613  |
| P43244        | NTHCSSLPHYQK                                                    | 1.232179839        | 2               | 2.316619  |
| P43244        | TEEGPTLSYGR                                                     | 1.316971392        | 2               | 2.558978  |
| P43244        | TENPAEGKEQEEK                                                   | 0.936725937        | 2               | 3.382387  |
| P43244        | YQLLQLVEPFGVISNHLILNK                                           | 1.289336766        | 3               | 3.760192  |
| <b>P43274</b> | <b>H14 Histone H1.4</b>                                         | <b>1.191190429</b> | <b>0.971828</b> | <b>4</b>  |
| P43274        | ALAAAGYDVEK                                                     | 1.219559882        | 2               | 3.861321  |
| P43274        | ALAAAGYDVEKNNSR                                                 | 0.736391101        | 2               | 3.29513   |
| P43274        | SGVSLAALK                                                       | 0.947464223        | 2               | 2.991817  |
| P43274        | SGVSLAALKK                                                      | 0.95249938         | 2               | 2.68434   |

|               |                                                                            |                    |                 |           |
|---------------|----------------------------------------------------------------------------|--------------------|-----------------|-----------|
| <b>P43278</b> | <b>H10 Histone H1.0</b>                                                    | <b>1.057889912</b> | <b>0.000577</b> | <b>2</b>  |
| P43278        | VGENADSQIK                                                                 | 0.921378558        | 2               | 3.439698  |
| P43278        | YSDMIVAAIQAEK                                                              | 1.365986629        | 2               | 4.472862  |
| <b>P43883</b> | <b>PLIN2 Perilipin_2</b>                                                   | <b>1.260607519</b> | <b>0.324904</b> | <b>2</b>  |
| P43883        | DSVASTVSGVVDK                                                              | 1.287091354        | 2               | 2.35521   |
| P43883        | LEPQIAVANTYACK                                                             | 0.257516695        | 2               | 3.944712  |
| <b>P45591</b> | <b>COF2 Cofilin_2</b>                                                      | <b>1.37480907</b>  | <b>0.10027</b>  | <b>2</b>  |
| P45591        | HEWQVNGLDDIKDR                                                             | 1.626957244        | 3               | 4.854836  |
| P45591        | QILVGDIGDVEDPYTSFVK                                                        | 1.355620714        | 2               | 3.860456  |
| <b>P45592</b> | <b>COF1 Cofilin_1</b>                                                      | <b>1.274951468</b> | <b>8.88E-06</b> | <b>5</b>  |
| P45592        | EILVGDVGQTVDDPYTTFVK                                                       | 1.242829012        | 2               | 5.110716  |
| P45592        | HELQANCYEEVK                                                               | 1.061421382        | 2               | 3.830191  |
| P45592        | HELQANCYEEVKDR                                                             | 1.559909642        | 3               | 5.627933  |
| P45592        | MLPDKDCR                                                                   | 1.452580394        | 2               | 2.336674  |
| P45592        | NIILEEGKEILVGDVGQTVDDPYTTFVK                                               | 1.413225909        | 3               | 4.803088  |
| <b>P45878</b> | <b>FKBP2 Peptidyl_prolyl cis_trans isomerase FKBP2</b>                     | <b>1.141232369</b> | <b>0.003903</b> | <b>4</b>  |
| P45878        | GWDQGLLGMCEGEK                                                             | 0.958521793        | 2               | 4.301601  |
| P45878        | KGDVLMHMYTGK                                                               | 0.577251154        | 2               | 3.875701  |
| P45878        | KLVIPSELGYGER                                                              | 1.617460468        | 2               | 2.749429  |
| P45878        | LVIPSELGYGER                                                               | 1.478817354        | 2               | 2.794266  |
| <b>P45953</b> | <b>ACADV Very long_chain specific acyl_CoA dehydrogenase_mitochondrial</b> | <b>1.151498077</b> | <b>2.73E-05</b> | <b>17</b> |
| P45953        | AMVENGLVTSNPLR                                                             | 0.807909224        | 2               | 4.051934  |
| P45953        | AMVENGLVTSNPLRV                                                            | 1.588791507        | 2               | 4.196594  |
| P45953        | ASNTSEVYFDGVK                                                              | 1.419194569        | 2               | 3.605339  |
| P45953        | ELGAFGLQVPSELGGLSNTQYAR                                                    | 1.875444012        | 3               | 5.121884  |
| P45953        | ENMASLQSNPQQQLFR                                                           | 1.41259735         | 2               | 4.249867  |
| P45953        | FFEEVNDPAK                                                                 | 0.888272288        | 2               | 3.025122  |
| P45953        | FFEEVNDPAKNDSLEKVEEDTLQGLK                                                 | 1.357485658        | 3               | 5.583981  |
| P45953        | GIVNEQFLQR                                                                 | 1.112518851        | 2               | 3.141248  |
| P45953        | IFEGTNDILR                                                                 | 1.860228864        | 2               | 3.146416  |
| P45953        | NDSLEKVEEDTLQGLK                                                           | 1.325133302        | 2               | 3.640109  |
| P45953        | NPLGNVGLLIGEASK                                                            | 1.149868591        | 2               | 3.707093  |
| P45953        | SFGGVTHGLPEK                                                               | 1.412767641        | 2               | 2.606049  |
| P45953        | SFGGVTHGLPEKK                                                              | 1.00307257         | 2               | 2.957566  |
| P45953        | SGELAVQALEQFATVVEAK                                                        | 1.336770604        | 3               | 4.121156  |
| P45953        | SLSEGYPTAQHEK                                                              | 1.332434375        | 2               | 3.429792  |
| P45953        | TGIGSGLSLSGIVHPELSR                                                        | 1.214654604        | 3               | 4.606817  |
| P45953        | VEEDTLQGLK                                                                 | 0.698142467        | 2               | 2.769583  |
| <b>P46061</b> | <b>RAGP1 Ran GTPase_activating protein 1</b>                               | <b>1.632632807</b> | <b>0.005179</b> | <b>2</b>  |
| P46061        | TAVLDAIDALMK                                                               | 1.551727987        | 2               | 3.176596  |
| P46061        | VINLNDNTFTEK                                                               | 1.665008237        | 2               | 2.512266  |
| <b>P46418</b> | <b>GSTA5 Glutathione S_transferase alpha_5</b>                             | <b>1.168845825</b> | <b>8.83E-05</b> | <b>4</b>  |
| P46418        | AILNYIATK                                                                  | 0.567546936        | 2               | 3.291475  |
| P46418        | SDGSLMFEQVPMVEIDGMK                                                        | 1.355469133        | 2               | 4.38341   |
| P46418        | SHGQDYLVGNK                                                                | 1.515734882        | 2               | 3.637712  |
| P46418        | VSNLPTVK                                                                   | 1.151555987        | 2               | 2.768827  |
| <b>P46425</b> | <b>GSTP2 Glutathione S_transferase P 2</b>                                 | <b>1.071575894</b> | <b>0.024477</b> | <b>3</b>  |
| P46425        | ALPGHLKPFETLLSQNGGK                                                        | 0.84371464         | 2               | 4.162653  |
| P46425        | FEDGDLTLYQSNAILR                                                           | 1.083732342        | 2               | 4.533219  |
| P46425        | MLLADQGSWK                                                                 | 1.384422506        | 2               | 2.509147  |
| <b>P46462</b> | <b>TERA Transitional endoplasmic reticulum ATPase</b>                      | <b>0.928636944</b> | <b>3E-15</b>    | <b>24</b> |
| P46462        | AIANECQANFISIK                                                             | 0.989466611        | 2               | 3.706075  |
| P46462        | EDEEESLNEVGYDDIGGCR                                                        | 18.05749624        | 2               | 5.308833  |
| P46462        | ELQELVQYPVEHPDK                                                            | 1.188640555        | 2               | 4.566929  |
| P46462        | ETVVEVPQVTWEDIGGLEDVK                                                      | 0.805254663        | 2               | 4.472165  |
| P46462        | ETVVEVPQVTWEDIGGLEDVKR                                                     | 1.450560332        | 2               | 4.112364  |

|               |                                                                                           |                    |                 |           |
|---------------|-------------------------------------------------------------------------------------------|--------------------|-----------------|-----------|
| P46462        | EVDIGIPDATGR                                                                              | 0.99312249         | 2               | 2.739487  |
| P46462        | GDDLSTAILK                                                                                | 1.23371034         | 2               | 3.060446  |
| P46462        | GGNIGDGGGAADR                                                                             | 1.311640022        | 2               | 3.055141  |
| P46462        | GILLYGPPGTGK                                                                              | 1.070541695        | 2               | 2.852868  |
| P46462        | IVSQLLTLMDGLK                                                                             | 1.991145141        | 2               | 3.512601  |
| P46462        | KYEMFAQTLQQSR                                                                             | 1.541428715        | 2               | 4.056845  |
| P46462        | LADDVDLEQVANETHGHVGADLAALCSEALQAIR                                                        | 2.147031743        | 3               | 6.143382  |
| P46462        | LAGESESNLKAFEEAEK                                                                         | 1.274084361        | 2               | 2.574522  |
| P46462        | LDQLIYIPLPEK                                                                              | 1.51749262         | 2               | 4.507355  |
| P46462        | LEILQIHTK                                                                                 | 1.220220682        | 2               | 2.828236  |
| P46462        | LGDVISIQPCPDVK                                                                            | 1.015240739        | 2               | 3.969112  |
| P46462        | LIVDEAINEDNSVLSQPK                                                                        | 1.398665092        | 2               | 5.452277  |
| P46462        | MDELQLFR                                                                                  | 1.362546623        | 2               | 3.190644  |
| P46462        | MTNGFSGADLTEICQR                                                                          | 0.5827602          | 2               | 4.462412  |
| P46462        | NAPAIIFIDELDAIAPK                                                                         | 0.774348967        | 2               | 4.931983  |
| P46462        | QTNPSAMEVEEDDPVPEIR                                                                       | 0.804277321        | 2               | 4.396362  |
| P46462        | RSVSDNDR                                                                                  | 0.791116291        | 2               | 2.609674  |
| P46462        | VINQLTEMDGMSTK                                                                            | 1.747539067        | 2               | 4.591311  |
| P46462        | WALSQSNPSALR                                                                              | 1.874595511        | 2               | 3.451112  |
| <b>P46664</b> | <b>PURA2 Adenylosuccinate synthetase isozyme 2</b>                                        | <b>1.737264448</b> | <b>0.000658</b> | <b>5</b>  |
| P46664        | FIEDELQIPVK                                                                               | 1.004771006        | 2               | 3.152793  |
| P46664        | LDILDMFTEIK                                                                               | 1.692807769        | 2               | 3.266029  |
| P46664        | MCDLVSDFDFGFSER                                                                           | 3.104625564        | 2               | 3.662362  |
| P46664        | VGIGAFPTEQDNEIGELLQTR                                                                     | 1.919166124        | 2               | 4.382331  |
| P46664        | VVDLLAQDADIVCR                                                                            | 2.202514422        | 2               | 3.518876  |
| <b>P46720</b> | <b>SO1A1 Solute carrier organic anion transporter family member 1A1</b>                   | <b>0.819073897</b> | <b>0.133509</b> | <b>4</b>  |
| P46720        | ESEHTDVHGSPQVENDGELK                                                                      | 1.364751731        | 3               | 3.745527  |
| P46720        | GIGETPIVPLGISVIEDFAK                                                                      | 1.428606184        | 2               | 3.801636  |
| P46720        | GVQHQLHVESK                                                                               | 0.793567568        | 2               | 3.021428  |
| P46720        | SENSPLYIGILEMGK                                                                           | 1.553852278        | 2               | 3.439306  |
| <b>P46844</b> | <b>BIEA Biliverdin reductase A</b>                                                        | <b>1.081425743</b> | <b>0.681209</b> | <b>4</b>  |
| P46844        | FGVVVGVGR                                                                                 | 1.524713708        | 2               | 2.834647  |
| P46844        | GLLSWIEEK                                                                                 | 1.689100081        | 2               | 2.517597  |
| P46844        | LLDQVSAEDLAAEK                                                                            | 1.065012689        | 2               | 4.658231  |
| P46844        | MTVQLETQNK                                                                                | 1.009849315        | 2               | 2.496026  |
| <b>P46953</b> | <b>3HAO 3_hydroxyanthranilate 3_4_dioxygenase</b>                                         | <b>1.332255362</b> | <b>0.227119</b> | <b>10</b> |
| P46953        | AQGSVALSVTQDPACK                                                                          | 2.334356523        | 2               | 4.521562  |
| P46953        | ASFQPPVCNK                                                                                | 1.315053166        | 2               | 2.55939   |
| P46953        | DLGTQLAPIIQEFFHSEQYR                                                                      | 1.316655256        | 2               | 3.547767  |
| P46953        | FANTMGLVIER                                                                               | 1.249138743        | 2               | 3.56083   |
| P46953        | METELDGLR                                                                                 | 1.391096362        | 2               | 2.740808  |
| P46953        | QDQDVWLWQLEGSSK                                                                           | 1.436227169        | 2               | 2.347336  |
| P46953        | QGEIFLLPAR                                                                                | 1.060512613        | 2               | 2.766766  |
| P46953        | RMETELDGLR                                                                                | 1.004603198        | 2               | 2.488079  |
| P46953        | TGKPNPDQLLK                                                                               | 1.252579576        | 3               | 3.582463  |
| P46953        | YYVGDTEVDLFEK                                                                             | 1.340382164        | 2               | 3.544656  |
| <b>P46978</b> | <b>STT3A Dolichyl_diphosphooligosaccharide__protein glycosyltransferase subunit STT3A</b> | <b>1.451017894</b> | <b>5.25E-06</b> | <b>7</b>  |
| P46978        | FESVIHEFDYPYFNRY                                                                          | 1.8559928          | 2               | 2.343237  |
| P46978        | FGQVYTEAK                                                                                 | 1.48540445         | 2               | 2.724549  |
| P46978        | FHNWFDDR                                                                                  | 1.533227619        | 2               | 2.546376  |
| P46978        | FYSLLDPSYAK                                                                               | 1.543653739        | 2               | 2.896611  |
| P46978        | NLDISRPDKK                                                                                | 1.641163746        | 2               | 2.412539  |
| P46978        | VGQAMASTEEL                                                                               | 0.752134388        | 2               | 3.170659  |
| P46978        | VGQAMASTEEL+Oxidation(4                                                                   | 1.030202697        |                 |           |

|               |                                                           |                    |                 |           |
|---------------|-----------------------------------------------------------|--------------------|-----------------|-----------|
| <b>P47198</b> | <b>RL22 60S ribosomal protein L22</b>                     | <b>1.711771799</b> | <b>7.61E-05</b> | <b>2</b>  |
| P47198        | AGNLGGGVVTIER                                             | 1.208893469        | 2               | 3.064136  |
| P47198        | FTLDCTHPVEDGIMDAANFEQLQER                                 | 1.856418427        | 3               | 5.531898  |
| <b>P47875</b> | <b>CSRP1 Cysteine and glycine_rich protein 1</b>          | <b>0.991046991</b> | <b>0.000145</b> | <b>4</b>  |
| P47875        | GFGFGQGAGALVHSE                                           | 1.389077759        | 2               | 3.158011  |
| P47875        | GLESTTLADKDGIEYCK                                         | 1.680198265        | 2               | 5.256585  |
| P47875        | HEEAPGHRPTTNPNAASK                                        | 0.629366604        | 2               | 3.633925  |
| P47875        | NLDSTTVAVHGEEIYCK                                         | 1.011287311        | 2               | 4.721465  |
| <b>P47942</b> | <b>DPYL2 Dihydropyrimidinase_related protein 2</b>        | <b>1.08670353</b>  | <b>0.959267</b> | <b>3</b>  |
| P47942        | FQMPDQGMTSADDFQGTK                                        | 0.97213558         | 2               | 4.076668  |
| P47942        | GLYDGPVCEVSVTPK                                           | 1.429788723        | 2               | 3.565344  |
| P47942        | SITIANQTNCPLYVTK                                          | 1.085374329        | 2               | 3.428096  |
| <b>P48004</b> | <b>PSA7 Proteasome subunit alpha type_7</b>               | <b>1.049784092</b> | <b>0.07551</b>  | <b>2</b>  |
| P48004        | NYTDDAIETDDLTIK                                           | 0.867331385        | 2               | 4.543657  |
| P48004        | YVAEIEKEKEENEK                                            | 1.371580719        | 2               | 5.432276  |
| <b>P48024</b> | <b>EIF1 Eukaryotic translation initiation factor 1</b>    | <b>1.510962779</b> | <b>0.01467</b>  | <b>2</b>  |
| P48024        | FACNGTVIEHPEYGEVIQLQGDQR                                  | 1.516915738        | 3               | 5.676169  |
| P48024        | TLTTVQGIADDYDK                                            | 1.340685898        | 2               | 3.668185  |
| <b>P48037</b> | <b>ANXA6 Annexin A6</b>                                   | <b>1.361877372</b> | <b>2.72E-13</b> | <b>20</b> |
| P48037        | AANDFNPDAK                                                | 0.873011532        | 2               | 3.552063  |
| P48037        | AINEAYKEDYHK                                              | 1.307678429        | 2               | 3.396749  |
| P48037        | ALIEILATR                                                 | 1.418733078        | 2               | 3.217064  |
| P48037        | ALLALCGGED                                                | 1.754038905        | 1               | 2.150714  |
| P48037        | CLIEILASR                                                 | 1.051615756        | 2               | 2.657546  |
| P48037        | DAFVAIVQSVK                                               | 1.16061831         | 2               | 3.826552  |
| P48037        | DLESIIIGDTSGHFQK                                          | 1.520450789        | 2               | 4.436759  |
| P48037        | ENDDVVEDLVQQVDQDLYEAGELK                                  | 1.154637154        | 2               | 5.15064   |
| P48037        | GELSGDFEK                                                 | 0.996250875        | 1               | 2.180691  |
| P48037        | GFGSDKESILELTSR                                           | 0.922202856        | 2               | 4.275832  |
| P48037        | GIGTDEATIIDIITQR                                          | 1.50219173         | 2               | 4.264729  |
| P48037        | GSVHDFADFANQDAEALYTAMK                                    | 1.283081776        | 3               | 4.136739  |
| P48037        | QRQEICQSYK                                                | 1.044586948        | 2               | 3.197263  |
| P48037        | SEIDLLNIR                                                 | 1.856172821        | 2               | 3.070961  |
| P48037        | SEISGLAR                                                  | 1.450373206        | 2               | 2.344545  |
| P48037        | SELDMLDIR                                                 | 1.252187705        | 2               | 2.960925  |
| P48037        | SLEDALSSDTSGHFK                                           | 1.400194738        | 2               | 3.675353  |
| P48037        | TNEQIHQLVAAYK                                             | 1.260832629        | 2               | 4.02279   |
| P48037        | TNYDIEHVIK                                                | 1.072493331        | 2               | 3.088604  |
| P48037        | TTGKPIEASIR                                               | 1.826294519        | 2               | 2.537423  |
| <b>P48500</b> | <b>TPIS Triosephosphate isomerase</b>                     | <b>1.137393007</b> | <b>0.011509</b> | <b>15</b> |
| P48500        | CLGELICTLNAAK                                             | 1.407876852        | 2               | 3.566662  |
| P48500        | CNVSEGVAQCTR                                              | 1.515147439        | 2               | 3.955785  |
| P48500        | DLGATWVVLGHSER                                            | 1.92382809         | 2               | 4.164804  |
| P48500        | ELASQPDVDGFLVGGASLKPEFVDIINAK                             | 1.211549479        | 4               | 5.940062  |
| P48500        | HIFGESDELIGQK                                             | 1.246854049        | 2               | 4.680532  |
| P48500        | IAVAAQNCYK                                                | 1.688171805        | 2               | 2.7012    |
| P48500        | IYGGSVTGATCK                                              | 1.288210646        | 2               | 4.339893  |
| P48500        | LPADTEVVCAPPTAYIDFAR                                      | 1.337374437        | 2               | 4.41963   |
| P48500        | RHIFGESDELIGQK                                            | 1.325601918        | 2               | 4.416492  |
| P48500        | TATPQQAQEVHEK                                             | 1.165040062        | 2               | 3.639288  |
| P48500        | TATPQQAQEVHEKLR                                           | 0.925384438        | 2               | 2.399762  |
| P48500        | VNHALSEGLGVIACIGEK                                        | 1.633421792        | 2               | 5.674907  |
| P48500        | VTNGAFTGEISPGMIK                                          | 1.137045437        | 2               | 4.865503  |
| P48500        | VVFEQTK                                                   | 1.157432879        | 1               | 1.933349  |
| P48500        | VVLAYEPVWAIGTGK                                           | 1.209603754        | 2               | 4.532421  |
| <b>P48508</b> | <b>GSH0 Glutamate__cysteine ligase regulatory subunit</b> | <b>0.90452813</b>  | <b>0.087282</b> | <b>4</b>  |

|               |                                              |                    |                 |           |
|---------------|----------------------------------------------|--------------------|-----------------|-----------|
| P48508        | ASTLHLQGTGNLLNWGR                            | 0.934551616        | 3               | 4.011608  |
| P48508        | FFPDVLECTMSHAVEK                             | 1.075876838        | 2               | 3.592967  |
| P48508        | INPDEREEMK                                   | 1.445457993        | 2               | 2.643714  |
| P48508        | TLNEWSSQISPDVLR                              | 0.887987632        | 2               | 4.684856  |
| <b>P48675</b> | <b>DESM Desmin</b>                           | <b>1.757733272</b> | <b>0.59285</b>  | <b>3</b>  |
| P48675        | NISEAEEWYKSK                                 | 1.687128068        | 2               | 2.325622  |
| P48675        | TSGGAGGLGSLR                                 | 1.85765017         | 2               | 2.701077  |
| P48675        | VSDLTQAANK                                   | 3.109176993        | 2               | 2.982995  |
| <b>P48679</b> | <b>LMNA Prelamin_A/C</b>                     | <b>1.1918134</b>   | <b>0.063984</b> | <b>19</b> |
| P48679        | AAYEAEIGDAR                                  | 1.43144658         | 2               | 2.365023  |
| P48679        | AQHEDQVEQYK                                  | 1.007764217        | 2               | 3.046567  |
| P48679        | AQHEDQVEQYKK                                 | 1.250143235        | 2               | 4.33551   |
| P48679        | GSHCSSGDPAEYNLR                              | 1.336189519        | 2               | 3.950425  |
| P48679        | IDSLSAQLSQLQK                                | 1.30044057         | 2               | 3.169589  |
| P48679        | ITESEEVVSR                                   | 1.099492201        | 2               | 3.155397  |
| P48679        | LEAALGEAK                                    | 1.800871257        | 2               | 2.316311  |
| P48679        | LKDLEALLNSK                                  | 1.254444441        | 2               | 2.864124  |
| P48679        | LQEKEDLQELNDR                                | 1.504779926        | 2               | 4.228195  |
| P48679        | MQQQLDEYQELLDIK                              | 1.580365384        | 2               | 4.554407  |
| P48679        | NIYSEELR                                     | 1.390924222        | 1               | 2.059408  |
| P48679        | NSNLVGAAHEELQQSR                             | 1.019211061        | 2               | 4.710769  |
| P48679        | SGAQASSTPLSPTR                               | 1.071371014        | 2               | 3.791151  |
| P48679        | SLETENAGLR                                   | 1.289300236        | 2               | 2.868083  |
| P48679        | SVGGSSGGSGFDNLVTR                            | 1.006755854        | 2               | 3.584023  |
| P48679        | TALINATGEEVAMR                               | 1.211059205        | 2               | 3.576835  |
| P48679        | TLEGELHDLR                                   | 2.45899108         | 2               | 2.492499  |
| P48679        | TVLCGTCGQPADK                                | 1.108379323        | 2               | 3.44474   |
| P48679        | VAVEEVDEEGK                                  | 1.286991821        | 2               | 3.108805  |
| <b>P48721</b> | <b>GRP75 Stress_70 protein_mitochondrial</b> | <b>1.306579348</b> | <b>9.9E-20</b>  | <b>30</b> |
| P48721        | AQFEGIVTDLIK                                 | 1.364608166        | 2               | 3.720623  |
| P48721        | ASNGDAWVEAHGK                                | 1.552509166        | 2               | 3.815917  |
| P48721        | DAGQISGLNVLR                                 | 2.525057378        | 2               | 2.757384  |
| P48721        | DDIENMVK                                     | 1.925511402        | 1               | 2.022432  |
| P48721        | EQQIVIQSSGGLSK                               | 1.207659193        | 2               | 3.863011  |
| P48721        | EQQIVIQSSGGLSKDDIENMVK                       | 1.732435749        | 2               | 4.529761  |
| P48721        | ERVEAVNMAEGIIHDTEK                           | 1.128067991        | 3               | 5.565117  |
| P48721        | ETAENYLGHATAK                                | 1.32494672         | 2               | 3.1378    |
| P48721        | GAVVGIDLGTNSCAVMEGK                          | 1.31184849         | 2               | 5.385311  |
| P48721        | LFEMAYK                                      | 1.218897742        | 2               | 2.305128  |
| P48721        | LLGQFTLIGIPPAPR                              | 2.128028954        | 2               | 3.732023  |
| P48721        | MEEFKDQLPADECNK                              | 2.215066059        | 2               | 4.607238  |
| P48721        | MEEFKDQLPADECNK+Oxidation(0                  | 2.323596367        |                 |           |
| P48721        | MKETAENYLGHATAK                              | 1.113441904        | 2               | 4.308012  |
| P48721        | MKETAENYLGHATAK+Oxidation(0                  | 1.261060462        |                 |           |
| P48721        | NAVITVPAYFNDSQR                              | 1.348718912        | 2               | 3.464715  |
| P48721        | QAVTNPNTFYATK                                | 1.119435868        | 2               | 3.802908  |
| P48721        | RETVGDLTK                                    | 0.732215906        | 2               | 2.32814   |
| P48721        | RYDDPEVQK                                    | 1.289742152        | 2               | 3.230685  |
| P48721        | RYDDPEVQKDTK                                 | 1.276764323        | 2               | 3.78626   |
| P48721        | SDIGEVILVGGMTR                               | 1.326177554        | 2               | 3.983572  |
| P48721        | SQVFSTAADGQTQVEIK                            | 1.06350217         | 2               | 4.605309  |
| P48721        | STNGDTFLGGEDFDQALLR                          | 1.243690133        | 2               | 6.078481  |
| P48721        | TTPSVVAFTPDGER                               | 1.036435001        | 2               | 3.394622  |
| P48721        | VEAVNMAEGIIHDTEK                             | 1.462427192        | 2               | 4.573091  |
| P48721        | VINEPTAAALAYGLDK                             | 1.614681026        | 2               | 3.882973  |
| P48721        | VLENAEGAR                                    | 0.961763541        | 2               | 3.093744  |
| P48721        | VQQTQQLDFGR                                  | 1.071966545        | 2               | 3.729154  |



|               |                                                                            |                    |                 |           |
|---------------|----------------------------------------------------------------------------|--------------------|-----------------|-----------|
| P48721        | YDDPEVQK                                                                   | 1.387963131        | 2               | 2.350807  |
| P48721        | YDDPEVQKDTK                                                                | 1.374507462        | 2               | 2.749007  |
| <b>P48998</b> | <b>INVO Involucrin</b>                                                     | <b>1.179363741</b> | <b>0.275794</b> | <b>2</b>  |
| P48998        | ELLDQRLDQELVNK                                                             | 1.209500979        | 2               | 2.325285  |
| P48998        | HKLENLTQKEK                                                                | 1.177939853        | 1               | 1.938639  |
| <b>P49025</b> | <b>CTRO Citron Rho_interacting kinase</b>                                  | <b>1.45153271</b>  | <b>0.160306</b> | <b>2</b>  |
| P49025        | LEEQLEK                                                                    | 1.452879988        | 1               | 2.010406  |
| P49025        | LMMNQLLEEDLVSARR+Oxidation(1                                               | 1.07677102         |                 |           |
| <b>P49134</b> | <b>ITB1 Integrin beta_1</b>                                                | <b>1.109349872</b> | <b>0.645783</b> | <b>3</b>  |
| P49134        | CNCQSHGIPASPK                                                              | 1.393175679        | 2               | 3.348118  |
| P49134        | FCECDNFNCDR                                                                | 0.785128547        | 2               | 3.367566  |
| P49134        | GEFFNELVGQQR                                                               | 0.989868246        | 2               | 2.883482  |
| <b>P49186</b> | <b>MK09 Mitogen_activated protein kinase 9</b>                             | <b>1.061147337</b> | <b>0.287732</b> | <b>2</b>  |
| P49186        | DLLSKMLVIDPDK                                                              | 0.934826694        | 1               | 1.977767  |
| P49186        | VIEQLGTPSAEFMK                                                             | 1.365872011        | 2               | 2.60854   |
| <b>P49242</b> | <b>RS3A 40S ribosomal protein S3a</b>                                      | <b>0.947548664</b> | <b>1.39E-07</b> | <b>9</b>  |
| P49242        | ACQSIYPLHDVFR                                                              | 1.568751642        | 2               | 4.315433  |
| P49242        | ADGYEPPVQESV                                                               | 0.824565864        | 1               | 2.080672  |
| P49242        | LIPDSIGKDIEK                                                               | 1.414697422        | 2               | 2.512843  |
| P49242        | LITEDVQGK                                                                  | 7.189141511        | 2               | 2.563357  |
| P49242        | LMELHGEGGSSGK                                                              | 1.574189226        | 2               | 3.516199  |
| P49242        | LMELHGEGGSSGK+Oxidation(1                                                  | 0.963604678        |                 |           |
| P49242        | NCLTNFHGMDLTR                                                              | 0.987420482        | 2               | 3.981197  |
| P49242        | TTDGYLLR                                                                   | 1.826481407        | 2               | 2.716384  |
| P49242        | VFEVSLADLQNDEVAFR                                                          | 1.772611831        | 2               | 4.54017   |
| <b>P49432</b> | <b>ODPB Pyruvate dehydrogenase E1 component subunit beta_mitochondrial</b> | <b>1.09999621</b>  | <b>0.218412</b> | <b>7</b>  |
| P49432        | EAINQGMDEELERDEK                                                           | 2.469833317        | 2               | 3.713857  |
| P49432        | ILEDNSIPQVK                                                                | 1.051653518        | 2               | 3.382252  |
| P49432        | IMEGPAFNFLDAPAVR                                                           | 1.431991232        | 2               | 4.531613  |
| P49432        | IMEGPAFNFLDAPAVR+Oxidation(1                                               | 1.077503674        |                 |           |
| P49432        | TIRPMDIEAIEASVMK                                                           | 1.089417569        | 3               | 4.463601  |
| P49432        | VLLGEEVAQYDGAYK                                                            | 1.436214901        | 2               | 4.225796  |
| P49432        | VTGADVPMPIYAK                                                              | 0.874387924        | 2               | 2.554392  |
| <b>P49889</b> | <b>ST1E3 Estrogen sulfotransferase_ isoform 3</b>                          | <b>1.023035238</b> | <b>0.993418</b> | <b>12</b> |
| P49889        | CKEDALFNR                                                                  | 1.070689934        | 2               | 2.503449  |
| P49889        | FEEHYQQQMK                                                                 | 1.055181313        | 2               | 2.987748  |
| P49889        | FEEHYQQQMK+Oxidation(8                                                     | 0.996102433        |                 |           |
| P49889        | FMEGQVPYGSWYDHVK                                                           | 1.199542338        | 2               | 4.129925  |
| P49889        | IIQHTSFQEMK                                                                | 0.712909888        | 2               | 2.882983  |
| P49889        | LIEFLER                                                                    | 1.057661724        | 2               | 2.471407  |
| P49889        | LIEFLERDPSAELVDR                                                           | 2.931656713        | 3               | 5.171266  |
| P49889        | NEDLINGIK                                                                  | 0.920384872        | 2               | 3.081187  |
| P49889        | NNPCTNYSMLPETMIDLK                                                         | 0.963177211        | 2               | 5.26169   |
| P49889        | NNPCTNYSMLPETMIDLK+Oxidation(13                                            | 1.292597125        |                 |           |
| P49889        | NNPCTNYSMLPETMIDLK+Oxidation(8                                             | 1.292597125        |                 |           |
| P49889        | SGSTWISEIVDMIYK                                                            | 1.133922358        | 2               | 4.065467  |
| <b>P50137</b> | <b>TKT Transketolase</b>                                                   | <b>1.051577575</b> | <b>9.88E-15</b> | <b>24</b> |
| P50137        | AVELAANTK                                                                  | 0.715874748        | 1               | 2.093319  |
| P50137        | GITGIEDK                                                                   | 1.097209274        | 1               | 2.562754  |
| P50137        | GITGIEDKEAWHGKPLPK                                                         | 1.104294955        | 3               | 3.606737  |
| P50137        | HQPTAIIAK                                                                  | 0.067048466        | 2               | 2.330532  |
| P50137        | IIALDGDTK                                                                  | 2.507614431        | 2               | 2.670165  |
| P50137        | ILATPPQEDAPSVDIANIR                                                        | 1.310348469        | 2               | 4.801414  |
| P50137        | ISSDLDGHPVVK                                                               | 1.156341464        | 2               | 3.372873  |
| P50137        | KISSDLDGHPVVK                                                              | 1.030948782        | 2               | 3.840163  |
| P50137        | LAVSQVPR                                                                   | 1.171870016        | 2               | 2.36242   |

|               |                                                  |                    |                 |           |
|---------------|--------------------------------------------------|--------------------|-----------------|-----------|
| P50137        | LAVSQVPRSGKPAELLK                                | 1.25138548         | 2               | 2.587433  |
| P50137        | LDNLVAIFDINR                                     | 1.25489249         | 2               | 4.524677  |
| P50137        | LGQSDPAPLQHQVDVYQK                               | 1.364070995        | 2               | 3.860001  |
| P50137        | MFGIDKDAIVQAVK                                   | 1.21549642         | 2               | 4.853958  |
| P50137        | MFGIDKDAIVQAVK+Oxidation(0                       | 1.273727251        |                 |           |
| P50137        | NMAEQIIQEIYSQVQSK                                | 1.051441183        | 3               | 6.022956  |
| P50137        | NSTFSELFK                                        | 1.22686989         | 2               | 2.415645  |
| P50137        | QAFTDVATGSLGQGLGAACGMAYTGK                       | 2.223257191        | 3               | 4.37783   |
| P50137        | SGKPAELLK                                        | 0.14006102         | 3               | 3.300893  |
| P50137        | SKDDQVTVIGAGVTLHEALAAEMLK                        | 1.423588802        | 3               | 4.590706  |
| P50137        | SVPMSTVFYPSDGVATEK                               | 1.131889716        | 2               | 4.500248  |
| P50137        | SVPMSTVFYPSDGVATEK+Oxidation(3                   | 1.493904838        |                 |           |
| P50137        | TSRPENAIIYSNNEDFQVGQAK                           | 0.956973511        | 3               | 5.894084  |
| P50137        | VLDPFTIKPLDK                                     | 1.191303352        | 2               | 3.240458  |
| P50137        | VLDPFTIKPLDKK                                    | 0.847106988        | 2               | 2.534468  |
| <b>P50169</b> | <b>RDH3 Retinol dehydrogenase 3</b>              | <b>1.17487332</b>  | <b>0.00466</b>  | <b>9</b>  |
| P50169        | AMESLVNTCSGDLSLVTDCMEHALTSCHPR                   | 1.289889358        | 3               | 5.030165  |
| P50169        | AMESLVNTCSGDLSLVTDCMEHALTSCHPR+Oxidation(1       | 1.315179833        |                 |           |
| P50169        | FQDSYMK                                          | 1.332188514        | 1               | 1.986191  |
| P50169        | GLWGLVNNAGISVPGPNEWMMR                           | 1.664682379        | 3               | 3.367166  |
| P50169        | KLWDQTTEEVK                                      | 1.475142553        | 2               | 3.050054  |
| P50169        | KLWDQTTEEVKEIYGEK                                | 1.178425688        | 3               | 4.978757  |
| P50169        | LWDQTTEEVK                                       | 1.063924663        | 2               | 3.170134  |
| P50169        | LWDQTTEEVKEIYGEK                                 | 1.247910544        | 2               | 4.810603  |
| P50169        | MSLVGGGYCISK                                     | 1.172745691        | 2               | 4.053123  |
| <b>P50237</b> | <b>ST1C1 Sulfotransferase 1C1</b>                | <b>1.348995239</b> | <b>0.00415</b>  | <b>12</b> |
| P50237        | AGTTWTQEIVDMIQNDGDVQK                            | 1.394854012        | 3               | 5.279291  |
| P50237        | DISEEVLNK                                        | 0.988796791        | 1               | 2.468704  |
| P50237        | DLHLGEQDLQPETR                                   | 1.21586271         | 2               | 4.628257  |
| P50237        | EVNGILMSK                                        | 0.818270831        | 1               | 1.916024  |
| P50237        | FLEKDISEEVLNK                                    | 1.163836951        | 2               | 2.889341  |
| P50237        | HPFIEWTLPSPLNSGLDLANK                            | 1.467651191        | 3               | 4.036582  |
| P50237        | IWNFQAKPDDLIIATYAK                               | 1.816155087        | 3               | 3.678375  |
| P50237        | MKDLHLGEQDLQPETR                                 | 1.317406607        | 2               | 5.189457  |
| P50237        | MLPDPGTLGEYIEQFK                                 | 1.21287782         | 3               | 4.946307  |
| P50237        | MLPDPGTLGEYIEQFK+Oxidation(0                     | 1.982092251        |                 |           |
| P50237        | THLPVHMLPPSFWK                                   | 3.403710324        | 3               | 3.71863   |
| P50237        | VLWGSWYDHVK                                      | 1.047721968        | 2               | 2.978031  |
| <b>P50398</b> | <b>GDIA Rab GDP dissociation inhibitor alpha</b> | <b>1.287193391</b> | <b>1.11E-16</b> | <b>7</b>  |
| P50398        | FDLGQDVIDFTGHALALYR                              | 1.495982101        | 3               | 4.617767  |
| P50398        | FQLLEGPPESMGR                                    | 1.388675649        | 2               | 3.952432  |
| P50398        | KQNDVFGADQ                                       | 1.485946018        | 2               | 3.288814  |
| P50398        | NPYYGGESSITPLEELYK                               | 1.472360965        | 2               | 5.909615  |
| P50398        | QLICDPSYIPDR                                     | 0.686665151        | 2               | 3.014831  |
| P50398        | TDDYLDQPCLTINR                                   | 0.599309166        | 2               | 4.961609  |
| P50398        | TFEGVDPQTSMR                                     | 1.364921538        | 2               | 3.384315  |
| <b>P50399</b> | <b>GDIB Rab GDP dissociation inhibitor beta</b>  | <b>1.229278207</b> | <b>0.000376</b> | <b>15</b> |
| P50399        | AYDATTHFETTCDDIK                                 | 0.881037423        | 2               | 4.120151  |
| P50399        | AYDATTHFETTCDDIKDIYK                             | 1.493750319        | 3               | 6.220264  |
| P50399        | EIRPALELLEPIEQK                                  | 1.176163365        | 3               | 3.8109    |
| P50399        | EPEKEIRPALELLEPIEQK                              | 1.371312385        | 3               | 3.421732  |
| P50399        | FDLGQDVIDFTGHSLALYR                              | 1.356572837        | 3               | 4.040238  |
| P50399        | FKLPGQPPASMGR                                    | 1.69639905         | 2               | 2.602103  |
| P50399        | FVSISDLFVPK                                      | 1.202035149        | 2               | 3.268447  |
| P50399        | LSAIYGGTYMLNKPIEIIVQNGK                          | 2.851199521        | 3               | 4.580137  |
| P50399        | MLLFTEVTR                                        | 1.301607586        | 2               | 2.357827  |

|               |                                                             |                    |                 |           |
|---------------|-------------------------------------------------------------|--------------------|-----------------|-----------|
| P50399        | MTGSEFDFEEMKR                                               | 1.283955528        | 2               | 3.634531  |
| P50399        | NTNDANSCQIHPQNVNR                                           | 0.784693591        | 2               | 4.37439   |
| P50399        | TDDYLDQPCCEINR                                              | 1.596412088        | 2               | 4.850991  |
| P50399        | TFEGVDPK                                                    | 1.919010289        | 2               | 2.404865  |
| P50399        | VIEGSFVYK                                                   | 1.366410341        | 2               | 2.330506  |
| P50399        | VLHMDQNPYYGGESASITPLEDLYK                                   | 1.423965253        | 2               | 5.517198  |
| <b>P50431</b> | <b>GLYC Serine hydroxymethyltransferase_ cytosolic</b>      | <b>1.173072917</b> | <b>0.925323</b> | <b>7</b>  |
| P50431        | ALSDALTELGK                                                 | 1.157610923        | 2               | 4.080372  |
| P50431        | AVLEALGSLNNK                                                | 1.08590256         | 2               | 4.272254  |
| P50431        | GLLEEDFQK                                                   | 1.403076656        | 1               | 2.096672  |
| P50431        | IMGLDLPDGGHLTHGFMTDK                                        | 1.0636523          | 2               | 2.800994  |
| P50431        | IYQLQVLANCR                                                 | 1.086219422        | 2               | 2.820818  |
| P50431        | VLEACSIACNK                                                 | 1.173462337        | 2               | 4.01854   |
| P50431        | YSEGYPGQR                                                   | 1.217713003        | 2               | 2.81589   |
| <b>P50475</b> | <b>SYAC Alanyl_tRNA synthetase_ cytoplasmic</b>             | <b>1.117883405</b> | <b>0.126156</b> | <b>16</b> |
| P50475        | ASEWVQVQVGLMDGK                                             | 1.167506338        | 2               | 4.478455  |
| P50475        | AVFDEYDPVPR                                                 | 1.092587498        | 2               | 3.272998  |
| P50475        | DIINEEVQFLK                                                 | 1.427069964        | 2               | 2.711903  |
| P50475        | ESDGVLKPLPK                                                 | 1.482882616        | 2               | 2.379001  |
| P50475        | GLEATDDSPK                                                  | 1.277728113        | 2               | 2.701353  |
| P50475        | HNDLDDVGK                                                   | 1.100141642        | 2               | 2.557026  |
| P50475        | ITCLCQVPQNAANR                                              | 1.108263745        | 2               | 3.826     |
| P50475        | IVAVTGAEAQK                                                 | 1.39151341         | 2               | 2.573763  |
| P50475        | NVGCLQEALQLATSFAQLR                                         | 1.555883859        | 3               | 3.941396  |
| P50475        | QIWQNLGLDEAK                                                | 1.462137389        | 2               | 3.048444  |
| P50475        | RIVAVTGAEAQK                                                | 1.740081235        | 2               | 2.773591  |
| P50475        | SVLGDADQK                                                   | 1.496572718        | 1               | 2.207099  |
| P50475        | TEEIVNGMIEAAKPVYTLDCPLAAK                                   | 1.735822994        | 3               | 3.675295  |
| P50475        | TITVALADGGRPDNTGR                                           | 1.101923753        | 2               | 3.033164  |
| P50475        | VDDSSSEDKTEFTVK                                             | 1.223116572        | 2               | 4.066047  |
| P50475        | VGAEDTDGIDMAYR                                              | 1.386911951        | 2               | 3.871379  |
| <b>P50503</b> | <b>F10A1 Hsc70_interacting protein</b>                      | <b>1.402174989</b> | <b>5.08E-13</b> | <b>6</b>  |
| P50503        | AIDLFTDAIK                                                  | 1.737206673        | 2               | 2.743276  |
| P50503        | AIEINPDSAQPYK                                               | 1.402108567        | 2               | 3.530184  |
| P50503        | GAAIDALNDGELQK                                              | 1.140693274        | 2               | 3.710059  |
| P50503        | KGAAIDALNDGELQK                                             | 1.620963842        | 2               | 4.685584  |
| P50503        | LDYDEDASAMLR                                                | 1.198303116        | 2               | 3.343299  |
| P50503        | QDPSVLHTEEMR                                                | 1.526027168        | 2               | 2.319453  |
| <b>P50516</b> | <b>VATA V_type proton ATPase catalytic subunit A</b>        | <b>1.467185049</b> | <b>0.337516</b> | <b>2</b>  |
| P50516        | TALVANTSMPVAAR                                              | 1.216070919        | 2               | 3.195357  |
| P50516        | VLDALFPCVQGGTTAIPGAFGCGK                                    | 1.471570345        | 2               | 3.312716  |
| <b>P50554</b> | <b>GABT 4_aminobutyrate aminotransferase_ mitochondrial</b> | <b>1.45035747</b>  | <b>0.000389</b> | <b>14</b> |
| P50554        | GMCQLITMACGSCSNENAFK                                        | 1.669408763        | 2               | 4.556716  |
| P50554        | GNYLVDVDGNR                                                 | 2.056810575        | 2               | 2.64162   |
| P50554        | GTFCSFDPDEAIR                                               | 5.597399775        | 2               | 3.224224  |
| P50554        | HGCAFLVDEVQTGGGCTGK                                         | 1.116355396        | 2               | 6.113246  |
| P50554        | IDIPSFWDWPIAPFPR                                            | 1.229669041        | 2               | 3.804311  |
| P50554        | IFNTWLGDPK                                                  | 1.786877085        | 2               | 3.009854  |
| P50554        | KHGCAFLVDEVQTGGGCTGK                                        | 1.243772955        | 2               | 5.036607  |
| P50554        | LVQQPQNASTFINRPALGILPPENFVVK                                | 1.278884827        | 3               | 3.303688  |
| P50554        | MLDLYSQISSVPIGYNHPALAK                                      | 1.303836757        | 3               | 3.406765  |
| P50554        | NLLLAEVINIK                                                 | 1.124032694        | 3               | 5.323947  |
| P50554        | REDLLNNVAHAGK                                               | 1.215233463        | 3               | 3.620203  |
| P50554        | TLLTGLLDLQAQYQFVSR                                          | 2.467254056        | 2               | 3.161711  |
| P50554        | TVAGIIVEPIQSEGGDNHASDDFFR                                   | 1.679833814        | 2               | 4.021005  |
| P50554        | VDFEFDYDGPLMK                                               | 1.615898859        | 2               | 4.048791  |

|               |                                                                 |                    |                 |           |
|---------------|-----------------------------------------------------------------|--------------------|-----------------|-----------|
| <b>P50580</b> | <b>PA2G4 Proliferation_associated protein 2G4</b>               | <b>1.098046528</b> | <b>0.999351</b> | <b>2</b>  |
| P50580        | GDAMIIMEETGK                                                    | 0.993747779        | 2               | 2.664113  |
| P50580        | TIIQNPTDQQK                                                     | 1.098835063        | 2               | 3.154985  |
| <b>P50878</b> | <b>RL4 60S ribosomal protein L4</b>                             | <b>1.227536852</b> | <b>9.9E-20</b>  | <b>11</b> |
| P50878        | FCIWTESAFR                                                      | 1.625319201        | 2               | 2.56805   |
| P50878        | KLDELYGTWR                                                      | 1.347286169        | 2               | 2.970752  |
| P50878        | KLEAAAAALAAK                                                    | 1.315332926        | 3               | 4.941208  |
| P50878        | LDELYGTWR                                                       | 1.49249486         | 2               | 2.571163  |
| P50878        | LEAAAAALAAK                                                     | 2.187580976        | 2               | 3.610692  |
| P50878        | NIPGITLLNVSK                                                    | 1.48596811         | 1               | 2.696272  |
| P50878        | NVTLPVAFK                                                       | 1.409276741        | 1               | 2.241946  |
| P50878        | RGPCIIYNEDNGIIK                                                 | 0.713972928        | 2               | 2.990682  |
| P50878        | SGQGAFGNMCR                                                     | 1.596873942        | 2               | 2.836194  |
| P50878        | SNYNLPMHK                                                       | 1.541209961        | 2               | 2.637905  |
| P50878        | YAICSALAASALPALVMSK                                             | 1.588764929        | 2               | 2.548637  |
| <b>P51583</b> | <b>PUR6 Multifunctional protein ADE2</b>                        | <b>1.127802226</b> | <b>0.851224</b> | <b>3</b>  |
| P51583        | ACGNFGIPCELR                                                    | 1.067827343        | 2               | 2.600871  |
| P51583        | SWLPQNCTLVDMK                                                   | 1.312019249        | 2               | 2.744097  |
| P51583        | VVVLMGSTDLGHCEK                                                 | 1.653733044        | 2               | 3.039305  |
| <b>P51635</b> | <b>AK1A1 Alcohol dehydrogenase [NADP_]</b>                      | <b>1.100730255</b> | <b>3.44E-15</b> | <b>7</b>  |
| P51635        | ALEALVAK                                                        | 1.716620913        | 2               | 2.826975  |
| P51635        | GLEVTAYSPLGSSDR                                                 | 0.780285388        | 2               | 4.114704  |
| P51635        | HHPEDVEPAVR                                                     | 1.244947083        | 3               | 3.589575  |
| P51635        | HIDCASVYGNETEIGEALK                                             | 1.06782557         | 2               | 6.041212  |
| P51635        | HIDCASVYGNETEIGEALKESVGAGK                                      | 1.279558151        | 3               | 6.261342  |
| P51635        | HPDEPVLLEEPVVLALAEK                                             | 2.291359552        | 3               | 6.061058  |
| P51635        | YIVPMITVDGK                                                     | 1.317818641        | 2               | 2.328477  |
| <b>P51647</b> | <b>AL1A1 Retinal dehydrogenase 1</b>                            | <b>1.195043047</b> | <b>9.9E-20</b>  | <b>17</b> |
| P51647        | ANNTTYGLAAGVFTK                                                 | 1.187587799        | 2               | 4.601446  |
| P51647        | EAGFPPGVVNIYPGYPTAGAAISSHMDVDK                                  | 1.570942823        | 3               | 3.667674  |
| P51647        | FPVLNPATEEVICHVEEGDK                                            | 1.467741612        | 3               | 3.828281  |
| P51647        | FPVLNPATEEVICHVEEGDKADVDK                                       | 1.462864771        | 4               | 5.050517  |
| P51647        | IFINNEWHDSVSGK                                                  | 1.666623043        | 2               | 4.280609  |
| P51647        | IFVEESVYDEFVR                                                   | 1.613109981        | 2               | 4.22951   |
| P51647        | IGPALSCGNTVVVKPAEQTLTALHMASLIK                                  | 2.032536669        | 3               | 5.611658  |
| P51647        | IHGQTIPSDGDIFFTR                                                | 1.87033087         | 3               | 4.280681  |
| P51647        | KFPVLNPATEEVICHVEEGDK                                           | 0.916797142        | 3               | 3.568044  |
| P51647        | KFPVLNPATEEVICHVEEGDKADVDK                                      | 1.384229137        | 4               | 4.877313  |
| P51647        | KYVLGNPLTQGINQGPDKEQHDK                                         | 1.248783329        | 3               | 5.523383  |
| P51647        | LLLATIEAINGGK                                                   | 9.265571678        | 2               | 4.19882   |
| P51647        | VAFTGSTQVGK                                                     | 2.361505055        | 2               | 2.518713  |
| P51647        | VFANAYLSDLGGSIK                                                 | 2.075837235        | 2               | 4.444872  |
| P51647        | YCAGWADK                                                        | 1.598894936        | 2               | 2.489247  |
| P51647        | YVLGNPLTQGINQGPDQDK                                             | 1.286458082        | 2               | 5.22237   |
| P51647        | YVLGNPLTQGINQGPDKEQHDK                                          | 1.225281905        | 2               | 3.886786  |
| <b>P51650</b> | <b>SSDH Succinate semialdehyde dehydrogenase_ mitochondrial</b> | <b>1.000170962</b> | <b>0.460372</b> | <b>9</b>  |
| P51650        | EVGEVLCTDPLVSK                                                  | 2.671774456        | 2               | 3.776339  |
| P51650        | GIHDSFVTK                                                       | 1.084208361        | 2               | 2.404372  |
| P51650        | HQSGGNFFPEPTLLSNVTR                                             | 1.206263153        | 2               | 3.784001  |
| P51650        | IITAESGKPLK                                                     | 1.672848997        | 2               | 2.822287  |
| P51650        | ILLHHAANSVK                                                     | 1.472760394        | 2               | 2.61054   |
| P51650        | LGTVADCGVPEAR                                                   | 0.841082623        | 2               | 3.662265  |
| P51650        | VGNGFEEGTTQGPIINEK                                              | 0.917043755        | 2               | 4.610662  |
| P51650        | WLPTPATFPVYDPASGAK                                              | 1.127275678        | 2               | 3.544464  |
| P51650        | YGIDEYLEVK                                                      | 1.709397262        | 2               | 2.908433  |
| <b>P51863</b> | <b>VA0D1 V_type proton ATPase subunit d 1</b>                   | <b>1.068159579</b> | <b>0.767255</b> | <b>2</b>  |

|               |                                                                                  |                    |                 |          |
|---------------|----------------------------------------------------------------------------------|--------------------|-----------------|----------|
| P51863        | ADDYEQVK                                                                         | 1.306689           | 2               | 2.489688 |
| P51863        | LLFEGAGSNPGDK                                                                    | 0.941328509        | 2               | 3.053885 |
| <b>P51869</b> | <b>CP4F4 Cytochrome P450 4F4</b>                                                 | <b>1.625285622</b> | <b>2.43E-09</b> | <b>4</b> |
| P51869        | ALPSQHEDDILK                                                                     | 1.515960368        | 2               | 2.594843 |
| P51869        | NISLMTLDSLQK                                                                     | 1.517803529        | 2               | 3.523234 |
| P51869        | TLDFIDVLLTK                                                                      | 2.04412339         | 2               | 3.613848 |
| P51869        | WQDLASGGSAR                                                                      | 1.323866666        | 2               | 3.177908 |
| <b>P51886</b> | <b>LUM Lumican</b>                                                               | <b>1.111313778</b> | <b>0.867984</b> | <b>2</b> |
| P51886        | NNQIDHIDEK                                                                       | 1.10675397         | 2               | 3.206459 |
| P51886        | SLQDLQLANNK                                                                      | 1.176606723        | 2               | 2.497982 |
| <b>P52296</b> | <b>IMB1 Importin subunit beta_1</b>                                              | <b>1.50820792</b>  | <b>0.489851</b> | <b>7</b> |
| P52296        | AAVENLPTFLVELSR                                                                  | 1.289969012        | 2               | 3.67735  |
| P52296        | GALQYLVPILTQTLTK                                                                 | 1.710433829        | 2               | 3.304526 |
| P52296        | GDQENVHPDVMLVQPR                                                                 | 1.259068745        | 2               | 2.979903 |
| P52296        | SNEILTAIIQGMK                                                                    | 1.588099338        | 2               | 2.936603 |
| P52296        | TVSPDRLELEAAQK                                                                   | 1.04945754         | 2               | 3.151765 |
| P52296        | VLANPGNSQVAR                                                                     | 1.249848306        | 2               | 3.055084 |
| P52296        | VQHQDALQISDVVMASLLR                                                              | 1.638650659        | 2               | 2.885161 |
| <b>P52303</b> | <b>AP1B1 AP_1 complex subunit beta_1</b>                                         | <b>0.850635884</b> | <b>0.040968</b> | <b>5</b> |
| P52303        | KPTETQELVQQVLSLATQSDNPDLR                                                        | 1.759977315        | 3               | 3.346579 |
| P52303        | MEPLNNLQVAVK                                                                     | 1.572882955        | 2               | 2.539657 |
| P52303        | NINLIVQK                                                                         | 0.750919908        | 1               | 2.408912 |
| P52303        | NSFGLAAPLQVHAPLSPNQTVVEISLPLNTVGSVMK                                             | 1.341250009        | 3               | 3.693463 |
| P52303        | SQPDMAIMAVNTFK                                                                   | 1.462994756        | 2               | 3.339198 |
| <b>P52504</b> | <b>NDUS6 NADH dehydrogenase [ubiquinone] iron_sulfur protein 6_mitochondrial</b> | <b>1.430091874</b> | <b>0.000438</b> | <b>2</b> |
| P52504        | IIACDGGGALGHPK                                                                   | 1.477073515        | 2               | 4.123787 |
| P52504        | VYINLDKETK                                                                       | 1.328741043        | 2               | 2.617587 |
| <b>P52555</b> | <b>ERP29 Endoplasmic reticulum resident protein 29</b>                           | <b>1.287631828</b> | <b>0.97865</b>  | <b>3</b> |
| P52555        | FDTQYPYGEK                                                                       | 1.763895722        | 2               | 2.650203 |
| P52555        | ILDQGEDFPASELAR                                                                  | 1.183295957        | 2               | 5.053833 |
| P52555        | SLNILTAFR                                                                        | 1.414641272        | 2               | 2.341288 |
| <b>P52631</b> | <b>STAT3 Signal transducer and activator of transcription 3</b>                  | <b>3.317214313</b> | <b>2.01E-08</b> | <b>3</b> |
| P52631        | GLSIEQLTLAEK                                                                     | 2.111161451        | 2               | 2.39859  |
| P52631        | LLQTAATAAQGGQANHPHTAAVVTEK                                                       | 3.319907367        | 3               | 4.605139 |
| P52631        | MQQLEQMLTALDQMR                                                                  | 1.578204963        | 2               | 2.440681 |
| <b>P52759</b> | <b>UK114 Ribonuclease UK114</b>                                                  | <b>1.141705882</b> | <b>0.040999</b> | <b>7</b> |
| P52759        | AAGCDFTNVVK                                                                      | 2.008259939        | 2               | 3.062975 |
| P52759        | AAYQVAALPK                                                                       | 0.757487447        | 2               | 2.679744 |
| P52759        | IEIEAIVQGPFTTAGL                                                                 | 1.192975955        | 2               | 3.240477 |
| P52759        | NLGEILK                                                                          | 0.990341449        | 1               | 2.287736 |
| P52759        | TIYVSGQIGMDPSSGQLVPGGVAEEAK                                                      | 1.346389135        | 2               | 4.525706 |
| P52759        | TTVLLADINDFGTVNEIYK                                                              | 1.7277155          | 2               | 5.666708 |
| P52759        | TYFQGNLPAR                                                                       | 1.152338649        | 2               | 2.507899 |
| <b>P52845</b> | <b>ST1E2 Estrogen sulfotransferase_ isoform 2</b>                                | <b>1.08446115</b>  | <b>0.852974</b> | <b>2</b> |
| P52845        | CKEDAIENR                                                                        | 1.070689934        | 2               | 2.503449 |
| P52845        | SGSTWIGEIVDMIYK                                                                  | 1.962267913        | 2               | 3.364449 |
| <b>P52847</b> | <b>ST1B1 Sulfotransferase family cytosolic 1B member 1</b>                       | <b>1.395642868</b> | <b>8.42E-08</b> | <b>8</b> |
| P52847        | DNPLVNYTHLPTIMDHDK                                                               | 2.477858758        | 2               | 4.468409 |
| P52847        | FLAGNVAYGSWFDHVK                                                                 | 0.890784519        | 2               | 3.854979 |
| P52847        | IEEFQSRPCDIVIPTYK                                                                | 1.519127666        | 3               | 5.26857  |
| P52847        | IVHHTSFEVMK                                                                      | 1.136408265        | 2               | 3.053289 |
| P52847        | NYFTMTQSEK                                                                       | 1.270481079        | 2               | 2.924855 |
| P52847        | SGVELLK                                                                          | 1.497405938        | 2               | 2.339941 |
| P52847        | THLPIDLLPK                                                                       | 1.725091088        | 3               | 3.555724 |

|               |                                                                                                                       |                    |                 |           |
|---------------|-----------------------------------------------------------------------------------------------------------------------|--------------------|-----------------|-----------|
| P52847        | TLDEHTLER                                                                                                             | 1.39539044         | 2               | 3.092446  |
| <b>P52873</b> | <b>PYC Pyruvate carboxylase_mitochondrial</b>                                                                         | <b>0.97774791</b>  | <b>9.9E-20</b>  | <b>39</b> |
| P52873        | ADEAYLIGR                                                                                                             | 1.040028787        | 2               | 2.806849  |
| P52873        | ADFAQACQDAGVR                                                                                                         | 0.653052199        | 2               | 4.47163   |
| P52873        | AEAEAQAEELSFPF                                                                                                        | 1.134079162        | 2               | 4.704005  |
| P52873        | AGTHILCIK                                                                                                             | 2.390697787        | 2               | 2.71725   |
| P52873        | ALAVSDLNR                                                                                                             | 1.108452764        | 2               | 2.583564  |
| P52873        | AYSEALAAFNGALFVEK                                                                                                     | 2.558480402        | 2               | 3.689992  |
| P52873        | AYVEANQMLGLDIK                                                                                                        | 1.56924885         | 2               | 4.70824   |
| P52873        | DAHQSLLATR                                                                                                            | 1.495842366        | 1               | 3.173891  |
| P52873        | DFTATFGPLDSLNR                                                                                                        | 2.637863128        | 2               | 3.756638  |
| P52873        | DMAGLLKPAACTMLVSSLR                                                                                                   | 1.600627239        | 3               | 3.388147  |
| P52873        | ELIPNIPFQMLLR                                                                                                         | 1.381989827        | 2               | 2.849156  |
| P52873        | ENGVDVAVHPGYGFLSER                                                                                                    | 1.484792147        | 2               | 2.969886  |
| P52873        | FIGPSPEVVR                                                                                                            | 1.014804846        | 2               | 2.436676  |
| P52873        | FLYECVWR                                                                                                              | 1.310849928        | 2               | 2.605958  |
| P52873        | GANAVGYTNYPDNVVFK                                                                                                     | 1.252059993        | 2               | 4.575528  |
| P52873        | GLAPVQAYLHIPDIK                                                                                                       | 0.755209419        | 2               | 2.980513  |
| P52873        | GQIGAPMPGK                                                                                                            | 1.276570756        | 2               | 2.427273  |
| P52873        | GTPLDTEVPLER                                                                                                          | 0.854807098        | 2               | 3.65032   |
| P52873        | HGEEVTPEDVLSAAMYDPVFAQFK                                                                                              | 2.391392995        | 3               | 5.416217  |
| P52873        | HIEVQILGDQYGNILHLIER                                                                                                  | 1.789166875        | 3               | 7.008325  |
| P52873        | HYFIEVNSR                                                                                                             | 1.236275076        | 2               | 2.338978  |
| P52873        | IAEEFEVELER                                                                                                           | 1.394065729        | 2               | 3.24429   |
| P52873        | IEGRPGASLPPLNLK                                                                                                       | 0.971935711        | 2               | 3.437396  |
| P52873        | INGCAIQCR                                                                                                             | 1.387500142        | 2               | 3.250948  |
| P52873        | IVGDLAQFMVQNGLSR                                                                                                      | 1.74210896         | 2               | 4.842085  |
| P52873        | LDNASAFQGAIVSPHYDLSLVK                                                                                                | 1.26927529         | 3               | 5.770468  |
| P52873        | LLHYLGHVMVNGPTTPIPVK                                                                                                  | 1.686727908        | 3               | 3.677512  |
| P52873        | LQVEHTVTEITDVDLVHAQIHVSEGR                                                                                            | 1.307987796        | 4               | 6.503133  |
| P52873        | NHQGLLLMDTTFR                                                                                                         | 1.005048579        | 3               | 3.320544  |
| P52873        | QKADEAYLIGR                                                                                                           | 1.35878274         | 2               | 2.495136  |
| P52873        | QVGYENAGTVEFLVDK                                                                                                      | 1.755455114        | 2               | 3.776635  |
| P52873        | SSTAPVASPNVR                                                                                                          | 0.992647851        | 2               | 2.345997  |
| P52873        | SVVEFLQGYIGIPHGGFPEPFR                                                                                                | 1.261014291        | 2               | 4.805422  |
| P52873        | TVAVYSEQDTGQMHR                                                                                                       | 1.447129695        | 2               | 4.569159  |
| P52873        | VFDYSEYWEGR                                                                                                           | 1.481234388        | 2               | 4.537129  |
| P52873        | VSPSPVDPIVPVPIGPPAGFR                                                                                                 | 1.318075616        | 2               | 4.123032  |
| P52873        | VVEIAPATHLDPQLR                                                                                                       | 1.351034478        | 2               | 4.236594  |
| P52873        | VVHSYEELEENYTR                                                                                                        | 1.270732322        | 2               | 5.238379  |
| P52873        | YSLEYMGLAEELVR                                                                                                        | 1.501781124        | 3               | 4.510306  |
| <b>P52925</b> | <b>HMGB2 High mobility group protein B2</b>                                                                           | <b>1.198583338</b> | <b>0.53246</b>  | <b>2</b>  |
| P52925        | KHPDSSVNFAEFSK                                                                                                        | 1.222941532        | 2               | 2.740416  |
| P52925        | SEHPGLSIGDTAK                                                                                                         | 1.1972639          | 2               | 2.846153  |
| <b>P52944</b> | <b>PDL1 PDZ and LIM domain protein 1</b>                                                                              | <b>1.305995941</b> | <b>0.000558</b> | <b>5</b>  |
| P52944        | CGTGIVGVFVK                                                                                                           | 1.302932395        | 2               | 2.434757  |
| P52944        | GHFFVGDQIYCEK                                                                                                         | 1.461754854        | 2               | 3.787676  |
| P52944        | TSASGEEANSRPSAQPHPSGGLIIDK                                                                                            | 1.304402912        | 3               | 4.499169  |
| P52944        | TSASGEEANSRPSAQPHPSGGLIIDKESEVYK                                                                                      | 1.988863971        | 3               | 5.015387  |
| P52944        | VTPPEGYDVVTVFVK                                                                                                       | 1.320151183        | 2               | 2.710248  |
| <b>P53395</b> | <b>ODB2 Lipoamide acyltransferase component of branched_chain alpha_keto acid dehydrogenase complex_mitochondrial</b> | <b>1.768598852</b> | <b>2.08E-14</b> | <b>4</b>  |
| P53395        | LREELKPVALAR                                                                                                          | 1.904324853        | 2               | 2.674104  |
| P53395        | LSDIGEGIR                                                                                                             | 1.66486702         | 2               | 3.023681  |
| P53395        | RLAMENNIK                                                                                                             | 1.279080933        | 2               | 2.378535  |
| P53395        | SYLENPAFMLLDLK                                                                                                        | 1.84403411         | 2               | 4.606715  |

|               |                                                                              |                    |                 |           |
|---------------|------------------------------------------------------------------------------|--------------------|-----------------|-----------|
| <b>P53987</b> | <b>MOT1 Monocarboxylate transporter 1</b>                                    | <b>1.259789576</b> | <b>0.000283</b> | <b>5</b>  |
| P53987        | DGKEDETSTDVDEKPK                                                             | 1.677802551        | 3               | 5.489101  |
| P53987        | DGKEDETSTDVDEKPKK                                                            | 1.057754913        | 3               | 4.047904  |
| P53987        | EDETSTDVDEKPK                                                                | 1.232497698        | 2               | 3.976382  |
| P53987        | ETQSPAPLQNSSGDPAAEEESPV                                                      | 0.935631384        | 2               | 5.049421  |
| P53987        | SDANTDLIGGSPK                                                                | 1.126966901        | 2               | 4.135689  |
| <b>P54313</b> | <b>GBB2 Guanine nucleotide_binding protein G(I)/G(S)/G(T) subunit beta_2</b> | <b>1.529193839</b> | <b>0.168717</b> | <b>2</b>  |
| P54313        | ACGDSTLTQITAGLDPVGR                                                          | 1.741795127        | 2               | 3.997175  |
| P54313        | TFVSGACDASIK                                                                 | 1.081767748        | 2               | 2.724099  |
| <b>P54319</b> | <b>PLAP Phospholipase A_2 activating protein</b>                             | <b>1.007973541</b> | <b>0.916248</b> | <b>3</b>  |
| P54319        | IGDVVGSSGANQQTSGK                                                            | 1.031861129        | 2               | 4.658643  |
| P54319        | TGDLGDINAELPGR                                                               | 1.823951305        | 2               | 4.130882  |
| P54319        | YVPGTSGPSNTVQTADPFTGAGR                                                      | 0.781325998        | 2               | 3.390711  |
| <b>P54822</b> | <b>PUR8 Adenylosuccinate lyase</b>                                           | <b>1.366908333</b> | <b>0.164231</b> | <b>2</b>  |
| P54822        | KVDIEVLSVLASLGASVHK                                                          | 1.811965979        | 3               | 4.416427  |
| P54822        | VLSQQAADVVK                                                                  | 1.319898992        | 2               | 2.854376  |
| <b>P54921</b> | <b>SNAA Alpha_soluble NSF attachment protein</b>                             | <b>0.770634128</b> | <b>0.515942</b> | <b>5</b>  |
| P54921        | AIAHYEQSADYYKGEESNSSANK                                                      | 1.531727999        | 3               | 4.891563  |
| P54921        | AIDIYEQVGTSAMDSPLLK                                                          | 2.074031015        | 2               | 3.793165  |
| P54921        | IEEACEIYAR                                                                   | 0.76734253         | 2               | 2.757394  |
| P54921        | NSQFFSGLFGGSSK                                                               | 1.097558957        | 2               | 3.792224  |
| P54921        | YEELPFAFSDSR                                                                 | 1.579847356        | 2               | 2.620309  |
| <b>P55006</b> | <b>RDH7 Retinol dehydrogenase 7</b>                                          | <b>1.127778746</b> | <b>3.67E-07</b> | <b>11</b> |
| P55006        | LETVILDVTK                                                                   | 1.313042865        | 2               | 3.517367  |
| P55006        | TESIVAATQWVK                                                                 | 1.2211044          | 2               | 4.081845  |
| P55006        | TNVTNMER                                                                     | 0.558052961        | 2               | 2.74532   |
| P55006        | TNVTNMER+Oxidation(5                                                         | 0.378136132        |                 |           |
| P55006        | TSDRLETVILDVTK                                                               | 1.709541368        | 3               | 4.584667  |
| P55006        | VAIIEPGGFK                                                                   | 0.650341866        | 2               | 2.385883  |
| P55006        | VLAACLTEK                                                                    | 1.333504321        | 2               | 3.074588  |
| P55006        | VVNIASTMGR                                                                   | 1.197451971        | 2               | 3.78917   |
| P55006        | VVNIASTMGR+Oxidation(7                                                       | 1.321755945        |                 |           |
| P55006        | YGVFAFSDSLR                                                                  | 1.3950914          | 2               | 3.864886  |
| P55006        | YVFITGCDSGFGNLLAR                                                            | 1.539228599        | 2               | 3.665496  |
| <b>P55051</b> | <b>FABP7 Fatty acid_binding protein_brain</b>                                | <b>1.143452416</b> | <b>0.652887</b> | <b>4</b>  |
| P55051        | ALGVGFATR                                                                    | 1.599847392        | 2               | 2.645137  |
| P55051        | LTDSQNFDEYMK                                                                 | 1.745056645        | 2               | 4.049841  |
| P55051        | QVGNVTKPTVIISQEGGK                                                           | 1.132300008        | 3               | 4.129147  |
| P55051        | WDGKETNCVR                                                                   | 1.044591459        | 2               | 2.886392  |
| <b>P55053</b> | <b>FABP5 Fatty acid_binding protein_epidermal</b>                            | <b>1.212443395</b> | <b>0.931097</b> | <b>6</b>  |
| P55053        | FDETTADGR                                                                    | 1.181290792        | 2               | 3.205886  |
| P55053        | KTETVCTFTDGALVQHQQ                                                           | 1.312946308        | 3               | 5.30947   |
| P55053        | LVESHGFEDYMK                                                                 | 1.492948552        | 2               | 3.427332  |
| P55053        | MGAMAKPDCIITLDGNLTVK                                                         | 1.158670218        | 2               | 4.124904  |
| P55053        | MVVECVMNNAICTR                                                               | 1.594361663        | 2               | 3.847544  |
| P55053        | TETVCTFTDGALVQHQQ                                                            | 1.210799506        | 2               | 4.683166  |
| <b>P55159</b> | <b>PON1 Serum paraoxonase/arylesterase 1</b>                                 | <b>1.296107251</b> | <b>3.9E-11</b>  | <b>7</b>  |
| P55159        | GIEAGAEDLEILPGLTFSTGLK                                                       | 2.185925369        | 3               | 5.867096  |
| P55159        | IFFYDSENPPGSEVLR                                                             | 1.101869801        | 2               | 6.215265  |
| P55159        | IQSILSEDPK                                                                   | 1.37179011         | 2               | 3.259762  |
| P55159        | TITHELLPSINDIAAVGPESFYATNDHYFADPYLR                                          | 1.627219412        | 3               | 4.074989  |
| P55159        | VLSFDTLVDNISVDPVTGDLVWVGCHPNGMR                                              | 1.298338147        | 3               | 5.408141  |
| P55159        | VVADGDFDFANGIGISLDGK                                                         | 1.279523316        | 2               | 4.446301  |
| P55159        | VVYIAELLAHK                                                                  | 1.770786145        | 2               | 2.677353  |
| <b>P55260</b> | <b>ANXA4 Annexin A4</b>                                                      | <b>1.387107178</b> | <b>0.280695</b> | <b>4</b>  |
| P55260        | AEIDMLDIPANFK                                                                | 1.212328926        | 1               | 2.177678  |

|               |                                                           |                    |                 |           |
|---------------|-----------------------------------------------------------|--------------------|-----------------|-----------|
| P55260        | GAGTDEGCLIEILASR                                          | 1.341511729        | 2               | 3.783448  |
| P55260        | GLGTDEDAIIGVLACR                                          | 1.412892603        | 2               | 3.908335  |
| P55260        | INQTYQQYGR                                                | 1.281262294        | 2               | 3.616781  |
| <b>P55770</b> | <b>NH2L1 NHP2_like protein 1</b>                          | <b>1.387492629</b> | <b>0.054318</b> | <b>2</b>  |
| P55770        | LLDLVQQSCNYK                                              | 1.49424454         | 2               | 3.891955  |
| P55770        | QQIQSIQQSIER                                              | 1.372526419        | 2               | 2.929913  |
| <b>P55937</b> | <b>GOGA3 Golgin subfamily A member 3</b>                  | <b>1.396911388</b> | <b>0.482286</b> | <b>2</b>  |
| P55937        | LDSEMKELRQELIK+Oxidation(4                                | 1.316066522        |                 |           |
| P55937        | QWYQQQLTLAQEAR                                            | 1.486929107        | 2               | 2.44317   |
| <b>P56399</b> | <b>UBP5 Ubiquitin carboxyl terminal hydrolase 5</b>       | <b>1.192605191</b> | <b>0.350876</b> | <b>5</b>  |
| P56399        | GTGLQPGEELPDIAPPLVTPDEPK                                  | 1.341422419        | 2               | 4.524675  |
| P56399        | IFQNAPTDPTQDFSTQVAK                                       | 0.854103737        | 2               | 4.191671  |
| P56399        | IGEWELIQESGVPLKPLFGPGYTGIR                                | 1.151582922        | 3               | 3.858413  |
| P56399        | KQEVQAWDGEVR                                              | 1.144384809        | 2               | 3.355608  |
| P56399        | SSENPNEVFR                                                | 1.556243782        | 2               | 2.456969  |
| <b>P56522</b> | <b>ADRO NADPH:adenodoxin oxidoreductase_mitochondrial</b> | <b>1.235878628</b> | <b>0.540911</b> | <b>4</b>  |
| P56522        | AGLLPSGPRPGYTAIQALLSDR                                    | 2.588731949        | 3               | 3.46841   |
| P56522        | LEGVGESTR                                                 | 0.849165726        | 2               | 2.308931  |
| P56522        | TATEKPGVEEAR                                              | 1.159299792        | 2               | 3.258079  |
| P56522        | TDITEVALGVLR                                              | 1.244750603        | 2               | 3.924618  |
| <b>P56574</b> | <b>IDHP Isocitrate dehydrogenase [NADP]_mitochondrial</b> | <b>1.011021216</b> | <b>0.005404</b> | <b>17</b> |
| P56574        | ATDFVVDVDR                                                | 1.613120077        | 2               | 2.463671  |
| P56574        | CATITPDEAR                                                | 2.12583761         | 2               | 2.304518  |
| P56574        | DLAGCIHGLSNVK                                             | 1.520094541        | 2               | 2.50456   |
| P56574        | DQTNDQVTIDSALATQK                                         | 0.601705761        | 2               | 5.425661  |
| P56574        | FKDIFQEIFDK                                               | 1.259297651        | 2               | 3.432907  |
| P56574        | GKLDGNQDLIR                                               | 11.12353789        | 2               | 2.968915  |
| P56574        | IKVEKPVVEMDGDVEMTR                                        | 1.927601489        | 3               | 3.475136  |
| P56574        | LDGNQDLIR                                                 | 0.758458588        | 2               | 2.449787  |
| P56574        | LIDDMVAQVLK                                               | 2.62423814         | 2               | 4.057062  |
| P56574        | LNEHFLNTTDFLDTIK                                          | 1.741718622        | 2               | 4.560071  |
| P56574        | NILGGTVFR                                                 | 1.29168595         | 2               | 2.780075  |
| P56574        | NILGGTVFREPIICK                                           | 5.46070947         | 2               | 3.000834  |
| P56574        | SSGGFVWACK                                                | 0.515899864        | 2               | 2.449724  |
| P56574        | TIEAAAHGTVTR                                              | 1.308643196        | 2               | 3.927422  |
| P56574        | VCVQTVESGAMTK                                             | 1.20496812         | 2               | 3.860638  |
| P56574        | VEKPVVEMDGDVEMTR                                          | 1.241234082        | 3               | 4.018549  |
| P56574        | YFDLGLPNR                                                 | 1.05003669         | 2               | 2.522527  |
| <b>P56593</b> | <b>CP2AC Cytochrome P450 2A12</b>                         | <b>1.107821955</b> | <b>0.968976</b> | <b>3</b>  |
| P56593        | MLQGTGAPIDPTIYLSK                                         | 1.044090888        | 2               | 4.70444   |
| P56593        | NRQPQYEDHMK                                               | 1.271444627        | 3               | 4.131853  |
| P56593        | NRQPQYEDHMK+Oxidation(9                                   | 0.952236033        |                 |           |
| <b>P56656</b> | <b>CP239 Cytochrome P450 2C39</b>                         | <b>1.102243208</b> | <b>0.683693</b> | <b>4</b>  |
| P56656        | EHQESLDVTNPR                                              | 1.21823895         | 2               | 3.680467  |
| P56656        | IKEHQESLDVTNPR                                            | 1.017648056        | 3               | 4.872485  |
| P56656        | NYLIPK                                                    | 1.524705192        | 1               | 2.1687    |
| P56656        | VQEEIDHVIGR                                               | 2.181416972        | 2               | 3.695102  |
| <b>P56812</b> | <b>PDCD5 Programmed cell death protein 5</b>              | <b>0.859350705</b> | <b>0.999999</b> | <b>3</b>  |
| P56812        | HGDPGDAAQAEAK                                             | 0.782707473        | 2               | 4.396952  |
| P56812        | NSILAQVLDQSAR                                             | 0.972841665        | 2               | 3.845855  |
| P56812        | VSEQLIEILEK                                               | 1.05150753         | 2               | 3.330403  |
| <b>P57093</b> | <b>PAHX Phytanoyl CoA dioxygenase_peroxisomal</b>         | <b>0.712331813</b> | <b>5.77E-15</b> | <b>8</b>  |
| P57093        | AISCHYGSSDCK                                              | 0.352294948        | 2               | 3.228014  |
| P57093        | IQDFQQNEELFR                                              | 1.182697773        | 2               | 3.579447  |
| P57093        | KFYEENGFLVIK                                              | 1.312180116        | 2               | 2.676775  |



|               |                                                                |                    |                 |           |
|---------------|----------------------------------------------------------------|--------------------|-----------------|-----------|
| P57093        | MDYTRAGAR                                                      | 0.675900706        | 2               | 2.560495  |
| P57093        | MYHGIQDYDPDSPR                                                 | 1.340650716        | 2               | 2.98107   |
| P57093        | NLVSDDDIQR                                                     | 0.687657616        | 2               | 2.428208  |
| P57093        | NNGCLVVLPGTHK                                                  | 0.94245894         | 2               | 2.920339  |
| P57093        | YCALPQIVK                                                      | 0.671981767        | 1               | 2.07252   |
| <b>P57113</b> | <b>MAAI Maleylacetoacetate isomerase</b>                       | <b>1.624247469</b> | <b>0.0433</b>   | <b>11</b> |
| P57113        | AITSGFNALEK                                                    | 1.144503621        | 2               | 3.415542  |
| P57113        | ALLALEAFQVSHPCR                                                | 1.631039915        | 2               | 4.127131  |
| P57113        | DGGQQFSEEFQTLNPMK                                              | 1.303995033        | 2               | 4.926748  |
| P57113        | FKVDLSPYPTISHINK                                               | 1.192869281        | 2               | 4.902491  |
| P57113        | GIDYEIVPINLIK                                                  | 1.090885639        | 2               | 4.404492  |
| P57113        | IDGITIGQSLAILEYLEETRPIPR                                       | 1.275697815        | 3               | 4.186342  |
| P57113        | MISDLIASGIQLQLNSVLK                                            | 1.320570193        | 2               | 5.435742  |
| P57113        | MISDLIASGIQLQLNSVLK+Oxidation(0                                | 1.393143557        |                 |           |
| P57113        | QVGQENQMPWAQK                                                  | 1.198537492        | 2               | 3.821304  |
| P57113        | VDLSPYPTISHINK                                                 | 1.073565149        | 2               | 3.782733  |
| P57113        | YCVGDEVSMADVCLAPQVANAER                                        | 4.627258802        | 3               | 6.559028  |
| <b>P57722</b> | <b>PCBP3 Poly(rC)_binding protein 3</b>                        | <b>1.504725783</b> | <b>3.49E-11</b> | <b>3</b>  |
| P57722        | ESTGAQVQVAGDMLPNSTER                                           | 1.487649872        | 2               | 5.28909   |
| P57722        | INISEGNCPER                                                    | 1.506064911        | 2               | 3.538505  |
| P57722        | LVVPASQCGSLIGK                                                 | 1.545594235        | 2               | 2.59727   |
| <b>P58321</b> | <b>UCHL4 Ubiquitin carboxyl_ terminal hydrolase isozyme L4</b> | <b>1.494417648</b> | <b>0.016858</b> | <b>2</b>  |
| P58321        | VTHE TSAHEGQTEAPSIDEK                                          | 1.224507124        | 3               | 4.678893  |
| P58321        | WLPLEANPEVTNQFLK                                               | 1.668742975        | 2               | 3.017756  |
| <b>P58389</b> | <b>PTPA Serine/threonine_protein phosphatase 2A activator</b>  | <b>0.955858671</b> | <b>0.52856</b>  | <b>3</b>  |
| P58389        | FGSLLPIHPVTSG                                                  | 1.156620796        | 2               | 2.404476  |
| P58389        | KEIHTVPDMGK                                                    | 1.533617718        | 2               | 2.420179  |
| P58389        | WIDETPPVDQPSR                                                  | 0.955707549        | 2               | 3.478476  |
| <b>P58751</b> | <b>RELN Reelin</b>                                             | <b>0.656085382</b> | <b>0.391926</b> | <b>2</b>  |
| P58751        | CGILSSGNNLFFNEDGLR                                             | 0.670560496        | 2               | 2.32494   |
| P58751        | QNYMMNFSRQHGLR                                                 | 0.638276947        | 2               | 2.427728  |
| <b>P58775</b> | <b>TPM2 Tropomyosin beta chain</b>                             | <b>1.343614194</b> | <b>0.165562</b> | <b>11</b> |
| P58775        | AISEELDNALNDITSL                                               | 2.002640954        | 2               | 4.390842  |
| P58775        | ATDAEADVASLNR                                                  | 3.885977969        | 2               | 4.232215  |
| P58775        | DAQEKLEQAEK                                                    | 1.28949819         | 2               | 2.904305  |
| P58775        | KATDAEADVASLNR                                                 | 1.490746102        | 2               | 4.086799  |
| P58775        | LDKENAIDR                                                      | 1.810926825        | 2               | 3.089513  |
| P58775        | LKGTEDEVK                                                      | 0.452492494        | 2               | 2.856405  |
| P58775        | MELQEMQLK                                                      | 1.090693878        | 2               | 2.981383  |
| P58775        | QLEEEQALQK                                                     | 0.964568629        | 2               | 3.554138  |
| P58775        | SLEAQADKYSTK                                                   | 2.141668765        | 2               | 3.756636  |
| P58775        | TIDDLEDEVYAQK                                                  | 2.613108988        | 2               | 3.950403  |
| P58775        | YSESVKDAQEK                                                    | 0.356972246        | 2               | 3.099243  |
| <b>P59242</b> | <b>CING Cingulin</b>                                           | <b>1.576130394</b> | <b>0.005616</b> | <b>2</b>  |
| P59242        | LGQEQQALNR                                                     | 1.906148171        | 2               | 2.793544  |
| P59242        | LQGLEQEAENK                                                    | 1.488227226        | 2               | 2.96285   |
| <b>P59999</b> | <b>ARPC4 Actin_related protein 2/3 complex subunit 4</b>       | <b>1.640208285</b> | <b>0.004684</b> | <b>2</b>  |
| P59999        | ELLQPVTISR                                                     | 1.339012547        | 2               | 3.025986  |
| P59999        | FMRFMMMR+Oxidation(4)Oxidation(5                               | 2.972953833        |                 |           |
| <b>P60335</b> | <b>PCBP1 Poly(rC)_binding protein 1</b>                        | <b>1.577450109</b> | <b>2.85E-11</b> | <b>4</b>  |
| P60335        | AITIAGVPQSVTECVK                                               | 1.396852213        | 2               | 3.529007  |
| P60335        | IITLTGPTNAIFK                                                  | 1.809286013        | 2               | 2.904875  |
| P60335        | LVVPATQCGSLIGK                                                 | 1.586771523        | 2               | 2.989144  |
| P60335        | VMTIPYQMPASSPVICAGGQDR                                         | 1.716438406        | 3               | 4.438498  |

|               |                                                                                         |                    |                 |          |
|---------------|-----------------------------------------------------------------------------------------|--------------------|-----------------|----------|
| <b>P60843</b> | <b>IF4A1 Eukaryotic initiation factor 4A_I</b>                                          | <b>1.799863698</b> | <b>2.82E-06</b> | <b>6</b> |
| P60843        | ATQALVLAPTR                                                                             | 1.001567289        | 1               | 1.958489 |
| P60843        | GFKDQYDIFQK                                                                             | 1.822456895        | 3               | 3.886211 |
| P60843        | GVAINMVTEEDKR                                                                           | 1.496145751        | 2               | 3.229809 |
| P60843        | KEELTLEGIR                                                                              | 1.626486008        | 2               | 2.353129 |
| P60843        | KGVAINMVTEEDKR                                                                          | 1.872620409        | 3               | 4.670231 |
| P60843        | LQMEAPHIIVGTPGR                                                                         | 1.464520378        | 3               | 3.87773  |
| <b>P60868</b> | <b>RS20 40S ribosomal protein S20</b>                                                   | <b>1.274408336</b> | <b>0.000636</b> | <b>3</b> |
| P60868        | DTGKTPVEPEVAIHR                                                                         | 1.503047024        | 3               | 4.419885 |
| P60868        | LIDLHSPSEIVK                                                                            | 1.245962643        | 2               | 3.134587 |
| P60868        | TPVEPEVAIHR                                                                             | 2.161191685        | 2               | 2.458653 |
| <b>P60901</b> | <b>PSA6 Proteasome subunit alpha type_6</b>                                             | <b>1.163662327</b> | <b>0.157982</b> | <b>2</b> |
| P60901        | AINQGGLTSVAVR                                                                           | 1.131159078        | 2               | 3.411844 |
| P60901        | LLDSSTVTHLFK                                                                            | 1.642051113        | 2               | 3.008124 |
| <b>P61087</b> | <b>UBE2K Ubiquitin_conjugating enzyme E2 K</b>                                          | <b>0.988093897</b> | <b>0.071146</b> | <b>2</b> |
| P61087        | GEIAGPPDTPYEGGR                                                                         | 1.363403038        | 2               | 3.205256 |
| P61087        | VDLVDENFTELR                                                                            | 0.97386033         | 2               | 3.504663 |
| <b>P61107</b> | <b>RAB14 Ras_related protein Rab_14</b>                                                 | <b>1.25577848</b>  | <b>0.011623</b> | <b>5</b> |
| P61107        | IYQNIQDGSLDLNAAESGVQHKPSAPQGGR                                                          | 1.147659547        | 3               | 3.727832 |
| P61107        | NLTNPNTVILIGNK                                                                          | 1.07409059         | 2               | 3.989622 |
| P61107        | SCLLHQFTEK                                                                              | 1.682514762        | 2               | 3.087084 |
| P61107        | STYNHLSSWLTDAR                                                                          | 1.178093452        | 2               | 3.315717 |
| P61107        | TGENVEDAFLEAAK                                                                          | 1.255917053        | 2               | 3.693744 |
| <b>P61222</b> | <b>ABCE1 ATP_binding cassette sub_family E member 1</b>                                 | <b>1.278276657</b> | <b>0.313452</b> | <b>3</b> |
| P61222        | GSELQNYFTK                                                                              | 1.365256361        | 2               | 2.340125 |
| P61222        | NTVANSQPQLLAGMNK                                                                        | 1.291802764        | 2               | 4.090226 |
| P61222        | VAETANEEEVKK                                                                            | 1.033297971        | 2               | 2.96918  |
| <b>P61314</b> | <b>RL15 60S ribosomal protein L15</b>                                                   | <b>1.032826556</b> | <b>9.9E-20</b>  | <b>5</b> |
| P61314        | FFEVLIDPFHK                                                                             | 1.7949457          | 3               | 3.421684 |
| P61314        | GATYGKPVHHGVNQLK                                                                        | 1.452270079        | 2               | 4.386039 |
| P61314        | SLQSVAEER                                                                               | 1.383124261        | 2               | 2.793447 |
| P61314        | VLNSYWVGEDSTYK                                                                          | 1.465059888        | 2               | 4.083551 |
| P61314        | YIQELWR                                                                                 | 1.028539255        | 2               | 2.612045 |
| <b>P61354</b> | <b>RL27 60S ribosomal protein L27</b>                                                   | <b>1.177094306</b> | <b>0.761203</b> | <b>2</b> |
| P61354        | NIDDGTSRDPYSHALVAGIDR                                                                   | 1.177083306        | 3               | 4.937042 |
| P61354        | VYNYNHLMPTR                                                                             | 1.246503316        | 2               | 3.019335 |
| <b>P61459</b> | <b>PHS Pterin_4_alpha_carbinolamine dehydratase</b>                                     | <b>1.120701612</b> | <b>0.999999</b> | <b>3</b> |
| P61459        | AVGWNELEGR                                                                              | 1.122411529        | 2               | 3.196966 |
| P61459        | LDHHPWFVFNYNK                                                                           | 0.85479796         | 3               | 4.978459 |
| P61459        | LSAEERDQLLPNLR                                                                          | 1.14968915         | 3               | 4.320259 |
| <b>P61589</b> | <b>RHOA Transforming protein RhoA</b>                                                   | <b>1.307724097</b> | <b>0.057474</b> | <b>4</b> |
| P61589        | HFCPNVPIILVGNK                                                                          | 2.79744771         | 2               | 3.296093 |
| P61589        | HFCPNVPIILVGNKK                                                                         | 1.453059166        | 3               | 4.512496 |
| P61589        | MKQEPVKPEEGR                                                                            | 1.374706158        | 3               | 4.121106 |
| P61589        | MKQEPVKPEEGR+Oxidation(0                                                                | 0.909432834        |                 |          |
| <b>P61751</b> | <b>ARF4 ADP_ribosylation factor 4</b>                                                   | <b>1.572544718</b> | <b>5.35E-14</b> | <b>6</b> |
| P61751        | ILMVGLDAAGK                                                                             | 2.002613289        | 2               | 2.890382 |
| P61751        | IQEGA AVLQK                                                                             | 1.240874217        | 2               | 2.943055 |
| P61751        | KQMRILMVGLDAAGK                                                                         | 1.426470997        | 2               | 2.371472 |
| P61751        | LGEIVTTIPTIGFNVETVEYK                                                                   | 1.454286511        | 3               | 4.255967 |
| P61751        | NICFTVWDVGGQDK                                                                          | 1.496516203        | 2               | 4.217439 |
| P61751        | QDLPNAMAISEMTDK                                                                         | 1.860801425        | 2               | 3.607818 |
| <b>P61805</b> | <b>DAD1 Dolichyl_diphosphooligosaccharide__protein glycosyltransferase subunit DAD1</b> | <b>1.318446286</b> | <b>0.976068</b> | <b>2</b> |
| P61805        | ADFQGISPER                                                                              | 1.145554184        | 2               | 3.110425 |

|               |                                                                            |                    |                 |          |
|---------------|----------------------------------------------------------------------------|--------------------|-----------------|----------|
| P61805        | FLEEYLSSTPQR                                                               | 1.337656968        | 2               | 3.781814 |
| <b>P61924</b> | <b>COPZ1 Coatomer subunit zeta_1</b>                                       | <b>1.346469025</b> | <b>0.015523</b> | <b>2</b> |
| P61924        | GEDVPLTEQTVSQVLQSAK                                                        | 1.347703165        | 2               | 4.62344  |
| P61924        | YYDDTYPSVK                                                                 | 1.131366874        | 2               | 2.493596 |
| <b>P61972</b> | <b>NTF2 Nuclear transport factor 2</b>                                     | <b>2.106983253</b> | <b>0.192583</b> | <b>2</b> |
| P61972        | IQHSITAQDHPDSCSIISMVVGQLK                                                  | 3.357575951        | 3               | 4.296495 |
| P61972        | NINDAWVCTNDMFR                                                             | 1.290274923        | 2               | 3.772995 |
| <b>P61980</b> | <b>HNRPK Heterogeneous nuclear ribonucleoprotein K</b>                     | <b>1.320646784</b> | <b>9.9E-20</b>  | <b>9</b> |
| P61980        | GSDFDCELR                                                                  | 2.090272619        | 2               | 2.768961 |
| P61980        | GSYDGLGGPIITQVTIPK                                                         | 1.052808937        | 2               | 5.164811 |
| P61980        | IDEPLEGSEDR                                                                | 2.193618454        | 2               | 3.677006 |
| P61980        | IILDISESPIK                                                                | 1.456100938        | 2               | 4.095618 |
| P61980        | IITITGTQDQIQNAQYLLQNSVK                                                    | 1.371333172        | 3               | 7.09349  |
| P61980        | LFQECCPHSTDR                                                               | 1.434175651        | 2               | 3.90689  |
| P61980        | NTDEMVELR                                                                  | 2.214357177        | 2               | 2.665109 |
| P61980        | RSRNTDEMVELR                                                               | 1.155720418        | 2               | 2.50928  |
| P61980        | TDYNASVSPDSSGPER                                                           | 1.047836921        | 2               | 4.563363 |
| <b>P61983</b> | <b>1433G 14_3_3 protein gamma</b>                                          | <b>1.327014985</b> | <b>0.000727</b> | <b>4</b> |
| P61983        | AYSEAHEISK                                                                 | 0.655936645        | 2               | 3.530486 |
| P61983        | NVTELENEPLSNEER                                                            | 1.335613236        | 2               | 4.657289 |
| P61983        | TAFDDAIAELDTLNEDSYK                                                        | 1.061633779        | 2               | 4.773418 |
| P61983        | YLAEVATGEK                                                                 | 1.194625452        | 2               | 3.080956 |
| <b>P62076</b> | <b>TIM13 Mitochondrial import inner membrane translocase subunit Tim13</b> | <b>1.307744936</b> | <b>0.191014</b> | <b>5</b> |
| P62076        | CIGKPGGSLDNSEQK                                                            | 1.128970835        | 2               | 4.092801 |
| P62076        | KCIGKPGGSLDNSEQK                                                           | 1.387441553        | 3               | 3.977994 |
| P62076        | LDPGAIMQVVK                                                                | 0.948691735        | 2               | 2.949828 |
| P62076        | VQIAVANAEQLLQR                                                             | 1.297558891        | 2               | 5.01919  |
| P62076        | YMDAWNTVSR                                                                 | 1.121419863        | 2               | 3.083282 |
| <b>P62083</b> | <b>RS7 40S ribosomal protein S7</b>                                        | <b>1.611057306</b> | <b>9.9E-20</b>  | <b>5</b> |
| P62083        | AIIIFVVPQLK                                                                | 1.766891059        | 2               | 3.759352 |
| P62083        | IVKPNGEKPDFESGISQALLEMNSDLK                                                | 2.13367978         | 3               | 5.182621 |
| P62083        | KAIIFVVPQLK                                                                | 1.227699182        | 2               | 3.6696   |
| P62083        | TLTAVHDAILEDLVFPSEIVGK                                                     | 1.613711413        | 2               | 5.163402 |
| P62083        | VETFSGVYK                                                                  | 0.92435962         | 2               | 2.321308 |
| <b>P62161</b> | <b>CALM Calmodulin</b>                                                     | <b>1.276137337</b> | <b>0.869616</b> | <b>4</b> |
| P62161        | DGNGYISAAELR                                                               | 1.301840483        | 2               | 2.970815 |
| P62161        | EADIDGDGQVNYEEFVQMMTAK                                                     | 2.448737165        | 2               | 5.228692 |
| P62161        | EAFSLFDKDGDTITTK                                                           | 1.100195089        | 2               | 4.715992 |
| P62161        | VFDKDGNGYISAAELR                                                           | 1.071749657        | 2               | 4.968894 |
| <b>P62193</b> | <b>PRS4 26S protease regulatory subunit 4</b>                              | <b>1.3063489</b>   | <b>0.000388</b> | <b>4</b> |
| P62193        | AICTEAGLMALRERR+Oxidation(8                                                | 4.073505431        |                 |          |
| P62193        | AVANQTSATFLR                                                               | 1.392875952        | 2               | 3.093301 |
| P62193        | NQEQMKPLEEK                                                                | 1.093829753        | 2               | 3.545059 |
| P62193        | TMLELLNQLDGFDSR                                                            | 2.279860584        | 2               | 4.136252 |
| <b>P62198</b> | <b>PRS8 26S protease regulatory subunit 8</b>                              | <b>1.572181983</b> | <b>1.91E-05</b> | <b>6</b> |
| P62198        | EVIELPVKHPELFEALGIAQPK                                                     | 1.182338788        | 3               | 4.387872 |
| P62198        | IAELMPGASGAEVK                                                             | 1.102790788        | 2               | 3.161131 |
| P62198        | LEGGSGGDSEVQR                                                              | 1.649085911        | 2               | 3.709428 |
| P62198        | LLREELQLLQEQGSYVGEVVR                                                      | 1.670210827        | 3               | 3.996678 |
| P62198        | TMLELLNQLDGFATK                                                            | 2.240152932        | 2               | 3.716094 |
| P62198        | VHVTQEDFEMAVAK                                                             | 1.091064069        | 2               | 3.13595  |
| <b>P62243</b> | <b>RS8 40S ribosomal protein S8</b>                                        | <b>1.329273198</b> | <b>9.9E-20</b>  | <b>9</b> |
| P62243        | ADGYVLE GK                                                                 | 2.496424535        | 2               | 3.169785 |
| P62243        | IIDVVYNASNELVR                                                             | 1.951689151        | 2               | 4.228573 |
| P62243        | ISSLLEEQFQQGK                                                              | 1.619451351        | 2               | 4.239766 |

|               |                                                  |                    |                 |          |
|---------------|--------------------------------------------------|--------------------|-----------------|----------|
| P62243        | KYELGRPAANTK                                     | 1.338092231        | 2               | 3.587833 |
| P62243        | LDVGNFSWGSECCTR                                  | 1.356057325        | 2               | 3.963382 |
| P62243        | LTPEEEEEILNK                                     | 1.207165831        | 2               | 3.071696 |
| P62243        | NCIVLIDSTPYR                                     | 1.384474169        | 2               | 3.475894 |
| P62243        | QWYESHYALPLGR                                    | 2.343509994        | 2               | 2.923625 |
| P62243        | YELGRPAANTK                                      | 1.456725791        | 2               | 2.954505 |
| <b>P62246</b> | <b>RS15A 40S ribosomal protein S15a</b>          | <b>1.390201034</b> | <b>2.21E-05</b> | <b>4</b> |
| P62246        | HGYIGEFEIIDDHR                                   | 1.379154635        | 3               | 4.921476 |
| P62246        | IVVNLTGR                                         | 1.979987844        | 2               | 2.329178 |
| P62246        | MNVLADALK                                        | 1.435801124        | 2               | 2.739142 |
| P62246        | WQNNLLPSR                                        | 1.220187233        | 2               | 3.117388 |
| <b>P62250</b> | <b>RS16 40S ribosomal protein S16</b>            | <b>1.423412673</b> | <b>0.004431</b> | <b>6</b> |
| P62250        | ALVAYYQK                                         | 3.285297469        | 1               | 2.239725 |
| P62250        | EIKDILIQYDR                                      | 1.493967682        | 2               | 2.614253 |
| P62250        | GGGHVAQIYAIR                                     | 2.000135148        | 2               | 3.075345 |
| P62250        | LLEPVLLLGK                                       | 1.386531878        | 2               | 2.803022 |
| P62250        | TLLVADPR                                         | 1.416437931        | 2               | 2.608602 |
| P62250        | VNGRPLEMIEPR                                     | 1.330421329        | 2               | 2.695855 |
| <b>P62260</b> | <b>1433E 14_3_3 protein epsilon</b>              | <b>1.744980851</b> | <b>9.9E-20</b>  | <b>9</b> |
| P62260        | AAFDDAIAELDTLSEESYK                              | 1.298016611        | 2               | 6.038109 |
| P62260        | EENKGGEDKLK                                      | 1.774121461        | 2               | 2.702422 |
| P62260        | HLIPAANTGESK                                     | 1.337264061        | 2               | 3.198699 |
| P62260        | IISSIEQK                                         | 1.368598039        | 2               | 2.608193 |
| P62260        | LICCDILDVLDK                                     | 2.837537654        | 2               | 4.056403 |
| P62260        | YDEMVESMK                                        | 1.177472443        | 2               | 2.710773 |
| P62260        | YDEMVESMKK                                       | 1.930717724        | 2               | 2.674832 |
| P62260        | YLAEFATGNDR                                      | 0.915743539        | 2               | 2.942227 |
| P62260        | YLAEFATGNDRK                                     | 1.704141967        | 2               | 2.73987  |
| <b>P62268</b> | <b>RS23 40S ribosomal protein S23</b>            | <b>1.490773829</b> | <b>0.003904</b> | <b>2</b> |
| P62268        | GHAVGDIPGVR                                      | 1.497148733        | 2               | 2.747655 |
| P62268        | KGHAVGDIPGVR                                     | 1.22790337         | 2               | 2.825577 |
| <b>P62271</b> | <b>RS18 40S ribosomal protein S18</b>            | <b>1.150799455</b> | <b>9.9E-20</b>  | <b>6</b> |
| P62271        | AGELTEDEVER                                      | 2.628266555        | 2               | 3.696181 |
| P62271        | LREDLER                                          | 1.374402617        | 1               | 2.21055  |
| P62271        | RAGELTEDEVER                                     | 0.486424343        | 2               | 3.105144 |
| P62271        | VITIMQNPR                                        | 1.171305427        | 2               | 2.838989 |
| P62271        | VLNTNIDGR                                        | 2.567045282        | 2               | 3.127369 |
| P62271        | YSQVLANGLDNK                                     | 1.594186112        | 2               | 4.042987 |
| <b>P62278</b> | <b>RS13 40S ribosomal protein S13</b>            | <b>1.468796142</b> | <b>1.67E-08</b> | <b>5</b> |
| P62278        | GLAPDLPEDLYHLIK                                  | 1.473927876        | 2               | 3.091916 |
| P62278        | GLSQSALPYR                                       | 1.176171618        | 2               | 2.478468 |
| P62278        | GLTPSQIGVILR                                     | 1.450647303        | 2               | 2.981237 |
| P62278        | KGLTPSQIGVILR                                    | 1.11450151         | 3               | 3.891465 |
| P62278        | LILIESR                                          | 1.670639205        | 1               | 2.073099 |
| <b>P62329</b> | <b>TYB4 Thymosin beta_4</b>                      | <b>1.143491557</b> | <b>0.992834</b> | <b>3</b> |
| P62329        | ETIEQEKQAGES                                     | 1.194227368        | 2               | 2.446251 |
| P62329        | NPLPSKETIEQEK                                    | 1.038560191        | 2               | 2.73218  |
| P62329        | TETQEKNLPSK                                      | 1.087457642        | 2               | 3.739312 |
| <b>P62332</b> | <b>ARF6 ADP_ribosylation factor 6</b>            | <b>1.394728451</b> | <b>0.021122</b> | <b>2</b> |
| P62332        | FNVWDVGGQDK                                      | 1.326790041        | 2               | 3.024646 |
| P62332        | LGQSVTTIPTVGFNVETVYK                             | 1.513923946        | 2               | 2.673682 |
| <b>P62334</b> | <b>PRS10 26S protease regulatory subunit 10B</b> | <b>1.135315179</b> | <b>0.009127</b> | <b>5</b> |
| P62334        | ADHDFVQEDFMK                                     | 1.212015989        | 2               | 2.323827 |
| P62334        | ALQSVGQIVGEVLK                                   | 1.225928834        | 2               | 3.615002 |
| P62334        | EVIELPLTNPELFQR                                  | 1.516453358        | 2               | 3.035747 |
| P62334        | HGEIDYEAIVK                                      | 0.812624017        | 2               | 3.530829 |
| P62334        | NVCTEAGMFAIR                                     | 1.32377981         | 2               | 2.767191 |

|               |                                                   |                    |                 |           |
|---------------|---------------------------------------------------|--------------------|-----------------|-----------|
| <b>P62425</b> | <b>RL7A 60S ribosomal protein L7a</b>             | <b>1.186414464</b> | <b>0.011324</b> | <b>11</b> |
| P62425        | AGVNTVTTLVENK                                     | 1.265666655        | 2               | 4.029154  |
| P62425        | AGVNTVTTLVENKK                                    | 2.625007616        | 2               | 3.334574  |
| P62425        | HWGGNVLGPK                                        | 1.262019062        | 1               | 2.915874  |
| P62425        | KVVNPLFEK                                         | 0.984017039        | 2               | 2.366081  |
| P62425        | LKVPPAINQFTQALDR                                  | 1.8017354          | 3               | 4.296217  |
| P62425        | NFGIGQDIQPK                                       | 1.097084132        | 2               | 3.368641  |
| P62425        | TCTTVAFTQVNSEDK                                   | 1.466184071        | 2               | 3.350617  |
| P62425        | TCTTVAFTQVNSEDKGALAK                              | 1.77681822         | 2               | 4.682706  |
| P62425        | TNYNDRYDEIR                                       | 1.324174544        | 2               | 2.356894  |
| P62425        | VAPAPAVVK                                         | 0.959288616        | 1               | 2.153366  |
| P62425        | VPPAINQFTQALDR                                    | 1.202195142        | 2               | 3.697337  |
| <b>P62630</b> | <b>EF1A1 Elongation factor 1_alpha 1</b>          | <b>1.374938425</b> | <b>9.9E-20</b>  | <b>13</b> |
| P62630        | DGSASGTTLLEALDCILPPTPTDKPLR                       | 1.496107526        | 3               | 4.986901  |
| P62630        | KDGSASGTTLLEALDCILPPTPTDKPLR                      | 1.591684653        | 4               | 5.250643  |
| P62630        | MDSTEPYSQK                                        | 1.397891332        | 2               | 3.741361  |
| P62630        | MDSTEPYSQK+Oxidation(0)                           | 1.545744569        |                 |           |
| P62630        | NDPPMEAAGFTAQVILNHPGQISAGYAPVLDCHTAHIACK          | 1.484059668        | 5               | 5.934408  |
| P62630        | RYEEIVK                                           | 1.112996025        | 2               | 2.739399  |
| P62630        | SGDAAIVDMVPGKPMCVESFSYDYPPLGR                     | 1.300876156        | 3               | 5.207468  |
| P62630        | SGDAAIVDMVPGKPMCVESFSYDYPPLGR+Oxidation(14)       | 1.612532059        |                 |           |
| P62630        | SGDAAIVDMVPGKPMCVESFSYDYPPLGR+Oxidation(8)        | 1.483903576        |                 |           |
| P62630        | VETGVLKPGMVVTFAPVNVTTVEK                          | 1.846109997        | 3               | 5.633935  |
| P62630        | VETGVLKPGMVVTFAPVNVTTVEK+Oxidation(9)             | 0.883725967        |                 |           |
| P62630        | YEEIVK                                            | 1.247139086        | 2               | 2.341627  |
| P62630        | YYVTIIDAPGHR                                      | 0.827074111        | 3               | 4.103999  |
| <b>P62632</b> | <b>EF1A2 Elongation factor 1_alpha 2</b>          | <b>1.858046601</b> | <b>9.9E-20</b>  | <b>7</b>  |
| P62632        | EHALLAYTLGVK                                      | 1.645459731        | 3               | 3.703176  |
| P62632        | IGGIGTVPVGR                                       | 1.574507109        | 2               | 3.548563  |
| P62632        | NMITGTSQADCAVLIVAAGVGEFEAGISK                     | 1.367007625        | 3               | 4.565644  |
| P62632        | QLIVGVNK                                          | 1.237582204        | 1               | 2.43109   |
| P62632        | STTTGHLIYK                                        | 5.47519879         | 2               | 3.069805  |
| P62632        | THINIVVIGHVDSGK                                   | 1.987989594        | 2               | 5.397683  |
| P62632        | VETGILRPGMVVTFAPVNVITTEVK                         | 2.058859589        | 3               | 3.944329  |
| <b>P62634</b> | <b>CNBP Cellular nucleic acid_binding protein</b> | <b>1.352336272</b> | <b>2.25E-05</b> | <b>2</b>  |
| P62634        | CGETGHVAINCSK                                     | 1.339475674        | 2               | 4.453517  |
| P62634        | CYSCGEFGHIQK                                      | 1.380664267        | 2               | 3.379993  |
| <b>P62703</b> | <b>RS4X 40S ribosomal protein S4_X isoform</b>    | <b>1.378961432</b> | <b>0.418106</b> | <b>5</b>  |
| P62703        | FDTGNLCMVTGGANLGR                                 | 1.360763731        | 2               | 4.779842  |
| P62703        | GIPHLVTHDAR                                       | 1.328711324        | 2               | 2.746728  |
| P62703        | LSNIFVIGK                                         | 1.471788869        | 2               | 3.123281  |
| P62703        | TDITYPAGFMDVISIDK                                 | 1.575735511        | 2               | 4.946909  |
| P62703        | VNDTIQIDLETGK                                     | 1.691019829        | 2               | 4.548001  |
| <b>P62718</b> | <b>RL18A 60S ribosomal protein L18a</b>           | <b>1.118609912</b> | <b>0.453208</b> | <b>2</b>  |
| P62718        | DLTTAGAVTQCYR                                     | 1.063960624        | 2               | 3.163642  |
| P62718        | SSGEIVYCGQVFEKSPLR                                | 2.296444126        | 2               | 2.508621  |
| <b>P62752</b> | <b>RL23A 60S ribosomal protein L23a</b>           | <b>1.459303804</b> | <b>1.12E-08</b> | <b>7</b>  |
| P62752        | KLYDIDVAK                                         | 1.374954902        | 2               | 2.391035  |
| P62752        | LAPDYDALDVANK                                     | 1.356730231        | 2               | 3.71814   |
| P62752        | LDHYAIK                                           | 1.378132138        | 2               | 2.522631  |
| P62752        | LYDIDVAK                                          | 1.444073893        | 1               | 1.985749  |
| P62752        | NKLDHYAIK                                         | 1.191710535        | 3               | 3.39016   |
| P62752        | VNTLIRPDGEK                                       | 1.462777011        | 2               | 3.340559  |
| P62752        | VNTLIRPDGEKK                                      | 1.554383751        | 2               | 2.930458  |
| <b>P62755</b> | <b>RS6 40S ribosomal protein S6</b>               | <b>1.238498962</b> | <b>3.33E-16</b> | <b>4</b>  |

|               |                                                             |                    |                 |          |
|---------------|-------------------------------------------------------------|--------------------|-----------------|----------|
| P62755        | LIEVDDER                                                    | 1.040651638        | 2               | 3.077241 |
| P62755        | LNISFPATGCQK                                                | 1.11007233         | 2               | 2.850919 |
| P62755        | MATEVAADALGEEWK                                             | 1.758637424        | 2               | 4.785816 |
| P62755        | MATEVAADALGEEWK+Oxidation(0                                 | 1.237797165        |                 |          |
| <b>P62775</b> | <b>MTPN Myotrophin</b>                                      | <b>1.039234478</b> | <b>0.970062</b> | <b>3</b> |
| P62775        | GPDGLTALEATDNQAIK                                           | 1.375085301        | 2               | 3.90549  |
| P62775        | HHITPLLSAVYEGHVSCVK                                         | 0.989225657        | 3               | 3.942154 |
| P62775        | NGDLDEVKDYVAK                                               | 1.035095652        | 2               | 3.191914 |
| <b>P62804</b> | <b>H4 Histone H4</b>                                        | <b>1.059657534</b> | <b>9.9E-20</b>  | <b>9</b> |
| P62804        | DAVITYTEHAK                                                 | 1.620315241        | 2               | 3.011259 |
| P62804        | DNIQGITKPAIR                                                | 1.415556714        | 2               | 3.141638 |
| P62804        | ISGLIYEETR                                                  | 1.428674474        | 2               | 3.972643 |
| P62804        | KTVTAMDVVYALK                                               | 1.303928622        | 3               | 4.774006 |
| P62804        | RISGLIYEETR                                                 | 1.37619173         | 2               | 2.403309 |
| P62804        | TVTAMDVVYALK                                                | 1.052567308        | 2               | 3.900661 |
| P62804        | TVTAMDVVYALK+Oxidation(4                                    | 1.614298065        |                 |          |
| P62804        | VFLENVIR                                                    | 1.330762913        | 2               | 3.264373 |
| P62804        | VFLENVIRDAVITYTEHAK                                         | 1.232035946        | 3               | 3.87555  |
| <b>P62815</b> | <b>VATB2 V_type proton ATPase subunit B_ brain isoform</b>  | <b>1.205481821</b> | <b>0.21529</b>  | <b>3</b> |
| P62815        | AVVQVFEGTSGIDAK                                             | 0.763286978        | 2               | 3.643313 |
| P62815        | IYPEEMIQTGISAIDGMNSIAR                                      | 2.167875142        | 3               | 3.440888 |
| P62815        | SGQVLEVSGSK                                                 | 1.218735013        | 2               | 2.812166 |
| <b>P62845</b> | <b>RS15 40S ribosomal protein S15</b>                       | <b>1.393499277</b> | <b>0.157987</b> | <b>2</b> |
| P62845        | DMIIIPEMVGSVMGVYNGK                                         | 1.416301997        | 2               | 3.158473 |
| P62845        | KEAPPMKPEVVK                                                | 1.387389892        | 3               | 4.032125 |
| <b>P62850</b> | <b>RS24 40S ribosomal protein S24</b>                       | <b>1.588042084</b> | <b>1.25E-09</b> | <b>2</b> |
| P62850        | KQMVIDVLHPGK                                                | 2.04840906         | 3               | 3.67591  |
| P62850        | TTGFGMIYDSLIDYAK                                            | 1.584960907        | 2               | 4.004062 |
| <b>P62856</b> | <b>RS26 40S ribosomal protein S26</b>                       | <b>1.380773256</b> | <b>3.59E-07</b> | <b>4</b> |
| P62856        | DISEASVFDAYVLPK                                             | 1.705271908        | 2               | 3.110003 |
| P62856        | FRPAGAAPRPPPKPM                                             | 1.066022252        | 2               | 2.73655  |
| P62856        | LHYCVSCAIHSK                                                | 1.193687655        | 3               | 3.337881 |
| P62856        | NIVEAAAVR                                                   | 1.379817189        | 2               | 3.013587 |
| <b>P62859</b> | <b>RS28 40S ribosomal protein S28</b>                       | <b>1.552878505</b> | <b>3.79E-05</b> | <b>2</b> |
| P62859        | EGDVLTLLESER                                                | 1.566831609        | 2               | 3.536335 |
| P62859        | VEFMDDTSR                                                   | 1.339545004        | 2               | 2.704906 |
| <b>P62870</b> | <b>ELOB Transcription elongation factor B polypeptide 2</b> | <b>1.270443679</b> | <b>0.325442</b> | <b>3</b> |
| P62870        | ADDTFEALR                                                   | 1.226464648        | 2               | 2.547496 |
| P62870        | LYKDDQLLDGK                                                 | 1.270282833        | 2               | 2.9807   |
| P62870        | TLGECGFTSQARQPATVGLAFR                                      | 1.383950547        | 3               | 4.520145 |
| <b>P62890</b> | <b>RL30 60S ribosomal protein L30</b>                       | <b>0.925188169</b> | <b>2.54E-10</b> | <b>3</b> |
| P62890        | LVILANNCPALR                                                | 1.389991781        | 2               | 3.065414 |
| P62890        | TGVHHYSGNIELGTACGK                                          | 1.13458164         | 2               | 5.689928 |
| P62890        | VCTLAIIDPGDSDIIR                                            | 2.332337473        | 2               | 4.240249 |
| <b>P62898</b> | <b>CYC Cytochrome c_somatic</b>                             | <b>1.320200959</b> | <b>9.9E-20</b>  | <b>7</b> |
| P62898        | ADLIAYLK                                                    | 1.156404025        | 2               | 3.125129 |
| P62898        | ADLIAYLKKATNE                                               | 1.294159208        | 2               | 2.462525 |
| P62898        | GITWGEDTLMEYLENPK                                           | 1.786699596        | 2               | 4.988049 |
| P62898        | GITWGEDTLMEYLENPKK                                          | 1.637274385        | 2               | 4.316432 |
| P62898        | KTGQAAGFSYTDANK                                             | 1.14032494         | 2               | 5.192502 |
| P62898        | TGPNLHGLFGR                                                 | 0.919721103        | 2               | 3.372039 |
| P62898        | TGQAAGFSYTDANK                                              | 1.348162362        | 2               | 4.189436 |
| <b>P62902</b> | <b>RL31 60S ribosomal protein L31</b>                       | <b>1.5435816</b>   | <b>0.15882</b>  | <b>2</b> |
| P62902        | NLQTVNVNVDEN                                                | 1.484306247        | 1               | 2.419814 |
| P62902        | SAINEVVTR                                                   | 1.863787529        | 2               | 3.054344 |

|               |                                                           |                    |                 |           |
|---------------|-----------------------------------------------------------|--------------------|-----------------|-----------|
| <b>P62907</b> | <b>RL10A 60S ribosomal protein L10a</b>                   | <b>1.380327117</b> | <b>5.23E-09</b> | <b>6</b>  |
| P62907        | AVDIPHMDIEALK                                             | 1.434039061        | 2               | 3.038153  |
| P62907        | AVDIPHMDIEALKK                                            | 1.179370966        | 2               | 3.072406  |
| P62907        | FSVCLGDQQCDEAK                                            | 1.393138236        | 2               | 4.123172  |
| P62907        | KYDAFLASESLIK                                             | 1.348078354        | 2               | 3.843312  |
| P62907        | VLCLAVAVGHVK                                              | 0.898546868        | 2               | 3.234421  |
| P62907        | YDAFLASESLIK                                              | 1.024898359        | 2               | 3.305998  |
| <b>P62909</b> | <b>RS3 40S ribosomal protein S3</b>                       | <b>1.543495245</b> | <b>9.9E-20</b>  | <b>10</b> |
| P62909        | AELNEFLTR                                                 | 1.328881768        | 2               | 3.194365  |
| P62909        | DEILPTTPISEQK                                             | 1.312305972        | 2               | 3.3224    |
| P62909        | ELAEDGYSGVEVR                                             | 1.546945388        | 2               | 3.832286  |
| P62909        | ELTAVVQK                                                  | 1.40629574         | 1               | 2.051346  |
| P62909        | FGFPEGSVELYAEK                                            | 3.699060133        | 2               | 3.56604   |
| P62909        | FVDGLMIHSGDPVNYVDTAVR                                     | 1.546004516        | 3               | 4.761268  |
| P62909        | GCEVVVSGK                                                 | 1.231278715        | 2               | 2.416892  |
| P62909        | GGKPEPPAMPQPVPTA                                          | 1.588476728        | 2               | 4.071256  |
| P62909        | GLCAIAQAESLR                                              | 1.0806369          | 2               | 3.360262  |
| P62909        | TEIILATR                                                  | 1.723969098        | 2               | 3.281584  |
| <b>P62912</b> | <b>RL32 60S ribosomal protein L32</b>                     | <b>1.193757919</b> | <b>6.22E-05</b> | <b>3</b>  |
| P62912        | ELEVLLMCNK                                                | 1.330012674        | 2               | 3.296674  |
| P62912        | GQILMPNIGYGSNK                                            | 1.192659644        | 2               | 3.15751   |
| P62912        | SYCAEIAHNVSSK                                             | 1.2801797          | 2               | 4.413827  |
| <b>P62914</b> | <b>RL11 60S ribosomal protein L11</b>                     | <b>1.074182408</b> | <b>0.017651</b> | <b>2</b>  |
| P62914        | VLEQLTGQTPVFSK                                            | 1.038920635        | 2               | 4.426752  |
| P62914        | YDGIILPGK                                                 | 1.27362103         | 2               | 3.059244  |
| <b>P62919</b> | <b>RL8 60S ribosomal protein L8</b>                       | <b>1.40277895</b>  | <b>9.9E-20</b>  | <b>4</b>  |
| P62919        | ASGNATVISHNPETK                                           | 1.385647959        | 2               | 4.435143  |
| P62919        | AVDFAER                                                   | 1.47502699         | 1               | 1.977413  |
| P62919        | AVVGVVAGGGR                                               | 1.402988217        | 2               | 3.618767  |
| P62919        | KAQLNIGNVLPVGTMPGETIVCCLEEKPGDR                           | 1.391883554        | 3               | 5.372764  |
| <b>P62944</b> | <b>AP2B1 AP_2 complex subunit beta</b>                    | <b>1.645891622</b> | <b>0.080759</b> | <b>3</b>  |
| P62944        | KPSETQELVQQVLSLATQSDNPDLR                                 | 1.964717494        | 3               | 3.304678  |
| P62944        | LQNNNVYTIK                                                | 1.647488535        | 2               | 2.407783  |
| P62944        | SQPDMAIMAVNSFVK                                           | 1.172600668        | 2               | 2.973409  |
| <b>P62959</b> | <b>HINT1 Histidine triad nucleotide_binding protein 1</b> | <b>1.01216546</b>  | <b>0.06832</b>  | <b>7</b>  |
| P62959        | AQVAQPGGDTIFGK                                            | 1.059973199        | 2               | 4.752118  |
| P62959        | CAADLGLK                                                  | 1.221885941        | 2               | 2.52929   |
| P62959        | CLAFHDISPQAPTHFLVIPK                                      | 1.322582227        | 3               | 4.290545  |
| P62959        | HISQISVADDDDESLLGHLMIVGK                                  | 1.555166418        | 3               | 6.725867  |
| P62959        | IIFEDDR                                                   | 1.344967773        | 2               | 2.599562  |
| P62959        | KHISQISVADDDDESLLGHLMIVGK                                 | 1.476040105        | 3               | 5.490684  |
| P62959        | MVVNEGADGGQSVYHIHLHLVGGRR                                 | 0.701857931        | 3               | 4.379941  |
| <b>P62961</b> | <b>YBOX1 Nuclease_sensitive element_binding protein 1</b> | <b>1.351064558</b> | <b>0.873749</b> | <b>6</b>  |
| P62961        | EDGNEEDKENQGGDETQGGQPPQR                                  | 1.251609846        | 3               | 5.126131  |
| P62961        | GAEAAVNTGPGGVPVQGSK                                       | 0.926404331        | 2               | 4.973924  |
| P62961        | NEGSESAPEGQAQQR                                           | 1.407534163        | 2               | 5.211066  |
| P62961        | NYQQNYQNSSESKEK                                           | 1.177158453        | 2               | 4.823812  |
| P62961        | NYQQNYQNSSESKEKNEGSESAPEGQAQQR                            | 0.907094419        | 3               | 5.129217  |
| P62961        | RPQYSNPPVQGEVMEGADNQGAGEQGRPVR                            | 1.386984191        | 3               | 5.12013   |
| <b>P62963</b> | <b>PROF1 Profilin_1</b>                                   | <b>1.371950471</b> | <b>3.33E-16</b> | <b>6</b>  |
| P62963        | CYEMASHLR                                                 | 1.815106173        | 2               | 2.394007  |
| P62963        | DSLLQDGEFTMDLR                                            | 1.807527784        | 2               | 3.409657  |
| P62963        | DSPSVWAAVPGK                                              | 1.314781859        | 2               | 2.740582  |
| P62963        | SSFFVNGLTLGGQK                                            | 1.370908333        | 2               | 4.35779   |
| P62963        | STGGAPTFNVTVTMTAK                                         | 1.375600917        | 2               | 3.434676  |

|               |                                                      |                    |                 |           |
|---------------|------------------------------------------------------|--------------------|-----------------|-----------|
| P62963        | TFVSITPAEVLGVLVGK                                    | 1.243676657        | 2               | 4.637149  |
| <b>P63018</b> | <b>HSP7C Heat shock cognate 71 kDa protein</b>       | <b>1.32474456</b>  | <b>9.9E-20</b>  | <b>25</b> |
| P63018        | ARFEELNADLFR                                         | 1.481290384        | 3               | 3.739548  |
| P63018        | CNEIISWLDK                                           | 1.777450554        | 2               | 3.179036  |
| P63018        | DAGTIAGLNLVR                                         | 2.084632008        | 2               | 3.69132   |
| P63018        | FDDAVVQSDMK                                          | 1.192492537        | 2               | 3.871005  |
| P63018        | FEELNADLFR                                           | 1.265826103        | 2               | 3.289832  |
| P63018        | FELTGIPPAPR                                          | 1.283951216        | 2               | 3.13579   |
| P63018        | HWPFMVVNDAGRPK                                       | 3.945572633        | 3               | 3.510468  |
| P63018        | IINEPTAAAIAYGLDK                                     | 1.459092411        | 2               | 5.428555  |
| P63018        | IINEPTAAAIAYGLDKK                                    | 1.320943348        | 2               | 4.279563  |
| P63018        | LLQDFFNKG                                            | 1.751683243        | 2               | 2.692153  |
| P63018        | MKEIAEAYLGK                                          | 1.219546556        | 2               | 3.452201  |
| P63018        | MVNHFAIEFK                                           | 0.8824493          | 2               | 2.861875  |
| P63018        | NQTAEKEEFEHQK                                        | 1.139111927        | 2               | 5.268318  |
| P63018        | NQVAMNPTNTVFDAK                                      | 1.102424894        | 2               | 4.970622  |
| P63018        | NQVAMNPTNTVFDAK+Oxidation(4                          | 1.471028004        |                 |           |
| P63018        | NSLESYAFNMK                                          | 1.079470143        | 2               | 3.506338  |
| P63018        | RFDDAVVQSDMK                                         | 1.259581337        | 2               | 3.628594  |
| P63018        | SFYPEEVSSMVLTK                                       | 1.353107654        | 2               | 4.957209  |
| P63018        | SFYPEEVSSMVLTK+Oxidation(9                           | 1.665769192        |                 |           |
| P63018        | SINPDEAVAYGAAVQAAILSGDK                              | 1.688094215        | 2               | 5.931759  |
| P63018        | SQIHDIVLVGGSTR                                       | 1.29022323         | 2               | 4.466779  |
| P63018        | STAGDTHLGGEDFDNR                                     | 1.22909594         | 2               | 4.729926  |
| P63018        | TVTNAVVTVPAYFNDSQR                                   | 1.310316312        | 3               | 4.900881  |
| P63018        | VCNPIITK                                             | 1.321984005        | 2               | 2.538222  |
| P63018        | VQVEYKGETK                                           | 1.402684334        | 2               | 2.543759  |
| <b>P63029</b> | <b>TCTP Translationally controlled tumor protein</b> | <b>1.360987437</b> | <b>0.347048</b> | <b>3</b>  |
| P63029        | DLISHDELFSDIYK                                       | 1.787080836        | 2               | 3.900172  |
| P63029        | EIADGLCLEVEGK                                        | 1.33630013         | 2               | 3.267323  |
| P63029        | VKPFMTGAAEQIK                                        | 1.389935329        | 3               | 3.341167  |
| <b>P63036</b> | <b>DNJA1 Dnaj homolog subfamily A member 1</b>       | <b>1.328258824</b> | <b>0.284268</b> | <b>7</b>  |
| P63036        | ETTYDVLGVKPNATQEELKK                                 | 1.08191331         | 3               | 3.56827   |
| P63036        | HYNGEAYEDDEHHPK                                      | 1.33108795         | 3               | 4.959896  |
| P63036        | ITFHGEGDQEPGLEPGDIIIVLDQK                            | 1.579041605        | 3               | 4.00024   |
| P63036        | NVVHQLSVTLEDLYNGATR                                  | 1.043724666        | 2               | 4.050008  |
| P63036        | QISQAYEVLADSK                                        | 1.115501242        | 2               | 3.17226   |
| P63036        | TIVITSHPGQIVK                                        | 1.637555881        | 2               | 3.626172  |
| P63036        | VNFPENGFLSPDK                                        | 1.109849326        | 2               | 3.421634  |
| <b>P63039</b> | <b>CH60 60 kDa heat shock protein_mitochondrial</b>  | <b>1.236456498</b> | <b>9.9E-20</b>  | <b>36</b> |
| P63039        | AAVEEGIVLGGCALLR                                     | 1.484093365        | 2               | 5.380049  |
| P63039        | ALMLQGVDLLADAVAVTMGPK                                | 1.541934043        | 3               | 6.582479  |
| P63039        | ALMLQGVDLLADAVAVTMGPK+Oxidation(17                   | 1.455670602        |                 |           |
| P63039        | CEFQDAYVLLSEK                                        | 2.853100567        | 2               | 4.408102  |
| P63039        | CIPALDSLKPANEDQK                                     | 1.061561605        | 2               | 3.53513   |
| P63039        | DDAMLLK                                              | 1.479996464        | 1               | 1.999974  |
| P63039        | DIGNIISDAMK                                          | 1.064530821        | 2               | 3.37775   |
| P63039        | GIHPTK                                               | 1.267060712        | 1               | 1.930636  |
| P63039        | GVMLAVDAVIAELK                                       | 1.471459806        | 2               | 4.538907  |
| P63039        | GVMLAVDAVIAELKK                                      | 1.179457774        | 2               | 4.63125   |
| P63039        | GYISPYFINTSK                                         | 0.603962059        | 2               | 3.091484  |
| P63039        | IGIEIIK                                              | 0.962287263        | 2               | 2.679756  |
| P63039        | IGIEIIKR                                             | 2.808531809        | 2               | 2.419956  |
| P63039        | ILQSSSEVGYDAMLGDFVNMVEK                              | 2.266908919        | 3               | 5.091751  |
| P63039        | IQEITEQLDITTSEYEK                                    | 1.529429173        | 2               | 5.623862  |
| P63039        | IQEITEQLDITTSEYEK                                    | 1.254762585        | 2               | 5.269607  |
| P63039        | ISSVQSIVPALEIANAHR                                   | 1.633554939        | 2               | 4.326787  |



|               |                                                                      |                    |                 |           |
|---------------|----------------------------------------------------------------------|--------------------|-----------------|-----------|
| P63039        | KISSVQSIVPALEIANHR                                                   | 2.17499898         | 3               | 4.38552   |
| P63039        | KPLVIAEDVDGEALSTLVLR                                                 | 1.787163008        | 2               | 6.014946  |
| P63039        | LSDGVAVLK                                                            | 1.275222872        | 2               | 2.968635  |
| P63039        | LVQDVANNTNEEAGDGTATVLR                                               | 1.356894809        | 2               | 6.517145  |
| P63039        | NAGVEGLIVEK                                                          | 1.266648076        | 2               | 3.412197  |
| P63039        | QSKPVTTPEEIAQVATISANGDK                                              | 1.206951584        | 2               | 3.415241  |
| P63039        | QSKPVTTPEEIAQVATISANGDKDIGNIISDAMK                                   | 1.011555619        | 3               | 4.849346  |
| P63039        | RGVMLAVDAVIAELKK                                                     | 0.145051452        | 3               | 5.931686  |
| P63039        | TALLDAAGVASLLTTAEAVVTEIPKEEK                                         | 3.135487408        | 3               | 5.146729  |
| P63039        | TLNDELEIIEGMK                                                        | 1.352671817        | 2               | 4.79828   |
| P63039        | TLNDELEIIEGMK+Oxidation(11                                           | 2.938070601        |                 |           |
| P63039        | TVIIEQSWGSPK                                                         | 1.086883698        | 2               | 4.427644  |
| P63039        | VGEVIVTK                                                             | 1.090346342        | 2               | 3.241752  |
| P63039        | VGEVIVTKDDAMLLK                                                      | 1.125940046        | 2               | 3.609174  |
| P63039        | VGGTSDVEVNEK                                                         | 0.420282059        | 2               | 3.803713  |
| P63039        | VGGTSDVEVNEKK                                                        | 1.376505883        | 2               | 3.736011  |
| P63039        | VGGTSDVEVNEKKDR                                                      | 0.831625221        | 2               | 3.417169  |
| P63039        | VGLQVVAVK                                                            | 1.377302574        | 2               | 3.098645  |
| P63039        | VTDALNATR                                                            | 1.167788386        | 2               | 3.442991  |
| <b>P63092</b> | <b>subunit alpha isoforms short</b>                                  | <b>1.350494623</b> | <b>0.001777</b> | <b>2</b>  |
| P63092        | AFEPFYDEIKSGALVK                                                     | 1.351439254        |                 |           |
| P63092        | YTPPEDATPEPGEDPR                                                     | 0.75761715         |                 |           |
| <b>P63102</b> | <b>1433Z 14_3_3 protein zeta/delta</b>                               | <b>1.115627325</b> | <b>0.131009</b> | <b>10</b> |
| P63102        | DICNDVLSLLEK                                                         | 1.703340708        | 3               | 3.817304  |
| P63102        | EMQPTHPIR                                                            | 2.255925702        | 2               | 2.323834  |
| P63102        | FLIPNASQPESK                                                         | 1.110915349        | 2               | 2.909475  |
| P63102        | GIVDQSQAYQEAFAEISK                                                   | 1.304108632        | 2               | 5.67016   |
| P63102        | KGIVDQSQAYQEAFAEISK                                                  | 0.979393391        | 2               | 5.266699  |
| P63102        | SVTEQGAELSNEER                                                       | 0.759435619        | 2               | 5.174216  |
| P63102        | TAFDEAIAELDTLSEESYK                                                  | 2.483904322        | 3               | 4.635648  |
| P63102        | YDDMAACMK                                                            | 1.735806216        | 2               | 2.523872  |
| P63102        | YLAEVAAGDDK                                                          | 1.575688785        | 2               | 2.360577  |
| P63102        | YLAEVAAGDDK                                                          | 1.371723646        | 2               | 3.515499  |
| <b>P63159</b> | <b>HMGB1 High mobility group protein B1</b>                          | <b>1.241174938</b> | <b>0.010862</b> | <b>6</b>  |
| P63159        | GEHPGLSIGDVAK                                                        | 1.097618821        | 2               | 2.978562  |
| P63159        | GKFEDMAK                                                             | 1.227974142        | 1               | 2.015042  |
| P63159        | IKGEHPGLSIGDVAK                                                      | 1.925819054        | 2               | 4.02613   |
| P63159        | KHPDASVNFSEFSK                                                       | 1.162966965        | 3               | 4.193828  |
| P63159        | KLGEWNNNTAADDKQPYEK                                                  | 1.268520417        | 3               | 4.61693   |
| P63159        | LGEMWNNNTAADDKQPYEK                                                  | 1.446228163        | 2               | 4.932132  |
| <b>P63174</b> | <b>RL38 60S ribosomal protein L38</b>                                | <b>1.388112313</b> | <b>7.82E-07</b> | <b>2</b>  |
| P63174        | IEEIKDFLLTAR                                                         | 1.566803489        | 2               | 3.032556  |
| P63174        | KIEEIKDFLLTAR                                                        | 1.370084225        | 2               | 4.602397  |
| <b>P63245</b> | <b>GBLP Guanine nucleotide_binding protein subunit beta_2_like 1</b> | <b>1.336982775</b> | <b>7.26E-05</b> | <b>13</b> |
| P63245        | DETNYGIPQR                                                           | 1.037130767        | 2               | 2.521435  |
| P63245        | DGQAMLWDLNEGK                                                        | 1.891036188        | 2               | 3.3529    |
| P63245        | FSPNSSNPIIVSCGWDK                                                    | 1.22898696         | 2               | 4.22051   |
| P63245        | GHNGWVTQIATTPQFPDMILSASR                                             | 1.426645182        | 3               | 4.196202  |
| P63245        | HLYTLGGDIINALCFSPNR                                                  | 1.715164224        | 2               | 6.134309  |
| P63245        | IIVDELK                                                              | 1.807093687        | 2               | 2.497849  |
| P63245        | IIVDELKQEVISTSSK                                                     | 1.391292238        | 3               | 4.084158  |
| P63245        | IWDLEGK                                                              | 1.33681765         | 2               | 2.364232  |
| P63245        | LWDLTTGTTR                                                           | 0.80297469         | 1               | 1.957726  |
| P63245        | TNHIGHTGYLNTVTVSPDGSILCASGGK                                         | 1.103148216        | 3               | 5.394726  |
| P63245        | VWNLANCK                                                             | 1.281483841        | 2               | 2.586869  |
| P63245        | VWQVTIGTR                                                            | 1.627774198        | 2               | 2.862437  |

|               |                                                                  |                    |                 |           |
|---------------|------------------------------------------------------------------|--------------------|-----------------|-----------|
| P63245        | YWLCAATGPSIK                                                     | 0.810807843        | 2               | 3.534124  |
| <b>P63259</b> | <b>ACTG Actin_cytoplasmic 2</b>                                  | <b>1.11919066</b>  | <b>4.04E-14</b> | <b>8</b>  |
| P63259        | CPEALFQPSFLGMESCGIHETTFNSIMK                                     | 1.410779392        | 3               | 5.688723  |
| P63259        | DLYANTVLSGGTTMYPGIADR                                            | 0.773509301        | 2               | 6.093601  |
| P63259        | DLYANTVLSGGTTMYPGIADR+Oxidation(13                               | 0.990423459        |                 |           |
| P63259        | GYSFTTTAER                                                       | 1.099556333        | 2               | 3.516659  |
| P63259        | KDLYANTVLSGGTTMYPGIADR                                           | 1.293340045        | 2               | 6.300117  |
| P63259        | KDLYANTVLSGGTTMYPGIADR+Oxidation(14                              | 1.36332363         |                 |           |
| P63259        | QEYDESGPSIVHR                                                    | 1.263221125        | 3               | 3.506428  |
| P63259        | VAPEEHPVLLTEAPLNPK                                               | 1.349796887        | 2               | 4.680664  |
| <b>P63324</b> | <b>RS12 40S ribosomal protein S12</b>                            | <b>1.495008136</b> | <b>0.029727</b> | <b>4</b>  |
| P63324        | KVVGCSVVVK                                                       | 1.054969471        | 2               | 3.278168  |
| P63324        | LGEWVGLCK                                                        | 1.541151202        | 2               | 3.16608   |
| P63324        | QAHLCLVLANCDEPMYVK                                               | 1.504650863        | 3               | 3.989175  |
| P63324        | VVGCSVVVK                                                        | 1.51279849         | 2               | 3.239241  |
| <b>P67779</b> | <b>PHB Prohibitin</b>                                            | <b>1.219471066</b> | <b>0.412215</b> | <b>11</b> |
| P67779        | AAELIANSLATAGDGLIELR                                             | 1.183285511        | 3               | 5.068403  |
| P67779        | AAIISAEGDSK                                                      | 1.423941983        | 2               | 2.578406  |
| P67779        | DLQNVNITLR                                                       | 0.916023211        | 2               | 3.242949  |
| P67779        | FDAGELITQR                                                       | 0.798385666        | 2               | 3.725565  |
| P67779        | FGLALAVAGGVNSALYNVDAGHR                                          | 1.589078235        | 3               | 3.376012  |
| P67779        | GVQDIVVGEGETHFLIPWVQKPIIFDCR                                     | 1.497770588        | 3               | 4.434541  |
| P67779        | IYTSIGEDYDER                                                     | 1.394169232        | 2               | 3.502151  |
| P67779        | KLEAAEDIAYQLSR                                                   | 1.097723961        | 2               | 4.643274  |
| P67779        | NVPVITGSK                                                        | 0.994509381        | 1               | 2.286965  |
| P67779        | QVSDDLTER                                                        | 0.835781909        | 2               | 2.453339  |
| P67779        | VLPSITTEILK                                                      | 1.852254675        | 2               | 2.402501  |
| <b>P68037</b> | <b>UB2L3 Ubiquitin_conjugating enzyme E2 L3</b>                  | <b>1.384598024</b> | <b>5.79E-12</b> | <b>4</b>  |
| P68037        | ADLAEESK                                                         | 3.687347856        | 2               | 2.388268  |
| P68037        | GQVCLPVISAEWKPATK                                                | 0.926921744        | 2               | 4.407991  |
| P68037        | IEINFPAEYFPKPPK                                                  | 0.861680797        | 2               | 3.332929  |
| P68037        | TDQVIQSLIALVNDPQPEHPLR                                           | 1.395851801        | 2               | 5.288611  |
| <b>P68101</b> | <b>IF2A Eukaryotic translation initiation factor 2 subunit 1</b> | <b>1.083916215</b> | <b>0.243276</b> | <b>5</b>  |
| P68101        | AGLNCSTETMPIK                                                    | 1.448950485        | 2               | 3.129727  |
| P68101        | HAVSDPSILDSLNLNEDEREVLININR                                      | 0.945780153        | 3               | 4.078288  |
| P68101        | HVAEVLEYTKDEQLESLFQR                                             | 1.050223166        | 3               | 4.00685   |
| P68101        | TEGLSVLNQAMAVIK                                                  | 1.455480713        | 2               | 4.135961  |
| P68101        | VVTDTEDELAR                                                      | 0.872473635        | 2               | 3.779957  |
| <b>P68136</b> | <b>ACTS Actin_alpha skeletal muscle</b>                          | <b>0.9122363</b>   | <b>0.366424</b> | <b>18</b> |
| P68136        | AGFAGDDAPR                                                       | 1.360175994        | 2               | 3.464919  |
| P68136        | AVFPSIVGRPR                                                      | 0.976359361        | 2               | 2.422471  |
| P68136        | DLYANNVMSGGTTMYPGIADR                                            | 1.16574161         | 2               | 4.723485  |
| P68136        | DSYVGDEAQSK                                                      | 162.4691371        | 2               | 3.462277  |
| P68136        | DSYVGDEAQSKR                                                     | 0.885866539        | 2               | 2.571075  |
| P68136        | EITALAPSTMK                                                      | 1.214340084        | 2               | 2.984336  |
| P68136        | EITALAPSTMK+Oxidation(9                                          | 1.12135878         |                 |           |
| P68136        | GYSFVTTAER                                                       | 1.575256302        | 2               | 3.724853  |
| P68136        | IWHHTFYNELR                                                      | 2.241059008        | 2               | 2.961479  |
| P68136        | KDLYANNVMSGGTTMYPGIADR                                           | 0.640887914        | 2               | 5.141508  |
| P68136        | KDLYANNVMSGGTTMYPGIADR+Oxidation(14                              | 1.583525653        |                 |           |
| P68136        | MQKEITALAPSTMK                                                   | 14.85240319        | 2               | 3.519155  |
| P68136        | QEYDEAGPSIVHR                                                    | 3.948520469        | 3               | 3.300134  |
| P68136        | TTGIVLDSGDGVTHNVPIYEGYALPHAIMR                                   | 2.981544969        | 3               | 6.090837  |
| P68136        | TTGIVLDSGDGVTHNVPIYEGYALPHAIMR+Oxidation(28                      | 5.300009984        |                 |           |
| P68136        | VAPEEHPVLLTEAPLNPK                                               | 1.853344195        | 2               | 4.242673  |

|               |                                                                    |                    |                 |           |
|---------------|--------------------------------------------------------------------|--------------------|-----------------|-----------|
| P68136        | YPIEHGIITNWDDMEK                                                   | 1.419205469        | 2               | 4.757529  |
| P68136        | YPIEHGIITNWDDMEK+Oxidation(13)                                     | 1.589134366        |                 |           |
| <b>P68255</b> | <b>1433T 14_3_3 protein theta</b>                                  | <b>0.947183444</b> | <b>0.543844</b> | <b>7</b>  |
| P68255        | AVTEQGAELSNEER                                                     | 0.773281969        | 2               | 4.687196  |
| P68255        | SICTTVLELLDK                                                       | 1.796885125        | 2               | 3.226551  |
| P68255        | TAFDEAIAELDTLNEDSYK                                                | 1.052985784        | 2               | 3.286028  |
| P68255        | VISSIEQK                                                           | 0.945421048        | 2               | 2.609917  |
| P68255        | YLAEVACGDDR                                                        | 0.742042868        | 2               | 2.353106  |
| P68255        | YLAEVACGDDRK                                                       | 1.458087867        | 2               | 3.161403  |
| P68255        | YLIANATNPESK                                                       | 1.651866412        | 2               | 3.172269  |
| <b>P68511</b> | <b>1433F 14_3_3 protein eta</b>                                    | <b>1.39132847</b>  | <b>0.686712</b> | <b>5</b>  |
| P68511        | AVTELNEPLSNEDR                                                     | 1.169167408        | 2               | 4.996502  |
| P68511        | ELETVCNDVLALLDK                                                    | 0.943958579        | 2               | 3.572496  |
| P68511        | NCNDFQYESK                                                         | 1.276398006        | 2               | 2.616769  |
| P68511        | NSVVEASEAAYK                                                       | 1.430011727        | 2               | 2.806298  |
| P68511        | YLAEVASGEK                                                         | 2.274243973        | 2               | 2.54534   |
| <b>P69897</b> | <b>TBB5 Tubulin beta_5 chain</b>                                   | <b>1.372107922</b> | <b>9.9E-20</b>  | <b>4</b>  |
| P69897        | ALTVPELTQQVFDK                                                     | 1.402395984        | 2               | 3.275477  |
| P69897        | FWEVISDEHGIDPTGYHGDSDLQLDR                                         | 1.395650622        | 3               | 4.529301  |
| P69897        | ISVYYNEATGGK                                                       | 1.779829583        | 2               | 2.879512  |
| P69897        | LTTPTYGDLNHLVSATMSGVTTCLR                                          | 1.129457633        | 2               | 5.170762  |
| <b>P70191</b> | <b>TRAF5 TNF receptor_associated factor 5</b>                      | <b>1.086611622</b> | <b>0.4836</b>   | <b>2</b>  |
| P70191        | SLRELNSVPICPVDK                                                    | 0.371378072        | 2               | 2.342856  |
| P70191        | VTLMMLLDQSGK                                                       | 1.090352695        | 2               | 2.459722  |
| <b>P70372</b> | <b>ELAV1 ELAV_like protein 1</b>                                   | <b>1.520919702</b> | <b>0.016731</b> | <b>3</b>  |
| P70372        | SLFSSIGEVEK                                                        | 1.589189885        | 2               | 3.222713  |
| P70372        | TNLIVNYLPQNMTQEELR                                                 | 1.534161166        | 2               | 3.548444  |
| P70372        | VLVDQTTGLSR                                                        | 1.005357511        | 2               | 2.79901   |
| <b>P70470</b> | <b>LypA1 Acyl_protein thioesterase 1</b>                           | <b>1.34323837</b>  | <b>0.518485</b> | <b>4</b>  |
| P70470        | ASFSQGPINSANR                                                      | 1.232174469        | 2               | 3.093076  |
| P70470        | DISVLQCHGDCDPLVPLMFGSLTVER                                         | 1.387236461        | 3               | 3.702856  |
| P70470        | GLVNPANVTFK                                                        | 1.298546458        | 2               | 2.455553  |
| P70470        | VYEGMMHSSCQEMMDVK                                                  | 1.34328024         | 3               | 3.351581  |
| <b>P70473</b> | <b>AMACR Alpha_methylacyl_CoA racemase</b>                         | <b>1.016641819</b> | <b>0.019587</b> | <b>11</b> |
| P70473        | ADVLLPEFR                                                          | 1.048525278        | 2               | 3.339565  |
| P70473        | AEWCQIFDGTDCVTPVLTLEEALHHQHNR                                      | 1.563700183        | 4               | 4.72753   |
| P70473        | DYGFQSEIHLHSDR                                                     | 1.259919775        | 2               | 4.804685  |
| P70473        | GLGLESEELPQMSIEDWPEMK                                              | 1.542994555        | 3               | 4.502789  |
| P70473        | GQNLLDGGAPFYTTYK                                                   | 0.889146234        | 2               | 4.859505  |
| P70473        | GSFITDEEQHACPRPAPQLSR                                              | 1.133137524        | 3               | 4.298388  |
| P70473        | LGSVNHPHSLAR                                                       | 1.542861176        | 2               | 3.312409  |
| P70473        | LQLGPETLR                                                          | 1.021129123        | 2               | 2.405218  |
| P70473        | RDPSVGEHTVEVLK                                                     | 0.988925053        | 3               | 4.242515  |
| P70473        | RDPSVGEHTVEVLKDYGFQSEIHLHSDR                                       | 0.879248602        | 4               | 5.425123  |
| P70473        | TQAMGLWAQPR                                                        | 1.342345443        | 2               | 3.47042   |
| <b>P70550</b> | <b>RAB8B Ras_related protein Rab_8B</b>                            | <b>1.672026887</b> | <b>2.82E-07</b> | <b>2</b>  |
| P70550        | LLIGDSGVGK                                                         | 1.672046722        | 2               | 2.912005  |
| P70550        | NIEEHASSDVER                                                       | 1.527805878        | 2               | 2.980766  |
| <b>P70552</b> | <b>GFRP GTP cyclohydrolase 1 feedback regulatory protein</b>       | <b>1.103399091</b> | <b>0.049514</b> | <b>2</b>  |
| P70552        | MEVGPTMVGDEHSDPELMQQLGASK                                          | 1.068905351        | 3               | 5.170335  |
| P70552        | VLGNNFYEYVNDPPR                                                    | 1.226523697        | 2               | 4.281553  |
| <b>P70580</b> | <b>PGRC1 Membrane_associated progesterone receptor component 1</b> | <b>0.925623514</b> | <b>0.798795</b> | <b>9</b>  |
| P70580        | EALKDEYDDLSDLTPAQQETLNDWDSQFTFK                                    | 2.189366516        | 3               | 5.384453  |
| P70580        | EGEPTVYSDDDEPKDEAAR                                                | 0.500035988        | 2               | 4.595736  |
| P70580        | FYGPEGYGVFAGR                                                      | 1.038979762        | 2               | 4.537755  |

|               |                                                                                  |                    |                 |           |
|---------------|----------------------------------------------------------------------------------|--------------------|-----------------|-----------|
| P70580        | GDQPGASGDNDDEPPPLPR                                                              | 66.63741586        | 2               | 4.997778  |
| P70580        | IVRGDQPGASGDNDDEPPPLPR                                                           | 1.486758316        | 3               | 5.551701  |
| P70580        | KFYGPEGPYGVFAGR                                                                  | 0.733834937        | 2               | 3.904198  |
| P70580        | LLKEGEEPTVYSDDEEPKDEAAR                                                          | 1.259107772        | 3               | 4.285386  |
| P70580        | RYDGVQDPR                                                                        | 1.542842431        | 1               | 2.080881  |
| P70580        | YDGVQDPR                                                                         | 0.84636858         | 2               | 2.876349  |
| <b>P70584</b> | <b>ACDSB Short/branched chain specific acyl_CoA dehydrogenase_ mitochondrial</b> | <b>1.286654433</b> | <b>0.000132</b> | <b>9</b>  |
| P70584        | ASSTCQLTFENVK                                                                    | 1.718859957        | 2               | 2.89981   |
| P70584        | FAQEQIAPLVSTMDENSK                                                               | 1.274084361        | 2               | 4.619984  |
| P70584        | IFDFQGLQHVAHVATQLEAAR                                                            | 1.665426294        | 3               | 6.060272  |
| P70584        | IGTIYEGTSNIQLNTIAK                                                               | 1.434573137        | 2               | 4.507664  |
| P70584        | KFAQEQIAPLVSTMDENSK                                                              | 1.016186681        | 2               | 6.008411  |
| P70584        | SGNYVINGSK                                                                       | 1.457182112        | 2               | 3.362151  |
| P70584        | SVIQGLFQQGMMGIEVEAK                                                              | 1.632913156        | 2               | 4.497092  |
| P70584        | VDASVALLCDIQNTVINK                                                               | 2.348545482        | 2               | 4.870868  |
| P70584        | YYASEVAGLTTSK                                                                    | 1.119912659        | 2               | 4.224216  |
| <b>P70615</b> | <b>LMNB1 Lamin_B1</b>                                                            | <b>1.687170805</b> | <b>0.015494</b> | <b>5</b>  |
| P70615        | ALYETELADAR                                                                      | 1.649012006        | 2               | 3.119909  |
| P70615        | KESDLSGAQIK                                                                      | 1.231807707        | 2               | 2.451973  |
| P70615        | LSSEMNTSTVNSAR                                                                   | 1.413662073        | 2               | 3.935456  |
| P70615        | NQNSWGTGEDVK                                                                     | 1.153775098        | 2               | 3.369616  |
| P70615        | SLEGDLEDLKDQIAQLEASLSAAK                                                         | 1.756062164        | 3               | 3.621233  |
| <b>P70712</b> | <b>KYNU Kynureninase</b>                                                         | <b>1.286979391</b> | <b>0.000317</b> | <b>11</b> |
| P70712        | FKDCFYIPK                                                                        | 1.303251886        | 2               | 2.651535  |
| P70712        | IATELNCDPTDER                                                                    | 2.279173301        | 2               | 3.815662  |
| P70712        | IGAYGHEVGK                                                                       | 5.04303098         | 2               | 2.833856  |
| P70712        | LDEEDKLK                                                                         | 0.549380692        | 2               | 2.331851  |
| P70712        | LDEEDKLR                                                                         | 1.405483851        | 2               | 2.687615  |
| P70712        | LLTAILDSTERN                                                                     | 1.568116366        | 2               | 3.306723  |
| P70712        | MEDILEVIEK                                                                       | 1.448112991        | 2               | 3.054292  |
| P70712        | TYLEEELDK                                                                        | 1.518314653        | 1               | 2.103857  |
| P70712        | TYLEEELDKWAK                                                                     | 0.855614425        | 2               | 2.736161  |
| P70712        | VAPVPLYNSFHVDVYK                                                                 | 1.604369986        | 2               | 3.42916   |
| P70712        | YLNAGGAGLAGAFIHEK                                                                | 1.503696105        | 2               | 4.456246  |
| <b>P80067</b> | <b>CATC Dipeptidyl peptidase 1</b>                                               | <b>1.467645518</b> | <b>9.9E-20</b>  | <b>5</b>  |
| P80067        | GINFVSPVR                                                                        | 0.985021356        | 2               | 3.004387  |
| P80067        | GTDECAIESIAMAIIPIK                                                               | 1.380005347        | 2               | 5.137283  |
| P80067        | NSWGSQWGESGYFR                                                                   | 1.782527964        | 2               | 3.413845  |
| P80067        | RGTDECAIESIAMAIIPIK                                                              | 1.787984772        | 2               | 4.106503  |
| P80067        | YAQDFGVVEENCFPYTATDAPCKPK                                                        | 1.397131474        | 3               | 5.782828  |
| <b>P80254</b> | <b>DOPD D_dopachrome decarboxylase</b>                                           | <b>1.013473706</b> | <b>2.31E-05</b> | <b>4</b>  |
| P80254        | FFPLEPWQIGK                                                                      | 0.81653634         | 2               | 2.789074  |
| P80254        | FLTEELSLDQDR                                                                     | 1.979796267        | 2               | 3.733937  |
| P80254        | LCAATATILDKPEDR                                                                  | 2.038058409        | 2               | 4.48946   |
| P80254        | STEPCAHLLISSIGVVGTAEQNR                                                          | 1.004185032        | 2               | 5.495889  |
| <b>P80299</b> | <b>HYES Epoxide hydrolase 2</b>                                                  | <b>1.072220949</b> | <b>0.842098</b> | <b>4</b>  |
| P80299        | ATEMGGILVGTPEDPK                                                                 | 1.583387609        | 2               | 3.470818  |
| P80299        | GHIEDCGHWTQIEKPAEVNQLIK                                                          | 0.94008969         | 3               | 4.254334  |
| P80299        | TEIQNPSVTSK                                                                      | 0.867634965        | 2               | 2.656689  |
| P80299        | TSDDMGLLTVNK                                                                     | 1.134042437        | 2               | 3.205378  |
| <b>P80313</b> | <b>TCPH T_complex protein 1 subunit eta</b>                                      | <b>1.249929949</b> | <b>3.45E-05</b> | <b>6</b>  |
| P80313        | ATISNDGATILK                                                                     | 1.486537115        | 2               | 2.634861  |
| P80313        | EGTDSSQGIPQLVSNISACQVIAEAVR                                                      | 3.990613848        | 3               | 4.156898  |
| P80313        | GGAEQFMEETER                                                                     | 1.248277722        | 2               | 3.149136  |
| P80313        | LLDVVHPAAK                                                                       | 1.525824358        | 2               | 2.549361  |
| P80313        | QLCDNAGFDATNILNK                                                                 | 1.169878783        | 2               | 3.845605  |

|               |                                                                   |                    |                 |           |
|---------------|-------------------------------------------------------------------|--------------------|-----------------|-----------|
| P80313        | SQDAEVDGTTSVTLAAEFLK                                              | 1.5876455          | 2               | 3.459234  |
| <b>P80317</b> | <b>TCPZ T_complex protein 1 subunit zeta</b>                      | <b>1.159759266</b> | <b>1.28E-05</b> | <b>10</b> |
| P80317        | ALQFLEQVK                                                         | 2.462639142        | 2               | 2.704194  |
| P80317        | DGNVLLHEMQIQHPTASLIAK                                             | 1.785514348        | 3               | 4.664173  |
| P80317        | GIDPFSLDALAK                                                      | 2.448130493        | 2               | 2.829506  |
| P80317        | HKSETDTSLIR                                                       | 1.321383238        | 2               | 3.143186  |
| P80317        | IITEGFEEAAK                                                       | 1.501720114        | 2               | 2.531834  |
| P80317        | MLVSGAGDIK                                                        | 0.628498295        | 2               | 2.348649  |
| P80317        | NAIDDGCVVPGAGAVEVALAEALIK                                         | 1.201163495        | 3               | 3.732854  |
| P80317        | TEVNSGFFYK                                                        | 1.18776241         | 2               | 2.666821  |
| P80317        | VATAQDDITGDGTTSNVLIIGELLK                                         | 1.216665531        | 2               | 4.713727  |
| P80317        | VLAQNSGFDLQETLVK                                                  | 1.151046403        | 2               | 3.732818  |
| <b>P81155</b> | <b>VDAC2 Voltage_dependent anion_selective channel protein 2</b>  | <b>0.8110784</b>   | <b>0.230722</b> | <b>4</b>  |
| P81155        | LTFDITTFSPNTGK                                                    | 1.237960996        | 2               | 3.594403  |
| P81155        | TGDFQLHTNVNNGTEFGGSIYQK                                           | 1.639479737        | 3               | 3.985525  |
| P81155        | VNNSSLIGVGYTQLRPGVK                                               | 0.783266055        | 2               | 3.586435  |
| P81155        | YQLDPTASISAK                                                      | 0.801490061        | 2               | 2.949876  |
| <b>P82198</b> | <b>BGH3 Transforming growth factor_beta_induced protein ig_h3</b> | <b>1.31975864</b>  | <b>0.400792</b> | <b>2</b>  |
| P82198        | MLTPPMGTVM DVLK+Oxidation(0)Oxidation(5)                          | 1.685194013        |                 |           |
| P82198        | SLQGDKLEVSSK                                                      | 1.315271624        | 2               | 3.096658  |
| <b>P82995</b> | <b>HS90A Heat shock protein HSP 90_alpha</b>                      | <b>1.22229898</b>  | <b>0.004281</b> | <b>14</b> |
| P82995        | DQVANSAFVER                                                       | 0.851527094        | 2               | 2.680401  |
| P82995        | ELHINLIPNKQDR                                                     | 1.850335652        | 2               | 2.819498  |
| P82995        | ELISNSSDALDK                                                      | 1.294336099        | 2               | 2.928744  |
| P82995        | FYEQFSK                                                           | 1.186749161        | 1               | 2.106743  |
| P82995        | HIYFITGETK                                                        | 1.056804164        | 2               | 3.133231  |
| P82995        | HLEINPDHSIETLR                                                    | 1.251776902        | 2               | 4.686529  |
| P82995        | HSQFIGYPITLFEVK                                                   | 2.510589025        | 3               | 3.722916  |
| P82995        | KHGLEVIYMIPIDEYCVQLK                                              | 1.756441414        | 3               | 3.330358  |
| P82995        | LGIHEDSQNR                                                        | 1.071419252        | 1               | 3.111243  |
| P82995        | NPDDITNEEYGEFYK                                                   | 6.691570527        | 2               | 5.087471  |
| P82995        | SLTNDWEEHLAVK                                                     | 1.141685735        | 2               | 4.057657  |
| P82995        | TLTIVDTGIGMTK                                                     | 1.321357909        | 2               | 4.279113  |
| P82995        | TLTIVDTGIGMTK+Oxidation(10)                                       | 1.877561295        |                 |           |
| P82995        | YYTSASGDENVSLK                                                    | 1.682288538        | 2               | 3.137735  |
| <b>P83732</b> | <b>RL24 60S ribosomal protein L24</b>                             | <b>1.584334595</b> | <b>1.11E-16</b> | <b>5</b>  |
| P83732        | AITGASLADIMAK                                                     | 1.585842867        | 2               | 4.619991  |
| P83732        | CESAFLSK                                                          | 1.566707747        | 2               | 2.366067  |
| P83732        | QINWTVLYR                                                         | 1.553115883        | 2               | 2.597057  |
| P83732        | VELCSFSGYK                                                        | 1.091682906        | 2               | 2.340479  |
| P83732        | VFQFLNAK                                                          | 1.916764749        | 2               | 2.346518  |
| <b>P83868</b> | <b>TEBP Prostaglandin E synthase 3</b>                            | <b>1.554662489</b> | <b>3.67E-07</b> | <b>2</b>  |
| P83868        | HLNEIDL FHCIDPNDSK                                                | 1.761733113        | 3               | 4.053787  |
| P83868        | LTFSCLGGSDNFK                                                     | 1.554388029        | 2               | 2.755632  |
| <b>P83883</b> | <b>RL36A 60S ribosomal protein L36a</b>                           | <b>1.221012513</b> | <b>1.55E-11</b> | <b>2</b>  |
| P83883        | HFELGGDK                                                          | 1.133447785        | 1               | 2.378389  |
| P83883        | LECVENPCR                                                         | 1.391942053        | 2               | 2.524775  |
| <b>P83941</b> | <b>ELOC Transcription elongation factor B polypeptide 1</b>       | <b>1.382572525</b> | <b>0.119329</b> | <b>3</b>  |
| P83941        | AMLSGPGQFAENETNEVNFNR                                             | 1.463037581        | 2               | 4.948304  |
| P83941        | LISSDGHEFIVK                                                      | 1.464816391        | 2               | 2.405482  |
| P83941        | TYGGCEGPDAMYVK                                                    | 1.380260211        | 2               | 3.821238  |
| <b>P84082</b> | <b>ARF2 ADP_ribosylation factor 2</b>                             | <b>1.247048742</b> | <b>0.940853</b> | <b>4</b>  |
| P84082        | EELTRMLAEDEL R+Oxidation(5)                                       | 1.583460624        |                 |           |
| P84082        | MLAEDEL R                                                         | 1.205568739        | 2               | 2.602858  |

|               |                                                              |                    |                 |           |
|---------------|--------------------------------------------------------------|--------------------|-----------------|-----------|
| P84082        | NISFTVWDVGGQDK                                               | 1.287285081        | 2               | 4.324118  |
| P84082        | QDLPNAMNAAEITDK                                              | 0.878634664        | 2               | 4.205989  |
| <b>P84083</b> | <b>ARF5 ADP_ribosylation factor 5</b>                        | <b>0.99476966</b>  | <b>1.03E-05</b> | <b>4</b>  |
| P84083        | DAVLLVFANK                                                   | 1.345317802        | 2               | 4.121659  |
| P84083        | MLQEDELK                                                     | 1.27439357         | 2               | 2.472753  |
| P84083        | QDMPNAMPVSELTDK                                              | 0.795237896        | 2               | 3.352104  |
| P84083        | VQESADELQK                                                   | 1.025412366        | 2               | 3.070387  |
| <b>P84089</b> | <b>ERH Enhancer of rudimentary homolog</b>                   | <b>1.165300945</b> | <b>0.781423</b> | <b>2</b>  |
| P84089        | ADTQTYQPYNK                                                  | 1.159977047        | 2               | 2.609885  |
| P84089        | TYADYESVNECEMEGVCK                                           | 1.408028272        | 2               | 4.880086  |
| <b>P84092</b> | <b>AP2M1 AP_2 complex subunit mu</b>                         | <b>1.203085287</b> | <b>0.168696</b> | <b>3</b>  |
| P84092        | ISEENIK                                                      | 1.235776642        | 1               | 1.949835  |
| P84092        | SNFKPSLLAQK                                                  | 1.536766662        | 2               | 2.61487   |
| P84092        | VFEPKLNYSHDHVIK                                              | 1.155453604        | 2               | 2.745652  |
| <b>P84100</b> | <b>RL19 60S ribosomal protein L19</b>                        | <b>1.324524248</b> | <b>0.007482</b> | <b>3</b>  |
| P84100        | ILMEHIHK                                                     | 2.049938256        | 2               | 2.320086  |
| P84100        | LLADQAEAR                                                    | 1.312205991        | 2               | 3.31571   |
| P84100        | VWLDPNETNEIANANSR                                            | 1.427518846        | 2               | 5.631696  |
| <b>P84104</b> | <b>SRSF3 Serine/arginine_rich splicing factor 3</b>          | <b>1.012080152</b> | <b>0.050156</b> | <b>2</b>  |
| P84104        | NPPGFAFVEFEDPRDAADAVR                                        | 1.912080943        | 2               | 2.578234  |
| P84104        | VYVGNLGNNGNK                                                 | 0.286993936        | 2               | 2.431258  |
| <b>P84245</b> | <b>H33 Histone H3.3</b>                                      | <b>1.274697695</b> | <b>0.313158</b> | <b>6</b>  |
| P84245        | DIQLAR                                                       | 248.5682253        | 1               | 2.109842  |
| P84245        | EIAQDFK                                                      | 1.72792606         | 1               | 2.040887  |
| P84245        | FQSAAIGALQEASEAYLVGLFEDTNLCAIHAK                             | 1.711386511        | 4               | 4.915173  |
| P84245        | RVTIMPKDIQLAR+Oxidation(4                                    | 1.284512174        |                 |           |
| P84245        | STELLIR                                                      | 1.205720939        | 2               | 2.609493  |
| P84245        | YRPGTVALR                                                    | 1.024451311        | 2               | 2.383649  |
| <b>P84817</b> | <b>FIS1 Mitochondrial fission 1 protein</b>                  | <b>1.20518337</b>  | <b>0.040325</b> | <b>4</b>  |
| P84817        | FQSEQAAGSVSK                                                 | 1.28834866         | 2               | 3.051023  |
| P84817        | GIVLLELLPK                                                   | 1.644282198        | 2               | 2.950423  |
| P84817        | GLLQTEPQNNQAK                                                | 1.19509342         | 2               | 3.695009  |
| P84817        | KFQSEQAAGSVSK                                                | 0.946308422        | 2               | 4.479058  |
| <b>P85834</b> | <b>EFTU Elongation factor Tu_mitochondrial</b>               | <b>1.192331931</b> | <b>0.048397</b> | <b>16</b> |
| P85834        | AEAGDNLGALVR                                                 | 1.145182467        | 2               | 3.700528  |
| P85834        | DKPHVNVGTIGHVDHGK                                            | 1.480378833        | 2               | 3.845953  |
| P85834        | DLEKPFLLPVESVYIPGR                                           | 1.549188823        | 2               | 4.226386  |
| P85834        | GDECELLGHNK                                                  | 1.240067909        | 2               | 2.875432  |
| P85834        | GEETPVIVGSALCALEQR                                           | 1.323333872        | 2               | 4.404292  |
| P85834        | GITINAAHVEYSTAAR                                             | 1.892374139        | 2               | 2.84616   |
| P85834        | GTVVTGTLER                                                   | 1.123341413        | 2               | 2.84794   |
| P85834        | HYAHTDCPGHADYVK                                              | 1.191006333        | 3               | 5.009711  |
| P85834        | KGDECELLGHNK                                                 | 1.095194216        | 3               | 4.43353   |
| P85834        | KYEEIDNAPEER                                                 | 1.123794726        | 2               | 3.792962  |
| P85834        | LLDAVDYIPVPTR                                                | 1.382703287        | 2               | 3.687344  |
| P85834        | QIGVEHVVVYVVK                                                | 0.90079355         | 2               | 2.963275  |
| P85834        | TIGTGLVTDVPAMTEEDK                                           | 1.626428824        | 2               | 4.341583  |
| P85834        | TIGTGLVTDVPAMTEEDKNIK                                        | 1.333120814        | 2               | 4.456575  |
| P85834        | TVVTGIEMFHK                                                  | 0.665085369        | 2               | 2.344173  |
| P85834        | YEEIDNAPEER                                                  | 0.804841218        | 2               | 3.349031  |
| <b>P85968</b> | <b>6PGD 6_phosphogluconate dehydrogenase_decarboxylating</b> | <b>1.383064434</b> | <b>4.91E-14</b> | <b>11</b> |
| P85968        | AGQAVDDFIEK                                                  | 1.391609199        | 2               | 3.251263  |
| P85968        | CLSSLKEER                                                    | 1.665597273        | 2               | 2.595069  |
| P85968        | FQDTDGKELLPK                                                 | 1.280719934        | 2               | 3.430985  |
| P85968        | GILFVSGVSGGEEGAR                                             | 1.144588057        | 2               | 4.654916  |
| P85968        | HEMLPANLIQAQR                                                | 1.218196411        | 2               | 3.193345  |

|               |                                             |                    |                 |           |
|---------------|---------------------------------------------|--------------------|-----------------|-----------|
| P85968        | LVPLLDTGDIIDGGNSEYR                         | 3.711596477        | 2               | 5.253135  |
| P85968        | NPELQNLDDDFK                                | 1.962528495        | 2               | 4.439637  |
| P85968        | SAVDDCQDSWR                                 | 0.827864244        | 2               | 2.88359   |
| P85968        | TIFQAIAAK                                   | 0.632874495        | 2               | 2.694856  |
| P85968        | VGTGEPCCDWVVGDEGAGHFVK                      | 1.379321991        | 2               | 4.349175  |
| P85968        | YGPSLMPGGNK                                 | 1.609396026        | 2               | 2.481591  |
| <b>P85971</b> | <b>6PGL 6_phosphogluconolactonase</b>       | <b>2.202866587</b> | <b>0.000359</b> | <b>5</b>  |
| P85971        | DLPAATAPAGPASFAR                            | 3.812461405        | 2               | 2.449059  |
| P85971        | ILEDQESALPAAMVQPR                           | 0.867208184        | 2               | 4.805883  |
| P85971        | LPIPDSQVLTIDPALVEDAAEDYAR                   | 2.203163819        | 2               | 4.512886  |
| P85971        | TGALCWFLDEAAAR                              | 1.833262309        | 2               | 3.579779  |
| P85971        | WTLGFCDER                                   | 1.291502397        | 2               | 2.583934  |
| <b>P85972</b> | <b>VINC Vinculin</b>                        | <b>1.194342795</b> | <b>0.011601</b> | <b>15</b> |
| P85972        | ALASQLQDSLK                                 | 1.373195324        | 2               | 2.603351  |
| P85972        | AQQVSQGLDVLTA                               | 1.191759042        | 2               | 4.300091  |
| P85972        | AVAGNISDPGLQK                               | 0.915961039        | 2               | 3.352688  |
| P85972        | DPNASPGDAGEQAIR                             | 0.977704061        | 2               | 2.360285  |
| P85972        | GNDIIAAAK                                   | 1.40896373         | 2               | 2.433863  |
| P85972        | KIDAAQNWLADPNNGPEGEEQIR                     | 0.791919529        | 3               | 5.116208  |
| P85972        | MLGQMTDQVADLR                               | 1.250435016        | 2               | 3.52398   |
| P85972        | MSAEINEIIR                                  | 1.257357355        | 2               | 2.436271  |
| P85972        | MTGLVDEAIDTK                                | 2.233687835        | 2               | 2.842847  |
| P85972        | QVATALQNLQTK                                | 1.40964114         | 2               | 3.386614  |
| P85972        | SLLDASEEAIKK                                | 1.355882329        | 2               | 2.73273   |
| P85972        | STVEGIQASVK                                 | 1.254320671        | 2               | 2.609895  |
| P85972        | VDQLAAQLADLAAR                              | 1.427568867        | 2               | 3.268409  |
| P85972        | VLQLTSWDEDAWASK                             | 1.317089431        | 2               | 3.26238   |
| P85972        | WIDNPTVDDR                                  | 2.138253267        | 2               | 2.97304   |
| <b>P85973</b> | <b>PNPH Purine nucleoside phosphorylase</b> | <b>0.869821913</b> | <b>9.9E-20</b>  | <b>13</b> |
| P85973        | ASHQEVLEAGK                                 | 0.896968054        | 2               | 3.597887  |
| P85973        | DHINLPGFCGQNPLR                             | 1.463234628        | 3               | 4.051781  |
| P85973        | ELQEGTYIMSAGPTFETVAESCLLR                   | 1.550890645        | 2               | 5.212224  |
| P85973        | FEVGDIMLIR                                  | 1.510378226        | 2               | 3.799633  |
| P85973        | FHMYEGYSLSK                                 | 2.563859911        | 2               | 2.33016   |
| P85973        | HRPQVAVICGSGGLGLTAK                         | 0.856813005        | 3               | 6.003437  |
| P85973        | LTQPQAFDYNEIPFPQSTVQGHAGR                   | 1.980184765        | 3               | 3.778079  |
| P85973        | MLGADAVGMSTVPEVIVAR                         | 1.343718857        | 2               | 5.907095  |
| P85973        | MLGADAVGMSTVPEVIVAR+Oxidation(0             | 2.640889851        |                 |           |
| P85973        | MLGADAVGMSTVPEVIVAR+Oxidation(8             | 2.805233231        |                 |           |
| P85973        | VFGSLITNK                                   | 1.764089025        | 2               | 3.135253  |
| P85973        | VFHLLGVDTLVVTTNAAGGLNPK                     | 2.017224318        | 2               | 5.393752  |
| P85973        | VVMDYNNLEK                                  | 1.656220407        | 2               | 2.4631    |
| <b>P86048</b> | <b>RL10L 60S ribosomal protein L10_like</b> | <b>1.587661608</b> | <b>2.83E-07</b> | <b>6</b>  |
| P86048        | AKVDEFPLCGHMSDEYEQLSSEALEAAR                | 1.724563336        | 3               | 6.042484  |
| P86048        | GAFGKPQGTVAR                                | 1.520571335        | 2               | 2.827141  |
| P86048        | MLSCAGADR                                   | 1.288911997        | 2               | 2.366628  |
| P86048        | RLIPDGCGVK                                  | 1.0162155          | 2               | 2.314985  |
| P86048        | VDEFPLCGHMSDEYEQLSSEALEAAR                  | 1.955568887        | 3               | 5.43705   |
| P86048        | VHIGQVIMSIR                                 | 1.350647596        | 2               | 3.015568  |
| <b>P86252</b> |                                             | <b>1.126530767</b> | <b>0.474388</b> | <b>7</b>  |
| P86252        | ALELDPNLYR                                  | 1.411242237        |                 |           |
| P86252        | ANGFAELIPNAQLLQK                            | 0.68583745         |                 |           |
| P86252        | CTSLGVNQGIYEPPK                             | 0.940351501        |                 |           |
| P86252        | LGFGQAQDLANMFRFYALKPDR                      | 1.997001406        |                 |           |
| P86252        | LIDDYGVEEPAELPEGTSLTVDNK                    | 2.23189112         | 2               | 4.029375  |
| P86252        | LIDDYGVEEPAELPEGTSLTVDNKR                   | 2.911131645        | 3               | 4.518113  |
| P86252        | VASDAQLELDKLDGELKK                          | 1.711482813        |                 |           |

|               |                                                                   |                    |                 |           |
|---------------|-------------------------------------------------------------------|--------------------|-----------------|-----------|
| <b>P97313</b> | <b>PRKDC DNA_dependent protein kinase catalytic subunit</b>       | <b>2.6024843</b>   | <b>0.092148</b> | <b>3</b>  |
| P97313        | FHGVMKTLCLEVVLCR+Oxidation(4)                                     | 1.382133703        |                 |           |
| P97313        | LCHDAFTENMVGESQLLEK                                               | 2.998039548        | 2               | 2.534858  |
| P97313        | QLFSSLFSGILKEMNK+Oxidation(13)                                    | 2.187664839        |                 |           |
| <b>P97384</b> | <b>ANX11 Annexin A11</b>                                          | <b>2.298795649</b> | <b>0.128948</b> | <b>2</b>  |
| P97384        | GFGTDEQAIIDCLGSR                                                  | 1.507099016        | 2               | 3.95441   |
| P97384        | SELDLLDIR                                                         | 2.324100761        | 2               | 2.544088  |
| <b>P97519</b> | <b>HMGCL Hydroxymethylglutaryl_CoA lyase_mitochondrial</b>        | <b>1.244328213</b> | <b>0.011604</b> | <b>8</b>  |
| P97519        | FDGVMQAAR                                                         | 2.080173684        | 2               | 2.830923  |
| P97519        | GFEEAVAAGAK                                                       | 3.960021519        | 2               | 3.3043    |
| P97519        | GYVSCALGCPYEGK                                                    | 1.098809387        | 2               | 3.865539  |
| P97519        | KNVNCSIEESFQR                                                     | 1.16933937         | 2               | 3.74566   |
| P97519        | LIDMLSEAGLPVIEATSFVSPK                                            | 1.583876764        | 2               | 3.104891  |
| P97519        | LLEAGDFICQALNR                                                    | 2.041312725        | 2               | 4.536502  |
| P97519        | NVNCSIEESFQR                                                      | 1.061900072        | 2               | 3.395039  |
| P97519        | WVPQMADHSDVLK                                                     | 0.950747433        | 2               | 2.951693  |
| <b>P97521</b> | <b>MCAT Mitochondrial carnitine/acylcarnitine carrier protein</b> | <b>1.32542201</b>  | <b>6.15E-06</b> | <b>7</b>  |
| P97521        | CLLQIQASSGK                                                       | 1.25295208         | 2               | 2.604986  |
| P97521        | EEGVTSLYK                                                         | 0.835887245        | 1               | 2.03939   |
| P97521        | KLYQEFGR                                                          | 1.858722233        | 2               | 2.32925   |
| P97521        | LQTQPPSLPGQPPMYSGTIDCFR                                           | 1.538185905        | 2               | 3.846842  |
| P97521        | LYQEFGR                                                           | 1.51253673         | 2               | 2.762195  |
| P97521        | SVHDLVPR                                                          | 1.429990167        | 3               | 3.550459  |
| P97521        | YSGTLDCAK                                                         | 1.272762166        | 2               | 2.352825  |
| <b>P97524</b> | <b>S27A2 Very long chain acyl_CoA synthetase</b>                  | <b>1.134946275</b> | <b>3.45E-08</b> | <b>13</b> |
| P97524        | ALHDHLGLR                                                         | 0.795114051        | 2               | 2.334589  |
| P97524        | GEVGLLICK                                                         | 1.388208809        | 2               | 2.338283  |
| P97524        | MKENYEFNGK                                                        | 1.431870798        | 2               | 2.802262  |
| P97524        | SLLHCFQCCGAK                                                      | 0.760374827        | 2               | 2.95297   |
| P97524        | TILHVFLEQAR                                                       | 1.006136362        | 2               | 3.181235  |
| P97524        | TSNTNGVDTVLDKVDGVSADPIPESWR                                       | 1.176113209        | 3               | 5.691184  |
| P97524        | TYVPMTEDIYNALIDK                                                  | 1.259078839        | 3               | 4.794456  |
| P97524        | VDGVSADPIPESWR                                                    | 1.276143189        | 2               | 2.872199  |
| P97524        | VLLASPELHEAVEEVPLTLK                                              | 1.60548125         | 3               | 4.928368  |
| P97524        | VTLMEEGFNPSVIK                                                    | 2.420309885        | 2               | 4.187378  |
| P97524        | YDVEKDEPVR                                                        | 1.134072067        | 2               | 2.898706  |
| P97524        | YLCNTPQKPNDR                                                      | 1.8138425          | 2               | 3.215416  |
| P97524        | YNATVIQYIGELLR                                                    | 1.043187101        | 2               | 3.484168  |
| <b>P97532</b> | <b>THTM 3_mercaptopyruvate sulfurtransferase</b>                  | <b>1.089269686</b> | <b>8.88E-16</b> | <b>10</b> |
| P97532        | AFGHHSVSLLDGGFR                                                   | 1.369157007        | 3               | 3.68447   |
| P97532        | ALVSAQWVAEALK                                                     | 1.430542396        | 2               | 3.89037   |
| P97532        | AQPEHVISQGR                                                       | 1.090437458        | 2               | 3.208365  |
| P97532        | DGIEPGHIPGSVNIPFTEFLTSEGLEK                                       | 1.746869441        | 3               | 6.458148  |
| P97532        | FQGTQPEPR                                                         | 1.087700324        | 2               | 3.611533  |
| P97532        | HIPGAAFFDIDR                                                      | 1.450852306        | 2               | 2.557489  |
| P97532        | LLDASWYLPK                                                        | 1.925220362        | 2               | 3.735216  |
| P97532        | SPSEPAEFCAQLDPSFIK                                                | 0.52377779         | 2               | 2.950286  |
| P97532        | THEDILENLAR                                                       | 1.181695695        | 2               | 3.875099  |
| P97532        | YWLSQNLPISSGK                                                     | 1.223646943        | 2               | 3.955185  |
| <b>P97536</b> | <b>CAND1 Cullin_associated NEDD8_dissociated protein 1</b>        | <b>1.390956364</b> | <b>0.000848</b> | <b>7</b>  |
| P97536        | AADIDQEVK                                                         | 1.259773047        | 2               | 2.484295  |
| P97536        | EGPAVVGQFIQDVK                                                    | 2.54224676         | 2               | 2.721148  |
| P97536        | FTISDHPQPIDLLK                                                    | 1.013034023        | 2               | 2.595715  |



|               |                                                             |                    |                 |           |
|---------------|-------------------------------------------------------------|--------------------|-----------------|-----------|
| P97536        | ITSEALLVTQQLVK                                              | 1.557632993        | 2               | 3.152541  |
| P97536        | LGTLALDILIK                                                 | 3.501570595        | 2               | 2.455437  |
| P97536        | SVILEAFSSPSEEVK                                             | 1.893671921        | 2               | 2.885886  |
| P97536        | TYIQCIAISR                                                  | 1.15591184         | 2               | 3.45873   |
| <b>P97562</b> | <b>ACOX2 Peroxisomal acyl_coenzyme A oxidase 2</b>          | <b>1.136240954</b> | <b>0.005272</b> | <b>16</b> |
| P97562        | ATFADFCAQGAEICR                                             | 0.878156828        | 2               | 4.749543  |
| P97562        | CSAQTAAADR                                                  | 1.156210614        | 2               | 2.936164  |
| P97562        | DFSLLPELHALSTGMK                                            | 1.015581348        | 2               | 2.823986  |
| P97562        | EAFDLLPLIR                                                  | 0.973425093        | 2               | 2.860144  |
| P97562        | ILEYQTQQQK                                                  | 1.0172394          | 2               | 3.737188  |
| P97562        | KVESIIQSDPVFNLK                                             | 1.055359072        | 2               | 5.036143  |
| P97562        | LDKEPEIQR                                                   | 1.012115181        | 3               | 3.402149  |
| P97562        | LFEWAQK                                                     | 0.99947035         | 2               | 2.520918  |
| P97562        | LGTPQSNYLGMLVTR                                             | 1.496265262        | 2               | 3.376647  |
| P97562        | LSGLPTLVAR                                                  | 1.43751888         | 2               | 2.525777  |
| P97562        | LTNILDGGLPNTVLR                                             | 1.197526963        | 2               | 4.496737  |
| P97562        | SGVDQHDAWNQTIVHLQAAK                                        | 0.965119866        | 3               | 6.023118  |
| P97562        | SLEDHTPLPGITVGDIGPK                                         | 0.979935941        | 3               | 4.34066   |
| P97562        | SLGSDEQIAK                                                  | 2.616997292        | 2               | 3.006895  |
| P97562        | VESIIQSDPVFNLK                                              | 1.015943943        | 2               | 4.26298   |
| P97562        | VLDGNVNLSLHGVMNAIR                                          | 1.207772127        | 2               | 4.339486  |
| <b>P97576</b> | <b>GRPE1 GrpE protein homolog 1_mitochondrial</b>           | <b>1.233936755</b> | <b>0.330753</b> | <b>4</b>  |
| P97576        | ALADTENLR                                                   | 2.000781893        | 2               | 2.588734  |
| P97576        | DLLEVADILEK                                                 | 1.021120216        | 2               | 3.684689  |
| P97576        | EEVSNNNPHLK                                                 | 1.329115671        | 2               | 3.047381  |
| P97576        | TLRPALVGIVK                                                 | 1.076684891        | 3               | 3.541067  |
| <b>P97584</b> | <b>PTGR1 Prostaglandin reductase 1</b>                      | <b>1.213937236</b> | <b>0.137698</b> | <b>6</b>  |
| P97584        | ALDLMNWNVSEK                                                | 1.227061631        | 2               | 4.184976  |
| P97584        | GGETVLVNAAGAVGSVVGQIAK                                      | 1.56687103         | 2               | 4.196931  |
| P97584        | HFEFGPTDSNFELR                                              | 1.206877671        | 2               | 3.782829  |
| P97584        | LKEGDSMMGEQVAR                                              | 1.217829441        | 2               | 3.779966  |
| P97584        | TGPCPPGPSPEVIYQQLR                                          | 1.37524298         | 2               | 4.129807  |
| P97584        | YHEYITEGFEK                                                 | 1.209933544        | 2               | 2.931904  |
| <b>P97608</b> | <b>OPLA 5_oxoprolinase</b>                                  | <b>1.276469533</b> | <b>0.05553</b>  | <b>8</b>  |
| P97608        | AGDFGAAFVER                                                 | 1.252974978        | 2               | 2.930494  |
| P97608        | GHTACADAYLPTIQR                                             | 1.402203427        | 2               | 4.586618  |
| P97608        | GSILDPSPEAAVVGGNLTSQR                                       | 2.040164735        | 2               | 4.963136  |
| P97608        | ISVGAEGPSMADR+Oxidation(9                                   | 0.700987989        |                 |           |
| P97608        | ITDPEILESR                                                  | 1.713516302        | 2               | 2.370362  |
| P97608        | LLESDPANYADAPTEGIR                                          | 0.965295343        | 2               | 4.948683  |
| P97608        | SGLQLEDTPK                                                  | 1.40903773         | 2               | 2.629538  |
| P97608        | TGDLLEIQQPVDLEALR                                           | 1.245067259        | 2               | 4.636333  |
| <b>P97612</b> | <b>FAAH1 Fatty_acid amide hydrolase 1</b>                   | <b>1.098264191</b> | <b>4.04E-06</b> | <b>7</b>  |
| P97612        | GHDSTLGLSLNEGMPSESDCVVQVLK                                  | 1.464222953        | 3               | 3.970855  |
| P97612        | GTNCVTSYLTDCETQLSQAPR                                       | 1.147003831        | 2               | 4.945265  |
| P97612        | GYFGDIWDIILK                                                | 1.962668146        | 2               | 3.8686    |
| P97612        | NSVGLPVAVQCVALPWQEELCLR                                     | 2.112178061        | 3               | 3.815731  |
| P97612        | QGLLYGVPVSLK                                                | 0.902706782        | 2               | 2.852521  |
| P97612        | SPGGSSGEGALIGSGGSPGLGTDIGGSIR                               | 0.968073152        | 2               | 4.756588  |
| P97612        | VGYETDNYTMPSPAMR                                            | 0.941558302        | 2               | 4.029428  |
| <b>P97690</b> | <b>SMC3 Structural maintenance of chromosomes protein 3</b> | <b>1.505890006</b> | <b>0.059709</b> | <b>2</b>  |
| P97690        | KMVTKNDVMNLESAGFSR+Oxidation(1                              | 1.542297664        |                 |           |
| P97690        | NLEQYNKLDQDLNEVK                                            | 1.395010093        | 2               | 2.590656  |
| <b>P97697</b> | <b>IMPA1 Inositol monophosphatase 1</b>                     | <b>1.256476118</b> | <b>0.602135</b> | <b>2</b>  |
| P97697        | SSPADLVTVDQK                                                | 1.227666548        | 2               | 2.85215   |
| P97697        | VSQQEDITK                                                   | 1.272231388        | 2               | 2.806889  |

|               |                                                                       |                    |                 |           |
|---------------|-----------------------------------------------------------------------|--------------------|-----------------|-----------|
| <b>P97700</b> | <b>M2OM Mitochondrial 2_oxoglutarate/malate carrier protein</b>       | <b>1.131335865</b> | <b>0.183471</b> | <b>3</b>  |
| P97700        | AVVVNAAQLASYSQSK                                                      | 1.045211284        | 2               | 4.983741  |
| P97700        | GIYTGLSAGLLR                                                          | 1.168565451        | 2               | 2.989297  |
| P97700        | LTGADGTPPGFLLK                                                        | 1.393081578        | 2               | 3.86219   |
| <b>P97834</b> | <b>CSN1 COP9 signalosome complex subunit 1</b>                        | <b>1.591434483</b> | <b>0.252407</b> | <b>3</b>  |
| P97834        | EGSQGELTPANSQSR                                                       | 1.771439045        | 2               | 2.88486   |
| P97834        | MLDEMKNLLLDMYLAPHVR+Oxidation(0                                       | 1.533767108        |                 |           |
| P97834        | MLDEMKNLLLDMYLAPHVR+Oxidation(4                                       | 1.533767108        |                 |           |
| <b>P97852</b> | <b>DHB4 Peroxisomal multifunctional enzyme type 2</b>                 | <b>1.09316267</b>  | <b>9.69E-05</b> | <b>25</b> |
| P97852        | AAVAVPSRPPDAVLR                                                       | 0.954920071        | 2               | 2.304813  |
| P97852        | AVANYDSVEAGEK                                                         | 1.005065018        | 2               | 3.810808  |
| P97852        | AYALFAER                                                              | 0.927235428        | 2               | 3.411252  |
| P97852        | CEAVIADILDK                                                           | 1.034277885        | 2               | 2.567678  |
| P97852        | DTTSLNQAALYR                                                          | 1.083924138        | 2               | 2.890492  |
| P97852        | FVYEGSADFSCLPTFGVIVAQK                                                | 0.698083991        | 2               | 3.682887  |
| P97852        | GALVVVNDLGGDFK                                                        | 1.186068941        | 2               | 3.860662  |
| P97852        | GSSAADKVVEIR                                                          | 1.053196739        | 2               | 3.452387  |
| P97852        | HVLQQFADNDVSR                                                         | 0.967778371        | 2               | 4.700099  |
| P97852        | ICDFSNASKPK                                                           | 1.420094749        | 3               | 3.905319  |
| P97852        | IDSEGISQNHGTQVASADASGFAGVVGHK                                         | 1.061977922        | 3               | 5.672197  |
| P97852        | IDVVVNNAGILR                                                          | 1.073842177        | 2               | 4.074324  |
| P97852        | ISDEDWDIIQR                                                           | 1.791580408        | 2               | 3.691881  |
| P97852        | KNNIHCNTIAPNAGSR                                                      | 0.815015053        | 2               | 5.049695  |
| P97852        | LGLLGLANTLVIEGR                                                       | 1.689152154        | 2               | 3.623751  |
| P97852        | LNPQNAFSGR                                                            | 0.891464977        | 2               | 2.838742  |
| P97852        | NGSGEVYQGPAK                                                          | 0.938772785        | 2               | 3.49526   |
| P97852        | NNIHCNTIAPNAGSR                                                       | 1.007872577        | 2               | 4.649899  |
| P97852        | NQPMTPEAVR                                                            | 0.983679323        | 2               | 2.352014  |
| P97852        | SIQESTGGIIEVLHK                                                       | 1.082973701        | 2               | 4.167066  |
| P97852        | SLMSGGLAEVPGLSINFAK                                                   | 1.141251889        | 2               | 4.574514  |
| P97852        | TALDTFGR                                                              | 1.418784642        | 2               | 2.330812  |
| P97852        | VLHGEQYLELYKPLPR                                                      | 0.926592281        | 2               | 5.016753  |
| P97852        | VNAVFEWHITK                                                           | 0.789173298        | 2               | 3.16815   |
| P97852        | VVLVTGAGGGLGR                                                         | 1.124611443        | 2               | 4.375841  |
| <b>P97874</b> | <b>GAK Cyclin G associated kinase</b>                                 | <b>1.210804807</b> | <b>0.374386</b> | <b>2</b>  |
| P97874        | AMVEEIEITRNTTPMYR+Oxidation(13                                        | 3.51635784         |                 |           |
| P97874        | QELARDTDPFKLK                                                         | 1.083885289        | 2               | 2.408808  |
| <b>Q00238</b> | <b>ICAM1 Intercellular adhesion molecule 1</b>                        | <b>1.354798828</b> | <b>0.183631</b> | <b>2</b>  |
| Q00238        | LTPDLLLEVGTQQK                                                        | 1.329356345        | 2               | 3.511435  |
| Q00238        | VELDPLPAWQQVGK                                                        | 1.654567097        | 2               | 2.480091  |
| <b>Q00438</b> | <b>PTBP1 Polypyrimidine tract binding protein 1</b>                   | <b>1.674347835</b> | <b>3.93E-10</b> | <b>4</b>  |
| Q00438        | IAIPGLAGAGNSVLLVSNLNP                                                 | 1.498602625        | 2               | 4.632898  |
| Q00438        | IIVENLFYPTLDVLHQIFSK                                                  | 1.490414845        | 3               | 4.328897  |
| Q00438        | KLPDVTEGEVISLGLPFGK                                                   | 1.67385118         | 2               | 4.369342  |
| Q00438        | NNQFQALLQYADPVSAQHAK                                                  | 1.680202939        | 2               | 5.466889  |
| <b>Q00981</b> | <b>UCHL1 Ubiquitin carboxyl terminal hydrolase isozyme L1</b>         | <b>1.280520511</b> | <b>0.390543</b> | <b>2</b>  |
| Q00981        | KQIEELK                                                               | 1.110708926        | 2               | 2.352952  |
| Q00981        | MQLKPEINPEMLNK+Oxidation(0                                            | 1.334345017        |                 |           |
| <b>Q00P19</b> | <b>HNRL2 Heterogeneous nuclear ribonucleoprotein U like protein 2</b> | <b>1.507977873</b> | <b>0.615487</b> | <b>3</b>  |
| Q00P19        | AVEEQGDDQDSEK                                                         | 1.524318092        | 2               | 3.989712  |
| Q00P19        | EEAQPIVTKYK                                                           | 1.448875848        | 1               | 1.971182  |
| Q00P19        | SGDETPGSEAPGDK                                                        | 1.400045955        | 2               | 3.241435  |
| <b>Q01177</b> | <b>PLMN Plasminogen</b>                                               | <b>0.908571711</b> | <b>0.194122</b> | <b>3</b>  |
| Q01177        | ILGSDVQQIAVTK                                                         | 0.94833013         | 2               | 3.794187  |

|               |                                                                                                                            |                    |                 |           |
|---------------|----------------------------------------------------------------------------------------------------------------------------|--------------------|-----------------|-----------|
| Q01177        | LVLEPNDADIALLK                                                                                                             | 0.830141568        | 2               | 2.819751  |
| Q01177        | STELCAGHLAGGIIDSCQGDSSGGLVCFEK                                                                                             | 1.034912393        | 3               | 4.061543  |
| <b>Q01205</b> | <b>ODO2 Dihydrolipoylysine_residue succinyltransferase component of 2_oxoglutarate dehydrogenase complex_mitochondrial</b> | <b>1.194513844</b> | <b>0.001203</b> | <b>4</b>  |
| Q01205        | ASAFALQEPPVNAVIDDATK                                                                                                       | 1.134154917        | 2               | 6.165077  |
| Q01205        | NDVITVQTPAFAESVTEGDVR                                                                                                      | 1.455697446        | 2               | 5.407289  |
| Q01205        | NVETMNYADIER                                                                                                               | 0.965695802        | 2               | 3.768661  |
| Q01205        | VEGGTPLFTLR                                                                                                                | 1.184758383        | 2               | 3.435865  |
| <b>Q01279</b> | <b>EGFR Epidermal growth factor receptor</b>                                                                               | <b>1.250760722</b> | <b>0.237469</b> | <b>2</b>  |
| Q01279        | NLQEILIGAVR                                                                                                                | 2.107005268        | 2               | 3.96008   |
| Q01279        | NYVVTDHGSCVR                                                                                                               | 1.200009278        | 2               | 2.698134  |
| <b>Q01405</b> | <b>SC23A Protein transport protein Sec23A</b>                                                                              | <b>1.121159757</b> | <b>7.44E-06</b> | <b>8</b>  |
| Q01405        | AETEEGPDVLR                                                                                                                | 1.17854683         | 2               | 3.227137  |
| Q01405        | AVLNPLCQVDYR                                                                                                               | 1.609513092        | 2               | 2.718889  |
| Q01405        | HFEALANR                                                                                                                   | 1.084774586        | 1               | 2.021003  |
| Q01405        | HLLQAPVDDAQEILHSR                                                                                                          | 1.166187382        | 3               | 5.491585  |
| Q01405        | MVVPVAALFTPLK                                                                                                              | 1.255638814        | 2               | 2.621876  |
| Q01405        | SGYQDMPEYENFR                                                                                                              | 0.110097596        | 2               | 3.094906  |
| Q01405        | SWHDIEKDNAK                                                                                                                | 1.435142326        | 2               | 3.13193   |
| Q01405        | YIDTEHGGSQAR                                                                                                               | 1.152936488        | 2               | 3.438504  |
| <b>Q02253</b> | <b>MMSA Methylmalonate_semialdehyde dehydrogenase [acylating]_mitochondrial</b>                                            | <b>1.301240524</b> | <b>9.9E-20</b>  | <b>33</b> |
| Q02253        | AEMEAAVAACK                                                                                                                | 1.151048795        | 2               | 4.01936   |
| Q02253        | AEMEAAVAACK+Oxidation(2)                                                                                                   | 1.258153153        |                 |           |
| Q02253        | AEMEAAVAACKR                                                                                                               | 0.980917827        | 2               | 3.11029   |
| Q02253        | AFPAWADTSILSR                                                                                                              | 1.398115614        | 2               | 4.132041  |
| Q02253        | AISFVGSNQAGEYIFER                                                                                                          | 1.381642312        | 2               | 5.275858  |
| Q02253        | CMALSTAVLVGEAK                                                                                                             | 1.985089442        | 2               | 4.492992  |
| Q02253        | CMALSTAVLVGEAK+Oxidation(1)                                                                                                | 1.195517588        |                 |           |
| Q02253        | EEDATLSSPAVVMPTMGR                                                                                                         | 1.577416996        | 2               | 4.731556  |
| Q02253        | EEDATLSSPAVVMPTMGR+Oxidation(12)                                                                                           | 9.594247886        |                 |           |
| Q02253        | EEDATLSSPAVVMPTMGR+Oxidation(15)                                                                                           | 9.594247886        |                 |           |
| Q02253        | EEIFGPVLVVLETETLDEAIK                                                                                                      | 0.805501311        | 2               | 3.309968  |
| Q02253        | ENTLNQLVGAAFGAAGQR                                                                                                         | 1.066031779        | 2               | 5.147336  |
| Q02253        | GDTNIFYGK                                                                                                                  | 1.028526197        | 2               | 2.617481  |
| Q02253        | GLQVVEHACSVTSLMLGETMPSITK                                                                                                  | 1.565678029        | 2               | 5.647118  |
| Q02253        | GYENGNFVGPTIISNVKPSMTCYK                                                                                                   | 1.209286911        | 3               | 3.856564  |
| Q02253        | IVNDNPYGNGTAFITNGAIAR                                                                                                      | 1.133583865        | 2               | 5.398407  |
| Q02253        | KWLPELVER                                                                                                                  | 1.971414371        | 3               | 3.331805  |
| Q02253        | LFIDGK                                                                                                                     | 3.765486415        | 1               | 2.014251  |
| Q02253        | LITLEQGK                                                                                                                   | 1.257700343        | 2               | 2.82319   |
| Q02253        | LLQDSGAPDGTLNIIHGQHEAVNFICDHPDIK                                                                                           | 0.975517425        | 3               | 4.355514  |
| Q02253        | NHGVVMPDANK                                                                                                                | 0.923840174        | 2               | 3.566811  |
| Q02253        | NHGVVMPDANK+Oxidation(5)                                                                                                   | 1.212174078        |                 |           |
| Q02253        | NHGVVMPDANKENTLNQLVGAAFGAAGQR                                                                                              | 1.749920621        | 3               | 6.137279  |
| Q02253        | NHGVVMPDANKENTLNQLVGAAFGAAGQR+Oxidation(5)                                                                                 | 1.765906002        |                 |           |
| Q02253        | QGIQFYTLK                                                                                                                  | 0.984827894        | 2               | 2.794362  |
| Q02253        | SDKWIDIHNPATNEVVGR                                                                                                         | 1.045647439        | 2               | 5.26877   |
| Q02253        | TITSQWKEEDATLSSPAVVMPTMGR                                                                                                  | 1.250384655        | 2               | 5.475821  |
| Q02253        | TLADAEGDVFR                                                                                                                | 1.036958021        | 2               | 3.672229  |
| Q02253        | VCNLIDSGAK                                                                                                                 | 0.87438932         | 2               | 3.393078  |
| Q02253        | VNAGDQPGADLGLITPQAK                                                                                                        | 0.500058345        | 2               | 5.879705  |
| Q02253        | WIDIHNPATNEVVGR                                                                                                            | 0.972992661        | 2               | 4.891312  |
| Q02253        | WLPELVER                                                                                                                   | 1.111697156        | 2               | 2.401557  |
| Q02253        | YAHMVDVGQGVNVPVPLPMFSFTGSR                                                                                                 | 1.802430809        | 3               | 3.527001  |

|               |                                             |                    |                 |           |
|---------------|---------------------------------------------|--------------------|-----------------|-----------|
| <b>Q02769</b> | <b>FDFT Squalene synthase</b>               | <b>1.064810093</b> | <b>0.317322</b> | <b>4</b>  |
| Q02769        | KLEDFVKPENVDVAVK                            | 1.355483917        | 2               | 4.035981  |
| Q02769        | SFAAVIQALDGDGDIR                            | 1.049526358        | 2               | 3.663059  |
| Q02769        | TQSLPNCQLISR                                | 1.275949262        | 2               | 2.91068   |
| Q02769        | VVLEDFPTISLEFR                              | 1.580477049        | 2               | 3.281074  |
| <b>Q02874</b> | <b>H2AY Core histone macro_H2A.1</b>        | <b>1.174600278</b> | <b>0.025276</b> | <b>4</b>  |
| Q02874        | AASADSTTEGAPTDGFTVLSTK                      | 0.901000652        | 2               | 4.194602  |
| Q02874        | GVTIASGGVLPNIHPELLAK                        | 1.175260418        | 2               | 4.201245  |
| Q02874        | NCLALADDR                                   | 1.491469109        | 2               | 2.475091  |
| Q02874        | NGPLEVAGAAVSAGHGLPAK                        | 1.097543919        | 2               | 2.810144  |
| <b>Q02974</b> | <b>KHK Ketohekoxinase</b>                   | <b>1.355712628</b> | <b>2.9E-05</b>  | <b>8</b>  |
| Q02974        | GATLICAWAEEGADALGPDGQLLHSDAFPPPR            | 1.393154039        | 3               | 5.580824  |
| Q02974        | GGNASNSCTVLSLLGAR                           | 1.255535489        | 2               | 4.720075  |
| Q02974        | GNSMQEALR                                   | 1.231512879        | 2               | 3.004877  |
| Q02974        | GVDVSVQVAWQSQGDTPCCSCCIVNNSNGSR             | 1.095446803        | 3               | 5.853639  |
| Q02974        | IEQYNATQPLQKQ                               | 0.797533799        | 2               | 4.816424  |
| Q02974        | RGVDVSVQVAWQSQGDTPCCSCCIVNNSNGSR            | 0.440004688        | 3               | 6.500533  |
| Q02974        | TIILYDTNLPDVSAK                             | 1.272074511        | 2               | 5.151032  |
| Q02974        | VSVEIEKPR                                   | 1.188167495        | 2               | 2.51895   |
| <b>Q03248</b> | <b>BUP1 Beta_ureidopropionase</b>           | <b>1.383428882</b> | <b>9.9E-20</b>  | <b>15</b> |
| Q03248        | AHHDLDGYFYGSSYVAAPDGSR                      | 1.322261921        | 2               | 6.141911  |
| Q03248        | EDLVLPSSG                                   | 1.082216145        | 1               | 2.23347   |
| Q03248        | EKLPWTEFAESAEDGLTTR                         | 1.277703032        | 2               | 4.721282  |
| Q03248        | ELAEAVKPNYSPNIVK                            | 1.237500691        | 2               | 4.652629  |
| Q03248        | ELAEAVKPNYSPNIVKEDLVLPSSG                   | 4.370089627        | 3               | 3.490008  |
| Q03248        | HLPPDLSQVK                                  | 1.052166418        | 2               | 2.529366  |
| Q03248        | HNMVVISPILER                                | 1.529239006        | 2               | 3.082943  |
| Q03248        | HNMVVISPILER+Oxidation(2                    | 1.493928681        |                 |           |
| Q03248        | IPLPTSAPVAEQVSALHK                          | 1.515349431        | 3               | 4.875127  |
| Q03248        | KHNMMVVISPILER                              | 0.837707428        | 3               | 3.55404   |
| Q03248        | KHNMMVVISPILER+Oxidation(3                  | 1.521744332        |                 |           |
| Q03248        | NAAIANHCFTCALNR                             | 1.355206279        | 2               | 4.689579  |
| Q03248        | VGDFNESTYYMEGNLGHVPVFTQFGR                  | 1.517897062        | 3               | 5.111598  |
| Q03248        | VGQEHYPNEFTSGDGK                            | 1.793758787        | 2               | 4.355787  |
| Q03248        | VGQEHYPNEFTSGDGKK                           | 1.430346293        | 3               | 4.796508  |
| <b>Q03336</b> | <b>RGN Regucalcin</b>                       | <b>0.848526316</b> | <b>6.01E-10</b> | <b>16</b> |
| Q03336        | CGESPVWEEASK                                | 1.125846834        | 2               | 4.669443  |
| Q03336        | CLLFVDIPSK                                  | 1.216772627        | 2               | 3.424089  |
| Q03336        | DEQIPDGMCIDVEGK                             | 0.851769327        | 2               | 4.443646  |
| Q03336        | DYSEMYVTCAR                                 | 1.163279502        | 2               | 3.268499  |
| Q03336        | FNDGKVDPAGR                                 | 1.082713338        | 2               | 3.051797  |
| Q03336        | HQGSLSLFPDHSVK                              | 0.871013247        | 3               | 4.897844  |
| Q03336        | KYFDQVDISNGLDWSLDHK                         | 1.633622908        | 3               | 4.967375  |
| Q03336        | LWVACYNGGR                                  | 1.100098904        | 2               | 2.766793  |
| Q03336        | MEKDEQIPDGMCIDVEGK                          | 1.114965981        | 2               | 5.065202  |
| Q03336        | MEKDEQIPDGMCIDVEGK+Oxidation(0              | 1.175018807        |                 |           |
| Q03336        | MEKDEQIPDGMCIDVEGK+Oxidation(10             | 1.472874111        |                 |           |
| Q03336        | QSGGYVATIGTK                                | 1.175310592        | 2               | 2.786207  |
| Q03336        | VGVDAPVSSVALR                               | 1.064180775        | 2               | 3.568007  |
| Q03336        | YFAGTMAEETAPAVLER                           | 1.289173519        | 2               | 5.670483  |
| Q03336        | YFAGTMAEETAPAVLER+Oxidation(5               | 0.950013073        |                 |           |
| Q03336        | YFDQVDISNGLDWSLDHK                          | 0.693075708        | 2               | 4.695905  |
| <b>Q03410</b> | <b>SYCP1 Synaptonemal complex protein 1</b> | <b>1.252653903</b> | <b>0.310758</b> | <b>2</b>  |
| Q03410        | ATVDEAVKLQKEIDLR                            | 1.279204484        | 2               | 2.466755  |
| Q03410        | LKMEQENTAILTDK                              | 1.250025302        | 2               | 2.368283  |
| <b>Q03626</b> | <b>MUG1 Murinoglobulin_1</b>                | <b>1.238008832</b> | <b>6.28E-06</b> | <b>7</b>  |
| Q03626        | EDNSIHWERPQKPTK                             | 0.985584104        | 2               | 2.623197  |

|               |                                                       |                    |                 |           |
|---------------|-------------------------------------------------------|--------------------|-----------------|-----------|
| Q03626        | EESSCIHSSCTAER                                        | 1.09314182         | 2               | 4.231871  |
| Q03626        | GGEFEMMPLGVNK                                         | 1.069125823        | 2               | 3.477507  |
| Q03626        | LTAQPAPSPEDLALSMGTIK                                  | 1.402610093        | 3               | 4.122586  |
| Q03626        | NLHPLNELFPLAYIEDPK                                    | 1.662468184        | 3               | 4.118049  |
| Q03626        | VQTVPLTCNNPK                                          | 1.013602703        | 2               | 2.964466  |
| Q03626        | VYHKEESSCIHSSCTAER                                    | 1.277292605        | 2               | 5.819111  |
| <b>Q04462</b> | <b>SYVC Valyl_tRNA synthetase</b>                     | <b>0.929583155</b> | <b>0.620526</b> | <b>4</b>  |
| Q04462        | ALNPLEEWLR                                            | 1.179733259        | 2               | 2.333169  |
| Q04462        | ITPAHDQNDYEVGQR                                       | 1.28771495         | 2               | 3.687371  |
| Q04462        | LQQTEAELR                                             | 1.212393521        | 2               | 2.341319  |
| Q04462        | SVTQQPGSEITAPQK                                       | 0.928831042        | 2               | 3.546373  |
| <b>Q05982</b> | <b>NDKA Nucleoside diphosphate kinase A</b>           | <b>1.609759115</b> | <b>0.301864</b> | <b>2</b>  |
| Q05982        | EISLWFQPEELVDYK                                       | 1.589653111        | 2               | 2.852583  |
| Q05982        | FIQASEDLLK                                            | 1.629606359        | 2               | 2.365308  |
| <b>Q06647</b> | <b>ATPO ATP synthase subunit O_mitochondrial</b>      | <b>1.380742574</b> | <b>9.9E-20</b>  | <b>8</b>  |
| Q06647        | FSPLTANLMNLLAENGR                                     | 1.824062071        | 2               | 4.310371  |
| Q06647        | GEVPCTVTTAFPLDEAVLSELK                                | 1.330013753        | 3               | 6.047032  |
| Q06647        | GQLNLEVK                                              | 0.909504781        | 2               | 2.736655  |
| Q06647        | LGNTQGVISAFSTIMSVHR                                   | 1.79306337         | 3               | 3.641376  |
| Q06647        | TDPSIMGGMIVR                                          | 1.378716402        | 2               | 3.320391  |
| Q06647        | TVLNSFLSK                                             | 1.168550267        | 2               | 2.725518  |
| Q06647        | VGQLLKDPK                                             | 2.228255839        | 1               | 2.161299  |
| Q06647        | VSLAVLNPYIK                                           | 1.137581216        | 2               | 3.581119  |
| <b>Q07071</b> | <b>GCKR Glucokinase regulatory protein</b>            | <b>1.615397109</b> | <b>2.08E-07</b> | <b>13</b> |
| Q07071        | AAPISCHVQVAHEK                                        | 1.303178479        | 2               | 4.901689  |
| Q07071        | CIESLLQAIHFPPQLSDDVR                                  | 1.664703275        | 3               | 4.441214  |
| Q07071        | CLLEILR                                               | 1.53469411         | 2               | 2.526961  |
| Q07071        | GFLIGDHSDFMNFQK                                       | 1.48850977         | 2               | 3.831923  |
| Q07071        | LLGQCDAEIFQEEGQIVPTYQR                                | 4.206109636        | 2               | 5.031868  |
| Q07071        | LSAASSVCEVVR                                          | 2.539675116        | 2               | 2.791999  |
| Q07071        | LYSESVLTTMLQVAGK                                      | 1.576926479        | 2               | 3.835548  |
| Q07071        | QEAFLNPAIGPEGLSGSSR                                   | 1.615568918        | 2               | 4.862584  |
| Q07071        | TVDQGVVSSQR                                           | 1.098454745        | 2               | 3.56929   |
| Q07071        | VIPTALLSLLL                                           | 1.832449564        | 2               | 2.968017  |
| Q07071        | VQEVLEKPDGGLVVLVSGGTSGR                               | 1.383891055        | 2               | 5.05545   |
| Q07071        | WVLNTVSTGAHVLLGK                                      | 2.366753594        | 2               | 3.444504  |
| Q07071        | YQHVIETPEPGEWELSGYEAAPITEK                            | 1.016900874        | 3               | 6.070068  |
| <b>Q07116</b> | <b>SUOX Sulfite oxidase_mitochondrial</b>             | <b>1.0121167</b>   | <b>0.379364</b> | <b>9</b>  |
| Q07116        | AVDDSYNVQPDTVAPIWNLR                                  | 1.550399096        | 2               | 4.618759  |
| Q07116        | ETEAHVCFEGLSDPTGTAYGASIPLAR                           | 2.294680418        | 3               | 3.936766  |
| Q07116        | FVDLHPGGQSK                                           | 1.501954202        | 2               | 2.676932  |
| Q07116        | IGELNPEDR                                             | 1.128040844        | 2               | 2.443203  |
| Q07116        | LCDVLAQAGHR                                           | 0.778685457        | 2               | 3.240449  |
| Q07116        | LHVGAPGGQSLSLDDLHK                                    | 1.640630889        | 3               | 3.706066  |
| Q07116        | MSPPLEASDPYSNDPMR                                     | 5.001763559        | 2               | 3.827767  |
| Q07116        | NHLVPNLDPDYR                                          | 1.082072972        | 2               | 2.668844  |
| Q07116        | VSVSEESYSHWQR                                         | 0.74322822         | 2               | 4.126024  |
| <b>Q07205</b> | <b>IF5 Eukaryotic translation initiation factor 5</b> | <b>1.096750055</b> | <b>0.262878</b> | <b>3</b>  |
| Q07205        | AMGPLVLTEVLFDEK                                       | 1.744390049        | 2               | 3.677452  |
| Q07205        | LQDMLDGFVK                                            | 1.206924098        | 2               | 2.311766  |
| Q07205        | TVIVNMVDVAK                                           | 1.096016503        | 2               | 2.859763  |
| <b>Q07523</b> | <b>HAOX2 Hydroxyacid oxidase 2</b>                    | <b>0.821111171</b> | <b>0.657183</b> | <b>12</b> |
| Q07523        | ALKEEKPTQSVPVSPFK                                     | 0.735615885        | 2               | 4.818585  |
| Q07523        | ALVITIDTPVLGMR                                        | 0.801221927        | 2               | 3.961407  |
| Q07523        | ASFCWNDLSLQISIR                                       | 1.113059544        | 2               | 4.07296   |
| Q07523        | EDAELAMK                                              | 1.58143216         | 1               | 2.018636  |
| Q07523        | EKPTQSVPVSPFK                                         | 0.855703606        | 2               | 3.764906  |

|               |                                                                    |                    |                 |          |
|---------------|--------------------------------------------------------------------|--------------------|-----------------|----------|
| Q07523        | EVLDILTAELHR                                                       | 1.099061847        | 2               | 3.275317 |
| Q07523        | GEDGVKEVLDILTAELHR                                                 | 1.173759151        | 3               | 5.127806 |
| Q07523        | HNVQGVVSNHGGR                                                      | 0.765503196        | 3               | 6.360639 |
| Q07523        | NQLNLEANILLK                                                       | 0.95435238         | 2               | 3.880228 |
| Q07523        | QLDEVSASIDALR                                                      | 0.952749534        | 2               | 3.11643  |
| Q07523        | TSWDFIEGEADDGITYSENIAAFK                                           | 0.994558615        | 3               | 3.301944 |
| Q07523        | TTIQGQEISAPICISPTAFHSIAWPDGK                                       | 0.861763674        | 3               | 4.73957  |
| <b>Q07803</b> | <b>EFGM Elongation factor G_ mitochondrial</b>                     | <b>1.869067056</b> | <b>0.17457</b>  | <b>4</b> |
| Q07803        | GIIDLIEER                                                          | 1.974913625        | 2               | 2.869314 |
| Q07803        | LEFSDETFGANVPK                                                     | 1.355043306        | 2               | 2.852776 |
| Q07803        | NYQGELKK                                                           | 0.520894464        | 1               | 2.086219 |
| Q07803        | YQPCSPSTQEELVNK                                                    | 3.161743052        | 2               | 3.092536 |
| <b>Q07936</b> | <b>ANXA2 Annexin A2</b>                                            | <b>1.186988854</b> | <b>0.815507</b> | <b>3</b> |
| Q07936        | GLGTDEDSLIEICSR                                                    | 1.28687049         | 2               | 3.370492 |
| Q07936        | GVDEVTVNILTNR                                                      | 1.120179657        | 2               | 3.101222 |
| Q07936        | TNQELQEINR                                                         | 1.641671423        | 2               | 2.952035 |
| <b>Q07984</b> | <b>SSRD Translocon_ associated protein subunit delta</b>           | <b>1.564577833</b> | <b>1.3E-10</b>  | <b>3</b> |
| Q07984        | FFDEESYSLLR                                                        | 2.083549618        | 2               | 3.67008  |
| Q07984        | NNEDVSIIPFLTVDVHR                                                  | 1.438858992        | 2               | 4.338617 |
| Q07984        | VQNMALYADVSGK                                                      | 1.266013097        | 2               | 3.699968 |
| <b>Q08163</b> | <b>CAP1 Adenylyl cyclase_ associated protein 1</b>                 | <b>1.118172553</b> | <b>0.296572</b> | <b>7</b> |
| Q08163        | ALLVTASQCQPAGNK                                                    | 1.074277795        | 2               | 4.090575 |
| Q08163        | KEPALLELEGK                                                        | 1.534890993        | 2               | 2.343218 |
| Q08163        | LEAVSHTSDMHCYGDSPSK                                                | 1.425854763        | 3               | 5.074891 |
| Q08163        | NSLDCEIVSAK                                                        | 1.066562638        | 2               | 3.072783 |
| Q08163        | SALFAQINQGESITHALK                                                 | 1.177971332        | 2               | 4.180212 |
| Q08163        | SSEMNVLIPTEGGDFNEFPVPEQFK                                          | 1.172083201        | 2               | 4.264634 |
| Q08163        | VENQENVSNLVIDDTLTK                                                 | 1.696345466        | 2               | 5.36006  |
| <b>Q08201</b> | <b>MDR2 Multidrug resistance protein 2</b>                         | <b>1.975039996</b> | <b>0.174304</b> | <b>2</b> |
| Q08201        | AKLSAAYLFLFERQPLIDYSYR                                             | 2.048784356        | 2               | 2.552104 |
| Q08201        | FDTLVGDRGAQLSGGQK                                                  | 1.88899599         | 2               | 2.537317 |
| <b>Q08415</b> | <b>KAT1 Kynurenine__oxoglutarate transaminase 1_ mitochondrial</b> | <b>1.501745603</b> | <b>7.07E-12</b> | <b>6</b> |
| Q08415        | ATLQAMDER                                                          | 1.402595072        | 2               | 2.432838 |
| Q08415        | EQQHFGQPSSYFLQLPQAMELNR                                            | 1.500097393        | 3               | 5.710249 |
| Q08415        | ILVLNTPNNPLGK                                                      | 2.192924272        | 2               | 3.269145 |
| Q08415        | LGASNDWQLDPAELASK                                                  | 2.945039155        | 2               | 4.254275 |
| Q08415        | RLDGIDQNLWVEFGK                                                    | 1.387560994        | 2               | 2.362453 |
| Q08415        | VGWVMGPDNIMK                                                       | 1.480287419        | 2               | 2.450415 |
| <b>Q09073</b> | <b>ADT2 ADP/ATP translocase 2</b>                                  | <b>1.13188043</b>  | <b>0.959586</b> | <b>7</b> |
| Q09073        | AAYFGIYDTAK                                                        | 1.163745809        | 2               | 2.426242 |
| Q09073        | DFLAGGVAAAIK                                                       | 0.901242914        | 2               | 4.93099  |
| Q09073        | GLGDCLVK                                                           | 1.369463986        | 2               | 2.800288 |
| Q09073        | GTDIMYGTLDWCWR                                                     | 1.549761138        | 2               | 3.619744 |
| Q09073        | KGTDIMYGTLDWCWR                                                    | 1.128493077        | 3               | 3.789656 |
| Q09073        | LLLQVQHASK                                                         | 1.403125175        | 2               | 2.773169 |
| Q09073        | QIFLGGVDKR                                                         | 1.017990743        | 2               | 2.391847 |
| <b>Q0D2L3</b> | <b>SPEB Agmatinase_ mitochondrial</b>                              | <b>1.370619186</b> | <b>0.00562</b>  | <b>9</b> |
| Q0D2L3        | EAYQNILATGCIPLTGGDHTITYPILQAVAK                                    | 1.562767499        | 3               | 4.13204  |
| Q0D2L3        | EESLMLGTVNPSTGALPFQSLR                                             | 1.5113448          | 2               | 3.57721  |
| Q0D2L3        | EHGPPVGLVHVGAHSNTSDKPLEDK                                          | 1.12981051         | 3               | 3.533533 |
| Q0D2L3        | IREESLMLGTVNPSTGALPFQSLR                                           | 1.273853337        | 3               | 4.458374 |
| Q0D2L3        | SVDEGLLDSK                                                         | 0.604800513        | 2               | 2.74482  |
| Q0D2L3        | SVDEGLLDSKR                                                        | 1.294266222        | 2               | 3.14827  |
| Q0D2L3        | VADLGNVNVNLYNLQDSCR                                                | 1.61465944         | 2               | 5.295788 |
| Q0D2L3        | VCSMMHLPLQSSPEGLDAAFVGVPLDTGTSNRPGAR                               | 2.598543603        | 3               | 5.564571 |
| Q0D2L3        | VVLAEDCWMK                                                         | 1.34019607         | 2               | 2.523122 |

|               |                                                                            |                    |                 |           |
|---------------|----------------------------------------------------------------------------|--------------------|-----------------|-----------|
| <b>Q0VAV2</b> | <b>EXPH5 Exophilin_5</b>                                                   | <b>0.673869263</b> | <b>0.32308</b>  | <b>4</b>  |
| Q0VAV2        | DMDVSVSKDEQLNK                                                             | 1.120902319        | 2               | 2.328467  |
| Q0VAV2        | DMDVSVSKDEQLNK+Oxidation(1)                                                | 0.587209183        |                 |           |
| Q0VAV2        | GMAKNPDMELQTPR+Oxidation(1)Oxidation(7)                                    | 0.756916326        |                 |           |
| Q0VAV2        | SLSDDQDPGQEQREEK                                                           | 1.119148975        | 2               | 2.482729  |
| <b>Q0VGK3</b> | <b>GLCK Glycerate kinase</b>                                               | <b>1.381055843</b> | <b>0.000406</b> | <b>3</b>  |
| Q0VGK3        | AVLGMAAAADELLGQHLVQGVISVPK                                                 | 1.587214288        | 2               | 5.178473  |
| Q0VGK3        | GATIQELNTIR                                                                | 1.951094173        | 2               | 2.801062  |
| Q0VGK3        | QLFDSAVGAVQPGPMLQR                                                         | 1.308788976        | 2               | 3.58777   |
| <b>Q0ZHH6</b> | <b>ATLA3 Atlastin_3</b>                                                    | <b>1.373337988</b> | <b>0.000779</b> | <b>7</b>  |
| Q0ZHH6        | ALASVLLQDHIR                                                               | 1.558190151        | 2               | 2.617037  |
| Q0ZHH6        | EHQHEEIQNVR                                                                | 1.269120675        | 2               | 3.398778  |
| Q0ZHH6        | EQLQTLIPYVNLPSK                                                            | 1.415983936        | 2               | 2.760027  |
| Q0ZHH6        | GGSDPETTGIQIWSEVFTVK                                                       | 1.227758242        | 2               | 4.523299  |
| Q0ZHH6        | IYQGEDLPHPK                                                                | 1.370426136        | 2               | 2.524233  |
| Q0ZHH6        | LAMDEIFQKPFQTLMLVR+Oxidation(2)                                            | 1.380829938        |                 |           |
| Q0ZHH6        | YQQELEEEITELYENFCK                                                         | 2.052206797        | 2               | 5.276007  |
| <b>Q10728</b> | <b>MYPT1 Protein phosphatase 1 regulatory subunit 12A</b>                  | <b>1.192568354</b> | <b>0.769858</b> | <b>2</b>  |
| Q10728        | EQENEKDKEEK                                                                | 1.023419112        | 2               | 2.324766  |
| Q10728        | SLLEMEKRER+Oxidation(4)                                                    | 1.211166517        |                 |           |
| <b>Q10758</b> | <b>K2C8 Keratin_type II cytoskeletal 8</b>                                 | <b>1.212423053</b> | <b>9.9E-20</b>  | <b>27</b> |
| Q10758        | AEAETMYQIK                                                                 | 1.387912477        | 2               | 3.322094  |
| Q10758        | AQYEEIANR                                                                  | 1.252159212        | 2               | 3.131649  |
| Q10758        | ATLEAAIADAEQR                                                              | 1.171842416        | 2               | 4.70628   |
| Q10758        | DVDEAYMKNKVELESR                                                           | 1.031565482        | 2               | 3.447923  |
| Q10758        | ELQSQISDTSVLLSMDNSR                                                        | 2.037002981        | 2               | 6.240154  |
| Q10758        | GSLGGFGGAGVGGITAVTVNQSLNPLK                                                | 1.274646656        | 2               | 4.991036  |
| Q10758        | KDVDEAYMKNK                                                                | 1.814860598        | 2               | 3.318818  |
| Q10758        | LEGLTDEINFLR                                                               | 1.510594495        | 2               | 4.392922  |
| Q10758        | LESGMQNMSIHTK                                                              | 1.645512525        | 2               | 3.879261  |
| Q10758        | LEVDPNIQAVR                                                                | 1.254240986        | 2               | 3.693965  |
| Q10758        | LEVELGNMQGLVEDFK                                                           | 1.376617599        | 2               | 5.057513  |
| Q10758        | LKLEVELGNMQGLVEDFK                                                         | 1.588306965        | 3               | 3.520644  |
| Q10758        | LQAEIDALK                                                                  | 1.334298956        | 2               | 2.973222  |
| Q10758        | LVSESSDIMSK                                                                | 1.210168318        | 2               | 3.496125  |
| Q10758        | QHHEEIR                                                                    | 1.216260635        | 1               | 2.195948  |
| Q10758        | QLEALGQEK                                                                  | 1.393931874        | 1               | 2.167854  |
| Q10758        | RQLEALGQEK                                                                 | 1.238789486        | 2               | 2.57175   |
| Q10758        | SKTEISEMNR                                                                 | 1.43339064         | 3               | 3.760076  |
| Q10758        | SKTEISEMNR+Oxidation(7)                                                    | 1.04025114         |                 |           |
| Q10758        | SLDMDSIIAEVR                                                               | 1.197430661        | 2               | 4.67944   |
| Q10758        | SNMDNMFESYINLR                                                             | 1.074824146        | 2               | 4.205699  |
| Q10758        | SRAEAETMYQIK                                                               | 1.602553363        | 2               | 3.673638  |
| Q10758        | TEISEMNR                                                                   | 1.858808489        | 2               | 2.320929  |
| Q10758        | TEMENEFVLIK                                                                | 1.368100175        | 2               | 3.604664  |
| Q10758        | TEMENEFVLIK+Oxidation(2)                                                   | 1.443231032        |                 |           |
| Q10758        | WSLLQQQK                                                                   | 1.015360382        | 2               | 3.005718  |
| Q10758        | YEELQTLGK                                                                  | 1.463748301        | 2               | 3.60237   |
| <b>Q148W0</b> | <b>AT8B1 Probable phospholipid_transporting ATPase IC</b>                  | <b>1.044118265</b> | <b>0.001162</b> | <b>2</b>  |
| Q148W0        | LGQSHFINWDLQMYAEK+Oxidation(12)                                            | 1.058565335        |                 |           |
| Q148W0        | TCEVIKGRFK                                                                 | 1.352360827        | 1               | 2.296004  |
| <b>Q14DH7</b> | <b>ACSS3 Acyl_CoA synthetase short_chain family member 3_mitochondrial</b> | <b>1.544236295</b> | <b>0.586587</b> | <b>7</b>  |
| Q14DH7        | CVPGYNVMIILDNMQK                                                           | 1.84107242         | 2               | 2.973577  |
| Q14DH7        | IAIHYDSPVTDK                                                               | 0.940102451        | 2               | 2.930412  |

|               |                                                                   |                    |                 |           |
|---------------|-------------------------------------------------------------------|--------------------|-----------------|-----------|
| Q14DH7        | STLSALVNGKPYK                                                     | 0.830218515        | 2               | 2.781722  |
| Q14DH7        | THFAASVADPER                                                      | 1.494496552        | 2               | 3.666326  |
| Q14DH7        | VDDVINVAGHR                                                       | 1.752016803        | 2               | 3.616512  |
| Q14DH7        | VLAEHGVAALFTAPTAIR                                                | 1.122795671        | 2               | 4.429534  |
| Q14DH7        | VTPTIEDPSIFGHIEEVLK                                               | 1.195488958        | 2               | 3.425675  |
| <b>Q1H5H1</b> | <b>SELT Selenoprotein T</b>                                       | <b>1.64997385</b>  | <b>0.038644</b> | <b>2</b>  |
| Q1H5H1        | IEGENYLPQPIYR                                                     | 1.450951865        | 2               | 2.836025  |
| Q1H5H1        | LESGHLPSMQQLVQILDNEMK                                             | 1.725872714        | 3               | 3.984879  |
| <b>Q1HCL7</b> | <b>NAKD1 NAD kinase domain_containing protein 1</b>               | <b>1.406162971</b> | <b>0.008262</b> | <b>11</b> |
| Q1HCL7        | GSSYSGLLER                                                        | 1.298717048        | 2               | 2.434811  |
| Q1HCL7        | LKPVIGVNTDPER                                                     | 1.405618834        | 3               | 3.464705  |
| Q1HCL7        | LYLEGTGINPSPVDLHEQQLSLNQHSR                                       | 1.414717553        | 3               | 5.230477  |
| Q1HCL7        | NVEHIIDSLRDEGIEVR                                                 | 1.200793376        | 2               | 3.543599  |
| Q1HCL7        | QGNLTLPLNK                                                        | 1.602366221        | 2               | 2.489264  |
| Q1HCL7        | SEASGPQLLPVR                                                      | 1.330956302        | 2               | 3.107535  |
| Q1HCL7        | SEGHLCPLVR                                                        | 0.92669633         | 2               | 2.774505  |
| Q1HCL7        | SSGLNLCTGTGSK                                                     | 1.137710489        | 2               | 3.617954  |
| Q1HCL7        | VTNEYNESLLYSPEEPK                                                 | 1.420742073        | 2               | 4.722686  |
| Q1HCL7        | YAELSEEDLK                                                        | 1.310990001        | 2               | 2.772131  |
| Q1HCL7        | YTHSFPEALQK                                                       | 1.561030448        | 2               | 2.493729  |
| <b>Q1JU68</b> | <b>EIF3A Eukaryotic translation initiation factor 3 subunit A</b> | <b>1.075509214</b> | <b>0.438743</b> | <b>7</b>  |
| Q1JU68        | AVEDIHGLFSLSK                                                     | 2.580962848        | 2               | 3.19418   |
| Q1JU68        | EEEEQRRAEEQMLK                                                    | 1.539126061        | 2               | 2.456296  |
| Q1JU68        | FNVLQYVVPEVK                                                      | 1.920494315        | 2               | 3.409885  |
| Q1JU68        | ILQEHEQIK                                                         | 1.142807507        | 2               | 2.3826    |
| Q1JU68        | KGPEADSEWR                                                        | 0.880076155        | 2               | 2.610711  |
| Q1JU68        | LLDMDGIIVEK                                                       | 0.759830397        | 2               | 3.015522  |
| Q1JU68        | NQLTAMSSVLAK                                                      | 1.028754671        | 2               | 2.777844  |
| <b>Q29RW1</b> | <b>MYH4 Myosin_4</b>                                              | <b>2.291408182</b> | <b>0.936746</b> | <b>13</b> |
| Q29RW1        | ANLMQAEIEELR                                                      | 3.166208333        | 2               | 2.94908   |
| Q29RW1        | ELENEVENEQKR                                                      | 3.955705456        | 2               | 3.109784  |
| Q29RW1        | GQDDLKEQLAMVER                                                    | 1.348404454        | 2               | 2.87192   |
| Q29RW1        | LQDAEEHVEAVNSK                                                    | 5.690837832        | 2               | 4.841591  |
| Q29RW1        | LQDLVDKQLQTK                                                      | 1.953713648        | 1               | 1.941858  |
| Q29RW1        | MEGDLNEMEIQLNHANR                                                 | 1.435522126        | 2               | 4.044161  |
| Q29RW1        | MEIDDLASNMETVSK                                                   | 13.25353553        | 2               | 4.335881  |
| Q29RW1        | NAYEESLDQLETLKR                                                   | 2.578301929        | 2               | 4.016444  |
| Q29RW1        | SAETEKEMATMK                                                      | 1.119215845        | 2               | 2.774539  |
| Q29RW1        | SELQASLEEAESLEHEEGK                                               | 2.9683324          | 2               | 4.858123  |
| Q29RW1        | TEGGATVTVK                                                        | 2.549151508        | 2               | 2.917394  |
| Q29RW1        | TKLEQQVDDLEGSLEQEK                                                | 1.988537482        | 2               | 4.93899   |
| Q29RW1        | TKLEQQVDDLEGSLEQEK                                                | 0.3095138          | 3               | 4.625255  |
| <b>Q2PQA9</b> | <b>KINH Kinesin_1 heavy chain</b>                                 | <b>3.175890889</b> | <b>0.099359</b> | <b>4</b>  |
| Q2PQA9        | HVAVTNMNEHSSR                                                     | 3.33275972         | 3               | 4.041239  |
| Q2PQA9        | MEENEKELAACQLR                                                    | 1.468834184        | 2               | 2.356405  |
| Q2PQA9        | SAEVSDDTGGSAAQK                                                   | 1.232842531        | 2               | 5.215311  |
| Q2PQA9        | TGAEGAVLDEAK                                                      | 1.484954238        | 2               | 2.424347  |
| <b>Q2TA68</b> | <b>OPA1 Dynamin_like 120 kDa protein_mitochondrial</b>            | <b>0.945938797</b> | <b>0.27717</b>  | <b>6</b>  |
| Q2TA68        | AKNEILDEVISLSQVTPK                                                | 1.792782132        | 2               | 3.968228  |
| Q2TA68        | AVEVAWETLQDEFSR                                                   | 1.350624437        | 2               | 2.363897  |
| Q2TA68        | GKEHDDIFDK                                                        | 1.272302654        | 2               | 2.403606  |
| Q2TA68        | IDQLQEELLHTQLK                                                    | 0.945559479        | 2               | 2.64901   |
| Q2TA68        | TSVLEMIAQAR                                                       | 1.125343921        | 2               | 3.299251  |
| Q2TA68        | VVVVGDQSAGK                                                       | 1.483133237        | 2               | 2.54199   |
| <b>Q2V057</b> | <b>PROD2 Probable proline dehydrogenase 2</b>                     | <b>1.596349915</b> | <b>0.042245</b> | <b>7</b>  |



|               |                                                                            |                    |                 |          |
|---------------|----------------------------------------------------------------------------|--------------------|-----------------|----------|
| Q2V057        | ASIYQQFVAGETAEEVR                                                          | 2.074644233        | 2               | 3.180244 |
| Q2V057        | EDCTQPDYEATSR                                                              | 2.006232551        | 2               | 3.92341  |
| Q2V057        | GCVQQLQAIGLQPLLAVPTEEEPDSAAK                                               | 1.357144586        | 3               | 3.603206 |
| Q2V057        | NLQLSCLSTEQNQHLQASLSR                                                      | 1.393971988        | 2               | 5.445899 |
| Q2V057        | SIPYGCLEEVIPYLIR                                                           | 2.606420763        | 2               | 2.531735 |
| Q2V057        | SVTQLHGKEDCTQPDYEATSR                                                      | 1.259754159        | 3               | 5.449209 |
| Q2V057        | TSEAWYEGNLSAMLHCVDLSR                                                      | 1.59974052         | 2               | 3.453966 |
| <b>Q3B7D0</b> | <b>HEM6 Coproporphyrinogen_III oxidase_mitochondrial</b>                   | <b>1.63096612</b>  | <b>0.0092</b>   | <b>4</b> |
| Q3B7D0        | AGVNISVVHGNLSEEAANQMR                                                      | 1.269922502        | 3               | 4.740949 |
| Q3B7D0        | FGLFTPGSR                                                                  | 1.171737175        | 2               | 2.33909  |
| Q3B7D0        | HCDDSYTPQDK                                                                | 1.751978578        | 2               | 3.785692 |
| Q3B7D0        | LEEDGDELAR                                                                 | 3.483305571        | 2               | 2.823946 |
| <b>Q3B7U9</b> | <b>FKBP8 Peptidyl_prolyl cis_trans isomerase FKBP8</b>                     | <b>1.245750425</b> | <b>0.644976</b> | <b>4</b> |
| Q3B7U9        | SCSQVLEHQPDNIK                                                             | 1.24357546         | 2               | 4.137336 |
| Q3B7U9        | TAEDGPDLEMLSGQER                                                           | 1.27415677         | 2               | 4.216661 |
| Q3B7U9        | VDMTCEEEEEELLQK                                                            | 1.543167357        | 2               | 4.147151 |
| Q3B7U9        | VLAQQGEYSEAIPILR                                                           | 1.154589784        | 2               | 3.4743   |
| <b>Q3B8Q2</b> | <b>IF4A3 Eukaryotic initiation factor 4A_III</b>                           | <b>0.91639012</b>  | <b>0.076106</b> | <b>2</b> |
| Q3B8Q2        | GIYAYGFEKPSAIQQR                                                           | 0.913642879        | 2               | 4.584264 |
| Q3B8Q2        | GRDVIAQSQSGTGK                                                             | 1.372615303        | 2               | 3.888091 |
| <b>Q3KRD8</b> | <b>IF6 Eukaryotic translation initiation factor 6</b>                      | <b>1.494767239</b> | <b>0.06251</b>  | <b>3</b> |
| Q3KRD8        | ASFENNCEVGCFAK                                                             | 1.491106128        | 2               | 2.430109 |
| Q3KRD8        | HGLLVNNTTDQELQHIR                                                          | 1.470903211        | 3               | 4.832182 |
| Q3KRD8        | TSIEDQDELSSLLQVPLVAGTVNR                                                   | 1.497495554        | 3               | 3.902983 |
| <b>Q3KRE0</b> | <b>ATAD3 ATPase family AAA domain_containing protein 3</b>                 | <b>1.114422985</b> | <b>0.385162</b> | <b>3</b> |
| Q3KRE0        | GEGTGPPPLPPAQPGEESGGDR                                                     | 0.948288429        | 2               | 3.66028  |
| Q3KRE0        | ISVLEALR                                                                   | 3.15783393         | 2               | 2.418639 |
| Q3KRE0        | QQQLLNEENLR                                                                | 1.197180066        | 2               | 2.364246 |
| <b>Q3KRE8</b> | <b>TBB2B Tubulin beta_2B chain</b>                                         | <b>1.242002661</b> | <b>0.000154</b> | <b>2</b> |
| Q3KRE8        | ALTVPQLTQQMFDSK                                                            | 1.24446708         | 2               | 3.22134  |
| Q3KRE8        | ESESCDCLQGFQLTHSLGGGTGSGMGTLLISK                                           | 0.966550383        | 3               | 5.051366 |
| <b>Q3MIB4</b> | <b>LONP2 Lon protease homolog 2_peroxisomal</b>                            | <b>1.111236733</b> | <b>0.877931</b> | <b>2</b> |
| Q3MIB4        | MEIIQVPGYTQEEK                                                             | 1.107661211        | 2               | 3.727233 |
| Q3MIB4        | TVGVNPNVFLLEDEVDK                                                          | 1.138986151        | 2               | 2.444358 |
| <b>Q3MIE0</b> | <b>ECHD3 Enoyl_CoA hydratase domain_containing protein 3_mitochondrial</b> | <b>1.164596617</b> | <b>0.747482</b> | <b>6</b> |
| Q3MIE0        | DGQEGIEAFIQK                                                               | 1.279196913        | 2               | 2.767094 |
| Q3MIE0        | SDILHEAESEDLK                                                              | 0.989885221        | 3               | 3.666263 |
| Q3MIE0        | SSFATPGVNVGLFCSTPAVALGR                                                    | 1.25100771         | 2               | 4.732429 |
| Q3MIE0        | VALEMLFTGEPISAQEALR                                                        | 0.993802932        | 2               | 3.663281 |
| Q3MIE0        | VIIISAEGPVFSSGHDLK                                                         | 0.943776679        | 2               | 4.477846 |
| Q3MIE0        | VVPEEQLEEEATR                                                              | 1.131600171        | 2               | 3.971935 |
| <b>Q3MIF4</b> | <b>XYLB Xylulose kinase</b>                                                | <b>1.271479998</b> | <b>0.005583</b> | <b>8</b> |
| Q3MIF4        | CCLGWDFSTQQVK                                                              | 1.697100579        | 2               | 3.205227 |
| Q3MIF4        | DLPEFGTQGGVHVHK                                                            | 1.196358063        | 2               | 2.751265 |
| Q3MIF4        | FNADNMEVSAPGQDVEIR                                                         | 1.441448444        | 2               | 4.45379  |
| Q3MIF4        | IHAEGLYR                                                                   | 1.458608827        | 2               | 2.347418 |
| Q3MIF4        | IRDESASCSWNK                                                               | 1.510982391        | 2               | 4.173065 |
| Q3MIF4        | VVAFTGDNPASLAGMR                                                           | 1.13699995         | 2               | 3.871351 |
| Q3MIF4        | VWSQAQLDACAPHLK                                                            | 2.153734599        | 2               | 3.811449 |
| Q3MIF4        | YSPIDYSDGSGMNLQIQEK                                                        | 1.261598606        | 2               | 5.275795 |
| <b>Q3SWS9</b> | <b>JKIP1 Janus kinase and microtubule_interacting protein 1</b>            | <b>1.360458491</b> | <b>0.339564</b> | <b>2</b> |
| Q3SWS9        | LEMEENQLK+Oxidation(2                                                      | 0.826767231        |                 |          |
| Q3SWS9        | VKTALLADAREEAR                                                             | 1.382555454        | 2               | 2.38817  |

|               |                                                                                           |                    |                 |           |
|---------------|-------------------------------------------------------------------------------------------|--------------------|-----------------|-----------|
| <b>Q3T1I4</b> | <b>PRRC1 Protein PRRC1</b>                                                                | <b>1.061257677</b> | <b>6.94E-05</b> | <b>2</b>  |
| Q3T1I4        | GQDDAPAGGIWGFJK                                                                           | 1.305420386        | 2               | 3.682922  |
| Q3T1I4        | WSGLLVTVGEVLEK                                                                            | 0.793917268        | 2               | 2.746097  |
| <b>Q3T1J1</b> | <b>IF5A1 Eukaryotic translation initiation factor 5A_1</b>                                | <b>1.551974792</b> | <b>0.000663</b> | <b>4</b>  |
| Q3T1J1        | EDLRLPEGDLGK                                                                              | 1.301062704        | 2               | 2.968026  |
| Q3T1J1        | EDLRLPEGDLGKEIEQK                                                                         | 1.332777384        | 2               | 4.257016  |
| Q3T1J1        | NDFQLIGIQDGYLSLLQDSGEVR                                                                   | 1.943138464        | 2               | 5.071415  |
| Q3T1J1        | RNDFQLIGIQDGYLSLLQDSGEVR                                                                  | 2.247762588        | 3               | 4.240447  |
| <b>Q3T1K5</b> | <b>CAZA2 F_actin_capping protein subunit alpha_2</b>                                      | <b>1.091615739</b> | <b>0.000163</b> | <b>3</b>  |
| Q3T1K5        | FIIHAPPGEFNEVFNDVR                                                                        | 1.442501145        | 3               | 4.025432  |
| Q3T1K5        | FTVTPSTTQVVGILK                                                                           | 1.507028383        | 2               | 4.085737  |
| Q3T1K5        | KVDGQQTIIACIESHQFQAK                                                                      | 1.008255381        | 3               | 3.770624  |
| <b>Q3TDQ1</b> | <b>STT3B Dolichyl_diphosphooligosaccharide__protein glycosyltransferase subunit STT3B</b> | <b>1.333978634</b> | <b>0.095779</b> | <b>2</b>  |
| Q3TDQ1        | FGEMQLDFR                                                                                 | 1.535172342        | 2               | 2.334878  |
| Q3TDQ1        | HLEEAFTSEHWLVR                                                                            | 1.331577145        | 3               | 4.077015  |
| <b>Q3U0D9</b> | <b>HACE1 E3 ubiquitin_protein ligase HACE1</b>                                            | <b>1.178245727</b> | <b>0.370816</b> | <b>2</b>  |
| Q3U0D9        | DSIFRSSCEIVSKANCAK                                                                        | 1.064211667        | 2               | 2.3169    |
| Q3U0D9        | MERAMEQLNRLTR                                                                             | 2.037651304        | 2               | 2.32771   |
| <b>Q3U0J8</b> | <b>TBD2B TBC1 domain family member 2B</b>                                                 | <b>1.258466425</b> | <b>0.31345</b>  | <b>2</b>  |
| Q3U0J8        | DTTDIISQHPNPSAEK                                                                          | 1.220797173        | 2               | 2.526188  |
| Q3U0J8        | QIELDLLRTLPNNK                                                                            | 1.279109659        | 2               | 2.5996    |
| <b>Q3UHR0</b> | <b>BAHC1 BAH and coiled_coil domain_containing protein 1</b>                              | <b>0.982999817</b> | <b>0.758081</b> | <b>2</b>  |
| Q3UHR0        | MQILQRKDTWAPK+Oxidation(0                                                                 | 1.623596149        |                 |           |
| Q3UHR0        | NLEEPGLLSR                                                                                | 1.022008175        | 2               | 2.368669  |
| <b>Q3ULJ0</b> | <b>GPD1L Glycerol_3_phosphate dehydrogenase 1_like protein</b>                            | <b>0.810324071</b> | <b>9.9E-20</b>  | <b>3</b>  |
| Q3ULJ0        | GIDEGPDGLK                                                                                | 0.63866536         | 2               | 2.820177  |
| Q3ULJ0        | LGLMEMIAFAK                                                                               | 1.911571817        | 2               | 3.815067  |
| Q3ULJ0        | LTDIINNDHENVKYLPGHK                                                                       | 1.76269061         | 2               | 2.40201   |
| <b>Q3UMF0</b> | <b>COBL1 Cordon_bleu protein_like 1</b>                                                   | <b>1.252772163</b> | <b>0.476993</b> | <b>2</b>  |
| Q3UMF0        | RAPLPPMPTSQGAAQGGERR+Oxidation(6                                                          | 1.354019372        |                 |           |
| Q3UMF0        | SQGTSTYVQDR                                                                               | 1.249967235        | 2               | 2.393463  |
| <b>Q3UQ44</b> | <b>IQGA2 Ras GTPase_activating_like protein IQGAP2</b>                                    | <b>1.450575835</b> | <b>1.11E-16</b> | <b>18</b> |
| Q3UQ44        | ALVGSENPLTVIR                                                                             | 1.112983575        | 2               | 3.855686  |
| Q3UQ44        | AWVNLQLETQTGEASK                                                                          | 1.1972331          | 2               | 5.200054  |
| Q3UQ44        | GVLLGIDDLQTNQFK                                                                           | 1.355290758        | 2               | 4.293905  |
| Q3UQ44        | HTDNTVQWLR                                                                                | 1.355901964        | 2               | 3.003618  |
| Q3UQ44        | KKGGEIEILNNTDNK                                                                           | 1.129779546        | 2               | 2.37617   |
| Q3UQ44        | LFEGENEHLSSMNNYLSEYQEFR                                                                   | 2.586259852        | 3               | 4.710339  |
| Q3UQ44        | LGIAPQIQDLLGK                                                                             | 2.091561108        | 2               | 2.993097  |
| Q3UQ44        | LPYDVTTEQALTYPEVK                                                                         | 1.78668387         | 2               | 4.104656  |
| Q3UQ44        | LPYDVTTEQALTYPEVKNK                                                                       | 1.490427264        | 2               | 2.372267  |
| Q3UQ44        | LSAEEMDER                                                                                 | 1.220284057        | 2               | 3.091775  |
| Q3UQ44        | NPNAVLTVCVDDSLSQEYQK                                                                      | 1.396426864        | 2               | 5.231676  |
| Q3UQ44        | SKVDQVQDIVTGNPTVIK                                                                        | 1.28755393         | 2               | 4.990259  |
| Q3UQ44        | TALEEEIK                                                                                  | 1.460805748        | 2               | 2.407169  |
| Q3UQ44        | TLDTLLLPTANIR                                                                             | 1.123576494        | 2               | 3.578648  |
| Q3UQ44        | VDFTEEEISNMR                                                                              | 2.212389975        | 2               | 3.953048  |
| Q3UQ44        | VDQVQDIVTGNPTVIK                                                                          | 0.939670301        | 2               | 5.097965  |
| Q3UQ44        | YGSIVDDER                                                                                 | 0.955204204        | 2               | 2.459141  |
| Q3UQ44        | YQDILNEIAK                                                                                | 1.374359453        | 2               | 3.061035  |
| <b>Q3UV17</b> | <b>K22O Keratin_type II cytoskeletal 2 oral</b>                                           | <b>1.193870741</b> | <b>0.080858</b> | <b>2</b>  |
| Q3UV17        | AQYEDIAQK                                                                                 | 1.057858286        | 1               | 2.124419  |
| Q3UV17        | KQNTNMQTSIAEAEQR+Oxidation(5                                                              | 1.217469564        |                 |           |

|               |                                                                |                    |                 |           |
|---------------|----------------------------------------------------------------|--------------------|-----------------|-----------|
| <b>Q3V0K9</b> | <b>PLSI Plastin_1</b>                                          | <b>1.350645666</b> | <b>0.823915</b> | <b>3</b>  |
| Q3V0K9        | AYFHLLNQIAPK                                                   | 1.008911713        | 2               | 3.054777  |
| Q3V0K9        | KIENCNYAVELGK                                                  | 1.258443113        | 2               | 3.730831  |
| Q3V0K9        | QFVTPADVVSIGNPK                                                | 1.363082571        | 2               | 3.302485  |
| <b>Q3V132</b> | <b>ADT4 ADP/ATP translocase 4</b>                              | <b>1.416672136</b> | <b>0.712225</b> | <b>2</b>  |
| Q3V132        | GNLANVIR                                                       | 1.429242991        | 2               | 2.75501   |
| Q3V132        | YFPTQALNFAFK                                                   | 1.399504848        | 2               | 3.405254  |
| <b>Q3ZAV8</b> | <b>EDC4 Enhancer of mRNA_decapping protein 4</b>               | <b>1.293305471</b> | <b>0.267575</b> | <b>2</b>  |
| Q3ZAV8        | SSHSTWPVDVSQIK                                                 | 2.082275072        | 2               | 2.330533  |
| Q3ZAV8        | VISVSTERTLLK                                                   | 1.169734134        | 2               | 2.574868  |
| <b>Q497B0</b> | <b>NIT2 Omega_amidase NIT2</b>                                 | <b>1.178114882</b> | <b>9.9E-20</b>  | <b>15</b> |
| Q497B0        | ADLYSVESK                                                      | 1.288015643        | 2               | 3.060788  |
| Q497B0        | AGTEETILYSIDLK                                                 | 1.596729985        | 2               | 3.732111  |
| Q497B0        | ASYVAWGHSTVVPWQVLTG                                            | 1.176694204        | 3               | 5.856664  |
| Q497B0        | AVDNQVYVATASPAR                                                | 1.177958632        | 2               | 4.680212  |
| Q497B0        | AVDNQVYVATASPARDEK                                             | 1.179884485        | 2               | 3.586406  |
| Q497B0        | ENSIYLIGGSIPEEDDGK                                             | 1.279828199        | 2               | 3.460678  |
| Q497B0        | ENSIYLIGGSIPEEDDGKLYNTCAVFGPDGNLLVK                            | 1.175712366        | 3               | 4.96519   |
| Q497B0        | FAELAQIYAR                                                     | 1.519232165        | 2               | 3.925858  |
| Q497B0        | IHLFDIDVPGK                                                    | 1.391793123        | 3               | 3.4871    |
| Q497B0        | KIHLFDIDVPGK                                                   | 1.605963466        | 3               | 4.735209  |
| Q497B0        | LALIQLQVSSIK                                                   | 2.07733808         | 2               | 3.069322  |
| Q497B0        | LYNTCAVFGPDGNLLVK                                              | 1.345417255        | 2               | 4.122396  |
| Q497B0        | QGANIVSLPECFNSPYGTNYFPEYAEK                                    | 1.413213807        | 3               | 4.97485   |
| Q497B0        | TLSPGDSFSTFDTPYCR                                              | 1.482405879        | 2               | 4.775801  |
| Q497B0        | VGLGICYDMR                                                     | 1.611678387        | 2               | 2.861018  |
| <b>Q498D5</b> | <b>RMD2 Regulator of microtubule dynamics protein 2</b>        | <b>1.300427034</b> | <b>0.721379</b> | <b>4</b>  |
| Q498D5        | AYGDMYDLSTNTQEK                                                | 0.888146233        | 2               | 4.561281  |
| Q498D5        | FCNLALLLPIVTK                                                  | 1.883911634        | 2               | 3.229704  |
| Q498D5        | GQLQILEK                                                       | 1.281071219        | 1               | 2.059002  |
| Q498D5        | LNELLTNVEELKEEK                                                | 1.300382478        | 2               | 2.871537  |
| <b>Q498U4</b> | <b>SARNP SAP domain_containing ribonucleoprotein</b>           | <b>0.756035823</b> | <b>0.11777</b>  | <b>2</b>  |
| Q498U4        | EEEEPEKVVDMASEK                                                | 0.425716369        | 2               | 2.365702  |
| Q498U4        | FGIVTSSAGTGTTEDTEAK                                            | 1.304778514        | 2               | 3.342865  |
| <b>Q499N5</b> | <b>ACSF2 Acyl_CoA synthetase family member 2_mitochondrial</b> | <b>1.216918863</b> | <b>0.072208</b> | <b>7</b>  |
| Q499N5        | GATLSHHNIVNNSNLIGQR                                            | 1.76543428         | 2               | 5.329549  |
| Q499N5        | GGENIYPAELEDFHFK                                               | 1.140501295        | 2               | 2.976698  |
| Q499N5        | SGETTTEEEK                                                     | 1.229909228        | 2               | 3.160728  |
| Q499N5        | TFETVGQDR                                                      | 2.140909297        | 2               | 2.672361  |
| Q499N5        | TGDIASMDEQGFCR                                                 | 1.334691338        | 2               | 3.724995  |
| Q499N5        | TVGECLDATAQR                                                   | 3.510654552        | 2               | 2.909511  |
| Q499N5        | YIVFVEGYPLTVSGK                                                | 1.47818703         | 2               | 4.379837  |
| <b>Q4AEF8</b> | <b>COPG Coatomer subunit gamma</b>                             | <b>1.222570575</b> | <b>0.510987</b> | <b>6</b>  |
| Q4AEF8        | FGAQNEEMLPSILVLLK                                              | 1.43457921         | 2               | 3.501854  |
| Q4AEF8        | SLPYNQPGTCYTLVALPK                                             | 1.008019041        | 2               | 2.440931  |
| Q4AEF8        | SSPEPVALTESEYVIR                                               | 1.267114819        | 2               | 3.612556  |
| Q4AEF8        | TLEEAVGNIVK                                                    | 1.105487706        | 2               | 2.640277  |
| Q4AEF8        | VVLEHEEVR                                                      | 1.892230589        | 2               | 2.4354    |
| Q4AEF8        | VVVVQAISALCQK                                                  | 3.53956797         | 2               | 2.469675  |
| <b>Q4FZT0</b> | <b>STML2 Stomatin_like protein 2</b>                           | <b>1.600637348</b> | <b>0.000567</b> | <b>5</b>  |
| Q4FZT0        | AEQINQAAGEASAVLAK                                              | 1.159053909        | 2               | 4.704899  |
| Q4FZT0        | ASYGVEDPEYAVTQLAQTMMR                                          | 1.678504623        | 2               | 5.548516  |
| Q4FZT0        | ATVLESEGTR                                                     | 1.152884245        | 2               | 2.803684  |
| Q4FZT0        | DVQTTDTSIEELGR                                                 | 2.07180802         | 2               | 2.922502  |
| Q4FZT0        | IIEPGLNVLIPVLDR                                                | 1.307309715        | 2               | 3.019914  |

|               |                                                                                      |                    |                 |           |
|---------------|--------------------------------------------------------------------------------------|--------------------|-----------------|-----------|
| <b>Q4FZT9</b> | <b>PSMD2 26S proteasome non_ATPase regulatory subunit 2</b>                          | <b>1.091855638</b> | <b>0.5373</b>   | <b>8</b>  |
| Q4FZT9        | DKTPVQSQPSATAPSGADEK                                                                 | 1.06770761         | 3               | 4.8805    |
| Q4FZT9        | FGSGSQVDSAR                                                                          | 1.31978203         | 2               | 3.396187  |
| Q4FZT9        | SETELKDTYAR                                                                          | 1.344622931        | 2               | 3.040888  |
| Q4FZT9        | SGALLACGIVNSGVR                                                                      | 1.222074466        | 2               | 3.367528  |
| Q4FZT9        | SSTTSMTSVPKPLK                                                                       | 1.015659168        | 2               | 3.497869  |
| Q4FZT9        | TITGFQTHHTPVLLAHGER                                                                  | 0.83396701         | 3               | 3.925929  |
| Q4FZT9        | TPVQSQPSATAPSGADEK                                                                   | 0.980444623        | 2               | 4.879749  |
| Q4FZT9        | VGQAVDVVGGQAGKPK                                                                     | 1.215644207        | 2               | 3.462116  |
| <b>Q4FZX7</b> | <b>SRPRB Signal recognition particle receptor subunit beta</b>                       | <b>1.243280493</b> | <b>0.378621</b> | <b>4</b>  |
| Q4FZX7        | GDAGSADVQDLEK                                                                        | 2.861786077        | 2               | 3.469195  |
| Q4FZX7        | GNSLTLIDLPGHESLR                                                                     | 1.284181174        | 2               | 2.808884  |
| Q4FZX7        | SAAPSTLDSSTAPAQLGK                                                                   | 1.34532226         | 2               | 4.842886  |
| Q4FZX7        | VGDGAGGAFQPYLDSLRL                                                                   | 1.237819332        | 2               | 3.128299  |
| <b>Q4FZY0</b> | <b>EFHD2 EF_hand domain_containing protein D2</b>                                    | <b>1.305342232</b> | <b>0.552924</b> | <b>2</b>  |
| Q4FZY0        | KQAEVVK                                                                              | 1.02047862         | 1               | 1.944053  |
| Q4FZY0        | LSEIDVSTEGVK                                                                         | 2.388035322        | 2               | 2.598047  |
| <b>Q4G061</b> | <b>EIF3B Eukaryotic translation initiation factor 3 subunit B</b>                    | <b>1.154486264</b> | <b>0.810324</b> | <b>6</b>  |
| Q4G061        | AEEEGGSDGSAAEAEPK                                                                    | 0.764796595        | 2               | 4.959178  |
| Q4G061        | AKPAAQSEETAASPAASPTPQSAQEPSAPGK                                                      | 7.552335197        | 3               | 5.011341  |
| Q4G061        | DRPQEADGIDSVIVVDNVPQVGPDR                                                            | 2.518695145        | 3               | 3.561203  |
| Q4G061        | GTQGVVTFNFEIFR                                                                       | 1.198205296        | 2               | 3.00808   |
| Q4G061        | IINDYYPEEDGK                                                                         | 2.55678853         | 2               | 2.865315  |
| Q4G061        | TEDAEDAEARPEPEVR                                                                     | 0.728897929        | 3               | 3.619127  |
| <b>Q4G063</b> | <b>CREL2 Cysteine_rich with EGF_like domain protein 2</b>                            | <b>1.775885078</b> | <b>0.28255</b>  | <b>2</b>  |
| Q4G063        | ACCLPGTYGPDCK                                                                        | 1.654394799        | 2               | 3.03808   |
| Q4G063        | FNQGMANTAR                                                                           | 3.183407511        | 2               | 2.418098  |
| <b>Q4KLF8</b> | <b>ARPC5 Actin_related protein 2/3 complex subunit 5</b>                             | <b>1.115087126</b> | <b>0.782479</b> | <b>2</b>  |
| Q4KLF8        | ALAAGGVGSIVR                                                                         | 0.924388895        | 2               | 2.844649  |
| Q4KLF8        | QGNMTAALQAALK                                                                        | 1.437986531        | 2               | 2.348902  |
| <b>Q4KLP0</b> | <b>DHTK1 Probable 2_oxoglutarate dehydrogenase E1 component DHKTD1_mitochondrial</b> | <b>1.39154201</b>  | <b>1.85E-13</b> | <b>16</b> |
| Q4KLP0        | ARPSVDHGLAR                                                                          | 0.703413886        | 2               | 3.062382  |
| Q4KLP0        | HAMVVQCNTDDVYIPLNHMDPNQK                                                             | 1.330281445        | 3               | 5.713457  |
| Q4KLP0        | KSIPDTYAEHLIASGLMTQEEVSDIK                                                           | 1.528463903        | 3               | 4.68575   |
| Q4KLP0        | LEELCPFPLDSLQEMGK                                                                    | 1.016944598        | 3               | 5.421255  |
| Q4KLP0        | LLLESQEFDFHFLATK                                                                     | 1.733041844        | 2               | 3.956747  |
| Q4KLP0        | LSAYGGITDIIIGMPHR                                                                    | 1.91376521         | 3               | 4.444344  |
| Q4KLP0        | LVTVYCEHGK                                                                           | 1.156642468        | 2               | 2.367888  |
| Q4KLP0        | QQSQEDGDYSPNGSAQPGDK                                                                 | 2.17277684         | 2               | 2.630986  |
| Q4KLP0        | QWGHNELDEPFTNPVMYK                                                                   | 0.95307155         | 3               | 3.997117  |
| Q4KLP0        | SIPDTYAEHLIASGLMTQEEVSDIK                                                            | 1.325510064        | 3               | 5.021566  |
| Q4KLP0        | SSLYSSDIGK                                                                           | 0.930145349        | 2               | 2.837844  |
| Q4KLP0        | SVEVPEELQLHSHLLK                                                                     | 1.358390425        | 2               | 3.310037  |
| Q4KLP0        | WLLQSGLVILLPHGYDGAGPDHSSCR                                                           | 1.286710809        | 3               | 3.36754   |
| Q4KLP0        | WQGLVQPAACVTTWDTGVPLELLR                                                             | 1.52663346         | 2               | 4.956798  |
| Q4KLP0        | YGGEGAESMMGFFHELLK                                                                   | 1.380840454        | 2               | 4.436105  |
| Q4KLP0        | YPVAVSTLEEMAPGTAFKPVIQDSSVDPK                                                        | 1.408559533        | 3               | 4.569089  |
| <b>Q4KLZ6</b> | <b>AAPTPEAEPEATAAGGVASK</b>                                                          | <b>1.178140237</b> | <b>4.18E-07</b> | <b>16</b> |
| Q4KLZ6        | AAPTPEAEPEATAAGGVASK                                                                 | 1.872231851        | 2               | 4.915477  |
| Q4KLZ6        | AILEVLQTK                                                                            | 0.804608133        | 2               | 2.89094   |
| Q4KLZ6        | ANTDLPAWSAAMDAGLK                                                                    | 1.396283261        | 2               | 3.612692  |

|               |                                                               |                    |                 |          |
|---------------|---------------------------------------------------------------|--------------------|-----------------|----------|
| Q4KLZ6        | ASYISSAQLDQDPGAVAAAAIFR                                       | 1.175212969        | 2               | 4.962479 |
| Q4KLZ6        | AVAQAGTAGTLLIVK                                               | 1.373925855        | 2               | 4.362641 |
| Q4KLZ6        | EGPTPASPAQVLSK                                                | 1.134503163        | 2               | 3.385814 |
| Q4KLZ6        | GLCGTILHK                                                     | 1.4675571          | 2               | 2.401484 |
| Q4KLZ6        | GVSLTLMVDEPLLK                                                | 1.417744211        | 2               | 3.0735   |
| Q4KLZ6        | ISTTLIGLEEHLNALDR                                             | 2.876702702        | 2               | 3.609056 |
| Q4KLZ6        | LIDAETNAK                                                     | 2.244498929        | 2               | 2.372961 |
| Q4KLZ6        | LNFLAMEQAK                                                    | 0.960801403        | 2               | 2.404557 |
| Q4KLZ6        | LSVLLLEK                                                      | 1.603636816        | 2               | 2.605484 |
| Q4KLZ6        | MGGSSGALYGLFLTAAQPLK                                          | 1.76603122         | 2               | 3.563245 |
| Q4KLZ6        | MVNSVEGCAGDALAGFVACNPDLQLLQGYR                                | 1.27836967         | 3               | 5.908218 |
| Q4KLZ6        | VAGALAEEGMGLEEITK                                             | 1.625713655        | 2               | 4.535806 |
| Q4KLZ6        | VALLSGGSGHEPAHAGFIGK                                          | 1.894603643        | 2               | 5.352368 |
| <b>Q4KM49</b> | <b>SYYC Tyrosyl_tRNA synthetase_cytoplasmic</b>               | <b>1.31000023</b>  | <b>0.163505</b> | <b>5</b> |
| Q4KM49        | AFCEPGNVENNGVLSFVK                                            | 0.873201457        | 2               | 2.472954 |
| Q4KM49        | IDVGAEPR                                                      | 0.626205933        | 2               | 2.350825 |
| Q4KM49        | QVEPLDPPAGSAPGER                                              | 1.587481163        | 2               | 2.595564 |
| Q4KM49        | TVVSGLVQFVPK                                                  | 0.905458326        | 2               | 3.067024 |
| Q4KM49        | VDAQFGGIDQR                                                   | 0.429851941        | 2               | 3.128448 |
| <b>Q4KM73</b> | <b>KCY UMP_CMP kinase</b>                                     | <b>1.51919919</b>  | <b>9.99E-15</b> | <b>7</b> |
| Q4KM73        | EMDQTMAANAQK                                                  | 1.529107182        | 2               | 3.183456 |
| Q4KM73        | IQTYLESTKPIIDLIEEMGK                                          | 1.526547187        | 3               | 4.592179 |
| Q4KM73        | IVPVEITISLLK                                                  | 1.477194699        | 2               | 2.497502 |
| Q4KM73        | KNPDSQYGELIEK                                                 | 1.241756713        | 2               | 3.800174 |
| Q4KM73        | NQDNLQGWNK                                                    | 1.619038215        | 2               | 2.841768 |
| Q4KM73        | SVDEVFGDVMK                                                   | 1.384675814        | 2               | 3.45938  |
| Q4KM73        | YGYTHLSAGELLR                                                 | 0.999003429        | 3               | 4.279063 |
| <b>Q4KM74</b> | <b>SC22B Vesicle trafficking protein SEC22b</b>               | <b>1.220665283</b> | <b>1.53E-05</b> | <b>5</b> |
| Q4KM74        | DLQQYQSQAK                                                    | 1.593860602        | 2               | 3.552372 |
| Q4KM74        | GEALSALDSK                                                    | 1.541652168        | 2               | 2.851285 |
| Q4KM74        | IMVANIEEVLR                                                   | 1.244842016        | 2               | 2.789131 |
| Q4KM74        | NLGSINTELQDVQR                                                | 1.090228175        | 2               | 4.383837 |
| Q4KM74        | VADGLPLAASMQEDEQSGR                                           | 0.860899906        | 2               | 4.364812 |
| <b>Q4KMA2</b> | <b>RD23B UV excision repair protein RAD23 homolog B</b>       | <b>1.165644056</b> | <b>0.302655</b> | <b>3</b> |
| Q4KMA2        | IDIDPEETVK                                                    | 1.135522118        | 2               | 2.759573 |
| Q4KMA2        | NFVVMVTKPK                                                    | 1.052447993        | 2               | 2.97463  |
| Q4KMA2        | QIIQQNPSLLPALLQQIGR                                           | 1.347651006        | 2               | 4.24825  |
| <b>Q4QQW3</b> | <b>HOT Hydroxyacid_oxoacid transhydrogenase_mitochondrial</b> | <b>1.271233086</b> | <b>0.370904</b> | <b>6</b> |
| Q4QQW3        | AANLYACSPHSEFLDYVNAPIGK                                       | 1.395533738        | 3               | 3.569177 |
| Q4QQW3        | FLFDLNVDDGLAALGYSK                                            | 1.695689796        | 2               | 2.437374 |
| Q4QQW3        | HLETAEILGANIR                                                 | 1.285096572        | 2               | 3.458913 |
| Q4QQW3        | IQDAGPVLADALR                                                 | 0.619603045        | 2               | 2.9916   |
| Q4QQW3        | NLSQLPPVQIVMDSLSK                                             | 1.39006775         | 2               | 2.964382 |
| Q4QQW3        | TTDYAFEMAVSNIR                                                | 0.425056466        | 2               | 3.704363 |
| <b>Q4QRB4</b> | <b>TBB3 Tubulin beta_3 chain</b>                              | <b>1.465756916</b> | <b>1.66E-05</b> | <b>5</b> |
| Q4QRB4        | AILVDLEPGTMDSVR                                               | 1.683878537        | 2               | 4.562135 |
| Q4QRB4        | AILVDLEPGTMDSVR+Oxidation(10                                  | 1.905171439        |                 |          |
| Q4QRB4        | EIVHIQAGQCGNQIGAK                                             | 1.361507424        | 2               | 4.93126  |
| Q4QRB4        | IMNTFSVVPSPK                                                  | 1.827690767        | 2               | 4.101501 |
| Q4QRB4        | ISEQFTAMFR                                                    | 1.408706166        | 2               | 3.379239 |
| <b>Q4V7C7</b> | <b>ARP3 Actin_related protein 3</b>                           | <b>1.247945458</b> | <b>0.042336</b> | <b>6</b> |
| Q4V7C7        | GVDDLDFFIGDEAIEKPTYATK                                        | 1.621335482        | 2               | 4.387814 |
| Q4V7C7        | KDYEEIGPSICR                                                  | 1.198743098        | 2               | 3.663021 |
| Q4V7C7        | LGYAGNTEPQFIIPSCIAIK                                          | 1.413805243        | 2               | 3.347808 |
| Q4V7C7        | LSEELSGGR                                                     | 1.412747974        | 2               | 2.566124 |

|               |                                                                                          |                    |                 |           |
|---------------|------------------------------------------------------------------------------------------|--------------------|-----------------|-----------|
| Q4V7C7        | NIVLSGGSTMFR                                                                             | 0.982445499        | 2               | 3.093104  |
| Q4V7C7        | TLTGTVDSGDGVTHVIPVAEGYVIGSCIK                                                            | 1.227246791        | 3               | 5.242676  |
| <b>Q4V8K1</b> | <b>STEAP4 Metalloredutase STEAP4</b>                                                     | <b>1.308995667</b> | <b>0.003605</b> | <b>6</b>  |
| Q4V8K1        | MNQYPESNAEYLAQLVPGAHVVK                                                                  | 1.320339868        | 3               | 3.733385  |
| Q4V8K1        | QVFVCGNDSK                                                                               | 1.142202612        | 2               | 2.382655  |
| Q4V8K1        | SDVIVLAVHR                                                                               | 1.456071942        | 2               | 2.82238   |
| Q4V8K1        | TCADFFPLTVDSSEK                                                                          | 1.340845916        | 2               | 4.488022  |
| Q4V8K1        | TLGLTPLDQGSVAAK                                                                          | 1.395699084        | 2               | 3.811183  |
| Q4V8K1        | VLIDVSNQK                                                                                | 1.088382013        | 2               | 2.535116  |
| <b>Q501J6</b> | <b>DDX17 Probable ATP_dependent RNA helicase DDX17</b>                                   | <b>0.861403249</b> | <b>0.352503</b> | <b>2</b>  |
| Q501J6        | ELAQQVQVADDYGK                                                                           | 0.562297021        | 2               | 3.122041  |
| Q501J6        | VLEEQAINPK                                                                               | 0.865657549        | 2               | 2.623311  |
| <b>Q505J8</b> | <b>SYFA Phenylalanyl_tRNA synthetase alpha chain</b>                                     | <b>0.772427302</b> | <b>0.000199</b> | <b>4</b>  |
| Q505J8        | LQQVQAGQAEK                                                                              | 0.71400263         | 2               | 2.675399  |
| Q505J8        | RLEVADGGLDSAELATQLGVEHQAVVGAVK                                                           | 2.091606208        | 3               | 4.590388  |
| Q505J8        | SLQALGEVIEAELR                                                                           | 1.173552352        | 2               | 3.745198  |
| Q505J8        | VVDSIEDEVQR                                                                              | 1.819994155        | 2               | 2.935382  |
| <b>Q561R9</b> | <b>LACB2 Beta_lactamase_like protein 2</b>                                               | <b>1.210358539</b> | <b>0.17223</b>  | <b>4</b>  |
| Q561R9        | ANIIYPGHGPIVHNAEAK                                                                       | 0.966343168        | 2               | 4.093429  |
| Q561R9        | ILIDTGEPSVPEYISCLK                                                                       | 1.232625527        | 2               | 3.791219  |
| Q561R9        | NISNDATYCIK                                                                              | 1.461282628        | 2               | 2.951407  |
| Q561R9        | NNREEQIITVFR                                                                             | 0.694062148        | 2               | 2.691479  |
| <b>Q561S0</b> | <b>NDUAA NADH dehydrogenase [ubiquinone] 1 alpha subcomplex subunit 10_mitochondrial</b> | <b>1.153336044</b> | <b>0.026325</b> | <b>6</b>  |
| Q561S0        | LLQYSDALEHLLSTGGQGVVLER                                                                  | 1.995247796        | 3               | 3.763039  |
| Q561S0        | LTLPEYLPHAVIYIDVPVSEIQSR                                                                 | 1.571843654        | 3               | 4.185788  |
| Q561S0        | VITVDGNICSGK                                                                             | 0.9780776          | 2               | 2.458092  |
| Q561S0        | VVEDIEYLNYNK                                                                             | 0.932076738        | 2               | 3.900411  |
| Q561S0        | YAPGYNADVGDK                                                                             | 0.600402144        | 2               | 2.66096   |
| Q561S0        | YGLLASILGDK                                                                              | 2.030470162        | 2               | 3.149049  |
| <b>Q562C4</b> | <b>MET7B Methyltransferase_like protein 7B</b>                                           | <b>1.151166947</b> | <b>0.080379</b> | <b>5</b>  |
| Q562C4        | AQFSEVQLEWQPPPFK                                                                         | 1.542300119        | 2               | 4.516967  |
| Q562C4        | FIVAYGENMK                                                                               | 1.10195976         | 1               | 2.533913  |
| Q562C4        | HIGDGCHLTR                                                                               | 1.428465249        | 3               | 3.317531  |
| Q562C4        | VLQEVQR                                                                                  | 1.144485549        | 2               | 2.548768  |
| Q562C4        | VTCVDPNPNFEK                                                                             | 1.110609628        | 2               | 3.604127  |
| <b>Q562C9</b> | <b>MTND 1_2_dihydroxy_3_keto_5_methylthiopentene dioxygenase</b>                         | <b>1.21800902</b>  | <b>0.733397</b> | <b>3</b>  |
| Q562C9        | GDMITLPAGIYHR                                                                            | 1.20539181         | 2               | 2.319875  |
| Q562C9        | LDADKYENDPELEQIR                                                                         | 1.353170393        | 2               | 4.200839  |
| Q562C9        | MFFEEHLHLDEEIR                                                                           | 3.124360551        | 2               | 2.428597  |
| <b>Q58FK9</b> | <b>KAT3 Kynurenine__oxoglutarate transaminase 3</b>                                      | <b>1.095127575</b> | <b>0.522193</b> | <b>11</b> |
| Q58FK9        | AIILNTPHNPIGK                                                                            | 0.806503655        | 2               | 3.389632  |
| Q58FK9        | DSTLDAEEIFR                                                                              | 13.57289485        | 2               | 3.198891  |
| Q58FK9        | DSTLDAEEIFRTWNSR                                                                         | 1.448771423        | 2               | 2.361196  |
| Q58FK9        | IEGLDQNVWVEFTK                                                                           | 1.89928252         | 2               | 4.555703  |
| Q58FK9        | LAADPSVVNLGQGFDPITLPSYVQEELSK                                                            | 1.195300103        | 3               | 4.487945  |
| Q58FK9        | MAGAVPVFIPLR                                                                             | 1.613485966        | 2               | 2.496653  |
| Q58FK9        | MDDPECYFNLSLPK                                                                           | 0.950504128        | 2               | 4.185047  |
| Q58FK9        | RIEGLDQNVWVEFTK                                                                          | 1.331130131        | 2               | 3.72454   |
| Q58FK9        | RMDDPECYFNLSLPK                                                                          | 1.015617278        | 2               | 2.769822  |
| Q58FK9        | SDEPYDYK                                                                                 | 2.63672916         | 2               | 2.448512  |
| Q58FK9        | WTSSDWFNPNQELESK                                                                         | 0.956033096        | 2               | 5.062608  |
| <b>Q5BJQ0</b> | <b>ADCK3 Chaperone activity of bc1 complex_like_mitochondrial</b>                        | <b>1.258696544</b> | <b>3.97E-07</b> | <b>3</b>  |

|               |                                                                                         |                    |                 |           |
|---------------|-----------------------------------------------------------------------------------------|--------------------|-----------------|-----------|
| Q5BJQ0        | AVLDSSPFLSEANAER                                                                        | 1.101135448        | 2               | 4.613414  |
| Q5BJQ0        | KMGGSFLICSKLK+Oxidation(1                                                               | 1.684423872        |                 |           |
| Q5BJQ0        | TLNNDLGPHWR                                                                             | 1.679768993        | 2               | 2.561803  |
| <b>Q5BJY9</b> | <b>K1C18 Keratin_ type I cytoskeletal 18</b>                                            | <b>1.327087029</b> | <b>9.9E-20</b>  | <b>25</b> |
| Q5BJY9        | AQIFANSVDNAR                                                                            | 1.112325817        | 2               | 3.959989  |
| Q5BJY9        | AQYEQLAQK                                                                               | 1.196095236        | 2               | 3.47068   |
| Q5BJY9        | DAETTLLELR                                                                              | 1.499652206        | 2               | 2.941591  |
| Q5BJY9        | IREYLEK                                                                                 | 1.476709994        | 2               | 2.402464  |
| Q5BJY9        | KNHEEEVQGLEAQIASSGLTVEVDAPK                                                             | 2.16706324         | 3               | 4.90783   |
| Q5BJY9        | KVVDNITR                                                                                | 1.165689317        | 2               | 3.072279  |
| Q5BJY9        | LEAEIATYR                                                                               | 1.126613327        | 2               | 3.280515  |
| Q5BJY9        | LLEDGDDFSLNDALDSSNSMQTVQR                                                               | 1.173011273        | 3               | 5.545954  |
| Q5BJY9        | LQLETEIEALKEELFMK                                                                       | 2.587413634        | 2               | 5.044447  |
| Q5BJY9        | NHEEEVQGLEAQIASSGLTVEVDAPK                                                              | 1.350197859        | 2               | 6.304823  |
| Q5BJY9        | NQNINLENNLGEVEAR                                                                        | 1.704766195        | 2               | 5.564956  |
| Q5BJY9        | NREELDKYWSQQIEESTTVVTTK                                                                 | 1.172871741        | 3               | 5.18546   |
| Q5BJY9        | QSVESDIHGLR                                                                             | 1.339726256        | 2               | 2.85054   |
| Q5BJY9        | QSVESDIHGLRK                                                                            | 2.302588957        | 2               | 2.676454  |
| Q5BJY9        | QTQEYEALLNIK                                                                            | 1.497028116        | 2               | 3.522492  |
| Q5BJY9        | SVWGGSVGSAGLAGMGGVQTEK                                                                  | 1.365253188        | 2               | 5.895795  |
| Q5BJY9        | SVWGGSVGSAGLAGMGGVQTEKETMQDLNDR                                                         | 1.437323097        | 3               | 4.348719  |
| Q5BJY9        | TLQTLIDLDMSK                                                                            | 1.375842631        | 2               | 4.520379  |
| Q5BJY9        | VKLEAEIATYR                                                                             | 1.623361116        | 2               | 3.281035  |
| Q5BJY9        | VKYETELAMR                                                                              | 1.345404085        | 3               | 3.423982  |
| Q5BJY9        | VQMEQLNGVLLHLESELAQTR                                                                   | 1.817282165        | 2               | 5.271057  |
| Q5BJY9        | VRPASSAASVYAGAGGSGSR                                                                    | 0.598265105        | 2               | 5.070503  |
| Q5BJY9        | VVDNITR                                                                                 | 1.063722209        | 2               | 3.448374  |
| Q5BJY9        | YETELAMR                                                                                | 0.967232816        | 2               | 2.617405  |
| Q5BJY9        | YWSQQIEESTTVVTTK                                                                        | 1.182900024        | 2               | 3.896211  |
| <b>Q5BK63</b> | <b>NDUA9 NADH dehydrogenase [ubiquinone] 1 alpha subcomplex subunit 9_mitochondrial</b> | <b>1.947886376</b> | <b>4.87E-08</b> | <b>4</b>  |
| Q5BK63        | AVQHSNVVINLIGR                                                                          | 0.966779759        | 2               | 3.657626  |
| Q5BK63        | IHISDVMATDLPGLEDLGVPPTPLELK                                                             | 1.333902055        | 3               | 6.066943  |
| Q5BK63        | NDFEDVFNIPR                                                                             | 2.389068614        | 2               | 3.856344  |
| Q5BK63        | WLSSEIETPKAK                                                                            | 1.49814881         | 2               | 3.293032  |
| <b>Q5BK81</b> | <b>PTGR2 Prostaglandin reductase 2</b>                                                  | <b>1.080022214</b> | <b>0.570351</b> | <b>3</b>  |
| Q5BK81        | DVPYPPPLPPAVEAIIQK                                                                      | 10.6806585         | 2               | 2.661551  |
| Q5BK81        | TGNVAEQLR                                                                               | 2.216031608        | 2               | 2.933232  |
| Q5BK81        | VEEVSLPDTINEGQVR                                                                        | 0.944524103        | 2               | 4.074362  |
| <b>Q5BQE6</b> | <b>DHC24 Delta(24)_sterol reductase</b>                                                 | <b>1.295722913</b> | <b>0.877567</b> | <b>3</b>  |
| Q5BQE6        | LYEQHHVVQDMLVPMK                                                                        | 1.390150742        | 3               | 3.580483  |
| Q5BQE6        | QLGCQDAFPEVYDK                                                                          | 1.302252395        | 2               | 4.215884  |
| Q5BQE6        | YLFQWVMPK                                                                               | 1.151910805        | 2               | 2.695338  |
| <b>Q5DTN8</b> | <b>JKIP3 Janus kinase and microtubule_interacting protein 3</b>                         | <b>1.2906098</b>   | <b>0.680129</b> | <b>2</b>  |
| Q5DTN8        | MKELQAVREALLR                                                                           | 1.40637611         | 2               | 2.32857   |
| Q5DTN8        | TREQLQAEIQRAQTR                                                                         | 1.279204484        | 2               | 2.981337  |
| <b>Q5DU56</b> | <b>NLRC3 Protein NLRC3</b>                                                              | <b>1.136917683</b> | <b>0.404778</b> | <b>2</b>  |
| Q5DU56        | LTGLALGHLYR                                                                             | 1.366412082        | 2               | 2.365989  |
| Q5DU56        | TLEILDLR                                                                                | 1.043702643        | 2               | 2.505149  |
| <b>Q5EB77</b> | <b>RAB18 Ras_related protein Rab_18</b>                                                 | <b>1.133435637</b> | <b>0.000122</b> | <b>2</b>  |
| Q5EB77        | NDIVNMLVGNK                                                                             | 1.073332517        | 2               | 3.462287  |
| Q5EB77        | TCDGVQCAFEELVEK                                                                         | 1.408993458        | 2               | 3.865454  |
| <b>Q5FVM4</b> | <b>NONO Non_POU domain_containing octamer_binding protein</b>                           | <b>1.644120423</b> | <b>0.001812</b> | <b>2</b>  |
| Q5FVM4        | MEELHNQEVQK                                                                             | 1.644661608        | 2               | 3.907037  |
| Q5FVM4        | RMEELHNQEVQK                                                                            | 1.549618792        | 3               | 4.288568  |

|               |                                                                                |                    |                 |          |
|---------------|--------------------------------------------------------------------------------|--------------------|-----------------|----------|
| <b>Q5FVQ4</b> | <b>MLEC Malectin</b>                                                           | <b>1.328559629</b> | <b>0.575975</b> | <b>3</b> |
| Q5FVQ4        | KEEEEEEEYDEGSNLKR                                                              | 1.331088673        | 3               | 5.588675 |
| Q5FVQ4        | LSVQGEVSTFTGK                                                                  | 1.257938926        | 2               | 3.367083 |
| Q5FVQ4        | STPEDQILYQTER                                                                  | 1.179906647        | 2               | 4.691784 |
| <b>Q5FVR2</b> | <b>TYPH Thymidine phosphorylase</b>                                            | <b>1.342078006</b> | <b>0.714534</b> | <b>5</b> |
| Q5FVR2        | AQDTQIGAMLMAIR+Oxidation(10                                                    | 1.513481379        |                 |          |
| Q5FVR2        | AQDTQIGAMLMAIR+Oxidation(8                                                     | 0.896533471        |                 |          |
| Q5FVR2        | FGGAAVFPDQEK                                                                   | 0.969798           | 2               | 2.594561 |
| Q5FVR2        | KQEELSPADGIVECVR                                                               | 1.295119821        | 2               | 4.071118 |
| Q5FVR2        | VSLVLAPALAACGCK                                                                | 1.370802413        | 2               | 3.055124 |
| <b>Q5FVR5</b> | <b>ACNT2 Acyl_coenzyme A amino acid N_acyltransferase 2</b>                    | <b>1.446293151</b> | <b>0.22284</b>  | <b>3</b> |
| Q5FVR5        | DEKENLFQSK                                                                     | 0.989790385        | 2               | 2.463252 |
| Q5FVR5        | ILFIVGENDQCLASK                                                                | 1.430304772        | 2               | 3.736695 |
| Q5FVR5        | IQQPGIGVISVSK                                                                  | 1.451790735        | 2               | 3.356598 |
| <b>Q5FW57</b> | <b>GLYAL Glycine N_acyltransferase_like protein</b>                            | <b>1.291135502</b> | <b>0.791881</b> | <b>3</b> |
| Q5FW57        | AIDQEMFK                                                                       | 1.285423883        | 2               | 2.713635 |
| Q5FW57        | SSQMLQMLESSLR                                                                  | 1.380631617        | 2               | 4.101768 |
| Q5FW57        | VYGTVFHMNQGNPFK                                                                | 1.087922637        | 2               | 3.735129 |
| <b>Q5I0C3</b> | <b>MCCA Methylcrotonoyl_CoA carboxylase subunit alpha_mitochondrial</b>        | <b>1.308934692</b> | <b>0.38702</b>  | <b>8</b> |
| Q5I0C3        | AGDALMVMIAMK                                                                   | 0.916243768        | 1               | 1.958551 |
| Q5I0C3        | HAPLVEFEEEEV                                                                   | 1.320899359        | 2               | 2.964818 |
| Q5I0C3        | IIEEAPAGIDPEVR                                                                 | 0.997231541        | 2               | 3.863775 |
| Q5I0C3        | IYAEDPDNNFMPGAGPLVHLSTPPDMSTR                                                  | 1.608438545        | 3               | 4.658177 |
| Q5I0C3        | QEGIIFIGPPSTAIR                                                                | 0.90112841         | 2               | 2.497921 |
| Q5I0C3        | SEKEFQEQLSAR                                                                   | 1.05559609         | 2               | 3.470319 |
| Q5I0C3        | VFFSEGAQANR                                                                    | 1.37724473         | 2               | 2.444635 |
| Q5I0C3        | YLSVSAEGTQGGTIAPMTGTIEK                                                        | 1.406308826        | 2               | 5.141131 |
| <b>Q5I0D1</b> | <b>GLOD4 Glyoxalase domain_containing protein 4</b>                            | <b>1.111651748</b> | <b>0.041216</b> | <b>3</b> |
| Q5I0D1        | ESQSILTPLVSLDTPGK                                                              | 2.013999152        | 2               | 3.70615  |
| Q5I0D1        | HEEFEEGCK                                                                      | 1.236305655        | 2               | 2.878057 |
| Q5I0D1        | VTLAVSDLQK                                                                     | 1.201727173        | 2               | 2.494292 |
| <b>Q5I0D5</b> | <b>LHPP Phospholysine phosphohistidine inorganic pyrophosphate phosphatase</b> | <b>1.291293604</b> | <b>0.004396</b> | <b>2</b> |
| Q5I0D5        | FRPGDEHHPEVR                                                                   | 1.348776935        | 3               | 3.658023 |
| Q5I0D5        | LGFDISEGEVTAPAPATCQILK                                                         | 1.173154209        | 2               | 4.363254 |
| <b>Q5I0D7</b> | <b>PEPD Xaa_Pro dipeptidase</b>                                                | <b>1.706815074</b> | <b>0.06573</b>  | <b>2</b> |
| Q5I0D7        | GVNTDSGNVCR                                                                    | 1.605320331        | 2               | 3.166402 |
| Q5I0D7        | YAVDDVQYADEIASVLTSR                                                            | 1.993077582        | 2               | 2.73932  |
| <b>Q5I0E7</b> | <b>TMED9 Transmembrane emp24 domain_containing protein 9</b>                   | <b>1.224591335</b> | <b>0.297938</b> | <b>2</b> |
| Q5I0E7        | QLVEQVEQIQK                                                                    | 1.149476059        | 2               | 3.5686   |
| Q5I0E7        | QREEYQPATPGLGMFVEVKDPEDK                                                       | 1.502025008        | 3               | 3.394444 |
| <b>Q5I0H9</b> | <b>PDIAS Protein disulfide_isomerase A5</b>                                    | <b>1.363165733</b> | <b>0.012914</b> | <b>9</b> |
| Q5I0H9        | DKNQDLCQESVK                                                                   | 1.804152387        | 2               | 4.280535 |
| Q5I0H9        | FIEWMQNPEAPPPPEPTWEEQQTSLHLVGDNFR                                              | 1.698071273        | 3               | 4.122601 |
| Q5I0H9        | GHTVLAGMNVYPPEFENIKEEYNVR                                                      | 1.699242655        | 3               | 3.649138 |
| Q5I0H9        | GPPLWEEDPGAK                                                                   | 1.283620006        | 2               | 3.375934 |
| Q5I0H9        | GQGTICWVDCGDAESR                                                               | 1.080708378        | 2               | 4.104399 |
| Q5I0H9        | NGEQQAVPALR                                                                    | 1.290818997        | 2               | 2.555932 |
| Q5I0H9        | NPQPPQPVPETPWADEGGSVYHLTDEDFDQFVK                                              | 2.772656819        | 3               | 4.125755 |
| Q5I0H9        | NQDLCQESVK                                                                     | 2.210924526        | 2               | 3.425429 |
| Q5I0H9        | TELGFTSFIR                                                                     | 1.152135895        | 2               | 2.447618 |
| <b>Q5I0J9</b> | <b>ASPD Putative L_aspartate dehydrogenase</b>                                 | <b>1.290543357</b> | <b>0.00014</b>  | <b>7</b> |
| Q5I0J9        | HANLLVGSALADQTTTER                                                             | 1.160148485        | 2               | 5.784337 |
| Q5I0J9        | LDAAGGLQSLR                                                                    | 0.95278987         | 2               | 3.992821 |



|               |                                                                         |                    |                 |           |
|---------------|-------------------------------------------------------------------------|--------------------|-----------------|-----------|
| Q5I0J9        | LEGPLAAAHSSGPR                                                          | 1.166351532        | 2               | 3.75329   |
| Q5I0J9        | LGQSLVSR                                                                | 1.510083104        | 2               | 2.310632  |
| Q5I0J9        | MAGSVPPALQLEDLTTLEER                                                    | 2.024065029        | 2               | 3.388189  |
| Q5I0J9        | NSNTMAAAAALAPSLGFDR                                                     | 1.300497051        | 2               | 4.635964  |
| Q5I0J9        | TVLYEGPVR                                                               | 1.221585238        | 2               | 2.624068  |
| <b>Q5I0M2</b> | <b>NADC Nicotinate_nucleotide pyrophosphorylase [carboxylating]</b>     | <b>1.558320451</b> | <b>5.88E-08</b> | <b>6</b>  |
| Q5I0M2        | CSGIASAAATAVEVATSTGWAGHVAGTR                                            | 2.107626769        | 3               | 3.379321  |
| Q5I0M2        | DNHVVAAGSMEK                                                            | 1.58243531         | 2               | 2.655863  |
| Q5I0M2        | EALQAAEAGADLVMLDNFKPEELHPTAATLK                                         | 1.813753713        | 3               | 4.801347  |
| Q5I0M2        | LYAEGDIPVPHAR                                                           | 1.470201208        | 2               | 3.554389  |
| Q5I0M2        | VEVECSSLK                                                               | 1.605110265        | 2               | 2.507241  |
| Q5I0M2        | YDLGGLVMVK                                                              | 1.869786883        | 2               | 2.524256  |
| <b>Q5M7T9</b> | <b>THNS2 Threonine synthase_like 2</b>                                  | <b>1.703888537</b> | <b>5.55E-15</b> | <b>2</b>  |
| Q5M7T9        | FPEAVQAAGLTPETPAEILALEHK                                                | 1.705504585        | 3               | 5.589877  |
| Q5M7T9        | LSEAVTSESVSDEAITQTMGR                                                   | 1.450582792        | 2               | 4.480843  |
| <b>Q5M7U6</b> | <b>ARP2 Actin_related protein 2</b>                                     | <b>1.254355475</b> | <b>0.663965</b> | <b>5</b>  |
| Q5M7U6        | GYAFNHSADFETVR                                                          | 1.131155649        | 2               | 4.001706  |
| Q5M7U6        | HLWDYTFGPEK                                                             | 1.137770307        | 2               | 3.196839  |
| Q5M7U6        | ILLTEPPMNPTK                                                            | 1.009105937        | 2               | 2.851513  |
| Q5M7U6        | SMLEVNYPMENGIVR                                                         | 1.415298823        | 2               | 4.094187  |
| Q5M7U6        | VVVCNNGTGFVK                                                            | 1.294329738        | 2               | 2.709429  |
| <b>Q5M7W5</b> | <b>MAP4 Microtubule_associated protein 4</b>                            | <b>1.367018408</b> | <b>0.83808</b>  | <b>10</b> |
| Q5M7W5        | AAVGLTGNDIATPPNK                                                        | 2.36708405         | 2               | 3.480933  |
| Q5M7W5        | ATSPSTLVSTGSSSR                                                         | 1.465134829        | 2               | 3.868305  |
| Q5M7W5        | EAETALPIEMDLAPPEDVALPK                                                  | 1.250443579        | 2               | 3.080683  |
| Q5M7W5        | ESEGSPTDAAPGPDTDVTLTK                                                   | 0.68043427         | 2               | 4.185924  |
| Q5M7W5        | ETSGSQPPELCSGVSR                                                        | 1.7623205          | 2               | 3.347014  |
| Q5M7W5        | NTAPPTEETVPGK                                                           | 1.519829813        | 2               | 2.581572  |
| Q5M7W5        | NTTPTGATPPAGMASTR                                                       | 1.486704541        | 2               | 3.567999  |
| Q5M7W5        | STLPVDEGSPLEK                                                           | 1.311620167        | 2               | 2.476973  |
| Q5M7W5        | VGSLDNVGHLPAGGTVK                                                       | 1.055015033        | 2               | 3.713764  |
| Q5M7W5        | VTEFNNTPLSEEEVASIK                                                      | 1.135105446        | 2               | 3.144942  |
| <b>Q5M875</b> | <b>DHB13 17_beta_hydroxysteroid dehydrogenase 13</b>                    | <b>1.400388564</b> | <b>0.13843</b>  | <b>7</b>  |
| Q5M875        | ALTAELDTLTK                                                             | 1.170437256        | 2               | 3.078044  |
| Q5M875        | IQNIQFEAIVGHR                                                           | 1.461201067        | 3               | 4.241198  |
| Q5M875        | LWPVLEPDEVAR                                                            | 1.189643836        | 2               | 2.494882  |
| Q5M875        | NSGHIVTVASVCGHR                                                         | 2.013671962        | 2               | 4.501653  |
| Q5M875        | SLIDGILTNIK                                                             | 1.527080423        | 2               | 3.311132  |
| Q5M875        | SVAGQTVLITGAGHGIGR                                                      | 1.260499667        | 2               | 4.096278  |
| Q5M875        | TSCLCPVFVNTGFTK                                                         | 1.165988315        | 2               | 3.948629  |
| <b>Q5M9G3</b> | <b>CAPR1 Caprin_1</b>                                                   | <b>1.005225531</b> | <b>0.296376</b> | <b>2</b>  |
| Q5M9G3        | LNQDQLDAVSK                                                             | 1.490941448        | 2               | 3.179749  |
| Q5M9G3        | YQEVNTNLEFAK                                                            | 0.992148593        | 2               | 3.037392  |
| <b>Q5M9I5</b> | <b>QCR6 Cytochrome b_c1 complex subunit 6_mitochondrial</b>             | <b>1.804765278</b> | <b>0.001892</b> | <b>2</b>  |
| Q5M9I5        | EEEEELVDPLTTVR                                                          | 1.690528689        | 2               | 4.23759   |
| Q5M9I5        | SQTEEDCTEELDFLHAR                                                       | 2.646223875        | 2               | 4.831091  |
| <b>Q5PPL3</b> | <b>NSDHL Sterol_4_alpha_carboxylate 3_dehydrogenase_decarboxylating</b> | <b>1.490732276</b> | <b>0.000441</b> | <b>10</b> |
| Q5PPL3        | CTVIGSGFLGQHMVQLLSR                                                     | 0.857921922        | 2               | 4.996286  |
| Q5PPL3        | DPQLVPVLIDAAAR                                                          | 1.830792217        | 2               | 2.42473   |
| Q5PPL3        | GQVTGTDLINEVSK                                                          | 1.359612578        | 2               | 4.078396  |
| Q5PPL3        | GVSTVFHCASPPSNSNNK                                                      | 1.204810058        | 2               | 4.306683  |
| Q5PPL3        | GYAVNVFDVR                                                              | 1.924473281        | 2               | 3.567833  |
| Q5PPL3        | ILTGLNYEAPK                                                             | 1.579334771        | 2               | 3.587623  |

|               |                                                                                 |                    |                 |           |
|---------------|---------------------------------------------------------------------------------|--------------------|-----------------|-----------|
| Q5PPL3        | KGQVTGTDLINEVSK                                                                 | 1.988522615        | 2               | 4.41052   |
| Q5PPL3        | NGTEDLPYAMKPIDYYTETK                                                            | 1.5204246          | 2               | 3.936774  |
| Q5PPL3        | NLVDFTFVENVVHGHILAAEHLR                                                         | 1.541253396        | 3               | 3.520414  |
| Q5PPL3        | VQFFIGDLCNQDLYPALK                                                              | 1.282740843        | 2               | 5.410961  |
| <b>Q5PQT3</b> | <b>GLYAT Glycine N_acyltransferase</b>                                          | <b>1.161813432</b> | <b>0.187321</b> | <b>7</b>  |
| Q5PQT3        | AINQEMFK                                                                        | 1.436731576        | 1               | 1.952903  |
| Q5PQT3        | AIQNLASIHSLQVK                                                                  | 1.015258986        | 2               | 4.045582  |
| Q5PQT3        | DPENCQEFLGSSEVINWK                                                              | 2.054142212        | 2               | 5.291511  |
| Q5PQT3        | KLFPSLLDTK                                                                      | 0.891339716        | 2               | 2.714327  |
| Q5PQT3        | LSSLDVTHAALVNK                                                                  | 1.369794886        | 2               | 3.616019  |
| Q5PQT3        | MGGTVPQYR                                                                       | 1.565858418        | 2               | 2.561755  |
| Q5PQT3        | QHLQIQSSQSHLNK                                                                  | 1.736268229        | 2               | 3.393383  |
| <b>Q5PQX1</b> | <b>TOIP1 Torsin_1A interacting protein 1</b>                                    | <b>1.058440691</b> | <b>0.849598</b> | <b>2</b>  |
| Q5PQX1        | LEQHSQQAQQQLSPATSGR                                                             | 1.353469946        | 3               | 4.665357  |
| Q5PQX1        | SDFGNQSPSTR                                                                     | 1.052571692        | 2               | 2.627681  |
| <b>Q5RJR2</b> | <b>TWF1 Twinfilin_1</b>                                                         | <b>1.316058057</b> | <b>0.013574</b> | <b>2</b>  |
| Q5RJR2        | HQTLQGVAFPIR                                                                    | 1.175910526        | 2               | 3.020106  |
| Q5RJR2        | YLLSQSSPAPLTAEEELR                                                              | 1.316060269        | 2               | 4.322939  |
| <b>Q5RJR8</b> | <b>LRC59 Leucine_rich repeat_containing protein 59</b>                          | <b>1.055666417</b> | <b>0.410958</b> | <b>5</b>  |
| Q5RJR8        | ATVLDLSCNK                                                                      | 1.053817299        | 2               | 2.81952   |
| Q5RJR8        | DKLDGNELDLSLDLNEVPVK                                                            | 1.618115109        | 2               | 6.211306  |
| Q5RJR8        | LDGNELDLSLDLNEVPVK                                                              | 1.386318737        | 2               | 4.056415  |
| Q5RJR8        | LQQLPADFGR                                                                      | 1.594693296        | 1               | 1.92139   |
| Q5RJR8        | WLDLKDNPDPVLAK                                                                  | 1.247862897        | 2               | 2.671821  |
| <b>Q5RKI0</b> | <b>WDR1 WD repeat_containing protein 1</b>                                      | <b>1.619688047</b> | <b>4.4E-07</b>  | <b>3</b>  |
| Q5RKI0        | AHDGGIYAISWSPDSTHLLSASGDK                                                       | 1.860882446        | 3               | 4.753004  |
| Q5RKI0        | CFSIDNPGYEPEVVAVHPGGDTVAVGGSDGNVR                                               | 1.232824324        | 3               | 4.765683  |
| Q5RKI0        | YAPSGFYIASGDISGK                                                                | 1.57919081         | 2               | 4.534091  |
| <b>Q5RKI1</b> | <b>IF4A2 Eukaryotic initiation factor 4A_II</b>                                 | <b>1.625884681</b> | <b>1.83E-13</b> | <b>5</b>  |
| Q5RKI1        | ELAQQIQK                                                                        | 1.527838276        | 1               | 2.28296   |
| Q5RKI1        | GIDVQQVSLVINYLPTNR                                                              | 2.214159999        | 2               | 3.619074  |
| Q5RKI1        | GYDVIAQAQSGTGK                                                                  | 1.28025789         | 2               | 5.137969  |
| Q5RKI1        | MFVLDEADEMSLR                                                                   | 2.23077203         | 2               | 4.492397  |
| Q5RKI1        | VLITTDLLAR                                                                      | 1.535002177        | 2               | 3.068539  |
| <b>Q5S6T3</b> | <b>ISPD 2_C_methyl_D_erythritol 4_phosphate cytidyltransferase_like protein</b> | <b>1.080997788</b> | <b>0.574399</b> | <b>2</b>  |
| Q5S6T3        | ISLAEAGATR                                                                      | 4.501355444        | 2               | 2.341984  |
| Q5S6T3        | MENLVWIRELAK                                                                    | 1.028842691        | 2               | 2.348057  |
| <b>Q5SGE0</b> | <b>LPPRC Leucine_rich PPR motif_containing protein_mitochondrial</b>            | <b>1.252629717</b> | <b>2.94E-10</b> | <b>15</b> |
| Q5SGE0        | AALDLEQVPSELAVTR                                                                | 0.6996564          | 2               | 4.107992  |
| Q5SGE0        | CIANNQVETLEK                                                                    | 1.291994817        | 2               | 3.012738  |
| Q5SGE0        | GLDAIELSR                                                                       | 0.743652745        | 2               | 2.521475  |
| Q5SGE0        | HCVTMDTPAEK                                                                     | 1.520929452        | 2               | 2.968091  |
| Q5SGE0        | HDNAEDALNLK                                                                     | 1.824205084        | 2               | 3.644531  |
| Q5SGE0        | LIDYCK                                                                          | 2.374588135        | 1               | 1.93197   |
| Q5SGE0        | MEGANIQPNR                                                                      | 1.352138529        | 2               | 2.97081   |
| Q5SGE0        | SCGSLLPELSLAER                                                                  | 1.475756309        | 2               | 2.77297   |
| Q5SGE0        | SGSPGSNQALLLR                                                                   | 1.672342233        | 2               | 2.884081  |
| Q5SGE0        | SGSQFDWALMR                                                                     | 1.515879273        | 2               | 2.394822  |
| Q5SGE0        | SSLSSSSPSAGDVTVEK                                                               | 2.510708681        | 2               | 3.885435  |
| Q5SGE0        | SYVADKDVASAK                                                                    | 1.367109537        | 2               | 3.164685  |
| Q5SGE0        | TLLELIPELR                                                                      | 1.441540406        | 2               | 3.100693  |
| Q5SGE0        | TSQFTSSDLESTLEK                                                                 | 1.544174648        | 2               | 4.18987   |
| Q5SGE0        | VIEEQMEPALEK                                                                    | 1.38026497         | 2               | 3.111521  |
| <b>Q5SW19</b> | <b>K0664 Protein KIAA0664</b>                                                   | <b>1.389006116</b> | <b>0.221598</b> | <b>3</b>  |
| Q5SW19        | GLEMDPIDCTPPEVILPGSR                                                            | 1.004457657        | 2               | 3.384758  |

|               |                           |                    |          |           |
|---------------|---------------------------|--------------------|----------|-----------|
| Q5SW19        | IGIGELITR                 | 1.703757846        | 2        | 2.400033  |
| Q5SW19        | SVEGLQEGSVLR              | 1.400108502        | 2        | 2.737927  |
| <b>Q5SX40</b> | <b>MYH1 Myosin_1</b>      | <b>1.682157062</b> | <b>1</b> | <b>86</b> |
| Q5SX40        | AAYLQNLNSADLLK            | 1.346412282        | 2        | 3.44502   |
| Q5SX40        | ADIAESQVNK                | 2.959708003        | 2        | 3.704841  |
| Q5SX40        | AEDEEEINAELTAK            | 5.487019972        | 2        | 4.21949   |
| Q5SX40        | AGLLGLLEEMR               | 4.45708039         | 2        | 4.265569  |
| Q5SX40        | AGLLGLLEEMRDDK            | 2.262447134        | 2        | 3.385749  |
| Q5SX40        | ALQEAHQQTLDLQAEEDK        | 4.528766914        | 3        | 4.511956  |
| Q5SX40        | ALQEAHQQTLDLQAEEDKVNTLTK  | 0.444375318        | 3        | 6.778407  |
| Q5SX40        | ANLLQAEIEELR              | 5.022936209        | 2        | 3.717834  |
| Q5SX40        | ANSEVAQWR                 | 1.241203648        | 2        | 2.875629  |
| Q5SX40        | DDKLAQLITR                | 2.952572064        | 2        | 2.352811  |
| Q5SX40        | DLEEATLQHEATAATLR         | 2.140634801        | 2        | 5.085145  |
| Q5SX40        | DTQLHLDDALR               | 0.7521422          | 2        | 2.845197  |
| Q5SX40        | EEQAEPDGTEVADK            | 0.776967909        | 2        | 3.389882  |
| Q5SX40        | EFEMSNLQSK                | 3.166259537        | 1        | 2.63379   |
| Q5SX40        | ELEGEVENEQK               | 0.662157159        | 2        | 2.881448  |
| Q5SX40        | ELEGEVENEQKR              | 2.70145141         | 2        | 3.028635  |
| Q5SX40        | ELTYQTEEDRK               | 1.645001771        | 2        | 3.127402  |
| Q5SX40        | EMANMKEEFEK               | 2.750105975        | 2        | 2.823982  |
| Q5SX40        | ENQSILITGESGAGK           | 6.347289101        | 2        | 4.108367  |
| Q5SX40        | EQYEEEQEAK                | 2.5216553          | 1        | 3.213044  |
| Q5SX40        | GQEDLKEQLAMVER            | 1.893321107        | 2        | 4.419429  |
| Q5SX40        | GSSFQTVSALFR              | 0.82084765         | 2        | 3.067356  |
| Q5SX40        | HADSVaelGEQIDNLQR         | 3.439204368        | 2        | 6.017416  |
| Q5SX40        | IAEQELLDASER              | 2.770951311        | 2        | 3.233256  |
| Q5SX40        | IEAQNKPFDAK               | 0.993198015        | 2        | 3.037445  |
| Q5SX40        | IEDEQALGMQLQK             | 5.454679777        | 2        | 4.605048  |
| Q5SX40        | IEDEQALGMQLQK+Oxidation(8 | 4.058174026        |          |           |
| Q5SX40        | IEDMAMMTHLHEPAVLYNLK      | 2.047843282        | 3        | 4.302855  |
| Q5SX40        | IEEEEEEIEAER              | 2.77386642         | 2        | 4.345762  |
| Q5SX40        | IKLEQQVDDLEGSLEQEK        | 2.562264197        | 2        | 5.116448  |
| Q5SX40        | IKLEQQVDDLEGSLEQEKK       | 1.256005111        | 3        | 4.101195  |
| Q5SX40        | IQHELEEAER                | 2.195389801        | 2        | 3.693294  |
| Q5SX40        | IQHELEEAERADIAESQVNK      | 2.38001533         | 3        | 3.880238  |
| Q5SX40        | IQLELNQVK                 | 1.814339637        | 2        | 2.704928  |
| Q5SX40        | KIAEQELLDASER             | 2.226737544        | 2        | 3.828229  |
| Q5SX40        | KIQHELEEAER               | 2.28815399         | 3        | 4.115162  |
| Q5SX40        | KKEFEMSNLQSK              | 2.497534806        | 2        | 3.862054  |
| Q5SX40        | KKLETDISQIQGEMEDIVQEAR    | 2.063931141        | 3        | 6.08285   |
| Q5SX40        | KLEDECSELK                | 1.719861537        | 2        | 2.918715  |
| Q5SX40        | KLEDECSELKK               | 0.886386439        | 2        | 4.027037  |
| Q5SX40        | KLETDISQIQGEMEDIVQEAR     | 2.670558012        | 2        | 5.647849  |
| Q5SX40        | KMEGDLNEMEIQLNHSNR        | 1.679031687        | 3        | 4.613261  |
| Q5SX40        | LAQESTMDVENDKQQLDEK       | 2.995964167        | 2        | 4.863285  |
| Q5SX40        | LDEAEQLALK                | 3.263276505        | 2        | 3.235038  |
| Q5SX40        | LEDECSELKK                | 2.693548667        | 2        | 3.32472   |
| Q5SX40        | LEEAGGATSAQIEMNK          | 2.524733667        | 2        | 5.153748  |
| Q5SX40        | LEQQVDDLEGSLEQEK          | 0.873713229        | 2        | 5.465362  |
| Q5SX40        | LEQQVDDLEGSLEQEKK         | 1.406581304        | 2        | 4.163102  |
| Q5SX40        | LETDISQIQGEMEDIVQEAR      | 0.693351073        | 2        | 5.190956  |
| Q5SX40        | LINELTAQR                 | 11.50769656        | 2        | 3.147175  |
| Q5SX40        | LQDAEEHVEAVNAK            | 2.279605828        | 2        | 4.815016  |
| Q5SX40        | LQDLVDK                   | 0.38687325         | 2        | 2.446842  |
| Q5SX40        | LQDLVDKQSK                | 2.062245681        | 2        | 2.553188  |
| Q5SX40        | LQNEVEDLMIDVER            | 3.220665195        | 2        | 4.46346   |

|               |                                                                                    |                    |                 |          |
|---------------|------------------------------------------------------------------------------------|--------------------|-----------------|----------|
| Q5SX40        | LQTESGEYSR                                                                         | 1.379791619        | 2               | 2.519906 |
| Q5SX40        | LTGAVMHYGNMK                                                                       | 1.573822981        | 2               | 2.676922 |
| Q5SX40        | MEGDLNEMEIQLNHSNR                                                                  | 1.505056359        | 2               | 4.733225 |
| Q5SX40        | MEGDLNEMEIQLNHSNRMAAEALR+Oxidation(0)Oxidation(17                                  | 1.369088536        |                 |          |
| Q5SX40        | MEIDDLASNMEVISK                                                                    | 0.456640339        | 2               | 4.957572 |
| Q5SX40        | MQGTLEDQIISANPLLEAFGNAK                                                            | 3.090767526        | 3               | 6.376588 |
| Q5SX40        | MQGTLEDQIISANPLLEAFGNAK+Oxidation(0                                                | 2.317101801        |                 |          |
| Q5SX40        | NDLQLQVQSEADSLADAEER                                                               | 13.52240409        | 2               | 6.306685 |
| Q5SX40        | NKDPLNETVVGLYQK                                                                    | 2.975684322        | 2               | 4.691516 |
| Q5SX40        | NLQQEISDLTEQIAEGGK                                                                 | 3.003001839        | 2               | 6.028763 |
| Q5SX40        | NLQQEISDLTEQIAEGGKR                                                                | 1.906640403        | 2               | 4.273369 |
| Q5SX40        | NLTEEMAGLDETIK                                                                     | 2.750986211        | 2               | 4.788482 |
| Q5SX40        | QAEAEQSNVNLAK                                                                      | 6.789264469        | 2               | 4.411219 |
| Q5SX40        | QKYEETHAELEASQK                                                                    | 1.74857052         | 2               | 3.911906 |
| Q5SX40        | QLDEKDSLVSQLSR                                                                     | 1.651137971        | 2               | 3.190784 |
| Q5SX40        | QLEEEIK                                                                            | 1.452879988        | 1               | 2.203425 |
| Q5SX40        | QREEQAEPDGTVEADK                                                                   | 3.463348193        | 2               | 4.124691 |
| Q5SX40        | RDLEEATLQHEATAATLR                                                                 | 1.499858601        | 3               | 3.629238 |
| Q5SX40        | SAETEKEMANMKEEFEK                                                                  | 0.573533167        | 3               | 4.015881 |
| Q5SX40        | SELQAALAEAEASLEHEEGK                                                               | 0.71969135         | 2               | 5.749967 |
| Q5SX40        | SSVFVVDK                                                                           | 2.722855354        | 2               | 2.527957 |
| Q5SX40        | TKYETDAIQR                                                                         | 1.746831387        | 3               | 3.452014 |
| Q5SX40        | TLEDQVSELK                                                                         | 4.33054779         | 2               | 2.949191 |
| Q5SX40        | TNAACAALDK                                                                         | 1.673083454        | 1               | 1.98446  |
| Q5SX40        | TNAACAALDKK                                                                        | 0.349618499        | 2               | 2.980511 |
| Q5SX40        | VLNASAIPEGQFIDSK                                                                   | 2.780279952        | 2               | 4.297973 |
| Q5SX40        | VQLLHTQNTSLINTK                                                                    | 1.863736383        | 2               | 4.710315 |
| Q5SX40        | VRELEGEVENEQK                                                                      | 0.562540648        | 2               | 3.856357 |
| Q5SX40        | VRELEGEVENEQKR                                                                     | 1.893410277        | 3               | 4.14079  |
| Q5SX40        | VVESMQSTLDAEIR                                                                     | 1.024666138        | 2               | 3.741544 |
| Q5SX40        | YEETHAELEASQK                                                                      | 2.225157036        | 2               | 4.738616 |
| Q5SX40        | YETDAIQR                                                                           | 2.657076783        | 2               | 2.620345 |
| <b>Q5U206</b> | <b>CALL3 Calmodulin_like protein 3</b>                                             | <b>1.36131707</b>  | <b>0.384846</b> | <b>5</b> |
| Q5U206        | DTDSEEEIR                                                                          | 1.326789198        | 2               | 2.832051 |
| Q5U206        | KMKDTDSEEEIR                                                                       | 1.413790792        | 3               | 3.410882 |
| Q5U206        | KMKDTDSEEEIR+Oxidation(1                                                           | 1.881262062        |                 |          |
| Q5U206        | MKDTDSEEEIR                                                                        | 1.18334788         | 3               | 4.327105 |
| Q5U206        | MKDTDSEEEIR+Oxidation(0                                                            | 1.171323681        |                 |          |
| <b>Q5U2Q7</b> | <b>ERF1 Eukaryotic peptide chain release factor subunit 1</b>                      | <b>1.46605492</b>  | <b>1.48E-08</b> | <b>4</b> |
| Q5U2Q7        | GFGGIGGILR                                                                         | 1.505528068        | 2               | 2.758224 |
| Q5U2Q7        | LSVLGAITSVQQR                                                                      | 1.679394233        | 2               | 2.939879 |
| Q5U2Q7        | YFDEISQDTGK                                                                        | 2.365610628        | 2               | 2.534869 |
| Q5U2Q7        | YVLHCQGTETEEK                                                                      | 1.452044887        | 2               | 3.683923 |
| <b>Q5U2S3</b> | <b>ZUFSP Zinc finger with UFM1_specific peptidase domain protein</b>               | <b>1.369662613</b> | <b>0.002215</b> | <b>2</b> |
| Q5U2S3        | QYGLDNSGGYKQQQLR                                                                   | 1.367109625        | 2               | 2.677021 |
| Q5U2S3        | TLCLLIFDPGCPSPREMQLLK+Oxidation(15                                                 | 5.219267025        |                 |          |
| <b>Q5U2U0</b> | <b>CLPX ATP_dependent Clp protease ATP_binding subunit clpX_like_mitochondrial</b> | <b>0.846211941</b> | <b>0.242751</b> | <b>5</b> |
| Q5U2U0        | LLEGTIVNVPEK                                                                       | 1.872522954        | 2               | 2.624495 |
| Q5U2U0        | QQAEEVK                                                                            | 1.02047862         | 1               | 1.917793 |
| Q5U2U0        | SGESNTHQDIEEK                                                                      | 1.525608401        | 2               | 3.600021 |
| Q5U2U0        | SGESNTHQDIEEKDR                                                                    | 0.831136432        | 3               | 4.32588  |
| Q5U2U0        | SNILLGPTGSGK                                                                       | 1.395717562        | 2               | 2.37762  |
| <b>Q5U2V4</b> | <b>PLBL1 Phospholipase B_like 1</b>                                                | <b>1.698093948</b> | <b>0.060074</b> | <b>2</b> |

|               |                                                         |                    |                 |           |
|---------------|---------------------------------------------------------|--------------------|-----------------|-----------|
| Q5U2V4        | IWEMGHCSALIK+Oxidation(3                                | 14.43555928        |                 |           |
| Q5U2V4        | LGLDYSYDLAPR                                            | 1.397158857        | 2               | 2.51104   |
| <b>Q5U2Z7</b> | <b>RHG24 Rho GTPase_activating protein 24</b>           | <b>1.302646379</b> | <b>0.36591</b>  | <b>2</b>  |
| Q5U2Z7        | EEEAGVKELTKQVK                                          | 1.312432178        | 2               | 2.387398  |
| Q5U2Z7        | FTMIEIKMRNAER+Oxidation(7                               | 1.279289312        |                 |           |
| <b>Q5U300</b> | <b>UBA1 Ubiquitin_like modifier_activating enzyme 1</b> | <b>1.291910569</b> | <b>7.07E-05</b> | <b>14</b> |
| Q5U300        | AAVASLLQSVQPEFTPK                                       | 1.29579718         | 3               | 3.671613  |
| Q5U300        | AENYDISPADR                                             | 0.971623883        | 2               | 3.191067  |
| Q5U300        | DNPGVVTCLEEAR                                           | 1.357288585        | 2               | 3.399971  |
| Q5U300        | FEVQGLQPNGEEMTLK                                        | 1.540835879        | 2               | 4.019649  |
| Q5U300        | IHVSDQELQSANASVDDSR                                     | 1.999774994        | 3               | 3.487239  |
| Q5U300        | IYDDDFQNLQDGVANALDNVDAR                                 | 1.380510383        | 2               | 4.711717  |
| Q5U300        | LDQPMTEIVSR                                             | 1.126582998        | 2               | 3.394889  |
| Q5U300        | LKSDTAAAAVR                                             | 1.435322268        | 2               | 2.822456  |
| Q5U300        | NEEDATELVTLAQAVNAR                                      | 1.744202624        | 3               | 4.687948  |
| Q5U300        | NFPNAIEHTLQWAR                                          | 1.268251356        | 2               | 3.407256  |
| Q5U300        | SLPASLAEPDFVMTDFAK                                      | 1.165985625        | 2               | 4.057586  |
| Q5U300        | SPPAVQQDNVDEDLIR                                        | 1.147649251        | 2               | 4.76979   |
| Q5U300        | SPPAVQQDNVDEDLIRK                                       | 1.438382024        | 3               | 3.322069  |
| Q5U300        | VVQGHQQLDSYK                                            | 1.462055339        | 2               | 3.426212  |
| <b>Q5U4E6</b> | <b>GOGA4 Golgin subfamily A member 4</b>                | <b>1.196045095</b> | <b>0.193324</b> | <b>3</b>  |
| Q5U4E6        | EFNTQLAQK                                               | 1.19460047         | 2               | 2.349419  |
| Q5U4E6        | EQAQQILTEKENVILQMR+Oxidation(16                         | 1.992643889        |                 |           |
| Q5U4E6        | VQCAKDTESQLSELR                                         | 5.501797198        | 2               | 2.310873  |
| <b>Q5XFW8</b> | <b>SEC13 Protein SEC13 homolog</b>                      | <b>0.906366328</b> | <b>0.926136</b> | <b>4</b>  |
| Q5XFW8        | DVAWAPSIGLPTSTIASCSQDGR                                 | 0.89722706         | 2               | 3.45853   |
| Q5XFW8        | EEEDGQWKKEQK                                            | 1.023419112        | 2               | 2.757006  |
| Q5XFW8        | LEAHSWVR                                                | 1.125016821        | 2               | 2.368684  |
| Q5XFW8        | NGGQILIALDR                                             | 1.274145497        | 2               | 2.481695  |
| <b>Q5XFX0</b> | <b>TAGL2 Transgelin_2</b>                               | <b>1.072511218</b> | <b>3.92E-05</b> | <b>6</b>  |
| Q5XFX0        | DDGLFSGDPNWFPK                                          | 3.908129087        | 2               | 3.66492   |
| Q5XFX0        | NFSDNQLQEGK                                             | 0.898680315        | 2               | 3.157585  |
| Q5XFX0        | NVIGLQMGTR                                              | 0.767969207        | 2               | 3.026118  |
| Q5XFX0        | QMEQISQFLQAAER                                          | 1.196237419        | 2               | 2.803067  |
| Q5XFX0        | TLMNLGGLAVAR                                            | 1.534308233        | 2               | 3.358201  |
| Q5XFX0        | YGINTTDFQTVDLWEGK                                       | 1.729776532        | 2               | 4.739267  |
| <b>Q5XHYS</b> | <b>SYTC Threonyl_tRNA synthetase_cytoplasmic</b>        | <b>1.415891072</b> | <b>2.38E-09</b> | <b>11</b> |
| Q5XHYS        | AEHDSILA EK                                             | 1.58893844         | 2               | 2.838853  |
| Q5XHYS        | FLGDIEIWNQAEK                                           | 1.488921424        | 2               | 3.762261  |
| Q5XHYS        | FMVDIDLDPGCTLNK                                         | 1.240854508        | 2               | 3.756401  |
| Q5XHYS        | GFQEVVTPNIFNSR                                          | 2.723282272        | 2               | 3.90931   |
| Q5XHYS        | LKAEHDSILA EK                                           | 0.836930056        | 2               | 3.346968  |
| Q5XHYS        | NELSGALTGLTR                                            | 1.125393906        | 2               | 3.20448   |
| Q5XHYS        | QLENSLNEFGEK                                            | 1.002556066        | 2               | 3.156332  |
| Q5XHYS        | QVMVVPVGPTCDEYA QK                                      | 1.593319955        | 2               | 3.668219  |
| Q5XHYS        | TTPYQIACGISQGLADNTVVAK                                  | 1.385225187        | 2               | 4.151703  |
| Q5XHYS        | VVWDLDRPLETDCTLELLK                                     | 3.002198476        | 2               | 3.881314  |
| Q5XHYS        | WELNPGDGAFYGP K                                         | 1.636427292        | 2               | 3.963933  |
| <b>Q5XHZ0</b> | <b>TRAP1 Heat shock protein 75 kDa_mitochondrial</b>    | <b>1.542284156</b> | <b>1.2E-08</b>  | <b>14</b> |
| Q5XHZ0        | AFLEALQHQAE TSSR                                        | 1.33264362         | 2               | 4.684554  |
| Q5XHZ0        | AQLLQPTLEINPR                                           | 1.235951377        | 2               | 3.723259  |
| Q5XHZ0        | EGIVTTAEQDIKEDIA K                                      | 0.808144667        | 2               | 2.326745  |
| Q5XHZ0        | ELISNASDALEK                                            | 0.287161115        | 2               | 2.706632  |
| Q5XHZ0        | FEDTSPAGER                                              | 2.023619192        | 2               | 2.496381  |
| Q5XHZ0        | GTITIQDTGIGMTK                                          | 1.333257536        | 2               | 3.56485   |
| Q5XHZ0        | GVVDESDIPLNLSR                                          | 1.356115972        | 2               | 4.806192  |

|               |                                                                        |                    |                 |           |
|---------------|------------------------------------------------------------------------|--------------------|-----------------|-----------|
| Q5XH20        | HLAEHSPYYEAMK                                                          | 1.856326403        | 2               | 3.726214  |
| Q5XH20        | LDTHPAMVTVLEMGAAR                                                      | 1.269740231        | 3               | 4.056579  |
| Q5XH20        | NIYYLCAPNR                                                             | 1.066575124        | 2               | 2.414728  |
| Q5XH20        | SDCKDFANESR                                                            | 1.5791712          | 2               | 2.701574  |
| Q5XH20        | VCEGQVLPMEIHLQTDAEK                                                    | 1.598774305        | 3               | 3.64968   |
| Q5XH20        | YESSALPAGQLTSLSDYASR                                                   | 2.087433547        | 2               | 5.63993   |
| Q5XH20        | YIAQAYDKPR                                                             | 1.755306023        | 2               | 2.661063  |
| <b>Q5XI22</b> | <b>THIC Acetyl_CoA acetyltransferase_ cytosolic</b>                    | <b>2.244130102</b> | <b>0.005778</b> | <b>9</b>  |
| Q5XI22        | AGHFDKEIVPVHVSSR                                                       | 2.471234883        | 2               | 4.993508  |
| Q5XI22        | ELGLSPEK                                                               | 2.414883255        | 1               | 1.950416  |
| Q5XI22        | HGSNLEAMSK                                                             | 1.619634832        | 2               | 2.683468  |
| Q5XI22        | LKPYFLTDGTGTVPANASGMNDGAAAVVLMK                                        | 2.165849766        | 3               | 5.219206  |
| Q5XI22        | MGEVPLADSLCDGLTDAFHNYHMGITAENVAK                                       | 1.863724481        | 3               | 4.073259  |
| Q5XI22        | MLKPLAQVVSWSQAGVEPSVMGVGPIPAIK                                         | 2.191675168        | 3               | 4.536588  |
| Q5XI22        | TAIGSFNGALSTVPVHNLGTTVIK                                               | 2.850051021        | 2               | 5.422345  |
| Q5XI22        | VAPEEVSEVIFGHVLTAGCGQNPTR                                              | 1.741305889        | 2               | 5.185032  |
| Q5XI22        | VNIDGGAIALGHPLGASGCR                                                   | 1.693836721        | 2               | 5.443277  |
| <b>Q5XI29</b> | <b>CPSF7 Cleavage and polyadenylation specificity factor subunit 7</b> | <b>1.081445039</b> | <b>0.507712</b> | <b>2</b>  |
| Q5XI29        | QNLQFEAQR                                                              | 1.352966019        | 2               | 2.416333  |
| Q5XI29        | SIGVYDVVELK                                                            | 1.081434832        | 2               | 2.367136  |
| <b>Q5XI32</b> | <b>CAPZB F_actin_capping protein subunit beta</b>                      | <b>1.190870106</b> | <b>0.000422</b> | <b>8</b>  |
| Q5XI32        | GCWDSIHVVEVQEK                                                         | 1.156789777        | 2               | 3.742956  |
| Q5XI32        | KLEVEANNAFDQYR                                                         | 1.447177341        | 2               | 4.138146  |
| Q5XI32        | LEVEANNAFDQYR                                                          | 0.895760093        | 2               | 3.759038  |
| Q5XI32        | LVEDMENK                                                               | 1.690644633        | 2               | 2.668736  |
| Q5XI32        | NDLVEALK                                                               | 1.248876182        | 2               | 2.404436  |
| Q5XI32        | SGSGTMNLGGSLTR                                                         | 1.621497769        | 2               | 3.303425  |
| Q5XI32        | STLNEIYFGK                                                             | 1.10633424         | 1               | 2.057582  |
| Q5XI32        | YDPPLDGA MPSAR                                                         | 0.986272848        | 2               | 3.583294  |
| <b>Q5XI60</b> | <b>REEP6 Receptor expression_enhancing protein 6</b>                   | <b>1.393095393</b> | <b>0.968666</b> | <b>3</b>  |
| Q5XI60        | ALDIAAGITR                                                             | 1.209046391        | 2               | 3.267238  |
| Q5XI60        | HHVALDSAASQLSGR                                                        | 1.340020182        | 2               | 4.600824  |
| Q5XI60        | NVATDALGALEAR                                                          | 1.489955954        | 2               | 3.983206  |
| <b>Q5XI73</b> | <b>GDIR1 Rho GDP_dissociation inhibitor 1</b>                          | <b>1.370985925</b> | <b>0.610823</b> | <b>6</b>  |
| Q5XI73        | AEEYFLTPMEEAPK                                                         | 1.662536436        | 2               | 4.40899   |
| Q5XI73        | IDKTDYMGVSYGPR                                                         | 1.443437171        | 2               | 3.989285  |
| Q5XI73        | SIQEIQLDKDDESLR                                                        | 0.622287921        | 2               | 5.289581  |
| Q5XI73        | SIQEIQLDKDDESLRK                                                       | 1.013472089        | 2               | 4.653828  |
| Q5XI73        | TDYMGVSYGPR                                                            | 1.425977299        | 2               | 2.414232  |
| Q5XI73        | VAVSADPNVNPVIVTR                                                       | 0.814001217        | 2               | 3.97865   |
| <b>Q5XI78</b> | <b>ODO1 2_oxoglutarate dehydrogenase_ mitochondrial</b>                | <b>0.836859061</b> | <b>0.014853</b> | <b>18</b> |
| Q5XI78        | FGLEGCEVLIPALK                                                         | 1.419465864        | 2               | 3.587001  |
| Q5XI78        | FLDTAFDLDAFK                                                           | 2.054391448        | 2               | 2.660427  |
| Q5XI78        | FLDTAFDLDAFKK                                                          | 1.644976861        | 2               | 2.93743   |
| Q5XI78        | GHHVAQLDPLGILDADLDSSVPADIISSTDK                                        | 1.330702553        | 3               | 5.910299  |
| Q5XI78        | ICEEAFTR                                                               | 1.489800069        | 2               | 2.340133  |
| Q5XI78        | IEQLSPFPDLLLLK                                                         | 1.033250458        | 2               | 3.325492  |
| Q5XI78        | LEAADEGS GDMK                                                          | 0.939277294        | 2               | 3.516473  |
| Q5XI78        | LNVLANVIR                                                              | 17.04169287        | 2               | 2.321543  |
| Q5XI78        | LVEDHLAVQSLIR                                                          | 1.649364972        | 2               | 2.901086  |
| Q5XI78        | NITLSLVANPSHLEAADPVVMGK                                                | 1.301558995        | 2               | 5.550704  |
| Q5XI78        | NQGYDYVKPR                                                             | 1.245623396        | 2               | 2.378892  |
| Q5XI78        | NTNAGAPPGTAYQSPLSLR                                                    | 0.081739768        | 2               | 2.853565  |
| Q5XI78        | SSLATMAHAQSLVEAQP NVDK                                                 | 0.834179462        | 3               | 4.405403  |
| Q5XI78        | TSFDEMLPGTHFQR                                                         | 1.28144421         | 2               | 2.308486  |

|               |                                                                                   |                    |                 |           |
|---------------|-----------------------------------------------------------------------------------|--------------------|-----------------|-----------|
| Q5XI78        | VIPEDGPAAQNPK                                                                     | 1.521042484        | 2               | 2.944821  |
| Q5XI78        | VVNAPIFHVNSDDPEAVMYVCK                                                            | 1.714373082        | 3               | 4.246809  |
| Q5XI78        | YAELLSVQGVVNQPEYEEIISK                                                            | 2.047498999        | 2               | 4.070637  |
| Q5XI78        | YAELLSVQGVVNQPEYEEIISKYDK                                                         | 3.475808796        | 3               | 3.932368  |
| <b>Q5XI95</b> | <b>ADH6 Alcohol dehydrogenase 6</b>                                               | <b>1.344123126</b> | <b>0.018432</b> | <b>6</b>  |
| Q5XI95        | ATVLWKPGAPLAIIEIEVAPPK                                                            | 1.466282233        | 2               | 3.941933  |
| Q5XI95        | FNIDPLITHLTLSEANEAVQLMK                                                           | 1.622827212        | 3               | 4.985782  |
| Q5XI95        | IIAVDINK                                                                          | 1.344001722        | 2               | 2.737931  |
| Q5XI95        | MVATGVCGTDIK                                                                      | 1.170245387        | 2               | 3.021445  |
| Q5XI95        | NNICTEIR                                                                          | 1.637827241        | 2               | 2.47322   |
| Q5XI95        | TVGATDCVDPR                                                                       | 2.6909777          | 2               | 2.827778  |
| <b>Q5XIC0</b> | <b>ECI2 Enoyl_CoA delta isomerase 2_ mitochondrial</b>                            | <b>1.23595656</b>  | <b>0.195329</b> | <b>6</b>  |
| Q5XIC0        | AAEMLLFGK                                                                         | 2.155472951        | 2               | 2.45247   |
| Q5XIC0        | ATQQDFENAMNQVK                                                                    | 1.084421194        | 2               | 4.272891  |
| Q5XIC0        | GILVTSEGGITK                                                                      | 1.217745925        | 2               | 3.450741  |
| Q5XIC0        | LHAVNEEECTTLR                                                                     | 1.235957928        | 2               | 3.851182  |
| Q5XIC0        | QNYVDLVSSLSSSEASSQGK                                                              | 0.792568562        | 2               | 5.408242  |
| Q5XIC0        | WDAWNALGSLPK                                                                      | 1.105766584        | 2               | 3.691369  |
| <b>Q5XIC1</b> | <b>GMPPA Mannose_1_phosphate guanyltransferase alpha</b>                          | <b>1.114209432</b> | <b>0.418803</b> | <b>2</b>  |
| Q5XIC1        | VAPSAVLGPNVSIGK                                                                   | 0.695117519        | 2               | 2.628219  |
| Q5XIC1        | VEGTPNDPNPNDPR                                                                    | 2.600550663        | 2               | 3.189665  |
| <b>Q5XIE6</b> | <b>HIBCH 3_hydroxyisobutyryl_CoA hydrolase_ mitochondrial</b>                     | <b>1.358191707</b> | <b>0.028678</b> | <b>7</b>  |
| Q5XIE6        | AGIATHFVDSEK                                                                      | 1.165193668        | 2               | 3.112767  |
| Q5XIE6        | AVLIDKDQTPK                                                                       | 1.409982053        | 2               | 2.836672  |
| Q5XIE6        | GCAGVITLNRPK                                                                      | 0.865919805        | 2               | 2.91632   |
| Q5XIE6        | HTETAEVLLER                                                                       | 1.947192071        | 2               | 2.878844  |
| Q5XIE6        | INSCFSANTVEQILENLR                                                                | 1.675194684        | 2               | 3.161813  |
| Q5XIE6        | LHVLEEELLALK                                                                      | 2.56354498         | 3               | 4.101669  |
| Q5XIE6        | WKPADLKDVTDEDLNSYFK                                                               | 2.03830453         | 2               | 2.315773  |
| <b>Q5XIF3</b> | <b>NDUS4 NADH dehydrogenase [ubiquinone] iron_sulfur protein 4_ mitochondrial</b> | <b>1.247755536</b> | <b>0.868794</b> | <b>3</b>  |
| Q5XIF3        | DTQLITVDEK                                                                        | 0.910843483        | 2               | 2.484307  |
| Q5XIF3        | HGWSYDVEGR                                                                        | 1.250764602        | 2               | 2.884388  |
| Q5XIF3        | LDVTPLTGVPEEHK                                                                    | 1.20664954         | 3               | 3.661286  |
| <b>Q5XIF6</b> | <b>TBA4A Tubulin alpha_4A chain</b>                                               | <b>1.333662165</b> | <b>9.22E-12</b> | <b>5</b>  |
| Q5XIF6        | AVFVDLEPTVIDEIR                                                                   | 1.211785324        | 2               | 3.844597  |
| Q5XIF6        | AYHEQLSVAEITNACFEPANQMVK                                                          | 1.334157375        | 2               | 5.220331  |
| Q5XIF6        | DVNAIAIAIK                                                                        | 2.006480493        | 2               | 3.108192  |
| Q5XIF6        | SIQFVDWCPTGFK                                                                     | 1.093238333        | 2               | 4.138381  |
| Q5XIF6        | TIGGGDDSFSTFFCETGAGK                                                              | 1.764991624        | 2               | 2.78316   |
| <b>Q5XIG4</b> | <b>OCAD1 OCIA domain_containing protein 1</b>                                     | <b>1.198067725</b> | <b>0.587159</b> | <b>2</b>  |
| Q5XIG4        | SVPLAATSMMLITQGLISK                                                               | 1.72902682         | 2               | 4.398521  |
| Q5XIG4        | YDSNVSGQSSFGTSPAADNIEK                                                            | 1.186668941        | 2               | 5.665212  |
| <b>Q5XIH7</b> | <b>PHB2 Prohibitin_2</b>                                                          | <b>1.130181677</b> | <b>1.06E-07</b> | <b>10</b> |
| Q5XIH7        | DLQMVNISLR                                                                        | 4.71785153         | 2               | 2.730489  |
| Q5XIH7        | FNASQLITQR                                                                        | 0.886104862        | 2               | 3.781612  |
| Q5XIH7        | IGGVQQDTILAEGLHFR                                                                 | 1.449995638        | 3               | 4.924634  |
| Q5XIH7        | IPWFQYPIIYDIR                                                                     | 2.331284998        | 2               | 2.470196  |
| Q5XIH7        | IVQAEGEAEAAK                                                                      | 1.074954169        | 2               | 4.057411  |
| Q5XIH7        | IYLTADNLVNLQDESFTFR                                                               | 1.942192361        | 2               | 4.042464  |
| Q5XIH7        | LGLDYEER                                                                          | 0.962468469        | 2               | 2.467785  |
| Q5XIH7        | LLGAGAVAYGVR                                                                      | 3.328856386        | 2               | 3.784027  |
| Q5XIH7        | VLPSIVNEVLK                                                                       | 1.514243369        | 1               | 2.297766  |
| Q5XIH7        | VLSRPNAQELPSMYQR                                                                  | 1.816673617        | 2               | 4.761806  |
| <b>Q5XIM9</b> | <b>TCPB T_complex protein 1 subunit beta</b>                                      | <b>2.340130569</b> | <b>9.9E-20</b>  | <b>12</b> |

|               |                                                                          |                    |                 |           |
|---------------|--------------------------------------------------------------------------|--------------------|-----------------|-----------|
| Q5XIM9        | DASLMVTNDGATILK                                                          | 5.668111812        | 2               | 2.991523  |
| Q5XIM9        | EALLSSAVDHGSDEVK                                                         | 2.067277136        | 2               | 4.253445  |
| Q5XIM9        | FWQDLMNIAGTTLSSK                                                         | 1.64184021         | 2               | 3.477302  |
| Q5XIM9        | GATQQILDEAER                                                             | 1.516757891        | 2               | 3.873988  |
| Q5XIM9        | GSGNLEAIHVIK                                                             | 1.219000949        | 2               | 2.569248  |
| Q5XIM9        | HGINCFINR                                                                | 0.658322356        | 2               | 2.651577  |
| Q5XIM9        | LIEEVMIGEDK                                                              | 1.144240272        | 2               | 3.155605  |
| Q5XIM9        | MLPTIIADNAGYDSADLVAQLR                                                   | 1.258891186        | 3               | 3.31328   |
| Q5XIM9        | NIGVDNPAAK                                                               | 1.236129549        | 1               | 1.953843  |
| Q5XIM9        | SLHDALCVLAQTVK                                                           | 2.075837235        | 2               | 3.899406  |
| Q5XIM9        | VAEIEHAEKEK                                                              | 1.400257636        | 2               | 2.794805  |
| Q5XIM9        | VQDDEVGDGTTSVTLAAELLR                                                    | 2.376671151        | 2               | 4.352936  |
| <b>Q5XIN6</b> | <b>LETM1 LETM1 and EF_hand domain_containing protein 1_mitochondrial</b> | <b>1.267780735</b> | <b>0.009774</b> | <b>10</b> |
| Q5XIN6        | AAEVEGEQVDNK                                                             | 1.285956901        | 2               | 3.877725  |
| Q5XIN6        | AMYLPTLSPADQLK                                                           | 1.104622869        | 2               | 2.466151  |
| Q5XIN6        | DIQPEVAEATVPGRPGAELQPK                                                   | 0.749269734        | 2               | 4.544624  |
| Q5XIN6        | FLQDTIEEMALK                                                             | 1.684388624        | 2               | 3.036834  |
| Q5XIN6        | KLEEGGPVYSPAQVVVK                                                        | 1.430819779        | 2               | 3.729424  |
| Q5XIN6        | LDPAAASSPTGESVISVDELISAMK                                                | 1.257890415        | 2               | 5.304123  |
| Q5XIN6        | LEEGGPVYSPAQVVVK                                                         | 0.812107417        | 2               | 3.392336  |
| Q5XIN6        | LFEDLTLNLRPQLVALCK                                                       | 2.06906534         | 3               | 3.982033  |
| Q5XIN6        | LLELQSIGTNNFLR                                                           | 1.294281214        | 2               | 3.466008  |
| Q5XIN6        | STLQTLPEIVAK                                                             | 1.098192436        | 2               | 2.576723  |
| <b>Q5XIT9</b> | <b>MCCB Methylcrotonyl_CoA carboxylase beta chain_mitochondrial</b>      | <b>1.236569876</b> | <b>0.578609</b> | <b>9</b>  |
| Q5XIT9        | AATGEEVSAEDLGGADLHCR                                                     | 1.20572569         | 2               | 5.224376  |
| Q5XIT9        | ALVNQLHER                                                                | 1.22701832         | 2               | 2.684438  |
| Q5XIT9        | ALYGDTLVTGFAR                                                            | 1.005423593        | 2               | 3.512196  |
| Q5XIT9        | AQEIALQNR                                                                | 1.238431425        | 2               | 2.570481  |
| Q5XIT9        | LGTQPDSGSSTYQENYEQMK                                                     | 1.298665223        | 2               | 5.251388  |
| Q5XIT9        | LWDDGIIDPVDTR                                                            | 1.20604512         | 2               | 3.53647   |
| Q5XIT9        | LYGEEVPAGGIITGIGR                                                        | 5.031394103        | 2               | 4.765272  |
| Q5XIT9        | RFEEEGNPYYSSAR                                                           | 2.114998043        | 2               | 4.254006  |
| Q5XIT9        | VSGVECMIVANDATVK                                                         | 1.439629916        | 2               | 3.39354   |
| <b>Q5XIU5</b> | <b>PSMF1 Proteasome inhibitor PI31 subunit</b>                           | <b>0.74800704</b>  | <b>0.1477</b>   | <b>2</b>  |
| Q5XIU5        | ALIDPSSGLPNR                                                             | 0.766233568        | 2               | 2.7933    |
| Q5XIU5        | SGIITPIHEQWEK                                                            | 0.660177194        | 2               | 3.036075  |
| <b>Q5XIU9</b> | <b>PGRC2 Membrane_associated progesterone receptor component 2</b>       | <b>1.002358402</b> | <b>0.080893</b> | <b>3</b>  |
| Q5XIU9        | GLATFCLDK                                                                | 1.354434456        | 2               | 2.80292   |
| Q5XIU9        | GLCSGPGAGEESPAATLPR                                                      | 0.994941065        | 2               | 4.839227  |
| Q5XIU9        | VFDVTK                                                                   | 1.323258746        | 1               | 1.987391  |
| <b>Q60587</b> | <b>ECHB Trifunctional enzyme subunit beta_mitochondrial</b>              | <b>1.307683989</b> | <b>0.002606</b> | <b>9</b>  |
| Q60587        | ALAMGYKPK                                                                | 0.512411007        | 2               | 2.405054  |
| Q60587        | AMDSDFWFAQNYMGR                                                          | 1.959673093        | 2               | 3.158256  |
| Q60587        | AQDEGHLSDIVPFK                                                           | 0.81914138         | 2               | 2.486638  |
| Q60587        | DFIYVSQDPK                                                               | 0.589641096        | 2               | 2.795557  |
| Q60587        | DGGQYALVAACAAGGQGHAMIVEAYPK                                              | 1.632852639        | 3               | 4.677299  |
| Q60587        | DNGIRPSSLEQMAK                                                           | 1.222362193        | 2               | 3.64398   |
| Q60587        | DQLLLGPTYATPK                                                            | 1.554810954        | 2               | 3.759946  |
| Q60587        | MMLDLNK                                                                  | 1.088708642        | 1               | 2.127558  |
| Q60587        | NIVVVEGVR                                                                | 1.450905387        | 2               | 3.063334  |
| <b>Q60598</b> | <b>SRC8 Src substrate cortactin</b>                                      | <b>1.250060718</b> | <b>0.369875</b> | <b>3</b>  |
| Q60598        | NASTFEEVVQVPSAYQK                                                        | 1.267614215        | 2               | 3.547376  |
| Q60598        | TVQGSQGHQEHINIK                                                          | 0.800977289        | 2               | 3.473675  |



|               |                                                                                |                    |                 |          |
|---------------|--------------------------------------------------------------------------------|--------------------|-----------------|----------|
| Q60598        | VDQSAVGFEYQ GK                                                                 | 1.207120499        | 2               | 3.345992 |
| <b>Q60759</b> | <b>GCDH Glutaryl_CoA dehydrogenase_mitochondrial</b>                           | <b>1.583467</b>    | <b>0.00014</b>  | <b>4</b> |
| Q60759        | DILGGNGISDEYHVIR                                                               | 1.675387111        | 2               | 3.860195 |
| Q60759        | DIVYEMGELGVLGPTIK                                                              | 1.586905304        | 2               | 3.896854 |
| Q60759        | GYGCAGVSSVAYGLLTR                                                              | 1.268021347        | 2               | 3.321871 |
| Q60759        | HAMNLEAVNTYEGTHDIHALILGR                                                       | 1.585282891        | 3               | 5.098244 |
| <b>Q60817</b> | <b>NACA Nascent polypeptide_associated complex subunit alpha</b>               | <b>1.207390049</b> | <b>0.362832</b> | <b>3</b> |
| Q60817        | DIELVMSQANVSR                                                                  | 1.380061243        | 2               | 3.418987 |
| Q60817        | IEDLSQQAQLAAAEK                                                                | 1.178655144        | 2               | 4.676005 |
| Q60817        | NILFVITKPDVYK                                                                  | 0.841941385        | 2               | 3.666666 |
| <b>Q60952</b> | <b>CP250 Centrosome_associated protein CEP250</b>                              | <b>1.254028217</b> | <b>0.491586</b> | <b>2</b> |
| Q60952        | GQIQDLKK                                                                       | 1.239418489        | 1               | 1.955204 |
| Q60952        | QQIDELQK                                                                       | 2.653689461        | 1               | 2.035223 |
| <b>Q61029</b> | <b>LAP2B Lamina_associated polypeptide 2_isoforms beta/delta/epsilon/gamma</b> | <b>1.039060627</b> | <b>0.998882</b> | <b>2</b> |
| Q61029        | SELVANNVTLPAGEQR                                                               | 1.04476342         | 2               | 4.566918 |
| Q61029        | YGVNPGPIVGTR                                                                   | 1.038660291        | 2               | 2.71646  |
| <b>Q61035</b> | <b>SYHC Histidyl_tRNA synthetase_cytoplasmic</b>                               | <b>1.367822652</b> | <b>0.235587</b> | <b>2</b> |
| Q61035        | ASAEQIEEVTK                                                                    | 1.958353098        | 2               | 2.776581 |
| Q61035        | REDLVEEIR                                                                      | 1.333993314        | 2               | 2.466448 |
| <b>Q61043</b> | <b>NIN Ninein</b>                                                              | <b>1.006045848</b> | <b>0.854161</b> | <b>3</b> |
| Q61043        | NEITTLNEEDSISNLK                                                               | 0.754345454        | 2               | 2.474047 |
| Q61043        | RQLQMAFDEEKAQLQEELR+Oxidation(4                                                | 0.80672053         |                 |          |
| Q61043        | SLENVLAEK                                                                      | 1.14693076         | 1               | 2.024421 |
| <b>Q61301</b> | <b>CTNA2 Catenin alpha_2</b>                                                   | <b>1.339428835</b> | <b>0.000161</b> | <b>3</b> |
| Q61301        | LLEPLVTQVTLVNTSNK                                                              | 1.417441976        | 2               | 3.826974 |
| Q61301        | TSVQTEDDQLIAGQSAR                                                              | 1.532785037        | 2               | 5.001553 |
| Q61301        | WDDSGNDIIVLAK                                                                  | 1.300460976        | 2               | 3.036304 |
| <b>Q61335</b> | <b>BAP31 B_cell receptor_associated protein 31</b>                             | <b>1.079371289</b> | <b>0.92929</b>  | <b>5</b> |
| Q61335        | AENEALAMQK                                                                     | 1.254346901        | 2               | 3.416152 |
| Q61335        | KYMEENDQLK                                                                     | 1.287733224        | 2               | 2.637512 |
| Q61335        | KYMEENDQLKK                                                                    | 0.943465795        | 3               | 3.968243 |
| Q61335        | YMEENDQLK                                                                      | 1.425183443        | 2               | 2.742815 |
| Q61335        | YMEENDQLKK                                                                     | 1.105374176        | 2               | 2.901673 |
| <b>Q61545</b> | <b>EWS RNA_binding protein EWS</b>                                             | <b>1.363705663</b> | <b>0.315585</b> | <b>2</b> |
| Q61545        | GDATVSYEDPPTAK                                                                 | 1.887299725        | 2               | 3.41173  |
| Q61545        | GGPGGPGGPGMGR                                                                  | 1.645020106        | 2               | 2.863945 |
| <b>Q61595</b> | <b>KTN1 Kinectin</b>                                                           | <b>1.055373376</b> | <b>0.241105</b> | <b>2</b> |
| Q61595        | TAEHEAAQDLQSK                                                                  | 1.378729564        | 2               | 4.379523 |
| Q61595        | VEPVLVTK                                                                       | 0.440805875        | 2               | 2.357152 |
| <b>Q61655</b> | <b>DD19A ATP_dependent RNA helicase DDX19A</b>                                 | <b>1.27171181</b>  | <b>0.118856</b> | <b>2</b> |
| Q61655        | SNLVDNTNQVEVLQR                                                                | 1.158738687        | 2               | 4.182843 |
| Q61655        | TSTTAEKTEEEEKEDR                                                               | 1.72842641         | 3               | 3.985461 |
| <b>Q61656</b> | <b>DDX5 Probable ATP_dependent RNA helicase DDX5</b>                           | <b>1.269584371</b> | <b>1.36E-11</b> | <b>6</b> |
| Q61656        | ELAQVQVAAEYCR                                                                  | 1.19607752         | 2               | 2.882295 |
| Q61656        | GDGPICLVLAPTR                                                                  | 1.949442819        | 2               | 2.955872 |
| Q61656        | MLDMGFEPQIR                                                                    | 1.879670988        | 2               | 3.346453 |
| Q61656        | NFYQEHPDLAR                                                                    | 2.09042305         | 2               | 3.307261 |
| Q61656        | STCIYGGAPK                                                                     | 1.53028282         | 2               | 2.475777 |
| Q61656        | TAQEVDTYR                                                                      | 1.487958217        | 2               | 2.31755  |
| <b>Q61830</b> | <b>MRC1 Macrophage mannose receptor 1</b>                                      | <b>1.463904177</b> | <b>0.32152</b>  | <b>3</b> |
| Q61830        | LKLPWHEAETYCK                                                                  | 1.182264003        | 2               | 2.350836 |
| Q61830        | WTVDEQVQFTHWNADMPGR+Oxidation(15                                               | 2.484118974        |                 |          |
| Q61830        | YLNWLPGPSSEPGK                                                                 | 1.446813476        | 2               | 2.628163 |

|               |                                                                           |                    |                 |           |
|---------------|---------------------------------------------------------------------------|--------------------|-----------------|-----------|
| <b>Q61941</b> | <b>transhydrogenase_mitochondrial</b>                                     | <b>1.207942129</b> | <b>0.000245</b> | <b>13</b> |
| Q61941        | AQYPIADLVK                                                                | 1.334273573        | 2               | 2.479295  |
| Q61941        | DDDFDGTMSHVIR                                                             | 1.468114193        | 2               | 2.526869  |
| Q61941        | EANSIVITPGYGLCAAK                                                         | 1.429580916        | 2               | 3.839342  |
| Q61941        | FFTGQITAAGK                                                               | 1.164079006        | 2               | 2.742116  |
| Q61941        | GITHIGYTDLPSR                                                             | 1.035275131        | 2               | 3.747139  |
| Q61941        | ILIVGGGVAGLASAGAAK                                                        | 2.284312419        | 2               | 3.90539   |
| Q61941        | KTTVLAMDQVPR                                                              | 1.088227054        | 2               | 3.288739  |
| Q61941        | MATQASTLYSNNITK                                                           | 1.10772986         | 2               | 4.726693  |
| Q61941        | QGFNVVVEGAGEASK                                                           | 1.249961961        | 2               | 4.148831  |
| Q61941        | SLGAEPLEVDLK                                                              | 1.230289952        | 2               | 3.513805  |
| Q61941        | TTVLAMDQVPR                                                               | 1.22135314         | 2               | 2.575528  |
| Q61941        | TVAELEAEK                                                                 | 1.1866038          | 2               | 2.980571  |
| Q61941        | VTIAQGYDALSSMANISGYK                                                      | 1.402366351        | 2               | 5.331681  |
| <b>Q61990</b> | <b>PCBP2 Poly(rC)_binding protein 2</b>                                   | <b>1.741044968</b> | <b>0.015548</b> | <b>2</b>  |
| Q61990        | AITIAGIPQSIIECVK                                                          | 1.713725798        | 2               | 2.332909  |
| Q61990        | IITLAGPTNAIFK                                                             | 2.575815668        | 2               | 2.544732  |
| <b>Q62009</b> | <b>POSTN Periostin</b>                                                    | <b>1.618463639</b> | <b>0.230823</b> | <b>2</b>  |
| Q62009        | ISTGGGETGETLQKFLQK                                                        | 1.291888728        | 2               | 2.521237  |
| Q62009        | TEGPAMTKIQIEGDPDFR                                                        | 1.722105217        | 2               | 2.309934  |
| <b>Q62095</b> | <b>DDX3Y ATP_dependent RNA helicase DDX3Y</b>                             | <b>1.77121853</b>  | <b>9.9E-20</b>  | <b>4</b>  |
| Q62095        | HVINFDLPSDIEEYVHR                                                         | 2.23037059         | 3               | 4.445738  |
| Q62095        | SFLDLLLNATGK                                                              | 1.943070929        | 2               | 4.173014  |
| Q62095        | VGNLGLATSFNER                                                             | 1.6560836          | 2               | 3.112155  |
| Q62095        | VGSTSENITQK                                                               | 0.615536428        | 2               | 2.860748  |
| <b>Q62261</b> | <b>SPTB2 Spectrin beta chain_brain 1</b>                                  | <b>1.280617957</b> | <b>1.39E-06</b> | <b>20</b> |
| Q62261        | AKDEQSAVSMK                                                               | 1.34715254         | 2               | 2.472989  |
| Q62261        | ALVADSHPESEK                                                              | 1.477921595        | 2               | 3.190837  |
| Q62261        | DQNTVETLQR                                                                | 1.258957737        | 2               | 2.999768  |
| Q62261        | EAEKLESEHPDQAQAILSR                                                       | 2.099342288        | 3               | 3.843669  |
| Q62261        | EGMQLISEKPEEAVVKEK                                                        | 1.638277009        | 2               | 2.340947  |
| Q62261        | EIEELQSQAQALSQEGK                                                         | 0.957079587        | 2               | 3.783779  |
| Q62261        | FESLEPEMNNQASR                                                            | 1.294362409        | 2               | 3.904787  |
| Q62261        | HLLGVEDLLQK                                                               | 1.486811101        | 2               | 3.409025  |
| Q62261        | HQIQEQAVEDYAETVHQLSK                                                      | 1.27214468         | 3               | 5.534888  |
| Q62261        | ITDLYTDLR                                                                 | 1.222859158        | 2               | 2.439145  |
| Q62261        | LTTLELLEVR                                                                | 2.400421278        | 2               | 2.91883   |
| Q62261        | LVSDGNINSDR                                                               | 1.245657509        | 2               | 3.324292  |
| Q62261        | LVSQDNFGFDLPAVEAATK                                                       | 2.018259894        | 2               | 3.178743  |
| Q62261        | SNAHYNLQNAFNLAEQHLGLTK                                                    | 1.217322358        | 3               | 3.897827  |
| Q62261        | SQNIITDSSSLNAEAIR                                                         | 1.022260847        | 2               | 5.243514  |
| Q62261        | TLETPAAQMEGFLNR                                                           | 2.306975447        | 2               | 3.225232  |
| Q62261        | TQILAASYELHK                                                              | 1.550778906        | 2               | 2.571994  |
| Q62261        | TQTAIASEDMPNLTAEAK                                                        | 1.468242869        | 2               | 5.219253  |
| Q62261        | VIESTQDLGNDLAGVMALQR                                                      | 0.233207037        | 2               | 4.459213  |
| Q62261        | VLDNAIETEK                                                                | 1.014774987        | 2               | 2.471166  |
| <b>Q62376</b> | <b>RU17 U1 small nuclear ribonucleoprotein 70 kDa</b>                     | <b>1.065752234</b> | <b>0.57195</b>  | <b>2</b>  |
| Q62376        | IERRQEVETELK                                                              | 0.584584809        | 2               | 2.304791  |
| Q62376        | RQQEVETELK                                                                | 1.100889316        | 2               | 2.484204  |
| <b>Q62425</b> | <b>NDUA4 NADH dehydrogenase [ubiquinone] 1 alpha subcomplex subunit 4</b> | <b>1.062272111</b> | <b>0.320788</b> | <b>3</b>  |
| Q62425        | FYSVNVVDYSK                                                               | 1.072701236        | 2               | 2.843378  |
| Q62425        | KNNPEPWNK                                                                 | 0.507523455        | 2               | 2.547746  |
| Q62425        | LGPNEQYK                                                                  | 0.993774832        | 1               | 2.025448  |
| <b>Q62446</b> | <b>FKBP3 Peptidyl_prolyl cis_trans isomerase FKBP3</b>                    | <b>1.614882623</b> | <b>0.018602</b> | <b>2</b>  |
| Q62446        | GWDEALLTMSK                                                               | 1.691223926        | 2               | 2.479952  |
| Q62446        | SEETLDEGPPK                                                               | 1.611918717        | 2               | 3.040901  |

|               |                                                                       |                    |                 |           |
|---------------|-----------------------------------------------------------------------|--------------------|-----------------|-----------|
| <b>Q62452</b> | <b>UD19 UDP_glucuronosyltransferase 1_9</b>                           | <b>0.751168565</b> | <b>0.000115</b> | <b>4</b>  |
| Q62452        | AMEIAEALGR                                                            | 1.032515447        | 2               | 4.104401  |
| Q62452        | GAGVTLNVLEMTADDLENALK                                                 | 1.203858933        | 2               | 5.390175  |
| Q62452        | WLPQNDLLGHPK                                                          | 1.116147905        | 2               | 3.294807  |
| Q62452        | YTGTRPSNLAK                                                           | 0.396427513        | 2               | 2.720869  |
| <b>Q62465</b> | <b>VAT1 Synaptic vesicle membrane protein VAT_1 homolog</b>           | <b>1.09038849</b>  | <b>0.051396</b> | <b>8</b>  |
| Q62465        | ACGLNFADLMGR                                                          | 1.322599573        | 2               | 2.906566  |
| Q62465        | CLVLTGFGGYDK                                                          | 0.966092294        | 2               | 2.924945  |
| Q62465        | ENGVTHPIDYHTTDYVDEIKK                                                 | 1.235207885        | 3               | 3.544729  |
| Q62465        | GVDIVMDPLGGSDTAK                                                      | 0.968926643        | 2               | 4.370294  |
| Q62465        | IDSVWPFKEK                                                            | 1.065725032        | 2               | 2.774368  |
| Q62465        | TVENVTVFGTASASK                                                       | 1.131913332        | 2               | 3.522699  |
| Q62465        | VLLVPGPEKET                                                           | 1.150007611        | 2               | 2.792584  |
| Q62465        | VVTYGMANLLTGPK                                                        | 1.348105375        | 2               | 3.48565   |
| <b>Q62636</b> | <b>RAP1B Ras_related protein Rap_1b</b>                               | <b>1.604654274</b> | <b>4.5E-11</b>  | <b>4</b>  |
| Q62636        | INVNEIFYDLVR                                                          | 1.80009354         | 2               | 4.026201  |
| Q62636        | LVVLGSGGVGK                                                           | 1.672088878        | 2               | 2.636943  |
| Q62636        | QWSNCAFLESSAK                                                         | 1.000866213        | 2               | 2.540851  |
| Q62636        | VKDTDDVPMILVGNK                                                       | 1.034375888        | 2               | 2.781354  |
| <b>Q62651</b> | <b>ECH1 Delta(3_5)_Delta(2_4)_dienoyl_CoA isomerase_mitochondrial</b> | <b>1.239730269</b> | <b>0.351322</b> | <b>4</b>  |
| Q62651        | HVLHVQLNRPEK                                                          | 1.485537327        | 2               | 3.794765  |
| Q62651        | MMADEALDSGLVSR                                                        | 1.229483714        | 2               | 4.376722  |
| Q62651        | RIPEEVSDHNYESIQTSAQK                                                  | 1.291790495        | 3               | 5.607813  |
| Q62651        | SLVNELTFTAR                                                           | 1.22050891         | 2               | 3.1926    |
| <b>Q62730</b> | <b>DHB2 Estradiol 17_beta_dehydrogenase 2</b>                         | <b>1.401803633</b> | <b>0.890601</b> | <b>7</b>  |
| Q62730        | AVLVTGADSGFGHALAK                                                     | 1.083914221        | 2               | 4.349936  |
| Q62730        | DIQHAICAK                                                             | 1.362330888        | 2               | 2.392377  |
| Q62730        | EIQENYQGEYVHTQK                                                       | 1.417780417        | 2               | 4.504911  |
| Q62730        | EMSNPDITPVLR                                                          | 1.147187615        | 2               | 2.665439  |
| Q62730        | LSVLQMDVTKPEQIK                                                       | 1.748940073        | 2               | 3.694517  |
| Q62730        | LSVLQMDVTKPEQIKDVHSEVAEK                                              | 1.097543919        | 3               | 4.607848  |
| Q62730        | VVTIHPGGFQTNIVGSDSWDK                                                 | 1.465736375        | 2               | 5.815256  |
| <b>Q62736</b> | <b>CALD1 Non_muscle caldesmon</b>                                     | <b>1.252741327</b> | <b>0.000665</b> | <b>14</b> |
| Q62736        | ASGDKEAEGAPQEAGK                                                      | 1.320947814        | 2               | 4.851412  |
| Q62736        | ASGDKEAEGAPQEAGKR                                                     | 1.504804869        | 3               | 3.97246   |
| Q62736        | EEIERR                                                                | 1.679060897        | 1               | 1.904695  |
| Q62736        | EFDPITDGSLSVPSR                                                       | 1.443775918        | 2               | 3.67397   |
| Q62736        | GGNLGENQIKDEK                                                         | 1.237778824        | 2               | 3.475792  |
| Q62736        | GSVFSSPSASGTPNK                                                       | 1.250557076        | 2               | 2.305127  |
| Q62736        | KVLEEEEQR                                                             | 0.866046394        | 2               | 2.743766  |
| Q62736        | LEQYTNAIEGTK                                                          | 1.129675879        | 2               | 3.373482  |
| Q62736        | MQNNSAENETAEGEEK                                                      | 1.039977633        | 2               | 4.885186  |
| Q62736        | MQNNSAENETAEGEEKGESR                                                  | 0.893428469        | 3               | 4.628217  |
| Q62736        | MQNNSAENETAEGEEKGESR+Oxidation(0                                      | 0.823096867        |                 |           |
| Q62736        | RGETESEEFK                                                            | 1.295136195        | 2               | 3.316064  |
| Q62736        | RRGETESEEFK                                                           | 1.347798928        | 2               | 2.899158  |
| Q62736        | VLEEEEQR                                                              | 1.321171333        | 2               | 2.598369  |
| <b>Q62745</b> | <b>CD81 CD81 antigen</b>                                              | <b>1.694436991</b> | <b>0.692528</b> | <b>2</b>  |
| Q62745        | NSLCPSSNSFTQLLK                                                       | 1.796844012        | 2               | 3.172975  |
| Q62745        | QFYDQALQQAVMDDDDANNAK                                                 | 1.681835509        | 2               | 5.035611  |
| <b>Q62769</b> | <b>UN13B Protein unc_13 homolog B</b>                                 | <b>0.92700963</b>  | <b>0.482266</b> | <b>3</b>  |
| Q62769        | DHVMREETRNLTPK                                                        | 0.929931728        | 2               | 2.587775  |
| Q62769        | ILSQRSNDEVAR                                                          | 3.098432238        | 2               | 2.351807  |
| Q62769        | SNDEVAREFVK                                                           | 0.651841054        | 1               | 1.936553  |
| <b>Q62770</b> | <b>UN13C Protein unc_13 homolog C</b>                                 | <b>1.756792773</b> | <b>0.243238</b> | <b>2</b>  |

|               |                                                          |                    |                 |           |
|---------------|----------------------------------------------------------|--------------------|-----------------|-----------|
| Q62770        | ENFPASNSERLQDLK                                          | 1.199569342        | 2               | 2.374516  |
| Q62770        | NLSMDETGLTILR                                            | 10.66422215        | 2               | 2.376304  |
| <b>Q62785</b> | <b>HAP28 28 kDa heat_ and acid_stable phosphoprotein</b> | <b>1.47121466</b>  | <b>0.968564</b> | <b>6</b>  |
| Q62785        | ANEEDQEEGDGASGDPK                                        | 1.421656067        | 2               | 5.573848  |
| Q62785        | ANEEDQEEGDGASGDPKK                                       | 1.277208646        | 3               | 3.51232   |
| Q62785        | GVEGLIDIENPNR                                            | 1.734579593        | 2               | 2.92045   |
| Q62785        | QKANEEDQEEGDGASGDPK                                      | 1.295360199        | 3               | 4.35504   |
| Q62785        | QKANEEDQEEGDGASGDPKK                                     | 0.914019063        | 3               | 3.430189  |
| Q62785        | YMKMHLAGKTEQAK                                           | 0.927439442        | 2               | 2.307572  |
| <b>Q62789</b> | <b>UD2B7 UDP_glucuronosyltransferase 2B7</b>             | <b>1.227226176</b> | <b>0.020665</b> | <b>2</b>  |
| Q62789        | IILDELVQR                                                | 1.246787067        | 2               | 3.543433  |
| Q62789        | WIPQNLLGHPK                                              | 1.116147905        | 2               | 3.294807  |
| <b>Q62812</b> | <b>MYH9 Myosin_9</b>                                     | <b>1.154964667</b> | <b>9.9E-20</b>  | <b>68</b> |
| Q62812        | ALEEAMEQK                                                | 1.129013872        | 2               | 3.295444  |
| Q62812        | ALELDSNLYR                                               | 1.462218882        | 2               | 3.284624  |
| Q62812        | ALEQQVEEMK                                               | 2.055745           | 2               | 3.302304  |
| Q62812        | ALEQQVEEMKTQLEEEDELQATEDAK                               | 1.627885459        | 3               | 3.392353  |
| Q62812        | ANLQIDQINTDLNLR                                          | 1.692036662        | 2               | 5.434532  |
| Q62812        | ASIAALEAK                                                | 1.322835731        | 2               | 2.686718  |
| Q62812        | ASREEILAQAK                                              | 2.076625634        | 2               | 2.985129  |
| Q62812        | CQYLQAEK                                                 | 1.312629209        | 1               | 2.330164  |
| Q62812        | DFSALSQLQDTQELLEENR                                      | 1.149742922        | 3               | 6.726772  |
| Q62812        | DLEAHIDTANK                                              | 1.426696742        | 2               | 3.467631  |
| Q62812        | DLGEELEALKTELEDLTDSTAAQQELR                              | 1.078421542        | 3               | 4.493731  |
| Q62812        | DLQGRDEQSEEK                                             | 1.178692908        | 2               | 2.925707  |
| Q62812        | EEILAQAK                                                 | 1.222775461        | 1               | 2.374926  |
| Q62812        | EEILAQAKENEK                                             | 1.237778824        | 2               | 2.343708  |
| Q62812        | ELEDATETADAMNR                                           | 1.342955162        | 2               | 4.423321  |
| Q62812        | ELETQISELQEDLESER                                        | 2.531398447        | 2               | 4.864941  |
| Q62812        | EMEALEDERK                                               | 0.921372681        | 2               | 3.325268  |
| Q62812        | HEAMITDLEER                                              | 0.819114238        | 2               | 3.271591  |
| Q62812        | HEDELLAK                                                 | 1.140343971        | 2               | 3.046887  |
| Q62812        | HSQAVEELAEQLEQTK                                         | 1.155464016        | 2               | 5.020916  |
| Q62812        | HSQAVEELAEQLEQTKR                                        | 1.108183965        | 3               | 5.658849  |
| Q62812        | IIGLDQVAGMSETALPGAFK                                     | 2.39698403         | 2               | 5.394994  |
| Q62812        | IMGIPEDQMGLLR                                            | 1.361938014        | 2               | 2.617218  |
| Q62812        | IRELETQISELQEDLESER                                      | 1.497749701        | 2               | 5.435102  |
| Q62812        | KEEELQAALAR                                              | 1.314581728        | 3               | 3.362902  |
| Q62812        | KKVEAQLQELQVK                                            | 1.038390639        | 2               | 4.620467  |
| Q62812        | KLEEDQIIMEDQNCK                                          | 1.139486575        | 2               | 6.009548  |
| Q62812        | KLEGDSTDLSQIAELQAQIAELK                                  | 1.913425895        | 2               | 5.578339  |
| Q62812        | KQELEEICHDLER                                            | 1.197272154        | 2               | 4.73266   |
| Q62812        | KVEAQLQELQVK                                             | 1.372829404        | 2               | 4.550151  |
| Q62812        | LDPHLVLDQLR                                              | 1.289353731        | 3               | 3.421467  |
| Q62812        | LEEDQIIMEDQNCK                                           | 0.898127478        | 2               | 4.990447  |
| Q62812        | LEGDSTDLSQIAELQAQIAELK                                   | 1.483866478        | 3               | 5.225784  |
| Q62812        | LEVNLQAMK                                                | 0.885378788        | 2               | 2.636608  |
| Q62812        | LQEMESAVK                                                | 1.351214315        | 2               | 2.753379  |
| Q62812        | LQQELDDLLVDLHQR                                          | 1.360599693        | 2               | 4.818476  |
| Q62812        | LQVELDSVTGLLNQSDSK                                       | 1.265457374        | 2               | 5.487123  |
| Q62812        | LTEMETMQQLMAEK                                           | 1.563889094        | 2               | 4.972543  |
| Q62812        | MEDGVGCLETAEEAK                                          | 1.223626759        | 2               | 4.37249   |
| Q62812        | MQQNIQEELEEEESAR                                         | 1.249495549        | 2               | 6.322113  |
| Q62812        | NAEQFKDQADK                                              | 1.377486896        | 2               | 3.458148  |
| Q62812        | NKHEAMITDLEER                                            | 1.607083446        | 3               | 4.102787  |
| Q62812        | NLPIYSEEIVDMYK                                           | 1.762625525        | 2               | 3.796722  |

|               |                                                        |                    |                 |          |
|---------------|--------------------------------------------------------|--------------------|-----------------|----------|
| Q62812        | NMDPLNDNIATLLHQSSDK                                    | 1.629341012        | 2               | 4.946885 |
| Q62812        | NTDQASMPDNTAAQK                                        | 2.489611127        | 2               | 5.312929 |
| Q62812        | NTDQASMPDNTAAQK+Oxidation(6                            | 2.4365469          |                 |          |
| Q62812        | QAQQRDELADEIANSSGK                                     | 1.02083541         | 3               | 4.195017 |
| Q62812        | QIATLHAQVTDMK                                          | 0.698034529        | 2               | 2.384528 |
| Q62812        | QLEEAEEEAQR                                            | 2.016552075        | 2               | 3.877197 |
| Q62812        | QSVSNLEK                                               | 1.23477235         | 2               | 2.470817 |
| Q62812        | QTLENERGELANEVK                                        | 0.622296655        | 2               | 3.385685 |
| Q62812        | RGDMPFVVTR                                             | 0.958491323        | 2               | 2.967351 |
| Q62812        | RKLEGDSTDLSQIAELQAQIAELK                               | 1.225565112        | 3               | 5.758426 |
| Q62812        | RQLEEAEEEAQR                                           | 1.064017156        | 2               | 4.600445 |
| Q62812        | SMEAEMIQLEELAAAER                                      | 1.422366458        | 3               | 4.335388 |
| Q62812        | SMEAEMIQLEELAAERAKR+Oxidation(1                        | 2.367589465        |                 |          |
| Q62812        | SMEAEMIQLEELAAAERAKR+Oxidation(1)Oxidation(5           | 1.14654599         |                 |          |
| Q62812        | TDLLEPYNK                                              | 1.032040105        | 2               | 3.419269 |
| Q62812        | TELEDTLSTAAQQELR                                       | 0.801775671        | 2               | 5.338693 |
| Q62812        | TEMEDLMSSK                                             | 1.971452765        | 2               | 2.589689 |
| Q62812        | THEAQIQEMR                                             | 1.273594506        | 3               | 3.436859 |
| Q62812        | TQLEEELEDELQATEDAK                                     | 1.022456309        | 2               | 6.590839 |
| Q62812        | VAEFTTDLMEEEK                                          | 1.775307645        | 2               | 4.480554 |
| Q62812        | VEAQLQELQVK                                            | 0.714128403        | 2               | 3.483668 |
| Q62812        | VEDMAELTCLNEASVLHNLK                                   | 1.330945364        | 2               | 4.499723 |
| Q62812        | VISGVLQLGNIVFK                                         | 1.445577332        | 2               | 3.757948 |
| Q62812        | VSHLLGINVTDFTFR                                        | 1.673535748        | 2               | 3.812301 |
| Q62812        | YEILTPNSIPK                                            | 1.115655991        | 2               | 3.134212 |
| <b>Q62824</b> | <b>EXOC4 Exocyst complex component 4</b>               | <b>1.580159538</b> | <b>0.148369</b> | <b>2</b> |
| Q62824        | EDLDCDPEENSTLFMGILIQGLAR                               | 1.532693763        | 2               | 2.31916  |
| Q62824        | SQTGVGDQTTQNTNR                                        | 1.581491916        | 2               | 3.117584 |
| <b>Q62826</b> | <b>HNRPM Heterogeneous nuclear ribonucleoprotein M</b> | <b>1.315366122</b> | <b>0.00615</b>  | <b>7</b> |
| Q62826        | ADILEDKDGK                                             | 1.565682349        | 2               | 2.790576 |
| Q62826        | AFITNIPFDVK                                            | 1.627099064        | 2               | 3.240886 |
| Q62826        | GIGMGNLPGAGMGMEGIGFGINK                                | 2.274128784        | 2               | 3.918765 |
| Q62826        | GNFGGSFAGSFGGAGGHAPGVAR                                | 0.957950605        | 2               | 5.029048 |
| Q62826        | INEILSNALK                                             | 1.873636667        | 2               | 2.612685 |
| Q62826        | MGPAMG PALGAGIER                                       | 1.225096735        | 2               | 2.755434 |
| Q62826        | MGPVMDR MATGLER+Oxidation(0)Oxidation(4)Oxidation(7    | 1.189433693        |                 |          |
| <b>Q62868</b> | <b>ROCK2 Rho-associated protein kinase 2</b>           | <b>1.929157671</b> | <b>0.164507</b> | <b>2</b> |
| Q62868        | DEEISAAIK                                              | 4.896042077        | 1               | 1.900369 |
| Q62868        | QENNHLMEMKMNLEK+Oxidation(6                            | 1.737580698        |                 |          |
| <b>Q62871</b> | <b>DC112 Cytoplasmic dynein 1 intermediate chain 2</b> | <b>0.918411816</b> | <b>0.028043</b> | <b>2</b> |
| Q62871        | ADAEAAAATR                                             | 2.589689938        | 2               | 3.170895 |
| Q62871        | SVSTPSEAGSQDSDGAVGSR                                   | 0.717450357        | 2               | 5.218959 |
| <b>Q62902</b> | <b>LMAN1 Protein ERGIC_53</b>                          | <b>1.26906092</b>  | <b>5.87E-05</b> | <b>7</b> |
| Q62902        | GAGTPGQPQVSSQQLDVTVVR                                  | 1.134272328        | 2               | 4.150277 |
| Q62902        | GHPDLQGGPADDIFESIGDR                                   | 1.526150399        | 2               | 5.01564  |
| Q62902        | LVSGVQHPGSAGVYETTQHFMEDIK                              | 1.181364666        | 3               | 3.42386  |
| Q62902        | NNPAIVVVGNNGQINYDHQNDGATQALASCQR                       | 1.032484869        | 3               | 6.36976  |
| Q62902        | RGAGTPGQPQVSSQQLDVTVVR                                 | 1.215040333        | 3               | 4.454383 |
| Q62902        | YQEEFEHFQQLDK                                          | 1.163329969        | 2               | 5.314008 |
| Q62902        | YVSSLTEEISR                                            | 1.287865256        | 2               | 3.046477 |
| <b>Q62904</b> | <b>DHB7 3_keto_steroid reductase</b>                   | <b>1.167437757</b> | <b>0.632979</b> | <b>3</b> |
| Q62904        | MDVDEDTAEK                                             | 6.83734228         | 2               | 2.389572 |
| Q62904        | YATDLLNVALNR                                           | 1.167440833        | 2               | 2.573166 |
| Q62904        | YLSGTTGLGTNYVK                                         | 0.952416225        | 2               | 2.988279 |

|               |                                                                   |                    |                 |           |
|---------------|-------------------------------------------------------------------|--------------------|-----------------|-----------|
| <b>Q62967</b> | <b>MVD1 Diphosphomevalonate decarboxylase</b>                     | <b>0.943899563</b> | <b>0.162746</b> | <b>2</b>  |
| Q62967        | GLQVAPVLLSDELK                                                    | 0.925413806        | 2               | 3.741494  |
| Q62967        | VYGVEDLSEVAR                                                      | 2.301867891        | 2               | 3.420812  |
| <b>Q62991</b> | <b>SCFD1 Sec1 family domain containing protein 1</b>              | <b>1.416394696</b> | <b>0.01896</b>  | <b>3</b>  |
| Q62991        | ALTDAGCNLSPLQYIK                                                  | 3.764775255        | 2               | 2.904189  |
| Q62991        | FGQDIISPLLSVK                                                     | 1.42823257         | 2               | 2.361158  |
| Q62991        | SLLDVISDPDAGTPEDK                                                 | 1.317091402        | 2               | 2.862056  |
| <b>Q63041</b> | <b>A1M Alpha_1_macroglobulin</b>                                  | <b>0.871721691</b> | <b>0.927569</b> | <b>12</b> |
| Q63041        | AEDITHNGIVYTPK                                                    | 0.886284969        | 2               | 3.668512  |
| Q63041        | AEQGAYLGPLPYK                                                     | 0.694012124        | 2               | 3.238184  |
| Q63041        | AESPVFVQTDKPIYKPGQTVK                                             | 0.78831905         | 3               | 4.012474  |
| Q63041        | DTVVKPVIVEPEGIEK                                                  | 0.741858785        | 2               | 3.754483  |
| Q63041        | GSIFNSGSHVLPLEQ GK                                                | 0.835030002        | 2               | 4.075487  |
| Q63041        | KLQDQSNQR                                                         | 0.832596224        | 2               | 2.571226  |
| Q63041        | LIVYTILPNEELIADVQK                                                | 1.592163163        | 2               | 2.998634  |
| Q63041        | LQDQSNQR                                                          | 0.644049074        | 2               | 2.9837    |
| Q63041        | QDLNDNDAYSVFQSIGLK                                                | 1.005698311        | 2               | 2.6273    |
| Q63041        | VNTLPLNFDK                                                        | 0.783958296        | 2               | 2.749008  |
| Q63041        | YNILPEAEGEAPFTLK                                                  | 1.106055283        | 2               | 4.908989  |
| Q63041        | YVVLVPSELYAGVPEK                                                  | 1.15080711         | 2               | 3.009185  |
| <b>Q63060</b> | <b>GLPK Glycerol kinase</b>                                       | <b>1.30708537</b>  | <b>2.86E-12</b> | <b>12</b> |
| Q63060        | AGALEGVPISGCLGDSAAALVGMCFQDQAK                                    | 1.8937098          | 3               | 4.567799  |
| Q63060        | AVLGPLVGAVDQGTSSSTR                                               | 1.325998605        | 2               | 5.194014  |
| Q63060        | CVFSEHLLTTVAYK                                                    | 0.920065507        | 2               | 4.281955  |
| Q63060        | DCGIPLSHLQVDGGMTSNK                                               | 1.33740896         | 2               | 4.436728  |
| Q63060        | EILQSVYECIEK                                                      | 1.197998392        | 2               | 3.419255  |
| Q63060        | FEPQINAESEIR                                                      | 1.582856259        | 2               | 3.642443  |
| Q63060        | KVQEAveenr                                                        | 0.661721334        | 2               | 3.352234  |
| Q63060        | LGQLNIDISNIK                                                      | 1.825629653        | 2               | 3.230658  |
| Q63060        | NTYGTGCFLLCNTGHK                                                  | 0.91428915         | 2               | 3.812618  |
| Q63060        | SSSEIYGLMK                                                        | 1.832566003        | 2               | 2.515342  |
| Q63060        | TAELLSHHQVEIK                                                     | 1.486787182        | 2               | 3.457383  |
| Q63060        | VQEAveenr                                                         | 1.617527432        | 2               | 3.244871  |
| <b>Q63081</b> | <b>PDIA6 Protein disulfide isomerase A6</b>                       | <b>1.181020939</b> | <b>2.2E-13</b>  | <b>11</b> |
| Q63081        | ALDLFSDNAPPELLEIINEDIAK                                           | 1.273153718        | 3               | 5.129878  |
| Q63081        | GESPVDYDGGR                                                       | 2.658027757        | 2               | 2.857019  |
| Q63081        | GSFSEQGINEFLR                                                     | 1.349908707        | 2               | 4.196577  |
| Q63081        | GSTAPVGGGSPNITPR                                                  | 1.057461904        | 2               | 4.878219  |
| Q63081        | HQSLGGQYGVQGFPTIK                                                 | 1.370709667        | 2               | 5.078053  |
| Q63081        | KTCEEHQLCVVAVLPHILDGTATGR                                         | 0.918980535        | 3               | 5.234771  |
| Q63081        | NLEPEWAAAATEVK                                                    | 1.102205961        | 2               | 4.024937  |
| Q63081        | NSYLEVLLK                                                         | 1.471002432        | 2               | 2.973777  |
| Q63081        | TCEEHQLCVVAVLPHILDGTATGR                                          | 1.179299049        | 3               | 5.022287  |
| Q63081        | TGEAIVDAALSALR                                                    | 1.184520625        | 3               | 4.875083  |
| Q63081        | VGAVNADKHQSLGGQYGVQGFPTIK                                         | 0.824817734        | 3               | 4.606942  |
| <b>Q63083</b> | <b>NUCB1 Nucleobindin_1</b>                                       | <b>1.450038708</b> | <b>0.023004</b> | <b>3</b>  |
| Q63083        | LSQETEALGR                                                        | 2.168874663        | 2               | 2.818551  |
| Q63083        | VNVPGSQAQLK                                                       | 1.244865017        | 2               | 2.440251  |
| Q63083        | YLQEVINVLETGDFHR                                                  | 1.500559577        | 3               | 4.114141  |
| <b>Q63108</b> | <b>EST3 Liver carboxylesterase 3</b>                              | <b>1.22808676</b>  | <b>0.446722</b> | <b>4</b>  |
| Q63108        | GGTSKEEINLSK                                                      | 0.900229441        | 2               | 3.427361  |
| Q63108        | LDPMTATSLK                                                        | 1.047457377        | 2               | 2.507528  |
| Q63108        | QKTEEELETTLK                                                      | 1.391814238        | 2               | 3.500254  |
| Q63108        | SSFLNLPEEAIPVAVEK                                                 | 1.228552856        | 2               | 4.83555   |
| <b>Q63120</b> | <b>MRP2 Canalicular multispecific organic anion transporter 1</b> | <b>1.531888957</b> | <b>0.000135</b> | <b>7</b>  |
| Q63120        | ACALLPDLEILPGDMAEIGEK                                             | 3.167243907        | 2               | 4.827564  |

|               |                                                           |                    |                 |           |
|---------------|-----------------------------------------------------------|--------------------|-----------------|-----------|
| Q63120        | HGEIQFNQYQVR                                              | 2.019025575        | 2               | 2.729025  |
| Q63120        | IVEYGSPEELLSNR                                            | 2.076173091        | 2               | 3.317959  |
| Q63120        | QSQSQDVLVLEEAK                                            | 1.721356845        | 2               | 2.563772  |
| Q63120        | YFAWEPSFQEQVQGIR                                          | 1.930108456        | 2               | 3.934591  |
| Q63120        | YLGDDLDLTSAIR                                             | 0.370174253        | 2               | 2.361479  |
| Q63120        | YRPELDLVLK                                                | 0.956421649        | 3               | 3.663076  |
| <b>Q63150</b> | <b>DPYS Dihydropyrimidinase</b>                           | <b>1.162318984</b> | <b>0.067961</b> | <b>10</b> |
| Q63150        | ALGKDDFTK                                                 | 1.288682441        | 2               | 2.55283   |
| Q63150        | DQTCTPIPVKR                                               | 2.042097126        | 2               | 2.492831  |
| Q63150        | EIGAIAQVHAENGLIAEGAK                                      | 1.654234935        | 2               | 4.998999  |
| Q63150        | FVAVTSTNAAK                                               | 1.174203645        | 2               | 3.176676  |
| Q63150        | GSSLIEAFETWR                                              | 1.845944622        | 2               | 3.541104  |
| Q63150        | IAVGSDADIVIWDPEATR                                        | 1.846778108        | 2               | 3.262145  |
| Q63150        | MLALGITGPEGHLCRPEAVEAEATLR                                | 1.121428811        | 3               | 3.749743  |
| Q63150        | VVNDDFSQVADVLVEDGVVR                                      | 1.15818225         | 2               | 5.955635  |
| Q63150        | VVYEAGVFDVTAGHGK                                          | 1.276550728        | 2               | 4.201988  |
| Q63150        | VVYGEPIAAGLGTDTQYWNK                                      | 3.234830345        | 2               | 5.823098  |
| <b>Q63228</b> | <b>GMFB Glia maturation factor beta</b>                   | <b>1.944176656</b> | <b>0.190211</b> | <b>2</b>  |
| Q63228        | LVVLDEELEGVSPDELKDELPER                                   | 2.100022402        | 3               | 3.70804   |
| Q63228        | NTEDLTEEWLR                                               | 1.594112792        | 2               | 2.599456  |
| <b>Q63269</b> | <b>ITPR3 Inositol 1_4_5_trisphosphate receptor type 3</b> | <b>1.005477315</b> | <b>0.4944</b>   | <b>2</b>  |
| Q63269        | LLDGGNTEIQK                                               | 0.972453043        | 1               | 2.459567  |
| Q63269        | QKLMRDENILK+Oxidation(3                                   | 1.248703226        |                 |           |
| <b>Q63270</b> | <b>ACOC Cytoplasmic aconitate hydratase</b>               | <b>1.34551554</b>  | <b>9.9E-20</b>  | <b>19</b> |
| Q63270        | AVEAGLNKPYVK                                              | 0.995731084        | 2               | 2.968586  |
| Q63270        | AVLAESYER                                                 | 2.240173445        | 2               | 2.641603  |
| Q63270        | DFSDSSQDPDFTQVVLDLK                                       | 1.357890441        | 2               | 3.665324  |
| Q63270        | FVEFFGPGVAQLSIADR                                         | 2.045704089        | 2               | 5.296787  |
| Q63270        | GFQVAPDHHNDHK                                             | 0.217248607        | 2               | 3.415375  |
| Q63270        | IDFEKEPLGVNAQGGQVFLK                                      | 1.258714328        | 3               | 6.128051  |
| Q63270        | IIPPGSGIIHQVNLEYLAR                                       | 1.442140137        | 2               | 2.520668  |
| Q63270        | KNDIENILNWSIMQHK                                          | 1.612945094        | 3               | 4.5379    |
| Q63270        | NCDEFVLK                                                  | 1.566636102        | 2               | 2.32397   |
| Q63270        | NDIENILNWSIMQHK                                           | 1.525871072        | 2               | 2.513948  |
| Q63270        | NQDLEFER                                                  | 1.068953393        | 1               | 2.698658  |
| Q63270        | QAPQTVHLPSGETLDVFAAER                                     | 0.944055012        | 3               | 3.624273  |
| Q63270        | SIEVPFKPAR                                                | 0.994103364        | 2               | 2.540916  |
| Q63270        | SIVDAYVLLNLGDSVTTDHISPAGNIAR                              | 1.954696457        | 3               | 4.671852  |
| Q63270        | SPPFFESLTLDLQPPK                                          | 1.295554669        | 3               | 4.475412  |
| Q63270        | SWNALAAPSEK                                               | 1.281903168        | 2               | 2.606666  |
| Q63270        | TSLSPGSGVVYYLR                                            | 1.555876786        | 2               | 3.548267  |
| Q63270        | VILQDFTGVPVAVVDFAAAMR                                     | 1.474329638        | 2               | 4.778577  |
| Q63270        | YQQAGLPLIVLAGK                                            | 1.151290035        | 2               | 3.553062  |
| <b>Q63276</b> | <b>BAAT Bile acid_CoA:amino acid N_acyltransferase</b>    | <b>1.124338795</b> | <b>8.23E-13</b> | <b>18</b> |
| Q63276        | AHGHLFVVGEDDKNLNSK                                        | 1.133647437        | 2               | 6.078642  |
| Q63276        | ASEVGEVDLER                                               | 1.975925339        | 2               | 4.032866  |
| Q63276        | DDKGNLFNSQAFYR                                            | 1.137345194        | 2               | 3.3099    |
| Q63276        | GNLFNSQAFYR                                               | 0.852122817        | 2               | 2.678582  |
| Q63276        | LCHPYFPVEGK                                               | 1.700891624        | 3               | 3.518904  |
| Q63276        | LTAVPLSALVDPEVHIR                                         | 1.426448069        | 2               | 3.948138  |
| Q63276        | MPFVIPSINWGGEVIPHAAAQEHWSK                                | 1.191159401        | 4               | 4.636931  |
| Q63276        | NWTLLSYPGAGHLIEPPYSPLCSASR                                | 1.720654302        | 3               | 4.237051  |
| Q63276        | QHLNPGFNSQL                                               | 1.113615889        | 2               | 3.50833   |
| Q63276        | QITATVLINGPNFVSSNPHVYR                                    | 1.294584217        | 3               | 4.779086  |
| Q63276        | TFEETADK                                                  | 1.200630259        | 1               | 1.921011  |
| Q63276        | TFEETADKDSK                                               | 0.942226546        | 2               | 3.79436   |

|               |                                                                           |                    |                 |           |
|---------------|---------------------------------------------------------------------------|--------------------|-----------------|-----------|
| Q63276        | VDLEYFEEGVFLLR                                                            | 1.523692077        | 2               | 4.334498  |
| Q63276        | VFQPTPCSEEFVTTNALGLVEFYR                                                  | 1.920895524        | 3               | 5.157936  |
| Q63276        | VISSLDSLILR                                                               | 1.290933178        | 2               | 4.493979  |
| Q63276        | VTGLTPFQVVCLQASLK                                                         | 0.880627765        | 3               | 5.2183    |
| Q63276        | WYVAPGVTR                                                                 | 0.954002998        | 1               | 2.123471  |
| Q63276        | YCFPIEK                                                                   | 1.237885063        | 2               | 2.579024  |
| <b>Q63342</b> | <b>M2GD Dimethylglycine dehydrogenase_mitochondrial</b>                   | <b>0.964750056</b> | <b>0.142197</b> | <b>26</b> |
| Q63342        | ADIINIVNGPITYSPDILPMVGP HQGVR                                             | 1.354907976        | 3               | 6.022555  |
| Q63342        | AWGSEMNCNTNPLEAGLDYFIK                                                    | 1.25784953         | 2               | 4.730072  |
| Q63342        | DGLLFGPYEQEK                                                              | 1.438873567        | 2               | 2.71546   |
| Q63342        | EGQESPPSPPEWK                                                             | 1.66252235         | 2               | 2.68183   |
| Q63342        | GGYDVEIR                                                                  | 1.187145919        | 2               | 2.635637  |
| Q63342        | GQDSTQLLDHLCANVIPK                                                        | 1.136378234        | 2               | 4.100558  |
| Q63342        | IHELFP LLNMDK                                                             | 0.944390372        | 2               | 2.75267   |
| Q63342        | IHYDSIK                                                                   | 0.97212034         | 1               | 2.36116   |
| Q63342        | IMNAGQEEGIDNFGTYALNALR                                                    | 0.977341192        | 2               | 4.482948  |
| Q63342        | ISDIPVTAIR                                                                | 1.125812101        | 2               | 3.336002  |
| Q63342        | ITEHVEAAMEMV PVLK                                                         | 1.548213407        | 2               | 4.64274   |
| Q63342        | KADIINIVNGPITYSPDILPMVGP HQGVR                                            | 1.319516839        | 3               | 5.933321  |
| Q63342        | LEEETGQVVFHQPGSIR                                                         | 1.013055811        | 2               | 4.837958  |
| Q63342        | LNKPADFTGK                                                                | 1.807042646        | 2               | 3.019946  |
| Q63342        | LTSEDLSDDFVK                                                              | 1.038733088        | 2               | 4.03729   |
| Q63342        | NITDELGV LGVAGPYAR                                                        | 1.682521858        | 2               | 4.770461  |
| Q63342        | NYPATIIQEPLV LTEPTR                                                       | 1.147530842        | 2               | 4.47272   |
| Q63342        | REDSAALYER                                                                | 0.576733887        | 2               | 2.65566   |
| Q63342        | TNWHATEQYIIIEPEK                                                          | 0.784747881        | 2               | 3.712564  |
| Q63342        | VGFTNISHMLTPR                                                             | 0.912974016        | 2               | 3.113694  |
| Q63342        | VGVIDLSPFGK                                                               | 1.121169685        | 2               | 3.529462  |
| Q63342        | VIGNTTSGSYSYIQK                                                           | 1.179872261        | 2               | 4.335649  |
| Q63342        | VYAELTVSHQSPGEFLITGSGSELHDLR                                              | 2.01922086         | 3               | 4.308772  |
| Q63342        | WIEEA AVR                                                                 | 1.375636555        | 2               | 2.817202  |
| Q63342        | WTTTQYTEAK                                                                | 1.035007384        | 2               | 2.727261  |
| Q63342        | YLSDWILHGEPFDLIEDPNR                                                      | 1.239205245        | 2               | 4.498356  |
| <b>Q63347</b> | <b>PRS7 26S protease regulatory subunit 7</b>                             | <b>1.4477682</b>   | <b>0.003745</b> | <b>7</b>  |
| Q63347        | ALDEGDIALLK                                                               | 1.077511159        | 2               | 2.819002  |
| Q63347        | FDDGAGGDNEVQR                                                             | 1.229033193        | 2               | 4.283764  |
| Q63347        | FVVDLSDQVAPT DIIIEGMR                                                     | 1.147817347        | 2               | 3.72301   |
| Q63347        | IINADSEDPK                                                                | 1.305501367        | 2               | 3.205634  |
| Q63347        | QTLQSEQPLQVAR                                                             | 1.490249388        | 2               | 3.671575  |
| Q63347        | QVEDDIQQLLK                                                               | 1.38698462         | 2               | 2.988644  |
| Q63347        | TMLELINQLDGF DPR                                                          | 1.478970023        | 2               | 3.016543  |
| <b>Q63362</b> | <b>NDUA5 NADH dehydrogenase [ubiquinone] 1 alpha subcomplex subunit 5</b> | <b>1.160410218</b> | <b>0.374127</b> | <b>4</b>  |
| Q63362        | KLENLLQGGEVEEVLQAEK                                                       | 1.221841525        | 2               | 5.702415  |
| Q63362        | KYTEQITSEK                                                                | 1.205620999        | 2               | 2.72064   |
| Q63362        | TTGLVGLAVCDTPHER                                                          | 0.914703166        | 2               | 4.25738   |
| Q63362        | YTEQITSEK                                                                 | 1.204473101        | 1               | 2.323508  |
| <b>Q63413</b> | <b>DX39B Spliceosome RNA helicase Ddx39b</b>                              | <b>1.914265479</b> | <b>0.054664</b> | <b>2</b>  |
| Q63413        | CIALAQLLVEQNFP AIAIHR                                                     | 1.915732347        | 3               | 3.392187  |
| Q63413        | NCPHIVGTPGR                                                               | 1.47938345         | 2               | 2.981466  |
| <b>Q63429</b> | <b>UBC Polyubiquitin_C</b>                                                | <b>1.216336404</b> | <b>0.082153</b> | <b>3</b>  |
| Q63429        | ESTLHLVLR                                                                 | 1.010109042        | 2               | 2.504061  |
| Q63429        | TITLEVPSDTIENVK                                                           | 1.216358747        | 2               | 4.853921  |
| Q63429        | TLSDYNIQK                                                                 | 1.301412245        | 2               | 2.685681  |
| <b>Q63448</b> | <b>ACOX3 Peroxisomal acyl_coenzyme A oxidase 3</b>                        | <b>0.932873661</b> | <b>2.58E-12</b> | <b>10</b> |
| Q63448        | ADWLDSEAPLAAYR                                                            | 0.967039978        | 2               | 4.324253  |



|               |                                                               |                    |                 |           |
|---------------|---------------------------------------------------------------|--------------------|-----------------|-----------|
| Q63448        | EIHALASAGKPLASWTAQR                                           | 1.119956295        | 2               | 4.574153  |
| Q63448        | GGYISGEQTGK                                                   | 0.816007385        | 2               | 3.011995  |
| Q63448        | LGASLGSLSGR                                                   | 0.751606139        | 2               | 2.710799  |
| Q63448        | NLWAAVLQSGVLER                                                | 1.215360376        | 2               | 4.517843  |
| Q63448        | QFGPTDKKEIPVLEYPLQQWR                                         | 0.920755484        | 3               | 4.515859  |
| Q63448        | TIFLDLIELQR                                                   | 1.745992255        | 2               | 2.51954   |
| Q63448        | TIFSTLENDPLFARPFADLPLEK                                       | 1.254290748        | 3               | 4.506968  |
| Q63448        | TTAHYDPATQEFILHSPDFEAAK                                       | 0.931071933        | 3               | 4.468224  |
| Q63448        | TVNFLEAYPGILGQK                                               | 1.248847852        | 2               | 5.116671  |
| <b>Q63507</b> | <b>RL14 60S ribosomal protein L14</b>                         | <b>1.502985457</b> | <b>1.69E-06</b> | <b>3</b>  |
| Q63507        | CMQLTDFILK                                                    | 1.00715588         | 2               | 2.756161  |
| Q63507        | LVAIVDVIDQNR                                                  | 1.776351193        | 2               | 4.12323   |
| Q63507        | RFVEVGR                                                       | 1.194671632        | 2               | 2.35885   |
| <b>Q63524</b> | <b>TMED2 Transmembrane emp24 domain_containing protein 2</b>  | <b>1.317281551</b> | <b>0.001687</b> | <b>4</b>  |
| Q63524        | GQDMETEAHQNKLEEMINELAVAMTAVK                                  | 1.241325295        | 3               | 4.564274  |
| Q63524        | HEQEYMEVR                                                     | 1.629419825        | 2               | 3.437142  |
| Q63524        | HEQEYMEVR+Oxidation(5                                         | 1.372459103        |                 |           |
| Q63524        | LEEMINELAVAMTAVK                                              | 1.215448243        | 2               | 3.542566  |
| <b>Q63525</b> | <b>NUDC Nuclear migration protein nudC</b>                    | <b>1.317905922</b> | <b>0.014991</b> | <b>4</b>  |
| Q63525        | GQAPVIDGELYNEVK                                               | 1.13416497         | 2               | 3.611216  |
| Q63525        | LVTSDPEINTK                                                   | 1.441400313        | 2               | 2.437115  |
| Q63525        | VEESSWLIEDGK                                                  | 1.249769001        | 2               | 2.417131  |
| Q63525        | WTQTLSELDAVPPFR                                               | 1.387748591        | 2               | 2.831102  |
| <b>Q63569</b> | <b>PRS6A 26S protease regulatory subunit 6A</b>               | <b>1.277422115</b> | <b>0.001865</b> | <b>6</b>  |
| Q63569        | AMEVDERPTEQYSDIGGLDK                                          | 1.153311069        | 3               | 5.327534  |
| Q63569        | CTDDFNGAQCK                                                   | 2.058883014        | 2               | 3.261086  |
| Q63569        | MNVSPDVNYEELAR                                                | 1.280198086        | 2               | 3.575395  |
| Q63569        | QTYFLPVIGLVDAEK                                               | 1.186642112        | 2               | 2.46088   |
| Q63569        | TMLELLNQLDGFQPNQVK                                            | 0.7730739          | 2               | 3.929385  |
| Q63569        | VDILDPELLR                                                    | 1.371222081        | 2               | 2.910823  |
| <b>Q63570</b> | <b>PRS6B 26S protease regulatory subunit 6B</b>               | <b>1.118767083</b> | <b>0.403472</b> | <b>4</b>  |
| Q63570        | FDAQTGADR                                                     | 1.420442194        | 2               | 2.738136  |
| Q63570        | IQDEIPALSVSRPQTGLSFLGPEPEDEDLYSR                              | 1.242049968        | 3               | 5.808391  |
| Q63570        | KDEQEHEFYK                                                    | 1.387577853        | 2               | 3.420682  |
| Q63570        | RFDAQTGADR                                                    | 0.875558453        | 2               | 3.018686  |
| <b>Q63584</b> | <b>TMEDA Transmembrane emp24 domain_containing protein 10</b> | <b>1.391601343</b> | <b>1.67E-14</b> | <b>4</b>  |
| Q63584        | ITDSAGHILYAK                                                  | 1.446754912        | 2               | 3.733475  |
| Q63584        | LEDLSESIVNDFAYMK                                              | 1.942877344        | 2               | 3.581854  |
| Q63584        | NYEEIAK                                                       | 1.423706558        | 1               | 2.409726  |
| Q63584        | RLEDLSESIVNDFAYMK                                             | 1.384415609        | 2               | 3.669169  |
| <b>Q63598</b> | <b>PLST Plastin_3</b>                                         | <b>1.183161561</b> | <b>0.102968</b> | <b>13</b> |
| Q63598        | AESMLQQADK                                                    | 1.468166406        | 2               | 3.424381  |
| Q63598        | ATDDIIVNWVNGTLSEAGK                                           | 0.95477258         | 2               | 5.112678  |
| Q63598        | AVGDGIVLCK                                                    | 3.12923071         | 2               | 2.445187  |
| Q63598        | EGICALGGTSELSSEGTQHSYSEEEK                                    | 0.98321249         | 3               | 3.473838  |
| Q63598        | HVIPMNPNTDDLK                                                 | 1.165954808        | 2               | 3.038685  |
| Q63598        | IDINMSGFNETDDLK                                               | 1.195244099        | 2               | 4.460014  |
| Q63598        | INNFSAK                                                       | 1.477151766        | 2               | 2.393737  |
| Q63598        | KLENCNYAVELGK                                                 | 1.258443113        | 2               | 3.730831  |
| Q63598        | NEALAALLR                                                     | 1.074990404        | 2               | 2.611552  |
| Q63598        | TISSSLAVVDLIDAIQPGCINYLK                                      | 1.263024523        | 3               | 3.565217  |
| Q63598        | VYALPEDLVEVKPK                                                | 1.335079037        | 2               | 3.090429  |
| Q63598        | YPALTKPENQDIDWTLEGETR                                         | 1.255465716        | 3               | 5.370895  |
| Q63598        | YTLNVMEDLGEGQK                                                | 1.085268208        | 2               | 3.683099  |
| <b>Q63610</b> | <b>TPM3 Tropomyosin alpha_3 chain</b>                         | <b>1.198381769</b> | <b>0.997082</b> | <b>8</b>  |

|               |                                                     |                    |                 |           |
|---------------|-----------------------------------------------------|--------------------|-----------------|-----------|
| Q63610        | IQVLQQQADDAEER                                      | 1.297626689        | 2               | 5.125083  |
| Q63610        | KIQLVQQQADDAEER                                     | 1.273066144        | 2               | 5.435381  |
| Q63610        | KLVIIEGDLER                                         | 1.292661925        | 2               | 3.228494  |
| Q63610        | LEKTIDDEDLKLK                                       | 3.055996836        | 2               | 2.718252  |
| Q63610        | LVIIEGDLER                                          | 1.17089355         | 2               | 2.947642  |
| Q63610        | MELQEIQLK                                           | 1.175448826        | 2               | 3.123402  |
| Q63610        | TIDDEDLKLK                                          | 1.2823218          | 2               | 2.696399  |
| Q63610        | YSQKEDKYEEIEK                                       | 1.182447896        | 2               | 4.949893  |
| <b>Q63617</b> | <b>HYOU1 Hypoxia up_regulated protein 1</b>         | <b>1.208400172</b> | <b>0.001898</b> | <b>15</b> |
| Q63617        | AANSLEAFIFETQDK                                     | 1.638951787        | 2               | 2.560568  |
| Q63617        | DAVITVPAFFNQAER                                     | 1.01948578         | 2               | 2.80569   |
| Q63617        | EGETPDEKESGDKSEAQKPNK                               | 1.004999854        | 3               | 3.991046  |
| Q63617        | FLGDSAAGMAIK                                        | 1.027264936        | 2               | 2.522767  |
| Q63617        | GQAGPEGVPPAPEEEKK                                   | 1.28771306         | 2               | 3.41887   |
| Q63617        | LIPEMDQIFTDVEMTTLEK                                 | 1.534994164        | 2               | 3.352895  |
| Q63617        | LYQPEYQEVSTEEQR                                     | 1.159927332        | 2               | 5.265845  |
| Q63617        | NINADEAAAMGAVYQAAALSK                               | 1.379137668        | 2               | 5.327019  |
| Q63617        | SLAEDFAEQPIK                                        | 1.196298757        | 2               | 2.982169  |
| Q63617        | SLAEDFAEQPIKDAVITVPAFFNQAER                         | 1.850523432        | 3               | 3.439419  |
| Q63617        | TLGGLEMELR                                          | 1.337502804        | 2               | 2.974303  |
| Q63617        | TVLSANADHMAQIEGLMDDVDFK                             | 1.551156836        | 3               | 3.889606  |
| Q63617        | VEFEELCADLFR                                        | 2.157563798        | 2               | 3.421132  |
| Q63617        | VESVFETLVEDSPEEESTLTK                               | 1.527394027        | 2               | 4.015532  |
| Q63617        | VLQLINDNTATALSYGVFR                                 | 1.176941448        | 2               | 4.689823  |
| <b>Q63692</b> | <b>CDC37 Hsp90 co_chaperone Cdc37</b>               | <b>1.583194236</b> | <b>0.024865</b> | <b>2</b>  |
| Q63692        | EGEEAGPGDPLLEAVPK                                   | 1.583221155        | 2               | 3.325545  |
| Q63692        | LGPGLDPVEVYSLPEELQK                                 | 1.411171802        | 2               | 3.007656  |
| <b>Q63716</b> | <b>PRDX1 Peroxiredoxin_1</b>                        | <b>1.207947959</b> | <b>0.060274</b> | <b>15</b> |
| Q63716        | ADEGISFR                                            | 1.107925795        | 2               | 3.079179  |
| Q63716        | ATAVMPDGQFK                                         | 1.199077157        | 2               | 2.873782  |
| Q63716        | GLFIIDDKGILR                                        | 1.31348609         | 2               | 2.862012  |
| Q63716        | HGEVCPAGWKPGSDTIKPDVVK                              | 1.247772418        | 4               | 5.822434  |
| Q63716        | IGHPAPFSK                                           | 3.105697639        | 1               | 1.91633   |
| Q63716        | KQGGLGPMNIPLVSDPK                                   | 1.149346948        | 2               | 4.070116  |
| Q63716        | KQGGLGPMNIPLVSDPKR                                  | 0.874466472        | 3               | 3.810011  |
| Q63716        | LNCQVIGASVDSHFCHLAWINTPK                            | 1.631146107        | 3               | 3.391421  |
| Q63716        | LVQAFQFTDK                                          | 1.680162029        | 2               | 3.297121  |
| Q63716        | QGGLGPMNIPLVSDPK                                    | 1.08473873         | 2               | 3.139241  |
| Q63716        | QGGLGPMNIPLVSDPK+Oxidation(6                        | 1.319425625        |                 |           |
| Q63716        | QITINDLPVGR                                         | 1.135630509        | 2               | 3.154166  |
| Q63716        | RTIAQDYGVLK                                         | 1.354966651        | 2               | 2.481167  |
| Q63716        | SVDEILR                                             | 1.2589895          | 2               | 2.482807  |
| Q63716        | TIAQDYGVLK                                          | 1.154550874        | 2               | 3.210533  |
| <b>Q63797</b> | <b>PSME1 Proteasome activator complex subunit 1</b> | <b>1.179727158</b> | <b>3.63E-07</b> | <b>10</b> |
| Q63797        | ISELDAFLK                                           | 1.169137038        | 2               | 2.369173  |
| Q63797        | ISELDAFLKEPALNEANLSNLK                              | 1.567313415        | 2               | 5.35168   |
| Q63797        | KGDEDDKGPCCGPVNCNEK                                 | 1.450819499        | 3               | 4.816278  |
| Q63797        | KISELDAFLKEPALNEANLSNLK                             | 1.08393015         | 3               | 5.881336  |
| Q63797        | LEGFQTQISK                                          | 1.333334291        | 2               | 2.71279   |
| Q63797        | NAYAVLYDIILK                                        | 2.04949205         | 2               | 3.557421  |
| Q63797        | QLVHELDEAEYQEIR                                     | 1.184417614        | 2               | 4.185077  |
| Q63797        | TENLLGSYFPK                                         | 1.118646182        | 2               | 3.494833  |
| Q63797        | VDVFREDLCSK                                         | 1.241781655        | 2               | 2.521598  |
| Q63797        | VFELMTSLHTK                                         | 1.045800682        | 2               | 3.047935  |
| <b>Q63798</b> | <b>PSME2 Proteasome activator complex subunit 2</b> | <b>1.141367391</b> | <b>0.185087</b> | <b>4</b>  |
| Q63798        | AFYAELHHIISNLEK                                     | 1.047022884        | 2               | 3.915185  |
| Q63798        | IEDGNDFGVAIQEK                                      | 1.702430365        | 2               | 4.049587  |

|               |                                                                          |                    |                 |           |
|---------------|--------------------------------------------------------------------------|--------------------|-----------------|-----------|
| Q63798        | KIISLSQLQEDSLNVADLSSLR                                                   | 1.518618868        | 3               | 3.63328   |
| Q63798        | TKVEAFQTAISK                                                             | 1.038793127        | 2               | 3.561247  |
| <b>Q63836</b> | <b>SBP2 Selenium_binding protein 2</b>                                   | <b>1.56740554</b>  | <b>4.77E-05</b> | <b>3</b>  |
| Q63836        | GGSVQVLEDQELTCQPEPLVVK                                                   | 2.477971339        | 2               | 5.340981  |
| Q63836        | IYVVDVGSEPR                                                              | 1.279876385        | 2               | 3.828118  |
| Q63836        | LNPNFLVDFGKEPLGPAHELRL                                                   | 1.333259684        | 3               | 3.843831  |
| <b>Q63945</b> | <b>SET Protein SET</b>                                                   | <b>1.464765206</b> | <b>0.008916</b> | <b>2</b>  |
| Q63945        | IDFYFDENPYFENK                                                           | 2.013264244        | 2               | 4.279914  |
| Q63945        | LNEQASEEILK                                                              | 1.349910928        | 2               | 3.167086  |
| <b>Q63965</b> | <b>SFXN1 Sideroflexin_1</b>                                              | <b>1.243508781</b> | <b>0.09474</b>  | <b>5</b>  |
| Q63965        | NILLTNEQLENAR                                                            | 1.169781008        | 2               | 4.389843  |
| Q63965        | QAITQVVISR                                                               | 1.388356823        | 2               | 2.336221  |
| Q63965        | QGIVPAGLTENELWR                                                          | 1.539454116        | 2               | 3.176319  |
| Q63965        | WDQSTFIGR                                                                | 1.005016449        | 2               | 2.791946  |
| Q63965        | YAYDSAFHPDTGEK                                                           | 1.360527479        | 2               | 4.284468  |
| <b>Q64012</b> | <b>RALY RNA_binding protein Raly</b>                                     | <b>1.265907245</b> | <b>0.364747</b> | <b>2</b>  |
| Q64012        | LEQIAEEQK                                                                | 1.384705454        | 2               | 2.521497  |
| Q64012        | SNIDALLGR                                                                | 1.253587995        | 2               | 2.356158  |
| <b>Q64057</b> | <b>AL7A1 Alpha_aminoadipic semialdehyde dehydrogenase</b>                | <b>1.198189618</b> | <b>9.9E-20</b>  | <b>19</b> |
| Q64057        | AWNIIWADIPAPK                                                            | 1.470463929        | 2               | 3.805845  |
| Q64057        | DYEETIGK                                                                 | 2.166126113        | 1               | 1.928674  |
| Q64057        | EDNEGVFNQSWGGR                                                           | 1.325183912        | 2               | 3.688457  |
| Q64057        | FKNEEEVFEWNNEVK                                                          | 1.178584182        | 2               | 5.75616   |
| Q64057        | GAPTTSLVSIIVTK                                                           | 1.122465233        | 2               | 5.005093  |
| Q64057        | GEVITTYCPANNEPIAR                                                        | 1.113157346        | 2               | 5.007843  |
| Q64057        | GSDCGIVNVNIPTSGAIEGAFGGEK                                                | 0.879741523        | 2               | 5.600403  |
| Q64057        | LFLHESIHDEVVDR                                                           | 1.760839572        | 2               | 4.37684   |
| Q64057        | LVSLEMGK                                                                 | 1.920957694        | 2               | 2.44717   |
| Q64057        | NEEEVFEWNNEVK                                                            | 1.290003756        | 2               | 4.569401  |
| Q64057        | QAVSMFVQAVEEAK                                                           | 1.602287116        | 2               | 3.391872  |
| Q64057        | QAVSMFVQAVEEAKK                                                          | 1.309856327        | 2               | 2.838072  |
| Q64057        | QGLSSSIFTK                                                               | 1.886140184        | 2               | 2.753333  |
| Q64057        | QVALMVQER                                                                | 1.308486111        | 2               | 2.516644  |
| Q64057        | STCTINYSTALPLAQGIK                                                       | 0.882040281        | 2               | 4.87192   |
| Q64057        | VGNPWPDPNLYGPLHTK                                                        | 1.595549102        | 3               | 4.399542  |
| Q64057        | VMDHPGNYVEPTIVTGLVHDAPIVHK                                               | 1.631703041        | 3               | 6.072845  |
| Q64057        | VMDHPGNYVEPTIVTGLVHDAPIVHK+Oxidation(1                                   | 1.854211072        |                 |           |
| Q64057        | VNLLSFTGSTQVVK                                                           | 1.707604041        | 2               | 4.68843   |
| <b>Q64112</b> | <b>IFIT2 Interferon_induced protein with tetratricopeptide repeats 2</b> | <b>0.984946611</b> | <b>0.207759</b> | <b>2</b>  |
| Q64112        | DPSAIDTLRL                                                               | 0.941894053        | 2               | 2.558428  |
| Q64112        | NQAMALVEEALK                                                             | 2.038285311        | 2               | 2.310532  |
| <b>Q64119</b> | <b>MYL6 Myosin light polypeptide 6</b>                                   | <b>1.197364011</b> | <b>9.9E-20</b>  | <b>7</b>  |
| Q64119        | DQGTIEDYVEGLR                                                            | 0.875638487        | 2               | 3.378403  |
| Q64119        | EGNGTVMGAEIR                                                             | 1.322425976        | 2               | 2.730787  |
| Q64119        | HVLVTLGEK                                                                | 1.264977066        | 2               | 2.570175  |
| Q64119        | ILYSQCQDVMR                                                              | 1.367168283        | 2               | 2.918643  |
| Q64119        | NKDQGTIEDYVEGLR                                                          | 1.194428253        | 2               | 4.147234  |
| Q64119        | VFDKEGNGTVMGAEIR                                                         | 1.356200473        | 2               | 4.115485  |
| Q64119        | VLDFEHFLPMLQTVAK                                                         | 1.351103213        | 2               | 4.781628  |
| <b>Q64122</b> | <b>MYL9 Myosin regulatory light polypeptide 9</b>                        | <b>1.35511588</b>  | <b>0.019639</b> | <b>2</b>  |
| Q64122        | DGFIDKEDLHDMLASLGK                                                       | 1.365566108        | 2               | 5.230736  |
| Q64122        | LNGTDPEDVIR                                                              | 1.163324272        | 2               | 2.608849  |
| <b>Q64176</b> | <b>EST22 Liver carboxylesterase 22</b>                                   | <b>1.150778203</b> | <b>0.968186</b> | <b>3</b>  |
| Q64176        | AISESGVALTAGLVK                                                          | 1.15969218         | 2               | 4.588659  |
| Q64176        | EGYLQIGATTQQAQK                                                          | 0.927439442        | 2               | 4.669311  |

|               |                                                                                            |                    |                 |           |
|---------------|--------------------------------------------------------------------------------------------|--------------------|-----------------|-----------|
| Q64176        | NFNTVPYIVGINK                                                                              | 0.91693973         | 2               | 3.469729  |
| <b>Q641Y0</b> | <b>OST48 Dolichyl_diphosphooligosaccharide__protein glycosyltransferase 48 kDa subunit</b> | <b>1.710855063</b> | <b>9.9E-20</b>  | <b>7</b>  |
| Q641Y0        | ELGSECGIEFDEEK                                                                             | 1.191478248        | 2               | 4.040938  |
| Q641Y0        | NLLIAGLQAR                                                                                 | 2.079726688        | 2               | 3.426159  |
| Q641Y0        | SSLNPILFR                                                                                  | 3.115589093        | 2               | 2.467113  |
| Q641Y0        | TADDPSSLIK                                                                                 | 1.188667494        | 2               | 2.577113  |
| Q641Y0        | TAVIDHHNYDVSDLGQHTLIVADTENLLK                                                              | 1.721857409        | 3               | 6.69727   |
| Q641Y0        | TLVLLDNLNVR                                                                                | 1.501201569        | 2               | 4.124851  |
| Q641Y0        | WVPFDGDDIQLEFVR                                                                            | 1.742555774        | 2               | 3.078633  |
| <b>Q641Y2</b> | <b>NDUS2 NADH dehydrogenase [ubiquinone] iron_sulfur protein 2_ mitochondrial</b>          | <b>1.146037546</b> | <b>0.86606</b>  | <b>4</b>  |
| Q641Y2        | GGSIQWDLR                                                                                  | 1.201322365        | 2               | 2.524621  |
| Q641Y2        | IDEVEEMLTNRR                                                                               | 1.288478531        | 2               | 3.860513  |
| Q641Y2        | IIEQCLNK                                                                                   | 1.118247451        | 2               | 2.748193  |
| Q641Y2        | TQPYDVYDQVEFDVPIGSR                                                                        | 1.255911418        | 2               | 4.369472  |
| <b>Q641Z6</b> | <b>EHD1 EH domain_containing protein 1</b>                                                 | <b>1.515488318</b> | <b>0.13936</b>  | <b>2</b>  |
| Q641Z6        | LLDTVDDMLANDIAR                                                                            | 1.514976079        | 2               | 3.935029  |
| Q641Z6        | MQELLQTQDFSK                                                                               | 1.526877193        | 2               | 2.624095  |
| <b>Q64232</b> | <b>TECR Trans_2_3_enoyl_CoA reductase</b>                                                  | <b>1.411921235</b> | <b>0.006413</b> | <b>3</b>  |
| Q64232        | HYEVEIR                                                                                    | 1.359539926        | 2               | 2.497379  |
| Q64232        | LCFLDKVEPQATISEIK                                                                          | 1.947122283        | 2               | 3.605485  |
| Q64232        | SLKDEDVLQK                                                                                 | 1.305119819        | 2               | 3.562632  |
| <b>Q64240</b> | <b>AMBP Protein AMBP</b>                                                                   | <b>0.678512887</b> | <b>0.000217</b> | <b>2</b>  |
| Q64240        | AVLPQENEGSGSEPLITGTLK                                                                      | 1.042097169        | 2               | 4.174345  |
| Q64240        | TIAACNLPVQGPCR                                                                             | 0.675824725        | 2               | 3.838509  |
| <b>Q642G4</b> | <b>PEX14 Peroxisomal membrane protein PEX14</b>                                            | <b>1.332959</b>    | <b>0.536323</b> | <b>2</b>  |
| Q642G4        | GGDGQINEQVEK                                                                               | 1.335390618        | 2               | 2.885967  |
| Q642G4        | LLGPQEEGEGVVDVK                                                                            | 1.328977015        | 2               | 2.780948  |
| <b>Q64380</b> | <b>SARDH Sarcosine dehydrogenase_ mitochondrial</b>                                        | <b>1.343337201</b> | <b>0.345145</b> | <b>20</b> |
| Q64380        | AIDSLSIEK                                                                                  | 1.032182753        | 2               | 3.007977  |
| Q64380        | AYGIESHVLSPAETK                                                                            | 1.299791597        | 2               | 4.948268  |
| Q64380        | DGTMDPAGTCTTLTR                                                                            | 0.822414259        | 2               | 3.882903  |
| Q64380        | DILQDVLADLSNEAFPSTHQLVPR                                                                   | 2.607319692        | 3               | 5.3948    |
| Q64380        | DLYPLMNVDDLYGTLYVPR                                                                        | 1.127268685        | 2               | 3.872077  |
| Q64380        | FHHSLTDHPR                                                                                 | 0.62721607         | 2               | 2.649528  |
| Q64380        | FYLLGADAR                                                                                  | 1.029512989        | 2               | 2.643284  |
| Q64380        | GAQVIENCAVTGIR                                                                             | 0.92746349         | 2               | 3.785055  |
| Q64380        | HGLVNAGYR                                                                                  | 0.795084942        | 2               | 2.681378  |
| Q64380        | IEGIQNMPNVR                                                                                | 0.906857109        | 2               | 3.193539  |
| Q64380        | LGVGGVVLLER                                                                                | 2.636977911        | 2               | 3.277625  |
| Q64380        | LQGDALSVGGYEANPIFWDEVSDK                                                                   | 3.111842769        | 2               | 4.202571  |
| Q64380        | NGDYALER                                                                                   | 0.840821656        | 2               | 2.435715  |
| Q64380        | NYSVVFPHDEPLAGR                                                                            | 0.77321806         | 2               | 4.208261  |
| Q64380        | QVVDHLEETGLHTGWIQNGGLFIASNQQR                                                              | 1.04507059         | 3               | 4.07024   |
| Q64380        | RDPLHEELLGQGCVFQER                                                                         | 3.697104896        | 3               | 5.805913  |
| Q64380        | SDDSPLEAGLAFTCK                                                                            | 1.981744661        | 2               | 4.519202  |
| Q64380        | STVCGPESFTPDKPLMGEAPELR                                                                    | 0.897631321        | 3               | 4.863589  |
| Q64380        | STVCGPESFTPDKPLMGEAPELR+Oxidation(16                                                       | 1.370759094        |                 |           |
| Q64380        | VTAVETQHGSIQTPCVVNCAGVWASSVGR                                                              | 1.048418556        | 3               | 5.767711  |
| <b>Q64428</b> | <b>ECHA Trifunctional enzyme subunit alpha_ mitochondrial</b>                              | <b>1.18104816</b>  | <b>4.55E-13</b> | <b>29</b> |
| Q64428        | ADMVIEAVFEDLAVK                                                                            | 1.437831146        | 3               | 4.110341  |
| Q64428        | ALMGLYNGQVLCK                                                                              | 1.558675988        | 2               | 3.459968  |
| Q64428        | CLAPMMSEVIR                                                                                | 2.923552914        | 2               | 2.497653  |
| Q64428        | DGPGFYTR                                                                                   | 5.86947697         | 2               | 2.31759   |

|               |                                             |                    |                 |           |
|---------------|---------------------------------------------|--------------------|-----------------|-----------|
| Q64428        | DSIFSNLIGQLDYK                              | 1.314277542        | 2               | 3.05077   |
| Q64428        | DTTASAVAVGLK                                | 1.563630456        | 2               | 3.799399  |
| Q64428        | EVESVTPEHCIFASNTSALPINQIAAVSQRPEK           | 0.958894524        | 3               | 6.314146  |
| Q64428        | EVQSEFVEVMNEIWANDQIR                        | 1.634523781        | 3               | 4.206859  |
| Q64428        | FGELALTK                                    | 1.194063396        | 2               | 3.02917   |
| Q64428        | FGGGSVELLK                                  | 1.160327476        | 2               | 3.188765  |
| Q64428        | FVDLYGAQK                                   | 1.205430977        | 2               | 3.02356   |
| Q64428        | GFYIYQSGSK                                  | 0.997936927        | 2               | 3.05216   |
| Q64428        | ILQEGVDPK                                   | 1.616764482        | 2               | 3.18369   |
| Q64428        | KLDALTTGFGFPVGAATLADEVGIDVAQHVAEDLGK        | 1.224100758        | 4               | 5.436531  |
| Q64428        | KTVLGVPEVLLGILPGAGGTQR                      | 1.510723189        | 3               | 4.150676  |
| Q64428        | KYESAYGTQFTPCQLLR                           | 1.691675574        | 2               | 4.704691  |
| Q64428        | LPAKPEVSSDEDIQYR                            | 1.128670842        | 3               | 4.469494  |
| Q64428        | MGLVDQLVDPLGPGIK                            | 1.273170945        | 2               | 5.084553  |
| Q64428        | MGLVDQLVDPLGPGIK+Oxidation(0                | 0.970700559        |                 |           |
| Q64428        | MQLLEIITTDK                                 | 1.24348143         | 2               | 3.820327  |
| Q64428        | MQLLEIITTDK+Oxidation(0                     | 1.680899095        |                 |           |
| Q64428        | MVGVPAAFDMMMLTGR                            | 1.77525903         | 2               | 3.337604  |
| Q64428        | NLNSEIDNILVNL                               | 1.157277725        | 2               | 4.415108  |
| Q64428        | SAVLISSKPGCFVAGADINMLASCTTPQEAAAR           | 1.360717637        | 3               | 3.886035  |
| Q64428        | TGLEQGNDAGYLAESEK                           | 1.194763844        | 2               | 5.102751  |
| Q64428        | TIEYLEEVAVNFAK                              | 1.365123312        | 2               | 3.804162  |
| Q64428        | TVLGVPEVLLGILPGAGGTQR                       | 1.208682416        | 3               | 4.751201  |
| Q64428        | TVQQLAILGAGLMGAGIAQVSVDK                    | 1.324693089        | 3               | 6.030047  |
| Q64428        | YESAYGTQFTPCQLLR                            | 1.382325084        | 2               | 4.007347  |
| <b>Q64458</b> | <b>CP2CT Cytochrome P450 2C29</b>           | <b>1.069589859</b> | <b>0.000126</b> | <b>6</b>  |
| Q64458        | EHKESLDVTNPR                                | 1.21823895         | 2               | 3.409563  |
| Q64458        | IKEHKESLDVTNPR                              | 1.003556432        | 3               | 5.204857  |
| Q64458        | LPPGPTPLPIIGNFLQIDVK                        | 2.16952633         | 3               | 4.986677  |
| Q64458        | VQEEAQCLVEELR                               | 1.683004827        | 2               | 4.202095  |
| Q64458        | VQEEAQCLVEELRK                              | 1.178211243        | 2               | 3.801943  |
| Q64458        | VQEEIDR                                     | 1.134370959        | 2               | 2.530909  |
| <b>Q64464</b> | <b>CP3AD Cytochrome P450 3A13</b>           | <b>1.159077333</b> | <b>0.960042</b> | <b>2</b>  |
| Q64464        | ALLSPTFTSGR                                 | 1.159364398        | 2               | 2.893162  |
| Q64464        | LQDEIDAALPNK                                | 1.102158536        | 2               | 2.414547  |
| <b>Q64481</b> | <b>CP3AG Cytochrome P450 3A16</b>           | <b>0.993127719</b> | <b>0.086862</b> | <b>3</b>  |
| Q64481        | EMFPVIEQYGDILVK                             | 1.931751086        | 2               | 2.403791  |
| Q64481        | GSIDPYVYLPFGNGPR                            | 1.161579858        | 2               | 4.043172  |
| Q64481        | VLQNFQFQPK                                  | 0.981474691        | 2               | 2.78413   |
| <b>Q64550</b> | <b>UD11 UDP-glucuronosyltransferase 1_1</b> | <b>0.894942709</b> | <b>1.05E-10</b> | <b>4</b>  |
| Q64550        | GHEVVVIAPEASIIHK                            | 1.318378827        | 2               | 4.61325   |
| Q64550        | NMIIALTENFLCR                               | 1.184983411        | 2               | 4.504038  |
| Q64550        | SVFDQDPFLR                                  | 3.393885971        | 2               | 3.46737   |
| Q64550        | VVYSPYGLATEILQK                             | 1.270265067        | 2               | 4.966804  |
| <b>Q64560</b> | <b>TPP2 Tripeptidyl-peptidase 2</b>         | <b>0.974449826</b> | <b>0.696016</b> | <b>3</b>  |
| Q64560        | ACVDSNENGDGK                                | 0.972588573        | 2               | 3.487929  |
| Q64560        | GTLIEAFPVLGGK                               | 1.115552946        | 2               | 3.172281  |
| Q64560        | HEQISLDR                                    | 1.494856769        | 2               | 2.596377  |
| <b>Q64563</b> | <b>ADH4 Alcohol dehydrogenase 4</b>         | <b>1.080486573</b> | <b>0.646806</b> | <b>15</b> |
| Q64563        | AAVDCTVVGWGSCTVVGAK                         | 2.77334578         | 2               | 2.594997  |
| Q64563        | ALFPVVLGHECAGIVESVGPVGNFKPGDK               | 1.585458291        | 3               | 5.721965  |
| Q64563        | ALGATDCLNPR                                 | 2.007193719        | 2               | 3.232743  |
| Q64563        | DLDKPVQDVITELTGGGVDFSLDCAGTAQTLK            | 1.964934578        | 3               | 6.054819  |
| Q64563        | FDLDDLVTALPFDK                              | 1.49373213         | 3               | 4.300697  |
| Q64563        | IIAIDINSEKFPK                               | 0.920217369        | 2               | 3.069661  |
| Q64563        | INDAIDL MNQ GK                              | 1.647620023        | 2               | 4.166101  |
| Q64563        | KFDLDDLVTALPFDK                             | 1.028423487        | 3               | 5.280221  |

|               |                                                                            |                    |                 |           |
|---------------|----------------------------------------------------------------------------|--------------------|-----------------|-----------|
| Q64563        | LCLSPLTNLCGK                                                               | 0.95186328         | 2               | 2.466152  |
| Q64563        | SVDSVPLNLVTDYK                                                             | 2.254471136        | 2               | 3.492907  |
| Q64563        | TDSPLCIEEIEVSPPK                                                           | 1.367932365        | 2               | 4.113116  |
| Q64563        | VCLIGCGFTSGYGAAINTAK                                                       | 0.346294984        | 2               | 4.880959  |
| Q64563        | VDDEANLER                                                                  | 1.48975909         | 2               | 3.091066  |
| Q64563        | VDEMNIQVDMILGR                                                             | 1.575651238        | 2               | 4.069987  |
| Q64563        | VIATCVCPDINATNPK                                                           | 1.417642595        | 2               | 4.701272  |
| <b>Q64565</b> | <b>AGT2 Alanine__glyoxylate aminotransferase 2_ mitochondrial</b>          | <b>1.009707273</b> | <b>0.12248</b>  | <b>15</b> |
| Q64565        | AYSNHTDIISFR                                                               | 1.371443764        | 2               | 3.484087  |
| Q64565        | GGNFSQTFR                                                                  | 1.011148889        | 2               | 2.597938  |
| Q64565        | GGVCIADDEVQTFGR                                                            | 0.76464025         | 2               | 4.041951  |
| Q64565        | GIGNGFMAAVVTTPETIASLAK                                                     | 1.405128412        | 2               | 4.326011  |
| Q64565        | GLMVGIEVMVQDK                                                              | 1.846572369        | 2               | 3.37818   |
| Q64565        | HNMPPCDFSPK                                                                | 0.892620391        | 2               | 3.234702  |
| Q64565        | LSALLPEPLK                                                                 | 1.712911095        | 2               | 2.752019  |
| Q64565        | NSQEVGTVMMLK                                                               | 0.788550096        | 2               | 3.318816  |
| Q64565        | SALTQHMER                                                                  | 1.66351155         | 2               | 2.529057  |
| Q64565        | SALTQHMER+Oxidation(6                                                      | 1.521226493        |                 |           |
| Q64565        | TEVNQIHEDCK                                                                | 1.064476164        | 2               | 3.296992  |
| Q64565        | TEVNQIHEDCKDMLLVGR                                                         | 1.123005344        | 2               | 5.248972  |
| Q64565        | VIFLVNSGSEANDLAMVMAR                                                       | 2.131051548        | 2               | 3.166913  |
| Q64565        | YIEQFK                                                                     | 1.054067125        | 1               | 2.257898  |
| Q64565        | YQSLAYNHVLEIHK                                                             | 1.727170777        | 2               | 3.953983  |
| <b>Q64578</b> | <b>AT2A1 Sarcoplasmic/endoplasmic reticulum calcium ATPase 1</b>           | <b>2.233482629</b> | <b>0.980983</b> | <b>9</b>  |
| Q64578        | AVGIVATTGVSTEIGK                                                           | 3.981403865        | 2               | 3.425933  |
| Q64578        | DIVPGDIVEVAVGDKVPADIR                                                      | 3.829999621        | 2               | 3.384947  |
| Q64578        | IGIFSENEEVADR                                                              | 1.688160667        | 2               | 3.403374  |
| Q64578        | IRDQMAATEQDKTPLQK                                                          | 2.14434084         | 3               | 4.392905  |
| Q64578        | MNVFNTEVR                                                                  | 1.621011372        | 2               | 2.787178  |
| Q64578        | REEMVLDDSAK                                                                | 2.245782223        | 2               | 2.768773  |
| Q64578        | TGTLTTNQMSVCK                                                              | 2.61004409         | 2               | 3.445841  |
| Q64578        | VGEATETALTTLVEK                                                            | 3.531420682        | 2               | 4.49547   |
| Q64578        | YGNELPAEEGK                                                                | 2.079388634        | 2               | 3.010919  |
| <b>Q64581</b> | <b>CP3A1 Cytochrome P450 3A18</b>                                          | <b>0.825544941</b> | <b>0.732816</b> | <b>3</b>  |
| Q64581        | AITMSEDEEWKR                                                               | 1.141309668        | 2               | 2.317189  |
| Q64581        | LAVIGVLQNFNIQCEK                                                           | 1.528443403        | 2               | 3.205315  |
| Q64581        | NPEYWLEPEEFNPER                                                            | 1.100070574        | 2               | 3.861085  |
| <b>Q64591</b> | <b>DECR 2_4_dienoyl_CoA reductase_ mitochondrial</b>                       | <b>1.045965786</b> | <b>0.583106</b> | <b>10</b> |
| Q64591        | ATAEEITSK                                                                  | 1.371153141        | 2               | 3.017014  |
| Q64591        | CDVRDPDMVHNTVLELIK                                                         | 0.973525307        | 4               | 5.052145  |
| Q64591        | DPDMVHNTVLELIK                                                             | 1.201628704        | 3               | 4.141829  |
| Q64591        | EEWDVIEGLIR                                                                | 0.74573415         | 2               | 3.543766  |
| Q64591        | FFPILKPMPLPPNAFQGK                                                         | 1.005324496        | 2               | 3.259077  |
| Q64591        | FNIIQPGPIK                                                                 | 0.6291568          | 2               | 2.892037  |
| Q64591        | NIDVLK                                                                     | 0.915040838        | 1               | 2.289355  |
| Q64591        | SLAAEWGR                                                                   | 0.947764227        | 2               | 2.376821  |
| Q64591        | VAFITGGGTGLGK                                                              | 1.31477292         | 2               | 2.690706  |
| Q64591        | VTKEEWDVIEGLIR                                                             | 0.960718703        | 3               | 4.901304  |
| <b>Q64602</b> | <b>AADAT Kynurenine/alpha_aminoadipate aminotransferase_ mitochondrial</b> | <b>1.420324859</b> | <b>2.24E-05</b> | <b>7</b>  |
| Q64602        | ASFSQVTPAQMDLVFQR                                                          | 1.29835865         | 2               | 4.488817  |
| Q64602        | DIISLAPGSPNPK                                                              | 0.726620223        | 2               | 3.217999  |
| Q64602        | EILLVPGNSFFVDNSAPSSFFR                                                     | 1.608977491        | 2               | 3.481009  |
| Q64602        | FLYTIPNGNPTGNSLTGDR                                                        | 1.19160931         | 2               | 3.988447  |
| Q64602        | LHNPPTVNYSPNEGQMDLCITSGCQDGLCK                                             | 2.110876027        | 3               | 6.467585  |

|               |                                                         |                    |                 |           |
|---------------|---------------------------------------------------------|--------------------|-----------------|-----------|
| Q64602        | SAVFTVENGSTIR                                           | 1.150406262        | 2               | 4.105209  |
| Q64602        | VLSQWKPEDSKDPTKR                                        | 1.420333715        | 3               | 4.140683  |
| <b>Q64611</b> | <b>CSAD Cysteine sulfinic acid decarboxylase</b>        | <b>1.214150449</b> | <b>0.683657</b> | <b>14</b> |
| Q64611        | AQGGQGLEWR                                              | 1.254990701        | 2               | 2.939613  |
| Q64611        | CHGSQASYLFQQDK                                          | 0.880711534        | 2               | 4.960562  |
| Q64611        | DVFGIVVDEAIR                                            | 1.724357129        | 2               | 3.076346  |
| Q64611        | FFNQLFSGLDPHALAGR                                       | 1.22226713         | 3               | 3.853553  |
| Q64611        | FYNVALDTGDK                                             | 0.965734195        | 2               | 3.106771  |
| Q64611        | GAAFLGLGTDSVR                                           | 1.317698702        | 2               | 3.245358  |
| Q64611        | GTMMIGYQPHGTR                                           | 1.437155045        | 2               | 2.872854  |
| Q64611        | IDQAFALTR                                               | 1.127760457        | 2               | 3.462724  |
| Q64611        | KGTMIGYQPHGTR                                           | 1.451212879        | 3               | 3.979218  |
| Q64611        | LSQVAPVLK                                               | 0.824929638        | 2               | 2.301967  |
| Q64611        | QLLDLELQSQGESR                                          | 1.160670997        | 2               | 4.516384  |
| Q64611        | TLDGDPVAVEALLR                                          | 1.160413758        | 2               | 4.602102  |
| Q64611        | VCEWKEPEELK                                             | 1.325812035        | 3               | 3.724098  |
| Q64611        | YLVEEIK                                                 | 1.357973537        | 1               | 2.407216  |
| <b>Q64638</b> | <b>UD15 UDP-glucuronosyltransferase 1_5</b>             | <b>1.282685042</b> | <b>0.039728</b> | <b>2</b>  |
| Q64638        | VVFETGNYVK                                              | 1.214852444        | 1               | 2.058449  |
| Q64638        | YESLASELLQR                                             | 1.292191869        | 2               | 3.033484  |
| <b>Q64640</b> | <b>ADK Adenosine kinase</b>                             | <b>1.138777381</b> | <b>0.027331</b> | <b>11</b> |
| Q64640        | AADAHVDAHYYEQNEQPTGTCAACITGGNR                          | 1.344605118        | 3               | 7.141896  |
| Q64640        | AATFFGCIGIDK                                            | 1.134651274        | 2               | 3.330186  |
| Q64640        | AGHYAASVIIR                                             | 1.350300012        | 3               | 3.634379  |
| Q64640        | FGEILK                                                  | 1.202468201        | 2               | 2.352203  |
| Q64640        | FKVEYHAGGSTQNSMK                                        | 1.174676901        | 2               | 4.106092  |
| Q64640        | HKELFDELVK                                              | 1.04020625         | 3               | 4.053576  |
| Q64640        | SLVANLAAANCYK                                           | 1.098442419        | 2               | 4.331227  |
| Q64640        | TGCTFPEKPDFH                                            | 1.663961713        | 2               | 2.742945  |
| Q64640        | VEYHAGGSTQNSMK                                          | 1.604017084        | 2               | 4.060144  |
| Q64640        | VEYHAGGSTQNSMK+Oxidation(12)                            | 1.131344939        |                 |           |
| Q64640        | YSLKPNQILAEDK                                           | 1.238237333        | 3               | 4.259914  |
| <b>Q64654</b> | <b>CP51A Lanosterol 14_alpha demethylase</b>            | <b>1.213462568</b> | <b>0.241415</b> | <b>8</b>  |
| Q64654        | EPAEDILQTLDDSTYK                                        | 1.023189421        | 2               | 3.824011  |
| Q64654        | GVAYDVPNAVFLQK                                          | 1.013792163        | 2               | 4.325193  |
| Q64654        | NEDLNAAEEVYGR                                           | 0.789933574        | 2               | 3.723989  |
| Q64654        | SGLNIAHFK                                               | 6.793293377        | 2               | 2.99592   |
| Q64654        | TFTYLLGSDAAALLFNSK                                      | 2.025779653        | 3               | 3.90519   |
| Q64654        | TVCGEDLPPLTYEQLK                                        | 1.214930458        | 2               | 4.42687   |
| Q64654        | YGPVFSFTMVGK                                            | 1.20088762         | 2               | 2.809703  |
| Q64654        | YLQDNPASGEK                                             | 1.725590242        | 2               | 2.793907  |
| <b>Q65240</b> | <b>WAPL Wings apart_like protein homolog</b>            | <b>1.325291005</b> | <b>0.022382</b> | <b>2</b>  |
| Q65240        | EKSISRIPEDNANK                                          | 1.168665267        | 2               | 2.585145  |
| Q65240        | LGQKRPNFKPDIQEIPK                                       | 1.330964735        | 2               | 2.394772  |
| <b>Q66H12</b> | <b>NAGAB Alpha_N_acetylgalactosaminidase</b>            | <b>1.72882082</b>  | <b>0.002409</b> | <b>5</b>  |
| Q66H12        | CNINCEEDPK                                              | 1.866015811        | 2               | 2.340341  |
| Q66H12        | INQDPLGIQGR                                             | 1.32577965         | 2               | 2.878064  |
| Q66H12        | MTCMGYPGTTLDKVELDAATFAEWK+Oxidation(0)                  | 1.464708226        |                 |           |
| Q66H12        | MTCMGYPGTTLDKVELDAATFAEWK+Oxidation(3)                  | 1.464708226        |                 |           |
| Q66H12        | TISPQNIDILQNPLLIK                                       | 1.820763077        | 2               | 3.435765  |
| <b>Q66H15</b> | <b>RMD3 Regulator of microtubule dynamics protein 3</b> | <b>0.697515635</b> | <b>0.079765</b> | <b>2</b>  |
| Q66H15        | SLQGLAGEIVGEVR                                          | 1.147997732        | 2               | 3.390301  |
| Q66H15        | SQSLPNSLDYAQTSEK                                        | 0.591600649        | 2               | 3.014697  |
| <b>Q66H45</b> | <b>TTC36 Tetratricopeptide repeat protein 36</b>        | <b>1.135150034</b> | <b>0.210775</b> | <b>2</b>  |
| Q66H45        | ALELQGVR                                                | 0.601440225        | 2               | 2.473109  |
| Q66H45        | LQGDVAGALEDLER                                          | 1.139579751        | 2               | 3.752761  |

|               |                                                                           |                    |                 |           |
|---------------|---------------------------------------------------------------------------|--------------------|-----------------|-----------|
| <b>Q66H71</b> | <b>CPPED Calcineurin_like phosphoesterase domain_containing protein 1</b> | <b>1.030189142</b> | <b>0.005215</b> | <b>2</b>  |
| Q66H71        | LTEQAVEAINK                                                               | 1.024746736        | 2               | 3.511743  |
| Q66H71        | SIDEDDDYFNLTK                                                             | 1.859625064        | 2               | 2.980465  |
| <b>Q66H80</b> | <b>COPD Coatomer subunit delta</b>                                        | <b>1.671313291</b> | <b>5.15E-07</b> | <b>8</b>  |
| Q66H80        | GVQLQTHPNVDKK                                                             | 1.396896331        | 2               | 3.516724  |
| Q66H80        | LFTAESLIGLK                                                               | 1.751367864        | 2               | 3.021107  |
| Q66H80        | NSNILEDLETLR                                                              | 2.090396657        | 2               | 3.512583  |
| Q66H80        | NTLEWCLPVIDAK                                                             | 1.219151712        | 2               | 2.727463  |
| Q66H80        | SEGETIMSSNMGK                                                             | 3.815051277        | 2               | 2.767968  |
| Q66H80        | TFTEMDSHEEK                                                               | 0.835967668        | 2               | 2.655349  |
| Q66H80        | VAPAPARPSGSPK                                                             | 1.426117606        | 2               | 2.54033   |
| Q66H80        | VTQVDGNSPVR                                                               | 1.251250132        | 2               | 3.018992  |
| <b>Q66HA8</b> | <b>HS105 Heat shock protein 105 kDa</b>                                   | <b>1.256440283</b> | <b>0.003579</b> | <b>10</b> |
| Q66HA8        | AGGIETIANEFSDR                                                            | 1.27440334         | 2               | 2.94507   |
| Q66HA8        | FQEAERPR                                                                  | 0.77335226         | 2               | 2.459458  |
| Q66HA8        | FVVQNVSAQK                                                                | 1.32840348         | 2               | 2.68755   |
| Q66HA8        | LKETAENNLK                                                                | 1.173222879        | 2               | 2.587992  |
| Q66HA8        | NQQITHANNTVSSFK                                                           | 1.248990719        | 2               | 4.717197  |
| Q66HA8        | RGPFLEAFYSDPQAVPYPEAK                                                     | 1.982478787        | 3               | 3.787335  |
| Q66HA8        | SQFEELCAELLQK                                                             | 1.242340072        | 2               | 2.605168  |
| Q66HA8        | SVLDAAQIVGLNCLR                                                           | 1.705644025        | 2               | 3.707395  |
| Q66HA8        | VLGTAFDPFLGGK                                                             | 1.07966671         | 2               | 2.982876  |
| Q66HA8        | YNHIDESEMK                                                                | 2.324150081        | 2               | 2.506241  |
| <b>Q66HD0</b> | <b>ENPL Endoplasmic</b>                                                   | <b>1.063324609</b> | <b>9.9E-20</b>  | <b>27</b> |
| Q66HD0        | DISTNYYASQK                                                               | 1.461212463        | 2               | 3.162388  |
| Q66HD0        | EATEKEFEP LLNWMK                                                          | 1.725366037        | 2               | 3.505596  |
| Q66HD0        | EEASDYLELDTIK                                                             | 1.515294727        | 2               | 4.250368  |
| Q66HD0        | EEEEAIQLDGLNASQIR                                                         | 1.894032541        | 2               | 4.601177  |
| Q66HD0        | EFEPLLNWMK                                                                | 1.538569734        | 2               | 2.906619  |
| Q66HD0        | EVEEDEYK                                                                  | 1.248985418        | 1               | 2.44448   |
| Q66HD0        | FQSSHSTDITSLDQYVER                                                        | 1.221428046        | 3               | 6.632833  |
| Q66HD0        | GLFDEYGSK                                                                 | 1.847892724        | 2               | 2.449319  |
| Q66HD0        | GVVDSDDLPLNVSR                                                            | 0.811342904        | 2               | 5.150775  |
| Q66HD0        | KEAESSPFVER                                                               | 1.254773927        | 2               | 3.507187  |
| Q66HD0        | KGYEVIYLTEPVDEYCIQALPEFDGKR                                               | 1.079111886        | 3               | 3.591553  |
| Q66HD0        | LGVIEDHSNR                                                                | 1.343973792        | 2               | 3.116692  |
| Q66HD0        | LISLTDENALAGNEELTVK                                                       | 2.215245213        | 2               | 5.428667  |
| Q66HD0        | LTESPCALVASQYGWSGNMER                                                     | 1.829641901        | 2               | 5.483465  |
| Q66HD0        | MKEKQDK                                                                   | 0.378067556        | 1               | 1.925055  |
| Q66HD0        | NLLHVTDGTGVMTR                                                            | 1.168634408        | 3               | 4.144524  |
| Q66HD0        | NLLHVTDGTGVMTR+Oxidation(11                                               | 1.518119137        |                 |           |
| Q66HD0        | RVFITDDFHDMMPK                                                            | 1.44033906         | 3               | 3.72948   |
| Q66HD0        | SGTSEFLNK                                                                 | 1.286601293        | 2               | 3.052815  |
| Q66HD0        | SGYLLPDTK                                                                 | 1.07529617         | 2               | 3.445093  |
| Q66HD0        | SILFVPTSAPR                                                               | 1.730483474        | 2               | 3.531105  |
| Q66HD0        | TDDEVVQREEEAIQLDGLNASQIR                                                  | 1.875604209        | 3               | 5.154072  |
| Q66HD0        | TETVEEPLLEDETAQEEK                                                        | 0.621326018        | 2               | 5.279763  |
| Q66HD0        | TETVEEPLLEDETAQEEKEEADDEAAVEEEEEKKPK                                      | 0.80054658         | 5               | 6.240074  |
| Q66HD0        | TFEINPR                                                                   | 1.247473171        | 2               | 2.73857   |
| Q66HD0        | VFITDDFHDMMPK                                                             | 1.44775266         | 2               | 4.010989  |
| Q66HD0        | YNDTFWK                                                                   | 1.028507217        | 2               | 2.383627  |
| <b>Q66HF1</b> | <b>NDUS1 NADH_ubiquinone oxidoreductase 75 kDa subunit_mitochondrial</b>  | <b>1.232470143</b> | <b>0.000193</b> | <b>15</b> |
| Q66HF1        | ALSEIAGITLPYDTLDQVR                                                       | 1.548400142        | 3               | 3.937481  |
| Q66HF1        | AVTEGAQAVEEPSIC                                                           | 1.25599655         | 2               | 2.804026  |
| Q66HF1        | DDGAAILAAVSSIAQK                                                          | 1.037848436        | 2               | 4.354223  |



|               |                                                                 |                    |                 |           |
|---------------|-----------------------------------------------------------------|--------------------|-----------------|-----------|
| Q66HF1        | DLLNKVSDTLCTEEIFPNEGAGTDLR                                      | 2.694115845        | 3               | 4.260973  |
| Q66HF1        | FASEIAGVDDLGTTR                                                 | 1.625834014        | 2               | 4.588344  |
| Q66HF1        | GLLYTYSWEDALSR                                                  | 1.2385919          | 2               | 3.670604  |
| Q66HF1        | GNDMQVGTYIEK                                                    | 0.79918383         | 2               | 2.814176  |
| Q66HF1        | GWNILTNSEK                                                      | 1.132845631        | 1               | 2.263394  |
| Q66HF1        | ILQDIASGNHEFSK                                                  | 1.827701637        | 2               | 4.176137  |
| Q66HF1        | LGEVSPNLVR                                                      | 1.334579926        | 2               | 3.007973  |
| Q66HF1        | LVDQEFLADPLVPPQLTIK                                             | 1.206125418        | 2               | 3.961185  |
| Q66HF1        | SATYVNTTEGR                                                     | 0.872089876        | 2               | 2.317441  |
| Q66HF1        | VAVTPPGLAR                                                      | 0.73483841         | 2               | 2.538117  |
| Q66HF1        | VSDTLCTEEIFPNEGAGTDLR                                           | 0.736200804        | 2               | 4.731698  |
| Q66HF1        | YDHLGDSPK                                                       | 1.31692308         | 2               | 2.476601  |
| <b>Q66HF8</b> | <b>AL1B1 Aldehyde dehydrogenase X_mitochondrial</b>             | <b>1.180951576</b> | <b>9.9E-20</b>  | <b>13</b> |
| Q66HF8        | ADVDLAVR                                                        | 0.729081441        | 2               | 2.365483  |
| Q66HF8        | EAGFPPGVVNIITGYGPTAGAAIAQHMDVDK                                 | 2.119635263        | 3               | 4.192543  |
| Q66HF8        | EEIFGPVQPLFK                                                    | 1.46278281         | 2               | 3.259798  |
| Q66HF8        | IEEVIQR                                                         | 5.040922612        | 2               | 2.30519   |
| Q66HF8        | KTFPTVNPTTGEVIGHVAEGDR                                          | 1.253409027        | 3               | 3.911878  |
| Q66HF8        | KVGNPFELDTQQGPQVDEKQFEK                                         | 1.371132252        | 3               | 4.161424  |
| Q66HF8        | LAPALATGNTVVMK                                                  | 1.467181938        | 2               | 3.392511  |
| Q66HF8        | TFPTVNPTTGEVIGHVAEGDR                                           | 1.753177906        | 2               | 4.885669  |
| Q66HF8        | TFVEESYHEFLER                                                   | 1.158325957        | 2               | 4.462079  |
| Q66HF8        | VAEQTPLSALYLASLIK                                               | 2.891220016        | 2               | 3.002755  |
| Q66HF8        | VGNPFELDTQQGPQVQDK                                              | 1.239879403        | 2               | 4.400221  |
| Q66HF8        | VGNPFELDTQQGPQVDEKQFEK                                          | 1.524172008        | 2               | 4.497054  |
| Q66HF8        | YGLAAAVFTR                                                      | 1.684715018        | 2               | 3.295395  |
| <b>Q66HG4</b> | <b>GALM Aldose 1_epimerase</b>                                  | <b>1.280182564</b> | <b>0.215359</b> | <b>3</b>  |
| Q66HG4        | ASDVVLGFAELEGYLQK                                               | 1.359868361        | 2               | 4.50189   |
| Q66HG4        | TVFGELPSGGGAVEK                                                 | 0.939171471        | 2               | 3.848718  |
| Q66HG4        | VSPDGEEGYPGELK                                                  | 1.417294448        | 2               | 4.070729  |
| <b>Q66HG9</b> | <b>MAVS Mitochondrial antiviral_signaling protein</b>           | <b>1.108390988</b> | <b>0.43706</b>  | <b>3</b>  |
| Q66HG9        | ICELPGLAEQVTR                                                   | 1.680169015        | 2               | 2.764787  |
| Q66HG9        | STAATPSTVPTNIAPSK                                               | 1.10672083         | 2               | 3.178306  |
| Q66HG9        | TTLSSSSTGSFAK                                                   | 1.291600479        | 2               | 2.344908  |
| <b>Q66X93</b> | <b>SND1 Staphylococcal nuclease domain_containing protein 1</b> | <b>1.051864704</b> | <b>9.9E-20</b>  | <b>19</b> |
| Q66X93        | ADDADEFGYSR                                                     | 0.886503027        | 2               | 2.613153  |
| Q66X93        | ALLLPDHYLVTVMLSGIK                                              | 1.689977525        | 3               | 4.255041  |
| Q66X93        | DIQNTQCLLNVEHLSASCPHVTLQFADSK                                   | 1.184877505        | 3               | 6.064765  |
| Q66X93        | DTNGENIAESLVAEGLASR                                             | 1.604313286        | 2               | 4.344325  |
| Q66X93        | ETDGSETPEPFAAEAK                                                | 1.441428395        | 2               | 3.789739  |
| Q66X93        | FVDGEWYR                                                        | 1.949087681        | 2               | 2.7819    |
| Q66X93        | GDVGLGLVK                                                       | 1.189755918        | 2               | 2.579649  |
| Q66X93        | HFVDSHHQKPVNAIIEHVR                                             | 1.643389847        | 3               | 5.015004  |
| Q66X93        | LEGDNIQDK                                                       | 0.971797338        | 2               | 2.992664  |
| Q66X93        | NLPGLVQEGEPFSEETLFTK                                            | 1.769302102        | 2               | 5.73209   |
| Q66X93        | SAYYKPLLSAEAAK                                                  | 0.946481018        | 2               | 3.113378  |
| Q66X93        | SDISSHPPVEGAYAPR                                                | 1.143880566        | 3               | 4.416551  |
| Q66X93        | SSHYDELLAAEAR                                                   | 1.402040574        | 2               | 4.031101  |
| Q66X93        | TCATVTIGGINIAEALVSK                                             | 1.317914145        | 2               | 3.494553  |
| Q66X93        | TDAVDSVVR                                                       | 16.46425334        | 2               | 2.713062  |
| Q66X93        | VITEYLNAQESAK                                                   | 1.152772232        | 2               | 3.926461  |
| Q66X93        | VMQVLNADAIVVK                                                   | 2.183333911        | 2               | 4.10818   |
| Q66X93        | VSVTVDIRPASPATETVPAFSEK                                         | 1.125880671        | 3               | 5.146455  |
| Q66X93        | VWAHYEEQPVEEVMPLVEEK                                            | 0.963856189        | 3               | 4.533551  |
| <b>Q68FL6</b> | <b>SYMC Methionyl_tRNA synthetase_cytoplasmic</b>               | <b>1.089540426</b> | <b>0.45511</b>  | <b>3</b>  |
| Q68FL6        | ADKNQVAEEVAK                                                    | 1.456518162        | 2               | 3.055454  |

|               |                                                 |                    |                 |           |
|---------------|-------------------------------------------------|--------------------|-----------------|-----------|
| Q68FL6        | LENDQIENLR                                      | 0.884742526        | 2               | 2.691295  |
| Q68FL6        | NSELLNNGNFINR                                   | 1.503595687        | 2               | 2.819151  |
| <b>Q68FP2</b> | <b>PON3 Serum paraoxonase/lactonase 3</b>       | <b>1.361230262</b> | <b>1.66E-11</b> | <b>8</b>  |
| Q68FP2        | HELFESVNDIVVLGPEQFYATR                          | 1.599547191        | 3               | 3.902705  |
| Q68FP2        | HNNWDLTPVK                                      | 1.376813649        | 2               | 3.207797  |
| Q68FP2        | IFLMDLNEPYPK                                    | 1.778139743        | 2               | 4.051851  |
| Q68FP2        | IQDPLSDNPR                                      | 1.196903652        | 2               | 3.014298  |
| Q68FP2        | KHNNWDLTPVK                                     | 0.790152259        | 2               | 2.497894  |
| Q68FP2        | LLIYNPEDPPGSEVLR                                | 0.989023663        | 2               | 4.389105  |
| Q68FP2        | VIQLGLVDNLTVPATGDILAGCHPNPMK                    | 1.364320242        | 3               | 4.59446   |
| Q68FP2        | YVYVADVTAKE                                     | 1.178170621        | 1               | 2.99083   |
| <b>Q68FQ0</b> | <b>TCPE T_complex protein 1 subunit epsilon</b> | <b>1.525470284</b> | <b>3.51E-07</b> | <b>7</b>  |
| Q68FQ0        | GSNDMQYQHVIETLIGK                               | 1.263932635        | 2               | 2.823049  |
| Q68FQ0        | GVIVDKDFSHQMPK                                  | 1.784878406        | 2               | 2.807951  |
| Q68FQ0        | HKLDVTSVEDYK                                    | 1.80033817         | 2               | 3.631608  |
| Q68FQ0        | ISDNVLVDINNPEPLIQTAK                            | 2.408357785        | 2               | 5.01982   |
| Q68FQ0        | LDVTSVEDYK                                      | 1.11987931         | 2               | 2.943625  |
| Q68FQ0        | SLHDALCVIR                                      | 1.736469509        | 2               | 2.693924  |
| Q68FQ0        | WVGPEIEIAIATGGR                                 | 1.438267421        | 2               | 3.820365  |
| <b>Q68FR6</b> | <b>EF1G Elongation factor 1_gamma</b>           | <b>1.209744371</b> | <b>7.94E-08</b> | <b>8</b>  |
| Q68FR6        | AAAPAPEEEMDECEQALAAEPK                          | 1.222259632        | 2               | 4.98693   |
| Q68FR6        | ALIAAQYSGAQIR                                   | 1.358065217        | 2               | 4.337448  |
| Q68FR6        | ILGLDTHLK                                       | 1.87259302         | 2               | 2.512637  |
| Q68FR6        | KAAAPAPEEEMDECEQALAAEPK                         | 1.279006699        | 2               | 4.217491  |
| Q68FR6        | KLDPGSEETQTLVR                                  | 1.371035856        | 2               | 4.100359  |
| Q68FR6        | LDPGSEETQTLVR                                   | 2.631785449        | 2               | 3.544139  |
| Q68FR6        | STFVLDEFKR                                      | 1.242341027        | 2               | 2.520959  |
| Q68FR6        | WFLTCINQPQFR                                    | 1.197635588        | 2               | 3.353024  |
| <b>Q68FR9</b> | <b>EF1D Elongation factor 1_delta</b>           | <b>1.545751882</b> | <b>9.9E-20</b>  | <b>6</b>  |
| Q68FR9        | ATAPQTQHVSPMR                                   | 1.520384868        | 2               | 3.301425  |
| Q68FR9        | ATAPQTQHVSPMR+Oxidation(11                      | 1.160627557        |                 |           |
| Q68FR9        | FYEQMNGPVTAGSR                                  | 1.434634729        | 2               | 4.526236  |
| Q68FR9        | GVVQDLQQAISK                                    | 1.547042449        | 2               | 3.438109  |
| Q68FR9        | SIQLDGLVWGASK                                   | 1.546356049        | 2               | 3.25988   |
| Q68FR9        | SLAGSSGPGASSGPGGDHSDLIVR                        | 1.681661701        | 2               | 5.380884  |
| <b>Q68FS2</b> | <b>CSN4 COP9 signalosome complex subunit 4</b>  | <b>1.649514682</b> | <b>0.173602</b> | <b>3</b>  |
| Q68FS2        | ATTADGSSILDR                                    | 2.272749317        | 2               | 2.328008  |
| Q68FS2        | NAAQVLVGIPLTGQK                                 | 1.624508144        | 2               | 2.982836  |
| Q68FS2        | QIQSLCFQVNNLLEK                                 | 1.677630365        | 2               | 2.408341  |
| <b>Q68FS4</b> | <b>AMPL Cytosol aminopeptidase</b>              | <b>1.575169184</b> | <b>9.9E-20</b>  | <b>17</b> |
| Q68FS4        | ADMGGAATICSIVSAAK                               | 1.231752203        | 2               | 5.101499  |
| Q68FS4        | ADMGGAATICSIVSAAK+Oxidation(2                   | 1.295587226        |                 |           |
| Q68FS4        | DKDDDVPQFTSAGENFNK                              | 0.975458611        | 2               | 5.381462  |
| Q68FS4        | GITFDSGGISIK                                    | 1.222698245        | 2               | 3.182206  |
| Q68FS4        | GSEEPVFLEIHYTGSPNATEAPLVFVGK                    | 1.578553272        | 3               | 6.169946  |
| Q68FS4        | GVLFASGQNLAR                                    | 1.182368088        | 2               | 3.43383   |
| Q68FS4        | LFEASVETGDR                                     | 1.330783582        | 2               | 3.587468  |
| Q68FS4        | LHSGDLEAWEK                                     | 1.758093272        | 2               | 2.95171   |
| Q68FS4        | LNLPINIIGLAPLCEMPSGK                            | 2.091995277        | 2               | 5.044971  |
| Q68FS4        | QLMESPANEMTPTR                                  | 1.230603552        | 2               | 3.653934  |
| Q68FS4        | QVIDCQLADVNNLNGK                                | 49.54890313        | 2               | 4.729132  |
| Q68FS4        | SAGACTAAAFRL                                    | 1.105731708        | 2               | 3.886227  |
| Q68FS4        | SAGVDDQENWHEGK                                  | 1.01669484         | 2               | 3.971177  |
| Q68FS4        | SWIEEQEMGSFLSAK                                 | 1.579774716        | 2               | 5.149011  |
| Q68FS4        | TFYGLHQDFPSVVVVLGK                              | 1.478102936        | 2               | 4.70411   |
| Q68FS4        | TIQVDNTDAEGR                                    | 0.985393517        | 2               | 4.145203  |
| Q68FS4        | TLIEFLLR                                        | 1.539654156        | 2               | 2.789928  |

|               |                                                                                       |                    |                 |           |
|---------------|---------------------------------------------------------------------------------------|--------------------|-----------------|-----------|
| <b>Q68FT1</b> | <b>COQ9 Ubiquinone biosynthesis protein COQ9_mitochondrial</b>                        | <b>1.322320516</b> | <b>0.446601</b> | <b>4</b>  |
| Q68FT1        | INDAMNMGHTAK                                                                          | 1.580680225        | 2               | 3.10169   |
| Q68FT1        | LNHVLEEEQK                                                                            | 1.439472786        | 2               | 3.400321  |
| Q68FT1        | STGEALVQGLMGAAVTLK                                                                    | 1.305497275        | 2               | 3.763371  |
| Q68FT1        | YTDQSGEEEEEDYESEEQIQHR                                                                | 1.117117516        | 3               | 4.682537  |
| <b>Q68FT3</b> | <b>PYRD2 Pyridine nucleotide_disulfide oxidoreductase domain_containing protein 2</b> | <b>0.800544017</b> | <b>0.999475</b> | <b>7</b>  |
| Q68FT3        | HVIGGAAVTEIIPGFK                                                                      | 0.922352857        | 2               | 3.803288  |
| Q68FT3        | ISQLDTQSPVTK                                                                          | 1.680678396        | 2               | 3.500858  |
| Q68FT3        | SLLLGTDVAENQK                                                                         | 0.897408293        | 2               | 3.401096  |
| Q68FT3        | TLGAQLPQYYEVLTAISK                                                                    | 1.003308426        | 2               | 4.069752  |
| Q68FT3        | VFDCIEAYAPGFK                                                                         | 0.631413815        | 2               | 2.823511  |
| Q68FT3        | VLDQWFSEPLK                                                                           | 1.604846998        | 2               | 3.590827  |
| Q68FT3        | VQGVVLQGGEEVR                                                                         | 0.852403478        | 2               | 3.261044  |
| <b>Q68FT5</b> | <b>BHMT2 Betaine_homocysteine S_methyltransferase 2</b>                               | <b>1.316815394</b> | <b>9.9E-20</b>  | <b>10</b> |
| Q68FT5        | AGANIIGVNCR                                                                           | 1.317022252        | 2               | 3.623626  |
| Q68FT5        | AGLWTPEAVVEYPSAVR                                                                     | 1.086119333        | 3               | 4.09577   |
| Q68FT5        | AIAEELAPER                                                                            | 1.446235821        | 2               | 3.796228  |
| Q68FT5        | DAGLQAHLMVQCLGFHTPCGK                                                                 | 1.580025174        | 3               | 4.692014  |
| Q68FT5        | EVGAPVAVTMCIGPEGDMHGVTPGEC AVR                                                        | 1.702612045        | 3               | 4.668151  |
| Q68FT5        | FGPWTSLQTMK                                                                           | 1.481878885        | 2               | 2.510084  |
| Q68FT5        | GGFVDLPEYFPGLEPR                                                                      | 1.295087572        | 2               | 4.218585  |
| Q68FT5        | LDSGEVVVGDDGGLFTLEK                                                                   | 1.557728763        | 2               | 2.670145  |
| Q68FT5        | REYWETLLPASGRPFPCSLKPD A                                                              | 1.151995992        | 3               | 3.661617  |
| Q68FT5        | YIGGCCGFEPYHIR                                                                        | 2.459712564        | 2               | 4.655065  |
| <b>Q68FT9</b> | <b>SCLY Selenocysteine lyase</b>                                                      | <b>1.246873935</b> | <b>6.23E-13</b> | <b>6</b>  |
| Q68FT9        | AEVDLIVQDLK                                                                           | 1.438349662        | 2               | 3.900523  |
| Q68FT9        | CFHEQQTQGR                                                                            | 1.144081042        | 2               | 2.760026  |
| Q68FT9        | NFRPGTENTPMIAGLGK                                                                     | 0.614104222        | 2               | 4.303239  |
| Q68FT9        | RVDVEDLGVDLTI VGHK                                                                    | 1.662827708        | 3               | 5.331914  |
| Q68FT9        | TVDQISPEEGTRPHFITCTVEHDSIR                                                            | 1.205123668        | 3               | 4.656634  |
| Q68FT9        | VLVHTDAAQALGK                                                                         | 1.26989717         | 3               | 3.314451  |
| <b>Q68FU3</b> | <b>ETFB Electron transfer flavoprotein subunit beta</b>                               | <b>0.998483581</b> | <b>0.773543</b> | <b>13</b> |
| Q68FU3        | AGDLGVDLTSK                                                                           | 1.06214367         | 2               | 3.490509  |
| Q68FU3        | EIDGGLETIR                                                                            | 2.007418595        | 2               | 2.337366  |
| Q68FU3        | EIIAVSCGPPQCQETIR                                                                     | 1.01518143         | 2               | 5.313342  |
| Q68FU3        | GIHVEVPGAEAEENLGPLQVAR                                                                | 0.677190959        | 2               | 5.84644   |
| Q68FU3        | HSMNPFCEIAVEEAVR                                                                      | 1.734384131        | 2               | 5.597868  |
| Q68FU3        | HSMNPFCEIAVEEAVR+Oxidation(2)                                                         | 1.333572654        |                 |           |
| Q68FU3        | LKLPAVVTADLR                                                                          | 2.713606266        | 2               | 2.360348  |
| Q68FU3        | QAIDDDCNQTGQMTAGLLDWPGTFASQVTLEGDKVK                                                  | 2.274440275        | 3               | 5.732076  |
| Q68FU3        | RVIDFAVK                                                                              | 1.286077916        | 2               | 2.639637  |
| Q68FU3        | VDLLFLGK                                                                              | 0.986095242        | 2               | 2.73127   |
| Q68FU3        | VETTEDLVAK                                                                            | 1.809288308        | 2               | 3.564368  |
| Q68FU3        | VIDFAVK                                                                               | 0.839564315        | 2               | 2.428571  |
| Q68FU3        | VSVISVEEPPQR                                                                          | 0.997045879        | 2               | 3.563654  |
| <b>Q68FY0</b> | <b>QCR1 Cytochrome b_c1 complex subunit 1_mitochondrial</b>                           | <b>1.05076592</b>  | <b>0.259028</b> | <b>10</b> |
| Q68FY0        | HQQLDLAQDHSSVSQVYEEDAVPSITPCR                                                         | 1.873883567        | 3               | 6.012558  |
| Q68FY0        | IEEVDAQMVR                                                                            | 1.165916165        | 2               | 3.844921  |
| Q68FY0        | LCTSATESEVTR                                                                          | 1.414671632        | 2               | 2.855254  |
| Q68FY0        | NALISHLDGTTTPCEDIGR                                                                   | 1.262937521        | 2               | 4.566181  |
| Q68FY0        | NNGAGYFLEHLAFK                                                                        | 1.029367757        | 2               | 3.524264  |
| Q68FY0        | RIPLAEWESR                                                                            | 0.866670665        | 2               | 2.678354  |
| Q68FY0        | SGMFWLR                                                                               | 1.066896408        | 2               | 2.397294  |

|               |                                                                    |                    |                 |          |
|---------------|--------------------------------------------------------------------|--------------------|-----------------|----------|
| Q68FY0        | TDLTDYLSR                                                          | 1.070949065        | 2               | 2.945399 |
| Q68FY0        | VVELLADIVQNISLEDSQIEK                                              | 1.495019747        | 3               | 5.368584 |
| Q68FY0        | YFYDQCPAVAGYGPQIEQLSDYNR                                           | 1.043785396        | 3               | 5.237371 |
| <b>Q68G31</b> | <b>PBLD Phenazine biosynthesis_like domain_containing protein</b>  | <b>1.301148672</b> | <b>7.76E-05</b> | <b>7</b> |
| Q68G31        | AAIGDTTVQDIQYSPDTR                                                 | 0.892535846        | 2               | 4.72678  |
| Q68G31        | AEDGIVLDFPLYPTFPQDFHEVK                                            | 1.605510648        | 3               | 4.008799 |
| Q68G31        | GESGGQTPPYDFYSR                                                    | 1.292336755        | 2               | 3.96294  |
| Q68G31        | LQPTDSFSQSSCFGLR                                                   | 1.410757057        | 2               | 3.551032 |
| Q68G31        | NVNSTLTFVTLSGELK                                                   | 0.890856646        | 2               | 4.257295 |
| Q68G31        | RAEDGIVLDFPLYPTFPQDFHEVK                                           | 1.646691937        | 3               | 5.774004 |
| Q68G31        | VNTEPLPGIEK                                                        | 1.007083991        | 2               | 2.642453 |
| <b>Q69Z23</b> | <b>DYH17 Dynein heavy chain 17_axonemal</b>                        | <b>1.320186151</b> | <b>0.478231</b> | <b>2</b> |
| Q69Z23        | GDPTRAEDQVLMRALR                                                   | 1.279204484        | 2               | 2.416615 |
| Q69Z23        | YFIDLLMEK                                                          | 8.603662246        | 1               | 2.017305 |
| <b>Q6A028</b> | <b>SWP70 Switch_associated protein 70</b>                          | <b>3.005687266</b> | <b>0.02068</b>  | <b>2</b> |
| Q6A028        | FILEKVQDNFDK                                                       | 3.006850535        | 1               | 1.912642 |
| Q6A028        | KGDILLDENCCVESLPDKDGK                                              | 1.960211218        | 2               | 2.339804 |
| <b>Q6A0A9</b> | <b>F120A Constitutive coactivator of PPAR_gamma_like protein 1</b> | <b>1.610630191</b> | <b>3.78E-07</b> | <b>3</b> |
| Q6A0A9        | LYEPDQLQELK                                                        | 1.113461531        | 2               | 2.393905 |
| Q6A0A9        | SQGGVQPIPSQGGK                                                     | 1.622463257        | 2               | 3.346219 |
| Q6A0A9        | VEGSSTASSGSQLAEGK                                                  | 1.30043653         | 2               | 4.232867 |
| <b>Q6AW69</b> | <b>CGNL1 Cingulin_like protein 1</b>                               | <b>1.274199455</b> | <b>0.627918</b> | <b>2</b> |
| Q6AW69        | NRRELAEMQTLK+Oxidation(7                                           | 1.753712952        |                 |          |
| Q6AW69        | QDSAGPILDGAR                                                       | 1.274199449        | 2               | 2.506153 |
| <b>Q6AXM8</b> | <b>PON2 Serum paraoxonase/arylesterase 2</b>                       | <b>1.060364544</b> | <b>0.308866</b> | <b>3</b> |
| Q6AXM8        | FQEEENSLHLK                                                        | 1.059205518        | 2               | 3.708792 |
| Q6AXM8        | LFVYDPNHPPSSEVLR                                                   | 1.308886411        | 2               | 2.46719  |
| Q6AXM8        | LVAEGFDSANGINISPDKK                                                | 1.500255415        | 2               | 3.538681 |
| <b>Q6AXS5</b> | <b>PAIRB Plasminogen activator inhibitor 1 RNA_binding protein</b> | <b>0.970195521</b> | <b>0.269928</b> | <b>4</b> |
| Q6AXS5        | EETQPPVALKK                                                        | 0.756669634        | 2               | 2.422615 |
| Q6AXS5        | FDQLFDDESDPFVFLK                                                   | 0.980096643        | 2               | 5.295574 |
| Q6AXS5        | RFEKPLEEK                                                          | 1.456620664        | 2               | 2.421241 |
| Q6AXS5        | SAAQAAAQTNSNAAGK                                                   | 0.512703387        | 2               | 4.549628 |
| <b>Q6AXY0</b> | <b>GSTA6 Glutathione S_transferase A6</b>                          | <b>1.040793669</b> | <b>0.99999</b>  | <b>2</b> |
| Q6AXY0        | FLQPGSQR                                                           | 1.01502838         | 2               | 2.562101 |
| Q6AXY0        | YFPAFEK                                                            | 1.051429415        | 1               | 2.009278 |
| <b>Q6AY09</b> | <b>HNRH2 Heterogeneous nuclear ribonucleoprotein H2</b>            | <b>1.236180584</b> | <b>0.009382</b> | <b>4</b> |
| Q6AY09        | ATENDIYNFFSPLNPMR                                                  | 1.485344159        | 2               | 2.783998 |
| Q6AY09        | GLPWSCSAEEVMR                                                      | 1.595344973        | 2               | 2.945832 |
| Q6AY09        | HTGPNSPDTANDGFVR                                                   | 1.22625084         | 2               | 4.174157 |
| Q6AY09        | STGEAFVQFASQEIAEK                                                  | 1.328805807        | 2               | 3.927957 |
| <b>Q6AY20</b> | <b>MPRD Cation_dependent mannose_6_phosphate receptor</b>          | <b>1.318492461</b> | <b>0.00033</b>  | <b>2</b> |
| Q6AY20        | HTLAGNFPVSEER                                                      | 1.318408609        | 2               | 4.175228 |
| Q6AY20        | SCDLVGEKDKEK                                                       | 1.50627721         | 2               | 3.685519 |
| <b>Q6AY30</b> | <b>SCPDH Probable saccharopine dehydrogenase</b>                   | <b>1.162999452</b> | <b>0.307865</b> | <b>6</b> |
| Q6AY30        | ACIENGTCIDICGEPQFLELMHVK                                           | 2.101985212        | 3               | 4.010573 |
| Q6AY30        | ATLVNLCVGPYR                                                       | 0.910918758        | 2               | 2.823792 |
| Q6AY30        | GGGVFTPGAASFR                                                      | 1.21478224         | 2               | 2.365057 |
| Q6AY30        | GVYIIGSSGFDSIPADLGVLYTR                                            | 1.355066428        | 2               | 2.929661 |
| Q6AY30        | LQQVLEK                                                            | 1.107899833        | 1               | 2.320714 |
| Q6AY30        | SVSNLKPVPVIGSK                                                     | 1.221742751        | 2               | 3.799309 |
| <b>Q6AY56</b> | <b>TBA8 Tubulin alpha_8 chain</b>                                  | <b>1.263670257</b> | <b>9.9E-20</b>  | <b>7</b> |

|               |                                                                |                    |                 |          |
|---------------|----------------------------------------------------------------|--------------------|-----------------|----------|
| Q6AY56        | AVCMLSNTTAAIEAWAR                                              | 1.239357474        | 2               | 4.558115 |
| Q6AY56        | FDGALNVDLTFEQTNLVPYPR                                          | 0.791350559        | 2               | 5.105412 |
| Q6AY56        | LISQIVSSITASLR                                                 | 2.450349101        | 2               | 3.755096 |
| Q6AY56        | NLDIERPTYTNLNR                                                 | 1.297933903        | 2               | 3.313298 |
| Q6AY56        | QLFHPEQLITGK                                                   | 0.952540993        | 2               | 3.091588 |
| Q6AY56        | TIQFVDWCPTGFK                                                  | 1.358735622        | 2               | 3.70063  |
| Q6AY56        | VGINYQPPTVVPGGDLAK                                             | 1.254323042        | 2               | 4.395792 |
| <b>Q6AY80</b> | <b>NQO2 Ribosylidihyronicotinamide dehydrogenase [quinone]</b> | <b>1.359930117</b> | <b>0.542912</b> | <b>5</b> |
| Q6AY80        | ALTSDILEEQR                                                    | 1.46130133         | 2               | 3.242375 |
| Q6AY80        | EPIHCTPSWYFQG                                                  | 1.593858856        | 2               | 2.698269 |
| Q6AY80        | NDVTGALSNPEVFK                                                 | 1.043133899        | 2               | 3.930036 |
| Q6AY80        | VLAPQISFGPEVSSEQR                                              | 1.225724974        | 2               | 4.341974 |
| Q6AY80        | VLCQGFAFDVPGFYDSGFLK                                           | 1.588111884        | 2               | 2.800551 |
| <b>Q6AYG5</b> | <b>ECHD1 Enoyl_CoA hydratase domain_containing protein 1</b>   | <b>1.029687797</b> | <b>0.662865</b> | <b>3</b> |
| Q6AYG5        | DVLETLWGGPANLEAIK                                              | 1.655606197        | 2               | 4.051223 |
| Q6AYG5        | ILEQFPGGSIDLQK                                                 | 0.995187384        | 2               | 3.41098  |
| Q6AYG5        | NTFCSGSDLNAVK                                                  | 1.218283395        | 2               | 2.48237  |
| <b>Q6AYH5</b> | <b>DCTN2 Dynactin subunit 2</b>                                | <b>1.465281597</b> | <b>0.03363</b>  | <b>3</b> |
| Q6AYH5        | ASVEDADTQNK                                                    | 1.320858546        | 2               | 2.809825 |
| Q6AYH5        | VNALDLAVLDQVEAR                                                | 1.718580561        | 2               | 3.412948 |
| Q6AYH5        | WSPVASTLPELVQR                                                 | 1.26345758         | 2               | 2.903625 |
| <b>Q6AYK6</b> | <b>CYBP Calcyclin_binding protein</b>                          | <b>1.406550015</b> | <b>0.547593</b> | <b>2</b> |
| Q6AYK6        | IYEDGDDDMKR                                                    | 0.921901222        | 2               | 2.406855 |
| Q6AYK6        | WDYLTQVEK                                                      | 4.661245887        | 2               | 2.601891 |
| <b>Q6AYQ8</b> | <b>FAHD1 Acylpyruvase FAHD1_mitochondrial</b>                  | <b>0.903715871</b> | <b>0.905676</b> | <b>4</b> |
| Q6AYQ8        | IITLEEGDLILTGP                                                 | 1.450047822        | 2               | 5.170192 |
| Q6AYQ8        | NLHHEVELGVLLGR                                                 | 0.903531546        | 3               | 4.707316 |
| Q6AYQ8        | SFTSSCPVSAFVPK                                                 | 1.012608902        | 2               | 3.98761  |
| Q6AYQ8        | STVLSEPVFLKPAYAPEGSPVLMPAYCR                                   | 1.114054113        | 3               | 3.723543 |
| <b>Q6AYR8</b> | <b>SCRN2 Secernin_2</b>                                        | <b>1.305596074</b> | <b>0.168289</b> | <b>2</b> |
| Q6AYR8        | GHQAAALGLMDEQEQAQLR                                            | 1.244100147        | 3               | 4.301841 |
| Q6AYR8        | QEQQSLEQEGLEALR                                                | 1.324723247        | 2               | 3.885577 |
| <b>Q6AYS7</b> | <b>ACY1A Aminoacylase_1A</b>                                   | <b>1.875521869</b> | <b>0.001487</b> | <b>2</b> |
| Q6AYS7        | EMNLTLEPEIFPAATDSR                                             | 1.480945549        | 2               | 3.811532 |
| Q6AYS7        | ICTVQPNPDYGSVTFLEER                                            | 4.112027738        | 2               | 4.576272 |
| <b>Q6AYS8</b> | <b>DHB11 Estradiol 17_beta_dehydrogenase 11</b>                | <b>1.248216356</b> | <b>0.74922</b>  | <b>3</b> |
| Q6AYS8        | ALTDELAALGCTGVR                                                | 1.116829446        | 2               | 4.057905 |
| Q6AYS8        | FDAVVGYK                                                       | 1.482535704        | 1               | 2.286601 |
| Q6AYS8        | SVAGEIVLITGAGHGIGR                                             | 1.147478756        | 2               | 4.029947 |
| <b>Q6AYT9</b> | <b>ACSM5 Acyl_coenzyme A synthetase ACSM5_mitochondrial</b>    | <b>0.733882386</b> | <b>0.959647</b> | <b>4</b> |
| Q6AYT9        | AFIVLSPAYVSHDPEALTR                                            | 0.854425485        | 2               | 3.434348 |
| Q6AYT9        | ASPPYDVQIVDEEGNVLP                                             | 0.615705122        | 2               | 3.208886 |
| Q6AYT9        | NDDVINSSSYR                                                    | 3.527386279        | 2               | 3.34475  |
| Q6AYT9        | TGVVMIPGISLQTK                                                 | 0.654042304        | 2               | 3.144312 |
| <b>Q6AYZ1</b> | <b>TBA1C Tubulin alpha_1C chain</b>                            | <b>1.367211468</b> | <b>9.9E-20</b>  | <b>6</b> |
| Q6AYZ1        | AVFVDLEPTVIDEVR                                                | 1.261768672        | 2               | 5.409662 |
| Q6AYZ1        | AYHEQLTVAEITNACFEPANQMVK                                       | 1.371353997        | 3               | 4.145511 |
| Q6AYZ1        | DVNAAIATIK                                                     | 1.044588656        | 2               | 3.172939 |
| Q6AYZ1        | IHFPLATYAPVISA                                                 | 2.093115062        | 2               | 3.799992 |
| Q6AYZ1        | TIGGGDDSFNTFFSETGAGK                                           | 1.597629449        | 2               | 5.460062 |
| Q6AYZ1        | VGINYQPPTVVPGGDLAR                                             | 1.404148071        | 2               | 4.702286 |
| <b>Q6DGG0</b> | <b>PPID Peptidyl_prolyl cis_trans isomerase D</b>              | <b>0.990201045</b> | <b>0.398367</b> | <b>4</b> |
| Q6DGG0        | GTGPTTGKPLHFK                                                  | 0.593115784        | 2               | 2.356661 |
| Q6DGG0        | IVLELFADIVPK                                                   | 1.124275175        | 2               | 2.310369 |

|               |                                                          |                    |                 |           |
|---------------|----------------------------------------------------------|--------------------|-----------------|-----------|
| Q6DGG0        | MLENVEVNGEKPAK                                           | 1.603417552        | 2               | 3.708082  |
| Q6DGG0        | VFFDVDIGGER                                              | 0.95601272         | 2               | 2.836786  |
| <b>Q6DGG1</b> | <b>ABHEB Abhydrolase domain_containing protein 14B</b>   | <b>1.045736199</b> | <b>5.51E-05</b> | <b>6</b>  |
| Q6DGG1        | AVAILPGLGR                                               | 1.131035413        | 2               | 3.564353  |
| Q6DGG1        | FSSETWQNLGTLHR                                           | 1.260414008        | 2               | 3.636135  |
| Q6DGG1        | FSVLLHGIR                                                | 1.872913752        | 2               | 3.088484  |
| Q6DGG1        | GYVPVAPICTDK                                             | 1.03086928         | 1               | 2.653982  |
| Q6DGG1        | INAADYAR                                                 | 1.259905921        | 2               | 2.467744  |
| Q6DGG1        | TPTLIVYGDQDPMGSSSFQHLK                                   | 1.37064767         | 2               | 5.382257  |
| <b>Q6EDY6</b> | <b>LR16A Leucine_rich repeat_containing protein 16A</b>  | <b>1.073956095</b> | <b>0.43451</b>  | <b>2</b>  |
| Q6EDY6        | ELMESIK+Oxidation(2                                      | 1.701431195        |                 |           |
| Q6EDY6        | IENYLLR                                                  | 1.072536887        | 2               | 2.455609  |
| <b>Q6GQP4</b> | <b>RAB31 Ras_related protein Rab_31</b>                  | <b>0.89066197</b>  | <b>0.773475</b> | <b>2</b>  |
| Q6GQP4        | CDLSDIREVPLK                                             | 0.890640642        | 2               | 2.5344    |
| Q6GQP4        | CDLSDIREVPLKDAK                                          | 0.89848344         | 2               | 2.916077  |
| <b>Q6GQT1</b> | <b>A2MP Alpha_2_macroglobulin_P</b>                      | <b>2.409483891</b> | <b>0.093015</b> | <b>3</b>  |
| Q6GQT1        | ASVTVLGDILGSAMQNTQDLLK                                   | 1.070939607        | 2               | 2.351327  |
| Q6GQT1        | IQEEGTGVEETGK                                            | 15.40852594        | 2               | 3.722674  |
| Q6GQT1        | SSGSLNNAMK                                               | 1.231568196        | 2               | 3.097877  |
| <b>Q6I7R3</b> | <b>ISOC1 Isochorismatase domain_containing protein 1</b> | <b>1.520768164</b> | <b>0.000378</b> | <b>3</b>  |
| Q6I7R3        | GLGSTVQEIDLTGVK                                          | 1.324206642        | 2               | 3.879374  |
| Q6I7R3        | ILGIPVIITEQYPK                                           | 1.529546516        | 2               | 3.007985  |
| Q6I7R3        | YFGDIISVGQR                                              | 1.73338597         | 2               | 2.578387  |
| <b>Q6IE52</b> | <b>MUG2 Murinoglobulin_2</b>                             | <b>1.109447274</b> | <b>0.932004</b> | <b>14</b> |
| Q6IE52        | AHFSVMGDILSSAIK                                          | 1.050212604        | 2               | 3.671941  |
| Q6IE52        | HGIPFFVK                                                 | 1.042141802        | 2               | 2.747216  |
| Q6IE52        | HTSSWLVTPK                                               | 0.741008999        | 2               | 2.808944  |
| Q6IE52        | LPSSEEEESLDINIEGAK                                       | 1.43312948         | 2               | 2.88293   |
| Q6IE52        | MLIYTILPDGEVIADSVK                                       | 1.151850299        | 2               | 3.836036  |
| Q6IE52        | MLSGFIPLKPTVK                                            | 1.008795017        | 2               | 3.155607  |
| Q6IE52        | MLSGFIPLKPTVK+Oxidation(0                                | 0.723062528        |                 |           |
| Q6IE52        | NLYPLKELVQDPK                                            | 1.524103577        | 1               | 2.044113  |
| Q6IE52        | QLSFSLSAEPIQGYPK                                         | 1.162282159        | 2               | 4.277303  |
| Q6IE52        | QQNSHGGFSSQTQDVTVALDALS                                  | 1.209849028        | 3               | 3.659071  |
| Q6IE52        | VHLSFSPSQLPASQTHMR                                       | 0.694820967        | 3               | 3.93723   |
| Q6IE52        | VKTVPLTCNNPK                                             | 1.020117374        | 2               | 2.964466  |
| Q6IE52        | VTASPSQLCGLR                                             | 2.414432069        | 2               | 2.507361  |
| Q6IE52        | YMLVLPVPSQLYTETPEK                                       | 1.013752901        | 2               | 3.725561  |
| <b>Q6IFW6</b> | <b>K1C10 Keratin_type I cytoskeletal 10</b>              | <b>0.594444131</b> | <b>0.322034</b> | <b>2</b>  |
| Q6IFW6        | LENEIQTYR                                                | 0.974022775        | 2               | 2.348988  |
| Q6IFW6        | QSLEASLAETEGR                                            | 0.352565835        | 2               | 3.44501   |
| <b>Q6IFZ9</b> | <b>K2C74 Keratin_type II cytoskeletal 74</b>             | <b>0.874568146</b> | <b>0.402137</b> | <b>2</b>  |
| Q6IFZ9        | FLEQQNQVLQTK                                             | 0.525871347        | 2               | 4.169481  |
| Q6IFZ9        | GDSALKDAWAKLDELEGALQQA                                   | 4.795232271        | 3               | 3.603644  |
| <b>Q6IMF3</b> | <b>K2C1 Keratin_type II cytoskeletal 1</b>               | <b>1.210635416</b> | <b>4.44E-16</b> | <b>4</b>  |
| Q6IMF3        | TNAENEFVTIK                                              | 1.074450056        | 2               | 2.751327  |
| Q6IMF3        | TNAENEFVIKK                                              | 0.373200106        | 2               | 2.93977   |
| Q6IMF3        | WELLQQVDTSTR                                             | 0.799799807        | 2               | 3.617955  |
| Q6IMF3        | YEELQITAGK                                               | 1.463733029        | 2               | 3.467762  |
| <b>Q6IRK9</b> | <b>PGCP Plasma glutamate carboxypeptidase</b>            | <b>1.266638678</b> | <b>1.79E-09</b> | <b>7</b>  |
| Q6IRK9        | AIQIMYQNLQDGLNVHLEQVR                                    | 1.219544023        | 3               | 5.463465  |
| Q6IRK9        | GEESAVMVVPR                                              | 1.602393364        | 2               | 2.827027  |
| Q6IRK9        | IVVYNQPYTDYGK                                            | 1.41543748         | 2               | 2.917647  |
| Q6IRK9        | LGLLDVTVGPR                                              | 1.848830869        | 2               | 2.983609  |

|               |                                                                 |                    |                 |           |
|---------------|-----------------------------------------------------------------|--------------------|-----------------|-----------|
| Q6IRK9        | SVASFSIYSPHTGHQGYQDGVPK                                         | 1.391124729        | 3               | 3.458466  |
| Q6IRK9        | TYPDTDSFNVAEITGSK                                               | 1.665871528        | 2               | 3.731941  |
| Q6IRK9        | VGAVASLR                                                        | 2.085223573        | 2               | 2.529449  |
| <b>Q6MGB5</b> | <b>DHB8 Estradiol 17_beta_dehydrogenase 8</b>                   | <b>1.243605562</b> | <b>0.405249</b> | <b>4</b>  |
| Q6MGB5        | AGVIGLTQTAAR                                                    | 1.45516836         | 2               | 3.195551  |
| Q6MGB5        | CNSVLPGFATPMTQK                                                 | 2.052306863        | 2               | 2.348606  |
| Q6MGB5        | GSIINISSIVGK                                                    | 2.246736477        | 2               | 2.775103  |
| Q6MGB5        | VGNIGQNTYASSK                                                   | 0.929124045        | 2               | 2.760011  |
| <b>Q6NSR8</b> | <b>PEPL1 Probable aminopeptidase NPEPL1</b>                     | <b>1.033244535</b> | <b>0.841425</b> | <b>3</b>  |
| Q6NSR8        | GIVYDTGGLSIK                                                    | 1.068143635        | 2               | 2.364544  |
| Q6NSR8        | HNSPSAAHFITR                                                    | 0.757060121        | 3               | 3.954587  |
| Q6NSR8        | TVEINNTDAEGR                                                    | 1.051863938        | 2               | 2.9926    |
| <b>Q6NYB7</b> | <b>RAB1A Ras_related protein Rab_1A</b>                         | <b>0.818516299</b> | <b>0.299724</b> | <b>3</b>  |
| Q6NYB7        | EFADSLGIPFLETSK                                                 | 0.798480789        | 2               | 3.791878  |
| Q6NYB7        | NATNVEQSFMTMAAEIK                                               | 1.591865063        | 2               | 5.092525  |
| Q6NYB7        | TITSSYYR                                                        | 1.375871549        | 1               | 1.978612  |
| <b>Q6NZJ6</b> | <b>IF4G1 Eukaryotic translation initiation factor 4 gamma 1</b> | <b>1.324979932</b> | <b>2.03E-06</b> | <b>9</b>  |
| Q6NZJ6        | FMLQDVLDLR                                                      | 1.73447212         | 2               | 2.796247  |
| Q6NZJ6        | GLPLVDDGGWNTVPISK                                               | 1.047629904        | 2               | 2.872664  |
| Q6NZJ6        | GSSGGSGAKPSDTASEATRPATLNR                                       | 1.357500531        | 3               | 3.353128  |
| Q6NZJ6        | IHNAENIQPGEQK                                                   | 1.256484703        | 2               | 3.955145  |
| Q6NZJ6        | ITKPGSIDSNNQLFAPGGR                                             | 1.476891822        | 3               | 3.561689  |
| Q6NZJ6        | KVEYTLGEESEAPGQR                                                | 1.322674031        | 2               | 4.750581  |
| Q6NZJ6        | LGIESTLER                                                       | 1.419711116        | 2               | 2.4185    |
| Q6NZJ6        | LKEELEEAR                                                       | 1.326656758        | 2               | 2.702291  |
| Q6NZJ6        | TASTPTPPQTGGSLPQPNGESPQVAVIIRPDDR                               | 1.290710347        | 3               | 4.991287  |
| <b>Q6P0K8</b> | <b>PLAK Junction plakoglobin</b>                                | <b>1.326915442</b> | <b>0.09421</b>  | <b>3</b>  |
| Q6P0K8        | LLNDEDPVVVTK                                                    | 1.098058043        | 2               | 3.225651  |
| Q6P0K8        | NLALCPANHAPLQEAIVIPR                                            | 1.326919616        | 3               | 3.628233  |
| Q6P0K8        | TMQNTSDLDTAR                                                    | 1.368234476        | 2               | 3.259889  |
| <b>Q6P502</b> | <b>TCPG T_complex protein 1 subunit gamma</b>                   | <b>1.516681547</b> | <b>7.11E-10</b> | <b>14</b> |
| Q6P502        | AMTGVEQWPYR                                                     | 1.221361727        | 2               | 2.707216  |
| Q6P502        | AVAQALEVIPR                                                     | 1.80096083         | 2               | 2.450603  |
| Q6P502        | DMMLNIINSITTK                                                   | 0.703799338        | 2               | 3.976569  |
| Q6P502        | EIQVQHAAK                                                       | 1.294006165        | 2               | 3.302261  |
| Q6P502        | GISDLAQHYLMR                                                    | 1.546161116        | 2               | 3.048059  |
| Q6P502        | IVLLDSSLEYK                                                     | 1.836208335        | 2               | 2.559093  |
| Q6P502        | IVSRPEELREDDVGTGAGLLEIK                                         | 2.213732238        | 3               | 4.094107  |
| Q6P502        | KGESQTDIEITR                                                    | 1.139871068        | 2               | 3.277578  |
| Q6P502        | MLLDPMGGIVMTNDGNAILR                                            | 2.330622817        | 2               | 3.885154  |
| Q6P502        | NLQDAMQVCR                                                      | 4.667575398        | 2               | 3.31944   |
| Q6P502        | NVLLDPQLVPGGASEMAVAHALTEK                                       | 2.311332463        | 2               | 3.870822  |
| Q6P502        | TAVETAVLLLR                                                     | 1.89812389         | 2               | 3.73921   |
| Q6P502        | TLIQNCGASTIR                                                    | 1.419551035        | 2               | 3.345924  |
| Q6P502        | WSSLACNIALDAVK                                                  | 1.498046405        | 2               | 3.796398  |
| <b>Q6P6M7</b> | <b>selenium transferase</b>                                     | <b>1.031407061</b> | <b>0.912081</b> | <b>4</b>  |
| <b>Q6P6R2</b> | <b>DLDH Dihydrolipoyl dehydrogenase_mitochondrial</b>           | <b>0.99039799</b>  | <b>1.09E-11</b> | <b>14</b> |
| Q6P6R2        | ALLNNSHYHLAHLGK                                                 | 0.663325581        | 2               | 3.3111    |
| Q6P6R2        | ALTGGIAHLFK                                                     | 0.855241306        | 2               | 2.632448  |
| Q6P6R2        | EANLAASFGKPINF                                                  | 1.180310752        | 1               | 1.929015  |
| Q6P6R2        | IDVSVEAASGGK                                                    | 1.195508327        | 2               | 3.039462  |
| Q6P6R2        | ILGAHILGPGAGEMVNEAALALEYGASCEDVAR                               | 1.178569608        | 3               | 3.993563  |
| Q6P6R2        | IPNIFAIGDVVAGPMLAHLK                                            | 1.627122307        | 3               | 3.50005   |
| Q6P6R2        | NETLGGTCLNVGCIPSK                                               | 0.881054859        | 2               | 5.167176  |
| Q6P6R2        | NQVTATTADGSTQVIGTK                                              | 0.981303581        | 2               | 5.630736  |

|               |                                                                   |                    |                 |           |
|---------------|-------------------------------------------------------------------|--------------------|-----------------|-----------|
| Q6P6R2        | RPFTQNLGLEELGIELDPK                                               | 1.530995885        | 3               | 4.603387  |
| Q6P6R2        | SEEQLKEEGVEFK                                                     | 0.982830053        | 2               | 3.531238  |
| Q6P6R2        | TNADTDGMVK                                                        | 1.189417853        | 2               | 2.825343  |
| Q6P6R2        | TNADTDGMVK+Oxidation(7                                            | 1.306488265        |                 |           |
| Q6P6R2        | VCHAHPTLSEAFR                                                     | 1.193489387        | 3               | 3.782745  |
| Q6P6R2        | VVHVNGFGK                                                         | 1.65807876         | 3               | 3.45103   |
| <b>Q6P6S9</b> | <b>ENTP5 Ectonucleoside triphosphate diphosphohydrolase 5</b>     | <b>1.283430338</b> | <b>0.031947</b> | <b>6</b>  |
| Q6P6S9        | AAETHLIDYEK                                                       | 1.266932017        | 2               | 2.667594  |
| Q6P6S9        | AQTLLEVEEIFK                                                      | 1.193188206        | 2               | 3.270327  |
| Q6P6S9        | GQETVGTLDLGGASTQITFLPQLEK                                         | 1.095363408        | 2               | 4.397387  |
| Q6P6S9        | QGAETVQELLEVAK                                                    | 1.177656733        | 2               | 3.143733  |
| Q6P6S9        | TSGQLPFLEGEIFDSVKPGLSAFVDQPK                                      | 1.322685363        | 3               | 3.627939  |
| Q6P6S9        | WLEAEWIFGGVK                                                      | 1.500947782        | 2               | 2.770267  |
| <b>Q6P6V0</b> | <b>G6PI Glucose_6_phosphate isomerase</b>                         | <b>1.512733929</b> | <b>2.49E-07</b> | <b>9</b>  |
| Q6P6V0        | DVMPEVNKVLDK+Oxidation(2                                          | 1.446724558        |                 |           |
| Q6P6V0        | HFVALSTNTDK                                                       | 1.439251851        | 1               | 3.255269  |
| Q6P6V0        | KIEPELDGSSAVTSHSSTNGLIGFIK                                        | 1.422206047        | 3               | 6.001237  |
| Q6P6V0        | MIPCDFLIPVQTQHPPIR                                                | 1.941512392        | 2               | 2.426195  |
| Q6P6V0        | TFTTQETITNAETAK                                                   | 1.459403209        | 2               | 4.756831  |
| Q6P6V0        | TLANLNPESSLIASK                                                   | 1.223929858        | 3               | 5.205965  |
| Q6P6V0        | VDYQTGPVWGEPTNGQHAFYQLIHQGTK                                      | 1.261920214        | 3               | 4.022248  |
| Q6P6V0        | VFEGNRPTSIVFTK                                                    | 1.354696153        | 2               | 3.38279   |
| Q6P6V0        | VWVFSNIDGTHIAK                                                    | 0.355772563        | 2               | 3.63236   |
| <b>Q6P7Q4</b> | <b>LGUL Lactoylg glutathione lyase</b>                            | <b>1.440655523</b> | <b>0.0068</b>   | <b>6</b>  |
| Q6P7Q4        | DFLLQQTMLR                                                        | 2.21725706         | 2               | 3.382379  |
| Q6P7Q4        | FEELGVK                                                           | 1.135196872        | 1               | 1.937783  |
| Q6P7Q4        | GFGHIGIAVPDVYEACK                                                 | 1.221126879        | 2               | 4.000095  |
| Q6P7Q4        | GLAFVQDPDGYWIEILNPNK                                              | 1.443701742        | 2               | 5.738204  |
| Q6P7Q4        | RFEELGVK                                                          | 1.215765073        | 2               | 2.323681  |
| Q6P7Q4        | VLGLTLLQK                                                         | 1.762635195        | 2               | 2.480991  |
| <b>Q6P7R8</b> | <b>DHB12 Estradiol 17_beta_dehydrogenase 12</b>                   | <b>1.503240484</b> | <b>0.271043</b> | <b>2</b>  |
| Q6P7R8        | GIFVQSVLPFFVATK                                                   | 1.369480416        | 2               | 3.46805   |
| Q6P7R8        | LGEWAVVTGGTDGIGK                                                  | 1.504351754        | 2               | 4.23867   |
| <b>Q6P9T8</b> | <b>TBB2C Tubulin beta_2C chain</b>                                | <b>1.101241068</b> | <b>9.9E-20</b>  | <b>13</b> |
| Q6P9T8        | AVLVDLEPGTMDSVR                                                   | 1.488106903        | 2               | 4.509984  |
| Q6P9T8        | AVLVDLEPGTMDSVR+Oxidation(10                                      | 1.120441697        |                 |           |
| Q6P9T8        | EAESCDCLQGFLTHSLGGTGSGMGTLLISK                                    | 1.490435206        | 3               | 5.658007  |
| Q6P9T8        | EIVHLQAGQCGNQIGAK                                                 | 1.361507424        | 2               | 4.93126   |
| Q6P9T8        | EVDEQMLNVQNK                                                      | 2.257634374        | 2               | 4.473939  |
| Q6P9T8        | FWEVISDEHGIDPTGTYHGSDQLQLER                                       | 1.345251686        | 3               | 4.850315  |
| Q6P9T8        | INVYYNEATGGK                                                      | 1.244958186        | 2               | 3.076027  |
| Q6P9T8        | KEAESCDCLQGFLTHSLGGTGSGMGTLLISK                                   | 1.790864698        | 3               | 6.605772  |
| Q6P9T8        | LHFFMPGFAPLTSR                                                    | 2.361073458        | 2               | 3.269073  |
| Q6P9T8        | MSATFIGNSTAIQELFK                                                 | 1.703716857        | 2               | 4.331597  |
| Q6P9T8        | SGPFGQIFRPDNFVFGQSGAGNNWAK                                        | 1.616975752        | 3               | 5.803611  |
| Q6P9T8        | TAVCDIPPR                                                         | 1.571315933        | 2               | 2.500897  |
| Q6P9T8        | YLTVAAVFR                                                         | 1.764940692        | 2               | 2.683813  |
| <b>Q6P9U8</b> | <b>EIF3H Eukaryotic translation initiation factor 3 subunit H</b> | <b>1.499383105</b> | <b>0.000324</b> | <b>2</b>  |
| Q6P9U8        | ANITFEHMFEEVPIVIK                                                 | 1.076357304        | 3               | 3.731251  |
| Q6P9U8        | EGTGSTATSSSTGGAVGK                                                | 1.824336502        | 2               | 4.270665  |
| <b>Q6PA06</b> | <b>ATLA2 Atlastin_2</b>                                           | <b>1.233119337</b> | <b>0.000436</b> | <b>5</b>  |
| Q6PA06        | AGLTDQVSHHAR                                                      | 1.456731686        | 2               | 3.18057   |
| Q6PA06        | NLVPLLLAPENLVEK                                                   | 1.411350878        | 2               | 3.022973  |
| Q6PA06        | QNQHEELQNVRI                                                      | 1.149892055        | 2               | 2.929742  |
| Q6PA06        | SMEQVCGGDKPYIAPSDLER                                              | 1.210280506        | 3               | 3.803212  |



|               |                                                                                    |                    |                 |           |
|---------------|------------------------------------------------------------------------------------|--------------------|-----------------|-----------|
| Q6PA06        | SMLQATAEANNLAAVAGAR                                                                | 1.596211088        | 2               | 4.500933  |
| <b>Q6PCL9</b> | <b>polymerase gamma</b>                                                            | <b>1.316888619</b> | <b>0.381032</b> | <b>2</b>  |
| Q6PCL9        | LTEILK                                                                             | 1.38313251         |                 |           |
| Q6PCL9        | QANNINMLKDGMK                                                                      | 1.180310752        |                 |           |
| <b>Q6PCU2</b> | <b>VATE1 V_type proton ATPase subunit E 1</b>                                      | <b>1.727867307</b> | <b>0.010341</b> | <b>2</b>  |
| Q6PCU2        | ARDDLITDLLNEAK                                                                     | 1.794176239        | 2               | 2.972431  |
| Q6PCU2        | LDLIAQQMMPEVR                                                                      | 1.331034435        | 2               | 2.565131  |
| <b>Q6PDM2</b> | <b>SRSF1 Serine/arginine_rich splicing factor 1</b>                                | <b>1.285321729</b> | <b>0.569787</b> | <b>2</b>  |
| Q6PDM2        | SHEGETAYIR                                                                         | 1.31100481         | 2               | 2.40953   |
| Q6PDM2        | TKDIEDVFK                                                                          | 1.273996142        | 2               | 2.753317  |
| <b>Q6PDV7</b> | <b>RL10 60S ribosomal protein L10</b>                                              | <b>1.638565084</b> | <b>5.39E-07</b> | <b>2</b>  |
| Q6PDV7        | FNADEFEDMVAEK                                                                      | 1.650057572        | 2               | 3.812463  |
| Q6PDV7        | FNADEFEDMVAEKR                                                                     | 1.523589192        | 2               | 3.304233  |
| <b>Q6PEC1</b> | <b>TBCA Tubulin_specific chaperone A</b>                                           | <b>1.486173528</b> | <b>0.290479</b> | <b>6</b>  |
| Q6PEC1        | AEDGENYAIK                                                                         | 1.220022906        | 2               | 2.690401  |
| Q6PEC1        | AEDGENYAIKK                                                                        | 1.493670021        | 2               | 2.475244  |
| Q6PEC1        | LEAAYTLR                                                                           | 1.763035169        | 2               | 2.811616  |
| Q6PEC1        | MKAEDGENYAIK                                                                       | 0.109108309        | 2               | 2.793792  |
| Q6PEC1        | QAEILQESR                                                                          | 0.861978794        | 2               | 2.583644  |
| Q6PEC1        | QILESEKDLEEAEEYKEAR                                                                | 1.212209357        | 3               | 4.09466   |
| <b>Q6PEC4</b> | <b>SKP1 S_phase kinase_associated protein 1</b>                                    | <b>1.063717304</b> | <b>0.445013</b> | <b>3</b>  |
| Q6PEC4        | NDFTEEEAQVR                                                                        | 1.062665056        | 2               | 3.451865  |
| Q6PEC4        | RTDDIPVWDQEFK                                                                      | 1.183601248        | 2               | 3.028023  |
| Q6PEC4        | TDDIPVWDQEFK                                                                       | 1.313830783        | 2               | 3.189246  |
| <b>Q6Q0N1</b> | <b>CNDP2 Cytosolic non_specific dipeptidase</b>                                    | <b>1.242599582</b> | <b>0.22268</b>  | <b>6</b>  |
| Q6Q0N1        | AVFQYIDENQDR                                                                       | 0.551228791        | 2               | 3.026163  |
| Q6Q0N1        | EGGSIPVTLTFQEATGK                                                                  | 1.184496499        | 2               | 2.762043  |
| Q6Q0N1        | LGGSVELVDIGK                                                                       | 1.056723063        | 2               | 3.582653  |
| Q6Q0N1        | MTEAAAADVQR                                                                        | 1.490056823        | 2               | 3.143737  |
| Q6Q0N1        | TGQEIPVNLK                                                                         | 1.547816078        | 2               | 2.574807  |
| Q6Q0N1        | TVFGVEPDLTR                                                                        | 1.470746786        | 2               | 2.397709  |
| <b>Q6RT24</b> | <b>CENPE Centromere_associated protein E</b>                                       | <b>1.307534352</b> | <b>0.06683</b>  | <b>3</b>  |
| Q6RT24        | ENEDLKLK                                                                           | 1.309487483        | 2               | 2.329729  |
| Q6RT24        | MELENVNMKLQEK                                                                      | 1.306659051        | 2               | 2.559444  |
| Q6RT24        | NLQEYIDAKSEKMK                                                                     | 1.2770583          | 2               | 2.406041  |
| <b>Q6SKG1</b> | <b>ACSM3 Acyl_coenzyme A synthetase ACSM3_mitochondrial</b>                        | <b>0.925538081</b> | <b>0.633668</b> | <b>2</b>  |
| Q6SKG1        | FDSTSILQTLK                                                                        | 1.29352498         | 2               | 3.756126  |
| Q6SKG1        | TGTVLIPGTTQLTQK                                                                    | 0.826646929        | 2               | 2.859184  |
| <b>Q6TUG0</b> | <b>DJB11 DnaJ homolog subfamily B member 11</b>                                    | <b>1.280854413</b> | <b>0.788301</b> | <b>4</b>  |
| Q6TUG0        | FQDLGAAYEVLSDSEK                                                                   | 1.28489134         | 2               | 4.646751  |
| Q6TUG0        | FQMTQEVVCECPNVK                                                                    | 1.257222388        | 2               | 5.578425  |
| Q6TUG0        | KGEGLPNFDNNDIK                                                                     | 1.095659048        | 2               | 3.649173  |
| Q6TUG0        | TLEVEIEPGVR                                                                        | 1.4191074          | 2               | 3.155499  |
| <b>Q6UPE1</b> | <b>ETFD Electron transfer flavoprotein_ubiquinone oxidoreductase_mitochondrial</b> | <b>1.158481672</b> | <b>5.38E-07</b> | <b>19</b> |
| Q6UPE1        | AAQIGAHTLSGACLDPAAFK                                                               | 1.040294384        | 2               | 5.095387  |
| Q6UPE1        | ALNEGGLQSIK                                                                        | 0.940184449        | 2               | 3.364232  |
| Q6UPE1        | ASCDATYIGLK                                                                        | 1.096521118        | 2               | 4.053927  |
| Q6UPE1        | DCTPIEYKPDGQISFDLLSSVALSGTNHEHDQPAHLTK                                             | 0.768543816        | 4               | 4.625688  |
| Q6UPE1        | FAEEDVVIVGAGPAGLSAAIR                                                              | 2.063918916        | 2               | 3.086116  |
| Q6UPE1        | FCPAGVYFVPLEQGDGFR                                                                 | 1.640898964        | 2               | 4.522505  |
| Q6UPE1        | GAPLNTPVTEDR                                                                       | 0.854551837        | 2               | 3.482643  |
| Q6UPE1        | GIATNDVGIQK                                                                        | 1.280230022        | 2               | 3.789166  |
| Q6UPE1        | HHPSIRPTLEGGK                                                                      | 0.763273918        | 2               | 2.420196  |
| Q6UPE1        | HHPSIRPTLEGGKR                                                                     | 1.239709906        | 2               | 2.820377  |
| Q6UPE1        | LQINAQNCVHCK                                                                       | 1.927441401        | 2               | 3.723388  |

|               |                                                            |                    |                 |          |
|---------------|------------------------------------------------------------|--------------------|-----------------|----------|
| Q6UPE1        | NLSIYDGPEQR                                                | 1.034691831        | 2               | 3.143724 |
| Q6UPE1        | QLAAEQEKDIR                                                | 1.293405505        | 2               | 2.701544 |
| Q6UPE1        | QLTSENLOSK                                                 | 1.105430226        | 2               | 2.463722 |
| Q6UPE1        | SGSLAAEAIFK                                                | 0.935880537        | 2               | 3.140819 |
| Q6UPE1        | TAGLHVTEYEDNLK                                             | 1.370206051        | 2               | 3.973487 |
| Q6UPE1        | TCDIKDPNQINWVPEGGGGPAYNGM                                  | 6.975930066        | 2               | 4.390004 |
| Q6UPE1        | VDHTVGWPLDR                                                | 0.967565582        | 2               | 2.476052 |
| Q6UPE1        | VTIFAEGCHGLAK                                              | 0.871299194        | 2               | 3.677919 |
| <b>Q6URK4</b> | <b>ROA3 Heterogeneous nuclear ribonucleoprotein A3</b>     | <b>1.374371663</b> | <b>2.75E-14</b> | <b>8</b> |
| Q6URK4        | EDSVKPGAHLTVK                                              | 1.378893867        | 2               | 3.48456  |
| Q6URK4        | EDTEEYNLR                                                  | 1.361727572        | 2               | 2.453233 |
| Q6URK4        | GFAFVTFDDHDTVDK                                            | 5.15266146         | 2               | 4.095193 |
| Q6URK4        | IETIEVMEDR                                                 | 1.461238077        | 2               | 3.4034   |
| Q6URK4        | IFVGGIKEDTEEYNLR                                           | 1.914797654        | 2               | 4.257796 |
| Q6URK4        | SSGSPYGGGYGSGGGGGYGSR                                      | 1.176237619        | 2               | 5.227034 |
| Q6URK4        | WGTLTDCVVMR                                                | 1.542041932        | 2               | 3.241398 |
| Q6URK4        | YHTINGHNCVCK                                               | 1.082198839        | 2               | 3.507973 |
| <b>Q6URW6</b> | <b>MYH14 Myosin_14</b>                                     | <b>1.12181075</b>  | <b>0.963624</b> | <b>4</b> |
| Q6URW6        | EDQSILCTGESGAGK                                            | 1.187396642        | 2               | 4.396406 |
| Q6URW6        | FDQLLAEEK                                                  | 1.266291779        | 1               | 2.04082  |
| Q6URW6        | KFDQLLAEEK                                                 | 1.109159399        | 2               | 2.837328 |
| Q6URW6        | QLLQANPILEAFGNAK                                           | 1.045037934        | 2               | 4.491557 |
| <b>Q6XQN1</b> | <b>PNCB Nicotinate phosphoribosyltransferase</b>           | <b>0.765352182</b> | <b>0.109785</b> | <b>5</b> |
| Q6XQN1        | AFAQQSLR                                                   | 1.798350329        | 2               | 2.493515 |
| Q6XQN1        | GSEVNVIGIGTNNVTCPK                                         | 0.704993385        | 2               | 4.222678 |
| Q6XQN1        | LDSGDLQQAQK                                                | 0.898960309        | 2               | 3.061677 |
| Q6XQN1        | LYLQQGQPYEPLPLEESR                                         | 1.488021134        | 2               | 5.036246 |
| Q6XQN1        | QLQNPAVYQValsek                                            | 1.656851791        | 2               | 3.831927 |
| <b>Q6ZPJ3</b> | <b>UBE2O Ubiquitin_conjugating enzyme E2 O</b>             | <b>1.353429817</b> | <b>0.162159</b> | <b>2</b> |
| Q6ZPJ3        | FRTTDIVIR                                                  | 1.046562534        | 2               | 2.600351 |
| Q6ZPJ3        | NCAQGECSMAKKVK                                             | 2.570338892        | 2               | 2.821203 |
| <b>Q6ZPV2</b> | <b>INO80 DNA helicase INO80</b>                            | <b>1.094068856</b> | <b>0.672669</b> | <b>2</b> |
| Q6ZPV2        | FIDVSPAEMANLMLQGLLAR+Oxidation(12                          | 0.74996504         |                 |          |
| Q6ZPV2        | KLDEEMREAK+Oxidation(5                                     | 1.149908345        |                 |          |
| <b>Q6ZWR6</b> | <b>SYNE1 Nesprin_1</b>                                     | <b>1.216828979</b> | <b>0.486346</b> | <b>4</b> |
| Q6ZWR6        | FGSITNQLLK                                                 | 1.246067126        | 2               | 2.398786 |
| Q6ZWR6        | KDEIEGWSNSSLPK                                             | 0.705237457        | 2               | 2.525392 |
| Q6ZWR6        | LETILK                                                     | 1.38313251         | 1               | 1.900741 |
| Q6ZWR6        | LKAKTDDLHVAK                                               | 1.0690319          | 2               | 2.314591 |
| <b>Q70FJ1</b> | <b>AKAP9 A_kinase anchor protein 9</b>                     | <b>1.373462157</b> | <b>0.068969</b> | <b>2</b> |
| Q70FJ1        | EDGGQPPPALPSEDLLK                                          | 0.779889356        | 2               | 2.742035 |
| Q70FJ1        | MDQITQSLCNLNK+Oxidation(0                                  | 2.186403868        |                 |          |
| <b>Q711G3</b> | <b>IAH1 Isoamyl acetate_hydrolyzing esterase 1 homolog</b> | <b>1.701508425</b> | <b>6.22E-05</b> | <b>5</b> |
| Q711G3        | DCGTDVLDLWTLMQK                                            | 1.580999506        | 2               | 4.408664 |
| Q711G3        | DVEETKPELSLLGDGDH                                          | 2.944082802        | 2               | 4.131206 |
| Q711G3        | LNVAVGGEYAK                                                | 1.269919159        | 2               | 2.763311 |
| Q711G3        | QHVPLDEYSANLR                                              | 2.520516785        | 2               | 2.632076 |
| Q711G3        | VILITPPPLCEAAWEK                                           | 1.833054279        | 2               | 2.733925 |
| <b>Q71LX4</b> | <b>TLN2 Talin_2</b>                                        | <b>1.117894753</b> | <b>0.483259</b> | <b>3</b> |
| Q71LX4        | QEDVIATANLSR                                               | 1.300875931        | 1               | 1.970315 |
| Q71LX4        | QVAASTAQLLVACK                                             | 1.115587671        | 2               | 3.189486 |
| Q71LX4        | VMVTNVTSLLK                                                | 0.488778183        | 2               | 2.377382 |
| <b>Q71TY3</b> | <b>RS27 40S ribosomal protein S27</b>                      | <b>1.617531246</b> | <b>0.026163</b> | <b>3</b> |
| Q71TY3        | DLLHPSPEEEK                                                | 1.972062546        | 2               | 2.916672 |
| Q71TY3        | LTEGCSFR                                                   | 1.421580466        | 2               | 2.387608 |

|               |                                                                                               |                    |                 |           |
|---------------|-----------------------------------------------------------------------------------------------|--------------------|-----------------|-----------|
| Q71TY3        | LVQSPNSYFMDVK                                                                                 | 1.359264114        | 2               | 2.800424  |
| <b>Q75N33</b> | <b>SC16B Protein transport protein Sec16B</b>                                                 | <b>1.384734316</b> | <b>0.397103</b> | <b>2</b>  |
| Q75N33        | NLLTGEIPLNVDTPAQIVEK                                                                          | 0.700720233        | 2               | 3.67124   |
| Q75N33        | VLEPDWLVLQR                                                                                   | 1.633056822        | 2               | 2.806057  |
| <b>Q75Q39</b> | <b>TOM70 Mitochondrial import receptor subunit TOM70</b>                                      | <b>1.048366691</b> | <b>0.675028</b> | <b>6</b>  |
| Q75Q39        | NADLSTFYQNR                                                                                   | 1.559716112        | 2               | 2.958164  |
| Q75Q39        | NREPLMPSPQFIK                                                                                 | 1.018151276        | 2               | 2.821916  |
| Q75Q39        | QYMEEENYDK                                                                                    | #NUM!              | 1               | 1.948622  |
| Q75Q39        | SDEKDKKEGEALVK                                                                                | 1.577628956        | 2               | 4.228317  |
| Q75Q39        | WKEVAQDCTK                                                                                    | 1.044591459        | 2               | 2.339485  |
| Q75Q39        | YEQAIQCYTEAISLCPTEK                                                                           | 1.007990481        | 2               | 2.497809  |
| <b>Q76MZ3</b> | <b>2AAA Serine/threonine_protein phosphatase 2A 65 kDa regulatory subunit A alpha isoform</b> | <b>1.572632297</b> | <b>0.160696</b> | <b>8</b>  |
| Q76MZ3        | AISHEHSPDLEAHFVPLVK                                                                           | 1.161461893        | 3               | 5.137702  |
| Q76MZ3        | IGPILDNSTLQSEVKPILEK                                                                          | 1.403526299        | 2               | 4.996356  |
| Q76MZ3        | LSTIALALGVER                                                                                  | 1.487350977        | 2               | 2.360965  |
| Q76MZ3        | LTQDQDQVDVK                                                                                   | 1.618042576        | 2               | 2.979821  |
| Q76MZ3        | QLSQSLLPAIVELAEDA                                                                             | 1.876463637        | 3               | 4.137728  |
| Q76MZ3        | SALASVIMGLSPILGK                                                                              | 1.115072313        | 2               | 2.891028  |
| Q76MZ3        | SEIIPMFSNLASDEQDSVR                                                                           | 1.281945811        | 2               | 3.969186  |
| Q76MZ3        | VLELDNVK                                                                                      | 1.454334246        | 2               | 2.514905  |
| <b>Q78IK4</b> | <b>APOOL Apolipoprotein O_like</b>                                                            | <b>1.188493503</b> | <b>0.655548</b> | <b>2</b>  |
| Q78IK4        | EEEPKK                                                                                        | 5.253452119        | 1               | 1.961384  |
| Q78IK4        | SESTSGTTQFIPDPK                                                                               | 1.163903552        | 2               | 2.42113   |
| <b>Q78P75</b> | <b>DYL2 Dynein light chain 2_cytoplasmic</b>                                                  | <b>0.865328237</b> | <b>0.13733</b>  | <b>3</b>  |
| Q78P75        | NADMSEDMQQDAVDCATQAMEK                                                                        | 0.65236453         | 3               | 5.66937   |
| Q78P75        | NFGSYVTHETK                                                                                   | 1.152380971        | 2               | 2.922776  |
| Q78P75        | YNPTWHCIVGR                                                                                   | 0.83625566         | 2               | 2.86639   |
| <b>Q791V5</b> | <b>MTCH2 Mitochondrial carrier homolog 2</b>                                                  | <b>1.007731797</b> | <b>0.921581</b> | <b>6</b>  |
| Q791V5        | EEGIVGFFAGLIPR                                                                                | 0.808139625        | 2               | 3.428821  |
| Q791V5        | GLFTGLTPR                                                                                     | 1.118752754        | 2               | 2.58243   |
| Q791V5        | LCSGVLGTVVHGK                                                                                 | 0.924991534        | 2               | 2.995635  |
| Q791V5        | SAATLITHPFHVITLR                                                                              | 0.808364671        | 3               | 3.566185  |
| Q791V5        | VLIQVGYEPLPPTIGR                                                                              | 1.094673318        | 2               | 4.184767  |
| Q791V5        | YCGLCDSIVTIYR                                                                                 | 1.465536883        | 2               | 2.915088  |
| <b>Q794E4</b> | <b>HNRPF Heterogeneous nuclear ribonucleoprotein F</b>                                        | <b>1.441941189</b> | <b>5.69E-06</b> | <b>4</b>  |
| Q794E4        | ATENDIYNFFSPLNPVR                                                                             | 1.220117667        | 3               | 4.091864  |
| Q794E4        | HSGPNSADSANDGFVR                                                                              | 1.375278133        | 2               | 3.946498  |
| Q794E4        | ITGEAFVQFASQELA                                                                               | 1.250265783        | 2               | 2.713714  |
| Q794E4        | VHIEIGPDGR                                                                                    | 1.477341886        | 2               | 2.790099  |
| <b>Q7M0E3</b> | <b>DEST Dextrin</b>                                                                           | <b>1.176491648</b> | <b>3.36E-09</b> | <b>2</b>  |
| Q7M0E3        | HEYQANGPEDLNR                                                                                 | 1.175399842        | 2               | 4.766291  |
| Q7M0E3        | HFVGMLPEKDCR                                                                                  | 1.90365344         | 2               | 3.485506  |
| <b>Q7TMA5</b> | <b>APOB Apolipoprotein B_100</b>                                                              | <b>1.012622353</b> | <b>0.862569</b> | <b>12</b> |
| Q7TMA5        | ALEGKSDTVARLHTEK                                                                              | 1.585918864        | 2               | 2.417762  |
| Q7TMA5        | GFEPTLEALFGK                                                                                  | 1.098888071        | 2               | 2.918231  |
| Q7TMA5        | IEGNLVFDPSSYLK                                                                                | 1.10279016         | 2               | 2.997787  |
| Q7TMA5        | IEIDIPLLGK                                                                                    | 0.481099116        | 2               | 2.778122  |
| Q7TMA5        | ITDNDVLIALDSAK                                                                                | 1.066772622        | 2               | 3.325538  |
| Q7TMA5        | KGTVATEMSTER                                                                                  | 1.065952109        | 2               | 2.841465  |
| Q7TMA5        | LSISEQNAQR                                                                                    | 1.026645703        | 2               | 2.742728  |
| Q7TMA5        | LSTSPFALNLTMLPK                                                                               | 1.14196801         | 1               | 1.901728  |
| Q7TMA5        | NFVASHIANILNSEELYVQDLK                                                                        | 0.783429741        | 3               | 3.849286  |
| Q7TMA5        | NLQHCDGFQPISTSVSPLALIK                                                                        | 1.314196227        | 3               | 3.793248  |
| Q7TMA5        | TILFDTFVNDVAPVEK                                                                              | 1.004049439        | 2               | 3.132509  |

|               |                                                             |                    |                 |          |
|---------------|-------------------------------------------------------------|--------------------|-----------------|----------|
| Q7TMA5        | VRSFTIDLLEIKAK                                              | 1.14196801         | 1               | 1.999437 |
| <b>Q7TNG8</b> | <b>LDHD Probable D_lactate dehydrogenase_ mitochondrial</b> | <b>1.277211866</b> | <b>0.11428</b>  | <b>4</b> |
| Q7TNG8        | AVVGSPhVSTASAVR                                             | 1.069209257        | 2               | 2.939182 |
| Q7TNG8        | AYSTDVCPISR                                                 | 1.292596757        | 2               | 3.380218 |
| Q7TNG8        | GSQGLSQDFVEALK                                              | 1.214044641        | 2               | 3.632104 |
| Q7TNG8        | QLLQEEVGPVGVETMR                                            | 0.662178526        | 2               | 3.229623 |
| <b>Q7TP47</b> | <b>HNRPQ Heterogeneous nuclear ribonucleoprotein Q</b>      | <b>1.314552702</b> | <b>0.067994</b> | <b>2</b> |
| Q7TP47        | DLFEDELVPLFEK                                               | 1.964862689        | 2               | 3.279659 |
| Q7TP47        | NLANTVTEEILEK                                               | 1.260083183        | 2               | 3.686627 |
| <b>Q7TP48</b> | <b>APMAP Adipocyte plasma membrane_associated protein</b>   | <b>1.163039335</b> | <b>0.007999</b> | <b>4</b> |
| Q7TP48        | ANPGFSMLDFLSDKPFK                                           | 1.685120396        | 2               | 3.002428 |
| Q7TP48        | LENGEIETIAR                                                 | 1.14338309         | 2               | 3.52103  |
| Q7TP48        | LLEYDTVTK                                                   | 1.36635014         | 2               | 2.491065 |
| Q7TP48        | LLSSETPIEGK                                                 | 1.187794768        | 2               | 2.911974 |
| <b>Q7TP52</b> | <b>CMBL Carboxymethylenebutenolidase homolog</b>            | <b>1.244930343</b> | <b>0.079255</b> | <b>8</b> |
| Q7TP52        | AGVSVYGIIR                                                  | 1.529878555        | 2               | 2.746556 |
| Q7TP52        | EDCSPADKPYIEEAR                                             | 1.119128176        | 2               | 3.714843 |
| Q7TP52        | KREDCSPADKPYIEEAR                                           | 1.347508004        | 3               | 4.213161 |
| Q7TP52        | LDYGGMGQEVQVEHIK                                            | 1.345390367        | 2               | 4.611239 |
| Q7TP52        | LKEHCIVNYQVK                                                | 1.114308623        | 2               | 4.07233  |
| Q7TP52        | NLIEWLNK                                                    | 1.667915064        | 2               | 2.356101 |
| Q7TP52        | REDCSPADKPYIEEAR                                            | 1.296005753        | 3               | 3.698438 |
| Q7TP52        | TFSGQTHGFVHR                                                | 1.196725382        | 2               | 3.660386 |
| <b>Q7TPB1</b> | <b>TCPD T_complex protein 1 subunit delta</b>               | <b>0.865476013</b> | <b>0.348995</b> | <b>6</b> |
| Q7TPB1        | ALIAGGGAPEIELALR                                            | 1.608337927        | 2               | 3.881849 |
| Q7TPB1        | ETLLNSATTSLSNK                                              | 1.657052548        | 2               | 3.312957 |
| Q7TPB1        | GDVTITNDGATILK                                              | 1.412521545        | 2               | 3.517375 |
| Q7TPB1        | SIHDALCVIR                                                  | 1.736469509        | 2               | 2.693924 |
| Q7TPB1        | TGCNVLLIQK                                                  | 0.753339354        | 2               | 2.607968 |
| Q7TPB1        | VIDPATATSVDLR                                               | 0.976176732        | 2               | 3.841635 |
| <b>Q7TPJ0</b> | <b>SSRA Translocon_associated protein subunit alpha</b>     | <b>1.335188473</b> | <b>1.4E-09</b>  | <b>3</b> |
| Q7TPJ0        | FLVGFTNK                                                    | 1.771772996        | 2               | 2.488126 |
| Q7TPJ0        | GEDFPANNIVK                                                 | 1.28343427         | 2               | 3.203325 |
| Q7TPJ0        | GTEDFIVESLDASFR                                             | 1.416202915        | 2               | 4.371697 |
| <b>Q7TQ20</b> | <b>DNJC2 Dnaj homolog subfamily C member 2</b>              | <b>1.276635523</b> | <b>0.676263</b> | <b>2</b> |
| Q7TQ20        | MMEEVEKLCDR+Oxidation(0)                                    | 1.288528674        |                 |          |
| Q7TQ20        | QIEEVNELMRK+Oxidation(8)                                    | 1.258151029        |                 |          |
| <b>Q7TQ94</b> | <b>NIT1 Nitrilase homolog 1</b>                             | <b>1.535504065</b> | <b>0.084378</b> | <b>2</b> |
| Q7TQ94        | GQDWEQTQK                                                   | 1.371484731        | 2               | 2.464553 |
| Q7TQ94        | NPAETLLLSEPLDGDLLGQYQLAR                                    | 1.584930976        | 3               | 4.218682 |
| <b>Q7TQM4</b> | <b>SOAT2 Sterol O_acyltransferase 2</b>                     | <b>0.910236433</b> | <b>0.213292</b> | <b>3</b> |
| Q7TQM4        | AIWEAVQAYPK                                                 | 0.923191151        | 2               | 2.563189 |
| Q7TQM4        | QDRPLPSTASDSTR                                              | 1.058200248        | 2               | 2.845041 |
| Q7TQM4        | TQCLEQAQR                                                   | 0.805064263        | 2               | 2.883857 |
| <b>Q7TSI0</b> | <b>ZNF12 Zinc finger protein 12</b>                         | <b>0.777036323</b> | <b>0.928268</b> | <b>2</b> |
| Q7TSI0        | HMSRLMEEDQGGEENQSSSAVFSYR+Oxidation(1)                      | 0.829090916        |                 |          |
| Q7TSI0        | HMSRLMEEDQGGEENQSSSAVFSYR+Oxidation(5)                      | 0.696230725        |                 |          |
| <b>Q80V31</b> | <b>CE104 Centrosomal protein of 104 kDa</b>                 | <b>1.237006929</b> | <b>0.399433</b> | <b>2</b> |
| Q80V31        | IDGSVLPTEAEVRAQK                                            | 1.223648734        | 2               | 2.558857 |
| Q80V31        | KLMEMPVGTQK+Oxidation(2)Oxidation(4)                        | 1.296332672        |                 |          |
| <b>Q80VM7</b> | <b>ANR24 Ankyrin repeat domain_containing protein 24</b>    | <b>1.328407841</b> | <b>0.501004</b> | <b>2</b> |
| Q80VM7        | ADEVVLAQAAGLTGTIVR                                          | 1.279204484        | 2               | 2.688193 |
| Q80VM7        | QNQELLEK                                                    | 2.653689461        | 1               | 2.019255 |

|               |                                                                         |                    |                 |           |
|---------------|-------------------------------------------------------------------------|--------------------|-----------------|-----------|
| <b>Q80W21</b> | <b>GSTM7 Glutathione S_transferase Mu 7</b>                             | <b>1.166410888</b> | <b>9.9E-20</b>  | <b>13</b> |
| Q80W21        | CLDAFPNLK                                                               | 1.117049405        | 2               | 3.2003    |
| Q80W21        | CLDAFPNLKDFIAR                                                          | 1.250663046        | 2               | 3.118843  |
| Q80W21        | FKLGLDFPNLPYLIDGSHK                                                     | 1.516879703        | 3               | 5.07351   |
| Q80W21        | HNLCGETEEER                                                             | 0.887519608        | 2               | 3.891625  |
| Q80W21        | IRVDILENQLMDNR                                                          | 1.286944794        | 2               | 3.049441  |
| Q80W21        | ITQSNAILR                                                               | 1.456772945        | 2               | 3.077128  |
| Q80W21        | KHNLCGETEEER                                                            | 1.165381377        | 2               | 3.998601  |
| Q80W21        | KISDYMK                                                                 | 1.16701232         | 1               | 2.001362  |
| Q80W21        | LFLEYDSSYEK                                                             | 0.542105032        | 2               | 4.043871  |
| Q80W21        | LGLDFPNLPYLIDGSHK                                                       | 0.92705641         | 3               | 4.67577   |
| Q80W21        | LKPGYLEQLPGMMR                                                          | 1.285158443        | 2               | 3.180714  |
| Q80W21        | LYSEFLGK                                                                | 1.201057298        | 2               | 2.355919  |
| Q80W21        | VDILENQLMDNR                                                            | 1.33568917         | 2               | 3.714658  |
| <b>Q80W93</b> | <b>HYDIN Hydrocephalus_inducing protein</b>                             | <b>2.039340934</b> | <b>0.088287</b> | <b>3</b>  |
| Q80W93        | ELERLAKEMQEK+Oxidation(8)                                               | 3.641240331        |                 |           |
| Q80W93        | LAKEMQEK                                                                | 1.417053259        | 1               | 1.932595  |
| Q80W93        | LQTLDEDEYDALTAEEK                                                       | 2.053219857        | 2               | 2.301608  |
| <b>Q80WS3</b> | <b>FBL1 rRNA/tRNA 2_O_methyltransferase fibrillar_in_like protein 1</b> | <b>1.002396501</b> | <b>0.7074</b>   | <b>3</b>  |
| Q80WS3        | DHAVVGVYRPPPK                                                           | 0.964669746        | 3               | 3.740932  |
| Q80WS3        | MKPAGGRGGWGWGGGK+Oxidation(0)                                           | 1.274819619        |                 |           |
| Q80WS3        | TNIIPVLEDAR                                                             | 1.305039547        | 2               | 2.401611  |
| <b>Q80X50</b> | <b>UBP2L Ubiquitin_associated protein 2_like</b>                        | <b>1.270367605</b> | <b>0.124186</b> | <b>2</b>  |
| Q80X50        | IDLAVLLGK                                                               | 1.249309767        | 2               | 3.142393  |
| Q80X50        | QRPQATAEQIR                                                             | 1.403527462        | 2               | 2.518869  |
| <b>Q80X90</b> | <b>FLNB Filamin_B</b>                                                   | <b>1.411792319</b> | <b>9.44E-05</b> | <b>11</b> |
| Q80X90        | ADIEMPFDPK                                                              | 1.405231186        | 2               | 2.373427  |
| Q80X90        | FNDEHIPDSPYLVPVIAPSDDAR                                                 | 1.685956473        | 3               | 3.64952   |
| Q80X90        | GAGIGGLGITVEGPSESK                                                      | 1.41580321         | 2               | 3.836604  |
| Q80X90        | GEAGIPAEFSIWTR                                                          | 1.333215916        | 2               | 2.314445  |
| Q80X90        | IGNLQTDLSGLR                                                            | 1.570773812        | 2               | 2.45996   |
| Q80X90        | ILAQDGEGQPIDIQMK                                                        | 1.084630931        | 2               | 3.3675    |
| Q80X90        | TFEMSDFIVDTR                                                            | 1.709469461        | 2               | 2.301604  |
| Q80X90        | VDIQTEDLEDGTCK                                                          | 1.087342056        | 2               | 3.796     |
| Q80X90        | VGEPGILCVCSEAGPGLGLEAVSDSGAK                                            | 0.968347511        | 3               | 4.110542  |
| Q80X90        | VTASGPGLSAYGVASPLPVEFAIDAR                                              | 1.361588938        | 3               | 3.475507  |
| Q80X90        | VVASGPGLEHGK                                                            | 1.166104402        | 2               | 2.379746  |
| <b>Q80XC3</b> | <b>US6NL USP6_N_terminal_like protein</b>                               | <b>1.128810906</b> | <b>0.616497</b> | <b>2</b>  |
| Q80XC3        | HYNHAAANQNSNAISNVRK                                                     | 1.711314513        | 2               | 2.37964   |
| Q80XC3        | SVDEGSKNLK                                                              | 1.122016291        | 2               | 2.410464  |
| <b>Q80X13</b> | <b>IF4G3 Eukaryotic translation initiation factor 4 gamma 3</b>         | <b>1.614816788</b> | <b>3.78E-07</b> | <b>3</b>  |
| Q80X13        | FLKITKPTIDEK                                                            | 1.169734134        | 2               | 2.608567  |
| Q80X13        | FMLQDVIDLR                                                              | 1.73447212         | 2               | 2.796247  |
| Q80X13        | NHDEESLECLR                                                             | 1.649075959        | 2               | 3.368722  |
| <b>Q80Y84</b> | <b>KDM5B Lysine_specific demethylase 5B</b>                             | <b>1.086286768</b> | <b>0.937177</b> | <b>2</b>  |
| Q80Y84        | CDIGLLGLK                                                               | 1.010174154        | 1               | 2.075303  |
| Q80Y84        | SSSEKNDCLRGK                                                            | 1.130029489        | 1               | 1.93582   |
| <b>Q80YR7</b> | <b>CLSPN Claspin</b>                                                    | <b>1.315529998</b> | <b>0.007704</b> | <b>2</b>  |
| Q80YR7        | GASFLPTAGFRSPSPGLFR                                                     | 1.300460406        | 2               | 2.412566  |
| Q80YR7        | LEGASHAKPGEKLQMLK+Oxidation(14)                                         | 1.316587108        |                 |           |
| <b>Q80Z25</b> | <b>OFD1 Oral_facial_digital syndrome 1 protein homolog</b>              | <b>1.09383641</b>  | <b>0.98231</b>  | <b>2</b>  |
| Q80Z25        | ELEQEERLEK                                                              | 1.093829753        | 2               | 2.939973  |
| Q80Z25        | MIEESLK+Oxidation(0)                                                    | 1.185854038        |                 |           |
| <b>Q80Z29</b> | <b>NAMPT Nicotinamide phosphoribosyltransferase</b>                     | <b>1.368864862</b> | <b>9.55E-15</b> | <b>4</b>  |

|               |                                                              |                    |                 |           |
|---------------|--------------------------------------------------------------|--------------------|-----------------|-----------|
| Q80Z29        | NAQLNMEQDVAPH                                                | 1.007780506        | 2               | 2.534869  |
| Q80Z29        | STEAPLIIRPDSGNPLDVLK                                         | 1.72912843         | 2               | 3.788352  |
| Q80Z29        | VIQGDGVDINTLQEIVEGMK                                         | 1.323815428        | 2               | 5.379294  |
| Q80Z29        | YLLETSGNLDGLEYK                                              | 1.695998139        | 2               | 4.552656  |
| <b>Q80Z36</b> | <b>ZHX3 Zinc fingers and homeobox protein 3</b>              | <b>1.221729391</b> | <b>0.001422</b> | <b>2</b>  |
| Q80Z36        | FPYPTKAELCYLTVVTK                                            | 2.211505024        | 2               | 2.626986  |
| Q80Z36        | YPEEQLK                                                      | 0.378067556        | 1               | 2.09197   |
| <b>Q811D2</b> | <b>ANR26 Ankyrin repeat domain_containing protein 26</b>     | <b>1.353366626</b> | <b>0.099499</b> | <b>5</b>  |
| Q811D2        | AQEDFDK                                                      | 0.485527432        | 1               | 1.911425  |
| Q811D2        | LSGSEDSQQKVEEK                                               | 1.992326397        | 2               | 2.369598  |
| Q811D2        | NKDDLTPMLLAVK                                                | 1.5138414          | 2               | 2.4119    |
| Q811D2        | SADQLSEK                                                     | 1.366819755        | 2               | 2.307898  |
| Q811D2        | SNLEEEARDLK                                                  | 1.181667071        | 1               | 1.994843  |
| <b>Q811X6</b> | <b>CRYL1 Lambda_crystallin homolog</b>                       | <b>1.503295235</b> | <b>0.056046</b> | <b>4</b>  |
| Q811X6        | EMKSLEQSGSLK+Oxidation(1)                                    | 1.352360827        |                 |           |
| Q811X6        | IVDDQVILSSSSCLLPSK                                           | 1.130342862        | 2               | 3.930299  |
| Q811X6        | LYDIEQQQITNALESIR                                            | 1.324918655        | 2               | 4.27153   |
| Q811X6        | TFGPVPEFSGDTVEK                                              | 1.596795647        | 2               | 2.898605  |
| <b>Q8BFZ3</b> | <b>ACTBL Beta_actin_like protein 2</b>                       | <b>1.057998591</b> | <b>9.9E-20</b>  | <b>10</b> |
| Q8BFZ3        | CDVDIR                                                       | 2.715432221        | 2               | 2.32686   |
| Q8BFZ3        | DLTDYLMK                                                     | 1.616518272        | 1               | 2.215929  |
| Q8BFZ3        | HQGVVMVGMGQK                                                 | 1.636327694        | 3               | 3.636645  |
| Q8BFZ3        | HQGVVMVGMGQK+Oxidation(4)                                    | 1.008876076        |                 |           |
| Q8BFZ3        | HQGVVMVGMGQK+Oxidation(4)Oxidation(7)                        | 1.015031594        |                 |           |
| Q8BFZ3        | HQGVVMVGMGQK+Oxidation(7)                                    | 0.937849031        |                 |           |
| Q8BFZ3        | SYELPDGQVITIGNER                                             | 0.91297209         | 3               | 5.230312  |
| Q8BFZ3        | TTGIVMDSGDGVTHTVPIYEGYALPHAILR                               | 1.374144695        | 3               | 6.640037  |
| Q8BFZ3        | TTGIVMDSGDGVTHTVPIYEGYALPHAILR+Oxidation(5)                  | 1.677253923        |                 |           |
| Q8BFZ3        | VAPDEHPILLTEAPLNPK                                           | 1.350072303        | 3               | 4.329675  |
| <b>Q8BG32</b> | <b>PSD11 26S proteasome non_ATPase regulatory subunit 11</b> | <b>1.509049679</b> | <b>0.178903</b> | <b>6</b>  |
| Q8BG32        | LYDNLLEQNLR                                                  | 1.814752437        | 2               | 3.393902  |
| Q8BG32        | TGQAAELGGLK                                                  | 0.967711893        | 2               | 3.151299  |
| Q8BG32        | TTANAICYPPK                                                  | 10.80824394        | 2               | 2.643955  |
| Q8BG32        | TYEAALETIQNMSK                                               | 1.35940888         | 2               | 2.373568  |
| Q8BG32        | VQIEHISSLIK                                                  | 1.641855071        | 2               | 2.70242   |
| Q8BG32        | YQEALHLGSQLLR                                                | 1.509241747        | 2               | 2.500066  |
| <b>Q8BGD9</b> | <b>IF4B Eukaryotic translation initiation factor 4B</b>      | <b>1.365915316</b> | <b>0.029665</b> | <b>2</b>  |
| Q8BGD9        | SQSSDTEQPSPSTGGGK                                            | 1.348687493        | 2               | 5.377588  |
| Q8BGD9        | VDVADQAQDKDRDDR                                              | 2.128355657        | 2               | 2.378849  |
| <b>Q8BGT5</b> | <b>ALAT2 Alanine aminotransferase 2</b>                      | <b>0.978023023</b> | <b>0.659458</b> | <b>2</b>  |
| Q8BGT5        | LLEETGICVVPGSFGQR                                            | 0.403911771        | 2               | 3.838397  |
| Q8BGT5        | VLCIINPGNPTGQVQSR                                            | 1.025796714        | 2               | 5.079283  |
| <b>Q8BGY2</b> | <b>IF5A2 Eukaryotic translation initiation factor 5A_2</b>   | <b>1.350821911</b> | <b>1.11E-16</b> | <b>3</b>  |
| Q8BGY2        | KYEDICPSTHNMDVPNIK                                           | 1.353293409        | 3               | 4.792913  |
| Q8BGY2        | VHLVGIDIFTGK                                                 | 1.550900273        | 3               | 3.741223  |
| Q8BGY2        | YEDICPSTHNMDVPNIK                                            | 1.281537414        | 2               | 3.882569  |
| <b>Q8BH00</b> | <b>AL8A1 Aldehyde dehydrogenase family 8 member A1</b>       | <b>1.438500483</b> | <b>9.9E-20</b>  | <b>8</b>  |
| Q8BH00        | ELLMLENFIGGK                                                 | 1.464074639        | 2               | 3.593711  |
| Q8BH00        | ELNLPGGMK                                                    | 1.690034839        | 1               | 2.49095   |
| Q8BH00        | FLPCNSYIDSYDPSTGEVYCK                                        | 1.155942628        | 3               | 5.307595  |
| Q8BH00        | ILCGEGVDQLSLPLR                                              | 1.473924158        | 3               | 4.954574  |
| Q8BH00        | ITQLSAPHCK                                                   | 1.513824623        | 2               | 3.129054  |
| Q8BH00        | KLSELEGGK                                                    | 1.307252088        | 1               | 2.255054  |

|               |                                                                      |                    |                 |           |
|---------------|----------------------------------------------------------------------|--------------------|-----------------|-----------|
| Q8BH00        | NPAlIFEDANLEECIPATVR                                                 | 1.366018734        | 2               | 5.0365    |
| Q8BH00        | SSFANQGEICLCTSR                                                      | 1.44501584         | 2               | 3.900934  |
| <b>Q8BH18</b> | <b>TM117 Transmembrane protein 117</b>                               | <b>1.992045169</b> | <b>0.174351</b> | <b>2</b>  |
| Q8BH18        | FLKNEQGMENQDK                                                        | 2.186403868        | 2               | 2.344062  |
| Q8BH18        | FLKNEQGMENQDK+Oxidation(7)                                           | 1.52951167         |                 |           |
| <b>Q8BH59</b> | <b>CMC1 Calcium_binding mitochondrial carrier protein Aralar1</b>    | <b>1.425012866</b> | <b>5.22E-05</b> | <b>3</b>  |
| Q8BH59        | GLIPQLIGVAPEK                                                        | 1.396850676        | 1               | 3.072476  |
| Q8BH59        | IAPLAEGALPYNLAELQR                                                   | 1.7925514          | 2               | 2.851885  |
| Q8BH59        | YLGLYNDPNSNPK                                                        | 1.524675019        | 2               | 3.111524  |
| <b>Q8BHN3</b> | <b>GANAB Neutral alpha_glucosidase AB</b>                            | <b>1.290880332</b> | <b>0.312977</b> | <b>11</b> |
| Q8BHN3        | AEKDEPGAWEEETFK                                                      | 1.25320412         | 2               | 3.063616  |
| Q8BHN3        | DDNSVELTVAEGPYK                                                      | 1.237797165        | 2               | 3.410111  |
| Q8BHN3        | LVAIVDPHIK                                                           | 0.991376526        | 2               | 2.343493  |
| Q8BHN3        | MLDYLQGSGETPQTDIR                                                    | 1.129720811        | 2               | 5.344609  |
| Q8BHN3        | REPWLLASQYQDAIR                                                      | 1.468035532        | 3               | 4.330945  |
| Q8BHN3        | SGGIERPFVLSR                                                         | 1.167369274        | 2               | 2.453803  |
| Q8BHN3        | SIRPGLSPYR                                                           | 0.731934435        | 2               | 2.356498  |
| Q8BHN3        | SLLLSVNAR                                                            | 1.12845361         | 2               | 2.487659  |
| Q8BHN3        | VDSGYRVHEELRNHGLYVK                                                  | 0.743903242        | 2               | 2.330521  |
| Q8BHN3        | VTEGGEPYR                                                            | 1.413196382        | 2               | 2.407525  |
| Q8BHN3        | VVIMGAGKPAAVVLQTK                                                    | 2.40226734         | 3               | 3.858203  |
| <b>Q8BI84</b> | <b>MIA3 Melanoma inhibitory activity protein 3</b>                   | <b>1.620085384</b> | <b>0.291859</b> | <b>2</b>  |
| Q8BI84        | DDNISALTNCTQLNR                                                      | 1.817449231        | 2               | 2.321241  |
| Q8BI84        | TQTAVSIVEEDLK                                                        | 1.606041408        | 2               | 2.435646  |
| <b>Q8BIJ6</b> | <b>SYIM Isoleucyl_tRNA synthetase_mitochondrial</b>                  | <b>1.255552485</b> | <b>0.638891</b> | <b>2</b>  |
| Q8BIJ6        | DTVLLPQTSFPMK                                                        | 1.180310752        | 1               | 2.193151  |
| Q8BIJ6        | SCQTALAEILDVLR                                                       | 1.313704276        | 2               | 3.513583  |
| <b>Q8BJ64</b> | <b>CHDH Choline dehydrogenase_mitochondrial</b>                      | <b>1.060289006</b> | <b>0.72125</b>  | <b>10</b> |
| Q8BJ64        | ADSAYHPSTCK                                                          | 0.201428657        | 2               | 3.185607  |
| Q8BJ64        | AEVQTLVSR                                                            | 1.245839502        | 2               | 2.887091  |
| Q8BJ64        | ELQPGSHVQSDK                                                         | 1.063431315        | 2               | 3.07472   |
| Q8BJ64        | ELQPGSHVQSDKEIDAFVR                                                  | 1.153551891        | 2               | 4.245545  |
| Q8BJ64        | GGDGPLHVSR                                                           | 1.03120408         | 2               | 2.348651  |
| Q8BJ64        | HELGANMYR                                                            | 0.981415728        | 2               | 2.348654  |
| Q8BJ64        | SRPGVPHPDQFHLPSQVIDHGR                                               | 1.309159203        | 5               | 5.016565  |
| Q8BJ64        | TNHPLHQAFQAAR                                                        | 1.518635685        | 3               | 4.000042  |
| Q8BJ64        | VIGVENLR                                                             | 1.171595655        | 2               | 2.746133  |
| Q8BJ64        | VLLLEAGPK                                                            | 1.718314935        | 2               | 2.62868   |
| <b>Q8BJY1</b> | <b>PSMD5 26S proteasome non_ATPase regulatory subunit 5</b>          | <b>1.418139468</b> | <b>0.036141</b> | <b>2</b>  |
| Q8BJY1        | GLTHPDDSVK                                                           | 1.114401485        | 2               | 2.456716  |
| Q8BJY1        | TVAEIFGNSNYLR                                                        | 2.424138192        | 2               | 2.483907  |
| <b>Q8BK5</b>  | <b>IPO5 Importin_5</b>                                               | <b>1.219548058</b> | <b>0.284009</b> | <b>2</b>  |
| Q8BK5         | IFSIIAEGEMHEAIK                                                      | 1.331767507        | 2               | 2.3325    |
| Q8BK5         | VAAAESMPLLECARVR+Oxidation(6)                                        | 0.599520041        |                 |           |
| <b>Q8BKZ9</b> | <b>ODPX Pyruvate dehydrogenase protein X component_mitochondrial</b> | <b>1.116322805</b> | <b>0.356262</b> | <b>2</b>  |
| Q8BKZ9        | HSLDASQGTATGPR                                                       | 1.094521586        | 2               | 3.943347  |
| Q8BKZ9        | VSVNDFIIR                                                            | 3.278770435        | 2               | 3.054825  |
| <b>Q8BL66</b> | <b>EEA1 Early endosome antigen 1</b>                                 | <b>0.963552043</b> | <b>0.349755</b> | <b>2</b>  |
| Q8BL66        | MQAAVTELTAVKAQK                                                      | 0.508486887        | 2               | 2.442981  |
| Q8BL66        | QESIKEITNLKDAK                                                       | 2.841928902        | 2               | 2.305933  |
| <b>Q8BL97</b> | <b>SRSF7 Serine/arginine_rich splicing factor 7</b>                  | <b>1.327915302</b> | <b>0.12588</b>  | <b>2</b>  |
| Q8BL97        | NPPGFAFVEFEDPR                                                       | 1.357093983        | 2               | 2.816183  |
| Q8BL97        | VYVGNLGTGAGK                                                         | 1.178530999        | 2               | 2.569474  |
| <b>Q8BMA5</b> | <b>NPAT Protein NPAT</b>                                             | <b>1.061739927</b> | <b>0.99151</b>  | <b>2</b>  |

|               |                                                               |                    |                 |          |
|---------------|---------------------------------------------------------------|--------------------|-----------------|----------|
| Q8BMA5        | AKETSNDVPTIMSSLWKK+Oxidation(11)                              | 1.132862175        |                 |          |
| Q8BMA5        | KKLPSSFPAGMDVDK+Oxidation(10)                                 | 1.04236927         |                 |          |
| <b>Q8BP47</b> | <b>SYNC AsparaginyI_tRNA synthetase_ cytoplasmic</b>          | <b>1.43899193</b>  | <b>0.195253</b> | <b>5</b> |
| Q8BP47        | KEDGTFYEFGDDIPEAPER                                           | 0.850894386        | 2               | 4.403046 |
| Q8BP47        | LEDLVCDVVDR                                                   | 1.3227546          | 2               | 2.816987 |
| Q8BP47        | LMTDTINEPILLCR                                                | 3.776695777        | 2               | 3.340169 |
| Q8BP47        | LTESVDVLMPNVGEIVGGSMR                                         | 1.427431994        | 2               | 2.916399 |
| Q8BP47        | YGTCPHGGYGLGLER                                               | 1.605773859        | 2               | 3.160977 |
| <b>Q8BTM8</b> | <b>FLNA Filamin_A</b>                                         | <b>0.912181244</b> | <b>0.689698</b> | <b>6</b> |
| Q8BTM8        | AFPGPLQGGNAGSPAR                                              | 1.435588326        | 2               | 3.561977 |
| Q8BTM8        | ALGALVDSCAPGLCPDWDSWDASKPVNNAR                                | 1.263662494        | 3               | 3.62483  |
| Q8BTM8        | ANLPQSFQVDTSK                                                 | 0.977217227        | 2               | 2.44741  |
| Q8BTM8        | GAGTGGLGLAVEGPSEAK                                            | 0.885728305        | 2               | 3.723769 |
| Q8BTM8        | IVSPSGAAVPCCK                                                 | 1.176274402        | 2               | 2.411139 |
| Q8BTM8        | VEPGLGADNSVVR                                                 | 1.39892811         | 2               | 2.860118 |
| <b>Q8BU33</b> | <b>ILVBL Acetolactate synthase_ like protein</b>              | <b>1.104610234</b> | <b>0.775</b>    | <b>3</b> |
| Q8BU33        | AAVETLGVPCFLGGMSR                                             | 0.871174176        | 2               | 3.133554 |
| Q8BU33        | LPNSLMGR+Oxidation(5)                                         | 1.117894948        |                 |          |
| Q8BU33        | NAQVAQSPVLLGGAASTLLQK                                         | 0.765442183        | 3               | 3.958508 |
| <b>Q8BWM0</b> | <b>PGES2 Prostaglandin E synthase 2</b>                       | <b>1.266761105</b> | <b>0.412825</b> | <b>2</b> |
| Q8BWM0        | AFLDFHSLPYQVVEVNPVR                                           | 1.312761046        | 3               | 3.529848 |
| Q8BWM0        | KVPILVAQEGDSLQQLNDSSVIISALK                                   | 1.141847664        | 3               | 4.620969 |
| <b>Q8BWQ1</b> | <b>UD2A3 UDP_glucuronosyltransferase 2A3</b>                  | <b>1.252106723</b> | <b>0.272389</b> | <b>2</b> |
| Q8BWQ1        | ADIWLIR                                                       | 1.25826842         | 2               | 2.448104 |
| Q8BWQ1        | IHHDQPVKPLDR                                                  | 1.246052421        | 3               | 3.514179 |
| <b>Q8BWR8</b> | <b>RHPN2 Rhophilin_2</b>                                      | <b>1.413277856</b> | <b>0.725675</b> | <b>2</b> |
| Q8BWR8        | ETKEVDFSVFK                                                   | 1.235817932        | 2               | 2.53472  |
| Q8BWR8        | TGAENLLKVATNQK                                                | 1.615423109        | 2               | 2.485848 |
| <b>Q8BX70</b> | <b>VP13C Vacuolar protein sorting_ associated protein 13C</b> | <b>1.020313992</b> | <b>0.878473</b> | <b>2</b> |
| Q8BX70        | ENALSELDVPFVKV                                                | 1.015943943        | 2               | 2.626139 |
| Q8BX70        | TVLQADSPQHDEILKPVNMLLCIQR+Oxidation(19)                       | 1.213851083        |                 |          |
| <b>Q8BY87</b> | <b>UBP47 Ubiquitin carboxyl_ terminal hydrolase 47</b>        | <b>1.186887331</b> | <b>0.098735</b> | <b>2</b> |
| Q8BY87        | AGGDSGNVDDDCER                                                | 1.737827495        | 2               | 3.499607 |
| Q8BY87        | QNIFDEMCK                                                     | 1.184802213        | 2               | 2.430665 |
| <b>Q8BZ10</b> | <b>AF1L1 Actin filament_ associated protein 1_ like 1</b>     | <b>0.909363626</b> | <b>0.255499</b> | <b>2</b> |
| Q8BZ10        | IYDEVPEYK                                                     | 1.046338332        | 1               | 2.0261   |
| Q8BZ10        | LSQEKQNSDSDSLGMNDSGSLGR                                       | 0.523488832        | 3               | 3.59391  |
| <b>Q8BZQ7</b> | <b>ANC2 Anaphase_ promoting complex subunit 2</b>             | <b>1.056366109</b> | <b>0.541211</b> | <b>2</b> |
| Q8BZQ7        | EIRNVELLK                                                     | 1.268629209        | 2               | 2.415272 |
| Q8BZQ7        | QALEQFNQLSQVLHR                                               | 0.808218814        | 2               | 2.752257 |
| <b>Q8C6K9</b> | <b>chain</b>                                                  | <b>1.262707113</b> | <b>0.455402</b> | <b>3</b> |
| Q8C6K9        | NEHSFQVVGIVQR                                                 | 1.414181345        |                 |          |
| Q8C6K9        | TMNPAFMGLDRATR+Oxidation(1)Oxidation(6)                       | 1.22669099         |                 |          |
| Q8C6K9        | YLIVVTDGHPLEGYKEPCGGLEDAVNEAK                                 | 1.336776684        |                 |          |
| <b>Q8C7X2</b> | <b>K0090 Uncharacterized protein KIAA0090</b>                 | <b>0.996105663</b> | <b>0.803052</b> | <b>2</b> |
| Q8C7X2        | FNVEDGEIVQQVR                                                 | 1.007149614        | 2               | 3.984222 |
| Q8C7X2        | VMGDRSVLYK+Oxidation(1)                                       | 0.946799448        |                 |          |
| <b>Q8CC88</b> | <b>K0564 Uncharacterized protein KIAA0564 homolog</b>         | <b>1.185439574</b> | <b>0.406505</b> | <b>3</b> |
| Q8CC88        | FLPSLAQSALEK                                                  | 1.283429889        | 2               | 2.440753 |
| Q8CC88        | HQATGELDDAK                                                   | 1.18543603         | 2               | 3.410404 |
| Q8CC88        | VSSDQLSSENLTSAVGQK                                            | 1.535231209        | 2               | 3.207691 |
| <b>Q8CDI6</b> | <b>CD158 Coiled_ coil domain_ containing protein 158</b>      | <b>1.20895004</b>  | <b>0.455586</b> | <b>3</b> |
| Q8CDI6        | EKELSLEKEQNK                                                  | 1.562466263        | 2               | 2.35146  |
| Q8CDI6        | EKVANMEVALDK+Oxidation(5)                                     | 1.190840229        |                 |          |



|               |                                                             |                    |                 |           |
|---------------|-------------------------------------------------------------|--------------------|-----------------|-----------|
| Q8CDI6        | ELDDRNMEVQRLEALLK                                           | 0.928308116        | 2               | 2.322781  |
| <b>Q8CFN2</b> | <b>CDC42 Cell division control protein 42 homolog</b>       | <b>1.256500111</b> | <b>0.464224</b> | <b>3</b>  |
| Q8CFN2        | NVFDEAIIAALEPPPEPK                                          | 1.427967404        | 3               | 4.686936  |
| Q8CFN2        | WVPEITHHCPK                                                 | 0.388750743        | 2               | 2.507734  |
| Q8CFN2        | YVECSALTQK                                                  | 1.261003018        | 1               | 2.701882  |
| <b>Q8CG45</b> | <b>ARK72 Aflatoxin B1 aldehyde reductase member 2</b>       | <b>1.26312945</b>  | <b>5.19E-06</b> | <b>10</b> |
| Q8CG45        | AVSGAPLRPGTVLGTMEMGR                                        | 1.232696893        | 3               | 3.74259   |
| Q8CG45        | EHHFEAIALVEK                                                | 1.488275222        | 2               | 2.987954  |
| Q8CG45        | FFGNSWSETYR                                                 | 1.240405517        | 2               | 3.009532  |
| Q8CG45        | FYAYNPLAGLLTGK                                              | 1.358210984        | 2               | 4.366068  |
| Q8CG45        | MDASASAATVR                                                 | 1.484436419        | 2               | 3.838039  |
| Q8CG45        | QVETELLPLCR                                                 | 1.301902929        | 2               | 3.035589  |
| Q8CG45        | RMDASASAATVR                                                | 1.032347398        | 2               | 3.314865  |
| Q8CG45        | TTYGTSAPSMTSAAALR                                           | 1.230556885        | 2               | 4.455987  |
| Q8CG45        | VDLFYLHAPDHGTPIVETLQACQLHQEGK                               | 1.230510792        | 3               | 5.473598  |
| Q8CG45        | WMYHHSQIQGTR                                                | 1.09566689         | 3               | 3.744586  |
| <b>Q8CG48</b> | <b>SMC2 Structural maintenance of chromosomes protein 2</b> | <b>1.320996752</b> | <b>0.316049</b> | <b>3</b>  |
| Q8CG48        | EELLEK                                                      | 1.452879988        | 1               | 1.927409  |
| Q8CG48        | IKALNCEIEELER                                               | 1.156942533        | 2               | 2.439118  |
| Q8CG48        | KIKALNCEIEELER                                              | 1.056708735        | 2               | 2.647216  |
| <b>Q8CGC7</b> | <b>SYEP Bifunctional aminoacyl_tRNA synthetase</b>          | <b>1.38685749</b>  | <b>4.23E-05</b> | <b>11</b> |
| Q8CGC7        | AIQGATSHHLGQNFSK                                            | 1.21489915         | 2               | 4.599587  |
| Q8CGC7        | DQDVEPGAPSMGAK                                              | 0.954659797        | 2               | 3.358124  |
| Q8CGC7        | DQVDSAVQELLQLK                                              | 1.357679184        | 2               | 4.151786  |
| Q8CGC7        | FVELPGAEMGK                                                 | 2.179451928        | 2               | 2.528395  |
| Q8CGC7        | GDVSIISVEEGKNLLR                                            | 1.396220211        | 2               | 4.002715  |
| Q8CGC7        | GSQFGQSCCLR                                                 | 1.372817853        | 2               | 2.861389  |
| Q8CGC7        | KEENLAEWYSQVITK                                             | 1.392214055        | 2               | 4.466881  |
| Q8CGC7        | SLCIPFNPLCELQPGAMCVCGK                                      | 1.649713424        | 2               | 4.364565  |
| Q8CGC7        | SQSGLSGGGAGEGQGPK                                           | 1.344660507        | 2               | 4.864162  |
| Q8CGC7        | TELAEPPIAIRPTSETVMYPAYAK                                    | 1.21126598         | 3               | 3.470516  |
| Q8CGC7        | VYEELLAIPVVR                                                | 1.676248449        | 2               | 3.429921  |
| <b>Q8CGN4</b> | <b>BCOR BCL_6 corepressor</b>                               | <b>1.18122736</b>  | <b>0.165253</b> | <b>3</b>  |
| Q8CGN4        | FLTDYLNLDLQGR                                               | 0.999559139        | 1               | 1.940411  |
| Q8CGN4        | NWLLSDVLK                                                   | 4.178001839        | 2               | 2.527874  |
| Q8CGN4        | VCIELTGLHPKK                                                | 1.301232596        | 2               | 2.342775  |
| <b>Q8CHB8</b> | <b>TLL5 Tubulin polyglutamylase TLL5</b>                    | <b>1.077652973</b> | <b>0.99297</b>  | <b>2</b>  |
| Q8CHB8        | ASSNLQHSLRMVLPSPR+Oxidation(10                              | 1.049281902        |                 |           |
| Q8CHB8        | DSGGQTLSPSWAAK                                              | 1.337925824        | 1               | 2.138637  |
| <b>Q8CHM7</b> | <b>HACL1 2_hydroxyacyl_CoA lyase 1</b>                      | <b>1.661882323</b> | <b>0.035753</b> | <b>8</b>  |
| Q8CHM7        | DTSKPCLINIMIEPQSTR                                          | 1.315779774        | 3               | 4.753793  |
| Q8CHM7        | GAAYSHAEDSIR                                                | 1.065442246        | 2               | 3.376467  |
| Q8CHM7        | GVVPDNHPNCVGAAR                                             | 1.343775758        | 2               | 3.246629  |
| Q8CHM7        | GYFVQTPEELQDSLRL                                            | 2.346454573        | 2               | 3.832544  |
| Q8CHM7        | LVELCNLPFLPTPMGK                                            | 1.321101498        | 2               | 4.480631  |
| Q8CHM7        | NCFIVSEGANTMDIGR                                            | 1.616105717        | 2               | 4.693971  |
| Q8CHM7        | NQEAMGAFQEFQVEACR                                           | 1.42368511         | 2               | 6.433916  |
| Q8CHM7        | SSYGRPGACYIDVPADLVTLQESTTSIK                                | 1.473235499        | 3               | 4.016663  |
| <b>Q8CIB5</b> | <b>FERM2 Fermitin family homolog 2</b>                      | <b>1.031518887</b> | <b>0.552649</b> | <b>2</b>  |
| Q8CIB5        | GCEVTPDVISGQK                                               | 1.030736754        | 2               | 3.513737  |
| Q8CIB5        | TSTILGDITSIPELADYIK                                         | 1.391172451        | 2               | 2.721384  |
| <b>Q8CIE6</b> | <b>COPA Coatomer subunit alpha</b>                          | <b>1.435706878</b> | <b>7.88E-10</b> | <b>10</b> |
| Q8CIE6        | ASNLENSTYDLYTIPIK                                           | 1.60975183         | 2               | 4.133943  |
| Q8CIE6        | DADSQNPDAPEGK                                               | 1.612608757        | 2               | 4.018267  |
| Q8CIE6        | GITGVDFLFGTTDAVVK                                           | 1.581493292        | 2               | 3.716005  |

|               |                                                                           |                    |                 |           |
|---------------|---------------------------------------------------------------------------|--------------------|-----------------|-----------|
| Q8CIE6        | GVNWAAFHPTMPLIVSGADDR                                                     | 1.239219079        | 3               | 3.780686  |
| Q8CIE6        | LLELGPKEVAQQTR                                                            | 1.411318657        | 2               | 3.152246  |
| Q8CIE6        | QELILNSSEDK                                                               | 1.747381401        | 2               | 2.620279  |
| Q8CIE6        | QQPLFVSGGDDYK                                                             | 1.1535373          | 2               | 2.711696  |
| Q8CIE6        | SILLSVPLLVDNK                                                             | 1.246088601        | 2               | 4.009565  |
| Q8CIE6        | SSGLTAVVVAR                                                               | 0.903532931        | 2               | 2.44891   |
| Q8CIE6        | TLDLPIYVTR                                                                | 1.274515758        | 2               | 2.826869  |
| <b>Q8CJ27</b> | <b>ASPM Abnormal spindle_like microcephaly_associated protein homolog</b> | <b>0.782781078</b> | <b>0.590299</b> | <b>2</b>  |
| Q8CJ27        | ALHLLTYKHLAAILDALK                                                        | 1.065358046        | 2               | 2.365558  |
| Q8CJ27        | FLSLRKTAIWIQR                                                             | 0.744812001        | 2               | 2.636055  |
| <b>Q8CJ40</b> | <b>CROCC Rootletin</b>                                                    | <b>1.464323296</b> | <b>0.033083</b> | <b>4</b>  |
| Q8CJ40        | DLLQLGGELVRTSR                                                            | 1.284512174        | 2               | 2.429625  |
| Q8CJ40        | ELEERTGNLGRQR                                                             | 1.617706225        | 2               | 2.402068  |
| Q8CJ40        | LRDQTAASAQAQEDAQR                                                         | 1.596211088        | 2               | 2.369804  |
| Q8CJ40        | QQQAEHATTMAVEK+Oxidation(9)                                               | 1.279590451        |                 |           |
| <b>Q8JZN5</b> | <b>ACAD9 Acyl_CoA dehydrogenase family member 9_mitochondrial</b>         | <b>1.202302525</b> | <b>0.522678</b> | <b>4</b>  |
| Q8JZN5        | GIILVGNEEQK                                                               | 1.220399119        | 2               | 2.41553   |
| Q8JZN5        | GSNTCEVHFENTR                                                             | 1.20620776         | 2               | 4.527013  |
| Q8JZN5        | NLSEFGLIQEK                                                               | 1.260393453        | 2               | 2.462198  |
| Q8JZN5        | SGNVTTVMETIGR                                                             | 0.75490096         | 2               | 2.965831  |
| <b>Q8K009</b> | <b>AL1L2 Mitochondrial 10_formyltetrahydrofolate dehydrogenase</b>        | <b>1.267016703</b> | <b>0.960485</b> | <b>19</b> |
| Q8K009        | AMVEAVQLIADGK                                                             | 1.26586342         | 2               | 4.194268  |
| Q8K009        | ANNTEYGLASGVFTR                                                           | 1.089371542        | 2               | 4.625493  |
| Q8K009        | DLGEEALNEYLK                                                              | 0.970320845        | 2               | 3.779577  |
| Q8K009        | EESFGPIMVISK                                                              | 1.282154149        | 2               | 3.050856  |
| Q8K009        | FLFPEGIK                                                                  | 0.809743032        | 2               | 2.455593  |
| Q8K009        | FQNGDIDGVLQR                                                              | 0.915425633        | 2               | 3.21425   |
| Q8K009        | GVINIIPGSGGVAGQR                                                          | 1.122429972        | 2               | 3.878968  |
| Q8K009        | HGSIIYHPSLLPR                                                             | 1.14890215         | 2               | 4.369674  |
| Q8K009        | KLGFSTSVGK                                                                | 1.339894526        | 2               | 2.497195  |
| Q8K009        | KVSLELGGK                                                                 | 0.261350713        | 1               | 2.039033  |
| Q8K009        | NGLVLFNGDGK                                                               | 1.24349554         | 2               | 2.427232  |
| Q8K009        | NLQFEDGK                                                                  | 0.99219803         | 1               | 2.186249  |
| Q8K009        | SAACLAAGNTLVLPKPAQVPTLTK                                                  | 1.181442029        | 3               | 4.027486  |
| Q8K009        | SCDVKPNDTVDSLNR                                                           | 4.953302264        | 2               | 4.481185  |
| Q8K009        | TDVAAPFGGMK+Oxidation(9)                                                  | 1.625444373        |                 |           |
| Q8K009        | TPQPEEGATYEGIQK                                                           | 1.004820115        | 2               | 2.582869  |
| Q8K009        | VSYASLADVDR                                                               | 1.203613065        | 2               | 2.916564  |
| Q8K009        | VVGVFTVPDKDGK                                                             | 1.33944062         | 2               | 3.262164  |
| Q8K009        | YFAGWCDK                                                                  | 0.98401117         | 1               | 2.100296  |
| <b>Q8K1N2</b> | <b>PHLB2 Pleckstrin homology_like domain family B member 2</b>            | <b>0.850038035</b> | <b>0.949063</b> | <b>2</b>  |
| Q8K1N2        | EKENLCNLEKK                                                               | 0.843928752        | 2               | 2.419114  |
| Q8K1N2        | LQEETSQRQKLIK                                                             | 0.886868185        | 2               | 2.380094  |
| <b>Q8K1Q0</b> | <b>NMT1 Glycylpeptide N_tetradecanoyltransferase 1</b>                    | <b>1.318877868</b> | <b>0.652114</b> | <b>2</b>  |
| Q8K1Q0        | GNDMDSTQDQPVK                                                             | 1.942613166        | 2               | 2.531109  |
| Q8K1Q0        | LGEVVNTHGVPDPKDNIR                                                        | 1.047172946        | 3               | 3.444547  |
| <b>Q8K1S6</b> | <b>SPIR2 Protein spire homolog 2</b>                                      | <b>1.955708528</b> | <b>0.000116</b> | <b>3</b>  |
| Q8K1S6        | ALFVETLELR                                                                | 2.242290231        | 2               | 2.505284  |
| Q8K1S6        | DTADILLRR                                                                 | 1.856172821        | 2               | 2.314963  |
| Q8K1S6        | RDAFQSLQGPKWR                                                             | 1.491644537        | 2               | 2.304473  |
| <b>Q8K2H2</b> | <b>OTU6B OTU domain_containing protein 6B</b>                             | <b>1.451273641</b> | <b>0.006217</b> | <b>2</b>  |
| Q8K2H2        | EELEQLK                                                                   | 1.452879988        | 1               | 2.080839  |

|               |                                                                                  |                    |                 |           |
|---------------|----------------------------------------------------------------------------------|--------------------|-----------------|-----------|
| Q8K2H2        | EERIAEAEIENLSGAR                                                                 | 1.195536572        | 2               | 2.468031  |
| <b>Q8K2Z4</b> | <b>CND1 Condensin complex subunit 1</b>                                          | <b>1.710084939</b> | <b>0.005963</b> | <b>2</b>  |
| Q8K2Z4        | AIIDEFEQKLR                                                                      | 1.358065217        | 2               | 2.369612  |
| Q8K2Z4        | LLESFENMTSQTSLIDLIDIGGK                                                          | 2.088121904        | 2               | 2.445446  |
| <b>Q8K3J1</b> | <b>NDUS8 NADH dehydrogenase [ubiquinone] iron_sulfur protein 8_mitochondrial</b> | <b>1.310558757</b> | <b>0.001901</b> | <b>2</b>  |
| Q8K3J1        | ILMWTELIR+Oxidation(2                                                            | 2.242290231        |                 |           |
| Q8K3J1        | LCEAICPAQAITEAEPR                                                                | 1.293833476        | 3               | 4.908556  |
| <b>Q8K442</b> | <b>ABC8A ATP_binding cassette sub_family A member 8_A</b>                        | <b>1.473611325</b> | <b>1.99E-06</b> | <b>6</b>  |
| Q8K442        | EDVQPLSQAFFK                                                                     | 1.659931937        | 2               | 2.891826  |
| Q8K442        | GQITAILGHSGAGK                                                                   | 1.470679166        | 2               | 3.748363  |
| Q8K442        | IDDFIHSLEQQNIALEVDAFGTR                                                          | 1.472298028        | 3               | 4.094284  |
| Q8K442        | LTGVCPQCNCVQFDLTVR                                                               | 1.579410797        | 2               | 2.832537  |
| Q8K442        | NTQNILVQNLGGQK                                                                   | 1.332701412        | 2               | 2.969511  |
| Q8K442        | STLLNVLSGLCVPTK                                                                  | 2.105190986        | 2               | 3.794128  |
| <b>Q8K4C0</b> | <b>FMO5 Dimethylaniline monooxygenase [N_oxide_forming] 5</b>                    | <b>0.91473197</b>  | <b>0.642267</b> | <b>12</b> |
| Q8K4C0        | CCELEGLEPVCFER                                                                   | 1.235639423        | 2               | 4.397594  |
| Q8K4C0        | FDHEMFGLPKP                                                                      | 1.488312244        | 2               | 3.323276  |
| Q8K4C0        | GYPIDILSSR                                                                       | 1.25550773         | 2               | 3.271616  |
| Q8K4C0        | HSALGQHPTINDDLPNR                                                                | 1.14514168         | 2               | 4.997354  |
| Q8K4C0        | IAVIGSGASGLTCK                                                                   | 1.455843381        | 2               | 4.198352  |
| Q8K4C0        | KLPSQSEMMAEINK                                                                   | 0.793331233        | 2               | 3.889401  |
| Q8K4C0        | KQPFDSTSGQWQVVTEHEGK                                                             | 0.945320208        | 3               | 4.749394  |
| Q8K4C0        | KTILTTEDR                                                                        | 0.87100957         | 2               | 2.801741  |
| Q8K4C0        | QQVDVFDGVLVCTGHHTDPHLPDLSFPGIEK                                                  | 1.595775516        | 3               | 3.778594  |
| Q8K4C0        | SDDIGGLWR                                                                        | 1.042211377        | 2               | 3.027843  |
| Q8K4C0        | VFPPNLEKPTLAIIGLIQPLGAIMPISELQGR                                                 | 0.989531257        | 4               | 5.019901  |
| Q8K4C0        | WATQVFK                                                                          | 1.485936406        | 1               | 1.954203  |
| <b>Q8K4T4</b> | <b>FLIP1 Filamin_A_interacting protein 1</b>                                     | <b>1.3872141</b>   | <b>0.522219</b> | <b>3</b>  |
| Q8K4T4        | EVLNLTK                                                                          | 1.217581303        | 1               | 2.118205  |
| Q8K4T4        | IEELETNKSLOK                                                                     | 1.699685929        | 2               | 2.558     |
| Q8K4T4        | IHELMNK                                                                          | 2.060433313        | 1               | 2.092971  |
| <b>Q8K4Z3</b> | <b>AIBP Apolipoprotein A_I_binding protein</b>                                   | <b>1.28619676</b>  | <b>0.002203</b> | <b>2</b>  |
| Q8K4Z3        | GNPSGIQPDLLISLTPAK                                                               | 1.284693814        | 2               | 3.833237  |
| Q8K4Z3        | SPPTVLVICPGNNGDGLVCAR                                                            | 1.369312338        | 2               | 5.809548  |
| <b>Q8K4Z5</b> | <b>SF3A1 Splicing factor 3A subunit 1</b>                                        | <b>1.734843837</b> | <b>0.015097</b> | <b>2</b>  |
| Q8K4Z5        | HKVSEFKGK                                                                        | 1.621322788        | 2               | 2.300611  |
| Q8K4Z5        | IGEEEIQKPEEK                                                                     | 1.736659932        | 2               | 2.601644  |
| <b>Q8K586</b> | <b>RANT GTP_binding nuclear protein Ran_testis_specific isoform</b>              | <b>1.273108946</b> | <b>0.004392</b> | <b>5</b>  |
| Q8K586        | FNVWDTAGQEK                                                                      | 1.072714879        | 2               | 3.311691  |
| Q8K586        | HLTGFEK                                                                          | 1.332506502        | 1               | 2.043822  |
| Q8K586        | LVLVGDGGTGK                                                                      | 1.102933096        | 2               | 2.372777  |
| Q8K586        | NLQYYDISAK                                                                       | 1.249732288        | 1               | 2.135574  |
| Q8K586        | VCENIPIVLCGNK                                                                    | 1.164699734        | 2               | 3.72718   |
| <b>Q8K5B3</b> | <b>MCFD2 Multiple coagulation factor deficiency protein 2 homolog</b>            | <b>0.928518487</b> | <b>0.230328</b> | <b>2</b>  |
| Q8K5B3        | DDDKNNNGYIDYAEFAK                                                                | 0.907218875        | 2               | 4.353566  |
| Q8K5B3        | STVHDQEHIMEHLEGVINQPEAEMSPQELQLHYFK                                              | 2.002764737        | 4               | 5.870281  |
| <b>Q8QZY1</b> | <b>EIF3L Eukaryotic translation initiation factor 3 subunit L</b>                | <b>1.033331347</b> | <b>0.079474</b> | <b>3</b>  |
| Q8QZY1        | VFSDEVQQQAQLSTIR                                                                 | 0.918061994        | 2               | 3.853329  |
| Q8QZY1        | VSGGPSLEQR                                                                       | 1.470017952        | 2               | 2.627123  |
| Q8QZY1        | VYEIQDIYENSWTK                                                                   | 1.623483606        | 2               | 3.926468  |

|               |                                                               |                    |                 |          |
|---------------|---------------------------------------------------------------|--------------------|-----------------|----------|
| <b>Q8R081</b> | <b>HNRPL Heterogeneous nuclear ribonucleoprotein L</b>        | <b>1.35809404</b>  | <b>0.000482</b> | <b>6</b> |
| Q8R081        | ASLNGADIYSGCCTLK                                              | 3.831031276        | 2               | 2.955995 |
| Q8R081        | NDQDTWDYTNPNLSGQDPPGSPNPNKR                                   | 0.907000745        | 3               | 5.029496 |
| Q8R081        | SDALETLGFLNHYQMK                                              | 1.541436381        | 2               | 3.686985 |
| Q8R081        | SKPGAAMVEMADGYAVDR                                            | 0.64997152         | 2               | 3.893934 |
| Q8R081        | SSSGLLEWDSK                                                   | 0.801007963        | 2               | 2.327813 |
| Q8R081        | TENAGDQHGGGGGGSGAAGGGGGENYDDPHK                               | 1.273203788        | 3               | 7.14297  |
| <b>Q8R0F9</b> | <b>S14L4 SEC14_like protein 4</b>                             | <b>0.949314165</b> | <b>0.094178</b> | <b>5</b> |
| Q8R0F9        | FDNTYSLLHTK                                                   | 1.764488736        | 2               | 3.130025 |
| Q8R0F9        | GSSHQVENEILFPGCVLR                                            | 0.947329694        | 2               | 4.755095 |
| Q8R0F9        | VCEMLLHECELQSQK                                               | 1.926591308        | 2               | 4.976276 |
| Q8R0F9        | VGYTAEVLLPDK                                                  | 1.397695742        | 2               | 2.956088 |
| Q8R0F9        | VGYTAEVLLPDKACEEK                                             | 1.145856764        | 2               | 2.448467 |
| <b>Q8R0K2</b> | <b>TRI31 E3 ubiquitin_protein ligase TRIM31</b>               | <b>1.387490139</b> | <b>0.317592</b> | <b>2</b> |
| Q8R0K2        | LQSSMELLKDIKDALS                                              | 1.324918655        | 2               | 2.552    |
| Q8R0K2        | QRLDEEESFLLSR                                                 | 2.017149846        | 2               | 2.431845 |
| <b>Q8R164</b> | <b>BPHL Valacyclovir hydrolase</b>                            | <b>1.05574167</b>  | <b>0.456473</b> | <b>3</b> |
| Q8R164        | FADEFNR                                                       | 1.963279275        | 2               | 2.366869 |
| Q8R164        | FTLVAWDPR                                                     | 1.269429642        | 2               | 2.982094 |
| Q8R164        | TDFAPQLQSLNK                                                  | 0.971036586        | 2               | 3.728002 |
| <b>Q8R1F5</b> | <b>HYI Putative hydroxypyruvate isomerase</b>                 | <b>1.359732976</b> | <b>0.275142</b> | <b>2</b> |
| Q8R1F5        | GDTVEGLSWLR                                                   | 1.330418397        | 2               | 3.142664 |
| Q8R1F5        | GEMGLGAVPGR                                                   | 2.232445596        | 2               | 2.537495 |
| <b>Q8R1V4</b> | <b>TMED4 Transmembrane emp24 domain_containing protein 4</b>  | <b>1.252286433</b> | <b>0.254298</b> | <b>2</b> |
| Q8R1V4        | CFIEEIPDETMVIGNYR                                             | 2.364889089        | 2               | 4.48738  |
| Q8R1V4        | QLLDQVEQIQK                                                   | 1.149476059        | 2               | 2.896046 |
| <b>Q8R3Q6</b> | <b>CCD58 Coiled_coil domain_containing protein 58</b>         | <b>1.04316614</b>  | <b>0.093749</b> | <b>2</b> |
| Q8R3Q6        | IVHELNTTPTASFAGK                                              | 1.087402281        | 2               | 3.946125 |
| Q8R3Q6        | NCIAQTSAVVK                                                   | 1.358922355        | 2               | 2.791858 |
| <b>Q8R491</b> | <b>EHD3 EH domain_containing protein 3</b>                    | <b>1.374657124</b> | <b>0.01467</b>  | <b>6</b> |
| Q8R491        | ADQIETQQLMR                                                   | 1.659800688        | 2               | 2.612211 |
| Q8R491        | GGAFEGTLQGPFGHGYGEGAGEGIDDAEWWVAR                             | 3.508404009        | 3               | 4.332998 |
| Q8R491        | LDISDEFSEVIK                                                  | 1.189417633        | 2               | 3.637642 |
| Q8R491        | LFEAEEQDLFK                                                   | 2.025960426        | 2               | 3.495023 |
| Q8R491        | MQDQLQAQDFSK                                                  | 1.524332615        | 2               | 3.838326 |
| Q8R491        | QEETQRPVQMVK                                                  | 1.545459607        | 2               | 2.753904 |
| <b>Q8VBU2</b> | <b>NDRG2 Protein NDRG2</b>                                    | <b>0.828535588</b> | <b>0.016675</b> | <b>6</b> |
| Q8VBU2        | CPVMLVVGDAQPHEDAVVECNSK                                       | 0.698676012        | 3               | 5.113845 |
| Q8VBU2        | LDPTQTSFLK                                                    | 1.261056262        | 1               | 2.088614 |
| Q8VBU2        | MADSGGQPQLTQPGK                                               | 1.046013329        | 2               | 3.133596 |
| Q8VBU2        | SLITHAPNLENIELYWNSYNRR                                        | 1.451951616        | 3               | 4.667002 |
| Q8VBU2        | TLSQSSESGTLPSGPPGHTMEVSC                                      | 0.811462815        | 2               | 4.516999 |
| Q8VBU2        | YALNHPDTVEGLVLINIDPNAK                                        | 1.607895933        | 2               | 4.740813 |
| <b>Q8VC12</b> | <b>HUTU Urocanate hydratase</b>                               | <b>0.986785186</b> | <b>9.9E-20</b>  | <b>9</b> |
| Q8VC12        | DHHDVSGTDSFPR                                                 | 1.842127487        | 2               | 2.683586 |
| Q8VC12        | HQLVVGSQLAR                                                   | 0.595578273        | 2               | 2.913155 |
| Q8VC12        | LLALEFAQELR                                                   | 2.503112476        | 2               | 3.961465 |
| Q8VC12        | LQYMDNIR                                                      | 1.277143967        | 2               | 2.428343 |
| Q8VC12        | LVITNGMVIPNYSSR                                               | 1.34141728         | 2               | 3.825133 |
| Q8VC12        | MMLSDVDSNGVAR                                                 | 1.243647526        | 2               | 3.173674 |
| Q8VC12        | VAIAVAINQAIASGK                                               | 2.173317325        | 2               | 4.001644 |
| Q8VC12        | VFVTSGLGGMSGAAQAK                                             | 1.105599766        | 2               | 4.541272 |
| Q8VC12        | VFVTSGLGGMSGAAQAK+Oxidation(9)                                | 0.947471136        |                 |          |
| <b>Q8VDC1</b> | <b>FYCO1 FYVE and coiled_coil domain_containing protein 1</b> | <b>1.221271107</b> | <b>0.07925</b>  | <b>2</b> |

|               |                                                        |                    |                 |           |
|---------------|--------------------------------------------------------|--------------------|-----------------|-----------|
| Q8VDC1        | GLELQVMQLQQEK                                          | 1.335949759        | 2               | 2.390159  |
| Q8VDC1        | MLVSRQGGQLQVEK+Oxidation(0)                            | 0.715228892        |                 |           |
| <b>Q8VDG5</b> | <b>PPCS Phosphopantothenate__cysteine ligase</b>       | <b>1.251449883</b> | <b>0.459404</b> | <b>2</b>  |
| Q8VDG5        | FLDNFSSGR                                              | 1.78537298         | 2               | 2.456367  |
| Q8VDG5        | LETDPDIISR                                             | 1.206558924        | 2               | 2.58724   |
| <b>Q8VE11</b> | <b>MTMR6 Myotubularin__related protein 6</b>           | <b>0.247337323</b> | <b>0.001189</b> | <b>2</b>  |
| Q8VE11        | TMKGFMLVLEK+Oxidation(1)                               | 0.247337323        |                 |           |
| Q8VE11        | TMKGFMLVLEK+Oxidation(5)                               | 0.247337323        |                 |           |
| <b>Q8VED5</b> | <b>K2C79 Keratin__type II cytoskeletal 79</b>          | <b>1.114277178</b> | <b>0.765229</b> | <b>5</b>  |
| Q8VED5        | FLEQQNKVLETK                                           | 0.164275467        | 2               | 3.668514  |
| Q8VED5        | NKYEDEINK                                              | 1.184802213        | 2               | 2.954535  |
| Q8VED5        | NKYEDEINKR                                             | 1.067205171        | 3               | 3.337077  |
| Q8VED5        | NLDLDSIIAEVK                                           | 0.745458812        | 2               | 3.541003  |
| Q8VED5        | YEDEINK                                                | 0.983547465        | 1               | 2.341678  |
| <b>Q8VEK3</b> | <b>HNRPU Heterogeneous nuclear ribonucleoprotein U</b> | <b>1.301156936</b> | <b>1.02E-14</b> | <b>12</b> |
| Q8VEK3        | EKPYFPIPEDCTFIQNVPLEDR                                 | 1.31277918         | 3               | 4.774993  |
| Q8VEK3        | FIEIAAR                                                | 1.739705752        | 1               | 1.907015  |
| Q8VEK3        | GYFEYIEENK                                             | 0.930443199        | 2               | 3.372343  |
| Q8VEK3        | LLEQYKEESK                                             | 1.395002754        | 2               | 3.26815   |
| Q8VEK3        | LLEQYKEESKK                                            | 1.301232596        | 2               | 3.668766  |
| Q8VEK3        | LQAALDNEAGGRPAMEPGNGSLDLGGDAAGR                        | 1.078066432        | 3               | 4.755062  |
| Q8VEK3        | NFILDQTNVSAQAQR                                        | 1.162641607        | 2               | 4.89524   |
| Q8VEK3        | NGQDLGVAFK                                             | 1.312860725        | 2               | 2.400917  |
| Q8VEK3        | TCNCETEDYGEK                                           | 1.532775718        | 2               | 3.575615  |
| Q8VEK3        | VSELKEELK                                              | 2.827390556        | 2               | 2.891933  |
| Q8VEK3        | VSELKEELKK                                             | 1.502160502        | 2               | 2.689186  |
| Q8VEK3        | YNILGTNTIMDK                                           | 1.424023686        | 2               | 3.655999  |
| <b>Q8VHE9</b> | <b>RETST All__trans__retinol 13__14__reductase</b>     | <b>1.689566116</b> | <b>0.063058</b> | <b>8</b>  |
| Q8VHE9        | ATVQSVLLDSAGR                                          | 1.494278601        | 2               | 3.868125  |
| Q8VHE9        | FLPLPLTQLLNK                                           | 2.297488856        | 2               | 3.22782   |
| Q8VHE9        | GATYGADHDLAR                                           | 1.71452058         | 2               | 3.267914  |
| Q8VHE9        | NLYSDLQALGSK                                           | 1.720401248        | 2               | 3.619696  |
| Q8VHE9        | RPPEPLVTDK                                             | 1.804522015        | 2               | 2.954525  |
| Q8VHE9        | RPPEPLVTDKEAR                                          | 2.046962204        | 3               | 4.206893  |
| Q8VHE9        | VESVTGGSPLTNQYLAHR                                     | 1.366241934        | 2               | 3.979195  |
| Q8VHE9        | VVAHGVSHAILLK                                          | 2.390062137        | 2               | 2.874022  |
| <b>Q8VHF5</b> | <b>CISY Citrate synthase__mitochondrial</b>            | <b>1.444574739</b> | <b>0.483463</b> | <b>4</b>  |
| Q8VHF5        | AYAEGINR                                               | 1.172916113        | 2               | 2.518066  |
| Q8VHF5        | EGSSIGAIDSK                                            | 1.396867833        | 2               | 2.350767  |
| Q8VHF5        | GLVYETSVLDPDEGIR                                       | 2.44763318         | 2               | 4.343808  |
| Q8VHF5        | GYSIPECQK                                              | 1.038358228        | 2               | 2.80161   |
| <b>Q8VHK7</b> | <b>HDGF Hepatoma__derived growth factor</b>            | <b>0.891202407</b> | <b>0.947021</b> | <b>3</b>  |
| Q8VHK7        | GFSEGLWEIENNPVK                                        | 0.769532449        | 2               | 3.702526  |
| Q8VHK7        | NSTPSEPDSGQPPPEEEEEEEEEAAKEEAEAQGVR                    | 0.757119855        | 3               | 6.10673   |
| Q8VHK7        | SCAEPEVEPEAHEGDGDKK                                    | 1.48963354         | 3               | 3.940601  |
| <b>Q8VHT6</b> | <b>AS3MT Arsenite methyltransferase</b>                | <b>1.435022826</b> | <b>0.577982</b> | <b>4</b>  |
| Q8VHT6        | FAHDFLFTPVEASLLAPQTK                                   | 2.182894185        | 2               | 4.367731  |
| Q8VHT6        | ILDLSGSGSR                                             | 1.103149052        | 2               | 2.908334  |
| Q8VHT6        | SLQNVHEEVISR                                           | 1.598432479        | 2               | 3.208845  |
| Q8VHT6        | TSADLQTNACVTPAK                                        | 1.196826939        | 2               | 3.875553  |
| <b>Q8VHX6</b> | <b>FLNC Filamin__C</b>                                 | <b>1.160930864</b> | <b>0.604651</b> | <b>3</b>  |
| Q8VHX6        | GAGTGGLGLTVEGPCEAK                                     | 1.160055719        | 2               | 3.973449  |
| Q8VHX6        | IECDDKGDGSDVR                                          | 1.522103105        | 2               | 3.443933  |
| Q8VHX6        | LIALLEVLQK                                             | 2.444446095        | 2               | 2.628568  |
| <b>Q8VI04</b> | <b>ASGL1 L__asparaginase</b>                           | <b>1.048002913</b> | <b>0.812915</b> | <b>5</b>  |
| Q8VI04        | DLSAGAVSAVRCIANPVK                                     | 1.279204484        | 2               | 2.353392  |

|               |                                                                   |                    |                 |           |
|---------------|-------------------------------------------------------------------|--------------------|-----------------|-----------|
| Q8VI04        | FAADMGIPQTPAEK                                                    | 1.048042314        | 2               | 3.44424   |
| Q8VI04        | GNLAYATSTGGIVNK                                                   | 1.031449016        | 2               | 4.358949  |
| Q8VI04        | NSGTVGVAVALDCK                                                    | 1.200083371        | 2               | 3.290692  |
| Q8VI04        | TVDEAATLALDYMK                                                    | 1.322580812        | 2               | 3.573679  |
| <b>Q8VID1</b> | <b>DHRS4 Dehydrogenase/reductase SDR family member 4</b>          | <b>0.868412788</b> | <b>5.23E-05</b> | <b>5</b>  |
| Q8VID1        | AVATLQGEGLSVTGVVCHVGK                                             | 1.640649341        | 2               | 4.013859  |
| Q8VID1        | LAEDGAHVVISSR                                                     | 1.12521014         | 2               | 3.70507   |
| Q8VID1        | NFAAELAPK                                                         | 0.754296253        | 2               | 2.458763  |
| Q8VID1        | TALLGLTK                                                          | 1.388154953        | 2               | 2.415642  |
| Q8VID1        | VNCLAPGLIK                                                        | 1.724764374        | 2               | 2.516085  |
| <b>Q8VIF7</b> | <b>SBP1 Selenium_binding protein 1</b>                            | <b>1.290797035</b> | <b>6.48E-05</b> | <b>11</b> |
| Q8VIF7        | CGPGYATPLEAMK                                                     | 0.392583284        | 2               | 3.107667  |
| Q8VIF7        | FLHDPDATQGFVGCALSSNIQR                                            | 1.71810063         | 2               | 5.423259  |
| Q8VIF7        | GGFVLLDGETFEVK                                                    | 2.21555868         | 2               | 3.909051  |
| Q8VIF7        | GTWEKPGGEAPMGYDFWYQPR                                             | 1.778681603        | 2               | 3.779766  |
| Q8VIF7        | HEIIQLQMK                                                         | 1.560474749        | 2               | 2.84595   |
| Q8VIF7        | HNIMVSTEWAAPNVFK                                                  | 1.586744543        | 2               | 4.609447  |
| Q8VIF7        | LTGQIFLGGIVK                                                      | 1.368385244        | 2               | 3.018772  |
| Q8VIF7        | NEGGTWSVEK                                                        | 1.285473682        | 2               | 3.161759  |
| Q8VIF7        | NTGIEAPDYLATVDVDPK                                                | 1.217585063        | 2               | 4.164054  |
| Q8VIF7        | QYDISNPK                                                          | 1.162478907        | 1               | 2.116134  |
| Q8VIF7        | VIEPNEIHAK                                                        | 1.640179015        | 2               | 2.967858  |
| <b>Q8VIJ6</b> | <b>SFPQ Splicing factor_proline_and glutamine_rich</b>            | <b>0.970236662</b> | <b>0.99712</b>  | <b>3</b>  |
| Q8VIJ6        | FGQGGAGPVGGQGPR                                                   | 0.964324582        | 2               | 3.206601  |
| Q8VIJ6        | MEELHSQEMQK                                                       | 1.089780572        | 2               | 3.795302  |
| Q8VIJ6        | RMEELHSQEMQK                                                      | 1.091100004        | 2               | 3.900165  |
| <b>Q91VA0</b> | <b>ACSM1 Acyl_coenzyme A synthetase ACSM1_mitochondrial</b>       | <b>1.123836087</b> | <b>0.765551</b> | <b>5</b>  |
| Q91VA0        | AFIVLNPEFLSHDQEQLIK                                               | 1.471511489        | 2               | 5.409288  |
| Q91VA0        | AILPFDLQIIDEK                                                     | 0.919721242        | 2               | 3.857377  |
| Q91VA0        | GNILPPNTEGYIGIR                                                   | 0.888513212        | 2               | 2.909138  |
| Q91VA0        | KVEFVSELPK                                                        | 0.885615559        | 2               | 2.901508  |
| Q91VA0        | NKEFGQL                                                           | 1.398951647        | 1               | 2.148697  |
| <b>Q91VA6</b> | <b>PDIP2 Polymerase delta_interacting protein 2</b>               | <b>1.065342566</b> | <b>0.665998</b> | <b>2</b>  |
| Q91VA6        | VLETVGVFEVVK                                                      | 1.03042095         | 2               | 3.40001   |
| Q91VA6        | VTVIPFYMGMROxidation(9                                            | 1.755531787        |                 |           |
| <b>Q91VM5</b> | <b>RBMXL Heterogeneous nuclear ribonucleoprotein G_like 1</b>     | <b>1.074431058</b> | <b>0.540667</b> | <b>2</b>  |
| Q91VM5        | LFIGLNTETNEK                                                      | 0.83763089         | 2               | 2.791485  |
| Q91VM5        | VEQATKPSFESGR                                                     | 1.21811481         | 2               | 3.938913  |
| <b>Q91VM9</b> | <b>IPYR2 Inorganic pyrophosphatase 2_mitochondrial</b>            | <b>0.943020959</b> | <b>0.99529</b>  | <b>2</b>  |
| Q91VM9        | IIAINVNDPEAEK                                                     | 0.857162958        | 2               | 3.218228  |
| Q91VM9        | MEIATEEPLNPIK                                                     | 1.504924784        | 2               | 4.434556  |
| <b>Q91W43</b> | <b>GCSF Glycine dehydrogenase [decarboxylating]_mitochondrial</b> | <b>1.144309069</b> | <b>0.488234</b> | <b>6</b>  |
| Q91W43        | AGHQLQHDLFFDTLK                                                   | 0.961332999        | 2               | 3.029573  |
| Q91W43        | DISLVHSMIPLGCTMK                                                  | 1.049996994        | 2               | 2.726485  |
| Q91W43        | EMLQALGLASIDELIEK                                                 | 1.386285594        | 2               | 2.544508  |
| Q91W43        | IDDIYGDQHLVCTCPPMEVYESPFSEQK                                      | 1.835361039        | 3               | 4.430251  |
| Q91W43        | NLLENSGWVTQYTPYQPEVSQGR                                           | 2.701577171        | 3               | 4.648387  |
| Q91W43        | VSFQPNSGAQGEYAGLATIR                                              | 1.569847546        | 2               | 5.203534  |
| <b>Q91W90</b> | <b>TXND5 Thioredoxin domain_containing protein 5</b>              | <b>1.471299395</b> | <b>0.278687</b> | <b>3</b>  |
| Q91W90        | GTVLALTEK                                                         | 1.957663149        | 2               | 2.391437  |
| Q91W90        | SFEDTIAQGITFVK                                                    | 1.487354276        | 2               | 4.028061  |
| Q91W90        | VDCTQHYAVCSEHQVR                                                  | 1.241132033        | 3               | 4.488551  |

|               |                                                                           |                    |                 |           |
|---------------|---------------------------------------------------------------------------|--------------------|-----------------|-----------|
| <b>Q91WL5</b> | <b>CP4CA Cytochrome P450 4A12A</b>                                        | <b>1.093836016</b> | <b>0.836574</b> | <b>2</b>  |
| Q91WL5        | FELLPDPTR                                                                 | 1.465975274        | 2               | 2.666255  |
| Q91WL5        | IQLQDEEELEK                                                               | 1.093829753        | 2               | 2.487579  |
| <b>Q91X77</b> | <b>CY250 Cytochrome P450 2C50</b>                                         | <b>1.06680354</b>  | <b>0.964452</b> | <b>5</b>  |
| Q91X77        | EHEESLDVTIPR                                                              | 1.21823895         | 2               | 2.307839  |
| Q91X77        | IKEHEESLDVTIPR                                                            | 1.047044501        | 3               | 3.663489  |
| Q91X77        | NFLLEK                                                                    | 1.096145291        | 1               | 2.102529  |
| Q91X77        | NYFIPK                                                                    | 0.828539163        | 1               | 1.920561  |
| Q91X77        | YALLLLLK                                                                  | 1.263484261        | 2               | 2.921456  |
| <b>Q91X78</b> | <b>ERLN1 Erlin_1</b>                                                      | <b>1.208168544</b> | <b>0.220945</b> | <b>4</b>  |
| Q91X78        | DLNTMAPGLTIQAVR                                                           | 1.36639281         | 2               | 3.442455  |
| Q91X78        | ISEIEDAAFLAR                                                              | 1.298926077        | 2               | 2.978405  |
| Q91X78        | RISEIEDAAFLAREK                                                           | 1.441796188        | 2               | 2.307327  |
| Q91X78        | SVQTTLQTDEVK                                                              | 0.90097666         | 2               | 3.096241  |
| <b>Q91Y78</b> | <b>UCHL3 Ubiquitin carboxyl-terminal hydrolase isozyme L3</b>             | <b>1.182284457</b> | <b>0.821777</b> | <b>2</b>  |
| Q91Y78        | FLEESVAMSPEER                                                             | 1.353841995        | 2               | 3.260727  |
| Q91Y78        | HLENYDAIR                                                                 | 1.155266341        | 2               | 2.582448  |
| <b>Q91Y81</b> | <b>SEPT2 Septin_2</b>                                                     | <b>1.232272635</b> | <b>0.340841</b> | <b>4</b>  |
| Q91Y81        | ASIPFSVVGSNQLIEAK                                                         | 1.988926216        | 2               | 2.660184  |
| Q91Y81        | ILDEIEEHSIK                                                               | 1.138697958        | 2               | 2.653354  |
| Q91Y81        | KVENEDMKNKQJLLEK                                                          | 1.089486709        | 3               | 3.692378  |
| Q91Y81        | LTVVDTPGYGDAINSR                                                          | 0.998830381        | 2               | 4.378148  |
| <b>Q91YP0</b> | <b>L2HDH L_2_hydroxyglutarate dehydrogenase_mitochondrial</b>             | <b>1.093673087</b> | <b>0.838033</b> | <b>3</b>  |
| Q91YP0        | LIQQEDIK                                                                  | 1.070313603        | 2               | 2.400776  |
| Q91YP0        | LIVAVEQEEIPR                                                              | 1.451894188        | 2               | 2.803038  |
| Q91YP0        | NAPSPAATSSLAISR                                                           | 1.009309825        | 2               | 3.297056  |
| <b>Q91YT0</b> | <b>NDUV1 NADH dehydrogenase [ubiquinone] flavoprotein 1_mitochondrial</b> | <b>1.135719756</b> | <b>0.000292</b> | <b>10</b> |
| Q91YT0        | GAGAYICGEETALIESIEGK                                                      | 1.459284393        | 2               | 2.575128  |
| Q91YT0        | GDARPAEIDSLWEISK                                                          | 1.668134297        | 2               | 2.877144  |
| Q91YT0        | GEFYNEASNLRQVAIR                                                          | 1.509827538        | 2               | 3.552352  |
| Q91YT0        | GGAGFPPTGLK                                                               | 1.24414442         | 2               | 2.37067   |
| Q91YT0        | HFRPELEDR                                                                 | 1.734403594        | 2               | 2.331968  |
| Q91YT0        | KTSFGSLKDEDR                                                              | 1.311086197        | 2               | 3.480266  |
| Q91YT0        | LKPPFPADVGVFGCPTTVANVETVAVSPTICR                                          | 1.829627719        | 3               | 4.197679  |
| Q91YT0        | LVEGCLVGGR                                                                | 1.024539995        | 2               | 2.743399  |
| Q91YT0        | TSFGSLKDEDR                                                               | 1.417057923        | 2               | 2.49589   |
| Q91YT0        | YLVVNADEGEPGTCK                                                           | 1.128317318        | 2               | 4.941728  |
| <b>Q91Z53</b> | <b>GRHPR Glyoxylate reductase/hydroxypyruvate reductase</b>               | <b>1.122124034</b> | <b>5.27E-10</b> | <b>6</b>  |
| Q91Z53        | GDVVNQEDLYQALASGQIAAAGLDVTTPELPPSHPLTLK                                   | 1.468949827        | 3               | 6.776829  |
| Q91Z53        | LLDAAGANLR                                                                | 0.989878639        | 2               | 3.262514  |
| Q91Z53        | NCVILPHIGSATYK                                                            | 0.864366605        | 2               | 3.70573   |
| Q91Z53        | NTMSLLAANNLLAGLR                                                          | 1.586437259        | 2               | 4.739762  |
| Q91Z53        | RLPEAIEEVK                                                                | 1.070539594        | 3               | 3.300493  |
| Q91Z53        | VISTLSVGVDDLALDEIK                                                        | 1.884010705        | 2               | 4.75026   |
| <b>Q91ZJ5</b> | <b>UGPA UTP-glucose_1_phosphate uridylyltransferase</b>                   | <b>1.302394079</b> | <b>9.9E-20</b>  | <b>14</b> |
| Q91ZJ5        | AMSQDGASQFQEVILQELESVK                                                    | 2.141934479        | 2               | 4.699468  |
| Q91ZJ5        | GGTLTQYEGK                                                                | 1.155686948        | 2               | 2.371033  |
| Q91ZJ5        | GLPDNISSVLNK                                                              | 1.255792546        | 2               | 3.376895  |
| Q91ZJ5        | GTVIIIANHGDR                                                              | 1.444105031        | 2               | 3.008195  |
| Q91ZJ5        | IDIPPGAVLENK                                                              | 1.230965721        | 2               | 2.877012  |
| Q91ZJ5        | IQRPPEDSIQPYEK                                                            | 1.422962349        | 3               | 5.178171  |

|               |                                                                                        |                    |                 |           |
|---------------|----------------------------------------------------------------------------------------|--------------------|-----------------|-----------|
| Q91ZJ5        | LNGGLGTSMGCK                                                                           | 1.750345916        | 2               | 2.969231  |
| Q91ZJ5        | LVEIAQVPK                                                                              | 1.525722           | 2               | 3.451312  |
| Q91ZJ5        | NENTFLDLTVQQIEHLNK                                                                     | 1.511789487        | 2               | 5.052098  |
| Q91ZJ5        | RCEFVMEVTNK                                                                            | 1.218283395        | 2               | 2.375895  |
| Q91ZJ5        | RFESIPDMLELDHLTVSGDVTFGK                                                               | 1.844600592        | 3               | 3.335068  |
| Q91ZJ5        | SFENSLGINVPR                                                                           | 1.326976187        | 2               | 3.442564  |
| Q91ZJ5        | TLDGGLNVIQLETAVGAAIK                                                                   | 1.217954111        | 2               | 5.313269  |
| Q91ZJ5        | TYNTDVPLVLMNSFNTDEDTKK                                                                 | 1.39940565         | 2               | 4.49399   |
| <b>Q91ZU6</b> | <b>DYST Dystonin</b>                                                                   | <b>0.992199258</b> | <b>0.154927</b> | <b>2</b>  |
| Q91ZU6        | LDMLQQIATR+Oxidation(2)                                                                | 1.525925368        |                 |           |
| Q91ZU6        | SAETNIDQDITNLK                                                                         | 0.67497334         | 2               | 2.373625  |
| <b>Q91ZV0</b> | <b>MIA2 Melanoma inhibitory activity protein 2</b>                                     | <b>1.744785282</b> | <b>0.223708</b> | <b>2</b>  |
| Q91ZV0        | CGDLECETLISRVLALR                                                                      | 1.746766474        | 2               | 2.419046  |
| Q91ZV0        | KMLDQDDIVENDK+Oxidation(1)                                                             | 1.513431159        |                 |           |
| <b>Q91ZX7</b> | <b>LRP1 Prolow_density lipoprotein receptor_related protein 1</b>                      | <b>1.208244777</b> | <b>0.376146</b> | <b>6</b>  |
| Q91ZX7        | CLQGACVVNK                                                                             | 1.408527195        | 2               | 2.432559  |
| Q91ZX7        | GCHVNECLSR                                                                             | 1.100664543        | 2               | 2.703519  |
| Q91ZX7        | ILQEDFTCR                                                                              | 1.084781512        | 2               | 2.494498  |
| Q91ZX7        | MYDAQQQVGTNK                                                                           | 1.035602768        | 2               | 4.437589  |
| Q91ZX7        | TVLWPNGSLDIPAGR                                                                        | 0.675991547        | 2               | 2.490558  |
| Q91ZX7        | VFFTDYGGQIPK                                                                           | 1.311675162        | 2               | 3.277374  |
| <b>Q920A6</b> | <b>RISC Retinoid_inducible serine carboxypeptidase</b>                                 | <b>1.913884517</b> | <b>1E-12</b>    | <b>2</b>  |
| Q920A6        | GLAEVSDIAEQVLNAVNK                                                                     | 1.915263435        | 3               | 5.645745  |
| Q920A6        | NTDGVNFYNILTK                                                                          | 1.386732743        | 2               | 2.912838  |
| <b>Q920D2</b> | <b>DYR Dihydrofolate reductase</b>                                                     | <b>1.413026975</b> | <b>9.9E-20</b>  | <b>4</b>  |
| Q920D2        | IMQEFESDTFFPEIDLEK                                                                     | 1.314727719        | 2               | 4.677299  |
| Q920D2        | LIEQPELASK                                                                             | 1.041586671        | 2               | 3.003575  |
| Q920D2        | LLPEYPGVLSEIQEEK                                                                       | 1.439192977        | 2               | 3.704051  |
| Q920D2        | NGDLPWPLLR                                                                             | 1.335904608        | 2               | 3.231205  |
| <b>Q920F3</b> | <b>KHDR2 KH domain_containing_RNA_binding_signal transduction_associated protein 2</b> | <b>1.025312387</b> | <b>0.316873</b> | <b>2</b>  |
| Q920F3        | LQEETGAKMSILKGSMSR+Oxidation(8)                                                        | 1.768961571        |                 |           |
| Q920F3        | MSHALEEIKK                                                                             | 1.023989847        | 1               | 2.259695  |
| <b>Q920F5</b> | <b>DCMC Malonyl_CoA decarboxylase_mitochondrial</b>                                    | <b>1.244557672</b> | <b>0.559398</b> | <b>5</b>  |
| Q920F5        | ADLLEAQALK                                                                             | 1.218574345        | 2               | 2.338957  |
| Q920F5        | EIAEVTGDPVHESLK                                                                        | 1.357389882        | 2               | 3.437613  |
| Q920F5        | ISECEAVHPVK                                                                            | 1.259685753        | 2               | 3.358164  |
| Q920F5        | LCSGLTASAMDELLR                                                                        | 0.812137808        | 2               | 2.30838   |
| Q920F5        | WLLGLLNVQGK                                                                            | 1.228513144        | 2               | 3.381225  |
| <b>Q920J4</b> | <b>TXNL1 Thioredoxin_like protein 1</b>                                                | <b>0.999392048</b> | <b>0.430288</b> | <b>4</b>  |
| Q920J4        | AGCECLNESDEHGFDNCLR                                                                    | 1.172240306        | 3               | 4.038232  |
| Q920J4        | IDQYQGADAVGLEEK                                                                        | 0.87071789         | 2               | 4.823668  |
| Q920J4        | QHLENDPGSNEDTDIPK                                                                      | 1.88344931         | 2               | 2.385123  |
| Q920J4        | SEPTQALELTEDDIKEDGIVPLR                                                                | 1.795543009        | 2               | 3.405476  |
| <b>Q920L2</b> | <b>DHSA Succinate dehydrogenase [ubiquinone] flavoprotein subunit_mitochondrial</b>    | <b>1.304303059</b> | <b>0.000136</b> | <b>18</b> |
| Q920L2        | ACALSIAESCRPGDK                                                                        | 0.753570801        | 2               | 2.870187  |
| Q920L2        | AGLPCQDLFVQFHPTGIYAGCLITEGCR                                                           | 1.297917711        | 3               | 4.506897  |
| Q920L2        | ANAGEESVMNLDK                                                                          | 1.296064996        | 2               | 3.645887  |
| Q920L2        | GEGGILINSQGER                                                                          | 0.982010574        | 2               | 4.062121  |
| Q920L2        | GVIALCIEDGSIHR                                                                         | 1.256324158        | 2               | 3.355162  |
| Q920L2        | HTLSYVDTK                                                                              | 2.370016244        | 2               | 2.489301  |
| Q920L2        | HVNGQDQIVPGLYACGEAACASVHGANSR                                                          | 1.224867055        | 3               | 6.760015  |
| Q920L2        | IDEYDYSKPIEGQQK                                                                        | 1.234231283        | 2               | 4.476025  |
| Q920L2        | KHTLSYVDTK                                                                             | 0.597810136        | 2               | 2.765818  |



|               |                                                                  |                    |                 |          |
|---------------|------------------------------------------------------------------|--------------------|-----------------|----------|
| Q920L2        | NTIATGGYGR                                                       | 1.07197091         | 2               | 2.785492 |
| Q920L2        | SMQSHAAVFR                                                       | 1.341141323        | 2               | 2.690073 |
| Q920L2        | TGHSLHLTYGR                                                      | 0.872772517        | 2               | 2.955507 |
| Q920L2        | TLNEADCATVPPAIR                                                  | 1.133855566        | 2               | 3.690838 |
| Q920L2        | TYFSCTSHTSTGDGTAMVTR                                             | 1.323088969        | 2               | 5.698668 |
| Q920L2        | VGSVLQEGCEK                                                      | 1.212960762        | 2               | 3.540959 |
| Q920L2        | VSDAISTQYPVVDHEFDVAVVVGAGGAGLR                                   | 2.283120328        | 3               | 4.921842 |
| Q920L2        | VSQLYGDLQHLK                                                     | 1.187679545        | 2               | 3.496259 |
| Q920L2        | VTLDYRPVIDK                                                      | 1.105923498        | 2               | 2.975891 |
| <b>Q920P0</b> | <b>DCXR L_xylulose reductase</b>                                 | <b>1.203794241</b> | <b>0.761173</b> | <b>7</b> |
| Q920P0        | ALTNHTVYCSTK                                                     | 1.164881691        | 2               | 3.151167 |
| Q920P0        | AVVQVSQIVAR                                                      | 1.316011134        | 2               | 3.169536 |
| Q920P0        | GVPGAIVNVSSQASQR                                                 | 1.052213942        | 2               | 5.78407  |
| Q920P0        | SSMTTGSALPVDGGFLAT                                               | 1.293442341        | 2               | 2.857385 |
| Q920P0        | STVLALQAAGAQQVAVSR                                               | 1.206241893        | 2               | 3.918899 |
| Q920P0        | TREDLDSLVR                                                       | 1.138025263        | 2               | 2.96284  |
| Q920P0        | VNAVNPVTVMTPMGR                                                  | 1.628126282        | 2               | 3.441971 |
| <b>Q921F2</b> | <b>TADBP TAR DNA_binding protein 43</b>                          | <b>1.123666135</b> | <b>0.01051</b>  | <b>5</b> |
| Q921F2        | FGGNPGGFGNQGGFNSR                                                | 1.11877145         | 2               | 4.413055 |
| Q921F2        | FTEYETQVK                                                        | 1.348196926        | 2               | 2.636263 |
| Q921F2        | GISVHISNAEPK                                                     | 1.096186677        | 2               | 2.528919 |
| Q921F2        | KDLKTGHSK                                                        | 1.150931273        | 2               | 2.442498 |
| Q921F2        | TSDLIVLGLPWK                                                     | 1.40912539         | 2               | 3.272691 |
| <b>Q921M3</b> | <b>SF3B3 Splicing factor 3B subunit 3</b>                        | <b>0.911779616</b> | <b>0.664432</b> | <b>3</b> |
| Q921M3        | FLAVGLVDNTR                                                      | 1.721776207        | 2               | 2.834676 |
| Q921M3        | LPPNTNDEVEDPTGNK                                                 | 0.772580561        | 2               | 2.686201 |
| Q921M3        | TVLDPVTGDLSDTR                                                   | 0.924048816        | 2               | 2.665644 |
| <b>Q922F4</b> | <b>TBB6 Tubulin beta_6 chain</b>                                 | <b>1.291536547</b> | <b>9.9E-20</b>  | <b>7</b> |
| Q922F4        | ALTVELTQQMFDAK                                                   | 1.486628187        | 2               | 3.984235 |
| Q922F4        | ALTVELTQQMFDAK+Oxidation(10                                      | 1.244505732        |                 |          |
| Q922F4        | GHYTEGAELVDSVLDDVVR                                              | 1.388137095        | 2               | 6.636072 |
| Q922F4        | IREEYPDR                                                         | 1.291280032        | 2               | 2.97651  |
| Q922F4        | MASTFIGNSTAIQELFK                                                | 1.703716857        | 2               | 4.346158 |
| Q922F4        | NMMAACDPR                                                        | 1.717159968        | 2               | 2.751477 |
| Q922F4        | NSSYFVEWIPNNVK                                                   | 1.407808891        | 2               | 4.748125 |
| <b>Q922J3</b> | <b>CLIP1 CAP_Gly domain_containing linker protein 1</b>          | <b>1.274868084</b> | <b>0.041143</b> | <b>2</b> |
| Q922J3        | EMETMQAKLMK+Oxidation(4                                          | 1.316446931        |                 |          |
| Q922J3        | HEEILQNLQKMLADTEDK                                               | 1.159922889        | 2               | 2.334868 |
| <b>Q923D2</b> |                                                                  | <b>1.638968265</b> | <b>0.027592</b> | <b>4</b> |
| Q923D2        | HDLGHFMLR                                                        | 1.291943423        | 3               | 3.361802 |
| Q923D2        | LQDVTDDHIR                                                       | 1.541696414        | 2               | 3.166772 |
| Q923D2        | TGLTTLAQAVQAGYEVTVLVR                                            | 1.650066762        | 3               | 4.15661  |
| Q923D2        | YVAVMPPHIGDQPLTGAYVTLDGR                                         | 1.373583954        | 3               | 4.193653 |
| <b>Q923K9</b> | <b>A1CF APOBEC1 complementation factor</b>                       | <b>1.166850609</b> | <b>0.037188</b> | <b>3</b> |
| Q923K9        | LAPQLEEICQK                                                      | 2.584424759        | 2               | 2.901546 |
| Q923K9        | TGYSLVQENGQR                                                     | 1.166138116        | 2               | 2.519145 |
| Q923K9        | VTEGVVDVIVYPSAADK                                                | 1.151046403        | 2               | 3.785762 |
| <b>Q923M1</b> | <b>MSRA Mitochondrial peptide methionine sulfoxide reductase</b> | <b>1.387922178</b> | <b>0.167285</b> | <b>2</b> |
| Q923M1        | SAVYPTSAVQMEAAALK                                                | 1.561439573        | 2               | 4.215207 |
| Q923M1        | VISAEALPGR                                                       | 1.32271051         | 2               | 2.917979 |
| <b>Q923V8</b> | <b>SEP15 15 kDa selenoprotein</b>                                | <b>1.187722864</b> | <b>9.8E-05</b>  | <b>3</b> |
| Q923V8        | GCCQEEAQFETK                                                     | 1.184881225        | 2               | 4.156827 |
| Q923V8        | LLDDNGNIAEELSILK                                                 | 1.942652045        | 2               | 4.078097 |
| Q923V8        | WNTDSVEEFLSEK                                                    | 2.122645356        | 2               | 2.768538 |

|               |                                                                               |                    |                 |           |
|---------------|-------------------------------------------------------------------------------|--------------------|-----------------|-----------|
| <b>Q924C3</b> | <b>ENPP1 Ectonucleotide pyrophosphatase/phosphodiesterase family member 1</b> | <b>2.264676022</b> | <b>0.102141</b> | <b>5</b>  |
| Q924C3        | AEYLHTWGGLLPVISK                                                              | 2.270953561        | 3               | 3.917227  |
| Q924C3        | ELESPAAASLLAPMDLGEEPLEK                                                       | 2.151525008        | 2               | 4.407134  |
| Q924C3        | GQPIWVTANHQEVR                                                                | 0.864165746        | 2               | 3.336105  |
| Q924C3        | SGTYFWPGSDVEIDGILPDIYK                                                        | 1.899563804        | 2               | 2.518334  |
| Q924C3        | SVSSDLGCTCDPSIVPIMDFEK                                                        | 1.613114391        | 2               | 3.879627  |
| <b>Q924S5</b> | <b>LONM Lon protease homolog_ mitochondrial</b>                               | <b>1.114093232</b> | <b>0.815372</b> | <b>14</b> |
| Q924S5        | AGVTCIILPAENR                                                                 | 0.969696021        | 2               | 2.314547  |
| Q924S5        | AQLSATVLTLLIK                                                                 | 0.97850511         | 2               | 3.453834  |
| Q924S5        | AQSVLEEDHYGMEDVK                                                              | 1.223068602        | 2               | 4.268158  |
| Q924S5        | EHQEALAVR                                                                     | 1.36374692         | 2               | 2.519455  |
| Q924S5        | ELGLEKDDKDAIEEK                                                               | 0.87276498         | 2               | 3.74027   |
| Q924S5        | FSVGGMTDVAEIK                                                                 | 1.076637594        | 2               | 3.070374  |
| Q924S5        | GYQGDPSALLELDPEQANFLDHYLDVDPVLSK                                              | 1.331947712        | 3               | 5.099291  |
| Q924S5        | HVMDVVDEELSK                                                                  | 0.882349243        | 2               | 3.625859  |
| Q924S5        | IVSGEAQTVHVTPELQDFVGKPVFTVER                                                  | 1.57454207         | 3               | 5.925712  |
| Q924S5        | MEMINVSQYVAQEK                                                                | 2.14392854         | 2               | 2.660993  |
| Q924S5        | QLEVEPEGLEPEAENK                                                              | 1.083499189        | 2               | 4.350005  |
| Q924S5        | QSDENLDLAR                                                                    | 1.513435764        | 2               | 2.467745  |
| Q924S5        | TENPLVLIDEVDK                                                                 | 1.364083372        | 2               | 2.996889  |
| Q924S5        | VLEFIAVSQLR                                                                   | 0.950968461        | 2               | 2.776484  |
| <b>Q924W5</b> | <b>SMC6 Structural maintenance of chromosomes protein 6</b>                   | <b>1.614290049</b> | <b>0.148456</b> | <b>2</b>  |
| Q924W5        | ELDMKEKELQEK                                                                  | 3.641240331        | 2               | 2.372996  |
| Q924W5        | TKEQINQGEERLTELK                                                              | 1.572176131        | 2               | 2.557731  |
| <b>Q99020</b> | <b>ROAA Heterogeneous nuclear ribonucleoprotein A/B</b>                       | <b>1.079650579</b> | <b>8.3E-13</b>  | <b>4</b>  |
| Q99020        | EYFGQFGEIAIPLDPK                                                              | 2.994441069        | 2               | 3.560331  |
| Q99020        | FGEVVDCTIK                                                                    | 0.608462407        | 2               | 3.208948  |
| Q99020        | IFVGGLNPEATEEK                                                                | 1.678243597        | 2               | 4.174219  |
| Q99020        | MFVGGLSWDTSK                                                                  | 1.606025878        | 2               | 2.557251  |
| <b>Q99068</b> | <b>AMRP Alpha_2_macroglobulin receptor_associated protein</b>                 | <b>1.132116642</b> | <b>0.957699</b> | <b>2</b>  |
| Q99068        | EELKHFEAKIEK                                                                  | 1.144196187        | 2               | 2.439551  |
| Q99068        | HVESIGDPEHISR                                                                 | 1.12645341         | 3               | 4.120231  |
| <b>Q99J14</b> | <b>PSMD6 26S proteasome non_ATPase regulatory subunit 6</b>                   | <b>1.439017911</b> | <b>0.124952</b> | <b>3</b>  |
| Q99J14        | GAEILEVLHSLPAVR                                                               | 1.982575096        | 2               | 2.98469   |
| Q99J14        | RLDEELEDAAK                                                                   | 1.625584108        | 2               | 3.186154  |
| Q99J14        | VNEIVETNRPDSK                                                                 | 1.43380954         | 2               | 3.70418   |
| <b>Q99JW2</b> | <b>ACY1 Aminoacylase_1</b>                                                    | <b>1.082713068</b> | <b>0.380723</b> | <b>3</b>  |
| Q99JW2        | FIEDTAAEK                                                                     | 1.07540783         | 2               | 2.690768  |
| Q99JW2        | SVSIQYLEAVR                                                                   | 1.750056364        | 2               | 2.56252   |
| Q99JW2        | TIHMTFVPDEEVGGHK                                                              | 0.684144686        | 3               | 3.919342  |
| <b>Q99KK9</b> | <b>SYHM Probable histidyl_tRNA synthetase_ mitochondrial</b>                  | <b>1.332585149</b> | <b>0.122709</b> | <b>2</b>  |
| Q99KK9        | IIAELWDAGIKAEMLYK+Oxidation(13                                                | 1.167826546        |                 |           |
| Q99KK9        | YDLTVPFAR                                                                     | 1.492904773        | 2               | 2.364349  |
| <b>Q99KN9</b> | <b>EPN4 Clathrin interactor 1</b>                                             | <b>1.222414748</b> | <b>0.618722</b> | <b>3</b>  |
| Q99KN9        | GEFKDEEETVTTK                                                                 | 1.175642351        | 2               | 3.58409   |
| Q99KN9        | HIHITQATETTTTR                                                                | 1.259911256        | 2               | 3.353887  |
| Q99KN9        | IGSTIDTISK                                                                    | 1.130406392        | 2               | 2.55054   |
| <b>Q99L04</b> | <b>DHRS1 Dehydrogenase/reductase SDR family member 1</b>                      | <b>0.973733041</b> | <b>0.999999</b> | <b>3</b>  |
| Q99L04        | ATAQEAQSLGGR                                                                  | 0.872261808        | 2               | 3.323043  |

|               |                                                                         |                    |                 |          |
|---------------|-------------------------------------------------------------------------|--------------------|-----------------|----------|
| Q99L04        | CVPVCDSSQESEVK                                                          | 1.179887736        | 2               | 4.306995 |
| Q99L04        | GQVCVVTGASR                                                             | 0.991130164        | 2               | 2.812001 |
| <b>Q99LF4</b> | <b>RTCB tRNA_splicing ligase RtcB homolog</b>                           | <b>1.279707025</b> | <b>0.080896</b> | <b>5</b> |
| Q99LF4        | GLGHQVATDALVAMEK                                                        | 1.039445612        | 2               | 3.692619 |
| Q99LF4        | NLDFQDVLDK                                                              | 1.96311907         | 2               | 3.083274 |
| Q99LF4        | NVTDVVNTCHDAGISK                                                        | 1.157658192        | 2               | 4.334417 |
| Q99LF4        | NYNDELQFLDK                                                             | 1.591833406        | 2               | 3.183576 |
| Q99LF4        | TNLDESVDVQPVK                                                           | 1.157645669        | 2               | 3.466625 |
| <b>Q99LH1</b> | <b>NOG2 Nucleolar GTP_binding protein 2</b>                             | <b>1.431660007</b> | <b>0.043076</b> | <b>2</b> |
| Q99LH1        | GGEPDMLTVSKMVLNDWQR+Oxidation(11                                        | 1.431660007        |                 |          |
| Q99LH1        | GGEPDMLTVSKMVLNDWQR+Oxidation(5                                         | 1.431660007        |                 |          |
| <b>Q99M73</b> | <b>KRT84 Keratin_type II cuticular Hb4</b>                              | <b>1.384608846</b> | <b>0.703912</b> | <b>2</b> |
| Q99M73        | CKLADLEGALQQAQDMAR                                                      | 1.090947617        | 2               | 2.672738 |
| Q99M73        | EYQELMNVK                                                               | 1.666338005        | 1               | 2.093333 |
| <b>Q99M87</b> | <b>DNJA3 Dnal homolog subfamily A member 3_mitochondrial</b>            | <b>0.93226741</b>  | <b>0.615732</b> | <b>2</b> |
| Q99M87        | GGPSVDPEELFR                                                            | 1.26146589         | 2               | 2.351203 |
| Q99M87        | GSIIITNPCVVCR                                                           | 0.93171223         | 2               | 2.977026 |
| <b>Q99ML5</b> | <b>PCYOX Prenylcysteine oxidase</b>                                     | <b>1.451075961</b> | <b>0.067428</b> | <b>2</b> |
| Q99ML5        | ELGLSSVPASGGLGVYNGK                                                     | 1.505981458        | 2               | 2.971882 |
| Q99ML5        | NFDPPIIEFNPDYQQLVTTLIK                                                  | 1.449295053        | 3               | 4.824368 |
| <b>Q99MS0</b> | <b>S14L2 SEC14_like protein 2</b>                                       | <b>1.340467605</b> | <b>0.123255</b> | <b>6</b> |
| Q99MS0        | AGEMTEVLPNQR                                                            | 1.362453618        | 2               | 3.568959 |
| Q99MS0        | AGEMTEVLPNQR+Oxidation(3                                                | 1.557710108        |                 |          |
| Q99MS0        | HISPDQLPVEYGGTMDPDGNPK                                                  | 0.962817434        | 3               | 4.967525 |
| Q99MS0        | INYGGDIPK                                                               | 1.188803182        | 2               | 2.419945 |
| Q99MS0        | QQYEHSVQISR                                                             | 1.338803096        | 2               | 2.393233 |
| Q99MS0        | YNSHMVPEDGTLTLCSEPGIYVLR                                                | 1.42801955         | 3               | 3.570745 |
| <b>Q99MZ8</b> | <b>LASP1 LIM and SH3 domain protein 1</b>                               | <b>0.938761278</b> | <b>0.505515</b> | <b>8</b> |
| Q99MZ8        | GFSVVADTPELQR                                                           | 1.231040649        | 2               | 3.647566 |
| Q99MZ8        | MGPSGGEGIEPER                                                           | 1.109142055        | 2               | 3.356931 |
| Q99MZ8        | MGPSGGEGIEPERR                                                          | 1.155249469        | 2               | 2.422318 |
| Q99MZ8        | QQSELQSQVR                                                              | 1.258163033        | 2               | 2.984425 |
| Q99MZ8        | QSFTMVADTPENLR                                                          | 0.899512973        | 2               | 3.562724 |
| Q99MZ8        | TGDTGMLPANYVEAI                                                         | 1.44725085         | 1               | 2.204384 |
| Q99MZ8        | TQDQISNIK                                                               | 1.163024401        | 2               | 2.709134 |
| Q99MZ8        | YHEEFK                                                                  | 0.673766803        | 2               | 2.410148 |
| <b>Q99N27</b> | <b>SNX1 Sorting nexin_1</b>                                             | <b>1.226410195</b> | <b>0.095047</b> | <b>2</b> |
| Q99N27        | LQVEVEEEQR                                                              | 1.125806501        | 2               | 2.495664 |
| Q99N27        | SLAMLGSSSEDNTALSR                                                       | 1.789041768        | 2               | 3.113087 |
| <b>Q99NA5</b> | <b>IDH3A Isocitrate dehydrogenase [NAD] subunit alpha_mitochondrial</b> | <b>1.397970857</b> | <b>0.530899</b> | <b>4</b> |
| Q99NA5        | ENTEGEYSGIEHVIVDGVVQSIK                                                 | 1.3090405          | 3               | 3.343175 |
| Q99NA5        | HMGLFDHAAK                                                              | 2.364813339        | 3               | 3.410003 |
| Q99NA5        | IEAACFATIK                                                              | 0.978216889        | 2               | 2.614379 |
| Q99NA5        | NVTAIQGGPGGK                                                            | 1.362373813        | 2               | 2.542091 |
| <b>Q99NB7</b> | <b>ACO12 Acyl_coenzyme A thioesterase 12</b>                            | <b>1.148983208</b> | <b>0.909365</b> | <b>2</b> |
| Q99NB7        | GSISNTNVEALK                                                            | 1.186425956        | 2               | 2.565649 |
| Q99NB7        | KGSISNTNVEALK                                                           | 0.851885138        | 2               | 3.257645 |
| <b>Q99NB9</b> | <b>SF3B1 Splicing factor 3B subunit 1</b>                               | <b>0.907487276</b> | <b>0.589821</b> | <b>3</b> |
| Q99NB9        | EWMRICFELLELLK+Oxidation(2                                              | 0.801445763        |                 |          |
| Q99NB9        | GDTPGHATPGHGGATSSAR                                                     | 1.079939226        | 3               | 3.773548 |
| Q99NB9        | WDQTADQTPGATPK                                                          | 0.418530401        | 2               | 2.514996 |
| <b>Q99P39</b> | <b>NFS1 Cysteine desulfurase_mitochondrial</b>                          | <b>1.172927792</b> | <b>0.984067</b> | <b>2</b> |
| Q99P39        | AIGTDEDLAHSSIR                                                          | 0.918415126        | 2               | 2.718382 |
| Q99P39        | VEALQSGGGQER                                                            | 1.173141277        | 2               | 2.998538 |
| <b>Q99PF5</b> | <b>FUBP2 Far upstream element_binding protein 2</b>                     | <b>0.983271534</b> | <b>5.74E-06</b> | <b>9</b> |

|               |                                         |                    |                 |           |
|---------------|-----------------------------------------|--------------------|-----------------|-----------|
| Q99PF5        | AINQQTGAFVEISR                          | 1.309612709        | 2               | 3.490928  |
| Q99PF5        | GGGGPGGGGPGGGGASGGPSQPPGGGGPGIR         | 1.254157141        | 2               | 6.940836  |
| Q99PF5        | IGGDAATTNNNTPDFGFGGQK                   | 2.078456671        | 2               | 4.965032  |
| Q99PF5        | IGQQPQPQPGAPPQQDYTK                     | 0.730857369        | 2               | 4.048737  |
| Q99PF5        | IINDLLQSLR                              | 1.901725748        | 2               | 3.1882    |
| Q99PF5        | SVSLTGAPESVQK                           | 0.974935574        | 2               | 2.56959   |
| Q99PF5        | VGGGIDVPVPR                             | 1.010952132        | 2               | 3.211156  |
| Q99PF5        | VQISPDSSGLPER                           | 0.586643572        | 2               | 2.486714  |
| Q99PF5        | VQQACEMVMDILR                           | 1.33207556         | 2               | 2.348382  |
| <b>Q99PL5</b> | <b>RRBP1 Ribosome_binding protein 1</b> | <b>1.585627879</b> | <b>9.9E-20</b>  | <b>20</b> |
| Q99PL5        | AMEALALAER                              | 0.744302235        | 2               | 2.932542  |
| Q99PL5        | DALNQATSQVESK                           | 3.490996784        | 2               | 3.612901  |
| Q99PL5        | EAEETQNSLQAECDQYR                       | 1.24452669         | 2               | 5.36002   |
| Q99PL5        | EHTSHLEAELEK                            | 1.671384955        | 2               | 3.49551   |
| Q99PL5        | EQEIAAVQAR                              | 2.537261715        | 2               | 2.483325  |
| Q99PL5        | GELESSDQVR                              | 1.078312228        | 2               | 3.136981  |
| Q99PL5        | HLEDIVEK                                | 1.473397906        | 2               | 2.382866  |
| Q99PL5        | HMAAASAECQNYAK                          | 1.863910102        | 2               | 4.478719  |
| Q99PL5        | HMAAASAECQNYAK+Oxidation(1              | 1.444753187        |                 |           |
| Q99PL5        | IQEELEK                                 | 1.452879988        | 1               | 2.338361  |
| Q99PL5        | LIEILSEK                                | 1.569497061        | 1               | 2.150092  |
| Q99PL5        | LKELESQVSCLEK                           | 1.511495268        | 2               | 4.277822  |
| Q99PL5        | LLATEQEEDAAVAK                          | 1.33354324         | 2               | 3.70648   |
| Q99PL5        | LQQENSILR                               | 0.977929921        | 2               | 2.679968  |
| Q99PL5        | LQSSEVEVK                               | 1.563615047        | 2               | 2.734719  |
| Q99PL5        | QLLLESQSQLDEAK                          | 0.89162686         | 2               | 2.334303  |
| Q99PL5        | TILAETEGMLK                             | 2.067889913        | 2               | 2.784647  |
| Q99PL5        | TLQEQLENGPNQLAR                         | 1.095530127        | 2               | 5.0442    |
| Q99PL5        | TLVSTVGSVMVFSEGEAQR                     | 1.701115805        | 3               | 4.52774   |
| Q99PL5        | VEPAVSSIVNSIQVLASK                      | 1.629339338        | 2               | 4.425313  |
| <b>Q99PP2</b> |                                         | <b>1.347241955</b> | <b>0.002417</b> | <b>69</b> |
| Q99PP2        | AAGSLLTDECR                             | 1.05423224         | 2               | 2.995425  |
| Q99PP2        | ADSAEYSVMTTGGQSSAK                      | 2.56632498         |                 |           |
| Q99PP2        | AEVSELPVVR                              | 1.138596023        | 2               | 3.119912  |
| Q99PP2        | ALLTPVAIAAGR                            | 1.325427552        |                 |           |
| Q99PP2        | ASMMGQRASLLTAR+Oxidation(2)Oxidation(3  | 1.384191862        |                 |           |
| Q99PP2        | AVAENQPFIEAMTYR                         | 1.260503959        | 2               | 3.590897  |
| Q99PP2        | AVDEAADALLK                             | 1.511051554        | 2               | 2.59679   |
| Q99PP2        | DQMVKNHFTLK+Oxidation(2                 | 1.032617092        |                 |           |
| Q99PP2        | EKIEKK                                  | 0.941360101        |                 |           |
| Q99PP2        | EELEKMK                                 | 0.378067556        | 1               | 1.936553  |
| Q99PP2        | EIAGATPYITAAEEK                         | 2.183943836        | 2               | 3.129329  |
| Q99PP2        | EKMNKPELFNGGEKK                         | 1.88899599         |                 |           |
| Q99PP2        | ELDSITPDITPGWK                          | 1.569293551        | 2               | 2.938004  |
| Q99PP2        | EQVIESRRQMQAVK                          | 0.942815026        |                 |           |
| Q99PP2        | FEFEQDLSEK                              | 1.158640979        | 2               | 2.675205  |
| Q99PP2        | FFRPHFLQAPGDLTVQEGK                     | 1.333572272        |                 |           |
| Q99PP2        | FKLINSTNIR                              | 2.197720045        |                 |           |
| Q99PP2        | GIEQAVQSHAVAEER                         | 1.516349735        | 2               | 4.976109  |
| Q99PP2        | GNIYSLNEGYAK                            | 1.179019525        | 2               | 3.997293  |
| Q99PP2        | GSAAAAATTSTREAEGAERR                    | 1.395010093        |                 |           |
| Q99PP2        | GVYSEETLR                               | 1.224970464        | 2               | 2.464947  |
| Q99PP2        | HFVTISSPLATQIPQAVGAAYAAK                | 1.15070524         | 2               | 4.91951   |
| Q99PP2        | HLQTYGEHYPLDHFDK                        | 1.122599298        | 3               | 3.691361  |
| Q99PP2        | HVIHTVGPIAVGQPTASQAAELR                 | 1.273064517        | 3               | 5.343746  |
| Q99PP2        | IENWPFSIKPTLR                           | 1.379066029        |                 |           |
| Q99PP2        | IGHHSTSDSSAYR                           | 0.770787996        | 3               | 4.53531   |

|               |                                                                           |                    |                 |          |
|---------------|---------------------------------------------------------------------------|--------------------|-----------------|----------|
| Q99PP2        | INLSNNK                                                                   | 1.699433141        |                 |          |
| Q99PP2        | KAMQEINYGPSNDNSIKLVR                                                      | 1.751929305        |                 |          |
| Q99PP2        | KGNIYSLNEGYAK                                                             | 0.847694745        | 2               | 4.48673  |
| Q99PP2        | KLQHELEAEER                                                               | 2.28815399         | 3               | 4.115162 |
| Q99PP2        | LEFIQPNVISGIPIYR                                                          | 0.891532939        | 2               | 2.43712  |
| Q99PP2        | LFDDRLESIIQK                                                              | 0.164275467        |                 |          |
| Q99PP2        | LGDAVEQGVINNSVLGYFIGR                                                     | 1.673249788        | 2               | 3.792546 |
| Q99PP2        | LIEVEGPNLSLK                                                              | 1.31523021         |                 |          |
| Q99PP2        | LKLVMNFIYQTK                                                              | 1.079677105        |                 |          |
| Q99PP2        | LMQVNDTLTSEDAGLR                                                          | 0.779889356        |                 |          |
| Q99PP2        | LQHELEAEER                                                                | 2.195389801        | 2               | 3.693294 |
| Q99PP2        | LQHELEAEERADIAESQVNK                                                      | 2.38001533         | 3               | 3.880238 |
| Q99PP2        | MKKNMEQTVK+Oxidation(4                                                    | 1.218768815        |                 |          |
| Q99PP2        | MNLQDELDLQK                                                               | 1.12934149         | 2               | 2.321496 |
| Q99PP2        | MNLQDELDLQK+Oxidation(0                                                   | 0.766666991        |                 |          |
| Q99PP2        | MQQVEASLQPETLK+Oxidation(0                                                | 1.493778794        |                 |          |
| Q99PP2        | MQQVEASLQPETLKK+Oxidation(0                                               | 2.238396823        |                 |          |
| Q99PP2        | NESGLDSGRSQR                                                              | 1.062733444        |                 |          |
| Q99PP2        | NNGYAISTPTSEQYR                                                           | 0.860679502        | 2               | 3.813489 |
| Q99PP2        | QGQIINPSEDPHLPQEEVLK                                                      | 0.720665931        | 2               | 2.642791 |
| Q99PP2        | QRAEQETKLLK                                                               | 1.776162877        |                 |          |
| Q99PP2        | QTCLKTVVLLTDNK                                                            | 1.14196801         |                 |          |
| Q99PP2        | QTITAQNAAVQAVK                                                            | 1.481682277        | 2               | 3.963229 |
| Q99PP2        | QYLLNQGWWDDEEQEK                                                          | 0.937615362        | 2               | 3.437244 |
| Q99PP2        | RAALQAEIEELR                                                              | 5.022936209        | 2               | 3.750518 |
| Q99PP2        | RFSTEVGSDCVSDNDR                                                          | 3.128860439        |                 |          |
| Q99PP2        | SCYDLSCHAR                                                                | 1.313639226        | 2               | 2.33992  |
| Q99PP2        | SCYLSLDLLEHR                                                              | 1.003325592        | 2               | 2.630773 |
| Q99PP2        | SLEDALNQTATVTR                                                            | 0.781547875        | 2               | 4.423911 |
| Q99PP2        | SMTLLNTMDR                                                                | 0.912636732        | 2               | 2.750193 |
| Q99PP2        | SVDEVNYWDK                                                                | 1.000757303        | 2               | 2.562562 |
| Q99PP2        | TAMDNSEIAGEK                                                              | 1.487260408        | 2               | 2.410137 |
| Q99PP2        | TAMDNSEIAGEKK                                                             | 1.615240077        | 2               | 2.502185 |
| Q99PP2        | TLHVVEVVSVEPSFGLGR                                                        | 1.122271491        | 3               | 3.685176 |
| Q99PP2        | TSSAEMPTIPLGSAVEAIR                                                       | 1.371331082        | 2               | 3.884869 |
| Q99PP2        | TWTAADMAAQITR+Oxidation(6                                                 | 1.140224066        |                 |          |
| Q99PP2        | VDDSSGSIGR                                                                | 1.0531118          | 2               | 2.867106 |
| Q99PP2        | VDGNDVFAVYNATK                                                            | 0.918616287        | 2               | 2.859012 |
| Q99PP2        | VMEAFEQAER                                                                | 0.703264742        | 2               | 3.288264 |
| Q99PP2        | VTMQNKISEATQEEDRL+Oxidation(2                                             | 1.274084361        |                 |          |
| Q99PP2        | VVSQYHELIVQAR                                                             | 2.417484633        | 2               | 3.523229 |
| Q99PP2        | YNENHQHGK                                                                 | 0.617324967        |                 |          |
| Q99PP2        | YSTSSSGVTAGK                                                              | 1.305676625        | 2               | 2.892481 |
| <b>Q99PV0</b> | <b>PRP8 Pre_mRNA_processing_splicing factor 8</b>                         | <b>1.513836188</b> | <b>0.671579</b> | <b>2</b> |
| Q99PV0        | AAVMHDILDMMPEGIK+Oxidation(3)Oxidation(10                                 | 1.513836188        |                 |          |
| Q99PV0        | AAVMHDILDMMPEGIK+Oxidation(3)Oxidation(9                                  | 1.513836188        |                 |          |
| <b>Q9CPQ1</b> | <b>COX6C Cytochrome c oxidase subunit 6C</b>                              | <b>1.301172613</b> | <b>0.485925</b> | <b>2</b> |
| Q9CPQ1        | FGVAEPR                                                                   | 1.319661501        | 2               | 2.452548 |
| Q9CPQ1        | NYDSMKDFEEMR                                                              | 1.231161058        | 2               | 3.762555 |
| <b>Q9CQ75</b> | <b>NDUA2 NADH dehydrogenase [ubiquinone] 1 alpha subcomplex subunit 2</b> | <b>1.52975459</b>  | <b>0.262751</b> | <b>2</b> |
| Q9CQ75        | EIRVHLCQRSPGSQGV                                                          | 1.529925052        | 2               | 2.334036 |
| Q9CQ75        | TVSLNLSADEVTR                                                             | 1.377721671        | 2               | 2.411937 |
| <b>Q9CQS8</b> | <b>SC61B Protein transport protein Sec61 subunit beta</b>                 | <b>1.280478887</b> | <b>0.633119</b> | <b>2</b> |
| Q9CQS8        | FYTEDSPGLK                                                                | 1.280048471        | 2               | 2.432882 |
| Q9CQS8        | TTSAGTGMWR                                                                | 1.329101732        | 2               | 2.344058 |

|               |                                                                                            |                    |                 |          |
|---------------|--------------------------------------------------------------------------------------------|--------------------|-----------------|----------|
| <b>Q9CQZ5</b> | <b>NDUA6 NADH dehydrogenase [ubiquinone] 1 alpha subcomplex subunit 6</b>                  | <b>1.632588596</b> | <b>0.000162</b> | <b>3</b> |
| Q9CQZ5        | EVNPTVHLMQLDITVK                                                                           | 1.645274985        | 2               | 2.490978 |
| Q9CQZ5        | FFHETETPRPK                                                                                | 1.695932045        | 2               | 2.908828 |
| Q9CQZ5        | VVDLLVIK                                                                                   | 1.513717768        | 2               | 2.938837 |
| <b>Q9CRB9</b> | <b>CHCH3 Coiled_coil_helix_coiled_coil_helix domain_containing protein 3_mitochondrial</b> | <b>0.870496369</b> | <b>0.937184</b> | <b>2</b> |
| Q9CRB9        | VAEELALEQAK                                                                                | 0.910487211        | 2               | 3.646535 |
| Q9CRB9        | YEYHPVCADLQTK                                                                              | 0.825372584        | 2               | 3.78162  |
| <b>Q9CTN4</b> | <b>RHBT3 Rho_related BTB domain_containing protein 3</b>                                   | <b>1.740508506</b> | <b>0.49254</b>  | <b>2</b> |
| Q9CTN4        | ELASMNLDIVDLLK                                                                             | 1.761693808        | 2               | 2.571501 |
| Q9CTN4        | LKDSGDVSDIIEK                                                                              | 1.147916997        | 2               | 2.468512 |
| <b>Q9CW42</b> | <b>MOSC1 MOSC domain_containing protein 1_mitochondrial</b>                                | <b>1.295516855</b> | <b>0.642224</b> | <b>2</b> |
| Q9CW42        | DLLLPIPPATNPLLQCR                                                                          | 0.984310038        | 3               | 3.518643 |
| Q9CW42        | GLSVSEAECTAMGLR                                                                            | 1.29621527         | 2               | 3.904058 |
| <b>Q9CWH6</b> | <b>PSA7L Proteasome subunit alpha type_7_like</b>                                          | <b>1.220891675</b> | <b>0.008872</b> | <b>4</b> |
| Q9CWH6        | AITVFSPDGHFLQVEYAQEAVK                                                                     | 1.128904777        | 2               | 4.468487 |
| Q9CWH6        | ALLEVVQSGGK                                                                                | 0.938409938        | 2               | 3.034716 |
| Q9CWH6        | LTVEDPVTVEYITR                                                                             | 1.221193361        | 2               | 4.0456   |
| Q9CWH6        | LYQTDPSGTYHAWK                                                                             | 1.014267287        | 2               | 2.892626 |
| <b>Q9CWK8</b> | <b>SNX2 Sorting nexin_2</b>                                                                | <b>1.289336607</b> | <b>0.230663</b> | <b>4</b> |
| Q9CWK8        | AVNTQALSGAGILR                                                                             | 1.377776124        | 2               | 3.212738 |
| Q9CWK8        | QQQFENLDQQLR                                                                               | 1.234916348        | 2               | 2.516118 |
| Q9CWK8        | WEDAQITLLK                                                                                 | 1.248526326        | 2               | 2.479125 |
| Q9CWK8        | YLESLVQTQQQLIK                                                                             | 1.390187254        | 2               | 4.008821 |
| <b>Q9CWL2</b> | <b>CASZ1 Zinc finger protein castor homolog 1</b>                                          | <b>1.180310752</b> | <b>0.705998</b> | <b>2</b> |
| Q9CWL2        | ISASKGLISPMMAR+Oxidation(10                                                                | 1.180310752        |                 |          |
| Q9CWL2        | ISASKGLISPMMAR+Oxidation(11                                                                | 1.180310752        |                 |          |
| <b>Q9CXS4</b> | <b>CENPV Centromere protein V</b>                                                          | <b>2.246547837</b> | <b>3.01E-05</b> | <b>2</b> |
| Q9CXS4        | LLDTFEYQGLVK                                                                               | 2.248829486        | 2               | 3.905836 |
| Q9CXS4        | SNPGGFGIAPHCLDEGTVR                                                                        | 1.680586323        | 2               | 2.565918 |
| <b>Q9CYN2</b> | <b>SPCS2 Signal peptidase complex subunit 2</b>                                            | <b>0.92330486</b>  | <b>0.11178</b>  | <b>2</b> |
| Q9CYN2        | LHDSLATER                                                                                  | 0.67370458         | 2               | 2.682302 |
| Q9CYN2        | YVENFGLIDGR                                                                                | 1.618798574        | 2               | 2.886197 |
| <b>Q9CYW4</b> | <b>HDHD3 Haloacid dehalogenase_like hydrolase domain_containing protein 3</b>              | <b>0.949424472</b> | <b>0.166505</b> | <b>2</b> |
| Q9CYW4        | LEDILTGLGLR                                                                                | 1.413707763        | 2               | 4.383315 |
| Q9CYW4        | RLEDILTGLGLR                                                                               | 0.532686794        | 3               | 3.533661 |
| <b>Q9CZY3</b> | <b>UB2V1 Ubiquitin_conjugating enzyme E2 variant 1</b>                                     | <b>1.076379964</b> | <b>0.971255</b> | <b>3</b> |
| Q9CZY3        | LLEELEEGQK                                                                                 | 0.92702853         | 1               | 2.98371  |
| Q9CZY3        | VNMSGVSSNGVVDPR                                                                            | 1.091168706        | 2               | 3.107043 |
| Q9CZY3        | WTGMIIGPPR                                                                                 | 1.176196971        | 2               | 2.861742 |
| <b>Q9D024</b> | <b>CC47 Coiled_coil domain_containing protein 47</b>                                       | <b>0.891637893</b> | <b>2.61E-06</b> | <b>3</b> |
| Q9D024        | ERIMNEEDPEKQR                                                                              | 1.923199929        | 2               | 2.459018 |
| Q9D024        | IMQEEGQPLKLPDTK                                                                            | 0.635384641        | 2               | 3.19694  |
| Q9D024        | RLEEAALR                                                                                   | 1.441840152        | 2               | 2.605419 |
| <b>Q9D0M3</b> | <b>CY1 Cytochrome c1_heme protein_mitochondrial</b>                                        | <b>1.40414709</b>  | <b>1.52E-14</b> | <b>5</b> |
| Q9D0M3        | ALAEVEVQDGPNDGEMFMRPGK                                                                     | 2.176941296        | 3               | 4.237427 |
| Q9D0M3        | GLLSSLDHTSIR                                                                               | 1.046141086        | 2               | 3.029222 |
| Q9D0M3        | HGGEDYVFSLLTGYCEPPTGVSLR                                                                   | 1.483769675        | 3               | 5.557282 |
| Q9D0M3        | HLVGVCYTEEEAK                                                                              | 1.461167222        | 2               | 3.830478 |
| Q9D0M3        | LSDYFPKYPNPEAAR                                                                            | 1.289632449        | 3               | 3.895288 |
| <b>Q9D0S9</b> | <b>HINT2 Histidine triad nucleotide_binding protein 2_mitochondrial</b>                    | <b>1.761738143</b> | <b>9.9E-20</b>  | <b>3</b> |

|               |                                                          |                    |                 |           |
|---------------|----------------------------------------------------------|--------------------|-----------------|-----------|
| Q9D0S9        | DVAPQAPVHFLVIPR                                          | 1.283507667        | 2               | 2.94313   |
| Q9D0S9        | ISQAEEDDQQLLGHLLLVAK                                     | 1.866298433        | 2               | 4.739595  |
| Q9D0S9        | SLPADILYEDQQCLVFR                                        | 1.89293063         | 2               | 3.541469  |
| <b>Q9D172</b> | <b>ES1 ES1 protein homolog_ mitochondrial</b>            | <b>1.837923845</b> | <b>9.9E-20</b>  | <b>3</b>  |
| Q9D172        | GVEVTVGHEQEEGGK                                          | 1.148276114        | 2               | 4.078919  |
| Q9D172        | ITSLAQLNAANHDAAIFFPGGFAGAAK                              | 1.885403872        | 3               | 4.593657  |
| Q9D172        | NLSTFAVDGK                                               | 1.288747609        | 1               | 2.447046  |
| <b>Q9D180</b> | <b>WDR65 WD repeat_containing protein 65</b>             | <b>1.049560726</b> | <b>0.002571</b> | <b>2</b>  |
| Q9D180        | ERDLEALVR                                                | 0.854666356        | 2               | 2.561948  |
| Q9D180        | KNQELEK                                                  | 1.452879988        | 1               | 2.179122  |
| <b>Q9D1M7</b> | <b>FKB11 Peptidyl_prolyl cis_trans isomerase FKBP11</b>  | <b>1.428877969</b> | <b>0.191532</b> | <b>2</b>  |
| Q9D1M7        | IIDTSLTRDPLVIELGQK                                       | 1.32830593         | 3               | 3.428686  |
| Q9D1M7        | QVIPGLEQLLDMCVGEK                                        | 1.544723076        | 2               | 3.190273  |
| <b>Q9D1Q6</b> | <b>ERP44 Endoplasmic reticulum resident protein 44</b>   | <b>1.330976527</b> | <b>3.94E-11</b> | <b>4</b>  |
| Q9D1Q6        | MNPAVFLSLADLR+Oxidation(0)                               | 2.574522702        |                 |           |
| Q9D1Q6        | NIIGYFEQK                                                | 1.284730044        | 1               | 2.377177  |
| Q9D1Q6        | SNPVHEIQSLDEVTLNDR                                       | 1.33058351         | 2               | 5.565913  |
| Q9D1Q6        | VDCDQHSDIAQR                                             | 1.150693622        | 2               | 3.625312  |
| <b>Q9D2U9</b> | <b>H2B3A Histone H2B type 3_A</b>                        | <b>1.388545079</b> | <b>9.9E-20</b>  | <b>5</b>  |
| Q9D2U9        | AMGIMNSFVNDIFER                                          | 1.504982553        | 2               | 5.122623  |
| Q9D2U9        | AMGIMNSFVNDIFER+Oxidation(1)                             | 1.287258723        |                 |           |
| Q9D2U9        | AMGIMNSFVNDIFER+Oxidation(1)Oxidation(4)                 | 1.239917158        |                 |           |
| Q9D2U9        | AMGIMNSFVNDIFER+Oxidation(4)                             | 1.46282543         |                 |           |
| Q9D2U9        | LLPGELAK                                                 | 1.555324312        | 2               | 2.526498  |
| <b>Q9D417</b> | <b>FBX24 F_box only protein 24</b>                       | <b>1.316592345</b> | <b>0.53372</b>  | <b>2</b>  |
| Q9D417        | MKEIVGWMPLMAAQK+Oxidation(7)                             | 1.88899599         |                 |           |
| Q9D417        | RSCPSCGLEAGSEKK                                          | 1.28144421         | 2               | 2.409802  |
| <b>Q9D662</b> | <b>SC23B Protein transport protein Sec23B</b>            | <b>1.868994913</b> | <b>0.020658</b> | <b>2</b>  |
| Q9D662        | HLLQAPLDDAQEILQAR                                        | 1.965665504        | 3               | 3.988877  |
| Q9D662        | IDMNLTDLLGELQR                                           | 1.862793295        | 2               | 4.122829  |
| <b>Q9D6M3</b> | <b>GHC1 Mitochondrial glutamate carrier 1</b>            | <b>1.307740882</b> | <b>0.762928</b> | <b>3</b>  |
| Q9D6M3        | GAAVNLTLTPEK                                             | 1.297161403        | 2               | 3.344604  |
| Q9D6M3        | GVNEDTYSGFLLDCAR                                         | 1.416355592        | 2               | 4.710788  |
| Q9D6M3        | NHGIAGLYK                                                | 1.30597904         | 1               | 2.21762   |
| <b>Q9D6Y9</b> | <b>GLGB 1_4_alpha_glucan_branching enzyme</b>            | <b>1.115135178</b> | <b>0.851679</b> | <b>11</b> |
| Q9D6Y9        | CVAYAESHDAQALVGDK                                        | 1.428457812        | 2               | 5.011806  |
| Q9D6Y9        | EFKDEDWNMGNIIVYTLTNR                                     | 0.961609677        | 3               | 3.30356   |
| Q9D6Y9        | FLNDFDR                                                  | 1.239295916        | 2               | 2.40365   |
| Q9D6Y9        | GTHDLWDSR                                                | 1.188871727        | 2               | 2.742074  |
| Q9D6Y9        | GYESFGIHR                                                | 1.240460166        | 2               | 2.37497   |
| Q9D6Y9        | IVLSDAAEYGGHQQR                                          | 0.89716623         | 2               | 4.555433  |
| Q9D6Y9        | IYESHVGISSHEGK                                           | 1.21283826         | 2               | 4.591901  |
| Q9D6Y9        | NSEDGLNMFDTGDCYFHSGPR                                    | 1.273701923        | 3               | 3.464961  |
| Q9D6Y9        | QFNLTDDDLLR                                              | 1.311452851        | 2               | 2.731868  |
| Q9D6Y9        | RQFNLTDDDLLR                                             | 1.155720418        | 2               | 3.206887  |
| Q9D6Y9        | WELYIPPK                                                 | 1.401576205        | 2               | 2.505399  |
| <b>Q9D6Z1</b> | <b>NOP56 Nucleolar protein 56</b>                        | <b>1.187569225</b> | <b>0.626432</b> | <b>2</b>  |
| Q9D6Z1        | ELNEEKLEK                                                | 1.045957774        | 2               | 2.440639  |
| Q9D6Z1        | IDCFSEVPTSVFGEK                                          | 1.699159507        | 2               | 2.53695   |
| <b>Q9D7B6</b> | <b>ACAD8 Isobutyryl_CoA dehydrogenase_ mitochondrial</b> | <b>0.9257621</b>   | <b>0.846498</b> | <b>6</b>  |
| Q9D7B6        | AVIFEDCAVPVANR                                           | 0.891544478        | 2               | 3.80757   |
| Q9D7B6        | FASYCLTEPGSGSDAASLLTSAK                                  | 3.058110086        | 2               | 4.502868  |
| Q9D7B6        | IGTEGQGFLIAMK                                            | 1.222480765        | 2               | 3.01147   |
| Q9D7B6        | TAAVALQEER                                               | 1.357475793        | 2               | 3.190252  |
| Q9D7B6        | TDVGGSGLSR                                               | 1.138722051        | 2               | 2.506622  |
| Q9D7B6        | VHQILEGSNEVMR                                            | 1.04722929         | 2               | 3.39504   |

|               |                                                                                  |                    |                 |          |
|---------------|----------------------------------------------------------------------------------|--------------------|-----------------|----------|
| <b>Q9D7P6</b> | <b>ISCU Iron_sulfur cluster assembly enzyme ISCU_mitochondrial</b>               | <b>0.977322451</b> | <b>0.916853</b> | <b>2</b> |
| Q9D7P6        | NVGTGLVGAPACGDVMK                                                                | 0.975962139        | 2               | 3.612981 |
| Q9D7P6        | VVDHYENPR                                                                        | 1.158743666        | 2               | 2.517086 |
| <b>Q9D7X8</b> | <b>GGCT Gamma_glutamylcyclotransferase</b>                                       | <b>1.307160874</b> | <b>0.36095</b>  | <b>2</b> |
| Q9D7X8        | ISDEMEDIK                                                                        | 1.525389627        | 2               | 2.74569  |
| Q9D7X8        | SNISLDEQEGVK                                                                     | 1.306373016        | 2               | 3.433414 |
| <b>Q9D819</b> | <b>IPYR Inorganic pyrophosphatase</b>                                            | <b>1.539797758</b> | <b>0.001681</b> | <b>5</b> |
| Q9D819        | GISCMNTTVSESPFK                                                                  | 1.187970896        | 2               | 5.1814   |
| Q9D819        | GQYISPFHDVPIYADK                                                                 | 1.770364625        | 2               | 3.201455 |
| Q9D819        | GQYISPFHDVPIYADKDFVHMVVEVPR                                                      | 1.304929881        | 3               | 5.188514 |
| Q9D819        | VLGILAMIDEGETDWK                                                                 | 1.918793421        | 2               | 4.117979 |
| Q9D819        | YVANLFPYK                                                                        | 0.92891506         | 1               | 2.056457 |
| <b>Q9D880</b> | <b>TIM50 Mitochondrial import inner membrane translocase subunit TIM50</b>       | <b>1.155984825</b> | <b>0.001095</b> | <b>3</b> |
| Q9D880        | TIALNQVEDVR                                                                      | 1.079324784        | 2               | 2.957961 |
| Q9D880        | TVLEHYALEDDPLEAFK                                                                | 1.42382097         | 2               | 4.70519  |
| Q9D880        | VLLDLSAFLK                                                                       | 2.072622459        | 2               | 2.348762 |
| <b>Q9D8W5</b> | <b>PSD12 26S proteasome non_ATPase regulatory subunit 12</b>                     | <b>1.671839249</b> | <b>0.001732</b> | <b>3</b> |
| Q9D8W5        | LQEVITLLSLEK                                                                     | 1.66357074         | 2               | 3.791436 |
| Q9D8W5        | TASDMVSTSR                                                                       | 1.980553709        | 2               | 2.348341 |
| Q9D8W5        | WSTLVEDYGVLELR                                                                   | 2.935323898        | 2               | 3.126532 |
| <b>Q9DB15</b> | <b>RM12 39S ribosomal protein L12_mitochondrial</b>                              | <b>0.886871488</b> | <b>0.699324</b> | <b>3</b> |
| Q9DB15        | KLVESLPQEIK                                                                      | 1.266946604        | 2               | 3.002186 |
| Q9DB15        | NYVQGINLVQAK                                                                     | 1.331070358        | 2               | 2.498806 |
| Q9DB15        | SEALAGAPLDNAPK                                                                   | 0.886819979        | 2               | 2.329203 |
| <b>Q9DBC0</b> | <b>SELO Selenoprotein O</b>                                                      | <b>1.266016987</b> | <b>0.172024</b> | <b>2</b> |
| Q9DBC0        | LGLIRVEK                                                                         | 1.246666527        | 2               | 2.302638 |
| Q9DBC0        | LLESPYHSEEEATGPEAVAR                                                             | 1.473543629        | 3               | 3.360631 |
| <b>Q9DBG7</b> | <b>SRPR Signal recognition particle receptor subunit alpha</b>                   | <b>1.396409423</b> | <b>0.088456</b> | <b>2</b> |
| Q9DBG7        | GLVGSKSLSREDMESVLDK+Oxidation(12                                                 | 1.058504249        |                 |          |
| Q9DBG7        | NQGFVVLVDTAGR                                                                    | 1.495276972        | 2               | 2.910258 |
| <b>Q9DBH5</b> | <b>LMAN2 Vesicular integral_membrane protein VIP36</b>                           | <b>1.224098914</b> | <b>0.039197</b> | <b>2</b> |
| Q9DBH5        | TPEEESIDWTK                                                                      | 0.543562254        | 2               | 2.470237 |
| Q9DBH5        | WSELAGCTADFR                                                                     | 1.22738243         | 2               | 3.365577 |
| <b>Q9DC70</b> | <b>NDUS7 NADH dehydrogenase [ubiquinone] iron_sulfur protein 7_mitochondrial</b> | <b>1.685372613</b> | <b>0.000488</b> | <b>4</b> |
| Q9DC70        | LDDLINWAR                                                                        | 1.454200215        | 2               | 3.043871 |
| Q9DC70        | MAPALRKVYDQMPEPR+Oxidation(0)Oxidation(11                                        | 1.624975873        |                 |          |
| Q9DC70        | QADVMIAGTLTNK                                                                    | 1.705144791        | 2               | 3.521243 |
| Q9DC70        | VYDQMPEPR                                                                        | 3.278951121        | 2               | 2.458122 |
| <b>Q9DCH4</b> | <b>EIF3F Eukaryotic translation initiation factor 3 subunit F</b>                | <b>1.271401947</b> | <b>0.128362</b> | <b>2</b> |
| Q9DCH4        | FLMSLVNQVPK                                                                      | 1.554052862        | 2               | 2.764124 |
| Q9DCH4        | VIGLSSDLQQVGGASAR                                                                | 1.054127934        | 2               | 4.691638 |
| <b>Q9DCM0</b> | <b>ETHE1 Protein ETHE1_mitochondrial</b>                                         | <b>1.308265729</b> | <b>0.16009</b>  | <b>2</b> |
| Q9DCM0        | IFTLPGNCLIYPAHDYHGLTVSTVEEER                                                     | 2.451895771        | 3               | 4.311144 |
| Q9DCM0        | SLLPGCQSVISR                                                                     | 0.787929802        | 2               | 2.985887 |
| <b>Q9DCS9</b> | <b>NDUBA NADH dehydrogenase [ubiquinone] 1 beta subcomplex subunit 10</b>        | <b>1.561328464</b> | <b>1.94E-05</b> | <b>2</b> |
| Q9DCS9        | AYDLVVDWPVTLVR                                                                   | 1.569342677        | 2               | 4.656997 |
| Q9DCS9        | TPAPSPQTSLPNPITYLTK                                                              | 1.094304303        | 2               | 3.448193 |
| <b>Q9DCT2</b> | <b>NDUS3 NADH dehydrogenase [ubiquinone] iron_sulfur protein 3_mitochondrial</b> | <b>1.794026601</b> | <b>3.09E-09</b> | <b>5</b> |



|               |                                                                               |                    |                 |           |
|---------------|-------------------------------------------------------------------------------|--------------------|-----------------|-----------|
| Q9DCT2        | FDLNSPWAEFPAYR                                                                | 1.586497254        | 2               | 3.225391  |
| Q9DCT2        | ILTDYGFEGHPFR                                                                 | 2.240536354        | 2               | 2.800082  |
| Q9DCT2        | KFDLNSPWAEFPAYR                                                               | 1.856135743        | 2               | 3.558665  |
| Q9DCT2        | SLADLTAVDVPTR                                                                 | 1.221862035        | 2               | 3.4189    |
| Q9DCT2        | VVAEPVELAQEFR                                                                 | 0.896126187        | 2               | 3.784154  |
| <b>Q9DCU9</b> | <b>HOGA1 Probable 4_hydroxy_2_oxoglutarate aldolase_mitochondrial</b>         | <b>1.289504609</b> | <b>4.44E-13</b> | <b>3</b>  |
| Q9DCU9        | GFVVQGSGTEFPFLTSLR                                                            | 1.277294425        | 2               | 5.344366  |
| Q9DCU9        | LIEPNTAVTR                                                                    | 1.380673001        | 2               | 3.35929   |
| Q9DCU9        | TMDWFGYGGPCR                                                                  | 1.346116456        | 2               | 3.692101  |
| <b>Q9EP75</b> | <b>CP4FE Leukotriene_B4 omega_hydroxylase 3</b>                               | <b>1.669668952</b> | <b>0.020173</b> | <b>2</b>  |
| Q9EP75        | DEDGKELSEDIR                                                                  | 13.9940468         | 2               | 3.027963  |
| Q9EP75        | IFNDSTNIMHAK                                                                  | 1.654052243        | 2               | 3.67793   |
| <b>Q9EP89</b> | <b>LACTB Serine beta_lactamase_like protein LACTB_mitochondrial</b>           | <b>1.080902082</b> | <b>2.55E-13</b> | <b>10</b> |
| Q9EP89        | EVWSEGLYADVENR                                                                | 1.978731995        | 2               | 3.830234  |
| Q9EP89        | FENSIESLR                                                                     | 0.965913184        | 2               | 2.758235  |
| Q9EP89        | GIIVSIICNMQSVGLNSTALK                                                         | 1.21344639         | 3               | 3.960681  |
| Q9EP89        | IFHDLMLTTVQEENEPVIYNR                                                         | 2.920912453        | 2               | 5.675873  |
| Q9EP89        | IKDEVGAPGIVGVSVVDGK                                                           | 1.858707012        | 2               | 4.545087  |
| Q9EP89        | KNDFEQGELYLK                                                                  | 0.672691481        | 2               | 3.994308  |
| Q9EP89        | LDLDPVQHYVPEFPEK                                                              | 2.341836962        | 3               | 3.738698  |
| Q9EP89        | LDLDPVQHYVPEFPEKEYEGEK                                                        | 1.730365396        | 3               | 3.989088  |
| Q9EP89        | LVNTPYVDNSYK                                                                  | 1.495793714        | 2               | 3.16289   |
| Q9EP89        | WAGGGFLSTVGDLLK                                                               | 1.744566842        | 2               | 4.43359   |
| <b>Q9EPH2</b> | <b>MRP MARCKS_related protein</b>                                             | <b>1.045195625</b> | <b>0.496983</b> | <b>2</b>  |
| Q9EPH2        | AAATPESQEPQAK                                                                 | 1.216619013        | 2               | 2.443464  |
| Q9EPH2        | GDVTAEEAAGASPAK                                                               | 0.9585024          | 2               | 3.306813  |
| <b>Q9EPH8</b> | <b>PABP1 Polyadenylate_binding protein 1</b>                                  | <b>1.793063106</b> | <b>1.05E-07</b> | <b>10</b> |
| Q9EPH8        | ALDTMNFDFVIK                                                                  | 1.694954919        | 2               | 3.285613  |
| Q9EPH8        | GFGFVSFER                                                                     | 1.799775002        | 2               | 2.731773  |
| Q9EPH8        | GYGFVHFETQEAAR                                                                | 1.424670863        | 2               | 3.295907  |
| Q9EPH8        | ITGMILLEIDNSELLHMLSPESLR                                                      | 2.901502738        | 3               | 3.810517  |
| Q9EPH8        | KEFSPFGTITSAK                                                                 | 1.598737975        | 2               | 3.368816  |
| Q9EPH8        | NFGEDMDDER                                                                    | 22.96041597        | 2               | 2.562508  |
| Q9EPH8        | NLDDGIDDER                                                                    | 0.795819222        | 2               | 2.364954  |
| Q9EPH8        | SGVGNIFIK                                                                     | 1.342362875        | 2               | 2.768008  |
| Q9EPH8        | SKVDEAVAVLQAHQAK                                                              | 1.563305664        | 2               | 5.101853  |
| Q9EPH8        | VDEAVAVLQAHQAK                                                                | 2.045572218        | 2               | 2.855544  |
| <b>Q9EPJ0</b> | <b>NUCKS Nuclear ubiquitous casein and cyclin_dependent kinases substrate</b> | <b>0.94632696</b>  | <b>0.719648</b> | <b>2</b>  |
| Q9EPJ0        | NSQEDSEDSEEKDVK                                                               | 0.94170034         | 2               | 3.541842  |
| Q9EPJ0        | TPSPKEEDEEAESPPEK                                                             | 2.529862079        | 2               | 2.316608  |
| <b>Q9EQ76</b> | <b>FMO3 Dimethylaniline monooxygenase [N_oxide_forming] 3</b>                 | <b>2.364323844</b> | <b>9.9E-20</b>  | <b>13</b> |
| Q9EQ76        | ASIQSVFTNSSK                                                                  | 0.884326334        | 2               | 3.140303  |
| Q9EQ76        | GTCILPSVNDMMDDIDEK                                                            | 2.599196228        | 2               | 3.939768  |
| Q9EQ76        | ILCGTVSIKPNVK                                                                 | 1.022584692        | 2               | 3.002185  |
| Q9EQ76        | KEPVFNDELPAR                                                                  | 1.63982349         | 3               | 3.604383  |
| Q9EQ76        | LQEYITSFATEK                                                                  | 2.621719691        | 2               | 3.549567  |
| Q9EQ76        | NNEVTLYK                                                                      | 2.739074431        | 2               | 2.494755  |
| Q9EQ76        | NNLPTAISDWWYMK                                                                | 2.642794773        | 2               | 2.503373  |
| Q9EQ76        | SCLEEGLEPTCFER                                                                | 1.593796086        | 2               | 4.312561  |
| Q9EQ76        | SDDVGGLWK                                                                     | 1.853309429        | 2               | 2.92234   |
| Q9EQ76        | VAVIGAGVSGLAAIR                                                               | 3.515186438        | 2               | 4.199125  |
| Q9EQ76        | VLVIGLNSGCDIAAELSHVAQQVIISR                                                   | 2.828796815        | 3               | 3.698405  |
| Q9EQ76        | VWNDGYPWDMVVITR                                                               | 2.342056067        | 2               | 3.888012  |

|               |                                                             |                    |                 |           |
|---------------|-------------------------------------------------------------|--------------------|-----------------|-----------|
| Q9EQ76        | YIQFETLVTR                                                  | 3.707308756        | 2               | 3.186839  |
| <b>Q9EQG6</b> | <b>KDIS Kinase D_interacting substrate of 220 kDa</b>       | <b>1.292913163</b> | <b>0.597437</b> | <b>2</b>  |
| Q9EQG6        | HLLAMGADVQEGANSMTALIVAVK+Oxidation(4                        | 1.358364794        |                 |           |
| Q9EQG6        | SSERPSLFQTLK                                                | 1.017222078        | 2               | 2.329966  |
| <b>Q9EQH3</b> | <b>VPS35 Vacuolar protein sorting_associated protein 35</b> | <b>1.288115301</b> | <b>0.015995</b> | <b>8</b>  |
| Q9EQH3        | HFHNTLEHLR                                                  | 2.275533439        | 3               | 3.439142  |
| Q9EQH3        | IREDLPNLESSEETEIQINK                                        | 1.467644898        | 2               | 5.514778  |
| Q9EQH3        | LDFIFSQQVATVIQSR                                            | 3.246684131        | 3               | 3.329094  |
| Q9EQH3        | LLDEAIQAVK                                                  | 0.917474439        | 2               | 2.580805  |
| Q9EQH3        | LNLEHIATSSAVSK                                              | 1.724942592        | 2               | 4.277401  |
| Q9EQH3        | LSQLEGVNVER                                                 | 1.152926102        | 2               | 3.018682  |
| Q9EQH3        | NIIIALIDR                                                   | 1.670235554        | 2               | 2.411707  |
| Q9EQH3        | VLETTVEIFNK                                                 | 1.420701902        | 2               | 2.870666  |
| <b>Q9EQS0</b> | <b>TALDO Transaldolase</b>                                  | <b>1.201862256</b> | <b>7.72E-06</b> | <b>6</b>  |
| Q9EQS0        | ALAGCDFLTISPK                                               | 1.225330705        | 2               | 3.308388  |
| Q9EQS0        | ILDWHVANTDKK                                                | 1.574186217        | 2               | 3.475639  |
| Q9EQS0        | LGGPQEEQIK                                                  | 1.29702839         | 2               | 3.309699  |
| Q9EQS0        | LSSTWEGIQAGK                                                | 2.134686209        | 2               | 2.71191   |
| Q9EQS0        | SYEPQEDPGVK                                                 | 0.881290951        | 2               | 2.824434  |
| Q9EQS0        | WLHNEDQMAVEK                                                | 1.361839934        | 2               | 3.75689   |
| <b>Q9EQS3</b> | <b>MYCBP C_Myc_binding protein</b>                          | <b>1.442409199</b> | <b>0.19751</b>  | <b>2</b>  |
| Q9EQS3        | LVQYEPQEEK                                                  | 1.442430744        | 2               | 2.476275  |
| Q9EQS3        | VLVALYEEPEKPTSALDFLK                                        | 1.398002923        | 3               | 3.449148  |
| <b>Q9EQW7</b> | <b>KI13A Kinesin_like protein KIF13A</b>                    | <b>1.015362192</b> | <b>0.164158</b> | <b>3</b>  |
| Q9EQW7        | ADLTDSRALEKAVSR                                             | 1.062232268        | 3               | 3.341904  |
| Q9EQW7        | DETIAPLEENSALPK                                             | 0.929931728        | 2               | 2.590858  |
| Q9EQW7        | VTQWAEER                                                    | 1.3624579          | 2               | 2.43305   |
| <b>Q9EQX9</b> | <b>UBE2N Ubiquitin_conjugating enzyme E2 N</b>              | <b>1.189321446</b> | <b>0.013312</b> | <b>3</b>  |
| Q9EQX9        | LELFLPEEYPMMAAPK                                            | 1.206135176        | 2               | 4.342946  |
| Q9EQX9        | SNEAQAIETAR                                                 | 1.067944585        | 2               | 3.375891  |
| Q9EQX9        | YFHVVIAGPQDSPFEGGTFK                                        | 1.06522428         | 3               | 4.481384  |
| <b>Q9ER34</b> | <b>ACON Aconitate hydratase_mitochondrial</b>               | <b>1.533818255</b> | <b>0.000262</b> | <b>19</b> |
| Q9ER34        | ADIANLAEFEK                                                 | 1.346864445        | 2               | 3.565021  |
| Q9ER34        | CTTDHISAAGPWLK                                              | 1.371963945        | 2               | 4.019836  |
| Q9ER34        | DINQEVYNFLATAGAK                                            | 1.608302573        | 2               | 3.344197  |
| Q9ER34        | DLEDLQILIK                                                  | 0.724754538        | 2               | 2.47384   |
| Q9ER34        | FKLEAPDADELPR                                               | 1.120477154        | 3               | 4.169275  |
| Q9ER34        | FNPETDFLTGK                                                 | 1.641488905        | 1               | 2.487037  |
| Q9ER34        | GHLDNISNLLIGAINIENGK                                        | 1.554651426        | 2               | 5.80545   |
| Q9ER34        | IVYGHLDDPANQEIER                                            | 1.372238785        | 2               | 4.601389  |
| Q9ER34        | LNRPLTLEK                                                   | 1.957547399        | 2               | 2.450898  |
| Q9ER34        | LTGTLSGWTSPK                                                | 0.973049807        | 2               | 2.994564  |
| Q9ER34        | NAVQEFQFVVPDAR                                              | 1.099010581        | 2               | 4.437135  |
| Q9ER34        | NTIVTSYNR                                                   | 1.345432384        | 1               | 1.949047  |
| Q9ER34        | QGLPLTFADPSDYNK                                             | 1.343758353        | 2               | 3.35535   |
| Q9ER34        | SDFDPGQDQYQHPPK                                             | 1.607728322        | 2               | 2.879334  |
| Q9ER34        | SQFTITPGSEQIR                                               | 1.078084581        | 2               | 3.910782  |
| Q9ER34        | VAVPSTIHCDHLIEAQLGGEK                                       | 1.741952981        | 2               | 4.78304   |
| Q9ER34        | VDVSPTSQR                                                   | 1.276165643        | 2               | 2.446613  |
| Q9ER34        | VGLIGSCTNSSYEDMGR                                           | 1.284930162        | 2               | 4.200393  |
| Q9ER34        | WVIGDENYEGGSSR                                              | 1.268003621        | 2               | 4.414227  |
| <b>Q9ERU9</b> | <b>RBP2 E3 SUMO_protein ligase RanBP2</b>                   | <b>1.422399416</b> | <b>0.503851</b> | <b>2</b>  |
| Q9ERU9        | EINSLRGQEK                                                  | 1.475181149        | 2               | 2.613367  |
| Q9ERU9        | NLFRFGESTTGFNFSFK                                           | 1.021946353        | 2               | 2.323624  |
| <b>Q9ES21</b> | <b>SAC1 Phosphatidylinositide phosphatase SAC1</b>          | <b>1.365850088</b> | <b>0.025727</b> | <b>5</b>  |
| Q9ES21        | HFDSQVIYGK                                                  | 1.34684455         | 2               | 2.795872  |

|               |                                                                            |                    |                 |           |
|---------------|----------------------------------------------------------------------------|--------------------|-----------------|-----------|
| Q9ES21        | LEEQDEFEK                                                                  | 1.336878751        | 2               | 2.759493  |
| Q9ES21        | TNVIQSLLAR                                                                 | 4.270995955        | 2               | 2.394595  |
| Q9ES21        | TQLGLVMDGFNSLLR                                                            | 1.507959879        | 2               | 3.946997  |
| Q9ES21        | VVTNQEGVFR                                                                 | 1.320080306        | 2               | 2.810562  |
| <b>Q9ES38</b> | <b>S27A5 Bile acyl_CoA synthetase</b>                                      | <b>1.218882731</b> | <b>7.45E-05</b> | <b>14</b> |
| Q9ES38        | ACQAAWALK                                                                  | 1.655850204        | 2               | 2.572693  |
| Q9ES38        | ADVWENFQQR                                                                 | 1.154951163        | 2               | 2.954156  |
| Q9ES38        | EGFDVGVADPLYILDNK                                                          | 1.145696838        | 2               | 5.371817  |
| Q9ES38        | GATAILVLPK                                                                 | 1.287628955        | 2               | 3.207123  |
| Q9ES38        | HPPFLVDALEQQAQARPDQVALVCTGSEGCSITNR                                        | 1.479934075        | 4               | 4.546221  |
| Q9ES38        | IQDSLEITNTYK                                                               | 1.592455055        | 2               | 3.815158  |
| Q9ES38        | LKEATIQEDK                                                                 | 1.759245291        | 2               | 2.833807  |
| Q9ES38        | LLAENIR                                                                    | 1.436324566        | 2               | 2.466706  |
| Q9ES38        | MLTPLLELVQFDIETAEPVRDK                                                     | 1.91211751         | 2               | 4.201634  |
| Q9ES38        | QGFCIPVETGKPGLLLTG                                                         | 1.867377334        | 3               | 3.882008  |
| Q9ES38        | SISALSVFLGLAK                                                              | 1.477990563        | 2               | 3.320139  |
| Q9ES38        | SLMPDVYQAVCEGTWK                                                           | 1.067726131        | 2               | 3.905647  |
| Q9ES38        | YLCNVPQGPEDK                                                               | 1.191299173        | 2               | 3.377668  |
| Q9ES38        | YLCNVPQGPEDKK                                                              | 1.623639587        | 2               | 3.766982  |
| <b>Q9ESP1</b> | <b>SDF2L Stromal cell_derived factor 2_like protein 1</b>                  | <b>0.933871367</b> | <b>0.757499</b> | <b>2</b>  |
| Q9ESP1        | ASAGLVTCGSVLK                                                              | 0.933620691        | 2               | 3.592859  |
| Q9ESP1        | GQHEVHGMPNSANAHNTWK                                                        | 0.934694691        | 3               | 3.819128  |
| <b>Q9ESR9</b> | <b>ABCA2 ATP_binding cassette sub_family A member 2</b>                    | <b>1.350168501</b> | <b>2.9E-05</b>  | <b>2</b>  |
| Q9ESR9        | KEMDKMIEDLELSNK+Oxidation(2)Oxidation(5)                                   | 1.371873141        |                 |           |
| Q9ESR9        | RHSLVQTLSGGMKR                                                             | 1.052213942        | 2               | 2.362616  |
| <b>Q9EST6</b> | <b>AN32B Acidic leucine_rich nuclear phosphoprotein 32 family member B</b> | <b>0.744092485</b> | <b>2.63E-06</b> | <b>2</b>  |
| Q9EST6        | LAEELPSLTHLNLSGNNLK                                                        | 0.53055478         | 2               | 4.140507  |
| Q9EST6        | SLDLFGCEVTNR                                                               | 1.746626984        | 2               | 2.977428  |
| <b>Q9ESW0</b> | <b>DDB1 DNA damage_binding protein 1</b>                                   | <b>1.300462899</b> | <b>0.017567</b> | <b>3</b>  |
| Q9ESW0        | IEVQDTSGGTTALRPSASTQALSSVSSSK                                              | 1.421210738        | 3               | 5.828272  |
| Q9ESW0        | KTEPATGFIDGLIESFLDISRPK                                                    | 1.270838985        | 3               | 4.501591  |
| Q9ESW0        | QGQQLVTCGSAFK                                                              | 1.282833581        | 2               | 2.367665  |
| <b>Q9HB97</b> | <b>PARVA Alpha_parvin</b>                                                  | <b>1.109316131</b> | <b>0.287108</b> | <b>3</b>  |
| Q9HB97        | LNVAEVTQSEIAQK                                                             | 0.866298971        | 2               | 4.314168  |
| Q9HB97        | QIQEEITGNTEALSGR                                                           | 1.561393873        | 2               | 3.707076  |
| Q9HB97        | VLIDWINDVLVGER                                                             | 2.604428511        | 2               | 2.300397  |
| <b>Q9JHL4</b> | <b>DBNL Drebrin_like protein</b>                                           | <b>0.627372552</b> | <b>0.42189</b>  | <b>3</b>  |
| Q9JHL4        | AMSTTSVSSSQPGK                                                             | 1.063450592        | 2               | 2.552316  |
| Q9JHL4        | ERAMSTTSVSSSQPKLR+Oxidation(3)                                             | 0.446312405        |                 |           |
| Q9JHL4        | TGELEQEVVSR                                                                | 0.840236775        | 2               | 3.265641  |
| <b>Q9JHW0</b> | <b>PSB7 Proteasome subunit beta type_7</b>                                 | <b>1.09442051</b>  | <b>0.989529</b> | <b>2</b>  |
| Q9JHW0        | ATEGMVVADK                                                                 | 1.072253757        | 2               | 2.57047   |
| Q9JHW0        | FRPDMEEEEAKK                                                               | 1.159447539        | 3               | 3.817457  |
| <b>Q9JHZ9</b> | <b>S38A3 Sodium_coupled neutral amino acid transporter 3</b>               | <b>2.426199171</b> | <b>6.01E-08</b> | <b>3</b>  |
| Q9JHZ9        | AYEQLGYR                                                                   | 1.657299038        | 2               | 2.392027  |
| Q9JHZ9        | HLEGLLPVGMPTADTQR                                                          | 2.56311883         | 2               | 3.986796  |
| Q9JHZ9        | MEIPRQTEMVELVPNGK+Oxidation(0)Oxidation(8)                                 | 1.291764128        |                 |           |
| <b>Q9JI85</b> | <b>NUCB2 Nucleobindin_2</b>                                                | <b>1.225370716</b> | <b>0.70133</b>  | <b>8</b>  |
| Q9JI85        | FQQGIAPSGPAGELK                                                            | 1.222160288        | 2               | 3.153102  |
| Q9JI85        | HEEFKYEEMMK+Oxidation(8)                                                   | 0.69511367         |                 |           |
| Q9JI85        | HEEFKYEEMMK+Oxidation(9)                                                   | 0.69511367         |                 |           |
| Q9JI85        | LSQELDLVSHK                                                                | 1.395133689        | 2               | 2.628928  |
| Q9JI85        | QEYQQAVQQLQEQK                                                             | 1.192545875        | 2               | 4.595516  |
| Q9JI85        | TRLDELK                                                                    | 1.267788821        | 1               | 2.011131  |

|               |                                                                   |                    |                 |          |
|---------------|-------------------------------------------------------------------|--------------------|-----------------|----------|
| Q9JI85        | VHNVEPVESAR                                                       | 1.215038696        | 2               | 3.080074 |
| Q9JI85        | VYNPQNAEDDMIEMEEER                                                | 2.056858038        | 2               | 3.972005 |
| <b>Q9JI91</b> | <b>ACTN2 Alpha_actinin_2</b>                                      | <b>1.600537934</b> | <b>6.54E-09</b> | <b>8</b> |
| Q9JI91        | ETADTDTAEQVIASFR                                                  | 1.668111447        | 2               | 3.064212 |
| Q9JI91        | GYEELLNEIR                                                        | 2.472267821        | 2               | 3.486504 |
| Q9JI91        | HTNYTMEHIR                                                        | 1.176388346        | 3               | 3.545197 |
| Q9JI91        | KHEAFESDLAAHQDR                                                   | 1.600954529        | 2               | 5.363108 |
| Q9JI91        | MLDAEDIVNTPKPDER                                                  | 1.369657702        | 2               | 3.212601 |
| Q9JI91        | QSILAIQNEVEK                                                      | 1.835224435        | 2               | 2.722774 |
| Q9JI91        | SSIQTGALEDQMNQLK                                                  | 1.600679781        | 2               | 3.085317 |
| Q9JI91        | TINEVETQILTR                                                      | 1.702860945        | 2               | 3.144686 |
| <b>Q9JJ19</b> | <b>NHRF1 Na( )/H( ) exchange regulatory cofactor NHE_RF1</b>      | <b>1.10104766</b>  | <b>0.35961</b>  | <b>7</b> |
| Q9JJ19        | AVDPDSPAASGLR                                                     | 1.111703314        | 2               | 3.459783 |
| Q9JJ19        | IVEVNGVCMEGK                                                      | 1.126620638        | 2               | 3.723942 |
| Q9JJ19        | LLVDPETDEQLKK                                                     | 1.303702802        | 2               | 2.854161 |
| Q9JJ19        | LVEPGSPA EK                                                       | 0.658587551        | 2               | 2.702399 |
| Q9JJ19        | LVEVNGENVEK                                                       | 1.092777124        | 2               | 3.046629 |
| Q9JJ19        | SEHTEPPAAADTK                                                     | 1.097658411        | 2               | 3.326792 |
| Q9JJ19        | VTPSQEHL DGPLPEPFSNGEIQK                                          | 1.1724758          | 3               | 3.553252 |
| <b>Q9JJ40</b> | <b>NHRF3 Na( )/H( ) exchange regulatory cofactor NHE_RF3</b>      | <b>2.261213764</b> | <b>9.43E-05</b> | <b>5</b> |
| Q9JJ40        | AGVLADDHLIEVNGENVENASHEEVVEK                                      | 2.873080368        | 3               | 5.382559 |
| Q9JJ40        | GVFLTDITPQGVAMK                                                   | 1.308244874        | 2               | 3.378388 |
| Q9JJ40        | IEKDTDGHLVR                                                       | 1.492245136        | 2               | 3.193734 |
| Q9JJ40        | SGNSVTLLVLDGDSYEK                                                 | 2.325903184        | 2               | 3.796674 |
| Q9JJ40        | VIEEGSPA EK                                                       | 1.628860863        | 2               | 2.418427 |
| <b>Q9JJ46</b> | <b>EBP 3_beta_hydroxysteroid_Delta(8)_Delta(7)_isomerase</b>      | <b>1.982538094</b> | <b>0.003298</b> | <b>2</b> |
| Q9JJ46        | HLTNAQSMLDNK                                                      | 1.99299934         | 2               | 3.759764 |
| Q9JJ46        | VSVVPLGTGR                                                        | 1.586451682        | 2               | 2.451048 |
| <b>Q9JJ54</b> | <b>HNRPD Heterogeneous nuclear ribonucleoprotein D0</b>           | <b>1.256215897</b> | <b>0.004227</b> | <b>4</b> |
| Q9JJ54        | FGDVVDCTLK                                                        | 0.689007529        | 2               | 2.808339 |
| Q9JJ54        | IDASKNEEDEGHSSNSPR                                                | 1.253343055        | 3               | 4.660944 |
| Q9JJ54        | IFVGGLSPDTPEEK                                                    | 1.378606866        | 2               | 4.03937  |
| Q9JJ54        | IFVGGLSPDTPEEKIR                                                  | 2.332337473        | 2               | 2.405009 |
| <b>Q9JJ79</b> | <b>DYHC2 Cytoplasmic dynein 2 heavy chain 1</b>                   | <b>1.267089472</b> | <b>0.074966</b> | <b>4</b> |
| Q9JJ79        | NCLEEWTKAAGLEK                                                    | 1.2121393          | 2               | 2.650479 |
| Q9JJ79        | RASTAAAPLAAWVK                                                    | 1.372928153        | 2               | 2.538248 |
| Q9JJ79        | TVLRGSGNLLR                                                       | 1.440217832        | 2               | 2.466182 |
| Q9JJ79        | YVVQIGDK                                                          | 1.296751911        | 1               | 2.302719 |
| <b>Q9JJU8</b> | <b>SH3L1 SH3 domain_binding glutamic acid_rich_like protein</b>   | <b>1.418770954</b> | <b>0.361359</b> | <b>2</b> |
| Q9JJU8        | GDYDAFFEAR                                                        | 1.433945652        | 2               | 3.185981 |
| Q9JJU8        | QQDVLCLFLEANK                                                     | 1.417247488        | 2               | 3.217353 |
| <b>Q9JJW3</b> | <b>USMG5 Up_regulated during skeletal muscle growth protein 5</b> | <b>1.059574627</b> | <b>0.674158</b> | <b>2</b> |
| Q9JJW3        | MAGPESDGQFQFTGIKK+Oxidation(0)                                    | 3.372262249        |                 |          |
| Q9JJW3        | YFNSYTLTGR                                                        | 1.058375169        | 2               | 2.806125 |
| <b>Q9JK38</b> | <b>GNA1 Glucosamine 6_phosphate N_acetyltransferase</b>           | <b>1.326915128</b> | <b>3.77E-09</b> | <b>4</b> |
| Q9JK38        | GRVEDVVVSDECR                                                     | 1.679411423        | 2               | 2.518183 |
| Q9JK38        | ITLECLPQNVGFYK                                                    | 1.196899482        | 2               | 3.476281 |
| Q9JK38        | VEDVVVSDECR                                                       | 1.448443162        | 2               | 3.366512 |
| Q9JK38        | VLGQLTETGVVSPEQFMK                                                | 1.472918095        | 2               | 4.632431 |

|               |                                                                      |                    |                 |           |
|---------------|----------------------------------------------------------------------|--------------------|-----------------|-----------|
| <b>Q9JK72</b> | <b>CCS Copper chaperone for superoxide dismutase</b>                 | <b>1.435259283</b> | <b>0.735208</b> | <b>2</b>  |
| Q9JK72        | GDLGNVHAEASGR                                                        | 1.309112676        | 2               | 3.221515  |
| Q9JK72        | SLVVDEGEDDLGR                                                        | 1.435592274        | 2               | 3.022307  |
| <b>Q9JKJ9</b> | <b>CP39A 24_hydroxycholesterol 7_alpha_hydroxylase</b>               | <b>1.372232888</b> | <b>0.000197</b> | <b>2</b>  |
| Q9JKJ9        | TVLESISSVFGTAGK                                                      | 1.403005014        | 2               | 3.335968  |
| Q9JKJ9        | TYDEGFYGSQLEWLLR                                                     | 1.359391182        | 2               | 3.201489  |
| <b>Q9JKS4</b> | <b>LDB3 LIM domain_binding protein 3</b>                             | <b>1.339631537</b> | <b>0.596123</b> | <b>4</b>  |
| Q9JKS4        | DFNMPLTISR                                                           | 1.331273906        | 2               | 2.342838  |
| Q9JKS4        | DLAVDSASPVYQAVIK                                                     | 1.004767363        | 2               | 3.593089  |
| Q9JKS4        | GAPAYNPTGPQVTPLAR                                                    | 2.207753265        | 2               | 3.128092  |
| Q9JKS4        | TQSKPEDEADEWAR                                                       | 2.904692581        | 2               | 3.816067  |
| <b>Q9JLA3</b> | <b>UGGG1 UDP_glucose:glycoprotein glucosyltransferase 1</b>          | <b>1.592975375</b> | <b>0.001178</b> | <b>11</b> |
| Q9JLA3        | AYNYVGQEVDPGYHAFQTLTQIYNK                                            | 1.762797654        | 3               | 3.317707  |
| Q9JLA3        | FLFVDADQIVR                                                          | 1.980899365        | 2               | 2.620317  |
| Q9JLA3        | GQYQGLSQDPNSLSNLDQDLPNNMIHQVPIK                                      | 1.628323441        | 3               | 6.0139    |
| Q9JLA3        | IEYQFFEDK                                                            | 1.981602823        | 2               | 2.344564  |
| Q9JLA3        | ILETTFQFR                                                            | 2.302364319        | 2               | 2.8417    |
| Q9JLA3        | IVPEWQDYDQEIK                                                        | 1.258434394        | 2               | 3.319689  |
| Q9JLA3        | LNIQPSETDYAVDIR                                                      | 1.767837047        | 2               | 4.111472  |
| Q9JLA3        | TAAIANSMNYLTK                                                        | 1.053737555        | 2               | 2.577098  |
| Q9JLA3        | VDALLSAQPK                                                           | 1.778623582        | 2               | 2.741501  |
| Q9JLA3        | VEEDVASDLVMK                                                         | 2.363887768        | 2               | 3.824609  |
| Q9JLA3        | VWQLQDLSFQTAAR                                                       | 1.351622523        | 2               | 4.653905  |
| <b>Q9JLH7</b> | <b>CK5P3 CDK5 regulatory subunit_associated protein 3</b>            | <b>1.038332136</b> | <b>0.971325</b> | <b>2</b>  |
| Q9JLH7        | GSDALTLLEYPETR                                                       | 0.980978036        | 2               | 2.905873  |
| Q9JLH7        | KEEEGQAGAAEMR                                                        | 1.196018953        | 2               | 3.705168  |
| <b>Q9JLJ3</b> | <b>AL9A1 4_trimethylaminobutyraldehyde dehydrogenase</b>             | <b>1.16234521</b>  | <b>2.16E-05</b> | <b>18</b> |
| Q9JLJ3        | AGAPNGLFNVVQGGAAATGQFLCQHR                                           | 1.338589801        | 2               | 4.757272  |
| Q9JLJ3        | ANDTTFLAAGVFTR                                                       | 1.285072981        | 2               | 4.928795  |
| Q9JLJ3        | CQVLLAAR                                                             | 1.214718643        | 2               | 3.303736  |
| Q9JLJ3        | EQGATVLCGGEPYAPEDPK                                                  | 1.147316327        | 2               | 4.954382  |
| Q9JLJ3        | EQGATVLCGGEPYAPEDPKLK                                                | 1.227139241        | 3               | 3.39479   |
| Q9JLJ3        | EVNLAVENAK                                                           | 1.267747745        | 2               | 3.150413  |
| Q9JLJ3        | GALLANFLTQGGVCCNGTR                                                  | 1.046555288        | 2               | 5.572246  |
| Q9JLJ3        | GIKPITLLEGGK                                                         | 0.816496031        | 3               | 3.96727   |
| Q9JLJ3        | HGYMTPCILNCTDDMTCVK                                                  | 1.577788606        | 3               | 4.238648  |
| Q9JLJ3        | IGDPLLEDTR                                                           | 1.156092234        | 2               | 3.705498  |
| Q9JLJ3        | MGPLINAPHLER                                                         | 1.26636208         | 2               | 3.264421  |
| Q9JLJ3        | MGPLINAPHLER+Oxidation(0                                             | 1.271936246        |                 |           |
| Q9JLJ3        | RDEIAIMETINNGK                                                       | 1.174383441        | 2               | 5.298826  |
| Q9JLJ3        | SPLIIFSDCNMK                                                         | 0.998634184        | 2               | 2.60824   |
| Q9JLJ3        | VEPVDASGTEK                                                          | 1.150731718        | 2               | 2.414235  |
| Q9JLJ3        | VSFTGSVPTGMK                                                         | 1.165593801        | 2               | 3.105139  |
| Q9JLJ3        | VSFTGSVPTGMK+Oxidation(10                                            | 1.129901139        |                 |           |
| Q9JLJ3        | VTIEYYSQK                                                            | 1.248414642        | 2               | 3.084486  |
| <b>Q9JLR1</b> | <b>S61A2 Protein transport protein Sec61 subunit alpha isoform 2</b> | <b>1.174835495</b> | <b>0.000137</b> | <b>2</b>  |
| Q9JLR1        | IIEVGDTPK                                                            | 1.073001707        | 2               | 2.665517  |
| Q9JLR1        | TWIEVSGSSAK                                                          | 1.595552193        | 2               | 2.754697  |
| <b>Q9JLT0</b> | <b>MYH10 Myosin_10</b>                                               | <b>1.654383731</b> | <b>8.19E-06</b> | <b>2</b>  |
| Q9JLT0        | AGVLAHLEER                                                           | 1.637551152        | 2               | 3.428601  |
| Q9JLT0        | DAAGLESQLDQTQELLQEETR                                                | 3.080835514        | 2               | 3.181751  |
| <b>Q9JLZ1</b> | <b>GLRX3 Glutaredoxin_3</b>                                          | <b>0.838473829</b> | <b>0.569605</b> | <b>2</b>  |

|               |                                                          |                    |                 |           |
|---------------|----------------------------------------------------------|--------------------|-----------------|-----------|
| Q9JLZ1        | LEAEAVPEVSEK                                             | 0.660226209        | 2               | 2.319788  |
| Q9JLZ1        | YEISSVPTFLFFK                                            | 1.977989198        | 2               | 2.584764  |
| <b>Q9JLZ3</b> | <b>AUHM Methylglutaconyl_CoA hydratase_mitochondrial</b> | <b>0.832571385</b> | <b>0.596663</b> | <b>3</b>  |
| Q9JLZ3        | AVGLISHVLEQNQEGDAAYR                                     | 1.107119303        | 2               | 5.616707  |
| Q9JLZ3        | AVGLISHVLEQNQEGDAAYRK                                    | 0.686106083        | 3               | 4.470016  |
| Q9JLZ3        | SEVPGIFCAGADLK                                           | 1.145036923        | 2               | 2.953438  |
| <b>Q9JM53</b> | <b>AIFM1 Apoptosis_inducing factor 1_mitochondrial</b>   | <b>1.077025315</b> | <b>0.005358</b> | <b>15</b> |
| Q9JM53        | AIASAAEGGSVPPIR                                          | 1.160814456        | 2               | 2.767638  |
| Q9JM53        | CLIATGGTTPR                                              | 0.982882208        | 2               | 2.421601  |
| Q9JM53        | DGEQHEDLNEVAK                                            | 0.885388276        | 2               | 3.829643  |
| Q9JM53        | ILPEYLSNWTMEK                                            | 1.457861897        | 2               | 3.494593  |
| Q9JM53        | IMGLGLSPEEK                                              | 1.387471725        | 2               | 2.805508  |
| Q9JM53        | KSQASGIEVIQLFPEK                                         | 1.429681604        | 2               | 3.709891  |
| Q9JM53        | KVETDHIVTAVGLEPNVELAK                                    | 1.028296646        | 2               | 6.178644  |
| Q9JM53        | LNDGSQITFEK                                              | 1.234259157        | 2               | 3.508256  |
| Q9JM53        | SITVIGGGFLGSELACALGR                                     | 1.135429767        | 2               | 2.657076  |
| Q9JM53        | SQASGIEVIQLFPEK                                          | 1.621774477        | 2               | 4.131787  |
| Q9JM53        | TGGLEIDSDFGGFR                                           | 1.081781065        | 2               | 4.186753  |
| Q9JM53        | VETDHIVTAVGLEPNVELAK                                     | 1.145533654        | 2               | 5.182467  |
| Q9JM53        | VLIVSEPELPYMRPPLSK                                       | 1.189195471        | 3               | 3.938525  |
| Q9JM53        | VMPNAIVQSVGVSGGK                                         | 1.366734978        | 2               | 4.283277  |
| Q9JM53        | VNAELQAR                                                 | 1.129314617        | 2               | 2.60174   |
| <b>Q9JMA1</b> | <b>UBP14 Ubiquitin carboxyl_terminal hydrolase 14</b>    | <b>2.119222907</b> | <b>0.027621</b> | <b>2</b>  |
| Q9JMA1        | CTESEEEVTK                                               | 1.95021188         | 2               | 3.694068  |
| Q9JMA1        | EKESVNAKVLK                                              | 3.557942735        | 2               | 2.375329  |
| <b>Q9JMD3</b> | <b>PCTL PCTL_like protein</b>                            | <b>0.946800256</b> | <b>9.9E-20</b>  | <b>6</b>  |
| Q9JMD3        | AVSIQTGYLIQSTGPK                                         | 1.353709701        | 2               | 4.66817   |
| Q9JMD3        | ESVQVPDDQDFR                                             | 1.588254481        | 2               | 2.835652  |
| Q9JMD3        | MECCDVPAETLYDVLHDIEYR                                    | 1.722444008        | 3               | 4.405108  |
| Q9JMD3        | MECCDVPAETLYDVLHDIEYR+Oxidation(0                        | 1.540824785        |                 |           |
| Q9JMD3        | SSQFLAPK                                                 | 0.681326279        | 2               | 2.35623   |
| Q9JMD3        | WDSNVIETFDIAR                                            | 1.440846089        | 2               | 4.534047  |
| <b>Q9JME5</b> | <b>AP3B2 AP_3 complex subunit beta_2</b>                 | <b>1.308585744</b> | <b>0.003605</b> | <b>2</b>  |
| Q9JME5        | DELVVAESVVVIK                                            | 2.301367839        | 2               | 2.51605   |
| Q9JME5        | LLQMMPAQHGIIK                                            | 1.30560294         | 2               | 2.55969   |
| <b>Q9QVC8</b> | <b>FKBP4 Peptidyl_prolyl cis_trans isomerase FKBP4</b>   | <b>1.13076804</b>  | <b>0.914418</b> | <b>7</b>  |
| Q9QVC8        | ALELDSNNEK                                               | 1.182154872        | 2               | 2.630562  |
| Q9QVC8        | GEPNNVAGNQAQVK                                           | 1.037360455        | 2               | 3.859574  |
| Q9QVC8        | TEVAAGDHPTDAEMK                                          | 0.93363608         | 2               | 3.667866  |
| Q9QVC8        | TQLAVCQQR                                                | 1.146248184        | 2               | 2.728419  |
| Q9QVC8        | VAENGAQSAPLPLEGVDISPK                                    | 1.115787063        | 2               | 3.929371  |
| Q9QVC8        | VGEVCHITCKPEYAYGSAGSPPK                                  | 0.969233559        | 3               | 5.915501  |
| Q9QVC8        | VLQLYPSNK                                                | 0.72009391         | 2               | 2.333246  |
| <b>Q9QWN8</b> | <b>SPTN2 Spectrin beta chain_brain 2</b>                 | <b>1.353245263</b> | <b>0.046449</b> | <b>3</b>  |
| Q9QWN8        | ALAQEDQSAGEVER                                           | 1.337436479        | 2               | 3.770663  |
| Q9QWN8        | FETLEPEMNALAAR                                           | 2.001866725        | 2               | 2.72911   |
| Q9QWN8        | VGELTQEANALAAAGHPAQAPAINTR                               | 1.196059211        | 3               | 4.224523  |
| <b>Q9QX79</b> | <b>FETUB Fetuin_B</b>                                    | <b>1.159157713</b> | <b>0.384415</b> | <b>3</b>  |
| Q9QX79        | GSIQHLPEQEEPEDSKGK                                       | 1.458096185        | 3               | 3.830061  |
| Q9QX79        | IFYETVHGQCK                                              | 1.07639179         | 2               | 2.389929  |
| Q9QX79        | NTAPTSSPSITAPR                                           | 1.610592295        | 2               | 3.150381  |
| <b>Q9QXG4</b> | <b>ACSA Acetyl_coenzyme A synthetase_cytoplasmic</b>     | <b>1.904712222</b> | <b>0.055573</b> | <b>2</b>  |
| Q9QXG4        | AELGMNDSPSQSPPVK                                         | 1.922387401        | 2               | 3.679306  |
| Q9QXG4        | IGPIATPDYIQNAPGLPK                                       | 1.874066587        | 2               | 3.297698  |

|               |                                                                   |                    |                 |           |
|---------------|-------------------------------------------------------------------|--------------------|-----------------|-----------|
| <b>Q9QXQ0</b> | <b>ACTN4 Alpha_actinin_4</b>                                      | <b>1.093124061</b> | <b>9.9E-20</b>  | <b>32</b> |
| Q9QXQ0        | ACLISLGYDVENDR                                                    | 1.5253599          | 2               | 4.024054  |
| Q9QXQ0        | ACLISLGYDVENDRQGDAEFNR                                            | 1.708095593        | 3               | 3.852667  |
| Q9QXQ0        | AGTQIENIDEDFR                                                     | 1.086270569        | 2               | 3.562215  |
| Q9QXQ0        | AGTQIENIDEDFRDGLK                                                 | 1.188527708        | 2               | 4.257896  |
| Q9QXQ0        | ASFNFHFDKDHGGALGPEEFK                                             | 1.336508616        | 3               | 3.368466  |
| Q9QXQ0        | ASIHEAWTDGK                                                       | 0.963993383        | 2               | 2.45294   |
| Q9QXQ0        | DDPVTNLNNAFEVAEK                                                  | 1.64732522         | 2               | 3.606934  |
| Q9QXQ0        | ETTDTDADQVIASF                                                    | 2.396408511        | 2               | 4.710371  |
| Q9QXQ0        | HRDYETATLSDIK                                                     | 2.066975224        | 2               | 3.887416  |
| Q9QXQ0        | HRPELIEYDK                                                        | 1.094896264        | 3               | 4.402828  |
| Q9QXQ0        | HTNYTMEHLR                                                        | 1.176388346        | 3               | 3.545197  |
| Q9QXQ0        | ICDQWDNLGSLTHSR                                                   | 1.296543859        | 2               | 4.593717  |
| Q9QXQ0        | INNVNKALDFIAK                                                     | 1.002602966        | 2               | 2.303109  |
| Q9QXQ0        | KDDPVTNLNNAFEVAEK                                                 | 0.8260547          | 2               | 4.734687  |
| Q9QXQ0        | LSGSNPYTSVTPQIINSK                                                | 1.479858409        | 2               | 4.426512  |
| Q9QXQ0        | LVSIGAEIIVDGNK                                                    | 1.556510624        | 2               | 3.156628  |
| Q9QXQ0        | MAPYQGPDAAPGALDYK                                                 | 1.275760871        | 2               | 4.98175   |
| Q9QXQ0        | MAPYQGPDAAPGALDYK+Oxidation(0                                     | 1.103789117        |                 |           |
| Q9QXQ0        | MLDAEDIVNTARPDEK                                                  | 0.819837294        | 2               | 3.877101  |
| Q9QXQ0        | MLDAEDIVNTARPDEK+Oxidation(0                                      | 1.162526485        |                 |           |
| Q9QXQ0        | MVSDINNGWQHLEQAEK                                                 | 1.472453804        | 2               | 4.718013  |
| Q9QXQ0        | NFITAEELR                                                         | 1.280616203        | 1               | 2.125005  |
| Q9QXQ0        | NVNVQNFHISWK                                                      | 0.47654011         | 2               | 2.344028  |
| Q9QXQ0        | QFASQANMVGPIWQTK                                                  | 1.059012571        | 2               | 3.639458  |
| Q9QXQ0        | QLETIDQLHLEYAK                                                    | 1.395045127        | 2               | 3.280569  |
| Q9QXQ0        | RDHALLEEQSK                                                       | 1.086438235        | 3               | 3.881314  |
| Q9QXQ0        | SIVDYKPNLDLLEQQHQHLEALIFDNK                                       | 2.32226002         | 3               | 4.69341   |
| Q9QXQ0        | TINEVENQILTR                                                      | 0.882642733        | 2               | 3.673417  |
| Q9QXQ0        | VEQIAAIAQELNELDYDSSHVNTR                                          | 2.362712668        | 3               | 5.403461  |
| Q9QXQ0        | VGWEQLLTTIAR                                                      | 1.500990417        | 2               | 4.10189   |
| Q9QXQ0        | VLAGDKNFITAEELR                                                   | 0.978035303        | 2               | 3.232787  |
| Q9QXQ0        | VLAVNQENEHLMEDYER                                                 | 1.339620839        | 2               | 5.729714  |
| <b>Q9QXT0</b> | <b>CNPY2 Protein canopy homolog 2</b>                             | <b>1.341420459</b> | <b>0.011222</b> | <b>5</b>  |
| Q9QXT0        | ALVDELEWEIAR                                                      | 1.544896983        | 2               | 3.58611   |
| Q9QXT0        | IDSISGTLK                                                         | 1.15819946         | 2               | 2.625451  |
| Q9QXT0        | INPDGQSQSVVEVPYAR                                                 | 1.254111851        | 2               | 3.662562  |
| Q9QXT0        | RTDLCDHALHR                                                       | 1.530146373        | 3               | 3.925126  |
| Q9QXT0        | TDLCDHALHR                                                        | 1.246659319        | 2               | 3.207888  |
| <b>Q9QXX4</b> | <b>CMC2 Calcium_binding mitochondrial carrier protein Aralar2</b> | <b>1.552337381</b> | <b>9.9E-20</b>  | <b>18</b> |
| Q9QXX4        | DIMVTIRPHVLTFFVEECLVAAAGGTR                                       | 1.652083384        | 3               | 5.826471  |
| Q9QXX4        | DVEVTKEEFALAAQK                                                   | 1.268851265        | 2               | 4.478793  |
| Q9QXX4        | FGLGSIAGAVGATAVYPIDLVK                                            | 1.294725937        | 2               | 5.968352  |
| Q9QXX4        | FGLYLPLFKPSASTSK                                                  | 1.230157647        | 2               | 2.759892  |
| Q9QXX4        | GLLPQLLGVAPEK                                                     | 1.396850676        | 1               | 3.072476  |
| Q9QXX4        | IAPLEEGMLPFNLAEAR                                                 | 2.276381792        | 2               | 5.235605  |
| Q9QXX4        | ITLPAPNPDHVGQYK                                                   | 0.733881158        | 2               | 3.004119  |
| Q9QXX4        | KDVEVTKEEFALAAQK                                                  | 1.221037194        | 2               | 5.620311  |
| Q9QXX4        | LQVAGEITGPR                                                       | 1.392464872        | 2               | 3.731696  |
| Q9QXX4        | LTVNDFVR                                                          | 1.894311501        | 2               | 2.31738   |
| Q9QXX4        | NGEFFMSPHDFVTR                                                    | 1.241781082        | 2               | 4.20744   |
| Q9QXX4        | NSFDFCK                                                           | 1.29025856         | 1               | 1.973604  |
| Q9QXX4        | SSPQFGVTLTYELLQR                                                  | 1.849109202        | 2               | 3.8108    |
| Q9QXX4        | STGSFVQELMYK                                                      | 1.859572197        | 2               | 3.437364  |
| Q9QXX4        | TVELLSGVVDQTK                                                     | 1.638109581        | 2               | 4.511763  |
| Q9QXX4        | VSALSVVR                                                          | 1.466555026        | 2               | 2.305602  |

|               |                                                                         |                    |                 |          |
|---------------|-------------------------------------------------------------------------|--------------------|-----------------|----------|
| Q9QXX4        | YEGFFGLYR                                                               | 1.302734346        | 2               | 2.744856 |
| Q9QXX4        | YLNIFGESQPNPK                                                           | 0.987257723        | 2               | 4.434021 |
| <b>Q9QYU4</b> | <b>CRYM Thiomorpholine_carboxylate dehydrogenase</b>                    | <b>1.307681018</b> | <b>0.984927</b> | <b>4</b> |
| Q9QYU4        | GFLGVMPAYSAEDALTTK                                                      | 1.169207568        | 2               | 4.576121 |
| Q9QYU4        | RAPAFLSADEVQDHLR                                                        | 1.147996052        | 3               | 3.84162  |
| Q9QYU4        | SLGMAVEDLVAAK                                                           | 1.130635039        | 2               | 3.761277 |
| Q9QYU4        | SSLLIPLLEAALANFSK                                                       | 1.447702466        | 2               | 2.897213 |
| <b>Q9QZ76</b> | <b>MYG Myoglobin</b>                                                    | <b>1.586870461</b> | <b>0.909053</b> | <b>6</b> |
| Q9QZ76        | GQHAAEIQLAQSHATK                                                        | 0.580926979        | 2               | 4.913355 |
| Q9QZ76        | HGCTVLTALGTILK                                                          | 0.636662642        | 2               | 3.66195  |
| Q9QZ76        | KGQHAAEIQLAQSHATK                                                       | 5.93681432         | 3               | 5.459224 |
| Q9QZ76        | KKGQHAAEIQLAQSHATK                                                      | 2.825671316        | 3               | 4.50123  |
| Q9QZ76        | VEGDLAGHGQEVLSLFK                                                       | 1.373221956        | 3               | 4.112271 |
| Q9QZ76        | YSGDFGADAQGAMSK                                                         | 8.180464141        | 2               | 3.929589 |
| <b>Q9QZA2</b> | <b>PDC6I Programmed cell death 6_interacting protein</b>                | <b>1.200930093</b> | <b>0.547067</b> | <b>8</b> |
| Q9QZA2        | ATLVKPTPVNVPISQK                                                        | 1.368768024        | 2               | 3.267828 |
| Q9QZA2        | DTIALLCKPEPELNAAIPSANPAK                                                | 1.325083527        | 2               | 3.393026 |
| Q9QZA2        | HEGALETLR                                                               | 1.142062273        | 2               | 2.325645 |
| Q9QZA2        | LLDEEATDNDLR                                                            | 1.145577885        | 2               | 4.050151 |
| Q9QZA2        | MVPVSVQQSLAVFSQR                                                        | 1.358521428        | 2               | 3.131446 |
| Q9QZA2        | NIQVSHQEFK                                                              | 1.357307127        | 2               | 3.351847 |
| Q9QZA2        | STAVVEQGGIQTVDQLIK                                                      | 1.286270308        | 2               | 4.299539 |
| Q9QZA2        | TMQGSEVVNVLK                                                            | 1.281845497        | 2               | 3.277102 |
| <b>Q9QZD8</b> | <b>DIC Mitochondrial dicarboxylate carrier</b>                          | <b>1.165413985</b> | <b>0.000418</b> | <b>7</b> |
| Q9QZD8        | GALVTVGQLSCYDQAK                                                        | 1.097292546        | 2               | 5.082359 |
| Q9QZD8        | LFSGATMASSR                                                             | 0.871344864        | 2               | 2.514286 |
| Q9QZD8        | MTGMALQVVR                                                              | 1.341753542        | 2               | 2.78806  |
| Q9QZD8        | NYSHALDGLYR                                                             | 1.286999552        | 2               | 2.832427 |
| Q9QZD8        | VHLQTQQEVK                                                              | 1.190342966        | 2               | 3.048643 |
| Q9QZD8        | VLLGGISGLTGGFVGTADLVNVR                                                 | 1.166351848        | 2               | 5.680471 |
| Q9QZD8        | WYFGLASCGAACCTHPLDLLK                                                   | 1.248935912        | 3               | 3.538801 |
| <b>Q9QZH8</b> | <b>AAAD Arylacетamide deacetylase</b>                                   | <b>1.52396757</b>  | <b>0.000192</b> | <b>2</b> |
| Q9QZH8        | LDVVVSTDYGLAPK                                                          | 1.494809405        | 2               | 4.114955 |
| Q9QZH8        | WFLQEDILEK                                                              | 1.530869938        | 2               | 2.949725 |
| <b>Q9QZR9</b> | <b>chain</b>                                                            | <b>1.102265121</b> | <b>0.56282</b>  | <b>2</b> |
| Q9QZR9        | EGPSGPFALGQDQKDGPR                                                      | 20.19202609        |                 |          |
| Q9QZR9        | GASLLEMGPMPGMPGQK                                                       | 1.071531123        |                 |          |
| <b>Q9QZU7</b> | <b>BODG Gamma_butYRObetaine dioxygenase</b>                             | <b>1.487529971</b> | <b>5.97E-08</b> | <b>5</b> |
| Q9QZU7        | IDANNVAYTTGK                                                            | 0.963179476        | 2               | 3.07129  |
| Q9QZU7        | MDDLTFDQK                                                               | 3.002824085        | 2               | 2.554308 |
| Q9QZU7        | MNPGDVITFDNWR                                                           | 1.587681351        | 2               | 2.808377 |
| Q9QZU7        | QTVTGGDSEIVDGFNVQCQK                                                    | 1.22327077         | 2               | 4.794799 |
| Q9QZU7        | SYEAGTEISR                                                              | 1.754486442        | 2               | 2.754013 |
| <b>Q9QZX8</b> | <b>SO1B2 Solute carrier organic anion transporter family member 1B2</b> | <b>1.948036938</b> | <b>0.000113</b> | <b>2</b> |
| Q9QZX8        | GIGETPIVPLGISYLDLDDFAK                                                  | 1.953926092        | 2               | 3.489009 |
| Q9QZX8        | QFTDEGNPDSVNK                                                           | 1.082737648        | 2               | 3.582814 |
| <b>Q9R063</b> | <b>PRDX5 Peroxiredoxin_5_mitochondrial</b>                              | <b>1.187501277</b> | <b>4.62E-07</b> | <b>8</b> |
| Q9R063        | ALNVEPDGTGLTCSLAPNILSQL                                                 | 2.616422324        | 3               | 4.804595 |
| Q9R063        | ETDLLLDDSLVSLFGNR                                                       | 1.488658118        | 2               | 4.024667 |
| Q9R063        | GVLFGVPGAFTPGCSK                                                        | 1.354819794        | 2               | 4.191882 |
| Q9R063        | THLPGFVEQAGALK                                                          | 1.092897017        | 3               | 4.484272 |
| Q9R063        | VGDTIPSVEVFEGEPGK                                                       | 1.208733756        | 2               | 4.234874 |
| Q9R063        | VGDTIPSVEVFEGEPGKK                                                      | 1.073334916        | 2               | 4.170047 |
| Q9R063        | VNLAELFK                                                                | 1.334292662        | 2               | 2.564893 |



|               |                                                                   |                    |                 |           |
|---------------|-------------------------------------------------------------------|--------------------|-----------------|-----------|
| Q9R063        | VQLLADPTGAFGK                                                     | 1.306562405        | 2               | 3.557152  |
| <b>Q9R064</b> | <b>GORS2 Golgi reassembly_stacking protein 2</b>                  | <b>0.954539535</b> | <b>0.173453</b> | <b>2</b>  |
| Q9R064        | ADTSSLTVDMSPASK                                                   | 0.91445344         | 2               | 4.274127  |
| Q9R064        | LYVYNTDNDNCR                                                      | 2.32391518         | 2               | 2.531029  |
| <b>Q9R099</b> | <b>TBL2 Transducin beta_like protein 2</b>                        | <b>1.509951889</b> | <b>9.79E-07</b> | <b>4</b>  |
| Q9R099        | ANVELDHATLVR                                                      | 1.729017682        | 2               | 2.423787  |
| Q9R099        | FEEASTMPCR                                                        | 1.133565469        | 2               | 2.666215  |
| Q9R099        | FLASCGDR                                                          | 1.184137956        | 2               | 2.339933  |
| Q9R099        | LQQQLTQAQEQALK                                                    | 1.920770264        | 2               | 4.109718  |
| <b>Q9R0N0</b> | <b>GALK1 Galactokinase</b>                                        | <b>1.449309479</b> | <b>6.78E-08</b> | <b>6</b>  |
| Q9R0N0        | AEHSFAGVPCGIMDQLIALLGQK                                           | 1.271574181        | 3               | 4.464148  |
| Q9R0N0        | MEELEAGR                                                          | 1.541487906        | 2               | 2.459736  |
| Q9R0N0        | RQCEEVAQALGK                                                      | 1.004300469        | 2               | 3.20385   |
| Q9R0N0        | SLETSLVPLSDPK                                                     | 1.449281248        | 2               | 3.288851  |
| Q9R0N0        | TDGLVSLTTSK                                                       | 1.414104411        | 2               | 3.802475  |
| Q9R0N0        | VEELLAEAR                                                         | 1.483784519        | 2               | 3.116374  |
| <b>Q9R0T3</b> | <b>DNJC3 Dnal homolog subfamily C member 3</b>                    | <b>1.149370025</b> | <b>6.84E-05</b> | <b>6</b>  |
| Q9R0T3        | AEPSVAEYTVR                                                       | 1.185374292        | 2               | 2.4658    |
| Q9R0T3        | ICSEVLQLEPDNVNALK                                                 | 1.351439254        | 2               | 4.759593  |
| Q9R0T3        | KFDDGEDPLDAETQQGGGSPNFHR                                          | 0.977908161        | 3               | 5.658128  |
| Q9R0T3        | LIGSAEELIR                                                        | 1.110316865        | 2               | 2.616841  |
| Q9R0T3        | LKNDNTEAFYK                                                       | 1.53832142         | 2               | 2.649298  |
| Q9R0T3        | SNPSENEEKAQSQLVK                                                  | 1.249924349        | 2               | 5.157658  |
| <b>Q9R112</b> | <b>SQRD Sulfide:quinone oxidoreductase_mitochondrial</b>          | <b>1.196503095</b> | <b>0.012203</b> | <b>4</b>  |
| Q9R112        | EGNALTFPNTPVK                                                     | 1.360500721        | 2               | 3.039901  |
| Q9R112        | STLSVIPSGVQWIQDR                                                  | 1.578031615        | 2               | 2.790172  |
| Q9R112        | TAAAVAAQSGILDR                                                    | 1.076607688        | 2               | 3.326176  |
| Q9R112        | VGAENVAIVEPSEK                                                    | 1.142053338        | 2               | 2.86908   |
| <b>Q9R172</b> | <b>NOTC3 Neurogenic locus notch homolog protein 3</b>             | <b>1.213822036</b> | <b>0.652043</b> | <b>2</b>  |
| Q9R172        | CTHQQPSREAACLPLGWVGER                                             | 1.719405075        | 3               | 3.396993  |
| Q9R172        | YGGKCLDLVDK                                                       | 1.162773909        | 1               | 1.987887  |
| <b>Q9R1T3</b> | <b>CATZ Cathepsin Z</b>                                           | <b>1.652050852</b> | <b>8.2E-09</b>  | <b>2</b>  |
| Q9R1T3        | HGIPDETCNNYQAK                                                    | 1.655091139        | 2               | 3.865475  |
| Q9R1T3        | VGDYGSLSGR                                                        | 1.389162719        | 2               | 2.828759  |
| <b>Q9R1T4</b> | <b>SEPT6 Septin_6</b>                                             | <b>1.456304266</b> | <b>0.300163</b> | <b>2</b>  |
| Q9R1T4        | QMFVQRVKEK+Oxidation(1                                            | 0.885772637        |                 |           |
| Q9R1T4        | STLMDTLFNTK                                                       | 2.384076084        | 2               | 2.879758  |
| <b>Q9R1T5</b> | <b>ACY2 Aspartoacylase</b>                                        | <b>1.698446794</b> | <b>0.214048</b> | <b>2</b>  |
| Q9R1T5        | EFAKTKLTLNAK                                                      | 28.14072247        | 2               | 2.520172  |
| Q9R1T5        | VIPLGGDCTVYPVFVNEAAYEK                                            | 1.33375068         | 3               | 3.586843  |
| <b>Q9R1T9</b> | <b>KCNH4 Potassium voltage_gated channel subfamily H member 4</b> | <b>1.772249425</b> | <b>0.174875</b> | <b>2</b>  |
| Q9R1T9        | DGSFAFWCLDMMPIK+Oxidation(10                                      | 1.8014346          |                 |           |
| Q9R1T9        | KDGSFAFWCLDMMPIK+Oxidation(11)Oxidation(12                        | 1.117325348        |                 |           |
| <b>Q9R1Z0</b> | <b>VDAC3 Voltage_dependent anion_selective channel protein 3</b>  | <b>0.945356556</b> | <b>0.003325</b> | <b>4</b>  |
| Q9R1Z0        | LCQNNFALGYK                                                       | 1.406916737        | 2               | 2.403408  |
| Q9R1Z0        | LTLALVDGK                                                         | 1.81617123         | 2               | 2.300163  |
| Q9R1Z0        | LTVDTIFVPNTGK                                                     | 1.319665334        | 2               | 2.961826  |
| Q9R1Z0        | VNNASLIGLYTQSLRPGVK                                               | 0.915670316        | 2               | 4.295606  |
| <b>Q9WTR8</b> | <b>PHLP1 PH domain leucine_rich repeat protein phosphatase 1</b>  | <b>1.582118799</b> | <b>0.574171</b> | <b>2</b>  |
| Q9WTR8        | LEEELEIDISGNK                                                     | 2.65395794         | 2               | 2.721641  |
| Q9WTR8        | LEEELEIDISGNKLK                                                   | 1.300636768        | 2               | 2.396025  |
| <b>Q9WTT6</b> | <b>GUAD Guanine deaminase</b>                                     | <b>0.921363953</b> | <b>4.81E-08</b> | <b>10</b> |

|               |                                                                     |                    |                 |          |
|---------------|---------------------------------------------------------------------|--------------------|-----------------|----------|
| Q9WTT6        | EIGNFEVGKDFDALLINPR                                                 | 1.661638397        | 2               | 4.082459 |
| Q9WTT6        | ETTEESVKETER                                                        | 1.412734653        | 2               | 3.162794 |
| Q9WTT6        | FQSTDVAEEVYTR                                                       | 1.150583881        | 2               | 3.718604 |
| Q9WTT6        | FSLSCTETLMSELGNIAK                                                  | 1.598288709        | 2               | 3.643303 |
| Q9WTT6        | GTFVHSTWTCPEVLR                                                     | 1.227239112        | 2               | 3.159654 |
| Q9WTT6        | IVFLEESSQKEK                                                        | 1.26287847         | 2               | 4.253374 |
| Q9WTT6        | NIEEVYVGK                                                           | 0.770251944        | 1               | 2.695272 |
| Q9WTT6        | NYTDVYDKNNLLTNK                                                     | 0.653635649        | 2               | 4.417058 |
| Q9WTT6        | THDLYIQSHISENREEIEAVK                                               | 1.742790863        | 3               | 4.475668 |
| Q9WTT6        | VCMDLNNTVPEYK                                                       | 1.130015914        | 2               | 3.618476 |
| <b>Q9WTT7</b> | <b>BZW2 Basic leucine zipper and W2 domain containing protein 2</b> | <b>1.413454064</b> | <b>0.291203</b> | <b>2</b> |
| Q9WTT7        | AWMAEKDANSVTSSLR+Oxidation(2                                        | 1.483995203        |                 |          |
| Q9WTT7        | ELQERLSQECPIK                                                       | 1.400636908        | 2               | 2.550366 |
| <b>Q9WU19</b> | <b>HAOX1 Hydroxyacid oxidase 1</b>                                  | <b>1.022663202</b> | <b>0.109998</b> | <b>9</b> |
| Q9WU19        | AIFVTVDTPYLGNR                                                      | 0.808275328        | 2               | 4.254089 |
| Q9WU19        | AVFVGRPIIWGLAFQGEK                                                  | 0.823057542        | 3               | 4.011765 |
| Q9WU19        | GVQDVLLEILK                                                         | 1.19880855         | 2               | 3.62784  |
| Q9WU19        | GVQDVLLEILKEEFR                                                     | 1.202647961        | 2               | 4.301413 |
| Q9WU19        | HGVDGILVSNHGAR                                                      | 1.101736149        | 3               | 4.531812 |
| Q9WU19        | MKNFETNDLAFSPK+Oxidation(0                                          | 1.187970896        |                 |          |
| Q9WU19        | NFETNDLAFSPK                                                        | 0.762846363        | 2               | 3.57137  |
| Q9WU19        | NVADIDLSTSVLGQR                                                     | 1.484891148        | 2               | 4.943469 |
| Q9WU19        | VEVFLDGGVR                                                          | 1.588374279        | 2               | 2.685202 |
| <b>Q9WU79</b> | <b>PROD Proline dehydrogenase 1_mitochondrial</b>                   | <b>0.984147728</b> | <b>0.562816</b> | <b>2</b> |
| Q9WU79        | FTEEEEQMK                                                           | 0.979053005        | 2               | 3.118779 |
| Q9WU79        | HLVVPNVQTGQLEPLLSR                                                  | 1.476877101        | 2               | 2.339939 |
| <b>Q9WU82</b> | <b>CTNB1 Catenin beta_1</b>                                         | <b>1.292035571</b> | <b>5.3E-06</b>  | <b>5</b> |
| Q9WU82        | HQEAEMAQNAVR                                                        | 1.62593715         | 2               | 3.409784 |
| Q9WU82        | LLNDEDQVVVVK                                                        | 0.201578033        | 2               | 3.308506 |
| Q9WU82        | TMQNTNDVETAR                                                        | 0.98740493         | 2               | 3.586241 |
| Q9WU82        | TMQNTNDVETAR+Oxidation(1                                            | 1.614984141        |                 |          |
| Q9WU82        | TSMGGTQQQFVEGVR                                                     | 1.357390218        | 2               | 3.527608 |
| <b>Q9WUA2</b> | <b>SYFB Phenylalanyl_tRNA synthetase beta chain</b>                 | <b>1.158420746</b> | <b>0.499298</b> | <b>3</b> |
| Q9WUA2        | EMVRADLINKK                                                         | 1.241548526        | 2               | 2.388232 |
| Q9WUA2        | KEMVRADLINK                                                         | 1.241548526        | 2               | 2.360949 |
| Q9WUA2        | TYTIANQFPLNK                                                        | 1.134490745        | 2               | 2.448366 |
| <b>Q9WUC4</b> | <b>ATOX1 Copper transport protein ATOX1</b>                         | <b>1.467796978</b> | <b>1.41E-06</b> | <b>2</b> |
| Q9WUC4        | LGGVEFNIDLPNKK                                                      | 1.227810958        | 2               | 3.629192 |
| Q9WUC4        | VCIESEHSSDILLATLNK                                                  | 1.495407692        | 2               | 5.742793 |
| <b>Q9WUH4</b> | <b>FHL1 Four and a half LIM domains protein 1</b>                   | <b>2.634288541</b> | <b>0.746082</b> | <b>3</b> |
| Q9WUH4        | AIVAGDQNVVEYK                                                       | 2.919422016        | 2               | 2.674625 |
| Q9WUH4        | FCANTCVECR                                                          | 1.936559719        | 2               | 2.718921 |
| Q9WUH4        | FVFHNEQVYCPDCAK                                                     | 2.543734817        | 2               | 4.21178  |
| <b>Q9WUI1</b> | <b>MK11 Mitogen_activated protein kinase 11</b>                     | <b>1.461356905</b> | <b>0.116049</b> | <b>2</b> |
| Q9WUI1        | ILDFGLAR                                                            | 1.430380465        | 2               | 2.732132 |
| Q9WUI1        | QELNKTVWEVPQR                                                       | 1.700089199        | 2               | 2.430439 |
| <b>Q9WUJ8</b> | <b>ORC6 Origin recognition complex subunit 6</b>                    | <b>1.142197368</b> | <b>0.969544</b> | <b>2</b> |
| Q9WUJ8        | LSGLNKMMYQSCLK+Oxidation(6                                          | 1.12202703         |                 |          |
| Q9WUJ8        | LSGLNKMMYQSCLK+Oxidation(7                                          | 1.152979962        |                 |          |
| <b>Q9WUS0</b> | <b>KAD4 Adenylate kinase isoenzyme 4_mitochondrial</b>              | <b>1.067911799</b> | <b>0.87536</b>  | <b>5</b> |
| Q9WUS0        | AVILGPPGSGK                                                         | 1.103523726        | 2               | 2.458071 |
| Q9WUS0        | GVLHQFSGTETNR                                                       | 1.153334972        | 2               | 3.550042 |
| Q9WUS0        | TLVQAEALDR                                                          | 1.03505339         | 2               | 2.821752 |
| Q9WUS0        | VYNLDFNPPQVLGVDDITGEPLVQQEDDKPEALAAR                                | 1.787392202        | 3               | 5.105786 |
| Q9WUS0        | YKDAAKPVIELYK                                                       | 1.292500695        | 2               | 3.559247 |

|               |                                                                           |                    |                 |           |
|---------------|---------------------------------------------------------------------------|--------------------|-----------------|-----------|
| <b>Q9WUU8</b> | <b>TNIP1 TNFAIP3_interacting protein 1</b>                                | <b>1.640425183</b> | <b>0.062748</b> | <b>2</b>  |
| Q9WUU8        | IFEEDFQRRER                                                               | 1.30951591         | 2               | 2.326398  |
| Q9WUU8        | QENEALK                                                                   | 1.679060897        | 1               | 2.292133  |
| <b>Q9WV85</b> | <b>NDK3 Nucleoside diphosphate kinase 3</b>                               | <b>1.127566591</b> | <b>0.039927</b> | <b>3</b>  |
| Q9WV85        | LVKYMSSGPVAMVWQGLDVVHASR+Oxidation(4)Oxidation(12                         | 1.624579195        |                 |           |
| Q9WV85        | LVQASELLR                                                                 | 1.484091092        | 2               | 2.709014  |
| Q9WV85        | TFLAVKPDGVQR                                                              | 0.860482976        | 2               | 2.677974  |
| <b>Q9WVC0</b> | <b>SEPT7 Septin_7</b>                                                     | <b>1.160369821</b> | <b>0.092747</b> | <b>3</b>  |
| Q9WVC0        | ADTLTPEECQFK                                                              | 0.990297737        | 2               | 2.857772  |
| Q9WVC0        | FEDYLNAESR                                                                | 1.851000058        | 2               | 2.761629  |
| Q9WVC0        | NLEGYVGFANLPNQVYR                                                         | 1.448255883        | 2               | 3.62276   |
| <b>Q9WVD5</b> | <b>ORNT1 Mitochondrial ornithine transporter 1</b>                        | <b>2.988334864</b> | <b>1.14E-08</b> | <b>3</b>  |
| Q9WVD5        | DGPLGFYHGLSSTLLR                                                          | 2.107277806        | 2               | 2.924236  |
| Q9WVD5        | LQTMYEMETSGK                                                              | 2.989985649        | 2               | 3.128049  |
| Q9WVD5        | NEGITALYGLKPTMIR                                                          | 1.853353058        | 2               | 3.345052  |
| <b>Q9WVF7</b> | <b>DPOE1 DNA polymerase epsilon catalytic subunit A</b>                   | <b>0.973821223</b> | <b>0.352468</b> | <b>2</b>  |
| Q9WVF7        | AANMPDSELFELISENR                                                         | 1.764072247        | 2               | 2.475903  |
| Q9WVF7        | MAWQWRGEFMPASR+Oxidation(0)Oxidation(9                                    | 0.591455904        |                 |           |
| <b>Q9WVK3</b> | <b>PECR Peroxisomal trans_2_enoyl_CoA reductase</b>                       | <b>1.147819164</b> | <b>2.55E-07</b> | <b>13</b> |
| Q9WVK3        | AGVYNLTK                                                                  | 1.190284774        | 2               | 2.52272   |
| Q9WVK3        | ASQPPSSSTQVTAIQCNIR                                                       | 1.017477669        | 2               | 5.537068  |
| Q9WVK3        | DHGGSIVNIIVLLNNGFPTAAHSGAAR                                               | 1.087552783        | 3               | 6.299735  |
| Q9WVK3        | ELLHLGCNVVIASR                                                            | 1.189997813        | 2               | 4.243767  |
| Q9WVK3        | INFLVNNAGGQFMAPAEDITAK                                                    | 1.327693891        | 2               | 5.485016  |
| Q9WVK3        | INFLVNNAGGQFMAPAEDITAK+Oxidation(12                                       | 3.22099089         |                 |           |
| Q9WVK3        | KEEEVNLLVK                                                                | 1.160738881        | 3               | 4.018847  |
| Q9WVK3        | LTAAVDELK                                                                 | 1.379023086        | 2               | 3.187407  |
| Q9WVK3        | NFTIPDHDNWPVAGDSSFIK                                                      | 1.147769288        | 2               | 5.020341  |
| Q9WVK3        | NFTIPDHDNWPVAGDSSFIKK                                                     | 1.311189494        | 3               | 3.757136  |
| Q9WVK3        | SGQSYLAAGLLQNQVAVVTGGATGIGK                                               | 1.050091523        | 2               | 6.211107  |
| Q9WVK3        | TMALTWASSGVR                                                              | 0.874851719        | 2               | 3.800287  |
| Q9WVK3        | TMALTWASSGVR+Oxidation(1                                                  | 1.28366328         |                 |           |
| <b>Q9WVK7</b> | <b>HCDH Hydroxyacyl_coenzyme A dehydrogenase_mitochondrial</b>            | <b>1.311705715</b> | <b>0.360711</b> | <b>17</b> |
| Q9WVK7        | AADEFVEK                                                                  | 1.122492284        | 2               | 3.351208  |
| Q9WVK7        | DTPGFIVNR                                                                 | 1.551664688        | 2               | 2.703011  |
| Q9WVK7        | EDIDTAMK                                                                  | 0.811271323        | 1               | 2.151941  |
| Q9WVK7        | FAAEHTIFASNTSSLQITNIANATTR                                                | 1.052915201        | 3               | 4.765929  |
| Q9WVK7        | FILDGWHEMDPENPLFQPSMNNLVAQK                                               | 1.246311777        | 3               | 5.483439  |
| Q9WVK7        | FILDGWHEMDPENPLFQPSMNNLVAQK+Oxidation(21                                  | 1.244332462        |                 |           |
| Q9WVK7        | FILDGWHEMDPENPLFQPSMNNLVAQK+Oxidation(8                                   | 1.277738787        |                 |           |
| Q9WVK7        | GDASKEDIDTAMK                                                             | 0.950484903        | 2               | 3.891581  |
| Q9WVK7        | GDASKEDIDTAMK+Oxidation(11                                                | 1.008842846        |                 |           |
| Q9WVK7        | HVTVIGGLMGAGIAQVAAATGHTVVLVDQTEDILAK                                      | 0.968266644        | 4               | 5.895552  |
| Q9WVK7        | KGIEESLK                                                                  | 0.982246934        | 2               | 2.433297  |
| Q9WVK7        | KGIEESLKR                                                                 | 1.32102057         | 2               | 2.429588  |
| Q9WVK7        | LKNELFQR                                                                  | 1.492122064        | 2               | 2.645324  |
| Q9WVK7        | LLVPYLIEAIR                                                               | 1.158583213        | 2               | 2.758321  |
| Q9WVK7        | LVEVIK                                                                    | 1.115661927        | 2               | 2.411884  |
| Q9WVK7        | TFESLVDCK                                                                 | 1.335813701        | 2               | 3.443285  |
| Q9WVK7        | TLSSLSTSTDAASVHSTDLVVEAIVENLK                                             | 0.940444885        | 3               | 6.056847  |
| <b>Q9Z0N2</b> | <b>IF2H Eukaryotic translation initiation factor 2 subunit 3_Y_linked</b> | <b>1.270381318</b> | <b>0.002363</b> | <b>3</b>  |

|               |                                                                     |                    |                 |           |
|---------------|---------------------------------------------------------------------|--------------------|-----------------|-----------|
| Q9Z0N2        | IVLTNPVCTEVGEK                                                      | 1.010542155        | 2               | 2.914335  |
| Q9Z0N2        | SFDVNKPGCEVDDLK                                                     | 1.638727407        | 2               | 3.331222  |
| Q9Z0N2        | VGQEIEVRPGIVSK                                                      | 1.325727385        | 2               | 3.259018  |
| <b>Q9Z0U5</b> | <b>ADO Aldehyde oxidase</b>                                         | <b>2.589853471</b> | <b>1.06E-07</b> | <b>17</b> |
| Q9Z0U5        | EFQPLDPTQELIFPELMR                                                  | 1.863740945        | 2               | 2.626255  |
| Q9Z0U5        | ELSILYGGVGPPTIGAK                                                   | 1.779317875        | 2               | 3.546606  |
| Q9Z0U5        | GEDMLITGGR                                                          | 2.543877973        | 2               | 2.6167    |
| Q9Z0U5        | GTSTETVPNTNASGGSVVADLNLAVK                                          | 1.76371811         | 2               | 4.607535  |
| Q9Z0U5        | GYESNINWEK                                                          | 2.605350787        | 2               | 2.626504  |
| Q9Z0U5        | HATGEAIYCDDMPAVDR                                                   | 3.921427703        | 2               | 2.704537  |
| Q9Z0U5        | HIQDIVAATLK                                                         | 1.82430604         | 2               | 2.727388  |
| Q9Z0U5        | HLDSDLNPLLAVGNCTLNLLSK                                              | 2.235409296        | 3               | 3.686975  |
| Q9Z0U5        | KCPDSDLKPQEVLSVNI PCSR                                              | 1.579983612        | 3               | 3.498518  |
| Q9Z0U5        | KLECGNVDEAFK                                                        | 1.743016146        | 2               | 3.656691  |
| Q9Z0U5        | LVLDEVTLGASAPGGK                                                    | 2.988737626        | 2               | 3.726038  |
| Q9Z0U5        | MTWISPVTLEELVEAK                                                    | 1.483634028        | 2               | 3.41583   |
| Q9Z0U5        | NHPEPSLDQLTDALGGNLCR                                                | 2.519621073        | 2               | 3.099247  |
| Q9Z0U5        | NMASLGGHIVSR                                                        | 1.895580455        | 2               | 3.170923  |
| Q9Z0U5        | QQNALAIVNSGMR                                                       | 1.137342413        | 2               | 2.473143  |
| Q9Z0U5        | RLEPIISK                                                            | 3.779747974        | 2               | 2.324546  |
| Q9Z0U5        | VVENNVDPPEMMLLPYLR                                                  | 2.299909997        | 2               | 2.839889  |
| <b>Q9Z0V5</b> | <b>PRDX4 Peroxiredoxin_4</b>                                        | <b>1.151775947</b> | <b>0.248504</b> | <b>5</b>  |
| Q9Z0V5        | ENECHFYAGGQVYPGEVSR                                                 | 0.96990999         | 3               | 5.189641  |
| Q9Z0V5        | GLFIIDDK                                                            | 1.21613791         | 2               | 3.026597  |
| Q9Z0V5        | HGEVCPAGWKPGSETIIPDPAGK                                             | 1.353351915        | 3               | 3.559027  |
| Q9Z0V5        | QITLNDLPVGR                                                         | 1.135630509        | 2               | 3.154166  |
| Q9Z0V5        | TRENECHFYAGGQVYPGEVSR                                               | 1.146411824        | 3               | 5.615305  |
| <b>Q9Z0V6</b> | <b>PRDX3 Thioredoxin_dependent peroxide reductase_mitochondrial</b> | <b>1.256612965</b> | <b>0.001036</b> | <b>5</b>  |
| Q9Z0V6        | AFQFVETHGEVCPANWTPESPTIKPSPTASK                                     | 1.302660647        | 3               | 5.436292  |
| Q9Z0V6        | GLFIIDPNGVIK                                                        | 1.336498136        | 2               | 3.061068  |
| Q9Z0V6        | GTAVVNGEFK                                                          | 1.290375797        | 2               | 2.729446  |
| Q9Z0V6        | HLSVNDLPVGR                                                         | 1.249086791        | 2               | 2.589033  |
| Q9Z0V6        | NGGLGHMNITLLSDLTK                                                   | 0.953143901        | 3               | 3.481045  |
| <b>Q9Z0W7</b> | <b>CLIC4 Chloride intracellular channel protein 4</b>               | <b>1.20473438</b>  | <b>0.0014</b>   | <b>3</b>  |
| Q9Z0W7        | DEFTNTCPSDKEVEIAYS DVAK                                             | 1.046201522        | 3               | 3.642764  |
| Q9Z0W7        | FLDGDEMTLADCNLLPK                                                   | 1.156642252        | 2               | 4.24368   |
| Q9Z0W7        | NSRPEANEALER                                                        | 1.215910575        | 3               | 4.292357  |
| <b>Q9Z142</b> | <b>TMM33 Transmembrane protein 33</b>                               | <b>1.57622355</b>  | <b>0.054875</b> | <b>2</b>  |
| Q9Z142        | ALLANALTSALR                                                        | 1.558944845        | 2               | 3.754112  |
| Q9Z142        | LSTNQQNILK                                                          | 1.879139284        | 2               | 2.437054  |
| <b>Q9Z1A6</b> | <b>VIGLN Vigilin</b>                                                | <b>1.551855604</b> | <b>9.9E-20</b>  | <b>22</b> |
| Q9Z1A6        | ASVITQVFHVPLEER                                                     | 2.046043663        | 2               | 3.280233  |
| Q9Z1A6        | DLANIAEVEVSIPAK                                                     | 5.674118556        | 2               | 2.542457  |
| Q9Z1A6        | EALEALVPVTIEVEVPFDLHR                                               | 1.795342381        | 3               | 3.453621  |
| Q9Z1A6        | ELQAEQEDR                                                           | 1.368572157        | 2               | 2.410506  |
| Q9Z1A6        | HEVLLISAEQDKR                                                       | 1.149790014        | 3               | 4.518711  |
| Q9Z1A6        | ICLEIMQR                                                            | 1.138620611        | 2               | 2.52203   |
| Q9Z1A6        | IDLPAENSNSSETIVITGK                                                 | 0.85461076         | 2               | 4.228618  |
| Q9Z1A6        | IEGDPQGVQQAQ                                                        | 1.017347117        | 2               | 3.461374  |
| Q9Z1A6        | IIFPAAEDKQDQLITIGK                                                  | 1.163866617        | 2               | 4.477977  |
| Q9Z1A6        | IQIPRPDDPSNQIK                                                      | 1.508362249        | 2               | 2.500819  |
| Q9Z1A6        | ITLEGPTEDVNVAQEIQIEGMVK                                             | 1.584085077        | 2               | 3.470239  |
| Q9Z1A6        | IVGELEQMVSEVPLDHR                                                   | 1.544334609        | 2               | 4.778924  |
| Q9Z1A6        | LGQALTEVYAK                                                         | 1.245724048        | 2               | 3.455918  |
| Q9Z1A6        | LQDLELK                                                             | 1.381326732        | 1               | 2.392766  |
| Q9Z1A6        | LQTQASATVPIPK                                                       | 0.90294585         | 2               | 3.649959  |

|               |                                                                                            |                    |                 |           |
|---------------|--------------------------------------------------------------------------------------------|--------------------|-----------------|-----------|
| Q9Z1A6        | LVGEIMQETGTR                                                                               | 1.566188089        | 2               | 3.514382  |
| Q9Z1A6        | MDYVEINIDHK                                                                                | 1.342181871        | 2               | 2.803955  |
| Q9Z1A6        | MVADLVENSYSISVPIFK                                                                         | 1.345630696        | 3               | 3.405799  |
| Q9Z1A6        | RCDIIVISGR                                                                                 | 1.209498271        | 2               | 2.958162  |
| Q9Z1A6        | TGAHLELSLAK                                                                                | 1.451501933        | 3               | 3.800119  |
| Q9Z1A6        | TKDLIEQR                                                                                   | 1.61254724         | 2               | 2.67492   |
| Q9Z1A6        | VKELQAEQEDR                                                                                | 1.361991409        | 3               | 3.748861  |
| <b>Q9Z1J8</b> | <b>S14L3 SEC14_like protein 3</b>                                                          | <b>1.380106557</b> | <b>6.02E-05</b> | <b>3</b>  |
| Q9Z1J8        | ENVQDVLPALPNDDYFLLR                                                                        | 0.904021727        | 2               | 2.632661  |
| Q9Z1J8        | FRENVQDVLPALPNDDYFLLR                                                                      | 1.815668263        | 3               | 4.350212  |
| Q9Z1J8        | GSSHQVEYEILFPGCVLR                                                                         | 2.256088179        | 2               | 4.892803  |
| <b>Q9Z1L0</b> | <b>PK3CB Phosphatidylinositol_4_5_bisphosphate 3_kinase catalytic subunit beta isoform</b> | <b>1.148731277</b> | <b>0.346068</b> | <b>2</b>  |
| Q9Z1L0        | MARLCFAVYAVLDK+Oxidation(0                                                                 | 1.173487541        |                 |           |
| Q9Z1L0        | QPYYPFDFK                                                                                  | 1.148693153        | 1               | 1.941834  |
| <b>Q9Z1M9</b> | <b>SMC1A Structural maintenance of chromosomes protein 1A</b>                              | <b>1.811973263</b> | <b>0.082242</b> | <b>3</b>  |
| Q9Z1M9        | EIKEKSELNQK                                                                                | 1.401144131        | 2               | 2.563669  |
| Q9Z1M9        | IIDETMAQLQDLK                                                                              | 1.740715545        | 2               | 2.427644  |
| Q9Z1M9        | SGVISGGASDLKAKAR                                                                           | 1.81491328         | 2               | 2.337994  |
| <b>Q9Z1N1</b> | <b>F16P2 Fructose_1_6_bisphosphatase isozyme 2</b>                                         | <b>1.293935741</b> | <b>0.319881</b> | <b>2</b>  |
| Q9Z1N1        | YVGSMAVDVHR                                                                                | 1.198691255        | 2               | 2.698278  |
| Q9Z1N1        | YVGSMAVDVHR+Oxidation(4                                                                    | 1.604835775        |                 |           |
| <b>Q9Z1P2</b> | <b>ACTN1 Alpha_actinin_1</b>                                                               | <b>1.033928274</b> | <b>0.000462</b> | <b>5</b>  |
| Q9Z1P2        | DYETATLSEIK                                                                                | 1.450398996        | 1               | 1.970158  |
| Q9Z1P2        | GISQEQMNEFR                                                                                | 1.279229761        | 2               | 2.898403  |
| Q9Z1P2        | ICDQWDNLGALTQK                                                                             | 1.439355443        | 2               | 4.124104  |
| Q9Z1P2        | IDQLEGDHQLIQEALIFDNK                                                                       | 2.184190085        | 3               | 3.916862  |
| Q9Z1P2        | MVSDINNAWGCLEQAEK                                                                          | 0.953093098        | 2               | 2.710698  |
| <b>Q9Z1W6</b> | <b>LYRIC Protein LYRIC</b>                                                                 | <b>1.283907926</b> | <b>0.523304</b> | <b>5</b>  |
| Q9Z1W6        | KREEVTPPTAPEDPAQLK                                                                         | 1.282307016        | 3               | 4.567927  |
| Q9Z1W6        | SSSQVPPMLQDTPDKPK                                                                          | 1.53861349         | 2               | 3.411627  |
| Q9Z1W6        | SWQDELAQQAEEGSAR                                                                           | 2.037656184        | 2               | 5.682002  |
| Q9Z1W6        | TELGLDLGLEPK                                                                               | 1.584747154        | 2               | 3.379224  |
| Q9Z1W6        | TLPPAISAEPVTLTK                                                                            | 1.211211346        | 2               | 2.935138  |
| <b>Q9Z1Y3</b> | <b>CADH2 Cadherin_2</b>                                                                    | <b>1.862617062</b> | <b>0.051725</b> | <b>4</b>  |
| Q9Z1Y3        | FLEAGIYEVPIVITDSGNPPK                                                                      | 2.04724031         | 2               | 3.951784  |
| Q9Z1Y3        | IDPVNGQITTIIVLDR                                                                           | 1.472305584        | 2               | 3.926228  |
| Q9Z1Y3        | VCQCDSNGDCTDVDR                                                                            | 2.163155961        | 2               | 5.106618  |
| Q9Z1Y3        | YSVTGPGADQPPTGIFIINPISGQLSVTKPLDR                                                          | 1.307281233        | 3               | 3.597292  |
| <b>Q9Z270</b> | <b>VAPA Vesicle_associated membrane protein_associated protein A</b>                       | <b>1.138406028</b> | <b>0.843769</b> | <b>3</b>  |
| Q9Z270        | FKGPFTDVVTTNLK                                                                             | 1.077213168        | 2               | 3.043178  |
| Q9Z270        | HEQILVLDPPSDLK                                                                             | 1.159788188        | 2               | 3.748403  |
| Q9Z270        | QDGPLPKPHSVSLNDTETR                                                                        | 2.041958611        | 3               | 3.40779   |
| <b>Q9Z2C8</b> | <b>YBOX2 Y_box_binding protein 2</b>                                                       | <b>1.588364871</b> | <b>0.284495</b> | <b>2</b>  |
| Q9Z2C8        | SVGDGETVEFDVVEGEK                                                                          | 1.636492966        | 2               | 3.4501    |
| Q9Z2C8        | WFNVRNGYGFINRNDTK                                                                          | 1.567406295        | 2               | 2.30786   |
| <b>Q9Z2I8</b> | <b>SUCB2 Succinyl_CoA ligase [GDP_forming] subunit beta_mitochondrial</b>                  | <b>1.182779329</b> | <b>0.515035</b> | <b>10</b> |
| Q9Z2I8        | DIFAMDDKSENEPIEENAR                                                                        | 1.115823714        | 2               | 5.003272  |
| Q9Z2I8        | IDATQVEVNPFGETPEGQVVCFDAK                                                                  | 1.216293534        | 3               | 4.678381  |
| Q9Z2I8        | INFDDNAEFR                                                                                 | 0.787848229        | 2               | 3.159896  |
| Q9Z2I8        | LEGTNVQEAQNILK                                                                             | 1.018151276        | 2               | 5.201319  |
| Q9Z2I8        | SENEPIEENAR                                                                                | 0.955074241        | 2               | 4.197033  |
| Q9Z2I8        | SHNGPVIVGSPQGGVDIEEVAASSPELIFK                                                             | 1.375130777        | 2               | 6.150728  |
| Q9Z2I8        | SSGLPITSAVDLEDAK                                                                           | 1.246109554        | 2               | 4.963078  |

|               |                                                                           |                    |                 |           |
|---------------|---------------------------------------------------------------------------|--------------------|-----------------|-----------|
| Q9Z2I8        | SSGLPITSAVDLEDAAKK                                                        | 1.000200905        | 2               | 2.700267  |
| Q9Z2I8        | VMVAEALDISR                                                               | 1.289048625        | 2               | 3.197753  |
| Q9Z2I8        | VVGELAQQMIGYNLTK                                                          | 1.637471764        | 3               | 3.392198  |
| <b>Q9Z2I9</b> | <b>SUCB1 Succinyl_CoA ligase [ADP_forming] subunit beta_mitochondrial</b> | <b>1.465099294</b> | <b>6.45E-07</b> | <b>9</b>  |
| Q9Z2I9        | ALIADSGLK                                                                 | 1.548033387        | 1               | 2.156108  |
| Q9Z2I9        | AVSSQMIGQK                                                                | 1.703060819        | 2               | 2.924787  |
| Q9Z2I9        | ICNQVLVCER                                                                | 1.570941284        | 2               | 2.984698  |
| Q9Z2I9        | ILACDDLDEAAK                                                              | 1.063179686        | 2               | 3.312271  |
| Q9Z2I9        | INFDSNSAYR                                                                | 1.25461892         | 2               | 3.015954  |
| Q9Z2I9        | LSEIVTLAK                                                                 | 1.325450623        | 2               | 2.394992  |
| Q9Z2I9        | MGFPSNIVDSAAENMIK                                                         | 1.321545676        | 2               | 4.200814  |
| Q9Z2I9        | SSDEAYAIK                                                                 | 1.464990576        | 2               | 3.355447  |
| Q9Z2I9        | VQAILVNIFFGIMR                                                            | 1.842290931        | 2               | 3.835011  |
| <b>Q9Z2L0</b> | <b>VDAC1 Voltage_dependent anion_selective channel protein 1</b>          | <b>1.069442386</b> | <b>1.05E-08</b> | <b>13</b> |
| Q9Z2L0        | EHINLGCDDVDFDIAGPSIR                                                      | 2.959987534        | 2               | 3.128056  |
| Q9Z2L0        | KLETAVNLAWTAGNSNTR                                                        | 1.374689162        | 2               | 5.448183  |
| Q9Z2L0        | LTFDSSFSPTNGK                                                             | 1.221664034        | 2               | 3.720677  |
| Q9Z2L0        | LTFDSSFSPTNGKK                                                            | 1.696936714        | 2               | 2.799069  |
| Q9Z2L0        | LTLSALLDGK                                                                | 2.838448004        | 2               | 2.686695  |
| Q9Z2L0        | SENGLEFTSSGSANTETTK                                                       | 1.02800518         | 2               | 3.763026  |
| Q9Z2L0        | TDEFQLHTNVNDGTEFGGSIYQK                                                   | 1.422651276        | 2               | 4.988048  |
| Q9Z2L0        | TKSENGLEFTSSGSANTETTK                                                     | 0.635775389        | 3               | 3.597896  |
| Q9Z2L0        | VNSSLIGLGYTQTLKPGIK                                                       | 0.859569347        | 2               | 4.7374    |
| Q9Z2L0        | VTQSNFAVGYK                                                               | 1.349326955        | 2               | 3.432572  |
| Q9Z2L0        | WNTDNTLGTEITVEDQLAR                                                       | 1.034241657        | 2               | 4.915426  |
| Q9Z2L0        | WTEYGLTFTEK                                                               | 1.660092294        | 1               | 2.90325   |
| Q9Z2L0        | YQVDPDACFSAK                                                              | 1.244022241        | 2               | 3.394097  |
| <b>Q9Z2M4</b> | <b>DECR2 Peroxisomal 2_4_dienoyl_CoA reductase</b>                        | <b>0.896453561</b> | <b>1.32E-05</b> | <b>6</b>  |
| Q9Z2M4        | AAVDAMTR                                                                  | 0.933098276        | 2               | 2.32431   |
| Q9Z2M4        | GQVLQLHAGAAK                                                              | 0.960966571        | 2               | 3.42674   |
| Q9Z2M4        | HLAVEWGPQNIR                                                              | 1.159120524        | 2               | 3.498792  |
| Q9Z2M4        | LLEFESSAK                                                                 | 1.00838315         | 2               | 2.302423  |
| Q9Z2M4        | VNSLAPGAISGTEGLR                                                          | 0.799646921        | 2               | 3.831405  |
| Q9Z2M4        | VPPAVMAAVDQALK                                                            | 2.403424448        | 2               | 3.340923  |
| <b>Q9Z2M7</b> | <b>PMM2 Phosphomannomutase 2</b>                                          | <b>1.060152878</b> | <b>0.028744</b> | <b>3</b>  |
| Q9Z2M7        | IGVVGGSDFEK                                                               | 1.953603259        | 2               | 2.353583  |
| Q9Z2M7        | LQEQLGNDVVEK                                                              | 0.347944701        | 2               | 3.862124  |
| Q9Z2M7        | TVGYVTAPEDTR                                                              | 1.14035168         | 2               | 2.658996  |
| <b>Q9Z2Q1</b> | <b>SC31A Protein transport protein Sec31A</b>                             | <b>1.292895927</b> | <b>0.000296</b> | <b>17</b> |
| Q9Z2Q1        | AQDGSNPLSLQDLIEK                                                          | 1.074972053        | 2               | 3.420906  |
| Q9Z2Q1        | AVQLTQALDNTVVGALLAEK                                                      | 1.572903739        | 2               | 4.632329  |
| Q9Z2Q1        | CLSSATDPQTK                                                               | 0.6267439          | 2               | 2.851838  |
| Q9Z2Q1        | DQTLSPTIISGLHSIAR                                                         | 1.51370739         | 2               | 3.408799  |
| Q9Z2Q1        | GGPGPLAGHPQVSR                                                            | 0.711650682        | 2               | 3.117505  |
| Q9Z2Q1        | IDASQTDFEK                                                                | 1.009359716        | 2               | 2.330748  |
| Q9Z2Q1        | IIAGDKEVVIAQK                                                             | 1.417168835        | 2               | 3.037421  |
| Q9Z2Q1        | KIDASQTDFEK                                                               | 1.254454723        | 2               | 2.516876  |
| Q9Z2Q1        | LVTFENVTGQPQQGAEQPR                                                       | 1.119972257        | 2               | 3.073418  |
| Q9Z2Q1        | QVQHILASASPSGR                                                            | 1.683566053        | 2               | 3.278647  |
| Q9Z2Q1        | RQPVFISQVVTEK                                                             | 0.568364087        | 2               | 3.740601  |
| Q9Z2Q1        | RQPVFISQVVTEKDFLSR                                                        | 0.979611439        | 3               | 3.538083  |
| Q9Z2Q1        | TQPPEDISCIAWNRR                                                           | 1.227759369        | 2               | 2.966684  |
| Q9Z2Q1        | TTFEDLIQR                                                                 | 0.839534545        | 2               | 2.40678   |
| Q9Z2Q1        | VNFEEDSR                                                                  | 1.354798243        | 2               | 2.39294   |
| Q9Z2Q1        | VYSIMGGSIDGLR                                                             | 1.292534792        | 2               | 2.801044  |

|               |                                                |                    |                 |          |
|---------------|------------------------------------------------|--------------------|-----------------|----------|
| Q9Z2Q1        | YLELLGYR                                       | 1.182040245        | 2               | 2.373797 |
| <b>Q9Z2Z8</b> | <b>DHCR7 7 dehydrocholesterol reductase</b>    | <b>1.596517163</b> | <b>0.023191</b> | <b>4</b> |
| Q9Z2Z8        | AIECSYTSADGLK                                  | 5.664229141        | 2               | 3.409475 |
| Q9Z2Z8        | ASLADIWAK                                      | 2.032338295        | 2               | 2.352791 |
| Q9Z2Z8        | FLPGYVGGVQEGAITPAGIVNK                         | 1.94806071         | 2               | 5.566527 |
| Q9Z2Z8        | GYLFPTSAEDCK                                   | 1.28964794         | 2               | 2.793896 |
| <b>Q9Z339</b> | <b>GSTO1 Glutathione S_transferase omega_1</b> | <b>1.072424302</b> | <b>0.983968</b> | <b>2</b> |
| Q9Z339        | GSAPPGPVPEGQIR                                 | 1.081541706        | 2               | 3.156141 |
| Q9Z339        | LEALELNECIDHTPK                                | 0.638276947        | 2               | 3.689148 |

*Time point 8.0 hours*

| Accession number | Protein DESCRIPTION                                                   | Protein Ratio (8h)  | P-value (8 h)  | Peptide number (8 h) |
|------------------|-----------------------------------------------------------------------|---------------------|----------------|----------------------|
| Accession number | Peptide sequence                                                      | Peptide Ratio (8 h) | Charge state   | Xcorr                |
| <b>A0JPJ7</b>    | <b>OLA1 Obg_like ATPase 1</b>                                         | <b>1.40865398</b>   | <b>0.6206</b>  | <b>2</b>             |
| A0JPJ7           | IGIVGLPNVGK                                                           | 1.13690632          | 2              | 2.54238              |
| A0JPJ7           | YLEANMTQSALPK                                                         | 1.42298935          | 2              | 2.67676              |
| <b>A1L108</b>    | <b>ARP5L Actin_related protein 2/3 complex subunit 5_like protein</b> | <b>1.09979983</b>   | <b>0.57828</b> | <b>2</b>             |
| A1L108           | ALAVGGGLSIIIR                                                         | 1.03329037          | 2              | 2.75621              |
| A1L108           | SSEIEQAVQSLDR                                                         | 1.39335751          | 2              | 2.73853              |
| <b>A1L1L2</b>    | <b>TM214 Transmembrane protein 214</b>                                | <b>0.89594331</b>   | <b>0.3291</b>  | <b>2</b>             |
| A1L1L2           | KGSGSNEHVVTCDTACK                                                     | 6.40797431          | 3              | 3.52669              |
| A1L1L2           | YDLSSPIQPTSTLYER                                                      | 0.8522633           | 2              | 3.33895              |
| <b>A2A6A1</b>    | <b>GPTC8 G patch domain_containing protein 8</b>                      | <b>0.81923758</b>   | <b>0.30154</b> | <b>2</b>             |
| A2A6A1           | RVLEVEKEDTEELR                                                        | 0.85396447          | 2              | 2.54085              |
| A2A6A1           | YKDYVDKEK                                                             | 0.7699839           | 1              | 1.93375              |
| <b>A2AAE1</b>    | <b>K1109 Uncharacterized protein KIAA1109</b>                         | <b>0.99292784</b>   | <b>0.73818</b> | <b>3</b>             |
| A2AAE1           | FQTNYASTTHLMTGK+Oxidation(11                                          | 0.95850479          |                |                      |
| A2AAE1           | LHYNSKTLKTESPNASR                                                     | 1.26072582          | 2              | 2.55056              |
| A2AAE1           | QGTSSSQPGELRGRK                                                       | 0.81014243          | 2              | 2.52225              |
| <b>A2ADY9</b>    | <b>DDI2 Protein DDI1 homolog 2</b>                                    | <b>1.13267972</b>   | <b>0.89008</b> | <b>3</b>             |
| A2ADY9           | IDFSSIAVPGTSPNPQQR                                                    | 2.4549296           | 2              | 2.65825              |
| A2ADY9           | NPPLAEALLSGDLEK                                                       | 1.05896184          | 2              | 2.84212              |
| A2ADY9           | VLVEQQQDR                                                             | 1.21461843          | 2              | 2.88109              |
| <b>A2AF47</b>    | <b>DOC11 Dedicator of cytokinesis protein 11</b>                      | <b>1.0118257</b>    | <b>0.87655</b> | <b>3</b>             |
| A2AF47           | LCSSVDVDMIQLQLK                                                       | 1.9301454           | 2              | 2.50386              |
| A2AF47           | LTGLSEISLR                                                            | 0.92904471          | 2              | 2.35212              |
| A2AF47           | MPFAWAARPIFKDVQGSGLDLDR+Oxidation(0                                   | 1.01387062          |                |                      |
| <b>A2AGT5</b>    | <b>CKAP5 Cytoskeleton_associated protein 5</b>                        | <b>0.7866659</b>    | <b>0.05365</b> | <b>2</b>             |
| A2AGT5           | DQVLAMLEKAKANMPSPKPAAPAK+Oxidation(13                                 | 0.17451111          |                |                      |
| A2AGT5           | GESVQEELLK                                                            | 1.05596138          | 1              | 1.93865              |
| <b>A2APB8</b>    | <b>TPX2 Targeting protein for Xklp2</b>                               | <b>1.11277552</b>   | <b>0.47697</b> | <b>2</b>             |
| A2APB8           | GIGEPFQGKNSLRK                                                        | 1.31194845          | 2              | 2.3504               |
| A2APB8           | NKKDESLLPSK                                                           | 1.11182123          | 2              | 2.48351              |
| <b>A2AQP0</b>    | <b>MYH7B Myosin_7B</b>                                                | <b>1.72793203</b>   | <b>0.49598</b> | <b>7</b>             |
| A2AQP0           | AITDAAMMAEELKK                                                        | 1.87893166          | 2              | 3.33736              |
| A2AQP0           | DIDDLELTLAK                                                           | 1.01435925          | 2              | 3.61918              |
| A2AQP0           | EQDTS AHLER                                                           | 3.13263251          | 2              | 2.84886              |
| A2AQP0           | HDCDLLR                                                               | 3.10487384          | 1              | 2.05437              |
| A2AQP0           | KAITDAAMMAEELKK                                                       | 2.70280187          | 3              | 3.62427              |
| A2AQP0           | VEDEQLVGVQLQK                                                         | 2.8524123           | 2              | 2.41987              |
| A2AQP0           | VGNEYVTK                                                              | 3.06719234          | 2              | 2.41493              |
| <b>A2ASS6</b>    | <b>TITIN Titin</b>                                                    | <b>1.14959002</b>   | <b>0.76202</b> | <b>13</b>            |
| A2ASS6           | AENRFGIGPPAETIQRRTAR                                                  | 1.79853662          | 2              | 2.51301              |
| A2ASS6           | ATNEVGS DCACTVK                                                       | 4.32245096          | 2              | 3.82115              |
| A2ASS6           | ETAMLSWDVPENDGGAPVK+Oxidation(3                                       | 0.85174069          |                |                      |
| A2ASS6           | KDLNMVVSAAARISCGGAIR                                                  | 1.0957311           | 2              | 2.36533              |
| A2ASS6           | RRTEEGYYEAITAVELK                                                     | 1.35579733          | 2              | 2.57674              |
| A2ASS6           | TCEIEIGQLK                                                            | 1.05608248          | 2              | 2.31167              |
| A2ASS6           | TDSGAYILTATNPGGFAK                                                    | 1.6278045           | 2              | 2.39487              |
| A2ASS6           | TFLQDQLVSLQVLK                                                        | 1.30712124          | 1              | 1.9207               |
| A2ASS6           | VGDDAWIKDTTGTALR                                                      | 1.16624631          | 2              | 2.37483              |
| A2ASS6           | VLDRGPPEGPLAVSDVTSEK                                                  | 1.99702806          | 3              | 4.42801              |



|               |                                                                   |                   |                |           |
|---------------|-------------------------------------------------------------------|-------------------|----------------|-----------|
| A2ASS6        | VLDTGPPQNLAVK                                                     | 1.73728716        | 2              | 2.31419   |
| A2ASS6        | YDGGHKLTYGIVEK                                                    | 2.10392686        | 2              | 2.30845   |
| A2ASS6        | YGIGEPLDSEPETAR                                                   | 1.19155519        | 2              | 2.99747   |
| <b>A2AU72</b> | <b>ARMC3 Armadillo repeat_containing protein 3</b>                | <b>1.381323</b>   | <b>0.09607</b> | <b>2</b>  |
| A2AU72        | HASWAVMVCAGDEPMAVELCR+Oxidation(14                                | 2.84407337        |                |           |
| A2AU72        | TLGVITCDKEARTMLK+Oxidation(13                                     | 1.29865695        |                |           |
| <b>A2AWL7</b> | <b>MGAP MAX gene_associated protein</b>                           | <b>1.55749245</b> | <b>0.20224</b> | <b>2</b>  |
| A2AWL7        | ADVSLTLLTAQASLK                                                   | 1.47820968        | 2              | 2.46015   |
| A2AWL7        | TDQGILVTNRDARALLSR                                                | 2.37203638        | 3              | 3.32281   |
| <b>A2VCW9</b> | <b>AASS Alpha_aminoadipic semialdehyde synthase_mitochondrial</b> | <b>1.38025486</b> | <b>4.2E-05</b> | <b>11</b> |
| A2VCW9        | AEGIVFNTQSTIK                                                     | 1.90087904        | 2              | 2.48735   |
| A2VCW9        | AQEANMSLLDEVLK                                                    | 1.86119741        | 2              | 3.46036   |
| A2VCW9        | GAQEVFNELPCEYVEPHELK                                              | 2.09044719        | 2              | 4.46829   |
| A2VCW9        | KTDGVYDPVEYEKYPER                                                 | 1.48777669        | 3              | 3.61581   |
| A2VCW9        | KYDINTVNVTVGK                                                     | 1.99361673        | 2              | 3.95365   |
| A2VCW9        | LQSLVESQDLVISLLPYVLPVVAK                                          | 1.32993621        | 3              | 4.1841    |
| A2VCW9        | QDAQSLLVPAK                                                       | 1.14420603        | 2              | 2.55596   |
| A2VCW9        | REDVNAWER                                                         | 1.97438594        | 2              | 2.975     |
| A2VCW9        | SSVVPVEGCPPELPHK                                                  | 1.38025958        | 2              | 2.7061    |
| A2VCW9        | VNMVTASYITPAMK                                                    | 1.7541349         | 2              | 2.50333   |
| A2VCW9        | YDINTVNVTVGK                                                      | 0.87700482        | 2              | 2.34604   |
| <b>A4Q9F4</b> | <b>TTL11 Tubulin polyglutamylase TTL11</b>                        | <b>1.01660069</b> | <b>0.99769</b> | <b>2</b>  |
| A4Q9F4        | ALRIMQNLFPPEYNYFYPR+Oxidation(4                                   | 1.02246689        |                |           |
| A4Q9F4        | NLKPMLEVNANPSMR                                                   | 1.01330078        | 2              | 2.4453    |
| <b>A7VJC2</b> | <b>ROA2 Heterogeneous nuclear ribonucleoproteins A2/B1</b>        | <b>1.36347439</b> | <b>0.57388</b> | <b>12</b> |
| A7VJC2        | EESGKPGAHVTVK                                                     | 2.28066054        | 2              | 3.13958   |
| A7VJC2        | GFGFVTFDHDPVVK                                                    | 0.95606034        | 2              | 4.34796   |
| A7VJC2        | GGGGNFGPGGNSFR                                                    | 1.16167345        | 2              | 3.18919   |
| A7VJC2        | GGNFGFGDSR                                                        | 1.65304791        | 2              | 2.90223   |
| A7VJC2        | IDTIEIITDR                                                        | 0.95943252        | 2              | 3.98512   |
| A7VJC2        | LFIGGLSFETTEESLR                                                  | 2.59853363        | 2              | 3.64109   |
| A7VJC2        | LTDCVVMR                                                          | 1.48564801        | 2              | 2.61326   |
| A7VJC2        | NMGGPYGGNYGPGSGSGGGYGGGR                                          | 1.5918798         | 2              | 6.06358   |
| A7VJC2        | NYEQWGK                                                           | 1.59521873        | 2              | 2.40653   |
| A7VJC2        | QEMQEVQSSR                                                        | 1.02869062        | 2              | 3.02865   |
| A7VJC2        | QEMQEVQSSR+Oxidation(2                                            | 1.30332257        |                |           |
| A7VJC2        | YHTINGHNAEVR                                                      | 1.18833124        | 2              | 3.37763   |
| <b>B0BN93</b> | <b>PSD13 26S proteasome non_ATPase regulatory subunit 13</b>      | <b>1.51926309</b> | <b>0.31088</b> | <b>3</b>  |
| B0BN93        | GSIDEVDKR                                                         | 1.51890933        | 2              | 2.47745   |
| B0BN93        | LNIGDLQATK                                                        | 0.61070513        | 2              | 2.31404   |
| B0BN93        | SAWGQQPDLAANEALLR                                                 | 2.07331734        | 2              | 2.81676   |
| <b>B0BNA7</b> | <b>EIF3I Eukaryotic translation initiation factor 3 subunit I</b> | <b>1.63791506</b> | <b>0.00089</b> | <b>2</b>  |
| B0BNA7        | HVLTGSADNSCR                                                      | 1.63768112        | 2              | 3.48495   |
| B0BNA7        | LFDSTSLEHQK                                                       | 1.81524978        | 2              | 2.37482   |
| <b>B0BNE5</b> | <b>ESTD S_formylglutathione hydrolase</b>                         | <b>1.24129995</b> | <b>0.01659</b> | <b>7</b>  |
| B0BNE5        | AFNGYLGPDQSK                                                      | 0.93940844        | 2              | 3.17033   |
| B0BNE5        | FAIYLPPQAESAK                                                     | 1.65162039        | 2              | 2.67297   |
| B0BNE5        | MYSYVTEELPQLINANFPVDPQR                                           | 1.24283185        | 3              | 5.57758   |
| B0BNE5        | SGCQQAASEHGLVVIAPDTSR                                             | 1.06218984        | 2              | 5.77284   |
| B0BNE5        | SVSAFAPICNPVLCPWGK                                                | 1.25661987        | 3              | 4.20303   |
| B0BNE5        | SYSGPQIDILIDQKDFLSNGQLLPDNFIACTEK                                 | 1.34895726        | 3              | 4.88916   |
| B0BNE5        | VFEHSSVELK                                                        | 1.20484218        | 2              | 2.81127   |
| <b>B0BNN3</b> | <b>CAH1 Carbonic anhydrase 1</b>                                  | <b>0.6298021</b>  | <b>0.13345</b> | <b>2</b>  |

|               |                                                                        |                   |                |          |
|---------------|------------------------------------------------------------------------|-------------------|----------------|----------|
| B0BNN3        | ADGLAIIGVLMK                                                           | 0.60703258        | 2              | 3.30061  |
| B0BNN3        | HDSSLKPVSVSYNPATAK                                                     | 0.64021625        | 3              | 5.06419  |
| <b>B0K020</b> | <b>CISD1 CDGSH iron_sulfur domain_containing protein 1</b>             | <b>0.96297256</b> | <b>0.0057</b>  | <b>3</b> |
| B0K020        | AMVNLQIQK                                                              | 0.88615692        | 2              | 2.62225  |
| B0K020        | HNEETGDNVGPLLIK                                                        | 0.75559022        | 2              | 5.15707  |
| B0K020        | VVHAFDMEDLGDK                                                          | 1.28399294        | 3              | 3.93878  |
| <b>B1H267</b> | <b>SNX5 Sorting nexin_5</b>                                            | <b>1.07027687</b> | <b>0.99232</b> | <b>2</b> |
| B1H267        | NNVSLQSCIDLFK                                                          | 1.08005968        | 2              | 3.13254  |
| B1H267        | TTLPTFQSPEFSVTR                                                        | 1.06157292        | 2              | 3.59221  |
| <b>B2GUV7</b> | <b>IF2P Eukaryotic translation initiation factor 5B</b>                | <b>1.42141543</b> | <b>0.16066</b> | <b>2</b> |
| B2GUV7        | HLQAQGVVEVPSK                                                          | 1.32187701        | 2              | 2.76141  |
| B2GUV7        | LKEGDTIIVPGVEGPIVTQIR                                                  | 1.68805079        | 3              | 3.36647  |
| <b>B2GUZ5</b> | <b>CAZA1 F_actin_capping protein subunit alpha_1</b>                   | <b>1.00416132</b> | <b>0.56452</b> | <b>3</b> |
| B2GUZ5        | EASDPQPEDVDGGLK                                                        | 0.49476323        | 2              | 2.51639  |
| B2GUZ5        | FITHAPPGEFNEVFNDVR                                                     | 1.58485097        | 3              | 3.70062  |
| B2GUZ5        | FTITPPTAQVVGVLK                                                        | 1.20322833        | 2              | 2.94658  |
| <b>B2GV24</b> | <b>UFL1 E3 UFM1_protein ligase 1</b>                                   | <b>1.69009141</b> | <b>0.01669</b> | <b>3</b> |
| B2GV24        | NNPVHLITEEDLK                                                          | 1.36539097        | 2              | 2.54554  |
| B2GV24        | TYDLPGDFLTQALTQR                                                       | 1.71926139        | 2              | 3.2333   |
| B2GV24        | VNIVDLQQVINVDLTHIENR                                                   | 1.33422075        | 3              | 3.62073  |
| <b>B2RYW9</b> | <b>FAHD2 Fumarylacetoacetate hydrolase domain_containing protein 2</b> | <b>1.17615825</b> | <b>0.99286</b> | <b>6</b> |
| B2RYW9        | ALAAQLPLIPR                                                            | 0.82241576        | 2              | 2.85767  |
| B2RYW9        | GETALSVAR                                                              | 1.21997775        | 2              | 3.07367  |
| B2RYW9        | KGDEVQCEIEELGVIINK                                                     | 1.71454064        | 2              | 4.81224  |
| B2RYW9        | TFDTFCPLGPALVTK                                                        | 1.09398729        | 2              | 4.97568  |
| B2RYW9        | VICVGLNYADHCQEQNVR                                                     | 1.14100058        | 2              | 2.97759  |
| B2RYW9        | VNGEIVQSSNTNQMVFK                                                      | 1.14551399        | 2              | 4.78679  |
| <b>B2RZ78</b> | <b>VPS29 Vacuolar protein sorting_associated protein 29</b>            | <b>0.87014268</b> | <b>0.50628</b> | <b>2</b> |
| B2RZ78        | GDFDESLNYPEQK                                                          | 0.86968031        | 2              | 3.63955  |
| B2RZ78        | IQHILCTGNLCTK                                                          | 1.77658447        | 2              | 3.03615  |
| <b>B3DMA2</b> | <b>ACD11 Acyl_CoA dehydrogenase family member 11</b>                   | <b>1.05014867</b> | <b>0.99287</b> | <b>6</b> |
| B3DMA2        | AVLTVTQYR                                                              | 0.94835077        | 2              | 2.48295  |
| B3DMA2        | GSHIQENTGIPLMEELISIYCR                                                 | 0.76797477        | 2              | 2.32737  |
| B3DMA2        | LYEHEVVAHWIAK                                                          | 0.98131707        | 3              | 3.70689  |
| B3DMA2        | MELQDQAR                                                               | 1.11052019        | 2              | 2.47929  |
| B3DMA2        | NLPDSDNEECLVHGDFK                                                      | 0.81114564        | 2              | 3.46237  |
| B3DMA2        | SGQSNPTFFLQK                                                           | 1.30026271        | 2              | 2.58689  |
| <b>B5DFC8</b> | <b>EIF3C Eukaryotic translation initiation factor 3 subunit C</b>      | <b>1.75728066</b> | <b>0.00019</b> | <b>4</b> |
| B5DFC8        | FEELTNLIR                                                              | 1.757273          | 2              | 2.43461  |
| B5DFC8        | GTEITHAVVIK                                                            | 1.8912631         | 2              | 2.89775  |
| B5DFC8        | LGSLVENNER                                                             | 1.79914598        | 2              | 2.66618  |
| B5DFC8        | TEPTAQQLALQLAEK                                                        | 1.44767081        | 2              | 4.84914  |
| <b>B7ZNG0</b> | <b>KIF7 Kinesin_like protein KIF7</b>                                  | <b>1.06469971</b> | <b>2.1E-06</b> | <b>2</b> |
| B7ZNG0        | ELGRHMWINQELK+Oxidation(5                                              | 0.75766377        |                |          |
| B7ZNG0        | KEALMQEK                                                               | 2.22489156        | 2              | 2.72165  |
| <b>D3ZTX0</b> | <b>TMED7 Transmembrane emp24 domain_containing protein 7</b>           | <b>1.54579634</b> | <b>0.20442</b> | <b>2</b> |
| D3ZTX0        | QCFYEDITQGTK                                                           | 1.44408493        | 2              | 2.74209  |
| D3ZTX0        | SVIDYQTHFR                                                             | 1.54589286        | 2              | 2.83794  |
| <b>D3ZW55</b> | <b>ITPA Inosine triphosphate pyrophosphatase</b>                       | <b>1.94187714</b> | <b>0.0279</b>  | <b>5</b> |
| D3ZW55        | DFGWDFCFQPDGYEQTYAEMPK                                                 | 2.46657909        | 2              | 3.30029  |
| D3ZW55        | IDLPEYQGEPEISIQK                                                       | 2.13299162        | 2              | 4.34766  |

|               |                                                                     |                   |                |           |
|---------------|---------------------------------------------------------------------|-------------------|----------------|-----------|
| D3ZW55        | KLEEVILGDKFPCTLVAQK                                                 | 1.47109496        | 3              | 4.41666   |
| D3ZW55        | LKPEGLYQLLAGFEDK                                                    | 2.77889656        | 3              | 3.58711   |
| D3ZW55        | LQEYFGVTDGAGDH                                                      | 1.72828956        | 2              | 3.41133   |
| <b>D3ZZL9</b> | <b>GCC2 GRIP and coiled_coil domain_containing protein 2</b>        | <b>1.12591459</b> | <b>0.76481</b> | <b>2</b>  |
| D3ZZL9        | EKSQNDQNIMVQMK+Oxidation(12)                                        | 1.12591459        |                |           |
| D3ZZL9        | EKSQNDQNIMVQMK+Oxidation(9)                                         | 1.12591459        |                |           |
| <b>D4A4T9</b> | <b>CHR1 Cysteine and histidine_rich domain_containing protein 1</b> | <b>1.50621188</b> | <b>0.06192</b> | <b>4</b>  |
| D4A4T9        | FDPEANADDACTYHPGVPVFDALK                                            | 1.4543904         | 3              | 3.53312   |
| D4A4T9        | HNSEKPPPEVKPEVK                                                     | 1.40429233        | 3              | 3.65847   |
| D4A4T9        | KEEDSDEIKIGTSCK                                                     | 1.10231009        | 2              | 2.53985   |
| D4A4T9        | LSSGNEEDKKEEDSDEIK                                                  | 1.58604155        | 3              | 4.2974    |
| <b>D4A666</b> | <b>UBN2 Ubinuclein_2</b>                                            | <b>2.28929672</b> | <b>0.01356</b> | <b>2</b>  |
| D4A666        | GWMQARMLFK+Oxidation(2)Oxidation(6)                                 | 2.23123871        |                |           |
| D4A666        | KEEGEKEK                                                            | 2.29585957        | 1              | 1.9093    |
| <b>E9Q557</b> | <b>DESP Desmoplakin</b>                                             | <b>0.91381949</b> | <b>0.91863</b> | <b>2</b>  |
| E9Q557        | KQVQTSQKNLTR                                                        | 0.91154611        | 2              | 2.31847   |
| E9Q557        | SQCTQVVQER                                                          | 1.12243702        | 2              | 2.45344   |
| F6YLP3        | EMFVYLSTQLKK+Oxidation(1)                                           | 5.40002434        |                |           |
| F6YLP3        | KEMFVYLSTQLKK                                                       | 0.98442045        | 2              | 2.53663   |
| F6YLP3        | SGDISAVQPK                                                          | 0.95881318        | 2              | 3.07669   |
| F6YLP3        | SMVTAGFEPVVIENVLEGDLELR                                             | 1.76454178        | 2              | 3.59956   |
| <b>O08550</b> | <b>MLL4 Histone_lysine N_methyltransferase MLL4</b>                 | <b>1.79828537</b> | <b>0.02559</b> | <b>2</b>  |
| O08550        | HAAVALGQARAMVPEDVPR                                                 | 1.78647748        | 2              | 2.34271   |
| O08550        | MVQALTELLR+Oxidation(0)                                             | 1.80288089        |                |           |
| <b>O08557</b> | <b>DDAH1 N(G)_N(G)_dimethylarginine dimethylaminohydrolase 1</b>    | <b>1.24767761</b> | <b>0.49476</b> | <b>11</b> |
| O08557        | DENATLDGGDVLFTGR                                                    | 0.99825761        | 2              | 2.4135    |
| O08557        | DHLLIPVSNSEMEK                                                      | 1.01290536        | 2              | 2.49321   |
| O08557        | DYAVSTVPVADSLHLK                                                    | 1.16359751        | 2              | 3.67323   |
| O08557        | GAEILADTFK                                                          | 0.97072793        | 1              | 2.09651   |
| O08557        | KEVDMMK                                                             | 1.80431757        | 2              | 2.32322   |
| O08557        | LKDHLIPVSNSEMEK                                                     | 1.38024776        | 2              | 3.81113   |
| O08557        | LTVPDDMAANCIYLNIPSK                                                 | 1.32931374        | 2              | 3.26704   |
| O08557        | SFCSMAGPNLIAIGSSESAQK                                               | 1.15216881        | 2              | 4.77321   |
| O08557        | SQGEEVDFAR                                                          | 2.95371148        | 2              | 2.82443   |
| O08557        | TPEEYPESAK                                                          | 2.0472271         | 2              | 2.36629   |
| O08557        | VDGLLTCCSVFINK                                                      | 1.05758405        | 2              | 3.51176   |
| <b>O08583</b> | <b>THOC4 THO complex subunit 4</b>                                  | <b>0.94275643</b> | <b>0.54619</b> | <b>3</b>  |
| O08583        | MDMSLDDIIK                                                          | 2.73321492        | 2              | 2.66865   |
| O08583        | QQLSAEELDAQLDAYNAR                                                  | 0.87705578        | 2              | 3.40117   |
| O08583        | SLGTADVHFER                                                         | 1.63960493        | 2              | 2.74813   |
| <b>O08601</b> | <b>MTP Microsomal triglyceride transfer protein large subunit</b>   | <b>1.18637803</b> | <b>0.10443</b> | <b>15</b> |
| O08601        | EDTTMYLLALK                                                         | 1.44249           | 2              | 2.53186   |
| O08601        | EFYSYENEPVGIENLK                                                    | 1.68727966        | 2              | 4.23238   |
| O08601        | GCPSLAEHWKSIR                                                       | 1.02217683        | 2              | 3.84246   |
| O08601        | GHTTGSLNNER                                                         | 1.54784362        | 2              | 2.54587   |
| O08601        | GSFASNDIR                                                           | 1.31302457        | 2              | 2.71859   |
| O08601        | LILGGLEKPEK                                                         | 0.94725772        | 2              | 2.44707   |
| O08601        | MLSASGDPVSVVK                                                       | 1.21626056        | 2              | 3.57881   |
| O08601        | NALLPEGIPLLLK                                                       | 2.05906839        | 3              | 3.58331   |
| O08601        | NILLSIGELPK                                                         | 1.16004362        | 2              | 3.74861   |
| O08601        | REEILQILK                                                           | 1.47581219        | 3              | 3.47206   |
| O08601        | SDSSIILQER                                                          | 1.37201837        | 2              | 3.10638   |
| O08601        | SGSSSAYTYGVER                                                       | 0.99114868        | 2              | 3.67906   |

|               |                                                                    |                   |                |           |
|---------------|--------------------------------------------------------------------|-------------------|----------------|-----------|
| O08601        | SNLNIFQYIGK                                                        | 1.17675945        | 2              | 3.18284   |
| O08601        | TTAAAVILK                                                          | 1.0627737         | 2              | 2.31374   |
| O08601        | VKEFYSYENEPVGIENLK                                                 | 1.29137664        | 2              | 3.58374   |
| <b>O08629</b> | <b>TIF1B Transcription intermediary factor 1_beta</b>              | <b>1.36518305</b> | <b>0.05272</b> | <b>2</b>  |
| O08629        | IVAERPGTNSTGPGPMAPPR                                               | 1.44093879        | 3              | 3.91025   |
| O08629        | LDLDTSDSQPPVFK                                                     | 1.27415839        | 2              | 4.25639   |
| <b>O08795</b> | <b>GLU2B Glucosidase 2 subunit beta</b>                            | <b>1.98967605</b> | <b>0.2782</b>  | <b>6</b>  |
| O08795        | ETVVTSTTEPSR                                                       | 1.45790465        | 2              | 3.10225   |
| O08795        | KLWEEQAAAK                                                         | 1.10866076        | 2              | 3.41721   |
| O08795        | LWEEQAAAK                                                          | 1.32269711        | 2              | 2.98051   |
| O08795        | MPPYDEETQAIIDAAQEAR                                                | 3.26737086        | 2              | 5.1853    |
| O08795        | SLEDQVETLR                                                         | 0.87143773        | 2              | 3.15339   |
| O08795        | YEQGTGCWQGNR                                                       | 1.23199517        | 2              | 3.77679   |
| <b>O09158</b> | <b>CP3AP Cytochrome P450 3A25</b>                                  | <b>0.37766123</b> | <b>0.76963</b> | <b>2</b>  |
| O09158        | DVEINGVFIPK                                                        | 0.37766122        | 2              | 3.14244   |
| O09158        | VDFLQLMMNTQNSK                                                     | 1.01639436        | 2              | 3.1092    |
| <b>O09171</b> | <b>BHMT1 Betaine__homocysteine S_methyltransferase 1</b>           | <b>2.00787248</b> | <b>9.9E-20</b> | <b>14</b> |
| O09171        | AGAAIVGNCHFDPSLQTIK                                                | 1.64124475        | 2              | 6.13019   |
| O09171        | AGPWTPEAAVEHPEAVR                                                  | 2.00780554        | 2              | 5.0058    |
| O09171        | GAAELMQQK                                                          | 2.02469526        | 2              | 3.64947   |
| O09171        | GAAELMQQK+Oxidation(5                                              | 2.71628326        |                |           |
| O09171        | HGSWGSGLDMHTKPWIR                                                  | 3.8276928         | 3              | 4.70597   |
| O09171        | IFHQQLVFMK                                                         | 1.28505605        | 2              | 3.5635    |
| O09171        | ISGQKVNEAACDIAR                                                    | 1.50448183        | 2              | 4.44903   |
| O09171        | KEYWQNLN                                                           | 2.31599925        | 3              | 3.44041   |
| O09171        | LNAGEVVIGDGGFVFALEK                                                | 3.10319129        | 3              | 5.9219    |
| O09171        | QGFIDLPEFPFGLPR                                                    | 2.54655316        | 2              | 5.0369    |
| O09171        | QVADEGDALVAGGVSTPSYLSCK                                            | 86.9937927        | 2              | 6.10976   |
| O09171        | TSGKPIAATMCIGPEGDLHGVSPGEC AVR                                     | 2.03762992        | 3              | 6.19249   |
| O09171        | TSGKPIAATMCIGPEGDLHGVSPGEC AVR+Oxidation(9                         | 2.71146481        |                |           |
| O09171        | VNEAACDIAR                                                         | 1.81699618        | 2              | 4.03534   |
| <b>O09173</b> | <b>HGD Homogentisate 1_2_dioxygenase</b>                           | <b>1.30059597</b> | <b>8.5E-09</b> | <b>9</b>  |
| O09173        | CFYNSDGDFLIVPQK                                                    | 1.106306          | 2              | 3.09427   |
| O09173        | FSVDVFEETR                                                         | 1.62636463        | 2              | 3.60658   |
| O09173        | GYILEVYGVHFEPLDLP IGANLANPR                                        | 1.61647938        | 3              | 3.74208   |
| O09173        | NCMSEFMGLIK                                                        | 1.50534604        | 2              | 3.20137   |
| O09173        | QDVSPFNVAWHGNYTPYK                                                 | 1.81874896        | 2              | 3.75095   |
| O09173        | QGGFLPGGSLHSAMTPHGPDADCFEK                                         | 1.29829795        | 3              | 3.88122   |
| O09173        | SLRPGVAIADFVIFPPR                                                  | 0.86444516        | 2              | 3.71214   |
| O09173        | TFRPPYYHR                                                          | 0.91547103        | 3              | 3.49392   |
| O09173        | YISGFGNECASEDPR                                                    | 1.34186867        | 2              | 3.92119   |
| <b>O35077</b> | <b>GPDA Glycerol_3_phosphate dehydrogenase [NAD_]_ cytoplasmic</b> | <b>1.11493379</b> | <b>0.1853</b>  | <b>17</b> |
| O35077        | ANTIGISLIK                                                         | 1.02657747        | 2              | 3.07506   |
| O35077        | DPAQGQLLK                                                          | 1.52893977        | 2              | 2.38969   |
| O35077        | ELHSILQHK                                                          | 1.05996599        | 2              | 2.56608   |
| O35077        | FCETTIGCK                                                          | 1.17601039        | 2              | 2.66385   |
| O35077        | FCETTIGCKDPAQGQLLK                                                 | 1.14709079        | 2              | 5.33586   |
| O35077        | GIDEGPNGLK                                                         | 1.35891972        | 2              | 2.92108   |
| O35077        | GLVDKFLFTAVYK                                                      | 0.95688239        | 3              | 3.72259   |
| O35077        | ICDQLKGHLK                                                         | 0.94747104        | 3              | 3.7979    |
| O35077        | ITVVQEVDTVEICGALK                                                  | 2.45127279        | 2              | 3.1124    |
| O35077        | IVGSNASQLAHFDPR                                                    | 1.83475113        | 2              | 3.11567   |
| O35077        | KLTEIINTQHENVK                                                     | 1.12197783        | 2              | 5.27307   |
| O35077        | LTEIINTQHENVK                                                      | 1.13464383        | 2              | 4.41608   |

|               |                                                                                 |                   |                |          |
|---------------|---------------------------------------------------------------------------------|-------------------|----------------|----------|
| O35077        | NIVAVGAGFCDGLGFGDNTK                                                            | 1.97821781        | 2              | 5.57218  |
| O35077        | SIEQLEK                                                                         | 1.08727877        | 2              | 2.38229  |
| O35077        | VCIVGSGNWGSAIAK                                                                 | 1.38192748        | 2              | 4.35355  |
| O35077        | VCYEQPVGFEICCLQNHEPHM                                                           | 1.65887507        | 2              | 4.13189  |
| O35077        | VTMWVFEEDIGGR                                                                   | 1.45961966        | 2              | 3.39004  |
| <b>O35078</b> | <b>OXDA D_ amino_ acid oxidase</b>                                              | <b>0.86698063</b> | <b>0.26415</b> | <b>2</b> |
| O35078        | GQIIQVEAPWIK                                                                    | 0.83743558        | 2              | 3.09514  |
| O35078        | SCCQLEPTLK                                                                      | 6.0590146         | 2              | 2.64774  |
| <b>O35094</b> | <b>TIM44 Mitochondrial import inner membrane translocase subunit TIM44</b>      | <b>1.23956272</b> | <b>0.77895</b> | <b>4</b> |
| O35094        | AISQGVESVKK                                                                     | 1.1699592         | 2              | 2.37212  |
| O35094        | KLEESDALQEAR                                                                    | 1.24595013        | 2              | 3.59226  |
| O35094        | TEMSEVLTEILR                                                                    | 1.36501143        | 2              | 3.27418  |
| O35094        | VTDLLGGLFSK                                                                     | 1.10372491        | 2              | 2.58215  |
| <b>O35142</b> | <b>COPB2 Coatomer subunit beta_</b>                                             | <b>1.34910551</b> | <b>3.4E-05</b> | <b>5</b> |
| O35142        | AAESLADPTEYENLFPGLK                                                             | 2.02057096        | 2              | 3.88585  |
| O35142        | EEPAMSMMDANGKIIWAK                                                              | 1.84132163        | 2              | 2.53063  |
| O35142        | FELALQLGELK                                                                     | 1.62079622        | 2              | 3.05484  |
| O35142        | GSNNVALGYDEGSIIVK                                                               | 1.13729822        | 2              | 3.55879  |
| O35142        | TFEVCDLPVR                                                                      | 1.19512389        | 2              | 2.9816   |
| <b>O35244</b> | <b>PRDX6 Peroxiredoxin_6</b>                                                    | <b>1.24464939</b> | <b>0.38518</b> | <b>8</b> |
| O35244        | DINAYNGAAPTEK                                                                   | 1.34015048        | 2              | 3.95067  |
| O35244        | DLAILLGMLDPAEKDEK                                                               | 1.36817813        | 2              | 3.95115  |
| O35244        | GESVMVLPTLPEEEAK                                                                | 1.81462306        | 2              | 3.25513  |
| O35244        | KGESVMVLPTLPEEEAK                                                               | 1.20626272        | 2              | 5.33237  |
| O35244        | LSILYPATTGR                                                                     | 1.50702705        | 2              | 3.14751  |
| O35244        | NFDEILR                                                                         | 1.09015887        | 1              | 2.27184  |
| O35244        | VVDSLQLTASNVPVATPDWK                                                            | 1.48836852        | 3              | 5.52461  |
| O35244        | VVFIFGPDKK                                                                      | 1.1158099         | 2              | 2.89644  |
| <b>O35286</b> | <b>DHX15 Putative pre_mRNA_splicing factor ATP_dependent RNA helicase DHX15</b> | <b>1.54341625</b> | <b>0.00272</b> | <b>2</b> |
| O35286        | TCTDIKPEWLVK                                                                    | 0.90503705        | 2              | 2.41357  |
| O35286        | TLATDILMGVLK                                                                    | 1.60758529        | 2              | 3.72182  |
| <b>O35331</b> | <b>PDXK Pyridoxal kinase</b>                                                    | <b>0.86918549</b> | <b>0.11205</b> | <b>2</b> |
| O35331        | AEAGEGQKPSPAQLELR                                                               | 0.40969742        | 3              | 3.84535  |
| O35331        | MGPDTVITSSDLPSPK                                                                | 0.86975848        | 2              | 3.6926   |
| <b>O35469</b> | <b>3BH56 3 beta_ hydroxysteroid dehydrogenase/Delta 5__4_ isomerase type 6</b>  | <b>0.99681689</b> | <b>0.83037</b> | <b>2</b> |
| O35469        | DLGYEPLVSWEAK                                                                   | 1.08876386        | 2              | 4.34285  |
| O35469        | TSEWIGTLVEQHR                                                                   | 0.79350611        | 2              | 3.40918  |
| <b>O35509</b> | <b>RB11B Ras_ related protein Rab_11B</b>                                       | <b>1.18338016</b> | <b>0.89746</b> | <b>5</b> |
| O35509        | AQIWDTAGQER                                                                     | 1.05293517        | 2              | 3.23688  |
| O35509        | GAVGALLVYDIAK                                                                   | 1.13877865        | 2              | 3.98611  |
| O35509        | HLTYENVER                                                                       | 1.35860405        | 2              | 2.46795  |
| O35509        | NEFNLESK                                                                        | 1.19164476        | 1              | 2.14578  |
| O35509        | VVLIGDSGVGK                                                                     | 1.12369851        | 2              | 2.47453  |
| <b>O35547</b> | <b>ACSL4 Long_ chain_ fatty_ acid_ CoA ligase 4</b>                             | <b>0.95896561</b> | <b>0.98485</b> | <b>2</b> |
| O35547        | LERFEIPIK                                                                       | 1.00084437        | 2              | 2.53965  |
| O35547        | TAEDYSVDENGQR                                                                   | 0.92823412        | 2              | 3.23898  |
| <b>O35567</b> | <b>PUR9 Bifunctional purine biosynthesis protein PURH</b>                       | <b>0.96050958</b> | <b>0.78162</b> | <b>7</b> |
| O35567        | ALFEEVPELLTEAEK                                                                 | 1.55217648        | 2              | 3.50382  |
| O35567        | DGQVIGIGAGQQSR                                                                  | 2.50585164        | 2              | 3.89758  |
| O35567        | EVSDGIVAPGYEEALK                                                                | 0.9299747         | 2              | 3.80849  |
| O35567        | HVSPAGAAVGVPLSEDEAR                                                             | 1.08958134        | 2              | 5.15093  |
| O35567        | SGVAYIVAPSGSTADK                                                                | 1.06510506        | 2              | 2.86537  |
| O35567        | VTVVCEPEDYGAVAAEMQGGGNK                                                         | 1.04184085        | 2              | 5.41396  |

|               |                                                                                          |                   |                |          |
|---------------|------------------------------------------------------------------------------------------|-------------------|----------------|----------|
| O35567        | YTQNSVCIYAK                                                                              | 1.17893529        | 2              | 3.13696  |
| <b>O35593</b> | <b>PSDE 26S proteasome non_ATPase regulatory subunit 14</b>                              | <b>1.06560585</b> | <b>0.88182</b> | <b>3</b> |
| O35593        | AVAVVVDPIQSVK                                                                            | 1.04736025        | 2              | 3.078    |
| O35593        | AVEEEDKMTPEQLAIK                                                                         | 1.172301          | 2              | 4.72041  |
| O35593        | EMLELAKNYNK+Oxidation(1                                                                  | 1.18938986        |                |          |
| <b>O35660</b> | <b>GSTM6 Glutathione S_transferase Mu 6</b>                                              | <b>1.2278658</b>  | <b>0.94278</b> | <b>3</b> |
| O35660        | RYAMGDAPDYDR                                                                             | 1.20778961        | 2              | 3.37863  |
| O35660        | YAMGDAPDYDR                                                                              | 1.58047087        | 2              | 2.43877  |
| O35660        | YAMGDAPDYDR+Oxidation(2                                                                  | 1.2278818         |                |          |
| <b>O35760</b> | <b>IDI1 Isopentenyl_diphosphate Delta_isomerase 1</b>                                    | <b>1.57654141</b> | <b>0.81219</b> | <b>4</b> |
| O35760        | AELGIPLEEDLNEMNYLTR                                                                      | 4.32888066        | 2              | 4.21381  |
| O35760        | ITFPGCFTNSCCSHPLNNGELEEENDAMGVK                                                          | 0.69372056        | 3              | 3.41562  |
| O35760        | NCHLNENIDK                                                                               | 0.67360857        | 3              | 3.33813  |
| O35760        | NVTLNPDPEIK                                                                              | 0.56706715        | 2              | 3.14002  |
| <b>O35763</b> | <b>MOES Moesin</b>                                                                       | <b>0.97549536</b> | <b>0.8533</b>  | <b>5</b> |
| O35763        | ALTSELANAR                                                                               | 0.9603814         | 2              | 2.52082  |
| O35763        | AQMVQEDLEK                                                                               | 1.01560326        | 2              | 2.49221  |
| O35763        | AQQELEEQTR                                                                               | 0.94823124        | 2              | 2.81598  |
| O35763        | FYPEDVSEELIQDITQR                                                                        | 1.76983894        | 3              | 3.34265  |
| O35763        | TQEQLASEMAELTAR                                                                          | 1.47723948        | 2              | 4.01775  |
| <b>O35783</b> | <b>CALU Calumenin</b>                                                                    | <b>0.88802488</b> | <b>0.98628</b> | <b>2</b> |
| O35783        | HLVYESDQDKDGK                                                                            | 1.00081876        | 2              | 3.9685   |
| O35783        | VHNDAQNFYDHDHDAFLGAEAK                                                                   | 0.88791612        | 3              | 5.23784  |
| <b>O35796</b> | <b>C1QBP Complement component 1 Q subcomponent_binding protein_mitochondrial</b>         | <b>0.88696067</b> | <b>0.00209</b> | <b>4</b> |
| O35796        | AEEQEPELTSTPNFVVEVTK                                                                     | 1.30407039        | 2              | 4.78567  |
| O35796        | AFVEFLTDEIK                                                                              | 1.56619553        | 2              | 3.25357  |
| O35796        | AFVEFLTDEIKEEK                                                                           | 0.64691248        | 2              | 3.79041  |
| O35796        | TLVLDCHYPEDEIGHDEAESDIFSİK                                                               | 2.04513365        | 3              | 5.68488  |
| <b>O35814</b> | <b>STIP1 Stress_induced_phosphoprotein 1</b>                                             | <b>1.03851788</b> | <b>0.87555</b> | <b>7</b> |
| O35814        | ALDLSSCK                                                                                 | 1.32323375        | 1              | 2.44694  |
| O35814        | ALSAGNIDDALQCYSEAIK                                                                      | 1.24044208        | 2              | 5.76436  |
| O35814        | AMADPEVQQIMSDPAMR                                                                        | 2.76322539        | 2              | 3.9249   |
| O35814        | CQQAEEKILK                                                                               | 0.80515065        | 1              | 2.02042  |
| O35814        | DCEECIQLEPTFIK                                                                           | 1.55342208        | 2              | 4.42249  |
| O35814        | ELIEQLQNKPSDLGTK                                                                         | 0.9799319         | 2              | 4.02601  |
| O35814        | TVDLKPDWVK                                                                               | 1.04958891        | 2              | 2.68325  |
| <b>O35824</b> | <b>DNJA2 Dnaj homolog subfamily A member 2</b>                                           | <b>1.27392902</b> | <b>0.18531</b> | <b>2</b> |
| O35824        | NVLCASCSGQGGK                                                                            | 1.27367349        | 2              | 3.26328  |
| O35824        | VSLEDLYNGK                                                                               | 1.4200427         | 2              | 2.33159  |
| <b>O35826</b> | <b>GLCNE Bifunctional UDP_N_acetylglucosamine 2_epimerase/N_acetylmannosamine kinase</b> | <b>1.16382246</b> | <b>0.08412</b> | <b>8</b> |
| O35826        | DEAVGALHLIQAAC                                                                           | 1.4177701         | 2              | 3.50699  |
| O35826        | EVGAFGTPVINLGTR                                                                          | 1.17858434        | 2              | 3.20231  |
| O35826        | ILVGISTGGR                                                                               | 1.94555707        | 2              | 2.84115  |
| O35826        | IYGDGNAVPR                                                                               | 1.31090643        | 2              | 2.46368  |
| O35826        | SIDLQEPLQK                                                                               | 1.16240922        | 2              | 2.41405  |
| O35826        | TLVLFPNIDAGSK                                                                            | 1.25361978        | 2              | 2.66769  |
| O35826        | TPLSDTLHLPVWVDNDGNCAAMAER                                                                | 1.18151852        | 3              | 5.11907  |
| O35826        | VNPQEGVVLHSTK                                                                            | 2.03148359        | 2              | 2.53932  |
| <b>O35913</b> | <b>SO1A4 Solute carrier organic anion transporter family member 1A4</b>                  | <b>0.83832346</b> | <b>0.96853</b> | <b>5</b> |
| O35913        | EGLQENVDTGENAK                                                                           | 0.816419          | 2              | 3.75747  |
| O35913        | GASFVPAFFILR                                                                             | 1.06752338        | 2              | 2.63569  |
| O35913        | SLSGTYMNSMLTQJER                                                                         | 0.78517988        | 2              | 4.57415  |

|               |                                                                    |                   |                |          |
|---------------|--------------------------------------------------------------------|-------------------|----------------|----------|
| O35913        | SQTLNPTQDPSECVK                                                    | 1.40603821        | 2              | 4.14458  |
| O35913        | TFQFPGDIESSK                                                       | 0.85495137        | 2              | 2.40918  |
| <b>O35952</b> | <b>GLO2 Hydroxyacylglutathione hydrolase_mitochondrial</b>         | <b>1.03071565</b> | <b>0.65343</b> | <b>7</b> |
| O35952        | ALLEVLGR                                                           | 1.06890505        | 2              | 2.98591  |
| O35952        | FYEGTADEMYK                                                        | 1.16313807        | 2              | 3.10067  |
| O35952        | HVEPGNTAVQEK                                                       | 0.94919241        | 2              | 4.01675  |
| O35952        | LTTVLTHHHWDHAGGNEK                                                 | 1.58113796        | 3              | 3.5804   |
| O35952        | NAIGEPTVPSTLAEFTYNPFMR                                             | 1.37998735        | 3              | 4.34602  |
| O35952        | TVQQHAGETDPVTTMR                                                   | 1.15656236        | 2              | 4.74553  |
| O35952        | TVQQHAGETDPVTTMR+Oxidation(14                                      | 1.18512541        |                |          |
| <b>O35987</b> | <b>NSF1C NSF1 cofactor p47</b>                                     | <b>1.29405731</b> | <b>0.38952</b> | <b>5</b> |
| O35987        | ASSILINEAEPPTNIQIR                                                 | 1.18589978        | 2              | 4.47322  |
| O35987        | EANLLNAVIVQR                                                       | 1.56839947        | 2              | 3.06276  |
| O35987        | LGAAPPEESAYVAGER                                                   | 0.82588255        | 2              | 4.29335  |
| O35987        | SYQDPSNAQFLESIR                                                    | 1.31546547        | 2              | 4.18961  |
| O35987        | TGFSLDNGDLR                                                        | 0.59913925        | 2              | 2.91945  |
| <b>O54753</b> | <b>H17B6 17_beta_hydroxysteroid dehydrogenase type 6</b>           | <b>1.51891678</b> | <b>0.40517</b> | <b>3</b> |
| O54753        | IVNVSSVLGR                                                         | 1.514577          | 2              | 2.57722  |
| O54753        | TWEATPEHIR                                                         | 1.7458125         | 2              | 2.4014   |
| O54753        | YGVEAFSDVLR                                                        | 1.30279464        | 2              | 3.29152  |
| <b>O54975</b> | <b>XPP1 Xaa_Pro aminopeptidase 1</b>                               | <b>1.25782998</b> | <b>0.00534</b> | <b>3</b> |
| O54975        | GSLTFEPLTLVPIQTK                                                   | 1.27429202        | 2              | 4.09856  |
| O54975        | IENVVLVPAK                                                         | 1.03928064        | 2              | 2.6684   |
| O54975        | QQADFVDSFPTISSTGPNGAIHYAPIPETNR                                    | 1.50613094        | 3              | 3.71705  |
| <b>O55012</b> | <b>PICA Phosphatidylinositol_binding clathrin assembly protein</b> | <b>1.13875712</b> | <b>0.27928</b> | <b>4</b> |
| O55012        | ATTLNNAVSSLASTGLSLTK                                               | 2.92826001        | 2              | 4.23092  |
| O55012        | ITAAQHSVTGSAVSK                                                    | 1.4539245         | 2              | 4.63342  |
| O55012        | SGLQGYDMSTFIR                                                      | 1.52683028        | 2              | 3.74714  |
| O55012        | STNVAVDSGGGLLKPTVASQNQLPVAK                                        | 1.10935269        | 3              | 5.7464   |
| <b>O55096</b> | <b>DPP3 Dipeptidyl peptidase 3</b>                                 | <b>1.17470723</b> | <b>0.0006</b>  | <b>7</b> |
| O55096        | AGLLALEFYTPETANWR                                                  | 2.23676067        | 2              | 3.61981  |
| O55096        | GEFEGFVAMVNK                                                       | 0.95043144        | 2              | 2.68955  |
| O55096        | LASVLNTEPALDSELSK                                                  | 1.43740419        | 2              | 2.9879   |
| O55096        | LEGSEVQLVEYEASAAGLR                                                | 2.00073909        | 2              | 3.91228  |
| O55096        | NVSLGNVLAVAYATK                                                    | 0.86644788        | 2              | 2.68389  |
| O55096        | SYEFQGNHFQVTR                                                      | 0.94983422        | 2              | 4.03311  |
| O55096        | VLLEAGEGLVTVPTTGS DGRPDAR                                          | 1.17884592        | 3              | 3.94689  |
| <b>O55125</b> | <b>NIPS1 Protein NipSnap homolog 1</b>                             | <b>1.43290475</b> | <b>0.01394</b> | <b>4</b> |
| O55125        | AGPNIIYELR                                                         | 1.11839333        | 2              | 2.99004  |
| O55125        | FSGGYPALMDCMNK                                                     | 1.53982333        | 2              | 2.99941  |
| O55125        | GWDENVYYTVPLVR                                                     | 1.07627073        | 2              | 3.60117  |
| O55125        | IQFHNVKPECLDAYNSLTEAVLPK                                           | 1.67012461        | 3              | 5.09872  |
| <b>O55171</b> | <b>ACOT2 Acyl_coenzyme A thioesterase 2_mitochondrial</b>          | <b>1.38135751</b> | <b>0.99445</b> | <b>6</b> |
| O55171        | ADAGGELDLAR                                                        | 1.00167037        | 2              | 2.80929  |
| O55171        | DGLLDVVEALQSPVLDK                                                  | 1.40399848        | 2              | 4.92443  |
| O55171        | DVQKPYVVELEVDGHEPDGGQR                                             | 1.36659516        | 3              | 4.40854  |
| O55171        | GGELGLAMASFLK                                                      | 1.79450372        | 2              | 4.03292  |
| O55171        | IEYFEEAVNYLR                                                       | 1.22131889        | 2              | 4.04899  |
| O55171        | SCWDEPLSITVR                                                       | 1.14469672        | 2              | 3.99257  |
| <b>O70127</b> | <b>ABCBB Bile salt export pump</b>                                 | <b>1.72313326</b> | <b>2.9E-07</b> | <b>7</b> |
| O70127        | AGQITSEALS NIR                                                     | 1.23869247        | 2              | 3.17384  |
| O70127        | AGSIADEVLSIR                                                       | 2.03626519        | 2              | 2.9629   |
| O70127        | ILDNLSMVIKPGETTALVGSSGAGK                                          | 1.83102769        | 3              | 4.35131  |

|               |                                                                                           |                   |                |           |
|---------------|-------------------------------------------------------------------------------------------|-------------------|----------------|-----------|
| O70127        | ILLDEATSALDTESEK                                                                          | 1.89037799        | 2              | 4.27576   |
| O70127        | ILLDMATSALDNESEAR                                                                         | 6.08281015        | 2              | 2.31426   |
| O70127        | KFGEENHAFESDGSNNDDK                                                                       | 2.11662497        | 3              | 4.49019   |
| O70127        | STALQLIQR                                                                                 | 1.15035401        | 2              | 2.70162   |
| <b>O70133</b> | <b>DHX9 ATP_dependent RNA helicase A</b>                                                  | <b>0.98224661</b> | <b>0.96621</b> | <b>3</b>  |
| O70133        | ELDALDANDELTPPLGR                                                                         | 0.81734627        | 2              | 2.50678   |
| O70133        | KMTPAYEIRAVGNK                                                                            | 1.14172031        | 2              | 2.44311   |
| O70133        | YSPFFVFGEKIR                                                                              | 1.11173923        | 2              | 2.38157   |
| <b>O70173</b> | <b>P3C2G Phosphatidylinositol_4_phosphate 3_kinase C2 domain_containing subunit gamma</b> | <b>0.98898843</b> | <b>0.9977</b>  | <b>2</b>  |
| O70173        | LLGDIGEKVK                                                                                | 0.98751387        | 2              | 2.31537   |
| O70173        | WTFSHPLEALGLLTSR                                                                          | 0.98925174        | 2              | 2.4256    |
| <b>O70199</b> | <b>UGDH UDP_glucose 6_dehydrogenase</b>                                                   | <b>1.38557999</b> | <b>9.9E-20</b> | <b>14</b> |
| O70199        | EADLVFISVNTPTK                                                                            | 1.29269311        | 2              | 2.35235   |
| O70199        | EQIVVDSLHPGVSADDQVSR                                                                      | 1.07126928        | 2              | 5.61749   |
| O70199        | FSLQDPPNKKPK                                                                              | 1.76557242        | 2              | 2.38953   |
| O70199        | IFDANTKPNLNLQVLSNPEFLAEGTAIK                                                              | 1.68378436        | 3              | 6.6251    |
| O70199        | IIDSLFNTVTDK                                                                              | 1.66447269        | 2              | 2.38015   |
| O70199        | IIDSLFNTVTDK                                                                              | 1.03346968        | 2              | 3.73759   |
| O70199        | ILTTNTWSSELSK                                                                             | 1.19349718        | 2              | 3.84071   |
| O70199        | INAWNSPTLPIYEPGLK                                                                         | 1.34136417        | 2              | 4.20048   |
| O70199        | MLKPAFIFDGR                                                                               | 1.889091          | 2              | 2.44935   |
| O70199        | NLFFSTNIDDAIR                                                                             | 1.29438212        | 2              | 3.42067   |
| O70199        | VLDGLHNELQTIGFQIETIGK                                                                     | 1.40550073        | 2              | 5.42973   |
| O70199        | VLIGGDETPEGQR                                                                             | 1.19475382        | 2              | 3.52231   |
| O70199        | VTVVDVNEAR                                                                                | 1.31216125        | 2              | 3.17918   |
| O70199        | YWQQVIDMNDYQR                                                                             | 2.07095633        | 2              | 4.28493   |
| <b>O70251</b> | <b>EF1B Elongation factor 1_beta</b>                                                      | <b>1.56093571</b> | <b>0.28981</b> | <b>4</b>  |
| O70251        | SIQADGLVWSSSK                                                                             | 1.15273608        | 2              | 3.31493   |
| O70251        | SSILLDVKPWDEDTDMTK                                                                        | 1.76847219        | 2              | 4.27211   |
| O70251        | SSILLDVKPWDEDTDMTKLEECVR                                                                  | 2.00161823        | 3              | 5.22435   |
| O70251        | TPAGLQVLNDYLADK                                                                           | 1.58895976        | 2              | 3.97247   |
| <b>O70351</b> | <b>HCD2 3_hydroxyacyl_CoA dehydrogenase type_2</b>                                        | <b>1.27098492</b> | <b>2.6E-10</b> | <b>17</b> |
| O70351        | EVQAALTAK                                                                                 | 1.1502807         | 2              | 2.62171   |
| O70351        | GGIVGMTLPIAR                                                                              | 1.32050338        | 2              | 3.74667   |
| O70351        | GLVAVITGGASGLGLSTAK                                                                       | 1.2642467         | 2              | 4.84912   |
| O70351        | GVIINTASVAAFEGQVQQAAYSASK                                                                 | 1.33177989        | 3              | 4.83826   |
| O70351        | IDVAVNCAGIAVAIK                                                                           | 2.26301345        | 2              | 4.43783   |
| O70351        | KLGGNCIFAPANVTEK                                                                          | 1.19838152        | 2              | 4.85623   |
| O70351        | KNQVHTLEDFQR                                                                              | 1.40585849        | 2              | 3.95542   |
| O70351        | LGDPAEYAHLVQMVIENPFLNGEVIR                                                                | 1.20108994        | 3              | 5.28533   |
| O70351        | LGGNCIFAPANVTEK                                                                           | 1.32998876        | 2              | 3.42071   |
| O70351        | LVAGVMGQNEPDQGGQR                                                                         | 1.58888414        | 2              | 5.6786    |
| O70351        | LVGQGATAVLLDVPNSEGETEAK                                                                   | 1.96807254        | 2              | 5.41745   |
| O70351        | LVGQGATAVLLDVPNSEGETEAKK                                                                  | 1.04553023        | 3              | 4.28588   |
| O70351        | NFLASQVPPFSR                                                                              | 1.04828522        | 2              | 4.62477   |
| O70351        | NQVHTLEDFQR                                                                               | 1.2378566         | 2              | 3.33301   |
| O70351        | RLVGQGATAVLLDVPNSEGETEAK                                                                  | 1.09638928        | 2              | 5.55966   |
| O70351        | VINVNLIQTFNVIR                                                                            | 1.4751742         | 2              | 4.60512   |
| O70351        | VVTIAPGLFATPLLTLPDK                                                                       | 1.33191337        | 2              | 5.04859   |
| <b>O70456</b> | <b>1433S 14_3_3 protein sigma</b>                                                         | <b>1.0367159</b>  | <b>2.1E-12</b> | <b>3</b>  |
| O70456        | DSTLIMQLLR                                                                                | 1.84480285        | 2              | 3.74881   |
| O70456        | NLLSVAYK                                                                                  | 0.89347451        | 2              | 2.4321    |
| O70456        | VLSSIEQK                                                                                  | 1.07297529        | 2              | 2.60992   |
| <b>O88202</b> | <b>LPP60 60 kDa lysophospholipase</b>                                                     | <b>1.94462381</b> | <b>0.03464</b> | <b>4</b>  |
| O88202        | AAGAHLSPQELEDVGTLCR                                                                       | 1.62742804        | 3              | 3.89796   |



|               |                                                                                        |                   |                |           |
|---------------|----------------------------------------------------------------------------------------|-------------------|----------------|-----------|
| O88202        | GEMTLPTDDLLGDDMLGCR                                                                    | 4.35111005        | 2              | 3.82205   |
| O88202        | GVDVDACNEDGQSPDLLAVR                                                                   | 1.97338525        | 2              | 5.09815   |
| O88202        | SEGGVLVPGR                                                                             | 1.82681004        | 2              | 2.54307   |
| <b>O88379</b> | <b>BAZ1A Bromodomain adjacent to zinc finger domain protein 1A</b>                     | <b>1.83333042</b> | <b>6.8E-05</b> | <b>2</b>  |
| O88379        | ERDKLLK                                                                                | 2.07316173        | 2              | 2.34406   |
| O88379        | NTAKSASKNLR                                                                            | 1.82794324        | 2              | 2.79429   |
| <b>O88397</b> | <b>SO1A5 Solute carrier organic anion transporter family member 1A5</b>                | <b>1.04084109</b> | <b>0.51693</b> | <b>2</b>  |
| O88397        | TCLHWGTLK                                                                              | 0.71103936        | 2              | 2.32256   |
| O88397        | YLEQQYGK                                                                               | 1.11050969        | 2              | 2.76794   |
| <b>O88428</b> | <b>PAPS2 Bifunctional 3__phosphoadenosine 5__phosphosulfate synthase 2</b>             | <b>1.30561181</b> | <b>0.00062</b> | <b>6</b>  |
| O88428        | GCTVWLTGLSGAGK                                                                         | 2.84850617        | 2              | 3.26724   |
| O88428        | GFTGIDS DYKPEKTECVLK                                                                   | 1.30211866        | 2              | 4.96753   |
| O88428        | GIHELFPENK                                                                             | 1.41374576        | 2              | 2.75745   |
| O88428        | NLGFSAGDREENIR                                                                         | 1.15311423        | 2              | 3.30825   |
| O88428        | STNVVYQAHHVSR                                                                          | 1.14192481        | 2              | 4.25577   |
| O88428        | VLSMAPGLTSVEIIPFR                                                                      | 1.47028073        | 2              | 3.63824   |
| <b>O88491</b> | <b>NSD1 Histone_lysine N_methyltransferase_ H3 lysine_36 and H4 lysine_20 specific</b> | <b>1.16110319</b> | <b>0.08452</b> | <b>3</b>  |
| O88491        | ENSEGAFGVLLPADAVQKAR                                                                   | 0.85410552        | 2              | 2.36579   |
| O88491        | ETGIPSLMPQTK                                                                           | 1.61027457        | 2              | 2.32075   |
| O88491        | SGKGEGKLLNNMHEK                                                                        | 1.44767081        | 2              | 2.75928   |
| <b>O88600</b> | <b>HSP74 Heat shock 70 kDa protein 4</b>                                               | <b>1.20636964</b> | <b>0.48232</b> | <b>18</b> |
| O88600        | AESEEMETSQAGSK                                                                         | 1.25225677        | 2              | 4.662     |
| O88600        | AFSDPFVEAEK                                                                            | 1.06796175        | 2              | 3.02864   |
| O88600        | AGGIETIANEYSDR                                                                         | 1.31880696        | 2              | 3.41349   |
| O88600        | FLEMCDLLAR                                                                             | 0.87139123        | 2              | 2.50302   |
| O88600        | FQESEERPCK                                                                             | 1.19411336        | 2              | 2.76374   |
| O88600        | FVSEDDRNNFTLK                                                                          | 1.07593655        | 2              | 2.78235   |
| O88600        | GCALQCAILSPAFK                                                                         | 1.05583678        | 2              | 3.80004   |
| O88600        | HAEQNGPVDGQGNPQTAAEHGADTAVPSDGDK                                                       | 1.08902184        | 3              | 5.11052   |
| O88600        | LKETAESVLK                                                                             | 2.30858962        | 2              | 2.53628   |
| O88600        | MIMQDKLEK+Oxidation(0                                                                  | 1.23698334        |                |           |
| O88600        | MQVDQEEPHTEEQQPQTPAENK                                                                 | 1.09174666        | 3              | 5.32193   |
| O88600        | NFTTEQVTAMLLSK                                                                         | 1.60501971        | 2              | 4.11704   |
| O88600        | NKEDQYEHDAADMTK                                                                        | 1.55215478        | 3              | 3.74273   |
| O88600        | SNLAYDIVQLPTGLTIK                                                                      | 1.28393883        | 2              | 4.08276   |
| O88600        | SVMDATQIAGLNCLR                                                                        | 1.41762028        | 2              | 3.59303   |
| O88600        | TSTVDLPIESQLLWQLDR                                                                     | 1.34443629        | 2              | 3.70737   |
| O88600        | VLATAFDTTLGGR                                                                          | 1.39372388        | 2              | 3.79454   |
| O88600        | WNSPAEEGSSDCEVFPK                                                                      | 1.29711013        | 2              | 3.82314   |
| <b>O88618</b> | <b>FTCD Formimidoyltransferase_cyclodeaminase</b>                                      | <b>1.84181296</b> | <b>9.9E-20</b> | <b>21</b> |
| O88618        | AFAACLGAIK                                                                             | 1.47897488        | 2              | 3.13147   |
| O88618        | AGEYEALPEK                                                                             | 1.23330247        | 2              | 2.79113   |
| O88618        | ALLDAAAFYCDK                                                                           | 2.12022006        | 2              | 3.5       |
| O88618        | ALLDAAAFYCDKEK                                                                         | 1.58273475        | 2              | 3.41544   |
| O88618        | EAQELNLPVVGSQLVGLVPLK                                                                  | 1.84538172        | 3              | 4.27521   |
| O88618        | GVSMDECVLCAK                                                                           | 1.68190209        | 2              | 3.70068   |
| O88618        | IIEYLVPSGPEQSLLDASLR                                                                   | 1.61256898        | 2              | 4.86891   |
| O88618        | ISSLLQEAKEK                                                                            | 1.8386137         | 2              | 2.38561   |
| O88618        | KVQGIGWYLEEK                                                                           | 1.17579881        | 2              | 3.27075   |
| O88618        | LAEELNVPVYLYGEEAQMPSR                                                                  | 2.28962048        | 2              | 4.91619   |
| O88618        | LFVLEEEHR                                                                              | 1.34606116        | 2              | 2.84273   |
| O88618        | LGLDSLAPFDPK                                                                           | 2.04889317        | 2              | 3.84132   |
| O88618        | MGALDVCPIFVPR                                                                          | 1.48552456        | 2              | 3.93709   |

|               |                                                                                   |                   |                |           |
|---------------|-----------------------------------------------------------------------------------|-------------------|----------------|-----------|
| O88618        | MGALDVCPFIPVR+Oxidation(0                                                         | 0.47044589        |                |           |
| O88618        | NLAQVSTNLLDFEVTALHTVYEEAR                                                         | 2.92936006        | 3              | 4.10469   |
| O88618        | QAEWVPDFGPSSFVPSWGATVTGAR                                                         | 2.39647616        | 2              | 3.93634   |
| O88618        | TASQLIDMR                                                                         | 1.5510969         | 2              | 2.36918   |
| O88618        | TCALQEGLR                                                                         | 1.79250172        | 2              | 2.81015   |
| O88618        | TQAALVLGSLEAR                                                                     | 1.41692011        | 2              | 5.09415   |
| O88618        | TVYTFVGQPECVVEGALSAAR                                                             | 1.34702958        | 2              | 4.75826   |
| O88618        | VQGIGWYLEEK                                                                       | 1.63174266        | 2              | 3.07695   |
| <b>O88637</b> | <b>PCY2 Ethanolamine_phosphate cytidyltransferase</b>                             | <b>1.33879856</b> | <b>0.23533</b> | <b>9</b>  |
| O88637        | AHHSSQEMSSEYR                                                                     | 1.90560117        | 3              | 3.78689   |
| O88637        | GPPVFTQEER                                                                        | 1.22402804        | 2              | 2.70262   |
| O88637        | HKGPPVFTQEER                                                                      | 1.2005746         | 2              | 3.10687   |
| O88637        | HNCDFCVHGNDITLTVDGR                                                               | 1.49175107        | 3              | 3.88288   |
| O88637        | NRLEYEAR                                                                          | 1.52022435        | 2              | 2.40918   |
| O88637        | TEIVPDRDGSDPYEEPK                                                                 | 1.36436023        | 2              | 2.86998   |
| O88637        | TQGVSTTDLVGR                                                                      | 1.7686705         | 2              | 3.16976   |
| O88637        | WVDEVVPAAPYVTTLETLDK                                                              | 1.73946461        | 2              | 2.62211   |
| O88637        | YVSEVVIGAPYSVTAELLNHFK                                                            | 1.50667196        | 3              | 3.76594   |
| <b>O88656</b> | <b>ARC1B Actin_related protein 2/3 complex subunit 1B</b>                         | <b>1.01325131</b> | <b>0.95547</b> | <b>2</b>  |
| O88656        | ASSEGGAATGAGLDSLHK                                                                | 1.00749511        | 2              | 4.29018   |
| O88656        | NSVSQISVLSGGK                                                                     | 1.02271923        | 2              | 2.53192   |
| <b>O88696</b> | <b>CLPP Putative ATP_dependent Clp protease proteolytic subunit_mitochondrial</b> | <b>1.26596389</b> | <b>0.51929</b> | <b>2</b>  |
| O88696        | GQATDIAIQAEIMK                                                                    | 2.93657187        | 2              | 4.27359   |
| O88696        | VLVHPPQDGEDEPELVQK                                                                | 1.18649952        | 3              | 3.95258   |
| <b>O88735</b> | <b>MAP7 Ensconsin</b>                                                             | <b>1.30460494</b> | <b>0.75333</b> | <b>2</b>  |
| O88735        | KTTEQRNGDIAK                                                                      | 1.09532276        | 2              | 2.57664   |
| O88735        | TSAGTTDPEATR                                                                      | 1.31753704        | 2              | 2.6675    |
| <b>O88746</b> | <b>TOM1 Target of Myb protein 1</b>                                               | <b>1.18700637</b> | <b>0.9688</b>  | <b>3</b>  |
| O88746        | GDLSQHATPLPTPAVLPGDSPITPTPEIQGK                                                   | 1.11907589        | 3              | 5.52596   |
| O88746        | QQSTGAIPATQAR                                                                     | 1.02655153        | 2              | 2.70142   |
| O88746        | YEAPQTTDGLAGALDAR                                                                 | 1.20117859        | 2              | 3.89056   |
| <b>O88761</b> | <b>PSMD1 26S proteasome non_ATPase regulatory subunit 1</b>                       | <b>1.10745008</b> | <b>0.8859</b>  | <b>3</b>  |
| O88761        | DTSIEDIELVEPVAAHGPK                                                               | 0.90349433        | 2              | 4.1809    |
| O88761        | QGALIASALIMIQQTEITCPK                                                             | 1.7002896         | 2              | 2.41419   |
| O88761        | TVGTPIASVPGSTNTGTVPGPEK                                                           | 1.107472          | 2              | 3.69429   |
| <b>O88767</b> | <b>PARK7 Protein DJ_1</b>                                                         | <b>1.13702225</b> | <b>0.48769</b> | <b>8</b>  |
| O88767        | ALVILAK                                                                           | 1.96535925        | 2              | 2.37563   |
| O88767        | DVVICPDTSLLEAK                                                                    | 1.03484147        | 2              | 3.41998   |
| O88767        | GAEEMETVIPVDIMR                                                                   | 1.24263645        | 2              | 4.19968   |
| O88767        | GAEEMETVIPVDIMR+Oxidation(4                                                       | 1.43550294        |                |           |
| O88767        | GLIAAICAGPTALLAHEVGFQCK                                                           | 1.42956215        | 2              | 4.45687   |
| O88767        | KGLIAAICAGPTALLAHEVGFQCK                                                          | 0.92582015        | 3              | 3.99545   |
| O88767        | TQGPYDVVVLPGGNLGAQNLSESALVK                                                       | 1.13764886        | 3              | 4.69795   |
| O88767        | VTVAGLAGKDPVQCSR                                                                  | 1.12756201        | 2              | 4.25168   |
| <b>O88794</b> | <b>PNPO Pyridoxine_5__phosphate oxidase</b>                                       | <b>1.42843982</b> | <b>0.71016</b> | <b>3</b>  |
| O88794        | FFTNYESR                                                                          | 1.72262823        | 2              | 2.32863   |
| O88794        | KKNEELGQLYR                                                                       | 1.18973901        | 2              | 2.98328   |
| O88794        | SSQIGAVVSR                                                                        | 2.18119798        | 2              | 2.81686   |
| <b>O88813</b> | <b>ACSL5 Long_chain_fatty_acid_CoA ligase 5</b>                                   | <b>1.39555258</b> | <b>0.20108</b> | <b>14</b> |
| O88813        | AEYLGSCLLHK                                                                       | 1.04373626        | 2              | 2.72412   |
| O88813        | AILEDLQK                                                                          | 0.88361013        | 1              | 2.23086   |
| O88813        | ATMLIENVEK                                                                        | 1.31269642        | 2              | 2.34114   |
| O88813        | FFQTQJK                                                                           | 1.20843173        | 1              | 2.02618   |

|               |                                                                   |                   |                |           |
|---------------|-------------------------------------------------------------------|-------------------|----------------|-----------|
| O88813        | GAMLTHQNIIVSNMAAFLK                                               | 0.86578452        | 3              | 3.59441   |
| O88813        | GLAVSDNGPCLGYR                                                    | 1.14789917        | 2              | 3.43258   |
| O88813        | GSFEELCQNQCVK                                                     | 0.91979978        | 2              | 4.42662   |
| O88813        | GYLKDPEK                                                          | 1.08027857        | 2              | 2.3939    |
| O88813        | IGFFQGDIDR                                                        | 1.45683256        | 2              | 3.22653   |
| O88813        | SFLIGVVVPDPESLPSFAAK                                              | 1.05669263        | 2              | 4.35065   |
| O88813        | SIFVHPEPFSIENGLLTPTLK                                             | 1.62370146        | 2              | 3.63588   |
| O88813        | SRPILQVFVHGESLR                                                   | 0.58539986        | 3              | 3.76821   |
| O88813        | TQEVLDKDGWLHTGDIGR                                                | 1.06371289        | 3              | 3.7425    |
| O88813        | TVILMDPFDDDLMK                                                    | 2.15615616        | 2              | 3.51655   |
| <b>O88867</b> | <b>KMO Kynurenine 3_monooxygenase</b>                             | <b>1.00073991</b> | <b>0.99191</b> | <b>7</b>  |
| O88867        | AVGLEDQIVSK                                                       | 0.97617152        | 2              | 2.49406   |
| O88867        | DFLLPAQPMISVK                                                     | 1.5302737         | 2              | 2.7583    |
| O88867        | DLLTAVESYPNAK                                                     | 0.81239103        | 2              | 2.39351   |
| O88867        | FNNDLSVCLPEFSR                                                    | 1.11199804        | 2              | 4.06053   |
| O88867        | NFPDAIPLMGEQALMR                                                  | 1.16162127        | 2              | 3.27576   |
| O88867        | SINLALSIR                                                         | 1.35332412        | 2              | 2.38707   |
| O88867        | SQYILSISR                                                         | 0.96686431        | 2              | 2.41832   |
| <b>O88941</b> | <b>MOGS Mannosyl_oligosaccharide glucosidase</b>                  | <b>1.08174877</b> | <b>0.74532</b> | <b>3</b>  |
| O88941        | ALESHAAAFK                                                        | 0.8331269         | 2              | 2.46837   |
| O88941        | DLALPTLLNPK                                                       | 1.09945991        | 2              | 2.77078   |
| O88941        | MDPSLFPPVPLFSGVPSR                                                | 1.18893271        | 2              | 2.74233   |
| <b>O88986</b> | <b>KBL 2_amino_3_ketobutyrate coenzyme A ligase_mitochondrial</b> | <b>1.42708584</b> | <b>0.53749</b> | <b>3</b>  |
| O88986        | GTDELLGVMDQVTIINSTLGK                                             | 1.39589832        | 2              | 3.99463   |
| O88986        | HLDMADEAK                                                         | 1.52480045        | 2              | 2.44538   |
| O88986        | VQISAVHSEEDIDR                                                    | 1.2627828         | 2              | 3.96126   |
| <b>O88989</b> | <b>MDHC Malate dehydrogenase_cytoplasmic</b>                      | <b>1.43508121</b> | <b>3.2E-09</b> | <b>9</b>  |
| O88989        | DLDVAVLVGSMR                                                      | 1.97187185        | 3              | 4.18611   |
| O88989        | EKMDLTAKELTEEK+Oxidation(2                                        | 1.61357158        |                |           |
| O88989        | ELTEEKETAFFLSSA                                                   | 4.66833041        | 2              | 3.47368   |
| O88989        | EVGVYEALKDDSWLK                                                   | 2.69442883        | 2              | 4.40612   |
| O88989        | FVEGLPINDFSR                                                      | 1.87471445        | 2              | 3.41743   |
| O88989        | GEFITTVQQR                                                        | 1.28907499        | 2              | 3.98075   |
| O88989        | LGVTADDVK                                                         | 1.45568858        | 2              | 2.92232   |
| O88989        | NVIWGNHSSTQYPDVNHAK                                               | 1.28798694        | 2              | 5.81141   |
| O88989        | VIVVGNPANTNCLTASK                                                 | 1.33664673        | 2              | 5.24321   |
| <b>O88990</b> | <b>ACTN3 Alpha_actinin_3</b>                                      | <b>1.2397554</b>  | <b>0.58878</b> | <b>10</b> |
| O88990        | AGTQIENIEEDFR                                                     | 0.83125714        | 2              | 3.56462   |
| O88990        | ALDFIASK                                                          | 1.30283299        | 2              | 2.67111   |
| O88990        | CQLEINFNTLQTK                                                     | 1.25869078        | 2              | 3.84887   |
| O88990        | FAIQDISVEETSAK                                                    | 1.46278406        | 2              | 4.344     |
| O88990        | GAILGIQGEIQK                                                      | 2.24635455        | 2              | 3.07425   |
| O88990        | GLSQEQLNEFR                                                       | 1.58453827        | 2              | 2.71471   |
| O88990        | HEAFESDLAAHQDR                                                    | 1.50194211        | 3              | 4.45058   |
| O88990        | TINEVENQVLTR                                                      | 1.26605811        | 2              | 3.21732   |
| O88990        | VGWEQLLSIAR                                                       | 1.35302343        | 2              | 2.71509   |
| O88990        | VLAVNQENEK                                                        | 2.82949932        | 2              | 2.32277   |
| <b>O88994</b> | <b>MOSC2 MOSC domain_containing protein 2_mitochondrial</b>       | <b>0.97714946</b> | <b>0.00503</b> | <b>4</b>  |
| O88994        | CVLTTVDPDTGIIDR                                                   | 1.01585171        | 2              | 4.32217   |
| O88994        | GVSVCETECTDMGLR                                                   | 1.74130247        | 2              | 3.36238   |
| O88994        | QLQQVGTVSK                                                        | 1.00173333        | 1              | 2.1798    |
| O88994        | RQLQQVGTVSK                                                       | 0.79062181        | 2              | 3.08204   |
| <b>O89000</b> | <b>DPYD Dihydropyrimidine dehydrogenase [NADP_]</b>               | <b>1.07648006</b> | <b>0.48896</b> | <b>4</b>  |
| O89000        | GMGLACQDPELVR                                                     | 1.07653445        | 2              | 3.48695   |

|               |                                                         |                   |                |           |
|---------------|---------------------------------------------------------|-------------------|----------------|-----------|
| O89000        | LENNFDDIK                                               | 1.49044795        | 2              | 2.46471   |
| O89000        | QEYVGGSTSEIPQFR                                         | 0.8561579         | 2              | 3.3358    |
| O89000        | TEQDETGNWVEDEEQIVR                                      | 2.9081277         | 2              | 4.66486   |
| <b>O89032</b> | <b>SPD2A SH3 and PX domain_containing protein 2A</b>    | <b>0.91804164</b> | <b>0.99861</b> | <b>2</b>  |
| O89032        | DDSDINTSKTGEVSKR                                        | 0.89582959        | 2              | 2.59507   |
| O89032        | FPIEGGQKDPK                                             | 0.99477198        | 2              | 2.37496   |
| <b>O89046</b> | <b>COR1B Coronin_1B</b>                                 | <b>1.21328948</b> | <b>0.04205</b> | <b>3</b>  |
| O89046        | NDQCYEDIR                                               | 1.44764934        | 2              | 3.17609   |
| O89046        | NVLSDSKPAGYSR                                           | 1.21066132        | 2              | 3.25174   |
| O89046        | SGVSTATAITDIPSGNLAGSGEAGK                               | 0.70128483        | 2              | 3.86418   |
| <b>O89049</b> | <b>TRXR1 Thioredoxin reductase 1_cytoplasmic</b>        | <b>0.976482</b>   | <b>0.30607</b> | <b>5</b>  |
| O89049        | GFDQDMANK                                               | 0.45354325        | 2              | 2.45263   |
| O89049        | IEQIEAGTPGR                                             | 1.05676729        | 2              | 3.34847   |
| O89049        | IEQIEAGTPGRLK                                           | 1.57513707        | 2              | 2.63139   |
| O89049        | VVGFHVLGPNAGEVTQGFAAALK                                 | 1.04796615        | 3              | 4.42204   |
| O89049        | WGLGGTCVNVGCIPIK                                        | 1.07726475        | 2              | 3.63223   |
| <b>O89079</b> | <b>COPE Coatomer subunit epsilon</b>                    | <b>1.13148942</b> | <b>0.6967</b>  | <b>2</b>  |
| O89079        | NAFYIGSYQQCINEAQR                                       | 1.94075955        | 2              | 2.78795   |
| O89079        | YGVVLDEIKPSSAPELQAVR                                    | 1.1194026         | 3              | 4.07226   |
| <b>P00173</b> | <b>CYB5 Cytochrome b5</b>                               | <b>0.86573855</b> | <b>1.3E-15</b> | <b>6</b>  |
| P00173        | EQAGGDATENFEDVGHSTDAR                                   | 0.80217288        | 2              | 5.41112   |
| P00173        | FLEEHPGGEVLR                                            | 0.84716677        | 2              | 4.13475   |
| P00173        | STWVILHHK                                               | 0.77192287        | 2              | 2.94549   |
| P00173        | TYIIGELHPDDR                                            | 0.84034573        | 2              | 4.08594   |
| P00173        | VYDLTK                                                  | 0.94652465        | 1              | 2.04902   |
| P00173        | YYTLEEIQK                                               | 0.86974474        | 2              | 2.96554   |
| <b>P00388</b> | <b>NCPR NADPH_cytochrome P450 reductase</b>             | <b>1.77388029</b> | <b>0.00035</b> | <b>10</b> |
| P00388        | DVQNTFYDIVAEFGPMEHTQAVDYVK                              | 2.08522338        | 3              | 4.78158   |
| P00388        | GMSADPEEYDLADLSSLPEIDK                                  | 2.73988073        | 2              | 4.98285   |
| P00388        | HILAILQDYPSLRPPIDHLCCELLPR                              | 1.76936714        | 4              | 4.96519   |
| P00388        | KKEEIPFSK                                               | 1.09426062        | 2              | 2.73618   |
| P00388        | LEQLGAQR                                                | 1.5229697         | 2              | 2.53135   |
| P00388        | LIHEGGAHIYVCGDAR                                        | 2.25262042        | 3              | 3.63829   |
| P00388        | RSDEDLYR                                                | 1.44503911        | 2              | 2.80988   |
| P00388        | SYENQKPPFDAK                                            | 1.90257601        | 2              | 3.32394   |
| P00388        | TYEHFNAMGK                                              | 1.51842306        | 2              | 2.61355   |
| P00388        | VHPNSVHICAVEVEYAK                                       | 1.2621954         | 2              | 4.69648   |
| <b>P00406</b> | <b>COX2 Cytochrome c oxidase subunit 2</b>              | <b>1.51751752</b> | <b>0.30009</b> | <b>4</b>  |
| P00406        | ILYMMDEINNPVLTVK                                        | 1.15503938        | 2              | 4.45263   |
| P00406        | LLEV DNR                                                | 1.83225641        | 2              | 2.40901   |
| P00406        | VVLP MELPIR                                             | 1.4381773         | 2              | 2.44059   |
| P00406        | VVLP MELPIR+Oxidation(4                                 | 1.85367576        |                |           |
| <b>P00481</b> | <b>OTC Ornithine carbamoyltransferase_mitochondrial</b> | <b>1.17621042</b> | <b>0.01028</b> | <b>18</b> |
| P00481        | EATIPVINGLSLDYHPIQLADYLTQLQEHYGLK                       | 1.28480728        | 3              | 5.48309   |
| P00481        | FGMHLQAATPK                                             | 0.96354453        | 3              | 3.94349   |
| P00481        | GEYLPLLQ GK                                             | 0.96529586        | 2              | 3.09492   |
| P00481        | GGNVLITDTWISMGQEDEK                                     | 1.20033069        | 2              | 5.21338   |
| P00481        | GGNVLITDTWISMGQEDEKK                                    | 0.89988873        | 2              | 4.61875   |
| P00481        | GLTLSWIGDGNNILHSIMMSAAK                                 | 1.65863577        | 2              | 4.17853   |
| P00481        | GYEPDPNIVK                                              | 0.88425012        | 2              | 2.61914   |
| P00481        | LQAFQGYQVTMK                                            | 1.70016278        | 2              | 4.04133   |
| P00481        | LSMTNDPLEAAR                                            | 1.33781301        | 2              | 2.92172   |
| P00481        | LSTETGFALLGGHPSFLTQDIHLGVNESLTDAR                       | 2.17613004        | 3              | 6.03413   |
| P00481        | QKGEYLPLLQ GK                                           | 0.91282143        | 2              | 3.43646   |
| P00481        | QSDL DILAK                                              | 1.09665517        | 1              | 2.06386   |

|               |                                                      |                   |                |           |
|---------------|------------------------------------------------------|-------------------|----------------|-----------|
| P00481        | SLGMIFEK                                             | 1.19272719        | 2              | 2.81479   |
| P00481        | SLVFPEAENR                                           | 1.0168562         | 2              | 2.67016   |
| P00481        | SLVFPEAENRK                                          | 1.19621616        | 2              | 2.93898   |
| P00481        | VLSSMTDAVLAR                                         | 1.29919018        | 2              | 3.93124   |
| P00481        | VLSSMTDAVLAR+Oxidation(4                             | 1.54830636        |                |           |
| P00481        | YGKPVQSQVQLK                                         | 0.84967431        | 2              | 3.06799   |
| <b>P00502</b> | <b>GSTA1 Glutathione S_transferase alpha_1</b>       | <b>0.76707356</b> | <b>6E-14</b>   | <b>2</b>  |
| P00502        | FIQSPEDLEK                                           | 0.7676589         | 2              | 2.77343   |
| P00502        | WLLAAAGVEFDEK                                        | 0.62882315        | 2              | 4.37535   |
| <b>P00507</b> | <b>AATM Aspartate aminotransferase_mitochondrial</b> | <b>1.12544467</b> | <b>0.85136</b> | <b>19</b> |
| P00507        | ASAELALGENSEVLK                                      | 0.99364577        | 2              | 4.71201   |
| P00507        | DAGMQLQGYR                                           | 1.62840744        | 2              | 2.72527   |
| P00507        | DDNGKPYVLPVSR                                        | 0.8807642         | 2              | 3.55012   |
| P00507        | EGSSHNWQHITDQIGMFCFTGLKPEQVER                        | 1.03321732        | 3              | 5.22551   |
| P00507        | EYLPIGGLADFCK                                        | 1.27627506        | 2              | 2.88965   |
| P00507        | FVTVQTISGTGALR                                       | 1.14106586        | 2              | 5.16658   |
| P00507        | HFIEQGINVCLCQSYAK                                    | 1.66225114        | 2              | 4.88872   |
| P00507        | IAATILTSPDLR                                         | 2.06465448        | 2              | 3.05655   |
| P00507        | IPEQSVLLHACAHNPTGVDPRPEQWK                           | 1.38311626        | 3              | 4.7361    |
| P00507        | ISVAGVTSGNVGYLAHAIHQVTK                              | 1.26532493        | 2              | 4.42345   |
| P00507        | KMNLGVGAYR                                           | 1.74427874        | 2              | 2.65839   |
| P00507        | KQWLQEVK                                             | 0.77746952        | 1              | 2.16169   |
| P00507        | MNLGVGAYR                                            | 1.07681819        | 2              | 2.93945   |
| P00507        | NLDKEYLPIGGLADFCK                                    | 1.05286141        | 2              | 5.54931   |
| P00507        | NMGLYGER                                             | 1.26774242        | 2              | 2.66784   |
| P00507        | TCGFDFSGALEDISK                                      | 1.03098756        | 2              | 5.01904   |
| P00507        | TQLVSNLK                                             | 1.14224413        | 2              | 2.91855   |
| P00507        | VGAFVTVCK                                            | 1.12565628        | 2              | 3.23156   |
| P00507        | VGASFLQR                                             | 2.12880896        | 2              | 3.11008   |
| <b>P00564</b> | <b>KCRM Creatine kinase M_type</b>                   | <b>5.17025317</b> | <b>0.39888</b> | <b>9</b>  |
| P00564        | DLPDPIIQDR                                           | 2.72151653        | 2              | 2.78149   |
| P00564        | FEEILTR                                              | 2.05135496        | 2              | 2.49143   |
| P00564        | GGDDLDPNYVLSSR                                       | 3.43778108        | 2              | 4.60846   |
| P00564        | GQSIDDMIPAQK                                         | 1.00822579        | 2              | 3.6771    |
| P00564        | GTGGVDTAAVGAVFDISNADR                                | 6.03957764        | 2              | 5.34519   |
| P00564        | LGSSEVEQVQLVVDGVK                                    | 3.84030582        | 2              | 5.08929   |
| P00564        | LSVEALNSLTGEFK                                       | 2.3190502         | 2              | 4.29879   |
| P00564        | RGTGGVDTAAVGAVFDISNADR                               | 5.42005041        | 2              | 4.14748   |
| P00564        | SMTEQEQQQLIDHFLFDKPVSPLLASGMAR                       | 3.36899399        | 3              | 5.79625   |
| <b>P00787</b> | <b>CATB Cathepsin B</b>                              | <b>1.25742108</b> | <b>0.16111</b> | <b>5</b>  |
| P00787        | EQWSNCPTIAQIR                                        | 1.66707968        | 2              | 2.63425   |
| P00787        | GENHCGIESEIVAGIPR                                    | 1.10417862        | 2              | 4.91291   |
| P00787        | HEAGDVMGGHAIR                                        | 1.35071609        | 3              | 3.86374   |
| P00787        | HEAGDVMGGHAIR+Oxidation(6                            | 1.49554146        |                |           |
| P00787        | MCEAGYSTSYKEDK                                       | 1.57613834        | 2              | 4.40045   |
| <b>P00884</b> | <b>ALDOB Fructose_bisphosphate aldolase B</b>        | <b>1.18324772</b> | <b>5.7E-15</b> | <b>21</b> |
| P00884        | ALQASALAAWGGK                                        | 1.80880345        | 2              | 4.98375   |
| P00884        | ATQEAFMK                                             | 1.51339804        | 2              | 2.75294   |
| P00884        | ATQEAFMK+Oxidation(6                                 | 1.64475155        |                |           |
| P00884        | ELSEIAQR                                             | 1.67056606        | 1              | 2.19026   |
| P00884        | ETTIQGLDGLSER                                        | 1.29892059        | 2              | 3.87477   |
| P00884        | FPALTSEQK                                            | 1.46183415        | 2              | 2.35079   |
| P00884        | GILAADESVGTMGNR                                      | 1.08547519        | 2              | 5.41142   |
| P00884        | GILAADESVGTMGNR+Oxidation(11                         | 0.73955575        |                |           |
| P00884        | GIVVGIKLDQGGAPLAGTNK                                 | 1.65376094        | 2              | 4.37209   |
| P00884        | GIVVGIKLDQGGAPLAGTNKETTIQGLDGLSER                    | 2.42902712        | 3              | 5.41877   |

|               |                                          |                   |                |           |
|---------------|------------------------------------------|-------------------|----------------|-----------|
| P00884        | IKVENTEENR                               | 1.09108376        | 2              | 3.1908    |
| P00884        | IKVENTEENRR                              | 1.19477076        | 2              | 3.15911   |
| P00884        | ISDQCPSSLAIQENANALAR                     | 3.34459144        | 2              | 6.10385   |
| P00884        | KELSEIAQR                                | 1.43752286        | 3              | 3.36062   |
| P00884        | KYTPEQVAMATVTALHR                        | 1.99537158        | 3              | 6.03221   |
| P00884        | KYTPEQVAMATVTALHR+Oxidation(8            | 2.18850283        |                |           |
| P00884        | LDQGGAPLAGTNK                            | 1.35433188        | 2              | 4.65249   |
| P00884        | LDQGGAPLAGTNKETTIQGLDGLSER               | 1.36999516        | 3              | 4.3063    |
| P00884        | YASICQQNGLVPIVEVLPDGDHDLHCQYVSEK         | 1.50805454        | 3              | 4.75731   |
| P00884        | YTPEQVAMATVTALHR                         | 1.3873107         | 2              | 4.63929   |
| P00884        | YTPEQVAMATVTALHR+Oxidation(7             | 1.88930094        |                |           |
| <b>P01015</b> | <b>ANGT Angiotensinogen</b>              | <b>2.71242382</b> | <b>1.6E-06</b> | <b>3</b>  |
| P01015        | GSYNLQDLLAQAK                            | 2.86133906        | 2              | 3.1402    |
| P01015        | SLDLSTDPVLAQAK                           | 2.50140172        | 2              | 3.32871   |
| P01015        | STCAQLENPSVETLPEPTFEPVPIQAK              | 3.18784228        | 2              | 3.90488   |
| <b>P01026</b> | <b>CO3 Complement C3</b>                 | <b>1.12786923</b> | <b>1.6E-06</b> | <b>21</b> |
| P01026        | ACEPGVDYVYK                              | 1.27119507        | 2              | 2.48401   |
| P01026        | ADIGCTPGSGK                              | 1.69697881        | 2              | 3.02188   |
| P01026        | AFYEHPAK                                 | 0.98770295        | 2              | 2.44777   |
| P01026        | DSCVGTLVVKGDPDR                          | 0.86990133        | 2              | 2.58669   |
| P01026        | EYVLPSEFVLVEPTEK                         | 1.48283361        | 2              | 3.70341   |
| P01026        | IFTVDNLLPVGK                             | 1.48232142        | 2              | 3.58548   |
| P01026        | IGLQEVEVK                                | 1.11368774        | 2              | 2.6463    |
| P01026        | LPYSVVRNEQVEIR                           | 2.25935773        | 2              | 2.3282    |
| P01026        | QNEGFSLTAK                               | 1.12088722        | 2              | 2.45793   |
| P01026        | RVPVVTQGSDAQALTQDDGVAK                   | 1.18923902        | 3              | 5.65816   |
| P01026        | SDVDEDIPEEDIISR                          | 1.79671835        | 2              | 4.50376   |
| P01026        | SGIPIVTSPIYQIHFTK                        | 2.20560885        | 2              | 2.94932   |
| P01026        | SGSDEVQAGQER                             | 2.09588601        | 2              | 3.87248   |
| P01026        | SSVAVPYVIVPLK                            | 1.96520438        | 2              | 2.97736   |
| P01026        | TNQGLQTDQREDPECAKPAAR                    | 1.6133632         | 3              | 3.66002   |
| P01026        | TVLTGATGHLNR                             | 1.59886378        | 2              | 2.84118   |
| P01026        | TVVIVETPDGVPIKR                          | 1.61957795        | 2              | 2.73759   |
| P01026        | VELKPGDNLNVNFHLR                         | 1.56212291        | 3              | 3.91398   |
| P01026        | VHQFFNVGLIQPGSVK                         | 1.292827          | 3              | 4.15348   |
| P01026        | VLIEDGSGEAVLSR                           | 1.21918379        | 2              | 3.98511   |
| P01026        | VPVVTQGSDAQALTQDDGVAK                    | 0.89333642        | 2              | 5.56998   |
| <b>P01048</b> | <b>KNT1 T_kininogen 1</b>                | <b>0.91353645</b> | <b>0.89856</b> | <b>3</b>  |
| P01048        | FSVATQICNITPGK                           | 0.71635617        | 2              | 3.33431   |
| P01048        | KTEEDLCVGCFFQIPMDSSDLKPVLK               | 0.9154173         | 4              | 4.65972   |
| P01048        | TELTADCETK                               | 0.90768732        | 2              | 2.34715   |
| <b>P01946</b> | <b>HBA Hemoglobin subunit alpha_1/2</b>  | <b>0.58855032</b> | <b>1</b>       | <b>9</b>  |
| P01946        | AADHVEDLPGALSTLSLHAAK                    | 0.68166764        | 3              | 7.45363   |
| P01946        | FLASVSTVLTSK                             | 0.58768471        | 2              | 4.01308   |
| P01946        | FLSHCLLVTLACHHPGDFTPAMHASLDK             | 0.78330168        | 4              | 5.44757   |
| P01946        | FLSHCLLVTLACHHPGDFTPAMHASLDKFLASVSTVLTSK | 0.88382356        | 5              | 6.35712   |
| P01946        | IGGHGGEYGEALQR                           | 0.56845425        | 3              | 5.093     |
| P01946        | LRVDPVNFK                                | 0.80360012        | 2              | 2.572     |
| P01946        | MFAAFPTTK                                | 0.56493126        | 2              | 2.76803   |
| P01946        | MFAAFPTTK+Oxidation(0                    | 0.65062727        |                |           |
| P01946        | TYFSHIDVSPGSAQVK                         | 0.62631031        | 2              | 5.03779   |
| <b>P02089</b> | <b>HBB2 Hemoglobin subunit beta_2</b>    | <b>0.66010021</b> | <b>0.81507</b> | <b>4</b>  |
| P02089        | GTFASLSELHCDK                            | 0.68909774        | 2              | 3.76467   |
| P02089        | LHVDPENFR                                | 0.723645          | 2              | 2.51555   |
| P02089        | YFDSFGDLSASAIMGNPK                       | 0.46490108        | 2              | 6.51648   |
| P02089        | YFDSFGDLSASAIMGNPK+Oxidation(14          | 1.14850837        |                |           |

|               |                                             |                   |                |           |
|---------------|---------------------------------------------|-------------------|----------------|-----------|
| <b>P02091</b> | <b>HBB1 Hemoglobin subunit beta_1</b>       | <b>0.73216526</b> | <b>1</b>       | <b>10</b> |
| P02091        | AAVNGLWGK                                   | 1.13962793        | 2              | 2.7712    |
| P02091        | AAVNGLWGKVPDDVGGEALGR                       | 1.05857658        | 3              | 3.61442   |
| P02091        | EFTPCAQAAFQK                                | 0.76119372        | 2              | 3.17506   |
| P02091        | GTF AHLSELHC DK                             | 0.74293999        | 2              | 4.40014   |
| P02091        | GTF AHLSELHC DLHVDPENFR                     | 0.58218921        | 3              | 3.95259   |
| P02091        | KVINAFNDGLK                                 | 0.50014971        | 2              | 3.60008   |
| P02091        | LLGNMIVIVLGHHLGK                            | 0.73125246        | 4              | 4.61855   |
| P02091        | VINAFNDGLK                                  | 0.57743964        | 2              | 2.98589   |
| P02091        | VNPDDVGGEALGR                               | 0.59742104        | 2              | 4.03006   |
| P02091        | VVAGVASALAHK                                | 0.88336114        | 2              | 3.74172   |
| <b>P02401</b> | <b>RLA2 60S acidic ribosomal protein P2</b> | <b>1.18635319</b> | <b>1.1E-16</b> | <b>6</b>  |
| P02401        | ILDSVGIEADDER                               | 1.67523793        | 2              | 4.85031   |
| P02401        | KILDSVGIEADDER                              | 1.07065355        | 2              | 4.00956   |
| P02401        | LASVPAGGAVAVSAAPGSAAPAAGSAPAAAEK            | 1.09293208        | 3              | 5.90573   |
| P02401        | NIEDVIAQGVGK                                | 0.97976061        | 2              | 4.72825   |
| P02401        | VISELNGK                                    | 1.54346064        | 1              | 2.08877   |
| P02401        | YVASYLLAALGGNSNPSAK                         | 1.42607858        | 2              | 5.22184   |
| <b>P02564</b> | <b>MYH7 Myosin_7</b>                        | <b>1.17292152</b> | <b>0.67816</b> | <b>38</b> |
| P02564        | ALQEAHQALDDLQAEEDKVNTLTK                    | 1.17596818        | 3              | 5.81066   |
| P02564        | ANDDLKENIAIVER                              | 1.73079809        | 3              | 3.49      |
| P02564        | DLEEATLQHEATAAALR                           | 1.31474613        | 2              | 4.96562   |
| P02564        | DVFVPDDKEEFVK                               | 2.57342909        | 2              | 2.44454   |
| P02564        | EDQVMQQNPPK                                 | 2.10197142        | 2              | 3.04702   |
| P02564        | EEQAEPDGT E EADK                            | 6.51845034        | 2              | 3.06285   |
| P02564        | ELENELEAEQK                                 | 1.11723916        | 2              | 2.37769   |
| P02564        | GQNVQQVAYAIGALAK                            | 3.12505098        | 2              | 4.06569   |
| P02564        | GTLEDQIIQANPALEAFGNAK                       | 6.12742452        | 3              | 5.69473   |
| P02564        | IEDEQALGSQLQK                               | 5.09411863        | 2              | 5.09519   |
| P02564        | IEEEEELEAER                                 | 3.46859938        | 2              | 4.34576   |
| P02564        | IKELTYQTEEDRK                               | 2.0421141         | 2              | 2.62685   |
| P02564        | ILNPAAIPEGQFIDSR                            | 5.58216182        | 2              | 2.76913   |
| P02564        | KLAEKDEEMEQAK                               | 5.42951607        | 3              | 3.65182   |
| P02564        | KLAEQELIETSER                               | 1.8940881         | 2              | 3.50072   |
| P02564        | KLEDECSLKR                                  | 1.96127162        | 3              | 3.81971   |
| P02564        | KVQHELDEAEER                                | 2.50206772        | 2              | 3.72532   |
| P02564        | LAEQELIETSER                                | 0.77419458        | 2              | 3.39427   |
| P02564        | LDEAEQIALK                                  | 4.65759526        | 2              | 3.23504   |
| P02564        | LELDDVTSNMEQIIK                             | 1.53614317        | 2              | 4.47015   |
| P02564        | LQDAEEAVEAVNAK                              | 3.58009334        | 2              | 4.68299   |
| P02564        | LQNEIEDLMVDVER                              | 2.97727851        | 2              | 3.89151   |
| P02564        | LTQESIMDLENDKQQLDER                         | 5.35835784        | 3              | 3.82173   |
| P02564        | MDADLSQLQTEVEEAVQECR                        | 2.94073304        | 2              | 4.98524   |
| P02564        | NALAHALQSAR                                 | 2.06266165        | 2              | 2.36926   |
| P02564        | NAYEESLEHLETFK                              | 1.10785755        | 2              | 3.41042   |
| P02564        | NLQEEISDLTEQLGSTGK                          | 2.72198042        | 2              | 5.07216   |
| P02564        | NLTEEMAGLDEIIVK                             | 1.71334729        | 2              | 3.65398   |
| P02564        | NNLLQAELEELR                                | 2.49078974        | 2              | 3.59633   |
| P02564        | QAEEAEEQANTNLSK                             | 6.36847171        | 2              | 5.2352    |
| P02564        | QKYEESQSELESSQK                             | 2.38325953        | 2              | 3.78316   |
| P02564        | QLEAEKLELQSALEEAESLEHEEGK                   | 4.92360114        | 3              | 3.60724   |
| P02564        | QREEQAEPDGT E EADK                          | 4.426567          | 2              | 3.76492   |
| P02564        | TLEDQMNEHR                                  | 3.4808202         | 2              | 2.53192   |
| P02564        | VQHELDEAEER                                 | 1.42601892        | 2              | 3.46862   |
| P02564        | VQLLHSQNTSLINQK                             | 0.91987077        | 2              | 4.09822   |
| P02564        | VVDSLQTS LDAETR                             | 1.83492658        | 2              | 4.1174    |
| P02564        | YEESQSELESSQK                               | 4.09841606        | 2              | 4.32505   |

|               |                                                             |                   |                |           |
|---------------|-------------------------------------------------------------|-------------------|----------------|-----------|
| <b>P02600</b> | <b>MYL1 Myosin light chain 1/3_ skeletal muscle isoform</b> | <b>1.58100406</b> | <b>0.52975</b> | <b>12</b> |
| P02600        | ALGTNPTNAEVK                                                | 2.23524485        | 2              | 3.33677   |
| P02600        | ALGTNPTNAEVKK                                               | 4.38100807        | 2              | 2.94539   |
| P02600        | DQGGYEDFVEGLR                                               | 6.9256245         | 2              | 3.81599   |
| P02600        | IEFEQFLPMMQAISSNK                                           | 1.66617337        | 3              | 3.91506   |
| P02600        | ITLSQVGDVLR                                                 | 4.59534111        | 2              | 3.5886    |
| P02600        | KIEFEQFLPMMQAISSNK                                          | 2.00558501        | 2              | 4.90061   |
| P02600        | KIEFEQFLPMMQAISSNKDQGGYEDFVEGLR                             | 2.68308016        | 3              | 5.51342   |
| P02600        | KPAAAAAPAPAPAPAPAKPK                                        | 3.45055701        | 3              | 3.70325   |
| P02600        | KPAAAAAPAPAPAPAPAKPKEEK                                     | 3.13087078        | 3              | 5.2377    |
| P02600        | KVLGNPSNEEMNAK                                              | 4.17810536        | 2              | 3.65182   |
| P02600        | VLGNPSNEEMNAK                                               | 4.52530492        | 2              | 3.91882   |
| P02600        | VLGNPSNEEMNAK+Oxidation(9                                   | 2.19089998        |                |           |
| <b>P02625</b> | <b>PRVA Parvalbumin alpha</b>                               | <b>1.82393717</b> | <b>0.38141</b> | <b>5</b>  |
| P02625        | AIGAFTAADSFHDK                                              | 2.09902528        | 2              | 2.4556    |
| P02625        | AIGAFTAADSFHDKK                                             | 2.33993698        | 2              | 3.85334   |
| P02625        | SGFIEDELGSILK                                               | 1.61545373        | 2              | 4.03336   |
| P02625        | TLMAAGDKDGDGK                                               | 1.15270992        | 2              | 3.38868   |
| P02625        | TLMAAGDKDGDGK+Oxidation(2                                   | 11.386101         |                |           |
| <b>P02650</b> | <b>APOE Apolipoprotein E</b>                                | <b>1.19251159</b> | <b>0.81028</b> | <b>12</b> |
| P02650        | ELEEQLGPVAEETR                                              | 0.89594078        | 2              | 4.21141   |
| P02650        | GRLEEVGNQAR                                                 | 1.10224036        | 2              | 3.39432   |
| P02650        | GWFEPLVEDMQR                                                | 1.2273028         | 2              | 3.04135   |
| P02650        | LEEVGNQAR                                                   | 1.13175888        | 2              | 2.44534   |
| P02650        | LGADMEDLR                                                   | 1.12521084        | 2              | 3.16475   |
| P02650        | LGPLVEQGR                                                   | 1.11451575        | 2              | 2.99943   |
| P02650        | LQAEIFQAR                                                   | 1.3360973         | 2              | 2.53109   |
| P02650        | MEEQTQQIR                                                   | 1.25656646        | 2              | 3.37692   |
| P02650        | NEVNTMLGQSTEELR                                             | 1.02703902        | 2              | 4.64819   |
| P02650        | SKMEEQTQQIR                                                 | 1.16031567        | 2              | 3.338     |
| P02650        | SKMEEQTQQIR+Oxidation(2                                     | 1.70307427        |                |           |
| P02650        | TANLGAGAAQPLR                                               | 1.0031078         | 2              | 4.00139   |
| <b>P02680</b> | <b>FIBG Fibrinogen gamma chain</b>                          | <b>1.11695383</b> | <b>0.73875</b> | <b>4</b>  |
| P02680        | LSIGDGQQHMGGSK                                              | 1.5030794         | 2              | 3.40696   |
| P02680        | VGPESDKYR                                                   | 1.22637447        | 2              | 2.7223    |
| P02680        | YEALLTHESSIR                                                | 1.01034166        | 2              | 3.72808   |
| P02680        | YLQDIYTSNK                                                  | 1.0559404         | 2              | 2.86956   |
| <b>P02692</b> | <b>FABPL Fatty acid binding protein_liver</b>               | <b>1.12920627</b> | <b>1.8E-05</b> | <b>14</b> |
| P02692        | AMGLPEDLIQK                                                 | 0.87804539        | 2              | 3.48702   |
| P02692        | AMGLPEDLIQK+Oxidation(1                                     | 1.07640177        |                |           |
| P02692        | GVSEIVHEGK                                                  | 1.11097127        | 2              | 3.45281   |
| P02692        | GVSEIVHEGKK                                                 | 1.17177392        | 2              | 3.29625   |
| P02692        | MEGDNKMVTTFKGIK+Oxidation(6                                 | 0.70726209        |                |           |
| P02692        | SVTEFNGDTITNTMTLGDIVYK                                      | 1.40543615        | 3              | 5.76839   |
| P02692        | SVTEFNGDTITNTMTLGDIVYK+Oxidation(13                         | 1.58883212        |                |           |
| P02692        | SVTEFNGDTITNTMTLGDIVYKR                                     | 1.11550713        | 2              | 3.72356   |
| P02692        | VIHNEFTLGEECELETMTGEK                                       | 1.14736422        | 3              | 6.02258   |
| P02692        | VIHNEFTLGEECELETMTGEK+Oxidation(16                          | 1.08900886        |                |           |
| P02692        | VIHNEFTLGEECELETMTGEKVK                                     | 1.53418672        | 3              | 4.9054    |
| P02692        | VKLITYGSK                                                   | 0.99751521        | 1              | 2.02662   |
| P02692        | YQVQSQENFEPFMK                                              | 0.97686495        | 2              | 5.78362   |
| P02692        | YQVQSQENFEPFMK+Oxidation(12                                 | 0.88843355        |                |           |
| <b>P02696</b> | <b>RET1 Retinol binding protein 1</b>                       | <b>1.72797574</b> | <b>1.2E-06</b> | <b>6</b>  |
| P02696        | ALDVNVALR                                                   | 2.16316926        | 2              | 2.97428   |
| P02696        | CMTTVSWDGDKLQCVQK                                           | 1.15553324        | 2              | 4.23034   |
| P02696        | EFEEELTGIDDR                                                | 1.72060392        | 2              | 3.24756   |



|               |                                            |                   |                |           |
|---------------|--------------------------------------------|-------------------|----------------|-----------|
| P02696        | EFEEDLTGIDDRK                              | 1.68175064        | 2              | 3.49205   |
| P02696        | MLSNNENFEEYLR                              | 1.6099511         | 2              | 3.86972   |
| P02696        | MLSNNENFEEYLR+Oxidation(0                  | 2.40142631        |                |           |
| <b>P02706</b> | <b>ASGR1 Asialoglycoprotein receptor 1</b> | <b>1.07733533</b> | <b>0.88362</b> | <b>5</b>  |
| P02706        | DYQDFQHLDNENDHHQLQR                        | 0.89864124        | 3              | 4.12294   |
| P02706        | LVESQLEK                                   | 1.24073903        | 2              | 2.77993   |
| P02706        | SLSCQMAALR                                 | 1.24738927        | 2              | 2.80293   |
| P02706        | WVCETELGK                                  | 0.99402342        | 2              | 2.46677   |
| P02706        | WVDGTDYETGFK                               | 0.87747187        | 2              | 3.1856    |
| <b>P02770</b> | <b>ALBU Serum albumin</b>                  | <b>1.02896431</b> | <b>1.1E-08</b> | <b>25</b> |
| P02770        | AADKDNCFATEGPNLVAR                         | 1.76168766        | 2              | 4.44865   |
| P02770        | AETFTFHSDICTLPDKEK                         | 1.65960421        | 3              | 3.36995   |
| P02770        | CCAEGDPPACYGTVLAEFQPLVEEPK                 | 3.1601892         | 2              | 5.04219   |
| P02770        | CCSGSLVER                                  | 1.62227652        | 2              | 2.88549   |
| P02770        | CCTLPEAQR                                  | 1.49685344        | 2              | 3.06953   |
| P02770        | DLGEQHFH                                   | 1.58932129        | 1              | 2.1346    |
| P02770        | ECCHGDLLCADDR                              | 1.39545497        | 2              | 3.68599   |
| P02770        | ECCHGDLLCADDRAELAK                         | 1.40670727        | 2              | 5.55439   |
| P02770        | FKDLGEQHFH                                 | 1.24635065        | 3              | 4.18445   |
| P02770        | GLVLIAFSQYLQK                              | 2.31713381        | 2              | 4.12847   |
| P02770        | INKECCHGDLLCADDRAELAK                      | 1.67652174        | 3              | 4.81183   |
| P02770        | KQTALAEVVK                                 | 1.23942517        | 3              | 4.04055   |
| P02770        | KYEATLEK                                   | 0.74598237        | 1              | 2.61506   |
| P02770        | LGEYGFQNAVLVR                              | 40.790676         | 2              | 3.77918   |
| P02770        | LQACCDKPVVQK                               | 1.54599048        | 2              | 4.0486    |
| P02770        | LVQEVDFAK                                  | 0.54650379        | 2              | 3.51271   |
| P02770        | RHPDYSVSLLLR                               | 1.53840282        | 3              | 5.36587   |
| P02770        | SIHTLFGDK                                  | 1.47623754        | 1              | 2.59696   |
| P02770        | TCVADENAENCDK                              | 1.2375622         | 2              | 4.58551   |
| P02770        | TNCELYEK                                   | 1.51124858        | 2              | 2.86214   |
| P02770        | TVMGDFFAQFVVK                              | 1.29530173        | 2              | 3.88801   |
| P02770        | YEATLEK                                    | 1.72071031        | 1              | 1.96369   |
| P02770        | YMCENQATISSK                               | 1.09151269        | 2              | 4.14408   |
| P02770        | YMCENQATISSK+Oxidation(1                   | 2.03712812        |                |           |
| P02770        | YNEVLTQCCTESDK                             | 1.41510461        | 2              | 5.52498   |
| <b>P02803</b> | <b>MT1 Metallothionein_1</b>               | <b>25.9105534</b> | <b>9.9E-20</b> | <b>2</b>  |
| P02803        | MDPNCSCSTGGSCCTSSCGCK                      | 32.7174683        | 3              | 6.52961   |
| P02803        | SCCSCCPVGGCK                               | 13.9910357        | 2              | 4.11442   |
| <b>P04041</b> | <b>GPX1 Glutathione peroxidase 1</b>       | <b>1.05254886</b> | <b>0.67585</b> | <b>11</b> |
| P04041        | DYTEMNDLQK                                 | 26.589377         | 2              | 2.41201   |
| P04041        | FLVGPDPVPR                                 | 1.04573087        | 2              | 3.21799   |
| P04041        | GLVVLGFPCNQFGHQENK                         | 2.01520494        | 2              | 4.06915   |
| P04041        | GLVVLGFPCNQFGHQENKNEEILNSLK                | 1.29964886        | 3              | 4.20041   |
| P04041        | NALPAPSDPTALMTDPK                          | 1.22446569        | 2              | 3.17598   |
| P04041        | NALPAPSDPTALMTDPK+Oxidation(13             | 0.89404619        |                |           |
| P04041        | NDISWNFEK                                  | 1.10835438        | 2              | 3.02235   |
| P04041        | NEEILNSLK                                  | 1.28649925        | 2              | 2.48231   |
| P04041        | TIDIEPDIEALLSK                             | 1.42229508        | 3              | 5.43006   |
| P04041        | YIIWSPVCR                                  | 1.38138414        | 2              | 2.80239   |
| P04041        | YVRPGGGFEPNFTLFEK                          | 1.34399455        | 3              | 4.70879   |
| <b>P04167</b> | <b>CP2B2 Cytochrome P450 2B2</b>           | <b>1.24416803</b> | <b>0.79102</b> | <b>2</b>  |
| P04167        | GTIAVIEPIFK                                | 1.73181788        | 2              | 2.91433   |
| P04167        | NLQEILDYIGHIVEK                            | 1.13679302        | 2              | 4.33955   |
| <b>P04176</b> | <b>PH4H Phenylalanine_4_hydroxylase</b>    | <b>1.42723463</b> | <b>3.6E-05</b> | <b>16</b> |
| P04176        | AYGAGLLSSFGELOQYCLSDKPK                    | 1.74589297        | 3              | 3.50529   |
| P04176        | EDNIPQLEDVSQLQCTGFR                        | 1.33583172        | 3              | 5.16658   |
| P04176        | FANQILSYGAELDADHPGFKDPVYR                  | 1.49612657        | 3              | 3.98974   |

|               |                                                                     |                   |                |           |
|---------------|---------------------------------------------------------------------|-------------------|----------------|-----------|
| P04176        | HGSKPMYTPEDICHELLGHVPLFSDR                                          | 1.55160668        | 3              | 3.93199   |
| P04176        | ILADSIINSEVGILCNALQK                                                | 1.39437076        | 3              | 6.47502   |
| P04176        | LNKDEYEFFTYLDK                                                      | 3.72512986        | 2              | 3.57632   |
| P04176        | LNKDEYEFFTYLDKR                                                     | 1.58148347        | 3              | 3.53333   |
| P04176        | LRPVAGLLSSR                                                         | 1.91799379        | 2              | 2.69481   |
| P04176        | NDIGATVHELRS                                                        | 1.37139351        | 2              | 3.75022   |
| P04176        | QFADIAYNYR                                                          | 1.18332358        | 2              | 2.41491   |
| P04176        | SFAQFSQEIGLASLGAPDEYIEK                                             | 1.9707314         | 2              | 4.93304   |
| P04176        | THACYEHNHIFLLEK                                                     | 1.38657529        | 4              | 4.98313   |
| P04176        | VEVDNTQQLK                                                          | 1.21048003        | 2              | 3.83769   |
| P04176        | VEYTEEEK                                                            | 1.44159934        | 2              | 2.74199   |
| P04176        | VEYTEEEKQTWGTVFR                                                    | 1.39347864        | 2              | 3.89734   |
| P04176        | YCGFREDNIPQLEDVSQLTCTGFR                                            | 1.27593659        | 3              | 5.12928   |
| <b>P04182</b> | <b>OAT Ornithine aminotransferase_ mitochondrial</b>                | <b>1.04130176</b> | <b>0.97963</b> | <b>8</b>  |
| P04182        | AFYNNVLGEYEEYITK                                                    | 1.37780052        | 2              | 4.60059   |
| P04182        | GIYMWDVEGR                                                          | 0.95324287        | 2              | 3.12071   |
| P04182        | GLLNAIVIR                                                           | 1.18092639        | 2              | 3.26114   |
| P04182        | KTEQGPSSEYIFER                                                      | 1.03395436        | 2              | 4.15833   |
| P04182        | TEQGPSSEYIFER                                                       | 0.81124451        | 2              | 3.9498    |
| P04182        | VLPMTGVEAGETACK                                                     | 1.23085658        | 2              | 4.1541    |
| P04182        | WLAVDHENVRPDIIVLLGK                                                 | 1.2143351         | 2              | 5.27923   |
| P04182        | YGAHNYHPLPVALER                                                     | 1.26239787        | 2              | 4.21891   |
| <b>P04256</b> | <b>ROA1 Heterogeneous nuclear ribonucleoprotein A1</b>              | <b>1.28199538</b> | <b>0.13542</b> | <b>4</b>  |
| P04256        | EDSQRPGAHLTVK                                                       | 1.54821059        | 2              | 3.1967    |
| P04256        | IEVIEIMTDR                                                          | 1.29783706        | 2              | 3.42468   |
| P04256        | NQGGYGGSSSSSYGSGR                                                   | 1.12382772        | 2              | 5.16704   |
| P04256        | YHTVNGHNCEVR                                                        | 1.18601962        | 2              | 3.38097   |
| <b>P04276</b> | <b>VTDB Vitamin D_binding protein</b>                               | <b>1.24403995</b> | <b>0.00461</b> | <b>3</b>  |
| P04276        | CCSINSPPR                                                           | 1.08417959        | 2              | 2.52545   |
| P04276        | SCESDAPFPVHPGTSECTK                                                 | 1.66966286        | 2              | 4.6312    |
| P04276        | YCSSQIDAEMR                                                         | 1.91652921        | 2              | 3.21518   |
| <b>P04355</b> | <b>MT2 Metallothionein_2</b>                                        | <b>92.6728192</b> | <b>9.9E-20</b> | <b>2</b>  |
| P04355        | MDPNCSCATDGSCSCAGSCK                                                | 229.595447        | 2              | 6.24475   |
| P04355        | SCCSCCPVGCAK                                                        | 25.6360153        | 2              | 4.25339   |
| <b>P04466</b> | <b>MLRS Myosin regulatory light chain 2_skeletal muscle isoform</b> | <b>3.75514752</b> | <b>0.41715</b> | <b>8</b>  |
| P04466        | AAAEGSSNVFSMFDQTIQEFK                                               | 2.13063038        | 3              | 5.25676   |
| P04466        | GADPEDVITGAFK                                                       | 1.9391371         | 2              | 4.19398   |
| P04466        | LKGADPEDVITGAFK                                                     | 3.14830734        | 3              | 3.47748   |
| P04466        | NEELDAMMK                                                           | 3.63472351        | 1              | 2.2033    |
| P04466        | NICYVITHGDAK                                                        | 5.35422           | 2              | 2.84465   |
| P04466        | NICYVITHGDAKDQE                                                     | 5.47818211        | 2              | 4.43959   |
| P04466        | NMWAAFPPDVGGNVVDYK                                                  | 2.76887155        | 2              | 3.07871   |
| P04466        | QFLELLTTQCDR                                                        | 2.80134658        | 2              | 3.99813   |
| <b>P04550</b> | <b>PTMS Parathyrosin</b>                                            | <b>0.95746371</b> | <b>0.0655</b>  | <b>4</b>  |
| P04550        | RTAEEDEADPKR                                                        | 1.22962287        | 3              | 4.10261   |
| P04550        | SVEAAAELSAK                                                         | 0.83983963        | 2              | 3.86464   |
| P04550        | TAEEDEADPK                                                          | 2.3699157         | 2              | 3.33814   |
| P04550        | TAEEDEADPKR                                                         | 1.84542919        | 2              | 3.77786   |
| <b>P04636</b> | <b>MDHM Malate dehydrogenase_ mitochondrial</b>                     | <b>1.10184466</b> | <b>7.8E-16</b> | <b>19</b> |
| P04636        | AGAGSATLSMAYAGAR                                                    | 1.16836233        | 2              | 4.54798   |
| P04636        | AGAGSATLSMAYAGAR+Oxidation(9                                        | 1.62149308        |                |           |
| P04636        | ANTFVAELK                                                           | 0.9592391         | 2              | 3.36116   |
| P04636        | EGVIECSFVQSK                                                        | 1.31511349        | 2              | 3.18595   |
| P04636        | ETECTYFSTPLLLGK                                                     | 1.52768748        | 2              | 3.74073   |
| P04636        | FVFSLVDMANGK                                                        | 1.18177661        | 2              | 4.46147   |

|               |                                             |                   |                |           |
|---------------|---------------------------------------------|-------------------|----------------|-----------|
| P04636        | GCDVVVIPAGVPR                               | 0.68701174        | 2              | 4.35481   |
| P04636        | GYLGPEQLPDCLK                               | 1.09106155        | 2              | 4.25715   |
| P04636        | IFGVTTLDIVR                                 | 1.8130532         | 2              | 3.35587   |
| P04636        | IQEAGTEVVK                                  | 1.05183131        | 2              | 2.76192   |
| P04636        | IQEAGTEVVKAK                                | 1.29865036        | 2              | 2.8792    |
| P04636        | ITPFEEK                                     | 1.19564224        | 1              | 1.94166   |
| P04636        | LTYDIAHTPGVAADLSHIETR                       | 1.30089055        | 3              | 6.8526    |
| P04636        | MIAEAIPELK                                  | 1.00123955        | 2              | 3.46179   |
| P04636        | MIAEAIPELK+Oxidation(0                      | 1.29456393        |                |           |
| P04636        | TIIP LISQCTPK                               | 1.16136385        | 2              | 3.55599   |
| P04636        | VAVLGASGGIGQPLSLLK                          | 2.40740257        | 2              | 6.29371   |
| P04636        | VDFPQDQLATLTGR                              | 0.75857059        | 2              | 4.72404   |
| P04636        | VNVPVIGGHAGK                                | 1.08675805        | 2              | 3.77754   |
| <b>P04638</b> | <b>APOA2 Apolipoprotein A_II</b>            | <b>0.88595377</b> | <b>0.93224</b> | <b>2</b>  |
| P04638        | AQPSEIQNQAK                                 | 0.84822843        | 2              | 2.74153   |
| P04638        | TGTNLMDFLSR                                 | 0.99419896        | 2              | 2.72502   |
| <b>P04639</b> | <b>APOA1 Apolipoprotein A_I</b>             | <b>1.68483284</b> | <b>0.48764</b> | <b>5</b>  |
| P04639        | LQEQLGPVTQEFWANLEK                          | 1.77744516        | 2              | 3.51349   |
| P04639        | NEMNKDLENVK                                 | 1.19611861        | 2              | 3.59204   |
| P04639        | NHPTLIEYHTK                                 | 0.92752532        | 3              | 3.83728   |
| P04639        | QLNLNLLDNWDTLGSTVGR                         | 1.77194585        | 2              | 4.19133   |
| P04639        | WNEEVEAYR                                   | 1.24106741        | 2              | 2.8765    |
| <b>P04642</b> | <b>LDHA L_lactate dehydrogenase A chain</b> | <b>1.19866533</b> | <b>3.2E-07</b> | <b>21</b> |
| P04642        | DLADELALVDVIEDK                             | 1.31460741        | 2              | 5.3144    |
| P04642        | DLADELALVDVIEDKLK                           | 1.10928586        | 2              | 3.94485   |
| P04642        | DQLIVNLLK                                   | 1.40602188        | 2              | 3.0364    |
| P04642        | DQLIVNLLKEEQVPQNK                           | 1.75572755        | 2              | 4.34529   |
| P04642        | EDVFLSVPCILGQNGISDVVK                       | 1.33108079        | 2              | 4.86267   |
| P04642        | GEMMDLQHGSLFLK                              | 1.48012003        | 2              | 4.11821   |
| P04642        | GEMMDLQHGSLFLK+Oxidation(2                  | 0.66727455        |                |           |
| P04642        | GEMMDLQHGSLFLK+Oxidation(3                  | 1.63225325        |                |           |
| P04642        | GYTWSAIGLSVADLAESIMK                        | 0.84641743        | 2              | 4.88495   |
| P04642        | IVSSKDYSVTANSK                              | 0.90954846        | 2              | 3.63953   |
| P04642        | KSADTLWGIQK                                 | 1.54510554        | 2              | 3.15057   |
| P04642        | LGVHPLSCHGWVLEHGDSSVPVWSGVNVAGVSLK          | 1.94158776        | 3              | 5.72876   |
| P04642        | LKGEMMDLQHGSLFLK                            | 1.76683592        | 2              | 3.99007   |
| P04642        | NVNIFK                                      | 2.56107407        | 1              | 2.07206   |
| P04642        | QVVDASAYEVK                                 | 1.16838479        | 2              | 3.25565   |
| P04642        | RVHPITMIK                                   | 1.14730627        | 2              | 2.55841   |
| P04642        | SADTLWGIQK                                  | 1.18133678        | 2              | 3.92659   |
| P04642        | SLNPQLGTDADK                                | 0.87073682        | 2              | 2.77051   |
| P04642        | SLNPQLGTDADKEQWK                            | 1.157472          | 2              | 4.74541   |
| P04642        | SLNPQLGTDADKEQWKDVHK                        | 1.71729037        | 3              | 3.43593   |
| P04642        | VTLTPDEEAR                                  | 1.2212979         | 2              | 3.01289   |
| <b>P04644</b> | <b>RS17 40S ribosomal protein S17</b>       | <b>1.41038186</b> | <b>0.00216</b> | <b>3</b>  |
| P04644        | DNYVPEVSALDQEIIIEVDPTK                      | 6.05428985        | 2              | 4.27681   |
| P04644        | LLDFGSLSNLQVTQPTVGMNFK                      | 1.95934963        | 2              | 4.72342   |
| P04644        | VCEEIAIIPSK                                 | 1.12775101        | 2              | 3.09423   |
| <b>P04692</b> | <b>TPM1 Tropomyosin alpha_1 chain</b>       | <b>1.54</b>       | <b>0.73088</b> | <b>10</b> |
| P04692        | AISELDHALNDMTSI                             | 3.39566568        | 2              | 2.56342   |
| P04692        | GTEDELDKYSEALK                              | 1.50779532        | 2              | 3.24046   |
| P04692        | KLVIIESDLER                                 | 1.61978174        | 2              | 3.30136   |
| P04692        | LDKENALDR                                   | 2.16502467        | 2              | 3.08951   |
| P04692        | LKGTEDELDK                                  | 3.79764805        | 2              | 2.49803   |
| P04692        | LVIIESDLER                                  | 0.95601111        | 2              | 3.13081   |
| P04692        | MEIQEIQLK                                   | 1.12386906        | 2              | 3.1234    |
| P04692        | QLEDELVSLQK                                 | 2.68087436        | 2              | 2.40528   |

|               |                                             |                   |                |           |
|---------------|---------------------------------------------|-------------------|----------------|-----------|
| P04692        | SIDDELEDELYAQK                              | 4.84560529        | 2              | 4.38194   |
| P04692        | SKQLEDELVSLQK                               | 0.5372453         | 2              | 3.05108   |
| <b>P04694</b> | <b>ATTY Tyrosine aminotransferase</b>       | <b>6.54678374</b> | <b>9.9E-20</b> | <b>6</b>  |
| P04694        | ILGPCTIVQGALK                               | 5.76189127        | 2              | 2.93723   |
| P04694        | IQEFCEQHYHCAEGSQEEDCK                       | #NUM!             | 3              | 4.92323   |
| P04694        | LIAEQAVHCLPATCFEYPNFFR                      | 3.14523317        | 3              | 3.98137   |
| P04694        | TACLVVNNPNSPCGSVFSK                         | 9.03844365        | 2              | 4.96927   |
| P04694        | TVISLSIGDPTVFGNLPTDPEVTQAMK                 | 5.13221905        | 2              | 3.11028   |
| P04694        | YEPLANLSTNVPILSCGGLAK                       | 14.704292         | 2              | 3.60447   |
| <b>P04762</b> | <b>CATA Catalase</b>                        | <b>1.06254621</b> | <b>2.4E-05</b> | <b>32</b> |
| P04762        | APQKPDVLTGGGNPIGDK                          | 2.73883172        | 2              | 4.3417    |
| P04762        | DAMLFPSFIHSQK+Oxidation(2                   | 1.27408355        |                |           |
| P04762        | DAQLFIQR                                    | 0.99058025        | 2              | 2.96241   |
| P04762        | DGPMCMHDNQGGAPNYYPNSFSAPEQQGSALEHHSQCSADVK  | 0.8933328         | 4              | 4.76379   |
| P04762        | DGPMCMHDNQGGAPNYYPNSFSAPEQQGSALEHHSQCSADVKR | 1.02709713        | 4              | 5.30929   |
| P04762        | DPASDQMK                                    | 1.38479045        | 1              | 2.55677   |
| P04762        | DPASDQMK+Oxidation(6                        | 1.37868414        |                |           |
| P04762        | DYPLIPVGK                                   | 0.77597163        | 1              | 2.26444   |
| P04762        | EAETFPFNPFDLTK                              | 1.02010452        | 2              | 3.96457   |
| P04762        | FNSANEDNVTQVR                               | 1.54874206        | 2              | 4.57475   |
| P04762        | FSTVAGESGSADTVR                             | 0.79102342        | 2              | 5.07742   |
| P04762        | FSTVAGESGSADTVRDP                           | 0.87894667        | 2              | 2.65521   |
| P04762        | FYTEDGNWDLVGNNTPIFFIR                       | 2.61586815        | 3              | 6.13444   |
| P04762        | GAGAFGYFEVTHDIR                             | 0.94982796        | 2              | 4.89049   |
| P04762        | GPLLVDVVFTDEMAHFDR                          | 1.55569491        | 2              | 5.50944   |
| P04762        | HMNGYGSHTFK                                 | 1.00915303        | 3              | 4.30958   |
| P04762        | HMNGYGSHTFK+Oxidation(1                     | 0.81043352        |                |           |
| P04762        | LAQEDPDYGLR                                 | 3.50904374        | 2              | 2.92098   |
| P04762        | LCENIANHLK                                  | 1.00834027        | 3              | 4.04224   |
| P04762        | LFAYPDTHR                                   | 1.08641168        | 2              | 2.97332   |
| P04762        | LGPNYLQIPVNCYPYR                            | 1.23165846        | 2              | 4.02765   |
| P04762        | LNIMTAGPR                                   | 1.15791414        | 2              | 3.14891   |
| P04762        | LVNANGEAVYCK                                | 0.94098786        | 2              | 3.90932   |
| P04762        | NAIHTYVQAGSHIAAK                            | 0.94255548        | 3              | 5.6258    |
| P04762        | NFTDVHPDYGAR                                | 0.80232886        | 2              | 4.02292   |
| P04762        | NLPVEEAGR                                   | 0.7827379         | 2              | 2.34334   |
| P04762        | NPANYFAEVEQMAFDPSNMPPGIEPSPDK               | 2.12953975        | 3              | 5.57231   |
| P04762        | RFNSANEDNVTQVR                              | 0.74938894        | 2              | 5.28592   |
| P04762        | VFEHIGK                                     | 0.92983503        | 2              | 2.44287   |
| P04762        | VFEHIGKR                                    | 0.6585704         | 2              | 2.71282   |
| P04762        | VQALLDQYNSQKPK                              | 0.8571235         | 2              | 4.86796   |
| P04762        | VWPHKDYPLIPVGK                              | 0.98451688        | 2              | 3.96364   |
| <b>P04764</b> | <b>ENO Alpha_enolase</b>                    | <b>1.17838739</b> | <b>9.9E-12</b> | <b>16</b> |
| P04764        | AGYTDQVVIGMDVAASEFYR                        | 2.32186618        | 2              | 4.85387   |
| P04764        | DATNVGDEGGFAPNILENK                         | 0.84977509        | 2              | 5.63743   |
| P04764        | DYPVVSIEDPFDQDDWDAWQK                       | 1.17853959        | 2              | 4.30796   |
| P04764        | FTATAGIQVVGDDLTVTNPK                        | 1.45949661        | 2              | 4.72111   |
| P04764        | GNPTVEVDLYTAK                               | 1.54747753        | 2              | 4.07359   |
| P04764        | HIADLAGNPEVILPVPAFNVINGGSHAGNK              | 1.43541831        | 3              | 6.15986   |
| P04764        | IDQLMIEMDGTENK                              | 1.21471427        | 2              | 4.87195   |
| P04764        | IEEELGSK                                    | 1.18796187        | 2              | 2.54216   |
| P04764        | IGAEVYHNLK                                  | 1.31684178        | 2              | 3.30834   |
| P04764        | KLNVVEQEK                                   | 0.35146807        | 2              | 2.54152   |
| P04764        | KLNVVEQEKIDQLMIEMDGTENK                     | 1.48259135        | 3              | 5.9754    |
| P04764        | LNVEQEK                                     | 1.19805807        | 2              | 3.0934    |

|               |                                                     |                   |                |           |
|---------------|-----------------------------------------------------|-------------------|----------------|-----------|
| P04764        | LNVVEQEKIDQLMIEMDGTENK                              | 1.38670278        | 3              | 5.2948    |
| P04764        | SCNCLLLK                                            | 1.19418161        | 2              | 2.79394   |
| P04764        | VNQIGSVTESLQACK                                     | 1.16956192        | 2              | 4.95931   |
| P04764        | YITPDQLADLYK                                        | 1.38441581        | 2              | 3.61877   |
| <b>P04785</b> | <b>PDIA1 Protein disulfide isomerase</b>            | <b>1.22220973</b> | <b>9.9E-20</b> | <b>25</b> |
| P04785        | DHENIVIAK                                           | 1.16589866        | 2              | 2.74915   |
| P04785        | EADDIVNWLK                                          | 1.15948519        | 2              | 2.51986   |
| P04785        | HNQLPLVIEFTEQTAPK                                   | 1.19982029        | 3              | 5.45981   |
| P04785        | IFGGEIK                                             | 1.4324302         | 1              | 1.96317   |
| P04785        | IKPHLMSQELPEDWDKQPVK                                | 1.22395655        | 3              | 4.95468   |
| P04785        | IKPHLMSQELPEDWDKQPVK+Oxidation(5                    | 1.89316895        |                |           |
| P04785        | ILEFFGLK                                            | 1.73879497        | 2              | 2.95026   |
| P04785        | ILFIFIDSDHTDNQR                                     | 0.77299049        | 2              | 2.63651   |
| P04785        | LGETYKDHENIVIAK                                     | 1.26538579        | 3              | 5.50444   |
| P04785        | LITLEEEMTK                                          | 1.14618144        | 2              | 3.5772    |
| P04785        | LITLEEEMTK+Oxidation(7                              | 1.54440142        |                |           |
| P04785        | LKAEGSEIR                                           | 0.70996233        | 2              | 2.44262   |
| P04785        | LLDFIK                                              | 1.36492933        | 2              | 2.43801   |
| P04785        | MDSTANEVEAVK                                        | 1.63037537        | 2              | 4.26409   |
| P04785        | MDSTANEVEAVK+Oxidation(0                            | 1.06894616        |                |           |
| P04785        | NFEEVAFDEK                                          | 1.0951582         | 1              | 3.19827   |
| P04785        | NFEEVAFDEKK                                         | 1.08309794        | 2              | 3.97768   |
| P04785        | NNFEGEITK                                           | 1.2622311         | 2              | 2.59229   |
| P04785        | QFLLAEEAVDDIPFGITSNSDVFSK                           | 1.39702267        | 3              | 6.30544   |
| P04785        | TGPAATLSDTAAAEVLVDSSEVTVIGFFK                       | 1.30858802        | 3              | 6.16215   |
| P04785        | THILLFLPK                                           | 1.83018884        | 2              | 3.09429   |
| P04785        | TVIDYNGER                                           | 1.06825481        | 2              | 2.97578   |
| P04785        | VDATEESDLAQQYGVV                                    | 0.99103982        | 2              | 5.46142   |
| P04785        | YKPESDELTAEK                                        | 1.12855662        | 3              | 4.50905   |
| P04785        | YQLDKDGVVLFK                                        | 1.12810611        | 2              | 3.79384   |
| <b>P04797</b> | <b>G3P Glyceraldehyde 3 phosphate dehydrogenase</b> | <b>1.87629516</b> | <b>9.9E-20</b> | <b>16</b> |
| P04797        | GAAQNIIPASTGAAK                                     | 1.84367987        | 2              | 4.14523   |
| P04797        | GILGYTEDQVVSDFNSNSHSSTFDAGAGIALNDNFVK               | 2.94543019        | 3              | 4.71846   |
| P04797        | IVSNASCCTTNCLAPLAK                                  | 1.53399813        | 2              | 4.96471   |
| P04797        | LISWYDNEYGYSNR                                      | 2.69838104        | 2              | 4.3046    |
| P04797        | LVIKPKPITIFQER                                      | 1.42636451        | 3              | 4.37649   |
| P04797        | RVIISAPSADAPMFVMGVNHEK                              | 1.66385286        | 3              | 5.95905   |
| P04797        | VGVNGFGR                                            | 2.48258751        | 2              | 2.34018   |
| P04797        | VIHDFGIVEGLMTTVHAITATQK                             | 1.48834985        | 3              | 7.57061   |
| P04797        | VIHDFGIVEGLMTTVHAITATQK+Oxidation(12                | 1.97061976        |                |           |
| P04797        | VIISAPSADAPMFVMGVNHEK                               | 1.40834386        | 2              | 4.62497   |
| P04797        | VIISAPSADAPMFVMGVNHEK+Oxidation(11                  | 1.7594826         |                |           |
| P04797        | VIISAPSADAPMFVMGVNHEK+Oxidation(14                  | 1.75546295        |                |           |
| P04797        | VPTPNVSVVDLTCR                                      | 3.76343758        | 2              | 3.18092   |
| P04797        | VVDLMAYMASK                                         | 1.74634291        | 2              | 3.8111    |
| P04797        | VVDLMAYMASKE                                        | 1.19286771        | 2              | 2.41447   |
| P04797        | WGDAGAEYVVSTGVFTTMEK                                | 1.83078258        | 2              | 5.5687    |
| <b>P04799</b> | <b>CP1A2 Cytochrome P450 1A2</b>                    | <b>1.83732371</b> | <b>1.1E-16</b> | <b>8</b>  |
| P04799        | FLTNDNTAIDK                                         | 1.4567639         | 2              | 2.62703   |
| P04799        | IGSTPVVLSGLNTIK                                     | 1.80544963        | 2              | 3.36481   |
| P04799        | IHEELDTVIGR                                         | 1.68866682        | 2              | 2.92841   |
| P04799        | KSEEMLNLVK                                          | 1.22885302        | 2              | 2.50428   |
| P04799        | NSIQDITGALFK                                        | 2.08285654        | 2              | 3.77559   |
| P04799        | SMTFNPDSGPVWAAR                                     | 1.66494993        | 2              | 3.42265   |
| P04799        | TCEHVQAWPR                                          | 1.80586542        | 2              | 2.5527    |
| P04799        | TVQEHYQDFNK                                         | 1.71752313        | 2              | 3.72857   |

|               |                                                |                   |                |           |
|---------------|------------------------------------------------|-------------------|----------------|-----------|
| <b>P04903</b> | <b>GSTA2 Glutathione S_transferase alpha_2</b> | <b>1.08015205</b> | <b>0.00793</b> | <b>10</b> |
| P04903        | DGNLMFDQVPMVEIDGMK                             | 0.86961018        | 2              | 5.28943   |
| P04903        | DGNLMFDQVPMVEIDGMK+Oxidation(10                | 0.77815504        |                |           |
| P04903        | DGNLMFDQVPMVEIDGMK+Oxidation(16                | 0.76957876        |                |           |
| P04903        | DGNLMFDQVPMVEIDGMK+Oxidation(4                 | 1.08745338        |                |           |
| P04903        | KDGNLMFDQVPMVEIDGMK                            | 0.80266139        | 2              | 5.05617   |
| P04903        | LIQSPEDLEK                                     | 1.22805926        | 2              | 3.17113   |
| P04903        | LKKDGNLMFDQVPMVEIDGMK                          | 1.78703262        | 3              | 3.43062   |
| P04903        | WLLAAAGVEFEEK                                  | 1.29018519        | 2              | 3.68958   |
| P04903        | YDLYGK                                         | 0.65649354        | 1              | 1.97605   |
| P04903        | YLPAFEK                                        | 0.6058101         | 1              | 2.04342   |
| <b>P04904</b> | <b>GSTA3 Glutathione S_transferase alpha_3</b> | <b>1.34606216</b> | <b>3.9E-15</b> | <b>10</b> |
| P04904        | ADVYLQVLYHVEELDPSALANFPLK                      | 2.00819588        | 3              | 5.41861   |
| P04904        | ALIDMYAEGVADLDEIVLHYPYIPPGEK                   | 2.23587267        | 4              | 7.75469   |
| P04904        | KPLEDEKCVESAVK                                 | 0.98839451        | 2              | 3.67708   |
| P04904        | LRNDGSLMFQQVPMVEIDGMK                          | 1.78577812        | 2              | 4.82442   |
| P04904        | NDGSLMFQQVPMVEIDGMK                            | 1.4920091         | 2              | 4.92645   |
| P04904        | NDGSLMFQQVPMVEIDGMK+Oxidation(11               | 1.38229184        |                |           |
| P04904        | NDGSLMFQQVPMVEIDGMK+Oxidation(17               | 1.38105339        |                |           |
| P04904        | NDGSLMFQQVPMVEIDGMK+Oxidation(5                | 1.38268398        |                |           |
| P04904        | SHGQDYLGNR                                     | 0.83357554        | 2              | 3.93402   |
| P04904        | WLLAAAGVEFEEQFLK                               | 1.39737788        | 2              | 5.70406   |
| <b>P04905</b> | <b>GSTM1 Glutathione S_transferase Mu 1</b>    | <b>1.19882776</b> | <b>9.9E-20</b> | <b>14</b> |
| P04905        | ADIVENQVMDNR                                   | 0.86512336        | 2              | 4.1382    |
| P04905        | ADIVENQVMDNR+Oxidation(8                       | 1.2420487         |                |           |
| P04905        | CLDAFPNLKDFLAR                                 | 1.15731085        | 2              | 3.11884   |
| P04905        | FKLGLDFPNLPYLIDGSR                             | 1.25628243        | 3              | 5.37654   |
| P04905        | HHLCGETEER                                     | 1.10047536        | 3              | 3.85558   |
| P04905        | IRADIVENQVMDNR                                 | 1.39269198        | 2              | 4.05557   |
| P04905        | ITQSNAIMR                                      | 1.43809564        | 2              | 3.10246   |
| P04905        | ITQSNAIMR+Oxidation(7                          | 1.27078692        |                |           |
| P04905        | KHHLCGETEER                                    | 0.98413832        | 3              | 4.08363   |
| P04905        | KITQSNAIMR                                     | 1.20254587        | 3              | 4.16256   |
| P04905        | KITQSNAIMR+Oxidation(8                         | 0.66962254        |                |           |
| P04905        | LGLDFPNLPYLIDGSR                               | 1.92785409        | 2              | 4.71755   |
| P04905        | MQLIMLCYNPDFEK                                 | 1.78347818        | 2              | 4.30947   |
| P04905        | YLSTPIFSK                                      | 0.9553412         | 2              | 2.79507   |
| <b>P04906</b> | <b>GSTP1 Glutathione S_transferase P</b>       | <b>1.2374659</b>  | <b>0.48137</b> | <b>2</b>  |
| P04906        | EAALVDMVNDGVEDLR                               | 1.23750499        | 2              | 5.01928   |
| P04906        | STCLYQLPK                                      | 1.23157992        | 2              | 2.57489   |
| <b>P04937</b> | <b>FINC Fibronectin</b>                        | <b>1.13675349</b> | <b>0.16678</b> | <b>7</b>  |
| P04937        | ATGVFTTLQPLR                                   | 1.07431662        | 2              | 2.39039   |
| P04937        | FTQVSPTTLTAQWTAPSVK                            | 1.20850928        | 2              | 4.39166   |
| P04937        | HYQINQWER                                      | 2.88828533        | 2              | 2.55867   |
| P04937        | ITYGETGGNSPVQEFTVPGSK                          | 1.4660085         | 2              | 2.39202   |
| P04937        | SSPVVIDASTAIDAPSNLR                            | 0.6871187         | 2              | 3.26054   |
| P04937        | SYTITGLQPGTDYK                                 | 0.99380724        | 2              | 3.01772   |
| P04937        | YIVNVYQISEEGK                                  | 0.64742327        | 2              | 2.84667   |
| <b>P05065</b> | <b>ALDOA Fructose_bisphosphate aldolase A</b>  | <b>1.6828596</b>  | <b>0.85963</b> | <b>9</b>  |
| P05065        | ADDGRPPQVIK                                    | 1.90512839        | 2              | 2.33158   |
| P05065        | ALANSLACQ GK                                   | 1.84713225        | 2              | 2.87116   |
| P05065        | ALSDHHVYLEGTLKPNMVTGPHACTQK                    | 5.01653896        | 3              | 5.00818   |
| P05065        | FSNEEIAMATVTALR                                | 2.17693419        | 2              | 4.15722   |
| P05065        | GILAADESTGSIK                                  | 1.77182343        | 2              | 3.85415   |
| P05065        | GVVPLAGTNGETTTQGLDGLSER                        | 1.54111947        | 2              | 5.19452   |
| P05065        | IGEHTPSSLAIMENANVLAR                           | 1.38213603        | 2              | 4.4112    |
| P05065        | LQSIGTEN TEENR                                 | 4.81869681        | 2              | 4.02651   |

|               |                                  |                   |                |           |
|---------------|----------------------------------|-------------------|----------------|-----------|
| P05065        | RLQSIGTENTEENR                   | 3.03605082        | 2              | 3.64054   |
| <b>P05178</b> | <b>CP2C6 Cytochrome P450 2C6</b> | <b>0.86340001</b> | <b>0.00028</b> | <b>8</b>  |
| P05178        | DLGIVFSHG NR                     | 1.23889034        | 2              | 2.38239   |
| P05178        | EALIDHGEEFAER                    | 0.79744289        | 2              | 3.45801   |
| P05178        | FFPDPEIFDPGHFLDGNGK              | 0.72740427        | 2              | 2.91887   |
| P05178        | FDYKDQDFLNLMEK                   | 0.91436394        | 3              | 4.91352   |
| P05178        | FIDLIP TNLPHAVTCDIK              | 0.72305175        | 2              | 3.5973    |
| P05178        | GTTIITSLSSVLHDSK                 | 1.19698116        | 2              | 3.68069   |
| P05178        | MCAGEGLAR                        | 0.8594116         | 2              | 2.73944   |
| P05178        | NITQSLTSFSK                      | 0.61812152        | 2              | 2.68473   |
| <b>P05179</b> | <b>CP2C7 Cytochrome P450 2C7</b> | <b>1.80096002</b> | <b>9.5E-15</b> | <b>7</b>  |
| P05179        | ACVGEGLAR                        | 1.8219714         | 2              | 3.08125   |
| P05179        | FINFVPTNLPHAVTCDIK               | 2.88507596        | 3              | 3.34391   |
| P05179        | HMPYTDAMIHEVQR                   | 1.98749979        | 3              | 3.96349   |
| P05179        | IEEHQESLDVTNPR                   | 3.01470623        | 2              | 4.79203   |
| P05179        | KIEEHQESLDVTNPR                  | 2.50243054        | 2              | 4.875     |
| P05179        | KLPPGPTPLPIIGNFLQIDVK            | 2.58761105        | 3              | 5.74599   |
| P05179        | VLTSLSV LHD SK                   | 1.29100854        | 2              | 2.86089   |
| <b>P05182</b> | <b>CP2E1 Cytochrome P450 2E1</b> | <b>1.272382</b>   | <b>0.99917</b> | <b>16</b> |
| P05182        | AKEHLQSLDINCAR                   | 1.14573395        | 3              | 4.68477   |
| P05182        | DIDLSPVTVGFGSIPPQFK              | 1.19533685        | 2              | 2.75925   |
| P05182        | DRLDMPYMDAVVHEIQR                | 0.94238164        | 3              | 3.35647   |
| P05182        | DTVFGQYVIPK                      | 1.27990179        | 2              | 2.62918   |
| P05182        | DVTDCLLIEMEKEK                   | 1.68700963        | 2              | 2.65073   |
| P05182        | DVTDCLLIEMEKEK                   | 3.10848197        | 2              | 3.09422   |
| P05182        | DVTDCLLIEMEKEK+Oxidation(9)      | 0.84981648        |                |           |
| P05182        | EHLQSLDINCAR                     | 1.16990119        | 2              | 3.47016   |
| P05182        | FINLVPSNLPHEATR                  | 1.11536822        | 2              | 3.66087   |
| P05182        | FKPEHFLNENGG                     | 0.88304711        | 2              | 3.36973   |
| P05182        | GDIPVFQYK                        | 0.91306757        | 2              | 2.59419   |
| P05182        | GIIFNNGPTWK                      | 0.95668481        | 2              | 2.75793   |
| P05182        | GTVVIPTLDSLLYDSHEFPDPEK          | 1.47471562        | 2              | 5.07511   |
| P05182        | LDMPYMDAVVHEIQR                  | 1.0051775         | 2              | 3.11696   |
| P05182        | RVCVGEGLAR                       | 1.93053935        | 2              | 2.35621   |
| P05182        | YGLLILMK                         | 1.37001906        | 2              | 3.00967   |
| <b>P05183</b> | <b>CP3A2 Cytochrome P450 3A2</b> | <b>1.23075836</b> | <b>0.10398</b> | <b>12</b> |
| P05183        | DFGPVGIMGK                       | 3.57017136        | 2              | 2.86713   |
| P05183        | DIELDGLFIPK                      | 2.81973643        | 2              | 3.585     |
| P05183        | EMFPIIEQYGDILVK                  | 2.32281961        | 2              | 3.93193   |
| P05183        | KDIELDGLFIPK                     | 1.19248842        | 2              | 2.87139   |
| P05183        | KLQEEIDGALPSK                    | 1.55209323        | 2              | 4.02133   |
| P05183        | LQEEIDGALPSK                     | 0.72684596        | 2              | 4.09189   |
| P05183        | QAILEPEKPIVLK                    | 1.04321954        | 2              | 3.41415   |
| P05183        | QEAETGKPVMTK                     | 0.98227016        | 2              | 3.44976   |
| P05183        | QEAETGKPVMTK+Oxidation(10)       | 1.3770118         |                |           |
| P05183        | RDFGPVGIMGK                      | 1.33032341        | 2              | 2.39059   |
| P05183        | VDFLQLMLNAHNNSK                  | 1.03577912        | 2              | 3.371     |
| P05183        | YLKQEAETGKPVMTK                  | 1.43983858        | 3              | 3.31601   |
| <b>P05197</b> | <b>EF2 Elongation factor 2</b>   | <b>1.57546424</b> | <b>9.9E-20</b> | <b>30</b> |
| P05197        | ALLELQLEPEELYQTFQR               | 2.25943579        | 3              | 5.23297   |
| P05197        | ARPPFDGLAEDIDKGEVSAR             | 1.27519533        | 3              | 6.45462   |
| P05197        | AYLPVNESFGFTADLR                 | 1.59202275        | 2              | 3.78199   |
| P05197        | CELLYEGPPDDEAAMGIK               | 1.20415501        | 2              | 3.65729   |
| P05197        | DLEEDHACIPIK                     | 1.19142096        | 2              | 3.77374   |
| P05197        | DLEEDHACIPIKK                    | 1.53484037        | 2              | 3.71966   |
| P05197        | EGIPALDNFLDK                     | 0.90950575        | 2              | 2.67665   |
| P05197        | EGIPALDNFLDKL                    | 4.13403131        | 2              | 3.4492    |

|               |                                             |                   |                |           |
|---------------|---------------------------------------------|-------------------|----------------|-----------|
| P05197        | ETVSEESNVLCISK                              | 1.88640345        | 2              | 4.45299   |
| P05197        | GEGQLGAAER                                  | 1.7405824         | 2              | 3.04751   |
| P05197        | GHVFEEESQVAGTPMFVVK                         | 1.73371083        | 2              | 5.90146   |
| P05197        | IWCFCGPDGTGPNILTDITK                        | 1.84120235        | 2              | 5.20761   |
| P05197        | KEDLYLKPIQR                                 | 1.70378094        | 2              | 3.37276   |
| P05197        | KIWCFCGPDGTGPNILTDITK                       | 1.40438574        | 2              | 5.02003   |
| P05197        | KVEDMMK                                     | 1.80366751        | 2              | 2.574     |
| P05197        | KVEDMMK+Oxidation(4                         | 1.77199142        |                |           |
| P05197        | KVEDMMK+Oxidation(5                         | 1.77199142        |                |           |
| P05197        | LDSEDKDKEGKPLLK                             | 1.39248896        | 2              | 4.06098   |
| P05197        | NMSVIAHVDHGK                                | 0.85913829        | 2              | 3.65338   |
| P05197        | NMSVIAHVDHGK+Oxidation(1                    | 1.63344962        |                |           |
| P05197        | SDPVVSYR                                    | 1.69686182        | 2              | 2.30352   |
| P05197        | STLTDSLVC                                   | 1.62700191        | 2              | 3.18135   |
| P05197        | TFCQLILDPIFK                                | 1.86492604        | 2              | 4.19923   |
| P05197        | TGTITTFEHAHNMR                              | 1.45971826        | 2              | 4.00219   |
| P05197        | VFDAIMNFR                                   | 2.47032614        | 2              | 3.31539   |
| P05197        | VFSGVSTGLK                                  | 1.62966026        | 2              | 3.09305   |
| P05197        | WLPAGDALLQMITIHLPSVTAQK                     | 1.50258962        | 3              | 3.5946    |
| P05197        | YEWVDAEAR                                   | 1.26567578        | 2              | 3.14639   |
| P05197        | YFDPANGK                                    | 1.46440377        | 1              | 2.21181   |
| P05197        | YVEPIEDVPCGNIVGLVGDQFLVK                    | 1.89271317        | 3              | 5.96445   |
| <b>P05369</b> | <b>FPPS Farnesyl pyrophosphate synthase</b> | <b>0.9550378</b>  | <b>0.9925</b>  | <b>11</b> |
| P05369        | ALYEELDLR                                   | 1.12257678        | 2              | 3.19343   |
| P05369        | EVLEYNTVGGK                                 | 1.20942891        | 2              | 3.00185   |
| P05369        | GLTVVQTFQELVEPR                             | 0.90318457        | 3              | 4.21982   |
| P05369        | IKEVLEYNTVGGK                               | 1.004163          | 3              | 4.2431    |
| P05369        | QILEENYGQK                                  | 1.30496174        | 2              | 2.61646   |
| P05369        | QILEENYGQKDEPK                              | 0.53815043        | 2              | 3.60068   |
| P05369        | SLIEQCSAPLPPSIFLELANK                       | 1.22933994        | 2              | 4.8517    |
| P05369        | VGTDIQDNK                                   | 1.0507253         | 2              | 3.79731   |
| P05369        | VLTEDELGHPEK                                | 0.67560729        | 2              | 2.77619   |
| P05369        | VLTEDELGHPEKGDAITR                          | 1.00408753        | 2              | 4.68737   |
| P05369        | YEEDSYNR                                    | 2.22078788        | 2              | 2.4574    |
| <b>P05426</b> | <b>RL7 60S ribosomal protein L7</b>         | <b>1.21259684</b> | <b>1.4E-15</b> | <b>7</b>  |
| P05426        | AGNFYVPAEPK                                 | 1.24166014        | 2              | 3.06486   |
| P05426        | FGIICMEDLIHEIYTVGK                          | 1.89829441        | 3              | 4.80491   |
| P05426        | KKVPAVPETLK                                 | 1.13515623        | 2              | 2.70811   |
| P05426        | NFAELK                                      | 1.45516058        | 1              | 1.90921   |
| P05426        | SVNELIYK                                    | 1.2301028         | 2              | 2.32386   |
| P05426        | TTHFVEGGDAGNR                               | 1.08076496        | 3              | 3.75081   |
| P05426        | TTHFVEGGDAGNREDQINR                         | 1.26842133        | 2              | 4.54414   |
| <b>P05544</b> | <b>SPA3L Serine protease inhibitor A3L</b>  | <b>2.2220884</b>  | <b>1.2E-08</b> | <b>6</b>  |
| P05544        | AVLDVDETGTEATAATGVATVIR                     | 3.21357899        | 2              | 4.37677   |
| P05544        | DSTMEEILEGLK                                | 1.8541345         | 2              | 3.11908   |
| P05544        | IAELFSDLEER                                 | 2.07935173        | 2              | 2.95923   |
| P05544        | MQQVESSLQPETLK                              | 1.47871722        | 2              | 4.1842    |
| P05544        | MQQVESSLQPETLKK                             | 2.31100767        | 2              | 3.91799   |
| P05544        | VFSQQADLSR                                  | 2.49077095        | 2              | 3.04575   |
| <b>P05545</b> | <b>SPA3K Serine protease inhibitor A3K</b>  | <b>1.54996774</b> | <b>0.00228</b> | <b>6</b>  |
| P05545        | AVLDVDETGTEGAAATAVTAALK                     | 1.54979085        | 2              | 5.86145   |
| P05545        | IAELFSELDER                                 | 2.07946259        | 2              | 2.82554   |
| P05545        | IFSQQADLSR                                  | 1.60457586        | 2              | 2.55678   |
| P05545        | KIFSQQADLSR                                 | 1.92275177        | 2              | 2.39508   |
| P05545        | LSQPEDQAEINTGSALFIDKEQPILSEFQEK             | 1.19067452        | 3              | 3.69476   |
| P05545        | NLHVSQVVK                                   | 1.3953191         | 2              | 2.47458   |
| <b>P05712</b> | <b>RAB2A Ras_related protein Rab_2A</b>     | <b>1.1591831</b>  | <b>0.96618</b> | <b>2</b>  |



|               |                                                                   |                   |                |           |
|---------------|-------------------------------------------------------------------|-------------------|----------------|-----------|
| P05712        | IQEGVFDINNEANGIK                                                  | 1.16105047        | 2              | 4.56114   |
| P05712        | TASNVEEAFINTAK                                                    | 1.15587921        | 2              | 2.97454   |
| <b>P05765</b> | <b>RS21 40S ribosomal protein S21</b>                             | <b>1.33279039</b> | <b>0.0175</b>  | <b>3</b>  |
| P05765        | DHASIQMNVAEVDR                                                    | 1.63192683        | 2              | 3.93561   |
| P05765        | MGESDDSLR                                                         | 1.30797011        | 2              | 3.27114   |
| P05765        | TYGICGAIR                                                         | 1.35037273        | 2              | 3.31347   |
| <b>P06214</b> | <b>HEM2 Delta_aminolevulinic acid dehydratase</b>                 | <b>0.85849824</b> | <b>0.02854</b> | <b>9</b>  |
| P06214        | AGADIIITYFAPQLLK                                                  | 1.35208333        | 2              | 3.66608   |
| P06214        | AGAFDLR                                                           | 1.10013842        | 2              | 2.50458   |
| P06214        | AGCQVVAPSDMMDGR                                                   | 0.85864185        | 2              | 3.6028    |
| P06214        | CVLIFGVPSR                                                        | 1.05273376        | 2              | 2.85991   |
| P06214        | DEQGSAAEDSPTIEAVR                                                 | 0.5717238         | 2              | 5.82811   |
| P06214        | DIQEGADILMVKGPLYLDVMQEVK                                          | 1.05344762        | 3              | 4.63134   |
| P06214        | TAVLESMTAFR                                                       | 1.21283398        | 2              | 3.53858   |
| P06214        | VPKDEQGSAAEDSPTIEAVR                                              | 0.9487517         | 3              | 5.806     |
| P06214        | YGVNQLEEMLRPLVEAGLR                                               | 1.03349514        | 3              | 4.66805   |
| <b>P06302</b> | <b>PTMA Prothymosin alpha</b>                                     | <b>1.08626244</b> | <b>0.99996</b> | <b>3</b>  |
| P06302        | RVAEDEDDEDDVETKK                                                  | 1.02750253        | 3              | 5.75299   |
| P06302        | VAEDEDDEDDVETK                                                    | 1.16651616        | 2              | 4.37964   |
| P06302        | VAEDEDDEDDVETKK                                                   | 1.19408678        | 2              | 4.80353   |
| <b>P06399</b> | <b>FIBA Fibrinogen alpha chain</b>                                | <b>1.14781515</b> | <b>0.80834</b> | <b>9</b>  |
| P06399        | AQQIQVLQK                                                         | 0.88719364        | 2              | 2.56098   |
| P06399        | EVVTSDDGSDCGDGM DLGLTHSFSGR                                       | 2.28874759        | 3              | 3.61527   |
| P06399        | GDFANANNFDNTFGQVSEDLR                                             | 1.78370103        | 2              | 5.32089   |
| P06399        | GDFANANNFDNTFGQVSEDLRR                                            | 1.33449189        | 3              | 3.34685   |
| P06399        | GDKELLIGNEK                                                       | 1.33938968        | 2              | 2.56571   |
| P06399        | GLIDEANQDFTNR                                                     | 0.91110867        | 2              | 3.4943    |
| P06399        | MADEAASEA HQEGDTR                                                 | 1.12323429        | 2              | 4.44889   |
| P06399        | SQLQEGPPEWK                                                       | 1.34476319        | 2              | 2.88732   |
| P06399        | TSDSDIFTDIENPSSHVPEFSSSSK                                         | 3.73684403        | 3              | 3.86129   |
| <b>P06685</b> | <b>AT1A1 Sodium/potassium_transporting ATPase subunit alpha_1</b> | <b>1.14788845</b> | <b>0.0063</b>  | <b>7</b>  |
| P06685        | AVAGDASESALLK                                                     | 1.24914029        | 2              | 3.52351   |
| P06685        | AVFQANQENLPILK                                                    | 1.29681771        | 2              | 3.18331   |
| P06685        | DKYEPAAVSEHGDKK                                                   | 1.37716953        | 3              | 3.74223   |
| P06685        | DMTSEELDDILR                                                      | 0.57198655        | 2              | 2.97013   |
| P06685        | LNIPVNQVNPR                                                       | 1.13258396        | 2              | 3.00185   |
| P06685        | MSINAEDVVVGLLVEVK                                                 | 2.50015427        | 2              | 2.95446   |
| P06685        | YEPAAVSEHGDKK                                                     | 1.30138241        | 2              | 3.29365   |
| <b>P06687</b> | <b>AT1A3 Sodium/potassium_transporting ATPase subunit alpha_3</b> | <b>1.18435792</b> | <b>0.17841</b> | <b>3</b>  |
| P06687        | DGPNALTPPTTPEVVK                                                  | 1.0304086         | 2              | 3.36608   |
| P06687        | GVGIISEGNETVEDIAAR                                                | 1.34591782        | 2              | 4.6752    |
| P06687        | QGAIVAVTGDGVNDSPALK                                               | 1.11044327        | 2              | 4.62584   |
| <b>P06757</b> | <b>ADH1 Alcohol dehydrogenase 1</b>                               | <b>1.17025798</b> | <b>1</b>       | <b>16</b> |
| P06757        | AAVLWEPHKPFTIEDIEVAPPK                                            | 1.2335721         | 3              | 5.76734   |
| P06757        | FPLEPLITHVLPFEK                                                   | 1.24738772        | 3              | 4.69981   |
| P06757        | GAIFGGFK                                                          | 0.69853572        | 2              | 2.75724   |
| P06757        | GALLDGTSR                                                         | 1.00439149        | 2              | 2.9695    |
| P06757        | GKPIHHFISTSTFSQYTVVDDIAVAK                                        | 0.87165292        | 3              | 5.34264   |
| P06757        | HPESNLCCQTK                                                       | 1.03568755        | 2              | 3.24545   |
| P06757        | ICKHPESNLCCQTK                                                    | 0.73799729        | 3              | 4.1981    |
| P06757        | IDAAAPLDK                                                         | 1.19385639        | 2              | 2.91263   |
| P06757        | IIAVDINKDK                                                        | 0.98274066        | 2              | 2.95461   |
| P06757        | INEAFDLLR                                                         | 0.94384673        | 2              | 3.63854   |
| P06757        | KFPLEPLITHVLPFEK                                                  | 0.93769498        | 3              | 4.64681   |
| P06757        | MVATGVCR                                                          | 0.68664335        | 2              | 2.49079   |

|               |                                                                                      |                   |                |           |
|---------------|--------------------------------------------------------------------------------------|-------------------|----------------|-----------|
| P06757        | SDDHAVSGSLFTPLPAVLGHEGAGIVESIGEGVTCVKPGDK                                            | 1.20557068        | 4              | 7.54586   |
| P06757        | VCLIGCGFSTGYGSAVQVAK                                                                 | 1.02074402        | 2              | 6.31846   |
| P06757        | VIPLFSPQCGK                                                                          | 0.84737327        | 2              | 3.03683   |
| P06757        | VTPGSTCAVFGGLGGVGLSVVIGCK                                                            | 1.38005492        | 2              | 5.06988   |
| <b>P06761</b> | <b>GRP78 78 kDa glucose_regulated protein</b>                                        | <b>1.25950205</b> | <b>3.8E-07</b> | <b>31</b> |
| P06761        | AKFEELNMDLFR                                                                         | 1.37942962        | 3              | 4.66838   |
| P06761        | DAGTIAGLNVMR                                                                         | 1.3229946         | 2              | 3.652     |
| P06761        | DNHLLGTFDLTGIPPAPR                                                                   | 1.29500713        | 2              | 4.32849   |
| P06761        | ELEEIVQPIISK                                                                         | 1.25271609        | 2              | 4.3178    |
| P06761        | ETAEAYLGK                                                                            | 1.90597219        | 1              | 2.07649   |
| P06761        | FEELNMDLFR                                                                           | 1.1160365         | 2              | 3.67616   |
| P06761        | IEIESFFEGEDFSETLTR                                                                   | 1.88107876        | 2              | 4.74762   |
| P06761        | IEWLESHQDADIEDFK                                                                     | 1.29846612        | 2              | 5.65328   |
| P06761        | IEWLESHQDADIEDFKAK                                                                   | 1.12381384        | 3              | 4.34794   |
| P06761        | IINEPTAAAIAYGLDKR                                                                    | 1.39874982        | 2              | 4.56116   |
| P06761        | ITITNDQNR                                                                            | 1.32255119        | 2              | 2.7296    |
| P06761        | ITPSYVAFTPEGER                                                                       | 1.40945772        | 2              | 4.08301   |
| P06761        | KKELEEIVQPIISK                                                                       | 0.95812814        | 2              | 5.24619   |
| P06761        | KSDIDEIVLVGGSTR                                                                      | 1.16447684        | 2              | 5.01469   |
| P06761        | KSQIFSTASDNQPTVTIK                                                                   | 0.86906708        | 2              | 5.27532   |
| P06761        | LYGSGGPPPTGEEDTSEKDEL                                                                | 2.1782596         | 2              | 5.34628   |
| P06761        | MKETAEAYLGK                                                                          | 1.64860192        | 2              | 3.44756   |
| P06761        | MKETAEAYLGK+Oxidation(0                                                              | 1.46449768        |                |           |
| P06761        | MKETAEAYLGKK                                                                         | 1.07705596        | 2              | 2.85694   |
| P06761        | NELESYAYSLK                                                                          | 1.08069173        | 2              | 3.37148   |
| P06761        | NQLTSNPENTVFDKAK                                                                     | 1.07930015        | 2              | 4.76765   |
| P06761        | SDIDEIVLVGGSTR                                                                       | 1.09293837        | 2              | 3.80536   |
| P06761        | SQIFSTASDNQPTVTIK                                                                    | 0.94244632        | 2              | 5.36966   |
| P06761        | TFAPEEISAMVLTK                                                                       | 1.60348144        | 3              | 4.75106   |
| P06761        | TFAPEEISAMVLTK+Oxidation(9                                                           | 1.77360899        |                |           |
| P06761        | TKPYIQVDIGGGQTK                                                                      | 1.16269767        | 3              | 4.71136   |
| P06761        | TWNDPSVQQDIK                                                                         | 0.91216799        | 2              | 3.9831    |
| P06761        | VLESDLK                                                                              | 1.34171618        | 2              | 2.47726   |
| P06761        | VLESDLKK                                                                             | 1.24978718        | 2              | 2.51852   |
| P06761        | VTHAVVTVPAYFNDAQR                                                                    | 1.22741491        | 2              | 5.06552   |
| P06761        | VYGERPLTK                                                                            | 1.14501272        | 2              | 2.94021   |
| <b>P06866</b> | <b>HPT Haptoglobin</b>                                                               | <b>1.8446014</b>  | <b>9.9E-20</b> | <b>8</b>  |
| P06866        | ATDLKDWVQETMAK                                                                       | 1.32688624        | 2              | 3.63808   |
| P06866        | GAVSPVGVQPILNK                                                                       | 1.9328832         | 2              | 4.45439   |
| P06866        | HTFCAGLTK                                                                            | 3.59635864        | 1              | 2.4074    |
| P06866        | LQTEGDGIYTLNSEK                                                                      | 1.95667746        | 2              | 4.43493   |
| P06866        | NQLVEIEK                                                                             | 1.68692798        | 1              | 2.33215   |
| P06866        | SCAVAIEYGVYVR                                                                        | 3.26832397        | 2              | 3.45217   |
| P06866        | SVVDIGLIK                                                                            | 2.06521847        | 1              | 2.0186    |
| P06866        | YVMLPVADQEK                                                                          | 1.86537504        | 2              | 2.5149    |
| <b>P07150</b> | <b>ANXA1 Annexin A1</b>                                                              | <b>1.20532831</b> | <b>0.69198</b> | <b>2</b>  |
| P07150        | GLGTDEDTLIEILTTR                                                                     | 1.3366121         | 2              | 3.79267   |
| P07150        | GVDEATIIDLTK                                                                         | 1.17232427        | 3              | 4.0629    |
| <b>P07153</b> | <b>RPN1 Dolichyl_diphosphooligosaccharide__protein glycosyltransferase subunit 1</b> | <b>1.44208424</b> | <b>3.4E-06</b> | <b>16</b> |
| P07153        | ASSFVLALEPELESR                                                                      | 1.56531831        | 2              | 4.2464    |
| P07153        | AVTSEIAVLQSR                                                                         | 1.17365992        | 2              | 3.89807   |
| P07153        | FVDHVFDEQVIDSLTVK                                                                    | 1.51918047        | 2              | 4.64806   |
| P07153        | GEDEEDNNLEVR                                                                         | 1.96253994        | 2              | 3.85473   |
| P07153        | HFDETVNR                                                                             | 1.03060778        | 1              | 2.71197   |

|               |                                                                  |                   |                |           |
|---------------|------------------------------------------------------------------|-------------------|----------------|-----------|
| P07153        | IDHILDAL                                                         | 2.54709382        | 2              | 2.40005   |
| P07153        | ISIVVETVYTHVLHPYPTQITQSEK                                        | 1.12212206        | 3              | 4.91024   |
| P07153        | LKTEGSDLCDR                                                      | 1.34918045        | 3              | 3.43198   |
| P07153        | NIQVDSPYDISR                                                     | 1.1983813         | 2              | 3.50743   |
| P07153        | NLVEQHIQDIVVHYTFNK                                               | 1.44395997        | 3              | 4.90029   |
| P07153        | SEDILDYGPFK                                                      | 2.91595318        | 2              | 3.48043   |
| P07153        | TEGSDLCDR                                                        | 2.47448011        | 2              | 2.69471   |
| P07153        | TILPAAAQDVYYR                                                    | 1.51764558        | 2              | 2.88432   |
| P07153        | TVDLSSHLAK                                                       | 1.37300276        | 2              | 2.58741   |
| P07153        | VHYENNSPFLTITSMTR                                                | 2.41718851        | 2              | 4.03744   |
| P07153        | VTAEVVLAHPGGGSTAR                                                | 1.30889891        | 2              | 4.87007   |
| <b>P07323</b> | <b>ENOG Gamma_enolase</b>                                        | <b>1.71281225</b> | <b>9.9E-06</b> | <b>3</b>  |
| P07323        | AAVPSGASTGIYEALER                                                | 1.79888479        | 2              | 5.28674   |
| P07323        | GNPTVEVDLHTAK                                                    | 3.5801936         | 2              | 3.17231   |
| P07323        | SGETEDTFIADLVVGLCTGQIK                                           | 1.37959657        | 3              | 4.94792   |
| <b>P07335</b> | <b>KCRB Creatine kinase B_type</b>                               | <b>1.24716239</b> | <b>0.16723</b> | <b>3</b>  |
| P07335        | FCTGLTQIETLFK                                                    | 1.31485263        | 2              | 2.80903   |
| P07335        | LEQGQPIDDLMAPAQK                                                 | 0.69317051        | 2              | 2.72387   |
| P07335        | TDLNPDNLQGGDDLDPNVLSR                                            | 0.87584289        | 2              | 3.57291   |
| <b>P07340</b> | <b>AT1B1 Sodium/potassium_transporting ATPase subunit beta_1</b> | <b>1.14681459</b> | <b>0.34725</b> | <b>3</b>  |
| P07340        | AYGENIGYSEK                                                      | 1.44662388        | 2              | 2.72504   |
| P07340        | VAPPGLTQIPQIQK                                                   | 1.29095389        | 2              | 2.58273   |
| P07340        | YNPNVLPVQCTGK                                                    | 1.14258716        | 2              | 2.61205   |
| <b>P07379</b> | <b>PCKGC Phosphoenolpyruvate carboxykinase_cytosolic [GTP]</b>   | <b>2.27848745</b> | <b>9.9E-20</b> | <b>18</b> |
| P07379        | AINPENGGFVAPGTSVK                                                | 2.43939714        | 2              | 4.44334   |
| P07379        | EEGWLAEHMLILGITNPEGK                                             | 2.64091066        | 2              | 5.14535   |
| P07379        | EISFGSGYGGNSLLGK                                                 | 3.44177475        | 2              | 2.55412   |
| P07379        | EVEEIDKYLEQVNADLPYEIER                                           | 1.97245175        | 2              | 4.87224   |
| P07379        | FVEGNAQLCQPEYIHICDGSEEEYGR                                       | 2.30180541        | 3              | 5.19227   |
| P07379        | GLGDVNVEELFGISK                                                  | 5.92022654        | 2              | 3.77223   |
| P07379        | IGIELTDSYVVASMR                                                  | 2.49811279        | 2              | 4.24743   |
| P07379        | MGTSVLEALGDGEFIK                                                 | 2.29830276        | 2              | 4.75779   |
| P07379        | MGTSVLEALGDGEFIK+Oxidation(0                                     | 2.63880278        |                |           |
| P07379        | TNLAMMNPTLPGWK                                                   | 1.9476123         | 2              | 3.13418   |
| P07379        | TVIITQEQR                                                        | 2.4205682         | 2              | 2.46263   |
| P07379        | VECVGDDIAWMK                                                     | 2.53987702        | 2              | 3.83109   |
| P07379        | VIQGSLDLSPQEV                                                    | 2.18733425        | 2              | 3.90576   |
| P07379        | VLEWMFGR                                                         | 2.68203727        | 2              | 2.53086   |
| P07379        | WMSEEDFEK                                                        | 2.11842718        | 2              | 2.37451   |
| P07379        | YDNCWLALTDPR                                                     | 1.75505642        | 2              | 2.51999   |
| P07379        | YLAAPPSACGK                                                      | 1.54307981        | 2              | 2.72062   |
| P07379        | YLEDQVNADLPYEIER                                                 | 1.34797193        | 2              | 5.05747   |
| <b>P07483</b> | <b>FABPH Fatty acid_binding protein_heart</b>                    | <b>2.78694446</b> | <b>0.55964</b> | <b>2</b>  |
| P07483        | QVASMTPKPTTIEK                                                   | 1.97117254        | 2              | 3.26915   |
| P07483        | WDGQETTLTR                                                       | 2.78705777        | 2              | 2.53159   |
| <b>P07632</b> | <b>SODC Superoxide dismutase [Cu_Zn]</b>                         | <b>1.0859406</b>  | <b>0.99999</b> | <b>4</b>  |
| P07632        | DGVANVSIEDR                                                      | 1.02398354        | 2              | 2.73234   |
| P07632        | GDGPVQGVIIHFEQK                                                  | 1.06531737        | 2              | 3.79552   |
| P07632        | HVGDLGNVAAGK                                                     | 1.09516719        | 2              | 4.04199   |
| P07632        | VISLSGEHSIIGR                                                    | 1.23983753        | 2              | 3.02934   |
| <b>P07633</b> | <b>PCCB Propionyl_CoA carboxylase beta chain_mitochondrial</b>   | <b>0.99141169</b> | <b>0.65071</b> | <b>10</b> |
| P07633        | AFDNDVDALCNLR                                                    | 1.19447917        | 2              | 4.07653   |
| P07633        | AYNMLDIIHHAVIDER                                                 | 1.27294983        | 2              | 3.88651   |
| P07633        | GFVDDIIQPSSTR                                                    | 1.11621663        | 2              | 3.23984   |

|               |                                                                   |                   |                |           |
|---------------|-------------------------------------------------------------------|-------------------|----------------|-----------|
| P07633        | HLLGDTNYAWPTAEIAVMGAK                                             | 1.44583778        | 2              | 5.75789   |
| P07633        | ICCDLEVLASK                                                       | 1.13458626        | 2              | 3.49778   |
| P07633        | IMDQAITVGPVIGLNDSGGAR                                             | 0.79620848        | 3              | 5.02559   |
| P07633        | LVPELDTVVPLESSK                                                   | 1.21425592        | 2              | 3.70332   |
| P07633        | NKFPGDSVVTGR                                                      | 0.32304545        | 2              | 2.40977   |
| P07633        | SVTNEDVTQEQLGGAK                                                  | 1.12967227        | 2              | 5.2441    |
| P07633        | TVGIVGNQPNVASGCLDINSSVK                                           | 1.25199213        | 2              | 4.91488   |
| <b>P07687</b> | <b>HYEP Epoxide hydrolase 1</b>                                   | <b>1.07769545</b> | <b>0.98116</b> | <b>26</b> |
| P07687        | DIELLYPYK                                                         | 0.45183032        | 1              | 2.30278   |
| P07687        | DKEETLPLGDGWVGPSSKPSAK                                            | 1.23841604        | 3              | 5.65544   |
| P07687        | EDESIRPFK                                                         | 1.05787645        | 2              | 2.95196   |
| P07687        | EDESIRPFKVETSDEEIKDLHQR                                           | 1.02985727        | 3              | 5.9852    |
| P07687        | ELEDGGLER                                                         | 2.11603287        | 2              | 2.34874   |
| P07687        | ENLGQGIMVHK                                                       | 1.47563083        | 2              | 3.20023   |
| P07687        | ENLGQGIMVHK+Oxidation(7                                           | 1.32775108        |                |           |
| P07687        | ESGYLHIQATKPDTVGCALNDSPVGLAAYILEK                                 | 1.29070827        | 3              | 5.66983   |
| P07687        | FHYGFNSNYMK                                                       | 0.78398993        | 2              | 2.62501   |
| P07687        | FLGYTEKDIELLYPYK                                                  | 1.00170262        | 3              | 4.74074   |
| P07687        | FYIQGGDWGSLICTNMAQMVPNHVK                                         | 1.27649814        | 3              | 3.3837    |
| P07687        | GGHFAAFEEPK                                                       | 1.16222055        | 2              | 3.46158   |
| P07687        | GLHLNMAFISR                                                       | 0.78029104        | 2              | 2.79208   |
| P07687        | IEGLDIHFHVKPPQLPSGR                                               | 0.87300212        | 3              | 4.26091   |
| P07687        | IIPLLTDPK                                                         | 1.32152397        | 1              | 1.9007    |
| P07687        | KFVSLAELQ                                                         | 1.36306607        | 2              | 2.80163   |
| P07687        | KQVEILNQYPHFK                                                     | 0.86649356        | 3              | 5.21234   |
| P07687        | LLAQDIR                                                           | 1.19922834        | 2              | 2.50907   |
| P07687        | QVEILNQYPHFK                                                      | 0.81552493        | 2              | 3.5948    |
| P07687        | SEYRELEDGGLER                                                     | 0.85574436        | 3              | 3.66431   |
| P07687        | SFYMTMTPLLGQR                                                     | 1.67215189        | 2              | 3.78076   |
| P07687        | SHGLSDEHVFEVICPSIPGYGYSEASSK                                      | 1.22748457        | 3              | 6.59517   |
| P07687        | TKIEGLDIHFHVKPPQLPSGR                                             | 1.3317682         | 3              | 4.03182   |
| P07687        | VETSDEEIK                                                         | 0.90213581        | 2              | 2.62877   |
| P07687        | VETSDEEIKDLHQR                                                    | 1.00484127        | 2              | 4.72047   |
| P07687        | VFVPTGFSAFPSELLHAPEK                                              | 1.09514358        | 2              | 4.54154   |
| <b>P07756</b> | <b>CPSM Carbamoyl_phosphate synthase [ammonia]_ mitochondrial</b> | <b>1.023641</b>   | <b>9.9E-20</b> | <b>99</b> |
| P07756        | AADTIGYPVMIR                                                      | 1.69421344        | 2              | 3.87525   |
| P07756        | AADTIGYPVMIR+Oxidation(9                                          | 2.24184202        |                |           |
| P07756        | AERPDGLILGMGGQTALNCGVELFK                                         | 1.71078274        | 3              | 6.91184   |
| P07756        | AERPDGLILGMGGQTALNCGVELFK+Oxidation(10                            | 1.54804296        |                |           |
| P07756        | AFAISGPFNVQFLVK                                                   | 2.05247329        | 2              | 4.95617   |
| P07756        | AFAMTNQILVER                                                      | 1.41850434        | 2              | 4.58938   |
| P07756        | AFAMTNQILVER+Oxidation(3                                          | 1.43850104        |                |           |
| P07756        | ALENNMSLDEIVK                                                     | 0.85109376        | 2              | 4.81389   |
| P07756        | ALENNMSLDEIVK+Oxidation(5                                         | 1.30105994        |                |           |
| P07756        | AMLSTGFK                                                          | 1.36506611        | 2              | 2.49318   |
| P07756        | AQTAHIVLEDGTK                                                     | 1.02293513        | 2              | 4.47708   |
| P07756        | ATGYPLAFIAAK                                                      | 1.24287794        | 2              | 3.18313   |
| P07756        | CEMASTGEVACFGEGIHAFK                                              | 1.33031157        | 3              | 5.4082    |
| P07756        | CEMASTGEVACFGEGIHAFK+Oxidation(2                                  | 1.24233681        |                |           |
| P07756        | CLGLEAQTR                                                         | 1.12328689        | 2              | 3.61715   |
| P07756        | DADDNCVTVCNMENV DAMGVHTGDSVVVAPAQTL SNAEFQMLR                     | 3.21206798        | 3              | 5.16436   |
| P07756        | DELGLNK                                                           | 1.26457267        | 1              | 2.34751   |
| P07756        | DGSIDLVINLPNNNTK                                                  | 0.81943169        | 2              | 5.31511   |
| P07756        | DILNMDK                                                           | 1.21466738        | 1              | 2.03257   |
| P07756        | EIEYEVVR                                                          | 3.24715349        | 1              | 2.09313   |

|        |                                                       |            |   |         |
|--------|-------------------------------------------------------|------------|---|---------|
| P07756 | EIGFSDKQISK                                           | 1.57826064 | 2 | 3.1471  |
| P07756 | EPLFGISTGNIITGLAAGAK                                  | 1.49772829 | 3 | 5.65663 |
| P07756 | ETLMDLGTK                                             | 1.77179049 | 1 | 2.33659 |
| P07756 | EVEMDAVGK                                             | 1.7422382  | 1 | 2.1106  |
| P07756 | FIEGAREVEMDAVGKEGR                                    | 1.14887786 | 3 | 3.6484  |
| P07756 | FLEEATR                                               | 2.40795448 | 2 | 2.46326 |
| P07756 | FLGVAEQLHNEGFK                                        | 1.14321715 | 2 | 4.80351 |
| P07756 | FVHDNYVIR                                             | 1.11519774 | 3 | 3.35219 |
| P07756 | GAEVHLPWNHDFMQMDYDGLLIAGGPGNPALAQPLIQNVK              | 1.60379718 | 3 | 6.06903 |
| P07756 | GAEVHLPWNHDFMQMDYDGLLIAGGPGNPALAQPLIQNVK+Oxidation(15 | 2.07267774 |   |         |
| P07756 | GILIGIQSFRPR                                          | 1.87678461 | 2 | 2.46131 |
| P07756 | GLNSESVTEETLR                                         | 1.08643483 | 2 | 4.84807 |
| P07756 | GNDVLVIECNLR                                          | 1.05406848 | 2 | 4.45974 |
| P07756 | GQILTMANPIIGNGGAPDPTAR                                | 1.16537729 | 2 | 6.00427 |
| P07756 | GQILTMANPIIGNGGAPDPTAR+Oxidation(5                    | 1.29750746 |   |         |
| P07756 | GQILTMANPIIGNGGAPDPTARDELGLNK                         | 0.95579277 | 3 | 4.91201 |
| P07756 | GQNQPVLNITNR                                          | 1.00542344 | 2 | 4.38972 |
| P07756 | GTTITSVLPKALVASR                                      | 1.34645287 | 2 | 3.35451 |
| P07756 | GYSFGHPSSVAGEVVFNTGLGGYSEALDTPAYK                     | 2.61505682 | 3 | 5.98097 |
| P07756 | HLPtleQPIIPSDYVAIK                                    | 1.25789187 | 2 | 5.58522 |
| P07756 | IALGIPLPEIK                                           | 2.42120839 | 2 | 2.82732 |
| P07756 | IAPSFAVESMEDALK                                       | 2.55727814 | 2 | 5.25688 |
| P07756 | IAPSFAVESMEDALK+Oxidation(9                           | 1.28030009 |   |         |
| P07756 | IAPSFAVESMEDALKAADTIGYPVMIR                           | 1.7151316  | 3 | 4.13075 |
| P07756 | IEFEGQSVDFVDPNK                                       | 1.35080984 | 2 | 5.29866 |
| P07756 | IEFEGQSVDFVDPNKQNLIAEVSTK                             | 1.22421439 | 3 | 5.55141 |
| P07756 | ILDYHQAECNGCIISVGGQIPNNLAVPLYK                        | 1.73284419 | 3 | 5.62339 |
| P07756 | ILESDRKEPLFGISTGNIITGLAAGAK                           | 1.42710007 | 3 | 4.69763 |
| P07756 | IMGTSPLQIDR                                           | 1.88484814 | 2 | 3.26957 |
| P07756 | IMGTSPLQIDR+Oxidation(1                               | 3.06914938 |   |         |
| P07756 | IMGTSPLQIDRAEDR                                       | 0.72835389 | 2 | 2.517   |
| P07756 | KEPLFGISTGNIITGLAAGAK                                 | 1.44000092 | 2 | 5.10797 |
| P07756 | KTVVVCNCPETVSTDFDECDK                                 | 0.40295078 | 2 | 4.98109 |
| P07756 | LFAEAVQK                                              | 1.27319929 | 2 | 3.44823 |
| P07756 | LFATEATSDWLNANNVPATPVAVWPSQEGQNPSSSIR                 | 1.35126075 | 4 | 4.71588 |
| P07756 | LRDADPILR                                             | 1.4305999  | 2 | 3.21114 |
| P07756 | LTSIDKWFLYK                                           | 1.31189798 | 2 | 2.76499 |
| P07756 | LYFEELSLER                                            | 2.8619756  | 2 | 3.67267 |
| P07756 | MCHPSVDGFTPR                                          | 1.27675141 | 3 | 4.89757 |
| P07756 | MCHPSVDGFTPR+Oxidation(0                              | 1.48271924 |   |         |
| P07756 | MRDILNMDK                                             | 1.37501424 | 2 | 3.14774 |
| P07756 | MRDILNMDK+Oxidation(0                                 | 1.95166167 |   |         |
| P07756 | QADAVYFLPITPQFVTEVIK                                  | 3.26515473 | 3 | 4.19449 |
| P07756 | QLFSDKLNEINEK                                         | 1.24740812 | 2 | 3.82525 |
| P07756 | QNLIAEVSTK                                            | 0.97432891 | 1 | 2.63927 |
| P07756 | RFLEEATR                                              | 1.28320141 | 2 | 2.68996 |
| P07756 | RGAEVHLPWNHDFMQMDYDGLLIAGGPGNPALAQPLIQNVK             | 2.28120924 | 4 | 4.62964 |
| P07756 | RTAVDSGIALLTNFQVTK                                    | 1.23106277 | 2 | 5.16508 |
| P07756 | RTSINVVR                                              | 0.74661778 | 2 | 2.33993 |
| P07756 | SAYALGGLGSGICPNK                                      | 1.4030982  | 2 | 4.94947 |
| P07756 | SAYALGGLGSGICPNKETLMDLGTK                             | 1.39242226 | 3 | 4.69494 |
| P07756 | SIFSAVLDELK                                           | 1.29522062 | 2 | 3.83489 |
| P07756 | SIFSAVLDELKVAQAPWK                                    | 2.05871541 | 3 | 4.29703 |
| P07756 | SLGQWLQFEK                                            | 0.96417652 | 2 | 4.06453 |

|               |                                                    |                   |                |           |
|---------------|----------------------------------------------------|-------------------|----------------|-----------|
| P07756        | SLGQWLQEEKVPAIYGVDR                                | 2.28807738        | 2              | 3.7954    |
| P07756        | SVGEVMAIGR                                         | 1.02859555        | 2              | 3.51829   |
| P07756        | SVGEVMAIGR+Oxidation(5)                            | 1.62865879        |                |           |
| P07756        | TAVDSGIALLTNFQVTK                                  | 1.3662996         | 3              | 6.50634   |
| P07756        | TAVDSGIALLTNFQVTKLFAEAVQK                          | 1.28812085        | 3              | 5.41638   |
| P07756        | TFEESFQK                                           | 1.06118068        | 2              | 2.50366   |
| P07756        | TLGVDFIDVATK                                       | 1.01333275        | 2              | 4.28344   |
| P07756        | TSACFEPGLDYMVTK                                    | 1.22481588        | 2              | 4.55608   |
| P07756        | TSACFEPGLDYMVTK+Oxidation(11)                      | 1.20706248        |                |           |
| P07756        | TVLMNPNIASVQTNEVGLK                                | 1.19307691        | 2              | 6.11632   |
| P07756        | TVLMNPNIASVQTNEVGLK+Oxidation(3)                   | 0.98009141        |                |           |
| P07756        | TVVNCNPETVSTDFDECDK                                | 0.85931473        | 2              | 5.61548   |
| P07756        | TVVNCNPETVSTDFDECDKLYFEELSLER                      | 3.12543931        | 3              | 5.56397   |
| P07756        | VISHAISEHVEDAGVHSGDATLMLPTQTISQGAIEK               | 1.44241862        | 3              | 7.42585   |
| P07756        | VISHAISEHVEDAGVHSGDATLMLPTQTISQGAIEK+Oxidation(22) | 1.52386182        |                |           |
| P07756        | VLGTSVESIMATEDR                                    | 1.10884625        | 2              | 4.70256   |
| P07756        | VLGTSVESIMATEDR+Oxidation(9)                       | 1.19444863        |                |           |
| P07756        | VLILGSGGLSIGQAGEFDYSGSQAVK                         | 1.83912604        | 2              | 5.82353   |
| P07756        | VMIGESVDEK                                         | 1.30277544        | 2              | 3.68868   |
| P07756        | VMIGESVDEK+Oxidation(1)                            | 1.67659962        |                |           |
| P07756        | VSQEHVVLTK                                         | 1.31316268        | 2              | 3.84969   |
| P07756        | VVAVDCGIK                                          | 1.52910399        | 2              | 2.52538   |
| P07756        | VVAVDCGIKNNVIR                                     | 1.26964546        | 2              | 3.80094   |
| P07756        | YMESDGIK                                           | 1.1816082         | 2              | 2.61315   |
| P07756        | YMESDGIK+Oxidation(1)                              | 1.49872146        |                |           |
| <b>P07824</b> | <b>ARG1 Arginase_1</b>                             | <b>1.35902369</b> | <b>9.9E-20</b> | <b>16</b> |
| P07824        | ANEQLAAVVAETQK                                     | 1.22728648        | 2              | 5.20274   |
| P07824        | DHGDLAFVDVDPNDSPFQIVK                              | 0.99228937        | 2              | 6.21711   |
| P07824        | DIVYIGLR                                           | 1.10786401        | 2              | 2.3264    |
| P07824        | DVDPGEHYIK                                         | 2.52620829        | 2              | 3.41139   |
| P07824        | EGNHKPEDYKPPK                                      | 1.98388659        | 2              | 2.76863   |
| P07824        | GKFPDVPGFVWVTPCISAK                                | 1.80363599        | 3              | 4.96103   |
| P07824        | LKETEVNVR                                          | 1.46754449        | 3              | 3.33979   |
| P07824        | NGTISVVLGGDHSMAIGSISGHAR                           | 1.46865453        | 3              | 4.34269   |
| P07824        | RPIHLSFDVDGLDPVFTPATGTPVVGGLSYR                    | 3.48768907        | 3              | 5.75482   |
| P07824        | TGLLSGLDIMEVNPTLTK                                 | 1.78751006        | 2              | 5.64583   |
| P07824        | TGLLSGLDIMEVNPTLTK+Oxidation(9)                    | 1.17778538        |                |           |
| P07824        | TVNTAVALTSLCFGTK                                   | 1.91752566        | 2              | 5.03746   |
| P07824        | VHPDLCVIWVDAHTDINTPLTSSGNLHGQPVAFLK                | 2.9934064         | 4              | 5.50347   |
| P07824        | VMEETFSYLLGR                                       | 2.39168338        | 2              | 3.70997   |
| P07824        | YFSMTEVDK                                          | 1.64185178        | 1              | 2.3222    |
| P07824        | YFSMTEVDKLGIGK+Oxidation(3)                        | 1.2153622         |                |           |
| <b>P07871</b> | <b>THIKB 3_ketoacyl_CoA thiolase B_peroxisomal</b> | <b>0.80860454</b> | <b>0.04663</b> | <b>17</b> |
| P07871        | AEELGLPILGVLR                                      | 0.85595975        | 2              | 4.30189   |
| P07871        | AEIVPVTTTFLDDK                                     | 0.93430609        | 2              | 4.7357    |
| P07871        | AEIVPVTTTFLDDKGDGR                                 | 1.09169593        | 2              | 3.68683   |
| P07871        | AEIVPVTTTFLDDKGDGRK                                | 0.85655516        | 2              | 4.36588   |
| P07871        | DCLIPMGITSENAER                                    | 1.59970459        | 2              | 3.91008   |
| P07871        | DGGSTTAGNSSQVSDGAAAVLLAR                           | 0.88309191        | 2              | 6.3436    |
| P07871        | IAQFLSGIPETVPLSAVNR                                | 1.59949917        | 2              | 3.21586   |
| P07871        | KTITVSQDEGVRPSTTMEGLAK                             | 0.90414678        | 3              | 3.7047    |
| P07871        | LKPECLGDISVGNLQPGAGAAMAR                           | 0.75294915        | 3              | 5.14145   |
| P07871        | QCSSGLQAVANIAGGIR                                  | 0.81953977        | 2              | 4.69981   |
| P07871        | QDAFALASQK                                         | 0.98328603        | 2              | 3.75977   |
| P07871        | QKQDAFALASQK                                       | 0.96658966        | 2              | 4.15368   |
| P07871        | QVVTLLNELK                                         | 0.49607692        | 2              | 2.38165   |

|               |                                                      |                   |                |           |
|---------------|------------------------------------------------------|-------------------|----------------|-----------|
| P07871        | SKAEELGLPILGVL                                       | 0.70797297        | 3              | 4.83084   |
| P07871        | SYAVVGVPPDIMGIGPAYAIPAALQK                           | 0.88032351        | 3              | 4.74667   |
| P07871        | TITVSQDEGVRPSTTMEGLAK                                | 0.79788176        | 2              | 4.3676    |
| P07871        | VNPLGGAIALGHPLGCTGAR                                 | 0.90737692        | 2              | 4.99562   |
| <b>P07872</b> | <b>ACOX1 Peroxisomal acyl_coenzyme A oxidase 1</b>   | <b>1.06821622</b> | <b>0.3203</b>  | <b>21</b> |
| P07872        | AFTTWTANAGIEECR                                      | 2.42611568        | 2              | 3.81496   |
| P07872        | ASATFNPELITHILDGSPENTR                               | 0.81884288        | 2              | 4.77986   |
| P07872        | ASEAHCHYVVVK                                         | 0.89191997        | 3              | 4.14354   |
| P07872        | EIENLILNDPDFQHEDYNFLTR                               | 2.06748565        | 2              | 4.54409   |
| P07872        | EIGTHKPLPGITVGDIGPK                                  | 0.83864614        | 3              | 4.12068   |
| P07872        | EVAWNLTSDVLR                                         | 1.2545391         | 2              | 3.14678   |
| P07872        | EYGISDPEEIMWFK                                       | 0.96279283        | 2              | 3.43568   |
| P07872        | FGYEEMDNGYK                                          | 0.60361322        | 2              | 3.87587   |
| P07872        | GGDFLEGSITGAQLSQVNAR                                 | 2.04553378        | 2              | 5.24332   |
| P07872        | GLETTATYDPK                                          | 1.05964707        | 2              | 3.67608   |
| P07872        | INESIGQGDLSPELHALTAGLK                               | 0.92733733        | 3              | 5.51523   |
| P07872        | LVEIAAK                                              | 0.91527495        | 1              | 2.20189   |
| P07872        | LVGGMVSYLNDLPSQR                                     | 1.35171882        | 2              | 3.23561   |
| P07872        | NLCLLYSLYISQK                                        | 1.71142797        | 2              | 3.26243   |
| P07872        | QSEPEPQILDFTQQYK                                     | 0.82622241        | 2              | 4.78958   |
| P07872        | SFLVGNAASLSK                                         | 0.83220998        | 2              | 4.29144   |
| P07872        | SKEVAWNLTSDVLR                                       | 1.54125806        | 3              | 3.82654   |
| P07872        | TQEFILNSPTVTSIK                                      | 0.836839          | 2              | 4.57435   |
| P07872        | TSNHAIVLAQLITQGECYGLHAFVPIR                          | 1.06519505        | 4              | 4.92351   |
| P07872        | YAQVKPDGTYVKPLSNK                                    | 1.84318126        | 3              | 3.749     |
| P07872        | YDGNVYENLFEWAK                                       | 2.03395104        | 2              | 4.82144   |
| <b>P07895</b> | <b>SODM Superoxide dismutase [Mn]_ mitochondrial</b> | <b>0.97497726</b> | <b>0.99845</b> | <b>5</b>  |
| P07895        | AIWNVINWENVSQLR                                      | 0.9749198         | 2              | 3.87497   |
| P07895        | GDVTTQVALQPALK                                       | 1.02895728        | 2              | 3.98569   |
| P07895        | GELLEAIKR                                            | 1.01638907        | 2              | 2.33723   |
| P07895        | HHATYVNNLNVTEEK                                      | 1.38027117        | 2              | 4.82983   |
| P07895        | NVRPDYK                                              | 1.28059063        | 2              | 2.30242   |
| <b>P07896</b> | <b>ECHP Peroxisomal bifunctional enzyme</b>          | <b>1.05460803</b> | <b>2.4E-11</b> | <b>24</b> |
| P07896        | EWQSLAGPHGSK                                         | 0.48161914        | 2              | 2.48304   |
| P07896        | GGPMFYAASVGLPTVLEK                                   | 1.30852779        | 2              | 3.88934   |
| P07896        | GQGLTGPSLPPGTPVR                                     | 1.05461641        | 2              | 3.92712   |
| P07896        | GWYQYDKPLGR                                          | 1.01802724        | 2              | 2.90122   |
| P07896        | IFNKPVPSLPNMDSVFAEIAIK                               | 1.96422559        | 3              | 4.74482   |
| P07896        | IGVVVGNCGYGFVGNR                                     | 2.06300017        | 2              | 3.44347   |
| P07896        | IIDKPIEPR                                            | 0.92671053        | 2              | 2.4274    |
| P07896        | KGQGLTGPSLPPGTPVR                                    | 0.8576032         | 2              | 4.26845   |
| P07896        | KQYPGVLAPETCVR                                       | 0.78668205        | 2              | 4.34685   |
| P07896        | LCNPPVNAVSPVIR                                       | 0.92913603        | 2              | 4.2708    |
| P07896        | LGILDAVVK                                            | 0.95944797        | 2              | 2.81922   |
| P07896        | LLEVIPSR                                             | 0.68073448        | 2              | 2.82499   |
| P07896        | LVAQGSPLK                                            | 1.04899323        | 2              | 2.54035   |
| P07896        | QNPDIPLQLEPSDYLR                                     | 0.62147706        | 2              | 3.95562   |
| P07896        | QYPGVLAPETCVR                                        | 0.66013514        | 2              | 3.07371   |
| P07896        | RLVAQGSPLK                                           | 0.67813325        | 2              | 2.33736   |
| P07896        | TASAQPVSSVGLGLGTMR                                   | 0.90255111        | 2              | 5.88839   |
| P07896        | TISKEILER                                            | 0.88543227        | 2              | 2.65437   |
| P07896        | VGISVVAVESDPK                                        | 1.09541725        | 2              | 3.90225   |
| P07896        | VGLPEVTLGILPGAR                                      | 0.91591015        | 2              | 3.62223   |
| P07896        | VSDLAGLDVGVK                                         | 0.71021972        | 2              | 4.27189   |
| P07896        | YLSADEALR                                            | 1.3322235         | 2              | 2.97647   |
| P07896        | YSPLGDMLEAGR                                         | 0.7619019         | 2              | 4.33706   |

|               |                                                                   |                   |                |           |
|---------------|-------------------------------------------------------------------|-------------------|----------------|-----------|
| P07896        | YSSPTTIATVMVLSLK                                                  | 0.74665882        | 2              | 3.49345   |
| <b>P07943</b> | <b>ALDR Aldose reductase</b>                                      | <b>1.24000958</b> | <b>0.71903</b> | <b>2</b>  |
| P07943        | AIGVSNFNPLQIER                                                    | 1.5051292         | 2              | 3.06443   |
| P07943        | HIDCAQVYQNEK                                                      | 1.12052937        | 2              | 4.45897   |
| <b>P07953</b> | <b>F261 6_phosphofructo_2_kinase/fructose_2_6_biphosphatase 1</b> | <b>1.76253494</b> | <b>0.01912</b> | <b>5</b>  |
| P07953        | HGESELNLR                                                         | 1.15585012        | 2              | 2.59769   |
| P07953        | IGGDSGLSAR                                                        | 0.61740342        | 2              | 2.77474   |
| P07953        | NYEFFRPDNTAQLIR                                                   | 3.90133985        | 2              | 3.39267   |
| P07953        | TIQTAEALGVPEYQWK                                                  | 2.68672473        | 2              | 3.06574   |
| P07953        | YLNWIGTPTK                                                        | 1.32325492        | 2              | 2.95927   |
| <b>P08009</b> | <b>GSTM4 Glutathione S_transferase Yb_3</b>                       | <b>0.81278215</b> | <b>0.60717</b> | <b>6</b>  |
| P08009        | LCYNPDFEK                                                         | 1.54017304        | 2              | 3.04941   |
| P08009        | LLLEYTDSSYEK                                                      | 0.73752428        | 2              | 4.83114   |
| P08009        | LLLEYTDSSYEKRR                                                    | 1.26976247        | 2              | 4.00991   |
| P08009        | NQVFEATCLDAFPNLK                                                  | 0.8169695         | 2              | 4.56452   |
| P08009        | SQWLNEK                                                           | 1.14533596        | 2              | 2.70843   |
| P08009        | YTMGDAPDFDR                                                       | 0.8832064         | 2              | 2.81479   |
| <b>P08010</b> | <b>GSTM2 Glutathione S_transferase Mu 2</b>                       | <b>1.09428556</b> | <b>9E-06</b>   | <b>15</b> |
| P08010        | FLSKPIFAK                                                         | 1.23209307        | 2              | 2.33711   |
| P08010        | IRVDVLENQAMDTR                                                    | 1.25720705        | 3              | 4.2239    |
| P08010        | ITYVDFLVYDVLQHR                                                   | 1.3401228         | 2              | 5.01125   |
| P08010        | KKPEYLEGLPEK                                                      | 0.88471459        | 3              | 4.16745   |
| P08010        | KPEYLEGLPEK                                                       | 1.03960315        | 2              | 3.42906   |
| P08010        | KYSMGDAPDYDR                                                      | 1.65092837        | 2              | 3.8264    |
| P08010        | LFLEYTDTSYEDK                                                     | 0.27114906        | 2              | 5.54148   |
| P08010        | LFLEYTDTSYEDKK                                                    | 0.9794887         | 2              | 4.36844   |
| P08010        | LQLAMVCYSPDFER                                                    | 1.62872848        | 2              | 4.32852   |
| P08010        | LQLAMVCYSPDFER+Oxidation(4                                        | 1.77403467        |                |           |
| P08010        | SQWLSEK                                                           | 1.15989042        | 2              | 2.46407   |
| P08010        | VDVLENQAMDTR                                                      | 0.76707027        | 2              | 4.69443   |
| P08010        | VDVLENQAMDTR+Oxidation(8                                          | 1.15525859        |                |           |
| P08010        | YSMGDAPDYDR                                                       | 1.22816014        | 2              | 3.3708    |
| P08010        | YSMGDAPDYDR+Oxidation(2                                           | 1.28036152        |                |           |
| <b>P08011</b> | <b>MGST1 Microsomal glutathione S_transferase 1</b>               | <b>0.83517581</b> | <b>0.50346</b> | <b>6</b>  |
| P08011        | IYHTIAYLPLPQPNR                                                   | 0.76436166        | 2              | 5.3202    |
| P08011        | MMFLSSATAFQR                                                      | 1.15299231        | 2              | 3.60354   |
| P08011        | MMFLSSATAFQR+Oxidation(0                                          | 1.45495502        |                |           |
| P08011        | MMFLSSATAFQR+Oxidation(1                                          | 1.45495502        |                |           |
| P08011        | VFANPEDCAGFGK                                                     | 0.83112546        | 2              | 4.67898   |
| P08011        | VFANPEDCAGFGKGENAK                                                | 1.02406192        | 2              | 4.62132   |
| <b>P08032</b> | <b>SPTA1 Spectrin alpha chain_ erythrocyte</b>                    | <b>0.88461498</b> | <b>0.70579</b> | <b>4</b>  |
| P08032        | ADVVESWIGEK                                                       | 0.87333793        | 2              | 2.63621   |
| P08032        | DLVAAKNLLNR                                                       | 1.22682182        | 2              | 2.43823   |
| P08032        | DQARDLTSAGNLLK                                                    | 0.95836869        | 2              | 2.43349   |
| P08032        | QELNTRWNSLK                                                       | 1.88850578        | 2              | 2.30182   |
| <b>P08081</b> | <b>CLCA Clathrin light chain A</b>                                | <b>1.15445219</b> | <b>0.75669</b> | <b>2</b>  |
| P08081        | LEALDANSR                                                         | 1.75536564        | 2              | 2.74592   |
| P08081        | WREEQTER                                                          | 1.13998202        | 2              | 2.47819   |
| <b>P08290</b> | <b>ASGR2 Asialoglycoprotein receptor 2</b>                        | <b>1.6137643</b>  | <b>0.14872</b> | <b>3</b>  |
| P08290        | DFQDIQLDSEENDHQLIGDEEQGSHVQNLN                                    | 1.64582043        | 3              | 6.50026   |
| P08290        | EEQEFVVK                                                          | 1.4916931         | 1              | 2.06398   |
| P08290        | WVDGTEYR                                                          | 2.59041303        | 2              | 2.32283   |
| <b>P08430</b> | <b>UD16 UDP_glucuronosyltransferase 1_6</b>                       | <b>1.19880138</b> | <b>0.77158</b> | <b>2</b>  |
| P08430        | GHDIVVLVPEVNLGLESK                                                | 1.0094338         | 3              | 3.81951   |
| P08430        | YEILASDLLK                                                        | 1.19915354        | 2              | 2.47489   |



|               |                                                                                                                     |                   |                |           |
|---------------|---------------------------------------------------------------------------------------------------------------------|-------------------|----------------|-----------|
| <b>P08461</b> | <b>ODP2 Dihydrolipoyllysine_residue acetyltransferase component of pyruvate dehydrogenase complex_mitochondrial</b> | <b>1.30171464</b> | <b>1.9E-05</b> | <b>5</b>  |
| P08461        | AAPAAAAAPPGPR                                                                                                       | 1.15147628        | 2              | 2.32012   |
| P08461        | DVPLGTPLCIIVEK                                                                                                      | 1.23391298        | 2              | 3.42531   |
| P08461        | DVPVGSIIICITVEKPDIEAFK                                                                                              | 2.79383658        | 2              | 3.90108   |
| P08461        | GLETIASDVVSLASK                                                                                                     | 1.2926063         | 2              | 4.49826   |
| P08461        | VAPTPAGVFIDIPISNIR                                                                                                  | 1.69276026        | 2              | 4.57957   |
| <b>P08503</b> | <b>ACADM Medium_chain specific acyl_CoA dehydrogenase_mitochondrial</b>                                             | <b>1.22235574</b> | <b>0.72081</b> | <b>9</b>  |
| P08503        | AFAGDIANQLATDAVQIFGGYGFNTEYPVEK                                                                                     | 1.43991276        | 3              | 5.1906    |
| P08503        | AFTGFIVEADTPGIHIGK                                                                                                  | 1.09057168        | 2              | 4.44266   |
| P08503        | EEIIPVAPDYDK                                                                                                        | 0.96400405        | 2              | 3.57535   |
| P08503        | GITFEDVR                                                                                                            | 1.02235877        | 2              | 2.42656   |
| P08503        | IYQIYEGTAQIQR                                                                                                       | 1.18629472        | 2              | 4.73162   |
| P08503        | KGDEYVINGQK                                                                                                         | 1.13252986        | 2              | 4.12428   |
| P08503        | MTEQPMMCAYCVTEPSAGSDVAGIK                                                                                           | 1.21175294        | 2              | 4.4693    |
| P08503        | SGEYPFPLIK                                                                                                          | 1.29301419        | 2              | 2.79131   |
| P08503        | TRPTVAAGAVGLAQR                                                                                                     | 1.22391528        | 2              | 4.41669   |
| <b>P08541</b> | <b>UD2B2 UDP_glucuronosyltransferase 2B2</b>                                                                        | <b>0.8930337</b>  | <b>0.00086</b> | <b>11</b> |
| P08541        | DELQNHFIK                                                                                                           | 1.86714714        | 2              | 2.59063   |
| P08541        | FEIFSTSISKDELQNHFIK                                                                                                 | 1.63508057        | 3              | 4.89458   |
| P08541        | FILPPSYVPVILSGLAGK                                                                                                  | 0.37636803        | 3              | 6.12973   |
| P08541        | GAAVSLNIR                                                                                                           | 1.65447338        | 2              | 2.919     |
| P08541        | GHEVTVLKPSAYFFLDPK                                                                                                  | 1.65697375        | 2              | 4.34859   |
| P08541        | HKEWDTFYSEILGRPTTVDETMASK                                                                                           | 1.00799774        | 3              | 4.43988   |
| P08541        | LLDVWVYELPR                                                                                                         | 1.8886967         | 2              | 4.05144   |
| P08541        | NVMMLSTIHHDQPMKPLDR                                                                                                 | 1.19461202        | 3              | 3.78731   |
| P08541        | NVMMLSTIHHDQPMKPLDR+Oxidation(2                                                                                     | 2.57132828        |                |           |
| P08541        | VEIWLIR                                                                                                             | 1.64767479        | 2              | 3.025     |
| P08541        | VLVWPMDFSHWMNIK                                                                                                     | 1.78388412        | 2              | 2.48399   |
| <b>P08542</b> | <b>UDB17 UDP_glucuronosyltransferase 2B17</b>                                                                       | <b>0.97810598</b> | <b>0.94745</b> | <b>6</b>  |
| P08542        | EIINNPYK                                                                                                            | 1.19380015        | 1              | 2.07174   |
| P08542        | FETFPTSIVSKDELENYFIK                                                                                                | 1.107028          | 2              | 4.18042   |
| P08542        | KWDPFYSEILGRPTTLAETMGK                                                                                              | 1.55986779        | 2              | 4.06018   |
| P08542        | LVDVWVYELQR                                                                                                         | 1.2433478         | 2              | 3.5694    |
| P08542        | NAVWLSTIHHDQPMKPLDK                                                                                                 | 0.60880784        | 3              | 4.16042   |
| P08542        | WDPFYSEILGRPTTLAETMGK                                                                                               | 1.51653349        | 2              | 3.7438    |
| <b>P08649</b> | <b>CO4 Complement C4</b>                                                                                            | <b>1.81412538</b> | <b>0.33745</b> | <b>2</b>  |
| P08649        | SLEIPGSSDPNVIPDGFSSFVR                                                                                              | 1.39407997        | 2              | 2.86038   |
| P08649        | VTASEPLETLGSEGALSPGGVASLLR                                                                                          | 1.84586413        | 2              | 2.87177   |
| <b>P08661</b> | <b>MBL2 Mannose_binding protein C</b>                                                                               | <b>0.71229547</b> | <b>0.00312</b> | <b>2</b>  |
| P08661        | ALCSELQGTVATPR                                                                                                      | 0.44991617        | 2              | 3.34046   |
| P08661        | TENVFEDLTGNR                                                                                                        | 0.83325154        | 2              | 2.85044   |
| <b>P08683</b> | <b>CP2CB Cytochrome P450 2C11</b>                                                                                   | <b>0.90304567</b> | <b>1</b>       | <b>18</b> |
| P08683        | DIDTTPAISGFGHLPFYACFIPVQR                                                                                           | 1.05658948        | 3              | 4.89658   |
| P08683        | EALVDLGEFFSGR                                                                                                       | 0.95494539        | 2              | 3.91402   |
| P08683        | EHQESLKDKNPR                                                                                                        | 1.60281228        | 2              | 3.97237   |
| P08683        | FDPGHFLDER                                                                                                          | 1.02133781        | 2              | 2.63743   |
| P08683        | FDYKDPTFLNLMHR                                                                                                      | 1.15906907        | 3              | 4.84963   |
| P08683        | FNENFR                                                                                                              | 1.09865945        | 1              | 2.09618   |
| P08683        | GAPFDPTFILGCAPCNVICSIIFQNR                                                                                          | 0.92878527        | 3              | 6.02482   |
| P08683        | GTNVIVSLSSILHDDKEFPNPEK                                                                                             | 1.16302863        | 2              | 4.99096   |
| P08683        | HNPQSEFTLESIVATVDMFGAGTETTSTTLR                                                                                     | 0.81874437        |                |           |
| P08683        | ICAGEALAR                                                                                                           | 1.19724244        | 2              | 3.02145   |
| P08683        | LPPGPTPLPIIGNTLQIYMK                                                                                                | 1.53636426        | 3              | 3.97036   |
| P08683        | NFFYIK                                                                                                              | 1.46734651        | 1              | 1.91941   |

|               |                                                                                |                   |                |           |
|---------------|--------------------------------------------------------------------------------|-------------------|----------------|-----------|
| P08683        | NYVLEK                                                                         | 0.80840748        | 1              | 2.03016   |
| P08683        | SQMPYTDVAVVHEIQR                                                               | 1.00405133        | 2              | 4.43892   |
| P08683        | VKEHQESLDKDNPR                                                                 | 1.62661064        | 3              | 5.26034   |
| P08683        | VQEEIER                                                                        | 0.88802478        | 2              | 2.46213   |
| P08683        | YGLLLLLK                                                                       | 1.24108652        | 2              | 3.19947   |
| P08683        | YIDLVPNTLPHLVTR                                                                | 1.23871723        | 2              | 4.23395   |
| <b>P08733</b> | <b>MLRV Myosin regulatory light chain 2_ventricular/cardiac muscle isoform</b> | <b>1.4034674</b>  | <b>0.40742</b> | <b>3</b>  |
| P08733        | GADPEETILNAFK                                                                  | 1.21249563        | 2              | 2.32703   |
| P08733        | NEEIDEMIK                                                                      | 1.87917012        | 1              | 2.63221   |
| P08733        | NLVHIITHGEEKD                                                                  | 4.49705767        | 2              | 2.91725   |
| <b>P09006</b> | <b>SPA3N Serine protease inhibitor A3N</b>                                     | <b>4.63125073</b> | <b>7E-05</b>   | <b>2</b>  |
| P09006        | AVLDAETGTEAAAATGVK                                                             | 3.56731784        | 2              | 4.87133   |
| P09006        | GNSMEEILEGLK                                                                   | 6.4598253         | 2              | 3.14438   |
| <b>P09034</b> | <b>ASSY Argininosuccinate synthase</b>                                         | <b>2.12625545</b> | <b>9.9E-20</b> | <b>17</b> |
| P09034        | APNTPDVLEIEFK                                                                  | 4.01139582        | 2              | 3.66081   |
| P09034        | DGTTHSTSLDLFMYLNEVAGK                                                          | 2.75678671        | 2              | 4.82449   |
| P09034        | EFVEEFIWPAVQSSALYEDR                                                           | 3.95319414        | 3              | 5.72916   |
| P09034        | EQGYDVIAYLANIGQK                                                               | 2.49677974        | 2              | 4.70463   |
| P09034        | FAELVYTGFWHSPECFVR                                                             | 7.6680434         | 2              | 4.59087   |
| P09034        | FELTCYSLAPQIK                                                                  | 2.59272171        | 2              | 4.46314   |
| P09034        | GRNDLMEYAK                                                                     | 2.48000383        | 2              | 3.33498   |
| P09034        | IDIVENR                                                                        | 1.40591428        | 2              | 2.37392   |
| P09034        | KVFIEDVSK                                                                      | 1.80958493        | 3              | 3.62154   |
| P09034        | NDLMEYAK                                                                       | 2.06148532        | 2              | 2.63173   |
| P09034        | NDLMEYAK+Oxidation(3                                                           | 2.38827183        |                |           |
| P09034        | NQAPPGLYTK                                                                     | 1.73124762        | 2              | 2.3122    |
| P09034        | SPWSMDENLMHISYEAGILENPK                                                        | 4.91542286        | 3              | 5.63126   |
| P09034        | TQDPAKAPNTPDVLEIEFK                                                            | 2.05074182        | 2              | 5.06488   |
| P09034        | TQDPAKAPNTPDVLEIEFKK                                                           | 1.91351169        | 3              | 5.39563   |
| P09034        | VFIEDVSK                                                                       | 1.76989806        | 2              | 2.35657   |
| P09034        | VQVSVFK                                                                        | 1.5431422         | 2              | 2.4449    |
| <b>P09041</b> | <b>PGK2 Phosphoglycerate kinase 2</b>                                          | <b>0.87183528</b> | <b>0.55726</b> | <b>5</b>  |
| P09041        | FHVEEEGK                                                                       | 1.10209621        | 2              | 2.6503    |
| P09041        | FHVEEEGK GK                                                                    | 1.17660004        | 2              | 2.52993   |
| P09041        | LGDVVYVNDAFGTAHR                                                               | 1.24037854        | 3              | 4.21655   |
| P09041        | VDFNVPMK                                                                       | 1.13277703        | 2              | 2.33805   |
| P09041        | VSHVSTGGGASLELLEGGK                                                            | 0.87165481        | 2              | 5.82734   |
| <b>P09117</b> | <b>ALDOC Fructose_bisphosphate aldolase C</b>                                  | <b>1.60570934</b> | <b>1.6E-12</b> | <b>3</b>  |
| P09117        | VLAAYYK                                                                        | 1.57039034        | 2              | 2.68449   |
| P09117        | YASICQQNGIVPIVEPEILPDGDHDLK                                                    | 4.40890441        | 3              | 3.59953   |
| P09117        | YASICQQNGIVPIVEPEILPDGDHDLKR                                                   | 1.63323683        | 3              | 5.11891   |
| <b>P09139</b> | <b>SPYA Serine__pyruvate aminotransferase_mitochondrial</b>                    | <b>1.58432015</b> | <b>0.12953</b> | <b>3</b>  |
| P09139        | IGLLGYNATTENADR                                                                | 1.28322742        | 2              | 3.11332   |
| P09139        | LLLGPGPSNLAPR                                                                  | 2.25397544        | 2              | 2.51964   |
| P09139        | VLNAPPGISLISFNDK                                                               | 2.04511751        | 2              | 2.39283   |
| <b>P09367</b> | <b>SDHL L_serine dehydratase/L_threonine deaminase</b>                         | <b>8.72954001</b> | <b>4.5E-08</b> | <b>4</b>  |
| P09367        | ALGVNTVGAQTLK                                                                  | 8.42149834        | 2              | 3.54529   |
| P09367        | AQLGLNELLK                                                                     | 1.95162481        | 1              | 2.19022   |
| P09367        | LGLPATIVVPSTTPALTIER                                                           | 9.61856365        | 2              | 2.70583   |
| P09367        | LKNEGATVEVVGEMLEAIQLAK                                                         | 6.05379838        | 3              | 3.97793   |
| <b>P09495</b> | <b>TPM4 Tropomyosin alpha_4 chain</b>                                          | <b>1.2920723</b>  | <b>0.76899</b> | <b>12</b> |
| P09495        | AEGDAAALNR                                                                     | 1.11371545        | 2              | 2.55131   |
| P09495        | EDKYEIEIK                                                                      | 1.5928492         | 1              | 2.69296   |
| P09495        | EENVGLHQTLDTLNLNCI                                                             | 3.25792258        | 2              | 5.23139   |

|               |                                                          |                   |                |           |
|---------------|----------------------------------------------------------|-------------------|----------------|-----------|
| P09495        | IQALQQQADDAEDR                                           | 1.28544219        | 2              | 4.46353   |
| P09495        | IQLVEEELDR                                               | 1.11762124        | 2              | 3.48684   |
| P09495        | IQLVEEELDRAQER                                           | 1.2550012         | 2              | 3.01552   |
| P09495        | KLVILEGELER                                              | 0.5562473         | 3              | 4.05098   |
| P09495        | LEEAEKAADESER                                            | 2.05501606        | 2              | 4.1334    |
| P09495        | LVILEGELER                                               | 2.11363608        | 2              | 3.14805   |
| P09495        | MEIQEMQLK                                                | 0.98903137        | 2              | 2.98138   |
| P09495        | RIQLVEEELDR                                              | 1.19488775        | 2              | 2.79499   |
| P09495        | YSEKEDKYEEIEK                                            | 1.29993761        | 2              | 4.535     |
| <b>P09527</b> | <b>RAB7A Ras_related protein Rab_7a</b>                  | <b>0.97048039</b> | <b>0.08053</b> | <b>6</b>  |
| P09527        | ATIGADFLTK                                               | 0.99949564        | 2              | 2.61116   |
| P09527        | DPENFPFVVLGNK                                            | 2.03978503        | 2              | 3.79691   |
| P09527        | GADCCVLVFDVTAPNTFK                                       | 1.35949287        | 2              | 3.39603   |
| P09527        | TLDSWRDEFLIQASPR                                         | 1.46704965        | 3              | 3.50582   |
| P09527        | TSLMNQYVVK                                               | 1.05752621        | 2              | 2.83383   |
| P09527        | VIIIGDSGVGK                                              | 0.96811278        | 2              | 2.42567   |
| <b>P09605</b> | <b>KCRS Creatine kinase S_type_mitochondrial</b>         | <b>4.90642427</b> | <b>0.16593</b> | <b>2</b>  |
| P09605        | GTGGVDTAAVADVYDISNDR                                     | 3.92840534        | 2              | 3.8282    |
| P09605        | LSEMTEQDQQR                                              | 5.12058071        | 2              | 3.36361   |
| <b>P09606</b> | <b>GLNA Glutamine synthetase</b>                         | <b>1.41936084</b> | <b>4.5E-09</b> | <b>8</b>  |
| P09606        | CIEEAIDK                                                 | 2.2244602         | 2              | 2.34831   |
| P09606        | ITGTNAEVMPAQWFEQIGPCEGIR                                 | 1.66536415        | 3              | 5.46739   |
| P09606        | LTGFHETSNINDFSAGVANR                                     | 1.45629973        | 2              | 6.01703   |
| P09606        | MGDHLWVAR                                                | 1.50389828        | 2              | 3.03217   |
| P09606        | QMYMNLPGQEK                                              | 1.29458202        | 2              | 2.38968   |
| P09606        | RLTGFHETSNINDFSAGVANR                                    | 1.19892588        | 3              | 5.51941   |
| P09606        | TCLLNETGDEPFQYK                                          | 1.24810314        | 2              | 5.30161   |
| P09606        | TCLLNETGDEPFQYKN                                         | 1.50273811        | 2              | 5.46664   |
| <b>P09626</b> | <b>ATP4A Potassium_transporting ATPase alpha chain 1</b> | <b>1.34056806</b> | <b>0.69323</b> | <b>2</b>  |
| P09626        | VDNSSLTGESEPQTR                                          | 1.26508924        | 2              | 4.20254   |
| P09626        | VIMVTGDHPITAK                                            | 1.36955977        | 2              | 3.28713   |
| <b>P09811</b> | <b>PYGL Glycogen phosphorylase_liver form</b>            | <b>1.08781282</b> | <b>0.55794</b> | <b>27</b> |
| P09811        | AWNTMVLRL                                                | 1.90237494        | 2              | 2.39321   |
| P09811        | DFSELEPDKFQNK                                            | 1.37318204        | 2              | 3.48768   |
| P09811        | DVGVTVFDAFPDQVAIQLNDTHPALAIPELMR                         | 1.71963422        | 4              | 5.47697   |
| P09811        | DLSQLTK                                                  | 1.15578772        | 1              | 2.1468    |
| P09811        | EGWQVEEADDWLR                                            | 1.48155307        | 2              | 3.71017   |
| P09811        | FSQFLEK                                                  | 1.23522958        | 1              | 2.0447    |
| P09811        | GIVGVENVAELK                                             | 1.10586524        | 2              | 3.01163   |
| P09811        | GIVGVENVAELKK                                            | 0.95288408        | 2              | 3.33362   |
| P09811        | HLQIYEINQK                                               | 0.86239821        | 2              | 3.79598   |
| P09811        | IFVDIEK                                                  | 1.13747538        | 1              | 2.05413   |
| P09811        | INMAHLCIVGCHAVNGVAK                                      | 1.36411221        | 3              | 5.01629   |
| P09811        | INPSSMFDVHVK                                             | 1.32559029        | 2              | 3.1747    |
| P09811        | LVIDQIDNGFFSPNQPDFK                                      | 1.29442905        | 2              | 5.27898   |
| P09811        | LVTSVAEVVNDPMPVGSK                                       | 1.71996933        | 2              | 4.67995   |
| P09811        | MSLIEEEGGK                                               | 1.28833854        | 2              | 2.42289   |
| P09811        | MSLIEEEGGKR                                              | 0.2922443         | 2              | 2.72165   |
| P09811        | RWLLLCNPGLADLIAEK                                        | 1.35887369        | 3              | 5.04234   |
| P09811        | TFAYTNHTVLPALER                                          | 1.11512555        | 2              | 4.9232    |
| P09811        | VDDVAALDK                                                | 1.01113588        | 2              | 2.70679   |
| P09811        | VDDVAALDKK                                               | 1.1001403         | 3              | 3.77455   |
| P09811        | VFADYEAYVK                                               | 1.21945627        | 2              | 2.64659   |
| P09811        | VIPATDLSEQISTAGTEASGTGNMK                                | 1.29106538        | 2              | 5.96223   |
| P09811        | VLYPNDNFFEGK                                             | 1.28377241        | 2              | 2.64317   |
| P09811        | VSQLYMNQK                                                | 0.59924152        | 2              | 3.03173   |

|               |                                                                           |                   |                |           |
|---------------|---------------------------------------------------------------------------|-------------------|----------------|-----------|
| P09811        | WLLCNPLADLIAEK                                                            | 2.8195983         | 2              | 4.83604   |
| P09811        | WVDTQVVLALPYDTPVPGYMNNTVNTMR                                              | 1.75048752        | 3              | 4.28154   |
| P09811        | YEGIFNQK                                                                  | 1.09054531        | 2              | 2.63368   |
| <b>P09812</b> | <b>PYGM Glycogen phosphorylase_ muscle form</b>                           | <b>1.35975749</b> | <b>0.21674</b> | <b>9</b>  |
| P09812        | GYNAQEYYDR                                                                | 2.36614233        | 2              | 2.3255    |
| P09812        | HLQIYEINQR                                                                | 1.18639356        | 2              | 2.33396   |
| P09812        | LITAIGDVVNHDPAVGDR                                                        | 1.85921934        | 2              | 3.2642    |
| P09812        | NLAENISR                                                                  | 1.25198284        | 2              | 2.72201   |
| P09812        | QIIEQLSSGFFSPK                                                            | 2.38499856        | 2              | 3.66077   |
| P09812        | VIFLENYR                                                                  | 1.34588515        | 2              | 2.5118    |
| P09812        | VIPAADLSEQISTAGTEASGTGNMK                                                 | 5.00491054        | 2              | 4.78652   |
| P09812        | WLVLCNPGLAEVIAER                                                          | 1.60785967        | 2              | 3.8157    |
| P09812        | YEGIFNQK                                                                  | 1.68382817        | 2              | 2.44447   |
| <b>P09875</b> | <b>UD2B1 UDP_glucuronosyltransferase 2B1</b>                              | <b>1.12392165</b> | <b>0.18895</b> | <b>6</b>  |
| P09875        | ANVVASALAIQIPQK                                                           | 0.79731608        | 3              | 3.61551   |
| P09875        | FSGGLPLPPSYVPVVLSELSDR                                                    | 1.30697709        | 3              | 3.61704   |
| P09875        | IILNELAQR                                                                 | 1.16593247        | 2              | 3.00327   |
| P09875        | SDLEYSFAK                                                                 | 0.74083114        | 2              | 2.35784   |
| P09875        | VDFSILSTTGLLTALK                                                          | 1.05736116        | 2              | 4.55381   |
| P09875        | WIDEWTR                                                                   | 0.50188798        | 2              | 2.60036   |
| <b>P09895</b> | <b>RL5 60S ribosomal protein L5</b>                                       | <b>1.38106823</b> | <b>0.00348</b> | <b>5</b>  |
| P09895        | GAVDGGLSIPHSTK                                                            | 1.46138347        | 2              | 4.37423   |
| P09895        | HIMGQNVADYMR                                                              | 1.37554024        | 2              | 3.54644   |
| P09895        | NNVTPDMMEEMYK                                                             | 1.23092371        | 2              | 3.39451   |
| P09895        | RFPGYDSESK                                                                | 1.31887423        | 2              | 2.84887   |
| P09895        | YLMEEDDAYKK                                                               | 1.31736052        | 2              | 3.54788   |
| <b>POC057</b> | <b>H2AZ Histone H2A.Z</b>                                                 | <b>1.05432024</b> | <b>0.97168</b> | <b>2</b>  |
| POC057        | ATIAGGGVIPHIHK                                                            | 1.05489725        | 2              | 3.51307   |
| POC057        | GDEELDSLK                                                                 | 0.90407172        | 2              | 3.40999   |
| <b>POC2X9</b> | <b>AL4A1 Delta_1_pyrraline_5_carboxylate dehydrogenase_ mitochondrial</b> | <b>0.91859622</b> | <b>0.00623</b> | <b>20</b> |
| POC2X9        | AIEAAVLAR                                                                 | 1.10382218        | 2              | 2.90877   |
| POC2X9        | ALNDLKDQTEAIPCVMGDEEVWTSQVR                                               | 1.48790141        | 2              | 5.13168   |
| POC2X9        | AQIFLK                                                                    | 1.30781403        | 2              | 2.31133   |
| POC2X9        | DPQEPIMKEEIFGPVLTVVYYPDEK                                                 | 0.61270181        | 3              | 3.58991   |
| POC2X9        | DQTEAIPCVMGDEEVWTSQVR                                                     | 6.07629655        | 2              | 5.29363   |
| POC2X9        | EAGLPPNVIQFVPADGPTFGDVTSSSEHLGGINFTGSVPTFK                                | 1.55735508        | 3              | 3.6695    |
| POC2X9        | EEIFGPVLTVVYYPDEK                                                         | 0.49828917        | 2              | 3.83408   |
| POC2X9        | ETLQLVDSTTSYGLTGAVFAQDK                                                   | 2.26059434        | 2              | 5.51257   |
| POC2X9        | KEWDLKPVADR                                                               | 1.08483172        | 2              | 3.5834    |
| POC2X9        | LYVPQSLWPQIK                                                              | 2.52505368        | 2              | 3.20898   |
| POC2X9        | NAAGNFYINDK                                                               | 1.67563237        | 2              | 3.60515   |
| POC2X9        | NFHFVHSSADVDSVSGTLR                                                       | 0.95245005        | 2              | 5.73886   |
| POC2X9        | SAFEYGGQK                                                                 | 1.04263562        | 1              | 2.43333   |
| POC2X9        | SSPSLSILAGGQCNEISVGFVEPCIESK                                              | 2.01829494        | 3              | 5.74857   |
| POC2X9        | STGSVVGQQPFGGAR                                                           | 0.90036163        | 2              | 4.39369   |
| POC2X9        | TIVQEATR                                                                  | 0.99244333        | 2              | 2.92718   |
| POC2X9        | VANEPILAFTQGSPER                                                          | 1.0752331         | 2              | 5.214     |
| POC2X9        | WKHASSLKVANEPILAFTQGSPER                                                  | 2.21230001        | 2              | 2.50873   |
| POC2X9        | YQLSPFNHGK                                                                | 0.648169          | 2              | 2.98252   |
| POC2X9        | YRETLQLVDSTTSYGLTGAVFAQDK                                                 | 2.02052047        | 3              | 4.0534    |
| <b>POC5H9</b> | <b>MANF Mesencephalic astrocyte_derived neurotrophic factor</b>           | <b>1.28751694</b> | <b>0.57275</b> | <b>5</b>  |
| POC5H9        | DRDVFSPATIEELIK                                                           | 1.08919544        | 2              | 4.92631   |
| POC5H9        | DVTFSPATIEELIK                                                            | 1.25758304        | 2              | 3.21595   |
| POC5H9        | IINEVSKPLAHHIPVEK                                                         | 1.66651846        | 3              | 4.04905   |

|               |                                                      |                   |                |           |
|---------------|------------------------------------------------------|-------------------|----------------|-----------|
| P0C5H9        | ILDDWGEMCK                                           | 0.59601944        | 2              | 3.03043   |
| P0C5H9        | INELMPK                                              | 1.11084866        | 2              | 2.48919   |
| <b>P0C6F1</b> | <b>DYH2 Dynein heavy chain 2_ axonemal</b>           | <b>0.752982</b>   | <b>0.34246</b> | <b>2</b>  |
| P0C6F1        | AMLPGEWENACNEMQRMLIVR+Oxidation(16                   | 0.71795247        |                |           |
| P0C6F1        | EKVEVMSLELEDAK+Oxidation(5                           | 0.75392153        |                |           |
| <b>P10111</b> | <b>PPIA Peptidyl_prolyl cis_trans isomerase A</b>    | <b>1.16479351</b> | <b>1.4E-14</b> | <b>11</b> |
| P10111        | EGMSIVEAMER                                          | 1.51728733        | 1              | 2.80427   |
| P10111        | FEDEFILK                                             | 1.03225937        | 2              | 3.42604   |
| P10111        | HTGPGILSMANAGPNTNGSQFFICTAK                          | 1.24025066        | 3              | 6.09178   |
| P10111        | IIPGFMCQGGDFTR                                       | 1.40079647        | 2              | 3.41568   |
| P10111        | IIPGFMCQGGDFTR+Oxidation(5                           | 1.72242098        |                |           |
| P10111        | KITISDCGQL                                           | 1.25616005        | 2              | 3.51117   |
| P10111        | SIYGEKFEDEFILK                                       | 1.20175907        | 2              | 4.54036   |
| P10111        | TEWLDGK                                              | 1.49815166        | 2              | 2.30247   |
| P10111        | VCFELFADK                                            | 1.66469817        | 2              | 3.24606   |
| P10111        | VCFELFADKVPK                                         | 0.88593959        | 2              | 3.89845   |
| P10111        | VKEGMSIVEAMER                                        | 1.00300599        | 3              | 3.6379    |
| <b>P10536</b> | <b>RAB1B Ras_related protein Rab_1B</b>              | <b>1.74323116</b> | <b>0.83709</b> | <b>3</b>  |
| P10536        | MGPAAASGGERPNLK                                      | 1.33036764        | 2              | 4.09043   |
| P10536        | NATNVEQAFMTMAAEIK+Oxidation(11                       | 1.94085455        |                |           |
| P10536        | NATNVEQAFMTMAAEIK+Oxidation(9                        | 1.91678616        |                |           |
| <b>P10633</b> | <b>CP2D1 Cytochrome P450 2D1</b>                     | <b>1.17977473</b> | <b>0.00018</b> | <b>3</b>  |
| P10633        | SQGVILASYGPEWR                                       | 0.76420368        | 2              | 4.08668   |
| P10633        | TFMALLDNLLAENR                                       | 1.40009755        | 2              | 3.71049   |
| P10633        | YGDVFSLQK                                            | 0.99746557        | 2              | 2.71123   |
| <b>P10634</b> | <b>CP2DQ Cytochrome P450 2D26</b>                    | <b>1.20616211</b> | <b>0.99878</b> | <b>21</b> |
| P10634        | ACLGEPLAR                                            | 0.99124692        | 2              | 2.74757   |
| P10634        | AKGNPESSFNDENLR                                      | 1.66540302        | 2              | 3.44884   |
| P10634        | AVSNVIASLVYAR                                        | 1.1461883         | 2              | 4.24841   |
| P10634        | DETVWEKPLR                                           | 1.07829169        | 2              | 2.34993   |
| P10634        | DMTDAFLAEMQK                                         | 1.54013704        | 2              | 3.51868   |
| P10634        | EAEHPFNPSILLSK                                       | 1.28545318        | 2              | 2.66698   |
| P10634        | ELLVYGEDTADRPLLPYHNHLGYGNK                           | 1.18539619        | 3              | 5.71514   |
| P10634        | FADIVPTNIPHMSTR                                      | 1.71866347        | 3              | 3.68723   |
| P10634        | FEYEDPFFNR                                           | 1.08959914        | 2              | 2.82611   |
| P10634        | FHPEHFLDAQGNFVK                                      | 1.10996398        | 3              | 4.70054   |
| P10634        | FQGFLIPK                                             | 0.76964239        | 2              | 2.32181   |
| P10634        | GNPESSFNDENLR                                        | 1.41038442        | 2              | 4.42134   |
| P10634        | GTTLIPNLSSVLK                                        | 0.8745099         | 2              | 2.40056   |
| P10634        | GTTLIPNLSSVLKDETVWEKPLR                              | 1.09886257        | 2              | 4.72424   |
| P10634        | GVLAPYGPEWR                                          | 1.07666242        | 2              | 3.20211   |
| P10634        | LNSFIALVDK                                           | 2.2314575         | 2              | 3.26995   |
| P10634        | RFEYEDPFFNR                                          | 1.02405176        | 2              | 4.02844   |
| P10634        | RVHEEIDEVIGQVR                                       | 1.23904979        | 2              | 4.26971   |
| P10634        | SLEQWVTEEAGHLCDTFAK                                  | 1.18452728        | 2              | 4.79247   |
| P10634        | SWDPAQPPR                                            | 1.07841595        | 2              | 2.85481   |
| P10634        | VHEEIDEVIGQVR                                        | 1.04573847        | 2              | 4.8402    |
| <b>P10719</b> | <b>ATPB ATP synthase subunit beta_ mitochondrial</b> | <b>1.45756337</b> | <b>9.9E-20</b> | <b>32</b> |
| P10719        | AHGGYSVFAGVGER                                       | 0.96949418        | 2              | 4.25433   |
| P10719        | AIAELGIYPAVDPLDSTSR                                  | 1.31556892        | 2              | 5.5855    |
| P10719        | EGNDLYHEMIESGVINLK                                   | 1.31067456        | 2              | 5.20792   |
| P10719        | EGNDLYHEMIESGVINLK+Oxidation(8                       | 2.06564097        |                |           |
| P10719        | FLSQPFQVAEFTGHMGK                                    | 2.77252213        | 2              | 4.46316   |
| P10719        | FTQAGSEVSALLGR                                       | 1.28605074        | 2              | 4.85767   |
| P10719        | GFQQILAGDYDHLPEQAFYMVGPPIEEAVAK                      | 2.22666458        | 4              | 4.5936    |
| P10719        | IGLFGGAGVGK                                          | 0.91020401        | 2              | 3.29063   |
| P10719        | IGLFGGAGVGKTVLIMELINNVAK                             | 0.8669037         | 3              | 3.51369   |

|               |                                                              |                   |                |           |
|---------------|--------------------------------------------------------------|-------------------|----------------|-----------|
| P10719        | ILQDYK                                                       | 1.31058787        | 1              | 2.03284   |
| P10719        | IMDPNIVGSEHYDVAR                                             | 1.2837898         | 2              | 4.96367   |
| P10719        | IMDPNIVGSEHYDVAR+Oxidation(1                                 | 1.28684935        |                |           |
| P10719        | IMNVIGEPIDER                                                 | 1.49225262        | 2              | 4.07792   |
| P10719        | IMNVIGEPIDER+Oxidation(1                                     | 1.80210633        |                |           |
| P10719        | IPSAVGYQPTLATDMGMTQER                                        | 2.5671665         | 2              | 4.77871   |
| P10719        | IPSAVGYQPTLATDMGMTQER+Oxidation(14                           | 2.50720162        |                |           |
| P10719        | IPSAVGYQPTLATDMGMTQER+Oxidation(17                           | 2.50720162        |                |           |
| P10719        | KGSITSVQAIYVPADDLTD PAPATTF AHL DATT VLSR                    | 1.76319662        | 3              | 6.44076   |
| P10719        | LVLEVAQHLGESTVR                                              | 1.4713261         | 2              | 4.80138   |
| P10719        | QFAPIHAEAPEFIEMSVEQEILVTGIK                                  | 1.57796505        | 3              | 4.91654   |
| P10719        | SLQDIIAILGMDELSEEDKLTVSR                                     | 1.55655013        | 3              | 4.90977   |
| P10719        | SLQDIIAILGMDELSEEDKLTVSR+Oxidation(10                        | 1.47171813        |                |           |
| P10719        | TIAMDGTEGLVR                                                 | 1.13382331        | 2              | 3.80455   |
| P10719        | TIAMDGTEGLVR+Oxidation(3                                     | 1.45752319        |                |           |
| P10719        | TREGNDLYHEMIESGVINLK                                         | 0.65746711        | 2              | 6.03984   |
| P10719        | TVLIMELINNVAK                                                | 1.01032075        | 2              | 5.11593   |
| P10719        | TVLIMELINNVAK+Oxidation(4                                    | 1.32186875        |                |           |
| P10719        | VALTGLTVAEYFR                                                | 2.67361844        | 2              | 4.06678   |
| P10719        | VALVYGMNEPPGAR                                               | 1.75424623        | 2              | 4.02356   |
| P10719        | VLDSGAPIK                                                    | 1.24446576        | 2              | 3.37277   |
| P10719        | VLDSGAPIKIPVGPETLGR                                          | 1.21212466        | 3              | 5.00241   |
| P10719        | VVDLLAPYAK                                                   | 1.28881069        | 2              | 3.23735   |
| <b>P10760</b> | <b>SAHH Adenosylhomocysteinase</b>                           | <b>1.42548051</b> | <b>9.9E-20</b> | <b>20</b> |
| P10760        | AGIPVFAWK                                                    | 1.73117662        | 2              | 2.84386   |
| P10760        | ALDIAENEMPGLMR                                               | 1.22697541        | 2              | 3.77382   |
| P10760        | ALDIAENEMPGLMR+Oxidation(12                                  | 2.21889588        |                |           |
| P10760        | ATDVMIAGK                                                    | 1.48767659        | 2              | 2.9032    |
| P10760        | DGPLNMILDDGGDLTLNIHTK                                        | 1.47307297        | 2              | 5.57914   |
| P10760        | DGPLNMILDDGGDLTLNIHTK+Oxidation(5                            | 1.73012637        |                |           |
| P10760        | EMYSASKPLK                                                   | 2.06495768        | 2              | 2.36064   |
| P10760        | FDNLYGCR                                                     | 1.42145537        | 2              | 2.8435    |
| P10760        | GETDEEYLWCIEQTLHFK                                           | 2.1693631         | 2              | 4.46233   |
| P10760        | GISETTTGVHNLYK                                               | 1.13360999        | 2              | 4.23768   |
| P10760        | IILLAAGR                                                     | 1.85424065        | 2              | 2.92536   |
| P10760        | KLDEAVAEHLGK                                                 | 1.46478547        | 3              | 5.05049   |
| P10760        | LDEAVAEHLGK                                                  | 1.15499157        | 2              | 3.67498   |
| P10760        | RATDVMIAGK                                                   | 1.44646263        | 2              | 2.52628   |
| P10760        | SKFDNLYGCR                                                   | 1.53895612        | 2              | 3.10014   |
| P10760        | VAVVAGYGDVGK                                                 | 1.35936118        | 2              | 4.14517   |
| P10760        | VIITEIDPINALQAAMEGYEVTTMDEACK                                | 1.05960357        | 3              | 6.54741   |
| P10760        | VNIKPQVDR                                                    | 1.36077442        | 2              | 2.7501    |
| P10760        | WLNENAVEK                                                    | 1.36281241        | 2              | 2.81673   |
| P10760        | WSSCNIFSTQDHAAAAIAK                                          | 1.07159978        | 2              | 5.17942   |
| <b>P10818</b> | <b>CX6A1 Cytochrome c oxidase subunit 6A1_ mitochondrial</b> | <b>1.40597039</b> | <b>0.61622</b> | <b>2</b>  |
| P10818        | HEEHERPEFVAYPHLR                                             | 1.39246547        | 3              | 3.67167   |
| P10818        | SRHEEHERPEFVAYPHLR                                           | 1.41125375        | 3              | 4.10219   |
| <b>P10860</b> | <b>DHE3 Glutamate dehydrogenase 1_ mitochondrial</b>         | <b>0.97448551</b> | <b>0.85585</b> | <b>29</b> |
| P10860        | ALASLMTYK                                                    | 1.09864925        | 2              | 3.62211   |
| P10860        | CAVVDPFGGAK                                                  | 0.77051247        | 2              | 3.07172   |
| P10860        | CVGVGESDGSIWNPDGIDPK                                         | 1.02968619        | 2              | 5.09498   |
| P10860        | DDGSWEVIEGYR                                                 | 0.68397858        | 2              | 3.97291   |
| P10860        | DIVHSGLAYTMER                                                | 1.53410208        | 2              | 3.36619   |
| P10860        | DIVHSGLAYTMER+Oxidation(10                                   | 1.55295984        |                |           |
| P10860        | DSNYHLLMSVQESLER                                             | 0.96989731        | 2              | 4.23282   |

|               |                                                                     |                   |                |          |
|---------------|---------------------------------------------------------------------|-------------------|----------------|----------|
| P10860        | EDDPNFFK                                                            | 0.68696076        | 1              | 2.15232  |
| P10860        | FTMELAK                                                             | 1.57341915        | 2              | 2.39471  |
| P10860        | GASIVEDKLVEDLK                                                      | 1.22012004        | 2              | 3.58532  |
| P10860        | GFIGPGIDVPAPDMSTGER                                                 | 1.36522357        | 2              | 4.99593  |
| P10860        | GFIGPGIDVPAPDMSTGER+Oxidation(13                                    | 1.12342341        |                |          |
| P10860        | HGGTIPVVPTAEFQDR                                                    | 1.05599118        | 2              | 4.72888  |
| P10860        | IIAEGANGPTTPEADK                                                    | 1.22447149        | 2              | 5.38195  |
| P10860        | IIAEGANGPTTPEADKIFLER                                               | 1.09208133        | 2              | 4.84898  |
| P10860        | ISGASEKDIVHSGLAYTMER                                                | 1.19737858        | 3              | 3.59329  |
| P10860        | KGFIGPGIDVPAPDMSTGER                                                | 1.01919663        | 2              | 5.13157  |
| P10860        | LQHGSILGFPK                                                         | 1.06722037        | 1              | 3.08417  |
| P10860        | MVEGFFDR                                                            | 1.08477145        | 2              | 2.89927  |
| P10860        | MVEGFFDR+Oxidation(0                                                | 1.37246347        |                |          |
| P10860        | NLNHVSYGR                                                           | 0.81497265        | 1              | 2.86818  |
| P10860        | NYTDNELEK                                                           | 1.10895133        | 2              | 2.48609  |
| P10860        | RDDGSWEVIEGYR                                                       | 0.75549244        | 2              | 4.43619  |
| P10860        | RFTMELAK                                                            | 1.08225703        | 2              | 2.49237  |
| P10860        | TAAYVNAIEK                                                          | 1.25010346        | 2              | 3.6314   |
| P10860        | TFVVQGFVGNVGLHSMR                                                   | 1.24948144        | 2              | 4.53745  |
| P10860        | VYEGSILEADCDILIPAASEK                                               | 1.19281506        | 3              | 6.00546  |
| P10860        | YNLGLDLR                                                            | 1.12255795        | 2              | 3.16748  |
| P10860        | YSTDVSVDEVK                                                         | 0.70205421        | 2              | 3.39863  |
| <b>P10867</b> | <b>GGLO L_gulonolactone oxidase</b>                                 | <b>1.18680711</b> | <b>0.61974</b> | <b>7</b> |
| P10867        | EKLDPTGMFLNSYLEK                                                    | 1.24108342        | 3              | 3.53458  |
| P10867        | GDDILLSPCFQR                                                        | 1.20847358        | 2              | 3.22715  |
| P10867        | LDPTGMFLNSYLEK                                                      | 1.29127045        | 2              | 4.12281  |
| P10867        | LDYWLAYETIMK                                                        | 1.23590727        | 2              | 4.0198   |
| P10867        | NADVQAAAR                                                           | 1.20927206        | 2              | 2.86951  |
| P10867        | TYGCSPEVYQPTSVEEVR                                                  | 0.97755868        | 2              | 4.8395   |
| P10867        | VVAHYVPEVR                                                          | 1.25377123        | 2              | 2.75673  |
| <b>P10868</b> | <b>GAMT Guanidinoacetate N_methyltransferase</b>                    | <b>1.65984513</b> | <b>0.02247</b> | <b>3</b> |
| P10868        | EHWIECNDGVFQR                                                       | 1.28305562        | 3              | 3.80169  |
| P10868        | YTDITAMFEETQVPALLEAGFQR                                             | 1.38089591        | 3              | 4.58187  |
| P10868        | YYAFPQMITPLVTK                                                      | 1.99313669        | 2              | 3.78     |
| <b>P10888</b> | <b>COX41 Cytochrome c oxidase subunit 4 isoform 1_mitochondrial</b> | <b>1.05643164</b> | <b>0.62536</b> | <b>7</b> |
| P10888        | ADWSSLSR                                                            | 1.34100496        | 2              | 2.34799  |
| P10888        | DYPLPDVAHVK                                                         | 1.7636404         | 2              | 2.7672   |
| P10888        | IQFNESFAEMNK                                                        | 1.51359598        | 2              | 4.04551  |
| P10888        | RDYPLPDVAHVK                                                        | 1.05287997        | 2              | 2.30233  |
| P10888        | SEDYALPSYVDR                                                        | 0.95146544        | 2              | 3.86736  |
| P10888        | VNPIQGFSAK                                                          | 0.91578186        | 1              | 2.13487  |
| P10888        | WDYNKNEWK                                                           | 1.48930245        | 2              | 2.39344  |
| <b>P10959</b> | <b>EST2 Liver carboxylesterase 1</b>                                | <b>1.26678984</b> | <b>0.21779</b> | <b>3</b> |
| P10959        | AISESGVLLTTNLDKK                                                    | 0.67437505        | 2              | 3.41963  |
| P10959        | EGASEEETNLSKLVMK                                                    | 1.26772637        | 2              | 2.66072  |
| P10959        | GNWAHLDLQAALR                                                       | 0.83875303        | 2              | 3.01174  |
| <b>P11030</b> | <b>ACBP Acyl_CoA_binding protein</b>                                | <b>1.23965758</b> | <b>0.92979</b> | <b>5</b> |
| P11030        | AKWDSWVK                                                            | 1.05416325        | 2              | 2.40659  |
| P11030        | QATVGDVNTDRPGLLDLK                                                  | 1.37445327        | 2              | 3.65335  |
| P11030        | TQPTDEEMLFYSHFK                                                     | 1.62665003        | 2              | 3.91036  |
| P11030        | TYVEKVEELK                                                          | 1.17303846        | 2              | 2.34317  |
| P11030        | WDSWVK                                                              | 1.12364466        | 1              | 2.08017  |
| <b>P11232</b> | <b>THIO Thioredoxin</b>                                             | <b>0.99720134</b> | <b>0.84983</b> | <b>2</b> |
| P11232        | EAFQEALAAAGDK                                                       | 1.1664865         | 2              | 4.51578  |
| P11232        | VGEFSGANK                                                           | 0.59538114        | 2              | 2.7038   |

|               |                                                            |                   |                |           |
|---------------|------------------------------------------------------------|-------------------|----------------|-----------|
| <b>P11240</b> | <b>COX5A Cytochrome c oxidase subunit 5A_mitochondrial</b> | <b>1.21144168</b> | <b>9.7E-06</b> | <b>6</b>  |
| P11240        | EIYPYVIQELRPTLNELGISTPEELGLDK                              | 0.54640484        | 3              | 5.93058   |
| P11240        | EIYPYVIQELRPTLNELGISTPEELGLDKV                             | 2.31608829        | 3              | 6.98547   |
| P11240        | GMNTLVGYDLVPEPK                                            | 1.26866014        | 2              | 4.01758   |
| P11240        | IIDAALR                                                    | 1.54594683        | 1              | 2.1019    |
| P11240        | LNDFASAVR                                                  | 1.18329188        | 2              | 3.27435   |
| P11240        | RLNDFASAVR                                                 | 1.33952937        | 2              | 2.48269   |
| <b>P11348</b> | <b>DHPR Dihydropteridine reductase</b>                     | <b>1.07367403</b> | <b>0.14794</b> | <b>12</b> |
| P11348        | AALDGTPGMIGYMAK                                            | 1.02404715        | 2              | 3.86588   |
| P11348        | EGLLTLGAK                                                  | 1.07421518        | 2              | 2.92322   |
| P11348        | GAVHQLCQSLAGK                                              | 1.5003906         | 3              | 4.29872   |
| P11348        | MTDSFTEQADQVTAEVGK                                         | 1.31146011        | 2              | 5.82575   |
| P11348        | MTDSFTEQADQVTAEVGK+Oxidation(0                             | 0.87154267        |                |           |
| P11348        | NCDLMWK                                                    | 1.05679571        | 2              | 2.35414   |
| P11348        | NSGMPSGAAAIAPVTLDTPMNR                                     | 1.24143732        | 2              | 5.39483   |
| P11348        | NSGMPSGAAAIAPVTLDTPMNR+Oxidation(3                         | 2.09758556        |                |           |
| P11348        | QSIWSTISSHLATK                                             | 1.53305716        | 2              | 3.81882   |
| P11348        | RPNSGSLIQVTTDGGK                                           | 1.52682759        | 2              | 3.71702   |
| P11348        | TELTAYF                                                    | 2.9610965         | 1              | 2.01746   |
| P11348        | VDAILCVAGGWAGGNAK                                          | 1.51939022        | 2              | 3.92479   |
| <b>P11442</b> | <b>CLH Clathrin heavy chain 1</b>                          | <b>1.21827833</b> | <b>7.3E-07</b> | <b>39</b> |
| P11442        | ADDPSSYMEVVQAANTSGNWEELVK                                  | 1.91205079        | 3              | 4.05348   |
| P11442        | AFMTADLPNELIELLEK                                          | 1.14673406        | 3              | 4.69238   |
| P11442        | AHIAQLCEK                                                  | 1.65538892        | 2              | 2.3787    |
| P11442        | AHTMTDDVTFWK                                               | 1.52247265        | 2              | 2.52308   |
| P11442        | ALEHFTDLYDIK                                               | 1.49071253        | 3              | 3.96542   |
| P11442        | CNEPAVWSQLAK                                               | 1.1235856         | 2              | 3.43146   |
| P11442        | FDVNTSAVQVLIHIGNLDR                                        | 1.48718711        | 3              | 4.17424   |
| P11442        | FNALFAQGNYSEAAK                                            | 1.1993055         | 2              | 5.04448   |
| P11442        | GQCDLELINVCNENSLFK                                         | 1.51775979        | 2              | 5.56819   |
| P11442        | GQFSTDELVAEVEK                                             | 1.63826099        | 2              | 4.04968   |
| P11442        | GQFSTDELVAEVEKR                                            | 1.20548687        | 2              | 3.67921   |
| P11442        | HELIEFR                                                    | 1.17251459        | 2              | 2.50616   |
| P11442        | HSSLAGCQIINYR                                              | 1.4564537         | 2              | 3.78654   |
| P11442        | IHEGCEEPATHNALAK                                           | 1.26238594        | 2              | 5.39535   |
| P11442        | ISGETIFVTAPHEATAGIIGVNR                                    | 1.18731024        | 2              | 5.21436   |
| P11442        | IVLDNSVFSEHR                                               | 1.09063614        | 2              | 2.94672   |
| P11442        | IYIDSNNNPER                                                | 1.82975174        | 2              | 3.02607   |
| P11442        | KDPELWGSVLESNPYR                                           | 1.30048065        | 3              | 3.63699   |
| P11442        | KFDVNTSAVQVLIHIGNLDR                                       | 1.20483668        | 3              | 6.13883   |
| P11442        | KFNALFAQGNYSEAAK                                           | 0.87514008        | 2              | 4.89737   |
| P11442        | LAELEEFINGPNAHIQQVGDR                                      | 1.05378924        | 2              | 5.41117   |
| P11442        | LECSEELGDLVK                                               | 1.13603661        | 2              | 2.9125    |
| P11442        | LHIEVGTPTGNQPFK                                            | 1.11406329        | 2              | 4.42141   |
| P11442        | LPVVIGLLDVCSEDVVK                                          | 2.03120822        | 2              | 4.81917   |
| P11442        | LTDQLPLIIVCDR                                              | 1.22986742        | 2              | 3.31382   |
| P11442        | NLQNLLILTAIK                                               | 1.44615273        | 3              | 4.23416   |
| P11442        | NNLAGAEELFAR                                               | 1.31273173        | 2              | 3.79278   |
| P11442        | NNRPSEGPLQTR                                               | 1.16373937        | 3              | 4.13976   |
| P11442        | RPLIDQVVQTALSETQDPEEVSVTVK                                 | 1.33966019        | 3              | 6.30522   |
| P11442        | SVDPTLALSVYLR                                              | 1.33146219        | 2              | 2.60965   |
| P11442        | SVNESLNNLFITEEDYQALR                                       | 1.29523516        | 2              | 5.16167   |
| P11442        | TLQIFNIEMK                                                 | 1.61197766        | 2              | 3.02098   |
| P11442        | TSIDAYDNFDNISLAQR                                          | 0.80508844        | 2              | 3.62563   |
| P11442        | VGEQAQVVIIDMNDPSNPIR                                       | 1.64010397        | 2              | 5.05414   |
| P11442        | VIQCFIETGQVQK                                              | 1.18414855        | 2              | 4.79582   |



|               |                                                                  |                   |                |           |
|---------------|------------------------------------------------------------------|-------------------|----------------|-----------|
| P11442        | VSQPIEGHAASFAQFK                                                 | 0.96643492        | 2              | 4.38184   |
| P11442        | WLLLTGISAQQNR                                                    | 1.38104942        | 2              | 3.64063   |
| P11442        | YESLELCRPVLQQGR                                                  | 1.16879729        | 2              | 2.80687   |
| P11442        | YIEIYVQK                                                         | 1.30535484        | 1              | 1.95379   |
| <b>P11497</b> | <b>ACACA Acetyl_CoA carboxylase 1</b>                            | <b>1.25032557</b> | <b>0.05345</b> | <b>8</b>  |
| P11497        | DEPIHILNVAIK                                                     | 0.94089158        | 2              | 2.56064   |
| P11497        | GGSWVVIDPTINPR                                                   | 2.04714371        | 2              | 2.9903    |
| P11497        | LLETESFQLNR                                                      | 1.23438267        | 2              | 2.42497   |
| P11497        | LLLEDLVK                                                         | 2.40752478        | 2              | 2.37114   |
| P11497        | LPELLLK                                                          | 3.78255111        | 2              | 2.37799   |
| P11497        | TLRDPSLPLELQDIMTSVSGR                                            | 2.25399759        | 3              | 3.48147   |
| P11497        | TVELSVPADPANLDESEAK                                              | 0.75584807        | 2              | 2.53261   |
| P11497        | VQQAELHTGSLPQIQTALR                                              | 0.70758012        | 3              | 3.53639   |
| <b>P11507</b> | <b>AT2A2 Sarcoplasmic/endoplasmic reticulum calcium ATPase 2</b> | <b>1.06333431</b> | <b>0.96035</b> | <b>8</b>  |
| P11507        | DIVPGDIVEIavgdkvpadir                                            | 2.37890455        | 2              | 2.86545   |
| P11507        | IGIFGQDEDVTSK                                                    | 0.98965185        | 2              | 3.55969   |
| P11507        | IRDEMVAEQER                                                      | 1.20777059        | 2              | 3.35055   |
| P11507        | KSEIGIAMGSGTAVAK                                                 | 1.19751475        | 2              | 3.87256   |
| P11507        | LDEFGEQLSK                                                       | 1.6899191         | 2              | 2.77234   |
| P11507        | NAENAIEALKEYEPEMGK                                               | 1.08996931        | 2              | 3.46581   |
| P11507        | SEIGIAMGSGTAVAK                                                  | 1.05861988        | 2              | 3.37901   |
| P11507        | VDQSILTGESVSVIK                                                  | 2.88404088        | 2              | 4.44379   |
| <b>P11598</b> | <b>PDIA3 Protein disulfide_isomerase A3</b>                      | <b>1.05691537</b> | <b>0.00043</b> | <b>28</b> |
| P11598        | DASVVGFFR                                                        | 1.43276979        | 2              | 2.51231   |
| P11598        | DGEEAGAYDGPR                                                     | 1.67549944        | 2              | 3.42295   |
| P11598        | DLFSDGHSEFLK                                                     | 1.84995587        | 2              | 3.08118   |
| P11598        | DLLTAYYDVDEYK                                                    | 1.86880325        | 2              | 3.58615   |
| P11598        | DPNIVIAK                                                         | 1.33682862        | 2              | 2.45673   |
| P11598        | EATNPPIIQEEKPK                                                   | 1.23313296        | 2              | 3.56968   |
| P11598        | ELNDFISYLQR                                                      | 1.19211199        | 2              | 3.11032   |
| P11598        | EYDDNGEGITIFRPLHLANK                                             | 1.36647595        | 2              | 4.18492   |
| P11598        | FAHTNVEVLK                                                       | 1.86704704        | 3              | 3.38123   |
| P11598        | FIQESIFGLCPHMTEDNKDLIQGK                                         | 1.94139165        | 3              | 4.99491   |
| P11598        | FISDKDASVVGFFR                                                   | 0.99595786        | 2              | 4.36724   |
| P11598        | FLQEYFDGNLK                                                      | 0.97148643        | 2              | 3.72212   |
| P11598        | FLQEYFDGNLKR                                                     | 1.05539003        | 2              | 3.53128   |
| P11598        | FVMQEEFSR                                                        | 1.05042481        | 2              | 2.92936   |
| P11598        | IFRDGEEAGAYDGPR                                                  | 1.03090419        | 2              | 3.95445   |
| P11598        | KTFSHELSDFGLESTTGEIPVVAIR                                        | 1.40503635        | 3              | 4.38281   |
| P11598        | LAPEYAAAATR                                                      | 1.1475946         | 2              | 2.89025   |
| P11598        | LNFAVASR                                                         | 1.66423652        | 2              | 2.53544   |
| P11598        | LSKDPNIVIAK                                                      | 1.46365482        | 3              | 4.0293    |
| P11598        | MDATANDVPSPYEVK                                                  | 1.22904866        | 2              | 4.37502   |
| P11598        | MDATANDVPSPYEVK+Oxidation(0                                      | 2.01265825        |                |           |
| P11598        | RLAPEYAAAATR                                                     | 0.99672112        | 2              | 3.66656   |
| P11598        | SEPIPETNEGPVK                                                    | 1.07315907        | 2              | 2.88446   |
| P11598        | TADGIVSHLK                                                       | 2.18045392        | 2              | 2.7983    |
| P11598        | TFLDAGHK                                                         | 0.62462762        | 1              | 1.90221   |
| P11598        | TFSHELSDFGLESTTGEIPVVAIR                                         | 1.29623485        | 2              | 6.03875   |
| P11598        | VDCTANTNCTNK                                                     | 1.03751764        | 2              | 3.88552   |
| P11598        | YGVSGYPTLK                                                       | 0.85190025        | 2              | 3.21822   |
| <b>P11711</b> | <b>CP2A1 Cytochrome P450 2A1</b>                                 | <b>1.14328032</b> | <b>0.06147</b> | <b>6</b>  |
| P11711        | GEQATYNTLFK                                                      | 1.31953736        | 2              | 2.56123   |
| P11711        | GTDVFPILGSLMTDPK                                                 | 1.0907062         | 2              | 3.46086   |
| P11711        | ILEEAGYLIK                                                       | 1.05419625        | 2              | 3.40363   |
| P11711        | LEDINESPKPLGFTR                                                  | 1.17738066        | 2              | 3.42735   |

|               |                                                   |                   |                |           |
|---------------|---------------------------------------------------|-------------------|----------------|-----------|
| P11711        | TVSNVISSIVFGER                                    | 1.4963796         | 2              | 3.6523    |
| P11711        | VHEEIEQVIGR                                       | 1.3695416         | 2              | 3.06757   |
| <b>P11714</b> | <b>CP2D9 Cytochrome P450 2D9</b>                  | <b>0.97090096</b> | <b>0.92688</b> | <b>2</b>  |
| P11714        | GNPESSFNDENLLMVVR                                 | 0.87344051        | 2              | 2.44001   |
| P11714        | VQQEIDEVIGQVR                                     | 0.97090099        | 2              | 4.70771   |
| <b>P11862</b> | <b>GAS2 Growth arrest_specific protein 2</b>      | <b>1.45072524</b> | <b>0.31843</b> | <b>3</b>  |
| P11862        | EIEQEETLSAPSPSPSSK                                | 1.10216425        | 2              | 4.11684   |
| P11862        | LDNGALLCQLAATVQEK                                 | 1.72391034        | 2              | 3.8059    |
| P11862        | YGVPEPGLIK                                        | 1.14064826        | 2              | 2.32449   |
| <b>P11884</b> | <b>ALDH2 Aldehyde dehydrogenase_mitochondrial</b> | <b>1.10973457</b> | <b>2.9E-13</b> | <b>27</b> |
| P11884        | AAQAAFQLGSPWR                                     | 1.53073276        | 2              | 2.91178   |
| P11884        | DGMTIAKEEIFGPMQILK                                | 2.66674708        | 3              | 4.01103   |
| P11884        | EAGFPPGVVNVPGFGPTAGAAIASHEDVVK                    | 0.97714069        | 3              | 4.45642   |
| P11884        | EEIFGPMQILK                                       | 1.25915184        | 2              | 4.06304   |
| P11884        | EEIFGPMQILK+Oxidation(7                           | 1.11772423        |                |           |
| P11884        | ELGEYGLQAYTEVK                                    | 1.94126859        | 2              | 4.38967   |
| P11884        | GYFIQPTVFGDVK                                     | 1.15468638        | 2              | 4.28528   |
| P11884        | HEPVGVCQIIPWNFPLMQAWK                             | 1.77506904        | 3              | 4.24194   |
| P11884        | KTFPTVNPSTGEVICQVAEGNKEDVVK                       | 0.97667675        | 3              | 6.48146   |
| P11884        | LGPALATGNVVVMK                                    | 1.3564339         | 2              | 3.81526   |
| P11884        | LGPALATGNVVVMK+Oxidation(12                       | 1.29220751        |                |           |
| P11884        | LLCGGGAADR                                        | 1.55646016        | 2              | 3.38588   |
| P11884        | RVTLELGGK                                         | 1.32209519        | 2              | 2.92244   |
| P11884        | TEQGPQVDETQFK                                     | 0.95333157        | 2              | 4.56965   |
| P11884        | TEQGPQVDETQFKK                                    | 1.32100826        | 2              | 3.56918   |
| P11884        | TFPTVNPSTGEVICQVAEGNK                             | 0.92758968        | 2              | 5.29401   |
| P11884        | TFPTVNPSTGEVICQVAEGNKEDVVK                        | 1.14193502        | 2              | 4.30225   |
| P11884        | TFVQEDVYDEFVER                                    | 1.0992766         | 2              | 5.11162   |
| P11884        | TIEEVVGR                                          | 1.17930899        | 2              | 2.98471   |
| P11884        | TIPIDGFFSYTR                                      | 1.55210015        | 2              | 2.81701   |
| P11884        | VAEQPLTALYVANLIK                                  | 1.60921277        | 2              | 5.49268   |
| P11884        | VAFTGSTEVGHLIQVAAGSSNLK                           | 1.24889691        | 2              | 6.53716   |
| P11884        | VAFTGSTEVGHLIQVAAGSSNLKR                          | 2.23075214        | 3              | 3.99173   |
| P11884        | VTLELGGK                                          | 1.06350325        | 1              | 2.05357   |
| P11884        | VVGPNFDSR                                         | 2.11803337        | 2              | 2.95273   |
| P11884        | YGLAAAVFTK                                        | 1.39088796        | 2              | 4.04562   |
| P11884        | YYAGWADK                                          | 1.09887827        | 2              | 2.54063   |
| <b>P11915</b> | <b>NLTP Non_specific lipid_transfer protein</b>   | <b>1.21647967</b> | <b>2E-05</b>   | <b>21</b> |
| P11915        | ADCTITMADSDLLALMTGK                               | 1.45559299        | 2              | 5.40223   |
| P11915        | ANLIFK                                            | 1.64527875        | 2              | 2.32691   |
| P11915        | AVEIVAQEMVTMPSTFEEK                               | 1.42277057        | 2              | 5.30567   |
| P11915        | GHPLGATGLAQCAELCWQLR                              | 1.6313585         | 3              | 3.58373   |
| P11915        | GSVLPDSK                                          | 0.87325321        | 1              | 2.08974   |
| P11915        | GSVLPDSKK                                         | 0.48964828        | 2              | 2.60047   |
| P11915        | HIDVLINK                                          | 1.18594804        | 2              | 2.9382    |
| P11915        | HSVNNPYSQFQDEYSLDEIMK                             | 1.35672589        | 3              | 6.17153   |
| P11915        | KADCTITMADSDLLALMTGK                              | 1.67352885        | 3              | 3.48586   |
| P11915        | KLEEEGEEFVK                                       | 1.03404352        | 3              | 4.24514   |
| P11915        | KLEEEGEEFVK                                       | 1.12711381        | 3              | 4.85396   |
| P11915        | LEEEGEEFVK                                        | 0.42921792        | 2              | 2.81904   |
| P11915        | LEEEGEEFVK                                        | 0.95882938        | 2              | 3.58774   |
| P11915        | LQSLQLQPK                                         | 1.26835814        | 2              | 3.16929   |
| P11915        | MGFPEAASSFR                                       | 1.24346263        | 2              | 2.61485   |
| P11915        | MNPQSAFFQK                                        | 0.80524628        | 2              | 3.22935   |
| P11915        | SRPVDFLTVLQCPTSDGAAAAIVSSEEFVQK                   | 1.5405758         | 3              | 4.37054   |
| P11915        | THQJSAAPTSSAGDGFK                                 | 1.25542823        | 2              | 4.64028   |

|               |                                                                              |                   |                |           |
|---------------|------------------------------------------------------------------------------|-------------------|----------------|-----------|
| P11915        | VFVVGVMGTMK                                                                  | 0.99949564        | 2              | 2.67829   |
| P11915        | WVINPSGGLISK                                                                 | 1.27307516        | 2              | 3.11443   |
| P11915        | YGMSACPFAPQLFGSAGK                                                           | 1.60614207        | 2              | 4.0614    |
| <b>P11980</b> | <b>KPYM Pyruvate kinase isozymes M1/M2</b>                                   | <b>1.4061498</b>  | <b>0.40806</b> | <b>4</b>  |
| P11980        | GADYLVTEVENGGSLGSK                                                           | 2.36258836        | 2              | 4.76206   |
| P11980        | GVNLPGAAVDLPAVSEK                                                            | 1.50021325        | 2              | 4.06188   |
| P11980        | IYVDDGLISLQVK                                                                | 2.03660253        | 2              | 2.44236   |
| P11980        | NTGICTIGPASR                                                                 | 1.26009966        | 2              | 3.29981   |
| <b>P12001</b> | <b>RL18 60S ribosomal protein L18</b>                                        | <b>1.16722092</b> | <b>9.9E-20</b> | <b>5</b>  |
| P12001        | GTVLLSGPR                                                                    | 1.31157194        | 2              | 3.1428    |
| P12001        | ILTFDQLALESPK                                                                | 1.55227428        | 2              | 4.85503   |
| P12001        | TAVVVGITDDVVR                                                                | 1.23975857        | 2              | 4.33315   |
| P12001        | TNRPPLSLR                                                                    | 1.32750578        | 3              | 3.66187   |
| P12001        | TNSTFNQVVLK                                                                  | 0.80093355        | 2              | 2.99677   |
| <b>P12007</b> | <b>IVD Isovaleryl-CoA dehydrogenase_mitochondrial</b>                        | <b>1.13118118</b> | <b>0.35497</b> | <b>9</b>  |
| P12007        | AQEIDQSNDFK                                                                  | 0.73934627        | 2              | 3.43611   |
| P12007        | FVQENLAPK                                                                    | 1.13201068        | 2              | 2.94552   |
| P12007        | FWITNGPDADVLVVYAK                                                            | 1.72045495        | 2              | 3.58472   |
| P12007        | GSNTCELVFEDCK                                                                | 1.12054647        | 2              | 4.55817   |
| P12007        | GSNTCELVFEDCKVPAANILSQESK                                                    | 1.16567856        | 3              | 5.22953   |
| P12007        | GVYVLMISGLDLER                                                               | 1.33189778        | 2              | 2.95199   |
| P12007        | IGQFQLMQGK                                                                   | 1.29430985        | 2              | 2.76344   |
| P12007        | LYEIGGGTSEVR                                                                 | 1.15185442        | 2              | 2.8232    |
| P12007        | TDLTAVPASR                                                                   | 0.96184239        | 2              | 3.09366   |
| <b>P12075</b> | <b>COX5B Cytochrome c oxidase subunit 5B_mitochondrial</b>                   | <b>1.2695174</b>  | <b>0.37619</b> | <b>2</b>  |
| P12075        | EDPNLVPVSNK                                                                  | 1.26645858        | 2              | 3.22824   |
| P12075        | GLDPYNMLPPK                                                                  | 1.52132491        | 2              | 2.31776   |
| <b>P12336</b> | <b>GTR2 Solute carrier family 2_facilitated glucose transporter member 2</b> | <b>1.27928492</b> | <b>0.05748</b> | <b>3</b>  |
| P12336        | HVLGVPLDDR                                                                   | 1.73870732        | 2              | 2.33126   |
| P12336        | HVLGVPLDDR                                                                   | 1.31207228        | 3              | 3.3095    |
| P12336        | SFDEIAAEFR                                                                   | 1.27923696        | 2              | 3.34138   |
| <b>P12346</b> | <b>TRFE Serotransferrin</b>                                                  | <b>1.11956905</b> | <b>0.04417</b> | <b>23</b> |
| P12346        | ADRDQYELLCLDNTR                                                              | 1.31903216        | 2              | 4.31865   |
| P12346        | ASDSSINWNNLK                                                                 | 1.34064596        | 2              | 3.07084   |
| P12346        | DFQLFGSPLGK                                                                  | 2.64057564        | 2              | 3.59528   |
| P12346        | DGGGDVAFVK                                                                   | 1.71361058        | 2              | 2.46836   |
| P12346        | DLKQEDFQLLCPDGTK                                                             | 1.41693305        | 2              | 4.57533   |
| P12346        | EGVCPESIDSAPVK                                                               | 1.17220182        | 2              | 3.47231   |
| P12346        | EGYNGYTGAFAQCLVEK                                                            | 1.41574771        | 2              | 3.25762   |
| P12346        | FDEFFSQGCAPGYK                                                               | 1.01749215        | 2              | 4.06314   |
| P12346        | GDKDCTGNFCLFR                                                                | 1.24143832        | 2              | 3.58545   |
| P12346        | GTDFQLNQLQGK                                                                 | 1.12408936        | 2              | 3.51885   |
| P12346        | GYAVAVVK                                                                     | 1.08860503        | 2              | 2.95011   |
| P12346        | HQTVLENTNGK                                                                  | 9.97004294        | 2              | 2.47251   |
| P12346        | HTTIFEVLPQK                                                                  | 0.87652682        | 3              | 4.01045   |
| P12346        | KGTFQLNQLQGK                                                                 | 1.17562043        | 2              | 4.58998   |
| P12346        | KTSYQDCIK                                                                    | 1.38268817        | 2              | 2.64941   |
| P12346        | LPEGTTYEYLGAEYLQAVGNIR                                                       | 1.88618288        | 2              | 4.58329   |
| P12346        | NGDGKEDLIWEILK                                                               | 1.12033155        | 2              | 3.69213   |
| P12346        | QEDFQLLCPDGTK                                                                | 1.06357844        | 2              | 3.22916   |
| P12346        | SKDFQLFGSPLGK                                                                | 1.25644135        | 2              | 3.14005   |
| P12346        | TSYQDCIK                                                                     | 1.15886246        | 2              | 2.46459   |
| P12346        | VSTVLTAAQK                                                                   | 1.13322635        | 2              | 2.72709   |
| P12346        | WCALSHQER                                                                    | 1.45344919        | 2              | 3.18049   |

|               |                                                                            |                   |                |           |
|---------------|----------------------------------------------------------------------------|-------------------|----------------|-----------|
| P12346        | WCAVSEHENTK                                                                | 1.22742353        | 2              | 3.61857   |
| <b>P12368</b> | <b>KAP2 cAMP dependent protein kinase type II_alpha regulatory subunit</b> | <b>1.88735251</b> | <b>0.00223</b> | <b>3</b>  |
| P12368        | MFESFIESVPLFK                                                              | 1.56508083        | 2              | 3.44172   |
| P12368        | NISHYEEQLVK                                                                | 0.89573526        | 2              | 2.53913   |
| P12368        | NLDQEQLSQVLDMAMFEK                                                         | 1.91075806        | 3              | 3.89886   |
| <b>P12711</b> | <b>ADHX Alcohol dehydrogenase class_3</b>                                  | <b>1.07872026</b> | <b>0.02083</b> | <b>10</b> |
| P12711        | AAVAWEAGKPLSIEEIVAPPQAHEVR                                                 | 1.54797803        | 3              | 6.70961   |
| P12711        | AFDLMHSGNSIR                                                               | 0.62943654        | 2              | 3.28735   |
| P12711        | AGDVIPLYIPQCGECK                                                           | 1.24851614        | 2              | 3.7181    |
| P12711        | AKEFGATECINPQDFSK                                                          | 0.9443709         | 2              | 4.76371   |
| P12711        | EFGATECINPQDFSK                                                            | 5.17505526        | 2              | 4.35277   |
| P12711        | IDPSAPLDK                                                                  | 1.0508139         | 1              | 2.17802   |
| P12711        | IIGIDINK                                                                   | 0.88528558        | 1              | 2.03836   |
| P12711        | IIGIDINKDK                                                                 | 0.98411783        | 2              | 2.43535   |
| P12711        | VCLLGCISTGYGAAVNTAK                                                        | 1.59549408        | 2              | 6.07831   |
| P12711        | VDEFVTGNLSFDQINK                                                           | 1.0440214         | 2              | 4.99031   |
| <b>P12749</b> | <b>RL26 60S ribosomal protein L26</b>                                      | <b>1.34431975</b> | <b>0.41275</b> | <b>5</b>  |
| P12749        | DDEVQVVR                                                                   | 1.2668946         | 2              | 2.94547   |
| P12749        | FNPFVTSR                                                                   | 1.08372732        | 2              | 2.75645   |
| P12749        | HFNAPSHIR                                                                  | 1.2818161         | 3              | 3.88091   |
| P12749        | KDEVQVVR                                                                   | 1.57538048        | 2              | 3.26208   |
| P12749        | YVIYIER                                                                    | 0.97021223        | 1              | 1.97401   |
| <b>P12785</b> | <b>FAS Fatty acid synthase</b>                                             | <b>1.77477926</b> | <b>9.9E-20</b> | <b>45</b> |
| P12785        | ACIDTALENLSTLK                                                             | 2.52740502        | 2              | 4.47468   |
| P12785        | AEAVVAVLLTK                                                                | 1.83903259        | 2              | 3.83213   |
| P12785        | AGSDTELAAPK                                                                | 1.61957321        | 2              | 3.4142    |
| P12785        | CPPGVVPACHNSEDTVTISGPQAAVNEFVEQLK                                          | 2.24442401        | 3              | 5.52807   |
| P12785        | DAMLENQTPELFQDVNPKK                                                        | 1.81180141        | 2              | 4.17341   |
| P12785        | DANLPAGSMAAVGLSWECK                                                        | 0.80178968        | 2              | 3.08915   |
| P12785        | DGGFLLMHTVLK                                                               | 1.16140145        | 2              | 3.33915   |
| P12785        | DPETLLGYSMVGCQR                                                            | 1.85560341        | 2              | 3.93981   |
| P12785        | DTSFEQHVLLHTGGK                                                            | 2.26087687        | 2              | 2.99097   |
| P12785        | EEPEAMLPGAQPTLISAISK                                                       | 2.18694559        | 2              | 3.94726   |
| P12785        | EQGVTFPSGEAQEQLIR                                                          | 0.97029669        | 2              | 4.29349   |
| P12785        | FDASFFGVHPK                                                                | 1.53162248        | 2              | 3.4069    |
| P12785        | FDLSNNHPLGMAIFLK                                                           | 2.76657426        | 2              | 3.43606   |
| P12785        | FVFTPHVEPECLSESAILQK                                                       | 2.40265766        | 3              | 5.07461   |
| P12785        | GLESIIIIHSSLAEPK                                                           | 1.850112          | 2              | 4.416     |
| P12785        | GNAGQSNYGFANSTMER                                                          | 1.64031868        | 2              | 4.70319   |
| P12785        | GVDLVLSLAEEK                                                               | 1.77108139        | 2              | 3.48034   |
| P12785        | HFQLEQDKPEEQTAHAFVNVLTR                                                    | 1.94176253        | 3              | 3.40921   |
| P12785        | LFDHPEVPIAESESISR                                                          | 1.61464545        | 2              | 4.26387   |
| P12785        | LLLPEPLISGLLNSQALK                                                         | 1.89853065        | 3              | 4.7815    |
| P12785        | LTPGCEAEAEAEICFFIK                                                         | 4.1565744         | 2              | 3.76223   |
| P12785        | MTVPGLEDLPQHGLPR                                                           | 1.56897128        | 2              | 3.59142   |
| P12785        | QAQLNLSILLVNPEGPTLTR                                                       | 2.3190757         | 2              | 3.08443   |
| P12785        | RQQEQLVPTLEK                                                               | 1.26437138        | 2              | 3.12097   |
| P12785        | SDEALKPLGVK                                                                | 1.32779759        | 2              | 2.97413   |
| P12785        | SFDDSGNGYCR                                                                | 1.20698294        | 2              | 3.05912   |
| P12785        | SGECPAAIVGGINLLKPNQSVQFMK                                                  | 0.8162356         | 3              | 3.96689   |
| P12785        | SLYQPGGVAPESLEYIEAHGTGK                                                    | 1.95399889        | 2              | 5.23347   |
| P12785        | SNMGHPEPASGLAALTK                                                          | 1.53889704        | 3              | 4.17648   |
| P12785        | SNMGHPEPASGLAALTK+Oxidation(2                                              | 2.32131777        |                |           |
| P12785        | TGGTYGEDLGADYNLSQVCDGK                                                     | 1.38800327        | 2              | 5.04823   |
| P12785        | TGTVPLEVR                                                                  | 1.30496064        | 2              | 2.46229   |
| P12785        | TMEAVQGLLEQGR                                                              | 1.62030186        | 2              | 3.88832   |

|               |                                          |                   |                |           |
|---------------|------------------------------------------|-------------------|----------------|-----------|
| P12785        | VFTTVGSAEK                               | 2.2743033         | 2              | 2.3602    |
| P12785        | VGDPQELNGITR                             | 0.54274212        | 2              | 3.15346   |
| P12785        | VHLTGIDINPNALFPPVEFPVPR                  | 2.25918257        | 2              | 4.90093   |
| P12785        | VLEALLPLK                                | 1.97723445        | 2              | 3.3012    |
| P12785        | VLESDLVMNVYR                             | 1.94646071        | 2              | 3.40659   |
| P12785        | VSVHIEGDHR                               | 2.14796524        | 2              | 2.81774   |
| P12785        | VTAIYIDPATHLQK                           | 1.9190315         | 2              | 3.80096   |
| P12785        | VYATILNAGTNTDGCK                         | 2.01765524        | 2              | 4.98002   |
| P12785        | VYMLEGDTQVADVTTSR                        | 2.4583783         | 2              | 3.58574   |
| P12785        | VYQWEDPDSK                               | 1.60209727        | 2              | 3.2511    |
| P12785        | WLSTSIPEAQWQSSLAR                        | 0.70168075        | 2              | 2.67496   |
| P12785        | YNGTLNLDR                                | 2.42431794        | 1              | 2.10228   |
| <b>P12791</b> | <b>CP2BA Cytochrome P450 2B10</b>        | <b>1.03911606</b> | <b>1</b>       | <b>2</b>  |
| P12791        | IQEEAQLVEELR                             | 1.06034098        | 2              | 4.58548   |
| P12791        | IQEEAQLVEELRK                            | 1.03883726        | 2              | 3.76327   |
| <b>P12847</b> | <b>MYH3 Myosin_3</b>                     | <b>1.06077458</b> | <b>0.18295</b> | <b>5</b>  |
| P12847        | GTLEDQIISANPLLEAFGNAK                    | 0.58702895        | 2              | 3.11892   |
| P12847        | IEAQNQPFDAK                              | 0.87070516        | 2              | 3.03745   |
| P12847        | KELEEKLVTLVQEK                           | 0.67212874        | 2              | 2.76737   |
| P12847        | MKGTLEDQIISANPLLEAFGNAK                  | 3.77365612        | 3              | 6.70384   |
| P12847        | MKGTLEDQIISANPLLEAFGNAK+Oxidation(0      | 2.63358265        |                |           |
| <b>P12928</b> | <b>KPYR Pyruvate kinase isozymes R/L</b> | <b>1.52338602</b> | <b>6.7E-13</b> | <b>20</b> |
| P12928        | AAVIAVTR                                 | 1.84571095        | 2              | 2.62289   |
| P12928        | AETSDVANAVLDGADCIMLSGETAK                | 2.77188601        | 2              | 5.97997   |
| P12928        | CCAAAIIVLTK                              | 1.23330357        | 2              | 3.08597   |
| P12928        | CNLAGKPVVCATQMLESMTIK                    | 1.72225875        | 3              | 4.86376   |
| P12928        | EATESFATSPLSYRPAIALDTK                   | 2.20906828        | 2              | 4.02342   |
| P12928        | EPPEAIWADDVDR                            | 1.95504405        | 2              | 2.64996   |
| P12928        | GDLGIEIPAEK                              | 1.16817566        | 2              | 3.147     |
| P12928        | GSFPVEAVMMQHAJAR                         | 1.98312283        | 2              | 3.91374   |
| P12928        | GSQVLTVDPK                               | 1.62111912        | 2              | 2.93878   |
| P12928        | GVNLPNTEVDLPGLSEQDLLDLR                  | 2.97379909        | 2              | 4.90819   |
| P12928        | IGPEGLVTEVEHGILGSR                       | 1.47275283        | 2              | 5.04771   |
| P12928        | IYIDGLISLVVQK                            | 2.49225432        | 2              | 4.41485   |
| P12928        | KFDEILEVSDGIMVAR                         | 1.32196137        | 2              | 4.93118   |
| P12928        | KGVNLPNTEVDLPGLSEQDLLDLR                 | 2.44391071        | 3              | 4.66172   |
| P12928        | LNFSHGSHEYHAESIANIR                      | 2.83551733        | 2              | 5.72094   |
| P12928        | RVQFGIESGK                               | 0.87400784        | 2              | 2.55405   |
| P12928        | STSIIATIGPASR                            | 1.1742207         | 2              | 3.39026   |
| P12928        | TGVLQGGPESEIVEIK                         | 1.38707333        | 2              | 5.06898   |
| P12928        | TVWVDYHNITR                              | 1.7966444         | 2              | 2.68411   |
| P12928        | VQFGIESGK                                | 1.72151837        | 2              | 2.46101   |
| <b>P12938</b> | <b>CP2D3 Cytochrome P450 2D3</b>         | <b>0.89424599</b> | <b>0.98806</b> | <b>7</b>  |
| P12938        | DLTDAFLAEIEK                             | 0.88591905        | 2              | 4.42482   |
| P12938        | FDYGDPDFIK                               | 1.76905204        | 2              | 2.76539   |
| P12938        | GNPESSFNDANLR                            | 0.85865061        | 2              | 4.00462   |
| P12938        | RFDYGDPDFIK                              | 0.79083129        | 2              | 3.0478    |
| P12938        | TFLTMVDNLVTEHK                           | 1.3331383         | 2              | 3.33964   |
| P12938        | TWDPDQPPR                                | 0.7189807         | 2              | 2.45075   |
| P12938        | TWDPDQPPRDLTDAFLAEIEK                    | 1.11681562        | 3              | 3.67225   |
| <b>P12939</b> | <b>CP2DA Cytochrome P450 2D10</b>        | <b>1.32407393</b> | <b>0.04307</b> | <b>8</b>  |
| P12939        | ALCNVIASLIFAR                            | 2.09363093        | 2              | 3.50722   |
| P12939        | AVQEVLVTHGEDTADRPVPIFK                   | 1.30957758        | 3              | 5.59872   |
| P12939        | FEYEDPYLIR                               | 1.35670096        | 2              | 2.45893   |
| P12939        | FGDIAPLNLPR                              | 1.48217823        | 2              | 3.1325    |
| P12939        | ITSCDIEVQDFVIPK                          | 2.32742386        | 2              | 4.36936   |
| P12939        | NLTDAFLAEVEK                             | 1.63529922        | 2              | 4.16064   |

|               |                                                                               |                   |                |           |
|---------------|-------------------------------------------------------------------------------|-------------------|----------------|-----------|
| P12939        | RFEYEDPYLIR                                                                   | 1.30566242        | 3              | 3.46783   |
| P12939        | TTWDPAAQPPR                                                                   | 2.37814844        | 2              | 2.59151   |
| <b>P13084</b> | <b>NPM Nucleophosmin</b>                                                      | <b>1.8209426</b>  | <b>0.00029</b> | <b>2</b>  |
| P13084        | MTDQEAIQDLWQWR                                                                | 1.43698789        | 2              | 3.27561   |
| P13084        | VDNDENEHQLSLR                                                                 | 2.32261387        | 2              | 4.12753   |
| <b>P13086</b> | <b>SUCA Succinyl_CoA ligase [ADP/GDP_forming] subunit alpha_mitochondrial</b> | <b>1.3595564</b>  | <b>0.69203</b> | <b>5</b>  |
| P13086        | HLGLPVFNTVK                                                                   | 2.06098664        | 2              | 2.33359   |
| P13086        | LIGPNCPIINPGECK                                                               | 1.19453439        | 2              | 4.43545   |
| P13086        | MGHAGAIAGGK                                                                   | 1.49365864        | 3              | 3.46659   |
| P13086        | NIYIDK                                                                        | 1.02525575        | 1              | 2.1293    |
| P13086        | QGTFFHSQQALEYGTK                                                              | 1.37162142        | 2              | 2.72825   |
| <b>P13107</b> | <b>CP2B3 Cytochrome P450 2B3</b>                                              | <b>1.20095516</b> | <b>0.83492</b> | <b>8</b>  |
| P13107        | ATLDPNAPR                                                                     | 1.20304905        | 2              | 2.63511   |
| P13107        | EIDQVIGSQR                                                                    | 0.66144557        | 2              | 2.66546   |
| P13107        | EVLDYIDHSVENHR                                                                | 1.35326193        | 2              | 4.08286   |
| P13107        | FSDVSPMGLPCR                                                                  | 1.52037179        | 2              | 3.44387   |
| P13107        | GIIAVLQPIMQEYGVSVFVNEER                                                       | 1.44801745        | 3              | 5.76416   |
| P13107        | MCLGEGIAR                                                                     | 1.18685058        | 2              | 2.69242   |
| P13107        | QSVEDQIKEEAK                                                                  | 1.17566109        | 2              | 2.91521   |
| P13107        | SFIQLQEK                                                                      | 0.37176947        | 2              | 2.43396   |
| <b>P13221</b> | <b>AATC Aspartate aminotransferase_cytoplasmic</b>                            | <b>1.53844788</b> | <b>4.7E-13</b> | <b>7</b>  |
| P13221        | IGADFLGR                                                                      | 4.10303752        | 2              | 2.38995   |
| P13221        | ITWSNPPAQGAR                                                                  | 2.60079331        | 2              | 3.00608   |
| P13221        | IVATTLNPELFK                                                                  | 2.08483882        | 2              | 3.78562   |
| P13221        | NLDYVATSINEAVTK                                                               | 2.45961583        | 2              | 5.09798   |
| P13221        | SCASQLVLGDNPALR                                                               | 1.53847332        | 2              | 5.11447   |
| P13221        | TDDSQPWVLPVVR                                                                 | 1.04571431        | 2              | 3.26695   |
| P13221        | VGGVQSLGGTGALR                                                                | 0.67644075        | 2              | 3.00787   |
| <b>P13255</b> | <b>GNMT Glycine N_methyltransferase</b>                                       | <b>1.16964541</b> | <b>0.07964</b> | <b>8</b>  |
| P13255        | AHMVTLDYTVQVPGAGR                                                             | 1.44947443        | 2              | 5.07364   |
| P13255        | AWLLGLLR                                                                      | 1.29625864        | 2              | 2.57165   |
| P13255        | DITTSVLTVNNK                                                                  | 1.61125048        | 2              | 3.82661   |
| P13255        | LSYYPHCLASFTLELQAEFGGR                                                        | 2.0989385         | 3              | 3.64388   |
| P13255        | NIASMVRPGLLVIDHR                                                              | 2.35968563        | 3              | 3.74856   |
| P13255        | NYDYILSTGCAPP GK                                                              | 1.37393987        | 2              | 4.65123   |
| P13255        | SDLTKDITTSVLTVNNK                                                             | 1.71047019        | 2              | 2.89718   |
| P13255        | SLGVAAEGIPDQYADGEAAR                                                          | 0.85643637        | 2              | 5.25813   |
| <b>P13383</b> | <b>NUCL Nucleolin</b>                                                         | <b>1.35444869</b> | <b>0.0761</b>  | <b>8</b>  |
| P13383        | EAMEDGEIDGNK                                                                  | 2.6113868         | 2              | 2.93201   |
| P13383        | GFGFVDFNSEEDAK                                                                | 1.76855147        | 2              | 2.87702   |
| P13383        | GLSEDTEETLK                                                                   | 1.03757967        | 2              | 3.24166   |
| P13383        | GSPNARSQPSKTLFVK                                                              | 1.22775826        | 2              | 2.33221   |
| P13383        | IEGSEPTTFFNLFIGNLNPNK                                                         | 0.73935617        | 2              | 3.75733   |
| P13383        | NDLAAVDVR                                                                     | 1.42032858        | 2              | 2.56311   |
| P13383        | NLSFNITEDELK                                                                  | 1.24300459        | 2              | 2.6226    |
| P13383        | SEADAENLEEK                                                                   | 1.35415494        | 2              | 2.9488    |
| <b>P13437</b> | <b>THIM 3_ketoacyl_CoA thiolase_mitochondrial</b>                             | <b>1.08355069</b> | <b>0.51966</b> | <b>21</b> |
| P13437        | AANEAGYFNEEMAPIEVK                                                            | 0.93498733        | 2              | 5.1397    |
| P13437        | AANEAGYFNEEMAPIEVK+Oxidation(11                                               | 1.41527254        |                |           |
| P13437        | DAEVVLCGGTESMSQSPYSVR                                                         | 1.53410513        | 3              | 5.0537    |
| P13437        | DFTATDLTEFAAR                                                                 | 1.11671225        | 2              | 4.0434    |
| P13437        | DMDLIDVNEAFAPQFLAVQK                                                          | 1.92661578        | 3              | 6.51918   |
| P13437        | DMDLIDVNEAFAPQFLAVQK+Oxidation(1                                              | 1.86968037        |                |           |
| P13437        | EGTVTAGNASGMSDGAGVVIIASEDAVK                                                  | 0.97172236        | 3              | 5.77951   |
| P13437        | EGTVTAGNASGMSDGAGVVIIASEDAVKK                                                 | 1.15098114        | 3              | 4.88921   |
| P13437        | GVFIVA AK                                                                     | 1.50457515        | 2              | 2.47247   |

|               |                                                           |                   |                |           |
|---------------|-----------------------------------------------------------|-------------------|----------------|-----------|
| P13437        | HNFTPLAR                                                  | 1.31020944        | 2              | 2.36927   |
| P13437        | ITAHLVHELK                                                | 2.39554572        | 2              | 3.51449   |
| P13437        | LCGSGFQSIIVSGCQEICK                                       | 1.59875089        | 2              | 5.64092   |
| P13437        | LEDTLWAGLTDQHVK                                           | 0.9721156         | 2              | 5.06277   |
| P13437        | RTPFGAYGGLLK                                              | 0.64746256        | 3              | 3.38314   |
| P13437        | SLDLDPK                                                   | 0.58598299        | 2              | 2.72636   |
| P13437        | TNVSGGAIALGHPLGGSGSR                                      | 0.95201086        | 2              | 5.99104   |
| P13437        | VGVPETETGALTNR                                            | 0.9950495         | 2              | 3.63579   |
| P13437        | VPPETIDSVIVGNVMQSSDAAYLAR                                 | 1.06662721        | 2              | 5.91279   |
| P13437        | VPPETIDSVIVGNVMQSSDAAYLAR+Oxidation(14                    | 1.53401466        |                |           |
| P13437        | VVGYFVSGCDPAIMGIGPVPAITGALK                               | 1.46214711        | 3              | 5.02973   |
| P13437        | VVGYFVSGCDPAIMGIGPVPAITGALKK                              | 1.03123661        | 3              | 4.51412   |
| <b>P13439</b> | <b>UMPS Uridine 5__monophosphate synthase</b>             | <b>1.39982443</b> | <b>0.06901</b> | <b>2</b>  |
| P13439        | SGLSSPVYIDLK                                              | 1.40388784        | 2              | 2.42861   |
| P13439        | VTDAIVLLDR                                                | 1.39788349        | 2              | 2.36203   |
| <b>P13444</b> | <b>METK1 S_adenosylmethionine synthase isoform type_1</b> | <b>1.34871109</b> | <b>9.9E-20</b> | <b>9</b>  |
| P13444        | FVIGGPQGDAGVTGR                                           | 1.38559095        | 2              | 4.51991   |
| P13444        | HIGYDDSAK                                                 | 1.2339936         | 2              | 2.74085   |
| P13444        | ICDQISDAVLAHLK                                            | 1.42180751        | 3              | 5.26489   |
| P13444        | NEEDVGAGDQGLMFGYATDETEECMPLTIVLAHK                        | 1.23614917        | 3              | 6.92725   |
| P13444        | SEFPWEVPK                                                 | 1.53801019        | 2              | 2.37817   |
| P13444        | SGVLPWLRPDSK                                              | 1.16586277        | 2              | 2.94306   |
| P13444        | TCNVLVALEQQSPDIAQCVHLDR                                   | 2.21045632        | 3              | 5.99758   |
| P13444        | TQVTVQYVQDNGAVIPVR                                        | 1.9149268         | 2              | 5.43374   |
| P13444        | VHTIVISVQHNEEDITLEAMR                                     | 2.27648142        | 3              | 4.07736   |
| <b>P13471</b> | <b>RS14 40S ribosomal protein S14</b>                     | <b>1.30323642</b> | <b>0.15234</b> | <b>3</b>  |
| P13471        | ADRDESSPYAAMLAAQDVAQR                                     | 1.33532241        | 2              | 5.42994   |
| P13471        | ELGITALHIK                                                | 1.94373621        | 2              | 2.49773   |
| P13471        | IEDVTPIPSDSTR                                             | 0.84634902        | 2              | 3.9123    |
| <b>P13601</b> | <b>AL1A7 Aldehyde dehydrogenase_ cytosolic 1</b>          | <b>0.88911348</b> | <b>0.11641</b> | <b>20</b> |
| P13601        | ANNTPYGLAAGVFTK                                           | 0.72411642        | 2              | 4.37942   |
| P13601        | EEIFGPVQIMK                                               | 0.64559263        | 2              | 3.60608   |
| P13601        | EMGEQGVYEYELK                                             | 0.6100144         | 2              | 3.53665   |
| P13601        | FPVINPATEEVICHVEEGDK                                      | 0.23714866        | 3              | 3.82828   |
| P13601        | FPVINPATEEVICHVEEGDKADVDK                                 | 0.96036448        | 4              | 5.05052   |
| P13601        | GFFVQPTVFSNVTDENR                                         | 1.21266957        | 2              | 2.45955   |
| P13601        | IAKEEIFGPVQIMK                                            | 0.9599949         | 2              | 3.72034   |
| P13601        | IFINNEWHNSLNGK                                            | 0.83890946        | 2              | 3.90821   |
| P13601        | IHGQTIPSDGDVFTYTR                                         | 0.77061699        | 3              | 3.89745   |
| P13601        | ILDLESK                                                   | 0.91017213        | 2              | 3.19051   |
| P13601        | ILDLESK                                                   | 0.66483419        | 2              | 2.85552   |
| P13601        | KFPVINPATEEVICHVEEGDK                                     | 0.70564703        | 3              | 3.56804   |
| P13601        | KFPVINPATEEVICHVEEGDKADVDK                                | 1.35845386        | 4              | 4.87731   |
| P13601        | LFVEESIYDEFVR                                             | 0.55331535        | 2              | 3.60477   |
| P13601        | SIDEVIK                                                   | 0.70583018        | 2              | 2.49596   |
| P13601        | VLLATMESMNAGK                                             | 0.72067925        | 2              | 4.44039   |
| P13601        | VSFTGSTEVGK                                               | 0.57192194        | 2              | 2.74865   |
| P13601        | YFAGWADK                                                  | 0.68414992        | 2              | 2.31775   |
| P13601        | YVLGNPLDSGISQGPQIDK                                       | 0.87093604        | 2              | 4.75492   |
| P13601        | YVLGNPLDSGISQGPQIDKEQHAK                                  | 0.39978617        | 2              | 4.21713   |
| <b>P13697</b> | <b>MAOX NADP_dependent malic enzyme</b>                   | <b>1.26354235</b> | <b>0.00257</b> | <b>6</b>  |
| P13697        | AECSAEECYK                                                | 1.75455345        | 2              | 3.12663   |
| P13697        | AIFASGSPFDPVTLDPGR                                        | 1.49982393        | 2              | 4.49689   |
| P13697        | GHIASVLNAWPEDVVK                                          | 3.00776032        | 2              | 3.59331   |
| P13697        | HINDSVFLTTAEVISQVSDK                                      | 1.50324847        | 3              | 4.59759   |
| P13697        | ILGLDLGCNGMGIPVVK                                         | 1.91018015        | 2              | 2.8062    |

|               |                                                                        |                   |                |           |
|---------------|------------------------------------------------------------------------|-------------------|----------------|-----------|
| P13697        | NLEAIVQK                                                               | 1.26353849        | 1              | 2.40288   |
| <b>P13803</b> | <b>ETFA Electron transfer flavoprotein subunit alpha_mitochondrial</b> | <b>0.95532569</b> | <b>0.00231</b> | <b>15</b> |
| P13803        | AAVDAGFVPNDMQVGQTGK                                                    | 0.80224613        | 2              | 4.94719   |
| P13803        | AAVDAGFVPNDMQVGQTGK+Oxidation(11                                       | 1.24124996        |                |           |
| P13803        | DPEAPIFQVADYGIVADLFK                                                   | 1.13403692        | 2              | 4.98397   |
| P13803        | GLLPEELTPLILETQK                                                       | 1.2282617         | 2              | 4.48045   |
| P13803        | GTSFEAAAASGGSASSEK                                                     | 0.99223728        | 2              | 5.1968    |
| P13803        | LGGEVSCLVAGTK                                                          | 1.0670363         | 2              | 4.59815   |
| P13803        | LLYDLADQLHAAVGASR                                                      | 1.96867011        | 2              | 5.04928   |
| P13803        | LNVAPVSDIIEIK                                                          | 1.49974064        | 3              | 4.03899   |
| P13803        | QFSYTHICAGASAFGK                                                       | 0.79470242        | 2              | 3.23217   |
| P13803        | SDRPELTGAK                                                             | 1.10832142        | 3              | 3.54489   |
| P13803        | TIVAINKDPEAPIFQVADYGIVADLFK                                            | 1.33404194        | 3              | 6.62075   |
| P13803        | TIYAGNALCTVK                                                           | 0.90432377        | 2              | 3.70433   |
| P13803        | VLVAQHDAYK                                                             | 1.15008706        | 2              | 3.56115   |
| P13803        | VVPEMTEILK                                                             | 0.94995531        | 1              | 1.92887   |
| P13803        | VVQDLCK                                                                | 1.18970649        | 2              | 2.63306   |
| <b>P13832</b> | <b>MRLCA Myosin regulatory light chain RLC_A</b>                       | <b>1.17295281</b> | <b>0.22662</b> | <b>3</b>  |
| P13832        | ATSNVFAMFDQSQIQEFK                                                     | 1.43308469        | 2              | 5.08349   |
| P13832        | FTDEEVDELYR                                                            | 0.8835519         | 2              | 3.78271   |
| P13832        | GNFNYIEFTR                                                             | 1.14517932        | 2              | 3.193     |
| <b>P14046</b> | <b>A1I3 Alpha_1_inhibitor 3</b>                                        | <b>1.08469358</b> | <b>0.96731</b> | <b>5</b>  |
| P14046        | ETGLMAFTNLK                                                            | 1.40408805        | 2              | 2.62673   |
| P14046        | GDPIPNEQVLIK                                                           | 0.76617007        | 2              | 2.88023   |
| P14046        | GMYESLPVAVK                                                            | 1.03486627        | 2              | 3.34773   |
| P14046        | QQNSYGGFSTQDVTVALDALS                                                  | 1.1498406         | 2              | 3.49092   |
| P14046        | QSPGPGSEVATVPETGR                                                      | 0.80028055        | 2              | 3.43119   |
| <b>P14141</b> | <b>CAH3 Carbonic anhydrase 3</b>                                       | <b>1.24775607</b> | <b>0.02473</b> | <b>20</b> |
| P14141        | DIRHPSLQWSVSYDPGSAK                                                    | 0.66940212        | 3              | 3.86232   |
| P14141        | EAPFNHFDPSCLPACR                                                       | 1.3356503         | 2              | 4.23334   |
| P14141        | EKGEFQILLDALDK                                                         | 1.30726858        | 2              | 4.67005   |
| P14141        | EKGEFQILLDALDKIK                                                       | 0.93462184        | 2              | 3.70368   |
| P14141        | EPMTVSSDQMAK                                                           | 1.27830342        | 1              | 3.24039   |
| P14141        | EWGYASHNGPEHWHELYPIAK                                                  | 0.97239247        | 3              | 4.82179   |
| P14141        | GDNQSPIELHTK                                                           | 0.9579332         | 2              | 3.23947   |
| P14141        | GEFQILLDALDK                                                           | 1.14211978        | 2              | 4.56922   |
| P14141        | GEFQILLDALDKIK                                                         | 1.38434883        | 2              | 3.59343   |
| P14141        | GGPLSGPYR                                                              | 1.045124          | 2              | 2.75937   |
| P14141        | GKEAPFNHFDPSCLPACR                                                     | 0.94116121        | 2              | 4.19625   |
| P14141        | HDPQLPWSVSYDPGSAK                                                      | 0.70228579        | 3              | 5.58667   |
| P14141        | QFHLHWGSSDDHGSEHTVDGVK                                                 | 1.10730415        | 2              | 4.77049   |
| P14141        | QPDGIAVVGIFLK                                                          | 0.97443402        | 3              | 3.54867   |
| P14141        | SLFASAENPPVPLVGNWRPPQPIK                                               | 0.95898355        | 3              | 5.703     |
| P14141        | SLFASAENPPVPLVGNWRPPQPIKGR                                             | 1.48742269        | 3              | 4.37209   |
| P14141        | VVFDDTFDR                                                              | 1.24972229        | 2              | 3.3251    |
| P14141        | YAAELHLVHWNPK                                                          | 1.13350192        | 2              | 4.23882   |
| P14141        | YNTFGALK                                                               | 0.92518655        | 2              | 2.55988   |
| P14141        | YNTFGALKQPDGIAVVGIFLK                                                  | 1.07746705        | 3              | 6.11241   |
| <b>P14173</b> | <b>DDC Aromatic_L_amino_acid decarboxylase</b>                         | <b>1.34099626</b> | <b>7.7E-05</b> | <b>8</b>  |
| P14173        | AGEGGVIQGSASEATLVALLAAR                                                | 2.05340569        | 2              | 3.26032   |
| P14173        | ALIPPTAPQEPETYDIIR                                                     | 1.24902738        | 2              | 3.85561   |
| P14173        | GSNQLNETLLQR                                                           | 1.22818073        | 2              | 2.98679   |
| P14173        | HSHQDSGLITDYR                                                          | 0.98073248        | 3              | 3.77432   |
| P14173        | MLELPEAFLAGR                                                           | 1.41099567        | 2              | 3.45539   |
| P14173        | QLQAASPELTQAALMEK                                                      | 1.33996184        | 2              | 4.098     |
| P14173        | TDLTEAFNMDPVYLR                                                        | 2.83513592        | 2              | 3.84325   |



|               |                                                             |                   |                |           |
|---------------|-------------------------------------------------------------|-------------------|----------------|-----------|
| P14173        | TVESAHVQLAWEHIR                                             | 1.40744867        | 3              | 3.64039   |
| <b>P14408</b> | <b>FUMH Fumarate hydratase_ mitochondrial</b>               | <b>1.33433059</b> | <b>0.00207</b> | <b>15</b> |
| P14408        | AAAEVNQEYGLDPK                                              | 1.55328201        | 2              | 4.36643   |
| P14408        | AIEMLGELGSK                                                 | 1.00536011        | 2              | 3.95858   |
| P14408        | EFAQVIK                                                     | 1.37110133        | 1              | 1.92098   |
| P14408        | IEYDTFGELK                                                  | 0.82770218        | 2              | 3.25935   |
| P14408        | IEYDTFGELKVPTDK                                             | 1.09392621        | 2              | 3.73064   |
| P14408        | IYELAAGGTAVGTGLNTR                                          | 1.18480772        | 2              | 5.36743   |
| P14408        | LMNESLMLVLTALNPHIGYDK                                       | 2.18291547        | 3              | 5.51642   |
| P14408        | LNDHFPLVVWQTGSGTQTNMNVNEVISNR                               | 1.44868437        | 3              | 6.87714   |
| P14408        | SGLGELILPENEPGSSIMPGK                                       | 1.34523533        | 2              | 4.63581   |
| P14408        | SGLGELILPENEPGSSIMPGK+Oxidation(17                          | 1.65650541        |                |           |
| P14408        | SKEFAQVIK                                                   | 1.41329605        | 2              | 2.66651   |
| P14408        | SQSSNDTFPTAMHIAAALEVHQVLLPGLQK                              | 1.64344031        | 3              | 4.78378   |
| P14408        | TAIELGYLTAEQFDEWVKPK                                        | 1.46972982        | 2              | 4.87841   |
| P14408        | THTQDAVPLTLGQEFSGYVQVQYAMER                                 | 1.66694715        | 3              | 5.89325   |
| P14408        | YYGAQTVR                                                    | 1.12464251        | 2              | 2.4916    |
| <b>P14480</b> | <b>FIBB Fibrinogen beta chain</b>                           | <b>1.6672256</b>  | <b>4.7E-15</b> | <b>8</b>  |
| P14480        | AHYGGFTVQTEANK                                              | 2.46259499        | 2              | 3.46356   |
| P14480        | DNENVINEYSSILEQK                                            | 1.42845264        | 2              | 3.93521   |
| P14480        | GFGNIATNEDTK                                                | 1.80209272        | 2              | 3.08932   |
| P14480        | GFGNIATNEDTKK                                               | 2.05317989        | 2              | 3.58305   |
| P14480        | LESDISAQTEYCHTPCTVNCNIPVVS GK                               | 2.69822543        | 3              | 4.97951   |
| P14480        | LYIDETVNDNIPLNLR                                            | 2.17250168        | 2              | 2.93289   |
| P14480        | TENGWTVIQNR                                                 | 1.23955142        | 2              | 3.20598   |
| P14480        | YCGLPGEYWLGN DK                                             | 1.41037563        | 2              | 3.15456   |
| <b>P14604</b> | <b>ECHM Enoyl_CoA hydratase_ mitochondrial</b>              | <b>1.28875944</b> | <b>0.48032</b> | <b>10</b> |
| P14604        | AFAAGADIK                                                   | 1.22591751        | 2              | 3.08522   |
| P14604        | AQFGQPEILLGTIPGAGGTQR                                       | 1.04674075        | 2              | 5.68471   |
| P14604        | ESVNAAFEMTLTEGNKLEK                                         | 2.09284899        | 2              | 2.68186   |
| P14604        | FLSHWDHITR                                                  | 1.48963549        | 2              | 3.46626   |
| P14604        | IFPVETLVEEAIQCAEK                                           | 1.5077521         | 3              | 5.88413   |
| P14604        | NSSVGLIQLNRPK                                               | 1.0215823         | 2              | 3.57694   |
| P14604        | SLAMEMVLTGDR                                                | 1.2594559         | 2              | 3.80519   |
| P14604        | SLAMEMVLTGDR+Oxidation(3                                    | 1.36364405        |                |           |
| P14604        | SLAMEMVLTGDR+Oxidation(5                                    | 1.36364405        |                |           |
| P14604        | TFQDCYSGK                                                   | 1.27542213        | 2              | 2.89127   |
| <b>P14668</b> | <b>ANXA5 Annexin A5</b>                                     | <b>1.19582525</b> | <b>1.6E-05</b> | <b>5</b>  |
| P14668        | EFRKNFATSLYSMIK                                             | 0.98173955        | 2              | 2.33736   |
| P14668        | ETSGNLENLLAVVK                                              | 1.61615065        | 2              | 3.24921   |
| P14668        | GAGTDDHTLIR                                                 | 0.89679755        | 2              | 2.75949   |
| P14668        | GLGTDEDSILNLLTAR                                            | 1.46890316        | 2              | 5.11611   |
| P14668        | GTVTDFSGFDGR                                                | 1.08777737        | 2              | 3.00392   |
| <b>P14669</b> | <b>ANXA3 Annexin A3</b>                                     | <b>0.9297613</b>  | <b>0.43701</b> | <b>9</b>  |
| P14669        | GAGTDEFTLNR                                                 | 0.68278323        | 2              | 2.66357   |
| P14669        | GMGTDEDTLIEILTTR                                            | 1.26777422        | 2              | 4.38738   |
| P14669        | GTINNYPGFNPSVDAEAIR                                         | 1.05587402        | 2              | 4.96496   |
| P14669        | KDAQTLYDAGEK                                                | 1.03526958        | 2              | 3.26496   |
| P14669        | KDAQTLYDAGEKK                                               | 0.88565024        | 3              | 3.88508   |
| P14669        | QYQEAYEQALK                                                 | 0.78790852        | 2              | 2.9069    |
| P14669        | SEIDLLDIR                                                   | 1.87433159        | 2              | 2.54409   |
| P14669        | TLINILTER                                                   | 1.20373206        | 2              | 2.73803   |
| P14669        | WGTDDEKFTAILCLR                                             | 1.57314952        | 3              | 3.38065   |
| <b>P14685</b> | <b>PSMD3 26S proteasome non_ATPase regulatory subunit 3</b> | <b>1.34939341</b> | <b>0.53862</b> | <b>4</b>  |
| P14685        | AIQLEYSEAR                                                  | 1.19276029        | 2              | 3.01918   |
| P14685        | HDADGQATLLNLLL                                              | 1.82020074        | 2              | 3.79246   |

|               |                                                                 |                   |                |           |
|---------------|-----------------------------------------------------------------|-------------------|----------------|-----------|
| P14685        | LQLDSPEDAEIFIVAK                                                | 1.43477699        | 2              | 3.86703   |
| P14685        | SVFPEQANNNEWAR                                                  | 1.36436112        | 2              | 3.28049   |
| <b>P14740</b> | <b>DPP4 Dipeptidyl peptidase 4</b>                              | <b>1.0460992</b>  | <b>0.84554</b> | <b>5</b>  |
| P14740        | FRPAEPHFTSDGSSFYK                                               | 1.10074709        | 2              | 3.47716   |
| P14740        | HSYTASYSIYDLNKR                                                 | 1.30570768        | 3              | 3.78152   |
| P14740        | LGTLEVEDQIEAAR                                                  | 1.49941012        | 2              | 4.08775   |
| P14740        | VLEDNSALDK                                                      | 1.00094482        | 2              | 2.61836   |
| P14740        | WEYYDSVYTER                                                     | 0.8310823         | 2              | 2.5283    |
| <b>P14882</b> | <b>PCCA Propionyl-CoA carboxylase alpha chain_mitochondrial</b> | <b>1.06584767</b> | <b>0.95092</b> | <b>15</b> |
| P14882        | FLSDVYPDGFK                                                     | 0.95755444        | 2              | 2.80381   |
| P14882        | FSSQEAASSFGDDR                                                  | 1.20302467        | 2              | 3.92838   |
| P14882        | GVTHNIPLLR                                                      | 1.56484225        | 2              | 2.39832   |
| P14882        | HGNALWLNER                                                      | 1.67167674        | 2              | 3.31556   |
| P14882        | HIEIQVLGDK                                                      | 1.4077874         | 2              | 2.41751   |
| P14882        | HKQEDIPISGWAVECR                                                | 0.92311477        | 2              | 2.44155   |
| P14882        | LHDEDHTVVASNNNGPTFNVEVDGSK                                      | 1.02987345        | 3              | 6.74303   |
| P14882        | LQVEHPVTECITGLDLVQEMILVAK                                       | 1.77141274        | 3              | 3.8112    |
| P14882        | MADEAVCVGPAPTSK                                                 | 1.04078057        | 2              | 4.25564   |
| P14882        | MEDALDSYVIR                                                     | 1.17074632        | 2              | 3.50691   |
| P14882        | SYLNMDAIMEAIK                                                   | 1.42987638        | 2              | 3.28723   |
| P14882        | SYLNMDAIMEAIKK                                                  | 1.75526137        | 2              | 3.13295   |
| P14882        | TGAQAVHPGYGFLSENK                                               | 1.08153737        | 2              | 4.01556   |
| P14882        | TVAIHSDVDASSVHVK                                                | 1.4004809         | 3              | 4.04437   |
| P14882        | VVEEAPSIFLDPETR                                                 | 0.9816666         | 2              | 3.99447   |
| <b>P14942</b> | <b>GSTA4 Glutathione S-transferase alpha_4</b>                  | <b>1.07427644</b> | <b>0.3297</b>  | <b>3</b>  |
| P14942        | DGCLLFGQVPLVEIDGMLLTQTR                                         | 3.09151853        | 3              | 4.15424   |
| P14942        | KPPPDGHYVDVVR                                                   | 1.33126939        | 2              | 3.27493   |
| P14942        | YFPVFEK                                                         | 0.95328285        | 1              | 1.99856   |
| <b>P15083</b> | <b>PIGR Polymeric immunoglobulin receptor</b>                   | <b>0.81616279</b> | <b>0.76212</b> | <b>4</b>  |
| P15083        | EIQNAGDQAQENR                                                   | 0.67764449        | 2              | 4.02449   |
| P15083        | FSVLITGLR                                                       | 0.89062343        | 2              | 2.79705   |
| P15083        | GSPHINPTDANAR                                                   | 1.11879464        | 2              | 2.34721   |
| P15083        | GVTGGSVAIVCPYNPK                                                | 0.82038074        | 2              | 4.03122   |
| <b>P15149</b> | <b>CP2A2 Cytochrome P450 2A2</b>                                | <b>1.13746266</b> | <b>8.3E-14</b> | <b>13</b> |
| P15149        | DVQECILEEAGYLIK                                                 | 6.20661973        | 3              | 3.94304   |
| P15149        | DVYSSITQLSER                                                    | 2.97438116        | 2              | 3.11845   |
| P15149        | FKFPMNLEDINEYPSPIGFTR                                           | 1.32335015        | 3              | 3.74839   |
| P15149        | FSNLAPLGIPR                                                     | 0.9995273         | 2              | 3.32725   |
| P15149        | GELPTFNILFK                                                     | 0.37589282        | 2              | 2.69453   |
| P15149        | GTDVFPPIIGSLMTEPK                                               | 0.66848246        | 2              | 4.13446   |
| P15149        | GYGFSLSNVEQAK                                                   | 0.87099182        | 2              | 3.43163   |
| P15149        | IVVLYGYDAVK                                                     | 2.47466151        | 2              | 2.60158   |
| P15149        | LEDFMIEK                                                        | 1.30087128        | 1              | 1.9668    |
| P15149        | NFIDSFLIR                                                       | 1.14063112        | 2              | 2.42815   |
| P15149        | QNHSTLDPNSPR                                                    | 0.8275833         | 2              | 2.66313   |
| P15149        | TLQGTGAPIDPSIYLSK                                               | 0.44919507        | 2              | 4.60939   |
| P15149        | TVSNVINSIVFGNR                                                  | 0.82212701        | 2              | 3.2365    |
| <b>P15178</b> | <b>SYDC Aspartyl-tRNA synthetase_cytoplasmic</b>                | <b>1.77324103</b> | <b>0.28636</b> | <b>3</b>  |
| P15178        | ALHHGIDLEK                                                      | 1.34616071        | 3              | 3.30517   |
| P15178        | LEYCEALAMLR                                                     | 1.8755418         | 2              | 2.95031   |
| P15178        | QMVKFAANINK+Oxidation(1                                         | 1.35977273        |                |           |
| <b>P15429</b> | <b>ENOB Beta_enolase</b>                                        | <b>1.33219264</b> | <b>0.64361</b> | <b>6</b>  |
| P15429        | DATNVGDEGGFAPNILENNEALELLK                                      | 2.41827571        | 2              | 5.12995   |
| P15429        | FMIELDGTENK                                                     | 1.46828488        | 2              | 3.28281   |
| P15429        | HIADLAGNPDLVLPVPAFNVINGGSHAGNK                                  | 2.00787276        | 3              | 5.6371    |
| P15429        | IEEALGDK                                                        | 7.860393          | 1              | 2.41668   |

|               |                                                                        |                   |                |           |
|---------------|------------------------------------------------------------------------|-------------------|----------------|-----------|
| P15429        | TAIQAAGYDPK                                                            | 5.48223902        | 2              | 2.97379   |
| P15429        | VNQIGSVTESIQACK                                                        | 1.16956192        | 2              | 4.95931   |
| <b>P15650</b> | <b>ACADL Long_chain specific acyl_CoA dehydrogenase_mitochondrial</b>  | <b>1.33854241</b> | <b>3.3E-07</b> | <b>20</b> |
| P15650        | AFVDSCLQLHETK                                                          | 1.12891318        | 2              | 4.01376   |
| P15650        | AQDTAELFFEDVR                                                          | 1.52087221        | 2              | 4.80286   |
| P15650        | AQDTAELFFEDVRLPASALLGEENK                                              | 1.4439126         | 3              | 5.32631   |
| P15650        | CIGAIAMTEPGAGSDLQGVR                                                   | 1.45615426        | 2              | 6.35955   |
| P15650        | CIGAIAMTEPGAGSDLQGVR+Oxidation(6                                       | 1.5002189         |                |           |
| P15650        | EQIEQFIPQMTAGK                                                         | 1.28857339        | 2              | 4.98789   |
| P15650        | FFQEEVIPYHEEWEK                                                        | 2.40046642        | 2              | 5.21064   |
| P15650        | GFYYLMQELPQER                                                          | 1.57917443        | 2              | 4.14586   |
| P15650        | IFSSEHDIFR                                                             | 1.17676034        | 2              | 3.04391   |
| P15650        | KFFQEEVIPYHEEWEK                                                       | 1.50718892        | 2              | 5.14368   |
| P15650        | LDSASASMAK                                                             | 1.16754902        | 2              | 2.50517   |
| P15650        | LDSASASMAK+Oxidation(7                                                 | 1.4192073         |                |           |
| P15650        | QGLLGINIAEK                                                            | 1.178149          | 2              | 3.28884   |
| P15650        | RLDSASASMAK                                                            | 1.25098956        | 2              | 3.38134   |
| P15650        | RLDSASASMAK+Oxidation(8                                                | 0.85448225        |                |           |
| P15650        | SGSDWILNGSK                                                            | 1.25500675        | 2              | 2.69857   |
| P15650        | TNICVTR                                                                | 1.13336669        | 2              | 2.35139   |
| P15650        | TVAHIQTVQHK                                                            | 1.07769884        | 2              | 2.91804   |
| P15650        | VQPIYGGTNEIMK                                                          | 1.02228426        | 2              | 3.20376   |
| P15650        | VQPIYGGTNEIMK+Oxidation(11                                             | 1.33479565        |                |           |
| <b>P15651</b> | <b>ACADS Short_chain specific acyl_CoA dehydrogenase_mitochondrial</b> | <b>1.35077364</b> | <b>0.00232</b> | <b>9</b>  |
| P15651        | ASSTANLIFEDCR                                                          | 0.85948298        | 2              | 3.35461   |
| P15651        | EEGDSWVLNGTK                                                           | 1.03256011        | 2              | 2.76697   |
| P15651        | ELVPIAAQLDK                                                            | 1.05266778        | 2              | 2.9567    |
| P15651        | ELVPIAAQLDKEHLFPTSQVK                                                  | 0.68143315        | 2              | 4.48841   |
| P15651        | GISAFVPMPTPGLTLGK                                                      | 1.66876115        | 2              | 3.62999   |
| P15651        | IGCFALSEPGNGSDAGAASTTAR                                                | 1.33305521        | 2              | 6.30175   |
| P15651        | IGIASQALGIAQASLDCAVK                                                   | 2.40719254        | 3              | 4.96987   |
| P15651        | ITEIYEGTSEIQR                                                          | 1.05531612        | 2              | 4.42685   |
| P15651        | LAASEAATAISHQAIQLGGMGYVTEMPAER                                         | 1.28598212        | 4              | 4.96333   |
| <b>P15684</b> | <b>AMPN Aminopeptidase N</b>                                           | <b>0.92493463</b> | <b>0.28965</b> | <b>5</b>  |
| P15684        | ALGDTPAPNIDTTELVER                                                     | 1.97816796        | 2              | 4.32479   |
| P15684        | AQIIHDSFNLASAGK                                                        | 0.8812491         | 2              | 3.7072    |
| P15684        | LRSALACSNEVWILNR                                                       | 1.98099357        | 2              | 2.30839   |
| P15684        | VVATTQMQAADAR                                                          | 1.41919163        | 2              | 3.71342   |
| P15684        | YVEAVSPNR                                                              | 0.88034886        | 2              | 2.46438   |
| <b>P15709</b> | <b>ST2A1 Bile salt sulfotransferase</b>                                | <b>0.97447813</b> | <b>0.79534</b> | <b>2</b>  |
| P15709        | GNVLYGSWFEHIR                                                          | 0.87405254        | 2              | 2.60428   |
| P15709        | NHFTVSQAEAFDK                                                          | 1.61599123        | 1              | 3.75484   |
| <b>P15978</b> | <b>HA11 Class I histocompatibility antigen_Non_RT1.A alpha_1 chain</b> | <b>3.62571476</b> | <b>0.00588</b> | <b>3</b>  |
| P15978        | GYEQHAYDGR                                                             | 3.56373303        | 2              | 2.4385    |
| P15978        | VEHEGLPEPLSQR                                                          | 0.51220833        | 2              | 3.09697   |
| P15978        | YSDAENPR                                                               | 4.77518774        | 2              | 2.83425   |
| <b>P15999</b> | <b>ATPA ATP synthase subunit alpha_mitochondrial</b>                   | <b>1.61379854</b> | <b>6.3E-10</b> | <b>26</b> |
| P15999        | AVDSLPIGR                                                              | 1.04760985        | 2              | 3.57164   |
| P15999        | EIVTNFLAGFEP                                                           | 2.62537797        | 2              | 2.43216   |
| P15999        | EVAFAQFGSDLDAATQQLSR                                                   | 1.6150195         | 2              | 6.61768   |
| P15999        | FESAFLSHVVSQHQSLGNIR                                                   | 1.61209435        | 2              | 6.0138    |
| P15999        | GIRPAINVGLSVSR                                                         | 1.03191654        | 3              | 3.93396   |
| P15999        | GMSLNLEPDNVGVVVFNDK                                                    | 1.27202467        | 2              | 5.63109   |

|               |                                                      |                   |                |           |
|---------------|------------------------------------------------------|-------------------|----------------|-----------|
| P15999        | GMSLNLEPDNVGVVVFNDK+Oxidation(1                      | 1.40805459        |                |           |
| P15999        | GYLDKLEPSK                                           | 0.99177235        | 1              | 2.82773   |
| P15999        | HALIYDDLK                                            | 1.48136407        | 2              | 2.7812    |
| P15999        | ILGADTSVDLEETGR                                      | 2.85481344        | 2              | 4.89381   |
| P15999        | LELAQYR                                              | 1.29791469        | 2              | 2.48399   |
| P15999        | LKEIVTNFLAGFEP                                       | 2.32857694        | 2              | 3.03922   |
| P15999        | LTDADAMK                                             | 1.08785883        | 2              | 2.66313   |
| P15999        | NVQAEEMVEFSSGLK                                      | 1.45109804        | 2              | 4.34027   |
| P15999        | QGQYSPMAIEEQVAVIYAGVR                                | 1.27811516        | 3              | 5.25586   |
| P15999        | RLTDADAMK                                            | 1.23318994        | 2              | 2.92997   |
| P15999        | RSTVAQLVK                                            | 0.10721651        | 2              | 2.43216   |
| P15999        | RTGAIVDVPVGDDELLGR                                   | 1.29166332        | 2              | 3.09896   |
| P15999        | STVAQLVK                                             | 1.42686987        | 2              | 2.52357   |
| P15999        | TGAIVDVPVGDDELLGR                                    | 1.17341431        | 2              | 4.82722   |
| P15999        | TGTAEMSSILEER                                        | 1.01041763        | 2              | 4.37411   |
| P15999        | TGTAEMSSILEER+Oxidation(5                            | 1.18303878        |                |           |
| P15999        | TSIAIDIINQK                                          | 1.20642172        | 2              | 4.61757   |
| P15999        | VLSIGDGIAR                                           | 1.02774435        | 2              | 2.91216   |
| P15999        | VVDALGNAIDGK                                         | 1.04610845        | 2              | 4.42404   |
| P15999        | VVDALGNAIDGKGPVGSK                                   | 1.038293          | 2              | 3.72534   |
| <b>P16036</b> | <b>MPCP Phosphate carrier protein_ mitochondrial</b> | <b>1.34316128</b> | <b>0.01129</b> | <b>9</b>  |
| P16036        | ALYSNILGEENTYLWR                                     | 1.06925964        | 2              | 3.14802   |
| P16036        | EEGLNAFYK                                            | 1.06959222        | 1              | 2.61662   |
| P16036        | EKGSTASQVLQR                                         | 1.32910439        | 2              | 3.08548   |
| P16036        | FGFYEVFK                                             | 1.95023879        | 2              | 2.32737   |
| P16036        | GIFNGFSITLK                                          | 1.62227962        | 2              | 3.04245   |
| P16036        | GSTASQVLQR                                           | 1.18832148        | 2              | 3.07759   |
| P16036        | GWAPTLIGYSMQGLCK                                     | 1.14748209        | 2              | 2.79063   |
| P16036        | IQTQPGYANTLR                                         | 1.28960049        | 2              | 3.7901    |
| P16036        | MYKEEGLNAFYK                                         | 0.8579122         | 3              | 3.67296   |
| <b>P16086</b> | <b>SPTA2 Spectrin alpha chain_ brain</b>             | <b>1.20015318</b> | <b>0.49063</b> | <b>36</b> |
| P16086        | ALINADELANDVAGAEALLDR                                | 1.31672723        | 2              | 5.44427   |
| P16086        | ALSSEKPYVTK                                          | 1.21289462        | 2              | 3.45721   |
| P16086        | DLASVQALLR                                           | 1.5688615         | 2              | 2.36186   |
| P16086        | DLSSVQTLTK                                           | 1.3045603         | 2              | 3.14961   |
| P16086        | GNAMVEEGHFAAEDVK                                     | 1.29048848        | 2              | 4.10589   |
| P16086        | GVIDMGNSLIER                                         | 1.27206157        | 2              | 3.07557   |
| P16086        | HQAFAELHANADR                                        | 1.62079522        | 2              | 2.91677   |
| P16086        | HQAFAELSANQSR                                        | 0.63716028        | 2              | 4.25052   |
| P16086        | HQALQAEIAGHEPR                                       | 1.2085522         | 3              | 4.75946   |
| P16086        | HQEHKGEIDAHEDSFK                                     | 0.88196951        | 3              | 4.37673   |
| P16086        | HQLLEADISAHEDR                                       | 1.32254884        | 3              | 3.67163   |
| P16086        | KFEFQTDLAAHEER                                       | 1.42256501        | 3              | 4.31921   |
| P16086        | LGDSHDLQR                                            | 1.28441307        | 2              | 3.20129   |
| P16086        | LGESQTLQQFSR                                         | 0.41479574        | 2              | 3.10756   |
| P16086        | LIQEQHPPEELIK                                        | 0.99737844        | 2              | 4.08782   |
| P16086        | LQQSHPLSANQIQVK                                      | 1.42735293        | 2              | 4.40617   |
| P16086        | LQTASDESYKDPTNIQSK                                   | 1.13995467        | 2              | 5.09226   |
| P16086        | LQVASDENYKDPTNLQGK                                   | 1.1104699         | 2              | 5.1868    |
| P16086        | LSDDNITIGQEEIQQR                                     | 1.66263597        | 2              | 4.07653   |
| P16086        | MQHNLEQQIQAR                                         | 2.21068887        | 2              | 3.36507   |
| P16086        | MQHNLEQQIQAR+Oxidation(0                             | 0.90548589        |                |           |
| P16086        | MTLVASEDYGDTLAAIQGLLK                                | 1.12507056        | 2              | 3.79658   |
| P16086        | NQALNTDNYGHDLASVQALQR                                | 1.21205123        | 2              | 6.16928   |
| P16086        | QFQDAGHFDAENIKK                                      | 1.16268815        | 2              | 2.84578   |
| P16086        | REELITNWEQIR                                         | 1.34130978        | 2              | 4.38016   |
| P16086        | SADESGQALLAAGHYASDEVK                                | 1.46959136        | 2              | 4.57911   |

|               |                                                            |                   |                |           |
|---------------|------------------------------------------------------------|-------------------|----------------|-----------|
| P16086        | SLQQLAEER                                                  | 1.09179883        | 2              | 2.86877   |
| P16086        | SLLGSAHEVQR                                                | 0.5056016         | 2              | 3.29539   |
| P16086        | SSEEIESAFR                                                 | 1.27797945        | 2              | 2.59749   |
| P16086        | SSLSSAQADFNQLAELDR                                         | 1.22619861        | 2              | 4.74207   |
| P16086        | TATDEAYKDPNSLQGK                                           | 1.21983143        | 2              | 4.35716   |
| P16086        | TKQEEVNAAWQR                                               | 1.61122171        | 2              | 3.4483    |
| P16086        | VLETAEDIQER                                                | 0.97823262        | 2              | 3.77127   |
| P16086        | VNDVCTNGQDLIK                                              | 1.0181453         | 2              | 3.16657   |
| P16086        | VNEVNQFAAK                                                 | 1.27250616        | 2              | 2.56828   |
| P16086        | VNSLGETAQR                                                 | 1.39548343        | 2              | 3.17674   |
| <b>P16232</b> | <b>DHI1 Corticosteroid 11_beta_dehydrogenase isozyme 1</b> | <b>0.95047777</b> | <b>0.91569</b> | <b>9</b>  |
| P16232        | EECALEIIK                                                  | 1.10329688        | 1              | 2.06642   |
| P16232        | EMAYHLSKMGAHVVLTAR+Oxidation(8                             | 1.86839258        |                |           |
| P16232        | ETSGIILSQAAPK                                              | 0.9492329         | 2              | 3.13336   |
| P16232        | FALDGGFFSTIR                                               | 1.34755268        | 2              | 2.99853   |
| P16232        | FVVEAGK                                                    | 0.83618817        | 1              | 1.92354   |
| P16232        | KDEVYYDK                                                   | 0.76698948        | 2              | 2.32476   |
| P16232        | MGAHVLTAR                                                  | 2.30586553        | 1              | 1.94936   |
| P16232        | MTQPLIASYSASK                                              | 1.05570746        | 2              | 3.41385   |
| P16232        | SSWTPLLLGNPGR                                              | 0.91731618        | 2              | 3.74862   |
| <b>P16290</b> | <b>PGAM2 Phosphoglycerate mutase 2</b>                     | <b>1.61520683</b> | <b>0.07349</b> | <b>9</b>  |
| P16290        | ALPFWNEEIAPK                                               | 2.44960132        | 2              | 2.85574   |
| P16290        | AMEAVAAQGK                                                 | 1.36508277        | 2              | 2.58411   |
| P16290        | AMEAVAAQGK+Oxidation(1                                     | 1.40441394        |                |           |
| P16290        | HGESSWNQENR                                                | 5.38917733        | 2              | 3.95107   |
| P16290        | HNYIASISK                                                  | 3.6479921         | 2              | 2.52029   |
| P16290        | HYGGLTGLNK                                                 | 1.16167509        | 1              | 3.19366   |
| P16290        | SFDTPPPPMDEK                                               | 2.6131033         | 2              | 2.60675   |
| P16290        | TLWTILDVTDQMWWVPVR+Oxidation(11                            | 3.17624168        |                |           |
| P16290        | VLIAAHGNSLR                                                | 1.27329028        | 2              | 2.94739   |
| <b>P16303</b> | <b>CES3 Carboxylesterase 3</b>                             | <b>0.84296707</b> | <b>0.5829</b>  | <b>16</b> |
| P16303        | AKEAAEESHVK                                                | 0.79276914        | 2              | 4.06837   |
| P16303        | DGASEEETNLSK                                               | 0.74256827        | 2              | 4.18626   |
| P16303        | EAAEESHVK                                                  | 0.94405958        | 2              | 2.86087   |
| P16303        | ESYPFLPTVIDGVVLPK                                          | 0.83309169        | 2              | 4.15355   |
| P16303        | FAPPQPAEPWNFVK                                             | 0.38794457        | 1              | 2.33905   |
| P16303        | IGASTQAAQR                                                 | 1.03279282        | 2              | 2.80827   |
| P16303        | LDLLGNPK                                                   | 0.76433099        | 2              | 2.56699   |
| P16303        | MIPVVAEK                                                   | 0.91082731        | 1              | 1.98532   |
| P16303        | QEFGWIIPTLMGYPLSEK                                         | 1.36516105        | 2              | 2.57027   |
| P16303        | QKTEDELLETSLK                                              | 0.85241694        | 2              | 3.51366   |
| P16303        | SFNTVPYIVGINK                                              | 0.71113281        | 2              | 3.32145   |
| P16303        | TEDELLETSLK                                                | 0.72121481        | 2              | 3.86506   |
| P16303        | TPEEILAEK                                                  | 1.35232399        | 2              | 2.64664   |
| P16303        | TTTSAVMVHCLR                                               | 0.53291268        | 2              | 3.07174   |
| P16303        | TVIGDHGDELFSVFGSPFLK                                       | 1.01173712        | 2              | 5.47958   |
| P16303        | YFGGTDDPAK                                                 | 2.31366556        | 2              | 2.87755   |
| <b>P16332</b> | <b>MUTA Methylmalonyl_CoA mutase_mitochondrial</b>         | <b>1.45856422</b> | <b>0.81957</b> | <b>4</b>  |
| P16332        | GDVGMAGVAIDTVEDTK                                          | 1.47723948        | 2              | 4.29565   |
| P16332        | IDSGSEVIVGVNK                                              | 1.66008328        | 2              | 3.77944   |
| P16332        | NTQIIIQEEGIPK                                              | 1.15753381        | 2              | 3.59562   |
| P16332        | TGLQAGLTIDEFAPR                                            | 1.51418455        | 2              | 3.40072   |
| <b>P16409</b> | <b>MYL3 Myosin light chain 3</b>                           | <b>1.36724393</b> | <b>0.91564</b> | <b>8</b>  |
| P16409        | AAPAPAAAAPAAPEPERPK                                        | 7.40801116        | 2              | 4.46803   |
| P16409        | ALGQNPTQAEVLR                                              | 2.38852226        | 2              | 3.74313   |

|               |                                                         |                   |                |           |
|---------------|---------------------------------------------------------|-------------------|----------------|-----------|
| P16409        | EGNGTVMGAELR                                            | 1.36903991        | 2              | 2.73079   |
| P16409        | IEFTPEQIEEFK                                            | 1.44994404        | 2              | 3.01994   |
| P16409        | LTEDEVEK                                                | 3.03769988        | 1              | 2.14643   |
| P16409        | MMDFETFLPMLQHISK                                        | 3.34323239        | 3              | 3.83165   |
| P16409        | NKDTGTIEDFVEGLR                                         | 1.64940295        | 2              | 3.451     |
| P16409        | VFDKEGNGTVMGAELR                                        | 1.10343595        | 2              | 4.11548   |
| <b>P16617</b> | <b>PGK1 Phosphoglycerate kinase 1</b>                   | <b>1.14623371</b> | <b>1.1E-12</b> | <b>18</b> |
| P16617        | AHSSMVGVNLPQK                                           | 1.223716          | 3              | 4.06088   |
| P16617        | AHSSMVGVNLPQK+Oxidation(4                               | 1.43301874        |                |           |
| P16617        | ALESPERFLAILGGAK                                        | 0.78562486        | 3              | 4.75942   |
| P16617        | DCVGSEVENACANPAAGTVILLENLR                              | 1.46833147        | 3              | 6.49956   |
| P16617        | FCLDNGAK                                                | 1.17571437        | 1              | 1.96106   |
| P16617        | GCITIIGGGDTATCCAK                                       | 1.14156389        | 2              | 5.55183   |
| P16617        | IQLINMLDK                                               | 1.47940123        | 2              | 3.03563   |
| P16617        | IQLINMLDK+Oxidation(6                                   | 2.45361678        |                |           |
| P16617        | ITLPVDFVTADK                                            | 1.69604244        | 2              | 2.74657   |
| P16617        | ITLPVDFVTADKFDENAK                                      | 1.85918697        | 2              | 4.78655   |
| P16617        | SVVLMSHLGRPDGVPMPDK                                     | 1.11453676        | 3              | 3.74741   |
| P16617        | SVVLMSHLGRPDGVPMPDKYSLEPVAELK                           | 1.41674311        | 4              | 4.76504   |
| P16617        | TGQATVASGIPAGWMGLDCGTESSK                               | 1.1389777         | 2              | 5.03905   |
| P16617        | TGQATVASGIPAGWMGLDCGTESSK                               | 1.08002031        | 3              | 4.07681   |
| P16617        | VLNNMEIGTSLYDEEGAK                                      | 1.88459465        | 2              | 5.24542   |
| P16617        | VLPGVDALSNV                                             | 1.79031077        | 2              | 3.28639   |
| P16617        | WNTEDKVSHVSTGGGASLELLEGG                                | 1.16469201        | 3              | 4.835     |
| P16617        | YSLEPVAELK                                              | 1.13204798        | 2              | 3.49632   |
| <b>P16638</b> | <b>ACLY ATP_citrate synthase</b>                        | <b>1.4001899</b>  | <b>9.9E-20</b> | <b>25</b> |
| P16638        | AFDSGIIPMEFVNK                                          | 1.71157892        | 2              | 3.65403   |
| P16638        | AKPAMPQDSVPSPR                                          | 1.96156367        | 2              | 2.7421    |
| P16638        | DEPSVAAMVYPFTGDHK                                       | 1.09283064        | 2              | 2.95481   |
| P16638        | DLVSSLTGLLTIGDR                                         | 1.35952153        | 2              | 3.70077   |
| P16638        | EAYPEEAYIADLDAK                                         | 1.12938259        | 2              | 3.62656   |
| P16638        | FGGALDAAK                                               | 1.3988828         | 2              | 3.02035   |
| P16638        | GAIVPAQEVPPPTVPMDDYSWAR                                 | 2.95212192        | 2              | 4.09636   |
| P16638        | GGPNYQEGLR                                              | 2.07923919        | 2              | 2.95829   |
| P16638        | GVTIIGPATVGGIKPGCFK                                     | 1.81184398        | 2              | 3.70465   |
| P16638        | HLLVHAPEDK                                              | 1.00560094        | 2              | 2.68079   |
| P16638        | HLLVHAPEDKK                                             | 1.71663389        | 2              | 3.46117   |
| P16638        | IGNTGGMMLDNLASK                                         | 1.85364991        | 2              | 4.10394   |
| P16638        | LGLVGVNLSLDGVK                                          | 3.29024001        | 2              | 2.49956   |
| P16638        | LNAEDIK                                                 | 1.4216168         | 1              | 1.94409   |
| P16638        | QHFPATPLLDYALEVEK                                       | 1.41434042        | 3              | 3.84036   |
| P16638        | RGGPNYQEGLR                                             | 2.08952384        | 2              | 3.3       |
| P16638        | SAYDSTMETMNYAQIR                                        | 1.95460643        | 2              | 2.93082   |
| P16638        | SGGMSNELNNISR                                           | 1.16903139        | 2              | 3.65613   |
| P16638        | SMGFIGHYLDQK                                            | 1.16619211        | 2              | 2.91414   |
| P16638        | TIAlIAEGIPEALTR                                         | 1.63740553        | 2              | 4.98087   |
| P16638        | TTDGVYEGVAIGGDR                                         | 1.12576107        | 2              | 3.3363    |
| P16638        | TTDGVYEGVAIGGDRYPGSTFMDHVL                              | 2.0406894         | 3              | 3.45261   |
| P16638        | VDATADYICK                                              | 1.47413991        | 2              | 2.63092   |
| P16638        | WGDIFFPPFGR                                             | 1.34249509        | 2              | 3.90479   |
| P16638        | YICTTSAIQNR                                             | 1.66145949        | 2              | 3.1424    |
| <b>P16970</b> | <b>ABCD3 ATP_binding cassette sub_family D member 3</b> | <b>1.03549269</b> | <b>2.1E-09</b> | <b>10</b> |
| P16970        | DQVIYPDGKEDQK                                           | 1.52706178        | 2              | 2.82678   |
| P16970        | EGGWDSVQDWMDVLSGGEK                                     | 1.61233976        | 2              | 2.89161   |
| P16970        | FDHVPLATPNGDILIQDLSFEVR                                 | 1.18242313        | 3              | 4.14856   |
| P16970        | GIEGAQASPLIPGAGEIINADNIK                                | 0.61260024        | 3              | 5.36746   |

|               |                                                             |                   |                |           |
|---------------|-------------------------------------------------------------|-------------------|----------------|-----------|
| P16970        | GISDQVLK                                                    | 1.46672017        | 1              | 1.94651   |
| P16970        | GYLDNVQLGHILER                                              | 0.92138733        | 2              | 3.56445   |
| P16970        | HLHSTHSELLEDYYQSGR                                          | 1.1174051         | 3              | 5.85202   |
| P16970        | ITELMQVLK                                                   | 1.92766848        | 2              | 2.83461   |
| P16970        | KGISDQVLK                                                   | 0.691498          | 2              | 2.51888   |
| P16970        | SGANVLICGPNCGCK                                             | 0.95654691        | 2              | 3.2054    |
| <b>P17074</b> | <b>RS19 40S ribosomal protein S19</b>                       | <b>1.69028805</b> | <b>0.02579</b> | <b>5</b>  |
| P17074        | ELAPYDENWFYTR                                               | 1.43658813        | 2              | 2.95906   |
| P17074        | HKELAPYDENWFYTR                                             | 1.51356364        | 3              | 4.61017   |
| P17074        | LKVPEWVDTVK                                                 | 1.9521256         | 3              | 3.3472    |
| P17074        | RVLQALEGLK                                                  | 2.51184958        | 3              | 3.81539   |
| P17074        | VLQALEGLK                                                   | 1.6246614         | 2              | 2.70721   |
| <b>P17077</b> | <b>RL9 60S ribosomal protein L9</b>                         | <b>1.52276902</b> | <b>0.02321</b> | <b>8</b>  |
| P17077        | DFNHINVELSLLGK                                              | 2.15419458        | 2              | 3.0464    |
| P17077        | FLDGIYVSEK                                                  | 1.28371813        | 2              | 3.12915   |
| P17077        | GTVQQPDE                                                    | 27.0341601        | 1              | 2.03732   |
| P17077        | KFLDGIYVSEK                                                 | 1.2123886         | 2              | 2.94164   |
| P17077        | SVYAHFPINVVIQENGLVEIR                                       | 1.52302704        | 3              | 3.82579   |
| P17077        | TGVACSVSQAQK                                                | 1.21919761        | 2              | 3.50443   |
| P17077        | TICSHVQNMK                                                  | 1.5621145         | 2              | 3.17312   |
| P17077        | TILSNQTVDIPENVDTLTK                                         | 1.22996507        | 2              | 4.8665    |
| <b>P17078</b> | <b>RL35 60S ribosomal protein L35</b>                       | <b>1.28774928</b> | <b>0.0066</b>  | <b>2</b>  |
| P17078        | QLDDLKVELSCLR                                               | 1.32352604        | 2              | 2.97702   |
| P17078        | VLTVINQTQK                                                  | 1.2810953         | 2              | 2.92333   |
| <b>P17178</b> | <b>CP27A Sterol 26_hydroxylase_mitochondrial</b>            | <b>1.65330373</b> | <b>9.8E-05</b> | <b>5</b>  |
| P17178        | DHESTEGPGTGQDRPR                                            | 2.62486908        | 2              | 3.35757   |
| P17178        | SLAELPGPGTLR                                                | 1.82173604        | 2              | 2.61094   |
| P17178        | TNVNLLASAPLLEQVMR                                           | 1.60459063        | 2              | 3.65578   |
| P17178        | VGCLEPSIPEDTATFIR                                           | 1.71301913        | 2              | 3.21551   |
| P17178        | YEVVLSPGMGVEK                                               | 1.51441424        | 2              | 3.42202   |
| <b>P17209</b> | <b>MYL4 Myosin light chain 4</b>                            | <b>1.24216386</b> | <b>0.8585</b>  | <b>2</b>  |
| P17209        | HVLATLGEK                                                   | 2.67019326        | 1              | 2.64427   |
| P17209        | ITYGQCQGDVLR                                                | 1.14687765        | 2              | 2.3725    |
| <b>P17425</b> | <b>HMCS1 Hydroxymethylglutaryl_CoA synthase_cytoplasmic</b> | <b>0.62084515</b> | <b>0.9378</b>  | <b>10</b> |
| P17425        | ASAELFNQK                                                   | 0.78337388        | 2              | 3.51042   |
| P17425        | GTHMQHAYDFYKPDMLSEYPVVDGK                                   | 0.71395015        | 3              | 5.27687   |
| P17425        | ITASLCDLK                                                   | 0.74483446        | 2              | 2.53664   |
| P17425        | LEDTYFDRDVEK                                                | 0.67667068        | 2              | 2.96751   |
| P17425        | MFLNDFLNDQNR                                                | 1.33846192        | 2              | 3.48395   |
| P17425        | NSIYSGLEAFGDVK                                              | 0.70928542        | 2              | 3.22585   |
| P17425        | NLSYDCIGR                                                   | 0.4155699         | 1              | 2.08573   |
| P17425        | TCVAPDVFAENMK                                               | 0.80418686        | 2              | 3.25146   |
| P17425        | VTQDATPGSALDK                                               | 0.58720437        | 2              | 3.6139    |
| P17425        | YTIGLGQAR                                                   | 0.59150125        | 2              | 2.76626   |
| <b>P17426</b> | <b>AP2A1 AP_2 complex subunit alpha_1</b>                   | <b>1.33342204</b> | <b>0.10148</b> | <b>3</b>  |
| P17426        | FFQPTEMAAQDFFQR+Oxidation(6                                 | 1.31866086        |                |           |
| P17426        | NADVELQQR                                                   | 1.3300405         | 2              | 2.64205   |
| P17426        | VGGYILGEFGNLIAGDPR                                          | 1.39650851        | 2              | 3.94523   |
| <b>P17475</b> | <b>A1AT Alpha_1_antiproteinase</b>                          | <b>2.23837624</b> | <b>9.9E-20</b> | <b>9</b>  |
| P17475        | AFHLLQLTLNRPDSELQLNTGNGLFVNK                                | 0.6992794         | 3              | 4.54079   |
| P17475        | GTEAAGATVVEAVPMSLPPQVK                                      | 1.30114064        | 2              | 2.61991   |
| P17475        | MQHLEQLTK                                                   | 3.79801976        | 1              | 3.1274    |
| P17475        | MQHLEQLTK+Oxidation(0                                       | 3.70143819        |                |           |
| P17475        | NNYHSEAFSVNFADSEEAKK                                        | 3.48104402        | 3              | 5.07493   |
| P17475        | SAILYFPK                                                    | 4.03507985        | 2              | 2.39516   |
| P17475        | TLLSSLGITR                                                  | 3.80511091        | 2              | 2.98003   |

|               |                                                        |                   |                |           |
|---------------|--------------------------------------------------------|-------------------|----------------|-----------|
| P17475        | VFNNADLSGITEDAPLK                                      | 2.23713342        | 2              | 5.83886   |
| P17475        | VINDYVEK                                               | 2.13346285        | 2              | 2.65176   |
| <b>P17702</b> | <b>RL28 60S ribosomal protein L28</b>                  | <b>1.80160906</b> | <b>0.00013</b> | <b>2</b>  |
| P17702        | NCSSFLIK                                               | 1.80145649        | 2              | 2.42029   |
| P17702        | QTYSTEPNNLK                                            | 1.8016092         | 2              | 2.77923   |
| <b>P17712</b> | <b>HXK4 Glucokinase</b>                                | <b>1.36816423</b> | <b>0.37913</b> | <b>2</b>  |
| P17712        | ASGAEGNNIVGLLR                                         | 1.11171197        | 2              | 2.30268   |
| P17712        | STPEGSEVGDFLSLDLGGTNFR                                 | 1.47491442        | 2              | 3.17647   |
| <b>P17764</b> | <b>THIL Acetyl_CoA acetyltransferase_mitochondrial</b> | <b>1.25733859</b> | <b>6.3E-10</b> | <b>15</b> |
| P17764        | EEQDKYAIGSYTR                                          | 1.20845349        | 2              | 3.48772   |
| P17764        | ENGTVTAANASTLNDGAAAVVLMTAEAAQR                         | 1.57891674        | 3              | 3.96508   |
| P17764        | EYVMGNVIQGGEGQAPTR                                     | 0.7187909         | 2              | 5.06654   |
| P17764        | FANEITPITISVK                                          | 1.51291937        | 2              | 4.12178   |
| P17764        | GKPDVVVKEDEEYK                                         | 1.25423024        | 2              | 3.72773   |
| P17764        | GKPDVVVKEDEEYKR                                        | 1.19011468        | 2              | 5.17298   |
| P17764        | IAAFADAAVDPIDFPLAPAYAVPK                               | 1.78714812        | 2              | 4.96492   |
| P17764        | IHMGNCAENTAK                                           | 1.35632175        | 3              | 3.55753   |
| P17764        | IHMGNCAENTAK+Oxidation(2                               | 1.31554405        |                |           |
| P17764        | LEDLIVK                                                | 1.07179766        | 2              | 2.40383   |
| P17764        | LGTIAIQGAIEK                                           | 1.53095951        | 2              | 3.37283   |
| P17764        | QATLGAGLPIATPCTTVNK                                    | 1.12670286        | 2              | 4.63856   |
| P17764        | QGEFGLASICNGGGGASAVLIEK                                | 1.06881094        | 2              | 5.11913   |
| P17764        | TPIGSFLGSLASQPATK                                      | 1.90126049        | 2              | 4.31948   |
| P17764        | VNVHGGAVSLGHPIGMSGAR                                   | 1.2809528         | 2              | 5.8808    |
| <b>P17879</b> | <b>HS71B Heat shock 70 kDa protein 1B</b>              | <b>1.152522</b>   | <b>0.99999</b> | <b>3</b>  |
| P17879        | QTQFTTYSNQPGLVLIQVYEGER                                | 1.19567885        | 3              | 5.54856   |
| P17879        | TTPSYVAFTDTER                                          | 1.08358372        | 2              | 3.62278   |
| P17879        | VEIIANDQGNR                                            | 6.36247401        | 2              | 3.76421   |
| <b>P17988</b> | <b>ST1A1 Sulfotransferase 1A1</b>                      | <b>1.40207523</b> | <b>9.9E-20</b> | <b>4</b>  |
| P17988        | CPGVPSGLETLEETPAPR                                     | 2.11410062        | 2              | 4.23585   |
| P17988        | NTFTVAQNER                                             | 1.3866602         | 2              | 3.56406   |
| P17988        | SLPEETVDSIVHHTSFK                                      | 1.97841862        | 2              | 4.40445   |
| P17988        | THLPLSLLPQSLLDQK                                       | 2.62071755        | 2              | 4.71143   |
| <b>P18163</b> | <b>ACSL1 Long_chain_fatty_acid_CoA ligase 1</b>        | <b>1.11840919</b> | <b>0.87499</b> | <b>29</b> |
| P18163        | AELSVIFADKPEK                                          | 1.12958642        | 2              | 3.35532   |
| P18163        | ALEDLGR                                                | 0.85240856        | 2              | 2.33962   |
| P18163        | ALKPPCDLSMQSVEVTGTTEGVR                                | 1.1717458         | 2              | 4.30022   |
| P18163        | ALKPPCDLSMQSVEVTGTTEGVR+Oxidation(9                    | 1.33984833        |                |           |
| P18163        | CGVEIIGLK                                              | 1.05352826        | 2              | 2.87604   |
| P18163        | DGWLHTGDIGK                                            | 1.01482649        | 2              | 2.7965    |
| P18163        | GAMVTHQNIMNDCSGFIK                                     | 1.11024008        | 2              | 5.14771   |
| P18163        | GAMVTHQNIMNDCSGFIK+Oxidation(2                         | 1.14195083        |                |           |
| P18163        | GFQGSFEELCR                                            | 1.09394498        | 2              | 3.64198   |
| P18163        | GIAVHPELFSIDNGLLPTLK                                   | 1.54620146        | 2              | 5.30351   |
| P18163        | GIQVSNDBGPCLSGR                                        | 1.39233088        | 2              | 4.54336   |
| P18163        | IENIYLR                                                | 1.00669289        | 2              | 2.80915   |
| P18163        | IFGQANTSVK                                             | 1.09469081        | 2              | 2.8254    |
| P18163        | IIVIMDSYDNDLVER                                        | 1.70366828        | 2              | 5.06847   |
| P18163        | LLLEGVENK                                              | 1.11369048        | 2              | 3.34425   |
| P18163        | LLMDDLK                                                | 1.11008078        | 2              | 2.50697   |
| P18163        | LIMITGAAPVSATVLTFLR                                    | 1.96080273        | 3              | 4.11402   |
| P18163        | LVDVEDMNYQAAK                                          | 0.91156588        | 2              | 4.64933   |
| P18163        | NAGLKPFEQVK                                            | 1.09031606        | 2              | 3.77725   |
| P18163        | NNSLWDK                                                | 1.03456053        | 2              | 2.49225   |
| P18163        | QVAEMAECIGSALIQK                                       | 1.16128838        | 2              | 5.53411   |
| P18163        | SAVLEDDKLLLYYDDVVR                                     | 2.08303769        | 3              | 3.61841   |



|               |                                                           |                   |                |           |
|---------------|-----------------------------------------------------------|-------------------|----------------|-----------|
| P18163        | SQIDELYSTIK                                               | 0.86613699        | 2              | 3.61558   |
| P18163        | SQIDELYSTIKI                                              | 1.20475216        | 2              | 3.94699   |
| P18163        | TAEALDKDGLHTGDIGK                                         | 1.08476503        | 2              | 5.25147   |
| P18163        | TKPKPPEPEDLAICFTSGTTGNPK                                  | 1.93845679        | 3              | 5.15537   |
| P18163        | TMYDGFQR                                                  | 2.88212178        | 1              | 1.94556   |
| P18163        | VLQPTIFPVVPR                                              | 0.9632288         | 2              | 3.59794   |
| P18163        | WLLDFASK                                                  | 1.25268146        | 2              | 2.56555   |
| <b>P18297</b> | <b>SPRE Sepiapterin reductase</b>                         | <b>1.24591869</b> | <b>0.22952</b> | <b>5</b>  |
| P18297        | LGCAVCVLTGASR                                             | 1.32937218        | 2              | 3.03202   |
| P18297        | LLLINNAGTLGDVSK                                           | 1.22636136        | 2              | 3.89844   |
| P18297        | LNSEGELVDCGTSAQK                                          | 1.26109765        | 2              | 4.89868   |
| P18297        | TVVNISLCLQPFK                                             | 1.39381398        | 2              | 3.27479   |
| P18297        | VLSYAPGPLDTNMQQLAR                                        | 0.84429127        | 2              | 3.44383   |
| <b>P18298</b> | <b>METK2 S_adenosylmethionine synthase isoform type_2</b> | <b>1.56737192</b> | <b>0.6812</b>  | <b>3</b>  |
| P18298        | IIVDTYGGWGAHGGGAFSGK                                      | 1.56751572        | 2              | 5.49793   |
| P18298        | KIIVDTYGGWGAHGGGAFSGK                                     | 1.41876675        | 3              | 4.14974   |
| P18298        | YLDEDTIYHLQPSGR                                           | 1.42403922        | 2              | 4.7805    |
| <b>P18418</b> | <b>CALR Calreticulin</b>                                  | <b>1.04061654</b> | <b>0.98565</b> | <b>20</b> |
| P18418        | AKIDDPDTSKPEDWDKPEHIPDPAK                                 | 0.83811585        | 3              | 5.83845   |
| P18418        | CKDDEFTHLYTLIVRPDNTYEVK                                   | 0.93162806        | 3              | 4.92148   |
| P18418        | DMHGDSEYNIMFGPDICGPGTK                                    | 1.1471341         | 2              | 6.22996   |
| P18418        | DMHGDSEYNIMFGPDICGPGTK+Oxidation(1                        | 1.1897302         |                |           |
| P18418        | EQFLDGDAWTNR                                              | 2.327718          | 2              | 3.17007   |
| P18418        | FYALSAR                                                   | 1.75677669        | 2              | 2.38506   |
| P18418        | FYGDQEK                                                   | 1.07639813        | 1              | 2.11905   |
| P18418        | FYGDQEKDK                                                 | 1.14036779        | 1              | 2.92285   |
| P18418        | GQTLVVQFTVK                                               | 0.95882515        | 2              | 2.93733   |
| P18418        | HEQNIDCGGGYVK                                             | 1.15952384        | 2              | 4.4037    |
| P18418        | IDDPDTSKPEDWDKPEHIPDPAK                                   | 0.73392947        | 3              | 4.30204   |
| P18418        | IDNSQVESGSLEDDWDFLPPK                                     | 1.18926741        | 2              | 5.36384   |
| P18418        | IDNSQVESGSLEDDWDFLPPKK                                    | 3.10846952        | 3              | 4.88656   |
| P18418        | IKDPDAAKPEDWDER                                           | 1.43564656        | 2              | 4.368     |
| P18418        | KPEDWDEEMDGEWEPPIQNPEYK                                   | 1.89970993        | 3              | 5.51373   |
| P18418        | KVHVIFNYK                                                 | 1.23580661        | 2              | 2.33979   |
| P18418        | LFPGLDQK                                                  | 1.18685609        | 2              | 2.37105   |
| P18418        | QIDNPDYK                                                  | 1.13161499        | 1              | 2.09044   |
| P18418        | SGTIFDNFLITNDEAYAEFGNETWGVTK                              | 1.27876007        | 3              | 4.7888    |
| P18418        | VHVIFNYK                                                  | 1.04903955        | 1              | 2.55527   |
| <b>P18420</b> | <b>PSA1 Proteasome subunit alpha type_1</b>               | <b>1.35777744</b> | <b>0.05011</b> | <b>3</b>  |
| P18420        | AQPSQAADEPAEK                                             | 1.33447176        | 2              | 3.8529    |
| P18420        | IHQIEYAMEAVK                                              | 2.24545185        | 2              | 2.82726   |
| P18420        | NQYDNDVTWVSPQGR                                           | 1.67914369        | 2              | 2.99556   |
| <b>P18421</b> | <b>PSB1 Proteasome subunit beta type_1</b>                | <b>1.05162609</b> | <b>0.76301</b> | <b>4</b>  |
| P18421        | AGGSASAMLQPLLDNQVGFK                                      | 1.05076333        | 2              | 4.99356   |
| P18421        | AGGSASAMLQPLLDNQVGFK+Oxidation(7                          | 3.77548412        |                |           |
| P18421        | GAVYSFDPVGSYQR                                            | 1.30029845        | 2              | 3.00408   |
| P18421        | NMQNVEHVPLTLDR                                            | 1.19730383        | 2              | 3.64801   |
| <b>P18422</b> | <b>PSA3 Proteasome subunit alpha type_3</b>               | <b>1.45245419</b> | <b>1E-05</b>   | <b>2</b>  |
| P18422        | AVENSSTAIGIR                                              | 1.45237416        | 2              | 3.23243   |
| P18422        | TEIEKLQMKEMTCR+Oxidation(10                               | 3.04639481        |                |           |
| <b>P18445</b> | <b>RL27A 60S ribosomal protein L27a</b>                   | <b>1.18124605</b> | <b>0.49748</b> | <b>4</b>  |
| P18445        | LWTLVSEQTR                                                | 1.41605423        | 1              | 1.91416   |
| P18445        | NGVAPIIDVVR                                               | 1.54057342        | 1              | 2.15358   |
| P18445        | NQSFCTVNLDK                                               | 1.18132012        | 2              | 3.29904   |
| P18445        | RNQSFCTVNLDK                                              | 0.94132666        | 2              | 2.94568   |
| <b>P18484</b> | <b>AP2A2 AP_2 complex subunit alpha_2</b>                 | <b>1.49835399</b> | <b>0.03935</b> | <b>6</b>  |

|               |                                                                  |                   |                |           |
|---------------|------------------------------------------------------------------|-------------------|----------------|-----------|
| P18484        | FFQPTEMASQDFQQR                                                  | 1.31808214        | 2              | 4.02479   |
| P18484        | FVNLFPEVK                                                        | 1.52446275        | 2              | 2.83444   |
| P18484        | ILVAGDTMDSVK                                                     | 1.26821469        | 2              | 2.74705   |
| P18484        | LTECLELILNK                                                      | 1.39771696        | 2              | 2.42357   |
| P18484        | NNGVLFENQLLQIGLK                                                 | 1.96863255        | 2              | 3.37997   |
| P18484        | THIETVINALK                                                      | 0.70401023        | 2              | 2.8117    |
| <b>P18596</b> | <b>AT2A3 Sarcoplasmic/endoplasmic reticulum calcium ATPase 3</b> | <b>2.42175206</b> | <b>0.00837</b> | <b>4</b>  |
| P18596        | DIVPGDIVEVAVGDKVPADLR                                            | 4.36104506        | 2              | 3.38495   |
| P18596        | SLPSVETLGCTSVICSDK                                               | 2.53889845        | 2              | 4.61028   |
| P18596        | TGTLTTNQMSVCR                                                    | 1.27530955        | 2              | 3.22655   |
| P18596        | VGEATETALTCLVEK                                                  | 1.51403788        | 2              | 4.62514   |
| <b>P18757</b> | <b>CGL Cystathionine gamma_lyase</b>                             | <b>1.00857089</b> | <b>1.8E-15</b> | <b>15</b> |
| P18757        | AGDEVICMDEVYGGTNR                                                | 0.85899169        | 2              | 5.60928   |
| P18757        | ATLGISDTLIR                                                      | 1.19071936        | 2              | 3.74076   |
| P18757        | AVVLPISLATTFK                                                    | 0.84753833        | 3              | 4.28377   |
| P18757        | DLLEDLGQALK                                                      | 1.25962339        | 2              | 3.35707   |
| P18757        | FLQNSLGAVSPDFCYLCCR                                              | 2.71463655        | 2              | 3.91112   |
| P18757        | GTLQHAQVFLK                                                      | 1.49148045        | 2              | 3.35526   |
| P18757        | LFALAESLGGYESLAELPAIMTHASVPEK                                    | 2.36907248        | 3              | 4.42194   |
| P18757        | LFALAESLGGYESLAELPAIMTHASVPEKDR                                  | 2.84398203        | 4              | 5.6156    |
| P18757        | LLEAAITPQTK                                                      | 1.12237043        | 2              | 4.01647   |
| P18757        | LSVLEDEKDLLEDLGQALK                                              | 1.42243126        | 3              | 6.35427   |
| P18757        | LVWIETPTNPTLK                                                    | 1.19985609        | 2              | 3.88094   |
| P18757        | QCTGCPGMVSFYIK                                                   | 1.93794036        | 2              | 3.72762   |
| P18757        | QDSPGQSSGFVYSR                                                   | 1.21202439        | 2              | 3.85368   |
| P18757        | RVASEFGLK                                                        | 1.53677859        | 2              | 2.49904   |
| P18757        | VIYPGLPSHPQHELAK                                                 | 1.15868025        | 2              | 4.2341    |
| <b>P18886</b> | <b>CPT2 Carnitine O_palmitoyltransferase 2_mitochondrial</b>     | <b>1.32532217</b> | <b>0.00552</b> | <b>12</b> |
| P18886        | ATNLTVSAVR                                                       | 1.42361259        | 2              | 3.49467   |
| P18886        | ELHAHLLAQDK                                                      | 1.80832997        | 2              | 3.65249   |
| P18886        | HSVGLQHMMAECSK                                                   | 0.53566141        | 2              | 3.89476   |
| P18886        | LIFDGNEETLK                                                      | 0.85102105        | 2              | 3.08487   |
| P18886        | QKLIFDGNEETLKK                                                   | 1.3544115         | 2              | 2.33468   |
| P18886        | QYGQTVATYESCSTAAFK                                               | 1.48177622        | 2              | 3.69833   |
| P18886        | SEYNDQLTR                                                        | 1.59933181        | 2              | 3.07104   |
| P18886        | TETIRPASIFTK                                                     | 1.10425239        | 2              | 2.60541   |
| P18886        | TLQAGLLEPEVFHHLNPSK                                              | 0.77980513        | 2              | 3.44897   |
| P18886        | TLSIDSIQFQR                                                      | 1.60582794        | 2              | 3.0746    |
| P18886        | YILSDSSPVPEFPVAYLTSEN                                            | 1.38264347        | 2              | 5.31136   |
| P18886        | YLNAQKPLLDSDQFR                                                  | 1.17697689        | 2              | 4.65914   |
| <b>P19112</b> | <b>F16P1 Fructose_1_6_bisphosphatase 1</b>                       | <b>1.07553185</b> | <b>6.3E-13</b> | <b>19</b> |
| P19112        | AGGLATTGNEDILDIVPTEIHQK                                          | 1.12478048        | 3              | 6.45402   |
| P19112        | AGGTGEMTQLLNSLCTAIK                                              | 1.23778339        | 3              | 5.55676   |
| P19112        | APVIMGSTEDVQEFLEIYNK                                             | 2.27790222        | 2              | 4.97642   |
| P19112        | APVIMGSTEDVQEFLEIYNKDK                                           | 1.82954425        | 3              | 3.55884   |
| P19112        | DFDPAINIYIQR                                                     | 1.87293812        | 2              | 4.02159   |
| P19112        | ESPVHSICDEL                                                      | 3.09296577        | 2              | 2.35021   |
| P19112        | FPPDNSAPYGAR                                                     | 1.07400591        | 2              | 2.77043   |
| P19112        | GNIYSINEGYAK                                                     | 1.16356753        | 2              | 3.99729   |
| P19112        | KGNIYSINEGYAK                                                    | 1.36870702        | 2              | 4.48673   |
| P19112        | KLDILSNDLVINMLK                                                  | 1.49421982        | 2              | 4.76317   |
| P19112        | KTSANEPSEKDALQPGR                                                | 1.3483959         | 3              | 4.17629   |
| P19112        | LDILSNDLVINMLK                                                   | 1.50246212        | 2              | 5.10375   |
| P19112        | LLYECNPIAYVMEK                                                   | 1.60879835        | 2              | 4.45432   |
| P19112        | QAGIAQLYGIAGSTNVTGDQVK                                           | 1.33293333        | 3              | 5.78643   |

|               |                                                                            |                   |                |           |
|---------------|----------------------------------------------------------------------------|-------------------|----------------|-----------|
| P19112        | SRPSLPLQSR                                                                 | 1.06807877        | 2              | 3.35377   |
| P19112        | SSYATCVLVSEEDTHAIIIEPEKR                                                   | 1.48567478        | 3              | 5.16979   |
| P19112        | TLVYGGIFLYPANK                                                             | 1.04405236        | 2              | 3.8419    |
| P19112        | TLVYGGIFLYPANKK                                                            | 0.89533109        | 2              | 2.9054    |
| P19112        | TSANEPSEKDALQPGR                                                           | 1.19352801        | 2              | 4.4773    |
| <b>P19123</b> | <b>TNNC1 Troponin C_ slow skeletal and cardiac muscles</b>                 | <b>1.32051711</b> | <b>0.26217</b> | <b>3</b>  |
| P19123        | AAVEQLTEEQKNEFK                                                            | 3.18974855        | 2              | 2.55913   |
| P19123        | GKSEELSDLFR                                                                | 1.24653514        | 2              | 2.58643   |
| P19123        | SEELSDLFR                                                                  | 4.16235838        | 2              | 2.8364    |
| <b>P19132</b> | <b>FRIH Ferritin heavy chain</b>                                           | <b>1.27098643</b> | <b>0.19885</b> | <b>2</b>  |
| P19132        | QNYHQDSEAAINR                                                              | 2.082081          | 2              | 2.88734   |
| P19132        | YFLHQSHEER                                                                 | 1.26874698        | 2              | 2.55777   |
| <b>P19225</b> | <b>CP270 Cytochrome P450 2C70</b>                                          | <b>1.19774471</b> | <b>0.41098</b> | <b>15</b> |
| P19225        | ACIGELGAR                                                                  | 1.50087202        | 2              | 2.64995   |
| P19225        | ASLNLSNPQDFIDYFLIK                                                         | 1.75504717        | 2              | 3.1344    |
| P19225        | EALIDRGEEFSDK                                                              | 1.67622191        | 2              | 3.25692   |
| P19225        | FDPGHFLDEK                                                                 | 1.18745649        | 2              | 2.46362   |
| P19225        | FILMEINR                                                                   | 1.78778429        | 2              | 2.63737   |
| P19225        | GTSVMACTLSALHDDKEFPNPEK                                                    | 1.33315057        | 3              | 3.57707   |
| P19225        | IQEEITR                                                                    | 1.18074215        | 2              | 2.31765   |
| P19225        | IQEEVVYLLLEALR                                                             | 2.14106838        | 2              | 3.9269    |
| P19225        | KLPPGPTPLPIFGNILQVGVK                                                      | 1.11174046        | 3              | 4.03319   |
| P19225        | KTTQDVEFR                                                                  | 1.34555647        | 2              | 2.30194   |
| P19225        | LPPGPTPLPIFGNILQVGVK                                                       | 1.54820286        | 2              | 4.41558   |
| P19225        | NHMPYTDVAVLHEIQR                                                           | 1.37986262        | 3              | 3.82308   |
| P19225        | SDYFMAFSAGRR+Oxidation(4                                                   | 0.96993716        |                |           |
| P19225        | TTQDVEFR                                                                   | 1.21023987        | 2              | 2.43859   |
| P19225        | YIDFVPIPLPR                                                                | 1.18798046        | 2              | 3.12531   |
| <b>P19234</b> | <b>NDUV2 NADH dehydrogenase [ubiquinone] flavoprotein 2_ mitochondrial</b> | <b>1.04423841</b> | <b>0.58546</b> | <b>3</b>  |
| P19234        | DIEEIIDELR                                                                 | 7.62167138        | 2              | 3.61188   |
| P19234        | DTPENNPDPFDFTPENYER                                                        | 1.0296615         | 2              | 4.62126   |
| P19234        | FCCEPAGGLTSLTEPPK                                                          | 1.41761586        | 2              | 3.13799   |
| <b>P19468</b> | <b>GSH1 Glutamate__cysteine ligase catalytic subunit</b>                   | <b>1.19615107</b> | <b>0.94736</b> | <b>9</b>  |
| P19468        | ASGELMTVAR                                                                 | 1.15624578        | 2              | 2.94006   |
| P19468        | CNQIANELCEPELLGSGFR                                                        | 0.93512617        | 2              | 5.33809   |
| P19468        | IHLDDANESDHFENIQSTNWQTMR                                                   | 0.92976054        | 3              | 5.0486    |
| P19468        | NTPSPFVETPPEDEEASK                                                         | 1.14778722        | 2              | 4.59331   |
| P19468        | SLFFPDEAINK                                                                | 1.12762561        | 2              | 2.60786   |
| P19468        | SRYDSIDSYLSK                                                               | 0.77544357        | 2              | 2.70342   |
| P19468        | VQLLLNGGDVLETLQEK                                                          | 1.30405448        | 2              | 4.6747    |
| P19468        | VVINVPFK                                                                   | 2.15351303        | 2              | 2.69334   |
| P19468        | WGVISASVDDR                                                                | 1.71027656        | 2              | 3.13825   |
| <b>P19488</b> | <b>UDB37 UDP__glucuronosyltransferase 2B37</b>                             | <b>1.07884104</b> | <b>0.97709</b> | <b>9</b>  |
| P19488        | AEMWLIR                                                                    | 1.21987578        | 2              | 2.89249   |
| P19488        | ANAIAWALAIQIPQK                                                            | 1.46465651        | 3              | 6.45927   |
| P19488        | FETFPTSFSK                                                                 | 0.98770353        | 1              | 1.90668   |
| P19488        | FETFPTSFSKDELEK                                                            | 0.77201066        | 2              | 4.31848   |
| P19488        | GAAVTLNIR                                                                  | 1.27416106        | 2              | 2.56193   |
| P19488        | GHEVTVLKPSAYYVLDPK                                                         | 0.82109199        | 2              | 4.53022   |
| P19488        | NWDPFYTEILGRPTTLAETMGK                                                     | 1.55986779        | 2              | 4.86697   |
| P19488        | SDLFNALK                                                                   | 1.00537752        | 2              | 2.55647   |
| P19488        | TILDELVQR                                                                  | 0.95792879        | 2              | 3.39544   |
| <b>P19511</b> | <b>AT5F1 ATP synthase subunit b_ mitochondrial</b>                         | <b>1.12413048</b> | <b>0.00502</b> | <b>10</b> |
| P19511        | EGEHMINWVEK                                                                | 1.38532157        | 2              | 2.32933   |

|               |                                                                  |                   |                |           |
|---------------|------------------------------------------------------------------|-------------------|----------------|-----------|
| P19511        | HVIQSISAQQEK                                                     | 1.18297815        | 2              | 3.97659   |
| P19511        | HVIQSISAQQEKETIAK                                                | 1.28150356        | 3              | 4.75691   |
| P19511        | HYLFDVQR                                                         | 1.10201537        | 2              | 2.68848   |
| P19511        | KEGEHMINWVEK                                                     | 1.10266213        | 2              | 2.30447   |
| P19511        | LDYHISVQDMMR                                                     | 1.52328503        | 3              | 4.55136   |
| P19511        | LNEEKIAQLEEIK                                                    | 0.99359317        | 2              | 2.53071   |
| P19511        | NNIALALEVTYR                                                     | 2.28991389        | 2              | 2.62271   |
| P19511        | YGASIGEFIDK                                                      | 1.30776759        | 2              | 2.8361    |
| P19511        | YGASIGEFIDKLNEEK                                                 | 3.93454496        | 2              | 3.47583   |
| <b>P19643</b> | <b>AOFB Amine oxidase [flavin_containing] B</b>                  | <b>1.07565664</b> | <b>0.04821</b> | <b>13</b> |
| P19643        | FIGGSGQVSR                                                       | 1.40947376        | 2              | 3.31743   |
| P19643        | IISTTNGGQER                                                      | 0.69945152        | 2              | 2.73166   |
| P19643        | IPEDEIWQPEPESVDVPARPITNTFLER                                     | 1.75862142        | 3              | 4.63586   |
| P19643        | KFIGGSGQVSR                                                      | 0.71175084        | 2              | 3.04442   |
| P19643        | KLCELYAK                                                         | 0.49931096        | 2              | 2.52401   |
| P19643        | LERPVIHIDQTGENVVVK                                               | 1.1572215         | 2              | 5.29637   |
| P19643        | LLHDCGLSVVLEAR                                                   | 2.39700483        | 2              | 3.56399   |
| P19643        | TLNHEIYEAK                                                       | 1.40117268        | 2              | 3.05249   |
| P19643        | TMDEMGEIPSDAPWK                                                  | 1.3714586         | 2              | 4.41484   |
| P19643        | VKLERPVIHIDQTGENVVVK                                             | 0.93715006        | 3              | 4.44664   |
| P19643        | VLNSQEALQPVHYEEK                                                 | 1.29669861        | 2              | 4.6807    |
| P19643        | YVDLGGSVVGPQTQNR                                                 | 0.98407153        | 2              | 5.30995   |
| P19643        | YVISAIPPVLGMK                                                    | 1.78256978        | 2              | 3.2598    |
| <b>P19804</b> | <b>NDKB Nucleoside diphosphate kinase B</b>                      | <b>1.39822183</b> | <b>0.00311</b> | <b>9</b>  |
| P19804        | DRPFFPGLVK                                                       | 1.24824602        | 2              | 2.51363   |
| P19804        | EIGLWFKPEELIDYK                                                  | 1.37558383        | 2              | 3.83056   |
| P19804        | GDFCIQVGR                                                        | 1.20121194        | 2              | 3.31658   |
| P19804        | NIIHGSDSVESA EK                                                  | 1.25556098        | 3              | 4.01611   |
| P19804        | NIIHGSDSVESA EKEIGLWFKPEELIDYK                                   | 1.49961391        | 4              | 4.8357    |
| P19804        | TFIAIKPDGVQR                                                     | 1.16362003        | 2              | 2.94786   |
| P19804        | VMLGETNPADSKPGTIR                                                | 1.79166898        | 2              | 4.49908   |
| P19804        | VMLGETNPADSKPGTIR+Oxidation(1                                    | 1.40359003        |                |           |
| P19804        | YMNSGPPVAMVWEGLNVVK                                              | 1.55080206        | 2              | 5.32369   |
| <b>P19814</b> | <b>TGON3 Trans_Golgi network integral membrane protein TGN38</b> | <b>2.57641883</b> | <b>0.00576</b> | <b>2</b>  |
| P19814        | DSGSPTGGSDNTTGGDSNK                                              | 2.54364318        | 2              | 4.74314   |
| P19814        | TSGGDSNKPTGSDNDKPTGGDSNKPTSK                                     | 4.31797058        | 4              | 4.65954   |
| <b>P19944</b> | <b>RLA1 60S acidic ribosomal protein P1</b>                      | <b>1.33430343</b> | <b>9.3E-07</b> | <b>2</b>  |
| P19944        | AAGVNVPEFWPGLFAK                                                 | 1.91755298        | 2              | 2.94979   |
| P19944        | ALANVNI GSLICNVGAGGPAPAAGA APAGGPAPSAAAAPAE EK                   | 1.32579741        | 4              | 6.26471   |
| <b>P19945</b> | <b>RLA0 60S acidic ribosomal protein P0</b>                      | <b>1.64735183</b> | <b>9.9E-20</b> | <b>10</b> |
| P19945        | AFLADPSAFAAAA PVA AATTA AAAAA A PAK                              | 1.46455872        | 2              | 6.14348   |
| P19945        | AGAIAPCEVT VPA QNTGLGPEK                                         | 1.01510097        | 3              | 4.84083   |
| P19945        | CFIVGADNVGSK                                                     | 1.20354156        | 2              | 3.4121    |
| P19945        | GHLENNPALEK                                                      | 1.21950159        | 2              | 3.68968   |
| P19945        | GNVGFVFTK                                                        | 1.14234002        | 2              | 2.77154   |
| P19945        | GTIEILSDVQLIK                                                    | 1.58765414        | 2              | 3.62435   |
| P19945        | IIQLDDYPK                                                        | 2.15250919        | 2              | 3.74527   |
| P19945        | NVASVCLQIGYPTVASVPHSIINGYK                                       | 1.56798686        | 3              | 4.19996   |
| P19945        | TSFFQALGITTK                                                     | 1.67753184        | 2              | 4.16189   |
| P19945        | VLALSVETDYTFPLAEK                                                | 1.86792634        | 2              | 3.38682   |
| <b>P20059</b> | <b>HEMO Hemopexin</b>                                            | <b>1.03576413</b> | <b>0.00791</b> | <b>5</b>  |
| P20059        | ELGSPPGISLDTIDAAFSCPGSSK                                         | 1.76263202        | 2              | 5.17846   |
| P20059        | FNPVTGEVPPR                                                      | 1.06718929        | 2              | 2.65569   |
| P20059        | LFQEEFPGIPYPPDAAVECHR                                            | 1.37868674        | 3              | 4.34402   |
| P20059        | SGAQATWAELSWPHEK                                                 | 0.70008418        | 2              | 3.12737   |

|               |                                                                  |                   |                |           |
|---------------|------------------------------------------------------------------|-------------------|----------------|-----------|
| P20059        | VDGALCLEK                                                        | 1.78973439        | 2              | 2.54823   |
| <b>P20070</b> | <b>NB5R3 NADH_cytochrome b5 reductase 3</b>                      | <b>0.98272147</b> | <b>0.99093</b> | <b>6</b>  |
| P20070        | IDGNLVRPYTPVSSDDDKGFVLDLVK                                       | 1.38307233        | 3              | 5.06436   |
| P20070        | LIDKEIISHDTR                                                     | 1.25555292        | 3              | 4.14048   |
| P20070        | MSQYLENMNIGDTIEFR                                                | 0.79205625        | 2              | 4.42285   |
| P20070        | SSPAITLENPDIK                                                    | 0.98266665        | 2              | 3.99659   |
| P20070        | SSPAITLENPDIKYPLR                                                | 1.2508269         | 2              | 3.88838   |
| P20070        | SVGMIAGGTGITPMLQVIR                                              | 1.15506949        | 2              | 4.46415   |
| <b>P20280</b> | <b>RL21 60S ribosomal protein L21</b>                            | <b>1.16332359</b> | <b>0.96565</b> | <b>4</b>  |
| P20280        | HGVVPLATYMR                                                      | 1.1139113         | 2              | 2.56905   |
| P20280        | KGDIVDIK                                                         | 1.27552506        | 1              | 2.25277   |
| P20280        | TNGKEPELLEPIPYEFMA                                               | 1.09972639        | 2              | 3.6158    |
| P20280        | VYNVTQHAVGIIVNK                                                  | 0.97355539        | 2              | 4.42374   |
| <b>P20673</b> | <b>ARLY Argininosuccinate lyase</b>                              | <b>1.31636027</b> | <b>9E-10</b>   | <b>16</b> |
| P20673        | AEAECVLFPGYTHLQR                                                 | 1.39813605        | 2              | 4.92073   |
| P20673        | AEMQQLQLGDK                                                      | 1.25154901        | 2              | 4.53292   |
| P20673        | AVVVAEMK                                                         | 1.57762889        | 1              | 1.94993   |
| P20673        | EFNFVQLSDAYSTGSSLMPQK                                            | 2.04037408        | 2              | 5.80344   |
| P20673        | FNSSIAYDR                                                        | 1.16275534        | 2              | 2.54475   |
| P20673        | HLWNVDLQGSK                                                      | 1.2311186         | 1              | 3.30696   |
| P20673        | INVLPGLSGAIGNPLGVDR                                              | 2.09090441        | 2              | 5.48454   |
| P20673        | KNPDSLELIR                                                       | 1.03293518        | 2              | 2.61251   |
| P20673        | LKELIGEAAAGK                                                     | 1.55499342        | 2              | 3.19458   |
| P20673        | LYPNDEDIHTANER                                                   | 56.7066278        | 2              | 3.91401   |
| P20673        | MAEDLILYGTK                                                      | 1.09491134        | 2              | 3.70237   |
| P20673        | MAEDLILYGTK+Oxidation(0                                          | 1.4899454         |                |           |
| P20673        | NDQVVTDLR                                                        | 1.10316188        | 2              | 3.21711   |
| P20673        | SRNDQVVTDLR                                                      | 1.38793354        | 2              | 2.88317   |
| P20673        | VAEEWAQGIFK                                                      | 1.80856749        | 2              | 3.5697    |
| P20673        | VLIAMVDR                                                         | 1.42568743        | 2              | 2.75694   |
| <b>P20788</b> | <b>UCRI Cytochrome b_c1 complex subunit Rieske_mitochondrial</b> | <b>1.06295993</b> | <b>0.91739</b> | <b>6</b>  |
| P20788        | EIDQEA AVEVSQLR                                                  | 1.08162596        | 2              | 4.2458    |
| P20788        | EIDQEA AVEVSQLRDPQHDLR                                           | 0.73202917        | 3              | 3.37509   |
| P20788        | ESLSGQAATRLVATVGLNVPASVR                                         | 1.46314251        | 2              | 2.50068   |
| P20788        | GVAGALRPLLQSAVPATSEPPVLDVK                                       | 1.04516589        | 3              | 4.80667   |
| P20788        | LSDIPEGK                                                         | 1.34587468        | 1              | 2.02734   |
| P20788        | SGPFAPVLSATSR                                                    | 1.0921133         | 2              | 2.8626    |
| <b>P20801</b> | <b>TNNC2 Troponin C_skeletal muscle</b>                          | <b>2.40098794</b> | <b>0.61935</b> | <b>4</b>  |
| P20801        | GKSEELAECFR                                                      | 4.26899073        | 2              | 3.24512   |
| P20801        | NADGYIDAEELAEIFR                                                 | 1.27934818        | 2              | 4.82179   |
| P20801        | SEELAECFR                                                        | 2.15245069        | 2              | 3.2848    |
| P20801        | SYLSEEMIAEFK                                                     | 2.00362438        | 2              | 2.67499   |
| <b>P20814</b> | <b>CP2CD Cytochrome P450 2C13_male specific</b>                  | <b>1.67526878</b> | <b>0.00258</b> | <b>3</b>  |
| P20814        | FDYEDKDFLNLIK                                                    | 2.18296636        | 3              | 3.99428   |
| P20814        | GTAVLTSVLSVLDHDSK                                                | 1.57295088        | 2              | 3.73484   |
| P20814        | IKEHEESLDVSNPR                                                   | 1.673742          | 2              | 4.69764   |
| <b>P20817</b> | <b>CP4AE Cytochrome P450 4A14</b>                                | <b>0.85309399</b> | <b>0.94251</b> | <b>6</b>  |
| P20817        | ACQIAHEHTDGVIK                                                   | 0.82278294        | 2              | 4.26931   |
| P20817        | AQLQNEEELQK                                                      | 0.78059873        | 2              | 3.20137   |
| P20817        | AVEDLNNLTFRR                                                     | 0.81099599        | 2              | 3.3195    |
| P20817        | HLDLFDILLFAK                                                     | 1.05637736        | 2              | 3.81993   |
| P20817        | MRKAQLQNEEELQK+Oxidation(0                                       | 0.80714504        |                |           |
| P20817        | VLLYDPDYVK                                                       | 0.77838102        | 2              | 2.71002   |
| <b>P20852</b> | <b>CP2A5 Cytochrome P450 2A5</b>                                 | <b>1.05580328</b> | <b>0.76844</b> | <b>3</b>  |
| P20852        | DFIDSFLIR                                                        | 1.66090868        | 2              | 2.31995   |
| P20852        | DPKFFSNPKDFNPK                                                   | 1.61611922        | 2              | 2.538     |

|               |                                                           |                   |                |           |
|---------------|-----------------------------------------------------------|-------------------|----------------|-----------|
| P20852        | EALVDQAEFFSGR                                             | 0.9340773         | 2              | 3.36968   |
| <b>P21213</b> | <b>HUTH Histidine ammonia lyase</b>                       | <b>1.68310996</b> | <b>1.3E-07</b> | <b>12</b> |
| P21213        | ALDYLAIGVHELAAISER                                        | 1.72270844        | 3              | 4.06758   |
| P21213        | DIITTELNSATDNPMVFASR                                      | 1.83469927        | 2              | 4.21956   |
| P21213        | GETISGGNFHGEYPAK                                          | 1.36099959        | 2              | 4.13415   |
| P21213        | GEWLAVPCQDGK                                              | 1.19709596        | 2              | 2.46894   |
| P21213        | GYSGISLETLK                                               | 1.46385848        | 2              | 2.74128   |
| P21213        | LQELQVNLVR                                                | 1.71176812        | 2              | 3.17782   |
| P21213        | NKPDNGGFTSVDEVR                                           | 1.45568402        | 2              | 3.9932    |
| P21213        | SHSSGVGKPLSPER                                            | 1.27755265        | 2              | 4.37341   |
| P21213        | SLLDSDHHPSEIAESHR                                         | 1.31347016        | 3              | 4.82797   |
| P21213        | TVVYGITTFGFK                                              | 1.57338319        | 2              | 3.29553   |
| P21213        | VWEVAAPYIEK                                               | 1.54792023        | 2              | 2.41887   |
| P21213        | YIALDGDLSLSTEDLVNLGK                                      | 1.68478369        | 2              | 5.15879   |
| <b>P21396</b> | <b>AOFA Amine oxidase [flavin containing] A</b>           | <b>1.30506408</b> | <b>0.26699</b> | <b>9</b>  |
| P21396        | DVPAIEITHFLER                                             | 1.3898717         | 2              | 3.37243   |
| P21396        | FVGGSGQVSEQIMGLLGDK                                       | 1.30271561        | 2              | 3.14002   |
| P21396        | IFSVTNGGQER                                               | 0.9889823         | 2              | 2.6415    |
| P21396        | INVLVLEAR                                                 | 2.07082232        | 2              | 3.18034   |
| P21396        | KDIWVEEPESK                                               | 0.89573526        | 2              | 3.30015   |
| P21396        | KICELYAK                                                  | 0.49931096        | 2              | 2.52401   |
| P21396        | VLGSQEALYPVHYEEK                                          | 1.13116755        | 2              | 4.45402   |
| P21396        | WVDVGGAYVGPTQNR                                           | 0.72483719        | 2              | 4.50637   |
| P21396        | YVISAIPPILAK                                              | 1.34194841        | 2              | 2.94856   |
| <b>P21531</b> | <b>RL3 60S ribosomal protein L3</b>                       | <b>1.74955327</b> | <b>1.1E-07</b> | <b>7</b>  |
| P21531        | AHLMEIQVNGGTVAEK                                          | 1.10853639        | 2              | 5.38146   |
| P21531        | ERLEQQVPVNQVFGQDEMIDVIGVTK                                | 1.62878427        | 3              | 5.28547   |
| P21531        | HGSLGFLPR                                                 | 1.04230478        | 2              | 2.92632   |
| P21531        | LEQQVPVNQVFGQDEMIDVIGVTK                                  | 1.76908851        | 2              | 5.13959   |
| P21531        | NNASTDYDLSDK                                              | 1.47238341        | 2              | 3.70017   |
| P21531        | SINPLGGFVHYGEVTNDFIMLK                                    | 2.03912538        | 2              | 3.63843   |
| P21531        | TVFAEHISDECK                                              | 1.64386478        | 2              | 3.99984   |
| <b>P21533</b> | <b>RL6 60S ribosomal protein L6</b>                       | <b>1.43070043</b> | <b>2E-15</b>   | <b>10</b> |
| P21533        | AVDSQILPK                                                 | 1.40618658        | 2              | 2.78786   |
| P21533        | FVIATSTK                                                  | 1.25381826        | 1              | 2.22856   |
| P21533        | HLTDAYFK                                                  | 1.42056327        | 2              | 2.56802   |
| P21533        | HQEGEIFDTEK                                               | 1.4761245         | 2              | 3.36501   |
| P21533        | HQEGEIFDTEKEK                                             | 1.37494931        | 2              | 4.19414   |
| P21533        | HQEGEIFDTEKEYEITEQR                                       | 1.56594203        | 3              | 4.55576   |
| P21533        | QLGSGLLLVGTGPLALNR                                        | 1.54455218        | 2              | 5.19689   |
| P21533        | SQFSLTNGMYPHK                                             | 1.1249245         | 2              | 3.3313    |
| P21533        | SSITPGTVLIILTGR                                           | 1.2579878         | 2              | 4.13516   |
| P21533        | YYPTEDVPR                                                 | 3.02858418        | 1              | 1.99562   |
| <b>P21571</b> | <b>ATP5J ATP synthase_coupling factor 6_mitochondrial</b> | <b>0.94342185</b> | <b>0.19002</b> | <b>6</b>  |
| P21571        | FEVLDPKQS                                                 | 0.61800774        | 2              | 2.89692   |
| P21571        | FPTFNFDPKFEVLDPKQS                                        | 1.38460587        | 3              | 3.32777   |
| P21571        | GEMDKFPTFNFDPK                                            | 0.9897779         | 3              | 3.96244   |
| P21571        | GEMDKFPTFNFDPKFEVLDPKQS                                   | 1.52914632        | 3              | 3.83114   |
| P21571        | LASGGPVDTGPEYQQEVDR                                       | 1.26784131        | 2              | 5.31505   |
| P21571        | LASGGPVDTGPEYQQEVDRLEFK                                   | 2.64133135        | 2              | 2.94897   |
| <b>P21643</b> | <b>T23O Tryptophan 2_3_dioxygenase</b>                    | <b>6.97113295</b> | <b>9.9E-20</b> | <b>9</b>  |
| P21643        | AGTGGSSGYYLRL                                             | 5.06486423        | 2              | 2.93286   |
| P21643        | DNFEGDYNELLLK                                             | 1.95533386        | 2              | 3.59625   |
| P21643        | GGLIYGDYLLQLEK                                            | 21.1107838        | 2              | 3.62728   |
| P21643        | GLEEEFLK                                                  | 1.66291632        | 1              | 2.24592   |
| P21643        | ILNAQELQSEIK                                              | 12.301541         | 2              | 3.83426   |

|               |                                                                                    |                   |                |           |
|---------------|------------------------------------------------------------------------------------|-------------------|----------------|-----------|
| P21643        | KDSEEEKQMAEFR                                                                      | 23.8093226        | 2              | 3.85829   |
| P21643        | NLSMEDNEEDGAQTGVNR                                                                 | 119.81509         | 2              | 6.06042   |
| P21643        | YNHVCMVHRMLGSK+Oxidation(5                                                         | 1.93966637        |                |           |
| P21643        | YNHVCMVHRMLGSK+Oxidation(9                                                         | 1.64293996        |                |           |
| <b>P21670</b> | <b>PSA4 Proteasome subunit alpha type_4</b>                                        | <b>1.61897849</b> | <b>0.79712</b> | <b>2</b>  |
| P21670        | ATCIGNNSAAVSMK                                                                     | 1.20995892        | 2              | 3.41535   |
| P21670        | LLDEVFFSEK                                                                         | 1.62609173        | 2              | 3.375     |
| <b>P21775</b> | <b>THIKA 3_ketoacyl_CoA thiolase A_peroxisomal</b>                                 | <b>1.27579496</b> | <b>0.99974</b> | <b>2</b>  |
| P21775        | LKPECLGDISVGNVLEPGAGAVMAR                                                          | 1.46120106        | 2              | 5.0123    |
| P21775        | LKPECLGDISVGNVLEPGAGAVMAR+Oxidation(22                                             | 1.12367156        |                |           |
| <b>P21913</b> | <b>DHSB Succinate dehydrogenase [ubiquinone] iron_sulfur subunit_mitochondrial</b> | <b>1.29142891</b> | <b>0.24169</b> | <b>7</b>  |
| P21913        | CGPMVLDALIK                                                                        | 1.05093952        | 2              | 3.13622   |
| P21913        | CGPMVLDALIKIK                                                                      | 0.81849509        | 2              | 2.61755   |
| P21913        | CHTIMNCTQTCPK                                                                      | 1.28827989        | 2              | 4.48155   |
| P21913        | IDTDLGK                                                                            | 1.00884828        | 1              | 1.91315   |
| P21913        | IKNEIDSTLTFR                                                                       | 1.6088473         | 2              | 2.89163   |
| P21913        | LQDPFSLYR                                                                          | 1.87440089        | 2              | 2.76369   |
| P21913        | RIDTDLGK                                                                           | 1.23464051        | 2              | 2.58595   |
| <b>P21981</b> | <b>TGM2 Protein_glutamine gamma_glutamyltransferase 2</b>                          | <b>1.32184674</b> | <b>0.90192</b> | <b>6</b>  |
| P21981        | CDLEIQANGR                                                                         | 1.31907779        | 2              | 2.85641   |
| P21981        | DHHTADLCQEK                                                                        | 1.10586115        | 2              | 2.70764   |
| P21981        | KLVAEVSJK                                                                          | 2.22847941        | 2              | 2.45455   |
| P21981        | SEGTYCCGPVSVR                                                                      | 1.38288027        | 2              | 3.69216   |
| P21981        | VDFPTDIGLHK                                                                        | 0.86336681        | 2              | 2.65927   |
| P21981        | YSGCLTESNLK                                                                        | 1.13131891        | 2              | 3.55971   |
| <b>P22734</b> | <b>COMT Catechol O_methyltransferase</b>                                           | <b>1.60408348</b> | <b>5.3E-14</b> | <b>12</b> |
| P22734        | AIYQGPSSPKS                                                                        | 1.09060874        | 2              | 3.34702   |
| P22734        | EWAMNVGDAK                                                                         | 1.33651607        | 1              | 2.88443   |
| P22734        | GQIMDAVIR                                                                          | 1.14789816        | 2              | 2.9894    |
| P22734        | GQIMDAVIR+Oxidation(3                                                              | 1.80233222        |                |           |
| P22734        | GSSSFECTHYSSYLEYMK                                                                 | 6.22514206        | 2              | 4.43602   |
| P22734        | GTVLLADNVIVPGTPDFLAYVR                                                             | 2.81395498        | 3              | 5.04401   |
| P22734        | KGTVLLADNVIVPGTPDFLAYVR                                                            | 2.48670228        | 3              | 5.19426   |
| P22734        | KYDVDTLDMVFLDHWK                                                                   | 1.90639984        | 3              | 5.28126   |
| P22734        | VTILNGASQDLIPQLK                                                                   | 1.09217644        | 2              | 4.47632   |
| P22734        | YDVDTLDMVFLDHWK                                                                    | 2.5569021         | 2              | 4.49006   |
| P22734        | YLPDTLLEK                                                                          | 1.46218182        | 2              | 3.00144   |
| P22734        | YVQNAKPGDPQSVLEAIDTYCTQK                                                           | 1.74384792        | 3              | 6.4661    |
| <b>P22789</b> | <b>ST2A2 Alcohol sulfotransferase A</b>                                            | <b>1.49661736</b> | <b>0.06106</b> | <b>6</b>  |
| P22789        | EEDLILLTPK                                                                         | 1.34091532        | 2              | 2.99747   |
| P22789        | ETLQNVCKN                                                                          | 2.61642235        | 2              | 2.35427   |
| P22789        | FVVKEDLILLTPK                                                                      | 3.54059572        | 3              | 3.4317    |
| P22789        | KLEPDELVLK                                                                         | 1.59280004        | 2              | 3.76198   |
| P22789        | LEPDELVLK                                                                          | 1.31220135        | 2              | 2.3574    |
| P22789        | NHFTVAQAEAFDK                                                                      | 1.91991213        | 2              | 3.44297   |
| <b>P22791</b> | <b>HMCS2 Hydroxymethylglutaryl_CoA synthase_mitochondrial</b>                      | <b>1.24183941</b> | <b>0.02529</b> | <b>23</b> |
| P22791        | ASLDMFNK                                                                           | 1.12609861        | 2              | 2.79578   |
| P22791        | ASLDMFNKK                                                                          | 1.15107296        | 2              | 2.83551   |
| P22791        | DVGILALEVYFPAQYVDQTDLEK                                                            | 2.20108199        | 3              | 5.66205   |
| P22791        | GLKLEETYTNK                                                                        | 3.82779493        | 2              | 2.84651   |
| P22791        | GLKLEETYTNKDVDK                                                                    | 1.28515085        | 3              | 3.37082   |
| P22791        | GTHMENAYDFYKPNLASEYPLVDGK                                                          | 1.16324261        | 3              | 6.96637   |
| P22791        | GTHMENAYDFYKPNLASEYPLVDGK+Oxidation(3                                              | 1.40681669        |                |           |
| P22791        | IGAFSYGSLAASFSSFR                                                                  | 1.6944794         | 2              | 3.2888    |

|               |                                                       |                   |                |           |
|---------------|-------------------------------------------------------|-------------------|----------------|-----------|
| P22791        | LEETYTNK                                              | 1.13241132        | 2              | 3.15436   |
| P22791        | LEETYTNKDVDK                                          | 1.23475729        | 2              | 4.12729   |
| P22791        | LEVGTETIIDK                                           | 0.83051122        | 2              | 3.78082   |
| P22791        | LMFNDFLSSSSDK                                         | 1.91579145        | 2              | 4.32502   |
| P22791        | LMFNDFLSSSSDK+Oxidation(1                             | 2.35929289        |                |           |
| P22791        | LMFNDFLSSSSDKQNNLYK                                   | 1.82457482        | 2              | 4.78452   |
| P22791        | LSIQCYLR                                              | 1.27925104        | 2              | 2.44313   |
| P22791        | LVSSVSDLPK                                            | 1.24429928        | 2              | 3.45192   |
| P22791        | MGFCSVQEDINSLCLTVVQR                                  | 1.22359981        | 2              | 4.1632    |
| P22791        | MSPEEFTEIMNQR                                         | 0.92374914        | 2              | 4.89085   |
| P22791        | MSPEEFTEIMNQR+Oxidation(0                             | 1.40884201        |                |           |
| P22791        | MSPEEFTEIMNQR+Oxidation(9                             | 1.34546847        |                |           |
| P22791        | TKLPWDVAVGR                                           | 1.05368115        | 3              | 4.01192   |
| P22791        | VNFSPPGDTSNLFPGTWYLER                                 | 1.50568843        | 2              | 4.45927   |
| P22791        | YTVGLGQTR                                             | 1.13847242        | 2              | 3.44634   |
| <b>P22985</b> | <b>XDH Xanthine dehydrogenase/oxidase</b>             | <b>1.48891334</b> | <b>0.05099</b> | <b>10</b> |
| P22985        | DEVTCVGHIGAVVADTPEHAQR                                | 1.07765986        | 3              | 3.8216    |
| P22985        | DGGCCGSGSNNPNCMMNQTK                                  | 1.43556505        | 2              | 5.7519    |
| P22985        | DPPANVQLFQEVPK                                        | 1.45775264        | 2              | 2.88138   |
| P22985        | LDPTFASATLLFQK                                        | 1.64784445        | 2              | 3.80933   |
| P22985        | NQPEPTVEEIEENAFQGNLCR                                 | 1.49071795        | 2              | 5.0843    |
| P22985        | QLFQLDSPATPEK                                         | 0.83077449        | 2              | 3.4268    |
| P22985        | SVASIGGNIITASPIDLNPVFMASGAK                           | 1.43213965        | 3              | 5.2065    |
| P22985        | TGTVVALEVAHFSNGGNTEDLSR                               | 1.3717475         | 3              | 5.30885   |
| P22985        | TLLRPEEILLSIEIPYSK                                    | 0.87618221        | 3              | 4.46445   |
| P22985        | TNLPSNTAFR                                            | 1.39576959        | 1              | 2.046     |
| <b>P23358</b> | <b>RL12 60S ribosomal protein L12</b>                 | <b>1.12602802</b> | <b>0.00011</b> | <b>5</b>  |
| P23358        | CTGGEVGSALAPK                                         | 1.33627374        | 2              | 4.13048   |
| P23358        | EILGTAQSVGCNVDGR                                      | 1.27661696        | 2              | 4.50077   |
| P23358        | HNGNITFDEIVNIAR                                       | 1.41199243        | 2              | 3.85397   |
| P23358        | HPHDIIDDINSGAVECPAS                                   | 0.90877315        | 2              | 4.55591   |
| P23358        | QAQIEVPSASALIIK                                       | 2.13265793        | 2              | 3.84584   |
| <b>P23457</b> | <b>DIDH 3_alpha_hydroxysteroid dehydrogenase</b>      | <b>1.69142275</b> | <b>9.9E-20</b> | <b>10</b> |
| P23457        | ALDGLNR                                               | 1.27918225        | 2              | 2.39259   |
| P23457        | ELTQVFEFLASEDMK                                       | 2.09026478        | 2              | 4.13405   |
| P23457        | HFDSAYLYVEVEEVGQAIR                                   | 2.01218824        | 2              | 5.99956   |
| P23457        | MLDYCK                                                | 1.60124918        | 1              | 2.14713   |
| P23457        | SIGVSNFNCR                                            | 1.36556484        | 2              | 3.40528   |
| P23457        | SKDIILVSYCTLGSSR                                      | 0.93269808        | 2              | 4.44201   |
| P23457        | SPVLLDDPVLCAIAK                                       | 1.72959854        | 2              | 4.21325   |
| P23457        | VALNDGNFIPVLGFGTTVPEK                                 | 3.10191349        | 2              | 4.86066   |
| P23457        | YFDDHPNHPTDE                                          | 1.64843508        | 2              | 4.19011   |
| P23457        | YKPVCNQVECHLYLNQSK                                    | 0.84999556        | 2              | 4.63768   |
| <b>P23514</b> | <b>COPB Coatomer subunit beta</b>                     | <b>1.30971759</b> | <b>1.5E-10</b> | <b>8</b>  |
| P23514        | EAGELKPEEEITVGPVQK                                    | 0.83781558        | 2              | 4.08284   |
| P23514        | LVEKPSPLTLAPHDFANIK                                   | 1.68664602        | 3              | 3.72948   |
| P23514        | NFENLIPDAPELIHDFLVNEK                                 | 1.5687523         | 3              | 4.80343   |
| P23514        | TLQLALDLVSSR                                          | 1.30537374        | 2              | 3.4115    |
| P23514        | TNNVSEHEDTDKYR                                        | 1.05471023        | 2              | 3.81448   |
| P23514        | VLQDLVMDILR                                           | 1.68704962        | 2              | 3.52052   |
| P23514        | VLSECSPLMNDIFNK                                       | 1.37718792        | 2              | 2.86366   |
| P23514        | YEAAGTLVTLSSAPTAIK                                    | 1.46099332        | 2              | 5.29004   |
| <b>P23739</b> | <b>SUIS Sucrase_isomaltase_intestinal</b>             | <b>1.00096067</b> | <b>0.99198</b> | <b>2</b>  |
| P23739        | LPGFGFNDQFIQISTR                                      | 0.99566132        | 2              | 2.4404    |
| P23739        | RMMTLNYPPVFSPELR+Oxidation(1                          | 1.07457929        |                |           |
| <b>P23965</b> | <b>EC11 Enoyl_CoA delta isomerase 1_mitochondrial</b> | <b>1.04837277</b> | <b>0.00033</b> | <b>10</b> |



|               |                                                   |                   |                |           |
|---------------|---------------------------------------------------|-------------------|----------------|-----------|
| P23965        | ALQLGTLFPPAEALK                                   | 1.21125006        | 2              | 5.296     |
| P23965        | ATADNLIK                                          | 1.11922373        | 2              | 2.76712   |
| P23965        | AVQELWLR                                          | 1.37857933        | 2              | 2.72062   |
| P23965        | DNYVNTIGHR                                        | 1.30022003        | 2              | 2.67969   |
| P23965        | EGEAGIAVMK                                        | 1.14802367        | 1              | 2.00261   |
| P23965        | GVILTSEKPGIFASAGLDLMEMYGR                         | 1.89686761        | 3              | 5.49936   |
| P23965        | QREADIQNFTSFISR                                   | 1.06257891        | 2              | 3.04774   |
| P23965        | SLHVYLEK                                          | 0.90849112        | 1              | 2.1486    |
| P23965        | VGLVDEVVPEDQVHSK                                  | 0.97887908        | 2              | 4.8673    |
| P23965        | WFTIPDHSR                                         | 0.85707246        | 1              | 1.9616    |
| <b>P24049</b> | <b>RL17 60S ribosomal protein L17</b>             | <b>1.27766403</b> | <b>0.19779</b> | <b>4</b>  |
| P24049        | EQIVPKPEEEVAQK                                    | 1.32297646        | 2              | 3.8174    |
| P24049        | GLDVDSLVIHIIQVNK                                  | 1.46016755        | 2              | 4.39192   |
| P24049        | SAEFLHMLK                                         | 2.14353146        | 2              | 2.84709   |
| P24049        | YSLDPENPTK                                        | 0.93097595        | 2              | 2.60598   |
| <b>P24050</b> | <b>RS5 40S ribosomal protein S5</b>               | <b>1.92218212</b> | <b>0.00607</b> | <b>5</b>  |
| P24050        | AQCPIVER                                          | 1.50471928        | 2              | 2.31387   |
| P24050        | QAVDVSPLR                                         | 5.22747736        | 2              | 2.31656   |
| P24050        | RQAVDVSPLR                                        | 1.92120482        | 2              | 2.33084   |
| P24050        | VNQAIWLLCTGAR                                     | 2.43582002        | 2              | 4.2079    |
| P24050        | WSTDDVQINDISLQDYIAVK                              | 3.58493101        | 2              | 4.82144   |
| <b>P24090</b> | <b>FETUA Alpha_2_HS glycoprotein</b>              | <b>1.47076029</b> | <b>0.89601</b> | <b>6</b>  |
| P24090        | ELACDDPETEHVALIAVDYLNK                            | 1.55137579        | 2              | 4.2808    |
| P24090        | HAFSPVASVESASGEVLHSPK                             | 1.26619275        | 3              | 6.05787   |
| P24090        | LGGEESVACK                                        | 1.34565299        | 2              | 3.71209   |
| P24090        | VGQPGDAGAAGPVAPLCPGR                              | 1.14513056        | 2              | 5.20985   |
| P24090        | VLHAQCHSTPDSAEDVR                                 | 1.24663257        | 3              | 3.42023   |
| P24090        | VLHAQCHSTPDSAEDVRK                                | 1.17251977        | 3              | 4.01869   |
| <b>P24268</b> | <b>CATD Cathepsin D</b>                           | <b>1.37373504</b> | <b>6.5E-07</b> | <b>4</b>  |
| P24268        | AIGAVPLIQGEYMIPCEK                                | 1.34684573        | 2              | 3.31334   |
| P24268        | DPTGQPGGELMLGGTDSR                                | 0.90623588        | 2              | 4.73885   |
| P24268        | GGCEAIVDTGTSLLVGPVDEVK                            | 0.99097104        | 3              | 3.50207   |
| P24268        | LGGQNYELHPEK                                      | 2.12686829        | 2              | 3.24573   |
| <b>P24329</b> | <b>THTR Thiosulfate sulfurtransferase</b>         | <b>1.0968467</b>  | <b>0.00468</b> | <b>12</b> |
| P24329        | EGHPVTSESRPEPAVFK                                 | 1.4242561         | 2              | 4.57323   |
| P24329        | FQLVDSR                                           | 0.84327646        | 2              | 2.38934   |
| P24329        | GSVNVPFMNFLETEDGFVK                               | 1.82067503        | 2              | 3.25753   |
| P24329        | HVPGASFFDIEEER                                    | 1.34243934        | 2              | 4.10465   |
| P24329        | KVDLSQPLIATCR                                     | 1.01407007        | 2              | 4.65795   |
| P24329        | RFQLVDSR                                          | 0.88602044        | 2              | 2.49611   |
| P24329        | TVSVLNGGFR                                        | 1.10455758        | 2              | 2.91548   |
| P24329        | TYEQVLENLQSK                                      | 1.07863147        | 2              | 5.07622   |
| P24329        | VDLSQPLIATCR                                      | 1.05005035        | 2              | 3.73126   |
| P24329        | VLDAWYSPGTR                                       | 0.92579597        | 2              | 3.63676   |
| P24329        | WLAESIR                                           | 1.33609416        | 2              | 2.37692   |
| P24329        | YLGTPQEPDAVGLDSGHIR                               | 1.12709027        | 3              | 4.79824   |
| <b>P24368</b> | <b>PPIB Peptidyl_prolyl cis_trans isomerase B</b> | <b>1.10511689</b> | <b>0.94829</b> | <b>9</b>  |
| P24368        | DKPLKDVIIVDCGK                                    | 1.13898772        | 3              | 3.82458   |
| P24368        | DTNGSQFFITTVK                                     | 1.31357023        | 2              | 3.83181   |
| P24368        | DVIIVDCGK                                         | 0.71948311        | 1              | 1.98992   |
| P24368        | HYPGWVSMANAGK                                     | 1.80677043        | 2              | 4.00704   |
| P24368        | IEVEKPFIAIK                                       | 1.01922418        | 2              | 3.09217   |
| P24368        | IEVEKPFIAIKE                                      | 1.23730054        | 2              | 3.61651   |
| P24368        | TVDNFVALATGEK                                     | 0.92570285        | 2              | 4.10025   |
| P24368        | VLEGMDVVR                                         | 1.41762746        | 2              | 3.04046   |
| P24368        | VYFDFQIGDEPVGR                                    | 1.08636098        | 2              | 4.10535   |
| <b>P24457</b> | <b>CP2DB Cytochrome P450 2D11</b>                 | <b>1.12230383</b> | <b>0.56256</b> | <b>2</b>  |

|               |                                                                                      |                   |                |           |
|---------------|--------------------------------------------------------------------------------------|-------------------|----------------|-----------|
| P24457        | RFSVSTLR                                                                             | 0.69018948        | 2              | 2.564     |
| P24457        | SLEEWVTK                                                                             | 1.14787815        | 2              | 2.46066   |
| <b>P24470</b> | <b>CP2CN Cytochrome P450 2C23</b>                                                    | <b>0.94929878</b> | <b>0.4793</b>  | <b>12</b> |
| P24470        | ACVGESLAR                                                                            | 1.19325596        | 2              | 2.75607   |
| P24470        | DLDIKPITGGIINLPPPYK                                                                  | 0.92473766        | 2              | 3.869     |
| P24470        | EALLQQGDEFGLGR                                                                       | 1.10685895        | 2              | 2.69954   |
| P24470        | FGLLLLMK                                                                             | 2.16488907        | 2              | 3.08701   |
| P24470        | GTTVLPMLSSVMLDQK                                                                     | 1.1895209         | 2              | 3.98112   |
| P24470        | GYGLIFSNGER                                                                          | 0.87484987        | 2              | 3.7939    |
| P24470        | IEEEKDNLK                                                                            | 0.89976126        | 2              | 3.01472   |
| P24470        | LPPGPTPLPIIGNLLQLNLK                                                                 | 1.15808431        | 3              | 5.05692   |
| P24470        | RSLEERVQEER                                                                          | 1.09402448        | 2              | 2.49198   |
| P24470        | SEFHLENLAVCGSNLFTAGTETTSTTLR                                                         | 1.48120913        | 3              | 3.78411   |
| P24470        | TFLNLMDLLNK                                                                          | 1.59861731        | 2              | 3.9953    |
| P24470        | YITLLPSSLPHAVVQDTK                                                                   | 0.67894836        | 2              | 4.58589   |
| <b>P24473</b> | <b>GSTK1 Glutathione S_transferase kappa 1</b>                                       | <b>1.2005946</b>  | <b>0.82467</b> | <b>8</b>  |
| P24473        | AGMATAQAQHLLNK                                                                       | 1.29513159        | 2              | 4.19168   |
| P24473        | DEDITESQNILSAAEK                                                                     | 0.87390813        | 2              | 5.84502   |
| P24473        | DSGNQPPAMVPHK                                                                        | 1.87476398        | 2              | 2.75497   |
| P24473        | FLTAVSMEQPEMLEK                                                                      | 1.01184426        | 2              | 4.87768   |
| P24473        | IWSRDEDITESQNILSAAEK                                                                 | 1.90785448        | 3              | 3.67963   |
| P24473        | MELLAYLLGEK                                                                          | 1.44771848        | 2              | 3.85944   |
| P24473        | QLFQVPMSVPK                                                                          | 0.81068798        | 2              | 2.55549   |
| P24473        | YGAFGLPTTVAHVDGK                                                                     | 0.92637896        | 2              | 4.04841   |
| <b>P25093</b> | <b>FAAA Fumarylacetoacetase</b>                                                      | <b>1.26549268</b> | <b>2E-09</b>   | <b>16</b> |
| P25093        | AIDVGGQQR                                                                            | 1.05983629        | 2              | 3.46433   |
| P25093        | AQEHIHGMVLMNDWSAR                                                                    | 2.76578708        | 2              | 3.85305   |
| P25093        | ASLQNLISASQAQLR                                                                      | 1.00519853        | 2              | 4.88459   |
| P25093        | ASLQNLISASQAQLRDDK                                                                   | 1.5614086         | 2              | 3.58822   |
| P25093        | ASSVVVSGTPIR                                                                         | 1.26661376        | 2              | 3.83348   |
| P25093        | DIQQWEYVPLGPFLGK                                                                     | 1.44323225        | 2              | 4.99227   |
| P25093        | FGPEPIISK                                                                            | 1.06999168        | 2              | 2.89393   |
| P25093        | GEGMSQAATICR                                                                         | 1.23430653        | 2              | 3.74885   |
| P25093        | GEGMSQAATICR+Oxidation(3                                                             | 1.20676162        |                |           |
| P25093        | GKENALLPNWLHLPVGYHGR                                                                 | 1.57850684        | 4              | 4.53415   |
| P25093        | HLFTGPVLSK                                                                           | 1.20514598        | 1              | 2.73185   |
| P25093        | HQHVFDETTLNSFMGLGQAAWK                                                               | 1.17150608        | 2              | 5.42357   |
| P25093        | IGVAIGDQILDLSVIK                                                                     | 2.20685007        | 2              | 5.40393   |
| P25093        | SFGTTISPWVVPMDALMPFVVPNPK                                                            | 1.15066353        |                |           |
| P25093        | TFLLDGDEVIITGHCCQGDGYR                                                               | 1.14857546        | 2              | 5.0738    |
| P25093        | VGFGQCAGK                                                                            | 0.75879441        | 2              | 2.35363   |
| <b>P25113</b> | <b>PGAM1 Phosphoglycerate mutase 1</b>                                               | <b>1.30298201</b> | <b>0.35077</b> | <b>7</b>  |
| P25113        | ALPFWNEEIVPQIK                                                                       | 1.20376903        | 2              | 3.509     |
| P25113        | FSGWYDADLSPAGHEEAK                                                                   | 0.97913519        | 2              | 5.07037   |
| P25113        | FSGWYDADLSPAGHEEAKR                                                                  | 1.65732476        | 2              | 4.2297    |
| P25113        | HGESAWNLENR                                                                          | 1.34031007        | 2              | 3.78706   |
| P25113        | SYDVPPPPMEPDHPFYSNISK                                                                | 2.02866847        | 2              | 3.80281   |
| P25113        | YADLTEDQLPSCESLK                                                                     | 0.94117936        | 2              | 5.3641    |
| P25113        | YADLTEDQLPSCESLKDTIAR                                                                | 1.21980474        | 2              | 5.06723   |
| <b>P25235</b> | <b>RPN2 Dolichyl_diphosphooligosaccharide__protein glycosyltransferase subunit 2</b> | <b>1.20345897</b> | <b>0.0016</b>  | <b>15</b> |
| P25235        | EDQVIQLMNTIFSK                                                                       | 1.309479          | 2              | 3.88383   |
| P25235        | EETVLATVQALHTASHLSQQADLR                                                             | 1.52646678        | 3              | 5.07798   |
| P25235        | FELDTSER                                                                             | 1.31376744        | 1              | 2.39473   |
| P25235        | FPEEEAPSTVLSQNLFTPK                                                                  | 0.92232245        | 2              | 3.8375    |
| P25235        | ISTEVGITNVDLSTVDKQSIAPK                                                              | 1.28456134        | 2              | 4.68701   |

|               |                                                        |                   |                |           |
|---------------|--------------------------------------------------------|-------------------|----------------|-----------|
| P25235        | KNFESLSEAFSVASAAAALSQNR                                | 1.76712037        | 2              | 5.44087   |
| P25235        | LMDHVGTEPSIKEDQVIQLMNTIFSK                             | 1.28853393        | 3              | 5.14101   |
| P25235        | LQVSSVLSQPLAQAAVK                                      | 1.6165053         | 2              | 5.8478    |
| P25235        | LSKEETVLATVQALHTASHLSQQADLR                            | 1.64627956        | 3              | 5.56416   |
| P25235        | NFESLSEAFSVASAAAALSQNR                                 | 1.95811998        | 3              | 4.90533   |
| P25235        | NIVEEIEDLVAR                                           | 1.20044506        | 3              | 4.6323    |
| P25235        | NPILWNVADVVIK                                          | 1.14400374        | 2              | 3.25738   |
| P25235        | TGQEVVFAEPDNK                                          | 1.67762296        | 2              | 4.32545   |
| P25235        | YHVPVVVPEGSASDTQEAILR                                  | 1.13973293        | 3              | 6.39832   |
| P25235        | YIANTVELR                                              | 1.29518177        | 2              | 2.82702   |
| <b>P25318</b> | <b>chain</b>                                           | <b>1.12192004</b> | <b>0.6131</b>  | <b>3</b>  |
| P25318        | GEKGFMPGLPGLK+Oxidation(6)                             | 1.29714936        |                |           |
| P25318        | GQYLEMPLPMLPMDLKGEPGPPGKPGPR+Oxidation(5)Oxidation(12) | 1.08647999        |                |           |
| P25318        | GQYLEMPLPMLPMDLKGEPGPPGKPGPR+Oxidation(5)Oxidation(9)  | 1.08647999        |                |           |
| <b>P25409</b> | <b>ALAT1 Alanine aminotransferase 1</b>                | <b>1.38748482</b> | <b>0.46526</b> | <b>3</b>  |
| P25409        | LTEQVFNEAPGIR                                          | 1.34315469        | 2              | 2.91472   |
| P25409        | VLCVINPGNPTGQVQTR                                      | 3.36049519        | 2              | 4.50118   |
| P25409        | VLTLDTMNPVCR                                           | 1.35951599        | 2              | 2.50242   |
| <b>P26039</b> | <b>TLN1 Talin_1</b>                                    | <b>1.12052427</b> | <b>0.11111</b> | <b>24</b> |
| P26039        | ADAEGESDLENSR                                          | 1.50313558        | 2              | 3.62632   |
| P26039        | ADAEGESDLENSRK                                         | 1.26722333        | 2              | 3.20415   |
| P26039        | AGALQCSPSDVYTK                                         | 1.52845647        | 2              | 2.68833   |
| P26039        | ALEATTEHIR                                             | 1.30508172        | 2              | 2.36505   |
| P26039        | AQEACGPLEMDSALSVVQNLEK                                 | 1.46627041        | 2              | 4.49146   |
| P26039        | ASAGPQPLLVSCK                                          | 1.13735225        | 2              | 2.87108   |
| P26039        | ASVPTIQDQASAMQLSQCAK                                   | 0.76860026        | 2              | 3.36574   |
| P26039        | AVAEQIPLLVSQVGR                                        | 1.71815341        | 2              | 3.06253   |
| P26039        | EAAEGLRMATNAAAQNAIKK                                   | 1.20973097        | 2              | 2.65497   |
| P26039        | ILAQATSDLVNAIK                                         | 1.96385077        | 2              | 3.29756   |
| P26039        | LGAASLGAEDPETQVVLINAVK                                 | 2.09565765        | 2              | 4.27235   |
| P26039        | LLGEIAQGNENYAGIAAR                                     | 0.93819827        | 2              | 4.21337   |
| P26039        | LNEAAAGLNQAATELVQASR                                   | 1.27559072        | 2              | 5.11374   |
| P26039        | MATNAAAQNAIK                                           | 1.04224885        | 2              | 2.71029   |
| P26039        | NCGQMSEIEAK                                            | 1.37037235        | 2              | 2.94028   |
| P26039        | QFVQSAKEVANSTANLVK                                     | 1.23109142        | 2              | 2.39528   |
| P26039        | SNTSPEELGPLANQLTSDYGR                                  | 1.52244895        | 2              | 4.05546   |
| P26039        | TLAESALQLLYTAK                                         | 1.65242225        | 2              | 2.70907   |
| P26039        | TMLESAGGLIQTAR                                         | 1.22225587        | 2              | 2.61826   |
| P26039        | VGAIPANALDDGQWSQGLISAAR                                | 1.01080517        | 2              | 5.05663   |
| P26039        | VGDDPAVWQLK                                            | 1.09130707        | 2              | 3.2794    |
| P26039        | VLGEAMTGISQNAK                                         | 1.12049267        | 2              | 3.32931   |
| P26039        | VLVQNAAGSQEK                                           | 1.30756296        | 2              | 3.15086   |
| P26039        | VVAPTISPVCQEQLVEAGR                                    | 0.84123054        | 2              | 4.60903   |
| <b>P26043</b> | <b>RADI Radixin</b>                                    | <b>1.17186256</b> | <b>0.46494</b> | <b>11</b> |
| P26043        | AFAAQEDLEK                                             | 1.13602019        | 2              | 3.02097   |
| P26043        | ALELEQER                                               | 1.13397662        | 2              | 2.47008   |
| P26043        | EIHKPGYLANDR                                           | 1.60056317        | 2              | 2.40559   |
| P26043        | FFPEDVSEELIQEITQR                                      | 1.50750111        | 3              | 4.0962    |
| P26043        | IQNWHEEHR                                              | 0.8749102         | 2              | 2.48059   |
| P26043        | KKEEEATEWQHK                                           | 1.14661604        | 3              | 4.19243   |
| P26043        | KTQNDVLHAENVK                                          | 1.25030845        | 2              | 5.06086   |
| P26043        | NQEQLAAELAEFTAK                                        | 1.36586785        | 2              | 5.10067   |
| P26043        | QLQALSSELAQAR                                          | 0.86200621        | 2              | 4.04214   |
| P26043        | RKPDITIEVQQMK                                          | 1.12892336        | 2              | 3.74671   |
| P26043        | TQNDVLHAENVK                                           | 1.19912076        | 2              | 4.11405   |

|               |                                                                                          |                   |                |           |
|---------------|------------------------------------------------------------------------------------------|-------------------|----------------|-----------|
| <b>P26231</b> | <b>CTNA1 Catenin alpha_1</b>                                                             | <b>1.18695428</b> | <b>6.1E-07</b> | <b>8</b>  |
| P26231        | LIEVANLACISINNEEGVK                                                                      | 1.40385596        | 2              | 5.26296   |
| P26231        | LLEPLVTQVTTLVNTNSK                                                                       | 1.2584573         | 2              | 4.12106   |
| P26231        | NTSDVISAAC                                                                               | 1.35153605        | 2              | 2.39305   |
| P26231        | QIIVDPLSFSEER                                                                            | 1.28991559        | 2              | 2.88287   |
| P26231        | SAAGEFADDPCCSVK                                                                          | 1.23741125        | 2              | 4.39154   |
| P26231        | SDALNSAIDK                                                                               | 1.40241343        | 2              | 2.87703   |
| P26231        | TIADHCPDSACK                                                                             | 0.44771403        | 2              | 3.51977   |
| P26231        | VIHVVTSEMDNYEPGVYTEK                                                                     | 1.15637848        | 3              | 4.17196   |
| <b>P26284</b> | <b>ODPA Pyruvate dehydrogenase E1 component subunit alpha_somatic form_mitochondrial</b> | <b>1.09802211</b> | <b>0.81148</b> | <b>10</b> |
| P26284        | AILAELTGR                                                                                | 1.0794351         | 2              | 2.6912    |
| P26284        | EEIQEVRSK                                                                                | 0.80515065        | 1              | 1.93804   |
| P26284        | GFCHLCDGQEACCVGLEAGINPTDHLITAYR                                                          | 1.50187689        | 3              | 6.51304   |
| P26284        | LEEGPPVTTVLTR                                                                            | 1.10142537        | 2              | 3.51335   |
| P26284        | MVNSNLASVEELK                                                                            | 1.14906376        | 2              | 2.91926   |
| P26284        | MVNSNLASVEELKEIDVEVR                                                                     | 1.0653174         | 2              | 4.36405   |
| P26284        | NFYGGNGIVGAQVPLGAGIALACK                                                                 | 1.51024535        | 2              | 4.20054   |
| P26284        | RGDFIPGLR                                                                                | 1.37925015        | 2              | 2.35812   |
| P26284        | TREEIQEVR                                                                                | 1.01834132        | 3              | 3.55589   |
| P26284        | VDGMDILCVR                                                                               | 1.42825173        | 2              | 3.43546   |
| <b>P26376</b> | <b>IFM3 Interferon_induced transmembrane protein 3</b>                                   | <b>0.91746563</b> | <b>0.93961</b> | <b>2</b>  |
| P26376        | IKEEYEVSELGAPHGSASVR                                                                     | 0.90525614        | 3              | 4.08259   |
| P26376        | KMVGDMTGAQAYASTAK+Oxidation(5)                                                           | 1.039261          |                |           |
| <b>P26453</b> | <b>BASI Basigin</b>                                                                      | <b>1.4352512</b>  | <b>0.20685</b> | <b>7</b>  |
| P26453        | GNINVEGPPR                                                                               | 1.41631671        | 2              | 3.4814    |
| P26453        | KSEHASEGEFVK                                                                             | 1.0945112         | 3              | 3.40795   |
| P26453        | RKPDQTLDEDDPGAAPLK                                                                       | 1.40569135        | 3              | 4.00201   |
| P26453        | SEASHPPVDEWVWFK                                                                          | 0.87803996        | 2              | 3.28807   |
| P26453        | SEHASEGEFVK                                                                              | 1.44640959        | 3              | 3.74149   |
| P26453        | SGEYSCIFLPEPVGR                                                                          | 1.60939464        | 2              | 3.61876   |
| P26453        | VLQEDTLPDLQMK                                                                            | 1.07095217        | 2              | 4.11576   |
| <b>P26516</b> | <b>PSD7 26S proteasome non_ATPase regulatory subunit 7</b>                               | <b>1.483789</b>   | <b>0.71217</b> | <b>2</b>  |
| P26516        | SVVALHNLINNK                                                                             | 2.00977857        | 2              | 2.76135   |
| P26516        | TFEHTVSEIGAEAEVGVHLLR                                                                    | 1.32294602        | 3              | 4.49596   |
| <b>P26772</b> | <b>CH10 10 kDa heat shock protein_mitochondrial</b>                                      | <b>0.99155949</b> | <b>0.99978</b> | <b>7</b>  |
| P26772        | GGEIQPVSVK                                                                               | 1.15116862        | 2              | 3.46954   |
| P26772        | GGIMLPEK                                                                                 | 1.11273985        | 2              | 2.66682   |
| P26772        | GGIMLPEK+Oxidation(3)                                                                    | 1.16450775        |                |           |
| P26772        | GKGGEIQPVSVK                                                                             | 0.97163545        | 2              | 3.41747   |
| P26772        | VLLPEYGGTK                                                                               | 0.92044591        | 2              | 2.37234   |
| P26772        | VLQATVVAVGSGGK                                                                           | 0.97383445        | 2              | 5.39118   |
| P26772        | VVLDDKDYFLFR                                                                             | 1.60443306        | 3              | 3.69212   |
| <b>P27139</b> | <b>CAH2 Carbonic anhydrase 2</b>                                                         | <b>1.09742839</b> | <b>0.92183</b> | <b>4</b>  |
| P27139        | AVQHDPDGLAVLGIFLK                                                                        | 1.63406929        | 2              | 3.98462   |
| P27139        | IGPASQGLQK                                                                               | 0.92195648        | 2              | 3.5178    |
| P27139        | ITEALHSIK                                                                                | 1.189555          | 2              | 2.45669   |
| P27139        | QSPVDIDTGTQAQHDPSLQPLLCYDK                                                               | 2.15218214        | 3              | 3.40572   |
| <b>P27321</b> | <b>ICAL Calpastatin</b>                                                                  | <b>1.26948091</b> | <b>0.03425</b> | <b>5</b>  |
| P27321        | GSDEVTAASSAATGTSPR                                                                       | 2.69670653        | 2              | 4.2688    |
| P27321        | KGSDEVTAASSAATGTSPR                                                                      | 1.27947003        | 2              | 5.21008   |
| P27321        | KVEEEVMNDQALQALSDSLGTR                                                                   | 1.68555007        | 3              | 3.67625   |
| P27321        | LSAAVSETVSQVPAPSNTAAPPPTGTER                                                             | 1.57115753        | 3              | 4.64595   |
| P27321        | SQSSEPPVIEHK                                                                             | 0.39956429        | 2              | 3.50463   |

|               |                                                            |                   |                |           |
|---------------|------------------------------------------------------------|-------------------|----------------|-----------|
| <b>P27364</b> | <b>3BHS5 3 beta_hydroxysteroid dehydrogenase type 5</b>    | <b>0.94545007</b> | <b>0.55389</b> | <b>6</b>  |
| P27364        | AVLAANGSILK                                                | 0.75546878        | 2              | 2.99302   |
| P27364        | ETILNDREEEHR                                               | 0.95273187        | 2              | 2.92913   |
| P27364        | GDIVDAQFLR                                                 | 0.92428301        | 2              | 3.05994   |
| P27364        | IVQMLVQEK                                                  | 1.17997015        | 2              | 2.61716   |
| P27364        | NGGTFHTCALR                                                | 0.50752199        | 2              | 2.6045    |
| P27364        | QTILDVNVK                                                  | 0.90831945        | 2              | 2.38779   |
| <b>P27605</b> | <b>HPRT Hypoxanthine_guanine phosphoribosyltransferase</b> | <b>1.00841064</b> | <b>0.14509</b> | <b>6</b>  |
| P27605        | DLNHVCVISESGK                                              | 0.91200468        | 2              | 3.43581   |
| P27605        | FFADLLDYIK                                                 | 1.69306292        | 2              | 3.54966   |
| P27605        | NVLIVEDIIDTGG                                              | 1.08937238        | 2              | 3.86119   |
| P27605        | SVGYRPFVGFPEIPDK                                           | 1.24887031        | 3              | 4.03102   |
| P27605        | SYCNDQSTGDIK                                               | 1.15112689        | 2              | 4.00832   |
| P27605        | VIGGDDLSTLTGK                                              | 0.7796974         | 2              | 4.36202   |
| <b>P27653</b> | <b>C1TC C_1_tetrahydrofolate synthase_cytoplasmic</b>      | <b>1.40264381</b> | <b>9.9E-20</b> | <b>17</b> |
| P27653        | ASQAPSSFQLLYDLK                                            | 1.71822228        | 2              | 3.97226   |
| P27653        | AYTEEDLDLVEK                                               | 0.60687726        | 2              | 3.19383   |
| P27653        | GDILVVATGQPEMVK                                            | 3.76343758        | 2              | 2.5026    |
| P27653        | GEWIKPGAVVIDCGINYVPDDTKPNGR                                | 1.0379993         | 3              | 4.79251   |
| P27653        | IFHELTQTDK                                                 | 1.82368838        | 3              | 3.47881   |
| P27653        | ITIGQAPTEK                                                 | 1.75717696        | 2              | 2.43887   |
| P27653        | IYGADDIELLPEAQNK                                           | 2.6077973         | 2              | 4.99348   |
| P27653        | KITIGQAPTEK                                                | 1.46266729        | 2              | 2.86934   |
| P27653        | KVVGDVAYDEAK                                               | 1.41036473        | 2              | 3.70243   |
| P27653        | LDIDPETITWQR                                               | 1.3536408         | 2              | 3.82933   |
| P27653        | MHGGGPTVTAGLPLPK                                           | 0.87299212        | 2              | 3.81227   |
| P27653        | QGFGLNPICMAK                                               | 1.21878825        | 2              | 2.78848   |
| P27653        | TADLDKEVKNKGDILVVATGQPEMVK                                 | 1.45458547        | 3              | 5.59788   |
| P27653        | TDPAALTDDEINR                                              | 0.86725869        | 2              | 4.09686   |
| P27653        | THLSLSHNPEQK                                               | 1.4298358         | 2              | 3.85035   |
| P27653        | VVGDVAYDEAK                                                | 1.71475106        | 2              | 3.40638   |
| P27653        | YVVVTGITPTPLGEGK                                           | 1.36694433        | 2              | 4.82229   |
| <b>P27657</b> | <b>LIPP Pancreatic triacylglycerol lipase</b>              | <b>1.43852326</b> | <b>0.29426</b> | <b>2</b>  |
| P27657        | ATYTQATQNVN                                                | 1.16942923        | 2              | 2.96299   |
| P27657        | NILSQIVDIDGIWEGTR                                          | 1.44410971        | 2              | 2.93919   |
| <b>P27661</b> | <b>H2AX Histone H2A.x</b>                                  | <b>1.25420373</b> | <b>0.00383</b> | <b>3</b>  |
| P27661        | AGLQFPVGR                                                  | 0.88487283        | 2              | 3.22539   |
| P27661        | HLQLAIR                                                    | 1.31743561        | 2              | 2.71001   |
| P27661        | LLGGVTIAQGGVLPNIQAVLLPK                                    | 1.79580643        | 2              | 4.39413   |
| <b>P27768</b> | <b>TNNI2 Troponin I_fast skeletal muscle</b>               | <b>1.48421079</b> | <b>0.59675</b> | <b>4</b>  |
| P27768        | ELEDMNQK                                                   | 3.17739659        | 2              | 2.30775   |
| P27768        | IDAAEEKYDMEVK                                              | 1.42117744        | 2              | 3.25216   |
| P27768        | SVMLQIAATELEK                                              | 1.30730961        | 2              | 2.92447   |
| P27768        | SVMLQIAATELEKEESR                                          | 1.5664557         | 2              | 3.68925   |
| <b>P27867</b> | <b>DHSO Sorbitol dehydrogenase</b>                         | <b>1.06025005</b> | <b>0.11365</b> | <b>14</b> |
| P27867        | AMGASQVVVIDLSASR                                           | 1.29800077        | 2              | 4.07644   |
| P27867        | AVEAFETAK                                                  | 1.18161855        | 1              | 1.94922   |
| P27867        | EVGADFTIQVAK                                               | 1.53009136        | 2              | 3.15665   |
| P27867        | GENLSLVVHGGDIR                                             | 1.02642185        | 2              | 3.81485   |
| P27867        | HSADFCYK                                                   | 1.16306157        | 2              | 2.90614   |
| P27867        | IGDFVVK                                                    | 1.32493682        | 2              | 2.47232   |
| P27867        | LENYPIPELGPNDVLLK                                          | 1.03439851        | 2              | 4.88393   |
| P27867        | LPDSVTFEEGALIEPLSVGIYACR                                   | 1.36904409        | 3              | 4.1149    |
| P27867        | MHSVIGCGSDVHYWEHGR                                         | 1.36782019        | 2              | 6.04524   |

|               |                                                                |                   |                |           |
|---------------|----------------------------------------------------------------|-------------------|----------------|-----------|
| P27867        | MHSVIGICGSDVHYWEHGR+Oxidation(0                                | 1.33687784        |                |           |
| P27867        | TLNVKPLVTHR                                                    | 0.96257858        | 2              | 3.23657   |
| P27867        | VAIEPGVPR                                                      | 1.97245439        | 1              | 2.18025   |
| P27867        | VLVCGAGPIGIVTLLVAK                                             | 1.75752586        | 3              | 5.74355   |
| P27867        | YCNTWPMMAVSMASK                                                | 1.50464527        | 2              | 3.3753    |
| <b>P27952</b> | <b>RS2 40S ribosomal protein S2</b>                            | <b>1.49523455</b> | <b>0.00076</b> | <b>6</b>  |
| P27952        | AEDKEWIPVK                                                     | 1.98166578        | 2              | 3.39259   |
| P27952        | AFVAIGDYNGHVGLGVK                                              | 1.66173858        | 2              | 3.3435    |
| P27952        | GCTATLGNFAK                                                    | 1.24660936        | 2              | 3.20058   |
| P27952        | GTGIVSAPVPK                                                    | 1.26956056        | 2              | 2.4959    |
| P27952        | SLEEIYLFSLPIK                                                  | 1.49529642        | 2              | 3.49273   |
| P27952        | TYSYLTDLWK                                                     | 1.30853639        | 2              | 3.26723   |
| <b>P28037</b> | <b>AL111 Cytosolic 10_formyltetrahydrofolate dehydrogenase</b> | <b>1.13530288</b> | <b>0.46769</b> | <b>26</b> |
| P28037        | ADPLGLEAEK                                                     | 1.07090335        | 2              | 2.42663   |
| P28037        | ANATEFGLASGVFTR                                                | 1.36461674        | 2              | 4.85761   |
| P28037        | AVQMGMSSVFFNK                                                  | 1.65502875        | 2              | 3.35546   |
| P28037        | DLGEAALNEYLR                                                   | 1.1687529         | 2              | 3.47982   |
| P28037        | ECEVLDDTVSTLYNR                                                | 1.7288413         | 2              | 4.36165   |
| P28037        | EESFGPIMIISR                                                   | 1.21684072        | 2              | 3.07562   |
| P28037        | EGHEVVGFTIPDKDGK                                               | 1.18858494        | 2              | 4.56391   |
| P28037        | GNDKVPGAWTEACGQK                                               | 1.11799876        | 2              | 3.83084   |
| P28037        | GQALPEVVAK                                                     | 1.24681251        | 2              | 2.96649   |
| P28037        | GSASSDLELTAELATAEAVR                                           | 0.99244058        | 2              | 6.31158   |
| P28037        | GVVNILPGSGSLVGQR                                               | 1.04882097        | 2              | 4.82736   |
| P28037        | IGFTGSTEVGK                                                    | 1.09708643        | 2              | 2.78719   |
| P28037        | ILPNVPEVEDSTDFK                                                | 1.97465846        | 2              | 3.59059   |
| P28037        | INWDQPAEAIHNWIR                                                | 1.97068305        | 2              | 4.25018   |
| P28037        | IQGATIPINQARPNR                                                | 1.32648472        | 2              | 2.34545   |
| P28037        | KEGHEVVGFTIPDKDGK                                              | 1.03393786        | 3              | 4.18843   |
| P28037        | KIGFTGSTEVGK                                                   | 1.59325369        | 2              | 3.13217   |
| P28037        | KLVEYCQR                                                       | 1.23887773        | 2              | 2.41092   |
| P28037        | LFVEESIHNQFVQK                                                 | 1.10289962        | 2              | 4.45707   |
| P28037        | LIAEGTAPR                                                      | 1.08850909        | 2              | 3.52205   |
| P28037        | LSDHPDVR                                                       | 1.01907009        | 1              | 2.10967   |
| P28037        | NIQLEDGK                                                       | 1.34188616        | 1              | 2.3031    |
| P28037        | TAACLAAGNTVVIKPAQVPLTALK                                       | 1.56429145        | 3              | 4.4148    |
| P28037        | TDVAAPFGGFK                                                    | 1.18237975        | 2              | 3.11586   |
| P28037        | TYNTINPTDGSVICQVSLAQVSDVDK                                     | 1.37354656        | 3              | 5.27368   |
| P28037        | VVEEVEK                                                        | 1.16491073        | 1              | 2.07731   |
| <b>P28064</b> | <b>PSB8 Proteasome subunit beta type_8</b>                     | <b>1.0903478</b>  | <b>0.99611</b> | <b>3</b>  |
| P28064        | ASAGSYIATIR                                                    | 1.500937          | 2              | 2.77245   |
| P28064        | KGPGLYYVDDNGTR                                                 | 1.01519183        | 2              | 2.84732   |
| P28064        | QDLSPEEAYDLAR                                                  | 0.89142753        | 2              | 3.1804    |
| <b>P28480</b> | <b>TCPA T_complex protein 1 subunit alpha</b>                  | <b>1.45508348</b> | <b>1.1E-07</b> | <b>10</b> |
| P28480        | AFHNEAQVNPER                                                   | 1.42311172        | 2              | 3.61945   |
| P28480        | FATEAAITILR                                                    | 1.44596334        | 2              | 3.22714   |
| P28480        | HGGYENAVHSGALDD                                                | 1.28834275        | 2              | 3.34447   |
| P28480        | ICDDELILIK                                                     | 1.28232112        | 2              | 3.19386   |
| P28480        | LLEVEHPPAK                                                     | 1.57683167        | 2              | 2.77535   |
| P28480        | MLVDDIGDVTITNDGATILK                                           | 1.18588585        | 2              | 2.34524   |
| P28480        | SLLVIPNTLAVNAAQDSTDLVAK                                        | 1.39863792        | 2              | 4.93783   |
| P28480        | SQNVMAAASIANIVK                                                | 1.76584827        | 2              | 4.6017    |
| P28480        | SSLGPVGLDK                                                     | 1.18544911        | 2              | 2.41221   |
| P28480        | YINENLIINTDELGR                                                | 1.47953645        | 2              | 4.56631   |
| <b>P28492</b> | <b>GLSL Glutaminase liver isoform_mitochondrial</b>            | <b>1.18754613</b> | <b>0.96409</b> | <b>5</b>  |
| P28492        | ATGLQTS DPR                                                    | 1.23977786        | 2              | 2.7969    |

|               |                                                               |                   |                |           |
|---------------|---------------------------------------------------------------|-------------------|----------------|-----------|
| P28492        | GTPSHQPHSDHDASNSGMLPR                                         | 1.13921823        | 3              | 3.73105   |
| P28492        | MVQESSGGLDR                                                   | 1.36092709        | 2              | 3.62209   |
| P28492        | SNPDLWGVSLCTVDGQR                                             | 1.10316068        | 2              | 4.07981   |
| P28492        | TALHVAAAEGHIDVVK                                              | 1.29256739        | 3              | 3.58745   |
| <b>P28650</b> | <b>PURA1 Adenylosuccinate synthetase isozyme 1</b>            | <b>1.23421735</b> | <b>0.8952</b>  | <b>2</b>  |
| P28650        | LDILDVLEIK                                                    | 1.19061193        | 2              | 3.20016   |
| P28650        | VVDLLATDADIVSR                                                | 1.23431137        | 2              | 2.47061   |
| <b>P29147</b> | <b>BDH D_beta_hydroxybutyrate dehydrogenase_mitochondrial</b> | <b>1.12603368</b> | <b>0.98878</b> | <b>19</b> |
| P29147        | AVLVTGCDSGFGSLAK                                              | 0.99452434        | 2              | 5.64348   |
| P29147        | EVAEVLNLTGTVR                                                 | 1.78786256        | 2              | 2.42346   |
| P29147        | FGVEAFSDCLR                                                   | 1.25131324        | 2              | 3.66929   |
| P29147        | GFLVFAGCLLK                                                   | 0.9591419         | 2              | 3.7283    |
| P29147        | KMWDELPEVVR                                                   | 0.97310116        | 2              | 3.34313   |
| P29147        | KMWDELPEVVR+Oxidation(1                                       | 1.40253306        |                |           |
| P29147        | MANPARSPYCITK+Oxidation(0                                     | 1.0466666         |                |           |
| P29147        | METYCNSGSTDSSVINAVTHALTAATPYTR                                | 1.09331913        | 3              | 5.65484   |
| P29147        | METYCNSGSTDSSVINAVTHALTAATPYTR+Oxidation(0                    | 1.45377584        |                |           |
| P29147        | MQVMTHFPGAISDK                                                | 0.90204995        | 2              | 4.82906   |
| P29147        | MQVMTHFPGAISDK+Oxidation(0                                    | 1.00993047        |                |           |
| P29147        | MQVMTHFPGAISDK+Oxidation(3                                    | 1.00993047        |                |           |
| P29147        | MWDELPEVVR                                                    | 1.36305294        | 2              | 3.41854   |
| P29147        | MWDELPEVVR+Oxidation(0                                        | 1.11537046        |                |           |
| P29147        | TIQLNVCNSEEVEK                                                | 0.93501312        | 2              | 4.33444   |
| P29147        | VSVVEPGNFIAATSLYSER                                           | 0.93817348        | 2              | 5.99969   |
| P29147        | VVNISMLGR                                                     | 1.18138239        | 2              | 3.92976   |
| P29147        | YEMHPLGVK                                                     | 1.12281833        | 1              | 2.55044   |
| P29147        | YEMHPLGVK+Oxidation(2                                         | 1.5410613         |                |           |
| <b>P29266</b> | <b>3HIDH 3_hydroxyisobutyrate dehydrogenase_mitochondrial</b> | <b>1.05578461</b> | <b>0.17627</b> | <b>9</b>  |
| P29266        | DLGLAQDSATSTK                                                 | 0.79456783        | 2              | 3.74448   |
| P29266        | EAGEQVASSPADVAEK                                              | 0.74115441        | 2              | 4.98183   |
| P29266        | GSLIDSSTIDPSVSK                                               | 1.53374054        | 2              | 5.07553   |
| P29266        | HGYPLILYDVFPDVCK                                              | 1.50870744        | 2              | 5.13612   |
| P29266        | KGSLIDSSTIDPSVSK                                              | 0.94852648        | 2              | 4.08563   |
| P29266        | MGAVFMDAPVSGGVGAAR                                            | 1.14490823        | 2              | 5.32116   |
| P29266        | MGAVFMDAPVSGGVGAAR+Oxidation(0                                | 1.44250372        |                |           |
| P29266        | MGAVFMDAPVSGGVGAAR+Oxidation(5                                | 1.44250372        |                |           |
| P29266        | TPILLGSAHQIYR                                                 | 2.23422004        | 3              | 3.84981   |
| <b>P29314</b> | <b>RS9 40S ribosomal protein S9</b>                           | <b>1.2728194</b>  | <b>1.7E-05</b> | <b>9</b>  |
| P29314        | IEDFLER                                                       | 1.17689259        | 2              | 2.65748   |
| P29314        | IGVLDEGK                                                      | 0.78623707        | 2              | 2.62025   |
| P29314        | KGQGGAGAGDDEEED                                               | 1.21951305        | 2              | 3.23612   |
| P29314        | KQVFNIPSFIVR                                                  | 1.1781472         | 2              | 2.53673   |
| P29314        | LDYILGLK                                                      | 1.38092918        | 2              | 3.04203   |
| P29314        | LFEGNALLR                                                     | 1.57806144        | 2              | 3.00147   |
| P29314        | LIGEYGLR                                                      | 1.66763964        | 2              | 2.56291   |
| P29314        | QVFNIPSFIVR                                                   | 1.26783933        | 2              | 2.66039   |
| P29314        | SRLDQELK                                                      | 1.33065399        | 3              | 3.49595   |
| <b>P29315</b> | <b>RINI Ribonuclease inhibitor</b>                            | <b>1.17390362</b> | <b>0.15653</b> | <b>7</b>  |
| P29315        | ASLQELDLGSNK                                                  | 1.16781083        | 2              | 2.43099   |
| P29315        | ELVLSNDFHEAGIHTLCQGLK                                         | 1.28736063        | 3              | 3.50612   |
| P29315        | LDDCGLTEVR                                                    | 1.00743598        | 2              | 3.14918   |
| P29315        | LENGGITSANCK                                                  | 1.05479234        | 2              | 3.61645   |
| P29315        | LSLQNCSLTEAGCVLPDVLVLR                                        | 1.34513933        | 2              | 3.14955   |
| P29315        | SAIQANPALTELSLR                                               | 1.28053822        | 2              | 4.43585   |

|               |                                                            |                   |                |           |
|---------------|------------------------------------------------------------|-------------------|----------------|-----------|
| P29315        | TNELGDAGVGLVQLQNPCTK                                       | 1.34176413        | 2              | 5.34337   |
| <b>P29410</b> | <b>KAD2 Adenylate kinase 2_mitochondrial</b>               | <b>1.06177164</b> | <b>5.2E-13</b> | <b>11</b> |
| P29410        | AMVASGSELGK                                                | 1.22003632        | 2              | 3.11276   |
| P29410        | AMVASGSELGK+Oxidation(1                                    | 1.260355          |                |           |
| P29410        | AMVASGSELGKK                                               | 1.50781516        | 2              | 2.89378   |
| P29410        | AVLLGPPGAGK                                                | 0.97659221        | 2              | 2.60096   |
| P29410        | EAMKDDITGEPLIR                                             | 1.62507689        | 2              | 3.13877   |
| P29410        | LEAYHTQTTPLVEYYR                                           | 1.40512403        | 2              | 5.00483   |
| P29410        | LVSDVMVELIEK                                               | 1.56900751        | 2              | 4.1976    |
| P29410        | NGFLLDGFPR                                                 | 1.1689712         | 2              | 2.87766   |
| P29410        | NLETPSCK                                                   | 1.00329228        | 2              | 2.33067   |
| P29410        | SYHEEFNPPK                                                 | 0.97178686        | 3              | 3.44782   |
| P29410        | TRLEAYHTQTTPLVEYYR                                         | 1.45581555        | 3              | 3.52619   |
| <b>P29411</b> | <b>KAD3 GTP:AMP phosphotransferase_mitochondrial</b>       | <b>0.90391836</b> | <b>0.61109</b> | <b>6</b>  |
| P29411        | AYEAQTEPVLQYYQK                                            | 0.97993126        | 2              | 4.58133   |
| P29411        | GVLETFSGTETNK                                              | 1.09065566        | 2              | 2.87436   |
| P29411        | NLTQCSWLLDGFPR                                             | 1.47901389        | 2              | 3.82705   |
| P29411        | TVGIDDLTGEPLIQR                                            | 0.77286209        | 2              | 3.71508   |
| P29411        | VYNIEFNPPK                                                 | 1.05741095        | 2              | 2.6067    |
| P29411        | VYQIDTVINLNPFEVIK                                          | 1.33905828        | 2              | 3.29517   |
| <b>P29419</b> | <b>ATP5I ATP synthase subunit e_mitochondrial</b>          | <b>0.83003987</b> | <b>0.1796</b>  | <b>2</b>  |
| P29419        | ELAEAVEDVSIFK                                              | 0.8295139         | 2              | 3.43257   |
| P29419        | YSALILGMAYGAK                                              | 1.71872995        | 2              | 4.09777   |
| <b>P29457</b> | <b>SERPH Serpin H1</b>                                     | <b>1.21240718</b> | <b>0.57702</b> | <b>2</b>  |
| P29457        | GVVEVTHDLQK                                                | 1.18602078        | 2              | 3.15294   |
| P29457        | SALQSINEWASQTTDGG                                          | 1.96247431        | 2              | 2.5135    |
| <b>P30009</b> | <b>MARCS Myristoylated alanine_rich C_kinase substrate</b> | <b>1.23565074</b> | <b>0.82531</b> | <b>4</b>  |
| P30009        | AEDGAAPSPSETPK                                             | 1.1123985         | 2              | 3.65815   |
| P30009        | EAEAAPEQPEQPEQAAEPR                                        | 0.56067607        | 2              | 3.92005   |
| P30009        | EAGEGAEAGATADGAK                                           | 1.25611179        | 2              | 4.31611   |
| P30009        | GEAAAERPGEAAVASSPSK                                        | 1.2356799         | 2              | 4.56594   |
| <b>P30349</b> | <b>LKHA4 Leukotriene A_4 hydrolase</b>                     | <b>1.07539072</b> | <b>0.18986</b> | <b>3</b>  |
| P30349        | GSPMEISLPIALS                                              | 1.14341953        | 2              | 3.05245   |
| P30349        | SLSNVIAHEISHSWTGNLVTNK                                     | 0.21900322        | 3              | 3.86572   |
| P30349        | SSALQWLTPSEQTSGK                                           | 1.35519157        | 2              | 3.83139   |
| <b>P30427</b> | <b>PLEC Plectin</b>                                        | <b>1.12855794</b> | <b>0.25943</b> | <b>5</b>  |
| P30427        | LLEAAAQSSK                                                 | 1.08997354        | 2              | 2.43488   |
| P30427        | MSAAQALKKGWLYEAGQR+Oxidation(0                             | 1.26011071        |                |           |
| P30427        | SDQLTGSLPLSEK                                              | 1.99972039        | 2              | 2.51199   |
| P30427        | SKELAEQEAAR                                                | 1.08833176        | 2              | 2.92077   |
| P30427        | VLALPEPSPAAPTLR                                            | 1.08989123        | 2              | 2.9817    |
| <b>P30713</b> | <b>GSTT2 Glutathione S_transferase theta_2</b>             | <b>1.09418117</b> | <b>0.99778</b> | <b>7</b>  |
| P30713        | AQVHEYLGWHADNIR                                            | 0.8912218         | 2              | 4.9227    |
| P30713        | GQHLSEQFSQVNCLK                                            | 0.85500255        | 2              | 5.01445   |
| P30713        | NSMVLALQR                                                  | 1.10561093        | 2              | 3.29761   |
| P30713        | TLPVPPPEAHASMMLR                                           | 1.2169819         | 2              | 2.59385   |
| P30713        | VEAFLGAELCQEAHNPIMSVLGQAAK                                 | 1.45982645        | 3              | 4.0839    |
| P30713        | VLGPLIGVQVPEEK                                             | 1.09265901        | 2              | 4.0583    |
| P30713        | YQVADHWYPADLQAR                                            | 1.18595988        | 2              | 4.66661   |
| <b>P30835</b> | <b>K6PL 6_phosphofructokinase_liver type</b>               | <b>1.0324091</b>  | <b>0.03074</b> | <b>2</b>  |
| P30835        | NEWGSLLEELVK                                               | 1.73069154        | 2              | 2.83908   |
| P30835        | VFANAPDSACVIGLR                                            | 0.42155659        | 2              | 2.56271   |
| <b>P30839</b> | <b>AL3A2 Fatty aldehyde dehydrogenase</b>                  | <b>1.33891935</b> | <b>0.01407</b> | <b>9</b>  |
| P30839        | DILAAIAADLSK                                               | 1.33340123        | 2              | 3.05435   |
| P30839        | EKDILAAIAADLSK                                             | 1.08845218        | 2              | 4.26661   |



|               |                                                         |                   |                |           |
|---------------|---------------------------------------------------------|-------------------|----------------|-----------|
| P30839        | FDHILYTGNTAVGK                                          | 0.93157326        | 2              | 4.05788   |
| P30839        | HLTPVTLELGGK                                            | 1.55752895        | 3              | 3.42677   |
| P30839        | LQQLEALR                                                | 1.15973085        | 1              | 2.07449   |
| P30839        | NVEEAINFINDR                                            | 1.08830375        | 2              | 4.2853    |
| P30839        | VMQEEIFGPILPIVSVK                                       | 1.00264432        | 2              | 4.88933   |
| P30839        | VMQEEIFGPILPIVSVK+Oxidation(1                           | 1.38984729        |                |           |
| P30839        | YIAPTILTDVDPNSK                                         | 1.0320064         | 2              | 4.07383   |
| <b>P30904</b> | <b>MIF Macrophage migration inhibitory factor</b>       | <b>1.04657915</b> | <b>0.00074</b> | <b>2</b>  |
| P30904        | LHISPDR                                                 | 0.85703851        | 1              | 2.0557    |
| P30904        | LLCGLLSDR                                               | 1.80622395        | 2              | 2.92955   |
| <b>P30999</b> | <b>CTND1 Catenin delta_1</b>                            | <b>1.34946944</b> | <b>0.11637</b> | <b>3</b>  |
| P30999        | GYELLFQPEVVR                                            | 1.33465173        | 2              | 2.5908    |
| P30999        | HIEWESVLTNTAGCLR                                        | 1.47820212        | 2              | 2.80348   |
| P30999        | SLDNNYSTLNER                                            | 1.5862849         | 2              | 2.46552   |
| <b>P31000</b> | <b>VIME Vimentin</b>                                    | <b>0.85543525</b> | <b>0.35922</b> | <b>17</b> |
| P31000        | DGQVINETSQHHDDLE                                        | 0.81268965        | 2              | 3.04076   |
| P31000        | ETNLESPLVDTHSK                                          | 0.9360514         | 2              | 2.37687   |
| P31000        | FADLSEANR                                               | 1.27545091        | 2              | 2.89052   |
| P31000        | ILLAELEQLK                                              | 1.55102962        | 2              | 2.8724    |
| P31000        | KLLEGEESR                                               | 1.02725179        | 2              | 3.06194   |
| P31000        | KVESLQEEIAFLK                                           | 1.20692923        | 2              | 3.96662   |
| P31000        | KVESLQEEIAFLKK                                          | 0.8194323         | 2              | 2.33484   |
| P31000        | LGDLYEEEMR                                              | 0.72234102        | 2              | 2.78672   |
| P31000        | LLEGEESR                                                | 0.69566806        | 2              | 2.80147   |
| P31000        | LQDEIQNMKEEMAR                                          | 0.79142269        | 2              | 3.66286   |
| P31000        | NLQEAEEWYK                                              | 0.91598508        | 2              | 2.88632   |
| P31000        | QDVDNASLAR                                              | 0.90164564        | 2              | 2.96533   |
| P31000        | QVQSLTCEVDALK                                           | 0.89112816        | 2              | 3.30043   |
| P31000        | RQVDQLTNDK                                              | 0.99430728        | 2              | 3.02392   |
| P31000        | SLYSSPGGAYVTR                                           | 1.031387          | 2              | 2.86248   |
| P31000        | TNEKVELQELNDR                                           | 0.95541939        | 2              | 3.34615   |
| P31000        | VELQELNDR                                               | 0.76368442        | 2              | 2.99457   |
| <b>P31044</b> | <b>PEBP1 Phosphatidylethanolamine_binding protein 1</b> | <b>1.48004582</b> | <b>0.00023</b> | <b>6</b>  |
| P31044        | GNDISSGTVLSEYVGSPPK                                     | 1.14847321        | 2              | 5.95288   |
| P31044        | LYTLVLTPDPAPSR                                          | 1.8344271         | 2              | 4.93028   |
| P31044        | VDYGGVTVDELGK                                           | 0.8272559         | 2              | 4.82221   |
| P31044        | VLTPQVMNRPSSISWDGLDPGK                                  | 1.9726613         | 3              | 4.78184   |
| P31044        | YHLGAPVAGTCFQAEWDDSVPK                                  | 1.49054155        | 2              | 5.12574   |
| P31044        | YVWLVEEQEQLNCDEPILSNK                                   | 1.52604074        | 2              | 5.61372   |
| <b>P31210</b> | <b>AK1D1_3_oxo_5_beta_steroid_4_dehydrogenase</b>       | <b>1.2405544</b>  | <b>0.99926</b> | <b>18</b> |
| P31210        | DELLTSLGK                                               | 1.2872969         | 2              | 2.79549   |
| P31210        | DIEALNK                                                 | 1.29906366        | 1              | 2.55823   |
| P31210        | EEMKDIEALNK                                             | 1.65638103        | 2              | 3.31761   |
| P31210        | ENFQIFDFSLTK                                            | 1.22654994        | 2              | 3.34563   |
| P31210        | HIDGAYVYR                                               | 1.2046026         | 2              | 2.71516   |
| P31210        | IKENFQIFDFSLTK                                          | 1.35579533        | 2              | 4.35307   |
| P31210        | LWSTDHDPEMVRPALER                                       | 1.11458994        | 2              | 2.4929    |
| P31210        | NEHEVGEAIR                                              | 1.15266862        | 1              | 2.908     |
| P31210        | NPLWVNVSSPPLLK                                          | 1.56743765        | 2              | 4.37356   |
| P31210        | NPLWVNVSSPPLLKDELLTSLGK                                 | 1.52005548        | 3              | 4.9156    |
| P31210        | QLEVILNKPLGK                                            | 0.8033538         | 2              | 3.41556   |
| P31210        | REEIFYCGK                                               | 1.18139968        | 2              | 3.14858   |
| P31210        | RQLEVILNKPLGK                                           | 0.83014114        | 3              | 4.26637   |
| P31210        | SNLCATWEALEACK                                          | 1.15554572        | 2              | 4.40664   |
| P31210        | SNLCATWEALEACKDAGLVK                                    | 1.2374504         | 2              | 5.079     |
| P31210        | TAIDEGYR                                                | 1.10586104        | 2              | 2.57374   |

|               |                                                                                    |                   |                |           |
|---------------|------------------------------------------------------------------------------------|-------------------|----------------|-----------|
| P31210        | TQAQIVLR                                                                           | 1.38415037        | 2              | 3.02636   |
| P31210        | YKPVTNQVECHPYFTQTK                                                                 | 1.05181639        | 2              | 5.72203   |
| <b>P31230</b> | <b>AIMP1 Aminoacyl tRNA synthase complex_interacting multifunctional protein 1</b> | <b>1.00036591</b> | <b>0.13262</b> | <b>2</b>  |
| P31230        | GAEADQIIEYLK                                                                       | 1.95405838        | 2              | 2.98636   |
| P31230        | TVVSGLVNHPLEQMQNR                                                                  | 0.88786747        | 3              | 3.53475   |
| <b>P31399</b> | <b>ATP5H ATP synthase subunit d_mitochondrial</b>                                  | <b>1.08833936</b> | <b>0.73258</b> | <b>6</b>  |
| P31399        | ANVDPKGLVDDFK                                                                      | 1.17692812        | 2              | 3.80185   |
| P31399        | IPVPEDKYTALVDAEEKEDVK                                                              | 1.08321529        | 3              | 3.32943   |
| P31399        | NCAQFVTGSQAR                                                                       | 1.15987439        | 2              | 4.26891   |
| P31399        | NMIPFDQMTIDDLNEVPETK                                                               | 1.3780146         | 2              | 5.45486   |
| P31399        | SWNETFHTR                                                                          | 1.3087424         | 2              | 2.75927   |
| P31399        | YTALVDAEEKEDVK                                                                     | 0.96474242        | 2              | 3.77698   |
| <b>P32089</b> | <b>TXTP Tricarboxylate transport protein_mitochondrial</b>                         | <b>1.04631942</b> | <b>0.98898</b> | <b>5</b>  |
| P32089        | FIHDQTSNPK                                                                         | 1.03617028        | 1              | 3.4529    |
| P32089        | GLSLLYGSIPK                                                                        | 1.46465806        | 2              | 3.39515   |
| P32089        | NLDCGVQLK                                                                          | 1.02827901        | 2              | 2.39629   |
| P32089        | SHGVLGLYR                                                                          | 1.0178191         | 1              | 2.02628   |
| P32089        | TQLQLDER                                                                           | 1.28741699        | 2              | 2.47254   |
| <b>P32198</b> | <b>CPT1A Carnitine O_palmitoyltransferase 1_liver isoform</b>                      | <b>1.07401598</b> | <b>0.98329</b> | <b>6</b>  |
| P32198        | ELEQQMQQILDDPSEPQGEAK                                                              | 1.39784961        | 3              | 4.55885   |
| P32198        | GDTNPNIPKPTR                                                                       | 1.18231849        | 2              | 2.40292   |
| P32198        | MTALAQDFAVNLGPK                                                                    | 0.8644655         | 2              | 4.18235   |
| P32198        | SCTMESCNFVQAMMDPK                                                                  | 1.11723531        | 2              | 2.77267   |
| P32198        | TSPDAFIQLALQLAHYK                                                                  | 1.47342529        | 2              | 3.49923   |
| P32198        | YLESVRPLMK                                                                         | 1.0740466         | 2              | 2.32333   |
| <b>P32232</b> | <b>CBS Cystathionine beta_synthase</b>                                             | <b>1.18423161</b> | <b>9.9E-20</b> | <b>9</b>  |
| P32232        | AGTLKPGDTIIEPTSGNTGIGLALAAAVK                                                      | 2.27156953        | 3              | 5.95485   |
| P32232        | ALGAEIVR                                                                           | 1.28759356        | 1              | 2.04501   |
| P32232        | CIIVMPEK                                                                           | 1.58980556        | 2              | 2.51768   |
| P32232        | FDSPESHVGVAVR                                                                      | 1.0830958         | 2              | 3.50131   |
| P32232        | NASNPLAHYDDTAEEILQQCDGK                                                            | 1.66476375        | 2              | 5.66158   |
| P32232        | SNDDDSFAFAR                                                                        | 1.58378329        | 2              | 3.30077   |
| P32232        | VDMLVASAGTGGTITGIAR                                                                | 1.73018643        | 2              | 4.62982   |
| P32232        | VQELSLSAPLTVLPTVTCEHTIAILR                                                         | 2.10744071        | 3              | 4.23577   |
| P32232        | VRPSDEVCK                                                                          | 1.15168319        | 3              | 3.75438   |
| <b>P32551</b> | <b>QCR2 Cytochrome b_c1 complex subunit 2_mitochondrial</b>                        | <b>1.20373167</b> | <b>0.33634</b> | <b>11</b> |
| P32551        | AVAFQNPQTR                                                                         | 1.24805783        | 2              | 3.35116   |
| P32551        | AVAQGNLSSADVQAAK                                                                   | 1.18040506        | 2              | 5.3487    |
| P32551        | GNNTTSLLSQSVAK                                                                     | 1.20395417        | 2              | 4.15908   |
| P32551        | IENLHDVAYK                                                                         | 1.43157422        | 2              | 3.83772   |
| P32551        | ITSEELHYFVQNHFTSAR                                                                 | 1.43896856        | 3              | 4.04292   |
| P32551        | NALANPLYCPDYR                                                                      | 2.13289079        | 2              | 3.74444   |
| P32551        | RGNNTTSLLSQSVAK                                                                    | 1.16204767        | 2              | 3.30487   |
| P32551        | RWEVAALR                                                                           | 1.4199739         | 2              | 2.73014   |
| P32551        | SMTASGNLGHTPFLDEL                                                                  | 1.49452171        | 2              | 3.38016   |
| P32551        | TSAPGGVPLQPQLEFTK                                                                  | 1.0271097         | 2              | 4.04214   |
| P32551        | YENYNYLGTSHLLR                                                                     | 1.09642359        | 2              | 4.42947   |
| <b>P32755</b> | <b>HPPD 4_hydroxyphenylpyruvate dioxygenase</b>                                    | <b>1.54449231</b> | <b>9.9E-20</b> | <b>20</b> |
| P32755        | AFEEEEQALR                                                                         | 1.53138662        | 2              | 3.34721   |
| P32755        | DIAFEVEDCEHIVQK                                                                    | 1.82822345        | 2              | 4.08188   |
| P32755        | ENMDVLEELK                                                                         | 2.11857163        | 2              | 3.05278   |
| P32755        | EVVSHVIK                                                                           | 1.51003637        | 2              | 2.32575   |
| P32755        | FAVLQTYGDTTHTLVEK                                                                  | 1.59149717        | 2              | 5.25672   |

|               |                                                  |                   |                |           |
|---------------|--------------------------------------------------|-------------------|----------------|-----------|
| P32755        | FLHFHSVTFVWVGNNAK                                | 1.22756477        | 3              | 3.73515   |
| P32755        | FLPGFEAPTYK                                      | 1.63324987        | 2              | 2.7075    |
| P32755        | FWSVDDTQVHTEYSSLR                                | 1.27331373        | 2              | 5.84082   |
| P32755        | GMEFLAVPSSYYR                                    | 2.30121376        | 2              | 3.28155   |
| P32755        | GNLTDLETNGVR                                     | 1.40520521        | 2              | 3.83297   |
| P32755        | HNHQGFAGNFNSLFK                                  | 1.01392886        | 3              | 4.91846   |
| P32755        | ILVDYDEK                                         | 1.46792147        | 2              | 2.32865   |
| P32755        | IVFVLCALNPWNK                                    | 1.68072828        | 2              | 2.96899   |
| P32755        | IVREPWVEEDKFGK                                   | 2.38716361        | 3              | 4.96986   |
| P32755        | LPSCNLEIIDHIVGNQPDQEMESASEWYLK                   | 2.52847868        | 3              | 7.34228   |
| P32755        | LPSCNLEIIDHIVGNQPDQEMESASEWYLK+Oxidation(20      | 2.63832631        |                |           |
| P32755        | MGFEPLAYK                                        | 1.69723987        | 2              | 2.64896   |
| P32755        | SIVVANYEESIK                                     | 1.27620122        | 2              | 4.23279   |
| P32755        | SQIQEYVDYNGGAGVQHIALR                            | 1.64929449        | 2              | 5.81498   |
| P32755        | TEDIITIR                                         | 1.29976454        | 2              | 3.30782   |
| <b>P33124</b> | <b>ACSL6 Long_chain_fatty_acid__CoA ligase 6</b> | <b>1.00684484</b> | <b>0.98311</b> | <b>2</b>  |
| P33124        | ALRPITFPVVR                                      | 1.17795902        | 2              | 3.02346   |
| P33124        | IENIYIR                                          | 1.00669289        | 2              | 2.80915   |
| <b>P33273</b> | <b>CP255 Cytochrome P450 2C55</b>                | <b>0.92023717</b> | <b>0.41597</b> | <b>2</b>  |
| P33273        | FDYKDFNLNMEK                                     | 0.91576338        | 3              | 4.88464   |
| P33273        | NFAEIK                                           | 1.45516058        | 1              | 1.90921   |
| <b>P34058</b> | <b>HS90B Heat shock protein HSP 90_beta</b>      | <b>1.18371662</b> | <b>0.39542</b> | <b>26</b> |
| P34058        | ADLNNLGTIAK                                      | 0.96691515        | 2              | 4.08765   |
| P34058        | EDQTEYLEER                                       | 1.10161861        | 2              | 3.55983   |
| P34058        | EGLELPEDEEEK                                     | 0.83329183        | 2              | 2.51252   |
| P34058        | EGLELPEDEEEKK                                    | 1.1066826         | 2              | 2.56271   |
| P34058        | EGLELPEDEEEKKK                                   | 1.43127632        | 2              | 3.1537    |
| P34058        | ELISNASDALDK                                     | 1.0996398         | 2              | 3.6059    |
| P34058        | FYEAFSK                                          | 1.40924616        | 1              | 1.95922   |
| P34058        | GVVDSDELPLNISR                                   | 1.20725142        | 2              | 4.80619   |
| P34058        | HFSVEGQLEFR                                      | 1.25694561        | 2              | 2.66939   |
| P34058        | HLEINPDHPIVETLR                                  | 1.10046782        | 2              | 4.58497   |
| P34058        | HSQFIGYPITLYLEK                                  | 1.85501171        | 2              | 3.66626   |
| P34058        | IDIIPNPQER                                       | 1.03503311        | 2              | 3.05708   |
| P34058        | KHLEINPDHPIVETLR                                 | 1.30623193        | 2              | 4.83644   |
| P34058        | LGIHEDSTNR                                       | 1.21620809        | 2              | 2.90844   |
| P34058        | NPDDITQEEYGEFYK                                  | 0.99046885        | 2              | 4.96354   |
| P34058        | RAPFDLFENK                                       | 1.36427835        | 2              | 3.04066   |
| P34058        | RAPFDLFENKK                                      | 0.80349286        | 2              | 2.52583   |
| P34058        | SIYYITGESK                                       | 0.85893484        | 2              | 3.19449   |
| P34058        | SLTNDWEDHLAVK                                    | 1.15245959        | 2              | 4.32713   |
| P34058        | TLTLVDTGIGMTK                                    | 1.25291168        | 2              | 4.27911   |
| P34058        | TLTLVDTGIGMTK+Oxidation(10                       | 1.77469366        |                |           |
| P34058        | VILHLKEDQTEYLEER                                 | 1.35996971        | 3              | 4.04589   |
| P34058        | YESLTDPSK                                        | 1.16594231        | 1              | 2.70948   |
| P34058        | YESLTDPSKLD SGK                                  | 1.24717115        | 2              | 3.88405   |
| P34058        | YHTSQSGDEMTSLSEYVSR                              | 1.33780693        | 2              | 5.48955   |
| P34058        | YIDQEELNK                                        | 2.00776547        | 2              | 3.48696   |
| <b>P34064</b> | <b>PSA5 Proteasome subunit alpha type_5</b>      | <b>1.19790982</b> | <b>0.64223</b> | <b>7</b>  |
| P34064        | AIGSASEGAQSSLQEVYHK                              | 0.99206795        | 2              | 4.51446   |
| P34064        | EELEEVIKDI                                       | 1.03335849        | 2              | 2.5477    |
| P34064        | GVNTFSPEGR                                       | 1.32438621        | 2              | 3.08947   |
| P34064        | ITSPLMEPSSIEK                                    | 1.17899092        | 2              | 2.61133   |
| P34064        | LNATNIELATVQPGQNFHMFTK                           | 1.68049901        | 3              | 3.44823   |
| P34064        | SSLILK                                           | 1.30186603        | 2              | 2.39765   |
| P34064        | STTLKEAIKSSLIILK                                 | 1.0231754         | 2              | 2.3154    |

|               |                                                              |                   |                |           |
|---------------|--------------------------------------------------------------|-------------------|----------------|-----------|
| <b>P34067</b> | <b>PSB4 Proteasome subunit beta type_4</b>                   | <b>1.11049106</b> | <b>0.85725</b> | <b>3</b>  |
| P34067        | GVEIEGPLSAQTNWDIAHMSIGFE                                     | 1.70771307        | 2              | 3.13328   |
| P34067        | TQNPMVTGTSVLGVK                                              | 1.03667427        | 2              | 3.35656   |
| P34067        | VNDSTMLGASGDYADFQYLK                                         | 1.51884608        | 2              | 4.49448   |
| <b>P35171</b> | <b>CX7A2 Cytochrome c oxidase subunit 7A2_mitochondrial</b>  | <b>1.32299968</b> | <b>0.17059</b> | <b>2</b>  |
| P35171        | GGTSDALLYR                                                   | 1.2167088         | 2              | 3.41543   |
| P35171        | LFQEDNGMPVHLK                                                | 1.32654587        | 2              | 4.38558   |
| <b>P35213</b> | <b>1433B 14_3_3 protein beta/alpha</b>                       | <b>1.01813529</b> | <b>0.00821</b> | <b>7</b>  |
| P35213        | AVTEQGHLSNEER                                                | 1.22740532        | 2              | 4.48909   |
| P35213        | EKIEAELQDICSVDLELLDK                                         | 1.68994637        | 3              | 4.98565   |
| P35213        | QTTVSNSQAYQEAFFEISK                                          | 1.07635992        | 2              | 5.46302   |
| P35213        | TAFDEAIAELDTLNEESYK                                          | 0.99298813        | 2              | 4.81657   |
| P35213        | YDDMAAAMK                                                    | 3.65356724        | 2              | 3.09257   |
| P35213        | YLILNATHAESK                                                 | 1.59495905        | 2              | 3.58558   |
| P35213        | YLSEVASGDNK                                                  | 0.95312008        | 2              | 3.04129   |
| <b>P35278</b> | <b>RAB5C Ras_related protein Rab_5C</b>                      | <b>1.06684609</b> | <b>0.96502</b> | <b>4</b>  |
| P35278        | FEIWDTAGQER                                                  | 0.87339588        | 2              | 3.16344   |
| P35278        | GVDLQESNPASR                                                 | 1.23032083        | 2              | 2.70709   |
| P35278        | LVLLGESAVGK                                                  | 1.30412787        | 2              | 2.75      |
| P35278        | NEPQNAAGAPGR                                                 | 1.0518571         | 2              | 2.99653   |
| <b>P35427</b> | <b>RL13A 60S ribosomal protein L13a</b>                      | <b>1.25772231</b> | <b>0.13946</b> | <b>2</b>  |
| P35427        | CEGINISGNFYR                                                 | 1.40384493        | 2              | 3.14189   |
| P35427        | YQAVTATLEEK                                                  | 1.24724414        | 2              | 3.1429    |
| <b>P35434</b> | <b>ATPD ATP synthase subunit delta_mitochondrial</b>         | <b>1.24571761</b> | <b>0.97637</b> | <b>2</b>  |
| P35434        | AQSELSGADEAAR                                                | 1.30760654        | 2              | 4.66613   |
| P35434        | IEANEALVK                                                    | 1.1215258         | 2              | 2.84138   |
| <b>P35435</b> | <b>ATPG ATP synthase subunit gamma_mitochondrial</b>         | <b>1.48079986</b> | <b>0.00011</b> | <b>7</b>  |
| P35435        | GLCGAIHSSVAK                                                 | 1.35486082        | 2              | 3.69161   |
| P35435        | HLIIGVSSDR                                                   | 1.24228692        | 2              | 3.0661    |
| P35435        | NASDMIDK                                                     | 1.64747744        | 2              | 2.35038   |
| P35435        | NDMAALTAAGK                                                  | 1.49662098        | 2              | 3.94464   |
| P35435        | NDMAALTAAGK+Oxidation(2                                      | 1.7586923         |                |           |
| P35435        | THSDQFLVSFK                                                  | 0.83650092        | 1              | 3.03538   |
| P35435        | VYGTGSLALYEK                                                 | 1.87722601        | 2              | 3.10062   |
| <b>P35559</b> | <b>IDE Insulin_degrading enzyme</b>                          | <b>1.22764436</b> | <b>0.55611</b> | <b>4</b>  |
| P35559        | AIEDMTEEFQK                                                  | 1.0154441         | 2              | 3.13722   |
| P35559        | DREVNADVSEHEK                                                | 1.25791035        | 3              | 3.57133   |
| P35559        | SNPGHYLGHLIGHEGPGSLLSELK                                     | 0.39694635        | 3              | 3.30114   |
| P35559        | YTLETRPNQEGIDVR                                              | 1.25852886        | 2              | 2.53031   |
| <b>P35565</b> | <b>CALX Calnexin</b>                                         | <b>0.87990973</b> | <b>0.99865</b> | <b>11</b> |
| P35565        | AEDEILNR                                                     | 1.29449745        | 2              | 2.69464   |
| P35565        | EIEDPEDRKPEDWDERPK                                           | 1.80961188        | 3              | 3.33168   |
| P35565        | GSLSGWILSK                                                   | 2.31059254        | 2              | 2.50193   |
| P35565        | KIPNPdffEDLEPFR                                              | 1.09056477        | 3              | 4.29534   |
| P35565        | NKGDEEEEEKLEEK                                               | 0.86656899        | 3              | 5.05456   |
| P35565        | TDAPQPDVK                                                    | 1.10683657        | 2              | 2.38776   |
| P35565        | TDAPQPDVKDEEGKEEEK                                           | 0.91818331        | 3              | 4.36467   |
| P35565        | TSELNLDQFHDK                                                 | 0.94956835        | 2              | 3.6907    |
| P35565        | VVDDWANDGWGLK                                                | 0.79723626        | 2              | 4.23063   |
| P35565        | VVDDWANDGWGLKK                                               | 0.56715615        | 2              | 2.80435   |
| P35565        | WEVDEMKETK                                                   | 1.18091554        | 2              | 2.8193    |
| <b>P35571</b> | <b>GPDM Glycerol_3_phosphate dehydrogenase_mitochondrial</b> | <b>1.12202793</b> | <b>0.28069</b> | <b>2</b>  |
| P35571        | AITNLDVEQYR                                                  | 0.49041928        | 2              | 2.71551   |

|               |                                                                         |                   |                |           |
|---------------|-------------------------------------------------------------------------|-------------------|----------------|-----------|
| P35571        | KQEELETATR                                                              | 1.49286903        | 2              | 2.33559   |
| <b>P35704</b> | <b>PRDX2 Peroxiredoxin_2</b>                                            | <b>1.12209275</b> | <b>0.15763</b> | <b>5</b>  |
| P35704        | EGGLGPLNIPLLADVTK                                                       | 1.21011577        | 2              | 3.47604   |
| P35704        | KEGGLGPLNIPLLADVTK                                                      | 1.22919001        | 2              | 4.86094   |
| P35704        | NDEGIAYR                                                                | 1.24348563        | 1              | 1.95971   |
| P35704        | QITVNDLPVGR                                                             | 1.03664655        | 2              | 3.03412   |
| P35704        | SLSQNYGVVK                                                              | 1.00400256        | 2              | 2.47037   |
| <b>P35738</b> | <b>ODDB 2_oxoisovalerate dehydrogenase subunit beta_mitochondrial</b>   | <b>0.93744948</b> | <b>0.02656</b> | <b>5</b>  |
| P35738        | AAVEQVPVEPYK                                                            | 0.79234902        | 2              | 2.42939   |
| P35738        | GLLLSCIEDKNPCIFFEPK                                                     | 1.5264669         | 2              | 3.66665   |
| P35738        | MNLFQSITSALDNSLAK                                                       | 0.6734114         | 2              | 3.59215   |
| P35738        | SGDLFNCGLTIR                                                            | 0.72088674        | 2              | 3.01778   |
| P35738        | VCGYDTPFPHFIFPYIPDK                                                     | 1.23307063        | 3              | 3.49018   |
| <b>P35815</b> | <b>PPM1B Protein phosphatase 1B</b>                                     | <b>1.30842504</b> | <b>0.47359</b> | <b>2</b>  |
| P35815        | IQNAGGSVMIQR                                                            | 1.30848402        | 2              | 2.82335   |
| P35815        | SGFALEPSVENVK                                                           | 1.14469852        | 2              | 3.62746   |
| <b>P36201</b> | <b>CRIP2 Cysteine_rich protein 2</b>                                    | <b>0.8179628</b>  | <b>0.4827</b>  | <b>3</b>  |
| P36201        | ASSVTFTGEPNMCPDR                                                        | 0.97369991        | 2              | 3.68081   |
| P36201        | GVNIGGAGSYIYEKPPTEAPQVTGPIEVPVVR                                        | 0.7445164         | 3              | 6.47508   |
| P36201        | GVNTGAVGSIYDKDPEGTVQP                                                   | 0.85309427        | 2              | 4.31891   |
| <b>P36365</b> | <b>FMO1 Dimethylaniline monooxygenase [N_oxide_forming] 1</b>           | <b>0.82609225</b> | <b>0.3826</b>  | <b>11</b> |
| P36365        | ALQSDYIYIDLLTSINAKPDLR                                                  | 1.34270655        | 3              | 3.61061   |
| P36365        | ASLYNSVVSNSK                                                            | 0.65867058        | 2              | 2.92251   |
| P36365        | CCLEEGLEPTCFER                                                          | 0.56824292        | 2              | 4.28105   |
| P36365        | FTEHVEEGR                                                               | 0.86951512        | 2              | 3.02412   |
| P36365        | HSGFGLCYCK                                                              | 1.09195246        | 2              | 3.24699   |
| P36365        | NLLPTPVVSWLISK                                                          | 0.92777144        | 2              | 2.49186   |
| P36365        | SCDLGGLWR                                                               | 0.79981464        | 2              | 2.76923   |
| P36365        | TQLREPVLNDELPGR                                                         | 0.82637648        | 3              | 4.57949   |
| P36365        | VAIVGAGVSGLASIK                                                         | 2.03128168        | 2              | 2.82332   |
| P36365        | VEDGQASLYK                                                              | 0.92794722        | 2              | 3.46588   |
| P36365        | VLVVGMGNSGTDIAVEASHLAK                                                  | 0.92865983        | 2              | 4.55916   |
| <b>P36506</b> | <b>MP2K2 Dual specificity mitogen_activated protein kinase kinase 2</b> | <b>1.63348322</b> | <b>0.25576</b> | <b>2</b>  |
| P36506        | ISELGAGNGGVVTK                                                          | 1.87994404        | 2              | 2.36098   |
| P36506        | KLEELDLEQQR                                                             | 1.48391526        | 2              | 3.03969   |
| <b>P36511</b> | <b>UDB15 UDP_glucuronosyltransferase 2B15</b>                           | <b>1.25960169</b> | <b>0.33396</b> | <b>8</b>  |
| P36511        | ANIIAWALAQIPQK                                                          | 1.14945223        | 3              | 5.48749   |
| P36511        | FVNVVWYELPR                                                             | 0.95953074        | 2              | 3.6615    |
| P36511        | FVTFPTSFSHDLNFFTR                                                       | 1.39863284        | 2              | 4.44904   |
| P36511        | GHEVTVLRPSAFVFLDPK                                                      | 0.72591962        | 3              | 3.96885   |
| P36511        | IILELVQK                                                                | 1.23343462        | 2              | 3.53459   |
| P36511        | NAMWLSTIHHDQPTKPLDR                                                     | 0.97559058        | 3              | 3.41859   |
| P36511        | SDLLNALEEVIDNPFYK                                                       | 0.78631766        | 3              | 5.33736   |
| P36511        | TLGRPTTLAEIMGK                                                          | 1.55997581        | 2              | 3.1035    |
| <b>P36536</b> | <b>SAR1A GTP_binding protein SAR1a</b>                                  | <b>1.32958706</b> | <b>0.36915</b> | <b>2</b>  |
| P36536        | IDRTDAISEEK                                                             | 1.18688667        | 2              | 2.4917    |
| P36536        | VELNALMTDETISNVPILILGNK                                                 | 1.61112618        | 3              | 5.66942   |
| <b>P36953</b> | <b>AFAM Afamin</b>                                                      | <b>1.2281421</b>  | <b>0.44999</b> | <b>2</b>  |
| P36953        | FTDSENVQER                                                              | 1.22724357        | 2              | 2.99725   |
| P36953        | SLAMVQCECK                                                              | 1.79396705        | 2              | 2.75056   |
| <b>P36972</b> | <b>APT Adenine phosphoribosyltransferase</b>                            | <b>1.23617887</b> | <b>0.00039</b> | <b>2</b>  |
| P36972        | IDYIAGLSR                                                               | 0.92358706        | 2              | 3.04337   |
| P36972        | SFPDFPIPGVLFRR                                                          | 1.23627584        | 2              | 3.25029   |
| <b>P37397</b> | <b>CNN3 Calponin_3</b>                                                  | <b>1.13381783</b> | <b>0.91654</b> | <b>5</b>  |

|               |                                                 |                   |                |           |
|---------------|-------------------------------------------------|-------------------|----------------|-----------|
| P37397        | AGQSVIGLQMGTKN                                  | 1.12796473        | 2              | 3.37461   |
| P37397        | LTLQPVDNSTISLQMGTKN                             | 0.88399612        | 2              | 2.95356   |
| P37397        | MQTDKPFQTTISLQMGTKN                             | 1.25499664        | 3              | 3.55222   |
| P37397        | VNESSLNWPQLENIGNFIK                             | 1.01416852        | 2              | 3.15147   |
| P37397        | YDQQAEDLR                                       | 1.19445431        | 2              | 3.15414   |
| <b>P38650</b> | <b>DYHC1 Cytoplasmic dynein 1 heavy chain 1</b> | <b>1.19005103</b> | <b>0.53328</b> | <b>8</b>  |
| P38650        | DFPLNDLLSATELDKIR                               | 1.62574673        | 2              | 2.38742   |
| P38650        | ILDDDTIITLLENLK                                 | 1.27501238        | 2              | 2.50648   |
| P38650        | QLQNISQAAAAGGAK                                 | 1.00491451        | 2              | 3.37664   |
| P38650        | VLLTTQGVDMISK                                   | 1.20794868        | 2              | 2.663     |
| P38650        | VLRPQVTAQAQQNGEAPPEQDMK                         | 1.18067284        | 3              | 5.4378    |
| P38650        | VQGLTVEQAEAVAR                                  | 1.17917541        | 2              | 3.27985   |
| P38650        | VQVALEELQDLK                                    | 1.35198445        | 2              | 3.02736   |
| P38650        | VTDFGDKVEDPTFLNQLQSGVNR                         | 1.26429263        | 3              | 4.16205   |
| <b>P38652</b> | <b>PGM1 Phosphoglucomutase_1</b>                | <b>1.23558875</b> | <b>0.62228</b> | <b>17</b> |
| P38652        | ADNFEYSDPVDGSISK                                | 0.92118751        | 2              | 4.82459   |
| P38652        | AIGGIILTASHNPGGPNDFGIK                          | 1.18269136        | 2              | 5.7588    |
| P38652        | FFGNLMDASK                                      | 1.30886939        | 2              | 2.51639   |
| P38652        | FNISNGGPAPEAITDK                                | 1.15847028        | 2              | 4.30233   |
| P38652        | INQDPQVMLAPLISIALK                              | 1.14566373        | 3              | 4.60659   |
| P38652        | KQRVEDILK                                       | 0.98270786        | 1              | 2.02672   |
| P38652        | LSGTGSAGATIR                                    | 1.75624479        | 2              | 3.48021   |
| P38652        | LVIGQNGILSTPAVSCIIR                             | 1.58581603        | 2              | 4.08125   |
| P38652        | NIFDFNALK                                       | 1.20457407        | 2              | 2.92314   |
| P38652        | QEATLVVGGDGR                                    | 1.27534714        | 2              | 3.20018   |
| P38652        | QQFDLENK                                        | 0.90802657        | 1              | 2.12824   |
| P38652        | SGEHDFGAAFDGGDGR                                | 1.11832888        | 2              | 4.4598    |
| P38652        | SGEHDFGAAFDGGDRNMILGK                           | 1.56932957        | 3              | 3.7608    |
| P38652        | TIEEYAICPDLK                                    | 1.25802093        | 2              | 4.43188   |
| P38652        | TQAYPDQKPGTSGLR                                 | 0.9924518         | 2              | 3.4881    |
| P38652        | VFQGNANYAENFIQSIVSTVEPALR                       | 1.33016314        |                |           |
| P38652        | YDYEEVEAEGANK                                   | 1.0304275         | 2              | 5.18105   |
| <b>P38656</b> | <b>LA Lupus La protein homolog</b>              | <b>1.37837296</b> | <b>0.16619</b> | <b>2</b>  |
| P38656        | ITDDQQESLNK                                     | 2.14055144        | 2              | 4.19315   |
| P38656        | LDEGWVPLETMIK                                   | 1.31194845        | 2              | 2.99039   |
| <b>P38659</b> | <b>PDIA4 Protein disulfide isomerase A4</b>     | <b>0.84455699</b> | <b>0.99874</b> | <b>22</b> |
| P38659        | DLGLSESGEDVNAAILDESGKK                          | 1.07516814        | 2              | 5.15013   |
| P38659        | DNDPPIAVAK                                      | 1.07511317        | 2              | 2.40049   |
| P38659        | EVSQPDWTPPEVTLTLTK                              | 0.97712726        | 2              | 3.55213   |
| P38659        | FDVSGYPTIK                                      | 0.99956312        | 2              | 3.49007   |
| P38659        | FDVSGYPTLK                                      | 0.99956312        | 2              | 3.49007   |
| P38659        | FHHTFSTEIAK                                     | 1.16871958        | 3              | 3.50149   |
| P38659        | FIDEHATK                                        | 1.13282752        | 2              | 2.46554   |
| P38659        | FIDEHATKR                                       | 0.84436743        | 2              | 2.55172   |
| P38659        | GQAVDYDGSR                                      | 0.99823084        | 2              | 2.66653   |
| P38659        | GRPFDYNGPR                                      | 1.22236883        | 2              | 2.87645   |
| P38659        | IDATSASMLASK                                    | 1.04525001        | 2              | 3.97559   |
| P38659        | IDATSASMLASK+Oxidation(7                        | 0.78107942        |                |           |
| P38659        | KGQAVDYDGSR                                     | 2.22637049        | 2              | 2.93026   |
| P38659        | MDATANDITNDR                                    | 0.71354681        | 2              | 3.95544   |
| P38659        | MHVMDVQGSTEASAIK                                | 1.203724          | 2              | 4.62288   |
| P38659        | MHVMDVQGSTEASAIKDYYVVK                          | 1.05192927        | 3              | 4.59957   |
| P38659        | RFDVSGYPTLK                                     | 1.14731508        | 2              | 3.28803   |
| P38659        | RSPIPLAK                                        | 2.01600095        | 2              | 2.40611   |
| P38659        | TFDAIVMDPK                                      | 0.93131411        | 2              | 3.53451   |
| P38659        | VDATEQTDLAK                                     | 1.25443322        | 2              | 4.12692   |
| P38659        | VEGFPTIYFAPSGDK                                 | 1.3202729         | 2              | 3.44627   |

|               |                                                                      |                   |                |           |
|---------------|----------------------------------------------------------------------|-------------------|----------------|-----------|
| P38659        | YGIVDYMVEQSGPPSK                                                     | 1.18581862        | 2              | 5.10871   |
| <b>P38718</b> | <b>BR44 Brain protein 44</b>                                         | <b>1.16661115</b> | <b>0.35977</b> | <b>2</b>  |
| P38718        | LRPLYNHPAGPR                                                         | 1.17275863        | 2              | 2.82985   |
| P38718        | VELLLPK                                                              | 0.66003388        | 1              | 2.22143   |
| <b>P38918</b> | <b>ARK73 Aflatoxin B1 aldehyde reductase member 3</b>                | <b>1.00131247</b> | <b>0.54656</b> | <b>5</b>  |
| P38918        | EEHFNGIALVEK                                                         | 1.34441182        | 2              | 2.53456   |
| P38918        | FYAFNPLAGLLTGR                                                       | 1.40755126        | 2              | 4.63171   |
| P38918        | MDVTSSASVR                                                           | 0.91958871        | 2              | 3.58634   |
| P38918        | RMDVTSSASVR                                                          | 0.97654294        | 2              | 3.85364   |
| P38918        | TTYGPTAPSMISAAVR                                                     | 1.00664419        | 2              | 3.96068   |
| <b>P38983</b> | <b>RSSA 40S ribosomal protein SA</b>                                 | <b>1.26563596</b> | <b>0.00014</b> | <b>8</b>  |
| P38983        | ADHQLTEASYVNLPTIALCNTDSPLR                                           | 1.46586626        | 3              | 5.86294   |
| P38983        | AIVAIENPADVSVISSR                                                    | 1.51887685        | 2              | 4.80864   |
| P38983        | FAAATGATPIAGR                                                        | 0.26269457        | 2              | 3.16064   |
| P38983        | FLAAGTHLGGTNLDFQMEQYIYK                                              | 1.40034536        | 3              | 3.62384   |
| P38983        | FTPGFTFNQIQAAFR                                                      | 1.32265705        | 2              | 4.63599   |
| P38983        | KSDGIYIINLK                                                          | 4.03886817        | 2              | 3.52242   |
| P38983        | SDGIYIINLK                                                           | 1.31916644        | 2              | 3.02165   |
| P38983        | YVDIAIPCNNK                                                          | 1.16678252        | 2              | 3.55075   |
| <b>P39032</b> | <b>RL36 60S ribosomal protein L36</b>                                | <b>1.50679324</b> | <b>0.38797</b> | <b>2</b>  |
| P39032        | EELSNVLAAMR                                                          | 1.42639494        | 2              | 2.40552   |
| P39032        | KREELSNVLAAMR                                                        | 1.6814229         | 3              | 3.50914   |
| <b>P39052</b> | <b>DYN2 Dynamamin_2</b>                                              | <b>1.2538252</b>  | <b>0.43863</b> | <b>2</b>  |
| P39052        | ESSLILAVTPANMDLANSALK                                                | 1.6004912         | 2              | 2.36734   |
| P39052        | NLVDSYVAIINK                                                         | 1.10446444        | 2              | 3.11987   |
| <b>P40112</b> | <b>PSB3 Proteasome subunit beta type_3</b>                           | <b>1.29213503</b> | <b>0.00789</b> | <b>2</b>  |
| P40112        | FGIQAQMVTDFQK                                                        | 1.99471941        | 2              | 3.43311   |
| P40112        | FGPYYTEPVIAGLDPK                                                     | 1.27026645        | 2              | 3.09585   |
| <b>P40307</b> | <b>PSB2 Proteasome subunit beta type_2</b>                           | <b>1.05980459</b> | <b>0.23616</b> | <b>3</b>  |
| P40307        | FILNLPFTFSVR                                                         | 2.08572806        | 2              | 3.28235   |
| P40307        | NGYELSPTAAANFTR                                                      | 1.16530201        | 2              | 4.02458   |
| P40307        | VIDKDGIIHNLENITFTK                                                   | 1.04478845        | 2              | 4.03379   |
| <b>P41034</b> | <b>TTPA Alpha_tocopherol transfer protein</b>                        | <b>2.13335355</b> | <b>1.5E-08</b> | <b>4</b>  |
| P41034        | AECPELSADLHPR                                                        | 2.05924445        | 2              | 2.98702   |
| P41034        | AQEEGVPETPQPLTDAFLLR                                                 | 2.2791408         | 2              | 3.71279   |
| P41034        | QLNEQPDHSPLVQPGAELR                                                  | 1.41936222        | 3              | 4.05484   |
| P41034        | VSLITSELIVQEVETQR                                                    | 1.61991426        | 2              | 2.9696    |
| <b>P41123</b> | <b>RL13 60S ribosomal protein L13</b>                                | <b>1.18215228</b> | <b>0.0009</b>  | <b>3</b>  |
| P41123        | LATQLTGPMPIR                                                         | 3.13544861        | 2              | 3.12273   |
| P41123        | STESLQANVQR                                                          | 1.17997826        | 2              | 3.88965   |
| P41123        | VDTWFNQPAR                                                           | 1.22897606        | 2              | 3.46971   |
| <b>P41498</b> | <b>PPAC Low molecular weight phosphotyrosine protein phosphatase</b> | <b>0.94002984</b> | <b>0.98233</b> | <b>3</b>  |
| P41498        | IDSAATSTYEVGNPPDYR                                                   | 1.63211706        | 2              | 4.24839   |
| P41498        | IELLSYDPQK                                                           | 0.95825775        | 2              | 3.22101   |
| P41498        | LVTDENVSDNWR                                                         | 0.89871046        | 2              | 3.76149   |
| <b>P41542</b> | <b>USO1 General vesicular transport factor p115</b>                  | <b>1.28749787</b> | <b>0.19539</b> | <b>14</b> |
| P41542        | AWFEVGDENPGWSAQK                                                     | 1.04891485        | 2              | 4.66609   |
| P41542        | CQNEQLQTAVTQQASQIQHK                                                 | 1.03011148        | 3              | 5.30596   |
| P41542        | EQDDLVLADQDQK                                                        | 1.6014406         | 2              | 2.53703   |
| P41542        | GVMGGQSAGPQHTEAETIQK                                                 | 1.32290919        | 2              | 4.35896   |
| P41542        | IVAFENAFER                                                           | 1.15278797        | 2              | 3.05438   |
| P41542        | LQTENSELQQR                                                          | 1.20328926        | 2              | 3.13897   |
| P41542        | LREEIEELR                                                            | 1.13776581        | 2              | 2.72273   |
| P41542        | NNNSNQNFFK                                                           | 0.8793275         | 2              | 2.71611   |
| P41542        | QLGPPVQQIILVSPMGVSK                                                  | 2.08177063        | 2              | 4.0115    |

|               |                                                                 |                   |                |           |
|---------------|-----------------------------------------------------------------|-------------------|----------------|-----------|
| P41542        | SHQVLLQSQLAEK                                                   | 0.65509904        | 2              | 2.95188   |
| P41542        | SQLCSQSLEITR                                                    | 1.17505168        | 2              | 3.36524   |
| P41542        | SVPVEGESELVTAAK                                                 | 1.0742046         | 2              | 4.15425   |
| P41542        | TLEQHDNIVTHYK                                                   | 1.00301096        | 2              | 3.904     |
| P41542        | VLVSPTNPPGATSSCQK                                               | 1.44689862        | 2              | 3.92053   |
| <b>P41562</b> | <b>IDHC Isocitrate dehydrogenase [NADP] cytoplasmic</b>         | <b>0.73887273</b> | <b>0.00034</b> | <b>20</b> |
| P41562        | ATDFVVPGP GK                                                    | 1.01834783        | 2              | 3.63243   |
| P41562        | CATITPDEK                                                       | 1.53877062        | 2              | 2.72004   |
| P41562        | DIFQEYDK                                                        | 1.6042234         | 1              | 2.39727   |
| P41562        | DLAACIK                                                         | 0.77943715        | 1              | 1.90825   |
| P41562        | FKDIFQEYDK                                                      | 1.20587852        | 3              | 4.39488   |
| P41562        | GQETSTNPIASIFAWSR                                               | 1.33155048        | 2              | 4.79303   |
| P41562        | IHGGSVVEMQGD E MTR                                              | 1.62903581        | 2              | 5.30362   |
| P41562        | KIHGGSVVEMQGD E MTR                                             | 1.12372439        | 2              | 3.69044   |
| P41562        | LIDDMVAQAMK                                                     | 1.02932482        | 2              | 4.45949   |
| P41562        | LIDDMVAQAMK+Oxidation(4                                         | 1.45749358        |                |           |
| P41562        | LIDDMVAQAMK+Oxidation(9                                         | 0.88724053        |                |           |
| P41562        | LILPYVELDLHSYDLGIENR                                            | 2.6772483         | 2              | 4.86949   |
| P41562        | LVTGWVKPIIIGR                                                   | 1.09559081        | 2              | 3.24898   |
| P41562        | SDYLNTFEFMDK                                                    | 1.53924966        | 2              | 4.46038   |
| P41562        | SDYLNTFEFMDK+Oxidation(9                                        | 3.67795002        |                |           |
| P41562        | SEGGFIWACK                                                      | 1.00044707        | 2              | 3.30598   |
| P41562        | SIEDFAHSSFQMALSK                                                | 1.08173558        | 2              | 5.08409   |
| P41562        | TVEAEAAHGT VTR                                                  | 0.73114202        | 2              | 3.81893   |
| P41562        | VEITYTPK                                                        | 1.05398911        | 2              | 2.45448   |
| P41562        | VTYLVHDFEEGGVAMGMYNQDK                                          | 1.55384705        | 3              | 3.82442   |
| <b>P42123</b> | <b>LDHB L_lactate dehydrogenase B chain</b>                     | <b>1.24410287</b> | <b>0.03581</b> | <b>4</b>  |
| P42123        | DYSVTANSK                                                       | 1.9597947         | 2              | 2.54543   |
| P42123        | IVADKDY SVTANSK                                                 | 3.1686541         | 2              | 3.62665   |
| P42123        | SLADELALVDVLEDK                                                 | 1.43931432        | 2              | 3.6337    |
| P42123        | VIGSGCNLDSAR                                                    | 1.21516496        | 2              | 3.80732   |
| <b>P42228</b> | <b>STAT4 Signal transducer and activator of transcription 4</b> | <b>0.97048884</b> | <b>0.4283</b>  | <b>2</b>  |
| P42228        | FHSVEPYNK                                                       | 1.87917012        | 1              | 1.91816   |
| P42228        | GDKGYVPSVFIPISTIR                                               | 0.92610546        | 2              | 2.73883   |
| <b>P42667</b> | <b>SC11A Signal peptidase complex catalytic subunit SEC11A</b>  | <b>1.1759308</b>  | <b>0.78515</b> | <b>3</b>  |
| P42667        | GDLLFLTNR                                                       | 1.17987889        | 2              | 2.43788   |
| P42667        | MLSLDFLDDVR                                                     | 1.0013916         | 2              | 3.34428   |
| P42667        | VGEIVVFR                                                        | 1.1809633         | 2              | 3.27065   |
| <b>P42676</b> | <b>NEUL Neurolysin_mitochondrial</b>                            | <b>1.04767346</b> | <b>0.00515</b> | <b>3</b>  |
| P42676        | AELGALPDDFIDSLEK                                                | 1.82517315        | 2              | 3.32762   |
| P42676        | NLILKPGSLDGM DMLQNFLQR                                          | 1.49961545        | 3              | 4.1433    |
| P42676        | NLNEDDTSLVFSK                                                   | 0.7669864         | 2              | 3.38772   |
| <b>P42930</b> | <b>HSPB1 Heat shock protein beta_1</b>                          | <b>1.40974671</b> | <b>0.51072</b> | <b>2</b>  |
| P42930        | AQIGGPESEQSGAK                                                  | 1.40885383        | 2              | 3.39337   |
| P42930        | VSLDVNHFAPEELTVK                                                | 2.70051225        | 2              | 2.58121   |
| <b>P42932</b> | <b>TCPQ T_complex protein 1 subunit theta</b>                   | <b>1.21677057</b> | <b>0.47231</b> | <b>10</b> |
| P42932        | AIAGTGANVIVTG GK                                                | 1.23959547        | 2              | 2.75237   |
| P42932        | AVDDGVN TFK                                                     | 1.48887515        | 2              | 2.51088   |
| P42932        | ELEVQH PAAK                                                     | 1.63609212        | 2              | 2.85769   |
| P42932        | GEENLMDAQVK                                                     | 1.31220374        | 2              | 3.58777   |
| P42932        | GSTDNLMD DIER                                                   | 1.46168664        | 2              | 2.76197   |
| P42932        | HEKEDGAISTIVLR                                                  | 5.11016324        | 2              | 2.92369   |
| P42932        | HFSGLEEAVYR                                                     | 1.25056992        | 2              | 2.65739   |
| P42932        | NVGLDIEAEVPAVK                                                  | 1.30090179        | 2              | 4.01113   |



|               |                                                                            |                   |                |           |
|---------------|----------------------------------------------------------------------------|-------------------|----------------|-----------|
| P42932        | QITSYGETCPGLEQYAIK                                                         | 1.03080569        | 2              | 4.87195   |
| P42932        | TAEELMNFSK                                                                 | 1.14266954        | 2              | 2.58773   |
| <b>P43244</b> | <b>MATR3 Matrin_3</b>                                                      | <b>1.15716042</b> | <b>0.14218</b> | <b>5</b>  |
| P43244        | ITPENLPQILLQK                                                              | 1.72791547        | 2              | 3.42861   |
| P43244        | NTHCSSLPHYQK                                                               | 1.14866802        | 2              | 2.31662   |
| P43244        | TEEGPTLSYGR                                                                | 1.07066615        | 2              | 2.55898   |
| P43244        | TENPAEGKEQEEK                                                              | 1.03650887        | 2              | 3.38239   |
| P43244        | YQLLQLVEPFGVISNHLINL                                                       | 1.17820688        | 3              | 3.76019   |
| <b>P43274</b> | <b>H14 Histone H1.4</b>                                                    | <b>1.3480857</b>  | <b>0.98347</b> | <b>4</b>  |
| P43274        | ALAAAGYDVEK                                                                | 1.35796985        | 2              | 3.86132   |
| P43274        | ALAAAGYDVEKNNSR                                                            | 0.6027291         | 2              | 3.29513   |
| P43274        | SGVSLAALK                                                                  | 0.96206608        | 2              | 2.99182   |
| P43274        | SGVSLAALKK                                                                 | 0.79626463        | 2              | 2.68434   |
| <b>P43278</b> | <b>H10 Histone H1.0</b>                                                    | <b>0.83841492</b> | <b>0.97165</b> | <b>2</b>  |
| P43278        | VGENADSQIK                                                                 | 0.83781972        | 2              | 3.4397    |
| P43278        | YSDMIVAAIQAEK                                                              | 1.02410143        | 2              | 4.47286   |
| <b>P43883</b> | <b>PLIN2 Perilipin_2</b>                                                   | <b>1.3274757</b>  | <b>0.28049</b> | <b>2</b>  |
| P43883        | DSVASTVSGVVDK                                                              | 1.32787719        | 2              | 2.35521   |
| P43883        | LEPQIAVANTYACK                                                             | 0.39878407        | 2              | 3.94471   |
| <b>P45591</b> | <b>COF2 Cofilin_2</b>                                                      | <b>1.47389489</b> | <b>0.11537</b> | <b>2</b>  |
| P45591        | HEWQVNGLDDIKDR                                                             | 1.56390211        | 3              | 4.85484   |
| P45591        | QILVGDIGDTVEDPYTSFVK                                                       | 1.45554431        | 2              | 3.86046   |
| <b>P45592</b> | <b>COF1 Cofilin_1</b>                                                      | <b>1.36192656</b> | <b>0.80747</b> | <b>5</b>  |
| P45592        | EILVGDVGQTVDDPYTTFVK                                                       | 1.12469815        | 2              | 5.11072   |
| P45592        | HELQANCYEEVK                                                               | 1.08432948        | 2              | 3.83019   |
| P45592        | HELQANCYEEVKDR                                                             | 1.40380759        | 3              | 5.62793   |
| P45592        | MLPDKDCR                                                                   | 1.37961982        | 2              | 2.33667   |
| P45592        | NIILEEGKEILVGDVGQTVDDPYTTFVK                                               | 1.23552198        | 3              | 4.80309   |
| <b>P45878</b> | <b>FKBP2 Peptidyl_prolyl cis_trans isomerase FKBP2</b>                     | <b>1.31136583</b> | <b>0.12876</b> | <b>4</b>  |
| P45878        | GWDQQLGMCEGEK                                                              | 1.48882316        | 2              | 4.3016    |
| P45878        | KGDVLMHMYTGK                                                               | 0.58753001        | 2              | 3.8757    |
| P45878        | KLVIPSELGYGER                                                              | 1.58787067        | 2              | 2.74943   |
| P45878        | LVIPSELGYGER                                                               | 1.31123707        | 2              | 2.79427   |
| <b>P45953</b> | <b>ACADV Very long_chain specific acyl_CoA dehydrogenase_mitochondrial</b> | <b>1.05104338</b> | <b>0.21284</b> | <b>17</b> |
| P45953        | AMVENGGLVTSNPLR                                                            | 0.895096          | 2              | 4.05193   |
| P45953        | AMVENGGLVTSNPLRV                                                           | 1.17902864        | 2              | 4.19659   |
| P45953        | ASNTSEVYFDGVK                                                              | 1.23210275        | 2              | 3.60534   |
| P45953        | ELGAFGLQVPELGGGLSNTQYAR                                                    | 1.99240827        | 3              | 5.12188   |
| P45953        | ENMASLQSNPQQQLFR                                                           | 1.35554889        | 2              | 4.24987   |
| P45953        | FFEEVNDPAK                                                                 | 0.86459653        | 2              | 3.02512   |
| P45953        | FFEEVNDPAKNDSLEKVEEDTLQGLK                                                 | 0.83800705        | 3              | 5.58398   |
| P45953        | GIVNEQFLLQR                                                                | 1.03670254        | 2              | 3.14125   |
| P45953        | IFEGTNDILR                                                                 | 1.76439092        | 2              | 3.14642   |
| P45953        | NDSLEKVEEDTLQGLK                                                           | 1.28255581        | 2              | 3.64011   |
| P45953        | NPLGNVGLLIGEASK                                                            | 1.6455587         | 2              | 3.70709   |
| P45953        | SFGGVTHGLPEK                                                               | 1.44756287        | 2              | 2.60605   |
| P45953        | SFGGVTHGLPEKK                                                              | 1.11854261        | 2              | 2.95757   |
| P45953        | SGELAVQALEQFATVVEAK                                                        | 1.25780419        | 3              | 4.12116   |
| P45953        | SLSEGYPTAQHEK                                                              | 1.30731917        | 2              | 3.42979   |
| P45953        | TGIGSGLSLSGIVHPELSR                                                        | 1.19370635        | 3              | 4.60682   |
| P45953        | VEEDTLQGLK                                                                 | 0.77617467        | 2              | 2.76958   |
| <b>P46061</b> | <b>RAGP1 Ran GTPase_activating protein 1</b>                               | <b>1.71136398</b> | <b>0.00599</b> | <b>2</b>  |
| P46061        | TAVLDAIDALMK                                                               | 1.71756484        | 2              | 3.1766    |
| P46061        | VINLNDNTTFEK                                                               | 1.64728272        | 2              | 2.51227   |
| <b>P46418</b> | <b>GSTA5 Glutathione S_transferase alpha_5</b>                             | <b>1.04096986</b> | <b>0.19215</b> | <b>4</b>  |

|               |                                                                         |                   |                |           |
|---------------|-------------------------------------------------------------------------|-------------------|----------------|-----------|
| P46418        | AILNYIATK                                                               | 0.45840606        | 2              | 3.29148   |
| P46418        | SDGSLMFEQVPMVEIDGMK                                                     | 1.07071172        | 2              | 4.38341   |
| P46418        | SHGQDYLVGNK                                                             | 0.92113603        | 2              | 3.63771   |
| P46418        | VSNLPTVK                                                                | 1.06321946        | 2              | 2.76883   |
| <b>P46425</b> | <b>GSTP2 Glutathione S_transferase P 2</b>                              | <b>0.78624724</b> | <b>0.21021</b> | <b>3</b>  |
| P46425        | ALPGHLKPFETLLSQNQGGK                                                    | 0.78694022        | 2              | 4.16265   |
| P46425        | FEDGDLTYQSNAILR                                                         | 0.73802817        | 2              | 4.53322   |
| P46425        | MLLADQGQSWK                                                             | 1.13058823        | 2              | 2.50915   |
| <b>P46462</b> | <b>TERA Transitional endoplasmic reticulum ATPase</b>                   | <b>0.91298871</b> | <b>0.01045</b> | <b>24</b> |
| P46462        | AIANECQANFISIK                                                          | 1.12899292        | 2              | 3.70608   |
| P46462        | EDEEESLNEVGYYDDIGGCR                                                    | 9.18904942        | 2              | 5.30883   |
| P46462        | ELQELVQYPVEHPDK                                                         | 1.23184591        | 2              | 4.56693   |
| P46462        | ETVVEVPQVTWEDIGGLEDVK                                                   | 0.95781293        | 2              | 4.47217   |
| P46462        | ETVVEVPQVTWEDIGGLEDVKR                                                  | 1.75752251        | 2              | 4.11236   |
| P46462        | EVDIGIPDATGR                                                            | 0.99265153        | 2              | 2.73949   |
| P46462        | GDDLSTAILK                                                              | 1.12409469        | 2              | 3.06045   |
| P46462        | GGNIGDGGGAADR                                                           | 1.8697344         | 2              | 3.05514   |
| P46462        | GILLYGPPGTGK                                                            | 1.05886999        | 2              | 2.85287   |
| P46462        | IVSQLLTLMDGLK                                                           | 1.9876486         | 2              | 3.5126    |
| P46462        | KYEMFAQTLQQSR                                                           | 1.40697598        | 2              | 4.05685   |
| P46462        | LADDVDLEQVANETHGHVGADLAALCEAALQAIR                                      | 2.31286302        | 3              | 6.14338   |
| P46462        | LAGESESNLKAFEEAEK                                                       | 1.00392999        | 2              | 2.57452   |
| P46462        | LDQLIYIPLPEK                                                            | 1.19908235        | 2              | 4.50735   |
| P46462        | LEILQHTK                                                                | 0.81690888        | 2              | 2.82824   |
| P46462        | LGDVISIQPCPDVK                                                          | 0.86595835        | 2              | 3.96911   |
| P46462        | LIVDEAINEDNSVLSQPK                                                      | 1.29280308        | 2              | 5.45228   |
| P46462        | MDELQLFR                                                                | 1.28087279        | 2              | 3.19064   |
| P46462        | MTNGFSGADLTEICQR                                                        | 0.70396774        | 2              | 4.46241   |
| P46462        | NAPAIIFIDELDAIAPK                                                       | 1.42745022        | 2              | 4.93198   |
| P46462        | QTNPSAMEVEEDDPVPEIR                                                     | 0.83010523        | 2              | 4.39636   |
| P46462        | RSVSDNDR                                                                | 1.50079598        | 2              | 2.60967   |
| P46462        | VINQILTEMDGMSTK                                                         | 1.4764416         | 2              | 4.59131   |
| P46462        | WALSQSNPSALR                                                            | 1.86641111        | 2              | 3.45111   |
| <b>P46664</b> | <b>PURA2 Adenylosuccinate synthetase isozyme 2</b>                      | <b>1.7708223</b>  | <b>0.00061</b> | <b>5</b>  |
| P46664        | FIEDELQIPVK                                                             | 1.11314649        | 2              | 3.15279   |
| P46664        | LDILDMFTEIK                                                             | 1.75465792        | 2              | 3.26603   |
| P46664        | MCDLVSDFDGFSER                                                          | 2.63596482        | 2              | 3.66236   |
| P46664        | VGIGAFPTEQDNEIGELLQTR                                                   | 1.69351215        | 2              | 4.38233   |
| P46664        | VVDLLAQDADIVCR                                                          | 2.40524129        | 2              | 3.51888   |
| <b>P46720</b> | <b>SO1A1 Solute carrier organic anion transporter family member 1A1</b> | <b>1.22516796</b> | <b>0.19399</b> | <b>4</b>  |
| P46720        | ESEHTDVHGSPQVENDGELK                                                    | 1.69596184        | 3              | 3.74553   |
| P46720        | GIGETPIVPLGISYIEDFAK                                                    | 1.43129654        | 2              | 3.80164   |
| P46720        | GVQHQLHVESK                                                             | 0.69816843        | 2              | 3.02143   |
| P46720        | SENSPLYIGILEMGK                                                         | 1.47095899        | 2              | 3.43931   |
| <b>P46844</b> | <b>BIEA Biliverdin reductase A</b>                                      | <b>0.7789026</b>  | <b>0.99241</b> | <b>4</b>  |
| P46844        | FGVVVGVGR                                                               | 1.20556549        | 2              | 2.83465   |
| P46844        | GLLSWIEEK                                                               | 1.26844417        | 2              | 2.5176    |
| P46844        | LLDQVSAEDLAAEK                                                          | 0.46698483        | 2              | 4.65823   |
| P46844        | MTVQLETQNK                                                              | 0.97292009        | 2              | 2.49603   |
| <b>P46953</b> | <b>3HAO 3_hydroxyanthranilate 3_4_dioxygenase</b>                       | <b>1.23325775</b> | <b>0.67365</b> | <b>10</b> |
| P46953        | AQGSVALSVTQDPACK                                                        | 1.22106581        | 2              | 4.52156   |
| P46953        | ASFQPPVCNK                                                              | 1.28711751        | 2              | 2.55939   |
| P46953        | DLGTQLAPIIQEFFHSEQYR                                                    | 1.24881312        | 2              | 3.54777   |
| P46953        | FANTMGLVIER                                                             | 1.24380043        | 2              | 3.56083   |
| P46953        | METELDGLR                                                               | 1.02866174        | 2              | 2.74081   |

|               |                                                                                           |                   |                |           |
|---------------|-------------------------------------------------------------------------------------------|-------------------|----------------|-----------|
| P46953        | QDVDVWLWQLEGSSK                                                                           | 1.38879446        | 2              | 2.34734   |
| P46953        | QGEIFLLPAR                                                                                | 1.39412625        | 2              | 2.76677   |
| P46953        | RMETELDGLR                                                                                | 1.01493636        | 2              | 2.48808   |
| P46953        | TGKPNPDQLLK                                                                               | 1.23511126        | 3              | 3.58246   |
| P46953        | YYVGDTEDVLF EK                                                                            | 1.30715381        | 2              | 3.54466   |
| <b>P46978</b> | <b>STT3A Dolichyl_diphosphooligosaccharide__protein glycosyltransferase subunit STT3A</b> | <b>1.17555896</b> | <b>0.02087</b> | <b>7</b>  |
| P46978        | FESVIHEFDYPFNRY                                                                           | 1.36466922        | 2              | 2.34324   |
| P46978        | FGQVYTEAK                                                                                 | 1.59033906        | 2              | 2.72455   |
| P46978        | FHNWFDDR                                                                                  | 1.47256588        | 2              | 2.54638   |
| P46978        | FYSLLDPSYAK                                                                               | 1.54963691        | 2              | 2.89661   |
| P46978        | NLDIRPDKK                                                                                 | 1.42635981        | 2              | 2.41254   |
| P46978        | VGQAMASTE EK                                                                              | 0.86797057        | 2              | 3.17066   |
| P46978        | VGQAMASTE EK+Oxidation(4                                                                  | 1.7659658         |                |           |
| <b>P47198</b> | <b>RL22 60S ribosomal protein L22</b>                                                     | <b>1.43465123</b> | <b>0.09014</b> | <b>2</b>  |
| P47198        | AGNLGGGVVTIER                                                                             | 1.0707122         | 2              | 3.06414   |
| P47198        | FTLDCTHPVEDGIMDAANFEQLQER                                                                 | 1.9934935         | 3              | 5.5319    |
| <b>P47875</b> | <b>CSRP1 Cysteine and glycine_rich protein 1</b>                                          | <b>1.23323544</b> | <b>0.08091</b> | <b>4</b>  |
| P47875        | GFGFGQGAGALVHSE                                                                           | 1.51077754        | 2              | 3.15801   |
| P47875        | GLESTTLADKDGEIYCK                                                                         | 1.57807953        | 2              | 5.25659   |
| P47875        | HEEAPGHRPTTNP NASK                                                                        | 1.18553636        | 2              | 3.63392   |
| P47875        | NLDSTTVAVHGEEIYCK                                                                         | 1.20649699        | 2              | 4.72147   |
| <b>P47942</b> | <b>DPYL2 Dihydropyrimidinase_related protein 2</b>                                        | <b>1.00697054</b> | <b>0.75128</b> | <b>3</b>  |
| P47942        | FQMPDQGMTSADDFFGTK                                                                        | 0.79875876        | 2              | 4.07667   |
| P47942        | GLYDGPVCEVSVTPK                                                                           | 1.09183635        | 2              | 3.56534   |
| P47942        | SITIANQTNCLYVTK                                                                           | 1.00430988        | 2              | 3.4281    |
| <b>P48004</b> | <b>PSA7 Proteasome subunit alpha type_7</b>                                               | <b>0.96476467</b> | <b>0.99906</b> | <b>2</b>  |
| P48004        | NYTDDAIETD DLTIK                                                                          | 0.94691059        | 2              | 4.54366   |
| P48004        | YVAEIEKEKEENEK                                                                            | 1.17785553        | 2              | 5.43228   |
| <b>P48024</b> | <b>EIF1 Eukaryotic translation initiation factor 1</b>                                    | <b>1.42742597</b> | <b>0.02431</b> | <b>2</b>  |
| P48024        | FACNGTVIEHPEYGEVIQLQGDQR                                                                  | 2.16784483        | 3              | 5.67617   |
| P48024        | TLTTVQGIAD D YDK                                                                          | 1.36804406        | 2              | 3.66818   |
| <b>P48037</b> | <b>ANXA6 Annexin A6</b>                                                                   | <b>0.90253874</b> | <b>0.88395</b> | <b>20</b> |
| P48037        | AANDFNPDADAK                                                                              | 1.0753059         | 2              | 3.55206   |
| P48037        | AINEAYKEDYHK                                                                              | 1.13162393        | 2              | 3.39675   |
| P48037        | ALIEILATR                                                                                 | 1.2784997         | 2              | 3.21706   |
| P48037        | ALLALCGGED                                                                                | 1.78058738        | 1              | 2.15071   |
| P48037        | CLIEILASR                                                                                 | 0.88019697        | 2              | 2.65755   |
| P48037        | DAFVAIVQSVK                                                                               | 1.30989422        | 2              | 3.82655   |
| P48037        | DLESDIIGDTS GHFQK                                                                         | 1.25355472        | 2              | 4.43676   |
| P48037        | ENDDVVSEDLVQQD VQDLYEAGELK                                                                | 1.0151383         | 2              | 5.15064   |
| P48037        | GELSGDFEK                                                                                 | 1.51344573        | 1              | 2.18069   |
| P48037        | GFGSDKESILELITSR                                                                          | 1.12028783        | 2              | 4.27583   |
| P48037        | GIGTDEATIIDIITQR                                                                          | 0.99119143        | 2              | 4.26473   |
| P48037        | GSVHDFADFDANQDAEALYTAMK                                                                   | 1.06264364        | 3              | 4.13674   |
| P48037        | QRQEICQSYK                                                                                | 0.97953264        | 2              | 3.19726   |
| P48037        | SEIDLLNIR                                                                                 | 1.57526632        | 2              | 3.07096   |
| P48037        | SEISGLAR                                                                                  | 1.27594068        | 2              | 2.34455   |
| P48037        | SELDMLDIR                                                                                 | 0.65884348        | 2              | 2.96092   |
| P48037        | SLEDALSSDTS GHFK                                                                          | 1.26246358        | 2              | 3.67535   |
| P48037        | TNEQIHQLVAAYK                                                                             | 0.93152672        | 2              | 4.02279   |
| P48037        | TNYDIEHVIK                                                                                | 0.90083845        | 2              | 3.0886    |
| P48037        | TTGKPIEASIR                                                                               | 1.6904563         | 2              | 2.53742   |
| <b>P48500</b> | <b>TPIS Triosephosphate isomerase</b>                                                     | <b>1.42625319</b> | <b>1.9E-11</b> | <b>15</b> |
| P48500        | CLGELICTLNAAK                                                                             | 1.06987905        | 2              | 3.56666   |
| P48500        | CNVSEGV AQCTR                                                                             | 1.42272242        | 2              | 3.95579   |

|               |                                                           |                   |                |           |
|---------------|-----------------------------------------------------------|-------------------|----------------|-----------|
| P48500        | DLGATWVVLGHSER                                            | 1.59205748        | 2              | 4.1648    |
| P48500        | ELASQPDVDGFLVGGASLKPEFVDIINAK                             | 1.36716661        | 4              | 5.94006   |
| P48500        | HIFGESDELIGQK                                             | 1.3439295         | 2              | 4.68053   |
| P48500        | IAVAAQNCYK                                                | 1.60494574        | 2              | 2.7012    |
| P48500        | IYGGSVTGATCK                                              | 1.7290473         | 2              | 4.33989   |
| P48500        | LPADTEVVCAPPTAYIDFAR                                      | 1.96606518        | 2              | 4.41963   |
| P48500        | RHIFGESDELIGQK                                            | 1.30994886        | 2              | 4.41649   |
| P48500        | TATPQQAQEVHEK                                             | 1.18340015        | 2              | 3.63929   |
| P48500        | TATPQQAQEVHEKLR                                           | 0.8233386         | 2              | 2.39976   |
| P48500        | VNHALSEGLGVIACIGEK                                        | 1.81540689        | 2              | 5.67491   |
| P48500        | VTNGAFTGEISPGMIK                                          | 1.39223662        | 2              | 4.8655    |
| P48500        | VVFEQTK                                                   | 1.29945888        | 1              | 1.93335   |
| P48500        | VVLAYEPVWAIGTGK                                           | 1.28182035        | 2              | 4.53242   |
| <b>P48508</b> | <b>GSH0 Glutamate__cysteine ligase regulatory subunit</b> | <b>0.82240208</b> | <b>2.5E-05</b> | <b>4</b>  |
| P48508        | ASTLHLQTNLLNWGR                                           | 0.63245491        | 3              | 4.01161   |
| P48508        | FFPDVLECTMSHAVEK                                          | 0.80234994        | 2              | 3.59297   |
| P48508        | INPDEREEMK                                                | 0.97655213        | 2              | 2.64371   |
| P48508        | TLNEWSSQISPDLVR                                           | 0.70826766        | 2              | 4.68486   |
| <b>P48675</b> | <b>DESM Desmin</b>                                        | <b>2.17662346</b> | <b>0.55465</b> | <b>3</b>  |
| P48675        | NISEAEWYKSK                                               | 1.35481723        | 2              | 2.32562   |
| P48675        | TSGGAGGLGSLR                                              | 2.11482804        | 2              | 2.70108   |
| P48675        | VSDLTQAANK                                                | 4.63181165        | 2              | 2.983     |
| <b>P48679</b> | <b>LMNA Prelamin_A/C</b>                                  | <b>1.15119979</b> | <b>0.99978</b> | <b>19</b> |
| P48679        | AAYEAEGLDAR                                               | 1.80287735        | 2              | 2.36502   |
| P48679        | AQHEDQVEQYK                                               | 0.94294304        | 2              | 3.04657   |
| P48679        | AQHEDQVEQYKK                                              | 1.23972958        | 2              | 4.33551   |
| P48679        | GSHCSSGDPAEYNLR                                           | 1.4799388         | 2              | 3.95042   |
| P48679        | IDSLSAQLSQLQK                                             | 1.05425309        | 2              | 3.16959   |
| P48679        | ITSEEVVSR                                                 | 1.04796132        | 2              | 3.1554    |
| P48679        | LEAALGEAK                                                 | 1.24668829        | 2              | 2.31631   |
| P48679        | LKDLEALLNSK                                               | 1.09708038        | 2              | 2.86412   |
| P48679        | LQEKEDLQELNDR                                             | 1.26416622        | 2              | 4.2282    |
| P48679        | MQQQLDEYQELLDIK                                           | 1.26187666        | 2              | 4.55441   |
| P48679        | NIYSEELR                                                  | 1.11494775        | 1              | 2.05941   |
| P48679        | NSNLVGAAHEELQQSR                                          | 0.95458132        | 2              | 4.71077   |
| P48679        | SGAQASSTPLSPTR                                            | 0.94132506        | 2              | 3.79115   |
| P48679        | SLETENAGLR                                                | 2.07680404        | 2              | 2.86808   |
| P48679        | SVGGSGGSGFDNLVTR                                          | 0.88791114        | 2              | 3.58402   |
| P48679        | TALINATGEEVAMR                                            | 2.12067588        | 2              | 3.57683   |
| P48679        | TLEGELHDLR                                                | 1.92264162        | 2              | 2.4925    |
| P48679        | TVLCGTCGQPADK                                             | 1.07011396        | 2              | 3.44474   |
| P48679        | VAVEEVDEEGK                                               | 1.10148693        | 2              | 3.1088    |
| <b>P48721</b> | <b>GRP75 Stress_70 protein_mitochondrial</b>              | <b>1.36993604</b> | <b>1.2E-09</b> | <b>30</b> |
| P48721        | AQFEGIVTDLIK                                              | 1.30355014        | 2              | 3.72062   |
| P48721        | ASNGDAWVEAHGK                                             | 1.48530698        | 2              | 3.81592   |
| P48721        | DAGQISGLNVLR                                              | 2.1671472         | 2              | 2.75738   |
| P48721        | DDIENMVK                                                  | 1.76733156        | 1              | 2.02243   |
| P48721        | EQQIVIQSSGGLSK                                            | 1.14567154        | 2              | 3.86301   |
| P48721        | EQQIVIQSSGGLSKDDIENMVK                                    | 1.59422418        | 2              | 4.52976   |
| P48721        | ERVEAVNMAEGIIHDTETK                                       | 1.302151          | 3              | 5.56512   |
| P48721        | ETAENYLGHAK                                               | 1.38879401        | 2              | 3.1378    |
| P48721        | GAVVGIDLGTNSCVAVMEGK                                      | 1.87533026        | 2              | 5.38531   |
| P48721        | LFEMAYK                                                   | 1.27475068        | 2              | 2.30513   |
| P48721        | LLGQFTLIGIPPAPR                                           | 2.19092285        | 2              | 3.73202   |
| P48721        | MEEFKDQLPADECNK                                           | 1.3975034         | 2              | 4.60724   |
| P48721        | MEEFKDQLPADECNK+Oxidation(0                               | 2.18257617        |                |           |

|               |                                                                            |                   |                |           |
|---------------|----------------------------------------------------------------------------|-------------------|----------------|-----------|
| P48721        | MKETAENYLGHTAK                                                             | 1.06929865        | 2              | 4.30801   |
| P48721        | MKETAENYLGHTAK+Oxidation(0                                                 | 1.02577922        |                |           |
| P48721        | NAVITVPAYFNDSQR                                                            | 1.15454539        | 2              | 3.46472   |
| P48721        | QAVTNPNTFYATK                                                              | 1.62020161        | 2              | 3.80291   |
| P48721        | RETGVDLTK                                                                  | 0.82151803        | 2              | 2.32814   |
| P48721        | RYDDPEVQK                                                                  | 1.14200249        | 2              | 3.23068   |
| P48721        | RYDDPEVQKDTK                                                               | 1.07873276        | 2              | 3.78626   |
| P48721        | SDIGEVILVGGMTR                                                             | 1.12814291        | 2              | 3.98357   |
| P48721        | SQVFSTAADGQTQVEIK                                                          | 1.02016236        | 2              | 4.60531   |
| P48721        | STNGDFTLGGEDFDQALLR                                                        | 1.91085583        | 2              | 6.07848   |
| P48721        | TTPSVVAFTPDGER                                                             | 1.02441362        | 2              | 3.39462   |
| P48721        | VEAVNMAEGIIHDTETK                                                          | 0.76439346        | 2              | 4.57309   |
| P48721        | VINEPTAAALAYGLDK                                                           | 3.77548875        | 2              | 3.88297   |
| P48721        | VLENAEGAR                                                                  | 1.05986411        | 2              | 3.09374   |
| P48721        | VQQTVDLDFGR                                                                | 0.99743387        | 2              | 3.72915   |
| P48721        | YDDPEVQK                                                                   | 1.40598731        | 2              | 2.35081   |
| P48721        | YDDPEVQKDTK                                                                | 1.31924426        | 2              | 2.74901   |
| <b>P48998</b> | <b>INVO Involucrin</b>                                                     | <b>1.06296653</b> | <b>0.80527</b> | <b>2</b>  |
| P48998        | ELLDQRDLQELVNK                                                             | 0.9833341         | 2              | 2.32528   |
| P48998        | HKLENLTQKEK                                                                | 1.17006654        | 1              | 1.93864   |
| <b>P49025</b> | <b>CTRO Citron Rho_interacting kinase</b>                                  | <b>1.07432355</b> | <b>0.89559</b> | <b>2</b>  |
| P49025        | LEEQLEK                                                                    | 1.13562997        | 1              | 2.01041   |
| P49025        | LMMNQLEEDLVSARR+Oxidation(1                                                | 1.03204508        |                |           |
| <b>P49134</b> | <b>ITB1 Integrin beta_1</b>                                                | <b>0.88550586</b> | <b>0.97335</b> | <b>3</b>  |
| P49134        | CNCQSHGIPASPK                                                              | 0.95251964        | 2              | 3.34812   |
| P49134        | FCECDNFNCDR                                                                | 0.91354259        | 2              | 3.36757   |
| P49134        | GEFFNELVGQQR                                                               | 0.87906137        | 2              | 2.88348   |
| <b>P49186</b> | <b>MK09 Mitogen_activated protein kinase 9</b>                             | <b>1.19316762</b> | <b>0.67971</b> | <b>2</b>  |
| P49186        | DLLSKMLVIDPDK                                                              | 0.71285905        | 1              | 1.97777   |
| P49186        | VIEQLGTPSAEFMK                                                             | 1.19318632        | 2              | 2.60854   |
| <b>P49242</b> | <b>RS3A 40S ribosomal protein S3a</b>                                      | <b>1.69161731</b> | <b>3.1E-07</b> | <b>9</b>  |
| P49242        | ACQSIYPLHDVFVR                                                             | 1.71862014        | 2              | 4.31543   |
| P49242        | ADGYEPPVQESV                                                               | 1.05718415        | 1              | 2.08067   |
| P49242        | LIPDSIGKDIEK                                                               | 1.28637412        | 2              | 2.51284   |
| P49242        | LITEDVQGK                                                                  | 4.17762737        | 2              | 2.56336   |
| P49242        | LMELHGEGGSSGK                                                              | 1.4776776         | 2              | 3.5162    |
| P49242        | LMELHGEGGSSGK+Oxidation(1                                                  | 1.21972506        |                |           |
| P49242        | NCLTNFHGMDLTR                                                              | 1.12624817        | 2              | 3.9812    |
| P49242        | TTDGYLLR                                                                   | 1.52128248        | 2              | 2.71638   |
| P49242        | VFEVSLADLQNDEVAFR                                                          | 1.73117964        | 2              | 4.54017   |
| <b>P49432</b> | <b>ODPB Pyruvate dehydrogenase E1 component subunit beta_mitochondrial</b> | <b>1.38058317</b> | <b>0.9475</b>  | <b>7</b>  |
| P49432        | EAINQGMDEELERDEK                                                           | 2.3581776         | 2              | 3.71386   |
| P49432        | ILEDNSIPQVK                                                                | 1.17845291        | 2              | 3.38225   |
| P49432        | IMEGPAFNFLDAPAVR                                                           | 1.57346666        | 2              | 4.53161   |
| P49432        | IMEGPAFNFLDAPAVR+Oxidation(1                                               | 0.98567776        |                |           |
| P49432        | TIRPMDIEAIEASVMK                                                           | 1.42412196        | 3              | 4.4636    |
| P49432        | VFLGEEVAQYDGAJK                                                            | 1.23913851        | 2              | 4.2258    |
| P49432        | VTGADVMPYAK                                                                | 1.12492818        | 2              | 2.55439   |
| <b>P49889</b> | <b>ST1E3 Estrogen sulfotransferase_ isoform 3</b>                          | <b>0.94714224</b> | <b>6.8E-12</b> | <b>12</b> |
| P49889        | CKEDALFNR                                                                  | 1.29855601        | 2              | 2.50345   |
| P49889        | FEEHYQQQMK                                                                 | 0.95535602        | 2              | 2.98775   |
| P49889        | FEEHYQQQMK+Oxidation(8                                                     | 1.06366099        |                |           |
| P49889        | FMEGQVPYGSWYDHSV                                                           | 1.03419499        | 2              | 4.12992   |
| P49889        | IIQHTSFQEMK                                                                | 0.70241619        | 2              | 2.88298   |
| P49889        | LIEFLER                                                                    | 0.95857161        | 2              | 2.47141   |
| P49889        | LIEFLERDPSAELVDR                                                           | 1.03519927        | 3              | 5.17127   |

|               |                                                  |                   |                |           |
|---------------|--------------------------------------------------|-------------------|----------------|-----------|
| P49889        | NEDLINGIK                                        | 0.72616817        | 2              | 3.08119   |
| P49889        | NNPCTNYSMLPETMIDLK                               | 0.79659281        | 2              | 5.26169   |
| P49889        | NNPCTNYSMLPETMIDLK+Oxidation(13)                 | 1.16078137        |                |           |
| P49889        | NNPCTNYSMLPETMIDLK+Oxidation(8)                  | 1.16078137        |                |           |
| P49889        | SGSTWISEIVDMIYK                                  | 1.25675298        | 2              | 4.06547   |
| <b>P50137</b> | <b>TKT Transketolase</b>                         | <b>1.23433955</b> | <b>5.7E-07</b> | <b>24</b> |
| P50137        | AVELAANTK                                        | 0.8722844         | 1              | 2.09332   |
| P50137        | GITGIEDK                                         | 1.02402239        | 1              | 2.56275   |
| P50137        | GITGIEDKEAWHGKPLPK                               | 1.20627092        | 3              | 3.60674   |
| P50137        | HQPTAIIAK                                        | 0.11996927        | 2              | 2.33053   |
| P50137        | IIALDGTK                                         | 2.42504448        | 2              | 2.67016   |
| P50137        | ILATPPQEDAPSVDIANIR                              | 1.18429197        | 2              | 4.80141   |
| P50137        | ISSDLDGHPVPK                                     | 1.19019992        | 2              | 3.37287   |
| P50137        | KISSDLDGHPVPK                                    | 1.10012008        | 2              | 3.84016   |
| P50137        | LAVSQVPR                                         | 1.44244985        | 2              | 2.36242   |
| P50137        | LAVSQVPRSGKPAELLK                                | 2.43564686        | 2              | 2.58743   |
| P50137        | LDNLVAIFDINR                                     | 1.26308214        | 2              | 4.52468   |
| P50137        | LGQSDPAPLQHQVDVYQK                               | 1.21813539        | 2              | 3.86      |
| P50137        | MFGIDKDAIVQAVK                                   | 1.1420219         | 2              | 4.85396   |
| P50137        | MFGIDKDAIVQAVK+Oxidation(0)                      | 1.12203533        |                |           |
| P50137        | NMAEQIIQEIYSQVQSK                                | 1.07135687        | 3              | 6.02296   |
| P50137        | NSTFSELFK                                        | 1.31803306        | 2              | 2.41564   |
| P50137        | QAFTDVATGSLGQGLGAACGMAYTGK                       | 3.89639104        | 3              | 4.37783   |
| P50137        | SGKPAELLK                                        | 0.30945059        | 3              | 3.30089   |
| P50137        | SKDDQVTVIGAGVTLHEALAAEMLK                        | 1.48553931        | 3              | 4.59071   |
| P50137        | SVPMSTVFYPSDGVATEK                               | 1.16897014        | 2              | 4.50025   |
| P50137        | SVPMSTVFYPSDGVATEK+Oxidation(3)                  | 1.55726457        |                |           |
| P50137        | TSRPENAIISNNEDFQVGQAK                            | 1.03266105        | 3              | 5.89408   |
| P50137        | VLDPFTIKPLDK                                     | 1.11502771        | 2              | 3.24046   |
| P50137        | VLDPFTIKPLDKK                                    | 0.94106356        | 2              | 2.53447   |
| <b>P50169</b> | <b>RDH3 Retinol dehydrogenase 3</b>              | <b>1.09134289</b> | <b>0.59266</b> | <b>9</b>  |
| P50169        | AMESLVNTCSGDLSLVTDCMEHALTSCHPR                   | 1.08518914        | 3              | 5.03017   |
| P50169        | AMESLVNTCSGDLSLVTDCMEHALTSCHPR+Oxidation(1)      | 1.42660333        |                |           |
| P50169        | FQDSYMK                                          | 1.11289875        | 1              | 1.98619   |
| P50169        | GLWGLVNNAGISVPVGPNEWMR                           | 1.66285985        | 3              | 3.36717   |
| P50169        | KLWDQTTEEVK                                      | 1.56221215        | 2              | 3.05005   |
| P50169        | KLWDQTTEEVKEIYGK                                 | 0.90824733        | 3              | 4.97876   |
| P50169        | LWDQTTEEVK                                       | 1.05233226        | 2              | 3.17013   |
| P50169        | LWDQTTEEVKEIYGK                                  | 1.04136509        | 2              | 4.8106    |
| P50169        | MSLVGGGYCISK                                     | 1.09334994        | 2              | 4.05312   |
| <b>P50237</b> | <b>ST1C1 Sulfotransferase 1C1</b>                | <b>1.13360137</b> | <b>0.01208</b> | <b>12</b> |
| P50237        | AGTTWTQEIVDMIQNDGDVQK                            | 0.96899215        | 3              | 5.27929   |
| P50237        | DISEEVLNK                                        | 0.80967064        | 1              | 2.4687    |
| P50237        | DLHLGEQDLQPETR                                   | 0.76034193        | 2              | 4.62826   |
| P50237        | EVNGILMSK                                        | 0.60875447        | 1              | 1.91602   |
| P50237        | FLEKDISEEVLNK                                    | 0.90021802        | 2              | 2.88934   |
| P50237        | HPFIEWTLPSPLNSGLDLANK                            | 1.71354105        | 3              | 4.03658   |
| P50237        | IWNFQAKPDDLIIATYAK                               | 1.97458401        | 3              | 3.67837   |
| P50237        | MKDLHLGEQDLQPETR                                 | 0.96831163        | 2              | 5.18946   |
| P50237        | MLPDPGTLGEYIEQFK                                 | 1.10339736        | 3              | 4.94631   |
| P50237        | MLPDPGTLGEYIEQFK+Oxidation(0)                    | 1.50539721        |                |           |
| P50237        | THLPVHMLPPSFWK                                   | 3.38398557        | 3              | 3.71863   |
| P50237        | VLWGSWYDHVK                                      | 1.24153647        | 2              | 2.97803   |
| <b>P50398</b> | <b>GDIA Rab GDP dissociation inhibitor alpha</b> | <b>0.92963615</b> | <b>0.45809</b> | <b>7</b>  |
| P50398        | FDLGQDVIDFTGHALALYR                              | 1.47144186        | 3              | 4.61777   |
| P50398        | FQLLEGPPESMGR                                    | 1.21936484        | 2              | 3.95243   |

|               |                                                        |                   |                |           |
|---------------|--------------------------------------------------------|-------------------|----------------|-----------|
| P50398        | KQNDVFGHADQ                                            | 1.43412545        | 2              | 3.28881   |
| P50398        | NPYYGGESSITPLEELYK                                     | 1.56959759        | 2              | 5.90962   |
| P50398        | QLICDPSYIPDR                                           | 0.72700869        | 2              | 3.01483   |
| P50398        | TDDYLDQPCLETINR                                        | 0.85731884        | 2              | 4.96161   |
| P50398        | TFEGVDPQTSMR                                           | 1.01486291        | 2              | 3.38432   |
| <b>P50399</b> | <b>GDIB Rab GDP dissociation inhibitor beta</b>        | <b>0.95921652</b> | <b>0.4937</b>  | <b>15</b> |
| P50399        | AYDATTHFETTCDDIK                                       | 1.13213439        | 2              | 4.12015   |
| P50399        | AYDATTHFETTCDDIKDIYK                                   | 1.41907384        | 3              | 6.22026   |
| P50399        | EIRPALELLEPIEQK                                        | 0.99060307        | 3              | 3.8109    |
| P50399        | EPEKEIRPALELLEPIEQK                                    | 1.19919426        | 3              | 3.42173   |
| P50399        | FDLGGQDVIDFTGHSLALYR                                   | 0.9551331         | 3              | 4.04024   |
| P50399        | FKLPGQPASMGMR                                          | 1.52355155        | 2              | 2.6021    |
| P50399        | FVSISDLFVPK                                            | 1.27669744        | 2              | 3.26845   |
| P50399        | LSAIYGGTYMLNKPIEIIVQNGK                                | 3.07106368        | 3              | 4.58014   |
| P50399        | MLLFTEVTR                                              | 1.43121242        | 2              | 2.35783   |
| P50399        | MTGSEDFEEMKR                                           | 1.13827349        | 2              | 3.63453   |
| P50399        | NTNDANSCQIIIPQNVNR                                     | 0.87499972        | 2              | 4.37439   |
| P50399        | TDDYLDQPCCTINR                                         | 2.8378944         | 2              | 4.85099   |
| P50399        | TFEGVDPK                                               | 2.3228886         | 2              | 2.40487   |
| P50399        | VIEGSFVYK                                              | 1.09861682        | 2              | 2.33051   |
| P50399        | VLHMDQNPYYGGESASITPLEDLYK                              | 1.23184986        | 2              | 5.5172    |
| <b>P50431</b> | <b>GLYC Serine hydroxymethyltransferase_ cytosolic</b> | <b>1.29330863</b> | <b>0.01446</b> | <b>7</b>  |
| P50431        | ALSDALTELYK                                            | 0.92531833        | 2              | 4.08037   |
| P50431        | AVLEALGSLNNK                                           | 1.03430962        | 2              | 4.27225   |
| P50431        | GLLEEDFQK                                              | 1.55615551        | 1              | 2.09667   |
| P50431        | IMGLDLPDGGHLTHGFMTDK                                   | 0.82766061        | 2              | 2.80099   |
| P50431        | IYQLQVLANCR                                            | 1.18615531        | 2              | 2.82082   |
| P50431        | VLEACSIACNK                                            | 1.29445346        | 2              | 4.01854   |
| P50431        | YSEGYPGQR                                              | 1.4911541         | 2              | 2.81589   |
| <b>P50475</b> | <b>SYAC Alanyl_tRNA synthetase_ cytoplasmic</b>        | <b>1.10939151</b> | <b>0.03922</b> | <b>16</b> |
| P50475        | ASEWVQVSGLMDGK                                         | 1.1108377         | 2              | 4.47846   |
| P50475        | AVFDETYDPVPR                                           | 0.99033416        | 2              | 3.273     |
| P50475        | DIINEEVQFLK                                            | 1.24484968        | 2              | 2.7119    |
| P50475        | ESDGVLKPLPK                                            | 1.61506413        | 2              | 2.379     |
| P50475        | GLEATDDSPK                                             | 1.70420116        | 2              | 2.70135   |
| P50475        | HNDLDDVGK                                              | 0.96303517        | 2              | 2.55703   |
| P50475        | ITCLCQVPQNAANR                                         | 1.17964651        | 2              | 3.826     |
| P50475        | IVAVTGAEAQK                                            | 1.36268214        | 2              | 2.57376   |
| P50475        | NVGCLQEALQLATSFAQLR                                    | 1.87238248        | 3              | 3.9414    |
| P50475        | QIWQNLGLDEAK                                           | 1.47212394        | 2              | 3.04844   |
| P50475        | RIVAVTGAEAQK                                           | 1.55776325        | 2              | 2.77359   |
| P50475        | SVLGDADQK                                              | 0.99434158        | 1              | 2.2071    |
| P50475        | TEEIVNGMIEAAKPVYTLDCPLAAAK                             | 1.62058441        | 3              | 3.67529   |
| P50475        | TITVALADGGRPDNTGR                                      | 0.99879485        | 2              | 3.03316   |
| P50475        | VDDSSSEKTEFTVK                                         | 1.29066419        | 2              | 4.06605   |
| P50475        | VGAEDTDGIDMAYR                                         | 1.0251923         | 2              | 3.87138   |
| <b>P50503</b> | <b>F10A1 Hsc70_interacting protein</b>                 | <b>1.35132131</b> | <b>0.00054</b> | <b>6</b>  |
| P50503        | AIDLFTDAIK                                             | 1.4914891         | 2              | 2.74328   |
| P50503        | AIEINPDSAQPYK                                          | 1.3632046         | 2              | 3.53018   |
| P50503        | GAAIDALNDGELQK                                         | 1.23752144        | 2              | 3.71006   |
| P50503        | KGAAIDALNDGELQK                                        | 2.00301732        | 2              | 4.68558   |
| P50503        | LDYDEASAMLR                                            | 0.98161887        | 2              | 3.3433    |
| P50503        | QDPSVLHTEEMR                                           | 1.03302315        | 2              | 2.31945   |
| <b>P50516</b> | <b>VATA V_type proton ATPase catalytic subunit A</b>   | <b>1.13756612</b> | <b>0.43715</b> | <b>2</b>  |
| P50516        | TALVANTSNMPVAAR                                        | 1.0993928         | 2              | 3.19536   |
| P50516        | VLDALFPCVQGGTTAIPGAFGCGK                               | 1.85307273        | 2              | 3.31272   |

|               |                                                            |                   |                |           |
|---------------|------------------------------------------------------------|-------------------|----------------|-----------|
| <b>P50554</b> | <b>GABT 4_aminobutyrate aminotransferase_mitochondrial</b> | <b>1.50259009</b> | <b>0.03162</b> | <b>14</b> |
| P50554        | GMCQLITMACGSCSNENAFK                                       | 1.44018862        | 2              | 4.55672   |
| P50554        | GNYLVDVDGNR                                                | 1.73536906        | 2              | 2.64162   |
| P50554        | GTFCSDTPDEAIR                                              | 2.01831126        | 2              | 3.22422   |
| P50554        | HGCAFLVDEVQTGGGCTGK                                        | 1.21244545        | 2              | 6.11325   |
| P50554        | IDIPSFWDWPIAPFPR                                           | 3.03064831        | 2              | 3.80431   |
| P50554        | IFNTWLGDPK                                                 | 1.80611037        | 2              | 3.00985   |
| P50554        | KHGCAFLVDEVQTGGGCTGK                                       | 1.31814702        | 2              | 5.03661   |
| P50554        | LVQQPQNASTFINRPALGILPPENFVVK                               | 1.51888524        | 3              | 3.30369   |
| P50554        | MLDLYSQISSVPIGYNHPALAK                                     | 1.29920396        | 3              | 3.40676   |
| P50554        | NLLLAEVINIHK                                               | 1.57860358        | 3              | 5.32395   |
| P50554        | REDLLNNVAHAGK                                              | 1.25216705        | 3              | 3.6202    |
| P50554        | TLLTGLLDLQAQYPQFVSR                                        | 2.36208941        | 2              | 3.16171   |
| P50554        | TVAGIIVEPIQSEGGDNHASDDFFR                                  | 1.27965132        | 2              | 4.021     |
| P50554        | VDFEFDYDGPLMK                                              | 1.37853721        | 2              | 4.04879   |
| <b>P50580</b> | <b>PA2G4 Proliferation-associated protein 2G4</b>          | <b>1.42141289</b> | <b>0.05932</b> | <b>2</b>  |
| P50580        | GDAMIIMEETGK                                               | 1.1040597         | 2              | 2.66411   |
| P50580        | TIQNPTDQQK                                                 | 1.45625527        | 2              | 3.15499   |
| <b>P50878</b> | <b>RL4 60S ribosomal protein L4</b>                        | <b>1.30071015</b> | <b>5.9E-10</b> | <b>11</b> |
| P50878        | FCIWTESAFR                                                 | 1.57683441        | 2              | 2.56805   |
| P50878        | KLDELYGTWR                                                 | 1.38350128        | 2              | 2.97075   |
| P50878        | KLEAAAAALAAK                                               | 1.5285943         | 3              | 4.94121   |
| P50878        | LDELYGTWR                                                  | 1.41177445        | 2              | 2.57116   |
| P50878        | LEAAAAALAAK                                                | 1.76593726        | 2              | 3.61069   |
| P50878        | NIPGITLLNVSK                                               | 1.4872226         | 1              | 2.69627   |
| P50878        | NVTLPVAFK                                                  | 2.25395485        | 1              | 2.24195   |
| P50878        | RGPCIIYNEDNGIHK                                            | 0.90957008        | 2              | 2.99068   |
| P50878        | SGQGAFGNMCR                                                | 1.68632864        | 2              | 2.83619   |
| P50878        | SNYNLPMHK                                                  | 1.41944576        | 2              | 2.63791   |
| P50878        | YAICALAASALPALVMSK                                         | 2.62307866        | 2              | 2.54864   |
| <b>P51583</b> | <b>PUR6 Multifunctional protein ADE2</b>                   | <b>1.09396081</b> | <b>0.98563</b> | <b>3</b>  |
| P51583        | ACGNFGIPCELR                                               | 1.09004666        | 2              | 2.60087   |
| P51583        | SWLPQNCTLVDMK                                              | 1.07643858        | 2              | 2.7441    |
| P51583        | VVVLMSGSTDLGHCEK                                           | 1.30922863        | 2              | 3.03931   |
| <b>P51635</b> | <b>AK1A1 Alcohol dehydrogenase [NADP_]</b>                 | <b>1.14732912</b> | <b>1.2E-05</b> | <b>7</b>  |
| P51635        | ALEALVAK                                                   | 1.60148421        | 2              | 2.82697   |
| P51635        | GLEVTAYSPLGSSDR                                            | 1.13886219        | 2              | 4.1147    |
| P51635        | HHPEDVEPAVR                                                | 1.14057324        | 3              | 3.58958   |
| P51635        | HIDCASVYGNETEIGEALK                                        | 0.98494005        | 2              | 6.04121   |
| P51635        | HIDCASVYGNETEIGEALKESVGAGK                                 | 1.13708319        | 3              | 6.26134   |
| P51635        | HPDEPVLLEEPVVLALAEK                                        | 1.79288814        | 3              | 6.06106   |
| P51635        | YIVPMITVDGK                                                | 1.12942884        | 2              | 2.32848   |
| <b>P51647</b> | <b>AL1A1 Retinal dehydrogenase 1</b>                       | <b>0.80242756</b> | <b>0.92524</b> | <b>17</b> |
| P51647        | ANNTTYGLAAGVFTK                                            | 1.05007899        | 2              | 4.60145   |
| P51647        | EAGFPPGVVNVIPGYGPTAGAAISSHMDVVK                            | 1.10474192        | 3              | 3.66767   |
| P51647        | FPVLNPATEEVICHVEEGDK                                       | 0.23714866        | 3              | 3.82828   |
| P51647        | FPVLNPATEEVICHVEEGDKADVVK                                  | 0.96036448        | 4              | 5.05052   |
| P51647        | IFINNEWHDSVSGK                                             | 1.19873979        | 2              | 4.28061   |
| P51647        | IFVEESVYDEFVR                                              | 0.83586609        | 2              | 4.22951   |
| P51647        | IGPASCNGTVVVVKAPEQTLTALHMASLIK                             | 1.49639374        | 3              | 5.61166   |
| P51647        | IHGQTIPSDGDIFTR                                            | 1.38420853        | 3              | 4.28068   |
| P51647        | KFPVLNPATEEVICHVEEGDK                                      | 0.70564703        | 3              | 3.56804   |
| P51647        | KFPVLNPATEEVICHVEEGDKADVVK                                 | 1.35845386        | 4              | 4.87731   |
| P51647        | KYVLGNPLTQGINQGPQIDKEQHDK                                  | 0.89733984        | 3              | 5.52338   |
| P51647        | LLLATIEAINGGK                                              | 4.86208423        | 2              | 4.19882   |
| P51647        | VAFTGSTQVVK                                                | 2.72233356        | 2              | 2.51871   |



|               |                                                                                   |                   |                |          |
|---------------|-----------------------------------------------------------------------------------|-------------------|----------------|----------|
| P51647        | VFANAYLSDLGGSIK                                                                   | 1.45352072        | 2              | 4.44487  |
| P51647        | YCAGWADK                                                                          | 1.16741575        | 2              | 2.48925  |
| P51647        | YVLGNPLTQGINQGQPQIDK                                                              | 0.81403773        | 2              | 5.22237  |
| P51647        | YVLGNPLTQGINQGQPQIDKEQHDK                                                         | 0.92861436        | 2              | 3.88679  |
| <b>P51650</b> | <b>SSDH Succinate semialdehyde dehydrogenase_ mitochondrial</b>                   | <b>1.0973458</b>  | <b>0.81918</b> | <b>9</b> |
| P51650        | EVGEVLCTDPLVSK                                                                    | 2.98827211        | 2              | 3.77634  |
| P51650        | GIHDSFVK                                                                          | 1.10847146        | 2              | 2.40437  |
| P51650        | HQSGGNFFEPTLLSNVTR                                                                | 1.36609649        | 2              | 3.784    |
| P51650        | IITAESGKPLK                                                                       | 1.57870713        | 2              | 2.82229  |
| P51650        | ILLHHAANSVK                                                                       | 1.91684947        | 2              | 2.61054  |
| P51650        | LGTVADCGVPEAR                                                                     | 0.78799248        | 2              | 3.66227  |
| P51650        | VGNGFEEGTTQGPLAINK                                                                | 0.88621695        | 2              | 4.61066  |
| P51650        | WLPTPATFPVYPASGAK                                                                 | 0.94252656        | 2              | 3.54446  |
| P51650        | YGIDEYLEVK                                                                        | 1.64581363        | 2              | 2.90843  |
| <b>P51863</b> | <b>VA0D1 V_type proton ATPase subunit d 1</b>                                     | <b>1.03286797</b> | <b>0.6744</b>  | <b>2</b> |
| P51863        | ADDYEQVK                                                                          | 1.63016008        | 2              | 2.48969  |
| P51863        | LLFEGAGSNPGDK                                                                     | 1.02619536        | 2              | 3.05388  |
| <b>P51869</b> | <b>CP4F4 Cytochrome P450 4F4</b>                                                  | <b>2.0693104</b>  | <b>0.00066</b> | <b>4</b> |
| P51869        | ALPSQHEDDILK                                                                      | 1.42560596        | 2              | 2.59484  |
| P51869        | NISLMTLDSLQK                                                                      | 1.48925759        | 2              | 3.52323  |
| P51869        | TLDFIDVLLTK                                                                       | 2.16579756        | 2              | 3.61385  |
| P51869        | WQDLASGGGAR                                                                       | 1.2226242         | 2              | 3.17791  |
| <b>P51886</b> | <b>LUM Lumican</b>                                                                | <b>0.88013478</b> | <b>0.43971</b> | <b>2</b> |
| P51886        | NNQIDHIDEK                                                                        | 0.93209657        | 2              | 3.20646  |
| P51886        | SLQDLQLANNK                                                                       | 0.77371698        | 2              | 2.49798  |
| <b>P52296</b> | <b>IMB1 Importin subunit beta_1</b>                                               | <b>1.47165237</b> | <b>0.56401</b> | <b>7</b> |
| P52296        | AAVENLPTFLVELSR                                                                   | 1.27470935        | 2              | 3.67735  |
| P52296        | GALQYLVPILTQTLTK                                                                  | 1.65004849        | 2              | 3.30453  |
| P52296        | GDQENVHPDVMLVQPR                                                                  | 1.43584772        | 2              | 2.9799   |
| P52296        | SNEILTAIQGMR                                                                      | 1.47602508        | 2              | 2.9366   |
| P52296        | TVSPDRLELEAAQK                                                                    | 0.9052293         | 2              | 3.15176  |
| P52296        | VLANPGNSQVAR                                                                      | 1.19591257        | 2              | 3.05508  |
| P52296        | VQHQDALQISDVVMASLLR                                                               | 1.46051439        | 2              | 2.88516  |
| <b>P52303</b> | <b>AP1B1 AP_1 complex subunit beta_1</b>                                          | <b>1.31637252</b> | <b>0.376</b>   | <b>5</b> |
| P52303        | KPTETQELVQQVLSLATQDSDNPDLR                                                        | 1.52487067        | 3              | 3.34658  |
| P52303        | MEPLNNLQVAVK                                                                      | 1.47104995        | 2              | 2.53966  |
| P52303        | NINLIVQK                                                                          | 0.83926754        | 1              | 2.40891  |
| P52303        | NSFGLAAPLQVHAPLSPNQTVESLPLNTVGSVMK                                                | 1.35053068        | 3              | 3.69346  |
| P52303        | SQPDMAIMAVNTFVK                                                                   | 1.29257057        | 2              | 3.3392   |
| <b>P52504</b> | <b>NDUS6 NADH dehydrogenase [ubiquinone] iron_sulfur protein 6_ mitochondrial</b> | <b>1.46249836</b> | <b>0.08472</b> | <b>2</b> |
| P52504        | IIACDGGGALGHPK                                                                    | 1.47463746        | 2              | 4.12379  |
| P52504        | VYINLDKETK                                                                        | 1.39283077        | 2              | 2.61759  |
| <b>P52555</b> | <b>ERP29 Endoplasmic reticulum resident protein 29</b>                            | <b>0.97752706</b> | <b>0.84438</b> | <b>3</b> |
| P52555        | FDTQYPYGEK                                                                        | 1.31699471        | 2              | 2.6502   |
| P52555        | ILDQGEDFPASELAR                                                                   | 0.97735811        | 2              | 5.05383  |
| P52555        | SLNILTAFR                                                                         | 2.55335618        | 2              | 2.34129  |
| <b>P52631</b> | <b>STAT3 Signal transducer and activator of transcription 3</b>                   | <b>3.16503228</b> | <b>6.7E-09</b> | <b>3</b> |
| P52631        | GLSIEQLTLAEK                                                                      | 2.11611383        | 2              | 2.39859  |
| P52631        | LLQTAATAAQGGQANHPATAAVVTEK                                                        | 3.20308374        | 3              | 4.60514  |
| P52631        | MQQLEQMLTALDQMR                                                                   | 1.80627244        | 2              | 2.44068  |
| <b>P52759</b> | <b>UK114 Ribonuclease UK114</b>                                                   | <b>1.1140289</b>  | <b>0.00193</b> | <b>7</b> |
| P52759        | AAGCDFTNVVK                                                                       | 2.06631596        | 2              | 3.06297  |
| P52759        | AAVQVAALPK                                                                        | 0.67403301        | 2              | 2.67974  |

|               |                                                            |                   |                |           |
|---------------|------------------------------------------------------------|-------------------|----------------|-----------|
| P52759        | IEIEAIVQGPFTTAGL                                           | 1.78534662        | 2              | 3.24048   |
| P52759        | NLGEILK                                                    | 1.02180436        | 1              | 2.28774   |
| P52759        | TIYVSGQIGMDPSSGQLVPGGVAAEEAK                               | 1.29450824        | 2              | 4.52571   |
| P52759        | TTVLLADINDFGTVNEIYK                                        | 1.84423256        | 2              | 5.66671   |
| P52759        | TYFQGNLPAR                                                 | 0.98400638        | 2              | 2.5079    |
| <b>P52845</b> | <b>ST1E2 Estrogen sulfotransferase_ isoform 2</b>          | <b>1.36369321</b> | <b>0.3732</b>  | <b>2</b>  |
| P52845        | CKEDAIFNR                                                  | 1.29855601        | 2              | 2.50345   |
| P52845        | SGSTWIGEIVDMIYK                                            | 1.69912562        | 2              | 3.36445   |
| <b>P52847</b> | <b>ST1B1 Sulfotransferase family cytosolic 1B member 1</b> | <b>1.35686952</b> | <b>9E-07</b>   | <b>8</b>  |
| P52847        | DNPLVNYTHLPTIEMDHSK                                        | 2.26155345        | 2              | 4.46841   |
| P52847        | FLAGNVAYGSWFDHVK                                           | 0.86680592        | 2              | 3.85498   |
| P52847        | IEEFQSRPCDIVIPTYK                                          | 1.35308827        | 3              | 5.26857   |
| P52847        | IVHHTSFEVMK                                                | 0.83646568        | 2              | 3.05329   |
| P52847        | NYFTMTQSEK                                                 | 1.16487918        | 2              | 2.92485   |
| P52847        | SGVELLK                                                    | 1.51735197        | 2              | 2.33994   |
| P52847        | THLPIDLLPK                                                 | 1.74626129        | 3              | 3.55572   |
| P52847        | TLDEHTLER                                                  | 1.38379343        | 2              | 3.09245   |
| <b>P52873</b> | <b>PYC Pyruvate carboxylase_ mitochondrial</b>             | <b>0.84462987</b> | <b>9.9E-20</b> | <b>39</b> |
| P52873        | ADEAYLIGR                                                  | 1.15401152        | 2              | 2.80685   |
| P52873        | ADFAQACQDAGVR                                              | 0.92974686        | 2              | 4.47163   |
| P52873        | AEAEAAEELSFP                                               | 1.10948021        | 2              | 4.704     |
| P52873        | AGTHILCIK                                                  | 1.66380218        | 2              | 2.71725   |
| P52873        | ALAVSDLNR                                                  | 1.2374219         | 2              | 2.58356   |
| P52873        | AYSEALAAFNGALFVEK                                          | 1.83396682        | 2              | 3.68999   |
| P52873        | AYVEANQMLGLDIK                                             | 1.47795251        | 2              | 4.70824   |
| P52873        | DAHQSLLATR                                                 | 1.86997995        | 1              | 3.17389   |
| P52873        | DFTATFGPLDSLNR                                             | 2.70102618        | 2              | 3.75664   |
| P52873        | DMAGLLKPAACTMLVSSLR                                        | 1.52247082        | 3              | 3.38815   |
| P52873        | ELIPNIPFQMLLR                                              | 1.74534396        | 2              | 2.84916   |
| P52873        | ENGVDVHHPGYGFLSER                                          | 1.40336544        | 2              | 2.96989   |
| P52873        | FIGPSPEVVR                                                 | 1.1199169         | 2              | 2.43668   |
| P52873        | FLYECVWR                                                   | 1.25053839        | 2              | 2.60596   |
| P52873        | GANAVGYTNPDNVVK                                            | 1.34021458        | 2              | 4.57553   |
| P52873        | GLAPVQAYLHIPDIK                                            | 0.89975103        | 2              | 2.98051   |
| P52873        | GQIGAPMPGK                                                 | 1.3418691         | 2              | 2.42727   |
| P52873        | GTPLDTEVPLER                                               | 0.84462922        | 2              | 3.65032   |
| P52873        | HGEEVTPEDVLSAAMYDPVFAQFK                                   | 2.61163911        | 3              | 5.41622   |
| P52873        | HIEVQILGDQYGNILHLYER                                       | 1.86241321        | 3              | 7.00833   |
| P52873        | HYFIEVNSR                                                  | 1.30220208        | 2              | 2.33898   |
| P52873        | IAEEFEVELER                                                | 1.36064916        | 2              | 3.24429   |
| P52873        | IEGRPGASLPPLNLK                                            | 0.94833955        | 2              | 3.4374    |
| P52873        | INGCAIQCR                                                  | 1.79112001        | 2              | 3.25095   |
| P52873        | IVGDLAQFMVQNGLSR                                           | 1.901824          | 2              | 4.84208   |
| P52873        | LDNASAFQGAVISPHYDLSLLVK                                    | 1.46580687        | 3              | 5.77047   |
| P52873        | LLHYLGHVMMVNGPTTPIPVK                                      | 1.43156376        | 3              | 3.67751   |
| P52873        | LQVEHTVTEEITDVLVHAQIHVSEGR                                 | 1.49484395        | 4              | 6.50313   |
| P52873        | NHQGLLLMDTTFR                                              | 1.29054824        | 3              | 3.32054   |
| P52873        | QKADEAYLIGR                                                | 1.40027429        | 2              | 2.49514   |
| P52873        | QVGYENAGTVEFLVDK                                           | 1.71424928        | 2              | 3.77663   |
| P52873        | SSTAPVASPNVR                                               | 1.29104275        | 2              | 2.346     |
| P52873        | SVVEFLQGYIGIPHGGFPEPFR                                     | 1.47630175        | 2              | 4.80542   |
| P52873        | TVAVYSEQDTGQMHR                                            | 1.73971491        | 2              | 4.56916   |
| P52873        | VFDYSEYWEGAR                                               | 1.579392          | 2              | 4.53713   |
| P52873        | VSPSPVDPIPVVPIGPPPAGFR                                     | 1.2644817         | 2              | 4.12303   |
| P52873        | VVEIAPATHLDPQLR                                            | 1.51631345        | 2              | 4.23659   |
| P52873        | VVHSYEELEENYTR                                             | 1.22953596        | 2              | 5.23838   |

|               |                                                                                                                      |                   |                |           |
|---------------|----------------------------------------------------------------------------------------------------------------------|-------------------|----------------|-----------|
| P52873        | YSLEYMGLAEELVR                                                                                                       | 1.72278111        | 3              | 4.51031   |
| <b>P52925</b> | <b>HMGB2 High mobility group protein B2</b>                                                                          | <b>1.37625086</b> | <b>0.8717</b>  | <b>2</b>  |
| P52925        | KHPDSSVNFAEFSK                                                                                                       | 1.55154388        | 2              | 2.74042   |
| P52925        | SEHPGLSIGDTAK                                                                                                        | 1.16459141        | 2              | 2.84615   |
| <b>P52944</b> | <b>PDL1 PDZ and LIM domain protein 1</b>                                                                             | <b>1.16715013</b> | <b>0.98158</b> | <b>5</b>  |
| P52944        | CGTGIVGVFVK                                                                                                          | 1.1904037         | 2              | 2.43476   |
| P52944        | GHHFVGDQIYCEK                                                                                                        | 1.11295585        | 2              | 3.78768   |
| P52944        | TSASGEEANSRPSAQPHPSGGLIIDK                                                                                           | 1.1535085         | 3              | 4.49917   |
| P52944        | TSASGEEANSRPSAQPHPSGGLIIDKESEVYK                                                                                     | 1.23371441        | 3              | 5.01539   |
| P52944        | VTPPEGYDVVTVFPK                                                                                                      | 1.20511943        | 2              | 2.71025   |
| <b>P53395</b> | <b>ODB2 Lipamide acyltransferase component of branched_chain alpha_keto acid dehydrogenase complex_mitochondrial</b> | <b>2.08646795</b> | <b>1.7E-07</b> | <b>4</b>  |
| P53395        | LREELKPVALAR                                                                                                         | 2.01824269        | 2              | 2.6741    |
| P53395        | LSDIGEGIR                                                                                                            | 2.0862444         | 2              | 3.02368   |
| P53395        | RLAMENNIK                                                                                                            | 1.06908754        | 2              | 2.37853   |
| P53395        | SYLENPAFMILLDLK                                                                                                      | 2.23498737        | 2              | 4.60672   |
| <b>P53987</b> | <b>MOT1 Monocarboxylate transporter 1</b>                                                                            | <b>1.29564628</b> | <b>3.7E-06</b> | <b>5</b>  |
| P53987        | DGKEDETSTDVDEKPK                                                                                                     | 2.12362824        | 3              | 5.4891    |
| P53987        | DGKEDETSTDVDEKPKK                                                                                                    | 1.60732806        | 3              | 4.0479    |
| P53987        | EDETSTDVDEKPK                                                                                                        | 1.44134462        | 2              | 3.97638   |
| P53987        | ETQSPAPLQNSSGDPAAEESPV                                                                                               | 32.4263693        | 2              | 5.04942   |
| P53987        | SDANTDLIGGSPK                                                                                                        | 1.27043745        | 2              | 4.13569   |
| <b>P54313</b> | <b>GBB2 Guanine nucleotide_binding protein G(I)/G(S)/G(T) subunit beta_2</b>                                         | <b>1.05544649</b> | <b>0.5141</b>  | <b>2</b>  |
| P54313        | ACGDSTLTQITAGLDPVGR                                                                                                  | 1.67271797        | 2              | 3.99717   |
| P54313        | TFVSGACDASIK                                                                                                         | 1.02791263        | 2              | 2.7241    |
| <b>P54319</b> | <b>PLAP Phospholipase A_2 activating protein</b>                                                                     | <b>1.05582306</b> | <b>0.99053</b> | <b>3</b>  |
| P54319        | IGDVVGSSGANQTSQK                                                                                                     | 1.05715855        | 2              | 4.65864   |
| P54319        | TGDLGDINAEQLPGR                                                                                                      | 1.17530763        | 2              | 4.13088   |
| P54319        | YVPGTSGPSNTVQTADPFTGAGR                                                                                              | 0.8464329         | 2              | 3.39071   |
| <b>P54822</b> | <b>PUR8 Adenylosuccinate lyase</b>                                                                                   | <b>2.2759663</b>  | <b>0.03334</b> | <b>2</b>  |
| P54822        | KVDIEVLSVLASLGASVHK                                                                                                  | 2.43636763        | 3              | 4.41643   |
| P54822        | VLSQQAADVVK                                                                                                          | 1.2829027         | 2              | 2.85438   |
| <b>P54921</b> | <b>SNAA Alpha_soluble NSF attachment protein</b>                                                                     | <b>1.10309615</b> | <b>0.56252</b> | <b>5</b>  |
| P54921        | AIAHYEQSADYYKGEESNSSANK                                                                                              | 1.59937343        | 3              | 4.89156   |
| P54921        | AIDIYEQVGTSAMDSPLLK                                                                                                  | 1.94767022        | 2              | 3.79316   |
| P54921        | IEEACEIYAR                                                                                                           | 0.76867083        | 2              | 2.75739   |
| P54921        | NSQFFSGLFGGSSK                                                                                                       | 1.09972593        | 2              | 3.79222   |
| P54921        | YEELFPAFSDSR                                                                                                         | 1.73051787        | 2              | 2.62031   |
| <b>P55006</b> | <b>RDH7 Retinol dehydrogenase 7</b>                                                                                  | <b>1.09477669</b> | <b>0.16139</b> | <b>11</b> |
| P55006        | LETVILDVTK                                                                                                           | 5.90128208        | 2              | 3.51737   |
| P55006        | TESIVAATQWVK                                                                                                         | 1.08678757        | 2              | 4.08185   |
| P55006        | TNVTNMER                                                                                                             | 1.00063689        | 2              | 2.74532   |
| P55006        | TNVTNMER+Oxidation(5                                                                                                 | 0.74337945        |                |           |
| P55006        | TSDRLETVILDVTK                                                                                                       | 1.33390884        | 3              | 4.58467   |
| P55006        | VAIIPEGGFK                                                                                                           | 1.06306422        | 2              | 2.38588   |
| P55006        | VLAACLEK                                                                                                             | 1.20865765        | 2              | 3.07459   |
| P55006        | VVNIASTMGR                                                                                                           | 1.06718206        | 2              | 3.78917   |
| P55006        | VVNIASTMGR+Oxidation(7                                                                                               | 1.23025307        |                |           |
| P55006        | YGVEAFSDSLR                                                                                                          | 1.39271825        | 2              | 3.86489   |
| P55006        | YVFIGCDSGFGNLLAR                                                                                                     | 1.67622677        | 2              | 3.6655    |
| <b>P55051</b> | <b>FABP7 Fatty acid_binding protein_brain</b>                                                                        | <b>0.9144992</b>  | <b>0.52634</b> | <b>4</b>  |
| P55051        | ALGVGFATR                                                                                                            | 1.20358116        | 2              | 2.64514   |
| P55051        | LTDSQNFDEYMK                                                                                                         | 1.69110828        | 2              | 4.04984   |
| P55051        | QVGNVTKPTVIISQEGGK                                                                                                   | 0.91423277        | 3              | 4.12915   |
| P55051        | WDGKETNCVR                                                                                                           | 0.82173139        | 2              | 2.88639   |

|               |                                                           |                   |                |           |
|---------------|-----------------------------------------------------------|-------------------|----------------|-----------|
| <b>P55053</b> | <b>FABP5 Fatty acid_binding protein_epidermal</b>         | <b>1.46423593</b> | <b>1.6E-09</b> | <b>6</b>  |
| P55053        | FDETTADGR                                                 | 1.40079109        | 2              | 3.20589   |
| P55053        | KTETVCTFTDGALVQHQQ                                        | 1.4137852         | 3              | 5.30947   |
| P55053        | LVESHGFEDYMK                                              | 1.37607517        | 2              | 3.42733   |
| P55053        | MGAMAKPDCIITLDGNLTVK                                      | 1.60445078        | 2              | 4.1249    |
| P55053        | MVVECVMNNAICTR                                            | 1.52745085        | 2              | 3.84754   |
| P55053        | TETVCTFTDGALVQHQQ                                         | 1.50092343        | 2              | 4.68317   |
| <b>P55159</b> | <b>PON1 Serum paraoxonase/arylesterase 1</b>              | <b>1.04026534</b> | <b>0.2015</b>  | <b>7</b>  |
| P55159        | GIEAGAEDLEILPGLTFFSTGLK                                   | 1.47692231        | 3              | 5.8671    |
| P55159        | IFFYDSENPPEGSEVLR                                         | 0.86078174        | 2              | 6.21527   |
| P55159        | IQSILSEDPK                                                | 1.17630346        | 2              | 3.25976   |
| P55159        | TITHELLPSINDIAAVGPESFYATNDHYFADPYLR                       | 1.97263749        | 3              | 4.07499   |
| P55159        | VLSFDTLVDNISVDPVTGDLWVGCHPNGMR                            | 0.9479359         | 3              | 5.40814   |
| P55159        | VVADGDFDFANGIGISLDGK                                      | 1.55476127        | 2              | 4.4463    |
| P55159        | YVYIAELLAHK                                               | 1.15459045        | 2              | 2.67735   |
| <b>P55260</b> | <b>ANXA4 Annexin A4</b>                                   | <b>1.37606912</b> | <b>0.30246</b> | <b>4</b>  |
| P55260        | AEIDMLDIPANFK                                             | 1.57744072        | 1              | 2.17768   |
| P55260        | GAGTDEGLIEILASR                                           | 1.44343239        | 2              | 3.78345   |
| P55260        | GLGTDEDAIIGVLACR                                          | 1.30064723        | 2              | 3.90833   |
| P55260        | INQTYQQYGR                                                | 1.16117036        | 2              | 3.61678   |
| <b>P55770</b> | <b>NH2L1 NHP2_like protein 1</b>                          | <b>1.23554883</b> | <b>0.76501</b> | <b>2</b>  |
| P55770        | LLDLVQQSCNYK                                              | 1.35149782        | 2              | 3.89196   |
| P55770        | QQIQSIQQSIER                                              | 1.22922969        | 2              | 2.92991   |
| <b>P55937</b> | <b>GOGA3 Golgin subfamily A member 3</b>                  | <b>1.43731164</b> | <b>0.48776</b> | <b>2</b>  |
| P55937        | LDSEMKELRQELIK+Oxidation(4                                | 1.43996197        |                |           |
| P55937        | QWYQQQLTLAQEAR                                            | 1.43550245        | 2              | 2.44317   |
| <b>P56399</b> | <b>UBP5 Ubiquitin carboxyl_terminal hydrolase 5</b>       | <b>1.31848066</b> | <b>0.82058</b> | <b>5</b>  |
| P56399        | GTGLQPGEEELPDIAPPLVTPDEPK                                 | 1.70886111        | 2              | 4.52467   |
| P56399        | IFQNAPTDPTQDFSTQVAK                                       | 1.02569401        | 2              | 4.19167   |
| P56399        | IGEWELIQESGVPLKPLFGPGYTGIR                                | 1.46587577        | 3              | 3.85841   |
| P56399        | KQEVQAWDGEVR                                              | 0.96472254        | 2              | 3.35561   |
| P56399        | SSENPNEVFR                                                | 1.30814573        | 2              | 2.45697   |
| <b>P56522</b> | <b>ADRO NADPH:adenodoxin oxidoreductase_mitochondrial</b> | <b>1.15508959</b> | <b>0.87889</b> | <b>4</b>  |
| P56522        | AGLLPSGPRPGYTAIQALLSDR                                    | 3.34723334        | 3              | 3.46841   |
| P56522        | LEGVGESTR                                                 | 1.10459804        | 2              | 2.30893   |
| P56522        | TATEKPGVEEAR                                              | 1.15345083        | 2              | 3.25808   |
| P56522        | TDITEVALGVLR                                              | 1.1572734         | 2              | 3.92462   |
| <b>P56574</b> | <b>IDHP Isocitrate dehydrogenase [NADP]_mitochondrial</b> | <b>1.29249776</b> | <b>0.06891</b> | <b>17</b> |
| P56574        | ATDFVVDVDR                                                | 1.73479949        | 2              | 2.46367   |
| P56574        | CATITPDEAR                                                | 2.09036363        | 2              | 2.30452   |
| P56574        | DLAGCIHGLSNVK                                             | 1.52965095        | 2              | 2.50456   |
| P56574        | DQTNDQVTIDSALATQK                                         | 0.85610238        | 2              | 5.42566   |
| P56574        | FKDIFQEIFDK                                               | 1.2003898         | 2              | 3.43291   |
| P56574        | GKLDGNQDLIR                                               | 10.7014756        | 2              | 2.96892   |
| P56574        | IKVEKPVVEMDGDDEMTR                                        | 1.6450463         | 3              | 3.47514   |
| P56574        | LDGNQDLIR                                                 | 1.09094637        | 2              | 2.44979   |
| P56574        | LIDDMVAQVLK                                               | 4.03242177        | 2              | 4.05706   |
| P56574        | LNEHFLNTDFLDTIK                                           | 1.49154767        | 2              | 4.56007   |
| P56574        | NILGGTVFR                                                 | 1.1934515         | 2              | 2.78008   |
| P56574        | NILGGTVFREPIICK                                           | 5.20970753        | 2              | 3.00083   |
| P56574        | SSGGFVWACK                                                | 0.56194531        | 2              | 2.44972   |
| P56574        | TIEAAAHGTVTR                                              | 1.17172895        | 2              | 3.92742   |
| P56574        | VCVQTVESGAMTK                                             | 1.21368724        | 2              | 3.86064   |
| P56574        | VEKPVVEMDGDDEMTR                                          | 1.47810476        | 3              | 4.01855   |
| P56574        | YFDLGLPNR                                                 | 1.2791573         | 2              | 2.52253   |

|               |                                                               |                   |                |           |
|---------------|---------------------------------------------------------------|-------------------|----------------|-----------|
| <b>P56593</b> | <b>CP2AC Cytochrome P450 2A12</b>                             | <b>0.94462344</b> | <b>0.72861</b> | <b>3</b>  |
| P56593        | MLQGTGAPIDPTIYLSK                                             | 0.90308009        | 2              | 4.70444   |
| P56593        | NRQPQYEDHMK                                                   | 1.02226095        | 3              | 4.13185   |
| P56593        | NRQPQYEDHMK+Oxidation(9                                       | 0.86897696        |                |           |
| <b>P56656</b> | <b>CP239 Cytochrome P450 2C39</b>                             | <b>0.89176708</b> | <b>0.94422</b> | <b>4</b>  |
| P56656        | EHQESLDVTNPR                                                  | 0.89175099        | 2              | 3.68047   |
| P56656        | IKEHQESLDVTNPR                                                | 1.00940863        | 3              | 4.87248   |
| P56656        | NYLIPK                                                        | 1.56559808        | 1              | 2.1687    |
| P56656        | VQEEIDHVIGR                                                   | 1.41980029        | 2              | 3.6951    |
| <b>P56812</b> | <b>PDCD5 Programmed cell death protein 5</b>                  | <b>0.96195445</b> | <b>1</b>       | <b>3</b>  |
| P56812        | HGDPGDAAQQEAK                                                 | 0.92858699        | 2              | 4.39695   |
| P56812        | NSILAQVLDQ SAR                                                | 1.00751994        | 2              | 3.84585   |
| P56812        | VSEQGLIEIEK                                                   | 0.97368492        | 2              | 3.3304    |
| <b>P57093</b> | <b>PAHX Phytanoyl_CoA dioxygenase_peroxisomal</b>             | <b>1.26326124</b> | <b>0.69132</b> | <b>8</b>  |
| P57093        | AISCHYGSSDCK                                                  | 0.97506606        | 2              | 3.22801   |
| P57093        | IQDFQQNEELFR                                                  | 1.40934946        | 2              | 3.57945   |
| P57093        | KFYEENGFLVIK                                                  | 1.54563108        | 2              | 2.67677   |
| P57093        | MDYTRAGAR                                                     | 0.61174425        | 2              | 2.5605    |
| P57093        | MYHGIQDYDPDSPR                                                | 1.65455834        | 2              | 2.98107   |
| P57093        | NLVSDDDIQR                                                    | 1.25075919        | 2              | 2.42821   |
| P57093        | NNGCLVVLPGTHK                                                 | 1.26030346        | 2              | 2.92034   |
| P57093        | YCALPQIVK                                                     | 1.17970294        | 1              | 2.07252   |
| <b>P57113</b> | <b>MAAI Maleylacetoacetate isomerase</b>                      | <b>1.25147902</b> | <b>5.3E-07</b> | <b>11</b> |
| P57113        | AITSGFNALEK                                                   | 1.25524563        | 2              | 3.41554   |
| P57113        | ALLALEAFQVSHPCR                                               | 1.54829073        | 2              | 4.12713   |
| P57113        | DGGQQFSEEFQTLNPMK                                             | 1.07761963        | 2              | 4.92675   |
| P57113        | FKVDLSPYPTISHINK                                              | 1.35820554        | 2              | 4.90249   |
| P57113        | GIDYEIVPINLIK                                                 | 1.1657766         | 2              | 4.40449   |
| P57113        | IDGITIGQSLAILEYLEETRPIPR                                      | 1.41822632        | 3              | 4.18634   |
| P57113        | MISDLIASGIQLQNL SVLK                                          | 1.46796404        | 2              | 5.43574   |
| P57113        | MISDLIASGIQLQNL SVLK+Oxidation(0                              | 2.31681684        |                |           |
| P57113        | QVGQENQMPWAQK                                                 | 1.07467855        | 2              | 3.8213    |
| P57113        | VDLSPYPTISHINK                                                | 1.14511215        | 2              | 3.78273   |
| P57113        | YCVGDEVSMADVCLAPQVANAER                                       | 1.86026048        | 3              | 6.55903   |
| <b>P57722</b> | <b>PCBP3 Poly(rC)_binding protein 3</b>                       | <b>1.37712511</b> | <b>6.9E-07</b> | <b>3</b>  |
| P57722        | ESTGAQVQVAGDMLPNSTER                                          | 1.36140925        | 2              | 5.28909   |
| P57722        | INISEGNCPER                                                   | 1.37591169        | 2              | 3.5385    |
| P57722        | LVPASQCGSLIGK                                                 | 1.49566385        | 2              | 2.59727   |
| <b>P58321</b> | <b>UCHL4 Ubiquitin carboxyl_terminal hydrolase isozyme L4</b> | <b>1.26167659</b> | <b>0.2062</b>  | <b>2</b>  |
| P58321        | VTHETSAHEGQTEAPSIDEK                                          | 1.26057508        | 3              | 4.67889   |
| P58321        | WLPLEANPEVTNQFLK                                              | 1.35767168        | 2              | 3.01776   |
| <b>P58389</b> | <b>PTPA Serine/threonine_protein phosphatase 2A activator</b> | <b>1.09654094</b> | <b>0.84688</b> | <b>3</b>  |
| P58389        | FGSLLPIHPVTSG                                                 | 0.87623214        | 2              | 2.40448   |
| P58389        | KEIHTVPDMGK                                                   | 1.26976617        | 2              | 2.42018   |
| P58389        | WIDETPPVDQPSR                                                 | 1.08416623        | 2              | 3.47848   |
| <b>P58751</b> | <b>RELN Reelin</b>                                            | <b>0.68922266</b> | <b>0.38582</b> | <b>2</b>  |
| P58751        | CGILSSGNNLFFNEDGLR                                            | 0.6843771         | 2              | 2.32494   |
| P58751        | QNYMMNFSRQHGLR                                                | 0.70023963        | 2              | 2.42773   |
| <b>P58775</b> | <b>TPM2 Tropomyosin beta chain</b>                            | <b>1.10545721</b> | <b>0.53544</b> | <b>11</b> |
| P58775        | AISEELDNALNDITSL                                              | 2.6147476         | 2              | 4.39084   |
| P58775        | ATDAEADVASLNR                                                 | 3.97245532        | 2              | 4.23221   |
| P58775        | DAQEKLEQAEK                                                   | 1.79803086        | 2              | 2.9043    |
| P58775        | KATDAEADVASLNR                                                | 2.2414089         | 2              | 4.0868    |
| P58775        | LDKENAIDR                                                     | 2.16502467        | 2              | 3.08951   |
| P58775        | LKGTEDEVK                                                     | 3.79764805        | 2              | 2.85641   |

|               |                                                          |                   |                |          |
|---------------|----------------------------------------------------------|-------------------|----------------|----------|
| P58775        | MELQEMQLK                                                | 0.98903137        | 2              | 2.98138  |
| P58775        | QLEEEQALQK                                               | 3.04319812        | 2              | 3.55414  |
| P58775        | SLEAQADKYSTK                                             | 1.92326949        | 2              | 3.75664  |
| P58775        | TIDDLEDEVYAQK                                            | 0.58129704        | 2              | 3.9504   |
| P58775        | YSESVKDAQEK                                              | 0.47806513        | 2              | 3.09924  |
| <b>P59242</b> | <b>CING Cingulin</b>                                     | <b>1.49652921</b> | <b>0.0056</b>  | <b>2</b> |
| P59242        | LGQEQQALNR                                               | 1.93775888        | 2              | 2.79354  |
| P59242        | LQGLEQEAENK                                              | 1.44914416        | 2              | 2.96285  |
| <b>P59999</b> | <b>ARPC4 Actin_related protein 2/3 complex subunit 4</b> | <b>1.45024103</b> | <b>0.03733</b> | <b>2</b> |
| P59999        | ELLLQPVVISR                                              | 1.45018528        | 2              | 3.02599  |
| P59999        | FMRFMMMR+Oxidation(4)Oxidation(5                         | 1.61655163        |                |          |
| <b>P60335</b> | <b>PCBP1 Poly(rC)_ binding protein 1</b>                 | <b>1.33108428</b> | <b>2.2E-10</b> | <b>4</b> |
| P60335        | AITIAGVPQSVTECVK                                         | 1.34032187        | 2              | 3.52901  |
| P60335        | IITLTGPTNAIFK                                            | 2.17707241        | 2              | 2.90487  |
| P60335        | LVVPATQCGSLIGK                                           | 1.56689348        | 2              | 2.98914  |
| P60335        | VMTIPYQPMPPASSPVICAGGQDR                                 | 1.26155012        | 3              | 4.4385   |
| <b>P60843</b> | <b>IF4A1 Eukaryotic initiation factor 4A_I</b>           | <b>1.42419246</b> | <b>0.00063</b> | <b>6</b> |
| P60843        | ATQALVLAPTR                                              | 1.11037198        | 1              | 1.95849  |
| P60843        | GFKDQYDIFQK                                              | 1.41522044        | 3              | 3.88621  |
| P60843        | GVAINMVTEEDKR                                            | 1.343663          | 2              | 3.22981  |
| P60843        | KEELTLEGIR                                               | 1.42429985        | 2              | 2.35313  |
| P60843        | KGVAINMVTEEDKR                                           | 1.81547414        | 3              | 4.67023  |
| P60843        | LQMEAPHIIVGTPGR                                          | 1.30891502        | 3              | 3.87773  |
| <b>P60868</b> | <b>RS20 40S ribosomal protein S20</b>                    | <b>1.38613432</b> | <b>8.3E-08</b> | <b>3</b> |
| P60868        | DTGKTPVEPEVAIHR                                          | 1.65288266        | 3              | 4.41989  |
| P60868        | LIDLHSPSEIVK                                             | 1.37400817        | 2              | 3.13459  |
| P60868        | TPVEPEVAIHR                                              | 2.10497089        | 2              | 2.45865  |
| <b>P60901</b> | <b>PSA6 Proteasome subunit alpha type_6</b>              | <b>1.17174743</b> | <b>0.28079</b> | <b>2</b> |
| P60901        | AINQGGLTSVAVR                                            | 1.16800186        | 2              | 3.41184  |
| P60901        | LLDSSTVTHLFK                                             | 1.46397426        | 2              | 3.00812  |
| <b>P61087</b> | <b>UBE2K Ubiquitin_conjugating enzyme E2 K</b>           | <b>1.14036745</b> | <b>0.96785</b> | <b>2</b> |
| P61087        | GEIAGPPDTPYEGGR                                          | 1.35396077        | 2              | 3.20526  |
| P61087        | VDLVDFTELRL                                              | 1.13130048        | 2              | 3.50466  |
| <b>P61107</b> | <b>RAB14 Ras_related protein Rab_14</b>                  | <b>1.14973117</b> | <b>0.44157</b> | <b>5</b> |
| P61107        | IYQNIQDGLDLNAAESGVQHKPSAPQGGR                            | 1.24387433        | 3              | 3.72783  |
| P61107        | NLTNPNTVILIGNK                                           | 1.07463477        | 2              | 3.98962  |
| P61107        | SCLLHQFTEK                                               | 1.32385942        | 2              | 3.08708  |
| P61107        | STYNHLSSWLTDAR                                           | 1.06098457        | 2              | 3.31572  |
| P61107        | TGENVEDAFLEAAK                                           | 1.15887805        | 2              | 3.69374  |
| <b>P61222</b> | <b>ABCE1 ATP_binding cassette sub_family E member 1</b>  | <b>1.14956557</b> | <b>0.2664</b>  | <b>3</b> |
| P61222        | GSELQNYFTK                                               | 1.35885165        | 2              | 2.34013  |
| P61222        | NTVANSPQTLLAGMKN                                         | 1.14361415        | 2              | 4.09023  |
| P61222        | VAETANEEVKK                                              | 1.52973432        | 2              | 2.96918  |
| <b>P61314</b> | <b>RL15 60S ribosomal protein L15</b>                    | <b>1.47014729</b> | <b>2.1E-14</b> | <b>5</b> |
| P61314        | FFEVLIDPFHK                                              | 1.59327831        | 3              | 3.42168  |
| P61314        | GATYGKPVHHGVNQLK                                         | 1.52110561        | 2              | 4.38604  |
| P61314        | SLQSVAEER                                                | 1.38059956        | 2              | 2.79345  |
| P61314        | VLNSYWVGEDSTYK                                           | 1.41314498        | 2              | 4.08355  |
| P61314        | YIQELWR                                                  | 1.51254328        | 2              | 2.61205  |
| <b>P61354</b> | <b>RL27 60S ribosomal protein L27</b>                    | <b>1.47129241</b> | <b>0.58523</b> | <b>2</b> |
| P61354        | NIDDGTSRDPYSHALVAGIDR                                    | 1.47133981        | 3              | 4.93704  |
| P61354        | VYNYNHLMPTR                                              | 1.34976834        | 2              | 3.01933  |
| <b>P61459</b> | <b>PHS Pterin_4_alpha_carbinolamine dehydratase</b>      | <b>1.09247356</b> | <b>1</b>       | <b>3</b> |
| P61459        | AVGWNELEGR                                               | 1.05550243        | 2              | 3.19697  |
| P61459        | LDHHPWFVFNK                                              | 1.15247338        | 3              | 4.97846  |

|               |                                                                                         |                   |                |          |
|---------------|-----------------------------------------------------------------------------------------|-------------------|----------------|----------|
| P61459        | LSAEERDQLLPNLR                                                                          | 1.14270335        | 3              | 4.32026  |
| <b>P61589</b> | <b>RHOA Transforming protein RhoA</b>                                                   | <b>1.41566896</b> | <b>0.44926</b> | <b>4</b> |
| P61589        | HFCPNVPIILVGNK                                                                          | 2.63481095        | 2              | 3.29609  |
| P61589        | HFCPNVPIILVGNKK                                                                         | 1.79076872        | 3              | 4.5125   |
| P61589        | MKQEPVKPEEGR                                                                            | 1.4298194         | 3              | 4.12111  |
| P61589        | MKQEPVKPEEGR+Oxidation(0                                                                | 1.26828908        |                |          |
| <b>P61751</b> | <b>ARF4 ADP_ribosylation factor 4</b>                                                   | <b>1.7614227</b>  | <b>1.9E-08</b> | <b>6</b> |
| P61751        | ILMVGLDAAGK                                                                             | 1.9587136         | 2              | 2.89038  |
| P61751        | IQEGA AVLQK                                                                             | 1.33108304        | 2              | 2.94305  |
| P61751        | KQMRILMVGLDAAGK                                                                         | 1.41344997        | 2              | 2.37147  |
| P61751        | LGEIVTTIPTIGFNVETVEYK                                                                   | 1.49884815        | 3              | 4.25597  |
| P61751        | NICFTVWDVGGQDK                                                                          | 1.35091704        | 2              | 4.21744  |
| P61751        | QDLPNAMAISEMTDK                                                                         | 1.82620096        | 2              | 3.60782  |
| <b>P61805</b> | <b>DAD1 Dolichyl_diphosphooligosaccharide__protein glycosyltransferase subunit DAD1</b> | <b>1.15343371</b> | <b>0.99453</b> | <b>2</b> |
| P61805        | ADFQGISPER                                                                              | 1.15343681        | 2              | 3.11042  |
| P61805        | FLEEYLSSTPQR                                                                            | 1.06045087        | 2              | 3.78181  |
| <b>P61924</b> | <b>COPZ1 Coatomer subunit zeta_1</b>                                                    | <b>1.22348913</b> | <b>0.48633</b> | <b>2</b> |
| P61924        | GEDVPLTEQTVSQVLQSAK                                                                     | 1.21775791        | 2              | 4.62344  |
| P61924        | YYDDTYPVK                                                                               | 1.44022233        | 2              | 2.4936   |
| <b>P61972</b> | <b>NTF2 Nuclear transport factor 2</b>                                                  | <b>1.99750844</b> | <b>0.4699</b>  | <b>2</b> |
| P61972        | IQHSITAQD HQPTPDCIISMVVGQLK                                                             | 3.45765848        | 3              | 4.2965   |
| P61972        | NINDAWVCTNDMFR                                                                          | 1.48755128        | 2              | 3.77299  |
| <b>P61980</b> | <b>HNRPK Heterogeneous nuclear ribonucleoprotein K</b>                                  | <b>1.28365536</b> | <b>9.9E-20</b> | <b>9</b> |
| P61980        | GSDFDCELR                                                                               | 1.56105291        | 2              | 2.76896  |
| P61980        | GSYDGLGGPIITQVTIPK                                                                      | 0.92454836        | 2              | 5.16481  |
| P61980        | IDEPLEGSEDR                                                                             | 1.90137562        | 2              | 3.67701  |
| P61980        | IILDISESPIK                                                                             | 1.39533583        | 2              | 4.09562  |
| P61980        | IITITGTQDQIQNAQYLLQNSVK                                                                 | 1.3787989         | 3              | 7.09349  |
| P61980        | LFQECCPHSTDR                                                                            | 1.28216768        | 2              | 3.90689  |
| P61980        | NTDEMVELR                                                                               | 1.62590979        | 2              | 2.66511  |
| P61980        | RSRNTDEMVELR                                                                            | 1.19343917        | 2              | 2.50928  |
| P61980        | TDYNASVSVDPSSGPER                                                                       | 1.13354383        | 2              | 4.56336  |
| <b>P61983</b> | <b>1433G 14_3_3 protein gamma</b>                                                       | <b>1.19041605</b> | <b>0.99993</b> | <b>4</b> |
| P61983        | AYSEAHEISK                                                                              | 1.04917123        | 2              | 3.53049  |
| P61983        | NVTELNEPLSNEER                                                                          | 1.19993184        | 2              | 4.65729  |
| P61983        | TAFDDAIAELDTLNEDSYK                                                                     | 1.62134001        | 2              | 4.77342  |
| P61983        | YLAEVATGEK                                                                              | 1.18247317        | 2              | 3.08096  |
| <b>P62076</b> | <b>TIM13 Mitochondrial import inner membrane translocase subunit Tim13</b>              | <b>1.06663241</b> | <b>0.99806</b> | <b>5</b> |
| P62076        | CIGKPGGSLDNSEQK                                                                         | 1.01516787        | 2              | 4.0928   |
| P62076        | KCIGKPGGSLDNSEQK                                                                        | 1.08453132        | 3              | 3.97799  |
| P62076        | LDPGAIMEQVK                                                                             | 0.84392617        | 2              | 2.94983  |
| P62076        | VQIAVANAQELLQR                                                                          | 1.0887723         | 2              | 5.01919  |
| P62076        | YMDAWNTVSR                                                                              | 1.07781431        | 2              | 3.08328  |
| <b>P62083</b> | <b>RS7 40S ribosomal protein S7</b>                                                     | <b>1.60798917</b> | <b>9.9E-20</b> | <b>5</b> |
| P62083        | AIIIFVVPVQLK                                                                            | 1.71124724        | 2              | 3.75935  |
| P62083        | IVKPNGEKPDEFESGISQALLELEMNSDLK                                                          | 2.1518051         | 3              | 5.18262  |
| P62083        | KAIIFVVPVQLK                                                                            | 1.03909597        | 2              | 3.6696   |
| P62083        | TLTAVHDAILEDLVFPSEIVGK                                                                  | 1.63710546        | 2              | 5.1634   |
| P62083        | VETFSGVYK                                                                               | 1.07958226        | 2              | 2.32131  |
| <b>P62161</b> | <b>CALM Calmodulin</b>                                                                  | <b>1.2662836</b>  | <b>0.9151</b>  | <b>4</b> |
| P62161        | DGNNGYISAAELR                                                                           | 1.14215974        | 2              | 2.97082  |
| P62161        | EADIDGDGQVNYEEFVQMMTAK                                                                  | 2.63929003        | 2              | 5.22869  |
| P62161        | EAFSLFDKDGDTITTK                                                                        | 1.16057102        | 2              | 4.71599  |

|               |                                               |                   |                |          |
|---------------|-----------------------------------------------|-------------------|----------------|----------|
| P62161        | VFDKDGNGYISAAELR                              | 1.08612233        | 2              | 4.96889  |
| <b>P62193</b> | <b>PRS4 26S protease regulatory subunit 4</b> | <b>1.38724303</b> | <b>0.11313</b> | <b>4</b> |
| P62193        | AICTEAGLMALRERR+Oxidation(8)                  | 4.09018285        |                |          |
| P62193        | AVANQTSATFLR                                  | 1.29112995        | 2              | 3.0933   |
| P62193        | NQEQMKPLEEK                                   | 1.19093537        | 2              | 3.54506  |
| P62193        | TMLELLNQLDGFDSR                               | 1.49279538        | 2              | 4.13625  |
| <b>P62198</b> | <b>PRS8 26S protease regulatory subunit 8</b> | <b>1.43379703</b> | <b>0.00468</b> | <b>6</b> |
| P62198        | EVIELPVKHPELFEALGIAQPK                        | 1.37136235        | 3              | 4.38787  |
| P62198        | IAELMPGASGAEVK                                | 1.19153736        | 2              | 3.16113  |
| P62198        | LEGGSGGDSEVQR                                 | 1.47386919        | 2              | 3.70943  |
| P62198        | LLREELQLLQEQGSYVGEVVR                         | 1.51208208        | 3              | 3.99668  |
| P62198        | TMLELLNQLDGFPEATK                             | 2.08567461        | 2              | 3.71609  |
| P62198        | VHVTQEDFEMAVAK                                | 0.97995312        | 2              | 3.13595  |
| <b>P62243</b> | <b>RS8 40S ribosomal protein S8</b>           | <b>1.27737679</b> | <b>9.9E-20</b> | <b>9</b> |
| P62243        | ADGYVLE GK                                    | 2.48267479        | 2              | 3.16979  |
| P62243        | IIDVVYNASNNE LVR                              | 2.20616469        | 2              | 4.22857  |
| P62243        | ISSLLEEQFQQGK                                 | 1.75085581        | 2              | 4.23977  |
| P62243        | KYELGRPAANTK                                  | 1.44442091        | 2              | 3.58783  |
| P62243        | LDVGNFSWGSECCTR                               | 1.24791925        | 2              | 3.96338  |
| P62243        | LTPEEEEEILNK                                  | 1.19668456        | 2              | 3.0717   |
| P62243        | NCIVLIDSTPYR                                  | 1.55937287        | 2              | 3.47589  |
| P62243        | QWYESHYALPLGR                                 | 1.70801503        | 2              | 2.92363  |
| P62243        | YELGRPAANTK                                   | 0.8605631         | 2              | 2.9545   |
| <b>P62246</b> | <b>RS15A 40S ribosomal protein S15a</b>       | <b>1.30153217</b> | <b>1.7E-06</b> | <b>4</b> |
| P62246        | HGYIGEFEIIDDHR                                | 1.31780061        | 3              | 4.92148  |
| P62246        | IVVNL TGR                                     | 2.02553911        | 2              | 2.32918  |
| P62246        | MNVLADALK                                     | 1.43743172        | 2              | 2.73914  |
| P62246        | WQNNLLPSR                                     | 1.29608032        | 2              | 3.11739  |
| <b>P62250</b> | <b>RS16 40S ribosomal protein S16</b>         | <b>1.73644849</b> | <b>0.01319</b> | <b>6</b> |
| P62250        | ALVAYYQK                                      | 2.69859166        | 1              | 2.23972  |
| P62250        | EIKDILIQYDR                                   | 1.13642282        | 2              | 2.61425  |
| P62250        | GGGHVAQIYAIR                                  | 1.8041962         | 2              | 3.07535  |
| P62250        | LLEPVLLLGK                                    | 1.68391223        | 2              | 2.80302  |
| P62250        | TLLVADPR                                      | 1.29730194        | 2              | 2.6086   |
| P62250        | VNGRPLEMIEPR                                  | 1.55224738        | 2              | 2.69585  |
| <b>P62260</b> | <b>1433E 14_3_3 protein epsilon</b>           | <b>1.19740022</b> | <b>1.7E-11</b> | <b>9</b> |
| P62260        | AAFDDAIAELDTLSEESYK                           | 1.32793037        | 2              | 6.03811  |
| P62260        | EENKGGEDK LK                                  | 1.71078003        | 2              | 2.70242  |
| P62260        | HLIPAANTGESK                                  | 1.25807359        | 2              | 3.1987   |
| P62260        | ISSIEQK                                       | 1.34296619        | 2              | 2.60819  |
| P62260        | LICCDILDVLDK                                  | 2.91055341        | 2              | 4.0564   |
| P62260        | YDEMVESMK                                     | 1.31903311        | 2              | 2.71077  |
| P62260        | YDEMVESM K K                                  | 2.08662318        | 2              | 2.67483  |
| P62260        | YLAEFATGNDR                                   | 0.7467003         | 2              | 2.94223  |
| P62260        | YLAEFATGNDRK                                  | 1.4679278         | 2              | 2.73987  |
| <b>P62268</b> | <b>RS23 40S ribosomal protein S23</b>         | <b>1.39601275</b> | <b>0.00944</b> | <b>2</b> |
| P62268        | GHAVGDIPGVR                                   | 1.39721107        | 2              | 2.74766  |
| P62268        | KGHAVGDIPGVR                                  | 1.32050106        | 2              | 2.82558  |
| <b>P62271</b> | <b>RS18 40S ribosomal protein S18</b>         | <b>1.16030639</b> | <b>0.06238</b> | <b>6</b> |
| P62271        | AGELTEDEVER                                   | 1.89058736        | 2              | 3.69618  |
| P62271        | LREDLER                                       | 1.22244178        | 1              | 2.21055  |
| P62271        | RAGELTEDEVER                                  | 0.79874637        | 2              | 3.10514  |
| P62271        | VITIMQNPR                                     | 1.15573534        | 2              | 2.83899  |
| P62271        | VLNTNIDGR                                     | 3.21967261        | 2              | 3.12737  |
| P62271        | YSQVLANGLDNK                                  | 1.36897552        | 2              | 4.04299  |
| <b>P62278</b> | <b>RS13 40S ribosomal protein S13</b>         | <b>1.15276097</b> | <b>0.06018</b> | <b>5</b> |
| P62278        | GLAPDLPEDLYHLIK                               | 1.41518756        | 2              | 3.09192  |



|               |                                                   |                   |                |           |
|---------------|---------------------------------------------------|-------------------|----------------|-----------|
| P62278        | GLSQSALPYR                                        | 1.10686716        | 2              | 2.47847   |
| P62278        | GLTPSQIGVILR                                      | 1.06222011        | 2              | 2.98124   |
| P62278        | KGLTPSQIGVILR                                     | 1.20267714        | 3              | 3.89147   |
| P62278        | LILIESR                                           | 1.77542708        | 1              | 2.0731    |
| <b>P62329</b> | <b>TYB4 Thymosin beta_4</b>                       | <b>0.93185058</b> | <b>0.98813</b> | <b>3</b>  |
| P62329        | ETIEQEKQAGES                                      | 1.26795368        | 2              | 2.44625   |
| P62329        | NPLPSKETIEQEK                                     | 1.00382312        | 2              | 2.73218   |
| P62329        | TETQEKNPSPK                                       | 0.91003333        | 2              | 3.73931   |
| <b>P62332</b> | <b>ARF6 ADP_ribosylation factor 6</b>             | <b>1.58919357</b> | <b>0.33801</b> | <b>2</b>  |
| P62332        | FNVWDVGGQDK                                       | 1.58834459        | 2              | 3.02465   |
| P62332        | LGQSVTTIPTVGFNVETVYK                              | 1.66495421        | 2              | 2.67368   |
| <b>P62334</b> | <b>PRS10 26S protease regulatory subunit 10B</b>  | <b>1.10190062</b> | <b>0.00089</b> | <b>5</b>  |
| P62334        | ADHDFVQEDFMK                                      | 1.18643172        | 2              | 2.32383   |
| P62334        | ALQSVGQIVGEVLK                                    | 1.16646877        | 2              | 3.615     |
| P62334        | EVIELPTNPELFQR                                    | 1.4824319         | 2              | 3.03575   |
| P62334        | HGEIDYEAIVK                                       | 0.55007081        | 2              | 3.53083   |
| P62334        | NVCTEAGMFAIR                                      | 1.10475944        | 2              | 2.76719   |
| <b>P62425</b> | <b>RL7A 60S ribosomal protein L7a</b>             | <b>1.10780957</b> | <b>0.157</b>   | <b>11</b> |
| P62425        | AGVNTVTTLVENK                                     | 1.25062851        | 2              | 4.02915   |
| P62425        | AGVNTVTTLVENKK                                    | 1.44839901        | 2              | 3.33457   |
| P62425        | HWGGNVLGPK                                        | 1.8291057         | 1              | 2.91587   |
| P62425        | KVVNPLFEK                                         | 1.4932191         | 2              | 2.36608   |
| P62425        | LKVPPAINQFTQALDR                                  | 1.93517984        | 3              | 4.29622   |
| P62425        | NFGIGQDIQPK                                       | 1.05040652        | 2              | 3.36864   |
| P62425        | TCTTVAFTQVNSEDK                                   | 1.25645332        | 2              | 3.35062   |
| P62425        | TCTTVAFTQVNSEDKGALAK                              | 1.9759251         | 2              | 4.68271   |
| P62425        | TNYNDRYDEIR                                       | 1.33007417        | 2              | 2.35689   |
| P62425        | VAPAPAVVK                                         | 1.09653075        | 1              | 2.15337   |
| P62425        | VPPAINQFTQALDR                                    | 1.38136932        | 2              | 3.69734   |
| <b>P62630</b> | <b>EF1A1 Elongation factor 1_alpha 1</b>          | <b>1.78996196</b> | <b>9.9E-20</b> | <b>13</b> |
| P62630        | DGSASGTTLLEALDCILPPTPTDKPLR                       | 1.57321775        | 3              | 4.9869    |
| P62630        | KDGSASGTTLLEALDCILPPTPTDKPLR                      | 1.60836317        | 4              | 5.25064   |
| P62630        | MDSTEPPYSQK                                       | 1.49195305        | 2              | 3.74136   |
| P62630        | MDSTEPPYSQK+Oxidation(0                           | 1.79106456        |                |           |
| P62630        | NDPPMEAAGFTAQVIILNHPGQISAGYAPVLDCHTAHIACK         | 1.35163642        | 5              | 5.93441   |
| P62630        | RYEEIVK                                           | 1.19315655        | 2              | 2.7394    |
| P62630        | SGDAAIVDMVPGKPMCVESFSDYPPLGR                      | 0.82771318        | 3              | 5.20747   |
| P62630        | SGDAAIVDMVPGKPMCVESFSDYPPLGR+Oxidation(14         | 1.40749836        |                |           |
| P62630        | SGDAAIVDMVPGKPMCVESFSDYPPLGR+Oxidation(8          | 1.13319455        |                |           |
| P62630        | VETGVLPKGMVVTFAPVNVTTTEVK                         | 1.74686527        | 3              | 5.63393   |
| P62630        | VETGVLPKGMVVTFAPVNVTTTEVK+Oxidation(9             | 1.45793256        |                |           |
| P62630        | YEEIVK                                            | 1.2752932         | 2              | 2.34163   |
| P62630        | YYVTIIDAPGHR                                      | 1.05828898        | 3              | 4.104     |
| <b>P62632</b> | <b>EF1A2 Elongation factor 1_alpha 2</b>          | <b>1.46676185</b> | <b>9.9E-20</b> | <b>7</b>  |
| P62632        | EHALLAYTLGVK                                      | 1.79475221        | 3              | 3.70318   |
| P62632        | IGGIGTVPVGR                                       | 1.62289584        | 2              | 3.54856   |
| P62632        | NMITGTSQADCAVLIVAAGVGEFEAGISK                     | 1.417772          | 3              | 4.56564   |
| P62632        | QLIVGVNK                                          | 1.33582331        | 1              | 2.43109   |
| P62632        | STTTGHLIYK                                        | 1.88556403        | 2              | 3.06981   |
| P62632        | THINIVVIGHVDSGK                                   | 0.86677388        | 2              | 5.39768   |
| P62632        | VETGILRPGMVVTFAPVNVITTEVK                         | 2.11374683        | 3              | 3.94433   |
| <b>P62634</b> | <b>CNBP Cellular nucleic acid_binding protein</b> | <b>1.39583778</b> | <b>0.0234</b>  | <b>2</b>  |
| P62634        | CGETGHVAINCSK                                     | 1.35996294        | 2              | 4.45352   |
| P62634        | CYSCGEFGHIQK                                      | 1.46429174        | 2              | 3.37999   |

|               |                                                             |                   |                |          |
|---------------|-------------------------------------------------------------|-------------------|----------------|----------|
| <b>P62703</b> | <b>RS4X 40S ribosomal protein S4_X isoform</b>              | <b>1.28187025</b> | <b>0.22803</b> | <b>5</b> |
| P62703        | FDTGNLCMVTGGANLGR                                           | 1.13609528        | 2              | 4.77984  |
| P62703        | GIPHLVTHDAR                                                 | 1.4631776         | 2              | 2.74673  |
| P62703        | LSNIFVIGK                                                   | 1.59048647        | 2              | 3.12328  |
| P62703        | TDITYPAGFMDVISIDK                                           | 1.70320012        | 2              | 4.94691  |
| P62703        | VNDTIQIDLETGK                                               | 1.99145354        | 2              | 4.548    |
| <b>P62718</b> | <b>RL18A 60S ribosomal protein L18a</b>                     | <b>0.97650038</b> | <b>0.72424</b> | <b>2</b> |
| P62718        | DLTTAGAVTQCYR                                               | 0.86155221        | 2              | 3.16364  |
| P62718        | SSGEIVYCGQVFEKSPLR                                          | 1.82498477        | 2              | 2.50862  |
| <b>P62752</b> | <b>RL23A 60S ribosomal protein L23a</b>                     | <b>1.58952508</b> | <b>0.00126</b> | <b>7</b> |
| P62752        | KLYDIDVAK                                                   | 1.61053422        | 2              | 2.39104  |
| P62752        | LAPDYDALDVANK                                               | 1.11850882        | 2              | 3.71814  |
| P62752        | LDHYAIK                                                     | 1.33833878        | 2              | 2.52263  |
| P62752        | LYDIDVAK                                                    | 1.15457658        | 1              | 1.98575  |
| P62752        | NKLDHYAIK                                                   | 1.41500381        | 3              | 3.39016  |
| P62752        | VNTLIRPDGEK                                                 | 1.39501699        | 2              | 3.34056  |
| P62752        | VNTLIRPDGEKK                                                | 1.5395229         | 2              | 2.93046  |
| <b>P62755</b> | <b>RS6 40S ribosomal protein S6</b>                         | <b>1.075886</b>   | <b>3.2E-08</b> | <b>4</b> |
| P62755        | LIEVDDER                                                    | 0.98510243        | 2              | 3.07724  |
| P62755        | LNISFPATGCQK                                                | 1.18643674        | 2              | 2.85092  |
| P62755        | MATEVAADALGEEWK                                             | 1.70207869        | 2              | 4.78582  |
| P62755        | MATEVAADALGEEWK+Oxidation(0                                 | 1.07589216        |                |          |
| <b>P62775</b> | <b>MTPN Myotrophin</b>                                      | <b>0.87622824</b> | <b>0.79079</b> | <b>3</b> |
| P62775        | GPDGLTALEATDNQAIK                                           | 1.90973123        | 2              | 3.90549  |
| P62775        | HHITPLLSAVYEGHVSCVK                                         | 0.94775274        | 3              | 3.94215  |
| P62775        | NGDLDEVKDYVAK                                               | 0.87400493        | 2              | 3.19191  |
| <b>P62804</b> | <b>H4 Histone H4</b>                                        | <b>1.44282337</b> | <b>3.3E-16</b> | <b>9</b> |
| P62804        | DAVYTEHAK                                                   | 1.78401126        | 2              | 3.01126  |
| P62804        | DNIQGITKPAIR                                                | 1.32731866        | 2              | 3.14164  |
| P62804        | ISGLIYEETR                                                  | 2.13155102        | 2              | 3.97264  |
| P62804        | KTVTAMDVVYALK                                               | 1.83315067        | 3              | 4.77401  |
| P62804        | RISGLIYEETR                                                 | 1.33044165        | 2              | 2.40331  |
| P62804        | TVTAMDVVYALK                                                | 1.39577241        | 2              | 3.90066  |
| P62804        | TVTAMDVVYALK+Oxidation(4                                    | 1.11120715        |                |          |
| P62804        | VFLENVIR                                                    | 1.27497119        | 2              | 3.26437  |
| P62804        | VFLENVIRDAVYTEHAK                                           | 1.66535206        | 3              | 3.87555  |
| <b>P62815</b> | <b>VATB2 V_type proton ATPase subunit B_ brain isoform</b>  | <b>0.82724222</b> | <b>0.22807</b> | <b>3</b> |
| P62815        | AVVQVFEGTSGIDAK                                             | 0.75669788        | 2              | 3.64331  |
| P62815        | IYPEEMIQTGISAIDGMNSIAR                                      | 1.85907943        | 3              | 3.44089  |
| P62815        | SGQVLEVSGSK                                                 | 1.23379595        | 2              | 2.81217  |
| <b>P62845</b> | <b>RS15 40S ribosomal protein S15</b>                       | <b>1.3954775</b>  | <b>0.35729</b> | <b>2</b> |
| P62845        | DMIILPEMVGSMVGVYNGK                                         | 1.49526747        | 2              | 3.15847  |
| P62845        | KEAPPMEKPEVVK                                               | 1.39245645        | 3              | 4.03212  |
| <b>P62850</b> | <b>RS24 40S ribosomal protein S24</b>                       | <b>1.44014488</b> | <b>0.02278</b> | <b>2</b> |
| P62850        | KQMVIDVLHPGK                                                | 1.94875586        | 3              | 3.67591  |
| P62850        | TTGFGMIYDSLIDYAK                                            | 1.39929438        | 2              | 4.00406  |
| <b>P62856</b> | <b>RS26 40S ribosomal protein S26</b>                       | <b>1.24119313</b> | <b>0.03212</b> | <b>4</b> |
| P62856        | DISEASVFDAYVLPK                                             | 1.19310265        | 2              | 3.11     |
| P62856        | FRPAGAAPRPPPKPM                                             | 0.97115518        | 2              | 2.73655  |
| P62856        | LHYCVSCAIHSK                                                | 1.48217273        | 3              | 3.33788  |
| P62856        | NIVEAAAVR                                                   | 1.39403637        | 2              | 3.01359  |
| <b>P62859</b> | <b>RS28 40S ribosomal protein S28</b>                       | <b>1.65739231</b> | <b>0.07892</b> | <b>2</b> |
| P62859        | EGDVLTLLESER                                                | 1.67724128        | 2              | 3.53634  |
| P62859        | VEFMDDTSR                                                   | 1.51930478        | 2              | 2.70491  |
| <b>P62870</b> | <b>ELOB Transcription elongation factor B polypeptide 2</b> | <b>1.57169767</b> | <b>1.5E-06</b> | <b>3</b> |

|               |                                                           |                   |                |           |
|---------------|-----------------------------------------------------------|-------------------|----------------|-----------|
| P62870        | ADDTFEALR                                                 | 1.11368799        | 2              | 2.5475    |
| P62870        | LYKDDQLLDDGK                                              | 1.58065603        | 2              | 2.9807    |
| P62870        | TLGECGFTSQRTARQPATVGLAFR                                  | 1.82450676        | 3              | 4.52014   |
| <b>P62890</b> | <b>RL30 60S ribosomal protein L30</b>                     | <b>1.51709843</b> | <b>0.13477</b> | <b>3</b>  |
| P62890        | LVILANNCPALR                                              | 1.37070199        | 2              | 3.06541   |
| P62890        | TGVHHYSGNNIELGTACGK                                       | 1.58165787        | 2              | 5.68993   |
| P62890        | VCTLAIIDPGDSDIIR                                          | 1.96493476        | 2              | 4.24025   |
| <b>P62898</b> | <b>CYC Cytochrome c_somatic</b>                           | <b>1.32781043</b> | <b>0.08335</b> | <b>7</b>  |
| P62898        | ADLIAYLK                                                  | 1.1164528         | 2              | 3.12513   |
| P62898        | ADLIAYLKKATNE                                             | 0.72150354        | 2              | 2.46253   |
| P62898        | GITWGEDTLMEYLENPK                                         | 1.46545546        | 2              | 4.98805   |
| P62898        | GITWGEDTLMEYLENPKK                                        | 1.30224906        | 2              | 4.31643   |
| P62898        | KTGQAAGFSYTDANK                                           | 1.02417132        | 2              | 5.1925    |
| P62898        | TGPNLHGLFGR                                               | 0.91194013        | 2              | 3.37204   |
| P62898        | TGQAAGFSYTDANK                                            | 1.15619321        | 2              | 4.18944   |
| <b>P62902</b> | <b>RL31 60S ribosomal protein L31</b>                     | <b>1.74673536</b> | <b>0.15096</b> | <b>2</b>  |
| P62902        | NLQTVNVNVDEN                                              | 1.00812544        | 1              | 2.41981   |
| P62902        | SAINEVVTR                                                 | 1.92923078        | 2              | 3.05434   |
| <b>P62907</b> | <b>RL10A 60S ribosomal protein L10a</b>                   | <b>1.26950097</b> | <b>1.6E-14</b> | <b>6</b>  |
| P62907        | AVDIPHMDIEALK                                             | 1.40991389        | 2              | 3.03815   |
| P62907        | AVDIPHMDIEALKK                                            | 1.17434712        | 2              | 3.07241   |
| P62907        | FSVCVLGDQQHCDEAK                                          | 1.46111464        | 2              | 4.12317   |
| P62907        | KYDAFLASESLIK                                             | 1.13055556        | 2              | 3.84331   |
| P62907        | VLCLAVAVGHVK                                              | 1.11110537        | 2              | 3.23442   |
| P62907        | YDAFLASESLIK                                              | 1.21489006        | 2              | 3.306     |
| <b>P62909</b> | <b>RS3 40S ribosomal protein S3</b>                       | <b>1.19110058</b> | <b>9.9E-20</b> | <b>10</b> |
| P62909        | AELNEFLTR                                                 | 1.21783332        | 2              | 3.19437   |
| P62909        | DEILPTTPISEQK                                             | 1.31841006        | 2              | 3.3224    |
| P62909        | ELAEDGYSGVEVR                                             | 1.00648862        | 2              | 3.83229   |
| P62909        | ELTAVVQK                                                  | 1.54744351        | 1              | 2.05135   |
| P62909        | FGFPEGSVELYAEK                                            | 4.13117927        | 2              | 3.56604   |
| P62909        | FVDGLMIHSGDPVNYVDTAVR                                     | 1.48281393        | 3              | 4.76127   |
| P62909        | GCEVVVSGK                                                 | 1.27327573        | 2              | 2.41689   |
| P62909        | GGKPEPPAMPQPVPTA                                          | 1.51566057        | 2              | 4.07126   |
| P62909        | GLCAIAQAESLR                                              | 1.16682279        | 2              | 3.36026   |
| P62909        | TEIILATR                                                  | 1.65725406        | 2              | 3.28158   |
| <b>P62912</b> | <b>RL32 60S ribosomal protein L32</b>                     | <b>1.53356705</b> | <b>3E-07</b>   | <b>3</b>  |
| P62912        | ELEVLLMCNK                                                | 1.30960609        | 2              | 3.29667   |
| P62912        | GQILMPNIGYGSNK                                            | 1.25156477        | 2              | 3.15751   |
| P62912        | SYCAEIAHNVSSK                                             | 1.53521943        | 2              | 4.41383   |
| <b>P62914</b> | <b>RL11 60S ribosomal protein L11</b>                     | <b>1.52191211</b> | <b>0.36443</b> | <b>2</b>  |
| P62914        | VLEQLTGQTPVFSK                                            | 1.52191467        | 2              | 4.42675   |
| P62914        | YDGIIIPGK                                                 | 1.22629947        | 2              | 3.05924   |
| <b>P62919</b> | <b>RL8 60S ribosomal protein L8</b>                       | <b>1.44680245</b> | <b>3.1E-10</b> | <b>4</b>  |
| P62919        | ASGNYATVISHNPETK                                          | 1.43223112        | 2              | 4.43514   |
| P62919        | AVDFAER                                                   | 1.52045491        | 1              | 1.97741   |
| P62919        | AVVGVVAGGGR                                               | 1.40936971        | 2              | 3.61877   |
| P62919        | KAQLNIGNVLPVGTMPGEGTIVCCLEEKPGDR                          | 1.56978799        | 3              | 5.37276   |
| <b>P62944</b> | <b>AP2B1 AP_2 complex subunit beta</b>                    | <b>1.28785227</b> | <b>0.25077</b> | <b>3</b>  |
| P62944        | KPSETQELVQQVLSLATQSDSNPDLR                                | 1.96715182        | 3              | 3.30468   |
| P62944        | LQNNNVYTIK                                                | 1.22826201        | 2              | 2.40778   |
| P62944        | SQPDMAIMAVNSFVK                                           | 1.01714857        | 2              | 2.97341   |
| <b>P62959</b> | <b>HINT1 Histidine triad nucleotide_binding protein 1</b> | <b>1.0602113</b>  | <b>0.98851</b> | <b>7</b>  |
| P62959        | AQVAQPGGDTIFGK                                            | 1.0369821         | 2              | 4.75212   |
| P62959        | CAADLGLK                                                  | 1.25762756        | 2              | 2.52929   |
| P62959        | CLAFHDISPQAPTHFLVIPK                                      | 1.34116474        | 3              | 4.29055   |

|               |                                                           |                   |                |           |
|---------------|-----------------------------------------------------------|-------------------|----------------|-----------|
| P62959        | HISQISVADDDDESLLGHLMIVGK                                  | 1.23719705        | 3              | 6.72587   |
| P62959        | IIFEDDR                                                   | 1.38540706        | 2              | 2.59956   |
| P62959        | KHISQISVADDDDESLLGHLMIVGK                                 | 1.21271214        | 3              | 5.49068   |
| P62959        | MVVNEGADGGQSVYHIHLHLVGGRR                                 | 1.05807998        | 3              | 4.37994   |
| <b>P62961</b> | <b>YBOX1 Nuclease_sensitive element_binding protein 1</b> | <b>1.29884528</b> | <b>0.08404</b> | <b>6</b>  |
| P62961        | EDGNEEDKENQGDETQGQPPQR                                    | 1.33567304        | 3              | 5.12613   |
| P62961        | GAEAAVNTGPGGVPVQGSK                                       | 0.93766781        | 2              | 4.97392   |
| P62961        | NEGSESAPEGQAQQR                                           | 1.4667135         | 2              | 5.21107   |
| P62961        | NYQQNYQNSSEGEK                                            | 1.11849584        | 2              | 4.82381   |
| P62961        | NYQQNYQNSSEGEKNEGSESAPEGQAQQR                             | 1.20193692        | 3              | 5.12922   |
| P62961        | RPQYSNPPVQGEVMEGADNQGAGEQGRPVR                            | 1.75395769        | 3              | 5.12013   |
| <b>P62963</b> | <b>PROF1 Profilin_1</b>                                   | <b>1.37111643</b> | <b>0.32081</b> | <b>6</b>  |
| P62963        | CYEMASHLR                                                 | 1.5675808         | 2              | 2.39401   |
| P62963        | DSLLQDGEFTMDLR                                            | 1.67697387        | 2              | 3.40966   |
| P62963        | DSPSVWAAVPGK                                              | 0.97813398        | 2              | 2.74058   |
| P62963        | SSFFVNGLTGGQK                                             | 1.2271116         | 2              | 4.35779   |
| P62963        | STGGAPTFNVTVTMTAK                                         | 1.40121627        | 2              | 3.43468   |
| P62963        | TFVSITPAEVLVVGK                                           | 1.23189499        | 2              | 4.63715   |
| <b>P63018</b> | <b>HSP7C Heat shock cognate 71 kDa protein</b>            | <b>0.99558624</b> | <b>9.9E-20</b> | <b>25</b> |
| P63018        | ARFEELNADLFR                                              | 1.49073714        | 3              | 3.73955   |
| P63018        | CNEIISWLDK                                                | 1.39476362        | 2              | 3.17904   |
| P63018        | DAGTIAGLNVLR                                              | 1.63355927        | 2              | 3.69132   |
| P63018        | FDDAVVQSDMK                                               | 1.20859657        | 2              | 3.871     |
| P63018        | FEELNADLFR                                                | 1.27429393        | 2              | 3.28983   |
| P63018        | FELTGIPPAPR                                               | 1.30390582        | 2              | 3.13579   |
| P63018        | HWPFFMVVNDAGRPK                                           | 4.496166          | 3              | 3.51047   |
| P63018        | IINEPTAAAIAYGLDK                                          | 1.50031068        | 2              | 5.42855   |
| P63018        | IINEPTAAAIAYGLDKK                                         | 1.52614045        | 2              | 4.27956   |
| P63018        | LLQDFFNGK                                                 | 1.94187346        | 2              | 2.69215   |
| P63018        | MKEIAEAYLGK                                               | 1.23790949        | 2              | 3.4522    |
| P63018        | MVNHFAIEFK                                                | 0.88266204        | 2              | 2.86187   |
| P63018        | NQTAEKEEFHQK                                              | 1.11277635        | 2              | 5.26832   |
| P63018        | NQVAMNPTNTVFDK                                            | 1.10796805        | 2              | 4.97062   |
| P63018        | NQVAMNPTNTVFDK+Oxidation(4                                | 1.24710092        |                |           |
| P63018        | NSLESYAFNMK                                               | 1.16251999        | 2              | 3.50634   |
| P63018        | RFDDAVVQSDMK                                              | 1.38372896        | 2              | 3.62859   |
| P63018        | SFYPEEVSSMVLTK                                            | 1.08540376        | 2              | 4.95721   |
| P63018        | SFYPEEVSSMVLTK+Oxidation(9                                | 1.51495784        |                |           |
| P63018        | SINPDEAVAYGAAVQAAILSGDK                                   | 1.83680422        | 2              | 5.93176   |
| P63018        | SQIHDIIVLVGGSTR                                           | 1.11389559        | 2              | 4.46678   |
| P63018        | STAGDTHLGGEDFDNR                                          | 1.23795604        | 2              | 4.72993   |
| P63018        | TVTNAVVTVPAYFNDSQR                                        | 0.99528176        | 3              | 4.90088   |
| P63018        | VCNPIITK                                                  | 1.33534906        | 2              | 2.53822   |
| P63018        | VQVEYKGETK                                                | 1.33091366        | 2              | 2.54376   |
| <b>P63029</b> | <b>TCTP Translationally_controlled tumor protein</b>      | <b>1.08774696</b> | <b>0.46391</b> | <b>3</b>  |
| P63029        | DLISHDELFSDIYK                                            | 1.68009705        | 2              | 3.90017   |
| P63029        | EIADGLCLEVEGK                                             | 1.08523147        | 2              | 3.26732   |
| P63029        | VKPFMTGAAEQIK                                             | 1.64650203        | 3              | 3.34117   |
| <b>P63036</b> | <b>DNJA1 Dnaj homolog subfamily A member 1</b>            | <b>1.09098197</b> | <b>0.99502</b> | <b>7</b>  |
| P63036        | ETTYDVLGVKPNATQEELKK                                      | 1.11232726        | 3              | 3.56827   |
| P63036        | HYNGEAYEDDEHHPR                                           | 1.17841533        | 3              | 4.9599    |
| P63036        | ITFHGEGDQEPGLEPGDIIVLDQK                                  | 1.46907616        | 3              | 4.00024   |
| P63036        | NVVHQLSVTLLEDLYNGATR                                      | 1.03752792        | 2              | 4.05001   |
| P63036        | QISQAYEVLADSK                                             | 1.02950308        | 2              | 3.17226   |
| P63036        | TIVITSHPGQIVK                                             | 1.08871504        | 2              | 3.62617   |
| P63036        | VNFPENGLSPDK                                              | 1.05857658        | 2              | 3.42163   |

|               |                                                      |                   |                |           |
|---------------|------------------------------------------------------|-------------------|----------------|-----------|
| <b>P63039</b> | <b>CH60 60 kDa heat shock protein_ mitochondrial</b> | <b>1.1789964</b>  | <b>0.00044</b> | <b>36</b> |
| P63039        | AAVEEGIVLGGGCALLR                                    | 1.18385823        | 2              | 5.38005   |
| P63039        | ALMLQGVDLLADAVAVTMGPK                                | 0.90412224        | 3              | 6.58248   |
| P63039        | ALMLQGVDLLADAVAVTMGPK+Oxidation(17                   | 1.452382          |                |           |
| P63039        | CEFQDAYVLLSEK                                        | 2.40792802        | 2              | 4.4081    |
| P63039        | CIPALDSLKPANEDQK                                     | 1.05624713        | 2              | 3.53513   |
| P63039        | DDAMLLK                                              | 1.3040282         | 1              | 1.99997   |
| P63039        | DIGNIISDAMK                                          | 0.78209856        | 2              | 3.37775   |
| P63039        | GIIDPTK                                              | 1.30737165        | 1              | 1.93064   |
| P63039        | GVMLAVDAVIAELK                                       | 1.66749498        | 2              | 4.53891   |
| P63039        | GVMLAVDAVIAELKK                                      | 1.33172671        | 2              | 4.63125   |
| P63039        | GYISPYFINTSK                                         | 1.42664664        | 2              | 3.09148   |
| P63039        | IGIEIIK                                              | 0.96880581        | 2              | 2.67976   |
| P63039        | IGIEIKR                                              | 2.25449077        | 2              | 2.41996   |
| P63039        | ILQSSSEVGYDAMLGDFVNMVEK                              | 2.3383742         | 3              | 5.09175   |
| P63039        | IQEITEQLDITTSEYEK                                    | 1.66492994        | 2              | 5.62386   |
| P63039        | IQEITEQLDITTSEYEK                                    | 1.28062452        | 2              | 5.26961   |
| P63039        | ISSVQSIVPALEIANAHR                                   | 2.42119268        | 2              | 4.32679   |
| P63039        | KISSVQSIVPALEIANAHR                                  | 1.80511897        | 3              | 4.38552   |
| P63039        | KPLVIAEDVDGEALSTLVNLR                                | 2.01450507        | 2              | 6.01495   |
| P63039        | LSDGVAVLK                                            | 1.20209406        | 2              | 2.96864   |
| P63039        | LVQDVANNTNEEAGDGTATVLR                               | 3.18260813        | 2              | 6.51714   |
| P63039        | NAGVEGSLIVEK                                         | 0.91470405        | 2              | 3.4122    |
| P63039        | QSKPVTTPEEIAQVATISANGDK                              | 1.13419287        | 2              | 3.41524   |
| P63039        | QSKPVTTPEEIAQVATISANGDKDIGNIISDAMK                   | 1.25565069        | 3              | 4.84935   |
| P63039        | RGVMLAVDAVIAELKK                                     | 0.74482415        | 3              | 5.93169   |
| P63039        | TALLDAAGVASLTTAEAVVTEIPKEEK                          | 1.71110587        | 3              | 5.14673   |
| P63039        | TLNDELEIIEGMK                                        | 0.69427816        | 2              | 4.79828   |
| P63039        | TLNDELEIIEGMK+Oxidation(11                           | 2.47618801        |                |           |
| P63039        | TVIIEQSWGSPK                                         | 1.03499298        | 2              | 4.42764   |
| P63039        | VGEVIVTK                                             | 1.22878087        | 2              | 3.24175   |
| P63039        | VGEVIVTKDDAMLLK                                      | 1.1160636         | 2              | 3.60917   |
| P63039        | VGGTSDVEVNEK                                         | 1.21242067        | 2              | 3.80371   |
| P63039        | VGGTSDVEVNEKK                                        | 1.34126993        | 2              | 3.73601   |
| P63039        | VGGTSDVEVNEKKDR                                      | 1.02635581        | 2              | 3.41717   |
| P63039        | VGLQVVAVK                                            | 1.38026959        | 2              | 3.09865   |
| P63039        | VTDALNATR                                            | 1.16933532        | 2              | 3.44299   |
| <b>P63092</b> | <b>subunit alpha isoforms short</b>                  | <b>1.09928233</b> | <b>0.99826</b> | <b>2</b>  |
| P63092        | AFEPFYDEIKSKGALVK                                    | 1.12723832        |                |           |
| P63092        | YTPEDATPEPGEDPR                                      | 0.82532119        |                |           |
| <b>P63102</b> | <b>1433Z 14_3_3 protein zeta/delta</b>               | <b>1.15958519</b> | <b>0.90957</b> | <b>10</b> |
| P63102        | DICNDVLSLLEK                                         | 1.10292508        | 3              | 3.8173    |
| P63102        | EMQPTHPIR                                            | 1.75171752        | 2              | 2.32383   |
| P63102        | FLIPNASQPESK                                         | 1.03594617        | 2              | 2.90948   |
| P63102        | GIVDQSQQAYQEAFEISK                                   | 1.2995469         | 2              | 5.67016   |
| P63102        | KGIVDQSQQAYQEAFEISK                                  | 0.88045612        | 2              | 5.2667    |
| P63102        | SVTEQGAELSNEER                                       | 1.1760923         | 2              | 5.17422   |
| P63102        | TAFDEAIAELDTLSEESYK                                  | 1.73370903        | 3              | 4.63565   |
| P63102        | YDDMAACMK                                            | 1.15849872        | 2              | 2.52387   |
| P63102        | YLAEVAAGDDK                                          | 1.61225877        | 2              | 2.36058   |
| P63102        | YLAEVAAGDDKK                                         | 1.34458179        | 2              | 3.5155    |
| <b>P63159</b> | <b>HMGB1 High mobility group protein B1</b>          | <b>1.14523916</b> | <b>0.23527</b> | <b>6</b>  |
| P63159        | GEHPGLSIGDVAK                                        | 1.11003201        | 2              | 2.97856   |
| P63159        | GKFEDMAK                                             | 1.261929          | 1              | 2.01504   |
| P63159        | IKGEHPGLSIGDVAK                                      | 1.91820064        | 2              | 4.02613   |
| P63159        | KHPDASVNFSEFSK                                       | 1.50988779        | 3              | 4.19383   |
| P63159        | KLGEWNNNTAADDKQPYEK                                  | 1.26329316        | 3              | 4.61693   |

|               |                                                                      |                   |                |           |
|---------------|----------------------------------------------------------------------|-------------------|----------------|-----------|
| P63159        | LGEMWNNTAADDKQPYEK                                                   | 1.02089287        | 2              | 4.93213   |
| <b>P63174</b> | <b>RL38 60S ribosomal protein L38</b>                                | <b>1.31897328</b> | <b>0.05399</b> | <b>2</b>  |
| P63174        | IEEIKDFLLTAR                                                         | 1.40912579        | 2              | 3.03256   |
| P63174        | KIEEIKDFLLTAR                                                        | 1.31870476        | 2              | 4.6024    |
| <b>P63245</b> | <b>GBLP Guanine nucleotide_binding protein subunit beta_2_like 1</b> | <b>1.22674997</b> | <b>2.8E-05</b> | <b>13</b> |
| P63245        | DETNYGIPQR                                                           | 1.01208479        | 2              | 2.52143   |
| P63245        | DGQAMLWDLNEGK                                                        | 1.58358794        | 2              | 3.3529    |
| P63245        | FSPNSSNPIIVSCGWDK                                                    | 1.32088812        | 2              | 4.22051   |
| P63245        | GHNGWVTQIATTPQFPDMILSASR                                             | 1.53421411        | 3              | 4.1962    |
| P63245        | HLYLDGGDIINALCFSPNR                                                  | 1.87015267        | 2              | 6.13431   |
| P63245        | IIVDELK                                                              | 1.54824387        | 2              | 2.49785   |
| P63245        | IIVDELKQEVISTSSK                                                     | 1.44728199        | 3              | 4.08416   |
| P63245        | IWDLEGK                                                              | 1.29526176        | 2              | 2.36423   |
| P63245        | LWDLTTGTTTR                                                          | 0.80558674        | 1              | 1.95773   |
| P63245        | TNHIGHTGYLNTVTVSPDGLCASGGK                                           | 1.29922459        | 3              | 5.39473   |
| P63245        | VWNLANCK                                                             | 1.46892397        | 2              | 2.58687   |
| P63245        | VWQVTIGTR                                                            | 0.86377351        | 2              | 2.86244   |
| P63245        | YWLCAATGPSIK                                                         | 0.77005027        | 2              | 3.53412   |
| <b>P63259</b> | <b>ACTG Actin_cytoplasmic 2</b>                                      | <b>1.15311502</b> | <b>0.46184</b> | <b>8</b>  |
| P63259        | CPEALFQPSFLGMESCGIHETTFNSIMK                                         | 1.58584015        | 3              | 5.68872   |
| P63259        | DLYANTVLSGGTTMYPGIADR                                                | 0.82455522        | 2              | 6.0936    |
| P63259        | DLYANTVLSGGTTMYPGIADR+Oxidation(13                                   | 1.52098559        |                |           |
| P63259        | GYSFTTTAER                                                           | 1.09566432        | 2              | 3.51666   |
| P63259        | KDLYANTVLSGGTTMYPGIADR                                               | 1.35774017        | 2              | 6.30012   |
| P63259        | KDLYANTVLSGGTTMYPGIADR+Oxidation(14                                  | 1.4003331         |                |           |
| P63259        | QEYDESGPSIVHR                                                        | 1.22846624        | 3              | 3.50643   |
| P63259        | VAPEEHPVLLTEAPLNPK                                                   | 1.20762394        | 2              | 4.68066   |
| <b>P63324</b> | <b>RS12 40S ribosomal protein S12</b>                                | <b>1.49729279</b> | <b>0.00112</b> | <b>4</b>  |
| P63324        | KVVGCSVVVK                                                           | 1.16928639        | 2              | 3.27817   |
| P63324        | LGEWVGLCK                                                            | 1.69019356        | 2              | 3.16608   |
| P63324        | QAHLCLASNCDEPMYVK                                                    | 1.68958678        | 3              | 3.98918   |
| P63324        | VVGCSVVVK                                                            | 1.53906758        | 2              | 3.23924   |
| <b>P67779</b> | <b>PHB Prohibitin</b>                                                | <b>1.28188798</b> | <b>0.02688</b> | <b>11</b> |
| P67779        | AAELIANSLATAGDGLIELR                                                 | 1.245864          | 3              | 5.0684    |
| P67779        | AAIISAEGDSK                                                          | 1.6034606         | 2              | 2.57841   |
| P67779        | DLQNVNITLR                                                           | 0.99457384        | 2              | 3.24295   |
| P67779        | FDAGELITQR                                                           | 0.94913491        | 2              | 3.72557   |
| P67779        | FGLALAVAGGVVNSALYNVDAGHR                                             | 1.68103395        | 3              | 3.37601   |
| P67779        | GVQDIVVGEGETHFLIPWVQKPIIFDCR                                         | 1.7494811         | 3              | 4.43454   |
| P67779        | IYTSIGEDYDER                                                         | 1.1391142         | 2              | 3.50215   |
| P67779        | KLEAAEDIAYQLSR                                                       | 1.21043504        | 2              | 4.64327   |
| P67779        | NVPVITGSK                                                            | 1.06570701        | 1              | 2.28696   |
| P67779        | QVSDDLTER                                                            | 0.85845338        | 2              | 2.45334   |
| P67779        | VLPSITTEILK                                                          | 1.7754033         | 2              | 2.4025    |
| <b>P68037</b> | <b>UB2L3 Ubiquitin_conjugating enzyme E2 L3</b>                      | <b>1.31245454</b> | <b>1.8E-08</b> | <b>4</b>  |
| P68037        | ADLAEEYSK                                                            | 4.07458748        | 2              | 2.38827   |
| P68037        | GQVCLPVISAENWKPATK                                                   | 1.6621566         | 2              | 4.40799   |
| P68037        | IEINFPAEYPFKPPK                                                      | 0.98293543        | 2              | 3.33293   |
| P68037        | TDQVIQSLIALVNDPQPEHPLR                                               | 1.38184721        | 2              | 5.28861   |
| <b>P68101</b> | <b>IF2A Eukaryotic translation initiation factor 2 subunit 1</b>     | <b>1.18851854</b> | <b>0.11179</b> | <b>5</b>  |
| P68101        | AGLNCSTETMPIK                                                        | 1.27516475        | 2              | 3.12973   |
| P68101        | HAVSDPSILDSLNLNEDEREVLINNINR                                         | 0.76542747        | 3              | 4.07829   |
| P68101        | HVAEVLEYTKDEQLSFLQR                                                  | 0.95224594        | 3              | 4.00685   |
| P68101        | TEGLSVLNQAMAVIK                                                      | 1.19097781        | 2              | 4.13596   |
| P68101        | VVTDTEDELAR                                                          | 0.86095686        | 2              | 3.77996   |

|               |                                                |                   |                |           |
|---------------|------------------------------------------------|-------------------|----------------|-----------|
| <b>P68136</b> | <b>ACTS Actin_ alpha skeletal muscle</b>       | <b>1.11985205</b> | <b>1.1E-16</b> | <b>18</b> |
| P68136        | AGFAGDDAPR                                     | 1.80282153        | 2              | 3.46492   |
| P68136        | AVFPSIVGRPR                                    | 0.80089721        | 2              | 2.42247   |
| P68136        | DLYANNVMSGGTTMYPGIADR                          | 3.31607982        | 2              | 4.72348   |
| P68136        | DSYVGDEAQSK                                    | 1.09413213        | 2              | 3.46228   |
| P68136        | DSYVGDEAQSKR                                   | 1.0217494         | 2              | 2.57108   |
| P68136        | EITALAPSTMK                                    | 1.19138449        | 2              | 2.98434   |
| P68136        | EITALAPSTMK+Oxidation(9                        | 1.00999105        |                |           |
| P68136        | GYSFVTTAER                                     | 1.78324688        | 2              | 3.72485   |
| P68136        | IWHHTFYNELR                                    | 2.55876215        | 2              | 2.96148   |
| P68136        | KDLYANNVMSGGTTMYPGIADR                         | 3.90420323        | 2              | 5.14151   |
| P68136        | KDLYANNVMSGGTTMYPGIADR+Oxidation(14            | 1.20502782        |                |           |
| P68136        | MQKEITALAPSTMK                                 | 2.3809414         | 2              | 3.51916   |
| P68136        | QEYDEAGPSIVHR                                  | 5.23675663        | 3              | 3.30013   |
| P68136        | TTGIVLDSGDGVTHNVPIYEGYALPHAIMR                 | 3.26636203        | 3              | 6.09084   |
| P68136        | TTGIVLDSGDGVTHNVPIYEGYALPHAIMR+Oxidation(28    | 4.38446162        |                |           |
| P68136        | VAPEEHPTLLTEAPLNPK                             | 2.13112881        | 2              | 4.24267   |
| P68136        | YPIEHGIITNWDDMEK                               | 1.76148822        | 2              | 4.75753   |
| P68136        | YPIEHGIITNWDDMEK+Oxidation(13                  | 2.04991822        |                |           |
| <b>P68255</b> | <b>1433T 14_3_3 protein theta</b>              | <b>1.22969306</b> | <b>0.71055</b> | <b>7</b>  |
| P68255        | AVTEQGAELSNEER                                 | 1.055753          | 2              | 4.6872    |
| P68255        | SICTTVLELLDK                                   | 1.7797162         | 2              | 3.22655   |
| P68255        | TAFDEAIAELDTLNEDSYK                            | 0.99437844        | 2              | 3.28603   |
| P68255        | VISSIEQK                                       | 1.07297529        | 2              | 2.60992   |
| P68255        | YLAEVACGDDR                                    | 0.77136951        | 2              | 2.35311   |
| P68255        | YLAEVACGDDRK                                   | 1.31683724        | 2              | 3.1614    |
| P68255        | YLIANATNPESK                                   | 1.53669593        | 2              | 3.17227   |
| <b>P68511</b> | <b>1433F 14_3_3 protein eta</b>                | <b>1.45149958</b> | <b>0.14916</b> | <b>5</b>  |
| P68511        | AVTELNEPLSNEDR                                 | 1.2444137         | 2              | 4.9965    |
| P68511        | ELETVCNDVLALLDK                                | 1.35163601        | 2              | 3.5725    |
| P68511        | NCNDFQYESK                                     | 1.55448969        | 2              | 2.61677   |
| P68511        | NSVVEASEAAYK                                   | 1.65673858        | 2              | 2.8063    |
| P68511        | YLAEVASGEK                                     | 2.16181725        | 2              | 2.54534   |
| <b>P69897</b> | <b>TBB5 Tubulin beta_5 chain</b>               | <b>1.34016726</b> | <b>1.7E-12</b> | <b>4</b>  |
| P69897        | ALTVELTQQVFDK                                  | 1.3753057         | 2              | 3.27548   |
| P69897        | FWEVISDEHGIDPTGYHGSDQLQDR                      | 1.54904934        | 3              | 4.5293    |
| P69897        | ISVYYNEATGGK                                   | 2.28200595        | 2              | 2.87951   |
| P69897        | LTTPTYGDLNHLVSATMSGVTTCLR                      | 2.08968871        | 2              | 5.17076   |
| <b>P70191</b> | <b>TRAF5 TNF receptor_ associated factor 5</b> | <b>0.99948253</b> | <b>0.82944</b> | <b>2</b>  |
| P70191        | SLRELNSVPICPVDK                                | 0.53649331        | 2              | 2.34286   |
| P70191        | VTLMLLDQSGK                                    | 1.00706619        | 2              | 2.45972   |
| <b>P70372</b> | <b>ELAV1 ELAV_ like protein 1</b>              | <b>1.19812103</b> | <b>0.64471</b> | <b>3</b>  |
| P70372        | SLFSSIGEVESAK                                  | 1.49542914        | 2              | 3.22271   |
| P70372        | TNLIVNYLPQNMTQEELR                             | 0.9420388         | 2              | 3.54844   |
| P70372        | VLVDQTTGLSR                                    | 0.98509441        | 2              | 2.79901   |
| <b>P70470</b> | <b>LYPA1 Acyl_ protein thioesterase 1</b>      | <b>1.26324929</b> | <b>0.61275</b> | <b>4</b>  |
| P70470        | ASFSQGPINSANR                                  | 1.44518919        | 2              | 3.09308   |
| P70470        | DISVLQCHGDCDPLVPLMFGSLTVER                     | 1.38938557        | 3              | 3.70286   |
| P70470        | GLVNPANVTFK                                    | 1.45397846        | 2              | 2.45555   |
| P70470        | VYEGMMHSSCQEMMDVK                              | 1.19450251        | 3              | 3.35158   |
| <b>P70473</b> | <b>AMACR Alpha_ methylacyl_ CoA racemase</b>   | <b>0.83559075</b> | <b>6.9E-08</b> | <b>11</b> |
| P70473        | ADVLLPEFR                                      | 0.82797864        | 2              | 3.33956   |
| P70473        | AEWCQIFDGTDACTVPTVLTLEEALHHQHNR                | 1.09646566        | 4              | 4.72753   |
| P70473        | DYGFSQEEIHQLHSDR                               | 0.74196715        | 2              | 4.80469   |
| P70473        | GLGLESEELPSQMSIEDWPEMK                         | 1.32866356        | 3              | 4.50279   |
| P70473        | GQNLLDGGAPFYTTYK                               | 0.71005532        | 2              | 4.8595    |

|               |                                                                                 |                   |                |           |
|---------------|---------------------------------------------------------------------------------|-------------------|----------------|-----------|
| P70473        | GSFITDEEQHACPRPAPQLSR                                                           | 0.72577131        | 3              | 4.29839   |
| P70473        | LGSVNHPHSLAR                                                                    | 1.33514631        | 2              | 3.31241   |
| P70473        | LQLGPETLR                                                                       | 0.81314072        | 2              | 2.40522   |
| P70473        | RDPSVGEHTVEVLK                                                                  | 0.93242558        | 3              | 4.24251   |
| P70473        | RDPSVGEHTVEVLKDYGFQSQEEIHLHSDR                                                  | 0.86448162        | 4              | 5.42512   |
| P70473        | TQAMGLWAQPR                                                                     | 0.90943852        | 2              | 3.47042   |
| <b>P70550</b> | <b>RAB8B Ras_related protein Rab_8B</b>                                         | <b>1.62222796</b> | <b>6.6E-05</b> | <b>2</b>  |
| P70550        | LLIGDSGVGK                                                                      | 1.62810647        | 2              | 2.91201   |
| P70550        | NIEEHASSDVER                                                                    | 1.58242294        | 2              | 2.98077   |
| <b>P70552</b> | <b>GFRP GTP cyclohydrolase 1 feedback regulatory protein</b>                    | <b>1.1732398</b>  | <b>0.96333</b> | <b>2</b>  |
| P70552        | MEVGPTMVGDEHSDPELMQQLGASK                                                       | 1.16007869        | 3              | 5.17034   |
| P70552        | VLGNNFYEYYVNDPPR                                                                | 1.34680703        | 2              | 4.28155   |
| <b>P70580</b> | <b>PGRC1 Membrane_associated progesterone receptor component 1</b>              | <b>0.89651615</b> | <b>0.98089</b> | <b>9</b>  |
| P70580        | EALKDEYDDLSDLTPAQQLTNDWDSQFTFK                                                  | 0.94310144        | 3              | 5.38445   |
| P70580        | EGEPTVYSDDDEPKDEAAR                                                             | 0.87259268        | 2              | 4.59574   |
| P70580        | FYGPEGPYGVFAGR                                                                  | 0.92516557        | 2              | 4.53776   |
| P70580        | GDQPGASGDNDDEPPPLPR                                                             | 609.508951        | 2              | 4.99778   |
| P70580        | IVRGDQPGASGDNDDEPPPLPR                                                          | 1.11992032        | 3              | 5.5517    |
| P70580        | KFYGPEGPYGVFAGR                                                                 | 0.68127912        | 2              | 3.9042    |
| P70580        | LLKEGEEPTVYSDDDEPKDEAAR                                                         | 1.39403425        | 3              | 4.28539   |
| P70580        | RYDGVQDPR                                                                       | 1.10023573        | 1              | 2.08088   |
| P70580        | YDGVQDPR                                                                        | 0.95132797        | 2              | 2.87635   |
| <b>P70584</b> | <b>ACDSB Short/branched chain specific acyl_CoA dehydrogenase_mitochondrial</b> | <b>0.92220378</b> | <b>0.67272</b> | <b>9</b>  |
| P70584        | ASSTCQLTFENVK                                                                   | 1.25821787        | 2              | 2.89981   |
| P70584        | FAQEIQIAPLVSTMDENSK                                                             | 1.00392999        | 2              | 4.61998   |
| P70584        | IFDFQGLQHVAHVATQLEAAR                                                           | 1.54941162        | 3              | 6.06027   |
| P70584        | IGTIYEGTSNIQLNTIAK                                                              | 1.15582769        | 2              | 4.50766   |
| P70584        | KFAQEIQIAPLVSTMDENSK                                                            | 0.78106606        | 2              | 6.00841   |
| P70584        | SGNYVINGSK                                                                      | 1.27656696        | 2              | 3.36215   |
| P70584        | SVIQGLFQQGMMGIEVEAK                                                             | 1.44323684        | 2              | 4.49709   |
| P70584        | VDASVALLCDIQNTVINK                                                              | 1.36121595        | 2              | 4.87087   |
| P70584        | YYASEVAGLTTSK                                                                   | 0.92219362        | 2              | 4.22422   |
| <b>P70615</b> | <b>LMNB1 Lamin_B1</b>                                                           | <b>1.1775566</b>  | <b>0.68768</b> | <b>5</b>  |
| P70615        | ALYETELADAR                                                                     | 1.47969869        | 2              | 3.11991   |
| P70615        | KESDLSGAQIK                                                                     | 1.21225043        | 2              | 2.45197   |
| P70615        | LSSEMNTSTVNSAR                                                                  | 1.69294776        | 2              | 3.93546   |
| P70615        | NQNSWGTGEDVK                                                                    | 1.10954055        | 2              | 3.36962   |
| P70615        | SLEGDLEDLKDQIAQLEASLSAAK                                                        | 1.17755413        | 3              | 3.62123   |
| <b>P70712</b> | <b>KYNU Kynureninase</b>                                                        | <b>1.19956338</b> | <b>0.03068</b> | <b>11</b> |
| P70712        | FKDCFYIPK                                                                       | 1.42131568        | 2              | 2.65154   |
| P70712        | IATELNCDPTDER                                                                   | 1.64645507        | 2              | 3.81566   |
| P70712        | IGAYGHEVGK                                                                      | 4.22316347        | 2              | 2.83386   |
| P70712        | LDEEDKLK                                                                        | 0.62380186        | 2              | 2.33185   |
| P70712        | LDEEDKLR                                                                        | 1.40540042        | 2              | 2.68761   |
| P70712        | LLTAILDSTERN                                                                    | 1.79683779        | 2              | 3.30672   |
| P70712        | MEDILEVIEK                                                                      | 1.5166931         | 2              | 3.05429   |
| P70712        | TYLEEELDK                                                                       | 1.42572727        | 1              | 2.10386   |
| P70712        | TYLEEELDKWAK                                                                    | 1.08509077        | 2              | 2.73616   |
| P70712        | VAPVPLYNSFHDVYK                                                                 | 1.29792363        | 2              | 3.42916   |
| P70712        | YLNAGGAGLAGAFIHEK                                                               | 1.51663714        | 2              | 4.45625   |
| <b>P80067</b> | <b>CATC Dipeptidyl peptidase 1</b>                                              | <b>1.30811616</b> | <b>0.00027</b> | <b>5</b>  |
| P80067        | GINFVSPVR                                                                       | 0.90781417        | 2              | 3.00439   |
| P80067        | GTDECAIESIAMAAPIPK                                                              | 1.21646919        | 2              | 5.13728   |
| P80067        | NSWGSQWGESGYFR                                                                  | 1.40146093        | 2              | 3.41384   |



|               |                                                                   |                   |                |           |
|---------------|-------------------------------------------------------------------|-------------------|----------------|-----------|
| P80067        | RGTDECAIESIAMAIIPIK                                               | 1.56580234        | 2              | 4.1065    |
| P80067        | YAQDFGVVEENCFPYTATDAPCKPK                                         | 1.50921988        | 3              | 5.78283   |
| <b>P80254</b> | <b>DOPD D_dopachrome decarboxylase</b>                            | <b>1.28075932</b> | <b>0.00766</b> | <b>4</b>  |
| P80254        | FFPLEPWQIGK                                                       | 1.06469297        | 2              | 2.78907   |
| P80254        | FLTEELSLDQDR                                                      | 1.1283241         | 2              | 3.73394   |
| P80254        | LCAATATILDKPEDR                                                   | 1.90810712        | 2              | 4.48946   |
| P80254        | STEPCAHLLISSIGVVGTAEQNR                                           | 1.01849629        | 2              | 5.49589   |
| <b>P80299</b> | <b>HYES Epoxide hydrolase 2</b>                                   | <b>1.04825186</b> | <b>0.97391</b> | <b>4</b>  |
| P80299        | AEMGGILVGTPEPK                                                    | 1.43773159        | 2              | 3.47082   |
| P80299        | GHIEDCGHWTQIEKPAEVNQILIK                                          | 1.01244297        | 3              | 4.25433   |
| P80299        | TEIQNPSVTSK                                                       | 1.04224885        | 2              | 2.65669   |
| P80299        | TSDDMGLLTVNK                                                      | 1.23003541        | 2              | 3.20538   |
| <b>P80313</b> | <b>TCPH T_complex protein 1 subunit eta</b>                       | <b>1.36230996</b> | <b>0.00121</b> | <b>6</b>  |
| P80313        | ATISNDGATILK                                                      | 1.30750179        | 2              | 2.63486   |
| P80313        | EGTDSSQGIPQLVSNISACQVIAEAVR                                       | 3.74281016        | 3              | 4.1569    |
| P80313        | GGAEQFMEETER                                                      | 1.17931087        | 2              | 3.14914   |
| P80313        | LLDVVHPAAK                                                        | 1.38041541        | 2              | 2.54936   |
| P80313        | QLCDNAGFDATNILNK                                                  | 0.73434853        | 2              | 3.84561   |
| P80313        | SQDAEVDGTTSVTLAAEFLK                                              | 2.104137          | 2              | 3.45923   |
| <b>P80317</b> | <b>TCPZ T_complex protein 1 subunit zeta</b>                      | <b>1.24867272</b> | <b>0.00073</b> | <b>10</b> |
| P80317        | ALQFLEQVK                                                         | 2.65978679        | 2              | 2.70419   |
| P80317        | DGNVLLHEMQIQHPTASLIAK                                             | 1.39723007        | 3              | 4.66417   |
| P80317        | GIDPFSLDALAK                                                      | 2.35730534        | 2              | 2.82951   |
| P80317        | HKSETDTSLIR                                                       | 1.31663991        | 2              | 3.14319   |
| P80317        | IITEGFEEAK                                                        | 1.29518177        | 2              | 2.53183   |
| P80317        | MLVSGAGDIK                                                        | 0.64080353        | 2              | 2.34865   |
| P80317        | NAIDDGCVVPGAGAVEVALAEALIK                                         | 1.18716924        | 3              | 3.73285   |
| P80317        | TEVNSGFFYK                                                        | 1.11927467        | 2              | 2.66682   |
| P80317        | VATAQDDITGDGTTSNVLIIGELLK                                         | 1.08610193        | 2              | 4.71373   |
| P80317        | VLAQNSGFDLQETLVK                                                  | 1.23222624        | 2              | 3.73282   |
| <b>P81155</b> | <b>VDAC2 Voltage_dependent anion_selective channel protein 2</b>  | <b>0.92087136</b> | <b>0.58543</b> | <b>4</b>  |
| P81155        | LTFDTTFSPNTGK                                                     | 2.14838254        | 2              | 3.5944    |
| P81155        | TGDFQLHTNVNNGTEFGGSIYQK                                           | 1.42017749        | 3              | 3.98552   |
| P81155        | VNNSSLIGVGYTQLRPGVK                                               | 1.24532578        | 2              | 3.58643   |
| P81155        | YQLDPTASISAK                                                      | 0.78167705        | 2              | 2.94988   |
| <b>P82198</b> | <b>BGH3 Transforming growth factor_beta_induced protein ig_h3</b> | <b>1.09351613</b> | <b>0.7862</b>  | <b>2</b>  |
| P82198        | MLTPPMGTVMVDVK+Oxidation(0)Oxidation(5)                           | 1.46440608        |                |           |
| P82198        | SLQGDKLEVSSK                                                      | 1.08840286        | 2              | 3.09666   |
| <b>P82995</b> | <b>HS90A Heat shock protein HSP 90_alpha</b>                      | <b>1.07197644</b> | <b>0.82588</b> | <b>14</b> |
| P82995        | DQVANSFVER                                                        | 1.14280772        | 2              | 2.6804    |
| P82995        | ELHINLIPNKQDR                                                     | 0.86449574        | 2              | 2.8195    |
| P82995        | ELISNSSDALDK                                                      | 1.07400724        | 2              | 2.92874   |
| P82995        | FYEQFSK                                                           | 1.28483344        | 1              | 2.10674   |
| P82995        | HIYFITGETK                                                        | 0.98129543        | 2              | 3.13323   |
| P82995        | HLEINPDHSIIETLR                                                   | 1.12441824        | 2              | 4.68653   |
| P82995        | HSQFIGYPITLFVEK                                                   | 2.41872458        | 3              | 3.72292   |
| P82995        | KHGLEVIYMIPIDEYCVQQLK                                             | 1.73439057        | 3              | 3.33036   |
| P82995        | LGIHEDSQNR                                                        | 1.1280954         | 1              | 3.11124   |
| P82995        | NPDDITNEEYGEFYK                                                   | 0.97138884        | 2              | 5.08747   |
| P82995        | SLTNDWEEHLAVK                                                     | 1.09627119        | 2              | 4.05766   |
| P82995        | TLTIVDTGIGMTK                                                     | 1.25291168        | 2              | 4.27911   |
| P82995        | TLTIVDTGIGMTK+Oxidation(10)                                       | 1.77469366        |                |           |
| P82995        | YYTSASGDEMVSLLK                                                   | 1.50407929        | 2              | 3.13773   |
| <b>P83732</b> | <b>RL24 60S ribosomal protein L24</b>                             | <b>1.41033109</b> | <b>3.4E-06</b> | <b>5</b>  |
| P83732        | AITGASLADIMAK                                                     | 1.5096846         | 2              | 4.61999   |

|               |                                                             |                   |                |           |
|---------------|-------------------------------------------------------------|-------------------|----------------|-----------|
| P83732        | CESAFLSK                                                    | 1.40255092        | 2              | 2.36607   |
| P83732        | QINWTVLYR                                                   | 2.18234078        | 2              | 2.59706   |
| P83732        | VELCSFSGYK                                                  | 1.10783803        | 2              | 2.34048   |
| P83732        | VFQFLNAK                                                    | 1.94132384        | 2              | 2.34652   |
| <b>P83868</b> | <b>TEBP Prostaglandin E synthase 3</b>                      | <b>1.43728743</b> | <b>0.14516</b> | <b>2</b>  |
| P83868        | HLNEIDLHFCIDPNDSK                                           | 1.76004511        | 3              | 4.05379   |
| P83868        | LTFSCLGGSDNFK                                               | 1.40995354        | 2              | 2.75563   |
| <b>P83883</b> | <b>RL36A 60S ribosomal protein L36a</b>                     | <b>1.44145341</b> | <b>0.00562</b> | <b>2</b>  |
| P83883        | HFELGGDK                                                    | 1.1869537         | 1              | 2.37839   |
| P83883        | LECVENPCR                                                   | 1.57210026        | 2              | 2.52478   |
| <b>P83941</b> | <b>ELOC Transcription elongation factor B polypeptide 1</b> | <b>1.27122003</b> | <b>0.4979</b>  | <b>3</b>  |
| P83941        | AMLSGPGQFAENETNEVNFR                                        | 1.37249718        | 2              | 4.9483    |
| P83941        | LISSDGHEFIVK                                                | 1.37399007        | 2              | 2.40548   |
| P83941        | TYGGCEGPDAMYVK                                              | 1.24890894        | 2              | 3.82124   |
| <b>P84082</b> | <b>ARF2 ADP_ribosylation factor 2</b>                       | <b>1.11741762</b> | <b>0.96554</b> | <b>4</b>  |
| P84082        | EELTRMLAEDELR+Oxidation(5)                                  | 1.2978886         |                |           |
| P84082        | MLAEDELR                                                    | 0.72983266        | 2              | 2.60286   |
| P84082        | NISFTVWDVGGQDK                                              | 1.23543739        | 2              | 4.32412   |
| P84082        | QDLPNAMNAAEITDK                                             | 0.83396748        | 2              | 4.20599   |
| <b>P84083</b> | <b>ARF5 ADP_ribosylation factor 5</b>                       | <b>1.08452484</b> | <b>0.57457</b> | <b>4</b>  |
| P84083        | DAVLLVFANK                                                  | 1.27025624        | 2              | 4.12166   |
| P84083        | MLQEDELRL                                                   | 1.17529918        | 2              | 2.47275   |
| P84083        | QDMPNAMPVSELTDK                                             | 0.95668695        | 2              | 3.3521    |
| P84083        | VQESADELQK                                                  | 1.08477286        | 2              | 3.07039   |
| <b>P84089</b> | <b>ERH Enhancer of rudimentary homolog</b>                  | <b>1.12420127</b> | <b>0.8239</b>  | <b>2</b>  |
| P84089        | ADTQTYQPYNK                                                 | 1.12699821        | 2              | 2.60988   |
| P84089        | TYADYESVNECMGVCK                                            | 1.09132143        | 2              | 4.88009   |
| <b>P84092</b> | <b>AP2M1 AP_2 complex subunit mu</b>                        | <b>1.17369026</b> | <b>0.30336</b> | <b>3</b>  |
| P84092        | ISEENIK                                                     | 1.26545361        | 1              | 1.94984   |
| P84092        | SNFKPSLLAQK                                                 | 1.3905055         | 2              | 2.61487   |
| P84092        | VFEPKLNYSDDHVIK                                             | 1.1410505         | 2              | 2.74565   |
| <b>P84100</b> | <b>RL19 60S ribosomal protein L19</b>                       | <b>1.26716855</b> | <b>0.1835</b>  | <b>3</b>  |
| P84100        | ILMEHIHK                                                    | 2.06894141        | 2              | 2.32009   |
| P84100        | LLADQAEAR                                                   | 1.36570688        | 2              | 3.31571   |
| P84100        | VWLDPNETNEIANANSR                                           | 1.13214902        | 2              | 5.6317    |
| <b>P84104</b> | <b>SRSF3 Serine/arginine rich splicing factor 3</b>         | <b>0.86220015</b> | <b>0.20833</b> | <b>2</b>  |
| P84104        | NPPGFAFVFEFEDPRDAADAVR                                      | 1.57666577        | 2              | 2.57823   |
| P84104        | VYVGNLGNNGNK                                                | 0.28137506        | 2              | 2.43126   |
| <b>P84245</b> | <b>H33 Histone H3.3</b>                                     | <b>1.43458634</b> | <b>0.44437</b> | <b>6</b>  |
| P84245        | DIQLAR                                                      | 267.550905        | 1              | 2.10984   |
| P84245        | EIAQDFK                                                     | 1.33376892        | 1              | 2.04089   |
| P84245        | FQSAAGALQEASEAYLVGLFEDTNLCAIHAK                             | 2.04453532        | 4              | 4.91517   |
| P84245        | RVTIMPKDIQLAR+Oxidation(4)                                  | 1.18547198        |                |           |
| P84245        | STELLIR                                                     | 1.07095295        | 2              | 2.60949   |
| P84245        | YRPGTVLR                                                    | 0.89194241        | 2              | 2.38365   |
| <b>P84817</b> | <b>FIS1 Mitochondrial fission 1 protein</b>                 | <b>1.1472433</b>  | <b>0.07763</b> | <b>4</b>  |
| P84817        | FQSEQAAGSVSK                                                | 1.10018585        | 2              | 3.05102   |
| P84817        | GIVLLELLPK                                                  | 1.443514          | 2              | 2.95042   |
| P84817        | GLLQTEPQNNQAK                                               | 1.16374055        | 2              | 3.69501   |
| P84817        | KFQSEQAAGSVSK                                               | 1.15293444        | 2              | 4.47906   |
| <b>P85834</b> | <b>EFTU Elongation factor Tu_mitochondrial</b>              | <b>0.99888659</b> | <b>0.52406</b> | <b>16</b> |
| P85834        | AEAGDNLGALVR                                                | 1.03022543        | 2              | 3.70053   |
| P85834        | DKPHVNVGTIGHVDHGK                                           | 1.10451896        | 2              | 3.84595   |
| P85834        | DLEKPFLLPVESVYIPGR                                          | 1.78614767        | 2              | 4.22639   |
| P85834        | GDECELLGHNK                                                 | 1.12874066        | 2              | 2.87543   |
| P85834        | GEETPVIVGSALCALEQR                                          | 1.16581272        | 2              | 4.40429   |

|               |                                                              |                   |                |           |
|---------------|--------------------------------------------------------------|-------------------|----------------|-----------|
| P85834        | GITINAAHVEYSTAAR                                             | 1.94819122        | 2              | 2.84616   |
| P85834        | GTVVTGTLER                                                   | 1.09458028        | 2              | 2.84794   |
| P85834        | HYAHTDCPGHADYVK                                              | 0.98556394        | 3              | 5.00971   |
| P85834        | KGDECELLGHNK                                                 | 1.05272797        | 3              | 4.43353   |
| P85834        | KYEEIDNAPEER                                                 | 0.99887488        | 2              | 3.79296   |
| P85834        | LLDAVDYIPVPTR                                                | 1.2173958         | 2              | 3.68734   |
| P85834        | QIGVEHVVVYVVK                                                | 1.03769074        | 2              | 2.96328   |
| P85834        | TIGTGLVTDVPAMTEEDK                                           | 1.63671854        | 2              | 4.34158   |
| P85834        | TIGTGLVTDVPAMTEEDKNIK                                        | 1.02465037        | 2              | 4.45657   |
| P85834        | TVVTGIEMFHK                                                  | 0.50484863        | 2              | 2.34417   |
| P85834        | YEEIDNAPEER                                                  | 0.61171831        | 2              | 3.34903   |
| <b>P85968</b> | <b>6PGD 6_phosphogluconate dehydrogenase_decarboxylating</b> | <b>1.53265292</b> | <b>3E-14</b>   | <b>11</b> |
| P85968        | AGQAVDDFIEK                                                  | 1.25124487        | 2              | 3.25126   |
| P85968        | CLSSLKEER                                                    | 1.46949788        | 2              | 2.59507   |
| P85968        | FQDTDGKELLPK                                                 | 1.52243356        | 2              | 3.43098   |
| P85968        | GILFVGSVSGGEEGAR                                             | 1.14525273        | 2              | 4.65492   |
| P85968        | HEMLPANLIQAQR                                                | 1.31954134        | 2              | 3.19334   |
| P85968        | LVPLLDTGDIIDGGNSEYR                                          | 3.60808301        | 2              | 5.25314   |
| P85968        | NPELQNLLDDFFK                                                | 2.646614          | 2              | 4.43964   |
| P85968        | SAVDDCQDSWR                                                  | 0.90449113        | 2              | 2.88359   |
| P85968        | TIFQAIIAK                                                    | 0.93496926        | 2              | 2.69486   |
| P85968        | VGTGEPCCDWVGEAGHFVK                                          | 1.26474127        | 2              | 4.34917   |
| P85968        | YGPLMPGGNK                                                   | 1.35435172        | 2              | 2.48159   |
| <b>P85971</b> | <b>6PGL 6_phosphogluconolactonase</b>                        | <b>1.68033012</b> | <b>0.02703</b> | <b>5</b>  |
| P85971        | DLPAATAPAGPASFAR                                             | 2.51308587        | 2              | 2.44906   |
| P85971        | ILEDQESALPAAMVQPR                                            | 0.85247701        | 2              | 4.80588   |
| P85971        | LPIPSQVLTIDPALPVEDAAEDYAR                                    | 1.72432401        | 2              | 4.51289   |
| P85971        | TGALCWFLDEAAAR                                               | 1.85448547        | 2              | 3.57978   |
| P85971        | WTLGFCDER                                                    | 1.12048496        | 2              | 2.58393   |
| <b>P85972</b> | <b>VINC Vinculin</b>                                         | <b>1.13171855</b> | <b>0.8443</b>  | <b>15</b> |
| P85972        | ALASQLQDSLK                                                  | 1.15726316        | 2              | 2.60335   |
| P85972        | AQQVSQGLDVLAK                                                | 1.06205599        | 2              | 4.30009   |
| P85972        | AVAGNISDPGLQK                                                | 1.0696741         | 2              | 3.35269   |
| P85972        | DPNASPGDAGEQAIR                                              | 1.01817664        | 2              | 2.36029   |
| P85972        | GNDIIAAK                                                     | 1.30775317        | 2              | 2.43386   |
| P85972        | KIDAAQNWLDAPNGGPEGEEQIR                                      | 0.58710333        | 3              | 5.11621   |
| P85972        | MLGQMTDQVADLR                                                | 1.17703626        | 2              | 3.52398   |
| P85972        | MSAEINEIIR                                                   | 1.13890121        | 2              | 2.43627   |
| P85972        | MTGLVDEAIDTK                                                 | 1.97925615        | 2              | 2.84285   |
| P85972        | QVATALQNLQTK                                                 | 1.20668363        | 2              | 3.38661   |
| P85972        | SLLDASEEAIK                                                  | 1.10112613        | 2              | 2.73273   |
| P85972        | STVEGIQASVK                                                  | 1.09291571        | 2              | 2.6099    |
| P85972        | VDQLAAQLADLAAR                                               | 1.26101393        | 2              | 3.26841   |
| P85972        | VLQLTSWDEDAWASK                                              | 0.99521298        | 2              | 3.26238   |
| P85972        | WIDNPTVDDR                                                   | 1.30349129        | 2              | 2.97304   |
| <b>P85973</b> | <b>PNPH Purine nucleoside phosphorylase</b>                  | <b>1.42855511</b> | <b>9.8E-06</b> | <b>13</b> |
| P85973        | ASHQEVLEAGK                                                  | 0.84408844        | 2              | 3.59789   |
| P85973        | DHINLPGFCGQNPLR                                              | 1.40474967        | 3              | 4.05178   |
| P85973        | ELQEGTYIMSAGPTFETVAESCLLR                                    | 3.5180218         | 2              | 5.21222   |
| P85973        | FEVGDIMLIR                                                   | 1.23184827        | 2              | 3.79963   |
| P85973        | FHMYEGYLSK                                                   | 2.10432616        | 2              | 2.33016   |
| P85973        | HRPQVAVICGSLGGLTAK                                           | 0.97241888        | 3              | 6.00344   |
| P85973        | LTQPQAFDYNEIPNFQSTVQGHAGR                                    | 1.74547648        | 3              | 3.77808   |
| P85973        | MLGADAVGMSTVPEVIVAR                                          | 1.43835769        | 2              | 5.9071    |
| P85973        | MLGADAVGMSTVPEVIVAR+Oxidation(0                              | 1.96326471        |                |           |
| P85973        | MLGADAVGMSTVPEVIVAR+Oxidation(8                              | 2.19773654        |                |           |

|               |                                                                   |                   |                |           |
|---------------|-------------------------------------------------------------------|-------------------|----------------|-----------|
| P85973        | VFGFSLITNK                                                        | 1.52362249        | 2              | 3.13525   |
| P85973        | VFHLLGVDTLVVTTNAAGGLNPK                                           | 2.37195377        | 2              | 5.39375   |
| P85973        | VVMDYNNLEK                                                        | 1.2334504         | 2              | 2.4631    |
| <b>P86048</b> | <b>RL10L 60S ribosomal protein L10_like</b>                       | <b>1.49454983</b> | <b>0.37359</b> | <b>6</b>  |
| P86048        | AKVDEFPLCGHMSVEYEQLSSEALEAAR                                      | 1.52730495        | 3              | 6.04248   |
| P86048        | GAFGKPGQTVAR                                                      | 1.51781523        | 2              | 2.82714   |
| P86048        | MLSCAGADR                                                         | 1.36061944        | 2              | 2.36663   |
| P86048        | RLIPDGCGVK                                                        | 1.06539322        | 2              | 2.31498   |
| P86048        | VDEFPLCGHMSVEYEQLSSEALEAAR                                        | 1.42915415        | 3              | 5.43705   |
| P86048        | VHIGQVIMSIR                                                       | 8.04588488        | 2              | 3.01557   |
| <b>P86252</b> |                                                                   | <b>1.00914639</b> | <b>0.6731</b>  | <b>7</b>  |
| P86252        | ALELDPNLYR                                                        | 1.19957673        |                |           |
| P86252        | ANGFAELIPNAQLLQK                                                  | 0.65780323        |                |           |
| P86252        | CTSLGVNQGIYEEPK                                                   | 0.79778674        |                |           |
| P86252        | LGFQGAQDLANMFRFYALKPDR                                            | 1.46052221        |                |           |
| P86252        | LIDDYGVVEEPAELPEGTSLTVDNK                                         | 1.61446219        | 2              | 4.02937   |
| P86252        | LIDDYGVVEEPAELPEGTSLTVDNKR                                        | 2.58442141        | 3              | 4.51811   |
| P86252        | VASDAQLELDKLDGELKK                                                | 1.59862316        |                |           |
| <b>P97313</b> | <b>PRKDC DNA_dependent protein kinase catalytic subunit</b>       | <b>1.30238166</b> | <b>0.20889</b> | <b>3</b>  |
| P97313        | FHGVMTLCLEVLCR+Oxidation(4                                        | 1.30198642        |                |           |
| P97313        | LCHDAFTENMVGESQLLEK                                               | 7.63095329        | 2              | 2.53486   |
| P97313        | QLFSSLFSGILKEMNK+Oxidation(13                                     | 1.85306573        |                |           |
| <b>P97384</b> | <b>ANX11 Annexin A11</b>                                          | <b>0.92964075</b> | <b>0.02378</b> | <b>2</b>  |
| P97384        | GFGTDEQAIIDCLGSR                                                  | 0.86949122        | 2              | 3.95441   |
| P97384        | SELDLLDIR                                                         | 1.87433159        | 2              | 2.54409   |
| <b>P97519</b> | <b>HMGCL Hydroxymethylglutaryl_CoA lyase_mitochondrial</b>        | <b>1.03861763</b> | <b>0.12359</b> | <b>8</b>  |
| P97519        | FDGVMQAAR                                                         | 1.79920974        | 2              | 2.83092   |
| P97519        | GFEAAVAAGAK                                                       | 1.72988885        | 2              | 3.3043    |
| P97519        | GYVSCALGCPYEGK                                                    | 1.04312342        | 2              | 3.86554   |
| P97519        | KNVNCSIEESFQR                                                     | 1.32866907        | 2              | 3.74566   |
| P97519        | LIDMLSEAGLPVIEATSFVSPK                                            | 1.53534127        | 2              | 3.10489   |
| P97519        | LLEAGDFICQALNR                                                    | 0.58238793        | 2              | 4.5365    |
| P97519        | NVNCSIEESFQR                                                      | 0.94752087        | 2              | 3.39504   |
| P97519        | WVPQMADHSDVLK                                                     | 0.73388926        | 2              | 2.95169   |
| <b>P97521</b> | <b>MCAT Mitochondrial carnitine/acylcarnitine carrier protein</b> | <b>1.0807215</b>  | <b>0.82091</b> | <b>7</b>  |
| P97521        | CLLQIQASSGK                                                       | 1.0648513         | 2              | 2.60499   |
| P97521        | EEGVTSLYK                                                         | 0.88018718        | 1              | 2.03939   |
| P97521        | KLYQEFGR                                                          | 1.58573106        | 2              | 2.32925   |
| P97521        | LQTQPPSLPGQPPMYSGTIDCFR                                           | 1.20557832        | 2              | 3.84684   |
| P97521        | LYQEFGR                                                           | 1.40014549        | 2              | 2.76219   |
| P97521        | SVHDLVPR                                                          | 1.37620536        | 3              | 3.55046   |
| P97521        | YSGTLDCAK                                                         | 1.29309515        | 2              | 2.35282   |
| <b>P97524</b> | <b>S27A2 Very long_chain acyl_CoA synthetase</b>                  | <b>0.98244255</b> | <b>0.9691</b>  | <b>13</b> |
| P97524        | ALHDHLGLR                                                         | 0.60552202        | 2              | 2.33459   |
| P97524        | GEVLLICK                                                          | 0.99718611        | 2              | 2.33828   |
| P97524        | MKENYEFNGK                                                        | 1.19394912        | 2              | 2.80226   |
| P97524        | SLLHCFQCCGAK                                                      | 0.98680932        | 2              | 2.95297   |
| P97524        | TILHVLEQAR                                                        | 0.81294995        | 2              | 3.18124   |
| P97524        | TSNTNGVDTVLDKVDGVSADPIPESWR                                       | 1.09178375        | 3              | 5.69118   |
| P97524        | TYVPMTEDIYNAIIDK                                                  | 0.87788788        | 3              | 4.79446   |
| P97524        | VDGVSADPIPESWR                                                    | 1.25887733        | 2              | 2.8722    |
| P97524        | VLLASPELHEAVEEVLPTLK                                              | 0.97826467        | 3              | 4.92837   |
| P97524        | VTLMEEGFNPSVIK                                                    | 1.93075511        | 2              | 4.18738   |
| P97524        | YDVEKDEPVR                                                        | 1.0396136         | 2              | 2.89871   |

|               |                                                            |                   |                |           |
|---------------|------------------------------------------------------------|-------------------|----------------|-----------|
| P97524        | YLCNTPQKPNDR                                               | 1.16449179        | 2              | 3.21542   |
| P97524        | YNATVIQYIGELLR                                             | 0.82013443        | 2              | 3.48417   |
| <b>P97532</b> | <b>THTM 3_mercaptopyruvate sulfurtransferase</b>           | <b>1.22975381</b> | <b>4.8E-06</b> | <b>10</b> |
| P97532        | AFGHHSVSLDGGFR                                             | 1.13368959        | 3              | 3.68447   |
| P97532        | ALVSAQWVAEALK                                              | 0.85630773        | 2              | 3.89037   |
| P97532        | AQPEHVISQGR                                                | 1.13860379        | 2              | 3.20836   |
| P97532        | DGIEPGHIPGSVNIPFTEFLTSEGLEK                                | 1.61751771        | 3              | 6.45815   |
| P97532        | FQGTQPEPR                                                  | 1.10376172        | 2              | 3.61153   |
| P97532        | HIPGAAFFDIDR                                               | 1.35799003        | 2              | 2.55749   |
| P97532        | LLDASWYLPK                                                 | 1.69971975        | 2              | 3.73522   |
| P97532        | SPSEPAEFCAQLDPSFIK                                         | 1.2305226         | 2              | 2.95029   |
| P97532        | THEDILENLDR                                                | 1.21255076        | 2              | 3.8751    |
| P97532        | YWLSQNLPISSGK                                              | 1.10153298        | 2              | 3.95519   |
| <b>P97536</b> | <b>CAND1 Cullin_associated NEDD8_dissociated protein 1</b> | <b>1.11661835</b> | <b>0.03092</b> | <b>7</b>  |
| P97536        | AADIDQEVK                                                  | 1.02587849        | 2              | 2.4843    |
| P97536        | EGPAVVGQFIQDVK                                             | 2.46764291        | 2              | 2.72115   |
| P97536        | FTISDHPQPIDPLK                                             | 1.16003112        | 2              | 2.59571   |
| P97536        | ITSEALLVTQQLVK                                             | 1.50557025        | 2              | 3.15254   |
| P97536        | LGTLSDILIK                                                 | 2.8277983         | 2              | 2.45544   |
| P97536        | SVILEAFSSPSEEVK                                            | 1.7895701         | 2              | 2.88589   |
| P97536        | TYIQCAAISR                                                 | 1.10988809        | 2              | 3.45873   |
| <b>P97562</b> | <b>ACOX2 Peroxisomal acyl_coenzyme A oxidase 2</b>         | <b>1.06442496</b> | <b>0.98507</b> | <b>16</b> |
| P97562        | ATFADFCAQGAEICR                                            | 1.04076165        | 2              | 4.74954   |
| P97562        | CSAQTAAADR                                                 | 1.16832762        | 2              | 2.93616   |
| P97562        | DFSLLPELHALSTGMK                                           | 0.8144789         | 2              | 2.82399   |
| P97562        | EAFDLLPLIR                                                 | 1.01177358        | 2              | 2.86014   |
| P97562        | ILEYQTQQQK                                                 | 1.0757881         | 2              | 3.73719   |
| P97562        | KVESIIQSDPVFNLK                                            | 1.28197462        | 2              | 5.03614   |
| P97562        | LDKEPEIQR                                                  | 1.06703673        | 3              | 3.40215   |
| P97562        | LFEWAQK                                                    | 0.94246445        | 2              | 2.52092   |
| P97562        | LGTPQSNYLGMLVTR                                            | 1.54079118        | 2              | 3.37665   |
| P97562        | LSGLPTLVAR                                                 | 1.61219495        | 2              | 2.52578   |
| P97562        | LTNILDGGLPNTVLR                                            | 1.24402775        | 2              | 4.49674   |
| P97562        | SGVDQHDAWNQTTVIHLQAAK                                      | 1.08859771        | 3              | 6.02312   |
| P97562        | SLEDHTPLPGITVGDIGPK                                        | 0.89150357        | 3              | 4.34066   |
| P97562        | SLGSDEQIAK                                                 | 1.03921997        | 2              | 3.00689   |
| P97562        | VESIIQSDPVFNLK                                             | 1.08665951        | 2              | 4.26298   |
| P97562        | VLDGNVNLSLHGVMNAIR                                         | 0.84392996        | 2              | 4.33949   |
| <b>P97576</b> | <b>GRPE1 GrpE protein homolog 1_mitochondrial</b>          | <b>1.08257108</b> | <b>0.19617</b> | <b>4</b>  |
| P97576        | ALADTENLR                                                  | 1.9127671         | 2              | 2.58873   |
| P97576        | DLLEVADILEK                                                | 1.07850565        | 2              | 3.68469   |
| P97576        | EEVSNNNPHLK                                                | 1.56701234        | 2              | 3.04738   |
| P97576        | TLRPALVGVVK                                                | 0.95912455        | 3              | 3.54107   |
| <b>P97584</b> | <b>PTGR1 Prostaglandin reductase 1</b>                     | <b>0.95223582</b> | <b>0.89001</b> | <b>6</b>  |
| P97584        | ALTDLMNWVSEK                                               | 0.87125035        | 2              | 4.18498   |
| P97584        | GGETVLVNAAAGAVGSVVGQIAK                                    | 1.41775343        | 2              | 4.19693   |
| P97584        | HFEGFPTDSNFELR                                             | 1.02854494        | 2              | 3.78283   |
| P97584        | LKEGDSMMGEQVAR                                             | 1.17088104        | 2              | 3.77997   |
| P97584        | TGPCPPGPSPEVIYQQLR                                         | 1.04190226        | 2              | 4.12981   |
| P97584        | YHEYITEGFEK                                                | 0.95409379        | 2              | 2.9319    |
| <b>P97608</b> | <b>OPLA 5_oxoprolinase</b>                                 | <b>1.25606724</b> | <b>0.91757</b> | <b>8</b>  |
| P97608        | AGDFGAAFVER                                                | 1.11230752        | 2              | 2.93049   |
| P97608        | GHTACADAYLTPTIQR                                           | 1.08829506        | 2              | 4.58662   |
| P97608        | GSILDPSPEAAVVGGNVLSQR                                      | 1.34448472        | 2              | 4.96314   |
| P97608        | ISVGAEGPSMADR+Oxidation(9                                  | 0.65164675        |                |           |
| P97608        | ITDPEILES                                                  | 1.58017829        | 2              | 2.37036   |

|               |                                                                 |                   |                |           |
|---------------|-----------------------------------------------------------------|-------------------|----------------|-----------|
| P97608        | LLSEDPANYADAPTEGIR                                              | 1.22404608        | 2              | 4.94868   |
| P97608        | SGLQLEDTPK                                                      | 1.17173154        | 2              | 2.62954   |
| P97608        | TGDLLLEIQQPVDLEALR                                              | 1.46968492        | 2              | 4.63633   |
| <b>P97612</b> | <b>FAAH1 Fatty_acid amide hydrolase 1</b>                       | <b>1.37649199</b> | <b>6.9E-05</b> | <b>7</b>  |
| P97612        | GHDSTLGLSLNEGMPSESDCVVVQVLK                                     | 1.49993417        | 3              | 3.97085   |
| P97612        | GTNCVTSYLTDCETQLSQAPR                                           | 1.12602882        | 2              | 4.94526   |
| P97612        | GYFGDIWDIILK                                                    | 1.89858287        | 2              | 3.8686    |
| P97612        | NSVGLPVAVQCVALPWQEELCLR                                         | 2.4936356         | 3              | 3.81573   |
| P97612        | QGLLYGVPVSLK                                                    | 1.06062672        | 2              | 2.85252   |
| P97612        | SPGGSSGGEGALIGSGGSPGLGTDIGGSIR                                  | 1.94632094        | 2              | 4.75659   |
| P97612        | VGYETDNYTMPSPAMR                                                | 1.4102396         | 2              | 4.02943   |
| <b>P97690</b> | <b>SMC3 Structural maintenance of chromosomes protein 3</b>     | <b>1.19850236</b> | <b>0.63862</b> | <b>2</b>  |
| P97690        | KMVTKNVDMNLLSAGFSR+Oxidation(1                                  | 1.19863766        |                |           |
| P97690        | NLEQYNKLDQDLNEVK                                                | 1.16841547        | 2              | 2.59066   |
| <b>P97697</b> | <b>IMPA1 Inositol monophosphatase 1</b>                         | <b>1.47307573</b> | <b>0.00063</b> | <b>2</b>  |
| P97697        | SSPADLVTVDQK                                                    | 1.34163483        | 2              | 2.85215   |
| P97697        | VSQQEDITK                                                       | 1.56840624        | 2              | 2.80689   |
| <b>P97700</b> | <b>M2OM Mitochondrial 2_oxoglutarate/malate carrier protein</b> | <b>1.0308602</b>  | <b>0.01586</b> | <b>3</b>  |
| P97700        | AVVVNAAQLASYSQSK                                                | 1.02497298        | 2              | 4.98374   |
| P97700        | GIYTGLSAGLLR                                                    | 1.24817506        | 2              | 2.9893    |
| P97700        | LTGADGTPPGFLK                                                   | 1.39075451        | 2              | 3.86219   |
| <b>P97834</b> | <b>CSN1 COP9 signalosome complex subunit 1</b>                  | <b>2.20345137</b> | <b>0.24743</b> | <b>3</b>  |
| P97834        | EGSQGELTPANSQSR                                                 | 1.67205222        | 2              | 2.88486   |
| P97834        | MLDEMKNLMLLDMYLAPHVR+Oxidation(0                                | 2.26934602        |                |           |
| P97834        | MLDEMKNLMLLDMYLAPHVR+Oxidation(4                                | 2.26934602        |                |           |
| <b>P97852</b> | <b>DHB4 Peroxisomal multifunctional enzyme type 2</b>           | <b>0.83528047</b> | <b>0.1406</b>  | <b>25</b> |
| P97852        | AAVAVPSRPPDAVLR                                                 | 0.92012749        | 2              | 2.30481   |
| P97852        | AVANYDSVEAGEK                                                   | 0.97473003        | 2              | 3.81081   |
| P97852        | AYALFAER                                                        | 0.91029984        | 2              | 3.41125   |
| P97852        | CEAVIADILDK                                                     | 0.92435156        | 2              | 2.56768   |
| P97852        | DTTSLNQAALYR                                                    | 0.96451993        | 2              | 2.89049   |
| P97852        | FVYEGSADFSLPTFGVIVAQK                                           | 1.78210436        | 2              | 3.68289   |
| P97852        | GALVVVNDLGGDFK                                                  | 1.31579962        | 2              | 3.86066   |
| P97852        | GSSAADKVVEEIR                                                   | 0.85637562        | 2              | 3.45239   |
| P97852        | HVLQQFADNDVSR                                                   | 0.84432983        | 2              | 4.7001    |
| P97852        | ICDFSNASKPK                                                     | 1.14199195        | 3              | 3.90532   |
| P97852        | IDSEGISQNHGTQVASADASGFAGVVGHK                                   | 0.95674766        | 3              | 5.6722    |
| P97852        | IDVVVNNAGILR                                                    | 0.91664821        | 2              | 4.07432   |
| P97852        | ISDEDWDIIQR                                                     | 1.31316338        | 2              | 3.69188   |
| P97852        | KNNIHCNTIAPNAGSR                                                | 0.79320021        | 2              | 5.0497    |
| P97852        | LGLLGLANTLVIEGR                                                 | 1.63199745        | 2              | 3.62375   |
| P97852        | LNPQNAFFSGR                                                     | 0.71913766        | 2              | 2.83874   |
| P97852        | NGSGEVYQGPAK                                                    | 0.88846233        | 2              | 3.49526   |
| P97852        | NNIHCNTIAPNAGSR                                                 | 0.81775251        | 2              | 4.6499    |
| P97852        | NQPMTPEAVR                                                      | 0.84933323        | 2              | 2.35201   |
| P97852        | SIQESTGGIIEVLHK                                                 | 0.82663836        | 2              | 4.16707   |
| P97852        | SLMSGGLAEVPGLSINFAK                                             | 1.04139522        | 2              | 4.57451   |
| P97852        | TALDTFGR                                                        | 1.37213653        | 2              | 2.33081   |
| P97852        | VLHGQYLEYKPLPR                                                  | 0.86252191        | 2              | 5.01675   |
| P97852        | VNAVFEWHITK                                                     | 0.8848187         | 2              | 3.16815   |
| P97852        | VVLVTGAGGGLGR                                                   | 0.80818959        | 2              | 4.37584   |
| <b>P97874</b> | <b>GAK Cyclin_G associated kinase</b>                           | <b>1.07181405</b> | <b>0.50567</b> | <b>2</b>  |
| P97874        | AMVEEITRNTTPMYR+Oxidation(13                                    | 3.06527865        |                |           |
| P97874        | QELARDTDPFKLK                                                   | 1.04356847        | 2              | 2.40881   |

|               |                                                                                                                             |                   |                |           |
|---------------|-----------------------------------------------------------------------------------------------------------------------------|-------------------|----------------|-----------|
| <b>Q00238</b> | <b>ICAM1 Intercellular adhesion molecule 1</b>                                                                              | <b>0.86732732</b> | <b>0.94132</b> | <b>2</b>  |
| Q00238        | LDTPDLLEVGTQQK                                                                                                              | 0.86622492        | 2              | 3.51144   |
| Q00238        | VELDPLPAWQQVGK                                                                                                              | 1.0457698         | 2              | 2.48009   |
| <b>Q00438</b> | <b>PTBP1 Polypyrimidine tract binding protein 1</b>                                                                         | <b>1.53101013</b> | <b>0.33741</b> | <b>4</b>  |
| Q00438        | IAIPGLAGAGNSVLLVSNLNER                                                                                                      | 1.62365657        | 2              | 4.6329    |
| Q00438        | IIVENLFYPVTLVDLHQIFSK                                                                                                       | 1.50402895        | 3              | 4.3289    |
| Q00438        | KLPSDVTEGEVISLGLPFGK                                                                                                        | 1.41582222        | 2              | 4.36934   |
| Q00438        | NNQFQALLQYADPVSAQHAK                                                                                                        | 1.54869731        | 2              | 5.46689   |
| <b>Q00981</b> | <b>UCHL1 Ubiquitin carboxyl terminal hydrolase isozyme L1</b>                                                               | <b>1.20250946</b> | <b>0.46602</b> | <b>2</b>  |
| Q00981        | KQIEELK                                                                                                                     | 1.41379197        | 2              | 2.35295   |
| Q00981        | MQLKPEINPEMLNK+Oxidation(0)                                                                                                 | 1.20175907        |                |           |
| <b>Q00PI9</b> | <b>HNRL2 Heterogeneous nuclear ribonucleoprotein U like protein 2</b>                                                       | <b>1.94681669</b> | <b>0.69737</b> | <b>3</b>  |
| Q00PI9        | AVEEQGDDQDSEK                                                                                                               | 1.35644905        | 2              | 3.98971   |
| Q00PI9        | EEAQPIVTKYK                                                                                                                 | 1.75719888        | 1              | 1.97118   |
| Q00PI9        | SGDETPGSEAPGDK                                                                                                              | 1.98867427        | 2              | 3.24144   |
| <b>Q01177</b> | <b>PLMN Plasminogen</b>                                                                                                     | <b>0.89443697</b> | <b>0.95298</b> | <b>3</b>  |
| Q01177        | ILGSDVQQIAVTK                                                                                                               | 0.89322091        | 2              | 3.79419   |
| Q01177        | LVLEPNDADIALLK                                                                                                              | 0.86836258        | 2              | 2.81975   |
| Q01177        | STELCAGHLAGGIDSCQGDGGPLVCFEK                                                                                                | 1.01031262        | 3              | 4.06154   |
| <b>Q01205</b> | <b>ODO2 Dihydrolypoyllysine residue succinyltransferase component of 2_oxoglutarate dehydrogenase complex_mitochondrial</b> | <b>1.09086349</b> | <b>0.48429</b> | <b>4</b>  |
| Q01205        | ASAFALQEQPVVNAVIDDATK                                                                                                       | 1.08245617        | 2              | 6.16508   |
| Q01205        | NDVITVQTPAFAESVTEGDVR                                                                                                       | 1.48176216        | 2              | 5.40729   |
| Q01205        | NVETMNYADIAR                                                                                                                | 1.15846854        | 2              | 3.76866   |
| Q01205        | VEGGTPLFLTR                                                                                                                 | 0.83208948        | 2              | 3.43586   |
| <b>Q01279</b> | <b>EGFR Epidermal growth factor receptor</b>                                                                                | <b>1.11254565</b> | <b>0.64778</b> | <b>2</b>  |
| Q01279        | NLQEILIGAVR                                                                                                                 | 1.96794155        | 2              | 3.96008   |
| Q01279        | NYVVTDHGSCVR                                                                                                                | 0.96579131        | 2              | 2.69813   |
| <b>Q01405</b> | <b>SC23A Protein transport protein Sec23A</b>                                                                               | <b>1.30808805</b> | <b>1.8E-05</b> | <b>8</b>  |
| Q01405        | AETEEGPDVLR                                                                                                                 | 1.40451354        | 2              | 3.22714   |
| Q01405        | AVLNPLCQVDYR                                                                                                                | 1.58099026        | 2              | 2.71889   |
| Q01405        | HFEALANR                                                                                                                    | 0.98191408        | 1              | 2.021     |
| Q01405        | HLLQAPVDDAQEILHSR                                                                                                           | 1.29494883        | 3              | 5.49159   |
| Q01405        | MVVPVAALFTPLK                                                                                                               | 1.56558957        | 2              | 2.62188   |
| Q01405        | SGYQDMPEYENFR                                                                                                               | 0.15596923        | 2              | 3.09491   |
| Q01405        | SWHDIEKDNAK                                                                                                                 | 1.33823136        | 2              | 3.13193   |
| Q01405        | YIDTEHGGSQAR                                                                                                                | 1.30407925        | 2              | 3.4385    |
| <b>Q02253</b> | <b>MMSA Methylmalonate semialdehyde dehydrogenase [acylating]_mitochondrial</b>                                             | <b>0.99348547</b> | <b>0.89479</b> | <b>33</b> |
| Q02253        | AEMEAAVAACK                                                                                                                 | 1.32730276        | 2              | 4.01936   |
| Q02253        | AEMEAAVAACK+Oxidation(2)                                                                                                    | 1.54026227        |                |           |
| Q02253        | AEMEAAVAACKR                                                                                                                | 1.2453755         | 2              | 3.11029   |
| Q02253        | AFPAWADTSILSR                                                                                                               | 1.36712387        | 2              | 4.13204   |
| Q02253        | AISFVGSNQAGEYIFER                                                                                                           | 0.84844757        | 2              | 5.27586   |
| Q02253        | CMALSTAVLVGEAK                                                                                                              | 1.44664526        | 2              | 4.49299   |
| Q02253        | CMALSTAVLVGEAK+Oxidation(1)                                                                                                 | 1.07897262        |                |           |
| Q02253        | EEDATLSSPAVVMPTMGR                                                                                                          | 1.77611838        | 2              | 4.73156   |
| Q02253        | EEDATLSSPAVVMPTMGR+Oxidation(12)                                                                                            | 7.50263151        |                |           |
| Q02253        | EEDATLSSPAVVMPTMGR+Oxidation(15)                                                                                            | 7.50263151        |                |           |
| Q02253        | EEIFGPVLVLETETLDEAIK                                                                                                        | 0.95373584        | 2              | 3.30997   |
| Q02253        | ENTLNQLVGAAGAAGQR                                                                                                           | 1.10755513        | 2              | 5.14734   |
| Q02253        | GDTNFGYK                                                                                                                    | 1.09600093        | 2              | 2.61748   |
| Q02253        | GLQVVEHACSVTSLMLGETMPSITK                                                                                                   | 1.52854282        | 2              | 5.64712   |

|               |                                           |                   |                |           |
|---------------|-------------------------------------------|-------------------|----------------|-----------|
| Q02253        | GYENGNFVGPTIISNVKPSMTCYK                  | 1.18218992        | 3              | 3.85656   |
| Q02253        | IVNDNPYNGTAFITTINGAIAR                    | 1.047052          | 2              | 5.39841   |
| Q02253        | KWLPELVER                                 | 1.73604125        | 3              | 3.3318    |
| Q02253        | LFIDGK                                    | 3.35856253        | 1              | 2.01425   |
| Q02253        | LITLEQGK                                  | 1.13156293        | 2              | 2.82319   |
| Q02253        | LLQDSGAPDGTLNIIHGQHEAVNFICDHPDIK          | 0.87263332        | 3              | 4.35551   |
| Q02253        | NHGVVMPDANK                               | 1.22322907        | 2              | 3.56681   |
| Q02253        | NHGVVMPDANK+Oxidation(5                   | 1.1506875         |                |           |
| Q02253        | NHGVVMPDANKENTLNQLVGAAFGAAGQR             | 1.43024727        | 3              | 6.13728   |
| Q02253        | NHGVVMPDANKENTLNQLVGAAFGAAGQR+Oxidation(5 | 1.29328782        |                |           |
| Q02253        | QGIQFYTLK                                 | 1.15762359        | 2              | 2.79436   |
| Q02253        | SDKWIDIHNPATNEVVGR                        | 0.98074323        | 2              | 5.26877   |
| Q02253        | TITSQWKEEDATLSSPAVVMPTMGR                 | 1.09559967        | 2              | 5.47582   |
| Q02253        | TLADAEGDVFR                               | 0.94687041        | 2              | 3.67223   |
| Q02253        | VCNLIDSGAK                                | 1.09777741        | 2              | 3.39308   |
| Q02253        | VNAGDQPGADLGPLITPQAK                      | 1.18681541        | 2              | 5.87971   |
| Q02253        | WIDIHNPATNEVVGR                           | 0.88948327        | 2              | 4.89131   |
| Q02253        | WLPELVER                                  | 0.98586794        | 2              | 2.40156   |
| Q02253        | YAHMVDVGQVGVNVPIVPLPMFSFTGSR              | 1.80444067        | 3              | 3.527     |
| <b>Q02769</b> | <b>FDFT Squalene synthase</b>             | <b>0.72082965</b> | <b>0.01789</b> | <b>4</b>  |
| Q02769        | KLEDFVKPENVDVAVK                          | 0.72085347        | 2              | 4.03598   |
| Q02769        | SFAAVIQALDGDIR                            | 0.64939163        | 2              | 3.66306   |
| Q02769        | TQSLPNCQLISR                              | 0.51210158        | 2              | 2.91068   |
| Q02769        | VVLEDFPTISLEFR                            | 1.496223          | 2              | 3.28107   |
| <b>Q02874</b> | <b>H2AY Core histone macro_H2A.1</b>      | <b>1.1496872</b>  | <b>0.48933</b> | <b>4</b>  |
| Q02874        | AASADSTTEGAPTDGFTVLSTK                    | 1.10596082        | 2              | 4.1946    |
| Q02874        | GVTIASGGVLPNIHPELLAK                      | 1.47610772        | 2              | 4.20125   |
| Q02874        | NCLALADDR                                 | 1.60765876        | 2              | 2.47509   |
| Q02874        | NGPLEVAGAAVSAGHGLPAK                      | 0.92354769        | 2              | 2.81014   |
| <b>Q02974</b> | <b>KHK Ketoheokinase</b>                  | <b>1.09738804</b> | <b>0.00087</b> | <b>8</b>  |
| Q02974        | GATLICAWAEEGADALGPDGQLLHSDAFPPPR          | 1.19209165        | 3              | 5.58082   |
| Q02974        | GGNASNSCTVLSLLGAR                         | 1.32208055        | 2              | 4.72008   |
| Q02974        | GNSMQEALR                                 | 1.24279637        | 2              | 3.00488   |
| Q02974        | GVDVSQVAWQSQGDTPCSCCIVNNSNGSR             | 0.89280167        | 3              | 5.85364   |
| Q02974        | IEQYNATQPLQKQ                             | 0.94546955        | 2              | 4.81642   |
| Q02974        | RGVDVSQVAWQSQGDTPCSCCIVNNSNGSR            | 0.49446746        | 3              | 6.50053   |
| Q02974        | TIILYDTNLPDVSAK                           | 1.09582966        | 2              | 5.15103   |
| Q02974        | VSVEIEKPR                                 | 1.25233266        | 2              | 2.51895   |
| <b>Q03248</b> | <b>BUP1 Beta_ureidopropionase</b>         | <b>1.24147237</b> | <b>9.9E-20</b> | <b>15</b> |
| Q03248        | AHHDLGIFYGSSYVAAPDGSR                     | 1.22512502        | 2              | 6.14191   |
| Q03248        | EDLV LAPSSG                               | 1.06395233        | 1              | 2.23347   |
| Q03248        | EKLPWTEFAESAEDGLTTR                       | 1.12385551        | 2              | 4.72128   |
| Q03248        | ELAEAVKPNYSPNIVK                          | 1.25295631        | 2              | 4.65263   |
| Q03248        | ELAEAVKPNYSPNIVKEDLV LAPSSG               | 3.38556963        | 3              | 3.49001   |
| Q03248        | HLPPDDL SQVK                              | 1.08800363        | 2              | 2.52937   |
| Q03248        | HNMMVISPILER                              | 1.29458576        | 2              | 3.08294   |
| Q03248        | HNMMVISPILER+Oxidation(2                  | 1.39805162        |                |           |
| Q03248        | IPLPTSAPVAEQVSALHK                        | 2.208885          | 3              | 4.87513   |
| Q03248        | KHNMMVISPILER                             | 1.025262          | 3              | 3.55404   |
| Q03248        | KHNMMVISPILER+Oxidation(3                 | 0.9170842         |                |           |
| Q03248        | NAAIANHCFTCALNR                           | 1.48454382        | 2              | 4.68958   |
| Q03248        | VGDFNESTYYMEGNLGHVPVFTQFGR                | 1.53097832        | 3              | 5.1116    |
| Q03248        | VGQEHYPNEFTSGDGK                          | 1.85208534        | 2              | 4.35579   |
| Q03248        | VGQEHYPNEFTSGDGKK                         | 1.32926034        | 3              | 4.79651   |
| <b>Q03336</b> | <b>RGN Regucalcin</b>                     | <b>1.16860661</b> | <b>0.92673</b> | <b>16</b> |
| Q03336        | CGESPVWEEASK                              | 1.19346794        | 2              | 4.66944   |



|               |                                                  |                   |                |           |
|---------------|--------------------------------------------------|-------------------|----------------|-----------|
| Q03336        | CLLFVDIPSK                                       | 1.19735476        | 2              | 3.42409   |
| Q03336        | DEQIPDGMCIDVEGK                                  | 0.92403687        | 2              | 4.44365   |
| Q03336        | DYSEMYVTCAR                                      | 1.88540901        | 2              | 3.2685    |
| Q03336        | FNDGKVDPAGR                                      | 1.00547067        | 2              | 3.0518    |
| Q03336        | HQGSLSLFPDHSVK                                   | 1.20222258        | 3              | 4.89784   |
| Q03336        | KYFDQVDISNGLDWSLDHK                              | 1.23334183        | 3              | 4.96737   |
| Q03336        | LWVACYNGGR                                       | 1.11449811        | 2              | 2.76679   |
| Q03336        | MEKDEQIPDGMCIDVEGK                               | 0.95113575        | 2              | 5.0652    |
| Q03336        | MEKDEQIPDGMCIDVEGK+Oxidation(0                   | 0.97105227        |                |           |
| Q03336        | MEKDEQIPDGMCIDVEGK+Oxidation(10                  | 1.43095071        |                |           |
| Q03336        | QSGGYVATIGTK                                     | 1.158398          | 2              | 2.78621   |
| Q03336        | VGVDAPVSSVALR                                    | 1.03000401        | 2              | 3.56801   |
| Q03336        | YFAGTMAEETAPAVLER                                | 1.28166358        | 2              | 5.67048   |
| Q03336        | YFAGTMAEETAPAVLER+Oxidation(5                    | 0.9001496         |                |           |
| Q03336        | YFDQVDISNGLDWSLDHK                               | 1.29840145        | 2              | 4.6959    |
| <b>Q03410</b> | <b>SYCP1 Synaptonemal complex protein 1</b>      | <b>1.17073071</b> | <b>0.38197</b> | <b>2</b>  |
| Q03410        | ATVDEAVKLQKEIDLR                                 | 0.98925174        | 2              | 2.46675   |
| Q03410        | LKMEQENTAILTDK                                   | 1.34713688        | 2              | 2.36828   |
| <b>Q03626</b> | <b>MUG1 Murinoglobulin_1</b>                     | <b>1.06101263</b> | <b>0.76668</b> | <b>7</b>  |
| Q03626        | EDNSIHWERPQKPTK                                  | 0.67369798        | 2              | 2.6232    |
| Q03626        | EESSCIHSSCTAER                                   | 1.08565897        | 2              | 4.23187   |
| Q03626        | GGEFEMMPLGVNK                                    | 0.7465529         | 2              | 3.47751   |
| Q03626        | LTAQPAPSPEDLALSMGTIK                             | 1.32411002        | 3              | 4.12259   |
| Q03626        | NLHPLNELFLAYIEDPK                                | 1.64508485        | 3              | 4.11805   |
| Q03626        | VQTVPLTCNNPK                                     | 1.06684477        | 2              | 2.96447   |
| Q03626        | VYHKEESSCIHSSCTAER                               | 1.00462441        | 2              | 5.81911   |
| <b>Q04462</b> | <b>SYVC Valyl_tRNA synthetase</b>                | <b>1.26081107</b> | <b>0.98732</b> | <b>4</b>  |
| Q04462        | ALNPLEEWLR                                       | 0.99958972        | 2              | 2.33317   |
| Q04462        | ITPAHDQNDYEVGQR                                  | 1.26084845        | 2              | 3.68737   |
| Q04462        | LQQTEAELR                                        | 0.94760795        | 2              | 2.34132   |
| Q04462        | SVTQQPGSEITAPQK                                  | 1.1277706         | 2              | 3.54637   |
| <b>Q05982</b> | <b>NDKA Nucleoside diphosphate kinase A</b>      | <b>1.41882393</b> | <b>0.22169</b> | <b>2</b>  |
| Q05982        | EISLWFQPEELVDYK                                  | 1.54959978        | 2              | 2.85258   |
| Q05982        | FIQASEDLLK                                       | 1.38960422        | 2              | 2.36531   |
| <b>Q06647</b> | <b>ATPO ATP synthase subunit O_mitochondrial</b> | <b>1.2344628</b>  | <b>2.9E-10</b> | <b>8</b>  |
| Q06647        | FSPLTANLMNLLAENGR                                | 1.88168799        | 2              | 4.31037   |
| Q06647        | GEVPCTVTTAFPLDEAVLSELK                           | 1.17133107        | 3              | 6.04703   |
| Q06647        | GQILNLEVK                                        | 0.92816249        | 2              | 2.73665   |
| Q06647        | LGNTQGVISAFSTIMSVHR                              | 1.9094234         | 3              | 3.64138   |
| Q06647        | TDPSIMGGMIVR                                     | 1.25985266        | 2              | 3.32039   |
| Q06647        | TVLNSFLSK                                        | 1.05963578        | 2              | 2.72552   |
| Q06647        | VGQLLKDPK                                        | 1.77856999        | 1              | 2.1613    |
| Q06647        | VSLAVLNPIYIK                                     | 1.42675955        | 2              | 3.58112   |
| <b>Q07071</b> | <b>GCKR Glucokinase regulatory protein</b>       | <b>1.54377932</b> | <b>5.9E-09</b> | <b>13</b> |
| Q07071        | AAPISCHVQVAHEK                                   | 1.43126101        | 2              | 4.90169   |
| Q07071        | CIESLLQAIHFPQPLSDDVR                             | 1.56508385        | 3              | 4.44121   |
| Q07071        | CLLEILR                                          | 1.99946897        | 2              | 2.52696   |
| Q07071        | GFLIGDHSDMFNQK                                   | 1.56527196        | 2              | 3.83192   |
| Q07071        | LLGQCDAEIFQEEGQIVPTYQR                           | 4.01599686        | 2              | 5.03187   |
| Q07071        | LSAASSVCEVVR                                     | 2.32321347        | 2              | 2.792     |
| Q07071        | LYSESVLTTMLQVAGK                                 | 1.72272227        | 2              | 3.83555   |
| Q07071        | QEAFLVLPNPAIGPEGLSGSSR                           | 1.63618566        | 2              | 4.86258   |
| Q07071        | TVDQGVVSSQR                                      | 1.51857212        | 2              | 3.56929   |
| Q07071        | VIPTALLSLLLR                                     | 2.84773634        | 2              | 2.96802   |
| Q07071        | VQEVLEKPDGGLVVLVSGGGTSGR                         | 1.60871421        | 2              | 5.05545   |
| Q07071        | WVLNTVSTGAHVLLGK                                 | 2.85074415        | 2              | 3.4445    |
| Q07071        | YQHVIETPEPGEWELSGYEAAPITEK                       | 1.33292087        | 3              | 6.07007   |

|               |                                                                    |                   |                |           |
|---------------|--------------------------------------------------------------------|-------------------|----------------|-----------|
| <b>Q07116</b> | <b>SUOX Sulfite oxidase_ mitochondrial</b>                         | <b>1.14281486</b> | <b>0.61433</b> | <b>9</b>  |
| Q07116        | AVDDSYNVQPDTVAPIWNLR                                               | 1.47150892        | 2              | 4.61876   |
| Q07116        | ETEAHVCFEGLSDPTGTAYGASIPLAR                                        | 3.45911501        | 3              | 3.93677   |
| Q07116        | FVDLHPGGQSK                                                        | 1.30941161        | 2              | 2.67693   |
| Q07116        | IGELNPEDR                                                          | 0.97508318        | 2              | 2.4432    |
| Q07116        | LCDVLAQAGHR                                                        | 0.67365637        | 2              | 3.24045   |
| Q07116        | LHVVGAPGGQSLSLDLDLHK                                               | 1.86512536        | 3              | 3.70607   |
| Q07116        | MSPPLEASDPYSNDPMR                                                  | 1.44722559        | 2              | 3.82777   |
| Q07116        | NHLPVPLNDPDTYR                                                     | 1.04956411        | 2              | 2.66884   |
| Q07116        | VSVSEESYSHWQR                                                      | 1.05881533        | 2              | 4.12602   |
| <b>Q07205</b> | <b>IF5 Eukaryotic translation initiation factor 5</b>              | <b>1.00869673</b> | <b>0.62537</b> | <b>3</b>  |
| Q07205        | AMGPLVLTEVLFDEK                                                    | 1.3290083         | 2              | 3.67745   |
| Q07205        | LQDMLDGFJK                                                         | 1.3244753         | 2              | 2.31177   |
| Q07205        | TVIVNMVDVAK                                                        | 1.00519268        | 2              | 2.85976   |
| <b>Q07523</b> | <b>HAOX2 Hydroxyacid oxidase 2</b>                                 | <b>0.64583124</b> | <b>0.01407</b> | <b>12</b> |
| Q07523        | ALKEEKPTQSVPVSPFK                                                  | 0.58139826        | 2              | 4.81859   |
| Q07523        | ALVITIDTPVLGNR                                                     | 0.74305083        | 2              | 3.96141   |
| Q07523        | ASFQWVNDLSLLQSITR                                                  | 1.27616515        | 2              | 4.07296   |
| Q07523        | EDAELAMK                                                           | 1.36112762        | 1              | 2.01864   |
| Q07523        | EEKPTQSVPVSPFK                                                     | 0.80904036        | 2              | 3.76491   |
| Q07523        | EVLDTLAEHR                                                         | 1.01033994        | 2              | 3.27532   |
| Q07523        | GEDGVKEVLDILTAEHR                                                  | 0.99055991        | 3              | 5.12781   |
| Q07523        | HNVQGVVSNHGGR                                                      | 0.78127674        | 3              | 6.36064   |
| Q07523        | NQLNLEANILLK                                                       | 0.79714638        | 2              | 3.88023   |
| Q07523        | QLDEVSASIDALR                                                      | 0.71346965        | 2              | 3.11643   |
| Q07523        | TSWDFIEGEADDGITYSENIAAFK                                           | 1.07762516        | 3              | 3.30194   |
| Q07523        | TTIQQEISAPICISPTAFHSIAWPDGEK                                       | 0.88752354        | 3              | 4.73957   |
| <b>Q07803</b> | <b>EFGM Elongation factor G_ mitochondrial</b>                     | <b>1.66963357</b> | <b>0.21232</b> | <b>4</b>  |
| Q07803        | GIIDLIEER                                                          | 1.67004876        | 2              | 2.86931   |
| Q07803        | LEFSDFTFGANVPK                                                     | 1.30347177        | 2              | 2.85278   |
| Q07803        | NYQGELKK                                                           | 0.55999457        | 1              | 2.08622   |
| Q07803        | YQPCSPSTQEELVNK                                                    | 2.63926377        | 2              | 3.09254   |
| <b>Q07936</b> | <b>ANXA2 Annexin A2</b>                                            | <b>0.98721468</b> | <b>0.77071</b> | <b>3</b>  |
| Q07936        | GLGTDEDSLIEICSR                                                    | 1.34674749        | 2              | 3.37049   |
| Q07936        | GVDEVTVNLTNR                                                       | 0.98554383        | 2              | 3.10122   |
| Q07936        | TNQELQEINR                                                         | 1.43233598        | 2              | 2.95204   |
| <b>Q07984</b> | <b>SSRD Translocon_ associated protein subunit delta</b>           | <b>1.36280895</b> | <b>9.6E-05</b> | <b>3</b>  |
| Q07984        | FFDEESYSLLR                                                        | 1.66180482        | 2              | 3.67008   |
| Q07984        | NNEDVSIIPPLFTVSDVHR                                                | 1.33123185        | 2              | 4.33862   |
| Q07984        | VQNMALYADVSGK                                                      | 1.19687018        | 2              | 3.69997   |
| <b>Q08163</b> | <b>CAP1 Adenylyl cyclase_ associated protein 1</b>                 | <b>1.33322295</b> | <b>0.97019</b> | <b>7</b>  |
| Q08163        | ALLVTASQCQQPAGNK                                                   | 0.99784877        | 2              | 4.09057   |
| Q08163        | KEPALLELEGK                                                        | 1.29839047        | 2              | 2.34322   |
| Q08163        | LEAVSHTSDMHCGYGDSPSK                                               | 1.34473809        | 3              | 5.07489   |
| Q08163        | NSLDCEIVSAK                                                        | 1.1582354         | 2              | 3.07278   |
| Q08163        | SALFAQINQGESITHALK                                                 | 1.3234462         | 2              | 4.18021   |
| Q08163        | SSEMNVLIPTEGGDFNEFPVPEQFK                                          | 2.03502501        | 2              | 4.26463   |
| Q08163        | VENQENVSNLVDDTELK                                                  | 1.61230881        | 2              | 5.36006   |
| <b>Q08201</b> | <b>MDR2 Multidrug resistance protein 2</b>                         | <b>1.62339354</b> | <b>0.41792</b> | <b>2</b>  |
| Q08201        | AKLSAAYLFLFERQPLIDSYSR                                             | 1.56046062        | 2              | 2.5521    |
| Q08201        | FDTLVGDRGAQLSGGQK                                                  | 1.9301454         | 2              | 2.53732   |
| <b>Q08415</b> | <b>KAT1 Kynurenine_ oxoglutarate transaminase 1_ mitochondrial</b> | <b>1.31846513</b> | <b>0.00834</b> | <b>6</b>  |
| Q08415        | ATLQAMDER                                                          | 1.31068118        | 2              | 2.43284   |
| Q08415        | EQQHFGQPSSYFLQLPQAMELNR                                            | 1.3184537         | 3              | 5.71025   |
| Q08415        | ILVLNTPNNPLGK                                                      | 2.04932664        | 2              | 3.26915   |

|               |                                                           |                   |                |           |
|---------------|-----------------------------------------------------------|-------------------|----------------|-----------|
| Q08415        | LGASNDWQLDPAELASK                                         | 5.0923262         | 2              | 4.25427   |
| Q08415        | RLDGIDQNLWVEFGK                                           | 0.96195733        | 2              | 2.36245   |
| Q08415        | VGWVMGPDNIMK                                              | 1.22480273        | 2              | 2.45041   |
| <b>Q09073</b> | <b>ADT2 ADP/ATP translocase 2</b>                         | <b>1.41921902</b> | <b>0.43517</b> | <b>7</b>  |
| Q09073        | AAYFGIYDTAK                                               | 1.37601895        | 2              | 2.42624   |
| Q09073        | DFLAGGVAAAIISK                                            | 2.14547162        | 2              | 4.93099   |
| Q09073        | GLGDCLVK                                                  | 1.44526591        | 2              | 2.80029   |
| Q09073        | GTDIMYTGTLDCWR                                            | 1.6488928         | 2              | 3.61974   |
| Q09073        | KGTDIMYTGTLDCWR                                           | 1.23744375        | 3              | 3.78966   |
| Q09073        | LLLQVQHASK                                                | 1.91579301        | 2              | 2.77317   |
| Q09073        | QIFLGGVDKR                                                | 1.19755698        | 2              | 2.39185   |
| <b>Q0D2L3</b> | <b>SPEB Agmatinase_mitochondrial</b>                      | <b>0.89961365</b> | <b>0.21373</b> | <b>9</b>  |
| Q0D2L3        | EAYQNILATGCIPLTLGGDHTITYPILQAVAK                          | 1.6560936         | 3              | 4.13204   |
| Q0D2L3        | EESLMLGTVNPSTGALPFQSLR                                    | 1.52442934        | 2              | 3.57721   |
| Q0D2L3        | EHGPVGLVHVGAHSNTSDKPLEDK                                  | 1.10946427        | 3              | 3.53353   |
| Q0D2L3        | IREESLMLGTVNPSTGALPFQSLR                                  | 1.45976703        | 3              | 4.45837   |
| Q0D2L3        | SVDEGLLDSK                                                | 0.37622324        | 2              | 2.74482   |
| Q0D2L3        | SVDEGLLDSKR                                               | 1.10545214        | 2              | 3.14827   |
| Q0D2L3        | VADLGNVNVNLYNLQDSCR                                       | 1.50060922        | 2              | 5.29579   |
| Q0D2L3        | VCSMMHLPLQSSPEGLDAAFVGVPLDTGTSNRPGAR                      | 2.45770043        | 3              | 5.56457   |
| Q0D2L3        | VVLAEDCWMK                                                | 1.17701759        | 2              | 2.52312   |
| <b>Q0VAV2</b> | <b>EXPH5 Exophilin_5</b>                                  | <b>0.27166433</b> | <b>0.61111</b> | <b>4</b>  |
| Q0VAV2        | DMDVSVSKDEQLNK                                            | 0.90981822        | 2              | 2.32847   |
| Q0VAV2        | DMDVSVSKDEQLNK+Oxidation(1)                               | 0.26570061        |                |           |
| Q0VAV2        | GMAKNPMEQTTPR+Oxidation(1)Oxidation(7)                    | 0.64025061        |                |           |
| Q0VAV2        | SLSDQDPGQEQREEK                                           | 1.11066756        | 2              | 2.48273   |
| <b>Q0VGK3</b> | <b>GLCTK Glycerate kinase</b>                             | <b>1.15663097</b> | <b>0.43945</b> | <b>3</b>  |
| Q0VGK3        | AVLGMAAAADDELLGQHLVQGVISVPK                               | 1.24036658        | 2              | 5.17847   |
| Q0VGK3        | GATIQLNTR                                                 | 1.92490882        | 2              | 2.80106   |
| Q0VGK3        | QLFDSAVGAVQPGPMLQR                                        | 1.03187686        | 2              | 3.58777   |
| <b>Q0ZHH6</b> | <b>ATLA3 Atlastin_3</b>                                   | <b>1.30248489</b> | <b>0.19775</b> | <b>7</b>  |
| Q0ZHH6        | ALASVLLQDHIR                                              | 1.72245002        | 2              | 2.61704   |
| Q0ZHH6        | EHQHEEIQNVR                                               | 1.31309306        | 2              | 3.39878   |
| Q0ZHH6        | EQLQLTIPYVNLPSK                                           | 1.34593749        | 2              | 2.76003   |
| Q0ZHH6        | GGSDPETTGIIQWSEVFTVK                                      | 1.23394957        | 2              | 4.5233    |
| Q0ZHH6        | IYQGEDLPHPK                                               | 1.28888908        | 2              | 2.52423   |
| Q0ZHH6        | LAMDEIFQKPFQTLMLVR+Oxidation(2)                           | 1.09074174        |                |           |
| Q0ZHH6        | YQEELEEEITELYENFCK                                        | 1.49523385        | 2              | 5.27601   |
| <b>Q10728</b> | <b>MYPT1 Protein phosphatase 1 regulatory subunit 12A</b> | <b>0.97775499</b> | <b>0.71143</b> | <b>2</b>  |
| Q10728        | EQENEEKDKEEK                                              | 1.3739383         | 2              | 2.32477   |
| Q10728        | SLLEMEKRER+Oxidation(4)                                   | 0.91134302        |                |           |
| <b>Q10758</b> | <b>K2C8 Keratin_type II cytoskeletal 8</b>                | <b>1.00299854</b> | <b>0.98207</b> | <b>27</b> |
| Q10758        | AEAETMYQIK                                                | 1.24129163        | 2              | 3.32209   |
| Q10758        | AQYEEIANR                                                 | 1.12341802        | 2              | 3.13165   |
| Q10758        | ATLEAAIADAEQR                                             | 0.98450982        | 2              | 4.70628   |
| Q10758        | DVDEAYMKNKVELESR                                          | 0.7424441         | 2              | 3.44792   |
| Q10758        | ELQSQISDTSVVLMSDMSR                                       | 1.17119387        | 2              | 6.24015   |
| Q10758        | GSLGGFGGAGVGGITAVTVNQSLNPLK                               | 1.07320229        | 2              | 4.99104   |
| Q10758        | KDVDEAYMKNK                                               | 1.05635138        | 2              | 3.31882   |
| Q10758        | LEGLTDEINFLR                                              | 1.25003962        | 2              | 4.39292   |
| Q10758        | LESGMQNMSIHTK                                             | 1.4166346         | 2              | 3.87926   |
| Q10758        | LEVDPNIQAVR                                               | 1.14023319        | 2              | 3.69396   |
| Q10758        | LEVELGNMQGLVEDFK                                          | 1.33817718        | 2              | 5.05751   |
| Q10758        | LKLEVELGNMQGLVEDFK                                        | 1.36922851        | 3              | 3.52064   |
| Q10758        | LQAEIDALK                                                 | 1.07642702        | 2              | 2.97322   |
| Q10758        | LVSESSDIMSK                                               | 1.27417113        | 2              | 3.49612   |

|               |                                                                             |                   |                |           |
|---------------|-----------------------------------------------------------------------------|-------------------|----------------|-----------|
| Q10758        | QIHEEEIR                                                                    | 0.9338737         | 1              | 2.19595   |
| Q10758        | QLEALGQEK                                                                   | 1.03332576        | 1              | 2.16785   |
| Q10758        | RQLEALGQEK                                                                  | 0.98556912        | 2              | 2.57175   |
| Q10758        | SKTEISEMNR                                                                  | 1.32503921        | 3              | 3.76008   |
| Q10758        | SKTEISEMNR+Oxidation(7                                                      | 1.25907605        |                |           |
| Q10758        | SLDMDSIIAEVR                                                                | 0.95092477        | 2              | 4.67944   |
| Q10758        | SNMDNMFESYINNL                                                              | 0.97658616        | 2              | 4.2057    |
| Q10758        | SRAEAETMYQIK                                                                | 1.12336449        | 2              | 3.67364   |
| Q10758        | TEISEMNR                                                                    | 1.44106275        | 2              | 2.32093   |
| Q10758        | TEMENEFVLK                                                                  | 1.08013578        | 2              | 3.60466   |
| Q10758        | TEMENEFVLK+Oxidation(2                                                      | 1.14508207        |                |           |
| Q10758        | WLLQQQK                                                                     | 0.86584707        | 2              | 3.00572   |
| Q10758        | YEELQTLAGK                                                                  | 0.96261958        | 2              | 3.60237   |
| <b>Q148W0</b> | <b>AT8B1 Probable phospholipid transporting ATPase IC</b>                   | <b>1.0497339</b>  | <b>0.98425</b> | <b>2</b>  |
| Q148W0        | LGQSHFINWDLQMYAEK+Oxidation(12                                              | 0.96343502        |                |           |
| Q148W0        | TCEVIKDRFK                                                                  | 1.05758052        | 1              | 2.296     |
| <b>Q14DH7</b> | <b>ACSS3 Acyl CoA synthetase short chain family member 3_ mitochondrial</b> | <b>1.43277864</b> | <b>0.76283</b> | <b>7</b>  |
| Q14DH7        | CVPGYNMILDDNMQK                                                             | 1.67350872        | 2              | 2.97358   |
| Q14DH7        | IAIYDSPVTDK                                                                 | 1.14256293        | 2              | 2.93041   |
| Q14DH7        | STLSALVNGKPYK                                                               | 0.67726806        | 2              | 2.78172   |
| Q14DH7        | THFAASVADPER                                                                | 1.40199776        | 2              | 3.66633   |
| Q14DH7        | VDDVINVAGHR                                                                 | 1.8412044         | 2              | 3.61651   |
| Q14DH7        | VLAEHGVAALFTAPT AIR                                                         | 1.2863148         | 2              | 4.42953   |
| Q14DH7        | VTPTIEDPSIFGHIEEVLK                                                         | 1.11295846        | 2              | 3.42567   |
| <b>Q1H5H1</b> | <b>SELT Selenoprotein T</b>                                                 | <b>1.4892424</b>  | <b>0.25878</b> | <b>2</b>  |
| Q1H5H1        | IEGENYLPQPIYR                                                               | 1.39627969        | 2              | 2.83603   |
| Q1H5H1        | LESGHLPSMQQLVQILDNEMK                                                       | 1.53752868        | 3              | 3.98488   |
| <b>Q1HCL7</b> | <b>NAKD1 NAD kinase domain containing protein 1</b>                         | <b>1.24979849</b> | <b>0.98863</b> | <b>11</b> |
| Q1HCL7        | GSSYSGLLER                                                                  | 1.16528632        | 2              | 2.43481   |
| Q1HCL7        | LKPVIGVNTDPER                                                               | 1.37229603        | 3              | 3.4647    |
| Q1HCL7        | LYLEGTGINPSPVDLHEQQLSLNQHSR                                                 | 1.3222491         | 3              | 5.23048   |
| Q1HCL7        | NVEHIIDSLRDEGIEVR                                                           | 0.9769377         | 2              | 3.5436    |
| Q1HCL7        | QGNLTLPLNK                                                                  | 1.49094195        | 2              | 2.48926   |
| Q1HCL7        | SEASGPQLLPVR                                                                | 1.1717592         | 2              | 3.10753   |
| Q1HCL7        | SEGHLCPLVR                                                                  | 0.80945278        | 2              | 2.77451   |
| Q1HCL7        | SSGLNLCTGTGSK                                                               | 1.04078761        | 2              | 3.61795   |
| Q1HCL7        | VTNEYNESLSPPEEPK                                                            | 1.30909252        | 2              | 4.72269   |
| Q1HCL7        | YAELSEEDLK                                                                  | 1.33139234        | 2              | 2.77213   |
| Q1HCL7        | YTHSFPEALQK                                                                 | 1.43638039        | 2              | 2.49373   |
| <b>Q1JU68</b> | <b>EIF3A Eukaryotic translation initiation factor 3 subunit A</b>           | <b>1.17698398</b> | <b>0.9169</b>  | <b>7</b>  |
| Q1JU68        | AVEDIHGLFSLSK                                                               | 2.27870503        | 2              | 3.19418   |
| Q1JU68        | EEEEQRRAEEQMLK                                                              | 1.13118627        | 2              | 2.4563    |
| Q1JU68        | FNVLQYVVPEVK                                                                | 1.44787184        | 2              | 3.40989   |
| Q1JU68        | ILQEHEQIK                                                                   | 1.20131414        | 2              | 2.3826    |
| Q1JU68        | KGPEADSEWR                                                                  | 0.96157826        | 2              | 2.61071   |
| Q1JU68        | LLDMDGIIVEK                                                                 | 0.77252677        | 2              | 3.01552   |
| Q1JU68        | NQLTAMSSVLAK                                                                | 0.92194377        | 2              | 2.77784   |
| <b>Q29RW1</b> | <b>MYH4 Myosin_4</b>                                                        | <b>1.19204539</b> | <b>0.66782</b> | <b>13</b> |
| Q29RW1        | ANLMQAEIEELR                                                                | 2.73410543        | 2              | 2.94908   |
| Q29RW1        | ELENEVENEQKR                                                                | 3.6820001         | 2              | 3.10978   |
| Q29RW1        | GQDDLKEQLAMVER                                                              | 1.3606615         | 2              | 2.87192   |
| Q29RW1        | LQDAEEHVEAVNSK                                                              | 2.81080895        | 2              | 4.84159   |
| Q29RW1        | LQDLVDKLQTK                                                                 | 1.65297222        | 1              | 1.94186   |

|               |                                                            |                   |                |          |
|---------------|------------------------------------------------------------|-------------------|----------------|----------|
| Q29RW1        | MEGDLNEMEIQLNHANR                                          | 1.42463241        | 2              | 4.04416  |
| Q29RW1        | MEIDDLASNMETVSK                                            | 6.67824273        | 2              | 4.33588  |
| Q29RW1        | NAYEESLDQLETLLKR                                           | 3.16772375        | 2              | 4.01644  |
| Q29RW1        | SAETEKEMATMK                                               | 1.08057455        | 2              | 2.77454  |
| Q29RW1        | SELQASLEEAASLEHEEGK                                        | 1.65289829        | 2              | 4.85812  |
| Q29RW1        | TEGGATVTVK                                                 | 3.43206788        | 2              | 2.91739  |
| Q29RW1        | TKLEQQVDDLEGSLEQEK                                         | 1.02715731        | 2              | 4.93899  |
| Q29RW1        | TKLEQQVDDLEGSLEQEK                                         | 2.56278794        | 3              | 4.62526  |
| <b>Q2PQA9</b> | <b>KINH Kinesin_1 heavy chain</b>                          | <b>1.35782089</b> | <b>0.57983</b> | <b>4</b> |
| Q2PQA9        | HVAVTNMNEHSSR                                              | 3.00031629        | 3              | 4.04124  |
| Q2PQA9        | MEENEKELAACQLR                                             | 1.52946504        | 2              | 2.35641  |
| Q2PQA9        | SAEVSDDTGGSAAQK                                            | 1.2173927         | 2              | 5.21531  |
| Q2PQA9        | TGAEGAVLDEAK                                               | 1.26665503        | 2              | 2.42435  |
| <b>Q2TA68</b> | <b>OPA1 Dynamin_like 120 kDa protein_mitochondrial</b>     | <b>1.30538708</b> | <b>0.64623</b> | <b>6</b> |
| Q2TA68        | AKNEILDEVISLSQVTPK                                         | 1.32141088        | 2              | 3.96823  |
| Q2TA68        | AVEVAWETLQDEFSSR                                           | 1.28256646        | 2              | 2.3639   |
| Q2TA68        | GKEHDDIFDK                                                 | 1.25668201        | 2              | 2.40361  |
| Q2TA68        | IDQLQEELLHTQLK                                             | 0.9984991         | 2              | 2.64901  |
| Q2TA68        | TSVLEMIAQAR                                                | 0.93011045        | 2              | 3.29925  |
| Q2TA68        | VVVVGDSQAGK                                                | 1.37349374        | 2              | 2.54199  |
| <b>Q2V057</b> | <b>PROD2 Probable proline dehydrogenase 2</b>              | <b>1.43271631</b> | <b>0.00198</b> | <b>7</b> |
| Q2V057        | ASIQGFVAGETAEEVR                                           | 1.82996756        | 2              | 3.18024  |
| Q2V057        | EDCTQPDYEATSR                                              | 1.48084066        | 2              | 3.92341  |
| Q2V057        | GCVQQLQAIGLQPLLAVPTTEEPDSSAAK                              | 1.27472306        | 3              | 3.60321  |
| Q2V057        | NLQLSCLSTEQNQHLQASLSR                                      | 1.4878967         | 2              | 5.4459   |
| Q2V057        | SIPYGCLEEVIPIYLR                                           | 3.17903465        | 2              | 2.53174  |
| Q2V057        | SVTQLHGKEDCTQPDYEATSR                                      | 1.19410679        | 3              | 5.44921  |
| Q2V057        | TSEAWYEGNLSAMLHCVDLR                                       | 1.42139474        | 2              | 3.45397  |
| <b>Q3B7D0</b> | <b>HEM6 Coproporphyrinogen_III oxidase_mitochondrial</b>   | <b>1.15789537</b> | <b>0.31845</b> | <b>4</b> |
| Q3B7D0        | AGVNISSVHGNLSEEAANQMR                                      | 1.09359175        | 3              | 4.74095  |
| Q3B7D0        | FGLFTPGSR                                                  | 1.21192342        | 2              | 2.33909  |
| Q3B7D0        | HCDDSYTPQDK                                                | 1.61929923        | 2              | 3.78569  |
| Q3B7D0        | LEEDGDELAR                                                 | 2.55392118        | 2              | 2.82395  |
| <b>Q3B7U9</b> | <b>FKBP8 Peptidyl_prolyl cis_trans isomerase FKBP8</b>     | <b>1.11685175</b> | <b>0.99998</b> | <b>4</b> |
| Q3B7U9        | SCSQVLEHQPDNIK                                             | 1.12124995        | 2              | 4.13734  |
| Q3B7U9        | TAEDGPDLMLSGQER                                            | 1.07645651        | 2              | 4.21666  |
| Q3B7U9        | VDMTCEEEELLQIK                                             | 1.12083431        | 2              | 4.14715  |
| Q3B7U9        | VLAQQGEYSEAIPIR                                            | 0.94371152        | 2              | 3.4743   |
| <b>Q3B8Q2</b> | <b>IF4A3 Eukaryotic initiation factor 4A_III</b>           | <b>1.22409747</b> | <b>0.82488</b> | <b>2</b> |
| Q3B8Q2        | GIYAYGFKPSAIQQR                                            | 1.22393915        | 2              | 4.58426  |
| Q3B8Q2        | GRDVIAQSQSGTGK                                             | 1.25246545        | 2              | 3.88809  |
| <b>Q3KRD8</b> | <b>IF6 Eukaryotic translation initiation factor 6</b>      | <b>1.16436105</b> | <b>0.34684</b> | <b>3</b> |
| Q3KRD8        | ASFENNCEVGCFAK                                             | 1.16408486        | 2              | 2.43011  |
| Q3KRD8        | HGLLVPNNTTDQELQHIR                                         | 1.30661251        | 3              | 4.83218  |
| Q3KRD8        | TSIEDQDELSSLLQVPLVAGTVNR                                   | 1.451427          | 3              | 3.90298  |
| <b>Q3KRE0</b> | <b>ATAD3 ATPase family AAA domain_containing protein 3</b> | <b>1.20940137</b> | <b>0.47132</b> | <b>3</b> |
| Q3KRE0        | GEGTGPPPLPPAQPGAESGGDR                                     | 1.22197029        | 2              | 3.66028  |
| Q3KRE0        | ISVLEALR                                                   | 3.30768324        | 2              | 2.41864  |
| Q3KRE0        | QQQLLNEENLR                                                | 1.16828088        | 2              | 2.36425  |
| <b>Q3KRE8</b> | <b>TBB2B Tubulin beta_2B chain</b>                         | <b>1.12624478</b> | <b>0.39666</b> | <b>2</b> |
| Q3KRE8        | ALTVPILTQQMFDSK                                            | 1.21276985        | 2              | 3.22134  |
| Q3KRE8        | ESESCDCLQGFQLTHSLGGGTGSGMGTLLISK                           | 1.43177361        | 3              | 5.05137  |
| <b>Q3MIB4</b> | <b>LONP2 Lon protease homolog 2_peroxisomal</b>            | <b>1.16396952</b> | <b>0.94453</b> | <b>2</b> |

|               |                                                                                           |                   |                |          |
|---------------|-------------------------------------------------------------------------------------------|-------------------|----------------|----------|
| Q3MIB4        | MEIIQVPGYTQEEK                                                                            | 1.16436454        | 2              | 3.72723  |
| Q3MIB4        | TVGVNNPVFLDEVDK                                                                           | 1.05485667        | 2              | 2.44436  |
| <b>Q3MIE0</b> | <b>ECHD3 Enoyl_CoA hydratase domain_containing protein 3_mitochondrial</b>                | <b>1.0755413</b>  | <b>0.99576</b> | <b>6</b> |
| Q3MIE0        | DGQEGIEAFIQK                                                                              | 1.07556157        | 2              | 2.76709  |
| Q3MIE0        | SDILHEAESEDLK                                                                             | 1.08742677        | 3              | 3.66626  |
| Q3MIE0        | SSFATPGVNVGLFCSTPAVALGR                                                                   | 1.15697927        | 2              | 4.73243  |
| Q3MIE0        | VALEMLFTGEPISAQEALR                                                                       | 0.86775803        | 2              | 3.66328  |
| Q3MIE0        | VIIISAEGPVFSSGHDLK                                                                        | 0.93740922        | 2              | 4.47785  |
| Q3MIE0        | VVPEEQLEEEATR                                                                             | 0.86099355        | 2              | 3.97194  |
| <b>Q3MIF4</b> | <b>XYLB Xylulose kinase</b>                                                               | <b>0.91288326</b> | <b>0.34064</b> | <b>8</b> |
| Q3MIF4        | CCLGWDFSTQQVK                                                                             | 1.76471303        | 2              | 3.20523  |
| Q3MIF4        | DLPEFGTQGGVHVHK                                                                           | 0.92934181        | 2              | 2.75126  |
| Q3MIF4        | FNADNMEVSAPGDVEIR                                                                         | 1.27406913        | 2              | 4.45379  |
| Q3MIF4        | IHAEGLGYR                                                                                 | 1.41695517        | 2              | 2.34742  |
| Q3MIF4        | IRDESASCSWNK                                                                              | 1.55534366        | 2              | 4.17306  |
| Q3MIF4        | VVAFTGDNPASLAGMR                                                                          | 0.9115016         | 2              | 3.87135  |
| Q3MIF4        | VWSQAQLDACAPHLK                                                                           | 1.93103337        | 2              | 3.81145  |
| Q3MIF4        | YSPIDYSDGSGMNLQIQEK                                                                       | 2.1478324         | 2              | 5.27579  |
| <b>Q3SWS9</b> | <b>JKIP1 Janus kinase and microtubule_interacting protein 1</b>                           | <b>1.29468663</b> | <b>0.61349</b> | <b>2</b> |
| Q3SWS9        | LEMEENQLK+Oxidation(2                                                                     | 0.93856165        |                |          |
| Q3SWS9        | VKTALLADAREEAR                                                                            | 1.29511307        | 2              | 2.38817  |
| <b>Q3T1I4</b> | <b>PRRC1 Protein PRRC1</b>                                                                | <b>1.13254089</b> | <b>0.79435</b> | <b>2</b> |
| Q3T1I4        | GQDDAPAGGIWGFIK                                                                           | 1.16992766        | 2              | 3.68292  |
| Q3T1I4        | WSGLLVTVGEVLEK                                                                            | 0.89446179        | 2              | 2.7461   |
| <b>Q3T1J1</b> | <b>IF5A1 Eukaryotic translation initiation factor 5A_1</b>                                | <b>1.2938088</b>  | <b>0.00348</b> | <b>4</b> |
| Q3T1J1        | EDLRLPEGDLGK                                                                              | 1.41192101        | 2              | 2.96803  |
| Q3T1J1        | EDLRLPEGDLGKEIEQK                                                                         | 1.41917422        | 2              | 4.25702  |
| Q3T1J1        | NDFQLIGIQDGYLSLLQDSGEVR                                                                   | 1.74440745        | 2              | 5.07142  |
| Q3T1J1        | RNDFQLIGIQDGYLSLLQDSGEVR                                                                  | 2.35834695        | 3              | 4.24045  |
| <b>Q3T1K5</b> | <b>CAZA2 F_actin_capping protein subunit alpha_2</b>                                      | <b>1.00486537</b> | <b>0.06615</b> | <b>3</b> |
| Q3T1K5        | FIIHAPPGEFNEVFNDVR                                                                        | 1.12246921        | 3              | 4.02543  |
| Q3T1K5        | FTVTPSTTQVVGILK                                                                           | 1.36485749        | 2              | 4.08574  |
| Q3T1K5        | KVDGQQTIACIESHQFQAK                                                                       | 1.04057751        | 3              | 3.77062  |
| <b>Q3TDQ1</b> | <b>STT3B Dolichyl_diphosphooligosaccharide__protein glycosyltransferase subunit STT3B</b> | <b>1.18561095</b> | <b>0.63424</b> | <b>2</b> |
| Q3TDQ1        | FGEMQLDFR                                                                                 | 1.41317592        | 2              | 2.33488  |
| Q3TDQ1        | HLEEAFTSEHWLVR                                                                            | 1.18472304        | 3              | 4.07701  |
| <b>Q3U0D9</b> | <b>HACE1 E3 ubiquitin_protein ligase HACE1</b>                                            | <b>1.09613192</b> | <b>0.47413</b> | <b>2</b> |
| Q3U0D9        | DSIFRSSCEIVSKANCAK                                                                        | 1.08246776        | 2              | 2.3169   |
| Q3U0D9        | MERAMEQLNRLTR                                                                             | 2.01237974        | 2              | 2.32771  |
| <b>Q3U0J8</b> | <b>TBD2B TBC1 domain family member 2B</b>                                                 | <b>1.22613829</b> | <b>0.77878</b> | <b>2</b> |
| Q3U0J8        | DTTDIISQHPNPSAEK                                                                          | 1.02369276        | 2              | 2.52619  |
| Q3U0J8        | QIELDLLRTLPNK                                                                             | 1.2380639         | 2              | 2.5996   |
| <b>Q3UHR0</b> | <b>BAHC1 BAH and coiled_coil domain_containing protein 1</b>                              | <b>1.04360086</b> | <b>0.75989</b> | <b>2</b> |
| Q3UHR0        | MQILQRKDTWAPK+Oxidation(0                                                                 | 1.50988309        |                |          |
| Q3UHR0        | NLEEPGLLSR                                                                                | 1.04337687        | 2              | 2.36867  |
| <b>Q3ULJ0</b> | <b>GPD1L Glycerol_3_phosphate dehydrogenase 1_like protein</b>                            | <b>1.86265848</b> | <b>1.1E-06</b> | <b>3</b> |
| Q3ULJ0        | GIDEGPDGLK                                                                                | 1.07545847        | 2              | 2.82018  |
| Q3ULJ0        | LGLMEMIAFAK                                                                               | 2.21697045        | 2              | 3.81507  |
| Q3ULJ0        | LTDIINNDHENVKYLPGHK                                                                       | 1.56088597        | 2              | 2.40201  |
| <b>Q3UMF0</b> | <b>COBL1 Cordon_bleu protein_like 1</b>                                                   | <b>1.23531727</b> | <b>0.65411</b> | <b>2</b> |

|               |                                                         |                   |                |           |
|---------------|---------------------------------------------------------|-------------------|----------------|-----------|
| Q3UMF0        | RAPLPPMPTSQGAAQGQERR+Oxidation(6                        | 1.31045798        |                |           |
| Q3UMF0        | SGGTSTYVQDR                                             | 1.22395546        | 2              | 2.39346   |
| <b>Q3UQ44</b> | <b>IQGA2 Ras GTPase_activating_like protein IQGAP2</b>  | <b>1.1915551</b>  | <b>0.00057</b> | <b>18</b> |
| Q3UQ44        | ALVGENPPLTVIR                                           | 1.16427641        | 2              | 3.85569   |
| Q3UQ44        | AWVNQLETQTGEASK                                         | 1.08830376        | 2              | 5.20005   |
| Q3UQ44        | GVLGIDDLQTNQFK                                          | 1.29964244        | 2              | 4.29391   |
| Q3UQ44        | HTDNTVQWLR                                              | 1.44603965        | 2              | 3.00362   |
| Q3UQ44        | KKGGEIEILNNTDNK                                         | 0.64225216        | 2              | 2.37617   |
| Q3UQ44        | LFEGENEHLSSMNNYLETYQEFR                                 | 2.14845762        | 3              | 4.71034   |
| Q3UQ44        | LGIAPQIQDLLGK                                           | 2.10814154        | 2              | 2.9931    |
| Q3UQ44        | LPYDVTTEQALTYPEVK                                       | 1.99096078        | 2              | 4.10466   |
| Q3UQ44        | LPYDVTTEQALTYPEVKNK                                     | 1.69460668        | 2              | 2.37227   |
| Q3UQ44        | LSAEEMDER                                               | 1.29661412        | 2              | 3.09178   |
| Q3UQ44        | NPNAVLTCVDDLSQEYQK                                      | 1.20820722        | 2              | 5.23168   |
| Q3UQ44        | SKVDQVQDIVTGNPTVIK                                      | 1.0735437         | 2              | 4.99026   |
| Q3UQ44        | TALEEEIK                                                | 1.36412507        | 2              | 2.40717   |
| Q3UQ44        | TLDTLLPTANIR                                            | 1.04075957        | 2              | 3.57865   |
| Q3UQ44        | VDFTEEEISNMR                                            | 1.65417068        | 2              | 3.95305   |
| Q3UQ44        | VDQVQDIVTGNPTVIK                                        | 1.01059587        | 2              | 5.09797   |
| Q3UQ44        | YGSIVDDER                                               | 1.2655749         | 2              | 2.45914   |
| Q3UQ44        | YQDILNEIAK                                              | 1.13604889        | 2              | 3.06104   |
| <b>Q3UV17</b> | <b>K220 Keratin_type II cytoskeletal 2 oral</b>         | <b>1.67477392</b> | <b>0.33647</b> | <b>2</b>  |
| Q3UV17        | AQYEDIAQK                                               | 1.88575578        | 1              | 2.12442   |
| Q3UV17        | KQNTNMQTSIAEAEQR+Oxidation(5                            | 1.67339268        |                |           |
| <b>Q3V0K9</b> | <b>PLSI Plastin_1</b>                                   | <b>1.16719353</b> | <b>0.99995</b> | <b>3</b>  |
| Q3V0K9        | AYFHLLNQIAPK                                            | 0.91327879        | 2              | 3.05478   |
| Q3V0K9        | KIENCNYAVELGK                                           | 1.003212          | 2              | 3.73083   |
| Q3V0K9        | QFVTPADVVSGNPK                                          | 1.22258625        | 2              | 3.30249   |
| <b>Q3V132</b> | <b>ADT4 ADP/ATP translocase 4</b>                       | <b>1.79115512</b> | <b>0.44576</b> | <b>2</b>  |
| Q3V132        | GNLANVIR                                                | 1.52387573        | 2              | 2.75501   |
| Q3V132        | YFPTQALNFAFK                                            | 2.16227834        | 2              | 3.40525   |
| <b>Q3ZAV8</b> | <b>EDC4 Enhancer of mRNA_decapping protein 4</b>        | <b>1.6410326</b>  | <b>0.23955</b> | <b>2</b>  |
| Q3ZAV8        | SSHSTWPVDVVSQIK                                         | 1.64606359        | 2              | 2.33053   |
| Q3ZAV8        | VISVSTERTLLK                                            | 1.59506789        | 2              | 2.57487   |
| <b>Q497B0</b> | <b>NIT2 Omega_amidase NIT2</b>                          | <b>1.19922849</b> | <b>0.44806</b> | <b>15</b> |
| Q497B0        | ADLYSVESK                                               | 1.1905455         | 2              | 3.06079   |
| Q497B0        | AGTEETILYSIDLK                                          | 1.35553176        | 2              | 3.73211   |
| Q497B0        | ASYVAWGHSTVVDVDPWGQVLT                                  | 1.22022255        | 3              | 5.85666   |
| Q497B0        | AVDNQVYVATASPAR                                         | 0.88844899        | 2              | 4.68021   |
| Q497B0        | AVDNQVYVATASPARDEK                                      | 1.01724558        | 2              | 3.58641   |
| Q497B0        | ENSIYLIGGSPIEEDDGK                                      | 1.33058528        | 2              | 3.46068   |
| Q497B0        | ENSIYLIGGSPIEEDDGKLYNTCAVFGPDGNLLVK                     | 1.02875465        | 3              | 4.96519   |
| Q497B0        | FAELAQIYAR                                              | 1.8755158         | 2              | 3.92586   |
| Q497B0        | IHLFDIDVPGK                                             | 1.17523922        | 3              | 3.4871    |
| Q497B0        | KIHLFDIDVPGK                                            | 1.08916864        | 3              | 4.73521   |
| Q497B0        | LALIQLQVSSIK                                            | 2.68465227        | 2              | 3.06932   |
| Q497B0        | LYNTCAVFGPDGNLLVK                                       | 1.17466721        | 2              | 4.1224    |
| Q497B0        | QGANIVSLPECFNSPYGTNYFPEYAEK                             | 1.22931435        | 3              | 4.97485   |
| Q497B0        | TLSPGDSFSTFDTPYCR                                       | 1.20889244        | 2              | 4.7758    |
| Q497B0        | VGLGICYDMR                                              | 1.68879996        | 2              | 2.86102   |
| <b>Q498D5</b> | <b>RMD2 Regulator of microtubule dynamics protein 2</b> | <b>0.94847659</b> | <b>0.79412</b> | <b>4</b>  |
| Q498D5        | AYGDMYDLSTNTQEK                                         | 0.88796382        | 2              | 4.56128   |
| Q498D5        | FCNLALLPIVTK                                            | 2.07743151        | 2              | 3.2297    |
| Q498D5        | GQLQILEK                                                | 0.90547781        | 1              | 2.059     |
| Q498D5        | LNELLTNVEELKEEIK                                        | 1.09602088        | 2              | 2.87154   |

|               |                                                                   |                   |                |          |
|---------------|-------------------------------------------------------------------|-------------------|----------------|----------|
| <b>Q498U4</b> | <b>SARNP SAP domain_containing ribonucleoprotein</b>              | <b>1.11906592</b> | <b>0.20532</b> | <b>2</b> |
| Q498U4        | EEEEPEKVVDMASEK                                                   | 0.44365463        | 2              | 2.3657   |
| Q498U4        | FGIVTSSAGTGTTEDTEAK                                               | 1.14242347        | 2              | 3.34286  |
| <b>Q499N5</b> | <b>ACSF2 Acyl_CoA synthetase family member 2_mitochondrial</b>    | <b>1.25006836</b> | <b>0.01177</b> | <b>7</b> |
| Q499N5        | GATLSHHNIVNNSNLIGQR                                               | 1.50309205        | 2              | 5.32955  |
| Q499N5        | GGENIYPAELEDFHFK                                                  | 0.98705554        | 2              | 2.9767   |
| Q499N5        | SGETTTEEEIK                                                       | 1.11852159        | 2              | 3.16073  |
| Q499N5        | TFETVQGDR                                                         | 1.8611015         | 2              | 2.67236  |
| Q499N5        | TGDIASMDEQGFRC                                                    | 1.1901509         | 2              | 3.72499  |
| Q499N5        | TVGECLDATAQR                                                      | 2.30370398        | 2              | 2.90951  |
| Q499N5        | YIVFVEGYPLTVSGK                                                   | 1.50405404        | 2              | 4.37984  |
| <b>Q4AEF8</b> | <b>COPG Coatomer subunit gamma</b>                                | <b>1.23731613</b> | <b>0.47624</b> | <b>6</b> |
| Q4AEF8        | FGAQNEEMLPSILVLLK                                                 | 1.38583865        | 2              | 3.50185  |
| Q4AEF8        | SLPYNQPGTCYTLVALPK                                                | 1.05179074        | 2              | 2.44093  |
| Q4AEF8        | SSPEPVALTESETEVVIR                                                | 1.37172791        | 2              | 3.61256  |
| Q4AEF8        | TLEEAVGNIVK                                                       | 1.07450336        | 2              | 2.64028  |
| Q4AEF8        | VVLEHEEVR                                                         | 1.52387199        | 2              | 2.4354   |
| Q4AEF8        | VVVVQAISALCQK                                                     | 3.08484959        | 2              | 2.46967  |
| <b>Q4FZT0</b> | <b>STML2 Stomatin_like protein 2</b>                              | <b>1.14752415</b> | <b>0.09825</b> | <b>5</b> |
| Q4FZT0        | AEQINQAAGEASAVLAK                                                 | 1.12573631        | 2              | 4.7049   |
| Q4FZT0        | ASYGVEDPEYAVTQLAQTMR                                              | 1.5247805         | 2              | 5.54852  |
| Q4FZT0        | ATVLESEGTR                                                        | 1.14741937        | 2              | 2.80368  |
| Q4FZT0        | DVQTTDTSIEELGR                                                    | 1.88384119        | 2              | 2.9225   |
| Q4FZT0        | ILEPGLNVLIPVLDLDR                                                 | 1.3074139         | 2              | 3.01991  |
| <b>Q4FZT9</b> | <b>PSMD2 26S proteasome non_ATPase regulatory subunit 2</b>       | <b>1.15605573</b> | <b>0.98566</b> | <b>8</b> |
| Q4FZT9        | DKTPVQSQQPSATAPSGADEK                                             | 1.10228051        | 3              | 4.8805   |
| Q4FZT9        | FGGSGSQVDSAR                                                      | 1.21808518        | 2              | 3.39619  |
| Q4FZT9        | SETELKDTYAR                                                       | 1.24685623        | 2              | 3.04089  |
| Q4FZT9        | SGALLACGIVNSGVR                                                   | 1.2157739         | 2              | 3.36753  |
| Q4FZT9        | SSTTSMTSVPKPLK                                                    | 0.96846582        | 2              | 3.49787  |
| Q4FZT9        | TITGFQTHHTPVLLAHGER                                               | 1.11648175        | 3              | 3.92593  |
| Q4FZT9        | TPVQSQQPSATAPSGADEK                                               | 1.02241329        | 2              | 4.87975  |
| Q4FZT9        | VGQAVDVVGGQAGKPK                                                  | 0.90663964        | 2              | 3.46212  |
| <b>Q4FZX7</b> | <b>SRPRB Signal recognition particle receptor subunit beta</b>    | <b>1.44573832</b> | <b>2E-07</b>   | <b>4</b> |
| Q4FZX7        | GDAGSADVQDLEK                                                     | 3.41922755        | 2              | 3.4692   |
| Q4FZX7        | GNSLTLIDLPGHESLR                                                  | 1.4054537         | 2              | 2.80888  |
| Q4FZX7        | SAAPSTLSSSTAPAQLGK                                                | 1.90218558        | 2              | 4.84289  |
| Q4FZX7        | VGDGAGGAFQPYLDSLRL                                                | 1.27281042        | 2              | 3.1283   |
| <b>Q4FZY0</b> | <b>EFHD2 EF_hand domain_containing protein D2</b>                 | <b>1.17639478</b> | <b>0.53842</b> | <b>2</b> |
| Q4FZY0        | KQAEVVK                                                           | 1.16491073        | 1              | 1.94405  |
| Q4FZY0        | LSEIDVSTEGVK                                                      | 1.90122102        | 2              | 2.59805  |
| <b>Q4G061</b> | <b>EIF3B Eukaryotic translation initiation factor 3 subunit B</b> | <b>1.15072134</b> | <b>0.74208</b> | <b>6</b> |
| Q4G061        | AEEEGSDGSAEAEPR                                                   | 1.27109606        | 2              | 4.95918  |
| Q4G061        | AKPAAQSEETAASPAASPTPQSAQEPSAPGK                                   | 5.43935206        | 3              | 5.01134  |
| Q4G061        | DRPQEADGIDSVIVVDNVPQVGPDR                                         | 1.96684079        | 3              | 3.5612   |
| Q4G061        | GTQGVVTNFEIFR                                                     | 1.05325576        | 2              | 3.00808  |
| Q4G061        | IINDYYPEEDGK                                                      | 1.34807075        | 2              | 2.86532  |
| Q4G061        | TEDAEDAEARPEPEVR                                                  | 0.5175204         | 3              | 3.61913  |
| <b>Q4G063</b> | <b>CREL2 Cysteine_rich with EGF_like domain protein 2</b>         | <b>1.53201375</b> | <b>0.33496</b> | <b>2</b> |
| Q4G063        | ACCLPGTYGPDCK                                                     | 1.44090936        | 2              | 3.03808  |
| Q4G063        | FNQGMANTAR                                                        | 2.19472445        | 2              | 2.4181   |



|               |                                                                                      |                   |                |           |
|---------------|--------------------------------------------------------------------------------------|-------------------|----------------|-----------|
| <b>Q4KLF8</b> | <b>ARPC5 Actin_related protein 2/3 complex subunit 5</b>                             | <b>0.96818925</b> | <b>0.6605</b>  | <b>2</b>  |
| Q4KLF8        | ALAAGGVGSIVR                                                                         | 0.78877107        | 2              | 2.84465   |
| Q4KLF8        | QGNMTAALQAALK                                                                        | 1.45934934        | 2              | 2.3489    |
| <b>Q4KLP0</b> | <b>DHTK1 Probable 2_oxoglutarate dehydrogenase E1 component DHKTD1_mitochondrial</b> | <b>1.41415143</b> | <b>0.00017</b> | <b>16</b> |
| Q4KLP0        | ARPSVDHGLAR                                                                          | 0.84847324        | 2              | 3.06238   |
| Q4KLP0        | HAMVVCQNTDDVYIPLNHMDPNQK                                                             | 1.76882935        | 3              | 5.71346   |
| Q4KLP0        | KSIPDTYAEHLIASGLMTQEEVSDIK                                                           | 1.44278434        | 3              | 4.68575   |
| Q4KLP0        | LEELCPFPLDSLQEQEMGK                                                                  | 1.56780163        | 3              | 5.42125   |
| Q4KLP0        | LLLESQEFDFHFLATK                                                                     | 1.21779659        | 2              | 3.95675   |
| Q4KLP0        | LSAYGGITDIIIGMPHR                                                                    | 2.02327968        | 3              | 4.44434   |
| Q4KLP0        | LVTYVCEHGK                                                                           | 1.58745658        | 2              | 2.36789   |
| Q4KLP0        | QQSQEDGDYSPNGSAQPGDK                                                                 | 1.98401134        | 2              | 2.63099   |
| Q4KLP0        | QWGHNELDEPFFNPNVMYK                                                                  | 1.45358536        | 3              | 3.99712   |
| Q4KLP0        | SIPDTYAEHLIASGLMTQEEVSDIK                                                            | 1.28587059        | 3              | 5.02157   |
| Q4KLP0        | SSLYSSDIGK                                                                           | 1.37221431        | 2              | 2.83784   |
| Q4KLP0        | SVEVPEELQLHSHLLK                                                                     | 1.20159862        | 2              | 3.31004   |
| Q4KLP0        | WLLQSGLVILLPHGYDAGDPDHSSCR                                                           | 1.17794925        | 3              | 3.36754   |
| Q4KLP0        | WQGLVQPAACVTTWDTGVPLELLR                                                             | 1.90228677        | 2              | 4.9568    |
| Q4KLP0        | YGGEGAESMMGFFHELLK                                                                   | 1.55474161        | 2              | 4.43611   |
| Q4KLP0        | YPVAVSTLEEMAPGTAFKPVIGDSSVDPK                                                        | 1.65006813        | 3              | 4.56909   |
| <b>Q4KLZ6</b> |                                                                                      | <b>1.58324643</b> | <b>0.08906</b> | <b>16</b> |
| Q4KLZ6        | AAPTEPAEAEATAAGGVASK                                                                 | 1.38302871        | 2              | 4.91548   |
| Q4KLZ6        | AILEVLQTK                                                                            | 1.17824286        | 2              | 2.89094   |
| Q4KLZ6        | ANTDLPAWSAAAMDAGLK                                                                   | 1.61300328        | 2              | 3.61269   |
| Q4KLZ6        | ASYISSAQLDQPDPAVAAAAIFR                                                              | 1.23971395        | 2              | 4.96248   |
| Q4KLZ6        | AVAQAGTAGTLIVK                                                                       | 1.6855552         | 2              | 4.36264   |
| Q4KLZ6        | EGPTPASPAQVLSK                                                                       | 1.41346332        | 2              | 3.38581   |
| Q4KLZ6        | GLCGTILIK                                                                            | 1.1696091         | 2              | 2.40148   |
| Q4KLZ6        | GVSLTLMVDEPLLK                                                                       | 1.98788997        | 2              | 3.0735    |
| Q4KLZ6        | ISTTLIGLEEHLNALDR                                                                    | 2.58252264        | 2              | 3.60906   |
| Q4KLZ6        | LIDAETNAK                                                                            | 1.87703115        | 2              | 2.37296   |
| Q4KLZ6        | LNFLAMEQAK                                                                           | 1.10754448        | 2              | 2.40456   |
| Q4KLZ6        | LSVLLLEK                                                                             | 2.13392543        | 2              | 2.60548   |
| Q4KLZ6        | MGGSSGALYGLFLTAAQPLK                                                                 | 2.05776801        | 2              | 3.56324   |
| Q4KLZ6        | MVNSVEGCAGDALAGFVACNPDLQLLQGYR                                                       | 1.72102625        | 3              | 5.90822   |
| Q4KLZ6        | VAGALAEFGMGLEEITK                                                                    | 2.11425414        | 2              | 4.53581   |
| Q4KLZ6        | VALLSGGSGHEPAHAGFIGK                                                                 | 2.15039567        | 2              | 5.35237   |
| <b>Q4KM49</b> | <b>SYYC Tyrosyl_tRNA synthetase_cytoplasmic</b>                                      | <b>0.92233255</b> | <b>0.43458</b> | <b>5</b>  |
| Q4KM49        | AFCEPGNVENNGVLSFVK                                                                   | 0.45680325        | 2              | 2.47295   |
| Q4KM49        | IDVGAEPR                                                                             | 0.57998085        | 2              | 2.35082   |
| Q4KM49        | QVEPLDPPAGSAPGER                                                                     | 0.97681759        | 2              | 2.59556   |
| Q4KM49        | TVVSGLVQFVPK                                                                         | 1.54537133        | 2              | 3.06702   |
| Q4KM49        | VDAQFGGIDQR                                                                          | 0.42620535        | 2              | 3.12845   |
| <b>Q4KM73</b> | <b>KCY UMP_CMP kinase</b>                                                            | <b>1.20271061</b> | <b>0.001</b>   | <b>7</b>  |
| Q4KM73        | EMDQTMANAQK                                                                          | 1.70152213        | 2              | 3.18346   |
| Q4KM73        | IQTYLESTKPIIDLVEEMGK                                                                 | 1.43339864        | 3              | 4.59218   |
| Q4KM73        | IVPVEITISLLK                                                                         | 2.21570722        | 2              | 2.4975    |
| Q4KM73        | KNPDSQYGELIEK                                                                        | 1.22472642        | 2              | 3.80017   |
| Q4KM73        | NQDNLQGWNK                                                                           | 1.33340052        | 2              | 2.84177   |
| Q4KM73        | SVDEVFGDVMK                                                                          | 1.11811558        | 2              | 3.45938   |
| Q4KM73        | YGYTHLSAGELLR                                                                        | 1.02679919        | 3              | 4.27906   |
| <b>Q4KM74</b> | <b>SC22B Vesicle_trafficking protein SEC22b</b>                                      | <b>1.42565794</b> | <b>0.00404</b> | <b>5</b>  |
| Q4KM74        | DLQQYQSQAK                                                                           | 1.59021217        | 2              | 3.55237   |
| Q4KM74        | GEALSALDSK                                                                           | 1.47610823        | 2              | 2.85129   |
| Q4KM74        | IMVANIEEVLRQ                                                                         | 1.15980342        | 2              | 2.78913   |

|               |                                                                                           |                   |                |          |
|---------------|-------------------------------------------------------------------------------------------|-------------------|----------------|----------|
| Q4KM74        | NLGSINTELQDVQR                                                                            | 1.17152688        | 2              | 4.38384  |
| Q4KM74        | VADGLPLAASMQEDEQSGR                                                                       | 1.12152936        | 2              | 4.36481  |
| <b>Q4KMA2</b> | <b>RD23B UV excision repair protein RAD23 homolog B</b>                                   | <b>1.02326185</b> | <b>0.63511</b> | <b>3</b> |
| Q4KMA2        | IDIDPEETVK                                                                                | 1.01807586        | 2              | 2.75957  |
| Q4KMA2        | NFVVVMVTKPK                                                                               | 0.7597127         | 2              | 2.97463  |
| Q4KMA2        | QIIQQNPSPALLQQIGR                                                                         | 1.28382349        | 2              | 4.24825  |
| <b>Q4QQW3</b> | <b>HOT Hydroxyacid_oxoacid transhydrogenase_ mitochondrial</b>                            | <b>0.95588696</b> | <b>0.1239</b>  | <b>6</b> |
| Q4QQW3        | AANLYACSPHSEFLDYVNAPIGK                                                                   | 1.35465462        | 3              | 3.56918  |
| Q4QQW3        | FLFDLNVDDGLAALGYSK                                                                        | 2.10416658        | 2              | 2.43737  |
| Q4QQW3        | HLETAELGANIR                                                                              | 1.48798518        | 2              | 3.45891  |
| Q4QQW3        | IQDAGPVLADALR                                                                             | 0.67473546        | 2              | 2.9916   |
| Q4QQW3        | NLSQLPPVQIVMDSLK                                                                          | 1.4410464         | 2              | 2.96438  |
| Q4QQW3        | TTDYAFEMAVSNIR                                                                            | 0.42819824        | 2              | 3.70436  |
| <b>Q4QRB4</b> | <b>TBB3 Tubulin beta_3 chain</b>                                                          | <b>1.65715263</b> | <b>0.00839</b> | <b>5</b> |
| Q4QRB4        | AILVDLEPGTMDSVR                                                                           | 1.23442639        | 2              | 4.56213  |
| Q4QRB4        | AILVDLEPGTMDSVR+Oxidation(10                                                              | 1.64473269        |                |          |
| Q4QRB4        | EIVHIQAGQCGNQIGAK                                                                         | 2.86261165        | 2              | 4.93126  |
| Q4QRB4        | IMNTFSVVPSPK                                                                              | 1.31532377        | 2              | 4.1015   |
| Q4QRB4        | ISEQFTAMFR                                                                                | 1.62829494        | 2              | 3.37924  |
| <b>Q4V7C7</b> | <b>ARP3 Actin_related protein 3</b>                                                       | <b>1.21780712</b> | <b>0.00799</b> | <b>6</b> |
| Q4V7C7        | GVDDLDFIGDEAIEKPTYATK                                                                     | 1.32341812        | 2              | 4.38781  |
| Q4V7C7        | KDYEEIGPSICR                                                                              | 1.05370185        | 2              | 3.66302  |
| Q4V7C7        | LGYAGNTEPQFIIPSCIAIK                                                                      | 1.71835059        | 2              | 3.34781  |
| Q4V7C7        | LSEELSGGR                                                                                 | 1.27932778        | 2              | 2.56612  |
| Q4V7C7        | NIVLSGGSTMFR                                                                              | 1.0549974         | 2              | 3.0931   |
| Q4V7C7        | TLTGTVIDSGDGVTHVIPVAEGYVIGSCK                                                             | 1.36978784        | 3              | 5.24268  |
| <b>Q4V8K1</b> | <b>STEAP4 Metalloreductase STEAP4</b>                                                     | <b>1.1977982</b>  | <b>0.94111</b> | <b>6</b> |
| Q4V8K1        | MNQYPESNAEYLAQLVPGAHVVK                                                                   | 1.30519275        | 3              | 3.73339  |
| Q4V8K1        | QVFVCGNDSK                                                                                | 1.19164895        | 2              | 2.38265  |
| Q4V8K1        | SDVIVLAVHR                                                                                | 1.43636243        | 2              | 2.82238  |
| Q4V8K1        | TCADFPPLTVDSSEK                                                                           | 1.16436755        | 2              | 4.48802  |
| Q4V8K1        | TLGLTPLDQGSLSAAK                                                                          | 1.19417787        | 2              | 3.81118  |
| Q4V8K1        | VLIDVSNNQK                                                                                | 1.02537082        | 2              | 2.53512  |
| <b>Q501J6</b> | <b>DDX17 Probable ATP_dependent RNA helicase DDX17</b>                                    | <b>1.00173266</b> | <b>0.47322</b> | <b>2</b> |
| Q501J6        | ELAQVQVADDYQK                                                                             | 0.64824659        | 2              | 3.12204  |
| Q501J6        | VLEEQAINPK                                                                                | 1.0365925         | 2              | 2.62331  |
| <b>Q505J8</b> | <b>SYFA Phenylalanyl_tRNA synthetase alpha chain</b>                                      | <b>1.22341773</b> | <b>0.68537</b> | <b>4</b> |
| Q505J8        | LQQVQAGQAEK                                                                               | 1.03981694        | 2              | 2.6754   |
| Q505J8        | RLEVADGGGLDSAELATQLGVEHQAVVGAVK                                                           | 1.77948418        | 3              | 4.59039  |
| Q505J8        | SLQALGEVIEAELR                                                                            | 1.22834044        | 2              | 3.7452   |
| Q505J8        | VVDSIEDEVQR                                                                               | 1.44612942        | 2              | 2.93538  |
| <b>Q561R9</b> | <b>LACB2 Beta_lactamase_like protein 2</b>                                                | <b>1.07822799</b> | <b>0.80464</b> | <b>4</b> |
| Q561R9        | ANIYYPGHGPVIHNAEAK                                                                        | 0.66991917        | 2              | 4.09343  |
| Q561R9        | ILIDTGEPSPVEYISCLK                                                                        | 1.07757139        | 2              | 3.79122  |
| Q561R9        | NISNDATYCIK                                                                               | 1.21069           | 2              | 2.95141  |
| Q561R9        | NNREEQIITVFR                                                                              | 0.77948926        | 2              | 2.69148  |
| <b>Q561S0</b> | <b>NDUAA NADH dehydrogenase [ubiquinone] 1 alpha subcomplex subunit 10_ mitochondrial</b> | <b>1.25357299</b> | <b>0.05024</b> | <b>6</b> |
| Q561S0        | LLQYSDALEHLLSTGQGVVLER                                                                    | 2.62411852        | 3              | 3.76304  |
| Q561S0        | LTLPEYLPPHAVIYIDVPVSEIQSR                                                                 | 2.0067867         | 3              | 4.18579  |
| Q561S0        | VITVDGNICSGK                                                                              | 1.16022109        | 2              | 2.45809  |
| Q561S0        | VVEDIEYLNYNK                                                                              | 0.99935594        | 2              | 3.90041  |
| Q561S0        | YAPGYNADVGDK                                                                              | 0.7581802         | 2              | 2.66096  |
| Q561S0        | YGLLASILGDK                                                                               | 2.37366862        | 2              | 3.14905  |

|               |                                                                                         |                   |                |           |
|---------------|-----------------------------------------------------------------------------------------|-------------------|----------------|-----------|
| <b>Q562C4</b> | <b>MET7B Methyltransferase_like protein 7B</b>                                          | <b>0.67050699</b> | <b>0.98265</b> | <b>5</b>  |
| Q562C4        | AQFSEVQLEWQPPPFK                                                                        | 0.85114818        | 2              | 4.51697   |
| Q562C4        | FIVAYGENMK                                                                              | 0.61589557        | 1              | 2.53391   |
| Q562C4        | HIGDGCHLTR                                                                              | 0.72169762        | 3              | 3.31753   |
| Q562C4        | VLQEVQR                                                                                 | 0.62185039        | 2              | 2.54877   |
| Q562C4        | VTCVDPNPNFEK                                                                            | 0.84836806        | 2              | 3.60413   |
| <b>Q562C9</b> | <b>MTND 1_2_dihydroxy_3_keto_5_methylthiopentene dioxygenase</b>                        | <b>1.21246638</b> | <b>0.66486</b> | <b>3</b>  |
| Q562C9        | GDMITLPAGIYHR                                                                           | 1.22436245        | 2              | 2.31988   |
| Q562C9        | LDADKYENDPELEQIR                                                                        | 1.10493448        | 2              | 4.20084   |
| Q562C9        | MFFEEHLHLDEEIR                                                                          | 3.76072757        | 2              | 2.4286    |
| <b>Q58FK9</b> | <b>KAT3 Kynurenine__oxoglutarate transaminase 3</b>                                     | <b>1.24259762</b> | <b>0.90916</b> | <b>11</b> |
| Q58FK9        | AIILNTPHNPIGK                                                                           | 0.85108215        | 2              | 3.38963   |
| Q58FK9        | DSTLDAEEIFR                                                                             | 1.35213953        | 2              | 3.19889   |
| Q58FK9        | DSTLDAEEIFRTWNSR                                                                        | 1.27870463        | 2              | 2.3612    |
| Q58FK9        | IEGLDQNVWVEFTK                                                                          | 1.28062058        | 2              | 4.5557    |
| Q58FK9        | LAADPSVNLGQGFDPITLPSYVQEELSK                                                            | 1.25876608        | 3              | 4.48794   |
| Q58FK9        | MAGAVPVFIPLR                                                                            | 2.05221334        | 2              | 2.49665   |
| Q58FK9        | MDDPECYFNLPK                                                                            | 0.82001751        | 2              | 4.18505   |
| Q58FK9        | RIEGLDQNVWVEFTK                                                                         | 1.08122656        | 2              | 3.72454   |
| Q58FK9        | RMDDPECYFNLPK                                                                           | 0.98386012        | 2              | 2.76982   |
| Q58FK9        | SDEPYDYK                                                                                | 3.23169862        | 2              | 2.44851   |
| Q58FK9        | WTSSDWTFNPELESK                                                                         | 0.89491063        | 2              | 5.06261   |
| <b>Q5BJQ0</b> | <b>ADCK3 Chaperone activity of bc1 complex_like_mitochondrial</b>                       | <b>1.26018995</b> | <b>0.0588</b>  | <b>3</b>  |
| Q5BJQ0        | AVLDSSPFLSEANAER                                                                        | 1.2446676         | 2              | 4.61341   |
| Q5BJQ0        | KMGGSFLICKSLK+Oxidation(1                                                               | 1.85847706        |                |           |
| Q5BJQ0        | TLNNDLGPWHR                                                                             | 1.47810191        | 2              | 2.5618    |
| <b>Q5BJY9</b> | <b>K1C18 Keratin_type I cytoskeletal 18</b>                                             | <b>0.81003166</b> | <b>0.39612</b> | <b>25</b> |
| Q5BJY9        | AQIFANSVDNAR                                                                            | 1.00877034        | 2              | 3.95999   |
| Q5BJY9        | AQYEQLAQK                                                                               | 0.99420941        | 2              | 3.47068   |
| Q5BJY9        | DAETLLELR                                                                               | 2.14022461        | 2              | 2.94159   |
| Q5BJY9        | IREYLEK                                                                                 | 1.20818859        | 2              | 2.40246   |
| Q5BJY9        | KNHEEEVQGLEAQIASSGLTVEVDAPK                                                             | 1.71977301        | 3              | 4.90783   |
| Q5BJY9        | KVVDNITR                                                                                | 0.98157668        | 2              | 3.07228   |
| Q5BJY9        | LEAEIATYR                                                                               | 0.99580414        | 2              | 3.28052   |
| Q5BJY9        | LLEDGDDFSLNDALDSSNSMQTVQR                                                               | 1.03442337        | 3              | 5.54595   |
| Q5BJY9        | LQLETEIEALKEELFMK                                                                       | 1.96631364        | 2              | 5.04445   |
| Q5BJY9        | NHEEEVQGLEAQIASSGLTVEVDAPK                                                              | 1.1797525         | 2              | 6.30482   |
| Q5BJY9        | NQNINLENNLGEVEAR                                                                        | 1.02529571        | 2              | 5.56496   |
| Q5BJY9        | NREELDKYWSQIEESTTVVTTK                                                                  | 0.98655959        | 3              | 5.18546   |
| Q5BJY9        | QSVESDIHGLR                                                                             | 1.17893293        | 2              | 2.85054   |
| Q5BJY9        | QSVESDIHGLRK                                                                            | 1.9692628         | 2              | 2.67645   |
| Q5BJY9        | QTQEYEAALLNIK                                                                           | 1.12452751        | 2              | 3.52249   |
| Q5BJY9        | SVWGGSVGSAGLAGMGGVQTEK                                                                  | 0.98298585        | 2              | 5.8958    |
| Q5BJY9        | SVWGGSVGSAGLAGMGGVQTEKTMQDLNDR                                                          | 1.04113239        | 3              | 4.34872   |
| Q5BJY9        | TLQTLLEIDLDSMK                                                                          | 1.20693144        | 2              | 4.52038   |
| Q5BJY9        | VKLEAEIATYR                                                                             | 1.2464984         | 2              | 3.28103   |
| Q5BJY9        | VKYETELAMR                                                                              | 1.00427108        | 3              | 3.42398   |
| Q5BJY9        | VQMEQLNGVLLHLESELAQTR                                                                   | 1.45827623        | 2              | 5.27106   |
| Q5BJY9        | VRPASSAASVYAGAGGSGSR                                                                    | 0.98774173        | 2              | 5.0705    |
| Q5BJY9        | VVDNITR                                                                                 | 0.99674232        | 2              | 3.44837   |
| Q5BJY9        | YETELAMR                                                                                | 0.70614581        | 2              | 2.6174    |
| Q5BJY9        | YWSQIEESTTVVTTK                                                                         | 1.191017          | 2              | 3.89621   |
| <b>Q5BK63</b> | <b>NDUA9 NADH dehydrogenase [ubiquinone] 1 alpha subcomplex subunit 9_mitochondrial</b> | <b>1.54791589</b> | <b>3E-05</b>   | <b>4</b>  |

|               |                                                                         |                   |                |          |
|---------------|-------------------------------------------------------------------------|-------------------|----------------|----------|
| Q5BK63        | AVQHSNVVINLIGR                                                          | 0.80619938        | 2              | 3.65763  |
| Q5BK63        | IHISDVMATDLPGLLEDLGVQPTPLELK                                            | 1.44026486        | 3              | 6.06694  |
| Q5BK63        | NDFDFEDVFNIPR                                                           | 2.21869406        | 2              | 3.85634  |
| Q5BK63        | WLSSEIETKPAK                                                            | 1.36866515        | 2              | 3.29303  |
| <b>Q5BK81</b> | <b>PTGR2 Prostaglandin reductase 2</b>                                  | <b>1.38399024</b> | <b>0.5111</b>  | <b>3</b> |
| Q5BK81        | DVPYPPPLPAVEAIQK                                                        | 7.6970479         | 2              | 2.66155  |
| Q5BK81        | TGNVAEQLR                                                               | 2.24156491        | 2              | 2.93323  |
| Q5BK81        | VEEVSLPDTINEGQVR                                                        | 0.8856906         | 2              | 4.07436  |
| <b>Q5BQE6</b> | <b>DHC24 Delta(24)_sterol reductase</b>                                 | <b>1.11324455</b> | <b>0.87653</b> | <b>3</b> |
| Q5BQE6        | LYEQHHVVQDMLVPMK                                                        | 1.46081921        | 3              | 3.58048  |
| Q5BQE6        | QLGCQDAFPEVYDK                                                          | 1.11318666        | 2              | 4.21588  |
| Q5BQE6        | YLFGWVMPK                                                               | 0.99515537        | 2              | 2.69534  |
| <b>Q5DTN8</b> | <b>JKIP3 Janus kinase and microtubule_interacting protein 3</b>         | <b>0.99426881</b> | <b>0.81963</b> | <b>2</b> |
| Q5DTN8        | MKELQAVREALLR                                                           | 1.65644286        | 2              | 2.32857  |
| Q5DTN8        | TREQLQAEIQRAQTR                                                         | 0.98925174        | 2              | 2.98134  |
| <b>Q5DU56</b> | <b>NLRC3 Protein NLRC3</b>                                              | <b>1.08965293</b> | <b>0.40388</b> | <b>2</b> |
| Q5DU56        | LTGLALGHLYR                                                             | 1.39069078        | 2              | 2.36599  |
| Q5DU56        | TLEILDLR                                                                | 1.04238443        | 2              | 2.50515  |
| <b>Q5EB77</b> | <b>RAB18 Ras_related protein Rab_18</b>                                 | <b>1.2605374</b>  | <b>0.21274</b> | <b>2</b> |
| Q5EB77        | NDIVNMLVGNK                                                             | 1.26419853        | 2              | 3.46229  |
| Q5EB77        | TCDGVQCAFEELVEK                                                         | 1.19627101        | 2              | 3.86545  |
| <b>Q5FVM4</b> | <b>NONO Non_POU domain_containing octamer_binding protein</b>           | <b>1.45345884</b> | <b>0.33828</b> | <b>2</b> |
| Q5FVM4        | MEELHNQEVQK                                                             | 1.48891992        | 2              | 3.90704  |
| Q5FVM4        | RMEELHNQEVQK                                                            | 1.40792873        | 3              | 4.28857  |
| <b>Q5FVQ4</b> | <b>MLEC Malectin</b>                                                    | <b>1.20444027</b> | <b>0.96979</b> | <b>3</b> |
| Q5FVQ4        | KEEEEEEEYDEGSNLKR                                                       | 1.34978841        | 3              | 5.58868  |
| Q5FVQ4        | LSVQGEVSTFTGK                                                           | 1.14877161        | 2              | 3.36708  |
| Q5FVQ4        | STPEDQILYQTER                                                           | 1.24315812        | 2              | 4.69178  |
| <b>Q5FVR2</b> | <b>TYPH Thymidine phosphorylase</b>                                     | <b>1.02442031</b> | <b>0.12262</b> | <b>5</b> |
| Q5FVR2        | AQDTQIGAMLMAIR+Oxidation(10                                             | 1.09479826        |                |          |
| Q5FVR2        | AQDTQIGAMLMAIR+Oxidation(8                                              | 0.78590906        |                |          |
| Q5FVR2        | FGGAAVFPDQEK                                                            | 0.86400335        | 2              | 2.59456  |
| Q5FVR2        | KQEELSPADGIVECVR                                                        | 1.36547491        | 2              | 4.07112  |
| Q5FVR2        | VSLVLPALAAACGCK                                                         | 1.02193701        | 2              | 3.05512  |
| <b>Q5FVR5</b> | <b>ACNT2 Acyl_coenzyme A amino acid N_acyltransferase 2</b>             | <b>1.12420145</b> | <b>0.98655</b> | <b>3</b> |
| Q5FVR5        | DEKENLFQSK                                                              | 0.84085369        | 2              | 2.46325  |
| Q5FVR5        | ILFIVGENDQCLASK                                                         | 1.15207897        | 2              | 3.73669  |
| Q5FVR5        | IQQPGIGVISVK                                                            | 1.11708019        | 2              | 3.3566   |
| <b>Q5FW57</b> | <b>GLYAL Glycine N_acyltransferase_like protein</b>                     | <b>1.18612823</b> | <b>0.98468</b> | <b>3</b> |
| Q5FW57        | AIDQEMFK                                                                | 1.15976586        | 2              | 2.71364  |
| Q5FW57        | SSQMLQMLESLR                                                            | 1.38881075        | 2              | 4.10177  |
| Q5FW57        | VYGTVFHMNQGNPDK                                                         | 1.60153794        | 2              | 3.73513  |
| <b>Q5I0C3</b> | <b>MCCA Methylcrotonoyl_CoA carboxylase subunit alpha_mitochondrial</b> | <b>0.82070547</b> | <b>0.88189</b> | <b>8</b> |
| Q5I0C3        | AGDALMVMIAMK                                                            | 0.74934223        | 1              | 1.95855  |
| Q5I0C3        | HAPLVEFEVEEV                                                            | 1.34266784        | 2              | 2.96482  |
| Q5I0C3        | IIEEAPAPGIDPEVR                                                         | 0.78029517        | 2              | 3.86378  |
| Q5I0C3        | IYAEDPDNNFMPGAGPLVHLSTPPDMSTR                                           | 1.80483195        | 3              | 4.65818  |
| Q5I0C3        | QEGIIFIGPPSTAIR                                                         | 0.91172961        | 2              | 2.49792  |
| Q5I0C3        | SEKEFQEQLSAR                                                            | 1.08934906        | 2              | 3.47032  |
| Q5I0C3        | VFFSEGAQANR                                                             | 1.51237798        | 2              | 2.44464  |
| Q5I0C3        | YLSVSAEGTQGGTIAPMTGTIEK                                                 | 1.30013021        | 2              | 5.14113  |
| <b>Q5I0D1</b> | <b>GLOD4 Glyoxalase domain_containing protein 4</b>                     | <b>1.03939415</b> | <b>0.82483</b> | <b>3</b> |
| Q5I0D1        | ESQSILTPLVSLDTPGK                                                       | 1.00362853        | 2              | 3.70615  |

|               |                                                                                |                   |                |           |
|---------------|--------------------------------------------------------------------------------|-------------------|----------------|-----------|
| Q5I0D1        | HEEFEEGCK                                                                      | 1.08157092        | 2              | 2.87806   |
| Q5I0D1        | VTLAVSDLQK                                                                     | 1.22666338        | 2              | 2.49429   |
| <b>Q5I0D5</b> | <b>LHPP Phospholysine phosphohistidine inorganic pyrophosphate phosphatase</b> | <b>1.19667056</b> | <b>0.20664</b> | <b>2</b>  |
| Q5I0D5        | FRPGDEHHPEVR                                                                   | 1.17654245        | 3              | 3.65806   |
| Q5I0D5        | LGFDISEGEVTAPATCQILK                                                           | 1.34645797        | 2              | 4.36325   |
| <b>Q5I0D7</b> | <b>PEPD Xaa_Pro dipeptidase</b>                                                | <b>1.4157246</b>  | <b>0.36925</b> | <b>2</b>  |
| Q5I0D7        | GVNTDSGNVCR                                                                    | 1.37363604        | 2              | 3.1664    |
| Q5I0D7        | YAVDDVQYADEIASVLTSR                                                            | 1.96668508        | 2              | 2.73932   |
| <b>Q5I0E7</b> | <b>TMED9 Transmembrane emp24 domain_containing protein 9</b>                   | <b>1.40910538</b> | <b>0.52463</b> | <b>2</b>  |
| Q5I0E7        | QLVEQVEQIQK                                                                    | 1.00707457        | 2              | 3.5686    |
| Q5I0E7        | QREYQPATPGLGMFVEVKDPEDK                                                        | 1.69229608        | 3              | 3.39444   |
| <b>Q5I0H9</b> | <b>PDIA5 Protein disulfide_isomerase A5</b>                                    | <b>1.30426497</b> | <b>0.00183</b> | <b>9</b>  |
| Q5I0H9        | DKNQDLCQESVK                                                                   | 1.5384538         | 2              | 4.28053   |
| Q5I0H9        | FIEWMQNPEAPPPPEPTWEEQQTSLHLVGDNFR                                              | 1.89678307        | 3              | 4.1226    |
| Q5I0H9        | GHTVLAGMNVYPPEFENIKEEYNVR                                                      | 1.79165127        | 3              | 3.64914   |
| Q5I0H9        | GPPLWEEDPGAK                                                                   | 1.25169642        | 2              | 3.37593   |
| Q5I0H9        | GQGTICWVDCGDAESR                                                               | 1.06316455        | 2              | 4.1044    |
| Q5I0H9        | NGEQQAVPALR                                                                    | 1.44461735        | 2              | 2.55593   |
| Q5I0H9        | NPQPPQPQVPETPWADEGGSVYHLTDEDFDQFVK                                             | 3.02554938        | 3              | 4.12575   |
| Q5I0H9        | NQDLCQESVK                                                                     | 0.96891486        | 2              | 3.42543   |
| Q5I0H9        | TELGFTSFIR                                                                     | 1.15571863        | 2              | 2.44762   |
| <b>Q5I0J9</b> | <b>ASPD Putative L_aspartate dehydrogenase</b>                                 | <b>1.46214363</b> | <b>0.25954</b> | <b>7</b>  |
| Q5I0J9        | HANLLVGSPSALADQTTTR                                                            | 1.30023344        | 2              | 5.78434   |
| Q5I0J9        | LDAAGGLQSLR                                                                    | 1.02656839        | 2              | 3.99282   |
| Q5I0J9        | LEGPLAAAHSSGPR                                                                 | 1.13527209        | 2              | 3.75329   |
| Q5I0J9        | LGQSLVSR                                                                       | 1.64250166        | 2              | 2.31063   |
| Q5I0J9        | MAGSVPPALQLEDLTTLEER                                                           | 1.76772934        | 2              | 3.38819   |
| Q5I0J9        | NSNTMAAAAALAPSLGFDR                                                            | 1.07443713        | 2              | 4.63596   |
| Q5I0J9        | TVLYEGPVR                                                                      | 1.18957145        | 2              | 2.62407   |
| <b>Q5I0M2</b> | <b>NADC Nicotinate_nucleotide pyrophosphorylase [carboxylating]</b>            | <b>1.59824887</b> | <b>0.00122</b> | <b>6</b>  |
| Q5I0M2        | CSGIAASAAATAVEVATSTGWAGHVAGTR                                                  | 1.99497213        | 3              | 3.37932   |
| Q5I0M2        | DNHVVAAGSMEK                                                                   | 1.32704947        | 2              | 2.65586   |
| Q5I0M2        | EALQAAEAGADLVMLDNFKPEELHPTAATLK                                                | 1.66282139        | 3              | 4.80135   |
| Q5I0M2        | LYAEGDIPVPHAR                                                                  | 1.33438801        | 2              | 3.55439   |
| Q5I0M2        | VEVECSSLK                                                                      | 1.68509081        | 2              | 2.50724   |
| Q5I0M2        | YDLGGLVMVK                                                                     | 1.69273124        | 2              | 2.52426   |
| <b>Q5M7T9</b> | <b>THNS2 Threonine synthase_like 2</b>                                         | <b>1.6559186</b>  | <b>4.6E-06</b> | <b>2</b>  |
| Q5M7T9        | FPEAVQAAGLTPETPAEILALEHK                                                       | 1.65592892        | 3              | 5.58988   |
| Q5M7T9        | LSEAVTSESVSDEAITQTMGR                                                          | 1.41927137        | 2              | 4.48084   |
| <b>Q5M7U6</b> | <b>ARP2 Actin_related protein 2</b>                                            | <b>1.04423108</b> | <b>0.99982</b> | <b>5</b>  |
| Q5M7U6        | GYAFNHSADFETVR                                                                 | 0.9400406         | 2              | 4.00171   |
| Q5M7U6        | HLWDYTFGPEK                                                                    | 1.02347001        | 2              | 3.19684   |
| Q5M7U6        | ILLTEPPMNPTK                                                                   | 0.99991404        | 2              | 2.85151   |
| Q5M7U6        | SMLEVNYPMENGIVR                                                                | 1.19860117        | 2              | 4.09419   |
| Q5M7U6        | VVVCNDGTGFVK                                                                   | 1.18000999        | 2              | 2.70943   |
| <b>Q5M7W5</b> | <b>MAP4 Microtubule_associated protein 4</b>                                   | <b>1.43932382</b> | <b>0.97338</b> | <b>10</b> |
| Q5M7W5        | AAVGLTGNDIATPPNK                                                               | 2.30354796        | 2              | 3.48093   |
| Q5M7W5        | ATSPSTLVSTGSSSR                                                                | 1.44111186        | 2              | 3.8683    |
| Q5M7W5        | EAETALPIEMDLAPPEDVALPK                                                         | 1.08575189        | 2              | 3.08068   |
| Q5M7W5        | ESEGSPDTDAAPGPDVTLTK                                                           | 0.91859392        | 2              | 4.18592   |
| Q5M7W5        | ETSGSQPPELCSGVSR                                                               | 1.44051298        | 2              | 3.34701   |
| Q5M7W5        | NTAPPTEETVPGK                                                                  | 1.53236495        | 2              | 2.58157   |
| Q5M7W5        | NTTPTGATPPAGMASTR                                                              | 1.33214111        | 2              | 3.568     |
| Q5M7W5        | STLPVDEGSPLEK                                                                  | 1.26846112        | 2              | 2.47697   |

|               |                                                                          |                   |                |           |
|---------------|--------------------------------------------------------------------------|-------------------|----------------|-----------|
| Q5M7W5        | VGSLDNVGHLPAGGTVK                                                        | 1.00548656        | 2              | 3.71376   |
| Q5M7W5        | VTEFNNVTPLSEEEVASIK                                                      | 0.72361769        | 2              | 3.14494   |
| <b>Q5M875</b> | <b>DHB13 17_beta_hydroxysteroid dehydrogenase 13</b>                     | <b>1.45546322</b> | <b>0.03923</b> | <b>7</b>  |
| Q5M875        | ALTAELDTL GK                                                             | 1.3827767         | 2              | 3.07804   |
| Q5M875        | IQNIQFEAIVGHR                                                            | 1.64608351        | 3              | 4.2412    |
| Q5M875        | LWPVLEPDEVAR                                                             | 1.29895683        | 2              | 2.49488   |
| Q5M875        | NSGHIVTVASVCGHR                                                          | 1.95659156        | 2              | 4.50165   |
| Q5M875        | SLIDGILT NK                                                              | 1.43691612        | 2              | 3.31113   |
| Q5M875        | SVAGQTVLITGAGHGIGR                                                       | 1.13985589        | 2              | 4.09628   |
| Q5M875        | TSCLCPVFNVTGFTK                                                          | 1.40007511        | 2              | 3.94863   |
| <b>Q5M9G3</b> | <b>CAPR1 Caprin_1</b>                                                    | <b>1.14590941</b> | <b>0.05473</b> | <b>2</b>  |
| Q5M9G3        | LNQDQLDAVSK                                                              | 1.58927172        | 2              | 3.17975   |
| Q5M9G3        | YQEVNTNNLEFAK                                                            | 1.12016493        | 2              | 3.03739   |
| <b>Q5M9I5</b> | <b>QCR6 Cytochrome b_c1 complex subunit 6_mitochondrial</b>              | <b>1.15584719</b> | <b>0.51864</b> | <b>2</b>  |
| Q5M9I5        | EEEEELVDPLTTVR                                                           | 1.15253105        | 2              | 4.23759   |
| Q5M9I5        | SQTEEDCTEELDFLHAR                                                        | 2.52926335        | 2              | 4.83109   |
| <b>Q5PPL3</b> | <b>NSDHL Sterol_4_alpha_carboxylate 3_dehydrogenase_ decarboxylating</b> | <b>1.12068888</b> | <b>0.87367</b> | <b>10</b> |
| Q5PPL3        | CTVIGGSGFLGQHMVEQLLSR                                                    | 1.77744185        | 2              | 4.99629   |
| Q5PPL3        | DPQLVPLIDAAR                                                             | 1.61032515        | 2              | 2.42473   |
| Q5PPL3        | GQVTGTDLINEVSK                                                           | 0.87523019        | 2              | 4.0784    |
| Q5PPL3        | GVSTVFHCASPPSNSNNK                                                       | 1.12595895        | 2              | 4.30668   |
| Q5PPL3        | GYAVNVFDVR                                                               | 1.46571463        | 2              | 3.56783   |
| Q5PPL3        | ILTGLN YEAPK                                                             | 1.18611338        | 2              | 3.58762   |
| Q5PPL3        | KGQVTGTDLINEVSK                                                          | 1.23097309        | 2              | 4.41052   |
| Q5PPL3        | NGTEDLPYAMKPIDYYTETK                                                     | 1.08794538        | 2              | 3.93677   |
| Q5PPL3        | NLVDFTFVENVVHGHILAAEHLSR                                                 | 1.1994157         | 3              | 3.52041   |
| Q5PPL3        | VQFFIGDLCNQDLYPALK                                                       | 1.14485556        | 2              | 5.41096   |
| <b>Q5PQT3</b> | <b>GLYAT Glycine N_acyltransferase</b>                                   | <b>1.27911134</b> | <b>0.22227</b> | <b>7</b>  |
| Q5PQT3        | AINQEMFK                                                                 | 1.43136382        | 1              | 1.9529    |
| Q5PQT3        | AIQNLASIHSLQVK                                                           | 0.97506128        | 2              | 4.04558   |
| Q5PQT3        | DPENCQEF LGSSEVINWK                                                      | 2.02827615        | 2              | 5.29151   |
| Q5PQT3        | KLFPSLLDTK                                                               | 1.06057266        | 2              | 2.71433   |
| Q5PQT3        | LSSLDVTHAALVNK                                                           | 1.74272864        | 2              | 3.61602   |
| Q5PQT3        | MGGTVPQYR                                                                | 1.53977053        | 2              | 2.56175   |
| Q5PQT3        | QHLQIQSSQSHLNK                                                           | 1.36190027        | 2              | 3.39338   |
| <b>Q5PQX1</b> | <b>TOIP1 Torsin_1A interacting protein 1</b>                             | <b>1.25539149</b> | <b>0.90044</b> | <b>2</b>  |
| Q5PQX1        | LEQHSQQAQQQLSPATSGR                                                      | 1.24280386        | 3              | 4.66536   |
| Q5PQX1        | SDFGNQSPSTR                                                              | 1.29029724        | 2              | 2.62768   |
| <b>Q5RJR2</b> | <b>TWF1 Twinfilin_1</b>                                                  | <b>1.43244153</b> | <b>0.87438</b> | <b>2</b>  |
| Q5RJR2        | HQTLQGVAFPISR                                                            | 1.12787617        | 2              | 3.02011   |
| Q5RJR2        | YLLSQSSPAPLTAEEELR                                                       | 1.53831247        | 2              | 4.32294   |
| <b>Q5RJR8</b> | <b>LRC59 Leucine rich repeat_containing protein 59</b>                   | <b>0.82441932</b> | <b>0.58424</b> | <b>5</b>  |
| Q5RJR8        | ATVLDLSCNK                                                               | 0.79232445        | 2              | 2.81952   |
| Q5RJR8        | DKLDGNELDLSLDLNEVPVK                                                     | 1.30841147        | 2              | 6.21131   |
| Q5RJR8        | LDGNELDLSLDLNEVPVK                                                       | 1.07052024        | 2              | 4.05641   |
| Q5RJR8        | LQQLPADFGR                                                               | 1.71313232        | 1              | 1.92139   |
| Q5RJR8        | WLDLKDNLDPVLAK                                                           | 1.22245996        | 2              | 2.67182   |
| <b>Q5RKI0</b> | <b>WDR1 WD repeat_containing protein 1</b>                               | <b>1.75745184</b> | <b>0.37733</b> | <b>3</b>  |
| Q5RKI0        | AHDGGIYAISWSPDSTHLLSASGDK                                                | 3.39693732        | 3              | 4.753     |
| Q5RKI0        | CFSIDNPGYEPEVVAVHPGGDTVAVGGSDGNVR                                        | 1.41699565        | 3              | 4.76568   |
| Q5RKI0        | YAPSGFYIASGDISGK                                                         | 1.2952735         | 2              | 4.53409   |
| <b>Q5RKI1</b> | <b>IF4A2 Eukaryotic initiation factor 4A_II</b>                          | <b>1.64286908</b> | <b>2.5E-11</b> | <b>5</b>  |
| Q5RKI1        | ELAQQIQK                                                                 | 1.64403585        | 1              | 2.28296   |

|               |                                                                                 |                   |                |           |
|---------------|---------------------------------------------------------------------------------|-------------------|----------------|-----------|
| Q5RK11        | GIDVQQVSLVINYLPTNR                                                              | 2.3676182         | 2              | 3.61907   |
| Q5RK11        | GYDVIAQAQSGTGK                                                                  | 1.4904021         | 2              | 5.13797   |
| Q5RK11        | MFVLDEADEMLSR                                                                   | 2.21024657        | 2              | 4.4924    |
| Q5RK11        | VLITTDLLAR                                                                      | 1.64458619        | 2              | 3.06854   |
| <b>Q5S6T3</b> | <b>ISPD 2_C_methyl_D_erythritol 4_phosphate cytidyltransferase_like protein</b> | <b>1.01409226</b> | <b>0.5174</b>  | <b>2</b>  |
| Q5S6T3        | ISLAEAGATR                                                                      | 4.32622651        | 2              | 2.34198   |
| Q5S6T3        | MENLVWIRELAK                                                                    | 0.95836869        | 2              | 2.34806   |
| <b>Q5SGE0</b> | <b>LPPRC Leucine_rich PPR motif_containing protein_mitochondrial</b>            | <b>1.28440211</b> | <b>0.95303</b> | <b>15</b> |
| Q5SGE0        | AALDLEQVPSELAVTR                                                                | 0.77211219        | 2              | 4.10799   |
| Q5SGE0        | CIANNQVETLEK                                                                    | 1.16420003        | 2              | 3.01274   |
| Q5SGE0        | GLDAIELSR                                                                       | 0.70094158        | 2              | 2.52148   |
| Q5SGE0        | HCVTMDTPAEK                                                                     | 1.32008874        | 2              | 2.96809   |
| Q5SGE0        | HDNAEDALNLK                                                                     | 1.63457202        | 2              | 3.64453   |
| Q5SGE0        | LIDYCK                                                                          | 2.03235096        | 1              | 1.93197   |
| Q5SGE0        | MEGANIQPNR                                                                      | 1.18060927        | 2              | 2.97081   |
| Q5SGE0        | SCGSLLPELSLAER                                                                  | 1.0695556         | 2              | 2.77297   |
| Q5SGE0        | SGSPGSNQALLLR                                                                   | 1.15122838        | 2              | 2.88408   |
| Q5SGE0        | SGSQFDWALMR                                                                     | 1.45877266        | 2              | 2.39482   |
| Q5SGE0        | SSLSSSPSAGDVTVEK                                                                | 1.82435423        | 2              | 3.88544   |
| Q5SGE0        | SYVADKDVASAK                                                                    | 1.13309749        | 2              | 3.16469   |
| Q5SGE0        | TLLELIPELR                                                                      | 1.03334369        | 2              | 3.10069   |
| Q5SGE0        | TSQFTSSDLESTLEK                                                                 | 1.19799182        | 2              | 4.18987   |
| Q5SGE0        | VIEEQMEPALEK                                                                    | 1.0617274         | 2              | 3.11152   |
| <b>Q5SW19</b> | <b>K0664 Protein KIAA0664</b>                                                   | <b>1.27110101</b> | <b>0.19899</b> | <b>3</b>  |
| Q5SW19        | GLEMDPIDCTPPEYILPGSR                                                            | 0.774131          | 2              | 3.38476   |
| Q5SW19        | IGIGELITR                                                                       | 1.75039237        | 2              | 2.40003   |
| Q5SW19        | SVEGLQEGSVLR                                                                    | 1.24720497        | 2              | 2.73793   |
| <b>Q5SX40</b> | <b>MYH1 Myosin_1</b>                                                            | <b>1.40319018</b> | <b>0.97959</b> | <b>86</b> |
| Q5SX40        | AAYLQNLNSADLLK                                                                  | 3.08223924        | 2              | 3.44502   |
| Q5SX40        | ADIAESQVNK                                                                      | 5.633268          | 2              | 3.70484   |
| Q5SX40        | AEDEEEINAELTAK                                                                  | 3.65229633        | 2              | 4.21949   |
| Q5SX40        | AGLLGLLEEMR                                                                     | 0.3252825         | 2              | 4.26557   |
| Q5SX40        | AGLLGLLEEMRDDK                                                                  | 2.88338589        | 2              | 3.38575   |
| Q5SX40        | ALQEAHQQLDDLQAEEDK                                                              | 2.43410326        | 3              | 4.51196   |
| Q5SX40        | ALQEAHQQLDDLQAEEDKVNTLTK                                                        | 2.99149688        | 3              | 6.77841   |
| Q5SX40        | ANLLQAEIEELR                                                                    | 3.83482902        | 2              | 3.71783   |
| Q5SX40        | ANSEVAQWR                                                                       | 1.29002548        | 2              | 2.87563   |
| Q5SX40        | DDKLAQLITR                                                                      | 2.1921784         | 2              | 2.35281   |
| Q5SX40        | DLEEATLQHEATAATLR                                                               | 3.62109084        | 2              | 5.08514   |
| Q5SX40        | DTQLHLDDALR                                                                     | 2.4534304         | 2              | 2.8452    |
| Q5SX40        | EEQAEPDGTVEADK                                                                  | 0.47095254        | 2              | 3.38988   |
| Q5SX40        | EFEMSNLQSK                                                                      | 3.1170903         | 1              | 2.63379   |
| Q5SX40        | ELEGEVENEQK                                                                     | 0.42481107        | 2              | 2.88145   |
| Q5SX40        | ELEGEVENEQKR                                                                    | 5.38729583        | 2              | 3.02863   |
| Q5SX40        | ELTYQTEEDRK                                                                     | 1.49606138        | 2              | 3.1274    |
| Q5SX40        | EMANMKEEFEK                                                                     | 2.74409583        | 2              | 2.82398   |
| Q5SX40        | ENQSILITGESGAGK                                                                 | 5.46208792        | 2              | 4.10837   |
| Q5SX40        | EQYEEEQEAK                                                                      | 5.75649822        | 1              | 3.21304   |
| Q5SX40        | GQEDLKEQLAMVER                                                                  | 1.89035493        | 2              | 4.41943   |
| Q5SX40        | GSSFQTVSALFR                                                                    | 0.92705851        | 2              | 3.06736   |
| Q5SX40        | HADSVaelGEQIDNLQR                                                               | 1.14941115        | 2              | 6.01742   |
| Q5SX40        | IAEQELLDASER                                                                    | 3.87625191        | 2              | 3.23326   |
| Q5SX40        | IEAQNKPFDAK                                                                     | 1.49647853        | 2              | 3.03745   |
| Q5SX40        | IEDEQALGMQLQK                                                                   | 4.04534159        | 2              | 4.60505   |
| Q5SX40        | IEDEQALGMQLQK+Oxidation(8                                                       | 3.23239581        |                |           |

|        |                                                   |            |   |         |
|--------|---------------------------------------------------|------------|---|---------|
| Q5SX40 | IEDMAMMTHLHEPAVLYNLK                              | 2.54194389 | 3 | 4.30286 |
| Q5SX40 | IEEEEEIEAER                                       | 3.46859938 | 2 | 4.34576 |
| Q5SX40 | IKLEQQVDDLEGSLEQEK                                | 3.72132206 | 2 | 5.11645 |
| Q5SX40 | IKLEQQVDDLEGSLEQEKK                               | 1.30745693 | 3 | 4.10119 |
| Q5SX40 | IQHELEEAER                                        | 2.70169316 | 2 | 3.69329 |
| Q5SX40 | IQHELEEAERADIAESQVNK                              | 2.74190939 | 3 | 3.88024 |
| Q5SX40 | IQLELNQVK                                         | 2.44273171 | 2 | 2.70493 |
| Q5SX40 | KIAEQELLDASER                                     | 3.16639839 | 2 | 3.82823 |
| Q5SX40 | KIQHELEEAER                                       | 3.11114583 | 3 | 4.11516 |
| Q5SX40 | KKEFEMSNLQSK                                      | 4.31287112 | 2 | 3.86205 |
| Q5SX40 | KKLETDISQIQGEMEDIVQEAR                            | 2.85360158 | 3 | 6.08285 |
| Q5SX40 | KLEDECSELK                                        | 2.35902342 | 2 | 2.91871 |
| Q5SX40 | KLEDECSELKK                                       | 1.5981391  | 2 | 4.02704 |
| Q5SX40 | KLETDISQIQGEMEDIVQEAR                             | 2.88612144 | 2 | 5.64785 |
| Q5SX40 | KMEGDLNEMEIQLNHSNR                                | 1.87491453 | 3 | 4.61326 |
| Q5SX40 | LAQESTMDVENDKQQLDEK                               | 7.39657549 | 2 | 4.86328 |
| Q5SX40 | LDEAEQLALK                                        | 4.65759526 | 2 | 3.23504 |
| Q5SX40 | LEDECSELK                                         | 4.12409927 | 2 | 3.32472 |
| Q5SX40 | LEEAGGATSAQIEMNK                                  | 0.99257126 | 2 | 5.15375 |
| Q5SX40 | LEQQVDDLEGSLEQEK                                  | 0.28670146 | 2 | 5.46536 |
| Q5SX40 | LEQQVDDLEGSLEQEKK                                 | 1.24137283 | 2 | 4.1631  |
| Q5SX40 | LETDISQIQGEMEDIVQEAR                              | 1.49692767 | 2 | 5.19096 |
| Q5SX40 | LINELTAQR                                         | 1.77270155 | 2 | 3.14717 |
| Q5SX40 | LQDAEEHVEAVNAK                                    | 3.7003257  | 2 | 4.81502 |
| Q5SX40 | LQDLVDK                                           | 3.94062224 | 2 | 2.44684 |
| Q5SX40 | LQDLVDKLQSK                                       | 1.69188144 | 2 | 2.55319 |
| Q5SX40 | LQNEVEDLMIDVER                                    | 3.18447294 | 2 | 4.46346 |
| Q5SX40 | LQTESGEYSR                                        | 2.39322079 | 2 | 2.51991 |
| Q5SX40 | LTGAVMHYGNMK                                      | 1.71110593 | 2 | 2.67692 |
| Q5SX40 | MEGDLNEMEIQLNHSNR                                 | 1.56133299 | 2 | 4.73322 |
| Q5SX40 | MEGDLNEMEIQLNHSNRMAAEALR+Oxidation(0)Oxidation(17 | 1.25913223 |   |         |
| Q5SX40 | MEIDDLASNMEVISK                                   | 13.9473598 | 2 | 4.95757 |
| Q5SX40 | MQGTLEDQIISANPLLEAFGNAK                           | 3.64707341 | 3 | 6.37659 |
| Q5SX40 | MQGTLEDQIISANPLLEAFGNAK+Oxidation(0               | 2.63358265 |   |         |
| Q5SX40 | NDLQLQVQSEADSLADAEER                              | 13.5607477 | 2 | 6.30669 |
| Q5SX40 | NKDPLNETVVGLYQK                                   | 3.42249434 | 2 | 4.69152 |
| Q5SX40 | NLQQEISDLTEQIAEGGK                                | 2.76537266 | 2 | 6.02876 |
| Q5SX40 | NLQQEISDLTEQIAEGGKR                               | 2.64698635 | 2 | 4.27337 |
| Q5SX40 | NLTEEMAGLDETIK                                    | 2.94859249 | 2 | 4.78848 |
| Q5SX40 | QAEEAEQSNVNLAK                                    | 6.78235022 | 2 | 4.41122 |
| Q5SX40 | QKYEETHAELEASQK                                   | 4.03520986 | 2 | 3.91191 |
| Q5SX40 | QLDEKDSLVSQLSR                                    | 2.11085198 | 2 | 3.19078 |
| Q5SX40 | QLEEEIK                                           | 1.13562997 | 1 | 2.20342 |
| Q5SX40 | QREEQAEPDGTVEADK                                  | 5.27873234 | 2 | 4.12469 |
| Q5SX40 | RDLEEATLQHEATAATLR                                | 1.8406793  | 3 | 3.62924 |
| Q5SX40 | SAETEKEMANMKKEFEK                                 | 0.75979463 | 3 | 4.01588 |
| Q5SX40 | SELQAALAEAEASLEHEEGK                              | 2.30400891 | 2 | 5.74997 |
| Q5SX40 | SSVFVVDK                                          | 2.79335297 | 2 | 2.52796 |
| Q5SX40 | TKYETDAIQR                                        | 2.8167993  | 3 | 3.45201 |
| Q5SX40 | TLEDQVSELK                                        | 1.37590063 | 2 | 2.94919 |
| Q5SX40 | TNAACAALDK                                        | 2.77423736 | 1 | 1.98446 |
| Q5SX40 | TNAACAALDKK                                       | 1.88827542 | 2 | 2.98051 |
| Q5SX40 | VLNASAIPEGQFIDSK                                  | 2.95327319 | 2 | 4.29797 |
| Q5SX40 | VQLLHTQNTSLINTK                                   | 1.20864113 | 2 | 4.71032 |
| Q5SX40 | VRELEGEVENEQK                                     | 0.47294379 | 2 | 3.85636 |
| Q5SX40 | VRELEGEVENEQKR                                    | 2.28637301 | 3 | 4.14079 |



|               |                                                                                    |                   |                |           |
|---------------|------------------------------------------------------------------------------------|-------------------|----------------|-----------|
| Q5SX40        | VVESMQSTLDAEIR                                                                     | 1.63637956        | 2              | 3.74154   |
| Q5SX40        | YEETHAELEASQK                                                                      | 3.26193627        | 2              | 4.73862   |
| Q5SX40        | YETDAIQR                                                                           | 4.06508988        | 2              | 2.62035   |
| <b>Q5U206</b> | <b>CALL3 Calmodulin_like protein 3</b>                                             | <b>1.21072969</b> | <b>0.99003</b> | <b>5</b>  |
| Q5U206        | DTDSEEEIR                                                                          | 1.76546387        | 2              | 2.83205   |
| Q5U206        | KMKDSEEEIR                                                                         | 1.22805146        | 3              | 3.41088   |
| Q5U206        | KMKDSEEEIR+Oxidation(1                                                             | 1.74714059        |                |           |
| Q5U206        | MKDSEEEIR                                                                          | 1.04978131        | 3              | 4.32711   |
| Q5U206        | MKDSEEEIR+Oxidation(0                                                              | 1.07571089        |                |           |
| <b>Q5U2Q7</b> | <b>ERF1 Eukaryotic peptide chain release factor subunit 1</b>                      | <b>1.50181067</b> | <b>1.2E-05</b> | <b>4</b>  |
| Q5U2Q7        | GFGGIGGILR                                                                         | 1.43246281        | 2              | 2.75822   |
| Q5U2Q7        | LSVLGAITSVQQR                                                                      | 1.55712257        | 2              | 2.93988   |
| Q5U2Q7        | YFDEISQDTGK                                                                        | 1.97901655        | 2              | 2.53487   |
| Q5U2Q7        | YVLHCQGTEEEK                                                                       | 1.50617024        | 2              | 3.68392   |
| <b>Q5U2S3</b> | <b>ZUFSP Zinc finger with UFM1_specific peptidase domain protein</b>               | <b>1.13333777</b> | <b>0.70795</b> | <b>2</b>  |
| Q5U2S3        | QYGLDNSGYKQQLR                                                                     | 1.05845083        | 2              | 2.67702   |
| Q5U2S3        | TLCLIFDPGCPREMQKLLK+Oxidation(15                                                   | 5.67390303        |                |           |
| <b>Q5U2U0</b> | <b>CLPX ATP_dependent Clp protease ATP_binding subunit clpX_like_mitochondrial</b> | <b>1.57956419</b> | <b>0.70889</b> | <b>5</b>  |
| Q5U2U0        | LLEGTIVNVPEK                                                                       | 1.89703237        | 2              | 2.62449   |
| Q5U2U0        | QQAEEVEK                                                                           | 1.16491073        | 1              | 1.91779   |
| Q5U2U0        | SGESNTHQDIEEK                                                                      | 1.56268644        | 2              | 3.60002   |
| Q5U2U0        | SGESNTHQDIEEKDR                                                                    | 1.61153362        | 3              | 4.32588   |
| Q5U2U0        | SNILLGPTGSGK                                                                       | 1.45456494        | 2              | 2.37762   |
| <b>Q5U2V4</b> | <b>PLBL1 Phospholipase B_like 1</b>                                                | <b>1.85259222</b> | <b>0.05799</b> | <b>2</b>  |
| Q5U2V4        | IWEMGHCSALIK+Oxidation(3                                                           | 14.9387213        |                |           |
| Q5U2V4        | LGLDYSYDLAPR                                                                       | 1.42629591        | 2              | 2.51104   |
| <b>Q5U2Z7</b> | <b>RHG24 Rho GTPase_activating protein 24</b>                                      | <b>0.9315354</b>  | <b>0.70914</b> | <b>2</b>  |
| Q5U2Z7        | EEEAGVKELTKQVK                                                                     | 0.88278013        | 2              | 2.3874    |
| Q5U2Z7        | FTMIEIKMRNAER+Oxidation(7                                                          | 1.22762965        |                |           |
| <b>Q5U300</b> | <b>UBA1 Ubiquitin_like modifier_activating enzyme 1</b>                            | <b>1.21485882</b> | <b>0.49678</b> | <b>14</b> |
| Q5U300        | AAVASLLQSVQPEFTP                                                                   | 1.2279999         | 3              | 3.67161   |
| Q5U300        | AENYDISPADR                                                                        | 0.83618396        | 2              | 3.19107   |
| Q5U300        | DNPGVVTCLDEAR                                                                      | 0.95400531        | 2              | 3.39997   |
| Q5U300        | FEVQGLQPNGEEMTLK                                                                   | 1.36984159        | 2              | 4.01965   |
| Q5U300        | IHVSDQELQSANASVDDSR                                                                | 1.36031796        | 3              | 3.48724   |
| Q5U300        | IYDDDFQNLGDGVANALDNVDAR                                                            | 1.42774399        | 2              | 4.71172   |
| Q5U300        | LDQPMTEIVSR                                                                        | 0.9523477         | 2              | 3.39489   |
| Q5U300        | LKSDTAAAVR                                                                         | 1.42921595        | 2              | 2.82246   |
| Q5U300        | NEEDATELVTLAQAVNAR                                                                 | 2.7614067         | 3              | 4.68795   |
| Q5U300        | NFPNAIEHTLQWAR                                                                     | 1.38137378        | 2              | 3.40726   |
| Q5U300        | SLPASLAEPDFVMTDFAK                                                                 | 1.11891447        | 2              | 4.05759   |
| Q5U300        | SPPAVQQDNVDEDLIR                                                                   | 1.24284194        | 2              | 4.76979   |
| Q5U300        | SPPAVQQDNVDEDLIRK                                                                  | 1.07591043        | 3              | 3.32207   |
| Q5U300        | VVQGHQQLDSYK                                                                       | 1.39137732        | 2              | 3.42621   |
| <b>Q5U4E6</b> | <b>GOGA4 Golgin subfamily A member 4</b>                                           | <b>1.12255898</b> | <b>0.89895</b> | <b>3</b>  |
| Q5U4E6        | EFNTQLAQK                                                                          | 1.05279137        | 2              | 2.34942   |
| Q5U4E6        | EQAQQILTEKENVILQMR+Oxidation(16                                                    | 1.05278947        |                |           |
| Q5U4E6        | VQCAKDTESQLSELR                                                                    | 4.44223796        | 2              | 2.31087   |
| <b>Q5XFW8</b> | <b>SEC13 Protein SEC13 homolog</b>                                                 | <b>1.31352954</b> | <b>0.85254</b> | <b>4</b>  |
| Q5XFW8        | DVAWAPSIGLPTSTIASCSQDGR                                                            | 1.39084631        | 2              | 3.45853   |
| Q5XFW8        | EEEDGQWKEEQK                                                                       | 1.3739383         | 2              | 2.75701   |
| Q5XFW8        | LEAHSWVR                                                                           | 1.03161688        | 2              | 2.36868   |
| Q5XFW8        | NGGQJLIADLR                                                                        | 1.32688939        | 2              | 2.48169   |

|               |                                                                        |                   |                |           |
|---------------|------------------------------------------------------------------------|-------------------|----------------|-----------|
| <b>Q5XFX0</b> | <b>TAGL2 Transgelin_2</b>                                              | <b>1.0835768</b>  | <b>0.07609</b> | <b>6</b>  |
| Q5XFX0        | DDGLFSGDPNWFPK                                                         | 2.70661413        | 2              | 3.66492   |
| Q5XFX0        | NFSDNQLQEGK                                                            | 1.55125389        | 2              | 3.15758   |
| Q5XFX0        | NVIGLQMGTR                                                             | 0.81768298        | 2              | 3.02612   |
| Q5XFX0        | QMEQISQFLQAAER                                                         | 0.94813609        | 2              | 2.80307   |
| Q5XFX0        | TLMNLGGLAVAR                                                           | 1.93990939        | 2              | 3.3582    |
| Q5XFX0        | YGINTTDFQTVDLWEGK                                                      | 1.43185916        | 2              | 4.73927   |
| <b>Q5XHYS</b> | <b>SYTC Threonyl_tRNA synthetase_cytoplasmic</b>                       | <b>1.23378756</b> | <b>0.00225</b> | <b>11</b> |
| Q5XHYS        | AEHDSILAEK                                                             | 1.25402476        | 2              | 2.83885   |
| Q5XHYS        | FLGDIEIWNQAEK                                                          | 1.47024839        | 2              | 3.76226   |
| Q5XHYS        | FMVDIDLDPGCTLNK                                                        | 1.20166869        | 2              | 3.7564    |
| Q5XHYS        | GFQEVVTPNIFNSR                                                         | 2.78735773        | 2              | 3.90931   |
| Q5XHYS        | LKAEHDSILAEK                                                           | 1.06758089        | 2              | 3.34697   |
| Q5XHYS        | NELSGALTGLTR                                                           | 1.47049052        | 2              | 3.20448   |
| Q5XHYS        | QLENSLNEFGEK                                                           | 1.08205517        | 2              | 3.15633   |
| Q5XHYS        | QVMVVPVGPCTDEYAK                                                       | 1.57958226        | 2              | 3.66822   |
| Q5XHYS        | TTPYQIACGISQGLADNTVAK                                                  | 1.49237198        | 2              | 4.1517    |
| Q5XHYS        | VVWDLDRPLETDCTLELLK                                                    | 2.73712297        | 2              | 3.88131   |
| Q5XHYS        | WELNPGDGAIFYGPK                                                        | 1.03685453        | 2              | 3.96393   |
| <b>Q5XHZ0</b> | <b>TRAP1 Heat shock protein 75 kDa_mitochondrial</b>                   | <b>1.33757146</b> | <b>0.24967</b> | <b>14</b> |
| Q5XHZ0        | AFLEALQHQAEISSR                                                        | 1.39893889        | 2              | 4.68455   |
| Q5XHZ0        | AQLLQPTLEINPR                                                          | 1.04057201        | 2              | 3.72326   |
| Q5XHZ0        | EGIVTTAEQDIKEDIAK                                                      | 1.0136502         | 2              | 2.32675   |
| Q5XHZ0        | ELISNASDALEK                                                           | 0.62857772        | 2              | 2.70663   |
| Q5XHZ0        | FEDTSPAGER                                                             | 2.71394562        | 2              | 2.49638   |
| Q5XHZ0        | GTITIQDTGIGMTK                                                         | 1.07781801        | 2              | 3.56485   |
| Q5XHZ0        | GVVDESDIPLNLSR                                                         | 1.20725142        | 2              | 4.80619   |
| Q5XHZ0        | HLAEHSPYYEAMK                                                          | 1.45170485        | 2              | 3.72621   |
| Q5XHZ0        | LDTHPAMVTVLEMGAAR                                                      | 1.10006758        | 3              | 4.05658   |
| Q5XHZ0        | NIYYLCAPNR                                                             | 1.00161294        | 2              | 2.41473   |
| Q5XHZ0        | SDCKDFANESR                                                            | 1.30300289        | 2              | 2.70157   |
| Q5XHZ0        | VCEGQVLPMEIHLQTDAAK                                                    | 1.49527138        | 3              | 3.64968   |
| Q5XHZ0        | YESSALPAGQLTSLSDYASR                                                   | 2.9488309         | 2              | 5.63993   |
| Q5XHZ0        | YIAQAYDKPR                                                             | 1.60762104        | 2              | 2.66106   |
| <b>Q5XI22</b> | <b>THIC Acetyl_CoA acetyltransferase_cytosolic</b>                     | <b>0.90806093</b> | <b>0.75657</b> | <b>9</b>  |
| Q5XI22        | AGHFDKEIVPVHVSRR                                                       | 1.356602          | 2              | 4.99351   |
| Q5XI22        | ELGLSPEK                                                               | 1.36938994        | 1              | 1.95042   |
| Q5XI22        | HGSNLEAMSK                                                             | 2.46946867        | 2              | 2.68347   |
| Q5XI22        | LKPYFLTDGTGTVPANASGMNDGAAAVVLMK                                        | 1.36138015        | 3              | 5.21921   |
| Q5XI22        | MGEVPLADSILCDGLTDAFHNYHMGITAENVAK                                      | 1.34023824        | 3              | 4.07326   |
| Q5XI22        | MLKPLAQVVSWSQAGVEPSVMGVGPIPAIK                                         | 1.4056596         | 3              | 4.53659   |
| Q5XI22        | TAIGSFNGALSTVPVHNLGTTVIK                                               | 0.58668391        | 2              | 5.42234   |
| Q5XI22        | VAPEEVSEVIFGHVLTAGCGQNPTK                                              | 0.9208098         | 2              | 5.18503   |
| Q5XI22        | VNIDGGAIALGHPLGASGCR                                                   | 1.02575635        | 2              | 5.44328   |
| <b>Q5XI29</b> | <b>CPSF7 Cleavage and polyadenylation specificity factor subunit 7</b> | <b>1.07417089</b> | <b>0.63856</b> | <b>2</b>  |
| Q5XI29        | QNLSQFEAQAR                                                            | 1.07400749        | 2              | 2.41633   |
| Q5XI29        | SIGVYDVVELK                                                            | 1.35945192        | 2              | 2.36714   |
| <b>Q5XI32</b> | <b>CAPZB F_actin_capping protein subunit beta</b>                      | <b>1.26817178</b> | <b>0.5361</b>  | <b>8</b>  |
| Q5XI32        | GCWDSIHVVEVQEK                                                         | 1.03564623        | 2              | 3.74296   |
| Q5XI32        | KLEVEANNAFDQYR                                                         | 1.29808119        | 2              | 4.13815   |
| Q5XI32        | LEVEANNAFDQYR                                                          | 1.00283087        | 2              | 3.75904   |
| Q5XI32        | LVEDMENK                                                               | 1.59552129        | 2              | 2.66874   |
| Q5XI32        | NDLVEALK                                                               | 1.06800027        | 2              | 2.40444   |
| Q5XI32        | SGSGTMNLGGSLTR                                                         | 1.31006964        | 2              | 3.30343   |
| Q5XI32        | STLNEIFYGK                                                             | 0.99986555        | 1              | 2.05758   |

|               |                                                              |                   |                |           |
|---------------|--------------------------------------------------------------|-------------------|----------------|-----------|
| Q5XI32        | YDPPLEDGAMPSAR                                               | 0.8958874         | 2              | 3.58329   |
| <b>Q5XI60</b> | <b>REEP6 Receptor expression_enhancing protein 6</b>         | <b>1.20977972</b> | <b>0.98261</b> | <b>3</b>  |
| Q5XI60        | ALDIAAGITR                                                   | 0.95140526        | 2              | 3.26724   |
| Q5XI60        | HHVALDSAASQLSGR                                              | 1.27910385        | 2              | 4.60082   |
| Q5XI60        | NVATDALGALEAR                                                | 1.2232006         | 2              | 3.98321   |
| <b>Q5XI73</b> | <b>GDIR1 Rho GDP_dissociation inhibitor 1</b>                | <b>0.9030718</b>  | <b>0.9794</b>  | <b>6</b>  |
| Q5XI73        | AEEYEFLLPMEEAPK                                              | 1.31748494        | 2              | 4.40899   |
| Q5XI73        | IDKTDYMGVSYGPR                                               | 1.19022565        | 2              | 3.98928   |
| Q5XI73        | SIQEIQLDKDDESLR                                              | 0.71018147        | 2              | 5.28958   |
| Q5XI73        | SIQEIQLDKDDESLRK                                             | 0.88814994        | 2              | 4.65383   |
| Q5XI73        | TDYMGVSYGPR                                                  | 1.03509753        | 2              | 2.41423   |
| Q5XI73        | VAVSADPNVNVIVTR                                              | 0.94235394        | 2              | 3.97865   |
| <b>Q5XI78</b> | <b>ODO1 2_oxoglutarate dehydrogenase_mitochondrial</b>       | <b>0.96694855</b> | <b>0.0012</b>  | <b>18</b> |
| Q5XI78        | FGLEGCEVLIPALK                                               | 1.25959208        | 2              | 3.587     |
| Q5XI78        | FLDTAFDLDAFK                                                 | 2.06792901        | 2              | 2.66043   |
| Q5XI78        | FLDTAFDLDAFKK                                                | 1.25393501        | 2              | 2.93743   |
| Q5XI78        | GHHVAQLDPLGILDADLDSSVPADIISSTDK                              | 1.12718344        | 3              | 5.9103    |
| Q5XI78        | ICEEAFTR                                                     | 1.32716784        | 2              | 2.34013   |
| Q5XI78        | IEQLSPFPDLLLK                                                | 1.62416141        | 2              | 3.32549   |
| Q5XI78        | LEAADEGSGDMK                                                 | 0.9984792         | 2              | 3.51647   |
| Q5XI78        | LNVLANVIR                                                    | 5.56311557        | 2              | 2.32154   |
| Q5XI78        | LVEDHLAVQSLIR                                                | 1.43901421        | 2              | 2.90109   |
| Q5XI78        | NITLSLVANPSHLEAADPVVMGK                                      | 1.81166892        | 2              | 5.5507    |
| Q5XI78        | NQGYDYVKPR                                                   | 1.14337938        | 2              | 2.37889   |
| Q5XI78        | NTNAGAPPGTAYQSPLSLR                                          | 0.18671502        | 2              | 2.85357   |
| Q5XI78        | SSLATMAHAQSLVEAQPNDVK                                        | 1.0540404         | 3              | 4.4054    |
| Q5XI78        | TSFDEMLPGTHFQR                                               | 1.33234399        | 2              | 2.30849   |
| Q5XI78        | VIPEDGPAAQNPDK                                               | 1.27649635        | 2              | 2.94482   |
| Q5XI78        | VVNAPIFHVNSDDPEAVMYVCK                                       | 1.5366096         | 3              | 4.24681   |
| Q5XI78        | YAELLVSGGVNQPEYEEEISK                                        | 1.83242178        | 2              | 4.07064   |
| Q5XI78        | YAELLVSGGVNQPEYEEEISKYDK                                     | 1.68971315        | 3              | 3.93237   |
| <b>Q5XI95</b> | <b>ADH6 Alcohol dehydrogenase 6</b>                          | <b>0.95420743</b> | <b>0.91757</b> | <b>6</b>  |
| Q5XI95        | ATVLWKPGAPLAIEIEVAPPK                                        | 0.8561207         | 2              | 3.94193   |
| Q5XI95        | FNIDPLITHLTLSEANEAVQLMK                                      | 1.38080796        | 3              | 4.98578   |
| Q5XI95        | IIAVDINK                                                     | 0.89414143        | 2              | 2.73793   |
| Q5XI95        | MVATGVCGTDIK                                                 | 0.98848636        | 2              | 3.02144   |
| Q5XI95        | NNICTEIR                                                     | 1.24392643        | 2              | 2.47322   |
| Q5XI95        | TVGATDCVDPR                                                  | 1.89974034        | 2              | 2.82778   |
| <b>Q5XIC0</b> | <b>ECI2 Enoyl_CoA delta isomerase 2_mitochondrial</b>        | <b>1.08827214</b> | <b>0.49007</b> | <b>6</b>  |
| Q5XIC0        | AAEMLLFGK                                                    | 2.69449526        | 2              | 2.45247   |
| Q5XIC0        | ATQQDFENAMNQVK                                               | 0.91345397        | 2              | 4.27289   |
| Q5XIC0        | GILVTSEGGITK                                                 | 1.08956647        | 2              | 3.45074   |
| Q5XIC0        | LHAVNEEECTTLR                                                | 1.31841914        | 2              | 3.85118   |
| Q5XIC0        | QNYVDLVSSLSSSEASSQ GK                                        | 0.67566792        | 2              | 5.40824   |
| Q5XIC0        | WDAWNALGSLPK                                                 | 0.90836549        | 2              | 3.69137   |
| <b>Q5XIC1</b> | <b>GMPPA Mannose_1_phosphate guanylttransferase alpha</b>    | <b>1.03705511</b> | <b>0.67059</b> | <b>2</b>  |
| Q5XIC1        | VAPSAVLGPNVSGIK                                              | 0.76227871        | 2              | 2.62822   |
| Q5XIC1        | VEGTPNDPNPNDR                                                | 3.02040057        | 2              | 3.18967   |
| <b>Q5XIE6</b> | <b>HIBCH 3_hydroxyisobutyryl_CoA hydrolase_mitochondrial</b> | <b>1.16454327</b> | <b>0.72656</b> | <b>7</b>  |
| Q5XIE6        | AGIATHFVDSEK                                                 | 1.05492163        | 2              | 3.11277   |
| Q5XIE6        | AVLIDKDQTPK                                                  | 1.16587084        | 2              | 2.83667   |
| Q5XIE6        | GCAGVITLNRPK                                                 | 1.33589524        | 2              | 2.91632   |

|               |                                                                                  |                   |                |           |
|---------------|----------------------------------------------------------------------------------|-------------------|----------------|-----------|
| Q5XIE6        | HTETAEVLLER                                                                      | 2.24476817        | 2              | 2.87884   |
| Q5XIE6        | INSCFSANTVEQILENLR                                                               | 1.59147685        | 2              | 3.16181   |
| Q5XIE6        | LHVLEEELLALK                                                                     | 2.0345069         | 3              | 4.10167   |
| Q5XIE6        | WKPADLKDVTEDELNSYFK                                                              | 1.24600894        | 2              | 2.31577   |
| <b>Q5XIF3</b> | <b>NDU54 NADH dehydrogenase [ubiquinone] iron_sulfur protein 4_mitochondrial</b> | <b>1.13922449</b> | <b>0.40695</b> | <b>3</b>  |
| Q5XIF3        | DTQLITVDEK                                                                       | 0.91432152        | 2              | 2.48431   |
| Q5XIF3        | HGWSYDVEGR                                                                       | 1.43098212        | 2              | 2.88439   |
| Q5XIF3        | LDVTPLTGVPEEHK                                                                   | 0.88966632        | 3              | 3.66129   |
| <b>Q5XIF6</b> | <b>TBA4A Tubulin alpha_4A chain</b>                                              | <b>1.15899192</b> | <b>0.00611</b> | <b>5</b>  |
| Q5XIF6        | AVFVDLEPTVIDEIR                                                                  | 1.15702015        | 2              | 3.8446    |
| Q5XIF6        | AYHEQLSVAEITNACFEPANQMVK                                                         | 1.31711307        | 2              | 5.22033   |
| Q5XIF6        | DVNAIAAAIK                                                                       | 1.80279971        | 2              | 3.10819   |
| Q5XIF6        | SIQFVDWCPTGFK                                                                    | 1.0557942         | 2              | 4.13838   |
| Q5XIF6        | TIGGGDDSFSTFFCETGAGK                                                             | 2.60258106        | 2              | 2.78316   |
| <b>Q5XIG4</b> | <b>OCAD1 OCIA domain_containing protein 1</b>                                    | <b>1.23347087</b> | <b>0.99222</b> | <b>2</b>  |
| Q5XIG4        | SVPLAATSMMLITQGLISK                                                              | 1.25857111        | 2              | 4.39852   |
| Q5XIG4        | YDSNVSGQSSFSTPAADNIEK                                                            | 1.21971062        | 2              | 5.66521   |
| <b>Q5XIH7</b> | <b>PHB2 Prohibitin_2</b>                                                         | <b>1.0474292</b>  | <b>4.5E-05</b> | <b>10</b> |
| Q5XIH7        | DLQMVNISLR                                                                       | 3.54919628        | 2              | 2.73049   |
| Q5XIH7        | FNASQLITQR                                                                       | 0.96181231        | 2              | 3.78161   |
| Q5XIH7        | IGGVQDDTILAEGLHFR                                                                | 1.96310474        | 3              | 4.92463   |
| Q5XIH7        | IPWFQYPIIYDIR                                                                    | 1.83626709        | 2              | 2.4702    |
| Q5XIH7        | IVQAEGEAAEK                                                                      | 1.26033758        | 2              | 4.05741   |
| Q5XIH7        | IYLTADNLVNLQDESFTTR                                                              | 2.47124981        | 2              | 4.04246   |
| Q5XIH7        | LGLDYEER                                                                         | 0.83271621        | 2              | 2.46778   |
| Q5XIH7        | LLLGAGAVAYGVR                                                                    | 4.32304124        | 2              | 3.78403   |
| Q5XIH7        | VLPISIVNEVLK                                                                     | 1.25219346        | 1              | 2.29777   |
| Q5XIH7        | VLSRPNAQELPSMYQR                                                                 | 1.56836074        | 2              | 4.76181   |
| <b>Q5XIM9</b> | <b>TCPB T_complex protein 1 subunit beta</b>                                     | <b>1.42342947</b> | <b>8.1E-07</b> | <b>12</b> |
| Q5XIM9        | DASLMVTNDGATILK                                                                  | 4.31664257        | 2              | 2.99152   |
| Q5XIM9        | EALLSSAVDHGSDEVK                                                                 | 1.70277789        | 2              | 4.25345   |
| Q5XIM9        | FWQDLMNIAGTTLSSK                                                                 | 1.72946583        | 2              | 3.4773    |
| Q5XIM9        | GATQQILDEAER                                                                     | 1.37952439        | 2              | 3.87399   |
| Q5XIM9        | GSGNLEAIHVIK                                                                     | 1.24039062        | 2              | 2.56925   |
| Q5XIM9        | HGINCFINR                                                                        | 0.80062415        | 2              | 2.65158   |
| Q5XIM9        | LIEEVMIGEDK                                                                      | 1.09804716        | 2              | 3.15561   |
| Q5XIM9        | MLPTIADNAGYDSADLVAQLR                                                            | 1.4438007         | 3              | 3.31328   |
| Q5XIM9        | NIGVDNPAK                                                                        | 1.15719583        | 1              | 1.95384   |
| Q5XIM9        | SLHDALCVLAQTVK                                                                   | 1.45352072        | 2              | 3.89941   |
| Q5XIM9        | VAEIEHAEKEK                                                                      | 1.74594408        | 2              | 2.7948    |
| Q5XIM9        | VQDDEVGDGTTSVTLAAELLR                                                            | 1.92426668        | 2              | 4.35294   |
| <b>Q5XIN6</b> | <b>LETM1 LETM1 and EF_hand domain_containing protein 1_mitochondrial</b>         | <b>1.30743035</b> | <b>0.15377</b> | <b>10</b> |
| Q5XIN6        | AAEVEGEQVDNK                                                                     | 1.47525759        | 2              | 3.87772   |
| Q5XIN6        | AMYLPTLSPADQLK                                                                   | 1.24486084        | 2              | 2.46615   |
| Q5XIN6        | DIQPEVAEATVPGRGAELQPK                                                            | 0.81931575        | 2              | 4.54462   |
| Q5XIN6        | FLQDTIEEMALK                                                                     | 1.56280967        | 2              | 3.03683   |
| Q5XIN6        | KLEEGPVVYSPPAQVVVK                                                               | 1.31415526        | 2              | 3.72942   |
| Q5XIN6        | LDPAAASPTGESVISVDELISAMK                                                         | 1.54000412        | 2              | 5.30412   |
| Q5XIN6        | LEEGPVVYSPPAQVVVK                                                                | 0.82922336        | 2              | 3.39234   |
| Q5XIN6        | LFDELTLNLRPQLVALCK                                                               | 1.30328517        | 3              | 3.98203   |
| Q5XIN6        | LLELQSIGTNNFLR                                                                   | 1.39139891        | 2              | 3.46601   |
| Q5XIN6        | STLQTLPEIVAK                                                                     | 0.90021699        | 2              | 2.57672   |
| <b>Q5XIT9</b> | <b>MCCB Methylcrotonoyl_CoA carboxylase beta chain_mitochondrial</b>             | <b>1.23909118</b> | <b>0.79242</b> | <b>9</b>  |
| Q5XIT9        | AATGEEVSAEDLGGADLHCR                                                             | 1.02074989        | 2              | 5.22438   |

|               |                                                                                |                   |                |          |
|---------------|--------------------------------------------------------------------------------|-------------------|----------------|----------|
| Q5XIT9        | ALVNQLHER                                                                      | 1.16148468        | 2              | 2.68444  |
| Q5XIT9        | ALYGDTLVTGFAR                                                                  | 1.20291434        | 2              | 3.5122   |
| Q5XIT9        | AQEIALQNR                                                                      | 1.28003276        | 2              | 2.57048  |
| Q5XIT9        | LGTQPDGSGSSTYQENYEQMK                                                          | 1.01673864        | 2              | 5.25139  |
| Q5XIT9        | LWDDGIIDPVDR                                                                   | 1.21058836        | 2              | 3.53647  |
| Q5XIT9        | LYGEEVVPAGGIITGIGR                                                             | 13.0570746        | 2              | 4.76527  |
| Q5XIT9        | RFEEEGNPPYSSAR                                                                 | 1.76696681        | 2              | 4.25401  |
| Q5XIT9        | VSGVECMIVANDATVK                                                               | 1.15759828        | 2              | 3.39354  |
| <b>Q5XIU5</b> | <b>PSMF1 Proteasome inhibitor PI31 subunit</b>                                 | <b>0.87944394</b> | <b>0.84446</b> | <b>2</b> |
| Q5XIU5        | ALIDPSSGLPNR                                                                   | 0.88457282        | 2              | 2.7933   |
| Q5XIU5        | SGIITPIHEQWEK                                                                  | 0.83213333        | 2              | 3.03607  |
| <b>Q5XIU9</b> | <b>PGRC2 Membrane-associated progesterone receptor component 2</b>             | <b>1.1243986</b>  | <b>0.86584</b> | <b>3</b> |
| Q5XIU9        | GLATFCLDK                                                                      | 1.23781932        | 2              | 2.80292  |
| Q5XIU9        | GLCSGPGAGEESPAATLPR                                                            | 0.87307794        | 2              | 4.83923  |
| Q5XIU9        | VFDVTK                                                                         | 1.12658785        | 1              | 1.98739  |
| <b>Q60587</b> | <b>ECHB Trifunctional enzyme subunit beta_mitochondrial</b>                    | <b>0.97835474</b> | <b>0.86921</b> | <b>9</b> |
| Q60587        | ALAMGYKPK                                                                      | 0.6983715         | 2              | 2.40505  |
| Q60587        | AMDSDWFAQNYMGR                                                                 | 0.61636219        | 2              | 3.15826  |
| Q60587        | AQDEGHLSDIVPFK                                                                 | 0.99052306        | 2              | 2.48664  |
| Q60587        | DFIYVSQDPK                                                                     | 0.60291945        | 2              | 2.79556  |
| Q60587        | DGGQYALVAACAAGGQGHAMIVEAYPK                                                    | 1.87497556        | 3              | 4.6773   |
| Q60587        | DNGIRPSSLEQMAK                                                                 | 0.97848246        | 2              | 3.64398  |
| Q60587        | DQLLLGPTYATPK                                                                  | 1.04406638        | 2              | 3.75995  |
| Q60587        | MMLDLNK                                                                        | 0.95325088        | 1              | 2.12756  |
| Q60587        | NIVVVEGVR                                                                      | 1.14493554        | 2              | 3.06333  |
| <b>Q60598</b> | <b>SRC8 Src substrate cortactin</b>                                            | <b>1.09879153</b> | <b>0.57527</b> | <b>3</b> |
| Q60598        | NASTFEEVVQVPSAYQK                                                              | 1.406511          | 2              | 3.54738  |
| Q60598        | TVQGSQGHQEHINHK                                                                | 1.1311677         | 2              | 3.47368  |
| Q60598        | VDQSAVGFYQGGK                                                                  | 1.08868868        | 2              | 3.34599  |
| <b>Q60759</b> | <b>GCDH Glutaryl-CoA dehydrogenase_mitochondrial</b>                           | <b>1.56317557</b> | <b>0.04846</b> | <b>4</b> |
| Q60759        | DILGGNGISDEYHVIR                                                               | 1.36030703        | 2              | 3.86019  |
| Q60759        | DIVYEMGELGLGPTIK                                                               | 1.39471614        | 2              | 3.89685  |
| Q60759        | GYGCAGVSSVAYGLLTR                                                              | 1.35817264        | 2              | 3.32187  |
| Q60759        | HAMNLEAVNTYEGTHDIHALILGR                                                       | 1.63224748        | 3              | 5.09824  |
| <b>Q60817</b> | <b>NACA Nascent polypeptide-associated complex subunit alpha</b>               | <b>0.95180325</b> | <b>0.08381</b> | <b>3</b> |
| Q60817        | DIELVMSQANVSR                                                                  | 1.49525821        | 2              | 3.41899  |
| Q60817        | IEDLSQQAQLAAAEK                                                                | 1.37840099        | 2              | 4.676    |
| Q60817        | NILFVITKPDVYK                                                                  | 0.5721367         | 2              | 3.66666  |
| <b>Q60952</b> | <b>CP250 Centrosome-associated protein CEP250</b>                              | <b>1.40845471</b> | <b>0.26844</b> | <b>2</b> |
| Q60952        | GQIQDLKK                                                                       | 0.88361013        | 1              | 1.9552   |
| Q60952        | QQIDELQK                                                                       | 9.84842846        | 1              | 2.03522  |
| <b>Q61029</b> | <b>LAP2B Lamina-associated polypeptide 2_isoforms beta/delta/epsilon/gamma</b> | <b>0.98043205</b> | <b>0.99555</b> | <b>2</b> |
| Q61029        | SELVANNVTLPAGEQR                                                               | 1.16690079        | 2              | 4.56692  |
| Q61029        | YGVNPGPIVGTTR                                                                  | 0.97918269        | 2              | 2.71646  |
| <b>Q61035</b> | <b>SYHC Histidyl_tRNA synthetase_cytoplasmic</b>                               | <b>1.53527943</b> | <b>0.14639</b> | <b>2</b> |
| Q61035        | ASAEQEIEEVTK                                                                   | 1.71161472        | 2              | 2.77658  |
| Q61035        | REDLVEEIR                                                                      | 1.50081414        | 2              | 2.46645  |
| <b>Q61043</b> | <b>NIN Ninein</b>                                                              | <b>0.88855305</b> | <b>0.5404</b>  | <b>3</b> |
| Q61043        | NEITTLNEEDSISNLK                                                               | 0.44272692        | 2              | 2.47405  |
| Q61043        | RQLQMAFDEEKAQLQEELR+Oxidation(4                                                | 0.77872512        |                |          |
| Q61043        | SLENVLAEK                                                                      | 0.88936422        | 1              | 2.02442  |
| <b>Q61301</b> | <b>CTNA2 Catenin alpha_2</b>                                                   | <b>1.5469888</b>  | <b>0.1884</b>  | <b>3</b> |

|               |                                                      |                   |                |           |
|---------------|------------------------------------------------------|-------------------|----------------|-----------|
| Q61301        | LLEPLVTQVTTLVNTSNK                                   | 1.25295698        | 2              | 3.82697   |
| Q61301        | TSVQTEDDQLIAGQSAR                                    | 1.22827836        | 2              | 5.00155   |
| Q61301        | WDDSGNDIIVLAK                                        | 1.64419463        | 2              | 3.0363    |
| <b>Q61335</b> | <b>BAP31 B_cell receptor associated protein 31</b>   | <b>1.10187628</b> | <b>1</b>       | <b>5</b>  |
| Q61335        | AENEALAMQK                                           | 1.10523222        | 2              | 3.41615   |
| Q61335        | KYMEENDQLK                                           | 1.14730773        | 2              | 2.63751   |
| Q61335        | KYMEENDQLKK                                          | 0.88166443        | 3              | 3.96824   |
| Q61335        | YMEENDQLK                                            | 1.18447387        | 2              | 2.74282   |
| Q61335        | YMEENDQLKK                                           | 0.94874364        | 2              | 2.90167   |
| <b>Q61545</b> | <b>EWS RNA binding protein EWS</b>                   | <b>0.97664877</b> | <b>0.62056</b> | <b>2</b>  |
| Q61545        | GDATVSYEDPPTAK                                       | 0.92138233        | 2              | 3.41173   |
| Q61545        | GGPGGPGGPGPMGR                                       | 1.62868168        | 2              | 2.86395   |
| <b>Q61595</b> | <b>KTN1 Kinectin</b>                                 | <b>1.14852648</b> | <b>0.50486</b> | <b>2</b>  |
| Q61595        | TAEHEAAQQDLQSK                                       | 1.20503262        | 2              | 4.37952   |
| Q61595        | VEPVLVTK                                             | 0.37794739        | 2              | 2.35715   |
| <b>Q61655</b> | <b>DD19A ATP dependent RNA helicase DDX19A</b>       | <b>1.2356443</b>  | <b>0.30639</b> | <b>2</b>  |
| Q61655        | SNLVDNTNQVEVLQR                                      | 1.23301931        | 2              | 4.18284   |
| Q61655        | TSTTAEKTEEEKEDR                                      | 1.86514312        | 3              | 3.98546   |
| <b>Q61656</b> | <b>DDX5 Probable ATP dependent RNA helicase DDX5</b> | <b>1.90293072</b> | <b>8.8E-07</b> | <b>6</b>  |
| Q61656        | ELAQVQQVAAEYCR                                       | 0.93720846        | 2              | 2.8823    |
| Q61656        | GDGPICLVLAPTR                                        | 1.76565931        | 2              | 2.95587   |
| Q61656        | MLDMGFEPQIR                                          | 1.96476099        | 2              | 3.34645   |
| Q61656        | NFYQEHPDLAR                                          | 2.19941589        | 2              | 3.30726   |
| Q61656        | STCIYGGAPK                                           | 1.55435082        | 2              | 2.47578   |
| Q61656        | TAQEVDTYR                                            | 1.69731582        | 2              | 2.31755   |
| <b>Q61830</b> | <b>MRC1 Macrophage mannose receptor 1</b>            | <b>1.32195224</b> | <b>0.39509</b> | <b>3</b>  |
| Q61830        | LKLPWHEAETYCK                                        | 1.55593033        | 2              | 2.35084   |
| Q61830        | WTVDEQVQFTHWNADMPGR+Oxidation(15                     | 2.21650757        |                |           |
| Q61830        | YLNWLPGPSSEPGK                                       | 1.27944808        | 2              | 2.62816   |
| <b>Q61941</b> | <b>transhydrogenase_mitochondrial</b>                | <b>1.31141929</b> | <b>0.00116</b> | <b>13</b> |
| Q61941        | AQYPIADLVK                                           | 1.23611223        | 2              | 2.47929   |
| Q61941        | DDDFGTMSHVIR                                         | 1.41320731        | 2              | 2.52687   |
| Q61941        | EANSIVITPGYGLCAAK                                    | 1.49605453        | 2              | 3.83934   |
| Q61941        | FFTQGITAAGK                                          | 1.19112106        | 2              | 2.74212   |
| Q61941        | GITHIGYTDLPSR                                        | 0.92139686        | 2              | 3.74714   |
| Q61941        | ILIVGGGVAGLASAGAAK                                   | 1.93135005        | 2              | 3.90539   |
| Q61941        | KTTVLAMDQVPR                                         | 1.23273169        | 2              | 3.28874   |
| Q61941        | MATQASTLYSNNITK                                      | 1.15341412        | 2              | 4.72669   |
| Q61941        | QGFNVVVEGAGASK                                       | 1.36968513        | 2              | 4.14883   |
| Q61941        | SLGAEPLEVDLK                                         | 1.31278681        | 2              | 3.51381   |
| Q61941        | TTVLAMDQVPR                                          | 1.32633261        | 2              | 2.57553   |
| Q61941        | TVAELEAEK                                            | 1.33153449        | 2              | 2.98057   |
| Q61941        | VTIAQGYDALSSMANISGYK                                 | 1.40903973        | 2              | 5.33168   |
| <b>Q61990</b> | <b>PCBP2 Poly(rC) binding protein 2</b>              | <b>1.5754308</b>  | <b>0.12686</b> | <b>2</b>  |
| Q61990        | AITIAGIPQSIIECVK                                     | 1.55992902        | 2              | 2.33291   |
| Q61990        | IITLAGPTNAIFK                                        | 3.24972941        | 2              | 2.54473   |
| <b>Q62009</b> | <b>POSTN Periostin</b>                               | <b>1.92725664</b> | <b>0.20836</b> | <b>2</b>  |
| Q62009        | ISTGGGETGETLQKFLQK                                   | 1.11052608        | 2              | 2.52124   |
| Q62009        | TEGPAMTKIQIEGDPDFR                                   | 1.93088739        | 2              | 2.30993   |
| <b>Q62095</b> | <b>DDX3Y ATP dependent RNA helicase DDX3Y</b>        | <b>2.2705879</b>  | <b>3.5E-12</b> | <b>4</b>  |
| Q62095        | HVINFDLPSDIEEYVHR                                    | 2.35984874        | 3              | 4.44574   |
| Q62095        | SFLDLLNATGK                                          | 2.27033802        | 2              | 4.17301   |
| Q62095        | VGNLGLATSFNER                                        | 2.12415751        | 2              | 3.11215   |
| Q62095        | VGSTSENITQK                                          | 1.60211921        | 2              | 2.86075   |
| <b>Q62261</b> | <b>SPTB2 Spectrin beta chain brain 1</b>             | <b>1.45544879</b> | <b>0.05393</b> | <b>20</b> |
| Q62261        | AKDEQSAVSMMLK                                        | 1.24002651        | 2              | 2.47299   |

|               |                                                                           |                   |                |          |
|---------------|---------------------------------------------------------------------------|-------------------|----------------|----------|
| Q62261        | ALVADSHPESER                                                              | 1.36118433        | 2              | 3.19084  |
| Q62261        | DQNTVETLQR                                                                | 1.05596053        | 2              | 2.99977  |
| Q62261        | EAEKLESEHPDQAQAILSR                                                       | 4.19153689        | 3              | 3.84367  |
| Q62261        | EGMQLISEKPETEAVVKEK                                                       | 1.41890598        | 2              | 2.34095  |
| Q62261        | EIEELQSQAQALSQEGK                                                         | 0.69454556        | 2              | 3.78378  |
| Q62261        | FESLEPEMNNQASR                                                            | 1.06003223        | 2              | 3.90479  |
| Q62261        | HLLGVEDLLQK                                                               | 1.26810052        | 2              | 3.40903  |
| Q62261        | HQILEQAVEDYAETVHQLSK                                                      | 1.34912442        | 3              | 5.53489  |
| Q62261        | ITDLYTDLR                                                                 | 1.15606747        | 2              | 2.43914  |
| Q62261        | LTTLELLEVR                                                                | 2.60370177        | 2              | 2.91883  |
| Q62261        | LVSDGNINSDR                                                               | 1.51900285        | 2              | 3.32429  |
| Q62261        | LVSQDNFGFDLPAVEAATK                                                       | 3.59520333        | 2              | 3.17874  |
| Q62261        | SNAHYNLQNAFNLAEQHLGLTK                                                    | 0.9071213         | 3              | 3.89783  |
| Q62261        | SQNIITDSSSLNAEAIR                                                         | 0.97729082        | 2              | 5.24351  |
| Q62261        | TLETPAAQMEGFLNR                                                           | 2.30077112        | 2              | 3.22523  |
| Q62261        | TQILAASYELHK                                                              | 1.78309492        | 2              | 2.57199  |
| Q62261        | TQTAIASEDMPNTLTEAEK                                                       | 1.36748287        | 2              | 5.21925  |
| Q62261        | VIESTQDLGNDLAGVMALQR                                                      | 0.22466774        | 2              | 4.45921  |
| Q62261        | VLDNAIETEK                                                                | 1.03318501        | 2              | 2.47117  |
| <b>Q62376</b> | <b>RU17 U1 small nuclear ribonucleoprotein 70 kDa</b>                     | <b>1.15279193</b> | <b>0.39336</b> | <b>2</b> |
| Q62376        | IERRQQEVETELK                                                             | 0.49342449        | 2              | 2.30479  |
| Q62376        | RQQEVETELK                                                                | 1.16555008        | 2              | 2.4842   |
| <b>Q62425</b> | <b>NDUA4 NADH dehydrogenase [ubiquinone] 1 alpha subcomplex subunit 4</b> | <b>1.17067662</b> | <b>0.88338</b> | <b>3</b> |
| Q62425        | FYSVNVDYSK                                                                | 1.17201623        | 2              | 2.84338  |
| Q62425        | KNNPEPWNK                                                                 | 1.01071558        | 2              | 2.54775  |
| Q62425        | LGPNEQYK                                                                  | 1.00846451        | 1              | 2.02545  |
| <b>Q62446</b> | <b>FKBP3 Peptidyl_prolyl cis_trans isomerase FKBP3</b>                    | <b>1.44420598</b> | <b>0.29531</b> | <b>2</b> |
| Q62446        | GWDEALLTMSK                                                               | 1.70019556        | 2              | 2.47995  |
| Q62446        | SEETLDEGPPK                                                               | 1.44170609        | 2              | 3.0409   |
| <b>Q62452</b> | <b>UD19 UDP_glucuronosyltransferase 1_9</b>                               | <b>1.07541562</b> | <b>7.4E-05</b> | <b>4</b> |
| Q62452        | AMEIAEALGR                                                                | 0.74928217        | 2              | 4.1044   |
| Q62452        | GAGVTLNVLEMTADDLENALK                                                     | 1.14818901        | 2              | 5.39017  |
| Q62452        | WLPQNDLLGHPK                                                              | 1.10434828        | 2              | 3.29481  |
| Q62452        | YTGTRPSNLAK                                                               | 0.56709825        | 2              | 2.72087  |
| <b>Q62465</b> | <b>VAT1 Synaptic vesicle membrane protein VAT_1 homolog</b>               | <b>1.10068337</b> | <b>0.08974</b> | <b>8</b> |
| Q62465        | ACGLNFADLMGR                                                              | 1.04042969        | 2              | 2.90657  |
| Q62465        | CLVLTGFGGYDK                                                              | 0.77497062        | 2              | 2.92495  |
| Q62465        | ENGVTHPIDYHTTDYVDEIKK                                                     | 1.40861346        | 3              | 3.54473  |
| Q62465        | GVDIVMDPLGGSDTAK                                                          | 1.34025071        | 2              | 4.37029  |
| Q62465        | IDSVWPF EK                                                                | 0.80530473        | 2              | 2.77437  |
| Q62465        | TVENVTVFGTASASK                                                           | 0.98010001        | 2              | 3.5227   |
| Q62465        | VLLVPGPEKET                                                               | 0.99066249        | 2              | 2.79258  |
| Q62465        | VVTYGMANLLTGPK                                                            | 1.93764146        | 2              | 3.48565  |
| <b>Q62636</b> | <b>RAP1B Ras_related protein Rap_1b</b>                                   | <b>1.37036481</b> | <b>0.02044</b> | <b>4</b> |
| Q62636        | INVNEIFYDLVR                                                              | 1.52209369        | 2              | 4.0262   |
| Q62636        | LVLGSGGVGK                                                                | 1.39074655        | 2              | 2.63694  |
| Q62636        | QWSNCAFLESSAK                                                             | 0.91798529        | 2              | 2.54085  |
| Q62636        | VKDTDDVPMILVGNK                                                           | 0.92609826        | 2              | 2.78135  |
| <b>Q62651</b> | <b>ECH1 Delta(3_5)_Delta(2_4)_dienoyl_CoA isomerase_mitochondrial</b>     | <b>0.79277558</b> | <b>0.9044</b>  | <b>4</b> |
| Q62651        | HVLHVQLNRPEK                                                              | 1.32702624        | 2              | 3.79476  |
| Q62651        | MMADEALDSGLVSR                                                            | 1.02284179        | 2              | 4.37672  |
| Q62651        | RIPEEVSDHNYESIQTSAQK                                                      | 0.90314398        | 3              | 5.60781  |

|               |                                                         |                   |                |           |
|---------------|---------------------------------------------------------|-------------------|----------------|-----------|
| Q62651        | SLVNELTFTAR                                             | 0.78125879        | 2              | 3.1926    |
| <b>Q62730</b> | <b>DHB2 Estradiol 17 beta_dehydrogenase 2</b>           | <b>1.35646642</b> | <b>3.6E-09</b> | <b>7</b>  |
| Q62730        | AVLVTGADSGFGHALAK                                       | 1.46083224        | 2              | 4.34994   |
| Q62730        | DIQHAICAK                                               | 1.90504289        | 2              | 2.39238   |
| Q62730        | EIQENYQQEYVHTQK                                         | 2.27083601        | 2              | 4.50491   |
| Q62730        | EMSNPDITPVLR                                            | 1.52489977        | 2              | 2.66544   |
| Q62730        | LSVLQMDVTKPEQIK                                         | 2.7254822         | 2              | 3.69452   |
| Q62730        | LSVLQMDVTKPEQIKDVHSEVAEK                                | 0.92354769        | 3              | 4.60785   |
| Q62730        | VVTIHPGGFQTNIVGSQDSWDK                                  | 2.09445612        | 2              | 5.81526   |
| <b>Q62736</b> | <b>CALD1 Non_muscle caldesmon</b>                       | <b>1.11013662</b> | <b>0.68177</b> | <b>14</b> |
| Q62736        | ASGDKEAEGAPQEAGK                                        | 1.24342741        | 2              | 4.85141   |
| Q62736        | ASGDKEAEGAPQEAGKR                                       | 1.45046276        | 3              | 3.97246   |
| Q62736        | EEIERR                                                  | 1.27007789        | 1              | 1.90469   |
| Q62736        | EFDPTITDGSLSVPSR                                        | 1.20453162        | 2              | 3.67397   |
| Q62736        | GGNLGENQIKDEK                                           | 1.17460521        | 2              | 3.47579   |
| Q62736        | GSVFSSPSASGTPNK                                         | 1.18553655        | 2              | 2.30513   |
| Q62736        | KVLEEEQR                                                | 1.11974345        | 2              | 2.74377   |
| Q62736        | LEQYTNAIEGTK                                            | 1.10475606        | 2              | 3.37348   |
| Q62736        | MQNNSAENETAEGEEK                                        | 1.03247753        | 2              | 4.88519   |
| Q62736        | MQNNSAENETAEGEEKGESR                                    | 1.17006377        | 3              | 4.62822   |
| Q62736        | MQNNSAENETAEGEEKGESR+Oxidation(0                        | 1.30489944        |                |           |
| Q62736        | RGETESEFEK                                              | 1.28912397        | 2              | 3.31606   |
| Q62736        | RRGETESEFEK                                             | 1.54845989        | 2              | 2.89916   |
| Q62736        | VLEEEQR                                                 | 1.32131923        | 2              | 2.59837   |
| <b>Q62745</b> | <b>CD81 CD81 antigen</b>                                | <b>1.1668906</b>  | <b>0.88699</b> | <b>2</b>  |
| Q62745        | NSLCPSSNSFTQLLK                                         | 1.14059803        | 2              | 3.17297   |
| Q62745        | QFYDQALQQAVMDDANNAK                                     | 1.80805595        | 2              | 5.03561   |
| <b>Q62769</b> | <b>UN13B Protein unc_13 homolog B</b>                   | <b>0.94148567</b> | <b>0.39512</b> | <b>3</b>  |
| Q62769        | DHVMRETRNLTPK                                           | 0.94664658        | 2              | 2.58778   |
| Q62769        | ILSQRSNDEVAR                                            | 3.10454891        | 2              | 2.35181   |
| Q62769        | SNDEVAREFVK                                             | 0.63251123        | 1              | 1.93655   |
| <b>Q62770</b> | <b>UN13C Protein unc_13 homolog C</b>                   | <b>1.54986964</b> | <b>0.46884</b> | <b>2</b>  |
| Q62770        | ENFPASNSERLQDLK                                         | 1.12412655        | 2              | 2.37452   |
| Q62770        | NLSMDETGLTILR                                           | 5.76046446        | 2              | 2.3763    |
| <b>Q62785</b> | <b>HAP28 28 kDa heat_and acid_stable phosphoprotein</b> | <b>1.60455878</b> | <b>0.43901</b> | <b>6</b>  |
| Q62785        | ANEEDQEEGDGASGDPK                                       | 1.35977164        | 2              | 5.57385   |
| Q62785        | ANEEDQEEGDGASGDPKK                                      | 1.46969988        | 3              | 3.51232   |
| Q62785        | GVEGLIDIENPNR                                           | 1.80426107        | 2              | 2.92045   |
| Q62785        | QKANEEDQEEGDGASGDPK                                     | 1.35122577        | 3              | 4.35504   |
| Q62785        | QKANEEDQEEGDGASGDPKK                                    | 1.89738543        | 3              | 3.43019   |
| Q62785        | YMKMHLAGKTEQAK                                          | 0.75392153        | 2              | 2.30757   |
| <b>Q62789</b> | <b>UD2B7 UDP_glucuronosyltransferase 2B7</b>            | <b>1.09127693</b> | <b>0.72144</b> | <b>2</b>  |
| Q62789        | IILDELVQR                                               | 1.0425841         | 2              | 3.54343   |
| Q62789        | WIPQNDLLGHPK                                            | 1.10434828        | 2              | 3.29481   |
| <b>Q62812</b> | <b>MYH9 Myosin_9</b>                                    | <b>0.90433001</b> | <b>0.84487</b> | <b>68</b> |
| Q62812        | ALEEAMEQK                                               | 1.17107012        | 2              | 3.29544   |
| Q62812        | ALELDSNLYR                                              | 1.07100731        | 2              | 3.28462   |
| Q62812        | ALEQQVEEMK                                              | 1.86104992        | 2              | 3.3023    |
| Q62812        | ALEQQVEEMKTLQLEELDELQATEDAK                             | 1.32603195        | 3              | 3.39235   |
| Q62812        | ANLQIDQINTDLNLER                                        | 1.26017119        | 2              | 5.43453   |
| Q62812        | ASIAALEAK                                               | 1.24328156        | 2              | 2.68672   |
| Q62812        | ASREEILAQAK                                             | 2.00725524        | 2              | 2.98513   |
| Q62812        | CQYLQAEK                                                | 1.27134523        | 1              | 2.33016   |
| Q62812        | DFSALESQLQDTQELLQEENR                                   | 0.94606402        | 3              | 6.72677   |
| Q62812        | DLEAHIDTANK                                             | 1.31064048        | 2              | 3.46763   |
| Q62812        | DLGEELEALKTELEDTLDSTAAQQELR                             | 1.18290526        | 3              | 4.49373   |



|        |                                              |            |   |         |
|--------|----------------------------------------------|------------|---|---------|
| Q62812 | DLQGRDEQSEEK                                 | 2.07584341 | 2 | 2.92571 |
| Q62812 | EEILAQAK                                     | 1.14676313 | 1 | 2.37493 |
| Q62812 | EEILAQAKENEK                                 | 1.17460521 | 2 | 2.34371 |
| Q62812 | ELEDATETADAMNR                               | 0.89475257 | 2 | 4.42332 |
| Q62812 | ELETQISELQEDLESER                            | 1.14509936 | 2 | 4.86494 |
| Q62812 | EMEAELEDERK                                  | 0.87909994 | 2 | 3.32527 |
| Q62812 | HEAMITDLEER                                  | 0.62575403 | 2 | 3.27159 |
| Q62812 | HEDELLAK                                     | 1.12643436 | 2 | 3.04689 |
| Q62812 | HSQAVEELAEQLEQTK                             | 1.05650356 | 2 | 5.02092 |
| Q62812 | HSQAVEELAEQLEQTKR                            | 1.17494826 | 3 | 5.65885 |
| Q62812 | IIGLDQVAGMSETALPGAFK                         | 2.26197516 | 2 | 5.39499 |
| Q62812 | IMGIPEDQMGLLR                                | 1.42098505 | 2 | 2.61722 |
| Q62812 | IRELETQISELQEDLESER                          | 1.21536796 | 2 | 5.4351  |
| Q62812 | KEEELQAALAR                                  | 1.15332534 | 3 | 3.3629  |
| Q62812 | KKVEAQLQELQVK                                | 1.15703074 | 2 | 4.62047 |
| Q62812 | KLEEDQIIMEDQNCK                              | 0.97579574 | 2 | 6.00955 |
| Q62812 | KLEGDSTDLSQIAELQAQIAELK                      | 1.49553761 | 2 | 5.57834 |
| Q62812 | KQELEEICHDLER                                | 1.1691981  | 2 | 4.73266 |
| Q62812 | KVEAQLQELQVK                                 | 1.28844332 | 2 | 4.55015 |
| Q62812 | LDPHLVLDQLR                                  | 1.16147918 | 3 | 3.42147 |
| Q62812 | LEEDQIIMEDQNCK                               | 0.87445827 | 2 | 4.99045 |
| Q62812 | LEGDSTDLSQIAELQAQIAELK                       | 1.48042883 | 3 | 5.22578 |
| Q62812 | LEVNLQAMK                                    | 0.90296917 | 2 | 2.63661 |
| Q62812 | LQEMESAVK                                    | 1.22773392 | 2 | 2.75338 |
| Q62812 | LQQELDLLVDLDHQR                              | 1.10699007 | 2 | 4.81848 |
| Q62812 | LQVELDSVTGLLNQSDSK                           | 1.17971156 | 2 | 5.48712 |
| Q62812 | LTEMETMQSQLMAEK                              | 1.49591455 | 2 | 4.97254 |
| Q62812 | MEDGVGCLETAEEAK                              | 1.15794809 | 2 | 4.37249 |
| Q62812 | MQQNIQELEEQLIEEESAR                          | 1.76334399 | 2 | 6.32211 |
| Q62812 | NAEQFKDQADK                                  | 1.38771531 | 2 | 3.45815 |
| Q62812 | NKHEAMITDLEER                                | 1.50882834 | 3 | 4.10279 |
| Q62812 | NLPIYSEEIVDMYK                               | 1.32681916 | 2 | 3.79672 |
| Q62812 | NMDPLNDNIATLLHQSSDK                          | 1.09054009 | 2 | 4.94688 |
| Q62812 | NTDQASMPDNTAAQK                              | 1.73565367 | 2 | 5.31293 |
| Q62812 | NTDQASMPDNTAAQK+Oxidation(6                  | 1.83676128 |   |         |
| Q62812 | QAAQERDELADEIANSSGK                          | 1.19929216 | 3 | 4.19502 |
| Q62812 | QIATLHAQVTDMK                                | 0.85206567 | 2 | 2.38453 |
| Q62812 | QLEEAEEEAQR                                  | 1.09597216 | 2 | 3.8772  |
| Q62812 | QSVSNLEK                                     | 1.14891885 | 2 | 2.47082 |
| Q62812 | QTLENERGELANEVK                              | 0.78191284 | 2 | 3.38568 |
| Q62812 | RGDMFPFVTR                                   | 0.9840989  | 2 | 2.96735 |
| Q62812 | RKLEGDSTDLSQIAELQAQIAELK                     | 1.02672766 | 3 | 5.75843 |
| Q62812 | RQLEEAEEEAQR                                 | 1.0077954  | 2 | 4.60045 |
| Q62812 | SMEAEMIQLEELAAAER                            | 1.20331008 | 3 | 4.33539 |
| Q62812 | SMEAEMIQLEELAAAERAKR+Oxidation(1             | 2.11266923 |   |         |
| Q62812 | SMEAEMIQLEELAAAERAKR+Oxidation(1)Oxidation(5 | 1.03155321 |   |         |
| Q62812 | TDLLLEPYNK                                   | 1.10919316 | 2 | 3.41927 |
| Q62812 | TELEDTLSTAAQQELR                             | 0.71923826 | 2 | 5.33869 |
| Q62812 | TEMEDLMSSK                                   | 1.44470755 | 2 | 2.58969 |
| Q62812 | THEAQIQEMR                                   | 1.17658546 | 3 | 3.43686 |
| Q62812 | TQLEEELEDELQATEDAK                           | 1.35406287 | 2 | 6.59084 |
| Q62812 | VAEFTTDLMEEEEEK                              | 1.62119615 | 2 | 4.48055 |
| Q62812 | VEAQLQELQVK                                  | 0.55822282 | 2 | 3.48367 |
| Q62812 | VEDMAELTCLNEASVLHNLK                         | 1.22897836 | 2 | 4.49972 |
| Q62812 | VISGVLQLGNIVFK                               | 1.64083917 | 2 | 3.75795 |
| Q62812 | VSHLLGINVTDFTR                               | 1.88397776 | 2 | 3.8123  |

|               |                                                        |                   |                |           |
|---------------|--------------------------------------------------------|-------------------|----------------|-----------|
| Q62812        | YEILTPNSIPK                                            | 0.94062511        | 2              | 3.13421   |
| <b>Q62824</b> | <b>EXOC4 Exocyst complex component 4</b>               | <b>0.92181446</b> | <b>0.86838</b> | <b>2</b>  |
| Q62824        | EDLDCDPEENSTLFMGILIQGLAR                               | 1.19264194        | 2              | 2.31916   |
| Q62824        | SQTGVGDQTTQNTR                                         | 0.9205755         | 2              | 3.11758   |
| <b>Q62826</b> | <b>HNRPM Heterogeneous nuclear ribonucleoprotein M</b> | <b>1.3705555</b>  | <b>0.93965</b> | <b>7</b>  |
| Q62826        | ADILEDKDGK                                             | 1.37106667        | 2              | 2.79058   |
| Q62826        | AFITNIPFDVK                                            | 1.46428784        | 2              | 3.24089   |
| Q62826        | GIGMGNLGPAGMGMEGIFGINK                                 | 1.72594213        | 2              | 3.91876   |
| Q62826        | GNFGGSFAGSFGAGGHAPGVAR                                 | 1.10648411        | 2              | 5.02905   |
| Q62826        | INEILSNALK                                             | 1.73819385        | 2              | 2.61269   |
| Q62826        | MGPAMGPPALGAGIER                                       | 1.1651661         | 2              | 2.75543   |
| Q62826        | MGPVMDRMTGLER+Oxidation(0)Oxidation(4)Oxidation(7)     | 2.37737766        |                |           |
| <b>Q62868</b> | <b>ROCK2 Rho associated protein kinase 2</b>           | <b>1.08114387</b> | <b>0.5202</b>  | <b>2</b>  |
| Q62868        | DEEISAAAIK                                             | 3.15589327        | 1              | 1.90037   |
| Q62868        | QENNHLMEMKMNLEK+Oxidation(6)                           | 1.07726633        |                |           |
| <b>Q62871</b> | <b>DC1I2 Cytoplasmic dynein 1 intermediate chain 2</b> | <b>0.89902805</b> | <b>0.13454</b> | <b>2</b>  |
| Q62871        | ADAEAAAATR                                             | 2.39615541        | 2              | 3.17089   |
| Q62871        | SVSTPSEAGSQDSGDGAVGSR                                  | 0.6620457         | 2              | 5.21896   |
| <b>Q62902</b> | <b>LMAN1 Protein ERGIC_53</b>                          | <b>1.25973058</b> | <b>3.7E-07</b> | <b>7</b>  |
| Q62902        | GAGTPGQPGQVSQQELDTVVR                                  | 1.14223862        | 2              | 4.15028   |
| Q62902        | GHPDLQGGPADDIFESIGDR                                   | 1.4906322         | 2              | 5.01564   |
| Q62902        | LVSGVQHPSAGVYETTQHFMDIK                                | 1.19982396        | 3              | 3.42386   |
| Q62902        | NNPAIVVVGNNQINVDHQNDGATQALASCQR                        | 1.0250776         | 3              | 6.36976   |
| Q62902        | RGAGTPGQPGQVSQQELDTVVR                                 | 1.26599121        | 3              | 4.45438   |
| Q62902        | YQEEFEHFQQLDK                                          | 1.31987677        | 2              | 5.31401   |
| Q62902        | YVSSLTEEISR                                            | 1.40603521        | 2              | 3.04648   |
| <b>Q62904</b> | <b>DHB7 3_keto_steroid reductase</b>                   | <b>1.0406556</b>  | <b>0.7471</b>  | <b>3</b>  |
| Q62904        | MDVDEDTAEK                                             | 3.65352822        | 2              | 2.38957   |
| Q62904        | YATDLLNVALNR                                           | 1.02367384        | 2              | 2.57317   |
| Q62904        | YLSGTTGLGTNYVK                                         | 1.03043067        | 2              | 2.98828   |
| <b>Q62967</b> | <b>MVD1 Diphosphomevalonate decarboxylase</b>          | <b>0.83856083</b> | <b>0.0028</b>  | <b>2</b>  |
| Q62967        | GLQVAPVLLSDELK                                         | 0.93715334        | 2              | 3.74149   |
| Q62967        | VYGVEDLSEVAR                                           | 0.83191599        | 2              | 3.42081   |
| <b>Q62991</b> | <b>SCFD1 Sec1 family domain containing protein 1</b>   | <b>1.20756833</b> | <b>0.12969</b> | <b>3</b>  |
| Q62991        | ALTDAGCNLSPLQYIK                                       | 2.33472838        | 2              | 2.90419   |
| Q62991        | FGQDIISPLSVK                                           | 1.58718245        | 2              | 2.36116   |
| Q62991        | SLLDVISDPDAGTPEDK                                      | 0.93909059        | 2              | 2.86206   |
| <b>Q63041</b> | <b>A1M Alpha_1_macroglobulin</b>                       | <b>0.83556532</b> | <b>0.81553</b> | <b>12</b> |
| Q63041        | AEDITHNGIVYTPK                                         | 1.22467384        | 2              | 3.66851   |
| Q63041        | AEQGAYLGPLYK                                           | 0.69139123        | 2              | 3.23818   |
| Q63041        | AESPVVFQTDKPIYKPGQTVK                                  | 0.733998          | 3              | 4.01247   |
| Q63041        | DTVVKPVIVEPEGIEK                                       | 1.03485567        | 2              | 3.75448   |
| Q63041        | GSIFNSGSHVLPLEQGK                                      | 1.06831954        | 2              | 4.07549   |
| Q63041        | KLQDQSNIQR                                             | 0.83624679        | 2              | 2.57123   |
| Q63041        | LIVYTILPNEELIADVQK                                     | 1.494381          | 2              | 2.99863   |
| Q63041        | LQDQSNIQR                                              | 0.72812386        | 2              | 2.9837    |
| Q63041        | QDLNDNDAYSVFQSIGLK                                     | 1.38487831        | 2              | 2.6273    |
| Q63041        | VNTLPLNFDK                                             | 0.75616016        | 2              | 2.74901   |
| Q63041        | YNILPEAEAGEAPFTLK                                      | 0.92513848        | 2              | 4.90899   |
| Q63041        | YVVLVPSSELYAGVPEK                                      | 1.00816103        | 2              | 3.00918   |
| <b>Q63060</b> | <b>GLPK Glycerol kinase</b>                            | <b>1.38504599</b> | <b>5E-13</b>   | <b>12</b> |
| Q63060        | AGALEGVPIISGCLGDQSAALVGMCFQDQAK                        | 1.81065745        | 3              | 4.5678    |
| Q63060        | AVLGPLVGAVDQGTSSSTR                                    | 1.37861913        | 2              | 5.19401   |
| Q63060        | CVFSEHLLTTVAYK                                         | 1.1128928         | 2              | 4.28195   |

|               |                                                                   |                   |                |           |
|---------------|-------------------------------------------------------------------|-------------------|----------------|-----------|
| Q63060        | DCGIPLSHLQVDGGMTSNK                                               | 1.35175491        | 2              | 4.43673   |
| Q63060        | EILQSVYECIEK                                                      | 1.43652075        | 2              | 3.41925   |
| Q63060        | FEPQINAESEIR                                                      | 1.28632901        | 2              | 3.64244   |
| Q63060        | KVQEAveenr                                                        | 1.49356959        | 2              | 3.35223   |
| Q63060        | LGQLNIDISNIK                                                      | 2.19648839        | 2              | 3.23066   |
| Q63060        | NTYGTGCFLLCNTGHK                                                  | 0.88076742        | 2              | 3.81262   |
| Q63060        | SSSEIYGLMK                                                        | 1.69122648        | 2              | 2.51534   |
| Q63060        | TAELLSHHQVEIK                                                     | 1.59615199        | 2              | 3.45738   |
| Q63060        | VQEAveenr                                                         | 2.18542844        | 2              | 3.24487   |
| <b>Q63081</b> | <b>PDIA6 Protein disulfide_isomerase A6</b>                       | <b>1.06314735</b> | <b>0.31907</b> | <b>11</b> |
| Q63081        | ALDLFSDNAPPELLEIINEDIAK                                           | 1.26609014        | 3              | 5.12988   |
| Q63081        | GESPVDYDGGR                                                       | 2.14217938        | 2              | 2.85702   |
| Q63081        | GSFSEQGINEFLR                                                     | 1.24011305        | 2              | 4.19658   |
| Q63081        | GSTAPVGGGSPNITPR                                                  | 0.99610708        | 2              | 4.87822   |
| Q63081        | HQSLGGQYGVQGFPTIK                                                 | 1.42259624        | 2              | 5.07805   |
| Q63081        | KTCEEHQLCVVAVLPHILDTGATGR                                         | 0.80264984        | 3              | 5.23477   |
| Q63081        | NLEPEWAAAAATEVK                                                   | 0.97304431        | 2              | 4.02494   |
| Q63081        | NSYLEVLLK                                                         | 1.41613807        | 2              | 2.97378   |
| Q63081        | TCEEHQLCVVAVLPHILDTGATGR                                          | 1.02871443        | 3              | 5.02229   |
| Q63081        | TGEAIVDAALSALR                                                    | 1.03662435        | 3              | 4.87508   |
| Q63081        | VGAVNADKHQSLGGQYGVQGFPTIK                                         | 1.03693372        | 3              | 4.60694   |
| <b>Q63083</b> | <b>NUCB1 Nucleobindin_1</b>                                       | <b>1.32027152</b> | <b>0.15954</b> | <b>3</b>  |
| Q63083        | LSQETEALGR                                                        | 1.89272174        | 2              | 2.81855   |
| Q63083        | VNVPGSQAQLK                                                       | 1.23093583        | 2              | 2.44025   |
| Q63083        | YLQEVINVLETDGHFR                                                  | 1.3253026         | 3              | 4.11414   |
| <b>Q63108</b> | <b>EST3 Liver carboxylesterase 3</b>                              | <b>1.06066518</b> | <b>0.9987</b>  | <b>4</b>  |
| Q63108        | GGTSKEEINLSK                                                      | 0.88668185        | 2              | 3.42736   |
| Q63108        | LDPMTATSLK                                                        | 1.43152002        | 2              | 2.50753   |
| Q63108        | QKTEEELETTLK                                                      | 1.22394177        | 2              | 3.50025   |
| Q63108        | SSFLNLPEEAIPVAVEK                                                 | 1.05903958        | 2              | 4.83555   |
| <b>Q63120</b> | <b>MRP2 Canalicular multispecific organic anion transporter 1</b> | <b>1.29395726</b> | <b>0.00238</b> | <b>7</b>  |
| Q63120        | ACALLPDLEILPGDMAEIGEK                                             | 2.65024688        | 2              | 4.82756   |
| Q63120        | HGEIQFNQYQVR                                                      | 2.2395862         | 2              | 2.72902   |
| Q63120        | IVEYGSPEELLSNR                                                    | 2.26440326        | 2              | 3.31796   |
| Q63120        | QSQSQDVLVLEAK                                                     | 1.75845475        | 2              | 2.56377   |
| Q63120        | YFAWEPFQEQVQGIR                                                   | 2.04383037        | 2              | 3.93459   |
| Q63120        | YLGDDLDTSAIR                                                      | 0.61368615        | 2              | 2.36148   |
| Q63120        | YRPELDLVK                                                         | 1.17651647        | 3              | 3.66308   |
| <b>Q63150</b> | <b>DPYS Dihydropyrimidinase</b>                                   | <b>1.15968226</b> | <b>0.15826</b> | <b>10</b> |
| Q63150        | ALGKDDFTK                                                         | 1.26787806        | 2              | 2.55283   |
| Q63150        | DQTCTPIPVKR                                                       | 1.57487204        | 2              | 2.49283   |
| Q63150        | EIGAIAQVHAENGDLIAEGAK                                             | 1.59598824        | 2              | 4.999     |
| Q63150        | FVAVTSTNAAK                                                       | 1.25162812        | 2              | 3.17668   |
| Q63150        | GSSLIEAFETWR                                                      | 2.31613226        | 2              | 3.5411    |
| Q63150        | IAVGSDADIVIWDPEATR                                                | 2.05743483        | 2              | 3.26214   |
| Q63150        | MLALGITGPEGHELCPAEVAAEATLR                                        | 1.19048271        | 3              | 3.74974   |
| Q63150        | VVNDDFSQVADVLVEDGVVR                                              | 1.35017742        | 2              | 5.95564   |
| Q63150        | VVYAGVFDVTAGHGK                                                   | 1.35865735        | 2              | 4.20199   |
| Q63150        | VVYGEPIAAGLGTGTQYWNK                                              | 1.50814895        | 2              | 5.8231    |
| <b>Q63228</b> | <b>GMFB Glia maturation factor beta</b>                           | <b>1.72760802</b> | <b>0.23149</b> | <b>2</b>  |
| Q63228        | LVVLDEELEGVSPDEKDELPER                                            | 1.72781925        | 3              | 3.70804   |
| Q63228        | NTEDLTEEWR                                                        | 1.66015244        | 2              | 2.59946   |
| <b>Q63269</b> | <b>ITPR3 Inositol 1_4_5_trisphosphate receptor type 3</b>         | <b>0.7716863</b>  | <b>9.8E-05</b> | <b>2</b>  |
| Q63269        | LLDGGNTEIQK                                                       | 0.7699839         | 1              | 2.45957   |
| Q63269        | QKLMRDENILK+Oxidation(3                                           | 1.29714936        |                |           |

|               |                                                         |                   |                |           |
|---------------|---------------------------------------------------------|-------------------|----------------|-----------|
| <b>Q63270</b> | <b>ACOC Cytoplasmic aconitate hydratase</b>             | <b>1.18941365</b> | <b>3.9E-10</b> | <b>19</b> |
| Q63270        | AVEAGLNVKPYVK                                           | 0.90613185        | 2              | 2.96859   |
| Q63270        | AVLAESYER                                               | 1.27308374        | 2              | 2.6416    |
| Q63270        | DFSDDSSQDPDFTQVVLDLK                                    | 1.9574375         | 2              | 3.66532   |
| Q63270        | FVEFFGPGVAQLSIADR                                       | 1.7641262         | 2              | 5.29679   |
| Q63270        | GFQVAPDHHNDHK                                           | 0.36985826        | 2              | 3.41537   |
| Q63270        | IDFEKEPLGVNAQQQVFLK                                     | 1.11372389        | 3              | 6.12805   |
| Q63270        | IIPPGSGIHHQVNLEYLAR                                     | 1.42909938        | 2              | 2.52067   |
| Q63270        | KNDIENILNWSIMQHK                                        | 1.47854448        | 3              | 4.5379    |
| Q63270        | NCDEFLVK                                                | 1.04049071        | 2              | 2.32397   |
| Q63270        | NDIENILNWSIMQHK                                         | 1.30602131        | 2              | 2.51395   |
| Q63270        | NQDLEFER                                                | 1.30496951        | 1              | 2.69866   |
| Q63270        | QAPQTVHLPSETLDVFDAAER                                   | 0.6154185         | 3              | 3.62427   |
| Q63270        | SIEVPFKPAR                                              | 0.84851998        | 2              | 2.54092   |
| Q63270        | SIVDAYVLLNLGDSVTTDHISPAIGNAR                            | 1.83417602        | 3              | 4.67185   |
| Q63270        | SPPFFESLTLDLQPPK                                        | 1.35381987        | 3              | 4.47541   |
| Q63270        | SWNALAAPSEK                                             | 1.17231353        | 2              | 2.60667   |
| Q63270        | TSLSPGSGVVTTYLR                                         | 1.27385481        | 2              | 3.54827   |
| Q63270        | VILQDFTGVPVAVVDFAAAMR                                   | 1.32214904        | 2              | 4.77858   |
| Q63270        | YQQAGLPLIVLAGK                                          | 1.0599112         | 2              | 3.55306   |
| <b>Q63276</b> | <b>BAAT Bile acid_CoA:amino acid N_acyltransferase</b>  | <b>0.95415505</b> | <b>0.26195</b> | <b>18</b> |
| Q63276        | AHGHFLFVVGEDDKNLNSK                                     | 1.16807274        | 2              | 6.07864   |
| Q63276        | ASEVGEVDLER                                             | 5.09618337        | 2              | 4.03287   |
| Q63276        | DDKGNLFNSQAFYR                                          | 0.94200547        | 2              | 3.3099    |
| Q63276        | GNLFNSQAFYR                                             | 0.77172606        | 2              | 2.67858   |
| Q63276        | LCHPYFPVEGK                                             | 1.14553169        | 3              | 3.5189    |
| Q63276        | LTAVPLSALVDEPVHIR                                       | 3.26877589        | 2              | 3.94814   |
| Q63276        | MPFVIPSINWGEVIPHAAAQEHWSK                               | 1.44480112        | 4              | 4.63693   |
| Q63276        | NWTLLSYPGAGHLIEPPYSPLCSASR                              | 1.97946433        | 3              | 4.23705   |
| Q63276        | QHLNPGFNSQL                                             | 0.98405182        | 2              | 3.50833   |
| Q63276        | QITATVLINGPNFVSSNPHVYR                                  | 1.1903688         | 3              | 4.77909   |
| Q63276        | TFEETADK                                                | 1.05149855        | 1              | 1.92101   |
| Q63276        | TFEETADKDSK                                             | 0.85249854        | 2              | 3.79436   |
| Q63276        | VDLEYFEEGVEFLLR                                         | 1.15582375        | 2              | 4.3345    |
| Q63276        | VFQPTPCSEEFVTTNALGLVEFYR                                | 1.76038388        | 3              | 5.15794   |
| Q63276        | VISSLDSLILR                                             | 0.76854183        | 2              | 4.49398   |
| Q63276        | VTGLTPFQVVCLQASLK                                       | 1.18796702        | 3              | 5.2183    |
| Q63276        | WYVAPGVTR                                               | 0.78524214        | 1              | 2.12347   |
| Q63276        | YCFPIEK                                                 | 1.00613312        | 2              | 2.57902   |
| <b>Q63342</b> | <b>M2GD Dimethylglycine dehydrogenase_mitochondrial</b> | <b>1.04149625</b> | <b>0.43917</b> | <b>26</b> |
| Q63342        | ADIINIVNGPITYSPDILPMVGP HQGVR                           | 1.49787169        | 3              | 6.02255   |
| Q63342        | AWGSEMNCDTNPLEAGLDYFIK                                  | 1.8894241         | 2              | 4.73007   |
| Q63342        | DGLLFGPYEQEK                                            | 1.81163493        | 2              | 2.71546   |
| Q63342        | EGQESPPSPPEWK                                           | 1.03399475        | 2              | 2.68183   |
| Q63342        | GGYDVEIR                                                | 1.37243864        | 2              | 2.63564   |
| Q63342        | GQDSTQLLDHLCANVIPK                                      | 1.22512945        | 2              | 4.10056   |
| Q63342        | IHELFP LLNMDK                                           | 1.1938573         | 2              | 2.75267   |
| Q63342        | IHYDSIK                                                 | 1.21013146        | 1              | 2.36116   |
| Q63342        | IMNAGQEEGIDNFGTYALNALR                                  | 1.22743977        | 2              | 4.48295   |
| Q63342        | ISDIPVTAIR                                              | 1.18012425        | 2              | 3.336     |
| Q63342        | ITEHVEAAMEMV PVLK                                       | 1.65936669        | 2              | 4.64274   |
| Q63342        | KADIINIVNGPITYSPDILPMVGP HQGVR                          | 1.51791454        | 3              | 5.93332   |
| Q63342        | LEEETGQVVG F HQPGSIR                                    | 1.11820607        | 2              | 4.83796   |
| Q63342        | LNKPADFTGK                                              | 1.75282361        | 2              | 3.01995   |
| Q63342        | LTS EDLSDDVFK                                           | 0.81691297        | 2              | 4.03729   |

|               |                                                                           |                   |                |           |
|---------------|---------------------------------------------------------------------------|-------------------|----------------|-----------|
| Q63342        | NITDELGVLGVAGPYAR                                                         | 1.87175959        | 2              | 4.77046   |
| Q63342        | NYPATIIQEPLVLTEPTR                                                        | 1.40781333        | 2              | 4.47272   |
| Q63342        | REDSAALYER                                                                | 0.48605629        | 2              | 2.65566   |
| Q63342        | TNWHATEQYIIIEPEK                                                          | 1.02562724        | 2              | 3.71256   |
| Q63342        | VGFTNISHMLTPR                                                             | 1.00452135        | 2              | 3.11369   |
| Q63342        | VGVIDLSPFGK                                                               | 1.20000045        | 2              | 3.52946   |
| Q63342        | VIGNTTSGSYSYSIQK                                                          | 1.31523037        | 2              | 4.33565   |
| Q63342        | VYAELTVSHQSPGEFLITGSGSELHDLR                                              | 1.94322943        | 3              | 4.30877   |
| Q63342        | WIEEAAVR                                                                  | 2.07918128        | 2              | 2.8172    |
| Q63342        | WTTTQYTEAK                                                                | 1.03812564        | 2              | 2.72726   |
| Q63342        | YLSDWILHGEPFDLIEDPNR                                                      | 1.32724792        | 2              | 4.49836   |
| <b>Q63347</b> | <b>PRS7 26S protease regulatory subunit 7</b>                             | <b>1.17101167</b> | <b>0.78783</b> | <b>7</b>  |
| Q63347        | ALDEGDIALLK                                                               | 1.2700345         | 2              | 2.819     |
| Q63347        | FDDGAGGDNEVQR                                                             | 1.01031937        | 2              | 4.28376   |
| Q63347        | FVVDLSDQVAPTDIIEGMR                                                       | 1.1368931         | 2              | 3.72301   |
| Q63347        | IINADSEDPK                                                                | 1.17037256        | 2              | 3.20563   |
| Q63347        | QTLQSEQPLQVAR                                                             | 1.17705093        | 2              | 3.67158   |
| Q63347        | QVEDDIQQLLK                                                               | 1.36146058        | 2              | 2.98864   |
| Q63347        | TMLELINQLDGFDP                                                            | 1.00315202        | 2              | 3.01654   |
| <b>Q63362</b> | <b>NDUA5 NADH dehydrogenase [ubiquinone] 1 alpha subcomplex subunit 5</b> | <b>1.21261431</b> | <b>0.78553</b> | <b>4</b>  |
| Q63362        | KLENLLQGGEVEEVLQAEK                                                       | 1.40709412        | 2              | 5.70241   |
| Q63362        | KYTEQITSEK                                                                | 1.21989592        | 2              | 2.72064   |
| Q63362        | TTGLVGLAVCDTPHER                                                          | 1.1719676         | 2              | 4.25738   |
| Q63362        | YTEQITSEK                                                                 | 1.21317298        | 1              | 2.32351   |
| <b>Q63413</b> | <b>DX39B Spliceosome RNA helicase Ddx39b</b>                              | <b>1.14360373</b> | <b>0.30327</b> | <b>2</b>  |
| Q63413        | CIALAQLLVEQNFPAAIHR                                                       | 1.93733509        | 3              | 3.39219   |
| Q63413        | NCPHIVVGTGPR                                                              | 1.0931743         | 2              | 2.98147   |
| <b>Q63429</b> | <b>UBC Polyubiquitin_C</b>                                                | <b>1.05294852</b> | <b>0.83143</b> | <b>3</b>  |
| Q63429        | ESTLHLVLR                                                                 | 0.801885          | 2              | 2.50406   |
| Q63429        | TITLEVEPSDTIENVK                                                          | 1.07045198        | 2              | 4.85392   |
| Q63429        | TLSDYNIQK                                                                 | 1.18170831        | 2              | 2.68568   |
| <b>Q63448</b> | <b>ACOX3 Peroxisomal acyl_coenzyme A oxidase 3</b>                        | <b>0.95665172</b> | <b>0.87927</b> | <b>10</b> |
| Q63448        | ADWLDSEAPLAAYR                                                            | 1.44921892        | 2              | 4.32425   |
| Q63448        | EIHALASAGKPLASWTAQR                                                       | 0.9360083         | 2              | 4.57415   |
| Q63448        | GGYISGEQTGK                                                               | 0.96123146        | 2              | 3.01199   |
| Q63448        | LGASLGSLSGR                                                               | 0.69992807        | 2              | 2.7108    |
| Q63448        | NLWAAVLQQSGVLER                                                           | 0.98486442        | 2              | 4.51784   |
| Q63448        | QFGPTDKEEIPVLEYPLQQWR                                                     | 0.74179772        | 3              | 4.51586   |
| Q63448        | TIFDLIELQR                                                                | 1.82268613        | 2              | 2.51954   |
| Q63448        | TIFSTLENDPLFARPFADLPLEK                                                   | 1.13118794        | 3              | 4.50697   |
| Q63448        | TTAHYDPATQEFILHSPDFEAAK                                                   | 0.87131936        | 3              | 4.46822   |
| Q63448        | TVNFLEAYPGILGQK                                                           | 1.12828268        | 2              | 5.11667   |
| <b>Q63507</b> | <b>RL14 60S ribosomal protein L14</b>                                     | <b>1.30610063</b> | <b>3.1E-09</b> | <b>3</b>  |
| Q63507        | CMQLTDFILK                                                                | 0.81796205        | 2              | 2.75616   |
| Q63507        | LVAIVDVIDQNR                                                              | 1.68209886        | 2              | 4.12323   |
| Q63507        | RFVEVGR                                                                   | 1.21248317        | 2              | 2.35885   |
| <b>Q63524</b> | <b>TMED2 Transmembrane emp24 domain_containing protein 2</b>              | <b>1.52396351</b> | <b>0.4355</b>  | <b>4</b>  |
| Q63524        | GQDMETEAHQNKLEEMINELAVAMTAVK                                              | 1.41329722        | 3              | 4.56427   |
| Q63524        | HEQEYMEVR                                                                 | 1.53739086        | 2              | 3.43714   |
| Q63524        | HEQEYMEVR+Oxidation(5                                                     | 1.33754657        |                |           |
| Q63524        | LEEMINELAVAMTAVK                                                          | 1.146655          | 2              | 3.54257   |
| <b>Q63525</b> | <b>NUDC Nuclear migration protein nudC</b>                                | <b>1.26497761</b> | <b>0.03313</b> | <b>4</b>  |
| Q63525        | GQAPVIDGELYNEVK                                                           | 1.23846594        | 2              | 3.61122   |
| Q63525        | LVTSDPEINTK                                                               | 1.41420814        | 2              | 2.43712   |
| Q63525        | VESSWLIEDGK                                                               | 1.18058489        | 2              | 2.41713   |

|               |                                                               |                   |                |           |
|---------------|---------------------------------------------------------------|-------------------|----------------|-----------|
| Q63525        | WTQTLSELDLAVPFR                                               | 1.40816617        | 2              | 2.8311    |
| <b>Q63569</b> | <b>PRS6A 26S protease regulatory subunit 6A</b>               | <b>1.07589216</b> | <b>0.06824</b> | <b>6</b>  |
| Q63569        | AMEVDERPTEQYSIDIGGLDK                                         | 1.12613469        | 3              | 5.32753   |
| Q63569        | CTDDFNGAQCK                                                   | 1.68727472        | 2              | 3.26109   |
| Q63569        | MNVSPDVNYEELAR                                                | 1.07589222        | 2              | 3.57539   |
| Q63569        | QTYFLPVIGLVDAEK                                               | 1.49246086        | 2              | 2.46088   |
| Q63569        | TMLELLNQLDGFQPNQVK                                            | 0.6637626         | 2              | 3.92939   |
| Q63569        | VDILDPELLR                                                    | 1.19889484        | 2              | 2.91082   |
| <b>Q63570</b> | <b>PRS6B 26S protease regulatory subunit 6B</b>               | <b>1.16587024</b> | <b>0.91298</b> | <b>4</b>  |
| Q63570        | FDAQTGADR                                                     | 1.2157437         | 2              | 2.73814   |
| Q63570        | IQDEIPALSVSRPQTGLSFLGPEPEDEDLYSR                              | 1.41179364        | 3              | 5.80839   |
| Q63570        | KDEQEHEFYK                                                    | 1.16766191        | 2              | 3.42068   |
| Q63570        | RFDAQTGADR                                                    | 1.06303092        | 2              | 3.01869   |
| <b>Q63584</b> | <b>TMEDA Transmembrane emp24 domain-containing protein 10</b> | <b>1.37869647</b> | <b>0.1571</b>  | <b>4</b>  |
| Q63584        | ITDSAGHILYAK                                                  | 1.51243172        | 2              | 3.73348   |
| Q63584        | LEDLSESIVNDFAYMK                                              | 1.76965439        | 2              | 3.58185   |
| Q63584        | NYEEIAK                                                       | 1.29626313        | 1              | 2.40973   |
| Q63584        | RLEDLSESIVNDFAYMK                                             | 1.1595032         | 2              | 3.66917   |
| <b>Q63598</b> | <b>PLST Plastin_3</b>                                         | <b>1.32189007</b> | <b>0.98152</b> | <b>13</b> |
| Q63598        | AESMLQQADK                                                    | 1.21442534        | 2              | 3.42438   |
| Q63598        | ATDDIIVNWVNGTLSEAGK                                           | 1.35066601        | 2              | 5.11268   |
| Q63598        | AVGDGIVLCK                                                    | 2.29631642        | 2              | 2.44519   |
| Q63598        | EGICALGGTSELSSEGTQHSYSEEEK                                    | 0.83186912        | 3              | 3.47384   |
| Q63598        | HVIPMNPNTDDLKFK                                               | 1.03719389        | 2              | 3.03868   |
| Q63598        | IDINMSGFNETDDLKR                                              | 1.00768087        | 2              | 4.46001   |
| Q63598        | INNFSADIK                                                     | 1.46183415        | 2              | 2.39374   |
| Q63598        | KLENCNYAVELGK                                                 | 1.003212          | 2              | 3.73083   |
| Q63598        | NEALAALLR                                                     | 0.93993528        | 2              | 2.61155   |
| Q63598        | TISSSLAVVDLIDAIQPGCINYLK                                      | 1.27024491        | 3              | 3.56522   |
| Q63598        | VYALPEDLVEVKPK                                                | 1.14739714        | 2              | 3.09043   |
| Q63598        | YPALTKPENQDIDWTLLEGETR                                        | 1.11914745        | 3              | 5.3709    |
| Q63598        | YTLNVMEDLGEQK                                                 | 0.83746585        | 2              | 3.6831    |
| <b>Q63610</b> | <b>TPM3 Tropomyosin alpha_3 chain</b>                         | <b>1.12024189</b> | <b>0.99964</b> | <b>8</b>  |
| Q63610        | IQVLQQADDAEER                                                 | 1.10828216        | 2              | 5.12508   |
| Q63610        | KIQLVQQADDAEER                                                | 1.25126132        | 2              | 5.43538   |
| Q63610        | KLVIIEGDLR                                                    | 0.81824155        | 2              | 3.22849   |
| Q63610        | LEKTIDLEDKLK                                                  | 2.1769859         | 2              | 2.71825   |
| Q63610        | LVIIEGDLR                                                     | 1.23117875        | 2              | 2.94764   |
| Q63610        | MELQEIQLK                                                     | 1.12386906        | 2              | 3.1234    |
| Q63610        | TIDLEDKLK                                                     | 0.88461573        | 2              | 2.6964    |
| Q63610        | YSQKEDKYEEIK                                                  | 1.48990027        | 2              | 4.94989   |
| <b>Q63617</b> | <b>HYOU1 Hypoxia up-regulated protein 1</b>                   | <b>1.25176163</b> | <b>0.272</b>   | <b>15</b> |
| Q63617        | AANSLEAFIFETQDK                                               | 1.60868802        | 2              | 2.56057   |
| Q63617        | DAVITVPAFFNQAER                                               | 0.84828065        | 2              | 2.80569   |
| Q63617        | EGETPDEKESGDKSEAQKPNK                                         | 1.19154308        | 3              | 3.99105   |
| Q63617        | FLGDSAAGMAIK                                                  | 1.19112127        | 2              | 2.52277   |
| Q63617        | GQAGPEGVPPAPEEEK                                              | 1.29747262        | 2              | 3.41887   |
| Q63617        | LIPEMDQIFDVMETTLK                                             | 1.50079627        | 2              | 3.35289   |
| Q63617        | LYQPEYQEVSTEEQR                                               | 0.75674382        | 2              | 5.26585   |
| Q63617        | NINADEAAAMGAVVQAALSK                                          | 1.26105187        | 2              | 5.32702   |
| Q63617        | SLAEDFAEQPIK                                                  | 0.94817666        | 2              | 2.98217   |
| Q63617        | SLAEDFAEQPIKDAVITVPAFFNQAER                                   | 1.77306817        | 3              | 3.43942   |
| Q63617        | TLGGLEMELR                                                    | 1.17509182        | 2              | 2.9743    |
| Q63617        | TVLSANADHMAQIEGLMDDVDFK                                       | 1.4377717         | 3              | 3.88961   |
| Q63617        | VEFEELCADLFDR                                                 | 2.048713          | 2              | 3.42113   |
| Q63617        | VESVFETLVEDSPEEESTLTK                                         | 1.47055587        | 2              | 4.01553   |

|               |                                                           |                   |                |           |
|---------------|-----------------------------------------------------------|-------------------|----------------|-----------|
| Q63617        | VLQLINDNTATALSYGVFR                                       | 1.42004213        | 2              | 4.68982   |
| <b>Q63692</b> | <b>CDC37 Hsp90 co_chaperone Cdc37</b>                     | <b>1.09098767</b> | <b>0.22137</b> | <b>2</b>  |
| Q63692        | EGEEAGPGDPLLEAVPK                                         | 1.08918643        | 2              | 3.32555   |
| Q63692        | LGPGGLDPVEVYESLPEELQK                                     | 1.51990386        | 2              | 3.00766   |
| <b>Q63716</b> | <b>PRDX1 Peroxiredoxin_1</b>                              | <b>1.14097006</b> | <b>0.23233</b> | <b>15</b> |
| Q63716        | ADEGISFR                                                  | 1.12680891        | 2              | 3.07918   |
| Q63716        | ATAVMPDGQFK                                               | 1.085045          | 2              | 2.87378   |
| Q63716        | GLFIIDDKGILR                                              | 1.39371673        | 2              | 2.86201   |
| Q63716        | HGEVCPAGWKPGSDTIKPDVVK                                    | 1.21674078        | 4              | 5.82243   |
| Q63716        | IGHPAPSFK                                                 | 3.10184578        | 1              | 1.91633   |
| Q63716        | KQGGLGPMNIPLVSDPK                                         | 1.22306087        | 2              | 4.07012   |
| Q63716        | KQGGLGPMNIPLVSDPKR                                        | 0.86186914        | 3              | 3.81001   |
| Q63716        | LNCQVIGASVDSHFCHLAWINTPK                                  | 1.5308117         | 3              | 3.39142   |
| Q63716        | LVQAFQFTDK                                                | 1.66068991        | 2              | 3.29712   |
| Q63716        | QGGLGPMNIPLVSDPK                                          | 0.92608031        | 2              | 3.13924   |
| Q63716        | QGGLGPMNIPLVSDPK+Oxidation(6                              | 1.32571129        |                |           |
| Q63716        | QITINDLPVGR                                               | 1.12698814        | 2              | 3.15417   |
| Q63716        | RTIAQDYGVLK                                               | 1.26760996        | 2              | 2.48117   |
| Q63716        | SVDEILR                                                   | 1.14961854        | 2              | 2.48281   |
| Q63716        | TIAQDYGVLK                                                | 1.11881957        | 2              | 3.21053   |
| <b>Q63797</b> | <b>PSME1 Proteasome activator complex subunit 1</b>       | <b>1.27783794</b> | <b>0.01503</b> | <b>10</b> |
| Q63797        | ISELDAFLK                                                 | 1.19872886        | 2              | 2.36917   |
| Q63797        | ISELDAFLKEPALNEANLSNLK                                    | 1.71744239        | 2              | 5.35168   |
| Q63797        | KGDEDDKGPCCGPVNCNEK                                       | 1.28828932        | 3              | 4.81628   |
| Q63797        | KISELDAFLKEPALNEANLSNLK                                   | 1.33226693        | 3              | 5.88134   |
| Q63797        | LEGFQTQISK                                                | 1.20301586        | 2              | 2.71279   |
| Q63797        | NAYAVLYDILK                                               | 2.33226859        | 2              | 3.55742   |
| Q63797        | QLVHELDEAEYQEIR                                           | 1.16862051        | 2              | 4.18508   |
| Q63797        | TENLLGSYFPK                                               | 1.39609556        | 2              | 3.49483   |
| Q63797        | VDVFREDLCSK                                               | 1.06153344        | 2              | 2.5216    |
| Q63797        | VFELMTSLHTK                                               | 0.99803551        | 2              | 3.04794   |
| <b>Q63798</b> | <b>PSME2 Proteasome activator complex subunit 2</b>       | <b>1.24365965</b> | <b>0.32268</b> | <b>4</b>  |
| Q63798        | AFYAELHHIISNLEK                                           | 1.17991107        | 2              | 3.91519   |
| Q63798        | IEDGNDFGVAIQEK                                            | 1.60676592        | 2              | 4.04959   |
| Q63798        | KIISLSQLQEDSLNVADLSSLR                                    | 1.50627133        | 3              | 3.63328   |
| Q63798        | TKVEAFQTAISK                                              | 1.25717274        | 2              | 3.56125   |
| <b>Q63836</b> | <b>SBP2 Selenium_binding protein 2</b>                    | <b>1.26056756</b> | <b>0.21445</b> | <b>3</b>  |
| Q63836        | GGSVQVLEDQELTCQPEPLVVK                                    | 1.60546073        | 2              | 5.34098   |
| Q63836        | IYVVDVGSEPR                                               | 1.10164584        | 2              | 3.82812   |
| Q63836        | LNPNFLVDGKEPLGALAEHLR                                     | 1.24242232        | 3              | 3.84383   |
| <b>Q63945</b> | <b>SET Protein SET</b>                                    | <b>0.98274633</b> | <b>0.81804</b> | <b>2</b>  |
| Q63945        | IDFYFDENPYFENK                                            | 1.67657569        | 2              | 4.27991   |
| Q63945        | LNEQASEEILK                                               | 0.96799579        | 2              | 3.16709   |
| <b>Q63965</b> | <b>SFXN1 Sideroflexin_1</b>                               | <b>1.32352181</b> | <b>0.31813</b> | <b>5</b>  |
| Q63965        | NILLTNEQLENAR                                             | 1.25902796        | 2              | 4.38984   |
| Q63965        | QAITQVVISR                                                | 1.89933992        | 2              | 2.33622   |
| Q63965        | QGIVPAGLTENELWR                                           | 1.42827203        | 2              | 3.17632   |
| Q63965        | WDQSTFIGR                                                 | 1.14884521        | 2              | 2.79195   |
| Q63965        | YAYDSAFHPDTGEK                                            | 1.53698088        | 2              | 4.28447   |
| <b>Q64012</b> | <b>RALY RNA_binding protein Raly</b>                      | <b>1.33177634</b> | <b>0.53233</b> | <b>2</b>  |
| Q64012        | LEQIAEEQK                                                 | 1.47510398        | 2              | 2.5215    |
| Q64012        | SNIDALLGR                                                 | 1.17738629        | 2              | 2.35616   |
| <b>Q64057</b> | <b>AL7A1 Alpha_aminoadipic semialdehyde dehydrogenase</b> | <b>1.68425054</b> | <b>4.9E-09</b> | <b>19</b> |
| Q64057        | AWNIWADIPAPK                                              | 1.85650645        | 2              | 3.80585   |
| Q64057        | DYEETIGK                                                  | 1.59562158        | 1              | 1.92867   |
| Q64057        | EDNEGVFNQSWGGR                                            | 1.33331454        | 2              | 3.68846   |

|               |                                                                                            |                   |                |          |
|---------------|--------------------------------------------------------------------------------------------|-------------------|----------------|----------|
| Q64057        | FKNEEEVFEWNNEVK                                                                            | 1.1608556         | 2              | 5.75616  |
| Q64057        | GAPTTSLVSIIVTK                                                                             | 1.09030165        | 2              | 5.00509  |
| Q64057        | GEVITTYCPANNEPIAR                                                                          | 1.19688472        | 2              | 5.00784  |
| Q64057        | GSDCGIVNVNIPTSGAEIGGAFGGEK                                                                 | 1.36138983        | 2              | 5.6004   |
| Q64057        | LFLHESIHDEVVDR                                                                             | 1.68429802        | 2              | 4.37684  |
| Q64057        | LVSLEMGK                                                                                   | 1.83244038        | 2              | 2.44717  |
| Q64057        | NEEEVFEWNNEVK                                                                              | 1.32226432        | 2              | 4.5694   |
| Q64057        | QAVSMFVQAVEEAK                                                                             | 1.76454957        | 2              | 3.39187  |
| Q64057        | QAVSMFVQAVEEAKK                                                                            | 1.3570818         | 2              | 2.83807  |
| Q64057        | QGLSSSIFTK                                                                                 | 1.88496367        | 2              | 2.75333  |
| Q64057        | QVALMVQER                                                                                  | 1.30200354        | 2              | 2.51664  |
| Q64057        | STCTINYSTALPLAQGIK                                                                         | 1.40458351        | 2              | 4.87192  |
| Q64057        | VGNPWDPNLYGPLHTK                                                                           | 1.8074413         | 3              | 4.39954  |
| Q64057        | VMDHPGNYVEPTIVTGLVHDAPIVHK                                                                 | 1.4701379         | 3              | 6.07284  |
| Q64057        | VMDHPGNYVEPTIVTGLVHDAPIVHK+Oxidation(1                                                     | 2.51757147        |                |          |
| Q64057        | VNLLSFTGSTQVVGK                                                                            | 1.72903694        | 2              | 4.68843  |
| <b>Q64112</b> | <b>IFIT2 Interferon_induced protein with tetratricopeptide repeats 2</b>                   | <b>1.15849473</b> | <b>0.70629</b> | <b>2</b> |
| Q64112        | DPSAIDTLR                                                                                  | 1.02383218        | 2              | 2.55843  |
| Q64112        | NQAMALVEEALK                                                                               | 1.66029272        | 2              | 2.31053  |
| <b>Q64119</b> | <b>MYL6 Myosin light polypeptide 6</b>                                                     | <b>1.17625721</b> | <b>0.04827</b> | <b>7</b> |
| Q64119        | DQGTIEDYVEGLR                                                                              | 0.79904758        | 2              | 3.3784   |
| Q64119        | EGNGTVMGAEIR                                                                               | 1.36903991        | 2              | 2.73079  |
| Q64119        | HVLVTLGEK                                                                                  | 1.20768794        | 2              | 2.57018  |
| Q64119        | ILYSQCGDVMR                                                                                | 1.23396524        | 2              | 2.91864  |
| Q64119        | NKDQGTIEDYVEGLR                                                                            | 1.17179371        | 2              | 4.14723  |
| Q64119        | VFDKEGNGTVMGAEIR                                                                           | 1.10343595        | 2              | 4.11548  |
| Q64119        | VLDFEHFLPMLQTVAK                                                                           | 1.26490232        | 2              | 4.78163  |
| <b>Q64122</b> | <b>MYL9 Myosin regulatory light polypeptide 9</b>                                          | <b>1.29778466</b> | <b>0.59456</b> | <b>2</b> |
| Q64122        | DGFIDKEDLHDMLASLGK                                                                         | 1.29930331        | 2              | 5.23074  |
| Q64122        | LNGTDPEDVIR                                                                                | 1.05938656        | 2              | 2.60885  |
| <b>Q64176</b> | <b>EST22 Liver carboxylesterase 22</b>                                                     | <b>0.84655907</b> | <b>0.05295</b> | <b>3</b> |
| Q64176        | AISESGVALTAGLVK                                                                            | 0.9536582         | 2              | 4.58866  |
| Q64176        | EGYLQIGATTQQAQK                                                                            | 0.75392153        | 2              | 4.66931  |
| Q64176        | NFNTVPYIVGINK                                                                              | 0.99886767        | 2              | 3.46973  |
| <b>Q641Y0</b> | <b>OST48 Dolichyl_diphosphooligosaccharide__protein glycosyltransferase 48 kDa subunit</b> | <b>1.50813857</b> | <b>8.3E-05</b> | <b>7</b> |
| Q641Y0        | ELGSECGIEFDEEK                                                                             | 1.39502281        | 2              | 4.04094  |
| Q641Y0        | NLLIAGLQAR                                                                                 | 1.80653709        | 2              | 3.42616  |
| Q641Y0        | SSLNPILFR                                                                                  | 2.92194409        | 2              | 2.46711  |
| Q641Y0        | TADDPSSLIK                                                                                 | 1.02729902        | 2              | 2.57711  |
| Q641Y0        | TAVIDHHNYDVSDLGQHTLIVADTENLLK                                                              | 1.52413454        | 3              | 6.69727  |
| Q641Y0        | TLVLLDNLNVR                                                                                | 1.40607694        | 2              | 4.12485  |
| Q641Y0        | WVPFDGDDIQLEFVR                                                                            | 1.82500616        | 2              | 3.07863  |
| <b>Q641Y2</b> | <b>NDUS2 NADH dehydrogenase [ubiquinone] iron_sulfur protein 2_ mitochondrial</b>          | <b>0.99592294</b> | <b>0.86874</b> | <b>4</b> |
| Q641Y2        | GSGIQWDLR                                                                                  | 1.21135953        | 2              | 2.52462  |
| Q641Y2        | IDEVEEMLTNRR                                                                               | 0.9609991         | 2              | 3.86051  |
| Q641Y2        | IIEQCLNK                                                                                   | 1.13299031        | 2              | 2.74819  |
| Q641Y2        | TQPYDVYDQVEFDVPIGSR                                                                        | 2.51838628        | 2              | 4.36947  |
| <b>Q641Z6</b> | <b>EHD1 EH domain_containing protein 1</b>                                                 | <b>1.10403495</b> | <b>0.73606</b> | <b>2</b> |
| Q641Z6        | LLDVTDDMLANDIAR                                                                            | 1.38911512        | 2              | 3.93503  |
| Q641Z6        | MQELLQTQDFSK                                                                               | 0.86549689        | 2              | 2.6241   |
| <b>Q64232</b> | <b>TECR Trans_2_3_enoyl_CoA reductase</b>                                                  | <b>1.18683226</b> | <b>0.90215</b> | <b>3</b> |
| Q64232        | HYEVEIR                                                                                    | 1.15100176        | 2              | 2.49738  |
| Q64232        | LCFLDKVEPQATISEIK                                                                          | 1.32431006        | 2              | 3.60549  |



|               |                                                               |                   |                |           |
|---------------|---------------------------------------------------------------|-------------------|----------------|-----------|
| Q64232        | SLKDEDVLQK                                                    | 1.18683225        | 2              | 3.56263   |
| <b>Q64240</b> | <b>AMBP Protein AMBP</b>                                      | <b>0.75920606</b> | <b>0.00079</b> | <b>2</b>  |
| Q64240        | AVLPQENEGSGSEPLITGTLK                                         | 0.76860298        | 2              | 4.17435   |
| Q64240        | TIAACNLPIVQGPCR                                               | 0.75766377        | 2              | 3.83851   |
| <b>Q642G4</b> | <b>PEX14 Peroxisomal membrane protein PEX14</b>               | <b>1.42414766</b> | <b>0.20215</b> | <b>2</b>  |
| Q642G4        | GGDGGQINEQVEK                                                 | 1.42468455        | 2              | 2.88597   |
| Q642G4        | LLGPQEEGEGVVDVK                                               | 1.41849227        | 2              | 2.78095   |
| <b>Q64380</b> | <b>SARDH Sarcosine dehydrogenase_ mitochondrial</b>           | <b>1.0092659</b>  | <b>0.99983</b> | <b>20</b> |
| Q64380        | AIDSLSIEK                                                     | 1.00033888        | 2              | 3.00798   |
| Q64380        | AYGIESHVLSPAETK                                               | 1.11167815        | 2              | 4.94827   |
| Q64380        | DGTMDPAGTCTTLTR                                               | 0.9587645         | 2              | 3.8829    |
| Q64380        | DILQDVLADALSNEAFPSTHQLVR                                      | 2.16460881        | 3              | 5.3948    |
| Q64380        | DLYPLMNVDDLYGTLVYPR                                           | 1.18567378        | 2              | 3.87208   |
| Q64380        | FHHSLTDHPR                                                    | 1.32058745        | 2              | 2.64953   |
| Q64380        | FYLLGADAR                                                     | 1.05097773        | 2              | 2.64328   |
| Q64380        | GAQVIENCAVTGIR                                                | 1.17250454        | 2              | 3.78505   |
| Q64380        | HGLVNAGYR                                                     | 1.02297257        | 2              | 2.68138   |
| Q64380        | IEGIQNMPNVR                                                   | 0.94883635        | 2              | 3.19354   |
| Q64380        | LGVGGVVLLER                                                   | 2.61901311        | 2              | 3.27762   |
| Q64380        | LQGDALSVGGYEANPIFWDEVSDK                                      | 2.87464262        | 2              | 4.20257   |
| Q64380        | NGDYALER                                                      | 0.99733148        | 2              | 2.43571   |
| Q64380        | NYSVVFPHDEPLAGR                                               | 0.90847557        | 2              | 4.20826   |
| Q64380        | QVVDHLEETGLHTGWIQNGGLFIASNQQR                                 | 1.50216491        | 3              | 4.07024   |
| Q64380        | RDPLHEELLGQGCVFQER                                            | 4.13156976        | 3              | 5.80591   |
| Q64380        | SDDSPLEAGLAFTCK                                               | 1.15881438        | 2              | 4.5192    |
| Q64380        | STVCGPESFTPDKHPLMGEAPELR                                      | 1.00696685        | 3              | 4.86359   |
| Q64380        | STVCGPESFTPDKHPLMGEAPELR+Oxidation(16                         | 1.29094396        |                |           |
| Q64380        | VTAVETQHGSIQTPCVVNCAGVWASSVGR                                 | 1.05433711        | 3              | 5.76771   |
| <b>Q64428</b> | <b>ECHA Trifunctional enzyme subunit alpha_ mitochondrial</b> | <b>1.10379737</b> | <b>0.08948</b> | <b>29</b> |
| Q64428        | ADMVIEAVFEDLAVK                                               | 1.36430364        | 3              | 4.11034   |
| Q64428        | ALMGLYNGQVLCK                                                 | 1.75585175        | 2              | 3.45997   |
| Q64428        | CLAPMMSEVIR                                                   | 2.33313351        | 2              | 2.49765   |
| Q64428        | DGPGFYTTR                                                     | 3.85140656        | 2              | 2.31759   |
| Q64428        | DSIFSNLIGQLDYK                                                | 1.28549082        | 2              | 3.05077   |
| Q64428        | DTTASAVAVGLK                                                  | 1.27307062        | 2              | 3.7994    |
| Q64428        | EVESVTPHECIFASNTSALPINQIAAVSQRPEK                             | 0.85243494        | 3              | 6.31415   |
| Q64428        | EVQSEFVEVMNEIWANDQIR                                          | 1.55189036        | 3              | 4.20686   |
| Q64428        | FGELALTK                                                      | 1.14498553        | 2              | 3.02917   |
| Q64428        | FGGGSVELLK                                                    | 1.09985149        | 2              | 3.18877   |
| Q64428        | FVDLYGAQK                                                     | 1.02644564        | 2              | 3.02356   |
| Q64428        | GFYIYQSGSK                                                    | 0.82990656        | 2              | 3.05216   |
| Q64428        | ILQEGVDPK                                                     | 1.37546939        | 2              | 3.18369   |
| Q64428        | KLDALTTGFGFPVGAATLADEVGIDVAQHVAEDLGK                          | 1.22849435        | 4              | 5.43653   |
| Q64428        | KTVLGVPEVLLGILPGAGGTQR                                        | 1.82547827        | 3              | 4.15068   |
| Q64428        | KYESAYGTQFTPCQLLR                                             | 1.83445103        | 2              | 4.70469   |
| Q64428        | LPAKPEVSSDEDIQYR                                              | 1.82611708        | 3              | 4.46949   |
| Q64428        | MGLVDQLVDPLGPGIK                                              | 0.94051027        | 2              | 5.08455   |
| Q64428        | MGLVDQLVDPLGPGIK+Oxidation(0                                  | 1.07332973        |                |           |
| Q64428        | MQLLEIITDK                                                    | 1.07672605        | 2              | 3.82033   |
| Q64428        | MQLLEIITDK+Oxidation(0                                        | 1.66569234        |                |           |
| Q64428        | MVGVPAAFDMMMLTGR                                              | 1.97679525        | 2              | 3.3376    |
| Q64428        | NLNSEIDNILVNLR                                                | 1.16752694        | 2              | 4.41511   |
| Q64428        | SAVLISSKPGCFVAGADINMLASCTTPQEARR                              | 1.18763941        | 3              | 3.88604   |
| Q64428        | TGLEQGNDAGYLAESEK                                             | 1.01190759        | 2              | 5.10275   |
| Q64428        | TIEYLEEVAVNFAK                                                | 1.64586806        | 2              | 3.80416   |

|               |                                                                 |                   |                |           |
|---------------|-----------------------------------------------------------------|-------------------|----------------|-----------|
| Q64428        | TVLGVPEVLLGILPGAGGTQR                                           | 1.14441219        | 3              | 4.7512    |
| Q64428        | TVQQLAILGAGLMGAGIAQVSVDK                                        | 1.27426004        | 3              | 6.03005   |
| Q64428        | YESAYGTQFTPCQLLR                                                | 1.38629439        | 2              | 4.00735   |
| <b>Q64458</b> | <b>CP2CT Cytochrome P450 2C29</b>                               | <b>0.89343465</b> | <b>8.9E-09</b> | <b>6</b>  |
| Q64458        | EHKESLDVTNPR                                                    | 0.89175099        | 2              | 3.40956   |
| Q64458        | IKEHKESLDVTNPR                                                  | 0.96189703        | 3              | 5.20486   |
| Q64458        | LPPGPTPLPIIGNFLQJDVK                                            | 2.36492749        | 3              | 4.98668   |
| Q64458        | VQEEAQCLVEELR                                                   | 1.91821461        | 2              | 4.2021    |
| Q64458        | VQEEAQCLVEELRK                                                  | 2.69563878        | 2              | 3.80194   |
| Q64458        | VQEEIDR                                                         | 1.55781561        | 2              | 2.53091   |
| <b>Q64464</b> | <b>CP3AD Cytochrome P450 3A13</b>                               | <b>1.03565992</b> | <b>0.49734</b> | <b>2</b>  |
| Q64464        | ALLSPTFTSGR                                                     | 1.03993425        | 2              | 2.89316   |
| Q64464        | LQDEIDAALPNK                                                    | 0.67598362        | 2              | 2.41455   |
| <b>Q64481</b> | <b>CP3AG Cytochrome P450 3A16</b>                               | <b>1.09148265</b> | <b>0.36651</b> | <b>3</b>  |
| Q64481        | EMFPVIEQYGDILVK                                                 | 1.82633209        | 2              | 2.40379   |
| Q64481        | GSIDPYVYLPFGNGPR                                                | 0.99609211        | 2              | 4.04317   |
| Q64481        | VLQNFQFQPK                                                      | 0.91894773        | 2              | 2.78413   |
| <b>Q64550</b> | <b>UD11 UDP-glucuronosyltransferase 1_1</b>                     | <b>1.40475752</b> | <b>0.02455</b> | <b>4</b>  |
| Q64550        | GHEVVVIAPEASIIHK                                                | 0.5678439         | 2              | 4.61325   |
| Q64550        | NMIIALTENFLCR                                                   | 0.98059141        | 2              | 4.50404   |
| Q64550        | SVFDQDPFLLR                                                     | 2.75056919        | 2              | 3.46737   |
| Q64550        | VVYSPYGLATEILQK                                                 | 0.87084215        | 2              | 4.9668    |
| <b>Q64560</b> | <b>TPP2 Tripeptidyl-peptidase 2</b>                             | <b>1.02311956</b> | <b>0.51164</b> | <b>3</b>  |
| Q64560        | ACVDSNENGDGK                                                    | 1.01467467        | 2              | 3.48793   |
| Q64560        | GTLIEAFPVLGGK                                                   | 1.14585189        | 2              | 3.17228   |
| Q64560        | HEQISDLDR                                                       | 1.4266056         | 2              | 2.59638   |
| <b>Q64563</b> | <b>ADH4 Alcohol dehydrogenase 4</b>                             | <b>1.09125194</b> | <b>0.00798</b> | <b>15</b> |
| Q64563        | AAVDCTVVGWGSCTVVGAK                                             | 4.31548597        | 2              | 2.595     |
| Q64563        | ALFPVVLGHECAGIVESVGPVGNFKPGDK                                   | 1.40961092        | 3              | 5.72197   |
| Q64563        | ALGATDCLNPR                                                     | 1.14595868        | 2              | 3.23274   |
| Q64563        | DLDKPVQDVITELTGGGVDFSLDCAGTAQTLK                                | 1.17389475        | 3              | 6.05482   |
| Q64563        | FDDLTVHALPFDK                                                   | 1.48680981        | 3              | 4.3007    |
| Q64563        | IIAIDINSEKFPK                                                   | 0.98236451        | 2              | 3.06966   |
| Q64563        | INDAIDL MNQ GK                                                  | 1.38973083        | 2              | 4.1661    |
| Q64563        | KFDLTVHALPFDK                                                   | 1.12563631        | 3              | 5.28022   |
| Q64563        | LCLSPLTNLCGK                                                    | 1.14613423        | 2              | 2.46615   |
| Q64563        | SVDSVPLNLTVDYK                                                  | 1.66649764        | 2              | 3.49291   |
| Q64563        | TDSPLCIEIEVSPPK                                                 | 1.5650222         | 2              | 4.11312   |
| Q64563        | VCLIGCGFTSGYGAAINTAK                                            | 0.46973543        | 2              | 4.88096   |
| Q64563        | VDDEANLER                                                       | 1.45098108        | 2              | 3.09107   |
| Q64563        | VDEMNI TVDMILGR                                                 | 1.18478076        | 2              | 4.06999   |
| Q64563        | VIATCVCPDINATNPK                                                | 3.6559472         | 2              | 4.70127   |
| <b>Q64565</b> | <b>AGT2 Alanine-glyoxylate aminotransferase 2_mitochondrial</b> | <b>1.10746642</b> | <b>0.33851</b> | <b>15</b> |
| Q64565        | AYSNHTDIISFR                                                    | 1.00671536        | 2              | 3.48409   |
| Q64565        | GGNFSQTFR                                                       | 0.99543459        | 2              | 2.59794   |
| Q64565        | GGVCI ADEVQTGFGR                                                | 0.7865866         | 2              | 4.04195   |
| Q64565        | GIGNGFMAAVVTTPEIASSLAK                                          | 1.45464308        | 2              | 4.32601   |
| Q64565        | GLMVGIEMVQDK                                                    | 1.51748547        | 2              | 3.37818   |
| Q64565        | HNMPPCDF SPEK                                                   | 1.01594881        | 2              | 3.2347    |
| Q64565        | LSALLPEPLK                                                      | 2.99385997        | 2              | 2.75202   |
| Q64565        | NSQEVGT YMLLK                                                   | 0.8872169         | 2              | 3.31882   |
| Q64565        | SALTQHMER                                                       | 1.90519118        | 2              | 2.52906   |
| Q64565        | SALTQHMER+Oxidation(6                                           | 1.73753728        |                |           |
| Q64565        | TEVNQIHEDCK                                                     | 1.01214161        | 2              | 3.29699   |
| Q64565        | TEVNQIHEDCKMGLLVGR                                              | 1.06479167        | 2              | 5.24897   |
| Q64565        | VIFLVNSGSEANDLAMVMAR                                            | 1.9784042         | 2              | 3.16691   |

|               |                                                                           |                   |                |           |
|---------------|---------------------------------------------------------------------------|-------------------|----------------|-----------|
| Q64565        | YIEQFK                                                                    | 1.17311027        | 1              | 2.2579    |
| Q64565        | YQSLAYNHVLEIHK                                                            | 2.1112786         | 2              | 3.95398   |
| <b>Q64578</b> | <b>AT2A1 Sarcoplasmic/endoplasmic reticulum calcium ATPase 1</b>          | <b>4.0916564</b>  | <b>0.52052</b> | <b>9</b>  |
| Q64578        | AVGIVATTGVSTEIGK                                                          | 5.93069212        | 2              | 3.42593   |
| Q64578        | DIVPGDIVEVAVGDKVPADIR                                                     | 4.36104506        | 2              | 3.38495   |
| Q64578        | IGIFSENEEVADR                                                             | 2.07113645        | 2              | 3.40337   |
| Q64578        | IRDQMAATEQDKTPLQKQ                                                        | 2.87395115        | 3              | 4.39291   |
| Q64578        | MNVFNTEVR                                                                 | 1.9995131         | 2              | 2.78718   |
| Q64578        | REEMVLDDSAK                                                               | 2.52590087        | 2              | 2.76877   |
| Q64578        | TGTLTTNQMSVCK                                                             | 4.00784195        | 2              | 3.44584   |
| Q64578        | VGEATETALTTLVEK                                                           | 3.23699655        | 2              | 4.49547   |
| Q64578        | YGPNELPAEEGK                                                              | 2.74477263        | 2              | 3.01092   |
| <b>Q64581</b> | <b>CP3A1 Cytochrome P450 3A18</b>                                         | <b>0.68005297</b> | <b>0.64088</b> | <b>3</b>  |
| Q64581        | AITMSEDEEWKR                                                              | 0.80518414        | 2              | 2.31719   |
| Q64581        | LAVIGVLQNFNIQPCEK                                                         | 0.90139388        | 2              | 3.20531   |
| Q64581        | NPEYWLEPEEFNPER                                                           | 0.60151964        | 2              | 3.86108   |
| <b>Q64591</b> | <b>DECR 2_4_dienoyl_CoA reductase_mitochondrial</b>                       | <b>0.78781292</b> | <b>0.44225</b> | <b>10</b> |
| Q64591        | ATAEEITSK                                                                 | 1.53271825        | 2              | 3.01701   |
| Q64591        | CDVRDPDMVHNTVLELIK                                                        | 0.69707416        | 4              | 5.05214   |
| Q64591        | DPDMVHNTVLELIK                                                            | 1.33790178        | 3              | 4.14183   |
| Q64591        | EEWDVIEGLIR                                                               | 0.81982217        | 2              | 3.54377   |
| Q64591        | FFPILKPMPLPPNAFQGK                                                        | 1.10273669        | 2              | 3.25908   |
| Q64591        | FNIIQPGPIK                                                                | 0.54512057        | 2              | 2.89204   |
| Q64591        | NIDVLK                                                                    | 0.84202061        | 1              | 2.28936   |
| Q64591        | SLAAEWGR                                                                  | 0.97005843        | 2              | 2.37682   |
| Q64591        | VAFITGGGTGLGK                                                             | 1.39323705        | 2              | 2.69071   |
| Q64591        | VTKEEWDVIEGLIR                                                            | 1.09474365        | 3              | 4.9013    |
| <b>Q64602</b> | <b>AADAT Kynurenine/alpha_aminoadipate aminotransferase_mitochondrial</b> | <b>1.36323356</b> | <b>0.12051</b> | <b>7</b>  |
| Q64602        | ASFSQVTPAQMDLVFQR                                                         | 1.2991255         | 2              | 4.48882   |
| Q64602        | DIISLAPGSPNPK                                                             | 0.96395563        | 2              | 3.218     |
| Q64602        | EILLVPGNSFFVDNSAPSSFFR                                                    | 1.79900041        | 2              | 3.48101   |
| Q64602        | FLYTIPNGNPTGNSLTGDR                                                       | 1.39968447        | 2              | 3.98845   |
| Q64602        | LHNPPTVNYSPNEGQMDLCITSGCQDGLCK                                            | 2.63662151        | 3              | 6.46759   |
| Q64602        | SAVFTVENGSTIR                                                             | 1.19753747        | 2              | 4.10521   |
| Q64602        | VLSQWKPEDSKDPTKR                                                          | 1.26400537        | 3              | 4.14068   |
| <b>Q64611</b> | <b>CSAD Cysteine sulfinic acid decarboxylase</b>                          | <b>1.21020202</b> | <b>0.02463</b> | <b>14</b> |
| Q64611        | AQGGQGLEWR                                                                | 1.18484822        | 2              | 2.93961   |
| Q64611        | CHGSQASYLFQQDK                                                            | 1.20812401        | 2              | 4.96056   |
| Q64611        | DVFGIVVDEAIR                                                              | 1.25423345        | 2              | 3.07635   |
| Q64611        | FFNQLFSGLDPHALAGR                                                         | 1.54824396        | 3              | 3.85355   |
| Q64611        | FYNVALDTGDK                                                               | 1.01768869        | 2              | 3.10677   |
| Q64611        | GAAFLGLGTDSVR                                                             | 1.33626561        | 2              | 3.24536   |
| Q64611        | GTMMIGYQPHGTR                                                             | 1.25217979        | 2              | 2.87285   |
| Q64611        | IDQAFALTR                                                                 | 1.14106748        | 2              | 3.46272   |
| Q64611        | KGTMMIGYQPHGTR                                                            | 1.45598388        | 3              | 3.97922   |
| Q64611        | LSQVAPVLK                                                                 | 1.49523418        | 2              | 2.30197   |
| Q64611        | QLLDLELQSQGESR                                                            | 0.7533305         | 2              | 4.51638   |
| Q64611        | TLDGDPVAVEALLR                                                            | 1.08093952        | 2              | 4.6021    |
| Q64611        | VCEWKPEPELK                                                               | 1.11845397        | 3              | 3.7241    |
| Q64611        | YLVEEIK                                                                   | 0.98253931        | 1              | 2.40722   |
| <b>Q64638</b> | <b>UD15 UDP_glucuronosyltransferase 1_5</b>                               | <b>0.85406031</b> | <b>0.55214</b> | <b>2</b>  |
| Q64638        | VVFETGNYVK                                                                | 0.66715279        | 1              | 2.05845   |
| Q64638        | YESLASELLQR                                                               | 0.9832398         | 2              | 3.03348   |
| <b>Q64640</b> | <b>ADK Adenosine kinase</b>                                               | <b>1.268578</b>   | <b>1.7E-05</b> | <b>11</b> |

|               |                                                                           |                   |                |           |
|---------------|---------------------------------------------------------------------------|-------------------|----------------|-----------|
| Q64640        | AADAHVDAHYYEQNEQPTGTCAACITGGNR                                            | 1.28016815        | 3              | 7.1419    |
| Q64640        | AATFFGCIGIDK                                                              | 1.21367477        | 2              | 3.33019   |
| Q64640        | AGHYAASVIIR                                                               | 1.49803013        | 3              | 3.63438   |
| Q64640        | FGEILK                                                                    | 1.16146801        | 2              | 2.3522    |
| Q64640        | FKVEYHAGGSTQNSMK                                                          | 1.28763447        | 2              | 4.10609   |
| Q64640        | HKELFDELVK                                                                | 1.24389645        | 3              | 4.05358   |
| Q64640        | SLVANLAAANCYK                                                             | 1.33547096        | 2              | 4.33123   |
| Q64640        | TGCTFPEKPDFH                                                              | 1.68170255        | 2              | 2.74294   |
| Q64640        | VEYHAGGSTQNSMK                                                            | 1.49444516        | 2              | 4.06014   |
| Q64640        | VEYHAGGSTQNSMK+Oxidation(12)                                              | 1.39592743        |                |           |
| Q64640        | YSLKPNQILAEDK                                                             | 1.30767207        | 3              | 4.25991   |
| <b>Q64654</b> | <b>CP51A Lanosterol 14_alpha demethylase</b>                              | <b>0.76027023</b> | <b>0.29147</b> | <b>8</b>  |
| Q64654        | EPAEDILQTLDDSTYK                                                          | 1.04988087        | 2              | 3.82401   |
| Q64654        | GVAYDVPNAVFLQK                                                            | 0.87447593        | 2              | 4.32519   |
| Q64654        | NEDLNAAEEVYGR                                                             | 0.65222163        | 2              | 3.72399   |
| Q64654        | SGLNIAHFK                                                                 | 2.94387303        | 2              | 2.99592   |
| Q64654        | TFTYLLGSDAAALLFNSK                                                        | 1.16547497        | 3              | 3.90519   |
| Q64654        | TVCGEDLPPLTYEQLK                                                          | 0.56690317        | 2              | 4.42687   |
| Q64654        | YGPVFSFTMVGK                                                              | 0.84307383        | 2              | 2.8097    |
| Q64654        | YLQDNPASGEK                                                               | 0.90926989        | 2              | 2.79391   |
| <b>Q65240</b> | <b>WAPL Wings apart_like protein homolog</b>                              | <b>1.04157699</b> | <b>0.77978</b> | <b>2</b>  |
| Q65240        | EKSISRIPDNANK                                                             | 1.02823804        | 2              | 2.58514   |
| Q65240        | LGQKRPNFKPDIQIPIK                                                         | 1.28610094        | 2              | 2.39477   |
| <b>Q66H12</b> | <b>NAGAB Alpha_N_acetylgalactosaminidase</b>                              | <b>1.28561975</b> | <b>0.26402</b> | <b>5</b>  |
| Q66H12        | CNINCEEDPK                                                                | 1.24272684        | 2              | 2.34034   |
| Q66H12        | INQDPLGIQGR                                                               | 0.96168484        | 2              | 2.87806   |
| Q66H12        | MTCMGYPGTTLDKVELDAATFAEWK+Oxidation(0)                                    | 1.78139883        |                |           |
| Q66H12        | MTCMGYPGTTLDKVELDAATFAEWK+Oxidation(3)                                    | 1.78139883        |                |           |
| Q66H12        | TISPQNIDILQNPLLIK                                                         | 1.5011384         | 2              | 3.43576   |
| <b>Q66H15</b> | <b>RMD3 Regulator of microtubule dynamics protein 3</b>                   | <b>1.29678386</b> | <b>0.31066</b> | <b>2</b>  |
| Q66H15        | SLQGLAGEIVGEVR                                                            | 1.32611122        | 2              | 3.3903    |
| Q66H15        | SQSLPNSLDYAQTSER                                                          | 0.69265213        | 2              | 3.0147    |
| <b>Q66H45</b> | <b>TTC36 Tetratricopeptide repeat protein 36</b>                          | <b>1.18198968</b> | <b>0.36859</b> | <b>2</b>  |
| Q66H45        | ALELQGVR                                                                  | 0.6776555         | 2              | 2.47311   |
| Q66H45        | LQGDVAGALEDLER                                                            | 1.24025377        | 2              | 3.75276   |
| <b>Q66H71</b> | <b>CPPED Calcineurin_like phosphoesterase domain_containing protein 1</b> | <b>0.87641796</b> | <b>0.10891</b> | <b>2</b>  |
| Q66H71        | LTEQAVEAINK                                                               | 0.92504932        | 2              | 3.51174   |
| Q66H71        | SIDEDDDYFNLTk                                                             | 0.71406613        | 2              | 2.98046   |
| <b>Q66H80</b> | <b>COPD Coatomer subunit delta</b>                                        | <b>1.74912741</b> | <b>5.3E-05</b> | <b>8</b>  |
| Q66H80        | GVQLQTHPNVDKK                                                             | 1.48153199        | 2              | 3.51672   |
| Q66H80        | LFTAESLIGLK                                                               | 1.79470885        | 2              | 3.02111   |
| Q66H80        | NSNILEDLTLR                                                               | 1.91686098        | 2              | 3.51258   |
| Q66H80        | NTLEWCLPVIDAK                                                             | 1.17322374        | 2              | 2.72746   |
| Q66H80        | SEGETIMSSNMKG                                                             | 3.92152408        | 2              | 2.76797   |
| Q66H80        | TFTEMDSHEEK                                                               | 0.9573143         | 2              | 2.65535   |
| Q66H80        | VAPAPARPSGPSK                                                             | 1.45206525        | 2              | 2.54033   |
| Q66H80        | VTQVDGNSPVR                                                               | 1.71299043        | 2              | 3.01899   |
| <b>Q66HA8</b> | <b>HS105 Heat shock protein 105 kDa</b>                                   | <b>1.28847205</b> | <b>0.03701</b> | <b>10</b> |
| Q66HA8        | AGGIETIANEFSDR                                                            | 1.38285812        | 2              | 2.94507   |
| Q66HA8        | FQEAERPR                                                                  | 0.75828457        | 2              | 2.45946   |
| Q66HA8        | FVVQNVSAQK                                                                | 1.319668          | 2              | 2.68755   |
| Q66HA8        | LKETAENNLK                                                                | 1.27389778        | 2              | 2.58799   |
| Q66HA8        | NQQITHANNTVSSFK                                                           | 1.34870943        | 2              | 4.7172    |
| Q66HA8        | RGPFLEAFYSDPQAVPYPEAK                                                     | 1.66865697        | 3              | 3.78733   |
| Q66HA8        | SQFEELCAELLQK                                                             | 1.06155976        | 2              | 2.60517   |

|               |                                                                           |                   |                |           |
|---------------|---------------------------------------------------------------------------|-------------------|----------------|-----------|
| Q66HA8        | SVLDAAQIVGLNCLR                                                           | 1.66096905        | 2              | 3.70739   |
| Q66HA8        | VLGTAFDPPFLGGK                                                            | 1.10098604        | 2              | 2.98288   |
| Q66HA8        | YNHIDSEMK                                                                 | 0.97990367        | 2              | 2.50624   |
| <b>Q66HD0</b> | <b>ENPL Endoplasmin</b>                                                   | <b>0.93977528</b> | <b>0.35294</b> | <b>27</b> |
| Q66HD0        | DISTNYYASQK                                                               | 1.20420274        | 2              | 3.16239   |
| Q66HD0        | EATEKEFEPLLNWMK                                                           | 1.67559281        | 2              | 3.5056    |
| Q66HD0        | EEASDYLELDTIK                                                             | 1.48269332        | 2              | 4.25037   |
| Q66HD0        | EEEAQLDGLNASQIR                                                           | 1.30373406        | 2              | 4.60118   |
| Q66HD0        | EFEP LLNWMK                                                               | 1.44995849        | 2              | 2.90662   |
| Q66HD0        | EVEEDEYK                                                                  | 1.26613328        | 1              | 2.44448   |
| Q66HD0        | FQSSHSTDITSLDQYVER                                                        | 1.15433094        | 3              | 6.63283   |
| Q66HD0        | GLFDEYGSK                                                                 | 1.84920966        | 2              | 2.44932   |
| Q66HD0        | GVVDSDDLPLNVS R                                                           | 0.9364012         | 2              | 5.15077   |
| Q66HD0        | KEAESSPFVER                                                               | 1.14508295        | 2              | 3.50719   |
| Q66HD0        | KGYEVYLTPEVDEYCIQALPEFDGKR                                                | 0.94963551        | 3              | 3.59155   |
| Q66HD0        | LGVIEDHSNR                                                                | 1.30941253        | 2              | 3.11669   |
| Q66HD0        | LISLTDENALAGNEELTVK                                                       | 1.88309711        | 2              | 5.42867   |
| Q66HD0        | LTESPCALVASQYGWSGNMER                                                     | 2.22224518        | 2              | 5.48347   |
| Q66HD0        | MKEKQDK                                                                   | 0.6017598         | 1              | 1.92505   |
| Q66HD0        | NLLHVTD TGVMTR                                                            | 1.1181713         | 3              | 4.14452   |
| Q66HD0        | NLLHVTD TGVMTR+Oxidation(11                                               | 1.11269105        |                |           |
| Q66HD0        | RVFITDDFHDMMPK                                                            | 1.47151466        | 3              | 3.72948   |
| Q66HD0        | SGTSEFLNK                                                                 | 1.21394648        | 2              | 3.05282   |
| Q66HD0        | SGYLLPDTK                                                                 | 0.9467149         | 2              | 3.44509   |
| Q66HD0        | SILFVPTSAPR                                                               | 1.28207522        | 2              | 3.5311    |
| Q66HD0        | TDDEVVQREEEAIQLDGLNASQIR                                                  | 1.39014665        | 3              | 5.15407   |
| Q66HD0        | TETVEEPLEETAQEEK                                                          | 0.91596892        | 2              | 5.27976   |
| Q66HD0        | TETVEEPLEETAQEEKEADDEAAVEEEEEKKPK                                         | 0.61188485        | 5              | 6.24007   |
| Q66HD0        | TFEINPR                                                                   | 1.19091391        | 2              | 2.73857   |
| Q66HD0        | VFITDDFHDMMPK                                                             | 1.53776929        | 2              | 4.01099   |
| Q66HD0        | YNDTFWK                                                                   | 0.86931802        | 2              | 2.38363   |
| <b>Q66HF1</b> | <b>NDUS1 NADH_ubiquinone oxidoreductase 75 kDa subunit_ mitochondrial</b> | <b>1.30854996</b> | <b>0.00501</b> | <b>15</b> |
| Q66HF1        | ALSEIAGITLPYDTLDQVR                                                       | 0.80977318        | 3              | 3.93748   |
| Q66HF1        | AVTEGAQAVEEPSIC                                                           | 1.20797088        | 2              | 2.80403   |
| Q66HF1        | DDGAAILAAVSSIAQK                                                          | 1.24366331        | 2              | 4.35422   |
| Q66HF1        | DLLNKVDSDTLCTEEIFPNEGAGTDLR                                               | 2.75660011        | 3              | 4.26097   |
| Q66HF1        | FASEIAGVDDLGTGR                                                           | 1.6630833         | 2              | 4.58834   |
| Q66HF1        | GLLTYTSWEDALS R                                                           | 1.16967307        | 2              | 3.6706    |
| Q66HF1        | GNDMQVGTYIEK                                                              | 0.95533761        | 2              | 2.81418   |
| Q66HF1        | GWNILTNSEK                                                                | 0.84762042        | 1              | 2.26339   |
| Q66HF1        | ILQDIASGNHEFSK                                                            | 1.65236618        | 2              | 4.17614   |
| Q66HF1        | LGEVSPNLVR                                                                | 1.25008385        | 2              | 3.00797   |
| Q66HF1        | LVDQEFLADPLVPPQLTIK                                                       | 1.51555865        | 2              | 3.96118   |
| Q66HF1        | SATVVNTEGR                                                                | 1.11188252        | 2              | 2.31744   |
| Q66HF1        | VAVTPPGLAR                                                                | 0.72225795        | 2              | 2.53812   |
| Q66HF1        | VDSDTLCTEEIFPNEGAGTDLR                                                    | 1.25478225        | 2              | 4.7317    |
| Q66HF1        | YDHLGDSPK                                                                 | 1.28840587        | 2              | 2.4766    |
| <b>Q66HF8</b> | <b>AL1B1 Aldehyde dehydrogenase X_ mitochondrial</b>                      | <b>1.57421791</b> | <b>7E-06</b>   | <b>13</b> |
| Q66HF8        | ADVDLAVR                                                                  | 0.53788898        | 2              | 2.36548   |
| Q66HF8        | EAGFPPGVVNIITGYGPTAGAAIAQHMDV DK                                          | 2.11593974        | 3              | 4.19254   |
| Q66HF8        | EEIFGPVQPLFK                                                              | 1.39272925        | 2              | 3.2598    |
| Q66HF8        | IEEVIQR                                                                   | 3.29421829        | 2              | 2.30519   |
| Q66HF8        | KTFPTVNPTTGEVIGHVAEGDR                                                    | 1.35749857        | 3              | 3.91188   |
| Q66HF8        | KVGNPFELDTQQGPQVDKEQFEK                                                   | 1.38331976        | 3              | 4.16142   |
| Q66HF8        | LAPALATGNTVVMK                                                            | 1.80388789        | 2              | 3.39251   |

|               |                                                                 |                   |                |           |
|---------------|-----------------------------------------------------------------|-------------------|----------------|-----------|
| Q66HF8        | TFPTVNPPTGEVIGHVAEGDR                                           | 1.63034121        | 2              | 4.88567   |
| Q66HF8        | TFVEESIYHEFLER                                                  | 1.06241022        | 2              | 4.46208   |
| Q66HF8        | VAEQTPLSALYLASLIK                                               | 2.94589007        | 2              | 3.00276   |
| Q66HF8        | VGNPFELDTQQGPQVDK                                               | 1.0612233         | 2              | 4.40022   |
| Q66HF8        | VGNPFELDTQQGPQVDKEQFEK                                          | 1.34921399        | 2              | 4.49705   |
| Q66HF8        | YGLAAAVFTR                                                      | 1.68968046        | 2              | 3.29539   |
| <b>Q66HG4</b> | <b>GALM Aldose 1_epimerase</b>                                  | <b>0.98581322</b> | <b>0.28554</b> | <b>3</b>  |
| Q66HG4        | ASDVVLGFAELEGYLQK                                               | 1.45785029        | 2              | 4.50189   |
| Q66HG4        | TVFGELPSGGGAVEK                                                 | 0.86563222        | 2              | 3.84872   |
| Q66HG4        | VSPDGEGYPGELK                                                   | 1.23184376        | 2              | 4.07073   |
| <b>Q66HG9</b> | <b>MAVS Mitochondrial antiviral_signaling protein</b>           | <b>1.40256597</b> | <b>0.88271</b> | <b>3</b>  |
| Q66HG9        | ICELPLAEQVTR                                                    | 1.67704136        | 2              | 2.76479   |
| Q66HG9        | STAATPSTVPTNIAPSK                                               | 1.19872411        | 2              | 3.17831   |
| Q66HG9        | TTLSSSSTGSFAFK                                                  | 1.19032126        | 2              | 2.34491   |
| <b>Q66X93</b> | <b>SND1 Staphylococcal nuclease domain_containing protein 1</b> | <b>1.17702576</b> | <b>3.2E-07</b> | <b>19</b> |
| Q66X93        | ADDADEFYYSR                                                     | 1.65822751        | 2              | 2.61315   |
| Q66X93        | ALLLPDHYLVTVMLSGIK                                              | 1.59193579        | 3              | 4.25504   |
| Q66X93        | DIQNTQCLLNVEHLSASCPHVTLQFADSK                                   | 0.9603204         | 3              | 6.06477   |
| Q66X93        | DTNGENIAESLVAEGLASR                                             | 2.08617546        | 2              | 4.34433   |
| Q66X93        | ETDGSETPEPFAAEAK                                                | 1.41848763        | 2              | 3.78974   |
| Q66X93        | FVDGEWYR                                                        | 1.53692791        | 2              | 2.7819    |
| Q66X93        | GDVGLGLVK                                                       | 1.25359406        | 2              | 2.57965   |
| Q66X93        | HFVDSSHQKPVNAIEHVR                                              | 1.58781566        | 3              | 5.015     |
| Q66X93        | LEGDNIQDK                                                       | 1.50874256        | 2              | 2.99266   |
| Q66X93        | NLPGLVQEGEPFSEATLFTK                                            | 1.62633889        | 2              | 5.73209   |
| Q66X93        | SAYYKPLLSAEAAK                                                  | 1.15069043        | 2              | 3.11338   |
| Q66X93        | SDISSHPPVEGAYAPR                                                | 1.31904381        | 3              | 4.41655   |
| Q66X93        | SSHYDELLAAEAR                                                   | 1.30929976        | 2              | 4.0311    |
| Q66X93        | TCATVTIGGINIAEALVSK                                             | 1.12310549        | 2              | 3.49455   |
| Q66X93        | TDAVDSVVR                                                       | 16.7338007        | 2              | 2.71306   |
| Q66X93        | VITEYLNAQESAK                                                   | 1.16041782        | 2              | 3.92646   |
| Q66X93        | VMQVLNADAIVVK                                                   | 2.02926384        | 2              | 4.10818   |
| Q66X93        | VSVTVDIYRASPATETVPAFSEK                                         | 1.19044243        | 3              | 5.14646   |
| Q66X93        | VWAHYEEQPVVEVMPVLEEK                                            | 0.87288914        | 3              | 4.53355   |
| <b>Q68FL6</b> | <b>SYMC Methionyl_tRNA synthetase_cytoplasmic</b>               | <b>1.02110582</b> | <b>0.91715</b> | <b>3</b>  |
| Q68FL6        | ADKNQVAEEVAK                                                    | 1.23542785        | 2              | 3.05545   |
| Q68FL6        | LENDQIENLR                                                      | 0.902337          | 2              | 2.6913    |
| Q68FL6        | NNSELLNLLGNFINR                                                 | 1.13141973        | 2              | 2.81915   |
| <b>Q68FP2</b> | <b>PON3 Serum paraoxonase/lactonase 3</b>                       | <b>0.84562543</b> | <b>0.00843</b> | <b>8</b>  |
| Q68FP2        | HELFEVNDIVVLGPEQFYATR                                           | 1.46926052        | 3              | 3.90271   |
| Q68FP2        | HNNWDLTPVK                                                      | 1.2352832         | 2              | 3.2078    |
| Q68FP2        | IFLMDLNPEYPK                                                    | 1.55492307        | 2              | 4.05185   |
| Q68FP2        | IQDPLSDNPR                                                      | 1.28622566        | 2              | 3.0143    |
| Q68FP2        | KHNNWDLTPVK                                                     | 0.8540244         | 2              | 2.49789   |
| Q68FP2        | LLIYNPEDPPGSEVLR                                                | 0.53135644        | 2              | 4.3891    |
| Q68FP2        | VIQLGLVDNLTVDPATGDILAGCHPNPMK                                   | 1.24758468        | 3              | 4.59446   |
| Q68FP2        | YVYVADVTK                                                       | 0.9113101         | 1              | 2.99083   |
| <b>Q68FQ0</b> | <b>TCPE T_complex protein 1 subunit epsilon</b>                 | <b>1.402857</b>   | <b>0.07873</b> | <b>7</b>  |
| Q68FQ0        | GSNDMQYQHVIETLIGK                                               | 1.12506102        | 2              | 2.82305   |
| Q68FQ0        | GVIVDKDFSHPQMPK                                                 | 1.34569285        | 2              | 2.80795   |
| Q68FQ0        | HKLDVTSVEDYK                                                    | 2.00559708        | 2              | 3.63161   |
| Q68FQ0        | ISDNVLVDINNPEPLIQTAK                                            | 2.05177497        | 2              | 5.01982   |
| Q68FQ0        | LDVTSVEDYK                                                      | 1.0694997         | 2              | 2.94363   |
| Q68FQ0        | SLHDALCVIR                                                      | 1.50020374        | 2              | 2.69392   |
| Q68FQ0        | WVGGEIELIAIATGGR                                                | 1.33041814        | 2              | 3.82036   |
| <b>Q68FR6</b> | <b>EF1G Elongation factor 1_gamma</b>                           | <b>1.08087253</b> | <b>6.9E-06</b> | <b>8</b>  |

|               |                                                                                       |                   |                |           |
|---------------|---------------------------------------------------------------------------------------|-------------------|----------------|-----------|
| Q68FR6        | AAAPAPEEEMDECEQALAAEPK                                                                | 1.00571104        | 2              | 4.98693   |
| Q68FR6        | ALIAAQYSGAQIR                                                                         | 1.45391243        | 2              | 4.33745   |
| Q68FR6        | ILGLLDTHLK                                                                            | 1.91731212        | 2              | 2.51264   |
| Q68FR6        | KAAAPAPEEEMDECEQALAAEPK                                                               | 1.31735169        | 2              | 4.21749   |
| Q68FR6        | KLDPGSEETQLVR                                                                         | 1.51970601        | 2              | 4.10036   |
| Q68FR6        | LDPGSEETQLVR                                                                          | 1.15464244        | 2              | 3.54414   |
| Q68FR6        | STFVLDEFKR                                                                            | 1.18088335        | 2              | 2.52096   |
| Q68FR6        | WFLTCINQPQFR                                                                          | 0.98619537        | 2              | 3.35302   |
| <b>Q68FR9</b> | <b>EF1D Elongation factor 1_delta</b>                                                 | <b>1.26967487</b> | <b>0.00017</b> | <b>6</b>  |
| Q68FR9        | ATAPQTQHVSPMR                                                                         | 1.3491451         | 2              | 3.30142   |
| Q68FR9        | ATAPQTQHVSPMR+Oxidation(11                                                            | 0.9880986         |                |           |
| Q68FR9        | FYEQMNGPVTAGSR                                                                        | 1.2696738         | 2              | 4.52624   |
| Q68FR9        | GVVQDLQQAISK                                                                          | 1.21339085        | 2              | 3.43811   |
| Q68FR9        | SIQLDGLVWGASK                                                                         | 1.36377385        | 2              | 3.25988   |
| Q68FR9        | SLAGSSGPGASSGPGGDHSDLIVR                                                              | 1.37598913        | 2              | 5.38088   |
| <b>Q68FS2</b> | <b>CSN4 COP9 signalosome complex subunit 4</b>                                        | <b>1.13812564</b> | <b>0.28643</b> | <b>3</b>  |
| Q68FS2        | ATTADGSSILDR                                                                          | 2.78705777        | 2              | 2.32801   |
| Q68FS2        | NAAQVLVGIPILETGQK                                                                     | 0.89008954        | 2              | 2.98284   |
| Q68FS2        | QIQSLCFQVNNLLEK                                                                       | 1.57147556        | 2              | 2.40834   |
| <b>Q68FS4</b> | <b>AMPL Cytosol aminopeptidase</b>                                                    | <b>1.18442302</b> | <b>3.7E-09</b> | <b>17</b> |
| Q68FS4        | ADMGGAATICSIAVSAAK                                                                    | 1.13920067        | 2              | 5.1015    |
| Q68FS4        | ADMGGAATICSIAVSAAK+Oxidation(2                                                        | 1.10785755        |                |           |
| Q68FS4        | DKDDDVPQFTSAGENFNK                                                                    | 0.90439377        | 2              | 5.38146   |
| Q68FS4        | GITFDGGISIK                                                                           | 1.24960679        | 2              | 3.18221   |
| Q68FS4        | GSEEPVFLFIHYTGSPNATEAPLVFVGK                                                          | 1.57857689        | 3              | 6.16995   |
| Q68FS4        | GVLFASGQNLAR                                                                          | 1.6431098         | 2              | 3.43383   |
| Q68FS4        | LFEASVETGDR                                                                           | 1.36673833        | 2              | 3.58747   |
| Q68FS4        | LHGSGDLEAWEK                                                                          | 1.75390611        | 2              | 2.95171   |
| Q68FS4        | LNLPINIIGLAPLCENMPSPGK                                                                | 2.09534479        | 2              | 5.04497   |
| Q68FS4        | QLMESPANEMTPTR                                                                        | 0.97472993        | 2              | 3.65393   |
| Q68FS4        | QVIDCQLADVNNLNGK                                                                      | 1.71573851        | 2              | 4.72913   |
| Q68FS4        | SAGACTAAAFRL                                                                          | 1.11495326        | 2              | 3.88623   |
| Q68FS4        | SAGVDDQENWHEGK                                                                        | 1.00117381        | 2              | 3.97118   |
| Q68FS4        | SWIEEQEMGSFLSVAK                                                                      | 1.31410026        | 2              | 5.14901   |
| Q68FS4        | TFYGLHQDFPSVVVGLGK                                                                    | 1.4996203         | 2              | 4.70411   |
| Q68FS4        | TIQVDNTDAEGR                                                                          | 1.01107517        | 2              | 4.1452    |
| Q68FS4        | TLIEFLLR                                                                              | 1.45757542        | 2              | 2.78993   |
| <b>Q68FT1</b> | <b>COQ9 Ubiquinone biosynthesis protein COQ9_mitochondrial</b>                        | <b>1.15244531</b> | <b>0.99321</b> | <b>4</b>  |
| Q68FT1        | INDAMNMGHTAK                                                                          | 1.07725888        | 2              | 3.10169   |
| Q68FT1        | LNHVLEEEQK                                                                            | 1.19466924        | 2              | 3.40032   |
| Q68FT1        | STGEALVQGLMGAAVTLK                                                                    | 0.99373373        | 2              | 3.76337   |
| Q68FT1        | YTDQSGEEEDYSEEQIQHR                                                                   | 1.00513602        | 3              | 4.68254   |
| <b>Q68FT3</b> | <b>PYRD2 Pyridine nucleotide_disulfide oxidoreductase domain_containing protein 2</b> | <b>0.97949539</b> | <b>0.95281</b> | <b>7</b>  |
| Q68FT3        | HVIGGAAVTEIIPGFK                                                                      | 0.8585568         | 2              | 3.80329   |
| Q68FT3        | ISQLDTQSPVTK                                                                          | 1.61001711        | 2              | 3.50086   |
| Q68FT3        | SLLLGTDAENQK                                                                          | 0.84537247        | 2              | 3.4011    |
| Q68FT3        | TLGAQLPQYYEVLTAPIK                                                                    | 0.98322796        | 2              | 4.06975   |
| Q68FT3        | VFDICIEAYAPGFK                                                                        | 0.84626687        | 2              | 2.82351   |
| Q68FT3        | VLDQWFSEPLK                                                                           | 1.41488089        | 2              | 3.59083   |
| Q68FT3        | VQGVVLQGGEEVR                                                                         | 0.73264497        | 2              | 3.26104   |
| <b>Q68FT5</b> | <b>BHMT2 Betaine_homocysteine S_methyltransferase 2</b>                               | <b>0.98208967</b> | <b>9.9E-20</b> | <b>10</b> |
| Q68FT5        | AGANIIGVNCR                                                                           | 1.2758358         | 2              | 3.62363   |
| Q68FT5        | AGLWTPAEAVVEYPSAVR                                                                    | 1.27682084        | 3              | 4.09577   |
| Q68FT5        | AIAEELAPER                                                                            | 2.0967727         | 2              | 3.79623   |

|               |                                                                   |                   |                |           |
|---------------|-------------------------------------------------------------------|-------------------|----------------|-----------|
| Q68FT5        | DAGLQAHLMVQCLGFHTPDCGK                                            | 1.57384192        | 3              | 4.69201   |
| Q68FT5        | EVGAPVAVTMCIGPEGDMHGVTPGEC AVR                                    | 1.78202511        | 3              | 4.66815   |
| Q68FT5        | FGPWTSLQTMK                                                       | 1.91253535        | 2              | 2.51008   |
| Q68FT5        | GGFVDLPEYPFGLEPR                                                  | 1.33648055        | 2              | 4.21859   |
| Q68FT5        | LDSGEVVVDGGFLFTLEK                                                | 1.8332924         | 2              | 2.67014   |
| Q68FT5        | REYWETLLPASGRPFPCPSLSKPDA                                         | 0.37963633        | 3              | 3.66162   |
| Q68FT5        | YIGGCCGFEPYHIR                                                    | 4.29307144        | 2              | 4.65506   |
| <b>Q68FT9</b> | <b>SCLY Selenocysteine lyase</b>                                  | <b>1.01199211</b> | <b>0.0587</b>  | <b>6</b>  |
| Q68FT9        | AEVDLIVQDLK                                                       | 1.25880194        | 2              | 3.90052   |
| Q68FT9        | CFHEQQTQGR                                                        | 1.13430061        | 2              | 2.76003   |
| Q68FT9        | NFRPGTENTPMIAGLGK                                                 | 0.5989687         | 2              | 4.30324   |
| Q68FT9        | RVDVEDLGVDFLTVGHK                                                 | 1.3064638         | 3              | 5.33191   |
| Q68FT9        | TVDQISPEEGTRPHFITCTVEHDSIR                                        | 1.12507954        | 3              | 4.65663   |
| Q68FT9        | VLVHTDAAQALGK                                                     | 1.19356831        | 3              | 3.31445   |
| <b>Q68FU3</b> | <b>ETFB Electron transfer flavoprotein subunit beta</b>           | <b>1.02125354</b> | <b>0.8759</b>  | <b>13</b> |
| Q68FU3        | AGDLGVDLTSK                                                       | 0.82969168        | 2              | 3.49051   |
| Q68FU3        | EIDGGLETIR                                                        | 1.53205793        | 2              | 2.33737   |
| Q68FU3        | EIIAVSCGPPQCQETIR                                                 | 1.0934506         | 2              | 5.31334   |
| Q68FU3        | GIHVEVPGAEAEENGLPLQVAR                                            | 1.5221042         | 2              | 5.84644   |
| Q68FU3        | HSMNPFCEIAVEEAVR                                                  | 0.99942008        | 2              | 5.59787   |
| Q68FU3        | HSMNPFCEIAVEEAVR+Oxidation(2                                      | 1.26468739        |                |           |
| Q68FU3        | LKLPAVVTADLR                                                      | 3.12671466        | 2              | 2.36035   |
| Q68FU3        | QAIDDDCNQTGQMTAGLLDWPQGTAFASQVTLEGDKVK                            | 3.18035021        | 3              | 5.73208   |
| Q68FU3        | RVIDFAVK                                                          | 1.06781311        | 2              | 2.63964   |
| Q68FU3        | VDLLFLGK                                                          | 0.99743202        | 2              | 2.73127   |
| Q68FU3        | VETTEDLVAK                                                        | 0.80133422        | 2              | 3.56437   |
| Q68FU3        | VIDFAVK                                                           | 0.83569091        | 2              | 2.42857   |
| Q68FU3        | VSVISVEEPPQR                                                      | 1.01936298        | 2              | 3.56365   |
| <b>Q68FY0</b> | <b>QCR1 Cytochrome b_c1 complex subunit 1_ mitochondrial</b>      | <b>1.29618401</b> | <b>0.01732</b> | <b>10</b> |
| Q68FY0        | HQQLDLAQDHSSVSQVYEEDAVPSITPCR                                     | 1.72980897        | 3              | 6.01256   |
| Q68FY0        | IEEVDAQMVR                                                        | 3.80970341        | 2              | 3.84492   |
| Q68FY0        | LCTSATESEVTR                                                      | 1.61612167        | 2              | 2.85525   |
| Q68FY0        | NALISHLDGTTTPCEDIGR                                               | 1.04537015        | 2              | 4.56618   |
| Q68FY0        | NNGAGYFLEHLAFK                                                    | 0.67959013        | 2              | 3.52426   |
| Q68FY0        | RIPLAEWESR                                                        | 0.84232679        | 2              | 2.67835   |
| Q68FY0        | SGMFWLR                                                           | 1.12400895        | 2              | 2.39729   |
| Q68FY0        | TDLTDYLSR                                                         | 0.88963927        | 2              | 2.9454    |
| Q68FY0        | VVELLADIVQNISLEDSQIEK                                             | 1.35805105        | 3              | 5.36858   |
| Q68FY0        | YFYDQCPAVAGYGPQIEQLSDYNR                                          | 1.14056093        | 3              | 5.23737   |
| <b>Q68G31</b> | <b>PBLD Phenazine biosynthesis_like domain_containing protein</b> | <b>0.88080898</b> | <b>0.03731</b> | <b>7</b>  |
| Q68G31        | AAIGDTTVQDIQYSPDTR                                                | 0.98942847        | 2              | 4.72678   |
| Q68G31        | AEDGIVLDFPLYPTFPQDFHEVK                                           | 1.52044764        | 3              | 4.0088    |
| Q68G31        | GESGGQTPYDFYSR                                                    | 0.99633432        | 2              | 3.96294   |
| Q68G31        | LQPTDSFSQSSCFGLR                                                  | 1.17958214        | 2              | 3.55103   |
| Q68G31        | NVNSTLTFVTLSGELK                                                  | 1.09061184        | 2              | 4.2573    |
| Q68G31        | RAEDGIVLDFPLYPTFPQDFHEVK                                          | 1.58981944        | 3              | 5.774     |
| Q68G31        | VNTEPLPGIEK                                                       | 0.73885963        | 2              | 2.64245   |
| <b>Q69Z23</b> | <b>DYH17 Dynein heavy chain 17_axonemal</b>                       | <b>1.12442511</b> | <b>0.5321</b>  | <b>2</b>  |
| Q69Z23        | GDPTRAEDQVLMRALR                                                  | 0.98925174        | 2              | 2.41662   |
| Q69Z23        | YFIDLLMEK                                                         | 2.83752409        | 1              | 2.0173    |
| <b>Q6A028</b> | <b>SWP70 Switch_associated protein 70</b>                         | <b>4.05579485</b> | <b>0.01522</b> | <b>2</b>  |
| Q6A028        | FILEKVQDNFDK                                                      | 4.52416992        | 1              | 1.91264   |
| Q6A028        | KGDILLDENCCVESLPDKDGK                                             | 2.84407337        | 2              | 2.3398    |



|               |                                                                    |                   |                |          |
|---------------|--------------------------------------------------------------------|-------------------|----------------|----------|
| <b>Q6A0A9</b> | <b>F120A Constitutive coactivator of PPAR_gamma_like protein 1</b> | <b>1.24811052</b> | <b>0.59184</b> | <b>3</b> |
| Q6A0A9        | LYEPDQLQELK                                                        | 1.14950726        | 2              | 2.3939   |
| Q6A0A9        | SQGGVQPIPSQGGK                                                     | 1.12163292        | 2              | 3.34622  |
| Q6A0A9        | VEGSSTASSGSLAEGK                                                   | 1.249722          | 2              | 4.23287  |
| <b>Q6AW69</b> | <b>CGNL1 Cingulin_like protein 1</b>                               | <b>1.64141672</b> | <b>0.14851</b> | <b>2</b> |
| Q6AW69        | NRRELAEMQTQLK+Oxidation(7                                          | 1.22518895        |                |          |
| Q6AW69        | QDSAGPILDGAR                                                       | 1.70466717        | 2              | 2.50615  |
| <b>Q6AXM8</b> | <b>PON2 Serum paraoxonase/arylesterase 2</b>                       | <b>0.93297652</b> | <b>0.98963</b> | <b>3</b> |
| Q6AXM8        | FQEEENSLHLK                                                        | 0.93269587        | 2              | 3.70879  |
| Q6AXM8        | LFVYDPNHPPSSEVLR                                                   | 0.99837168        | 2              | 2.46719  |
| Q6AXM8        | LVAEGFDSANGINISPDKK                                                | 1.09280672        | 2              | 3.53868  |
| <b>Q6AXS5</b> | <b>PAIRB Plasminogen activator inhibitor 1 RNA_binding protein</b> | <b>1.08818646</b> | <b>0.74176</b> | <b>4</b> |
| Q6AXS5        | EETQPPVALKK                                                        | 0.50072261        | 2              | 2.42261  |
| Q6AXS5        | FDQLFDESDFEVLK                                                     | 1.07285456        | 2              | 5.29557  |
| Q6AXS5        | RFEKPLEEK                                                          | 1.37401693        | 2              | 2.42124  |
| Q6AXS5        | SAAQAAAQTNNAAGK                                                    | 0.7934782         | 2              | 4.54963  |
| <b>Q6AXY0</b> | <b>GSTA6 Glutathione S_transferase A6</b>                          | <b>0.9078073</b>  | <b>0.6255</b>  | <b>2</b> |
| Q6AXY0        | FLQPGSQR                                                           | 0.81249578        | 2              | 2.5621   |
| Q6AXY0        | YFPAFEK                                                            | 0.97142862        | 1              | 2.00928  |
| <b>Q6AY09</b> | <b>HNRH2 Heterogeneous nuclear ribonucleoprotein H2</b>            | <b>1.32225961</b> | <b>0.40846</b> | <b>4</b> |
| Q6AY09        | ATENDIYNFFSPLNPMR                                                  | 1.8207861         | 2              | 2.784    |
| Q6AY09        | GLPWSCSAEEVMR                                                      | 1.72985041        | 2              | 2.94583  |
| Q6AY09        | HTGPNSPDTANDGFVR                                                   | 1.20131979        | 2              | 4.17416  |
| Q6AY09        | STGEAFVQFASQEIAEK                                                  | 1.22827875        | 2              | 3.92796  |
| <b>Q6AY20</b> | <b>MPRD Cation_dependent mannose_6_phosphate receptor</b>          | <b>1.23199529</b> | <b>0.85096</b> | <b>2</b> |
| Q6AY20        | HTLAGNFNPVSEER                                                     | 1.23491815        | 2              | 4.17523  |
| Q6AY20        | SCDLVGEKDKEK                                                       | 1.22050859        | 2              | 3.68552  |
| <b>Q6AY30</b> | <b>SCPDH Probable saccharopine dehydrogenase</b>                   | <b>1.039288</b>   | <b>0.153</b>   | <b>6</b> |
| Q6AY30        | ACIENGTSCIDICGEPQFLELMHVK                                          | 2.07670291        | 3              | 4.01057  |
| Q6AY30        | ATLVLNCVGPYR                                                       | 0.99155383        | 2              | 2.82379  |
| Q6AY30        | GGGVFTPGAASFR                                                      | 1.352248          | 2              | 2.36506  |
| Q6AY30        | GVYIIGSSGFDSIPADLVLYTR                                             | 1.39279464        | 2              | 2.92966  |
| Q6AY30        | LQQVLEK                                                            | 1.13943062        | 1              | 2.32071  |
| Q6AY30        | SVSNLKPVPVIGSK                                                     | 0.9875066         | 2              | 3.79931  |
| <b>Q6AY56</b> | <b>TBA8 Tubulin alpha_8 chain</b>                                  | <b>1.30838693</b> | <b>0.00264</b> | <b>7</b> |
| Q6AY56        | AVCMLSNTTAAEAWAR                                                   | 1.66663212        | 2              | 4.55811  |
| Q6AY56        | FDGALNVDLTFQTNLVYPPR                                               | 1.49226632        | 2              | 5.10541  |
| Q6AY56        | LISQIVSSITASLR                                                     | 2.87198193        | 2              | 3.7551   |
| Q6AY56        | NLDIERPTYNLNR                                                      | 1.18698571        | 2              | 3.3133   |
| Q6AY56        | QLFHPEQLITGK                                                       | 0.9131445         | 2              | 3.09159  |
| Q6AY56        | TIQFVDWCPTGFK                                                      | 1.2241285         | 2              | 3.70063  |
| Q6AY56        | VGINYQPPTVPPGGDLAK                                                 | 1.10251544        | 2              | 4.39579  |
| <b>Q6AY80</b> | <b>NQO2 Ribosyldihyronicotinamide dehydrogenase [quinone]</b>      | <b>0.91159436</b> | <b>0.84599</b> | <b>5</b> |
| Q6AY80        | ALTSDILEEQR                                                        | 1.42168227        | 2              | 3.24238  |
| Q6AY80        | EEPIHCTPSWYFQG                                                     | 1.0932819         | 2              | 2.69827  |
| Q6AY80        | NDVTGALSNEPVFK                                                     | 0.76745159        | 2              | 3.93004  |
| Q6AY80        | VLAPQISFGPEVSSSEQR                                                 | 1.12287402        | 2              | 4.34197  |
| Q6AY80        | VLCQGAFDVPGFYDSGFLK                                                | 1.50874935        | 2              | 2.80055  |
| <b>Q6AYG5</b> | <b>ECHD1 Enoyl_CoA hydratase domain_containing protein 1</b>       | <b>0.95371277</b> | <b>0.08746</b> | <b>3</b> |
| Q6AYG5        | DVLETLWGGPANLEIAIK                                                 | 1.40673005        | 2              | 4.05122  |
| Q6AYG5        | ILEQFPGGSIDLQK                                                     | 0.62873664        | 2              | 3.41098  |

|               |                                                             |                   |                |          |
|---------------|-------------------------------------------------------------|-------------------|----------------|----------|
| Q6AYG5        | NTFCGSDLNAVK                                                | 0.9967747         | 2              | 2.48237  |
| <b>Q6AYH5</b> | <b>DCTN2 Dynactin subunit 2</b>                             | <b>1.45791406</b> | <b>0.12841</b> | <b>3</b> |
| Q6AYH5        | ASVEDADTQNK                                                 | 1.4894068         | 2              | 2.80982  |
| Q6AYH5        | VNALDLAVLDQVEAR                                             | 1.59172231        | 2              | 3.41295  |
| Q6AYH5        | WSPVASTLPELVQR                                              | 1.44304883        | 2              | 2.90362  |
| <b>Q6AYK6</b> | <b>CYBP Calcyclin_binding protein</b>                       | <b>1.08743897</b> | <b>0.63404</b> | <b>2</b> |
| Q6AYK6        | IYEDGDDDMKR                                                 | 0.57194379        | 2              | 2.40685  |
| Q6AYK6        | WDYLTQVEK                                                   | 2.90867985        | 2              | 2.60189  |
| <b>Q6AYQ8</b> | <b>FAHD1 Acylpyruvase FAHD1_mitochondrial</b>               | <b>0.95742679</b> | <b>0.99734</b> | <b>4</b> |
| Q6AYQ8        | IITLEEGDLITGTPK                                             | 1.27283023        | 2              | 5.17019  |
| Q6AYQ8        | NLHHEVELGVLLGR                                              | 0.78487956        | 3              | 4.70732  |
| Q6AYQ8        | SFTSSCPVSAFVPK                                              | 0.92380859        | 2              | 3.98761  |
| Q6AYQ8        | STVLSEPVLFKLPSTAYAPEGSPVLPAYCR                              | 1.17440701        | 3              | 3.72354  |
| <b>Q6AYR8</b> | <b>SCRN2 Secernin_2</b>                                     | <b>1.19743564</b> | <b>0.81095</b> | <b>2</b> |
| Q6AYR8        | GHQAALGLMDEQEQAQLR                                          | 1.10477077        | 3              | 4.30184  |
| Q6AYR8        | QEQQSLEQEGLEALR                                             | 1.19951477        | 2              | 3.88558  |
| <b>Q6AYS7</b> | <b>ACY1A Aminoacylase_1A</b>                                | <b>1.45061725</b> | <b>0.03947</b> | <b>2</b> |
| Q6AYS7        | EMNLTLEPEIFPAATDSR                                          | 1.57956537        | 2              | 3.81153  |
| Q6AYS7        | ICTVQPNPDYGSAVTFLEER                                        | 5.24982969        | 2              | 4.57627  |
| <b>Q6AYS8</b> | <b>DHB11 Estradiol 17_beta_dehydrogenase 11</b>             | <b>0.85347999</b> | <b>0.51189</b> | <b>3</b> |
| Q6AYS8        | ALTDELAALGCTGVR                                             | 0.64079185        | 2              | 4.05791  |
| Q6AYS8        | FDAVVGYS                                                    | 1.34609226        | 1              | 2.2866   |
| Q6AYS8        | SVAGEIVLITGAGHGIGR                                          | 0.80382869        | 2              | 4.02995  |
| <b>Q6AYT9</b> | <b>ACSM5 Acyl_coenzyme A synthetase ACSM5_mitochondrial</b> | <b>0.75384814</b> | <b>0.68321</b> | <b>4</b> |
| Q6AYT9        | AFIVLSPAYVSHDPEALTR                                         | 0.84452756        | 2              | 3.43435  |
| Q6AYT9        | ASPPYDVQIVDEEGNVLPPEGK                                      | 0.49034466        | 2              | 3.20889  |
| Q6AYT9        | NDDVINSSYSR                                                 | 2.18202013        | 2              | 3.34475  |
| Q6AYT9        | TGVVMIPGISQLTQK                                             | 0.50715481        | 2              | 3.14431  |
| <b>Q6AYZ1</b> | <b>TBA1C Tubulin alpha_1C chain</b>                         | <b>1.24501898</b> | <b>5.3E-11</b> | <b>6</b> |
| Q6AYZ1        | AVFVDLEPTVIDEVR                                             | 1.27875551        | 2              | 5.40966  |
| Q6AYZ1        | AYHEQLTVAEITNACFEPANQMVK                                    | 1.31596382        | 3              | 4.14551  |
| Q6AYZ1        | DVNAAIATIK                                                  | 1.04034176        | 2              | 3.17294  |
| Q6AYZ1        | IHFPLATYAPVISAEEK                                           | 2.49553525        | 2              | 3.79999  |
| Q6AYZ1        | TIGGGDDSFNTFFSETGAGK                                        | 2.27447474        | 2              | 5.46006  |
| Q6AYZ1        | VGINYQPPTVPPGGDLAR                                          | 1.10811117        | 2              | 4.70229  |
| <b>Q6DGG0</b> | <b>PPID Peptidyl_prolyl cis_trans isomerase D</b>           | <b>0.92838243</b> | <b>0.73329</b> | <b>4</b> |
| Q6DGG0        | GTGPTTGKPLHFK                                               | 0.64852816        | 2              | 2.35666  |
| Q6DGG0        | IVLELFADIVPK                                                | 1.01050422        | 2              | 2.31037  |
| Q6DGG0        | MLENVEVNGEKPAAK                                             | 1.32392075        | 2              | 3.70808  |
| Q6DGG0        | VFFDVIDIGGER                                                | 1.43534817        | 2              | 2.83679  |
| <b>Q6DGG1</b> | <b>ABHEB Abhydrolase domain_containing protein 14B</b>      | <b>0.9219954</b>  | <b>0.43197</b> | <b>6</b> |
| Q6DGG1        | AVAILDPLGLR                                                 | 1.04339525        | 2              | 3.56435  |
| Q6DGG1        | FSSETWQNLGTLHR                                              | 1.31081761        | 2              | 3.63614  |
| Q6DGG1        | FSVLLHGIR                                                   | 2.25802863        | 2              | 3.08848  |
| Q6DGG1        | GYVPVAPICDK                                                 | 0.92127248        | 1              | 2.65398  |
| Q6DGG1        | INAADYAR                                                    | 1.19685094        | 2              | 2.46774  |
| Q6DGG1        | TPTLIVYGDQDPMGSSSFQHLK                                      | 1.62464226        | 2              | 5.38226  |
| <b>Q6EDY6</b> | <b>LR16A Leucine_rich repeat_containing protein 16A</b>     | <b>0.91335978</b> | <b>0.6808</b>  | <b>2</b> |
| Q6EDY6        | ELMESIK+Oxidation(2)                                        | 1.66177502        |                |          |
| Q6EDY6        | IENYLLR                                                     | 0.90175462        | 2              | 2.45561  |
| <b>Q6GQP4</b> | <b>RAB31 Ras_related protein Rab_31</b>                     | <b>0.76910927</b> | <b>0.07854</b> | <b>2</b> |
| Q6GQP4        | CDLSDIREVPLK                                                | 0.73179675        | 2              | 2.5344   |
| Q6GQP4        | CDLSDIREVPLKDAK                                             | 0.85878008        | 2              | 2.91608  |
| <b>Q6GQT1</b> | <b>AZMP Alpha_2_macrolobulin_P</b>                          | <b>1.40854429</b> | <b>0.10193</b> | <b>3</b> |

|               |                                                                 |                   |                |           |
|---------------|-----------------------------------------------------------------|-------------------|----------------|-----------|
| Q6GQT1        | ASVTVLGDILGSAMQNTQDLLK                                          | 1.16744004        | 2              | 2.35133   |
| Q6GQT1        | IQEEGTGVEETGK                                                   | 23.2249401        | 2              | 3.72267   |
| Q6GQT1        | SSGSLLNNAMK                                                     | 1.274608          | 2              | 3.09788   |
| <b>Q6I7R3</b> | <b>ISOC1 Isochorismatase domain_containing protein 1</b>        | <b>1.14356433</b> | <b>0.05587</b> | <b>3</b>  |
| Q6I7R3        | GLGSTVQEIDLTGVK                                                 | 1.06829654        | 2              | 3.87937   |
| Q6I7R3        | ILGIPVIITEQYPK                                                  | 2.36578696        | 2              | 3.00799   |
| Q6I7R3        | YFGDIISVGQR                                                     | 1.47754781        | 2              | 2.57839   |
| <b>Q6IE52</b> | <b>MUG2 Murinoglobulin_2</b>                                    | <b>1.09295958</b> | <b>0.99787</b> | <b>14</b> |
| Q6IE52        | AHFSVMGDILSSAIK                                                 | 1.04238202        | 2              | 3.67194   |
| Q6IE52        | HGIPFFVK                                                        | 0.83675057        | 2              | 2.74722   |
| Q6IE52        | HTSSWLVTPK                                                      | 0.85999016        | 2              | 2.80894   |
| Q6IE52        | LPSSEEEESLDINIEGAK                                              | 1.503804          | 2              | 2.88293   |
| Q6IE52        | MLIYTILPDGEVIADSVK                                              | 1.09223091        | 2              | 3.83604   |
| Q6IE52        | MLSGFIPLKPTVK                                                   | 1.55388967        | 2              | 3.15561   |
| Q6IE52        | MLSGFIPLKPTVK+Oxidation(0                                       | 0.86159268        |                |           |
| Q6IE52        | NLYPLKELVQDPK                                                   | 1.63562424        | 1              | 2.04411   |
| Q6IE52        | QLSFSLSAEPQQGPYK                                                | 0.95121224        | 2              | 4.27773   |
| Q6IE52        | QQNSHGGFSSTQDVTVALDALS                                          | 1.11365184        | 3              | 3.65907   |
| Q6IE52        | VHLSFSPQSLPASQTHMR                                              | 0.72225593        | 3              | 3.93723   |
| Q6IE52        | VKTVPLTCNNPK                                                    | 1.07703433        | 2              | 2.96447   |
| Q6IE52        | VTASPSQLCGLR                                                    | 2.35718384        | 2              | 2.50736   |
| Q6IE52        | YMLVLPVSQLYTETPEK                                               | 0.89587134        | 2              | 3.72556   |
| <b>Q6IFW6</b> | <b>K1C10 Keratin_type I cytoskeletal 10</b>                     | <b>0.70466208</b> | <b>0.54995</b> | <b>2</b>  |
| Q6IFW6        | LENEIQTYR                                                       | 1.00396146        | 2              | 2.34899   |
| Q6IFW6        | QSLEASLAETGR                                                    | 0.49566678        | 2              | 3.44501   |
| <b>Q6IFZ9</b> | <b>K2C74 Keratin_type II cytoskeletal 74</b>                    | <b>2.06256116</b> | <b>0.05323</b> | <b>2</b>  |
| Q6IFZ9        | FLEQQNQVLQTK                                                    | 1.72403193        | 2              | 4.16948   |
| Q6IFZ9        | GDSALKDAWAKLDELEGALQQA                                          | 6.05379838        | 3              | 3.60364   |
| <b>Q6IMF3</b> | <b>K2C1 Keratin_type II cytoskeletal 1</b>                      | <b>0.9628462</b>  | <b>0.98389</b> | <b>4</b>  |
| Q6IMF3        | TNAENEFVTIK                                                     | 1.77646329        | 2              | 2.75133   |
| Q6IMF3        | TNAENEFVIKK                                                     | 1.12990746        | 2              | 2.93977   |
| Q6IMF3        | WELLQQVDTSTR                                                    | 1.12083958        | 2              | 3.61795   |
| Q6IMF3        | YEELQITAGK                                                      | 0.96200514        | 2              | 3.46776   |
| <b>Q6IRK9</b> | <b>PGCP Plasma glutamate carboxypeptidase</b>                   | <b>1.04140554</b> | <b>0.49614</b> | <b>7</b>  |
| Q6IRK9        | AIQIMYQNLQDGLNVHLEQVR                                           | 0.87357227        | 3              | 5.46347   |
| Q6IRK9        | GEESAVMVVPR                                                     | 1.31912469        | 2              | 2.82703   |
| Q6IRK9        | IVVYNQPYTDYK                                                    | 1.55998857        | 2              | 2.91765   |
| Q6IRK9        | LGLLVDTVGPR                                                     | 1.58799074        | 2              | 2.98361   |
| Q6IRK9        | SVASFYSIYPHTGHQGYQDGVK                                          | 0.83476598        | 3              | 3.45847   |
| Q6IRK9        | TYPDTDSFNTVAEITGSK                                              | 3.51257017        | 2              | 3.73194   |
| Q6IRK9        | VGAVASLIR                                                       | 1.4697477         | 2              | 2.52945   |
| <b>Q6MGB5</b> | <b>DHB8 Estradiol_17_beta_dehydrogenase 8</b>                   | <b>1.02926977</b> | <b>0.77237</b> | <b>4</b>  |
| Q6MGB5        | AGVIGLTQTAAR                                                    | 1.09894239        | 2              | 3.19555   |
| Q6MGB5        | CNSVLPGFIATPMTQK                                                | 2.09916387        | 2              | 2.34861   |
| Q6MGB5        | GSIIINISSIVGK                                                   | 1.74863847        | 2              | 2.7751    |
| Q6MGB5        | VGNIGQNTYASSK                                                   | 0.99135324        | 2              | 2.76001   |
| <b>Q6NSR8</b> | <b>PEPL1 Probable aminopeptidase NPEPL1</b>                     | <b>1.00891222</b> | <b>0.99982</b> | <b>3</b>  |
| Q6NSR8        | GIVYDTGGLSIK                                                    | 0.95952168        | 2              | 2.36454   |
| Q6NSR8        | HNSPSAAHFITR                                                    | 1.13681072        | 3              | 3.95459   |
| Q6NSR8        | TVEINNTDAEGR                                                    | 1.01385384        | 2              | 2.9926    |
| <b>Q6NYB7</b> | <b>RAB1A Ras_related protein Rab_1A</b>                         | <b>1.34692397</b> | <b>0.85917</b> | <b>3</b>  |
| Q6NYB7        | EFADSLGIPFLETSK                                                 | 1.25328187        | 2              | 3.79188   |
| Q6NYB7        | NATNVEQSFMTMAAEIK                                               | 1.86951006        | 2              | 5.09252   |
| Q6NYB7        | TITSSYYR                                                        | 1.24010869        | 1              | 1.97861   |
| <b>Q6NZJ6</b> | <b>IF4G1 Eukaryotic translation initiation factor 4 gamma 1</b> | <b>1.46269749</b> | <b>0.00321</b> | <b>9</b>  |

|               |                                                               |                   |                |           |
|---------------|---------------------------------------------------------------|-------------------|----------------|-----------|
| Q6NZJ6        | FMLQDVLDLR                                                    | 1.63135672        | 2              | 2.79625   |
| Q6NZJ6        | GLPLVDDGGWNTVPISK                                             | 1.05372841        | 2              | 2.87266   |
| Q6NZJ6        | GSSGGSGAKPSDTASEATRPATLNR                                     | 1.22027229        | 3              | 3.35313   |
| Q6NZJ6        | IHNAENIQPGEQK                                                 | 1.32070035        | 2              | 3.95514   |
| Q6NZJ6        | ITKPGSIDSNNQLFAPGGR                                           | 1.67369585        | 3              | 3.56169   |
| Q6NZJ6        | KVEYTLGEESEAPGQR                                              | 1.41329422        | 2              | 4.75058   |
| Q6NZJ6        | LGIESTLER                                                     | 1.24226138        | 2              | 2.4185    |
| Q6NZJ6        | LKEELEEAR                                                     | 1.46021949        | 2              | 2.70229   |
| Q6NZJ6        | TASTPTPPQTGGSLPQPNGESPQVAVIIRPDDR                             | 1.10882963        | 3              | 4.99129   |
| <b>Q6P0K8</b> | <b>PLAK Junction plakoglobin</b>                              | <b>1.34994454</b> | <b>0.49558</b> | <b>3</b>  |
| Q6P0K8        | LLNDEDPVVVTK                                                  | 0.91099782        | 2              | 3.22565   |
| Q6P0K8        | NLALCPANHAPLQEAAVIPR                                          | 1.52104201        | 3              | 3.62823   |
| Q6P0K8        | TMQNTSDLDTAR                                                  | 1.25547066        | 2              | 3.25989   |
| <b>Q6P502</b> | <b>TCPG T_complex protein 1 subunit gamma</b>                 | <b>1.37545237</b> | <b>1.7E-10</b> | <b>14</b> |
| Q6P502        | AMTGVEQWPYR                                                   | 1.25205941        | 2              | 2.70722   |
| Q6P502        | AVAQALEVIPR                                                   | 1.77914838        | 2              | 2.4506    |
| Q6P502        | DMMMLNIINSSITTK                                               | 0.86332542        | 2              | 3.97657   |
| Q6P502        | EIQVQHPAAK                                                    | 1.30383954        | 2              | 3.30226   |
| Q6P502        | GISDLAQHYLMR                                                  | 1.59807604        | 2              | 3.04806   |
| Q6P502        | IVLLDSSLEYK                                                   | 1.8750559         | 2              | 2.55909   |
| Q6P502        | IVSRPEELREDDVGTGAGLLEIK                                       | 1.78000766        | 3              | 4.09411   |
| Q6P502        | KGESQTDIEITR                                                  | 1.37105467        | 2              | 3.27758   |
| Q6P502        | MLLDPMGGIVMTNDGNAILR                                          | 2.24984378        | 2              | 3.88515   |
| Q6P502        | NLQDAMQVCR                                                    | 1.84452968        | 2              | 3.31944   |
| Q6P502        | NVLLDPQLVPGGGASEMAVAHALTEK                                    | 2.57178067        | 2              | 3.87082   |
| Q6P502        | TAVETAVLLLR                                                   | 1.37038857        | 2              | 3.73921   |
| Q6P502        | TLIQNCGASTIR                                                  | 1.40529076        | 2              | 3.34592   |
| Q6P502        | WSSLACNIALDAVK                                                | 1.42084791        | 2              | 3.7964    |
| <b>Q6P6M7</b> | <b>selenium transferase</b>                                   | <b>0.98615383</b> | <b>0.85203</b> | <b>4</b>  |
| <b>Q6P6R2</b> | <b>DLDH Dihydropolyl dehydrogenase_mitochondrial</b>          | <b>0.98372589</b> | <b>0.63198</b> | <b>14</b> |
| Q6P6R2        | ALLNNSHYHHLAHGK                                               | 1.14717633        | 2              | 3.3111    |
| Q6P6R2        | ALTGGIAHLFK                                                   | 1.15724264        | 2              | 2.63245   |
| Q6P6R2        | EANLAASFGKPINF                                                | 1.49569666        | 1              | 1.92902   |
| Q6P6R2        | IDVSVEAASGGK                                                  | 3.00503148        | 2              | 3.03946   |
| Q6P6R2        | ILGAHILGPGAGEMVNEAALALEYGASCEDVAR                             | 1.16032067        | 3              | 3.99356   |
| Q6P6R2        | IPNIFAIGDVVAGPMLAHK                                           | 1.65989056        | 3              | 3.50005   |
| Q6P6R2        | NETLGGTCLNVGCIPIK                                             | 0.82981712        | 2              | 5.16718   |
| Q6P6R2        | NQVTATTADGSTQVIGTK                                            | 1.05838975        | 2              | 5.63074   |
| Q6P6R2        | RPFTQNLGLEELGIELDPK                                           | 1.00454028        | 3              | 4.60339   |
| Q6P6R2        | SEEQLKEEGVEFK                                                 | 1.04936148        | 2              | 3.53124   |
| Q6P6R2        | TNADTDGMVK                                                    | 1.39389487        | 2              | 2.82534   |
| Q6P6R2        | TNADTDGMVK+Oxidation(7                                        | 1.95471773        |                |           |
| Q6P6R2        | VCHAHPTLSEAFR                                                 | 1.28731264        | 3              | 3.78274   |
| Q6P6R2        | VVHVNGFGK                                                     | 1.73575895        | 3              | 3.45103   |
| <b>Q6P6S9</b> | <b>ENTP5 Ectonucleoside triphosphate diphosphohydrolase 5</b> | <b>0.87461832</b> | <b>0.20861</b> | <b>6</b>  |
| Q6P6S9        | AAETHLIDYEK                                                   | 1.40803975        | 2              | 2.66759   |
| Q6P6S9        | AQTLLEVEEIFK                                                  | 1.18775226        | 2              | 3.27033   |
| Q6P6S9        | GQETVGTLDLGGASTQITFLPQLEK                                     | 0.75914513        | 2              | 4.39739   |
| Q6P6S9        | QGAETVQELLEVAK                                                | 1.74553528        | 2              | 3.14373   |
| Q6P6S9        | TSGQLPFLGEIFDVKPGLSAFVDQPK                                    | 0.95649586        | 3              | 3.62794   |
| Q6P6S9        | WLEAEWIFGGVK                                                  | 1.27657497        | 2              | 2.77027   |
| <b>Q6P6V0</b> | <b>G6PI Glucose_6_phosphate isomerase</b>                     | <b>1.33017477</b> | <b>1.4E-13</b> | <b>9</b>  |
| Q6P6V0        | DVMPEVNVKLDK+Oxidation(2                                      | 0.97259642        |                |           |
| Q6P6V0        | HFVALSTNTDK                                                   | 1.45638562        | 1              | 3.25527   |
| Q6P6V0        | KIEPELDGSSAVTSHDSSTNGLIGFIK                                   | 1.2941725         | 3              | 6.00124   |

|               |                                                                   |                   |                |           |
|---------------|-------------------------------------------------------------------|-------------------|----------------|-----------|
| Q6P6V0        | MIPCDFLIPVQTQHPIR                                                 | 2.24537529        | 2              | 2.42619   |
| Q6P6V0        | TFTTQETITNAETAK                                                   | 1.40260628        | 2              | 4.75683   |
| Q6P6V0        | TLANLNPESSLFIIASK                                                 | 1.20607644        | 3              | 5.20596   |
| Q6P6V0        | VDYQTGPVWGEPTNGQHAFYQLIHQGTK                                      | 1.62931915        | 3              | 4.02225   |
| Q6P6V0        | VFEGNRPTNSIVFTK                                                   | 1.28550639        | 2              | 3.38279   |
| Q6P6V0        | VWVFSNIDGTHIAK                                                    | 0.49213959        | 2              | 3.63236   |
| <b>Q6P7Q4</b> | <b>LGUL Lactoylglutathione lyase</b>                              | <b>1.20640718</b> | <b>0.32547</b> | <b>6</b>  |
| Q6P7Q4        | DFLLQQTMLR                                                        | 1.4355251         | 2              | 3.38238   |
| Q6P7Q4        | FEELGVK                                                           | 1.17182891        | 1              | 1.93778   |
| Q6P7Q4        | GFGHIGIAVPDVYEACK                                                 | 1.30322732        | 2              | 4.0001    |
| Q6P7Q4        | GLAFVQDPDGYWIEILNPNK                                              | 1.31285336        | 2              | 5.7382    |
| Q6P7Q4        | RFEELGVK                                                          | 1.24470477        | 2              | 2.32368   |
| Q6P7Q4        | VLGLTLLQK                                                         | 2.14975036        | 2              | 2.48099   |
| <b>Q6P7R8</b> | <b>DHB12 Estradiol 17_beta_dehydrogenase 12</b>                   | <b>0.94529603</b> | <b>0.46597</b> | <b>2</b>  |
| Q6P7R8        | GIFVQSVLPFFVATK                                                   | 0.8161084         | 2              | 3.46805   |
| Q6P7R8        | LGEWAVVTGGTDGIGK                                                  | 1.4354055         | 2              | 4.23867   |
| <b>Q6P9T8</b> | <b>TBB2C Tubulin beta_2C chain</b>                                | <b>1.14906273</b> | <b>0.05754</b> | <b>13</b> |
| Q6P9T8        | AVLVDLEPGTMDSVR                                                   | 1.34086257        | 2              | 4.50998   |
| Q6P9T8        | AVLVDLEPGTMDSVR+Oxidation(10                                      | 0.99779391        |                |           |
| Q6P9T8        | EAESCDCLQGFQLTHSLGGGTGSGMGTLLISK                                  | 1.4798471         | 3              | 5.65801   |
| Q6P9T8        | EIVHLQAGQCGNQIGAK                                                 | 2.86261165        | 2              | 4.93126   |
| Q6P9T8        | EVDEQMLNVQNK                                                      | 8.62479852        | 2              | 4.47394   |
| Q6P9T8        | FWEVISDEHGIDPTGTYHGSDSLQLER                                       | 0.90579311        | 3              | 4.85032   |
| Q6P9T8        | INVYYNEATGGK                                                      | 1.12762768        | 2              | 3.07603   |
| Q6P9T8        | KEAESCDCLQGFQLTHSLGGGTGSGMGTLLISK                                 | 1.53524226        | 3              | 6.60577   |
| Q6P9T8        | LHFFMPGFAPLTSR                                                    | 1.60006068        | 2              | 3.26907   |
| Q6P9T8        | MSATFIGNSTAIQELFK                                                 | 1.76555582        | 2              | 4.3316    |
| Q6P9T8        | SGPFGQIFRPDNFVFGQSGAGNNWAK                                        | 1.49067165        | 3              | 5.80361   |
| Q6P9T8        | TAVCDIPPR                                                         | 1.28425684        | 2              | 2.5009    |
| Q6P9T8        | YLTVAAVFR                                                         | 1.84582685        | 2              | 2.68381   |
| <b>Q6P9U8</b> | <b>EIF3H Eukaryotic translation initiation factor 3 subunit H</b> | <b>1.50633057</b> | <b>0.02567</b> | <b>2</b>  |
| Q6P9U8        | ANITFEHMFEEVPIVIK                                                 | 1.42558991        | 3              | 3.73125   |
| Q6P9U8        | EGTGSTATSSSTGGAVGK                                                | 1.51223323        | 2              | 4.27067   |
| <b>Q6PA06</b> | <b>ATLA2 Atlantin 2</b>                                           | <b>1.52393354</b> | <b>1.5E-06</b> | <b>5</b>  |
| Q6PA06        | AGLTDQVSHHAR                                                      | 1.21595843        | 2              | 3.18057   |
| Q6PA06        | NLVPLLLAPENLVEK                                                   | 1.60100238        | 2              | 3.02297   |
| Q6PA06        | QNQHEELQNVK                                                       | 1.29858938        | 2              | 2.92974   |
| Q6PA06        | SMEQVCGGDKPYIAPSDLER                                              | 1.10417833        | 3              | 3.80321   |
| Q6PA06        | SMLQATAEANNLAAVAGAR                                               | 1.74586954        | 2              | 4.50093   |
| <b>Q6PCL9</b> | <b>polymerase gamma</b>                                           | <b>1.40414403</b> | <b>0.08933</b> | <b>2</b>  |
| Q6PCL9        | LTEILK                                                            | 1.31107386        |                |           |
| Q6PCL9        | QANNINMLKDGMK                                                     | 1.49569666        |                |           |
| <b>Q6PCU2</b> | <b>VATE1 V_type proton ATPase subunit E 1</b>                     | <b>1.65097043</b> | <b>0.03431</b> | <b>2</b>  |
| Q6PCU2        | ARDDLITDLLNEAK                                                    | 1.71277946        | 2              | 2.97243   |
| Q6PCU2        | LDLIAQQMMPEVR                                                     | 1.23911416        | 2              | 2.56513   |
| <b>Q6PDM2</b> | <b>SRSF1 Serine/arginine_rich splicing factor 1</b>               | <b>1.03199822</b> | <b>0.76419</b> | <b>2</b>  |
| Q6PDM2        | SHEGETAYIR                                                        | 1.25656646        | 2              | 2.40953   |
| Q6PDM2        | TKDIEDVFK                                                         | 1.02185275        | 2              | 2.75332   |
| <b>Q6PDV7</b> | <b>RL10 60S ribosomal protein L10</b>                             | <b>1.87184914</b> | <b>0.7146</b>  | <b>2</b>  |
| Q6PDV7        | FNADEFEDMVAEK                                                     | 2.44993871        | 2              | 3.81246   |
| Q6PDV7        | FNADEFEDMVAEKR                                                    | 1.33809022        | 2              | 3.30423   |
| <b>Q6PEC1</b> | <b>TBCA Tubulin_specific chaperone A</b>                          | <b>1.28887818</b> | <b>0.3329</b>  | <b>6</b>  |
| Q6PEC1        | AEDGENYAIK                                                        | 1.33296331        | 2              | 2.6904    |
| Q6PEC1        | AEDGENYAIKK                                                       | 1.31207423        | 2              | 2.47524   |
| Q6PEC1        | LEAAYTDLR                                                         | 1.59903768        | 2              | 2.81162   |
| Q6PEC1        | MKAEDGENYAIK                                                      | 0.20870108        | 2              | 2.79379   |

|               |                                                                                    |                   |                |           |
|---------------|------------------------------------------------------------------------------------|-------------------|----------------|-----------|
| Q6PEC1        | QAEILQESR                                                                          | 1.48142951        | 2              | 2.58364   |
| Q6PEC1        | QILESEKDLEEAEYKEAR                                                                 | 1.24113603        | 3              | 4.09466   |
| <b>Q6PEC4</b> | <b>SKP1 S_phase kinase associated protein 1</b>                                    | <b>1.25758818</b> | <b>0.61143</b> | <b>3</b>  |
| Q6PEC4        | NDFTEEEAQVR                                                                        | 1.4115903         | 2              | 3.45187   |
| Q6PEC4        | RTDDIPVWDQEFK                                                                      | 1.1866197         | 2              | 3.02802   |
| Q6PEC4        | TDDIPVWDQEFK                                                                       | 1.14555147        | 2              | 3.18925   |
| <b>Q6Q0N1</b> | <b>CNDP2 Cytosolic non_specific dipeptidase</b>                                    | <b>1.34896647</b> | <b>0.45752</b> | <b>6</b>  |
| Q6Q0N1        | AVFQYIDENQDR                                                                       | 0.73882528        | 2              | 3.02616   |
| Q6Q0N1        | EGGSIPVTLTFQEATGK                                                                  | 1.04201217        | 2              | 2.76204   |
| Q6Q0N1        | LGGVELVDIGK                                                                        | 1.02939784        | 2              | 3.58265   |
| Q6Q0N1        | MTEAAAADVQR                                                                        | 1.41665807        | 2              | 3.14374   |
| Q6Q0N1        | TGQEI PVNLR                                                                        | 1.36493993        | 2              | 2.57481   |
| Q6Q0N1        | TVFGVEPDLTR                                                                        | 1.39237285        | 2              | 2.39771   |
| <b>Q6RT24</b> | <b>CENPE Centromere associated protein E</b>                                       | <b>1.16872569</b> | <b>0.30542</b> | <b>3</b>  |
| Q6RT24        | ENEDLKLK                                                                           | 1.35155486        | 2              | 2.32973   |
| Q6RT24        | MELENVNMKLEK                                                                       | 1.13663201        | 2              | 2.55944   |
| Q6RT24        | NLQEYIDAKQSEKMK                                                                    | 1.33445316        | 2              | 2.40604   |
| <b>Q6SKG1</b> | <b>ACSM3 Acyl_coenzyme A synthetase ACSM3_mitochondrial</b>                        | <b>0.9273609</b>  | <b>0.98703</b> | <b>2</b>  |
| Q6SKG1        | FDSTSILQTLK                                                                        | 0.95743957        | 2              | 3.75613   |
| Q6SKG1        | TGTVLIPGTTQLTQK                                                                    | 0.90814456        | 2              | 2.85918   |
| <b>Q6TUG0</b> | <b>DJB11 DnaJ homolog subfamily B member 11</b>                                    | <b>1.19420792</b> | <b>0.8753</b>  | <b>4</b>  |
| Q6TUG0        | FQDLGAAEVLSDSEK                                                                    | 2.13012886        | 2              | 4.64675   |
| Q6TUG0        | FQMTQEVVDCPNVK                                                                     | 1.14949148        | 2              | 5.57842   |
| Q6TUG0        | KGGLPNFDNNDK                                                                       | 1.05714806        | 2              | 3.64917   |
| Q6TUG0        | TLEVEIEPGVR                                                                        | 1.3793789         | 2              | 3.1555    |
| <b>Q6UPE1</b> | <b>ETFD Electron transfer flavoprotein_ubiquinone oxidoreductase_mitochondrial</b> | <b>1.26442119</b> | <b>0.16751</b> | <b>19</b> |
| Q6UPE1        | AAQIGAHTLSGACLDPAAFK                                                               | 1.25158866        | 2              | 5.09539   |
| Q6UPE1        | ALNEGGLQSIK                                                                        | 0.89667497        | 2              | 3.36423   |
| Q6UPE1        | ASCDATYIGLK                                                                        | 1.13131524        | 2              | 4.05393   |
| Q6UPE1        | DCTPIEYKPKDQISFDLLSSVALSGTNHEHDQPAHLTK                                             | 0.71343839        | 4              | 4.62569   |
| Q6UPE1        | FAEEADVIVGAGPAGLSAAIR                                                              | 2.03643271        | 2              | 3.08612   |
| Q6UPE1        | FCPAGVYEFVPLEQGDGFR                                                                | 1.37953815        | 2              | 4.5225    |
| Q6UPE1        | GAPLNTPVTEDR                                                                       | 0.99438074        | 2              | 3.48264   |
| Q6UPE1        | GIATNDVGIQK                                                                        | 1.31323268        | 2              | 3.78917   |
| Q6UPE1        | HHPSIRPTLEGGK                                                                      | 0.46111996        | 2              | 2.4202    |
| Q6UPE1        | HHPSIRPTLEGGK                                                                      | 1.32675486        | 2              | 2.82038   |
| Q6UPE1        | LQINAQNCVHCK                                                                       | 0.95846078        | 2              | 3.72339   |
| Q6UPE1        | NLSIYDGPEQR                                                                        | 0.88010112        | 2              | 3.14372   |
| Q6UPE1        | QLAAEQEKDIR                                                                        | 0.96785019        | 2              | 2.70154   |
| Q6UPE1        | QLTSENLSK                                                                          | 1.053046          | 2              | 2.46372   |
| Q6UPE1        | SGSLAAEAIFK                                                                        | 0.86075042        | 2              | 3.14082   |
| Q6UPE1        | TAGLHVTEYEDNLK                                                                     | 1.32000997        | 2              | 3.97349   |
| Q6UPE1        | TCDIKDPSQINWVVEGGGGPAYNGM                                                          | 7.05672542        | 2              | 4.39      |
| Q6UPE1        | VDHTVGWPLDR                                                                        | 0.95420971        | 2              | 2.47605   |
| Q6UPE1        | VTIFAEGCHGLAK                                                                      | 1.35950631        | 2              | 3.67792   |
| <b>Q6URK4</b> | <b>ROA3 Heterogeneous nuclear ribonucleoprotein A3</b>                             | <b>1.16084009</b> | <b>0.26043</b> | <b>8</b>  |
| Q6URK4        | EDSVKPGAHLTVK                                                                      | 1.30531575        | 2              | 3.48456   |
| Q6URK4        | EDTEEYNLR                                                                          | 1.33513606        | 2              | 2.45323   |
| Q6URK4        | GFAFVTFDDHDTVDK                                                                    | 2.14385255        | 2              | 4.09519   |
| Q6URK4        | IETIEVMEDR                                                                         | 1.41721481        | 2              | 3.4034    |
| Q6URK4        | IFVGGIKEDTEEYNLR                                                                   | 1.85125256        | 2              | 4.2578    |
| Q6URK4        | SSGSPYGGYGGGGGGYGSR                                                                | 1.07499026        | 2              | 5.22703   |
| Q6URK4        | WGTLTDCVVMR                                                                        | 1.30676387        | 2              | 3.2414    |

|               |                                                                                               |                   |                |          |
|---------------|-----------------------------------------------------------------------------------------------|-------------------|----------------|----------|
| Q6URK4        | YHTINGHNCEVK                                                                                  | 1.18063119        | 2              | 3.50797  |
| <b>Q6URW6</b> | <b>MYH14 Myosin_14</b>                                                                        | <b>1.01022981</b> | <b>0.99999</b> | <b>4</b> |
| Q6URW6        | EDQSILCTGESGAGK                                                                               | 1.06993307        | 2              | 4.39641  |
| Q6URW6        | FDQLLAEEK                                                                                     | 0.97456189        | 1              | 2.04082  |
| Q6URW6        | KFDQLLAEEK                                                                                    | 1.28851355        | 2              | 2.83733  |
| Q6URW6        | QLLQANPILEAFGNAK                                                                              | 0.98026139        | 2              | 4.49156  |
| <b>Q6XQN1</b> | <b>PNCB Nicotinate phosphoribosyltransferase</b>                                              | <b>1.07506595</b> | <b>0.73132</b> | <b>5</b> |
| Q6XQN1        | AFAQQSLSR                                                                                     | 1.73305172        | 2              | 2.49352  |
| Q6XQN1        | GSEVNVIGIGTNVVTCPK                                                                            | 1.02278941        | 2              | 4.22268  |
| Q6XQN1        | LDSGDLLQQAQ                                                                                   | 0.9986188         | 2              | 3.06168  |
| Q6XQN1        | LYLQQGQPYEPLPSLEESR                                                                           | 1.15527169        | 2              | 5.03625  |
| Q6XQN1        | QLQNPVAVYQVALSEK                                                                              | 1.84129299        | 2              | 3.83193  |
| <b>Q6ZPJ3</b> | <b>UBE2O Ubiquitin_conjugating enzyme E2 O</b>                                                | <b>1.18554698</b> | <b>0.49597</b> | <b>2</b> |
| Q6ZPJ3        | FRTTDIVIR                                                                                     | 0.8358667         | 2              | 2.60035  |
| Q6ZPJ3        | NCAQGEESMAKKVK                                                                                | 1.18792837        | 2              | 2.8212   |
| <b>Q6ZPV2</b> | <b>INO80 DNA helicase INO80</b>                                                               | <b>0.85076254</b> | <b>0.42961</b> | <b>2</b> |
| Q6ZPV2        | FIDVSPAEMANLMLQGLLAR+Oxidation(12                                                             | 0.60938428        |                |          |
| Q6ZPV2        | KLDEEMREAK+Oxidation(5                                                                        | 0.90684663        |                |          |
| <b>Q6ZWR6</b> | <b>SYNE1 Nesprin_1</b>                                                                        | <b>0.91159956</b> | <b>0.67129</b> | <b>4</b> |
| Q6ZWR6        | FGSITNQLLK                                                                                    | 1.24538008        | 2              | 2.39879  |
| Q6ZWR6        | KDEIEGWSNSSLPK                                                                                | 0.72959659        | 2              | 2.52539  |
| Q6ZWR6        | LETILK                                                                                        | 1.31107386        | 1              | 1.90074  |
| Q6ZWR6        | LKAKTDDLHVAK                                                                                  | 0.93475349        | 2              | 2.31459  |
| <b>Q70FJ1</b> | <b>AKAP9 A_kinase anchor protein 9</b>                                                        | <b>1.16544188</b> | <b>0.18485</b> | <b>2</b> |
| Q70FJ1        | EDGGQPPPALPSEDLLK                                                                             | 0.66801015        | 2              | 2.74204  |
| Q70FJ1        | MDQITQSLCNLNK+Oxidation(0                                                                     | 1.54578762        |                |          |
| <b>Q711G3</b> | <b>IAH1 Isoamyl acetate_hydrolyzing esterase 1 homolog</b>                                    | <b>1.18844592</b> | <b>0.05839</b> | <b>5</b> |
| Q711G3        | DCGTDVLDLWTLMQK                                                                               | 1.02539204        | 2              | 4.40866  |
| Q711G3        | DVEETKPELSLLGDGDH                                                                             | 0.90828505        | 2              | 4.13121  |
| Q711G3        | LNVAVGGEYAK                                                                                   | 1.16762549        | 2              | 2.76331  |
| Q711G3        | QHVPLDEYSANLR                                                                                 | 2.07233441        | 2              | 2.63208  |
| Q711G3        | VILITPPPLCEAAWEK                                                                              | 1.71720138        | 2              | 2.73393  |
| <b>Q71LX4</b> | <b>TLN2 Talin_2</b>                                                                           | <b>1.12936205</b> | <b>0.47394</b> | <b>3</b> |
| Q71LX4        | QEDVIATANLSR                                                                                  | 1.42755248        | 1              | 1.97032  |
| Q71LX4        | QVAASTAQLLVACK                                                                                | 1.02723002        | 2              | 3.18949  |
| Q71LX4        | VMVTNVTSLLK                                                                                   | 0.51794253        | 2              | 2.37738  |
| <b>Q71TY3</b> | <b>RS27 40S ribosomal protein S27</b>                                                         | <b>1.88775036</b> | <b>0.03106</b> | <b>3</b> |
| Q71TY3        | DLLHPSPEEEK                                                                                   | 2.25306755        | 2              | 2.91667  |
| Q71TY3        | LTEGCSFR                                                                                      | 1.56450998        | 2              | 2.38761  |
| Q71TY3        | LVQSPNSYFMDVK                                                                                 | 1.27300136        | 2              | 2.80042  |
| <b>Q75N33</b> | <b>SC16B Protein transport protein Sec16B</b>                                                 | <b>1.18416335</b> | <b>0.53085</b> | <b>2</b> |
| Q75N33        | NLLTGEIPLNVDTPAQIVEK                                                                          | 1.03161074        | 2              | 3.67124  |
| Q75N33        | VLEPDWLVLQLR                                                                                  | 1.67669426        | 2              | 2.80606  |
| <b>Q75Q39</b> | <b>TOM70 Mitochondrial import receptor subunit TOM70</b>                                      | <b>1.05294687</b> | <b>0.639</b>   | <b>6</b> |
| Q75Q39        | NADLSTFYQNR                                                                                   | 1.60016141        | 2              | 2.95816  |
| Q75Q39        | NREPLMPSPQFIK                                                                                 | 0.99359317        | 2              | 2.82192  |
| Q75Q39        | QYMEENYDK                                                                                     | #NUM!             | 1              | 1.94862  |
| Q75Q39        | SDEDKDKEGEALEVK                                                                               | 1.38726862        | 2              | 4.22832  |
| Q75Q39        | WKEVAQDCTK                                                                                    | 0.82173139        | 2              | 2.33949  |
| Q75Q39        | YEQAIQCYTEAISLCPTEK                                                                           | 0.61086426        | 2              | 2.49781  |
| <b>Q76MZ3</b> | <b>2AAA Serine/threonine_protein phosphatase 2A 65 kDa regulatory subunit A alpha isoform</b> | <b>2.00104919</b> | <b>0.69515</b> | <b>8</b> |
| Q76MZ3        | AISHEHSPSDLEAHFVPLVK                                                                          | 2.31335532        | 3              | 5.1377   |
| Q76MZ3        | IGPILDNSTLQSEVKPILEK                                                                          | 1.39299456        | 2              | 4.99636  |
| Q76MZ3        | LSTIALALGVER                                                                                  | 2.38342864        | 2              | 2.36096  |

|               |                                                            |                   |                |           |
|---------------|------------------------------------------------------------|-------------------|----------------|-----------|
| Q76MZ3        | LTQDQDQDVK                                                 | 1.14816501        | 2              | 2.97982   |
| Q76MZ3        | QLSQSLLPAIVELAEDAK                                         | 1.90708507        | 3              | 4.13773   |
| Q76MZ3        | SALASVIMGLSPILGK                                           | 1.19765243        | 2              | 2.89103   |
| Q76MZ3        | SEIIPMFNSLASDEQDSVR                                        | 0.98669772        | 2              | 3.96919   |
| Q76MZ3        | VLELDNVK                                                   | 1.22088443        | 2              | 2.5149    |
| <b>Q78IK4</b> | <b>APOOL Apolipoprotein O_like</b>                         | <b>1.26938016</b> | <b>0.50459</b> | <b>2</b>  |
| Q78IK4        | EEEEPKK                                                    | 3.95458524        | 1              | 1.96138   |
| Q78IK4        | SESTSGTTQFIPDPK                                            | 1.15528684        | 2              | 2.42113   |
| <b>Q78P75</b> | <b>DYL2 Dynein light chain 2_cytoplasmic</b>               | <b>0.87678225</b> | <b>0.16997</b> | <b>3</b>  |
| Q78P75        | NADMSEDMQQDAVDCATQAMEK                                     | 0.88017144        | 3              | 5.66937   |
| Q78P75        | NFGSYVTHETK                                                | 1.36019475        | 2              | 2.92278   |
| Q78P75        | YNPTWHCIVGR                                                | 0.69476158        | 2              | 2.86639   |
| <b>Q791V5</b> | <b>MTCH2 Mitochondrial carrier homolog 2</b>               | <b>1.16614909</b> | <b>0.00082</b> | <b>6</b>  |
| Q791V5        | EEGIVGFFAGLIPR                                             | 1.06327181        | 2              | 3.42882   |
| Q791V5        | GLFTGLTPR                                                  | 1.19998841        | 2              | 2.58243   |
| Q791V5        | LCSGVLGTVVHGK                                              | 1.39745259        | 2              | 2.99564   |
| Q791V5        | SAATLITHPFHVITLR                                           | 1.18605375        | 3              | 3.56618   |
| Q791V5        | VLIQVGYEPLPPTIGR                                           | 1.18523003        | 2              | 4.18477   |
| Q791V5        | YCGLCDSIVTIYR                                              | 1.69809553        | 2              | 2.91509   |
| <b>Q794E4</b> | <b>HNRPF Heterogeneous nuclear ribonucleoprotein F</b>     | <b>1.39488673</b> | <b>0.23067</b> | <b>4</b>  |
| Q794E4        | ATENDIYNFFSPLNPVR                                          | 1.39767593        | 3              | 4.09186   |
| Q794E4        | HSGPNSADSANDGFVR                                           | 1.34516941        | 2              | 3.9465    |
| Q794E4        | ITGEAFVQFASQELAEK                                          | 0.99380894        | 2              | 2.71371   |
| Q794E4        | VHIEIGPDGR                                                 | 1.39826447        | 2              | 2.7901    |
| <b>Q7M0E3</b> | <b>DEST Dextrin</b>                                        | <b>1.79036766</b> | <b>0.05635</b> | <b>2</b>  |
| Q7M0E3        | HEYQANGPEDLNR                                              | 1.67291326        | 2              | 4.76629   |
| Q7M0E3        | HFVGMLEPKDCR                                               | 1.9306646         | 2              | 3.48551   |
| <b>Q7TMA5</b> | <b>APOB Apolipoprotein B_100</b>                           | <b>0.88700679</b> | <b>0.94788</b> | <b>12</b> |
| Q7TMA5        | ALEGKSDTVARLHTEK                                           | 1.44767081        | 2              | 2.41776   |
| Q7TMA5        | GFEPTLEALFGK                                               | 0.89927513        | 2              | 2.91823   |
| Q7TMA5        | IEGNLVFDPSSYLPK                                            | 1.1425015         | 2              | 2.99779   |
| Q7TMA5        | IEIDIPLPLGGK                                               | 0.46194718        | 2              | 2.77812   |
| Q7TMA5        | ITDNDVLIALDSAK                                             | 0.87823188        | 2              | 3.32554   |
| Q7TMA5        | KGTVATEMSTER                                               | 1.02699923        | 2              | 2.84147   |
| Q7TMA5        | LSISEQNAQR                                                 | 0.81375839        | 2              | 2.74273   |
| Q7TMA5        | LSTSPFALNLTMLPK                                            | 1.07941442        | 1              | 1.90173   |
| Q7TMA5        | NFVASHIANILNSEELYVQDLK                                     | 0.80236648        | 3              | 3.84929   |
| Q7TMA5        | NLQHCDGFGPISTSVSPLALIK                                     | 1.21020716        | 3              | 3.79325   |
| Q7TMA5        | TILFDTFVNDVAPVEK                                           | 0.85022183        | 2              | 3.13251   |
| Q7TMA5        | VRSFTIDLLEIKAK                                             | 1.07941442        | 1              | 1.99944   |
| <b>Q7TNG8</b> | <b>LDHD Probable D_lactate dehydrogenase_mitochondrial</b> | <b>1.09617881</b> | <b>0.90676</b> | <b>4</b>  |
| Q7TNG8        | AVVGSPhVSTASAVR                                            | 1.12424801        | 2              | 2.93918   |
| Q7TNG8        | AYSTDVCVPISR                                               | 1.15791341        | 2              | 3.38022   |
| Q7TNG8        | GSQGGLSQDFVEALK                                            | 0.96289311        | 2              | 3.6321    |
| Q7TNG8        | QLLQEEVGPVGVETMR                                           | 0.76934736        | 2              | 3.22962   |
| <b>Q7TP47</b> | <b>HNRPQ Heterogeneous nuclear ribonucleoprotein Q</b>     | <b>1.0896642</b>  | <b>0.73007</b> | <b>2</b>  |
| Q7TP47        | DLFEDELVPLFEK                                              | 1.9036872         | 2              | 3.27966   |
| Q7TP47        | NLANTVTTEEILEK                                             | 1.10082558        | 2              | 3.68663   |
| <b>Q7TP48</b> | <b>APMAP Adipocyte plasma membrane_associated protein</b>  | <b>1.11702358</b> | <b>0.05979</b> | <b>4</b>  |
| Q7TP48        | ANPGFSMLDFLSDKPFIK                                         | 1.5155514         | 2              | 3.00243   |
| Q7TP48        | LENGEIETIAR                                                | 1.11240934        | 2              | 3.52103   |
| Q7TP48        | LLEYDVTVK                                                  | 1.32471727        | 2              | 2.49107   |
| Q7TP48        | LLSSETPIEGK                                                | 1.27510084        | 2              | 2.91197   |



|               |                                                          |                   |                |           |
|---------------|----------------------------------------------------------|-------------------|----------------|-----------|
| <b>Q7TP52</b> | <b>CMBL Carboxymethylenebutenolidase homolog</b>         | <b>1.26422442</b> | <b>0.97929</b> | <b>8</b>  |
| Q7TP52        | AGVSVYGIIR                                               | 1.36758383        | 2              | 2.74656   |
| Q7TP52        | EDCSPADKPYIEEAR                                          | 1.0465322         | 2              | 3.71484   |
| Q7TP52        | KREDCSPADKPYIEEAR                                        | 1.16915641        | 3              | 4.21316   |
| Q7TP52        | LDYGGMGQEVQVEHIK                                         | 1.28212074        | 2              | 4.61124   |
| Q7TP52        | LKEHCIVNYQVK                                             | 1.51276896        | 2              | 4.07233   |
| Q7TP52        | NLIEWLNK                                                 | 1.51275237        | 2              | 2.3561    |
| Q7TP52        | REDCSPADKPYIEEAR                                         | 1.17988375        | 3              | 3.69844   |
| Q7TP52        | TFSGQTHGFVHR                                             | 1.27078393        | 2              | 3.66039   |
| <b>Q7TPB1</b> | <b>TCPD T_complex protein 1 subunit delta</b>            | <b>1.24503517</b> | <b>0.98081</b> | <b>6</b>  |
| Q7TPB1        | ALIAGGGAPEIELALR                                         | 1.43470847        | 2              | 3.88185   |
| Q7TPB1        | ETLLNSATTSLSNK                                           | 1.50270013        | 2              | 3.31296   |
| Q7TPB1        | GDVTITNDGATILK                                           | 1.26838331        | 2              | 3.51737   |
| Q7TPB1        | SIHDALCVIR                                               | 1.50020374        | 2              | 2.69392   |
| Q7TPB1        | TGCNVLLIQK                                               | 0.88543347        | 2              | 2.60797   |
| Q7TPB1        | VIDPATATSVDLR                                            | 1.20372985        | 2              | 3.84164   |
| <b>Q7TPJ0</b> | <b>SSRA Translocon_associated protein subunit alpha</b>  | <b>1.28313824</b> | <b>0.01267</b> | <b>3</b>  |
| Q7TPJ0        | FLVGFTNK                                                 | 1.70610256        | 2              | 2.48813   |
| Q7TPJ0        | GEDFPANNIVK                                              | 1.23390056        | 2              | 3.20333   |
| Q7TPJ0        | GTEDFIVESLDASFR                                          | 1.63507322        | 2              | 4.3717    |
| <b>Q7TQ20</b> | <b>DNJC2 Dnaj homolog subfamily C member 2</b>           | <b>0.92507355</b> | <b>0.74081</b> | <b>2</b>  |
| Q7TQ20        | MMEEVEKLCDR+Oxidation(0)                                 | 0.96941353        |                |           |
| Q7TQ20        | QIEEVNELMRK+Oxidation(8)                                 | 0.90384538        |                |           |
| <b>Q7TQ94</b> | <b>NIT1 Nitrilase homolog 1</b>                          | <b>1.81709558</b> | <b>0.14905</b> | <b>2</b>  |
| Q7TQ94        | GQDWEQTQK                                                | 1.3862742         | 2              | 2.46455   |
| Q7TQ94        | NPAETLLLSEPLDGLLQYSQLAR                                  | 1.82288366        | 3              | 4.21868   |
| <b>Q7TQM4</b> | <b>SOAT2 Sterol O_acyltransferase 2</b>                  | <b>1.13886455</b> | <b>0.91286</b> | <b>3</b>  |
| Q7TQM4        | AIWEAVQAYPK                                              | 0.88006653        | 2              | 2.56319   |
| Q7TQM4        | QDRPLPSTASDSTR                                           | 0.9288673         | 2              | 2.84504   |
| Q7TQM4        | TQCLEQAQR                                                | 1.14948467        | 2              | 2.88386   |
| <b>Q7TSI0</b> | <b>ZNF12 Zinc finger protein 12</b>                      | <b>0.74047311</b> | <b>0.94265</b> | <b>2</b>  |
| Q7TSI0        | HMSRLMEEDQGGEEHQSSSAVFSYR+Oxidation(1)                   | 0.77478362        |                |           |
| Q7TSI0        | HMSRLMEEDQGGEEHQSSSAVFSYR+Oxidation(5)                   | 0.69319244        |                |           |
| <b>Q80V31</b> | <b>CE104 Centrosomal protein of 104 kDa</b>              | <b>1.08772237</b> | <b>0.83043</b> | <b>2</b>  |
| Q80V31        | IDGSVLPTEAEVRAQK                                         | 1.02400562        | 2              | 2.55886   |
| Q80V31        | KLMEMPVGTQK+Oxidation(2)Oxidation(4)                     | 1.0892046         |                |           |
| <b>Q80VM7</b> | <b>ANR24 Ankyrin repeat domain_containing protein 24</b> | <b>1.44837201</b> | <b>0.35264</b> | <b>2</b>  |
| Q80VM7        | ADEVVLAQAGLTGTVIR                                        | 0.98925174        | 2              | 2.68819   |
| Q80VM7        | QNQELLEK                                                 | 9.84842846        | 1              | 2.01925   |
| <b>Q80W21</b> | <b>GSTM7 Glutathione S_transferase Mu 7</b>              | <b>1.05775254</b> | <b>0.07902</b> | <b>13</b> |
| Q80W21        | CLDAFPNLK                                                | 0.96069237        | 2              | 3.2003    |
| Q80W21        | CLDAFPNLKDFIAR                                           | 1.15731085        | 2              | 3.11884   |
| Q80W21        | FKLGLDFPNLPYLIDGSHK                                      | 1.02579069        | 3              | 5.07351   |
| Q80W21        | HNLCGETEEER                                              | 0.78993321        | 2              | 3.89162   |
| Q80W21        | IRVDILENQLMDNR                                           | 1.19125777        | 2              | 3.04944   |
| Q80W21        | ITQSNAILR                                                | 1.27542496        | 2              | 3.07713   |
| Q80W21        | KHNLCGETEEER                                             | 1.46262071        | 2              | 3.9986    |
| Q80W21        | KISDYMK                                                  | 0.87840253        | 1              | 2.00136   |
| Q80W21        | LFLEYDSSYEK                                              | 0.26614574        | 2              | 4.04387   |
| Q80W21        | LGLDFPNLPYLIDGSHK                                        | 1.38247504        | 3              | 4.67577   |
| Q80W21        | LKPGYLEQLPMMR                                            | 1.18945854        | 2              | 3.18071   |
| Q80W21        | LYSEFLGK                                                 | 1.12637064        | 2              | 2.35592   |
| Q80W21        | VDILENQLMDNR                                             | 0.68695834        | 2              | 3.71466   |
| <b>Q80W93</b> | <b>HYDIN Hydrocephalus_inducing protein</b>              | <b>1.88579527</b> | <b>0.02255</b> | <b>3</b>  |
| Q80W93        | ELERLAKEMQEK+Oxidation(8)                                | 2.97700898        |                |           |

|               |                                                                           |                   |                |           |
|---------------|---------------------------------------------------------------------------|-------------------|----------------|-----------|
| Q80W93        | LAKEMQEK                                                                  | 2.29585957        | 1              | 1.93259   |
| Q80W93        | LQTLDEDEYDALTAEEK                                                         | 1.88387487        | 2              | 2.30161   |
| <b>Q80WS3</b> | <b>FBLL1 rRNA/tRNA 2__O_methyltransferase fibrillar_in_like protein 1</b> | <b>0.96062768</b> | <b>0.57147</b> | <b>3</b>  |
| Q80WS3        | DHAVVGVYRPPPK                                                             | 0.91260286        | 3              | 3.74093   |
| Q80WS3        | MKPAGGRGGWGWGGGK+Oxidation(0                                              | 1.06161233        |                |           |
| Q80WS3        | TNIIPVLEDAR                                                               | 1.43537433        | 2              | 2.40161   |
| <b>Q80X50</b> | <b>UBP2L Ubiquitin_associated protein 2_like</b>                          | <b>1.21006495</b> | <b>0.1746</b>  | <b>2</b>  |
| Q80X50        | IDLAVLLGK                                                                 | 1.17705931        | 2              | 3.14239   |
| Q80X50        | QRPQATAEQIR                                                               | 1.5221617         | 2              | 2.51887   |
| <b>Q80X90</b> | <b>FLNB Filamin_B</b>                                                     | <b>1.31970826</b> | <b>0.28808</b> | <b>11</b> |
| Q80X90        | ADIEMPFDPK                                                                | 1.51377315        | 2              | 2.37343   |
| Q80X90        | FNDEHIPDSPYLVPVIAPSDAR                                                    | 1.68768739        | 3              | 3.64952   |
| Q80X90        | GAGIGGLGITVEGPSESK                                                        | 1.40317993        | 2              | 3.8366    |
| Q80X90        | GEAGIPAEFSIWTR                                                            | 1.29569792        | 2              | 2.31444   |
| Q80X90        | IGNLQTDLSGLR                                                              | 1.40633119        | 2              | 2.45996   |
| Q80X90        | ILAQDGEQPIDQMK                                                            | 1.01772804        | 2              | 3.3675    |
| Q80X90        | TFEMSDFIVDTR                                                              | 1.79075027        | 2              | 2.3016    |
| Q80X90        | VDIQTEDLEDGTCK                                                            | 1.49343242        | 2              | 3.796     |
| Q80X90        | VGEPGILCVCSEAGPGLGLEAVSDSGAK                                              | 1.18629115        | 3              | 4.11054   |
| Q80X90        | VTASGPGLSAYGVASPLPVEFAIDAR                                                | 1.3484478         | 3              | 3.47551   |
| Q80X90        | VVASGPGLEHGK                                                              | 1.18483671        | 2              | 2.37975   |
| <b>Q80XC3</b> | <b>US6NL USP6_N_terminal_like protein</b>                                 | <b>1.14667152</b> | <b>0.84007</b> | <b>2</b>  |
| Q80XC3        | HYNHAAANQNSNAISNVRK                                                       | 2.41250678        | 2              | 2.37964   |
| Q80XC3        | SVDEGSKNLK                                                                | 1.13917001        | 2              | 2.41046   |
| <b>Q80XI3</b> | <b>IF4G3 Eukaryotic translation initiation factor 4 gamma 3</b>           | <b>1.63209961</b> | <b>0.00175</b> | <b>3</b>  |
| Q80XI3        | FLKITKPTIDEK                                                              | 1.59506789        | 2              | 2.60857   |
| Q80XI3        | FMLQDVIDLR                                                                | 1.63135672        | 2              | 2.79625   |
| Q80XI3        | NHDEESLECLR                                                               | 1.65338014        | 2              | 3.36872   |
| <b>Q80Y84</b> | <b>KDM5B Lysine_specific demethylase 5B</b>                               | <b>1.04459491</b> | <b>0.52997</b> | <b>2</b>  |
| Q80Y84        | CDIGLLGLK                                                                 | 1.05194218        | 1              | 2.0753    |
| Q80Y84        | SSSEKNDCLRGK                                                              | 0.63737519        | 1              | 1.93582   |
| <b>Q80YR7</b> | <b>CLSPN Claspin</b>                                                      | <b>1.2145349</b>  | <b>0.42951</b> | <b>2</b>  |
| Q80YR7        | GASFLPTAGFRSPGLFR                                                         | 1.05721506        | 2              | 2.41257   |
| Q80YR7        | LEGASHAKPGEKQLMLK+Oxidation(14                                            | 1.27981408        |                |           |
| <b>Q80Z25</b> | <b>OFD1 Oral_facial_digital syndrome 1 protein homolog</b>                | <b>1.1909995</b>  | <b>0.97337</b> | <b>2</b>  |
| Q80Z25        | ELEQEAERLEK                                                               | 1.19093537        | 2              | 2.93997   |
| Q80Z25        | MIEESLK+Oxidation(0                                                       | 1.23384897        |                |           |
| <b>Q80Z29</b> | <b>NAMPT Nicotinamide phosphoribosyltransferase</b>                       | <b>1.61120138</b> | <b>0.00869</b> | <b>4</b>  |
| Q80Z29        | NAQLNMEQDVAPH                                                             | 1.04514252        | 2              | 2.53487   |
| Q80Z29        | STEAPLIIRPDSGNPLDTVLK                                                     | 1.54698352        | 2              | 3.78835   |
| Q80Z29        | VIQGDGVDINTLQEIVEGMK                                                      | 1.62027498        | 2              | 5.37929   |
| Q80Z29        | YLLETSGNLDGLEYK                                                           | 1.59016294        | 2              | 4.55266   |
| <b>Q80Z36</b> | <b>ZHX3 Zinc fingers and homeoboxes protein 3</b>                         | <b>1.15505354</b> | <b>0.1847</b>  | <b>2</b>  |
| Q80Z36        | FPYPTKAELCYLTVVTK                                                         | 1.82303596        | 2              | 2.62699   |
| Q80Z36        | YPPEQLK                                                                   | 0.6017598         | 1              | 2.09197   |
| <b>Q811D2</b> | <b>ANR26 Ankyrin repeat domain_containing protein 26</b>                  | <b>1.1741783</b>  | <b>0.6047</b>  | <b>5</b>  |
| Q811D2        | AQEDFDK                                                                   | 0.74110085        | 1              | 1.91143   |
| Q811D2        | LSGSEDSQKVEEK                                                             | 1.93192858        | 2              | 2.3696    |
| Q811D2        | NKDDLTPMLLAVK                                                             | 1.37948375        | 2              | 2.4119    |
| Q811D2        | SADQLSEK                                                                  | 1.15989042        | 2              | 2.3079    |
| Q811D2        | SNLEEEARDLK                                                               | 1.17539529        | 1              | 1.99484   |
| <b>Q811X6</b> | <b>CRYL1 Lambda_crystallin homolog</b>                                    | <b>1.04571517</b> | <b>0.44524</b> | <b>4</b>  |

|               |                                                                   |                   |                |           |
|---------------|-------------------------------------------------------------------|-------------------|----------------|-----------|
| Q811X6        | EMKSLEQSGSLK+Oxidation(1                                          | 1.05758052        |                |           |
| Q811X6        | IVDDQVILSSSSCLLPK                                                 | 0.72703338        | 2              | 3.9303    |
| Q811X6        | LYDIEQQITNALESIR                                                  | 1.26375288        | 2              | 4.27153   |
| Q811X6        | TFGPVPEFSGDTEK                                                    | 1.54955062        | 2              | 2.8986    |
| <b>Q8BFZ3</b> | <b>ACTBL Beta_actin_like protein 2</b>                            | <b>0.99459076</b> | <b>1.6E-07</b> | <b>10</b> |
| Q8BFZ3        | CDVDIR                                                            | 2.48700788        | 2              | 2.32686   |
| Q8BFZ3        | DLTDYLMK                                                          | 1.23884677        | 1              | 2.21593   |
| Q8BFZ3        | HQGVMVGMGQK                                                       | 1.65040444        | 3              | 3.63664   |
| Q8BFZ3        | HQGVMVGMGQK+Oxidation(4                                           | 1.18964955        |                |           |
| Q8BFZ3        | HQGVMVGMGQK+Oxidation(4)Oxidation(7                               | 1.54596327        |                |           |
| Q8BFZ3        | HQGVMVGMGQK+Oxidation(7                                           | 1.04406661        |                |           |
| Q8BFZ3        | SYELPDGQVITIGNER                                                  | 0.98224345        | 3              | 5.23031   |
| Q8BFZ3        | TTGIVMDSGDVHTTVPIYEGYALPHAILR                                     | 1.4087146         | 3              | 6.64004   |
| Q8BFZ3        | TTGIVMDSGDVHTTVPIYEGYALPHAILR+Oxidation(5                         | 1.58293486        |                |           |
| Q8BFZ3        | VAPDEHPILLTEAPLNPK                                                | 1.20818023        | 3              | 4.32967   |
| <b>Q8BG32</b> | <b>PSD11 26S proteasome non_ATPase regulatory subunit 11</b>      | <b>1.40965754</b> | <b>0.30373</b> | <b>6</b>  |
| Q8BG32        | LYDNLLEQNLIR                                                      | 1.406937          | 2              | 3.3939    |
| Q8BG32        | TGQAAELGGLK                                                       | 1.18647878        | 2              | 3.1513    |
| Q8BG32        | TTANAIYCPK                                                        | 7.79235181        | 2              | 2.64396   |
| Q8BG32        | TYEAALETIQNMSK                                                    | 1.37040685        | 2              | 2.37357   |
| Q8BG32        | VQIEHISLIK                                                        | 1.62983784        | 2              | 2.70242   |
| Q8BG32        | YQEALHLGSLLR                                                      | 1.29427715        | 2              | 2.50007   |
| <b>Q8BGD9</b> | <b>IF4B Eukaryotic translation initiation factor 4B</b>           | <b>1.207401</b>   | <b>0.48905</b> | <b>2</b>  |
| Q8BGD9        | SQSSDTEQSPSTGGGK                                                  | 1.17974679        | 2              | 5.37759   |
| Q8BGD9        | VDVADQAQDKDRDDR                                                   | 1.92468471        | 2              | 2.37885   |
| <b>Q8BGT5</b> | <b>ALAT2 Alanine aminotransferase 2</b>                           | <b>1.21670425</b> | <b>0.20174</b> | <b>2</b>  |
| Q8BGT5        | LLEETGICVVPKSGFQQR                                                | 0.47336061        | 2              | 3.8384    |
| Q8BGT5        | VLCIINPGNPTGQVQSR                                                 | 1.31750221        | 2              | 5.07928   |
| <b>Q8BGY2</b> | <b>IF5A2 Eukaryotic translation initiation factor 5A_2</b>        | <b>1.22173712</b> | <b>0.41827</b> | <b>3</b>  |
| Q8BGY2        | KYEDICPSTHNMDVPNIK                                                | 1.22231863        | 3              | 4.79291   |
| Q8BGY2        | VHLVGIDIFTGK                                                      | 1.46865481        | 3              | 3.74122   |
| Q8BGY2        | YEDICPSTHNMDVPNIK                                                 | 1.21895435        | 2              | 3.88257   |
| <b>Q8BH00</b> | <b>AL8A1 Aldehyde dehydrogenase family 8 member A1</b>            | <b>1.15852182</b> | <b>9.9E-20</b> | <b>8</b>  |
| Q8BH00        | ELLMLENFIGGK                                                      | 1.35749845        | 2              | 3.59371   |
| Q8BH00        | ELNLPFGGMK                                                        | 1.43016212        | 1              | 2.49095   |
| Q8BH00        | FLPCNSYIDSYDPSTGEVYCK                                             | 1.07416944        | 3              | 5.3076    |
| Q8BH00        | ILCGEGVDQLSLPLR                                                   | 1.53045763        | 3              | 4.95457   |
| Q8BH00        | ITQLSAPHCK                                                        | 1.55396289        | 2              | 3.12905   |
| Q8BH00        | KLSLELGGK                                                         | 1.18646244        | 1              | 2.25505   |
| Q8BH00        | NPAIIFEDANLEECIPATVR                                              | 1.57974945        | 2              | 5.0365    |
| Q8BH00        | SSFANQGEICLCTSR                                                   | 1.5660372         | 2              | 3.90093   |
| <b>Q8BH18</b> | <b>TM117 Transmembrane protein 117</b>                            | <b>1.59460769</b> | <b>0.323</b>   | <b>2</b>  |
| Q8BH18        | FLKNEQGMENQDK                                                     | 1.54578762        | 2              | 2.34406   |
| Q8BH18        | FLKNEQGMENQDK+Oxidation(7                                         | 1.73472913        |                |           |
| <b>Q8BH59</b> | <b>CMC1 Calcium_binding mitochondrial carrier protein Aralar1</b> | <b>1.51883392</b> | <b>0.04148</b> | <b>3</b>  |
| Q8BH59        | GLIPQLIGVAPEK                                                     | 1.51856263        | 1              | 3.07248   |
| Q8BH59        | IAPLAEGALPYNLAELQR                                                | 1.66439539        | 2              | 2.85188   |
| Q8BH59        | YLGLYNDPNSNPK                                                     | 1.20796533        | 2              | 3.11152   |
| <b>Q8BHN3</b> | <b>GANAB Neutral alpha_glucosidase AB</b>                         | <b>1.07590942</b> | <b>0.89659</b> | <b>11</b> |
| Q8BHN3        | AEKDEPGAWEEFTK                                                    | 1.02688028        | 2              | 3.06362   |
| Q8BHN3        | DDNSVELTVAEGPYK                                                   | 1.07589216        | 2              | 3.41011   |
| Q8BHN3        | LVAIVDPHIK                                                        | 0.96823405        | 2              | 2.34349   |

|               |                                                                      |                   |                |           |
|---------------|----------------------------------------------------------------------|-------------------|----------------|-----------|
| Q8BHN3        | MLDYLQSGSETPQTDIR                                                    | 0.88002819        | 2              | 5.34461   |
| Q8BHN3        | REPWLLASQYQDAIR                                                      | 1.727362          | 3              | 4.33095   |
| Q8BHN3        | SGGIERPFVLSR                                                         | 1.08375108        | 2              | 2.4538    |
| Q8BHN3        | SIRPGLSPYR                                                           | 0.9347132         | 2              | 2.3565    |
| Q8BHN3        | SLLLSVNR                                                             | 1.1521033         | 2              | 2.48766   |
| Q8BHN3        | VDSGYRVHEELRNHGLYVK                                                  | 0.89472306        | 2              | 2.33052   |
| Q8BHN3        | VTEGGEPYR                                                            | 1.46807007        | 2              | 2.40752   |
| Q8BHN3        | VVIMGAGKPAAVVLQTK                                                    | 2.47407925        | 3              | 3.8582    |
| <b>Q8BI84</b> | <b>MIA3 Melanoma inhibitory activity protein 3</b>                   | <b>1.62918872</b> | <b>0.27752</b> | <b>2</b>  |
| Q8BI84        | DDNISALTNCITQLNR                                                     | 2.12183677        | 2              | 2.32124   |
| Q8BI84        | TQTAVSIVEEDLK                                                        | 1.6070416         | 2              | 2.43565   |
| <b>Q8BIJ6</b> | <b>SYIM Isoleucyl_tRNA synthetase_mitochondrial</b>                  | <b>1.44823289</b> | <b>0.10568</b> | <b>2</b>  |
| Q8BIJ6        | DTVLLPQTSFPMK                                                        | 1.49569666        | 1              | 2.19315   |
| Q8BIJ6        | SCQTALAEILDVLR                                                       | 1.27062712        | 2              | 3.51358   |
| <b>Q8BJ64</b> | <b>CHDH Choline dehydrogenase_mitochondrial</b>                      | <b>1.05274195</b> | <b>0.9999</b>  | <b>10</b> |
| Q8BJ64        | ADSAYHPSCTCK                                                         | 0.34558395        | 2              | 3.18561   |
| Q8BJ64        | AEVQTLVSR                                                            | 1.22653576        | 2              | 2.88709   |
| Q8BJ64        | ELQPGSHVQSDK                                                         | 1.04638552        | 2              | 3.07472   |
| Q8BJ64        | ELQPGSHVQSDKEIDAFVR                                                  | 1.05165844        | 2              | 4.24555   |
| Q8BJ64        | GGDGPLHVSRR                                                          | 1.00319325        | 2              | 2.34865   |
| Q8BJ64        | HELGANMYR                                                            | 0.93549942        | 2              | 2.34865   |
| Q8BJ64        | SRPGVPHPDQFHFPLSQVIDHGR                                              | 0.96048289        | 5              | 5.01656   |
| Q8BJ64        | TNHPLHQAFLOAAR                                                       | 1.25756287        | 3              | 4.00004   |
| Q8BJ64        | VIGVENLR                                                             | 1.03720982        | 2              | 2.74613   |
| Q8BJ64        | VLLLEAGPK                                                            | 1.49329041        | 2              | 2.62868   |
| <b>Q8BJY1</b> | <b>PSMD5 26S proteasome non_ATPase regulatory subunit 5</b>          | <b>1.21552934</b> | <b>0.1407</b>  | <b>2</b>  |
| Q8BJY1        | GLTHPDDSVK                                                           | 1.08655183        | 2              | 2.45672   |
| Q8BJY1        | TVAEIFGNSNYLR                                                        | 2.97499777        | 2              | 2.48391   |
| <b>Q8BKCS</b> | <b>IPOS Importin_5</b>                                               | <b>1.21627295</b> | <b>0.06415</b> | <b>2</b>  |
| Q8BKCS        | IFSIIAEGEMHEAIK                                                      | 1.41246657        | 2              | 2.3325    |
| Q8BKCS        | VAAAESMPILLECARVR+Oxidation(6                                        | 0.38046265        |                |           |
| <b>Q8BKZ9</b> | <b>ODPX Pyruvate dehydrogenase protein X component_mitochondrial</b> | <b>1.01200084</b> | <b>0.77006</b> | <b>2</b>  |
| Q8BKZ9        | HSLDASQGTATGPR                                                       | 1.00640665        | 2              | 3.94335   |
| Q8BKZ9        | VSVNDFIIR                                                            | 2.6563922         | 2              | 3.05482   |
| <b>Q8BL66</b> | <b>EEA1 Early endosome antigen 1</b>                                 | <b>0.87580802</b> | <b>0.54406</b> | <b>2</b>  |
| Q8BL66        | MQAAVTELTAVKAQK                                                      | 0.52490332        | 2              | 2.44298   |
| Q8BL66        | QESIKEITNLKDAK                                                       | 1.62717475        | 2              | 2.30593   |
| <b>Q8BL97</b> | <b>SRSF7 Serine/arginine_rich splicing factor 7</b>                  | <b>1.26149876</b> | <b>0.69332</b> | <b>2</b>  |
| Q8BL97        | NPPGFVFEFEDPR                                                        | 1.00946697        | 2              | 2.81618   |
| Q8BL97        | VYVGNLGTGAGK                                                         | 1.28908569        | 2              | 2.56947   |
| <b>Q8BMA5</b> | <b>NPAT Protein NPAT</b>                                             | <b>1.00771641</b> | <b>0.99999</b> | <b>2</b>  |
| Q8BMA5        | AKETSNDVPTIMSSLWKK+Oxidation(11                                      | 1.07072707        |                |           |
| Q8BMA5        | KKLPSSFPAGMDVDK+Oxidation(10                                         | 1.0065012         |                |           |
| <b>Q8BP47</b> | <b>SYNC AsparaginyI_tRNA synthetase_cytoplasmic</b>                  | <b>1.31098296</b> | <b>0.16233</b> | <b>5</b>  |
| Q8BP47        | KEDGTFYFEGDDIPEAPER                                                  | 0.87018976        | 2              | 4.40305   |
| Q8BP47        | LEDLVCDVVDR                                                          | 1.22648304        | 2              | 2.81699   |
| Q8BP47        | LMTDTINEPILLCR                                                       | 2.99398178        | 2              | 3.34017   |
| Q8BP47        | LTESVDVLMPNVGEIVGGSMR                                                | 1.31098267        | 2              | 2.9164    |
| Q8BP47        | YGTCPHGGYGLGLER                                                      | 1.53853141        | 2              | 3.16098   |
| <b>Q8BTM8</b> | <b>FLNA Filamin_A</b>                                                | <b>1.06317043</b> | <b>0.73534</b> | <b>6</b>  |
| Q8BTM8        | AFGPGQLQGGNAGSPAR                                                    | 1.37302815        | 2              | 3.56198   |
| Q8BTM8        | ALGALVDSCAPGLCPDWDSDASKPVNNAR                                        | 1.03316793        | 3              | 3.62483   |
| Q8BTM8        | ANLPQSFQVDTSK                                                        | 1.13153214        | 2              | 2.44741   |
| Q8BTM8        | GAGTGGLGLAVEGPSEAK                                                   | 0.9353496         | 2              | 3.72377   |
| Q8BTM8        | IVSPSGAAVPCK                                                         | 1.45043006        | 2              | 2.41114   |

|               |                                                              |                   |                |           |
|---------------|--------------------------------------------------------------|-------------------|----------------|-----------|
| Q8BTM8        | VEPGLGADNSVVR                                                | 1.66436057        | 2              | 2.86012   |
| <b>Q8BU33</b> | <b>ILVBL Acetolactate synthase_like protein</b>              | <b>0.98755018</b> | <b>0.8424</b>  | <b>3</b>  |
| Q8BU33        | AAVETLGVPCFLGGMSR                                            | 0.90435074        | 2              | 3.13355   |
| Q8BU33        | LPNSLMGR+Oxidation(5                                         | 1.03450627        |                |           |
| Q8BU33        | NAQVAQSPVLLGGAASTLLQK                                        | 0.77995581        | 3              | 3.95851   |
| <b>Q8BWM0</b> | <b>PGES2 Prostaglandin E synthase 2</b>                      | <b>1.11914023</b> | <b>0.65897</b> | <b>2</b>  |
| Q8BWM0        | AFLDFHSLPYQVVEVNPVR                                          | 1.06146753        | 3              | 3.52985   |
| Q8BWM0        | KVPILVAQEGDSLQQLNDSSVIISALK                                  | 1.15984006        | 3              | 4.62097   |
| <b>Q8BWQ1</b> | <b>UD2A3 UDP_glucuronosyltransferase 2A3</b>                 | <b>0.96456916</b> | <b>1</b>       | <b>2</b>  |
| Q8BWQ1        | ADIWLIR                                                      | 1.01053053        | 2              | 2.4481    |
| Q8BWQ1        | IHHQPVKPLDR                                                  | 0.94433509        | 3              | 3.51418   |
| <b>Q8BWR8</b> | <b>RHPN2 Rhophilin_2</b>                                     | <b>1.13552311</b> | <b>0.78393</b> | <b>2</b>  |
| Q8BWR8        | ETKEVDFSIVFK                                                 | 1.12484131        | 2              | 2.53472   |
| Q8BWR8        | TGAENLLKVATNQK                                               | 1.1409016         | 2              | 2.48585   |
| <b>Q8BX70</b> | <b>VP13C Vacuolar protein sorting_associated protein 13C</b> | <b>1.08675229</b> | <b>0.94468</b> | <b>2</b>  |
| Q8BX70        | ENALSELDVPFKVK                                               | 1.08665951        | 2              | 2.62614   |
| Q8BX70        | TVLQADSPQHDEILKPVNMLLCIQR+Oxidation(19                       | 1.18290283        |                |           |
| <b>Q8BY87</b> | <b>UBP47 Ubiquitin carboxyl_terminal hydrolase 47</b>        | <b>1.22634068</b> | <b>0.83564</b> | <b>2</b>  |
| Q8BY87        | AGGDSGNVDDDCER                                               | 1.53156066        | 2              | 3.49961   |
| Q8BY87        | QNIQDEMCK                                                    | 1.08695208        | 2              | 2.43066   |
| <b>Q8BZ10</b> | <b>AF1L1 Actin filament_associated protein 1_like 1</b>      | <b>0.933658</b>   | <b>0.87932</b> | <b>2</b>  |
| Q8BZ10        | IYDEVPEYK                                                    | 0.95908237        | 1              | 2.0261    |
| Q8BZ10        | LSQEKQNSDSDSLGMNDSGSTLGR                                     | 0.81486712        | 3              | 3.59391   |
| <b>Q8BZQ7</b> | <b>ANC2 Anaphase_promoting complex subunit 2</b>             | <b>0.97379655</b> | <b>0.40449</b> | <b>2</b>  |
| Q8BZQ7        | EIRNVELLK                                                    | 1.05980483        | 2              | 2.41527   |
| Q8BZQ7        | QALEQFNQLSQVLHR                                              | 0.69000374        | 2              | 2.75226   |
| <b>Q8C6K9</b> | <b>chain</b>                                                 | <b>0.97092037</b> | <b>0.79903</b> | <b>3</b>  |
| Q8C6K9        | NEHSFQVVGIVQR                                                | 0.97091318        |                |           |
| Q8C6K9        | TMNPAFMGLDRATR+Oxidation(1)Oxidation(6                       | 0.94983422        |                |           |
| Q8C6K9        | YLIVVTDGHPLEGYKEPCGGLEDVNEAK                                 | 1.41164368        |                |           |
| <b>Q8C7X2</b> | <b>K0090 Uncharacterized protein KIAA0090</b>                | <b>1.06278808</b> | <b>0.01512</b> | <b>2</b>  |
| Q8C7X2        | FNVEDGEIVQQR                                                 | 0.93777922        | 2              | 3.98422   |
| Q8C7X2        | VMGDRSVLYK+Oxidation(1                                       | 2.75865654        |                |           |
| <b>Q8CC88</b> | <b>K0564 Uncharacterized protein KIAA0564 homolog</b>        | <b>1.37522908</b> | <b>0.67364</b> | <b>3</b>  |
| Q8CC88        | FLPSLAQSALEK                                                 | 1.07431662        | 2              | 2.44075   |
| Q8CC88        | HQATGELDDAK                                                  | 1.43335014        | 2              | 3.4104    |
| Q8CC88        | VSSDQLSSENLTSAVGQK                                           | 1.47043522        | 2              | 3.20769   |
| <b>Q8CDI6</b> | <b>CD158 Coiled_coil domain_containing protein 158</b>       | <b>1.05230148</b> | <b>0.92936</b> | <b>3</b>  |
| Q8CDI6        | EKELSLEKEQNK                                                 | 1.20394939        | 2              | 2.35146   |
| Q8CDI6        | EKVANMEVALDK+Oxidation(5                                     | 1.05964617        |                |           |
| Q8CDI6        | ELDDRNMEVQRLEALLK                                            | 0.87938724        | 2              | 2.32278   |
| <b>Q8CFN2</b> | <b>CDC42 Cell division control protein 42 homolog</b>        | <b>1.20749672</b> | <b>0.91762</b> | <b>3</b>  |
| Q8CFN2        | NVFDEAIIAALEPPPEPK                                           | 1.3688333         | 3              | 4.68694   |
| Q8CFN2        | WVPEITHHCPK                                                  | 2.17279102        | 2              | 2.50773   |
| Q8CFN2        | YVECSALTQK                                                   | 1.20692969        | 1              | 2.70188   |
| <b>Q8CG45</b> | <b>ARK72 Aflatoxin B1 aldehyde reductase member 2</b>        | <b>0.9284189</b>  | <b>0.04668</b> | <b>10</b> |
| Q8CG45        | AVSGAPLRPGTVLGTMEMGR                                         | 0.92135516        | 3              | 3.74259   |
| Q8CG45        | EHHFEAIALVEK                                                 | 1.19917145        | 2              | 2.98795   |
| Q8CG45        | FFGNSWSETYR                                                  | 1.14424956        | 2              | 3.00953   |
| Q8CG45        | FYAYNPLAGLLTGK                                               | 1.29920542        | 2              | 4.36607   |
| Q8CG45        | MDASASAATVR                                                  | 1.1207195         | 2              | 3.83804   |

|               |                                                                           |                   |                |           |
|---------------|---------------------------------------------------------------------------|-------------------|----------------|-----------|
| Q8CG45        | QVETELLPLCR                                                               | 1.32184931        | 2              | 3.03559   |
| Q8CG45        | RMDASASAATVR                                                              | 1.21919761        | 2              | 3.31487   |
| Q8CG45        | TTYGTSAPSMTSAAALR                                                         | 1.23332345        | 2              | 4.45599   |
| Q8CG45        | VDLFYLHAPDHGTPIVETLQACQQLHQEGK                                            | 1.25349746        | 3              | 5.4736    |
| Q8CG45        | WMYHHSQLQGTR                                                              | 1.06267795        | 3              | 3.74459   |
| <b>Q8CG48</b> | <b>SMC2 Structural maintenance of chromosomes protein 2</b>               | <b>1.02428454</b> | <b>0.98791</b> | <b>3</b>  |
| Q8CG48        | EKLLLEK                                                                   | 1.13562997        | 1              | 1.92741   |
| Q8CG48        | IKALNCEIEELER                                                             | 1.06034098        | 2              | 2.43912   |
| Q8CG48        | KIKALNCEIEELER                                                            | 1.02393046        | 2              | 2.64722   |
| <b>Q8CGC7</b> | <b>SYEP Bifunctional aminoacyl_tRNA synthetase</b>                        | <b>1.40650004</b> | <b>1.7E-07</b> | <b>11</b> |
| Q8CGC7        | AIQGATSHHLGQNFQSK                                                         | 1.36914999        | 2              | 4.59959   |
| Q8CGC7        | DQDVEPGAPSMGAK                                                            | 1.36546068        | 2              | 3.35812   |
| Q8CGC7        | DQVDSAVQELLQLK                                                            | 1.65462625        | 2              | 4.15179   |
| Q8CGC7        | FVELPGAEMGK                                                               | 2.1132689         | 2              | 2.5284    |
| Q8CGC7        | GDVSVVEEGKENLLR                                                           | 1.36134677        | 2              | 4.00271   |
| Q8CGC7        | GSQFGQSCCLR                                                               | 1.55076494        | 2              | 2.86139   |
| Q8CGC7        | KEENLAEWYSQVITK                                                           | 0.92504778        | 2              | 4.46688   |
| Q8CGC7        | SLCIPFNPLCELQPGAMCVCGK                                                    | 1.85203736        | 2              | 4.36456   |
| Q8CGC7        | SQGSGLSSGGAGEGQGPK                                                        | 1.29148577        | 2              | 4.86416   |
| Q8CGC7        | TELAEPAIRPTSETVMYPAYAK                                                    | 0.89438696        | 3              | 3.47052   |
| Q8CGC7        | VYEELLAIPVVR                                                              | 1.86334692        | 2              | 3.42992   |
| <b>Q8CGN4</b> | <b>BCOR BCL_6 corepressor</b>                                             | <b>1.14218755</b> | <b>0.38852</b> | <b>3</b>  |
| Q8CGN4        | FLTDYLNLDLQGR                                                             | 0.97714757        | 1              | 1.94041   |
| Q8CGN4        | NWLLLSDLVK                                                                | 3.71118097        | 2              | 2.52787   |
| Q8CGN4        | VCIELTGLHPKK                                                              | 1.25681913        | 2              | 2.34277   |
| <b>Q8CHB8</b> | <b>TLL5 Tubulin polyglutamylase TLL5</b>                                  | <b>1.05301978</b> | <b>0.98224</b> | <b>2</b>  |
| Q8CHB8        | ASSNLQHSLRMVLPSPR+Oxidation(10                                            | 1.01080867        |                |           |
| Q8CHB8        | DSGGQTLSPSWAAK                                                            | 1.25735126        | 1              | 2.13864   |
| <b>Q8CHM7</b> | <b>HACL1 2_hydroxyacyl_CoA lyase 1</b>                                    | <b>1.54416007</b> | <b>0.0048</b>  | <b>8</b>  |
| Q8CHM7        | DTSKPCLINIMIEPQSTR                                                        | 1.31207983        | 3              | 4.75379   |
| Q8CHM7        | GAAYSHAEDSIR                                                              | 1.4281051         | 2              | 3.37647   |
| Q8CHM7        | GVPDPNHPNCVGAAR                                                           | 1.41426421        | 2              | 3.24663   |
| Q8CHM7        | GYFVQTPEELQDSLR                                                           | 1.91604253        | 2              | 3.83254   |
| Q8CHM7        | LVELCNLPFLPTPMGK                                                          | 1.2986752         | 2              | 4.48063   |
| Q8CHM7        | NCFIVSEGANTMDIGR                                                          | 1.69909317        | 2              | 4.69397   |
| Q8CHM7        | NQEAMGAFQEFPPQVEACR                                                       | 1.17317636        | 2              | 6.43392   |
| Q8CHM7        | SSYGRPGACYIDVPADLVTLQESTTSIK                                              | 1.55143832        | 3              | 4.01666   |
| <b>Q8CIB5</b> | <b>FERM2 Fermitin family homolog 2</b>                                    | <b>0.82669416</b> | <b>0.07582</b> | <b>2</b>  |
| Q8CIB5        | GCEVTPDVNISGQK                                                            | 0.78709368        | 2              | 3.51374   |
| Q8CIB5        | TSTILGDITSIPELADYIK                                                       | 1.36351642        | 2              | 2.72138   |
| <b>Q8CIE6</b> | <b>COPA Coatomer subunit alpha</b>                                        | <b>1.35152395</b> | <b>1.5E-12</b> | <b>10</b> |
| Q8CIE6        | ASNLENSTYDLYTIPK                                                          | 1.68095187        | 2              | 4.13394   |
| Q8CIE6        | DADSQNPDAPEGK                                                             | 1.41018393        | 2              | 4.01827   |
| Q8CIE6        | GITGVDLFGTTDAVVK                                                          | 1.56117927        | 2              | 3.716     |
| Q8CIE6        | GVNWAAFHPTMPLIVSGADDR                                                     | 1.1758087         | 3              | 3.78069   |
| Q8CIE6        | LLELGPKEVAQQTR                                                            | 1.31895332        | 2              | 3.15225   |
| Q8CIE6        | QELILNSSEDK                                                               | 1.73913999        | 2              | 2.62028   |
| Q8CIE6        | QQPLFVSGGDDYK                                                             | 1.14223217        | 2              | 2.7117    |
| Q8CIE6        | SILLSVPLLVDNK                                                             | 1.49255914        | 2              | 4.00956   |
| Q8CIE6        | SSGLTAVVVAR                                                               | 0.71089307        | 2              | 2.44891   |
| Q8CIE6        | TLDLPIYVTR                                                                | 1.23944439        | 2              | 2.82687   |
| <b>Q8CJ27</b> | <b>ASPM Abnormal spindle_like microcephaly_associated protein homolog</b> | <b>0.95768302</b> | <b>0.27957</b> | <b>2</b>  |
| Q8CJ27        | ALHHLLTYKHLAILEDALK                                                       | 1.22161195        | 2              | 2.36556   |
| Q8CJ27        | FLSLRKTAIWIQR                                                             | 0.71035457        | 2              | 2.63605   |
| <b>Q8CJ40</b> | <b>CROCC Rootletin</b>                                                    | <b>1.35907695</b> | <b>0.0247</b>  | <b>4</b>  |

|               |                                                                                   |                   |                |           |
|---------------|-----------------------------------------------------------------------------------|-------------------|----------------|-----------|
| Q8CJ40        | DLLQLGGELVRTSR                                                                    | 1.18547198        | 2              | 2.42963   |
| Q8CJ40        | ELEERTGNLGRQR                                                                     | 1.71836301        | 2              | 2.40207   |
| Q8CJ40        | LRDQTAASAQAQEDAQR                                                                 | 1.74586954        | 2              | 2.3698    |
| Q8CJ40        | QQQAEHATTMAVEK+Oxidation(9)                                                       | 1.37577066        |                |           |
| <b>Q8JZN5</b> | <b>ACAD9 Acyl_CoA dehydrogenase family member 9_ mitochondrial</b>                | <b>1.10453838</b> | <b>0.99547</b> | <b>4</b>  |
| Q8JZN5        | GIILVGNEEQK                                                                       | 1.0825938         | 2              | 2.41553   |
| Q8JZN5        | GSNTCEVHFENTR                                                                     | 1.11425664        | 2              | 4.52701   |
| Q8JZN5        | NLSEFGLIQEK                                                                       | 1.3497834         | 2              | 2.4622    |
| Q8JZN5        | SGNVTTVMETIGR                                                                     | 0.86038359        | 2              | 2.96583   |
| <b>Q8K009</b> | <b>AL1L2 Mitochondrial 10_ formyltetrahydrofolate dehydrogenase</b>               | <b>1.08718898</b> | <b>0.82242</b> | <b>19</b> |
| Q8K009        | AMVEAVQLIADGK                                                                     | 1.23479797        | 2              | 4.19427   |
| Q8K009        | ANNTEYGLASGVFTR                                                                   | 1.24961399        | 2              | 4.62549   |
| Q8K009        | DLGEEALNEYLK                                                                      | 1.29758529        | 2              | 3.77958   |
| Q8K009        | EESFGPIMVISK                                                                      | 1.65621551        | 2              | 3.05086   |
| Q8K009        | FLFPEGIK                                                                          | 0.72829739        | 2              | 2.45559   |
| Q8K009        | FQNGDIDGVLQR                                                                      | 1.07934695        | 2              | 3.21425   |
| Q8K009        | GVINIIPGSGGVAQGR                                                                  | 1.20537923        | 2              | 3.87897   |
| Q8K009        | HGSIIYHPSLLPR                                                                     | 1.1914984         | 2              | 4.36967   |
| Q8K009        | KLGFSTGTSVKG                                                                      | 1.51499525        | 2              | 2.49719   |
| Q8K009        | KVSLELGK                                                                          | 0.6315245         | 1              | 2.03903   |
| Q8K009        | NGLVLFNGDGK                                                                       | 1.06564306        | 2              | 2.42723   |
| Q8K009        | NLQFEDGK                                                                          | 1.03918989        | 1              | 2.18625   |
| Q8K009        | SAACLAAGNTLVLPKPAQVPLTALK                                                         | 1.47386695        | 3              | 4.02749   |
| Q8K009        | SCDVKPNDTVDSLNR                                                                   | 3.59484497        | 2              | 4.48119   |
| Q8K009        | TDVAAPFGGMK+Oxidation(9)                                                          | 1.36440094        |                |           |
| Q8K009        | TPQPEEGATYEGIQK                                                                   | 1.19598966        | 2              | 2.58287   |
| Q8K009        | VSYASLADVDR                                                                       | 1.35266069        | 2              | 2.91656   |
| Q8K009        | VVGFTVDPKDGK                                                                      | 1.24468368        | 2              | 3.26216   |
| Q8K009        | YFAGWCDK                                                                          | 0.99671333        | 1              | 2.1003    |
| <b>Q8K1N2</b> | <b>PHLB2 Pleckstrin homology_like domain family B member 2</b>                    | <b>0.78690707</b> | <b>0.7428</b>  | <b>2</b>  |
| Q8K1N2        | EKENLCNLEKK                                                                       | 0.60153629        | 2              | 2.41911   |
| Q8K1N2        | LQEETSQRQKLIK                                                                     | 1.11934719        | 2              | 2.38009   |
| <b>Q8K1Q0</b> | <b>NMT1 Glycylpeptide N_tetradecanoyltransferase 1</b>                            | <b>1.05993887</b> | <b>0.68414</b> | <b>2</b>  |
| Q8K1Q0        | GNDMDSTQDQPVK                                                                     | 1.85658845        | 2              | 2.53111   |
| Q8K1Q0        | LGEVVNTHGVPDPKDNIR                                                                | 1.03117826        | 3              | 3.44455   |
| <b>Q8K1S6</b> | <b>SPIR2 Protein spire homolog 2</b>                                              | <b>1.60424178</b> | <b>0.0196</b>  | <b>3</b>  |
| Q8K1S6        | ALFVETLELR                                                                        | 1.9266557         | 2              | 2.50528   |
| Q8K1S6        | DTADILLRR                                                                         | 1.57526632        | 2              | 2.31496   |
| Q8K1S6        | RDAFQSLQGPKWR                                                                     | 1.41124332        | 2              | 2.30447   |
| <b>Q8K2H2</b> | <b>OTU6B OTU domain_containing protein 6B</b>                                     | <b>1.0837833</b>  | <b>0.99382</b> | <b>2</b>  |
| Q8K2H2        | EELEQLK                                                                           | 1.13562997        | 1              | 2.08084   |
| Q8K2H2        | EERIAEAEIENLSGAR                                                                  | 0.99389385        | 2              | 2.46803   |
| <b>Q8K2Z4</b> | <b>CND1 Condensin complex subunit 1</b>                                           | <b>1.64896192</b> | <b>0.02795</b> | <b>2</b>  |
| Q8K2Z4        | AIIDFEQKLR                                                                        | 1.45391243        | 2              | 2.36961   |
| Q8K2Z4        | LLESFENMTSQTSLIDLIGGK                                                             | 1.95558825        | 2              | 2.44545   |
| <b>Q8K3J1</b> | <b>NDUS8 NADH dehydrogenase [ubiquinone] iron_sulfur protein 8_ mitochondrial</b> | <b>1.35917818</b> | <b>0.12807</b> | <b>2</b>  |
| Q8K3J1        | ILMWTELIR+Oxidation(2)                                                            | 1.9266557         |                |           |
| Q8K3J1        | LCEAICPAQAITIEAEPR                                                                | 1.29664462        | 3              | 4.90856   |
| <b>Q8K442</b> | <b>ABC8A ATP_binding cassette sub_family A member 8_A</b>                         | <b>1.52324638</b> | <b>0.35128</b> | <b>6</b>  |
| Q8K442        | EDVQPLSQAFFK                                                                      | 1.63636457        | 2              | 2.89183   |
| Q8K442        | GQITAILGHSAGK                                                                     | 1.28631643        | 2              | 3.74836   |

|               |                                                                       |                   |                |           |
|---------------|-----------------------------------------------------------------------|-------------------|----------------|-----------|
| Q8K442        | IDDFIHSLEQQNIALEVDAFGTR                                               | 1.35378217        | 3              | 4.09428   |
| Q8K442        | LTGVCPQCNVQDFLTVR                                                     | 1.95938806        | 2              | 2.83254   |
| Q8K442        | NTQNILVQNLSSGGQK                                                      | 1.18711418        | 2              | 2.96951   |
| Q8K442        | STLLNVLSGLCVPTK                                                       | 1.56720497        | 2              | 3.79413   |
| <b>Q8K4C0</b> | <b>FMO5 Dimethylaniline monooxygenase [N_oxide_forming] 5</b>         | <b>0.95644629</b> | <b>0.81878</b> | <b>12</b> |
| Q8K4C0        | CCEEGLEPVCFER                                                         | 0.96882825        | 2              | 4.39759   |
| Q8K4C0        | FDHEMFGLPKK                                                           | 1.17139381        | 2              | 3.32328   |
| Q8K4C0        | GYPIDILLSSR                                                           | 1.24345775        | 2              | 3.27162   |
| Q8K4C0        | HSALGQHPTINDDLPNR                                                     | 1.0633961         | 2              | 4.99735   |
| Q8K4C0        | IAVIGSGASGLTCIK                                                       | 1.52787037        | 2              | 4.19835   |
| Q8K4C0        | KLPSQSEMMAEINK                                                        | 0.94839584        | 2              | 3.8894    |
| Q8K4C0        | KQPDFSTSGWQVVTEHEGK                                                   | 0.86804           | 3              | 4.74939   |
| Q8K4C0        | KTILTTEDR                                                             | 0.86559204        | 2              | 2.80174   |
| Q8K4C0        | QQVDVFDGVLVCTGHHTDPHPLDSFPGIEK                                        | 1.56208467        | 3              | 3.77859   |
| Q8K4C0        | SDDIGGLWR                                                             | 1.05500305        | 2              | 3.02784   |
| Q8K4C0        | VFPPNLEKPTLAIIGLIQLGAIMPISELQGR                                       | 1.47230909        | 4              | 5.0199    |
| Q8K4C0        | WATQVFK                                                               | 1.56942585        | 1              | 1.9542    |
| <b>Q8K4T4</b> | <b>FLIP1 Filamin_A_interacting protein 1</b>                          | <b>1.08692095</b> | <b>0.92775</b> | <b>3</b>  |
| Q8K4T4        | EVLNLTK                                                               | 0.99943893        | 1              | 2.1182    |
| Q8K4T4        | IEELETNKSLOK                                                          | 1.70990316        | 2              | 2.558     |
| Q8K4T4        | IHELMNK                                                               | 1.2273517         | 1              | 2.09297   |
| <b>Q8K4Z3</b> | <b>AIBP Apolipoprotein A_I_binding protein</b>                        | <b>1.08199158</b> | <b>0.9999</b>  | <b>2</b>  |
| Q8K4Z3        | GNPSGIQPDLLISLTAPK                                                    | 1.08202737        | 2              | 3.83324   |
| Q8K4Z3        | SPPTVLVICPGNNGDGLVCAR                                                 | 1.02464354        | 2              | 5.80955   |
| <b>Q8K4Z5</b> | <b>SF3A1 Splicing factor 3A subunit 1</b>                             | <b>1.60142043</b> | <b>0.12951</b> | <b>2</b>  |
| Q8K4Z5        | HKVSEFKEGK                                                            | 1.57220281        | 2              | 2.30061   |
| Q8K4Z5        | IGEEEIQKPEEK                                                          | 1.60178185        | 2              | 2.60164   |
| <b>Q8K586</b> | <b>RANT GTP_binding nuclear protein Ran_testis_specific isoform</b>   | <b>1.16208852</b> | <b>0.99557</b> | <b>5</b>  |
| Q8K586        | FNVWDTAGQEK                                                           | 1.17543862        | 2              | 3.31169   |
| Q8K586        | HLTGEFEK                                                              | 1.08763151        | 1              | 2.04382   |
| Q8K586        | LVLVGDGGTGK                                                           | 1.03742097        | 2              | 2.37278   |
| Q8K586        | NLQYYDISAK                                                            | 1.10654231        | 1              | 2.13557   |
| Q8K586        | VCENIPVLCGNK                                                          | 1.09734692        | 2              | 3.72718   |
| <b>Q8K5B3</b> | <b>MCFD2 Multiple coagulation factor deficiency protein 2 homolog</b> | <b>1.19489509</b> | <b>0.41324</b> | <b>2</b>  |
| Q8K5B3        | DDDKNNDGYIDYAEFAK                                                     | 0.9409336         | 2              | 4.35357   |
| Q8K5B3        | STVHDQEHIMEHLEGVINQPEAEMSPQELQLHYFK                                   | 2.13722165        | 4              | 5.87028   |
| <b>Q8QZY1</b> | <b>EIF3L Eukaryotic translation initiation factor 3 subunit L</b>     | <b>0.99608864</b> | <b>0.40308</b> | <b>3</b>  |
| Q8QZY1        | VFSDEVQQAQLSTIR                                                       | 0.88150306        | 2              | 3.85333   |
| Q8QZY1        | VSGGPSLEQR                                                            | 1.63328176        | 2              | 2.62712   |
| Q8QZY1        | VYEIQDIYENSWTK                                                        | 1.54135503        | 2              | 3.92647   |
| <b>Q8R081</b> | <b>HNRPL Heterogeneous nuclear ribonucleoprotein L</b>                | <b>0.75892395</b> | <b>0.35813</b> | <b>6</b>  |
| Q8R081        | ASLNGADIYSGCCTLK                                                      | 4.60366642        | 2              | 2.95599   |
| Q8R081        | NDQDTWDYTNPNLSGGDPGSPNPKR                                             | 0.99325111        | 3              | 5.0295    |
| Q8R081        | SDALETGLFLNHYQMK                                                      | 1.2137923         | 2              | 3.68698   |
| Q8R081        | SKPGAAMVEMADGYAVDR                                                    | 0.58590524        | 2              | 3.89393   |
| Q8R081        | SSSGLLEWDSK                                                           | 0.85382121        | 2              | 2.32781   |
| Q8R081        | TENAGDQHGGGGGGSGAAGGGGGENYDDPHK                                       | 1.01768398        | 3              | 7.14297   |
| <b>Q8R0F9</b> | <b>S14L4 SEC14_like protein 4</b>                                     | <b>1.14327878</b> | <b>0.96953</b> | <b>5</b>  |
| Q8R0F9        | FDNTYSLHTK                                                            | 1.05133127        | 2              | 3.13002   |
| Q8R0F9        | GSSHQVENEILFPGCVLR                                                    | 1.0063698         | 2              | 4.7551    |
| Q8R0F9        | VCEMLLHECELQSQK                                                       | 1.22853334        | 2              | 4.97628   |
| Q8R0F9        | VGYTAEVLLPDK                                                          | 0.99090358        | 2              | 2.95609   |



|               |                                                               |                   |                |          |
|---------------|---------------------------------------------------------------|-------------------|----------------|----------|
| Q8R0F9        | VGytaevLLPDKACEEK                                             | 1.14672154        | 2              | 2.44847  |
| <b>Q8R0K2</b> | <b>TRI31 E3 ubiquitin_protein ligase TRIM31</b>               | <b>1.29137711</b> | <b>0.43481</b> | <b>2</b> |
| Q8R0K2        | LQSSMELLKDIKDALSr                                             | 1.26375288        | 2              | 2.552    |
| Q8R0K2        | QRLDEEESFLLSR                                                 | 2.20662269        | 2              | 2.43184  |
| <b>Q8R164</b> | <b>BPHL Valacyclovir hydrolase</b>                            | <b>1.05592275</b> | <b>0.04634</b> | <b>3</b> |
| Q8R164        | FADEFNR                                                       | 2.02482407        | 2              | 2.36687  |
| Q8R164        | FTLVAWDPR                                                     | 1.36428241        | 2              | 2.98209  |
| Q8R164        | TDFAPQLQLSNK                                                  | 1.05397024        | 2              | 3.728    |
| <b>Q8R1F5</b> | <b>HYI Putative hydroxypyruvate isomerase</b>                 | <b>1.3773418</b>  | <b>0.56078</b> | <b>2</b> |
| Q8R1F5        | GDTVEGLSWLR                                                   | 1.32686063        | 2              | 3.14266  |
| Q8R1F5        | GEMGLGAVPGR                                                   | 1.86865711        | 2              | 2.53749  |
| <b>Q8R1V4</b> | <b>TMED4 Transmembrane emp24 domain_containing protein 4</b>  | <b>1.16845599</b> | <b>0.99242</b> | <b>2</b> |
| Q8R1V4        | CFIEEIPDETMVIGNYR                                             | 1.55492753        | 2              | 4.48738  |
| Q8R1V4        | QLLDQVEQIQK                                                   | 1.00707457        | 2              | 2.89605  |
| <b>Q8R3Q6</b> | <b>CCD58 Coiled_coil domain_containing protein 58</b>         | <b>1.17604159</b> | <b>0.78597</b> | <b>2</b> |
| Q8R3Q6        | IVHELNTTVPTASFAGK                                             | 1.20797143        | 2              | 3.94613  |
| Q8R3Q6        | NCIAQTSAVVK                                                   | 1.1739975         | 2              | 2.79186  |
| <b>Q8R491</b> | <b>EHD3 EH domain_containing protein 3</b>                    | <b>1.3477068</b>  | <b>0.02579</b> | <b>6</b> |
| Q8R491        | ADQIETQQLMR                                                   | 1.69143975        | 2              | 2.61221  |
| Q8R491        | GGAFEGTLQGPFGHGYGEGAGEGIDDAEWVVAR                             | 4.58500076        | 3              | 4.333    |
| Q8R491        | LDISDEFSEVIK                                                  | 1.62491302        | 2              | 3.63764  |
| Q8R491        | LFEAEEQDLFK                                                   | 2.17623463        | 2              | 3.49502  |
| Q8R491        | MQDQLQAQDFSK                                                  | 0.92857216        | 2              | 3.83833  |
| Q8R491        | QEETQRPVQMVK                                                  | 1.39808161        | 2              | 2.7539   |
| <b>Q8VBU2</b> | <b>NDRG2 Protein NDRG2</b>                                    | <b>0.91573843</b> | <b>0.69361</b> | <b>6</b> |
| Q8VBU2        | CPVMLVVGDAQPHEDAVVECNSK                                       | 0.88477369        | 3              | 5.11384  |
| Q8VBU2        | LDPTQTSFLK                                                    | 1.20501016        | 1              | 2.08861  |
| Q8VBU2        | MADSGGQPQLTQPGK                                               | 1.31245823        | 2              | 3.1336   |
| Q8VBU2        | SLITHAPNLENIELYWNSYNNR                                        | 1.26462646        | 3              | 4.667    |
| Q8VBU2        | TLSQSSESGTLPSGPPGHTMEVSC                                      | 0.79597381        | 2              | 4.517    |
| Q8VBU2        | YALNHPDTEGLVLINIDPNAK                                         | 1.34088961        | 2              | 4.74081  |
| <b>Q8VC12</b> | <b>HUTU Urocanate hydratase</b>                               | <b>1.13669728</b> | <b>0.00069</b> | <b>9</b> |
| Q8VC12        | DHHDVSGTDSFPR                                                 | 1.93700822        | 2              | 2.68359  |
| Q8VC12        | HQLVVGSQLR                                                    | 0.97063582        | 2              | 2.91315  |
| Q8VC12        | LLALEFAQELR                                                   | 2.90414632        | 2              | 3.96146  |
| Q8VC12        | LQYMDNIR                                                      | 1.44586305        | 2              | 2.42834  |
| Q8VC12        | LVITNGMVIPNYSSR                                               | 1.51849772        | 2              | 3.82513  |
| Q8VC12        | MMLSWDVSNGVAR                                                 | 1.31040498        | 2              | 3.17367  |
| Q8VC12        | VAIAVAINQAIASGK                                               | 2.82573705        | 2              | 4.00164  |
| Q8VC12        | VFVTSGLGGMSGAAQAK                                             | 1.26476239        | 2              | 4.54127  |
| Q8VC12        | VFVTSGLGGMSGAAQAK+Oxidation(9                                 | 0.87705579        |                |          |
| <b>Q8VDC1</b> | <b>FYCO1 FYVE and coiled_coil domain_containing protein 1</b> | <b>1.19720207</b> | <b>0.53585</b> | <b>2</b> |
| Q8VDC1        | GLELQVMQLQQEK                                                 | 1.19725121        | 2              | 2.39016  |
| Q8VDC1        | MLVSRQGGQLQVEK+Oxidation(0                                    | 0.77476732        |                |          |
| <b>Q8VDG5</b> | <b>PPCS Phosphopantothenate__cysteine ligase</b>              | <b>1.15651691</b> | <b>0.56475</b> | <b>2</b> |
| Q8VDG5        | FLDNFSSGR                                                     | 1.76412701        | 2              | 2.45637  |
| Q8VDG5        | LETDPDIISR                                                    | 1.05256255        | 2              | 2.58724  |
| <b>Q8VE11</b> | <b>MTMR6 Myotubularin_related protein 6</b>                   | <b>0.73610172</b> | <b>0.49865</b> | <b>2</b> |
| Q8VE11        | TMKGFMLIEK+Oxidation(1                                        | 0.73610172        |                |          |
| Q8VE11        | TMKGFMLIEK+Oxidation(5                                        | 0.73610172        |                |          |
| <b>Q8VED5</b> | <b>K2C79 Keratin_type II cytoskeletal 79</b>                  | <b>1.20595507</b> | <b>0.97904</b> | <b>5</b> |
| Q8VED5        | FLEQQNKVLETK                                                  | 1.21375309        | 2              | 3.66851  |
| Q8VED5        | NKYEDEINK                                                     | 1.08695208        | 2              | 2.95454  |
| Q8VED5        | NKYEDEINKR                                                    | 1.03819485        | 3              | 3.33708  |

|               |                                                          |                   |                |           |
|---------------|----------------------------------------------------------|-------------------|----------------|-----------|
| Q8VED5        | NLDLDSIIAEVK                                             | 2.92656041        | 2              | 3.541     |
| Q8VED5        | YEDEINK                                                  | 1.41271276        | 1              | 2.34168   |
| <b>Q8VEK3</b> | <b>HNRPU Heterogeneous nuclear ribonucleoprotein U</b>   | <b>1.11924765</b> | <b>0.01334</b> | <b>12</b> |
| Q8VEK3        | EKPYFPIPEDCTFIQNVPLEDR                                   | 1.54126216        | 3              | 4.77499   |
| Q8VEK3        | FIEIAAR                                                  | 1.51752122        | 1              | 1.90702   |
| Q8VEK3        | GYFEYIEENK                                               | 1.02837347        | 2              | 3.37234   |
| Q8VEK3        | LLEQYKEESK                                               | 1.38605724        | 2              | 3.26815   |
| Q8VEK3        | LLEQYKEESKK                                              | 1.25681913        | 2              | 3.66877   |
| Q8VEK3        | LQAALDNEAGGRPAMEPGNGSLDLGGDAAGR                          | 0.83591701        | 3              | 4.75506   |
| Q8VEK3        | NFILDQTNVAAAQR                                           | 0.97594041        | 2              | 4.89524   |
| Q8VEK3        | NGQDLGVAFK                                               | 1.13463805        | 2              | 2.40092   |
| Q8VEK3        | TCNCETEDYGEK                                             | 1.26010914        | 2              | 3.57562   |
| Q8VEK3        | VSELKEELK                                                | 1.7668262         | 2              | 2.89193   |
| Q8VEK3        | VSELKEELKK                                               | 1.42519962        | 2              | 2.68919   |
| Q8VEK3        | YNILGTNTIMDK                                             | 1.35531757        | 2              | 3.656     |
| <b>Q8VHE9</b> | <b>RETST All_trans_retinol 13_14_reductase</b>           | <b>1.11234768</b> | <b>0.96528</b> | <b>8</b>  |
| Q8VHE9        | ATVQSVLLDSAGR                                            | 1.12551246        | 2              | 3.86813   |
| Q8VHE9        | FLPLPLTQLLNK                                             | 0.79777875        | 2              | 3.22782   |
| Q8VHE9        | GATYGADHDLAR                                             | 1.14589576        | 2              | 3.26791   |
| Q8VHE9        | NLYSDLQALGSK                                             | 0.94539468        | 2              | 3.6197    |
| Q8VHE9        | RPPEPLVTDK                                               | 1.0710193         | 2              | 2.95453   |
| Q8VHE9        | RPPEPLVTDKEAR                                            | 1.15500242        | 3              | 4.20689   |
| Q8VHE9        | VESVTGGSPLTNQYLAHR                                       | 1.29247685        | 2              | 3.9792    |
| Q8VHE9        | VVAHGVSHAILLK                                            | 2.01158803        | 2              | 2.87402   |
| <b>Q8VHF5</b> | <b>CISY Citrate synthase_mitochondrial</b>               | <b>1.28066174</b> | <b>0.05859</b> | <b>4</b>  |
| Q8VHF5        | AYAEGINR                                                 | 1.18462709        | 2              | 2.51807   |
| Q8VHF5        | EGSSIGAIDSK                                              | 1.66024018        | 2              | 2.35077   |
| Q8VHF5        | GLVYETSVLDPDEGIR                                         | 2.18007815        | 2              | 4.34381   |
| Q8VHF5        | GYSIPECQK                                                | 1.40830908        | 2              | 2.80161   |
| <b>Q8VHK7</b> | <b>HDGF Hepatoma_derived growth factor</b>               | <b>1.26808121</b> | <b>0.32601</b> | <b>3</b>  |
| Q8VHK7        | GFSEGLWEIENPTVK                                          | 0.55159157        | 2              | 3.70253   |
| Q8VHK7        | NSTPSEPDGSGQPPPEEEEGEEAAKEEAEAQGVR                       | 1.27397674        | 3              | 6.10673   |
| Q8VHK7        | SCAEPEVEPEAHEGDGDKK                                      | 1.40473697        | 3              | 3.9406    |
| <b>Q8VHT6</b> | <b>AS3MT Arsenite methyltransferase</b>                  | <b>1.53468573</b> | <b>0.00392</b> | <b>4</b>  |
| Q8VHT6        | FAHDFLFTPVEASLLAPQTK                                     | 3.78401963        | 2              | 4.36773   |
| Q8VHT6        | ILDLGSGSGR                                               | 1.07712693        | 2              | 2.90833   |
| Q8VHT6        | SLQNVHEEIVSR                                             | 1.9724797         | 2              | 3.20885   |
| Q8VHT6        | TSADLQTNACVTPAK                                          | 1.37537973        | 2              | 3.87555   |
| <b>Q8VHX6</b> | <b>FLNC Filamin_C</b>                                    | <b>1.19663931</b> | <b>0.40991</b> | <b>3</b>  |
| Q8VHX6        | GAGTGGLGLTVEGPCEAK                                       | 1.18790077        | 2              | 3.97345   |
| Q8VHX6        | IECDDKGDGSDVR                                            | 1.46026432        | 2              | 3.44393   |
| Q8VHX6        | LIALLEVLQK                                               | 3.08444665        | 2              | 2.62857   |
| <b>Q8VI04</b> | <b>ASGL1 L_asparaginase</b>                              | <b>0.97267283</b> | <b>0.98619</b> | <b>5</b>  |
| Q8VI04        | DLSAGAVSAVRCIANPVK                                       | 0.98925174        | 2              | 2.35339   |
| Q8VI04        | FAADMGIPQTPAEK                                           | 0.9180047         | 2              | 3.44424   |
| Q8VI04        | GNLAYATSTGGIVNK                                          | 0.95485975        | 2              | 4.35895   |
| Q8VI04        | NSGTGVAVALDCK                                            | 1.25699357        | 2              | 3.29069   |
| Q8VI04        | TVDEAATLALDYMK                                           | 1.21780323        | 2              | 3.57368   |
| <b>Q8VID1</b> | <b>DHRS4 Dehydrogenase/reductase SDR family member 4</b> | <b>1.03174807</b> | <b>0.47631</b> | <b>5</b>  |
| Q8VID1        | AVATLQGEGLSVTGVVCHVGK                                    | 1.15619608        | 2              | 4.01386   |
| Q8VID1        | LAEDGAHVVISSR                                            | 1.15948403        | 2              | 3.70507   |
| Q8VID1        | NFAAELAPK                                                | 0.74082812        | 2              | 2.45876   |
| Q8VID1        | TALLGLTK                                                 | 1.38436839        | 2              | 2.41564   |
| Q8VID1        | VNCLAPGLIK                                               | 1.79430752        | 2              | 2.51608   |
| <b>Q8VIF7</b> | <b>SBP1 Selenium_binding protein 1</b>                   | <b>1.26945704</b> | <b>0.72503</b> | <b>11</b> |

|               |                                                                    |                   |                |          |
|---------------|--------------------------------------------------------------------|-------------------|----------------|----------|
| Q8VIF7        | CGPGYATPLEAMK                                                      | 0.81225686        | 2              | 3.10767  |
| Q8VIF7        | FLHDPDATQGFVGCALSSNIQR                                             | 1.3534122         | 2              | 5.42326  |
| Q8VIF7        | GGFVLLDGETFEVK                                                     | 1.69959064        | 2              | 3.90905  |
| Q8VIF7        | GTWEKPGGEAPMGYDFWYQPR                                              | 1.3797359         | 2              | 3.77977  |
| Q8VIF7        | HEIIQLQMK                                                          | 1.20498711        | 2              | 2.84595  |
| Q8VIF7        | HNIMVSTEWAAPNVFK                                                   | 1.57429665        | 2              | 4.60945  |
| Q8VIF7        | LTGQFLGGSIVK                                                       | 1.24745183        | 2              | 3.01877  |
| Q8VIF7        | NEGGTWSVEK                                                         | 1.0821465         | 2              | 3.16176  |
| Q8VIF7        | NTGIEAPDYLATVDVDPK                                                 | 1.03544618        | 2              | 4.16405  |
| Q8VIF7        | QYDISNPK                                                           | 1.08105573        | 1              | 2.11613  |
| Q8VIF7        | VIEPNEIHAK                                                         | 1.27797891        | 2              | 2.96786  |
| <b>Q8VIJ6</b> | <b>SFPQ Splicing factor_ proline_ and glutamine rich</b>           | <b>0.83659755</b> | <b>0.94023</b> | <b>3</b> |
| Q8VIJ6        | FGQGGAGPVGGQGPR                                                    | 0.82551081        | 2              | 3.2066   |
| Q8VIJ6        | MEELHSQEMQK                                                        | 0.91314228        | 2              | 3.7953   |
| Q8VIJ6        | RMEELHSQEMQK                                                       | 1.07528392        | 2              | 3.90017  |
| <b>Q91VA0</b> | <b>ACSM1 Acyl_ coenzyme A synthetase ACSM1_ mitochondrial</b>      | <b>0.88936583</b> | <b>0.52426</b> | <b>5</b> |
| Q91VA0        | AFIVLNPEFLSHDQEQLIK                                                | 1.2439256         | 2              | 5.40929  |
| Q91VA0        | AILPFDLQIIDEK                                                      | 1.14081815        | 2              | 3.85738  |
| Q91VA0        | GNILPPNTEGYIGIR                                                    | 0.70691486        | 2              | 2.90914  |
| Q91VA0        | KVEFVSELPK                                                         | 0.62349585        | 2              | 2.90151  |
| Q91VA0        | NKEFGQL                                                            | 0.8858349         | 1              | 2.1487   |
| <b>Q91VA6</b> | <b>PDIP2 Polymerase delta_ interacting protein 2</b>               | <b>0.96435824</b> | <b>0.79704</b> | <b>2</b> |
| Q91VA6        | VLETVGVFEVVK                                                       | 0.86233041        | 2              | 3.40001  |
| Q91VA6        | VTVIPFYMGM+Oxidation(9                                             | 1.51584865        |                |          |
| <b>Q91VM5</b> | <b>RBMXL Heterogeneous nuclear ribonucleoprotein G_ like 1</b>     | <b>1.31494756</b> | <b>0.34615</b> | <b>2</b> |
| Q91VM5        | LFIGLNTETNEK                                                       | 1.05508778        | 2              | 2.79149  |
| Q91VM5        | VEQATKPSFESGR                                                      | 1.31499256        | 2              | 3.93891  |
| <b>Q91VM9</b> | <b>IPYR2 Inorganic pyrophosphatase 2_ mitochondrial</b>            | <b>0.87834556</b> | <b>0.99503</b> | <b>2</b> |
| Q91VM9        | IIAINVNDPEAEK                                                      | 0.85091364        | 2              | 3.21823  |
| Q91VM9        | MEIATEEPLNPIK                                                      | 1.13225339        | 2              | 4.43456  |
| <b>Q91W43</b> | <b>GCSF Glycine dehydrogenase [decarboxylating]_ mitochondrial</b> | <b>1.17951551</b> | <b>0.23902</b> | <b>6</b> |
| Q91W43        | AGHQLQHDLFFDTLK                                                    | 2.14210934        | 2              | 3.02957  |
| Q91W43        | DISLVHSMIPLGSCMTK                                                  | 0.9127883         | 2              | 2.72649  |
| Q91W43        | EMLQALGLASIDELIEK                                                  | 1.59553843        | 2              | 2.54451  |
| Q91W43        | IDDIYGDQHLVCTCPPMEVYESPFSEQK                                       | 1.3235371         | 3              | 4.43025  |
| Q91W43        | NLLENSGWVTQYTPYQPEVSQGR                                            | 3.12992161        | 3              | 4.64839  |
| Q91W43        | VSFQPNSGAQGEYAGLATIR                                               | 1.49985264        | 2              | 5.20353  |
| <b>Q91W90</b> | <b>TXND5 Thioredoxin domain_ containing protein 5</b>              | <b>1.19738091</b> | <b>0.18288</b> | <b>3</b> |
| Q91W90        | GTVLALTEK                                                          | 1.60023468        | 2              | 2.39144  |
| Q91W90        | SFEDTIAQGITFVK                                                     | 0.95056649        | 2              | 4.02806  |
| Q91W90        | VDCTQHYAVCSEHQVR                                                   | 1.22037491        | 3              | 4.48855  |
| <b>Q91WL5</b> | <b>CP4CA Cytochrome P450 4A12A</b>                                 | <b>1.1909563</b>  | <b>0.82152</b> | <b>2</b> |
| Q91WL5        | FELLDPTR                                                           | 1.22820734        | 2              | 2.66626  |
| Q91WL5        | IQLQDEEELEK                                                        | 1.19093537        | 2              | 2.48758  |
| <b>Q91X77</b> | <b>CY250 Cytochrome P450 2C50</b>                                  | <b>0.89206075</b> | <b>0.22437</b> | <b>5</b> |
| Q91X77        | EHEESLDVTIPR                                                       | 0.89175099        | 2              | 2.30784  |
| Q91X77        | IKEHEESLDVTIPR                                                     | 1.04621256        | 3              | 3.66349  |
| Q91X77        | NFLLEK                                                             | 0.72564532        | 1              | 2.10253  |
| Q91X77        | NYFIPK                                                             | 0.80201682        | 1              | 1.92056  |
| Q91X77        | YALLLLLK                                                           | 1.59788929        | 2              | 2.92146  |
| <b>Q91X78</b> | <b>ERLN1 Erlin_1</b>                                               | <b>1.07556098</b> | <b>0.63315</b> | <b>4</b> |

|               |                                                                            |                   |                |           |
|---------------|----------------------------------------------------------------------------|-------------------|----------------|-----------|
| Q91X78        | DLNTMAPGLTIQAVR                                                            | 0.94779616        | 2              | 3.44246   |
| Q91X78        | ISEIEDAAFLAR                                                               | 1.07556161        | 2              | 2.9784    |
| Q91X78        | RISEIEDAAFLAREK                                                            | 1.70670051        | 2              | 2.30733   |
| Q91X78        | SVQTTLQTDEVK                                                               | 0.84309998        | 2              | 3.09624   |
| <b>Q91Y78</b> | <b>UCHL3 Ubiquitin carboxyl_ terminal hydrolase isozyme L3</b>             | <b>1.10949351</b> | <b>0.99389</b> | <b>2</b>  |
| Q91Y78        | FLEESVAMSPEER                                                              | 1.23149256        | 2              | 3.26073   |
| Q91Y78        | HLENYDAIR                                                                  | 1.10936466        | 2              | 2.58245   |
| <b>Q91Y81</b> | <b>SEPT2 Septin_2</b>                                                      | <b>1.06614647</b> | <b>0.78442</b> | <b>4</b>  |
| Q91Y81        | ASIPFSVVGSNQLIEAK                                                          | 1.27283018        | 2              | 2.66018   |
| Q91Y81        | ILDEIEEHSIK                                                                | 1.05465374        | 2              | 2.65335   |
| Q91Y81        | KVENEDMNKDQILLEK                                                           | 1.20074864        | 3              | 3.69238   |
| Q91Y81        | LTVVDTPGYGDAINSR                                                           | 1.02194532        | 2              | 4.37815   |
| <b>Q91YP0</b> | <b>L2HDH L_2_ hydroxyglutarate dehydrogenase_ mitochondrial</b>            | <b>1.0566123</b>  | <b>0.8427</b>  | <b>3</b>  |
| Q91YP0        | LIQQEDIK                                                                   | 1.13128873        | 2              | 2.40078   |
| Q91YP0        | LIVAVEQEEIPR                                                               | 1.36112843        | 2              | 2.80304   |
| Q91YP0        | NAPSPAATSSLAISR                                                            | 0.90897762        | 2              | 3.29706   |
| <b>Q91YT0</b> | <b>NDUV1 NADH dehydrogenase [ubiquinone] flavoprotein 1_ mitochondrial</b> | <b>1.30853781</b> | <b>0.02119</b> | <b>10</b> |
| Q91YT0        | GAGAYICGEETALIESIEGK                                                       | 1.6090403         | 2              | 2.57513   |
| Q91YT0        | GDARPAEIDSLWEISK                                                           | 1.30353849        | 2              | 2.87714   |
| Q91YT0        | GEFYNEASNQVAIR                                                             | 1.38559574        | 2              | 3.55235   |
| Q91YT0        | GGAGFPTGLK                                                                 | 1.32961444        | 2              | 2.37067   |
| Q91YT0        | HFRPELEDR                                                                  | 1.57768149        | 2              | 2.33197   |
| Q91YT0        | KTSFGSLKDEDR                                                               | 1.48032052        | 2              | 3.48027   |
| Q91YT0        | LKPPFPADVGVFGCPTTVANVETVAVSPTICR                                           | 1.85822838        | 3              | 4.19768   |
| Q91YT0        | LVEGCLVGGR                                                                 | 1.74937745        | 2              | 2.7434    |
| Q91YT0        | TSFGSLKDEDR                                                                | 1.50666983        | 2              | 2.49589   |
| Q91YT0        | YLVVNADEGEPGTCK                                                            | 1.06744046        | 2              | 4.94173   |
| <b>Q91Z53</b> | <b>GRHPR Glyoxylate reductase/hydroxypyruvate reductase</b>                | <b>1.02331444</b> | <b>0.08617</b> | <b>6</b>  |
| Q91Z53        | GDVVNQEDLYQALASGQIAAAGLDVTTPEPLPPSHPLTLK                                   | 1.29513035        | 3              | 6.77683   |
| Q91Z53        | LLDAAGANLR                                                                 | 0.96214215        | 2              | 3.26251   |
| Q91Z53        | NCVILPHIGSATYK                                                             | 0.90912683        | 2              | 3.70573   |
| Q91Z53        | NTMSLLAANNLLAGLR                                                           | 2.22515689        | 2              | 4.73976   |
| Q91Z53        | RLPEAIEEVK                                                                 | 0.93824804        | 3              | 3.30049   |
| Q91Z53        | VISTLSVGDHLALDEIK                                                          | 1.64218128        | 2              | 4.75026   |
| <b>Q91ZJ5</b> | <b>UGPA UTP_ glucose_ 1_ phosphate uridylyltransferase</b>                 | <b>1.09202283</b> | <b>0.46669</b> | <b>14</b> |
| Q91ZJ5        | AMSQDGASQFQEVILQELESVK                                                     | 1.6870741         | 2              | 4.69947   |
| Q91ZJ5        | GGTLTQYEGK                                                                 | 1.07925582        | 2              | 2.37103   |
| Q91ZJ5        | GLPDNISSVLNK                                                               | 1.40571919        | 2              | 3.37689   |
| Q91ZJ5        | GTVIIIANHGDR                                                               | 1.27783094        | 2              | 3.00819   |
| Q91ZJ5        | IDIPPGAVLENK                                                               | 1.64916108        | 2              | 2.87701   |
| Q91ZJ5        | IQRPPEDSIQPYEK                                                             | 1.34396536        | 3              | 5.17817   |
| Q91ZJ5        | LNGGLGTSMGCK                                                               | 1.71383179        | 2              | 2.96923   |
| Q91ZJ5        | LVEIAQVPK                                                                  | 1.3790758         | 2              | 3.45131   |
| Q91ZJ5        | NENTFLDLTVQQIEHLNK                                                         | 1.19776681        | 2              | 5.0521    |
| Q91ZJ5        | RCEFVMEVTNK                                                                | 0.9967747         | 2              | 2.37589   |
| Q91ZJ5        | RFESIPDMLELDHLTVSGDVTFGK                                                   | 1.77550695        | 3              | 3.33507   |
| Q91ZJ5        | SFENSLGINVPR                                                               | 1.08936659        | 2              | 3.44256   |
| Q91ZJ5        | TLDGGLNVIQLETAVGAAIK                                                       | 1.07177002        | 2              | 5.31327   |
| Q91ZJ5        | TYNTDVPLVLMNSFNTDEDTKK                                                     | 1.14006904        | 2              | 4.49399   |
| <b>Q91ZU6</b> | <b>DYST Dystonin</b>                                                       | <b>1.04524197</b> | <b>0.42616</b> | <b>2</b>  |
| Q91ZU6        | LDMLQQIATR+Oxidation(2                                                     | 1.43661415        |                |           |

|               |                                                                                        |                   |                |           |
|---------------|----------------------------------------------------------------------------------------|-------------------|----------------|-----------|
| Q91ZU6        | SAETNIDQDITNLK                                                                         | 0.7847953         | 2              | 2.37363   |
| <b>Q91ZV0</b> | <b>MIA2 Melanoma inhibitory activity protein 2</b>                                     | <b>1.92991372</b> | <b>0.14171</b> | <b>2</b>  |
| Q91ZV0        | CGDLECETLISRVLALR                                                                      | 1.93153796        | 2              | 2.41905   |
| Q91ZV0        | KMLDQDDIVENDK+Oxidation(1                                                              | 1.58671437        |                |           |
| <b>Q91ZX7</b> | <b>LRP1 Prolow_density lipoprotein receptor_related protein 1</b>                      | <b>1.01007155</b> | <b>0.82797</b> | <b>6</b>  |
| Q91ZX7        | CLQGACVVNK                                                                             | 1.4325964         | 2              | 2.43256   |
| Q91ZX7        | GCHVNECLSR                                                                             | 1.00330971        | 2              | 2.70352   |
| Q91ZX7        | ILQEDFTCR                                                                              | 0.92223202        | 2              | 2.4945    |
| Q91ZX7        | MYDAQQQQVGTNK                                                                          | 1.62078698        | 2              | 4.43759   |
| Q91ZX7        | TVLWPNGSLDIPAGR                                                                        | 0.62536677        | 2              | 2.49056   |
| Q91ZX7        | VFFTDYGQIPK                                                                            | 0.99512177        | 2              | 3.27737   |
| <b>Q920A6</b> | <b>RISC Retinoid_inducible serine carboxypeptidase</b>                                 | <b>1.61808751</b> | <b>0.02097</b> | <b>2</b>  |
| Q920A6        | GLAEVSDIAEQVLNAVNK                                                                     | 1.62139853        | 3              | 5.64574   |
| Q920A6        | NTDGVNFYNI LTK                                                                         | 1.45515866        | 2              | 2.91284   |
| <b>Q920D2</b> | <b>DYR Dihydrofolate reductase</b>                                                     | <b>1.27340365</b> | <b>0.10231</b> | <b>4</b>  |
| Q920D2        | IMQEFESDTFFPEIDLEK                                                                     | 1.57433179        | 2              | 4.6773    |
| Q920D2        | LIEQPELASK                                                                             | 1.03504089        | 2              | 3.00358   |
| Q920D2        | LLPEYPGVLSEIQEEK                                                                       | 1.38807724        | 2              | 3.70405   |
| Q920D2        | NGDLPWPLLR                                                                             | 1.22038486        | 2              | 3.2312    |
| <b>Q920F3</b> | <b>KHDR2 KH domain_containing_RNA_binding_signal transduction_associated protein 2</b> | <b>1.11089509</b> | <b>0.34969</b> | <b>2</b>  |
| Q920F3        | LQEETGAKMSILGKSMR+Oxidation(8                                                          | 1.71821623        |                |           |
| Q920F3        | MSHALEEIKK                                                                             | 1.10799504        | 1              | 2.2597    |
| <b>Q920F5</b> | <b>DCMC Malonyl_CoA decarboxylase_mitochondrial</b>                                    | <b>1.0939755</b>  | <b>0.95926</b> | <b>5</b>  |
| Q920F5        | ADLLEAQALK                                                                             | 1.11642274        | 2              | 2.33896   |
| Q920F5        | EIAEVTGDPVHESLK                                                                        | 1.10427216        | 2              | 3.43761   |
| Q920F5        | ISECEAVHPVK                                                                            | 1.13169689        | 2              | 3.35816   |
| Q920F5        | LCSGLTASAMDELLR                                                                        | 0.79619211        | 2              | 2.30838   |
| Q920F5        | WLLGLLNVQGK                                                                            | 0.9901324         | 2              | 3.38123   |
| <b>Q920J4</b> | <b>TXNL1 Thioredoxin_like protein 1</b>                                                | <b>1.1090023</b>  | <b>0.82011</b> | <b>4</b>  |
| Q920J4        | AGCECLNESDEHGFNDCLR                                                                    | 1.13733946        | 3              | 4.03823   |
| Q920J4        | IDQYQGADAVGLEEK                                                                        | 0.99390283        | 2              | 4.82367   |
| Q920J4        | QHLENDPGSNEDTDIPK                                                                      | 1.47218573        | 2              | 2.38512   |
| Q920J4        | SEPTQALELTEDDIKEDGIVPLR                                                                | 1.87017795        | 2              | 3.40548   |
| <b>Q920L2</b> | <b>DHSA Succinate dehydrogenase [ubiquinone] flavoprotein subunit_mitochondrial</b>    | <b>1.07725917</b> | <b>0.91931</b> | <b>18</b> |
| Q920L2        | ACALSIAESCRPGDK                                                                        | 0.87486792        | 2              | 2.87019   |
| Q920L2        | AGLPCQDLFVQFHPTGIYAGCLITEGCR                                                           | 1.34227869        | 3              | 4.5069    |
| Q920L2        | ANAGEESVMNLDK                                                                          | 1.11212865        | 2              | 3.64589   |
| Q920L2        | GEGGILINSQGER                                                                          | 1.20371272        | 2              | 4.06212   |
| Q920L2        | GVIALCIEDGSIHR                                                                         | 1.17490647        | 2              | 3.35516   |
| Q920L2        | HTLSYVDTK                                                                              | 1.43141972        | 2              | 2.4893    |
| Q920L2        | HVNGQDQIVPGLYACGEAACASVHGANR                                                           | 1.1562608         | 3              | 6.76002   |
| Q920L2        | IDEYDYSKPIEGQQK                                                                        | 0.92599893        | 2              | 4.47603   |
| Q920L2        | KHTLSYVDTK                                                                             | 0.81564614        | 2              | 2.76582   |
| Q920L2        | NTIIATGGYGR                                                                            | 1.22987958        | 2              | 2.78549   |
| Q920L2        | SMQSHAAVFR                                                                             | 1.26829938        | 2              | 2.69007   |
| Q920L2        | TGHSLHLTYGR                                                                            | 1.02096953        | 2              | 2.95551   |
| Q920L2        | TLNEADCATVPPAIR                                                                        | 1.07902904        | 2              | 3.69084   |
| Q920L2        | TYFSCTSAHTSTGDGTAMVTR                                                                  | 1.11175556        | 2              | 5.69867   |
| Q920L2        | VGSVLQEGCEK                                                                            | 1.20696461        | 2              | 3.54096   |
| Q920L2        | VSDAISTQYPVVDHEFDVAVVVGAGGAGLR                                                         | 1.71391093        | 3              | 4.92184   |
| Q920L2        | VSQLYGDLQHLK                                                                           | 1.24408279        | 2              | 3.49626   |
| Q920L2        | VTLDYRPVIDK                                                                            | 1.03631299        | 2              | 2.97589   |

|               |                                                                               |                   |                |           |
|---------------|-------------------------------------------------------------------------------|-------------------|----------------|-----------|
| <b>Q920P0</b> | <b>DCXR L_xylulose reductase</b>                                              | <b>1.03044832</b> | <b>0.96283</b> | <b>7</b>  |
| Q920P0        | ALTNHTVYCSTK                                                                  | 2.45701729        | 2              | 3.15117   |
| Q920P0        | AVVQVSQIVAR                                                                   | 1.23818871        | 2              | 3.16954   |
| Q920P0        | GVPGAIVNVSSQASQR                                                              | 1.02632752        | 2              | 5.78407   |
| Q920P0        | SSMTTGSALPVDGGFLAT                                                            | 1.1660594         | 2              | 2.85738   |
| Q920P0        | STVLALQAAGAQQVAVSR                                                            | 1.13947643        | 2              | 3.9189    |
| Q920P0        | TREDLDSLVR                                                                    | 1.45582575        | 2              | 2.96284   |
| Q920P0        | VNAVNPVVMTPMGR                                                                | 1.5060403         | 2              | 3.44197   |
| <b>Q921F2</b> | <b>TADBP TAR DNA_binding protein 43</b>                                       | <b>1.15223519</b> | <b>0.00024</b> | <b>5</b>  |
| Q921F2        | FGGNPGGFGNQGGFGNSR                                                            | 1.11511521        | 2              | 4.41305   |
| Q921F2        | FTEYETQVK                                                                     | 1.44003714        | 2              | 2.63626   |
| Q921F2        | GISVHISNAEPK                                                                  | 0.86163951        | 2              | 2.52892   |
| Q921F2        | KDLKTGHSK                                                                     | 1.15116862        | 2              | 2.4425    |
| Q921F2        | TSDLIVLGLPWK                                                                  | 1.58694165        | 2              | 3.27269   |
| <b>Q921M3</b> | <b>SF3B3 Splicing factor 3B subunit 3</b>                                     | <b>1.00525588</b> | <b>0.88209</b> | <b>3</b>  |
| Q921M3        | FLAVGLVDNTR                                                                   | 1.5433559         | 2              | 2.83468   |
| Q921M3        | LPPNTNDEVDEPTGNK                                                              | 0.88222056        | 2              | 2.6862    |
| Q921M3        | TVLDPVTGDLSLTR                                                                | 1.02093332        | 2              | 2.66564   |
| <b>Q922F4</b> | <b>TBB6 Tubulin beta_6 chain</b>                                              | <b>1.19456941</b> | <b>0.0005</b>  | <b>7</b>  |
| Q922F4        | ALTVPQLTQQMFDK                                                                | 1.39919752        | 2              | 3.98424   |
| Q922F4        | ALTVPQLTQQMFDK+Oxidation(10                                                   | 1.20456038        |                |           |
| Q922F4        | GHYTEGAELVDSVLDDVVR                                                           | 1.35699463        | 2              | 6.63607   |
| Q922F4        | IREEYPDR                                                                      | 1.31235919        | 2              | 2.97651   |
| Q922F4        | MASTFIGNSTAIQELFK                                                             | 1.76555582        | 2              | 4.34616   |
| Q922F4        | NMMAACDPR                                                                     | 1.55922753        | 2              | 2.75148   |
| Q922F4        | NSSYFVEWIPNNVK                                                                | 1.42707769        | 2              | 4.74812   |
| <b>Q922J3</b> | <b>CLIP1 CAP_Gly domain_containing linker protein 1</b>                       | <b>1.0819437</b>  | <b>0.99431</b> | <b>2</b>  |
| Q922J3        | EMETMQAKLMK+Oxidation(4                                                       | 1.08298155        |                |           |
| Q922J3        | HEEILQNLQKMLADTEDK                                                            | 1.06026302        | 2              | 2.33487   |
| <b>Q923D2</b> |                                                                               | <b>1.35751935</b> | <b>0.88493</b> | <b>4</b>  |
| Q923D2        | HDLGHFMLR                                                                     | 1.15660778        | 3              | 3.3618    |
| Q923D2        | LQDVTDDHIR                                                                    | 1.35943454        | 2              | 3.16677   |
| Q923D2        | TGLTTLAQAVQAGYEVTVLR                                                          | 1.34955224        | 3              | 4.15661   |
| Q923D2        | YVAVMPPHIGDQPLTGAYTVTLDDGR                                                    | 1.50276611        | 3              | 4.19365   |
| <b>Q923K9</b> | <b>A1CF APOBEC1 complementation factor</b>                                    | <b>1.36412685</b> | <b>0.01838</b> | <b>3</b>  |
| Q923K9        | LAPQILEEICQK                                                                  | 2.54751792        | 2              | 2.90155   |
| Q923K9        | TGYSLVQENGQR                                                                  | 1.1695852         | 2              | 2.51915   |
| Q923K9        | VTEGVVDVIVYPSAADK                                                             | 1.23222624        | 2              | 3.78576   |
| <b>Q923M1</b> | <b>MSRA Mitochondrial peptide methionine sulfoxide reductase</b>              | <b>1.06160987</b> | <b>0.00047</b> | <b>2</b>  |
| Q923M1        | SAVYPTSAVQMEAAALK                                                             | 1.36801717        | 2              | 4.21521   |
| Q923M1        | VISAEELPGR                                                                    | 1.10234797        | 2              | 2.91798   |
| <b>Q923V8</b> | <b>SEP15 15 kDa selenoprotein</b>                                             | <b>1.1315391</b>  | <b>0.41487</b> | <b>3</b>  |
| Q923V8        | GCCQEAEQFETK                                                                  | 1.19325221        | 2              | 4.15683   |
| Q923V8        | LLDDNGNIAEELSILK                                                              | 1.13112894        | 2              | 4.0781    |
| Q923V8        | WNTDSVEEFLSEK                                                                 | 2.05411539        | 2              | 2.76854   |
| <b>Q924C3</b> | <b>ENPP1 Ectonucleotide pyrophosphatase/phosphodiesterase family member 1</b> | <b>2.33720772</b> | <b>0.11184</b> | <b>5</b>  |
| Q924C3        | AEYLHTWGGLLPVISK                                                              | 2.37167655        | 3              | 3.91723   |
| Q924C3        | ELESPAASLLAPMDLGEPELEK                                                        | 1.75002836        | 2              | 4.40713   |
| Q924C3        | GQPIWVTANHQEVR                                                                | 1.45038755        | 2              | 3.3361    |
| Q924C3        | SGTYFWPGSDVEIDGILPDIYK                                                        | 1.82235954        | 2              | 2.51833   |
| Q924C3        | SVSSDLGCTCDPSIVPIMDFEK                                                        | 1.69471728        | 2              | 3.87963   |
| <b>Q924S5</b> | <b>LONM Lon protease homolog_mitochondrial</b>                                | <b>0.87718776</b> | <b>0.96892</b> | <b>14</b> |
| Q924S5        | AGVTCILPAENR                                                                  | 0.96320728        | 2              | 2.31455   |

|               |                                                               |                   |                |          |
|---------------|---------------------------------------------------------------|-------------------|----------------|----------|
| Q924S5        | AQLSATVLTLLIK                                                 | 1.50473314        | 2              | 3.45383  |
| Q924S5        | AQSVLEEDHYGMEDVK                                              | 1.07273417        | 2              | 4.26816  |
| Q924S5        | EHQEALAVER                                                    | 1.28307827        | 2              | 2.51945  |
| Q924S5        | ELGLEKDDKDAIEEK                                               | 1.49156224        | 2              | 3.74027  |
| Q924S5        | FSVGGMTDVAEIK                                                 | 1.17644578        | 2              | 3.07037  |
| Q924S5        | GYQGDPSALLELLDPEQANFLDHYLDVPVDLSK                             | 1.31515474        | 3              | 5.09929  |
| Q924S5        | HVMDVVDEELSK                                                  | 0.84846603        | 2              | 3.62586  |
| Q924S5        | IVSGEAQTVHVTPELQDFVGKPVFTVER                                  | 1.38168869        | 3              | 5.92571  |
| Q924S5        | MEMINVSQYVAQEK                                                | 1.16191316        | 2              | 2.66099  |
| Q924S5        | QLEVEPEGLEPEAENK                                              | 1.12722102        | 2              | 4.35001  |
| Q924S5        | QSDENLDLAR                                                    | 1.272925          | 2              | 2.46775  |
| Q924S5        | TENPLVLIDEVDK                                                 | 1.26281183        | 2              | 2.99689  |
| Q924S5        | VLEFIAVSQLR                                                   | 1.23413925        | 2              | 2.77648  |
| <b>Q924W5</b> | <b>SMC6 Structural maintenance of chromosomes protein 6</b>   | <b>1.24849904</b> | <b>0.51608</b> | <b>2</b> |
| Q924W5        | ELDMKEKELQEK                                                  | 2.97700898        | 2              | 2.373    |
| Q924W5        | TKEQINQGEERLTELK                                              | 1.1473841         | 2              | 2.55773  |
| <b>Q99020</b> | <b>ROAA Heterogeneous nuclear ribonucleoprotein A/B</b>       | <b>1.37622061</b> | <b>1.3E-09</b> | <b>4</b> |
| Q99020        | EYFGQFGEIEAIELPIDPK                                           | 2.40745289        | 2              | 3.56033  |
| Q99020        | FGEVVDCTIK                                                    | 0.60849549        | 2              | 3.20895  |
| Q99020        | IFVGGLNPEATEEK                                                | 1.76826651        | 2              | 4.17422  |
| Q99020        | MFVGGLSWDTSK                                                  | 1.51840823        | 2              | 2.55725  |
| <b>Q99068</b> | <b>AMRP Alpha_2_macroglobulin receptor_associated protein</b> | <b>1.22988263</b> | <b>0.90488</b> | <b>2</b> |
| Q99068        | EELKHFEAKIEK                                                  | 1.17783124        | 2              | 2.43955  |
| Q99068        | HVESIGDPEHISR                                                 | 1.23228265        | 3              | 4.12023  |
| <b>Q99J14</b> | <b>PSMD6 26S proteasome non_ATPase regulatory subunit 6</b>   | <b>1.4673067</b>  | <b>0.21869</b> | <b>3</b> |
| Q99J14        | GAEILEVLHSLPAVR                                               | 1.85938622        | 2              | 2.98469  |
| Q99J14        | RLDEELEDAAEK                                                  | 1.8502948         | 2              | 3.18615  |
| Q99J14        | VNEIVETNRPDSK                                                 | 1.4562334         | 2              | 3.70418  |
| <b>Q99JW2</b> | <b>ACY1 Aminoacylase_1</b>                                    | <b>1.16425327</b> | <b>0.6712</b>  | <b>3</b> |
| Q99JW2        | FIEDTAAEK                                                     | 1.16356347        | 2              | 2.69077  |
| Q99JW2        | SVSIQYLEAVR                                                   | 1.74206054        | 2              | 2.56252  |
| Q99JW2        | TIHMTFVPDEEVGGHK                                              | 1.00714193        | 3              | 3.91934  |
| <b>Q99KK9</b> | <b>SYHM Probable histidyl_tRNA synthetase_mitochondrial</b>   | <b>1.33805112</b> | <b>0.21143</b> | <b>2</b> |
| Q99KK9        | IIAELWDAGIKAEMLYK+Oxidation(13)                               | 1.08400675        |                |          |
| Q99KK9        | YDLTVPFAR                                                     | 1.50992674        | 2              | 2.36435  |
| <b>Q99KN9</b> | <b>EPN4 Clathrin interactor 1</b>                             | <b>1.04639793</b> | <b>0.96509</b> | <b>3</b> |
| Q99KN9        | GEFKDEEETVTTK                                                 | 1.03776068        | 2              | 3.58409  |
| Q99KN9        | HIHITQATETTTTR                                                | 1.21801229        | 2              | 3.35389  |
| Q99KN9        | IGSTIDDTISK                                                   | 1.04638657        | 2              | 2.55054  |
| <b>Q99L04</b> | <b>DHRS1 Dehydrogenase/reductase SDR family member 1</b>      | <b>0.89794466</b> | <b>0.95422</b> | <b>3</b> |
| Q99L04        | ATAQEAQSLGGR                                                  | 0.87824246        | 2              | 3.32304  |
| Q99L04        | CVPVCDSSQSEVK                                                 | 1.18451393        | 2              | 4.30699  |
| Q99L04        | GQVCVVTGASR                                                   | 2.40437055        | 2              | 2.812    |
| <b>Q99LF4</b> | <b>RTCB tRNA_splicing ligase RtcB homolog</b>                 | <b>1.62297375</b> | <b>0.45594</b> | <b>5</b> |
| Q99LF4        | GLGHQVATDALVAMEK                                              | 1.15968469        | 2              | 3.69262  |
| Q99LF4        | NLDFQDVLDK                                                    | 1.75768583        | 2              | 3.08327  |
| Q99LF4        | NVTDVVNTCHDAGISK                                              | 1.39655797        | 2              | 4.33442  |
| Q99LF4        | NYNDELQFLDK                                                   | 1.81771984        | 2              | 3.18358  |
| Q99LF4        | TNLDESVDQPVK                                                  | 1.39863252        | 2              | 3.46662  |
| <b>Q99LH1</b> | <b>NOG2 Nucleolar GTP_binding protein 2</b>                   | <b>1.44183105</b> | <b>0.07555</b> | <b>2</b> |
| Q99LH1        | GGEPDMLTVSKMVLNDWQR+Oxidation(11)                             | 1.44183105        |                |          |

|               |                                                                         |                   |                |           |
|---------------|-------------------------------------------------------------------------|-------------------|----------------|-----------|
| Q99LH1        | GGEPDMLTVSKMVLNDWQR+Oxidation(5)                                        | 1.44183105        |                |           |
| <b>Q99M73</b> | <b>KRT84 Keratin_type II cuticular Hb4</b>                              | <b>1.08816418</b> | <b>0.99875</b> | <b>2</b>  |
| Q99M73        | CKLADLEGALQQAKQDMAR                                                     | 1.01925632        | 2              | 2.67274   |
| Q99M73        | EYQELMNVK                                                               | 1.09181466        | 1              | 2.09333   |
| <b>Q99M87</b> | <b>DNJA3 Dnaj homolog subfamily A member 3_mitochondrial</b>            | <b>0.94426583</b> | <b>0.44831</b> | <b>2</b>  |
| Q99M87        | GGPSVDPEELFR                                                            | 1.31955118        | 2              | 2.3512    |
| Q99M87        | GSITNPCVVCR                                                             | 0.94426226        | 2              | 2.97703   |
| <b>Q99ML5</b> | <b>PCYOX Prenylcysteine oxidase</b>                                     | <b>1.34201854</b> | <b>0.17035</b> | <b>2</b>  |
| Q99ML5        | ELGLSSVPASGGLVGVYNGK                                                    | 1.30687039        | 2              | 2.97188   |
| Q99ML5        | NFDPPIEEFNDPYQQLVTTLIK                                                  | 1.36160452        | 3              | 4.82437   |
| <b>Q99MS0</b> | <b>S14L2 SEC14_like protein 2</b>                                       | <b>1.05349829</b> | <b>0.9998</b>  | <b>6</b>  |
| Q99MS0        | AGEMTEVLPNQR                                                            | 1.01724164        | 2              | 3.56896   |
| Q99MS0        | AGEMTEVLPNQR+Oxidation(3)                                               | 1.29251108        |                |           |
| Q99MS0        | HISPDQLPVEYGGTMDPDGNPK                                                  | 0.8994834         | 3              | 4.96753   |
| Q99MS0        | INYGGDIPK                                                               | 1.01319556        | 2              | 2.41994   |
| Q99MS0        | QQYEHSVQISR                                                             | 1.09634737        | 2              | 2.39323   |
| Q99MS0        | YNSHMVPEDGTLTCEPDIYVLR                                                  | 1.1148208         | 3              | 3.57075   |
| <b>Q99MZ8</b> | <b>LASP1 LIM and SH3 domain protein 1</b>                               | <b>0.97855935</b> | <b>0.99975</b> | <b>8</b>  |
| Q99MZ8        | GFSVVADTPELQR                                                           | 0.86904826        | 2              | 3.64757   |
| Q99MZ8        | MGPSGGEGIEPER                                                           | 1.02372455        | 2              | 3.35693   |
| Q99MZ8        | MGPSGGEGIEPERR                                                          | 1.14201787        | 2              | 2.42232   |
| Q99MZ8        | QQSELQSQVR                                                              | 1.00693413        | 2              | 2.98442   |
| Q99MZ8        | QSFTMVADTPENLR                                                          | 0.88412812        | 2              | 3.56272   |
| Q99MZ8        | TGDTGMLPANYVEAI                                                         | 1.62502642        | 1              | 2.20438   |
| Q99MZ8        | TQDQISNIK                                                               | 1.00261766        | 2              | 2.70913   |
| Q99MZ8        | YHEEFK                                                                  | 1.03173579        | 2              | 2.41015   |
| <b>Q99N27</b> | <b>SNX1 Sorting nexin_1</b>                                             | <b>1.2777092</b>  | <b>0.31632</b> | <b>2</b>  |
| Q99N27        | LQEVECEEQR                                                              | 0.98989222        | 2              | 2.49566   |
| Q99N27        | SLAMLGSSDNTALSR                                                         | 1.73023975        | 2              | 3.11309   |
| <b>Q99NA5</b> | <b>IDH3A Isocitrate dehydrogenase [NAD] subunit alpha_mitochondrial</b> | <b>1.41741627</b> | <b>0.38179</b> | <b>4</b>  |
| Q99NA5        | ENTEGEYSGIEHVIVDGVVQSIK                                                 | 1.24824888        | 3              | 3.34318   |
| Q99NA5        | HMGLFDHAAK                                                              | 2.16166474        | 3              | 3.41      |
| Q99NA5        | IEAACFATIK                                                              | 1.33636596        | 2              | 2.61438   |
| Q99NA5        | NVTAIQPGPGK                                                             | 1.39238757        | 2              | 2.54209   |
| <b>Q99NB7</b> | <b>ACO12 Acyl_coenzyme A thioesterase 12</b>                            | <b>1.02615203</b> | <b>0.97862</b> | <b>2</b>  |
| Q99NB7        | GSISNTNVEALK                                                            | 1.05947308        | 2              | 2.56565   |
| Q99NB7        | KGSISNTNVEALK                                                           | 0.82806867        | 2              | 3.25764   |
| <b>Q99NB9</b> | <b>SF3B1 Splicing factor 3B subunit 1</b>                               | <b>1.19973524</b> | <b>0.13904</b> | <b>3</b>  |
| Q99NB9        | EWMRICELELLK+Oxidation(2)                                               | 0.50934919        |                |           |
| Q99NB9        | GDTPGHATPGHGGATSSAR                                                     | 1.87502571        | 3              | 3.77355   |
| Q99NB9        | WDQTADQTPGATPK                                                          | 0.44756003        | 2              | 2.515     |
| <b>Q99P39</b> | <b>NFS1 Cysteine desulfurase_mitochondrial</b>                          | <b>1.17057125</b> | <b>0.62429</b> | <b>2</b>  |
| Q99P39        | AIGTDEDLAHSIR                                                           | 0.62697867        | 2              | 2.71838   |
| Q99P39        | VEALQSGGQER                                                             | 1.17479422        | 2              | 2.99854   |
| <b>Q99PF5</b> | <b>FUBP2 Far upstream element_binding protein 2</b>                     | <b>1.0733277</b>  | <b>0.67618</b> | <b>9</b>  |
| Q99PF5        | AINQQTGAFVEISR                                                          | 1.24760959        | 2              | 3.49093   |
| Q99PF5        | GGGGPGGGGPGGGGASGGPSQPPGGGGPGIR                                         | 1.19564924        | 2              | 6.94084   |
| Q99PF5        | IGGDAATTNNNTPDFGFGGQK                                                   | 1.97381233        | 2              | 4.96503   |
| Q99PF5        | IGQQPQQPGAPPQQDYTK                                                      | 0.97219926        | 2              | 4.04874   |
| Q99PF5        | IINDLLQSLR                                                              | 1.75812903        | 2              | 3.1882    |
| Q99PF5        | SVSLTGAPESVQK                                                           | 0.96931349        | 2              | 2.56959   |
| Q99PF5        | VGGGIDVPVPR                                                             | 0.98670864        | 2              | 3.21116   |
| Q99PF5        | VQJSPDSGGLPER                                                           | 0.91322689        | 2              | 2.48671   |
| Q99PF5        | VQQACEMVMDILR                                                           | 1.3063192         | 2              | 2.34838   |
| <b>Q99PL5</b> | <b>RRBP1 Ribosome_binding protein 1</b>                                 | <b>1.15100856</b> | <b>0.00108</b> | <b>20</b> |



|               |                                        |                   |                |           |
|---------------|----------------------------------------|-------------------|----------------|-----------|
| Q99PL5        | AMEALALAER                             | 0.70790955        | 2              | 2.93254   |
| Q99PL5        | DALNQATSQVESK                          | 1.48829697        | 2              | 3.6129    |
| Q99PL5        | EAEETQNSLQAECQYR                       | 1.37941158        | 2              | 5.36002   |
| Q99PL5        | EHTSHLEAELEK                           | 1.38846731        | 2              | 3.49551   |
| Q99PL5        | EQEIAAVQAR                             | 1.90967228        | 2              | 2.48333   |
| Q99PL5        | GELESSDQVR                             | 1.68507825        | 2              | 3.13698   |
| Q99PL5        | HLEDIVEK                               | 1.68776284        | 2              | 2.38287   |
| Q99PL5        | HMAAASAECQNYAK                         | 1.47656781        | 2              | 4.47872   |
| Q99PL5        | HMAAASAECQNYAK+Oxidation(1             | 1.24505127        |                |           |
| Q99PL5        | IQEELEK                                | 1.13562997        | 1              | 2.33836   |
| Q99PL5        | LIEILSEK                               | 1.57022824        | 1              | 2.15009   |
| Q99PL5        | LKELESQVSCLEK                          | 1.18555746        | 2              | 4.27782   |
| Q99PL5        | LLATEQEDAAVAK                          | 1.03020433        | 2              | 3.70648   |
| Q99PL5        | LQQENSILR                              | 0.90403867        | 2              | 2.67997   |
| Q99PL5        | LQSSEVEVK                              | 1.46879751        | 2              | 2.73472   |
| Q99PL5        | QLLLESQSQLDEAK                         | 0.75246629        | 2              | 2.3343    |
| Q99PL5        | TILAETEGMLK                            | 2.03346487        | 2              | 2.78465   |
| Q99PL5        | TLQEQLENGPNTQLAR                       | 1.07627309        | 2              | 5.0442    |
| Q99PL5        | TLVSTVGSMVFSEGEAQR                     | 1.42403443        | 3              | 4.52774   |
| Q99PL5        | VEPAVSSIVNSIQVLASK                     | 1.13140108        | 2              | 4.42531   |
| <b>Q99PP2</b> |                                        | <b>1.19937437</b> | <b>1.5E-06</b> | <b>69</b> |
| Q99PP2        | AAGSLLTDECR                            | 1.02562367        | 2              | 2.99542   |
| Q99PP2        | ADSAEYSVMTTGGQSSAK                     | 3.2528707         |                |           |
| Q99PP2        | AEVSELPVVR                             | 1.0298733         | 2              | 3.11991   |
| Q99PP2        | ALLTPVAIAAGR                           | 1.60946743        |                |           |
| Q99PP2        | ASMMGQRASLLTAR+Oxidation(2)Oxidation(3 | 1.00025984        |                |           |
| Q99PP2        | AVAENQPFLIEAMTYR                       | 1.22671717        | 2              | 3.5909    |
| Q99PP2        | AVDEAADALLK                            | 1.39523456        | 2              | 2.59679   |
| Q99PP2        | DQMVKNNHFTLK+Oxidation(2               | 0.89723472        |                |           |
| Q99PP2        | EKIEKK                                 | 1.07663854        |                |           |
| Q99PP2        | EELEKMK                                | 0.6017598         | 1              | 1.93655   |
| Q99PP2        | EIAGATPYITAAEEK                        | 2.02167469        | 2              | 3.12933   |
| Q99PP2        | EKMKNPELFGGEKK                         | 1.9301454         |                |           |
| Q99PP2        | ELDSITPDITPGWK                         | 2.23626249        | 2              | 2.938     |
| Q99PP2        | EQVIESRRQMQAVK                         | 1.01650881        |                |           |
| Q99PP2        | FEFEQDLSEK                             | 1.32722606        | 2              | 2.6752    |
| Q99PP2        | FFRPFLQAPGDLTVQEGK                     | 1.25791857        |                |           |
| Q99PP2        | FKLINSTNIR                             | 2.12489069        |                |           |
| Q99PP2        | GIEQAVQSHAVAEER                        | 1.33817851        | 2              | 4.97611   |
| Q99PP2        | GNIYSLNEGyak                           | 1.16356753        | 2              | 3.99729   |
| Q99PP2        | GSAAAAATTSTREAEGAERR                   | 1.16841547        |                |           |
| Q99PP2        | GVYSEETLR                              | 1.28388009        | 2              | 2.46495   |
| Q99PP2        | HFVTISSPLATQIPQAVGAAYAAK               | 0.91881015        | 2              | 4.91951   |
| Q99PP2        | HLQTYGEHYPLDHFdk                       | 0.9150221         | 3              | 3.69136   |
| Q99PP2        | HVIHTVGPIAVGQPTASQAAELR                | 1.3312127         | 3              | 5.34375   |
| Q99PP2        | IENWPFSIKPTLR                          | 1.22449994        |                |           |
| Q99PP2        | IGHHSTSDSSAYR                          | 0.9300311         | 3              | 4.53531   |
| Q99PP2        | INLSNNK                                | 1.4216168         |                |           |
| Q99PP2        | KAMQEINYGPSDNSIKLVR                    | 1.57863187        |                |           |
| Q99PP2        | KGNIYSLNEGyak                          | 1.36870702        | 2              | 4.48673   |
| Q99PP2        | KLQHELEEAER                            | 3.11114583        | 3              | 4.11516   |
| Q99PP2        | LEFIQPNVISGPIIYR                       | 0.57640565        | 2              | 2.43712   |
| Q99PP2        | LFDDRLESIIQK                           | 1.21375309        |                |           |
| Q99PP2        | LGDAVEQGVINNSVLGYFIGR                  | 1.66599346        | 2              | 3.79255   |
| Q99PP2        | LIEVEGPNLKG                            | 1.3365685         |                |           |
| Q99PP2        | LKLVMNFIYQTK                           | 1.02758019        |                |           |
| Q99PP2        | LMQVNDTLTSEDAGLR                       | 0.66801015        |                |           |

|               |                                                                                            |                   |                |          |
|---------------|--------------------------------------------------------------------------------------------|-------------------|----------------|----------|
| Q99PP2        | LQHELEEAER                                                                                 | 2.70169316        | 2              | 3.69329  |
| Q99PP2        | LQHELEEAERADIAESQVNK                                                                       | 2.74190939        | 3              | 3.88024  |
| Q99PP2        | MKKNMEQTVK+Oxidation(4                                                                     | 1.23834151        |                |          |
| Q99PP2        | MNLQDELDELK                                                                                | 1.05195184        | 2              | 2.3215   |
| Q99PP2        | MNLQDELDELK+Oxidation(0                                                                    | 0.69770998        |                |          |
| Q99PP2        | MQQVEASLQPETLK+Oxidation(0                                                                 | 1.47871722        |                |          |
| Q99PP2        | MQQVEASLQPETLKK+Oxidation(0                                                                | 2.31100767        |                |          |
| Q99PP2        | NESGLDSGRSQR                                                                               | 0.86151764        |                |          |
| Q99PP2        | NNGYAISTPTSEQYR                                                                            | 0.61206517        | 2              | 3.81349  |
| Q99PP2        | QGQIINPSEDPHLPQEEVLK                                                                       | 0.39146487        | 2              | 2.64279  |
| Q99PP2        | QRAEQETKLLK                                                                                | 1.73563401        |                |          |
| Q99PP2        | QTCLKTVVLLTDNK                                                                             | 1.07941442        |                |          |
| Q99PP2        | QTITAQNAAVQAVK                                                                             | 1.39975491        | 2              | 3.96323  |
| Q99PP2        | QYLLNQGWWDDEEQK                                                                            | 0.76642976        | 2              | 3.43724  |
| Q99PP2        | RAALQAEIEELR                                                                               | 3.83482902        | 2              | 3.75052  |
| Q99PP2        | RFSTEVGSDCVSDNDR                                                                           | 2.8490313         |                |          |
| Q99PP2        | SCYDLSCHAR                                                                                 | 1.32759171        | 2              | 2.33992  |
| Q99PP2        | SCYLSLDLLEHR                                                                               | 0.93564016        | 2              | 2.63077  |
| Q99PP2        | SLEDALNQTATVTR                                                                             | 0.67943596        | 2              | 4.42391  |
| Q99PP2        | SMTLLNTMDR                                                                                 | 1.39835545        | 2              | 2.75019  |
| Q99PP2        | SVDEVNYWDK                                                                                 | 0.61678907        | 2              | 2.56256  |
| Q99PP2        | TAMDNSEIAGEK                                                                               | 1.71787707        | 2              | 2.41014  |
| Q99PP2        | TAMDNSEIAGEKK                                                                              | 1.71424918        | 2              | 2.50219  |
| Q99PP2        | TLHVEEVVPSVIEPSFGLGR                                                                       | 1.20374532        | 3              | 3.68518  |
| Q99PP2        | TSSAEMPTIPLGSAVEAIR                                                                        | 0.77482927        | 2              | 3.88487  |
| Q99PP2        | TWTAADMAAQITR+Oxidation(6                                                                  | 1.07463044        |                |          |
| Q99PP2        | VDDSSGSIGR                                                                                 | 1.67705376        | 2              | 2.86711  |
| Q99PP2        | VDGNDVFAVYNATK                                                                             | 0.56823619        | 2              | 2.85901  |
| Q99PP2        | VMEAFEQAER                                                                                 | 0.53103354        | 2              | 3.28826  |
| Q99PP2        | VTMQNKISEATQEEDRL+Oxidation(2                                                              | 1.00392999        |                |          |
| Q99PP2        | VVSQYHELVVQAR                                                                              | 2.76153499        | 2              | 3.52323  |
| Q99PP2        | YNENHQHGK                                                                                  | 0.92794863        |                |          |
| Q99PP2        | YSTSSSGVTAGK                                                                               | 1.00146341        | 2              | 2.89248  |
| <b>Q99PV0</b> | <b>PRP8 Pre_mRNA_processing_splicing factor 8</b>                                          | <b>1.55051409</b> | <b>0.43431</b> | <b>2</b> |
| Q99PV0        | AAVMHDILDMMPEGIK+Oxidation(3)Oxidation(10                                                  | 1.55051409        |                |          |
| Q99PV0        | AAVMHDILDMMPEGIK+Oxidation(3)Oxidation(9                                                   | 1.55051409        |                |          |
| <b>Q9CPQ1</b> | <b>COX6C Cytochrome c oxidase subunit 6C</b>                                               | <b>1.31773903</b> | <b>0.47251</b> | <b>2</b> |
| Q9CPQ1        | FGVAEPR                                                                                    | 1.30534438        | 2              | 2.45255  |
| Q9CPQ1        | NYDSMKDFEEMR                                                                               | 1.33550846        | 2              | 3.76256  |
| <b>Q9CQ75</b> | <b>NDUA2 NADH dehydrogenase [ubiquinone] 1 alpha subcomplex subunit 2</b>                  | <b>1.8253282</b>  | <b>0.26056</b> | <b>2</b> |
| Q9CQ75        | EIRVHLCQRSPGSQGVV                                                                          | 1.9412208         | 2              | 2.33404  |
| Q9CQ75        | TVSLNLSADEVTR                                                                              | 1.32463349        | 2              | 2.41194  |
| <b>Q9CQS8</b> | <b>SC61B Protein transport protein Sec61 subunit beta</b>                                  | <b>1.13324249</b> | <b>0.61852</b> | <b>2</b> |
| Q9CQS8        | FYTEDSPGLK                                                                                 | 1.11169264        | 2              | 2.43288  |
| Q9CQS8        | TTSAGTGGMWR                                                                                | 1.37471564        | 2              | 2.34406  |
| <b>Q9CQZ5</b> | <b>NDUA6 NADH dehydrogenase [ubiquinone] 1 alpha subcomplex subunit 6</b>                  | <b>1.43777723</b> | <b>0.23965</b> | <b>3</b> |
| Q9CQZ5        | EVPNTVHLMQLDITVK                                                                           | 1.76785766        | 2              | 2.49098  |
| Q9CQZ5        | FFHETETPRPK                                                                                | 1.48914222        | 2              | 2.90883  |
| Q9CQZ5        | VVDLLVIK                                                                                   | 1.33884245        | 2              | 2.93884  |
| <b>Q9CRB9</b> | <b>CHCH3 Coiled_coil_helix_coiled_coil_helix domain_containing protein 3_mitochondrial</b> | <b>0.94955692</b> | <b>0.99955</b> | <b>2</b> |
| Q9CRB9        | VAEELALEQAK                                                                                | 0.92467503        | 2              | 3.64654  |
| Q9CRB9        | YEYHPVCADLQTK                                                                              | 0.98939778        | 2              | 3.78162  |

|               |                                                                               |                   |                |          |
|---------------|-------------------------------------------------------------------------------|-------------------|----------------|----------|
| <b>Q9CTN4</b> | <b>RHBT3 Rho_related BTB domain_containing protein 3</b>                      | <b>1.48201766</b> | <b>0.68411</b> | <b>2</b> |
| Q9CTN4        | ELASMNLDIVDLLK                                                                | 1.48335544        | 2              | 2.5715   |
| Q9CTN4        | LKDSGDVSDIIEK                                                                 | 1.35771132        | 2              | 2.46851  |
| <b>Q9CW42</b> | <b>MOSC1 MOSC domain_containing protein 1_mitochondrial</b>                   | <b>1.1650043</b>  | <b>0.89476</b> | <b>2</b> |
| Q9CW42        | DLLLPIPPATNPLLQCR                                                             | 0.8903792         | 3              | 3.51864  |
| Q9CW42        | GLSVSEAECTAMGLR                                                               | 1.18571673        | 2              | 3.90406  |
| <b>Q9CWH6</b> | <b>PSA7L Proteasome subunit alpha type_7_like</b>                             | <b>0.9945686</b>  | <b>0.72975</b> | <b>4</b> |
| Q9CWH6        | AITVFPDGHFLFQVEYAQEAVK                                                        | 1.1688518         | 2              | 4.46849  |
| Q9CWH6        | ALLEVVQSGGK                                                                   | 1.02330632        | 2              | 3.03472  |
| Q9CWH6        | LTVEDPVTVEYITR                                                                | 1.55732698        | 2              | 4.0456   |
| Q9CWH6        | LYQTDPSGTYHAWK                                                                | 0.9246923         | 2              | 2.89263  |
| <b>Q9CWK8</b> | <b>SNX2 Sorting nexin_2</b>                                                   | <b>1.12817568</b> | <b>0.85622</b> | <b>4</b> |
| Q9CWK8        | AVNTQALSGAGILR                                                                | 1.22338851        | 2              | 3.21274  |
| Q9CWK8        | QQQFENLDQQLR                                                                  | 1.05841376        | 2              | 2.51612  |
| Q9CWK8        | WEDAQITLLK                                                                    | 1.17154405        | 2              | 2.47912  |
| Q9CWK8        | YLESLVQTQQQLIK                                                                | 1.25932611        | 2              | 4.00882  |
| <b>Q9CWL2</b> | <b>CASZ1 Zinc finger protein castor homolog 1</b>                             | <b>1.49569666</b> | <b>0.15156</b> | <b>2</b> |
| Q9CWL2        | ISASKGLISPMMAR+Oxidation(10                                                   | 1.49569666        |                |          |
| Q9CWL2        | ISASKGLISPMMAR+Oxidation(11                                                   | 1.49569666        |                |          |
| <b>Q9CXS4</b> | <b>CENPV Centromere protein V</b>                                             | <b>2.04282064</b> | <b>0.00037</b> | <b>2</b> |
| Q9CXS4        | LLDTFEYQGLVK                                                                  | 2.05572187        | 2              | 3.90584  |
| Q9CXS4        | SNPGGFGIAPHCLDEGTVR                                                           | 1.41110535        | 2              | 2.56592  |
| <b>Q9CYN2</b> | <b>SPCS2 Signal peptidase complex subunit 2</b>                               | <b>1.2097535</b>  | <b>0.74292</b> | <b>2</b> |
| Q9CYN2        | LHDSLATER                                                                     | 0.93416957        | 2              | 2.6823   |
| Q9CYN2        | YVENFGLIDGR                                                                   | 1.48716991        | 2              | 2.8862   |
| <b>Q9CYW4</b> | <b>HDHD3 Haloacid dehalogenase_like hydrolase domain_containing protein 3</b> | <b>1.27635328</b> | <b>0.58772</b> | <b>2</b> |
| Q9CYW4        | LEDILTGLGLR                                                                   | 1.02713634        | 2              | 4.38331  |
| Q9CYW4        | RLEDILTGLGLR                                                                  | 1.3084039         | 3              | 3.53366  |
| <b>Q9CZY3</b> | <b>UB2V1 Ubiquitin_conjugating enzyme E2 variant 1</b>                        | <b>0.94876908</b> | <b>0.99616</b> | <b>3</b> |
| Q9CZY3        | LLEELEEGQK                                                                    | 0.96351393        | 1              | 2.98371  |
| Q9CZY3        | VNMSGVSSNGVVDP                                                                | 0.87639934        | 2              | 3.10704  |
| Q9CZY3        | WTGMIIGPPR                                                                    | 1.01809342        | 2              | 2.86174  |
| <b>Q9D024</b> | <b>CC47 Coiled_coil domain_containing protein 47</b>                          | <b>1.52278134</b> | <b>0.06812</b> | <b>3</b> |
| Q9D024        | ERIMNEEDPEKQR                                                                 | 1.57937463        | 2              | 2.45902  |
| Q9D024        | IMQEEGQPLKLPDTK                                                               | 0.73959866        | 2              | 3.19694  |
| Q9D024        | RLEEAALR                                                                      | 1.49921332        | 2              | 2.60542  |
| <b>Q9D0M3</b> | <b>CY1 Cytochrome c1_heme protein_mitochondrial</b>                           | <b>1.37881922</b> | <b>1.9E-06</b> | <b>5</b> |
| Q9D0M3        | ALAEVEVQDGPNDGEMFMRPGK                                                        | 2.08834935        | 3              | 4.23743  |
| Q9D0M3        | GLLSSLDHTSIR                                                                  | 1.08579897        | 2              | 3.02922  |
| Q9D0M3        | HGGEDYVFSLLTGYCEPPTGVSLR                                                      | 1.60379654        | 3              | 5.55728  |
| Q9D0M3        | HLVGVCYTEEEAK                                                                 | 1.59671797        | 2              | 3.83048  |
| Q9D0M3        | LSDYFPKYPNPEAAR                                                               | 1.27208295        | 3              | 3.89529  |
| <b>Q9D0S9</b> | <b>HINT2 Histidine triad nucleotide_binding protein 2_mitochondrial</b>       | <b>1.35204593</b> | <b>0.00176</b> | <b>3</b> |
| Q9D0S9        | DVAPQAPVHFLVIPR                                                               | 0.83455696        | 2              | 2.94313  |
| Q9D0S9        | ISQAEEDDQQLLGHLLLVAK                                                          | 1.45768844        | 2              | 4.73959  |
| Q9D0S9        | SLPADILYEDQQCLVFR                                                             | 1.99016461        | 2              | 3.54147  |
| <b>Q9D172</b> | <b>ES1 ES1 protein homolog_mitochondrial</b>                                  | <b>1.19546626</b> | <b>0.00478</b> | <b>3</b> |
| Q9D172        | GVEVTVGHEQEEGGK                                                               | 1.01304779        | 2              | 4.07892  |
| Q9D172        | ITSLAQLNAANHDAIIFPGGFGAAK                                                     | 1.87833077        | 3              | 4.59366  |
| Q9D172        | NLSTFAVDGK                                                                    | 1.19521245        | 1              | 2.44705  |
| <b>Q9D180</b> | <b>WDR65 WD repeat_containing protein 65</b>                                  | <b>1.04264798</b> | <b>0.48438</b> | <b>2</b> |

|               |                                                                    |                   |                |           |
|---------------|--------------------------------------------------------------------|-------------------|----------------|-----------|
| Q9D180        | ERDLEALVR                                                          | 0.71122202        | 2              | 2.56195   |
| Q9D180        | KNQELEK                                                            | 1.13562997        | 1              | 2.17912   |
| <b>Q9D1M7</b> | <b>FKB11 Peptidyl_prolyl cis_trans isomerase FKBP11</b>            | <b>1.1998645</b>  | <b>0.36085</b> | <b>2</b>  |
| Q9D1M7        | IIDTSLTRDPLVIELGQK                                                 | 1.32692472        | 3              | 3.42869   |
| Q9D1M7        | QVIPGLEQSLDMCVGEK                                                  | 1.15371762        | 2              | 3.19027   |
| <b>Q9D1Q6</b> | <b>ERP44 Endoplasmic reticulum resident protein 44</b>             | <b>1.16506818</b> | <b>0.12894</b> | <b>4</b>  |
| Q9D1Q6        | MNPAVFLSLADLR+Oxidation(0)                                         | 3.05204139        |                |           |
| Q9D1Q6        | NIIGYFEQK                                                          | 1.19107484        | 1              | 2.37718   |
| Q9D1Q6        | SNPVHEIQSLDEVNLDLR                                                 | 1.16255111        | 2              | 5.56591   |
| Q9D1Q6        | VDCDQHSDIAQR                                                       | 1.12180175        | 2              | 3.62531   |
| <b>Q9D2U9</b> | <b>H2B3A Histone H2B type 3_A</b>                                  | <b>1.79484965</b> | <b>9.9E-20</b> | <b>5</b>  |
| Q9D2U9        | AMGIMNSFVNDIFER                                                    | 2.3778107         | 2              | 5.12262   |
| Q9D2U9        | AMGIMNSFVNDIFER+Oxidation(1)                                       | 1.67539964        |                |           |
| Q9D2U9        | AMGIMNSFVNDIFER+Oxidation(1)Oxidation(4)                           | 1.3571525         |                |           |
| Q9D2U9        | AMGIMNSFVNDIFER+Oxidation(4)                                       | 1.68516618        |                |           |
| Q9D2U9        | LLPGELAK                                                           | 1.48793739        | 2              | 2.5265    |
| <b>Q9D417</b> | <b>FBX24 F_box only protein 24</b>                                 | <b>1.34029577</b> | <b>0.71333</b> | <b>2</b>  |
| Q9D417        | MKEIVGWMPMLAAQK+Oxidation(7)                                       | 1.9301454         |                |           |
| Q9D417        | RSCPSCGLEAGSEKK                                                    | 1.33234399        | 2              | 2.4098    |
| <b>Q9D662</b> | <b>SC23B Protein transport protein Sec23B</b>                      | <b>2.3004373</b>  | <b>0.21926</b> | <b>2</b>  |
| Q9D662        | HLLQAPLDDAQEILQAR                                                  | 1.76009092        | 3              | 3.98888   |
| Q9D662        | IDMNLDLLGELQR                                                      | 2.37788775        | 2              | 4.12283   |
| <b>Q9D6M3</b> | <b>GHC1 Mitochondrial glutamate carrier 1</b>                      | <b>1.6547897</b>  | <b>0.0899</b>  | <b>3</b>  |
| Q9D6M3        | GAAVNLTIVTPEK                                                      | 1.88921302        | 2              | 3.3446    |
| Q9D6M3        | GVNEDTYSGLDCAR                                                     | 1.23426479        | 2              | 4.71079   |
| Q9D6M3        | NHGIAGLYK                                                          | 1.62620326        | 1              | 2.21762   |
| <b>Q9D6Y9</b> | <b>GLGB 1_4_alpha_glucan_branching enzyme</b>                      | <b>1.29811594</b> | <b>0.11133</b> | <b>11</b> |
| Q9D6Y9        | CVAYAESHDAQALVGDK                                                  | 1.38398367        | 2              | 5.01181   |
| Q9D6Y9        | EFKDEDWNMGNIIVYLTNR                                                | 1.24533259        | 3              | 3.30356   |
| Q9D6Y9        | FLNDFDR                                                            | 1.44559226        | 2              | 2.40365   |
| Q9D6Y9        | GTHDLWDSR                                                          | 1.42944019        | 2              | 2.74207   |
| Q9D6Y9        | GYESFGIHR                                                          | 1.4484438         | 2              | 2.37497   |
| Q9D6Y9        | IVLSDAAEYGGHQR                                                     | 1.09115195        | 2              | 4.55543   |
| Q9D6Y9        | IYESHVGISSEHGK                                                     | 1.34210235        | 2              | 4.5919    |
| Q9D6Y9        | NSEDGLNMFDDGTDCYFHSQPR                                             | 1.64768435        | 3              | 3.46496   |
| Q9D6Y9        | QFNLTDDDLLR                                                        | 1.21702099        | 2              | 2.73187   |
| Q9D6Y9        | RQFNLTDDDLLR                                                       | 1.19343917        | 2              | 3.20689   |
| Q9D6Y9        | WELYIPPK                                                           | 1.54467105        | 2              | 2.5054    |
| <b>Q9D6Z1</b> | <b>NOP56 Nucleolar protein 56</b>                                  | <b>1.30600176</b> | <b>0.38668</b> | <b>2</b>  |
| Q9D6Z1        | ELNEEKLEK                                                          | 1.24805783        | 2              | 2.44064   |
| Q9D6Z1        | IDCFSEVPTSVFGEK                                                    | 1.51875291        | 2              | 2.53695   |
| <b>Q9D7B6</b> | <b>ACAD8 Isobutyryl_CoA dehydrogenase_mitochondrial</b>            | <b>0.97179795</b> | <b>0.50811</b> | <b>6</b>  |
| Q9D7B6        | AVIFEDCAVPVANR                                                     | 0.78644548        | 2              | 3.80757   |
| Q9D7B6        | FASYCLTEPGSGSDAASLLTSAK                                            | 2.4673867         | 2              | 4.50287   |
| Q9D7B6        | IGTEGQGFLIAMK                                                      | 0.72617816        | 2              | 3.01147   |
| Q9D7B6        | TAAVALQEER                                                         | 1.30418021        | 2              | 3.19025   |
| Q9D7B6        | TDVGGSGLSR                                                         | 1.64038212        | 2              | 2.50662   |
| Q9D7B6        | VHQILEGSNEVMR                                                      | 1.20925672        | 2              | 3.39504   |
| <b>Q9D7P6</b> | <b>ISCU Iron_sulfur cluster assembly enzyme ISCU_mitochondrial</b> | <b>1.01282262</b> | <b>0.90368</b> | <b>2</b>  |
| Q9D7P6        | NVGTGLVGAPACGDVMK                                                  | 1.0113717         | 2              | 3.61298   |
| Q9D7P6        | VVDHYENPR                                                          | 1.19260462        | 2              | 2.51709   |
| <b>Q9D7X8</b> | <b>GGCT Gamma_glutamylcyclotransferase</b>                         | <b>1.35438695</b> | <b>0.33277</b> | <b>2</b>  |
| Q9D7X8        | ISDEMEDIK                                                          | 1.35896089        | 2              | 2.74569   |

|               |                                                                                  |                   |                |          |
|---------------|----------------------------------------------------------------------------------|-------------------|----------------|----------|
| Q9D7X8        | SNISLDEQEGVK                                                                     | 1.35434161        | 2              | 3.43341  |
| <b>Q9D819</b> | <b>IPYR Inorganic pyrophosphatase</b>                                            | <b>1.5910071</b>  | <b>5.3E-05</b> | <b>5</b> |
| Q9D819        | GISCMNTTVSESPFK                                                                  | 1.51658026        | 2              | 5.1814   |
| Q9D819        | GQYISPFHDVPIYADK                                                                 | 1.54896452        | 2              | 3.20145  |
| Q9D819        | GQYISPFHDVPIYADKDVFMVVEVPR                                                       | 1.48706941        | 3              | 5.18851  |
| Q9D819        | VLGILAMIDEGETDWK                                                                 | 1.79043826        | 2              | 4.11798  |
| Q9D819        | YVANLFPYK                                                                        | 1.17956049        | 1              | 2.05646  |
| <b>Q9D880</b> | <b>TIM50 Mitochondrial import inner membrane translocase subunit TIM50</b>       | <b>1.22168422</b> | <b>0.30202</b> | <b>3</b> |
| Q9D880        | TIALNQVEDVR                                                                      | 0.91890762        | 2              | 2.95796  |
| Q9D880        | TVLEHYALEDDPLEAFK                                                                | 1.21175767        | 2              | 4.70519  |
| Q9D880        | VLLDLSAFLK                                                                       | 1.81226871        | 2              | 2.34876  |
| <b>Q9D8W5</b> | <b>PSD12 26S proteasome non_ATPase regulatory subunit 12</b>                     | <b>1.79709395</b> | <b>0.06998</b> | <b>3</b> |
| Q9D8W5        | LQEVITLLSLEK                                                                     | 1.68714858        | 2              | 3.79144  |
| Q9D8W5        | TASDMVSTSR                                                                       | 1.80236506        | 2              | 2.34834  |
| Q9D8W5        | WSTLVEDYGVVELR                                                                   | 2.76990663        | 2              | 3.12653  |
| <b>Q9DB15</b> | <b>RM12 39S ribosomal protein L12_mitochondrial</b>                              | <b>1.27995057</b> | <b>0.51974</b> | <b>3</b> |
| Q9DB15        | KLVESLPQEIK                                                                      | 1.28731231        | 2              | 3.00219  |
| Q9DB15        | NYVQGINLVQAK                                                                     | 1.28731428        | 2              | 2.49881  |
| Q9DB15        | SEALAGAPLDNAPK                                                                   | 0.84184006        | 2              | 2.3292   |
| <b>Q9DBC0</b> | <b>SELO Selenoprotein O</b>                                                      | <b>0.99935453</b> | <b>0.96346</b> | <b>2</b> |
| Q9DBC0        | LGLIRVEK                                                                         | 0.95944797        | 2              | 2.30264  |
| Q9DBC0        | LLESPYHSEEEATGPEAVAR                                                             | 1.06404872        | 3              | 3.36063  |
| <b>Q9DBG7</b> | <b>SRPR Signal recognition particle receptor subunit alpha</b>                   | <b>1.38038548</b> | <b>0.0763</b>  | <b>2</b> |
| Q9DBG7        | GLVGSKSLSREDMESVLDK+Oxidation(12                                                 | 1.29640095        |                |          |
| Q9DBG7        | NQGFVVVLVDTAGR                                                                   | 1.44118933        | 2              | 2.91026  |
| <b>Q9DBH5</b> | <b>LMAN2 Vesicular integral_membrane protein VIP36</b>                           | <b>1.24725143</b> | <b>0.04981</b> | <b>2</b> |
| Q9DBH5        | TPEEESIDWTK                                                                      | 0.83480353        | 2              | 2.47024  |
| Q9DBH5        | WSELAGCTADFR                                                                     | 1.25255345        | 2              | 3.36558  |
| <b>Q9DC70</b> | <b>NDUS7 NADH dehydrogenase [ubiquinone] iron_sulfur protein 7_mitochondrial</b> | <b>1.47987808</b> | <b>8.6E-05</b> | <b>4</b> |
| Q9DC70        | LDDLINWAR                                                                        | 1.20082029        | 2              | 3.04387  |
| Q9DC70        | MAPALRKVYDQMPEPR+Oxidation(0)Oxidation(11                                        | 1.44305764        |                |          |
| Q9DC70        | QADVMIVAGTLTNK                                                                   | 1.70180969        | 2              | 3.52124  |
| Q9DC70        | VYDQMPEPR                                                                        | 2.70576369        | 2              | 2.45812  |
| <b>Q9DCH4</b> | <b>EIF3F Eukaryotic translation initiation factor 3 subunit F</b>                | <b>1.29393439</b> | <b>0.32335</b> | <b>2</b> |
| Q9DCH4        | FLMSLVNQVPK                                                                      | 1.49348124        | 2              | 2.76412  |
| Q9DCH4        | VIGLSSDLQVGGASAR                                                                 | 1.15418086        | 2              | 4.69164  |
| <b>Q9DCM0</b> | <b>ETHE1 Protein ETHE1_mitochondrial</b>                                         | <b>1.16381154</b> | <b>0.2474</b>  | <b>2</b> |
| Q9DCM0        | IFTLPGNCLIYPAHDYHGLTVSTVEEER                                                     | 3.08332419        | 3              | 4.31114  |
| Q9DCM0        | SLLPGCQSVISR                                                                     | 1.05147058        | 2              | 2.98589  |
| <b>Q9DCS9</b> | <b>NDUBA NADH dehydrogenase [ubiquinone] 1 beta subcomplex subunit 10</b>        | <b>1.58999802</b> | <b>8.2E-06</b> | <b>2</b> |
| Q9DCS9        | AYDLVVDWVPVTLVR                                                                  | 1.58926918        | 2              | 4.657    |
| Q9DCS9        | TPAPSPQTSLPNPITYLTK                                                              | 1.67026038        | 2              | 3.44819  |
| <b>Q9DCT2</b> | <b>NDUS3 NADH dehydrogenase [ubiquinone] iron_sulfur protein 3_mitochondrial</b> | <b>1.29524174</b> | <b>0.07251</b> | <b>5</b> |
| Q9DCT2        | FDLNSPWEAFPAYR                                                                   | 1.49791114        | 2              | 3.22539  |
| Q9DCT2        | ILTDYGFEGHPFR                                                                    | 1.76908338        | 2              | 2.80008  |
| Q9DCT2        | KFDLNSPWEAFPAYR                                                                  | 1.50960461        | 2              | 3.55867  |
| Q9DCT2        | SLADLTAVDVPTTR                                                                   | 1.26392747        | 2              | 3.4189   |

|               |                                                                               |                   |                |           |
|---------------|-------------------------------------------------------------------------------|-------------------|----------------|-----------|
| Q9DCT2        | VVAEPVELAQEFR                                                                 | 0.81490626        | 2              | 3.78415   |
| <b>Q9DCU9</b> | <b>HOGA1 Probable 4_hydroxy_2_oxoglutarate aldolase_mitochondrial</b>         | <b>1.35739705</b> | <b>1.1E-06</b> | <b>3</b>  |
| Q9DCU9        | GFVVQGSTGEFFFLSLR                                                             | 1.37454008        | 2              | 5.34437   |
| Q9DCU9        | LIEPNTAVTR                                                                    | 1.2194493         | 2              | 3.35929   |
| Q9DCU9        | TMDWFGYGGPCR                                                                  | 1.37541238        | 2              | 3.6921    |
| <b>Q9EP75</b> | <b>CP4FE Leukotriene_B4 omega_hydroxylase 3</b>                               | <b>1.58425687</b> | <b>0.13162</b> | <b>2</b>  |
| Q9EP75        | DEDGKELSDIEDIR                                                                | 7.21399744        | 2              | 3.02796   |
| Q9EP75        | IFNDSTNIMHAK                                                                  | 1.57342654        | 2              | 3.67793   |
| <b>Q9EP89</b> | <b>LACTB Serine beta_lactamase_like protein LACTB_mitochondrial</b>           | <b>1.35299508</b> | <b>0.09887</b> | <b>10</b> |
| Q9EP89        | EVWSEGLYADVENR                                                                | 1.14432473        | 2              | 3.83023   |
| Q9EP89        | FENSIESLR                                                                     | 0.68312809        | 2              | 2.75824   |
| Q9EP89        | GIIVSICNMQSVGLNSTALK                                                          | 1.13602914        | 3              | 3.96068   |
| Q9EP89        | IFHDLMLTTVQEENEPVIYNR                                                         | 2.14807758        | 2              | 5.67587   |
| Q9EP89        | IKDEVGAPGIVVGVSDGK                                                            | 1.46011384        | 2              | 4.54509   |
| Q9EP89        | KNDFEQGELYLK                                                                  | 0.6647097         | 2              | 3.99431   |
| Q9EP89        | LDLDPVQHYVPEFPEK                                                              | 1.5403489         | 3              | 3.7387    |
| Q9EP89        | LDLDPVQHYVPEFPEKEYEGEK                                                        | 1.54082943        | 3              | 3.98909   |
| Q9EP89        | LVNTPYVDNSYK                                                                  | 1.04992234        | 2              | 3.16289   |
| Q9EP89        | WAGGGFLSTVGDLLK                                                               | 1.63761449        | 2              | 4.43359   |
| <b>Q9EPH2</b> | <b>MRP MARCKS_related protein</b>                                             | <b>1.19557994</b> | <b>0.14914</b> | <b>2</b>  |
| Q9EPH2        | AAATPESQEPQAK                                                                 | 1.31471352        | 2              | 2.44346   |
| Q9EPH2        | GDVTAEAAAGASPAK                                                               | 0.86032767        | 2              | 3.30681   |
| <b>Q9EPH8</b> | <b>PABP1 Polyadenylate_binding protein 1</b>                                  | <b>1.88613094</b> | <b>0.00033</b> | <b>10</b> |
| Q9EPH8        | ALDTMNFVVIK                                                                   | 1.68786099        | 2              | 3.28561   |
| Q9EPH8        | GFGFVSFER                                                                     | 2.23353803        | 2              | 2.73177   |
| Q9EPH8        | GYGFVHFETQAAAER                                                               | 1.44615413        | 2              | 3.29591   |
| Q9EPH8        | ITGMILLEIDNSELLHMLESPESLR                                                     | 3.09661428        | 3              | 3.81052   |
| Q9EPH8        | KEFSPFGTITSAK                                                                 | 1.49221839        | 2              | 3.36882   |
| Q9EPH8        | NFGEDMDDER                                                                    | 17.8389681        | 2              | 2.56251   |
| Q9EPH8        | NLDDGIDDER                                                                    | 1.06608064        | 2              | 2.36495   |
| Q9EPH8        | SGVGNIFIK                                                                     | 1.44303427        | 2              | 2.76801   |
| Q9EPH8        | SKVDEAVAVLQAHQAK                                                              | 1.41594854        | 2              | 5.10185   |
| Q9EPH8        | VDEAVAVLQAHQAK                                                                | 1.79687239        | 2              | 2.85554   |
| <b>Q9EPJ0</b> | <b>NUCKS Nuclear ubiquitous casein and cyclin_dependent kinases substrate</b> | <b>1.04682642</b> | <b>0.75639</b> | <b>2</b>  |
| Q9EPJ0        | NSQEDSEDEEKDVK                                                                | 1.03388547        | 2              | 3.54184   |
| Q9EPJ0        | TPSPKEEDEEAESPPEK                                                             | 2.49207917        | 2              | 2.31661   |
| <b>Q9EQ76</b> | <b>FMO3 Dimethylaniline monooxygenase [N_oxide_forming] 3</b>                 | <b>4.39692909</b> | <b>9.9E-20</b> | <b>13</b> |
| Q9EQ76        | ASIQSVFTNSSK                                                                  | 2.59434534        | 2              | 3.1403    |
| Q9EQ76        | GTCILPSVNDMMDDIDEK                                                            | 6.06673645        | 2              | 3.93977   |
| Q9EQ76        | ILCGTVSIKPNVK                                                                 | 0.90904661        | 2              | 3.00218   |
| Q9EQ76        | KEPVFNDELPAR                                                                  | 2.10034505        | 3              | 3.60438   |
| Q9EQ76        | LQEYITSFATEK                                                                  | 2.37833382        | 2              | 3.54957   |
| Q9EQ76        | NNEVTLYK                                                                      | 3.89970083        | 2              | 2.49475   |
| Q9EQ76        | NNLPTAISDWWYMK                                                                | 2.57397849        | 2              | 2.50337   |
| Q9EQ76        | SCLEEGLEPTCFER                                                                | 1.48367457        | 2              | 4.31256   |
| Q9EQ76        | SDDVGGLWK                                                                     | 2.55291912        | 2              | 2.92234   |
| Q9EQ76        | VAVIGAGVSGLAAIR                                                               | 10.4937477        | 2              | 4.19912   |
| Q9EQ76        | VLVIGLNGSGCDIAAELSHVAQQVIISR                                                  | 2.30472053        | 3              | 3.69841   |
| Q9EQ76        | VWNDGYPWDMVVITR                                                               | 2.28703961        | 2              | 3.88801   |
| Q9EQ76        | YIQFETLVTR                                                                    | 4.39060493        | 2              | 3.18684   |
| <b>Q9EQG6</b> | <b>KDIS Kinase D_interacting substrate of 220 kDa</b>                         | <b>1.0725875</b>  | <b>0.97267</b> | <b>2</b>  |
| Q9EQG6        | HLLAMGADVQEGANSMTALIVAVK+Oxidation(4                                          | 1.97112014        |                |           |
| Q9EQG6        | SSERPSLFQTLKLLK                                                               | 1.02834195        | 2              | 2.32997   |

|               |                                                             |                   |                |           |
|---------------|-------------------------------------------------------------|-------------------|----------------|-----------|
| <b>Q9EQH3</b> | <b>VPS35 Vacuolar protein sorting_associated protein 35</b> | <b>1.13119283</b> | <b>0.4218</b>  | <b>8</b>  |
| Q9EQH3        | HFHNTLEHLR                                                  | 2.03811566        | 3              | 3.43914   |
| Q9EQH3        | IREDLPNLESSEETEIQNK                                         | 1.49365858        | 2              | 5.51478   |
| Q9EQH3        | LFDIFSQQVATVIQSR                                            | 2.3142429         | 3              | 3.32909   |
| Q9EQH3        | LLDEAIQAVK                                                  | 0.69494685        | 2              | 2.5808    |
| Q9EQH3        | LNLEHIATSSAVSK                                              | 1.33935658        | 2              | 4.2774    |
| Q9EQH3        | LSQLEGVNVER                                                 | 1.1125553         | 2              | 3.01868   |
| Q9EQH3        | NIIIALIDR                                                   | 1.48650268        | 2              | 2.41171   |
| Q9EQH3        | VLETTVEIFNK                                                 | 1.31475885        | 2              | 2.87067   |
| <b>Q9EQS0</b> | <b>TALDO Transaldolase</b>                                  | <b>1.24349721</b> | <b>0.00018</b> | <b>6</b>  |
| Q9EQS0        | ALAGCDFLTISPK                                               | 1.23329326        | 2              | 3.30839   |
| Q9EQS0        | ILDWHVANTDKK                                                | 1.46889806        | 2              | 3.47564   |
| Q9EQS0        | LGGPQEEQIK                                                  | 1.39883919        | 2              | 3.3097    |
| Q9EQS0        | LSSTWEGIQAGK                                                | 1.01956095        | 2              | 2.71191   |
| Q9EQS0        | SYEPQEDPGVK                                                 | 1.01959106        | 2              | 2.82443   |
| Q9EQS0        | WLHNEDQMAVEK                                                | 1.23023941        | 2              | 3.75689   |
| <b>Q9EQS3</b> | <b>MYCBP C_Myc_binding protein</b>                          | <b>1.42459987</b> | <b>0.25517</b> | <b>2</b>  |
| Q9EQS3        | LVQYEPPEEK                                                  | 1.43632676        | 2              | 2.47627   |
| Q9EQS3        | VLVALYEEPEKPTSALDFLK                                        | 1.2116557         | 3              | 3.44915   |
| <b>Q9EQW7</b> | <b>KI13A Kinesin_like protein KIF13A</b>                    | <b>1.06961893</b> | <b>0.23048</b> | <b>3</b>  |
| Q9EQW7        | ADLTDRALEKAVSR                                              | 1.27674769        | 3              | 3.3419    |
| Q9EQW7        | DETIAPLEENSALPK                                             | 0.94664658        | 2              | 2.59086   |
| Q9EQW7        | VTQWAEER                                                    | 1.34959473        | 2              | 2.43305   |
| <b>Q9EQX9</b> | <b>UBE2N Ubiquitin_conjugating enzyme E2 N</b>              | <b>1.04285109</b> | <b>0.87967</b> | <b>3</b>  |
| Q9EQX9        | LELFLPEEYPMAAPK                                             | 1.16287764        | 2              | 4.34295   |
| Q9EQX9        | SNEAQAIETAR                                                 | 1.03620878        | 2              | 3.37589   |
| Q9EQX9        | YFHVVIAGPQDSPFEGGTFK                                        | 1.2508928         | 3              | 4.48138   |
| <b>Q9ER34</b> | <b>ACON Aconitate hydratase_mitochondrial</b>               | <b>1.32637953</b> | <b>0.00935</b> | <b>19</b> |
| Q9ER34        | ADIANLAEFEK                                                 | 1.1701468         | 2              | 3.56502   |
| Q9ER34        | CTTDHISAAGPWLK                                              | 1.40245411        | 2              | 4.01984   |
| Q9ER34        | DINQEVYNFLATAGAK                                            | 1.21807539        | 2              | 3.3442    |
| Q9ER34        | DLEDLQILIK                                                  | 1.10511161        | 2              | 2.47384   |
| Q9ER34        | FKLEAPDADELPR                                               | 1.22617235        | 3              | 4.16928   |
| Q9ER34        | FNPETDFLTGK                                                 | 1.63017387        | 1              | 2.48704   |
| Q9ER34        | GHLDNISNLLIGAINIENGK                                        | 1.230733          | 2              | 5.80545   |
| Q9ER34        | IVYGHLDPPANQEIER                                            | 1.3500546         | 2              | 4.60139   |
| Q9ER34        | LNRPLTLSEK                                                  | 1.44451398        | 2              | 2.4509    |
| Q9ER34        | LTGTLSGWTSWK                                                | 1.29794632        | 2              | 2.99456   |
| Q9ER34        | NAVTVQEFQVVPDPTAR                                           | 1.26087908        | 2              | 4.43713   |
| Q9ER34        | NTIVTSYNR                                                   | 1.60473053        | 1              | 1.94905   |
| Q9ER34        | QGLLPLTFADPSDYNK                                            | 1.37757506        | 2              | 3.35535   |
| Q9ER34        | SDFDPGQDQYQHPPK                                             | 1.56143109        | 2              | 2.87933   |
| Q9ER34        | SQFTITPGSEQIR                                               | 1.12975998        | 2              | 3.91078   |
| Q9ER34        | VAVPSTIHC DHLIEAQLGGEK                                      | 1.64547473        | 2              | 4.78304   |
| Q9ER34        | VDVSPTSQR                                                   | 1.55430015        | 2              | 2.44661   |
| Q9ER34        | VGLIGCTNSSYEDMGR                                            | 1.35787582        | 2              | 4.20039   |
| Q9ER34        | WVIGDENYGEKSSR                                              | 1.1084773         | 2              | 4.41423   |
| <b>Q9ERU9</b> | <b>RBP2 E3 SUMO_protein ligase RanBP2</b>                   | <b>1.25135705</b> | <b>0.50361</b> | <b>2</b>  |
| Q9ERU9        | EINSLRGQEK                                                  | 1.16250815        | 2              | 2.61337   |
| Q9ERU9        | NLFRFGESTTGFNFSFK                                           | 1.25809152        | 2              | 2.32362   |
| <b>Q9ES21</b> | <b>SAC1 Phosphatidylinositide phosphatase SAC1</b>          | <b>1.0815628</b>  | <b>0.4242</b>  | <b>5</b>  |
| Q9ES21        | HFDSQVIYQK                                                  | 1.07035174        | 2              | 2.79587   |
| Q9ES21        | LEEQDEFEK                                                   | 1.06682464        | 2              | 2.75949   |
| Q9ES21        | TNVIQSLAR                                                   | 3.73737284        | 2              | 2.3946    |
| Q9ES21        | TQLGLVMDGFNSLLR                                             | 1.30725327        | 2              | 3.947     |
| Q9ES21        | VVTNQEGVFR                                                  | 1.16436613        | 2              | 2.81056   |

|               |                                                                            |                   |                |           |
|---------------|----------------------------------------------------------------------------|-------------------|----------------|-----------|
| <b>Q9ES38</b> | <b>S27A5 Bile acyl_CoA synthetase</b>                                      | <b>1.18977272</b> | <b>1.4E-05</b> | <b>14</b> |
| Q9ES38        | ACQAAWALK                                                                  | 1.45391284        | 2              | 2.57269   |
| Q9ES38        | ADVWENFQQR                                                                 | 1.1706272         | 2              | 2.95416   |
| Q9ES38        | EGFDVGVIAADPLYLDNK                                                         | 1.30197226        | 2              | 5.37182   |
| Q9ES38        | GATAILVLPK                                                                 | 1.15138197        | 2              | 3.20712   |
| Q9ES38        | HPPELVDALEQQAQARPDQVALVCTGSEGCSTNR                                         | 1.36342249        | 4              | 4.54622   |
| Q9ES38        | IQDSLEITNTYK                                                               | 1.39535567        | 2              | 3.81516   |
| Q9ES38        | LKEATIQEDK                                                                 | 1.49686498        | 2              | 2.83381   |
| Q9ES38        | LLAENIR                                                                    | 1.19922834        | 2              | 2.46671   |
| Q9ES38        | MLTPLELVQFDIETAEPVRDK                                                      | 1.83488297        | 2              | 4.20163   |
| Q9ES38        | QGFCIPVETGKPGLLTK                                                          | 1.71400519        | 3              | 3.88201   |
| Q9ES38        | SISALSVFLGLAK                                                              | 1.63018665        | 2              | 3.32014   |
| Q9ES38        | SLMPDVYQAVCEGTWK                                                           | 0.91891872        | 2              | 3.90565   |
| Q9ES38        | YLCNVPGQPEDK                                                               | 1.25165653        | 2              | 3.37767   |
| Q9ES38        | YLCNVPGQPEDKK                                                              | 1.32529344        | 2              | 3.76698   |
| <b>Q9ESP1</b> | <b>SDF2L Stromal cell_derived factor 2_like protein 1</b>                  | <b>0.89232186</b> | <b>0.77962</b> | <b>2</b>  |
| Q9ESP1        | ASAGLVTCGSVLK                                                              | 0.89609105        | 2              | 3.59286   |
| Q9ESP1        | GQHEVHGMPSANAHNTWK                                                         | 0.86382316        | 3              | 3.81913   |
| <b>Q9ESR9</b> | <b>ABCA2 ATP_binding cassette sub_family A member 2</b>                    | <b>1.02744651</b> | <b>0.98143</b> | <b>2</b>  |
| Q9ESR9        | KEMDKMIEDLELSNK+Oxidation(2)Oxidation(5)                                   | 1.11717869        |                |           |
| Q9ESR9        | RHSLVQTLSGGMKR                                                             | 1.02632752        | 2              | 2.36262   |
| <b>Q9EST6</b> | <b>AN32B Acidic leucine_rich nuclear phosphoprotein 32 family member B</b> | <b>0.79917065</b> | <b>0.00161</b> | <b>2</b>  |
| Q9EST6        | LAEELPSLTHLNLSGNNLK                                                        | 0.39123924        | 2              | 4.14051   |
| Q9EST6        | SLDLFGCEVTNR                                                               | 1.53529409        | 2              | 2.97743   |
| <b>Q9ESW0</b> | <b>DDB1 DNA damage_binding protein 1</b>                                   | <b>1.43557428</b> | <b>0.23399</b> | <b>3</b>  |
| Q9ESW0        | IEVQDTSGGTTALRPSASTQALSSSVSSK                                              | 1.43565093        | 3              | 5.82827   |
| Q9ESW0        | KTEPATGFIDGDLIESFLDISRPK                                                   | 1.39291946        | 3              | 4.50159   |
| Q9ESW0        | QGQQLVTCGAFK                                                               | 1.23124652        | 2              | 2.36767   |
| <b>Q9HB97</b> | <b>PARVA Alpha_parvin</b>                                                  | <b>0.99647622</b> | <b>0.53446</b> | <b>3</b>  |
| Q9HB97        | LNVAEVTQSEIAQK                                                             | 0.89440116        | 2              | 4.31417   |
| Q9HB97        | QIQEEITGNTEALSGR                                                           | 1.51469007        | 2              | 3.70708   |
| Q9HB97        | VLIDWINDVLVGER                                                             | 1.75109418        | 2              | 2.3004    |
| <b>Q9JHL4</b> | <b>DBNL Drebrin_like protein</b>                                           | <b>0.52015478</b> | <b>0.29701</b> | <b>3</b>  |
| Q9JHL4        | AMSTTSVSSSQPGK                                                             | 0.99237257        | 2              | 2.55232   |
| Q9JHL4        | ERAMSTTSVSSSQPKLR+Oxidation(3)                                             | 0.43304548        |                |           |
| Q9JHL4        | TGELEQEVVSR                                                                | 0.74535723        | 2              | 3.26564   |
| <b>Q9JHW0</b> | <b>PSB7 Proteasome subunit beta type_7</b>                                 | <b>1.16178197</b> | <b>0.4972</b>  | <b>2</b>  |
| Q9JHW0        | ATEGMVVADK                                                                 | 1.0969221         | 2              | 2.57047   |
| Q9JHW0        | FRPDMEEEEAKK                                                               | 1.41212076        | 3              | 3.81746   |
| <b>Q9JHZ9</b> | <b>S38A3 Sodium_coupled neutral amino acid transporter 3</b>               | <b>2.27980363</b> | <b>9.9E-20</b> | <b>3</b>  |
| Q9JHZ9        | AYEQLGYR                                                                   | 1.92884149        | 2              | 2.39203   |
| Q9JHZ9        | HLEGLLPVGMPTADTQR                                                          | 2.76867755        | 2              | 3.9868    |
| Q9JHZ9        | MEIPRQTEMVELVPNGK+Oxidation(0)Oxidation(8)                                 | 1.26288963        |                |           |
| <b>Q9JI85</b> | <b>NUCB2 Nucleobindin_2</b>                                                | <b>1.03030823</b> | <b>0.9245</b>  | <b>8</b>  |
| Q9JI85        | FQQGIAPSGPAGELK                                                            | 1.1795553         | 2              | 3.1531    |
| Q9JI85        | HEEFKKYEMMK+Oxidation(8)                                                   | 0.59401402        |                |           |
| Q9JI85        | HEEFKKYEMMK+Oxidation(9)                                                   | 0.59401402        |                |           |
| Q9JI85        | LSQELDLVSHK                                                                | 1.1896896         | 2              | 2.62893   |
| Q9JI85        | QEYQQAVQLEQK                                                               | 0.92847009        | 2              | 4.59552   |
| Q9JI85        | TRLDELK                                                                    | 0.99071745        | 1              | 2.01113   |
| Q9JI85        | VHNVEPVESAR                                                                | 1.0278408         | 2              | 3.08007   |
| Q9JI85        | VYNPQNAEDDMIEMEEER                                                         | 1.9653523         | 2              | 3.972     |
| <b>Q9JI91</b> | <b>ACTN2 Alpha_actinin_2</b>                                               | <b>2.23292992</b> | <b>0.00061</b> | <b>8</b>  |



|               |                                                                   |                   |                |          |
|---------------|-------------------------------------------------------------------|-------------------|----------------|----------|
| Q9JI91        | ETADTDTAEQVIASFR                                                  | 1.60034926        | 2              | 3.06421  |
| Q9JI91        | GYEEWLLNEIR                                                       | 2.33017675        | 2              | 3.4865   |
| Q9JI91        | HTNYTMEHIR                                                        | 1.19404613        | 3              | 3.5452   |
| Q9JI91        | KHEAFESDLAAHQDR                                                   | 1.65877188        | 2              | 5.36311  |
| Q9JI91        | MLDAEDIVNTPKDER                                                   | 1.22998515        | 2              | 3.2126   |
| Q9JI91        | QSILAIQNEVEK                                                      | 1.88396593        | 2              | 2.72277  |
| Q9JI91        | SSIQITGALEDQMNLK                                                  | 1.47185711        | 2              | 3.08532  |
| Q9JI91        | TINEVETQILTR                                                      | 1.65070193        | 2              | 3.14469  |
| <b>Q9JJ19</b> | <b>NHRF1 Na( )/H( ) exchange regulatory cofactor NHE_RF1</b>      | <b>1.04201006</b> | <b>0.77187</b> | <b>7</b> |
| Q9JJ19        | AVDPDSPAEASGLR                                                    | 1.01395282        | 2              | 3.45978  |
| Q9JJ19        | IVEVNGVCMEGK                                                      | 1.02417309        | 2              | 3.72394  |
| Q9JJ19        | LLVVDPEDEQLKK                                                     | 1.21861787        | 2              | 2.85416  |
| Q9JJ19        | LVEPGSPA EK                                                       | 0.75303353        | 2              | 2.7024   |
| Q9JJ19        | LVEVNGENVEK                                                       | 0.93120688        | 2              | 3.04663  |
| Q9JJ19        | SEHTEPPAAADTK                                                     | 1.33331877        | 2              | 3.32679  |
| Q9JJ19        | VTPSQEHL DGPLPEPFSNGEIQK                                          | 1.18361845        | 3              | 3.55325  |
| <b>Q9JJ40</b> | <b>NHRF3 Na( )/H( ) exchange regulatory cofactor NHE_RF3</b>      | <b>1.45594109</b> | <b>0.33857</b> | <b>5</b> |
| Q9JJ40        | AGVLADDHLIEVNGENVENASHEEVVEK                                      | 2.42997328        | 3              | 5.38256  |
| Q9JJ40        | GVFLTDITPQGVAMK                                                   | 1.14214861        | 2              | 3.37839  |
| Q9JJ40        | IEKDTDGHLVR                                                       | 1.52422014        | 2              | 3.19373  |
| Q9JJ40        | SGNSVTL LVL DGDSEYK                                               | 3.72325738        | 2              | 3.79667  |
| Q9JJ40        | VIEEGSPA EK                                                       | 1.29626082        | 2              | 2.41843  |
| <b>Q9JJ46</b> | <b>EBP 3_beta_hydroxysteroid_Delta(8)_Delta(7)_isomerase</b>      | <b>1.32965966</b> | <b>0.87157</b> | <b>2</b> |
| Q9JJ46        | HLTNAQSM LDK                                                      | 1.37300374        | 2              | 3.75976  |
| Q9JJ46        | VSVVPLGTGR                                                        | 1.01614118        | 2              | 2.45105  |
| <b>Q9JJ54</b> | <b>HNRPD Heterogeneous nuclear ribonucleoprotein D0</b>           | <b>1.35292473</b> | <b>0.29811</b> | <b>4</b> |
| Q9JJ54        | FGDVVDCTLK                                                        | 1.26807211        | 2              | 2.80834  |
| Q9JJ54        | IDASKNEE DEGHSSNSPR                                               | 1.65220215        | 3              | 4.66094  |
| Q9JJ54        | IFVGGLSPDTPEEK                                                    | 1.87154033        | 2              | 4.03937  |
| Q9JJ54        | IFVGGLSPDTPEEKIR                                                  | 1.96493476        | 2              | 2.40501  |
| <b>Q9JJ79</b> | <b>DYHC2 Cytoplasmic dynein 2 heavy chain 1</b>                   | <b>1.09652352</b> | <b>0.16474</b> | <b>4</b> |
| Q9JJ79        | NCLEEWTKAAGLEK                                                    | 1.08087497        | 2              | 2.65048  |
| Q9JJ79        | RASTAAAPLAAWVK                                                    | 1.2880669         | 2              | 2.53825  |
| Q9JJ79        | TVLRGSGNLLR                                                       | 1.36925348        | 2              | 2.46618  |
| Q9JJ79        | YVVQIGDK                                                          | 1.41779644        | 1              | 2.30272  |
| <b>Q9JJU8</b> | <b>SH3L1 SH3 domain_binding glutamic acid_rich_like protein</b>   | <b>1.40121832</b> | <b>0.20242</b> | <b>2</b> |
| Q9JJU8        | GDYDAFFEAR                                                        | 1.40177363        | 2              | 3.18598  |
| Q9JJU8        | QQDVLCFLEANK                                                      | 1.40121826        | 2              | 3.21735  |
| <b>Q9JJW3</b> | <b>USMG5 Up_regulated during skeletal muscle growth protein 5</b> | <b>1.15467701</b> | <b>0.77381</b> | <b>2</b> |
| Q9JJW3        | MAGPESDGGQFTGIKK+Oxidation(0)                                     | 2.1521498         |                |          |
| Q9JJW3        | YFNSYTLTGR                                                        | 1.1544612         | 2              | 2.80612  |
| <b>Q9JK38</b> | <b>GNA1 Glucosamine 6_phosphate N_acetyltransferase</b>           | <b>1.31174869</b> | <b>0.20905</b> | <b>4</b> |
| Q9JK38        | GRVEDVVVSDECR                                                     | 1.67847363        | 2              | 2.51818  |
| Q9JK38        | ITLECLPQNVGFYK                                                    | 1.22608931        | 2              | 3.47628  |
| Q9JK38        | VEDVVVSDECR                                                       | 1.39968369        | 2              | 3.36651  |
| Q9JK38        | VLGQLTETGVVSPEQFMK                                                | 1.33203497        | 2              | 4.63243  |
| <b>Q9JK72</b> | <b>CCS Copper chaperone for superoxide dismutase</b>              | <b>1.14809956</b> | <b>0.6866</b>  | <b>2</b> |
| Q9JK72        | GDLGNVHA EASGR                                                    | 1.31840669        | 2              | 3.22151  |

|               |                                                                      |                   |                |           |
|---------------|----------------------------------------------------------------------|-------------------|----------------|-----------|
| Q9JK72        | SLVVDEGEDDLGR                                                        | 1.13058699        | 2              | 3.02231   |
| <b>Q9JKJ9</b> | <b>CP39A 24_hydroxycholesterol 7_alpha_hydroxylase</b>               | <b>1.41848924</b> | <b>0.00788</b> | <b>2</b>  |
| Q9JKJ9        | TVLESISSVFGTAGK                                                      | 1.2734732         | 2              | 3.33597   |
| Q9JKJ9        | TYDEGFYGSQLEWLLR                                                     | 1.64267451        | 2              | 3.20149   |
| <b>Q9JKS4</b> | <b>LDB3 LIM domain_binding protein 3</b>                             | <b>2.24112576</b> | <b>0.548</b>   | <b>4</b>  |
| Q9JKS4        | DFNMPLTISR                                                           | 1.33045342        | 2              | 2.34284   |
| Q9JKS4        | DLAVDSASPVYQAVIK                                                     | 0.86390669        | 2              | 3.59309   |
| Q9JKS4        | GAPAYNPTGPQVTPLAR                                                    | 2.12796807        | 2              | 3.12809   |
| Q9JKS4        | TQSKPEDEADEWAR                                                       | 3.570654          | 2              | 3.81607   |
| <b>Q9JLA3</b> | <b>UGGG1 UDP_glucose:glycoprotein glucosyltransferase 1</b>          | <b>1.1555488</b>  | <b>0.52552</b> | <b>11</b> |
| Q9JLA3        | AYNYVQVEVDGYHAFQTLTQIYNK                                             | 1.60234605        | 3              | 3.31771   |
| Q9JLA3        | FLFVDADQIVR                                                          | 2.0287903         | 2              | 2.62032   |
| Q9JLA3        | GQYQGLSQDPNSLSNLDQDLPNMNIHQVPIK                                      | 1.26785651        | 3              | 6.0139    |
| Q9JLA3        | IEYQFFEDK                                                            | 1.85720784        | 2              | 2.34456   |
| Q9JLA3        | ILETTTFFQR                                                           | 1.97037006        | 2              | 2.8417    |
| Q9JLA3        | IVPEWQDYDQEIK                                                        | 1.15550583        | 2              | 3.31969   |
| Q9JLA3        | LNIQPSETDYAVDIR                                                      | 1.62183965        | 2              | 4.11147   |
| Q9JLA3        | TAAIANSMNYLTK                                                        | 1.16280809        | 2              | 2.5771    |
| Q9JLA3        | VDALLSAQPK                                                           | 1.40438804        | 2              | 2.7415    |
| Q9JLA3        | VEEDVASDLVMK                                                         | 1.56067595        | 2              | 3.82461   |
| Q9JLA3        | VWQLQDLSFQTAAR                                                       | 1.1882018         | 2              | 4.65391   |
| <b>Q9JLH7</b> | <b>CK5P3 CDK5 regulatory subunit_associated protein 3</b>            | <b>0.92086956</b> | <b>0.70689</b> | <b>2</b>  |
| Q9JLH7        | GSDALTLEYPETR                                                        | 0.78604259        | 2              | 2.90587   |
| Q9JLH7        | KEEEQGAGAAEMR                                                        | 0.9449612         | 2              | 3.70517   |
| <b>Q9JLJ3</b> | <b>AL9A1 4_trimethylaminobutyraldehyde dehydrogenase</b>             | <b>1.20868155</b> | <b>0.00096</b> | <b>18</b> |
| Q9JLJ3        | AGAPNGLFNVVQGAATGQFLCQHR                                             | 1.9566214         | 2              | 4.75727   |
| Q9JLJ3        | ANDTTFLAAGVFTR                                                       | 1.23102407        | 2              | 4.92879   |
| Q9JLJ3        | CQVLLAAR                                                             | 1.26480423        | 2              | 3.30374   |
| Q9JLJ3        | EQGATVLCGGEPYAPEDPK                                                  | 1.09570272        | 2              | 4.95438   |
| Q9JLJ3        | EQGATVLCGGEPYAPEDPKL                                                 | 1.26354089        | 3              | 3.39479   |
| Q9JLJ3        | EVNLAVENAK                                                           | 1.4391089         | 2              | 3.15041   |
| Q9JLJ3        | GALLANFLTQGGVCCNGTR                                                  | 1.28993633        | 2              | 5.57225   |
| Q9JLJ3        | GIKPITLELGGK                                                         | 0.86343236        | 3              | 3.96727   |
| Q9JLJ3        | HGYMTPCILNCTDDMTCVK                                                  | 1.39652922        | 3              | 4.23865   |
| Q9JLJ3        | IGDPILLEDTR                                                          | 1.20564859        | 2              | 3.7055    |
| Q9JLJ3        | MGPLINAPHLER                                                         | 1.24482411        | 2              | 3.26442   |
| Q9JLJ3        | MGPLINAPHLER+Oxidation(0                                             | 1.28881785        |                |           |
| Q9JLJ3        | RDEIAIMETINNGK                                                       | 1.21101855        | 2              | 5.29883   |
| Q9JLJ3        | SPLIIFSDCNMK                                                         | 1.75381167        | 2              | 2.60824   |
| Q9JLJ3        | VEPVDASGTEK                                                          | 1.21111546        | 2              | 2.41424   |
| Q9JLJ3        | VSFTGSVPTGMK                                                         | 1.23670624        | 2              | 3.10514   |
| Q9JLJ3        | VSFTGSVPTGMK+Oxidation(10                                            | 1.27742933        |                |           |
| Q9JLJ3        | VTIEYSQLK                                                            | 1.42126534        | 2              | 3.08449   |
| <b>Q9JLR1</b> | <b>S61A2 Protein transport protein Sec61 subunit alpha isoform 2</b> | <b>1.39895116</b> | <b>0.16616</b> | <b>2</b>  |
| Q9JLR1        | IIEVGDTPK                                                            | 1.4168157         | 2              | 2.66552   |
| Q9JLR1        | TWIEVSGSSAK                                                          | 1.34387272        | 2              | 2.7547    |
| <b>Q9JLTO</b> | <b>MYH10 Myosin_10</b>                                               | <b>1.56660964</b> | <b>0.11616</b> | <b>2</b>  |
| Q9JLTO        | AGVLAHLEER                                                           | 1.49640287        | 2              | 3.4286    |
| Q9JLTO        | DAAGLESQLDQTQELLEETR                                                 | 1.80504578        | 2              | 3.18175   |
| <b>Q9JLZ1</b> | <b>GLRX3 Glutaredoxin_3</b>                                          | <b>0.80234846</b> | <b>0.34004</b> | <b>2</b>  |
| Q9JLZ1        | LEAEAVPEVSEK                                                         | 0.4611838         | 2              | 2.31979   |
| Q9JLZ1        | YEISSVPTFLFFK                                                        | 1.69442383        | 2              | 2.58476   |

|               |                                                          |                   |                |           |
|---------------|----------------------------------------------------------|-------------------|----------------|-----------|
| <b>Q9JLZ3</b> | <b>AUHM Methylglutaconyl_CoA hydratase_mitochondrial</b> | <b>0.94559159</b> | <b>0.90064</b> | <b>3</b>  |
| Q9JLZ3        | AVGLISHVLEQNQEGDAAYR                                     | 0.93249741        | 2              | 5.61671   |
| Q9JLZ3        | AVGLISHVLEQNQEGDAAYRK                                    | 0.74311365        | 3              | 4.47002   |
| Q9JLZ3        | SEVPGIFCAGADLK                                           | 1.08240792        | 2              | 2.95344   |
| <b>Q9JM53</b> | <b>AIFM1 Apoptosis_inducing factor 1_mitochondrial</b>   | <b>1.28622756</b> | <b>0.8407</b>  | <b>15</b> |
| Q9JM53        | AIASAAEGGSVPPIR                                          | 1.0148384         | 2              | 2.76764   |
| Q9JM53        | CLIATGGTTPR                                              | 0.89251516        | 2              | 2.4216    |
| Q9JM53        | DGEQHEDLNEVAK                                            | 1.00952366        | 2              | 3.82964   |
| Q9JM53        | ILPEYLSNWTMEK                                            | 1.58614741        | 2              | 3.49459   |
| Q9JM53        | IMGLGLSPEEK                                              | 1.49124829        | 2              | 2.80551   |
| Q9JM53        | KSQASGIEVIQLFPEK                                         | 1.3498596         | 2              | 3.70989   |
| Q9JM53        | KVETDHIVTAVGLEPNVELAK                                    | 1.22217666        | 2              | 6.17864   |
| Q9JM53        | LNDGSQITFEK                                              | 1.21199891        | 2              | 3.50826   |
| Q9JM53        | SITVIGGGFLGSELACALGR                                     | 1.10789873        | 2              | 2.65708   |
| Q9JM53        | SQASGIEVIQLFPEK                                          | 1.05805769        | 2              | 4.13179   |
| Q9JM53        | TGGLEIDSDFGGFR                                           | 1.18683901        | 2              | 4.18675   |
| Q9JM53        | VETDHIVTAVGLEPNVELAK                                     | 1.09416713        | 2              | 5.18247   |
| Q9JM53        | VLIVSEDPPELPMRPLSK                                       | 1.11387927        | 3              | 3.93852   |
| Q9JM53        | VMPNAIVQSVGVSGGK                                         | 1.29507837        | 2              | 4.28328   |
| Q9JM53        | VNAELQAR                                                 | 1.26117656        | 2              | 2.60174   |
| <b>Q9JMA1</b> | <b>UBP14 Ubiquitin carboxyl_terminal hydrolase 14</b>    | <b>1.58698366</b> | <b>0.45874</b> | <b>2</b>  |
| Q9JMA1        | CTESEEEVTK                                               | 1.49759376        | 2              | 3.69407   |
| Q9JMA1        | EKESVNAKVLK                                              | 2.72595327        | 2              | 2.37533   |
| <b>Q9JMD3</b> | <b>PCTL PCTL_like protein</b>                            | <b>1.57015678</b> | <b>1.9E-09</b> | <b>6</b>  |
| Q9JMD3        | AVSIQTGYLIQSTGPK                                         | 1.3544115         | 2              | 4.66817   |
| Q9JMD3        | ESVQVDDQDFR                                              | 1.08517006        | 2              | 2.83565   |
| Q9JMD3        | MECCDVPAETLYDVLHDIEYR                                    | 1.72384805        | 3              | 4.40511   |
| Q9JMD3        | MECCDVPAETLYDVLHDIEYR+Oxidation(0                        | 1.77591913        |                |           |
| Q9JMD3        | SSQFLAPK                                                 | 0.84294387        | 2              | 2.35623   |
| Q9JMD3        | WDSNVIETFDIAR                                            | 1.52183998        | 2              | 4.53405   |
| <b>Q9JME5</b> | <b>AP3B2 AP_3 complex subunit beta_2</b>                 | <b>1.35358997</b> | <b>0.16234</b> | <b>2</b>  |
| Q9JME5        | DELVVAESVVVIK                                            | 2.06746452        | 2              | 2.51605   |
| Q9JME5        | LLQMMPAQHGIIK                                            | 1.14602499        | 2              | 2.55969   |
| <b>Q9QVC8</b> | <b>FKBP4 Peptidyl_prolyl cis_trans isomerase FKBP4</b>   | <b>1.06732743</b> | <b>0.87961</b> | <b>7</b>  |
| Q9QVC8        | ALELDSNNEK                                               | 1.22942959        | 2              | 2.63056   |
| Q9QVC8        | GEPNNVAGNQAQVK                                           | 1.04039976        | 2              | 3.85957   |
| Q9QVC8        | TEVAAGDHPTDAEMK                                          | 0.968466          | 2              | 3.66787   |
| Q9QVC8        | TQLAVCQQR                                                | 1.22716184        | 2              | 2.72842   |
| Q9QVC8        | VAENGAQSAPLPLEGVDISPK                                    | 0.94136158        | 2              | 3.92937   |
| Q9QVC8        | VGEVCHITCKPEYAYGSAGSPPK                                  | 1.03331842        | 3              | 5.9155    |
| Q9QVC8        | VLQLYPSNK                                                | 0.74291435        | 2              | 2.33325   |
| <b>Q9QWN8</b> | <b>SPTN2 Spectrin beta chain_brain 2</b>                 | <b>1.17991117</b> | <b>0.43638</b> | <b>3</b>  |
| Q9QWN8        | ALAQEDQSAGEVER                                           | 1.37347452        | 2              | 3.77066   |
| Q9QWN8        | FETLEPEMNALAAR                                           | 1.69407099        | 2              | 2.72911   |
| Q9QWN8        | VGELTQEANALAAGHPAQAPAINTR                                | 1.1081994         | 3              | 4.22452   |
| <b>Q9QX79</b> | <b>FETUB Fetuin_B</b>                                    | <b>1.08398705</b> | <b>0.97511</b> | <b>3</b>  |
| Q9QX79        | GSIQHLPEQEEPEDSKGG                                       | 1.29882877        | 3              | 3.83006   |
| Q9QX79        | IFYETVHGQCK                                              | 1.08415201        | 2              | 2.38993   |
| Q9QX79        | NTAPTSSPSITAPR                                           | 0.99325288        | 2              | 3.15038   |
| <b>Q9QXG4</b> | <b>ACSA Acetyl_coenzyme A synthetase_cytoplasmic</b>     | <b>9.05393823</b> | <b>0.98022</b> | <b>2</b>  |
| Q9QXG4        | AELGMNDSPSQSPVK                                          | 9.57070731        | 2              | 3.67931   |
| Q9QXG4        | IGPIATPDYIQNAPGLPK                                       | 1.39156655        | 2              | 3.2977    |

|               |                                                                   |                   |                |           |
|---------------|-------------------------------------------------------------------|-------------------|----------------|-----------|
| <b>Q9QXQ0</b> | <b>ACTN4 Alpha_actinin_4</b>                                      | <b>1.27367765</b> | <b>9.6E-08</b> | <b>32</b> |
| Q9QXQ0        | ACLISLGYDVENDR                                                    | 1.38841457        | 2              | 4.02405   |
| Q9QXQ0        | ACLISLGYDVENDRQGDADFNR                                            | 1.42567781        | 3              | 3.85267   |
| Q9QXQ0        | AGTQIENIDEDFR                                                     | 1.08874977        | 2              | 3.56221   |
| Q9QXQ0        | AGTQIENIDEDFRDGLK                                                 | 1.20071429        | 2              | 4.2579    |
| Q9QXQ0        | ASFNFHFDKDHGGALGPEEFK                                             | 1.40196552        | 3              | 3.36847   |
| Q9QXQ0        | ASIHEAWTDGK                                                       | 0.80777544        | 2              | 2.45294   |
| Q9QXQ0        | DDPVTNLNNAFEVAEK                                                  | 1.55607986        | 2              | 3.60693   |
| Q9QXQ0        | ETTDTDADQVIASFK                                                   | 1.15562866        | 2              | 4.71037   |
| Q9QXQ0        | HRDYETATLSDIK                                                     | 1.78923844        | 2              | 3.88742   |
| Q9QXQ0        | HRPELIEYDK                                                        | 1.10220472        | 3              | 4.40283   |
| Q9QXQ0        | HTNYTMEHLR                                                        | 1.19404613        | 3              | 3.5452    |
| Q9QXQ0        | ICDQWDNLGSLTHSR                                                   | 1.27484069        | 2              | 4.59372   |
| Q9QXQ0        | INNVNKALDFIASK                                                    | 0.98767521        | 2              | 2.30311   |
| Q9QXQ0        | KDDPVTNLNNAFEVAEK                                                 | 0.77213372        | 2              | 4.73469   |
| Q9QXQ0        | LSGSNPYTSVTPQIINSK                                                | 1.6599358         | 2              | 4.42651   |
| Q9QXQ0        | LVSIGAEIIVDGNAK                                                   | 1.65707835        | 2              | 3.15663   |
| Q9QXQ0        | MAPYQGPDAAPGALDYK                                                 | 1.22490106        | 2              | 4.98175   |
| Q9QXQ0        | MAPYQGPDAAPGALDYK+Oxidation(0                                     | 1.29131381        |                |           |
| Q9QXQ0        | MLDAEDIVNTARPDEK                                                  | 0.76319931        | 2              | 3.8771    |
| Q9QXQ0        | MLDAEDIVNTARPDEK+Oxidation(0                                      | 0.95851989        |                |           |
| Q9QXQ0        | MVSDINNGWQHLEQAEK                                                 | 1.47918059        | 2              | 4.71801   |
| Q9QXQ0        | NFITAEELR                                                         | 1.32996526        | 1              | 2.125     |
| Q9QXQ0        | NVNVQNFHISWK                                                      | 0.32444356        | 2              | 2.34403   |
| Q9QXQ0        | QFASQANMVGPPWIQTK                                                 | 0.85112118        | 2              | 3.63946   |
| Q9QXQ0        | QLETIDQLHLEYAK                                                    | 1.32664375        | 2              | 3.28057   |
| Q9QXQ0        | RDHALLEEQSK                                                       | 1.21037705        | 3              | 3.88131   |
| Q9QXQ0        | SIVDYKPNLDLLEQQHQHQLIQEALIFDNK                                    | 2.70808345        | 3              | 4.69341   |
| Q9QXQ0        | TINEVENQILTR                                                      | 0.99488182        | 2              | 3.67342   |
| Q9QXQ0        | VEQIAAIAQELNELDYDSSHVNTR                                          | 2.18210428        | 3              | 5.40346   |
| Q9QXQ0        | VGWEQLLTTIAR                                                      | 2.18710276        | 2              | 4.10189   |
| Q9QXQ0        | VLAGDKNFITAEELR                                                   | 0.99219586        | 2              | 3.23279   |
| Q9QXQ0        | VLAVNQENEHLMEDYER                                                 | 1.23405748        | 2              | 5.72971   |
| <b>Q9QXT0</b> | <b>CNPY2 Protein canopy homolog 2</b>                             | <b>1.10147281</b> | <b>0.9151</b>  | <b>5</b>  |
| Q9QXT0        | ALVDELEWEIAR                                                      | 1.41421013        | 2              | 3.58611   |
| Q9QXT0        | IDSDISGTLK                                                        | 0.98900254        | 2              | 2.62545   |
| Q9QXT0        | INPDGSQSVVEVPYAR                                                  | 1.08293072        | 2              | 3.66256   |
| Q9QXT0        | RTDLCDHALHR                                                       | 1.30981084        | 3              | 3.92513   |
| Q9QXT0        | TDLCDHALHR                                                        | 1.09318619        | 2              | 3.20789   |
| <b>Q9QXX4</b> | <b>CMC2 Calcium_binding mitochondrial carrier protein Aralar2</b> | <b>1.02083166</b> | <b>9.9E-20</b> | <b>18</b> |
| Q9QXX4        | DIMVTIRPHVLTFFVEECLVAAAGGTR                                       | 1.47285982        | 3              | 5.82647   |
| Q9QXX4        | DVEVTKEEFALAAQK                                                   | 1.31423532        | 2              | 4.47879   |
| Q9QXX4        | FGLGSIAGAVGATAVYPIDLK                                             | 1.33687766        | 2              | 5.96835   |
| Q9QXX4        | FGLYLPLFKPSASTSK                                                  | 1.63579378        | 2              | 2.75989   |
| Q9QXX4        | GLLPQLLGVAPEK                                                     | 1.51856263        | 1              | 3.07248   |
| Q9QXX4        | IAPLEEGMLPFNLAEQR                                                 | 2.34415632        | 2              | 5.23561   |
| Q9QXX4        | ITLPAPNPDHVGQYK                                                   | 0.96093322        | 2              | 3.00412   |
| Q9QXX4        | KDVEVTKEEFALAAQK                                                  | 1.13623766        | 2              | 5.62031   |
| Q9QXX4        | LQVAGEITGPR                                                       | 1.33303349        | 2              | 3.7317    |
| Q9QXX4        | LTVNDFVR                                                          | 2.08910352        | 2              | 2.31738   |
| Q9QXX4        | NGEFFMSPHDFVTR                                                    | 1.26733531        | 2              | 4.20744   |
| Q9QXX4        | NSFDCFK                                                           | 1.23925489        | 1              | 1.9736    |
| Q9QXX4        | SSPQFGVTLTYELLQR                                                  | 1.87272494        | 2              | 3.8108    |
| Q9QXX4        | STGSFVGELMYK                                                      | 1.63117004        | 2              | 3.43736   |
| Q9QXX4        | TVELLSGVVDQTK                                                     | 1.47705289        | 2              | 4.51176   |
| Q9QXX4        | VSALSVVR                                                          | 1.79433251        | 2              | 2.3056    |

|               |                                                                         |                   |                |          |
|---------------|-------------------------------------------------------------------------|-------------------|----------------|----------|
| Q9QXX4        | YEGFFGLYR                                                               | 1.36427538        | 2              | 2.74486  |
| Q9QXX4        | YLNIFGESQPNPK                                                           | 0.99789679        | 2              | 4.43402  |
| <b>Q9QYU4</b> | <b>CRYM Thiomorpholine_carboxylate dehydrogenase</b>                    | <b>1.01564169</b> | <b>0.99717</b> | <b>4</b> |
| Q9QYU4        | GFLGVMPAYSAEDALTTK                                                      | 0.94248846        | 2              | 4.57612  |
| Q9QYU4        | RAPAFLSADEVQDHLR                                                        | 0.88334155        | 3              | 3.84162  |
| Q9QYU4        | SLGMAVEDLVAAK                                                           | 0.85556263        | 2              | 3.76128  |
| Q9QYU4        | SSLLIPPLEAALANFSK                                                       | 1.06860511        | 2              | 2.89721  |
| <b>Q9QZ76</b> | <b>MYG Myoglobin</b>                                                    | <b>1.91274029</b> | <b>0.63526</b> | <b>6</b> |
| Q9QZ76        | GQHAAEIQLAQSHATK                                                        | 1.54384119        | 2              | 4.91335  |
| Q9QZ76        | HGCTVLTALGTILK                                                          | 3.38823921        | 2              | 3.66195  |
| Q9QZ76        | KGQHAAEIQLAQSHATK                                                       | 8.8553711         | 3              | 5.45922  |
| Q9QZ76        | KKGQHAAEIQLAQSHATK                                                      | 4.58781505        | 3              | 4.50123  |
| Q9QZ76        | VEGDLAGHGQEVLSLFK                                                       | 1.0341272         | 3              | 4.11227  |
| Q9QZ76        | YSGDFGADAQGAMSK                                                         | 7.62221669        | 2              | 3.92959  |
| <b>Q9QZA2</b> | <b>PDC6I Programmed cell death 6_interacting protein</b>                | <b>1.20604133</b> | <b>0.90734</b> | <b>8</b> |
| Q9QZA2        | ATLVKPTPVNVPISQK                                                        | 1.24833305        | 2              | 3.26783  |
| Q9QZA2        | DTIALLCKPEPELNAAIPSANPAK                                                | 1.33237284        | 2              | 3.39303  |
| Q9QZA2        | HEGALETLR                                                               | 1.13648983        | 2              | 2.32565  |
| Q9QZA2        | LLDEEATDNDLR                                                            | 1.07130727        | 2              | 4.05015  |
| Q9QZA2        | MVPVSVQQSLAVFSQR                                                        | 1.34792088        | 2              | 3.13145  |
| Q9QZA2        | NIQVSHQEFK                                                              | 1.32551898        | 2              | 3.35185  |
| Q9QZA2        | STAVVEQGGIQTVDQLIK                                                      | 1.18933624        | 2              | 4.29954  |
| Q9QZA2        | TMQGSEVVNVLK                                                            | 0.90844405        | 2              | 3.2771   |
| <b>Q9QZD8</b> | <b>DIC Mitochondrial dicarboxylate carrier</b>                          | <b>1.36281715</b> | <b>0.00139</b> | <b>7</b> |
| Q9QZD8        | GALVTVGQLSCYDQAK                                                        | 1.17968438        | 2              | 5.08236  |
| Q9QZD8        | LFSGATMASSR                                                             | 0.81407529        | 2              | 2.51429  |
| Q9QZD8        | MTGMALQVVR                                                              | 1.54278213        | 2              | 2.78806  |
| Q9QZD8        | NYSHALDGLYR                                                             | 1.14337808        | 2              | 2.83243  |
| Q9QZD8        | VHLQTQQEVK                                                              | 1.2487954         | 2              | 3.04864  |
| Q9QZD8        | VLLGGISGLTGGFVGTADLVNVR                                                 | 1.56572125        | 2              | 5.68047  |
| Q9QZD8        | WYFGLASCGAACCTHPLDLLK                                                   | 1.44404314        | 3              | 3.5388   |
| <b>Q9QZH8</b> | <b>AAAD Arylacetamide deacetylase</b>                                   | <b>1.44432649</b> | <b>0.14624</b> | <b>2</b> |
| Q9QZH8        | LDVVVSTDYGLAPK                                                          | 1.64483274        | 2              | 4.11496  |
| Q9QZH8        | WFLQEDILEK                                                              | 1.2465209         | 2              | 2.94973  |
| <b>Q9QZR9</b> | <b>chain</b>                                                            | <b>0.88851526</b> | <b>0.33808</b> | <b>2</b> |
| Q9QZR9        | EGPSGPFALGQDQKDGPR                                                      | 16.3783749        |                |          |
| Q9QZR9        | GASLLEMGPMPGMPGQK                                                       | 0.78614544        |                |          |
| <b>Q9QZU7</b> | <b>BODG Gamma_butYRObetaine dioxygenase</b>                             | <b>1.99310921</b> | <b>0.00046</b> | <b>5</b> |
| Q9QZU7        | IDANNVAYTTGK                                                            | 1.71147456        | 2              | 3.07129  |
| Q9QZU7        | MDDLTFDQK                                                               | 2.40691555        | 2              | 2.55431  |
| Q9QZU7        | MNPGDVITFDNWR                                                           | 2.00205953        | 2              | 2.80838  |
| Q9QZU7        | QTVTGGDSEIVDGFNVQCQK                                                    | 1.5320778         | 2              | 4.7948   |
| Q9QZU7        | SYEAGTEISR                                                              | 1.91890074        | 2              | 2.75401  |
| <b>Q9QZX8</b> | <b>SO1B2 Solute carrier organic anion transporter family member 1B2</b> | <b>1.8393862</b>  | <b>0.00041</b> | <b>2</b> |
| Q9QZX8        | GIGETPIVPLGISYLDLDDFAK                                                  | 1.8452601         | 2              | 3.48901  |
| Q9QZX8        | QFTDEGNPDSVVK                                                           | 1.34032553        | 2              | 3.58281  |
| <b>Q9R063</b> | <b>PRDX5 Peroxiredoxin_5_mitochondrial</b>                              | <b>0.86113395</b> | <b>0.34622</b> | <b>8</b> |
| Q9R063        | ALNVEPDGTGLTCSLAPNILSQL                                                 | 2.04452543        | 3              | 4.80459  |
| Q9R063        | ETDLLLDDSLVSLFGNR                                                       | 2.06891509        | 2              | 4.02467  |
| Q9R063        | GVLFGVPGAFTPGCSK                                                        | 1.14933862        | 2              | 4.19188  |
| Q9R063        | THLPGFVEQAGALK                                                          | 1.06203852        | 3              | 4.48427  |
| Q9R063        | VGDTIPSVEVFEGEPGK                                                       | 1.41061331        | 2              | 4.23487  |
| Q9R063        | VGDTIPSVEVFEGEPGKK                                                      | 0.98559659        | 2              | 4.17005  |
| Q9R063        | VNLAELFK                                                                | 1.10981106        | 2              | 2.56489  |

|               |                                                                   |                   |                |          |
|---------------|-------------------------------------------------------------------|-------------------|----------------|----------|
| Q9R063        | VQLLADPTGAFGK                                                     | 0.84244363        | 2              | 3.55715  |
| <b>Q9R064</b> | <b>GORS2 Golgi reassembly_stacking protein 2</b>                  | <b>0.97000816</b> | <b>0.25829</b> | <b>2</b> |
| Q9R064        | ADTSSLTVDMSPASK                                                   | 0.95632813        | 2              | 4.27413  |
| Q9R064        | LYVYNTDNDNCR                                                      | 1.79098374        | 2              | 2.53103  |
| <b>Q9R099</b> | <b>TBL2 Transducin beta_like protein 2</b>                        | <b>1.29737433</b> | <b>0.00646</b> | <b>4</b> |
| Q9R099        | ANVELDHATLVR                                                      | 1.42228977        | 2              | 2.42379  |
| Q9R099        | FEEASTMPCR                                                        | 0.96501051        | 2              | 2.66621  |
| Q9R099        | FLASCGDR                                                          | 1.18716355        | 2              | 2.33993  |
| Q9R099        | LQQQLTQAQEQALK                                                    | 1.60589743        | 2              | 4.10972  |
| <b>Q9R0N0</b> | <b>GALK1 Galactokinase</b>                                        | <b>1.22917998</b> | <b>0.04732</b> | <b>6</b> |
| Q9R0N0        | AEHSFAGVPCGIMDQLIALLGQK                                           | 1.57787266        | 3              | 4.46415  |
| Q9R0N0        | MEELEAGR                                                          | 1.26103133        | 2              | 2.45974  |
| Q9R0N0        | RQCEEVAQALGK                                                      | 0.97739962        | 2              | 3.20385  |
| Q9R0N0        | SLETSVPLSDPK                                                      | 1.25415927        | 2              | 3.28885  |
| Q9R0N0        | TDGLVSLTTSK                                                       | 1.25370197        | 2              | 3.80247  |
| Q9R0N0        | VEELLAEAR                                                         | 1.14715837        | 2              | 3.11637  |
| <b>Q9R0T3</b> | <b>DNJC3 Dnaj homolog subfamily C member 3</b>                    | <b>1.02847743</b> | <b>0.99785</b> | <b>6</b> |
| Q9R0T3        | AEPSVAEYTVR                                                       | 0.98754272        | 2              | 2.4658   |
| Q9R0T3        | ICSEVLQLEPDNVNALK                                                 | 1.12723832        | 2              | 4.75959  |
| Q9R0T3        | KFDDGEDPLDAETQGGGSSNPFHR                                          | 0.90573134        | 3              | 5.65813  |
| Q9R0T3        | LIGSAEELIR                                                        | 1.06824624        | 2              | 2.61684  |
| Q9R0T3        | LKNDNTEAFYK                                                       | 1.40880129        | 2              | 2.6493   |
| Q9R0T3        | SNPSENEEKEAQSQVLK                                                 | 1.01833059        | 2              | 5.15766  |
| <b>Q9R112</b> | <b>SQRD Sulfide:quinone oxidoreductase_mitochondrial</b>          | <b>1.00621943</b> | <b>0.99111</b> | <b>4</b> |
| Q9R112        | EGNALFTFPNTPVK                                                    | 1.35546165        | 2              | 3.0399   |
| Q9R112        | STLSVIPSGVQWIQDR                                                  | 1.41527331        | 2              | 2.79017  |
| Q9R112        | TAAAVAAQSGILDR                                                    | 0.98095995        | 2              | 3.32618  |
| Q9R112        | VGAENVAIVEPSEK                                                    | 0.99287464        | 2              | 2.86908  |
| <b>Q9R172</b> | <b>NOTC3 Neurogenic locus notch homolog protein 3</b>             | <b>0.84808174</b> | <b>0.37198</b> | <b>2</b> |
| Q9R172        | CTHQQPSREAACLPLGWVGER                                             | 1.67982187        | 3              | 3.39699  |
| Q9R172        | YGGKCLDLVDK                                                       | 0.786234          | 1              | 1.98789  |
| <b>Q9R1T3</b> | <b>CATZ Cathepsin Z</b>                                           | <b>1.42899072</b> | <b>0.36859</b> | <b>2</b> |
| Q9R1T3        | HGIPDETCNNYQAK                                                    | 1.45476013        | 2              | 3.86547  |
| Q9R1T3        | VGDYGSLSGR                                                        | 1.29345432        | 2              | 2.82876  |
| <b>Q9R1T4</b> | <b>SEPT6 Septin_6</b>                                             | <b>1.146435</b>   | <b>0.66412</b> | <b>2</b> |
| Q9R1T4        | QMFVQRVKEK+Oxidation(1                                            | 0.95088262        |                |          |
| Q9R1T4        | STLMDTLFNTK                                                       | 1.80558683        | 2              | 2.87976  |
| <b>Q9R1T5</b> | <b>ACY2 Aspartoacylase</b>                                        | <b>1.61412718</b> | <b>0.4527</b>  | <b>2</b> |
| Q9R1T5        | EAFAKTKLTLNAK                                                     | 21.2293213        | 2              | 2.52017  |
| Q9R1T5        | VIPLGGDCTVYPVFVNEAAYEK                                            | 1.59917189        | 3              | 3.58684  |
| <b>Q9R1T9</b> | <b>KCNH4 Potassium voltage_gated channel subfamily H member 4</b> | <b>1.71123251</b> | <b>0.21355</b> | <b>2</b> |
| Q9R1T9        | DGSFAFWCLLDMMPIK+Oxidation(10                                     | 2.24246523        |                |          |
| Q9R1T9        | KDGSFAFWCLLDMMPIK+Oxidation(11)Oxidation(12                       | 1.03120974        |                |          |
| <b>Q9R1Z0</b> | <b>VDAC3 Voltage_dependent anion_selective channel protein 3</b>  | <b>1.51410134</b> | <b>0.03617</b> | <b>4</b> |
| Q9R1Z0        | LCQNNFALGYK                                                       | 1.43644599        | 2              | 2.40341  |
| Q9R1Z0        | LTLALVDGK                                                         | 2.36664619        | 2              | 2.30016  |
| Q9R1Z0        | LTVDTIFVPNTGK                                                     | 1.24046861        | 2              | 2.96183  |
| Q9R1Z0        | VNNASLIGLGYTQSLRPGVK                                              | 1.53738087        | 2              | 4.29561  |
| <b>Q9WTR8</b> | <b>PHLP1 PH domain leucine_rich repeat protein phosphatase 1</b>  | <b>1.372202</b>   | <b>0.70025</b> | <b>2</b> |
| Q9WTR8        | LEEEIEIDISGNK                                                     | 3.45087481        | 2              | 2.72164  |
| Q9WTR8        | LEEEIEIDISGNKLL                                                   | 1.27488193        | 2              | 2.39603  |

|               |                                                                      |                   |                |           |
|---------------|----------------------------------------------------------------------|-------------------|----------------|-----------|
| <b>Q9WTT6</b> | <b>GUAD Guanine deaminase</b>                                        | <b>1.21519447</b> | <b>0.14601</b> | <b>10</b> |
| Q9WTT6        | EIGNFEVKGKDFDALLINPR                                                 | 1.51988706        | 2              | 4.08246   |
| Q9WTT6        | ETTEESVKETER                                                         | 1.21561465        | 2              | 3.16279   |
| Q9WTT6        | FQSTDVAEEVYTR                                                        | 0.98287459        | 2              | 3.7186    |
| Q9WTT6        | FSLSCTETLMSELGNIK                                                    | 1.57526264        | 2              | 3.6433    |
| Q9WTT6        | GTFVHSTWTCPMEVLR                                                     | 0.69204467        | 2              | 3.15965   |
| Q9WTT6        | IVFLEESSQQEK                                                         | 1.080443          | 2              | 4.25337   |
| Q9WTT6        | NIEEVYVGK                                                            | 0.60424066        | 1              | 2.69527   |
| Q9WTT6        | NYTDVYDKNNLLTNK                                                      | 0.91333563        | 2              | 4.41706   |
| Q9WTT6        | THDLYIQSHISENREEIEAVK                                                | 1.45942107        | 3              | 4.47567   |
| Q9WTT6        | VCMDLNNTVPEYK                                                        | 1.11990241        | 2              | 3.61848   |
| <b>Q9WTT7</b> | <b>BZW2 Basic leucine zipper and W2 domain_ containing protein 2</b> | <b>1.27998068</b> | <b>0.67342</b> | <b>2</b>  |
| Q9WTT7        | AWMAEKDANSVSSLR+Oxidation(2                                          | 1.3793145         |                |           |
| Q9WTT7        | ELQERLSQECPIK                                                        | 1.25363161        | 2              | 2.55037   |
| <b>Q9WU19</b> | <b>HAOX1 Hydroxyacid oxidase 1</b>                                   | <b>1.13703934</b> | <b>0.99416</b> | <b>9</b>  |
| Q9WU19        | AIFVTVDTPYLGNR                                                       | 0.93817504        | 2              | 4.25409   |
| Q9WU19        | AVFVGRPIIWGLAFQGEK                                                   | 0.92249667        | 3              | 4.01176   |
| Q9WU19        | GVQDVLEILK                                                           | 0.96483417        | 2              | 3.62784   |
| Q9WU19        | GVQDVLEILKEEFR                                                       | 0.96891077        | 2              | 4.30141   |
| Q9WU19        | HGVDGILVSNHGAR                                                       | 1.03073754        | 3              | 4.53181   |
| Q9WU19        | MKNFETNDLAFSPK+Oxidation(0                                           | 1.51658026        |                |           |
| Q9WU19        | NFETNDLAFSPK                                                         | 0.77731726        | 2              | 3.57137   |
| Q9WU19        | NVADIDLSTSVLGQR                                                      | 1.96528704        | 2              | 4.94347   |
| Q9WU19        | VEVFLDGGVR                                                           | 1.08792907        | 2              | 2.6852    |
| <b>Q9WU79</b> | <b>PROD Proline dehydrogenase 1_ mitochondrial</b>                   | <b>1.27665891</b> | <b>0.79927</b> | <b>2</b>  |
| Q9WU79        | FTEEEEQQMK                                                           | 1.49922763        | 2              | 3.11878   |
| Q9WU79        | HLVVPNVQTGQLEPLLSR                                                   | 1.15667847        | 2              | 2.33994   |
| <b>Q9WU82</b> | <b>CTNB1 Catenin beta_1</b>                                          | <b>1.14023022</b> | <b>0.4383</b>  | <b>5</b>  |
| Q9WU82        | HQEAEMAQNAVR                                                         | 1.431735          | 2              | 3.40978   |
| Q9WU82        | LLNDEDQVVVVK                                                         | 0.88544028        | 2              | 3.30851   |
| Q9WU82        | TMQNTNDVETAR                                                         | 0.9565464         | 2              | 3.58624   |
| Q9WU82        | TMQNTNDVETAR+Oxidation(1                                             | 1.76726474        |                |           |
| Q9WU82        | TSMGGTQQQFVEGVR                                                      | 1.16064421        | 2              | 3.52761   |
| <b>Q9WUA2</b> | <b>SYFB Phenylalanyl_ tRNA synthetase beta chain</b>                 | <b>1.20985335</b> | <b>0.50068</b> | <b>3</b>  |
| Q9WUA2        | EMVRADLINKK                                                          | 1.18147943        | 2              | 2.38823   |
| Q9WUA2        | KEMVRADLINK                                                          | 1.18147943        | 2              | 2.36095   |
| Q9WUA2        | TYTIANQFPLNK                                                         | 1.21118317        | 2              | 2.44837   |
| <b>Q9WUC4</b> | <b>ATOX1 Copper transport protein ATOX1</b>                          | <b>1.26363785</b> | <b>0.00192</b> | <b>2</b>  |
| Q9WUC4        | LGGVEFNIDLPNKK                                                       | 1.2203038         | 2              | 3.62919   |
| Q9WUC4        | VCIESEHSSDILLATLNK                                                   | 1.37670719        | 2              | 5.74279   |
| <b>Q9WUH4</b> | <b>FHL1 Four and a half LIM domains protein 1</b>                    | <b>2.93471724</b> | <b>0.53773</b> | <b>3</b>  |
| Q9WUH4        | AIVAGDQNVEYK                                                         | 3.09835427        | 2              | 2.67463   |
| Q9WUH4        | FCANTCVECR                                                           | 2.60534463        | 2              | 2.71892   |
| Q9WUH4        | FVFHNEQVYCPDCAK                                                      | 2.50263723        | 2              | 4.21178   |
| <b>Q9WUI1</b> | <b>MK11 Mitogen_ activated protein kinase 11</b>                     | <b>1.32500635</b> | <b>0.22467</b> | <b>2</b>  |
| Q9WUI1        | ILDFGLAR                                                             | 1.27588141        | 2              | 2.73213   |
| Q9WUI1        | QELNKTVWEVPQR                                                        | 2.21149511        | 2              | 2.43044   |
| <b>Q9WUJ8</b> | <b>ORC6 Origin recognition complex subunit 6</b>                     | <b>1.51824446</b> | <b>0.93113</b> | <b>2</b>  |
| Q9WUJ8        | LSGLNKMMYQSLK+Oxidation(6                                            | 1.51211605        |                |           |
| Q9WUJ8        | LSGLNKMMYQSLK+Oxidation(7                                            | 1.52147757        |                |           |
| <b>Q9WUS0</b> | <b>KAD4 Adenylate kinase isoenzyme 4_ mitochondrial</b>              | <b>0.86418928</b> | <b>0.36735</b> | <b>5</b>  |
| Q9WUS0        | AVILGPPGSGK                                                          | 0.94619691        | 2              | 2.45807   |
| Q9WUS0        | GVLHQFSGTETNR                                                        | 0.88962754        | 2              | 3.55004   |
| Q9WUS0        | TLVQAEALDR                                                           | 0.83411758        | 2              | 2.82175   |
| Q9WUS0        | VYNLDFNPPQVLGVDDITGEPLVQEQEDDKPEALAAR                                | 1.59578833        | 3              | 5.10579   |

|               |                                                                |                   |                |           |
|---------------|----------------------------------------------------------------|-------------------|----------------|-----------|
| Q9WU50        | YKDAAKPVIELYK                                                  | 1.30739763        | 2              | 3.55925   |
| <b>Q9WUU8</b> | <b>TNIP1 TNFAIP3_interacting protein 1</b>                     | <b>1.26033315</b> | <b>0.7041</b>  | <b>2</b>  |
| Q9WUU8        | IFEEDFQRER                                                     | 1.18938986        | 2              | 2.3264    |
| Q9WUU8        | QENEALK                                                        | 1.27007789        | 1              | 2.29213   |
| <b>Q9WV85</b> | <b>NDK3 Nucleoside diphosphate kinase 3</b>                    | <b>1.34890616</b> | <b>0.17819</b> | <b>3</b>  |
| Q9WV85        | LVKYMSSGPVAMVWQGLDVVHASR+Oxidation(4)Oxidation(12)             | 1.28325583        |                |           |
| Q9WV85        | LVQASELLR                                                      | 1.5255987         | 2              | 2.70901   |
| Q9WV85        | TFLAVKPDGVQR                                                   | 0.81798528        | 2              | 2.67797   |
| <b>Q9WVC0</b> | <b>SEPT7 Septin_7</b>                                          | <b>1.19585239</b> | <b>0.85697</b> | <b>3</b>  |
| Q9WVC0        | ADTLTPEECQQFK                                                  | 0.83642831        | 2              | 2.85777   |
| Q9WVC0        | FEDYLNAESR                                                     | 1.28715728        | 2              | 2.76163   |
| Q9WVC0        | NLEGYVGFANLPNQVYR                                              | 1.48056712        | 2              | 3.62276   |
| <b>Q9WVD5</b> | <b>ORNT1 Mitochondrial ornithine transporter 1</b>             | <b>2.55646473</b> | <b>4.4E-06</b> | <b>3</b>  |
| Q9WVD5        | DGPLGFYHGLSSTLLR                                               | 2.29306243        | 2              | 2.92424   |
| Q9WVD5        | LQTMYEMETSGK                                                   | 3.63784732        | 2              | 3.12805   |
| Q9WVD5        | NEGITALYSGLKPTMIR                                              | 1.54599302        | 2              | 3.34505   |
| <b>Q9WVF7</b> | <b>DPOE1 DNA polymerase epsilon catalytic subunit A</b>        | <b>1.5663253</b>  | <b>0.43437</b> | <b>2</b>  |
| Q9WVF7        | AANMPDSELFELISENR                                              | 1.31096935        | 2              | 2.4759    |
| Q9WVF7        | MAWQWRGEFMPASR+Oxidation(0)Oxidation(9)                        | 4.68083153        |                |           |
| <b>Q9WVK3</b> | <b>PECR Peroxisomal trans_2_enoyl_CoA reductase</b>            | <b>1.24049661</b> | <b>0.85063</b> | <b>13</b> |
| Q9WVK3        | AGVYNLTK                                                       | 1.19133612        | 2              | 2.52272   |
| Q9WVK3        | ASQPPSSSTQVTAIQCNIR                                            | 0.8649219         | 2              | 5.53707   |
| Q9WVK3        | DHGGSIVNIIVLLNNGFPTAAHSGAAR                                    | 1.10733236        | 3              | 6.29974   |
| Q9WVK3        | ELLHLGCNVVIASR                                                 | 1.15606847        | 2              | 4.24377   |
| Q9WVK3        | INFLVNNAGGQFMAPAEDITAK                                         | 1.21212049        | 2              | 5.48502   |
| Q9WVK3        | INFLVNNAGGQFMAPAEDITAK+Oxidation(12)                           | 3.03200015        |                |           |
| Q9WVK3        | KEEEVNNLVK                                                     | 0.96825986        | 3              | 4.01885   |
| Q9WVK3        | LTAADVDEL                                                      | 1.29816408        | 2              | 3.18741   |
| Q9WVK3        | NFTIPDHDNWPVGAGDSSFIK                                          | 0.97438972        | 2              | 5.02034   |
| Q9WVK3        | NFTIPDHDNWPVGAGDSSFIK                                          | 1.01236085        | 3              | 3.75714   |
| Q9WVK3        | SGQSYLAAGLLQNQVAVVTGGATGIGK                                    | 0.9464099         | 2              | 6.21111   |
| Q9WVK3        | TMALTWASSGVR                                                   | 0.87438035        | 2              | 3.80029   |
| Q9WVK3        | TMALTWASSGVR+Oxidation(1)                                      | 1.25230835        |                |           |
| <b>Q9WVK7</b> | <b>HCDH Hydroxyacyl_coenzyme A dehydrogenase_mitochondrial</b> | <b>1.15134595</b> | <b>0.99538</b> | <b>17</b> |
| Q9WVK7        | AADEFVEK                                                       | 1.20546856        | 2              | 3.35121   |
| Q9WVK7        | DTPGFIVNR                                                      | 1.49939599        | 2              | 2.70301   |
| Q9WVK7        | EDIDTAMK                                                       | 1.00845154        | 1              | 2.15194   |
| Q9WVK7        | FAAEHTIFASNTSSLQITNIANATTR                                     | 1.12376011        | 3              | 4.76593   |
| Q9WVK7        | FILDGWHEMDPENPLFQSPSMNNLVAQK                                   | 1.11435819        | 3              | 5.48344   |
| Q9WVK7        | FILDGWHEMDPENPLFQSPSMNNLVAQK+Oxidation(21)                     | 1.58519992        |                |           |
| Q9WVK7        | FILDGWHEMDPENPLFQSPSMNNLVAQK+Oxidation(8)                      | 1.58677383        |                |           |
| Q9WVK7        | GDASKEDIDTAMK                                                  | 1.19059542        | 2              | 3.89158   |
| Q9WVK7        | GDASKEDIDTAMK+Oxidation(11)                                    | 1.76217888        |                |           |
| Q9WVK7        | HVTVIGGGLMGAGIAQVAAATGHTVVLVDQTEDILAK                          | 1.05977596        | 4              | 5.89555   |
| Q9WVK7        | KGIEESLK                                                       | 1.17646842        | 2              | 2.4333    |
| Q9WVK7        | KGIEESLKR                                                      | 1.1372298         | 2              | 2.42959   |
| Q9WVK7        | LKNELFQR                                                       | 1.94255676        | 2              | 2.64532   |
| Q9WVK7        | LLVPYLIEAIR                                                    | 0.93559163        | 2              | 2.75832   |
| Q9WVK7        | LVEVIK                                                         | 1.08436374        | 2              | 2.41188   |
| Q9WVK7        | TFESLVDCK                                                      | 0.97126113        | 2              | 3.44328   |
| Q9WVK7        | TLSSLSTDAASVHSTDLVVEAIVENLK                                    | 1.24041525        | 3              | 6.05685   |



|               |                                                                           |                   |                |           |
|---------------|---------------------------------------------------------------------------|-------------------|----------------|-----------|
| <b>Q9Z0N2</b> | <b>IF2H Eukaryotic translation initiation factor 2 subunit 3_Y_linked</b> | <b>1.07086769</b> | <b>0.99143</b> | <b>3</b>  |
| Q9Z0N2        | IVLTNPVCTEVEGK                                                            | 1.03458444        | 2              | 2.91434   |
| Q9Z0N2        | SFDVNKPGCEVDDLK                                                           | 1.51779118        | 2              | 3.33122   |
| Q9Z0N2        | VGQEIEVRPGIVSK                                                            | 1.07146353        | 2              | 3.25902   |
| <b>Q9Z0U5</b> | <b>ADO Aldehyde oxidase</b>                                               | <b>1.44812328</b> | <b>0.81339</b> | <b>17</b> |
| Q9Z0U5        | EFQPLDPTQELIFPPELMR                                                       | 1.43971824        | 2              | 2.62625   |
| Q9Z0U5        | ELSILYGGVGPPTIGAK                                                         | 1.17733316        | 2              | 3.54661   |
| Q9Z0U5        | GEDMLITGGR                                                                | 1.89051501        | 2              | 2.6167    |
| Q9Z0U5        | GTSTETVPNTNASGGSVVADLNGLAVK                                               | 1.27544762        | 2              | 4.60753   |
| Q9Z0U5        | GYESNINWEK                                                                | 1.62882839        | 2              | 2.6265    |
| Q9Z0U5        | HATGEAIYCDDMPAVDR                                                         | 2.03903836        | 2              | 2.70454   |
| Q9Z0U5        | HIQDIVAATLK                                                               | 1.44339859        | 2              | 2.72739   |
| Q9Z0U5        | HLDSDLNPLLA VG NCTLNLLSK                                                  | 1.78261181        | 3              | 3.68698   |
| Q9Z0U5        | KCPDSDLKPQEVLVSNIPCSR                                                     | 0.99827641        | 3              | 3.49852   |
| Q9Z0U5        | KLECGNVDEAFK                                                              | 1.40025874        | 2              | 3.65669   |
| Q9Z0U5        | LVLDEVTLAGSAPGGK                                                          | 1.9225316         | 2              | 3.72604   |
| Q9Z0U5        | MTWISPVTLLEELVEAK                                                         | 1.14538241        | 2              | 3.41583   |
| Q9Z0U5        | NHPEPSLDQLTDALGGNLCR                                                      | 1.82705361        | 2              | 3.09925   |
| Q9Z0U5        | NMASLGGHIVSR                                                              | 1.52643981        | 2              | 3.17092   |
| Q9Z0U5        | QQNALAIVNSGMR                                                             | 1.02412748        | 2              | 2.47314   |
| Q9Z0U5        | RLEPIISK                                                                  | 2.49300949        | 2              | 2.32455   |
| Q9Z0U5        | VVENNVDPPEMMLLPYLR                                                        | 2.12216173        | 2              | 2.83989   |
| <b>Q9Z0V5</b> | <b>PRDX4 Peroxiredoxin_4</b>                                              | <b>0.87867393</b> | <b>0.93027</b> | <b>5</b>  |
| Q9Z0V5        | ENECHFYGAGQVYPGEVSR                                                       | 0.78419562        | 3              | 5.18964   |
| Q9Z0V5        | GLFIIDDK                                                                  | 1.09943207        | 2              | 3.0266    |
| Q9Z0V5        | HGEVCPAGWKPGSETIIPDPAGK                                                   | 0.86981119        | 3              | 3.55903   |
| Q9Z0V5        | QITLNDLPVGR                                                               | 1.12698814        | 2              | 3.15417   |
| Q9Z0V5        | TRENECHFYGAGQVYPGEVSR                                                     | 1.13366621        | 3              | 5.6153    |
| <b>Q9Z0V6</b> | <b>PRDX3 Thioredoxin_dependent peroxide reductase_mitochondrial</b>       | <b>1.13358378</b> | <b>0.77259</b> | <b>5</b>  |
| Q9Z0V6        | AFQFVETHGEVCPANWTPESPTIKPSPTASK                                           | 1.12025022        | 3              | 5.43629   |
| Q9Z0V6        | GLFIIDPNGVIK                                                              | 1.1113887         | 2              | 3.06107   |
| Q9Z0V6        | GTAVVNGEFK                                                                | 1.2386496         | 2              | 2.72945   |
| Q9Z0V6        | HLSVNDLPVGR                                                               | 1.10242269        | 2              | 2.58903   |
| Q9Z0V6        | NGGLGHMNITLLSDLTK                                                         | 1.19496802        | 3              | 3.48105   |
| <b>Q9Z0W7</b> | <b>CLIC4 Chloride intracellular channel protein 4</b>                     | <b>1.08063592</b> | <b>0.93235</b> | <b>3</b>  |
| Q9Z0W7        | DEFTNTCPSDKEVEIAYS DVAK                                                   | 1.3068779         | 3              | 3.64276   |
| Q9Z0W7        | FLDGDEMTLADCNLLPK                                                         | 1.30320892        | 2              | 4.24368   |
| Q9Z0W7        | NSRPEANEALER                                                              | 1.05059402        | 3              | 4.29236   |
| <b>Q9Z142</b> | <b>TMM33 Transmembrane protein 33</b>                                     | <b>1.67972434</b> | <b>0.07134</b> | <b>2</b>  |
| Q9Z142        | ALLANALTSALR                                                              | 1.50049842        | 2              | 3.75411   |
| Q9Z142        | LSTNQNILK                                                                 | 1.75450254        | 2              | 2.43705   |
| <b>Q9Z1A6</b> | <b>VIGLN Vigilin</b>                                                      | <b>1.2677286</b>  | <b>2.7E-05</b> | <b>22</b> |
| Q9Z1A6        | ASVITQVFHVPLEER                                                           | 2.02474335        | 2              | 3.28023   |
| Q9Z1A6        | DLANIAEVEVSIPAK                                                           | 5.15961668        | 2              | 2.54246   |
| Q9Z1A6        | EALEALVPVTIEVEVPFDLHR                                                     | 2.17156136        | 3              | 3.45362   |
| Q9Z1A6        | ELQAEQEDR                                                                 | 1.59820894        | 2              | 2.41051   |
| Q9Z1A6        | HEVLLISAEQDKR                                                             | 1.22304987        | 3              | 4.51871   |
| Q9Z1A6        | ICLEIMQR                                                                  | 1.23546851        | 2              | 2.52203   |
| Q9Z1A6        | IDLPAENSNSSETIVITGK                                                       | 0.74969756        | 2              | 4.22862   |
| Q9Z1A6        | IEGDPQGVQQA K                                                             | 1.24983289        | 2              | 3.46137   |
| Q9Z1A6        | IIFPAAEDKDQDLITIIGK                                                       | 1.51542682        | 2              | 4.47798   |
| Q9Z1A6        | IQIPRPDDPSNQIK                                                            | 1.34190952        | 2              | 2.50082   |
| Q9Z1A6        | ITLEGPTEDVNVAQEIQIEGMVK                                                   | 1.38143887        | 2              | 3.47024   |
| Q9Z1A6        | IVGELEQMVSEVDPLDHR                                                        | 1.18391024        | 2              | 4.77892   |
| Q9Z1A6        | LGQALTEVYAK                                                               | 1.6738995         | 2              | 3.45592   |

|               |                                                                                            |                   |                |           |
|---------------|--------------------------------------------------------------------------------------------|-------------------|----------------|-----------|
| Q9Z1A6        | LQDLELK                                                                                    | 1.13964548        | 1              | 2.39277   |
| Q9Z1A6        | LQTQASATVPIPK                                                                              | 1.17132918        | 2              | 3.64996   |
| Q9Z1A6        | LVGEIMQETGTR                                                                               | 1.36274637        | 2              | 3.51438   |
| Q9Z1A6        | MDYVEINIDHK                                                                                | 1.21500132        | 2              | 2.80396   |
| Q9Z1A6        | MVADLVENSYSISVPIFK                                                                         | 1.35826003        | 3              | 3.4058    |
| Q9Z1A6        | RCDIIVISGR                                                                                 | 1.26564769        | 2              | 2.95816   |
| Q9Z1A6        | TGAHLELSLAK                                                                                | 1.20184324        | 3              | 3.80012   |
| Q9Z1A6        | TKDLIIEQR                                                                                  | 1.43699726        | 2              | 2.67492   |
| Q9Z1A6        | VKELQAEQEDR                                                                                | 1.48435491        | 3              | 3.74886   |
| <b>Q9Z1J8</b> | <b>S14L3 SEC14_like protein 3</b>                                                          | <b>1.64339232</b> | <b>0.01034</b> | <b>3</b>  |
| Q9Z1J8        | ENVQDVLPALPNPDDYFLLR                                                                       | 1.6060992         | 2              | 2.63266   |
| Q9Z1J8        | FRENVQDVLPALPNPDDYFLLR                                                                     | 1.58034219        | 3              | 4.35021   |
| Q9Z1J8        | GSSHQVEYEIFPGCVLR                                                                          | 1.83300796        | 2              | 4.8928    |
| <b>Q9Z1L0</b> | <b>PK3CB Phosphatidylinositol_4_5_bisphosphate 3_kinase catalytic subunit beta isoform</b> | <b>0.99566545</b> | <b>0.85718</b> | <b>2</b>  |
| Q9Z1L0        | MARLCFAVYAVLDK+Oxidation(0                                                                 | 0.98428575        |                |           |
| Q9Z1L0        | QPYYPYPPFDK                                                                                | 4.36265281        | 1              | 1.94183   |
| <b>Q9Z1M9</b> | <b>SMC1A Structural maintenance of chromosomes protein 1A</b>                              | <b>1.34453088</b> | <b>0.62056</b> | <b>3</b>  |
| Q9Z1M9        | EIKEKDESELNQK                                                                              | 1.21533703        | 2              | 2.56367   |
| Q9Z1M9        | IIDETMAQLQDLK                                                                              | 1.35484537        | 2              | 2.42764   |
| Q9Z1M9        | SGVISGGASDLKAKAR                                                                           | 1.4246429         | 2              | 2.33799   |
| <b>Q9Z1N1</b> | <b>F16P2 Fructose_1_6_bisphosphatase isozyme 2</b>                                         | <b>1.3153778</b>  | <b>0.34985</b> | <b>2</b>  |
| Q9Z1N1        | YVGS MVADVHR                                                                               | 1.29299638        | 2              | 2.69828   |
| Q9Z1N1        | YVGS MVADVHR+Oxidation(4                                                                   | 1.38866005        |                |           |
| <b>Q9Z1P2</b> | <b>ACTN1 Alpha_actinin_1</b>                                                               | <b>1.14852116</b> | <b>0.37001</b> | <b>5</b>  |
| Q9Z1P2        | DYETATLSEIK                                                                                | 1.67379222        | 1              | 1.97016   |
| Q9Z1P2        | GISQEQMNEFR                                                                                | 0.95437544        | 2              | 2.8984    |
| Q9Z1P2        | ICDQWDNLGALTQK                                                                             | 1.10275325        | 2              | 4.1241    |
| Q9Z1P2        | IDQLEGDHQLIQEALIFDNK                                                                       | 1.37348108        | 3              | 3.91686   |
| Q9Z1P2        | MVSDINNAWGCLEQAEK                                                                          | 0.44469733        | 2              | 2.7107    |
| <b>Q9Z1W6</b> | <b>LYRIC Protein LYRIC</b>                                                                 | <b>1.22957638</b> | <b>0.96483</b> | <b>5</b>  |
| Q9Z1W6        | KREEVTPPTAPEDPAQLK                                                                         | 1.28304419        | 3              | 4.56793   |
| Q9Z1W6        | SSSQVPPMLQDTPDKPK                                                                          | 1.70695479        | 2              | 3.41163   |
| Q9Z1W6        | SWQDELAQQAEEGSAR                                                                           | 1.20214505        | 2              | 5.682     |
| Q9Z1W6        | TELGDLGLLEPK                                                                               | 1.65730222        | 2              | 3.37922   |
| Q9Z1W6        | TLPPAISAEPVTLISK                                                                           | 1.04486316        | 2              | 2.93514   |
| <b>Q9Z1Y3</b> | <b>CADH2 Cadherin_2</b>                                                                    | <b>1.4208425</b>  | <b>0.41119</b> | <b>4</b>  |
| Q9Z1Y3        | FLEAGIYEVPIVITDSGNPPK                                                                      | 1.51601619        | 2              | 3.95178   |
| Q9Z1Y3        | IDPVNGQITIAVLDR                                                                            | 1.31090629        | 2              | 3.92623   |
| Q9Z1Y3        | VCQCDSNGDCTDVDR                                                                            | 2.43931105        | 2              | 5.10662   |
| Q9Z1Y3        | YSVTGPGADQPPTGIFIINPISGQLSVTKPLDR                                                          | 1.47100755        | 3              | 3.59729   |
| <b>Q9Z270</b> | <b>VAPA Vesicle_associated membrane protein_associated protein A</b>                       | <b>1.08200491</b> | <b>0.87036</b> | <b>3</b>  |
| Q9Z270        | FKGPFTDVVTTNLK                                                                             | 1.13173058        | 2              | 3.04318   |
| Q9Z270        | HEQJLVLDPPSDLK                                                                             | 1.07781977        | 2              | 3.7484    |
| Q9Z270        | QDGPLPKPHSVSLNDTETR                                                                        | 2.08772998        | 3              | 3.40779   |
| <b>Q9Z2C8</b> | <b>YBOX2 Y_box_binding protein 2</b>                                                       | <b>1.61585638</b> | <b>0.21991</b> | <b>2</b>  |
| Q9Z2C8        | SVGDGETVEFDVVEGEK                                                                          | 1.62741114        | 2              | 3.4501    |
| Q9Z2C8        | WFNVRNGYGFINRNDTK                                                                          | 1.51124827        | 2              | 2.30786   |
| <b>Q9Z2I8</b> | <b>SUCB2 Succinyl_CoA ligase [GDP_forming] subunit beta_mitochondrial</b>                  | <b>1.10615978</b> | <b>0.99972</b> | <b>10</b> |
| Q9Z2I8        | DIFAMDDKSENEPIEENAAAR                                                                      | 0.6371902         | 2              | 5.00327   |
| Q9Z2I8        | IDATQVEVNPFGETPEGQVVCFAK                                                                   | 1.50776487        | 3              | 4.67838   |
| Q9Z2I8        | INFDDNAEFR                                                                                 | 1.01308012        | 2              | 3.1599    |
| Q9Z2I8        | LEGTNVQEAQNILK                                                                             | 0.99359317        | 2              | 5.20132   |
| Q9Z2I8        | SENEPIEENAAAR                                                                              | 1.01425515        | 2              | 4.19703   |

|               |                                                                           |                   |                |           |
|---------------|---------------------------------------------------------------------------|-------------------|----------------|-----------|
| Q9Z2I8        | SHNGPVIVGSPQGGVDIEEVAASSPELIFK                                            | 1.23893898        | 2              | 6.15073   |
| Q9Z2I8        | SSGLPITSAVDLEDAAK                                                         | 0.87212889        | 2              | 4.96308   |
| Q9Z2I8        | SSGLPITSAVDLEDAAKK                                                        | 0.90707566        | 2              | 2.70027   |
| Q9Z2I8        | VMVAEALDISR                                                               | 1.300701          | 2              | 3.19775   |
| Q9Z2I8        | VVGELAQQMIGYNLTK                                                          | 1.51396137        | 3              | 3.3922    |
| <b>Q9Z2I9</b> | <b>SUCB1 Succinyl_CoA ligase [ADP_forming] subunit beta_mitochondrial</b> | <b>1.24951756</b> | <b>0.00015</b> | <b>9</b>  |
| Q9Z2I9        | ALIADSLK                                                                  | 1.15296536        | 1              | 2.15611   |
| Q9Z2I9        | AVSSQMIGQK                                                                | 1.34932247        | 2              | 2.92479   |
| Q9Z2I9        | ICNQVLVCER                                                                | 1.86006384        | 2              | 2.9847    |
| Q9Z2I9        | ILACDDLDEAAK                                                              | 1.38731341        | 2              | 3.31227   |
| Q9Z2I9        | INFDSNSAYR                                                                | 0.96047848        | 2              | 3.01595   |
| Q9Z2I9        | LSEIVTLAK                                                                 | 1.48123156        | 2              | 2.39499   |
| Q9Z2I9        | MGFSPNIVDSAAENMIK                                                         | 0.85164289        | 2              | 4.20081   |
| Q9Z2I9        | SSDEAYAIK                                                                 | 1.41628617        | 2              | 3.35545   |
| Q9Z2I9        | VQAILVNIFFGIMR                                                            | 1.65663628        | 2              | 3.83501   |
| <b>Q9Z2L0</b> | <b>VDAC1 Voltage_dependent anion_selective channel protein 1</b>          | <b>1.09009483</b> | <b>3.5E-05</b> | <b>13</b> |
| Q9Z2L0        | EHINLGCDVDFDIAGPSIR                                                       | 2.5699186         | 2              | 3.12806   |
| Q9Z2L0        | KLETAVNLAWTAGNSNTR                                                        | 1.01048635        | 2              | 5.44818   |
| Q9Z2L0        | LTFDSSFSPNTGK                                                             | 1.08708635        | 2              | 3.72068   |
| Q9Z2L0        | LTFDSSFSPNTGKK                                                            | 1.26905185        | 2              | 2.79907   |
| Q9Z2L0        | LTLSALLD GK                                                               | 2.9778364         | 2              | 2.6867    |
| Q9Z2L0        | SENGLEFTSSGSANTETTK                                                       | 1.39015347        | 2              | 3.76303   |
| Q9Z2L0        | TDEFQLHTNVNDGTEFGGSIIYQK                                                  | 1.08605192        | 2              | 4.98805   |
| Q9Z2L0        | TKSENGLEFTSSGSANTETTK                                                     | 0.60730509        | 3              | 3.5979    |
| Q9Z2L0        | VNSSLIGLGYTQLKPGIK                                                        | 1.10019926        | 2              | 4.7374    |
| Q9Z2L0        | VTQSNFAVGYK                                                               | 1.19196247        | 2              | 3.43257   |
| Q9Z2L0        | WNTDNTLGTETVEDQLAR                                                        | 1.94428029        | 2              | 4.91543   |
| Q9Z2L0        | WTEYGLTFTEK                                                               | 1.58095887        | 1              | 2.90325   |
| Q9Z2L0        | YQVDPDACFSAK                                                              | 1.28471673        | 2              | 3.3941    |
| <b>Q9Z2M4</b> | <b>DECR2 Peroxisomal 2_4_dienoyl_CoA reductase</b>                        | <b>0.6008963</b>  | <b>3.3E-16</b> | <b>6</b>  |
| Q9Z2M4        | AAVDAMTR                                                                  | 0.956097          | 2              | 2.32431   |
| Q9Z2M4        | GQVLQLHAGAAK                                                              | 1.06960095        | 2              | 3.42674   |
| Q9Z2M4        | HLAVEWGPQNIR                                                              | 0.97726261        | 2              | 3.49879   |
| Q9Z2M4        | LLEFESSAK                                                                 | 0.63236206        | 2              | 2.30242   |
| Q9Z2M4        | VNSLAPGAISGTEGLR                                                          | 0.58767269        | 2              | 3.83141   |
| Q9Z2M4        | VPPAVMAAVDQALK                                                            | 1.82263401        | 2              | 3.34092   |
| <b>Q9Z2M7</b> | <b>PMM2 Phosphomannomutase 2</b>                                          | <b>0.87282032</b> | <b>0.32889</b> | <b>3</b>  |
| Q9Z2M7        | IGVVGGSDFEK                                                               | 1.40618462        | 2              | 2.35358   |
| Q9Z2M7        | LQEQLGNDVVEK                                                              | 0.43641379        | 2              | 3.86212   |
| Q9Z2M7        | TVGYVTAPEDTR                                                              | 1.05497418        | 2              | 2.659     |
| <b>Q9Z2Q1</b> | <b>SC31A Protein transport protein Sec31A</b>                             | <b>1.14778133</b> | <b>0.15139</b> | <b>17</b> |
| Q9Z2Q1        | AQDGSNPLSLQDLIEK                                                          | 1.12512345        | 2              | 3.42091   |
| Q9Z2Q1        | AVQLTQALDNTV GALLAEK                                                      | 1.52662844        | 2              | 4.63233   |
| Q9Z2Q1        | CLSSATDPQTK                                                               | 0.65235566        | 2              | 2.85184   |
| Q9Z2Q1        | DQTLSPTIISGLHSIAR                                                         | 1.17218305        | 2              | 3.4088    |
| Q9Z2Q1        | GGPGPLAGHPQVSR                                                            | 0.62619545        | 2              | 3.11751   |
| Q9Z2Q1        | IDASQDFEK                                                                 | 1.12384329        | 2              | 2.33075   |
| Q9Z2Q1        | IIAGDKEVIAQK                                                              | 1.2968653         | 2              | 3.03742   |
| Q9Z2Q1        | KIDASQDFEK                                                                | 1.17932896        | 2              | 2.51688   |
| Q9Z2Q1        | LVTFENVTGQPQQGAEQPR                                                       | 1.25622824        | 2              | 3.07342   |
| Q9Z2Q1        | QVQHILASASPSGR                                                            | 1.57634932        | 2              | 3.27865   |
| Q9Z2Q1        | RQPVFISQVVTEK                                                             | 0.48256312        | 2              | 3.7406    |
| Q9Z2Q1        | RQPVFISQVVTEKDFLSR                                                        | 1.07796326        | 3              | 3.53808   |
| Q9Z2Q1        | TQPPEDISCIAWN R                                                           | 1.08899858        | 2              | 2.96668   |
| Q9Z2Q1        | TTFEDLIQR                                                                 | 1.0096072         | 2              | 2.40678   |

|               |                                                |                   |                |          |
|---------------|------------------------------------------------|-------------------|----------------|----------|
| Q9Z2Q1        | VNFEEDSR                                       | 1.28849372        | 2              | 2.39294  |
| Q9Z2Q1        | VYSIMGGSIDGLR                                  | 1.27764178        | 2              | 2.80104  |
| Q9Z2Q1        | YLELLGYR                                       | 1.05799009        | 2              | 2.3738   |
| <b>Q9Z2Z8</b> | <b>DHCR7 7_dehydrocholesterol reductase</b>    | <b>1.17642498</b> | <b>0.91977</b> | <b>4</b> |
| Q9Z2Z8        | AIECSYTSADGLK                                  | 1.20580371        | 2              | 3.40947  |
| Q9Z2Z8        | ASLADIWAK                                      | 1.38406722        | 2              | 2.35279  |
| Q9Z2Z8        | FLPGYVGGVQEGAITPAGIVNK                         | 1.03818108        | 2              | 5.56653  |
| Q9Z2Z8        | GYLFPTSAEDCK                                   | 0.96281172        | 2              | 2.7939   |
| <b>Q9Z339</b> | <b>GSTO1 Glutathione S_transferase omega_1</b> | <b>1.04167143</b> | <b>0.99829</b> | <b>2</b> |
| Q9Z339        | GSAPPGPVPEGQIR                                 | 1.04975416        | 2              | 3.15614  |
| Q9Z339        | LEALELNECIDHTPK                                | 0.70023963        | 2              | 3.68915  |

Time point 12 hours

| Accession number | Protein DESCRIPTION                                       | Protein Ratio (12 h) | P-value (12 h) | Peptide number (12 h) |
|------------------|-----------------------------------------------------------|----------------------|----------------|-----------------------|
| Accession number | Peptide sequence                                          | Peptide Ratio (12 h) | Charge state   | Xcorr                 |
| <b>A0FKI7</b>    | <b>ACBD5 Acyl_CoA_binding domain_containing protein 5</b> | <b>1.161504078</b>   | <b>0.0664</b>  | <b>3</b>              |
| A0FKI7           | LQEDMQNVLQR                                               | 1.810262011          | 2              | 2.585372              |
| A0FKI7           | RGGESEDISGVR                                              | 1.073827176          | 2              | 2.624462              |
| A0FKI7           | SSDLTSDLGNVLTSSNAK                                        | 0.964968775          | 2              | 3.258466              |
| <b>A2AAE1</b>    | <b>K1109 Uncharacterized protein KIAA1109</b>             | <b>0.849199768</b>   | <b>0.62852</b> | <b>2</b>              |
| A2AAE1           | SSRSLDQDSPSK                                              | 0.84089735           | 2              | 2.660615              |
| A2AAE1           | TVDGNVNSMKRK                                              | 0.882498668          | 2              | 2.311105              |
| <b>A2ADY9</b>    | <b>DDI2 Protein DDI1 homolog 2</b>                        | <b>0.914120228</b>   | <b>0.31539</b> | <b>3</b>              |
| A2ADY9           | IDFSSIAVPGTSPNPQQR                                        | 0.896677809          | 2              | 3.243532              |
| A2ADY9           | NPPLAEALLSGDLEK                                           | 0.84877232           | 2              | 3.426769              |
| A2ADY9           | VLVEQQQDR                                                 | 0.99691041           | 2              | 2.469646              |
| <b>A2AGT5</b>    | <b>CKAP5 Cytoskeleton_associated protein 5</b>            | <b>0.679899393</b>   | <b>0.32448</b> | <b>2</b>              |
| A2AGT5           | DQVLAMLEKAKANMPSPKPAAPAK+Oxidation(13)                    | 0.67948714           |                |                       |
| A2AGT5           | IGSKENTKEGLAELYEYK                                        | 0.731169417          | 2              | 2.548419              |
| <b>A2AQP0</b>    | <b>MYH7B Myosin_7B</b>                                    | <b>1.002290106</b>   | <b>0.99505</b> | <b>13</b>             |
| A2AQP0           | AITDAAMMAEELK                                             | 1.522287774          | 2              | 2.93084               |
| A2AQP0           | AITDAAMMAEELKK                                            | 3.037879941          | 2              | 3.533626              |
| A2AQP0           | AITDAAMMAEELKK+Oxidation(6)                               | 2.002530734          |                |                       |
| A2AQP0           | AITDAAMMAEELKK+Oxidation(7)                               | 2.002530734          | 2              | 2.92241               |
| A2AQP0           | CNGVLEGIR                                                 | 1.477574291          | 2              | 2.56169               |
| A2AQP0           | DIDDLELTLAK                                               | 1.625458009          | 2              | 3.795369              |
| A2AQP0           | ELEELSER                                                  | 7.139843504          | 1              | 2.076466              |
| A2AQP0           | EQDTSÄHLER                                                | 2.74660322           | 2              | 2.491106              |
| A2AQP0           | KDIDDLELTLAK                                              | 1.007549323          | 2              | 2.374543              |
| A2AQP0           | SIQELEK                                                   | 0.995795173          | 2              | 2.393534              |
| A2AQP0           | TEELEEK                                                   | 2.064726245          | 2              | 2.364938              |
| A2AQP0           | VEDEQLVGVQLQK                                             | 2.713727121          | 2              | 2.320039              |
| A2AQP0           | VGNEYVTK                                                  | 1.53272942           | 2              | 3.03588               |
| <b>A2ASS6</b>    | <b>TITIN Titin</b>                                        | <b>0.89390551</b>    | <b>0.96464</b> | <b>32</b>             |
| A2ASS6           | ACDALYPPGPPSNPK                                           | 1.82601052           | 2              | 2.53571               |
| A2ASS6           | AENRFGIGPPAETIQRRTAR                                      | 0.863714844          | 2              | 2.571583              |
| A2ASS6           | AGEDVQLLIPFK                                              | 1.373509535          | 2              | 2.586797              |
| A2ASS6           | APPIEPAPTPIAAPVTAPVVGK                                    | 4.616344651          | 2              | 4.506479              |
| A2ASS6           | ATGLIEGLDYQFR                                             | 0.886099648          | 2              | 2.990193              |
| A2ASS6           | ATLTWTPPLEDGGSPIK                                         | 0.94330042           | 2              | 2.316728              |
| A2ASS6           | ATNEVGSCTCACTVK                                           | 4.902925027          | 2              | 4.2124                |
| A2ASS6           | DGQELQIADRIKIQK                                           | 1.05563582           | 2              | 2.788064              |
| A2ASS6           | DPFDKPSQPGELEILSISK                                       | 1.007090686          | 3              | 3.67113               |
| A2ASS6           | GQSDPVTIGPLTVK                                            | 7.387717027          | 2              | 2.838985              |
| A2ASS6           | GYDEIPLPNDKTEILK                                          | 2.034324138          | 2              | 2.419614              |
| A2ASS6           | IEALPSDISIDEGK                                            | 1.119238631          | 2              | 2.420704              |
| A2ASS6           | KDGTQLACKVTGTPTPIK                                        | 2.196236771          | 2              | 2.671027              |
| A2ASS6           | NAADNFSEPSESSGAITAR                                       | 5.186557922          | 2              | 3.984609              |
| A2ASS6           | NAADSVSEPESTGPITVK                                        | 1.946413204          | 2              | 2.342911              |
| A2ASS6           | NAADSVSEPESTGPITVKDDVEAPR                                 | 0.80290557           | 3              | 3.44918               |
| A2ASS6           | NAAGVFSEPESTGAITAR                                        | 1.158592795          | 2              | 4.287962              |
| A2ASS6           | QEKIEGLDRAMLK+Oxidation(10)                               | 1.218404367          |                |                       |
| A2ASS6           | QETEEIAASMVVATAK                                          | 0.859651459          | 2              | 2.311084              |
| A2ASS6           | SAANLIVEEDLR                                              | 1.035077778          | 2              | 2.596856              |

|               |                                                                      |                    |                |           |
|---------------|----------------------------------------------------------------------|--------------------|----------------|-----------|
| A2ASS6        | VFAENEYIGDPGETR                                                      | 0.175515291        | 2              | 3.595248  |
| A2ASS6        | VGTGEPVETDSPVEAR                                                     | 2.356753062        | 2              | 4.02984   |
| A2ASS6        | VIGSPNTPGPLEYDDIQAR                                                  | 2.429938323        | 2              | 3.607061  |
| A2ASS6        | VLACNAGGPGPAEVPGETVK                                                 | 5.597643482        | 2              | 3.04132   |
| A2ASS6        | VLAENEIGIGPCETTEPVK                                                  | 3.360487951        | 2              | 3.780295  |
| A2ASS6        | VLAENEYIGLPAETAESVK                                                  | 2.587881952        | 2              | 3.502002  |
| A2ASS6        | VLDRPGPPEGLAVSDVTSEK                                                 | 1.561094695        | 3              | 3.598027  |
| A2ASS6        | VNAESTENNSLLTIK                                                      | 1.897616139        | 2              | 3.736063  |
| A2ASS6        | VSGENEFGVGVPAETK                                                     | 2.996992124        | 2              | 3.676018  |
| A2ASS6        | VSNVAGDNACSGILTVK                                                    | 7.481464421        | 2              | 2.932786  |
| A2ASS6        | VSVLDVPGPPGPIEISNVSAEK                                               | 3.833592268        | 2              | 2.720303  |
| A2ASS6        | YGIGEPLDSEPETAR                                                      | 1.70142205         | 2              | 3.220699  |
| <b>A2AU37</b> | <b>RD21L Double_strand_break repair protein rad21_like protein 1</b> | <b>0.803416065</b> | <b>0.61164</b> | <b>2</b>  |
| A2AU37        | MKMTFRPGLVDLPK                                                       | 0.538840229        | 1              | 2.065607  |
| A2AU37        | RGVDMLLSTATQDLINDELK                                                 | 1.082017606        | 2              | 2.361515  |
| <b>A2AWA9</b> | <b>RBGP1 Rab GTPase activating protein 1</b>                         | <b>0.811609917</b> | <b>0.08266</b> | <b>2</b>  |
| A2AWA9        | IVICVQQTANKELAIER                                                    | 0.59570136         | 2              | 2.347069  |
| A2AWA9        | RLMELACNTKISQK+Oxidation(2)                                          | 1.105773298        |                |           |
| <b>A2VCW9</b> | <b>AASS Alpha_aminoadipic semialdehyde synthase_mitochondrial</b>    | <b>1.664084007</b> | <b>2.2E-16</b> | <b>11</b> |
| A2VCW9        | AEGIVFNTQSTIK                                                        | 1.624257735        | 2              | 2.755304  |
| A2VCW9        | AGGILQEDITEACLILGVK                                                  | 1.783771868        | 2              | 3.923125  |
| A2VCW9        | AQEANMSLLDEVLK                                                       | 1.473460963        | 2              | 4.386465  |
| A2VCW9        | GAQEVFNELPCEYVEPHELK                                                 | 1.660199531        | 2              | 4.814317  |
| A2VCW9        | KTDGVYDPVEYKYPER                                                     | 1.403112269        | 3              | 3.912395  |
| A2VCW9        | KYDINTVNVTVGK                                                        | 1.932840506        | 2              | 4.093321  |
| A2VCW9        | LQSLVESQDLVISLLPYVLHPVAK                                             | 1.475626737        | 3              | 4.090736  |
| A2VCW9        | QDAQSLLVPVK                                                          | 1.007392849        | 2              | 2.666499  |
| A2VCW9        | REDVNAWER                                                            | 1.785032982        | 2              | 3.088103  |
| A2VCW9        | SSVVPVEGCPPELPHK                                                     | 1.892139989        | 2              | 2.828781  |
| A2VCW9        | YDINTVNVTVGK                                                         | 1.574742566        | 2              | 2.458222  |
| <b>A6H584</b> | <b>chain</b>                                                         | <b>1.147082043</b> | <b>0.4063</b>  | <b>7</b>  |
| A6H584        | FVNRAVFRMANGIDR+Oxidation(8)                                         | 0.759697548        |                |           |
| A6H584        | NEHSFQVVGQVR                                                         | 1.057519023        |                |           |
| A6H584        | QGDPIEGPIGFPVK                                                       | 0.92020894         |                |           |
| A6H584        | RGTQGYGPIGYDQVK                                                      | 1.244569581        |                |           |
| A6H584        | TMNPAFMGLDRATR+Oxidation(1)                                          | 0.611430019        |                |           |
| A6H584        | YDVTDAVKVLK                                                          | 0.749442848        |                |           |
| A6H584        | YLIVVTDGHPLGYKEPCGGLEDAVNEAK                                         | 0.949301345        |                |           |
| <b>A7VJC2</b> | <b>ROA2 Heterogeneous nuclear ribonucleoproteins A2/B1</b>           | <b>0.841518695</b> | <b>0.35703</b> | <b>12</b> |
| A7VJC2        | GFGFVTFDDHDPVVK                                                      | 0.98166342         | 2              | 3.113469  |
| A7VJC2        | GGGGNFGPGPGSNFR                                                      | 0.947204821        | 2              | 3.529153  |
| A7VJC2        | GGNFGFGDSR                                                           | 1.18466075         | 2              | 2.481533  |
| A7VJC2        | IDTIEIITDR                                                           | 0.92491911         | 2              | 4.104054  |
| A7VJC2        | LFIGLSFETTEESLR                                                      | 1.239367495        | 2              | 3.873233  |
| A7VJC2        | LTDCVVMR                                                             | 1.087333076        | 2              | 2.531387  |
| A7VJC2        | NMGGPYGGNYGPGSGSGGYGGR                                               | 1.133358014        | 2              | 6.311837  |
| A7VJC2        | NYEQWGK                                                              | 1.130334771        | 1              | 2.438159  |
| A7VJC2        | QEMQEVQSSR                                                           | 0.880102716        | 2              | 3.014442  |
| A7VJC2        | QEMQEVQSSR+Oxidation(2)                                              | 1.013783028        |                |           |
| A7VJC2        | TLETVPLER                                                            | 1.300607714        | 2              | 2.316374  |
| A7VJC2        | YHTINGHNAEVR                                                         | 0.898863389        | 2              | 3.443421  |
| <b>B0BN93</b> | <b>PSD13 26S proteasome non_ATPase regulatory subunit 13</b>         | <b>1.118894367</b> | <b>0.82301</b> | <b>2</b>  |
| B0BN93        | QMTDPNVALTFLEK                                                       | 1.14344294         | 2              | 2.613935  |

|               |                                                                        |                    |                |          |
|---------------|------------------------------------------------------------------------|--------------------|----------------|----------|
| B0BN93        | SAWQQPDLAANEALLR                                                       | 0.999867037        | 2              | 4.055935 |
| <b>B0BN94</b> | <b>F136A Protein FAM136A</b>                                           | <b>1.242012932</b> | <b>0.77364</b> | <b>2</b> |
| B0BN94        | CHAPLAQAQALVTSELR                                                      | 1.365376215        | 2              | 3.155535 |
| B0BN94        | CSANCCEDNQASMQQVHQCIER                                                 | 1.100219819        | 3              | 4.887235 |
| <b>B0BNE5</b> | <b>ESTD S_formylglutathione hydrolase</b>                              | <b>0.987288875</b> | <b>4.1E-05</b> | <b>9</b> |
| B0BNE5        | AFNGYLGPDQSK                                                           | 1.028874565        | 2              | 3.454436 |
| B0BNE5        | AYDATCLVK                                                              | 1.056469577        | 2              | 2.492888 |
| B0BNE5        | FAIYLPPQAESAK                                                          | 1.383314346        | 2              | 3.34819  |
| B0BNE5        | LQEGYDHSYFIATFITDHIR                                                   | 1.071367756        | 3              | 3.807578 |
| B0BNE5        | MYSYVTEELPQLINANFPVDPQR                                                | 0.890848555        | 3              | 5.430045 |
| B0BNE5        | SGCQQAASEHGLVVIAPDTSR                                                  | 0.985173444        | 2              | 5.709257 |
| B0BNE5        | SVSAFAPICNPVLCPPWGK                                                    | 0.9331954          | 2              | 4.041839 |
| B0BNE5        | SYSGPQIDILIDQGG                                                        | 1.019536072        | 2              | 3.625741 |
| B0BNE5        | VFEHSSVELK                                                             | 1.085338191        | 2              | 2.596017 |
| <b>B0BNN3</b> | <b>CAH1 Carbonic anhydrase 1</b>                                       | <b>0.646446978</b> | <b>0.04382</b> | <b>4</b> |
| B0BNN3        | ADGLAIIGVLMK                                                           | 0.298419055        | 2              | 3.155029 |
| B0BNN3        | GLLSSAEGEPAVPVLSNHRPPQLK                                               | 0.185142458        | 3              | 3.38408  |
| B0BNN3        | HDSSLKPVSVSYNPATAK                                                     | 0.842635055        | 3              | 4.418994 |
| B0BNN3        | VGPANPNLQK                                                             | 0.33667985         | 2              | 2.923068 |
| <b>B0K020</b> | <b>CISD1 CDGSH iron_sulfur domain_containing protein 1</b>             | <b>1.00257751</b>  | <b>1</b>       | <b>3</b> |
| B0K020        | AMVNLQIQK                                                              | 0.995339595        | 2              | 2.36063  |
| B0K020        | HNEETGDNVGPLIK                                                         | 1.097961342        | 2              | 5.499594 |
| B0K020        | VVHAFDMEDLGDK                                                          | 0.893282017        | 3              | 3.474493 |
| <b>B2GUY2</b> | <b>TFR2 Transferrin receptor protein 2</b>                             | <b>1.054784224</b> | <b>0.36708</b> | <b>2</b> |
| B2GUY2        | MEQRWGLLRK                                                             | 0.8046578          | 2              | 2.307011 |
| B2GUY2        | SAVGTAILELVR                                                           | 1.068672775        | 2              | 2.440598 |
| <b>B2GV24</b> | <b>UFL1 E3 UFM1_protein ligase 1</b>                                   | <b>0.912837692</b> | <b>0.60751</b> | <b>2</b> |
| B2GV24        | TYDLPGDFTLQALTQR                                                       | 0.905793723        | 2              | 3.170732 |
| B2GV24        | VNIVDLQQVINVDLTHIENR                                                   | 0.918136146        | 3              | 3.333813 |
| <b>B2RX88</b> | <b>CSPP1 Centrosome and spindle pole associated protein 1</b>          | <b>0.973266555</b> | <b>0.85959</b> | <b>2</b> |
| B2RX88        | SISSVNVQVRMRNEDR                                                       | 0.967168779        | 2              | 2.660302 |
| B2RX88        | SISSVNVQVRMRNEDR+Oxidation(11)                                         | 0.887828291        |                |          |
| <b>B2RYW9</b> | <b>FAHD2 Fumarylacetoacetate hydrolase domain_containing protein 2</b> | <b>0.895580414</b> | <b>0.08314</b> | <b>6</b> |
| B2RYW9        | ALAAQLPIPR                                                             | 0.964436606        | 2              | 2.40873  |
| B2RYW9        | ATDVMAYVAGFTVAHDVSAR                                                   | 0.794605986        | 3              | 3.825161 |
| B2RYW9        | GETALSVAR                                                              | 0.979588134        | 2              | 2.424387 |
| B2RYW9        | KGDEVQCEIEELGVIINK                                                     | 0.845475321        | 2              | 5.030748 |
| B2RYW9        | TFDTFCPLGPALVTK                                                        | 0.934309997        | 2              | 4.608132 |
| B2RYW9        | VNGEIVQSSNTNQMVFK                                                      | 0.803595328        | 2              | 2.63537  |
| <b>B3DMA2</b> | <b>ACD11 Acyl_CoA dehydrogenase family member 11</b>                   | <b>1.226459792</b> | <b>0.69867</b> | <b>4</b> |
| B3DMA2        | AVLTVTQYR                                                              | 0.889502554        | 2              | 2.528278 |
| B3DMA2        | LDNIVFHPK                                                              | 0.971731704        | 2              | 2.452926 |
| B3DMA2        | NLPDSDNEECLVHGDFK                                                      | 1.021807504        | 2              | 3.163522 |
| B3DMA2        | SGQSNPTFFLQK                                                           | 0.89029929         | 2              | 2.794599 |
| <b>B3GNI6</b> | <b>SEP11 Septin_11</b>                                                 | <b>0.944936308</b> | <b>0.8077</b>  | <b>3</b> |
| B3GNI6        | AAAQLLQSQAQSGAQQTQK                                                    | 0.877972613        | 3              | 3.423206 |
| B3GNI6        | FESDPATHNEPGVR                                                         | 1.240126349        | 2              | 3.341409 |
| B3GNI6        | SYELQESNVR                                                             | 0.960645404        | 2              | 3.007154 |
| <b>B5DFC8</b> | <b>EIF3C Eukaryotic translation initiation factor 3 subunit C</b>      | <b>1.062809643</b> | <b>0.44789</b> | <b>3</b> |
| B5DFC8        | GTEITHAVVIK                                                            | 1.308759057        | 2              | 2.370891 |
| B5DFC8        | GTTEEICQIYLR                                                           | 1.207157571        | 2              | 2.366318 |
| B5DFC8        | TEPTAQNLALQLAEK                                                        | 1.055383923        | 2              | 4.94246  |

|               |                                                                      |                    |                |           |
|---------------|----------------------------------------------------------------------|--------------------|----------------|-----------|
| <b>D3ZTX0</b> | <b>TMED7 Transmembrane emp24 domain_containing protein 7</b>         | <b>0.913862273</b> | <b>0.99503</b> | <b>2</b>  |
| D3ZTX0        | QCFYEDITQGTK                                                         | 0.989019772        | 2              | 2.487056  |
| D3ZTX0        | SVIDYQTHFR                                                           | 0.908283169        | 2              | 2.505766  |
| <b>D3ZW55</b> | <b>ITPA Inosine triphosphate pyrophosphatase</b>                     | <b>1.004413427</b> | <b>0.96104</b> | <b>4</b>  |
| D3ZW55        | IDLPEYQGEPEISIQK                                                     | 0.978433511        | 2              | 4.673555  |
| D3ZW55        | KLEEVILGDKFPCTLVAQK                                                  | 0.943522368        | 3              | 4.068567  |
| D3ZW55        | LKPEGLYQLLAGFEDK                                                     | 1.117642792        | 3              | 3.523536  |
| D3ZW55        | LQEYFGVTDGAGDH                                                       | 1.37253592         | 2              | 3.564531  |
| <b>D3ZZL9</b> | <b>GCC2 GRIP and coiled_coil domain_containing protein 2</b>         | <b>1.045943253</b> | <b>0.61005</b> | <b>2</b>  |
| D3ZZL9        | ELNQKLTNKNSK                                                         | 1.337338121        | 2              | 2.375901  |
| D3ZZL9        | IKCLQEESVQCEELR                                                      | 0.989325286        | 2              | 2.355404  |
| <b>D4A4T9</b> | <b>CHRD1 Cysteine and histidine_rich domain_containing protein 1</b> | <b>1.165483708</b> | <b>0.53027</b> | <b>2</b>  |
| D4A4T9        | KEEDSDEIKIGTSCK                                                      | 1.014888264        | 2              | 2.317466  |
| D4A4T9        | LSSGNEEDKKEEDSDEIK                                                   | 1.173041962        | 3              | 4.327742  |
| <b>E9Q557</b> | <b>DESP Desmoplakin</b>                                              | <b>0.842795861</b> | <b>0.85555</b> | <b>2</b>  |
| E9Q557        | KQVQTSQKNLTR                                                         | 0.835615469        | 1              | 2.113665  |
| E9Q557        | SQCTQVVQER                                                           | 0.962912782        | 2              | 2.316055  |
| <b>F6YLP3</b> | <b>selenium transferase</b>                                          | <b>0.746616272</b> | <b>0.56775</b> | <b>3</b>  |
| <b>O08557</b> | <b>DDAH1 N(G)_N(G)_dimethylarginine dimethylaminohydrolase 1</b>     | <b>0.997265531</b> | <b>2.7E-15</b> | <b>8</b>  |
| O08557        | DENATLDGGDVLFTGR                                                     | 0.733690129        | 2              | 3.3439    |
| O08557        | DYAVSTVPVADSLHLK                                                     | 1.317813159        | 2              | 3.654308  |
| O08557        | GAEILADTFK                                                           | 1.016833185        | 2              | 2.425145  |
| O08557        | GAEILADTFKDYAVSTVPVADSLHLK                                           | 0.857019478        | 3              | 3.715405  |
| O08557        | SFCSMAGPNLIAIGSSESAQK                                                | 0.898099343        | 2              | 4.946534  |
| O08557        | SQGEEVDFAR                                                           | 1.078578533        | 2              | 2.82503   |
| O08557        | TPEEYPESAK                                                           | 1.502035122        | 2              | 2.823317  |
| O08557        | VDGLLTCCSVFINK                                                       | 1.009729794        | 2              | 3.501412  |
| <b>O08583</b> | <b>THOC4 THO complex subunit 4</b>                                   | <b>0.992734303</b> | <b>8.5E-07</b> | <b>2</b>  |
| O08583        | QQLSAEELDAQLDAYNAR                                                   | 0.731786016        | 2              | 5.05844   |
| O08583        | SLGTADVHFER                                                          | 1.016456085        | 2              | 2.512042  |
| <b>O08601</b> | <b>MTP Microsomal triglyceride transfer protein large subunit</b>    | <b>1.166590189</b> | <b>0.97677</b> | <b>13</b> |
| O08601        | EDTTMYLLALK                                                          | 0.848611751        | 2              | 2.368634  |
| O08601        | EFYSYENEPVGIENLK                                                     | 3.885191177        | 2              | 4.147633  |
| O08601        | GCPSLAEHWKSIR                                                        | 0.939233007        | 2              | 3.732044  |
| O08601        | GSFASNDIR                                                            | 0.926336962        | 2              | 2.506254  |
| O08601        | MLSASGDPVSVVK                                                        | 1.17428033         | 2              | 3.050823  |
| O08601        | MLSASGDPVSVVK+Oxidation(0)                                           | 0.983246781        |                |           |
| O08601        | NALLPEGIPLLLK                                                        | 0.896229307        | 1              | 2.379188  |
| O08601        | NILLSIGELPK                                                          | 0.94791234         | 2              | 3.57962   |
| O08601        | REEILQILK                                                            | 0.897260341        | 3              | 3.545714  |
| O08601        | SDSSIILQER                                                           | 1.035421551        | 2              | 3.298037  |
| O08601        | SGSSSAYTGYVER                                                        | 1.12772446         | 2              | 3.423101  |
| O08601        | SNLNIFQYIGK                                                          | 1.167983433        | 2              | 3.61238   |
| O08601        | VKEFYSYENEPVGIENLK                                                   | 0.925763561        | 2              | 2.879602  |
| <b>O08795</b> | <b>GLU2B Glucosidase 2 subunit beta</b>                              | <b>1.377407907</b> | <b>0.0011</b>  | <b>6</b>  |
| O08795        | ETVVTSTTEPSR                                                         | 1.842596679        | 2              | 3.109632  |
| O08795        | KLWEEQQAQAAK                                                         | 1.008534238        | 2              | 2.921249  |
| O08795        | LWEEQQAQAAK                                                          | 1.070730433        | 2              | 3.331707  |
| O08795        | MPPYDEETQAIIDAAQEAR                                                  | 1.01872311         | 2              | 3.128101  |
| O08795        | SLEDQVETLR                                                           | 1.358113877        | 2              | 3.260869  |
| O08795        | YEQGTGCWQGPNR                                                        | 1.111441728        | 2              | 4.040441  |



|               |                                                                   |                    |                |           |
|---------------|-------------------------------------------------------------------|--------------------|----------------|-----------|
| <b>O08810</b> | <b>USS1 116 kDa U5 small nuclear ribonucleoprotein component</b>  | <b>0.950270689</b> | <b>0.65844</b> | <b>2</b>  |
| O08810        | GGGQIIPAR                                                         | 1.159210081        | 2              | 2.632741  |
| O08810        | GLAEDIENEVVQITWNR                                                 | 0.915790624        | 3              | 3.569975  |
| <b>O09158</b> | <b>CP3AP Cytochrome P450 3A25</b>                                 | <b>1.427774406</b> | <b>3.5E-06</b> | <b>3</b>  |
| O09158        | DVEINGVFIPK                                                       | 2.92170601         | 2              | 3.153576  |
| O09158        | TLLSPTFTSGK                                                       | 1.426944619        | 1              | 1.937561  |
| O09158        | VDFLQLMMNTQNSK                                                    | 1.062886681        | 2              | 2.839521  |
| <b>O09171</b> | <b>BHMT1 Betaine__homocysteine S_methyltransferase 1</b>          | <b>1.491150564</b> | <b>9.9E-20</b> | <b>16</b> |
| O09171        | AGAAIVGVNCHFDPSTSLQTIK                                            | 1.546570611        | 2              | 5.840227  |
| O09171        | AGPWTPEAAVEHPEAVR                                                 | 1.673295324        | 2              | 5.082752  |
| O09171        | AGSNVMQFTFFYASEDK                                                 | 1.695283867        | 2              | 2.91907   |
| O09171        | AGSNVMQFTFFYASEDKLENR                                             | 1.353168191        | 2              | 4.506721  |
| O09171        | EATTEQQLR                                                         | 1.730800481        | 2              | 2.40755   |
| O09171        | GAAELMQQK                                                         | 1.796743717        | 2              | 3.57105   |
| O09171        | GAAELMQQK+Oxidation(5)                                            | 1.834901069        |                |           |
| O09171        | HGSWGSGLDMHTKPWIR                                                 | 1.529059313        | 3              | 3.705908  |
| O09171        | IFHQQLVFMK                                                        | 1.335784461        | 2              | 2.756684  |
| O09171        | KEYWQNLN                                                          | 1.634380108        | 3              | 3.805479  |
| O09171        | LNAGEVVIGDGGFVFALEK                                               | 1.49882825         | 3              | 6.242911  |
| O09171        | QGFIDLPEFPFGLLEPR                                                 | 1.386793423        | 2              | 5.351922  |
| O09171        | QVADEGDALVAGGVSQTPSYLSCK                                          | 1.734706299        | 3              | 6.355076  |
| O09171        | TSGKPIAATMCIGPEGDLHGVSPGEC AVR                                    | 1.529677504        | 3              | 6.552706  |
| O09171        | TSGKPIAATMCIGPEGDLHGVSPGEC AVR+Oxidation(9)                       | 1.770592357        |                |           |
| O09171        | VNEAACDIAR                                                        | 1.602649166        | 2              | 4.035687  |
| <b>O09173</b> | <b>HGD Homogentisate 1_2_dioxygenase</b>                          | <b>1.062206128</b> | <b>0.81787</b> | <b>10</b> |
| O09173        | CFYNSDGDFLIVPQK                                                   | 1.185371453        | 2              | 2.947672  |
| O09173        | FSVDVFEETR                                                        | 1.061169702        | 2              | 3.188252  |
| O09173        | GYILEVYGVHFEPLDGPIGANLANPR                                        | 0.968683045        | 3              | 5.988619  |
| O09173        | LLIYTEFGK                                                         | 1.189103254        | 1              | 2.054518  |
| O09173        | NCMSEFMGLIK                                                       | 0.865947486        | 2              | 3.413135  |
| O09173        | QDVSPFNVAWHGNYTPYK                                                | 0.980344109        | 2              | 3.647918  |
| O09173        | QGGFLPGGSLHSAMTPHGPDADCFEK                                        | 0.96581048         | 3              | 3.720453  |
| O09173        | SLRPGVAIADFVIFPPR                                                 | 0.96136914         | 2              | 3.543944  |
| O09173        | TFRPPYYHR                                                         | 1.254151798        | 3              | 3.340116  |
| O09173        | YISGFGNECASEDPR                                                   | 1.273203497        | 2              | 3.992374  |
| <b>O35077</b> | <b>GPDA Glycerol_3_phosphate dehydrogenase [NAD_]_cytoplasmic</b> | <b>0.965683494</b> | <b>0.02503</b> | <b>19</b> |
| O35077        | ANTIGISLIK                                                        | 0.939637148        | 2              | 3.173305  |
| O35077        | DPAQGQLLK                                                         | 1.07078656         | 2              | 2.412752  |
| O35077        | ELHSILQHK                                                         | 1.442206198        | 1              | 2.950029  |
| O35077        | FCETTIGCK                                                         | 1.003345796        | 2              | 2.629511  |
| O35077        | FCETTIGCKDPAQGQLLK                                                | 0.823692848        | 2              | 5.054601  |
| O35077        | GIDEGPNGLK                                                        | 0.914313349        | 2              | 2.964919  |
| O35077        | GLVDKFLPFTAVYK                                                    | 0.985333116        | 3              | 3.607473  |
| O35077        | ICDQLKGHLK                                                        | 0.803307381        | 3              | 3.359608  |
| O35077        | ITVVQEVDTVEICGALK                                                 | 0.860126941        | 3              | 4.424297  |
| O35077        | IVGSNASQLAHFDPR                                                   | 1.034066385        | 2              | 3.143669  |
| O35077        | KLTEIINTQHENVK                                                    | 0.96451699         | 2              | 5.103872  |
| O35077        | LISEVIGESLGIPMSVLMGANIASEVAEEK                                    | 0.652035034        |                |           |
| O35077        | LPPNVVAVPDVVQAATGADILVFVPHQFIGK                                   | 1.057486317        | 3              | 5.100658  |
| O35077        | LTEIINTQHENVK                                                     | 0.925043289        | 2              | 4.516027  |
| O35077        | NIVAVGAGFCDGLGFGDNTK                                              | 0.89577549         | 2              | 5.425735  |
| O35077        | SIEQLEK                                                           | 0.995795173        | 2              | 2.470503  |
| O35077        | VCIVGSGNWGSAIAK                                                   | 0.941940881        | 2              | 4.706996  |

|               |                                                                              |                    |                |           |
|---------------|------------------------------------------------------------------------------|--------------------|----------------|-----------|
| O35077        | VCYEGQPVGEFICCLQNHPEHM                                                       | 0.901815903        | 2              | 3.922442  |
| O35077        | VTMWVFEEDIGGR                                                                | 0.844558395        | 2              | 3.467677  |
| <b>O35078</b> | <b>OXDA D_amino_acid oxidase</b>                                             | <b>0.793137622</b> | <b>0.33381</b> | <b>2</b>  |
| O35078        | GQIIQVEAPWIK                                                                 | 0.685993443        | 2              | 3.207431  |
| O35078        | SCCQLEPTLK                                                                   | 0.996107737        | 2              | 2.427518  |
| <b>O35094</b> | <b>TIM44 Mitochondrial import inner membrane translocase subunit TIM44</b>   | <b>0.93063701</b>  | <b>0.22202</b> | <b>2</b>  |
| O35094        | KLEESDALQEAR                                                                 | 0.893229404        | 2              | 3.354514  |
| O35094        | TEMSEVLTEILR                                                                 | 0.95972764         | 2              | 3.566688  |
| <b>O35142</b> | <b>COPB2 Coatomer subunit beta_</b>                                          | <b>1.036477676</b> | <b>0.54702</b> | <b>4</b>  |
| O35142        | AAESLADPTEYENLFPGLK                                                          | 0.99184377         | 2              | 3.363929  |
| O35142        | FELALQLGELK                                                                  | 1.133094631        | 2              | 3.043797  |
| O35142        | GSNNVALGYDEGSIIVK                                                            | 0.876440188        | 2              | 3.587583  |
| O35142        | TFEVCDLPVR                                                                   | 1.040639016        | 2              | 2.770555  |
| <b>O35244</b> | <b>PRDX6 Peroxiredoxin_6</b>                                                 | <b>0.943031645</b> | <b>0.99833</b> | <b>10</b> |
| O35244        | DINAYNGAAPTEK                                                                | 1.099095461        | 2              | 3.944559  |
| O35244        | DLAILLGMLDPAEKDEK                                                            | 1.022804085        | 2              | 4.318313  |
| O35244        | FHDFLGDSWGILFSHPR                                                            | 0.993767649        | 3              | 3.841123  |
| O35244        | GESVMVLPTLPEEEAK                                                             | 0.918701077        | 2              | 3.181739  |
| O35244        | KGESVMVLPTLPEEEAK                                                            | 0.955873693        | 2              | 4.874437  |
| O35244        | KGESVMVLPTLPEEEAK+Oxidation(5)                                               | 0.973169115        |                |           |
| O35244        | LSILYPATTGR                                                                  | 1.150666543        | 2              | 2.876872  |
| O35244        | NFDEILR                                                                      | 0.861333           | 2              | 2.440198  |
| O35244        | VVDSLQLTASNVPVATPVDWK                                                        | 0.936193626        | 3              | 5.764417  |
| O35244        | VVFIFGPDKK                                                                   | 0.908797727        | 2              | 2.385901  |
| <b>O35469</b> | <b>3BHS6 3 beta_hydroxysteroid dehydrogenase/Delta 5__4_isomerase type 6</b> | <b>0.964278751</b> | <b>1.5E-11</b> | <b>2</b>  |
| O35469        | DLGYEPLVSWEAK                                                                | 1.222583857        | 2              | 4.225851  |
| O35469        | TSEWIGTLVEQHR                                                                | 0.739564263        | 2              | 3.485808  |
| <b>O35509</b> | <b>RB11B Ras_related protein Rab_11B</b>                                     | <b>1.083512586</b> | <b>0.97876</b> | <b>5</b>  |
| O35509        | AQIWDTAGQER                                                                  | 0.997759026        | 2              | 2.84259   |
| O35509        | GAVGALLVYDIAK                                                                | 0.915202486        | 2              | 4.216823  |
| O35509        | HLTYENVER                                                                    | 0.949319456        | 2              | 3.010223  |
| O35509        | NEFNLESK                                                                     | 1.085156091        | 1              | 2.14975   |
| O35509        | VVLIGDSGVGK                                                                  | 1.02864764         | 2              | 2.704652  |
| <b>O35547</b> | <b>ACSL4 Long_chain_fatty_acid_CoA ligase 4</b>                              | <b>0.99868063</b>  | <b>0.99395</b> | <b>2</b>  |
| O35547        | LERFEIPIK                                                                    | 0.999609363        | 2              | 2.679689  |
| O35547        | LSPEPWPETGLVTDFAK                                                            | 0.753729946        | 2              | 2.728541  |
| <b>O35567</b> | <b>PUR9 Bifunctional purine biosynthesis protein PURH</b>                    | <b>1.006946008</b> | <b>0.70935</b> | <b>8</b>  |
| O35567        | AEVSNPIDQYVTGTIGEGEDLVK                                                      | 0.822563548        | 2              | 4.408747  |
| O35567        | ALFEEVPELLTEAEK                                                              | 0.972505456        | 2              | 3.774465  |
| O35567        | DGQVIGIGAGQQSR                                                               | 1.124940472        | 2              | 3.168031  |
| O35567        | EVSDGIVAPGYEEALK                                                             | 1.091977188        | 2              | 4.171121  |
| O35567        | HVSPAGAAVGVPLSEDEAR                                                          | 1.194361538        | 2              | 3.510359  |
| O35567        | RAEVSNPIDQYVTGTIGEGEDLVK                                                     | 0.977218777        | 3              | 3.74148   |
| O35567        | SGVAYIVAPSGSTADK                                                             | 1.024782117        | 2              | 3.097062  |
| O35567        | VTVCEPEDYGAVAAEMQSGGNK                                                       | 1.036211553        | 2              | 5.278191  |
| <b>O35593</b> | <b>PSDE 26S proteasome non_ATPase regulatory subunit 14</b>                  | <b>0.983785917</b> | <b>0.30105</b> | <b>2</b>  |
| O35593        | AVAVVVDPIQSVK                                                                | 1.02934668         | 2              | 2.712783  |
| O35593        | VIDVFAMPQSGTGVSVAEVDPVFQAK                                                   | 0.498631987        | 2              | 3.74656   |
| <b>O35660</b> | <b>GSTM6 Glutathione S_transferase Mu 6</b>                                  | <b>1.1379977</b>   | <b>1</b>       | <b>2</b>  |
| O35660        | RYAMGDAPDYDR                                                                 | 1.119321203        | 2              | 3.130999  |
| O35660        | YAMGDAPDYDR+Oxidation(2)                                                     | 1.096930699        |                |           |
| <b>O35760</b> | <b>IDI1 Isopentenyl_diphosphate Delta_isomerase 1</b>                        | <b>1.092940773</b> | <b>0.99968</b> | <b>3</b>  |

|               |                                                                                          |                    |                |          |
|---------------|------------------------------------------------------------------------------------------|--------------------|----------------|----------|
| O35760        | AELGIPLLEVDLNEMNYLTR                                                                     | 0.967208798        | 2              | 4.26437  |
| O35760        | NCHLNENIDK                                                                               | 1.092884025        | 2              | 2.988859 |
| O35760        | NVTLNPDPEIK                                                                              | 1.357558078        | 2              | 2.89706  |
| <b>O35763</b> | <b>MOES Moesin</b>                                                                       | <b>0.916717015</b> | <b>0.69467</b> | <b>2</b> |
| O35763        | ALTSELANAR                                                                               | 0.917482721        | 2              | 3.170505 |
| O35763        | FYPEDVSEELIQDITQR                                                                        | 0.825291839        | 2              | 4.400842 |
| <b>O35783</b> | <b>CALU Calumenin</b>                                                                    | <b>1.112636837</b> | <b>0.93845</b> | <b>2</b> |
| O35783        | HLVYESDQDKDGK                                                                            | 1.111005474        | 2              | 4.045784 |
| O35783        | VHNDAQNFYDHDHDAFLGAEAAK                                                                  | 1.335332902        | 3              | 4.150329 |
| <b>O35796</b> | <b>C1QBP Complement component 1 Q subcomponent_binding protein_mitochondrial</b>         | <b>1.125209689</b> | <b>0.96176</b> | <b>4</b> |
| O35796        | AEEQPELTSTPNFVVEVTK                                                                      | 1.02614776         | 2              | 4.698423 |
| O35796        | AFVEFLTDEIK                                                                              | 0.943352129        | 2              | 3.625874 |
| O35796        | AFVEFLTDEIKEEK                                                                           | 1.01377983         | 2              | 3.572408 |
| O35796        | TLVLDCHYPEDEIGHDEAESDIFSIK                                                               | 1.412292971        | 3              | 5.770348 |
| <b>O35814</b> | <b>STIP1 Stress_induced_phosphoprotein 1</b>                                             | <b>1.026434153</b> | <b>0.09813</b> | <b>6</b> |
| O35814        | ALDLSSCK                                                                                 | 0.993191346        | 2              | 2.366043 |
| O35814        | ALSAGNIDDALQCYSEAIK                                                                      | 0.969472738        | 2              | 5.29577  |
| O35814        | DCEECIQLEPTFIK                                                                           | 1.06955527         | 2              | 3.933009 |
| O35814        | ELIEQLQNKPSDLGTK                                                                         | 1.575324282        | 2              | 3.866702 |
| O35814        | LDPQNHVLYSNR                                                                             | 1.129539999        | 2              | 2.613568 |
| O35814        | LMDVGLIAIR                                                                               | 1.059116156        | 2              | 2.451773 |
| <b>O35820</b> | <b>RCL Deoxyribonucleoside 5__monophosphate N_glycosidase</b>                            | <b>0.827229025</b> | <b>0.6023</b>  | <b>2</b> |
| O35820        | GGREDQALYAR                                                                              | 0.827007584        | 2              | 2.559    |
| O35820        | YFEAYLPQK                                                                                | 1.109768095        | 2              | 2.334074 |
| <b>O35821</b> | <b>MBB1A Myb_binding protein 1A</b>                                                      | <b>1.407612461</b> | <b>0.00115</b> | <b>2</b> |
| O35821        | ALDLIEVLVTK                                                                              | 1.292491832        | 2              | 3.055256 |
| O35821        | NVANVTPLTAQQR                                                                            | 1.616480175        | 2              | 3.027622 |
| <b>O35824</b> | <b>DNJA2 Dnaj homolog subfamily A member 2</b>                                           | <b>1.100131116</b> | <b>0.30421</b> | <b>2</b> |
| O35824        | FDVQFPENNWINPDK                                                                          | 0.959259144        | 2              | 3.291251 |
| O35824        | NVLCSACSGQGGK                                                                            | 1.111861823        | 2              | 3.272644 |
| <b>O35826</b> | <b>GLCNE Bifunctional UDP_N_acetylglucosamine 2_epimerase/N_acetylmannosamine kinase</b> | <b>1.175126379</b> | <b>0.01892</b> | <b>8</b> |
| O35826        | DEAVGALHLIQAQK                                                                           | 1.213375879        | 2              | 3.47456  |
| O35826        | EVGAFGTPVINLGR                                                                           | 1.159381928        | 2              | 2.864459 |
| O35826        | GEDEAMVESVGLALVK                                                                         | 1.280340228        | 2              | 2.453385 |
| O35826        | IYGDGNAVPR                                                                               | 1.198311866        | 2              | 2.577689 |
| O35826        | SIDLQEPLQK                                                                               | 1.25218424         | 2              | 2.373598 |
| O35826        | TLVLFPNIDAGSK                                                                            | 0.987142254        | 2              | 3.097761 |
| O35826        | TPLSDTLHLPVWVDNDGNCAAMAER                                                                | 1.211926179        | 3              | 5.235929 |
| O35826        | VNPQEGVVLHSTK                                                                            | 1.255223133        | 2              | 2.547785 |
| <b>O35913</b> | <b>SO1A4 Solute carrier organic anion transporter family member 1A4</b>                  | <b>0.976038808</b> | <b>0.03412</b> | <b>5</b> |
| O35913        | EGLQENVDTENAK                                                                            | 1.615866422        | 2              | 3.668488 |
| O35913        | GASFVPAFFILR                                                                             | 1.088890739        | 2              | 2.699051 |
| O35913        | ILAGIPAPIYFGALIDR                                                                        | 1.153297116        | 2              | 2.415658 |
| O35913        | SLSGYMNSMLTQIER                                                                          | 0.948358907        | 2              | 4.259255 |
| O35913        | SQTLNPTQDPSECVK                                                                          | 1.156924095        | 2              | 4.175505 |
| <b>O35923</b> | <b>BRCA2 Breast cancer type 2 susceptibility protein homolog</b>                         | <b>0.683988326</b> | <b>0.51646</b> | <b>2</b> |
| O35923        | AMKLFSDIENISEEPSTK                                                                       | 0.718466155        | 2              | 2.552217 |
| O35923        | SLLNEFDRIIESKQK                                                                          | 0.783095602        | 2              | 2.423902 |
| <b>O35952</b> | <b>GLO2 Hydroxyacylglutathione hydrolase_mitochondrial</b>                               | <b>0.918705367</b> | <b>0.00423</b> | <b>8</b> |
| O35952        | ALLEVLGR                                                                                 | 0.857067005        | 2              | 3.120642 |
| O35952        | FYEGTADEMYK                                                                              | 1.729197431        | 2              | 2.516407 |

|               |                                                                    |                    |                |          |
|---------------|--------------------------------------------------------------------|--------------------|----------------|----------|
| O35952        | HVEPGNTAVQEK                                                       | 1.070079892        | 2              | 4.055639 |
| O35952        | LTTVLTHHHWDHAGGNEK                                                 | 0.997534232        | 3              | 3.913594 |
| O35952        | NAIGEPTVPSTLAEFTYNPFFMR                                            | 0.769727357        | 2              | 3.547781 |
| O35952        | TVQQHAGETDPVTTMR                                                   | 0.934008571        | 2              | 5.104128 |
| O35952        | TVQQHAGETDPVTTMR+Oxidation(14)                                     | 0.938124174        |                |          |
| O35952        | VTHLSTLEVGSLSVK                                                    | 0.923735317        | 2              | 2.883583 |
| <b>O35987</b> | <b>NSF1C NSF1 cofactor p47</b>                                     | <b>1.050570037</b> | <b>0.01131</b> | <b>6</b> |
| O35987        | ASSILINEAEPTTNIQIR                                                 | 0.998225284        | 2              | 5.336307 |
| O35987        | EANLLNAVIVQR                                                       | 1.383565648        | 2              | 3.370299 |
| O35987        | LGAAPPEESAYVAGER                                                   | 1.202854481        | 2              | 4.021342 |
| O35987        | LGSTAPQVLNTSSPAQQAENEAK                                            | 1.142442097        | 2              | 3.968664 |
| O35987        | RGEVPAELR                                                          | 2.637837237        | 2              | 2.471083 |
| O35987        | SYQDPSNAQFLESIR                                                    | 0.997959452        | 2              | 4.488661 |
| <b>O54753</b> | <b>H17B6 17_beta_hydroxysteroid dehydrogenase type 6</b>           | <b>1.675294487</b> | <b>8.7E-05</b> | <b>3</b> |
| O54753        | CSTNLSLVTDCMEHALTSK                                                | 2.791563333        | 3              | 3.395102 |
| O54753        | TWEATPEHIR                                                         | 1.944257467        | 2              | 2.310511 |
| O54753        | YGVEAFSDVLR                                                        | 1.517400812        | 2              | 2.727089 |
| <b>O54975</b> | <b>XPP1 Xaa_Pro aminopeptidase 1</b>                               | <b>0.971165768</b> | <b>3.8E-06</b> | <b>2</b> |
| O54975        | GSLTFEPLTLVPIQTK                                                   | 0.981770186        | 2              | 4.041873 |
| O54975        | IENVVLVPAK                                                         | 0.82568763         | 2              | 2.895174 |
| <b>O55012</b> | <b>PICA Phosphatidylinositol_binding clathrin assembly protein</b> | <b>1.084418138</b> | <b>0.00278</b> | <b>5</b> |
| O55012        | ATLSNAVSSLASTGSLTK                                                 | 0.724602939        | 2              | 3.839085 |
| O55012        | ITAAQHSVTGSVAVSK                                                   | 1.479816324        | 2              | 4.302684 |
| O55012        | NLFLNSNFLDK                                                        | 1.113404939        | 2              | 2.540184 |
| O55012        | SGLQGYDMSTFIR                                                      | 0.974644474        | 2              | 2.361617 |
| O55012        | STNVAVDSGGGLLKPTVASQNQLPVAK                                        | 1.061012785        | 3              | 5.658778 |
| <b>O55096</b> | <b>DPP3 Dipeptidyl peptidase 3</b>                                 | <b>1.163983949</b> | <b>0.78141</b> | <b>6</b> |
| O55096        | AGLLALEFYTPETANWR                                                  | 0.995579375        | 2              | 3.922763 |
| O55096        | GEFEGFVAMVVK                                                       | 0.898481968        | 2              | 3.075861 |
| O55096        | LASVLNTEPALDSELTSK                                                 | 1.221661868        | 2              | 3.384279 |
| O55096        | NVSLGNVLAVAYATK                                                    | 0.781855867        | 2              | 2.38712  |
| O55096        | SYEFQGNHFQVTR                                                      | 0.840553308        | 2              | 3.819559 |
| O55096        | VLEAGEGLVTPTTGSGRPDAR                                              | 1.021975306        | 3              | 3.402171 |
| <b>O55125</b> | <b>NIPS1 Protein NipSnap homolog 1</b>                             | <b>0.948494223</b> | <b>0.30691</b> | <b>4</b> |
| O55125        | AGPNIYELR                                                          | 1.005817482        | 2              | 3.04349  |
| O55125        | FSGGYPALMDCMNK                                                     | 0.777340417        | 2              | 3.133015 |
| O55125        | GWDENVYYTVPLVR                                                     | 1.118507456        | 2              | 3.458383 |
| O55125        | IQFHNVKPECLDAYNSLTEAVLPK                                           | 0.917892637        | 3              | 4.36804  |
| <b>O55171</b> | <b>ACOT2 Acyl_coenzyme A thioesterase 2_mitochondrial</b>          | <b>1.199238096</b> | <b>0.80758</b> | <b>6</b> |
| O55171        | ADAGGELDLAR                                                        | 0.808250244        | 2              | 3.276752 |
| O55171        | DGLLDVVEALQSPVLDK                                                  | 1.181124235        | 2              | 5.071033 |
| O55171        | DVQKPYVVELEVLDGHEPDGGQR                                            | 1.16863319         | 3              | 4.466774 |
| O55171        | GGELGLAMASFLK                                                      | 1.158972781        | 2              | 3.847528 |
| O55171        | IEYFEEAVNYLR                                                       | 1.008268095        | 2              | 4.191815 |
| O55171        | SCWDEPLSITVR                                                       | 1.048438494        | 2              | 3.49113  |
| <b>O70127</b> | <b>ABCBB Bile salt export pump</b>                                 | <b>1.671349506</b> | <b>8.6E-06</b> | <b>8</b> |
| O70127        | AGQITSEALS NIR                                                     | 1.34427903         | 2              | 3.288379 |
| O70127        | AGSIADVLSSIR                                                       | 1.375988303        | 2              | 2.639027 |
| O70127        | ILDNLMSVIKPGETTALVGSSGAGK                                          | 1.440529031        | 3              | 4.16927  |
| O70127        | ILLDEATSALDTESEK                                                   | 1.479607475        | 2              | 4.181277 |
| O70127        | KFGEENHAFESDGSNNDDK                                                | 1.324739993        | 3              | 3.933345 |
| O70127        | KPPINVYSEAGEK                                                      | 2.241839848        | 2              | 3.316954 |
| O70127        | STALQLIQR                                                          | 1.771087664        | 2              | 2.350636 |
| O70127        | YETNVGIQGSQSLR                                                     | 0.929765539        | 2              | 3.46657  |

|               |                                                                                    |                    |                |           |
|---------------|------------------------------------------------------------------------------------|--------------------|----------------|-----------|
| <b>O70133</b> | <b>DHX9 ATP_dependent RNA helicase A</b>                                           | <b>1.210024797</b> | <b>0.923</b>   | <b>2</b>  |
| O70133        | KMTPAYEIRAVGNK                                                                     | 0.833217268        | 2              | 2.565521  |
| O70133        | YSPFFVFGKIR                                                                        | 1.311039709        | 2              | 2.500704  |
| <b>O70199</b> | <b>UGDH UDP_glucose 6_dehydrogenase</b>                                            | <b>0.942237741</b> | <b>0.01666</b> | <b>11</b> |
| O70199        | EQIVVDSLHPGVSADDQVSR                                                               | 1.097099755        | 2              | 5.671396  |
| O70199        | IFDANTKPNLNLQVLSNPEFLAEGTAIK                                                       | 0.966463803        | 3              | 5.211238  |
| O70199        | IIDSLFNTVTDK                                                                       | 0.881249834        | 2              | 2.87754   |
| O70199        | IIDSLFNTVTDK                                                                       | 0.815012756        | 2              | 3.543528  |
| O70199        | ILTTNTWSSELSK                                                                      | 0.952768941        | 2              | 3.342861  |
| O70199        | INAWNSPTLPIYEPGLK                                                                  | 0.984782236        | 2              | 3.728618  |
| O70199        | NLFFSTNIDDAIR                                                                      | 1.019657338        | 2              | 3.147455  |
| O70199        | VLDGLHNELQTIGFQIETIGK                                                              | 0.833763272        | 2              | 5.335101  |
| O70199        | VLIGGDETPEGQR                                                                      | 1.057792131        | 2              | 3.616722  |
| O70199        | VTVVVDVNEAR                                                                        | 1.004597412        | 2              | 3.363352  |
| O70199        | YWQQVIDMNDYQR                                                                      | 0.981858047        | 2              | 4.833843  |
| <b>O70251</b> | <b>EF1B Elongation factor 1_beta</b>                                               | <b>1.080597755</b> | <b>0.15338</b> | <b>4</b>  |
| O70251        | SIQADGLVWGSSK                                                                      | 1.108304835        | 2              | 3.765084  |
| O70251        | SSILLDVKPWDDDETDMTK                                                                | 1.09068289         | 2              | 4.20245   |
| O70251        | SSILLDVKPWDDDETDMTKLEECVR                                                          | 1.0756444          | 3              | 5.13022   |
| O70251        | TPAGLQVLNDYLADK                                                                    | 1.028713038        | 2              | 4.095759  |
| <b>O70351</b> | <b>HCD2 3_hydroxyacyl_CoA dehydrogenase type_2</b>                                 | <b>0.939860005</b> | <b>2.6E-05</b> | <b>16</b> |
| O70351        | GGIVGMTLPIAR                                                                       | 0.903068726        | 2              | 3.356582  |
| O70351        | GLVAVITGGASGLGLSTAK                                                                | 0.878083203        | 2              | 4.690108  |
| O70351        | GVIINTASVAAFEGQVQAAAYSASK                                                          | 0.970433925        | 3              | 4.100465  |
| O70351        | IDVAVNCAGIAVAIK                                                                    | 0.841689949        | 2              | 3.977468  |
| O70351        | KLGGNCIFAPANVTSEK                                                                  | 1.011919728        | 2              | 4.468948  |
| O70351        | KNQVHTLEDFQR                                                                       | 1.023054623        | 2              | 4.114242  |
| O70351        | LGDPAEYAHLVQMVIENPFLNGEVIR                                                         | 0.911212152        | 3              | 4.315888  |
| O70351        | LGGNCIFAPANVTSEK                                                                   | 0.988809732        | 2              | 3.486175  |
| O70351        | LVAGVMGQNEPDQGGQR                                                                  | 1.152809425        | 2              | 5.227586  |
| O70351        | LVAGVMGQNEPDQGGQR+Oxidation(5)                                                     | 0.817138708        |                |           |
| O70351        | LVGQGATAVLLDVPNSEGETEAK                                                            | 1.242492619        | 2              | 5.67453   |
| O70351        | NFLASQVPPFSR                                                                       | 0.912545633        | 2              | 4.559295  |
| O70351        | NQVHTLEDFQR                                                                        | 1.024535916        | 2              | 3.310391  |
| O70351        | RLVGQGATAVLLDVPNSEGETEAK                                                           | 1.015771887        | 2              | 5.040431  |
| O70351        | VINVNLIGTFNVIR                                                                     | 0.897403192        | 2              | 3.79679   |
| O70351        | VVTIAPGLFATPLLTLPDK                                                                | 0.977637085        | 2              | 5.420006  |
| <b>O70456</b> | <b>1433S 14_3_3 protein sigma</b>                                                  | <b>1.153591065</b> | <b>3.1E-13</b> | <b>3</b>  |
| O70456        | DSTLIMQLLR                                                                         | 1.495600834        | 2              | 3.412398  |
| O70456        | DSTLIMQLLR+Oxidation(5)                                                            | 1.177161527        |                |           |
| O70456        | VLSSIEQK                                                                           | 0.937676151        | 2              | 3.254664  |
| <b>O70593</b> | <b>SGTA Small glutamine_rich tetratricopeptide repeat_containing protein alpha</b> | <b>1.247174061</b> | <b>0.16874</b> | <b>2</b>  |
| O70593        | AIELNPANAVYFCNR                                                                    | 0.900964838        | 2              | 3.002361  |
| O70593        | TPPSEEDSAEER                                                                       | 1.276227927        | 2              | 2.710049  |
| <b>O88202</b> | <b>LPP60 60 kDa lysophospholipase</b>                                              | <b>1.133830969</b> | <b>0.98868</b> | <b>2</b>  |
| O88202        | AAGAHLSPQELEDVGTLCR                                                                | 1.031000993        | 3              | 3.690825  |
| O88202        | GVDVDACNEDGQSPDLLAVR                                                               | 1.11509839         | 2              | 5.224089  |
| <b>O88428</b> | <b>PAPS2 Bifunctional 3__phosphoadenosine 5__phosphosulfate synthase 2</b>         | <b>1.038677524</b> | <b>0.95547</b> | <b>5</b>  |
| O88428        | GCTVWLTGLSGAGK                                                                     | 0.949802707        | 2              | 2.848485  |
| O88428        | GIHELFPENK                                                                         | 1.144211292        | 2              | 2.611675  |
| O88428        | NLGFSA GDREENIR                                                                    | 1.070224695        | 2              | 3.361606  |
| O88428        | STNVVYQAHHVSR                                                                      | 0.906097495        | 2              | 3.474065  |
| O88428        | VLSMAPGLTSVEIIPFR                                                                  | 0.772685122        | 2              | 3.316246  |

|               |                                                                                       |                    |                |           |
|---------------|---------------------------------------------------------------------------------------|--------------------|----------------|-----------|
| <b>O88491</b> | <b>NSD1 Histone_lysine N_methyltransferase_H3 lysine_36 and H4 lysine_20 specific</b> | <b>0.781814263</b> | <b>0.19494</b> | <b>2</b>  |
| O88491        | ENSEGAFGVLLPADAVQKAR                                                                  | 0.711927916        | 2              | 2.344276  |
| O88491        | SGKGEGKLLNNMHEK                                                                       | 0.956850654        | 2              | 2.906617  |
| <b>O88600</b> | <b>HSP74 Heat shock 70 kDa protein 4</b>                                              | <b>1.059595035</b> | <b>0.85172</b> | <b>14</b> |
| O88600        | AESEEMETSQAGSK                                                                        | 0.908640723        | 2              | 4.514785  |
| O88600        | AGGIETIANEYSDR                                                                        | 0.978481578        | 2              | 3.463859  |
| O88600        | FQESEERPK                                                                             | 0.405214006        | 2              | 2.328101  |
| O88600        | GCALQCAILSPAFK                                                                        | 0.898613293        | 2              | 4.046768  |
| O88600        | HAEQNGPVDGQDNPQTAAEHGADTAVPSDGDK                                                      | 1.228835917        | 3              | 5.239132  |
| O88600        | LKETAESVLK                                                                            | 0.972714811        | 2              | 2.464055  |
| O88600        | MIMQDKLEK+Oxidation(0)                                                                | 1.002383861        |                |           |
| O88600        | MQVDQEEPHTTEQQPQTPAENK                                                                | 1.067859524        | 3              | 4.74823   |
| O88600        | NFTTEQVTAMLLSK                                                                        | 0.911886272        | 2              | 3.705788  |
| O88600        | SNLAYDIVQLPTGLTGIK                                                                    | 1.021463028        | 2              | 4.945822  |
| O88600        | SVM DATQIAGLNCLR                                                                      | 0.903233993        | 2              | 2.889576  |
| O88600        | TSTVDLPQESQLLWQLDR                                                                    | 0.919051303        | 2              | 3.834906  |
| O88600        | VLATAFDITLGG                                                                          | 1.043317755        | 2              | 3.479396  |
| O88600        | WNSPAEEGSSDCEVFPK                                                                     | 0.839593739        | 2              | 3.414482  |
| <b>O88618</b> | <b>FTCD Formimidoyltransferase_cyclodeaminase</b>                                     | <b>0.967779039</b> | <b>0.9739</b>  | <b>21</b> |
| O88618        | AFAACLGAIK                                                                            | 0.913004826        | 2              | 2.889683  |
| O88618        | AGEYEALPEK                                                                            | 1.009112972        | 2              | 2.863834  |
| O88618        | ALLDAAAFYCDK                                                                          | 1.033813952        | 2              | 3.467166  |
| O88618        | ALLDAAAFYCKEK                                                                         | 0.800699998        | 2              | 3.33453   |
| O88618        | EAQELNLPVVGSQLVGLVPLK                                                                 | 1.21842987         | 3              | 4.043879  |
| O88618        | GVSMDECVLCAK                                                                          | 1.033808375        | 2              | 3.906974  |
| O88618        | IIEYLVPDSGPEQSLDASLR                                                                  | 0.926225878        | 2              | 5.133275  |
| O88618        | ISSLLQEAQ                                                                             | 1.130495208        | 2              | 2.711395  |
| O88618        | LAEELNVPVLYGEEAQMPSR                                                                  | 0.931728143        | 2              | 4.975207  |
| O88618        | LAETVSQLWPALQELAQCGNLSCLSDLQVAAK                                                      | 1.046240898        | 4              | 5.012574  |
| O88618        | LFVLEEEHR                                                                             | 1.087390257        | 2              | 2.766589  |
| O88618        | LGLDSLAPFDPK                                                                          | 0.308646517        | 2              | 3.640337  |
| O88618        | LIPFFHAASAQLTSLVDADAR                                                                 | 1.186700414        | 3              | 3.554824  |
| O88618        | MGALDVCFPIVPR                                                                         | 0.874720638        | 2              | 3.794453  |
| O88618        | MGALDVCFPIVPR+Oxidation(0)                                                            | 0.905915472        |                |           |
| O88618        | NLAQVSTNLLDFEVTALHTVYEEAR                                                             | 0.920889636        | 3              | 4.505769  |
| O88618        | QAEWVPDFGPPSFPVSWGATVTGAR                                                             | 0.978996881        | 2              | 4.156594  |
| O88618        | TCALQEGLR                                                                             | 1.289390994        | 2              | 2.87365   |
| O88618        | TQAAALVLSLEAR                                                                         | 0.893162497        | 2              | 5.065959  |
| O88618        | TVYTFVGQPECVVEGALSAAR                                                                 | 1.034763839        | 2              | 4.854225  |
| O88618        | VQGIGWYLEEK                                                                           | 0.912379881        | 2              | 3.182912  |
| <b>O88637</b> | <b>PCY2 Ethanolamine_phosphate cytidyltransferase</b>                                 | <b>1.085819826</b> | <b>0.98533</b> | <b>5</b>  |
| O88637        | GPPVFTQEER                                                                            | 1.071265947        | 2              | 2.73447   |
| O88637        | HKGPPVFTQEER                                                                          | 1.123729707        | 2              | 2.624393  |
| O88637        | TQGVSTDLVGR                                                                           | 1.083230236        | 2              | 2.771423  |
| O88637        | WVDEVVPAAPYVTTLETLDK                                                                  | 0.946976156        | 2              | 3.142456  |
| O88637        | YVSEVVIGAPYSVTAELLNHFK                                                                | 0.899257864        | 3              | 3.425522  |
| <b>O88656</b> | <b>ARC1B Actin_related protein 2/3 complex subunit 1B</b>                             | <b>0.916865984</b> | <b>0.99547</b> | <b>2</b>  |
| O88656        | ASSEGGAATGAGLDSLHK                                                                    | 0.905673894        | 2              | 4.384912  |
| O88656        | NSVSQISVLSGGK                                                                         | 0.979600281        | 2              | 2.447628  |
| <b>O88696</b> | <b>CLPP Putative ATP_dependent Clp protease proteolytic subunit_mitochondrial</b>     | <b>1.077127629</b> | <b>0.39107</b> | <b>2</b>  |
| O88696        | GQATDIAIQAEIIMK                                                                       | 1.036955908        | 2              | 3.618744  |
| O88696        | VLVHPPQDGEDEPELVQK                                                                    | 1.32825243         | 3              | 4.499228  |
| <b>O88746</b> | <b>TOM1 Target of Myb protein 1</b>                                                   | <b>0.974916159</b> | <b>0.99999</b> | <b>3</b>  |

|               |                                                                      |                    |                |           |
|---------------|----------------------------------------------------------------------|--------------------|----------------|-----------|
| O88746        | GDL SQHATPLPTPAVLP GDSPTPTPEQIGK                                     | 1.004855487        | 3              | 5.876241  |
| O88746        | QQSTGAIPATQAR                                                        | 0.966424049        | 2              | 2.614947  |
| O88746        | YEAPQTTDGLAGALDAR                                                    | 0.999452467        | 2              | 4.199483  |
| <b>O88761</b> | <b>PSMD1 26S proteasome non_ATPase regulatory subunit 1</b>          | <b>1.000908738</b> | <b>0.10192</b> | <b>4</b>  |
| O88761        | DTSEDI EELV PVA AHGPK                                                | 1.082486712        | 2              | 3.818461  |
| O88761        | QCVENADLP EGEK                                                       | 1.292851888        | 2              | 2.501987  |
| O88761        | TPEQCPSV VLLSESYNPHVR                                                | 1.122681287        | 3              | 4.438766  |
| O88761        | TVGTPIASVPGSTNTGTVPGPEK                                              | 0.921551798        | 2              | 3.733288  |
| <b>O88767</b> | <b>PARK7 Protein DJ_1</b>                                            | <b>0.99800274</b>  | <b>0.99998</b> | <b>6</b>  |
| O88767        | DVVICPDTSLEEAK                                                       | 1.119495501        | 2              | 3.31286   |
| O88767        | GAEEMETVIPDIMR                                                       | 0.903339375        | 2              | 4.050001  |
| O88767        | GAEEMETVIPDIMR+Oxidation(13)                                         | 0.990343266        |                |           |
| O88767        | GLIAAICAGPTALLAHEVGF GCK                                             | 0.81453948         | 2              | 4.897345  |
| O88767        | TQGPYDV VVLP GGNLGAQNLSESALVK                                        | 0.986995729        | 2              | 4.723402  |
| O88767        | VTVAGLAGKDPVQCSR                                                     | 1.007529289        | 2              | 4.445266  |
| <b>O88794</b> | <b>PNPO Pyridoxine_5__phosphate oxidase</b>                          | <b>1.063367334</b> | <b>0.99135</b> | <b>2</b>  |
| O88794        | KKNEELGQLYR                                                          | 1.074058968        | 2              | 2.779869  |
| O88794        | SSQIGAVVSR                                                           | 1.060607938        | 2              | 2.89101   |
| <b>O88801</b> | <b>HOME2 Homer protein homolog 2</b>                                 | <b>0.831788805</b> | <b>0.52798</b> | <b>2</b>  |
| O88801        | EKEMELK                                                              | 0.846016494        | 1              | 2.10689   |
| O88801        | EKNTQLK                                                              | 0.792155665        | 1              | 2.020127  |
| <b>O88813</b> | <b>ACSL5 Long_chain_fatty_acid__CoA ligase 5</b>                     | <b>1.030798432</b> | <b>0.86228</b> | <b>15</b> |
| O88813        | AILEDLQK                                                             | 0.880081316        | 1              | 2.423197  |
| O88813        | ATMLIENVEK                                                           | 1.086777774        | 2              | 2.370865  |
| O88813        | ATMLIENVEKDLTPGLK                                                    | 1.164677665        | 2              | 2.451185  |
| O88813        | ATMLIENVEKDLTPGLK+Oxidation(2)                                       | 1.025386005        |                |           |
| O88813        | FFQTQIK                                                              | 0.846347258        | 1              | 1.991065  |
| O88813        | GLAVSDNGPCLGYR                                                       | 0.910520753        | 2              | 3.810367  |
| O88813        | GSFEELCQNQCVK                                                        | 0.991618398        | 2              | 4.287456  |
| O88813        | IGFFQGDIR                                                            | 1.048025953        | 2              | 3.321431  |
| O88813        | LVQGVIFSCGGK                                                         | 1.264826475        | 2              | 2.866491  |
| O88813        | NNDLILYYFSDAK                                                        | 0.826345916        | 2              | 3.724621  |
| O88813        | SFLIGVVVPDPESLPSFAAK                                                 | 0.842740928        | 2              | 4.330254  |
| O88813        | SIFVHPEPFSIENGLLTPTLK                                                | 0.883418733        | 2              | 3.032535  |
| O88813        | SRPILQVFVHGESLR                                                      | 0.27881906         | 3              | 3.86181   |
| O88813        | TQEVLDKDGWLHTGDIGR                                                   | 0.928040051        | 3              | 4.391942  |
| O88813        | TVILMDPFDDLMK                                                        | 0.828018504        | 2              | 3.128828  |
| <b>O88867</b> | <b>KMO Kynurenine_3__monooxygenase</b>                               | <b>0.907110026</b> | <b>0.00519</b> | <b>4</b>  |
| O88867        | AVGLEDQIVSK                                                          | 0.954719099        | 2              | 2.654234  |
| O88867        | DLLTAVESYPNAK                                                        | 2.210197476        | 2              | 2.792644  |
| O88867        | NFPDAIPLMGEQALMR                                                     | 0.999093894        | 2              | 2.862323  |
| O88867        | NFQVDVYEAR                                                           | 1.222862981        | 2              | 2.888409  |
| <b>O88941</b> | <b>MOGS Mannosyl_oligosaccharide glucosidase</b>                     | <b>1.166987209</b> | <b>0.08761</b> | <b>4</b>  |
| O88941        | DLALPTLLNPK                                                          | 1.17794013         | 2              | 2.529927  |
| O88941        | DQASEQLVGGQLTR                                                       | 1.29083049         | 2              | 2.905201  |
| O88941        | LGPLLDVLADSR                                                         | 0.977942555        | 2              | 3.293821  |
| O88941        | MDPSLFPVPVPLFSGVPSR                                                  | 0.911031349        | 2              | 2.71819   |
| <b>O88986</b> | <b>KBL_2_ amino_3__ketobutyrate coenzyme A ligase_ mitochondrial</b> | <b>0.910234593</b> | <b>0.97676</b> | <b>2</b>  |
| O88986        | GTDELLGVMDQVTIINSTLGK                                                | 0.900265945        | 2              | 3.31637   |
| O88986        | HLD MADLEAK                                                          | 0.975778454        | 2              | 2.315195  |
| <b>O88989</b> | <b>MDHC Malate dehydrogenase_ cytoplasmic</b>                        | <b>0.998896412</b> | <b>0.14736</b> | <b>8</b>  |
| O88989        | DLDVAVLVGSMR                                                         | 1.906935067        | 3              | 4.05575   |
| O88989        | ELTEEKETA FEFLSSA                                                    | 1.091425296        | 2              | 3.703944  |
| O88989        | EVGVYEALKD DSWLK                                                     | 1.435112991        | 2              | 3.752205  |
| O88989        | FVEGLPINDFSR                                                         | 0.897345685        | 2              | 3.630882  |

|               |                                                             |                    |                |           |
|---------------|-------------------------------------------------------------|--------------------|----------------|-----------|
| O88989        | GEFITTQQQR                                                  | 1.039806128        | 2              | 4.270136  |
| O88989        | LGVTADDVK                                                   | 1.146707162        | 2              | 2.85596   |
| O88989        | NVIWGNHSSTQYPDVNHAK                                         | 0.961736809        | 2              | 5.619033  |
| O88989        | VIVVGNPANTNCLTASK                                           | 1.028818149        | 2              | 5.389115  |
| <b>O88990</b> | <b>ACTN3 Alpha_actinin_3</b>                                | <b>0.819524534</b> | <b>4.4E-12</b> | <b>12</b> |
| O88990        | AGTQIENIEEDFR                                               | 0.75909683         | 2              | 3.579388  |
| O88990        | CQAICDQWDNLGLTLQK                                           | 2.807224835        | 2              | 5.168026  |
| O88990        | CQLEINFNTLQTK                                               | 0.817267167        | 2              | 4.118224  |
| O88990        | FAIQDISVEETSAK                                              | 0.847682943        | 2              | 3.664222  |
| O88990        | GKEEMLNQHDYESASLQEV                                         | 1.332230218        | 3              | 4.784576  |
| O88990        | GLSQEQLNEFR                                                 | 2.821846105        | 2              | 2.608653  |
| O88990        | HEAFESDLAAHQDR                                              | 1.194349156        | 3              | 4.498434  |
| O88990        | RHEAFESDLAAHQDR                                             | 3.35066763         | 3              | 4.798569  |
| O88990        | SGNPYITLSSQDINN                                             | 1.311377971        | 2              | 3.802952  |
| O88990        | VEHIAALAEQLNELDYHEAASVNSR                                   | 1.128113335        | 3              | 4.124232  |
| O88990        | VGWEQLLSIAR                                                 | 0.924971356        | 2              | 2.563041  |
| O88990        | VLAVNQENEK                                                  | 4.771921814        | 2              | 2.490795  |
| <b>O88994</b> | <b>MOSC2 MOSC domain_containing protein 2_mitochondrial</b> | <b>0.658527852</b> | <b>0.00688</b> | <b>2</b>  |
| O88994        | CVLTTVDPDTGIIDR                                             | 0.657467129        | 2              | 4.111473  |
| O88994        | RQLQQVGTVSK                                                 | 0.882406503        | 2              | 2.502644  |
| <b>O89000</b> | <b>DPYD Dihydropyrimidine dehydrogenase [NADP_]</b>         | <b>0.918841865</b> | <b>0.90974</b> | <b>7</b>  |
| O89000        | EGGADGVTATNTVSGMLGLK                                        | 1.000446067        | 2              | 3.829697  |
| O89000        | GAVIVLGAGDTAFDCATSALR                                       | 0.854503481        | 2              | 2.314921  |
| O89000        | GMGLACGQDPELVR                                              | 1.095616306        | 2              | 3.188407  |
| O89000        | GTTSGPLYGPGQSSFLNIEISEK                                     | 0.814885483        | 2              | 3.519427  |
| O89000        | LTPNVTDIVSIAR                                               | 1.306597592        | 2              | 2.349785  |
| O89000        | QEYVGGSTSEIPQFR                                             | 0.984785077        | 2              | 3.621115  |
| O89000        | TEQDETGNWVEDEEQIVR                                          | 0.999449256        | 2              | 4.719432  |
| <b>O89032</b> | <b>SPD2A SH3 and PX domain_containing protein 2A</b>        | <b>1.075637144</b> | <b>0.6033</b>  | <b>2</b>  |
| O89032        | DDSDINTSKTGEVSKR                                            | 1.271675949        | 2              | 2.547387  |
| O89032        | EGWAPASYIDKRRK                                              | 0.772191058        | 1              | 1.973449  |
| <b>O89046</b> | <b>COR1B Coronin_1B</b>                                     | <b>0.866492315</b> | <b>0.00067</b> | <b>3</b>  |
| O89046        | NDQCYEDIR                                                   | 0.916257508        | 2              | 2.82929   |
| O89046        | NVLSDSKPAGYSR                                               | 0.870192961        | 2              | 3.129846  |
| O89046        | SGVSTATAITDIPSGNLAGSGEAGK                                   | 0.663712163        | 2              | 3.814561  |
| <b>O89049</b> | <b>TRXR1 Thioredoxin reductase 1_cytoplasmic</b>            | <b>0.948880752</b> | <b>0.76454</b> | <b>6</b>  |
| O89049        | IEQIEAGTPGR                                                 | 1.284561427        | 2              | 3.420818  |
| O89049        | IEQIEAGTPGRLK                                               | 0.558564651        | 2              | 2.45242   |
| O89049        | LELTPVAIQAGR                                                | 1.026897586        | 2              | 2.66957   |
| O89049        | STNSEETIEDEFNTVLLAVGR                                       | 0.899949254        | 2              | 4.228694  |
| O89049        | VVGFHVLGPNAGEVTQGFAAALK                                     | 0.949069163        | 3              | 4.035128  |
| O89049        | WGLGGTCVNVGCIPK                                             | 0.954449628        | 2              | 2.922061  |
| <b>P00173</b> | <b>CYB5 Cytochrome b5</b>                                   | <b>1.035453121</b> | <b>1</b>       | <b>6</b>  |
| P00173        | EQAGGDATENFEDVGHSTDAR                                       | 1.145362581        | 2              | 5.440202  |
| P00173        | FLEEHPGGEEVLR                                               | 0.950454238        | 2              | 4.331065  |
| P00173        | STWVILHHK                                                   | 0.839140849        | 2              | 2.793056  |
| P00173        | TYIIGELHPDDR                                                | 1.024921934        | 2              | 4.244727  |
| P00173        | VYDLTK                                                      | 0.993963104        | 1              | 2.135064  |
| P00173        | YTTLEIQK                                                    | 1.041747871        | 2              | 3.017815  |
| <b>P00388</b> | <b>N CPR NADPH_cytochrome P450 reductase</b>                | <b>1.737345753</b> | <b>9.9E-20</b> | <b>12</b> |
| P00388        | DGALTQLNVAFSR                                               | 1.076570357        | 2              | 2.418118  |
| P00388        | DVQNTFYDIVAEFGPMEHTQAVDYVK                                  | 1.617585755        | 3              | 4.795228  |
| P00388        | FAVFGNGK                                                    | 2.153050718        | 2              | 2.508693  |
| P00388        | GMSADPEEYDLADLSSLPEIDK                                      | 1.75114212         | 2              | 5.055513  |



|               |                                                         |                    |                |           |
|---------------|---------------------------------------------------------|--------------------|----------------|-----------|
| P00388        | GVATSWLR                                                | 2.122457804        | 2              | 2.336932  |
| P00388        | LEQLGAQR                                                | 1.852547395        | 2              | 2.640414  |
| P00388        | NIIVFYGSQTGTAEAFANR                                     | 1.275417843        | 2              | 3.17912   |
| P00388        | RSDEDLYR                                                | 1.657309385        | 2              | 3.364368  |
| P00388        | SDEDLYR                                                 | 1.673252548        | 2              | 2.608301  |
| P00388        | SYENQKPPFDAK                                            | 1.748340733        | 2              | 3.25428   |
| P00388        | TALTYLDITNPPR                                           | 1.191116452        | 2              | 2.506228  |
| P00388        | TNVLYELAQYASEPSEQEHLHK                                  | 1.798421286        | 3              | 3.685663  |
| <b>P00406</b> | <b>COX2 Cytochrome c oxidase subunit 2</b>              | <b>1.200244776</b> | <b>0.99562</b> | <b>5</b>  |
| P00406        | ILYMMDEINNPVLTVK                                        | 0.835535288        | 2              | 2.307731  |
| P00406        | LLEVDNR                                                 | 1.171213408        | 2              | 2.52598   |
| P00406        | MLISSEDLHWSWAIPSLGLK                                    | 0.872212762        | 2              | 3.570268  |
| P00406        | VVLPMEPIR                                               | 1.034305065        | 2              | 2.680752  |
| P00406        | VVLPMEPIR+Oxidation(4)                                  | 1.013319578        |                |           |
| <b>P00481</b> | <b>OTC Ornithine carbamoyltransferase_mitochondrial</b> | <b>0.857344371</b> | <b>0.01312</b> | <b>16</b> |
| P00481        | FGMHLQAATPK                                             | 0.954914324        | 3              | 4.129622  |
| P00481        | GEYPLLLQGK                                              | 0.84116661         | 2              | 3.211051  |
| P00481        | GGNVLITDTWISMGQEDEK                                     | 0.748865059        | 2              | 4.995953  |
| P00481        | GGNVLITDTWISMGQEDEKK                                    | 0.669237599        | 2              | 4.640275  |
| P00481        | GLTSLWIGDGNLHLSIMMSAAK                                  | 0.787526039        | 2              | 4.19529   |
| P00481        | GYEPDPNIVK                                              | 0.925828029        | 2              | 2.69013   |
| P00481        | KPEEVDDDEVFYSR                                          | 1.779867421        | 2              | 3.52652   |
| P00481        | LQAFQGYQVTMK                                            | 1.009068184        | 2              | 3.839989  |
| P00481        | LSTETGFALLGGHPSFLTQDIHLGVNESLTDAR                       | 0.897222715        | 3              | 5.761353  |
| P00481        | QKGEYPLLLQGK                                            | 0.984957066        | 2              | 2.994097  |
| P00481        | SLGMIFEK                                                | 0.779141054        | 2              | 2.441405  |
| P00481        | SLVFPEAENR                                              | 0.957061353        | 2              | 2.649328  |
| P00481        | SLVFPEAENRK                                             | 0.874010587        | 2              | 2.95112   |
| P00481        | VLSSMTDAVLAR                                            | 0.835075651        | 2              | 3.980601  |
| P00481        | VLSSMTDAVLAR+Oxidation(4)                               | 1.015072708        |                |           |
| P00481        | YGKPVQSQVQLK                                            | 0.677278924        | 2              | 3.004725  |
| <b>P00502</b> | <b>GSTA1 Glutathione S transferase alpha_1</b>          | <b>0.770186285</b> | <b>1</b>       | <b>2</b>  |
| P00502        | FIQSPEDLEK                                              | 0.778010095        | 2              | 2.587286  |
| P00502        | WLLAAAGVEFDEK                                           | 0.790985624        | 2              | 4.326678  |
| <b>P00507</b> | <b>AATM Aspartate aminotransferase_mitochondrial</b>    | <b>0.90760071</b>  | <b>1.4E-05</b> | <b>18</b> |
| P00507        | ASAELALGENSEVLK                                         | 0.918155318        | 2              | 4.698341  |
| P00507        | DAGMQLQGYR                                              | 2.499218697        | 2              | 3.039075  |
| P00507        | DDNGKPYVLPVSR                                           | 1.084979131        | 2              | 2.740834  |
| P00507        | EGSSHNVQHITDQIGMFCFTGLKPEQVER                           | 1.115772624        | 3              | 5.41396   |
| P00507        | EYLPIGGLADFCK                                           | 1.396899669        | 2              | 2.819358  |
| P00507        | FVTVQTISGTGALR                                          | 0.869876794        | 2              | 5.039452  |
| P00507        | HFIEQGINVCLCQSYAK                                       | 0.911702586        | 2              | 4.522585  |
| P00507        | IAATILTSPDLR                                            | 1.154990224        | 2              | 3.093737  |
| P00507        | IPEQSVLLLHACAHNPTGVDPREQWK                              | 1.034262644        | 3              | 4.310308  |
| P00507        | ISVAGVTSGNVGYLAHAIHQVTK                                 | 0.752721277        | 2              | 4.782934  |
| P00507        | KQWLQEVK                                                | 0.80774795         | 1              | 2.138605  |
| P00507        | MNLGVGAYR                                               | 0.939738023        | 2              | 2.934601  |
| P00507        | NLDKEYLPIGGLADFCK                                       | 0.894251911        | 2              | 5.338366  |
| P00507        | NMGLYGER                                                | 0.971204548        | 2              | 2.506797  |
| P00507        | TCGFDFSGALEDISK                                         | 0.956159825        | 2              | 4.821503  |
| P00507        | TQLVSNLK                                                | 0.945070301        | 2              | 2.961006  |
| P00507        | VGAFTVVCK                                               | 0.968922609        | 2              | 3.367226  |
| P00507        | VGASFLQR                                                | 1.010027995        | 2              | 3.004443  |
| <b>P00564</b> | <b>KCRM Creatine kinase M_type</b>                      | <b>1.138870248</b> | <b>0.99965</b> | <b>11</b> |
| P00564        | DLPDPIQDR                                               | 0.923392202        | 2              | 2.490117  |

|               |                                               |                    |                |           |
|---------------|-----------------------------------------------|--------------------|----------------|-----------|
| P00564        | FEEILTR                                       | 2.786817817        | 2              | 2.469936  |
| P00564        | GGDDLDPNYVLSSR                                | 0.879722974        | 2              | 4.798523  |
| P00564        | GQSIDDMIPAQK                                  | 3.868366357        | 2              | 3.37611   |
| P00564        | GTGGVDTAAVGAVFDISNADR                         | 1.34914155         | 2              | 6.067082  |
| P00564        | LGSSEVEQVQLVVDGVK                             | 2.903929705        | 2              | 4.918209  |
| P00564        | LSVEALNSLTGEFK                                | 3.01736785         | 2              | 4.338848  |
| P00564        | RGTGGVDTAAVAVFDISNADR                         | 3.071859427        | 2              | 5.883774  |
| P00564        | SMTEQEQQLIDDHFLFDKPVSPLLASGMAR                | 2.824103467        | 3              | 5.872811  |
| P00564        | SMTEQEQQLIDDHFLFDKPVSPLLASGMAR+Oxidation(1)   | 2.140111494        |                |           |
| P00564        | TDLNHENLK                                     | 1.638987072        | 2              | 2.529152  |
| <b>P00787</b> | <b>CATB Cathepsin B</b>                       | <b>0.953896288</b> | <b>0.9809</b>  | <b>5</b>  |
| P00787        | GENHCGIEIVAGIPR                               | 0.955847329        | 2              | 4.52138   |
| P00787        | HEAGDVMGGHAIR                                 | 0.869167168        | 3              | 3.560832  |
| P00787        | HEAGDVMGGHAIR+Oxidation(6)                    | 1.218754277        |                |           |
| P00787        | MCEAGYSTSYKEDK                                | 1.095340144        | 2              | 3.880888  |
| P00787        | NGPVEGAFTVFSDFLTYK                            | 0.955334116        | 2              | 3.26154   |
| <b>P00884</b> | <b>ALDOB Fructose_bisphosphate aldolase B</b> | <b>0.990120678</b> | <b>0.12387</b> | <b>19</b> |
| P00884        | ALQASALAAWGGK                                 | 0.987102232        | 2              | 4.860201  |
| P00884        | ATQEAFMK                                      | 1.083601049        | 2              | 2.609433  |
| P00884        | ATQEAFMK+Oxidation(6)                         | 1.071361144        |                |           |
| P00884        | ELLFSVDNSISQSIGGVILFHETLYQK                   | 1.215823957        | 3              | 3.794712  |
| P00884        | ELSEIAQR                                      | 6.087707342        | 1              | 2.115321  |
| P00884        | ETTIQGLDGLSER                                 | 1.439519353        | 2              | 4.025199  |
| P00884        | GILAADESVGTMGNR                               | 1.024596828        | 2              | 5.584123  |
| P00884        | GILAADESVGTMGNR+Oxidation(11)                 | 1.041154498        |                |           |
| P00884        | GIVVGIKLDQGGAPLAGTNK                          | 1.216180274        | 2              | 3.465734  |
| P00884        | IKVENTEENR                                    | 1.306931948        | 2              | 2.478102  |
| P00884        | IKVENTEENRR                                   | 1.112620137        | 2              | 2.923598  |
| P00884        | ISDQCPSLAIQENANALAR                           | 0.967417714        | 2              | 6.218312  |
| P00884        | KELSEIAQR                                     | 1.092620677        | 2              | 2.843675  |
| P00884        | KYTPEQVAMATVTALHR                             | 0.892806265        | 3              | 5.706024  |
| P00884        | KYTPEQVAMATVTALHR+Oxidation(8)                | 0.884624662        |                |           |
| P00884        | LDQGGAPLAGTNK                                 | 0.985531032        | 2              | 4.596908  |
| P00884        | YASICQQNGLVPIVEEVLDPGDHDLHCQYVSEK             | 1.185369527        | 3              | 4.999493  |
| P00884        | YTPEQVAMATVTALHR                              | 0.920701023        | 2              | 4.5543    |
| P00884        | YTPEQVAMATVTALHR+Oxidation(7)                 | 0.945109333        |                |           |
| <b>P01015</b> | <b>ANGT Angiotensinogen</b>                   | <b>1.813612177</b> | <b>9.9E-20</b> | <b>3</b>  |
| P01015        | GSYNLQDLAQAQK                                 | 2.210197476        | 2              | 2.80368   |
| P01015        | SLDLSTDPVLAAQK                                | 1.690747388        | 2              | 3.317123  |
| P01015        | STCAQLENPSVETLPEPTFEPVPIQAK                   | 1.677795514        | 2              | 3.915774  |
| <b>P01026</b> | <b>CO3 Complement C3</b>                      | <b>1.250899188</b> | <b>3.9E-05</b> | <b>17</b> |
| P01026        | AAVFNHFISDGVK                                 | 1.087311421        | 2              | 2.354795  |
| P01026        | ACEPGVDYVYK                                   | 1.175054202        | 2              | 2.57538   |
| P01026        | ADIGCTPGSGK                                   | 1.266066691        | 2              | 2.841699  |
| P01026        | DSCVGTLVVKG DPR                               | 0.828977233        | 2              | 2.409441  |
| P01026        | EYVLPSEFVLVEPTEK                              | 1.012932041        | 2              | 3.254046  |
| P01026        | IFTVDNLLPVGK                                  | 1.124166648        | 2              | 3.105247  |
| P01026        | IGLQEVEVK                                     | 0.966911507        | 2              | 2.38234   |
| P01026        | RVPVVTQGSDAQALQTQDDGVAK                       | 1.163344259        | 3              | 5.53011   |
| P01026        | SGIPIVTSPIYQIHFTK                             | 1.820396556        | 2              | 3.209617  |
| P01026        | SGSDEVQAGQER                                  | 1.493834904        | 2              | 4.084831  |
| P01026        | SSVAVPYVIVPLK                                 | 1.007241769        | 2              | 3.151322  |
| P01026        | TVLTGATGHLNR                                  | 1.264146292        | 2              | 3.09662   |
| P01026        | VELKPGDNLNVNFHLR                              | 1.03758306         | 3              | 5.341079  |
| P01026        | VHQFFNVGLIQPGSVK                              | 1.328640763        | 3              | 3.971458  |
| P01026        | VLIEDGSGEAVLSR                                | 1.229919625        | 2              | 4.530239  |

|               |                                             |                    |                |           |
|---------------|---------------------------------------------|--------------------|----------------|-----------|
| P01026        | VPVVTQGSDAQALTQDDGVAK                       | 1.367527648        | 2              | 5.903897  |
| P01026        | VTIKPAPETAK                                 | 1.357847617        | 2              | 2.535371  |
| <b>P01048</b> | <b>KNT1 T_kininogen 1</b>                   | <b>0.469498126</b> | <b>0.64286</b> | <b>2</b>  |
| P01048        | FSVATQICNITPGK                              | 0.806611706        | 2              | 2.843359  |
| P01048        | TELTADCETK                                  | 0.416388746        | 2              | 2.379227  |
| <b>P01946</b> | <b>HBA Hemoglobin subunit alpha_1/2</b>     | <b>0.328576632</b> | <b>9.9E-20</b> | <b>9</b>  |
| P01946        | AADHVEDLPGALSTLSDLHAHK                      | 0.318455755        | 3              | 7.326679  |
| P01946        | FLASVSTVLTSK                                | 0.208849573        | 2              | 3.902756  |
| P01946        | FLSHCLLVTLACHHPGDFTPAMHASLDK                | 0.08827651         | 4              | 4.653927  |
| P01946        | FLSHCLLVTLACHHPGDFTPAMHASLDKFLASVSTVLTSK    | 0.25623372         | 4              | 6.330357  |
| P01946        | IGGHGGEYGEEALQR                             | 0.339357127        | 3              | 4.870887  |
| P01946        | LRVDPVNFK                                   | 0.360022636        | 2              | 2.583225  |
| P01946        | MFAAFPTTK                                   | 0.401003591        | 2              | 2.745217  |
| P01946        | MFAAFPTTK+Oxidation(0)                      | 0.21984389         |                |           |
| P01946        | TYFSHIDVSPGSAQVK                            | 0.324919613        | 2              | 5.175354  |
| <b>P02089</b> | <b>HBB2 Hemoglobin subunit beta_2</b>       | <b>0.321367271</b> | <b>9.9E-20</b> | <b>4</b>  |
| P02089        | GTFASLSELHCDK                               | 0.223774315        | 2              | 3.178641  |
| P02089        | LHVDPENFR                                   | 0.347199776        | 2              | 2.633535  |
| P02089        | YFDSFGDLSSASAIMGNPK                         | 0.261744963        | 2              | 6.343416  |
| P02089        | YFDSFGDLSSASAIMGNPK+Oxidation(14)           | 0.226748891        |                |           |
| <b>P02091</b> | <b>HBB1 Hemoglobin subunit beta_1</b>       | <b>0.129145394</b> | <b>9.9E-20</b> | <b>9</b>  |
| P02091        | AAVNGLWVK                                   | 0.366308122        | 2              | 2.593747  |
| P02091        | EFTPCAQAAFQK                                | 0.417870436        | 2              | 2.991656  |
| P02091        | GTFAPLSELHCDK                               | 0.316574967        | 2              | 4.274859  |
| P02091        | GTFAPLSELHCDKLHVDPENFR                      | 0.129071329        | 3              | 3.483479  |
| P02091        | KVINAFNDGLK                                 | 0.360221484        | 3              | 3.681827  |
| P02091        | LLGNMIVIVLGHHLGK                            | 0.490778311        | 4              | 4.798428  |
| P02091        | VINAFNDGLK                                  | 0.31475729         | 2              | 2.89435   |
| P02091        | VNPDDVGGEALGR                               | 0.304674254        | 2              | 4.027888  |
| P02091        | VVAGVASALAHK                                | 0.486342289        | 2              | 3.613917  |
| <b>P02401</b> | <b>RLA2 60S acidic ribosomal protein P2</b> | <b>1.169083987</b> | <b>0.01778</b> | <b>6</b>  |
| P02401        | ILDSVGIEADDER                               | 1.18902848         | 2              | 4.597485  |
| P02401        | KILDSVGIEADDER                              | 1.423766154        | 2              | 3.830423  |
| P02401        | LASVPAGGAVAVSAAPGSAAPAAGSAPAAAAEEK          | 1.194252999        | 3              | 6.306197  |
| P02401        | NIEDVIAQGVGK                                | 1.060266331        | 2              | 4.722207  |
| P02401        | VISELNGK                                    | 1.139940184        | 1              | 2.054207  |
| P02401        | YVASYLLAALGGNSNPSAK                         | 1.10773671         | 2              | 4.930248  |
| <b>P02563</b> | <b>MYH6 Myosin_6</b>                        | <b>1.0868585</b>   | <b>0.67402</b> | <b>3</b>  |
| P02563        | DTQLQLDDAVR                                 | 0.931548551        | 2              | 2.676833  |
| P02563        | VKLEQQVDDLEGSLEQEK                          | 2.295626223        | 2              | 5.157225  |
| P02563        | VKLEQQVDDLEGSLEQEKK                         | 2.811530814        | 3              | 3.494292  |
| <b>P02564</b> | <b>MYH7 Myosin_7</b>                        | <b>0.942780246</b> | <b>1</b>       | <b>42</b> |
| P02564        | ALQEAHQALDDLQAEEDKVNTLTK                    | 0.887440862        | 3              | 6.344643  |
| P02564        | ANDDLKENIAIVER                              | 1.400177823        | 2              | 3.525035  |
| P02564        | AQLEFNQIK                                   | 2.386735079        | 1              | 1.958119  |
| P02564        | DLEEATLQHEATAAALR                           | 1.941014657        | 2              | 5.202578  |
| P02564        | DTQIQLDDAVR                                 | 0.931548551        | 2              | 2.676833  |
| P02564        | EDQVMQNPVK                                  | 2.172572831        | 2              | 3.244556  |
| P02564        | ELENELEAQKR                                 | 2.555761518        | 2              | 2.882081  |
| P02564        | EQYEEETK                                    | 3.862439214        | 1              | 3.03225   |
| P02564        | GQNVQVAYIAGALAK                             | 1.512279675        | 2              | 3.759597  |
| P02564        | GTLEDQIQANPALEAFGNAK                        | 1.35968682         | 2              | 5.248735  |
| P02564        | IEDEQALGSQK                                 | 3.389120198        | 2              | 4.537066  |
| P02564        | IEEEEELEAER                                 | 2.329166246        | 2              | 4.26683   |
| P02564        | ILNPAAIPEGQFIDSR                            | 2.848673595        | 2              | 2.547411  |
| P02564        | KLAEKDEEMEQAK                               | 0.631288199        | 2              | 3.775279  |

|               |                                                             |                    |                |           |
|---------------|-------------------------------------------------------------|--------------------|----------------|-----------|
| P02564        | KLAEQELIETSER                                               | 1.801072983        | 2              | 3.534202  |
| P02564        | KLEDECSELKR                                                 | 3.511624301        | 3              | 3.445501  |
| P02564        | KVQHELDEAEER                                                | 3.06887793         | 2              | 3.541449  |
| P02564        | LAEQELIETSER                                                | 1.312461731        | 2              | 3.799828  |
| P02564        | LDEAEQIALK                                                  | 1.663346653        | 2              | 3.962439  |
| P02564        | LEEAGGATSVQIEMNK                                            | 1.946445234        | 2              | 4.369197  |
| P02564        | LELDDVTSNMEQIIK                                             | 0.958288908        | 2              | 4.070542  |
| P02564        | LELQSALEEAASLEHEEGK                                         | 0.899293098        | 2              | 4.138051  |
| P02564        | LLGSLDIDHNQYK                                               | 1.346212361        | 2              | 3.661696  |
| P02564        | LQDAEEAVEAVNAK                                              | 2.186607386        | 2              | 3.964658  |
| P02564        | LQNEIEDLMVDVER                                              | 2.036220379        | 2              | 3.89675   |
| P02564        | LTQESIMDLENDKQQLDER                                         | 4.367431239        | 2              | 4.551601  |
| P02564        | MDADLSQLQTEVEEAVQECR                                        | 0.86047162         | 2              | 5.235183  |
| P02564        | NDLQLQVQAEQDNLADAEER                                        | 3.41939206         | 2              | 5.463215  |
| P02564        | NLQEEISDLTEQLGSGTK                                          | 2.60643834         | 2              | 5.929419  |
| P02564        | NLTEEMAGLDEIIVK                                             | 1.3694187          | 2              | 4.750556  |
| P02564        | NNLLQAELEELR                                                | 2.884466023        | 2              | 3.888179  |
| P02564        | QAEEAEEQANTNLSK                                             | 2.73343311         | 2              | 4.975104  |
| P02564        | QKYEESQSELESSQK                                             | 2.091620912        | 2              | 3.39453   |
| P02564        | QREEQAEPDGTTEEADK                                           | 3.279910984        | 2              | 2.931566  |
| P02564        | QREEQAEPDGTTEEADKSAYLMGLNSADLLK                             | 5.010110965        | 3              | 4.911406  |
| P02564        | SAYLMGLNSADLLK                                              | 1.433893252        | 2              | 2.545759  |
| P02564        | TLEDQMNEHR                                                  | 2.542464901        | 2              | 2.651053  |
| P02564        | VQHELDEAEER                                                 | 1.917037754        | 2              | 3.062501  |
| P02564        | VQHELDEAEERADIAESQVNK                                       | 7.725707732        | 3              | 3.587075  |
| P02564        | VQLLSQNTSLINQK                                              | 3.189355192        | 2              | 3.987459  |
| P02564        | VRELENELEAEQKR                                              | 2.355286855        | 3              | 3.836714  |
| P02564        | VVDSLQTSLDAETR                                              | 2.788342934        | 2              | 4.193341  |
| <b>P02600</b> | <b>MYL1 Myosin light chain 1/3_ skeletal muscle isoform</b> | <b>3.251080547</b> | <b>0.99767</b> | <b>13</b> |
| P02600        | ALGTNPTNAEVK                                                | 1.956073622        | 2              | 3.536794  |
| P02600        | ALGTNPTNAEVKK                                               | 6.912132067        | 2              | 3.304775  |
| P02600        | DQGGYEDFVEGLR                                               | 0.457142359        | 2              | 3.560319  |
| P02600        | EQQEEFKAEFLFDR                                              | 1.483528593        | 2              | 3.581992  |
| P02600        | IEFEQFLPMMQAISSNK                                           | 1.210314834        | 3              | 3.918038  |
| P02600        | ITLSQVGDVLR                                                 | 4.018310956        | 2              | 3.239146  |
| P02600        | KIEFEQFLPMMQAISSNK                                          | 2.861095159        | 2              | 5.667635  |
| P02600        | KIEFEQFLPMMQAISSNKDQGGYEDFVEGLR                             | 1.989030857        | 4              | 5.266766  |
| P02600        | KPAAAAPAPAPAPAPAPAKPK                                       | 4.574888013        | 3              | 4.330929  |
| P02600        | KVLGNPSNEEMNAK                                              | 4.813214792        | 2              | 3.316699  |
| P02600        | KVLGNPSNEEMNAK+Oxidation(10)                                | 11.0854208         |                |           |
| P02600        | VLGNPSNEEMNAK                                               | 2.806761509        | 2              | 3.689341  |
| P02600        | VLGNPSNEEMNAK+Oxidation(9)                                  | 3.284837489        |                |           |
| <b>P02625</b> | <b>PRVA Parvalbumin alpha</b>                               | <b>2.683001624</b> | <b>0.91646</b> | <b>5</b>  |
| P02625        | AIGAFTAADSFHDK                                              | 2.654315242        | 2              | 3.381144  |
| P02625        | KVFHILDKDK                                                  | 7.252740145        | 2              | 2.301836  |
| P02625        | SGFIEEDELGSILK                                              | 2.528407544        | 2              | 4.860672  |
| P02625        | TLMAAGDKDGDGK                                               | 4.804903316        | 2              | 3.183165  |
| P02625        | TLMAAGDKDGDGK+Oxidation(2)                                  | 2.652371355        |                |           |
| <b>P02650</b> | <b>APOE Apolipoprotein E</b>                                | <b>0.705703429</b> | <b>9.9E-20</b> | <b>11</b> |
| P02650        | ELEEQLGPVAEETR                                              | 0.903440147        | 2              | 4.292765  |
| P02650        | GRLEEVGNQAR                                                 | 0.704254033        | 2              | 3.512826  |
| P02650        | GWFEPLVEDMQR                                                | 0.777629774        | 2              | 3.443292  |
| P02650        | LEEVGNQAR                                                   | 0.795566715        | 2              | 2.483841  |
| P02650        | LGADMEDLR                                                   | 0.819820868        | 2              | 2.742156  |
| P02650        | LGPLVEQGR                                                   | 0.75474128         | 2              | 2.766629  |
| P02650        | MEEQTQQIR                                                   | 0.759917994        | 2              | 3.153938  |

|               |                                               |                    |                |           |
|---------------|-----------------------------------------------|--------------------|----------------|-----------|
| P02650        | NEVNTMLGQSTEELR                               | 0.702617161        | 2              | 4.375723  |
| P02650        | SKMEEQTQQIR                                   | 0.742953429        | 2              | 3.23008   |
| P02650        | SKMEEQTQQIR+Oxidation(2)                      | 1.201012662        |                |           |
| P02650        | TANLGAGAAQPLR                                 | 0.675870757        | 2              | 3.67759   |
| <b>P02651</b> | <b>APOA4 Apolipoprotein A_IV</b>              | <b>0.926708382</b> | <b>0.90197</b> | <b>2</b>  |
| P02651        | TDVTQQLNLFQDK                                 | 0.833639978        | 2              | 4.376289  |
| P02651        | VSTNIDQLQK                                    | 1.018611478        | 2              | 2.310643  |
| <b>P02680</b> | <b>FIBG Fibrinogen gamma chain</b>            | <b>1.277776901</b> | <b>2.4E-07</b> | <b>5</b>  |
| P02680        | LSIGDGQQHMGGSK                                | 1.653311938        | 2              | 2.716701  |
| P02680        | VAQLEAQCQEPCK                                 | 1.903084972        | 2              | 3.509436  |
| P02680        | VGPESDKYR                                     | 1.372800299        | 2              | 2.784405  |
| P02680        | YEALLTHESSIR                                  | 1.271572349        | 2              | 3.894515  |
| P02680        | YLQDIYTSNK                                    | 1.564702082        | 2              | 2.442022  |
| <b>P02692</b> | <b>FABPL Fatty acid_binding protein_liver</b> | <b>0.904286451</b> | <b>9.9E-20</b> | <b>11</b> |
| P02692        | AMGLPEDLIQK                                   | 0.884747597        | 2              | 3.725098  |
| P02692        | AMGLPEDLIQK+Oxidation(1)                      | 0.838654143        |                |           |
| P02692        | GVSEIVHEGK                                    | 0.909386928        | 2              | 3.410163  |
| P02692        | GVSEIVHEGKK                                   | 0.856738016        | 2              | 3.223191  |
| P02692        | SVTEFNGDTITNTMTLGDIVYK                        | 0.803966929        | 2              | 5.532661  |
| P02692        | SVTEFNGDTITNTMTLGDIVYK+Oxidation(13)          | 0.914232256        |                |           |
| P02692        | SVTEFNGDTITNTMTLGDIVYKR                       | 0.812816955        | 2              | 3.632193  |
| P02692        | VIHNEFTLGEECELETMTGEK                         | 0.855702127        | 3              | 6.109758  |
| P02692        | VIHNEFTLGEECELETMTGEK+Oxidation(16)           | 0.921224853        |                |           |
| P02692        | YQVQSQENFEPFMK                                | 0.879248019        | 2              | 5.81941   |
| P02692        | YQVQSQENFEPFMK+Oxidation(12)                  | 0.881650959        |                |           |
| <b>P02696</b> | <b>RET1 Retinol_binding protein 1</b>         | <b>0.819377469</b> | <b>0.425</b>   | <b>5</b>  |
| P02696        | ALDVNVALR                                     | 0.778865612        | 2              | 3.313287  |
| P02696        | CMTTVSWDGDKLQCQVK                             | 0.638117307        | 2              | 4.672219  |
| P02696        | EFEEDLTGIDDR                                  | 0.930085366        | 2              | 2.46823   |
| P02696        | MLSNNFEEYLR                                   | 0.755895841        | 2              | 3.90598   |
| P02696        | MLSNNFEEYLR+Oxidation(0)                      | 0.745665331        |                |           |
| <b>P02706</b> | <b>ASGR1 Asialoglycoprotein receptor 1</b>    | <b>0.822444088</b> | <b>0.37687</b> | <b>6</b>  |
| P02706        | DYQDFQHLDNENDHHQLQR                           | 1.185772645        | 3              | 4.246231  |
| P02706        | FVQQHMGPLNTWIGLTDQNGPWK                       | 1.551545508        | 3              | 3.500044  |
| P02706        | LVESQLEK                                      | 0.954586103        | 2              | 2.494918  |
| P02706        | SLSCQMAALR                                    | 0.861246947        | 2              | 2.700068  |
| P02706        | WVCETELGK                                     | 0.800414579        | 2              | 2.358272  |
| P02706        | WVDGTDYETGFK                                  | 0.772589175        | 2              | 3.173732  |
| <b>P02770</b> | <b>ALBU Serum albumin</b>                     | <b>1.216122926</b> | <b>0.00059</b> | <b>24</b> |
| P02770        | AADKDNCFATEGPNLVAR                            | 1.595387781        | 2              | 4.97209   |
| P02770        | AETFTFHSDICTLPDKEK                            | 1.492844768        | 2              | 4.504495  |
| P02770        | CCAEGDPPACYGTVLAEFQPLVEEPK                    | 1.232613879        | 3              | 5.270844  |
| P02770        | CCSGSLVER                                     | 1.329163289        | 2              | 3.294529  |
| P02770        | CCTLPEAQR                                     | 1.186168794        | 2              | 3.199258  |
| P02770        | ECCHGDLLLECADDR                               | 1.408309846        | 2              | 3.626663  |
| P02770        | ECCHGDLLLECADDRRAELAK                         | 1.237984179        | 2              | 5.189486  |
| P02770        | FKDLGEQHFK                                    | 1.27397989         | 3              | 4.290384  |
| P02770        | GLVLIAFSQYLQK                                 | 1.207613521        | 2              | 4.143642  |
| P02770        | INKECCHGDLLLECADDRRAELAK                      | 1.728849701        | 3              | 4.70576   |
| P02770        | KQTALAEVVK                                    | 1.239996743        | 3              | 4.082566  |
| P02770        | KYEATLEK                                      | 1.56891637         | 1              | 2.707031  |
| P02770        | LQACCDKPVQLQK                                 | 1.25395578         | 2              | 4.323123  |
| P02770        | LVQEVTDFAK                                    | 1.253228162        | 2              | 3.589504  |
| P02770        | RHPDYSVSLLR                                   | 1.245304045        | 3              | 5.342217  |
| P02770        | SIHTLFGDK                                     | 1.390489674        | 1              | 2.537309  |
| P02770        | TCVADENAENCDK                                 | 1.192413709        | 2              | 4.496723  |
| P02770        | TNCELYEK                                      | 1.151871774        | 2              | 2.896055  |

|               |                                                        |                    |                |           |
|---------------|--------------------------------------------------------|--------------------|----------------|-----------|
| P02770        | TVMGDFAQFVDK                                           | 1.176530759        | 2              | 3.728814  |
| P02770        | TVMGDFAQFVDK+Oxidation(2)                              | 0.837268533        |                |           |
| P02770        | YEATLEK                                                | 1.195662876        | 1              | 1.938763  |
| P02770        | YMCENQATISSK                                           | 1.189361768        | 2              | 4.095817  |
| P02770        | YMCENQATISSK+Oxidation(1)                              | 1.24833748         |                |           |
| P02770        | YNEVLTQCCTESDK                                         | 1.272090437        | 2              | 5.921127  |
| <b>P02803</b> | <b>MT1 Metallothionein_1</b>                           | <b>21.1049952</b>  | <b>9.9E-20</b> | <b>2</b>  |
| P02803        | MDPNCSCTGGSCSCSSCGCK                                   | 12.7178822         | 2              | 5.284279  |
| P02803        | SCCSCCPVGCSK                                           | 22.53840198        | 2              | 3.903487  |
| <b>P04041</b> | <b>GPX1 Glutathione peroxidase 1</b>                   | <b>0.758953382</b> | <b>9.9E-20</b> | <b>10</b> |
| P04041        | FLVGPDGVVPR                                            | 0.807994676        | 2              | 3.482735  |
| P04041        | GLVVLGFPCNQFGHQENK                                     | 0.722876969        | 2              | 4.365985  |
| P04041        | GLVVLGFPCNQFGHQENKNEEILNSLK                            | 0.764157986        | 3              | 3.995894  |
| P04041        | NALPAPSDPTALMTDPK                                      | 0.788511497        | 2              | 3.11904   |
| P04041        | NALPAPSDPTALMTDPK+Oxidation(13)                        | 0.950936297        |                |           |
| P04041        | NDISWNFEK                                              | 0.743004266        | 2              | 2.94232   |
| P04041        | NEEILNSLK                                              | 0.777381627        | 1              | 2.388293  |
| P04041        | TIDIEPDIEALLSK                                         | 0.740836223        | 3              | 4.577692  |
| P04041        | YIIWSPVCR                                              | 0.794887281        | 2              | 3.110299  |
| P04041        | YVRPGGGFEPNFTLFEK                                      | 0.659058333        | 3              | 4.856639  |
| <b>P04167</b> | <b>CP2B2 Cytochrome P450 2B2</b>                       | <b>2.117063725</b> | <b>8.1E-12</b> | <b>2</b>  |
| P04167        | GTIAVIEPIFK                                            | 2.113382483        | 2              | 2.713934  |
| P04167        | NLQEILDYIGHIVEK                                        | 1.441417984        | 2              | 3.720965  |
| <b>P04176</b> | <b>PH4H Phenylalanine_4_hydroxylase</b>                | <b>1.510791261</b> | <b>9.9E-20</b> | <b>18</b> |
| P04176        | AYGAGLLSFGELQYCLSDKPK                                  | 1.75265723         | 2              | 4.185976  |
| P04176        | EDNIPQLEDVSQLTCTGFR                                    | 1.755308407        | 3              | 4.95246   |
| P04176        | FANQILSYGAELDADHPGFK                                   | 1.670075303        | 3              | 3.530921  |
| P04176        | FANQILSYGAELDADHPGFKDPVYR                              | 1.155564213        | 4              | 5.037365  |
| P04176        | ILADSINSEVGILCNALQK                                    | 0.980694559        | 3              | 6.644315  |
| P04176        | LNKDEYEFTYLDK                                          | 2.349635454        | 2              | 3.604046  |
| P04176        | LNKDEYEFTYLDKR                                         | 1.053599853        | 3              | 3.818912  |
| P04176        | LRPVAGLLSSR                                            | 2.339730623        | 2              | 2.339522  |
| P04176        | NDIGATVHELRS                                           | 1.625237039        | 2              | 3.615365  |
| P04176        | NTVPWFPR                                               | 1.327086148        | 2              | 2.501236  |
| P04176        | QFADIAYNYR                                             | 1.222292554        | 2              | 2.545489  |
| P04176        | SFAQFSQEIGLASLGAPDEYIEK                                | 1.537655448        | 2              | 5.016753  |
| P04176        | TACQEYSVTEFQPLYYVAESFSDAK                              | 1.017361982        | 2              | 4.733845  |
| P04176        | THACYEHNHIFLLEK                                        | 1.795773435        | 2              | 4.667121  |
| P04176        | VEVDNTQQLK                                             | 1.482932122        | 2              | 3.895681  |
| P04176        | VEYTEEEK                                               | 1.290946345        | 2              | 2.603281  |
| P04176        | VEYTEEEKQTWGTVFR                                       | 1.259957952        | 2              | 4.447991  |
| P04176        | YCGFREDNIPQLEDVSQLTCTGFR                               | 1.266515724        | 3              | 4.716255  |
| <b>P04182</b> | <b>OAT Ornithine aminotransferase_mitochondrial</b>    | <b>1.139041835</b> | <b>0.99503</b> | <b>8</b>  |
| P04182        | AFYNNVLGEYEEYITK                                       | 1.016365859        | 2              | 4.43028   |
| P04182        | DNGLLAKPTHGDIIR                                        | 1.088426709        | 2              | 2.581575  |
| P04182        | GLLNAIVIR                                              | 0.914146231        | 2              | 3.347982  |
| P04182        | KTEQGPPSSEYIFER                                        | 1.159680029        | 2              | 4.122945  |
| P04182        | TEQGPPSSEYIFER                                         | 1.140194612        | 2              | 4.149383  |
| P04182        | VLPMTGVEAGETACK                                        | 1.090426906        | 2              | 4.296223  |
| P04182        | WLAVDHENVRPDIVLLGK                                     | 0.903275928        | 2              | 4.059553  |
| P04182        | YGAHNYHPLPVALER                                        | 0.750195623        | 2              | 3.614229  |
| <b>P04256</b> | <b>ROA1 Heterogeneous nuclear ribonucleoprotein A1</b> | <b>1.196866945</b> | <b>3.3E-11</b> | <b>5</b>  |
| P04256        | EDSQRPGAHLTVK                                          | 1.295921238        | 2              | 3.053057  |
| P04256        | GFAFVTFDHDSVDK                                         | 1.186033984        | 2              | 2.902564  |
| P04256        | IEVIEIMTDR                                             | 1.0271231          | 2              | 3.408569  |

|               |                                                                     |                    |                |           |
|---------------|---------------------------------------------------------------------|--------------------|----------------|-----------|
| P04256        | NQGGYGGSSSSSYGSGR                                                   | 1.143396638        | 2              | 4.936421  |
| P04256        | SESPKEPEQLR                                                         | 1.044954013        | 2              | 2.362085  |
| <b>P04276</b> | <b>VTDB Vitamin D_binding protein</b>                               | <b>1.20078732</b>  | <b>6.5E-08</b> | <b>3</b>  |
| P04276        | SCESDAPFPVHPGTSECCTK                                                | 1.681420071        | 2              | 4.851318  |
| P04276        | VPTANLEDVLPALAE DLTEILSR                                            | 1.047343101        |                |           |
| P04276        | YCSSQIDAEMR                                                         | 1.420175477        | 2              | 2.46543   |
| <b>P04355</b> | <b>MT2 Metallothionein_2</b>                                        | <b>38.84861052</b> | <b>9.9E-20</b> | <b>3</b>  |
| P04355        | CSQGCICKEASDKSCCA                                                   | 2.137745456        | 3              | 3.632713  |
| P04355        | MDPNCSCATDGSCCAGSCK                                                 | 30.87228117        | 2              | 6.386932  |
| P04355        | SCCSCCPVGCAK                                                        | 31.71648215        | 2              | 4.216469  |
| <b>P04466</b> | <b>MLRS Myosin regulatory light chain 2_skeletal muscle isoform</b> | <b>2.785149336</b> | <b>0.99862</b> | <b>9</b>  |
| P04466        | AAAEGSSNVFSMFDQTQIQEFK                                              | 1.678149207        | 3              | 4.91573   |
| P04466        | GADPEDVITGAFK                                                       | 3.070294242        | 2              | 4.345148  |
| P04466        | KQFLELLTTQCDR                                                       | 2.119900176        | 2              | 3.817376  |
| P04466        | LKGADPEDVITGAFK                                                     | 2.785842432        | 2              | 3.765516  |
| P04466        | NEELDAMMK                                                           | 3.709525401        | 1              | 2.322364  |
| P04466        | NICYVITHGDAK                                                        | 1.608155931        | 2              | 3.073754  |
| P04466        | NICYVITHGDAKDQE                                                     | 1.91838342         | 2              | 3.980803  |
| P04466        | NMWAAFPDPVGGNVNDYK                                                  | 1.486854115        | 2              | 2.915712  |
| P04466        | QFLELLTTQCDR                                                        | 3.565248448        | 2              | 4.005283  |
| <b>P04550</b> | <b>PTMS Parathyrosin</b>                                            | <b>1.012894184</b> | <b>1</b>       | <b>4</b>  |
| P04550        | RTAEEDEADPKR                                                        | 1.096673666        | 3              | 4.408648  |
| P04550        | SVEAAAELSAK                                                         | 1.044207723        | 2              | 4.205069  |
| P04550        | TAEDEADPK                                                           | 1.129619797        | 2              | 3.714639  |
| P04550        | TAEDEADPKR                                                          | 1.085267561        | 3              | 3.740644  |
| <b>P04636</b> | <b>MDHM Malate dehydrogenase_mitochondrial</b>                      | <b>1.02056562</b>  | <b>1.5E-06</b> | <b>17</b> |
| P04636        | AGAGSATLSMAYAGAR                                                    | 0.875811429        | 2              | 4.757953  |
| P04636        | AGAGSATLSMAYAGAR+Oxidation(9)                                       | 1.079831073        |                |           |
| P04636        | ANTFVAELK                                                           | 1.035895146        | 2              | 2.738801  |
| P04636        | EGVIECSFVQSK                                                        | 1.655862165        | 1              | 3.060102  |
| P04636        | ETECTYFSTPLLLGK                                                     | 2.347957394        | 2              | 3.758039  |
| P04636        | FVFSLVDAMNGK                                                        | 0.872722213        | 2              | 4.290236  |
| P04636        | GCDVVVIPAGVPR                                                       | 1.003628209        | 2              | 4.263672  |
| P04636        | GYLGPEQLPDCLK                                                       | 0.94865864         | 2              | 4.307568  |
| P04636        | IFGVTTLDIVR                                                         | 1.022079259        | 2              | 3.452798  |
| P04636        | IQEAGTEVVK                                                          | 1.023241437        | 2              | 2.86749   |
| P04636        | LTLYDIAHTPGVAADLSHIETR                                              | 0.999576842        | 3              | 6.707665  |
| P04636        | MIAEAIPELK                                                          | 0.972367895        | 2              | 3.056718  |
| P04636        | MIAEAIPELK+Oxidation(0)                                             | 0.945560748        |                |           |
| P04636        | TIIP LISQCTPK                                                       | 0.719382606        | 2              | 3.710312  |
| P04636        | VAVLGASGGIGQPLSLLLK                                                 | 1.794781971        | 2              | 5.997471  |
| P04636        | VDFPQDQLATLTGR                                                      | 0.886487224        | 2              | 4.760095  |
| P04636        | VNVPVIGGHAGK                                                        | 1.13040863         | 2              | 3.61838   |
| <b>P04639</b> | <b>APOA1 Apolipoprotein A_I</b>                                     | <b>0.940634427</b> | <b>0.9999</b>  | <b>5</b>  |
| P04639        | LQEQLGPVTQEFWANLEK                                                  | 1.133284464        | 2              | 4.089848  |
| P04639        | NEMNKDLENVK                                                         | 1.110892084        | 2              | 3.16358   |
| P04639        | QLNLNLLDNWDTL GSTVGR                                                | 0.873125904        | 2              | 4.298866  |
| P04639        | VKDFATVYVDAVK                                                       | 0.950806845        | 2              | 2.832142  |
| P04639        | WNEEVEAYR                                                           | 1.095500591        | 2              | 2.598564  |
| <b>P04642</b> | <b>LDHA L_lactate dehydrogenase A chain</b>                         | <b>0.942746393</b> | <b>0.001</b>   | <b>21</b> |
| P04642        | DLADELALVDVIEDK                                                     | 0.698791606        | 2              | 5.457942  |
| P04642        | DQLIVNLLK                                                           | 1.142150358        | 2              | 2.928626  |
| P04642        | DQLIVNLLKEEQVPQNK                                                   | 0.833872017        | 2              | 4.577693  |
| P04642        | EDVFLSVPCILGQNGISDVVK                                               | 0.867054645        | 2              | 4.660959  |
| P04642        | FIIPNVVK                                                            | 0.786536744        | 2              | 2.382555  |
| P04642        | GEMMDLQHGSFLK                                                       | 0.775788347        | 2              | 3.94008   |

|               |                                           |                    |                |           |
|---------------|-------------------------------------------|--------------------|----------------|-----------|
| P04642        | GEMMDLQHGSFLK+Oxidation(2)                | 0.904280888        |                |           |
| P04642        | GEMMDLQHGSFLK+Oxidation(2)                | 0.832079176        |                |           |
| P04642        | GEMMDLQHGSFLK+Oxidation(3)                | 0.930027983        | 2              | 3.487276  |
| P04642        | KSADTLWGIQK                               | 0.860407005        | 2              | 3.318448  |
| P04642        | LLIVSNPVDILTYAWK                          | 0.965083847        | 2              | 4.863012  |
| P04642        | NVNIFK                                    | 0.929674014        | 1              | 2.082439  |
| P04642        | QVVD SAYEVIK                              | 0.818904963        | 2              | 3.502868  |
| P04642        | RVHPISTMIK                                | 0.731522172        | 2              | 2.519708  |
| P04642        | RVHPISTMIK+Oxidation(7)                   | 0.907065658        |                |           |
| P04642        | SADTLWGIQK                                | 0.887237226        | 2              | 3.934905  |
| P04642        | SLNPQLGTDADK                              | 1.066526614        | 1              | 2.322855  |
| P04642        | SLNPQLGTDADKEQWK                          | 0.971650479        | 2              | 4.857021  |
| P04642        | SLNPQLGTDADKEQWKDVHK                      | 0.973023091        | 3              | 3.431161  |
| P04642        | VHPISTMIK+Oxidation(6)                    | 1.156858458        |                |           |
| P04642        | VTLTPDEEAR                                | 0.974992161        | 2              | 2.741382  |
| <b>P04644</b> | <b>RS17 40S ribosomal protein S17</b>     | <b>0.912778347</b> | <b>0.62091</b> | <b>2</b>  |
| P04644        | LLDFGSLSNLQVTQPTVGMNFK                    | 0.980299014        | 2              | 4.278763  |
| P04644        | VCEEIAIIPSK                               | 1.062109117        | 2              | 2.866039  |
| <b>P04692</b> | <b>TPM1 Tropomyosin alpha_1 chain</b>     | <b>1.150389265</b> | <b>0.98887</b> | <b>11</b> |
| P04692        | AISEELDHALNDMTSI                          | 3.427952812        | 2              | 2.800011  |
| P04692        | GTEDELDKYSEALK                            | 1.541360659        | 2              | 3.645583  |
| P04692        | GTEDELDKYSEALKDAQEK                       | 5.713589755        | 2              | 4.108422  |
| P04692        | KLVIIESDLER                               | 1.959555815        | 2              | 3.46125   |
| P04692        | LDKENALDR                                 | 2.836685604        | 2              | 2.785169  |
| P04692        | LKGTDELDDK                                | 2.325073759        | 2              | 2.768812  |
| P04692        | LVIIESDLER                                | 1.305733412        | 2              | 2.458196  |
| P04692        | MEIQEIQLK                                 | 1.053913363        | 2              | 3.021322  |
| P04692        | QLEDELVSLQK                               | 3.828591011        | 2              | 2.855708  |
| P04692        | SIDDELELYAQK                              | 0.766127694        | 2              | 4.23555   |
| P04692        | SKQLEDELVSLQK                             | 1.183313804        | 2              | 3.335744  |
| <b>P04694</b> | <b>ATTY Tyrosine aminotransferase</b>     | <b>7.480229082</b> | <b>5.3E-06</b> | <b>5</b>  |
| P04694        | ILGPCTIVQGALK                             | 5.083672034        | 2              | 2.672603  |
| P04694        | IQEFCEQHYHCAEGSQEEDCK                     | 21.15943387        | 3              | 4.451884  |
| P04694        | TACLVVNNPSNPCGSVFSK                       | 10.49740066        | 2              | 4.933046  |
| P04694        | WDVRPSDMSNK                               | 6.775863368        | 2              | 2.36815   |
| P04694        | YEPLANLSTNVPIILSCGLAK                     | 34.25652149        | 2              | 3.429554  |
| <b>P04762</b> | <b>CATA Catalase</b>                      | <b>1.006208144</b> | <b>9.9E-20</b> | <b>32</b> |
| P04762        | APQKPDVLTGGGNPIGDK                        | 1.548335717        | 2              | 4.638016  |
| P04762        | DAMLFPSFIHSQK+Oxidation(2)                | 1.397093163        |                |           |
| P04762        | DAQLFIQR                                  | 1.53048906         | 2              | 2.997428  |
| P04762        | DGPMCMHDNQGGAPNYPNSFSAPEQQGSALEHHSQCSADVK | 0.848893015        | 4              | 4.567451  |
| P04762        | DPASDQMK                                  | 0.902781217        | 1              | 2.257921  |
| P04762        | DPASDQMK+Oxidation(6)                     | 1.203144958        |                |           |
| P04762        | DYPLIPVGK                                 | 0.95783707         | 1              | 2.244847  |
| P04762        | EAETFPFNPFDLTK                            | 1.436842183        | 2              | 3.960579  |
| P04762        | FNSANEDNVTVR                              | 0.906626527        | 2              | 4.558928  |
| P04762        | FSTVAGESGSADTVR                           | 1.0162357          | 2              | 5.280581  |
| P04762        | FSTVAGESGSADTVRDPR                        | 0.77937742         | 2              | 2.307338  |
| P04762        | FYTEDGNWDLVGNNTPIFFIR                     | 0.75812922         | 3              | 5.463285  |
| P04762        | GAGAFGYFEVTHDITR                          | 0.819169748        | 2              | 4.783739  |
| P04762        | GPLLVDVVFTDEMAHFDR                        | 0.991623766        | 2              | 5.47609   |
| P04762        | HMNGYGSHTFK                               | 0.856238292        | 3              | 4.108102  |
| P04762        | HMNGYGSHTFK+Oxidation(1)                  | 1.039305585        |                |           |
| P04762        | LAQEDPDYGLR                               | 1.037866751        | 2              | 2.72948   |
| P04762        | LCENIANHLK                                | 0.841999604        | 3              | 3.783859  |
| P04762        | LFAYPDTHR                                 | 1.051553541        | 2              | 2.914103  |



|               |                                                     |                    |                |           |
|---------------|-----------------------------------------------------|--------------------|----------------|-----------|
| P04762        | LGPNYLQIPVNCYPYR                                    | 0.976835204        | 3              | 4.052971  |
| P04762        | LNIMTAGPR                                           | 0.962085924        | 2              | 3.145642  |
| P04762        | LNIMTAGPR+Oxidation(3)                              | 1.11351126         |                |           |
| P04762        | LVNANGEAVYCK                                        | 0.856810742        | 2              | 3.894319  |
| P04762        | NAIHTYVQAGSHIAAK                                    | 0.757504842        | 3              | 5.898609  |
| P04762        | NFTDVHPDYGAR                                        | 1.038685636        | 2              | 4.140734  |
| P04762        | NLPVEEAGR                                           | 0.881927974        | 1              | 2.323009  |
| P04762        | NPANYFAEVEQMAFDPSNMPPGIEPSPDK                       | 2.135186419        | 3              | 5.677136  |
| P04762        | RFNSANEDNVTQVR                                      | 0.890796517        | 2              | 4.521218  |
| P04762        | VFEHIGK                                             | 1.009714335        | 2              | 2.476162  |
| P04762        | VFEHIGKR                                            | 0.877510529        | 2              | 2.369051  |
| P04762        | VQALLDQYNSQPKP                                      | 0.937532805        | 2              | 4.940297  |
| P04762        | VWPHKDYPLIPVGK                                      | 0.731854143        | 2              | 3.481071  |
| <b>P04764</b> | <b>ENOA Alpha_enolase</b>                           | <b>0.898139933</b> | <b>8.5E-05</b> | <b>14</b> |
| P04764        | AGYTDQVVIGMDVAASEFYR                                | 0.794929127        | 2              | 4.520521  |
| P04764        | DATNVGDEGGFAPNILENK                                 | 0.943493441        | 2              | 5.780879  |
| P04764        | FTATAGIQVVGDDLTVTNPK                                | 0.887383662        | 2              | 5.306463  |
| P04764        | GNPTVEVDLYTAK                                       | 0.960645772        | 2              | 4.078547  |
| P04764        | HIADLAGNPEVILPVPAFNVINGGSHAGNK                      | 0.810367914        | 3              | 6.15002   |
| P04764        | IDQLMIEMDGTENK                                      | 0.900126217        | 2              | 4.481691  |
| P04764        | IEEELGSK                                            | 0.893154559        | 2              | 2.321403  |
| P04764        | IGAEVYHNLK                                          | 1.068850937        | 2              | 3.209411  |
| P04764        | KLNVVEQEK                                           | 0.928396399        | 2              | 2.545506  |
| P04764        | LNVVEQEK                                            | 0.970157487        | 2              | 3.102386  |
| P04764        | LNVVEQEKIDQLMIEMDGTENK                              | 0.84276229         | 3              | 4.648707  |
| P04764        | SCNCLLLK                                            | 1.156684158        | 2              | 2.981885  |
| P04764        | VNQIGSVTESLQACK                                     | 0.921830963        | 2              | 5.042507  |
| P04764        | YITPDQLADLYK                                        | 0.896307838        | 2              | 3.470566  |
| <b>P04785</b> | <b>PDIA1 Protein disulfide_isomerase</b>            | <b>0.838152452</b> | <b>4.1E-10</b> | <b>25</b> |
| P04785        | DGVVLFK                                             | 1.421622883        | 2              | 2.440274  |
| P04785        | DHENIVIAK                                           | 1.214695333        | 2              | 2.75662   |
| P04785        | EADDIVNWLK                                          | 2.563319413        | 2              | 2.308766  |
| P04785        | HNQLPLVIEFTEQTAPK                                   | 0.915579079        | 3              | 5.686644  |
| P04785        | IKPHLMSQELPEDWVKQPVK                                | 1.116994645        | 4              | 4.660788  |
| P04785        | IKPHLMSQELPEDWVKQPVK+Oxidation(5)                   | 1.212871412        |                |           |
| P04785        | ILEFFGLK                                            | 0.958942368        | 2              | 3.074069  |
| P04785        | ILFIFIDSDHTDNQR                                     | 0.829843232        | 2              | 2.37653   |
| P04785        | LGETYKDHENIVIAK                                     | 0.990137955        | 3              | 4.736261  |
| P04785        | LITLEEEMTK                                          | 0.91291226         | 2              | 3.56582   |
| P04785        | LITLEEEMTK+Oxidation(7)                             | 1.230771611        |                |           |
| P04785        | LKAEGSEIR                                           | 1.194057749        | 1              | 2.096421  |
| P04785        | MDSTANEVEAVK                                        | 1.01511358         | 2              | 4.116548  |
| P04785        | MDSTANEVEAVK+Oxidation(0)                           | 0.973384355        |                |           |
| P04785        | NFEEVAFDEK                                          | 1.005601872        | 1              | 3.357725  |
| P04785        | NFEEVAFDEKK                                         | 1.039567051        | 2              | 3.736872  |
| P04785        | NNFEGEITK                                           | 0.99765783         | 2              | 2.534137  |
| P04785        | QFLAAEAVDDIPFGITNSDVFVK                             | 0.828212022        | 3              | 6.632107  |
| P04785        | TGPAATTLSDTAAAESLVDSEVTVIGFFK                       | 0.802005587        | 3              | 6.390738  |
| P04785        | THILLFLPK                                           | 1.049071759        | 2              | 2.77799   |
| P04785        | TVIDYNGER                                           | 1.094517099        | 2              | 2.565073  |
| P04785        | VDATEESDLAQQYQYVGR                                  | 0.952607331        | 2              | 5.625583  |
| P04785        | VHSFPTLK                                            | 0.916249231        | 1              | 1.920658  |
| P04785        | YKPESDELTAEK                                        | 1.036735322        | 3              | 4.586089  |
| P04785        | YQLDKDGVVLFK                                        | 0.860318904        | 2              | 3.936726  |
| <b>P04797</b> | <b>G3P Glyceraldehyde_3_phosphate dehydrogenase</b> | <b>0.983289149</b> | <b>0.71481</b> | <b>16</b> |
| P04797        | GAAQNIIPASTGAAK                                     | 1.083873023        | 2              | 4.273346  |

|               |                                                |                    |                |           |
|---------------|------------------------------------------------|--------------------|----------------|-----------|
| P04797        | IVSNASCTTNCLAPLAK                              | 1.089421106        | 2              | 4.764961  |
| P04797        | LISWYDNEYGYSNR                                 | 1.255796514        | 2              | 4.061031  |
| P04797        | LVINGKPITIFQER                                 | 1.361745232        | 3              | 3.720879  |
| P04797        | RVIISAPSADAPMFVMGVNHEK                         | 1.209494095        | 3              | 5.285765  |
| P04797        | RVIISAPSADAPMFVMGVNHEK+Oxidation(12)           | 0.655176515        |                |           |
| P04797        | VGVNGFGR                                       | 1.176576376        | 2              | 2.578372  |
| P04797        | VIHDNFGIVEGLMTTVHAITATQK                       | 0.99891177         | 3              | 7.493002  |
| P04797        | VIHDNFGIVEGLMTTVHAITATQK+Oxidation(12)         | 0.994265929        |                |           |
| P04797        | VIISAPSADAPMFVMGVNHEK                          | 0.887002179        | 2              | 4.64743   |
| P04797        | VIISAPSADAPMFVMGVNHEK+Oxidation(11)            | 0.89192465         |                |           |
| P04797        | VIISAPSADAPMFVMGVNHEK+Oxidation(14)            | 0.8777156          |                |           |
| P04797        | VPTPNVSVVDLTCR                                 | 1.24860414         | 2              | 3.774345  |
| P04797        | VVDLMAYMASK                                    | 1.475516466        | 2              | 3.805506  |
| P04797        | VVDLMAYMASKE                                   | 1.391526084        | 2              | 2.766998  |
| P04797        | WGDAGAIEYVVESTGVFTTMEK                         | 1.03845158         | 2              | 5.567223  |
| <b>P04799</b> | <b>CP1A2 Cytochrome P450 1A2</b>               | <b>1.291125512</b> | <b>4.5E-06</b> | <b>6</b>  |
| P04799        | DFVENVTSGNAVDFPVLRL                            | 1.108214241        | 2              | 3.760718  |
| P04799        | IGSTPVVVLGSLNTIK                               | 1.604368848        | 2              | 3.059791  |
| P04799        | NSIQDITGALFK                                   | 1.287522024        | 2              | 3.475518  |
| P04799        | SMTFNPDSGPVWAAR                                | 1.657730573        | 2              | 3.155394  |
| P04799        | TCEHVQAWPR                                     | 1.042431597        | 2              | 2.871635  |
| P04799        | TVQEHYQDFNK                                    | 1.291710825        | 2              | 3.458863  |
| <b>P04800</b> | <b>CP3A1 Cytochrome P450 3A1</b>               | <b>3.271034779</b> | <b>0.15425</b> | <b>2</b>  |
| P04800        | KLQEEIDR                                       | 1.520848109        | 2              | 2.31223   |
| P04800        | QGLLQPTKPIILK                                  | 3.314339518        | 2              | 2.387706  |
| <b>P04903</b> | <b>GSTA2 Glutathione S_transferase alpha_2</b> | <b>0.919881432</b> | <b>1</b>       | <b>10</b> |
| P04903        | DGNLMFDQVPMVEIDGMK                             | 0.850171313        | 2              | 4.917635  |
| P04903        | DGNLMFDQVPMVEIDGMK+Oxidation(10)               | 0.963850154        |                |           |
| P04903        | DGNLMFDQVPMVEIDGMK+Oxidation(16)               | 0.944341432        |                |           |
| P04903        | DGNLMFDQVPMVEIDGMK+Oxidation(4)                | 0.965812961        |                |           |
| P04903        | KDGNLMFDQVPMVEIDGMK                            | 0.958153476        | 2              | 4.395597  |
| P04903        | LIQSPEDLEK                                     | 1.257645453        | 2              | 3.116575  |
| P04903        | LKKDGNLMFDQVPMVEIDGMK                          | 0.917144053        | 2              | 2.692726  |
| P04903        | WLLAAAGVEFEEK                                  | 1.04854659         | 2              | 3.870257  |
| P04903        | YDLYGK                                         | 0.672190805        | 1              | 1.939573  |
| P04903        | YLPAFEK                                        | 0.960112149        | 1              | 2.002143  |
| <b>P04904</b> | <b>GSTA3 Glutathione S_transferase alpha_3</b> | <b>0.838323366</b> | <b>1.9E-05</b> | <b>9</b>  |
| P04904        | ADVLYLVQVLYHVEELDPSALANFPLLK                   | 1.093631724        | 3              | 5.295905  |
| P04904        | ALIDMYAEGVADLDEIVLHYPYIPGGEK                   | 1.05606492         | 4              | 7.904847  |
| P04904        | LRNDGSLMFQQVPMVEIDGMK                          | 0.882787708        | 2              | 3.804574  |
| P04904        | NDGSLMFQQVPMVEIDGMK                            | 0.805298043        | 2              | 4.639302  |
| P04904        | NDGSLMFQQVPMVEIDGMK+Oxidation(11)              | 0.868785926        |                |           |
| P04904        | NDGSLMFQQVPMVEIDGMK+Oxidation(17)              | 0.877148156        |                |           |
| P04904        | NDGSLMFQQVPMVEIDGMK+Oxidation(5)               | 0.861092697        |                |           |
| P04904        | SHGQDYLVGNR                                    | 0.836122595        | 2              | 3.9099    |
| P04904        | WLLAAAGVEFEEQFLK                               | 0.848533625        | 2              | 5.419931  |
| <b>P04905</b> | <b>GSTM1 Glutathione S_transferase Mu 1</b>    | <b>1.065401267</b> | <b>0.0485</b>  | <b>15</b> |
| P04905        | ADIVENQVMDNR                                   | 1.195780824        | 2              | 4.293469  |
| P04905        | ADIVENQVMDNR+Oxidation(8)                      | 1.017913262        |                |           |
| P04905        | CLDAFPNLKDFLAR                                 | 1.193056719        | 2              | 2.693651  |
| P04905        | FKLGLDFPNLPYLIDGSR                             | 0.937707525        | 3              | 4.854903  |
| P04905        | HHLCGETEER                                     | 1.184897572        | 3              | 4.43464   |
| P04905        | IRADIVENQVMDNR                                 | 1.052437324        | 2              | 3.954945  |
| P04905        | ITQSNAIMR                                      | 1.133016948        | 2              | 3.089123  |
| P04905        | ITQSNAIMR+Oxidation(7)                         | 1.203156309        |                |           |
| P04905        | KHHLCGETEER                                    | 1.414681672        | 3              | 3.686196  |
| P04905        | KITQSNAIMR                                     | 1.041638617        | 3              | 3.764464  |

|               |                                               |                    |                |           |
|---------------|-----------------------------------------------|--------------------|----------------|-----------|
| P04905        | KITQSNAIMR+Oxidation(8)                       | 1.089824168        |                |           |
| P04905        | LGLDFPNLPYLIDGSR                              | 1.086164887        | 2              | 5.113865  |
| P04905        | MQLIMLCYNPDFEK                                | 0.892572394        | 2              | 4.494752  |
| P04905        | VTYVDFLAYDILDQYHIFEPK                         | 1.106060831        | 3              | 3.7413    |
| P04905        | YLSTPIFSK                                     | 0.964972319        | 2              | 2.708584  |
| <b>P04906</b> | <b>GSTP1 Glutathione S_transferase P</b>      | <b>0.959227087</b> | <b>0.99972</b> | <b>2</b>  |
| P04906        | EAALVDMVNDGVEDLR                              | 0.984992163        | 2              | 4.733013  |
| P04906        | STCLYGQLPK                                    | 0.901006029        | 2              | 2.948133  |
| <b>P04937</b> | <b>FINC Fibronectin</b>                       | <b>0.877643436</b> | <b>0.1246</b>  | <b>4</b>  |
| P04937        | FTQVSPTTLTAQWTAPSVK                           | 1.573128899        | 2              | 3.529043  |
| P04937        | ITYGETGGNSPVQEFTVPGSK                         | 0.855038873        | 2              | 2.655801  |
| P04937        | SSPVVIDASTAIDAPSNLR                           | 0.952324214        | 2              | 2.466382  |
| P04937        | SYTITGLQPGTDYK                                | 0.880324168        | 2              | 2.758991  |
| <b>P05065</b> | <b>ALDOA Fructose_bisphosphate aldolase A</b> | <b>1.131262102</b> | <b>0.98295</b> | <b>9</b>  |
| P05065        | ALANSLACQ GK                                  | 1.505309901        | 2              | 2.964607  |
| P05065        | FSNEEIAMATVTALR                               | 1.955176494        | 2              | 4.498697  |
| P05065        | GILAADESTGSIK                                 | 1.813146254        | 2              | 4.228808  |
| P05065        | GVVPLAGTNGETTTQGLDGLSER                       | 1.099912678        | 2              | 5.399199  |
| P05065        | IGEHTPSSLAIMENANVLAR                          | 2.919578639        | 2              | 4.678485  |
| P05065        | KENLKAQEEYIK                                  | 1.10777078         | 2              | 2.411307  |
| P05065        | LQSIGTENTEENR                                 | 3.055824383        | 2              | 3.80651   |
| P05065        | LQSIGTENTEENRR                                | 3.184481209        | 2              | 2.521145  |
| P05065        | RLQSIGTENTEENR                                | 3.184481209        | 2              | 4.08288   |
| <b>P05178</b> | <b>CP2C6 Cytochrome P450 2C6</b>              | <b>0.90162101</b>  | <b>0.89162</b> | <b>9</b>  |
| P05178        | DQDFLNLMEK                                    | 1.119634332        | 2              | 2.581353  |
| P05178        | EALIDHGEEFAER                                 | 1.055780092        | 2              | 3.247572  |
| P05178        | FDYKDQDFLNLMEK                                | 0.865432851        | 3              | 4.555609  |
| P05178        | FIDLIPTNLPHAVTCDIK                            | 0.791965144        | 2              | 3.350196  |
| P05178        | GTTIITSLSSVLHDSK                              | 0.825625152        | 2              | 3.75694   |
| P05178        | LPPGIPLPIIGNIFQLNVK                           | 0.952697756        | 3              | 3.520749  |
| P05178        | MCAGEGLAR                                     | 0.859990779        | 2              | 2.576167  |
| P05178        | NITQSLTSFSK                                   | 0.852007319        | 2              | 2.472451  |
| P05178        | TNGSPCDPTFILGCAPCNVICSIIFQNR                  | 0.822831792        | 3              | 4.718562  |
| <b>P05179</b> | <b>CP2C7 Cytochrome P450 2C7</b>              | <b>0.630409655</b> | <b>0.00319</b> | <b>7</b>  |
| P05179        | ACVGEGLAR                                     | 0.646572783        | 2              | 2.892647  |
| P05179        | FINFVPTNLPHAVTCDIK                            | 0.830061273        | 2              | 2.656708  |
| P05179        | IEEHQESLDVTNPR                                | 0.56740186         | 2              | 4.568703  |
| P05179        | KIEEHQESLDVTNPR                               | 0.635202795        | 3              | 4.668203  |
| P05179        | KLPPGPTPLPIIGNFLQIDVK                         | 0.353728707        | 3              | 5.507406  |
| P05179        | SDYFLPFSAGK                                   | 1.224914791        | 2              | 2.598929  |
| P05179        | VLTSLSVLHDSK                                  | 0.610828817        | 2              | 3.416085  |
| <b>P05182</b> | <b>CP2E1 Cytochrome P450 2E1</b>              | <b>0.954994536</b> | <b>0.97629</b> | <b>14</b> |
| P05182        | AKEHLQSLDINCAR                                | 0.909424465        | 2              | 4.855285  |
| P05182        | DTVFQGYVIPK                                   | 1.376062841        | 2              | 2.820848  |
| P05182        | DVTDCLLIEMEK                                  | 1.55752536         | 2              | 3.026754  |
| P05182        | DVTDCLLIEMEKEK                                | 1.014880324        | 2              | 2.489502  |
| P05182        | EHLQSLDINCAR                                  | 1.438028892        | 2              | 3.429089  |
| P05182        | FINLVPSNLPHEATR                               | 1.004607789        | 2              | 3.822134  |
| P05182        | FKPEHFLNEN GK                                 | 0.724412221        | 2              | 2.97678   |
| P05182        | GIIFNNGPTWK                                   | 1.03548693         | 2              | 2.414363  |
| P05182        | GQPFDPFTFLIGCAPCNVIADILFNK                    | 0.744570467        |                |           |
| P05182        | GTVVIPTLDSLSDSHEFPDPEK                        | 0.926563355        | 2              | 4.885564  |
| P05182        | LDMPYMDAVVHEIQR                               | 0.834056841        | 2              | 2.671844  |
| P05182        | LHEEIDR                                       | 1.069145527        | 1              | 1.958606  |
| P05182        | VCVGEGLAR                                     | 1.059413755        | 2              | 2.38397   |
| P05182        | YGLLILMK                                      | 1.17265299         | 2              | 3.088043  |
| <b>P05183</b> | <b>CP3A2 Cytochrome P450 3A2</b>              | <b>1.338352429</b> | <b>9.9E-20</b> | <b>10</b> |

|               |                                             |                    |                |           |
|---------------|---------------------------------------------|--------------------|----------------|-----------|
| P05183        | DIELDGLFIPK                                 | 2.478722571        | 2              | 4.140474  |
| P05183        | DSIAFFQK                                    | 1.425292076        | 1              | 2.182205  |
| P05183        | EMFPIIEQYGDLVK                              | 1.196377044        | 2              | 3.951617  |
| P05183        | KDIELDGLFIPK                                | 1.125627385        | 3              | 3.558479  |
| P05183        | KLQEEIDGALPSK                               | 1.489434762        | 2              | 3.679556  |
| P05183        | LQEEIDGALPSK                                | 1.46461661         | 2              | 4.103528  |
| P05183        | QAILEPEKPIVLK                               | 0.842666847        | 2              | 3.283657  |
| P05183        | QEAETGKPVMTK                                | 1.270636096        | 2              | 3.193538  |
| P05183        | QEAETGKPVMTK+Oxidation(10)                  | 1.821139697        |                |           |
| P05183        | VDFLQLMLNAHNSK                              | 1.051341494        | 2              | 3.709425  |
| <b>P05197</b> | <b>EF2 Elongation factor 2</b>              | <b>1.370342594</b> | <b>9.9E-20</b> | <b>31</b> |
| P05197        | ALLELQLEPEELYQTFQR                          | 1.171815547        | 2              | 5.471809  |
| P05197        | ARPFDPGLAEDIDKGEVSAR                        | 1.256961825        | 3              | 6.160313  |
| P05197        | AYLPVNESFGFTADLR                            | 1.075693431        | 2              | 3.876123  |
| P05197        | CELLYEGPPDDEAAMGIK                          | 1.191592328        | 2              | 4.978745  |
| P05197        | CLYASVLTAQPR                                | 1.846464603        | 2              | 2.461268  |
| P05197        | DLEEDHACIPIK                                | 1.22563013         | 2              | 2.990952  |
| P05197        | DLEEDHACIPIK                                | 1.472895351        | 2              | 3.676381  |
| P05197        | EGIPALDNFLDK                                | 1.093509668        | 2              | 2.648639  |
| P05197        | EGIPALDNFLDKL                               | 2.932145701        | 2              | 3.578612  |
| P05197        | ETVSEESNVLCLSK                              | 2.666121768        | 2              | 4.058276  |
| P05197        | GEGQLGAAER                                  | 1.145165596        | 2              | 3.360289  |
| P05197        | GHVFEESQVAGTPMFVVK                          | 1.664519271        | 2              | 6.135114  |
| P05197        | GVQYLNEIK                                   | 2.168995979        | 2              | 2.342688  |
| P05197        | IWCFGPDGTGPNILTDITK                         | 0.96227101         | 2              | 5.060048  |
| P05197        | KEDLYLKPIQR                                 | 0.808743344        | 2              | 3.303408  |
| P05197        | KIWCFGPDGTGPNILTDITK                        | 1.174768153        | 2              | 4.830319  |
| P05197        | KVEDMMK+Oxidation(5)                        | 1.365766143        |                |           |
| P05197        | LDSEDKDKEGKPLLK                             | 1.415811079        | 2              | 3.961259  |
| P05197        | LMEPIYLVEIQCPQVGGIYGLNR                     | 1.027996097        | 3              | 5.989743  |
| P05197        | NMSVIAHVDHGK                                | 1.215837891        | 2              | 3.947744  |
| P05197        | NMSVIAHVDHGK+Oxidation(1)                   | 1.185188919        |                |           |
| P05197        | STAISLFYELSENDLNFIK                         | 1.551784318        | 3              | 4.766977  |
| P05197        | STLTDSLCK                                   | 1.238539528        | 2              | 2.897322  |
| P05197        | TFCQLLDPIFK                                 | 1.160991489        | 2              | 4.199083  |
| P05197        | TGTITTFEHAHNMR                              | 1.103859122        | 2              | 3.835143  |
| P05197        | VFDAIMNFR                                   | 0.984281444        | 2              | 2.826332  |
| P05197        | VFSGVVSTGLK                                 | 1.406162984        | 2              | 3.05037   |
| P05197        | WLPAGDALLQMITIHLPSVTAQK                     | 1.043526808        | 3              | 3.652965  |
| P05197        | YEWVVAEAR                                   | 1.222376149        | 2              | 3.038956  |
| P05197        | YFDPANGK                                    | 1.230058594        | 1              | 2.037084  |
| P05197        | YVEPIEDVPCGNIVGLVGDQFLVK                    | 1.151998151        | 3              | 4.735874  |
| <b>P05369</b> | <b>FPPS Farnesyl pyrophosphate synthase</b> | <b>1.182890583</b> | <b>0.99997</b> | <b>11</b> |
| P05369        | ALYEELDLR                                   | 1.244052552        | 2              | 3.059262  |
| P05369        | EVLEYNTVGGK                                 | 1.888109569        | 2              | 3.069732  |
| P05369        | GLTVVQTFQELVEPR                             | 1.11040604         | 3              | 3.864324  |
| P05369        | IKEVLEYNTVGGK                               | 1.123515884        | 3              | 4.167077  |
| P05369        | QILEENYQKDPEK                               | 0.999181972        | 2              | 3.777578  |
| P05369        | QNFIQHFSQIVK                                | 1.196309237        | 2              | 3.052457  |
| P05369        | SLIEQCSAPLPPSIFLELANK                       | 0.955591671        | 3              | 5.298708  |
| P05369        | VGTDIQDNK                                   | 1.056360767        | 2              | 3.686793  |
| P05369        | VLTEDELGHPEK                                | 1.429020657        | 2              | 2.720763  |
| P05369        | VLTEDELGHPEKGDATR                           | 1.359108948        | 2              | 4.569483  |
| P05369        | YEEDSYNR                                    | 0.959081246        | 2              | 2.345772  |
| <b>P05426</b> | <b>RL7 60S ribosomal protein L7</b>         | <b>1.010347817</b> | <b>0.65709</b> | <b>6</b>  |
| P05426        | AGNFYVPAEPK                                 | 1.115732278        | 2              | 2.672065  |
| P05426        | FGIICMEDLIHIYTVGK                           | 0.998841078        | 3              | 4.647248  |

|               |                                                                   |                    |                |          |
|---------------|-------------------------------------------------------------------|--------------------|----------------|----------|
| P05426        | IVEPYIAWGYPNLK                                                    | 0.940955328        | 2              | 2.95143  |
| P05426        | SVNELIYK                                                          | 1.155853239        | 2              | 2.795789 |
| P05426        | TTHFVEGGDAGNR                                                     | 1.078510793        | 2              | 3.267327 |
| P05426        | TTHFVEGGDAGNREDQINR                                               | 0.995883724        | 2              | 4.565462 |
| <b>P05544</b> | <b>SPA3L Serine protease inhibitor A3L</b>                        | <b>1.053650959</b> | <b>0.42409</b> | <b>6</b> |
| P05544        | AVLDVDETGTEATAATGVATVIR                                           | 0.918755457        | 2              | 4.603592 |
| P05544        | DSTMEEILEGLK                                                      | 0.962654328        | 2              | 3.013456 |
| P05544        | IAELFSDLEER                                                       | 0.936785323        | 2              | 2.875906 |
| P05544        | MQQVESSLQPETLK                                                    | 0.844350723        | 2              | 4.215751 |
| P05544        | MQQVESSLQPETLK+Oxidation(0)                                       | 1.067614255        |                |          |
| P05544        | VFSQQADLSR                                                        | 1.243729936        | 2              | 2.576789 |
| <b>P05545</b> | <b>SPA3K Serine protease inhibitor A3K</b>                        | <b>1.007445748</b> | <b>0.99872</b> | <b>8</b> |
| P05545        | ALYQAEAFVADFK                                                     | 1.004082497        | 2              | 2.884836 |
| P05545        | AVLDVDETGTEGAAATAVTAALK                                           | 1.031531355        | 2              | 5.443286 |
| P05545        | FSISTDYNLEEVLPGLGIR                                               | 0.901936349        | 2              | 3.486674 |
| P05545        | IAELFSELDER                                                       | 0.95688294         | 2              | 3.046522 |
| P05545        | IFSQQADLSR                                                        | 0.910215159        | 2              | 2.580773 |
| P05545        | LSQPEDQAEINTGSALFIDK                                              | 0.679312591        | 2              | 4.84718  |
| P05545        | LSQPEDQAEINTGSALFIDKEQPILSEFQEK                                   | 0.993043163        | 3              | 4.319727 |
| P05545        | NVVFSPSISAALAILSLGAK                                              | 0.983427943        |                |          |
| <b>P05765</b> | <b>RS21 40S ribosomal protein S21</b>                             | <b>0.916967086</b> | <b>0.07658</b> | <b>3</b> |
| P05765        | DHASIQMNVAEVDK                                                    | 2.016389388        | 2              | 3.838672 |
| P05765        | MGESDDSILR                                                        | 0.962492636        | 2              | 2.896264 |
| P05765        | TYGICGAIR                                                         | 0.982144367        | 2              | 2.511735 |
| <b>P06214</b> | <b>HEM2 Delta_aminolevulinic acid dehydratase</b>                 | <b>0.986173496</b> | <b>0.00636</b> | <b>8</b> |
| P06214        | AGADIIITYFAPQLLK                                                  | 1.422103541        | 2              | 4.187796 |
| P06214        | AGCQVVAPSDMMMDGR                                                  | 1.132617096        | 2              | 3.463431 |
| P06214        | CVLIFGVPSR                                                        | 0.995639063        | 2              | 2.835579 |
| P06214        | DEQGSAADESDSPTIEAVR                                               | 0.941939773        | 2              | 5.506608 |
| P06214        | DIQEGADILMVKGPLYLDVMVQEVK                                         | 0.886905484        | 3              | 4.583016 |
| P06214        | TAVLESMTAFR                                                       | 0.882214671        | 2              | 2.95096  |
| P06214        | VPKDEQGSAADESDSPTIEAVR                                            | 0.80518838         | 3              | 5.036238 |
| P06214        | YGVNQLEEMLRPLVEAGLR                                               | 0.872711938        | 3              | 4.589357 |
| <b>P06238</b> | <b>A2MG Alpha_2_macroglobulin</b>                                 | <b>1.567296352</b> | <b>0.00097</b> | <b>3</b> |
| P06238        | FQVNNNNQLLLQR                                                     | 15.83807511        | 2              | 3.072789 |
| P06238        | SESNMAIADVK                                                       | 1.228515856        | 2              | 2.473328 |
| P06238        | VAVQLEASPDFLAAPEEK                                                | 1.730818352        | 2              | 3.442948 |
| <b>P06302</b> | <b>PTMA Prothymosin alpha</b>                                     | <b>0.94660031</b>  | <b>0.99926</b> | <b>4</b> |
| P06302        | EVVEEAENGR                                                        | 0.961116248        | 2              | 2.345241 |
| P06302        | RVAEDEDDEDDVETKK                                                  | 1.007824797        | 3              | 5.884018 |
| P06302        | VAEDEDDEDDVETK                                                    | 1.135696408        | 2              | 3.862524 |
| P06302        | VAEDEDDEDDVETKK                                                   | 0.911732638        | 2              | 4.693449 |
| <b>P06399</b> | <b>FIBA Fibrinogen alpha chain</b>                                | <b>1.195349012</b> | <b>0.01199</b> | <b>8</b> |
| P06399        | AQQIQVLQK                                                         | 1.420279073        | 2              | 2.649024 |
| P06399        | EVVTSDDGSDCGDGMGLTHSFSGR                                          | 1.307427082        | 3              | 3.769013 |
| P06399        | GDFANANNFDNTFGQVSEDLR                                             | 1.28603532         | 2              | 5.694673 |
| P06399        | GDFANANNFDNTFGQVSEDLRR                                            | 1.063421803        | 3              | 3.303046 |
| P06399        | GLIDEANQDFTNR                                                     | 1.382901763        | 2              | 3.657563 |
| P06399        | MADEAASEAHQEGDTR                                                  | 1.415587203        | 2              | 4.116182 |
| P06399        | SQLQEGPPEWK                                                       | 0.447015882        | 2              | 2.602514 |
| P06399        | TSDSDIFTDIENPSSHVPEFSSSSK                                         | 1.299271541        | 2              | 4.672547 |
| <b>P06685</b> | <b>AT1A1 Sodium/potassium_transporting ATPase subunit alpha_1</b> | <b>1.137877084</b> | <b>0.02454</b> | <b>5</b> |
| P06685        | AVAGDASESALLK                                                     | 1.170397861        | 2              | 3.160472 |
| P06685        | AVFQANQENLPILK                                                    | 0.915455072        | 2              | 3.327251 |
| P06685        | EQPLDEELKDAFQNAVLELGGGLGER                                        | 0.846931301        | 3              | 3.326185 |
| P06685        | LNIPVNVQVNR                                                       | 1.164319465        | 2              | 3.032294 |

|               |                                                                   |                    |                |           |
|---------------|-------------------------------------------------------------------|--------------------|----------------|-----------|
| P06685        | YEPAAVSEHGDKK                                                     | 1.225074976        | 2              | 2.674323  |
| <b>P06687</b> | <b>AT1A3 Sodium/potassium_transporting ATPase subunit alpha_3</b> | <b>1.094069715</b> | <b>0.9358</b>  | <b>3</b>  |
| P06687        | DGNALTPPTTPEVVK                                                   | 1.058936845        | 2              | 2.647821  |
| P06687        | GVGIISEGNETVEDIAAR                                                | 1.06491348         | 2              | 4.688804  |
| P06687        | QGAIVAVTGDGVNDSPALK                                               | 1.1382825          | 2              | 4.797959  |
| <b>P06757</b> | <b>ADH1 Alcohol dehydrogenase 1</b>                               | <b>0.722947198</b> | <b>9.9E-20</b> | <b>18</b> |
| P06757        | AAVLWEPHKPFTIEDIEVAPPK                                            | 0.690812879        | 3              | 5.449578  |
| P06757        | FPLEPLITHVLPFEK                                                   | 0.644262205        | 3              | 4.512362  |
| P06757        | GAIFGGFK                                                          | 0.704261253        | 2              | 2.344639  |
| P06757        | GALLDGTSR                                                         | 0.788870974        | 2              | 2.859643  |
| P06757        | GKPIHHFISTSTFSQYTVVDDIAVAK                                        | 0.612928742        | 3              | 5.001085  |
| P06757        | HPESNLCCQTK                                                       | 0.63291881         | 2              | 3.229142  |
| P06757        | ICKHPESNLCCQTK                                                    | 1.240648225        | 3              | 4.133464  |
| P06757        | IDAAAPLDK                                                         | 0.688624173        | 2              | 2.745425  |
| P06757        | IIAVDINKDK                                                        | 0.494842322        | 2              | 2.719091  |
| P06757        | INEAFDLLR                                                         | 0.755555898        | 2              | 3.581264  |
| P06757        | KFPLEPLITHVLPFEK                                                  | 0.649957311        | 3              | 4.558144  |
| P06757        | LVADFMAK                                                          | 0.719061794        | 2              | 2.60782   |
| P06757        | MVATGVCR                                                          | 0.778069236        | 2              | 2.541071  |
| P06757        | MVATGVCR+Oxidation(0)                                             | 0.754692691        |                |           |
| P06757        | SDDHAVSGSLFPLPAVLGHGAGIVESIGEGVTCVKPGDK                           | 0.721391644        | 4              | 7.670705  |
| P06757        | VCLIGCGFSTGYGSAVQYAK                                              | 0.700441396        | 2              | 6.181609  |
| P06757        | VIPLFSPQCGK                                                       | 0.658501065        | 2              | 2.742628  |
| P06757        | VTPGSTCAVFLGGVGLSVVIGCK                                           | 0.642036768        | 2              | 5.143275  |
| <b>P06761</b> | <b>GRP78 78 kDa glucose_regulated protein</b>                     | <b>0.991114018</b> | <b>9.9E-20</b> | <b>30</b> |
| P06761        | AKFEELNMDLFR                                                      | 0.982825289        | 3              | 4.246301  |
| P06761        | DAGTIAGLNVMR                                                      | 1.708314975        | 2              | 3.492731  |
| P06761        | DNHLLGTFDLTGIPPAPR                                                | 1.113447144        | 2              | 4.246787  |
| P06761        | ELEEIVQPIISK                                                      | 1.123160722        | 2              | 3.980221  |
| P06761        | FEELNMDLFR                                                        | 0.848996087        | 2              | 3.484305  |
| P06761        | FEELNMDLFR+Oxidation(5)                                           | 0.906256121        |                |           |
| P06761        | IEIESFFEGEDFSETLTR                                                | 0.814931984        | 2              | 5.272079  |
| P06761        | IEWLESHQDADIEDFK                                                  | 1.017369948        | 2              | 5.687947  |
| P06761        | IEWLESHQDADIEDFKAK                                                | 0.778848144        | 3              | 4.164316  |
| P06761        | IINEPTAAAIAYGLDKR                                                 | 1.008234516        | 2              | 4.466039  |
| P06761        | ITITNDQNR                                                         | 1.042219434        | 2              | 2.664267  |
| P06761        | ITPSYVAFTPEGER                                                    | 1.103244151        | 2              | 4.282418  |
| P06761        | KKELEEIVQPIISK                                                    | 0.954472537        | 2              | 5.106496  |
| P06761        | KSDIDEIVLVGGSTR                                                   | 0.976563619        | 2              | 4.544512  |
| P06761        | KSQIFSTASDNQPTVTIK                                                | 0.850990581        | 2              | 5.517912  |
| P06761        | LYGSGPPPTGEEDTSEKDEL                                              | 1.374292977        | 2              | 5.698164  |
| P06761        | MKETAEAYLGK                                                       | 0.946850314        | 2              | 2.697902  |
| P06761        | MKETAEAYLGK+Oxidation(0)                                          | 1.311362169        |                |           |
| P06761        | NELESYAYSLK                                                       | 1.001290597        | 2              | 3.670024  |
| P06761        | NQLTSNPENTVFDK                                                    | 1.029201426        | 2              | 5.121109  |
| P06761        | SDIDEIVLVGGSTR                                                    | 1.072916086        | 1              | 3.508594  |
| P06761        | SQIFSTASDNQPTVTIK                                                 | 0.981944949        | 2              | 5.298091  |
| P06761        | TFAPEEISAMVLTK                                                    | 0.906631831        | 2              | 4.869541  |
| P06761        | TFAPEEISAMVLTK+Oxidation(9)                                       | 0.875525973        |                |           |
| P06761        | TKPYIQVDIGGGQTK                                                   | 0.966580954        | 3              | 4.631458  |
| P06761        | TWNDPSVQQDIK                                                      | 0.980886246        | 2              | 4.014555  |
| P06761        | VLEDSLK                                                           | 0.86824792         | 1              | 2.116509  |
| P06761        | VLEDSLKK                                                          | 0.864003575        | 2              | 2.359615  |
| P06761        | VTHAVVTVPAYFNDAQR                                                 | 0.966204735        | 2              | 5.056208  |
| P06761        | VYEGERPLTK                                                        | 0.949078374        | 2              | 2.89851   |

|               |                                                                                      |                    |                |           |
|---------------|--------------------------------------------------------------------------------------|--------------------|----------------|-----------|
| <b>P06866</b> | <b>HPT Haptoglobin</b>                                                               | <b>2.135107507</b> | <b>9.9E-20</b> | <b>8</b>  |
| P06866        | ATDLKDWVQETMAK                                                                       | 1.293129139        | 3              | 3.817987  |
| P06866        | CELHYEK                                                                              | 2.490500461        | 2              | 2.345129  |
| P06866        | GAVSPVGVQPILNK                                                                       | 1.854590504        | 2              | 4.604812  |
| P06866        | KGAVSPVGVQPILNK                                                                      | 3.146850891        | 2              | 3.100904  |
| P06866        | LQTEGDGIYTLNSEK                                                                      | 2.957154815        | 2              | 4.254277  |
| P06866        | NQLVEIEK                                                                             | 2.118358953        | 1              | 2.335609  |
| P06866        | SCAVAEYGVYVR                                                                         | 1.810262011        | 2              | 3.115407  |
| P06866        | SVVDIGLIK                                                                            | 1.761754183        | 2              | 2.762702  |
| <b>P07150</b> | <b>ANXA1 Annexin A1</b>                                                              | <b>0.827564231</b> | <b>0.72097</b> | <b>2</b>  |
| P07150        | GLGTDEDTLIEILTTR                                                                     | 0.827441777        | 2              | 4.279128  |
| P07150        | GVDEATIIDLTK                                                                         | 0.833813511        | 2              | 3.125175  |
| <b>P07153</b> | <b>RPN1 Dolichyl_diphosphooligosaccharide__protein glycosyltransferase subunit 1</b> | <b>0.966793232</b> | <b>0.00511</b> | <b>16</b> |
| P07153        | ASSFVLALEPELESR                                                                      | 1.004133763        | 2              | 4.464863  |
| P07153        | AVTSEIAVLQSR                                                                         | 0.944966683        | 2              | 2.703603  |
| P07153        | FVDHVFDEQVIDSLTVK                                                                    | 0.893313921        | 2              | 4.142312  |
| P07153        | GEDEEDNNLEVR                                                                         | 1.042224233        | 2              | 3.73351   |
| P07153        | HFDETVNR                                                                             | 0.907155575        | 2              | 2.511789  |
| P07153        | IDHILDAL                                                                             | 1.407678672        | 2              | 2.312999  |
| P07153        | ISIVVETVYTHVLHPYPTQITQSEK                                                            | 1.104215893        | 3              | 4.627875  |
| P07153        | LKTEGSDLCDR                                                                          | 0.955805916        | 3              | 3.412148  |
| P07153        | NIQVDSPYDISR                                                                         | 1.002022961        | 2              | 3.783175  |
| P07153        | NLVEQHIQDIVVHYTFNK                                                                   | 1.004374158        | 3              | 4.454648  |
| P07153        | SEDILDYGPFK                                                                          | 1.014217957        | 2              | 3.397948  |
| P07153        | TEGSDLCDR                                                                            | 1.026724716        | 2              | 2.33111   |
| P07153        | TILPAAAQDVYYR                                                                        | 1.415875607        | 2              | 3.295642  |
| P07153        | TVDLSSHLAK                                                                           | 0.929832183        | 2              | 2.59989   |
| P07153        | VHYENNSPFLTITSMTR                                                                    | 0.982389299        | 2              | 3.293406  |
| P07153        | VTAEVVLAHPGGSTAR                                                                     | 1.164171375        | 2              | 4.467195  |
| <b>P07323</b> | <b>ENOG Gamma_enolase</b>                                                            | <b>0.968304285</b> | <b>0.95962</b> | <b>4</b>  |
| P07323        | AAVPSGASTGIYEALELR                                                                   | 0.992631763        | 2              | 5.041862  |
| P07323        | FGANAILGVSLAVCK                                                                      | 0.917679248        | 2              | 3.509146  |
| P07323        | GNPTVEVDLHTAK                                                                        | 2.998431966        | 2              | 3.394585  |
| P07323        | SGETEDTFIADLVVGLCTGQIK                                                               | 0.812573152        | 3              | 5.528365  |
| <b>P07335</b> | <b>KCRB Creatine kinase B_type</b>                                                   | <b>1.004837442</b> | <b>0.85798</b> | <b>2</b>  |
| P07335        | FCTGLTQIETLFK                                                                        | 1.010594203        | 2              | 2.780213  |
| P07335        | GTGGVDTAAVGGVFDVSNADR                                                                | 0.947569907        | 2              | 3.937548  |
| <b>P07338</b> | <b>CTRB1 Chymotrypsinogen B</b>                                                      | <b>0.880099499</b> | <b>0.34389</b> | <b>2</b>  |
| P07338        | IVNGEDAIPGSWPVQVSLQDK                                                                | 0.924795986        | 2              | 3.258435  |
| P07338        | LQQAALPIVSEADCK                                                                      | 0.795289965        | 2              | 2.696569  |
| <b>P07340</b> | <b>AT1B1 Sodium/potassium_transporting ATPase subunit beta_1</b>                     | <b>1.741278293</b> | <b>0.02871</b> | <b>2</b>  |
| P07340        | SYEAYVLNIIIR                                                                         | 2.3347135          | 2              | 2.39268   |
| P07340        | YNPNVLPVQCTGK                                                                        | 1.409876502        | 2              | 2.604861  |
| <b>P07379</b> | <b>PCKGC Phosphoenolpyruvate carboxykinase_cytosolic [GTP]</b>                       | <b>0.948154683</b> | <b>0.97863</b> | <b>13</b> |
| P07379        | AINPENGGVAPGTSVK                                                                     | 1.224463576        | 2              | 4.712518  |
| P07379        | EEGWLAEHMLILGITNPEGK                                                                 | 1.20006931         | 2              | 4.018726  |
| P07379        | EVEIDKYLEQVNADLPYEIER                                                                | 1.17110501         | 3              | 3.469648  |
| P07379        | FVEGNAQLCQPEYIHCDSSEEEYGR                                                            | 0.98483148         | 3              | 4.941177  |
| P07379        | GLGDVNVEELFGISK                                                                      | 1.153263243        | 2              | 3.81999   |
| P07379        | IGIELTDSPPYVVASMR                                                                    | 1.043711885        | 2              | 3.60867   |
| P07379        | MGTSVLEALGDGEFIK                                                                     | 0.996952221        | 2              | 3.713335  |
| P07379        | MGTSVLEALGDGEFIK+Oxidation(0)                                                        | 1.165923534        |                |           |
| P07379        | TVIITQEQR                                                                            | 1.196878777        | 2              | 2.663221  |

|               |                                                                   |                    |                |           |
|---------------|-------------------------------------------------------------------|--------------------|----------------|-----------|
| P07379        | VECVGDDIAWMK                                                      | 1.212998063        | 2              | 2.965854  |
| P07379        | VIQGLDLSLPQEVK                                                    | 1.247177395        | 2              | 4.023687  |
| P07379        | YDNCWLALDPR                                                       | 0.984403564        | 2              | 2.502589  |
| P07379        | YLAFAFSPACGK                                                      | 1.143137449        | 2              | 2.892146  |
| <b>P07483</b> | <b>FABPH Fatty acid binding protein_ heart</b>                    | <b>8.237540871</b> | <b>0.67722</b> | <b>3</b>  |
| P07483        | NFDDYMK                                                           | 67.31185859        | 1              | 2.131093  |
| P07483        | QVAMTKPTTIEK                                                      | 1.306842405        | 2              | 3.407787  |
| P07483        | WDGQETTLTR                                                        | 1.591100033        | 2              | 2.874666  |
| <b>P07632</b> | <b>SODC Superoxide dismutase [Cu_Zn]</b>                          | <b>1.142779564</b> | <b>0.02654</b> | <b>4</b>  |
| P07632        | DGVANVSIEDR                                                       | 1.589326572        | 2              | 2.984033  |
| P07632        | GDGPVQGVHFEQK                                                     | 1.154798417        | 2              | 3.993328  |
| P07632        | HVGD LGNVAAGK                                                     | 1.077724343        | 2              | 3.567435  |
| P07632        | VISLSGEHSIIGR                                                     | 1.105176844        | 2              | 3.260971  |
| <b>P07633</b> | <b>PCCB Propionyl CoA carboxylase beta chain_ mitochondrial</b>   | <b>1.300451178</b> | <b>0.99934</b> | <b>10</b> |
| P07633        | AFDNDVDALCNLR                                                     | 1.069854685        | 2              | 3.899174  |
| P07633        | AYNMLDIIHVIDER                                                    | 0.852235271        | 2              | 4.040467  |
| P07633        | GFVDDIIQPSSTR                                                     | 1.143887074        | 2              | 4.086548  |
| P07633        | HLLGDTNYAWPTAEIAVMGAK                                             | 0.946354794        | 2              | 3.118145  |
| P07633        | ICCDLEVLASK                                                       | 1.004136438        | 2              | 3.034343  |
| P07633        | IMDQAITVGAPVIGLNDSSGAR                                            | 0.964212319        | 2              | 4.458251  |
| P07633        | IQEGVESLAGYADIFLR                                                 | 1.023776719        | 2              | 4.16819   |
| P07633        | LVPELDTVVPLESSK                                                   | 0.909798447        | 2              | 3.496977  |
| P07633        | SVTNEDVTQEQ LGGAK                                                 | 1.097940142        | 2              | 5.273132  |
| P07633        | TVGIVGNQPNVASGCLDINSSVK                                           | 0.892265577        | 2              | 5.178185  |
| <b>P07687</b> | <b>HYEP Epoxide hydrolase 1</b>                                   | <b>1.243635357</b> | <b>9.9E-20</b> | <b>23</b> |
| P07687        | DIELLYPYK                                                         | 2.360989234        | 2              | 2.425642  |
| P07687        | DKEETLPLGDGWWGPGSKPSAK                                            | 1.39449635         | 3              | 5.489526  |
| P07687        | EDESIRPFK                                                         | 1.776886807        | 2              | 2.671997  |
| P07687        | EDESIRPFKVETSDEEIKDLHQR                                           | 1.4562926          | 3              | 5.635212  |
| P07687        | ELEDGGLER                                                         | 1.76580835         | 2              | 2.667474  |
| P07687        | ENLGQGIMVHK                                                       | 1.930831001        | 2              | 2.750094  |
| P07687        | ESGYLHIQATKPDTVGCALNDSPVGLAAYILEK                                 | 1.194312903        | 3              | 6.227268  |
| P07687        | FHYGFNSNYMK                                                       | 1.408292442        | 2              | 2.565713  |
| P07687        | FLGYTEKDIELLYPYK                                                  | 1.216031952        | 2              | 4.687556  |
| P07687        | GGHFAAFEPK                                                        | 1.284322799        | 2              | 3.494933  |
| P07687        | IEGLDIHFHVKPPQLPSGR                                               | 1.160863144        | 3              | 3.675234  |
| P07687        | IPLLTDPK                                                          | 1.201984915        | 2              | 2.527847  |
| P07687        | KFVSLAELQ                                                         | 1.32979681         | 2              | 2.861175  |
| P07687        | KQVEILNQYPHFK                                                     | 1.214141885        | 3              | 4.834602  |
| P07687        | LLAQDIR                                                           | 1.375381096        | 2              | 2.518207  |
| P07687        | QVEILNQYPHFK                                                      | 1.18004781         | 2              | 3.747744  |
| P07687        | SEYRELEDGGLER                                                     | 1.071957084        | 2              | 2.375244  |
| P07687        | SFYTMTPLLGQR                                                      | 1.495137781        | 2              | 3.146075  |
| P07687        | SHGLSDEHVFEVICPSIPGYSEASSK                                        | 1.116136809        | 3              | 6.466357  |
| P07687        | TKIEGLDIHFHVKPPQLPSGR                                             | 2.811287249        | 3              | 3.882423  |
| P07687        | VETSDEEIK                                                         | 1.07233933         | 2              | 2.475019  |
| P07687        | VETSDEEIKDLHQR                                                    | 1.459645137        | 2              | 4.491154  |
| P07687        | VFVPTGFSAPSELLHAPEK                                               | 1.125048427        | 2              | 4.739214  |
| <b>P07756</b> | <b>CPSM Carbamoyl phosphate synthase [ammonia]_ mitochondrial</b> | <b>0.938602662</b> | <b>9.9E-20</b> | <b>96</b> |
| P07756        | AADTIGYPVMIR                                                      | 1.02805528         | 2              | 4.0677    |
| P07756        | AADTIGYPVMIR+Oxidation(9)                                         | 0.96221602         |                |           |
| P07756        | AERPDGLILGMGGQTALNCGVELFK                                         | 0.874208343        | 3              | 7.097282  |
| P07756        | AERPDGLILGMGGQTALNCGVELFK+Oxidation(10)                           | 0.978306684        |                |           |
| P07756        | AERPDGLILGMGGQTALNCGVELFKR                                        | 1.048869454        | 3              | 4.401909  |
| P07756        | AFAISGPFNVQFLVK                                                   | 0.779283671        | 2              | 5.075504  |



|        |                                                        |             |   |          |
|--------|--------------------------------------------------------|-------------|---|----------|
| P07756 | AFAMTNQILVER                                           | 0.920232135 | 2 | 4.448738 |
| P07756 | AFAMTNQILVER+Oxidation(3)                              | 0.930491426 |   |          |
| P07756 | ALENNMSLDEIVK                                          | 0.909636014 | 2 | 4.58932  |
| P07756 | ALENNMSLDEIVK+Oxidation(5)                             | 0.908625437 |   |          |
| P07756 | AQTAHIVLEDTGK                                          | 0.84134762  | 2 | 4.512268 |
| P07756 | ATGYPLAFIAAK                                           | 0.855512306 | 2 | 3.061823 |
| P07756 | CEMASTGEVACFGEIHTAFLK                                  | 0.843760488 | 3 | 5.364838 |
| P07756 | CEMASTGEVACFGEIHTAFLK+Oxidation(2)                     | 0.876758447 |   |          |
| P07756 | CLGLTEAQR                                              | 0.915832009 | 2 | 3.67824  |
| P07756 | DELGLNK                                                | 1.705573766 | 2 | 2.544711 |
| P07756 | DGSIDLVINLPNNNTK                                       | 1.165443067 | 2 | 5.461707 |
| P07756 | DILNMDK                                                | 1.557366511 | 1 | 1.952491 |
| P07756 | EIEYEVVR                                               | 1.906240603 | 2 | 2.302987 |
| P07756 | EPLFGISTGNIITGLAAGAK                                   | 0.952577729 | 3 | 5.735453 |
| P07756 | ETLMDLGTGK                                             | 2.236594848 | 1 | 2.31788  |
| P07756 | EVEMDAVGK                                              | 2.995156827 | 1 | 2.211108 |
| P07756 | FLEEATR                                                | 0.973155074 | 2 | 2.498129 |
| P07756 | FLGVAEQLHNEGFK                                         | 0.867355096 | 2 | 4.680483 |
| P07756 | FVHDNYVIR                                              | 0.842293159 | 3 | 3.432724 |
| P07756 | GAEVHLPWNHDFMQMDYDGLLIAGGPGNPALAQPLIQNVK               | 0.842740167 | 3 | 6.349681 |
| P07756 | GAEVHLPWNHDFMQMDYDGLLIAGGPGNPALAQPLIQNVK+Oxidation(15) | 0.869033184 |   |          |
| P07756 | GILIGIQQSFRPR                                          | 0.750518423 | 2 | 2.533752 |
| P07756 | GLNSESVTEETLR                                          | 1.014184183 | 2 | 4.852907 |
| P07756 | GNDVLVIECNLR                                           | 0.879357924 | 2 | 4.48727  |
| P07756 | GQILTMANPIIGNGGAPDPTAR                                 | 0.891909353 | 2 | 6.268684 |
| P07756 | GQILTMANPIIGNGGAPDPTAR+Oxidation(5)                    | 0.933146709 |   |          |
| P07756 | GQILTMANPIIGNGGAPDPTARDELGLNK                          | 0.731712957 | 3 | 4.852658 |
| P07756 | GQILTMANPIIGNGGAPDPTARDELGLNK+Oxidation(5)             | 0.831371857 |   |          |
| P07756 | GQNQPVLNITNR                                           | 0.907556653 | 2 | 4.228017 |
| P07756 | GTTITSVLPKALVASR                                       | 0.943912399 | 2 | 3.483668 |
| P07756 | GYSFGHPSSVAGEVVFNTGLGGYSEALDTPAYK                      | 1.205709081 | 3 | 6.620116 |
| P07756 | HLPTLEQPIIPSDYVAIK                                     | 0.920044881 | 2 | 5.619544 |
| P07756 | IALGIPLPEIK                                            | 1.056285109 | 2 | 3.277439 |
| P07756 | IAPSFAMESMEDALK                                        | 1.144674186 | 2 | 5.291159 |
| P07756 | IAPSFAMESMEDALK+Oxidation(9)                           | 0.918278677 |   |          |
| P07756 | IEFEGQSVDFVDPNK                                        | 0.970936774 | 2 | 5.163771 |
| P07756 | IEFEGQSVDFVDPNKQNLIAEVSTK                              | 0.843786082 | 3 | 5.333523 |
| P07756 | ILDYHQAACNGCIISVGGQIPNNLAVPLYK                         | 0.850221329 | 3 | 5.431993 |
| P07756 | ILESDRKEPLFGISTGNIITGLAAGAK                            | 1.267211106 | 3 | 3.697894 |
| P07756 | IMGTSPLQIDR                                            | 1.237444536 | 2 | 3.292778 |
| P07756 | IMGTSPLQIDR+Oxidation(1)                               | 1.160398799 |   |          |
| P07756 | IMGTSPLQIDRAEDR                                        | 0.76618804  | 2 | 2.588139 |
| P07756 | KEPLFGISTGNIITGLAAGAK                                  | 0.795772667 | 2 | 5.245474 |
| P07756 | KTVVVNCNPETVSTDFDECDK                                  | 0.708132589 | 2 | 4.918505 |
| P07756 | LFAEAVQK                                               | 1.04106248  | 2 | 3.13731  |
| P07756 | LFATEATSDWLNANNVPATPVAWPSQEQNPSSLSSIR                  | 1.100093166 | 3 | 4.976204 |
| P07756 | LRDADPILR                                              | 1.101877587 | 2 | 3.230293 |
| P07756 | LTSIDKWFLYK                                            | 1.008261455 | 2 | 2.576347 |
| P07756 | LYFEELSLER                                             | 1.339570047 | 2 | 3.584599 |
| P07756 | MCHPSVDGFTPR                                           | 0.925618817 | 3 | 4.969532 |
| P07756 | MCHPSVDGFTPR+Oxidation(0)                              | 1.022714114 |   |          |
| P07756 | MRDILNMDK                                              | 0.757982177 | 2 | 2.461464 |
| P07756 | MRDILNMDK+Oxidation(0)                                 | 1.088485485 |   |          |

|               |                                                    |                    |                |           |
|---------------|----------------------------------------------------|--------------------|----------------|-----------|
| P07756        | QADAVYFLPITPQFVTEVIK                               | 1.767049404        | 3              | 5.233864  |
| P07756        | QIDTLAAEYPSVTNLYLVTYNGQEHDIK                       | 1.02861077         | 3              | 4.858395  |
| P07756        | QLFSDK                                             | 1.041617327        | 1              | 1.900032  |
| P07756        | QLFSDKLNEINEK                                      | 0.931976899        | 2              | 3.729779  |
| P07756        | QNLIAEVSTK                                         | 0.893414151        | 1              | 2.799965  |
| P07756        | RFLEEATR                                           | 0.926753407        | 2              | 2.67996   |
| P07756        | RGAEVHLVPWNHDFQMDYDGLLIAGGPGNPALAQPLIQNVK          | 1.007224514        | 4              | 5.015932  |
| P07756        | RTAVDSGIALLTNFQVTK                                 | 0.825583265        | 2              | 5.020787  |
| P07756        | SAYALGGLGSGICPNK                                   | 1.010803282        | 2              | 5.041698  |
| P07756        | SAYALGGLGSGICPNKETLMDLGTK                          | 0.820783651        | 2              | 4.381637  |
| P07756        | SFPFVSK                                            | 0.896945732        | 1              | 1.916722  |
| P07756        | SIFSAVLDELK                                        | 0.972521121        | 2              | 4.114195  |
| P07756        | SIFSAVLDELKVAQAPWK                                 | 0.874158829        | 3              | 4.520582  |
| P07756        | SLGQWLQEEK                                         | 0.903584541        | 2              | 3.976821  |
| P07756        | SVGEVMAIGR                                         | 0.921606965        | 2              | 3.471697  |
| P07756        | SVGEVMAIGR+Oxidation(5)                            | 0.928483108        |                |           |
| P07756        | TAVDSGIALLTNFQVTK                                  | 0.85496097         | 3              | 6.61693   |
| P07756        | TAVDSGIALLTNFQVTKLFAEAVQK                          | 0.876843851        | 3              | 4.429137  |
| P07756        | TFEESFQK                                           | 0.920757896        | 2              | 2.545689  |
| P07756        | TLGVDFIDVATK                                       | 0.841722303        | 2              | 4.220283  |
| P07756        | TSACFEPSLDYMVTK                                    | 1.030444939        | 2              | 4.78583   |
| P07756        | TSACFEPSLDYMVTK+Oxidation(11)                      | 1.102384624        |                |           |
| P07756        | TVLMNPNIASVQTNEVGLK                                | 0.868807507        | 2              | 6.407845  |
| P07756        | TVLMNPNIASVQTNEVGLK+Oxidation(3)                   | 0.893347453        |                |           |
| P07756        | TVVVNCNPETVSTDFDECDK                               | 0.606996179        | 2              | 5.703702  |
| P07756        | TVVVNCNPETVSTDFDECDKLYFEELSLEK                     | 1.263008092        | 3              | 5.515955  |
| P07756        | VISHAISEHVEDAGVHSGDATLMLPTQTISQGAIEK               | 0.898511248        | 3              | 7.505328  |
| P07756        | VISHAISEHVEDAGVHSGDATLMLPTQTISQGAIEK+Oxidation(22) | 0.932189967        |                |           |
| P07756        | VLGTSVESIMATEDR                                    | 0.941684975        | 2              | 4.789233  |
| P07756        | VLGTSVESIMATEDR+Oxidation(9)                       | 0.997061393        |                |           |
| P07756        | VLILSGGLSIGQAGFDYSGSQAVK                           | 0.868304383        | 2              | 5.947125  |
| P07756        | VMIGESVDEK                                         | 0.907848791        | 2              | 3.516449  |
| P07756        | VMIGESVDEK+Oxidation(1)                            | 1.027251639        |                |           |
| P07756        | VSQEHVPVLTk                                        | 0.995458168        | 2              | 3.684518  |
| P07756        | VVAVDCGIK                                          | 1.002205612        | 2              | 2.599414  |
| P07756        | YMESDGIK                                           | 0.870752143        | 2              | 2.42034   |
| P07756        | YMESDGIK+Oxidation(1)                              | 0.898339561        |                |           |
| <b>P07824</b> | <b>ARG1 Arginase_1</b>                             | <b>1.023368455</b> | <b>5.2E-14</b> | <b>16</b> |
| P07824        | ANEQLAAVVAETQK                                     | 1.068967138        | 2              | 5.192086  |
| P07824        | DHGDALFVDVNPDPFQIVK                                | 1.177101128        | 2              | 6.303233  |
| P07824        | DIVYIGLR                                           | 1.893414657        | 2              | 2.386336  |
| P07824        | DVDPGEHYIK                                         | 3.894586361        | 2              | 3.361029  |
| P07824        | EGNHKPETDYLKPPK                                    | 1.497777068        | 2              | 2.689043  |
| P07824        | GKFPDVPGFVWVTPCISAK                                | 0.961235881        | 3              | 4.963168  |
| P07824        | LKETEYNVR                                          | 1.237379584        | 3              | 3.347389  |
| P07824        | NGTISVVLGGDHSMAIGSISGHAR                           | 0.975844245        | 3              | 4.418512  |
| P07824        | TGLLSGLDIMEVNPTLGK                                 | 1.064813478        | 2              | 5.853251  |
| P07824        | TGLLSGLDIMEVNPTLGK+Oxidation(9)                    | 0.814220307        |                |           |
| P07824        | TVNTAVALTLSCFGTK                                   | 1.35783776         | 2              | 5.269279  |
| P07824        | VHPDLCVIWVDAHTDINTPLTSSGNLHGQPVAFLK                | 1.21666819         | 4              | 5.560514  |
| P07824        | VMEETFSYLLGR                                       | 1.54227204         | 2              | 3.957619  |
| P07824        | VMEETFSYLLGR+Oxidation(1)                          | 1.488061704        |                |           |
| P07824        | YFSMTEVDK                                          | 1.121669133        | 2              | 2.425884  |
| P07824        | YFSMTEVDKLGIGK+Oxidation(3)                        | 1.042854923        |                |           |
| <b>P07871</b> | <b>THIKB 3_ketoacyl_CoA thiolase B_peroxisomal</b> | <b>0.785823958</b> | <b>9.9E-20</b> | <b>18</b> |

|               |                                                      |                    |                |           |
|---------------|------------------------------------------------------|--------------------|----------------|-----------|
| P07871        | AEELGLPILGVLR                                        | 0.819795016        | 2              | 4.265287  |
| P07871        | AEIVPVTTTVLDDK                                       | 0.855007301        | 2              | 4.420649  |
| P07871        | AEIVPVTTTVLDDKGDGR                                   | 0.786176512        | 2              | 3.978006  |
| P07871        | AEIVPVTTTVLDDKGDGRK                                  | 0.777044883        | 2              | 3.614794  |
| P07871        | DCLIPMGITSENAER                                      | 1.146702831        | 2              | 2.878241  |
| P07871        | DCLIPMGITSENAER+Oxidation(5)                         | 1.265626804        |                |           |
| P07871        | DGGSTTAGNSSQVSDGAAAVLLAR                             | 0.907906151        | 2              | 6.423011  |
| P07871        | GGFKDTPDELLSAVLTAVLQDVK                              | 0.503454573        |                |           |
| P07871        | IAQFLSGIPETVPLSAVNR                                  | 1.036329228        | 2              | 2.836739  |
| P07871        | LKPECLGDISVGNVLQPGAGAAMAR                            | 0.998754918        | 3              | 4.324794  |
| P07871        | QCSSGLQAVANIAGGIR                                    | 0.796668558        | 2              | 5.100989  |
| P07871        | QDAFALASQQK                                          | 0.81258934         | 2              | 3.421734  |
| P07871        | QKQDAFALASQQK                                        | 0.781298879        | 2              | 4.114099  |
| P07871        | QVVTLLNELK                                           | 0.777889329        | 2              | 2.596093  |
| P07871        | SKAEELGLPILGVLR                                      | 0.768147994        | 3              | 4.446339  |
| P07871        | SYAVVGVPPDIMGIGPAYAIPALQK                            | 0.722365553        | 3              | 4.855532  |
| P07871        | TITVQDEGVRPSTTMEGLAK                                 | 0.755417137        | 2              | 4.59334   |
| P07871        | VNPLGGAIALGHPLGCTGAR                                 | 0.725915916        | 2              | 4.778697  |
| <b>P07872</b> | <b>ACOX1 Peroxisomal acyl_coenzyme A oxidase 1</b>   | <b>0.902180386</b> | <b>0.03849</b> | <b>19</b> |
| P07872        | AFTTWTANAGIEECR                                      | 1.148568528        | 2              | 4.044143  |
| P07872        | ASATFNPELITHLDGSPENTR                                | 0.841387002        | 2              | 4.591238  |
| P07872        | ASEAHCHYVVVK                                         | 0.865696353        | 3              | 4.211193  |
| P07872        | EIENLILNDPDFQHEDYNFLTR                               | 0.702595777        | 2              | 4.41354   |
| P07872        | EIGTHKPLPGITVGDIGPK                                  | 0.817510643        | 2              | 3.550845  |
| P07872        | EVAWNLTSDVLR                                         | 1.171444187        | 2              | 3.762223  |
| P07872        | EYGISDPEEIMWFK                                       | 1.071530541        | 2              | 3.490992  |
| P07872        | FGYEEMDNGYLK                                         | 0.842415788        | 2              | 3.441206  |
| P07872        | GGDFLEGSITGAQLSQVNAR                                 | 0.92618116         | 2              | 5.751139  |
| P07872        | GLETTATYDPK                                          | 0.993992254        | 2              | 3.20909   |
| P07872        | INESIGQGDLSPELHALTAGLK                               | 0.851496722        | 3              | 5.486875  |
| P07872        | LVEIAAK                                              | 0.880375453        | 1              | 2.060848  |
| P07872        | LVGGMVSYLNDLPSQR                                     | 1.56167381         | 2              | 3.367737  |
| P07872        | QSEPEPQLDFQTQQYK                                     | 0.866997408        | 2              | 4.729783  |
| P07872        | SFLVGNAAQSLK                                         | 0.867713046        | 2              | 4.500191  |
| P07872        | TQEFILNSPTVTSIK                                      | 0.820481233        | 2              | 4.701035  |
| P07872        | TSNHAIVLAQLITQGECYGLHAFVPIR                          | 0.888721011        | 3              | 5.792662  |
| P07872        | YAQVKPDGTYYKPLSNK                                    | 1.53603099         | 3              | 3.786342  |
| P07872        | YDGNVYENLFEWAK                                       | 1.02307571         | 2              | 5.278123  |
| <b>P07895</b> | <b>SODM Superoxide dismutase [Mn]_ mitochondrial</b> | <b>1.049013905</b> | <b>1</b>       | <b>3</b>  |
| P07895        | AIWNVINWENVSQR                                       | 0.969179517        | 2              | 3.606142  |
| P07895        | GDVTTQVALQPALK                                       | 1.069789996        | 2              | 3.485644  |
| P07895        | HHATYVNNLNVTEEK                                      | 1.01294            | 2              | 4.625066  |
| <b>P07896</b> | <b>ECHP Peroxisomal bifunctional enzyme</b>          | <b>1.030052207</b> | <b>1</b>       | <b>25</b> |
| P07896        | ELSTVDLVVEAVFEDMNLK                                  | 1.077995261        |                |           |
| P07896        | EWQSLAGPHGSK                                         | 1.573164392        | 2              | 2.903282  |
| P07896        | GGPMFYAASVGLPTVLEK                                   | 1.015712491        | 2              | 3.937281  |
| P07896        | GQGLTGPSLPPGTPVR                                     | 0.854893832        | 2              | 4.010396  |
| P07896        | GWYQYDKPLGR                                          | 1.018495162        | 2              | 2.935923  |
| P07896        | IFNKPVPSLPNMDSVFAEIAIK                               | 0.948603146        | 3              | 4.068112  |
| P07896        | IGVVVGNICYGFVGNR                                     | 0.895025503        | 2              | 3.089379  |
| P07896        | IIDKPIEPR                                            | 1.034368866        | 2              | 2.637156  |
| P07896        | KGQGLTGPSLPPGTPVR                                    | 1.032507518        | 2              | 4.58959   |
| P07896        | KQYPGVLAPETCVR                                       | 0.90757163         | 2              | 3.759094  |
| P07896        | LCNPPVNAVSPVIR                                       | 1.032984165        | 2              | 4.338208  |
| P07896        | LGILDAVVK                                            | 0.936015741        | 2              | 2.815678  |
| P07896        | LLEVIPSR                                             | 0.856474314        | 2              | 2.382654  |

|               |                                                                                                                     |                    |                |           |
|---------------|---------------------------------------------------------------------------------------------------------------------|--------------------|----------------|-----------|
| P07896        | LVAQGSPLK                                                                                                           | 1.014141251        | 2              | 2.376482  |
| P07896        | QNPDIPLQLEPSDYLR                                                                                                    | 0.868232773        | 2              | 3.774805  |
| P07896        | QYPGVLAPETCVR                                                                                                       | 0.938980488        | 2              | 3.287457  |
| P07896        | TASAQPVSSVGLGLGTMR                                                                                                  | 0.931093455        | 2              | 5.192828  |
| P07896        | TASAQPVSSVGLGLGTMR+Oxidation(17)                                                                                    | 1.164951458        |                |           |
| P07896        | TISKEEILER                                                                                                          | 0.940783041        | 2              | 2.684462  |
| P07896        | VGISVVAVESDPK                                                                                                       | 0.953537514        | 2              | 3.819666  |
| P07896        | VGLPEVTLGILPGAR                                                                                                     | 0.85378469         | 2              | 3.558491  |
| P07896        | VSDLAGLDVGVWK                                                                                                       | 0.925964494        | 2              | 4.115533  |
| P07896        | YLSADEALR                                                                                                           | 0.992352136        | 2              | 2.657097  |
| P07896        | YSPLGDMLEAGR                                                                                                        | 0.946483503        | 2              | 4.076702  |
| P07896        | YSSPTTIATVMLSLK                                                                                                     | 0.94274561         | 2              | 3.356931  |
| <b>P07953</b> | <b>F261 6_phosphofructo_2_kinase/fructose_2_6_biphosphatase 1</b>                                                   | <b>1.082690947</b> | <b>0.06222</b> | <b>3</b>  |
| P07953        | IGGDSGLSAR                                                                                                          | 0.657028234        | 2              | 2.391631  |
| P07953        | NYEFFRPDNTAQLIR                                                                                                     | 0.865973889        | 2              | 2.97137   |
| P07953        | TIQTAEALGPVPEQWK                                                                                                    | 1.107756566        | 2              | 2.963765  |
| <b>P08009</b> | <b>GSTM4 Glutathione S_transferase Yb_3</b>                                                                         | <b>1.041547105</b> | <b>0.79796</b> | <b>5</b>  |
| P08009        | LCYNPDFEK                                                                                                           | 1.251332739        | 2              | 2.810278  |
| P08009        | LLLEYDSSYEK                                                                                                         | 1.062524202        | 2              | 4.815895  |
| P08009        | LLLEYDSSYEKRR                                                                                                       | 0.974179117        | 2              | 3.835348  |
| P08009        | NQVFEATCLDAFPNLK                                                                                                    | 1.09593968         | 2              | 4.897267  |
| P08009        | SQWLNEK                                                                                                             | 1.02187942         | 2              | 2.651681  |
| <b>P08010</b> | <b>GSTM2 Glutathione S_transferase Mu 2</b>                                                                         | <b>1.044263422</b> | <b>1</b>       | <b>15</b> |
| P08010        | FLSKPIFAK                                                                                                           | 1.086488305        | 1              | 1.932747  |
| P08010        | IRVDVLENQAMDTR                                                                                                      | 0.946493408        | 3              | 4.211671  |
| P08010        | ITYVDFLVYDVLQHR                                                                                                     | 0.85727703         | 2              | 4.808164  |
| P08010        | KKPEYLEGLPEK                                                                                                        | 1.007264556        | 3              | 4.432535  |
| P08010        | KPEYLEGLPEK                                                                                                         | 1.104997328        | 2              | 3.712527  |
| P08010        | KYSMGDAPDYDR                                                                                                        | 0.957715571        | 2              | 3.585454  |
| P08010        | LFLEYDTSYEDK                                                                                                        | 1.076346867        | 2              | 5.421856  |
| P08010        | LFLEYDTSYEDKK                                                                                                       | 1.013749287        | 2              | 4.268782  |
| P08010        | LQLAMVCYSPDFER                                                                                                      | 1.130654529        | 2              | 4.804973  |
| P08010        | LQLAMVCYSPDFER+Oxidation(4)                                                                                         | 1.114105205        |                |           |
| P08010        | SQWLSEK                                                                                                             | 1.003493094        | 2              | 2.456386  |
| P08010        | VDVLENQAMDTR                                                                                                        | 0.967708871        | 2              | 4.666551  |
| P08010        | VDVLENQAMDTR+Oxidation(8)                                                                                           | 0.976856178        |                |           |
| P08010        | YSMGDAPDYDR                                                                                                         | 1.127518234        | 2              | 3.11258   |
| P08010        | YSMGDAPDYDR+Oxidation(2)                                                                                            | 0.959922514        |                |           |
| <b>P08011</b> | <b>MGST1 Microsomal glutathione S_transferase 1</b>                                                                 | <b>0.983759314</b> | <b>0.99989</b> | <b>7</b>  |
| P08011        | IYHTIAYLPLQPNR                                                                                                      | 0.986458547        | 2              | 4.815242  |
| P08011        | MMFLSSATAFQR                                                                                                        | 1.018758227        | 2              | 3.305546  |
| P08011        | MMFLSSATAFQR+Oxidation(0)                                                                                           | 0.953289265        |                |           |
| P08011        | MMFLSSATAFQR+Oxidation(0)                                                                                           | 0.890652366        |                |           |
| P08011        | MMFLSSATAFQR+Oxidation(1)                                                                                           | 0.953289265        | 2              | 3.060802  |
| P08011        | VFANPEDCAGFGK                                                                                                       | 0.989800036        | 2              | 4.574967  |
| P08011        | VFANPEDCAGFGGENAK                                                                                                   | 0.815781641        | 2              | 4.526186  |
| <b>P08081</b> | <b>CLCA Clathrin light chain A</b>                                                                                  | <b>1.247931841</b> | <b>0.44885</b> | <b>2</b>  |
| P08081        | LEALDANSR                                                                                                           | 1.205116051        | 2              | 2.581615  |
| P08081        | WREEQTER                                                                                                            | 1.389236264        | 2              | 2.452036  |
| <b>P08290</b> | <b>ASGR2 Asialoglycoprotein receptor 2</b>                                                                          | <b>0.867619244</b> | <b>0.55977</b> | <b>2</b>  |
| P08290        | EEQEFVVK                                                                                                            | 0.871515165        | 1              | 1.948143  |
| P08290        | WVDGTEYR                                                                                                            | 0.856937424        | 2              | 2.314624  |
| <b>P08461</b> | <b>ODP2 Dihydroliopyllysine_residue acetyltransferase component of pyruvate dehydrogenase complex_mitochondrial</b> | <b>0.911933684</b> | <b>0.17869</b> | <b>4</b>  |

|               |                                                                                |                    |                |           |
|---------------|--------------------------------------------------------------------------------|--------------------|----------------|-----------|
| P08461        | AAPAAAAAAPPGPR                                                                 | 0.913751036        | 2              | 2.623331  |
| P08461        | DVPLGTPLCIIVEK                                                                 | 1.382119311        | 2              | 3.141072  |
| P08461        | GLETIASDVVSLASK                                                                | 0.890230779        | 2              | 3.905558  |
| P08461        | VAPTPAGVFIDIPISNIR                                                             | 0.849747043        | 2              | 4.907052  |
| <b>P08503</b> | <b>ACADM Medium_chain specific acyl_CoA dehydrogenase_mitochondrial</b>        | <b>1.033494634</b> | <b>1</b>       | <b>9</b>  |
| P08503        | AFTGFIVEADTPGIHIGK                                                             | 0.959675974        | 2              | 4.295234  |
| P08503        | ANWYFVLTR                                                                      | 0.925118189        | 2              | 2.624996  |
| P08503        | EEIIPVAPDYDK                                                                   | 1.351481634        | 2              | 3.288412  |
| P08503        | GITFEDVR                                                                       | 0.935108958        | 2              | 2.434762  |
| P08503        | IYQIYEGTAQIQR                                                                  | 1.008197479        | 2              | 4.972477  |
| P08503        | KGDEYVINGQK                                                                    | 1.022207181        | 2              | 4.340618  |
| P08503        | QEPGLGFSFELTEQQK                                                               | 0.991857416        | 2              | 3.20518   |
| P08503        | SGEYPPFLIK                                                                     | 0.93524831         | 2              | 2.485406  |
| P08503        | TRPTVAAGAVGLAQR                                                                | 0.860486079        | 2              | 4.462135  |
| <b>P08541</b> | <b>UD2B2 UDP_glucuronosyltransferase 2B2</b>                                   | <b>0.922967811</b> | <b>1</b>       | <b>10</b> |
| P08541        | DELQNHFIK                                                                      | 0.976387685        | 2              | 2.385172  |
| P08541        | FEIFSTSISK                                                                     | 1.064133596        | 2              | 2.437663  |
| P08541        | FEIFSTSISKDELQNHFIK                                                            | 1.058420855        | 2              | 4.175125  |
| P08541        | FILPPSYVPVILSGLAGK                                                             | 0.849535237        | 3              | 5.635575  |
| P08541        | GHEVTVLKPSAYFFLDPK                                                             | 0.851671724        | 2              | 4.078653  |
| P08541        | HKEWDTFYSEILGRPTTVDETMSK                                                       | 0.89892267         | 3              | 4.41874   |
| P08541        | LDFLSALEEVIDNPFYK                                                              | 0.635974189        |                |           |
| P08541        | LLDVWTYELPR                                                                    | 0.924225864        | 3              | 3.891724  |
| P08541        | NVMLLSTIHHDQPMKPLDR                                                            | 0.915650545        | 3              | 3.617476  |
| P08541        | VEIWLIR                                                                        | 0.857772167        | 2              | 2.928756  |
| <b>P08542</b> | <b>UDB17 UDP_glucuronosyltransferase 2B17</b>                                  | <b>1.064035241</b> | <b>0.11097</b> | <b>10</b> |
| P08542        | EIINNPYK                                                                       | 1.541603773        | 1              | 2.196939  |
| P08542        | FETFPYSVSKDELENYFIK                                                            | 1.005884436        | 2              | 4.075817  |
| P08542        | FSPGYKIEKSSGR                                                                  | 1.523428227        | 2              | 2.337285  |
| P08542        | KWDPFYSEILGRPTTLAETMGK                                                         | 0.967227239        | 2              | 3.950442  |
| P08542        | LVDVWTYELQR                                                                    | 0.842993403        | 2              | 3.510472  |
| P08542        | NAVWLSTIHHDQPMKPLDK                                                            | 0.999619378        | 3              | 3.308901  |
| P08542        | NAVWLSTIHHDQPMKPLDK+Oxidation(13)                                              | 1.044020295        |                |           |
| P08542        | SDLFNALKEIINNPYK                                                               | 0.908715949        | 2              | 2.328739  |
| P08542        | TPATLGPNTR                                                                     | 0.885592256        | 2              | 2.315405  |
| P08542        | WDPFYSEILGRPTTLAETMGK                                                          | 0.872318179        | 2              | 3.456259  |
| <b>P08683</b> | <b>CP2CB Cytochrome P450 2C11</b>                                              | <b>1.158216241</b> | <b>9.9E-20</b> | <b>17</b> |
| P08683        | DIDTTPAISGFHLPFYACFIPVQR                                                       | 1.351979907        | 3              | 5.235713  |
| P08683        | EALVDLGEFFSGR                                                                  | 1.495263271        | 2              | 4.03007   |
| P08683        | EHQESLDKDNPR                                                                   | 0.56071824         | 2              | 4.110683  |
| P08683        | FDPGHFLDER                                                                     | 1.030580642        | 2              | 2.342104  |
| P08683        | FDYKDPTFLNLMHR                                                                 | 1.01176981         | 3              | 5.037016  |
| P08683        | FNENFR                                                                         | 1.199356568        | 1              | 1.979918  |
| P08683        | GAPFDPTFILGCAPCNVICSIIFQNR                                                     | 0.870309734        | 3              | 5.247375  |
| P08683        | GTNVIVLSLILHDDKEFPNPEK                                                         | 1.094120411        | 2              | 5.194221  |
| P08683        | ICAGEALAR                                                                      | 1.251143131        | 2              | 2.806861  |
| P08683        | LPPGPTPLPIIGNTLQIYMK                                                           | 0.97295164         | 3              | 3.850737  |
| P08683        | NYVLEK                                                                         | 1.383769563        | 1              | 1.961482  |
| P08683        | SQMPYTDVAVVHEIQR                                                               | 1.177744144        | 2              | 4.255602  |
| P08683        | SQMPYTDVAVVHEIQR+Oxidation(2)                                                  | 1.317951719        |                |           |
| P08683        | VKEHQESLDKDNPR                                                                 | 1.419414864        | 3              | 5.026835  |
| P08683        | VQEEIER                                                                        | 1.243537158        | 2              | 2.564214  |
| P08683        | YGLLLLLK                                                                       | 1.245236419        | 2              | 3.032969  |
| P08683        | YIDLVPNTLPHLVTR                                                                | 1.009655294        | 2              | 4.177147  |
| <b>P08733</b> | <b>MLRV Myosin regulatory light chain 2_ventricular/cardiac muscle isoform</b> | <b>1.373206045</b> | <b>0.78464</b> | <b>3</b>  |

|               |                                                            |                    |                |           |
|---------------|------------------------------------------------------------|--------------------|----------------|-----------|
| P08733        | GADPEETILNAFK                                              | 1.212289628        | 2              | 3.500387  |
| P08733        | NEEIDEMIK                                                  | 1.287593753        | 1              | 2.497734  |
| P08733        | NLVHIITHGEEKD                                              | 3.18769424         | 2              | 2.978891  |
| <b>P09006</b> | <b>SPA3N Serine protease inhibitor A3N</b>                 | <b>2.238692717</b> | <b>9.4E-09</b> | <b>2</b>  |
| <b>P09034</b> | <b>ASSY Argininosuccinate synthase</b>                     | <b>1.51714095</b>  | <b>7.3E-05</b> | <b>15</b> |
| P09034        | APNTPDVLEIEFK                                              | 1.178048557        | 2              | 3.341692  |
| P09034        | DGTTHTSLDLFMLNEVAGK                                        | 1.605987211        | 2              | 5.794582  |
| P09034        | EFVEEFWPAVQSSALYEDR                                        | 1.443357642        | 3              | 5.624639  |
| P09034        | EQGYDVIAYLANIGQK                                           | 0.89934154         | 2              | 4.552794  |
| P09034        | FAELVYTGFWHSPECFVR                                         | 1.561866676        | 2              | 5.14998   |
| P09034        | FELTCYSLAPQIK                                              | 1.644135119        | 2              | 4.274148  |
| P09034        | GRNDLMEYAK                                                 | 1.238197402        | 2              | 3.060752  |
| P09034        | IDIVENR                                                    | 1.203832103        | 2              | 2.499088  |
| P09034        | KVFIEDVSK                                                  | 1.266706372        | 3              | 3.768346  |
| P09034        | NDLMEYAK                                                   | 1.135185921        | 2              | 2.645692  |
| P09034        | SPWSMDENLMHISYEAGILENPK                                    | 1.229364277        | 3              | 5.353886  |
| P09034        | TQDPAKAPNTPDVLEIEFK                                        | 1.14491323         | 2              | 4.745066  |
| P09034        | TQDPAKAPNTPDVLEIEFKK                                       | 1.100694386        | 3              | 4.287529  |
| P09034        | VFIEDVSK                                                   | 1.202249406        | 2              | 2.624222  |
| P09034        | VQVSVFK                                                    | 1.364708441        | 2              | 2.407244  |
| <b>P09041</b> | <b>PGK2 Phosphoglycerate kinase 2</b>                      | <b>0.993825931</b> | <b>0.97892</b> | <b>4</b>  |
| P09041        | FHVEEEGK                                                   | 0.915883693        | 2              | 2.727597  |
| P09041        | LGDVVVNDAFGTAHR                                            | 1.036016948        | 3              | 4.076824  |
| P09041        | VDFNVPMK                                                   | 0.898092863        | 1              | 2.068894  |
| P09041        | VSHVSTGGGASLELEGGK                                         | 1.021625387        | 2              | 5.654178  |
| <b>P09117</b> | <b>ALDOC Fructose_bisphosphate aldolase C</b>              | <b>1.117289971</b> | <b>0.85859</b> | <b>2</b>  |
| P09117        | VLAAYVK                                                    | 1.111522423        | 2              | 2.650187  |
| P09117        | YASICQQNGIVIVEPEILPDGDHDLKR                                | 2.078344691        | 3              | 3.621385  |
| <b>P09139</b> | <b>SPYA Serine_pyruvate aminotransferase_mitochondrial</b> | <b>1.036141048</b> | <b>0.99551</b> | <b>2</b>  |
| P09139        | IGLLGYNATTENADR                                            | 1.04751685         | 2              | 3.32791   |
| P09139        | VLNAPPGISLISFNDK                                           | 0.965304861        | 2              | 3.049233  |
| <b>P09367</b> | <b>SDHL L_serine dehydratase/L_threonine deaminase</b>     | <b>9.461306237</b> | <b>0.00119</b> | <b>4</b>  |
| P09367        | ALGVNTVGAQTLK                                              | 3.486165098        | 2              | 3.574248  |
| P09367        | AQLGLNELLK                                                 | 11.57159782        | 1              | 2.009157  |
| P09367        | LGLPATIVVPSTTPALTIER                                       | 3.122781336        | 2              | 3.30031   |
| P09367        | MDSSQPSGSFK                                                | 4.577627216        | 2              | 2.311677  |
| <b>P09495</b> | <b>TPM4 Tropomyosin alpha_4 chain</b>                      | <b>1.107935481</b> | <b>0.98622</b> | <b>13</b> |
| P09495        | AEGDAAALNR                                                 | 1.153026704        | 2              | 2.309447  |
| P09495        | EDKYEEEIK                                                  | 1.801781942        | 1              | 2.631262  |
| P09495        | EENVGLHQTLDQTLNELNCI                                       | 1.037595862        | 2              | 4.936319  |
| P09495        | IQALQQQADDAEDR                                             | 1.214257335        | 2              | 4.655852  |
| P09495        | IQLVEEELDR                                                 | 1.233165413        | 2              | 3.591852  |
| P09495        | IQLVEEELDRAQER                                             | 1.586536718        | 2              | 2.881613  |
| P09495        | KLVILEGELER                                                | 1.767489528        | 2              | 3.049757  |
| P09495        | LEEAEKAADESER                                              | 1.812138248        | 2              | 4.09306   |
| P09495        | LVILEGELER                                                 | 2.150808548        | 2              | 3.334882  |
| P09495        | MEIQEMQLK                                                  | 1.754096375        | 2              | 2.658723  |
| P09495        | RIQLVEEELDR                                                | 1.85092833         | 2              | 2.845778  |
| P09495        | YEEIEIK                                                    | 1.25642461         | 1              | 1.964746  |
| P09495        | YSEKEDKYEEEIK                                              | 0.855782501        | 2              | 4.182867  |
| <b>P09527</b> | <b>RAB7A Ras_related protein Rab_7a</b>                    | <b>1.331743356</b> | <b>0.35291</b> | <b>5</b>  |
| P09527        | DPENPFVVLGNK                                               | 1.19361831         | 2              | 3.528469  |
| P09527        | EAINVEQAFQTIAR                                             | 1.56463565         | 2              | 2.810843  |
| P09527        | GADCCVLVFDVTAPNTFK                                         | 1.069132326        | 2              | 4.124101  |
| P09527        | TLDSWRDEFLIQASPR                                           | 1.090695594        | 3              | 3.742782  |

|               |                                                  |                    |                |           |
|---------------|--------------------------------------------------|--------------------|----------------|-----------|
| P09527        | VIIIGDSGVGK                                      | 1.455935877        | 2              | 2.873304  |
| <b>P09605</b> | <b>KCRS Creatine kinase S_type_mitochondrial</b> | <b>1.129800978</b> | <b>0.1197</b>  | <b>4</b>  |
| P09605        | GTGGVDTAADVYDISNDR                               | 2.115463563        | 2              | 4.784618  |
| P09605        | LSEMTEQDQQR                                      | 2.547433996        | 2              | 3.629936  |
| P09605        | LSEMTEQDQQR+Oxidation(3)                         | 0.509783692        |                |           |
| P09605        | SEVELVQIVIDGVNLYVDCEK                            | 2.631843798        |                |           |
| <b>P09606</b> | <b>GLNA Glutamine synthetase</b>                 | <b>1.232605868</b> | <b>0.33448</b> | <b>6</b>  |
| P09606        | CIEEAIDK                                         | 1.148531547        | 2              | 2.849025  |
| P09606        | ITGTNAEVMPAQWEFQIGPCEGIR                         | 1.081849389        | 3              | 4.712731  |
| P09606        | LTGFHETSNINDFSAGVANR                             | 1.210720714        | 2              | 6.077756  |
| P09606        | RLTGFHETSNINDFSAGVANR                            | 0.951183408        | 3              | 5.081582  |
| P09606        | TCLLNETGDEPFQYK                                  | 1.476233204        | 2              | 5.31174   |
| P09606        | TCLLNETGDEPFQYKN                                 | 1.5815278          | 2              | 4.384977  |
| <b>P09811</b> | <b>PYGL Glycogen phosphorylase_liver form</b>    | <b>0.897897659</b> | <b>9.9E-20</b> | <b>20</b> |
| P09811        | DFSELEPDKFQNK                                    | 1.148599663        | 2              | 3.502312  |
| P09811        | DGVGTVFDAFPQVAIQLNDTHPALAIPELMR                  | 0.873394391        | 3              | 4.714675  |
| P09811        | EGWQVEEADDWLR                                    | 0.911490642        | 2              | 3.823123  |
| P09811        | GIVGVENVAELK                                     | 0.823126606        | 2              | 3.090299  |
| P09811        | GIVGVENVAELKK                                    | 1.140142828        | 2              | 2.443712  |
| P09811        | HLQIYEINQK                                       | 0.741219785        | 2              | 3.648097  |
| P09811        | IFVDIEK                                          | 0.796731757        | 1              | 2.082982  |
| P09811        | INPSSMFDVHVK                                     | 0.757408346        | 2              | 3.069651  |
| P09811        | LHSFVGDDIFLR                                     | 1.174483215        | 2              | 2.333138  |
| P09811        | LVIDQIDNGFFSPNQPDFK                              | 0.846373204        | 2              | 4.666643  |
| P09811        | LVTSAEVVNNPDMVGSK                                | 0.754778365        | 2              | 2.980352  |
| P09811        | TFAYTNHTVLPALER                                  | 0.725460373        | 2              | 4.020741  |
| P09811        | VDDVAALDK                                        | 0.90108712         | 1              | 2.128051  |
| P09811        | VDDVAALDKK                                       | 0.748799665        | 2              | 3.11268   |
| P09811        | VFADYEAYVK                                       | 0.758349546        | 2              | 2.401982  |
| P09811        | VIPATDLSEQISTAGTEASGTGNMK                        | 0.864137143        | 2              | 6.121733  |
| P09811        | VLYPNDNFFEGK                                     | 0.891889939        | 2              | 3.063613  |
| P09811        | VSQLYMNQK                                        | 1.337402736        | 2              | 3.091756  |
| P09811        | WLLLCNPLGLADLIAEK                                | 0.984824089        | 2              | 5.043386  |
| P09811        | YEYGFIFNQK                                       | 0.746763181        | 2              | 2.569544  |
| <b>P09812</b> | <b>PYGM Glycogen phosphorylase_muscle form</b>   | <b>0.985737163</b> | <b>0.92003</b> | <b>12</b> |
| P09812        | GLAGVENVSDLKK                                    | 1.600251146        | 2              | 3.034668  |
| P09812        | GYNAQEYYDRIPELR                                  | 15.90901186        | 2              | 2.770464  |
| P09812        | HLQIYEINQR                                       | 3.437023723        | 2              | 2.916353  |
| P09812        | IGEEYISDLQRL                                     | 2.340436248        | 2              | 3.854689  |
| P09812        | IGEEYISDLQLRK                                    | 1.577380526        | 2              | 2.924317  |
| P09812        | LITAIGDVVNHDPAVGDR                               | 2.534365652        | 2              | 3.605339  |
| P09812        | NLAENISR                                         | 0.911946578        | 1              | 2.473176  |
| P09812        | QIEQLSSGFFSPK                                    | 1.588802298        | 2              | 3.258137  |
| P09812        | TNFDAFPDK                                        | 2.45598988         | 2              | 2.323047  |
| P09812        | VHINPNSLFDVQVK                                   | 0.983891317        | 2              | 2.808653  |
| P09812        | VIPAADLSEQISTAGTEASGTGNMK                        | 2.560100707        | 2              | 5.036545  |
| P09812        | WLVLCNPLGLAEVIAER                                | 1.217492719        | 2              | 4.29391   |
| <b>P09875</b> | <b>UD2B1 UDP_glucuronosyltransferase 2B1</b>     | <b>1.026070844</b> | <b>0.70989</b> | <b>6</b>  |
| P09875        | ANVVASALAIQIPQK                                  | 1.012865656        | 3              | 4.258505  |
| P09875        | FSGGLPLPPSYVPVLSLSDR                             | 0.998954975        | 3              | 4.645263  |
| P09875        | IILNELAQR                                        | 1.348940509        | 2              | 3.022376  |
| P09875        | SDLEYSFAK                                        | 1.339741545        | 2              | 2.507524  |
| P09875        | VDFSILSTTGLLTALK                                 | 1.026652503        | 2              | 4.534775  |
| P09875        | VFNEYSVVENLCK                                    | 0.882396944        | 2              | 3.461263  |
| <b>P09895</b> | <b>RL5 60S ribosomal protein L5</b>              | <b>1.219343877</b> | <b>2.4E-14</b> | <b>5</b>  |
| P09895        | GAVDGGLSIPHSTK                                   | 1.184718225        | 2              | 4.376074  |
| P09895        | HIMGQNVADYMR                                     | 1.073389302        | 2              | 3.01488   |

|               |                                                                          |                    |                |           |
|---------------|--------------------------------------------------------------------------|--------------------|----------------|-----------|
| P09895        | NNVTPDMMEEMYK                                                            | 1.272040771        | 2              | 3.352194  |
| P09895        | RFPGYDSESK                                                               | 1.245153311        | 2              | 2.840241  |
| P09895        | YLMEEDEDAYKK                                                             | 1.047432327        | 2              | 3.253284  |
| <b>POC0S7</b> | <b>H2AZ Histone H2A.Z</b>                                                | <b>0.797794665</b> | <b>0.07782</b> | <b>2</b>  |
| POC0S7        | ATIAGGGVIPHIHK                                                           | 0.79043073         | 2              | 3.751095  |
| POC0S7        | GDEELDSLK                                                                | 0.790576608        | 2              | 3.518457  |
| <b>POC2X9</b> | <b>AL4A1 Delta_1_pyrraline_5_carboxylate dehydrogenase_mitochondrial</b> | <b>0.936414759</b> | <b>0.32258</b> | <b>17</b> |
| POC2X9        | AIEAAVLAR                                                                | 0.937924997        | 2              | 2.968482  |
| POC2X9        | ALNDLKDQTEAIPCVVGDEEVWTS DVR                                             | 0.746001669        | 3              | 5.561224  |
| POC2X9        | DQTEAIPCVVGDEEVWTS DVR                                                   | 0.858114298        | 2              | 4.758953  |
| POC2X9        | EAGLPPNVIQFVPADGPTFGDVTSS EHL CGINFTG SVPTFK                             | 0.927905904        | 3              | 3.749143  |
| POC2X9        | EEIFGPVLT VYVYPDEK                                                       | 1.077374534        | 2              | 4.145845  |
| POC2X9        | ETLQLVDSTSYGLT GAVFAQDK                                                  | 1.014075203        | 2              | 5.184915  |
| POC2X9        | KEWDLKPVADR                                                              | 1.035216287        | 2              | 3.341376  |
| POC2X9        | LYVPQSLWPQIK                                                             | 1.171198549        | 2              | 3.266038  |
| POC2X9        | NAAGNFYINDK                                                              | 1.091399237        | 2              | 3.512446  |
| POC2X9        | NHFVHSSADVDSV VSGTLR                                                     | 0.725266336        | 2              | 5.858699  |
| POC2X9        | SAFEYGGQK                                                                | 0.855212402        | 2              | 2.45889   |
| POC2X9        | SSP SLSILAGGQC NESVGYFVEPCIIESK                                          | 0.855662923        | 3              | 5.720127  |
| POC2X9        | STGSVVGQQPFGGAR                                                          | 0.941691065        | 2              | 4.400449  |
| POC2X9        | TVIQAEIDAAAELIDFFR                                                       | 0.722218248        |                |           |
| POC2X9        | VANEPILAF TQGSPER                                                        | 0.866501933        | 2              | 5.411601  |
| POC2X9        | VGNPAEDFGTFFSAVIDAK                                                      | 1.134857583        | 2              | 4.96786   |
| POC2X9        | YQLSPFNHGK                                                               | 0.604631327        | 2              | 2.935117  |
| <b>POC5H9</b> | <b>MANF Mesencephalic astrocyte_derived neurotrophic factor</b>          | <b>1.318294131</b> | <b>2.9E-09</b> | <b>4</b>  |
| POC5H9        | DRDVT FSPATIEELIK                                                        | 1.071443076        | 2              | 4.711087  |
| POC5H9        | DVTFSPATIEELIK                                                           | 1.125138688        | 2              | 3.209631  |
| POC5H9        | IINEVSKPLAHHIPVEK                                                        | 1.373537093        | 3              | 3.812029  |
| POC5H9        | ILDDWGEMCK                                                               | 0.961592233        | 2              | 2.390073  |
| <b>POC6F1</b> | <b>DYH2 Dynein heavy chain 2_axonemal</b>                                | <b>1.100107372</b> | <b>8.7E-07</b> | <b>3</b>  |
| POC6F1        | EDSVLGLQAFASWR                                                           | 1.081330401        | 2              | 2.303156  |
| POC6F1        | TMPLISDLR+Oxidation(1)                                                   | 1.353572101        |                |           |
| POC6F1        | TMPLISDLRNPALR                                                           | 1.073259554        | 2              | 2.396952  |
| <b>P10111</b> | <b>PPIA Peptidyl_prolyl cis_trans isomerase A</b>                        | <b>1.25641915</b>  | <b>0.99744</b> | <b>12</b> |
| P10111        | EGMSIVEAMER                                                              | 1.274084693        | 2              | 2.990081  |
| P10111        | FEDENFILK                                                                | 1.054470091        | 2              | 3.165493  |
| P10111        | HTGPGILSMANAGPNTNGSQFFICTAK                                              | 0.977534201        | 3              | 5.952951  |
| P10111        | HTGPGILSMANAGPNTNGSQFFICTAK+Oxidation(8)                                 | 0.94823915         |                |           |
| P10111        | IIPGFMCQGGDFTR                                                           | 1.076699168        | 2              | 3.32359   |
| P10111        | ITISDCGQL                                                                | 0.855554395        | 1              | 1.968194  |
| P10111        | KITISDCGQL                                                               | 1.223019941        | 2              | 3.330281  |
| P10111        | SIYGKFEFENFILK                                                           | 0.962143403        | 2              | 4.425166  |
| P10111        | TEWLDGK                                                                  | 1.022322324        | 2              | 2.351271  |
| P10111        | VCFELFADK                                                                | 1.071670374        | 2              | 3.320732  |
| P10111        | VCFELFADKVPK                                                             | 1.014278827        | 2              | 3.857755  |
| P10111        | VKEGMSIVEAMER                                                            | 1.021515798        | 2              | 3.000339  |
| <b>P10536</b> | <b>RAB1B Ras_related protein Rab_1B</b>                                  | <b>1.017798896</b> | <b>0.99434</b> | <b>3</b>  |
| P10536        | MGPGAASGGERPNLK                                                          | 1.108188151        | 2              | 3.295355  |
| P10536        | NATNVEQAFMTMAAEIK+Oxidation(11)                                          | 0.918052662        |                |           |
| P10536        | NATNVEQAFMTMAAEIK+Oxidation(9)                                           | 0.918357869        |                |           |
| <b>P10633</b> | <b>CP2D1 Cytochrome P450 2D1</b>                                         | <b>1.024123849</b> | <b>0.00131</b> | <b>4</b>  |
| P10633        | LVEESLTVSGFIPEVLNTPALLR                                                  | 0.831066304        |                |           |
| P10633        | SQGVILASYGPEWR                                                           | 0.776380318        | 2              | 4.197389  |



|               |                                                      |                    |                |           |
|---------------|------------------------------------------------------|--------------------|----------------|-----------|
| P10633        | TFMALLDNLLAENR                                       | 0.995988563        | 2              | 3.502585  |
| P10633        | YGDVFSLQK                                            | 1.291293963        | 2              | 2.84155   |
| <b>P10634</b> | <b>CP2DQ Cytochrome P450 2D26</b>                    | <b>1.007408339</b> | <b>0.38408</b> | <b>17</b> |
| P10634        | ACLGEPLAR                                            | 1.016933405        | 2              | 2.665581  |
| P10634        | AVSNVIASLVYAR                                        | 0.919386742        | 3              | 4.463062  |
| P10634        | DMTDAFLAEMQK                                         | 1.349367269        | 2              | 3.027043  |
| P10634        | EAEHPFNPSILLSK                                       | 1.845016934        | 2              | 3.082219  |
| P10634        | ELLVTYGEDTADRPLLIYNHLGYGNK                           | 1.08194781         | 3              | 4.909128  |
| P10634        | FADIVPTNIPHMTSR                                      | 0.897894986        | 2              | 2.668834  |
| P10634        | FEYEDPFFNR                                           | 0.948629254        | 2              | 2.698626  |
| P10634        | FHPEHFLDAQGNFVK                                      | 1.030103541        | 2              | 4.805937  |
| P10634        | GNPESSFNDENLR                                        | 1.251296065        | 2              | 4.206139  |
| P10634        | GTTLIPNLSSVLK                                        | 0.917537366        | 2              | 2.545521  |
| P10634        | GTTLIPNLSSVLKDETVWEKPLR                              | 1.003741072        | 2              | 4.334306  |
| P10634        | GVVLAPYGPEWR                                         | 0.924285607        | 2              | 3.436186  |
| P10634        | LNSFIALVDK                                           | 1.30344931         | 2              | 2.482055  |
| P10634        | RFEYEDPFFNR                                          | 0.998990548        | 3              | 4.071996  |
| P10634        | SLEQWVTEEAGHLCDTFAC                                  | 0.993634605        | 2              | 4.965187  |
| P10634        | SWDPAQPPR                                            | 0.994125981        | 2              | 2.653176  |
| P10634        | VHEEIDEVIGQVR                                        | 0.980958257        | 2              | 4.552141  |
| <b>P10719</b> | <b>ATPB ATP synthase subunit beta_ mitochondrial</b> | <b>0.99732936</b>  | <b>2.3E-05</b> | <b>34</b> |
| P10719        | AGTATGQIVAVIGAVVDVQFDEGLPPILNALEVQGR                 | 1.235371119        |                |           |
| P10719        | AHGGYSVFAGVGER                                       | 1.27224173         | 2              | 3.93031   |
| P10719        | AIAELGIYPAVDPLDSTSR                                  | 0.913147132        | 3              | 5.562542  |
| P10719        | DQEQGDVLLFIDNIFR                                     | 0.762253818        |                |           |
| P10719        | EGNDLYHEMIESGVINLK                                   | 0.991328097        | 2              | 5.1579    |
| P10719        | FLSQPFQVAEVFTGHMGK                                   | 1.011775751        | 2              | 4.06247   |
| P10719        | FTQAGSEVSALLGR                                       | 0.934282309        | 2              | 4.842857  |
| P10719        | GFQQILAGDYDHLPEQAFYMGVPIEEAVAK                       | 0.821411362        | 3              | 4.730116  |
| P10719        | GSITSVQAIYVPADDLTDPAPATTF AHL DATTVLSR               | 0.785796421        | 3              | 4.720021  |
| P10719        | IGLFGGAGVGK                                          | 1.059316703        | 2              | 3.025123  |
| P10719        | IGLFGGAGVGKTVLIMELINNVAK                             | 1.080099752        | 3              | 3.494787  |
| P10719        | ILQDYK                                               | 1.035204558        | 1              | 2.170173  |
| P10719        | IMDPNIVGSEHYDVAR                                     | 0.937424102        | 2              | 4.818998  |
| P10719        | IMDPNIVGSEHYDVAR+Oxidation(1)                        | 1.066965119        |                |           |
| P10719        | IMNVIGEPIDER                                         | 1.026049822        | 2              | 4.170508  |
| P10719        | IMNVIGEPIDER+Oxidation(1)                            | 1.024757715        |                |           |
| P10719        | IPSAVGYQPTLATDMGMTQER                                | 1.042048948        | 2              | 4.837956  |
| P10719        | IPSAVGYQPTLATDMGMTQER+Oxidation(14)                  | 0.941615923        |                |           |
| P10719        | IPSAVGYQPTLATDMGMTQER+Oxidation(17)                  | 1.030786827        |                |           |
| P10719        | LVLEVAQHLGESTVR                                      | 0.943239099        | 2              | 4.67961   |
| P10719        | QFAPIHAEAPEFIEMSVEQEILVTGIK                          | 0.997346248        | 3              | 4.985281  |
| P10719        | SLQDIIAILGMDELSEEDKLTVSR                             | 0.759082195        | 3              | 5.441735  |
| P10719        | SLQDIIAILGMDELSEEDKLTVSR+Oxidation(10)               | 1.024749868        |                |           |
| P10719        | TIAMDGTEGLVR                                         | 0.855484659        | 2              | 3.371756  |
| P10719        | TIAMDGTEGLVR+Oxidation(3)                            | 0.951235562        |                |           |
| P10719        | TREGNDLYHEMIESGVINLK                                 | 0.905346903        | 2              | 6.109365  |
| P10719        | TVLIMELINNVAK                                        | 0.776198371        | 2              | 4.571095  |
| P10719        | TVLIMELINNVAK+Oxidation(4)                           | 0.842863018        |                |           |
| P10719        | VALTGLTVAEYFR                                        | 1.108223196        | 2              | 4.072749  |
| P10719        | VALVYQGMNEPPGAR                                      | 1.039306835        | 2              | 4.363111  |
| P10719        | VALVYQGMNEPPGAR+Oxidation(7)                         | 1.033495398        |                |           |
| P10719        | VLDGAPIK                                             | 1.001295169        | 2              | 3.028409  |
| P10719        | VLDGAPIKIPVGPETLGR                                   | 0.890652268        | 3              | 4.761925  |
| P10719        | VVDLLAPYAK                                           | 0.85585365         | 2              | 3.03147   |
| <b>P10760</b> | <b>SAHH Adenosylhomocysteinase</b>                   | <b>1.21924488</b>  | <b>9.9E-20</b> | <b>18</b> |
| P10760        | ALDIAENEMPGLMR                                       | 1.076489561        | 2              | 4.316842  |

|               |                                                             |                    |                |           |
|---------------|-------------------------------------------------------------|--------------------|----------------|-----------|
| P10760        | ALDIAENEMPLMR+Oxidation(12)                                 | 1.046733541        |                |           |
| P10760        | ATDVMIAGK                                                   | 1.085064838        | 2              | 2.824625  |
| P10760        | DGPLNMILDDGGDLTNLIHTK                                       | 1.130968417        | 2              | 5.419811  |
| P10760        | DGPLNMILDDGGDLTNLIHTK+Oxidation(5)                          | 1.068978316        |                |           |
| P10760        | EMYSASKPLK                                                  | 1.732514625        | 2              | 2.495085  |
| P10760        | FDNLYGCR                                                    | 1.280642896        | 2              | 2.861892  |
| P10760        | GETDEEYLWCIEQTLHFK                                          | 1.190799597        | 2              | 4.279146  |
| P10760        | GISEETTTGVHNLTK                                             | 1.248674241        | 2              | 4.13385   |
| P10760        | IILLAAGR                                                    | 1.2866948          | 2              | 2.803187  |
| P10760        | KLDEAVAEHLGK                                                | 1.295842765        | 3              | 5.16178   |
| P10760        | LDEAVAEHLGK                                                 | 1.295794386        | 2              | 3.852326  |
| P10760        | RATDVMIAGK                                                  | 1.113915092        | 2              | 2.693585  |
| P10760        | SKFDNLYGCR                                                  | 1.242069501        | 2              | 2.876086  |
| P10760        | VAVVAGYGDVVK                                                | 1.311548859        | 2              | 4.235604  |
| P10760        | VNIKPQVDR                                                   | 1.191142441        | 2              | 2.919374  |
| P10760        | WLNENAVEK                                                   | 1.251162001        | 2              | 3.16334   |
| P10760        | WSSCNIFSTQDHAAAAIAK                                         | 1.086565085        | 2              | 5.086745  |
| <b>P10818</b> | <b>CX6A1 Cytochrome c oxidase subunit 6A1_mitochondrial</b> | <b>0.880228591</b> | <b>0.71597</b> | <b>2</b>  |
| P10818        | HEEHERPEFVAYPHLR                                            | 1.10421726         | 3              | 3.320403  |
| P10818        | SRHEEHERPEFVAYPHLR                                          | 0.879204206        | 3              | 3.669015  |
| <b>P10860</b> | <b>DHE3 Glutamate dehydrogenase 1_mitochondrial</b>         | <b>0.945501968</b> | <b>0.00018</b> | <b>28</b> |
| P10860        | ALASLMTYK                                                   | 0.920859997        | 2              | 3.120529  |
| P10860        | CAVVDVPFGGAK                                                | 0.916074028        | 2              | 3.288343  |
| P10860        | CVGVGESDGSIWNPDGIDPK                                        | 0.94030584         | 2              | 5.151681  |
| P10860        | DDGSWEVIEGYR                                                | 1.391921367        | 2              | 4.09852   |
| P10860        | DIVHSGLAYTMER                                               | 1.695241413        | 2              | 3.319003  |
| P10860        | DIVHSGLAYTMER+Oxidation(10)                                 | 1.491773805        |                |           |
| P10860        | DSNYHLLMSVQESLER                                            | 0.864641859        | 2              | 3.698667  |
| P10860        | DSNYHLLMSVQESLER+Oxidation(7)                               | 1.430386227        |                |           |
| P10860        | EDDPNFFK                                                    | 1.111231295        | 1              | 2.06388   |
| P10860        | GASIVEDKLVEDLK                                              | 0.827142307        | 2              | 3.425748  |
| P10860        | GFIGPGIDVPAPDMSTGER                                         | 0.914027752        | 2              | 5.552316  |
| P10860        | GFIGPGIDVPAPDMSTGER+Oxidation(13)                           | 0.928604939        |                |           |
| P10860        | HGGTIPVVPTAEFQDR                                            | 0.94755354         | 2              | 4.468529  |
| P10860        | IIEGANGPTTPEADK                                             | 1.018523106        | 2              | 5.261125  |
| P10860        | IIEGANGPTTPEADKIFLER                                        | 0.923063483        | 3              | 4.6932    |
| P10860        | KGFIGPGIDVPAPDMSTGER                                        | 0.995042733        | 2              | 5.539396  |
| P10860        | KGFIGPGIDVPAPDMSTGER+Oxidation(14)                          | 0.684855695        |                |           |
| P10860        | LQHGSILGFPK                                                 | 1.103404877        | 2              | 2.722525  |
| P10860        | MVEGFFDR                                                    | 0.989088067        | 2              | 2.828782  |
| P10860        | MVEGFFDR+Oxidation(0)                                       | 1.036062898        |                |           |
| P10860        | NLNHVSYGR                                                   | 1.053136501        | 2              | 2.334039  |
| P10860        | NYTDNELEK                                                   | 1.037273862        | 2              | 2.425296  |
| P10860        | RDDGSWEVIEGYR                                               | 0.919979071        | 2              | 4.242008  |
| P10860        | TAAYVNAIEK                                                  | 0.943781579        | 2              | 3.602264  |
| P10860        | TFVVQGFNGVGLHSMR                                            | 0.808679699        | 2              | 3.998473  |
| P10860        | VYEGSILEADCDILIPAASEK                                       | 0.96521682         | 3              | 5.922235  |
| P10860        | YNLGLDLR                                                    | 0.941471207        | 2              | 3.129853  |
| P10860        | YSTDVSVDEVK                                                 | 0.898358599        | 2              | 3.187912  |
| <b>P10867</b> | <b>GGLO L_gulonolactone oxidase</b>                         | <b>0.881372846</b> | <b>0.0744</b>  | <b>7</b>  |
| P10867        | GDDILLSPCFQR                                                | 0.953257083        | 1              | 2.074422  |
| P10867        | GVQFQNWAK                                                   | 1.155215221        | 2              | 2.407335  |
| P10867        | LDPTGMFLNSYLEK                                              | 0.775369179        | 2              | 4.415738  |
| P10867        | LDYWLAYETIMK                                                | 0.685177303        | 2              | 4.368528  |
| P10867        | NADVFQAAR                                                   | 0.918499167        | 2              | 2.805848  |

|               |                                                                     |                    |                |           |
|---------------|---------------------------------------------------------------------|--------------------|----------------|-----------|
| P10867        | TYGCSPEVYYQPTSVEEVR                                                 | 0.977878826        | 2              | 4.904958  |
| P10867        | VVAHYVPEVR                                                          | 1.045011983        | 2              | 2.796622  |
| <b>P10868</b> | <b>GAMT Guanidinoacetate N_methyltransferase</b>                    | <b>1.036183311</b> | <b>0.00869</b> | <b>4</b>  |
| P10868        | EHWIECNDGVFQR                                                       | 1.364025212        | 2              | 4.022839  |
| P10868        | WETPYMHSLAAAAASR                                                    | 0.93188426         | 2              | 3.91216   |
| P10868        | YTDITAMFEETQVPALLEAGFQR                                             | 0.950678497        | 3              | 6.55796   |
| P10868        | YYAFPQMITPLVTK                                                      | 0.758643689        | 2              | 3.481607  |
| <b>P10888</b> | <b>COX41 Cytochrome c oxidase subunit 4 isoform 1_mitochondrial</b> | <b>1.106450484</b> | <b>0.98845</b> | <b>2</b>  |
| P10888        | IQFNESFAEMNK                                                        | 1.076552158        | 2              | 4.51784   |
| P10888        | SEDYALPSYVDR                                                        | 1.082711774        | 2              | 4.045376  |
| <b>P11030</b> | <b>ACBP Acyl_CoA_binding protein</b>                                | <b>1.010382585</b> | <b>0.57928</b> | <b>3</b>  |
| P11030        | QATVGDVNTDRPGLLDLK                                                  | 1.028250634        | 3              | 3.652455  |
| P11030        | TQPTDEEMLFYISHFK                                                    | 2.065189687        | 2              | 4.393717  |
| P11030        | WDSWNK                                                              | 1.098122382        | 1              | 2.037078  |
| <b>P11232</b> | <b>THIO Thioredoxin</b>                                             | <b>1.054189666</b> | <b>3.4E-05</b> | <b>2</b>  |
| P11232        | EAFQEALAAAGDK                                                       | 1.861182099        | 2              | 4.316803  |
| P11232        | VEFGSGANK                                                           | 1.024475785        | 2              | 2.959635  |
| <b>P11240</b> | <b>COX5A Cytochrome c oxidase subunit 5A_mitochondrial</b>          | <b>0.969893059</b> | <b>0.77907</b> | <b>5</b>  |
| P11240        | EIYPYVIQELRPTLNELGISTPEELGLDK                                       | 0.403559356        | 3              | 6.728961  |
| P11240        | EIYPYVIQELRPTLNELGISTPEELGLDKV                                      | 0.820487329        | 3              | 6.626053  |
| P11240        | GMNTLVGYDLVPEPK                                                     | 0.9564332          | 2              | 3.662183  |
| P11240        | LNDFASAVR                                                           | 0.96565542         | 2              | 3.261882  |
| P11240        | RLNDFASAVR                                                          | 1.033150289        | 2              | 2.975237  |
| <b>P11348</b> | <b>DHPR Dihydropteridine reductase</b>                              | <b>0.890977622</b> | <b>0.88055</b> | <b>11</b> |
| P11348        | AALDGTGPMIGYMAK                                                     | 0.841503561        | 2              | 3.87694   |
| P11348        | EGLLTLAGAK                                                          | 0.982954562        | 2              | 3.123622  |
| P11348        | GAVHQLCQSLAGK                                                       | 1.007000819        | 3              | 4.601231  |
| P11348        | MTDSFTEQADQVTAEVGK                                                  | 0.982879112        | 2              | 5.547447  |
| P11348        | MTDSFTEQADQVTAEVGK+Oxidation(0)                                     | 0.841560407        |                |           |
| P11348        | NCDLMWK                                                             | 0.907170776        | 1              | 2.080392  |
| P11348        | NSGMPSGAAAIAVLPVTLDTMNR                                             | 0.93217641         | 2              | 5.363461  |
| P11348        | NSGMPSGAAAIAVLPVTLDTMNR+Oxidation(3)                                | 0.871234741        |                |           |
| P11348        | QSIWSTISSHLATK                                                      | 0.762040944        | 2              | 3.861891  |
| P11348        | RPNSGSLIQVTTDQK                                                     | 0.693150386        | 2              | 4.089117  |
| P11348        | VDAILCVAGGWAGGNAK                                                   | 0.839540398        | 2              | 4.489226  |
| <b>P11442</b> | <b>CLH Clathrin heavy chain 1</b>                                   | <b>1.268263491</b> | <b>0.04161</b> | <b>37</b> |
| P11442        | AFMTADLPNELIELLEK                                                   | 0.826104043        | 3              | 4.596352  |
| P11442        | AHIAQLCEK                                                           | 1.258347316        | 1              | 2.256866  |
| P11442        | ALEHFTDLYDIK                                                        | 0.692699204        | 3              | 3.876439  |
| P11442        | CNEPAVWSQLAK                                                        | 1.012350602        | 2              | 3.255463  |
| P11442        | EDKLECSEELGDLVK                                                     | 0.958317616        | 2              | 2.716795  |
| P11442        | FDVNTSAVQVLIHIGNLDR                                                 | 0.935349104        | 3              | 3.624012  |
| P11442        | FNALFAQGNYSEAAK                                                     | 0.94273882         | 2              | 4.576741  |
| P11442        | GQCDLELINVCNENSFLK                                                  | 0.907710586        | 2              | 5.097107  |
| P11442        | GQFSTDELVAEVEK                                                      | 1.055443027        | 2              | 4.289725  |
| P11442        | GQFSTDELVAEVEKR                                                     | 0.970882708        | 2              | 3.647829  |
| P11442        | HELIEFR                                                             | 1.236439564        | 2              | 2.349464  |
| P11442        | HSSLAGCQIINYR                                                       | 0.922891843        | 2              | 2.713678  |
| P11442        | IHEGCEEPATHNALAK                                                    | 1.054080747        | 2              | 5.305377  |
| P11442        | ISGETIFVTAPHEATAGIIGVNR                                             | 0.946920338        | 2              | 5.329196  |
| P11442        | IVLDNSVFSEHR                                                        | 1.016877954        | 2              | 2.969058  |
| P11442        | IYIDSNNNPER                                                         | 0.859502751        | 2              | 3.193036  |
| P11442        | KFDVNTSAVQVLIHIGNLDR                                                | 0.926985586        | 3              | 5.637635  |
| P11442        | KFNALFAQGNYSEAAK                                                    | 1.005557606        | 2              | 4.36682   |
| P11442        | LAELEEFINGPNAHIQQVGDR                                               | 0.906591778        | 2              | 5.052642  |

|               |                                                                  |                    |                |           |
|---------------|------------------------------------------------------------------|--------------------|----------------|-----------|
| P11442        | LHIEVGTPTGNQPPFK                                                 | 0.899926764        | 2              | 4.188672  |
| P11442        | LLYNNVSNFGR                                                      | 0.907155629        | 2              | 2.340869  |
| P11442        | LPVVIGLLDVCSEDEVK                                                | 2.096779055        | 2              | 5.220828  |
| P11442        | LTDQLPLIIVCDR                                                    | 0.880066907        | 2              | 3.240528  |
| P11442        | NLQNLLILTAIK                                                     | 0.975031982        | 2              | 3.917333  |
| P11442        | NNLAGAEELFAR                                                     | 1.245786483        | 2              | 3.534899  |
| P11442        | NNRPSEGPLQTR                                                     | 0.975041157        | 3              | 4.19138   |
| P11442        | RPLIDQVVQTALSETQDPEEVSVTVK                                       | 1.059316813        | 3              | 5.737468  |
| P11442        | SVDPTLALSYYLR                                                    | 0.922581882        | 2              | 2.891626  |
| P11442        | SVNESLNNLFITEEDYQALR                                             | 1.00170183         | 3              | 5.126964  |
| P11442        | TLQIFNIEMK                                                       | 0.899754356        | 2              | 2.889971  |
| P11442        | TSIDAYDNFDNISLAQR                                                | 1.070523988        | 2              | 4.362551  |
| P11442        | VGEQAQVVIIDMNDPSNPIR                                             | 0.841834105        | 2              | 4.622175  |
| P11442        | VIQCFATGQVQK                                                     | 1.002324251        | 2              | 4.629882  |
| P11442        | VSQPIEGHAASFAQFK                                                 | 0.821964726        | 2              | 4.366082  |
| P11442        | WLLLTGISAQQNR                                                    | 0.932411858        | 2              | 3.255105  |
| P11442        | YESLELCRPVLQQGR                                                  | 0.963002325        | 2              | 2.676277  |
| P11442        | YIEIVVQK                                                         | 1.183137449        | 1              | 2.369032  |
| <b>P11497</b> | <b>ACACA Acetyl_CoA carboxylase 1</b>                            | <b>1.199114147</b> | <b>0.0193</b>  | <b>6</b>  |
| P11497        | GGSWVVIDPTINPR                                                   | 1.095592453        | 2              | 2.758224  |
| P11497        | GSVLEPEGTVEIK                                                    | 1.477570843        | 2              | 2.699714  |
| P11497        | ITSENPDGFKPSSGTVQELNFR                                           | 1.477583858        | 3              | 3.981685  |
| P11497        | TLRDPSLPLELQDIMTSVSGR                                            | 1.113372383        | 3              | 3.361255  |
| P11497        | VNNADDFPNLFR                                                     | 1.196398094        | 2              | 2.41684   |
| P11497        | VQQAELHTGSLPQIQSTALR                                             | 0.746406858        | 3              | 3.541937  |
| <b>P11507</b> | <b>AT2A2 Sarcoplasmic/endoplasmic reticulum calcium ATPase 2</b> | <b>0.907633169</b> | <b>0.98807</b> | <b>9</b>  |
| P11507        | DIVPGDIVEIavgdkvpadir                                            | 0.883162186        | 2              | 3.539428  |
| P11507        | IGIFGQDEDVTSK                                                    | 0.907520624        | 2              | 3.386089  |
| P11507        | IRDEMVAEQER                                                      | 1.28954209         | 2              | 3.106571  |
| P11507        | LDEFGEQLSK                                                       | 1.512813644        | 2              | 2.823526  |
| P11507        | NAENAIEALK                                                       | 1.152519027        | 2              | 2.339428  |
| P11507        | NAENAIEALKEYEPEMGK                                               | 1.593767239        | 2              | 3.939089  |
| P11507        | SEIGIAMGSGTAVAK                                                  | 1.084559518        | 2              | 2.711593  |
| P11507        | TASEMVLADDNFSTIVAAVEEGR                                          | 1.321788457        | 3              | 4.803927  |
| P11507        | VDQSILTGESVSVIK                                                  | 1.493679721        | 2              | 4.636975  |
| <b>P11598</b> | <b>PDIA3 Protein disulfide_isomerase A3</b>                      | <b>1.022011951</b> | <b>1.1E-11</b> | <b>25</b> |
| P11598        | DASVVGFFR                                                        | 1.611666507        | 2              | 2.700565  |
| P11598        | DGEEAGAYDGPR                                                     | 1.535183363        | 2              | 3.086436  |
| P11598        | DLLTAYYDVVYEK                                                    | 1.218264107        | 2              | 3.241627  |
| P11598        | EATNPPIIQEEKPK                                                   | 1.314053367        | 2              | 3.476962  |
| P11598        | EYDDNGEGITIFRPLHLANK                                             | 1.131465927        | 2              | 4.215931  |
| P11598        | FAHTNVESLVK                                                      | 1.077809877        | 3              | 3.354488  |
| P11598        | FIQESIFGLCPHMTEDNKDLIQGK                                         | 0.881391936        | 3              | 5.034542  |
| P11598        | FISDKDASVVGFFR                                                   | 1.075077675        | 2              | 4.289568  |
| P11598        | FLQEYFDGNLK                                                      | 0.963546769        | 2              | 3.393449  |
| P11598        | FLQEYFDGNLKR                                                     | 0.8950688          | 2              | 3.09834   |
| P11598        | FVMQEEFSR                                                        | 0.928491749        | 2              | 2.5818    |
| P11598        | GFPTIYFSPANK                                                     | 1.693691498        | 2              | 2.772385  |
| P11598        | IFRDGEEAGAYDGPR                                                  | 1.027082089        | 2              | 3.647818  |
| P11598        | LAPEYAAAATR                                                      | 1.078599074        | 2              | 3.441258  |
| P11598        | LNFAVASR                                                         | 1.003355442        | 2              | 2.441781  |
| P11598        | LSKDPNIVIAK                                                      | 1.034711653        | 3              | 3.790059  |
| P11598        | MDATANDVSPYEVK                                                   | 0.995603931        | 2              | 4.481105  |
| P11598        | MDATANDVSPYEVK+Oxidation(0)                                      | 0.929645805        |                |           |
| P11598        | QAGPASVPLR                                                       | 1.598154656        | 2              | 2.547553  |
| P11598        | RLAPEYAAAATR                                                     | 1.042619278        | 2              | 3.549448  |

|               |                                                   |                    |                |           |
|---------------|---------------------------------------------------|--------------------|----------------|-----------|
| P11598        | SEPIPETNEGPVK                                     | 1.014630011        | 2              | 2.978814  |
| P11598        | TADGIVSHLK                                        | 1.152768214        | 2              | 2.906025  |
| P11598        | TFSHELSDFGLESTTGEIPVVAIR                          | 0.878885269        | 2              | 6.226573  |
| P11598        | VDCTANTNTCNK                                      | 2.075977275        | 2              | 4.245453  |
| P11598        | YGVSGYPTLK                                        | 0.970446904        | 2              | 3.202235  |
| <b>P11711</b> | <b>CP2A1 Cytochrome P450 2A1</b>                  | <b>0.885460795</b> | <b>4E-05</b>   | <b>6</b>  |
| P11711        | GEQATYNTLFK                                       | 1.115784173        | 2              | 2.847202  |
| P11711        | GTDVFPILGSLMTDPK                                  | 0.8090805          | 2              | 3.653081  |
| P11711        | ILEEAGYLIK                                        | 0.953154887        | 2              | 2.726734  |
| P11711        | LEDINESPKPLGFTR                                   | 0.954988704        | 2              | 3.469052  |
| P11711        | TVSNVISSIVFGER                                    | 0.885430752        | 2              | 3.525805  |
| P11711        | VHEEIEQVIGR                                       | 1.250042253        | 2              | 3.209881  |
| <b>P11714</b> | <b>CP2D9 Cytochrome P450 2D9</b>                  | <b>1.146391017</b> | <b>0.97448</b> | <b>2</b>  |
| P11714        | GNPESSFNDENLLMVVR                                 | 0.817604417        | 2              | 2.34788   |
| P11714        | VQQEIDEVIGQVR                                     | 1.066158342        | 2              | 4.841065  |
| <b>P11862</b> | <b>GAS2 Growth arrest_specific protein 2</b>      | <b>1.041728126</b> | <b>0.60327</b> | <b>2</b>  |
| P11862        | EIEQEETLSAPSPSPSSK                                | 1.331014241        | 2              | 3.879451  |
| P11862        | LDNGALLCQLAATVQEK                                 | 1.017383541        | 2              | 4.086994  |
| <b>P11884</b> | <b>ALDH2 Aldehyde dehydrogenase_mitochondrial</b> | <b>0.887875799</b> | <b>9.9E-20</b> | <b>23</b> |
| P11884        | EAGFPPGVNIVPGFGPTAGAAIASHEDVDK                    | 0.702683691        | 3              | 4.583633  |
| P11884        | EEIFGPVMQILK                                      | 1.255507754        | 2              | 3.797481  |
| P11884        | EEIFGPVMQILK+Oxidation(7)                         | 1.271561092        |                |           |
| P11884        | ELGEYGLQAYTEVK                                    | 1.390993805        | 2              | 4.45975   |
| P11884        | GYFIQPTVFGDVK                                     | 0.92978493         | 2              | 4.096813  |
| P11884        | HEPVGVCQIIPWNFLLMQAWK                             | 0.844805057        | 3              | 4.190291  |
| P11884        | KTFPTVNPSTGEVICQVAEGNKEDVDK                       | 0.824666636        | 3              | 6.633285  |
| P11884        | LGPALATGNVVVMK                                    | 0.908724669        | 2              | 3.881171  |
| P11884        | LGPALATGNVVVMK+Oxidation(12)                      | 0.946714318        |                |           |
| P11884        | LLCGGAAADR                                        | 1.098090343        | 2              | 3.536341  |
| P11884        | RVTLELGK                                          | 1.016017521        | 2              | 2.744479  |
| P11884        | TEQGPQVDETQFK                                     | 0.937458783        | 2              | 4.756463  |
| P11884        | TFPTVNPSTGEVICQVAEGNK                             | 0.983250939        | 2              | 4.97016   |
| P11884        | TFPTVNPSTGEVICQVAEGNKEDVDK                        | 0.894269657        | 2              | 4.325205  |
| P11884        | TFVQEDVYDEFVER                                    | 0.867865681        | 2              | 5.176448  |
| P11884        | TIEEVVGR                                          | 0.868699501        | 2              | 3.001751  |
| P11884        | TIPIDGFFSYTR                                      | 0.903478962        | 2              | 2.949207  |
| P11884        | VAEQTPLTALYVANLIK                                 | 0.973915287        | 3              | 5.245028  |
| P11884        | VAFTGSTEVGHLIQVAAGSSNLK                           | 0.922643057        | 2              | 6.035166  |
| P11884        | VTLELGK                                           | 0.942007253        | 1              | 1.966558  |
| P11884        | VVGPNPDSR                                         | 0.957208685        | 2              | 2.839046  |
| P11884        | YGLAAAVFTK                                        | 0.830925292        | 2              | 3.784074  |
| P11884        | YYAGWADK                                          | 0.889983906        | 2              | 2.577942  |
| <b>P11915</b> | <b>NLTP Non_specific lipid_transfer protein</b>   | <b>0.908912442</b> | <b>0.00417</b> | <b>24</b> |
| P11915        | ADCTITMADSDLLALMTGK                               | 0.781246331        | 2              | 5.697645  |
| P11915        | ADCTITMADSDLLALMTGK+Oxidation(15)                 | 0.839394776        |                |           |
| P11915        | ADCTITMADSDLLALMTGK+Oxidation(6)                  | 0.837528008        |                |           |
| P11915        | ANLIFK                                            | 0.975034698        | 2              | 2.363153  |
| P11915        | AVEIVAQEMVTDMPTFEEK                               | 0.897779964        | 2              | 4.274205  |
| P11915        | GHPLGATGLAQAELCWQLR                               | 0.973027094        | 3              | 3.727941  |
| P11915        | GSVLPDSK                                          | 0.929936268        | 1              | 1.988598  |
| P11915        | GSVLPDSKK                                         | 1.104966652        | 2              | 2.628221  |
| P11915        | HIDVLINK                                          | 0.895954798        | 2              | 2.858802  |
| P11915        | HSVNNPYSQFQDEYSLDEIMK                             | 0.867963529        | 3              | 6.334317  |
| P11915        | KADCTITMADSDLLALMTGK                              | 1.072259172        | 2              | 4.402377  |
| P11915        | KLEEEGEEFVK                                       | 0.955314742        | 2              | 4.491902  |
| P11915        | KLEEEGEEFVKK                                      | 0.941823151        | 3              | 4.443469  |

|               |                                                       |                    |                |           |
|---------------|-------------------------------------------------------|--------------------|----------------|-----------|
| P11915        | LEEEGEEFVK                                            | 1.071095807        | 2              | 2.693956  |
| P11915        | LEEEGEEFVKK                                           | 0.944144136        | 2              | 3.565766  |
| P11915        | LQSLQLQPK                                             | 1.074626956        | 2              | 3.169401  |
| P11915        | MGFPEAASSFR                                           | 0.9393555          | 2              | 2.995764  |
| P11915        | MNPQSAFFQ GK                                          | 0.963439486        | 2              | 3.250317  |
| P11915        | MNPQSAFFQ GK+Oxidation(0)                             | 0.820612173        |                |           |
| P11915        | SRPVDFLTVLQCPTSDGAAAAIVSSEEFVQK                       | 0.977502185        | 3              | 5.17075   |
| P11915        | THQISAAPTSSAGDGFK                                     | 1.033902697        | 2              | 4.404951  |
| P11915        | VFVVGVM TK                                            | 0.957742952        | 2              | 2.556144  |
| P11915        | WVINPSGGLISK                                          | 0.931166393        | 2              | 3.308452  |
| P11915        | YGMSACPFAPQLFGSAGK                                    | 0.891061341        | 2              | 3.379063  |
| <b>P11980</b> | <b>KPYM Pyruvate kinase isozymes M1/M2</b>            | <b>1.061534057</b> | <b>0.9811</b>  | <b>10</b> |
| P11980        | AEGSDVANAVLDGADCIMLSGETAK                             | 1.024353276        | 2              | 4.525784  |
| P11980        | AGKPVICATQMLES MIK                                    | 1.192161298        | 3              | 3.342162  |
| P11980        | DAVLDAWAEDVDLR                                        | 1.567927909        | 2              | 4.025075  |
| P11980        | GADYLVTEVENGGSLGSK                                    | 1.390447551        | 2              | 5.314896  |
| P11980        | GVNLPGAAVDLP AVSEK                                    | 1.194686343        | 2              | 3.770245  |
| P11980        | IYVDDGLISLQVK                                         | 1.578502102        | 2              | 3.697804  |
| P11980        | KGVNLPGAAVDLP AVSEK                                   | 3.062546208        | 2              | 3.643487  |
| P11980        | LDIDSAPITAR                                           | 1.797765754        | 2              | 3.20909   |
| P11980        | NTGIICTIGPASR                                         | 1.436791422        | 2              | 3.324592  |
| P11980        | VFLAQKMMIGRCNR+Oxidation(6)                           | 0.949994846        |                |           |
| <b>P12001</b> | <b>RL18 60S ribosomal protein L18</b>                 | <b>0.91786925</b>  | <b>0.00937</b> | <b>5</b>  |
| P12001        | GTVLLSGPR                                             | 1.256622696        | 2              | 2.931015  |
| P12001        | ILTFDQLALESPK                                         | 1.191235749        | 2              | 4.870775  |
| P12001        | TAVVVGTTITDDVR                                        | 1.043561214        | 2              | 4.523719  |
| P12001        | TNRPPLSLR                                             | 1.187214146        | 3              | 3.366225  |
| P12001        | TNSTFNQVVLK                                           | 0.9537977          | 2              | 3.176213  |
| <b>P12007</b> | <b>IVD Isovaleryl_CoA dehydrogenase_mitochondrial</b> | <b>0.907507993</b> | <b>0.85486</b> | <b>9</b>  |
| P12007        | AQEIDQSNDFK                                           | 0.48942393         | 2              | 3.640245  |
| P12007        | FVQENLAPK                                             | 0.914114332        | 2              | 2.650152  |
| P12007        | FWITNGPDADVLVVYAK                                     | 0.977270784        | 2              | 3.653508  |
| P12007        | GSNTCELVFEDCK                                         | 1.050155754        | 2              | 4.458799  |
| P12007        | GSNTCELVFEDCKVPAANILSQESK                             | 0.891134561        | 3              | 4.917409  |
| P12007        | GVYVLMGDLDR                                           | 0.809243408        | 2              | 3.170815  |
| P12007        | IGQFQLMQGK                                            | 1.0977715          | 2              | 2.502737  |
| P12007        | LYEIGGGTSEVR                                          | 1.083647473        | 2              | 3.559751  |
| P12007        | TDLTAVPASR                                            | 0.919389717        | 2              | 2.963448  |
| <b>P12346</b> | <b>TRFE Serotransferrin</b>                           | <b>1.075504199</b> | <b>9.9E-20</b> | <b>23</b> |
| P12346        | ADRDQYELLCLDNTR                                       | 1.209434535        | 2              | 4.543229  |
| P12346        | ASDSSINWNNLK                                          | 1.320663654        | 2              | 3.270942  |
| P12346        | DGGGDVAFVK                                            | 1.198829058        | 2              | 3.113133  |
| P12346        | DLKQEDFQLLCPDGTK                                      | 1.119668203        | 2              | 4.446505  |
| P12346        | DQYELLCLDNTR                                          | 0.987055854        | 2              | 2.982026  |
| P12346        | EGVCEGSIDSAPVK                                        | 2.324646348        | 2              | 3.489291  |
| P12346        | EGYNGYTGA FQCLVEK                                     | 1.113790038        | 2              | 3.528948  |
| P12346        | FDEFFSQGCAPGYK                                        | 1.220945543        | 2              | 4.345944  |
| P12346        | GDKDCTGNFCLFR                                         | 1.02631316         | 2              | 3.593474  |
| P12346        | GTFQLNQLQ GK                                          | 1.267551306        | 2              | 3.122989  |
| P12346        | GYAVAVVK                                              | 1.262404103        | 2              | 2.79149   |
| P12346        | HQTVLENTNGK                                           | 1.039848613        | 2              | 2.579301  |
| P12346        | HTTIFEVLPQK                                           | 1.235516047        | 3              | 3.740234  |
| P12346        | KGTFQLNQLQ GK                                         | 1.476531521        | 2              | 3.59938   |
| P12346        | KTSYQDCIK                                             | 1.472540811        | 2              | 2.489622  |
| P12346        | LPEGTTYEYLGAEYLQAVGNIR                                | 0.866441801        | 2              | 4.675972  |
| P12346        | NGDGKEDLIWEILK                                        | 1.082942332        | 2              | 3.677605  |

|               |                                           |                    |                |           |
|---------------|-------------------------------------------|--------------------|----------------|-----------|
| P12346        | QEDFQLLCPDGTK                             | 1.319110555        | 2              | 3.582817  |
| P12346        | SKDFQLFGSPLGK                             | 1.315226688        | 2              | 3.488945  |
| P12346        | TSYQDCIK                                  | 1.20802326         | 2              | 2.528939  |
| P12346        | VSTVLTAQK                                 | 1.31938207         | 2              | 2.616675  |
| P12346        | WCALSHQER                                 | 1.331752694        | 2              | 3.230942  |
| P12346        | WCAVSEHENTK                               | 1.26325893         | 2              | 3.649519  |
| <b>P12711</b> | <b>ADHX Alcohol dehydrogenase class_3</b> | <b>0.837954186</b> | <b>7.2E-06</b> | <b>10</b> |
| P12711        | AAVAWEAGKPLSIEIEVAPPQAHEVR                | 0.862650164        | 3              | 5.782949  |
| P12711        | AFDLMHSGNSIR                              | 0.977886947        | 2              | 2.502499  |
| P12711        | AGDVIPLYIPQCGECK                          | 0.86011325         | 2              | 4.027006  |
| P12711        | EFGATECINPQDFSK                           | 1.365632301        | 2              | 4.189593  |
| P12711        | IDPSAPLDK                                 | 0.961521005        | 1              | 1.939675  |
| P12711        | IIGIDINK                                  | 0.763946342        | 2              | 2.371974  |
| P12711        | IIGIDINKDK                                | 0.447414598        | 1              | 2.430563  |
| P12711        | VCLLGGCISTGYGAAVNTAK                      | 0.89517661         | 2              | 5.521226  |
| P12711        | VDEFVTGNLSFDQINK                          | 0.927921594        | 2              | 5.130754  |
| P12711        | VEPGSTCAVFLGGVGLAVIMGCK                   | 0.84913066         | 2              | 4.143928  |
| <b>P12749</b> | <b>RL26 60S ribosomal protein L26</b>     | <b>1.225110241</b> | <b>1.8E-12</b> | <b>6</b>  |
| P12749        | DDEVQVVR                                  | 1.428529215        | 2              | 2.58808   |
| P12749        | FNPFVTSR                                  | 1.134320598        | 2              | 2.363353  |
| P12749        | HFNAPSHIR                                 | 1.112670044        | 3              | 3.701633  |
| P12749        | KDEVQVVR                                  | 1.232420293        | 2              | 3.385693  |
| P12749        | KIMSSPLSKELR+Oxidation(2)                 | 1.033485949        |                |           |
| P12749        | YVIYIER                                   | 0.986526455        | 1              | 1.919811  |
| <b>P12785</b> | <b>FAS Fatty acid synthase</b>            | <b>1.130640809</b> | <b>0.99218</b> | <b>44</b> |
| P12785        | ACIDTALENLSTLK                            | 1.174026798        | 2              | 4.915604  |
| P12785        | AGSDTELAAPK                               | 1.104381766        | 2              | 3.247803  |
| P12785        | CPPGVVPACHNSEDTVTISGPQAAVNEFVEQLK         | 1.175204451        | 3              | 5.73813   |
| P12785        | DANLPAGSMAAVGLSWECK                       | 1.251969368        | 2              | 3.660444  |
| P12785        | DGGFLLMHTVLK                              | 0.628701248        | 2              | 2.399549  |
| P12785        | DPETLLGYSMVGCQR                           | 1.067082281        | 2              | 3.767768  |
| P12785        | EEPEAMLPGAQPTLISAISK                      | 1.008700815        | 2              | 3.315189  |
| P12785        | EQGVTFPSGEAQEQLIR                         | 1.587148334        | 2              | 4.119235  |
| P12785        | FDASFFGVHPK                               | 1.097087218        | 2              | 3.123435  |
| P12785        | FVFTPHVEPECLSESAILQK                      | 1.303423899        | 2              | 4.565071  |
| P12785        | GHALGETLACLPEVQPGPSFLSQEEWESLFSR          | 1.362716085        | 3              | 4.70531   |
| P12785        | GLESIINIIHSSLAEPK                         | 1.103170279        | 2              | 4.76953   |
| P12785        | GNAGQSNYGFANSTMER                         | 1.125377063        | 2              | 4.43746   |
| P12785        | GTNTGVWVGVSGEASEALSR                      | 0.971845045        | 2              | 3.539723  |
| P12785        | GVDLVLSLAEEK                              | 1.236977733        | 2              | 3.214894  |
| P12785        | GYDYGPHFQGVYEATLEGEQK                     | 1.560035573        | 3              | 3.763916  |
| P12785        | HFQLEQDKPEEQTAHAFVNVLTR                   | 1.506406494        | 3              | 3.453434  |
| P12785        | LDPGSSELQK                                | 1.095837684        | 2              | 2.378937  |
| P12785        | LFDHPEVPIPAESESISR                        | 1.070191285        | 2              | 4.0873    |
| P12785        | LLLPEDPLISGLLSQALK                        | 1.115725537        | 3              | 5.021595  |
| P12785        | LTPGCEAEAEAEICFFIK                        | 1.150302518        | 2              | 4.082347  |
| P12785        | MTVPGLEDLPQHGLPR                          | 0.897284645        | 2              | 3.167776  |
| P12785        | QAQLNLSILLVNPPEPTLTR                      | 1.041269809        | 2              | 4.554855  |
| P12785        | QQEQLVPTLEK                               | 1.195910579        | 2              | 2.447166  |
| P12785        | QSPLLIGSTK                                | 1.396873144        | 1              | 2.107911  |
| P12785        | RQQEQLVPTLEK                              | 1.336387679        | 2              | 3.167008  |
| P12785        | SDEALKPLGVK                               | 0.995106861        | 2              | 3.146637  |
| P12785        | SFDDSGNGYCR                               | 0.985560664        | 2              | 3.1493    |
| P12785        | SLYQPGGVAPESLEYIEAHGTGTK                  | 1.09554718         | 2              | 5.063999  |
| P12785        | SNMGHPEPASGLAALTK                         | 1.106965148        | 2              | 3.647825  |
| P12785        | SNMGHPEPASGLAALTK+Oxidation(2)            | 1.144456483        |                |           |
| P12785        | TGGTYGEDLGADYNLSQVCDGK                    | 1.321810312        | 2              | 5.068894  |

|               |                                          |                    |                |           |
|---------------|------------------------------------------|--------------------|----------------|-----------|
| P12785        | TMEAVQGLLEQGR                            | 1.015595677        | 2              | 3.717564  |
| P12785        | TMEAVQGLLEQGR+Oxidation(1)               | 1.220546541        |                |           |
| P12785        | VGDPQELNGITR                             | 0.674379743        | 2              | 2.558468  |
| P12785        | VHLTGDINPNALFPPVEFPVPR                   | 1.080545534        | 2              | 5.039025  |
| P12785        | VLEALLPLK                                | 1.25404411         | 2              | 2.357012  |
| P12785        | VLESDLVMNVYR                             | 0.47258808         | 2              | 3.405668  |
| P12785        | VLLSLENGVWAPNLHFHNPPEIPALLDGR            | 1.096670969        | 3              | 4.056353  |
| P12785        | VSVHIEGDHR                               | 1.264907473        | 2              | 2.753283  |
| P12785        | VTAIYIDPATHLQK                           | 1.145980284        | 2              | 3.315601  |
| P12785        | VYATILNAGTNTDGCK                         | 0.917181011        | 2              | 4.87661   |
| P12785        | VYQWEDPDSK                               | 1.316794187        | 2              | 3.174712  |
| P12785        | WLSTSIPEAQWQSSLAR                        | 1.015767192        | 2              | 2.372029  |
| <b>P12791</b> | <b>CP2BA Cytochrome P450 2B10</b>        | <b>1.325997955</b> | <b>6.1E-05</b> | <b>2</b>  |
| P12791        | IQEEAQLVEELR                             | 1.253805354        | 2              | 3.759812  |
| P12791        | IQEEAQLVEELRK                            | 1.185171203        | 2              | 3.544593  |
| <b>P12847</b> | <b>MYH3 Myosin_3</b>                     | <b>0.851806315</b> | <b>0.98132</b> | <b>4</b>  |
| P12847        | IEAQNQPFDAK                              | 2.809624814        | 2              | 2.748584  |
| P12847        | MKGTLEDQIISANPLLEAFGNAK                  | 0.605245633        | 3              | 6.889268  |
| P12847        | MKGTLEDQIISANPLLEAFGNAK+Oxidation(0)     | 2.161888183        |                |           |
| P12847        | NALAHALQSSR                              | 1.28155373         | 2              | 2.618051  |
| <b>P12928</b> | <b>KPYR Pyruvate kinase isozymes R/L</b> | <b>0.828473155</b> | <b>0.98427</b> | <b>18</b> |
| P12928        | AETSDVANAVLDGADCIMLSGETAK                | 0.757836372        | 2              | 5.386181  |
| P12928        | CCAAAIIVLTK                              | 0.83121656         | 2              | 2.951444  |
| P12928        | CNLAGKPVVCATQMLESIMITK                   | 0.802394562        | 3              | 5.062019  |
| P12928        | EATESFATSPLSYRPAIALDTK                   | 1.282360055        | 3              | 4.059224  |
| P12928        | EPPEAIWADDVDR                            | 0.897980348        | 2              | 2.440576  |
| P12928        | EPPEAIWADDVDRR                           | 0.869839028        | 2              | 2.330976  |
| P12928        | GDLGIEIPAEK                              | 0.897637524        | 2              | 3.103087  |
| P12928        | GSQVLVTVDPK                              | 0.907256145        | 2              | 2.847728  |
| P12928        | GVNLPNTEVDLPGLSEQDLLDLR                  | 0.769472452        | 2              | 5.44598   |
| P12928        | IGPEGLVTEVEHGGILGSR                      | 0.804952456        | 2              | 4.779319  |
| P12928        | IYIDDGLISLVVQK                           | 0.795744618        | 2              | 4.156784  |
| P12928        | KFDEILEVSDGIMVAR                         | 0.81323027         | 3              | 3.386325  |
| P12928        | KGVNLNTEVDLPGLSEQDLLDLR                  | 0.962141946        | 3              | 4.315272  |
| P12928        | LNFSHGSHEYHAESIANIR                      | 0.870410147        | 3              | 4.181748  |
| P12928        | STSIIATIGPASR                            | 0.814569744        | 2              | 3.579793  |
| P12928        | TGVLQGGPESEVEIVK                         | 0.929090422        | 2              | 4.938263  |
| P12928        | TVWVDYHNITR                              | 1.002371575        | 2              | 2.510377  |
| P12928        | VQFGIESGK                                | 0.893294469        | 1              | 1.982685  |
| <b>P12938</b> | <b>CP2D3 Cytochrome P450 2D3</b>         | <b>0.861999182</b> | <b>0.30514</b> | <b>5</b>  |
| P12938        | DLTDAFLAEIEK                             | 0.961174841        | 2              | 4.142829  |
| P12938        | FDYGDPDFIK                               | 0.822630634        | 2              | 2.443841  |
| P12938        | GNPESSFNDANLR                            | 1.021408915        | 2              | 4.309071  |
| P12938        | RFDYGDPDFIK                              | 0.789567447        | 2              | 2.829973  |
| P12938        | TWDPDQPPR                                | 0.861966881        | 2              | 2.43149   |
| <b>P12939</b> | <b>CP2DA Cytochrome P450 2D10</b>        | <b>1.245942515</b> | <b>3.3E-07</b> | <b>8</b>  |
| P12939        | AVQEVLVTHGEDTADRPVPIFK                   | 1.266311837        | 3              | 5.298196  |
| P12939        | FEYEDPYLIR                               | 1.667799543        | 2              | 2.409207  |
| P12939        | FGDIAPLNLPR                              | 1.333050622        | 2              | 3.161536  |
| P12939        | ITSCDIEVQDFVIPK                          | 1.365308714        | 2              | 4.545211  |
| P12939        | NLTDAFLAEVEK                             | 1.151371359        | 2              | 4.136254  |
| P12939        | RFEYEDPYLIR                              | 1.254911056        | 3              | 3.535597  |
| P12939        | SQGVVFASYGPEWR                           | 1.087371983        | 2              | 3.59811   |
| P12939        | TTWDPAQPPR                               | 1.353148664        | 2              | 2.433837  |
| <b>P13084</b> | <b>NPM Nucleophosmin</b>                 | <b>1.452771507</b> | <b>0.12601</b> | <b>3</b>  |
| P13084        | MSVQPTVSLGGFEITPPVVLR                    | 1.277613111        | 2              | 3.582177  |
| P13084        | MTDQEAIQLWQWR                            | 1.065536716        | 2              | 3.16819   |



|               |                                                                               |                    |                |           |
|---------------|-------------------------------------------------------------------------------|--------------------|----------------|-----------|
| P13084        | VDNDENEHQLSLR                                                                 | 1.58201366         | 2              | 3.929126  |
| <b>P13086</b> | <b>SUCA Succinyl_CoA ligase [ADP/GDP_forming] subunit alpha_mitochondrial</b> | <b>0.988631104</b> | <b>0.99968</b> | <b>6</b>  |
| P13086        | LIGNPCGIINPGECK                                                               | 1.002718664        | 2              | 4.512835  |
| P13086        | MGHAGAIAGGK                                                                   | 1.014228509        | 1              | 2.793092  |
| P13086        | MGHAGAIAGGK+Oxidation(0)                                                      | 1.051304371        |                |           |
| P13086        | NIYIDK                                                                        | 0.939614372        | 1              | 1.971983  |
| P13086        | QGTFHSQQALEYGTK                                                               | 0.951660549        | 2              | 2.841769  |
| P13086        | VICQGFTGK                                                                     | 0.968029728        | 2              | 2.308482  |
| <b>P13107</b> | <b>CP2B3 Cytochrome P450 2B3</b>                                              | <b>0.98971642</b>  | <b>1</b>       | <b>11</b> |
| P13107        | ATLDPNAPR                                                                     | 1.011466882        | 2              | 2.326976  |
| P13107        | CLVEELK                                                                       | 0.972790273        | 1              | 2.00381   |
| P13107        | DFIDTLLHMEK                                                                   | 1.102615169        | 2              | 3.009206  |
| P13107        | EVLDYIDHSVENHR                                                                | 0.970561943        | 2              | 3.960704  |
| P13107        | FSDVSPMGLPCR                                                                  | 0.961352954        | 2              | 2.761684  |
| P13107        | FSDVSPMGLPCR+Oxidation(6)                                                     | 0.973639939        |                |           |
| P13107        | GIIAVLQPIMQEYGVSVNEER                                                         | 1.192552733        | 3              | 5.361229  |
| P13107        | LLDLLYR                                                                       | 1.129129324        | 2              | 2.488436  |
| P13107        | MCLGEGIAR                                                                     | 0.891558388        | 2              | 2.693204  |
| P13107        | QSVEDQIKEEAK                                                                  | 1.150392732        | 2              | 2.495909  |
| P13107        | SFIQLQEK                                                                      | 1.030332299        | 2              | 2.406467  |
| <b>P13221</b> | <b>AATC Aspartate aminotransferase_cytoplasmic</b>                            | <b>2.680557992</b> | <b>9.9E-20</b> | <b>8</b>  |
| P13221        | ITWSNPPAQGAR                                                                  | 2.577013387        | 2              | 3.393543  |
| P13221        | IVATTLSNPELFK                                                                 | 2.13350976         | 2              | 3.639694  |
| P13221        | NFLYNER                                                                       | 3.458518043        | 1              | 1.931059  |
| P13221        | NLDYVATSINEAVTK                                                               | 2.264156077        | 2              | 4.887107  |
| P13221        | SCASQLVLGDNSPALR                                                              | 2.929234127        | 2              | 5.405178  |
| P13221        | TDDSQPWVLPVVR                                                                 | 2.076831138        | 2              | 3.524652  |
| P13221        | VGGVQSLGGTGALR                                                                | 1.325074094        | 2              | 2.393139  |
| P13221        | VGNLTVVGK                                                                     | 1.018380206        | 2              | 2.550872  |
| <b>P13255</b> | <b>GNMT Glycine N_methyltransferase</b>                                       | <b>1.441508467</b> | <b>6.5E-13</b> | <b>8</b>  |
| P13255        | AHMVTLDYTVQVPGAGR                                                             | 1.080364004        | 2              | 4.934911  |
| P13255        | AWLLGLLR                                                                      | 1.462645606        | 2              | 2.789044  |
| P13255        | DITTSVLTVNKK                                                                  | 1.521251446        | 2              | 3.978507  |
| P13255        | LSYYPHCLASFTELVQEAFFGR                                                        | 1.101218036        | 3              | 3.700447  |
| P13255        | NYDYILSTGCAPP GK                                                              | 1.061608385        | 2              | 4.593596  |
| P13255        | SDLTKDITTSVLTVNKK                                                             | 0.737508082        | 2              | 3.09809   |
| P13255        | SLGVAEAGIPDQYADGEAAR                                                          | 1.151901986        | 2              | 5.755338  |
| P13255        | VWQLYIGDTR                                                                    | 0.74552155         | 2              | 2.605269  |
| <b>P13383</b> | <b>NUCL Nucleolin</b>                                                         | <b>1.38917418</b>  | <b>7.4E-05</b> | <b>8</b>  |
| P13383        | FGYVDFESAEDLEK                                                                | 1.56572012         | 2              | 2.638528  |
| P13383        | GFGFVDFNSEEDAK                                                                | 1.351561841        | 2              | 3.716178  |
| P13383        | GLSEDTEETLK                                                                   | 0.966826278        | 2              | 2.904298  |
| P13383        | IEGSEPTTFFNLFIGNLNPNK                                                         | 1.146841076        | 2              | 3.463486  |
| P13383        | NDLAAVDVR                                                                     | 1.485226222        | 2              | 2.431115  |
| P13383        | NLSFNITEDELK                                                                  | 1.331427185        | 2              | 2.777811  |
| P13383        | SEADAENLEEK                                                                   | 1.33006504         | 2              | 3.060445  |
| P13383        | SVSLYYTGEK                                                                    | 1.780676206        | 1              | 2.024874  |
| <b>P13437</b> | <b>THIM 3_ketoacyl_CoA thiolase_mitochondrial</b>                             | <b>0.984736919</b> | <b>0.99999</b> | <b>22</b> |
| P13437        | AANEAGYFNEEMAPIEVK                                                            | 0.956019838        | 2              | 5.24088   |
| P13437        | AANEAGYFNEEMAPIEVK+Oxidation(11)                                              | 0.950696656        |                |           |
| P13437        | DAEVVLCGGTESMSQSPYSVR                                                         | 1.444166619        | 2              | 5.16125   |
| P13437        | DFTATDLTEFAAR                                                                 | 1.831125425        | 2              | 4.920811  |
| P13437        | DMDLIDVNEAFAPQFLAVQK                                                          | 0.712890644        | 3              | 6.501692  |
| P13437        | DMDLIDVNEAFAPQFLAVQK+Oxidation(1)                                             | 1.068465054        |                |           |
| P13437        | EGTVTAGNASGMSDGAGVVIIASEDAVK                                                  | 1.020195852        | 3              | 5.731832  |
| P13437        | EGTVTAGNASGMSDGAGVVIIASEDAVKK                                                 | 0.921566325        | 3              | 4.948078  |

|               |                                                           |                    |                |           |
|---------------|-----------------------------------------------------------|--------------------|----------------|-----------|
| P13437        | GVFIVAAK                                                  | 0.966316077        | 2              | 2.583429  |
| P13437        | ITAHLVHELK                                                | 1.468796255        | 2              | 3.024678  |
| P13437        | LCGSGFQSVSGCQEICK                                         | 1.272754921        | 2              | 5.477032  |
| P13437        | LEDTLWAGLTDQHVK                                           | 0.926544353        | 2              | 5.388068  |
| P13437        | RTPFGAYGGLLK                                              | 0.990366228        | 2              | 2.944408  |
| P13437        | SLDLDPK                                                   | 1.101461625        | 2              | 3.019894  |
| P13437        | TNVSGGAIALGHPLGGSGR                                       | 0.994175157        | 2              | 6.242382  |
| P13437        | TPFGAYGGLLK                                               | 1.050324087        | 2              | 2.785176  |
| P13437        | VGVPTETGALTLNR                                            | 0.943432767        | 2              | 3.69551   |
| P13437        | VPPETIDSVIVGNVMQSSDAAYLAR                                 | 0.890789661        | 2              | 5.95532   |
| P13437        | VPPETIDSVIVGNVMQSSDAAYLAR+Oxidation(14)                   | 0.977356658        |                |           |
| P13437        | VVGYFVSGCDPAIMGIGPVPAITGALK                               | 0.874926813        | 3              | 5.472631  |
| P13437        | VVGYFVSGCDPAIMGIGPVPAITGALKK                              | 0.993127545        | 3              | 3.586936  |
| P13437        | YAVGSACIGGGQGISLIQNTA                                     | 0.973276624        | 2              | 2.477781  |
| <b>P13444</b> | <b>METK1 S_adenosylmethionine synthase isoform type_1</b> | <b>1.744338568</b> | <b>9.9E-20</b> | <b>8</b>  |
| P13444        | FVIGGPQGDAGVTGR                                           | 1.707297117        | 2              | 4.726541  |
| P13444        | HIGYDDSAK                                                 | 1.869549082        | 2              | 2.825247  |
| P13444        | ICDQISDAVLDAHLK                                           | 1.844811325        | 2              | 5.156051  |
| P13444        | NEEDVAGAGDQGLMFGYATDETEECMPLTIVLAHK                       | 1.148617359        | 3              | 5.423157  |
| P13444        | SEFPWEVPK                                                 | 1.511141074        | 2              | 2.541992  |
| P13444        | SGVLPWLRPDSK                                              | 1.004493492        | 2              | 3.107456  |
| P13444        | TCNVLVALEQQSPDIAQCVHLDR                                   | 1.753562397        | 3              | 5.684929  |
| P13444        | TQVTVQYVQDNGAVIPVR                                        | 1.711738904        | 2              | 5.094707  |
| <b>P13471</b> | <b>RS14 40S ribosomal protein S14</b>                     | <b>1.162801596</b> | <b>0.85483</b> | <b>3</b>  |
| P13471        | ADREDESSPYAAMLAAQDVAQR                                    | 1.248996993        | 2              | 5.853403  |
| P13471        | ELGITALHIK                                                | 1.326664994        | 2              | 2.416054  |
| P13471        | IEDVTPIPSDSTR                                             | 1.098142635        | 2              | 3.992328  |
| <b>P13601</b> | <b>AL1A7 Aldehyde dehydrogenase_ cytosolic 1</b>          | <b>1.489874161</b> | <b>1.7E-12</b> | <b>22</b> |
| P13601        | ANNTPYGLAAGVFTK                                           | 1.669713084        | 2              | 4.254565  |
| P13601        | EAGFPPGVVNVVPGYGSTAGAAISSHMDIDK                           | 1.642801954        | 3              | 3.305845  |
| P13601        | EEIFGPVQIMK                                               | 1.867669821        | 2              | 3.81693   |
| P13601        | EMGEQGVVEYTELK                                            | 2.164545333        | 2              | 3.887575  |
| P13601        | FPVINPATEEVICHVEEGDK                                      | 1.033472301        | 3              | 4.09538   |
| P13601        | FPVINPATEEVICHVEEGDKADVDK                                 | 0.888100324        | 4              | 5.142944  |
| P13601        | GFFVQPTVFSNVTDENR                                         | 1.718644587        | 2              | 4.312201  |
| P13601        | IAKEEIFGPVQIMK                                            | 1.174848181        | 2              | 3.864847  |
| P13601        | IFINNEWHNSLNGK                                            | 1.453333947        | 2              | 3.500032  |
| P13601        | IFTHAYLLDTEVSIKALK                                        | 1.152402721        | 2              | 2.341056  |
| P13601        | IHQQTIPSDGDVFTYTR                                         | 1.369051658        | 2              | 4.627728  |
| P13601        | ILDLESK                                                   | 1.123766239        | 2              | 2.729225  |
| P13601        | ILDLESK                                                   | 1.237086902        | 3              | 3.341717  |
| P13601        | KFPVINPATEEVICHVEEGDK                                     | 0.973636506        | 3              | 3.753911  |
| P13601        | KFPVINPATEEVICHVEEGDKADVDK                                | 0.970237613        | 4              | 4.866906  |
| P13601        | KYVLGNPLDSGISQGPQIDKEQHAK                                 | 1.274719964        | 3              | 5.60002   |
| P13601        | LFVEESIYDEFVR                                             | 1.49567822         | 2              | 4.067123  |
| P13601        | VLLATMESMNAGK                                             | 1.731665663        | 2              | 3.981084  |
| P13601        | VSFTGSTEVGK                                               | 1.799446671        | 2              | 3.086549  |
| P13601        | YFAGWADK                                                  | 1.374078624        | 1              | 2.056434  |
| P13601        | YVLGNPLDSGISQGPQIDK                                       | 1.613322441        | 2              | 4.961924  |
| P13601        | YVLGNPLDSGISQGPQIDKEQHAK                                  | 1.59884839         | 4              | 4.604517  |
| <b>P13697</b> | <b>MAOX NADP_ dependent malic enzyme</b>                  | <b>1.302776055</b> | <b>0.15454</b> | <b>5</b>  |
| P13697        | AECSAEECYK                                                | 1.324079793        | 1              | 2.810228  |
| P13697        | AIFASGSPFDPVTLDPGR                                        | 1.17170587         | 2              | 4.257449  |
| P13697        | GHIASVLNAWPEDVVK                                          | 1.010458969        | 2              | 3.816658  |
| P13697        | HINDSVFLTTAEVISQVSDK                                      | 1.301332423        | 3              | 4.341857  |
| P13697        | NLEAIVQK                                                  | 2.078590342        | 1              | 2.197101  |

|               |                                                                        |                    |                |           |
|---------------|------------------------------------------------------------------------|--------------------|----------------|-----------|
| <b>P13803</b> | <b>ETFA Electron transfer flavoprotein subunit alpha_mitochondrial</b> | <b>0.969019651</b> | <b>1.2E-08</b> | <b>14</b> |
| P13803        | AAVDAGFVPNDMQVGQTGK                                                    | 0.992843548        | 2              | 4.772173  |
| P13803        | AAVDAGFVPNDMQVGQTGK+Oxidation(11)                                      | 0.931262981        |                |           |
| P13803        | DPEAPIFQVADYGIVADLFK                                                   | 1.000642337        | 2              | 5.355403  |
| P13803        | GLLPEELTPLILETQK                                                       | 0.88082445         | 2              | 4.669336  |
| P13803        | GTSFEAAAASGGSASSEK                                                     | 1.101979471        | 2              | 5.340793  |
| P13803        | LGGEVSVCLVAGTK                                                         | 0.905131203        | 2              | 4.711003  |
| P13803        | LLYDLADQLHAAVGSAR                                                      | 0.983348736        | 2              | 4.643563  |
| P13803        | LNVAPVSDIIEIK                                                          | 1.015173814        | 3              | 4.717721  |
| P13803        | QFSYTHICAGASAFGK                                                       | 0.797278165        | 2              | 3.163802  |
| P13803        | SDRPELTGAK                                                             | 1.059425324        | 3              | 3.341209  |
| P13803        | TIVAINKDPEAPIFQVADYGIVADLFK                                            | 0.797444003        | 3              | 7.038399  |
| P13803        | TIYAGNALCTVK                                                           | 0.925256907        | 2              | 3.661068  |
| P13803        | VLVAQHDAYK                                                             | 0.880328626        | 2              | 3.259243  |
| P13803        | VVQDLCK                                                                | 0.893265128        | 2              | 2.751452  |
| <b>P13832</b> | <b>MRLCA Myosin regulatory light chain RLC_A</b>                       | <b>0.955544143</b> | <b>0.50028</b> | <b>3</b>  |
| P13832        | ATSNVFMFDQSQIQEFK                                                      | 0.883812122        | 2              | 4.652575  |
| P13832        | FTDEEVDELYR                                                            | 0.99574636         | 2              | 3.499027  |
| P13832        | GNFNIEFTR                                                              | 1.025436831        | 2              | 2.628266  |
| <b>P14046</b> | <b>A1I3 Alpha_1_inhibitor 3</b>                                        | <b>0.667666743</b> | <b>6.5E-12</b> | <b>5</b>  |
| P14046        | GDPIPNEQVLIK                                                           | 0.608515088        | 2              | 3.181515  |
| P14046        | GMYESLPVVAVK                                                           | 0.643278654        | 2              | 3.397591  |
| P14046        | ISLCHGNPTFSSETK                                                        | 1.00582429         | 2              | 3.682433  |
| P14046        | QQNSYGGFSSTQDVTVALDALS                                                 | 0.569159705        | 2              | 4.142656  |
| P14046        | QSPGPGSEVATVPETGR                                                      | 0.649699467        | 2              | 3.336217  |
| <b>P14141</b> | <b>CAH3 Carbonic anhydrase 3</b>                                       | <b>1.002798398</b> | <b>3.7E-12</b> | <b>18</b> |
| P14141        | EAPFNHFDPSCLFPACR                                                      | 1.414352556        | 2              | 4.341764  |
| P14141        | EKGEFQILLDALDK                                                         | 1.165048147        | 2              | 4.559532  |
| P14141        | EKGEFQILLDALDKIK                                                       | 1.214118566        | 2              | 3.110992  |
| P14141        | EPMTVSSDQMAK                                                           | 1.271344888        | 2              | 2.941079  |
| P14141        | EWGYASHNGPEHWHELYPIAK                                                  | 1.287567385        | 3              | 4.517257  |
| P14141        | GDNQSPIELHTK                                                           | 0.971615117        | 2              | 3.764329  |
| P14141        | GEFQILLDALDK                                                           | 0.928569714        | 2              | 4.664411  |
| P14141        | GEFQILLDALDKIK                                                         | 0.941443936        | 2              | 3.253896  |
| P14141        | GGPLSGPYR                                                              | 1.023682674        | 2              | 2.956714  |
| P14141        | GKEAPFNHFDPSCLFPACR                                                    | 0.773266051        | 3              | 3.525347  |
| P14141        | HDPSLQPWSVSYDPGSAK                                                     | 0.909812877        | 3              | 5.572367  |
| P14141        | QFHLHWGSSDDHGSEHTVDGVK                                                 | 1.083346932        | 2              | 4.643401  |
| P14141        | QPDGIAVVGIFLK                                                          | 1.056753434        | 2              | 2.576633  |
| P14141        | SLFASAENEPVPLVGNWRPPQPIK                                               | 0.939711885        | 3              | 5.701326  |
| P14141        | VVFDDTFDR                                                              | 0.97983772         | 2              | 3.372337  |
| P14141        | YAAELHLVHWNPK                                                          | 1.0211655          | 2              | 4.332443  |
| P14141        | YNTFGEALK                                                              | 1.029351302        | 2              | 2.314709  |
| P14141        | YNTFGEALKQPDGIAVVGIFLK                                                 | 0.895371906        | 3              | 6.01375   |
| <b>P14173</b> | <b>DDC Aromatic_L_amino_acid decarboxylase</b>                         | <b>1.057425316</b> | <b>0.0429</b>  | <b>7</b>  |
| P14173        | AGEGGGVIQGSASEATLVALLAAR                                               | 0.90715558         | 2              | 3.543346  |
| P14173        | ALIPTTAPQEPETYEDIIR                                                    | 1.144789034        | 3              | 4.096662  |
| P14173        | GSNQLNETLLQR                                                           | 1.125693845        | 2              | 2.866176  |
| P14173        | HSHQDSGLITDYR                                                          | 1.059711567        | 3              | 3.633439  |
| P14173        | MLELPEAFLAGR                                                           | 1.134442395        | 2              | 2.770898  |
| P14173        | QLQAASPELTQAALMEK                                                      | 1.093379825        | 2              | 3.814373  |
| P14173        | TDLTEAFNMDPVYLR                                                        | 1.068415041        | 2              | 3.676677  |
| <b>P14408</b> | <b>FUMH Fumarate hydratase_mitochondrial</b>                           | <b>0.949571598</b> | <b>0.95453</b> | <b>15</b> |
| P14408        | AAAENVNQEYGLDPK                                                        | 1.204921355        | 2              | 4.467802  |
| P14408        | AIEMLGELGSK                                                            | 0.950141868        | 2              | 3.507025  |
| P14408        | IEYDTFGELK                                                             | 0.9437493          | 2              | 3.542608  |

|               |                                                                 |                    |                |           |
|---------------|-----------------------------------------------------------------|--------------------|----------------|-----------|
| P14408        | IEYDTFGELKVPTDK                                                 | 0.776974654        | 2              | 3.649869  |
| P14408        | IYELAAGGTAVGTGLNTR                                              | 0.995697448        | 2              | 5.560617  |
| P14408        | KTAIELGYLTAEQFDEWVKPK                                           | 0.934935481        | 3              | 3.576987  |
| P14408        | LMNESLMLVLTALNPHIGYDK                                           | 1.040337875        | 3              | 5.647627  |
| P14408        | LMNESLMLVLTALNPHIGYDK+Oxidation(6)                              | 1.013839976        |                |           |
| P14408        | LNDHFPLVVWQTGSGTQTNMNVNEVISNR                                   | 0.918283057        | 3              | 6.411434  |
| P14408        | SGLGELILPENEPGSSIMPGK                                           | 0.954100801        | 2              | 4.37712   |
| P14408        | SGLGELILPENEPGSSIMPGK+Oxidation(17)                             | 0.939198953        |                |           |
| P14408        | SKEFAQVIK                                                       | 1.133978289        | 2              | 2.48217   |
| P14408        | SQSSNDTFTAMHIAAALEVHQVLLPGLQK                                   | 0.990722045        | 3              | 4.20594   |
| P14408        | TAIELGYLTAEQFDEWVKPK                                            | 0.936286463        | 2              | 4.527267  |
| P14408        | THTQDAVPLTLGQEFSGYVQVQYAMER                                     | 1.210075251        | 3              | 6.005599  |
| <b>P14480</b> | <b>FIBB Fibrinogen beta chain</b>                               | <b>1.541321794</b> | <b>9.9E-20</b> | <b>10</b> |
| P14480        | AHYGGFTVQTEANK                                                  | 2.003687542        | 2              | 2.906667  |
| P14480        | DNENVINEYSILEQK                                                 | 1.156054678        | 2              | 3.269349  |
| P14480        | GFGNIATNEDTK                                                    | 1.290476063        | 2              | 2.739107  |
| P14480        | GFGNIATNEDTKK                                                   | 2.033509121        | 2              | 2.819092  |
| P14480        | IGPTELLIEMEDWK                                                  | 1.783090061        | 2              | 3.57419   |
| P14480        | LESDISAQTEYCHTPCTVNCNIPVVSJK                                    | 1.645676359        | 3              | 5.218724  |
| P14480        | LYIDETVNDNIPLNLR                                                | 1.450092157        | 2              | 3.006875  |
| P14480        | QTLNHERPIK                                                      | 2.384644153        | 2              | 2.747412  |
| P14480        | TENGGWTVIQNR                                                    | 1.591490882        | 2              | 3.228431  |
| P14480        | YCGLPGEYWLGNCK                                                  | 1.414312845        | 2              | 3.318062  |
| <b>P14604</b> | <b>ECHM Enoyl_CoA hydratase_mitochondrial</b>                   | <b>0.936971525</b> | <b>0.08343</b> | <b>8</b>  |
| P14604        | AFAAGADIK                                                       | 1.090715846        | 2              | 3.234199  |
| P14604        | AQFGQPEILLGTIPGAGGTQR                                           | 0.932332771        | 2              | 5.647284  |
| P14604        | FLSHWDHITR                                                      | 0.983675253        | 2              | 3.129168  |
| P14604        | IFPVETLVEEAIQCAEK                                               | 0.971549667        | 2              | 5.81061   |
| P14604        | LFYSTFATDDR                                                     | 1.375888619        | 2              | 2.726903  |
| P14604        | NSSVGLIQLNRPK                                                   | 1.042190477        | 2              | 3.516642  |
| P14604        | SLAMEMVLTGDR                                                    | 0.845439266        | 2              | 3.384629  |
| P14604        | TFQDCYSGK                                                       | 1.026320448        | 2              | 2.788632  |
| <b>P14668</b> | <b>ANXA5 Annexin A5</b>                                         | <b>1.087296095</b> | <b>0.24397</b> | <b>3</b>  |
| P14668        | ETSGNLENLLAVVK                                                  | 1.120472126        | 2              | 3.481405  |
| P14668        | GLGTDEDSILNLLTAR                                                | 0.825991105        | 2              | 4.616629  |
| P14668        | GTVTDFSGFDGR                                                    | 0.690392088        | 2              | 2.932259  |
| <b>P14669</b> | <b>ANXA3 Annexin A3</b>                                         | <b>0.778207802</b> | <b>7.8E-14</b> | <b>5</b>  |
| P14669        | GMGTDEDTLIEILTR                                                 | 0.817278555        | 2              | 3.150109  |
| P14669        | GTINNYPGFNPSVDAEAIR                                             | 0.77313784         | 2              | 4.933701  |
| P14669        | QYQEAYEQALK                                                     | 0.778923129        | 2              | 2.551154  |
| P14669        | SEIDLLDIR                                                       | 0.866707692        | 2              | 2.617257  |
| P14669        | TLINILTER                                                       | 0.772337159        | 2              | 2.518674  |
| <b>P14685</b> | <b>PSMD3 26S proteasome non_ATPase regulatory subunit 3</b>     | <b>0.989269391</b> | <b>0.76367</b> | <b>3</b>  |
| P14685        | AIQLEYSEAR                                                      | 1.169672764        | 2              | 2.584062  |
| P14685        | LQLDSPEDAEIFAK                                                  | 1.053672723        | 2              | 3.861351  |
| P14685        | SVFPEQANNNEWAR                                                  | 0.953604801        | 2              | 3.043399  |
| <b>P14740</b> | <b>DPP4 Dipeptidyl peptidase 4</b>                              | <b>1.074800572</b> | <b>0.99857</b> | <b>2</b>  |
| P14740        | LGTLEVEDQIEAAR                                                  | 0.996092072        | 2              | 3.906668  |
| P14740        | VLEDNSALDK                                                      | 1.131035137        | 2              | 2.860023  |
| <b>P14882</b> | <b>PCCA Propionyl_CoA carboxylase alpha chain_mitochondrial</b> | <b>1.249936908</b> | <b>0.99999</b> | <b>12</b> |
| P14882        | FLSDVYPDGFK                                                     | 0.967599276        | 2              | 2.694512  |
| P14882        | FSSQEAASSFGDDR                                                  | 1.212027204        | 2              | 3.318769  |
| P14882        | HGNALWLNLR                                                      | 1.252623464        | 2              | 2.597135  |
| P14882        | HIEIQLGDK                                                       | 1.034832968        | 2              | 2.397127  |
| P14882        | LHDEDHTVVASNNGPTFNVEVDGSK                                       | 0.999723938        | 3              | 6.014308  |

|               |                                                                       |                    |                |           |
|---------------|-----------------------------------------------------------------------|--------------------|----------------|-----------|
| P14882        | LQVEHPVTECITGLDLVQEMILVAK                                             | 1.005186741        | 3              | 3.542439  |
| P14882        | MADEAVCVGPAPTSK                                                       | 1.143944621        | 2              | 4.370352  |
| P14882        | MEDALDSYVIR                                                           | 1.087234784        | 2              | 3.107002  |
| P14882        | SYLNMDAIMEAIK                                                         | 1.021592649        | 2              | 3.150029  |
| P14882        | TGAQAVHPGYGFLENK                                                      | 1.054850159        | 2              | 4.045664  |
| P14882        | TVAIHSVDVDASSVHK                                                      | 1.275473551        | 3              | 4.100473  |
| P14882        | VVEEAPSIFLDPETR                                                       | 0.903037965        | 2              | 4.150364  |
| <b>P15083</b> | <b>PIGR Polymeric immunoglobulin receptor</b>                         | <b>0.678459137</b> | <b>0.00016</b> | <b>4</b>  |
| P15083        | EIQNAGDQAQENR                                                         | 0.933063877        | 2              | 3.655425  |
| P15083        | FSVLITGLR                                                             | 0.66517799         | 2              | 2.667918  |
| P15083        | GVTGGSVAIVCPYNPK                                                      | 0.798547592        | 2              | 4.329145  |
| P15083        | NNADLQVLEPEPELLYK                                                     | 0.59570136         | 2              | 2.640825  |
| <b>P15149</b> | <b>CP2A2 Cytochrome P450 2A2</b>                                      | <b>0.907455341</b> | <b>0.00012</b> | <b>10</b> |
| P15149        | DVQECILEEAGYLIK                                                       | 1.031592574        | 3              | 4.597108  |
| P15149        | DVYSSITQLSER                                                          | 1.125224984        | 2              | 2.426858  |
| P15149        | FSNLAPLGIPR                                                           | 0.855173505        | 2              | 3.20416   |
| P15149        | GELPTFNILFK                                                           | 0.906898135        | 2              | 2.417119  |
| P15149        | GTDVFPPIIGSLMTEPK                                                     | 0.846262006        | 2              | 3.933875  |
| P15149        | GYGFSLSNVEQAK                                                         | 0.968997715        | 2              | 3.449176  |
| P15149        | NFIDSFLIR                                                             | 0.944007883        | 1              | 2.565989  |
| P15149        | QNHSTLDPNSPR                                                          | 1.009005659        | 2              | 3.029952  |
| P15149        | TLQGTGAPIDPSIYLSK                                                     | 0.886486181        | 2              | 4.209558  |
| P15149        | TVSNVINSIVFGNR                                                        | 0.846050203        | 2              | 3.530468  |
| <b>P15178</b> | <b>SYDC Aspartyl_tRNA synthetase_cytoplasmic</b>                      | <b>0.896734839</b> | <b>0.95636</b> | <b>6</b>  |
| P15178        | FQTEIQTVNK                                                            | 1.121333202        | 2              | 2.387757  |
| P15178        | GEEILSGAQR                                                            | 0.968334729        | 2              | 2.91514   |
| P15178        | LEYCEALMLR                                                            | 0.887024603        | 2              | 2.931232  |
| P15178        | LPLQLDDAIRPEVEGEDGR                                                   | 1.122022645        | 3              | 3.89853   |
| P15178        | QMVKFAANINK+Oxidation(1)                                              | 0.908218531        |                |           |
| P15178        | SNAYLAQSPQLYK                                                         | 0.905320183        | 2              | 2.842947  |
| <b>P15429</b> | <b>ENOB Beta_enolase</b>                                              | <b>0.924466242</b> | <b>0.98853</b> | <b>7</b>  |
| P15429        | DATNVGDEGGFAPNILENNEALELLK                                            | 1.4240449          | 2              | 5.692757  |
| P15429        | FMIELDGTENK                                                           | 2.30151031         | 2              | 2.341909  |
| P15429        | HIADLAGNPDLVLPVAFNVINGGSHAGNK                                         | 2.323764633        | 3              | 4.629873  |
| P15429        | IEEALGDK                                                              | 4.64306954         | 1              | 2.36389   |
| P15429        | TAIQAAGYPDK                                                           | 4.249985274        | 2              | 2.682114  |
| P15429        | VNQIGSVTESIQACK                                                       | 0.921830963        | 2              | 5.042507  |
| P15429        | YNQLMRIEALGDK                                                         | 0.956435672        | 2              | 2.492086  |
| <b>P15473</b> | <b>IBP3 Insulin_like growth factor_binding protein 3</b>              | <b>0.901150992</b> | <b>0.79191</b> | <b>2</b>  |
| P15473        | EMEDTLNHLKFLNVLSPR                                                    | 0.89328173         | 2              | 2.313431  |
| P15473        | MEVIKQARDSQR                                                          | 1.039774558        | 2              | 2.312101  |
| <b>P15650</b> | <b>ACADL Long_chain specific acyl_CoA dehydrogenase_mitochondrial</b> | <b>0.837681948</b> | <b>9.9E-20</b> | <b>20</b> |
| P15650        | AFVDSCLQLHETK                                                         | 0.898242004        | 2              | 4.137933  |
| P15650        | AQDTAELFFEDVR                                                         | 0.963051751        | 2              | 4.809271  |
| P15650        | AQDTAELFFEDVRLPASALLGEENK                                             | 0.99539493         | 3              | 4.291989  |
| P15650        | CIGAIAMTEPGAGSDLQGVR                                                  | 0.714809633        | 2              | 6.102579  |
| P15650        | CIGAIAMTEPGAGSDLQGVR+Oxidation(6)                                     | 0.77167463         |                |           |
| P15650        | EQIEQFIPQMTAGK                                                        | 1.745361212        | 2              | 4.990434  |
| P15650        | FFQEEVIPYHEEWEK                                                       | 1.199547014        | 2              | 4.958344  |
| P15650        | GFYYLMQELPQER                                                         | 0.804364919        | 2              | 3.911878  |
| P15650        | IFSSEHDIFR                                                            | 1.034037583        | 2              | 2.987184  |
| P15650        | KFFQEEVIPYHEEWEK                                                      | 0.963077394        | 3              | 5.007729  |
| P15650        | LDSASASMAK                                                            | 0.841997403        | 2              | 2.63886   |
| P15650        | LPASALLGEENK                                                          | 1.614701991        | 2              | 3.415677  |
| P15650        | LPASALLGEENKGFYYLMQELPQER                                             | 0.762881961        | 3              | 3.626521  |

|               |                                                                        |                    |                |           |
|---------------|------------------------------------------------------------------------|--------------------|----------------|-----------|
| P15650        | QLLGINIAEK                                                             | 0.848719748        | 2              | 3.297413  |
| P15650        | RLDSASASMAK                                                            | 0.787689772        | 2              | 3.485178  |
| P15650        | RLDSASASMAK+Oxidation(8)                                               | 0.961473318        |                |           |
| P15650        | RSGSDWILNGSK                                                           | 2.344838946        | 2              | 2.857289  |
| P15650        | SGSDWILNGSK                                                            | 0.956783946        | 2              | 2.932576  |
| P15650        | VQPIYGGTNEIMK                                                          | 0.82132507         | 2              | 3.250186  |
| P15650        | VQPIYGGTNEIMK+Oxidation(11)                                            | 0.87326078         |                |           |
| <b>P15651</b> | <b>ACADS Short_chain specific acyl_CoA dehydrogenase_mitochondrial</b> | <b>0.797192875</b> | <b>9.9E-20</b> | <b>9</b>  |
| P15651        | ASSTANLIFEDCR                                                          | 0.745924347        | 2              | 3.422934  |
| P15651        | EEGDSWVLNGTK                                                           | 1.444718686        | 2              | 2.304456  |
| P15651        | ELVPIAAQLDK                                                            | 1.212607598        | 1              | 1.956785  |
| P15651        | ELVPIAAQLDKEHLFPTSQVK                                                  | 0.299071898        | 2              | 4.037627  |
| P15651        | GISAFVPMPTPGLTLGK                                                      | 1.080455572        | 2              | 2.510096  |
| P15651        | IGCFALSEPGNGSDAGAASTTAR                                                | 0.902712398        | 2              | 5.58182   |
| P15651        | IGIASQALGIAQASLDCAVK                                                   | 0.801064205        | 2              | 4.930885  |
| P15651        | ITEIYEGTSEIQR                                                          | 0.824869562        | 2              | 4.297855  |
| P15651        | LAASEAATAISHQAIQLGGMGYVTEMPAER                                         | 0.787324821        | 4              | 4.912566  |
| <b>P15684</b> | <b>AMPN Aminopeptidase N</b>                                           | <b>1.394728152</b> | <b>4.1E-07</b> | <b>5</b>  |
| P15684        | ALGDTAPAPNIDTTELVER                                                    | 1.02418025         | 2              | 3.906228  |
| P15684        | AQIIHDSFNLASAGK                                                        | 1.678885326        | 2              | 3.77442   |
| P15684        | ESALVFDQSSSISNK                                                        | 2.601242837        | 2              | 2.454454  |
| P15684        | VMAVDALASSHPLSPANEVNTPAQISELFDISITYSK                                  | 1.453017058        | 3              | 3.823935  |
| P15684        | VVATTQMQAADAR                                                          | 1.25380546         | 2              | 2.777344  |
| <b>P15709</b> | <b>ST2A1 Bile salt sulfotransferase</b>                                | <b>1.039103441</b> | <b>0.0519</b>  | <b>2</b>  |
| P15709        | GNVLYGSWFEHIR                                                          | 1.132418899        | 2              | 3.04906   |
| P15709        | NHFTVSQAEAFDK                                                          | 0.491598326        | 2              | 3.661526  |
| <b>P15978</b> | <b>HA11 Class I histocompatibility antigen_Non_RT1.A alpha_1 chain</b> | <b>1.018815467</b> | <b>0.74849</b> | <b>2</b>  |
| P15978        | VEHEGLPEPLSQR                                                          | 1.042563462        | 2              | 3.271872  |
| P15978        | YSDAENPR                                                               | 0.659735342        | 2              | 2.722694  |
| <b>P15999</b> | <b>ATPA ATP synthase subunit alpha_mitochondrial</b>                   | <b>0.867625144</b> | <b>6.5E-11</b> | <b>24</b> |
| P15999        | AVDSLVIPIGR                                                            | 0.902576837        | 2              | 3.494999  |
| P15999        | EIVTNFLAGFEP                                                           | 3.718069367        | 2              | 2.409987  |
| P15999        | EVAFAQFGSDLDAATQQLSR                                                   | 0.920369826        | 2              | 6.775969  |
| P15999        | FESAFVSHVVSQHQSLGNIR                                                   | 0.839800354        | 2              | 6.011279  |
| P15999        | GIRPAINVGLSVSR                                                         | 0.931499732        | 3              | 3.626514  |
| P15999        | GMSLNLEPDNVGVVVFVFNK                                                   | 0.881246226        | 2              | 5.684156  |
| P15999        | GMSLNLEPDNVGVVVFVFNK+Oxidation(1)                                      | 0.875310447        |                |           |
| P15999        | GYLDKLEPSK                                                             | 0.864785633        | 1              | 2.593194  |
| P15999        | ILGADTSVDLEETGR                                                        | 1.095649868        | 2              | 5.006292  |
| P15999        | LELAQYR                                                                | 0.905826829        | 2              | 2.693234  |
| P15999        | LKEIVTNFLAGFEP                                                         | 1.184641317        | 2              | 3.256053  |
| P15999        | LTDADAMK                                                               | 0.875488189        | 2              | 2.552619  |
| P15999        | LTDADAMK+Oxidation(6)                                                  | 0.847043843        |                |           |
| P15999        | LYCIYVAIGQK                                                            | 1.233638933        | 2              | 2.409989  |
| P15999        | NVQAEEMVEFSSGLK                                                        | 0.969810109        | 2              | 4.355209  |
| P15999        | QGQYSPMAIEEQAVIYAGVR                                                   | 1.056786944        | 3              | 5.223771  |
| P15999        | RTGAIVDVPVGDPELLGR                                                     | 0.877721623        | 2              | 2.85457   |
| P15999        | STVAQLVK                                                               | 0.99584713         | 2              | 2.39713   |
| P15999        | TGAIVDVPVGDPELLGR                                                      | 0.889686497        | 2              | 4.928999  |
| P15999        | TGTAEMSSILEER                                                          | 0.808003994        | 2              | 4.265776  |
| P15999        | TGTAEMSSILEER+Oxidation(5)                                             | 1.019832526        |                |           |
| P15999        | TSIAIDTIINQK                                                           | 0.879762592        | 2              | 4.391929  |
| P15999        | VLSIGDGIAR                                                             | 0.905856065        | 2              | 3.160133  |
| P15999        | VVDALGNAIDGK                                                           | 0.945003838        | 2              | 4.185841  |

|               |                                                            |                    |                |           |
|---------------|------------------------------------------------------------|--------------------|----------------|-----------|
| <b>P16036</b> | <b>MPCP Phosphate carrier protein_mitochondrial</b>        | <b>1.051269687</b> | <b>0.92892</b> | <b>7</b>  |
| P16036        | ALYSNILGEENTYLWR                                           | 1.051456144        | 2              | 3.331951  |
| P16036        | EEGLNAFYK                                                  | 1.152143333        | 1              | 2.318203  |
| P16036        | FGFYEVFK                                                   | 1.020536867        | 2              | 2.342442  |
| P16036        | GIFNGFSITLK                                                | 0.817723223        | 2              | 2.82009   |
| P16036        | GSTASQVLQR                                                 | 1.052072114        | 2              | 2.970787  |
| P16036        | IQTQPGYANTLR                                               | 1.024885189        | 2              | 3.760676  |
| P16036        | MYKEEGLNAFYK                                               | 1.121787277        | 2              | 2.88434   |
| <b>P16086</b> | <b>SPTA2 Spectrin alpha chain_brain</b>                    | <b>0.995378269</b> | <b>0.07343</b> | <b>33</b> |
| P16086        | ALINADELANDVAGAEALLDR                                      | 0.983408199        | 2              | 5.12341   |
| P16086        | ALSSEGGPYVTK                                               | 1.085069528        | 2              | 3.021644  |
| P16086        | DLSSVQTLTK                                                 | 1.045509026        | 2              | 2.781344  |
| P16086        | EAALTSEEVGADLEQVEVLQK                                      | 0.882679409        | 2              | 3.743141  |
| P16086        | GEIDAHEDSFK                                                | 0.97711355         | 2              | 2.405044  |
| P16086        | GVIDMGNSLIER                                               | 1.069288938        | 2              | 3.189369  |
| P16086        | HQAFAELSANQSR                                              | 1.525085114        | 2              | 3.569421  |
| P16086        | HQEHKGEIDAHEDSFK                                           | 0.95696464         | 3              | 4.149324  |
| P16086        | HQLLEADISAHEDR                                             | 1.644113377        | 3              | 4.028481  |
| P16086        | KFEFQTDLAAHEER                                             | 1.155434095        | 3              | 4.819622  |
| P16086        | LFGAAEVQR                                                  | 1.208821845        | 2              | 2.582831  |
| P16086        | LGDSHDLQR                                                  | 1.151485429        | 2              | 3.187368  |
| P16086        | LGESQTLQQFSR                                               | 1.001076728        | 2              | 3.238065  |
| P16086        | LIQEQHPPEELIK                                              | 0.970929759        | 2              | 3.524149  |
| P16086        | LQQSHPLSANQIQVK                                            | 1.543628231        | 2              | 3.946393  |
| P16086        | LQTASDESYKDPTNIQSK                                         | 1.134029185        | 2              | 4.325     |
| P16086        | LQVASDENYKDPTNLQGK                                         | 1.279099188        | 2              | 4.613623  |
| P16086        | LSDDNTIGQEEIQQR                                            | 1.036758243        | 2              | 4.238682  |
| P16086        | MTLVASEDYGDTLAAIQGLLK                                      | 0.941802589        | 2              | 3.162891  |
| P16086        | NQALNTDNYGHDLASVQALQR                                      | 1.036893383        | 3              | 4.873584  |
| P16086        | NTTGVTEEALK                                                | 0.999205715        | 2              | 2.350149  |
| P16086        | QFQDAGHFDAENIKK                                            | 0.792913771        | 2              | 2.580685  |
| P16086        | REELITNWEQIR                                               | 1.281381954        | 2              | 3.451416  |
| P16086        | SADESGQALLAAGHYASDEV                                       | 1.043631064        | 3              | 3.639349  |
| P16086        | SLQLLAEER                                                  | 0.93552503         | 2              | 2.761007  |
| P16086        | SQLLGSAHEVQR                                               | 0.378759191        | 2              | 3.21781   |
| P16086        | SSEEIESAFR                                                 | 1.007659357        | 2              | 2.428163  |
| P16086        | SSLSSAQADFNQLAELDR                                         | 0.980633582        | 2              | 4.939239  |
| P16086        | TATDEAYKDPSNLQGK                                           | 1.06554267         | 2              | 3.581089  |
| P16086        | TKQEEVNAAWQR                                               | 1.110651728        | 2              | 3.027998  |
| P16086        | VLETAEDIQER                                                | 1.105177934        | 2              | 3.42193   |
| P16086        | VNDVCTNGQDLIK                                              | 1.175406408        | 2              | 3.177594  |
| P16086        | VNSLGETAQR                                                 | 1.112039879        | 2              | 2.34579   |
| <b>P16232</b> | <b>DHI1 Corticosteroid 11_beta_dehydrogenase isozyme 1</b> | <b>1.413956779</b> | <b>6.3E-09</b> | <b>10</b> |
| P16232        | EECALEIK                                                   | 2.144894414        | 1              | 1.97235   |
| P16232        | EMAYHLSKMGAHVVLTAR+Oxidation(1)                            | 1.007375904        |                |           |
| P16232        | EMAYHLSKMGAHVVLTAR+Oxidation(8)                            | 1.007375904        |                |           |
| P16232        | ETSGIILSQAAPK                                              | 1.516497554        | 2              | 3.317542  |
| P16232        | FALDGFSTIR                                                 | 1.282858099        | 2              | 3.079359  |
| P16232        | KDEVYYDK                                                   | 1.237692514        | 2              | 3.00259   |
| P16232        | MGAHVLTAR                                                  | 1.373515514        | 2              | 2.919173  |
| P16232        | MTQPLIASYSASK                                              | 1.307779952        | 2              | 3.380455  |
| P16232        | MTQPLIASYSASK+Oxidation(0)                                 | 1.926096579        |                |           |
| P16232        | SSWTPLLLGNPGR                                              | 1.358390443        | 2              | 3.606695  |
| <b>P16290</b> | <b>PGAM2 Phosphoglycerate mutase 2</b>                     | <b>1.026625622</b> | <b>0.97954</b> | <b>7</b>  |
| P16290        | AMEAVAAQ GK                                                | 1.068596548        | 2              | 2.795687  |

|               |                                                     |                    |                |           |
|---------------|-----------------------------------------------------|--------------------|----------------|-----------|
| P16290        | AMEAVAAQGK+Oxidation(1)                             | 0.918828413        |                |           |
| P16290        | FLGDEETVR                                           | 2.126036372        | 2              | 2.669859  |
| P16290        | HGESSWNQENR                                         | 3.128641614        | 2              | 3.63271   |
| P16290        | HNYASISK                                            | 1.159849015        | 2              | 2.369684  |
| P16290        | HYGGLTGLNK                                          | 1.313768814        | 1              | 2.924372  |
| P16290        | VLIAAHGNSLR                                         | 1.214168768        | 2              | 2.827607  |
| <b>P16303</b> | <b>CES3 Carboxylesterase 3</b>                      | <b>0.956218836</b> | <b>0.00023</b> | <b>20</b> |
| P16303        | AISESGVLTSLITTDSPKIANLIATLSGCK                      | 0.960785385        | 3              | 3.861336  |
| P16303        | AKEAAEESHWK                                         | 0.980560712        | 2              | 4.250408  |
| P16303        | DGASEEETNLSK                                        | 1.261596841        | 2              | 4.197501  |
| P16303        | EAAEESHWK                                           | 1.715127615        | 2              | 2.927894  |
| P16303        | ENIPLQFSEDCLYLNVYTPADLTK                            | 3.353763729        | 2              | 4.423151  |
| P16303        | ESYPFLPTVIDGVVLPK                                   | 1.31552736         | 2              | 4.154991  |
| P16303        | FAPPQPAEPWNVFK                                      | 0.796052931        | 2              | 2.551271  |
| P16303        | IGASTQAAQR                                          | 1.285866178        | 2              | 2.852261  |
| P16303        | KENIPLQFSEDCLYLNVYTPADLTK                           | 1.606122618        | 2              | 4.658246  |
| P16303        | LDLLGNPK                                            | 1.055207746        | 2              | 2.495217  |
| P16303        | QFEGWIPTLMGYPLSEK                                   | 1.253545296        | 2              | 4.090944  |
| P16303        | QKTEDELLETSLK                                       | 1.19138767         | 3              | 3.701194  |
| P16303        | SFNTVPYIVGINK                                       | 1.911683911        | 2              | 3.375175  |
| P16303        | TEDELLETSLK                                         | 1.084999429        | 2              | 3.726542  |
| P16303        | TPEEILAEK                                           | 1.48091224         | 2              | 2.342819  |
| P16303        | TTTSAVMVHCLR                                        | 1.026294441        | 2              | 2.803672  |
| P16303        | TTTSAVMVHCLR+Oxidation(6)                           | 0.938353725        |                |           |
| P16303        | TVIGDHGDELFSVFGSPFLK                                | 1.082820032        | 2              | 5.399829  |
| P16303        | YFGGTDDPAK                                          | 1.08873069         | 2              | 3.198878  |
| P16303        | YVNLEGFAQPVAVFLGIPFAKPLGSLR                         | 0.920466806        | 3              | 3.579983  |
| <b>P16332</b> | <b>MUTA Methylmalonyl_CoA mutase_ mitochondrial</b> | <b>1.023300859</b> | <b>0.91619</b> | <b>7</b>  |
| P16332        | AAVQLDDIEK                                          | 1.283865834        | 2              | 2.620392  |
| P16332        | AHCQTSGLTEQDPYNNIVR                                 | 1.044533952        | 3              | 5.170474  |
| P16332        | GDVGMAGVAIDTVEDTK                                   | 0.84810275         | 2              | 3.069168  |
| P16332        | IDSGSEVIVGVNK                                       | 1.142972219        | 2              | 3.577084  |
| P16332        | ILFDGIPLEK                                          | 0.98614792         | 2              | 2.318594  |
| P16332        | NTQIIIQEEGIPK                                       | 0.982769726        | 2              | 3.881436  |
| P16332        | TGLQAGLTIDEFAPR                                     | 1.017294782        | 2              | 3.439996  |
| <b>P16409</b> | <b>MYL3 Myosin light chain 3</b>                    | <b>1.766806303</b> | <b>0.93364</b> | <b>6</b>  |
| P16409        | AAPAPAAAPAAPEPERPK                                  | 3.012111358        | 2              | 4.281186  |
| P16409        | ALGQNPTQAEVLR                                       | 2.921960711        | 2              | 3.976088  |
| P16409        | DTGTIEDFVEGLR                                       | 2.067329942        | 2              | 3.297331  |
| P16409        | MMDFETFLPMLQHISK                                    | 1.16933665         | 2              | 2.926264  |
| P16409        | NKDTGTIEDFVEGLR                                     | 1.445365848        | 2              | 4.133505  |
| P16409        | VFDKEGNGTVMGAELR                                    | 2.701974062        | 2              | 3.517663  |
| <b>P16617</b> | <b>PGK1 Phosphoglycerate kinase 1</b>               | <b>1.002998134</b> | <b>1</b>       | <b>18</b> |
| P16617        | AHSSMVGVNLPQK                                       | 1.092491162        | 3              | 4.083166  |
| P16617        | AHSSMVGVNLPQK+Oxidation(4)                          | 1.361171706        |                |           |
| P16617        | ALESPERFLAILGGAK                                    | 1.086929306        | 3              | 4.525317  |
| P16617        | DCVGSEVENACANPAAGTVILLENLR                          | 1.050429879        | 3              | 6.297062  |
| P16617        | FCLDNQAK                                            | 0.861235049        | 1              | 2.05084   |
| P16617        | GCITIIGGDTATCCA                                     | 1.051181123        | 2              | 5.566938  |
| P16617        | IQLINNMLDK                                          | 0.988918831        | 2              | 2.72171   |
| P16617        | IQLINNMLDK+Oxidation(6)                             | 1.337311865        |                |           |
| P16617        | ITLPVDFVTADKFDENAK                                  | 1.098879614        | 2              | 4.905708  |
| P16617        | QIVWNGPVGVFWEAFAR                                   | 1.017071987        | 2              | 3.100346  |
| P16617        | SVVLMSHLGRPDGVPMPDKYSLEPVAAELK                      | 0.876746695        | 4              | 4.691022  |
| P16617        | TGQATVASGIPAGWMGLDCGTESSK                           | 0.93413591         | 2              | 4.736675  |
| P16617        | TGQATVASGIPAGWMGLDCGTESSK                           | 0.900335403        | 3              | 4.254049  |



|               |                                                         |                    |                |           |
|---------------|---------------------------------------------------------|--------------------|----------------|-----------|
| P16617        | VLNNMEIGTSLYDEEGAK                                      | 1.061290498        | 2              | 5.54474   |
| P16617        | VLNNMEIGTSLYDEEGAK+Oxidation(4)                         | 0.941083012        |                |           |
| P16617        | VLPQVDALSNV                                             | 1.09299051         | 2              | 2.735156  |
| P16617        | WNTEDKVSHVSTGGASLELLEK                                  | 0.883526272        | 3              | 4.855772  |
| P16617        | YSLEPVAAELK                                             | 0.968243344        | 2              | 3.618829  |
| <b>P16638</b> | <b>ACLY ATP_citrate synthase</b>                        | <b>0.970228691</b> | <b>1</b>       | <b>25</b> |
| P16638        | AFDSGIIPMEFVNK                                          | 0.986150739        | 2              | 4.132862  |
| P16638        | AFDSGIIPMEFVNK+Oxidation(8)                             | 0.868400644        |                |           |
| P16638        | DEPSVAAMVYPFTGDHK                                       | 0.934910686        | 2              | 3.228929  |
| P16638        | DGVYILDAAK                                              | 1.060479624        | 2              | 2.982784  |
| P16638        | DLVSLTSGLLTIGDR                                         | 1.204184472        | 2              | 3.486832  |
| P16638        | EAYPEEAYIADLDAK                                         | 1.05343325         | 2              | 3.064889  |
| P16638        | FGGALDAAK                                               | 0.939367469        | 2              | 2.458114  |
| P16638        | GAIVPAQEVPPPTVPMDSWAR                                   | 0.944167127        | 2              | 4.228379  |
| P16638        | GGPNYQEGLR                                              | 1.013995903        | 2              | 2.718846  |
| P16638        | GVTIIGPATVGGIKPGCFK                                     | 0.881972465        | 2              | 2.852841  |
| P16638        | HLLVHAPEDK                                              | 0.978919773        | 2              | 2.664155  |
| P16638        | HLLVHAPEDKK                                             | 0.975255291        | 2              | 3.564683  |
| P16638        | IGNTGGMLDNILASK                                         | 0.953994399        | 2              | 3.65479   |
| P16638        | LGLVGVNLSLDGVK                                          | 1.145318283        | 2              | 2.830339  |
| P16638        | LNAEDIK                                                 | 0.996827193        | 1              | 1.913635  |
| P16638        | QHFPATPLLDYALEVEK                                       | 0.994449864        | 3              | 4.445997  |
| P16638        | RGGPNYQEGLR                                             | 1.296069942        | 2              | 3.176728  |
| P16638        | SFDELGEIIQSVYEDLVAK                                     | 0.813916262        |                |           |
| P16638        | SGGMSNELNNIISR                                          | 0.97043213         | 2              | 3.700621  |
| P16638        | TIAIIAEGIPEALTR                                         | 0.981436647        | 2              | 5.253416  |
| P16638        | TTDGVYEGVAIGGDR                                         | 1.198164334        | 2              | 3.421449  |
| P16638        | TTDGVYEGVAIGDGRYPGSTFMDHVLR                             | 0.930705029        | 3              | 4.084336  |
| P16638        | VDATADYICK                                              | 1.06870536         | 2              | 2.470526  |
| P16638        | WGDIEFPPPFGR                                            | 0.955957197        | 2              | 3.933861  |
| P16638        | YICTTSAIQNR                                             | 0.938989952        | 2              | 2.813505  |
| <b>P16970</b> | <b>ABCD3 ATP_binding cassette sub_family D member 3</b> | <b>0.918058189</b> | <b>0.00028</b> | <b>5</b>  |
| P16970        | FDHVPLATPNGDILIQDLSFEVR                                 | 0.875268417        | 2              | 2.48301   |
| P16970        | GIEGAQASPLIPGAGEIINADNIK                                | 0.739188957        | 3              | 4.97734   |
| P16970        | GYLDNVQLGHILER                                          | 0.864518928        | 2              | 3.446207  |
| P16970        | HLHSTHSELLEDYYSQGR                                      | 1.05719827         | 3              | 5.156248  |
| P16970        | SGANVLICGPNCGCK                                         | 0.844657012        | 2              | 3.116311  |
| <b>P17074</b> | <b>RS19 40S ribosomal protein S19</b>                   | <b>1.011586186</b> | <b>0.98069</b> | <b>5</b>  |
| P17074        | DVNQEFVR                                                | 0.650743536        | 2              | 2.368493  |
| P17074        | ELAPYDENWFYTR                                           | 0.735996131        | 2              | 2.484498  |
| P17074        | HKELAPYDENWFYTR                                         | 1.011570004        | 3              | 3.352571  |
| P17074        | RVLQALEGLK                                              | 1.16994358         | 3              | 3.319066  |
| P17074        | VLQALEGLK                                               | 1.017233111        | 2              | 2.717939  |
| <b>P17077</b> | <b>RL9 60S ribosomal protein L9</b>                     | <b>0.995339162</b> | <b>1.1E-12</b> | <b>8</b>  |
| P17077        | DFNHINVELSLLGK                                          | 1.747507335        | 3              | 3.752424  |
| P17077        | FLDGIYVSEK                                              | 1.123227768        | 2              | 3.201822  |
| P17077        | GTVQQPDE                                                | 1.145172767        | 1              | 2.101096  |
| P17077        | KFLDGIYVSEK                                             | 1.179931645        | 2              | 2.726167  |
| P17077        | SVYAHFPINVVIQENGLSVEIR                                  | 1.1419688          | 3              | 3.74064   |
| P17077        | TGVACSVSQAQK                                            | 1.273216825        | 2              | 3.669527  |
| P17077        | TICSHVQNMIK                                             | 0.901587013        | 2              | 2.878561  |
| P17077        | TILSNQTVDIPENVDTLTK                                     | 0.967064566        | 2              | 3.154075  |
| <b>P17078</b> | <b>RL35 60S ribosomal protein L35</b>                   | <b>1.161858673</b> | <b>0.76008</b> | <b>2</b>  |
| P17078        | QLDDLKVELSQLR                                           | 1.018740242        | 2              | 2.586651  |
| P17078        | VLTVINQTQK                                              | 1.175356835        | 2              | 3.248564  |
| <b>P17178</b> | <b>CP27A Sterol 26_hydroxylase_mitochondrial</b>        | <b>1.276237624</b> | <b>0.00044</b> | <b>4</b>  |

|               |                                                              |                    |                |           |
|---------------|--------------------------------------------------------------|--------------------|----------------|-----------|
| P17178        | DHESTEGPGTGQDRPR                                             | 4.777671359        | 2              | 2.52979   |
| P17178        | MLKPAAEALYTDALNEVISDFIAR                                     | 1.323485851        | 3              | 4.138936  |
| P17178        | VGCLEPSIPEDTATFIR                                            | 1.426830681        | 2              | 2.884553  |
| P17178        | YEVVLSPGMGEVK                                                | 1.102953244        | 2              | 3.745264  |
| <b>P17425</b> | <b>HMCS1 Hydroxymethylglutaryl_CoA synthase_ cytoplasmic</b> | <b>0.884125794</b> | <b>0.99995</b> | <b>15</b> |
| P17425        | ASAELFNQK                                                    | 0.951468141        | 2              | 3.109892  |
| P17425        | DKNSIYSGLEAFGDVK                                             | 1.257468421        | 2              | 3.026466  |
| P17425        | DVGIVALEIYFPSQYVDQAELEK                                      | 0.793924395        | 3              | 3.689102  |
| P17425        | GTHMQHAYDFYKPDMLSEYPVVDGK+Oxidation(3)                       | 0.755652991        |                |           |
| P17425        | ITASLCDLK                                                    | 0.922388663        | 1              | 1.942125  |
| P17425        | LEDTYFDRDVEK                                                 | 0.820524378        | 2              | 2.920728  |
| P17425        | LPATSGEPESAVISNGEH                                           | 0.813040927        | 2              | 4.239635  |
| P17425        | MFLNDFLNDQNR                                                 | 0.723582311        | 2              | 2.97792   |
| P17425        | MFLNDFLNDQNR+Oxidation(0)                                    | 0.440905485        |                |           |
| P17425        | MGFCTDREDINSLCLTVVQK                                         | 0.791686951        | 3              | 4.179461  |
| P17425        | NSLSYDCIGR                                                   | 1.149094639        | 2              | 2.872298  |
| P17425        | RPSTNDHSLDEGVGLVHSNTATEHIPSPAK                               | 0.96243022         | 4              | 4.604982  |
| P17425        | TCVAPDVFAENMK                                                | 0.852302719        | 2              | 2.783931  |
| P17425        | VTQDATPGSALDK                                                | 0.731201961        | 2              | 3.805212  |
| P17425        | YTIGLGQAR                                                    | 0.869177086        | 2              | 2.688532  |
| <b>P17426</b> | <b>AP2A1 AP_2 complex subunit alpha_1</b>                    | <b>1.106278946</b> | <b>0.65955</b> | <b>2</b>  |
| P17426        | NADVELQQR                                                    | 1.10721925         | 2              | 2.807719  |
| P17426        | VGGYILGEFGNLIAGDPR                                           | 1.067681932        | 2              | 3.750861  |
| <b>P17475</b> | <b>A1AT Alpha_1 antiproteinase</b>                           | <b>2.42733714</b>  | <b>9.9E-20</b> | <b>5</b>  |
| P17475        | MQHLEQLTK                                                    | 1.978124038        | 2              | 3.007922  |
| P17475        | MQHLEQLTK+Oxidation(0)                                       | 2.359819674        |                |           |
| P17475        | TLLSSLGTR                                                    | 2.271354747        | 2              | 3.155347  |
| P17475        | VFNNADADLSGITEDAPLK                                          | 1.632661583        | 2              | 5.7359    |
| P17475        | VINDYVEK                                                     | 1.906240753        | 2              | 2.34795   |
| <b>P17702</b> | <b>RL28 60S ribosomal protein L28</b>                        | <b>1.292666821</b> | <b>0.52075</b> | <b>2</b>  |
| P17702        | NCSSFLIK                                                     | 1.219556432        | 2              | 2.415654  |
| P17702        | QTYSTEPNNLK                                                  | 1.29700327         | 2              | 3.01876   |
| <b>P17764</b> | <b>THIL Acetyl_CoA acetyltransferase_ mitochondrial</b>      | <b>1.110018243</b> | <b>0.70407</b> | <b>17</b> |
| P17764        | EEQDKYAIGSYTR                                                | 1.270279148        | 2              | 3.561487  |
| P17764        | ENGTVTAANASTLNDGAAAVLMTAEAAQR                                | 1.092249808        | 2              | 4.623279  |
| P17764        | EVYMGNVIQGGEGQAPTR                                           | 1.492007607        | 2              | 5.394138  |
| P17764        | EVYMGNVIQGGEGQAPTR+Oxidation(3)                              | 2.042267751        |                |           |
| P17764        | FANEITPITISVK                                                | 0.926478916        | 2              | 3.848681  |
| P17764        | GKPDVVVKEDEEYK                                               | 1.0115697          | 2              | 3.453354  |
| P17764        | GKPDVVVKEDEEYKR                                              | 0.928984919        | 2              | 5.075504  |
| P17764        | IAAFADAAVDPIDFPLAPAYAVPK                                     | 1.132386668        | 2              | 5.742885  |
| P17764        | IHMGNCAENTAK                                                 | 1.081470072        | 2              | 3.178412  |
| P17764        | IHMGNCAENTAK+Oxidation(2)                                    | 0.899696619        |                |           |
| P17764        | LEDLIVK                                                      | 0.9999242          | 2              | 2.711647  |
| P17764        | LGTIAIQGAIEK                                                 | 1.231556019        | 2              | 3.293019  |
| P17764        | QATLGAGLPIATPCTTVNK                                          | 1.06480839         | 2              | 4.624789  |
| P17764        | QGEFGLASICNGGGGASAVLIEK                                      | 1.001845663        | 2              | 4.942674  |
| P17764        | TPIGSFLGSLASQPATK                                            | 1.132126157        | 2              | 4.479323  |
| P17764        | VNVHGGAVSLGHPIGMSGAR                                         | 0.871764069        | 2              | 5.807877  |
| P17764        | VNVHGGAVSLGHPIGMSGAR+Oxidation(15)                           | 1.131194991        |                |           |
| <b>P17879</b> | <b>HS71B Heat shock 70 kDa protein 1B</b>                    | <b>1.130683956</b> | <b>1</b>       | <b>3</b>  |
| P17879        | QTQFTTYSNQPGLIQVYEGER                                        | 0.970180861        | 3              | 5.323452  |
| P17879        | TTPSYVAFTDTER                                                | 1.08745803         | 2              | 3.729563  |
| P17879        | VEIANDQGNR                                                   | 1.058121204        | 2              | 3.77198   |
| <b>P17988</b> | <b>ST1A1 Sulfotransferase 1A1</b>                            | <b>1.378547636</b> | <b>9.9E-20</b> | <b>6</b>  |

|               |                                                           |                    |                |           |
|---------------|-----------------------------------------------------------|--------------------|----------------|-----------|
| P17988        | CPGVPSGLETLEETPAPR                                        | 0.782649096        | 2              | 4.797564  |
| P17988        | ILEFLGR                                                   | 1.344553259        | 2              | 2.344018  |
| P17988        | NTFTVAQNER                                                | 1.211045159        | 2              | 3.682426  |
| P17988        | SGTTWMSEILDMIYQGK                                         | 0.976433873        | 2              | 4.986846  |
| P17988        | SLPEETVDSIVHHTSFK                                         | 1.253524106        | 2              | 4.56665   |
| P17988        | THLPLSLLPQSLLDQK                                          | 1.577265018        | 2              | 4.978549  |
| <b>P18163</b> | <b>ACSL1 Long_chain_fatty_acid_CoA ligase 1</b>           | <b>0.896472154</b> | <b>9.9E-20</b> | <b>30</b> |
| P18163        | AELSVIFADKPEK                                             | 0.79065497         | 2              | 3.141895  |
| P18163        | ALEDLGR                                                   | 1.222368632        | 2              | 2.328306  |
| P18163        | ALKPPCDLSMQSVEVTGTTEGVR                                   | 0.887930349        | 2              | 4.535008  |
| P18163        | ALKPPCDLSMQSVEVTGTTEGVR+Oxidation(9)                      | 0.892845666        |                |           |
| P18163        | CGVEIIGLK                                                 | 0.792107994        | 2              | 2.879076  |
| P18163        | DGWLHTGDIGK                                               | 1.241523587        | 2              | 3.187433  |
| P18163        | GAMVTHQNIMNDCSGFIK                                        | 1.119907626        | 2              | 4.383051  |
| P18163        | GAMVTHQNIMNDCSGFIK+Oxidation(2)                           | 0.878529095        |                |           |
| P18163        | GFQGSFEELCR                                               | 0.820373525        | 2              | 3.625499  |
| P18163        | GIAVHPELFSIDNGLLPTLK                                      | 0.950611809        | 2              | 5.813646  |
| P18163        | GIQVSNDGPGCLGSR                                           | 0.926108088        | 2              | 4.508375  |
| P18163        | IENIYLR                                                   | 0.870309749        | 2              | 2.95509   |
| P18163        | IFGQANTSVK                                                | 0.98337814         | 2              | 2.76034   |
| P18163        | IIVIMDSYDNDLVER                                           | 0.752126879        | 2              | 4.590707  |
| P18163        | LLLEGVENK                                                 | 0.967002856        | 2              | 3.334471  |
| P18163        | LLMDDLK                                                   | 0.936368431        | 2              | 2.434906  |
| P18163        | LIMITGAAPVSATVLTFLR                                       | 0.666349057        | 2              | 3.52214   |
| P18163        | LVDVEDMNYQAAK                                             | 1.037455023        | 2              | 4.203762  |
| P18163        | LVDVEDMNYQAAK+Oxidation(6)                                | 0.936707799        |                |           |
| P18163        | NAGLKPFEQVK                                               | 0.96408304         | 2              | 3.831028  |
| P18163        | NNSLWDK                                                   | 0.797069169        | 2              | 2.545614  |
| P18163        | QVAEMAECIGSALIQQ                                          | 0.797169717        | 2              | 5.590154  |
| P18163        | QVAEMAECIGSALIQQ+Oxidation(4)                             | 0.905492632        |                |           |
| P18163        | SAVLEDDKLLYYDDVR                                          | 1.669018933        | 3              | 4.165587  |
| P18163        | SQIDELYSTIK                                               | 0.861356992        | 2              | 3.657451  |
| P18163        | SQIDELYSTIKI                                              | 0.808420646        | 2              | 4.152328  |
| P18163        | TAEALDKDGWLHTGDIGK                                        | 0.838684356        | 2              | 5.108146  |
| P18163        | TKPKPPEPEDLAICFTSGTTGNPK                                  | 1.685443542        | 3              | 5.415393  |
| P18163        | VLQPTIFPVVPR                                              | 0.886017836        | 2              | 3.500982  |
| P18163        | WLLDFASK                                                  | 0.828507022        | 2              | 2.381298  |
| <b>P18297</b> | <b>SPRE Sepiapterin reductase</b>                         | <b>1.06856971</b>  | <b>0.97392</b> | <b>4</b>  |
| P18297        | ALAPQLAGLLSPGSVLLLSAR                                     | 0.880891569        | 3              | 4.81566   |
| P18297        | LLLINNAGTLGDVSK                                           | 1.098927249        | 2              | 3.600589  |
| P18297        | LNSEGELVDCGTSQAK                                          | 1.203930461        | 2              | 4.78737   |
| P18297        | TVVNISSLCALQPFK                                           | 0.868993973        | 2              | 3.763449  |
| <b>P18298</b> | <b>METK2 S_adenosylmethionine synthase isoform type_2</b> | <b>1.682606794</b> | <b>1.1E-16</b> | <b>3</b>  |
| P18298        | IIVDTYGGWGAHGGGAFSGK                                      | 1.399087969        | 2              | 5.421152  |
| P18298        | KIIVDTYGGWGAHGGGAFSGK                                     | 1.373213002        | 3              | 3.46823   |
| P18298        | YLDEDTIYHLQPSGR                                           | 2.05377727         | 2              | 4.753562  |
| <b>P18418</b> | <b>CALR Calreticulin</b>                                  | <b>1.047607657</b> | <b>1</b>       | <b>19</b> |
| P18418        | AKIDDPTDSKPEDWDKPEHIPDDAK                                 | 1.104436762        | 3              | 5.440219  |
| P18418        | CKDDEFTHLYTLIVRPDNTYEVK                                   | 1.081595265        | 3              | 4.856501  |
| P18418        | DMHGDSEYNIMFGPDICGPGTK                                    | 1.052384472        | 2              | 6.398684  |
| P18418        | DMHGDSEYNIMFGPDICGPGTK+Oxidation(1)                       | 1.053347766        |                |           |
| P18418        | DMHGDSEYNIMFGPDICGPGTK+Oxidation(10)                      | 1.053347766        |                |           |
| P18418        | EQFLDGDWATNR                                              | 1.590393617        | 2              | 3.022876  |
| P18418        | FYGDQEK                                                   | 0.914191613        | 1              | 2.055975  |
| P18418        | FYGDQEKDK                                                 | 0.967151072        | 1              | 2.776472  |
| P18418        | GQTLVVQFTVK                                               | 0.849637473        | 2              | 3.255028  |

|               |                                                                  |                    |                |           |
|---------------|------------------------------------------------------------------|--------------------|----------------|-----------|
| P18418        | HEQNIDCGGGYVK                                                    | 0.925978785        | 2              | 4.420838  |
| P18418        | IDDPTDSKPEDWDKPEHIPDPAK                                          | 0.882961955        | 3              | 3.916787  |
| P18418        | IDNSQVESGSLEDDWDFLPPK                                            | 1.010162934        | 2              | 5.437834  |
| P18418        | IDNSQVESGSLEDDWDFLPPK                                            | 0.925933311        | 2              | 4.899996  |
| P18418        | IKDPDAAKPEDWDER                                                  | 1.234027615        | 2              | 4.383667  |
| P18418        | KPEDWDEEMDGEWEPPIQNPEYK                                          | 0.888333726        | 3              | 5.572803  |
| P18418        | LFPGGLDQK                                                        | 1.059534233        | 1              | 2.052844  |
| P18418        | QIDNPDYK                                                         | 0.925424692        | 1              | 2.290527  |
| P18418        | SGTIFDNFLITNDEAYAEFFGNETWGVTK                                    | 0.813496161        | 3              | 4.883288  |
| P18418        | VHVIFNYK                                                         | 1.090984793        | 1              | 2.268359  |
| <b>P18420</b> | <b>PSA1 Proteasome subunit alpha type_1</b>                      | <b>1.120630528</b> | <b>0.2716</b>  | <b>2</b>  |
| P18420        | AQPSQAADPEPAEK                                                   | 1.121429751        | 2              | 3.424672  |
| P18420        | NQYDNDVTWVSPQGR                                                  | 1.030363504        | 2              | 3.629484  |
| <b>P18421</b> | <b>PSB1 Proteasome subunit beta type_1</b>                       | <b>0.873148927</b> | <b>0.08926</b> | <b>3</b>  |
| P18421        | AGGSASAMLQPLLDNQVGFK                                             | 0.869625175        | 2              | 5.028276  |
| P18421        | GAVYSFDPVGSYQR                                                   | 1.196852953        | 2              | 3.86107   |
| P18421        | NMQNVEHVPLTLDR                                                   | 0.413096491        | 2              | 3.688417  |
| <b>P18445</b> | <b>RL27A 60S ribosomal protein L27a</b>                          | <b>1.120474953</b> | <b>0.00102</b> | <b>2</b>  |
| P18445        | NQSFCTVNLDK                                                      | 1.150811259        | 2              | 3.352818  |
| P18445        | RNQSFCTVNLDK                                                     | 0.869624861        | 2              | 3.029666  |
| <b>P18484</b> | <b>AP2A2 AP_2 complex subunit alpha_2</b>                        | <b>0.773966081</b> | <b>0.0319</b>  | <b>3</b>  |
| P18484        | LTECLEILNK                                                       | 0.86210321         | 2              | 2.73545   |
| P18484        | NNGVLFENQLLQJGLK                                                 | 0.702915016        | 2              | 3.254095  |
| P18484        | QLSNPQQEVQNIK                                                    | 1.28627247         | 2              | 3.409109  |
| <b>P18596</b> | <b>AT2A3 Sarcoplasmic/endoplasmic reticulum calcium ATPase 3</b> | <b>1.160035266</b> | <b>0.8933</b>  | <b>5</b>  |
| P18596        | DIVPGDIVEVAVGDK                                                  | 1.309576348        | 2              | 2.458181  |
| P18596        | DIVPGDIVEVAVGDKVPADLR                                            | 4.079039457        | 2              | 3.760574  |
| P18596        | SLPSVETLGCSTVICSDK                                               | 1.96208084         | 2              | 4.198058  |
| P18596        | TGTLTTNQMSVCR                                                    | 1.004527624        | 2              | 2.415793  |
| P18596        | VGEATETALTCLVEK                                                  | 1.155785057        | 2              | 4.386174  |
| <b>P18757</b> | <b>CGL Cystathionine gamma_lyase</b>                             | <b>0.786845567</b> | <b>1</b>       | <b>18</b> |
| P18757        | AGDEVICMDEVYGGTNR                                                | 0.930580092        | 2              | 5.387766  |
| P18757        | AGDEVICMDEVYGGTNR+Oxidation(7)                                   | 1.156435479        |                |           |
| P18757        | ATLGISDTLIR                                                      | 0.893288849        | 2              | 3.54182   |
| P18757        | AVAALDGAK                                                        | 1.257990993        | 2              | 2.670032  |
| P18757        | AVVLPISLATTFK                                                    | 0.87660843         | 3              | 4.291078  |
| P18757        | DLLEDLGQALK                                                      | 1.191148433        | 2              | 2.779878  |
| P18757        | FLQNSLGAVPSPFDCYLCCR                                             | 0.982785807        | 2              | 4.118407  |
| P18757        | GTLQHAQVFLK                                                      | 1.076093273        | 2              | 3.069681  |
| P18757        | LFALAESLGGYESLAELPAIMTHASVPEK                                    | 1.08439235         | 3              | 5.283734  |
| P18757        | LFALAESLGGYESLAELPAIMTHASVPEKDR                                  | 1.171313385        | 4              | 5.448231  |
| P18757        | LLEAAITPQTK                                                      | 1.023230945        | 2              | 3.884803  |
| P18757        | LSVGLLEDEKDLLEDLGQALK                                            | 0.950947005        | 3              | 6.474934  |
| P18757        | LVWIETPTNPTLK                                                    | 1.036565664        | 2              | 3.627706  |
| P18757        | QCTGCPGMVSFYIK                                                   | 0.916263632        | 2              | 3.741347  |
| P18757        | QCTGCPGMVSFYIK+Oxidation(7)                                      | 0.92056726         |                |           |
| P18757        | QDSPGQSSGFVYSR                                                   | 1.049682304        | 2              | 3.700495  |
| P18757        | RVASEFGLK                                                        | 1.224967995        | 2              | 2.585621  |
| P18757        | VIYPGLPSHPQHELAK                                                 | 1.18168127         | 2              | 4.256135  |
| <b>P18886</b> | <b>CPT2 Carnitine O_palmitoyltransferase 2_mitochondrial</b>     | <b>1.154599364</b> | <b>0.78508</b> | <b>10</b> |
| P18886        | ATNLTVSAVR                                                       | 1.114845501        | 2              | 3.302066  |
| P18886        | ELHAHLLAQDK                                                      | 1.714595841        | 2              | 3.009936  |
| P18886        | FFNEVFR                                                          | 1.082586009        | 2              | 2.30748   |
| P18886        | LIFDGNEETLK                                                      | 1.105826171        | 2              | 2.989042  |
| P18886        | QYQQT VATYESCSTAAFK                                              | 1.065779426        | 2              | 3.575184  |

|               |                                                                           |                    |                |           |
|---------------|---------------------------------------------------------------------------|--------------------|----------------|-----------|
| P18886        | SEYNDQLTR                                                                 | 1.21097511         | 2              | 2.673007  |
| P18886        | TETIRPASIFTK                                                              | 1.37396849         | 2              | 2.583139  |
| P18886        | TLSIDSIQFQR                                                               | 1.079008437        | 2              | 3.302003  |
| P18886        | YILSDSSPVPEFPVAYLTSEN                                                     | 1.241869142        | 2              | 5.495711  |
| P18886        | YLNAQKPLLDSSQFR                                                           | 1.087682882        | 2              | 4.368109  |
| <b>P19112</b> | <b>F16P1 Fructose_1_6_bisphosphatase 1</b>                                | <b>0.993463615</b> | <b>9.9E-20</b> | <b>18</b> |
| P19112        | AGGLATTGNEDILDIVPTEIHQK                                                   | 0.85800114         | 3              | 6.255063  |
| P19112        | AGGTGEMTQLLNSLCTAIK                                                       | 0.80538494         | 2              | 5.363754  |
| P19112        | AGGTGEMTQLLNSLCTAIK+Oxidation(6)                                          | 0.810172326        |                |           |
| P19112        | APVIMGSTEDVQEFLEIYNK                                                      | 0.949346023        | 2              | 5.246606  |
| P19112        | DFDPAINIYIQR                                                              | 1.346095969        | 2              | 3.916194  |
| P19112        | FPPDNSAPYGAR                                                              | 0.902539911        | 2              | 2.553975  |
| P19112        | GNIYSINEGYAK                                                              | 0.989239681        | 2              | 4.063055  |
| P19112        | KGNIYSINEGYAK                                                             | 1.00396404         | 2              | 3.924677  |
| P19112        | KLDILSNDLVINMLK                                                           | 0.794839355        | 2              | 6.077208  |
| P19112        | KTSANEPSEKDALQPGR                                                         | 0.826458736        | 3              | 3.639435  |
| P19112        | LDILSNDLVINMLK                                                            | 0.732856349        | 2              | 5.047803  |
| P19112        | LLYECNPIAYVMEK                                                            | 1.078523947        | 2              | 4.267875  |
| P19112        | QAGIAQLYGIAGSTNVTGDQVK                                                    | 0.869802574        | 3              | 6.084218  |
| P19112        | SRPSLPLQSR                                                                | 0.858475671        | 2              | 3.311398  |
| P19112        | SSYATCVLVSEEDTHAIIIPEKR                                                   | 0.957702125        | 3              | 5.78229   |
| P19112        | TLVYGGIFLYPANK                                                            | 0.821210941        | 2              | 4.206293  |
| P19112        | TLVYGGIFLYPANKK                                                           | 0.905778641        | 2              | 2.33301   |
| P19112        | TSANEPSEKDALQPGR                                                          | 0.772966268        | 2              | 3.885636  |
| <b>P19123</b> | <b>TNNC1 Troponin C_slow skeletal and cardiac muscles</b>                 | <b>1.089971606</b> | <b>0.92854</b> | <b>5</b>  |
| P19123        | AAVEQLTEEK                                                                | 1.258868602        | 2              | 2.861987  |
| P19123        | AAVEQLTEEKNEFK                                                            | 1.102815352        | 2              | 3.446536  |
| P19123        | GKSEELSDFLR                                                               | 1.02303009         | 2              | 2.570196  |
| P19123        | IDYDEFLEFMK                                                               | 1.226180617        | 2              | 3.178984  |
| P19123        | SEELSDFLR                                                                 | 2.698304961        | 2              | 2.930652  |
| <b>P19225</b> | <b>CP270 Cytochrome P450 2C70</b>                                         | <b>1.054486362</b> | <b>8.6E-09</b> | <b>14</b> |
| P19225        | ACIGEGLAR                                                                 | 1.673436407        | 2              | 2.789742  |
| P19225        | ASLNLSNPQDFIDYFLIK                                                        | 1.07114981         | 2              | 4.702113  |
| P19225        | EALIDRGEFSDK                                                              | 2.254384751        | 2              | 3.293825  |
| P19225        | FDPGHFLDEK                                                                | 1.301693937        | 2              | 2.313699  |
| P19225        | FDYSDEK                                                                   | 1.396297497        | 1              | 1.99506   |
| P19225        | FILMEINR                                                                  | 1.490660394        | 2              | 2.33989   |
| P19225        | GTSVMACLTSALHDDKEFPNPEK                                                   | 1.362746555        | 3              | 3.486035  |
| P19225        | IQEEITR                                                                   | 1.438073781        | 1              | 2.000205  |
| P19225        | IQEEVVYLLEALR                                                             | 2.187935425        | 2              | 3.357499  |
| P19225        | LPPGPTPLPIFGNILQVGVK                                                      | 0.970286268        | 3              | 4.910123  |
| P19225        | SDYFMAFSAGR+Oxidation(4)                                                  | 0.75113961         |                |           |
| P19225        | SEFTMDNLIVTIGDLFGAGTETTSSTIK                                              | 0.680494457        |                |           |
| P19225        | VSQGLGIVFSNGEIWK                                                          | 1.663786895        | 2              | 3.348341  |
| P19225        | YIDFVPIPLPR                                                               | 1.135882913        | 2              | 3.174598  |
| <b>P19234</b> | <b>NDUV2 NADH dehydrogenase [ubiquinone] flavoprotein 2_mitochondrial</b> | <b>1.202056779</b> | <b>0.44409</b> | <b>4</b>  |
| P19234        | AAAVLPVLDLAQR                                                             | 1.701059356        | 2              | 2.355726  |
| P19234        | DIEEIIDEL                                                                 | 1.190410024        | 2              | 3.551643  |
| P19234        | DTPENNPDPFDFTPENYER                                                       | 1.018098608        | 2              | 4.397674  |
| P19234        | FCCEPAGGLTSLTEPPK                                                         | 1.259426435        | 2              | 3.746825  |
| <b>P19468</b> | <b>GSH1 Glutamate_cysteine ligase catalytic subunit</b>                   | <b>0.903994533</b> | <b>0.39804</b> | <b>8</b>  |
| P19468        | ASGELMTVAR                                                                | 0.911947574        | 2              | 2.696695  |
| P19468        | CNQIANELCEPELLGSGFR                                                       | 0.978817221        | 2              | 5.099301  |
| P19468        | DKNTPSPFVETTFPEDEEASK                                                     | 0.943591066        | 3              | 3.43545   |

|               |                                                   |                    |                |           |
|---------------|---------------------------------------------------|--------------------|----------------|-----------|
| P19468        | GYVSDIDCR                                         | 1.032233951        | 2              | 2.584268  |
| P19468        | NTPSPFVETFPEDDEEASK                               | 1.223664191        | 2              | 4.776046  |
| P19468        | SLFFPDEAINK                                       | 0.984877709        | 2              | 2.661707  |
| P19468        | VQLLLNGGDVLETLQEK                                 | 0.868007606        | 2              | 4.72091   |
| P19468        | WGVISASVDDR                                       | 0.869192541        | 2              | 3.256202  |
| <b>P19488</b> | <b>UDB37 UDP_glucuronosyltransferase 2B37</b>     | <b>0.910114952</b> | <b>0.0006</b>  | <b>9</b>  |
| P19488        | AEMWLIR                                           | 0.999208824        | 2              | 2.918362  |
| P19488        | ANAIAWALAQIPQK                                    | 0.894208962        | 3              | 5.953065  |
| P19488        | FETFPTSFSK                                        | 1.077076612        | 1              | 2.001886  |
| P19488        | FETFPTSFSKDELEK                                   | 0.610438612        | 2              | 3.394245  |
| P19488        | GAAVTLNIR                                         | 0.961106148        | 2              | 2.511322  |
| P19488        | GHEVTVLKPSAYYVLDPK                                | 0.937416088        | 2              | 4.521748  |
| P19488        | NWDPFYTEILGRPTTLAETMGK                            | 0.967120442        | 2              | 5.012445  |
| P19488        | SDLFNALK                                          | 1.056868677        | 2              | 2.764688  |
| P19488        | TILDELVQR                                         | 0.913108123        | 2              | 3.196654  |
| <b>P19511</b> | <b>AT5F1 ATP synthase subunit b_mitochondrial</b> | <b>0.953990166</b> | <b>0.99275</b> | <b>10</b> |
| P19511        | HVIQSISAQKEK                                      | 0.937863025        | 2              | 3.994242  |
| P19511        | HVIQSISAQKEKETIAK                                 | 0.975946742        | 3              | 4.07216   |
| P19511        | HYLFDVQR                                          | 0.899399527        | 2              | 2.588789  |
| P19511        | LDYHISVQDMMR                                      | 0.805690491        | 3              | 4.311595  |
| P19511        | LGLIPEEFFQFLYPK                                   | 0.959366089        | 2              | 2.678539  |
| P19511        | LNEEKIAQLEEIK                                     | 1.016116375        | 2              | 2.530182  |
| P19511        | NNIALALEVTYR                                      | 0.868773115        | 2              | 2.350246  |
| P19511        | QIQDAINR                                          | 0.977718845        | 1              | 2.123898  |
| P19511        | YGASIGEFIDK                                       | 0.916264413        | 2              | 2.913744  |
| P19511        | YGASIGEFIDKLNEEK                                  | 0.969062833        | 2              | 3.847262  |
| <b>P19643</b> | <b>AOFB Amine oxidase [flavin_containing] B</b>   | <b>0.872817264</b> | <b>0.98719</b> | <b>12</b> |
| P19643        | FIGGSGQVSR                                        | 0.881109636        | 2              | 3.244701  |
| P19643        | IISTTNGGQER                                       | 1.115525257        | 2              | 3.063423  |
| P19643        | IPEDEIWQPEPESVDVPARPITNTFLER                      | 1.103484364        | 3              | 4.6288    |
| P19643        | KFIGGSGQVSR                                       | 1.158301718        | 2              | 3.105097  |
| P19643        | LERPVIHIDQTGENVVVK                                | 0.897372684        | 2              | 4.49568   |
| P19643        | LLHDCGLSVVLEAR                                    | 1.088207077        | 2              | 3.440828  |
| P19643        | TLNHEIYEAK                                        | 0.999153321        | 2              | 2.814503  |
| P19643        | TMDEMGGQIIPSDAPWK                                 | 0.987551203        | 2              | 4.181168  |
| P19643        | VLNSQEALQPVHYEEK                                  | 0.995440684        | 2              | 4.835337  |
| P19643        | YVDLGGSYVGPQNR                                    | 0.926067245        | 2              | 5.324489  |
| P19643        | YVISAIPPVLGMK                                     | 0.815703888        | 2              | 2.931791  |
| P19643        | YVISAIPPVLGMK+Oxidation(11)                       | 0.787763786        |                |           |
| <b>P19804</b> | <b>NDKB Nucleoside diphosphate kinase B</b>       | <b>1.118992148</b> | <b>3.6E-11</b> | <b>9</b>  |
| P19804        | DRPFFPGLVK                                        | 2.039442464        | 2              | 2.339988  |
| P19804        | EIGLWFKPEELIDYK                                   | 1.214739795        | 2              | 4.117491  |
| P19804        | GDFCIQVGR                                         | 1.066146951        | 2              | 3.198852  |
| P19804        | NIIHGSDSVESA EK                                   | 1.148708388        | 1              | 3.941249  |
| P19804        | TFIAIKPDGVQR                                      | 1.017541983        | 2              | 3.256384  |
| P19804        | VMLGETNPADSKPGTIR                                 | 1.148653311        | 2              | 3.896411  |
| P19804        | VMLGETNPADSKPGTIR+Oxidation(1)                    | 1.157745129        |                |           |
| P19804        | YMNSGPVAMVWEGLNVVK                                | 0.828949525        | 2              | 5.097666  |
| P19804        | YMNSGPVAMVWEGLNVVK+Oxidation(1)                   | 0.926024383        |                |           |
| <b>P19944</b> | <b>RLA1 60S acidic ribosomal protein P1</b>       | <b>1.078184976</b> | <b>0.53224</b> | <b>2</b>  |
| P19944        | AAGVNVPEFWPGLFAK                                  | 1.017009965        | 2              | 3.429322  |
| P19944        | ALANVNI GSLICNVGAGGPAPAAGAAPAGGPAPSAAAAPAE EK     | 1.083215941        | 3              | 5.706236  |
| <b>P19945</b> | <b>RLA0 60S acidic ribosomal protein P0</b>       | <b>1.027519599</b> | <b>0.21155</b> | <b>10</b> |
| P19945        | AFLADPSAFAAAAAPVAAATTAAPAAAAAPAK                  | 1.035786281        | 2              | 6.02914   |
| P19945        | AGAIAPCEVTVAQNTGLGPEK                             | 1.007283377        | 2              | 4.54503   |
| P19945        | CFIVGADNVGSK                                      | 0.95654906         | 2              | 3.674735  |

|               |                                                                  |                    |                |           |
|---------------|------------------------------------------------------------------|--------------------|----------------|-----------|
| P19945        | GHLENNPALEK                                                      | 1.060476556        | 2              | 3.695569  |
| P19945        | GNVGFVFTK                                                        | 1.0957721          | 2              | 2.793194  |
| P19945        | GTIEILSDVQLIK                                                    | 1.071250708        | 2              | 3.363508  |
| P19945        | IIQLDDYPK                                                        | 1.287748344        | 2              | 3.639399  |
| P19945        | NVASVCLQIGYPTVASVPHSIINGYK                                       | 0.965242763        | 3              | 3.874542  |
| P19945        | TSFFQALGITTK                                                     | 1.027859289        | 2              | 4.218082  |
| P19945        | VLALSVETDYTFPLAEK                                                | 0.962003182        | 2              | 3.940639  |
| <b>P20059</b> | <b>HEMO Hemopexin</b>                                            | <b>1.071016507</b> | <b>0.99465</b> | <b>7</b>  |
| P20059        | ELGSPPGISLDTIDAAFSCPGSSK                                         | 1.195817387        | 2              | 4.612888  |
| P20059        | FNPVTGEVPPR                                                      | 1.083750842        | 2              | 2.46482   |
| P20059        | GECQSEGVLFFQGNR                                                  | 0.924611183        | 2              | 3.756286  |
| P20059        | GGNNLVSGYPK                                                      | 1.129545445        | 2              | 2.539176  |
| P20059        | LFQEEFPGIPYPPDAAVECHR                                            | 1.130009703        | 3              | 3.750477  |
| P20059        | SGAQATWAELSWPHEK                                                 | 1.044168064        | 3              | 3.545642  |
| P20059        | VDGALCLEK                                                        | 1.069297028        | 2              | 2.64807   |
| <b>P20070</b> | <b>NB5R3 NADH_cytochrome b5 reductase 3</b>                      | <b>0.942927715</b> | <b>0.0958</b>  | <b>9</b>  |
| P20070        | AVLKDPNDHTVCYLLFANQSEK                                           | 0.849044961        | 3              | 4.702319  |
| P20070        | DILLRPELEELR                                                     | 1.194185097        | 2              | 2.552075  |
| P20070        | IDGNLVIRPYTPVSSDDDKGFVDLVVK                                      | 0.946306995        | 3              | 4.961462  |
| P20070        | LIDKEIISHDTR                                                     | 1.296926762        | 2              | 3.734611  |
| P20070        | MSQYLENMNIGDTIEFR                                                | 1.044268284        | 2              | 3.5756    |
| P20070        | SSPAITLENPDIK                                                    | 1.0561423          | 2              | 3.877282  |
| P20070        | SSPAITLENPDIKYPLR                                                | 0.734797337        | 2              | 3.847224  |
| P20070        | SVGMIAGGTGITPMLQVIR                                              | 0.911146462        | 2              | 5.092463  |
| P20070        | SVGMIAGGTGITPMLQVIR+Oxidation(3)                                 | 1.052382949        |                |           |
| <b>P20280</b> | <b>RL21 60S ribosomal protein L21</b>                            | <b>1.003882425</b> | <b>0.10698</b> | <b>3</b>  |
| P20280        | KGDIVDIK                                                         | 1.311876179        | 1              | 2.243574  |
| P20280        | TNGKEPELLEPIPYEFMA                                               | 1.134289844        | 2              | 3.014197  |
| P20280        | VYNVTQHAVGIIVNK                                                  | 0.990260874        | 2              | 4.618709  |
| <b>P20650</b> | <b>PPM1A Protein phosphatase 1A</b>                              | <b>1.091741198</b> | <b>0.52181</b> | <b>2</b>  |
| P20650        | SRLEVTDDLEK                                                      | 0.734121658        | 2              | 2.316962  |
| P20650        | VCNEVVDTCLYK                                                     | 1.091864726        | 2              | 2.536309  |
| <b>P20673</b> | <b>ARLY Argininosuccinate lyase</b>                              | <b>1.11344437</b>  | <b>1.4E-05</b> | <b>16</b> |
| P20673        | AEAECEVLFPGYTHLQR                                                | 1.022354121        | 2              | 4.595074  |
| P20673        | AEMQQLQLGLDK                                                     | 1.013174442        | 2              | 4.501705  |
| P20673        | AEMQQLQLGLDK+Oxidation(2)                                        | 1.191179818        |                |           |
| P20673        | AVVVAEMK                                                         | 1.214037484        | 2              | 2.380149  |
| P20673        | EFNFVQLSDAYSTGSSLMPQK                                            | 1.263212159        | 2              | 5.484978  |
| P20673        | ELIGEAAAGK                                                       | 2.252100101        | 1              | 1.932617  |
| P20673        | FNSSIAYDR                                                        | 1.161398299        | 2              | 2.774706  |
| P20673        | HLWNVDLQGSK                                                      | 1.159750619        | 1              | 3.161577  |
| P20673        | INVPLPLGSGAIAGNPLGVDR                                            | 1.22974916         | 2              | 5.577091  |
| P20673        | LKELIGEAAAGK                                                     | 1.106875974        | 2              | 2.986611  |
| P20673        | LYPNDEDIHTANER                                                   | 1.260981024        | 2              | 3.882632  |
| P20673        | MAEDLILYGTK                                                      | 0.965796241        | 2              | 3.742563  |
| P20673        | MAEDLILYGTK+Oxidation(0)                                         | 1.101225455        |                |           |
| P20673        | NDQVVTDLR                                                        | 0.977107124        | 2              | 3.408863  |
| P20673        | SRNDQVVTDLR                                                      | 0.95233361         | 2              | 2.630143  |
| P20673        | VAEWAQGIK                                                        | 1.118892948        | 2              | 3.819015  |
| <b>P20788</b> | <b>UCRI Cytochrome b_c1 complex subunit Rieske_mitochondrial</b> | <b>0.95907489</b>  | <b>1</b>       | <b>5</b>  |
| P20788        | EIDQEAAVEVSQLR                                                   | 1.207484556        | 2              | 4.250672  |
| P20788        | EIDQEAAVEVSQLRDPQHDLER                                           | 1.014785332        | 3              | 3.326869  |
| P20788        | GVAGALRPLLQSAVPATSEPPVLDVK                                       | 0.895780009        | 3              | 4.294538  |
| P20788        | LSDIPEGK                                                         | 1.042539992        | 1              | 2.021074  |
| P20788        | SGPFAPVLSATSR                                                    | 1.011237944        | 2              | 3.031933  |
| <b>P20801</b> | <b>TNNC2 Troponin C_skeletal muscle</b>                          | <b>1.41766262</b>  | <b>0.90726</b> | <b>5</b>  |

|               |                                                 |                    |                |           |
|---------------|-------------------------------------------------|--------------------|----------------|-----------|
| P20801        | AAFDMFDADGGDISVK                                | 2.110480201        | 2              | 4.173479  |
| P20801        | GKSEELAECFR                                     | 0.836028951        | 2              | 3.613492  |
| P20801        | NADGYIDAEELAEIFR                                | 1.490808755        | 2              | 4.794307  |
| P20801        | SEELAECFR                                       | 4.032417718        | 2              | 3.293289  |
| P20801        | SYLSEEMIAEFK                                    | 1.562412493        | 2              | 2.757431  |
| <b>P20814</b> | <b>CP2CD Cytochrome P450 2C13_male_specific</b> | <b>0.896062008</b> | <b>0.9736</b>  | <b>4</b>  |
| P20814        | FDYEDKDFLNLIK                                   | 0.85674291         | 3              | 4.161927  |
| P20814        | GTAVLTSLSVLHDSK                                 | 1.078643996        | 2              | 3.105676  |
| P20814        | IKEHEESLDVSNPR                                  | 0.99954292         | 3              | 4.048508  |
| P20814        | SDYFIPFSAGK                                     | 1.224914791        | 2              | 2.598929  |
| <b>P20817</b> | <b>CP4AE Cytochrome P450 4A14</b>               | <b>0.935696091</b> | <b>0.9912</b>  | <b>8</b>  |
| P20817        | ACQIAHEHTDGVK                                   | 1.044661531        | 2              | 3.977923  |
| P20817        | AQLQNEELQK                                      | 0.881548296        | 2              | 3.546     |
| P20817        | AVEDLNNLTFRR                                    | 0.881794453        | 2              | 3.414963  |
| P20817        | EFQQVLTWVEK                                     | 1.037922453        | 2              | 2.656531  |
| P20817        | HLDLFDILLFAK                                    | 0.927430548        | 2              | 3.235344  |
| P20817        | MEDGKLSDEDLR                                    | 0.955991155        | 2              | 2.391694  |
| P20817        | MRKAQLQNEELQK+Oxidation(0)                      | 0.982343645        |                |           |
| P20817        | VLLYDPDYVK                                      | 0.917340955        | 2              | 2.382238  |
| <b>P20852</b> | <b>CP2A5 Cytochrome P450 2A5</b>                | <b>1.642255629</b> | <b>0.5101</b>  | <b>2</b>  |
| P20852        | DFIDSLIR                                        | 1.055493843        | 2              | 2.662069  |
| P20852        | EALVDQAEFSGR                                    | 1.380391402        | 2              | 3.351563  |
| <b>P21213</b> | <b>HUTH Histidine ammonia_lyase</b>             | <b>0.666142658</b> | <b>1.3E-13</b> | <b>13</b> |
| P21213        | ALDYLAIGVHELAAISER                              | 0.581516963        | 2              | 4.196963  |
| P21213        | DIITTELSATDNPMVFASR                             | 0.669144351        | 2              | 4.286501  |
| P21213        | GETISGGNFHGEYPAK                                | 0.636664126        | 2              | 3.827773  |
| P21213        | GEWLAVPCQDGK                                    | 0.417163894        | 2              | 2.516691  |
| P21213        | GQIEVAFR                                        | 0.285420615        | 2              | 2.39418   |
| P21213        | LQELQVNLVR                                      | 0.583575675        | 2              | 3.256324  |
| P21213        | NKPDNGGFTSVDEVRR                                | 0.691709195        | 2              | 3.614604  |
| P21213        | QADIVAALTLEVLK                                  | 0.551851736        | 2              | 2.613843  |
| P21213        | SHSSGVGKPLSPER                                  | 0.631319133        | 2              | 3.63549   |
| P21213        | SLLSDHHPSEIAESHR                                | 0.52349309         | 3              | 4.384646  |
| P21213        | TVVYGITTFGFK                                    | 0.602908351        | 2              | 3.594153  |
| P21213        | VWEVAAPYIEK                                     | 0.791552274        | 2              | 2.875035  |
| P21213        | YIALDGDLSLSTEDLVNLGK                            | 0.575365524        | 2              | 5.177346  |
| <b>P21396</b> | <b>AOFA Amine oxidase [flavin_containing] A</b> | <b>0.93264364</b>  | <b>0.83044</b> | <b>7</b>  |
| P21396        | DVPAIEITHFLER                                   | 1.460366081        | 2              | 2.481183  |
| P21396        | IFSVTNGGQER                                     | 0.826406333        | 2              | 2.548023  |
| P21396        | INVLVLEAR                                       | 1.055990991        | 2              | 2.945532  |
| P21396        | KDIWVEEPESK                                     | 0.927628506        | 2              | 3.247698  |
| P21396        | VLGSQEALYPVHYEEK                                | 0.947112228        | 2              | 3.882811  |
| P21396        | WVDVGGAYVGPQNR                                  | 0.846475138        | 2              | 4.810678  |
| P21396        | YVISAIPPILTAK                                   | 0.710838358        | 2              | 2.905345  |
| <b>P21531</b> | <b>RL3 60S ribosomal protein L3</b>             | <b>1.290937798</b> | <b>4.7E-11</b> | <b>6</b>  |
| P21531        | AHLMEIQVNGGTVAEK                                | 1.081377206        | 2              | 5.237579  |
| P21531        | ERLEQQVPVNQVFGQDEMIDVIGVTK                      | 1.197352433        | 3              | 5.929224  |
| P21531        | HGSLGFLPR                                       | 1.180190292        | 2              | 3.112545  |
| P21531        | LEQQVPVNQVFGQDEMIDVIGVTK                        | 1.109900505        | 2              | 4.770232  |
| P21531        | NNASTDYDLSDK                                    | 1.293258336        | 2              | 3.225097  |
| P21531        | TVFAEHISDECK                                    | 1.379887677        | 2              | 3.690672  |
| <b>P21533</b> | <b>RL6 60S ribosomal protein L6</b>             | <b>1.101066274</b> | <b>4.3E-06</b> | <b>8</b>  |
| P21533        | AVDSQILPK                                       | 1.085793012        | 2              | 2.75714   |
| P21533        | FVIATSTK                                        | 1.223160153        | 1              | 2.017998  |
| P21533        | HLTDAYFK                                        | 1.197987311        | 2              | 2.436034  |
| P21533        | HQEGEIFDTEK                                     | 1.33111344         | 2              | 3.32333   |
| P21533        | HQEGEIFDTEKEK                                   | 1.120878291        | 2              | 4.00106   |



|               |                                                                                    |                    |                |           |
|---------------|------------------------------------------------------------------------------------|--------------------|----------------|-----------|
| P21533        | QLGSGLLLVGTGPLALNR                                                                 | 1.201140642        | 2              | 5.045406  |
| P21533        | SSITPGTVLIILTGR                                                                    | 1.073247056        | 2              | 3.891764  |
| P21533        | YYPTEDVPR                                                                          | 1.164378957        | 2              | 2.440053  |
| <b>P21571</b> | <b>ATP5J ATP synthase_coupling factor 6_mitochondrial</b>                          | <b>1.007977348</b> | <b>0.40088</b> | <b>6</b>  |
| P21571        | FEVLDPKQS                                                                          | 1.024706831        | 2              | 2.93575   |
| P21571        | GEMDKFPTFNFKFEVLDPKQS                                                              | 0.82467355         | 3              | 3.930324  |
| P21571        | GEMDKFPTFNFKFEVLDPKQS+Oxidation(2)                                                 | 0.78653035         |                |           |
| P21571        | LASGGPVDTGPEYQQEVDR                                                                | 1.320368744        | 2              | 5.28316   |
| P21571        | LASGGPVDTGPEYQQEVDRLEFK                                                            | 1.296514669        | 2              | 2.799888  |
| P21571        | RLASGGPVDTGPEYQQEVDR                                                               | 0.879676305        | 3              | 4.52364   |
| <b>P21643</b> | <b>T23O Tryptophan 2_3_dioxygenase</b>                                             | <b>3.166348661</b> | <b>2E-10</b>   | <b>2</b>  |
| P21643        | GGLIYGDYLQLEK                                                                      | 6.98605785         | 2              | 3.617439  |
| P21643        | ILNAQELQSEIK                                                                       | 2.318161854        | 2              | 3.652973  |
| <b>P21670</b> | <b>PSA4 Proteasome subunit alpha type 4</b>                                        | <b>1.002056102</b> | <b>0.97203</b> | <b>4</b>  |
| P21670        | ATCIGNNSAAAVSMLK                                                                   | 1.044529148        | 2              | 2.812556  |
| P21670        | LLDEVFFSEK                                                                         | 1.01441689         | 2              | 3.597595  |
| P21670        | LNEDMACSVAGITSDANVLNLR                                                             | 1.252439789        | 3              | 3.446458  |
| P21670        | YLLQYQEPICEQLVTALCDIK                                                              | 1.141976809        | 2              | 3.044539  |
| <b>P21775</b> | <b>THIKA 3_ketoacyl_CoA thiolase A_peroxisomal</b>                                 | <b>0.761058627</b> | <b>9.9E-20</b> | <b>2</b>  |
| P21775        | LKPECLGDISVGNVLEPGAGAVMAR                                                          | 0.788561445        | 3              | 5.287484  |
| P21775        | LKPECLGDISVGNVLEPGAGAVMAR+Oxidation(22)                                            | 0.830226919        |                |           |
| <b>P21913</b> | <b>DHSB Succinate dehydrogenase [ubiquinone] iron_sulfur subunit_mitochondrial</b> | <b>0.980034412</b> | <b>0.84388</b> | <b>6</b>  |
| P21913        | CGPMVLDALIKIK                                                                      | 0.741322403        | 2              | 2.4207    |
| P21913        | CHTIMNCTQTCPK                                                                      | 0.997039155        | 2              | 4.316717  |
| P21913        | CHTIMNCTQTCPK+Oxidation(4)                                                         | 1.307148719        |                |           |
| P21913        | IKNEIDSTLFR                                                                        | 1.15564956         | 2              | 2.395818  |
| P21913        | LQDPFSLYR                                                                          | 1.158440649        | 2              | 2.753863  |
| P21913        | RIDTDLGK                                                                           | 0.992662296        | 2              | 2.437272  |
| <b>P21981</b> | <b>TGM2 Protein glutamine gamma glutamyltransferase 2</b>                          | <b>0.922762613</b> | <b>0.99859</b> | <b>5</b>  |
| P21981        | CDLEIQANGR                                                                         | 0.918164504        | 2              | 2.991685  |
| P21981        | LVVNFQCDK                                                                          | 0.903309419        | 2              | 2.676165  |
| P21981        | SEGTYCCGPVSVR                                                                      | 0.928644692        | 2              | 3.694467  |
| P21981        | WDNNYGDGISPMAWIGSDILR                                                              | 0.928275567        | 3              | 4.197842  |
| P21981        | YSGCLTESLIK                                                                        | 0.931795844        | 2              | 3.566343  |
| <b>P22734</b> | <b>COMT Catechol O_methyltransferase</b>                                           | <b>0.798216619</b> | <b>0.99704</b> | <b>14</b> |
| P22734        | AIYQGPSSPDK                                                                        | 1.125640082        | 2              | 2.362952  |
| P22734        | AIYQGPSSPKS                                                                        | 0.748508002        | 2              | 3.150823  |
| P22734        | EWAMNVGDAK                                                                         | 2.845366847        | 1              | 2.769252  |
| P22734        | GQIMDAVIR                                                                          | 0.88525338         | 2              | 3.032671  |
| P22734        | GQIMDAVIR+Oxidation(3)                                                             | 1.112655087        |                |           |
| P22734        | GSSSFECTHYSSYLEYMK                                                                 | 2.388971421        | 2              | 4.563265  |
| P22734        | GTVLLADNVIVPGTPDFLAYVR                                                             | 0.711478556        | 3              | 4.868077  |
| P22734        | KGTVLLADNVIVPGTPDFLAYVR                                                            | 0.741458419        | 2              | 4.687739  |
| P22734        | KYDVRTLDMVFLDHWK                                                                   | 0.869791042        | 3              | 5.635423  |
| P22734        | VTILNGASQDLIPQLK                                                                   | 0.794990838        | 2              | 4.301364  |
| P22734        | VVDGLEK                                                                            | 0.831327081        | 2              | 2.380745  |
| P22734        | YDVRTLDMVFLDHWK                                                                    | 0.818629081        | 3              | 4.602151  |
| P22734        | YLPDTLLEK                                                                          | 0.837483386        | 2              | 2.913932  |
| P22734        | YVQQNAKPGDPQSVLEAIDTYCTQK                                                          | 0.785546814        | 3              | 6.094255  |
| <b>P22789</b> | <b>ST2A2 Alcohol sulfotransferase A</b>                                            | <b>0.777624628</b> | <b>0.53199</b> | <b>4</b>  |
| P22789        | EEDLILLTPK                                                                         | 0.984726208        | 2              | 2.591067  |
| P22789        | ETLQNVCKN                                                                          | 1.039472453        | 1              | 2.011793  |
| P22789        | KLEPDELVLK                                                                         | 0.563955885        | 3              | 4.730116  |
| P22789        | NHFTVAQAEAFDK                                                                      | 0.664237735        | 2              | 3.43943   |

|               |                                                               |                    |                |           |
|---------------|---------------------------------------------------------------|--------------------|----------------|-----------|
| <b>P22791</b> | <b>HMCS2 Hydroxymethylglutaryl_CoA synthase_mitochondrial</b> | <b>0.894200683</b> | <b>0.99996</b> | <b>21</b> |
| P22791        | ASLDMFNK                                                      | 1.086424636        | 2              | 2.46946   |
| P22791        | ASLDMFNKK                                                     | 0.981867068        | 2              | 2.525005  |
| P22791        | DVGILALEVYFPAQYVDQTDLEK                                       | 0.941098241        | 3              | 7.205613  |
| P22791        | GLKLEETYTNK                                                   | 0.76632094         | 2              | 2.782672  |
| P22791        | GTHMENAYDFYKPNLASEYPLVDGK                                     | 1.011991441        | 3              | 7.034035  |
| P22791        | GTHMENAYDFYKPNLASEYPLVDGK+Oxidation(3)                        | 0.947423646        |                |           |
| P22791        | IGAFSYGSLAASFFSFR                                             | 0.949072286        | 2              | 3.879208  |
| P22791        | LEETYTNK                                                      | 0.920012016        | 2              | 3.021606  |
| P22791        | LEETYTNKDVDK                                                  | 0.945829756        | 2              | 4.108529  |
| P22791        | LEVGTETIDK                                                    | 1.053396676        | 2              | 3.733799  |
| P22791        | LMFNDFLSSSSDK                                                 | 0.991982651        | 2              | 4.421253  |
| P22791        | LMFNDFLSSSSDK+Oxidation(1)                                    | 1.044270733        |                |           |
| P22791        | LSIQCYLR                                                      | 0.868464917        | 2              | 2.317     |
| P22791        | LVSSVSDLPK                                                    | 1.191420715        | 2              | 3.49174   |
| P22791        | MGFCSVQEDINSLCLTVVQR                                          | 1.017824405        | 3              | 3.493203  |
| P22791        | MSPEEFTEIMNQR                                                 | 0.933403754        | 2              | 4.656848  |
| P22791        | MSPEEFTEIMNQR+Oxidation(0)                                    | 0.939911618        |                |           |
| P22791        | MSPEEFTEIMNQR+Oxidation(9)                                    | 0.993195003        |                |           |
| P22791        | TKLPWDAVGR                                                    | 0.954744877        | 3              | 3.950933  |
| P22791        | VNFSPPGDTSNLFPGTWYLER                                         | 0.872432648        | 2              | 5.053218  |
| P22791        | YTVGLGQTR                                                     | 0.954994096        | 2              | 3.335884  |
| <b>P22985</b> | <b>XDH Xanthine dehydrogenase/oxidase</b>                     | <b>0.826101088</b> | <b>0.98018</b> | <b>10</b> |
| P22985        | DEVTCVGHIIGAVVADTPEHAQR                                       | 1.015515068        | 3              | 3.848655  |
| P22985        | DPPANVQLFQEVPK                                                | 0.992300744        | 2              | 3.843398  |
| P22985        | DQTVSLSPLFNPEDFKPLDPTQEPIFPPELLR                              | 1.093233184        | 3              | 3.389107  |
| P22985        | LDPTFASATLLFQK                                                | 0.914825171        | 2              | 4.018567  |
| P22985        | NQPEPTVEEIEENAFQGNLCR                                         | 0.982579153        | 2              | 4.713365  |
| P22985        | QLFLDSDPATPEK                                                 | 0.816500017        | 2              | 3.205284  |
| P22985        | SVASIGGNIITASPIDLNPVFMASGAK                                   | 1.008547169        | 3              | 5.768322  |
| P22985        | TGTVVALEVAHFSNGGNTEDLSR                                       | 0.840571486        | 3              | 4.624146  |
| P22985        | TLLRPEEILLSIEIPYSK                                            | 0.922918436        | 3              | 4.050619  |
| P22985        | TNLPSNTAFR                                                    | 0.629246054        | 1              | 2.258965  |
| <b>P23358</b> | <b>RL12 60S ribosomal protein L12</b>                         | <b>1.039885456</b> | <b>9.4E-05</b> | <b>7</b>  |
| P23358        | CTGGEVGATSALAPK                                               | 1.092648209        | 2              | 4.083876  |
| P23358        | EILGTAQSVGCNVVDR                                              | 1.964280734        | 2              | 4.437327  |
| P23358        | HNGNITFDEIVNIAR                                               | 1.060886803        | 2              | 4.24865   |
| P23358        | HPHDIIDDINGAVECPAS                                            | 1.080559304        | 2              | 4.839104  |
| P23358        | IGPLGLSPK                                                     | 1.283081988        | 2              | 2.539657  |
| P23358        | QAQIEVVPSASALIK                                               | 1.176666223        | 2              | 3.876422  |
| P23358        | VGDDIAKATGDWKGRL                                              | 0.902205682        | 2              | 2.412156  |
| <b>P23457</b> | <b>DIDH 3_alpha_hydroxysteroid dehydrogenase</b>              | <b>0.896394992</b> | <b>0.92608</b> | <b>10</b> |
| P23457        | ALDGLNR                                                       | 0.908854019        | 2              | 2.557236  |
| P23457        | ELTQVFEFQLASEDMK                                              | 0.799657814        | 2              | 3.290043  |
| P23457        | HFDSAYLYEVEEVEGQAIR                                           | 1.072177268        | 2              | 6.166505  |
| P23457        | MLDYCK                                                        | 0.783171605        | 1              | 1.974668  |
| P23457        | SIGVSNFNCR                                                    | 0.892650756        | 2              | 3.290779  |
| P23457        | SKDIIIVSYCTLGSSR                                              | 0.959571861        | 2              | 5.066266  |
| P23457        | SPVLLDDPVLCIAIK                                               | 0.976779929        | 2              | 3.925643  |
| P23457        | VALNDGNFIPVLGFGTTVPEK                                         | 0.957447063        | 2              | 5.186249  |
| P23457        | YFDDHPNHPFTDE                                                 | 0.619717975        | 2              | 3.745184  |
| P23457        | YKPVCNQVECHLYLNQSK                                            | 2.017830025        | 2              | 4.67289   |
| <b>P23514</b> | <b>COPB Coatomer subunit beta</b>                             | <b>1.076265551</b> | <b>0.72762</b> | <b>7</b>  |
| P23514        | EAGELKPEEEITVGPVQK                                            | 1.197555758        | 2              | 4.338065  |
| P23514        | EDIQSVMTVEVR                                                  | 1.074492813        | 2              | 2.941848  |
| P23514        | NFENLIPDAPELIHDFLVNEK                                         | 0.779380105        | 3              | 4.017214  |

|               |                                                       |                    |                |           |
|---------------|-------------------------------------------------------|--------------------|----------------|-----------|
| P23514        | TNNVSEHEDTDKYR                                        | 1.215626354        | 3              | 4.127946  |
| P23514        | VLQDLVMDILR                                           | 0.943322317        | 2              | 3.618531  |
| P23514        | VLSECSPLMNDIFNK                                       | 1.123976707        | 2              | 2.667123  |
| P23514        | YEAAGTLVTLSSAPTAIK                                    | 1.093105595        | 2              | 4.9897    |
| <b>P23965</b> | <b>ECI1 Enoyl_CoA delta isomerase 1_mitochondrial</b> | <b>0.991503389</b> | <b>0.99485</b> | <b>8</b>  |
| P23965        | ALQLGTLFPPAEALK                                       | 0.940826201        | 2              | 5.413283  |
| P23965        | AVQELWLR                                              | 1.028614867        | 2              | 2.60382   |
| P23965        | DNYVNTIGHR                                            | 1.186852569        | 2              | 3.032264  |
| P23965        | GVILTSEKPGIFSAGLDLMEYGR                               | 0.885045808        | 3              | 6.201207  |
| P23965        | QREADIQNFTSFISR                                       | 1.068440507        | 2              | 2.700237  |
| P23965        | SLHVYLEK                                              | 0.901884206        | 1              | 2.312779  |
| P23965        | VGLVDEVVPEDQVHSK                                      | 0.938291175        | 2              | 4.73955   |
| P23965        | WFTIPDHSR                                             | 0.874546797        | 2              | 3.196717  |
| <b>P24049</b> | <b>RL17 60S ribosomal protein L17</b>                 | <b>1.286286562</b> | <b>9.9E-20</b> | <b>3</b>  |
| P24049        | EQIVPKPEEEVAQK                                        | 1.691968535        | 2              | 3.547131  |
| P24049        | GLDVDSLVIHQVQNK                                       | 1.114953473        | 2              | 4.686262  |
| P24049        | YSLDPENPTK                                            | 1.246851787        | 1              | 2.764604  |
| <b>P24050</b> | <b>RS5 40S ribosomal protein S5</b>                   | <b>0.925565519</b> | <b>0.42712</b> | <b>4</b>  |
| P24050        | HAFEIHLTGENPLQVLVNAIINSGPR                            | 0.738829091        |                |           |
| P24050        | RQAVDVSPLR                                            | 1.184951488        | 2              | 2.364157  |
| P24050        | VNQAIWLLCTGAR                                         | 0.968101075        | 2              | 4.110164  |
| P24050        | WSTDDVQINDISLQDYIAVK                                  | 0.975983539        | 2              | 4.764235  |
| <b>P24063</b> | <b>ITAL Integrin alpha_L</b>                          | <b>1.124615841</b> | <b>0.40161</b> | <b>2</b>  |
| P24063        | ASEAQVLVKVDLIHEK                                      | 1.120596293        | 2              | 2.400362  |
| P24063        | DFEKILEFMK                                            | 1.150895493        | 3              | 3.333261  |
| <b>P24090</b> | <b>FETUA Alpha_2_HS glycoprotein</b>                  | <b>0.67866596</b>  | <b>9.9E-15</b> | <b>6</b>  |
| P24090        | AQNVFPVSTLVEFVIAATDCTGQEVTPAK                         | 0.635258342        |                |           |
| P24090        | ELACDDPETEHVALIAVDYLNK                                | 0.640201591        | 2              | 4.181743  |
| P24090        | HAFSPVASVESASGEVLHSPK                                 | 0.863687632        | 3              | 5.960438  |
| P24090        | LGGEVSVACK                                            | 0.697287563        | 2              | 3.692735  |
| P24090        | VGQPGDAGAAGPVAPLCPGR                                  | 0.679280787        | 2              | 5.089277  |
| P24090        | VLHAQCHSTPDSAEDVRK                                    | 0.625558329        | 3              | 4.009344  |
| <b>P24268</b> | <b>CATD Cathepsin D</b>                               | <b>0.818415313</b> | <b>0.00024</b> | <b>4</b>  |
| P24268        | AIGAVPLIQGEYMIPCEK                                    | 0.817941075        | 2              | 3.479833  |
| P24268        | DPTGQPGGELMLGGTDSR                                    | 1.037358554        | 2              | 4.746852  |
| P24268        | GGCEAIVDTGTSLLVGPVDEVK                                | 1.202270917        | 2              | 4.077839  |
| P24268        | LGGQNYELHPEK                                          | 0.938185709        | 2              | 2.911747  |
| <b>P24329</b> | <b>THTR Thiosulfate sulfurtransferase</b>             | <b>0.907477935</b> | <b>0.00468</b> | <b>12</b> |
| P24329        | EGHPVTSEPSRPEPAVFK                                    | 1.276821121        | 2              | 4.698688  |
| P24329        | FQLVDSR                                               | 0.87931684         | 2              | 2.466033  |
| P24329        | GSVNVPFMFLTEDGFVK                                     | 2.109647449        | 2              | 5.276097  |
| P24329        | HVPGASFFDIEECR                                        | 1.021543104        | 3              | 3.614053  |
| P24329        | KVDLSQPLIATCR                                         | 0.896501595        | 2              | 4.780231  |
| P24329        | RFQLVDSR                                              | 0.974939488        | 2              | 2.474419  |
| P24329        | TVSVLNGGFR                                            | 0.87772493         | 2              | 2.887061  |
| P24329        | TYEQVLENLQSK                                          | 0.884187568        | 2              | 5.085625  |
| P24329        | VDLSQPLIATCR                                          | 0.909933913        | 2              | 3.545904  |
| P24329        | VLDASWYSPGTR                                          | 0.876233183        | 2              | 3.735063  |
| P24329        | WLAESIR                                               | 0.908100583        | 2              | 2.359281  |
| P24329        | YLGTOPEPDAVGLDSGHIR                                   | 0.907842557        | 3              | 5.052375  |
| <b>P24368</b> | <b>PPIB Peptidyl_prolyl cis_trans isomerase B</b>     | <b>1.154362276</b> | <b>0.91536</b> | <b>9</b>  |
| P24368        | DKPLKDVIIVDCGK                                        | 1.172841061        | 2              | 3.641815  |
| P24368        | DTNGSQFFITTVK                                         | 1.23175724         | 2              | 3.580475  |
| P24368        | DVIIVDCGK                                             | 1.172197084        | 1              | 1.990567  |
| P24368        | HYPGWVSMANAGK                                         | 0.987455355        | 2              | 3.234995  |
| P24368        | IEVEKPFIAIK                                           | 1.061118142        | 2              | 3.292331  |

|               |                                                                                      |                    |                |           |
|---------------|--------------------------------------------------------------------------------------|--------------------|----------------|-----------|
| P24368        | IEVEKPFIAIKE                                                                         | 1.01663629         | 2              | 3.558626  |
| P24368        | TVDNFVALATGEK                                                                        | 0.936784353        | 2              | 3.755565  |
| P24368        | VLEGMDEVVR                                                                           | 1.018722312        | 2              | 2.775417  |
| P24368        | VYFDFQIGDEPVGR                                                                       | 0.912951664        | 2              | 4.321369  |
| <b>P24457</b> | <b>CP2DB Cytochrome P450 2D11</b>                                                    | <b>1.185850392</b> | <b>0.56482</b> | <b>2</b>  |
| P24457        | RFSVSTLR                                                                             | 1.149220729        | 2              | 2.541351  |
| P24457        | SLEEWVTK                                                                             | 1.234814052        | 2              | 2.756786  |
| <b>P24470</b> | <b>CP2CN Cytochrome P450 2C23</b>                                                    | <b>0.830742257</b> | <b>0.07793</b> | <b>10</b> |
| P24470        | ACVGESLAR                                                                            | 0.916669533        | 2              | 2.52792   |
| P24470        | AQPFDPFTFILACPCNVICSILFNDR                                                           | 0.734372451        |                |           |
| P24470        | DLDIKPITTGIIINLPPPYK                                                                 | 0.862131659        | 2              | 3.717576  |
| P24470        | EALLQQGDEFGLGR                                                                       | 1.2570194          | 2              | 2.581231  |
| P24470        | GTTVLPMLSSVMLDQK                                                                     | 0.889524047        | 2              | 4.008655  |
| P24470        | GYGLIFSNGER                                                                          | 0.804085881        | 2              | 3.241366  |
| P24470        | IIEEKDNLK                                                                            | 0.858372946        | 1              | 2.898257  |
| P24470        | LPPGPTPLPIIGNLLQLNLK                                                                 | 0.870546853        | 2              | 3.49408   |
| P24470        | TFLNLMDLLNK                                                                          | 0.826805352        | 2              | 3.86456   |
| P24470        | YITLLPSSLPHAVVQDTK                                                                   | 0.777430519        | 2              | 3.412023  |
| <b>P24473</b> | <b>GSTK1 Glutathione S_transferase kappa 1</b>                                       | <b>0.844438509</b> | <b>0.14369</b> | <b>9</b>  |
| P24473        | AGMATAQAQHLLNK                                                                       | 1.039398212        | 2              | 3.919411  |
| P24473        | AGMATAQAQHLLNK+Oxidation(2)                                                          | 0.973103535        |                |           |
| P24473        | DEDITESQNILSAAEK                                                                     | 1.016367533        | 2              | 5.743433  |
| P24473        | DSGNQPPAMVPHK                                                                        | 1.003870072        | 2              | 2.420162  |
| P24473        | FLTAVSMEQPEMLEK                                                                      | 0.777481117        | 2              | 4.188372  |
| P24473        | FLTAVSMEQPEMLEK+Oxidation(11)                                                        | 0.830078826        |                |           |
| P24473        | MELLAYLLGEK                                                                          | 0.843941615        | 2              | 4.110036  |
| P24473        | QLFQVPMSVPK                                                                          | 0.816228377        | 2              | 2.719655  |
| P24473        | YGAFGLPTTVAHVVDGK                                                                    | 0.849695306        | 2              | 3.759221  |
| <b>P25093</b> | <b>FAAA Fumarylacetoacetase</b>                                                      | <b>0.979983952</b> | <b>0.0244</b>  | <b>17</b> |
| P25093        | AIDVGGQQR                                                                            | 1.002511138        | 2              | 3.408475  |
| P25093        | AQEHIHGMVLMNDWSAR                                                                    | 0.942497629        | 3              | 3.693632  |
| P25093        | AQEHIHGMVLMNDWSAR+Oxidation(7)                                                       | 0.611181121        |                |           |
| P25093        | ASLQNLLSASQAQLR                                                                      | 0.961429984        | 2              | 4.802083  |
| P25093        | ASLQNLLSASQAQLRDDK                                                                   | 0.867740587        | 2              | 3.145474  |
| P25093        | ASSVVVSGTPIR                                                                         | 0.958304834        | 2              | 3.595053  |
| P25093        | DIQQWEYVPLGPFLGK                                                                     | 1.44089065         | 2              | 4.832111  |
| P25093        | FGPEPIISK                                                                            | 0.967740047        | 2              | 2.87535   |
| P25093        | GEGMSQAATICR                                                                         | 0.963967705        | 2              | 3.657554  |
| P25093        | GEGMSQAATICR+Oxidation(3)                                                            | 1.256828052        |                |           |
| P25093        | GKENALLPNWLHLPVGYHGR                                                                 | 0.759614954        | 3              | 3.470478  |
| P25093        | HLFTGPVLSK                                                                           | 1.097585763        | 1              | 2.707079  |
| P25093        | HQHVFDETTLNSFMGLGQAAWK                                                               | 0.856630507        | 2              | 5.374691  |
| P25093        | IGVAIGDQILDLSVIK                                                                     | 1.104194881        | 2              | 5.417109  |
| P25093        | IGVAIGDQILDLSVIKHLFTGPVLSK                                                           | 0.974266836        | 3              | 3.952735  |
| P25093        | TFLLDGDEVIIITGHCCQGDGYR                                                              | 0.967735575        | 2              | 5.027973  |
| P25093        | VGFGQCAGK                                                                            | 1.136265362        | 2              | 2.385562  |
| <b>P25113</b> | <b>PGAM1 Phosphoglycerate mutase 1</b>                                               | <b>1.005098207</b> | <b>0.99991</b> | <b>7</b>  |
| P25113        | ALPFWNEEIVPQIK                                                                       | 1.014043357        | 2              | 3.936657  |
| P25113        | FSGWYDADLSPAGHEEAK                                                                   | 0.859722309        | 2              | 4.953215  |
| P25113        | HGESAWNLENR                                                                          | 1.041583154        | 2              | 3.739516  |
| P25113        | HLEGLSEEAIMELNLPTGIPIVYELDK                                                          | 0.90778887         | 3              | 3.463135  |
| P25113        | SYDVPPPPMEPDHPFYSNISK                                                                | 0.913415754        | 2              | 4.318289  |
| P25113        | YADLTEDQLPSCESLK                                                                     | 0.956079773        | 2              | 5.490339  |
| P25113        | YADLTEDQLPSCESLKDIAR                                                                 | 0.898366402        | 2              | 5.017619  |
| <b>P25235</b> | <b>RPN2 Dolichyl_diphosphooligosaccharide__protein glycosyltransferase subunit 2</b> | <b>1.050173306</b> | <b>0.99908</b> | <b>14</b> |

|               |                                              |                    |                |           |
|---------------|----------------------------------------------|--------------------|----------------|-----------|
| P25235        | DLLAAVSEDSVAQIYHAVAALSFGFLPLASHEALGALTAR     | 0.767538758        |                |           |
| P25235        | EDQVIQLMNTIFSK                               | 1.986882822        | 2              | 2.394762  |
| P25235        | EETVLATVQALHTASHLSQQADLR                     | 1.109179885        | 3              | 4.313227  |
| P25235        | FELDTSER                                     | 0.982956737        | 1              | 2.048539  |
| P25235        | FPEEEAPSTVLSQNLFTPK                          | 0.953036463        | 2              | 4.258036  |
| P25235        | ISTEVGITNVDLSTVDKQDSIAPK                     | 1.025461973        | 2              | 4.523488  |
| P25235        | LQVSSVLSQPLAQAAVK                            | 1.170132363        | 2              | 5.727839  |
| P25235        | LSKEETVLATVQALHTASHLSQQADLR                  | 0.921513051        | 3              | 4.536286  |
| P25235        | NFESLSEAFSVASAAAALSQNR                       | 0.954286056        | 3              | 5.480579  |
| P25235        | NIVEEIEDLVAR                                 | 0.956508273        | 3              | 4.683619  |
| P25235        | NPILWNVADVVIK                                | 1.030290185        | 2              | 3.269099  |
| P25235        | TGQEVVFAEPDNK                                | 1.361148652        | 2              | 3.90921   |
| P25235        | YHVPVVVPEGSASDTQEAILR                        | 0.918525708        | 3              | 6.531534  |
| P25235        | YIANTVELR                                    | 0.972684481        | 2              | 2.587934  |
| <b>P25409</b> | <b>ALAT1 Alanine aminotransferase 1</b>      | <b>1.391660225</b> | <b>0.0065</b>  | <b>2</b>  |
| P25409        | LTEQVFNEAPGIR                                | 1.316152913        | 2              | 3.48034   |
| P25409        | VLCVINPGNPTGQVQTR                            | 1.923892853        | 2              | 4.639893  |
| <b>P25977</b> | <b>UBF1 Nucleolar transcription factor 1</b> | <b>0.909025417</b> | <b>0.06677</b> | <b>2</b>  |
| P25977        | AKYAKLHPEMSNDLTK                             | 0.982661233        | 2              | 2.336063  |
| P25977        | ALKAMEMTWNNMEKK+Oxidation(11)                | 0.766891           |                |           |
| <b>P26039</b> | <b>TLN1 Talin_1</b>                          | <b>1.000386169</b> | <b>1.2E-10</b> | <b>22</b> |
| P26039        | ADAEGESDLENSR                                | 0.791438081        | 2              | 2.895252  |
| P26039        | ADAEGESDLENSRK                               | 0.853268785        | 2              | 3.190112  |
| P26039        | AGALQCSPSDVYTK                               | 1.227916986        | 2              | 2.655855  |
| P26039        | ASAGPQPLLVSQCK                               | 0.993749273        | 2              | 3.023999  |
| P26039        | AVAEQIPLLQGVGR                               | 0.990383616        | 2              | 3.555277  |
| P26039        | EAAEGLRMATNAAAQNAIKK                         | 0.98064421         | 2              | 2.737611  |
| P26039        | ELMEEKKDEGTGLR+Oxidation(2)                  | 1.271675949        |                |           |
| P26039        | GTEWVDPEDPTVIAENELLGAAAAIEAAAK               | 0.845168356        |                |           |
| P26039        | GVGAAATAVTQALNELLQHVK                        | 0.94185703         | 3              | 3.591889  |
| P26039        | ILAQATSDLVNAIK                               | 1.2709753          | 2              | 2.623954  |
| P26039        | LGAASLGAEDPETQVVLINAVK                       | 0.901874323        | 2              | 4.412858  |
| P26039        | LLGEIAQGNENYAGIAAR                           | 1.187127706        | 2              | 4.275113  |
| P26039        | LNEAAAGLNQAATELVQASR                         | 0.871873469        | 2              | 5.238898  |
| P26039        | MVAAATNNLCEAANAQVGHASQEK                     | 1.152192698        | 3              | 3.432194  |
| P26039        | SNTSPEELGPLANQLTSDYGR                        | 0.874859067        | 2              | 4.014234  |
| P26039        | TLAESALQLLYTAK                               | 0.931751451        | 2              | 2.988723  |
| P26039        | TMLESAGGLIQTAR                               | 0.576330363        | 2              | 2.631551  |
| P26039        | VGAIPANALDDGQWSQGLISAAR                      | 0.927126814        | 2              | 4.517199  |
| P26039        | VGDDPAVWQLK                                  | 0.882498974        | 2              | 2.834435  |
| P26039        | VLGEAMTGISQNAK                               | 1.051379049        | 2              | 2.791625  |
| P26039        | VLVQNAAGSQEK                                 | 0.960203767        | 2              | 2.514229  |
| P26039        | VVAPTISPPVCQEQLVEAGR                         | 0.95811903         | 2              | 4.492325  |
| <b>P26043</b> | <b>RADI Radixin</b>                          | <b>0.930599674</b> | <b>0.23691</b> | <b>10</b> |
| P26043        | AFAAQEDLEK                                   | 1.277916231        | 2              | 2.558512  |
| P26043        | ALELEQER                                     | 0.991978694        | 1              | 1.927128  |
| P26043        | FFPEDVSEELIQEITQR                            | 0.871906952        | 3              | 4.641557  |
| P26043        | IQNWHEEHR                                    | 1.172930551        | 2              | 2.512294  |
| P26043        | KKEEEATEWQHK                                 | 1.127065804        | 3              | 3.736757  |
| P26043        | KTQNDVLHAENVK                                | 1.056672938        | 2              | 5.050867  |
| P26043        | NQEQLAAELAEFTAK                              | 0.930579032        | 2              | 5.102746  |
| P26043        | QLQALSSELAQAR                                | 1.044864272        | 2              | 3.757116  |
| P26043        | RKPDITIEVQQMK                                | 0.872079507        | 2              | 3.868768  |
| P26043        | TQNDVLHAENVK                                 | 1.117756796        | 2              | 3.942393  |
| <b>P26231</b> | <b>CTNA1 Catenin alpha_1</b>                 | <b>1.044418094</b> | <b>0.13947</b> | <b>10</b> |
| P26231        | AEVQNLGGELVSGVDSAMSLIQAQK                    | 0.916073243        | 3              | 4.156018  |

|               |                                                                                          |                    |                |          |
|---------------|------------------------------------------------------------------------------------------|--------------------|----------------|----------|
| P26231        | AHVLAASVEQATENFLEK                                                                       | 0.597059874        | 2              | 2.36008  |
| P26231        | AVMDHVSDFSLETNVPLLVLEIAAK                                                                | 0.972060529        | 3              | 3.537484 |
| P26231        | LIEVANLACISISNNEEGVK                                                                     | 1.073194764        | 2              | 4.894123 |
| P26231        | LLEPLVTQVTTLVNTNSK                                                                       | 0.888157331        | 2              | 4.011494 |
| P26231        | QIIVDPLSFSEER                                                                            | 1.039366226        | 2              | 2.683527 |
| P26231        | SAAGEFADDPCCSSVK                                                                         | 1.000815461        | 2              | 4.052165 |
| P26231        | SDALNSAIDK                                                                               | 1.324177487        | 2              | 2.521385 |
| P26231        | TIADHCPDSACK                                                                             | 0.322527896        | 2              | 3.559316 |
| P26231        | VIHVVTSEMDNYEPGVYTEK                                                                     | 0.991019801        | 3              | 3.553701 |
| <b>P26284</b> | <b>ODPA Pyruvate dehydrogenase E1 component subunit alpha_somatic form_mitochondrial</b> | <b>0.908426326</b> | <b>0.86615</b> | <b>8</b> |
| P26284        | AILAELTGR                                                                                | 0.900429509        | 2              | 2.572551 |
| P26284        | EEIQEVRSK                                                                                | 0.738925454        | 1              | 1.934391 |
| P26284        | GFCHLCDGQEACCVGLEAGINPTDHLITAYR                                                          | 0.720323235        | 3              | 6.632319 |
| P26284        | LEEGPPVTTVLTR                                                                            | 0.901698039        | 2              | 3.486447 |
| P26284        | MVNSNLASVEELKEIDVEVR                                                                     | 2.645664137        | 2              | 3.005507 |
| P26284        | RGDFIPGLR                                                                                | 1.089032657        | 2              | 2.708508 |
| P26284        | TREIQEVR                                                                                 | 0.875496846        | 3              | 3.489574 |
| P26284        | VDGMDILCVR                                                                               | 1.024094276        | 2              | 3.337078 |
| <b>P26453</b> | <b>BAS1 Basigin</b>                                                                      | <b>1.031142531</b> | <b>0.31909</b> | <b>7</b> |
| P26453        | GNINVEGPPR                                                                               | 1.001812462        | 2              | 3.469563 |
| P26453        | KSEHASEGEFVK                                                                             | 0.844904054        | 2              | 2.864264 |
| P26453        | RKPDQTLDEDDPGAAPLK                                                                       | 1.100301374        | 3              | 4.149471 |
| P26453        | SEASHPPVDEWVWFK                                                                          | 0.982221025        | 3              | 3.926523 |
| P26453        | SEHASEGEFVK                                                                              | 1.178995803        | 3              | 3.543998 |
| P26453        | SGEYSCIFLPEPVGR                                                                          | 0.969127162        | 2              | 3.463887 |
| P26453        | VLQEDTLPDLQMK                                                                            | 1.026143853        | 2              | 4.353234 |
| <b>P26772</b> | <b>CH10 10 kDa heat shock protein_mitochondrial</b>                                      | <b>0.822274961</b> | <b>0.99987</b> | <b>7</b> |
| P26772        | GGEIQPVSVK                                                                               | 1.019507047        | 2              | 3.260054 |
| P26772        | GGIMLPEK                                                                                 | 0.661066524        | 2              | 2.330966 |
| P26772        | GGIMLPEK+Oxidation(3)                                                                    | 0.996475842        |                |          |
| P26772        | GKGGEIQPVSVK                                                                             | 0.99098135         | 2              | 3.399598 |
| P26772        | VLLPEYGGTK                                                                               | 1.024235707        | 2              | 2.367303 |
| P26772        | VLQATVVAVGSGGK                                                                           | 1.027203109        | 2              | 5.511703 |
| P26772        | VVLDDKDYFLFR                                                                             | 0.901424015        | 3              | 3.403807 |
| <b>P27139</b> | <b>CAH2 Carbonic anhydrase 2</b>                                                         | <b>0.706293458</b> | <b>0.24824</b> | <b>2</b> |
| P27139        | IGPASQGLQK                                                                               | 0.709686612        | 2              | 2.541601 |
| P27139        | ITEALHSIK                                                                                | 0.696987753        | 2              | 2.426861 |
| <b>P27321</b> | <b>ICAL Calpastatin</b>                                                                  | <b>0.914537148</b> | <b>0.16754</b> | <b>4</b> |
| P27321        | KGSDEVTASSAATGTSR                                                                        | 1.138190374        | 2              | 4.842527 |
| P27321        | KVEEEVMNDQALQALSDSLGTR                                                                   | 0.85914749         | 3              | 3.571078 |
| P27321        | LSAAVSETVSQVPAPSNHTAAPPPTER                                                              | 1.206964831        | 3              | 4.182306 |
| P27321        | SQSSEPPVIEK                                                                              | 0.7588766          | 2              | 3.226077 |
| <b>P27364</b> | <b>3BHSS 3 beta_hydroxysteroid dehydrogenase type 5</b>                                  | <b>0.875354876</b> | <b>0.04521</b> | <b>6</b> |
| P27364        | AVLAANGSILK                                                                              | 0.873591625        | 2              | 2.891518 |
| P27364        | ETILNDREEEHR                                                                             | 1.201539092        | 2              | 2.920848 |
| P27364        | GDIVDAQFLR                                                                               | 0.822445775        | 2              | 2.993035 |
| P27364        | IVQMLVQEK                                                                                | 1.014267896        | 2              | 2.660714 |
| P27364        | NGGTFHTCALR                                                                              | 0.944488915        | 2              | 3.07916  |
| P27364        | QTILDVNVK                                                                                | 0.683432808        | 1              | 2.105358 |
| <b>P27605</b> | <b>HPRT Hypoxanthine_guanine phosphoribosyltransferase</b>                               | <b>1.062689557</b> | <b>9.8E-08</b> | <b>6</b> |
| P27605        | DLNHVCVISEGK                                                                             | 1.460516256        | 2              | 3.692392 |
| P27605        | FFADLLDIK                                                                                | 1.092523763        | 2              | 3.194604 |
| P27605        | NVLIVEDIIDTGK                                                                            | 1.006967477        | 2              | 4.105061 |
| P27605        | SVGYRPFVGFIPDK                                                                           | 0.974360197        | 3              | 3.809477 |

|               |                                                        |                    |                |           |
|---------------|--------------------------------------------------------|--------------------|----------------|-----------|
| P27605        | SYCNDQSTGDIK                                           | 1.096298334        | 2              | 3.961218  |
| P27605        | VIGGDDLSTLTGK                                          | 0.923249988        | 2              | 4.223195  |
| <b>P27653</b> | <b>C1TC C_1 tetrahydrofolate synthase_ cytoplasmic</b> | <b>1.450828288</b> | <b>4.9E-08</b> | <b>21</b> |
| P27653        | ASQAPSSFQLLYDLK                                        | 1.401573927        | 2              | 4.174053  |
| P27653        | AYTEEDLDLVEK                                           | 0.945298993        | 2              | 3.028994  |
| P27653        | CTHWAEGGQALALAQAVQR                                    | 1.035742422        | 2              | 5.196739  |
| P27653        | DVDGLTSINAGK                                           | 1.092496634        | 2              | 2.433334  |
| P27653        | GEWIKPGAVVIDCGINYPDDTKPNGR                             | 1.100018256        | 3              | 5.084738  |
| P27653        | GVPTGFVLPPIR                                           | 1.950841058        | 2              | 2.528205  |
| P27653        | IFHELTQTDK                                             | 1.352306043        | 3              | 3.613856  |
| P27653        | YGADDIELLPEAQNK                                        | 1.241416625        | 2              | 5.288408  |
| P27653        | KITIGQAPTEK                                            | 1.511597944        | 2              | 2.911438  |
| P27653        | KVVGDVAYDEAK                                           | 1.453528371        | 2              | 3.886915  |
| P27653        | LDIDPETITWQR                                           | 1.362824075        | 2              | 4.084001  |
| P27653        | MHGGGPTVTAGLPLPK+Oxidation(0)                          | 1.487169988        |                |           |
| P27653        | QGFGLNLPICMAK                                          | 0.964842023        | 2              | 3.162811  |
| P27653        | TADLDKEVVK                                             | 1.208851915        | 2              | 2.400633  |
| P27653        | TADLDKEVVKGDILVVATGQPEMVK                              | 1.177964875        | 3              | 4.611959  |
| P27653        | TDPAALTDDEINR                                          | 1.199793055        | 2              | 4.379691  |
| P27653        | THLSLSHNPEQK                                           | 1.234669476        | 2              | 3.832612  |
| P27653        | VLLSALDR                                               | 1.523228769        | 2              | 2.476872  |
| P27653        | VVGDVAYDEAK                                            | 1.2238992          | 2              | 3.727813  |
| P27653        | YSLQLPHVVVLVATVR                                       | 1.372355958        | 3              | 3.520746  |
| P27653        | YVVVTGITPTPLGEGK                                       | 1.218338698        | 2              | 4.88205   |
| <b>P27657</b> | <b>LIPP Pancreatic triacylglycerol lipase</b>          | <b>0.630616401</b> | <b>0.08234</b> | <b>2</b>  |
| P27657        | ATYTQATQNVK                                            | 0.631113139        | 2              | 2.520481  |
| P27657        | ITGLDAAEPYFQGTPEEVR                                    | 0.103023349        | 2              | 3.888477  |
| <b>P27661</b> | <b>H2AX Histone H2A.x</b>                              | <b>0.90757701</b>  | <b>0.0833</b>  | <b>3</b>  |
| P27661        | AGLQFPVGR                                              | 0.894714604        | 2              | 3.193053  |
| P27661        | HLQLAIR                                                | 1.007131691        | 2              | 2.642278  |
| P27661        | LLGGVTIAQGGVLPNIQAVLLPK                                | 0.891378349        | 3              | 4.717062  |
| <b>P27768</b> | <b>TNNI2 Troponin I_ fast skeletal muscle</b>          | <b>1.088883466</b> | <b>0.87052</b> | <b>3</b>  |
| P27768        | IDAAEEKYDMEVK                                          | 2.599735728        | 2              | 3.716147  |
| P27768        | SVMLQIAATELEK                                          | 0.985343398        | 2              | 2.529842  |
| P27768        | SVMLQIAATELEKEESR                                      | 2.118161815        | 2              | 3.105138  |
| <b>P27867</b> | <b>DHSO Sorbitol dehydrogenase</b>                     | <b>0.92070569</b>  | <b>0.00327</b> | <b>14</b> |
| P27867        | AMGASQVVVIDLSASR                                       | 0.967494825        | 2              | 4.037575  |
| P27867        | AVEAFETAK                                              | 0.875308268        | 2              | 2.990508  |
| P27867        | EVGADFTIQVAK                                           | 1.365434872        | 2              | 2.781494  |
| P27867        | GENLSLVVHGPDIR                                         | 0.932745132        | 2              | 3.973934  |
| P27867        | HSADFCYK                                               | 0.951869808        | 2              | 2.814023  |
| P27867        | IGDFVVK                                                | 0.966236662        | 2              | 2.62791   |
| P27867        | LENYPIPELGPNDVLLK                                      | 0.923156919        | 2              | 4.792784  |
| P27867        | LPDSVTFEEGALIEPLSVGIYACR                               | 0.846201183        | 2              | 4.750957  |
| P27867        | MHSVIGICGSDVHYWEHGR+Oxidation(0)                       | 0.914716292        |                |           |
| P27867        | TLNVKPLVTHR                                            | 0.907413648        | 2              | 3.259476  |
| P27867        | VAIEPGVPR                                              | 1.031063666        | 2              | 2.585423  |
| P27867        | VAIEPGVPREIDEFCKIGR                                    | 0.833135859        | 2              | 2.545574  |
| P27867        | VLVCGAGPIGIVTLVAK                                      | 0.747278319        | 3              | 6.226439  |
| P27867        | YNLTPSIFFCATPPDDGNLCR                                  | 2.234394998        | 2              | 4.203186  |
| <b>P27952</b> | <b>RS2 40S ribosomal protein S2</b>                    | <b>1.306920177</b> | <b>0.35506</b> | <b>7</b>  |
| P27952        | AEDKEWIPVTK                                            | 1.237236885        | 2              | 3.212702  |
| P27952        | AFVAIGDYNHVGGLVK                                       | 1.217722159        | 2              | 3.788078  |
| P27952        | ATFDAISK                                               | 1.117182341        | 2              | 2.444848  |
| P27952        | GCTATLGNFAK                                            | 1.168766323        | 2              | 2.840331  |
| P27952        | GTGIVSAPVVK                                            | 1.084090221        | 2              | 2.449337  |

|               |                                                                |                    |                |           |
|---------------|----------------------------------------------------------------|--------------------|----------------|-----------|
| P27952        | SLEEIYLFSLPIK                                                  | 0.57122069         | 1              | 2.712297  |
| P27952        | TYSYLTPLDLWK                                                   | 0.997615694        | 2              | 2.706529  |
| <b>P28037</b> | <b>AL1L1 Cytosolic 10_formyltetrahydrofolate dehydrogenase</b> | <b>1.047389352</b> | <b>0.57426</b> | <b>26</b> |
| P28037        | ADPLGLEAEK                                                     | 1.123234707        | 2              | 2.822206  |
| P28037        | ANATEFGLASGVFTR                                                | 1.052704513        | 2              | 4.444672  |
| P28037        | AVQMGMSSVFFNK                                                  | 1.024355736        | 2              | 3.511725  |
| P28037        | CPQSEEGATYEGIQK                                                | 0.805775647        | 2              | 4.314612  |
| P28037        | DLGEAALNEYLR                                                   | 1.615049008        | 2              | 3.288827  |
| P28037        | ECEVLDDTVSTLYNR                                                | 1.689214137        | 2              | 5.007122  |
| P28037        | EGHEVVGVTIPDKDGK                                               | 1.101875594        | 2              | 4.511124  |
| P28037        | GNDKVPGAWTEACGQK                                               | 1.209958378        | 2              | 3.536968  |
| P28037        | GQALPEVVAK                                                     | 1.029579659        | 2              | 2.596334  |
| P28037        | GSASSDLELTAELATAEAVR                                           | 1.016401763        | 2              | 6.296675  |
| P28037        | GVVNLPKSGSLVGQR                                                | 0.973111184        | 2              | 4.944245  |
| P28037        | IGFTGSTEVGK                                                    | 1.168529531        | 2              | 3.110392  |
| P28037        | ILPNVPEVEDSTDFK                                                | 1.334165016        | 2              | 3.691142  |
| P28037        | INWDQPAEAIHNWIR                                                | 0.984655924        | 2              | 3.67751   |
| P28037        | KEGHEVVGVTIPDKDGK                                              | 1.118769035        | 3              | 3.482716  |
| P28037        | KIGFTGSTEVGK                                                   | 0.994784119        | 2              | 2.950796  |
| P28037        | KLVEYCQR                                                       | 1.14018178         | 2              | 2.535579  |
| P28037        | LFVEESIHNFVQK                                                  | 1.045044387        | 2              | 4.598858  |
| P28037        | LIAEGTAPR                                                      | 1.159999402        | 2              | 3.134685  |
| P28037        | LQAGTVFINTYNK                                                  | 2.129373634        | 2              | 2.507685  |
| P28037        | LSDHPDVR                                                       | 0.957500714        | 1              | 2.099179  |
| P28037        | NIQLEDGK                                                       | 0.982873851        | 1              | 1.998016  |
| P28037        | TAACLAAGNTVVIKPAQVPLTALK                                       | 0.912729163        | 3              | 4.426006  |
| P28037        | TDVAAPFGGFK                                                    | 1.020774958        | 2              | 2.719699  |
| P28037        | TYNTINPTDGSVICQVSLAQVSDVDK                                     | 1.101352417        | 3              | 6.586313  |
| P28037        | VVEEVEK                                                        | 1.029127651        | 2              | 2.478464  |
| <b>P28064</b> | <b>PSB8 Proteasome subunit beta type_8</b>                     | <b>0.904852657</b> | <b>0.88134</b> | <b>3</b>  |
| P28064        | ASAGSYIATIR                                                    | 0.963796142        | 2              | 2.527466  |
| P28064        | QDLSPEEAYDLAR                                                  | 0.844105611        | 2              | 3.116903  |
| P28064        | VESTDVS DLLHK                                                  | 0.910074347        | 2              | 2.901866  |
| <b>P28480</b> | <b>TCPA T_complex protein 1 subunit alpha</b>                  | <b>1.119564516</b> | <b>0.28243</b> | <b>10</b> |
| P28480        | AFHNEAQVNPFR                                                   | 1.150270694        | 2              | 3.419807  |
| P28480        | FATEAAITILR                                                    | 0.99593015         | 2              | 3.260354  |
| P28480        | HGGYENAVHSGALDD                                                | 1.10427791         | 2              | 4.228732  |
| P28480        | ICDDELILIK                                                     | 1.077170761        | 2              | 3.170019  |
| P28480        | LLEVEHPAAK                                                     | 1.031786726        | 2              | 2.39514   |
| P28480        | MLVDDIGDVTITNDGATILK                                           | 0.930722873        | 2              | 4.338411  |
| P28480        | SLHDALCVVK                                                     | 0.898299329        | 2              | 2.455453  |
| P28480        | SLLVIPNTLAVNAAQDSTDLVAK                                        | 1.094257428        | 2              | 4.637555  |
| P28480        | SQNVMAASIANIVK                                                 | 1.039583385        | 2              | 4.022607  |
| P28480        | YINENLIINTDELGR                                                | 0.997218889        | 2              | 4.484542  |
| <b>P28492</b> | <b>GLSL Glutaminase liver isoform_mitochondrial</b>            | <b>0.793505188</b> | <b>0.35576</b> | <b>3</b>  |
| P28492        | MVQESSGGLLDR                                                   | 0.772262257        | 2              | 3.222004  |
| P28492        | SNPDLWGVSLCTVDGQR                                              | 0.811134667        | 2              | 3.155111  |
| P28492        | TALHVAAAEGHIDVVK                                               | 0.780458435        | 3              | 3.5419    |
| <b>P28650</b> | <b>PURA1 Adenylosuccinate synthetase isozyme 1</b>             | <b>1.149874989</b> | <b>0.97745</b> | <b>3</b>  |
| P28650        | CQGGNNAGHTVVVDGK                                               | 1.320629018        | 2              | 3.70611   |
| P28650        | LDILDVLEIK                                                     | 1.224740549        | 2              | 3.153514  |
| P28650        | VGIGAFPTEQINEIGDLLQNR                                          | 1.060353148        | 3              | 3.803699  |
| <b>P29147</b> | <b>BDH D_beta_hydroxybutyrate dehydrogenase_mitochondrial</b>  | <b>0.907905148</b> | <b>0.94384</b> | <b>20</b> |
| P29147        | AVLVTGCDSGFGFLAK                                               | 0.928460972        | 2              | 5.714079  |
| P29147        | EVAEVLNLTGTVR                                                  | 1.458609117        | 2              | 2.754992  |



|               |                                                                |                    |                |           |
|---------------|----------------------------------------------------------------|--------------------|----------------|-----------|
| P29147        | FGVEAFSDCLR                                                    | 0.996529285        | 2              | 3.706598  |
| P29147        | GFLVFAGCLLK                                                    | 1.253874335        | 2              | 3.480829  |
| P29147        | KMWDELPEVVR                                                    | 0.857347898        | 2              | 2.84792   |
| P29147        | KMWDELPEVVR+Oxidation(1)                                       | 0.843474067        |                |           |
| P29147        | METYCNSGSDTSSVINAVTHALTAATPYTR                                 | 1.07870014         | 3              | 5.449405  |
| P29147        | METYCNSGSDTSSVINAVTHALTAATPYTR+Oxidation(0)                    | 0.950376418        |                |           |
| P29147        | MQVMTHFPGAISDK                                                 | 1.034369203        | 2              | 4.578563  |
| P29147        | MQVMTHFPGAISDK+Oxidation(0)                                    | 1.075510944        |                |           |
| P29147        | MQVMTHFPGAISDK+Oxidation(0)                                    | 0.8398298          |                |           |
| P29147        | MQVMTHFPGAISDK+Oxidation(3)                                    | 0.802363788        |                |           |
| P29147        | MWDELPEVVR                                                     | 0.766956169        | 2              | 3.080644  |
| P29147        | MWDELPEVVR+Oxidation(0)                                        | 0.831685549        |                |           |
| P29147        | TIQLNVCNSEEVEK                                                 | 1.00202342         | 2              | 4.449669  |
| P29147        | VSVVEPGNFIAATSLYSER                                            | 0.956988298        | 2              | 6.10183   |
| P29147        | VVNISMLGR                                                      | 1.012989318        | 2              | 3.961768  |
| P29147        | VVNISMLGR+Oxidation(6)                                         | 1.038819341        |                |           |
| P29147        | YEMHPLGVK                                                      | 1.079413038        | 2              | 2.703852  |
| P29147        | YEMHPLGVK+Oxidation(2)                                         | 1.077108466        |                |           |
| <b>P29266</b> | <b>3H1DH 3_hydroxyisobutyrate dehydrogenase_ mitochondrial</b> | <b>1.035446969</b> | <b>1.5E-06</b> | <b>8</b>  |
| P29266        | DLGLAQDSATSTK                                                  | 1.008349821        | 2              | 4.0746    |
| P29266        | EAGEQVASSPADVAEK                                               | 1.21707293         | 2              | 4.741756  |
| P29266        | GSLIDSSTIDPSVSK                                                | 0.845422137        | 2              | 4.769774  |
| P29266        | HGYPLILYDVFPDVCK                                               | 0.897373929        | 2              | 4.997539  |
| P29266        | KGSLIDSSTIDPSVSK                                               | 0.955442432        | 2              | 4.659856  |
| P29266        | MGAVFMDAPVSGGVGAAR                                             | 1.209155403        | 2              | 4.789086  |
| P29266        | MGAVFMDAPVSGGVGAAR+Oxidation(0)                                | 0.8379367          |                |           |
| P29266        | MGAVFMDAPVSGGVGAAR+Oxidation(5)                                | 0.8379367          |                |           |
| <b>P29314</b> | <b>RS9 40S ribosomal protein S9</b>                            | <b>1.146973654</b> | <b>0.00476</b> | <b>9</b>  |
| P29314        | IEDFLER                                                        | 1.097805559        | 2              | 2.829904  |
| P29314        | IGVLDEGK                                                       | 1.143043516        | 2              | 2.395046  |
| P29314        | KGQGGAGAGDDEEED                                                | 0.852855057        | 2              | 4.175772  |
| P29314        | LDYILGLK                                                       | 1.050126358        | 2              | 2.547796  |
| P29314        | LFEGNALLR                                                      | 1.135616371        | 2              | 2.629325  |
| P29314        | LIGEYGLR                                                       | 1.362693037        | 2              | 2.646587  |
| P29314        | QVVNIPSFIVR                                                    | 1.147743012        | 2              | 2.454194  |
| P29314        | RLQTQVFK                                                       | 1.282128869        | 2              | 2.301405  |
| P29314        | SRLDQELK                                                       | 1.093176878        | 3              | 3.315833  |
| <b>P29315</b> | <b>RINI Ribonuclease inhibitor</b>                             | <b>1.001673295</b> | <b>0.6789</b>  | <b>6</b>  |
| P29315        | ASLQELDLGSNK                                                   | 0.894955506        | 2              | 2.827818  |
| P29315        | ELHLNDNPLGDEGLK                                                | 0.946684348        | 2              | 2.926205  |
| P29315        | LDDCGLTEVR                                                     | 0.897288473        | 2              | 2.926793  |
| P29315        | LENGGITSANCK                                                   | 0.916144883        | 2              | 3.330049  |
| P29315        | SAIQANPALTELSLR                                                | 0.94419522         | 2              | 4.594812  |
| P29315        | TNELGDAGVGLVLQGLQNPTCK                                         | 0.91068512         | 2              | 5.286791  |
| <b>P29410</b> | <b>KAD2 Adenylate kinase 2_ mitochondrial</b>                  | <b>0.934668903</b> | <b>0.38553</b> | <b>10</b> |
| P29410        | AMVASGSELGK                                                    | 1.034480434        | 2              | 2.361654  |
| P29410        | AMVASGSELGKK                                                   | 1.118331647        | 2              | 3.138547  |
| P29410        | AVLLGPPGAGK                                                    | 1.110943805        | 2              | 2.709268  |
| P29410        | EAMKDDITGEPLIR                                                 | 1.104276836        | 2              | 2.723557  |
| P29410        | GIHCAIDASQTPDVVFASILAAFSK                                      | 1.161653487        | 3              | 6.222835  |
| P29410        | LEAYHTQTTPLVEYYR                                               | 0.962706931        | 2              | 5.400816  |
| P29410        | LVSDEMVELIEK                                                   | 0.931082572        | 2              | 4.143301  |
| P29410        | NGFLLDGFPR                                                     | 0.870738084        | 2              | 3.35506   |
| P29410        | NLETPSCK                                                       | 0.937135666        | 2              | 2.349375  |
| P29410        | SYHEEFNPPK                                                     | 0.972368964        | 3              | 3.856591  |

|               |                                                            |                    |                |           |
|---------------|------------------------------------------------------------|--------------------|----------------|-----------|
| <b>P29411</b> | <b>KAD3 GTP:AMP phosphotransferase_mitochondrial</b>       | <b>0.865177059</b> | <b>0.92233</b> | <b>8</b>  |
| P29411        | AYEAQTEPVLQYYQK                                            | 0.910621097        | 2              | 4.183173  |
| P29411        | EDDKPETVIK                                                 | 1.29537721         | 2              | 2.633277  |
| P29411        | KGVLETFSGTETNK                                             | 0.857056884        | 2              | 3.050477  |
| P29411        | NLTQCSWLLDGFPR                                             | 0.838818413        | 2              | 3.339229  |
| P29411        | TLPQAEALDR                                                 | 0.936839357        | 2              | 2.339847  |
| P29411        | TVGIDDLTGEPLIQR                                            | 0.886018676        | 2              | 3.351763  |
| P29411        | VYNIEFNPPK                                                 | 0.888577653        | 2              | 3.155336  |
| P29411        | VYQIDTVINLNVPFVEIK                                         | 0.851939125        | 2              | 2.660056  |
| <b>P29419</b> | <b>ATP5I ATP synthase subunit e_mitochondrial</b>          | <b>1.065745357</b> | <b>2.4E-05</b> | <b>2</b>  |
| P29419        | ELAEAEVDSIFK                                               | 1.373436885        | 2              | 3.297797  |
| P29419        | YSALILGMAYGAK                                              | 0.894552451        | 2              | 4.087216  |
| <b>P30009</b> | <b>MARCS Myristoylated alanine_rich C_kinase substrate</b> | <b>0.921295015</b> | <b>0.99989</b> | <b>3</b>  |
| P30009        | AEDGAAPSPSSETPK                                            | 0.895839312        | 2              | 3.924316  |
| P30009        | AEEPSEAVGEK                                                | 0.988411076        | 2              | 2.78907   |
| P30009        | GEAAAERPGEAAVASSPSK                                        | 0.886198404        | 2              | 4.547205  |
| <b>P30349</b> | <b>LKHA4 Leukotriene A_4 hydrolase</b>                     | <b>0.825743107</b> | <b>0.06975</b> | <b>4</b>  |
| P30349        | EEDLNSFSIEDLK                                              | 1.099042478        | 2              | 2.668863  |
| P30349        | SLSNVIAHEISHSWTGNLVTNK                                     | 0.688041265        | 3              | 4.175377  |
| P30349        | SSALQWLTPPEQTS GK                                          | 0.897321307        | 2              | 2.99612   |
| P30349        | WEEAIPLALK                                                 | 0.852403262        | 2              | 2.913596  |
| <b>P30427</b> | <b>PLEC Plectin</b>                                        | <b>0.904031157</b> | <b>0.70186</b> | <b>6</b>  |
| P30427        | AQAEAQQPVFNTLR                                             | 0.986484332        | 2              | 2.994362  |
| P30427        | AQVEQELTLR                                                 | 0.895357495        | 2              | 2.514488  |
| P30427        | LLDPEDVDVPQPDEK                                            | 0.811830853        | 2              | 3.726467  |
| P30427        | LQAE EVAQK                                                 | 1.002370202        | 2              | 2.398628  |
| P30427        | MSAAQALKKGWLYEAGQR+Oxidation(0)                            | 0.878579385        |                |           |
| P30427        | VLALPEPSPAATLR                                             | 0.868243573        | 2              | 2.781167  |
| <b>P30713</b> | <b>GSTT2 Glutathione S_transferase theta_2</b>             | <b>0.975209459</b> | <b>4.4E-16</b> | <b>6</b>  |
| P30713        | AQVHEYLGWHADNIR                                            | 0.906514562        | 2              | 4.898557  |
| P30713        | GQHLSEQFSQVNCLK                                            | 0.836481845        | 2              | 4.794899  |
| P30713        | NSMVLALQR                                                  | 0.865815711        | 2              | 2.868994  |
| P30713        | VEAFLGAELCQEAHNPIMSVLGQAAK                                 | 0.920058884        | 3              | 4.296496  |
| P30713        | VLGPLIGVQVPEEK                                             | 0.875523137        | 2              | 3.897211  |
| P30713        | YQVADHWYPADLQAR                                            | 0.738410081        | 2              | 4.862041  |
| <b>P30835</b> | <b>K6PL 6_phosphofructokinase_liver type</b>               | <b>1.076529996</b> | <b>0.30007</b> | <b>2</b>  |
| P30835        | NEWGSLLEELVK                                               | 1.148149124        | 2              | 3.212283  |
| P30835        | VFANAPDSACVIGLR                                            | 0.474456336        | 2              | 2.403141  |
| <b>P30839</b> | <b>AL3A2 Fatty aldehyde dehydrogenase</b>                  | <b>1.107442444</b> | <b>0.00023</b> | <b>10</b> |
| P30839        | DILAAIAADLSK                                               | 1.282342061        | 2              | 3.030413  |
| P30839        | EKDILAAIAADLSK                                             | 1.37480076         | 2              | 4.115873  |
| P30839        | EKPLALYIFSHNNK                                             | 0.989432601        | 2              | 3.133023  |
| P30839        | FDHILYTGNTAVGK                                             | 1.032604544        | 2              | 3.935179  |
| P30839        | HLPVTLLEGGK                                                | 1.079776142        | 3              | 3.315098  |
| P30839        | NVEEAINFINDR                                               | 1.233330777        | 2              | 4.109665  |
| P30839        | QRFDHILYTGNTAVGK                                           | 1.04318541         | 2              | 2.83376   |
| P30839        | VMQEEIFGPILPIVSVK                                          | 0.861233762        | 2              | 4.425926  |
| P30839        | VMQEEIFGPILPIVSVK+Oxidation(1)                             | 0.893803982        |                |           |
| P30839        | YIAPTILTDVDPNSK                                            | 0.964644188        | 2              | 3.860017  |
| <b>P30904</b> | <b>MIF Macrophage migration inhibitory factor</b>          | <b>1.662522169</b> | <b>1E-06</b>   | <b>2</b>  |
| P30904        | LHISPD                                                     | 1.290783948        | 1              | 2.018165  |
| P30904        | LLCGLLSDR                                                  | 1.683705532        | 2              | 2.934856  |
| <b>P30999</b> | <b>CTND1 Catenin delta_1</b>                               | <b>0.853764147</b> | <b>0.00562</b> | <b>3</b>  |
| P30999        | GYELLFQPEVVR                                               | 0.873967001        | 2              | 2.842425  |
| P30999        | QDVYGPQPQVR                                                | 1.198276089        | 2              | 2.43279   |

|               |                                                                                    |                    |                |           |
|---------------|------------------------------------------------------------------------------------|--------------------|----------------|-----------|
| P30999        | SQSSHSYDDSTLPLIDR                                                                  | 0.67791267         | 2              | 2.594846  |
| <b>P31000</b> | <b>VIME Vimentin</b>                                                               | <b>0.789711655</b> | <b>1.9E-06</b> | <b>15</b> |
| P31000        | DGQVINETSQHHDDLE                                                                   | 0.739113407        | 2              | 3.114833  |
| P31000        | FADLSEAA NR                                                                        | 1.052612718        | 2              | 2.840343  |
| P31000        | ILLAELEQLK                                                                         | 0.82770082         | 2              | 3.222592  |
| P31000        | KLLEGEESR                                                                          | 0.914639388        | 2              | 2.730617  |
| P31000        | KVESLQEEIAFLK                                                                      | 0.714930877        | 2              | 3.975406  |
| P31000        | LGDLYEEEMR                                                                         | 0.931037818        | 2              | 2.336449  |
| P31000        | LLEGEESR                                                                           | 0.854954101        | 2              | 2.749329  |
| P31000        | LQEEMLQR                                                                           | 0.826676959        | 2              | 2.328545  |
| P31000        | NLQEAEEWYK                                                                         | 0.801783447        | 2              | 2.811154  |
| P31000        | QDV DNASLAR                                                                        | 0.772937879        | 2              | 2.805826  |
| P31000        | QVQSLTCEVDALK                                                                      | 0.863817194        | 2              | 3.541288  |
| P31000        | RQVDQLTNDK                                                                         | 0.816903313        | 2              | 2.516809  |
| P31000        | SLYSSPPGGAYVTR                                                                     | 0.894692273        | 2              | 2.809831  |
| P31000        | TNEKVELQELNDR                                                                      | 0.969001124        | 2              | 2.835557  |
| P31000        | VELQELNDR                                                                          | 1.064819419        | 2              | 2.587061  |
| <b>P31044</b> | <b>PEBP1 Phosphatidylethanolamine_binding protein 1</b>                            | <b>0.954942966</b> | <b>1.5E-08</b> | <b>7</b>  |
| P31044        | GNDISSGTVLSEYVGSPPK                                                                | 0.952709899        | 2              | 6.581267  |
| P31044        | KYHLGAPVAGTCFQAEWDDSVPK                                                            | 0.871907072        | 3              | 3.775324  |
| P31044        | LYTLVLTDPDAPSR                                                                     | 1.235088593        | 2              | 4.267089  |
| P31044        | VDYGGVTVDDELGK                                                                     | 0.951783959        | 2              | 4.858945  |
| P31044        | VLTPQTVMNRPSSISWDGLDPGK                                                            | 0.890047717        | 3              | 5.079072  |
| P31044        | YHLGAPVAGTCFQAEWDDSVPK                                                             | 1.540725303        | 2              | 5.398308  |
| P31044        | YVWLVYEQEQPLNCDEPILSNK                                                             | 0.960933381        | 2              | 5.405777  |
| <b>P31210</b> | <b>AK1D1 3_oxo_5_beta_steroid 4_dehydrogenase</b>                                  | <b>1.163290203</b> | <b>0.10687</b> | <b>19</b> |
| P31210        | DELLTSLGK                                                                          | 1.454720883        | 2              | 2.862387  |
| P31210        | DIEALNK                                                                            | 2.376879009        | 1              | 2.46768   |
| P31210        | EEMKDIEALNK                                                                        | 2.162583194        | 2              | 3.385076  |
| P31210        | ENFQIFDFSLTK                                                                       | 1.265871435        | 2              | 3.027293  |
| P31210        | HIDGAYVYR                                                                          | 1.143358363        | 2              | 2.939373  |
| P31210        | IKENFQIFDFSLTK                                                                     | 1.312465178        | 3              | 4.346778  |
| P31210        | LWSTDHDPEMVRPALER                                                                  | 1.17713618         | 3              | 3.668172  |
| P31210        | NEHEVGEAIR                                                                         | 1.124515721        | 2              | 3.07835   |
| P31210        | NPLWVNVSSPPLLK                                                                     | 1.263005469        | 2              | 4.442975  |
| P31210        | NPLWVNVSSPPLLKDELLTSLGK                                                            | 0.929350657        | 3              | 5.236874  |
| P31210        | QLEVILNKPLK                                                                        | 1.214852673        | 2              | 3.382973  |
| P31210        | REEIFYCGK                                                                          | 1.211110312        | 2              | 3.28525   |
| P31210        | RQLEVILNKPLK                                                                       | 1.184565762        | 3              | 3.680693  |
| P31210        | SLGVSFNFR                                                                          | 1.107885486        | 2              | 2.376778  |
| P31210        | SNLCATWEALEACK                                                                     | 1.202733277        | 2              | 4.941665  |
| P31210        | SNLCATWEALEACKDAGLVK                                                               | 1.114704171        | 2              | 5.145218  |
| P31210        | TAIDEGYR                                                                           | 1.19573807         | 2              | 2.436932  |
| P31210        | TQAQIVLR                                                                           | 1.212479731        | 2              | 3.036217  |
| P31210        | YKPVTNQVECHPYFTQTK                                                                 | 1.101323258        | 2              | 5.77276   |
| <b>P31230</b> | <b>AIMP1 Aminoacyl tRNA synthase complex_interacting multifunctional protein 1</b> | <b>1.060585503</b> | <b>0.02555</b> | <b>2</b>  |
| P31230        | GAEADQIIEYLK                                                                       | 1.059037855        | 2              | 3.477441  |
| P31230        | KEIEELK                                                                            | 1.438073781        | 1              | 1.999019  |
| <b>P31399</b> | <b>ATP5H ATP synthase subunit d_mitochondrial</b>                                  | <b>0.878544393</b> | <b>0.79916</b> | <b>7</b>  |
| P31399        | ANVDKPGLVDDFK                                                                      | 1.086399754        | 2              | 3.780981  |
| P31399        | KYPYWPHQPIENL                                                                      | 1.168250369        | 2              | 2.380995  |
| P31399        | NCAQFVTGSQAR                                                                       | 0.942766606        | 2              | 4.925229  |
| P31399        | NMIPFDQMTIDDLNEVPETK                                                               | 0.823044716        | 2              | 5.076017  |
| P31399        | SWNETFHTR                                                                          | 1.185657004        | 2              | 2.676055  |

|               |                                                                |                    |                |           |
|---------------|----------------------------------------------------------------|--------------------|----------------|-----------|
| P31399        | TIDWVSFVEIMPQNQK                                               | 1.055355818        | 2              | 4.12896   |
| P31399        | YTALVDAAEEKEDVK                                                | 1.020073672        | 2              | 3.638041  |
| <b>P32089</b> | <b>TXTP Tricarboxylate transport protein_ mitochondrial</b>    | <b>1.061207936</b> | <b>0.99636</b> | <b>6</b>  |
| P32089        | FIHDQTSSNP                                                     | 0.922156886        | 1              | 3.547732  |
| P32089        | GLSLLYGSIPK                                                    | 0.796122621        | 2              | 3.292212  |
| P32089        | GTYQGLTATVLK                                                   | 0.852726518        | 2              | 2.628208  |
| P32089        | NLDCGVQILK                                                     | 0.890857006        | 2              | 2.497192  |
| P32089        | SHGVLGLYR                                                      | 0.922966552        | 1              | 1.914029  |
| P32089        | TQLQLDER                                                       | 1.062349155        | 2              | 2.918798  |
| <b>P32198</b> | <b>CPT1A Carnitine O_palmitoyltransferase 1_ liver isoform</b> | <b>0.768486693</b> | <b>1.4E-06</b> | <b>6</b>  |
| P32198        | ELEQQMQQILDDPSEPQPGAEK                                         | 0.874411839        | 2              | 4.595607  |
| P32198        | GDTNPNIKPTR                                                    | 0.872637161        | 2              | 2.501151  |
| P32198        | LSTSQTPQQVELDFEK                                               | 1.605861361        | 2              | 2.815178  |
| P32198        | MTALAQDFAVNLGPK                                                | 0.677016222        | 2              | 3.388431  |
| P32198        | MTALAQDFAVNLGPK+Oxidation(0)                                   | 0.841451256        |                |           |
| P32198        | TSPDAFIQLALQLAHYK                                              | 0.793091943        | 2              | 3.259335  |
| <b>P32232</b> | <b>CBS Cystathionine beta_ synthase</b>                        | <b>1.229519527</b> | <b>9.9E-20</b> | <b>11</b> |
| P32232        | AGTLKPGDTIIEPTSGNTGIGLALAAVK                                   | 1.201265273        | 3              | 5.973728  |
| P32232        | ALGAEIVR                                                       | 1.420677253        | 1              | 1.970291  |
| P32232        | CVVILPDSVR                                                     | 1.159137176        | 2              | 2.467029  |
| P32232        | FDSPEHVGVAWR                                                   | 1.165998554        | 2              | 3.785591  |
| P32232        | LKNEIPNSHILDQYR                                                | 1.437930849        | 3              | 3.346921  |
| P32232        | NASNPLAHYDDTAEIILQQCDGK                                        | 1.39342492         | 2              | 5.300978  |
| P32232        | SNDDDSFAFAR                                                    | 1.45729091         | 2              | 3.32601   |
| P32232        | VDMLVASAGTGGTITGIAR                                            | 1.078251533        | 2              | 4.834332  |
| P32232        | VQELSLSAPLTVLPTVTCHEHTAILR                                     | 1.275187904        | 3              | 3.979408  |
| P32232        | VRPSDEVCK                                                      | 1.101365901        | 2              | 2.631969  |
| P32232        | VWISPDTPSR                                                     | 1.177511614        | 2              | 2.367357  |
| <b>P32551</b> | <b>QCR2 Cytochrome b_c1 complex subunit 2_ mitochondrial</b>   | <b>1.092508254</b> | <b>0.72847</b> | <b>13</b> |
| P32551        | AVAFQNPQTR                                                     | 1.094464939        | 2              | 3.220823  |
| P32551        | AVAQGNLSSADVQAAK                                               | 1.093465833        | 2              | 4.976707  |
| P32551        | GNNTTSLLSQSVAK                                                 | 1.156182911        | 2              | 4.174992  |
| P32551        | IENLHDVAYK                                                     | 1.338848155        | 2              | 3.558061  |
| P32551        | ITSEELHYFVQNHFTSAR                                             | 0.822064944        | 3              | 3.873832  |
| P32551        | LPNGLVIASLENYAPLSR                                             | 1.340862403        | 2              | 4.686533  |
| P32551        | NALANPLYCPDYR                                                  | 1.055598055        | 2              | 3.018948  |
| P32551        | RGNNTTSLLSQSVAK                                                | 1.757012712        | 2              | 3.279236  |
| P32551        | RWEVAALR                                                       | 1.089910725        | 2              | 2.410336  |
| P32551        | SMTASGNLGHPTFLDEL                                              | 1.050241465        | 2              | 3.213099  |
| P32551        | SMTASGNLGHPTFLDEL+Oxidation(1)                                 | 0.808560125        |                |           |
| P32551        | TSAPGGVPLQPQLEFTK                                              | 1.018562605        | 2              | 4.216162  |
| P32551        | YENYNYLGTSHLLR                                                 | 0.884226444        | 2              | 4.273424  |
| <b>P32755</b> | <b>HPPD 4_ hydroxyphenylpyruvate dioxygenase</b>               | <b>1.38248831</b>  | <b>9.9E-20</b> | <b>17</b> |
| P32755        | AFEEEEQALR                                                     | 1.446654588        | 2              | 3.559216  |
| P32755        | DIAFEVEDCEHIVQK                                                | 1.381597751        | 2              | 4.093562  |
| P32755        | ENMDVLEELK                                                     | 2.309655064        | 2              | 2.845803  |
| P32755        | FAVLQTYGDTTHTLVEK                                              | 1.289748783        | 2              | 4.977412  |
| P32755        | FLPGFEAPTYK                                                    | 1.223647937        | 1              | 2.402299  |
| P32755        | FWSVDDTQVHTEYSSLR                                              | 1.478030727        | 2              | 5.522952  |
| P32755        | GMEFLAVPSSYYR                                                  | 1.546351354        | 2              | 3.59925   |
| P32755        | GNLTDLETNGVR                                                   | 1.485555877        | 2              | 3.72886   |
| P32755        | HNHQGFAGNFNSLFK                                                | 1.450282682        | 3              | 5.647913  |
| P32755        | ILVDYDEK                                                       | 1.432019752        | 2              | 2.402559  |
| P32755        | IVFVLCALNPWNK                                                  | 1.369160821        | 2              | 3.657444  |

|               |                                                             |                    |                |           |
|---------------|-------------------------------------------------------------|--------------------|----------------|-----------|
| P32755        | IVREPWVEEDKFGK                                              | 1.438604109        | 3              | 4.488583  |
| P32755        | LPCSNLEIIDHIVGNQPDQEMESASEWYLK                              | 1.466299394        | 3              | 7.771306  |
| P32755        | MGFEPLAYK                                                   | 1.675427729        | 2              | 2.619258  |
| P32755        | SIVVANYEESIK                                                | 1.27266325         | 2              | 4.159398  |
| P32755        | SQIQEYVDYNGGAGVQHIALR                                       | 1.442564284        | 2              | 5.54957   |
| P32755        | TEDIITTIR                                                   | 1.356983471        | 2              | 3.391608  |
| <b>P33124</b> | <b>ACSL6 Long_chain_fatty_acid__CoA ligase 6</b>            | <b>0.860675301</b> | <b>0.00915</b> | <b>2</b>  |
| P33124        | ALRPTIFPVVPR                                                | 0.88818339         | 2              | 2.979572  |
| P33124        | IENIYIR                                                     | 0.870309749        | 2              | 2.95509   |
| <b>P33273</b> | <b>CP255 Cytochrome P450 2C55</b>                           | <b>0.963510847</b> | <b>0.94639</b> | <b>4</b>  |
| P33273        | DENFLNLMK                                                   | 1.042339975        | 2              | 2.312552  |
| P33273        | ELRHFSMLTLR                                                 | 0.898072191        | 2              | 2.365308  |
| P33273        | FDYKDENFLNLMK                                               | 0.865432851        | 3              | 4.522217  |
| P33273        | IQEEASCLVEELR                                               | 0.957720889        | 2              | 2.719774  |
| <b>P33274</b> | <b>CP4F1 Cytochrome P450 4F1</b>                            | <b>1.172168013</b> | <b>0.34215</b> | <b>2</b>  |
| P33274        | ACNLVHEFTDAVIR                                              | 1.185941803        | 3              | 3.738177  |
| P33274        | TLPDQGLDFLK                                                 | 1.120499977        | 2              | 2.517616  |
| <b>P34058</b> | <b>HS90B Heat shock protein HSP 90_beta</b>                 | <b>1.103509881</b> | <b>0.88301</b> | <b>25</b> |
| P34058        | ADLNNLGTIAK                                                 | 0.965225095        | 2              | 4.18483   |
| P34058        | EDQTEYLEER                                                  | 1.418301461        | 2              | 3.430418  |
| P34058        | EGLELPEDEEEK                                                | 0.693510742        | 2              | 2.541823  |
| P34058        | EGLELPEDEEEKK                                               | 1.255463657        | 2              | 3.370606  |
| P34058        | ELISNASDALDK                                                | 1.931546356        | 2              | 3.384502  |
| P34058        | EQVANSAFVER                                                 | 2.241252006        | 2              | 2.369812  |
| P34058        | GFEVVYMTPEIDYCVQQLK                                         | 0.618817929        | 2              | 4.445317  |
| P34058        | GVVDESDLPLNISR                                              | 1.043524545        | 2              | 4.912754  |
| P34058        | HFSVEGQLEFR                                                 | 0.994720597        | 2              | 2.571582  |
| P34058        | HLEINPDHPIVETLR                                             | 1.06240251         | 2              | 4.582771  |
| P34058        | HSQFIGYPITLYLEK                                             | 1.160327991        | 2              | 4.129283  |
| P34058        | IDIIPNPQER                                                  | 0.982490982        | 2              | 3.117871  |
| P34058        | KHLEINPDHPIVETLR                                            | 1.070226107        | 2              | 4.827516  |
| P34058        | LGIHEDSTNR                                                  | 1.019637971        | 2              | 3.40681   |
| P34058        | NPDDITQEEYGEFYK                                             | 1.206182335        | 2              | 4.753683  |
| P34058        | RAPFDLFENK                                                  | 1.028645048        | 2              | 2.811533  |
| P34058        | SIYYITGESK                                                  | 0.999391731        | 2              | 3.040217  |
| P34058        | SLTNDWEDHLAVK                                               | 1.01367367         | 2              | 4.017478  |
| P34058        | TLTLVDTGIGMTK                                               | 0.982615738        | 2              | 4.082806  |
| P34058        | TLTLVDTGIGMTK+Oxidation(10)                                 | 1.012793231        |                |           |
| P34058        | VILHLKEDQTEYLEER                                            | 1.099050769        | 3              | 3.719254  |
| P34058        | YESLTDPSK                                                   | 1.070476665        | 2              | 2.642702  |
| P34058        | YESLTDPSKLDGSK                                              | 1.129952156        | 2              | 3.596219  |
| P34058        | YHTSQSGDEMTSLSEYVSR                                         | 1.077310416        | 2              | 5.552259  |
| P34058        | YIDQEELNK                                                   | 1.009660179        | 2              | 3.487408  |
| <b>P34064</b> | <b>PSA5 Proteasome subunit alpha type_5</b>                 | <b>1.026710674</b> | <b>0.99896</b> | <b>3</b>  |
| P34064        | AIGSASEGAQSSLQEVYHK                                         | 1.236088038        | 2              | 4.718152  |
| P34064        | EELEEVIKDI                                                  | 0.970999692        | 2              | 2.494571  |
| P34064        | GVNTFSPEGR                                                  | 0.972207421        | 2              | 3.013032  |
| <b>P34067</b> | <b>PSB4 Proteasome subunit beta type_4</b>                  | <b>0.88015795</b>  | <b>0.37791</b> | <b>3</b>  |
| P34067        | GVEIEGPLSAQTNWDIAHMISGFE                                    | 0.859192591        | 2              | 3.634493  |
| P34067        | TQNPMVTGTSVLGVK                                             | 0.878633554        | 2              | 2.837394  |
| P34067        | VNDSTMLGASGDYADFQYLK                                        | 0.928813732        | 2              | 4.302262  |
| <b>P35171</b> | <b>CX7A2 Cytochrome c oxidase subunit 7A2_mitochondrial</b> | <b>1.029680375</b> | <b>0.99943</b> | <b>2</b>  |
| P35171        | GGTSDALLYR                                                  | 1.110033528        | 2              | 2.888413  |
| P35171        | LFQEDNGMPVHLK                                               | 1.059370507        | 2              | 3.616754  |
| <b>P35213</b> | <b>1433B 14_3_3 protein beta/alpha</b>                      | <b>0.943828188</b> | <b>0.94742</b> | <b>6</b>  |
| P35213        | AVTEQGHLSNEER                                               | 1.063701109        | 2              | 4.544152  |

|               |                                                                      |                    |                |           |
|---------------|----------------------------------------------------------------------|--------------------|----------------|-----------|
| P35213        | EKIEAELQDICS DVLELLDK                                                | 0.720638547        | 3              | 3.559023  |
| P35213        | QTTVSNSQAYQEAFEISK                                                   | 0.99841736         | 2              | 5.24455   |
| P35213        | TAFDEAIAELDTLNESYK                                                   | 0.856541474        | 2              | 4.837814  |
| P35213        | YLILNATHAESK                                                         | 1.099353962        | 2              | 3.207704  |
| P35213        | YLSEVASGDNK                                                          | 1.071369933        | 1              | 2.999391  |
| <b>P35278</b> | <b>RAB5C Ras_related protein Rab_5C</b>                              | <b>0.885792105</b> | <b>0.49899</b> | <b>2</b>  |
| P35278        | GVDLQESNPASR                                                         | 1.03673848         | 2              | 3.07112   |
| P35278        | NEPQNAAGAPGR                                                         | 0.873465708        | 2              | 2.857707  |
| <b>P35427</b> | <b>RL13A 60S ribosomal protein L13a</b>                              | <b>1.163805618</b> | <b>0.13093</b> | <b>2</b>  |
| P35427        | CEGINISGNFYR                                                         | 1.02239002         | 2              | 3.313946  |
| P35427        | YQAVTATLEEK                                                          | 1.142755399        | 2              | 3.434364  |
| <b>P35434</b> | <b>ATPD ATP synthase subunit delta_mitochondrial</b>                 | <b>0.980709026</b> | <b>0.9998</b>  | <b>2</b>  |
| P35434        | AQSELSGAADEAAR                                                       | 1.002434332        | 2              | 4.591399  |
| P35434        | IEANEALVK                                                            | 0.948744371        | 2              | 3.168806  |
| <b>P35435</b> | <b>ATPG ATP synthase subunit gamma_mitochondrial</b>                 | <b>0.975206047</b> | <b>1</b>       | <b>7</b>  |
| P35435        | GLCGAIHSSVAK                                                         | 1.017494481        | 2              | 3.798018  |
| P35435        | HLIIGVSSDR                                                           | 0.911177114        | 2              | 2.786877  |
| P35435        | NASDMIDK                                                             | 1.006919608        | 1              | 2.113865  |
| P35435        | NDMAALTAAGK                                                          | 0.972392524        | 2              | 3.376471  |
| P35435        | NDMAALTAAGK+Oxidation(2)                                             | 0.889265749        |                |           |
| P35435        | THSDQFLVSFK                                                          | 0.891540673        | 2              | 3.339708  |
| P35435        | VYGTGSLALYEK                                                         | 1.031669925        | 2              | 2.992851  |
| <b>P35565</b> | <b>CALX Calnexin</b>                                                 | <b>1.294093084</b> | <b>3.9E-07</b> | <b>9</b>  |
| P35565        | AEDEILNR                                                             | 2.199288718        | 2              | 2.914994  |
| P35565        | KIPNPDFFEDLEPFR                                                      | 1.002474965        | 3              | 3.99702   |
| P35565        | NKGDEEEEEKLEEK                                                       | 1.142991561        | 2              | 5.21963   |
| P35565        | SDTSTPPSPK                                                           | 1.536603425        | 2              | 2.530315  |
| P35565        | TDAPQPDVK                                                            | 1.004766526        | 2              | 2.343518  |
| P35565        | TDAPQPDVKDEEGKEEK                                                    | 1.037426261        | 2              | 3.868199  |
| P35565        | TSELNLDQFHDK                                                         | 1.395428211        | 2              | 3.883714  |
| P35565        | VVDDWANDGWGLK                                                        | 0.959984645        | 2              | 4.30863   |
| P35565        | VVDDWANDGWGLKK                                                       | 0.91079743         | 2              | 2.767107  |
| <b>P35704</b> | <b>PRDX2 Peroxiredoxin_2</b>                                         | <b>0.973525209</b> | <b>0.99998</b> | <b>4</b>  |
| P35704        | EGGLGPLNIPLLADVTK                                                    | 0.951624568        | 2              | 3.352696  |
| P35704        | KEGGLGPLNIPLLADVTK                                                   | 0.892750139        | 2              | 4.256789  |
| P35704        | NDEGIAYR                                                             | 0.958918361        | 2              | 2.392763  |
| P35704        | QITVNDLPVGR                                                          | 0.973543855        | 2              | 2.69115   |
| <b>P35738</b> | <b>ODDB2 oxoisovalerate dehydrogenase subunit beta_mitochondrial</b> | <b>0.881477168</b> | <b>0.46409</b> | <b>5</b>  |
| P35738        | AAVEQVPVEPYK                                                         | 1.030677989        | 2              | 2.660911  |
| P35738        | GLLLSCIEDKNPCIFFEPK                                                  | 0.938876962        | 2              | 3.466292  |
| P35738        | IPLSQAEVIQEGSDVTLVAWGTQVHVIR                                         | 0.89223987         | 3              | 4.104013  |
| P35738        | MNLFQSITSALDNSLAK                                                    | 0.780416115        | 2              | 2.629858  |
| P35738        | SGDLFNCGLTIR                                                         | 0.881149233        | 2              | 2.892294  |
| <b>P35815</b> | <b>PPM1B Protein phosphatase 1B</b>                                  | <b>1.085071192</b> | <b>0.77845</b> | <b>2</b>  |
| P35815        | IQNAGGSVMIQR                                                         | 0.957122979        | 2              | 3.083096  |
| P35815        | SGFALEPSVENVK                                                        | 1.101809213        | 2              | 3.126184  |
| <b>P36201</b> | <b>CRIP2 Cysteine_rich protein 2</b>                                 | <b>1.064155674</b> | <b>0.65769</b> | <b>3</b>  |
| P36201        | ASSVTTFTGEPNMCPR                                                     | 2.159338415        | 2              | 3.899054  |
| P36201        | GVNIGGAGSYIYEKPPTEAPQVTGPIEVPVVR                                     | 0.812363339        | 3              | 6.951923  |
| P36201        | GVNTGAVGSYIYDKDPEGTVPQ                                               | 0.939565565        | 2              | 4.259221  |
| <b>P36365</b> | <b>FMO1 Dimethylaniline monooxygenase [N_oxide_forming] 1</b>        | <b>1.002039089</b> | <b>0.93344</b> | <b>11</b> |
| P36365        | ALQSDYITYIDLLTSINAKPDLR                                              | 0.967960803        | 3              | 3.499315  |
| P36365        | ASLYNSVVSNSK                                                         | 1.030722886        | 2              | 2.308056  |

|               |                                                 |                    |                |           |
|---------------|-------------------------------------------------|--------------------|----------------|-----------|
| P36365        | CCLEEGLEPTCFER                                  | 1.041477744        | 2              | 4.114057  |
| P36365        | ENSVVFNNTPK                                     | 1.777951026        | 2              | 2.554125  |
| P36365        | FTEHVVEGR                                       | 0.874688132        | 2              | 3.131942  |
| P36365        | NLLPTPVVSWLISK                                  | 0.790179354        | 2              | 2.466439  |
| P36365        | SCDLGGLWR                                       | 1.068006484        | 2              | 2.766515  |
| P36365        | TQLREPVLNDELPGR                                 | 0.949766188        | 3              | 4.071889  |
| P36365        | VAIVGAGVSGLASIK                                 | 1.286227692        | 2              | 2.873965  |
| P36365        | VEDGQASLYK                                      | 1.022846459        | 2              | 3.531333  |
| P36365        | VLVVGMGNSGTDIAVEASHLAK                          | 0.996219059        | 2              | 2.945758  |
| <b>P36511</b> | <b>UDB15 UDP_glucuronosyltransferase 2B15</b>   | <b>0.947902223</b> | <b>1</b>       | <b>7</b>  |
| P36511        | ANIIAWALAIQIPQK                                 | 0.828940071        | 3              | 5.083358  |
| P36511        | FVNVVWYELPR                                     | 0.97922704         | 2              | 3.194323  |
| P36511        | FVTFPTSFSHDLNFFTR                               | 1.155460177        | 2              | 4.163317  |
| P36511        | GHEVTVLRPSAFVFLDPK                              | 1.139020355        | 3              | 3.524342  |
| P36511        | IILEELVQK                                       | 1.00384014         | 2              | 3.283202  |
| P36511        | SDLLNALEEVIDNPFYK                               | 0.667875588        | 2              | 5.231205  |
| P36511        | TLGRPTTLAEIMGK                                  | 1.107494696        | 3              | 3.614776  |
| <b>P36536</b> | <b>SAR1A GTP_binding protein SAR1a</b>          | <b>1.024957776</b> | <b>0.95056</b> | <b>2</b>  |
| P36536        | LVFLGLDNAGK                                     | 1.060492872        | 2              | 2.993917  |
| P36536        | VELNALMTDETISNPILILGNK                          | 0.935467885        | 3              | 4.625602  |
| <b>P36972</b> | <b>APT Adenine phosphoribosyltransferase</b>    | <b>0.862470903</b> | <b>0.05241</b> | <b>3</b>  |
| P36972        | GFLFGPSLAQELGVGCVLIR                            | 0.817558596        | 2              | 3.898834  |
| P36972        | IDYIAGLSR                                       | 0.857423437        | 2              | 3.457277  |
| P36972        | SFPDFPIPGVLFIR                                  | 0.887504849        | 2              | 3.550406  |
| <b>P37397</b> | <b>CNN3 Calponin_3</b>                          | <b>1.229914618</b> | <b>0.01923</b> | <b>3</b>  |
| P37397        | AGQSVIGLQMGTKN                                  | 1.235298431        | 2              | 4.283856  |
| P37397        | VNESSLNWPQLENIGNFIK                             | 0.966300739        | 2              | 3.378146  |
| P37397        | YDQQAEDLR                                       | 1.318452349        | 2              | 3.259101  |
| <b>P38650</b> | <b>DYHC1 Cytoplasmic dynein 1 heavy chain 1</b> | <b>0.981690936</b> | <b>0.39368</b> | <b>8</b>  |
| P38650        | FGNPLLQDVESYDPVLPVLPVLR                         | 0.90699799         | 2              | 4.533171  |
| P38650        | GWENHVEGQK                                      | 1.715127615        | 2              | 2.878756  |
| P38650        | ILDDDTIITLLENLK                                 | 0.932878863        | 2              | 2.694302  |
| P38650        | QLQNISQAAAAGGAK                                 | 0.923624212        | 2              | 3.302531  |
| P38650        | SSLQSQCLNEVLK                                   | 0.892264317        | 2              | 2.920714  |
| P38650        | VQGLTVEQAEAVAR                                  | 1.054301838        | 2              | 3.584492  |
| P38650        | VQVALEELQDLK                                    | 0.869763473        | 2              | 2.711881  |
| P38650        | VTDFGDKVEDPTFLNQLQSGVNR                         | 0.901508358        | 3              | 4.068075  |
| <b>P38652</b> | <b>PGM1 Phosphoglucomutase_1</b>                | <b>1.014564343</b> | <b>0.99869</b> | <b>16</b> |
| P38652        | ADNFEYSDPVDGSISK                                | 0.991402368        | 2              | 4.70753   |
| P38652        | AIGGIILTASHNPGGPNDFGIK                          | 0.801091962        | 2              | 5.283345  |
| P38652        | FFGNLMDASK                                      | 0.949660364        | 2              | 2.307066  |
| P38652        | FNISNGGPAPEAITDK                                | 0.919214453        | 2              | 4.284826  |
| P38652        | INQDPQVMLAPLISIALK                              | 0.775345912        | 2              | 4.933863  |
| P38652        | KQRVEDILK                                       | 0.447414598        | 1              | 1.982547  |
| P38652        | LSGTGSAGATIR                                    | 1.153050514        | 2              | 3.631773  |
| P38652        | LSLCGEESFGTGSDBIR                               | 1.018707673        | 2              | 3.557404  |
| P38652        | LVIGQNGILSTPAVSCIIR                             | 0.942066631        | 2              | 3.736856  |
| P38652        | NIFDFNALK                                       | 0.871388024        | 1              | 1.940837  |
| P38652        | QEATLVVGGDGR                                    | 1.056167738        | 2              | 2.991833  |
| P38652        | QQFDLENK                                        | 1.027786249        | 1              | 2.155559  |
| P38652        | SGEHDFGAADFDDGDR                                | 1.074294654        | 2              | 4.443589  |
| P38652        | TIEEYAIKPDLC                                    | 0.917843745        | 2              | 3.08145   |
| P38652        | TQAYPDQKPGTSGLR                                 | 1.000643978        | 2              | 3.362595  |
| P38652        | YDYEEVEAEGANK                                   | 0.941999778        | 2              | 5.05689   |
| <b>P38656</b> | <b>LA Lupus La protein homolog</b>              | <b>1.067962012</b> | <b>0.66674</b> | <b>2</b>  |
| P38656        | ITDDQQESLNK                                     | 1.067740304        | 2              | 3.934011  |
| P38656        | LDEGWVPLETMIK                                   | 0.859704114        | 2              | 2.450222  |

|               |                                                       |                    |                |           |
|---------------|-------------------------------------------------------|--------------------|----------------|-----------|
| <b>P38659</b> | <b>PDIA4 Protein disulfide isomerase A4</b>           | <b>1.021861258</b> | <b>1E-08</b>   | <b>20</b> |
| P38659        | DLGLSESGEDVNAAILDESGKK                                | 1.103584196        | 2              | 5.112491  |
| P38659        | DNDPPIAVAK                                            | 0.890190717        | 2              | 2.343389  |
| P38659        | EVSQPDWTPPEVTLTLTK                                    | 1.03172638         | 2              | 3.761898  |
| P38659        | FDVSGYPTIK                                            | 0.851742357        | 2              | 3.355823  |
| P38659        | FDVSGYPTLK                                            | 0.851742357        | 2              | 3.355823  |
| P38659        | FIDEHATK                                              | 0.984819447        | 2              | 2.63242   |
| P38659        | FIDEHATKR                                             | 1.181054534        | 2              | 2.765029  |
| P38659        | GQAVDYDGSR                                            | 0.926266806        | 2              | 2.845011  |
| P38659        | IDATSASMLASK                                          | 0.857476147        | 2              | 3.587105  |
| P38659        | IDATSASMLASK+Oxidation(7)                             | 1.036125376        |                |           |
| P38659        | KGQAVDYDGSR                                           | 1.657894761        | 2              | 2.633599  |
| P38659        | MDATANDITNDR                                          | 0.902156673        | 2              | 3.987757  |
| P38659        | MHVMDVQGSTEASAIKDYYVK                                 | 0.787835745        | 3              | 3.720118  |
| P38659        | QLEPVYTSLGK                                           | 0.854681658        | 2              | 2.556856  |
| P38659        | RFDVSGYPTLK                                           | 1.024171116        | 2              | 3.158771  |
| P38659        | RSPPIPLAK                                             | 0.790843114        | 2              | 2.373942  |
| P38659        | TQEEIVAK                                              | 1.003661764        | 2              | 2.396427  |
| P38659        | VDATEQTDLAK                                           | 0.95184037         | 2              | 4.046705  |
| P38659        | VEGFPTIYFAPSGDK                                       | 1.272039785        | 2              | 3.444849  |
| P38659        | YGIVDYMVEQSGPPSK                                      | 0.962066538        | 2              | 4.651431  |
| <b>P38918</b> | <b>ARK73 Aflatoxin B1 aldehyde reductase member 3</b> | <b>1.024730817</b> | <b>0.99863</b> | <b>7</b>  |
| P38918        | EEHFNGIALVEK                                          | 1.152474215        | 2              | 3.04461   |
| P38918        | FQLETSLK                                              | 1.193428471        | 1              | 1.943807  |
| P38918        | FYAFNPLAGLLTGR                                        | 1.122278472        | 2              | 4.475383  |
| P38918        | MDVTSSASVR                                            | 1.215648662        | 2              | 3.590468  |
| P38918        | QVETELFPCLR                                           | 0.971849515        | 2              | 2.492181  |
| P38918        | RMDVTSSASVR                                           | 1.09652251         | 2              | 3.549952  |
| P38918        | TTYGPTAPSMISAAVR                                      | 0.866957415        | 2              | 3.746691  |
| <b>P38983</b> | <b>RSSA 40S ribosomal protein SA</b>                  | <b>1.026777599</b> | <b>0.01336</b> | <b>9</b>  |
| P38983        | ADHQLPTEASYVNLPTIALCNTDSPLR                           | 1.181290752        | 3              | 5.82599   |
| P38983        | AIVAIENPADVSVISSR                                     | 1.045303395        | 2              | 5.649462  |
| P38983        | EHPWEVMPDLYFYRDPEEIEKEEQAAAEK                         | 0.516000765        | 3              | 3.756177  |
| P38983        | FAAATGATPIAGR                                         | 1.258244699        | 2              | 3.043618  |
| P38983        | FLAAGTHLGGTNLDFQMEQYIYK                               | 1.141140263        | 3              | 4.044478  |
| P38983        | FTPGTFTNQIAAFR                                        | 1.014303213        | 2              | 4.441462  |
| P38983        | KSDGIYIINLK                                           | 0.530602265        | 2              | 3.2187    |
| P38983        | SDGIYIINLK                                            | 1.144058573        | 2              | 2.975475  |
| P38983        | YVDIAIPCNNK                                           | 1.026178857        | 1              | 3.025011  |
| <b>P39032</b> | <b>RL36 60S ribosomal protein L36</b>                 | <b>1.092903809</b> | <b>0.72516</b> | <b>2</b>  |
| P39032        | EELSNVLAAMR                                           | 1.232015322        | 2              | 2.48169   |
| P39032        | KREELSNVLAAMR                                         | 1.04044674         | 2              | 3.831596  |
| <b>P39447</b> | <b>ZO1 Tight junction protein ZO_1</b>                | <b>0.724461208</b> | <b>0.67704</b> | <b>2</b>  |
| P39447        | GEEVTLAQK                                             | 0.38090541         | 2              | 2.478636  |
| P39447        | GGPAEQQLQENDR                                         | 1.011373578        | 2              | 2.914105  |
| <b>P40112</b> | <b>PSB3 Proteasome subunit beta type_3</b>            | <b>0.944267192</b> | <b>0.94042</b> | <b>2</b>  |
| P40112        | FGIQAQMVTTDFQK                                        | 0.870346722        | 2              | 3.4818    |
| P40112        | FGPYTEPVIAGLDPK                                       | 0.946333573        | 2              | 3.492236  |
| <b>P40307</b> | <b>PSB2 Proteasome subunit beta type_2</b>            | <b>1.006526522</b> | <b>0.9941</b>  | <b>3</b>  |
| P40307        | FILNLPFSVR                                            | 1.153865069        | 2              | 3.013951  |
| P40307        | NGYELSPTAAANFTR                                       | 0.940662005        | 2              | 3.554812  |
| P40307        | VIDKDGIHNLNITFTK                                      | 0.928550523        | 3              | 4.734424  |
| <b>P40329</b> | <b>SYRC Arginyl tRNA synthetase_cytoplasmic</b>       | <b>0.847580461</b> | <b>0.50377</b> | <b>2</b>  |
| P40329        | LNDYVFSFDK                                            | 1.12916013         | 2              | 2.704495  |
| P40329        | SDGGYTYDTSDLAAIK                                      | 0.837597975        | 2              | 4.012593  |
| <b>P41034</b> | <b>TPPA Alpha_tocopherol transfer protein</b>         | <b>0.933506832</b> | <b>0.30459</b> | <b>6</b>  |



|               |                                                                      |                    |                |           |
|---------------|----------------------------------------------------------------------|--------------------|----------------|-----------|
| P41034        | AECPELSADLHPR                                                        | 0.63810853         | 2              | 2.969157  |
| P41034        | AIFDLEGWQISHAFQITPSVAK                                               | 0.727989593        | 2              | 4.617293  |
| P41034        | AQEEGVPETPQPLTDAFLLR                                                 | 0.98463136         | 2              | 3.834833  |
| P41034        | GIHLINPVIFHAVFSMIKPFLEK                                              | 0.575325642        | 4              | 4.707664  |
| P41034        | QLNEQPDHSPLVQPGLAELR                                                 | 0.872896719        | 3              | 3.960544  |
| P41034        | VSLITSELIVQEVEVETQR                                                  | 1.013703754        | 3              | 3.797645  |
| <b>P41123</b> | <b>RL13 60S ribosomal protein L13</b>                                | <b>1.014669514</b> | <b>7.6E-13</b> | <b>3</b>  |
| P41123        | LATQLTGPMPIR                                                         | 0.945157537        | 2              | 2.952143  |
| P41123        | STESLQANVQR                                                          | 1.166418171        | 2              | 3.971032  |
| P41123        | VDTWFNQPAR                                                           | 1.032784675        | 2              | 3.451286  |
| <b>P41498</b> | <b>PPAC Low molecular weight phosphotyrosine protein phosphatase</b> | <b>0.903166607</b> | <b>0.99944</b> | <b>3</b>  |
| P41498        | IDSAATSTYEVGNPPDYR                                                   | 1.118110186        | 2              | 3.103318  |
| P41498        | IELLGSYDPQK                                                          | 0.914807202        | 2              | 3.437858  |
| P41498        | LVTDENVSDNWR                                                         | 1.171505434        | 2              | 3.796196  |
| <b>P41542</b> | <b>USO1 General vesicular transport factor p115</b>                  | <b>1.144992802</b> | <b>0.2043</b>  | <b>15</b> |
| P41542        | AWFEVGDENPGWSAQK                                                     | 0.812944173        | 2              | 4.63702   |
| P41542        | CQNEQLQTAVTQQASQIQQHK                                                | 1.040844083        | 3              | 4.119624  |
| P41542        | EQDLQLEELK                                                           | 1.16277818         | 2              | 2.487828  |
| P41542        | IVAFENAFER                                                           | 1.313117283        | 2              | 2.622846  |
| P41542        | LQTENSELQQR                                                          | 1.00107254         | 2              | 3.125226  |
| P41542        | LREEIEELR                                                            | 1.14290241         | 2              | 2.47305   |
| P41542        | NDGVLLQALTR                                                          | 0.965202851        | 2              | 3.437385  |
| P41542        | NNNSNQNFVK                                                           | 0.959229681        | 2              | 2.490579  |
| P41542        | QLDSSNSTIALQTEK                                                      | 1.141522828        | 2              | 3.906002  |
| P41542        | QLGPPVQQIILVSPMGVSK                                                  | 0.902474599        | 2              | 2.387461  |
| P41542        | QSEDLGSQFTEIFIK                                                      | 1.076068519        | 2              | 3.539407  |
| P41542        | SQLCSQSLEITR                                                         | 1.14369856         | 2              | 3.104682  |
| P41542        | SVPVEGESELVTAAK                                                      | 1.059964382        | 2              | 3.69433   |
| P41542        | TLEQHDNIVTHYK                                                        | 1.016629974        | 2              | 3.48302   |
| P41542        | VLVSPTNPPGATSSCQK                                                    | 1.069994267        | 2              | 4.18065   |
| <b>P41562</b> | <b>IDHC Isocitrate dehydrogenase [NADP] cytoplasmic</b>              | <b>0.873997178</b> | <b>2.9E-15</b> | <b>18</b> |
| P41562        | ATDFVVPQPK                                                           | 0.912580217        | 2              | 3.607947  |
| P41562        | CATITPDEK                                                            | 0.947791744        | 2              | 2.682965  |
| P41562        | DIFQEIYDK                                                            | 1.049560328        | 1              | 2.473907  |
| P41562        | DLAACIK                                                              | 2.206675605        | 1              | 2.002927  |
| P41562        | FKDIFQEIYDK                                                          | 0.883075437        | 3              | 4.118649  |
| P41562        | GQETSTNPIASIFAWSR                                                    | 0.725275911        | 2              | 4.963188  |
| P41562        | IHGGSVEMQGDENMTR                                                     | 1.16478858         | 2              | 4.612719  |
| P41562        | LIDDMVAQAMK                                                          | 0.898911961        | 2              | 4.588535  |
| P41562        | LIDDMVAQAMK+Oxidation(4)                                             | 1.006722676        |                |           |
| P41562        | LILPYVELDLHSYDLGIENR                                                 | 0.992042016        | 2              | 4.69077   |
| P41562        | LVTGWVKPIIIGR                                                        | 0.964319888        | 2              | 3.214007  |
| P41562        | SDYLNTFEFMDK                                                         | 0.843296068        | 2              | 4.336756  |
| P41562        | SDYLNTFEFMDK+Oxidation(9)                                            | 0.909114548        |                |           |
| P41562        | SEGGFIWACK                                                           | 0.826041141        | 2              | 3.322345  |
| P41562        | SIEDFAHSSFQMALSK                                                     | 0.815235231        | 2              | 4.935408  |
| P41562        | TVEAEAAHGTVTR                                                        | 0.985149267        | 2              | 3.966763  |
| P41562        | VEITYTPK                                                             | 0.856889546        | 2              | 2.764072  |
| P41562        | VTYLVHDFEEGGVAMGMYNQDK                                               | 0.971640549        | 3              | 3.328084  |
| <b>P42123</b> | <b>LDHB L lactate dehydrogenase B chain</b>                          | <b>0.908911603</b> | <b>0.07521</b> | <b>6</b>  |
| P42123        | DYSVTANSK                                                            | 1.429626218        | 2              | 2.453655  |
| P42123        | IVADKDYSVTANSK                                                       | 2.27946584         | 2              | 3.983585  |
| P42123        | LIAPVADETAVPNNK                                                      | 1.711389869        | 2              | 2.5292    |
| P42123        | LKDDEVAQLR                                                           | 1.776436392        | 2              | 2.565563  |
| P42123        | SLADELALVDVLEDK                                                      | 1.246834969        | 2              | 3.594932  |

|               |                                                                            |                    |                |           |
|---------------|----------------------------------------------------------------------------|--------------------|----------------|-----------|
| P42123        | VIGSGCNLDSAR                                                               | 0.938230933        | 2              | 3.926786  |
| <b>P42676</b> | <b>NEUL Neurolysin_mitochondrial</b>                                       | <b>0.756701341</b> | <b>0.02178</b> | <b>4</b>  |
| P42676        | AELGALPDDFIDSLEK                                                           | 0.756639851        | 2              | 3.013837  |
| P42676        | NLILKPGGSLDGMMLQNFQR                                                       | 0.87956927         | 3              | 3.472996  |
| P42676        | NLNEDDTSLVFSK                                                              | 0.90338444         | 2              | 3.120328  |
| P42676        | TRTEQLIAQTK                                                                | 0.705694691        | 2              | 2.754903  |
| <b>P42932</b> | <b>TCPQ T_complex protein 1 subunit theta</b>                              | <b>1.093186012</b> | <b>0.04569</b> | <b>9</b>  |
| P42932        | AIAGTGANVIVTGGK                                                            | 1.063018621        | 2              | 3.82366   |
| P42932        | AVDDGVNTFK                                                                 | 1.160143042        | 2              | 2.962775  |
| P42932        | EDGAISTIVLR                                                                | 0.951825151        | 2              | 2.660331  |
| P42932        | ELEVQHPAAK                                                                 | 1.62746149         | 2              | 2.941638  |
| P42932        | GEENLMDAQVK                                                                | 1.697231565        | 2              | 2.456546  |
| P42932        | HFSGLEEAVYR                                                                | 1.23333359         | 2              | 2.724827  |
| P42932        | NVGLDIEAEVPAVK                                                             | 1.159063179        | 2              | 3.07452   |
| P42932        | QITSYGETCPGLEQYAIK                                                         | 1.129856429        | 2              | 4.595458  |
| P42932        | TAEELMNFSK                                                                 | 0.976845585        | 2              | 2.329487  |
| <b>P43244</b> | <b>MATR3 Matrin_3</b>                                                      | <b>0.972837273</b> | <b>0.99519</b> | <b>3</b>  |
| P43244        | GDTDQASNILASFGLSAR                                                         | 0.781389063        | 2              | 3.43647   |
| P43244        | ITPENLPQILLQK                                                              | 0.912254747        | 2              | 3.679196  |
| P43244        | TENPAEGKEQEEK                                                              | 0.89820784         | 2              | 2.953317  |
| <b>P43274</b> | <b>H14 Histone H1.4</b>                                                    | <b>0.905628522</b> | <b>0.85973</b> | <b>3</b>  |
| P43274        | ALAAAGYDVEK                                                                | 0.918892672        | 2              | 3.611325  |
| P43274        | SGVSLAALK                                                                  | 1.07804008         | 2              | 2.922416  |
| P43274        | SGVSLAALKK                                                                 | 0.832890229        | 2              | 2.592466  |
| <b>P43276</b> | <b>H15 Histone H1.5</b>                                                    | <b>0.906938181</b> | <b>0.07589</b> | <b>2</b>  |
| P43276        | ALAAGGYDVEK                                                                | 0.657385329        | 2              | 2.551481  |
| P43276        | ATGPPVSELITK                                                               | 0.957266847        | 2              | 2.551647  |
| <b>P43278</b> | <b>H10 Histone H1.0</b>                                                    | <b>0.895687759</b> | <b>1E-10</b>   | <b>2</b>  |
| P43278        | VGENADSQIK                                                                 | 0.906861545        | 2              | 3.519381  |
| P43278        | YSDMIVAAIQAEK                                                              | 0.819911562        | 2              | 3.987155  |
| <b>P45591</b> | <b>COF2 Cofilin_2</b>                                                      | <b>1.096902234</b> | <b>0.20323</b> | <b>4</b>  |
| P45591        | HEWQVNLDDIKDR                                                              | 1.21361041         | 3              | 4.205368  |
| P45591        | KEDLVFIFWAPESAPLK                                                          | 1.434150919        | 3              | 3.570692  |
| P45591        | QIIVEEAK                                                                   | 1.058390625        | 2              | 2.355095  |
| P45591        | QLVGDIGDVTEDPYTSFVK                                                        | 0.842388415        | 2              | 4.77419   |
| <b>P45592</b> | <b>COF1 Cofilin_1</b>                                                      | <b>1.030394333</b> | <b>0.43591</b> | <b>4</b>  |
| P45592        | EILVGDVGQTVDDPYTTFVK                                                       | 1.013326056        | 2              | 4.593636  |
| P45592        | HELQANCYEEVK                                                               | 1.032633705        | 2              | 3.475245  |
| P45592        | HELQANCYEEVKDR                                                             | 1.003714535        | 3              | 5.294194  |
| P45592        | NIILEEGKEILVGDVGQTVDDPYTTFVK                                               | 0.762977498        | 3              | 4.866737  |
| <b>P45878</b> | <b>FKBP2 Peptidyl_prolyl cis_trans isomerase FKBP2</b>                     | <b>1.125269887</b> | <b>0.99397</b> | <b>4</b>  |
| P45878        | GWDQQLGMCEGEK                                                              | 0.953592176        | 2              | 3.979692  |
| P45878        | KLVIPSELGYGER                                                              | 1.073646449        | 2              | 2.557052  |
| P45878        | LEDGTEFDSSLPQNPVFLSGTGQVIK                                                 | 1.141431505        | 3              | 4.399527  |
| P45878        | LVIPSELGYGER                                                               | 1.079150575        | 2              | 2.659063  |
| <b>P45953</b> | <b>ACADV Very long_chain specific acyl_CoA dehydrogenase_mitochondrial</b> | <b>1.104089032</b> | <b>0.54499</b> | <b>18</b> |
| P45953        | AMVENGGLVTSNPLR                                                            | 0.944441482        | 2              | 3.433763  |
| P45953        | AMVENGGLVTSNPLRV                                                           | 1.045759182        | 2              | 3.22963   |
| P45953        | AMVENGGLVTSNPLRV+Oxidation(1)                                              | 0.971304427        |                |           |
| P45953        | ASNTSEVYFDGVK                                                              | 1.093235484        | 2              | 3.711103  |
| P45953        | ELGAFGLQVPSELGGLSNTQYAR                                                    | 1.036251139        | 2              | 4.81055   |
| P45953        | ENMASLQSNPQQQLFR                                                           | 1.3062705          | 2              | 4.292533  |
| P45953        | FFEEVNDPAK                                                                 | 0.979115563        | 2              | 3.128175  |
| P45953        | FFEEVNDPAKNDSLEKVEEDTLQGLK                                                 | 0.869824102        | 3              | 5.826537  |
| P45953        | GIVNEQFLLQR                                                                | 0.8046578          | 2              | 3.425009  |

|               |                                                                         |                    |                |           |
|---------------|-------------------------------------------------------------------------|--------------------|----------------|-----------|
| P45953        | IFEGTNDILR                                                              | 1.000255817        | 2              | 2.670158  |
| P45953        | NDSLEKVEEDTLQGLK                                                        | 0.747165864        | 2              | 3.444993  |
| P45953        | NPLGNVGLLIGEASK                                                         | 1.125507884        | 2              | 3.46002   |
| P45953        | SFGGVTHGLPEK                                                            | 1.030584509        | 2              | 2.311799  |
| P45953        | SFGGVTHGLPEKK                                                           | 0.997835477        | 2              | 3.009181  |
| P45953        | SGELAVQALEQFATVVEAK                                                     | 0.900167678        | 3              | 4.776571  |
| P45953        | SLSEGYPTAQHEK                                                           | 1.052107055        | 2              | 3.325535  |
| P45953        | TGIGSGLSLSGIVHPELSR                                                     | 1.011717397        | 2              | 4.521201  |
| P45953        | VEEDTLQGLK                                                              | 0.943542476        | 2              | 2.662334  |
| <b>P46418</b> | <b>GSTA5 Glutathione S_transferase alpha_5</b>                          | <b>1.210399719</b> | <b>0.99273</b> | <b>4</b>  |
| P46418        | AILNYIATK                                                               | 1.290637153        | 2              | 3.308846  |
| P46418        | SDGSLMFEQVPMVEIDGMK                                                     | 1.167259716        | 2              | 2.751177  |
| P46418        | SHGQDYLVGNK                                                             | 1.342111402        | 2              | 3.13551   |
| P46418        | VSNLPTVK                                                                | 0.960968615        | 2              | 2.892628  |
| <b>P46425</b> | <b>GSTP2 Glutathione S_transferase P 2</b>                              | <b>0.679895418</b> | <b>0.0057</b>  | <b>2</b>  |
| P46425        | ALPGHLKPFETLLSQNGGK                                                     | 0.687684579        | 3              | 3.971177  |
| P46425        | FEDGDLTLYQSNAILR                                                        | 0.757877564        | 2              | 4.711096  |
| <b>P46462</b> | <b>TERA Transitional endoplasmic reticulum ATPase</b>                   | <b>1.018945213</b> | <b>0.67346</b> | <b>28</b> |
| P46462        | AIANECQANFISIK                                                          | 1.352741301        | 2              | 3.73597   |
| P46462        | EAVCIVLSDDTCSDEK                                                        | 0.786736205        | 2              | 2.738125  |
| P46462        | ELQELVQYPVEHPDK                                                         | 1.134514425        | 2              | 4.269449  |
| P46462        | ETVVEVPQVTWEDIGGLEDVK                                                   | 0.945939815        | 2              | 3.017491  |
| P46462        | ETVVEVPQVTWEDIGGLEDVKR                                                  | 1.031103035        | 2              | 4.063055  |
| P46462        | EVDIGIPDATGR                                                            | 1.303178608        | 2              | 3.039968  |
| P46462        | GDDLSTAILK                                                              | 0.964307896        | 2              | 3.058485  |
| P46462        | GGNIGDGGGAADR                                                           | 1.310690327        | 2              | 3.975876  |
| P46462        | GILLYGPPGTGK                                                            | 1.091565576        | 2              | 3.193771  |
| P46462        | GVLFGPPGCGK                                                             | 1.079774297        | 2              | 2.507306  |
| P46462        | IVSQLLTLMDGLK                                                           | 1.216816899        | 2              | 3.058284  |
| P46462        | KYEMFAQTLQQR                                                            | 1.282279257        | 2              | 3.799582  |
| P46462        | LADDVDLEQVANETHGHVGADLAALCSEALQAIR                                      | 1.026199291        | 3              | 6.18906   |
| P46462        | LAGESESNLRKAFEEAEK                                                      | 1.079886096        | 2              | 2.605604  |
| P46462        | LDQLIYIPLPDEK                                                           | 0.900033086        | 2              | 4.471232  |
| P46462        | LEILQHTK                                                                | 1.321911103        | 2              | 2.693849  |
| P46462        | LGDVISIQPCPDVK                                                          | 1.017212754        | 2              | 4.263931  |
| P46462        | LIVDEAINEDNSVLSQPK                                                      | 1.032883163        | 2              | 5.833801  |
| P46462        | MDELQLFR                                                                | 0.883054706        | 2              | 3.037797  |
| P46462        | MDELQLFR+Oxidation(0)                                                   | 1.011990262        |                |           |
| P46462        | MTNGFSGADLTEICQR                                                        | 0.87015931         | 2              | 4.227392  |
| P46462        | MTNGFSGADLTEICQR+Oxidation(0)                                           | 1.038946633        |                |           |
| P46462        | NAPAIIFIDELDAIAPK                                                       | 1.066612245        | 2              | 5.098776  |
| P46462        | QAAPCVLFFDELDSIAK                                                       | 1.700879856        | 3              | 3.444426  |
| P46462        | QTNPSAMEVEEDDPVPEIR                                                     | 1.012738312        | 2              | 4.645095  |
| P46462        | RSVSDNDIR                                                               | 0.477395435        | 2              | 2.891446  |
| P46462        | VINQLITEMDGMSTK                                                         | 0.986659381        | 2              | 4.552554  |
| P46462        | WALSQSNPSALR                                                            | 1.006201614        | 2              | 3.169538  |
| <b>P46664</b> | <b>PURA2 Adenylosuccinate synthetase isozyme 2</b>                      | <b>0.98838571</b>  | <b>0.74941</b> | <b>4</b>  |
| P46664        | FIEDELQIPVK                                                             | 0.993740777        | 2              | 3.050907  |
| P46664        | LDILDMFTEIK                                                             | 0.820348903        | 2              | 3.409123  |
| P46664        | VGIGAFPTEQDNEIGELLQTR                                                   | 0.934415954        | 2              | 4.399871  |
| P46664        | VVDLLAQDADIVCR                                                          | 1.012901488        | 2              | 3.721214  |
| <b>P46720</b> | <b>SO1A1 Solute carrier organic anion transporter family member 1A1</b> | <b>0.963470315</b> | <b>0.20269</b> | <b>3</b>  |
| P46720        | ESEHTDVHGSPQVENDGELK                                                    | 1.430794526        | 3              | 3.477867  |
| P46720        | GIGETPIVPLGISYIEDFAK                                                    | 1.007119385        | 2              | 3.494571  |
| P46720        | SENSPLYIGILEMGK                                                         | 0.924549759        | 2              | 3.739497  |

|               |                                                                                           |                    |                |           |
|---------------|-------------------------------------------------------------------------------------------|--------------------|----------------|-----------|
| <b>P46844</b> | <b>BIEA Biliverdin reductase A</b>                                                        | <b>0.908100408</b> | <b>0.28543</b> | <b>3</b>  |
| P46844        | FGVVVGVGR                                                                                 | 1.044847342        | 2              | 2.753653  |
| P46844        | LLDQVSAEDLAAEK                                                                            | 0.99224857         | 2              | 4.371974  |
| P46844        | MTVQLETQNK                                                                                | 0.786951614        | 2              | 2.740632  |
| <b>P46953</b> | <b>3HAO 3_hydroxyanthranilate 3_4_dioxygenase</b>                                         | <b>0.957682757</b> | <b>0.03708</b> | <b>9</b>  |
| P46953        | AQGSVALSVTQDPACK                                                                          | 0.843583442        | 2              | 4.486174  |
| P46953        | ASFQPPVCNK                                                                                | 0.904618706        | 2              | 2.356057  |
| P46953        | DLGTQLAPIIQEFFHSEQYR                                                                      | 0.935223618        | 2              | 4.312824  |
| P46953        | FANTMGLVIER                                                                               | 1.150057388        | 2              | 2.608901  |
| P46953        | METELDGLR                                                                                 | 0.874768952        | 2              | 2.619124  |
| P46953        | QDVDVWLWQLEGSSK                                                                           | 0.93558815         | 2              | 3.890494  |
| P46953        | QGEIFLLPAR                                                                                | 1.304096483        | 2              | 3.270734  |
| P46953        | TGKPNPDQLLK                                                                               | 0.874403762        | 3              | 3.827189  |
| P46953        | YYVGDTEDVLF EK                                                                            | 0.990624945        | 2              | 4.019377  |
| <b>P46978</b> | <b>STT3A Dolichyl_diphosphooligosaccharide__protein glycosyltransferase subunit STT3A</b> | <b>1.058546964</b> | <b>0.97567</b> | <b>5</b>  |
| P46978        | FGQVYTEAK                                                                                 | 1.063691308        | 2              | 2.695893  |
| P46978        | FYSLLDPSYAK                                                                               | 1.025870176        | 2              | 2.92425   |
| P46978        | NLDISRPDKK                                                                                | 1.094184503        | 2              | 2.797149  |
| P46978        | VGQAMASTE EK                                                                              | 1.003027652        | 2              | 3.402025  |
| P46978        | VGQAMASTE EK+Oxidation(4)                                                                 | 0.302084027        |                |           |
| <b>P47198</b> | <b>RL22 60S ribosomal protein L22</b>                                                     | <b>0.938963283</b> | <b>0.99999</b> | <b>2</b>  |
| P47198        | AGNLGGGVVTIER                                                                             | 0.947075273        | 2              | 3.527872  |
| P47198        | FTLDCTHPVEDGIMDAANFEQLQER                                                                 | 1.037568614        | 3              | 5.18702   |
| <b>P47875</b> | <b>CSRP1 Cysteine and glycine rich protein 1</b>                                          | <b>1.08173587</b>  | <b>1.6E-05</b> | <b>4</b>  |
| P47875        | GFGFGQGAGALVHSE                                                                           | 0.793757414        | 2              | 3.211263  |
| P47875        | GLESTTLADKDG EYCK                                                                         | 0.914393873        | 2              | 5.188237  |
| P47875        | HEEAPGHRPTTNP NASK                                                                        | 0.988170063        | 3              | 3.810413  |
| P47875        | NLDSTTVAVHG E EYCK                                                                        | 0.990974047        | 2              | 3.687725  |
| <b>P47942</b> | <b>DPYL2 Dihydropyrimidinase related protein 2</b>                                        | <b>1.109002552</b> | <b>0.74579</b> | <b>2</b>  |
| P47942        | GIQEEMEALVK                                                                               | 0.768690941        | 2              | 2.800728  |
| P47942        | GLYDGPVCEVS VTPK                                                                          | 1.073695014        | 2              | 3.635516  |
| <b>P48004</b> | <b>PSA7 Proteasome subunit alpha type 7</b>                                               | <b>0.997619194</b> | <b>0.52761</b> | <b>3</b>  |
| P48004        | GRDIVVLGVEK                                                                               | 1.113118694        | 2              | 2.658012  |
| P48004        | NYTDDAIETDDLTIK                                                                           | 0.95267373         | 2              | 4.550107  |
| P48004        | YVAEIEKEKEENEK                                                                            | 0.888433853        | 2              | 5.051441  |
| <b>P48024</b> | <b>EIF1 Eukaryotic translation initiation factor 1</b>                                    | <b>1.416872191</b> | <b>9.9E-20</b> | <b>2</b>  |
| P48024        | FACNGTVIEHP EYGEVIQLQGDQR                                                                 | 1.803161235        | 3              | 5.465962  |
| P48024        | TLTTVQGIAD D YDK                                                                          | 1.406136683        | 2              | 3.168539  |
| <b>P48037</b> | <b>ANXA6 Annexin A6</b>                                                                   | <b>0.871880687</b> | <b>0.99995</b> | <b>19</b> |
| P48037        | AANDFNPDADAK                                                                              | 1.139895544        | 2              | 3.350109  |
| P48037        | AINEAYKEDYHK                                                                              | 1.140676431        | 2              | 3.176689  |
| P48037        | ALIEILATR                                                                                 | 0.988786891        | 2              | 3.34523   |
| P48037        | CLIEILASR                                                                                 | 1.109617103        | 2              | 2.517637  |
| P48037        | DAFVAIVQSVK                                                                               | 1.581789821        | 2              | 3.004673  |
| P48037        | DLESDIIGDTS GHFQK                                                                         | 1.302268992        | 2              | 3.860751  |
| P48037        | ENDDVVSEDLVQQDVQDLYEAGELK                                                                 | 0.8470147          | 2              | 4.935554  |
| P48037        | GELSGDFEK                                                                                 | 1.024979848        | 1              | 2.101067  |
| P48037        | GFGSDKESILELITSR                                                                          | 0.909351366        | 2              | 4.219398  |
| P48037        | GIGTDEATIIDIITQR                                                                          | 1.158859003        | 2              | 4.058478  |
| P48037        | KTN YDIEHVIK                                                                              | 1.167426128        | 2              | 2.478091  |
| P48037        | QRQEICQSYK                                                                                | 0.995306783        | 2              | 4.016341  |
| P48037        | SEIDLLNIR                                                                                 | 1.010339485        | 2              | 3.281227  |
| P48037        | SEISGDLAR                                                                                 | 1.041066832        | 2              | 2.360828  |
| P48037        | SELDMLDIR                                                                                 | 0.995151241        | 2              | 2.682776  |
| P48037        | SLEDALSSDTS GHFK                                                                          | 0.960421411        | 2              | 3.934227  |

|               |                                                           |                    |                |           |
|---------------|-----------------------------------------------------------|--------------------|----------------|-----------|
| P48037        | TNEQIHLVAAYK                                              | 0.988339054        | 2              | 3.982612  |
| P48037        | TNYDIEHVIK                                                | 1.067210808        | 2              | 3.250883  |
| P48037        | TTGKPIEASIR                                               | 0.928610062        | 2              | 2.501235  |
| <b>P48450</b> | <b>ERG7 Lanosterol synthase</b>                           | <b>2.184324336</b> | <b>0.2924</b>  | <b>2</b>  |
| P48450        | ILGIGPDDPDLVR                                             | 1.768108713        | 2              | 2.38531   |
| P48450        | SVQLPDGGWGLHIEDK                                          | 2.299705047        | 2              | 2.733079  |
| <b>P48500</b> | <b>TPIS Triosephosphate isomerase</b>                     | <b>1.113610282</b> | <b>1.4E-05</b> | <b>13</b> |
| P48500        | CNVSEGVAQCTR                                              | 1.035386215        | 2              | 3.708891  |
| P48500        | DLGATWVVLGHSER                                            | 1.659301018        | 2              | 3.686285  |
| P48500        | ELASQPDVDGFLVGGASLKPEFVDIINAK                             | 0.948755778        | 4              | 6.551955  |
| P48500        | HIFGESDELIGQK                                             | 1.146341278        | 2              | 4.016953  |
| P48500        | IAVAAQNCYK                                                | 1.193154465        | 2              | 2.697418  |
| P48500        | IYGGSVTGATCK                                              | 1.260893228        | 2              | 4.642459  |
| P48500        | LPADTEVVCAPPTAYIDFAR                                      | 0.94369402         | 2              | 5.048263  |
| P48500        | RHIFGESDELIGQK                                            | 1.128832713        | 2              | 3.918656  |
| P48500        | TATPQQAQEVHEK                                             | 1.311824739        | 2              | 3.741127  |
| P48500        | VNHALSEGLGVIACIGEK                                        | 0.931725543        | 2              | 5.277333  |
| P48500        | VTNGAFTGEISPGMIK                                          | 1.063168276        | 2              | 5.160472  |
| P48500        | VTNGAFTGEISPGMIK+Oxidation(13)                            | 1.068398297        |                |           |
| P48500        | VVLAYEPVWAIGTGK                                           | 0.949215857        | 3              | 4.661988  |
| <b>P48508</b> | <b>GSH0 Glutamate__cysteine ligase regulatory subunit</b> | <b>0.911644038</b> | <b>0.18027</b> | <b>5</b>  |
| P48508        | ASTLHLQTGNLLNWGR                                          | 0.85708867         | 3              | 4.298683  |
| P48508        | FFPDVLECTMSHAVEK                                          | 0.996596913        | 2              | 3.725932  |
| P48508        | INPDEREEMK                                                | 0.826419545        | 2              | 2.568276  |
| P48508        | LFIVGSNSSSTR                                              | 0.666857699        | 2              | 3.019517  |
| P48508        | TLNEWSSQISPDLVR                                           | 0.793154221        | 2              | 4.79794   |
| <b>P48675</b> | <b>DESM Desmin</b>                                        | <b>1.279169563</b> | <b>0.82119</b> | <b>3</b>  |
| P48675        | ADVDAATLAR                                                | 1.484094264        | 2              | 2.393958  |
| P48675        | FLEQQNAALAAEVNR                                           | 1.437728648        | 2              | 4.291257  |
| P48675        | VSDLTQAANK                                                | 1.876219459        | 2              | 2.988657  |
| <b>P48679</b> | <b>LMNA Prelamin_A/C</b>                                  | <b>0.908503413</b> | <b>9.5E-06</b> | <b>16</b> |
| P48679        | AAAYEALGDAR                                               | 1.181866426        | 2              | 2.957789  |
| P48679        | AQHEDQVEQYK                                               | 1.038648576        | 2              | 3.065216  |
| P48679        | AQHEDQVEQYK                                               | 1.153369505        | 3              | 3.937302  |
| P48679        | IDSLSAQLSQLQK                                             | 0.968909241        | 2              | 3.134309  |
| P48679        | ITSEEEVVR                                                 | 0.84173058         | 2              | 3.229878  |
| P48679        | LKDLEALLNSK                                               | 0.98023591         | 2              | 2.741622  |
| P48679        | LQEKEDLQELNDR                                             | 0.990419528        | 2              | 4.39889   |
| P48679        | LRDLESLAR                                                 | 0.798118156        | 2              | 2.468886  |
| P48679        | MQQQQLDEYQELLDIK                                          | 1.013433573        | 2              | 4.396125  |
| P48679        | MQQQQLDEYQELLDIK+Oxidation(0)                             | 0.993976652        |                |           |
| P48679        | NSNLVGAHEELQQSR                                           | 0.884622395        | 2              | 4.365974  |
| P48679        | SGAASSTPLSPTR                                             | 0.840707295        | 2              | 3.261025  |
| P48679        | SVGGSGGSGFGDNLVTR                                         | 0.811420865        | 2              | 3.984489  |
| P48679        | TALINATGEEVAMR                                            | 0.878395655        | 2              | 3.236383  |
| P48679        | TVLCGTCGQPADK                                             | 0.91498568         | 2              | 3.301952  |
| P48679        | VAVEEVDEEGK                                               | 1.22957921         | 2              | 2.930672  |
| <b>P48721</b> | <b>GRP75 Stress_70 protein_mitochondrial</b>              | <b>0.985483946</b> | <b>2.2E-16</b> | <b>28</b> |
| P48721        | AQFEGIVTDLIK                                              | 1.010737937        | 2              | 3.776506  |
| P48721        | ASNGDAWVVAHGK                                             | 1.034426939        | 2              | 3.740872  |
| P48721        | DAGQISGLNVLR                                              | 0.977673462        | 2              | 3.569642  |
| P48721        | EQQIVIQSSGGLSK                                            | 1.510774387        | 2              | 3.759012  |
| P48721        | EQQIVIQSSGGLSKDDIENMVK                                    | 1.222794059        | 2              | 4.436788  |
| P48721        | ERVEAVNMAEGIIHDTETK                                       | 1.093812548        | 3              | 5.767061  |
| P48721        | ETAENYLGHAK                                               | 1.584561426        | 2              | 3.59407   |
| P48721        | GAVVGIDLGTNSCAVMEGK                                       | 0.947797639        | 2              | 5.629698  |

|               |                                                                            |                    |                |           |
|---------------|----------------------------------------------------------------------------|--------------------|----------------|-----------|
| P48721        | LLGQFTLIGIPPAPR                                                            | 1.197441883        | 2              | 3.079156  |
| P48721        | MEEFKDQLPADECNK                                                            | 1.211789319        | 2              | 4.770112  |
| P48721        | MEEFKDQLPADECNK+Oxidation(0)                                               | 1.595014355        |                |           |
| P48721        | MKETAENYLGHTAK                                                             | 0.923536494        | 2              | 4.151165  |
| P48721        | MKETAENYLGHTAK+Oxidation(0)                                                | 1.136010567        |                |           |
| P48721        | NAVITVPAYFNDSQR                                                            | 1.150510172        | 2              | 3.569063  |
| P48721        | QAASSLQQASLK                                                               | 1.738807068        | 2              | 2.993021  |
| P48721        | QAVTNPNTFYATK                                                              | 1.484807285        | 2              | 3.781953  |
| P48721        | RYDDPEVQK                                                                  | 1.197803682        | 2              | 2.92188   |
| P48721        | RYDDPEVQKDTK                                                               | 1.058560312        | 2              | 3.766151  |
| P48721        | SDIGEVILVGGMTR                                                             | 0.990635188        | 2              | 4.318917  |
| P48721        | SQVFSTAADGQTQVEIK                                                          | 1.605605622        | 2              | 5.021915  |
| P48721        | STNGDTFLGGEDFDQALLR                                                        | 1.066169807        | 2              | 5.616467  |
| P48721        | TTPSVVAFTPDGER                                                             | 0.991281144        | 2              | 3.706936  |
| P48721        | VEAVNMAEGIIHDTETK                                                          | 0.975614025        | 2              | 4.325917  |
| P48721        | VINEPTAAALAYGLDK                                                           | 1.240844255        | 2              | 4.134956  |
| P48721        | VLENAEGAR                                                                  | 1.075250017        | 2              | 3.07982   |
| P48721        | VQQTVQDLFGR                                                                | 1.022004265        | 2              | 3.446519  |
| P48721        | YDDPEVQK                                                                   | 0.962745356        | 2              | 2.465925  |
| P48721        | YDDPEVQKDTK                                                                | 0.925277661        | 2              | 2.778764  |
| <b>P48725</b> | <b>PCNT Pericentrin</b>                                                    | <b>0.9259075</b>   | <b>0.66475</b> | <b>2</b>  |
| P48725        | EEVSGGNGPCRGSPPGRSLER                                                      | 0.925763561        | 2              | 2.332365  |
| P48725        | VYQSLSTAVEGLLEMALDSSKQLEEAR                                                | 2.848483677        | 3              | 3.332243  |
| <b>P49134</b> | <b>ITB1 Integrin beta_1</b>                                                | <b>0.887016802</b> | <b>0.45527</b> | <b>4</b>  |
| P49134        | CNCQSHGIPASPK                                                              | 0.818992752        | 2              | 3.655881  |
| P49134        | GEFFNELVGQQR                                                               | 0.856873073        | 2              | 2.800832  |
| P49134        | RITSDFRIGFGSFVEK                                                           | 0.883079624        | 2              | 2.359382  |
| P49134        | SAVTTVNPVK                                                                 | 0.887330308        | 2              | 2.437993  |
| <b>P49242</b> | <b>RS3A 40S ribosomal protein S3a</b>                                      | <b>1.080919922</b> | <b>0.00105</b> | <b>9</b>  |
| P49242        | ACQSIYPLHDVFR                                                              | 1.277205092        | 2              | 3.968821  |
| P49242        | ADGYEPPVQESV                                                               | 1.145939201        | 2              | 2.353567  |
| P49242        | LIPDSIGKDIEK                                                               | 1.128469871        | 2              | 2.508604  |
| P49242        | LITEDVQGK                                                                  | 1.107785597        | 2              | 2.744938  |
| P49242        | LMELHGEFGSSGK                                                              | 1.030817084        | 2              | 3.458177  |
| P49242        | LMELHGEFGSSGK+Oxidation(1)                                                 | 1.244643224        |                |           |
| P49242        | NCLTNFHGMDLTR                                                              | 0.972469209        | 2              | 3.800273  |
| P49242        | TTDGYLLR                                                                   | 1.138361076        | 2              | 3.069434  |
| P49242        | VFEVSLADLQNDVAFR                                                           | 0.957316723        | 2              | 4.274086  |
| <b>P49432</b> | <b>ODPB Pyruvate dehydrogenase E1 component subunit beta_mitochondrial</b> | <b>0.995878048</b> | <b>0.98519</b> | <b>6</b>  |
| P49432        | EAINQGMDEELERDEK                                                           | 0.909532098        | 2              | 2.557161  |
| P49432        | ILEDNSIPQVK                                                                | 1.011454967        | 2              | 3.077391  |
| P49432        | IMEGPAFNFLDAPAVR                                                           | 1.016235687        | 2              | 4.222926  |
| P49432        | IMEGPAFNFLDAPAVR+Oxidation(1)                                              | 0.922557526        |                |           |
| P49432        | TIRPMDIEAIEASVMK                                                           | 0.901842595        | 3              | 4.404881  |
| P49432        | VFLLGEEVAQYDGAYK                                                           | 1.140425341        | 2              | 3.539786  |
| <b>P49620</b> | <b>DGKG Diacylglycerol kinase gamma</b>                                    | <b>0.96552179</b>  | <b>0.71331</b> | <b>2</b>  |
| P49620        | QGERILQKFHYLLNPK                                                           | 3.380958974        | 2              | 2.496506  |
| P49620        | WGGGYEGGSLTKILK                                                            | 0.930212058        | 2              | 2.344863  |
| <b>P49717</b> | <b>MCM4 DNA replication licensing factor MCM4</b>                          | <b>0.741308051</b> | <b>0.00591</b> | <b>2</b>  |
| P49717        | GQSDTAITKDMFEEALR                                                          | 0.42763819         | 2              | 2.312626  |
| P49717        | YQQLFEDIR                                                                  | 0.753638432        | 1              | 1.979849  |
| <b>P49889</b> | <b>ST1E3 Estrogen sulfotransferase_ isoform 3</b>                          | <b>0.561427002</b> | <b>9.9E-20</b> | <b>13</b> |
| P49889        | CKEDALFNR                                                                  | 0.607438631        | 2              | 2.599116  |
| P49889        | FEEHYQQQMK                                                                 | 0.791577716        | 2              | 2.811329  |
| P49889        | FEEHYQQQMK+Oxidation(8)                                                    | 1.157153053        |                |           |
| P49889        | FMEGQVPYGSWYDHYK                                                           | 0.722063529        | 2              | 3.767872  |

|               |                                             |                    |                |           |
|---------------|---------------------------------------------|--------------------|----------------|-----------|
| P49889        | IIQHTSFQEMK                                 | 0.779948782        | 2              | 2.679441  |
| P49889        | LIEFLERDPSAELVDR                            | 0.702592728        | 3              | 5.062951  |
| P49889        | NEDLINGIK                                   | 0.644275268        | 2              | 2.907812  |
| P49889        | NNPCTNYSMLPETMIDLK                          | 0.514649755        | 2              | 4.478652  |
| P49889        | NNPCTNYSMLPETMIDLK+Oxidation(13)            | 0.429741465        |                |           |
| P49889        | NNPCTNYSMLPETMIDLK+Oxidation(8)             | 0.429741465        |                |           |
| P49889        | SFSEFVEK                                    | 0.688202953        | 2              | 2.374656  |
| P49889        | SGSTWISEIVDMIYK                             | 0.439808161        | 2              | 4.562672  |
| P49889        | YWEDVETFLARPDDLIVTPK                        | 1.164536408        | 3              | 4.197574  |
| <b>P50137</b> | <b>TKT Transketolase</b>                    | <b>0.891498482</b> | <b>0.00205</b> | <b>23</b> |
| P50137        | AVELAANTK                                   | 0.989047873        | 1              | 1.975096  |
| P50137        | GHAAPILYAVVWAEAGFLPEALLNLR                  | 1.090755317        | 3              | 3.482074  |
| P50137        | GITGIEDK                                    | 1.03030955         | 1              | 2.330757  |
| P50137        | IIALDGDTK                                   | 1.489465991        | 2              | 2.456312  |
| P50137        | ILATPPQEDAPSVDIANIR                         | 0.981043058        | 3              | 5.383316  |
| P50137        | ISSDLDGHPVPK                                | 1.004185591        | 2              | 3.244202  |
| P50137        | KISSDLDGHPVPK                               | 0.926121976        | 2              | 3.901942  |
| P50137        | LAVSQVPR                                    | 1.009900984        | 2              | 2.301791  |
| P50137        | LAVSQVPRSGKPAELLK                           | 1.909745998        | 2              | 2.601427  |
| P50137        | LDNLVAIFDINR                                | 0.961353686        | 2              | 4.3408    |
| P50137        | LGQSDPAPLQHQVDVYQK                          | 1.1072011          | 2              | 4.031178  |
| P50137        | MFGIDKDAIVQAVK                              | 0.825349516        | 2              | 4.396074  |
| P50137        | MFGIDKDAIVQAVK+Oxidation(0)                 | 0.86417206         |                |           |
| P50137        | NMAEQIIQEIYSQVQSK                           | 0.788135549        | 3              | 5.850729  |
| P50137        | NMAEQIIQEIYSQVQSK+Oxidation(1)              | 0.762523814        |                |           |
| P50137        | NSTFSELFK                                   | 0.98456288         | 2              | 2.396109  |
| P50137        | SGKPAELLK                                   | 1.092915737        | 3              | 3.400248  |
| P50137        | SKDDQVTVIGAGVTLHEALAAAEMLK                  | 0.885531841        | 3              | 4.069691  |
| P50137        | SVPMSTVFYPSDGVATEK                          | 0.907819837        | 2              | 4.290738  |
| P50137        | SVPMSTVFYPSDGVATEK+Oxidation(3)             | 0.951364212        |                |           |
| P50137        | TSRPENAIIYSNNEDEFQVQQAK                     | 0.930050184        | 3              | 6.319445  |
| P50137        | VLDPFTIKPLDK                                | 1.074185328        | 2              | 3.029834  |
| P50137        | VLDPFTIKPLDKK                               | 0.860142284        | 2              | 2.734724  |
| <b>P50169</b> | <b>RDH3 Retinol dehydrogenase 3</b>         | <b>1.003008672</b> | <b>0.04422</b> | <b>10</b> |
| P50169        | AMESLVNTCSGDLSLVTDCEHALTSCHPR               | 0.886929088        | 3              | 5.047653  |
| P50169        | AMESLVNTCSGDLSLVTDCEHALTSCHPR+Oxidation(1)  | 0.880262074        |                |           |
| P50169        | FQDSYMK                                     | 0.951056782        | 1              | 2.086136  |
| P50169        | GLWGLVNNAGISVPVGPNEWMR                      | 0.87018359         | 2              | 3.715937  |
| P50169        | KLWDQTTEEVK                                 | 0.887261839        | 2              | 3.076902  |
| P50169        | KLWDQTTEEVKEIYGEK                           | 0.922551889        | 3              | 4.721564  |
| P50169        | LWDQTTEEVK                                  | 1.096520877        | 2              | 3.255734  |
| P50169        | LWDQTTEEVKEIYGEK                            | 0.91954956         | 2              | 5.144002  |
| P50169        | MSLVGGGYCISK                                | 1.262640571        | 2              | 3.773761  |
| P50169        | MSLVGGGYCISK+Oxidation(0)                   | 1.278345335        |                |           |
| <b>P50237</b> | <b>ST1C1 Sulfotransferase 1C1</b>           | <b>0.825430875</b> | <b>2.2E-12</b> | <b>9</b>  |
| P50237        | AGTTWTQEIVDMIQNDGDVQK                       | 0.720548882        | 2              | 5.233977  |
| P50237        | DISEEVLNK                                   | 1.543766993        | 2              | 2.636224  |
| P50237        | DLHLGEQDLQPETR                              | 1.162736897        | 2              | 4.309466  |
| P50237        | HPFIEWTLPSPLNSGLDLANK                       | 0.318756432        | 3              | 3.322172  |
| P50237        | IWNFQAKPDDLIIATYAK                          | 0.995891049        | 3              | 3.750057  |
| P50237        | MKDLHLGEQDLQPETR                            | 0.995682804        | 2              | 3.980995  |
| P50237        | MLPDPGTLGEYIEQFK                            | 0.787728356        | 3              | 4.699763  |
| P50237        | MLPDPGTLGEYIEQFK+Oxidation(0)               | 0.853370014        |                |           |
| P50237        | VLWGSWYDHVK                                 | 1.298996762        | 2              | 3.119763  |
| <b>P50298</b> | <b>ARY2 Arylamine N_acetyltransferase 2</b> | <b>0.871519513</b> | <b>0.87371</b> | <b>2</b>  |
| P50298        | FSYKDNIDLVEFK                               | 0.976816337        | 2              | 2.683943  |

|               |                                                            |                    |                |           |
|---------------|------------------------------------------------------------|--------------------|----------------|-----------|
| P50298        | SLTEEEIEDVLK                                               | 0.864082692        | 2              | 2.767169  |
| <b>P50398</b> | <b>GDIA Rab GDP dissociation inhibitor alpha</b>           | <b>0.94090089</b>  | <b>0.00662</b> | <b>8</b>  |
| P50398        | FDLGQDVIDFTGHALALYR                                        | 0.884751642        | 3              | 4.230884  |
| P50398        | FQLLEGPPEMGR                                               | 0.934911558        | 2              | 3.548142  |
| P50398        | KQNDVFGAEDQ                                                | 1.057339875        | 2              | 2.635939  |
| P50398        | MLLYTEVTRYLDFK                                             | 0.961016013        | 2              | 2.34705   |
| P50398        | NPYYGGESSITPLEELYK                                         | 0.862503184        | 2              | 5.448057  |
| P50398        | QLICDPSYIPDR                                               | 1.001927861        | 2              | 3.348272  |
| P50398        | TDDYLDQPCLETINR                                            | 1.028099761        | 2              | 5.167658  |
| P50398        | TFEGVDPQTSMR                                               | 0.926534703        | 2              | 2.595511  |
| <b>P50399</b> | <b>GDIB Rab GDP dissociation inhibitor beta</b>            | <b>1.040101495</b> | <b>0.99316</b> | <b>7</b>  |
| P50399        | AYDATTHFETTCDDIK                                           | 1.995270615        | 2              | 4.772915  |
| P50399        | AYDATTHFETTCDDIKDIYK                                       | 0.964478062        | 3              | 5.506894  |
| P50399        | EIRPALELLEPIEQK                                            | 1.078926038        | 3              | 3.93112   |
| P50399        | FDLGQDVIDFTGHSLALYR                                        | 1.121617239        | 3              | 4.703263  |
| P50399        | FVSISDLFVPK                                                | 0.833987719        | 2              | 3.141755  |
| P50399        | NTNDANSCQIIPQNVNR                                          | 1.091124075        | 2              | 4.221483  |
| P50399        | TDDYLDQPCCEITINR                                           | 0.997107962        | 2              | 4.765975  |
| <b>P50431</b> | <b>GLYC Serine hydroxymethyltransferase_cytosolic</b>      | <b>1.218586785</b> | <b>0.40574</b> | <b>7</b>  |
| P50431        | ALSDALTELGK                                                | 1.013369147        | 2              | 3.998201  |
| P50431        | AVLEALGSLNNK                                               | 0.986549803        | 2              | 4.476895  |
| P50431        | GLLEEDFQK                                                  | 0.88274865         | 2              | 2.358482  |
| P50431        | ISATSIFFESMPYK                                             | 1.328103346        | 2              | 3.510657  |
| P50431        | IYQLQVLANCR                                                | 0.858489525        | 2              | 2.690809  |
| P50431        | VLEACSIACNK                                                | 0.977754308        | 2              | 3.92667   |
| P50431        | YSEGYPGQR                                                  | 1.150867458        | 2              | 2.772025  |
| <b>P50475</b> | <b>SYAC Alanyl_tRNA synthetase_cytoplasmic</b>             | <b>0.96794886</b>  | <b>0.88566</b> | <b>14</b> |
| P50475        | ASEWVQVSGLMDGK                                             | 1.022601953        | 2              | 4.166582  |
| P50475        | AVFDEYDPVPR                                                | 1.010450376        | 2              | 3.268637  |
| P50475        | DIINEEVQFLK                                                | 0.845791974        | 2              | 3.182424  |
| P50475        | GLEATDDSPK                                                 | 0.966275883        | 2              | 2.590701  |
| P50475        | ITCLCQVPQNAANR                                             | 1.14242076         | 2              | 4.588664  |
| P50475        | IVAVTGAEAQK                                                | 1.084775047        | 2              | 2.752509  |
| P50475        | NVGCLQEALQLATSAFQLR                                        | 0.89541211         | 2              | 2.918587  |
| P50475        | QIWQNLGLDEAK                                               | 1.038436118        | 2              | 3.140088  |
| P50475        | RIVAVTGAEAQK                                               | 1.467579861        | 2              | 2.946728  |
| P50475        | SVLGDADQK                                                  | 0.832730042        | 1              | 2.199129  |
| P50475        | TEEIVNGMIEAAKPVYTLDCPLAAAK                                 | 1.202634937        | 3              | 4.02376   |
| P50475        | TITVALADGGRPDNTGR                                          | 1.096812272        | 2              | 3.0999    |
| P50475        | VDDSSDKTEFTVK                                              | 1.27042841         | 2              | 3.751496  |
| P50475        | VGAEDTDGIDMAYR                                             | 1.059218557        | 2              | 3.851568  |
| <b>P50503</b> | <b>F10A1 Hsc70_interacting protein</b>                     | <b>1.434091256</b> | <b>9.9E-20</b> | <b>6</b>  |
| P50503        | AIDLFTDAIK                                                 | 1.312366111        | 2              | 2.900306  |
| P50503        | AIEINPDSAQPYK                                              | 1.547079509        | 2              | 3.461441  |
| P50503        | GAAIDALNDGELQK                                             | 1.497407843        | 2              | 3.666522  |
| P50503        | KGAAIDALNDGELQK                                            | 1.498604451        | 2              | 4.918941  |
| P50503        | LDYDEDASAMLR                                               | 1.19365366         | 2              | 3.564228  |
| P50503        | QDPSVLHTEEMR                                               | 1.735337777        | 2              | 2.5345    |
| <b>P50516</b> | <b>VATA V_type proton ATPase catalytic subunit A</b>       | <b>0.85809941</b>  | <b>0.72088</b> | <b>3</b>  |
| P50516        | ADYAQLLEDMQNAFR                                            | 0.844044317        | 2              | 3.741143  |
| P50516        | TALVANTSMPVVAAR                                            | 0.997359255        | 2              | 3.594894  |
| P50516        | VLDALFPCVQGGTTAIPGAFGCGK                                   | 0.968240494        | 2              | 2.847148  |
| <b>P50554</b> | <b>GABT 4_aminobutyrate aminotransferase_mitochondrial</b> | <b>0.906381697</b> | <b>0.8984</b>  | <b>12</b> |
| P50554        | GNYLVDVDGNR                                                | 1.068125566        | 1              | 2.183243  |
| P50554        | GTFCSFDPDEAIR                                              | 1.256669079        | 2              | 3.756868  |



|               |                                                   |                    |                |           |
|---------------|---------------------------------------------------|--------------------|----------------|-----------|
| P50554        | GVVLGGCGDK                                        | 0.970690583        | 2              | 2.304727  |
| P50554        | HGCAFLVDEVQTGGGCTGK                               | 0.843494031        | 2              | 5.863329  |
| P50554        | IDIPSFWDWPIAPFPR                                  | 0.774930215        | 2              | 3.742017  |
| P50554        | KHGCAFLVDEVQTGGGCTGK                              | 1.179106196        | 3              | 3.70531   |
| P50554        | LVQQPQNASTFINRPALGILPPENFVVK                      | 0.762106776        | 3              | 3.722294  |
| P50554        | NLLLAEVINIIK                                      | 0.818140163        | 3              | 4.942817  |
| P50554        | REDLLNNVAHAGK                                     | 1.329251867        | 2              | 2.360586  |
| P50554        | TLLTGLLDLQAQYPQFVSR                               | 0.994550918        | 3              | 4.104712  |
| P50554        | TVAGIIVEPIQSEGGDNHASDDFFR                         | 0.915028474        | 2              | 3.462449  |
| P50554        | YPLEEFVTDNQQEER                                   | 0.942609311        | 2              | 3.006053  |
| <b>P50580</b> | <b>PA2G4 Proliferation-associated protein 2G4</b> | <b>1.173172247</b> | <b>0.00054</b> | <b>4</b>  |
| P50580        | HELLQPFNVLYEK                                     | 1.033040823        | 2              | 2.964564  |
| P50580        | LVKPGNQNTQVTEAWNK                                 | 1.270970317        | 3              | 3.389173  |
| P50580        | SLVEASSSGVSVLSLCEK                                | 0.977419071        | 2              | 2.49089   |
| P50580        | TIIQNPTDQQK                                       | 1.179397331        | 2              | 3.135452  |
| <b>P50878</b> | <b>RL4 60S ribosomal protein L4</b>               | <b>1.11632236</b>  | <b>2.3E-05</b> | <b>11</b> |
| P50878        | FCIWTESAFR                                        | 1.0540357          | 2              | 2.528991  |
| P50878        | KLDELYGTWR                                        | 1.119002749        | 2              | 3.157358  |
| P50878        | KLEAAAAAALAAK                                     | 1.218821919        | 3              | 4.27761   |
| P50878        | LDELYGTWR                                         | 0.920783949        | 2              | 2.629948  |
| P50878        | LEAAAAAALAAK                                      | 1.205853579        | 2              | 3.0964    |
| P50878        | NIPGITLLNVSK                                      | 1.070106398        | 2              | 3.293212  |
| P50878        | NVTLPVAFK                                         | 1.218448138        | 1              | 2.003755  |
| P50878        | RGPCIIYNEDNGIIK                                   | 1.103272016        | 2              | 3.468535  |
| P50878        | SGQGAFGNMCR                                       | 1.207699625        | 2              | 2.378578  |
| P50878        | SNYNLPMHK                                         | 1.178905857        | 2              | 2.562851  |
| P50878        | YAICSALAASALPALVMSK                               | 1.316568652        | 2              | 3.499718  |
| <b>P51583</b> | <b>PUR6 Multifunctional protein ADE2</b>          | <b>1.107878031</b> | <b>0.26072</b> | <b>3</b>  |
| P51583        | ACGNFGIPCELR                                      | 1.097542941        | 2              | 2.64011   |
| P51583        | AEYEGDGIPVFAVAGR                                  | 1.212324082        | 2              | 3.204171  |
| P51583        | SWLPQNCTLVDMK                                     | 1.15369982         | 2              | 2.622981  |
| <b>P51635</b> | <b>AK1A1 Alcohol dehydrogenase [NADP_]</b>        | <b>0.819819435</b> | <b>6.3E-06</b> | <b>8</b>  |
| P51635        | ALEALVAK                                          | 0.910589872        | 2              | 2.527867  |
| P51635        | ALGLSNFSSR                                        | 1.111080213        | 2              | 2.806605  |
| P51635        | GLEVTAYSPLGSSDR                                   | 0.887625735        | 2              | 4.452848  |
| P51635        | HHPEDVEPAVR                                       | 0.947894144        | 3              | 3.740552  |
| P51635        | HIDCASVYGNETEIGEALK                               | 0.714189517        | 2              | 5.929032  |
| P51635        | HIDCASVYGNETEIGEALKESVGAGK                        | 1.0928502          | 3              | 6.122674  |
| P51635        | HPDEPVLLLEPVVLALEK                                | 1.026624697        | 3              | 6.084077  |
| P51635        | QLDALNK                                           | 0.972376616        | 1              | 2.300743  |
| <b>P51647</b> | <b>AL1A1 Retinal dehydrogenase 1</b>              | <b>1.101849744</b> | <b>1</b>       | <b>17</b> |
| P51647        | ANNTTYGLAAGVFTK                                   | 1.158039299        | 2              | 3.94088   |
| P51647        | EAGFPPGVVNVIPGYPTAGAAISSHMDVVK                    | 1.057060061        | 3              | 3.890269  |
| P51647        | ELGEHGLYEYELK                                     | 1.56126221         | 2              | 3.721067  |
| P51647        | FPVLNPATEEVICHVEEGDK                              | 1.033472301        | 3              | 4.09538   |
| P51647        | FPVLNPATEEVICHVEEGDKADVVK                         | 0.888100324        | 4              | 5.142944  |
| P51647        | IFINNEWHDSVSGK                                    | 1.10356724         | 2              | 4.352702  |
| P51647        | IFVEESVYDEFVR                                     | 0.949011815        | 2              | 4.264873  |
| P51647        | IGPALSCGNTVVVKAPEQTPLTALHMASLIK                   | 0.979998832        | 4              | 5.756516  |
| P51647        | IHGQTIPSDGDIPTFR                                  | 1.028129766        | 2              | 4.546439  |
| P51647        | KFPVLNPATEEVICHVEEGDK                             | 0.973636506        | 3              | 3.753911  |
| P51647        | KFPVLNPATEEVICHVEEGDKADVVK                        | 0.970237613        | 4              | 4.866906  |
| P51647        | KYVLGNPLTQGINQGPDKEQHDK                           | 1.002984994        | 3              | 3.774581  |
| P51647        | LLLATIEAINGGK                                     | 0.183980687        | 2              | 4.117346  |
| P51647        | VFANAYLSDLGGSIK                                   | 1.052470943        | 2              | 4.558314  |
| P51647        | YCAGWADK                                          | 1.007194266        | 1              | 2.056455  |
| P51647        | YVLGNPLTQGINQGPDQDK                               | 1.03954213         | 2              | 5.026834  |

|               |                                                                 |                    |                |          |
|---------------|-----------------------------------------------------------------|--------------------|----------------|----------|
| P51647        | YVLGNPLTQGINQGPKDKEQHDK                                         | 0.969012969        | 2              | 3.508366 |
| <b>P51650</b> | <b>SSDH Succinate semialdehyde dehydrogenase_ mitochondrial</b> | <b>0.828009895</b> | <b>0.02532</b> | <b>7</b> |
| P51650        | EVGEVLCTDPLVSK                                                  | 0.916938871        | 2              | 3.806841 |
| P51650        | HQSGGNFFPELTLNSVTR                                              | 1.02076289         | 2              | 3.581902 |
| P51650        | LGTVADCGVPEAR                                                   | 0.846138713        | 2              | 3.434222 |
| P51650        | VGNFEEGTTQGPLINEK                                               | 0.780310837        | 2              | 4.312137 |
| P51650        | VYGDIIYTSK                                                      | 0.816217532        | 2              | 2.664002 |
| P51650        | WLPTPATFPVYDPASGAK                                              | 0.857880268        | 2              | 3.764623 |
| P51650        | YGIDEYLEVK                                                      | 0.880413607        | 2              | 3.085031 |
| <b>P51869</b> | <b>CP4F4 Cytochrome P450 4F4</b>                                | <b>1.080958079</b> | <b>0.9943</b>  | <b>2</b> |
| P51869        | TLDFIDVLLTK                                                     | 1.10028396         | 2              | 3.61471  |
| P51869        | WQDLASGGGAR                                                     | 1.070356816        | 2              | 2.53931  |
| <b>P51886</b> | <b>LUM Lumican</b>                                              | <b>0.986546931</b> | <b>0.78388</b> | <b>3</b> |
| P51886        | ITNIPDEFNR                                                      | 0.498213672        | 2              | 2.333369 |
| P51886        | NNQIDHIDEK                                                      | 1.104014728        | 2              | 3.094421 |
| P51886        | SLQDLQLANNK                                                     | 0.940274111        | 2              | 2.69651  |
| <b>P52020</b> | <b>ERG1 Squalene monooxygenase</b>                              | <b>1.057103372</b> | <b>0.66819</b> | <b>2</b> |
| P52020        | DIPDLYDDAAIFQAK                                                 | 0.777506476        | 2              | 2.466207 |
| P52020        | GVLLGDAYNLR                                                     | 1.209133299        | 2              | 2.967228 |
| <b>P52296</b> | <b>IMB1 Importin subunit beta_1</b>                             | <b>0.952275654</b> | <b>0.97172</b> | <b>5</b> |
| P52296        | AAVENLPTFLVELSR                                                 | 0.889732577        | 2              | 3.41269  |
| P52296        | GALQYLVPILTQTLTK                                                | 0.912657535        | 2              | 2.446865 |
| P52296        | SNEILTAIQGMGR                                                   | 0.951827163        | 2              | 3.146467 |
| P52296        | TVSPDRLELEAAQK                                                  | 0.994073264        | 2              | 2.871838 |
| P52296        | VLANPGNSQVAR                                                    | 1.108384951        | 2              | 3.595824 |
| <b>P52303</b> | <b>AP1B1 AP_1 complex subunit beta_1</b>                        | <b>1.051056378</b> | <b>0.99971</b> | <b>4</b> |
| P52303        | NINLIVQK                                                        | 0.877224126        | 1              | 2.212781 |
| P52303        | NSFGLAPAAPLQVHAPLSPNQTEISLPLNTVGSVMK                            | 1.017530063        | 3              | 3.917299 |
| P52303        | SQPDMAIMAVNTFVK                                                 | 0.991674314        | 2              | 2.602387 |
| P52303        | YNDPIYVK                                                        | 1.073809673        | 2              | 2.524617 |
| <b>P52555</b> | <b>ERP29 Endoplasmic reticulum resident protein 29</b>          | <b>1.099317139</b> | <b>0.99978</b> | <b>3</b> |
| P52555        | ILDQGEDFPASELAR                                                 | 1.095411514        | 2              | 4.81951  |
| P52555        | QGQDGLSGVK                                                      | 1.028467321        | 2              | 2.465656 |
| P52555        | SLNILTAFR                                                       | 1.045025349        | 2              | 2.811404 |
| <b>P52631</b> | <b>STAT3 Signal transducer and activator of transcription 3</b> | <b>3.343733748</b> | <b>1.2E-12</b> | <b>3</b> |
| P52631        | GLSIEQLTTLAEK                                                   | 2.148524728        | 2              | 3.080907 |
| P52631        | LLQTAATAAQGGQANHPHTAAVVTEK                                      | 3.352925174        | 3              | 3.380996 |
| P52631        | TQIQSVPEYTK                                                     | 2.536034824        | 2              | 2.638862 |
| <b>P52734</b> | <b>FGD1 FYVE_RhoGEF and PH domain_containing protein 1</b>      | <b>1.105368342</b> | <b>0.87015</b> | <b>2</b> |
| P52734        | SLELQARTEEEKK                                                   | 1.00620499         | 2              | 2.504863 |
| P52734        | TEEEKKDWVQAINSTLLK                                              | 1.11437284         | 2              | 2.353791 |
| <b>P52759</b> | <b>UK114 Ribonuclease UK114</b>                                 | <b>0.893189846</b> | <b>0.00686</b> | <b>8</b> |
| P52759        | AAGCDFTNVVK                                                     | 1.084504096        | 2              | 3.009787 |
| P52759        | AAYQVAALPK                                                      | 1.158435901        | 2              | 2.641856 |
| P52759        | APAAIGAYSQAVLVDR                                                | 0.857703718        | 2              | 3.708164 |
| P52759        | IEIEAIAVQGPFTTAGL                                               | 0.712561023        | 2              | 3.513055 |
| P52759        | NLGEILK                                                         | 0.908095872        | 2              | 2.380661 |
| P52759        | TIYVSGQIGMDPSSGQLVPGGVAEEAK                                     | 0.725856914        | 2              | 4.30302  |
| P52759        | TTVLLADINDFGTVNEIYK                                             | 0.890266727        | 2              | 4.875    |
| P52759        | TYFQGNLPAR                                                      | 0.894784658        | 2              | 3.087487 |
| <b>P52845</b> | <b>ST1E2 Estrogen sulfotransferase_ isoform 2</b>               | <b>0.560667495</b> | <b>4.3E-10</b> | <b>2</b> |
| P52845        | CKEDAIFNR                                                       | 0.607438631        | 2              | 2.599116 |
| P52845        | SGSTWIGEIVDMIYK                                                 | 0.432123969        | 2              | 3.55171  |

|               |                                                            |                    |                |           |
|---------------|------------------------------------------------------------|--------------------|----------------|-----------|
| <b>P52847</b> | <b>ST1B1 Sulfotransferase family cytosolic 1B member 1</b> | <b>1.146216125</b> | <b>3.7E-05</b> | <b>8</b>  |
| P52847        | DNPLVNYTHLPTEIMDHSK                                        | 1.260540581        | 2              | 5.013755  |
| P52847        | FLAGNVAYGSWFDHVK                                           | 1.111242758        | 2              | 3.503611  |
| P52847        | IEEFQSRPCDIVIPTYPK                                         | 1.109864282        | 3              | 4.805368  |
| P52847        | IVHHTSFEVMK                                                | 1.390395001        | 2              | 2.915155  |
| P52847        | NYFTMTQSEK                                                 | 1.127199633        | 1              | 2.71535   |
| P52847        | SGTTWLSEIVDMVLNDGNVEK                                      | 0.962266609        |                |           |
| P52847        | THLPIDLLPK                                                 | 1.130442922        | 3              | 3.71345   |
| P52847        | TLDEHTLER                                                  | 1.229838678        | 2              | 3.003373  |
| <b>P52873</b> | <b>PYC Pyruvate carboxylase_mitochondrial</b>              | <b>0.971251823</b> | <b>7.4E-15</b> | <b>37</b> |
| P52873        | ADEAYLIGR                                                  | 0.872992888        | 2              | 2.946749  |
| P52873        | ADFAQACQDAGVR                                              | 0.904444862        | 2              | 4.476007  |
| P52873        | AEAEQAQEELSFPFR                                            | 0.958959565        | 2              | 4.44045   |
| P52873        | AGTHILCIK                                                  | 1.030875255        | 1              | 2.032533  |
| P52873        | ALAVSDLNR                                                  | 0.906476446        | 2              | 2.604053  |
| P52873        | AYSEALAAFNGALFVEK                                          | 0.770222927        | 2              | 3.705422  |
| P52873        | AYVEANQMLGDLIK                                             | 0.921299502        | 2              | 4.511999  |
| P52873        | DAHQSLATR                                                  | 1.538669357        | 1              | 3.117682  |
| P52873        | DFTATFGPLDSLNR                                             | 1.351267418        | 2              | 4.286073  |
| P52873        | DMAGLLKPAACTMLVSSLR                                        | 0.971745498        | 2              | 3.075082  |
| P52873        | ELIPNIPFQMLLR                                              | 1.420973338        | 2              | 2.404148  |
| P52873        | ENGVDVHVPYGYGLSER                                          | 1.116018551        | 2              | 3.072159  |
| P52873        | FLYECPCR                                                   | 0.876119158        | 2              | 2.606937  |
| P52873        | GANAVGYTNYPDNVVFK                                          | 1.057276378        | 2              | 4.332129  |
| P52873        | GLAPVQAYLHIPDIIK                                           | 0.837393188        | 2              | 2.95695   |
| P52873        | GTPLDTEVPLER                                               | 0.870413551        | 2              | 3.590704  |
| P52873        | HGEEVTPEDVLSAAMYDPVFAQFK                                   | 0.830682006        | 2              | 5.941383  |
| P52873        | HGEEVTPEDVLSAAMYDPVFAQFK+Oxidation(14)                     | 0.86782264         |                |           |
| P52873        | HIEVQILGDQYGNILHLYER                                       | 0.829130273        | 3              | 4.759448  |
| P52873        | HYFIEVNSR                                                  | 0.807853488        | 2              | 2.553222  |
| P52873        | IAEEFEVELER                                                | 0.81937761         | 2              | 3.287968  |
| P52873        | IEGRPGASLPLNLK                                             | 0.803047547        | 2              | 3.610756  |
| P52873        | INGCAIQCR                                                  | 0.92781767         | 2              | 2.843999  |
| P52873        | IVGDLAQFMVQNGLSR                                           | 0.816513557        | 2              | 5.297952  |
| P52873        | LDNASAFQGAVISPHYDLSLLVK                                    | 0.893133051        | 3              | 5.832052  |
| P52873        | LQVEHTVTEITDVDLVHAQIHVSEGR                                 | 0.866964512        | 4              | 5.441233  |
| P52873        | NHQGLLLMDTTFR                                              | 1.214256748        | 2              | 3.355662  |
| P52873        | QKADEAYLIGR                                                | 0.945127266        | 3              | 3.43804   |
| P52873        | QVFFELNGQLR                                                | 0.810318667        | 2              | 2.771383  |
| P52873        | QVGYENAGTVEFLVDK                                           | 1.003056186        | 2              | 4.107854  |
| P52873        | SVVEFLQGYIGIPHGGFPEPFR                                     | 0.82659895         | 2              | 4.300785  |
| P52873        | TVAVYSEQDTGQMHR                                            | 0.951240345        | 2              | 4.34306   |
| P52873        | VFDYSEYWEGAR                                               | 0.75991993         | 2              | 4.571292  |
| P52873        | VSPSPVDPIVPVPIGPPAGFR                                      | 0.753417237        | 2              | 4.461032  |
| P52873        | VVEIAPATHLDPQLR                                            | 0.878713045        | 2              | 4.116382  |
| P52873        | VVHSYEELEENYTR                                             | 0.892525685        | 2              | 5.158436  |
| P52873        | YSLEYMGLAEELVR                                             | 1.206928364        | 3              | 4.689162  |
| <b>P52944</b> | <b>PDL1 PDZ and LIM domain protein 1</b>                   | <b>0.849431934</b> | <b>0.4991</b>  | <b>7</b>  |
| P52944        | AAIANLCIGDLITAIIDGEDTSSMTHLEAQNK                           | 0.877354396        | 3              | 4.367404  |
| P52944        | CGTGIVGVFVK                                                | 0.806880239        | 2              | 2.437644  |
| P52944        | GCVDNMTLTVSR                                               | 1.26545592         | 2              | 2.36246   |
| P52944        | GHHFVGDQIYCEK                                              | 0.981331207        | 2              | 3.517665  |
| P52944        | QSTSFLVLQEILES DGK                                         | 0.785372857        | 2              | 2.435704  |
| P52944        | TSASGEEANSRPSAQPHPSGGLIIDK                                 | 1.0119457          | 3              | 3.953514  |
| P52944        | VTPPEGYDVVTVFPK                                            | 0.845807655        | 2              | 2.790221  |

|               |                                                                                                                       |                    |                |           |
|---------------|-----------------------------------------------------------------------------------------------------------------------|--------------------|----------------|-----------|
| <b>P53395</b> | <b>ODB2 Lipoamide acyltransferase component of branched_chain alpha_keto acid dehydrogenase complex_mitochondrial</b> | <b>1.166827195</b> | <b>0.9003</b>  | <b>3</b>  |
| P53395        | LSDIGEGIR                                                                                                             | 0.955413476        | 2              | 2.467001  |
| P53395        | LSEVVGSGK                                                                                                             | 0.947986123        | 2              | 2.343265  |
| P53395        | SYLENPAFMLLDLK                                                                                                        | 1.153030019        | 2              | 4.640735  |
| <b>P53987</b> | <b>MOT1 Monocarboxylate transporter 1</b>                                                                             | <b>1.077899628</b> | <b>0.00018</b> | <b>5</b>  |
| P53987        | DGKEDETSTDVDEKPK                                                                                                      | 1.521693574        | 3              | 5.626783  |
| P53987        | DGKEDETSTDVDEKPKK                                                                                                     | 1.79933806         | 3              | 3.870491  |
| P53987        | EDETSTDVDEKPK                                                                                                         | 1.569857271        | 2              | 3.100295  |
| P53987        | ETQSPAPLQNSSGDPAAEESPV                                                                                                | 1.062972513        | 2              | 4.404111  |
| P53987        | SDANTDLIGGSPK                                                                                                         | 0.985327227        | 2              | 4.050053  |
| <b>P54319</b> | <b>PLAP Phospholipase A_2 activating protein</b>                                                                      | <b>1.028799071</b> | <b>0.99704</b> | <b>4</b>  |
| P54319        | GQTLGLGNTSFSDPFTGGGR                                                                                                  | 1.020286521        | 2              | 3.343384  |
| P54319        | IGDVVGSSGANQQTSGK                                                                                                     | 1.030449838        | 2              | 4.515548  |
| P54319        | TGDLGDINAEQLPGR                                                                                                       | 1.100002688        | 2              | 3.665746  |
| P54319        | YVPGTSGPSNTVQTADPFTGAGR                                                                                               | 0.928185281        | 2              | 2.871021  |
| <b>P54822</b> | <b>PUR8 Adenylosuccinate lyase</b>                                                                                    | <b>0.975493112</b> | <b>0.99891</b> | <b>2</b>  |
| P54822        | KVDIEVLSVLASLGASVHK                                                                                                   | 0.97147046         | 3              | 4.43676   |
| P54822        | VLSQQAADVVK                                                                                                           | 0.976840767        | 2              | 2.3284    |
| <b>P54921</b> | <b>SNAA Alpha_soluble NSF attachment protein</b>                                                                      | <b>1.070109233</b> | <b>0.88634</b> | <b>5</b>  |
| P54921        | AIAHYEQSADYYKGEESNSSANK                                                                                               | 0.94072002         | 3              | 4.882149  |
| P54921        | HDAATCFVDAGNAFK                                                                                                       | 0.853492327        | 2              | 2.34596   |
| P54921        | IEEACEIYAR                                                                                                            | 1.137318331        | 2              | 2.711907  |
| P54921        | NSQSFFSGLFGGSSK                                                                                                       | 1.108634389        | 2              | 3.431803  |
| P54921        | YEELFPAFSDSR                                                                                                          | 0.945103852        | 2              | 2.893608  |
| <b>P55006</b> | <b>RDH7 Retinol dehydrogenase 7</b>                                                                                   | <b>1.011265171</b> | <b>0.46087</b> | <b>11</b> |
| P55006        | LETVILDVTK                                                                                                            | 1.053376324        | 2              | 3.238852  |
| P55006        | TESIVAATQWVK                                                                                                          | 0.963428948        | 2              | 3.939571  |
| P55006        | TNVTNMER                                                                                                              | 0.998924816        | 2              | 2.770482  |
| P55006        | TNVTNMER+Oxidation(5)                                                                                                 | 0.809860227        |                |           |
| P55006        | TSDRLETVILDVTK                                                                                                        | 0.979126876        | 3              | 4.194678  |
| P55006        | VAIIEPGGFK                                                                                                            | 1.003355359        | 2              | 2.645862  |
| P55006        | VLAACLTEK                                                                                                             | 1.205664142        | 2              | 3.324537  |
| P55006        | VVNIASTMGR                                                                                                            | 0.96108673         | 2              | 3.654848  |
| P55006        | VVNIASTMGR+Oxidation(7)                                                                                               | 1.036621608        |                |           |
| P55006        | YGVEAFSDSLR                                                                                                           | 1.080834781        | 2              | 3.835497  |
| P55006        | YVFITGCDSGFGNLLAR                                                                                                     | 1.046906173        | 2              | 3.677321  |
| <b>P55051</b> | <b>FABP7 Fatty acid binding protein_brain</b>                                                                         | <b>1.334092557</b> | <b>0.26182</b> | <b>4</b>  |
| P55051        | ALGVGFATR                                                                                                             | 1.352552398        | 2              | 2.713905  |
| P55051        | LTDSQNFDEYMK                                                                                                          | 1.14744102         | 2              | 4.400812  |
| P55051        | LTDSQNFDEYMK+Oxidation(10)                                                                                            | 1.711507692        |                |           |
| P55051        | QVGNVTKPTVIISQEGGK                                                                                                    | 1.253465614        | 3              | 3.837464  |
| <b>P55053</b> | <b>FABP5 Fatty acid binding protein_epidermal</b>                                                                     | <b>0.821878038</b> | <b>0.2473</b>  | <b>5</b>  |
| P55053        | FDETTADGR                                                                                                             | 0.755199665        | 2              | 2.961714  |
| P55053        | KTETVCTFTDGALVQHQQ                                                                                                    | 1.076908343        | 3              | 5.080284  |
| P55053        | LVESHGFEDYMK                                                                                                          | 1.017870337        | 2              | 2.62493   |
| P55053        | MVVECMNNAICTR                                                                                                         | 0.957041834        | 2              | 3.24547   |
| P55053        | TETVCTFTDGALVQHQQ                                                                                                     | 1.111298192        | 2              | 4.305476  |
| <b>P55159</b> | <b>PON1 Serum paraoxonase/arylesterase 1</b>                                                                          | <b>1.086569804</b> | <b>0.36351</b> | <b>7</b>  |
| P55159        | GIEAGAEDLEILPNGLTFSTGLK                                                                                               | 1.126161866        | 3              | 5.518301  |
| P55159        | IFFYDSENPPGSEVLR                                                                                                      | 1.068003027        | 2              | 5.901761  |
| P55159        | IQSILSEDPK                                                                                                            | 1.188766803        | 2              | 3.088877  |
| P55159        | TITHELLPSINDIAAVGPESFYATNDHYFADPYLR                                                                                   | 1.232730262        | 3              | 4.119244  |
| P55159        | VLSFDTLVDNISVDPVTGDLVVGCHPNGMR                                                                                        | 0.910951666        | 3              | 3.966547  |
| P55159        | VVADGDFDFANGIGISLDGK                                                                                                  | 0.882036714        | 2              | 4.085935  |
| P55159        | YVYIAELLAHK                                                                                                           | 0.956498752        | 2              | 2.879871  |

|               |                                                           |                    |                |           |
|---------------|-----------------------------------------------------------|--------------------|----------------|-----------|
| <b>P55260</b> | <b>ANXA4 Annexin A4</b>                                   | <b>1.094834852</b> | <b>0.33777</b> | <b>5</b>  |
| P55260        | AEIDMLDIPANFK                                             | 0.901483247        | 1              | 2.213793  |
| P55260        | GAGTDEGLIEILASR                                           | 0.905311971        | 2              | 3.410341  |
| P55260        | GLGTDEDAIIGVLACR                                          | 1.094104756        | 2              | 4.126154  |
| P55260        | INQTYQQQYGR                                               | 1.407333346        | 2              | 2.759853  |
| P55260        | SETSGSFEDALLAIVK                                          | 1.045869571        | 2              | 2.424878  |
| <b>P55770</b> | <b>NH2L1 NHP2_like protein 1</b>                          | <b>1.115664064</b> | <b>0.59517</b> | <b>2</b>  |
| P55770        | LLDLVQQSCNYK                                              | 1.104983611        | 2              | 2.66762   |
| P55770        | QQIQSIQQSIER                                              | 1.115698491        | 2              | 3.012279  |
| <b>P56399</b> | <b>UBP5 Ubiquitin carboxyl terminal hydrolase 5</b>       | <b>1.009694075</b> | <b>0.19284</b> | <b>6</b>  |
| P56399        | GTGLQPGEEELPDIAPLVTPDEPK                                  | 0.896849488        | 2              | 4.222363  |
| P56399        | IFQNAPTDPTQDFSTQVAK                                       | 1.293398079        | 2              | 3.966633  |
| P56399        | IGEWELIQESGVPLKPLFGPGYTGIR                                | 0.968358698        | 3              | 3.431857  |
| P56399        | IVILPDYLEIAR                                              | 0.978516887        | 2              | 2.623757  |
| P56399        | KQEVQAWDGEVR                                              | 0.996221203        | 2              | 3.12834   |
| P56399        | VTSAVEALLSADSASR                                          | 1.038622285        | 2              | 2.768435  |
| <b>P56522</b> | <b>ADRO NADPH:adenodoxin oxidoreductase_mitochondrial</b> | <b>0.930053473</b> | <b>0.21433</b> | <b>3</b>  |
| P56522        | AVPTGDVEDLPCGLLLSSVGYK                                    | 0.723249515        | 2              | 4.420526  |
| P56522        | TATEKPGVEEAAR                                             | 0.868492741        | 2              | 3.177993  |
| P56522        | TDITEVALGVLR                                              | 0.931703425        | 2              | 4.048718  |
| <b>P56574</b> | <b>IDHP Isocitrate dehydrogenase [NADP]_mitochondrial</b> | <b>1.204860511</b> | <b>0.7948</b>  | <b>14</b> |
| P56574        | CATITPDEAR                                                | 1.155768861        | 2              | 2.304648  |
| P56574        | DLAGCIHGLSNVK                                             | 1.273784536        | 2              | 2.856535  |
| P56574        | DQTNDQVTIDSALATQK                                         | 1.204141496        | 2              | 5.04928   |
| P56574        | FKDIFQEIFDK                                               | 1.057325994        | 2              | 3.236313  |
| P56574        | GKLDGNQDLIR                                               | 1.519157011        | 2              | 2.809859  |
| P56574        | LDGNQDLIR                                                 | 1.276425447        | 2              | 2.383461  |
| P56574        | LIDDMVAQVLK                                               | 1.146837026        | 2              | 4.314041  |
| P56574        | LNEHFLNTTDFLDTIK                                          | 1.179694622        | 2              | 4.724234  |
| P56574        | NILGGTVFR                                                 | 0.87139068         | 2              | 2.351218  |
| P56574        | SSGGFWWACK                                                | 1.279412797        | 2              | 2.53247   |
| P56574        | TIEEAAHGTVTR                                              | 1.034721206        | 2              | 4.098842  |
| P56574        | VCVQTVESGAMTK                                             | 1.218641831        | 2              | 3.096589  |
| P56574        | VEKPVVEMDGDDEMTR                                          | 1.221494365        | 3              | 3.64442   |
| P56574        | YFDLGLPNR                                                 | 0.966320911        | 2              | 2.535134  |
| <b>P56593</b> | <b>CP2AC Cytochrome P450 2A12</b>                         | <b>1.260972249</b> | <b>0.47293</b> | <b>3</b>  |
| P56593        | MLQGTCGAPIDPTIYLSK                                        | 0.898580176        | 2              | 3.959047  |
| P56593        | NRQPQYEDHMK                                               | 1.407313172        | 3              | 3.826875  |
| P56593        | YLPGPQQQIIK                                               | 0.809278171        | 2              | 2.444141  |
| <b>P56656</b> | <b>CP239 Cytochrome P450 2C39</b>                         | <b>0.92722284</b>  | <b>0.00676</b> | <b>5</b>  |
| P56656        | EHQESLDVTNPR                                              | 1.384097258        | 2              | 3.381594  |
| P56656        | IKEHQESLDVTNPR                                            | 0.843063624        | 3              | 4.751965  |
| P56656        | NYLIPK                                                    | 0.720349468        | 1              | 2.191697  |
| P56656        | SDHFMFASAGKRVCAEGELAR                                     | 0.90875747         | 2              | 2.390186  |
| P56656        | VQEEIDHVIGR                                               | 1.43853961         | 2              | 3.185246  |
| <b>P57093</b> | <b>PAHX Phytanoyl-CoA dioxygenase_peroxisomal</b>         | <b>1.924163975</b> | <b>9.9E-20</b> | <b>8</b>  |
| P57093        | AISCHYGSSDCK                                              | 1.811379217        | 2              | 3.384495  |
| P57093        | FYEENGFLVIK                                               | 1.846563645        | 2              | 2.588346  |
| P57093        | GDTVFFHPLLIHGSGR                                          | 2.512393856        | 3              | 3.538332  |
| P57093        | IQDFQQNEELFR                                              | 1.118422068        | 2              | 4.337041  |
| P57093        | KFYEENGFLVIK                                              | 1.908397167        | 2              | 3.388309  |
| P57093        | NLVSDDDIQR                                                | 2.514928935        | 1              | 2.865102  |
| P57093        | NNGCLVVLPGTHK                                             | 2.369192904        | 2              | 2.514804  |
| P57093        | YCALPQIVK                                                 | 1.909364975        | 1              | 2.199789  |

|               |                                                               |                    |                |           |
|---------------|---------------------------------------------------------------|--------------------|----------------|-----------|
| <b>P57113</b> | <b>MAAI Maleylacetoacetate isomerase</b>                      | <b>0.85707436</b>  | <b>3.3E-16</b> | <b>13</b> |
| P57113        | AITSGFNALEK                                                   | 1.00821539         | 2              | 3.292677  |
| P57113        | ALLALEAFQVSHPCR                                               | 0.79896274         | 2              | 4.283391  |
| P57113        | DGGQQFSEEFQTLNPMK                                             | 1.098620936        | 2              | 4.925333  |
| P57113        | FKVDLSPYPTISHINK                                              | 0.803722517        | 2              | 5.0818    |
| P57113        | GIDYEIVPINLIK                                                 | 0.838214483        | 2              | 4.469725  |
| P57113        | IDGITIGQSLAILEYLEETRPIPR                                      | 0.776746277        | 3              | 3.965795  |
| P57113        | LLPQDPQK                                                      | 0.991532445        | 1              | 2.099002  |
| P57113        | LLPQDPQKR                                                     | 1.032790535        | 2              | 2.54798   |
| P57113        | MISDLIASGIQLQNLSVLK                                           | 0.631644398        | 2              | 4.770432  |
| P57113        | MISDLIASGIQLQNLSVLK+Oxidation(0)                              | 0.893480836        |                |           |
| P57113        | QVGQENQMPWAQK                                                 | 0.960326509        | 2              | 3.890368  |
| P57113        | VDLSPYPTISHINK                                                | 0.841823633        | 2              | 3.469768  |
| P57113        | YCVGDEVSMADVCLAPQVANAER                                       | 0.794790078        | 3              | 6.312306  |
| <b>P57722</b> | <b>PCBP3 Poly(rC)_binding protein 3</b>                       | <b>1.06529108</b>  | <b>0.37504</b> | <b>3</b>  |
| P57722        | ESTGAQVQVAGDMLPNSTER                                          | 1.247443758        | 2              | 4.876122  |
| P57722        | INISEGNCPER                                                   | 1.065259379        | 2              | 3.45471   |
| P57722        | LVVPASQCGSLIGK                                                | 1.303201809        | 2              | 2.617839  |
| <b>P58321</b> | <b>UCHL4 Ubiquitin carboxyl_terminal hydrolase isozyne L4</b> | <b>0.923465695</b> | <b>0.95662</b> | <b>3</b>  |
| P58321        | SQGQDVTSSVYFMK                                                | 0.923465014        | 2              | 2.381233  |
| P58321        | VTHETSAHEGQTEAPSIDEK                                          | 1.002367925        | 3              | 4.700929  |
| P58321        | WLPLEANPEVTNQFLK                                              | 0.953477369        | 2              | 3.48753   |
| <b>P58751</b> | <b>RELN Reelin</b>                                            | <b>0.950261314</b> | <b>0.63668</b> | <b>2</b>  |
| <b>P58775</b> | <b>TPM2 Tropomyosin beta chain</b>                            | <b>1.156676751</b> | <b>0.99952</b> | <b>12</b> |
| P58775        | AISELDNALNDITSL                                               | 4.440369462        | 2              | 4.401304  |
| P58775        | ATDAEADVASLNR                                                 | 1.548975921        | 2              | 4.230064  |
| P58775        | CGDLEELK                                                      | 3.937842184        | 2              | 2.39582   |
| P58775        | DAQEKLEQAEK                                                   | 1.333118336        | 2              | 2.569577  |
| P58775        | KATDAEADVASLNR                                                | 4.603771414        | 2              | 4.181209  |
| P58775        | LDKENAIDR                                                     | 2.836685604        | 2              | 2.785169  |
| P58775        | LKGTEDEVEK                                                    | 2.296091856        | 3              | 3.581951  |
| P58775        | MELQEMQLK                                                     | 1.754096375        | 2              | 2.658723  |
| P58775        | QLEEEQALQK                                                    | 1.473798107        | 2              | 3.970421  |
| P58775        | SLEAQADKYSTK                                                  | 3.469279601        | 2              | 3.347279  |
| P58775        | TIDDLEDEVYAQK                                                 | 1.768139901        | 2              | 4.065521  |
| P58775        | YSESVKDAQEK                                                   | 0.858214474        | 2              | 2.995986  |
| <b>P59242</b> | <b>CING Cingulin</b>                                          | <b>1.097514845</b> | <b>0.06502</b> | <b>2</b>  |
| P59242        | LGQEQQALNR                                                    | 1.233692988        | 2              | 2.74131   |
| P59242        | LQGLEQEAEK                                                    | 1.024063712        | 2              | 2.543168  |
| <b>P59279</b> | <b>RAB2B Ras_related protein Rab_2B</b>                       | <b>1.024719286</b> | <b>0.86518</b> | <b>2</b>  |
| P59279        | GAAGALLVYDITR                                                 | 0.880153501        | 2              | 2.996588  |
| P59279        | LQIWDTAGQESFR                                                 | 1.029217354        | 2              | 3.677009  |
| <b>P59759</b> | <b>MKL2 MKL/myocardin_like protein 2</b>                      | <b>0.973257926</b> | <b>0.85519</b> | <b>2</b>  |
| P59759        | LVEVLK                                                        | 1.025692933        | 2              | 2.451511  |
| P59759        | QIEELK                                                        | 0.759123921        | 1              | 2.071705  |
| <b>P59895</b> | <b>NEK6 Serine/threonine_protein kinase Nek6</b>              | <b>1.067348313</b> | <b>0.8995</b>  | <b>2</b>  |
| P59895        | QDCVKEIGLLK                                                   | 1.104997328        | 2              | 2.346838  |
| P59895        | TVALKKVQIFEMMDAK+Oxidation(11)                                | 1.035600782        |                |           |
| <b>P59999</b> | <b>ARPC4 Actin_related protein 2/3 complex subunit 4</b>      | <b>0.915371747</b> | <b>0.04258</b> | <b>2</b>  |
| P59999        | AENFFILR                                                      | 0.852366553        | 2              | 2.571273  |
| P59999        | ELLQPVTISR                                                    | 1.394155343        | 2              | 2.691309  |
| <b>P60335</b> | <b>PCBP1 Poly(rC)_binding protein 1</b>                       | <b>1.018976693</b> | <b>0.02556</b> | <b>5</b>  |
| P60335        | AITIAGVPQSVTECVK                                              | 0.994155193        | 2              | 3.201518  |
| P60335        | CSDAAGYPHATHDLEGPPLDAYSIQGQHTISPLDLAK                         | 1.014458097        | 4              | 5.41702   |
| P60335        | IITLTGPTNAIFK                                                 | 1.059774417        | 2              | 2.666085  |

|               |                                                         |                    |                |          |
|---------------|---------------------------------------------------------|--------------------|----------------|----------|
| P60335        | LVVPATQCGLIGK                                           | 1.218216963        | 2              | 3.344987 |
| P60335        | VMTIPYQMPASSPVICAGGQDR                                  | 1.003020107        | 2              | 3.636625 |
| <b>P60843</b> | <b>IF4A1 Eukaryotic initiation factor 4A_I</b>          | <b>1.282694007</b> | <b>3.3E-08</b> | <b>5</b> |
| P60843        | ATQALVLAPTR                                             | 1.504662254        | 1              | 2.350039 |
| P60843        | GFKDQIYDIFQK                                            | 1.078607087        | 2              | 3.521557 |
| P60843        | KEELTLEGIR                                              | 1.377146423        | 2              | 2.50622  |
| P60843        | KGVAINMVTEEDKR                                          | 1.499904415        | 3              | 4.088434 |
| P60843        | LQMEAPHIIVGTPGR                                         | 1.218572331        | 3              | 3.843683 |
| <b>P60868</b> | <b>RS20 40S ribosomal protein S20</b>                   | <b>1.182060963</b> | <b>9.9E-08</b> | <b>3</b> |
| P60868        | DTGKTPVEVAIHR                                           | 1.056417399        | 3              | 3.533911 |
| P60868        | LIDLHSPSEIVK                                            | 1.22469662         | 2              | 3.199862 |
| P60868        | VCADLIR                                                 | 1.112292775        | 2              | 2.340431 |
| <b>P60901</b> | <b>PSA6 Proteasome subunit alpha type_6</b>             | <b>1.164750956</b> | <b>0.47645</b> | <b>2</b> |
| P60901        | AINQGGLTSVAVR                                           | 1.169582527        | 2              | 3.441447 |
| P60901        | LLDSSTVTHLFK                                            | 1.115912214        | 2              | 2.795613 |
| <b>P61087</b> | <b>UBE2K Ubiquitin_conjugating enzyme E2 K</b>          | <b>1.220881586</b> | <b>0.0158</b>  | <b>2</b> |
| P61087        | GEIAGPPDTPYEGGR                                         | 1.437288632        | 2              | 3.669807 |
| P61087        | VDLVDENFTELR                                            | 1.018004155        | 2              | 3.483526 |
| <b>P61107</b> | <b>RAB14 Ras_related protein Rab_14</b>                 | <b>0.982517446</b> | <b>0.94751</b> | <b>5</b> |
| P61107        | IYQNIQDGSLDLNAAESGVQHKSAPQGGR                           | 0.886566815        | 3              | 3.682695 |
| P61107        | LTSEPPQQR                                               | 0.988311832        | 2              | 2.562986 |
| P61107        | NLTNPNTVILIGNK                                          | 0.859254961        | 2              | 3.227733 |
| P61107        | SCLLHQFTEK                                              | 1.274841274        | 2              | 2.967806 |
| P61107        | STYNHLSSWLTDAR                                          | 0.922101383        | 2              | 3.284862 |
| <b>P61203</b> | <b>CSN2 COP9 signalosome complex subunit 2</b>          | <b>0.804924681</b> | <b>0.90781</b> | <b>2</b> |
| P61203        | NYDESGSPR                                               | 0.761699293        | 2              | 2.469565 |
| P61203        | WTNQLNSLNQAVVSK                                         | 0.996296583        | 2              | 2.980879 |
| <b>P61222</b> | <b>ABCE1 ATP_binding cassette sub_family E member 1</b> | <b>1.037955287</b> | <b>0.97672</b> | <b>4</b> |
| P61222        | GTVGSILDR                                               | 1.129049067        | 2              | 2.328647 |
| P61222        | NTVANSPQTLGAMNK                                         | 1.009142382        | 2              | 3.602403 |
| P61222        | NVEDLSGGELQR                                            | 1.190876687        | 2              | 2.921072 |
| P61222        | VAETANEEVKK                                             | 1.127679891        | 2              | 2.620749 |
| <b>P61314</b> | <b>RL15 60S ribosomal protein L15</b>                   | <b>1.026854913</b> | <b>0.00053</b> | <b>6</b> |
| P61314        | FFEVLIDPFHK                                             | 0.996674626        | 3              | 3.4665   |
| P61314        | GATYGKPVHGGVNLK                                         | 1.381985969        | 2              | 4.368115 |
| P61314        | SLQSVAEER                                               | 1.138775942        | 2              | 2.688399 |
| P61314        | SLQSVAEERAGR                                            | 1.067595394        | 2              | 2.482018 |
| P61314        | VLNSYWVGEDSTYK                                          | 1.092162849        | 2              | 4.257211 |
| P61314        | YIQELWR                                                 | 1.124180588        | 2              | 2.665078 |
| <b>P61354</b> | <b>RL27 60S ribosomal protein L27</b>                   | <b>1.383038234</b> | <b>0.00365</b> | <b>2</b> |
| P61354        | NIDDGTSDRPYSHALVAGIDR                                   | 1.924835759        | 3              | 4.116739 |
| P61354        | YSVDIPLDK                                               | 1.034169515        | 2              | 2.416169 |
| <b>P61459</b> | <b>PHS Pterin_4_alpha_carbinolamine dehydratase</b>     | <b>1.043167006</b> | <b>0.81437</b> | <b>4</b> |
| P61459        | AVGWNELEGR                                              | 1.07422109         | 2              | 3.129657 |
| P61459        | DQLLPNLR                                                | 1.712745281        | 2              | 2.354288 |
| P61459        | LDHHPEWFNVYNK                                           | 1.107411337        | 3              | 4.774946 |
| P61459        | LSAEERDQLLPNLR                                          | 0.964044568        | 3              | 4.01652  |
| <b>P61589</b> | <b>RHOA Transforming protein RhoA</b>                   | <b>1.022036091</b> | <b>0.94443</b> | <b>3</b> |
| P61589        | LVIVGDGACGK                                             | 0.951950957        | 2              | 2.709564 |
| P61589        | MKQEPVKPEEGR                                            | 1.200651826        | 3              | 3.451423 |
| P61589        | MKQEPVKPEEGR+Oxidation(0)                               | 0.938334461        |                |          |
| <b>P61751</b> | <b>ARF4 ADP_ribosylation factor 4</b>                   | <b>1.081629357</b> | <b>0.00034</b> | <b>4</b> |
| P61751        | IQEGAAVLQK                                              | 1.204665154        | 2              | 2.885529 |
| P61751        | LGEIVTTIPTIGFNVETVEYK                                   | 0.993407888        | 3              | 5.029695 |
| P61751        | NICTVWVDVGGQDK                                          | 1.027414997        | 2              | 4.127611 |

|               |                                                                                         |                    |                |          |
|---------------|-----------------------------------------------------------------------------------------|--------------------|----------------|----------|
| P61751        | QDLPNAMAISEMTDK                                                                         | 1.044805777        | 2              | 3.772226 |
| <b>P61805</b> | <b>DAD1 Dolichyl_diphosphooligosaccharide__protein glycosyltransferase subunit DAD1</b> | <b>1.06744834</b>  | <b>1</b>       | <b>2</b> |
| P61805        | ADFGISPER                                                                               | 1.12162211         | 2              | 2.940885 |
| P61805        | FLEEYLSSTPQR                                                                            | 1.009213394        | 2              | 3.698464 |
| <b>P61972</b> | <b>NTF2 Nuclear transport factor 2</b>                                                  | <b>1.006024532</b> | <b>0.99048</b> | <b>2</b> |
| P61972        | IQHSITAQDHQPTPDCIISMVVGQLK                                                              | 0.964814161        | 3              | 4.044783 |
| P61972        | NINDAWVCTNDMFR                                                                          | 1.01348916         | 2              | 3.601073 |
| <b>P61980</b> | <b>HNRPK Heterogeneous nuclear ribonucleoprotein K</b>                                  | <b>1.004885518</b> | <b>0.99615</b> | <b>8</b> |
| P61980        | GSDFDCELR                                                                               | 1.11137517         | 2              | 2.602711 |
| P61980        | GSYGLGGPIITQVTIPK                                                                       | 0.998558259        | 2              | 5.05323  |
| P61980        | IDEPLEGSEDR                                                                             | 1.197085626        | 2              | 3.460135 |
| P61980        | IILDLISEPIK                                                                             | 1.001962267        | 2              | 3.972289 |
| P61980        | IITITGTQDQIQNAQYLLQNSVK                                                                 | 0.978896915        | 3              | 7.045339 |
| P61980        | LFQECCPHSTDR                                                                            | 1.109376986        | 2              | 3.674992 |
| P61980        | TDYNASVSVDPSSGPER                                                                       | 1.192042754        | 2              | 4.231711 |
| P61980        | VVLIGGKPDR                                                                              | 1.021924498        | 2              | 2.517359 |
| <b>P61983</b> | <b>1433G 14_3_3 protein gamma</b>                                                       | <b>1.111564299</b> | <b>0.01773</b> | <b>4</b> |
| P61983        | AYSEAHEISK                                                                              | 1.038575085        | 2              | 3.239245 |
| P61983        | NVTELENEPLSNEER                                                                         | 1.231068928        | 2              | 4.937109 |
| P61983        | TAFDDAIAELDTLNEDSYK                                                                     | 0.837222507        | 2              | 5.16806  |
| P61983        | YLAEVATGK                                                                               | 1.115490338        | 2              | 2.922291 |
| <b>P62046</b> | <b>LRCH1 Leucine_rich repeat and calponin homology domain_containing protein 1</b>      | <b>0.963980617</b> | <b>0.66648</b> | <b>2</b> |
| P62046        | DRELDIAMIEQLR                                                                           | 0.991382042        | 2              | 2.586196 |
| P62046        | NLESIDPQFTIRRK                                                                          | 0.932951454        | 2              | 2.319091 |
| <b>P62076</b> | <b>TIM13 Mitochondrial import inner membrane translocase subunit Tim13</b>              | <b>0.986802803</b> | <b>1</b>       | <b>5</b> |
| P62076        | CIGKPGGSLDNSEQK                                                                         | 0.982474426        | 2              | 4.043394 |
| P62076        | KCIGKPGGSLDNSEQK                                                                        | 1.132506981        | 3              | 4.540523 |
| P62076        | LDPGAIMEQVK                                                                             | 0.94444009         | 2              | 3.22487  |
| P62076        | VQIAVANAQELLQR                                                                          | 1.009668593        | 2              | 4.958214 |
| P62076        | YMDAWNTVSR                                                                              | 0.940234349        | 2              | 2.757345 |
| <b>P62078</b> | <b>TIM8B Mitochondrial import inner membrane translocase subunit Tim8 B</b>             | <b>1.169549983</b> | <b>6.8E-05</b> | <b>2</b> |
| P62078        | FIDTTLAITGR                                                                             | 0.74554279         | 2              | 2.79627  |
| P62078        | TENCLSSCVDR                                                                             | 1.224672431        | 2              | 2.918724 |
| <b>P62083</b> | <b>RS7 40S ribosomal protein S7</b>                                                     | <b>1.025283396</b> | <b>0.98936</b> | <b>5</b> |
| P62083        | AIIFVVPVQLK                                                                             | 0.911366318        | 2              | 3.792275 |
| P62083        | DVNFEPPEFQL                                                                             | 2.32464672         | 2              | 2.404202 |
| P62083        | IVKPNGEKPDEFESGISQALLELEMNSDLK                                                          | 1.029157872        | 3              | 4.949751 |
| P62083        | KAIIFVVPVQLK                                                                            | 0.950752466        | 2              | 3.807272 |
| P62083        | TLTAVHDAILEDLVFPSEIVGK                                                                  | 1.086833373        | 2              | 5.099612 |
| <b>P62161</b> | <b>CALM Calmodulin</b>                                                                  | <b>1.037522779</b> | <b>0.99332</b> | <b>3</b> |
| P62161        | EADIDGGQVNYEEFVQMMTAK                                                                   | 0.781527878        | 2              | 4.775527 |
| P62161        | EAFSLFDKDGDTITTK                                                                        | 1.381964464        | 2              | 4.172574 |
| P62161        | VFDKDGNGYISAAELR                                                                        | 0.990448721        | 2              | 4.886259 |
| <b>P62193</b> | <b>PRS4 26S protease regulatory subunit 4</b>                                           | <b>0.977262722</b> | <b>0.99632</b> | <b>4</b> |
| P62193        | APQETYADIGGLDNQIQEIK                                                                    | 1.176098744        | 2              | 4.969431 |
| P62193        | MGQSQSGHGPGGGK+Oxidation(0)                                                             | 1.059524535        |                |          |
| P62193        | NQEOMKPLEEK                                                                             | 1.032833579        | 2              | 3.234378 |
| P62193        | TMLELLNQLDGFDSR                                                                         | 0.993510062        | 2              | 4.048751 |
| <b>P62198</b> | <b>PRS8 26S protease regulatory subunit 8</b>                                           | <b>1.056793383</b> | <b>0.99409</b> | <b>6</b> |
| P62198        | EELQLLEQGSYVGEVVR                                                                       | 0.912178151        | 2              | 2.487425 |
| P62198        | IAELMPGASGAEVK                                                                          | 1.130650635        | 2              | 2.429717 |



|               |                                                  |                    |                |           |
|---------------|--------------------------------------------------|--------------------|----------------|-----------|
| P62198        | IEELQLIVNDK                                      | 1.04929074         | 2              | 3.005128  |
| P62198        | LEGGSGGDSEVQR                                    | 1.083736681        | 2              | 3.750051  |
| P62198        | LLREELQLLQEQGSYVGEVVR                            | 1.06895998         | 3              | 4.049383  |
| P62198        | TMLELLNQLDGFQATK                                 | 1.045163993        | 2              | 3.626887  |
| <b>P62243</b> | <b>RS8 40S ribosomal protein S8</b>              | <b>1.136747948</b> | <b>9.9E-20</b> | <b>8</b>  |
| P62243        | ADGYVLEK                                         | 1.181544385        | 2              | 2.817324  |
| P62243        | IIDVVYNASNNEVLR                                  | 1.673870514        | 2              | 4.377695  |
| P62243        | ISSLLEEQFQQGK                                    | 1.19174764         | 2              | 3.991194  |
| P62243        | KYELGRPAANTK                                     | 1.165500415        | 2              | 3.317575  |
| P62243        | LDVGNFNSWGSECCTR                                 | 1.092619694        | 2              | 3.792821  |
| P62243        | LTPEEEEILNK                                      | 1.055030918        | 2              | 3.369033  |
| P62243        | NCIVLIDSTPYR                                     | 1.230837429        | 2              | 3.883613  |
| P62243        | YELGRPAANTK                                      | 1.191480291        | 2              | 2.98953   |
| <b>P62246</b> | <b>RS15A 40S ribosomal protein S15a</b>          | <b>1.078856978</b> | <b>0.42328</b> | <b>3</b>  |
| P62246        | HGYIGEFEEIIDDHR                                  | 1.082070978        | 2              | 4.955499  |
| P62246        | MNVLADALK                                        | 1.006915418        | 2              | 2.343958  |
| P62246        | WQNNLLPSR                                        | 1.095548812        | 2              | 3.000891  |
| <b>P62250</b> | <b>RS16 40S ribosomal protein S16</b>            | <b>1.225798467</b> | <b>0.74096</b> | <b>5</b>  |
| P62250        | ALVAYYQK                                         | 1.253690397        | 2              | 2.390972  |
| P62250        | EIKDILIQYDR                                      | 1.063709382        | 2              | 2.42965   |
| P62250        | GGGHVAQIYAIR                                     | 1.501243233        | 2              | 3.151434  |
| P62250        | LLEPVLLLGK                                       | 1.070439254        | 2              | 3.048643  |
| P62250        | TLLVADPR                                         | 1.114747546        | 2              | 2.715634  |
| <b>P62260</b> | <b>1433E 14_3_3 protein epsilon</b>              | <b>0.948980236</b> | <b>0.82466</b> | <b>8</b>  |
| P62260        | AAFDDAIAELDTLSEESYK                              | 0.935963005        | 2              | 6.356453  |
| P62260        | AAFDDAIAELDTLSEESYKDSLIMQLLR                     | 1.19573193         |                |           |
| P62260        | EENKGGEDKLK                                      | 1.781516833        | 2              | 2.743721  |
| P62260        | HLIPAANTGESK                                     | 0.967878189        | 1              | 3.152375  |
| P62260        | ISSIEQK                                          | 1.068682132        | 2              | 2.705436  |
| P62260        | LICCDILDVLDK                                     | 1.28014222         | 2              | 4.031466  |
| P62260        | YLAEFATGNDR                                      | 0.887816447        | 2              | 2.983791  |
| P62260        | YLAEFATGNDRK                                     | 0.985554097        | 2              | 2.836806  |
| <b>P62271</b> | <b>RS18 40S ribosomal protein S18</b>            | <b>0.862118962</b> | <b>1.7E-05</b> | <b>5</b>  |
| P62271        | AGELTEDEVER                                      | 1.158813445        | 2              | 3.734788  |
| P62271        | RAGELTEDEVER                                     | 0.33207228         | 2              | 3.485244  |
| P62271        | VITIMQNPR                                        | 1.043099979        | 2              | 2.878926  |
| P62271        | VLNTNIDGR                                        | 1.145925951        | 2              | 2.893923  |
| P62271        | YSQVLANGLDNK                                     | 1.170381943        | 2              | 4.14412   |
| <b>P62278</b> | <b>RS13 40S ribosomal protein S13</b>            | <b>1.117377673</b> | <b>0.43637</b> | <b>4</b>  |
| P62278        | GLAPDLPEDLYHLIK                                  | 1.096999709        | 2              | 2.972571  |
| P62278        | GLSQSALPYR                                       | 1.134099133        | 2              | 2.638877  |
| P62278        | KGLTPSQIGVILR                                    | 1.092158199        | 3              | 4.102226  |
| P62278        | LILIESR                                          | 1.687269418        | 2              | 2.332903  |
| <b>P62332</b> | <b>ARF6 ADP_ribosylation factor 6</b>            | <b>0.903426734</b> | <b>0.4066</b>  | <b>2</b>  |
| P62332        | FNVWDVGGQDK                                      | 0.851615901        | 2              | 2.818628  |
| P62332        | LGQSVTTIPTVGFNVETVTK                             | 0.976861332        | 2              | 3.422548  |
| <b>P62334</b> | <b>PRS10 26S protease regulatory subunit 10B</b> | <b>1.000323431</b> | <b>0.00254</b> | <b>5</b>  |
| P62334        | ALQSVGQIVGEVLK                                   | 1.011872042        | 2              | 3.088     |
| P62334        | AVASQLDCNFKL                                     | 1.479606978        | 2              | 2.728567  |
| P62334        | EVIELPLTNPELFQR                                  | 1.486156586        | 2              | 3.398631  |
| P62334        | FSEGTADR                                         | 1.021891507        | 2              | 2.522824  |
| P62334        | HGEIDYEAIVK                                      | 0.964622184        | 2              | 3.36691   |
| <b>P62425</b> | <b>RL7A 60S ribosomal protein L7a</b>            | <b>1.121355007</b> | <b>0.42456</b> | <b>12</b> |
| P62425        | AGVNTVTTLVENK                                    | 1.109764425        | 2              | 4.043626  |
| P62425        | AGVNTVTTLVENKK                                   | 1.088057508        | 2              | 2.857599  |
| P62425        | HWGGNVLGPK                                       | 0.879767836        | 1              | 1.979264  |
| P62425        | KVVNPLFEK                                        | 1.549211264        | 2              | 2.537223  |

|               |                                                   |                    |                |           |
|---------------|---------------------------------------------------|--------------------|----------------|-----------|
| P62425        | LKVPPAINQFTQALDR                                  | 1.139009029        | 3              | 4.502523  |
| P62425        | NFIGIGQDIQPK                                      | 1.074936106        | 2              | 3.47069   |
| P62425        | QTATQLLK                                          | 1.197155397        | 2              | 2.382945  |
| P62425        | TCTTVAFTQVNSEDK                                   | 1.654386147        | 2              | 4.132649  |
| P62425        | TCTTVAFTQVNSEDKGALAK                              | 2.013576978        | 2              | 3.93124   |
| P62425        | TNYNDRYDEIR                                       | 1.045941871        | 2              | 2.448781  |
| P62425        | VAPAPAVVK                                         | 1.271108543        | 1              | 2.162721  |
| P62425        | VPPAINQFTQALDR                                    | 1.006657344        | 2              | 3.522041  |
| <b>P62630</b> | <b>EF1A1 Elongation factor 1_alpha 1</b>          | <b>0.94931745</b>  | <b>0.0001</b>  | <b>13</b> |
| P62630        | DGSASGTTLLEALDCILPPTTRPTDKPLR                     | 1.092737619        | 3              | 5.326085  |
| P62630        | KDGSASGTTLLEALDCILPPTTRPTDKPLR                    | 1.0531096          | 4              | 5.790313  |
| P62630        | MDSTEPPYSQK                                       | 0.983167156        | 2              | 3.581632  |
| P62630        | MDSTEPPYSQK+Oxidation(0)                          | 1.082214574        |                |           |
| P62630        | NDPPMEAGFTAQVIILNHPGQISAGYAPVLDCHTAHIACK          | 1.050074724        | 5              | 6.546849  |
| P62630        | RYEEIVK                                           | 1.028167422        | 2              | 2.612775  |
| P62630        | SGDAAIVDMVPGKPMCVEFSFYDYPPLGR                     | 1.065910422        | 3              | 5.107624  |
| P62630        | SGDAAIVDMVPGKPMCVEFSFYDYPPLGR+Oxidation(14)       | 1.046005245        |                |           |
| P62630        | SGDAAIVDMVPGKPMCVEFSFYDYPPLGR+Oxidation(8)        | 1.005401361        |                |           |
| P62630        | VETGVLPKGMVVTAFVNVNTEVK                           | 1.073130947        | 2              | 5.471049  |
| P62630        | VETGVLPKGMVVTAFVNVNTEVK+Oxidation(9)              | 1.052203765        |                |           |
| P62630        | YEEIVK                                            | 1.169288995        | 1              | 2.091926  |
| P62630        | YYVTIIDAPGHR                                      | 1.078915615        | 3              | 3.641772  |
| <b>P62632</b> | <b>EF1A2 Elongation factor 1_alpha 2</b>          | <b>1.146138676</b> | <b>9.9E-20</b> | <b>9</b>  |
| P62632        | EHALLAYTLGVK                                      | 1.944272341        | 3              | 4.062109  |
| P62632        | IGGIGTVPVGR                                       | 1.282714831        | 2              | 3.651441  |
| P62632        | MDSTEPAYSEK                                       | 2.287549362        | 2              | 2.305096  |
| P62632        | NMITGTSQADCAVLIVAAGVGEFEAGISK                     | 0.970693313        | 3              | 4.571581  |
| P62632        | QLIVGVNK                                          | 1.473298825        | 1              | 2.771101  |
| P62632        | QTVAVGVK                                          | 1.205712519        | 1              | 2.245     |
| P62632        | STTTGHLIYK                                        | 1.07044711         | 2              | 3.250636  |
| P62632        | THINIVVIGHVDSGK                                   | 1.166181684        | 2              | 5.463567  |
| P62632        | VETGILRPGMVVTAFVNVNTEVK                           | 1.877696459        | 3              | 3.592238  |
| <b>P62634</b> | <b>CNBP Cellular nucleic acid_binding protein</b> | <b>1.001805878</b> | <b>0.95204</b> | <b>2</b>  |
| P62634        | CGETGHVAINCSK                                     | 1.02059968         | 2              | 4.427821  |
| P62634        | CYSCGEFGHIQK                                      | 0.966834292        | 2              | 3.083513  |
| <b>P62703</b> | <b>RS4X 40S ribosomal protein S4_X isoform</b>    | <b>1.031509827</b> | <b>1</b>       | <b>6</b>  |
| P62703        | FDTGNLCMVTGGANLGR                                 | 1.100651382        | 2              | 4.970669  |
| P62703        | FDTGNLCMVTGGANLGR+Oxidation(7)                    | 0.688009444        |                |           |
| P62703        | GIPHLVTHDAR                                       | 1.120491992        | 2              | 2.608608  |
| P62703        | LSNIFVIGK                                         | 1.162480726        | 2              | 2.874052  |
| P62703        | TDITYPAGFMDVISIDK                                 | 1.024239191        | 2              | 4.585635  |
| P62703        | VNDTIQIDLETGK                                     | 1.042779109        | 2              | 3.755436  |
| <b>P62718</b> | <b>RL18A 60S ribosomal protein L18a</b>           | <b>1.167358007</b> | <b>0.00024</b> | <b>2</b>  |
| P62718        | DLTTAGAVTQCYR                                     | 1.482076064        | 2              | 3.037     |
| P62718        | SSGEIVYCGQVFEKSPLR                                | 1.0750158          | 2              | 2.495971  |
| <b>P62752</b> | <b>RL23A 60S ribosomal protein L23a</b>           | <b>1.059812329</b> | <b>1.5E-07</b> | <b>6</b>  |
| P62752        | LAPDYDALDVANK                                     | 1.076837212        | 2              | 3.569261  |
| P62752        | LDHYAIK                                           | 1.228017293        | 2              | 2.405123  |
| P62752        | LYDIDVAK                                          | 1.164677665        | 1              | 1.921885  |
| P62752        | NKLDHYAIK                                         | 1.274728126        | 2              | 2.482819  |
| P62752        | VNTLIRPDGEK                                       | 1.267642629        | 2              | 3.084478  |
| P62752        | VNTLIRPDGEKK                                      | 1.433816682        | 2              | 2.83795   |
| <b>P62755</b> | <b>RS6 40S ribosomal protein S6</b>               | <b>1.102681431</b> | <b>0.42661</b> | <b>6</b>  |
| P62755        | DIPGLTDTTVPR                                      | 0.850180132        | 2              | 2.336389  |

|               |                                                             |                    |                |          |
|---------------|-------------------------------------------------------------|--------------------|----------------|----------|
| P62755        | EAAEYAKLLAK                                                 | 1.085017146        | 2              | 2.398875 |
| P62755        | LIEVDDER                                                    | 1.088552179        | 2              | 2.785909 |
| P62755        | LNISFPATGCQK                                                | 1.067918944        | 2              | 3.125343 |
| P62755        | MATEVAADALGEEWK                                             | 1.188337166        | 2              | 4.356373 |
| P62755        | MATEVAADALGEEWK+Oxidation(0)                                | 1.133856893        |                |          |
| <b>P62775</b> | <b>MTPN Myotrophin</b>                                      | <b>1.027421833</b> | <b>0.99624</b> | <b>2</b> |
| P62775        | GPDGLTALEATDNQAIK                                           | 1.10909859         | 2              | 3.706726 |
| P62775        | HHITPLLSAVYEGHVSCVK                                         | 1.010114497        | 3              | 3.61731  |
| <b>P62804</b> | <b>H4 Histone H4</b>                                        | <b>1.193949608</b> | <b>9.9E-20</b> | <b>9</b> |
| P62804        | DAVTYTEHAK                                                  | 3.255926374        | 2              | 3.091598 |
| P62804        | DNIQGITKPAIR                                                | 1.27161213         | 2              | 3.254271 |
| P62804        | ISGLIYEETR                                                  | 1.137268912        | 2              | 3.773031 |
| P62804        | KTVTAMDVVYALK                                               | 1.035176907        | 2              | 3.023273 |
| P62804        | RISGLIYEETR                                                 | 1.013229464        | 2              | 2.307495 |
| P62804        | TYLGGG                                                      | 0.546147588        | 1              | 1.95168  |
| P62804        | TVTAMDVVYALK                                                | 0.945190526        | 2              | 4.065288 |
| P62804        | TVTAMDVVYALK+Oxidation(4)                                   | 0.898864692        |                |          |
| P62804        | VFLENVIR                                                    | 0.888991302        | 2              | 3.015818 |
| <b>P62815</b> | <b>VATB2 V_type proton ATPase subunit B_brain isoform</b>   | <b>0.810645564</b> | <b>0.05455</b> | <b>3</b> |
| P62815        | AVVQVFEGTSGIDAK                                             | 0.814568596        | 2              | 3.637273 |
| P62815        | IYPEEMIQTGISAIDGMNSIAR                                      | 0.554291389        | 2              | 2.450038 |
| P62815        | QIYPPINVLPSLSR                                              | 1.010304035        | 2              | 2.353211 |
| <b>P62832</b> | <b>RL23 60S ribosomal protein L23</b>                       | <b>1.23986131</b>  | <b>0.48762</b> | <b>2</b> |
| P62832        | GSAITGPVAK                                                  | 1.094175524        | 2              | 2.38306  |
| P62832        | ISLGLPVGAVINCADNTGAK                                        | 1.069741914        | 2              | 4.896225 |
| <b>P62853</b> | <b>RS25 40S ribosomal protein S25</b>                       | <b>1.247155271</b> | <b>0.30684</b> | <b>2</b> |
| P62853        | GGDAPAAGEDA                                                 | 1.211682662        | 1              | 2.019867 |
| P62853        | LNNLVLFDK                                                   | 1.249606276        | 2              | 3.052199 |
| <b>P62856</b> | <b>RS26 40S ribosomal protein S26</b>                       | <b>1.119770931</b> | <b>0.07858</b> | <b>3</b> |
| P62856        | DISEASVFDAYVLPK                                             | 1.44275932         | 2              | 3.269862 |
| P62856        | FRPAGAAPRPPPKPM                                             | 0.694882333        | 2              | 2.352892 |
| P62856        | NIVEAAVR                                                    | 1.112736911        | 2              | 2.92795  |
| <b>P62859</b> | <b>RS28 40S ribosomal protein S28</b>                       | <b>1.54849274</b>  | <b>0.0006</b>  | <b>2</b> |
| P62859        | EGDVLTLLESER                                                | 1.645641823        | 2              | 3.234688 |
| P62859        | VEFMDDTSR                                                   | 1.453297619        | 2              | 2.597485 |
| <b>P62870</b> | <b>ELOB Transcription elongation factor B polypeptide 2</b> | <b>1.036878942</b> | <b>0.70725</b> | <b>2</b> |
| P62870        | ADDTFEALR                                                   | 0.995487666        | 2              | 2.583726 |
| P62870        | TLGECGFTSQTRPQAPATVGLAFR                                    | 1.143024561        | 3              | 3.421448 |
| <b>P62890</b> | <b>RL30 60S ribosomal protein L30</b>                       | <b>1.174217403</b> | <b>0.31303</b> | <b>2</b> |
| P62890        | TGVHHYSGNNIELGTACGK                                         | 1.184981714        | 2              | 5.654829 |
| P62890        | VCTLAIDPGDSDIIR                                             | 1.171733308        | 2              | 4.219794 |
| <b>P62898</b> | <b>CYC Cytochrome c_somatic</b>                             | <b>1.06685941</b>  | <b>0.99992</b> | <b>6</b> |
| P62898        | ADLIAYLK                                                    | 0.885498362        | 2              | 2.869547 |
| P62898        | GITWGEDTLMEYLENPK                                           | 1.049246032        | 2              | 4.962444 |
| P62898        | GITWGEDTLMEYLENPKK                                          | 1.037501187        | 2              | 4.559816 |
| P62898        | KTGQAAGFSYTDANK                                             | 0.939745676        | 2              | 4.752879 |
| P62898        | TGPNLHGLFGR                                                 | 1.036069318        | 2              | 3.266914 |
| P62898        | TGQAAGFSYTDANK                                              | 1.133847313        | 2              | 4.271093 |
| <b>P62902</b> | <b>RL31 60S ribosomal protein L31</b>                       | <b>1.100341013</b> | <b>8.3E-05</b> | <b>2</b> |
| P62902        | NLQTVNVDEN                                                  | 1.194485459        | 1              | 2.527725 |
| P62902        | SAINEVVTR                                                   | 1.118805487        | 2              | 2.938576 |
| <b>P62907</b> | <b>RL10A 60S ribosomal protein L10a</b>                     | <b>0.882283304</b> | <b>9.9E-20</b> | <b>6</b> |
| P62907        | AVDIPHMDIEALK                                               | 1.070270977        | 2              | 2.814103 |
| P62907        | AVDIPHMDIEALKK                                              | 0.943062331        | 2              | 2.603906 |
| P62907        | FSVCVLGDDQHCDEAK                                            | 1.371396232        | 2              | 4.194169 |

|               |                                                           |                    |                |           |
|---------------|-----------------------------------------------------------|--------------------|----------------|-----------|
| P62907        | KYDAFLASESLIK                                             | 0.800992994        | 2              | 4.006351  |
| P62907        | VLCLAVAVGHVK                                              | 0.661173391        | 3              | 3.895473  |
| P62907        | YDAFLASESLIK                                              | 1.075773382        | 2              | 3.453281  |
| <b>P62909</b> | <b>RS3 40S ribosomal protein S3</b>                       | <b>1.08188644</b>  | <b>4.8E-14</b> | <b>10</b> |
| P62909        | AELNEFLTR                                                 | 1.075864896        | 2              | 2.840172  |
| P62909        | DEILPTTPISEQK                                             | 1.081416406        | 2              | 3.703027  |
| P62909        | ELAEDGYSGVEVR                                             | 2.028198102        | 2              | 3.429917  |
| P62909        | ELTAVVQK                                                  | 1.461036122        | 1              | 2.077975  |
| P62909        | FGFPEGSVELYAEK                                            | 1.309334858        | 2              | 4.053975  |
| P62909        | FVDGLMIHSGDPVNYVDTAVR                                     | 1.040316368        | 3              | 4.938177  |
| P62909        | GCEVVVSGK                                                 | 1.193081858        | 2              | 2.772482  |
| P62909        | GGKPEPPAMPQPVPPTA                                         | 1.241414541        | 2              | 3.54081   |
| P62909        | GLCAIAQAESLR                                              | 1.072932951        | 2              | 3.390461  |
| P62909        | TEIILATR                                                  | 1.081824948        | 2              | 3.178227  |
| <b>P62912</b> | <b>RL32 60S ribosomal protein L32</b>                     | <b>1.259936948</b> | <b>9.9E-20</b> | <b>3</b>  |
| P62912        | ELEVLLMCNK                                                | 1.402974753        | 2              | 2.851244  |
| P62912        | GQILMPNIGYGSNK                                            | 0.886671317        | 2              | 2.932909  |
| P62912        | SYCAEIAHNVSSK                                             | 1.234769656        | 2              | 4.803632  |
| <b>P62914</b> | <b>RL11 60S ribosomal protein L11</b>                     | <b>0.938925048</b> | <b>0.95969</b> | <b>2</b>  |
| P62914        | VLEQLTGQTPVFSK                                            | 1.068015144        | 2              | 4.411545  |
| P62914        | YDGIIIPGK                                                 | 1.057811027        | 2              | 2.816654  |
| <b>P62919</b> | <b>RL8 60S ribosomal protein L8</b>                       | <b>1.115441089</b> | <b>9.9E-20</b> | <b>3</b>  |
| P62919        | ASGNYATVISHNPETK                                          | 1.287092678        | 2              | 4.673055  |
| P62919        | AVVGVVAGGGR                                               | 1.119512423        | 2              | 3.430963  |
| P62919        | KAQLNIGNVLPVGTMEPTIVCCLEEKPGDR                            | 0.776515331        | 3              | 4.549391  |
| <b>P62959</b> | <b>HINT1 Histidine triad nucleotide_binding protein 1</b> | <b>0.929603538</b> | <b>0.98959</b> | <b>7</b>  |
| P62959        | AQVAQPGGDTIFGK                                            | 0.95684528         | 2              | 4.618267  |
| P62959        | CAADLGLK                                                  | 1.104778398        | 2              | 2.751844  |
| P62959        | CLAFHDISPQAPTHFLVIPK                                      | 0.975200799        | 3              | 4.2221    |
| P62959        | HISQISVADDDDESLLGHLMIVGK                                  | 0.862574399        | 3              | 6.730711  |
| P62959        | IIFEDDR                                                   | 0.692426633        | 2              | 2.349279  |
| P62959        | KHISQISVADDDDESLLGHLMIVGK                                 | 0.858749114        | 3              | 5.558572  |
| P62959        | MVVNEGADGGQSVYHIHLHLVGGRR                                 | 0.974934891        | 3              | 4.706339  |
| <b>P62961</b> | <b>YBOX1 Nuclease_sensitive element_binding protein 1</b> | <b>1.379038271</b> | <b>9.9E-20</b> | <b>7</b>  |
| P62961        | AADPPAENSSAPEAEQGGAE                                      | 0.606979051        | 2              | 2.638389  |
| P62961        | EDGNEEDKENQGDQGGQPPQR                                     | 1.164019672        | 3              | 5.125838  |
| P62961        | GAEAAANVTGPGGVPVQGSK                                      | 1.591726209        | 2              | 5.013956  |
| P62961        | NEGSESAPPEGQAQQR                                          | 1.598273763        | 2              | 5.307773  |
| P62961        | NYQQNYQNSSEGEK                                            | 1.940094613        | 2              | 4.167553  |
| P62961        | NYQQNYQNSSEGEKNEGSESAPPEGQAQQR                            | 1.235183303        | 3              | 5.04581   |
| P62961        | RPQYSNPPVQGEVMEGADNQGAGEQGRPVR                            | 1.616076415        | 4              | 4.648341  |
| <b>P62963</b> | <b>PROF1 Profilin_1</b>                                   | <b>0.843200024</b> | <b>9.9E-20</b> | <b>6</b>  |
| P62963        | CYEMASHLR                                                 | 0.758853202        | 2              | 2.749566  |
| P62963        | DSLLQDGEFTMDLR                                            | 1.121218891        | 2              | 3.313122  |
| P62963        | DSPSVWAAVPGK                                              | 1.350783932        | 2              | 2.935594  |
| P62963        | SSFFVNGLTLGGQK                                            | 0.841620131        | 2              | 4.577405  |
| P62963        | STGGAPTFNVTMTAK                                           | 0.858015684        | 2              | 3.025207  |
| P62963        | TFVSITPAEVGVLVGK                                          | 0.806031333        | 2              | 4.78787   |
| <b>P63018</b> | <b>HSP7C Heat shock cognate 71 kDa protein</b>            | <b>1.260460668</b> | <b>9.9E-20</b> | <b>28</b> |
| P63018        | ARFEELNADLFR                                              | 1.326698947        | 2              | 2.980095  |
| P63018        | CNEIISWLDK                                                | 0.852473037        | 2              | 3.059733  |
| P63018        | DAGTIAGLNVLR                                              | 2.358117247        | 2              | 3.742252  |
| P63018        | EIAEAYLGK                                                 | 2.257299695        | 1              | 1.965855  |
| P63018        | FDDAVVQSDMK                                               | 1.182758527        | 2              | 3.937093  |
| P63018        | FEELNADLFR                                                | 1.136656966        | 2              | 3.179737  |

|               |                                                      |                    |                |           |
|---------------|------------------------------------------------------|--------------------|----------------|-----------|
| P63018        | FELTGIPPAPR                                          | 1.487615568        | 2              | 3.183309  |
| P63018        | GTLDPVEK                                             | 1.168003723        | 1              | 2.014535  |
| P63018        | HWPFFMVVNDAGRPK+Oxidation(4)                         | 1.186220914        |                |           |
| P63018        | IINEPTAAAIAYGLDK                                     | 1.139954859        | 2              | 5.129612  |
| P63018        | IINEPTAAAIAYGLDKK                                    | 1.133091206        | 2              | 4.717216  |
| P63018        | LLQDFFNGK                                            | 1.279363726        | 2              | 3.076245  |
| P63018        | MKEIAEAYLGK                                          | 0.788642452        | 2              | 2.883192  |
| P63018        | MKEIAEAYLGK+Oxidation(0)                             | 1.395331415        |                |           |
| P63018        | NQTAEKEEFEHQK                                        | 1.300729178        | 2              | 4.88416   |
| P63018        | NQVAMNPTNTVFDK                                       | 1.134543424        | 2              | 4.988507  |
| P63018        | NQVAMNPTNTVFDK+Oxidation(4)                          | 1.273197353        |                |           |
| P63018        | NSLESYAFNMK                                          | 1.348294183        | 2              | 3.569918  |
| P63018        | QATKDAGTIAGLNVLR                                     | 0.817950848        | 2              | 2.450734  |
| P63018        | RFDDAVVQSDMK                                         | 1.272344689        | 2              | 3.578502  |
| P63018        | SFYPEEVSSMVLTK                                       | 1.12283619         | 2              | 4.940659  |
| P63018        | SFYPEEVSSMVLTK+Oxidation(9)                          | 1.062905807        |                |           |
| P63018        | SINPDEAVAYGAAVQAAILSGDK                              | 1.158772849        | 2              | 6.059334  |
| P63018        | SQIHDIIVLVGGSTR                                      | 1.238373142        | 2              | 4.924558  |
| P63018        | STAGDTHLGGEDFDNR                                     | 1.359013343        | 2              | 4.248702  |
| P63018        | TVTNAVVTVPAYFNDSQR                                   | 1.134975733        | 3              | 4.360116  |
| P63018        | VCNPIITK                                             | 1.216533226        | 2              | 2.301606  |
| P63018        | VQVEYKGETK                                           | 1.113581229        | 2              | 2.55106   |
| <b>P63029</b> | <b>TCTP Translationally controlled tumor protein</b> | <b>1.776826638</b> | <b>3.5E-08</b> | <b>3</b>  |
| P63029        | DLISHDELFSDIYK                                       | 2.068164725        | 2              | 3.755276  |
| P63029        | EIADGLCLEVEGK                                        | 1.548327344        | 2              | 3.338216  |
| P63029        | TEGAIDSLIGGNASAEPEGEGTESTVVTGVDIVMNHHLQETSFTK        | 1.468468958        | 4              | 4.588511  |
| <b>P63036</b> | <b>DNJA1 Dnaj homolog subfamily A member 1</b>       | <b>0.893982115</b> | <b>0.99173</b> | <b>6</b>  |
| P63036        | HYNGEAYEDDEHHPR                                      | 1.222674141        | 3              | 5.353754  |
| P63036        | ITFHGEGDQEPGLEPGDIIIVLDQK                            | 1.145739946        | 3              | 4.491005  |
| P63036        | NVVHQLSVTLEDLYNGATR                                  | 1.207284027        | 2              | 4.116804  |
| P63036        | QISQAYEVLADSK                                        | 1.030334964        | 2              | 3.700417  |
| P63036        | TIVITSHPGQIVK                                        | 0.894571212        | 2              | 3.461507  |
| P63036        | VNFPENGFLSPDK                                        | 1.012504153        | 2              | 3.358402  |
| <b>P63039</b> | <b>CH60 60 kDa heat shock protein_mitochondrial</b>  | <b>1.136090343</b> | <b>1</b>       | <b>33</b> |
| P63039        | AAVEEGIVLGGGCALLR                                    | 0.933366114        | 2              | 5.253572  |
| P63039        | ALMLQGVDLLADAVAVTMGPK                                | 0.638639343        | 3              | 5.283134  |
| P63039        | ALMLQGVDLLADAVAVTMGPK+Oxidation(2)                   | 0.794770357        |                |           |
| P63039        | CEFQDAYVLLSEK                                        | 0.891146859        | 2              | 4.896836  |
| P63039        | CIPALDSLKPANEDQK                                     | 0.900365367        | 2              | 3.654528  |
| P63039        | DIGNIISDAMK                                          | 0.868843858        | 2              | 3.221639  |
| P63039        | GVMLAVDAVIAELK                                       | 0.998401812        | 2              | 3.839546  |
| P63039        | GVMLAVDAVIAELKK                                      | 1.024640275        | 2              | 4.479409  |
| P63039        | GYISPYFINTSK                                         | 1.22701273         | 2              | 3.029247  |
| P63039        | IGIEIK                                               | 0.941545863        | 2              | 2.589458  |
| P63039        | ILQSSSEVGYDAMLGDFVNMVEK                              | 1.021543004        | 2              | 4.979472  |
| P63039        | IQEITEQLDITTSEYEK                                    | 0.986943988        | 2              | 5.939842  |
| P63039        | IQEITEQLDITTSEYEKEK                                  | 0.924960514        | 2              | 5.061436  |
| P63039        | ISSVQSIVPALEIANHR                                    | 1.090908538        | 2              | 4.255525  |
| P63039        | KISSVQSIVPALEIANHR                                   | 0.838850644        | 3              | 4.550709  |
| P63039        | KPLVIIAEDVDGGEALSTLVLR                               | 0.924151549        | 2              | 6.136534  |
| P63039        | LSDGVAVLK                                            | 1.067738277        | 2              | 3.098129  |
| P63039        | LVQDVANNTNEEAGDGTATVLR                               | 1.029091285        | 2              | 6.636322  |
| P63039        | NAGVEGSLIVEK                                         | 1.022658012        | 2              | 3.584287  |
| P63039        | QSKPVTTPEEIAQVATISANGDK                              | 0.985803281        | 2              | 3.581943  |
| P63039        | QSKPVTTPEEIAQVATISANGDKDIGNIISDAMK                   | 0.875064345        | 3              | 4.842977  |
| P63039        | RGVMLAVDAVIAELKK                                     | 0.828232724        | 3              | 5.770705  |

|               |                                                                      |                    |                |           |
|---------------|----------------------------------------------------------------------|--------------------|----------------|-----------|
| P63039        | TALLDAAGVASLLTTAEAVVTEIPK                                            | 0.957668334        |                |           |
| P63039        | TALLDAAGVASLLTTAEAVVTEIPKEEK                                         | 0.997979973        | 3              | 5.031567  |
| P63039        | TLNDELEIIEGMK                                                        | 0.900653883        | 2              | 4.659017  |
| P63039        | TLNDELEIIEGMK+Oxidation(11)                                          | 0.955933931        |                |           |
| P63039        | TVIIEQSWGSPK                                                         | 0.958116381        | 2              | 4.378443  |
| P63039        | VGEVIVTK                                                             | 0.940792426        | 2              | 2.938201  |
| P63039        | VGEVIVTKDDAMLLK                                                      | 1.090595434        | 2              | 2.50118   |
| P63039        | VGGTSDVEVNEK                                                         | 1.018846411        | 2              | 3.820652  |
| P63039        | VGGTSDVEVNEKK                                                        | 1.10178638         | 2              | 3.518459  |
| P63039        | VGLQVVAVK                                                            | 1.06141352         | 2              | 3.282634  |
| P63039        | VTDALNATR                                                            | 0.969566213        | 2              | 3.571726  |
| <b>P63102</b> | <b>1433Z 14_3_3 protein zeta/delta</b>                               | <b>0.983141461</b> | <b>0.97204</b> | <b>9</b>  |
| P63102        | DICNDVLSLLEK                                                         | 1.631639263        | 3              | 3.680529  |
| P63102        | FLIPNASQPESK                                                         | 0.990698608        | 2              | 3.36873   |
| P63102        | GIVDQSQAYQEAFAEISK                                                   | 0.988731832        | 2              | 5.748536  |
| P63102        | GIVDQSQAYQEAFAEISKK                                                  | 1.010795623        | 2              | 2.62193   |
| P63102        | KGIVDQSQAYQEAFAEISK                                                  | 1.051697696        | 2              | 6.013041  |
| P63102        | SVTEQGAELSNEER                                                       | 1.122496584        | 2              | 5.56115   |
| P63102        | TAFDEAIAELDTLSEESYK                                                  | 1.000769933        | 2              | 5.686096  |
| P63102        | YDDMAACMK                                                            | 1.021355256        | 2              | 2.451387  |
| P63102        | YLAEVAAGDDKK                                                         | 0.964976613        | 2              | 3.611005  |
| <b>P63159</b> | <b>HMGB1 High mobility group protein B1</b>                          | <b>0.982958647</b> | <b>1</b>       | <b>4</b>  |
| P63159        | GEHPGLSIGDVAK                                                        | 1.039851389        | 2              | 3.117338  |
| P63159        | IKGEHPGLSIGDVAK                                                      | 0.976556674        | 2              | 3.950677  |
| P63159        | KHPDASVNFSEFSK                                                       | 1.030366882        | 2              | 4.289649  |
| P63159        | LGEMWNNTAADKQPYEK+Oxidation(3)                                       | 0.936859548        |                |           |
| <b>P63174</b> | <b>RL38 60S ribosomal protein L38</b>                                | <b>1.171222489</b> | <b>2.1E-06</b> | <b>4</b>  |
| P63174        | IEEIKDFLLTAR                                                         | 1.016368082        | 3              | 3.361184  |
| P63174        | KIEEIKDFLLTAR                                                        | 1.106005902        | 2              | 4.108852  |
| P63174        | YLTYLVITDK                                                           | 1.397258385        | 2              | 2.89703   |
| P63174        | YLTYLVITDKEK                                                         | 1.307506734        | 2              | 2.708998  |
| <b>P63245</b> | <b>GBLP Guanine nucleotide_binding protein subunit beta_2_like 1</b> | <b>1.2318204</b>   | <b>0.00016</b> | <b>12</b> |
| P63245        | DETNYGIPQR                                                           | 1.830025306        | 2              | 2.940192  |
| P63245        | DGQAMLWDLNEGK                                                        | 1.272061073        | 2              | 2.969844  |
| P63245        | FSPNSSNPIIVSCGWDK                                                    | 1.159487174        | 2              | 4.112599  |
| P63245        | GHNGWVTQIATTPQFDMILSASR                                              | 0.891374746        | 3              | 4.168629  |
| P63245        | HLYTLDGGDIINALCFSPNR                                                 | 1.117635104        | 2              | 5.901755  |
| P63245        | IIVDELKQEVISTSSK                                                     | 1.017340878        | 2              | 4.346048  |
| P63245        | LWDLTTGTTTR                                                          | 0.920439921        | 2              | 2.589536  |
| P63245        | TNHIGHTGYLNTVTVSPDGLCASGGK                                           | 1.102622918        | 3              | 5.536952  |
| P63245        | VWNLANCK                                                             | 1.161840242        | 2              | 2.67961   |
| P63245        | VWQVTIGTR                                                            | 1.185227044        | 2              | 2.736893  |
| P63245        | YTVQDESHSEWVSCVR                                                     | 1.243065664        | 2              | 4.654795  |
| P63245        | YWLCAATGPSIK                                                         | 1.197976328        | 2              | 2.844509  |
| <b>P63259</b> | <b>ACTG Actin_cytoplasmic 2</b>                                      | <b>0.945804764</b> | <b>0.9983</b>  | <b>8</b>  |
| P63259        | CPEALFQPSFLGMESCGIHETTFNSIMK                                         | 1.471165565        | 3              | 4.768364  |
| P63259        | DLYANTVLSGGTTMYPGIADR                                                | 1.290070386        | 2              | 6.086339  |
| P63259        | DLYANTVLSGGTTMYPGIADR+Oxidation(13)                                  | 1.155938712        |                |           |
| P63259        | GYSFTTAAER                                                           | 0.932686888        | 2              | 3.353513  |
| P63259        | KDLYANTVLSGGTTMYPGIADR                                               | 0.934829686        | 2              | 6.449868  |
| P63259        | KDLYANTVLSGGTTMYPGIADR+Oxidation(14)                                 | 0.988714065        |                |           |
| P63259        | QEYDESGPSIVHR                                                        | 0.82622632         | 3              | 3.422786  |
| P63259        | VAPEEHPVLLTEAPLNPK                                                   | 0.955979628        | 3              | 4.739213  |
| <b>P63324</b> | <b>RS12 40S ribosomal protein S12</b>                                | <b>1.158440876</b> | <b>9.1E-06</b> | <b>4</b>  |
| P63324        | KVVGCSVVVK                                                           | 1.223603928        | 2              | 3.379607  |
| P63324        | LGEWVGLCK                                                            | 0.999696317        | 2              | 2.847631  |

|               |                                                                                      |                    |                |           |
|---------------|--------------------------------------------------------------------------------------|--------------------|----------------|-----------|
| P63324        | QAHLCVLASNCDEPMYVK                                                                   | 1.09898146         | 3              | 3.552733  |
| P63324        | VVGCSCVVVK                                                                           | 1.213299658        | 2              | 3.238082  |
| <b>P63331</b> | <b>PP2AA Serine/threonine_protein phosphatase 2A catalytic subunit alpha isoform</b> | <b>1.095619791</b> | <b>0.26197</b> | <b>3</b>  |
| P63331        | CGNQAAIMELDDTLK                                                                      | 0.964053331        | 2              | 2.771279  |
| P63331        | NVVTIFSAPNYCYR                                                                       | 0.942113405        | 2              | 2.326139  |
| P63331        | YSFLQFDPAPR                                                                          | 1.106168837        | 2              | 3.419724  |
| <b>P67779</b> | <b>PHB Prohibitin</b>                                                                | <b>1.003914961</b> | <b>1</b>       | <b>12</b> |
| P67779        | AAELIANSLATAGDGLIELR                                                                 | 0.939821828        | 3              | 4.217194  |
| P67779        | AAISAEGDSK                                                                           | 1.057035321        | 2              | 2.481286  |
| P67779        | DLQNVNITLR                                                                           | 1.056672887        | 2              | 3.002888  |
| P67779        | FDAGELITQR                                                                           | 0.900361808        | 2              | 3.540552  |
| P67779        | FGLALAVAGGVNSALYNVDAGHR                                                              | 0.960725527        | 3              | 3.531134  |
| P67779        | GVQDIVVGEETHFLIPVWVQKPIIFDCR                                                         | 1.037336594        | 4              | 4.84002   |
| P67779        | IYTSIGEDYDER                                                                         | 0.97682632         | 2              | 3.367364  |
| P67779        | KLEAAEDIAYQLSR                                                                       | 0.972174423        | 2              | 4.813692  |
| P67779        | NITYLPAGQSVLLQLPQ                                                                    | 0.981305635        | 3              | 3.430168  |
| P67779        | NVPVITGSK                                                                            | 0.944253378        | 1              | 2.277607  |
| P67779        | QVSDDLTER                                                                            | 1.048286347        | 2              | 2.416462  |
| P67779        | VLPSITTEILK                                                                          | 0.882100496        | 2              | 2.314491  |
| <b>P68037</b> | <b>UB2L3 Ubiquitin_conjugating enzyme E2 L3</b>                                      | <b>1.008444526</b> | <b>1</b>       | <b>3</b>  |
| P68037        | ADLAEEYSK                                                                            | 1.004097342        | 2              | 2.63813   |
| P68037        | GQVCLPVISAENWKPKATK                                                                  | 0.984017493        | 2              | 3.764193  |
| P68037        | TDQVIQSLIALVNDPQPEHPLR                                                               | 0.989351624        | 2              | 5.153215  |
| <b>P68101</b> | <b>IF2A Eukaryotic translation initiation factor 2 subunit 1</b>                     | <b>1.177372575</b> | <b>0.1365</b>  | <b>3</b>  |
| P68101        | AGLNCSTETMPIK                                                                        | 1.176393579        | 2              | 3.406359  |
| P68101        | TEGLSVLNQAMAVIK                                                                      | 1.030573517        | 2              | 3.985758  |
| P68101        | VVTDTEDELAR                                                                          | 1.173347922        | 2              | 3.305271  |
| <b>P68136</b> | <b>ACTS Actin_alpha skeletal muscle</b>                                              | <b>1.82610607</b>  | <b>1.3E-09</b> | <b>16</b> |
| P68136        | AGFAGDDAPR                                                                           | 1.255986091        | 2              | 3.356367  |
| P68136        | AVFPSIVGRPR                                                                          | 1.133307313        | 2              | 2.6985    |
| P68136        | DLYANNVMSGGTTMYPGIADR                                                                | 3.076201345        | 2              | 4.663561  |
| P68136        | DSYVGDEAQSK                                                                          | 3.434310888        | 2              | 3.540015  |
| P68136        | EITALAPSTMK                                                                          | 1.384855283        | 2              | 3.137859  |
| P68136        | EITALAPSTMK+Oxidation(9)                                                             | 1.492574451        |                |           |
| P68136        | GYSFVTTAER                                                                           | 1.644853268        | 2              | 3.958458  |
| P68136        | IWHHTFYNELR                                                                          | 1.502899673        | 2              | 2.690291  |
| P68136        | KDLYANNVMSGGTTMYPGIADR                                                               | 2.198040214        | 2              | 5.034206  |
| P68136        | KDLYANNVMSGGTTMYPGIADR+Oxidation(14)                                                 | 1.466391006        |                |           |
| P68136        | QEYDEAGPSIVHR                                                                        | 2.617538352        | 2              | 3.163333  |
| P68136        | TTGIVLDSGDGVTHNVPIYEGYALPHAIMR                                                       | 2.974348855        | 3              | 6.811887  |
| P68136        | TTGIVLDSGDGVTHNVPIYEGYALPHAIMR+Oxidation(28)                                         | 1.323393536        |                |           |
| P68136        | VAPEEHPTLLTEAPLNPK                                                                   | 1.68656183         | 2              | 4.392037  |
| P68136        | YPIEHGIITNWDDMEK                                                                     | 1.193974038        | 2              | 4.450612  |
| P68136        | YPIEHGIITNWDDMEK+Oxidation(13)                                                       | 0.775739648        |                |           |
| <b>P68255</b> | <b>1433T 14_3_3 protein theta</b>                                                    | <b>0.965668856</b> | <b>1</b>       | <b>6</b>  |
| P68255        | AVTEQGAELSNEER                                                                       | 0.869993584        | 2              | 4.632949  |
| P68255        | SICTTVLELLDK                                                                         | 1.035498534        | 2              | 3.100723  |
| P68255        | TAFDEAIAELDTLNEDSYK                                                                  | 0.882606182        | 2              | 4.80388   |
| P68255        | VISSIEQK                                                                             | 0.937676151        | 2              | 3.254664  |
| P68255        | YLAEVACGDDR                                                                          | 1.003844523        | 2              | 3.001915  |
| P68255        | YLIANATNPESK                                                                         | 0.97381279         | 2              | 2.822546  |
| <b>P68511</b> | <b>1433F 14_3_3 protein eta</b>                                                      | <b>1.338751316</b> | <b>0.00912</b> | <b>4</b>  |
| P68511        | AVTELNEPLSNEDR                                                                       | 1.374785102        | 2              | 4.666099  |
| P68511        | ELETVCNDVLALLDK                                                                      | 0.910835104        | 2              | 3.471905  |

|               |                                                                                 |                    |                |           |
|---------------|---------------------------------------------------------------------------------|--------------------|----------------|-----------|
| P68511        | NCNDFQYESKVFYLK                                                                 | 1.078293962        | 2              | 2.347584  |
| P68511        | NSVVEASEAAYK                                                                    | 1.335713937        | 2              | 3.215416  |
| <b>P69897</b> | <b>TBB5 Tubulin beta_5 chain</b>                                                | <b>1.03091529</b>  | <b>0.92259</b> | <b>3</b>  |
| P69897        | ALTVPQLTQQVFDK                                                                  | 0.879805188        | 2              | 3.496055  |
| P69897        | ISVYYNEATGGK                                                                    | 1.058071296        | 2              | 2.942208  |
| P69897        | LTTPTYGDLNHLVSATMSGVTTCLR                                                       | 0.96480677         | 2              | 5.354481  |
| <b>P70372</b> | <b>ELAV1 ELAV_like protein 1</b>                                                | <b>1.100575403</b> | <b>0.74014</b> | <b>2</b>  |
| P70372        | TNLIVNYLPQNMTQEELR                                                              | 0.982841022        | 2              | 3.423189  |
| P70372        | VLVDQTTGLSR                                                                     | 1.128249382        | 2              | 2.41271   |
| <b>P70470</b> | <b>LYPA1 Acyl_protein thioesterase 1</b>                                        | <b>0.984351775</b> | <b>0.98044</b> | <b>2</b>  |
| P70470        | ASFSQGPINSANR                                                                   | 0.828881227        | 2              | 2.944511  |
| P70470        | DISVLQCHGDCDPLVPLMFGSLTVER                                                      | 0.985061712        | 3              | 4.041405  |
| <b>P70473</b> | <b>AMACR Alpha_methylacyl_CoA racemase</b>                                      | <b>0.823394509</b> | <b>9E-09</b>   | <b>11</b> |
| P70473        | ADVLLPEFR                                                                       | 0.7250223          | 2              | 3.362092  |
| P70473        | AEWCQIFDGTDACVTPVLTLEEALHHQHNR                                                  | 0.659171482        | 4              | 5.201691  |
| P70473        | DYGFSQEEIHLHSDR                                                                 | 0.920147211        | 2              | 4.859573  |
| P70473        | GLGLESEELPSQMSIEDWPEMK                                                          | 0.673852077        | 3              | 4.846204  |
| P70473        | GQNLLDGGAPFYTTYK                                                                | 0.793266359        | 2              | 5.439533  |
| P70473        | GSFITDEEQHACPRPAPQLSR                                                           | 0.898264411        | 3              | 3.852139  |
| P70473        | LGSVNHPSHLAR                                                                    | 0.80573923         | 2              | 3.395815  |
| P70473        | LSGFGQSGIFSK                                                                    | 0.882498974        | 2              | 3.040418  |
| P70473        | RDPSVGEHTVEVLK                                                                  | 0.748414098        | 3              | 4.396935  |
| P70473        | TADGEFMAVGAIEPQFYTLTK                                                           | 0.949710791        | 3              | 4.134341  |
| P70473        | TQAMGLWAQPR                                                                     | 0.612264063        | 2              | 3.131624  |
| <b>P70550</b> | <b>RAB8B Ras_related protein Rab_8B</b>                                         | <b>1.165794241</b> | <b>0.16386</b> | <b>2</b>  |
| P70550        | LLLIGDSGVGK                                                                     | 1.154761353        | 2              | 2.78506   |
| P70550        | NIEEHASSDVER                                                                    | 1.392687406        | 2              | 2.307937  |
| <b>P70552</b> | <b>GFRP GTP cyclohydrolase 1 feedback regulatory protein</b>                    | <b>0.609241704</b> | <b>0.00025</b> | <b>2</b>  |
| P70552        | MEVGPTMVGDHSDPELMQQLGASK                                                        | 0.661612772        | 3              | 4.136862  |
| P70552        | VLGNNFYEYYVNDPPR                                                                | 0.58680251         | 2              | 3.368034  |
| <b>P70580</b> | <b>PGRC1 Membrane_associated progesterone receptor component 1</b>              | <b>0.999178744</b> | <b>0.9995</b>  | <b>6</b>  |
| P70580        | FYGPEGPYGVFAGR                                                                  | 0.908611879        | 2              | 4.010903  |
| P70580        | GDQPGASGDNDDEPPPLPR                                                             | 1.114855926        | 2              | 4.976551  |
| P70580        | IVRGDQPGASGDNDDEPPPLPR                                                          | 1.16208794         | 3              | 5.030583  |
| P70580        | KFYGPEGPYGVFAGR                                                                 | 1.026763777        | 2              | 3.61088   |
| P70580        | RYDGVQDPR                                                                       | 0.903270227        | 1              | 2.152603  |
| P70580        | YDGVQDPR                                                                        | 1.053102484        | 2              | 2.837738  |
| <b>P70584</b> | <b>ACDSB Short/branched chain specific acyl_CoA dehydrogenase_mitochondrial</b> | <b>1.072994414</b> | <b>0.08817</b> | <b>8</b>  |
| P70584        | ASSTCQLTFENVK                                                                   | 1.148079758        | 2              | 3.288247  |
| P70584        | FAQEQIAPLVSTMDENSK                                                              | 1.079886096        | 2              | 4.963452  |
| P70584        | IFDFQGLQHVAHVATQLEAAR                                                           | 1.022390595        | 3              | 6.144009  |
| P70584        | IGTIYEGTSNIQLNTIAK                                                              | 1.049588459        | 2              | 4.556328  |
| P70584        | KFAQEQIAPLVSTMDENSK                                                             | 0.846024757        | 2              | 5.804394  |
| P70584        | SGNYVINGSK                                                                      | 0.92369228         | 2              | 2.883802  |
| P70584        | VDASVALLCDIQNTVINK                                                              | 2.706199421        | 2              | 4.921355  |
| P70584        | YYASEVAGLTTSK                                                                   | 1.071020437        | 2              | 4.13797   |
| <b>P70587</b> | <b>LRRC7 Leucine_rich repeat_containing protein 7</b>                           | <b>0.925938119</b> | <b>0.94426</b> | <b>2</b>  |
| P70587        | KESTDESEVDK                                                                     | 1.005395936        | 2              | 2.371924  |
| P70587        | SREQQPYEGNINK                                                                   | 0.924909006        | 2              | 2.487029  |
| <b>P70615</b> | <b>LMNB1 Lamin_B1</b>                                                           | <b>0.798532653</b> | <b>3.7E-07</b> | <b>5</b>  |
| P70615        | ALYETELADAR                                                                     | 0.981225486        | 2              | 3.075354  |
| P70615        | KESDLSGAQIK                                                                     | 0.955942806        | 2              | 2.531164  |
| P70615        | LSSEMNTSTVNSAR                                                                  | 0.799762841        | 2              | 3.783771  |



|               |                                                                  |                    |                |           |
|---------------|------------------------------------------------------------------|--------------------|----------------|-----------|
| P70615        | NQNSWGTGEDVK                                                     | 0.78761948         | 2              | 3.285865  |
| P70615        | SLEGDLEDLKDQIAQLEASLSAAK                                         | 0.727479944        | 3              | 4.62332   |
| <b>P70694</b> | <b>DHB5 Estradiol 17 beta_dehydrogenase 5</b>                    | <b>0.870332365</b> | <b>0.88657</b> | <b>2</b>  |
| P70694        | REDIFYTSK                                                        | 0.884169736        | 2              | 3.131126  |
| P70694        | SIGVSNFNR                                                        | 1.107885486        | 2              | 2.376778  |
| <b>P70712</b> | <b>KYNU Kynureninase</b>                                         | <b>0.896891785</b> | <b>0.98594</b> | <b>9</b>  |
| P70712        | IATELNCDPTDER                                                    | 1.164863275        | 2              | 3.587585  |
| P70712        | IGAYGHEVGK                                                       | 0.998316614        | 2              | 2.839433  |
| P70712        | LLTAILDSTERN                                                     | 1.029344357        | 2              | 3.290477  |
| P70712        | LQLIPGVNGFR                                                      | 0.883407301        | 2              | 2.524788  |
| P70712        | MEDILEVIEK                                                       | 0.900353504        | 2              | 2.588513  |
| P70712        | TYLEEELDK                                                        | 0.893121529        | 1              | 2.201579  |
| P70712        | TYLEEELDKWAK                                                     | 0.629233478        | 2              | 2.55421   |
| P70712        | VAPVPLYNSFHDVYK                                                  | 0.824168504        | 2              | 2.946423  |
| P70712        | YLNSGAGGLAGAFIHEK                                                | 1.991879196        | 2              | 4.307238  |
| <b>P80067</b> | <b>CATC Dipeptidyl peptidase 1</b>                               | <b>0.93078782</b>  | <b>0.28084</b> | <b>6</b>  |
| P80067        | GINFVSPVR                                                        | 0.832605132        | 2              | 3.120631  |
| P80067        | GTDECAIESIAMAAPIPK                                               | 0.886397712        | 3              | 4.523062  |
| P80067        | NQESCGSCYSFASLGMLEAR                                             | 0.763716086        | 2              | 3.400318  |
| P80067        | NSWGSQWGESGYFR                                                   | 0.93516635         | 2              | 3.612549  |
| P80067        | RGTDECAIESIAMAAPIPK                                              | 0.80880899         | 2              | 3.884704  |
| P80067        | YAQDFGVVEENCFPYTATDAPCKPK                                        | 0.845699008        | 3              | 5.995942  |
| <b>P80254</b> | <b>DOPD D_dopachrome decarboxylase</b>                           | <b>2.306865831</b> | <b>1.2E-05</b> | <b>4</b>  |
| P80254        | FFLEPWQIGK                                                       | 1.448575291        | 2              | 2.443477  |
| P80254        | FLTEELSLDQDR                                                     | 1.457057834        | 2              | 3.868703  |
| P80254        | LCAATATILDKPEDR                                                  | 2.356226623        | 2              | 4.249262  |
| P80254        | STEPCAHLLISSIGVVGTAEQNR                                          | 1.765815625        | 2              | 5.097519  |
| <b>P80299</b> | <b>HYES Epoxide hydrolase 2</b>                                  | <b>0.98007776</b>  | <b>0.38915</b> | <b>2</b>  |
| P80299        | ATEMGGILVGTPEDPK                                                 | 0.797372263        | 2              | 3.675416  |
| P80299        | TEIQNPSVTSK                                                      | 1.043105791        | 2              | 3.139398  |
| <b>P80313</b> | <b>TCPH T_complex protein 1 subunit eta</b>                      | <b>1.231780746</b> | <b>0.23877</b> | <b>5</b>  |
| P80313        | ATISNDGATILK                                                     | 1.157762207        | 2              | 2.597908  |
| P80313        | GGAEQFMEETER                                                     | 1.140301606        | 2              | 2.978167  |
| P80313        | LLDVVHPAAK                                                       | 1.239628903        | 2              | 2.571696  |
| P80313        | QLCDNAGFDATNILNK                                                 | 1.01272811         | 2              | 3.29668   |
| P80313        | SQDAEVGDGTTSVTLAAEFLK                                            | 1.134220424        | 2              | 4.824515  |
| <b>P80317</b> | <b>TCPZ T_complex protein 1 subunit zeta</b>                     | <b>1.101092078</b> | <b>0.85996</b> | <b>8</b>  |
| P80317        | ALQFLEQVK                                                        | 1.186881449        | 2              | 2.799048  |
| P80317        | DGNVLLHEMQIQHPTASLIAK                                            | 1.045491301        | 3              | 4.370374  |
| P80317        | GIDPFSLDALAK                                                     | 1.11888894         | 2              | 2.493104  |
| P80317        | NAIDDGCVVPGAGAVEVALAEALIK                                        | 0.896472786        | 3              | 4.183879  |
| P80317        | QADLYISEGLHPR                                                    | 1.234509527        | 2              | 2.389749  |
| P80317        | TEVNSGFFYK                                                       | 1.165585438        | 2              | 2.587647  |
| P80317        | VATAQDDITGDGTTSNVLIIGELLK                                        | 1.005281241        | 2              | 5.435468  |
| P80317        | VLAQNSGFDLQETLVK                                                 | 0.892176233        | 2              | 3.982014  |
| <b>P81155</b> | <b>VDAC2 Voltage_dependent anion_selective channel protein 2</b> | <b>1.130694759</b> | <b>0.69507</b> | <b>6</b>  |
| P81155        | LTFDTTFSPNTGK                                                    | 1.146293846        | 2              | 3.205997  |
| P81155        | SNFAVGYR                                                         | 1.175675044        | 2              | 2.440187  |
| P81155        | TGDFQLHTNVNNGTEFGGSIIYQK                                         | 1.039467501        | 3              | 3.332845  |
| P81155        | VNSSLIGVGYTQTLRPGVK                                              | 1.321150673        | 2              | 3.789334  |
| P81155        | WCEYGLTFTEK                                                      | 1.16379712         | 2              | 2.609626  |
| P81155        | YQLDPTASISAK                                                     | 1.074159082        | 2              | 3.235001  |
| <b>P82995</b> | <b>HS90A Heat shock protein HSP 90_alpha</b>                     | <b>1.066908647</b> | <b>0.78836</b> | <b>17</b> |
| P82995        | DQVANSFAVER                                                      | 1.261722732        | 2              | 2.548248  |
| P82995        | ELHINLIPNKQDR                                                    | 1.216264325        | 2              | 3.237441  |
| P82995        | ELISNSSDALDK                                                     | 1.343200756        | 2              | 2.801405  |

|               |                                                             |                    |                |           |
|---------------|-------------------------------------------------------------|--------------------|----------------|-----------|
| P82995        | FYEQFSK                                                     | 0.960811879        | 1              | 2.258059  |
| P82995        | HGLEVIYMIPIDEYCVQQLK                                        | 1.132340155        | 3              | 3.479845  |
| P82995        | HIYFITGETK                                                  | 0.991033903        | 2              | 2.734051  |
| P82995        | HLEINPDHSIETLR                                              | 1.036845465        | 2              | 4.453443  |
| P82995        | HSQFIGYPITLFVEK                                             | 1.726192021        | 2              | 3.751134  |
| P82995        | LGIHEDSQNR                                                  | 0.898522241        | 3              | 3.456845  |
| P82995        | NPDDITNEEYGEFYK                                             | 1.193646579        | 2              | 5.141033  |
| P82995        | RAPFDLFENR                                                  | 1.015302176        | 2              | 2.414553  |
| P82995        | SLTNDWEEHLAVK                                               | 0.997097811        | 2              | 4.009841  |
| P82995        | TDTGEPMGR                                                   | 1.050382585        | 2              | 2.536737  |
| P82995        | TDTGEPMGR+Oxidation(6)                                      | 1.09330633         |                |           |
| P82995        | TLTIVDTGIGMTK                                               | 0.982615738        | 2              | 4.082806  |
| P82995        | TLTIVDTGIGMTK+Oxidation(10)                                 | 1.012793231        |                |           |
| P82995        | YYTSASGDENVSLK                                              | 1.078012673        | 2              | 3.855253  |
| <b>P83732</b> | <b>RL24 60S ribosomal protein L24</b>                       | <b>1.048463969</b> | <b>0.60559</b> | <b>3</b>  |
| P83732        | AITGASLADIMAK                                               | 1.047550843        | 2              | 4.100321  |
| P83732        | CESAFLSK                                                    | 1.206572881        | 2              | 2.301211  |
| P83732        | VELCSFSGYK                                                  | 1.126292137        | 2              | 2.373016  |
| <b>P83868</b> | <b>TEBP Prostaglandin E synthase 3</b>                      | <b>1.258245097</b> | <b>0.01176</b> | <b>2</b>  |
| P83868        | HLNEIDLHFCIDPNSDK                                           | 1.371307427        | 3              | 3.456263  |
| P83868        | LTFSCGLGSDNFK                                               | 1.258180536        | 2              | 2.963548  |
| <b>P83941</b> | <b>ELOC Transcription elongation factor B polypeptide 1</b> | <b>1.075745984</b> | <b>0.82758</b> | <b>2</b>  |
| P83941        | AMLSGPGQFAENETNEVNFR                                        | 0.957292049        | 2              | 4.484667  |
| P83941        | TYGGCEGPDAMYVK                                              | 1.118777497        | 2              | 2.820043  |
| <b>P84082</b> | <b>ARF2 ADP_ribosylation factor 2</b>                       | <b>1.011656556</b> | <b>1</b>       | <b>2</b>  |
| P84082        | NISFTVWDVGGQDK                                              | 0.871640143        | 2              | 4.573415  |
| P84082        | QDLPNAMNAAEITDK                                             | 1.014824737        | 2              | 4.238098  |
| <b>P84083</b> | <b>ARF5 ADP_ribosylation factor 5</b>                       | <b>0.937972355</b> | <b>0.9994</b>  | <b>3</b>  |
| P84083        | DAVLLVFANK                                                  | 1.252304181        | 2              | 3.551579  |
| P84083        | QDMPNAMPVSELTDK                                             | 1.019696694        | 2              | 3.038013  |
| P84083        | VQESADELQK                                                  | 0.964166264        | 2              | 3.120927  |
| <b>P84089</b> | <b>ERH Enhancer of rudimentary homolog</b>                  | <b>1.102368699</b> | <b>0.93451</b> | <b>2</b>  |
| P84089        | ADTQTYQPYNK                                                 | 1.240764856        | 2              | 2.845531  |
| P84089        | TYADYESVNECMGVCK                                            | 1.0432791          | 2              | 4.376767  |
| <b>P84100</b> | <b>RL19 60S ribosomal protein L19</b>                       | <b>0.786696744</b> | <b>0.00037</b> | <b>2</b>  |
| P84100        | LLADQAEAR                                                   | 1.231605597        | 2              | 3.25748   |
| P84100        | VWLDPNETNEIANANSR                                           | 1.126351108        | 2              | 5.359803  |
| <b>P84104</b> | <b>SRSF3 Serine/arginine rich splicing factor 3</b>         | <b>0.948262726</b> | <b>0.7383</b>  | <b>2</b>  |
| P84104        | AFGYGPLR                                                    | 0.948491816        | 2              | 2.326913  |
| P84104        | VYVGNLGNNGNK                                                | 0.941652483        | 2              | 2.312838  |
| <b>P84245</b> | <b>H33 Histone H3.3</b>                                     | <b>0.874393623</b> | <b>0.66997</b> | <b>5</b>  |
| P84245        | DIQLAR                                                      | 1.584581648        | 1              | 1.954342  |
| P84245        | FQSAAIGALQEASEAYLVGLFEDTNLCAIHAK                            | 0.878367892        | 4              | 6.475613  |
| P84245        | RVTIMPKDIQLAR+Oxidation(4)                                  | 0.916650907        |                |           |
| P84245        | STELLIR                                                     | 0.934903222        | 2              | 2.396577  |
| P84245        | YRPGTVALR                                                   | 0.976355533        | 2              | 2.390287  |
| <b>P84817</b> | <b>FIS1 Mitochondrial fission 1 protein</b>                 | <b>1.023208866</b> | <b>0.96495</b> | <b>4</b>  |
| P84817        | FQSEQAAGSVSK                                                | 1.043438044        | 2              | 2.661446  |
| P84817        | GIVLLELLPK                                                  | 0.888672106        | 2              | 2.47952   |
| P84817        | GLLQTEPQNNQAK                                               | 1.08678093         | 2              | 3.404764  |
| P84817        | KFQSEQAAGSVSK                                               | 0.918983611        | 2              | 4.3534    |
| <b>P85834</b> | <b>EFTU Elongation factor Tu_mitochondrial</b>              | <b>0.989237915</b> | <b>0.33173</b> | <b>16</b> |
| P85834        | AEAGDNLGALVR                                                | 0.942962107        | 2              | 3.889097  |
| P85834        | DKPHVNVGTIGHVDHGK                                           | 1.684056544        | 3              | 3.862269  |
| P85834        | DLEKPFLLPVESVYIPGR                                          | 1.3072488          | 2              | 4.01343   |
| P85834        | ELLTEFGYKGEETPVIVGSALCALEQR                                 | 0.915729326        | 3              | 3.830712  |

|               |                                                               |                    |                |           |
|---------------|---------------------------------------------------------------|--------------------|----------------|-----------|
| P85834        | GDECELLGHNK                                                   | 1.066863579        | 2              | 2.598526  |
| P85834        | GEETPVIVGSALCALEQR                                            | 0.942244344        | 2              | 4.514171  |
| P85834        | GITINAAHVEYSTAAR                                              | 2.356226623        | 2              | 3.56819   |
| P85834        | GTVVGTGLR                                                     | 1.000243782        | 2              | 2.818779  |
| P85834        | HYAHTDCPGHADYVK                                               | 0.837237881        | 2              | 4.252855  |
| P85834        | KGDECELLGHNK                                                  | 0.834147648        | 2              | 3.707256  |
| P85834        | KYEEIDNAPEER                                                  | 0.962347037        | 2              | 3.770941  |
| P85834        | LLDAVDYIPVPTR                                                 | 0.833262624        | 2              | 3.810656  |
| P85834        | QIGVEHVVVVYVVK                                                | 0.939168082        | 2              | 2.6654    |
| P85834        | TIGTGLVTDVPAMTEEDK                                            | 0.927425156        | 2              | 3.254942  |
| P85834        | TIGTGLVTDVPAMTEEDKNIK                                         | 2.256630223        | 2              | 3.503105  |
| P85834        | YEEIDNAPEER                                                   | 0.991631451        | 2              | 3.4091    |
| <b>P85968</b> | <b>6PGD 6_phosphogluconate dehydrogenase_ decarboxylating</b> | <b>1.007560574</b> | <b>1</b>       | <b>10</b> |
| P85968        | AGQAVDDFIEK                                                   | 0.996810013        | 2              | 3.314199  |
| P85968        | CLSSLKEER                                                     | 0.975975775        | 2              | 2.625907  |
| P85968        | FQDTDGKELLPK                                                  | 1.170300715        | 2              | 2.954648  |
| P85968        | GILFVGSVSGGEEGAR                                              | 1.018511846        | 2              | 5.384297  |
| P85968        | HEMLPANLIQAQR                                                 | 0.811744742        | 2              | 2.704418  |
| P85968        | LVPLLDTGDIIDGGNSEYR                                           | 1.016381898        | 2              | 5.130198  |
| P85968        | NPELQNLLDDFFK                                                 | 0.912961948        | 2              | 4.459496  |
| P85968        | SAVDDCQDSWR                                                   | 1.143220844        | 2              | 3.109797  |
| P85968        | VGTGEPCCDWVGDGEGHFVK                                          | 0.879463831        | 2              | 4.455013  |
| P85968        | YGPSLMPGGNK                                                   | 1.010095926        | 2              | 2.31253   |
| <b>P85971</b> | <b>6PGL 6_phosphogluconolactonase</b>                         | <b>1.146838443</b> | <b>0.79949</b> | <b>5</b>  |
| P85971        | DLPAATAPAGPASFAR                                              | 1.147535374        | 2              | 3.196603  |
| P85971        | ILEDQESALPAAMVQPR                                             | 0.989086401        | 2              | 4.751103  |
| P85971        | LPIPDSQVLTIDPALPVEDAAEDYAR                                    | 0.906270736        | 2              | 4.655992  |
| P85971        | TGALCWFLDEAAAR                                                | 0.891656829        | 2              | 4.000999  |
| P85971        | WTLGFCDER                                                     | 1.016158282        | 2              | 2.582484  |
| <b>P85972</b> | <b>VINC Vinculin</b>                                          | <b>0.8895162</b>   | <b>4.2E-05</b> | <b>8</b>  |
| P85972        | AQQVSQGLDVLTAQ                                                | 1.044146065        | 2              | 3.984172  |
| P85972        | AVAGNISDPGLQK                                                 | 0.970663754        | 2              | 3.106084  |
| P85972        | KIDAAQNWADPNNGPEGEEQIR                                        | 0.805595072        | 3              | 5.229705  |
| P85972        | QVATALQNLQTK                                                  | 0.982073725        | 2              | 2.989647  |
| P85972        | SLLDASEEAIKK                                                  | 0.998104766        | 2              | 2.379302  |
| P85972        | STVEGIQASVK                                                   | 0.910678083        | 2              | 2.444925  |
| P85972        | VDQLAAQLADLAAR                                                | 0.810021354        | 2              | 3.093156  |
| P85972        | VLQLTSWDEDAAWASK                                              | 0.867188316        | 2              | 2.479235  |
| <b>P85973</b> | <b>PNPH Purine nucleoside phosphorylase</b>                   | <b>0.855314135</b> | <b>0.95593</b> | <b>11</b> |
| P85973        | ASHQEVLEAGK                                                   | 0.975656213        | 2              | 3.443137  |
| P85973        | DHINLPGFCGQNPLR                                               | 1.076346169        | 3              | 4.061932  |
| P85973        | ELQEGTYIMSAGPTFETVAESCLLR                                     | 0.940677727        | 2              | 5.300961  |
| P85973        | FEVGDIMLIR                                                    | 0.853820825        | 2              | 3.277911  |
| P85973        | HRPQVAVICGSLGGLTAK                                            | 1.012582618        | 3              | 6.021018  |
| P85973        | LTQPQAFDYNEIPNFQSTVQGHAGR                                     | 1.043440214        | 3              | 4.416514  |
| P85973        | MLGADAVGMSTVPEVIVAR                                           | 0.857401918        | 2              | 4.660902  |
| P85973        | MLGADAVGMSTVPEVIVAR+Oxidation(0)                              | 0.883023642        |                |           |
| P85973        | VFGFSLITNK                                                    | 0.807026408        | 2              | 3.361583  |
| P85973        | VFHLLGVDLTVVTAAGGLNPK                                         | 0.901711457        | 2              | 5.22585   |
| P85973        | VVMDYNNLEK                                                    | 0.843845833        | 2              | 2.637196  |
| <b>P86048</b> | <b>RL10L 60S ribosomal protein L10_like</b>                   | <b>0.975782216</b> | <b>0.28529</b> | <b>5</b>  |
| P86048        | AKVDEFPLCGHMVSDEYEQLSSEALEAAR                                 | 0.729437709        | 3              | 4.144639  |
| P86048        | GAFGKPGQTVAR                                                  | 1.187101058        | 2              | 2.540185  |
| P86048        | MLSCAGADR                                                     | 1.044495674        | 2              | 2.322023  |
| P86048        | VDEFPLCGHMVSDEYEQLSSEALEAAR                                   | 1.206284056        | 3              | 4.983397  |
| P86048        | VHIGQVIMSIR                                                   | 0.95230223         | 2              | 2.800275  |

| P86252 |                                  | 0.942482888 | 0.74793 | 4        |
|--------|----------------------------------|-------------|---------|----------|
| P86252 | AAGSLTDECR                       | 0.957163536 | 2       | 3.063311 |
| P86252 | ADSAEYSVMTTGGQSSAK               | 2.678410575 | 2       | 4.037457 |
| P86252 | AEVSELPVVR                       | 0.863426107 | 2       | 2.808608 |
| P86252 | AISGDLTAEHEELER                  | 0.852616917 |         |          |
| P86252 | ALLTPVAIAAGR                     | 0.996116026 | 2       | 2.515415 |
| P86252 | AMQEINYGPSPDNSIKLVR+Oxidation(1) | 0.895231131 |         |          |
| P86252 | ASMMGQRASLLTAR+Oxidation(2)      | 0.829371667 |         |          |
| P86252 | AVAENQPFLIEAMTYR                 | 1.098339612 | 2       | 4.512483 |
| P86252 | AVEIAHALCLTERQIK                 | 0.836701185 |         |          |
| P86252 | DQMVKNNHFTLK+Oxidation(2)        | 0.970026939 |         |          |
| P86252 | EELEKMK                          | 0.846016494 | 1       | 2.121805 |
| P86252 | EIAGATPYITAAEEK                  | 1.363995336 | 2       | 3.062317 |
| P86252 | EKMNKPELFGGEEK+Oxidation(2)      | 1.13671599  |         |          |
| P86252 | ELDSITPDITPGWK                   | 0.845057753 | 2       | 3.436802 |
| P86252 | FFRPHFLOAPGDLTVQEGK              | 0.878579385 |         |          |
| P86252 | FKLINSTNIR                       | 0.808984383 |         |          |
| P86252 | GENLVSMTEGPPPK                   | 1.440230306 |         |          |
| P86252 | GIEQAVQSHAVAEPEAR                | 1.229711726 | 2       | 4.984147 |
| P86252 | GNIYSLNEGYAK                     | 0.989239681 | 2       | 4.063055 |
| P86252 | GVYAVGDVCGK                      | 0.97528908  | 1       | 2.256901 |
| P86252 | HLQTYGEHYPLDHFDK                 | 0.585139031 | 3       | 3.382231 |
| P86252 | HVIHTVGPPIAVGQPTASQAAELR         | 1.009584639 | 3       | 4.892754 |
| P86252 | IGHHSTSDSSAYR                    | 1.402129059 | 3       | 4.058208 |
| P86252 | KAMQEINYGPSPDNSIKLVR             | 0.813025352 |         |          |
| P86252 | KGNIYSLNEGYAK                    | 1.00396404  | 2       | 3.924677 |
| P86252 | KHTLIIEGATK                      | 6.380388303 | 2       | 2.65277  |
| P86252 | KLQHELEEAER                      | 1.634400315 | 2       | 3.797122 |
| P86252 | KVVSDDLVMISHLK                   | 0.837706309 |         |          |
| P86252 | LEFIQPNVISGIPIYR                 | 0.870634776 | 2       | 2.797159 |
| P86252 | LFEEQLK                          | 0.846016494 |         |          |
| P86252 | LGDAVEQGVINNSVLGYFIGR            | 0.772798237 | 2       | 4.409735 |
| P86252 | LMQVNDTLTSEDAGLR                 | 1.056055021 |         |          |
| P86252 | LNNIYQNNLTK                      | 1.1723929   | 2       | 2.995801 |
| P86252 | LQHELEEAER                       | 3.435080516 | 2       | 3.616211 |
| P86252 | MNLQDELDELK                      | 0.989143131 | 2       | 2.48876  |
| P86252 | MNLQDELDELK+Oxidation(0)         | 0.90110873  |         |          |
| P86252 | MQQVEASLQPETLK+Oxidation(0)      | 0.844350723 |         |          |
| P86252 | NNGYAISTPTSEQYR                  | 0.855205934 | 2       | 3.662744 |
| P86252 | QGQASAQGRAGSQGQAQGR              | 0.738097916 |         |          |
| P86252 | QGQIINPSEDPHLPQEEVLK             | 0.833334581 | 2       | 2.993174 |
| P86252 | QTCLKTVLLTDNK                    | 0.538840229 |         |          |
| P86252 | QTITAQNAAVQAVK                   | 1.187804406 | 2       | 4.087745 |
| P86252 | QYLLNQGWWDDEEQEK                 | 1.042380076 | 2       | 3.815337 |
| P86252 | RAALQAEIEELR                     | 2.315686808 | 2       | 3.95424  |
| P86252 | SEIQAEQDR                        | 1.202505658 | 2       | 2.764528 |
| P86252 | SLEDALNQTATVTR                   | 0.994144011 | 2       | 4.29333  |
| P86252 | SSSLLAKSPSK                      | 0.712920514 |         |          |
| P86252 | TLHVEEVVPSVIEPSFGLGR             | 1.091282398 | 3       | 3.684277 |
| P86252 | TSSAEMPTIPLGSAVEAIR              | 1.006952211 | 2       | 4.047329 |
| P86252 | TVNVVQFEPNK                      | 1.137597288 | 2       | 2.448723 |
| P86252 | VDDSSGSIQR                       | 1.379482873 | 2       | 2.619897 |
| P86252 | VDGNDVFAVYNATK                   | 1.120701798 | 2       | 3.957363 |
| P86252 | VMEAFEQAER                       | 0.894496167 | 2       | 3.415471 |
| P86252 | VVSQYHELVVQAR                    | 2.983807429 | 2       | 3.593987 |
| P86252 | YNENHQHGK                        | 1.075990455 |         |          |
| P86252 | YSTSSSGVTAGK                     | 0.974945767 | 2       | 2.562317 |

|               |                                                                   |                    |                |           |
|---------------|-------------------------------------------------------------------|--------------------|----------------|-----------|
| P86252s       | DYLGDFIEHYAQLGPSQPPDLAQQAQDEPR                                    | 1.050785774        | 3              | 3.802206  |
| P86252s       | LEGDLKDLELQADSAVKGR                                               | 0.761724518        |                |           |
| P86252s       | LIDDYGVVEEPAELPEGTSLTVDNKR                                        | 1.001378302        | 3              | 4.302517  |
| P86252s       | VASDAQLELDKLDGELKK                                                | 1.106335182        |                |           |
| <b>P97384</b> | <b>ANX11 Annexin A11</b>                                          | <b>1.084889586</b> | <b>0.88375</b> | <b>2</b>  |
| P97384        | GFGTDEQAIIDCLGSR                                                  | 1.113208741        | 2              | 4.320592  |
| P97384        | SELDLDIR                                                          | 0.866707692        | 2              | 2.617257  |
| <b>P97519</b> | <b>HMGCL Hydroxymethylglutaryl_CoA lyase_ mitochondrial</b>       | <b>0.916557914</b> | <b>0.77877</b> | <b>7</b>  |
| P97519        | GFEEAVAAGAK                                                       | 1.106399288        | 2              | 3.594613  |
| P97519        | GYVSCALGCPYEGK                                                    | 0.974196194        | 2              | 4.214695  |
| P97519        | KNVNCSIEESFQR                                                     | 1.161705377        | 2              | 3.293892  |
| P97519        | LIDMLSEAGLPVIEATSFVSPK                                            | 0.797535081        | 3              | 4.579722  |
| P97519        | LLEAGDFICQALNR                                                    | 1.14272912         | 2              | 4.501926  |
| P97519        | NVNCSIEESFQR                                                      | 1.099197379        | 2              | 3.655052  |
| P97519        | WVPQMADHSDVLK                                                     | 0.968743559        | 2              | 2.797295  |
| <b>P97521</b> | <b>MCAT Mitochondrial carnitine/acylcarnitine carrier protein</b> | <b>0.870103856</b> | <b>0.97475</b> | <b>7</b>  |
| P97521        | CLLQIQASSGK                                                       | 0.727191128        | 1              | 2.917691  |
| P97521        | EEGVTSLYK                                                         | 1.003679841        | 1              | 2.024671  |
| P97521        | KLYQEFQIR                                                         | 1.036314505        | 2              | 2.533414  |
| P97521        | LQTQPPSLPGQPPMYSGTIDCFR                                           | 0.88728364         | 2              | 4.041005  |
| P97521        | LYQEFQIR                                                          | 0.877946921        | 2              | 2.60825   |
| P97521        | SVHDLSVPR                                                         | 0.877145151        | 2              | 2.594274  |
| P97521        | YSGTLDCAK                                                         | 0.811792141        | 2              | 2.345995  |
| <b>P97524</b> | <b>S27A2 Very long_chain acyl_CoA synthetase</b>                  | <b>1.032723104</b> | <b>0.80709</b> | <b>14</b> |
| P97524        | GEVLLICK                                                          | 1.01050043         | 2              | 2.62281   |
| P97524        | ITELTPFFGYAGGK                                                    | 1.113747408        | 2              | 2.924391  |
| P97524        | SEVTFTTPAVVIYTSGTTGLPK                                            | 1.485513164        | 2              | 2.995711  |
| P97524        | SLLHCFQCCGAK                                                      | 0.972546355        | 2              | 2.73525   |
| P97524        | TILHVFLQAR                                                        | 0.826229712        | 3              | 3.314967  |
| P97524        | TSNTNGVDTVLDKVDGVSADPIPESWR                                       | 1.038169521        | 3              | 4.804519  |
| P97524        | TYVPMTEDIYNAIIDK                                                  | 1.086391683        | 3              | 4.141877  |
| P97524        | VDGVSADPIPESWR                                                    | 1.490928526        | 2              | 3.059649  |
| P97524        | VLLASPELHEAVEEVLPTLK                                              | 1.023565102        | 3              | 4.220395  |
| P97524        | VTLMEEGFNPSVIK                                                    | 0.980779951        | 2              | 3.992028  |
| P97524        | YDVEKDEPVR                                                        | 0.941553207        | 2              | 3.115143  |
| P97524        | YDVEKDEPVRDANGYCIK                                                | 1.339226582        | 3              | 3.612456  |
| P97524        | YLCNTPQKPNDR                                                      | 1.112930591        | 2              | 3.058653  |
| P97524        | YNATVIQYIGELLR                                                    | 1.122333638        | 2              | 4.166836  |
| <b>P97532</b> | <b>THTM 3_mercaptopyruvate sulfurtransferase</b>                  | <b>1.085061076</b> | <b>0.99983</b> | <b>9</b>  |
| P97532        | AFGHHSVSLLDGGFR                                                   | 1.207698182        | 2              | 3.540091  |
| P97532        | ALVSAQWVAEALK                                                     | 1.068134454        | 2              | 4.239162  |
| P97532        | AQPEHVISQGR                                                       | 1.005540003        | 2              | 2.849282  |
| P97532        | DGIEPGHIPGSVNIPFTEFLTSEGLEK                                       | 1.084764036        | 3              | 6.738776  |
| P97532        | FQGTQPEPR                                                         | 1.035929944        | 2              | 2.820221  |
| P97532        | LLDASWYLPK                                                        | 1.101701871        | 2              | 3.828099  |
| P97532        | SPSEPAEFCAQLDPSFIK                                                | 0.307419802        | 2              | 3.001405  |
| P97532        | THEDILENLDR                                                       | 1.073355623        | 2              | 3.252385  |
| P97532        | YWLSQNLPISSGK                                                     | 0.969567351        | 2              | 3.75554   |
| <b>P97536</b> | <b>CAND1 Cullin_associated NEDD8_dissociated protein 1</b>        | <b>1.015022075</b> | <b>0.69343</b> | <b>8</b>  |
| P97536        | AADIDQEVK                                                         | 1.157822996        | 2              | 2.487307  |
| P97536        | EGPAVVGQFIQDVK                                                    | 1.053519372        | 2              | 3.104601  |
| P97536        | FTISDHPQPIDPLK                                                    | 0.877052359        | 2              | 2.399117  |
| P97536        | ITSEALLVTQQLVK                                                    | 0.918827652        | 2              | 2.703396  |
| P97536        | LTLIDPETLLPR                                                      | 1.086014876        | 2              | 2.801983  |

|               |                                                   |                    |                |           |
|---------------|---------------------------------------------------|--------------------|----------------|-----------|
| P97536        | SVILEAFSSPSEEVK                                   | 1.160891413        | 2              | 2.764555  |
| P97536        | TLEDPDLNVR                                        | 1.048496978        | 2              | 2.308181  |
| P97536        | TYIQCIAISR                                        | 0.943622408        | 2              | 2.959081  |
| <b>P97562</b> | <b>ACO2 Peroxisomal acyl_coenzyme A oxidase 2</b> | <b>0.985648152</b> | <b>0.98738</b> | <b>20</b> |
| P97562        | ATASCTYEGENTVLYLQVAR                              | 1.0827935          | 2              | 3.932951  |
| P97562        | ATFADFAQGAEICR                                    | 1.206054188        | 2              | 4.969956  |
| P97562        | CSAQTAAADR                                        | 1.185013989        | 2              | 2.989659  |
| P97562        | DFSLLPELHALSTGMK                                  | 0.894329373        | 2              | 2.378968  |
| P97562        | EAFDLLPLIR                                        | 1.081924294        | 2              | 2.878322  |
| P97562        | EELYEDAIQK                                        | 2.260355264        | 2              | 2.367866  |
| P97562        | FAEVLDPDGTQQR                                     | 0.680020678        | 2              | 2.753202  |
| P97562        | HSPSFSVER                                         | 0.97230907         | 2              | 2.410936  |
| P97562        | ILEYQTQQQK                                        | 0.98752892         | 2              | 3.814326  |
| P97562        | KVESIIQSDPVFNLK                                   | 0.934319586        | 2              | 4.956357  |
| P97562        | LDKEPEIQR                                         | 1.075009389        | 2              | 2.698369  |
| P97562        | LFEWAQK                                           | 0.854829519        | 2              | 2.455192  |
| P97562        | LGTPQSNYLGMLVTR                                   | 0.978128623        | 2              | 3.51787   |
| P97562        | LTNILDGGLPNTVLR                                   | 1.03595774         | 2              | 4.660285  |
| P97562        | MGLEHIDNGFLQNHVR                                  | 1.091132477        | 3              | 4.276673  |
| P97562        | SGVDQHDAWNQTTVIHLQAAK                             | 0.927357132        | 3              | 6.127796  |
| P97562        | SLEDHTPLPGITVGDIGPK                               | 0.945897851        | 3              | 4.6145    |
| P97562        | SLGSDEQIAK                                        | 1.029123287        | 2              | 2.630379  |
| P97562        | VESIIQSDPVFNLK                                    | 1.023286939        | 2              | 4.25094   |
| P97562        | VLDGNVNLHLGVMNAIR                                 | 0.775349528        | 2              | 3.217199  |
| <b>P97576</b> | <b>GRPE1 GrpE protein homolog 1_mitochondrial</b> | <b>1.126434655</b> | <b>0.00321</b> | <b>3</b>  |
| P97576        | ALADTENLR                                         | 1.08007633         | 2              | 2.652947  |
| P97576        | DLLEVADILEK                                       | 1.902666177        | 2              | 3.208895  |
| P97576        | TLRPALVGVVK                                       | 1.20382419         | 2              | 2.532409  |
| <b>P97584</b> | <b>PTGR1 Prostaglandin reductase 1</b>            | <b>0.876793362</b> | <b>0.00488</b> | <b>5</b>  |
| P97584        | ALDLMNWVSEGK                                      | 0.819098869        | 2              | 4.106936  |
| P97584        | GGETVLVNAAGAVGSSVVGQIAK                           | 0.959074493        | 2              | 5.645947  |
| P97584        | HFEFGPTDSNFELR                                    | 0.841292986        | 2              | 3.738657  |
| P97584        | TGPCPPGPSPEVIYQQLR                                | 0.979252692        | 2              | 4.031363  |
| P97584        | YHEYITEGFEK                                       | 0.906708396        | 2              | 2.835616  |
| <b>P97608</b> | <b>OPLA 5_oxoprolinase</b>                        | <b>1.171960073</b> | <b>0.74933</b> | <b>11</b> |
| P97608        | AGDFGAAFVER                                       | 0.9843608          | 2              | 3.01052   |
| P97608        | GGPVTVDANLVLR                                     | 1.050185439        | 2              | 2.737121  |
| P97608        | GHTACADAYLTPTIQR                                  | 0.834250527        | 2              | 3.424024  |
| P97608        | GSILDPSPEAAVVGGNVLTQR                             | 1.190196106        | 2              | 4.799467  |
| P97608        | ISVGAEGPSMADR                                     | 0.963252118        | 2              | 2.705291  |
| P97608        | ISVGAEGPSMADR+Oxidation(9)                        | 1.067796364        |                |           |
| P97608        | ITDPEILESR                                        | 0.594336414        | 2              | 2.644432  |
| P97608        | LLSEDPANYADAPTEGIR                                | 0.932042041        | 2              | 4.303636  |
| P97608        | SGLFVVGPEAGAHGPACYR                               | 0.985510046        | 2              | 3.774463  |
| P97608        | SGLQLEDTPK                                        | 1.414972209        | 2              | 2.505929  |
| P97608        | TGDLEIQPVDLEALR                                   | 0.927966625        | 2              | 4.335544  |
| <b>P97612</b> | <b>FAAH1 Fatty_acid amide hydrolase 1</b>         | <b>0.848187764</b> | <b>0.95629</b> | <b>7</b>  |
| P97612        | FMREVEQLMTPQK+Oxidation(8)                        | 0.916413292        |                |           |
| P97612        | GHDSTLGLSLNEGMPSESDCVVVQVLK                       | 0.938245581        | 3              | 4.687197  |
| P97612        | GTNCVTSYLTDCETQLSQAPR                             | 0.894005989        | 2              | 4.940621  |
| P97612        | GYFGDIWDIILK                                      | 0.837487627        | 2              | 3.012081  |
| P97612        | LQSGELSPEAVFFTYLKG                                | 1.032242736        | 2              | 4.712319  |
| P97612        | NSVGLPVAVQCVALPWQEELCLR                           | 0.876657922        | 2              | 4.173378  |
| P97612        | SPGGSSGGEGALIGSGSPLGLTDIGGSIR                     | 0.738703803        | 2              | 4.759167  |
| <b>P97697</b> | <b>IMPA1 Inositol monophosphatase 1</b>           | <b>0.911849556</b> | <b>0.65833</b> | <b>2</b>  |
| P97697        | SLLVTELGSSR                                       | 0.908630249        | 2              | 2.370705  |
| P97697        | SSPADLVTVDQK                                      | 1.070757847        | 2              | 2.782658  |

|               |                                                                       |                    |                |           |
|---------------|-----------------------------------------------------------------------|--------------------|----------------|-----------|
| <b>P97700</b> | <b>M2OM Mitochondrial 2_oxoglutarate/malate carrier protein</b>       | <b>1.013265344</b> | <b>0.7044</b>  | <b>4</b>  |
| P97700        | AVVVNAAQLASYSQSK                                                      | 0.86488282         | 2              | 4.764484  |
| P97700        | GIYTGLSAGLLR                                                          | 0.904403801        | 2              | 2.838662  |
| P97700        | LGIYTVLFR                                                             | 0.671868571        | 2              | 2.725049  |
| P97700        | LTGADGTPPGFLLK                                                        | 1.015607881        | 2              | 3.152544  |
| <b>P97840</b> | <b>LEG9 Galectin_9</b>                                                | <b>1.648323182</b> | <b>1.6E-06</b> | <b>2</b>  |
| P97840        | NTQINNSWGPEER                                                         | 1.485482215        | 2              | 2.45388   |
| P97840        | SINISGVVLPDAK                                                         | 1.827735201        | 2              | 3.382073  |
| <b>P97852</b> | <b>DHB4 Peroxisomal multifunctional enzyme type 2</b>                 | <b>0.971225258</b> | <b>9.9E-20</b> | <b>21</b> |
| P97852        | AVANYDSVEAGEK                                                         | 1.052600364        | 2              | 4.025462  |
| P97852        | AYALFAER                                                              | 1.034820873        | 2              | 3.573151  |
| P97852        | CEAVIADILDK                                                           | 0.983531046        | 2              | 2.462658  |
| P97852        | DTTSLNQAALYR                                                          | 2.665573139        | 2              | 2.474168  |
| P97852        | FVYEGSADFSLPTFGVIVAQK                                                 | 0.755230308        | 2              | 4.482731  |
| P97852        | GALVVVNDLGGDFK                                                        | 0.965047921        | 2              | 4.382337  |
| P97852        | GSSAADKVVVEIR                                                         | 0.972035083        | 2              | 2.719899  |
| P97852        | HVLQQFADNDVSR                                                         | 0.982207592        | 2              | 4.46525   |
| P97852        | ICDFSNASKPK                                                           | 0.915096723        | 3              | 3.767988  |
| P97852        | IDSEGISQNHGTQVASADASGFAGVVGHK                                         | 0.994354583        | 3              | 5.501728  |
| P97852        | IDVVVNNAGILR                                                          | 0.866429647        | 2              | 3.404274  |
| P97852        | ISDEDWDIIQR                                                           | 0.902266651        | 2              | 3.788776  |
| P97852        | KNNIHCNTIAPNAGSR                                                      | 0.753475389        | 2              | 4.858433  |
| P97852        | LNPQNAFFSGR                                                           | 1.006722676        | 2              | 2.634136  |
| P97852        | NGSGEVYQGPAK                                                          | 0.990083654        | 2              | 3.084965  |
| P97852        | NNIHCNTIAPNAGSR                                                       | 0.982731535        | 2              | 4.571816  |
| P97852        | SIQUESTGGIIEVLHK                                                      | 0.735484004        | 2              | 4.006524  |
| P97852        | SLMSGGLAEVPLGSINFAK                                                   | 0.80756101         | 2              | 3.042466  |
| P97852        | VLHGQYLELYKPLPR                                                       | 0.75200003         | 2              | 4.40263   |
| P97852        | VNAVFEWHITK                                                           | 1.092293106        | 2              | 2.518687  |
| P97852        | VVLVTGAGGGLGR                                                         | 1.00926952         | 2              | 3.716695  |
| <b>Q00238</b> | <b>ICAM1 Intercellular adhesion molecule 1</b>                        | <b>1.074910131</b> | <b>0.86975</b> | <b>2</b>  |
| Q00238        | LTPDLLEVGTQQK                                                         | 0.888348542        | 2              | 3.083777  |
| Q00238        | VELDPLPAWQQVGK                                                        | 1.120802166        | 2              | 2.946469  |
| <b>Q00438</b> | <b>PTBP1 Polypyrimidine tract_binding protein 1</b>                   | <b>0.914272158</b> | <b>0.99965</b> | <b>4</b>  |
| Q00438        | IAIPGLAGAGNSVLLSNLNP                                                  | 0.886415552        | 2              | 4.195621  |
| Q00438        | KLPSDVTEGEVISLGLPFGK                                                  | 0.989986481        | 2              | 4.71256   |
| Q00438        | LSLDGQNIYNACCTLR                                                      | 0.917654393        | 2              | 3.539298  |
| Q00438        | NNQFQALLQYADPVSQAQAK                                                  | 0.967454804        | 2              | 5.648084  |
| <b>Q00780</b> | <b>chain</b>                                                          | <b>0.890004053</b> | <b>2.1E-06</b> | <b>4</b>  |
| Q00780        | AGPMGMAGPKGPMGPMGPKGIGPYGQPGPK+Oxidation(3)                           | 1.079101758        |                |           |
| Q00780        | AGPMGMAGPKGPMGPMGPKGIGPYGQPGPK+Oxidation(5)                           | 1.079101758        |                |           |
| Q00780        | GQYLEMPLPMLPMDLKGEPGPPGKPGPR+Oxidation(5)                             | 0.734043114        |                |           |
| Q00780        | GQYLEMPLPMLPMDLKGEPGPPGKPGPR+Oxidation(5)                             | 0.734043114        |                |           |
| <b>Q00P19</b> | <b>HNRL2 Heterogeneous nuclear ribonucleoprotein U_like protein 2</b> | <b>0.920951566</b> | <b>0.09145</b> | <b>3</b>  |
| Q00P19        | AVEEQGDDQDSEK                                                         | 0.741069867        | 2              | 3.826132  |
| Q00P19        | EEAQPIVTKYK                                                           | 1.603172322        | 1              | 1.944967  |
| Q00P19        | SGDETPGSEAPGDK                                                        | 0.593414894        | 2              | 2.854772  |
| <b>Q01177</b> | <b>PLMN Plasminogen</b>                                               | <b>0.741250078</b> | <b>6.3E-09</b> | <b>3</b>  |
| Q01177        | ILGSDVQQIAVTK                                                         | 0.741708218        | 2              | 3.72667   |
| Q01177        | LVLEPNDADIALLK                                                        | 0.80753705         | 2              | 2.585154  |

|               |                                                                                                                              |                    |                |           |
|---------------|------------------------------------------------------------------------------------------------------------------------------|--------------------|----------------|-----------|
| Q01177        | STELCAGHLAGGIDSCQGDGSGPLVCFEK                                                                                                | 0.697220224        | 3              | 4.320611  |
| <b>Q01205</b> | <b>ODO2 Dihydropyridyllysine_residue succinyltransferase component of 2_oxoglutarate dehydrogenase complex_mitochondrial</b> | <b>0.903692732</b> | <b>0.00589</b> | <b>4</b>  |
| Q01205        | ASAFALQEQPVVNAVIDDATK                                                                                                        | 0.878332123        | 2              | 6.318629  |
| Q01205        | NDVITVQTPAFAESVTEGDVR                                                                                                        | 1.011858922        | 2              | 5.202766  |
| Q01205        | NVETMNYADIER                                                                                                                 | 0.899727691        | 2              | 3.414136  |
| Q01205        | VEGGTPLFTLR                                                                                                                  | 0.878545533        | 2              | 3.219785  |
| <b>Q01405</b> | <b>SC23A Protein transport protein Sec23A</b>                                                                                | <b>1.023202637</b> | <b>0.83487</b> | <b>4</b>  |
| Q01405        | AETEEGPDVLR                                                                                                                  | 1.045808465        | 2              | 2.906969  |
| Q01405        | AVLNPLCQVDYR                                                                                                                 | 1.010940653        | 2              | 2.731359  |
| Q01405        | HLLQAPVDDAQEILHSR                                                                                                            | 1.150722478        | 3              | 5.625575  |
| Q01405        | YIDTEHGGSQAR                                                                                                                 | 1.226622619        | 2              | 3.281142  |
| <b>Q02253</b> | <b>MMSA Methylmalonate_semialdehyde dehydrogenase [acylating]_mitochondrial</b>                                              | <b>0.908600146</b> | <b>9.9E-20</b> | <b>31</b> |
| Q02253        | AEMEAAVAACK                                                                                                                  | 0.945855114        | 2              | 3.806141  |
| Q02253        | AEMEAAVAACK+Oxidation(2)                                                                                                     | 0.989540635        |                |           |
| Q02253        | AFPAWADTSILSR                                                                                                                | 0.944161785        | 2              | 4.002167  |
| Q02253        | AISFVGSNQAGEYIFER                                                                                                            | 0.919811556        | 2              | 5.175509  |
| Q02253        | CMALSTAVLVGEAK                                                                                                               | 0.938745544        | 2              | 4.501402  |
| Q02253        | CMALSTAVLVGEAK+Oxidation(1)                                                                                                  | 0.938449385        |                |           |
| Q02253        | EEDATLSSPAVVMPTMGR                                                                                                           | 1.084217115        | 2              | 4.306534  |
| Q02253        | EEDATLSSPAVVMPTMGR+Oxidation(12)                                                                                             | 0.984796696        |                |           |
| Q02253        | EEDATLSSPAVVMPTMGR+Oxidation(15)                                                                                             | 0.851675059        |                |           |
| Q02253        | EGASILLDGR                                                                                                                   | 1.220536057        | 2              | 2.541578  |
| Q02253        | ENTLNQLVGAAFGAAGQR                                                                                                           | 1.05292088         | 2              | 5.499629  |
| Q02253        | GDTNIFYGK                                                                                                                    | 0.961005298        | 2              | 2.444874  |
| Q02253        | GLQVVEHACSVTSLMLGETMPSITK                                                                                                    | 0.605937893        | 2              | 5.593545  |
| Q02253        | GYENGNFVGPTIISNVKPSMTCYK                                                                                                     | 0.743320942        | 3              | 3.931876  |
| Q02253        | IVNDNPYGNGTAFITNGAIAR                                                                                                        | 0.805944829        | 2              | 5.41856   |
| Q02253        | LITLEQ GK                                                                                                                    | 0.987184909        | 2              | 2.815262  |
| Q02253        | LLQDSGAPDGTLLNIHQHEAVNFICDHPDIK                                                                                              | 1.287349467        | 3              | 4.297335  |
| Q02253        | NHGVVMPDANK                                                                                                                  | 1.03336323         | 1              | 3.367598  |
| Q02253        | NHGVVMPDANK+Oxidation(5)                                                                                                     | 0.994965366        |                |           |
| Q02253        | NHGVVMPDANKENTLNQLVGAAFGAAGQR                                                                                                | 0.839207159        | 3              | 6.170986  |
| Q02253        | NHGVVMPDANKENTLNQLVGAAFGAAGQR+Oxidation(5)                                                                                   | 0.776611021        |                |           |
| Q02253        | QGIQFYTLK                                                                                                                    | 0.919244624        | 2              | 2.723757  |
| Q02253        | SDKWIDIHNPATNEVVGR                                                                                                           | 0.779286775        | 2              | 5.280058  |
| Q02253        | TITSQWK                                                                                                                      | 0.992006122        | 2              | 2.52672   |
| Q02253        | TITSQWKEEDATLSSPAVVMPTMGR                                                                                                    | 0.791882934        | 2              | 5.272245  |
| Q02253        | TLADAEGDVFR                                                                                                                  | 0.961405698        | 2              | 3.487832  |
| Q02253        | VCNLIDSGAK                                                                                                                   | 1.006578899        | 2              | 3.481856  |
| Q02253        | VNAGDQPGADLGPLITPQAK                                                                                                         | 0.899022107        | 2              | 5.73663   |
| Q02253        | WIDIHNPATNEVVGR                                                                                                              | 0.782397306        | 2              | 4.919349  |
| Q02253        | WLPELVER                                                                                                                     | 0.915004301        | 2              | 2.503947  |
| Q02253        | YAHMVDVGVQVGNVPIVPLPMFSFTGSR                                                                                                 | 0.847098184        | 3              | 4.01954   |
| <b>Q02769</b> | <b>FDFT Squalene synthase</b>                                                                                                | <b>0.92672525</b>  | <b>0.99998</b> | <b>4</b>  |
| Q02769        | KLEDFVKPENVDVAVK                                                                                                             | 1.118901532        | 3              | 4.031358  |
| Q02769        | SFAAVIQALDGDIR                                                                                                               | 0.921756351        | 2              | 3.208762  |
| Q02769        | TQSLPNCQLISR                                                                                                                 | 1.128151201        | 2              | 2.720667  |
| Q02769        | VVLEDFPTISLEFR                                                                                                               | 1.078161634        | 2              | 3.461503  |
| <b>Q02874</b> | <b>H2AY Core histone macro_H2A.1</b>                                                                                         | <b>0.915594092</b> | <b>8E-07</b>   | <b>3</b>  |
| Q02874        | AASADSTTEGAPTDFVTLSTK                                                                                                        | 1.219644757        | 2              | 4.435774  |
| Q02874        | GVTIASGGVLPNIHPELLAK                                                                                                         | 0.787814897        | 2              | 4.139748  |
| Q02874        | NGPLEVAGAAVSAGHGLPAK                                                                                                         | 0.751531656        | 2              | 3.318297  |



|               |                                             |                    |                |           |
|---------------|---------------------------------------------|--------------------|----------------|-----------|
| <b>Q02974</b> | <b>KHK Ketoheokinase</b>                    | <b>0.911181855</b> | <b>5.4E-05</b> | <b>9</b>  |
| Q02974        | FGCQVAGK                                    | 0.797408252        | 2              | 2.540273  |
| Q02974        | GATLICAWAEEGADALGPDGQLLHSDAFPPPR            | 0.863916138        | 3              | 5.735806  |
| Q02974        | GGNASNSCTVLSLLGAR                           | 0.91167824         | 2              | 4.686769  |
| Q02974        | GNSMQEALR                                   | 0.976823701        | 2              | 3.038121  |
| Q02974        | GVDVSQVAWQSQGDTPCSCCIVNNSNGSR               | 1.014269364        | 3              | 5.765394  |
| Q02974        | IEQYNATQPLQKQ                               | 0.963587405        | 2              | 4.874523  |
| Q02974        | RGVDVSQVAWQSQGDTPCSCCIVNNSNGSR              | 0.885306237        | 3              | 5.239995  |
| Q02974        | TIILYDTNLPDVSAK                             | 0.82918477         | 2              | 5.020726  |
| Q02974        | VSVEIEKPR                                   | 0.941859145        | 2              | 2.374932  |
| <b>Q03248</b> | <b>BUP1 Beta_ureidopropionase</b>           | <b>1.055840106</b> | <b>0.00467</b> | <b>12</b> |
| Q03248        | AHHDLYGYFGSSYVAAPDGSR                       | 1.057893796        | 2              | 6.272588  |
| Q03248        | EKLPWTEFAESAEDGLTTR                         | 1.176544744        | 3              | 4.716307  |
| Q03248        | ELAEAVKPNYSPIVVK                            | 1.549367768        | 2              | 4.28682   |
| Q03248        | HNMMVVISPIILER                              | 0.874282138        | 2              | 2.940649  |
| Q03248        | HNMMVVISPIILER+Oxidation(2)                 | 0.969773377        |                |           |
| Q03248        | IPLPTSAPVAEQVSALHK                          | 1.135003343        | 3              | 4.797505  |
| Q03248        | KHNMMVVISPIILER                             | 0.77440263         | 2              | 2.932451  |
| Q03248        | KHNMMVVISPIILER+Oxidation(3)                | 1.156563371        |                |           |
| Q03248        | NAAIANHCFTCALNR                             | 1.044417371        | 2              | 4.462059  |
| Q03248        | VGDFNESTYYMEGNLGHVPVFTQFGR                  | 1.167509414        | 3              | 5.643678  |
| Q03248        | VGQEHYPNEFTSGDGK                            | 1.205715483        | 2              | 4.244584  |
| Q03248        | VGQEHYPNEFTSGDGKK                           | 1.070110276        | 3              | 4.940723  |
| <b>Q03336</b> | <b>RGN Regucalcin</b>                       | <b>0.846491419</b> | <b>9.9E-20</b> | <b>16</b> |
| Q03336        | CGESPVWEEASK                                | 0.872666617        | 2              | 4.676763  |
| Q03336        | CLLFVDIPSK                                  | 0.77157944         | 2              | 3.32637   |
| Q03336        | DEQIPDGMCIDVEGK                             | 0.973481321        | 2              | 4.613037  |
| Q03336        | DYSEMYVTCAR                                 | 2.128480984        | 2              | 2.767431  |
| Q03336        | FNDGKVDPAGR                                 | 0.995099701        | 2              | 2.721576  |
| Q03336        | HQGSLSLFPDHSVK                              | 1.115666265        | 2              | 4.72393   |
| Q03336        | KYFDQVDISNGLDWSLDHK                         | 0.881945715        | 3              | 5.688782  |
| Q03336        | LWVACYNGGR                                  | 0.771267509        | 2              | 2.983313  |
| Q03336        | MEKDEQIPDGMCIDVEGK                          | 0.792275188        | 2              | 5.107283  |
| Q03336        | MEKDEQIPDGMCIDVEGK+Oxidation(0)             | 0.756249513        |                |           |
| Q03336        | MEKDEQIPDGMCIDVEGK+Oxidation(10)            | 0.756774459        |                |           |
| Q03336        | QSGGYVATIGTK                                | 0.902262111        | 2              | 2.891176  |
| Q03336        | VGVDAPVSSVALR                               | 0.829632237        | 2              | 3.795334  |
| Q03336        | YFAGTMAEETAPAVLER                           | 0.829948692        | 2              | 5.590406  |
| Q03336        | YFAGTMAEETAPAVLER+Oxidation(5)              | 0.811299459        |                |           |
| Q03336        | YFDQVDISNGLDWSLDHK                          | 0.862855528        | 3              | 4.381349  |
| <b>Q03410</b> | <b>SYCP1 Synaptonemal complex protein 1</b> | <b>0.955896438</b> | <b>0.3159</b>  | <b>2</b>  |
| Q03410        | ISEEKLLGEVEK                                | 1.007549323        | 2              | 2.306461  |
| Q03410        | MEQENTAILTDKK+Oxidation(0)                  | 0.848692673        |                |           |
| <b>Q03626</b> | <b>MUG1 Murinoglobulin_1</b>                | <b>0.854187092</b> | <b>4E-07</b>   | <b>6</b>  |
| Q03626        | EESSCIHSSCTAER                              | 1.07695331         | 2              | 3.901366  |
| Q03626        | GGEFEMMPLGVNK                               | 0.597254078        | 2              | 3.138592  |
| Q03626        | LTAQPAPSPEDLALSMGTIK                        | 0.734023815        | 3              | 4.647064  |
| Q03626        | NLHPLNELFPLAYIEDPK                          | 0.746825662        | 3              | 4.434322  |
| Q03626        | VQTVPLTCNNPK                                | 0.664714628        | 2              | 2.902613  |
| Q03626        | VYHKEESSCIHSSCTAER                          | 1.132885153        | 3              | 4.376818  |
| <b>Q04462</b> | <b>SYVC Valyl_tRNA synthetase</b>           | <b>0.939913845</b> | <b>0.96079</b> | <b>6</b>  |
| Q04462        | ADFPAGIPECGTDALR                            | 1.012247981        | 2              | 2.420991  |
| Q04462        | ALNPLEEWLR                                  | 0.905154729        | 2              | 2.541792  |
| Q04462        | ITPAHDQNDYEVGQR                             | 1.132856926        | 2              | 3.35845   |
| Q04462        | LQQTEAELR                                   | 1.000139191        | 2              | 2.360418  |
| Q04462        | SVTQQPGSEITAPQK                             | 0.935751709        | 2              | 3.157324  |
| Q04462        | VQGSDSDEEVVATTR                             | 1.018205537        | 2              | 3.938783  |

|               |                                                        |                    |                |           |
|---------------|--------------------------------------------------------|--------------------|----------------|-----------|
| <b>Q05096</b> | <b>MYO1B Myosin Ib</b>                                 | <b>0.763957033</b> | <b>0.025</b>   | <b>2</b>  |
| Q05096        | LEDLATLIQK                                             | 0.735420151        |                |           |
| Q05096        | NAMQIVGFSDPAEESVLEVVAAVLK                              | 0.954361486        |                |           |
| <b>Q05144</b> | <b>RAC2 Ras_related C3 botulinum toxin substrate 2</b> | <b>0.990036665</b> | <b>0.94928</b> | <b>2</b>  |
| Q05144        | MQAIKCVVVGDGAVGK+Oxidation(0)                          | 0.933656685        |                |           |
| Q05144        | YLECSALTQR                                             | 1.079413027        | 2              | 2.977731  |
| <b>Q06647</b> | <b>ATPO ATP synthase subunit O_mitochondrial</b>       | <b>1.271461722</b> | <b>0.98439</b> | <b>9</b>  |
| Q06647        | FSPLTANLMNLLAENGR                                      | 0.918298207        | 3              | 4.128219  |
| Q06647        | GEVPCTVTTAFPLDEAVLSELK                                 | 0.90483111         | 3              | 5.819669  |
| Q06647        | GQILNLEVK                                              | 1.074763844        | 2              | 2.480382  |
| Q06647        | LGNTQGVISAFSTIMSVHR                                    | 0.901187032        | 3              | 3.331209  |
| Q06647        | LVRPPVQVYIGIEGR                                        | 1.218340273        | 3              | 3.537324  |
| Q06647        | TDPSIMGGMIVR                                           | 0.856011886        | 2              | 3.22957   |
| Q06647        | TVLNSFLSK                                              | 0.803420997        | 2              | 3.019607  |
| Q06647        | VSLAVLNPIYK                                            | 0.933670309        | 2              | 3.061923  |
| Q06647        | YATALYSAASK                                            | 1.502893628        | 2              | 3.433251  |
| <b>Q07071</b> | <b>GCKR Glucokinase regulatory protein</b>             | <b>0.988190729</b> | <b>0.78056</b> | <b>14</b> |
| Q07071        | AAPISCHVQVAHEK                                         | 0.952903853        | 2              | 4.917322  |
| Q07071        | CLLEILR                                                | 0.988423583        | 2              | 2.620968  |
| Q07071        | GFLIGDHSDMFNQK                                         | 1.127381762        | 2              | 3.540482  |
| Q07071        | GLGQKPLYTYLIAGGDR                                      | 1.259695295        | 2              | 3.116616  |
| Q07071        | LLGQCDAEIFQEEGQIVPTYQR                                 | 1.523517696        | 2              | 5.07553   |
| Q07071        | LYSESVLTTMLQVAGK                                       | 0.998125969        | 2              | 2.609931  |
| Q07071        | NDPIEDWR                                               | 0.921932835        | 1              | 1.903314  |
| Q07071        | QEAFLNPAIGPEGLSGSSR                                    | 0.641365964        | 2              | 3.052136  |
| Q07071        | STQALEDPACGTLN                                         | 0.940949977        | 2              | 2.404625  |
| Q07071        | TVDQGVVSSQR                                            | 0.863992875        | 2              | 3.528949  |
| Q07071        | VIPTALLSLLLR                                           | 0.800058382        | 2              | 3.557179  |
| Q07071        | VQEVLEKPDGGLVVLSSGGTSGR                                | 0.919730266        | 2              | 5.32788   |
| Q07071        | WVLNTVSTGAHVLLGK                                       | 0.430248323        | 2              | 2.746226  |
| Q07071        | YQHVIETPEPGEWELSGYEAAPITEK                             | 0.964004522        | 3              | 5.562906  |
| <b>Q07116</b> | <b>SUOX Sulfite oxidase_mitochondrial</b>              | <b>0.91973172</b>  | <b>0.99965</b> | <b>7</b>  |
| Q07116        | AVDDSYNVQPDTVAPIWNLR                                   | 0.947440476        | 2              | 4.616793  |
| Q07116        | FVDLHPGGQSK                                            | 1.261879289        | 2              | 2.438539  |
| Q07116        | LCDVLAQAGHR                                            | 0.877762468        | 2              | 2.992418  |
| Q07116        | MSPPLEASDPYSNDPMR                                      | 0.928974551        | 2              | 2.676604  |
| Q07116        | NHLPVPNLDPDTYR                                         | 0.963466181        | 2              | 2.479079  |
| Q07116        | VSVSEESYSHWQR                                          | 0.955447943        | 2              | 3.742706  |
| Q07116        | VVVPGVVGAR                                             | 0.903994476        | 2              | 2.441212  |
| <b>Q07523</b> | <b>HAOX2 Hydroxyacid oxidase 2</b>                     | <b>0.804903054</b> | <b>9.9E-20</b> | <b>10</b> |
| Q07523        | ALKEEKPTQSPVVSFPK                                      | 0.841964473        | 3              | 4.584561  |
| Q07523        | ALVITIDTPVLGNR                                         | 0.812297743        | 2              | 4.477938  |
| Q07523        | ASFCWNDLSLLQSITR                                       | 0.785894636        | 2              | 4.09175   |
| Q07523        | E EKPTQSPVVSFPK                                        | 0.90263064         | 2              | 2.963409  |
| Q07523        | EVL DILTAELHR                                          | 1.211365892        | 2              | 3.241111  |
| Q07523        | GEDGVKEVLDILTAELHR                                     | 0.855066443        | 3              | 5.187481  |
| Q07523        | HNVQGIVVSNHGGR                                         | 0.745925838        | 3              | 6.118731  |
| Q07523        | NQLNLEANILLK                                           | 0.763802817        | 2              | 3.470214  |
| Q07523        | QLDEVASIDALR                                           | 0.78394789         | 2              | 3.07338   |
| Q07523        | TTIQGQEISAPICISPTAFHSIAWPDGEK                          | 0.963292244        | 3              | 4.638498  |
| <b>Q07803</b> | <b>EFGM Elongation factor G_mitochondrial</b>          | <b>1.069977447</b> | <b>0.90997</b> | <b>3</b>  |
| Q07803        | GIIDLIEER                                              | 1.131261348        | 2              | 2.701093  |
| Q07803        | LEFSDETFGANVPK                                         | 0.982165297        | 2              | 3.698801  |
| Q07803        | YQPCSPSTQEELVNK                                        | 1.11903051         | 2              | 3.262235  |
| <b>Q07936</b> | <b>ANXA2 Annexin A2</b>                                | <b>0.880402151</b> | <b>0.00626</b> | <b>2</b>  |
| Q07936        | GLGTDEDSLIEICSR                                        | 0.880652585        | 2              | 3.027557  |

|                |                                                                  |                    |                |           |
|----------------|------------------------------------------------------------------|--------------------|----------------|-----------|
| Q07936         | GVDEVTIVNILTNR                                                   | 0.777449162        | 2              | 4.110605  |
| <b>Q07984</b>  | <b>SSRD Translocon_associated protein subunit delta</b>          | <b>0.989342331</b> | <b>1</b>       | <b>3</b>  |
| Q07984         | FFDEESYSLLR                                                      | 1.114843913        | 2              | 3.539228  |
| Q07984         | NNEDVSIIPPLFTVSDHR                                               | 0.967913815        | 3              | 3.918537  |
| Q07984         | VQNMALYADVSGK                                                    | 1.037484608        | 2              | 3.255476  |
| <b>Q08163</b>  | <b>CAP1 Adenylyl cyclase_associated protein 1</b>                | <b>0.957314573</b> | <b>0.00533</b> | <b>8</b>  |
| Q08163         | ALLVTASQCQQPAGNK                                                 | 0.724522561        | 2              | 4.680972  |
| Q08163         | GAVPYVQAFDSLLANPVAEYLK                                           | 1.157579129        | 3              | 3.773344  |
| Q08163         | LEAVSHTSDMHCGYGDSPSK                                             | 1.051503866        | 3              | 4.858672  |
| Q08163         | LSDLLAPISEQIQTFR                                                 | 1.023908889        | 2              | 3.428841  |
| Q08163         | NSLDCEIVSAK                                                      | 0.9612065          | 2              | 3.08192   |
| Q08163         | SALFAQINQGESITHALK                                               | 0.797869651        | 2              | 3.81525   |
| Q08163         | SSEMNVLIPTGGDFNEFPVPEQFK                                         | 0.872487637        | 2              | 3.668366  |
| Q08163         | VENQENVSNLVIDDELK                                                | 0.880088036        | 2              | 4.824555  |
| <b>Q08415</b>  | <b>KAT1 Kynurenine_oxoglutarate transaminase 1_mitochondrial</b> | <b>0.969399394</b> | <b>0.25607</b> | <b>4</b>  |
| Q08415         | EQQHFGQPSSYFLQLPQAMELNR                                          | 0.986222811        | 3              | 4.904198  |
| Q08415         | ILVLNTPNPLGK                                                     | 1.205127054        | 2              | 3.055063  |
| Q08415         | LGASNDWQLDPAELASK                                                | 0.787636901        | 2              | 3.342516  |
| Q08415         | RLDGIDQNLWVEFGK                                                  | 0.87900746         | 2              | 2.932952  |
| <b>Q09073</b>  | <b>ADT2 ADP/ATP translocase 2</b>                                | <b>1.340299142</b> | <b>1.1E-14</b> | <b>7</b>  |
| Q09073         | DFLAGGVAAAIK                                                     | 1.652276886        | 2              | 4.769534  |
| Q09073         | EQGVLSFWR                                                        | 2.246596185        | 1              | 1.908197  |
| Q09073         | GLGDCLVK                                                         | 0.969302817        | 2              | 2.582445  |
| Q09073         | GTDIMYGTLDLCWR                                                   | 1.079364342        | 2              | 3.633347  |
| Q09073         | KGTDIMYGTLDLCWR                                                  | 1.151740714        | 2              | 3.369285  |
| Q09073         | LLLQVQHASK                                                       | 1.568152209        | 2              | 2.74865   |
| Q09073         | QIFLGGVDK                                                        | 1.343405362        | 2              | 2.682165  |
| <b>Q0D2L3</b>  | <b>SPEB Agmatinase_mitochondrial</b>                             | <b>0.896949713</b> | <b>0.99822</b> | <b>6</b>  |
| Q0D2L3         | EESLMLGTVNPSTGALPFQSLR                                           | 0.823195946        | 2              | 3.742505  |
| Q0D2L3         | EHGPVGLVHVGHSNTSDKPLEDK                                          | 1.097443145        | 3              | 3.645275  |
| Q0D2L3         | IREESLMLGTVNPSTGALPFQSLR                                         | 0.825224783        | 3              | 4.635373  |
| Q0D2L3         | SVDEGLLDSK                                                       | 1.194540286        | 2              | 2.982182  |
| Q0D2L3         | SVDEGLLDSKR                                                      | 1.005963284        | 2              | 2.664193  |
| Q0D2L3         | VADLGNVNVNLYNLQDSCR                                              | 1.05241575         | 2              | 5.410556  |
| <b>Q0VAV2</b>  | <b>EXPH5 Exophilin_5</b>                                         | <b>1.033771087</b> | <b>0.96442</b> | <b>2</b>  |
| Q0VAV2         | DMDVSVSKDEQLNK+Oxidation(1)                                      | 1.013302205        |                |           |
| Q0VAV2         | GMAKNPMELOQTPR+Oxidation(1)                                      | 0.739197467        |                |           |
| <b>Q0VVGK3</b> | <b>GLTK Glycerate kinase</b>                                     | <b>0.8173414</b>   | <b>4.6E-11</b> | <b>3</b>  |
| Q0VVGK3        | AVLGMAAAADPELLGQHLVQGVISVPK                                      | 0.752601588        | 3              | 5.882719  |
| Q0VVGK3        | GATIQELNTR                                                       | 0.892819946        | 2              | 2.921111  |
| Q0VVGK3        | QLFDSAVGAVQPGPMLQR                                               | 1.730818352        | 2              | 3.81942   |
| <b>Q0ZHH6</b>  | <b>ATLA3 Atlantin_3</b>                                          | <b>0.883188186</b> | <b>0.7861</b>  | <b>4</b>  |
| Q0ZHH6         | EHGHSNWLGDPEEPLTGFSWR                                            | 1.104802224        | 3              | 4.070914  |
| Q0ZHH6         | GGSDPETTGIIQWSEVFTVK                                             | 0.901561107        | 2              | 4.557232  |
| Q0ZHH6         | LAMDEIFQKPFQTMFLVR+Oxidation(2)                                  | 1.196813514        |                |           |
| Q0ZHH6         | YQEELEEEITELYENFCK                                               | 0.787417733        | 2              | 4.759522  |
| <b>Q10758</b>  | <b>K2C8 Keratin_type II cytoskeletal 8</b>                       | <b>0.844361054</b> | <b>2E-06</b>   | <b>25</b> |
| Q10758         | AEAETMYQIK                                                       | 1.096778078        | 2              | 3.403797  |
| Q10758         | AQYEEIANR                                                        | 0.920701762        | 2              | 3.051852  |
| Q10758         | ATLEAAIADAEQR                                                    | 0.845700434        | 2              | 4.638978  |
| Q10758         | ELQSQISDTSVVLSMDNSR                                              | 1.185905001        | 2              | 5.746842  |
| Q10758         | GSLGGFGGAGVGGITAVTVNQSLNPLK                                      | 0.784423653        | 2              | 4.486948  |
| Q10758         | LEGLTDEINFLR                                                     | 0.859344905        | 2              | 4.255579  |
| Q10758         | LESGMQNMSIHTK                                                    | 0.728211936        | 2              | 3.778391  |
| Q10758         | LEVDPNIQAVR                                                      | 0.890384176        | 2              | 3.735526  |

|               |                                                                             |                    |                |           |
|---------------|-----------------------------------------------------------------------------|--------------------|----------------|-----------|
| Q10758        | LEVELGNMQGLVEDFK                                                            | 0.875796592        | 2              | 5.06192   |
| Q10758        | LKLEVELGNMQGLVEDFK                                                          | 0.960954108        | 3              | 4.004301  |
| Q10758        | LQAEIDALK                                                                   | 0.958487126        | 2              | 2.746445  |
| Q10758        | LVSESSDIMSK                                                                 | 1.06872878         | 2              | 3.012508  |
| Q10758        | QIHEEEIR                                                                    | 0.807165732        | 1              | 2.329552  |
| Q10758        | QLEALGQEK                                                                   | 0.815993188        | 1              | 2.260305  |
| Q10758        | RQLEALGQEK                                                                  | 1.013480562        | 2              | 2.326897  |
| Q10758        | SKTEISEMNR                                                                  | 0.807463121        | 3              | 3.435024  |
| Q10758        | SKTEISEMNR+Oxidation(7)                                                     | 1.045300605        |                |           |
| Q10758        | SLDMSIIAEVR                                                                 | 0.880302154        | 2              | 4.583012  |
| Q10758        | SNMDNMFESYINNL                                                              | 0.945190361        | 2              | 4.085135  |
| Q10758        | SRAEAETMYQIK                                                                | 1.049101309        | 2              | 3.519465  |
| Q10758        | TEISEMNR                                                                    | 0.981315092        | 2              | 2.487784  |
| Q10758        | TEMENEFVLK                                                                  | 0.850228833        | 2              | 3.333536  |
| Q10758        | TEMENEFVLK+Oxidation(2)                                                     | 0.827224992        |                |           |
| Q10758        | WSLLQQQK                                                                    | 1.092738045        | 2              | 2.915474  |
| Q10758        | YEELQTLGK                                                                   | 0.909443461        | 2              | 3.700737  |
| <b>Q148W0</b> | <b>AT8B1 Probable phospholipid_transporting ATPase IC</b>                   | <b>0.8574951</b>   | <b>0.52215</b> | <b>2</b>  |
| Q148W0        | FMAASVASSNRDEALDK+Oxidation(1)                                              | 1.187613889        |                |           |
| Q148W0        | TCEVIKGRFK                                                                  | 0.854874817        | 1              | 2.209782  |
| <b>Q14DH7</b> | <b>ACSS3 Acyl_CoA synthetase short_chain family member 3_ mitochondrial</b> | <b>0.922172</b>    | <b>0.05645</b> | <b>6</b>  |
| Q14DH7        | IAIYDSPVTDK                                                                 | 1.185337793        | 2              | 2.43253   |
| Q14DH7        | STLSALVNGKPYK                                                               | 1.043523529        | 2              | 2.816439  |
| Q14DH7        | THFAASVADPER                                                                | 0.835455191        | 2              | 3.603552  |
| Q14DH7        | VDDVINVAGHR                                                                 | 1.100435585        | 2              | 3.394854  |
| Q14DH7        | VLAEHGVAALFTAPTAIR                                                          | 0.595660947        | 2              | 3.773319  |
| Q14DH7        | VTPTIEDPSIFGHIEEVK                                                          | 0.798927861        | 2              | 3.405083  |
| <b>Q1HCL7</b> | <b>NAKD1 NAD kinase domain_containing protein 1</b>                         | <b>0.972092737</b> | <b>0.54206</b> | <b>12</b> |
| Q1HCL7        | ALNEVFIGESLSSR                                                              | 0.77441289         | 2              | 3.101025  |
| Q1HCL7        | ASYYEISVDDGPWEK                                                             | 0.961524075        | 2              | 3.25054   |
| Q1HCL7        | LKPVIGVNTDPER                                                               | 0.965702069        | 3              | 3.598658  |
| Q1HCL7        | LYLEGTGINPSPVDLHEQQLSLNQHSR                                                 | 0.918284139        | 3              | 5.227853  |
| Q1HCL7        | NVEHIIDSLRDEGIEVR                                                           | 0.774941065        | 2              | 3.463174  |
| Q1HCL7        | QGNLTLPLNK                                                                  | 0.829752332        | 2              | 3.024254  |
| Q1HCL7        | SEASGPQLLPVR                                                                | 0.844646332        | 2              | 3.419453  |
| Q1HCL7        | SEGHLCPLVR                                                                  | 1.097549851        | 2              | 2.345104  |
| Q1HCL7        | SSGLNLCTGTGSK                                                               | 0.896427224        | 2              | 3.592942  |
| Q1HCL7        | VTNEYNESLLYSPEEPK                                                           | 0.985291811        | 2              | 4.44559   |
| Q1HCL7        | YEFEQQR                                                                     | 1.157512879        | 2              | 2.535376  |
| Q1HCL7        | YTHSFPEALQK                                                                 | 0.765533199        | 2              | 2.662583  |
| <b>Q1JU68</b> | <b>EIF3A Eukaryotic translation initiation factor 3 subunit A</b>           | <b>1.062739208</b> | <b>0.2335</b>  | <b>5</b>  |
| Q1JU68        | EQPEKEPELQQYVPLQNNTILR                                                      | 1.46868819         | 3              | 3.472024  |
| Q1JU68        | FNVLQYVPEVK                                                                 | 1.050015371        | 2              | 3.160152  |
| Q1JU68        | ILQEHEQIK                                                                   | 0.925661391        | 2              | 2.671459  |
| Q1JU68        | KGPEADSEWR                                                                  | 1.092419274        | 2              | 2.563402  |
| Q1JU68        | LLDMDGIIVEK                                                                 | 0.914764848        | 2              | 2.905599  |
| <b>Q29RW1</b> | <b>MYH4 Myosin_4</b>                                                        | <b>1.043965641</b> | <b>0.9818</b>  | <b>15</b> |
| Q29RW1        | AGLLGTLEEMRDEK                                                              | 0.999077241        | 2              | 2.416799  |
| Q29RW1        | ELENEVENEQK                                                                 | 2.69322476         | 2              | 2.420846  |
| Q29RW1        | ELENEVENEQKR                                                                | 4.279683951        | 2              | 2.990504  |
| Q29RW1        | LINELSAQK                                                                   | 1.78432937         | 2              | 2.789417  |
| Q29RW1        | LQDAEEHVEAVNSK                                                              | 4.063822616        | 2              | 4.478714  |
| Q29RW1        | LQDLVDKLQTK                                                                 | 0.962980426        | 1              | 2.103887  |

|               |                                                                            |                    |                |          |
|---------------|----------------------------------------------------------------------------|--------------------|----------------|----------|
| Q29RW1        | MEGDLNEMEIQLNHANR                                                          | 1.432639232        | 2              | 4.315431 |
| Q29RW1        | MEIDDLASNMETVSK                                                            | 2.201821476        | 2              | 4.295159 |
| Q29RW1        | NAYEESLDQLETLK                                                             | 1.300824611        | 2              | 4.811811 |
| Q29RW1        | NAYEESLDQLETLKR                                                            | 3.812371201        | 2              | 3.791671 |
| Q29RW1        | QKYEETQAELEASQK                                                            | 6.568259624        | 2              | 3.587818 |
| Q29RW1        | SELQASLEEAESLEHEEGK                                                        | 2.120696558        | 2              | 4.69357  |
| Q29RW1        | SNAACAALDK                                                                 | 2.132717356        | 2              | 2.313639 |
| Q29RW1        | TLEDQLSEVK                                                                 | 1.811821463        | 2              | 2.460041 |
| Q29RW1        | VAEQELLDASER                                                               | 2.208186328        | 2              | 2.686498 |
| <b>Q2EMV9</b> | <b>PAR14 Poly [ADP_ribose] polymerase 14</b>                               | <b>1.32552493</b>  | <b>0.02331</b> | <b>2</b> |
| Q2EMV9        | LQEELTR                                                                    | 1.438073781        | 1              | 2.000205 |
| Q2EMV9        | VLVEFEKESLNIAGK                                                            | 0.945743593        | 2              | 2.446773 |
| <b>Q2TA68</b> | <b>OPA1 Dynamin_like 120 kDa protein_mitochondrial</b>                     | <b>0.937238762</b> | <b>0.20415</b> | <b>2</b> |
| Q2TA68        | TSVLEMIAQAR                                                                | 0.583360327        | 2              | 3.265171 |
| Q2TA68        | VIQHNALEDR                                                                 | 0.937641915        | 2              | 2.341963 |
| <b>Q2V057</b> | <b>PROD2 Probable proline dehydrogenase 2</b>                              | <b>0.915275692</b> | <b>0.95228</b> | <b>7</b> |
| Q2V057        | EDCTQPDYEATSR                                                              | 1.080785013        | 2              | 3.782402 |
| Q2V057        | GCVQQLQAIGLQPLLAIVPTTEEPDSAAK                                              | 0.954911864        | 2              | 4.489268 |
| Q2V057        | NLQLSCLSTEQNQLQASLSR                                                       | 0.854776303        | 2              | 5.577103 |
| Q2V057        | REQALLSQELWR                                                               | 0.72463555         | 2              | 3.060992 |
| Q2V057        | SIPYGCLEEVIPYLIR                                                           | 1.108330122        | 2              | 3.612137 |
| Q2V057        | SVTQLHGKEDCTQPDYEATSR                                                      | 0.934156012        | 3              | 3.729579 |
| Q2V057        | TSEAWYEGNLSAMLHCVDLSR                                                      | 0.986919301        | 2              | 2.737828 |
| <b>Q32Q06</b> | <b>AP1M1 AP_1 complex subunit mu_1</b>                                     | <b>0.886078893</b> | <b>0.25282</b> | <b>2</b> |
| Q32Q06        | HNNLYLVATSK                                                                | 1.364610902        | 2              | 2.411808 |
| Q32Q06        | MRVFLSGMPELR+Oxidation(0)                                                  | 0.820745237        |                |          |
| <b>Q3B7D0</b> | <b>HEM6 Coproporphyrinogen_III oxidase_mitochondrial</b>                   | <b>0.939691477</b> | <b>0.86764</b> | <b>4</b> |
| Q3B7D0        | AGVNISVVHGNLSEEAANQMR                                                      | 0.780121856        | 3              | 4.691477 |
| Q3B7D0        | HCDDSYTPQDK                                                                | 0.845923421        | 2              | 3.089515 |
| Q3B7D0        | LEEDGDELAR                                                                 | 1.225090487        | 2              | 2.499826 |
| Q3B7D0        | TCAEAVVPSYVPIVK                                                            | 1.105448947        | 2              | 3.190239 |
| <b>Q3B7U9</b> | <b>FKBP8 Peptidyl_prolyl cis_trans isomerase FKBP8</b>                     | <b>0.858628942</b> | <b>7.8E-05</b> | <b>4</b> |
| Q3B7U9        | SCSQVLEHQPDNIK                                                             | 0.846438621        | 2              | 4.108989 |
| Q3B7U9        | TAEDGPDLEMLSGQER                                                           | 1.191237871        | 2              | 3.801841 |
| Q3B7U9        | VDMTCEEEEEELLQLK                                                           | 0.806601813        | 2              | 4.211577 |
| Q3B7U9        | VLAQQGEYSEAIPILR                                                           | 0.734964849        | 2              | 3.131577 |
| <b>Q3KRD8</b> | <b>IF6 Eukaryotic translation initiation factor 6</b>                      | <b>1.047247516</b> | <b>0.96581</b> | <b>3</b> |
| Q3KRD8        | ASFENNCEVGCFAK                                                             | 1.094769999        | 2              | 2.843504 |
| Q3KRD8        | HGLLPNNTTDQELQHIR                                                          | 0.986034993        | 3              | 4.840389 |
| Q3KRD8        | TSIEDQDELSSLLQVPLVAGTVNR                                                   | 0.866955766        | 2              | 3.827856 |
| <b>Q3KRE0</b> | <b>ATAD3 ATPase family AAA domain_containing protein 3</b>                 | <b>0.981870416</b> | <b>0.43857</b> | <b>2</b> |
| Q3KRE0        | GEGTGPPLPLPPAQGAESGGDR                                                     | 0.55420814         | 2              | 3.244584 |
| Q3KRE0        | ISVLEALR                                                                   | 1.092672323        | 2              | 2.364279 |
| <b>Q3KRE8</b> | <b>TBB2B Tubulin beta_2B chain</b>                                         | <b>0.898899762</b> | <b>0.10748</b> | <b>2</b> |
| Q3KRE8        | ALTVPQLTQQMFDSK                                                            | 0.89883034         | 2              | 3.316341 |
| Q3KRE8        | ESESCDCLQGFQLTHSLGGGTGSGMGTLLISK                                           | 0.934626793        | 3              | 4.180816 |
| <b>Q3MIB4</b> | <b>LONP2 Lon protease homolog 2_peroxisomal</b>                            | <b>0.582073351</b> | <b>0.00489</b> | <b>2</b> |
| Q3MIB4        | MEIQVPGYTQEEK                                                              | 0.505343861        | 2              | 3.596625 |
| Q3MIB4        | TVGVNPNPVFLLEVDK                                                           | 0.979973744        | 2              | 3.608235 |
| <b>Q3MIE0</b> | <b>ECHD3 Enoyl_CoA hydratase domain_containing protein 3_mitochondrial</b> | <b>0.911821707</b> | <b>0.94386</b> | <b>7</b> |
| Q3MIE0        | DGQEGIEAFIQK                                                               | 1.089361184        | 2              | 3.310794 |
| Q3MIE0        | KVALEMLFTGEPISAQALR                                                        | 0.992443623        | 3              | 3.504132 |

|               |                                                                            |                    |                |           |
|---------------|----------------------------------------------------------------------------|--------------------|----------------|-----------|
| Q3MIE0        | SDILHEAESEDLK                                                              | 1.007757722        | 3              | 3.739595  |
| Q3MIE0        | SSFATPGVNVGLFCSTPAVALGR                                                    | 0.884303682        | 2              | 4.646878  |
| Q3MIE0        | VALEMLFTGEPISAQEALR                                                        | 0.824651949        | 2              | 3.375892  |
| Q3MIE0        | VIIISAEGPVFSSGHDLK                                                         | 0.845875708        | 2              | 4.28749   |
| Q3MIE0        | VVPEEQLEEEATR                                                              | 0.937449632        | 2              | 4.144634  |
| <b>Q3MIF4</b> | <b>XYLB Xylulose kinase</b>                                                | <b>0.860831903</b> | <b>1E-12</b>   | <b>7</b>  |
| Q3MIF4        | AFHGLAGGTGVAFSEVVK                                                         | 1.141522828        | 2              | 2.323471  |
| Q3MIF4        | CCLGWDFSTQQVK                                                              | 0.910542785        | 2              | 2.942708  |
| Q3MIF4        | FNADNMEVSAPGDVEIR                                                          | 0.790284276        | 2              | 4.04073   |
| Q3MIF4        | IRDESASCSWNK                                                               | 0.807908341        | 2              | 4.094701  |
| Q3MIF4        | SAPQPSLAATPNPGASQVYAALLPR                                                  | 1.053444979        | 2              | 4.378472  |
| Q3MIF4        | VVAFTGDNPASLAGMR                                                           | 0.910561965        | 2              | 3.668159  |
| Q3MIF4        | YSPIDYSDGSGMNLQIQEK                                                        | 0.997863822        | 2              | 5.297771  |
| <b>Q3T1J1</b> | <b>IF5A1 Eukaryotic translation initiation factor 5A_1</b>                 | <b>1.038969963</b> | <b>0.99998</b> | <b>4</b>  |
| Q3T1J1        | EDLRLPEGDLGK                                                               | 1.141991494        | 2              | 2.813557  |
| Q3T1J1        | EDLRLPEGDLGKEIEQK                                                          | 0.95808054         | 3              | 4.747553  |
| Q3T1J1        | NDFQLIGIQDGYLSLLQDSGEVR                                                    | 0.98779035         | 3              | 5.738932  |
| Q3T1J1        | RNDFQLIGIQDGYLSLLQDSGEVR                                                   | 1.02961389         | 3              | 3.76142   |
| <b>Q3T1K5</b> | <b>CAZA2 F_actin_capping protein subunit alpha_2</b>                       | <b>0.967088011</b> | <b>0.85307</b> | <b>3</b>  |
| Q3T1K5        | FIIHAPPGEFNEVFNDVR                                                         | 0.998842865        | 3              | 4.580015  |
| Q3T1K5        | FTVTPSTTQVVGILK                                                            | 0.936517054        | 2              | 3.706344  |
| Q3T1K5        | LLLNDNLLR                                                                  | 1.354768966        | 2              | 2.40651   |
| <b>Q3T1L0</b> | <b>A16A1 Aldehyde dehydrogenase family 16 member A1</b>                    | <b>1.103239642</b> | <b>0.34291</b> | <b>2</b>  |
| Q3T1L0        | HGAAPTVAETEVELSVR                                                          | 1.001957439        | 2              | 2.398283  |
| Q3T1L0        | VQDQGQTLQVTGLR                                                             | 1.106625737        | 2              | 4.167922  |
| <b>Q3TLP5</b> | <b>ECHD2 Enoyl_CoA hydratase domain_containing protein 2_mitochondrial</b> | <b>0.874112713</b> | <b>0.9758</b>  | <b>2</b>  |
| Q3TLP5        | ALALAQEILPQAPIAVR                                                          | 0.888165589        |                |           |
| Q3TLP5        | NALGNVFSLELEALQLR                                                          | 0.866437459        |                |           |
| <b>Q3U2P1</b> | <b>SC24A Protein transport protein Sec24A</b>                              | <b>0.995671618</b> | <b>0.82508</b> | <b>2</b>  |
| Q3U2P1        | CTLTSVPQTQALLNK                                                            | 0.959635721        | 2              | 3.598585  |
| Q3U2P1        | TLETQSALGPALQAAFK                                                          | 0.9443123          | 2              | 3.11167   |
| <b>Q3ULJ0</b> | <b>GPD1L Glycerol_3_phosphate dehydrogenase 1_like protein</b>             | <b>0.992231991</b> | <b>0.99994</b> | <b>2</b>  |
| Q3ULJ0        | GIDEGPDGLK                                                                 | 1.000237115        | 2              | 2.671374  |
| Q3ULJ0        | LGLMEMIAFAK                                                                | 0.897079033        | 2              | 3.82464   |
| <b>Q3UQ44</b> | <b>IQGA2 Ras GTPase_activating_like protein IQGAP2</b>                     | <b>0.946808769</b> | <b>0.99732</b> | <b>14</b> |
| Q3UQ44        | ALVGSENPLTVIR                                                              | 1.021445486        | 2              | 3.997128  |
| Q3UQ44        | AWVNQLETQTGEASK                                                            | 0.912372377        | 2              | 5.080618  |
| Q3UQ44        | GVLLGIDDLQTNQFK                                                            | 1.050363312        | 2              | 4.791054  |
| Q3UQ44        | HTDNTVQWLR                                                                 | 1.323807132        | 2              | 2.848342  |
| Q3UQ44        | LFEGENEHLSSMNNYSETYQEFR                                                    | 1.222914364        | 3              | 4.515428  |
| Q3UQ44        | LGIAPQIQDLLGK                                                              | 1.184186176        | 2              | 2.73368   |
| Q3UQ44        | LPYDVTTEQALTYPEVK                                                          | 1.138964468        | 2              | 4.329138  |
| Q3UQ44        | LSAEEMDER                                                                  | 0.97700078         | 2              | 2.698053  |
| Q3UQ44        | NPNAVLTCVDDSLSQEYQK                                                        | 0.87927198         | 2              | 4.969876  |
| Q3UQ44        | TALEEEIK                                                                   | 1.086453707        | 1              | 2.005997  |
| Q3UQ44        | TLDTLLLPATANIR                                                             | 0.837910899        | 2              | 2.55318   |
| Q3UQ44        | VDFTEEEISNMR                                                               | 0.839346621        | 2              | 3.389883  |
| Q3UQ44        | VDQVQDIVTGNPTVIK                                                           | 0.950041914        | 2              | 4.916214  |
| Q3UQ44        | YQDILNEIAK                                                                 | 0.976313853        | 2              | 2.605644  |
| <b>Q3UV17</b> | <b>K22O Keratin_type II cytoskeletal 2 oral</b>                            | <b>1.021955653</b> | <b>0.75422</b> | <b>3</b>  |
| Q3UV17        | AQYEDIAQK                                                                  | 1.48588292         | 1              | 2.129373  |
| Q3UV17        | KQNTNMQTSIAEAEQR+Oxidation(5)                                              | 1.052730729        |                |           |

|               |                                                                |                    |                |           |
|---------------|----------------------------------------------------------------|--------------------|----------------|-----------|
| Q3UV17        | VDSLTDINFLR                                                    | 0.907457128        | 2              | 2.468676  |
| <b>Q3UZYO</b> | <b>SFI1 Protein SFI1 homolog</b>                               | <b>1.548527214</b> | <b>0.01843</b> | <b>2</b>  |
| Q3UZYO        | EEWWVSQREWK                                                    | 1.549750531        | 2              | 2.704753  |
| Q3UZYO        | MGRAQA AHFHS AQLLSR+Oxidation(0)                               | 1.543137062        |                |           |
| <b>Q3V036</b> | <b>CCD27 Coiled_coil domain containing protein 27</b>          | <b>1.036849162</b> | <b>0.61385</b> | <b>2</b>  |
| Q3V036        | MDLISSERTIK+Oxidation(0)                                       | 0.736940118        |                |           |
| Q3V036        | SSEGPP E E A A A A K L S R P S Q S K                           | 1.133737593        | 2              | 2.749781  |
| <b>Q3V0K9</b> | <b>PLSI Plastin_1</b>                                          | <b>1.104786024</b> | <b>0.98985</b> | <b>3</b>  |
| Q3V0K9        | AYFHLLNQIAPK                                                   | 0.96551003         | 2              | 2.825564  |
| Q3V0K9        | KIENCNYAVELGK                                                  | 1.127555578        | 2              | 3.923074  |
| Q3V0K9        | QFVTPADVVSGNPK                                                 | 0.969059893        | 2              | 3.802747  |
| <b>Q3V132</b> | <b>ADT4 ADP/ATP translocase 4</b>                              | <b>0.957943731</b> | <b>1</b>       | <b>2</b>  |
| Q3V132        | GNLANVIR                                                       | 1.091373886        | 2              | 2.726654  |
| Q3V132        | YFPTQALNFAFK                                                   | 0.948519725        | 2              | 2.945507  |
| <b>Q497B0</b> | <b>NIT2 Omega_amidase NIT2</b>                                 | <b>1.012528436</b> | <b>0.82948</b> | <b>14</b> |
| Q497B0        | AGTEETILYSIDILK                                                | 1.03285296         | 2              | 4.27928   |
| Q497B0        | ASYVAWGHSTVVDVDPWGQVLTGK                                       | 0.967077757        | 2              | 4.908471  |
| Q497B0        | AVDNQVYVATASPAR                                                | 0.939726213        | 2              | 4.960291  |
| Q497B0        | AVDNQVYVATASPARDEK                                             | 0.817149349        | 2              | 3.383258  |
| Q497B0        | ENSIYLIGGSIP E E D D G K                                       | 0.858067217        | 2              | 2.837044  |
| Q497B0        | ENSIYLIGGSIP E E D D G K L Y N T C A V F G P D G N L L V K     | 0.877853639        | 3              | 4.478386  |
| Q497B0        | FAELAQIYAR                                                     | 1.14555251         | 2              | 3.704595  |
| Q497B0        | IHLFDIDVPGK                                                    | 0.964848629        | 2              | 2.833553  |
| Q497B0        | KIHLFDIDVPGK                                                   | 0.862438153        | 3              | 4.682935  |
| Q497B0        | LALIQLQVSSIK                                                   | 1.061348496        | 2              | 3.335123  |
| Q497B0        | LYNTCAVFGPDGNLLVK                                              | 1.089613467        | 2              | 4.455254  |
| Q497B0        | QGANIVSLPECFNSPYGTNYFPEYAEK                                    | 0.868670504        | 3              | 4.344718  |
| Q497B0        | TLSPGDSFSTFDTPYCR                                              | 1.039700844        | 2              | 4.702559  |
| Q497B0        | VGLGICYDMR                                                     | 0.950187806        | 2              | 2.744405  |
| <b>Q498D5</b> | <b>RMD2 Regulator of microtubule dynamics protein 2</b>        | <b>0.72270768</b>  | <b>0.17735</b> | <b>4</b>  |
| Q498D5        | AYGDMYDLSTNTQEK                                                | 0.658864861        | 2              | 4.155301  |
| Q498D5        | FCNLALLPIVTK                                                   | 0.681618887        | 2              | 3.224146  |
| Q498D5        | LEECIQDELGVR                                                   | 0.747448212        | 2              | 3.148288  |
| Q498D5        | LNELLTNVEELKEEIK                                               | 0.673249609        | 2              | 3.456348  |
| <b>Q498U4</b> | <b>SARNP SAP domain containing ribonucleoprotein</b>           | <b>0.939512738</b> | <b>0.86265</b> | <b>2</b>  |
| Q498U4        | EEEPPEKVVDMASEK                                                | 0.999195053        | 2              | 2.594336  |
| Q498U4        | FGIVTSSAGTGTTEDTEAK                                            | 1.423707121        | 2              | 4.130384  |
| <b>Q499N5</b> | <b>ACSF2 Acyl_CoA synthetase family member 2_mitochondrial</b> | <b>1.515758046</b> | <b>0.18069</b> | <b>10</b> |
| Q499N5        | GATLSHHNIVNNSNLIGQR                                            | 0.888312802        | 3              | 4.826545  |
| Q499N5        | GGENIYP AE L E D F F H K                                       | 1.138787851        | 2              | 3.088278  |
| Q499N5        | GGVIAGSLAPPELIR                                                | 1.275726847        | 2              | 2.670899  |
| Q499N5        | LPDLTTVISVDAPLPGTLLLLDEVVAAGGK                                 | 1.129753052        |                |           |
| Q499N5        | SGETTTEEEIK                                                    | 1.127845587        | 2              | 2.952603  |
| Q499N5        | TFETVGQDR                                                      | 1.398155965        | 2              | 2.514926  |
| Q499N5        | TGDIAMDEQGFCR                                                  | 1.589375935        | 2              | 3.680996  |
| Q499N5        | TVGECLDATAQR                                                   | 1.746628289        | 2              | 3.140662  |
| Q499N5        | YHQGFLSCYDPINIQFTSGTTGNPK                                      | 1.141240217        | 3              | 4.664974  |
| Q499N5        | YIVFVEGYPLTVSGK                                                | 1.315325546        | 2              | 4.652744  |
| <b>Q4AEF8</b> | <b>COPG Coatomer subunit gamma</b>                             | <b>0.943495004</b> | <b>0.02599</b> | <b>5</b>  |
| Q4AEF8        | FGAQNEEMLPSILVLLK                                              | 0.897477412        | 2              | 3.164956  |
| Q4AEF8        | QEIFQEQLAAVPEFQGLGPLFK                                         | 0.930556496        | 3              | 4.288921  |
| Q4AEF8        | SSPEPVALTESETEVVIR                                             | 1.186045915        | 2              | 3.99375   |
| Q4AEF8        | VVLEHEEVR                                                      | 1.321244934        | 2              | 2.35103   |

|               |                                                                                      |                    |                |           |
|---------------|--------------------------------------------------------------------------------------|--------------------|----------------|-----------|
| Q4AEF8        | VVVVQAISALCQK                                                                        | 1.521186458        | 2              | 2.306965  |
| <b>Q4FZT0</b> | <b>STML2 Stomatin_like protein 2</b>                                                 | <b>0.955987352</b> | <b>0.55491</b> | <b>6</b>  |
| Q4FZT0        | AEQINQAAGEASAVLAK                                                                    | 0.988673231        | 2              | 4.799156  |
| Q4FZT0        | ASYGVEDPEYAVTQLAQTMR                                                                 | 0.874919343        | 2              | 4.997075  |
| Q4FZT0        | ATVLESEGTR                                                                           | 1.007462672        | 2              | 2.770914  |
| Q4FZT0        | DVQTTDTSIEELGR                                                                       | 1.247415148        | 2              | 2.82636   |
| Q4FZT0        | ILEPGLNVLIPVLDLDR                                                                    | 0.929155458        | 2              | 3.655525  |
| Q4FZT0        | NTVILFVPQQEAWVVVER                                                                   | 0.835413065        | 2              | 3.051839  |
| <b>Q4FZT9</b> | <b>PSMD2 26S proteasome non_ATPase regulatory subunit 2</b>                          | <b>1.143316249</b> | <b>1.1E-13</b> | <b>8</b>  |
| Q4FZT9        | DKTPVQSQPSATAPSGADEK                                                                 | 1.587859677        | 3              | 4.971573  |
| Q4FZT9        | FGGSGSQVDSAR                                                                         | 1.079357552        | 2              | 3.891086  |
| Q4FZT9        | GEAIEAILAALEVSEPFRR                                                                  | 1.009427757        |                |           |
| Q4FZT9        | SETELKDTYAR                                                                          | 1.202217526        | 2              | 2.357594  |
| Q4FZT9        | SGALLACGIVNSGVR                                                                      | 1.266980567        | 2              | 3.677731  |
| Q4FZT9        | SSTTSMTSVPKPLK                                                                       | 0.978366968        | 2              | 2.582055  |
| Q4FZT9        | TITGFQTHHTPVLLAHGER                                                                  | 1.232514777        | 3              | 3.709084  |
| Q4FZT9        | TPVQSQSQPSATAPSGADEK                                                                 | 1.145991293        | 2              | 4.440697  |
| <b>Q4FZX7</b> | <b>SRPRB Signal recognition particle receptor subunit beta</b>                       | <b>1.004465931</b> | <b>4.2E-06</b> | <b>5</b>  |
| Q4FZX7        | DTQTSITDSSAIYK                                                                       | 0.845513914        | 2              | 3.096941  |
| Q4FZX7        | GDAGSADVQDLEK                                                                        | 1.115518769        | 2              | 3.329109  |
| Q4FZX7        | GNSLTLIDLPGHESLR                                                                     | 1.11554            | 2              | 3.491884  |
| Q4FZX7        | SAAPSTLDSSTAPAQLGK                                                                   | 1.564327196        | 2              | 4.616443  |
| Q4FZX7        | VGDGAGGAFQPYLDSLRL                                                                   | 1.134877111        | 2              | 3.283015  |
| <b>Q4G061</b> | <b>EIF3B Eukaryotic translation initiation factor 3 subunit B</b>                    | <b>0.950020673</b> | <b>0.76413</b> | <b>5</b>  |
| Q4G061        | AEEEGGSDGSAAEAEPRL                                                                   | 0.918108518        | 2              | 4.84523   |
| Q4G061        | AKPAAQSEETAASPAASPTQSAQEPSAPGK                                                       | 1.050274222        | 3              | 5.91656   |
| Q4G061        | GTQGVVTNFEIFRR                                                                       | 1.012953567        | 2              | 2.819967  |
| Q4G061        | IINDYYPEEDGK                                                                         | 1.022094467        | 2              | 2.60998   |
| Q4G061        | TEDAEEDEARPEPEVRL                                                                    | 0.432334456        | 3              | 3.900955  |
| <b>Q4G069</b> | <b>RMD1 Regulator of microtubule dynamics protein 1</b>                              | <b>1.159624943</b> | <b>0.49548</b> | <b>2</b>  |
| Q4G069        | IAEVLFANPPSSTYEEALK                                                                  | 0.567668966        | 2              | 2.488319  |
| Q4G069        | VLLYEALYAK                                                                           | 1.160386503        | 2              | 2.565507  |
| <b>Q4KLP0</b> | <b>DHTK1 Probable 2_oxoglutarate dehydrogenase E1 component DHKTD1_mitochondrial</b> | <b>1.032090153</b> | <b>0.98971</b> | <b>13</b> |
| Q4KLP0        | ARPSVDHGLAR                                                                          | 0.996771008        | 2              | 2.369559  |
| Q4KLP0        | LEELCPFPLDSLQQEMGK                                                                   | 0.932428015        | 2              | 5.123319  |
| Q4KLP0        | LLLESQEFDFHLATK                                                                      | 0.96253269         | 2              | 3.409804  |
| Q4KLP0        | LSAYGGITDIIGMPHRR                                                                    | 1.091115153        | 3              | 3.380409  |
| Q4KLP0        | LVTVYCEHGK                                                                           | 1.525305305        | 2              | 2.845205  |
| Q4KLP0        | NGTNLDWATAETLALGSLLAQGFNVR                                                           | 1.129314745        |                |           |
| Q4KLP0        | QWGHNELDEPFFTNPVMYK                                                                  | 0.977110562        | 3              | 3.792775  |
| Q4KLP0        | SIPDTYAEHLIASGLMTQEEVSDIK                                                            | 1.04467451         | 3              | 5.151444  |
| Q4KLP0        | SSLYSSDIGK                                                                           | 1.090821044        | 2              | 2.693988  |
| Q4KLP0        | SVEVPEELQLHSHLLK                                                                     | 1.041418115        | 2              | 3.813759  |
| Q4KLP0        | WQGLVQPAACVTTWDTGVPLELLR                                                             | 0.926412018        | 2              | 4.926007  |
| Q4KLP0        | YGGEGAESMMGFFHELLK                                                                   | 0.749073947        | 2              | 4.407415  |
| Q4KLP0        | YPVAVSTLEEMAPGTAFKPVIGDSSVDPK                                                        | 1.080749397        | 3              | 4.527272  |
| <b>Q4KLZ6</b> |                                                                                      | <b>0.896324512</b> | <b>4.6E-06</b> | <b>16</b> |
| Q4KLZ6        | AAPTEPAEAPETAAGGVASK                                                                 | 0.838193581        | 2              | 4.532551  |
| Q4KLZ6        | AILEVLQTK                                                                            | 0.733812703        | 2              | 2.713578  |
| Q4KLZ6        | ANTDLPAWSAAMDAGLK                                                                    | 0.782166703        | 2              | 3.889141  |
| Q4KLZ6        | ASYISSAQLDQDPGAVAAAAIFR                                                              | 0.861700165        | 2              | 5.905149  |
| Q4KLZ6        | AVAQAGTAGTLLIVK                                                                      | 0.788725283        | 2              | 4.368645  |



|               |                                                                         |                    |                |          |
|---------------|-------------------------------------------------------------------------|--------------------|----------------|----------|
| Q4KLZ6        | EGPTPASPAQVLSK                                                          | 0.865198869        | 2              | 3.055923 |
| Q4KLZ6        | GLCGTILIHK                                                              | 0.727381028        | 2              | 2.321606 |
| Q4KLZ6        | GVSLTLMVLVDEPLLK                                                        | 0.66062519         | 2              | 3.166383 |
| Q4KLZ6        | ISTTLIGLEEHLNALDR                                                       | 0.978609811        | 2              | 3.941124 |
| Q4KLZ6        | LIDAETNAK                                                               | 0.849540602        | 2              | 2.991795 |
| Q4KLZ6        | LNFLAMEQAK                                                              | 0.986887216        | 2              | 2.489008 |
| Q4KLZ6        | LSVLLLEK                                                                | 0.995608826        | 2              | 2.801949 |
| Q4KLZ6        | MVNSVEGCAGDALAGFVACNPDLQLLQGYR                                          | 0.760378316        | 3              | 5.444092 |
| Q4KLZ6        | TMLDSLWAAAQELQAWK                                                       | 0.710237481        | 2              | 4.337875 |
| Q4KLZ6        | VAGALAEFGMGLEEITK                                                       | 0.948076634        | 2              | 3.692878 |
| Q4KLZ6        | VALLSGGSGHEPAHAGFIGK                                                    | 1.304052173        | 2              | 5.297269 |
| <b>Q4KM49</b> | <b>SYYC Tyrosyl_tRNA synthetase_cytoplasmic</b>                         | <b>1.004526888</b> | <b>0.51078</b> | <b>4</b> |
| Q4KM49        | AFCEPGNVENNGVLSFVK                                                      | 0.793131747        | 2              | 3.433717 |
| Q4KM49        | QVEPLDPPAGSAPGER                                                        | 1.003985542        | 2              | 3.170385 |
| Q4KM49        | TVVSGLVQFVPK                                                            | 1.005276866        | 2              | 3.228129 |
| Q4KM49        | VDAQFGGIDQR                                                             | 1.129520672        | 2              | 2.940107 |
| <b>Q4KM73</b> | <b>KCY UMP_CMP kinase</b>                                               | <b>0.984753234</b> | <b>0.08677</b> | <b>6</b> |
| Q4KM73        | IQTYLESTKPIIDLVEEMGK                                                    | 0.902515491        | 2              | 4.499327 |
| Q4KM73        | IVPVEITISLLK                                                            | 0.695848269        | 2              | 2.319888 |
| Q4KM73        | KNPDSQYGELIEK                                                           | 1.077217192        | 2              | 3.669565 |
| Q4KM73        | NQDNLQGWNK                                                              | 0.959699789        | 2              | 3.088647 |
| Q4KM73        | SVDEVFGDVMK                                                             | 0.909931168        | 2              | 3.071751 |
| Q4KM73        | YGYTHLSAGELLR                                                           | 0.749337279        | 3              | 4.39207  |
| <b>Q4KM74</b> | <b>SC22B Vesicle_trafficking protein SEC22b</b>                         | <b>1.26083383</b>  | <b>2.7E-12</b> | <b>4</b> |
| Q4KM74        | DLQQYQSQAK                                                              | 1.278254141        | 2              | 3.297288 |
| Q4KM74        | GEALSALDSK                                                              | 1.285424986        | 2              | 2.557648 |
| Q4KM74        | NLGSINTELQDVQR                                                          | 1.281381954        | 2              | 4.204613 |
| Q4KM74        | VADGLPLAASMQEDEQSGR                                                     | 1.207481118        | 2              | 2.635653 |
| <b>Q4KMA2</b> | <b>RD23B UV excision repair protein RAD23 homolog B</b>                 | <b>0.915385489</b> | <b>0.99899</b> | <b>2</b> |
| Q4KMA2        | NFVVMVTKPK                                                              | 0.772592146        | 2              | 2.839968 |
| Q4KMA2        | QIIQQNPSPALLQQIGR                                                       | 1.003005988        | 2              | 4.658129 |
| <b>Q4KSH7</b> | <b>MP2K7 Dual specificity mitogen_activated protein kinase kinase 7</b> | <b>1.284877352</b> | <b>0.49678</b> | <b>2</b> |
| Q4KSH7        | RSGNKEENK                                                               | 1.228920111        | 1              | 1.989794 |
| Q4KSH7        | YNKLEHSFIK                                                              | 3.190335845        | 1              | 1.937529 |
| <b>Q4QQS8</b> | <b>NUP85 Nuclear pore complex protein Nup85</b>                         | <b>0.885554299</b> | <b>0.0923</b>  | <b>2</b> |
| Q4QQS8        | LEEELSGK                                                                | 0.896525512        |                |          |
| Q4QQS8        | RFGDAASLLLSLMTSQIAPR+Oxidation(12)                                      | 0.557802931        |                |          |
| <b>Q4QQV3</b> | <b>F162A Protein FAM162A</b>                                            | <b>0.949777056</b> | <b>1</b>       | <b>2</b> |
| Q4QQV3        | EEIIPETISFEMLDAAK                                                       | 0.966677175        | 2              | 4.118657 |
| Q4QQV3        | RHESLTSNLER                                                             | 0.968326102        | 3              | 4.249256 |
| <b>Q4QQW3</b> | <b>HOT Hydroxyacid_oxoacid transhydrogenase_mitochondrial</b>           | <b>0.846151067</b> | <b>0.15238</b> | <b>5</b> |
| Q4QQW3        | AANLYACSPHSEFLDYVNAPIGK                                                 | 1.001466374        | 3              | 3.7553   |
| Q4QQW3        | HLETAEILGANIR                                                           | 0.843643316        | 2              | 3.415718 |
| Q4QQW3        | IQDAGPVLADALR                                                           | 0.938401062        | 2              | 2.779708 |
| Q4QQW3        | NLSQLPPVQIVMDSLSK                                                       | 0.844652275        | 2              | 2.61558  |
| Q4QQW3        | VEPTDGSFMDAIEFAK                                                        | 1.016931738        | 2              | 2.668852 |
| <b>Q4QRB4</b> | <b>TBB3 Tubulin beta_3 chain</b>                                        | <b>0.976172107</b> | <b>0.98803</b> | <b>6</b> |
| Q4QRB4        | AILVDLEPGTMDSVR                                                         | 0.899067133        | 2              | 4.907288 |
| Q4QRB4        | AILVDLEPGTMDSVR+Oxidation(10)                                           | 0.927804592        |                |          |
| Q4QRB4        | EIVHIQAGQCGNQIGAK                                                       | 1.200454566        | 2              | 5.043253 |
| Q4QRB4        | IMNTFSVVPSPK                                                            | 1.04614141         | 2              | 3.418721 |
| Q4QRB4        | IMNTFSVVPSPK+Oxidation(1)                                               | 1.190063365        |                |          |
| Q4QRB4        | ISEQFTAMFR                                                              | 0.949610868        | 2              | 3.584484 |
| <b>Q4V7C7</b> | <b>ARP3 Actin_related protein 3</b>                                     | <b>0.936175187</b> | <b>0.65442</b> | <b>5</b> |

|               |                                                                                          |                    |                |           |
|---------------|------------------------------------------------------------------------------------------|--------------------|----------------|-----------|
| Q4V7C7        | KDYEEIGPSICR                                                                             | 1.078464552        | 2              | 3.647529  |
| Q4V7C7        | LGYAGNTEPQFIIPSCIAIK                                                                     | 0.810868252        | 2              | 3.149663  |
| Q4V7C7        | LSEELSGGR                                                                                | 0.973453354        | 2              | 2.713385  |
| Q4V7C7        | TLTGTVIDSGDGVTHVIPVAEGYVIGSCIK                                                           | 0.841264332        | 3              | 3.668952  |
| Q4V7C7        | YSYVCPDLVK                                                                               | 1.134419551        | 2              | 2.364987  |
| <b>Q4V8F9</b> | <b>HSDL2 Hydroxysteroid dehydrogenase_like protein 2</b>                                 | <b>0.93726286</b>  | <b>0.99053</b> | <b>3</b>  |
| Q4V8F9        | DEQQINSAVEK                                                                              | 0.909122858        | 2              | 3.098461  |
| Q4V8F9        | KVDIADAAYSIFK                                                                            | 0.951229116        | 2              | 2.403412  |
| Q4V8F9        | SFTGNFIIDENILK                                                                           | 1.063307642        | 2              | 2.932067  |
| <b>Q4V8K1</b> | <b>STE4 Metalloredutase STEAP4</b>                                                       | <b>1.022955141</b> | <b>0.99972</b> | <b>2</b>  |
| Q4V8K1        | TCADFFPLTVDSSEK                                                                          | 1.032368621        | 2              | 4.587189  |
| Q4V8K1        | TLGLTPLDQGSLSVAAK                                                                        | 1.03084707         | 2              | 3.809314  |
| <b>Q505J8</b> | <b>SYFA Phenylalanyl_tRNA synthetase alpha chain</b>                                     | <b>0.968208945</b> | <b>0.7741</b>  | <b>3</b>  |
| Q505J8        | LQQVQAGQAEK                                                                              | 1.049663332        | 2              | 2.513763  |
| Q505J8        | RLEVADGGLDSAELATQLGVEHQAVVGAVK                                                           | 0.968813713        | 3              | 4.930496  |
| Q505J8        | SLQALGEVIEAELR                                                                           | 0.823410712        | 2              | 3.581163  |
| <b>Q561R9</b> | <b>LACB2 Beta_lactamase_like protein 2</b>                                               | <b>0.869433887</b> | <b>0.63031</b> | <b>4</b>  |
| Q561R9        | ANIIYPGHGPIVHNAEAK                                                                       | 0.7489007          | 2              | 4.291328  |
| Q561R9        | ILIDTGEPSPVEYISCLK                                                                       | 0.890333433        | 2              | 3.363614  |
| Q561R9        | NISNDATYCIK                                                                              | 1.082188029        | 2              | 2.474453  |
| Q561R9        | NNREEQIITVFR                                                                             | 0.791225957        | 2              | 2.541478  |
| <b>Q561S0</b> | <b>NDUAA NADH dehydrogenase [ubiquinone] 1 alpha subcomplex subunit 10_mitochondrial</b> | <b>1.142150515</b> | <b>0.92945</b> | <b>5</b>  |
| Q561S0        | LLQYSDALEHLLSTGQGVVLER                                                                   | 1.067016869        | 3              | 3.665848  |
| Q561S0        | VITVDGNICSGK                                                                             | 1.275042811        | 2              | 2.923081  |
| Q561S0        | VVEDIEYLNYNK                                                                             | 1.243047842        | 2              | 4.201758  |
| Q561S0        | YAPGYNADVGDK                                                                             | 1.10270546         | 2              | 2.675377  |
| Q561S0        | YGLLASILGDK                                                                              | 0.88995499         | 2              | 2.947858  |
| <b>Q562C4</b> | <b>MET7B Methyltransferase_like protein 7B</b>                                           | <b>1.108229005</b> | <b>0.96146</b> | <b>5</b>  |
| Q562C4        | AQFSEVQLEWQPPPFK                                                                         | 1.168715505        | 2              | 4.897835  |
| Q562C4        | FIVAYGENMK                                                                               | 1.167133976        | 2              | 2.720356  |
| Q562C4        | HIGDGCHLTR                                                                               | 1.009263062        | 3              | 3.406351  |
| Q562C4        | VLQEVQR                                                                                  | 1.133358255        | 2              | 2.769327  |
| Q562C4        | VTCVDPNPNFEK                                                                             | 1.295267809        | 2              | 3.563125  |
| <b>Q58FK9</b> | <b>KAT3 Kynurenine__oxoglutarate transaminase 3</b>                                      | <b>1.464500879</b> | <b>1.2E-12</b> | <b>7</b>  |
| Q58FK9        | AIILNTPHNPIGK                                                                            | 1.921763767        | 2              | 3.220357  |
| Q58FK9        | DSTLDAEEIFR                                                                              | 1.712386832        | 2              | 2.946199  |
| Q58FK9        | IEGLDQNVWVEFTK                                                                           | 1.390691457        | 2              | 4.713377  |
| Q58FK9        | LAADPSVNLGQGFPDITLPSYVQEELSK                                                             | 1.600946276        | 2              | 4.058285  |
| Q58FK9        | MDDPECYFNLPK                                                                             | 1.368051322        | 2              | 3.673065  |
| Q58FK9        | RIEGLDQNVWVEFTK                                                                          | 1.518812266        | 2              | 3.940595  |
| Q58FK9        | WTSSDWFNPOELESK                                                                          | 1.58711866         | 2              | 5.071333  |
| <b>Q5BJP3</b> | <b>UFM1 Ubiquitin_fold modifier 1</b>                                                    | <b>0.996544269</b> | <b>0.58071</b> | <b>2</b>  |
| Q5BJP3        | VLSVPESTPFTAVLK                                                                          | 2.252804465        | 2              | 2.327214  |
| Q5BJP3        | VPAATSIIITNDGIGINPAQTAGNVFLK                                                             | 1.008829057        | 3              | 4.359497  |
| <b>Q5BJY9</b> | <b>K1C18 Keratin_type I cytoskeletal 18</b>                                              | <b>0.906003671</b> | <b>5.4E-13</b> | <b>27</b> |
| Q5BJY9        | AQIFANSVDNAR                                                                             | 0.953753162        | 2              | 3.837768  |
| Q5BJY9        | AQYEQLAQK                                                                                | 0.914128877        | 2              | 3.286449  |
| Q5BJY9        | DAETTLLELR                                                                               | 2.707446235        | 2              | 2.805743  |
| Q5BJY9        | IREYLEK                                                                                  | 0.991858962        | 3              | 3.354275  |
| Q5BJY9        | KNHEEEVQGLEAQIASSGLTVEVDAPK                                                              | 0.929380598        | 3              | 4.771309  |
| Q5BJY9        | KVVDDTNITR                                                                               | 0.958865874        | 2              | 3.025656  |
| Q5BJY9        | LEAEIATYR                                                                                | 0.914423276        | 2              | 3.009181  |
| Q5BJY9        | LLEDGDDFSLNDALDSSNSMQTVQR                                                                | 0.784783182        | 3              | 4.361937  |
| Q5BJY9        | LQLETEIEALK                                                                              | 1.258357623        | 2              | 2.899629  |
| Q5BJY9        | LQLETEIEALKEELFMK                                                                        | 0.872003234        | 2              | 5.307376  |

|               |                                                                                         |                    |                |          |
|---------------|-----------------------------------------------------------------------------------------|--------------------|----------------|----------|
| Q5BJY9        | NHEEEVQGLEAQIASSGLTVEVDAPK                                                              | 0.851271455        | 2              | 6.313861 |
| Q5BJY9        | NQNINLENNLGEVEAR                                                                        | 0.850447536        | 2              | 5.502141 |
| Q5BJY9        | NREELDKYWSQQIEESTTVVTTK                                                                 | 0.919897618        | 3              | 5.128973 |
| Q5BJY9        | QSVESDIHGLR                                                                             | 1.093745233        | 2              | 2.649623 |
| Q5BJY9        | QSVESDIHGLRK                                                                            | 0.936986062        | 2              | 2.650688 |
| Q5BJY9        | QTQEYEALLNIK                                                                            | 0.881106763        | 2              | 3.452058 |
| Q5BJY9        | SVWGGSVGSAGLAGMGGVQTEK                                                                  | 0.777927192        | 2              | 5.979166 |
| Q5BJY9        | SVWGGSVGSAGLAGMGGVQTEK+Oxidation(14)                                                    | 0.885678902        |                |          |
| Q5BJY9        | TLQTLEIDLDSMK                                                                           | 0.833629935        | 2              | 4.245171 |
| Q5BJY9        | TLQTLEIDLDSMK+Oxidation(11)                                                             | 1.027605747        |                |          |
| Q5BJY9        | VKLEAEIATYR                                                                             | 1.000312156        | 2              | 2.921019 |
| Q5BJY9        | VKYETELAMR                                                                              | 0.872300511        | 3              | 3.476688 |
| Q5BJY9        | VQMEQLNGVLLHLESELAQTR                                                                   | 0.880555345        | 3              | 5.1235   |
| Q5BJY9        | VRPASSAASVYAGAGGSGSR                                                                    | 1.540739571        | 2              | 5.635721 |
| Q5BJY9        | VVDDTNITR                                                                               | 0.944893326        | 2              | 3.336481 |
| Q5BJY9        | YETELAMR                                                                                | 0.909597021        | 2              | 2.751773 |
| Q5BJY9        | YWSQQIEESTTVVTTK                                                                        | 0.909308382        | 2              | 4.745063 |
| <b>Q5BK63</b> | <b>NDUA9 NADH dehydrogenase [ubiquinone] 1 alpha subcomplex subunit 9_mitochondrial</b> | <b>0.909866528</b> | <b>0.99995</b> | <b>4</b> |
| Q5BK63        | AVQHSNVVINLIGR                                                                          | 0.778053779        | 2              | 3.384199 |
| Q5BK63        | IHISDVMATDLPGLLEDLVQPTPLELK                                                             | 1.004719219        | 3              | 5.333165 |
| Q5BK63        | NDFDFDFVFNIPR                                                                           | 0.924340871        | 2              | 3.990403 |
| Q5BK63        | WLSSEIETKPAK                                                                            | 1.010426966        | 2              | 2.937504 |
| <b>Q5BK81</b> | <b>PTGR2 Prostaglandin reductase 2</b>                                                  | <b>0.936204732</b> | <b>0.59439</b> | <b>4</b> |
| Q5BK81        | AILDGNLEK                                                                               | 0.959582927        | 2              | 2.401326 |
| Q5BK81        | DVPYPPPLPPAVEAIQK                                                                       | 1.072783411        | 2              | 2.694816 |
| Q5BK81        | TGNVAEQLR                                                                               | 0.818159083        | 2              | 2.631785 |
| Q5BK81        | VEEVSLPDTINEGQVR                                                                        | 0.946391879        | 2              | 4.062984 |
| <b>Q5DTT3</b> | <b>F208B Protein FAM208B</b>                                                            | <b>1.094456966</b> | <b>0.06106</b> | <b>2</b> |
| Q5DTT3        | QGENIDKLMEYVKNK                                                                         | 1.605605622        | 2              | 2.326965 |
| Q5DTT3        | VSPSEHSENLSFLEK                                                                         | 0.53194799         | 2              | 2.343685 |
| <b>Q5DW34</b> | <b>EHMT1 Histone_lysine N_methyltransferase EHMT1</b>                                   | <b>0.86427355</b>  | <b>0.19874</b> | <b>2</b> |
| Q5DW34        | TPLMEAENNHLDVAVKYLK+Oxidation(3)                                                        | 1.116062357        |                |          |
| Q5DW34        | YDCVVLFSRDSVTLKNK                                                                       | 0.854297106        | 2              | 2.364569 |
| <b>Q5EB77</b> | <b>RAB18 Ras_related protein Rab_18</b>                                                 | <b>0.911280289</b> | <b>0.7815</b>  | <b>3</b> |
| Q5EB77        | LDNWLNELETYCTR                                                                          | 1.287323551        | 2              | 2.888129 |
| Q5EB77        | NDIVNMLVGNK                                                                             | 0.847309396        | 2              | 3.08801  |
| Q5EB77        | TCDGVQCAFEELVEK                                                                         | 1.074872559        | 2              | 3.467986 |
| <b>Q5FVM4</b> | <b>NONO Non_POU domain_containing octamer_binding protein</b>                           | <b>1.667634919</b> | <b>0.03156</b> | <b>2</b> |
| Q5FVM4        | MEELHNQEVQK                                                                             | 1.071850997        | 2              | 3.222231 |
| Q5FVM4        | MEELHNQEVQK+Oxidation(0)                                                                | 1.769721398        |                |          |
| <b>Q5FVQ4</b> | <b>MLEC Malectin</b>                                                                    | <b>0.86859582</b>  | <b>1</b>       | <b>2</b> |
| Q5FVQ4        | KEEEEEEEYDEGSNLKR                                                                       | 0.918827017        | 3              | 5.539516 |
| Q5FVQ4        | STPEDQILYQTER                                                                           | 1.037449676        | 2              | 4.009935 |
| <b>Q5FVR2</b> | <b>TYPH Thymidine phosphorylase</b>                                                     | <b>0.866601858</b> | <b>0.24544</b> | <b>5</b> |
| Q5FVR2        | AQDTQIGAMLMAIR+Oxidation(10)                                                            | 0.787320582        |                |          |
| Q5FVR2        | AQDTQIGAMLMAIR+Oxidation(8)                                                             | 0.76174461         |                |          |
| Q5FVR2        | DVTATVDSVPLITASILSK                                                                     | 1.353790111        | 2              | 2.499779 |
| Q5FVR2        | FGGAAVFPDQEK                                                                            | 0.630968121        | 2              | 2.329409 |
| Q5FVR2        | VSLVLAPALAACGCK                                                                         | 0.998608436        | 2              | 2.515367 |
| <b>Q5FVR5</b> | <b>ACNT2 Acyl_coenzyme A amino acid N_acyltransferase 2</b>                             | <b>0.928722146</b> | <b>0.98295</b> | <b>4</b> |
| Q5FVR5        | DEKENLFQSK                                                                              | 0.833613967        | 2              | 2.501851 |
| Q5FVR5        | ILFIVGENDQCLASK                                                                         | 0.879288148        | 2              | 3.897016 |
| Q5FVR5        | IQQPGIGVISVSK                                                                           | 0.8241566          | 2              | 3.025784 |

|               |                                                                                |                    |                |          |
|---------------|--------------------------------------------------------------------------------|--------------------|----------------|----------|
| Q5FVR5        | VLEEDLDYFEEAANFLAHPK                                                           | 0.846945607        | 3              | 4.101441 |
| <b>Q5FW57</b> | <b>GLYAL Glycine N_acyltransferase_like protein</b>                            | <b>1.099858103</b> | <b>0.50862</b> | <b>2</b> |
| Q5FW57        | AIDQEMFK                                                                       | 1.134824195        | 1              | 1.990007 |
| Q5FW57        | SSQMLQMLESLR                                                                   | 0.806781405        | 2              | 3.754406 |
| <b>Q5HZV9</b> | <b>PP1R7 Protein phosphatase 1 regulatory subunit 7</b>                        | <b>0.722226885</b> | <b>0.33568</b> | <b>3</b> |
| Q5HZV9        | AIENIDLTNLNLESLFLGK                                                            | 0.719618517        | 2              | 3.020503 |
| Q5HZV9        | ELDLYDNQIK                                                                     | 4.769208912        | 2              | 2.357517 |
| Q5HZV9        | ELDLYDNQIKK                                                                    | 2.717071414        | 2              | 2.40515  |
| <b>Q5HZY0</b> | <b>UBXN4 UBX domain_containing protein 4</b>                                   | <b>1.383995944</b> | <b>0.00381</b> | <b>2</b> |
| Q5HZY0        | LPDGSSFTNQFPSDAPLEEAR                                                          | 1.022176291        | 2              | 4.251848 |
| Q5HZY0        | NTELCETPTTSDPK                                                                 | 1.520857747        | 2              | 4.060839 |
| <b>Q5HZY2</b> | <b>SAR1B GTP_binding protein SAR1b</b>                                         | <b>0.97022238</b>  | <b>0.46755</b> | <b>2</b> |
| Q5HZY2        | EELDSLMTDETIANVPILIGNK                                                         | 0.953532575        | 3              | 3.527583 |
| Q5HZY2        | IDRPEAISEER                                                                    | 1.321233829        | 2              | 2.671447 |
| <b>Q5I0C3</b> | <b>MCCA Methylcrotonoyl_CoA carboxylase subunit alpha_mitochondrial</b>        | <b>0.862079799</b> | <b>0.03243</b> | <b>6</b> |
| Q5I0C3        | HAPLVEFEEEEV                                                                   | 0.86720844         | 2              | 2.939146 |
| Q5I0C3        | IIEEAPAPGIDPEVR                                                                | 0.828571374        | 2              | 3.840908 |
| Q5I0C3        | IYAEDPDNNFMPGAGPLVHLSTPPDMSTR                                                  | 0.827417211        | 3              | 3.407942 |
| Q5I0C3        | SEKEFQEQLESAR                                                                  | 1.029694393        | 2              | 3.20655  |
| Q5I0C3        | TNVDFLLR                                                                       | 0.885900234        | 2              | 2.382185 |
| Q5I0C3        | YLSVSAEGTQGGTIAPMTGTIEK                                                        | 0.767057325        | 2              | 5.126723 |
| <b>Q5I0D1</b> | <b>GLOD4 Glyoxalase domain_containing protein 4</b>                            | <b>0.954044932</b> | <b>0.45077</b> | <b>3</b> |
| Q5I0D1        | ESQSILTPLVSLDTPGK                                                              | 0.956906821        | 2              | 3.571954 |
| Q5I0D1        | HEEFEEGCK                                                                      | 0.869329313        | 2              | 2.560919 |
| Q5I0D1        | VTLAVSDLQK                                                                     | 0.774237854        | 2              | 2.323287 |
| <b>Q5I0D5</b> | <b>LHPP Phospholysine phosphohistidine inorganic pyrophosphate phosphatase</b> | <b>0.876573049</b> | <b>5.1E-05</b> | <b>2</b> |
| Q5I0D5        | AFQVLMELNPNVLISLGK                                                             | 1.003181208        | 3              | 3.789254 |
| Q5I0D5        | LGFDISEGEVTAPAPATCQILK                                                         | 0.792362114        | 2              | 4.340418 |
| <b>Q5I0D7</b> | <b>PEPD Xaa_Pro dipeptidase</b>                                                | <b>0.8447016</b>   | <b>0.00234</b> | <b>2</b> |
| Q5I0D7        | GVNTDSGNVCR                                                                    | 1.024624079        | 2              | 2.417106 |
| Q5I0D7        | YAVDDVQYADEIASVLTSR                                                            | 0.709723789        | 2              | 3.950121 |
| <b>Q5I0E7</b> | <b>TMED9 Transmembrane emp24 domain_containing protein 9</b>                   | <b>1.080015791</b> | <b>0.89902</b> | <b>2</b> |
| Q5I0E7        | QLVEQVEQIQK                                                                    | 0.981995584        | 2              | 3.741625 |
| Q5I0E7        | QREEYQPATPGLGMFVEVKDPEDK                                                       | 1.094687208        | 3              | 4.08146  |
| <b>Q5I0H9</b> | <b>PDIAS Protein disulfide_isomerase A5</b>                                    | <b>0.978951019</b> | <b>0.99914</b> | <b>4</b> |
| Q5I0H9        | DKNQDLCQQESVK                                                                  | 1.288592367        | 2              | 4.20531  |
| Q5I0H9        | GPPLWEEDPGAK                                                                   | 0.879689228        | 2              | 3.173129 |
| Q5I0H9        | GQGTICWVDCGDAESR                                                               | 0.803436399        | 2              | 4.062721 |
| Q5I0H9        | NQDLCQQESVK                                                                    | 0.82880356         | 2              | 3.190464 |
| <b>Q5I0J9</b> | <b>ASPD Putative L_aspartate dehydrogenase</b>                                 | <b>0.949158373</b> | <b>0.9526</b>  | <b>8</b> |
| Q5I0J9        | HANLLVGSPSALADQTTER                                                            | 0.896287619        | 2              | 5.469194 |
| Q5I0J9        | IHESGVQILR                                                                     | 0.995452595        | 2              | 2.511107 |
| Q5I0J9        | LDAAGGLQSLR                                                                    | 0.878148915        | 2              | 3.761127 |
| Q5I0J9        | LEGPLAAAHSSGPR                                                                 | 1.011970752        | 2              | 3.35916  |
| Q5I0J9        | MAGSVPPALQLEDLTTLEER                                                           | 1.02027611         | 2              | 3.098477 |
| Q5I0J9        | NSNTMAAAAALAPSGLFDR                                                            | 0.85347551         | 2              | 4.320286 |
| Q5I0J9        | TVLYEGPVR                                                                      | 0.998264309        | 2              | 2.834515 |
| Q5I0J9        | VGVVGYGR                                                                       | 1.026211143        | 2              | 2.343987 |
| <b>Q5I0M2</b> | <b>NADC Nicotinate_nucleotide pyrophosphorylase [carboxylating]</b>            | <b>1.026576064</b> | <b>0.23943</b> | <b>5</b> |
| Q5I0M2        | CSGIASAAATAVEVATSTGWAGHVAGTR                                                   | 0.869926525        | 3              | 4.324335 |
| Q5I0M2        | DNHVVAAGSMEK                                                                   | 1.334319061        | 2              | 2.84924  |
| Q5I0M2        | EALQAAEAGADLVMLDNFKPEELHPTAATLK                                                | 1.02474069         | 3              | 6.041539 |

|               |                                                                          |                    |                |          |
|---------------|--------------------------------------------------------------------------|--------------------|----------------|----------|
| Q5I0M2        | LYAEGDIPVPHAR                                                            | 0.93412121         | 2              | 2.951888 |
| Q5I0M2        | VEVECSSLK                                                                | 1.021134848        | 2              | 2.662642 |
| <b>Q5I0P2</b> | <b>GCSH Glycine cleavage system H protein_ mitochondrial</b>             | <b>0.997975305</b> | <b>0.92389</b> | <b>2</b> |
| Q5I0P2        | MTLSDPSELDELMSEEAYEK                                                     | 0.981993313        | 2              | 5.214109 |
| Q5I0P2        | SCYEDGWLIK                                                               | 0.937613907        | 2              | 2.306847 |
| <b>Q5M7T9</b> | <b>THNS2 Threonine synthase_like 2</b>                                   | <b>1.257787728</b> | <b>0.0284</b>  | <b>3</b> |
| Q5M7T9        | FPEAVQAAGLTPETPAEILALEHK                                                 | 1.25862996         | 3              | 5.418866 |
| Q5M7T9        | GDFSLCEVVR                                                               | 1.219809584        | 2              | 2.529871 |
| Q5M7T9        | MGLPISLVAVNR                                                             | 1.052696786        | 2              | 2.547187 |
| <b>Q5M7U6</b> | <b>ARP2 Actin_related protein 2</b>                                      | <b>0.857665725</b> | <b>0.00099</b> | <b>5</b> |
| Q5M7U6        | GYAFNHSADFETVR                                                           | 0.779098118        | 2              | 3.77078  |
| Q5M7U6        | HLWDYTFGPEK                                                              | 0.946705776        | 2              | 3.320496 |
| Q5M7U6        | KHMVFLGGAVLADIMK+Oxidation(2)                                            | 0.998186012        |                |          |
| Q5M7U6        | LCYVGYNIEQEQQ                                                            | 1.739442526        | 2              | 2.396196 |
| Q5M7U6        | SMLEVNYPMENGIVR                                                          | 0.815978038        | 2              | 3.193145 |
| <b>Q5M7W5</b> | <b>MAP4 Microtubule_associated protein 4</b>                             | <b>0.943280439</b> | <b>0.00021</b> | <b>7</b> |
| Q5M7W5        | AAVGLTGNDIATPPNK                                                         | 0.939814892        | 2              | 3.546937 |
| Q5M7W5        | ATSPSTLVSTGSSSR                                                          | 0.835434518        | 2              | 3.649583 |
| Q5M7W5        | NTTPTGATPPAGMASTR                                                        | 1.188390593        | 2              | 2.70681  |
| Q5M7W5        | STLPVDEGSPEK                                                             | 0.95757449         | 2              | 2.402106 |
| Q5M7W5        | TEFIPLLDGDEK                                                             | 0.932704152        | 2              | 2.504158 |
| Q5M7W5        | VGSLDNVGHLPAGGTVK                                                        | 1.004237885        | 2              | 3.369494 |
| Q5M7W5        | VTEFNNVTPLSEEEVASIK                                                      | 1.04243119         | 2              | 3.169424 |
| <b>Q5M875</b> | <b>DHB13 17_beta_hydroxysteroid dehydrogenase 13</b>                     | <b>1.008529836</b> | <b>1</b>       | <b>7</b> |
| Q5M875        | ALTAELDTLTK                                                              | 1.046874284        | 2              | 2.828357 |
| Q5M875        | IQNIQFEAIVGHR                                                            | 0.808921884        | 3              | 3.523788 |
| Q5M875        | LWPVLEPDEVAR                                                             | 1.015699895        | 2              | 2.400387 |
| Q5M875        | NSGHIVTVASVCGHR                                                          | 0.976032732        | 2              | 4.399843 |
| Q5M875        | SLIDGILTK                                                                | 1.034492091        | 2              | 3.324672 |
| Q5M875        | SVAGQTVLITGAGHGIGR                                                       | 0.971954472        | 2              | 4.027478 |
| Q5M875        | TSCLCPVFVNTGFTK                                                          | 0.82419367         | 2              | 3.81641  |
| <b>Q5M9G3</b> | <b>CAPR1 Caprin_1</b>                                                    | <b>1.265897549</b> | <b>0.04618</b> | <b>4</b> |
| Q5M9G3        | LNQDQLDAVSK                                                              | 1.277427571        | 2              | 3.254042 |
| Q5M9G3        | SSFSNTPNSGYTQSQFNAPR                                                     | 0.467756998        | 2              | 3.801034 |
| Q5M9G3        | TVLELQYVLDK                                                              | 1.38191888         | 2              | 2.437326 |
| Q5M9G3        | YQEVTTNNLEFAK                                                            | 1.135537386        | 2              | 2.742763 |
| <b>Q5M9I5</b> | <b>QCR6 Cytochrome b_c1 complex subunit 6_ mitochondrial</b>             | <b>1.052737173</b> | <b>0.99879</b> | <b>2</b> |
| Q5M9I5        | EEEEELVDPLTTVR                                                           | 0.987852841        | 2              | 2.678546 |
| Q5M9I5        | SQTEEDCTEELFDLHAR                                                        | 1.075171358        | 2              | 4.86154  |
| <b>Q5PPL3</b> | <b>NSDHL Sterol_4_alpha_carboxylate 3_dehydrogenase_ decarboxylating</b> | <b>1.133252808</b> | <b>1</b>       | <b>9</b> |
| Q5PPL3        | AVLDANDPKK                                                               | 1.077095608        | 2              | 2.479386 |
| Q5PPL3        | CTVIGSGFLGQHMVEQLLSR                                                     | 1.042250506        | 2              | 4.930092 |
| Q5PPL3        | DPQLVPVLIDAAAR                                                           | 1.066849468        | 3              | 3.405301 |
| Q5PPL3        | GQVTGTDLINEVSK                                                           | 1.040508411        | 2              | 3.785707 |
| Q5PPL3        | GVSTVFHCASPPSNNSNK                                                       | 1.16503397         | 2              | 4.786042 |
| Q5PPL3        | GYAVNVFDVR                                                               | 1.058943704        | 2              | 3.588144 |
| Q5PPL3        | ILTGLNIEAPK                                                              | 1.208675611        | 2              | 2.863304 |
| Q5PPL3        | KGQVTGTDLINEVSK                                                          | 1.041909309        | 2              | 4.079587 |
| Q5PPL3        | VQFFIGDLCNQDLYPALK                                                       | 1.022935593        | 3              | 5.26558  |
| <b>Q5PQQ2</b> | <b>WBP11 WW domain_binding protein 11</b>                                | <b>1.149652267</b> | <b>0.64213</b> | <b>4</b> |
| Q5PQQ2        | KLEVEYEQK                                                                | 6.591187209        | 1              | 2.173596 |
| Q5PQQ2        | LDEMEFNPVQQPQLNEKVLK+Oxidation(3)                                        | 1.527272407        |                |          |
| Q5PQQ2        | RDEDMLYSPELAQR                                                           | 1.01596514         | 2              | 2.325378 |

|               |                                                                      |                    |                |           |
|---------------|----------------------------------------------------------------------|--------------------|----------------|-----------|
| Q5PQQ2        | STSTKSGKFMNPTDQAR                                                    | 1.034152705        | 2              | 2.471763  |
| <b>Q5PQR4</b> | <b>RSRC2 Arginine/serine_rich coiled_coil protein 2</b>              | <b>0.973911123</b> | <b>0.03844</b> | <b>2</b>  |
| Q5PQR4        | EKEMVEK+Oxidation(3)                                                 | 1.13393557         |                |           |
| Q5PQR4        | KEGDKSQSAEIWEK                                                       | 0.417234391        | 2              | 2.543995  |
| <b>Q5PQT3</b> | <b>GLYAT Glycine N_acyltransferase</b>                               | <b>0.936582725</b> | <b>0.99317</b> | <b>6</b>  |
| Q5PQT3        | AIQNLAISHLQVK                                                        | 0.955590991        | 2              | 3.398991  |
| Q5PQT3        | DPENCQEFLGSSEVINWK                                                   | 0.880810897        | 2              | 5.326753  |
| Q5PQT3        | FWLFGGNER                                                            | 0.87744249         | 2              | 2.415078  |
| Q5PQT3        | GFPVYSHTDK                                                           | 0.907995988        | 2              | 2.676879  |
| Q5PQT3        | LSSLDVTHAALVNK                                                       | 1.048674061        | 2              | 3.241656  |
| Q5PQT3        | QHLQIQSSQSHLNK                                                       | 1.277601522        | 2              | 3.480844  |
| <b>Q5RJR8</b> | <b>LRC59 Leucine_rich repeat_containing protein 59</b>               | <b>1.06656231</b>  | <b>0.90967</b> | <b>6</b>  |
| Q5RJR8        | ATVLDLSCNK                                                           | 1.063940553        | 2              | 3.114544  |
| Q5RJR8        | DKLDGNELDLSDLNVEVPVK                                                 | 0.97275399         | 2              | 6.028548  |
| Q5RJR8        | HHEILQWVLQTDSSQQ                                                     | 0.875709427        | 2              | 3.239959  |
| Q5RJR8        | LDGNELDLSDLNVEVPVK                                                   | 1.100644313        | 2              | 3.92303   |
| Q5RJR8        | LQQLPADFGR                                                           | 1.278973355        | 2              | 2.354561  |
| Q5RJR8        | LSTLPSDFCGLTHLVK                                                     | 0.82278047         | 2              | 3.183544  |
| <b>Q5RKH1</b> | <b>PRP4B Serine/threonine_protein kinase PRP4 homolog</b>            | <b>0.860301222</b> | <b>0.39576</b> | <b>2</b>  |
| Q5RKH1        | DLLDQILMLDPAKR+Oxidation(7)                                          | 0.750702287        |                |           |
| Q5RKH1        | LAMDLGKMPNK+Oxidation(2)                                             | 0.926704544        |                |           |
| <b>Q5RKH6</b> | <b>OS9 Protein OS_9</b>                                              | <b>0.899560938</b> | <b>0.87229</b> | <b>3</b>  |
| Q5RKH6        | EQAILALTSTLDK                                                        | 0.899473429        | 2              | 2.423348  |
| Q5RKH6        | LQESQSPELVQK                                                         | 0.899550245        | 2              | 2.935137  |
| Q5RKH6        | QEQPGDDTTEAPQR                                                       | 0.919079848        | 2              | 3.091011  |
| <b>Q5RK10</b> | <b>WDR1 WD repeat_containing protein 1</b>                           | <b>1.012559816</b> | <b>0.99984</b> | <b>3</b>  |
| Q5RK10        | AHDGGIYAISWSPDSTHLLSASGDK                                            | 1.083161829        | 3              | 5.042492  |
| Q5RK10        | CFSIDNPGYEPEVVAVHPGGDTVAVGGSDGNVR                                    | 0.982706935        | 3              | 4.643034  |
| Q5RK10        | YAPSGFYIASGDISGK                                                     | 0.999707133        | 2              | 4.312936  |
| <b>Q5RK11</b> | <b>IF4A2 Eukaryotic initiation factor 4A_II</b>                      | <b>1.200094931</b> | <b>9.9E-20</b> | <b>5</b>  |
| Q5RK11        | ELAQQIQK                                                             | 1.692125453        | 1              | 2.229965  |
| Q5RK11        | GIDVQQVSLVINYLPTNR                                                   | 1.113840793        | 2              | 3.997807  |
| Q5RK11        | GYDVIAQAQSGTGK                                                       | 1.360185625        | 2              | 5.314204  |
| Q5RK11        | MFVLDEADEMLSR                                                        | 1.138446918        | 2              | 4.288107  |
| Q5RK11        | VLITTDLLAR                                                           | 1.01527245         | 2              | 3.487532  |
| <b>Q5S006</b> | <b>LRRK2 Leucine_rich repeat serine/threonine_protein kinase 2</b>   | <b>0.970468251</b> | <b>0.62545</b> | <b>2</b>  |
| Q5S006        | MPRITNLDASR+Oxidation(0)                                             | 0.705289833        |                |           |
| Q5S006        | WLCKVMAQILTVK                                                        | 0.972071127        | 2              | 2.334558  |
| <b>Q5SGE0</b> | <b>LPPRC Leucine_rich PPR motif_containing protein_mitochondrial</b> | <b>1.181768306</b> | <b>0.00063</b> | <b>16</b> |
| Q5SGE0        | AALDLEQVPSELAVTR                                                     | 1.026681355        | 2              | 4.194396  |
| Q5SGE0        | CIANNQVETLEK                                                         | 1.189781396        | 2              | 2.88551   |
| Q5SGE0        | DVGEPVPFTEPPESFGFYIK                                                 | 1.069489047        | 2              | 2.966461  |
| Q5SGE0        | GLDAIELSR                                                            | 1.018191191        | 2              | 2.69324   |
| Q5SGE0        | HCVTMDTPAEK                                                          | 1.064960955        | 2              | 3.008977  |
| Q5SGE0        | HDNAEDALNLK                                                          | 1.246195927        | 2              | 3.565758  |
| Q5SGE0        | MEGANIQPNR                                                           | 1.060031679        | 2              | 2.722537  |
| Q5SGE0        | SCGSLLPELSLAER                                                       | 1.152410779        | 2              | 2.36615   |
| Q5SGE0        | SCGSLLPELSLAERTEFAHK                                                 | 1.202882507        | 2              | 2.40415   |
| Q5SGE0        | SGSPGSNQALLLR                                                        | 1.243669426        | 2              | 2.828588  |
| Q5SGE0        | SSLSSSSPSAGDTVTEK                                                    | 1.021823668        | 2              | 4.347086  |
| Q5SGE0        | SYVADKDVASAK                                                         | 1.154812475        | 2              | 2.857055  |
| Q5SGE0        | TLLELIPELR                                                           | 1.150721904        | 2              | 3.005342  |

|               |                                 |                    |                |           |
|---------------|---------------------------------|--------------------|----------------|-----------|
| Q5SGE0        | TSQFTSSDLESTLEK                 | 1.348069383        | 2              | 3.05048   |
| Q5SGE0        | VIEEQMEPALEK                    | 1.118336951        | 2              | 2.92843   |
| Q5SGE0        | VYLQNEYR                        | 1.243314664        | 2              | 2.451252  |
| <b>Q5SNZ0</b> | <b>GRDN Girdin</b>              | <b>0.99562514</b>  | <b>0.44764</b> | <b>2</b>  |
| Q5SNZ0        | KVEILENEIIQEK                   | 0.910911438        | 2              | 2.523196  |
| Q5SNZ0        | YNQLLKQKGQLEDLEK                | 0.829205835        | 2              | 2.643322  |
| <b>Q5SW19</b> | <b>K0664 Protein KIAA0664</b>   | <b>1.210023268</b> | <b>1.1E-06</b> | <b>3</b>  |
| Q5SW19        | GLEMDPIDCTPPEYILPGSR            | 0.942680592        | 2              | 2.93945   |
| Q5SW19        | IGIGELITR                       | 1.462568761        | 2              | 2.917611  |
| Q5SW19        | SVEGLQEGSVLR                    | 1.284991651        | 2              | 2.823326  |
| <b>Q5SX40</b> | <b>MYH1 Myosin_1</b>            | <b>1.114896768</b> | <b>1</b>       | <b>95</b> |
| Q5SX40        | AAYLQNLNSADLLK                  | 1.090997505        | 2              | 3.658021  |
| Q5SX40        | ADIAESQVNK                      | 1.103517044        | 2              | 4.055568  |
| Q5SX40        | AEDEEEINAELTAK                  | 1.09556516         | 2              | 4.381058  |
| Q5SX40        | AGLLGLLEEMR                     | 2.234620657        | 2              | 3.978479  |
| Q5SX40        | AGLLGLLEEMRDDK                  | 2.090902779        | 2              | 3.335037  |
| Q5SX40        | ALQEAHQQTLLDDLQAEEDK            | 2.555849046        | 2              | 5.756624  |
| Q5SX40        | ALQEAHQQTLLDDLQAEEDKVNTLTK      | 2.596350461        | 3              | 6.764009  |
| Q5SX40        | ANLLQAEIEELR                    | 2.33304926         | 2              | 3.93121   |
| Q5SX40        | ANSEVAQWR                       | 1.236351014        | 2              | 3.037319  |
| Q5SX40        | DLEEATLQHEATAATLR               | 3.300992093        | 2              | 4.96199   |
| Q5SX40        | DTQLHLDDALR                     | 3.288869614        | 1              | 3.613188  |
| Q5SX40        | EEQAEPDGTVEADK                  | 4.830731653        | 2              | 3.558584  |
| Q5SX40        | EFEMSNLQSK                      | 2.454573062        | 1              | 2.543429  |
| Q5SX40        | ELEEISER                        | 7.139843504        | 1              | 2.076466  |
| Q5SX40        | ELEGEVENEQK                     | 4.394209225        | 2              | 2.69849   |
| Q5SX40        | ELEGEVENEQKR                    | 6.010647342        | 2              | 3.285165  |
| Q5SX40        | ELTYQTEEDRK                     | 3.523689324        | 2              | 3.095385  |
| Q5SX40        | ENQSILITGESGAGK                 | 3.819238706        | 2              | 4.716943  |
| Q5SX40        | EQYEEQEAK                       | 3.604105803        | 1              | 3.199806  |
| Q5SX40        | GQEDLKEQLAMVER                  | 2.988814676        | 2              | 4.443505  |
| Q5SX40        | GSSFQTVSALFR                    | 1.693728181        | 2              | 3.03157   |
| Q5SX40        | HADSVAEELGEQIDNLQR              | 2.436188471        | 2              | 5.959991  |
| Q5SX40        | IAEQELLDASER                    | 3.017602672        | 2              | 3.778352  |
| Q5SX40        | IEAQNKPFDAK                     | 2.809624814        | 2              | 2.748584  |
| Q5SX40        | IEDEQALGMQLQK                   | 1.994306038        | 2              | 4.865421  |
| Q5SX40        | IEDEQALGMQLQK+Oxidation(8)      | 4.569097178        |                |           |
| Q5SX40        | IEDMAMMTHLHEPAVLYNLK            | 1.167037947        | 3              | 4.340081  |
| Q5SX40        | IEELEEIEAER                     | 2.329166246        | 2              | 4.26683   |
| Q5SX40        | IKLEQQVDDLEGSLEQEK              | 3.165629548        | 2              | 5.140683  |
| Q5SX40        | IKLEQQVDDLEGSLEQEKK             | 4.401247926        | 2              | 5.21932   |
| Q5SX40        | INQQLDTK                        | 1.68520903         | 1              | 2.172988  |
| Q5SX40        | IQHELEEAER                      | 3.435080516        | 2              | 3.616211  |
| Q5SX40        | IQLELNQVK                       | 2.453451554        | 2              | 2.780883  |
| Q5SX40        | KALQEAHQQTLLDDLQAEEDKVNTLTK     | 3.84470158         | 3              | 7.394549  |
| Q5SX40        | KIAEQELLDASER                   | 3.697220893        | 2              | 3.631049  |
| Q5SX40        | KIQHELEEAER                     | 1.634400315        | 2              | 3.797122  |
| Q5SX40        | KKEFEMSNLQSK                    | 2.928492402        | 2              | 4.017015  |
| Q5SX40        | KKLETDISQIQGEMEDIVQEAR          | 1.364252756        | 3              | 5.967843  |
| Q5SX40        | KLEDECSSELK                     | 1.855943997        | 2              | 3.074796  |
| Q5SX40        | KLEDECSSELKK                    | 1.956122314        | 3              | 4.254461  |
| Q5SX40        | KLETDISQIQGEMEDIVQEAR           | 2.174334121        | 2              | 5.557512  |
| Q5SX40        | KMEGDLNEMEIQLNHSNR              | 1.530758647        | 3              | 4.224661  |
| Q5SX40        | KMEGDLNEMEIQLNHSNR+Oxidation(1) | 1.68996793         |                |           |
| Q5SX40        | LAQESTMDVENDKQQLDEK             | 6.434213661        | 2              | 4.648623  |
| Q5SX40        | LDEAEQLALK                      | 1.663346653        | 2              | 3.962439  |
| Q5SX40        | LEDECSSELK                      | 1.247752284        | 2              | 2.378723  |

|               |                                        |                    |                |          |
|---------------|----------------------------------------|--------------------|----------------|----------|
| Q5SX40        | LEDECESEK                              | 4.728246884        | 2              | 2.886516 |
| Q5SX40        | LEEAGGATSAQIEMNK                       | 1.229038366        | 2              | 4.728858 |
| Q5SX40        | LEEAGGATSAQIEMNK+Oxidation(13)         | 1.032594091        |                |          |
| Q5SX40        | LEQQVDDLEGSLEQEK                       | 4.168673522        | 2              | 5.633994 |
| Q5SX40        | LEQQVDDLEGSLEQEK                       | 1.015997705        | 2              | 4.511164 |
| Q5SX40        | LETDISIQGEMEDIVQEAR                    | 1.154059633        | 2              | 5.562187 |
| Q5SX40        | LINELTAQR                              | 2.312810325        | 2              | 2.947413 |
| Q5SX40        | LLGSIDIDHTQYK                          | 1.47630553         | 2              | 3.481214 |
| Q5SX40        | LQDAEEHVEAVNAK                         | 3.310406178        | 2              | 4.967914 |
| Q5SX40        | LQDLVDK                                | 4.464186729        | 1              | 2.132548 |
| Q5SX40        | LQDLVDKLSK                             | 1.167755456        | 2              | 2.583841 |
| Q5SX40        | LQNEVEDLMIDVER                         | 2.841295768        | 2              | 4.725507 |
| Q5SX40        | LQTESGEYSR                             | 2.698383715        | 2              | 2.525086 |
| Q5SX40        | LYEQHLGK                               | 2.109967271        | 2              | 2.32573  |
| Q5SX40        | MEGDLNEMEIQLNHSNR                      | 1.597542487        | 2              | 4.659929 |
| Q5SX40        | MEIDDLASNMEVISK                        | 4.718085282        | 2              | 5.13623  |
| Q5SX40        | MEIDDLASNMEVISK+Oxidation(0)           | 3.196379227        |                |          |
| Q5SX40        | MQGTLEDQIISANPLLEAFGNAK                | 0.595366629        | 3              | 6.71066  |
| Q5SX40        | MQGTLEDQIISANPLLEAFGNAK+Oxidation(0)   | 2.161888183        |                |          |
| Q5SX40        | NDLQLQVQSEADSLADAEER                   | 2.072308529        | 2              | 6.70725  |
| Q5SX40        | NKDPLNETVVGLYQK                        | 2.799779271        | 2              | 4.822206 |
| Q5SX40        | NLQQEISDLTEQIAEGGK                     | 2.458306586        | 2              | 6.905754 |
| Q5SX40        | NLQQEISDLTEQIAEGGK                     | 3.003353147        | 2              | 3.748134 |
| Q5SX40        | NLTEEMAGLDETIK                         | 2.294244473        | 2              | 4.854417 |
| Q5SX40        | NLTEEMAGLDETIK+Oxidation(5)            | 1.995676357        |                |          |
| Q5SX40        | QAEAEQSNVNLAK                          | 4.949209096        | 2              | 4.537892 |
| Q5SX40        | QKYEETHAELEASQK                        | 3.895319921        | 2              | 4.468509 |
| Q5SX40        | QLDEKDSLVSQLSR                         | 0.961290758        | 2              | 3.07626  |
| Q5SX40        | QLEEEIK                                | 1.438073781        | 1              | 2.149653 |
| Q5SX40        | QREEQAEPDGTVEADK                       | 4.265142878        | 2              | 3.97609  |
| Q5SX40        | RANLLQAEIEELR                          | 4.604468763        | 2              | 2.33789  |
| Q5SX40        | RDLEEATLQHEATAATLR                     | 0.766409313        | 2              | 4.946259 |
| Q5SX40        | SAETEKEMANMK                           | 1.065068404        | 2              | 3.064342 |
| Q5SX40        | SAETEKEMANMKKEFEK                      | 13.4956891         | 2              | 4.918159 |
| Q5SX40        | SELQAALAEAEASLEHEEGK                   | 4.131502877        | 2              | 6.020133 |
| Q5SX40        | SLSTELFK                               | 2.203734087        | 2              | 2.412401 |
| Q5SX40        | SSVFVVDK                               | 5.783367557        | 1              | 2.125075 |
| Q5SX40        | TKYETDAIQR                             | 1.143725897        | 3              | 3.493541 |
| Q5SX40        | TLEDQVSELK                             | 1.621188781        | 2              | 3.506889 |
| Q5SX40        | TNAACAAALDKK                           | 4.275091062        | 2              | 3.200219 |
| Q5SX40        | VKELTYQTEEDRK                          | 0.859609735        | 2              | 3.684565 |
| Q5SX40        | VLNASAIPEGQFIDSK                       | 2.300788165        | 2              | 4.429382 |
| Q5SX40        | VQLLHTQNTSLINTK                        | 2.227741675        | 2              | 4.620411 |
| Q5SX40        | VRELEGEVENEQKR                         | 2.854410956        | 3              | 3.889015 |
| Q5SX40        | VVESMQSTLDAEIR                         | 1.335515537        | 2              | 4.080634 |
| Q5SX40        | VVESMQSTLDAEIR+Oxidation(4)            | 1.678529058        |                |          |
| Q5SX40        | YDKIEDMAMMTHLHEPAVLYNLK                | 0.794352318        | 3              | 4.390036 |
| Q5SX40        | YEETHAELEASQK                          | 4.433653892        | 2              | 4.767837 |
| Q5SX40        | YETDAIQR                               | 2.281704755        | 2              | 2.578749 |
| <b>Q5U206</b> | <b>CALL3 Calmodulin_like protein 3</b> | <b>1.081677629</b> | <b>0.62299</b> | <b>5</b> |
| Q5U206        | DTDSEEEIR                              | 1.345776153        | 2              | 2.707368 |
| Q5U206        | KMKDSEEEIR                             | 0.492929354        | 2              | 2.306405 |
| Q5U206        | KMKDSEEEIR+Oxidation(1)                | 1.502543019        |                |          |
| Q5U206        | MKDSEEEIR                              | 0.919219524        | 2              | 3.104297 |
| Q5U206        | MKDSEEEIR+Oxidation(0)                 | 1.205500232        |                |          |
| <b>Q5U211</b> | <b>SNX3 Sorting nexin_3</b>            | <b>0.887203819</b> | <b>0.36306</b> | <b>2</b> |
| Q5U211        | CLHMFQDEIIDK                           | 0.698807615        | 2              | 2.37173  |



|               |                                                               |                    |                |           |
|---------------|---------------------------------------------------------------|--------------------|----------------|-----------|
| Q5U211        | GDDGIFDDNFIEER                                                | 1.068358192        | 2              | 2.842775  |
| <b>Q5U2Q7</b> | <b>ERF1 Eukaryotic peptide chain release factor subunit 1</b> | <b>1.127140191</b> | <b>0.90157</b> | <b>3</b>  |
| Q5U2Q7        | LSVLGAITSVQQR                                                 | 0.991676163        | 2              | 2.402318  |
| Q5U2Q7        | YFDEISQDTGK                                                   | 1.349632284        | 2              | 2.682383  |
| Q5U2Q7        | YVLHCQGTREEK                                                  | 1.140245297        | 2              | 3.63262   |
| <b>Q5U300</b> | <b>UBA1 Ubiquitin_like modifier_activating enzyme 1</b>       | <b>1.005918284</b> | <b>0.17908</b> | <b>12</b> |
| Q5U300        | AAVASLLQSVQVPEFTPK                                            | 0.963073759        | 3              | 3.715683  |
| Q5U300        | AENYDISPADR                                                   | 1.049928845        | 2              | 2.99153   |
| Q5U300        | DNPGVVTCLDEAR                                                 | 1.083506096        | 2              | 3.39023   |
| Q5U300        | FEVQGLQPNGEEMTLK                                              | 1.054170454        | 2              | 3.892946  |
| Q5U300        | IYDDDFQNLGDGVANALDNVDAR                                       | 0.78556146         | 2              | 4.449693  |
| Q5U300        | LDQPMTEIVSR                                                   | 0.98793736         | 2              | 2.627829  |
| Q5U300        | MLQTSSVLVSLGR                                                 | 0.941185843        | 2              | 2.372286  |
| Q5U300        | NEEDATELVTLAQAVNAR                                            | 0.907955023        | 2              | 4.557729  |
| Q5U300        | NFPNAIEHTLQWAR                                                | 1.121282577        | 2              | 3.440497  |
| Q5U300        | SLPASLAEPDFVMTDFAK                                            | 0.941989761        | 2              | 3.549592  |
| Q5U300        | SPPAVQQDNVDEDLIR                                              | 1.009104623        | 2              | 4.720029  |
| Q5U300        | VVQGHQQLDSYK                                                  | 1.251390997        | 2              | 3.925257  |
| <b>Q5XFX0</b> | <b>TAGL2 Transgelin_2</b>                                     | <b>0.88290221</b>  | <b>3.3E-05</b> | <b>4</b>  |
| Q5XFX0        | DDGLFSGDPNWFPK                                                | 0.831092056        | 2              | 3.560257  |
| Q5XFX0        | QMEQISQFLQAAER                                                | 0.733342482        | 2              | 3.099038  |
| Q5XFX0        | TLMNLGGLAVAR                                                  | 0.987712384        | 2              | 3.554724  |
| Q5XFX0        | YGINTTDFQTVDLWEGK                                             | 0.81692367         | 2              | 5.069996  |
| <b>Q5XH55</b> | <b>SYTC Threonyl_tRNA synthetase_cytoplasmic</b>              | <b>0.979639483</b> | <b>0.9977</b>  | <b>11</b> |
| Q5XH55        | AEHDSILAEK                                                    | 0.95390885         | 2              | 2.597994  |
| Q5XH55        | DQELYFFHELSPGSCFFLPK                                          | 1.703786843        | 3              | 3.418052  |
| Q5XH55        | FLGDIEIWNQAEK                                                 | 0.930435667        | 2              | 3.594064  |
| Q5XH55        | FMVDIDLDPGCTLNK                                               | 0.839338135        | 2              | 2.976842  |
| Q5XH55        | GFQEVVTPNIFNSR                                                | 0.964344465        | 2              | 3.122215  |
| Q5XH55        | LKAEHDSILAEK                                                  | 2.347741129        | 2              | 3.249691  |
| Q5XH55        | NELSGALTGLTR                                                  | 0.978990039        | 2              | 3.266307  |
| Q5XH55        | QLENSLNEFGEK                                                  | 1.086529139        | 2              | 3.185023  |
| Q5XH55        | QVMVVPVGPCTCDEYAQK                                            | 1.013544181        | 2              | 3.267956  |
| Q5XH55        | TTPYQIACGISQGLADNTVVAK                                        | 0.975849595        | 2              | 4.226333  |
| Q5XH55        | WELNPGDGAFYGPK                                                | 0.992931757        | 2              | 3.761512  |
| <b>Q5XH20</b> | <b>TRAP1 Heat shock protein 75 kDa_mitochondrial</b>          | <b>0.996024345</b> | <b>0.83852</b> | <b>13</b> |
| Q5XH20        | AFLEALQHQAEISSR                                               | 0.992182485        | 2              | 4.587068  |
| Q5XH20        | AQLLQPTLEINPR                                                 | 1.04575607         | 2              | 3.477069  |
| Q5XH20        | EELVSNLGTIAR                                                  | 0.994658205        | 2              | 2.55594   |
| Q5XH20        | ELISNASDALEK                                                  | 1.264057473        | 2              | 3.58824   |
| Q5XH20        | FEDTSPAGER                                                    | 1.223755235        | 2              | 2.767632  |
| Q5XH20        | GTITIQDTGIGMTK                                                | 0.977000135        | 2              | 3.493619  |
| Q5XH20        | GVVDESDIPLNSR                                                 | 1.043524545        | 2              | 4.912754  |
| Q5XH20        | HLAEHSPYYEAMK                                                 | 1.41280922         | 2              | 3.282081  |
| Q5XH20        | LDTHPAMVTVLEMGAAR                                             | 0.921838038        | 3              | 4.365638  |
| Q5XH20        | SDCKDFANESR                                                   | 1.089544699        | 2              | 2.759222  |
| Q5XH20        | VCEGQVLPMEIHLQTDAAK                                           | 1.152062535        | 3              | 3.615469  |
| Q5XH20        | YESSALPAGQLTSLSDYASR                                          | 0.938285873        | 2              | 5.707639  |
| Q5XH20        | YIAQAYDKPR                                                    | 1.245561574        | 2              | 2.878207  |
| <b>Q5XI22</b> | <b>THIC Acetyl_CoA acetyltransferase_cytosolic</b>            | <b>1.163934602</b> | <b>0.99873</b> | <b>7</b>  |
| Q5XI22        | AGHFDKEIVPVHVSSR                                              | 1.041195792        | 2              | 4.251559  |
| Q5XI22        | HGSNLEAMSK                                                    | 0.974257856        | 2              | 2.778616  |
| Q5XI22        | HGSNLEAMSK+Oxidation(7)                                       | 0.645903841        |                |           |
| Q5XI22        | LKPYFLTDGTGTVPANASGMNDGAAAVVLMK                               | 1.322236166        | 3              | 4.880542  |

|               |                                                              |                    |                |           |
|---------------|--------------------------------------------------------------|--------------------|----------------|-----------|
| Q5XI22        | TAIGSFNGALSTVPVHNLGTTVIK                                     | 1.124636253        | 2              | 4.888167  |
| Q5XI22        | VAPEEVSEVIFGHVLTAGCGQNPTR                                    | 1.341191023        | 3              | 5.933632  |
| Q5XI22        | VNIDGGAIALGHPLGASGCR                                         | 1.136068484        | 2              | 5.820588  |
| <b>Q5XI32</b> | <b>CAPZB F_actin_capping protein subunit beta</b>            | <b>1.042244595</b> | <b>0.69877</b> | <b>7</b>  |
| Q5XI32        | KLEVEANNAFDQYR                                               | 1.019626888        | 2              | 4.473894  |
| Q5XI32        | LEVEANNAFDQYR                                                | 1.03510842         | 2              | 3.371792  |
| Q5XI32        | LVEDMENK                                                     | 1.515710792        | 2              | 2.319997  |
| Q5XI32        | NLSDLIDLVPSLCEDLLSSVDQPLK                                    | 0.901392818        |                |           |
| Q5XI32        | SGSGTMNLGGSLTR                                               | 0.971555594        | 2              | 2.868657  |
| Q5XI32        | STLNEIFYGK                                                   | 0.829081988        | 2              | 2.610337  |
| Q5XI32        | YDPPLEDGAMP SAR                                              | 0.891994662        | 2              | 2.523153  |
| <b>Q5XI60</b> | <b>REEP6 Receptor expression_enhancing protein 6</b>         | <b>1.525954479</b> | <b>1.3E-14</b> | <b>3</b>  |
| Q5XI60        | ALDIAAGITR                                                   | 1.727648638        | 2              | 3.583572  |
| Q5XI60        | HHVALDSAASQLSGR                                              | 1.514115404        | 2              | 4.258485  |
| Q5XI60        | NVATDALGALEAR                                                | 1.772750259        | 2              | 3.819297  |
| <b>Q5XI73</b> | <b>GDIR1 Rho GDP_dissociation inhibitor 1</b>                | <b>1.003608776</b> | <b>0.70224</b> | <b>6</b>  |
| Q5XI73        | AEEYEF LPMEEAPK                                              | 0.897001241        | 2              | 4.365891  |
| Q5XI73        | LTLVCSTAPGPLELDLTGDLESFKK                                    | 0.861667345        | 3              | 3.312611  |
| Q5XI73        | SIQEIQLDKDDESLR                                              | 0.534717216        | 2              | 4.934564  |
| Q5XI73        | SIQEIQLDKDDESLRK                                             | 0.877490852        | 2              | 4.319915  |
| Q5XI73        | TDYMGVSGYGR                                                  | 0.883055165        | 2              | 2.67347   |
| Q5XI73        | VAVSADPNVNPVIVTR                                             | 1.009208934        | 2              | 4.454436  |
| <b>Q5XI78</b> | <b>ODO1 2_oxoglutarate dehydrogenase_mitochondrial</b>       | <b>1.056545094</b> | <b>0.84216</b> | <b>15</b> |
| Q5XI78        | FGLEGCEVLIPALK                                               | 1.223519586        | 2              | 3.408001  |
| Q5XI78        | FLDTAFDLDAFK                                                 | 1.05562319         | 2              | 2.468751  |
| Q5XI78        | FLDTAFDLDAFKK                                                | 1.104960186        | 2              | 2.83962   |
| Q5XI78        | GHHVAQLDPLGLDADLSSVPADIISSTDK                                | 0.827931545        | 3              | 4.433742  |
| Q5XI78        | ICEEAFTR                                                     | 1.119429064        | 2              | 2.440774  |
| Q5XI78        | IEQLSPFPDLLLLK                                               | 1.107931088        | 2              | 3.613792  |
| Q5XI78        | LEAADEGSGDMK                                                 | 0.962488269        | 2              | 2.423432  |
| Q5XI78        | NITLSLVANPSHLEAADPVVMGK                                      | 1.196309743        | 3              | 4.982562  |
| Q5XI78        | NTNAGAPPGTAYQSPLSLR                                          | 1.059150531        | 2              | 4.521922  |
| Q5XI78        | SSLATMAHAQSLVEAQPNVDK                                        | 1.055787634        | 3              | 4.480308  |
| Q5XI78        | SWDIFFR                                                      | 1.061546411        | 2              | 2.353437  |
| Q5XI78        | VIPEDGPAAQNPDK                                               | 1.317473999        | 2              | 3.079614  |
| Q5XI78        | VVNAPIFHVNSDDPEAVMYVCK                                       | 0.857625735        | 3              | 4.211287  |
| Q5XI78        | YAE LLVSQGVVNQPEYEEIEISK                                     | 0.847204368        | 2              | 4.176691  |
| Q5XI78        | YAE LLVSQGVVNQPEYEEIEISKYDK                                  | 1.067682322        | 3              | 3.80502   |
| <b>Q5XI95</b> | <b>ADH6 Alcohol dehydrogenase 6</b>                          | <b>0.664680249</b> | <b>0.14382</b> | <b>5</b>  |
| Q5XI95        | ATVLWKPGAPLAIIEIEVAPPK                                       | 0.59795285         | 2              | 3.88944   |
| Q5XI95        | IIAVDINK                                                     | 0.766409596        | 2              | 2.875825  |
| Q5XI95        | MVATGVC GTDIK                                                | 0.835351015        | 2              | 3.224852  |
| Q5XI95        | NNICTEIR                                                     | 0.802799521        | 2              | 2.461977  |
| Q5XI95        | TVGATDCV DPR                                                 | 0.579896645        | 2              | 2.601793  |
| <b>Q5XIC0</b> | <b>ECI2 Enoyl_CoA delta isomerase 2_mitochondrial</b>        | <b>1.033167878</b> | <b>0.01859</b> | <b>5</b>  |
| Q5XIC0        | ATQQDFENAMNQVK                                               | 0.824424859        | 2              | 4.765385  |
| Q5XIC0        | GILVTSEGGITK                                                 | 0.965722388        | 2              | 3.844986  |
| Q5XIC0        | LHAVNEEECTTLR                                                | 0.901982213        | 2              | 3.651217  |
| Q5XIC0        | QNYVDLVSSLSSSEASSQ GK                                        | 1.053423669        | 2              | 5.1551    |
| Q5XIC0        | WDAWNALGSLPK                                                 | 0.826129745        | 2              | 3.596739  |
| <b>Q5XIE6</b> | <b>HIBCH 3_hydroxyisobutyryl_CoA hydrolase_mitochondrial</b> | <b>0.822129206</b> | <b>0.90743</b> | <b>5</b>  |
| Q5XIE6        | AGIATHFVDSEK                                                 | 1.189792143        | 2              | 3.386729  |
| Q5XIE6        | AGQTLSQLFR                                                   | 1.037779191        | 2              | 2.382031  |

|               |                                                                                  |                    |                |           |
|---------------|----------------------------------------------------------------------------------|--------------------|----------------|-----------|
| Q5XIE6        | AVLIDKDQTPK                                                                      | 1.318005625        | 2              | 2.594764  |
| Q5XIE6        | INSCFSANTVEQILENLR                                                               | 0.925919007        | 2              | 3.847363  |
| Q5XIE6        | LHVLEEELLALK                                                                     | 1.227919072        | 3              | 3.679724  |
| <b>Q5XIF3</b> | <b>NDUS4 NADH dehydrogenase [ubiquinone] iron_sulfur protein 4_mitochondrial</b> | <b>1.031178061</b> | <b>0.9996</b>  | <b>2</b>  |
| Q5XIF3        | HGWSYDVEGR                                                                       | 0.990146035        | 2              | 2.842702  |
| Q5XIF3        | LDVPTLTGVPEEHIK                                                                  | 1.047505059        | 3              | 3.608404  |
| <b>Q5XIF6</b> | <b>TBA4A Tubulin alpha_4A chain</b>                                              | <b>1.007768536</b> | <b>0.99474</b> | <b>5</b>  |
| Q5XIF6        | AVFVDLEPTVIDEIR                                                                  | 1.010557729        | 2              | 3.760549  |
| Q5XIF6        | AYHEQLSVAEITNACFEPANQMVK                                                         | 1.021563765        | 3              | 5.324975  |
| Q5XIF6        | DVNAAIAAIK                                                                       | 1.001302472        | 2              | 2.880304  |
| Q5XIF6        | SIQFVDWCPTGFK                                                                    | 0.948549905        | 2              | 4.34043   |
| Q5XIF6        | TIGGGDDSTFFCETGAGK                                                               | 1.391457055        | 2              | 4.564332  |
| <b>Q5XIG4</b> | <b>OCAD1 OCIA domain_containing protein 1</b>                                    | <b>1.215742971</b> | <b>0.70463</b> | <b>2</b>  |
| Q5XIG4        | SVPLAATSMLITQGLISK                                                               | 0.734049596        | 2              | 3.996675  |
| Q5XIG4        | YDSNVSGQSSFGTSPAADNIEK                                                           | 1.209014993        | 2              | 5.894697  |
| <b>Q5XIH7</b> | <b>PHB2 Prohibitin_2</b>                                                         | <b>0.895338903</b> | <b>0.85329</b> | <b>11</b> |
| Q5XIH7        | AQVSLIIR                                                                         | 1.148296746        | 2              | 2.773294  |
| Q5XIH7        | DLQMVNISLR                                                                       | 1.07256814         | 2              | 3.193563  |
| Q5XIH7        | FNASQLITQR                                                                       | 0.868386561        | 2              | 3.687476  |
| Q5XIH7        | IGGVQQDTILAEGLHFR                                                                | 0.948050298        | 3              | 4.425041  |
| Q5XIH7        | IPWFQYPIIYDIR                                                                    | 0.990266264        | 2              | 2.953961  |
| Q5XIH7        | IVQAEGEAEAAK                                                                     | 0.896884531        | 2              | 4.184361  |
| Q5XIH7        | IYLTADNLVNLQDESFTFR                                                              | 0.958619158        | 2              | 4.575488  |
| Q5XIH7        | LGLDYEER                                                                         | 1.083676565        | 2              | 2.598001  |
| Q5XIH7        | LLLGAGAVAYGVR                                                                    | 1.247592832        | 2              | 3.493178  |
| Q5XIH7        | VLPSIVNEVLK                                                                      | 0.771002941        | 2              | 2.815963  |
| Q5XIH7        | VLSRPNAQELPSMYQR                                                                 | 1.050536096        | 2              | 3.836985  |
| <b>Q5XIM9</b> | <b>TCPB T_complex protein 1 subunit beta</b>                                     | <b>1.211037853</b> | <b>6.6E-11</b> | <b>9</b>  |
| Q5XIM9        | EALLSSAVDHGSDEVK                                                                 | 1.50399608         | 2              | 4.211146  |
| Q5XIM9        | GATQQILDEAER                                                                     | 1.226044355        | 2              | 3.909883  |
| Q5XIM9        | GSGNLEAIHVIK                                                                     | 1.515838091        | 2              | 2.915132  |
| Q5XIM9        | HGINCFINR                                                                        | 1.161565772        | 2              | 2.540056  |
| Q5XIM9        | ILIAN TGMDTDK                                                                    | 1.448690661        | 2              | 2.742394  |
| Q5XIM9        | LIEEVMIGEDK                                                                      | 1.124636568        | 2              | 3.128077  |
| Q5XIM9        | NIGVDNPAAK                                                                       | 1.032826359        | 1              | 2.026639  |
| Q5XIM9        | SLHDALCVLAQTVK                                                                   | 1.052470943        | 2              | 3.778103  |
| Q5XIM9        | VQDDEVGDGTTSVTVLAAELLR                                                           | 1.174983342        | 2              | 4.557994  |
| <b>Q5XIN6</b> | <b>LETM1 LETM1 and EF_hand domain_containing protein 1_mitochondrial</b>         | <b>1.020205391</b> | <b>0.92971</b> | <b>6</b>  |
| Q5XIN6        | AAEVEGEQVDNK                                                                     | 1.012089466        | 2              | 4.005324  |
| Q5XIN6        | FLQDTIEEMALK                                                                     | 1.024189813        | 2              | 2.958354  |
| Q5XIN6        | LDPAASSPTGESVISVDELISAMK                                                         | 0.951097497        | 2              | 5.473849  |
| Q5XIN6        | LEEGPVYSPPAQVVVK                                                                 | 0.960244977        | 2              | 3.09571   |
| Q5XIN6        | LFEDLTLNLRPQLVALCK                                                               | 1.185745549        | 3              | 4.42701   |
| Q5XIN6        | LLELQSIGTNNFLR                                                                   | 0.927223551        | 2              | 2.988791  |
| <b>Q5XIT9</b> | <b>MCCB Methylcrotonyl_CoA carboxylase beta chain_mitochondrial</b>              | <b>0.869319889</b> | <b>0.7888</b>  | <b>10</b> |
| Q5XIT9        | AATGEEVSAEDLGGADLHCR                                                             | 0.967586663        | 2              | 4.953421  |
| Q5XIT9        | ALVNQLHER                                                                        | 1.091502569        | 2              | 2.587605  |
| Q5XIT9        | ALYGDTLVTGFAR                                                                    | 0.925025102        | 2              | 3.679648  |
| Q5XIT9        | AQEIALQNR                                                                        | 0.804739942        | 2              | 2.627568  |
| Q5XIT9        | DRIDNLIDPGSPFLEFSQFAGYK                                                          | 1.15070323         | 3              | 4.390281  |
| Q5XIT9        | KLDVTVPESEPLFPADELYGIVGANLK                                                      | 0.94000089         | 3              | 4.436713  |
| Q5XIT9        | LGTQPDSGSSTYQENYEQMK                                                             | 1.212516059        | 2              | 5.084144  |
| Q5XIT9        | LWDDGIIDPVDR                                                                     | 0.903379105        | 2              | 3.265567  |
| Q5XIT9        | LYGEEVPAGGIITGIGR                                                                | 0.896540906        | 2              | 4.380058  |

|               |                                                                                |                    |                |          |
|---------------|--------------------------------------------------------------------------------|--------------------|----------------|----------|
| Q5XIT9        | QGTIFLAGPPLVK                                                                  | 1.09954839         | 2              | 2.46614  |
| <b>Q5XIU5</b> | <b>PSMF1 Proteasome inhibitor PI31 subunit</b>                                 | <b>1.024481557</b> | <b>0.85711</b> | <b>2</b> |
| Q5XIU5        | ALIDPSSGLPNR                                                                   | 1.030593597        | 2              | 2.540231 |
| Q5XIU5        | DPLSPFAVGGEDLDPFGCQR                                                           | 0.9015553          | 2              | 2.728643 |
| <b>Q5XIU9</b> | <b>PGRC2 Membrane_associated progesterone receptor component 2</b>             | <b>0.886763189</b> | <b>0.31973</b> | <b>3</b> |
| Q5XIU9        | FYGPAGPYGIFAGR                                                                 | 0.893592548        | 2              | 2.765221 |
| Q5XIU9        | GLATFCLDK                                                                      | 1.096566803        | 2              | 2.848962 |
| Q5XIU9        | GLCSGPGAGEESPAATLPR                                                            | 0.877928717        | 2              | 4.786752 |
| <b>Q5XKE0</b> | <b>MYPC2 Myosin_binding protein C_fast_type</b>                                | <b>0.879150069</b> | <b>0.58348</b> | <b>3</b> |
| Q5XKE0        | LVVEISDPDLPLK                                                                  | 0.864154375        | 2              | 2.824512 |
| Q5XKE0        | SEDAGELDFSGLLK                                                                 | 2.356049842        | 2              | 3.418824 |
| Q5XKE0        | TSDNSIVVAGNK                                                                   | 1.165290117        | 2              | 2.627337 |
| <b>Q60587</b> | <b>ECHB Trifunctional enzyme subunit beta_mitochondrial</b>                    | <b>1.15251665</b>  | <b>0.98776</b> | <b>7</b> |
| Q60587        | ALAMGYKPK                                                                      | 0.951584936        | 2              | 2.537009 |
| Q60587        | AQDEGHLSDIVPFK                                                                 | 1.08558867         | 2              | 3.040215 |
| Q60587        | DFIYVSQDPK                                                                     | 0.98036525         | 2              | 2.675435 |
| Q60587        | DGGQYALVAACAAGGQGHAMIVEAYPK                                                    | 0.899194925        | 3              | 4.630652 |
| Q60587        | DNGIRPSSLEQMAK                                                                 | 1.20516023         | 2              | 3.24394  |
| Q60587        | DQLLLGPTYATPK                                                                  | 1.334088231        | 2              | 3.72816  |
| Q60587        | NIVVVEGVR                                                                      | 0.955506618        | 2              | 2.859435 |
| <b>Q60598</b> | <b>SRC8 Src substrate cortactin</b>                                            | <b>1.490363953</b> | <b>0.41636</b> | <b>3</b> |
| Q60598        | ENVFQEHQTLK                                                                    | 1.866262875        | 2              | 2.305964 |
| Q60598        | NASTFEEVVQVPSAYQK                                                              | 1.058629545        | 2              | 3.476493 |
| Q60598        | VDQSAVGFYQ GK                                                                  | 1.139100891        | 2              | 3.031708 |
| <b>Q60759</b> | <b>GCDH Glutaryl_CoA dehydrogenase_mitochondrial</b>                           | <b>1.015083144</b> | <b>0.74569</b> | <b>4</b> |
| Q60759        | DILGGNGISDEYHVIR                                                               | 1.143024561        | 2              | 3.724004 |
| Q60759        | DIVYEMGELVGLPTIK                                                               | 1.178492328        | 2              | 2.378566 |
| Q60759        | GYGCAGVSSVAYGLLTR                                                              | 1.051798062        | 2              | 3.495746 |
| Q60759        | HAMNLEAVNTYEGTHDIHALILGR                                                       | 0.965612533        | 4              | 5.504468 |
| <b>Q60817</b> | <b>NACA Nascent polypeptide_associated complex subunit alpha</b>               | <b>1.166541735</b> | <b>1.2E-06</b> | <b>3</b> |
| Q60817        | DIELVMSQANVSR                                                                  | 1.171336547        | 2              | 3.21888  |
| Q60817        | IEDLSQQAQLAAAEK                                                                | 1.541366967        | 2              | 4.623466 |
| Q60817        | NILFVITKPDVYK                                                                  | 1.006380802        | 2              | 3.316381 |
| <b>Q60952</b> | <b>CP250 Centrosome_associated protein CEP250</b>                              | <b>0.947124402</b> | <b>0.96061</b> | <b>2</b> |
| Q60952        | AQVIESQRGQIQDLK                                                                | 0.973397554        | 2              | 2.485214 |
| Q60952        | GQIQDLKK                                                                       | 0.880081316        | 1              | 1.926622 |
| <b>Q61029</b> | <b>LAP2B Lamina_associated polypeptide 2_isoforms beta/delta/epsilon/gamma</b> | <b>0.881999237</b> | <b>0.23854</b> | <b>3</b> |
| Q61029        | SELVANNVTLPAGEQR                                                               | 0.945684291        | 2              | 4.318009 |
| Q61029        | SSTPLPTVSSAENTR                                                                | 0.867774296        | 2              | 2.861665 |
| Q61029        | YGVNPGPIVGTRR                                                                  | 0.918369902        | 2              | 2.49091  |
| <b>Q61035</b> | <b>SYHC Histidyl_tRNA synthetase_cytoplasmic</b>                               | <b>1.323817419</b> | <b>0.31042</b> | <b>2</b> |
| Q61035        | ASAEQIEEVTK                                                                    | 1.373156897        | 2              | 3.13664  |
| Q61035        | REDLVEEIR                                                                      | 1.300422096        | 2              | 2.446332 |
| <b>Q61043</b> | <b>NIN Ninein</b>                                                              | <b>0.929551137</b> | <b>0.64266</b> | <b>2</b> |
| Q61043        | ERATAAAMKQEILER                                                                | 2.25561267         | 2              | 2.347957 |
| Q61043        | NEITTLNEEDSISNLK                                                               | 0.929534697        | 2              | 2.369422 |
| <b>Q61301</b> | <b>CTNA2 Catenin alpha_2</b>                                                   | <b>0.926803509</b> | <b>0.00342</b> | <b>3</b> |
| Q61301        | LLEPLVTQVTTLVNTSNK                                                             | 0.888157331        | 2              | 3.852325 |
| Q61301        | TSVQTEDDQLIAGQSAR                                                              | 1.403125436        | 2              | 5.11628  |
| Q61301        | WDDSGNDIIVLAK                                                                  | 1.016087447        | 2              | 3.063114 |
| <b>Q61335</b> | <b>BAP31 B_cell receptor_associated protein 31</b>                             | <b>0.928971926</b> | <b>0.89061</b> | <b>3</b> |
| Q61335        | AENEALAMQK                                                                     | 0.947486613        | 2              | 3.189856 |

|               |                                                      |                    |                |           |
|---------------|------------------------------------------------------|--------------------|----------------|-----------|
| Q61335        | AENEALAMQK+Oxidation(7)                              | 0.890494407        |                |           |
| Q61335        | YMEENDQLK                                            | 0.804308952        | 2              | 2.606822  |
| <b>Q61595</b> | <b>KTN1 Kinectin</b>                                 | <b>1.250970317</b> | <b>0.53625</b> | <b>3</b>  |
| Q61595        | EKNWEAMEALASTEK                                      | 1.234382234        | 2              | 2.303116  |
| Q61595        | TAEHEAAQQDLQSK                                       | 0.980977664        | 2              | 4.094522  |
| Q61595        | VEPVLVTK                                             | 1.2866948          | 2              | 2.391616  |
| <b>Q61656</b> | <b>DDX5 Probable ATP dependent RNA helicase DDX5</b> | <b>1.164751951</b> | <b>4.8E-12</b> | <b>5</b>  |
| Q61656        | ELAQVQVAAEYCR                                        | 3.102005376        | 2              | 3.525018  |
| Q61656        | GDGPICLVLAPTR                                        | 1.302255835        | 2              | 3.290333  |
| Q61656        | LIDFLECGK                                            | 1.544147673        | 2              | 2.377806  |
| Q61656        | MLDMGFEPQIR                                          | 0.98596479         | 2              | 2.734263  |
| Q61656        | WNLDELPK                                             | 1.592203583        | 2              | 2.339129  |
| <b>Q61789</b> | <b>LAMA3 Laminin subunit alpha_3</b>                 | <b>0.88128229</b>  | <b>0.2042</b>  | <b>2</b>  |
| Q61789        | QLEEIK                                               | 0.759123921        | 1              | 2.071705  |
| Q61789        | RLQQVSPALNSLQTLK                                     | 0.897934673        | 2              | 2.358094  |
| <b>Q61838</b> | <b>A2M Alpha_2_macroglubulin</b>                     | <b>0.77070245</b>  | <b>0.18268</b> | <b>2</b>  |
| Q61838        | QQNSHGGFSSQTDTVVALQALSK                              | 0.764969466        | 3              | 3.40497   |
| Q61838        | TEVNTNHVLIYIEK                                       | 0.812374013        | 2              | 4.017232  |
| <b>Q61941</b> | <b>transhydrogenase_mitochondrial</b>                | <b>0.999306219</b> | <b>0.99535</b> | <b>11</b> |
| Q61941        | EANSIVITPGYGLCAAK                                    | 0.950930316        | 2              | 3.62171   |
| Q61941        | FGIHPVAGR                                            | 0.985986831        | 2              | 2.600293  |
| Q61941        | GITHIGYTDLPSR                                        | 0.939056031        | 3              | 3.492761  |
| Q61941        | ILIVGGGVAGLASAGAAK                                   | 1.042282097        | 2              | 4.986356  |
| Q61941        | KTTVLAMDQVPR                                         | 0.911373158        | 2              | 3.020321  |
| Q61941        | LGGLTAALGGAVGIMGLANGLR+Oxidation(14)                 | 0.920000671        |                |           |
| Q61941        | MATQASTLYSNNITK                                      | 1.2914382          | 2              | 4.302822  |
| Q61941        | QGFNVVVEGAGEASK                                      | 1.089983315        | 2              | 3.995804  |
| Q61941        | SLGAEPLEVDLK                                         | 0.871167192        | 2              | 3.072893  |
| Q61941        | TTVLAMDQVPR                                          | 0.88408037         | 2              | 3.108333  |
| Q61941        | VTIAQGYDALSSMANISGYK                                 | 0.954111056        | 2              | 5.16627   |
| <b>Q62095</b> | <b>DDX3Y ATP dependent RNA helicase DDX3Y</b>        | <b>1.566200901</b> | <b>2.3E-10</b> | <b>7</b>  |
| Q62095        | DLLDLLVEAK                                           | 7.810258091        | 2              | 2.673614  |
| Q62095        | GCHLLVATPGR                                          | 1.967858985        | 2              | 2.422241  |
| Q62095        | HVINFDLPSDIEEYVHR                                    | 1.3900748          | 3              | 3.741286  |
| Q62095        | QYPISLVLAPTR                                         | 1.285044751        | 2              | 2.366513  |
| Q62095        | SFLDLLNATGK                                          | 1.275057116        | 2              | 4.648483  |
| Q62095        | VGNLGLATSFNER                                        | 1.892901578        | 2              | 3.054713  |
| Q62095        | VGSTSENITQK                                          | 1.786898053        | 2              | 2.719128  |
| <b>Q62261</b> | <b>SPTB2 Spectrin beta chain_brain 1</b>             | <b>1.012880736</b> | <b>0.56574</b> | <b>17</b> |
| Q62261        | ALVADSHPESEK                                         | 1.035743917        | 2              | 3.214828  |
| Q62261        | EGMQLISEKPETEAVVK                                    | 1.003669613        | 2              | 2.633162  |
| Q62261        | EIEELQSQALQSQEGK                                     | 1.183202178        | 2              | 4.620604  |
| Q62261        | EVDDLEQWIAER                                         | 1.162619595        | 2              | 2.469398  |
| Q62261        | EVVAGSHELGDYEHVTMLQER                                | 0.969032946        | 3              | 4.185279  |
| Q62261        | HQLEQAVEDYAETVHQLSK                                  | 0.5574596          | 3              | 4.062027  |
| Q62261        | ITDLYTDLR                                            | 1.06731078         | 2              | 2.601324  |
| Q62261        | IVSSNDVGHDEYSTQSLVK                                  | 1.113402591        | 3              | 3.53696   |
| Q62261        | LSDGNELFQAK                                          | 0.787260876        | 2              | 2.425565  |
| Q62261        | LVSDGNINSDR                                          | 1.163393973        | 2              | 3.226314  |
| Q62261        | LVSQDNFGFDLPAVEAATK                                  | 1.090111137        | 2              | 3.10879   |
| Q62261        | SNAHYNLQNAFNLAEQHLGLTK                               | 1.001471995        | 3              | 3.701616  |
| Q62261        | SQNIITDSSSLNAEAIK                                    | 1.236284215        | 2              | 5.182074  |
| Q62261        | TLETAAQMEGFLNR                                       | 0.882641869        | 2              | 3.75248   |
| Q62261        | TQTAIASEDMPNTLTAEK                                   | 1.131991863        | 2              | 5.141212  |
| Q62261        | VIESTQDLGNDLAGVMALQR                                 | 0.920824487        | 3              | 4.310005  |
| Q62261        | VLDNAIETEK                                           | 0.980649619        | 2              | 2.523117  |

|               |                                                                           |                    |                |           |
|---------------|---------------------------------------------------------------------------|--------------------|----------------|-----------|
| <b>Q62425</b> | <b>NDUA4 NADH dehydrogenase [ubiquinone] 1 alpha subcomplex subunit 4</b> | <b>1.102438677</b> | <b>0.99927</b> | <b>3</b>  |
| Q62425        | FYSVNVVDSK                                                                | 1.115392261        | 2              | 2.875136  |
| Q62425        | KNNPEPWNK                                                                 | 1.085474633        | 2              | 2.46735   |
| Q62425        | LGPNEQYK                                                                  | 0.993377542        | 2              | 2.303015  |
| <b>Q62446</b> | <b>FKBP3 Peptidyl_prolyl cis_trans isomerase FKBP3</b>                    | <b>0.999202064</b> | <b>0.95787</b> | <b>2</b>  |
| Q62446        | FLQDHGSDSFLAEHK                                                           | 0.946321025        | 3              | 3.677244  |
| Q62446        | SEETLDEGPPK                                                               | 1.057010698        | 2              | 3.49318   |
| <b>Q62452</b> | <b>UD19 UDP_glucuronosyltransferase 1_9</b>                               | <b>0.914641985</b> | <b>0.05023</b> | <b>5</b>  |
| Q62452        | AMEIAEALGR                                                                | 1.069149448        | 2              | 3.802165  |
| Q62452        | GAGVTLNVLEMTADDLENALK                                                     | 0.795435675        | 3              | 5.544568  |
| Q62452        | GAGVTLNVLEMTADDLENALK+Oxidation(10)                                       | 1.056148335        |                |           |
| Q62452        | WLPQNDDLGHPK                                                              | 0.949719718        | 2              | 3.141353  |
| Q62452        | YTGTRPSNLAK                                                               | 1.343051024        | 2              | 2.621476  |
| <b>Q62465</b> | <b>VAT1 Synaptic vesicle membrane protein VAT_1 homolog</b>               | <b>1.030044645</b> | <b>0.03938</b> | <b>6</b>  |
| Q62465        | ACGLNFADLMGR                                                              | 0.988972201        | 2              | 3.002732  |
| Q62465        | CLVLTGFGGYDK                                                              | 0.986846757        | 2              | 3.433311  |
| Q62465        | GVDIVMDPLGGSDTAK                                                          | 1.004119125        | 2              | 4.022839  |
| Q62465        | IDSVWPF EK                                                                | 0.883860242        | 1              | 1.947339  |
| Q62465        | TVENVTVFGTASASK                                                           | 0.976876649        | 2              | 3.884974  |
| Q62465        | VLLVPGPEKET                                                               | 0.822286046        | 2              | 2.681477  |
| <b>Q62468</b> | <b>VILI Villin_1</b>                                                      | <b>1.068736595</b> | <b>0.7633</b>  | <b>2</b>  |
| Q62468        | HEDCYILDQGLKIFVWK                                                         | 1.081557052        | 2              | 2.466425  |
| Q62468        | SGAMSQALNFIKAK                                                            | 1.04941144         | 2              | 2.343069  |
| <b>Q62636</b> | <b>RAP1B Ras_related protein Rap_1b</b>                                   | <b>0.93099977</b>  | <b>0.28458</b> | <b>3</b>  |
| Q62636        | INVNEIFYDLVR                                                              | 0.796529623        | 2              | 3.998847  |
| Q62636        | QWSNCAFLESSAK                                                             | 0.990567665        | 2              | 2.809093  |
| Q62636        | YDPTIEDSYR                                                                | 0.780427097        | 2              | 2.369595  |
| <b>Q62651</b> | <b>ECH1 Delta(3_5)_Delta(2_4)_dienoyl_CoA isomerase_mitochondrial</b>     | <b>0.802231769</b> | <b>0.00029</b> | <b>7</b>  |
| Q62651        | HVLHVQLNRPEK                                                              | 0.86972627         | 2              | 3.623407  |
| Q62651        | IPEEVSDHNYESIQTSAQK                                                       | 1.059046971        | 3              | 3.86903   |
| Q62651        | MMADEALDGLVSR                                                             | 1.084672952        | 2              | 3.596234  |
| Q62651        | MMADEALDGLVSR+Oxidation(0)                                                | 0.833059933        |                |           |
| Q62651        | MMADEALDGLVSR+Oxidation(1)                                                | 0.833059933        | 2              | 3.352635  |
| Q62651        | RIPEEVSDHNYESIQTSAQK                                                      | 1.123230166        | 3              | 5.695125  |
| Q62651        | SLVNELTFTAR                                                               | 0.706527619        | 2              | 3.470867  |
| <b>Q62717</b> | <b>CAPS1 Calcium_dependent secretion activator 1</b>                      | <b>0.958335506</b> | <b>0.42048</b> | <b>2</b>  |
| Q62717        | IDELIEETVK                                                                | 1.087272513        | 2              | 2.579759  |
| Q62717        | NCPDQDLKIK                                                                | 0.794428871        | 1              | 1.930554  |
| <b>Q62730</b> | <b>DHB2 Estradiol 17_beta_dehydrogenase 2</b>                             | <b>1.294936673</b> | <b>0.08673</b> | <b>4</b>  |
| Q62730        | AVLVTGADSGFGHALAK                                                         | 1.294299491        | 2              | 4.166598  |
| Q62730        | EIQENYQGEYVHTQK                                                           | 1.5134839          | 2              | 4.414559  |
| Q62730        | LSVLQMDVTKPEIKDVHSEVAEK                                                   | 0.751531656        | 3              | 4.516719  |
| Q62730        | VVTIHPGGFQTNIVGSQDSWDK                                                    | 1.324631064        | 2              | 5.433097  |
| <b>Q62736</b> | <b>CALD1 Non_muscle caldesmon</b>                                         | <b>0.877768295</b> | <b>0.01277</b> | <b>12</b> |
| Q62736        | ASGDKEAEGAPQVEAGK                                                         | 0.853002879        | 2              | 4.556921  |
| Q62736        | ASGDKEAEGAPQVEAGKR                                                        | 0.920504498        | 3              | 3.881339  |
| Q62736        | EEIERR                                                                    | 2.150410157        | 1              | 1.936645  |
| Q62736        | EFDPITIDGSLVPSR                                                           | 1.399150774        | 2              | 3.764091  |
| Q62736        | GETESEEF EK                                                               | 0.929446176        | 2              | 2.755527  |
| Q62736        | GGNLGENQIKDEK                                                             | 0.803164935        | 2              | 3.428121  |
| Q62736        | LEQYTNAIEGTK                                                              | 0.739881375        | 2              | 3.908771  |
| Q62736        | MQNNSAENETAEGEEKGESR                                                      | 0.70818354         | 3              | 4.421706  |

|               |                                                          |                    |                |           |
|---------------|----------------------------------------------------------|--------------------|----------------|-----------|
| Q62736        | MQNNSAENETAEGEEKGESR+Oxidation(0)                        | 0.841488089        |                |           |
| Q62736        | NDDDEEEAAR                                               | 0.687317399        | 2              | 3.356249  |
| Q62736        | RGETESEFEK                                               | 1.002092665        | 2              | 3.156646  |
| Q62736        | VLEEEEQR                                                 | 1.011273242        | 2              | 2.471493  |
| <b>Q62745</b> | <b>CD81 CD81 antigen</b>                                 | <b>0.8283933</b>   | <b>0.84524</b> | <b>2</b>  |
| Q62745        | NSLCPSSNSFTQLLK                                          | 1.110589183        | 2              | 2.734691  |
| Q62745        | QFYDQALQAVMDDDDANNAK                                     | 0.739071576        | 2              | 5.214956  |
| <b>Q62785</b> | <b>HAP28 28 kDa heat_ and acid_stable phosphoprotein</b> | <b>1.051751758</b> | <b>0.95189</b> | <b>3</b>  |
| Q62785        | ANEEDQEEGGDGASGDPK                                       | 1.279174871        | 2              | 4.265042  |
| Q62785        | GVEGLIDIENPNR                                            | 1.041224493        | 2              | 2.859095  |
| Q62785        | KVTQLDLGPK                                               | 1.003048466        | 2              | 2.811088  |
| <b>Q62789</b> | <b>UD2B7 UDP_glucuronosyltransferase 2B7</b>             | <b>0.881233857</b> | <b>0.99639</b> | <b>2</b>  |
| Q62789        | IILDELVQR                                                | 0.86655821         | 2              | 3.580021  |
| Q62789        | WIPQNDLLGHPK                                             | 0.949719718        | 2              | 3.141353  |
| <b>Q62812</b> | <b>MYH9 Myosin_9</b>                                     | <b>0.892704147</b> | <b>0.00025</b> | <b>63</b> |
| Q62812        | ALEEAMEQK                                                | 0.965179557        | 2              | 3.043352  |
| Q62812        | ALELDSNLYR                                               | 0.982274344        | 2              | 3.322808  |
| Q62812        | ALEQQVEEMK                                               | 1.009287567        | 2              | 2.959561  |
| Q62812        | ANLQIDQINTDLNLER                                         | 0.90970373         | 2              | 4.672554  |
| Q62812        | ASIAALEAK                                                | 0.925216089        | 2              | 2.564772  |
| Q62812        | ASREEILAQAK                                              | 1.088566939        | 2              | 2.888782  |
| Q62812        | CQYLQAEK                                                 | 0.92359633         | 2              | 2.452314  |
| Q62812        | DELADEIANSSGK                                            | 1.264093387        | 2              | 2.848852  |
| Q62812        | DFSALESQLQDTQELLQEENR                                    | 0.916792363        | 3              | 5.59496   |
| Q62812        | DLEAHIDTANK                                              | 1.556418141        | 2              | 3.227349  |
| Q62812        | DLQGRDEQSEK                                              | 0.396341398        | 2              | 3.219682  |
| Q62812        | EEILAQAK                                                 | 1.039399418        | 1              | 2.314359  |
| Q62812        | EEILAQAKENEK                                             | 0.803164935        | 2              | 2.380374  |
| Q62812        | ELEDATETADAMNR                                           | 1.143810592        | 2              | 4.125894  |
| Q62812        | ELETQISELQEDLESER                                        | 0.921647189        | 2              | 3.977254  |
| Q62812        | HEAMITDLEER                                              | 0.888001525        | 2              | 3.125541  |
| Q62812        | HEDELLAK                                                 | 0.889484646        | 2              | 2.814973  |
| Q62812        | HSQAVEELAEQLEQTK                                         | 0.914883688        | 2              | 4.944811  |
| Q62812        | HSQAVEELAEQLEQTKR                                        | 0.944970893        | 3              | 4.918312  |
| Q62812        | IIGLDQVAGMSETALPGAFK                                     | 0.972103879        | 2              | 5.328916  |
| Q62812        | IRELETQISELQEDLESER                                      | 1.03942096         | 3              | 3.549749  |
| Q62812        | KEEELQAALAR                                              | 0.994222724        | 2              | 3.150658  |
| Q62812        | KKVEAQLQELQVK                                            | 0.858732233        | 2              | 4.650298  |
| Q62812        | KLEEDQIIMEDQNCK                                          | 1.039183218        | 2              | 5.908616  |
| Q62812        | KLEGDSTDLSDQIAELQAQIAELK                                 | 0.890462601        | 2              | 5.83131   |
| Q62812        | KQELEEICHDLER                                            | 0.977018039        | 2              | 4.495746  |
| Q62812        | KVEAQLQELQVK                                             | 1.033384259        | 2              | 4.244519  |
| Q62812        | LEEDQIIMEDQNCK                                           | 0.919377774        | 2              | 4.514317  |
| Q62812        | LEGDSTDLSDQIAELQAQIAELK                                  | 0.802107753        | 2              | 3.573766  |
| Q62812        | LEVNLQAMK                                                | 0.821580371        | 2              | 2.709557  |
| Q62812        | LQEMESAVK                                                | 0.88299323         | 2              | 2.543259  |
| Q62812        | LQQELDLLVDLDHQR                                          | 0.965337647        | 2              | 4.783808  |
| Q62812        | LQVELDSVTGLLNQSDSK                                       | 0.926236343        | 2              | 5.731694  |
| Q62812        | LTEMETMQSQLMAEK                                          | 0.912172032        | 2              | 3.787762  |
| Q62812        | MEDGVGCLETAEEAK                                          | 1.192982465        | 2              | 4.229836  |
| Q62812        | MQQNIQELEEQLEEEEESAR                                     | 0.976163217        | 2              | 6.155732  |
| Q62812        | MQQNIQELEEQLEEEEESAR+Oxidation(0)                        | 0.952709075        |                |           |
| Q62812        | NAEQFKDQADK                                              | 0.836138895        | 2              | 3.680455  |
| Q62812        | NLPIYSEEIVDMYK                                           | 1.035654147        | 2              | 3.213697  |
| Q62812        | NMDPLNDNIATLLHQSSDK                                      | 0.962459469        | 2              | 4.609973  |
| Q62812        | NTDQASMPDNTAAQK                                          | 0.937899444        | 2              | 5.421165  |

|               |                                                        |                    |                |           |
|---------------|--------------------------------------------------------|--------------------|----------------|-----------|
| Q62812        | NTDQASMPDNTAAQK+Oxidation(6)                           | 1.101702439        |                |           |
| Q62812        | QAQQRDELADEIANSSGK                                     | 1.035030558        | 3              | 4.37909   |
| Q62812        | QIATLHAQVTDMK                                          | 0.81270245         | 2              | 2.801854  |
| Q62812        | QLEEAEEEEAQR                                           | 0.985578139        | 2              | 3.685886  |
| Q62812        | QNKELK                                                 | 0.759123921        | 1              | 1.923305  |
| Q62812        | QSVSNLEK                                               | 1.028151933        | 2              | 2.601386  |
| Q62812        | QTLENERGELANEVK                                        | 1.102726932        | 2              | 2.913452  |
| Q62812        | RKLEGDSTDLSAQIAELQAQIAELK                              | 0.775270421        | 3              | 5.424296  |
| Q62812        | RQLEEAEEEEAQR                                          | 0.932817668        | 2              | 4.352044  |
| Q62812        | SMEAEMIQLEELAAAER                                      | 0.919669965        | 2              | 4.781615  |
| Q62812        | SMEAEMIQLEELAAERAKR+Oxidation(1)                       | 0.918786343        |                |           |
| Q62812        | TDLLEPYNK                                              | 0.807941169        | 2              | 2.848344  |
| Q62812        | TELEDTLSTAAQQLR                                        | 0.912555759        | 2              | 5.294106  |
| Q62812        | THEAQIQEMR                                             | 0.872176774        | 2              | 3.26961   |
| Q62812        | THEAQIQEMR+Oxidation(8)                                | 1.161619066        |                |           |
| Q62812        | TQLEEELEDELQATEDAK                                     | 0.882573995        | 2              | 5.893728  |
| Q62812        | VAEFTTDLMEEEK                                          | 1.065974566        | 2              | 4.137895  |
| Q62812        | VEAQLQELQVK                                            | 0.809278171        | 2              | 3.695632  |
| Q62812        | VEDMAELTCLNEASVLHNLK                                   | 1.043879194        | 2              | 4.46499   |
| Q62812        | VISGVLQGNIVFK                                          | 0.873449949        | 2              | 2.851271  |
| Q62812        | VSHLLGINVDFTR                                          | 0.836811714        | 2              | 3.813626  |
| Q62812        | YEILTPNSIPK                                            | 0.939587184        | 2              | 3.011113  |
| <b>Q62826</b> | <b>HNRPM Heterogeneous nuclear ribonucleoprotein M</b> | <b>0.876069558</b> | <b>3.2E-05</b> | <b>5</b>  |
| Q62826        | ADILEDKDGK                                             | 1.011193485        | 2              | 2.699049  |
| Q62826        | AFITNIPFDVK                                            | 1.052428658        | 2              | 3.359712  |
| Q62826        | GNFGGSFAGSFGGAGGHAPGVAR                                | 0.776699553        | 2              | 4.819779  |
| Q62826        | INEILSNALK                                             | 0.814773183        | 2              | 2.69234   |
| Q62826        | MGPVMDRMTGLER+Oxidation(0)                             | 0.922054278        |                |           |
| <b>Q62871</b> | <b>DC112 Cytoplasmic dynein 1 intermediate chain 2</b> | <b>1.041940708</b> | <b>0.79605</b> | <b>2</b>  |
| Q62871        | ADAEAAAATR                                             | 0.970630887        | 2              | 3.456928  |
| Q62871        | SVSTPSEAGSQDSGDGAVGSR                                  | 1.382738729        | 2              | 3.373426  |
| <b>Q62902</b> | <b>LMAN1 Protein ERGIC_53</b>                          | <b>1.065903806</b> | <b>0.98567</b> | <b>6</b>  |
| Q62902        | GAGTPGQPGQVSQQLDVTVVR                                  | 1.118488883        | 2              | 4.302756  |
| Q62902        | GHPDLQGGPADDIFESIGDR                                   | 1.080307226        | 2              | 4.739892  |
| Q62902        | NNPAIVVVGNNQINVDHQNDGATQALASCQR                        | 1.028963779        | 3              | 4.969922  |
| Q62902        | RGAGTPGQPGQVSQQLDVTVVR                                 | 1.014885973        | 3              | 4.417906  |
| Q62902        | YQEEFEHFQQLDK                                          | 1.096546899        | 2              | 4.730906  |
| Q62902        | YVSSLTEEISR                                            | 1.088953921        | 2              | 3.511666  |
| <b>Q62904</b> | <b>DHB7 3_keto_steroid reductase</b>                   | <b>1.071385054</b> | <b>0.98788</b> | <b>2</b>  |
| Q62904        | YATDLLNVALNR                                           | 0.967166913        | 2              | 2.648441  |
| Q62904        | YLSGTTGLGTNYVK                                         | 1.174113747        | 2              | 2.93935   |
| <b>Q62967</b> | <b>MVD1 Diphosphomevalonate decarboxylase</b>          | <b>0.909627105</b> | <b>0.09073</b> | <b>2</b>  |
| Q62967        | GLQVAPVLLSDELK                                         | 0.812958366        | 2              | 2.815267  |
| Q62967        | VYGVEDLSEVAR                                           | 1.55456585         | 2              | 3.137665  |
| <b>Q62975</b> | <b>ZPI Protein Z_dependent protease inhibitor</b>      | <b>0.92345351</b>  | <b>0.57414</b> | <b>2</b>  |
| Q62975        | FKLNQRYEMHELLK                                         | 0.813997843        | 2              | 2.70348   |
| Q62975        | KMEVFFPKFK                                             | 0.962980426        | 1              | 2.060384  |
| <b>Q63041</b> | <b>A1M Alpha_1_macroglobulin</b>                       | <b>0.649048476</b> | <b>8.3E-15</b> | <b>10</b> |
| Q63041        | AEDITHNGIVYTPK                                         | 0.628714777        | 2              | 3.463758  |
| Q63041        | AEQGAYLGPLPYK                                          | 0.716920453        | 2              | 3.238444  |
| Q63041        | AESPVFVQTDKPIYKPGQTVK                                  | 0.619600556        | 3              | 4.738815  |
| Q63041        | DTVVVKPVIVEPEGIEK                                      | 0.725029348        | 2              | 2.457087  |
| Q63041        | GSIFNSGSHVLPLEQ GK                                     | 0.719046625        | 2              | 3.75082   |
| Q63041        | LQDQSNIQR                                              | 0.592441328        | 2              | 2.916166  |
| Q63041        | QDLNDNDAYSVFQSIGLK                                     | 1.014104956        | 2              | 2.785951  |



|               |                                                                   |                    |                |           |
|---------------|-------------------------------------------------------------------|--------------------|----------------|-----------|
| Q63041        | QLNYQHSDGSYSTFGDR                                                 | 0.659688452        | 2              | 2.645306  |
| Q63041        | YNILPEAEGEAPFTLK                                                  | 0.676304764        | 2              | 4.984459  |
| Q63041        | YVVLVPSSELYAGVPEK                                                 | 0.647973697        | 2              | 3.074736  |
| <b>Q63060</b> | <b>GLPK Glycerol kinase</b>                                       | <b>0.91667327</b>  | <b>0.07292</b> | <b>11</b> |
| Q63060        | AVLGPLVGAVDQGTSSSTR                                               | 0.849542088        | 2              | 5.297806  |
| Q63060        | CVFSEHGLLTTVAYK                                                   | 0.843070397        | 2              | 4.015862  |
| Q63060        | DCGIPLSHLQVDGGMTSNK                                               | 1.242383468        | 2              | 3.790442  |
| Q63060        | EILQSVYECIEK                                                      | 1.343766412        | 2              | 3.635431  |
| Q63060        | FEPQINAESEIR                                                      | 1.034369203        | 2              | 3.518729  |
| Q63060        | KAVLGPLVGAVDQGTSSSTR                                              | 0.962035529        | 3              | 3.337056  |
| Q63060        | KVQEAveenr                                                        | 1.036051054        | 2              | 3.223442  |
| Q63060        | LGQLNIDISNIK                                                      | 1.114197414        | 2              | 2.82469   |
| Q63060        | NTYGTGFCFLCNTGHK                                                  | 0.902765791        | 2              | 4.149413  |
| Q63060        | TAELLSHHQVEIK                                                     | 0.971316486        | 2              | 3.149246  |
| Q63060        | VQEAveenr                                                         | 0.945445369        | 2              | 3.041784  |
| <b>Q63081</b> | <b>PDIA6 Protein disulfide isomerase A6</b>                       | <b>0.916688707</b> | <b>9.9E-20</b> | <b>11</b> |
| Q63081        | ALDLFSDNAPPELLEIINEDIAK                                           | 0.869955344        | 3              | 5.50354   |
| Q63081        | GESPDYDGGGR                                                       | 0.980678739        | 2              | 2.856317  |
| Q63081        | GSFSEQGINEFLR                                                     | 1.02703951         | 2              | 4.267861  |
| Q63081        | GSTAPVGGGSPNITPR                                                  | 0.967757477        | 2              | 4.823972  |
| Q63081        | HQSLGGQYGVQGFPTIK                                                 | 0.866968059        | 2              | 5.125422  |
| Q63081        | KDVVELTDDTFDK                                                     | 1.031472298        | 2              | 4.115155  |
| Q63081        | KTCEEHQLCVAVLPHILDTGATGR                                          | 0.914410559        | 4              | 5.215255  |
| Q63081        | NLEPEWAAAATEVK                                                    | 0.910281332        | 2              | 4.081563  |
| Q63081        | NSYLEVLLK                                                         | 0.912804287        | 2              | 2.72928   |
| Q63081        | TCEEHQLCVAVLPHILDTGATGR                                           | 0.891160857        | 3              | 4.550593  |
| Q63081        | TGEAIVDAALSALR                                                    | 0.915148183        | 3              | 4.58711   |
| <b>Q63083</b> | <b>NUCB1 Nucleobindin_1</b>                                       | <b>0.911190361</b> | <b>0.88575</b> | <b>4</b>  |
| Q63083        | ADTGDAPVPAPAGDQK                                                  | 1.009130194        | 2              | 3.463319  |
| Q63083        | ELQQAVLQMEQR                                                      | 1.253507016        | 2              | 2.64502   |
| Q63083        | LSQETEALGR                                                        | 0.943961989        | 2              | 2.828318  |
| Q63083        | VNVPGSQAQLK                                                       | 0.911179128        | 2              | 2.550505  |
| <b>Q63089</b> | <b>S22A1 Solute carrier family 22 member 1</b>                    | <b>0.88428056</b>  | <b>0.04883</b> | <b>2</b>  |
| Q63089        | ENTIYLVQVTGK                                                      | 0.89613876         | 2              | 2.317788  |
| Q63089        | GVALPETIEEAENLGR                                                  | 0.865399826        | 2              | 3.10419   |
| <b>Q63108</b> | <b>EST3 Liver carboxylesterase 3</b>                              | <b>0.981211545</b> | <b>0.54564</b> | <b>7</b>  |
| Q63108        | DFNTVPYIVGINK                                                     | 1.595297923        | 2              | 2.677123  |
| Q63108        | GGTSKEEINLSK                                                      | 0.892810388        | 2              | 3.540097  |
| Q63108        | LDPMTATSLK                                                        | 0.864271404        | 2              | 2.521205  |
| Q63108        | MKPSTVVGHDHGDEIYVFGAPILR                                          | 0.997132163        | 3              | 3.887483  |
| Q63108        | QKTEEELLETTLK                                                     | 1.006848336        | 2              | 3.574369  |
| Q63108        | SSFLLNLPEEAIPVAVEK                                                | 0.859579203        | 2              | 4.645937  |
| Q63108        | TEEELLETTLK                                                       | 1.05239955         | 2              | 2.499465  |
| <b>Q63120</b> | <b>MRP2 Canalicular multispecific organic anion transporter 1</b> | <b>0.871680359</b> | <b>1.1E-16</b> | <b>6</b>  |
| Q63120        | ACALLPDLEILPGGDMAEIGEK                                            | 1.693337231        | 2              | 3.498795  |
| Q63120        | ISEYINVENEAPWVTDK                                                 | 1.125113762        | 2              | 3.79597   |
| Q63120        | IVEYGSPEELLSNR                                                    | 1.064926051        | 2              | 3.41682   |
| Q63120        | QSQSQDVLVLEAK                                                     | 1.169709355        | 2              | 3.266795  |
| Q63120        | YFAWEPSFQEQVQGIR                                                  | 1.008327658        | 2              | 4.646604  |
| Q63120        | YRPELDLVLK                                                        | 1.439397439        | 2              | 2.399018  |
| <b>Q63150</b> | <b>DPYS Dihydropyrimidinase</b>                                   | <b>1.011545801</b> | <b>0.9915</b>  | <b>9</b>  |
| Q63150        | DQTCTPIPVK                                                        | 1.452901001        | 2              | 2.448888  |
| Q63150        | EIGAIAQVHAENGDLIAEGAK                                             | 1.141039737        | 2              | 4.997487  |
| Q63150        | FVAVTSTNAAK                                                       | 0.97430095         | 2              | 3.211935  |
| Q63150        | GEVITLKPR                                                         | 1.07144225         | 2              | 2.399349  |
| Q63150        | GSSLIEAFETWR                                                      | 1.013324228        | 2              | 3.06013   |

|               |                                                         |                    |                |           |
|---------------|---------------------------------------------------------|--------------------|----------------|-----------|
| Q63150        | MLALGITGPEGHELCPAEVEAEATLR                              | 0.993034035        | 3              | 3.627389  |
| Q63150        | VVNDDFSQVADVLVEDGVVR                                    | 1.00993405         | 2              | 5.589057  |
| Q63150        | VVYEAGVFDVTAGHGK                                        | 0.973690013        | 2              | 3.865458  |
| Q63150        | VVYGEPIAAGLGTGTQYWNK                                    | 0.899524632        | 2              | 5.477098  |
| <b>Q63270</b> | <b>ACOC Cytoplasmic aconitate hydratase</b>             | <b>1.043747449</b> | <b>3.5E-13</b> | <b>16</b> |
| Q63270        | AVEAGLNVKPYVK                                           | 0.843034721        | 2              | 3.255152  |
| Q63270        | AVLAESYER                                               | 1.040195968        | 2              | 2.370706  |
| Q63270        | FVEFFGPGVAQLSIADR                                       | 0.872390284        | 2              | 5.201436  |
| Q63270        | GFQVAPDHHNDHK                                           | 2.093454579        | 2              | 3.251628  |
| Q63270        | IDFEKEPLGVNAQQQVFLK                                     | 0.765593784        | 3              | 4.687419  |
| Q63270        | KNDIENILNWSIMQHK                                        | 0.814072816        | 3              | 4.652308  |
| Q63270        | NCDEFLVK                                                | 0.92233386         | 1              | 2.048974  |
| Q63270        | NQDLEFER                                                | 0.936168792        | 2              | 2.479582  |
| Q63270        | QAPQTVHLPSETLDVFDAAER                                   | 0.735511431        | 3              | 3.701478  |
| Q63270        | SIEVPFKPAR                                              | 1.147991529        | 2              | 2.589269  |
| Q63270        | SIVDAYVLLNLGDSVTTDHISPAAGNIAR                           | 0.859458918        | 3              | 5.093326  |
| Q63270        | SPPFFESLTLDLQPPK                                        | 1.048712986        | 3              | 3.88698   |
| Q63270        | SWNALAAPSEK                                             | 0.9156339          | 1              | 2.325432  |
| Q63270        | TSLSPGSGVVYYLR                                          | 1.000071444        | 2              | 3.470172  |
| Q63270        | VILQDFTGVPVAVVDFAAAMR                                   | 0.874417009        | 3              | 4.483238  |
| Q63270        | YQQAGLPLIVLAGK                                          | 0.827180167        | 2              | 3.539708  |
| <b>Q63276</b> | <b>BAAT Bile acid_CoA:amino acid N_acyltransferase</b>  | <b>0.785306253</b> | <b>3.2E-11</b> | <b>17</b> |
| Q63276        | AHGHFLFVVGEDDKNLNSK                                     | 0.924287981        | 2              | 5.835223  |
| Q63276        | ASEVGEVDLER                                             | 0.833279649        | 2              | 3.869868  |
| Q63276        | DDKGNLFNSQAFYR                                          | 0.795876193        | 2              | 3.298659  |
| Q63276        | GNLFNSQAFYR                                             | 0.762806547        | 2              | 3.048615  |
| Q63276        | LCHPYFPVEGK                                             | 0.956176167        | 2              | 2.656939  |
| Q63276        | LTAVPLSALVDEPVHIR                                       | 1.504391902        | 2              | 4.111654  |
| Q63276        | NWTLLSYPGAGHLIEPPYSPLCSASR                              | 0.730920452        | 2              | 4.057826  |
| Q63276        | QHLNPGFNSQL                                             | 0.857106036        | 2              | 3.547451  |
| Q63276        | QITATVLINGPNFVSSNPHVYR                                  | 0.661727568        | 3              | 5.248504  |
| Q63276        | TFEETADK                                                | 0.922353568        | 1              | 1.975335  |
| Q63276        | TFEETADKDSK                                             | 0.776685852        | 2              | 3.926252  |
| Q63276        | VDLEYFEEGVEFLLR                                         | 0.745197824        | 3              | 4.795879  |
| Q63276        | VFQPTPCSEEFVTTNALGLVEFYR                                | 0.742659319        | 2              | 5.307502  |
| Q63276        | VISSLDSLILR                                             | 0.781051628        | 2              | 3.537139  |
| Q63276        | VTGLTPFQVCLQASLK                                        | 0.807122947        | 3              | 5.327432  |
| Q63276        | WYVAPGVTR                                               | 0.632267247        | 2              | 2.65423   |
| Q63276        | YCFPIEK                                                 | 0.910085028        | 2              | 2.595945  |
| <b>Q63342</b> | <b>M2GD Dimethylglycine dehydrogenase_mitochondrial</b> | <b>0.863886434</b> | <b>0.97133</b> | <b>24</b> |
| Q63342        | ADIINIVNGPITYSPDILPMVGP HQGVR                           | 0.866798828        | 3              | 5.970218  |
| Q63342        | AWGSEMNCDTNPLEAGLDYFIK                                  | 0.842513496        | 2              | 4.50319   |
| Q63342        | DGLLFGPYEQEK                                            | 1.357981156        | 2              | 2.61695   |
| Q63342        | EGQESPPSPEWK                                            | 1.357416589        | 2              | 2.676322  |
| Q63342        | GGYDVEIR                                                | 0.945362316        | 2              | 2.306157  |
| Q63342        | GQDSTQLLDHLCANVIPK                                      | 0.873899637        | 2              | 4.022426  |
| Q63342        | IMNAGQEEGIDNFGTYALNALR                                  | 0.525619094        | 2              | 4.875884  |
| Q63342        | ISDIPVTAIR                                              | 0.952416888        | 2              | 3.232371  |
| Q63342        | ITEHVEAAMEMVPLK                                         | 0.916360059        | 2              | 3.927021  |
| Q63342        | KADIINIVNGPITYSPDILPMVGP HQGVR                          | 0.876038621        | 3              | 5.173427  |
| Q63342        | LEEETGQVGFHQPGSIR                                       | 0.858133017        | 2              | 4.767273  |
| Q63342        | LNKPADFTGK                                              | 1.087527438        | 2              | 2.636228  |
| Q63342        | LTSDELSDVFK                                             | 1.004426755        | 2              | 4.147946  |
| Q63342        | NITDELGVLGVAGPYAR                                       | 0.845573355        | 2              | 4.831796  |
| Q63342        | NYPATIIQEPLVLTETPR                                      | 0.949447302        | 2              | 4.1668    |

|               |                                                                           |                    |                |           |
|---------------|---------------------------------------------------------------------------|--------------------|----------------|-----------|
| Q63342        | REDSAALYER                                                                | 0.710362782        | 2              | 3.230521  |
| Q63342        | SLAFAYVPVELSEVGQQVEVELL GK                                                | 0.727021031        | 3              | 4.972811  |
| Q63342        | TNWHATEQYIIIEPK                                                           | 0.865188693        | 2              | 4.153389  |
| Q63342        | VGFTNISHMLTPR                                                             | 1.093691331        | 2              | 2.402288  |
| Q63342        | VGVIDLSPFGK                                                               | 0.843567571        | 2              | 3.399476  |
| Q63342        | VIGNTTSGSYSYSIQK                                                          | 0.941491203        | 2              | 4.334137  |
| Q63342        | WIEEAAVR                                                                  | 1.002897819        | 2              | 2.761974  |
| Q63342        | WTTTQYTEAK                                                                | 0.925092926        | 2              | 2.81355   |
| Q63342        | YLSDWILHGEPFDLIEDPNR                                                      | 0.771030935        | 3              | 4.346085  |
| <b>Q63347</b> | <b>PRS7 26S protease regulatory subunit 7</b>                             | <b>0.909000231</b> | <b>0.88765</b> | <b>8</b>  |
| Q63347        | ALDEGDIALLK                                                               | 1.042439037        | 2              | 3.094614  |
| Q63347        | ESDTGLAPPALWDLAADK                                                        | 1.044900368        | 2              | 2.508094  |
| Q63347        | FDDGAGGDNEVQR                                                             | 0.934918537        | 2              | 4.175218  |
| Q63347        | FVVDLSDQVAPTDIEEGMR                                                       | 0.855317975        | 2              | 3.856356  |
| Q63347        | IINADSEDPK                                                                | 1.090271027        | 2              | 3.047869  |
| Q63347        | QTLQSEQPLQVAR                                                             | 0.992283613        | 2              | 4.001585  |
| Q63347        | QVEDDIQQLLK                                                               | 1.063910795        | 2              | 2.441735  |
| Q63347        | TMLELINQLDGFDR                                                            | 0.789757698        | 2              | 2.964977  |
| <b>Q63355</b> | <b>MYO1C Myosin_Ic</b>                                                    | <b>0.984246213</b> | <b>0.14933</b> | <b>2</b>  |
| Q63355        | MSLLQLVEILR                                                               | 0.529986782        | 2              | 2.511883  |
| Q63355        | YMDVQDFDKGAPVGGHILSYLLEK+Oxidation(1)                                     | 1.827858052        |                |           |
| <b>Q63362</b> | <b>NDUA5 NADH dehydrogenase [ubiquinone] 1 alpha subcomplex subunit 5</b> | <b>0.987820249</b> | <b>0.99051</b> | <b>4</b>  |
| Q63362        | KLENLLQGGVEEVILQAEK                                                       | 1.015186774        | 2              | 6.6786    |
| Q63362        | KYTEQITSEK                                                                | 1.024144385        | 2              | 2.426236  |
| Q63362        | TTGLVGLAVCDTPHER                                                          | 0.905224549        | 2              | 3.476041  |
| Q63362        | YTEQITSEK                                                                 | 1.083484094        | 2              | 2.452557  |
| <b>Q63413</b> | <b>DX39B Spliceosome RNA helicase Ddx39b</b>                              | <b>1.299193315</b> | <b>0.85589</b> | <b>2</b>  |
| Q63413        | AIVDCGFHPEVQHECIPQAILGMDVLCQAK                                            | 0.92827033         | 3              | 3.799471  |
| Q63413        | NCPHIVGTPGR                                                               | 1.406052366        | 2              | 3.049633  |
| <b>Q63429</b> | <b>UBC Polyubiquitin_C</b>                                                | <b>1.003213283</b> | <b>0.36321</b> | <b>3</b>  |
| Q63429        | ESTLHLVLR                                                                 | 2.144843392        | 2              | 2.427556  |
| Q63429        | TITLEVPSDTIENVK                                                           | 1.003114008        | 2              | 4.717163  |
| Q63429        | TLSDYNIQK                                                                 | 0.98106577         | 2              | 2.548782  |
| <b>Q63448</b> | <b>ACOX3 Peroxisomal acyl_coenzyme A oxidase 3</b>                        | <b>0.804413251</b> | <b>1.6E-15</b> | <b>10</b> |
| Q63448        | ADWLDSEAPLAAYR                                                            | 0.866008843        | 2              | 4.247795  |
| Q63448        | DDAVALVDIAIPSDFLVLSPIGR                                                   | 0.804335904        | 3              | 4.142456  |
| Q63448        | EIHALASAGKPLASWTAQR                                                       | 0.802810043        | 2              | 4.096396  |
| Q63448        | GGYISGEQTGK                                                               | 0.80458848         | 2              | 2.920685  |
| Q63448        | NLWAAVLQQSGVLER                                                           | 0.67702294         | 2              | 4.46384   |
| Q63448        | QFGPTDKKEIPVLEYPLQQWR                                                     | 0.869529377        | 3              | 3.502545  |
| Q63448        | TIFLDLIELQR                                                               | 0.835113848        | 2              | 3.38361   |
| Q63448        | TIFSTLENDPLFARPFADLPLEK                                                   | 0.728018664        | 3              | 4.512849  |
| Q63448        | TTAHYDPATQEFILHSPDFEAAK                                                   | 0.741683617        | 3              | 4.542653  |
| Q63448        | TVNFLEAYPGILGQK                                                           | 0.833414941        | 2              | 4.615621  |
| <b>Q63507</b> | <b>RL14 60S ribosomal protein L14</b>                                     | <b>1.053986704</b> | <b>0.975</b>   | <b>3</b>  |
| Q63507        | ALVDGPCTR                                                                 | 1.205116051        | 2              | 2.415944  |
| Q63507        | CMQLTDFILK                                                                | 0.950627206        | 2              | 2.551852  |
| Q63507        | LVAIVDVIDQNR                                                              | 1.16468256         | 2              | 4.126261  |
| <b>Q63524</b> | <b>TMED2 Transmembrane emp24 domain_containing protein 2</b>              | <b>0.979225729</b> | <b>0.08913</b> | <b>3</b>  |
| Q63524        | GQDMETEAHQNKLEEMINELAVAMTAVK                                              | 0.824417699        | 3              | 5.36974   |
| Q63524        | HEQEYMEVR                                                                 | 0.995862648        | 2              | 3.33628   |
| Q63524        | HEQEYMEVR+Oxidation(5)                                                    | 1.304503784        |                |           |
| <b>Q63525</b> | <b>NUDC Nuclear migration protein nudC</b>                                | <b>1.026886237</b> | <b>0.58724</b> | <b>4</b>  |
| Q63525        | GQAPVIDGELYNEVK                                                           | 1.025137007        | 2              | 3.454822  |
| Q63525        | LSDLSETR                                                                  | 1.25542037         | 2              | 2.665147  |

|               |                                                               |                    |                |           |
|---------------|---------------------------------------------------------------|--------------------|----------------|-----------|
| Q63525        | LVTSDEINTK                                                    | 1.177746429        | 2              | 2.395669  |
| Q63525        | VEESSWLIEDGK                                                  | 1.041853624        | 2              | 3.01153   |
| <b>Q63569</b> | <b>PRS6A 26S protease regulatory subunit 6A</b>               | <b>1.071249403</b> | <b>0.16995</b> | <b>5</b>  |
| Q63569        | AMEVDERPTEQYSDIGGLDK                                          | 1.358879445        | 3              | 3.656654  |
| Q63569        | CTDDFNGAQCK                                                   | 0.919458495        | 2              | 3.332251  |
| Q63569        | MNVSPDVNYEELAR                                                | 1.189901749        | 2              | 3.309615  |
| Q63569        | MSTEEIVQR                                                     | 1.016560999        | 2              | 2.404523  |
| Q63569        | QTYFLPVIGLVDAEK                                               | 1.227439897        | 2              | 2.730999  |
| <b>Q63570</b> | <b>PRS6B 26S protease regulatory subunit 6B</b>               | <b>1.086894063</b> | <b>0.31989</b> | <b>4</b>  |
| Q63570        | GVLMYGPPGCGK+Oxidation(3)                                     | 1.079774297        |                |           |
| Q63570        | IQDEIPALSVSRPQTGLSFLGPEPEDEDLYSR                              | 1.21566887         | 3              | 5.442052  |
| Q63570        | KDEQEHEFYK                                                    | 1.411705034        | 2              | 2.956087  |
| Q63570        | RFDAQTGADR                                                    | 1.045414156        | 2              | 2.609976  |
| <b>Q63584</b> | <b>TMEDA Transmembrane emp24 domain_containing protein 10</b> | <b>0.926108303</b> | <b>0.04109</b> | <b>4</b>  |
| Q63584        | ITDSAGHILYAK                                                  | 0.975037374        | 2              | 3.314518  |
| Q63584        | LEDLSEIVNDFAYMK                                               | 0.865586126        | 2              | 2.92805   |
| Q63584        | NYEEIAK                                                       | 0.926737799        | 1              | 2.266356  |
| Q63584        | RLEDLSEIVNDFAYMK                                              | 1.00478323         | 2              | 3.829109  |
| <b>Q63598</b> | <b>PLST Plastin_3</b>                                         | <b>1.096447593</b> | <b>0.99995</b> | <b>11</b> |
| Q63598        | AESMLQQADK                                                    | 0.951904495        | 2              | 2.879221  |
| Q63598        | ATDDIIVNWVNGTLSEAGK                                           | 0.922024872        | 3              | 4.949576  |
| Q63598        | AVGDGIVLCK                                                    | 1.013706039        | 1              | 1.951555  |
| Q63598        | HVIPMNPNTDDLK                                                 | 0.879370018        | 2              | 2.782761  |
| Q63598        | IDINMSGFNETDDLK                                               | 0.971421948        | 2              | 4.337924  |
| Q63598        | INNFSADIK                                                     | 1.082851784        | 2              | 2.578387  |
| Q63598        | KLENCNYAVELGK                                                 | 1.127555578        | 2              | 3.923074  |
| Q63598        | NEALAALLR                                                     | 1.101730874        | 2              | 2.745475  |
| Q63598        | VYALPEDLVEVKPK                                                | 0.991051788        | 2              | 2.961497  |
| Q63598        | YPALTKPENQDIDWTLLEGETR                                        | 0.981038199        | 3              | 5.177026  |
| Q63598        | YTLNVMEDLGEGQK                                                | 1.044122463        | 2              | 3.698828  |
| <b>Q63610</b> | <b>TPM3 Tropomyosin alpha_3 chain</b>                         | <b>1.067880814</b> | <b>0.1518</b>  | <b>8</b>  |
| Q63610        | EQAEAEVASLNR                                                  | 1.805247179        | 2              | 2.865719  |
| Q63610        | IQVLQQQADDAEER                                                | 1.111389461        | 2              | 5.12711   |
| Q63610        | KIQLVQQQADDAEER                                               | 1.166536635        | 2              | 5.410338  |
| Q63610        | KLVIIEGDLER                                                   | 1.133344524        | 2              | 2.77177   |
| Q63610        | LVIIEGDLER                                                    | 0.997231964        | 2              | 2.482031  |
| Q63610        | MELQEIQLK                                                     | 1.053913363        | 2              | 3.021322  |
| Q63610        | TIDDLK                                                        | 0.844344285        | 2              | 2.861605  |
| Q63610        | YSQKEDKYEEIK                                                  | 1.618412158        | 2              | 4.677725  |
| <b>Q63617</b> | <b>HYOU1 Hypoxia up_regulated protein 1</b>                   | <b>0.957447698</b> | <b>0.24331</b> | <b>16</b> |
| Q63617        | AANSLEAFIFETQDK                                               | 0.864521314        | 2              | 3.303391  |
| Q63617        | DAVITVPAFFNQAER                                               | 1.02298543         | 2              | 2.333813  |
| Q63617        | EGETPDEKESGDKSEAQKPNEK                                        | 1.256692839        | 3              | 3.770401  |
| Q63617        | ESGDKSEAQKPNEK                                                | 1.197758735        | 2              | 2.348613  |
| Q63617        | FLGDSAAAGMAIK                                                 | 0.908478781        | 2              | 2.647946  |
| Q63617        | LEDLTR                                                        | 0.988363976        | 2              | 2.373968  |
| Q63617        | LGNTISSLFGGGTSSDAK                                            | 0.994285366        | 2              | 3.302428  |
| Q63617        | LIPEMDQIFTDVEMTTLEK                                           | 0.904305036        | 2              | 2.782573  |
| Q63617        | LYQPEYQEVSTEEQR                                               | 1.473561537        | 2              | 5.059073  |
| Q63617        | NINADEAAAMGAVVQAAALSK                                         | 0.933047401        | 2              | 2.993598  |
| Q63617        | SLAEDFAEQPIK                                                  | 1.168018754        | 2              | 2.735234  |
| Q63617        | SLAEDFAEQPIKDAVITVPAFFNQAER                                   | 0.803873444        | 3              | 3.91786   |
| Q63617        | TLGGLEMELR                                                    | 0.994534505        | 2              | 2.306415  |
| Q63617        | VEFEELCADLFDR                                                 | 1.070797135        | 2              | 3.89708   |
| Q63617        | VESVFETLVEDSPEEESTLTK                                         | 1.153388462        | 2              | 4.21553   |
| Q63617        | VLQLINDNTATLSYGVFR                                            | 0.97276343         | 2              | 2.947274  |

|               |                                                     |                    |                |           |
|---------------|-----------------------------------------------------|--------------------|----------------|-----------|
| <b>Q63692</b> | <b>CDC37 Hsp90 co_chaperone Cdc37</b>               | <b>0.981368652</b> | <b>0.97292</b> | <b>2</b>  |
| Q63692        | EGEEAGPGDPLLEAVPK                                   | 1.122904467        | 2              | 3.577682  |
| Q63692        | LGPGGLDPVEVYESLPEELQK                               | 0.955004237        | 2              | 2.685598  |
| <b>Q63716</b> | <b>PRDX1 Peroxiredoxin_1</b>                        | <b>1.004753721</b> | <b>0.99318</b> | <b>15</b> |
| Q63716        | ADEGISFR                                            | 1.094616406        | 2              | 3.06872   |
| Q63716        | ATAVMPDGQFK                                         | 1.028277164        | 2              | 2.943845  |
| Q63716        | DISLSDYK                                            | 3.827283899        | 2              | 2.505138  |
| Q63716        | HGEVCPAGWKPGSDTIKPDVVK                              | 1.101361773        | 4              | 6.228096  |
| Q63716        | IGHPAPSFK                                           | 1.63047055         | 1              | 1.932111  |
| Q63716        | KLNCQVIGASVDSHFCHLAWINTPK                           | 2.172617403        | 4              | 4.572121  |
| Q63716        | KQGGLGPMNIPLVSDPK                                   | 0.657920426        | 2              | 4.135698  |
| Q63716        | LNCQVIGASVDSHFCHLAWINTPK                            | 1.048656632        | 3              | 3.653662  |
| Q63716        | LVQAFQFTDK                                          | 1.209587657        | 2              | 3.532369  |
| Q63716        | QGGLGPMNIPLVSDPK                                    | 0.843922991        | 2              | 3.479512  |
| Q63716        | QGGLGPMNIPLVSDPK+Oxidation(6)                       | 0.909156995        |                |           |
| Q63716        | QITINDLPVGR                                         | 0.97343716         | 2              | 3.308394  |
| Q63716        | RTIAQDYGVLK                                         | 1.415199597        | 2              | 2.532115  |
| Q63716        | SVDEILR                                             | 0.988104621        | 2              | 2.699282  |
| Q63716        | TIAQDYGVLK                                          | 1.03473603         | 2              | 3.247339  |
| <b>Q63768</b> | <b>CRK Adapter molecule crk</b>                     | <b>1.13922747</b>  | <b>0.58327</b> | <b>2</b>  |
| Q63768        | IGDQEFDSLPALEFYK                                    | 1.066327479        | 2              | 3.292372  |
| Q63768        | VPNAYDKTALALEVGELVK                                 | 1.168835773        | 2              | 2.317183  |
| <b>Q63797</b> | <b>PSME1 Proteasome activator complex subunit 1</b> | <b>0.919440971</b> | <b>0.8774</b>  | <b>10</b> |
| Q63797        | EPALNEANLSNLK                                       | 0.3673086          | 2              | 2.400531  |
| Q63797        | ISELDAFLK                                           | 0.961367434        | 2              | 2.819068  |
| Q63797        | ISELDAFLKEPALNEANLSNLK                              | 0.847283938        | 3              | 6.055887  |
| Q63797        | KGDEDDKGPPCGPVNCEK                                  | 1.01577285         | 3              | 4.801366  |
| Q63797        | KISELDAFLKEPALNEANLSNLK                             | 0.913163306        | 3              | 5.739599  |
| Q63797        | LEGFQTQISK                                          | 1.007685262        | 2              | 3.01388   |
| Q63797        | NAYAVLYDILK                                         | 1.231435093        | 2              | 2.883824  |
| Q63797        | QLVHELDEAEYQEIR                                     | 0.940928053        | 3              | 4.660054  |
| Q63797        | TENLLGSYFPK                                         | 0.980671822        | 2              | 3.60702   |
| Q63797        | VDVFREDLCSK                                         | 0.900007214        | 2              | 2.387007  |
| <b>Q63798</b> | <b>PSME2 Proteasome activator complex subunit 2</b> | <b>0.986244656</b> | <b>0.99823</b> | <b>6</b>  |
| Q63798        | AFYAELHHIISNLEK                                     | 0.941211118        | 2              | 3.978549  |
| Q63798        | IEDGNDFGVAIQEK                                      | 0.928126079        | 2              | 4.24792   |
| Q63798        | IISLSQLLQEDSLNVADLSSLR                              | 1.096321002        | 2              | 2.33724   |
| Q63798        | KIISLSQLLQEDSLNVADLSSLR                             | 1.100297033        | 3              | 3.445489  |
| Q63798        | TKVEAFQTAISK                                        | 0.84544449         | 2              | 3.455294  |
| Q63798        | VEAFQTAISK                                          | 0.994424621        | 2              | 2.612056  |
| <b>Q63836</b> | <b>SBP2 Selenium_binding protein 2</b>              | <b>1.137004255</b> | <b>0.99215</b> | <b>5</b>  |
| Q63836        | GGSVQVLEDQELTCQPEPLVVK                              | 1.090436577        | 3              | 5.46247   |
| Q63836        | GSFVLLDGETFEVK                                      | 1.060345416        | 2              | 2.446326  |
| Q63836        | IYVVDVGSEPR                                         | 1.167711389        | 2              | 3.959319  |
| Q63836        | LNPNFLVDFGK                                         | 1.024744386        | 2              | 2.730465  |
| Q63836        | LNPNFLVDFGKEPLGALAHCLR                              | 1.074800422        | 3              | 4.310116  |
| <b>Q63945</b> | <b>SET Protein SET</b>                              | <b>1.040745085</b> | <b>0.94124</b> | <b>3</b>  |
| Q63945        | IDFYFDENPYFENK                                      | 1.040872047        | 2              | 3.856183  |
| Q63945        | LNEQASEEILK                                         | 1.040781096        | 2              | 2.725482  |
| Q63945        | VEVTEFEDIK                                          | 0.837575432        | 2              | 2.567454  |
| <b>Q63965</b> | <b>SFXN1 Sideroflexin_1</b>                         | <b>1.064881495</b> | <b>0.99994</b> | <b>6</b>  |
| Q63965        | MSGEVPPNINIKKEPR+Oxidation(0)                       | 1.044135647        |                |           |
| Q63965        | NILLTNEQLENAR                                       | 0.900214991        | 2              | 4.475253  |
| Q63965        | QAITQVVISR                                          | 1.123892979        | 2              | 2.43131   |
| Q63965        | QGIVPAGLTENELWR                                     | 1.004228806        | 2              | 2.972429  |
| Q63965        | WDQSTFIGR                                           | 0.907076499        | 2              | 2.833481  |
| Q63965        | YAYDSAFHPDGTGEK                                     | 1.232269358        | 2              | 4.07131   |

|               |                                                                                            |                    |                |           |
|---------------|--------------------------------------------------------------------------------------------|--------------------|----------------|-----------|
| <b>Q64057</b> | <b>AL7A1 Alpha_ aminoadipic semialdehyde dehydrogenase</b>                                 | <b>1.117180432</b> | <b>9.9E-20</b> | <b>17</b> |
| Q64057        | AWNIWADIPAPK                                                                               | 0.765359149        | 2              | 3.94756   |
| Q64057        | EDNEGVFNWSWGR                                                                              | 1.066262847        | 2              | 3.637798  |
| Q64057        | EGGTVVYGGK                                                                                 | 0.815825933        | 2              | 2.454009  |
| Q64057        | FKNEEEVFEWNNVEK                                                                            | 0.749113089        | 2              | 5.458163  |
| Q64057        | GAPTTSLVSIATK                                                                              | 0.611399859        | 2              | 4.213446  |
| Q64057        | GEVITTYCPANNEPIAR                                                                          | 0.805873476        | 2              | 5.085406  |
| Q64057        | GSDCGIVNVNIPTSGAEIGGAFGGEK                                                                 | 0.778929089        | 2              | 5.649642  |
| Q64057        | LFLHESIHDEVVDR                                                                             | 0.889025953        | 2              | 4.218174  |
| Q64057        | NEEEVFEWNNVEK                                                                              | 0.870313977        | 2              | 4.541942  |
| Q64057        | QAVSMFVQAVEEAK                                                                             | 0.854482599        | 2              | 3.084381  |
| Q64057        | QGLSSSIFTK                                                                                 | 0.936382068        | 2              | 2.567421  |
| Q64057        | QVALMVQER                                                                                  | 0.878958184        | 2              | 2.302101  |
| Q64057        | STCTINYSTALPLAQGIK                                                                         | 1.104853989        | 2              | 4.678034  |
| Q64057        | VGNPWDPNILYGPLHTK                                                                          | 0.95583213         | 3              | 4.141422  |
| Q64057        | VMDHPGNYVEPTIVTGLVHDAPIVHK                                                                 | 0.817661914        | 3              | 6.092217  |
| Q64057        | VMDHPGNYVEPTIVTGLVHDAPIVHK+Oxidation(1)                                                    | 0.848812123        |                |           |
| Q64057        | VNLLSFTGSTQVVK                                                                             | 0.783468391        | 2              | 4.875194  |
| <b>Q640L5</b> | <b>CCD18 Coiled_coil domain_containing protein 18</b>                                      | <b>2.23072966</b>  | <b>0.64068</b> | <b>2</b>  |
| Q640L5        | EVIDLGQELR                                                                                 | 1.797765754        | 2              | 2.355314  |
| Q640L5        | SMQLSQLDMVLDQTKTELEKTTNSVK                                                                 | 2.848483677        | 3              | 3.601153  |
| <b>Q64119</b> | <b>MYL6 Myosin light polypeptide 6</b>                                                     | <b>0.988435459</b> | <b>0.98524</b> | <b>6</b>  |
| Q64119        | DQGTIEDYVEGLR                                                                              | 1.248391575        | 2              | 3.351062  |
| Q64119        | HVLVTLGEK                                                                                  | 1.162842698        | 1              | 2.293932  |
| Q64119        | ILYSQCGDVMR                                                                                | 1.129943151        | 2              | 2.688288  |
| Q64119        | NKDQGTIEDYVEGLR                                                                            | 1.117354634        | 2              | 4.194821  |
| Q64119        | VFDKEGNGTVMGAEIR                                                                           | 2.701974062        | 2              | 3.517663  |
| Q64119        | VLDFEHFLPMLQTVAK                                                                           | 0.940577428        | 2              | 4.943352  |
| <b>Q64122</b> | <b>MYL9 Myosin regulatory light polypeptide 9</b>                                          | <b>0.877325208</b> | <b>0.73598</b> | <b>2</b>  |
| Q64122        | DGFIDKEDLHDMLASLGK                                                                         | 0.88559715         | 2              | 4.722607  |
| Q64122        | LNGTDPEDVIR                                                                                | 1.145422008        | 2              | 2.886698  |
| <b>Q64176</b> | <b>EST22 Liver carboxylesterase 22</b>                                                     | <b>0.863174576</b> | <b>0.0001</b>  | <b>4</b>  |
| Q64176        | AISESGVALTAGLVK                                                                            | 0.858563152        | 2              | 3.887493  |
| Q64176        | EGYLQIGATTQQAQK                                                                            | 1.087495127        | 2              | 4.587856  |
| Q64176        | LDQMTAMSLK+Oxidation(3)                                                                    | 1.102667832        |                |           |
| Q64176        | NFNTVPYIVGINK                                                                              | 1.455330695        | 2              | 3.455234  |
| <b>Q641Y0</b> | <b>OST48 Dolichyl_diphosphooligosaccharide__protein glycosyltransferase 48 kDa subunit</b> | <b>0.979942803</b> | <b>0.96937</b> | <b>9</b>  |
| Q641Y0        | ELGSECGIEFDEEK                                                                             | 1.190629971        | 2              | 3.523845  |
| Q641Y0        | GVMVADPDNPLVLDILTGSSTSYFFDPKPITQYPHAVGR                                                    | 1.350174158        | 4              | 6.983397  |
| Q641Y0        | NLLIAGLQAR                                                                                 | 0.974049872        | 2              | 3.819304  |
| Q641Y0        | SSLNPILFR                                                                                  | 1.221790244        | 2              | 2.411361  |
| Q641Y0        | TADDPSSLIK                                                                                 | 0.792248827        | 2              | 2.714213  |
| Q641Y0        | TAVIDHHNYDVSDLGQHTLIVADTENLLK                                                              | 0.97825259         | 4              | 6.546318  |
| Q641Y0        | TLVLLDNLNVR                                                                                | 0.981089809        | 2              | 3.846589  |
| Q641Y0        | WVPFDGDDIQLEFVR                                                                            | 0.965428611        | 2              | 2.734822  |
| Q641Y0        | YSQTGNYELAVLSR                                                                             | 1.198726414        | 2              | 3.453722  |
| <b>Q641Y2</b> | <b>NDUS2 NADH dehydrogenase [ubiquinone] iron_sulfur protein 2_ mitochondrial</b>          | <b>1.05147571</b>  | <b>0.84939</b> | <b>5</b>  |
| Q641Y2        | GSGIQWDLR                                                                                  | 0.996655809        | 2              | 2.547239  |
| Q641Y2        | IDEVEEMLTNNR                                                                               | 1.180318794        | 2              | 3.631346  |
| Q641Y2        | IIEQCLNK                                                                                   | 1.023955171        | 2              | 2.883131  |
| Q641Y2        | LYTEGYQVPPGATYTAIEAPK                                                                      | 0.985682017        | 2              | 2.946365  |

|               |                                                              |                    |                |           |
|---------------|--------------------------------------------------------------|--------------------|----------------|-----------|
| Q641Y2        | TQPYDVYDQVEFDVPIGSR                                          | 1.253842104        | 2              | 3.992386  |
| <b>Q641Y8</b> | <b>DDX1 ATP_dependent RNA helicase DDX1</b>                  | <b>1.041472182</b> | <b>0.86638</b> | <b>3</b>  |
| Q641Y8        | GDVRFLECTDVAAR                                               | 1.086109122        | 2              | 2.34389   |
| Q641Y8        | GHVDILAPTVQELAALEK                                           | 1.115453097        | 3              | 3.880937  |
| Q641Y8        | GSAFAIGSDGLCCQSR                                             | 1.035563042        | 2              | 3.700125  |
| <b>Q64232</b> | <b>TECR Trans_2_3_enoyl_CoA reductase</b>                    | <b>1.025561939</b> | <b>0.9993</b>  | <b>4</b>  |
| Q64232        | HYEVEIR                                                      | 0.986340807        | 2              | 2.311956  |
| Q64232        | LCFLDKVEPQATISEIK                                            | 1.051750857        | 2              | 4.690748  |
| Q64232        | SLKDEDVLQK                                                   | 0.995613637        | 2              | 3.338138  |
| Q64232        | VEPQATISEIK                                                  | 1.030230986        | 2              | 2.373876  |
| <b>Q64240</b> | <b>AMBP Protein AMBP</b>                                     | <b>0.757334521</b> | <b>9.9E-20</b> | <b>3</b>  |
| Q64240        | AFAELWAFDAAQ GK                                              | 0.723193896        | 2              | 3.526134  |
| Q64240        | AVLPQENEGSGSEPLITGLK                                         | 0.815759089        | 2              | 4.844437  |
| Q64240        | TIAACNLPIVQGPCR                                              | 0.727550618        | 2              | 3.263431  |
| <b>Q642G4</b> | <b>PEX14 Peroxisomal membrane protein PEX14</b>              | <b>1.191949109</b> | <b>1.1E-12</b> | <b>2</b>  |
| Q642G4        | GGDQINEQVEK                                                  | 1.524900858        | 2              | 3.136687  |
| Q642G4        | LLGPQEEGEGVVDVK                                              | 1.14338177         | 2              | 3.42698   |
| <b>Q64303</b> | <b>PAK2 Serine/threonine_protein kinase PAK 2</b>            | <b>1.055843682</b> | <b>0.00341</b> | <b>2</b>  |
| Q64303        | NKIISFSSTEK                                                  | 0.733027069        | 2              | 2.805637  |
| Q64303        | SVIDPIPAPVGDSNVDSGAK                                         | 1.194160657        | 2              | 2.832949  |
| <b>Q64380</b> | <b>SARDH Sarcosine dehydrogenase_mitochondrial</b>           | <b>0.730716201</b> | <b>9.9E-20</b> | <b>19</b> |
| Q64380        | AYGIESHVLSPAETK                                              | 0.763382423        | 2              | 4.588248  |
| Q64380        | DGTMDPAGTCTTLTR                                              | 1.526039908        | 2              | 4.071686  |
| Q64380        | DILQDVLADLSNEAFPSTHQLVR                                      | 0.713136225        | 3              | 5.652499  |
| Q64380        | DLYPLMNVDDLYGTLVPR                                           | 0.774407993        | 2              | 2.564961  |
| Q64380        | EEAQGASVVPQGPSQLPSTANVVVIGGSLGCQTLYHLAK                      | 0.766943416        | 3              | 3.592457  |
| Q64380        | FHSLTDHPR                                                    | 0.625378341        | 2              | 2.652392  |
| Q64380        | FYLLGADAR                                                    | 0.839514834        | 2              | 2.683296  |
| Q64380        | GAQVIENCAVTGIR                                               | 0.991038139        | 2              | 4.177184  |
| Q64380        | HGLVNAGYR                                                    | 0.844623916        | 2              | 2.575393  |
| Q64380        | IEGIQNPVNR                                                   | 0.710724029        | 2              | 3.324223  |
| Q64380        | LQGDALSVGGYEANPIFWDEVSDK                                     | 0.705021613        | 2              | 4.458218  |
| Q64380        | NGDYALER                                                     | 0.869628322        | 2              | 2.310163  |
| Q64380        | NYSVVFPHDEPLAGR                                              | 0.697461906        | 2              | 3.984923  |
| Q64380        | QVVSHDLEEETGLHTGWIQNGGLFIASNQQR                              | 0.641224418        | 3              | 4.655502  |
| Q64380        | RDPLHEELLGQGCVFQER                                           | 0.826810626        | 3              | 5.591014  |
| Q64380        | SDDSPLEAGLAFTCK                                              | 1.005578089        | 2              | 2.657634  |
| Q64380        | STVCGPESFTPDKPLMGAEPELR                                      | 0.780114558        | 3              | 4.378253  |
| Q64380        | STVCGPESFTPDKPLMGAEPELR+Oxidation(16)                        | 0.820163221        |                |           |
| Q64380        | VTAVETQHGSIQTPCVVNCAGVWASSVGR                                | 0.709886194        | 3              | 5.090612  |
| <b>Q64428</b> | <b>ECHA Trifunctional enzyme subunit alpha_mitochondrial</b> | <b>0.896658462</b> | <b>9.9E-20</b> | <b>29</b> |
| Q64428        | ADMVIEAVFEDLAVK                                              | 0.790972727        | 2              | 3.967575  |
| Q64428        | ALMGLYNGQVLCK                                                | 0.955627675        | 2              | 3.308134  |
| Q64428        | DSIFSNLIGQLDYK                                               | 1.631219261        | 2              | 3.478514  |
| Q64428        | DTTASAVAVGLK                                                 | 1.243087286        | 2              | 3.639003  |
| Q64428        | EVESVTEHCIFANSTALPINQIAAVSQRPEK                              | 0.976652811        | 3              | 5.405834  |
| Q64428        | EVQSEFVEVMNEIWANDQIR                                         | 0.828054365        | 3              | 4.221745  |
| Q64428        | FGELALTK                                                     | 0.945951667        | 2              | 3.015374  |
| Q64428        | FGGGSVELLK                                                   | 0.971199878        | 2              | 3.06003   |
| Q64428        | FVDLYGAQK                                                    | 0.966361267        | 2              | 2.916451  |
| Q64428        | GFYIYQSGSK                                                   | 0.982816352        | 2              | 2.835433  |
| Q64428        | ILQEGVDPK                                                    | 1.009863392        | 2              | 3.290217  |
| Q64428        | KLDALTTGFGFPVGAATLADEVGIDVAQHV AEDLGK                        | 0.667210003        | 4              | 5.096561  |
| Q64428        | KTVLGVPEVLLGILPGAGGTQR                                       | 0.889276585        | 2              | 4.316564  |

|               |                                                                   |                    |                |           |
|---------------|-------------------------------------------------------------------|--------------------|----------------|-----------|
| Q64428        | KYESAYGTQFTPCQLLR                                                 | 1.079082123        | 2              | 5.012655  |
| Q64428        | LDALTTGFGFPVGAATLADEVGIDVAQHVAAEDLGK                              | 0.928030053        |                |           |
| Q64428        | LPAKPEVSSDEDIQYR                                                  | 1.055914891        | 2              | 4.406058  |
| Q64428        | MGLVDQLVDPLGPGIK                                                  | 0.866962653        | 2              | 5.015884  |
| Q64428        | MGLVDQLVDPLGPGIK+Oxidation(0)                                     | 1.002970488        |                |           |
| Q64428        | MQLLEIITTDK                                                       | 0.843633068        | 2              | 3.931868  |
| Q64428        | MQLLEIITTDK+Oxidation(0)                                          | 0.877365785        |                |           |
| Q64428        | MVGVPAAFDMMMLTGR                                                  | 0.990468107        | 2              | 3.256285  |
| Q64428        | NLNSEIDNILVNLR                                                    | 0.819643787        | 2              | 4.710977  |
| Q64428        | SAVLISSKPGCFVAGADINMLASCTTPQEAAAR                                 | 0.85465121         | 3              | 3.909349  |
| Q64428        | SPKPVVAAISGSCLGGGLELAIACQYR                                       | 0.893066276        | 3              | 3.641849  |
| Q64428        | TGLEQGNDAGYLAESEK                                                 | 0.969929879        | 2              | 4.991644  |
| Q64428        | TIEYLEEVAVNFAK                                                    | 0.945180594        | 3              | 4.20218   |
| Q64428        | TVLGVPEVLLGILPGAGGTQR                                             | 0.761119885        | 3              | 5.119709  |
| Q64428        | TVQQLAILGAGLMGAGIAQVSVDK                                          | 0.882764323        | 3              | 6.421921  |
| Q64428        | YESAYGTQFTPCQLLR                                                  | 0.966825215        | 2              | 4.808635  |
| <b>Q64458</b> | <b>CP2CT Cytochrome P450 2C29</b>                                 | <b>0.683814013</b> | <b>6.7E-16</b> | <b>6</b>  |
| Q64458        | EHKESLDVTNPR                                                      | 1.384097258        | 2              | 3.291539  |
| Q64458        | IKEHKESLDVTNPR                                                    | 0.825106867        | 3              | 5.073951  |
| Q64458        | LPPGPTPLPIIGNFLQIDVK                                              | 0.628312343        | 2              | 4.004734  |
| Q64458        | VQEEAQCLVEELR                                                     | 0.548993616        | 2              | 4.387594  |
| Q64458        | VQEEAQCLVEELRK                                                    | 0.561595618        | 2              | 3.858618  |
| Q64458        | VQEEIDR                                                           | 0.783757813        | 2              | 2.410247  |
| <b>Q64481</b> | <b>CP3AG Cytochrome P450 3A16</b>                                 | <b>2.256974993</b> | <b>0.0013</b>  | <b>3</b>  |
| Q64481        | EMFPVIEQYGDILVK                                                   | 2.728067916        | 2              | 3.031672  |
| Q64481        | GSIDPYVYLPFGNGPR                                                  | 2.274740352        | 2              | 3.931224  |
| Q64481        | VLQNFSPQPK                                                        | 1.841867415        | 2              | 2.78399   |
| <b>Q64541</b> | <b>AT1A4 Sodium/potassium_transporting ATPase subunit alpha_4</b> | <b>0.918848882</b> | <b>0.45297</b> | <b>2</b>  |
| Q64541        | LIIVEGCQR                                                         | 1.14715521         | 2              | 2.678524  |
| Q64541        | NLEAVETLGSTSTICSDK                                                | 0.917463311        | 2              | 3.080789  |
| <b>Q64550</b> | <b>UD11 UDP_glucuronosyltransferase 1_1</b>                       | <b>1.113373095</b> | <b>1</b>       | <b>5</b>  |
| Q64550        | GHEVVVIAPEASIIHK                                                  | 1.101944335        | 2              | 4.889272  |
| Q64550        | LLVIPIDGSHWLSMLGVIQQLQK                                           | 0.925310298        | 3              | 4.470123  |
| Q64550        | NMIIALTENFLCR                                                     | 1.0298695          | 2              | 4.349101  |
| Q64550        | SVFDQDPFLLR                                                       | 1.153739308        | 2              | 3.184846  |
| Q64550        | VVYSPYGLATEILQK                                                   | 1.281419955        | 2              | 5.125023  |
| <b>Q64560</b> | <b>TPP2 Tripeptidyl_peptidase 2</b>                               | <b>0.853369108</b> | <b>0.88694</b> | <b>3</b>  |
| Q64560        | ACVDSNENGLGK                                                      | 0.750771628        | 2              | 3.433127  |
| Q64560        | DPVQVAAPSDHGVGIEPVFPENTENSEK                                      | 0.828427128        | 3              | 3.848384  |
| Q64560        | GTLIEAFPVLGGK                                                     | 0.889313922        | 2              | 2.601735  |
| <b>Q64563</b> | <b>ADH4 Alcohol dehydrogenase 4</b>                               | <b>1.261886271</b> | <b>0.89277</b> | <b>12</b> |
| Q64563        | AAVDCTVVGWGSCTVVGAK                                               | 1.658632043        | 2              | 3.864539  |
| Q64563        | ALFPVVLGHECAGIVESVGPVGNFKPGDK                                     | 1.226947853        | 3              | 5.246053  |
| Q64563        | ALGATDCLNPR                                                       | 1.374407512        | 2              | 3.218276  |
| Q64563        | FDLDLLVTHALPFDK                                                   | 1.045100953        | 3              | 4.313217  |
| Q64563        | INDAIDLMMNQGK                                                     | 1.020970899        | 2              | 3.396684  |
| Q64563        | KFDLDLLVTHALPFDK                                                  | 1.156968991        | 3              | 4.829554  |
| Q64563        | SVDSVPLVTDYK                                                      | 1.157263432        | 2              | 4.373028  |
| Q64563        | TDSPLCIEIEVSPPK                                                   | 1.421211492        | 2              | 3.785296  |
| Q64563        | VCLIGCGFTSGYGAAINTAK                                              | 0.998065199        | 2              | 3.670304  |
| Q64563        | VDDEANLER                                                         | 1.450232922        | 2              | 2.82535   |
| Q64563        | VDEMNIIVDMILGR                                                    | 1.084012796        | 2              | 3.480024  |
| Q64563        | VIATCVCPDINATNPK                                                  | 1.247065087        | 2              | 4.754181  |
| <b>Q64565</b> | <b>AGT2 Alanine_glyoxylate aminotransferase 2_mitochondrial</b>   | <b>0.885226075</b> | <b>0.81715</b> | <b>13</b> |
| Q64565        | AYSNHTDIISFR                                                      | 0.933095753        | 2              | 3.370985  |



|               |                                                                           |                    |                |           |
|---------------|---------------------------------------------------------------------------|--------------------|----------------|-----------|
| Q64565        | GGNFSQTFR                                                                 | 1.045162523        | 2              | 2.504953  |
| Q64565        | GGVCIADVEVQTGFGR                                                          | 1.05795493         | 2              | 4.354096  |
| Q64565        | GINGGFPMAAVVTTPEIASLAK                                                    | 0.945589459        | 2              | 4.637915  |
| Q64565        | LRDEFDIVGDVDR                                                             | 0.856075006        | 2              | 2.883657  |
| Q64565        | LSALLPEPLK                                                                | 1.282199706        | 2              | 2.781003  |
| Q64565        | NSQEVGTYMLLK                                                              | 0.754920586        | 2              | 2.85787   |
| Q64565        | SALTQHMER                                                                 | 1.175234916        | 2              | 2.530699  |
| Q64565        | SALTQHMER+Oxidation(6)                                                    | 0.661665983        |                |           |
| Q64565        | TEVNQIHEDCK                                                               | 1.046479813        | 2              | 2.997313  |
| Q64565        | TEVNQIHEDCKDMLLVGR                                                        | 0.750391548        | 2              | 5.521994  |
| Q64565        | VIFLVNSGSEANDLAMVMAR                                                      | 0.74728709         | 2              | 4.695429  |
| Q64565        | YIEQFK                                                                    | 0.880964737        | 1              | 2.15976   |
| <b>Q64578</b> | <b>AT2A1 Sarcoplasmic/endoplasmic reticulum calcium ATPase 1</b>          | <b>2.328279632</b> | <b>0.83594</b> | <b>8</b>  |
| Q64578        | AVGIVATTGVSTEIGK                                                          | 3.645797895        | 2              | 3.473829  |
| Q64578        | DIVPGDIVEVAVGDKVPADIR                                                     | 4.079039457        | 2              | 3.760574  |
| Q64578        | DQMAATEQDKTPLQKQ                                                          | 9.555829951        | 2              | 3.942774  |
| Q64578        | EFDDLPLAEQR                                                               | 2.534795809        | 2              | 2.685803  |
| Q64578        | IGIFSENEEVADR                                                             | 2.585437915        | 2              | 3.041716  |
| Q64578        | IRDQMAATEQDKTPLQKQ                                                        | 3.668764358        | 3              | 3.715467  |
| Q64578        | TGTLTTNQMSVCK                                                             | 4.096893944        | 2              | 2.876467  |
| Q64578        | VGEATETALTTLVEK                                                           | 1.347732149        | 2              | 4.784593  |
| <b>Q64581</b> | <b>CP3AI Cytochrome P450 3A18</b>                                         | <b>1.428370555</b> | <b>1.5E-10</b> | <b>5</b>  |
| Q64581        | AITMSEDEEWKR                                                              | 1.001230692        | 2              | 2.311385  |
| Q64581        | EEAKGEPINMK                                                               | 2.773758805        | 2              | 2.336759  |
| Q64581        | LAVIGVLQNFNIQPCEK                                                         | 1.15856045         | 3              | 3.320505  |
| Q64581        | NPEYWLEPEEFNPER                                                           | 1.841599108        | 2              | 4.133575  |
| Q64581        | TILSPTFTSGK                                                               | 1.426944619        | 1              | 1.937561  |
| <b>Q64591</b> | <b>DECR 2_4_dienoyl_CoA reductase_mitochondrial</b>                       | <b>0.875098979</b> | <b>0.99983</b> | <b>12</b> |
| Q64591        | ATAEEITSK                                                                 | 0.876599901        | 2              | 2.906292  |
| Q64591        | CDVRDPDMVHNTVLELIK                                                        | 0.924947613        | 4              | 4.873317  |
| Q64591        | DPDMVHNTVLELIK                                                            | 0.922421485        | 3              | 3.74667   |
| Q64591        | EEWDVIEGLIR                                                               | 1.199398109        | 2              | 3.740566  |
| Q64591        | FDGGEEVFLSGEFNSLKK                                                        | 0.508596857        | 2              | 2.939223  |
| Q64591        | FNIIQPGPIK                                                                | 0.78963807         | 2              | 2.670853  |
| Q64591        | LGTVEELANLATFLCSDYASWINGAVIR                                              | 1.168760584        |                |           |
| Q64591        | NIDVLK                                                                    | 1.018927647        | 1              | 2.090248  |
| Q64591        | SLAAEWGR                                                                  | 0.928428666        | 2              | 2.670436  |
| Q64591        | VAFITGGGTGLGK                                                             | 0.880753905        | 2              | 2.78525   |
| Q64591        | VAGHPDVVINNAAGNFISPSER                                                    | 1.089091279        | 2              | 6.101136  |
| Q64591        | VTKEEWDVIEGLIR                                                            | 0.925980392        | 3              | 4.784861  |
| <b>Q64602</b> | <b>AADAT Kynurenine/alpha_aminoadipate aminotransferase_mitochondrial</b> | <b>1.006983946</b> | <b>0.0427</b>  | <b>10</b> |
| Q64602        | ASFSQVTPAQMDLVFQR                                                         | 0.858967406        | 2              | 4.207116  |
| Q64602        | DIISLAPGSPNPK                                                             | 1.297781193        | 2              | 3.050683  |
| Q64602        | EILLVPGNSFFVDNSAPSSFFR                                                    | 1.148740597        | 2              | 3.586128  |
| Q64602        | FLTATSLAR                                                                 | 0.822349846        | 2              | 2.406299  |
| Q64602        | FLYTIPNGNPTGNSLTGDR                                                       | 0.879843649        | 2              | 4.011209  |
| Q64602        | GLAEWHVPK                                                                 | 1.141522353        | 2              | 2.449018  |
| Q64602        | LHNPPTVNYSPNEGQMDLCITSGCQDGLCK                                            | 1.044642001        | 3              | 5.774458  |
| Q64602        | SAVFTVENGSTIR                                                             | 0.962319348        | 2              | 3.436837  |
| Q64602        | VGFITGPK                                                                  | 1.086221556        | 1              | 1.910192  |
| Q64602        | VLSQWKPEDSKDPTKR                                                          | 1.092296083        | 3              | 3.659276  |
| <b>Q64611</b> | <b>CSAD Cysteine sulfinic acid decarboxylase</b>                          | <b>0.961611181</b> | <b>0.99858</b> | <b>11</b> |
| Q64611        | AQGGQGLEWR                                                                | 1.016139574        | 2              | 3.213446  |
| Q64611        | CHGSQASYLFQQDK                                                            | 0.990310305        | 2              | 4.352719  |

|               |                                                         |                    |                |           |
|---------------|---------------------------------------------------------|--------------------|----------------|-----------|
| Q64611        | FFNQLFSGLDPHALAGR                                       | 0.948909497        | 3              | 4.201155  |
| Q64611        | FYNVALDTGDK                                             | 0.760812012        | 2              | 3.268161  |
| Q64611        | GAAFLGLGTDSVR                                           | 0.876375703        | 2              | 3.076898  |
| Q64611        | IDQAFALTR                                               | 0.956631872        | 2              | 3.061519  |
| Q64611        | MVVANPILVQADIDFLLGELER                                  | 0.735797853        |                |           |
| Q64611        | QLLDLELQSQGESR                                          | 0.961158635        | 2              | 3.837628  |
| Q64611        | TLDGDPVAVEALLR                                          | 0.914390903        | 2              | 4.500065  |
| Q64611        | VCEWKEPEELK                                             | 0.931657434        | 3              | 3.697585  |
| Q64611        | YLVEEIK                                                 | 0.966817285        | 1              | 2.391475  |
| <b>Q64638</b> | <b>UD15 UDP-glucuronosyltransferase 1_5</b>             | <b>1.116644242</b> | <b>0.85786</b> | <b>3</b>  |
| Q64638        | GHQAVVLAPEVTVHIK                                        | 0.863031137        | 3              | 3.502925  |
| Q64638        | VVFETGNYVK                                              | 1.176048999        | 2              | 2.356892  |
| Q64638        | YESLASELLQR                                             | 0.996335868        | 2              | 3.197192  |
| <b>Q64640</b> | <b>ADK Adenosine kinase</b>                             | <b>1.068970716</b> | <b>0.03453</b> | <b>12</b> |
| Q64640        | AADAHVDAHYYEQNEQPTGTCAACITGGNR                          | 1.271186208        | 3              | 6.765608  |
| Q64640        | AATFFGCIGIDK                                            | 0.7739456          | 2              | 3.045069  |
| Q64640        | AGHYAASVIIR                                             | 1.048653393        | 3              | 3.578603  |
| Q64640        | FGEILK                                                  | 1.075213029        | 2              | 2.427885  |
| Q64640        | FKVEYHAGGSTQNSMK                                        | 1.485776845        | 2              | 3.026518  |
| Q64640        | HKELFDELVK                                              | 1.068549397        | 3              | 3.790277  |
| Q64640        | HLDLENNWMLVEK                                           | 0.929444483        | 2              | 3.788278  |
| Q64640        | SLVANLAAANCYK                                           | 0.975288141        | 2              | 4.737859  |
| Q64640        | VEAPEALSENVLFMGMPNLLDISAVVDKDFLDK                       | 0.856170264        |                |           |
| Q64640        | VEYHAGGSTQNSMK                                          | 1.031213969        | 2              | 4.050841  |
| Q64640        | VEYHAGGSTQNSMK+Oxidation(12)                            | 1.289659963        |                |           |
| Q64640        | YSLKPNQILAEDK                                           | 1.103248718        | 3              | 4.959095  |
| <b>Q64654</b> | <b>CP51A Lanosterol 14_alpha demethylase</b>            | <b>0.923704318</b> | <b>1</b>       | <b>7</b>  |
| Q64654        | EPAEDILQTLDDSTYK                                        | 0.986915342        | 2              | 3.919968  |
| Q64654        | GVAYDVPNAVFLQK                                          | 1.126614068        | 2              | 3.226981  |
| Q64654        | NEDLNAEEVYGR                                            | 1.071343469        | 2              | 4.106766  |
| Q64654        | SGLNIAHFK                                               | 1.082998838        | 2              | 2.966093  |
| Q64654        | TPQTVAGYTIPPGHQVCVSPVNR                                 | 1.181835847        | 3              | 3.94804   |
| Q64654        | TVCGEDLPLTYEQLK                                         | 0.96960942         | 2              | 4.072863  |
| Q64654        | YLQDNPASGEK                                             | 1.003020941        | 2              | 2.61559   |
| <b>Q65CL1</b> | <b>CTNA3 Catenin alpha_3</b>                            | <b>0.985276681</b> | <b>0.99938</b> | <b>2</b>  |
| Q65CL1        | MISESGSRMDVLAR+Oxidation(0)                             | 0.986150739        |                |           |
| Q65CL1        | NLMNAVVTQVK                                             | 0.982640033        | 2              | 2.888613  |
| <b>Q66H12</b> | <b>NAGAB Alpha_N-acetylgalactosaminidase</b>            | <b>1.021484291</b> | <b>0.92641</b> | <b>3</b>  |
| Q66H12        | CNINCEEDPK                                              | 0.813691014        | 2              | 2.711522  |
| Q66H12        | INQDPLGIQGR                                             | 0.81300239         | 2              | 3.109276  |
| Q66H12        | TISPQNIDILQNPLLIK                                       | 1.053613718        | 2              | 2.357762  |
| <b>Q66H15</b> | <b>RMD3 Regulator of microtubule dynamics protein 3</b> | <b>0.888546231</b> | <b>0.19728</b> | <b>3</b>  |
| Q66H15        | AEELQPGFSK                                              | 0.914832431        | 2              | 2.655945  |
| Q66H15        | AIELQPEDPR                                              | 0.894609825        | 2              | 2.342432  |
| Q66H15        | SLQGLAGEIVGEVR                                          | 0.782446237        | 2              | 2.755211  |
| <b>Q66H80</b> | <b>COPD Coatomer subunit delta</b>                      | <b>1.021798831</b> | <b>0.25027</b> | <b>5</b>  |
| Q66H80        | GVQLQTHPNVDDK                                           | 1.243672856        | 2              | 3.434421  |
| Q66H80        | LFTAESLIGLK                                             | 1.098482229        | 2              | 2.823047  |
| Q66H80        | NSNILELETLR                                             | 1.064746956        | 2              | 3.076531  |
| Q66H80        | NTLEWCLPVIDAK                                           | 1.024564726        | 2              | 2.858103  |
| Q66H80        | VTQVDGNSPVR                                             | 2.250313224        | 2              | 2.939242  |
| <b>Q66HA8</b> | <b>HS105 Heat shock protein 105 kDa</b>                 | <b>1.040474857</b> | <b>0.11849</b> | <b>9</b>  |
| Q66HA8        | AGGIETIANEFSDR                                          | 1.133299478        | 2              | 2.851369  |
| Q66HA8        | FQEAERPR                                                | 0.996690663        | 2              | 2.480205  |
| Q66HA8        | FVVQNVSAQK                                              | 0.958969224        | 2              | 2.387136  |
| Q66HA8        | IARFFGKDVSTTLNADEAVAR                                   | 0.698958125        | 2              | 2.317001  |

|               |                                                                           |                    |                |           |
|---------------|---------------------------------------------------------------------------|--------------------|----------------|-----------|
| Q66HA8        | NQQITHANNTVSSFK                                                           | 1.317760346        | 2              | 4.570228  |
| Q66HA8        | SVLDAAQIVGLNCLR                                                           | 1.068736962        | 2              | 3.456195  |
| Q66HA8        | TEEVSAIEIVGGATR                                                           | 0.729075786        | 2              | 3.408049  |
| Q66HA8        | VLGTAFDPFLGGK                                                             | 0.953621542        | 2              | 3.098852  |
| Q66HA8        | YNHIDESEMKKVEK                                                            | 0.727826143        | 2              | 2.612902  |
| <b>Q66HD0</b> | <b>ENPL Endoplasmin</b>                                                   | <b>0.967369857</b> | <b>0.84684</b> | <b>28</b> |
| Q66HD0        | DISTNYASQK                                                                | 1.366112446        | 2              | 2.997864  |
| Q66HD0        | EATEKEFEPLLNWMK                                                           | 1.261894703        | 2              | 2.830895  |
| Q66HD0        | EEASDYLELDTIK                                                             | 1.023324033        | 2              | 4.207668  |
| Q66HD0        | EEEAIQLDGLNASQIR                                                          | 1.049073308        | 2              | 4.398885  |
| Q66HD0        | EFEPPLNWMK                                                                | 1.188840735        | 2              | 2.347774  |
| Q66HD0        | EVEEDEYK                                                                  | 1.172359586        | 1              | 2.658949  |
| Q66HD0        | FQSSHSTDTISLDQYVER                                                        | 1.036805029        | 3              | 5.646537  |
| Q66HD0        | GLFDEYGSK                                                                 | 0.999860162        | 2              | 2.463858  |
| Q66HD0        | GVVDSDDLPLNVSR                                                            | 1.05059902         | 2              | 4.920107  |
| Q66HD0        | GYEVIYLTPEVDEYCIQALPEFDGKR                                                | 1.273296977        | 3              | 3.963573  |
| Q66HD0        | KEAESSPFVER                                                               | 1.16669354         | 2              | 3.173807  |
| Q66HD0        | LGVIEDHSNR                                                                | 1.077062408        | 2              | 3.358554  |
| Q66HD0        | LISLTDENALAGNEELTVK                                                       | 1.093251483        | 2              | 5.50101   |
| Q66HD0        | LTESPCALVASQYGWSGNMER                                                     | 0.986943637        | 2              | 5.476592  |
| Q66HD0        | LTESPCALVASQYGWSGNMER+Oxidation(18)                                       | 0.865804052        |                |           |
| Q66HD0        | NLLHVTDGTGVMTR                                                            | 1.106690176        | 2              | 3.98749   |
| Q66HD0        | NLLHVTDGTGVMTR+Oxidation(11)                                              | 1.074374105        |                |           |
| Q66HD0        | SGTSEFLNK                                                                 | 0.985021446        | 2              | 3.201717  |
| Q66HD0        | SGYLLPDTK                                                                 | 1.032197376        | 2              | 3.216391  |
| Q66HD0        | SILFVPTSAPR                                                               | 0.999759602        | 2              | 3.28606   |
| Q66HD0        | TDDEVVQR                                                                  | 1.051613625        | 2              | 3.312746  |
| Q66HD0        | TDDEVVQREEEAIQLDGLNASQIR                                                  | 0.993772153        | 3              | 5.450044  |
| Q66HD0        | TETVEEPLEEDETAQEEK                                                        | 1.226328301        | 2              | 5.23895   |
| Q66HD0        | TFEINPR                                                                   | 1.105272622        | 2              | 2.402784  |
| Q66HD0        | TVVDWELMNDIKPIWQRPSK                                                      | 0.878893972        | 3              | 3.317456  |
| Q66HD0        | VFITDDFHDMMPK                                                             | 0.994413197        | 2              | 3.840754  |
| Q66HD0        | YNDTFWK                                                                   | 1.033693388        | 1              | 2.101287  |
| Q66HD0        | YSQFINFIYVWSSK                                                            | 0.863893984        | 2              | 3.32529   |
| <b>Q66HD3</b> | <b>NASP Nuclear autoantigenic sperm protein</b>                           | <b>1.048880672</b> | <b>0.5719</b>  | <b>2</b>  |
| Q66HD3        | LSETKDGASVEEVK                                                            | 0.92880983         | 2              | 2.430129  |
| Q66HD3        | QDTLMKVVEIEAIDSEVK+Oxidation(4)                                           | 1.055967772        |                |           |
| <b>Q66HF1</b> | <b>NDU51 NADH_ubiquinone oxidoreductase 75 kDa subunit_ mitochondrial</b> | <b>1.036722138</b> | <b>0.49828</b> | <b>11</b> |
| Q66HF1        | ALSEIAGITLPYDLDQVR                                                        | 0.999156576        | 2              | 5.15308   |
| Q66HF1        | AVTEGAQAVEEPSIC                                                           | 1.121465814        | 2              | 3.185316  |
| Q66HF1        | DDGAAILAAVSSIAQK                                                          | 1.077030415        | 2              | 4.513566  |
| Q66HF1        | FASEIAGVDDLGTGR                                                           | 1.343882434        | 2              | 4.085585  |
| Q66HF1        | FEAPLFNAR                                                                 | 0.990769878        | 2              | 2.660874  |
| Q66HF1        | GLLTYTSWEDALS                                                             | 0.950443474        | 2              | 3.590138  |
| Q66HF1        | ILQDIASGNHEFSK                                                            | 1.395078689        | 2              | 4.192792  |
| Q66HF1        | LGEVSPNLVR                                                                | 1.118884254        | 2              | 2.961337  |
| Q66HF1        | LVDQEFLADPLVPPQLTIK                                                       | 0.950713861        | 2              | 3.110144  |
| Q66HF1        | VSDTLCTEEIFPNEGAGTDLR                                                     | 1.115390344        | 2              | 4.287465  |
| Q66HF1        | YDHLGDSPK                                                                 | 1.007482824        | 2              | 2.576717  |
| <b>Q66HF8</b> | <b>AL1B1 Aldehyde dehydrogenase X_ mitochondrial</b>                      | <b>1.028954783</b> | <b>2.2E-07</b> | <b>11</b> |
| Q66HF8        | EEIFGPVQPLFK                                                              | 1.254063106        | 2              | 3.039147  |
| Q66HF8        | KVGNPFELDTQQGPQVDKEQFEK                                                   | 0.734482374        | 3              | 3.456821  |
| Q66HF8        | LAPALATGNTVVMK                                                            | 0.937661644        | 2              | 3.299885  |
| Q66HF8        | TFPTVNPPTTGEVIGHVAEGDR                                                    | 1.008677979        | 2              | 4.794425  |
| Q66HF8        | TFVEESYHEFLER                                                             | 0.854448207        | 2              | 3.741059  |

|               |                                                                 |                    |                |           |
|---------------|-----------------------------------------------------------------|--------------------|----------------|-----------|
| Q66HF8        | VAEQTPLSALYLASLIK                                               | 1.247374447        | 2              | 3.606155  |
| Q66HF8        | VAFTGSTEVGHLIQK                                                 | 0.701821403        | 2              | 3.271901  |
| Q66HF8        | VGNPFELDTQQGPQVDK                                               | 0.911598103        | 2              | 3.796599  |
| Q66HF8        | VGNPFELDTQQGPQVDKEQFEK                                          | 0.906330414        | 2              | 4.495793  |
| Q66HF8        | YGLAAAVFTR                                                      | 0.639633418        | 2              | 3.084833  |
| Q66HF8        | YNQLFINNEWHDAVSK                                                | 0.947885671        | 2              | 3.536329  |
| <b>Q66HG4</b> | <b>GALM Aldose 1_epimerase</b>                                  | <b>0.72573864</b>  | <b>9.9E-20</b> | <b>3</b>  |
| Q66HG4        | ASDVVLGFALLEGYLQK                                               | 0.763061247        | 2              | 4.37411   |
| Q66HG4        | TVFGELPSGGGAVEK                                                 | 0.68099059         | 2              | 3.677706  |
| Q66HG4        | VSPDGEGYPGELK                                                   | 0.820126088        | 2              | 3.925192  |
| <b>Q66X93</b> | <b>SND1 Staphylococcal nuclease domain_containing protein 1</b> | <b>1.116321361</b> | <b>7.3E-06</b> | <b>20</b> |
| Q66X93        | ADDADEFGYSR                                                     | 2.29736928         | 2              | 2.549358  |
| Q66X93        | ALLLPDHVLTVMVLSGIK                                              | 0.958878953        | 3              | 4.24561   |
| Q66X93        | DIQNTQCLLNVEHLSASCPHVTLQFADSK                                   | 0.944417735        | 3              | 4.316439  |
| Q66X93        | DTNGENIAESLVAEGLASR                                             | 1.068487459        | 2              | 5.025278  |
| Q66X93        | ETDGSETPEPFAAEAK                                                | 1.324821458        | 2              | 3.806101  |
| Q66X93        | GDVGLGLVK                                                       | 1.111179381        | 2              | 2.43039   |
| Q66X93        | HFVDSHHQKPVNAIIIEHVR                                            | 1.167466596        | 3              | 4.056577  |
| Q66X93        | LEGDNIQDK                                                       | 1.017123008        | 2              | 2.860885  |
| Q66X93        | NLPGLVQEGEPFSEETLFTK                                            | 1.201051797        | 2              | 5.536663  |
| Q66X93        | SAYYKPLLSAEAAK                                                  | 1.126397472        | 2              | 3.223134  |
| Q66X93        | SDISSHPPVEGAYAPR                                                | 1.179760497        | 3              | 4.724852  |
| Q66X93        | SEAVVEYVFSGSR                                                   | 1.106716153        | 2              | 3.347418  |
| Q66X93        | SSHYDELLAAEAR                                                   | 1.19636155         | 2              | 3.529833  |
| Q66X93        | TCATVTIGGINIAEALVSK                                             | 0.942170796        | 2              | 3.512292  |
| Q66X93        | TDAVDSVVR                                                       | 1.266985056        | 2              | 2.680137  |
| Q66X93        | VADISGDTQK                                                      | 1.838206908        | 2              | 2.480506  |
| Q66X93        | VITEYLNAQESAK                                                   | 1.121415275        | 2              | 3.843806  |
| Q66X93        | VMQVLNADAIIVK                                                   | 0.962921766        | 2              | 2.878518  |
| Q66X93        | VSVTVDYIRPASPATETVPAFSEK                                        | 0.933555058        | 3              | 5.622403  |
| Q66X93        | VVAHYEEQPVEEVMVLEEK                                             | 0.912929478        | 3              | 3.982018  |
| <b>Q68FP2</b> | <b>PON3 Serum paraoxonase/lactonase 3</b>                       | <b>0.875156668</b> | <b>0.01821</b> | <b>8</b>  |
| Q68FP2        | HELFESVNDIVVLGPEQFYATR                                          | 1.006240099        | 3              | 3.777817  |
| Q68FP2        | HNNWDLTPVK                                                      | 0.861902851        | 2              | 2.977453  |
| Q68FP2        | IFLMDLNPEYPK                                                    | 0.945634405        | 2              | 3.19641   |
| Q68FP2        | IQDPLSDNPR                                                      | 0.923138225        | 2              | 3.127307  |
| Q68FP2        | LLIYNPEDPPGSEVLR                                                | 0.928867197        | 2              | 4.058468  |
| Q68FP2        | VIQLGTLVDNLTVDPATGDILAGCHPNPMK                                  | 0.928259841        | 3              | 4.768847  |
| Q68FP2        | VVAQGFSSANGITVSLDQK                                             | 0.791309391        | 2              | 3.367835  |
| Q68FP2        | YVYVADVTK                                                       | 0.882553486        | 1              | 3.0049    |
| <b>Q68FQ0</b> | <b>TCPE T_complex protein 1 subunit epsilon</b>                 | <b>0.931878231</b> | <b>0.25038</b> | <b>6</b>  |
| Q68FQ0        | GSNDMQYQHVIETLIGK                                               | 1.099401434        | 2              | 3.139063  |
| Q68FQ0        | HKLDVTSVEDYK                                                    | 1.11668192         | 2              | 3.201262  |
| Q68FQ0        | ISDNVLDINNPEPLIQTAK                                             | 1.123243666        | 2              | 5.188832  |
| Q68FQ0        | LDVTSVEDYK                                                      | 1.149650729        | 2              | 2.371968  |
| Q68FQ0        | SLHDALCVIR                                                      | 0.747642091        | 2              | 2.481982  |
| Q68FQ0        | WVGGPEIELIAIATGGR                                               | 0.944989038        | 2              | 3.903633  |
| <b>Q68FR6</b> | <b>EF1G Elongation factor 1_gamma</b>                           | <b>1.154876122</b> | <b>0.04036</b> | <b>9</b>  |
| Q68FR6        | AAAPAPEEEMDECEQALAAEPK                                          | 1.059341955        | 2              | 5.139385  |
| Q68FR6        | ALIAAQYSGAQIR                                                   | 1.157280463        | 2              | 3.712908  |
| Q68FR6        | GQDLAFPLSPDWQVDYESYTWK                                          | 1.038602554        | 2              | 4.251281  |
| Q68FR6        | ILGLDTHLK                                                       | 1.130870898        | 2              | 2.769705  |
| Q68FR6        | KAAAAPAEEMDECEQALAAEPK                                          | 1.12459977         | 3              | 3.806649  |
| Q68FR6        | KLDPGSEETQLVLR                                                  | 1.118105263        | 2              | 3.863262  |
| Q68FR6        | LDPGSEETQLVLR                                                   | 1.09182054         | 2              | 3.653568  |
| Q68FR6        | STFVLDEFKR                                                      | 1.158212964        | 2              | 2.479879  |

|               |                                                                                       |                    |                |           |
|---------------|---------------------------------------------------------------------------------------|--------------------|----------------|-----------|
| Q68FR6        | WFLTCINQPQFR                                                                          | 1.173359555        | 2              | 3.139211  |
| <b>Q68FR9</b> | <b>EF1D Elongation factor 1_delta</b>                                                 | <b>1.070206536</b> | <b>0.01518</b> | <b>6</b>  |
| Q68FR9        | ATAPQQTQHVSPMR                                                                        | 1.008132462        | 2              | 3.562022  |
| Q68FR9        | FYEQMNGPVTAGSR                                                                        | 1.179885248        | 2              | 4.418282  |
| Q68FR9        | GVVQDLQQAISK                                                                          | 1.040573974        | 2              | 3.754268  |
| Q68FR9        | SIQLDGLVWGASK                                                                         | 1.057969606        | 2              | 3.266758  |
| Q68FR9        | SLAGSSGPGASSGPGGDHSDLIVR                                                              | 1.149031482        | 2              | 5.518403  |
| Q68FR9        | VGTDLLEEEITK                                                                          | 1.146563708        | 2              | 3.484912  |
| <b>Q68FS2</b> | <b>CSN4 COP9 signalosome complex subunit 4</b>                                        | <b>1.062166179</b> | <b>0.64361</b> | <b>3</b>  |
| Q68FS2        | NAAQVLVGIPILETGQK                                                                     | 0.926369977        | 2              | 2.691726  |
| Q68FS2        | QDLAQLMNSSGSHK                                                                        | 2.588498884        | 2              | 2.391995  |
| Q68FS2        | VISFEEQVASIR                                                                          | 0.92230949         | 2              | 2.425801  |
| <b>Q68FS4</b> | <b>AMPL Cytosol aminopeptidase</b>                                                    | <b>0.922707479</b> | <b>2.2E-16</b> | <b>18</b> |
| Q68FS4        | ADMGGAATICSIAVSAAK                                                                    | 0.823126231        | 2              | 5.504634  |
| Q68FS4        | ADMGGAATICSIAVSAAK+Oxidation(2)                                                       | 1.007207893        |                |           |
| Q68FS4        | DKDDVPQFTSAGENFNK                                                                     | 1.138581628        | 2              | 4.939332  |
| Q68FS4        | GITFDSGGISIK                                                                          | 0.97768996         | 2              | 3.304582  |
| Q68FS4        | GSEPPVFLIHYTGSPNATEAPLVFVGK                                                           | 0.930875549        | 3              | 5.805487  |
| Q68FS4        | GVLFASGQNLAR                                                                          | 0.994495647        | 2              | 3.291774  |
| Q68FS4        | LFEASVETGDR                                                                           | 0.941073231        | 2              | 3.374507  |
| Q68FS4        | LHGSGDLEAWEK                                                                          | 1.024792403        | 2              | 3.650855  |
| Q68FS4        | LILADALCYAHTFNPK                                                                      | 1.015983365        | 2              | 3.985195  |
| Q68FS4        | LNLPINIIGLAPLCENMPSPGK                                                                | 0.963409253        | 2              | 5.039613  |
| Q68FS4        | QLMESPANEMTPTR                                                                        | 0.870748003        | 2              | 3.783976  |
| Q68FS4        | QVIDCQLADVNNLGK                                                                       | 0.938491555        | 2              | 4.979078  |
| Q68FS4        | SAGACTAAAFRL                                                                          | 0.959807973        | 2              | 3.502427  |
| Q68FS4        | SAGVDDQENWHEGK                                                                        | 0.991520215        | 2              | 3.748395  |
| Q68FS4        | SWIEEQEMGSFSLVAK                                                                      | 0.774876931        | 2              | 5.368445  |
| Q68FS4        | TFYGLHQDFPSVVVVGLGK                                                                   | 0.848341554        | 2              | 5.416978  |
| Q68FS4        | TIQVDNTDAEGR                                                                          | 0.882167754        | 2              | 3.795482  |
| Q68FS4        | TLIEFLLR                                                                              | 0.871105744        | 2              | 2.598734  |
| <b>Q68FT1</b> | <b>COQ9 Ubiquinone biosynthesis protein COQ9_mitochondrial</b>                        | <b>0.902512633</b> | <b>0.99475</b> | <b>4</b>  |
| Q68FT1        | INDAMNMGHTAK                                                                          | 0.811737998        | 2              | 3.035889  |
| Q68FT1        | LNHVLEEEQK                                                                            | 0.922388783        | 3              | 3.434418  |
| Q68FT1        | STGEALVQGLMGAAVTLK                                                                    | 0.942057962        | 2              | 3.00385   |
| Q68FT1        | YTDQSGEEEDYESEEQIQR                                                                   | 0.931060812        | 3              | 4.689087  |
| <b>Q68FT3</b> | <b>PYRD2 Pyridine nucleotide_disulfide oxidoreductase domain_containing protein 2</b> | <b>0.884509109</b> | <b>0.59032</b> | <b>7</b>  |
| Q68FT3        | HVIGGAAVTEIIPGFK                                                                      | 0.849635834        | 2              | 3.570796  |
| Q68FT3        | ISQLDTQSPVTK                                                                          | 0.884474467        | 2              | 3.420857  |
| Q68FT3        | SLLLGTDVAENQK                                                                         | 0.768014859        | 2              | 3.939502  |
| Q68FT3        | TLGAQLPQYEVLTAPISK                                                                    | 0.729891028        | 2              | 4.260234  |
| Q68FT3        | VFDCIEAYAPGFK                                                                         | 0.873422497        | 2              | 2.853969  |
| Q68FT3        | VLDQWFSEPLK                                                                           | 0.905915472        | 2              | 2.849102  |
| Q68FT3        | VQGVVLQGGEEVR                                                                         | 0.789453731        | 2              | 3.592483  |
| <b>Q68FT5</b> | <b>BHMT2 Betaine_homocysteine S_methyltransferase 2</b>                               | <b>1.043919633</b> | <b>9.9E-20</b> | <b>10</b> |
| Q68FT5        | AGADVLQTFFSAAEDR                                                                      | 1.849986208        | 2              | 2.655468  |
| Q68FT5        | AGANIIGVNCR                                                                           | 1.160348319        | 2              | 3.478096  |
| Q68FT5        | AGLWTPEAVVEYPSAVR                                                                     | 1.087837956        | 2              | 3.445393  |
| Q68FT5        | AIAEELAPER                                                                            | 1.756245229        | 2              | 3.778363  |
| Q68FT5        | DAGLQAHLMVQCLGFHTPCGK                                                                 | 1.038044409        | 3              | 4.462389  |
| Q68FT5        | EVGAPVAVTMCIGPEGDMHGVTPGEC AVR                                                        | 0.973795847        | 3              | 4.075529  |
| Q68FT5        | FGPWTSLQTMK                                                                           | 0.834819288        | 2              | 2.814073  |
| Q68FT5        | GGFVDLPEYPFGLPER                                                                      | 0.995948812        | 2              | 4.104311  |
| Q68FT5        | LDSGEVVVDGGFLFLEK                                                                     | 0.685905782        | 2              | 3.922539  |

|               |                                                                    |                    |                |           |
|---------------|--------------------------------------------------------------------|--------------------|----------------|-----------|
| Q68FT5        | YIGGCCGFEPYHIR                                                     | 2.148579114        | 2              | 4.710752  |
| <b>Q68FT9</b> | <b>SCLY Selenocysteine lyase</b>                                   | <b>1.14295824</b>  | <b>0.70952</b> | <b>4</b>  |
| Q68FT9        | AEVDLIVQDLK                                                        | 1.045241261        | 2              | 3.883864  |
| Q68FT9        | NFRPGTENTPMIAGLGK                                                  | 0.891598513        | 2              | 3.349958  |
| Q68FT9        | RVDVEDLGVDFTIVGHK                                                  | 1.088294476        | 3              | 5.547755  |
| Q68FT9        | VLVHTDAAQALGK                                                      | 1.230890492        | 2              | 2.473229  |
| <b>Q68FU3</b> | <b>ETFB Electron transfer flavoprotein subunit beta</b>            | <b>0.942779046</b> | <b>7.3E-10</b> | <b>11</b> |
| Q68FU3        | AGDLGVDLTSK                                                        | 0.952281258        | 2              | 3.636026  |
| Q68FU3        | EIIAVSCGPPQCQETIR                                                  | 1.25031836         | 2              | 4.782104  |
| Q68FU3        | GIHVEVPGAEAEENLGPLQVAR                                             | 0.462849185        | 2              | 6.043542  |
| Q68FU3        | HSMNPFCEIAVEEAVR                                                   | 0.985922731        | 2              | 5.254708  |
| Q68FU3        | HSMNPFCEIAVEEAVR+Oxidation(2)                                      | 0.903497376        |                |           |
| Q68FU3        | QAIDDDCNQTGQMTAGLLDWPQGTAFASQVTLEGDKVK                             | 0.805717018        | 3              | 5.085751  |
| Q68FU3        | RVIDFAVK                                                           | 1.000176319        | 2              | 2.804606  |
| Q68FU3        | VDLLFLGK                                                           | 0.841610039        | 2              | 2.80443   |
| Q68FU3        | VETTEDLVAK                                                         | 0.925808351        | 2              | 3.357481  |
| Q68FU3        | VIDFAVK                                                            | 1.047376323        | 2              | 2.412454  |
| Q68FU3        | VSVISVEEPPQR                                                       | 0.962979371        | 2              | 3.454462  |
| <b>Q68FY0</b> | <b>QCR1 Cytochrome b_c1 complex subunit 1_mitochondrial</b>        | <b>1.028929866</b> | <b>0.99951</b> | <b>9</b>  |
| Q68FY0        | HQQLDLAQDHFSSVSQVYEEDAVPSITPCR                                     | 1.031706528        | 3              | 5.630429  |
| Q68FY0        | IEEVDAQMVR                                                         | 1.068552572        | 2              | 3.606245  |
| Q68FY0        | LCTSATESEVTR                                                       | 1.251598803        | 2              | 3.277986  |
| Q68FY0        | NALISHLDGTTTPCEDIGR                                                | 0.926382205        | 2              | 4.513545  |
| Q68FY0        | NNGAGYFLEHLAFK                                                     | 0.945634293        | 2              | 3.371237  |
| Q68FY0        | RIPLAEWESR                                                         | 1.253697099        | 2              | 2.604239  |
| Q68FY0        | TDLTDYLSR                                                          | 1.112602009        | 2              | 2.820077  |
| Q68FY0        | VVELLADIVQNISLEDSQIEK                                              | 0.877847688        | 3              | 6.90851   |
| Q68FY0        | YFYDQCPAVAGYGPIEQLSDYNR                                            | 1.161507854        | 2              | 4.962695  |
| <b>Q68G31</b> | <b>PBLD Phenazine biosynthesis_like domain_containing protein</b>  | <b>0.929493424</b> | <b>0.99912</b> | <b>7</b>  |
| Q68G31        | AAIGDTTVQDIQYSPDTR                                                 | 0.903833693        | 2              | 4.670763  |
| Q68G31        | AEDGIVLDFPLYPTFPQDFHEVK                                            | 1.010641327        | 3              | 3.924644  |
| Q68G31        | GESGGQTPYDFYSR                                                     | 1.122702899        | 2              | 3.963842  |
| Q68G31        | LQPTDSFSQSSCFGLR                                                   | 0.700612073        | 2              | 3.668367  |
| Q68G31        | NVNSTLTFVTLSELK                                                    | 0.926068301        | 2              | 4.288925  |
| Q68G31        | RAEDGIVLDFPLYPTFPQDFHEVK                                           | 0.880739485        | 3              | 6.268124  |
| Q68G31        | VNTEPLGIEK                                                         | 1.057424028        | 2              | 2.412276  |
| <b>Q69Z23</b> | <b>DYH17 Dynein heavy chain 17_axonemal</b>                        | <b>1.225465776</b> | <b>0.83943</b> | <b>2</b>  |
| Q69Z23        | MNILTNEMRRLK+Oxidation(0)                                          | 1.301603531        |                |           |
| Q69Z23        | YFIDLLMEK                                                          | 1.414021275        | 1              | 2.141696  |
| <b>Q69ZH9</b> | <b>RHG23 Rho GTPase_activating protein 23</b>                      | <b>0.785590791</b> | <b>0.00641</b> | <b>2</b>  |
| Q69ZH9        | LEPMDTIFVKNVK                                                      | 0.710822661        | 2              | 2.43207   |
| Q69ZH9        | SRAEAEKPGAGTARACPR                                                 | 1.024467431        | 2              | 2.380046  |
| <b>Q6A0A9</b> | <b>F120A Constitutive coactivator of PPAR_gamma_like protein 1</b> | <b>1.162397263</b> | <b>0.42939</b> | <b>2</b>  |
| Q6A0A9        | SQGGVQIPISQGGK                                                     | 1.469699019        | 2              | 3.095812  |
| Q6A0A9        | VEGSSTASSGSLAEGK                                                   | 1.012152486        | 2              | 4.280548  |
| <b>Q6AXM8</b> | <b>PON2 Serum paraoxonase/arylesterase 2</b>                       | <b>1.148879593</b> | <b>0.00248</b> | <b>3</b>  |
| Q6AXM8        | FQEEENSLHLK                                                        | 0.544972503        | 2              | 2.715732  |
| Q6AXM8        | LFVYDPNHPPSSEVLR                                                   | 1.068097133        | 2              | 2.491378  |
| Q6AXM8        | WANVVVYSPPEVK                                                      | 3.200998133        | 2              | 3.553181  |
| <b>Q6AXN3</b> | <b>TMED5 Transmembrane emp24 domain_containing protein 5</b>       | <b>1.342564984</b> | <b>0.24451</b> | <b>2</b>  |
| Q6AXN3        | LEDILESINSIK                                                       | 1.168765282        | 2              | 3.850768  |
| Q6AXN3        | LEDILESINSIKSR                                                     | 1.35612626         | 2              | 2.50144   |

|               |                                                                    |                    |                |          |
|---------------|--------------------------------------------------------------------|--------------------|----------------|----------|
| <b>Q6AXS5</b> | <b>PAIRB Plasminogen activator inhibitor 1 RNA_binding protein</b> | <b>0.945634079</b> | <b>0.98569</b> | <b>3</b> |
| Q6AXS5        | EETQPPVALKK                                                        | 0.949186177        | 2              | 2.389626 |
| Q6AXS5        | FDQLFDESDPFEVLK                                                    | 0.938513564        | 2              | 4.3778   |
| Q6AXS5        | SAAQAAAQTNNAAGK                                                    | 1.087088979        | 2              | 4.432777 |
| <b>Q6AXY0</b> | <b>GSTA6 Glutathione S_transferase A6</b>                          | <b>0.970627756</b> | <b>0.99913</b> | <b>2</b> |
| Q6AXY0        | FLQPGSQR                                                           | 0.970246946        | 2              | 2.420994 |
| Q6AXY0        | YFPAFEK                                                            | 0.977527399        | 1              | 1.918532 |
| <b>Q6AY09</b> | <b>HNRH2 Heterogeneous nuclear ribonucleoprotein H2</b>            | <b>1.05627764</b>  | <b>0.90298</b> | <b>3</b> |
| Q6AY09        | ATENDIYNFFSPLNPMR                                                  | 0.884011603        | 2              | 2.689776 |
| Q6AY09        | HTGPNSPDTANDGFVR                                                   | 1.046598888        | 2              | 4.401614 |
| Q6AY09        | STGEAFVQFASQEIIEK                                                  | 1.08113703         | 2              | 4.386896 |
| <b>Q6AY30</b> | <b>SCPDH Probable saccharopine dehydrogenase</b>                   | <b>0.91278514</b>  | <b>0.55889</b> | <b>6</b> |
| Q6AY30        | ACIENGTSICIDICGEPQFLELMHVK                                         | 1.061812871        | 3              | 4.399938 |
| Q6AY30        | ATLVLCVGPYR                                                        | 0.915021099        | 2              | 2.613501 |
| Q6AY30        | GGGVFTPGAAFSR                                                      | 0.86057046         | 2              | 2.434473 |
| Q6AY30        | GVYIIIGSSGFDSIPADLVGLYTR                                           | 0.708997165        | 2              | 4.231153 |
| Q6AY30        | LQQVLEK                                                            | 1.083270969        | 1              | 2.015729 |
| Q6AY30        | SVSNLKPVPVIGSK                                                     | 0.929050435        | 2              | 3.835439 |
| <b>Q6AY56</b> | <b>TBA8 Tubulin alpha_8 chain</b>                                  | <b>0.977939767</b> | <b>0.95922</b> | <b>7</b> |
| Q6AY56        | AVCMLSNTTAAIEAWAR                                                  | 1.057153129        | 2              | 4.75739  |
| Q6AY56        | FDGALNVDLTFQTNLVPPYR                                               | 0.926371728        | 2              | 4.999843 |
| Q6AY56        | LISQIVSSITASLR                                                     | 1.002635744        | 2              | 3.415795 |
| Q6AY56        | NLDIERPTYTNLNR                                                     | 0.976557731        | 2              | 3.190492 |
| Q6AY56        | QLFHPEQLITGK                                                       | 0.691183665        | 2              | 2.417712 |
| Q6AY56        | TIQFVDWCPTGFK                                                      | 0.930098881        | 2              | 3.786335 |
| Q6AY56        | VGINYQPPTVPPGGDLAK                                                 | 0.978995732        | 2              | 4.529583 |
| <b>Q6AY80</b> | <b>NQO2 Ribosylidihyronicotinamide dehydrogenase [quinone]</b>     | <b>0.687093939</b> | <b>0.13342</b> | <b>3</b> |
| Q6AY80        | NDVTGALSNEVFK                                                      | 0.621209417        | 2              | 3.854708 |
| Q6AY80        | VLAPQISFGPEVSSEEQR                                                 | 0.622018643        | 2              | 4.37001  |
| Q6AY80        | VLCQGFAFDVPGFYDSGFLK                                               | 0.833994487        | 2              | 3.490055 |
| <b>Q6AYG5</b> | <b>ECHD1 Enoyl_CoA hydratase domain_containing protein 1</b>       | <b>1.075344954</b> | <b>0.99166</b> | <b>4</b> |
| Q6AYG5        | DVLETLWGGPANLEIAIK                                                 | 1.111640116        | 2              | 3.023892 |
| Q6AYG5        | ILEQFPGGSIDLQK                                                     | 1.052842331        | 2              | 3.135883 |
| Q6AYG5        | NTFCSGSDLNAVK                                                      | 0.948401426        | 2              | 2.587861 |
| Q6AYG5        | VIELENWTEGK                                                        | 1.213075135        | 2              | 2.948895 |
| <b>Q6AYH5</b> | <b>DCTN2 Dynactin subunit 2</b>                                    | <b>0.968552355</b> | <b>0.59863</b> | <b>3</b> |
| Q6AYH5        | ASVEDADTQNK                                                        | 1.060743458        | 2              | 2.342033 |
| Q6AYH5        | VNALDLAVLDQVEAR                                                    | 1.296177202        | 2              | 2.814499 |
| Q6AYH5        | WSPVASTLPELVQR                                                     | 0.960117305        | 2              | 2.995299 |
| <b>Q6AYM2</b> | <b>TEKT2 Tektin_2</b>                                              | <b>1.177766473</b> | <b>0.57941</b> | <b>2</b> |
| Q6AYM2        | RLEEDLR                                                            | 1.208540582        | 1              | 1.947017 |
| Q6AYM2        | TNTMLLDTKCMDIR+Oxidation(3)                                        | 0.878170195        |                |          |
| <b>Q6AYQ8</b> | <b>FAHD1 Acylpyruvase FAHD1_mitochondrial</b>                      | <b>0.777726076</b> | <b>9.9E-20</b> | <b>3</b> |
| Q6AYQ8        | IITLEEGDLITGTPK                                                    | 0.771081288        | 2              | 4.493897 |
| Q6AYQ8        | NLHHEVELGVLLGR                                                     | 0.820059264        | 3              | 4.135174 |
| Q6AYQ8        | SFTSSCPVSAFVPK                                                     | 0.761364171        | 2              | 4.080788 |
| <b>Q6AYR8</b> | <b>SCRN2 Secernin_2</b>                                            | <b>0.981108021</b> | <b>0.99867</b> | <b>2</b> |
| Q6AYR8        | GLLTGEQTPAPQELGSLFQAFVER                                           | 1.009770045        | 3              | 4.153685 |
| Q6AYR8        | QEQQSLEQEGLEALR                                                    | 0.984237874        | 2              | 4.008386 |
| <b>Q6AYS7</b> | <b>ACY1A Aminoacylase_1A</b>                                       | <b>0.884360175</b> | <b>0.08231</b> | <b>2</b> |
| Q6AYS7        | EMNLTLEPEIFPAATDSR                                                 | 0.847667887        | 2              | 4.701358 |
| Q6AYS7        | ICTVQPNPDYGSVTFLEER                                                | 1.399773034        | 2              | 4.517102 |
| <b>Q6AYS8</b> | <b>DHB11 Estradiol 17_beta_dehydrogenase 11</b>                    | <b>0.862968012</b> | <b>0.81162</b> | <b>4</b> |

|               |                                                                     |                    |                |           |
|---------------|---------------------------------------------------------------------|--------------------|----------------|-----------|
| Q6AYS8        | ALTDELAALGCTGVR                                                     | 0.887026284        | 2              | 3.731156  |
| Q6AYS8        | FDAVVGYK                                                            | 1.025042462        | 1              | 2.229856  |
| Q6AYS8        | MIFVPGSIALLTVLER                                                    | 1.094239777        | 2              | 2.767705  |
| Q6AYS8        | SVAGEIVLITGAGHGIGR                                                  | 0.86183297         | 2              | 3.983209  |
| <b>Q6AYT9</b> | <b>ACSM5 Acyl_coenzyme A synthetase ACSM5_mitochondrial</b>         | <b>0.934860926</b> | <b>0.99164</b> | <b>4</b>  |
| Q6AYT9        | AFIVLSPAYVSHDPEALTR                                                 | 0.976853454        | 2              | 4.369028  |
| Q6AYT9        | ASPPYDVQIVDEEGNVLPFGK                                               | 0.934454111        | 2              | 3.79195   |
| Q6AYT9        | NDDVINSSSYR                                                         | 0.897615622        | 2              | 2.588251  |
| Q6AYT9        | TGVVMIPGISQLTQK                                                     | 0.847908267        | 2              | 2.444242  |
| <b>Q6AYZ1</b> | <b>TBA1C Tubulin alpha_1C chain</b>                                 | <b>1.051221591</b> | <b>0.53232</b> | <b>5</b>  |
| Q6AYZ1        | AVFVDLEPTVIDEVR                                                     | 1.069838888        | 2              | 5.030551  |
| Q6AYZ1        | DVNAAIATIK                                                          | 1.203823718        | 2              | 3.061604  |
| Q6AYZ1        | IHFPLATYAPVISA EK                                                   | 1.256074235        | 2              | 3.413831  |
| Q6AYZ1        | TIGGGDDSFNTFFSETGAGK                                                | 1.061249942        | 2              | 5.396956  |
| Q6AYZ1        | VGINYQPPTVPPGGDLAR                                                  | 1.077991669        | 2              | 4.837774  |
| <b>Q6DGG1</b> | <b>ABHEB Abhydrolase domain_containing protein 14B</b>              | <b>1.046972939</b> | <b>3.1E-09</b> | <b>7</b>  |
| Q6DGG1        | AVAIDLPLGLR                                                         | 0.85677102         | 2              | 3.487673  |
| Q6DGG1        | FSSETWQNLGTLHR                                                      | 0.874537903        | 2              | 3.45856   |
| Q6DGG1        | FSVLLHGIR                                                           | 0.928395546        | 2              | 2.6252    |
| Q6DGG1        | GYVPVAPICTDK                                                        | 0.874336154        | 1              | 2.68742   |
| Q6DGG1        | INAADYAR                                                            | 0.921875622        | 2              | 2.461321  |
| Q6DGG1        | TPTLVYGDQDPMGSSSFQHLK                                               | 0.949080762        | 2              | 4.987156  |
| Q6DGG1        | TPTLVYGDQDPMGSSSFQHLK+Oxidation(12)                                 | 0.952698037        |                |           |
| <b>Q6EDY6</b> | <b>LR16A Leucine_rich repeat_containing protein 16A</b>             | <b>0.871355979</b> | <b>0.11487</b> | <b>2</b>  |
| Q6EDY6        | IENYLLR                                                             | 0.870309749        | 2              | 2.52352   |
| Q6EDY6        | SSDAHELGEDEKKK                                                      | 1.010324302        | 2              | 2.359173  |
| <b>Q6EJB6</b> | <b>UT14B U3 small nucleolar RNA_associated protein 14 homolog B</b> | <b>0.984355285</b> | <b>0.42359</b> | <b>2</b>  |
| Q6EJB6        | ARMTERMSLK+Oxidation(2)                                             | 0.832409539        |                |           |
| Q6EJB6        | EAAFSKTSQMLSR+Oxidation(9)                                          | 0.679403955        |                |           |
| <b>Q6GQP4</b> | <b>RAB31 Ras_related protein Rab_31</b>                             | <b>0.850512868</b> | <b>0.04218</b> | <b>2</b>  |
| Q6GQP4        | CDLSDIREVPLK                                                        | 0.689465692        | 2              | 2.391659  |
| Q6GQP4        | CDLSDIREVPLKDAK                                                     | 0.917663759        | 2              | 2.737571  |
| <b>Q6GQT1</b> | <b>A2MP Alpha_2_macroglobulin_P</b>                                 | <b>22.65174069</b> | <b>3.2E-05</b> | <b>2</b>  |
| Q6GQT1        | IQEEGTGVEETGK                                                       | 23.10982326        | 2              | 3.796557  |
| Q6GQT1        | QLSFPLSSEPTQGSYK                                                    | 3.413214217        | 2              | 2.817775  |
| <b>Q6GQT9</b> | <b>NOMO1 Nodal modulator 1</b>                                      | <b>0.989863446</b> | <b>0.99932</b> | <b>2</b>  |
| Q6GQT9        | SSIDSEPALVGLPK                                                      | 1.029477293        | 2              | 3.058939  |
| Q6GQT9        | VQVVVPEAETR                                                         | 0.968290376        | 2              | 2.484355  |
| <b>Q6I7R3</b> | <b>ISOC1 Isochormatase domain_containing protein 1</b>              | <b>0.912389187</b> | <b>0.00024</b> | <b>3</b>  |
| Q6I7R3        | GLGSTVQEIDLTGVK                                                     | 0.905571961        | 2              | 4.141586  |
| Q6I7R3        | ILGIPVIITEQYPK                                                      | 1.066115327        | 2              | 3.054214  |
| Q6I7R3        | YFGDIISVGQR                                                         | 0.924252494        | 2              | 2.864285  |
| <b>Q6IE47</b> | <b>ISK6 Serine protease inhibitor Kazal_type 6</b>                  | <b>1.092774146</b> | <b>0.66343</b> | <b>2</b>  |
| Q6IE47        | CAFCKALEK                                                           | 1.075990455        | 1              | 1.980058  |
| Q6IE47        | LFQINCGEFRDPK                                                       | 1.570976179        | 2              | 2.410531  |
| <b>Q6IE52</b> | <b>MUG2 Murinoglobulin_2</b>                                        | <b>0.95173107</b>  | <b>9.9E-20</b> | <b>14</b> |
| Q6IE52        | AHFSVMGDILSSAIK                                                     | 0.677016222        | 2              | 3.501241  |
| Q6IE52        | HTSSWLVTPK                                                          | 0.68621009         | 2              | 2.674901  |
| Q6IE52        | LPSSEEEESLDINIEGAK                                                  | 0.790846479        | 2              | 4.660444  |
| Q6IE52        | MLIYTILPDGEVIADSVK                                                  | 0.744888307        | 2              | 3.812035  |
| Q6IE52        | MLSGFIPLKPTVK+Oxidation(0)                                          | 0.876441293        |                |           |
| Q6IE52        | MNRIMQWQDVVK+Oxidation(0)                                           | 0.770508875        |                |           |



|               |                                                                 |                    |                |          |
|---------------|-----------------------------------------------------------------|--------------------|----------------|----------|
| Q6IE52        | NLYPLKELVQDPK                                                   | 0.684926391        | 1              | 2.079934 |
| Q6IE52        | QLSFSLSAEPIQGPK                                                 | 0.518060454        | 2              | 4.087656 |
| Q6IE52        | QQNSHGGFSSQTDTVVALDASK                                          | 0.752766204        | 3              | 3.521737 |
| Q6IE52        | VHLSFSPQSLPASQTHMR                                              | 0.745345878        | 3              | 3.414121 |
| Q6IE52        | VKTVPLTCNNPK                                                    | 0.659540493        | 2              | 2.902613 |
| Q6IE52        | VTASPSQLCGLR                                                    | 0.68599406         | 2              | 2.886737 |
| Q6IE52        | YMVLVPSQLYTETPEK                                                | 0.640248148        | 2              | 3.577462 |
| Q6IE52        | YMVLVPSQLYTETPEK+Oxidation(1)                                   | 0.729787297        |                |          |
| <b>Q6IFW6</b> | <b>K1C10 Keratin_ type I cytoskeletal 10</b>                    | <b>1.004053315</b> | <b>0.82986</b> | <b>2</b> |
| Q6IFW6        | LENEIQTYR                                                       | 1.194961565        | 2              | 2.517452 |
| Q6IFW6        | QSLEASLAETGR                                                    | 0.98244744         | 2              | 2.756063 |
| <b>Q6IMF3</b> | <b>K2C1 Keratin_ type II cytoskeletal 1</b>                     | <b>0.894655661</b> | <b>0.95408</b> | <b>4</b> |
| Q6IMF3        | TNAENEFVTIK                                                     | 1.490322439        | 2              | 2.952923 |
| Q6IMF3        | TNAENEFVIKK                                                     | 0.440249309        | 2              | 2.426961 |
| Q6IMF3        | WELLQQVDTSTR                                                    | 1.100286388        | 2              | 3.626365 |
| Q6IMF3        | YEELQITAGK                                                      | 0.911750503        | 2              | 3.470391 |
| <b>Q6IRK9</b> | <b>PGCP Plasma glutamate carboxypeptidase</b>                   | <b>1.017967306</b> | <b>0.83432</b> | <b>5</b> |
| Q6IRK9        | AIQIMYQNLQQDGLNVHLEQVR                                          | 0.883109091        | 3              | 5.379867 |
| Q6IRK9        | GEESAVMVVPR                                                     | 0.830458328        | 2              | 2.420935 |
| Q6IRK9        | IVVYNQPYTDYVK                                                   | 1.324443109        | 2              | 3.371046 |
| Q6IRK9        | TYPDTDSFNTVAEITGSK                                              | 0.944946425        | 2              | 3.797605 |
| Q6IRK9        | VGAVASLIR                                                       | 0.780035654        | 2              | 2.516366 |
| <b>Q6KCD5</b> | <b>NIPBL Nipped_B_like protein</b>                              | <b>0.911046142</b> | <b>0.55108</b> | <b>2</b> |
| Q6KCD5        | AFLISLLNLFDDTAK                                                 | 0.423694559        | 2              | 2.598496 |
| Q6KCD5        | QNNTRSENTKARPETPK                                               | 1.198810737        | 2              | 2.566816 |
| <b>Q6MGB5</b> | <b>DHB8 Estradiol 17_beta_dehydrogenase 8</b>                   | <b>0.915598069</b> | <b>0.98877</b> | <b>4</b> |
| Q6MGB5        | AGVIGLTQTAAR                                                    | 0.873517658        | 2              | 3.334717 |
| Q6MGB5        | GSIIINISSIVGK                                                   | 0.889095342        | 2              | 2.581352 |
| Q6MGB5        | SALALVTGAGSGIGR                                                 | 0.972643131        | 2              | 3.157082 |
| Q6MGB5        | VGNIGQNTYASSK                                                   | 1.223159809        | 2              | 2.366945 |
| <b>Q6NS46</b> | <b>RRP5 Protein RRP5 homolog</b>                                | <b>0.982889581</b> | <b>0.59644</b> | <b>2</b> |
| Q6NS46        | GKQTKSTEVPR                                                     | 0.88408037         | 2              | 2.678293 |
| Q6NS46        | IIDYSQMDLALLSLR                                                 | 1.108996558        | 2              | 2.370475 |
| <b>Q6NSR8</b> | <b>PEPL1 Probable aminopeptidase NPEPL1</b>                     | <b>1.099234459</b> | <b>0.62217</b> | <b>2</b> |
| Q6NSR8        | HNSPSAAHFITR                                                    | 0.981093948        | 3              | 3.557373 |
| Q6NSR8        | TVEINNTDAEGR                                                    | 0.855895055        | 2              | 2.693942 |
| <b>Q6NYB7</b> | <b>RAB1A Ras_related protein Rab_1A</b>                         | <b>0.948273039</b> | <b>0.95365</b> | <b>3</b> |
| Q6NYB7        | EFADSLGIPFLETSK                                                 | 1.366568099        | 2              | 3.616446 |
| Q6NYB7        | MGPATAGGAEK                                                     | 1.322015957        | 2              | 2.92138  |
| Q6NYB7        | NATNVEQSFMTMAAEIK                                               | 0.922211278        | 2              | 4.619451 |
| <b>Q6NZJ6</b> | <b>IF4G1 Eukaryotic translation initiation factor 4 gamma 1</b> | <b>1.189806931</b> | <b>2.3E-08</b> | <b>9</b> |
| Q6NZJ6        | DLDFAKAKPRMDQYFNQMEK+Oxidation(10)                              | 0.746585617        |                |          |
| Q6NZJ6        | GLPLVDDGGWNTVPISK                                               | 1.029413781        | 2              | 2.949481 |
| Q6NZJ6        | GSSGGSGAKPSDTASEATRPATLNR                                       | 1.155500114        | 3              | 3.472805 |
| Q6NZJ6        | IHNAENIQPGEQK                                                   | 1.188174391        | 2              | 4.175091 |
| Q6NZJ6        | ITKPGSIDSNNQLFAPGGR                                             | 1.306185357        | 3              | 3.58037  |
| Q6NZJ6        | LGIESTLER                                                       | 1.125484489        | 2              | 2.373941 |
| Q6NZJ6        | LKEELEEAR                                                       | 1.243654269        | 2              | 2.673569 |
| Q6NZJ6        | QVTQLAIDTEER                                                    | 1.182463853        | 2              | 2.854519 |
| Q6NZJ6        | TASTPTPPQTGGSLPEQPNGESPQVAVIIRPDDR                              | 0.740881412        | 3              | 4.776618 |
| <b>Q6P0K8</b> | <b>PLAK Junction plakoglobin</b>                                | <b>1.03926265</b>  | <b>0.99393</b> | <b>2</b> |
| Q6P0K8        | LLNDEDPVVVTK                                                    | 1.108455026        | 2              | 2.979309 |
| Q6P0K8        | NLALCPANHAPLQEAIVIPR                                            | 0.935413361        | 3              | 3.684323 |
| <b>Q6P502</b> | <b>TCPG T_complex protein 1 subunit gamma</b>                   | <b>1.045355366</b> | <b>4.8E-13</b> | <b>8</b> |
| Q6P502        | GISDLAQHYLMR                                                    | 1.084726111        | 2              | 2.378875 |
| Q6P502        | IVLLDSSLEYK                                                     | 0.900024048        | 2              | 2.679242 |

|               |                                                               |                    |                |           |
|---------------|---------------------------------------------------------------|--------------------|----------------|-----------|
| Q6P502        | IVSRPEELREDDVGTGAGLLEIK                                       | 1.082904553        | 3              | 3.686874  |
| Q6P502        | KGESQTDIEITR                                                  | 1.234325057        | 2              | 3.182367  |
| Q6P502        | NLQDAMQVCR                                                    | 1.323361949        | 2              | 2.802642  |
| Q6P502        | TAVETAVLLLR                                                   | 1.064504274        | 2              | 3.385841  |
| Q6P502        | TLIQNCGASTIR                                                  | 1.324354815        | 2              | 2.936961  |
| Q6P502        | WSSLACNIALDAVK                                                | 0.995244936        | 2              | 3.883981  |
| <b>Q6P5D3</b> | <b>DHX57 Putative ATP_dependent RNA helicase DHX57</b>        | <b>0.983090547</b> | <b>0.986</b>   | <b>2</b>  |
| Q6P5D3        | ARHNRTAQEEVEEDLR                                              | 0.978097997        | 2              | 2.304696  |
| Q6P5D3        | QEETLALKSICGEK                                                | 0.995251273        | 2              | 2.324683  |
| Q6P6M7        | EMFVYLSTQLKK+Oxidation(1)                                     | 4.330702105        |                |           |
| Q6P6M7        | SGDISAVQPK                                                    | 0.970785403        | 2              | 2.305707  |
| Q6P6M7        | SMVTAGFEPVVIENVLEGDLELR                                       | 0.790490355        | 2              | 3.998195  |
| <b>Q6P6R2</b> | <b>DLDH Dihydrolipoyl dehydrogenase_mitochondrial</b>         | <b>0.928882039</b> | <b>1</b>       | <b>12</b> |
| Q6P6R2        | ALTGGIAHLFK                                                   | 0.935984542        | 2              | 2.696993  |
| Q6P6R2        | EANLAASFGKPINF                                                | 0.905446457        | 1              | 2.056696  |
| Q6P6R2        | IDVSVEAASGGK                                                  | 1.052926416        | 2              | 3.659001  |
| Q6P6R2        | ILGAHILGPGAGEMVNEAALALEYGASCEDVAR                             | 0.922466849        | 3              | 4.130208  |
| Q6P6R2        | IPNIFAIGDVVAGPMLAHK                                           | 1.035122293        | 3              | 3.417117  |
| Q6P6R2        | NETLGGTCLNVGCIPSK                                             | 0.929534697        | 2              | 5.345018  |
| Q6P6R2        | NQVTATTADGSTQVIGTK                                            | 1.126716702        | 2              | 5.649474  |
| Q6P6R2        | RPFTQNLGLEELGIELDPK                                           | 1.032428244        | 3              | 4.214916  |
| Q6P6R2        | SEEQLKEEGVEFK                                                 | 1.008238281        | 3              | 4.12924   |
| Q6P6R2        | TNADTDGMVK                                                    | 0.900217481        | 2              | 2.824356  |
| Q6P6R2        | TNADTDGMVK+Oxidation(7)                                       | 0.962505731        |                |           |
| Q6P6R2        | VCHAHPTLSEAFR                                                 | 1.042274623        | 3              | 3.80575   |
| <b>Q6P6S9</b> | <b>ENTP5 Ectonucleoside triphosphate diphosphohydrolase 5</b> | <b>0.953257818</b> | <b>0.97871</b> | <b>7</b>  |
| Q6P6S9        | AAETHLIDYEK                                                   | 1.156053664        | 2              | 2.461366  |
| Q6P6S9        | AQTLLEVEEIFK                                                  | 1.063908857        | 2              | 3.8696    |
| Q6P6S9        | GQETVGTLDLGGASTQITFLPQLEK                                     | 0.926198327        | 2              | 4.732957  |
| Q6P6S9        | QGAETVQELLEVAK                                                | 0.880614182        | 2              | 3.313205  |
| Q6P6S9        | TSGQLPFLEGEIFDSVKPGLSAFVDQPK                                  | 0.891567517        | 3              | 3.851656  |
| Q6P6S9        | VEDFERKAR                                                     | 0.696899291        | 2              | 2.442626  |
| Q6P6S9        | WLEAEWIFGGVK                                                  | 0.891295484        | 2              | 3.082896  |
| <b>Q6P6V0</b> | <b>G6PI Glucose_6_phosphate isomerase</b>                     | <b>1.069630772</b> | <b>0.05961</b> | <b>8</b>  |
| Q6P6V0        | DVMPEVNVKLDK+Oxidation(2)                                     | 1.187805488        |                |           |
| Q6P6V0        | HFVALSTNTDK                                                   | 1.080463128        | 2              | 2.721133  |
| Q6P6V0        | KIEPELDGSSAVTSHDSSSTNGLIGFIK                                  | 0.806082425        | 3              | 5.439646  |
| Q6P6V0        | MIPCDFLIPVQTQHPIR                                             | 0.791635737        | 2              | 3.133447  |
| Q6P6V0        | TFTTQETITNAETAK                                               | 1.104117707        | 2              | 5.115226  |
| Q6P6V0        | TLANLNPESSLFIIASK                                             | 0.820167949        | 3              | 4.964591  |
| Q6P6V0        | VFEGNRPTNSIVFTK                                               | 0.84467763         | 2              | 3.392012  |
| Q6P6V0        | VWVFSNIDGTHIAK                                                | 0.792994594        | 2              | 3.464535  |
| <b>Q6P7B0</b> | <b>SYWC Tryptophanyl_tRNA synthetase_cytoplasmic</b>          | <b>1.054831373</b> | <b>0.98128</b> | <b>2</b>  |
| Q6P7B0        | ASEDFVDPWTVR                                                  | 1.047185937        | 2              | 2.694035  |
| Q6P7B0        | TLIDVLQPLIAEHQAR                                              | 1.134330656        | 3              | 3.314078  |
| <b>Q6P7Q4</b> | <b>LGUL Lactoylglutathione lyase</b>                          | <b>1.127271376</b> | <b>0.48355</b> | <b>6</b>  |
| Q6P7Q4        | ATLELTHNWGTEDDETSYHNGNSDPR                                    | 0.728925537        | 3              | 3.982593  |
| Q6P7Q4        | DFLLQQTMLR                                                    | 1.084381324        | 2              | 3.317003  |
| Q6P7Q4        | FEELGVK                                                       | 0.90283459         | 1              | 1.91717   |
| Q6P7Q4        | GFGHIGIAVPDVEACK                                              | 0.929219217        | 2              | 3.455763  |
| Q6P7Q4        | GLAFVQDPDGYWIEILNPNK                                          | 0.872859504        | 2              | 5.643552  |
| Q6P7Q4        | RFEELGVK                                                      | 0.994869886        | 2              | 2.648204  |
| <b>Q6P7R8</b> | <b>DHB12 Estradiol 17_beta_dehydrogenase 12</b>               | <b>1.147536737</b> | <b>0.00022</b> | <b>2</b>  |

|               |                                                                   |                    |                |           |
|---------------|-------------------------------------------------------------------|--------------------|----------------|-----------|
| Q6P7R8        | GIFVQSVLPFFVATK                                                   | 1.081975696        | 2              | 3.300225  |
| Q6P7R8        | LGEWAVVTGGTDGIGK                                                  | 1.147737819        | 2              | 4.03946   |
| <b>Q6P9T8</b> | <b>TBB2C Tubulin beta_2C chain</b>                                | <b>1.215544261</b> | <b>1.2E-05</b> | <b>13</b> |
| Q6P9T8        | AVLVDLEPGTMDSVR                                                   | 1.034876129        | 2              | 4.682413  |
| Q6P9T8        | AVLVDLEPGTMDSVR+Oxidation(10)                                     | 1.034068734        |                |           |
| Q6P9T8        | EAESCDCLQGFLTHSLGGGTGSGMGTLISK                                    | 1.313701421        | 3              | 5.302368  |
| Q6P9T8        | EIVHLQAGQCGNQIGAK                                                 | 1.200454566        | 2              | 5.043253  |
| Q6P9T8        | EVDEQMLNVQNK                                                      | 1.392096915        | 2              | 4.069465  |
| Q6P9T8        | FWEVISDEHGIDPTGTYHGSDLQLER                                        | 0.896042025        | 3              | 5.632992  |
| Q6P9T8        | INVYYNEATGGK                                                      | 1.029822164        | 2              | 3.468115  |
| Q6P9T8        | KEAESCDCLQGFLTHSLGGGTGSGMGTLISK                                   | 0.992520868        | 3              | 5.342913  |
| Q6P9T8        | LHFFMPGFAPLTSR                                                    | 1.297416196        | 2              | 2.700942  |
| Q6P9T8        | MSATFIGNSTAIQELFK                                                 | 0.91649274         | 2              | 3.974575  |
| Q6P9T8        | SGPFGQIFRPDNFVFGQSGAGNNWAK                                        | 1.227504141        | 3              | 4.662916  |
| Q6P9T8        | TAVCDIPPR                                                         | 1.025933783        | 2              | 2.500931  |
| Q6P9T8        | YLTVAAVFR                                                         | 1.015846749        | 2              | 2.469502  |
| <b>Q6P9U8</b> | <b>EIF3H Eukaryotic translation initiation factor 3 subunit H</b> | <b>1.265074268</b> | <b>8.2E-13</b> | <b>2</b>  |
| Q6P9U8        | ANITFEHMFEEVPIVIK                                                 | 0.652446408        | 3              | 4.351461  |
| Q6P9U8        | EGTGSTATSSSTGGAVGK                                                | 1.49635517         | 2              | 4.13056   |
| <b>Q6PA06</b> | <b>ATLA2 Atlastin_2</b>                                           | <b>1.265709446</b> | <b>0.00069</b> | <b>5</b>  |
| Q6PA06        | AGLTDQVSHHAR                                                      | 1.055804504        | 2              | 3.34998   |
| Q6PA06        | NLVPLLLAPENLVEK                                                   | 1.292489309        | 2              | 2.892005  |
| Q6PA06        | QNQHEELQNVN                                                       | 1.253908859        | 2              | 2.731601  |
| Q6PA06        | SMEQVCGGDKPYIAPSDLER                                              | 1.315263355        | 3              | 3.485745  |
| Q6PA06        | SMLQATAEANNLAAVAGAR                                               | 1.192207862        | 2              | 4.490577  |
| <b>Q6PCL9</b> | <b>polymerase gamma</b>                                           | <b>0.973267758</b> | <b>0.93282</b> | <b>4</b>  |
| Q6PCL9        | ATDITPIPMSEGGISDMPKR                                              | 0.995883724        |                |           |
| Q6PCL9        | LTEILK                                                            | 1.008333081        |                |           |
| Q6PCL9        | QANNINMLKDGMMK                                                    | 0.901483247        |                |           |
| Q6PCL9        | WEMDDPRPIAKAER                                                    | 1.096812272        |                |           |
| <b>Q6PDM2</b> | <b>SRSF1 Serine/arginine rich splicing factor 1</b>               | <b>1.198817705</b> | <b>0.07706</b> | <b>2</b>  |
| Q6PDM2        | SHEGETAYIR                                                        | 1.499072571        | 2              | 2.640331  |
| Q6PDM2        | VVVSGLPPSGSWQDLK                                                  | 1.198543281        | 2              | 2.310523  |
| <b>Q6PDN3</b> | <b>MYLK Myosin light chain kinase_smooth muscle</b>               | <b>0.888864192</b> | <b>0.74238</b> | <b>2</b>  |
| Q6PDN3        | LIDFGLAR                                                          | 0.721752417        | 2              | 2.373367  |
| Q6PDN3        | VSMSEKNGMQILEIRGVTR                                               | 0.895231131        | 2              | 2.444653  |
| <b>Q6PEC1</b> | <b>TBCA Tubulin specific chaperone A</b>                          | <b>1.062141937</b> | <b>0.94093</b> | <b>3</b>  |
| Q6PEC1        | LEAAYTDLR                                                         | 1.067856293        | 2              | 3.178392  |
| Q6PEC1        | QILESEKDLEEAEYKEAR                                                | 1.105172036        | 3              | 3.835938  |
| Q6PEC1        | RLEAAYTDLR                                                        | 1.032893461        | 2              | 2.347981  |
| <b>Q6PEC4</b> | <b>SKP1 S_phase kinase associated protein 1</b>                   | <b>1.229358518</b> | <b>0.0332</b>  | <b>3</b>  |
| Q6PEC4        | NDFTEEEEAQVR                                                      | 1.833788632        | 2              | 3.461069  |
| Q6PEC4        | TDDIPVWDQEFLK                                                     | 1.18524296         | 2              | 3.122371  |
| Q6PEC4        | TVANMIKGTPEEIR+Oxidation(4)                                       | 1.063334897        |                |           |
| <b>Q6Q0N1</b> | <b>CNDP2 Cytosolic non_specific dipeptidase</b>                   | <b>1.095665862</b> | <b>0.21453</b> | <b>6</b>  |
| Q6Q0N1        | AVFYIDENQDR                                                       | 0.941691237        | 2              | 3.008107  |
| Q6Q0N1        | EGGSIPVTLTFQEATGK                                                 | 1.117834053        | 2              | 2.612732  |
| Q6Q0N1        | LGGSVELVDIGK                                                      | 1.377847365        | 2              | 3.731147  |
| Q6Q0N1        | LVPDMIPEVSEQVSSYLSK                                               | 0.838800368        | 2              | 2.634509  |
| Q6Q0N1        | MTEAAAADVQR                                                       | 1.111161265        | 2              | 2.602796  |
| Q6Q0N1        | TVFGVEPDLTR                                                       | 1.065677205        | 2              | 2.547685  |
| <b>Q6SKG1</b> | <b>ACSM3 Acyl_coenzyme A synthetase ACSM3_mitochondrial</b>       | <b>0.969708958</b> | <b>0.68916</b> | <b>3</b>  |
| Q6SKG1        | AFIVLNPDYK                                                        | 0.954028154        | 2              | 2.790596  |
| Q6SKG1        | FDSTSILQTLISK                                                     | 0.967233469        | 2              | 3.127405  |

|               |                                                                                    |                    |                |           |
|---------------|------------------------------------------------------------------------------------|--------------------|----------------|-----------|
| Q6SKG1        | TGTVLIPGTTQLTQK                                                                    | 1.23853635         | 2              | 2.935618  |
| <b>Q6TUG0</b> | <b>DJB11 DnaJ homolog subfamily B member 11</b>                                    | <b>0.956194272</b> | <b>0.99997</b> | <b>4</b>  |
| Q6TUG0        | FQDLGAAYEVLSDSEK                                                                   | 0.968585781        | 2              | 4.513122  |
| Q6TUG0        | FQMTQEVVCECPNVK                                                                    | 1.010931062        | 2              | 5.165411  |
| Q6TUG0        | KGGLPNFDNNDIK                                                                      | 1.021008154        | 2              | 2.752147  |
| Q6TUG0        | TLEVEIEPGVR                                                                        | 0.937039392        | 2              | 3.227964  |
| <b>Q6UPE1</b> | <b>ETFD Electron transfer flavoprotein_ubiquinone oxidoreductase_mitochondrial</b> | <b>1.000302325</b> | <b>0.9928</b>  | <b>16</b> |
| Q6UPE1        | AAQIGAHTLSGACLDPAAFK                                                               | 0.926921083        | 2              | 4.313604  |
| Q6UPE1        | ALNEGGLQSIK                                                                        | 0.915024113        | 2              | 3.159334  |
| Q6UPE1        | ASCDATYGIQK                                                                        | 0.974269852        | 2              | 3.68383   |
| Q6UPE1        | FCPAGVYEFVPLEQGDGFR                                                                | 0.880335073        | 2              | 4.946673  |
| Q6UPE1        | GAPLNTPVTEDR                                                                       | 0.918013111        | 2              | 3.449286  |
| Q6UPE1        | GIATNDVGIQK                                                                        | 0.937946281        | 2              | 3.562947  |
| Q6UPE1        | HHPSIRPTLEGGK                                                                      | 0.808041055        | 2              | 2.424297  |
| Q6UPE1        | LQINAQNCVHCK                                                                       | 1.11310282         | 2              | 3.729051  |
| Q6UPE1        | NLSIYDGPQQR                                                                        | 0.911492278        | 2              | 3.21672   |
| Q6UPE1        | QLAAEQEKDIR                                                                        | 0.845207166        | 2              | 2.804508  |
| Q6UPE1        | QLTSENLSQK                                                                         | 0.866387444        | 2              | 2.462073  |
| Q6UPE1        | SGSLAAEAIFK                                                                        | 0.888181101        | 2              | 3.355657  |
| Q6UPE1        | TAGLHVTEYEDNLK                                                                     | 1.138832174        | 2              | 3.880151  |
| Q6UPE1        | TCDIKDPNQINWVVPESGGGPPAYNGM                                                        | 1.031873951        | 2              | 3.703534  |
| Q6UPE1        | VDHTVGWPLDR                                                                        | 0.871844155        | 2              | 2.646851  |
| Q6UPE1        | VTIFAEGCHGLAK                                                                      | 0.841619292        | 2              | 3.383801  |
| <b>Q6URK4</b> | <b>ROA3 Heterogeneous nuclear ribonucleoprotein A3</b>                             | <b>0.95793291</b>  | <b>0.99997</b> | <b>7</b>  |
| Q6URK4        | EDSVKPGAHLTVK                                                                      | 1.028410833        | 2              | 3.369654  |
| Q6URK4        | EDTEEYNLR                                                                          | 1.338108787        | 2              | 2.342645  |
| Q6URK4        | GFAFVTDDHDTVCK                                                                     | 0.844459402        | 2              | 4.251501  |
| Q6URK4        | IETIEVMEDR                                                                         | 0.93750569         | 2              | 3.391518  |
| Q6URK4        | SSGSPYGGGYSGGGSGGYGSR                                                              | 1.19035414         | 2              | 4.976744  |
| Q6URK4        | WGTLTDCVVMR                                                                        | 0.966629475        | 2              | 2.30274   |
| Q6URK4        | YHTINGHNCEVK                                                                       | 1.040332089        | 2              | 3.574183  |
| <b>Q6URW6</b> | <b>MYH14 Myosin_14</b>                                                             | <b>0.987898229</b> | <b>0.98504</b> | <b>4</b>  |
| Q6URW6        | EDQSILCTGESGAGK                                                                    | 1.184476314        | 2              | 4.497694  |
| Q6URW6        | FDQLLAEEK                                                                          | 0.947509527        | 2              | 2.33667   |
| Q6URW6        | KFDQLLAEEK                                                                         | 1.093157248        | 2              | 2.579592  |
| Q6URW6        | QLLQANPILEAFGNAK                                                                   | 0.917951254        | 2              | 4.332239  |
| <b>Q6XQN1</b> | <b>PNCB Nicotinate phosphoribosyltransferase</b>                                   | <b>1.059936972</b> | <b>0.99992</b> | <b>5</b>  |
| Q6XQN1        | GSEVNIGIGTNVVTCPK                                                                  | 1.034215159        | 2              | 4.118571  |
| Q6XQN1        | LDSGDLQQAQK                                                                        | 1.030029789        | 2              | 2.949369  |
| Q6XQN1        | LYLQQGQPYEPLPSLEESR                                                                | 1.098473857        | 2              | 4.483629  |
| Q6XQN1        | QLQNPVYQVALSEK                                                                     | 0.922953684        | 2              | 3.823194  |
| Q6XQN1        | VWLQGAQEPCTVKPAQVEPLLR                                                             | 1.065952219        | 3              | 3.648148  |
| <b>Q6Y7W8</b> | <b>PERQ2 PERQ amino acid_rich with GYF domain_containing protein 2</b>             | <b>0.985368891</b> | <b>0.16286</b> | <b>2</b>  |
| Q6Y7W8        | AEEENRSENSLSAKVPSR                                                                 | 0.74763938         | 2              | 2.419723  |
| Q6Y7W8        | KDEPKAEQVEK                                                                        | 0.986133268        | 2              | 2.517178  |
| <b>Q6ZPJ3</b> | <b>UBE2O Ubiquitin_conjugating enzyme E2 O</b>                                     | <b>0.881673923</b> | <b>0.48963</b> | <b>2</b>  |
| Q6ZPJ3        | FRTTIVIR                                                                           | 0.861145263        | 2              | 2.451537  |
| Q6ZPJ3        | NCAQGECSMAKKVK                                                                     | 1.002324251        | 2              | 2.563106  |
| <b>Q6ZPY5</b> | <b>ZN507 Zinc finger protein 507</b>                                               | <b>1.081641358</b> | <b>0.82996</b> | <b>2</b>  |
| Q6ZPY5        | CSLCGYVCSHPPSLK                                                                    | 1.132409364        | 2              | 2.341023  |
| Q6ZPY5        | IISSPNK                                                                            | 0.977390821        | 2              | 2.352312  |
| <b>Q704S8</b> | <b>CACP Carnitine O_acetyltransferase</b>                                          | <b>0.986371158</b> | <b>0.63278</b> | <b>3</b>  |
| Q704S8        | ALQPIVSEEEWAHTK                                                                    | 1.166224313        | 2              | 2.495661  |
| Q704S8        | DKVNRRESVNSIQK                                                                     | 1.183313804        | 2              | 2.333611  |

|               |                                                                                               |                    |                |           |
|---------------|-----------------------------------------------------------------------------------------------|--------------------|----------------|-----------|
| Q704S8        | FNITPEIKNDIEK                                                                                 | 0.974146324        | 2              | 3.187848  |
| <b>Q711G3</b> | <b>IAH1 Isoamyl acetate_hydrolyzing esterase 1 homolog</b>                                    | <b>0.979857331</b> | <b>0.99398</b> | <b>5</b>  |
| Q711G3        | DCGTDVLDLWTLMQK                                                                               | 1.209463652        | 2              | 3.87297   |
| Q711G3        | DVEETKPELSLLGDGDH                                                                             | 1.029861269        | 2              | 3.449936  |
| Q711G3        | LNVAVGEYAK                                                                                    | 0.976994578        | 2              | 3.027585  |
| Q711G3        | QHVPLDEYSANLR                                                                                 | 0.953440716        | 2              | 2.562931  |
| Q711G3        | VILITPPPLCEAAWEK                                                                              | 0.854501242        | 2              | 2.646211  |
| <b>Q71TY3</b> | <b>RS27 40S ribosomal protein S27</b>                                                         | <b>1.618213282</b> | <b>0.16188</b> | <b>2</b>  |
| Q71TY3        | DLLHPSPEEEK                                                                                   | 1.626939151        | 2              | 2.327085  |
| Q71TY3        | LVQSPNSYFMDVK                                                                                 | 1.184899809        | 2              | 2.86871   |
| <b>Q75N33</b> | <b>SC16B Protein transport protein Sec16B</b>                                                 | <b>0.797219857</b> | <b>0.52265</b> | <b>2</b>  |
| Q75N33        | NLLTGEIPLNVDTPAQIVEK                                                                          | 1.08727397         | 2              | 3.800258  |
| Q75N33        | VLEPDWLVLQR                                                                                   | 0.781982304        | 2              | 2.506728  |
| <b>Q75Q39</b> | <b>TOM70 Mitochondrial import receptor subunit TOM70</b>                                      | <b>1.033867114</b> | <b>0.6894</b>  | <b>3</b>  |
| Q75Q39        | NADLSTFYQNR                                                                                   | 1.054561268        | 2              | 2.573889  |
| Q75Q39        | NREPLMPSQFIK                                                                                  | 1.016116375        | 2              | 2.548639  |
| Q75Q39        | SDEKDKKEGEALEVK                                                                               | 1.29997138         | 2              | 4.165979  |
| <b>Q75WE7</b> | <b>VWA5A von Willebrand factor A domain_containing protein 5A</b>                             | <b>0.934978945</b> | <b>0.51849</b> | <b>2</b>  |
| Q75WE7        | YTQETIEEAVER                                                                                  | 1.130297472        | 2              | 2.552592  |
| Q75WE7        | YVQELPLESDGALR                                                                                | 0.777709626        | 2              | 2.611122  |
| <b>Q76MZ3</b> | <b>2AAA Serine/threonine_protein phosphatase 2A 65 kDa regulatory subunit A alpha isoform</b> | <b>0.942772278</b> | <b>0.92515</b> | <b>7</b>  |
| Q76MZ3        | AISHEHSPDLEAHFVPLVK                                                                           | 0.994828014        | 3              | 4.354185  |
| Q76MZ3        | DNTIEHLLPLFLAQLKDECEPVR                                                                       | 0.913887437        | 3              | 3.376251  |
| Q76MZ3        | IGPILDNSTLQSEVKPILEK                                                                          | 0.764829069        | 2              | 4.528924  |
| Q76MZ3        | LTQDQDQDVK                                                                                    | 1.010267667        | 2              | 2.886872  |
| Q76MZ3        | QLSQSLLPAIVELAEDA                                                                             | 0.987053           | 3              | 3.834573  |
| Q76MZ3        | SALASVIMGLSPILGK                                                                              | 0.85859346         | 2              | 3.083025  |
| Q76MZ3        | SEIIPMFSNLASDEQDSVR                                                                           | 0.955943188        | 2              | 3.855789  |
| <b>Q78P75</b> | <b>DYL2 Dynein light chain 2_cytoplasmic</b>                                                  | <b>0.885475092</b> | <b>0.98757</b> | <b>3</b>  |
| Q78P75        | NADMSEDMQQDAVDCATQAMEK                                                                        | 1.03578367         | 2              | 5.674018  |
| Q78P75        | NFGSYVTHETK                                                                                   | 1.139195663        | 2              | 2.710826  |
| Q78P75        | YNPTWHCIVGR                                                                                   | 0.954364649        | 2              | 2.721489  |
| <b>Q791V5</b> | <b>MTCH2 Mitochondrial carrier homolog 2</b>                                                  | <b>0.906031684</b> | <b>0.23077</b> | <b>5</b>  |
| Q791V5        | EEGIVGFFAGLIPR                                                                                | 0.815951761        | 2              | 3.596333  |
| Q791V5        | GLFTGLTPR                                                                                     | 0.908531857        | 2              | 2.801613  |
| Q791V5        | LCSGVLGTVVHGK                                                                                 | 1.259818248        | 3              | 3.354568  |
| Q791V5        | VLIQVGYEPLPPTIGR                                                                              | 0.878664213        | 2              | 4.165522  |
| Q791V5        | YCGLCDSIVTIYR                                                                                 | 0.899337139        | 2              | 2.932106  |
| <b>Q794E4</b> | <b>HNRPF Heterogeneous nuclear ribonucleoprotein F</b>                                        | <b>1.076447259</b> | <b>0.56129</b> | <b>4</b>  |
| Q794E4        | ATENDIYNFFSPLNPVR                                                                             | 1.098243555        | 3              | 4.899892  |
| Q794E4        | HSGPNSADSANDGFVR                                                                              | 1.021098982        | 2              | 4.180212  |
| Q794E4        | ITGEAFVQFASQELAEK                                                                             | 0.997704426        | 2              | 3.867411  |
| Q794E4        | VHIEIGPDGR                                                                                    | 1.133728611        | 2              | 2.742947  |
| <b>Q7M0E3</b> | <b>DEST Destrin</b>                                                                           | <b>1.080182329</b> | <b>2.7E-09</b> | <b>2</b>  |
| Q7M0E3        | HEYQANGPEDLNR                                                                                 | 1.146600939        | 2              | 4.373701  |
| Q7M0E3        | KEELMFFLWAPQAPLK                                                                              | 0.898087692        | 2              | 3.834273  |
| <b>Q7TMA5</b> | <b>APOB Apolipoprotein B_100</b>                                                              | <b>0.818585342</b> | <b>1.7E-12</b> | <b>12</b> |
| Q7TMA5        | GFEPTLEALFGK                                                                                  | 0.678879528        | 2              | 2.900756  |
| Q7TMA5        | GGINQVGLAFESTK                                                                                | 0.842660808        | 2              | 2.473005  |
| Q7TMA5        | IEGNLVFDPSSYLPK                                                                               | 0.77027346         | 2              | 3.489512  |
| Q7TMA5        | IEIDIPLPGGK                                                                                   | 0.895286146        | 2              | 3.085059  |
| Q7TMA5        | ITDNDVLIALDSAK                                                                                | 1.16217389         | 2              | 3.20563   |

|               |                                                             |                    |                |           |
|---------------|-------------------------------------------------------------|--------------------|----------------|-----------|
| Q7TMA5        | KGTVATEMSTER                                                | 1.79415586         | 2              | 2.643985  |
| Q7TMA5        | LLQWEQSEQVK                                                 | 0.943584348        | 2              | 2.433946  |
| Q7TMA5        | LSISEQNAQR                                                  | 0.88769402         | 2              | 2.580496  |
| Q7TMA5        | NFVASHIANILNSEEELYVDLK                                      | 0.888053677        | 3              | 3.645085  |
| Q7TMA5        | NSVSTALEHTLSALLTPAEQTSSWK                                   | 0.614744798        | 3              | 3.35974   |
| Q7TMA5        | SVGFHLPSEQEVIPTFTIPK                                        | 0.873064275        | 3              | 3.525585  |
| Q7TMA5        | TILFDTFVNDVAPVEK                                            | 0.689652642        | 2              | 3.475433  |
| <b>Q7TNG8</b> | <b>LDHD Probable D_lactate dehydrogenase_ mitochondrial</b> | <b>1.123826036</b> | <b>0.03395</b> | <b>4</b>  |
| Q7TNG8        | AVVGSPHVSTASAVR                                             | 1.071283165        | 2              | 2.375283  |
| Q7TNG8        | AYSTDVCPISR                                                 | 1.300105152        | 2              | 3.702007  |
| Q7TNG8        | GSQGGLSQDFVEALK                                             | 1.110484061        | 2              | 3.741249  |
| Q7TNG8        | QLLQEEVGPVGVETMR                                            | 1.304822071        | 2              | 2.694601  |
| <b>Q7TP47</b> | <b>HNRPQ Heterogeneous nuclear ribonucleoprotein Q</b>      | <b>1.074578464</b> | <b>0.56582</b> | <b>2</b>  |
| Q7TP47        | DLFEDELVPLFEK                                               | 1.351919           | 2              | 3.06382   |
| Q7TP47        | NLANTVTEEILEK                                               | 1.069480969        | 2              | 3.680556  |
| <b>Q7TP48</b> | <b>APMAP Adipocyte plasma membrane_associated protein</b>   | <b>1.015206452</b> | <b>0.22031</b> | <b>4</b>  |
| Q7TP48        | LENGEIETIAR                                                 | 0.983026775        | 2              | 3.319412  |
| Q7TP48        | LFENQLNGPESIVNIGDVLFTGTADGR                                 | 1.024705097        | 3              | 3.358104  |
| Q7TP48        | LLEYDVTVK                                                   | 0.911143242        | 2              | 2.358764  |
| Q7TP48        | LLSSETPIEGK                                                 | 1.941971233        | 2              | 2.989513  |
| <b>Q7TP52</b> | <b>CMBL Carboxymethylenebutenolidase homolog</b>            | <b>0.823372185</b> | <b>0.11711</b> | <b>7</b>  |
| Q7TP52        | AGVSVYGIIR                                                  | 1.32979681         | 2              | 2.393999  |
| Q7TP52        | EDCSPADKPYIEEAR                                             | 1.010794506        | 2              | 3.540596  |
| Q7TP52        | KREDCSPADKPYIEEAR                                           | 0.834988353        | 2              | 4.624423  |
| Q7TP52        | LDYGGMGQEVQVEHIK                                            | 0.891598513        | 2              | 4.417758  |
| Q7TP52        | LKEHCIVNYQVK                                                | 0.701421295        | 2              | 3.824452  |
| Q7TP52        | NLIEWLNK                                                    | 0.790921673        | 2              | 2.452743  |
| Q7TP52        | TFSGQTHGFVHR                                                | 0.83881514         | 2              | 3.603651  |
| <b>Q7TPB1</b> | <b>TCPD T_complex protein 1 subunit delta</b>               | <b>1.035191168</b> | <b>0.03565</b> | <b>11</b> |
| Q7TPB1        | ALIAGGGAPEIELALR                                            | 1.075301251        | 2              | 4.126056  |
| Q7TPB1        | DIEREDIEFICK                                                | 1.485085629        | 2              | 2.380545  |
| Q7TPB1        | ETLLNSATTSLSNSK                                             | 1.222071956        | 2              | 3.556609  |
| Q7TPB1        | GDVTITNDGATILK                                              | 0.847943085        | 2              | 3.287564  |
| Q7TPB1        | GIHPTIIESEFQK                                               | 1.115650217        | 2              | 2.636964  |
| Q7TPB1        | IDDVVNTR                                                    | 1.071978582        | 2              | 2.375369  |
| Q7TPB1        | LVIEEAER                                                    | 1.873392938        | 1              | 1.946073  |
| Q7TPB1        | MIQDGKGDVTITNDGATILK+Oxidation(0)                           | 0.821505221        |                |           |
| Q7TPB1        | SIHDALCVIR                                                  | 0.747642091        | 2              | 2.481982  |
| Q7TPB1        | TGCNVLLIQK                                                  | 0.680630037        | 2              | 2.502972  |
| Q7TPB1        | VIDPATATSVDLR                                               | 1.046185127        | 2              | 3.38237   |
| <b>Q7TPJ0</b> | <b>SSRA Translocon_associated protein subunit alpha</b>     | <b>1.094201216</b> | <b>1</b>       | <b>2</b>  |
| Q7TPJ0        | GEDFPANNIVK                                                 | 0.975632843        | 2              | 3.022465  |
| Q7TPJ0        | GTEDFIVESLDASFR                                             | 0.985192606        | 2              | 4.092875  |
| <b>Q7TQM4</b> | <b>SOAT2 Sterol O_acyltransferase 2</b>                     | <b>0.929998931</b> | <b>0.23719</b> | <b>2</b>  |
| Q7TQM4        | QDRPLPSTASDSTR                                              | 0.815299579        | 2              | 3.185305  |
| Q7TQM4        | TQCLEQAQR                                                   | 0.930274264        | 2              | 3.019858  |
| <b>Q80TV8</b> | <b>CLAP1 CLIP_associating protein 1</b>                     | <b>0.968657322</b> | <b>0.79796</b> | <b>2</b>  |
| Q80TV8        | MESCLAQVLQK                                                 | 1.406052366        | 2              | 2.498413  |
| Q80TV8        | MGADLLGSVQAKVQK+Oxidation(0)                                | 0.959446059        |                |           |
| <b>Q80W21</b> | <b>GSTM7 Glutathione S_transferase Mu 7</b>                 | <b>1.009726892</b> | <b>4.1E-05</b> | <b>11</b> |
| Q80W21        | CLDAFPNLK                                                   | 0.889137762        | 2              | 3.183004  |
| Q80W21        | CLDAFPNLKDFIAR                                              | 1.193056719        | 2              | 2.693651  |

|               |                                                                  |                    |                |           |
|---------------|------------------------------------------------------------------|--------------------|----------------|-----------|
| Q80W21        | FKLGLDFPNLPYLIDGSHK                                              | 0.842082889        | 3              | 4.137031  |
| Q80W21        | HNLCGETEEER                                                      | 1.000324197        | 2              | 3.825125  |
| Q80W21        | ITQSNAILR                                                        | 1.141029842        | 2              | 3.149814  |
| Q80W21        | KHNLCGETEEER                                                     | 1.109289388        | 3              | 4.447618  |
| Q80W21        | LFLEYDSSYEK                                                      | 1.056846592        | 2              | 3.974284  |
| Q80W21        | LGLDFPNLPYLIDGSHK                                                | 0.982760264        | 2              | 4.7105    |
| Q80W21        | LKPGYLEQLPGMMR                                                   | 0.755333455        | 2              | 2.619989  |
| Q80W21        | LYSEFLGK                                                         | 1.056252492        | 2              | 2.314208  |
| Q80W21        | VDILENQLMDNR                                                     | 0.967858363        | 2              | 3.693533  |
| <b>Q80X50</b> | <b>UBP2L Ubiquitin_associated protein 2_like</b>                 | <b>0.954479875</b> | <b>0.8449</b>  | <b>2</b>  |
| Q80X50        | IDLAVLLGK                                                        | 0.954254811        | 2              | 3.387492  |
| Q80X50        | QRPQATAEQIR                                                      | 1.088519978        | 2              | 2.33472   |
| <b>Q80X90</b> | <b>FLNB Filamin_B</b>                                            | <b>0.946240014</b> | <b>0.55984</b> | <b>9</b>  |
| Q80X90        | ADIEMPFDPK                                                       | 0.988223434        | 2              | 2.335035  |
| Q80X90        | AHGPGLEGGLVGKPAEFTIDTK                                           | 0.948304939        | 3              | 3.496061  |
| Q80X90        | GAGIGGLGITVEGPSEK                                                | 0.977996962        | 2              | 3.55208   |
| Q80X90        | GFLDGVYSFEYYPSTPGK                                               | 1.247073816        | 2              | 3.188443  |
| Q80X90        | IGNLQTDLSGDLR                                                    | 1.173512331        | 2              | 2.38394   |
| Q80X90        | ILAQDGEGQPIDIQMK                                                 | 0.942430567        | 2              | 3.852266  |
| Q80X90        | VDIQTEDLEDGTCK                                                   | 1.064486392        | 2              | 3.917562  |
| Q80X90        | VGEPGILCVCSEAGPGLGLEAVSDSGAK                                     | 1.547080617        | 3              | 3.900689  |
| Q80X90        | VTASGPGLSAYGVPASLPVEFAIDAR                                       | 1.017849964        | 2              | 3.887513  |
| <b>Q80YR5</b> | <b>SAFB2 Scaffold attachment factor B2</b>                       | <b>0.949046902</b> | <b>0.65089</b> | <b>2</b>  |
| Q80YR5        | GSKMEEEGSEDNGLEEDSR                                              | 0.662742238        | 2              | 2.393886  |
| Q80YR5        | SEPVKEEGSELEQPFAQATSSVGPDR                                       | 1.01422003         | 3              | 4.219013  |
| <b>Q80Z25</b> | <b>OFD1 Oral_facial_digital syndrome 1 protein homolog</b>       | <b>1.037300096</b> | <b>1</b>       | <b>2</b>  |
| Q80Z25        | ELEQEAERLEK                                                      | 1.032833579        | 2              | 2.939034  |
| Q80Z25        | MIEESLK+Oxidation(0)                                             | 1.05311388         |                |           |
| <b>Q80Z29</b> | <b>NAMPT Nicotinamide phosphoribosyltransferase</b>              | <b>1.119026437</b> | <b>0.02893</b> | <b>4</b>  |
| Q80Z29        | STEAPLIIRPDSGNPLDVLK                                             | 1.372715145        | 2              | 3.935778  |
| Q80Z29        | TPAGTFVTLEEGKDLEEYGHDLHTVFK                                      | 1.27322815         | 5              | 4.608683  |
| Q80Z29        | VIQGDGVDINTLQIEVGMK                                              | 1.120436797        | 2              | 4.45121   |
| Q80Z29        | YLLETSGNLDGLEYK                                                  | 1.155173841        | 2              | 4.222397  |
| <b>Q80Z36</b> | <b>ZHX3 Zinc fingers and homeoboxes protein 3</b>                | <b>0.960228747</b> | <b>0.99703</b> | <b>2</b>  |
| Q80Z36        | FPYPTKAELCYLTVVTK                                                | 1.007375904        | 2              | 2.729569  |
| Q80Z36        | YPEEQLK                                                          | 0.908086209        | 2              | 2.33479   |
| <b>Q80ZF0</b> | <b>chain</b>                                                     | <b>0.930102882</b> | <b>0.75058</b> | <b>2</b>  |
| <b>Q810B6</b> | <b>ANFY1 Ankyrin repeat and FYVE domain_containing protein 1</b> | <b>1.12941358</b>  | <b>0.45103</b> | <b>2</b>  |
| Q810B6        | QLDLELK                                                          | 1.139983495        | 1              | 2.257823  |
| Q810B6        | RESGAAEQVDNKGR                                                   | 0.862827335        | 1              | 1.925182  |
| <b>Q811D2</b> | <b>ANR26 Ankyrin repeat domain_containing protein 26</b>         | <b>1.281299489</b> | <b>0.84434</b> | <b>2</b>  |
| Q811D2        | AQEDFDK                                                          | 1.283881787        | 1              | 1.949182  |
| Q811D2        | LNMLSSKLDNEKQNK                                                  | 0.931756063        | 2              | 2.336043  |
| <b>Q811X6</b> | <b>CRYL1 Lambda_crystallin homolog</b>                           | <b>0.895647291</b> | <b>0.86469</b> | <b>3</b>  |
| Q811X6        | EMKSLEQSGSLK+Oxidation(1)                                        | 0.854874817        |                |           |
| Q811X6        | IVDDQVILSSSSCLLPSK                                               | 0.942829754        | 2              | 2.731198  |
| Q811X6        | TFGPVPEFSGDTVEK                                                  | 0.6541976          | 2              | 3.012004  |
| <b>Q8BFZ3</b> | <b>ACTBL Beta_actin_like protein 2</b>                           | <b>1.364563874</b> | <b>1</b>       | <b>10</b> |
| Q8BFZ3        | CDVDIR                                                           | 0.972251391        | 1              | 2.001956  |
| Q8BFZ3        | DLTDYLMK                                                         | 1.67384596         | 1              | 2.07498   |
| Q8BFZ3        | HQGVVMVGMGQK                                                     | 1.074655267        | 3              | 3.90187   |
| Q8BFZ3        | HQGVVMVGMGQK+Oxidation(4)                                        | 1.267639394        |                |           |
| Q8BFZ3        | HQGVVMVGMGQK+Oxidation(4)                                        | 1.143501965        |                |           |

|               |                                                                             |                    |                |          |
|---------------|-----------------------------------------------------------------------------|--------------------|----------------|----------|
| Q8BFZ3        | HQGVVMVGMGQK+Oxidation(7)                                                   | 1.033058182        |                |          |
| Q8BFZ3        | SYELPDGQVITIGNER                                                            | 1.064596025        | 3              | 5.169834 |
| Q8BFZ3        | TTGIVMDSGDGVTHTVPIYEGYALPHAILR                                              | 1.066151376        | 3              | 6.937174 |
| Q8BFZ3        | TTGIVMDSGDGVTHTVPIYEGYALPHAILR+Oxidation(5)                                 | 1.047960743        |                |          |
| Q8BFZ3        | VAPDEHPILLTEAPLNPK                                                          | 0.956185313        | 3              | 4.210713 |
| <b>Q8BG32</b> | <b>PSD11 26S proteasome non_ATPase regulatory subunit 11</b>                | <b>1.058634034</b> | <b>0.95384</b> | <b>5</b> |
| Q8BG32        | LYDNLLEQNLIR                                                                | 0.90304169         | 2              | 3.650634 |
| Q8BG32        | TGQAAELGGLLK                                                                | 1.051031876        | 2              | 2.474134 |
| Q8BG32        | TTANAIYCPPK                                                                 | 1.084065741        | 2              | 3.076473 |
| Q8BG32        | TYEAALETIQNMSK                                                              | 1.076421258        | 2              | 3.262693 |
| Q8BG32        | VQIEHISSLIK                                                                 | 1.112087456        | 2              | 3.159459 |
| <b>Q8BG79</b> | <b>C19L2 CWF19_like protein 2</b>                                           | <b>0.875413738</b> | <b>0.10811</b> | <b>2</b> |
| Q8BG79        | KNQDSSGNLRSK                                                                | 0.687361384        | 2              | 2.392182 |
| Q8BG79        | MWVPVSSPRETLDMKAER+Oxidation(12)                                            | 0.930543116        |                |          |
| <b>Q8BGC4</b> | <b>ZADH2 Zinc_binding alcohol dehydrogenase domain_containing protein 2</b> | <b>1.466578724</b> | <b>0.62024</b> | <b>2</b> |
| Q8BGC4        | DCPVPLPGDGLLVR                                                              | 1.461785029        | 2              | 2.343935 |
| Q8BGC4        | FVGINASDINYSAGR                                                             | 2.882514123        | 2              | 3.814173 |
| <b>Q8BGT5</b> | <b>ALAT2 Alanine aminotransferase 2</b>                                     | <b>1.177007476</b> | <b>9.4E-13</b> | <b>3</b> |
| Q8BGT5        | ILTLESMNPQVK                                                                | 0.885043701        | 2              | 2.604494 |
| Q8BGT5        | LLEETGICVVPVSGFGQR                                                          | 1.053439326        | 2              | 3.769341 |
| Q8BGT5        | VLCIINPGNPTGQVQSR                                                           | 1.665784502        | 2              | 4.51233  |
| <b>Q8BGY2</b> | <b>IF5A2 Eukaryotic translation initiation factor 5A_2</b>                  | <b>0.970049922</b> | <b>0.99944</b> | <b>4</b> |
| Q8BGY2        | KYEDICPSTHNMDVPNIK                                                          | 1.095036666        | 3              | 4.350031 |
| Q8BGY2        | KYEDICPSTHNMDVPNIK+Oxidation(11)                                            | 1.082445531        |                |          |
| Q8BGY2        | VHLVGIDIFTGK                                                                | 0.980750683        | 1              | 3.36391  |
| Q8BGY2        | YEDICPSTHNMDVPNIK                                                           | 0.913523408        | 2              | 4.045334 |
| <b>Q8BGY3</b> | <b>LUZP2 Leucine zipper protein 2</b>                                       | <b>0.797013322</b> | <b>0.22874</b> | <b>2</b> |
| Q8BGY3        | DLQENKSLK                                                                   | 1.087272513        | 2              | 2.312989 |
| Q8BGY3        | SLQEALQNQLK                                                                 | 0.73090149         | 2              | 2.477481 |
| <b>Q8BH00</b> | <b>AL8A1 Aldehyde dehydrogenase family 8 member A1</b>                      | <b>0.957677854</b> | <b>0.05445</b> | <b>9</b> |
| Q8BH00        | ELLMLENFIGGK                                                                | 1.506384755        | 2              | 3.387634 |
| Q8BH00        | ELNLPFGGMK                                                                  | 1.13054053         | 1              | 2.232169 |
| Q8BH00        | FLPCNSYIDSDPSTGEVYCK                                                        | 1.003432004        | 3              | 5.092261 |
| Q8BH00        | ILCGEGVDQLSLPLR                                                             | 1.013469034        | 2              | 4.385639 |
| Q8BH00        | ITQLSAPHCK                                                                  | 1.222199851        | 2              | 2.94709  |
| Q8BH00        | KLSELEGGK                                                                   | 0.959386523        | 1              | 2.004368 |
| Q8BH00        | NPAIIFEDANLEECIPATVR                                                        | 0.908049499        | 3              | 5.344548 |
| Q8BH00        | SSFANQGEICLCTSR                                                             | 1.888234605        | 2              | 4.445076 |
| Q8BH00        | TPVGIAGLISPWNPLPLYLLTWK                                                     | 0.880845032        |                |          |
| <b>Q8BH69</b> | <b>SPS1 Selenide_water dikinase 1</b>                                       | <b>0.810906806</b> | <b>0.17046</b> | <b>2</b> |
| Q8BH69        | IIEVAPQVATQNVNPTGATS                                                        | 0.809564273        | 2              | 3.680098 |
| Q8BH69        | YGEHQAWIIGIVEK                                                              | 0.768534208        | 2              | 2.364937 |
| <b>Q8BHN3</b> | <b>GANAB Neutral alpha_glucosidase AB</b>                                   | <b>1.090286854</b> | <b>0.99974</b> | <b>8</b> |
| Q8BHN3        | AEKDEPGAWEETFK                                                              | 1.148826108        | 2              | 3.427011 |
| Q8BHN3        | DDNSVELTVAEGPYK                                                             | 1.155203569        | 2              | 3.638777 |
| Q8BHN3        | MLDYLQGSGETPQTDIR                                                           | 0.979099009        | 2              | 4.764602 |
| Q8BHN3        | MLDYLQGSGETPQTDIR+Oxidation(0)                                              | 0.99891719         |                |          |
| Q8BHN3        | REPWLLASQYQDAIR                                                             | 0.933198229        | 3              | 3.755299 |
| Q8BHN3        | SGGIERPFVLSR                                                                | 1.029539414        | 2              | 2.527569 |
| Q8BHN3        | SLLLSVNAR                                                                   | 0.933377348        | 2              | 2.420121 |
| Q8BHN3        | VTEGGEPYR                                                                   | 0.965044499        | 2              | 2.536797 |
| <b>Q8BI84</b> | <b>MIA3 Melanoma inhibitory activity protein 3</b>                          | <b>0.846373003</b> | <b>0.04677</b> | <b>2</b> |



|               |                                                              |                    |                |          |
|---------------|--------------------------------------------------------------|--------------------|----------------|----------|
| Q8BI84        | LQLESEREQNVK                                                 | 0.117092676        | 2              | 2.342728 |
| Q8BI84        | TQTAVSIVEEDLK                                                | 0.862213907        | 2              | 2.619912 |
| <b>Q8BIJ6</b> | <b>SYIM Isoleucyl_tRNA synthetase_mitochondrial</b>          | <b>1.216560776</b> | <b>0.5673</b>  | <b>2</b> |
| Q8BIJ6        | DTVLLPQTSFPMK                                                | 0.901483247        | 1              | 2.230632 |
| Q8BIJ6        | SCQTALAEILDVLR                                               | 0.874060245        | 2              | 3.898237 |
| <b>Q8BIJ7</b> | <b>RUFY1 RUN and FYVE domain_containing protein 1</b>        | <b>1.005355937</b> | <b>0.48866</b> | <b>2</b> |
| Q8BIJ7        | EKDTSCLLQTELQQVEGLK                                          | 1.139664699        | 2              | 2.446253 |
| Q8BIJ7        | ELQDEKAELRK                                                  | 0.855462794        | 2              | 2.445209 |
| <b>Q8BJ64</b> | <b>CHDH Choline dehydrogenase_mitochondrial</b>              | <b>0.847211442</b> | <b>0.94558</b> | <b>7</b> |
| Q8BJ64        | ADSAYHPSTCK                                                  | 1.598534384        | 2              | 3.403724 |
| Q8BJ64        | AEVQTLVSR                                                    | 0.920253387        | 2              | 2.75354  |
| Q8BJ64        | ELQPGSHVQSDK                                                 | 1.144226861        | 2              | 2.5352   |
| Q8BJ64        | ELQPGSHVQSDKEIDAFVR                                          | 1.064957003        | 2              | 4.11539  |
| Q8BJ64        | SRPGVPHPDIQFHFLPSQVIDHGR                                     | 1.041154957        | 5              | 4.860238 |
| Q8BJ64        | TNHPLHQAFLOAAR                                               | 0.843353903        | 3              | 4.677282 |
| Q8BJ64        | VLLLEAGPK                                                    | 0.923388873        | 2              | 2.930708 |
| <b>Q8BJY1</b> | <b>PSMD5 26S proteasome non_ATPase regulatory subunit 5</b>  | <b>0.961964844</b> | <b>0.94684</b> | <b>2</b> |
| Q8BJY1        | GLTHPDDSVK                                                   | 0.950224027        | 2              | 2.487785 |
| Q8BJY1        | TVAEFIGNSNYLR                                                | 1.070576851        | 2              | 3.076345 |
| <b>Q8BL97</b> | <b>SRSF7 Serine/arginine_rich splicing factor 7</b>          | <b>0.95343311</b>  | <b>0.425</b>   | <b>2</b> |
| Q8BL97        | NPPGFADFVEFDPR                                               | 1.193789894        | 2              | 3.482625 |
| Q8BL97        | VYVGNLGTGAGK                                                 | 0.921154087        | 2              | 2.359843 |
| <b>Q8BMJ2</b> | <b>SYLC Leucyl_tRNA synthetase_cytoplasmic</b>               | <b>1.179002721</b> | <b>0.8223</b>  | <b>3</b> |
| Q8BMJ2        | QTGEGVGPQEYTLVK                                              | 1.227903771        | 2              | 2.366236 |
| Q8BMJ2        | SFITTDVNPYYDSFVR                                             | 1.02321639         | 2              | 3.315366 |
| Q8BMJ2        | STGNFLTSQAVDK                                                | 1.198991958        | 2              | 2.974211 |
| <b>Q8BTM8</b> | <b>FLNA Filamin_A</b>                                        | <b>1.097580921</b> | <b>0.95939</b> | <b>5</b> |
| Q8BTM8        | AFGPGGLQGGNAGSPAR                                            | 0.840670797        | 2              | 3.789589 |
| Q8BTM8        | ANLPQSFQVDTSK                                                | 0.944058598        | 2              | 2.465197 |
| Q8BTM8        | GAGTGGLGLAVEGPSEAK                                           | 1.1047685          | 2              | 3.685926 |
| Q8BTM8        | IVSPSGAAVPCK                                                 | 1.081923593        | 2              | 2.456903 |
| Q8BTM8        | VTAQGPGLPSGNIANK                                             | 0.982703334        | 2              | 3.940563 |
| <b>Q8BTZ7</b> | <b>GMPPB Mannose_1_phosphate guanyltransferase beta</b>      | <b>1.038373933</b> | <b>0.0003</b>  | <b>2</b> |
| Q8BTZ7        | HHGQEGSILVK                                                  | 0.818880034        | 3              | 3.756291 |
| Q8BTZ7        | YGVVCEADTGR                                                  | 1.048441121        | 2              | 3.255346 |
| <b>Q8BU33</b> | <b>ILVBL Acetolactate synthase_like protein</b>              | <b>1.019071967</b> | <b>0.99659</b> | <b>3</b> |
| Q8BU33        | AAVETLGVPCFLGGMSR                                            | 1.018908966        | 2              | 2.420279 |
| Q8BU33        | LPNSLMGR+Oxidation(5)                                        | 1.023629715        |                |          |
| Q8BU33        | NAQVAQSPVLLGGAASTLLQK                                        | 0.88339642         | 2              | 4.582908 |
| <b>Q8BWQ1</b> | <b>UD2A3 UDP_glucuronosyltransferase 2A3</b>                 | <b>1.178517812</b> | <b>0.99434</b> | <b>2</b> |
| Q8BWQ1        | ADIWLIR                                                      | 0.972812503        | 2              | 2.536914 |
| Q8BWQ1        | IHHDQPVKPLDR                                                 | 1.248317402        | 3              | 3.50576  |
| <b>Q8BX70</b> | <b>VP13C Vacuolar protein sorting_associated protein 13C</b> | <b>0.912573064</b> | <b>0.81946</b> | <b>2</b> |
| Q8BX70        | ENALSELDVPFKVK                                               | 1.02211022         | 2              | 2.902301 |
| Q8BX70        | TVLQADSPQHDVEILKPVNMLLCIQR+Oxidation(19)                     | 0.860921554        |                |          |
| <b>Q8C7X2</b> | <b>K0090 Uncharacterized protein KIAA0090</b>                | <b>1.258095213</b> | <b>0.00492</b> | <b>2</b> |
| Q8C7X2        | FNVEDGEIVQQR                                                 | 1.007643884        | 2              | 3.270266 |
| Q8C7X2        | VMGDRSVLYK+Oxidation(1)                                      | 1.591372446        |                |          |
| <b>Q8C8R3</b> | <b>ANK2 Ankyrin_2</b>                                        | <b>1.143477938</b> | <b>9.1E-13</b> | <b>2</b> |
| Q8C8R3        | STSSSRPGTSPTRER                                              | 0.727826143        | 2              | 2.43608  |
| Q8C8R3        | TSTDFSEVIKQLEDNDK                                            | 1.729234938        | 2              | 2.613098 |

|               |                                                             |                    |                |           |
|---------------|-------------------------------------------------------------|--------------------|----------------|-----------|
| <b>Q8CC88</b> | <b>K0564 Uncharacterized protein KIAA0564 homolog</b>       | <b>0.793528533</b> | <b>0.54717</b> | <b>4</b>  |
| Q8CC88        | HQATGELDDAK                                                 | 1.210989459        | 2              | 3.385847  |
| Q8CC88        | IILDNLQAK                                                   | 1.174226727        | 2              | 2.302537  |
| Q8CC88        | NLADQGIINYPYSTR                                             | 1.334624135        | 2              | 3.190962  |
| Q8CC88        | VSSDQLSSENLTSAVGQK                                          | 0.788806845        | 2              | 3.489278  |
| <b>Q8CDM4</b> | <b>CCD73 Coiled_coil domain_containing protein 73</b>       | <b>0.875157541</b> | <b>0.37796</b> | <b>2</b>  |
| Q8CDM4        | MEEESIDLIKEQK                                               | 1.707760812        | 2              | 2.39728   |
| Q8CDM4        | VTCQHKMEEESIDLIK                                            | 0.866371932        | 2              | 2.37989   |
| <b>Q8CFN2</b> | <b>CDC42 Cell division control protein 42 homolog</b>       | <b>1.100799282</b> | <b>0.01397</b> | <b>3</b>  |
| Q8CFN2        | NVFDEAILAALEPPPEPK                                          | 0.983393162        | 3              | 4.998273  |
| Q8CFN2        | WVPEITHHCPK                                                 | 1.053149565        | 2              | 2.406111  |
| Q8CFN2        | YVECSALTQK                                                  | 1.128805564        | 2              | 3.052529  |
| <b>Q8CFW1</b> | <b>ANO2 Anoctamin_2</b>                                     | <b>1.148876382</b> | <b>0.10682</b> | <b>2</b>  |
| Q8CFW1        | TEQTFEERLILK                                                | 1.19174764         | 2              | 2.368721  |
| Q8CFW1        | TKDIGIWFIDILSGIGK                                           | 0.647973697        | 2              | 2.339453  |
| <b>Q8CG45</b> | <b>ARK72 Aflatoxin B1 aldehyde reductase member 2</b>       | <b>1.117808842</b> | <b>0.00013</b> | <b>10</b> |
| Q8CG45        | AVSGAPLRPGTVLGTMEMGR                                        | 0.949451261        | 2              | 2.893334  |
| Q8CG45        | EHHFEAIALVEK                                                | 1.716478009        | 2              | 2.345078  |
| Q8CG45        | FFGNSWSETYR                                                 | 1.111916732        | 2              | 2.817085  |
| Q8CG45        | FYAYNPLAGLLTGK                                              | 0.972956609        | 2              | 4.537042  |
| Q8CG45        | MDASASAATVR                                                 | 0.989719708        | 2              | 3.673352  |
| Q8CG45        | MDASASAATVR+Oxidation(0)                                    | 1.05475113         |                |           |
| Q8CG45        | QVETELLPLCLR                                                | 0.990083678        | 2              | 2.962501  |
| Q8CG45        | RMDASASAATVR                                                | 1.274890331        | 2              | 2.760439  |
| Q8CG45        | TTYGTSAPSM TSAALR                                           | 0.984554935        | 2              | 4.211116  |
| Q8CG45        | VDLFYLHAPDHGTPIVETLQACQQLHQEGK                              | 1.102226126        | 3              | 5.550289  |
| <b>Q8CG48</b> | <b>SMC2 Structural maintenance of chromosomes protein 2</b> | <b>1.34640234</b>  | <b>0.00068</b> | <b>2</b>  |
| Q8CG48        | EEKLLEK                                                     | 1.438073781        | 1              | 1.965779  |
| Q8CG48        | IKALNCEIEELER                                               | 1.278472532        | 2              | 2.464792  |
| <b>Q8CGC7</b> | <b>SYEP Bifunctional aminoacyl_tRNA synthetase</b>          | <b>1.031702587</b> | <b>3.9E-10</b> | <b>10</b> |
| Q8CGC7        | AIQGATSHHLGQNFQSK                                           | 1.144358144        | 2              | 4.479011  |
| Q8CGC7        | DQDVEPGAPSMGAK                                              | 1.276387297        | 2              | 3.14168   |
| Q8CGC7        | DQVDSAVQELLQLK                                              | 1.165950958        | 2              | 3.728001  |
| Q8CGC7        | GDVSISVEEGKENLLR                                            | 1.353892912        | 2              | 3.47736   |
| Q8CGC7        | KEENLAEWYSQVITK                                             | 1.079549617        | 2              | 4.356993  |
| Q8CGC7        | KGDIIQLQR                                                   | 1.099351411        | 2              | 2.657011  |
| Q8CGC7        | SLCIPFNPLCELQPGAMCVCGK                                      | 1.052762351        | 2              | 4.380905  |
| Q8CGC7        | SQGSGLSSGGAGEGQGPK                                          | 1.230161874        | 2              | 4.633912  |
| Q8CGC7        | TELAEP AI RPTSETVMYPAYAK                                    | 1.077647287        | 3              | 3.47725   |
| Q8CGC7        | VYEELLAIPVVR                                                | 1.175269775        | 2              | 3.032671  |
| <b>Q8CHM7</b> | <b>HACL1 2_hydroxyacyl_CoA lyase 1</b>                      | <b>1.070537298</b> | <b>0.99275</b> | <b>9</b>  |
| Q8CHM7        | DTSKPCLINIMIEPQSTR                                          | 0.991318688        | 2              | 3.494121  |
| Q8CHM7        | GAAYSHAEDSIR                                                | 0.620290949        | 2              | 3.43655   |
| Q8CHM7        | GVVPDNHPNCVGAAR                                             | 1.129022639        | 2              | 3.364092  |
| Q8CHM7        | GYFVQTPEELQDSL R                                            | 0.984089956        | 2              | 4.051752  |
| Q8CHM7        | LVELCNLPFLTPMGMK                                            | 1.092692617        | 2              | 4.265065  |
| Q8CHM7        | NCFIVSEGANTMDIGR                                            | 1.145012165        | 2              | 4.907655  |
| Q8CHM7        | NQEAMGAFQEFPPQEACR                                          | 1.132206488        | 2              | 6.103219  |
| Q8CHM7        | SSYGRPGACYIDVPADLVTLQESTTSIK                                | 1.006700468        | 3              | 4.140991  |
| Q8CHM7        | YKECCMPPLSLAETS AVR                                         | 1.301118154        | 2              | 2.369579  |
| <b>Q8CI17</b> | <b>MB213 Protein mab_21_like 3</b>                          | <b>0.967182346</b> | <b>0.89425</b> | <b>2</b>  |
| Q8CI17        | QQISQTMEEVQK+Oxidation(6)                                   | 0.967637351        |                |           |
| Q8CI17        | RQQISQTMEEVQK                                               | 0.966320526        | 2              | 2.3575    |

|               |                                                                                  |                    |                |           |
|---------------|----------------------------------------------------------------------------------|--------------------|----------------|-----------|
| <b>Q8CIB5</b> | <b>FERM2 Fermitin family homolog 2</b>                                           | <b>0.934976598</b> | <b>0.42411</b> | <b>3</b>  |
| Q8CIB5        | GCEVTPDVNISGQK                                                                   | 0.97687428         | 2              | 3.165857  |
| Q8CIB5        | INQLYEQAK                                                                        | 0.888480163        | 2              | 2.969903  |
| Q8CIB5        | TSTILGDITSIPELADYIK                                                              | 0.807909865        | 2              | 2.898173  |
| <b>Q8CIE6</b> | <b>COPA Coatomer subunit alpha</b>                                               | <b>1.095213917</b> | <b>0.99936</b> | <b>7</b>  |
| Q8CIE6        | ASNLENSTYDLYTIPK                                                                 | 1.125017485        | 2              | 3.797963  |
| Q8CIE6        | DADSQNPDAPEGK                                                                    | 1.630558043        | 2              | 3.2413    |
| Q8CIE6        | GITGVDLFGTTDAVVK                                                                 | 1.086109122        | 2              | 3.995919  |
| Q8CIE6        | GVNWAAFHPTMPLIVSGADDR                                                            | 1.007943988        | 2              | 3.641241  |
| Q8CIE6        | LLELGPKEVAQQTR                                                                   | 1.098798534        | 2              | 3.470856  |
| Q8CIE6        | SILLSVPLLVDNK                                                                    | 0.980779776        | 2              | 3.5948    |
| Q8CIE6        | TLDLPIYVTR                                                                       | 0.997506021        | 2              | 2.672677  |
| <b>Q8CJ40</b> | <b>CROCC Rootletin</b>                                                           | <b>0.79916393</b>  | <b>0.3586</b>  | <b>4</b>  |
| Q8CJ40        | DLLQLGGELVRTSR                                                                   | 0.924812383        | 2              | 2.47817   |
| Q8CJ40        | ELEERTGNLGRQR                                                                    | 3.708500845        | 2              | 2.307867  |
| Q8CJ40        | LQEERRLLQER                                                                      | 1.074047017        | 2              | 2.359333  |
| Q8CJ40        | QQQAEHATTMAVEK+Oxidation(9)                                                      | 0.788236452        |                |           |
| <b>Q8JZN5</b> | <b>ACAD9 Acyl_CoA dehydrogenase family member 9_mitochondrial</b>                | <b>1.107644821</b> | <b>0.23874</b> | <b>3</b>  |
| Q8JZN5        | GSNTCEVHFENTR                                                                    | 1.127893492        | 2              | 4.359045  |
| Q8JZN5        | NLSEFGLIQEK                                                                      | 0.999327255        | 2              | 3.107225  |
| Q8JZN5        | SGNVTTVMETIGR                                                                    | 0.974709001        | 2              | 2.505223  |
| <b>Q8K009</b> | <b>AL1L2 Mitochondrial 10_formyltetrahydrofolate dehydrogenase</b>               | <b>0.947994859</b> | <b>5.9E-11</b> | <b>16</b> |
| Q8K009        | ADPLALAAEK                                                                       | 0.803107884        | 2              | 2.639571  |
| Q8K009        | AGFSVFWADDGLDTPILLQR                                                             | 0.845940291        | 2              | 3.867094  |
| Q8K009        | AMVEAVQLIADGK                                                                    | 0.624923985        | 2              | 3.769438  |
| Q8K009        | ANNTEYGLASGVFTR                                                                  | 0.739643972        | 2              | 4.734161  |
| Q8K009        | DLGEEALNEYLK                                                                     | 0.903524153        | 2              | 3.232624  |
| Q8K009        | EESFGPIMVISK                                                                     | 0.845080798        | 2              | 2.40331   |
| Q8K009        | FLFPEGIK                                                                         | 0.99497133         | 2              | 2.402335  |
| Q8K009        | FQNGDIDGVLQR                                                                     | 0.750606936        | 2              | 2.911394  |
| Q8K009        | GVINIIPGSGGVAGQR                                                                 | 0.744168854        | 2              | 3.957973  |
| Q8K009        | HGSIIYHPSSLPR                                                                    | 1.10966178         | 2              | 4.178293  |
| Q8K009        | LEAGTVFINTYNK                                                                    | 1.066428086        | 2              | 3.081229  |
| Q8K009        | NLQFEDGK                                                                         | 0.707147894        | 1              | 2.128599  |
| Q8K009        | SAACLAAGNTLVLKPAQVPTLTK                                                          | 0.654280928        | 3              | 3.709913  |
| Q8K009        | SCDVKNPNDTVDSLNR                                                                 | 0.934635642        | 2              | 4.433568  |
| Q8K009        | TPQPEEGATYEGIQK                                                                  | 0.932241369        | 2              | 3.200745  |
| Q8K009        | VVGVFVTPDKDGK                                                                    | 0.788484804        | 2              | 3.137646  |
| <b>Q8K1S6</b> | <b>SPIR2 Protein spire homolog 2</b>                                             | <b>1.209652826</b> | <b>0.07018</b> | <b>2</b>  |
| Q8K1S6        | ALFVETLELR                                                                       | 1.561095979        | 2              | 2.312166  |
| Q8K1S6        | DTADILLRR                                                                        | 1.010339485        | 2              | 2.424882  |
| <b>Q8K2F0</b> | <b>BRD3 Bromodomain_containing protein 3</b>                                     | <b>1.016676468</b> | <b>0.08082</b> | <b>2</b>  |
| Q8K2F0        | LNLPDYHKIHK                                                                      | 1.468138858        | 2              | 2.459141  |
| Q8K2F0        | QLSLDINRLPGEK                                                                    | 0.704041743        | 2              | 2.453372  |
| <b>Q8K3J1</b> | <b>NDUS8 NADH dehydrogenase [ubiquinone] iron_sulfur protein 8_mitochondrial</b> | <b>0.9990478</b>   | <b>0.99978</b> | <b>2</b>  |
| Q8K3J1        | LCEAICPAQAITIEAEPK                                                               | 0.97747699         | 2              | 4.369447  |
| Q8K3J1        | YVNKKEQESEVDMK                                                                   | 1.02130546         | 2              | 2.317082  |
| <b>Q8K440</b> | <b>ABC8B ATP_binding cassette sub_family A member 8_B</b>                        | <b>1.134245015</b> | <b>0.9609</b>  | <b>3</b>  |
| Q8K440        | GEILGLLGHNGAGKSTSLK                                                              | 0.920527932        | 2              | 2.313141  |
| Q8K440        | LMEMEQLSSLRETEK+Oxidation(1)                                                     | 1.087876363        |                |           |
| Q8K440        | LMEMEQLSSLRETEK+Oxidation(3)                                                     | 1.11653707         |                |           |
| <b>Q8K442</b> | <b>ABC8A ATP_binding cassette sub_family A member 8_A</b>                        | <b>1.02507778</b>  | <b>0.64613</b> | <b>5</b>  |

|               |                                                                     |                    |                |           |
|---------------|---------------------------------------------------------------------|--------------------|----------------|-----------|
| Q8K442        | GQITAILGHSGAGK                                                      | 1.517491617        | 2              | 3.506877  |
| Q8K442        | IDDFIHSLEQQNIALEVDFAFGTR                                            | 0.971900845        | 3              | 3.541419  |
| Q8K442        | LTGVCPQCNVQFDLTVR                                                   | 1.219688535        | 2              | 2.814696  |
| Q8K442        | NTQNILVQNLGGGQK                                                     | 0.994002444        | 2              | 3.425331  |
| Q8K442        | STLLNVLSGLCVPTK                                                     | 1.023708553        | 2              | 3.722986  |
| <b>Q8K4C0</b> | <b>FMO5 Dimethylaniline monooxygenase [N_oxide_forming] 5</b>       | <b>0.984327409</b> | <b>0.99931</b> | <b>9</b>  |
| Q8K4C0        | FDHEMFGLKPK                                                         | 1.222210746        | 2              | 2.921404  |
| Q8K4C0        | GYPIDILLSSR                                                         | 0.925607493        | 2              | 3.06238   |
| Q8K4C0        | HSALGQHPTINDDLPNR                                                   | 1.067368547        | 2              | 4.999358  |
| Q8K4C0        | IAVIGSGASGLTCIK                                                     | 1.22750092         | 2              | 4.029736  |
| Q8K4C0        | KLPSQSEMMAEINK                                                      | 1.052222876        | 2              | 3.820664  |
| Q8K4C0        | KQPDFSTSGWQVVTEHEGK                                                 | 1.043056           | 3              | 4.587523  |
| Q8K4C0        | KTILTTEDR                                                           | 0.97266641         | 2              | 2.560853  |
| Q8K4C0        | QQVDVFDGVLVCTGHHTDPHLPDLSFPGIEK                                     | 0.973273116        | 3              | 4.066142  |
| Q8K4C0        | SDDIGGLWR                                                           | 0.962279452        | 2              | 2.813447  |
| <b>Q8K4G6</b> |                                                                     | <b>0.993544587</b> | <b>0.60391</b> | <b>56</b> |
| <b>Q8K4T4</b> | <b>FLIP1 Filamin_A_interacting protein 1</b>                        | <b>0.970701274</b> | <b>0.45612</b> | <b>2</b>  |
| Q8K4T4        | FQPRAETQSMKIELK+Oxidation(9)                                        | 1.268287808        |                |           |
| Q8K4T4        | IEELEETNKSLOK                                                       | 0.961060802        | 2              | 2.406459  |
| <b>Q8K4Z3</b> | <b>AIBP Apolipoprotein A_I_binding protein</b>                      | <b>0.876120354</b> | <b>0.13037</b> | <b>2</b>  |
| Q8K4Z3        | GNPSGIQPDLLISLTAPK                                                  | 0.882925565        | 2              | 4.19953   |
| Q8K4Z3        | SPPTVLVICGPGNNGDGLVCAR                                              | 0.875506331        | 2              | 5.983057  |
| <b>Q8K586</b> | <b>RANT GTP_binding nuclear protein Ran_testis_specific isoform</b> | <b>1.073951769</b> | <b>0.89993</b> | <b>3</b>  |
| Q8K586        | FNVWDTAGQEK                                                         | 1.035248229        | 2              | 3.033225  |
| Q8K586        | NLQYYDISAK                                                          | 0.928758162        | 1              | 2.215826  |
| Q8K586        | VCENIPIVLCGNK                                                       | 1.094326247        | 2              | 3.828304  |
| <b>Q8QZY1</b> | <b>EIF3L Eukaryotic translation initiation factor 3 subunit L</b>   | <b>1.124607378</b> | <b>0.84186</b> | <b>2</b>  |
| Q8QZY1        | KSEGEMDFLRSNPK                                                      | 0.948146844        | 2              | 2.312369  |
| Q8QZY1        | VFSDEVQQQAQLSTIR                                                    | 1.133205498        | 2              | 3.875024  |
| <b>Q8R066</b> | <b>C1Q4 Complement C1q tumor necrosis factor_related protein 4</b>  | <b>1.089603343</b> | <b>0.05592</b> | <b>2</b>  |
| Q8R066        | NRDEVQAMIYDDGASRR                                                   | 0.964969465        | 2              | 2.326402  |
| Q8R066        | TLSVKLMKNR                                                          | 1.417842474        | 2              | 2.413723  |
| <b>Q8R081</b> | <b>HNRPL Heterogeneous nuclear ribonucleoprotein L</b>              | <b>1.036304207</b> | <b>0.35127</b> | <b>5</b>  |
| Q8R081        | ASLNGADIYSGCCTLK                                                    | 1.041735254        | 2              | 3.317305  |
| Q8R081        | NDQDTWYDTNPNLSGGQDGPSPNPNKR                                         | 1.148843795        | 3              | 5.179823  |
| Q8R081        | SDALETGLFLNHQMK                                                     | 0.977099887        | 2              | 2.988459  |
| Q8R081        | SSSGLLEWDSK                                                         | 0.741269741        | 2              | 2.833583  |
| Q8R081        | TENAGDQHGGGGGGGAAGGGGGENYDDPHK                                      | 0.791340103        | 3              | 7.479366  |
| <b>Q8R0F9</b> | <b>S14L4 SEC14_like protein 4</b>                                   | <b>1.019725774</b> | <b>0.3675</b>  | <b>6</b>  |
| Q8R0F9        | FDNTYSLHTK                                                          | 1.591156676        | 2              | 3.068027  |
| Q8R0F9        | GSSHQVENEILFPGCVLR                                                  | 1.254715246        | 2              | 5.072796  |
| Q8R0F9        | VCEMLLHECELQSQK                                                     | 1.634055544        | 2              | 4.637535  |
| Q8R0F9        | VCEMLLHECELQSQK+Oxidation(3)                                        | 2.037816182        |                |           |
| Q8R0F9        | VGYTAEVLLPDK                                                        | 1.589846337        | 2              | 2.695363  |
| Q8R0F9        | VGYTAEVLLPDKACEEK                                                   | 0.977015754        | 2              | 2.743185  |
| <b>Q8R164</b> | <b>BPHL Valacyclovir hydrolase</b>                                  | <b>0.997170152</b> | <b>0.9773</b>  | <b>3</b>  |
| Q8R164        | FADEFNR                                                             | 1.159011097        | 2              | 2.49064   |
| Q8R164        | QVSLLGWSDGGITALIAAAK                                                | 0.821004673        | 2              | 3.436995  |
| Q8R164        | TDFAPQLQSLNK                                                        | 0.987558947        | 2              | 3.547161  |
| <b>Q8R1V4</b> | <b>TMED4 Transmembrane emp24 domain_containing protein 4</b>        | <b>0.981333225</b> | <b>1</b>       | <b>2</b>  |
| Q8R1V4        | CFIEEIPDETMVIGNYR                                                   | 0.979877793        | 2              | 3.550782  |

|               |                                                        |                    |                |          |
|---------------|--------------------------------------------------------|--------------------|----------------|----------|
| Q8R1V4        | QLLDQVEQIQK                                            | 0.981995584        | 2              | 3.146686 |
| <b>Q8R3Q6</b> | <b>CCD58 Coiled_coil domain_containing protein 58</b>  | <b>1.133679776</b> | <b>0.74498</b> | <b>2</b> |
| Q8R3Q6        | IVHELNTTPTASFAGK                                       | 0.906524242        | 2              | 4.195305 |
| Q8R3Q6        | NCIAQTSAVVK                                            | 1.152508675        | 2              | 2.661136 |
| <b>Q8R491</b> | <b>EHD3 EH domain_containing protein 3</b>             | <b>0.945137607</b> | <b>1</b>       | <b>5</b> |
| Q8R491        | ADQJETQQLMR                                            | 0.950059333        | 2              | 2.79187  |
| Q8R491        | LDISDEFSEVIK                                           | 0.957060513        | 2              | 3.138056 |
| Q8R491        | LFEAEEQDLFK                                            | 0.933851332        | 2              | 3.6      |
| Q8R491        | MQDQLQAQDFSK                                           | 1.057504177        | 2              | 3.81479  |
| Q8R491        | QEETQRPVQMVK                                           | 0.934620593        | 2              | 2.529147 |
| <b>Q8VBU2</b> | <b>NDRG2 Protein NDRG2</b>                             | <b>0.816015492</b> | <b>0.00937</b> | <b>7</b> |
| Q8VBU2        | CPVMLVVGDAQPHEDAVVECNSK                                | 0.813344127        | 3              | 4.767313 |
| Q8VBU2        | CPVMLVVGDAQPHEDAVVECNSK+Oxidation(3)                   | 0.731437613        |                |          |
| Q8VBU2        | LDPTQTSFLK                                             | 0.608936889        | 1              | 1.909294 |
| Q8VBU2        | MADSGGQPQLTQPGK                                        | 0.912846622        | 2              | 3.85656  |
| Q8VBU2        | SLITHAPNLENIELYWNSYNRR                                 | 1.026584609        | 3              | 4.776059 |
| Q8VBU2        | TASLTSAAASIDGSR                                        | 1.057596174        | 2              | 3.109354 |
| Q8VBU2        | TLSQSSSEGLTLPSPGHTMEVSC                                | 0.723438705        | 2              | 4.424169 |
| <b>Q8VC12</b> | <b>HUTU Urocanate hydratase</b>                        | <b>1.027476958</b> | <b>0.99999</b> | <b>7</b> |
| Q8VC12        | HQLVVGSQLAR                                            | 1.052909594        | 2              | 3.096704 |
| Q8VC12        | LLALEFAQELR                                            | 1.062365072        | 2              | 3.781817 |
| Q8VC12        | LQYMDNIR                                               | 1.099826956        | 2              | 2.35022  |
| Q8VC12        | LVITNGMVIPNYSSR                                        | 1.065808155        | 2              | 3.353469 |
| Q8VC12        | VAIAVAINQAIASGK                                        | 0.846843038        | 2              | 3.664294 |
| Q8VC12        | VFVTSGLGGMSGAAQAK                                      | 0.923263585        | 2              | 4.50862  |
| Q8VC12        | VFVTSGLGGMSGAAQAK+Oxidation(9)                         | 1.020616386        |                |          |
| <b>Q8VDG5</b> | <b>PPCS Phosphopantothenate__cysteine ligase</b>       | <b>1.210884938</b> | <b>0.47586</b> | <b>2</b> |
| Q8VDG5        | FLDNFSSGR                                              | 1.104853746        | 2              | 2.483594 |
| Q8VDG5        | LETDPDIISR                                             | 1.236888731        | 2              | 3.169044 |
| <b>Q8VED5</b> | <b>K2C79 Keratin_type II cytoskeletal 79</b>           | <b>0.901435992</b> | <b>0.46542</b> | <b>4</b> |
| Q8VED5        | NKYEDEINK                                              | 0.889529839        | 2              | 2.761595 |
| Q8VED5        | NKYEDEINKR                                             | 0.882404157        | 3              | 3.440344 |
| Q8VED5        | NLDLDSIIAEVK                                           | 1.173155533        | 2              | 3.849866 |
| Q8VED5        | YEDEINK                                                | 0.899551906        | 1              | 2.480872 |
| <b>Q8VEK3</b> | <b>HNRPU Heterogeneous nuclear ribonucleoprotein U</b> | <b>0.979423437</b> | <b>0.81086</b> | <b>9</b> |
| Q8VEK3        | EKPYFPIPEDCTFIQNVPLEDR                                 | 1.029661576        | 3              | 4.495188 |
| Q8VEK3        | GYFEYIEENK                                             | 0.973392971        | 2              | 3.266571 |
| Q8VEK3        | LLEQYKEESK                                             | 1.003108808        | 2              | 3.166838 |
| Q8VEK3        | LLEQYKEESKK                                            | 0.87894101         | 2              | 3.383716 |
| Q8VEK3        | LQAAALDNEAGGRPAMEPGNSLDLGGDAAGR                        | 0.999389558        | 3              | 5.08896  |
| Q8VEK3        | NFILDQTNVSAQAQR                                        | 0.90068407         | 2              | 4.528125 |
| Q8VEK3        | TCNCETEDYGEK                                           | 1.048758774        | 2              | 3.385928 |
| Q8VEK3        | VSELKEELKK                                             | 1.158640004        | 2              | 2.42955  |
| Q8VEK3        | YNILGTNTIMDK                                           | 0.970033078        | 2              | 3.575292 |
| <b>Q8VHE9</b> | <b>RETST All_trans_retinol 13_14_reductase</b>         | <b>1.122237304</b> | <b>0.94981</b> | <b>7</b> |
| Q8VHE9        | ATVQSVLLDSAGR                                          | 1.112157284        | 2              | 3.539473 |
| Q8VHE9        | FLPLPLTQLLNK                                           | 1.599745983        | 2              | 2.857179 |
| Q8VHE9        | GATYGADHDLAR                                           | 1.24793394         | 2              | 3.173579 |
| Q8VHE9        | NLYSDLQALGSK                                           | 1.072259077        | 2              | 2.919394 |
| Q8VHE9        | RPPEPLVTDK                                             | 1.360457037        | 2              | 2.618397 |
| Q8VHE9        | VLVLEQHTK                                              | 1.559527641        | 2              | 2.387858 |
| Q8VHE9        | VVAHGVSHAILLK                                          | 0.9639291          | 2              | 2.420338 |
| <b>Q8VHT6</b> | <b>AS3MT Arsenite methyltransferase</b>                | <b>1.353902026</b> | <b>9.9E-20</b> | <b>4</b> |
| Q8VHT6        | DCYVLSQLVGQK                                           | 1.312776345        | 2              | 2.967536 |
| Q8VHT6        | ILDGSGSGR                                              | 0.917606499        | 2              | 2.688855 |

|               |                                                                   |                    |                |           |
|---------------|-------------------------------------------------------------------|--------------------|----------------|-----------|
| Q8VHT6        | SLQNVHEEVISR                                                      | 1.51054462         | 2              | 3.216307  |
| Q8VHT6        | TSADLQTNACVTPAK                                                   | 1.447404732        | 2              | 3.84688   |
| <b>Q8VHX6</b> | <b>FLNC Filamin_C</b>                                             | <b>1.03811215</b>  | <b>0.49451</b> | <b>3</b>  |
| Q8VHX6        | AFGPGLEGGLVNK                                                     | 1.061802126        | 2              | 2.600145  |
| Q8VHX6        | GAGTGGGLGLTVEGPCEAK                                               | 1.036947903        | 2              | 3.895885  |
| Q8VHX6        | LIALLEVLVSQK                                                      | 1.517486429        | 2              | 2.698955  |
| <b>Q8VI04</b> | <b>ASGL1 L_asparaginase</b>                                       | <b>0.874677433</b> | <b>0.66103</b> | <b>3</b>  |
| Q8VI04        | FAADMGIPQTPAEK                                                    | 1.109311037        | 2              | 2.711102  |
| Q8VI04        | GNLAYATSTGGIVNK                                                   | 0.874631469        | 2              | 4.287473  |
| Q8VI04        | TVDEAATLALDYMK                                                    | 0.858093376        | 2              | 2.656144  |
| <b>Q8VID1</b> | <b>DHRS4 Dehydrogenase/reductase SDR family member 4</b>          | <b>0.941571415</b> | <b>0.04287</b> | <b>4</b>  |
| Q8VID1        | AVATLQGEGLSVTVGVCHVGK                                             | 0.900782702        | 2              | 4.466636  |
| Q8VID1        | LAEDGAHVVISSR                                                     | 3.206957361        | 2              | 3.700807  |
| Q8VID1        | NFAAELAPK                                                         | 0.920027162        | 2              | 2.517546  |
| Q8VID1        | VNCLAPGLIK                                                        | 1.037456184        | 2              | 2.540972  |
| <b>Q8VIF7</b> | <b>SBP1 Selenium_binding protein 1</b>                            | <b>0.971330402</b> | <b>0.99953</b> | <b>10</b> |
| Q8VIF7        | CGPGYATPLEAMK                                                     | 1.084779917        | 2              | 3.467742  |
| Q8VIF7        | FLHDPDATQGFVGCALSSNIQR                                            | 1.262962049        | 2              | 4.957894  |
| Q8VIF7        | GGFVLLDGETFEVK                                                    | 1.044927222        | 2              | 4.192704  |
| Q8VIF7        | GTWEKPGGEAPMGYDFWYQPR                                             | 1.011866266        | 2              | 4.33114   |
| Q8VIF7        | HEIIQTLQMK                                                        | 1.037394098        | 2              | 2.641031  |
| Q8VIF7        | HNIMVSTEWAAPNVFK                                                  | 0.997318485        | 2              | 4.299456  |
| Q8VIF7        | LTGQFLGGSIVK                                                      | 0.790393288        | 2              | 3.003609  |
| Q8VIF7        | NEGGTWSVEK                                                        | 1.107264991        | 2              | 2.886699  |
| Q8VIF7        | NTGIEAPDYLATVDVDPK                                                | 0.940287662        | 2              | 5.206403  |
| Q8VIF7        | VIEPNEIHAK                                                        | 1.12303093         | 2              | 2.54865   |
| <b>Q8VIJ6</b> | <b>SFPQ Splicing factor_proline_and glutamine_rich</b>            | <b>1.088711926</b> | <b>0.93675</b> | <b>3</b>  |
| Q8VIJ6        | FGQGGAGPVGGQGPR                                                   | 1.09299027         | 2              | 2.827186  |
| Q8VIJ6        | NLSPYVSNELLEAFSQFGPIER                                            | 1.075571743        | 2              | 3.53484   |
| Q8VIJ6        | YGEPGEVFINK                                                       | 0.98518395         | 2              | 2.798023  |
| <b>Q91VA0</b> | <b>ACSM1 Acyl_coenzyme A synthetase ACSM1_mitochondrial</b>       | <b>0.82241256</b>  | <b>1</b>       | <b>6</b>  |
| Q91VA0        | AFIVLNPEFLSHDQEQLIK                                               | 0.975288748        | 2              | 5.577048  |
| Q91VA0        | AILPFDLQIIDEK                                                     | 0.911182134        | 2              | 3.773881  |
| Q91VA0        | GNILPPNTEGYIGIR                                                   | 0.852743319        | 2              | 3.009643  |
| Q91VA0        | HNQGLAFR                                                          | 0.839369804        | 2              | 2.323281  |
| Q91VA0        | KVEFVSELPK                                                        | 0.912172589        | 2              | 2.873079  |
| Q91VA0        | NKEFGQL                                                           | 1.086300622        | 1              | 2.108725  |
| <b>Q91VM5</b> | <b>RBMXL Heterogeneous nuclear ribonucleoprotein G_like 1</b>     | <b>0.958306518</b> | <b>0.86586</b> | <b>2</b>  |
| Q91VM5        | LFIGGLNTETNEK                                                     | 1.095537409        | 2              | 3.151284  |
| Q91VM5        | VEQATKPSFESGR                                                     | 0.955016778        | 2              | 3.522907  |
| <b>Q91VM9</b> | <b>IPYR2 Inorganic pyrophosphatase 2_mitochondrial</b>            | <b>0.781789231</b> | <b>2.1E-05</b> | <b>2</b>  |
| Q91VM9        | IIAINVNDPEAEK                                                     | 0.935531495        | 2              | 3.251032  |
| Q91VM9        | MEIATEEPLNPIK                                                     | 0.777792144        | 2              | 3.867111  |
| <b>Q91W43</b> | <b>GCSP Glycine dehydrogenase [decarboxylating]_mitochondrial</b> | <b>0.769415174</b> | <b>0.0058</b>  | <b>4</b>  |
| Q91W43        | AGHQLQHDLFFDTLK                                                   | 0.760677143        | 2              | 2.411082  |
| Q91W43        | NLLENSGWVTQYTPYQPEVSQGR                                           | 0.926817894        | 2              | 4.082502  |
| Q91W43        | VSFQPNNSGAQGEYAGLATIR                                             | 0.790608878        | 2              | 4.778082  |
| Q91W43        | YGNIIDVAHLK                                                       | 0.767127752        | 3              | 3.490403  |
| <b>Q91W90</b> | <b>TXND5 Thioredoxin domain_containing protein 5</b>              | <b>0.983074635</b> | <b>0.10029</b> | <b>2</b>  |
| Q91W90        | SFEDTIAQGITFVK                                                    | 0.97787759         | 2              | 3.558086  |

|               |                                                                            |                    |                |           |
|---------------|----------------------------------------------------------------------------|--------------------|----------------|-----------|
| Q91W90        | VDCTQHYAVCSEHQVR                                                           | 1.155665829        | 3              | 4.390991  |
| <b>Q91WL5</b> | <b>CP4CA Cytochrome P450 4A12A</b>                                         | <b>0.89800466</b>  | <b>0.98914</b> | <b>3</b>  |
| Q91WL5        | FELLPDPTR                                                                  | 0.886928172        | 2              | 2.396487  |
| Q91WL5        | IQLQDEEELEK                                                                | 1.032833579        | 2              | 2.35265   |
| Q91WL5        | VAVALTLR                                                                   | 0.970387015        | 2              | 2.599054  |
| <b>Q91X77</b> | <b>CY250 Cytochrome P450 2C50</b>                                          | <b>0.913330646</b> | <b>0.4995</b>  | <b>3</b>  |
| Q91X77        | IKEHEESLDVTIPR                                                             | 0.876292536        | 3              | 3.601666  |
| Q91X77        | NFLLEK                                                                     | 0.828514468        | 1              | 2.107804  |
| Q91X77        | YALLLLK                                                                    | 1.063466056        | 2              | 2.820367  |
| <b>Q91X78</b> | <b>ERLN1 Erlin_1</b>                                                       | <b>1.114920689</b> | <b>0.02255</b> | <b>2</b>  |
| Q91X78        | ISEIEDAAFLAR                                                               | 0.984776941        | 2              | 2.785827  |
| Q91X78        | SVQTTLQTDEVK                                                               | 1.229351229        | 2              | 3.215433  |
| <b>Q91XE8</b> | <b>TM205 Transmembrane protein 205</b>                                     | <b>0.885851973</b> | <b>0.59246</b> | <b>2</b>  |
| Q91XE8        | HTFGLVQSK                                                                  | 0.884291664        | 2              | 2.48441   |
| Q91XE8        | MEKGEDPGSLIK+Oxidation(0)                                                  | 1.912021529        |                |           |
| <b>Q91XQ0</b> | <b>DYH8 Dynein heavy chain 8_ axonemal</b>                                 | <b>0.857334156</b> | <b>0.65072</b> | <b>2</b>  |
| Q91XQ0        | FRPEICDMVGNLVSVR+Oxidation(7)                                              | 0.852683993        |                |           |
| Q91XQ0        | SMTGIPNLQETLKEKQAR                                                         | 1.078156055        | 2              | 2.585173  |
| <b>Q91XR8</b> | <b>GPX42 Phospholipid hydroperoxide glutathione peroxidase_ nuclear</b>    | <b>1.185620305</b> | <b>0.12232</b> | <b>2</b>  |
| Q91XR8        | TDVNYTQLVDLHAR                                                             | 0.905595983        | 3              | 3.442171  |
| Q91XR8        | YGPMEEPQVIEK                                                               | 1.194091814        | 2              | 2.519012  |
| <b>Q91Y81</b> | <b>SEPT2 Septin_2</b>                                                      | <b>0.874289793</b> | <b>0.99777</b> | <b>2</b>  |
| Q91Y81        | ASIPFSVVGSNQLIEAK                                                          | 0.800018177        | 2              | 3.384167  |
| Q91Y81        | LTVVDTPGYGDAISR                                                            | 0.87769852         | 2              | 4.060359  |
| <b>Q91YE2</b> | <b>EGLN2 Egl nine homolog 2</b>                                            | <b>0.990463746</b> | <b>0.9393</b>  | <b>2</b>  |
| Q91YE2        | ERAAARDK                                                                   | 0.911946578        | 1              | 2.038808  |
| Q91YE2        | YQLASGQK                                                                   | 1.078307034        | 1              | 1.943258  |
| <b>Q91YP0</b> | <b>L2HDH L_2_hydroxyglutarate dehydrogenase_ mitochondrial</b>             | <b>0.903996884</b> | <b>0.76011</b> | <b>2</b>  |
| Q91YP0        | ISELSGCNPDQPVPFR                                                           | 0.861520486        | 2              | 3.158764  |
| Q91YP0        | NAPSPAATSSLAIR                                                             | 1.022025704        | 2              | 3.44049   |
| <b>Q91YT0</b> | <b>NDUV1 NADH dehydrogenase [ubiquinone] flavoprotein 1_ mitochondrial</b> | <b>1.101522791</b> | <b>0.99989</b> | <b>9</b>  |
| Q91YT0        | GAGAYICGEETALIESIEGK                                                       | 0.968500118        | 2              | 3.312476  |
| Q91YT0        | GDARPAEIDSLWEISK                                                           | 1.021868952        | 2              | 3.21349   |
| Q91YT0        | GEFYNEASNLQVAIR                                                            | 1.013941219        | 2              | 3.505469  |
| Q91YT0        | KTSFGSLKDEDR                                                               | 1.031038268        | 2              | 3.271385  |
| Q91YT0        | LKPPFPADVGVFGCPTTVANVETVAVSPTICR                                           | 1.205509129        | 3              | 3.825422  |
| Q91YT0        | LVEGCLVGR                                                                  | 1.066646942        | 2              | 2.59467   |
| Q91YT0        | QIEGHTICALGDGAAWPVQGLIR                                                    | 0.970574594        | 3              | 3.540077  |
| Q91YT0        | TSFGSLKDEDR                                                                | 1.122976921        | 2              | 2.614883  |
| Q91YT0        | YLVVNADEGEPGTCK                                                            | 1.096224982        | 2              | 5.062545  |
| <b>Q91Z53</b> | <b>GRHPR Glyoxylate reductase/hydroxypyruvate reductase</b>                | <b>0.816540506</b> | <b>0.70343</b> | <b>6</b>  |
| Q91Z53        | GDVVNQEDLYQALASGQIAAAGLDVTTPEPLPPSHPLTLK                                   | 0.796052065        | 3              | 6.880455  |
| Q91Z53        | LLDAAGANLR                                                                 | 0.979090251        | 2              | 3.152913  |
| Q91Z53        | NCVILPHIGSATYK                                                             | 0.832637046        | 2              | 3.619254  |
| Q91Z53        | NTMSLLAANNLLAGLR                                                           | 0.784760307        | 2              | 4.523881  |
| Q91Z53        | RLPEAIEEVK                                                                 | 0.866922663        | 2              | 2.459644  |
| Q91Z53        | VISTLSVGVVDHLALDEIK                                                        | 1.044432631        | 2              | 4.234691  |
| <b>Q91ZJ5</b> | <b>UGPA UTP__glucose_1_phosphate uridylyltransferase</b>                   | <b>1.004753162</b> | <b>0.99998</b> | <b>14</b> |
| Q91ZJ5        | AMSQDGASQFQEVILQELELSVK                                                    | 0.912594866        | 3              | 4.776452  |
| Q91ZJ5        | FVQDSLK                                                                    | 0.848274532        | 1              | 1.990381  |
| Q91ZJ5        | GGTLTQYEGK                                                                 | 0.991756797        | 2              | 2.543858  |

|               |                                                                                     |                    |                |           |
|---------------|-------------------------------------------------------------------------------------|--------------------|----------------|-----------|
| Q91ZJ5        | GLPDNISSVLNK                                                                        | 0.981680718        | 2              | 3.876582  |
| Q91ZJ5        | GTVIIIANHGDR                                                                        | 0.950838043        | 2              | 3.043601  |
| Q91ZJ5        | IDIPPGAVLENK                                                                        | 0.9601895          | 2              | 3.036104  |
| Q91ZJ5        | IQRPPEDSIQPYEK                                                                      | 1.030939419        | 3              | 4.487566  |
| Q91ZJ5        | LNGGLGTSMGCK                                                                        | 1.017463589        | 2              | 3.127034  |
| Q91ZJ5        | LQEQNAIDMEIIVNPK                                                                    | 1.032049945        | 2              | 2.489109  |
| Q91ZJ5        | LVEIAQVPK                                                                           | 1.042658218        | 2              | 3.35483   |
| Q91ZJ5        | NENTFLDLTVQQIEHLNK                                                                  | 0.887856771        | 2              | 5.244436  |
| Q91ZJ5        | SFENSLGINVPR                                                                        | 0.924195531        | 2              | 3.22864   |
| Q91ZJ5        | TLDGGLNVIQLETAVGAAIK                                                                | 0.87798623         | 3              | 5.508804  |
| Q91ZJ5        | TYNTDVPLVLMNSFNTDEDTKK                                                              | 0.954571869        | 2              | 4.605159  |
| <b>Q91ZX7</b> | <b>LRP1 Prolow_density lipoprotein receptor_related protein 1</b>                   | <b>0.843241661</b> | <b>0.71658</b> | <b>7</b>  |
| Q91ZX7        | AVTDEEPFLIFANR                                                                      | 0.809296967        | 2              | 2.499593  |
| Q91ZX7        | CLQGACVVNK                                                                          | 1.247047461        | 2              | 2.335465  |
| Q91ZX7        | GCHVNECLSR                                                                          | 1.019193496        | 2              | 2.629994  |
| Q91ZX7        | IETAAMDGTLR                                                                         | 1.426875406        | 2              | 2.327921  |
| Q91ZX7        | ILQEDFTCR                                                                           | 0.994435004        | 2              | 2.55975   |
| Q91ZX7        | LDGLCIPLR                                                                           | 1.058239893        | 2              | 2.458098  |
| Q91ZX7        | MYDAQQQVGTNK                                                                        | 1.031281763        | 2              | 4.3498    |
| <b>Q920A6</b> | <b>RISC Retinoid_inducible serine carboxypeptidase</b>                              | <b>0.890917437</b> | <b>0.88903</b> | <b>3</b>  |
| Q920A6        | DLDTVASDMMVLLK                                                                      | 0.959246652        | 2              | 3.320173  |
| Q920A6        | GLAEVSDIAEQVLNAVNK                                                                  | 0.887593728        | 3              | 4.870239  |
| Q920A6        | NTDGVNFYNILTK                                                                       | 1.21855017         | 2              | 2.944644  |
| <b>Q920D2</b> | <b>DYR Dihydrofolate reductase</b>                                                  | <b>0.932307902</b> | <b>0.00847</b> | <b>4</b>  |
| Q920D2        | IMQEFESDTFFPEIDLEK                                                                  | 0.804997691        | 2              | 4.390249  |
| Q920D2        | LIEQPELASK                                                                          | 0.81342733         | 2              | 2.521969  |
| Q920D2        | LLPEYPGVLSEIQEEK                                                                    | 0.932871278        | 2              | 3.67855   |
| Q920D2        | NGDLPWPLLR                                                                          | 0.772075854        | 2              | 3.038924  |
| <b>Q920F5</b> | <b>DCMC Malonyl_CoA decarboxylase_mitochondrial</b>                                 | <b>1.000684861</b> | <b>0.83902</b> | <b>4</b>  |
| Q920F5        | ADLLEAQALK                                                                          | 0.797408655        | 2              | 2.312699  |
| Q920F5        | EIAEVTGDPVHESLK                                                                     | 1.202774435        | 2              | 2.971857  |
| Q920F5        | ISECEAVHPVK                                                                         | 0.942619207        | 2              | 3.344306  |
| Q920F5        | WLLGLLNVQGK                                                                         | 0.854382935        | 2              | 3.616333  |
| <b>Q920L2</b> | <b>DHSA Succinate dehydrogenase [ubiquinone] flavoprotein subunit_mitochondrial</b> | <b>0.892407833</b> | <b>0.86801</b> | <b>19</b> |
| Q920L2        | ACALSIAESCRPGDK                                                                     | 1.089705636        | 2              | 3.148103  |
| Q920L2        | AGLPCQDLFVQFHPTGIYGAGCLITEGCR                                                       | 0.836887172        | 3              | 4.823573  |
| Q920L2        | ANAGEESVMNLDK                                                                       | 1.038937283        | 2              | 4.005419  |
| Q920L2        | GEGGILINSQGER                                                                       | 0.963950818        | 2              | 4.334742  |
| Q920L2        | GSDWLGDDQDAIHYMTEQAPASVVELENYGMPFSR                                                 | 1.063373051        | 3              | 5.011825  |
| Q920L2        | GVIALCIEDGSIHR                                                                      | 0.910973294        | 2              | 3.499012  |
| Q920L2        | HTLSYVDTK                                                                           | 0.981231107        | 1              | 2.257205  |
| Q920L2        | HVNGQDQIVPGLYACGEAACASVHGANR                                                        | 0.88893568         | 3              | 6.994025  |
| Q920L2        | IDEYDYSKPIEGQQK                                                                     | 1.105974951        | 2              | 4.544931  |
| Q920L2        | KHTLSYVDTK                                                                          | 0.903415105        | 2              | 2.605049  |
| Q920L2        | LGANSLDLVVFGR                                                                       | 1.083766496        | 2              | 3.403199  |
| Q920L2        | NTIIATGGYGR                                                                         | 1.000704793        | 2              | 2.80642   |
| Q920L2        | TGHSLHHTLYGR                                                                        | 0.808977823        | 2              | 2.343961  |
| Q920L2        | TLNEADCATVPPAIR                                                                     | 0.895034903        | 2              | 3.617169  |
| Q920L2        | TYFSCTSAHTSTGDGTAMVTR                                                               | 1.092136912        | 3              | 3.426553  |
| Q920L2        | VGSVLQEGCEK                                                                         | 0.976518532        | 2              | 3.472378  |
| Q920L2        | VSDAISTQYPVVDHEFDVAVVVGAGGAGLR                                                      | 0.877671245        | 3              | 4.009187  |
| Q920L2        | VSQLYGDLQHLK                                                                        | 0.974980248        | 3              | 3.451027  |
| Q920L2        | VTLDYRPPVIDK                                                                        | 1.017968309        | 2              | 3.336547  |



|               |                                                                               |                    |                |           |
|---------------|-------------------------------------------------------------------------------|--------------------|----------------|-----------|
| <b>Q920P0</b> | <b>DCXR L_xylulose reductase</b>                                              | <b>0.852062298</b> | <b>0.99832</b> | <b>6</b>  |
| Q920P0        | AVVQVSQIVAR                                                                   | 0.824124591        | 2              | 2.997207  |
| Q920P0        | GVPGAINVSSQASQR                                                               | 0.941344131        | 2              | 5.490012  |
| Q920P0        | SSMTTGSALPVDGGFLAT                                                            | 0.971243806        | 2              | 2.871311  |
| Q920P0        | STVLALQAAGAQQVAVSR                                                            | 1.095356508        | 2              | 4.404534  |
| Q920P0        | TRELDLSLVR                                                                    | 0.969004422        | 2              | 3.042619  |
| Q920P0        | VNAVNPVTVMTPMGR                                                               | 0.968978512        | 2              | 2.845801  |
| <b>Q921F2</b> | <b>TADBP TAR DNA_binding protein 43</b>                                       | <b>1.034015385</b> | <b>0.83487</b> | <b>4</b>  |
| Q921F2        | FGGNPGGFGNQGGFGNSR                                                            | 1.013828938        | 2              | 4.071534  |
| Q921F2        | FTEYETQVK                                                                     | 1.070199224        | 2              | 2.674551  |
| Q921F2        | GISVHISNAEPK                                                                  | 1.249885052        | 2              | 2.664879  |
| Q921F2        | TSDLIVLGLPWK                                                                  | 1.068672775        | 2              | 3.12147   |
| <b>Q922F4</b> | <b>TBB6 Tubulin beta_6 chain</b>                                              | <b>0.978726723</b> | <b>0.99982</b> | <b>5</b>  |
| Q922F4        | ALTVELTQQMFDK                                                                 | 0.929831357        | 2              | 4.139413  |
| Q922F4        | GHYTEGAELVDSVLDDVVR                                                           | 1.00308319         | 2              | 6.669033  |
| Q922F4        | IREEYPDR                                                                      | 0.98547314         | 2              | 2.96996   |
| Q922F4        | MASTFIGNSTAIQELFK                                                             | 0.91649274         | 2              | 3.833952  |
| Q922F4        | NSSYFVEWIPNNVK                                                                | 1.045117193        | 2              | 4.782595  |
| <b>Q922J3</b> | <b>CLIP1 CAP_Gly domain_containing linker protein 1</b>                       | <b>1.054600789</b> | <b>0.99396</b> | <b>2</b>  |
| Q922J3        | EMETMQAKLMK+Oxidation(4)                                                      | 1.023490813        |                |           |
| Q922J3        | HEEILQNLQKMLADTEDK                                                            | 1.064957003        | 2              | 2.564286  |
| <b>Q923D2</b> |                                                                               | <b>0.919903881</b> | <b>0.61526</b> | <b>3</b>  |
| Q923D2        | LQDVTDDHIR                                                                    | 0.949995474        | 2              | 3.364575  |
| Q923D2        | TGLTTLAQAVQAGYEVTVLVR                                                         | 0.801030843        | 3              | 4.281244  |
| Q923D2        | YVAVMPPHIGDQPLTGAYTVTLGDR                                                     | 0.898106045        | 3              | 4.542738  |
| <b>Q923J6</b> | <b>DYH12 Dynein heavy chain 12_axonemal</b>                                   | <b>1.217631442</b> | <b>0.66896</b> | <b>2</b>  |
| Q923J6        | FFFLSNDEMLEILSETKDPLR                                                         | 1.287249569        | 2              | 2.412905  |
| Q923J6        | LEFLTNDLIK                                                                    | 0.808984383        | 1              | 2.099626  |
| <b>Q923K9</b> | <b>A1CF APOBEC1 complementation factor</b>                                    | <b>0.938266425</b> | <b>0.98136</b> | <b>2</b>  |
| Q923K9        | LAPQILEEICQK                                                                  | 0.982549995        | 2              | 2.33733   |
| Q923K9        | VTEGVVDVIVYPSAADK                                                             | 0.919740644        | 2              | 3.581791  |
| <b>Q923M1</b> | <b>MSRA Mitochondrial peptide methionine sulfoxide reductase</b>              | <b>0.828511879</b> | <b>0.01014</b> | <b>2</b>  |
| Q923M1        | SAVYPTSAVQMEAAALK                                                             | 0.834820256        | 2              | 3.812218  |
| Q923M1        | VISAEEALPGR                                                                   | 0.867183771        | 2              | 3.128269  |
| <b>Q923V8</b> | <b>SEP15 15 kDa selenoprotein</b>                                             | <b>0.904993463</b> | <b>0.21557</b> | <b>3</b>  |
| Q923V8        | GCCQEEAQFETK                                                                  | 0.959669199        | 2              | 3.891757  |
| Q923V8        | LLDDNGNIAEELSILK                                                              | 1.158009873        | 2              | 4.218528  |
| Q923V8        | WNTDSVEEFLSEK                                                                 | 0.849206819        | 2              | 2.954593  |
| <b>Q924C3</b> | <b>ENPP1 Ectonucleotide pyrophosphatase/phosphodiesterase family member 1</b> | <b>1.208456938</b> | <b>0.00371</b> | <b>5</b>  |
| Q924C3        | AEYLHTWGGLLPVISK                                                              | 0.864612881        | 3              | 3.951748  |
| Q924C3        | GQPIWVTANHQEVR                                                                | 0.820293846        | 2              | 2.925019  |
| Q924C3        | IEPLTFYLDPQWQLALNPSER                                                         | 1.208521836        | 2              | 2.427873  |
| Q924C3        | SGTYFWPGSDVEIDGILPDIYK                                                        | 0.570078754        | 2              | 3.438065  |
| Q924C3        | SVSSDLGCTCDPSIVPIMDFEK                                                        | 0.698476593        | 2              | 2.754629  |
| <b>Q924S5</b> | <b>LONM Lon protease homolog_mitochondrial</b>                                | <b>1.022122084</b> | <b>0.93382</b> | <b>13</b> |
| Q924S5        | AGVTCIILPAENR                                                                 | 1.046678077        | 2              | 2.623525  |
| Q924S5        | AQLSATVLTLLIK                                                                 | 1.336380736        | 2              | 3.864212  |
| Q924S5        | AQSVLEEDHYGMEDVK                                                              | 1.198747234        | 2              | 4.259191  |
| Q924S5        | EHQEALAVR                                                                     | 1.001137157        | 2              | 2.877724  |
| Q924S5        | EVGDELGAKPQLEMVTEATSDTSK                                                      | 0.854911066        | 3              | 3.453974  |
| Q924S5        | HVMDVVDEELSK                                                                  | 0.98476448         | 2              | 3.212523  |
| Q924S5        | IVSGEAQTVHVTPELQDFVGKPVFTVER                                                  | 1.147399766        | 3              | 6.188807  |
| Q924S5        | MEMINVSQYVAQEK                                                                | 1.997245748        | 2              | 2.543144  |

|               |                                                               |                    |                |          |
|---------------|---------------------------------------------------------------|--------------------|----------------|----------|
| Q924S5        | NYLDWLTSIPWGR                                                 | 0.769025537        | 2              | 2.883768 |
| Q924S5        | QLEVEPEGLEPEAENK                                              | 0.977675504        | 2              | 4.258727 |
| Q924S5        | QSDENLDLAR                                                    | 0.885016863        | 2              | 2.818621 |
| Q924S5        | TENPLVLIDEVDK                                                 | 0.948405482        | 2              | 2.778177 |
| Q924S5        | VLEFIAVSQLR                                                   | 0.818822581        | 2              | 3.088209 |
| <b>Q924W5</b> | <b>SMC6 Structural maintenance of chromosomes protein 6</b>   | <b>0.969602005</b> | <b>0.99921</b> | <b>2</b> |
| Q924W5        | ELDMKEKELQEK+Oxidation(3)                                     | 0.991961432        |                |          |
| Q924W5        | TKEQINQGEERLETK                                               | 0.962580667        | 2              | 2.455998 |
| <b>Q99020</b> | <b>ROAA Heterogeneous nuclear ribonucleoprotein A/B</b>       | <b>0.983070888</b> | <b>1.9E-13</b> | <b>3</b> |
| Q99020        | EYFGQFGEIAIELPIDPK                                            | 1.037459877        | 2              | 2.95541  |
| Q99020        | FGEVVDCTIK                                                    | 0.829800743        | 2              | 2.761502 |
| Q99020        | IFVGGLNPEATEEK                                                | 1.420037055        | 2              | 4.035909 |
| <b>Q99068</b> | <b>AMRP Alpha_2_macroglobulin receptor_associated protein</b> | <b>0.848613954</b> | <b>0.6533</b>  | <b>3</b> |
| Q99068        | EELKHFEAKIEK                                                  | 1.000104876        | 2              | 2.427901 |
| Q99068        | HLQDLSSR                                                      | 0.84829449         | 2              | 2.337855 |
| Q99068        | HVESIGDPEHISR                                                 | 1.110156805        | 3              | 3.373267 |
| <b>Q99J14</b> | <b>PSMD6 26S proteasome non_ATPase regulatory subunit 6</b>   | <b>1.147180885</b> | <b>0.87362</b> | <b>4</b> |
| Q99J14        | GAEILEVLHSLPAVR                                               | 1.207532802        | 2              | 2.35956  |
| Q99J14        | LDEELEDAEK                                                    | 1.116619437        | 2              | 2.397714 |
| Q99J14        | RLDEELEDAEK                                                   | 1.21236713         | 2              | 2.910735 |
| Q99J14        | VNEIVETNRPDSK                                                 | 1.041902102        | 2              | 3.589453 |
| <b>Q99KN9</b> | <b>EPN4 Clathrin interactor 1</b>                             | <b>0.994992009</b> | <b>0.68925</b> | <b>2</b> |
| Q99KN9        | GEFKDEEETVTTK                                                 | 1.142825819        | 2              | 3.05005  |
| Q99KN9        | HIHITQATETTTTR                                                | 0.968787641        | 3              | 3.387228 |
| <b>Q99L04</b> | <b>DHRS1 Dehydrogenase/reductase SDR family member 1</b>      | <b>0.91148734</b>  | <b>0.99954</b> | <b>2</b> |
| Q99L04        | ATAQEAQSLGGR                                                  | 0.914255868        | 2              | 3.64541  |
| Q99L04        | CVPVVCDSSESEVK                                                | 0.911383947        | 2              | 3.399817 |
| <b>Q99LF4</b> | <b>RTCB tRNA_splicing ligase RtcB homolog</b>                 | <b>0.954727394</b> | <b>0.86536</b> | <b>4</b> |
| Q99LF4        | GLGHQVATDALVAMEK                                              | 0.67368369         | 2              | 3.972651 |
| Q99LF4        | NVTDVVNTCHDAGISK                                              | 1.21169126         | 2              | 4.468873 |
| Q99LF4        | NYNDELQFLDK                                                   | 0.945030327        | 2              | 2.920885 |
| Q99LF4        | TNLDESVDQPVK                                                  | 0.96201831         | 2              | 3.316954 |
| <b>Q99LH1</b> | <b>NOG2 Nucleolar GTP_binding protein 2</b>                   | <b>1.055967772</b> | <b>0.63423</b> | <b>2</b> |
| Q99LH1        | GGEPDMLTVSKMVLNDWQR+Oxidation(11)                             | 1.055967772        |                |          |
| Q99LH1        | GGEPDMLTVSKMVLNDWQR+Oxidation(5)                              | 1.055967772        |                |          |
| <b>Q99ML5</b> | <b>PCYOX Prenylcysteine oxidase</b>                           | <b>0.846060863</b> | <b>0.34185</b> | <b>3</b> |
| Q99ML5        | ELGLSSVPASGGLVGVYNGK                                          | 0.795694173        | 2              | 2.518651 |
| Q99ML5        | NFDPPIEEFNDPYQLVTTLIK                                         | 0.923163482        | 3              | 4.483006 |
| Q99ML5        | YQSHDYAFSSVEK                                                 | 0.956586407        | 2              | 2.882505 |
| <b>Q99MS0</b> | <b>S14L2 SEC14_like protein 2</b>                             | <b>1.014474051</b> | <b>0.52859</b> | <b>5</b> |
| Q99MS0        | AGEMTEVLPNQR                                                  | 1.346001904        | 2              | 2.975658 |
| Q99MS0        | CGYDLGCPVWYDIIGPLDAK                                          | 0.611647024        | 2              | 3.191858 |
| Q99MS0        | HISPDQLPVEYGGTMDPDGPNK                                        | 1.018782175        | 3              | 4.807725 |
| Q99MS0        | INYGGDIPK                                                     | 1.042862192        | 2              | 2.504065 |
| Q99MS0        | QQYEHSVQISR                                                   | 1.012812803        | 2              | 2.478615 |
| <b>Q99MW1</b> | <b>STK31 Serine/threonine_protein kinase 31</b>               | <b>0.965783929</b> | <b>0.8731</b>  | <b>2</b> |
| Q99MW1        | EVLLENYKALELK                                                 | 0.821862527        | 2              | 2.304487 |
| Q99MW1        | QDQKLIIEENEK                                                  | 1.032833579        | 2              | 2.588887 |
| <b>Q99MZ8</b> | <b>LASP1 LIM and SH3 domain protein 1</b>                     | <b>0.882049709</b> | <b>0.1586</b>  | <b>7</b> |
| Q99MZ8        | GFSVVAADTPELQR                                                | 0.821020715        | 2              | 3.381973 |
| Q99MZ8        | MGPSGGEGIEPER                                                 | 0.997481927        | 2              | 3.194432 |
| Q99MZ8        | QQSELQSQVR                                                    | 0.877923262        | 2              | 2.431894 |

|               |                                                                         |                    |                |           |
|---------------|-------------------------------------------------------------------------|--------------------|----------------|-----------|
| Q99MZ8        | QSFTMVADTPENLR                                                          | 0.906307579        | 2              | 3.302576  |
| Q99MZ8        | TQDQISNIK                                                               | 1.061112303        | 2              | 2.659462  |
| Q99MZ8        | YHEEFEK                                                                 | 0.860326684        | 1              | 2.215444  |
| Q99MZ8        | YKEEFEK                                                                 | 0.817724485        | 1              | 2.325076  |
| <b>Q99NA5</b> | <b>IDH3A Isocitrate dehydrogenase [NAD] subunit alpha_mitochondrial</b> | <b>1.009840612</b> | <b>0.72063</b> | <b>2</b>  |
| Q99NA5        | IEAACFATIK                                                              | 0.885978997        | 2              | 2.315682  |
| Q99NA5        | NVTAIQGGPK                                                              | 1.196637301        | 2              | 2.437847  |
| <b>Q99NB7</b> | <b>ACO12 Acyl_coenzyme A thioesterase 12</b>                            | <b>1.12901894</b>  | <b>0.94088</b> | <b>3</b>  |
| Q99NB7        | GSISNTNVEALK                                                            | 1.134780783        | 2              | 2.856956  |
| Q99NB7        | KGSISNTNVEALK                                                           | 1.028166639        | 2              | 3.169024  |
| Q99NB7        | VHLKPVLLQTEQEVEHR                                                       | 1.006178685        | 3              | 3.845462  |
| <b>Q99PF5</b> | <b>FUBP2 Far upstream element_binding protein 2</b>                     | <b>0.99989459</b>  | <b>0.8418</b>  | <b>8</b>  |
| Q99PF5        | AINQQTGAFVEISR                                                          | 2.508169776        | 2              | 3.685945  |
| Q99PF5        | GGGGPGGGGPGGGGASGGPSQPPGGGGPGIR                                         | 0.949838515        | 2              | 6.111699  |
| Q99PF5        | IGGDAATTNNNTPDFGFGGQK                                                   | 1.099945495        | 2              | 4.655235  |
| Q99PF5        | IGQQPQQPGAPPQQDYTK                                                      | 1.424069602        | 2              | 3.685757  |
| Q99PF5        | IINDLLQSLR                                                              | 0.991798347        | 2              | 2.696557  |
| Q99PF5        | SVSLTGAPESVQK                                                           | 1.091882192        | 2              | 3.309307  |
| Q99PF5        | VGGGIDVPVPR                                                             | 0.859405366        | 2              | 2.879406  |
| Q99PF5        | VQISPDGGLPER                                                            | 0.807192476        | 2              | 2.566416  |
| <b>Q99PL5</b> | <b>RRBP1 Ribosome_binding protein 1</b>                                 | <b>1.210188688</b> | <b>4.4E-16</b> | <b>21</b> |
| Q99PL5        | DALNQATSQVESK                                                           | 1.663214106        | 2              | 3.758504  |
| Q99PL5        | EAEETQNSLQAECDQYR                                                       | 1.323379297        | 2              | 5.467913  |
| Q99PL5        | EEITQLK                                                                 | 0.792155665        | 1              | 1.977029  |
| Q99PL5        | EHTSHLEAELEK                                                            | 1.388954544        | 2              | 3.317014  |
| Q99PL5        | EQEIAAVQAR                                                              | 1.862536844        | 2              | 2.379784  |
| Q99PL5        | ETSYEEALANQR                                                            | 2.547637376        | 2              | 2.740476  |
| Q99PL5        | GELESSDQVR                                                              | 1.276252978        | 2              | 3.153927  |
| Q99PL5        | HLEDIVEK                                                                | 1.411866186        | 2              | 2.544025  |
| Q99PL5        | HMAAASAECQNYAK                                                          | 0.823433041        | 2              | 4.461192  |
| Q99PL5        | HMAAASAECQNYAK+Oxidation(1)                                             | 1.486338727        |                |           |
| Q99PL5        | IQEELEK                                                                 | 1.438073781        | 1              | 2.14268   |
| Q99PL5        | LKELESQVSCLEK                                                           | 0.991573162        | 2              | 4.059691  |
| Q99PL5        | LLATEQEDAAVAK                                                           | 1.261733245        | 2              | 4.539742  |
| Q99PL5        | LQQENSILR                                                               | 1.206468665        | 2              | 2.829821  |
| Q99PL5        | LQSSEVEVK                                                               | 1.082105025        | 2              | 2.524143  |
| Q99PL5        | LREAETQNSLQAECDQYR                                                      | 1.002297983        | 3              | 5.125143  |
| Q99PL5        | QLHLAEAQTK                                                              | 1.262573538        | 2              | 2.327596  |
| Q99PL5        | TILAETEGMLK                                                             | 1.048951656        | 2              | 3.038155  |
| Q99PL5        | TLQEQLENGPNQLAR                                                         | 1.069559441        | 2              | 4.824466  |
| Q99PL5        | TLVSTVGSMVFSEGEAQR                                                      | 1.112113638        | 3              | 4.837025  |
| Q99PL5        | VEPAVSSIVNSIQVLASK                                                      | 0.911461578        | 2              | 4.981925  |
| <b>Q99PV0</b> | <b>PRP8 Pre_mRNA_processing_splicing factor 8</b>                       | <b>0.891598513</b> | <b>0.89156</b> | <b>2</b>  |
| Q99PV0        | AAVMHDILDMMPEGIK+Oxidation(3)                                           | 0.891598513        |                |           |
| Q99PV0        | AAVMHDILDMMPEGIK+Oxidation(3)                                           | 0.891598513        |                |           |
| <b>Q9CPQ1</b> | <b>COX6C Cytochrome c oxidase subunit 6C</b>                            | <b>1.047604142</b> | <b>0.99884</b> | <b>2</b>  |
| Q9CPQ1        | FGVAEPR                                                                 | 1.047328677        | 2              | 2.345819  |
| Q9CPQ1        | NYDSMKDFEEMR                                                            | 1.22444532         | 2              | 3.545067  |
| <b>Q9CQS8</b> | <b>SC61B Protein transport protein Sec61 subunit beta</b>               | <b>1.067188005</b> | <b>0.53903</b> | <b>2</b>  |
| Q9CQS8        | FYTEDSPGLK                                                              | 1.224073348        | 2              | 2.331386  |
| Q9CQS8        | TTSAGTGGMWR                                                             | 1.030504865        | 2              | 2.3868    |
| <b>Q9CRB8</b> | <b>MTFP1 Mitochondrial fission process protein 1</b>                    | <b>0.918642167</b> | <b>0.47052</b> | <b>2</b>  |
| Q9CRB8        | SVDFLDSSLR                                                              | 0.869170082        | 2              | 2.799437  |
| Q9CRB8        | YLGYANEVGEAFR                                                           | 1.103349096        | 2              | 2.718529  |

|               |                                                                                            |                    |                |          |
|---------------|--------------------------------------------------------------------------------------------|--------------------|----------------|----------|
| <b>Q9CRB9</b> | <b>CHCH3 Coiled_coil_helix_coiled_coil_helix domain_containing protein 3_mitochondrial</b> | <b>1.254630751</b> | <b>0.01164</b> | <b>2</b> |
| Q9CRB9        | VAEELALEQAK                                                                                | 1.3586326          | 2              | 3.572165 |
| Q9CRB9        | YEYHPVCADLQTK                                                                              | 0.904666101        | 2              | 3.661733 |
| <b>Q9CW42</b> | <b>MOSC1 MOSC domain_containing protein 1_mitochondrial</b>                                | <b>0.942794096</b> | <b>0.03535</b> | <b>3</b> |
| Q9CW42        | DLLLPIPPATNPLLQCR                                                                          | 1.152811467        | 2              | 4.14524  |
| Q9CW42        | GLSVSEAECTAMGLR                                                                            | 0.826898614        | 2              | 3.313146 |
| Q9CW42        | LQQVGTVAQLWIYPIK                                                                           | 0.803286742        | 2              | 2.945435 |
| <b>Q9CWH6</b> | <b>PSA7L Proteasome subunit alpha type_7_like</b>                                          | <b>1.051855409</b> | <b>0.93056</b> | <b>3</b> |
| Q9CWH6        | AITVFPDGHFLFQVEYAQEAVK                                                                     | 1.012524585        | 2              | 4.488051 |
| Q9CWH6        | ALLEVQSGGK                                                                                 | 0.878148915        | 2              | 3.431706 |
| Q9CWH6        | LTVEDPVTVEYITR                                                                             | 1.086672227        | 2              | 3.902525 |
| <b>Q9CWK8</b> | <b>SNX2 Sorting nexin 2</b>                                                                | <b>0.950690484</b> | <b>0.96511</b> | <b>4</b> |
| Q9CWK8        | AVNTQALSGAGILR                                                                             | 0.896753488        | 2              | 3.189193 |
| Q9CWK8        | QQQFENLDQQLR                                                                               | 0.961437907        | 2              | 2.818141 |
| Q9CWK8        | WEDAQITLLK                                                                                 | 0.931244139        | 2              | 2.788138 |
| Q9CWK8        | YWEAFLPEAK                                                                                 | 1.019207315        | 2              | 2.53179  |
| <b>Q9CXS4</b> | <b>CENPV Centromere protein V</b>                                                          | <b>0.81083498</b>  | <b>0.00354</b> | <b>2</b> |
| Q9CXS4        | LLDTEFYQGLVK                                                                               | 0.817924736        | 2              | 3.939583 |
| Q9CXS4        | SVVTEEFNGSDWER                                                                             | 0.809890474        | 2              | 3.769433 |
| <b>Q9CYN2</b> | <b>SPCS2 Signal peptidase complex subunit 2</b>                                            | <b>1.222909568</b> | <b>3E-05</b>   | <b>2</b> |
| Q9CYN2        | LHDSLATER                                                                                  | 0.968025646        | 2              | 2.419529 |
| Q9CYN2        | YVENFGLIDGR                                                                                | 1.223899481        | 2              | 2.736593 |
| <b>Q9CYW4</b> | <b>HDHD3 Haloacid dehalogenase_like hydrolase domain_containing protein 3</b>              | <b>0.844083458</b> | <b>0.27147</b> | <b>2</b> |
| Q9CYW4        | LEDILTGLGLR                                                                                | 0.82552951         | 2              | 4.23748  |
| Q9CYW4        | RLEDILTGLGLR                                                                               | 0.643644214        | 2              | 3.281152 |
| <b>Q9CZY3</b> | <b>UB2V1 Ubiquitin_conjugating enzyme E2 variant 1</b>                                     | <b>0.971750315</b> | <b>0.60071</b> | <b>2</b> |
| Q9CZY3        | LLEELEEGQK                                                                                 | 0.951812652        | 2              | 2.749477 |
| Q9CZY3        | VNMSGVSSNGVVDPR                                                                            | 1.192760786        | 2              | 2.61564  |
| <b>Q9D0M3</b> | <b>CY1 Cytochrome c1_heme protein_mitochondrial</b>                                        | <b>1.027025383</b> | <b>0.9298</b>  | <b>4</b> |
| Q9D0M3        | GLLSSLDHTSIR                                                                               | 1.015197375        | 2              | 3.196044 |
| Q9D0M3        | HGGEDYVFSLLTGYCEPPTGVSLR                                                                   | 1.095932324        | 3              | 5.915704 |
| Q9D0M3        | HLVGVCYTEEEAK                                                                              | 1.061173259        | 2              | 3.734705 |
| Q9D0M3        | LSDYFPKYPNPEAAR                                                                            | 1.149300593        | 3              | 3.633964 |
| <b>Q9D0S9</b> | <b>HINT2 Histidine triad nucleotide_binding protein 2_mitochondrial</b>                    | <b>0.800427954</b> | <b>0.22948</b> | <b>3</b> |
| Q9D0S9        | DVAPQAPVHFLVIPR                                                                            | 0.847364613        | 2              | 2.823217 |
| Q9D0S9        | ISQAEEDDQQLLGHLLLVAK                                                                       | 0.996100181        | 2              | 5.156553 |
| Q9D0S9        | SLPADILYEDQQLVFR                                                                           | 0.866938416        | 2              | 3.498697 |
| <b>Q9D172</b> | <b>ES1 ES1 protein homolog_mitochondrial</b>                                               | <b>1.046787538</b> | <b>1</b>       | <b>4</b> |
| Q9D172        | GVEVTVGHEQEEGGK                                                                            | 1.084215924        | 2              | 3.801411 |
| Q9D172        | ITSLAQLNAANHDAIFPGGFGAAK                                                                   | 1.050047903        | 2              | 4.62831  |
| Q9D172        | NLSTFAVDGK                                                                                 | 0.983566719        | 1              | 2.622995 |
| Q9D172        | NVLAESAR                                                                                   | 0.995547612        | 1              | 1.930207 |
| <b>Q9D180</b> | <b>WDR65 WD repeat_containing protein 65</b>                                               | <b>1.334104236</b> | <b>0.07131</b> | <b>2</b> |
| Q9D180        | KNQELEK                                                                                    | 1.438073781        | 1              | 2.122219 |
| Q9D180        | QIEPRENEIK                                                                                 | 1.21358461         | 1              | 1.982005 |
| <b>Q9D1Q6</b> | <b>ERP44 Endoplasmic reticulum resident protein 44</b>                                     | <b>0.921062187</b> | <b>9.9E-20</b> | <b>4</b> |
| Q9D1Q6        | MNPAVFLSLADLR+Oxidation(0)                                                                 | 3.157682584        |                |          |
| Q9D1Q6        | NIIGYFEQK                                                                                  | 0.817061185        | 1              | 2.084002 |
| Q9D1Q6        | SNPVHEIQSLDEVTNLDR                                                                         | 0.879767351        | 2              | 5.255363 |
| Q9D1Q6        | VDCDQHS DIAQR                                                                              | 0.920548726        | 2              | 3.631815 |

|               |                                                                            |                    |                |           |
|---------------|----------------------------------------------------------------------------|--------------------|----------------|-----------|
| <b>Q9D2U9</b> | <b>H2B3A Histone H2B type 3_A</b>                                          | <b>0.90746924</b>  | <b>0.03832</b> | <b>6</b>  |
| Q9D2U9        | AMGIMNSFVNDIFER                                                            | 0.925080832        | 2              | 4.8175    |
| Q9D2U9        | AMGIMNSFVNDIFER+Oxidation(1)                                               | 0.839921256        |                |           |
| Q9D2U9        | AMGIMNSFVNDIFER+Oxidation(1)                                               | 0.903105181        |                |           |
| Q9D2U9        | AMGIMNSFVNDIFER+Oxidation(4)                                               | 0.903401424        |                |           |
| Q9D2U9        | LLLPGELAK                                                                  | 0.982151198        | 2              | 2.640281  |
| Q9D2U9        | QVHPDTGISSK                                                                | 0.997846953        | 2              | 2.37401   |
| <b>Q9D6M3</b> | <b>GHC1 Mitochondrial glutamate carrier 1</b>                              | <b>1.278910835</b> | <b>0.32924</b> | <b>3</b>  |
| Q9D6M3        | GAAVNLTLTPEK                                                               | 1.198751487        | 2              | 3.113856  |
| Q9D6M3        | GVNEDTYSGLDCAR                                                             | 1.47400855         | 2              | 4.846322  |
| Q9D6M3        | NHGIAGLYK                                                                  | 1.236380457        | 1              | 2.047149  |
| <b>Q9D6Y9</b> | <b>GLGB 1_4_alpha_glucan_branching enzyme</b>                              | <b>0.825475705</b> | <b>0.7203</b>  | <b>10</b> |
| Q9D6Y9        | CSDGGIYCK                                                                  | 0.872591716        | 1              | 2.085543  |
| Q9D6Y9        | CVAYAESHDAQLVGDK                                                           | 0.963739225        | 2              | 5.011642  |
| Q9D6Y9        | EFKDEDWNMGNIIVYTLNTR                                                       | 0.865096983        | 3              | 3.409191  |
| Q9D6Y9        | GTHDLWDSR                                                                  | 0.93504571         | 2              | 2.563571  |
| Q9D6Y9        | GYESFGIHR                                                                  | 0.862655053        | 2              | 2.45794   |
| Q9D6Y9        | IVLSDAAEYGGHQR                                                             | 1.191692445        | 2              | 4.534115  |
| Q9D6Y9        | IYESHVGISSEHGK                                                             | 0.825361417        | 2              | 4.405342  |
| Q9D6Y9        | NSEDGLNMFDTGDCYFHSGPR                                                      | 0.676756174        | 3              | 3.363416  |
| Q9D6Y9        | QFNLTDDLLR                                                                 | 0.793131094        | 2              | 2.494174  |
| Q9D6Y9        | RQFNLTDDLLR                                                                | 1.096902816        | 2              | 2.590854  |
| <b>Q9D7B6</b> | <b>ACAD8 Isobutyryl-CoA dehydrogenase_mitochondrial</b>                    | <b>1.045101472</b> | <b>0.01498</b> | <b>3</b>  |
| Q9D7B6        | AVIFEDCAVPVANR                                                             | 0.916039558        | 2              | 4.067587  |
| Q9D7B6        | FASYCLTEPGSGSDAASLLTSAK                                                    | 0.987617262        | 2              | 4.376923  |
| Q9D7B6        | VHQILEGSNEVMR                                                              | 1.35202058         | 2              | 2.589013  |
| <b>Q9D7S7</b> | <b>RL22L 60S ribosomal protein L22_like 1</b>                              | <b>1.592105391</b> | <b>1.4E-05</b> | <b>2</b>  |
| Q9D7S7        | FHLDLTHPVEDGIFDSGNFEQFLR                                                   | 1.419947504        | 3              | 3.788766  |
| Q9D7S7        | TGNLGNVVHIER                                                               | 3.835980963        | 2              | 2.476783  |
| <b>Q9D7W5</b> | <b>MED8 Mediator of RNA polymerase II transcription subunit 8</b>          | <b>1.15294891</b>  | <b>0.21666</b> | <b>2</b>  |
| Q9D7W5        | NQVIIPLVLPDRDEDLMR+Oxidation(17)                                           | 1.153630171        |                |           |
| Q9D7W5        | QIQSLNKMCNNLLEK+Oxidation(7)                                               | 1.284787212        |                |           |
| <b>Q9D7X8</b> | <b>GGCT Gamma-glutamylcyclotransferase</b>                                 | <b>0.853983975</b> | <b>0.00121</b> | <b>2</b>  |
| Q9D7X8        | ISDEMEDIK                                                                  | 0.803027546        | 2              | 2.959699  |
| Q9D7X8        | SNISLDEQEGVK                                                               | 0.960523276        | 2              | 3.056067  |
| <b>Q9D819</b> | <b>IPYR Inorganic pyrophosphatase</b>                                      | <b>1.048298154</b> | <b>0.37898</b> | <b>5</b>  |
| Q9D819        | GISCMNNTVSESPFK                                                            | 0.835622015        | 2              | 4.502737  |
| Q9D819        | GQYISPFHDVPIYADK                                                           | 1.093177192        | 2              | 3.77724   |
| Q9D819        | VLGILAMIDEGETDVK                                                           | 1.031631449        | 2              | 4.000464  |
| Q9D819        | YKVPDQKPENEFAFAEFK                                                         | 0.865198722        | 2              | 3.641628  |
| Q9D819        | YVANLFPYK                                                                  | 0.933187547        | 1              | 1.93985   |
| <b>Q9D880</b> | <b>TIM50 Mitochondrial import inner membrane translocase subunit TIM50</b> | <b>0.957536959</b> | <b>0.99976</b> | <b>2</b>  |
| Q9D880        | TIALNQVEDVR                                                                | 0.890404458        | 2              | 2.934498  |
| Q9D880        | TVLEHYALEDDPLEAFK                                                          | 0.975614844        | 2              | 5.039001  |
| <b>Q9DBA8</b> | <b>HUTI Probable imidazolonepropionase</b>                                 | <b>0.819487811</b> | <b>0.52198</b> | <b>4</b>  |
| Q9DBA8        | AGTTLVECK                                                                  | 0.944143057        | 2              | 2.600883  |
| Q9DBA8        | GVFDLDTTR                                                                  | 0.777850293        | 2              | 2.303739  |
| Q9DBA8        | QGDIIIINASR                                                                | 1.105892496        | 2              | 2.671376  |
| Q9DBA8        | SGYGLNLETELK                                                               | 1.013110763        | 2              | 2.36286   |
| <b>Q9DBH5</b> | <b>LMAN2 Vesicular integral membrane protein VIP36</b>                     | <b>1.187698054</b> | <b>0.26887</b> | <b>3</b>  |
| Q9DBH5        | LPTGYYFGASAGTGDLSNDHDIISK                                                  | 1.325342923        | 3              | 4.624665  |
| Q9DBH5        | TPEESIDWTK                                                                 | 1.072343393        | 2              | 2.42645   |
| Q9DBH5        | WSELAGCTADFR                                                               | 1.058979393        | 2              | 3.172407  |

|               |                                                                                   |                    |                |           |
|---------------|-----------------------------------------------------------------------------------|--------------------|----------------|-----------|
| <b>Q9DC70</b> | <b>NDUS7 NADH dehydrogenase [ubiquinone] iron_sulfur protein 7_ mitochondrial</b> | <b>1.102571808</b> | <b>0.48988</b> | <b>2</b>  |
| Q9DC70        | LDDLINWAR                                                                         | 1.06433707         | 2              | 2.990906  |
| Q9DC70        | QADVMIVAGTLTNK                                                                    | 1.110663579        | 2              | 3.313989  |
| <b>Q9DCH4</b> | <b>EIF3F Eukaryotic translation initiation factor 3 subunit F</b>                 | <b>1.137709911</b> | <b>0.01548</b> | <b>2</b>  |
| Q9DCH4        | IQDALSTVLQYAEDVLSGK                                                               | 1.129134144        |                |           |
| Q9DCH4        | VIGLSSDLQQVGGASAR                                                                 | 1.237419922        |                |           |
| <b>Q9DCM0</b> | <b>ETHE1 Protein ETHE1_ mitochondrial</b>                                         | <b>1.130441579</b> | <b>0.98825</b> | <b>2</b>  |
| Q9DCM0        | SLLPGCQSVISR                                                                      | 1.004967186        | 2              | 3.202382  |
| Q9DCM0        | TDFQQGCAK                                                                         | 1.190119553        | 2              | 2.363618  |
| <b>Q9DCS9</b> | <b>NDUBA NADH dehydrogenase [ubiquinone] 1 beta subcomplex subunit 10</b>         | <b>0.975651695</b> | <b>0.99233</b> | <b>2</b>  |
| Q9DCS9        | AYDLVVDWVPVTLVR                                                                   | 0.936451565        | 2              | 4.678904  |
| Q9DCS9        | TPAPSPQTSLPNPITYLTK                                                               | 1.110024763        | 2              | 3.350693  |
| <b>Q9DCT2</b> | <b>NDUS3 NADH dehydrogenase [ubiquinone] iron_sulfur protein 3_ mitochondrial</b> | <b>1.018149312</b> | <b>4E-05</b>   | <b>5</b>  |
| Q9DCT2        | FDLNSPWFAFPAYR                                                                    | 1.024139647        | 2              | 2.781314  |
| Q9DCT2        | ILTDYGFEGHPFR                                                                     | 0.833536936        | 2              | 2.639343  |
| Q9DCT2        | KFDLNSPWFAFPAYR                                                                   | 1.007702434        | 2              | 3.633706  |
| Q9DCT2        | SLADLTAVDVPTR                                                                     | 1.126334123        | 2              | 3.562822  |
| Q9DCT2        | VVAEPVELAQEFR                                                                     | 1.304219028        | 2              | 3.311777  |
| <b>Q9DCU9</b> | <b>HOGA1 Probable 4_hydroxy_2_oxoglutarate aldolase_ mitochondrial</b>            | <b>1.032313199</b> | <b>0.98827</b> | <b>3</b>  |
| Q9DCU9        | GFVVQGSGTEFPFLTSLER                                                               | 0.892603981        | 2              | 5.19591   |
| Q9DCU9        | LIEPNTAVTR                                                                        | 1.016390466        | 2              | 3.306714  |
| Q9DCU9        | TMDWFGYYGGPCR                                                                     | 1.099972082        | 2              | 3.402372  |
| <b>Q9EP75</b> | <b>CP4FE Leukotriene_B4 omega_hydroxylase 3</b>                                   | <b>1.660350005</b> | <b>0.07788</b> | <b>2</b>  |
| Q9EP75        | DEDGKELSDIEDIR                                                                    | 1.466267645        | 2              | 2.713569  |
| Q9EP75        | IFNDSTNIMHAK                                                                      | 1.660731348        | 2              | 3.303768  |
| <b>Q9EP89</b> | <b>LACTB Serine beta_lactamase_like protein LACTB_ mitochondrial</b>              | <b>0.716355627</b> | <b>0.00012</b> | <b>10</b> |
| Q9EP89        | FENSIESLR                                                                         | 0.860964584        | 2              | 2.828457  |
| Q9EP89        | GIIVSIICNMQSVGLNSTALK                                                             | 0.735072062        | 3              | 3.732419  |
| Q9EP89        | IFHDLMLTTVQEENEPVIYNR                                                             | 0.732180099        | 3              | 4.018808  |
| Q9EP89        | IKDEVGAPGIVVGVSDGK                                                                | 0.705199275        | 2              | 5.023402  |
| Q9EP89        | KNDFEQGELYLK                                                                      | 0.823635438        | 2              | 3.799617  |
| Q9EP89        | LDLDPVQHYVPEFPEK                                                                  | 0.824819056        | 2              | 3.133782  |
| Q9EP89        | LDLDPVQHYVPEFPEKEYEGEK                                                            | 0.885501098        | 3              | 3.666809  |
| Q9EP89        | LVNTPYVDNSYK                                                                      | 0.860772263        | 2              | 3.22032   |
| Q9EP89        | NDFEQGELYLK                                                                       | 0.483768953        | 2              | 2.911693  |
| Q9EP89        | WAGGGFLSTVGDLLK                                                                   | 0.708991836        | 2              | 4.316546  |
| <b>Q9EPH2</b> | <b>MRP MARCKS_related protein</b>                                                 | <b>1.141610544</b> | <b>0.18393</b> | <b>2</b>  |
| Q9EPH2        | AAATPESQEPQAK                                                                     | 1.151702514        | 2              | 2.77378   |
| Q9EPH2        | GDVTAEEAAGASPAK                                                                   | 1.006332044        | 2              | 3.416121  |
| <b>Q9EPH8</b> | <b>PABP1 Polyadenylate_binding protein 1</b>                                      | <b>1.275323199</b> | <b>6E-07</b>   | <b>13</b> |
| Q9EPH8        | ALDTMNFVVIK                                                                       | 1.154062762        | 2              | 3.303414  |
| Q9EPH8        | ALYDTFSAFGNILSCK                                                                  | 1.437526855        | 2              | 2.595096  |
| Q9EPH8        | FSPAGPILSIR                                                                       | 1.062218663        | 2              | 2.315148  |
| Q9EPH8        | GFGFVCFSSPEEATK                                                                   | 2.217282551        | 2              | 4.003506  |
| Q9EPH8        | GFGFVSFER                                                                         | 1.135788678        | 2              | 2.784455  |
| Q9EPH8        | GYGFVHFETQAAER                                                                    | 1.383781086        | 2              | 3.121152  |
| Q9EPH8        | ITGMILLEIDNSELLHMLSPESLR                                                          | 0.989480761        | 3              | 3.652498  |
| Q9EPH8        | KEFSPFGTITSAK                                                                     | 1.016934055        | 2              | 2.878023  |
| Q9EPH8        | NLDDGIDDER                                                                        | 1.015337428        | 2              | 2.848306  |
| Q9EPH8        | SGVGNIFIK                                                                         | 1.359750771        | 2              | 2.757515  |
| Q9EPH8        | SKVDEAVAVLQAHQAK                                                                  | 1.257287123        | 2              | 5.239744  |

|               |                                                                              |                    |                |           |
|---------------|------------------------------------------------------------------------------|--------------------|----------------|-----------|
| Q9EPH8        | SLGYAYVNFQQPADAER                                                            | 1.116066353        | 2              | 3.651202  |
| Q9EPH8        | VDEAVAVLQAHQAK                                                               | 1.399093646        | 2              | 3.149306  |
| <b>Q9EQ76</b> | <b>FMO3 Dimethylaniline monooxygenase [N_oxide_forming] 3</b>                | <b>1.432657513</b> | <b>2.2E-09</b> | <b>12</b> |
| Q9EQ76        | ASIQSVFTNSSK                                                                 | 1.222284862        | 2              | 3.178519  |
| Q9EQ76        | GTCILPSVNDMMDDIDEK                                                           | 1.492026151        | 2              | 3.594205  |
| Q9EQ76        | ILCGTVSIKPNVK                                                                | 1.05419742         | 2              | 2.995908  |
| Q9EQ76        | KEPVFNDELPAR                                                                 | 1.264461864        | 2              | 3.221512  |
| Q9EQ76        | LQEYITSFATEK                                                                 | 1.856804281        | 2              | 4.073552  |
| Q9EQ76        | NNEVTLYK                                                                     | 2.30027803         | 2              | 2.452675  |
| Q9EQ76        | NNLPTAISDWWYMK                                                               | 1.405977666        | 2              | 2.910594  |
| Q9EQ76        | SCLEEGLEPTCFER                                                               | 1.443213049        | 2              | 4.589561  |
| Q9EQ76        | SDDVGGGLWK                                                                   | 1.882690973        | 2              | 2.771746  |
| Q9EQ76        | VLVIGLNGSGCDIAAELSHVAQQVISSR                                                 | 1.299622146        | 3              | 5.19264   |
| Q9EQ76        | VWNDGYPWDMVVITR                                                              | 1.127896238        | 2              | 4.133258  |
| Q9EQ76        | YIQFETLVTR                                                                   | 1.587798888        | 2              | 3.305302  |
| <b>Q9EQH3</b> | <b>VPS35 Vacuolar protein sorting_associated protein 35</b>                  | <b>1.049291111</b> | <b>0.77168</b> | <b>6</b>  |
| Q9EQH3        | ACAELHQNVNVK                                                                 | 1.186178633        | 2              | 3.704721  |
| Q9EQH3        | IREDLPNLESSEETEQINK                                                          | 1.249833113        | 3              | 3.848196  |
| Q9EQH3        | LNLEHIATSSAVSK                                                               | 0.979265773        | 2              | 3.521428  |
| Q9EQH3        | LSQLEGVNVER                                                                  | 1.00515823         | 2              | 2.980165  |
| Q9EQH3        | NIIIALIDR                                                                    | 0.940301027        | 2              | 2.318205  |
| Q9EQH3        | VLETTVEIFNK                                                                  | 1.048461299        | 2              | 2.707417  |
| <b>Q9EQH7</b> | <b>NDST3 Bifunctional heparan sulfate N_deacetylase/N_sulfotransferase 3</b> | <b>0.853711177</b> | <b>0.75647</b> | <b>2</b>  |
| Q9EQH7        | KFALEHGIPDTMGYAVSPHHSGVYPVHVQLYEAWKK                                         | 0.852365316        | 3              | 3.349104  |
| Q9EQH7        | TTPATVMDEVQK+Oxidation(6)                                                    | 0.927044133        |                |           |
| <b>Q9EQN5</b> | <b>SMBP2 DNA_binding protein SMUBP_2</b>                                     | <b>0.938677123</b> | <b>0.81409</b> | <b>2</b>  |
| Q9EQN5        | CPTTSVRKPASAEQSRQEAR                                                         | 0.938752091        | 2              | 2.363061  |
| Q9EQN5        | KPSEKPLGSQVQPQHSSK                                                           | 0.813990194        | 2              | 2.349717  |
| <b>Q9EQS0</b> | <b>TALDO Transaldolase</b>                                                   | <b>1.153280927</b> | <b>8.9E-08</b> | <b>7</b>  |
| Q9EQS0        | ALAGCDFLTISPK                                                                | 1.00811933         | 2              | 3.480733  |
| Q9EQS0        | EAGISKDRILIK                                                                 | 0.958844251        | 2              | 2.348685  |
| Q9EQS0        | ILDWHVANTDKK                                                                 | 1.334814313        | 2              | 3.206593  |
| Q9EQS0        | LGGPQEEQIK                                                                   | 1.210251548        | 2              | 3.0213    |
| Q9EQS0        | LSSTWEGIQAGK                                                                 | 1.119087222        | 2              | 2.837765  |
| Q9EQS0        | SYEPQEDPGVK                                                                  | 0.925472042        | 2              | 2.893496  |
| Q9EQS0        | WLHNEDQMAVEK                                                                 | 1.022191808        | 3              | 3.321831  |
| <b>Q9EQX9</b> | <b>UBE2N Ubiquitin_conjugating enzyme E2 N</b>                               | <b>1.01644733</b>  | <b>0.99996</b> | <b>3</b>  |
| Q9EQX9        | LELFLPEEYPMAAPK                                                              | 0.946754443        | 2              | 3.44018   |
| Q9EQX9        | SNEAQAIETAR                                                                  | 0.973542477        | 2              | 3.656157  |
| Q9EQX9        | YFHVVIAGPQDSPFEGGTFK                                                         | 1.064457722        | 3              | 4.342836  |
| <b>Q9ER34</b> | <b>ACON Aconitate hydratase_mitochondrial</b>                                | <b>1.170218822</b> | <b>0.00025</b> | <b>23</b> |
| Q9ER34        | ADIANLAEFEK                                                                  | 1.336825405        | 2              | 3.482643  |
| Q9ER34        | CTTDHISAAGPWLK                                                               | 1.21956538         | 2              | 4.316233  |
| Q9ER34        | DINQEVYNFLATAGAK                                                             | 0.982053289        | 2              | 4.141652  |
| Q9ER34        | DLEDLQILIK                                                                   | 1.48731359         | 2              | 2.503135  |
| Q9ER34        | FKLEAPDADELPR                                                                | 1.001646895        | 3              | 4.274623  |
| Q9ER34        | FNPETDFLTGK                                                                  | 1.158450478        | 1              | 2.424444  |
| Q9ER34        | GHLDNISNLLIGAINIENGK                                                         | 1.123034604        | 2              | 5.065589  |
| Q9ER34        | IVYGHLDPPANQEIER                                                             | 1.447760974        | 2              | 4.952315  |
| Q9ER34        | LEAPDADELPR                                                                  | 1.23344646         | 2              | 2.591181  |
| Q9ER34        | LNRPLTSEK                                                                    | 1.706198262        | 2              | 2.44747   |
| Q9ER34        | LQLLEPFDKWDGKDLEDLQILIK                                                      | 0.955926495        | 3              | 3.680157  |
| Q9ER34        | LTGTLSGWTSFK                                                                 | 1.459619982        | 2              | 2.58896   |
| Q9ER34        | NAVTEQFGVPPDTAR                                                              | 1.248594965        | 2              | 4.557825  |

|               |                                                                            |                    |                |           |
|---------------|----------------------------------------------------------------------------|--------------------|----------------|-----------|
| Q9ER34        | NDANPETHAFVTSPEIVTALAIAGTLK                                                | 1.008732811        | 3              | 4.41255   |
| Q9ER34        | NTIVTSYNR                                                                  | 1.158029419        | 2              | 2.376795  |
| Q9ER34        | QGLLPLTFADPSDYNK                                                           | 1.174493012        | 2              | 3.443295  |
| Q9ER34        | SDFDPGQDITYQHPPK                                                           | 1.25047525         | 2              | 2.455174  |
| Q9ER34        | SQFTITPGSEQIR                                                              | 1.074163108        | 2              | 3.452129  |
| Q9ER34        | VAMQDATAQMAMLQFISSGLPK                                                     | 0.883818227        | 2              | 2.373071  |
| Q9ER34        | VAVPSTIHCDHLIEAQLGGEK                                                      | 1.485555753        | 2              | 4.916017  |
| Q9ER34        | VDVSPTSQR                                                                  | 1.248203575        | 2              | 2.40706   |
| Q9ER34        | VGLIGSCTNSSYEDMGR                                                          | 1.17312929         | 2              | 4.367917  |
| Q9ER34        | WVVGIDENYGEGRSSR                                                           | 1.171732144        | 2              | 4.51262   |
| <b>Q9ES21</b> | <b>SAC1 Phosphatidylinositide phosphatase SAC1</b>                         | <b>0.977661939</b> | <b>0.95559</b> | <b>3</b>  |
| Q9ES21        | LEEQDEFEK                                                                  | 1.253472389        | 2              | 2.818766  |
| Q9ES21        | TNVIQSLLR                                                                  | 1.026483234        | 2              | 2.339262  |
| Q9ES21        | TQLGLVMDGFNSLLR                                                            | 0.976877595        | 2              | 3.780588  |
| <b>Q9ES38</b> | <b>S27A5 Bile acyl_CoA synthetase</b>                                      | <b>1.061747952</b> | <b>0.99836</b> | <b>13</b> |
| Q9ES38        | ACQAAWALK                                                                  | 1.33555204         | 2              | 2.536236  |
| Q9ES38        | ADVWENFQQR                                                                 | 1.025609352        | 2              | 3.01327   |
| Q9ES38        | EGFDVGVIAADPLYLDNK                                                         | 0.955605083        | 2              | 5.338932  |
| Q9ES38        | GATAILVLPK                                                                 | 1.026124714        | 2              | 2.68855   |
| Q9ES38        | IQDSLEITNTYK                                                               | 1.010344485        | 2              | 3.73132   |
| Q9ES38        | LKEATIQEDK                                                                 | 1.109673173        | 2              | 2.607008  |
| Q9ES38        | LLAENIR                                                                    | 1.375381096        | 2              | 2.398221  |
| Q9ES38        | MLTPLELVQFDIETAEPVRDK                                                      | 0.92452553         | 2              | 4.282512  |
| Q9ES38        | QGFCIPVETGKPGLLLTG                                                         | 1.084002642        | 3              | 3.666495  |
| Q9ES38        | SISALSVFLGLAK                                                              | 0.641151903        | 2              | 3.4069    |
| Q9ES38        | SLMPDVYQAVCEGTWK                                                           | 1.108185236        | 2              | 3.956059  |
| Q9ES38        | YLCNVPGQPEDK                                                               | 1.110398962        | 2              | 3.328959  |
| Q9ES38        | YLCNVPGQPEDKK                                                              | 0.902702115        | 2              | 2.494618  |
| <b>Q9ES53</b> | <b>UFD1 Ubiquitin fusion degradation protein 1 homolog</b>                 | <b>0.942696137</b> | <b>0.18022</b> | <b>2</b>  |
| Q9ES53        | FQPQSPDFLDITNPK                                                            | 1.188107049        | 2              | 2.49985   |
| Q9ES53        | FVAFSGEGQSLRKK                                                             | 0.765732669        | 2              | 2.583275  |
| <b>Q9EST6</b> | <b>AN32B Acidic leucine_rich nuclear phosphoprotein 32 family member B</b> | <b>0.963720591</b> | <b>0.99936</b> | <b>2</b>  |
| Q9EST6        | SLDLFGCEVTNR                                                               | 0.963128779        | 2              | 3.098548  |
| Q9EST6        | TPAAVQELVLDNCK                                                             | 0.977524838        | 2              | 3.456145  |
| <b>Q9ESV1</b> | <b>LUZP1 Leucine zipper protein 1</b>                                      | <b>0.883957781</b> | <b>0.21648</b> | <b>2</b>  |
| Q9ESV1        | EKLEEEENLTR                                                                | 0.898922958        | 2              | 2.87248   |
| Q9ESV1        | RMADLEKLEELSR                                                              | 0.881196771        | 2              | 2.531142  |
| <b>Q9ESW0</b> | <b>DDB1 DNA damage_binding protein 1</b>                                   | <b>0.853096113</b> | <b>0.82081</b> | <b>4</b>  |
| Q9ESW0        | IEVQDTSGGTTALRPSASTQALSSVSSSK                                              | 1.123242107        | 3              | 6.021239  |
| Q9ESW0        | KTEPATGFIDGDLIESFLDISRPK                                                   | 0.879017592        | 3              | 3.961372  |
| Q9ESW0        | QGQGQLVTCGAFK                                                              | 1.065134031        | 2              | 2.899868  |
| Q9ESW0        | VTLGTQPTVLR                                                                | 0.99869502         | 2              | 2.633499  |
| <b>Q9HB97</b> | <b>PARVA Alpha_parvin</b>                                                  | <b>1.236021689</b> | <b>0.895</b>   | <b>2</b>  |
| Q9HB97        | DLAEDLYDGQVLQK                                                             | 1.514190072        | 2              | 3.101923  |
| Q9HB97        | LNVAEVTQSEIAQK                                                             | 1.231857594        | 2              | 4.336986  |
| <b>Q9JHL4</b> | <b>DBNL Drebrin_like protein</b>                                           | <b>0.781034176</b> | <b>0.03594</b> | <b>4</b>  |
| Q9JHL4        | AMSTTSVSSSQPGK                                                             | 0.778685236        | 2              | 2.585805  |
| Q9JHL4        | ERAMSTTSVSSSQPGKLR+Oxidation(3)                                            | 0.542663126        |                |           |
| Q9JHL4        | TGELEQEVVSR                                                                | 0.978486165        | 2              | 3.341404  |
| Q9JHL4        | VAGTGEGGLEELVEELNSGK                                                       | 0.755061675        | 2              | 2.865452  |
| <b>Q9JI85</b> | <b>NUCB2 Nucleobindin_2</b>                                                | <b>1.278754903</b> | <b>0.14343</b> | <b>4</b>  |
| Q9JI85        | FQQGIAPSGPAGELK                                                            | 1.170049837        | 2              | 2.733264  |
| Q9JI85        | QEYQQAVQQLQK                                                               | 1.100728957        | 2              | 4.3223    |
| Q9JI85        | QVIEVLETPHFR                                                               | 1.010270156        | 2              | 2.669342  |
| Q9JI85        | VHNVEPVESAR                                                                | 1.288687999        | 2              | 2.918343  |



|               |                                                                 |                    |                |           |
|---------------|-----------------------------------------------------------------|--------------------|----------------|-----------|
| <b>Q9JI91</b> | <b>ACTN2 Alpha_actinin_2</b>                                    | <b>1.081427237</b> | <b>0.96316</b> | <b>11</b> |
| Q9JI91        | DQSLQEELAR                                                      | 1.808802629        | 2              | 2.612214  |
| Q9JI91        | ETADTDTAEQVIASFR                                                | 1.743967994        | 2              | 3.933638  |
| Q9JI91        | GYEEWLLNEIR                                                     | 1.143559431        | 3              | 3.371127  |
| Q9JI91        | HRPDLIDYSK                                                      | 1.071986931        | 2              | 2.394802  |
| Q9JI91        | HTNYTMEHIR                                                      | 1.125010907        | 3              | 3.40227   |
| Q9JI91        | HTNYTMEHIR+Oxidation(5)                                         | 1.15590658         |                |           |
| Q9JI91        | KHEAFESDLAAHQDR                                                 | 1.175865897        | 2              | 5.367726  |
| Q9JI91        | LEGDHQLIQEGLVFDNK                                               | 1.05020061         | 3              | 4.948175  |
| Q9JI91        | MLDAEDIVNTPKPDER                                                | 2.510535678        | 2              | 3.889498  |
| Q9JI91        | QSILAIQNEVEK                                                    | 2.082947987        | 2              | 2.971831  |
| Q9JI91        | TINEVETQILTR                                                    | 2.690073818        | 2              | 2.530003  |
| <b>Q9JJ19</b> | <b>NHRF1 Na( )/H( ) exchange regulatory cofactor NHE_RF1</b>    | <b>1.163972057</b> | <b>9.9E-20</b> | <b>7</b>  |
| Q9JJ19        | AVDPDSPAEEASGLR                                                 | 1.887292552        | 2              | 3.683422  |
| Q9JJ19        | IVEVNGVCMEGK                                                    | 1.457046563        | 2              | 3.225758  |
| Q9JJ19        | LLVVDPETDEQLKK                                                  | 1.678446314        | 2              | 2.474663  |
| Q9JJ19        | LVEPGSPA EK                                                     | 1.482310168        | 2              | 2.526153  |
| Q9JJ19        | LVEVNGENVEK                                                     | 1.507166185        | 2              | 2.793793  |
| Q9JJ19        | SEHTEPPAAADTK                                                   | 0.751024527        | 2              | 3.033579  |
| Q9JJ19        | VTPSQEHLDGPLPEPFSNGEIQK                                         | 1.008004732        | 3              | 3.674628  |
| <b>Q9JJ22</b> | <b>ERAP1 Endoplasmic reticulum aminopeptidase 1</b>             | <b>0.87379229</b>  | <b>0.61919</b> | <b>2</b>  |
| Q9JJ22        | ASLINNAFQLVSI GK                                                | 0.918588289        | 2              | 2.522066  |
| Q9JJ22        | TQEFPHILTLIGR                                                   | 0.842267352        | 2              | 2.578067  |
| <b>Q9JJ40</b> | <b>NHRF3 Na( )/H( ) exchange regulatory cofactor NHE_RF3</b>    | <b>0.916264107</b> | <b>0.97799</b> | <b>3</b>  |
| Q9JJ40        | GVFLTDITPQGVAMK                                                 | 0.968490699        | 2              | 2.415186  |
| Q9JJ40        | NGGDQTTLLVLDK                                                   | 1.007549323        | 2              | 2.454234  |
| Q9JJ40        | SGNSVTLVLDGDSYEK                                                | 0.882820889        | 2              | 4.384834  |
| <b>Q9JJ46</b> | <b>EBP 3_beta_hydroxysteroid_Delta(8)_Delta(7)_isomerase</b>    | <b>1.047868511</b> | <b>0.93442</b> | <b>3</b>  |
| Q9JJ46        | HLTNAQSMLDNK                                                    | 0.94215743         | 2              | 3.52705   |
| Q9JJ46        | HLTNAQSMLDNK+Oxidation(7)                                       | 1.204533949        |                |           |
| Q9JJ46        | VSVVPLGTGR                                                      | 1.177015413        | 2              | 2.52231   |
| <b>Q9JJ54</b> | <b>HNRPD Heterogeneous nuclear ribonucleoprotein D0</b>         | <b>0.975527906</b> | <b>0.4987</b>  | <b>3</b>  |
| Q9JJ54        | FGDVVDCTLK                                                      | 0.906958052        | 2              | 2.987431  |
| Q9JJ54        | IFVGGLSPDTPEEK                                                  | 1.003469258        | 2              | 4.201118  |
| Q9JJ54        | IFVGGLSPDTPEEKIR                                                | 1.196778939        | 2              | 2.507551  |
| <b>Q9JJ79</b> | <b>DYHC2 Cytoplasmic dynein 2 heavy chain 1</b>                 | <b>1.018002896</b> | <b>0.93577</b> | <b>5</b>  |
| Q9JJ79        | ASDLKDLNSR                                                      | 0.914159517        | 2              | 2.321454  |
| Q9JJ79        | ELMLERETLLAR+Oxidation(2)                                       | 0.937700516        |                |           |
| Q9JJ79        | NCLEEWTKAAGLEK                                                  | 1.053139825        | 2              | 2.420096  |
| Q9JJ79        | TVLRGSGNLLR                                                     | 1.064504274        | 2              | 2.436831  |
| Q9JJ79        | YVVQIGDK                                                        | 0.979244197        | 1              | 2.072972  |
| <b>Q9JIM9</b> | <b>SEPT5 Septin_5</b>                                           | <b>1.06115228</b>  | <b>0.8166</b>  | <b>2</b>  |
| Q9JIM9        | LIRMKDEELR                                                      | 1.052880737        | 2              | 2.47511   |
| Q9JIM9        | MQEMLQKMK+Oxidation(3)                                          | 2.271045036        |                |           |
| <b>Q9JUU8</b> | <b>SH3L1 SH3 domain_binding glutamic acid_rich_like protein</b> | <b>0.777587315</b> | <b>0.01311</b> | <b>2</b>  |
| Q9JUU8        | GDYDAFFEAR                                                      | 0.934851486        | 2              | 2.486322  |
| Q9JUU8        | QQDVLFCLEANK                                                    | 0.838766533        | 2              | 3.280272  |
| <b>Q9JK11</b> | <b>RTN4 Reticulon_4</b>                                         | <b>1.104111871</b> | <b>0.52529</b> | <b>2</b>  |
| Q9JK11        | VDRKCLEDSEQK                                                    | 1.101057794        | 2              | 2.346146  |
| Q9JK11        | YSNSALGHVNSTIK                                                  | 1.213525803        | 2              | 2.698704  |

|               |                                                                      |                    |                |           |
|---------------|----------------------------------------------------------------------|--------------------|----------------|-----------|
| <b>Q9JK38</b> | <b>GNA1 Glucosamine 6_phosphate N_acetyltransferase</b>              | <b>0.991223519</b> | <b>1</b>       | <b>3</b>  |
| Q9JK38        | ITLECLPQNVGFYK                                                       | 1.004948522        | 2              | 3.030867  |
| Q9JK38        | VEDVVVSDECR                                                          | 1.00734793         | 2              | 3.536087  |
| Q9JK38        | VLGQLTETGVVSPEQFMK                                                   | 0.948755147        | 2              | 4.170403  |
| <b>Q9JK72</b> | <b>CCS Copper chaperone for superoxide dismutase</b>                 | <b>0.830935985</b> | <b>0.762</b>   | <b>2</b>  |
| Q9JK72        | GDLGNVHAEASGR                                                        | 0.932479063        | 2              | 2.770985  |
| Q9JK72        | SLVVDEGEDDLGR                                                        | 0.79502795         | 2              | 2.304827  |
| <b>Q9JKS4</b> | <b>LDB3 LIM domain_binding protein 3</b>                             | <b>2.569751737</b> | <b>0.60181</b> | <b>2</b>  |
| Q9JKS4        | GAPAYNPTGPQVTPLAR                                                    | 2.390655147        | 2              | 3.930653  |
| Q9JKS4        | TQSKPEDEADEWAR                                                       | 3.13307817         | 2              | 3.546019  |
| <b>Q9JLA3</b> | <b>UGGG1 UDP_glucose:glycoprotein glucosyltransferase 1</b>          | <b>1.029288773</b> | <b>0.99891</b> | <b>12</b> |
| Q9JLA3        | AIWAALQTQTSNSAK                                                      | 1.118554842        | 2              | 3.624517  |
| Q9JLA3        | FLFVDADQIVR                                                          | 0.994042624        | 2              | 2.90383   |
| Q9JLA3        | FLSPLQQNLLK                                                          | 0.98663335         | 2              | 2.385851  |
| Q9JLA3        | GQYQGLSQDPNLSLNDQLDPNNMIHQVPIK                                       | 0.983291249        | 3              | 6.338928  |
| Q9JLA3        | IEYQFFEDK                                                            | 1.040109751        | 2              | 2.520868  |
| Q9JLA3        | IVPEWQDYDQEIK                                                        | 0.91329684         | 2              | 3.289206  |
| Q9JLA3        | LNIQPSETDYAVDIR                                                      | 1.054382984        | 2              | 3.947537  |
| Q9JLA3        | TAAIANSMNLYTK                                                        | 0.997285374        | 2              | 2.553551  |
| Q9JLA3        | VDALLSAQPK                                                           | 1.036304338        | 2              | 3.003724  |
| Q9JLA3        | VEEDVASDLVMK                                                         | 0.970956675        | 2              | 3.505897  |
| Q9JLA3        | VWQLQDLSFQTAAR                                                       | 1.154839263        | 2              | 4.416657  |
| Q9JLA3        | YVLEPEISFTADNSFAK                                                    | 1.35334035         | 2              | 3.714201  |
| <b>Q9JLH7</b> | <b>CK5P3 CDK5 regulatory subunit_associated protein 3</b>            | <b>0.906180328</b> | <b>0.10676</b> | <b>3</b>  |
| Q9JLH7        | GSDALTLLPEPTEP                                                       | 0.853946585        | 2              | 2.47365   |
| Q9JLH7        | KEEEQGAGAAEMR+Oxidation(11)                                          | 0.79427596         |                |           |
| Q9JLH7        | QYGITGDNVRRELLALVK                                                   | 0.384103762        | 2              | 2.372433  |
| <b>Q9JLJ3</b> | <b>AL9A1 4_trimethylaminobutyraldehyde dehydrogenase</b>             | <b>0.986694308</b> | <b>0.84093</b> | <b>19</b> |
| Q9JLJ3        | AGAPNGLFNVVQGGAAATGQFLCQHR                                           | 0.758555714        | 2              | 4.330059  |
| Q9JLJ3        | ANDTTFGLAAGVFTR                                                      | 0.989808274        | 2              | 4.617095  |
| Q9JLJ3        | CQVLEAAR                                                             | 0.991621748        | 2              | 3.51146   |
| Q9JLJ3        | EQGATVLCGGEPYAPEDPK                                                  | 1.019714981        | 2              | 4.632158  |
| Q9JLJ3        | EQGATVLCGGEPYAPEDPKLK                                                | 0.965451258        | 3              | 3.355614  |
| Q9JLJ3        | EVNLAVENAK                                                           | 1.343809473        | 1              | 2.949497  |
| Q9JLJ3        | GALLANFLTQGVCCNGTR                                                   | 0.8830399          | 2              | 5.802242  |
| Q9JLJ3        | GIKPITLELGK                                                          | 1.007853826        | 3              | 3.972119  |
| Q9JLJ3        | HGYMTPCILNCTDDMTCVK                                                  | 0.975358698        | 3              | 3.605326  |
| Q9JLJ3        | IGDPLEDTR                                                            | 0.930423306        | 2              | 4.013814  |
| Q9JLJ3        | MGPLINAPHLER                                                         | 1.132534524        | 2              | 3.122439  |
| Q9JLJ3        | MGPLINAPHLER+Oxidation(0)                                            | 1.132857906        |                |           |
| Q9JLJ3        | RDEIAIMETINNGK                                                       | 1.02687328         | 2              | 5.36157   |
| Q9JLJ3        | SAPALACGNAMIFKPSFPTVSALLAEIYTK                                       | 0.867025699        | 3              | 3.459284  |
| Q9JLJ3        | SPLIIFSDCNMK                                                         | 1.049304208        | 2              | 2.554181  |
| Q9JLJ3        | VEPVDASGTEK                                                          | 0.980569362        | 1              | 2.24513   |
| Q9JLJ3        | VSFTGSVPTGMK                                                         | 0.963391894        | 2              | 3.574542  |
| Q9JLJ3        | VSFTGSVPTGMK+Oxidation(10)                                           | 0.983191366        |                |           |
| Q9JLJ3        | VTIEYYSQK                                                            | 1.365843999        | 2              | 3.126212  |
| <b>Q9JLQ0</b> | <b>CD2AP CD2_associated protein</b>                                  | <b>0.870513285</b> | <b>0.1073</b>  | <b>2</b>  |
| Q9JLQ0        | LQEEGWLEGELNGR                                                       | 1.010324302        | 2              | 2.338794  |
| Q9JLQ0        | SNLEVEIAK                                                            | 0.868785503        | 1              | 1.90647   |
| <b>Q9JLR1</b> | <b>S61A2 Protein transport protein Sec61 subunit alpha isoform 2</b> | <b>0.964433392</b> | <b>0.36705</b> | <b>3</b>  |

|               |                                                                |                    |                |           |
|---------------|----------------------------------------------------------------|--------------------|----------------|-----------|
| Q9JLR1        | GTLMELGISPIVTSGLIMQLLAGAK                                      | 1.061048754        |                |           |
| Q9JLR1        | IIEVGDTPK                                                      | 0.944293028        | 2              | 2.440527  |
| Q9JLR1        | TWIEVSGSSAK                                                    | 1.222142705        | 2              | 2.667454  |
| <b>Q9JLTO</b> | <b>MYH10 Myosin_10</b>                                         | <b>1.147864971</b> | <b>0.00815</b> | <b>2</b>  |
| Q9JLTO        | AGVLAHLEER                                                     | 1.147887604        | 2              | 3.572839  |
| Q9JLTO        | KFDQLLAEKGISAR                                                 | 1.101708739        | 2              | 2.409313  |
| <b>Q9JLZ1</b> | <b>GLRX3 Glutaredoxin_3</b>                                    | <b>0.67325414</b>  | <b>0.11673</b> | <b>2</b>  |
| Q9JLZ1        | ELEASEELDTICPK                                                 | 0.674398939        | 2              | 3.107807  |
| Q9JLZ1        | LEAEAVPEVSEK                                                   | 0.185677554        | 2              | 2.494289  |
| <b>Q9JLZ3</b> | <b>AUHM Methylglutaconyl_CoA hydratase_mitochondrial</b>       | <b>0.883501351</b> | <b>0.06532</b> | <b>4</b>  |
| Q9JLZ3        | AVGLISHVLEQNQEGDAAYR                                           | 0.883397536        | 2              | 5.713046  |
| Q9JLZ3        | AVGLISHVLEQNQEGDAAYRK                                          | 0.74673818         | 3              | 4.365326  |
| Q9JLZ3        | GIVVLGINR                                                      | 0.951924739        | 2              | 2.852493  |
| Q9JLZ3        | SEVPGIFCAGADLK                                                 | 0.898477512        | 2              | 2.937486  |
| <b>Q9JM53</b> | <b>AIFM1 Apoptosis_inducing factor_1_mitochondrial</b>         | <b>0.940338508</b> | <b>0.9988</b>  | <b>15</b> |
| Q9JM53        | AIASAAEGGSVPIR                                                 | 0.972413833        | 2              | 3.161554  |
| Q9JM53        | CLIATGGTPR                                                     | 0.87820342         | 2              | 2.583949  |
| Q9JM53        | DGEQHEDLNEVAK                                                  | 1.113099222        | 3              | 3.593656  |
| Q9JM53        | ILPEYLSNWTMEK                                                  | 1.030994156        | 2              | 3.104879  |
| Q9JM53        | KSQASGIEVIQLFPEK                                               | 0.969092366        | 2              | 3.847722  |
| Q9JM53        | KVETDHIVTAVGLEPNVELAK                                          | 0.871626658        | 2              | 6.305777  |
| Q9JM53        | LNDGSQITFEK                                                    | 0.886923128        | 2              | 3.346531  |
| Q9JM53        | SITVIGGGFLGSELACALGR                                           | 0.890460281        | 2              | 3.335269  |
| Q9JM53        | SQASGIEVIQLFPEK                                                | 0.944521951        | 2              | 4.461123  |
| Q9JM53        | TGGLEIDSDFGGFR                                                 | 0.904586704        | 2              | 4.566465  |
| Q9JM53        | VETDHIVTAVGLEPNVELAK                                           | 0.935748552        | 2              | 5.21568   |
| Q9JM53        | VLIVSEDPPELPMRPLSK                                             | 0.935396887        | 3              | 3.741368  |
| Q9JM53        | VMPNAIVQSVGVSQGGK                                              | 0.915608296        | 2              | 4.041173  |
| Q9JM53        | VMPNAIVQSVGVSQGGK+Oxidation(1)                                 | 0.908073833        |                |           |
| Q9JM53        | VNAELQAR                                                       | 0.9067375          | 2              | 2.486544  |
| <b>Q9JMA1</b> | <b>UBP14 Ubiquitin carboxyl_terminal hydrolase 14</b>          | <b>1.126680755</b> | <b>0.88954</b> | <b>2</b>  |
| Q9JMA1        | CTESEEEVTK                                                     | 1.095589178        | 2              | 3.621925  |
| Q9JMA1        | EKESVNAKVLK                                                    | 1.289601659        | 2              | 2.315269  |
| <b>Q9JMD3</b> | <b>PCTL PCTP_like protein</b>                                  | <b>0.848047412</b> | <b>0.08327</b> | <b>6</b>  |
| Q9JMD3        | AVSIQTGYLIQSTGPK                                               | 0.825023778        | 2              | 4.894949  |
| Q9JMD3        | ESVQVPDDQDFR                                                   | 2.262283995        | 2              | 2.362798  |
| Q9JMD3        | MECCDVPAETLYDVLHDIERY                                          | 0.887596501        | 3              | 4.597589  |
| Q9JMD3        | MECCDVPAETLYDVLHDIERY+Oxidation(0)                             | 0.934292717        |                |           |
| Q9JMD3        | SCVITYLAQVDPK                                                  | 0.988080422        | 2              | 3.148957  |
| Q9JMD3        | WDSNVIEFDIAR                                                   | 0.853098481        | 2              | 4.318172  |
| <b>Q9QVC8</b> | <b>FKBP4 Peptidyl_prolyl cis_trans isomerase FKBP4</b>         | <b>0.794385913</b> | <b>4E-09</b>   | <b>5</b>  |
| Q9QVC8        | GEPNNVAGNQAQVK                                                 | 0.906303439        | 2              | 4.135672  |
| Q9QVC8        | TEVAAGDHPTDAEMK                                                | 0.770942642        | 2              | 2.958541  |
| Q9QVC8        | TQLAVCQQR                                                      | 0.813923253        | 2              | 2.493568  |
| Q9QVC8        | VAENGAQSAPLPLEGVDISPK                                          | 0.778563174        | 2              | 4.122159  |
| Q9QVC8        | VGEVCHITCKPEYAYGSAGSPPK                                        | 0.841427903        | 3              | 5.068828  |
| <b>Q9QWN8</b> | <b>SPTN2 Spectrin beta chain_brain 2</b>                       | <b>1.049685208</b> | <b>0.95297</b> | <b>2</b>  |
| Q9QWN8        | ALAQEDQSAGEVER                                                 | 1.102321787        | 2              | 3.926124  |
| Q9QWN8        | VGELTQEANALAAGHPAQAPAINTR                                      | 1.04846535         | 3              | 4.347451  |
| <b>Q9QX74</b> | <b>SHAN2 SH3 and multiple ankyrin repeat domains protein 2</b> | <b>0.784749459</b> | <b>0.87645</b> | <b>2</b>  |
| Q9QX74        | KNMLINIVDTAQQK+Oxidation(2)                                    | 0.962434072        |                |           |
| Q9QX74        | SSSPASPENYVHPLTGR                                              | 0.781654971        | 2              | 2.590291  |

|               |                                                                   |                    |                |           |
|---------------|-------------------------------------------------------------------|--------------------|----------------|-----------|
| <b>Q9QX79</b> | <b>FETUB Fetuin_B</b>                                             | <b>1.386421754</b> | <b>3E-06</b>   | <b>2</b>  |
| Q9QX79        | GSIQHLPEQEEPEDSKGK                                                | 1.107919942        | 3              | 3.667366  |
| Q9QX79        | NTAPTSSPSITAPR                                                    | 1.396591321        | 2              | 3.599302  |
| <b>Q9QXG4</b> | <b>ACSA Acetyl_coenzyme A synthetase_cytoplasmic</b>              | <b>0.982975764</b> | <b>0.47777</b> | <b>3</b>  |
| Q9QXG4        | AELGMNDSPSQSPPVK                                                  | 1.335749272        | 2              | 3.721881  |
| Q9QXG4        | GATTNICYNVLR                                                      | 0.843889429        | 2              | 2.567111  |
| Q9QXG4        | IGPIATPDYIQNAPGLPK                                                | 1.444821969        | 2              | 3.047927  |
| <b>Q9QXH4</b> | <b>ITAX Integrin alpha_X</b>                                      | <b>0.9422774</b>   | <b>0.8461</b>  | <b>2</b>  |
| Q9QXH4        | GGSQMTFLVTFDVSPK+Oxidation(4)                                     | 1.102726932        |                |           |
| Q9QXH4        | MLDFVKAVMSQLQRPSTR                                                | 0.937133657        | 2              | 2.396969  |
| <b>Q9QXK3</b> | <b>COPG2 Coatomer subunit gamma_2</b>                             | <b>1.01944147</b>  | <b>1</b>       | <b>2</b>  |
| Q9QXK3        | SIATLAITLLK                                                       | 0.842030567        | 2              | 3.450824  |
| Q9QXK3        | SSEPVQLTEAETEFVR                                                  | 1.012686036        | 2              | 3.633356  |
| <b>Q9QXQ0</b> | <b>ACTN4 Alpha_actinin_4</b>                                      | <b>0.997850804</b> | <b>0.00217</b> | <b>27</b> |
| Q9QXQ0        | ACLISLGYDVENDR                                                    | 1.001259632        | 2              | 4.069881  |
| Q9QXQ0        | AGTQIENIDEDFR                                                     | 1.0239583          | 2              | 3.54526   |
| Q9QXQ0        | AGTQIENIDEDFRDGLK                                                 | 1.015613183        | 2              | 4.207278  |
| Q9QXQ0        | ASFNFHFDKDHGGALGPEEFK                                             | 1.271669127        | 3              | 3.547238  |
| Q9QXQ0        | ASIHEAWTDGK                                                       | 0.860414715        | 1              | 2.291869  |
| Q9QXQ0        | DDPVTNLNNAFEVAEK                                                  | 0.894696577        | 2              | 3.080803  |
| Q9QXQ0        | ETTDTDADQVIASF                                                    | 1.195264243        | 2              | 4.461416  |
| Q9QXQ0        | GISQEQMQEFR                                                       | 1.237731852        | 2              | 3.158813  |
| Q9QXQ0        | HRDYETATLSDIK                                                     | 1.308110288        | 2              | 3.519663  |
| Q9QXQ0        | HRPELIEYDK                                                        | 1.048021187        | 3              | 4.139844  |
| Q9QXQ0        | HTNYTMEHLR                                                        | 1.125010907        | 3              | 3.40227   |
| Q9QXQ0        | HTNYTMEHLR+Oxidation(5)                                           | 1.15590658         |                |           |
| Q9QXQ0        | ICDQWDNLGSLTHSR                                                   | 1.005573692        | 2              | 4.374999  |
| Q9QXQ0        | KDDPVTNLNNAFEVAEK                                                 | 0.917619067        | 2              | 4.513169  |
| Q9QXQ0        | LSGSNPYTSVTPQIINSK                                                | 1.073483195        | 2              | 4.867167  |
| Q9QXQ0        | LVSIGAEIIVDGNK                                                    | 1.09254369         | 2              | 3.236647  |
| Q9QXQ0        | MAPYQGPDAAPGALDYK                                                 | 0.985104295        | 2              | 4.62986   |
| Q9QXQ0        | MAPYQGPDAAPGALDYK+Oxidation(0)                                    | 0.98014618         |                |           |
| Q9QXQ0        | MLDAEDIVNTARPDEK                                                  | 1.054391805        | 2              | 3.708212  |
| Q9QXQ0        | QFASQANMVGPIWQTK                                                  | 0.818264235        | 2              | 3.828565  |
| Q9QXQ0        | QLETIDQLHLEYAK                                                    | 0.993831236        | 2              | 2.964627  |
| Q9QXQ0        | RDHALLEEQSK                                                       | 1.05661542         | 3              | 3.952373  |
| Q9QXQ0        | SIVDYKPNLDLLEQQHQLIQEALIFDNK                                      | 0.917325792        | 3              | 5.32006   |
| Q9QXQ0        | TINEVENQILTR                                                      | 1.119791287        | 2              | 3.677704  |
| Q9QXQ0        | VEQIAAIAQELNELDYDYSNVNTR                                          | 1.016378017        | 3              | 5.398366  |
| Q9QXQ0        | VGWEQLLTTIAR                                                      | 0.818314045        | 2              | 4.047909  |
| Q9QXQ0        | VLAVNQENEHLMEDYER                                                 | 1.28860089         | 2              | 5.049682  |
| <b>Q9QXT0</b> | <b>CNPY2 Protein canopy homolog 2</b>                             | <b>0.905918607</b> | <b>0.99754</b> | <b>5</b>  |
| Q9QXT0        | ALVDELEWEIAR                                                      | 0.847143864        | 2              | 3.554797  |
| Q9QXT0        | IDSISGTLK                                                         | 0.995188556        | 2              | 2.319111  |
| Q9QXT0        | INPDGSQSVVEVPYAR                                                  | 0.908473008        | 2              | 4.00082   |
| Q9QXT0        | RTDLCDHALHR                                                       | 1.038932071        | 3              | 3.429007  |
| Q9QXT0        | TDLCDHALHR                                                        | 1.022943384        | 2              | 2.862922  |
| <b>Q9QXX4</b> | <b>CMC2 Calcium_binding mitochondrial carrier protein Aralar2</b> | <b>0.842232268</b> | <b>0.79951</b> | <b>16</b> |
| Q9QXX4        | ASFANEDGQVSPGSLLAGAIAIGMPAASLVTPADVIK                             | 1.098083845        | 3              | 4.904266  |
| Q9QXX4        | ASGDAARPFLLQLAESAYR                                               | 1.26084176         | 2              | 3.558573  |
| Q9QXX4        | DGSVPLLAEIFAGGCAGGSQVIFTNPLEIVK                                   | 0.928343259        |                |           |
| Q9QXX4        | DVEVTKEEFALAAQK                                                   | 1.140752294        | 2              | 4.388765  |
| Q9QXX4        | FGLGSIAGAVGATAVYPIDLK                                             | 0.799795311        | 2              | 5.580944  |
| Q9QXX4        | GLLPQLLGVAPK                                                      | 0.928914735        | 2              | 2.995626  |
| Q9QXX4        | IAPLEEGMLPFNLAEAR                                                 | 1.210473107        | 2              | 5.060184  |

|               |                                                                         |                    |                |          |
|---------------|-------------------------------------------------------------------------|--------------------|----------------|----------|
| Q9QXX4        | ITLPAPNPDHVGGYK                                                         | 1.081330401        | 2              | 2.346985 |
| Q9QXX4        | KDVEVTKKEEFALAAQK                                                       | 1.008241012        | 2              | 4.777228 |
| Q9QXX4        | LQVAGEITTGPR                                                            | 1.07787734         | 2              | 3.503073 |
| Q9QXX4        | LTVNDFVR                                                                | 0.858083998        | 2              | 2.434569 |
| Q9QXX4        | NGEFFMSPHDFVTR                                                          | 0.867030255        | 2              | 3.661848 |
| Q9QXX4        | SSPQFGVTLTYELLQR                                                        | 1.131026731        | 2              | 3.966285 |
| Q9QXX4        | STGSFVGELMYK                                                            | 0.861495623        | 2              | 2.463364 |
| Q9QXX4        | TVELLSGVVDQTK                                                           | 0.942236608        | 2              | 4.298398 |
| Q9QXX4        | YLNIFGESQPNPK                                                           | 0.905841366        | 2              | 4.405842 |
| <b>Q9QYU2</b> | <b>EFTS Elongation factor Ts_ mitochondrial</b>                         | <b>0.94660181</b>  | <b>0.78134</b> | <b>2</b> |
| Q9QYU2        | ALETCGGDLK                                                              | 1.172085624        | 2              | 2.420243 |
| Q9QYU2        | YGALVICQTPEQITNLEEVGR                                                   | 0.849190674        | 2              | 4.676792 |
| <b>Q9QYU4</b> | <b>CRYM Thiomorpholine_carboxylate dehydrogenase</b>                    | <b>0.971947014</b> | <b>0.94909</b> | <b>4</b> |
| Q9QYU4        | GFLGVMPAYSAEEDALTTK                                                     | 0.921188805        | 2              | 3.723191 |
| Q9QYU4        | RAPAFLSADEVQDHLR                                                        | 0.923992607        | 3              | 4.63598  |
| Q9QYU4        | SLGMAVEDLVAAK                                                           | 0.811037335        | 2              | 3.143306 |
| Q9QYU4        | SSLLIPPLEAALANFSK                                                       | 0.943062733        | 2              | 3.088178 |
| <b>Q9QZ76</b> | <b>MYG Myoglobin</b>                                                    | <b>1.038118013</b> | <b>0.98851</b> | <b>5</b> |
| Q9QZ76        | GQHAAEQPLAQSHATK                                                        | 0.952091156        | 2              | 4.88546  |
| Q9QZ76        | HGCTVLTALGTILK                                                          | 0.581376025        | 2              | 3.535485 |
| Q9QZ76        | KGQHAAEQPLAQSHATK                                                       | 1.686709781        | 3              | 5.712786 |
| Q9QZ76        | VEGDLAGHQEVLISLFK                                                       | 2.211231642        | 3              | 4.915684 |
| Q9QZ76        | YSGDFGADAQGAMSK                                                         | 4.660828999        | 2              | 4.750554 |
| <b>Q9QZA2</b> | <b>PDC6I Programmed cell death 6_interacting protein</b>                | <b>1.096422854</b> | <b>0.90458</b> | <b>9</b> |
| Q9QZA2        | ATLVKPTPVNVPISQK                                                        | 0.965456399        | 2              | 3.703234 |
| Q9QZA2        | DTIALLCCKPEPELNAAIPSANPAK                                               | 0.934901583        | 2              | 3.538852 |
| Q9QZA2        | FYNELTEILVR                                                             | 0.937748485        | 2              | 2.943046 |
| Q9QZA2        | LLDEEEATDNDLR                                                           | 1.046593458        | 2              | 3.466552 |
| Q9QZA2        | MVPVSVQQSLAVFSQR                                                        | 1.024311165        | 2              | 2.676082 |
| Q9QZA2        | NIQVSHQEFSK                                                             | 1.15724287         | 2              | 3.357834 |
| Q9QZA2        | NLATAYDNFVELVANLK                                                       | 0.934541309        | 3              | 4.168279 |
| Q9QZA2        | STAVVEQGGIQTVDQLIK                                                      | 1.104373462        | 2              | 4.235548 |
| Q9QZA2        | YYDQICSIEPK                                                             | 1.051917397        | 2              | 2.345001 |
| <b>Q9QZD8</b> | <b>DIC Mitochondrial dicarboxylate carrier</b>                          | <b>0.903501773</b> | <b>0.80916</b> | <b>5</b> |
| Q9QZD8        | GALVTVGQLSCYDQAK                                                        | 0.908048258        | 2              | 4.869442 |
| Q9QZD8        | NYSHALDGLYR                                                             | 0.898156781        | 2              | 2.907637 |
| Q9QZD8        | VHLQTQQEVK                                                              | 0.888119964        | 1              | 3.011795 |
| Q9QZD8        | VLLGGISGLTGGFVGTADLVNVR                                                 | 0.860577749        | 2              | 5.651291 |
| Q9QZD8        | WYFGGLASCGAACCTHPLDLLK                                                  | 0.861792051        | 3              | 3.399382 |
| <b>Q9QZH8</b> | <b>AAAD Arylacetamide deacetylase</b>                                   | <b>0.94263122</b>  | <b>0.97295</b> | <b>2</b> |
| Q9QZH8        | LDVVVSTDYGLAPK                                                          | 1.117856711        | 2              | 4.119337 |
| Q9QZH8        | WFLQEDILEK                                                              | 0.908479592        | 2              | 3.349015 |
| <b>Q9QZK2</b> | <b>BCAR3 Breast cancer anti_estrogen resistance protein 3</b>           | <b>1.14739125</b>  | <b>0.64938</b> | <b>2</b> |
| Q9QZK2        | EGSLAEGRPDVVKR                                                          | 1.054704959        | 2              | 2.649199 |
| Q9QZK2        | FSSDARTGEALR                                                            | 1.413386679        | 2              | 2.317252 |
| <b>Q9QZU7</b> | <b>BODG Gamma_butYRObetaine dioxygenase</b>                             | <b>1.308565444</b> | <b>1.7E-07</b> | <b>6</b> |
| Q9QZU7        | IDANNVAYTTGK                                                            | 1.360603123        | 2              | 3.338987 |
| Q9QZU7        | IIELDKQGVVR                                                             | 1.571046611        | 2              | 2.543926 |
| Q9QZU7        | LLLEALDVNIR                                                             | 1.081295062        | 2              | 2.857077 |
| Q9QZU7        | MNPGDVITFDNWR                                                           | 1.294447576        | 2              | 3.172843 |
| Q9QZU7        | QTVTGGDSEIVDGFNVCCQK                                                    | 1.268944304        | 2              | 4.499276 |
| Q9QZU7        | SYEAGTEISR                                                              | 1.333724971        | 2              | 2.836032 |
| <b>Q9QZX8</b> | <b>SO1B2 Solute carrier organic anion transporter family member 1B2</b> | <b>0.850557702</b> | <b>0.99895</b> | <b>3</b> |

|               |                                                                  |                    |                |           |
|---------------|------------------------------------------------------------------|--------------------|----------------|-----------|
| Q9QZX8        | GIGETPIVPLGISYLDDFAK                                             | 0.91783607         | 2              | 3.048605  |
| Q9QZX8        | QEEQDPSNMTGFLR                                                   | 1.00580013         | 2              | 2.354832  |
| Q9QZX8        | QFTDEGNPDSVNK                                                    | 0.823936087        | 2              | 3.422201  |
| <b>Q9R063</b> | <b>PRDX5 Peroxiredoxin_5_mitochondrial</b>                       | <b>0.937784258</b> | <b>0.01644</b> | <b>8</b>  |
| Q9R063        | ALNVEPDGTGLTCSLAPNILSQL                                          | 1.141886093        | 2              | 4.088025  |
| Q9R063        | ETDLLLDDSLVSLFGNR                                                | 0.757392294        | 2              | 4.151052  |
| Q9R063        | GVLFGVPGAFTPGCSK                                                 | 0.922236319        | 2              | 4.193405  |
| Q9R063        | THLPGFVEQAGALK                                                   | 0.860820115        | 3              | 4.748904  |
| Q9R063        | VGDTIPSVEVFEGEPGK                                                | 0.9820562          | 2              | 3.758513  |
| Q9R063        | VGDTIPSVEVFEGEPGKK                                               | 0.934428348        | 2              | 3.754559  |
| Q9R063        | VNLAELFK                                                         | 0.912587679        | 2              | 2.852062  |
| Q9R063        | VQLLADPTGAFGK                                                    | 1.008140233        | 2              | 3.996456  |
| <b>Q9R0N0</b> | <b>GALK1 Galactokinase</b>                                       | <b>0.916681971</b> | <b>0.24625</b> | <b>6</b>  |
| Q9R0N0        | AEHSFAGVPCGIMDQLIALLGQK                                          | 0.821084965        | 3              | 4.378198  |
| Q9R0N0        | QCEEVAQALGK                                                      | 0.932697496        | 2              | 2.463462  |
| Q9R0N0        | RQCEEVAQALGK                                                     | 0.896909086        | 2              | 3.03592   |
| Q9R0N0        | SLETSLVPLSDPK                                                    | 0.850007473        | 2              | 3.204306  |
| Q9R0N0        | TDGLVSLTTSK                                                      | 0.912115349        | 2              | 3.433484  |
| Q9R0N0        | VEELLAEAR                                                        | 0.978386332        | 2              | 3.157166  |
| <b>Q9R0T3</b> | <b>DNJC3 Dnaj homolog subfamily C member 3</b>                   | <b>1.046793423</b> | <b>0.94819</b> | <b>6</b>  |
| Q9R0T3        | AEPSVAEYTVR                                                      | 0.896736469        | 2              | 2.743583  |
| Q9R0T3        | FDDGEDPLDAETQGGGSPNFHR                                           | 1.062159898        | 3              | 3.659253  |
| Q9R0T3        | ICSEVLQLEPDNVNALK                                                | 0.900711829        | 2              | 5.405903  |
| Q9R0T3        | KFDDGEDPLDAETQGGGSPNFHR                                          | 0.81674593         | 3              | 5.490442  |
| Q9R0T3        | LIGSAEELIR                                                       | 0.901604353        | 2              | 2.378122  |
| Q9R0T3        | SNPSENEEKEAQSQVLK                                                | 0.98132018         | 2              | 5.015873  |
| <b>Q9R112</b> | <b>SQRD Sulfide:quinone oxidoreductase_mitochondrial</b>         | <b>1.036886872</b> | <b>0.98646</b> | <b>4</b>  |
| Q9R112        | EGNALFTFPNTPVK                                                   | 1.11533455         | 2              | 2.707342  |
| Q9R112        | STLSVIPSGVQWIQDR                                                 | 1.036534302        | 2              | 2.549031  |
| Q9R112        | TAAAVAAQSGILDR                                                   | 1.197804046        | 2              | 2.791556  |
| Q9R112        | VGAENVAIVEPSEK                                                   | 0.992957954        | 2              | 2.867388  |
| <b>Q9R1T3</b> | <b>CATZ Cathepsin Z</b>                                          | <b>0.941311797</b> | <b>0.9936</b>  | <b>2</b>  |
| Q9R1T3        | HGIPDETCNNYQAK                                                   | 0.939175525        | 2              | 3.794746  |
| Q9R1T3        | VGDYGSLSGR                                                       | 1.243194876        | 2              | 2.64976   |
| <b>Q9R1Z0</b> | <b>VDAC3 Voltage_dependent anion_selective channel protein 3</b> | <b>1.095798879</b> | <b>0.19939</b> | <b>5</b>  |
| Q9R1Z0        | LCQNNFALGYK                                                      | 1.404765781        | 2              | 2.526619  |
| Q9R1Z0        | LTLNALVDGK                                                       | 1.374990864        | 2              | 2.720363  |
| Q9R1Z0        | LTVDTIFVPNTGK                                                    | 1.036739242        | 2              | 3.49559   |
| Q9R1Z0        | VNNASLIGLGYTQSLRPGVK                                             | 1.228347545        | 2              | 4.110036  |
| Q9R1Z0        | WNTDNTLGTEISWENK                                                 | 0.891097271        | 2              | 2.896702  |
| <b>Q9R1Z8</b> | <b>VINEX Vinexin</b>                                             | <b>0.901014796</b> | <b>0.7216</b>  | <b>2</b>  |
| Q9R1Z8        | LSAELDKDLR                                                       | 0.90067497         | 3              | 3.522681  |
| Q9R1Z8        | MPDLQLDWTLEDPPK+Oxidation(0)                                     | 1.142812664        |                |           |
| <b>Q9R257</b> | <b>HEBP1 Heme_binding protein 1</b>                              | <b>1.06069731</b>  | <b>0.43083</b> | <b>2</b>  |
| Q9R257        | FATVEVTDKPVDEALR                                                 | 0.9285409          | 2              | 3.528544  |
| Q9R257        | NSLFGSVETWPWQVLSTGGK                                             | 1.142243174        | 2              | 3.863076  |
| <b>Q9WTT6</b> | <b>GUAD Guanine deaminase</b>                                    | <b>1.30488862</b>  | <b>2.2E-05</b> | <b>10</b> |
| Q9WTT6        | EIGNFEVGKDFDALLINPR                                              | 0.94985828         | 2              | 3.565097  |
| Q9WTT6        | ETTEESVKETER                                                     | 1.313603554        | 2              | 3.253301  |
| Q9WTT6        | FQSTDVAEEVYTR                                                    | 0.978881714        | 2              | 4.313101  |
| Q9WTT6        | FSLSCTETLMSELGNIK                                                | 0.868303047        | 2              | 4.127766  |
| Q9WTT6        | GTFVHSTWTCPEVLR                                                  | 0.918936293        | 2              | 3.132769  |
| Q9WTT6        | IVFLEESSQEK                                                      | 1.041894666        | 2              | 3.919569  |
| Q9WTT6        | NIEEVYVGGK                                                       | 0.864161558        | 1              | 2.790273  |
| Q9WTT6        | NYTDVYDKNNLLTNK                                                  | 0.778045716        | 2              | 4.412564  |

|               |                                                                          |                    |                |          |
|---------------|--------------------------------------------------------------------------|--------------------|----------------|----------|
| Q9WTT6        | THDLYIQSHISENREEIEAVK                                                    | 0.887373739        | 3              | 3.755657 |
| Q9WTT6        | VCMDLNNTVPEYK                                                            | 1.038226589        | 2              | 3.978439 |
| <b>Q9WTV5</b> | <b>PSMD9 26S proteasome non_ATPase regulatory subunit 9</b>              | <b>1.093479388</b> | <b>0.99282</b> | <b>2</b> |
| Q9WTV5        | ADVLDYQVR                                                                | 1.050496423        | 2              | 2.705196 |
| Q9WTV5        | RKEEIEAQIK                                                               | 1.019522493        | 3              | 3.916663 |
| <b>Q9WU19</b> | <b>HAOX1 Hydroxyacid oxidase 1</b>                                       | <b>0.879036164</b> | <b>9.9E-20</b> | <b>9</b> |
| Q9WU19        | AIFVTVDTPYLGNR                                                           | 0.964233094        | 2              | 4.592975 |
| Q9WU19        | AVFVGRPIIWGLAFQGEK                                                       | 0.887522719        | 3              | 4.129823 |
| Q9WU19        | GVQDVLEILK                                                               | 0.867859851        | 2              | 2.912539 |
| Q9WU19        | GVQDVLEILKEEFR                                                           | 0.723625611        | 2              | 3.956644 |
| Q9WU19        | HGVDGILVSNHGAR                                                           | 0.808643379        | 3              | 5.21556  |
| Q9WU19        | MKNFETNDLAFSPK+Oxidation(0)                                              | 0.835370516        |                |          |
| Q9WU19        | NFETNDLAFSPK                                                             | 0.76220449         | 2              | 3.410523 |
| Q9WU19        | NVADIDLSTSVLGQR                                                          | 0.885321017        | 2              | 4.907847 |
| Q9WU19        | VEVFLDGGVR                                                               | 0.85089691         | 2              | 2.95267  |
| <b>Q9WU49</b> | <b>CHSP1 Calcium_regulated heat stable protein 1</b>                     | <b>0.839300633</b> | <b>0.70977</b> | <b>2</b> |
| Q9WU49        | GNNVPSPLPTR                                                              | 0.92305513         | 2              | 2.462003 |
| Q9WU49        | LQAVEVVITHLAPGTK                                                         | 0.837843605        | 2              | 3.991714 |
| <b>Q9WU65</b> | <b>GLPK2 Glycerol kinase 2</b>                                           | <b>0.848301574</b> | <b>0.11523</b> | <b>2</b> |
| Q9WU65        | GIICGLTQFTNK                                                             | 0.801088586        | 2              | 3.463225 |
| Q9WU65        | TGLPLSTYFSAVK                                                            | 1.791614468        | 2              | 2.617165 |
| <b>Q9WU82</b> | <b>CTNB1 Catenin beta_1</b>                                              | <b>0.915978474</b> | <b>0.93368</b> | <b>3</b> |
| Q9WU82        | HQEAEAMAQNAVR                                                            | 0.911684188        | 2              | 3.357732 |
| Q9WU82        | LLNDEDQVVVVK                                                             | 0.965907422        | 2              | 3.253192 |
| Q9WU82        | TMQNTNDVETAR                                                             | 0.837643739        | 2              | 3.417847 |
| <b>Q9WUC4</b> | <b>ATOX1 Copper transport protein ATOX1</b>                              | <b>0.975243794</b> | <b>1E-09</b>   | <b>3</b> |
| Q9WUC4        | LGGVEFNIDLPNK                                                            | 0.950988805        | 2              | 2.852182 |
| Q9WUC4        | LGGVEFNIDLPNKK                                                           | 1.010731725        | 2              | 3.457079 |
| Q9WUC4        | VCIESEHSSDILLATLNK                                                       | 1.233300554        | 2              | 5.705632 |
| <b>Q9WUH4</b> | <b>FHL1 Four and a half LIM domains protein 1</b>                        | <b>1.530234925</b> | <b>0.78272</b> | <b>2</b> |
| Q9WUH4        | FCANTCVECR                                                               | 1.324210833        | 2              | 2.999619 |
| Q9WUH4        | FVFHNEQVYCPDCAK                                                          | 1.739230262        | 2              | 4.135421 |
| <b>Q9WUI1</b> | <b>MK11 Mitogen_activated protein kinase 11</b>                          | <b>0.867426642</b> | <b>0.80004</b> | <b>2</b> |
| Q9WUI1        | ILDFGLAR                                                                 | 0.721752417        | 2              | 2.373367 |
| Q9WUI1        | QELNKTVWEVPQR                                                            | 0.887542849        | 2              | 2.345996 |
| <b>Q9WUS0</b> | <b>KAD4 Adenylate kinase isoenzyme 4_mitochondrial</b>                   | <b>0.979627963</b> | <b>0.99588</b> | <b>6</b> |
| Q9WUS0        | AVILGPPGSGK                                                              | 0.984647664        | 2              | 2.520515 |
| Q9WUS0        | GLLVDPDHVITR                                                             | 1.082560508        | 2              | 2.498282 |
| Q9WUS0        | GVLHQFSGTETNR                                                            | 0.909473081        | 2              | 3.619946 |
| Q9WUS0        | TLVQAEALDR                                                               | 0.963442149        | 2              | 2.901691 |
| Q9WUS0        | VYNLDFNPPQVLGVDDITGEPLVQQEDDKPEALAAAR                                    | 1.06577441         | 3              | 5.072241 |
| Q9WUS0        | YKDAAKPVIELYK                                                            | 1.11439055         | 2              | 2.536824 |
| <b>Q9WV97</b> | <b>TIM9 Mitochondrial import inner membrane translocase subunit Tim9</b> | <b>1.100596629</b> | <b>0.00203</b> | <b>2</b> |
| Q9WV97        | FQEYHIQQNEALAAK                                                          | 1.155931983        | 2              | 4.868166 |
| Q9WV97        | LTETCFLDVCVK                                                             | 0.831105006        | 2              | 2.385885 |
| <b>Q9WVC0</b> | <b>SEPT7 Septin_7</b>                                                    | <b>1.156823045</b> | <b>0.92994</b> | <b>2</b> |
| Q9WVC0        | ADTLTPEECQQFK                                                            | 1.152779354        | 2              | 3.356287 |
| Q9WVC0        | NLEGYVGFANLPNQVYR                                                        | 0.896632443        | 2              | 2.30755  |
| <b>Q9WVD5</b> | <b>ORNT1 Mitochondrial ornithine transporter 1</b>                       | <b>1.582578516</b> | <b>2.1E-14</b> | <b>4</b> |
| Q9WVD5        | DGPLGFYHGLSSTLLR                                                         | 1.821056096        | 2              | 3.076921 |
| Q9WVD5        | LQTMYEMETSGK                                                             | 1.971608917        | 2              | 2.377356 |
| Q9WVD5        | NEGITALYSLKPTMIR                                                         | 0.965614978        | 2              | 3.577058 |
| Q9WVD5        | SNPAIQAAIDLTAGAAGGTACVLTGQPFDTMK                                         | 1.635523302        | 3              | 4.556772 |

|               |                                                                             |                    |                |           |
|---------------|-----------------------------------------------------------------------------|--------------------|----------------|-----------|
| <b>Q9WVK3</b> | <b>PECR Peroxisomal trans_2_ enoyl_ CoA reductase</b>                       | <b>0.847661225</b> | <b>9.9E-20</b> | <b>13</b> |
| Q9WVK3        | AGVYNLTK                                                                    | 1.043415844        | 2              | 2.411403  |
| Q9WVK3        | ASQPPSSSTQVTAIQCNI                                                          | 0.924422333        | 2              | 5.47989   |
| Q9WVK3        | DHGGSIVNIIVLLNNGFPTAAHSGAAR                                                 | 0.89928876         | 3              | 6.884837  |
| Q9WVK3        | ELLHLGCNVVIASR                                                              | 1.40192713         | 2              | 3.852978  |
| Q9WVK3        | INFLVNNAGGQFMAPAEDITAK                                                      | 0.794480299        | 2              | 5.240016  |
| Q9WVK3        | INFLVNNAGGQFMAPAEDITAK+Oxidation(12)                                        | 0.895034678        |                |           |
| Q9WVK3        | KEEEVNNLVK                                                                  | 0.903933262        | 3              | 4.183327  |
| Q9WVK3        | LTAAVDEL                                                                    | 1.048564095        | 2              | 3.131771  |
| Q9WVK3        | NFTIPDHDNWPVGAGDSSFIK                                                       | 0.869783261        | 2              | 5.012838  |
| Q9WVK3        | NFTIPDHDNWPVGAGDSSFIKK                                                      | 0.880673182        | 3              | 3.334849  |
| Q9WVK3        | SGQSYLAAGLLQNQAVVTGGATGIGK                                                  | 0.799318943        | 2              | 6.327176  |
| Q9WVK3        | TMALTWASSGVR                                                                | 0.804171892        | 2              | 3.897732  |
| Q9WVK3        | TMALTWASSGVR+Oxidation(1)                                                   | 0.831024624        |                |           |
| <b>Q9WVK7</b> | <b>HCDH Hydroxyacyl_ coenzyme A dehydrogenase_ mitochondrial</b>            | <b>0.919484476</b> | <b>0.73028</b> | <b>14</b> |
| Q9WVK7        | AADEFVEK                                                                    | 1.145423826        | 2              | 3.132052  |
| Q9WVK7        | EDIDTAMK                                                                    | 1.09941309         | 1              | 1.983415  |
| Q9WVK7        | FAAEHTIFASNTSSLQITNIANATTR                                                  | 1.020452059        | 2              | 5.541116  |
| Q9WVK7        | FILDGWHMDPENPLFQPSMNNLVAQK                                                  | 0.915670518        | 3              | 5.373808  |
| Q9WVK7        | GDASKEDIDTAMK                                                               | 0.989340188        | 3              | 3.850496  |
| Q9WVK7        | GDASKEDIDTAMK+Oxidation(11)                                                 | 1.110825174        |                |           |
| Q9WVK7        | HVTVIGGLMGAGIAQVAAATGHTVVLVDQTEDILAK                                        | 0.88609207         | 3              | 7.517247  |
| Q9WVK7        | KGIEESLK                                                                    | 1.053541971        | 1              | 2.137823  |
| Q9WVK7        | KGIEESLKR                                                                   | 1.047762508        | 2              | 2.348249  |
| Q9WVK7        | LKNELFQR                                                                    | 1.056881451        | 2              | 2.694453  |
| Q9WVK7        | LLVPYLIEAIR                                                                 | 0.872665539        | 2              | 2.555841  |
| Q9WVK7        | LVEVIK                                                                      | 1.025692933        | 2              | 2.451511  |
| Q9WVK7        | TFESLVDFCK                                                                  | 1.075551958        | 2              | 3.441023  |
| Q9WVK7        | TLSSLSTDAASVVHSTDLVVEAIVENLK                                                | 0.92931284         | 3              | 6.204538  |
| <b>Q9Z0N2</b> | <b>IF2H Eukaryotic translation initiation factor 2 subunit 3_ Y_ linked</b> | <b>1.283292626</b> | <b>0.37183</b> | <b>3</b>  |
| Q9Z0N2        | IVLTNPVCTEVGEK                                                              | 1.033024381        | 2              | 3.306947  |
| Q9Z0N2        | SFDVNKPGCEVDDLK                                                             | 1.225861069        | 2              | 3.454753  |
| Q9Z0N2        | VGQEIEVRPGIVSK                                                              | 1.292225872        | 2              | 3.10233   |
| <b>Q9Z0U5</b> | <b>ADO Aldehyde oxidase</b>                                                 | <b>0.862766632</b> | <b>1</b>       | <b>17</b> |
| Q9Z0U5        | CGLSPEQVR                                                                   | 1.125068241        | 2              | 2.48427   |
| Q9Z0U5        | CTGYRPIIDACK                                                                | 0.842675034        | 2              | 2.621097  |
| Q9Z0U5        | DLEPLILTIEEAIQHK                                                            | 0.829327812        | 2              | 3.289575  |
| Q9Z0U5        | EFQPLDPTQELIFPPELMR                                                         | 0.804835634        | 2              | 3.069865  |
| Q9Z0U5        | ELSILYGGVGPPTIGAK                                                           | 0.949989923        | 2              | 3.496761  |
| Q9Z0U5        | GEDMLITGGR                                                                  | 1.012825503        | 2              | 2.36863   |
| Q9Z0U5        | GTSTETVPNTNASGGSVVADLNGLAVK                                                 | 0.766797192        | 2              | 4.614176  |
| Q9Z0U5        | GYESNINWEK                                                                  | 0.930674617        | 2              | 2.828918  |
| Q9Z0U5        | HIQDIVAATLK                                                                 | 0.755599861        | 2              | 2.447212  |
| Q9Z0U5        | HLSDLNPLLAVGNCTLNLLSK                                                       | 0.940084778        | 2              | 4.594275  |
| Q9Z0U5        | KCPDSDLKPQEVLSVNIIPCSR                                                      | 0.707925907        | 3              | 3.380001  |
| Q9Z0U5        | KLECGNVDEAFK                                                                | 0.777794829        | 2              | 3.549228  |
| Q9Z0U5        | LVLDEVTLGASAPGGK                                                            | 0.864308726        | 2              | 3.534112  |
| Q9Z0U5        | MTWISPVTLLELVEAK                                                            | 0.900686084        | 2              | 3.203017  |
| Q9Z0U5        | NHPEPSLDQLTDALGGNLCR                                                        | 0.688330442        | 2              | 3.722775  |
| Q9Z0U5        | RLEPIISK                                                                    | 0.977354494        | 2              | 2.436527  |
| Q9Z0U5        | VVENNVDPMMLLPYLR                                                            | 0.869974672        | 2              | 3.864388  |
| <b>Q9Z0V5</b> | <b>PRDX4 Peroxiredoxin_4</b>                                                | <b>0.960679735</b> | <b>0.64081</b> | <b>4</b>  |
| Q9Z0V5        | ENECHFYAGGQVYPGEVSR                                                         | 1.743667319        | 2              | 5.433118  |
| Q9Z0V5        | GLFIIDDK                                                                    | 0.982068061        | 2              | 2.978997  |



|               |                                                                      |                    |                |           |
|---------------|----------------------------------------------------------------------|--------------------|----------------|-----------|
| Q9Z0V5        | QITLNDLPVGR                                                          | 0.97343716         | 2              | 3.308394  |
| Q9Z0V5        | TRENECHFYAGGQVYPGEVSR                                                | 0.99529044         | 3              | 6.021302  |
| <b>Q9Z0V6</b> | <b>PRDX3 Thioredoxin_dependent peroxide reductase_mitochondrial</b>  | <b>0.958600648</b> | <b>0.99753</b> | <b>6</b>  |
| Q9Z0V6        | AFQFVETHGEVCPANWTPESPTIKPSPTASK                                      | 0.948182157        | 3              | 5.999172  |
| Q9Z0V6        | GLFIIDPNGVIK                                                         | 0.935262106        | 2              | 3.068291  |
| Q9Z0V6        | GTAVVNGEFK                                                           | 1.04484671         | 2              | 2.453907  |
| Q9Z0V6        | HLSVNDLPVGR                                                          | 0.946277705        | 2              | 2.87021   |
| Q9Z0V6        | NGGLGHMNITLLSDLTK                                                    | 1.057453176        | 2              | 2.817187  |
| Q9Z0V6        | SVEEPLRLVK                                                           | 0.852403262        | 2              | 2.488593  |
| <b>Q9Z142</b> | <b>TMM33 Transmembrane protein 33</b>                                | <b>0.885828964</b> | <b>0.71202</b> | <b>2</b>  |
| Q9Z142        | ALLANALTSALR                                                         | 0.921943836        | 2              | 3.72164   |
| Q9Z142        | LSTNQQNILK                                                           | 1.186203065        | 2              | 2.468726  |
| <b>Q9Z1A6</b> | <b>VIGLN Vigilin</b>                                                 | <b>1.014617078</b> | <b>0.00058</b> | <b>22</b> |
| Q9Z1A6        | ASVITQVFHVPLEER                                                      | 1.434862062        | 2              | 2.88712   |
| Q9Z1A6        | DKFPEVIINFDPAPK                                                      | 1.660424964        | 3              | 4.04574   |
| Q9Z1A6        | DLANIAEVEVSIPAK                                                      | 1.253723128        | 2              | 3.74732   |
| Q9Z1A6        | EALEALVPVTIEVEVPFDLHR                                                | 1.047382405        | 3              | 3.519886  |
| Q9Z1A6        | ELQAEQEDR                                                            | 1.301069542        | 2              | 2.50733   |
| Q9Z1A6        | GNSLQEILER                                                           | 1.049431381        | 2              | 2.524348  |
| Q9Z1A6        | HEVLLISAEQDKR                                                        | 1.123309741        | 3              | 4.274891  |
| Q9Z1A6        | IDLPAENSNSETIVITGK                                                   | 0.982453026        | 2              | 4.628772  |
| Q9Z1A6        | IEGDPQGVQQAQK                                                        | 0.95824253         | 2              | 3.178707  |
| Q9Z1A6        | IIFPAAEDKDQDLITIIGK                                                  | 0.998512498        | 2              | 3.236438  |
| Q9Z1A6        | ITLEGPTEDVNVAQEQIEGMVK                                               | 1.368822427        | 2              | 4.309167  |
| Q9Z1A6        | IVGELEQMVSEVDPLDHR                                                   | 1.00256333         | 2              | 4.52848   |
| Q9Z1A6        | LGQALTEVYAK                                                          | 1.164455045        | 2              | 3.205396  |
| Q9Z1A6        | LQDLELK                                                              | 1.139983495        | 1              | 2.320713  |
| Q9Z1A6        | LQTQASATVPIPK                                                        | 1.007533423        | 2              | 3.530967  |
| Q9Z1A6        | LVGEIMQETGTR                                                         | 1.132015121        | 2              | 3.385951  |
| Q9Z1A6        | MDYVEINIDHK                                                          | 1.100266972        | 2              | 3.225439  |
| Q9Z1A6        | MVADLVENSYSISVPIFK                                                   | 0.878140621        | 2              | 2.988643  |
| Q9Z1A6        | RCDIIVISGR                                                           | 0.968825405        | 2              | 2.776778  |
| Q9Z1A6        | TEIVFTGEKEQLAQAVAR                                                   | 0.918889315        | 2              | 4.179046  |
| Q9Z1A6        | TKDLIEQR                                                             | 1.166578973        | 2              | 2.525235  |
| Q9Z1A6        | VKELQAEQEDR                                                          | 0.951039433        | 2              | 3.015939  |
| <b>Q9Z1J8</b> | <b>S14L3 SEC14_like protein 3</b>                                    | <b>0.859641783</b> | <b>0.85202</b> | <b>3</b>  |
| Q9Z1J8        | ENVQDVLPALPNDDYFLLR                                                  | 0.841043921        | 3              | 3.857328  |
| Q9Z1J8        | FRENVQDVLPALPNDDYFLLR                                                | 0.989059049        | 3              | 3.815496  |
| Q9Z1J8        | GSSHQVEYEILFPGCVLRL                                                  | 0.939124667        | 2              | 4.619497  |
| <b>Q9Z1N1</b> | <b>F16P2 Fructose_1_6_bisphosphatase isozyme 2</b>                   | <b>0.842867329</b> | <b>0.00862</b> | <b>2</b>  |
| Q9Z1N1        | YVGSMVADVHR                                                          | 0.706952292        | 2              | 2.318095  |
| Q9Z1N1        | YVGSMVADVHR+Oxidation(4)                                             | 0.875189969        |                |           |
| <b>Q9Z1P2</b> | <b>ACTN1 Alpha_actinin_1</b>                                         | <b>0.868582998</b> | <b>0.01555</b> | <b>3</b>  |
| Q9Z1P2        | DYETATLSEIK                                                          | 1.223647937        | 1              | 2.080388  |
| Q9Z1P2        | ICDQWDNLGALTQK                                                       | 0.748436977        | 2              | 3.898709  |
| Q9Z1P2        | KDDPLTNLNTAFDVAER                                                    | 2.511242219        | 2              | 2.663866  |
| <b>Q9Z1W6</b> | <b>LYRIC Protein LYRIC</b>                                           | <b>0.878332796</b> | <b>0.89682</b> | <b>3</b>  |
| Q9Z1W6        | SWQDELAQAEEGSAR                                                      | 1.004116186        | 2              | 5.390511  |
| Q9Z1W6        | TELGDLGLEPK                                                          | 0.867534986        | 2              | 2.797747  |
| Q9Z1W6        | TLPPAISAEPSVTLSK                                                     | 0.82541717         | 2              | 3.161659  |
| <b>Q9Z1Y3</b> | <b>CADH2 Cadherin_2</b>                                              | <b>0.884961474</b> | <b>0.39813</b> | <b>2</b>  |
| Q9Z1Y3        | IDPVNGQITTIIVLDR                                                     | 0.882910219        | 2              | 3.495197  |
| Q9Z1Y3        | YSVTGPGADQPPTGIFIINPISGQLSVTKPLDR                                    | 1.0114684          | 3              | 3.387642  |
| <b>Q9Z270</b> | <b>VAPA Vesicle_associated membrane protein_associated protein A</b> | <b>1.005939065</b> | <b>0.94945</b> | <b>3</b>  |
| Q9Z270        | FKGPFTDVTNLIK                                                        | 0.865436867        | 2              | 2.602382  |

|               |                                                                           |                    |                |           |
|---------------|---------------------------------------------------------------------------|--------------------|----------------|-----------|
| Q9Z270        | HEQILVLDPPSDLK                                                            | 0.996022975        | 2              | 4.187204  |
| Q9Z270        | QDGPLPKPHSVSLNDTETR                                                       | 1.020097298        | 3              | 3.351138  |
| <b>Q9Z2C8</b> | <b>YBOX2 Y_box_binding protein 2</b>                                      | <b>0.914278211</b> | <b>0.21217</b> | <b>2</b>  |
| Q9Z2C8        | NDTKEDVVFVHQTAIK                                                          | 0.879925524        | 2              | 3.421593  |
| Q9Z2C8        | SVGDGETVEFDVVEGEK                                                         | 1.128983146        | 2              | 3.689335  |
| <b>Q9Z2I8</b> | <b>SUCB2 Succinyl_CoA ligase [GDP_forming] subunit beta_mitochondrial</b> | <b>0.895571048</b> | <b>6.9E-06</b> | <b>10</b> |
| Q9Z2I8        | DIFAMDDKSENEPIEENEAAR                                                     | 0.72364563         | 2              | 4.563154  |
| Q9Z2I8        | GKGVFNGLK                                                                 | 1.063948568        | 2              | 2.312438  |
| Q9Z2I8        | IDATQVEVNPFGETPEGQVVCFDAK                                                 | 0.84301443         | 3              | 4.77351   |
| Q9Z2I8        | INFDDNAEFR                                                                | 0.838048232        | 2              | 3.207994  |
| Q9Z2I8        | LEGTNVQEAQNILK                                                            | 1.016116375        | 2              | 5.226037  |
| Q9Z2I8        | SENEPIEENEAAR                                                             | 1.016002497        | 2              | 4.052405  |
| Q9Z2I8        | SHNGPVIIVGSPQGGVDIEEVAASSPELIFK                                           | 0.862283016        | 2              | 5.999477  |
| Q9Z2I8        | SSGLPITSAVDLEDAAK                                                         | 0.889993222        | 2              | 4.538201  |
| Q9Z2I8        | SSGLPITSAVDLEDAAKK                                                        | 0.897040726        | 2              | 2.952747  |
| Q9Z2I8        | VMVAEALDISR                                                               | 0.968030665        | 2              | 3.318779  |
| <b>Q9Z2I9</b> | <b>SUCB1 Succinyl_CoA ligase [ADP_forming] subunit beta_mitochondrial</b> | <b>0.9293025</b>   | <b>0.99999</b> | <b>8</b>  |
| Q9Z2I9        | ALIADSLK                                                                  | 0.98101832         | 1              | 2.08293   |
| Q9Z2I9        | ICNQVLCER                                                                 | 1.160248442        | 2              | 2.861273  |
| Q9Z2I9        | ILACDDLDEAAK                                                              | 0.940504212        | 2              | 3.392226  |
| Q9Z2I9        | INFDSNSAYR                                                                | 1.023339946        | 2              | 2.837421  |
| Q9Z2I9        | LSEIVTLAK                                                                 | 1.071988848        | 2              | 2.50533   |
| Q9Z2I9        | MGFPSNIVDSAAENMIK                                                         | 1.033024158        | 2              | 2.828672  |
| Q9Z2I9        | SSDEAYAIK                                                                 | 0.971674454        | 2              | 3.503048  |
| Q9Z2I9        | VQAILVNIFFGIMR                                                            | 0.746740724        | 2              | 3.837887  |
| <b>Q9Z2L0</b> | <b>VDAC1 Voltage_dependent anion_selective channel protein 1</b>          | <b>1.078467275</b> | <b>0.99291</b> | <b>11</b> |
| Q9Z2L0        | KLETAVNLAWTAGNSNTR                                                        | 0.912043588        | 2              | 5.814874  |
| Q9Z2L0        | LTFDSSFSPTNGK                                                             | 0.996430197        | 2              | 3.601147  |
| Q9Z2L0        | LTFDSSFSPTNGKK                                                            | 1.028636511        | 2              | 2.553809  |
| Q9Z2L0        | LTLSALLDGG                                                                | 1.321172863        | 2              | 2.493484  |
| Q9Z2L0        | SENGLEFTSSGSANTETTK                                                       | 1.2668888          | 2              | 4.596782  |
| Q9Z2L0        | TDEFQLHTNVNDGTEFGGSYQK                                                    | 0.978337118        | 3              | 5.105243  |
| Q9Z2L0        | VNSSLIGLGYTQTLKPGIK                                                       | 1.123328113        | 2              | 4.438754  |
| Q9Z2L0        | VTQSNFAVGYK                                                               | 1.028149722        | 2              | 3.132606  |
| Q9Z2L0        | WNTDNTLGTEITVEDQLAR                                                       | 1.008991896        | 2              | 4.545949  |
| Q9Z2L0        | WTEYGLTFTEK                                                               | 1.167052598        | 2              | 2.902601  |
| Q9Z2L0        | YQVDPDACFSAK                                                              | 1.07481551         | 2              | 3.553422  |
| <b>Q9Z2M4</b> | <b>DECR2 Peroxisomal 2_4_dienoyl_CoA reductase</b>                        | <b>0.991287816</b> | <b>1</b>       | <b>4</b>  |
| Q9Z2M4        | GQVLQLHAGAAK                                                              | 1.273666585        | 2              | 3.187414  |
| Q9Z2M4        | HLAVEWGPQNIR                                                              | 0.975770676        | 2              | 3.269214  |
| Q9Z2M4        | VNSLAPGAISGTEGLR                                                          | 0.956869927        | 2              | 3.931054  |
| Q9Z2M4        | VPPAVMAAVDQALK                                                            | 0.97817578         | 2              | 3.169947  |
| <b>Q9Z2M7</b> | <b>PMM2 Phosphomannomutase 2</b>                                          | <b>1.042298069</b> | <b>0.86924</b> | <b>4</b>  |
| Q9Z2M7        | IGVVGGSDFEK                                                               | 1.593545332        | 2              | 2.376433  |
| Q9Z2M7        | LQEQLGNDVVEK                                                              | 1.070485356        | 2              | 3.491516  |
| Q9Z2M7        | TVGYVTAPEDTR                                                              | 1.055131613        | 2              | 2.519665  |
| Q9Z2M7        | YDYVFPENGLVAYK                                                            | 0.882809847        | 2              | 3.340096  |
| <b>Q9Z2Q1</b> | <b>SC31A Protein transport protein Sec31A</b>                             | <b>0.982905131</b> | <b>1</b>       | <b>14</b> |
| Q9Z2Q1        | AQDGSNPLSLQDLIEK                                                          | 1.124177219        | 2              | 4.183478  |
| Q9Z2Q1        | AVQLTQALDNTNVTGALLAEK                                                     | 0.971123801        | 2              | 4.623977  |
| Q9Z2Q1        | CLSSATDPQTK                                                               | 0.874291357        | 2              | 2.623059  |
| Q9Z2Q1        | DQTLSPTIISGLHSIAR                                                         | 1.055493914        | 2              | 3.423858  |
| Q9Z2Q1        | GGPGPLAGHPQVSR                                                            | 0.907233754        | 2              | 3.098453  |
| Q9Z2Q1        | IDASQDFEK                                                                 | 1.173371335        | 2              | 2.494619  |

|               |                                                |                    |                |          |
|---------------|------------------------------------------------|--------------------|----------------|----------|
| Q9Z2Q1        | IIAGDKEVVIAQK                                  | 0.991826844        | 2              | 2.537663 |
| Q9Z2Q1        | KIDASQTFEK                                     | 1.003450207        | 2              | 3.043903 |
| Q9Z2Q1        | LVTFENVTGQPQQGAEQPR                            | 0.956534264        | 2              | 5.171887 |
| Q9Z2Q1        | QVQHILASASPSGR                                 | 0.974826433        | 2              | 2.912612 |
| Q9Z2Q1        | SSYEGQPLPK                                     | 0.967110728        | 2              | 2.477648 |
| Q9Z2Q1        | TQPPEDISCIAWNRR                                | 1.015713458        | 2              | 2.673215 |
| Q9Z2Q1        | TTFEDLIQR                                      | 1.044936365        | 2              | 2.34945  |
| Q9Z2Q1        | VYSIMGGSIDGLR                                  | 0.695549999        | 2              | 2.619166 |
| <b>Q9Z2Z8</b> | <b>DHCR7 7_dehydrocholesterol reductase</b>    | <b>1.349988345</b> | <b>0.74842</b> | <b>3</b> |
| Q9Z2Z8        | AIECSYTSADGLK                                  | 1.563999327        | 2              | 3.996382 |
| Q9Z2Z8        | ASLADIWAK                                      | 1.436778732        | 2              | 2.651257 |
| Q9Z2Z8        | FLPGYVGGVQEGAITPAGIVNK                         | 1.30264054         | 2              | 5.473073 |
| <b>Q9Z339</b> | <b>GSTO1 Glutathione S_transferase omega_1</b> | <b>0.943247769</b> | <b>0.89509</b> | <b>5</b> |
| Q9Z339        | GSAPPGPVPEGQIR                                 | 0.943317342        | 2              | 3.326944 |
| Q9Z339        | LEALELNECIDHTPK                                | 0.783664995        | 2              | 4.331292 |
| Q9Z339        | LEEAMANK                                       | 0.898977882        | 1              | 1.997001 |
| Q9Z339        | LEEAMANK+Oxidation(4)                          | 0.696691721        |                |          |
| Q9Z339        | LFPDDPYEKACQK                                  | 0.927285777        | 2              | 2.423779 |

*Time point 18 hours*

| Accession number | Protein DESCRIPTION                                       | Protein Ratio (18 h) | P-value (18 h) | Peptide number (18 h) |
|------------------|-----------------------------------------------------------|----------------------|----------------|-----------------------|
| Accession number | Peptide sequence                                          | Peptide Ratio (18 h) | Charge state   | Xcorr                 |
| <b>A0FKI7</b>    | <b>ACBD5 Acyl_CoA_binding domain_containing protein 5</b> | <b>1.052205134</b>   | <b>0.34537</b> | <b>3</b>              |
| A0FKI7           | LQEDMQNVLQR                                               | 2.139102071          | 2              | 2.585372              |
| A0FKI7           | RGGESEDISGVR                                              | 1.043448039          | 2              | 2.624462              |
| A0FKI7           | SSDLTSDLGNVLTSSNAK                                        | 0.986319998          | 2              | 3.258466              |
| <b>A2AAE1</b>    | <b>K1109 Uncharacterized protein KIAA1109</b>             | <b>0.661052031</b>   | <b>0.37661</b> | <b>2</b>              |
| A2AAE1           | SSRSLDQDSPSK                                              | 0.560473666          | 2              | 2.660615              |
| A2AAE1           | TVDGNVNSMKRK                                              | 0.81387359           | 2              | 2.311105              |
| <b>A2ADY9</b>    | <b>DDI2 Protein DDI1 homolog 2</b>                        | <b>0.947979336</b>   | <b>0.00136</b> | <b>3</b>              |
| A2ADY9           | IDFSSIAVPGTSPNPQQR                                        | 1.004546319          | 2              | 3.243532              |
| A2ADY9           | NPPLAEALLSGDLEK                                           | 0.797773895          | 2              | 3.426769              |
| A2ADY9           | VLVEQQQDR                                                 | 0.919943188          | 2              | 2.469646              |
| <b>A2AGT5</b>    | <b>CKAP5 Cytoskeleton_associated protein 5</b>            | <b>0.45086507</b>    | <b>0.00164</b> | <b>2</b>              |
| A2AGT5           | DQVLAMLEKAKANMPSKPAAPAK+Oxidation(13)                     | 0.197541578          |                |                       |
| A2AGT5           | IGSKENTKEGLAELYEYK                                        | 0.599739329          | 2              | 2.548419              |
| <b>A2AQP0</b>    | <b>MYH7B Myosin_7B</b>                                    | <b>1.029720577</b>   | <b>0.99992</b> | <b>13</b>             |
| A2AQP0           | AITDAAMMAEELK                                             | 0.976184423          | 2              | 2.93084               |
| A2AQP0           | AITDAAMMAEELKK                                            | 0.9369823            | 2              | 3.533626              |
| A2AQP0           | AITDAAMMAEELKK+Oxidation(6)                               | 0.915594871          |                |                       |
| A2AQP0           | AITDAAMMAEELKK+Oxidation(7)                               | 0.915594871          | 2              | 2.92241               |
| A2AQP0           | CNGVLEGIR                                                 | 0.783271973          | 2              | 2.56169               |
| A2AQP0           | DIDDLLETLAK                                               | 0.591972826          | 2              | 3.795369              |
| A2AQP0           | ELEELSER                                                  | 1.267267823          | 1              | 2.076466              |
| A2AQP0           | EQDTSÄHLER                                                | 1.350380815          | 2              | 2.491106              |
| A2AQP0           | KDIDDLLETLAK                                              | 1.000875638          | 2              | 2.374543              |
| A2AQP0           | SIQELEK                                                   | 1.013481804          | 2              | 2.393534              |
| A2AQP0           | TEELEEK                                                   | 1.069985369          | 2              | 2.364938              |
| A2AQP0           | VEDEQLVGVQLQK                                             | 1.280925754          | 2              | 2.320039              |
| A2AQP0           | VGNEYVTK                                                  | 1.008882669          | 2              | 3.03588               |
| <b>A2ASS6</b>    | <b>TITIN Titin</b>                                        | <b>1.045516194</b>   | <b>0.17933</b> | <b>32</b>             |
| A2ASS6           | ACDALYPPGPPSNPK                                           | 0.754211158          | 2              | 2.53571               |
| A2ASS6           | AENRFGIGPPAETIQRRTAR                                      | 0.878021582          | 2              | 2.571583              |
| A2ASS6           | AGEDVQLLIPFK                                              | 1.168877467          | 2              | 2.586797              |
| A2ASS6           | APPIEPAPTPIAAPVTAPVVGK                                    | 1.503151073          | 2              | 4.506479              |
| A2ASS6           | ATGLIEGLDYQFR                                             | 0.476732223          | 2              | 2.990193              |
| A2ASS6           | ATLTWTPPLEDGGSPIK                                         | 0.921152921          | 2              | 2.316728              |
| A2ASS6           | ATNEVGSCTCACTVK                                           | 1.166672552          | 2              | 4.2124                |
| A2ASS6           | DGQELQIADRIKIQK                                           | 1.356180803          | 2              | 2.788064              |
| A2ASS6           | DPFDKPSQPGELEILSISK                                       | 1.411397672          | 3              | 3.67113               |
| A2ASS6           | GQSDPVTIGPLTVK                                            | 1.683280108          | 2              | 2.838985              |
| A2ASS6           | GYDEIPLPNDKTEILK                                          | 0.881981603          | 2              | 2.419614              |
| A2ASS6           | IEALPSDISIDEGK                                            | 2.483010738          | 2              | 2.420704              |
| A2ASS6           | KDGTQLACKVTGTPIIK                                         | 0.349441136          | 2              | 2.671027              |
| A2ASS6           | NAADNFSEPSESSGAIAR                                        | 1.446437278          | 2              | 3.984609              |
| A2ASS6           | NAADSVSEPESTGPITVK                                        | 1.021398993          | 2              | 2.342911              |
| A2ASS6           | NAADSVSEPESTGPITVKDDVEAPR                                 | 0.828475657          | 3              | 3.44918               |
| A2ASS6           | NAAGVFSEPESTGAIAR                                         | 1.058276062          | 2              | 4.287962              |
| A2ASS6           | QEKIEGLDRAMLK+Oxidation(10)                               | 0.447118369          |                |                       |
| A2ASS6           | QETEEIAASMVVATAK                                          | 0.735297951          | 2              | 2.311084              |
| A2ASS6           | SAANLIVEEEDLR                                             | 0.42159355           | 2              | 2.596856              |

|               |                                                                      |                    |                |           |
|---------------|----------------------------------------------------------------------|--------------------|----------------|-----------|
| A2ASS6        | VFAENEYIGIDPGETR                                                     | 0.16373374         | 2              | 3.595248  |
| A2ASS6        | VGTGEPVETDSPVEAR                                                     | 1.010831848        | 2              | 4.02984   |
| A2ASS6        | VIGSPNTPEGPLEYDDIQAR                                                 | 0.801060825        | 2              | 3.607061  |
| A2ASS6        | VLACNAGGPGPAEVPGETVK                                                 | 1.381611864        | 2              | 3.04132   |
| A2ASS6        | VLAENEIGIGPCETTEPVK                                                  | 2.075515182        | 2              | 3.780295  |
| A2ASS6        | VLAENEYIGLPAETAESVK                                                  | 0.881464189        | 2              | 3.502002  |
| A2ASS6        | VLDRPGPPEGLAVSDVTSEK                                                 | 0.8101625          | 3              | 3.598027  |
| A2ASS6        | VNAESTENNSLLTIK                                                      | 0.470149234        | 2              | 3.736063  |
| A2ASS6        | VSGENEFVGVPAETK                                                      | 1.795118632        | 2              | 3.676018  |
| A2ASS6        | VSNVAGDNACSGILTVK                                                    | 3.61532595         | 2              | 2.932786  |
| A2ASS6        | VSVLDVPGPPGPIEISNVSAEK                                               | 1.785134481        | 2              | 2.720303  |
| A2ASS6        | YGIGEPLDSEPETAR                                                      | 0.862961481        | 2              | 3.220699  |
| <b>A2AU37</b> | <b>RD21L Double_strand_break repair protein rad21_like protein 1</b> | <b>0.446023914</b> | <b>0.2496</b>  | <b>2</b>  |
| A2AU37        | MKMTFRPGLVDLPK                                                       | 0.298849157        | 1              | 2.065607  |
| A2AU37        | RGVDMLLSTATQDLINDELK                                                 | 1.301541832        | 2              | 2.361515  |
| <b>A2AWA9</b> | <b>RBGP1 Rab GTPase activating protein 1</b>                         | <b>0.753040132</b> | <b>0.36543</b> | <b>2</b>  |
| A2AWA9        | IVICQQTANKELAIER                                                     | 0.763727191        | 2              | 2.347069  |
| A2AWA9        | RLMELACNTKISQK+Oxidation(2)                                          | 0.752155093        |                |           |
| <b>A2VCW9</b> | <b>AASS Alpha_aminoadipic semialdehyde synthase_mitochondrial</b>    | <b>1.113271941</b> | <b>0.30609</b> | <b>11</b> |
| A2VCW9        | AEGIVFNTQSTIK                                                        | 1.616230549        | 2              | 2.755304  |
| A2VCW9        | AGGILQEDITEACLILGVK                                                  | 0.733041738        | 2              | 3.923125  |
| A2VCW9        | AQEANMSLLDEVLK                                                       | 1.045074813        | 2              | 4.386465  |
| A2VCW9        | GAQEVFNELPCEYVEPHELK                                                 | 1.203073316        | 2              | 4.814317  |
| A2VCW9        | KTDGVYDPVEYKYPYER                                                    | 1.132749307        | 3              | 3.912395  |
| A2VCW9        | KYDINTVNVTVGK                                                        | 1.404251284        | 2              | 4.093321  |
| A2VCW9        | LQSLVESQDLVISLLPYVLHPVAK                                             | 1.396068514        | 3              | 4.090736  |
| A2VCW9        | QDAQSLLVPVK                                                          | 1.048637481        | 2              | 2.666499  |
| A2VCW9        | REDVNAWER                                                            | 1.225863197        | 2              | 3.088103  |
| A2VCW9        | SSVVPVEGCPPELPHK                                                     | 1.238138192        | 2              | 2.828781  |
| A2VCW9        | YDINTVNVTVGK                                                         | 0.90184009         | 2              | 2.458222  |
| <b>A6H584</b> | <b>chain</b>                                                         | <b>1.167445632</b> | <b>0.64034</b> | <b>7</b>  |
| A6H584        | FVNRAVFRMANGIDR+Oxidation(8)                                         | 1.267228932        |                |           |
| A6H584        | NEHSFQVVGIVQR                                                        | 0.945915402        |                |           |
| A6H584        | QGDPIGPIGIFPGPK                                                      | 0.823049638        |                |           |
| A6H584        | RGTQGYGPIGYDGQK                                                      | 1.512336291        |                |           |
| A6H584        | TMNPAFMGLDRATR+Oxidation(1)                                          | 1.197675638        |                |           |
| A6H584        | YDVTDAVKVLK                                                          | 1.123256812        |                |           |
| A6H584        | YLIVVTDGHPLGYKEPCGGLEDAVNEAK                                         | 0.808119344        |                |           |
| <b>A7VJC2</b> | <b>ROA2 Heterogeneous nuclear ribonucleoproteins A2/B1</b>           | <b>0.940539187</b> | <b>0.00055</b> | <b>12</b> |
| A7VJC2        | GFGFVTFDDHDPVVK                                                      | 0.913321526        | 2              | 3.113469  |
| A7VJC2        | GGGGNFGPGPGSNFR                                                      | 0.941448114        | 2              | 3.529153  |
| A7VJC2        | GGNFGFGDSR                                                           | 0.504397803        | 2              | 2.481533  |
| A7VJC2        | IDTIEIITDR                                                           | 0.833306132        | 2              | 4.104054  |
| A7VJC2        | LFIGLSFETTEESLR                                                      | 1.208085393        | 2              | 3.873233  |
| A7VJC2        | LTDCVVMR                                                             | 0.828382157        | 2              | 2.531387  |
| A7VJC2        | NMGGPYGGNYGPGSGSGGYGGR                                               | 0.914438763        | 2              | 6.311837  |
| A7VJC2        | NYEQWGK                                                              | 0.902084994        | 1              | 2.438159  |
| A7VJC2        | QEMQEVQSSR                                                           | 0.786347362        | 2              | 3.014442  |
| A7VJC2        | QEMQEVQSSR+Oxidation(2)                                              | 1.352986782        |                |           |
| A7VJC2        | TLETVPLER                                                            | 1.426245351        | 2              | 2.316374  |
| A7VJC2        | YHTINGHNAEVR                                                         | 1.3156954          | 2              | 3.443421  |
| <b>B0BN93</b> | <b>PSD13 26S proteasome non_ATPase regulatory subunit 13</b>         | <b>1.064126435</b> | <b>0.94222</b> | <b>2</b>  |
| B0BN93        | QMTDPNVALTFLEK                                                       | 1.134957106        | 2              | 2.613935  |

|               |                                                                        |                    |                |          |
|---------------|------------------------------------------------------------------------|--------------------|----------------|----------|
| B0BN93        | SAWQQPDLAANEALLR                                                       | 1.054308629        | 2              | 4.055935 |
| <b>B0BN94</b> | <b>F136A Protein FAM136A</b>                                           | <b>0.937292468</b> | <b>0.99988</b> | <b>2</b> |
| B0BN94        | CHAPLAQAQALVTSELR                                                      | 0.977849456        | 2              | 3.155535 |
| B0BN94        | CSANCCEDNQASMQQVHQCIER                                                 | 0.877814909        | 3              | 4.887235 |
| <b>B0BNE5</b> | <b>ESTD S_formylglutathione hydrolase</b>                              | <b>1.001329174</b> | <b>0.00559</b> | <b>9</b> |
| B0BNE5        | AFNGYLGPDQSK                                                           | 1.068747734        | 2              | 3.454436 |
| B0BNE5        | AYDATCLVK                                                              | 1.096580425        | 2              | 2.492888 |
| B0BNE5        | FAIYLPPQAESAK                                                          | 1.489652147        | 2              | 3.34819  |
| B0BNE5        | LQEGYDHSYYFIATFITDHIR                                                  | 2.056340574        | 3              | 3.807578 |
| B0BNE5        | MYSYVTEELPQLINANFPVDPQR                                                | 0.985266975        | 3              | 5.430045 |
| B0BNE5        | SGCQQAASEHGLVVIAPDTSR                                                  | 1.047359849        | 2              | 5.709257 |
| B0BNE5        | SVSAFAPICNPVLCPPWGK                                                    | 1.03341193         | 2              | 4.041839 |
| B0BNE5        | SYSGPQIDILIDQGG                                                        | 1.221983611        | 2              | 3.625741 |
| B0BNE5        | VFEHSSVELK                                                             | 0.916741432        | 2              | 2.596017 |
| <b>B0BNN3</b> | <b>CAH1 Carbonic anhydrase 1</b>                                       | <b>0.685818556</b> | <b>0.71117</b> | <b>4</b> |
| B0BNN3        | ADGLAIIGVLMK                                                           | 0.644505911        | 2              | 3.155029 |
| B0BNN3        | GLLSSAEGEPAVPVLSNHRPPQLK                                               | 0.729987432        | 3              | 3.38408  |
| B0BNN3        | HDSSLKPVSVSYNPATAK                                                     | 0.68939842         | 3              | 4.418994 |
| B0BNN3        | VGPANPNLQK                                                             | 0.705284081        | 2              | 2.923068 |
| <b>B0K020</b> | <b>CISD1 CDGSH iron_sulfur domain_containing protein 1</b>             | <b>0.891246855</b> | <b>0.00414</b> | <b>3</b> |
| B0K020        | AMVNLQIQK                                                              | 0.841577971        | 2              | 2.36063  |
| B0K020        | HNEETGDNVGPLIK                                                         | 0.832768223        | 2              | 5.499594 |
| B0K020        | VVHAFDMEDLGDK                                                          | 0.891820721        | 3              | 3.474493 |
| <b>B2GUY2</b> | <b>TFR2 Transferrin receptor protein 2</b>                             | <b>1.223167784</b> | <b>0.11495</b> | <b>2</b> |
| B2GUY2        | MEQRWGLLRK                                                             | 1.198949144        | 2              | 2.307011 |
| B2GUY2        | SAVGTAILELVR                                                           | 1.324663995        | 2              | 2.440598 |
| <b>B2GV24</b> | <b>UFL1 E3 UFM1_protein ligase 1</b>                                   | <b>1.100177371</b> | <b>0.83605</b> | <b>2</b> |
| B2GV24        | TYDLPDGDFLTQALTQR                                                      | 1.09939197         | 2              | 3.170732 |
| B2GV24        | VNIVDLQQVINVDLTHIENR                                                   | 0.903238924        | 3              | 3.333813 |
| <b>B2RX88</b> | <b>CSPP1 Centrosome and spindle pole associated protein 1</b>          | <b>0.838080551</b> | <b>0.95557</b> | <b>2</b> |
| B2RX88        | SISSVNVDQVRMRNEDR                                                      | 0.832705649        | 2              | 2.660302 |
| B2RX88        | SISSVNVDQVRMRNEDR+Oxidation(11)                                        | 0.923141425        |                |          |
| <b>B2RYW9</b> | <b>FAHD2 Fumarylacetoacetate hydrolase domain_containing protein 2</b> | <b>0.769830913</b> | <b>8.9E-16</b> | <b>6</b> |
| B2RYW9        | ALAAQLPIPR                                                             | 0.777967726        | 2              | 2.40873  |
| B2RYW9        | ATDVMAYVAGFTVAHDVSAR                                                   | 1.114801062        | 3              | 3.825161 |
| B2RYW9        | GETALSVAR                                                              | 0.712168847        | 2              | 2.424387 |
| B2RYW9        | KGDEVQCEIEELGVIINK                                                     | 0.717492914        | 2              | 5.030748 |
| B2RYW9        | TFDTFCPLGPALVTK                                                        | 0.773575667        | 2              | 4.608132 |
| B2RYW9        | VNGEIVQSSNTNQMVFK                                                      | 0.708393073        | 2              | 2.63537  |
| <b>B3DMA2</b> | <b>ACD11 Acyl_CoA dehydrogenase family member 11</b>                   | <b>0.928958761</b> | <b>0.99017</b> | <b>4</b> |
| B3DMA2        | AVLTVTQYR                                                              | 0.894725179        | 2              | 2.528278 |
| B3DMA2        | LDNIVFHPK                                                              | 1.062034644        | 2              | 2.452926 |
| B3DMA2        | NLPDSDNEECLVHGDFK                                                      | 1.107439394        | 2              | 3.163522 |
| B3DMA2        | SGQSNPTFFLQK                                                           | 0.927671265        | 2              | 2.794599 |
| <b>B3GNI6</b> | <b>SEP11 Septin_11</b>                                                 | <b>0.947372005</b> | <b>0.01311</b> | <b>3</b> |
| B3GNI6        | AAAQLLSQAQQSGAQQTK                                                     | 1.207425924        | 3              | 3.423206 |
| B3GNI6        | FESDPATHNEPGVR                                                         | 1.302644456        | 2              | 3.341409 |
| B3GNI6        | SYELQESNVR                                                             | 0.772034336        | 2              | 3.007154 |
| <b>B5DFC8</b> | <b>EIF3C Eukaryotic translation initiation factor 3 subunit C</b>      | <b>1.299916125</b> | <b>2.1E-08</b> | <b>3</b> |
| B5DFC8        | GTEITHAVVIK                                                            | 0.926416751        | 2              | 2.370891 |
| B5DFC8        | GTTEEICQIYLR                                                           | 1.16109314         | 2              | 2.366318 |
| B5DFC8        | TEPTAQQNLALQLAEK                                                       | 1.35626849         | 2              | 4.94246  |

|               |                                                                      |                    |                |           |
|---------------|----------------------------------------------------------------------|--------------------|----------------|-----------|
| <b>D3ZTX0</b> | <b>TMED7 Transmembrane emp24 domain_containing protein 7</b>         | <b>1.04285872</b>  | <b>0.69003</b> | <b>2</b>  |
| D3ZTX0        | QCFYEDITQGTK                                                         | 0.783946519        | 2              | 2.487056  |
| D3ZTX0        | SVIDYQTHFR                                                           | 1.215077203        | 2              | 2.505766  |
| <b>D3ZW55</b> | <b>ITPA Inosine triphosphate pyrophosphatase</b>                     | <b>1.25980494</b>  | <b>0.9162</b>  | <b>4</b>  |
| D3ZW55        | IDLPEYQGEPEDEISIQK                                                   | 1.029157933        | 2              | 4.673555  |
| D3ZW55        | KLEEVILGDKFPCCTLVAQK                                                 | 0.934460026        | 3              | 4.068567  |
| D3ZW55        | LKPEGLYQLLAGFEDK                                                     | 1.287551872        | 3              | 3.523536  |
| D3ZW55        | LQEYFGVTDGAGDH                                                       | 1.385790473        | 2              | 3.564531  |
| <b>D3ZZL9</b> | <b>GCC2 GRIP and coiled_coil domain_containing protein 2</b>         | <b>1.2062683</b>   | <b>0.57141</b> | <b>2</b>  |
| D3ZZL9        | ELNQKLTNKNSK                                                         | 1.147278446        | 2              | 2.375901  |
| D3ZZL9        | IKCLQEESVVQCEELR                                                     | 1.182722107        | 2              | 2.355404  |
| <b>D4A4T9</b> | <b>CHRD1 Cysteine and histidine_rich domain_containing protein 1</b> | <b>1.184550501</b> | <b>0.44535</b> | <b>2</b>  |
| D4A4T9        | KEEDSDEIKIGTSCK                                                      | 0.854126552        | 2              | 2.317466  |
| D4A4T9        | LSSGNEEDKKEEDSDEIK                                                   | 1.185924704        | 3              | 4.327742  |
| <b>E9Q557</b> | <b>DESP Desmoplakin</b>                                              | <b>0.756494509</b> | <b>0.38752</b> | <b>2</b>  |
| E9Q557        | KQVQTSQKNLTR                                                         | 0.678119938        | 1              | 2.113665  |
| E9Q557        | SQCTQVVQER                                                           | 0.868925923        | 2              | 2.316055  |
| <b>F6YLP3</b> | <b>selenium transferase</b>                                          | <b>1.112264616</b> | <b>0.82682</b> | <b>3</b>  |
| <b>O08557</b> | <b>DDAH1 N(G)_N(G)_dimethylarginine dimethylaminohydrolase 1</b>     | <b>0.885517409</b> | <b>9.9E-07</b> | <b>8</b>  |
| O08557        | DENATLDGGDVLFTGR                                                     | 0.667026443        | 2              | 3.3439    |
| O08557        | DYAVSTVPVADSLHLK                                                     | 1.067580774        | 2              | 3.654308  |
| O08557        | GAEILADTFK                                                           | 0.960090645        | 2              | 2.425145  |
| O08557        | GAEILADTFKDYAVSTVPVADSLHLK                                           | 0.801053076        | 3              | 3.715405  |
| O08557        | SFCSMAGPNLIAIGSSESAQK                                                | 0.747420444        | 2              | 4.946534  |
| O08557        | SQGEEVDFAR                                                           | 0.806947554        | 2              | 2.82503   |
| O08557        | TPEEYPESAK                                                           | 2.034987746        | 2              | 2.823317  |
| O08557        | VDGLLTCCSVFINK                                                       | 1.078050759        | 2              | 3.501412  |
| <b>O08583</b> | <b>THOC4 THO complex subunit 4</b>                                   | <b>0.722737651</b> | <b>2.6E-07</b> | <b>2</b>  |
| O08583        | QQLSAEELDAQLDAYNAR                                                   | 0.697631358        | 2              | 5.05844   |
| O08583        | SLGTADVHFER                                                          | 0.863788392        | 2              | 2.512042  |
| <b>O08601</b> | <b>MTP Microsomal triglyceride transfer protein large subunit</b>    | <b>1.193234243</b> | <b>0.1679</b>  | <b>13</b> |
| O08601        | EDTTMYLLALK                                                          | 0.877216409        | 2              | 2.368634  |
| O08601        | EFYSYENEPVGIENLK                                                     | 1.357090867        | 2              | 4.147633  |
| O08601        | GCPSLAEHWKSIR                                                        | 0.974991398        | 2              | 3.732044  |
| O08601        | GSFASNDIR                                                            | 1.118577336        | 2              | 2.506254  |
| O08601        | MLSASGDPVSVVK                                                        | 0.957107302        | 2              | 3.050823  |
| O08601        | MLSASGDPVSVVK+Oxidation(0)                                           | 0.904437521        |                |           |
| O08601        | NALLPEGIPLLLK                                                        | 1.204192113        | 1              | 2.379188  |
| O08601        | NILLSIGELPK                                                          | 0.972301003        | 2              | 3.57962   |
| O08601        | REEILQILK                                                            | 0.896799296        | 3              | 3.545714  |
| O08601        | SDSSIILQER                                                           | 1.103633115        | 2              | 3.298037  |
| O08601        | SGSSSAYTGYVER                                                        | 1.197191892        | 2              | 3.423101  |
| O08601        | SNLNIFQYIGK                                                          | 1.125949765        | 2              | 3.61238   |
| O08601        | VKEFYSYENEPVGIENLK                                                   | 1.127278508        | 2              | 2.879602  |
| <b>O08795</b> | <b>GLU2B Glucosidase 2 subunit beta</b>                              | <b>0.938407114</b> | <b>0.14324</b> | <b>6</b>  |
| O08795        | ETVVTSTTEPSR                                                         | 1.563059192        | 2              | 3.109632  |
| O08795        | KLWEEQQAQAAK                                                         | 0.967365365        | 2              | 2.921249  |
| O08795        | LWEEQQAQAAK                                                          | 0.802713046        | 2              | 3.331707  |
| O08795        | MPPYDEETQAIIDAAQEAR                                                  | 0.945371082        | 2              | 3.128101  |
| O08795        | SLEDQVETLR                                                           | 1.209623668        | 2              | 3.260869  |
| O08795        | YEQGTGCWQGPNR                                                        | 1.1238668          | 2              | 4.040441  |

|               |                                                                   |                    |                |           |
|---------------|-------------------------------------------------------------------|--------------------|----------------|-----------|
| <b>O08810</b> | <b>USS1 116 kDa U5 small nuclear ribonucleoprotein component</b>  | <b>1.015087021</b> | <b>0.10438</b> | <b>2</b>  |
| O08810        | GGGQIIPAR                                                         | 1.241941711        | 2              | 2.632741  |
| O08810        | GLAEDIENEVQITWNR                                                  | 0.686792156        | 3              | 3.569975  |
| <b>O09158</b> | <b>CP3AP Cytochrome P450 3A25</b>                                 | <b>1.314028893</b> | <b>0.99085</b> | <b>3</b>  |
| O09158        | DVEINGVFIPK                                                       | 1.016835457        | 2              | 3.153576  |
| O09158        | TLLSPTFTSGK                                                       | 1.156794817        | 1              | 1.937561  |
| O09158        | VDFLQLMMNTQNSK                                                    | 1.018589614        | 2              | 2.839521  |
| <b>O09171</b> | <b>BHMT1 Betaine__homocysteine S_methyltransferase 1</b>          | <b>0.79412029</b>  | <b>9.9E-20</b> | <b>16</b> |
| O09171        | AGAAIVGVNCHFDPSTSLQTIK                                            | 1.811503481        | 2              | 5.840227  |
| O09171        | AGPWTPEAAVEHPEAVR                                                 | 2.561704856        | 2              | 5.082752  |
| O09171        | AGSNVMQFTFFYASEDK                                                 | 6.12039425         | 2              | 2.91907   |
| O09171        | AGSNVMQFTFFYASEDKLENR                                             | 17.45093416        | 2              | 4.506721  |
| O09171        | EATTEQQLR                                                         | 1.294423188        | 2              | 2.40755   |
| O09171        | GAAELMQQK                                                         | 2.176569434        | 2              | 3.57105   |
| O09171        | GAAELMQQK+Oxidation(5)                                            | 2.433986889        |                |           |
| O09171        | HGSWGSGLDMHTKPWIR                                                 | 3.596550966        | 3              | 3.705908  |
| O09171        | IFHQQLVFMK                                                        | 1.541958721        | 2              | 2.756684  |
| O09171        | KEYWQNLN                                                          | 1.934805471        | 3              | 3.805479  |
| O09171        | LNAGEVVIGDGGFVFALEK                                               | 1.757169666        | 3              | 6.242911  |
| O09171        | QGFIDLPEFPFGLLEPR                                                 | 1.648059517        | 2              | 5.351922  |
| O09171        | QVADEGDALVAGGVSQTPSYLSCK                                          | 2.187970113        | 3              | 6.355076  |
| O09171        | TSGKPIAATMCIGPEGDLHGVSPEGCAVR                                     | 1.821239631        | 3              | 6.552706  |
| O09171        | TSGKPIAATMCIGPEGDLHGVSPEGCAVR+Oxidation(9)                        | 2.462221548        |                |           |
| O09171        | VNEAACDIAR                                                        | 1.933594026        | 2              | 4.035687  |
| <b>O09173</b> | <b>HGD Homogentisate 1_2_dioxygenase</b>                          | <b>1.280828724</b> | <b>0.00014</b> | <b>10</b> |
| O09173        | CFYNSDGDFLIVPQK                                                   | 1.224805828        | 2              | 2.947672  |
| O09173        | FSVDVFEETR                                                        | 1.417859777        | 2              | 3.188252  |
| O09173        | GYILEVYGVHFELPDLGPIGANLANPR                                       | 1.09397899         | 3              | 5.988619  |
| O09173        | LLIYTEFGK                                                         | 1.536095941        | 1              | 2.054518  |
| O09173        | NCMSEFMGLIK                                                       | 1.063801927        | 2              | 3.413135  |
| O09173        | QDVSPFNVAWHGNYTPYK                                                | 1.41052999         | 2              | 3.647918  |
| O09173        | QGGFLPGGSLHSAMTPHGPADCFEK                                         | 1.199911024        | 3              | 3.720453  |
| O09173        | SLRPGVAIADFVIFPPR                                                 | 1.047915495        | 2              | 3.543944  |
| O09173        | TFRPPYYHR                                                         | 1.3361239          | 3              | 3.340116  |
| O09173        | YISGFGNECASEDPR                                                   | 1.493179678        | 2              | 3.992374  |
| <b>O35077</b> | <b>GPDA Glycerol_3_phosphate dehydrogenase [NAD_]_cytoplasmic</b> | <b>1.284000678</b> | <b>0.1477</b>  | <b>19</b> |
| O35077        | ANTIGISLIK                                                        | 0.894096288        | 2              | 3.173305  |
| O35077        | DPAQGQLLK                                                         | 1.499701492        | 2              | 2.412752  |
| O35077        | ELHSILQHK                                                         | 1.491116082        | 1              | 2.950029  |
| O35077        | FCETTIGCK                                                         | 1.11037561         | 2              | 2.629511  |
| O35077        | FCETTIGCKDPAQGQLLK                                                | 0.910048263        | 2              | 5.054601  |
| O35077        | GIDEGPNGLK                                                        | 0.956613845        | 2              | 2.964919  |
| O35077        | GLVDKFLPFTAVYK                                                    | 1.294252109        | 3              | 3.607473  |
| O35077        | ICDQLKGHLK                                                        | 0.766003737        | 3              | 3.359608  |
| O35077        | ITVVQEVDTVICGALK                                                  | 0.805592035        | 3              | 4.424297  |
| O35077        | IVGSNASQLAHFDPR                                                   | 1.208956836        | 2              | 3.143669  |
| O35077        | KLTEIINTQHENVK                                                    | 0.890215936        | 2              | 5.103872  |
| O35077        | LISEVIGESLGIPMSVLMGANIASEVAEEK                                    | 0.747105573        |                |           |
| O35077        | LPPNVVAVPDVVQAATGADILVFVPHQFIGK                                   | 1.453944467        | 3              | 5.100658  |
| O35077        | LTEIINTQHENVK                                                     | 0.916603246        | 2              | 4.516027  |
| O35077        | NIVAVGAGFCDGLGFGDNTK                                              | 0.967001649        | 2              | 5.425735  |
| O35077        | SIEQLEK                                                           | 1.013481804        | 2              | 2.470503  |
| O35077        | VCIVGSGNWGSAIAK                                                   | 0.916047791        | 2              | 4.706996  |



|               |                                                                              |                    |                |           |
|---------------|------------------------------------------------------------------------------|--------------------|----------------|-----------|
| O35077        | VCYEGQPVGEFICLQNHPEHM                                                        | 0.999424325        | 2              | 3.922442  |
| O35077        | VTMWVFEEDIGGR                                                                | 1.062478287        | 2              | 3.467677  |
| <b>O35078</b> | <b>OXDA D_amino_acid oxidase</b>                                             | <b>0.727213055</b> | <b>0.08681</b> | <b>2</b>  |
| O35078        | GQIIQVEAPWIK                                                                 | 0.625085145        | 2              | 3.207431  |
| O35078        | SCCQLEPTLK                                                                   | 0.995213562        | 2              | 2.427518  |
| <b>O35094</b> | <b>TIM44 Mitochondrial import inner membrane translocase subunit TIM44</b>   | <b>1.003064328</b> | <b>2.5E-05</b> | <b>2</b>  |
| O35094        | KLEESDALQEAR                                                                 | 0.820351722        | 2              | 3.354514  |
| O35094        | TEMSEVLTEILR                                                                 | 1.018005904        | 2              | 3.566688  |
| <b>O35142</b> | <b>COPB2 Coatomer subunit beta_</b>                                          | <b>1.060685132</b> | <b>0.99983</b> | <b>4</b>  |
| O35142        | AAESLADPTEYENLFPGLK                                                          | 1.124355925        | 2              | 3.363929  |
| O35142        | FELALQLGELK                                                                  | 0.99701408         | 2              | 3.043797  |
| O35142        | GSNNVALGYDEGSIIVK                                                            | 1.040219889        | 2              | 3.587583  |
| O35142        | TFEVCPLPVR                                                                   | 1.059370144        | 2              | 2.770555  |
| <b>O35244</b> | <b>PRDX6 Peroxiredoxin_6</b>                                                 | <b>1.128316243</b> | <b>0.52474</b> | <b>10</b> |
| O35244        | DINAYNGAAPTEK                                                                | 0.893338994        | 2              | 3.944559  |
| O35244        | DLAILLGMLDPAEKDEK                                                            | 1.023663414        | 2              | 4.318313  |
| O35244        | FHDFLGDSWGILFSHPR                                                            | 0.7225943          | 3              | 3.841123  |
| O35244        | GESVMVLPTLPEEEAK                                                             | 1.013758928        | 2              | 3.181739  |
| O35244        | KGESVMVLPTLPEEEAK                                                            | 1.015009873        | 2              | 4.874437  |
| O35244        | KGESVMVLPTLPEEEAK+Oxidation(5)                                               | 1.190785841        |                |           |
| O35244        | LSILYPATTGR                                                                  | 1.187910303        | 2              | 2.876872  |
| O35244        | NFDEILR                                                                      | 0.786307074        | 2              | 2.440198  |
| O35244        | VVDSLQLTASNVPVATPVDWK                                                        | 0.9684542          | 3              | 5.764417  |
| O35244        | VVFIFGPDKK                                                                   | 0.71566463         | 2              | 2.385901  |
| <b>O35469</b> | <b>3BHS6 3 beta_hydroxysteroid dehydrogenase/Delta 5__4_isomerase type 6</b> | <b>0.850445893</b> | <b>0.87902</b> | <b>2</b>  |
| O35469        | DLGYEPLVSWEAK                                                                | 1.032439502        | 2              | 4.225851  |
| O35469        | TSEWIGTLVEQHR                                                                | 0.818776495        | 2              | 3.485808  |
| <b>O35509</b> | <b>RB11B Ras_related protein Rab_11B</b>                                     | <b>1.056600695</b> | <b>0.98591</b> | <b>5</b>  |
| O35509        | AQIWDTAGQER                                                                  | 1.008927048        | 2              | 2.84259   |
| O35509        | GAVGALLVYDIK                                                                 | 1.064217968        | 2              | 4.216823  |
| O35509        | HLTYENVER                                                                    | 0.957615073        | 2              | 3.010223  |
| O35509        | NEFNLESK                                                                     | 1.049200913        | 1              | 2.14975   |
| O35509        | VVLIGDSGVGK                                                                  | 1.053080685        | 2              | 2.704652  |
| <b>O35547</b> | <b>ACSL4 Long_chain_fatty_acid_CoA ligase 4</b>                              | <b>0.608527427</b> | <b>2.5E-07</b> | <b>2</b>  |
| O35547        | LERFEIPIK                                                                    | 0.581672981        | 2              | 2.679689  |
| O35547        | LSPEPWTPETGLVTDFAK                                                           | 0.877062254        | 2              | 2.728541  |
| <b>O35567</b> | <b>PUR9 Bifunctional purine biosynthesis protein PURH</b>                    | <b>1.127820597</b> | <b>0.00883</b> | <b>8</b>  |
| O35567        | AEVSNAIDQYVTGTIGEGEDLVK                                                      | 0.835151059        | 2              | 4.408747  |
| O35567        | ALFEEVPELLTEAEK                                                              | 1.20549037         | 2              | 3.774465  |
| O35567        | DGQVIGIGAGQQSR                                                               | 0.919194678        | 2              | 3.168031  |
| O35567        | EVSDGIVAPGYEEALK                                                             | 0.945408435        | 2              | 4.171121  |
| O35567        | HVSPAGAAVGVPLSEDEAR                                                          | 1.327276844        | 2              | 3.510359  |
| O35567        | RAEVSNAIDQYVTGTIGEGEDLVK                                                     | 1.014065013        | 3              | 3.74148   |
| O35567        | SGVAYIVAPSGSTADK                                                             | 1.166481831        | 2              | 3.097062  |
| O35567        | VTVCEPEDYGAVAAEMQSGGNK                                                       | 0.734666646        | 2              | 5.278191  |
| <b>O35593</b> | <b>PSDE 26S proteasome non_ATPase regulatory subunit 14</b>                  | <b>0.782210252</b> | <b>0.07081</b> | <b>2</b>  |
| O35593        | AVAVVVDPIQSVK                                                                | 1.153567963        | 2              | 2.712783  |
| O35593        | VIDVFAMPQSGTGVSVAEVDPVFQAK                                                   | 0.362164912        | 2              | 3.74656   |
| <b>O35660</b> | <b>GSTM6 Glutathione S_transferase Mu 6</b>                                  | <b>0.706688299</b> | <b>0.98075</b> | <b>2</b>  |
| O35660        | RYAMGDAPDYDR                                                                 | 0.763036097        | 2              | 3.130999  |
| O35660        | YAMGDAPDYDR+Oxidation(2)                                                     | 0.659048721        |                |           |
| <b>O35760</b> | <b>IDI1 Isopentenyl_diphosphate Delta_isomerase 1</b>                        | <b>0.857153796</b> | <b>1</b>       | <b>3</b>  |

|               |                                                                                          |                    |                |          |
|---------------|------------------------------------------------------------------------------------------|--------------------|----------------|----------|
| O35760        | AELGIPLLEVDLNEMNYLTR                                                                     | 0.945987059        | 2              | 4.26437  |
| O35760        | NCHLNENIDK                                                                               | 0.749918381        | 2              | 2.988859 |
| O35760        | NVTLNPDNEIK                                                                              | 0.871523298        | 2              | 2.89706  |
| <b>O35763</b> | <b>MOES Moesin</b>                                                                       | <b>0.738146059</b> | <b>2.8E-08</b> | <b>2</b> |
| O35763        | ALTSELANAR                                                                               | 0.74501384         | 2              | 3.170505 |
| O35763        | FYPEDVSEELIQDITQR                                                                        | 0.658950556        | 2              | 4.400842 |
| <b>O35783</b> | <b>CALU Calumenin</b>                                                                    | <b>1.231530268</b> | <b>0.6078</b>  | <b>2</b> |
| O35783        | HLVYESDQDKDGK                                                                            | 1.236769876        | 2              | 4.045784 |
| O35783        | VHNDAQNFYDHDHDAFLGAEAAK                                                                  | 0.854677032        | 3              | 4.150329 |
| <b>O35796</b> | <b>C1QBP Complement component 1 Q subcomponent_binding protein_mitochondrial</b>         | <b>1.056365945</b> | <b>0.32795</b> | <b>4</b> |
| O35796        | AEEQPELTSTPNFVVEVTK                                                                      | 1.016058905        | 2              | 4.698423 |
| O35796        | AFVEFLTDEIK                                                                              | 1.201550638        | 2              | 3.625874 |
| O35796        | AFVEFLTDEIKEEK                                                                           | 0.994515469        | 2              | 3.572408 |
| O35796        | TLVLDCHYPEDEIGHDEAESDIFSIK                                                               | 1.541135439        | 3              | 5.770348 |
| <b>O35814</b> | <b>STIP1 Stress_induced_phosphoprotein 1</b>                                             | <b>1.075418649</b> | <b>0.96034</b> | <b>6</b> |
| O35814        | ALDLSSCK                                                                                 | 1.11148124         | 2              | 2.366043 |
| O35814        | ALSAGNIDDALQCYSEAIK                                                                      | 1.07452047         | 2              | 5.29577  |
| O35814        | DCEECIQLEPTFIK                                                                           | 0.952622692        | 2              | 3.933009 |
| O35814        | ELIEQLQNKPSDLGTK                                                                         | 1.073248061        | 2              | 3.866702 |
| O35814        | LDPQNHVLYSNR                                                                             | 2.314971629        | 2              | 2.613568 |
| O35814        | LMDVGLIAIR                                                                               | 0.985611661        | 2              | 2.451773 |
| <b>O35820</b> | <b>RCL Deoxyribonucleoside 5__monophosphate N_glycosidase</b>                            | <b>1.025949717</b> | <b>0.83052</b> | <b>2</b> |
| O35820        | GGREDQALYAR                                                                              | 1.01766043         | 2              | 2.559    |
| O35820        | YFEAYLPQK                                                                                | 1.096026454        | 2              | 2.334074 |
| <b>O35821</b> | <b>MBB1A Myb_binding protein 1A</b>                                                      | <b>1.605676664</b> | <b>0.01618</b> | <b>2</b> |
| O35821        | ALDLIEVLVTK                                                                              | 1.564746839        | 2              | 3.055256 |
| O35821        | NVANVTPLTAQQR                                                                            | 1.636918202        | 2              | 3.027622 |
| <b>O35824</b> | <b>DNJA2 Dnaj homolog subfamily A member 2</b>                                           | <b>0.794346625</b> | <b>0.02734</b> | <b>2</b> |
| O35824        | FDVQFPENNWINPDK                                                                          | 0.535858608        | 2              | 3.291251 |
| O35824        | NVLCSACSGQGK                                                                             | 1.126902393        | 2              | 3.272644 |
| <b>O35826</b> | <b>GLCNE Bifunctional UDP_N_acetylglucosamine 2_epimerase/N_acetylmannosamine kinase</b> | <b>0.856821256</b> | <b>0.44842</b> | <b>8</b> |
| O35826        | DEAVGALHLIQAQK                                                                           | 1.038983348        | 2              | 3.47456  |
| O35826        | EVGAFGTPVINLGR                                                                           | 0.939552394        | 2              | 2.864459 |
| O35826        | GEDEAMVESVGLALVK                                                                         | 1.188771944        | 2              | 2.453385 |
| O35826        | IYGDGNAVPR                                                                               | 0.710211185        | 2              | 2.577689 |
| O35826        | SIDLQEPLQK                                                                               | 0.912547343        | 2              | 2.373598 |
| O35826        | TLVLFPNIDAGSK                                                                            | 0.7846299          | 2              | 3.097761 |
| O35826        | TPLSDTLHLPVWVDNDGNCAAMAER                                                                | 0.770478776        | 3              | 5.235929 |
| O35826        | VNPQEGVVLHSTK                                                                            | 1.208824549        | 2              | 2.547785 |
| <b>O35913</b> | <b>SO1A4 Solute carrier organic anion transporter family member 1A4</b>                  | <b>1.10937315</b>  | <b>7.4E-05</b> | <b>5</b> |
| O35913        | EGLQENVDTENAK                                                                            | 0.929684946        | 2              | 3.668488 |
| O35913        | GASFVPAFFILR                                                                             | 0.818886363        | 2              | 2.699051 |
| O35913        | ILAGIPAPIYFGALIDR                                                                        | 0.968270419        | 2              | 2.415658 |
| O35913        | SLSGYMNSMLTQIER                                                                          | 0.646585867        | 2              | 4.259255 |
| O35913        | SQTLNPTQDPSECVK                                                                          | 0.677662708        | 2              | 4.175505 |
| <b>O35923</b> | <b>BRCA2 Breast cancer type 2 susceptibility protein homolog</b>                         | <b>0.58044688</b>  | <b>0.04679</b> | <b>2</b> |
| O35923        | AMKLFSDIENISEEPSTK                                                                       | 0.63333495         | 2              | 2.552217 |
| O35923        | SLLEFDRRIESKQK                                                                           | 0.580420809        | 2              | 2.423902 |
| <b>O35952</b> | <b>GLO2 Hydroxyacylglutathione hydrolase_mitochondrial</b>                               | <b>0.891127744</b> | <b>4.6E-07</b> | <b>8</b> |
| O35952        | ALLEVLGR                                                                                 | 0.790442146        | 2              | 3.120642 |
| O35952        | FYEGTADEMYK                                                                              | 0.695166139        | 2              | 2.516407 |

|               |                                                                    |                    |                |          |
|---------------|--------------------------------------------------------------------|--------------------|----------------|----------|
| O35952        | HVEPGNTAVQEK                                                       | 1.079665736        | 2              | 4.055639 |
| O35952        | LTTVLTHHHWDHAGGNEK                                                 | 0.713827342        | 3              | 3.913594 |
| O35952        | NAIGEPTVPSTLAEFTYNPFFMR                                            | 0.898955239        | 2              | 3.547781 |
| O35952        | TVQQHAGETDPVTTMR                                                   | 0.809407347        | 2              | 5.104128 |
| O35952        | TVQQHAGETDPVTTMR+Oxidation(14)                                     | 0.930482631        |                |          |
| O35952        | VTHLSTLEVGSLSVK                                                    | 0.713291842        | 2              | 2.883583 |
| <b>O35987</b> | <b>NSF1C NSF1 cofactor p47</b>                                     | <b>1.112449712</b> | <b>0.11636</b> | <b>6</b> |
| O35987        | ASSSILINEAEPPTNIQIR                                                | 0.897962563        | 2              | 5.336307 |
| O35987        | EANLLNAVIVQR                                                       | 1.490420682        | 2              | 3.370299 |
| O35987        | LGAAPPEESAYVAGER                                                   | 1.165393133        | 2              | 4.021342 |
| O35987        | LGSTAPQVLNTSSPAQQAENEAK                                            | 0.989216039        | 2              | 3.968664 |
| O35987        | RGEVPAELR                                                          | 3.217380024        | 2              | 2.471083 |
| O35987        | SYQDPSNAQFLESIR                                                    | 0.991953509        | 2              | 4.488661 |
| <b>O54753</b> | <b>H17B6 17_beta_hydroxysteroid dehydrogenase type 6</b>           | <b>1.735997713</b> | <b>0.0776</b>  | <b>3</b> |
| O54753        | CSTNLSLVTDCMEHALTSK                                                | 2.737127511        | 3              | 3.395102 |
| O54753        | TWEATPEHIR                                                         | 1.905864726        | 2              | 2.310511 |
| O54753        | YGVEAFSDVLR                                                        | 1.69606476         | 2              | 2.727089 |
| <b>O54975</b> | <b>XPP1 Xaa_Pro aminopeptidase 1</b>                               | <b>1.066499943</b> | <b>0.43342</b> | <b>2</b> |
| O54975        | GSLTFEPLTLVPIQTK                                                   | 1.134261887        | 2              | 4.041873 |
| O54975        | IENVVLVPAK                                                         | 0.907581317        | 2              | 2.895174 |
| <b>O55012</b> | <b>PICA Phosphatidylinositol_binding clathrin assembly protein</b> | <b>1.114819764</b> | <b>0.93734</b> | <b>5</b> |
| O55012        | ATLSNAVSSLASTGSLTK                                                 | 1.169123432        | 2              | 3.839085 |
| O55012        | ITAAQHSVTGSVAVSK                                                   | 1.265730492        | 2              | 4.302684 |
| O55012        | NLFLNSNFLDK                                                        | 1.145497666        | 2              | 2.540184 |
| O55012        | SGLQGYDMSTFIR                                                      | 1.189371515        | 2              | 2.361617 |
| O55012        | STNVAVDSGGGLLKPTVASQNLSPVAK                                        | 0.929662054        | 3              | 5.658778 |
| <b>O55096</b> | <b>DPP3 Dipeptidyl peptidase 3</b>                                 | <b>1.194892996</b> | <b>0.77592</b> | <b>6</b> |
| O55096        | AGLLALEFYTPETANWR                                                  | 1.276608414        | 2              | 3.922763 |
| O55096        | GEFEGFVAMVVK                                                       | 1.116928678        | 2              | 3.075861 |
| O55096        | LASVLNTEPALDSELTSK                                                 | 1.386637195        | 2              | 3.384279 |
| O55096        | NVSLGNVLAVAYATK                                                    | 1.089039845        | 2              | 2.38712  |
| O55096        | SYEFQGNHFQVTR                                                      | 1.133364166        | 2              | 3.819559 |
| O55096        | VLEAGEGLVTPTTGS DGRPDAR                                            | 1.057670998        | 3              | 3.402171 |
| <b>O55125</b> | <b>NIPS1 Protein NipSnap homolog 1</b>                             | <b>0.969717395</b> | <b>0.84161</b> | <b>4</b> |
| O55125        | AGPNIYELR                                                          | 0.898560336        | 2              | 3.04349  |
| O55125        | FSGGYPALMDCMNK                                                     | 0.978140838        | 2              | 3.133015 |
| O55125        | GWDEVVYTVPLVR                                                      | 1.669342065        | 2              | 3.458383 |
| O55125        | IQFHNVKPECLDAYNSLTEAVLPK                                           | 1.159149514        | 3              | 4.36804  |
| <b>O55171</b> | <b>ACOT2 Acyl_coenzyme A thioesterase 2_mitochondrial</b>          | <b>0.908213061</b> | <b>0.49601</b> | <b>6</b> |
| O55171        | ADAGGELDLAR                                                        | 0.75048238         | 2              | 3.276752 |
| O55171        | DGLLDVVEALQSPLVDDK                                                 | 0.959461123        | 2              | 5.071033 |
| O55171        | DVQKPYVVEVLVDGHEPDGGQR                                             | 0.912858163        | 3              | 4.466774 |
| O55171        | GGELGLAMASFLK                                                      | 0.767331058        | 2              | 3.847528 |
| O55171        | IEYFEEAVNYLR                                                       | 0.932417752        | 2              | 4.191815 |
| O55171        | SCWDEPLSITVR                                                       | 0.943689484        | 2              | 3.49113  |
| <b>O70127</b> | <b>ABCBB Bile salt export pump</b>                                 | <b>1.363487942</b> | <b>9.8E-06</b> | <b>8</b> |
| O70127        | AGQITSEALSNIR                                                      | 1.466428613        | 2              | 3.288379 |
| O70127        | AGSIADVLSSIR                                                       | 1.586927135        | 2              | 2.639027 |
| O70127        | ILDNLMSVIKPGETTALVGSSGAGK                                          | 1.337991445        | 3              | 4.16927  |
| O70127        | ILLDEATSALDTESEK                                                   | 1.352573812        | 2              | 4.181277 |
| O70127        | KFGEENHAFESDGSNNDDK                                                | 0.919363725        | 3              | 3.933345 |
| O70127        | KPPINVYSEAGEK                                                      | 2.426099388        | 2              | 3.316954 |
| O70127        | STALQLIQR                                                          | 1.567065863        | 2              | 2.350636 |
| O70127        | YETNVGIQGSQSLR                                                     | 1.122132032        | 2              | 3.46657  |

|               |                                                                                    |                    |                |           |
|---------------|------------------------------------------------------------------------------------|--------------------|----------------|-----------|
| <b>O70133</b> | <b>DHX9 ATP_dependent RNA helicase A</b>                                           | <b>1.014089659</b> | <b>0.50517</b> | <b>2</b>  |
| O70133        | KMTPAYEIRAVGNK                                                                     | 0.698688669        | 2              | 2.565521  |
| O70133        | YSPFFVFGKIR                                                                        | 1.05824656         | 2              | 2.500704  |
| <b>O70199</b> | <b>UGDH UDP_glucose 6_dehydrogenase</b>                                            | <b>0.956238135</b> | <b>0.99918</b> | <b>11</b> |
| O70199        | EQIVVDSLHPGVSADDQVSR                                                               | 0.941652355        | 2              | 5.671396  |
| O70199        | IFDANTKPNLNLQVLSNPEFLAEGTAIK                                                       | 1.076840544        | 3              | 5.211238  |
| O70199        | IIDSLFNTVTDK                                                                       | 1.008459381        | 2              | 2.87754   |
| O70199        | IIDSLFNTVTDK                                                                       | 0.923273566        | 2              | 3.543528  |
| O70199        | ILTTNTWSSELSK                                                                      | 1.262565504        | 2              | 3.342861  |
| O70199        | INAWNSPTLPIYEPGLK                                                                  | 1.040791177        | 2              | 3.728618  |
| O70199        | NLFFSTNIDDAIR                                                                      | 1.151599394        | 2              | 3.147455  |
| O70199        | VLDGLHNELQTIGFQIETIGK                                                              | 0.907967298        | 2              | 5.335101  |
| O70199        | VLIGGDETPEGQR                                                                      | 0.997658483        | 2              | 3.616722  |
| O70199        | VTVVVDVNEAR                                                                        | 0.962250321        | 2              | 3.363352  |
| O70199        | YWQQVIDMNDYQR                                                                      | 0.862538399        | 2              | 4.833843  |
| <b>O70251</b> | <b>EF1B Elongation factor 1_beta</b>                                               | <b>1.130202121</b> | <b>2.2E-05</b> | <b>4</b>  |
| O70251        | SIQADGLVWGSSK                                                                      | 1.049352227        | 2              | 3.765084  |
| O70251        | SSILLDVKPWDDDETDMTK                                                                | 1.001869888        | 2              | 4.20245   |
| O70251        | SSILLDVKPWDDDETDMTKLEECVR                                                          | 0.758614305        | 3              | 5.13022   |
| O70251        | TPAGLQVLNDYLADK                                                                    | 1.624573483        | 2              | 4.095759  |
| <b>O70351</b> | <b>HCD2 3_hydroxyacyl_CoA dehydrogenase type_2</b>                                 | <b>0.755201409</b> | <b>8.7E-09</b> | <b>16</b> |
| O70351        | GGIVGMTLPIAR                                                                       | 0.697403583        | 2              | 3.356582  |
| O70351        | GLVAVITGGASGLGLSTAK                                                                | 0.797246842        | 2              | 4.690108  |
| O70351        | GVIINTASVAAFEGQVQAAAYSASK                                                          | 1.173932076        | 3              | 4.100465  |
| O70351        | IDVAVNCAGIAVAIK                                                                    | 0.727137228        | 2              | 3.977468  |
| O70351        | KLGGNCIFAPANVTSEK                                                                  | 0.911558255        | 2              | 4.468948  |
| O70351        | KNQVHTLEDFQR                                                                       | 0.815387183        | 2              | 4.114242  |
| O70351        | LGDPAEYAHLVQMVIENPFLNGEVIR                                                         | 0.894240124        | 3              | 4.315888  |
| O70351        | LGGNCIFAPANVTSEK                                                                   | 0.945971805        | 2              | 3.486175  |
| O70351        | LVAGVMGQNEPDQGGQR                                                                  | 0.863276894        | 2              | 5.227586  |
| O70351        | LVAGVMGQNEPDQGGQR+Oxidation(5)                                                     | 0.610411813        |                |           |
| O70351        | LVGQGATAVLLDVPNSEGETEAK                                                            | 1.159443528        | 2              | 5.67453   |
| O70351        | NFLASQVPPFSR                                                                       | 0.837561772        | 2              | 4.559295  |
| O70351        | NQVHTLEDFQR                                                                        | 0.846293476        | 2              | 3.310391  |
| O70351        | RLVGQGATAVLLDVPNSEGETEAK                                                           | 0.877013105        | 2              | 5.040431  |
| O70351        | VINVNLIPTFNVR                                                                      | 0.770413502        | 2              | 3.79679   |
| O70351        | VVTIAPGLFATPLLTLPDK                                                                | 0.896468775        | 2              | 5.420006  |
| <b>O70456</b> | <b>1433S 14_3_3 protein sigma</b>                                                  | <b>1.301264591</b> | <b>3.2E-12</b> | <b>3</b>  |
| O70456        | DSTLIMQLLR                                                                         | 1.555278708        | 2              | 3.412398  |
| O70456        | DSTLIMQLLR+Oxidation(5)                                                            | 1.421197344        |                |           |
| O70456        | VLSSIEQK                                                                           | 1.017683396        | 2              | 3.254664  |
| <b>O70593</b> | <b>SGTA Small glutamine_rich tetratricopeptide repeat_containing protein alpha</b> | <b>1.460731704</b> | <b>0.01411</b> | <b>2</b>  |
| O70593        | AIELNPANAVYFCNR                                                                    | 1.226757245        | 2              | 3.002361  |
| O70593        | TPPSEEDSAEER                                                                       | 1.486104341        | 2              | 2.710049  |
| <b>O88202</b> | <b>LPP60 60 kDa lysophospholipase</b>                                              | <b>1.027331477</b> | <b>0.99718</b> | <b>2</b>  |
| O88202        | AAGAHLSPQELEDVGTLCR                                                                | 0.957591475        | 3              | 3.690825  |
| O88202        | GVDVDACNEDGQSPDLLAVR                                                               | 0.962307238        | 2              | 5.224089  |
| <b>O88428</b> | <b>PAPS2 Bifunctional 3__phosphoadenosine 5__phosphosulfate synthase 2</b>         | <b>0.867620383</b> | <b>0.971</b>   | <b>5</b>  |
| O88428        | GCTVWLTGLSGAGK                                                                     | 0.838167104        | 2              | 2.848485  |
| O88428        | GIHELFPENK                                                                         | 1.008925332        | 2              | 2.611675  |
| O88428        | NLGFSAAGDREENIR                                                                    | 0.874396703        | 2              | 3.361606  |
| O88428        | STNVVYQAHHVSR                                                                      | 0.916997217        | 2              | 3.474065  |
| O88428        | VLSMAPGLTSVEIIPFR                                                                  | 0.830035029        | 2              | 3.316246  |

|               |                                                                                       |                    |                |           |
|---------------|---------------------------------------------------------------------------------------|--------------------|----------------|-----------|
| <b>O88491</b> | <b>NSD1 Histone_lysine N_methyltransferase_H3 lysine_36 and H4 lysine_20 specific</b> | <b>0.745156412</b> | <b>0.00074</b> | <b>2</b>  |
| O88491        | ENSEGAFGVLLPADAVQKAR                                                                  | 0.544641626        | 2              | 2.344276  |
| O88491        | SGKGEGKLLNNMHEK                                                                       | 1.379042451        | 2              | 2.906617  |
| <b>O88600</b> | <b>HSP74 Heat shock 70 kDa protein 4</b>                                              | <b>1.05628417</b>  | <b>0.91478</b> | <b>14</b> |
| O88600        | AESEEMETSQAGSK                                                                        | 1.018018743        | 2              | 4.514785  |
| O88600        | AGGIETIANEYSDR                                                                        | 0.920448308        | 2              | 3.463859  |
| O88600        | FQESEERPK                                                                             | 0.324914988        | 2              | 2.328101  |
| O88600        | GCALQCAILSPAFK                                                                        | 0.980880952        | 2              | 4.046768  |
| O88600        | HAEQNGPVDGQDNPQTAAEHGADTAVPSDGDK                                                      | 1.204910535        | 3              | 5.239132  |
| O88600        | LKETAESVLK                                                                            | 0.672384849        | 2              | 2.464055  |
| O88600        | MIMQDKLEK+Oxidation(0)                                                                | 0.956823766        |                |           |
| O88600        | MQVDQEEPHTTEEQPQTPAENK                                                                | 1.215778655        | 3              | 4.74823   |
| O88600        | NFTTEQVTAMLLSK                                                                        | 1.061669756        | 2              | 3.705788  |
| O88600        | SNLAYDIVQLPTGLTGIK                                                                    | 1.035516915        | 2              | 4.945822  |
| O88600        | SVM DATQIAGLNCLR                                                                      | 0.820295658        | 2              | 2.889576  |
| O88600        | TSTVDLPQESQLLWQLDR                                                                    | 0.895282141        | 2              | 3.84906   |
| O88600        | VLATAFDTTLGGR                                                                         | 0.940323507        | 2              | 3.479396  |
| O88600        | WNSPAEEGSSDCEVFPK                                                                     | 0.730826424        | 2              | 3.414482  |
| <b>O88618</b> | <b>FTCD Formimidoyltransferase_cyclodeaminase</b>                                     | <b>1.145835095</b> | <b>1.8E-08</b> | <b>21</b> |
| O88618        | AFAACLGAIK                                                                            | 0.929053606        | 2              | 2.889683  |
| O88618        | AGEYEALPEK                                                                            | 1.053181116        | 2              | 2.863834  |
| O88618        | ALLDAAAFYCDK                                                                          | 1.410492307        | 2              | 3.467166  |
| O88618        | ALLDAAAFYCKEK                                                                         | 0.901637003        | 2              | 3.33453   |
| O88618        | EAQELNLPVVGSQLVGLVPLK                                                                 | 1.350241841        | 3              | 4.043879  |
| O88618        | GVSMDECVLCAK                                                                          | 1.278743609        | 2              | 3.906974  |
| O88618        | IIEYLVPDSGPEQSLLDASLR                                                                 | 1.195223888        | 2              | 5.133275  |
| O88618        | ISSLLQEAK                                                                             | 1.279441659        | 2              | 2.711395  |
| O88618        | LAEELNVPVYLYGAAQMPSR                                                                  | 1.38963452         | 2              | 4.975207  |
| O88618        | LAETVSQLWPALQELAQCGNLSCLSDLQVAAK                                                      | 1.313044978        | 4              | 5.012574  |
| O88618        | LFVLEEEHR                                                                             | 0.722399629        | 2              | 2.766589  |
| O88618        | LGLDSLAPFDPK                                                                          | 1.027937816        | 2              | 3.640337  |
| O88618        | LIPFFHAASAQLTSLVDADAR                                                                 | 1.254192349        | 3              | 3.554824  |
| O88618        | MGALDVCFPIVVR                                                                         | 0.973784863        | 2              | 3.794453  |
| O88618        | MGALDVCFPIVVR+Oxidation(0)                                                            | 0.79948126         |                |           |
| O88618        | NLAQVSTNLLDFEVTALHTVYEEAR                                                             | 1.296062491        | 3              | 4.505769  |
| O88618        | QAEWVPDFGPPSFPVSWGATVTGAR                                                             | 1.307474108        | 2              | 4.156594  |
| O88618        | TCALQEGLR                                                                             | 1.322006578        | 2              | 2.87365   |
| O88618        | TQAAALVLSLEAR                                                                         | 1.063141012        | 2              | 5.065959  |
| O88618        | TVYTFVGQPECVVEGALSAAR                                                                 | 2.205043027        | 2              | 4.854225  |
| O88618        | VQGIGWYLEEK                                                                           | 1.14667367         | 2              | 3.182912  |
| <b>O88637</b> | <b>PCY2 Ethanolamine_phosphate cytidyltransferase</b>                                 | <b>1.008214521</b> | <b>0.63208</b> | <b>5</b>  |
| O88637        | GPPVFTQEER                                                                            | 1.028177344        | 2              | 2.73447   |
| O88637        | HKGPPVFTQEER                                                                          | 1.052898993        | 2              | 2.624393  |
| O88637        | TQGVSTDLVGR                                                                           | 1.29631068         | 2              | 2.771423  |
| O88637        | WVDEVVPAAPYVTTLETLDK                                                                  | 1.068550278        | 2              | 3.142456  |
| O88637        | YVSEVVIGAPYSVTAELLNHFK                                                                | 1.234762384        | 3              | 3.425522  |
| <b>O88656</b> | <b>ARC1B Actin_related protein 2/3 complex subunit 1B</b>                             | <b>0.892723296</b> | <b>0.97543</b> | <b>2</b>  |
| O88656        | ASSEGGAATGAGLDSLHK                                                                    | 0.891738412        | 2              | 4.384912  |
| O88656        | NSVSQISVLSGGK                                                                         | 1.067017439        | 2              | 2.447628  |
| <b>O88696</b> | <b>CLPP Putative ATP_dependent Clp protease proteolytic subunit_mitochondrial</b>     | <b>0.970243273</b> | <b>0.99928</b> | <b>2</b>  |
| O88696        | GQATDIAIQAEIIMK                                                                       | 0.945503359        | 2              | 3.618744  |
| O88696        | VLVHPPQDGEDEPELVQK                                                                    | 0.985049611        | 3              | 4.499228  |
| <b>O88746</b> | <b>TOM1 Target of Myb protein 1</b>                                                   | <b>0.925598231</b> | <b>0.64577</b> | <b>3</b>  |

|               |                                                                     |                    |                |           |
|---------------|---------------------------------------------------------------------|--------------------|----------------|-----------|
| O88746        | GDLSEQHATPLPTPAVLPGDSPTPTPEQIGK                                     | 0.908221321        | 3              | 5.876241  |
| O88746        | QQSTGAIPATQAR                                                       | 1.186963371        | 2              | 2.614947  |
| O88746        | YEAPQTTDGLAGALDAR                                                   | 1.048663405        | 2              | 4.199483  |
| <b>O88761</b> | <b>PSMD1 26S proteasome non_ATPase regulatory subunit 1</b>         | <b>0.792119108</b> | <b>0.7223</b>  | <b>4</b>  |
| O88761        | DTSEDIIEELVEPVAAHGPK                                                | 0.80020931         | 2              | 3.818461  |
| O88761        | QCVENADLPEGEK                                                       | 0.974445603        | 2              | 2.501987  |
| O88761        | TPEQCPSVVLLSESYNPHVR                                                | 1.451399405        | 3              | 4.438766  |
| O88761        | TVGTPIASVPGSTNTGTVPGPEK                                             | 0.971461965        | 2              | 3.733288  |
| <b>O88767</b> | <b>PARK7 Protein DJ_1</b>                                           | <b>0.860917226</b> | <b>3E-05</b>   | <b>6</b>  |
| O88767        | DVVICPDTSLEEAK                                                      | 1.165077872        | 2              | 3.31286   |
| O88767        | GAEEMETVIPVDIMR                                                     | 0.733155327        | 2              | 4.050001  |
| O88767        | GAEEMETVIPVDIMR+Oxidation(13)                                       | 0.749613971        |                |           |
| O88767        | GLIAAICAGPTALLAHEVGFCK                                              | 0.969031452        | 2              | 4.897345  |
| O88767        | TQGPYDVVVLPGGNLGAQNLSEALVK                                          | 0.868768467        | 2              | 4.723402  |
| O88767        | VTVAGLAGKDPVQCSR                                                    | 0.76076478         | 2              | 4.445266  |
| <b>O88794</b> | <b>PNPO Pyridoxine 5__phosphate oxidase</b>                         | <b>0.842127751</b> | <b>0.58465</b> | <b>2</b>  |
| O88794        | KKNEELGQLYR                                                         | 1.098140563        | 2              | 2.779869  |
| O88794        | SSQIGAVVSR                                                          | 0.840822116        | 2              | 2.89101   |
| <b>O88801</b> | <b>HOME2 Homer protein homolog 2</b>                                | <b>0.651788309</b> | <b>0.05382</b> | <b>2</b>  |
| O88801        | EKEMELK                                                             | 0.999574806        | 1              | 2.10689   |
| O88801        | EKNTQLK                                                             | 0.42500871         | 1              | 2.020127  |
| <b>O88813</b> | <b>ACSL5 Long_chain_fatty_acid__CoA ligase 5</b>                    | <b>0.911497097</b> | <b>0.0001</b>  | <b>15</b> |
| O88813        | AILEDLQK                                                            | 0.907294339        | 1              | 2.423197  |
| O88813        | ATMLIENVEK                                                          | 0.99894775         | 2              | 2.370865  |
| O88813        | ATMLIENVEKDLTPGLK                                                   | 1.069771844        | 2              | 2.451185  |
| O88813        | ATMLIENVEKDLTPGLK+Oxidation(2)                                      | 0.818417861        |                |           |
| O88813        | FFQTQIK                                                             | 0.774817907        | 1              | 1.991065  |
| O88813        | GLAVSDNGPCLGYR                                                      | 0.889827403        | 2              | 3.810367  |
| O88813        | GSFEELCQNQCVK                                                       | 0.836544109        | 2              | 4.287456  |
| O88813        | IGFFQGDIR                                                           | 1.022118441        | 2              | 3.321431  |
| O88813        | LVQGVIFSCGGK                                                        | 1.333939748        | 2              | 2.866491  |
| O88813        | NNDLILYYFSDAK                                                       | 1.576295793        | 2              | 3.724621  |
| O88813        | SFLIGVVVPDPESLPSFAAK                                                | 0.70896247         | 2              | 4.330254  |
| O88813        | SIFVHPEPFSIENLLTPTLK                                                | 1.762372671        | 2              | 3.032535  |
| O88813        | SRPILQVFVHGESLR                                                     | 0.528757702        | 3              | 3.86181   |
| O88813        | TQEVLDKDGWLHTGDIGR                                                  | 0.682176927        | 3              | 4.391942  |
| O88813        | TVILMDPFDDLMK                                                       | 0.696927193        | 2              | 3.128828  |
| <b>O88867</b> | <b>KMO Kynurenine 3_monooxygenase</b>                               | <b>0.91689247</b>  | <b>4.3E-05</b> | <b>4</b>  |
| O88867        | AVGLEDQIVSK                                                         | 0.732596671        | 2              | 2.654234  |
| O88867        | DLLTAVESYRNAK                                                       | 1.537726616        | 2              | 2.792644  |
| O88867        | NFPDAIPLMGEQALMR                                                    | 0.977955521        | 2              | 2.862323  |
| O88867        | NFQVDVYEAR                                                          | 0.969142886        | 2              | 2.888409  |
| <b>O88941</b> | <b>MOGS Mannosyl_oligosaccharide glucosidase</b>                    | <b>1.021257797</b> | <b>0.83058</b> | <b>4</b>  |
| O88941        | DLALPTLLNPK                                                         | 1.061325692        | 2              | 2.529927  |
| O88941        | DQASEQLVGGQLTR                                                      | 1.076221809        | 2              | 2.905201  |
| O88941        | LGPLLDVLADSR                                                        | 0.950758625        | 2              | 3.293821  |
| O88941        | MDPSLFPPVPLFSGVPSR                                                  | 0.984926137        | 2              | 2.71819   |
| <b>O88986</b> | <b>KBL 2_ amino_3_ketobutyrate coenzyme A ligase_ mitochondrial</b> | <b>0.635522697</b> | <b>0.07681</b> | <b>2</b>  |
| O88986        | GTDELLGVMDQVTIINSTLKG                                               | 0.699064836        | 2              | 3.31637   |
| O88986        | HLDMADLEAK                                                          | 0.530767878        | 2              | 2.315195  |
| <b>O88989</b> | <b>MDHC Malate dehydrogenase_ cytoplasmic</b>                       | <b>0.935537646</b> | <b>0.83817</b> | <b>8</b>  |
| O88989        | DLDVAVLVGSMR                                                        | 1.385851835        | 3              | 4.05575   |
| O88989        | ELTEEKETAFFLSSA                                                     | 1.810139783        | 2              | 3.703944  |
| O88989        | EVGVYEALKDDSWLK                                                     | 1.219022729        | 2              | 3.752205  |
| O88989        | FVEGLPINDFSR                                                        | 0.919030994        | 2              | 3.630882  |

|               |                                                             |                    |                |           |
|---------------|-------------------------------------------------------------|--------------------|----------------|-----------|
| O88989        | GEFITTQQQR                                                  | 1.082357383        | 2              | 4.270136  |
| O88989        | LGVTADDVK                                                   | 1.013959573        | 2              | 2.85596   |
| O88989        | NVIWGNHSSTQYPDVNHAK                                         | 1.023078608        | 2              | 5.619033  |
| O88989        | VIVVGNPANTNCLTASK                                           | 1.092817458        | 2              | 5.389115  |
| <b>O88990</b> | <b>ACTN3 Alpha_actinin_3</b>                                | <b>1.000553274</b> | <b>3.3E-05</b> | <b>12</b> |
| O88990        | AGTQIENIEEDFR                                               | 0.902777712        | 2              | 3.579388  |
| O88990        | CQAICDQWDNLGLTLQK                                           | 0.689913888        | 2              | 5.168026  |
| O88990        | CQLEINFNTLQTK                                               | 1.093485292        | 2              | 4.118224  |
| O88990        | FAIQDISVEETSAK                                              | 0.769131979        | 2              | 3.664222  |
| O88990        | GKEEMLNQHDYESASLQEV                                         | 1.028743603        | 3              | 4.784576  |
| O88990        | GLSQEQLNEFR                                                 | 0.952156102        | 2              | 2.608653  |
| O88990        | HEAFESDLAAHQDR                                              | 1.124902822        | 3              | 4.498434  |
| O88990        | RHEAFESDLAAHQDR                                             | 0.836708232        | 3              | 4.798569  |
| O88990        | SGNPYITLSSQDINN                                             | 1.188927996        | 2              | 3.802952  |
| O88990        | VEHIAALAEQLNELDYHEAASVNSR                                   | 0.766436709        | 3              | 4.124232  |
| O88990        | VGWEQLLSIAR                                                 | 0.939267878        | 2              | 2.563041  |
| O88990        | VLAVNQENEK                                                  | 1.327180737        | 2              | 2.490795  |
| <b>O88994</b> | <b>MOSC2 MOSC domain_containing protein 2_mitochondrial</b> | <b>0.719992417</b> | <b>0.01067</b> | <b>2</b>  |
| O88994        | CVLTTVDPDTGIHDR                                             | 0.641893075        | 2              | 4.111473  |
| O88994        | RQLQQVGTVSK                                                 | 0.840188799        | 2              | 2.502644  |
| <b>O89000</b> | <b>DPYD Dihydropyrimidine dehydrogenase [NADP_]</b>         | <b>0.884966747</b> | <b>0.88406</b> | <b>7</b>  |
| O89000        | EGGADGVTATNTVSGMLGLK                                        | 0.919779494        | 2              | 3.829697  |
| O89000        | GAVIVLGAGDTAFDCATSALR                                       | 0.890217561        | 2              | 2.314921  |
| O89000        | GMGLACGQDPELVR                                              | 0.828608325        | 2              | 3.188407  |
| O89000        | GTTSGPLYGPGQSSFLNIEISEK                                     | 1.209405825        | 2              | 3.519427  |
| O89000        | LTPNVTDIVSIAR                                               | 1.148490984        | 2              | 2.349785  |
| O89000        | QEYVGGSTSEIPQFR                                             | 0.921047401        | 2              | 3.621115  |
| O89000        | TEQDETGNWVEDEEQIVR                                          | 0.97098059         | 2              | 4.719432  |
| <b>O89032</b> | <b>SPD2A SH3 and PX domain_containing protein 2A</b>        | <b>1.221180871</b> | <b>0.02366</b> | <b>2</b>  |
| O89032        | DDSDINTSKTGEVSKR                                            | 1.31526441         | 2              | 2.547387  |
| O89032        | EGWAPASYDKRK                                                | 0.944539148        | 1              | 1.973449  |
| <b>O89046</b> | <b>COR1B Coronin_1B</b>                                     | <b>0.891472646</b> | <b>6E-06</b>   | <b>3</b>  |
| O89046        | NDQCYEDIR                                                   | 0.823566862        | 2              | 2.82929   |
| O89046        | NVLSDSKPAGYSR                                               | 1.072948409        | 2              | 3.129846  |
| O89046        | SGVSTATAITDIPSGNLAGSGEAGK                                   | 0.54722603         | 2              | 3.814561  |
| <b>O89049</b> | <b>TRXR1 Thioredoxin reductase 1_cytoplasmic</b>            | <b>1.055705342</b> | <b>0.5054</b>  | <b>6</b>  |
| O89049        | IEQIEAGTPGR                                                 | 1.035110401        | 2              | 3.420818  |
| O89049        | IEQIEAGTPGRLK                                               | 1.097253527        | 2              | 2.45242   |
| O89049        | LELTPVAIQAGR                                                | 1.106780543        | 2              | 2.66957   |
| O89049        | STNSEETIEDEFNTVLLAVGR                                       | 1.130879551        | 2              | 4.228694  |
| O89049        | VVGFHVLGPNAGEVTQGFAAALK                                     | 0.879717882        | 3              | 4.035128  |
| O89049        | WGLGGTCVNVGCIPK                                             | 0.886505073        | 2              | 2.922061  |
| <b>P00173</b> | <b>CYB5 Cytochrome b5</b>                                   | <b>1.035885335</b> | <b>0.34418</b> | <b>6</b>  |
| P00173        | EQAGGDATENFEDVGHSTDAR                                       | 0.933688785        | 2              | 5.440202  |
| P00173        | FLEEHPGGEEVLR                                               | 0.907499272        | 2              | 4.331065  |
| P00173        | STWVILHHK                                                   | 0.730174022        | 2              | 2.793056  |
| P00173        | TYIIGELHPDDR                                                | 0.913819135        | 2              | 4.244727  |
| P00173        | VYDLTK                                                      | 0.917014266        | 1              | 2.135064  |
| P00173        | YTTLEEIQK                                                   | 0.932977192        | 2              | 3.017815  |
| <b>P00388</b> | <b>N CPR NADPH__cytochrome P450 reductase</b>               | <b>1.792868753</b> | <b>3E-14</b>   | <b>12</b> |
| P00388        | DGALTQLNVAFSR                                               | 0.844765033        | 2              | 2.418118  |
| P00388        | DVQNTFYDIVAEFGPMEHTQAVDYVK                                  | 1.777278179        | 3              | 4.795228  |
| P00388        | FAVFGNGK                                                    | 2.259010656        | 2              | 2.508693  |
| P00388        | GMSADPEEYDLADLSSLPEIDK                                      | 1.584070265        | 2              | 5.055513  |

|               |                                                         |                    |                |           |
|---------------|---------------------------------------------------------|--------------------|----------------|-----------|
| P00388        | GVATSWLR                                                | 1.924419959        | 2              | 2.336932  |
| P00388        | LEQLGAQR                                                | 1.708180173        | 2              | 2.640414  |
| P00388        | NIIVFYGSQTGTAEFFANR                                     | 2.340342155        | 2              | 3.17912   |
| P00388        | RSDEDYLYR                                               | 1.212042705        | 2              | 3.364368  |
| P00388        | SDEDYLYR                                                | 1.387061345        | 2              | 2.608301  |
| P00388        | SYENQKPPFDAK                                            | 1.537465615        | 2              | 3.25428   |
| P00388        | TALTYLDITNPPR                                           | 1.112698712        | 2              | 2.506228  |
| P00388        | TNVLYELAQYASEPSEQEHLHK                                  | 2.528857259        | 3              | 3.685663  |
| <b>P00406</b> | <b>COX2 Cytochrome c oxidase subunit 2</b>              | <b>0.879652459</b> | <b>0.11077</b> | <b>5</b>  |
| P00406        | ILYMMDEINNPVLTVK                                        | 0.560962002        | 2              | 2.307731  |
| P00406        | LLEVDNR                                                 | 1.090140293        | 2              | 2.52598   |
| P00406        | MLISSEDLHWSWAIPSLGLK                                    | 0.419475793        | 2              | 3.570268  |
| P00406        | VVLPMEPIR                                               | 0.789094165        | 2              | 2.680752  |
| P00406        | VVLPMEPIR+Oxidation(4)                                  | 1.27173405         |                |           |
| <b>P00481</b> | <b>OTC Ornithine carbamoyltransferase_mitochondrial</b> | <b>0.811553853</b> | <b>9.9E-20</b> | <b>16</b> |
| P00481        | FGMHLQAATPK                                             | 0.686665951        | 3              | 4.129622  |
| P00481        | GEYPLLLQGK                                              | 0.74025266         | 2              | 3.211051  |
| P00481        | GGNVLITDTWISMGQEDEK                                     | 0.79079298         | 2              | 4.995953  |
| P00481        | GGNVLITDTWISMGQEDEKK                                    | 0.85674307         | 2              | 4.640275  |
| P00481        | GLTLSWIGDGNLHLSIMMSAAK                                  | 0.818800361        | 2              | 4.19529   |
| P00481        | GYEPDPNIVK                                              | 0.800315747        | 2              | 2.69013   |
| P00481        | KPEEVDDDEVFYSR                                          | 1.239695032        | 2              | 3.52652   |
| P00481        | LQAFQGYQVTMK                                            | 0.842943651        | 2              | 3.839989  |
| P00481        | LSTETGFALLGGHPSFLTQDIHLGVNESLTDAR                       | 0.744891499        | 3              | 5.761353  |
| P00481        | QKGEYPLLLQGK                                            | 0.738372089        | 2              | 2.994097  |
| P00481        | SLGMIFEK                                                | 0.581647805        | 2              | 2.441405  |
| P00481        | SLVFPEAENR                                              | 0.839310776        | 2              | 2.649328  |
| P00481        | SLVFPEAENRK                                             | 0.733240036        | 2              | 2.95112   |
| P00481        | VLSSMTDAVLAR                                            | 0.686896485        | 2              | 3.980601  |
| P00481        | VLSSMTDAVLAR+Oxidation(4)                               | 0.95382377         |                |           |
| P00481        | YGKPVQSQVQLK                                            | 0.360824808        | 2              | 3.004725  |
| <b>P00502</b> | <b>GSTA1 Glutathione S transferase alpha_1</b>          | <b>0.68033713</b>  | <b>0.33959</b> | <b>2</b>  |
| P00502        | FIQSPEDLEK                                              | 0.416852362        | 2              | 2.587286  |
| P00502        | WLLAAAGVEFDEK                                           | 0.683937631        | 2              | 4.326678  |
| <b>P00507</b> | <b>AATM Aspartate aminotransferase_mitochondrial</b>    | <b>1.061362787</b> | <b>9.9E-20</b> | <b>18</b> |
| P00507        | ASAELALGENSEVLK                                         | 0.884619266        | 2              | 4.698341  |
| P00507        | DAGMQLQGYR                                              | 1.59749452         | 2              | 3.039075  |
| P00507        | DDNGKPYVLPVSR                                           | 1.048667293        | 2              | 2.740834  |
| P00507        | EGSSHNVQHITDQIGMFCFTGLKPEQVER                           | 1.521949756        | 3              | 5.41396   |
| P00507        | EYLPIGGLADFCK                                           | 1.109539801        | 2              | 2.819358  |
| P00507        | FVTVQTISGTGALR                                          | 0.819479888        | 2              | 5.039452  |
| P00507        | HFIEQGINVCLCQSYAK                                       | 0.765582361        | 2              | 4.522585  |
| P00507        | IAATILTSPDLR                                            | 1.643636647        | 2              | 3.093737  |
| P00507        | IPEQSVLLLHACAHNPTGVDPREQWK                              | 1.573377352        | 3              | 4.310308  |
| P00507        | ISVAGVTSGNVGYLAHAIHQVTK                                 | 0.496526373        | 2              | 4.782934  |
| P00507        | KQWLQEVK                                                | 0.507655833        | 1              | 2.138605  |
| P00507        | MNLGVGAYR                                               | 0.814749541        | 2              | 2.934601  |
| P00507        | NLDKEYLPIGGLADFCK                                       | 0.777434697        | 2              | 5.338366  |
| P00507        | NMGLYGER                                                | 0.802177016        | 2              | 2.506797  |
| P00507        | TCGFDFSGALEDISK                                         | 0.932330418        | 2              | 4.821503  |
| P00507        | TQLVSNLK                                                | 0.833465261        | 2              | 2.961006  |
| P00507        | VGAFTVVCK                                               | 0.929922324        | 2              | 3.367226  |
| P00507        | VGASFLQR                                                | 1.030824742        | 2              | 3.004443  |
| <b>P00564</b> | <b>KCRM Creatine kinase M_type</b>                      | <b>0.938875299</b> | <b>1</b>       | <b>11</b> |
| P00564        | DLFDPHQR                                                | 1.445887648        | 2              | 2.490117  |



|               |                                               |                    |                |           |
|---------------|-----------------------------------------------|--------------------|----------------|-----------|
| P00564        | FEEILTR                                       | 1.028520339        | 2              | 2.469936  |
| P00564        | GGDDLDPNYVLSSR                                | 0.712971585        | 2              | 4.798523  |
| P00564        | GQSIDDMIPAQK                                  | 0.676921313        | 2              | 3.37611   |
| P00564        | GTGGVDTAAGVAFDISNADR                          | 0.886652516        | 2              | 6.067082  |
| P00564        | LGSSEVEQVQLVVDGVK                             | 0.94853363         | 2              | 4.918209  |
| P00564        | LSVEALNSLTGEFK                                | 1.005352908        | 2              | 4.338848  |
| P00564        | RGTGGVDTAAVGAVFISNADR                         | 0.895069693        | 2              | 5.883774  |
| P00564        | SMTEQEQQLIDHFLFDKPVSPLLASGMAR                 | 0.897349825        | 3              | 5.872811  |
| P00564        | SMTEQEQQLIDHFLFDKPVSPLLASGMAR+Oxidation(1)    | 0.983421126        |                |           |
| P00564        | TDLNHENLK                                     | 1.103563569        | 2              | 2.529152  |
| <b>P00787</b> | <b>CATB Cathepsin B</b>                       | <b>0.893644046</b> | <b>0.64852</b> | <b>5</b>  |
| P00787        | GENHCGIEIVAGIPR                               | 0.886492004        | 2              | 4.52138   |
| P00787        | HEAGDVMGGHAIR                                 | 0.895166841        | 3              | 3.560832  |
| P00787        | HEAGDVMGGHAIR+Oxidation(6)                    | 1.335806433        |                |           |
| P00787        | MCEAGYSTSYKEDK                                | 1.136869028        | 2              | 3.880888  |
| P00787        | NGPVEGAFTVFSDFLYK                             | 1.485252985        | 2              | 3.26154   |
| <b>P00884</b> | <b>ALDOB Fructose_bisphosphate aldolase B</b> | <b>1.211253973</b> | <b>9.9E-20</b> | <b>19</b> |
| P00884        | ALQASALAAWGGK                                 | 1.097341834        | 2              | 4.860201  |
| P00884        | ATQEAFMK                                      | 1.127588178        | 2              | 2.609433  |
| P00884        | ATQEAFMK+Oxidation(6)                         | 1.472856227        |                |           |
| P00884        | ELLFSVDNSISQSIGGVILFHETLYQK                   | 2.287366326        | 3              | 3.794712  |
| P00884        | ELSEIAQR                                      | 3.635972447        | 1              | 2.115321  |
| P00884        | ETTIQGLDGLSER                                 | 1.358057093        | 2              | 4.025199  |
| P00884        | GILAADESVGTMGNR                               | 0.990181935        | 2              | 5.584123  |
| P00884        | GILAADESVGTMGNR+Oxidation(11)                 | 1.375384542        |                |           |
| P00884        | GIVVGIKLDQGGAPLAGTNK                          | 1.395878402        | 2              | 3.465734  |
| P00884        | IKVENTEENR                                    | 1.535970132        | 2              | 2.478102  |
| P00884        | IKVENTEENRR                                   | 2.251555549        | 2              | 2.923598  |
| P00884        | ISDQCPSLAIQENANALAR                           | 1.101132167        | 2              | 6.218312  |
| P00884        | KELSEIAQR                                     | 1.077121482        | 2              | 2.843675  |
| P00884        | KYTPEQVAMATVTALHR                             | 0.858204152        | 3              | 5.706024  |
| P00884        | KYTPEQVAMATVTALHR+Oxidation(8)                | 0.987595718        |                |           |
| P00884        | LDQGGAPLAGTNK                                 | 1.044456539        | 2              | 4.596908  |
| P00884        | YASICQQNGLVPIVEEVLDPGDHDLHCQYVSEK             | 2.218863099        | 3              | 4.999493  |
| P00884        | YTPEQVAMATVTALHR                              | 0.937180044        | 2              | 4.5543    |
| P00884        | YTPEQVAMATVTALHR+Oxidation(7)                 | 0.832835903        |                |           |
| <b>P01015</b> | <b>ANGT Angiotensinogen</b>                   | <b>1.537626526</b> | <b>2E-06</b>   | <b>3</b>  |
| P01015        | GSYNLQDLAQAK                                  | 1.537726616        | 2              | 2.80368   |
| P01015        | SLDLSTDPVLAAQK                                | 1.262791565        | 2              | 3.317123  |
| P01015        | STCAQLENPSVETLPEPTFEPVPIQAK                   | 1.793605762        | 2              | 3.915774  |
| <b>P01026</b> | <b>CO3 Complement C3</b>                      | <b>1.393987277</b> | <b>6E-05</b>   | <b>17</b> |
| P01026        | AAVFNHFISDGVK                                 | 1.246708804        | 2              | 2.354795  |
| P01026        | ACEPGVDYVYK                                   | 1.436121664        | 2              | 2.57538   |
| P01026        | ADIGCTPGSGK                                   | 1.25583878         | 2              | 2.841699  |
| P01026        | DSCVGTLVVKG DPR                               | 0.874808536        | 2              | 2.409441  |
| P01026        | EYVLPSEVLVEPTEK                               | 1.104156501        | 2              | 3.254046  |
| P01026        | IFTVDNLLPVGK                                  | 1.099001278        | 2              | 3.105247  |
| P01026        | IGLQEVEVK                                     | 0.961369681        | 2              | 2.38234   |
| P01026        | RVPVVTQGSDAQALQDDGVAK                         | 1.118963168        | 3              | 5.53011   |
| P01026        | SGIPIVTSPIYQIHFTK                             | 2.032653638        | 2              | 3.209617  |
| P01026        | SGSDEVQAGQER                                  | 1.748139626        | 2              | 4.084831  |
| P01026        | SSVAVPYVIVPLK                                 | 1.582155552        | 2              | 3.151322  |
| P01026        | TVLTGATGHLNR                                  | 1.154834647        | 2              | 3.09662   |
| P01026        | VELKPGDNLNVNFHLR                              | 1.063219523        | 3              | 5.341079  |
| P01026        | VHQFFNVGLIQPGSVK                              | 1.727194214        | 3              | 3.971458  |
| P01026        | VLIEDGSGEAVLSR                                | 1.115532119        | 2              | 4.530239  |

|               |                                             |                    |                |           |
|---------------|---------------------------------------------|--------------------|----------------|-----------|
| P01026        | VPVVTQGSDAQALTQDDGVAK                       | 1.371018105        | 2              | 5.903897  |
| P01026        | VTIKPAPETAK                                 | 1.384258458        | 2              | 2.535371  |
| <b>P01048</b> | <b>KNT1 T_kininogen 1</b>                   | <b>0.703176317</b> | <b>0.56454</b> | <b>2</b>  |
| P01048        | FSVATQICNITPGK                              | 0.974495445        | 2              | 2.843359  |
| P01048        | TELTADCETK                                  | 0.290872829        | 2              | 2.379227  |
| <b>P01946</b> | <b>HBA Hemoglobin subunit alpha_1/2</b>     | <b>0.642327018</b> | <b>0.99997</b> | <b>9</b>  |
| P01946        | AADHVEDLPGALSTLSDLHAHK                      | 0.767038806        | 3              | 7.326679  |
| P01946        | FLASVSTVLTSK                                | 0.658351598        | 2              | 3.902756  |
| P01946        | FLSHCLLVTLACHHPGDFTPAMHASLDK                | 0.653501964        | 4              | 4.653927  |
| P01946        | FLSHCLLVTLACHHPGDFTPAMHASLDKFLASVSTVLTSK    | 0.680597335        | 4              | 6.330357  |
| P01946        | IGGGGGEYGEEALQR                             | 0.775512339        | 3              | 4.870887  |
| P01946        | LRVDPVNFK                                   | 0.678717159        | 2              | 2.583225  |
| P01946        | MFAAFPTTK                                   | 0.735487382        | 2              | 2.745217  |
| P01946        | MFAAFPTTK+Oxidation(0)                      | 0.604522456        |                |           |
| P01946        | TYFSHIDVSPGSAQVK                            | 0.761251411        | 2              | 5.175354  |
| <b>P02089</b> | <b>HBB2 Hemoglobin subunit beta_2</b>       | <b>0.680043587</b> | <b>0.99976</b> | <b>4</b>  |
| P02089        | GTFASLSELHCDK                               | 0.783741157        | 2              | 3.178641  |
| P02089        | LHVDPENFR                                   | 0.734002845        | 2              | 2.633535  |
| P02089        | YFDSFGDLSSASAIMGNPK                         | 0.67951808         | 2              | 6.343416  |
| P02089        | YFDSFGDLSSASAIMGNPK+Oxidation(14)           | 0.74933554         |                |           |
| <b>P02091</b> | <b>HBB1 Hemoglobin subunit beta_1</b>       | <b>0.532180514</b> | <b>0.96184</b> | <b>9</b>  |
| P02091        | AAVNGLWVK                                   | 2.052200395        | 2              | 2.593747  |
| P02091        | EFTPCAQAAFQK                                | 0.835427186        | 2              | 2.991656  |
| P02091        | GTFASLSELHCDK                               | 0.870699823        | 2              | 4.274859  |
| P02091        | GTFASLSELHCDKLHVDPENFR                      | 0.492116816        | 3              | 3.483479  |
| P02091        | KVINAFNDGLK                                 | 0.842255012        | 3              | 3.681827  |
| P02091        | LLGNMIVIVLGHHLGK                            | 0.699039662        | 4              | 4.798428  |
| P02091        | VINAFNDGLK                                  | 0.769959315        | 2              | 2.89435   |
| P02091        | VNPDDVGGEALGR                               | 0.771520139        | 2              | 4.027888  |
| P02091        | VVAGVASALAHK                                | 0.86455615         | 2              | 3.613917  |
| <b>P02401</b> | <b>RLA2 60S acidic ribosomal protein P2</b> | <b>1.159284681</b> | <b>1.9E-10</b> | <b>6</b>  |
| P02401        | ILDSVGIEADDER                               | 1.048119614        | 2              | 4.597485  |
| P02401        | KILDSVGIEADDER                              | 0.839905332        | 2              | 3.830423  |
| P02401        | LASVPAGGAVAVSAAPGSAAPAAGSAPAAAAEEK          | 1.101024253        | 3              | 6.306197  |
| P02401        | NIEDVIAQGVGK                                | 1.054962239        | 2              | 4.722207  |
| P02401        | VISELNGK                                    | 1.131227052        | 1              | 2.054207  |
| P02401        | YVASYLLAALGGNSNPSAK                         | 1.347103972        | 2              | 4.930248  |
| <b>P02563</b> | <b>MYH6 Myosin_6</b>                        | <b>0.884353831</b> | <b>0.82802</b> | <b>3</b>  |
| P02563        | DTQLQLDDAVR                                 | 0.921073421        | 2              | 2.676833  |
| P02563        | VKLEQQVDDLEGSLEQEK                          | 0.747432425        | 2              | 5.157225  |
| P02563        | VKLEQQVDDLEGSLEQEKK                         | 0.959664615        | 3              | 3.494292  |
| <b>P02564</b> | <b>MYH7 Myosin_7</b>                        | <b>0.933361276</b> | <b>0.99997</b> | <b>42</b> |
| P02564        | ALQEAHQALDDLQAEEDKVNTLTK                    | 0.816705776        | 3              | 6.344643  |
| P02564        | ANDDLKENIAIVER                              | 0.813628361        | 2              | 3.525035  |
| P02564        | AQLEFNQIK                                   | 0.934134422        | 1              | 1.958119  |
| P02564        | DLEEATLQHEATAAALR                           | 0.700982552        | 2              | 5.202578  |
| P02564        | DTQIQLDDAVR                                 | 0.921073421        | 2              | 2.676833  |
| P02564        | EDQVMQNPVK                                  | 1.065864718        | 2              | 3.244556  |
| P02564        | ELENELEAEQKR                                | 0.96791497         | 2              | 2.882081  |
| P02564        | EQYEEETK                                    | 0.764322914        | 1              | 3.03225   |
| P02564        | GQNVQVAYIAGALAK                             | 0.684645365        | 2              | 3.759597  |
| P02564        | GTLEDQIQANPALEAFGNAK                        | 0.862764693        | 2              | 5.248735  |
| P02564        | IEDEQALGSQLQK                               | 0.664611786        | 2              | 4.537066  |
| P02564        | IEEEEELEAER                                 | 0.598350202        | 2              | 4.26683   |
| P02564        | ILNPAAIPEGQFIDSR                            | 0.95438712         | 2              | 2.547411  |
| P02564        | KLAEKDEEMEQAK                               | 0.118299289        | 2              | 3.775279  |

|               |                                                             |                    |                |           |
|---------------|-------------------------------------------------------------|--------------------|----------------|-----------|
| P02564        | KLAEQELIETSER                                               | 0.846841777        | 2              | 3.534202  |
| P02564        | KLEDECSELKR                                                 | 1.015218312        | 3              | 3.445501  |
| P02564        | KVQHELDEAEER                                                | 1.17404057         | 2              | 3.541449  |
| P02564        | LAEQELIETSER                                                | 0.550161681        | 2              | 3.799828  |
| P02564        | LDEAEQIALK                                                  | 1.150637548        | 2              | 3.962439  |
| P02564        | LEEAGGATSVQIEMNK                                            | 1.000260259        | 2              | 4.369197  |
| P02564        | LELDDVTSNMEQIIK                                             | 0.958160074        | 2              | 4.070542  |
| P02564        | LELQSALEEAASLEHEEGK                                         | 0.66328271         | 2              | 4.138051  |
| P02564        | LLGSLDIDHNQYK                                               | 0.643351439        | 2              | 3.661696  |
| P02564        | LQDAEEAVEAVNAK                                              | 1.142872478        | 2              | 3.964658  |
| P02564        | LQNEIEDLMVDVER                                              | 0.845335913        | 2              | 3.89675   |
| P02564        | LTQESIMDLENDKQQLDER                                         | 0.350264334        | 2              | 4.551601  |
| P02564        | MDADLSQLQTEVEEAVQECR                                        | 1.013957696        | 2              | 5.235183  |
| P02564        | NDLQLQVQAEQDNLADAEER                                        | 0.84129141         | 2              | 5.463215  |
| P02564        | NLQEEISDLTEQLGSGTK                                          | 0.831935727        | 2              | 5.929419  |
| P02564        | NLTEEMAGLDEIIVK                                             | 1.191271518        | 2              | 4.750556  |
| P02564        | NNLLQAELEELR                                                | 0.915241815        | 2              | 3.388179  |
| P02564        | QAEEAEEQANTNLSK                                             | 0.853288268        | 2              | 4.975104  |
| P02564        | QKYEESQSELESSQK                                             | 0.999576275        | 2              | 3.39453   |
| P02564        | QREEQAEPDGTTEEADK                                           | 1.070534315        | 2              | 2.931566  |
| P02564        | QREEQAEPDGTTEEADKSAYLMGLNSADLLK                             | 2.033830798        | 3              | 4.911406  |
| P02564        | SAYLMGLNSADLLK                                              | 1.022204401        | 2              | 2.545759  |
| P02564        | TLEDQMNEHR                                                  | 0.669873759        | 2              | 2.651053  |
| P02564        | VQHELDEAEER                                                 | 0.928550733        | 2              | 3.062501  |
| P02564        | VQHELDEAEERADIAESQVNK                                       | 0.84047893         | 3              | 3.587075  |
| P02564        | VQLLSQNTSLINQK                                              | 1.096090653        | 2              | 3.987459  |
| P02564        | VRELENELEAEQKR                                              | 0.504657997        | 3              | 3.836714  |
| P02564        | VVDSLQTSLDAETR                                              | 0.91747267         | 2              | 4.193341  |
| <b>P02600</b> | <b>MYL1 Myosin light chain 1/3_ skeletal muscle isoform</b> | <b>1.570514129</b> | <b>0.99999</b> | <b>13</b> |
| P02600        | ALGTNPTNAEVK                                                | 1.112340472        | 2              | 3.536794  |
| P02600        | ALGTNPTNAEVKK                                               | 1.145362893        | 2              | 3.304775  |
| P02600        | DQGGYEDFVEGLR                                               | 0.528115367        | 2              | 3.560319  |
| P02600        | EQQEEFKEAFLLFDR                                             | 0.682472283        | 2              | 3.581992  |
| P02600        | IEFEQFLPMMQAISSNK                                           | 0.955063938        | 3              | 3.918038  |
| P02600        | ITLSQVGDVLR                                                 | 1.407615423        | 2              | 3.239146  |
| P02600        | KIEFEQFLPMMQAISSNK                                          | 1.02098425         | 2              | 5.667635  |
| P02600        | KIEFEQFLPMMQAISSNKDQGGYEDFVEGLR                             | 1.004866324        | 4              | 5.266766  |
| P02600        | KPAAAAPAPAPAPAPAPAKPK                                       | 2.416819765        | 3              | 4.330929  |
| P02600        | KVLGNPSNEEMNAK                                              | 0.764737391        | 2              | 3.316699  |
| P02600        | KVLGNPSNEEMNAK+Oxidation(10)                                | 1.144327513        |                |           |
| P02600        | VLGNPSNEEMNAK                                               | 1.168467742        | 2              | 3.689341  |
| P02600        | VLGNPSNEEMNAK+Oxidation(9)                                  | 1.06104363         |                |           |
| <b>P02625</b> | <b>PRVA Parvalbumin alpha</b>                               | <b>0.831084944</b> | <b>1</b>       | <b>5</b>  |
| P02625        | AIGAFTAADSFHDK                                              | 1.013913956        | 2              | 3.381144  |
| P02625        | KVFHILDKDK                                                  | 0.897668359        | 2              | 2.301836  |
| P02625        | SGFIEEDELGSILK                                              | 0.774525635        | 2              | 4.860672  |
| P02625        | TLMAAGDKDGDGK                                               | 0.845577494        | 2              | 3.183165  |
| P02625        | TLMAAGDKDGDGK+Oxidation(2)                                  | 1.130477392        |                |           |
| <b>P02650</b> | <b>APOE Apolipoprotein E</b>                                | <b>0.897767623</b> | <b>0.05612</b> | <b>11</b> |
| P02650        | ELEEQLGPVAEETR                                              | 1.067493101        | 2              | 4.292765  |
| P02650        | GRLEEVGNQAR                                                 | 0.836230881        | 2              | 3.512826  |
| P02650        | GWFEPLVEDMQR                                                | 0.91200704         | 2              | 3.443292  |
| P02650        | LEEVGNQAR                                                   | 0.921578068        | 2              | 2.483841  |
| P02650        | LGADMEDLR                                                   | 0.797752308        | 2              | 2.742156  |
| P02650        | LGPLVEQGR                                                   | 1.206062914        | 2              | 2.766629  |
| P02650        | MEEQTQQIR                                                   | 0.898925078        | 2              | 3.153938  |

|               |                                               |                    |                |           |
|---------------|-----------------------------------------------|--------------------|----------------|-----------|
| P02650        | NEVNTMLGQSTEELR                               | 0.838701821        | 2              | 4.375723  |
| P02650        | SKMEEQTQQIR                                   | 0.727575637        | 2              | 3.23008   |
| P02650        | SKMEEQTQQIR+Oxidation(2)                      | 1.787418728        |                |           |
| P02650        | TANLGAGAAQPLR                                 | 0.926201244        | 2              | 3.67759   |
| <b>P02651</b> | <b>APOA4 Apolipoprotein A_IV</b>              | <b>0.972518059</b> | <b>0.28507</b> | <b>2</b>  |
| P02651        | TDVTQQLNLFQDK                                 | 0.832699897        | 2              | 4.376289  |
| P02651        | VSTNIDQLQK                                    | 1.363366236        | 2              | 2.310643  |
| <b>P02680</b> | <b>FIBG Fibrinogen gamma chain</b>            | <b>1.696532311</b> | <b>2E-07</b>   | <b>5</b>  |
| P02680        | LSIGDGQQHMGGSK                                | 1.16865329         | 2              | 2.716701  |
| P02680        | VAQLEAQCQEPCK                                 | 2.514435058        | 2              | 3.509436  |
| P02680        | VGPESDKYR                                     | 1.360171604        | 2              | 2.784405  |
| P02680        | YEALLTHESSIR                                  | 1.435357858        | 2              | 3.894515  |
| P02680        | YLQDIYTSNK                                    | 1.687228475        | 2              | 2.442022  |
| <b>P02692</b> | <b>FABPL Fatty acid binding protein_liver</b> | <b>0.804250242</b> | <b>9.9E-20</b> | <b>11</b> |
| P02692        | AMGLPEDLIQK                                   | 0.768879171        | 2              | 3.725098  |
| P02692        | AMGLPEDLIQK+Oxidation(1)                      | 0.83809312         |                |           |
| P02692        | GVSEIVHEGK                                    | 0.825249424        | 2              | 3.410163  |
| P02692        | GVSEIVHEGKK                                   | 0.784789833        | 2              | 3.223191  |
| P02692        | SVTEFNGDTITNTMTLGDIVYK                        | 0.833532817        | 2              | 5.532661  |
| P02692        | SVTEFNGDTITNTMTLGDIVYK+Oxidation(13)          | 0.90185357         |                |           |
| P02692        | SVTEFNGDTITNTMTLGDIVYKR                       | 0.674479485        | 2              | 3.632193  |
| P02692        | VIHNEFTLGEECELETMTGEK                         | 0.819401401        | 3              | 6.109758  |
| P02692        | VIHNEFTLGEECELETMTGEK+Oxidation(16)           | 0.855043435        |                |           |
| P02692        | YQVQSQENFEPFMK                                | 0.936212904        | 2              | 5.81941   |
| P02692        | YQVQSQENFEPFMK+Oxidation(12)                  | 0.994229149        |                |           |
| <b>P02696</b> | <b>RET1 Retinol binding protein 1</b>         | <b>0.955518502</b> | <b>0.99846</b> | <b>5</b>  |
| P02696        | ALDVNVALR                                     | 0.923874984        | 2              | 3.313287  |
| P02696        | CMTTVSWDGDKLQCQVK                             | 0.938848375        | 2              | 4.672219  |
| P02696        | EFEEDLTGIDDR                                  | 1.007030328        | 2              | 2.46823   |
| P02696        | MLSNEEFEEYLR                                  | 0.722337818        | 2              | 3.90598   |
| P02696        | MLSNEEFEEYLR+Oxidation(0)                     | 0.994971438        |                |           |
| <b>P02706</b> | <b>ASGR1 Asialoglycoprotein receptor 1</b>    | <b>1.009305324</b> | <b>0.40079</b> | <b>6</b>  |
| P02706        | DYQDFQHLDNENDHHQLQR                           | 1.117192325        | 3              | 4.246231  |
| P02706        | FVQQHMGPLNTWIGLTDQNGPWK                       | 1.95344701         | 3              | 3.500044  |
| P02706        | LVESQLEK                                      | 1.077429471        | 2              | 2.494918  |
| P02706        | SLSCQMAALR                                    | 0.723373755        | 2              | 2.700068  |
| P02706        | WVCETELGK                                     | 0.818094781        | 2              | 2.358272  |
| P02706        | WVDGTDYETGFK                                  | 0.794445158        | 2              | 3.173732  |
| <b>P02770</b> | <b>ALBU Serum albumin</b>                     | <b>1.386046877</b> | <b>9.9E-20</b> | <b>24</b> |
| P02770        | AADKDNCFATEGPNLVAR                            | 2.414100043        | 2              | 4.97209   |
| P02770        | AETFTFHSDICTLPDKEK                            | 3.563040206        | 2              | 4.504495  |
| P02770        | CCAEGDPPACYGTVLAEFQPLVEEPK                    | 1.536493956        | 3              | 5.270844  |
| P02770        | CCSGSLVER                                     | 1.311348658        | 2              | 3.294529  |
| P02770        | CCTLPEAQR                                     | 1.253844695        | 2              | 3.199258  |
| P02770        | ECCHGDLLLECADDR                               | 1.365239662        | 2              | 3.626663  |
| P02770        | ECCHGDLLLECADDRRAELAK                         | 1.417526388        | 2              | 5.189486  |
| P02770        | FKDLGEQHFK                                    | 1.483260311        | 3              | 4.290384  |
| P02770        | GLVLIAFSQYLQK                                 | 1.709897855        | 2              | 4.143642  |
| P02770        | INKECCHGDLLLECADDRRAELAK                      | 1.589978639        | 3              | 4.70576   |
| P02770        | KQTALAEVVK                                    | 1.308803271        | 3              | 4.082566  |
| P02770        | KYEATLEK                                      | 1.936846312        | 1              | 2.707031  |
| P02770        | LQACCDKPVLQK                                  | 1.457021853        | 2              | 4.323123  |
| P02770        | LVQEVTDFAK                                    | 1.270800673        | 2              | 3.589504  |
| P02770        | RHPDYSVSLLR                                   | 1.290712278        | 3              | 5.342217  |
| P02770        | SIHTLFGDK                                     | 1.51709036         | 1              | 2.537309  |
| P02770        | TCVADENAENCDK                                 | 1.285347617        | 2              | 4.496723  |
| P02770        | TNCELYEK                                      | 1.392313961        | 2              | 2.896055  |

|               |                                                        |                    |                |           |
|---------------|--------------------------------------------------------|--------------------|----------------|-----------|
| P02770        | TVMGDFAQFVDK                                           | 1.174812096        | 2              | 3.728814  |
| P02770        | TVMGDFAQFVDK+Oxidation(2)                              | 0.897802761        |                |           |
| P02770        | YEATLEK                                                | 1.347296805        | 1              | 1.938763  |
| P02770        | YMCENQATISSK                                           | 1.365215148        | 2              | 4.095817  |
| P02770        | YMCENQATISSK+Oxidation(1)                              | 1.564334353        |                |           |
| P02770        | YNEVLTQCCTESDK                                         | 1.448647561        | 2              | 5.921127  |
| <b>P02803</b> | <b>MT1 Metallothionein_1</b>                           | <b>8.637905145</b> | <b>9.9E-20</b> | <b>2</b>  |
| P02803        | MDPNCSCSTGGSCSCSSCGCK                                  | 1.259781935        | 2              | 5.284279  |
| P02803        | SCCSCCPVGCSK                                           | 8.580790777        | 2              | 3.903487  |
| <b>P04041</b> | <b>GPX1 Glutathione peroxidase 1</b>                   | <b>0.638887094</b> | <b>9.9E-20</b> | <b>10</b> |
| P04041        | FLVGPDGVVPR                                            | 0.714872383        | 2              | 3.482735  |
| P04041        | GLVVLGFPCNQFGHQENK                                     | 0.609252136        | 2              | 4.365985  |
| P04041        | GLVVLGFPCNQFGHQENKNEEILNSLK                            | 0.665608944        | 3              | 3.995894  |
| P04041        | NALPAPSDDPALMTDPK                                      | 0.673094714        | 2              | 3.11904   |
| P04041        | NALPAPSDDPALMTDPK+Oxidation(13)                        | 0.744527322        |                |           |
| P04041        | NDISWNFEK                                              | 0.622440212        | 2              | 2.94232   |
| P04041        | NEEILNSLK                                              | 0.656472448        | 1              | 2.388293  |
| P04041        | TIDIEPDIEALLSK                                         | 0.761111707        | 3              | 4.577692  |
| P04041        | YIIWSPVCR                                              | 0.720687444        | 2              | 3.110299  |
| P04041        | YVRPGGGFEPNFTLFEK                                      | 0.574270072        | 3              | 4.856639  |
| <b>P04167</b> | <b>CP2B2 Cytochrome P450 2B2</b>                       | <b>1.275266272</b> | <b>0.92468</b> | <b>2</b>  |
| P04167        | GTIAVIEPIFK                                            | 1.453918347        | 2              | 2.713934  |
| P04167        | NLQEILDYIGHIVEK                                        | 1.183797834        | 2              | 3.720965  |
| <b>P04176</b> | <b>PH4H Phenylalanine_4_hydroxylase</b>                | <b>1.811862212</b> | <b>9.9E-20</b> | <b>18</b> |
| P04176        | AYGAGLLSSFGEIQCLSDPKK                                  | 2.661509049        | 2              | 4.185976  |
| P04176        | EDNIPQLEDVSQLQCTGFR                                    | 2.041167584        | 3              | 4.95246   |
| P04176        | FANQILSYGAELDADHPGFK                                   | 3.382388402        | 3              | 3.530921  |
| P04176        | FANQILSYGAELDADHPGFKDPVYR                              | 1.569672038        | 4              | 5.037365  |
| P04176        | ILADSINSEVGILCNALQK                                    | 0.804450787        | 3              | 6.644315  |
| P04176        | LNKDEYEFFTYLDK                                         | 10.36988259        | 2              | 3.604046  |
| P04176        | LNKDEYEFFTYLDKR                                        | 1.629314427        | 3              | 3.818912  |
| P04176        | LRPVAGLLSSR                                            | 1.484168336        | 2              | 2.339522  |
| P04176        | NDIGATVHELRS                                           | 1.666031202        | 2              | 3.615365  |
| P04176        | NTVPWFPR                                               | 1.389279594        | 2              | 2.501236  |
| P04176        | QFADIAYNYR                                             | 1.525284841        | 2              | 2.545489  |
| P04176        | SFAQFSQEIGLASLGAPDEYIEK                                | 2.286972633        | 2              | 5.016753  |
| P04176        | TACQEYSVTEFQPLYYVAESFSDAK                              | 9.080967008        | 2              | 4.733845  |
| P04176        | THACYEHNHIFPILLEK                                      | 1.699690891        | 2              | 4.667121  |
| P04176        | VEVLDNTQQLK                                            | 1.506054738        | 2              | 3.895681  |
| P04176        | VEYTEEEK                                               | 1.418361818        | 2              | 2.603281  |
| P04176        | VEYTEEEKQWGTVFR                                        | 1.199486714        | 2              | 4.447991  |
| P04176        | YCGFREDNIPQLEDVSQLQCTGFR                               | 1.723576669        | 3              | 4.716255  |
| <b>P04182</b> | <b>OAT Ornithine aminotransferase_mitochondrial</b>    | <b>0.948928079</b> | <b>0.9956</b>  | <b>8</b>  |
| P04182        | AFYNNVLGEYEEYITK                                       | 1.174226148        | 2              | 4.43028   |
| P04182        | DNGLLAKPTHGDIIR                                        | 1.00217339         | 2              | 2.581575  |
| P04182        | GLLNAIVIR                                              | 0.874977849        | 2              | 3.347982  |
| P04182        | KTEQGPPSSEYIFER                                        | 1.289891805        | 2              | 4.122945  |
| P04182        | TEQGPPSSEYIFER                                         | 1.082618648        | 2              | 4.149383  |
| P04182        | VLPMTGVEAGETACK                                        | 0.826159881        | 2              | 4.296223  |
| P04182        | WLAVDHENVRPDIVLLGK                                     | 0.89070064         | 2              | 4.059553  |
| P04182        | YGAHNYHPLPVALER                                        | 0.62855323         | 2              | 3.614229  |
| <b>P04256</b> | <b>ROA1 Heterogeneous nuclear ribonucleoprotein A1</b> | <b>0.95249875</b>  | <b>0.97734</b> | <b>5</b>  |
| P04256        | EDSQRPGAHLTVK                                          | 0.948525695        | 2              | 3.053057  |
| P04256        | GFAFVTFDDHDSVDK                                        | 1.048679015        | 2              | 2.902564  |
| P04256        | IEVIEIMTDR                                             | 0.882396283        | 2              | 3.408569  |
| P04256        | NQGGYGGSSSSSYGSGR                                      | 1.104868555        | 2              | 4.936421  |

|               |                                                                     |                    |                |           |
|---------------|---------------------------------------------------------------------|--------------------|----------------|-----------|
| P04256        | SESPKEPEQLR                                                         | 1.039310448        | 2              | 2.362085  |
| <b>P04276</b> | <b>VTDB Vitamin D binding protein</b>                               | <b>1.133184135</b> | <b>0.00098</b> | <b>3</b>  |
| P04276        | SCESDAPFPVHPGTSECTK                                                 | 1.410387912        | 2              | 4.851318  |
| P04276        | VPTANLEDVLPALDELTEILSR                                              | 1.156497184        |                |           |
| P04276        | YCSSLQIDAEMR                                                        | 1.283585236        | 2              | 2.46543   |
| <b>P04355</b> | <b>MT2 Metallothionein_2</b>                                        | <b>18.23845785</b> | <b>9.9E-20</b> | <b>3</b>  |
| P04355        | CSQGCICKEASDKCSCCA                                                  | 6.314216016        | 3              | 3.632713  |
| P04355        | MDPNCSCATDGSCSCAGSCK                                                | 5.239810964        | 2              | 6.386932  |
| P04355        | SCCSCCPVGCAK                                                        | 14.51813197        | 2              | 4.216469  |
| <b>P04466</b> | <b>MLRS Myosin regulatory light chain 2_skeletal muscle isoform</b> | <b>1.095660819</b> | <b>0.99836</b> | <b>9</b>  |
| P04466        | AAAEGSSNVFSMFDQTIQIEFK                                              | 1.049682303        | 3              | 4.91573   |
| P04466        | GADPEDVITGAFK                                                       | 0.694764765        | 2              | 4.345148  |
| P04466        | KQFLEELLTTQCDR                                                      | 0.751582652        | 2              | 3.817376  |
| P04466        | LKGADPEDVITGAFK                                                     | 0.94468857         | 2              | 3.765516  |
| P04466        | NEELDAMMK                                                           | 0.949614991        | 1              | 2.322364  |
| P04466        | NICYVITHGDAK                                                        | 1.467754036        | 2              | 3.073754  |
| P04466        | NICYVITHGDAKDQE                                                     | 0.687363728        | 2              | 3.980803  |
| P04466        | NMWAAFPPDVGGNVVDYK                                                  | 0.702432351        | 2              | 2.915712  |
| P04466        | QFLEELLTTQCDR                                                       | 0.557547926        | 2              | 4.005283  |
| <b>P04550</b> | <b>PTMS Parathyrosin</b>                                            | <b>1.030265948</b> | <b>0.89957</b> | <b>4</b>  |
| P04550        | RTAEEDEADPKR                                                        | 0.96304559         | 3              | 4.408648  |
| P04550        | SVEAAAELSAK                                                         | 1.083587492        | 2              | 4.205069  |
| P04550        | TAEDEADPK                                                           | 1.052543842        | 2              | 3.714639  |
| P04550        | TAEDEADPKR                                                          | 1.348762283        | 3              | 3.740644  |
| <b>P04636</b> | <b>MDHM Malate dehydrogenase_mitochondrial</b>                      | <b>0.966608695</b> | <b>8.2E-06</b> | <b>17</b> |
| P04636        | AGAGSATLSMAYAGAR                                                    | 0.952600317        | 2              | 4.757953  |
| P04636        | AGAGSATLSMAYAGAR+Oxidation(9)                                       | 1.373504882        |                |           |
| P04636        | ANTFVAELK                                                           | 0.973109694        | 2              | 2.738801  |
| P04636        | EGVIECSFVQSK                                                        | 1.132810918        | 1              | 3.060102  |
| P04636        | ETECTYFSTPLLLGK                                                     | 3.907109486        | 2              | 3.758039  |
| P04636        | FVFLVDAMNGK                                                         | 0.877508585        | 2              | 4.290236  |
| P04636        | GCDVVVIPAGVPR                                                       | 0.942350052        | 2              | 4.263672  |
| P04636        | GYLGPQLPDCLK                                                        | 0.917934307        | 2              | 4.307568  |
| P04636        | IFGVTTLDIVR                                                         | 1.102747018        | 2              | 3.452798  |
| P04636        | IQEAGTEVVK                                                          | 0.924661156        | 2              | 2.86749   |
| P04636        | LTLYDIAHTPGVAADLSHIETR                                              | 0.916918634        | 3              | 6.707665  |
| P04636        | MIAEAIPELK                                                          | 0.894744834        | 2              | 3.056718  |
| P04636        | MIAEAIPELK+Oxidation(0)                                             | 1.064918529        |                |           |
| P04636        | TIIP LISQCTPK                                                       | 0.892861785        | 2              | 3.710312  |
| P04636        | VAVLGASGGIGQPLSLLLK                                                 | 1.700343032        | 2              | 5.997471  |
| P04636        | VDFPQDQLATLTGR                                                      | 0.808894877        | 2              | 4.760095  |
| P04636        | VNVPVIGGHAGK                                                        | 0.903604239        | 2              | 3.61838   |
| <b>P04639</b> | <b>APOA1 Apolipoprotein A_1</b>                                     | <b>1.169197841</b> | <b>0.00552</b> | <b>5</b>  |
| P04639        | LQEQLGPVTQEFWANLEK                                                  | 1.649943486        | 2              | 4.089848  |
| P04639        | NEMNKDLENVK                                                         | 0.991138768        | 2              | 3.16358   |
| P04639        | QLNLNLLDNWDTLGSTVGR                                                 | 1.266475524        | 2              | 4.298866  |
| P04639        | VKDFATVYVDAVK                                                       | 2.049906731        | 2              | 2.832142  |
| P04639        | WNEEVEAYR                                                           | 1.534960381        | 2              | 2.598564  |
| <b>P04642</b> | <b>LDHA L_lactate dehydrogenase A chain</b>                         | <b>0.961894076</b> | <b>0.02588</b> | <b>21</b> |
| P04642        | DLADELALVDVIEDK                                                     | 0.894387133        | 2              | 5.457942  |
| P04642        | DQLIVNLLK                                                           | 1.274623047        | 2              | 2.928626  |
| P04642        | DQLIVNLLKEEQVPQNK                                                   | 0.971412322        | 2              | 4.577693  |
| P04642        | EDVFLSVPCILGQNGISDVVK                                               | 1.19151917         | 2              | 4.660959  |
| P04642        | FIIPNVVK                                                            | 0.833964047        | 2              | 2.382555  |
| P04642        | GEMMDLQHGSFLK                                                       | 0.85858298         | 2              | 3.94008   |
| P04642        | GEMMDLQHGSFLK+Oxidation(2)                                          | 1.450875254        |                |           |

|               |                                            |                    |                |           |
|---------------|--------------------------------------------|--------------------|----------------|-----------|
| P04642        | GEMMDLQHGSFLK+Oxidation(2)                 | 1.008885327        |                |           |
| P04642        | GEMMDLQHGSFLK+Oxidation(3)                 | 1.033518112        | 2              | 3.487276  |
| P04642        | KSADTLWGIQK                                | 1.191483722        | 2              | 3.318448  |
| P04642        | LLIVSNPVDILTYVAWK                          | 1.582898652        | 2              | 4.863012  |
| P04642        | NVNIFK                                     | 1.162840461        | 1              | 2.082439  |
| P04642        | QVVD SAYEVIK                               | 1.118734445        | 2              | 3.502868  |
| P04642        | RVHPITMIK                                  | 0.992605402        | 2              | 2.519708  |
| P04642        | RVHPITMIK+Oxidation(7)                     | 1.315203409        |                |           |
| P04642        | SADTLWGIQK                                 | 1.108446271        | 2              | 3.934905  |
| P04642        | SLNPQLGTDADK                               | 1.57257836         | 1              | 2.322855  |
| P04642        | SLNPQLGTDADKEQWK                           | 1.220465863        | 2              | 4.857021  |
| P04642        | SLNPQLGTDADKEQWKDVHK                       | 0.790417971        | 3              | 3.431161  |
| P04642        | VHPITMIK+Oxidation(6)                      | 2.108777538        |                |           |
| P04642        | VTLTPDEEAR                                 | 1.099403344        | 2              | 2.741382  |
| <b>P04644</b> | <b>RS17 40S ribosomal protein S17</b>      | <b>1.100701202</b> | <b>0.99865</b> | <b>2</b>  |
| P04644        | LLDFGSLSNLQVTQPTVGMNFK                     | 1.082020052        | 2              | 4.278763  |
| P04644        | VCEEIAIIPSK                                | 1.064960897        | 2              | 2.866039  |
| <b>P04692</b> | <b>TPM1 Tropomyosin alpha_1 chain</b>      | <b>1.000690754</b> | <b>0.99999</b> | <b>11</b> |
| P04692        | AISELDHALNDMTSI                            | 1.196286461        | 2              | 2.800011  |
| P04692        | GTEDELDKYSEALK                             | 1.016351492        | 2              | 3.645583  |
| P04692        | GTEDELDKYSEALKDAQEK                        | 0.927506692        | 2              | 4.108422  |
| P04692        | KLVIIESDLR                                 | 0.994046509        | 2              | 3.46125   |
| P04692        | LDKENALDR                                  | 1.024994441        | 2              | 2.785169  |
| P04692        | LKGTEDELDK                                 | 1.272898971        | 2              | 2.768812  |
| P04692        | LVIIESDLR                                  | 0.911172763        | 2              | 2.458196  |
| P04692        | MEIQEIQLK                                  | 0.985217119        | 2              | 3.021322  |
| P04692        | QLEDELVSLQK                                | 0.774235612        | 2              | 2.855708  |
| P04692        | SIDDELELYAQK                               | 0.506793647        | 2              | 4.23555   |
| P04692        | SKQLEDELVSLQK                              | 1.237520502        | 2              | 3.335744  |
| <b>P04694</b> | <b>ATTY Tyrosine aminotransferase</b>      | <b>0.87856784</b>  | <b>0.28444</b> | <b>5</b>  |
| P04694        | ILGPCTIVQGALK                              | 1.614394244        | 2              | 2.672603  |
| P04694        | IQEFCEQHYHCAEGSQEEDCK                      | 3.724452873        | 3              | 4.451884  |
| P04694        | TACLVVNNPSNPCGSVFSK                        | 0.791704636        | 2              | 4.933046  |
| P04694        | WVVRPSDMSNK                                | 1.100147555        | 2              | 2.36815   |
| P04694        | YEPLANLSTNVPII SCGLAK                      | 2.040714662        | 2              | 3.429554  |
| <b>P04762</b> | <b>CATA Catalase</b>                       | <b>1.009175472</b> | <b>9.9E-20</b> | <b>32</b> |
| P04762        | APQKPDVLTGGGNPIGDK                         | 4.112577441        | 2              | 4.638016  |
| P04762        | DAMLFPFIHSQK+Oxidation(2)                  | 1.674072004        |                |           |
| P04762        | DAQLFIQR                                   | 1.134412095        | 2              | 2.997428  |
| P04762        | DGPMCMHDNQGGAPNYYPNSFSAPEQQGSALEHHSQCSADVK | 0.595137503        | 4              | 4.567451  |
| P04762        | DPASDQMK                                   | 0.990129735        | 1              | 2.257921  |
| P04762        | DPASDQMK+Oxidation(6)                      | 1.625990572        |                |           |
| P04762        | DYPLIPVGK                                  | 0.8341974          | 1              | 2.244847  |
| P04762        | EAETFPFNPFDLTK                             | 1.050619013        | 2              | 3.960579  |
| P04762        | FNSANEDNVTQVR                              | 0.682442928        | 2              | 4.558928  |
| P04762        | FSTVAGESGSADTVR                            | 0.895244174        | 2              | 5.280581  |
| P04762        | FSTVAGESGSADTVR DPR                        | 0.38233254         | 2              | 2.307338  |
| P04762        | FYTEDGNWDLVGNNTPIFFIR                      | 1.162395944        | 3              | 5.463285  |
| P04762        | GAGAFGYFEVTHDITR                           | 0.792670691        | 2              | 4.783739  |
| P04762        | GPLLVDVVFTEDEMAHFDR                        | 1.592903934        | 2              | 5.47609   |
| P04762        | HMNGYGSHTFK                                | 0.796265699        | 3              | 4.108102  |
| P04762        | HMNGYGSHTFK+Oxidation(1)                   | 1.297094702        |                |           |
| P04762        | LAQEDPDYGLR                                | 1.451493688        | 2              | 2.72948   |
| P04762        | LCENIANHLK                                 | 0.761397008        | 3              | 3.783859  |
| P04762        | LFAYPDTHR                                  | 0.959770062        | 2              | 2.914103  |
| P04762        | LGPNYLQIPVNCYPYR                           | 0.964646165        | 3              | 4.052971  |

|               |                                                     |                    |                |           |
|---------------|-----------------------------------------------------|--------------------|----------------|-----------|
| P04762        | LNIMTAGPR                                           | 0.753318988        | 2              | 3.145642  |
| P04762        | LNIMTAGPR+Oxidation(3)                              | 1.150030281        |                |           |
| P04762        | LVNANGEAVYCK                                        | 0.890632607        | 2              | 3.894319  |
| P04762        | NAIHTYVQAGSHIAAK                                    | 0.653159959        | 3              | 5.898609  |
| P04762        | NFTDVHPDYGAR                                        | 0.738037339        | 2              | 4.140734  |
| P04762        | NLPVEEAGR                                           | 0.762576155        | 1              | 2.323009  |
| P04762        | NPANYFAEVEQMAFDPSNMPPGIEPSPDK                       | 3.348273814        | 3              | 5.677136  |
| P04762        | RFNSANEDNVTQVR                                      | 0.725500742        | 2              | 4.521218  |
| P04762        | VFEHIGK                                             | 0.914215736        | 2              | 2.476162  |
| P04762        | VFEHIGKR                                            | 0.817320473        | 2              | 2.369051  |
| P04762        | VQALLDQYNSQPK                                       | 0.824301335        | 2              | 4.940297  |
| P04762        | VWPHKDYPLIPVGK                                      | 0.494150845        | 2              | 3.481071  |
| <b>P04764</b> | <b>ENOA Alpha_enolase</b>                           | <b>1.085433107</b> | <b>0.24366</b> | <b>14</b> |
| P04764        | AGYTDQVVIGMDVAASEFYR                                | 0.816183386        | 2              | 4.520521  |
| P04764        | DATNVGDEGGFAPNILENK                                 | 1.004135796        | 2              | 5.780879  |
| P04764        | FTATAGIQVVGDDLTVTNPK                                | 1.147676584        | 2              | 5.306463  |
| P04764        | GNPTVEVDLYAK                                        | 1.377681584        | 2              | 4.078547  |
| P04764        | HIADLAGNPEVILPVPFNVINGGSHAGNK                       | 0.95307354         | 3              | 6.15002   |
| P04764        | IDQLMIEMDGTENK                                      | 0.945621033        | 2              | 4.481691  |
| P04764        | IEEELGSK                                            | 1.0490354          | 2              | 2.321403  |
| P04764        | IGAEVYHNLK                                          | 1.874713659        | 2              | 3.209411  |
| P04764        | KLNVVEQEK                                           | 1.435178698        | 2              | 2.545506  |
| P04764        | LNVVEQEK                                            | 1.119978977        | 2              | 3.102386  |
| P04764        | LNVVEQEKIDQLMIEMDGTENK                              | 0.859170408        | 3              | 4.648707  |
| P04764        | SCNCLLLK                                            | 1.253186578        | 2              | 2.981885  |
| P04764        | VNQIGSVTESLQACK                                     | 1.098756489        | 2              | 5.042507  |
| P04764        | YITPDQLADLYK                                        | 0.995972699        | 2              | 3.470566  |
| <b>P04785</b> | <b>PDIA1 Protein disulfide_isomerase</b>            | <b>0.961989315</b> | <b>0.49439</b> | <b>25</b> |
| P04785        | DGVVLFK                                             | 1.248741349        | 2              | 2.440274  |
| P04785        | DHENIVIAK                                           | 1.172108512        | 2              | 2.75662   |
| P04785        | EADDIVNWLK                                          | 1.22693759         | 2              | 2.308766  |
| P04785        | HNQLPLVIEFTEQTAPK                                   | 0.969414221        | 3              | 5.686644  |
| P04785        | IKPHLMSQELPEDWDKQPVK                                | 0.875530074        | 4              | 4.660788  |
| P04785        | IKPHLMSQELPEDWDKQPVK+Oxidation(5)                   | 1.257596854        |                |           |
| P04785        | ILEFFGLK                                            | 1.007763238        | 2              | 3.074069  |
| P04785        | ILFIFIDSDHTDNQR                                     | 0.934802041        | 2              | 2.37653   |
| P04785        | LGETYKDHENIVIAK                                     | 0.938292983        | 3              | 4.736261  |
| P04785        | LITLEEEMTK                                          | 0.880790421        | 2              | 3.56582   |
| P04785        | LITLEEEMTK+Oxidation(7)                             | 1.215149354        |                |           |
| P04785        | LKAEGSEIR                                           | 1.226963058        | 1              | 2.096421  |
| P04785        | MDSTANEVEAVK                                        | 0.937698291        | 2              | 4.116548  |
| P04785        | MDSTANEVEAVK+Oxidation(0)                           | 1.063785139        |                |           |
| P04785        | NFEEVAFDEK                                          | 0.914690846        | 1              | 3.357725  |
| P04785        | NFEEVAFDEKK                                         | 1.009821043        | 2              | 3.736872  |
| P04785        | NNFEGEITK                                           | 0.904816636        | 2              | 2.534137  |
| P04785        | QFLAAEAVDDIPFGITNSDVSFSK                            | 1.011968352        | 3              | 6.632107  |
| P04785        | TGPAATTLSDTAAAESLVDSSSEVTVIGFFK                     | 0.868355883        | 3              | 6.390738  |
| P04785        | THILLFLPK                                           | 1.015119889        | 2              | 2.77799   |
| P04785        | TVIDYNGER                                           | 0.810136717        | 2              | 2.565073  |
| P04785        | VDATEESDLAQQYGVR                                    | 0.844410805        | 2              | 5.625583  |
| P04785        | VHSFPTLK                                            | 0.812560909        | 1              | 1.920658  |
| P04785        | YKPESDELTAEK                                        | 1.00792385         | 3              | 4.586089  |
| P04785        | YQLDKDGVVLFK                                        | 0.915295204        | 2              | 3.936726  |
| <b>P04797</b> | <b>G3P Glyceraldehyde_3_phosphate dehydrogenase</b> | <b>0.873804009</b> | <b>3.3E-06</b> | <b>16</b> |
| P04797        | GAAQNIIPASTGAAK                                     | 1.273927941        | 2              | 4.273346  |
| P04797        | IVSNASCTTNCLAPLAK                                   | 1.146397214        | 2              | 4.764961  |



|               |                                                |                    |                |           |
|---------------|------------------------------------------------|--------------------|----------------|-----------|
| P04797        | LISWYDNEYGYSNR                                 | 1.223179136        | 2              | 4.061031  |
| P04797        | LVINGKPITIFQER                                 | 1.388848936        | 3              | 3.720879  |
| P04797        | RVIISAPSADAPMFVMGVNHEK                         | 1.591082884        | 3              | 5.285765  |
| P04797        | RVIISAPSADAPMFVMGVNHEK+Oxidation(12)           | 1.049290626        |                |           |
| P04797        | VGVNGFGR                                       | 1.257194212        | 2              | 2.578372  |
| P04797        | VIHDNFGIVEGLMTTVHAITATQK                       | 1.03149035         | 3              | 7.493002  |
| P04797        | VIHDNFGIVEGLMTTVHAITATQK+Oxidation(12)         | 1.282168736        |                |           |
| P04797        | VIISAPSADAPMFVMGVNHEK                          | 0.925567268        | 2              | 4.64743   |
| P04797        | VIISAPSADAPMFVMGVNHEK+Oxidation(11)            | 1.152606062        |                |           |
| P04797        | VIISAPSADAPMFVMGVNHEK+Oxidation(14)            | 1.152751967        |                |           |
| P04797        | VPTPNVSVVDLTCR                                 | 3.174919107        | 2              | 3.774345  |
| P04797        | VVDLMAYMASK                                    | 4.179721262        | 2              | 3.805506  |
| P04797        | VVDLMAYMASKE                                   | 6.962146633        | 2              | 2.766998  |
| P04797        | WGDAGAEEYVVESTGVFTTMEK                         | 1.15004951         | 2              | 5.567223  |
| <b>P04799</b> | <b>CP1A2 Cytochrome P450 1A2</b>               | <b>1.940091431</b> | <b>0.9727</b>  | <b>6</b>  |
| P04799        | DFVENVTSGNAVDFFPVL                             | 1.106363203        | 2              | 3.760718  |
| P04799        | IGSTPVVVLGSLNTIK                               | 1.326966978        | 2              | 3.059791  |
| P04799        | NSIQDITGALFK                                   | 1.052471804        | 2              | 3.475518  |
| P04799        | SMTFNPDSGPVWAAR                                | 1.968953562        | 2              | 3.155394  |
| P04799        | TCEHVQAWPR                                     | 0.492083869        | 2              | 2.871635  |
| P04799        | TVQEHYQDFNK                                    | 1.1802574          | 2              | 3.458863  |
| <b>P04800</b> | <b>CP3A1 Cytochrome P450 3A1</b>               | <b>3.487680161</b> | <b>0.2291</b>  | <b>2</b>  |
| P04800        | KLQEEIDR                                       | 0.720800856        | 2              | 2.31223   |
| P04800        | QGLLQPTKPIILK                                  | 3.697512324        | 2              | 2.387706  |
| <b>P04903</b> | <b>GSTA2 Glutathione S transferase alpha_2</b> | <b>0.748155477</b> | <b>0.01379</b> | <b>10</b> |
| P04903        | DGNLMFDQVPMVEIDGMK                             | 0.536287744        | 2              | 4.917635  |
| P04903        | DGNLMFDQVPMVEIDGMK+Oxidation(10)               | 0.800654304        |                |           |
| P04903        | DGNLMFDQVPMVEIDGMK+Oxidation(16)               | 0.808039929        |                |           |
| P04903        | DGNLMFDQVPMVEIDGMK+Oxidation(4)                | 0.79613045         |                |           |
| P04903        | KDGNLMFDQVPMVEIDGMK                            | 0.552892754        | 2              | 4.395597  |
| P04903        | LIQSPEDLEK                                     | 0.910588293        | 2              | 3.116575  |
| P04903        | LKKDGNLMFDQVPMVEIDGMK                          | 1.162763859        | 2              | 2.692726  |
| P04903        | WLLAAAGVEFEEK                                  | 0.772454752        | 2              | 3.870257  |
| P04903        | YDLYGK                                         | 0.6394911          | 1              | 1.939573  |
| P04903        | YLPAFEK                                        | 0.782977872        | 1              | 2.002143  |
| <b>P04904</b> | <b>GSTA3 Glutathione S transferase alpha_3</b> | <b>0.908538089</b> | <b>0.14637</b> | <b>9</b>  |
| P04904        | ADVYLVQVLYHVEELDPSALANFLLK                     | 1.195747661        | 3              | 5.295905  |
| P04904        | ALIDMYAEGVADLDEIVLHYPYIPPGK                    | 1.351799168        | 4              | 7.904847  |
| P04904        | LRNDGSLMFQQVPMVEIDGMK                          | 1.011294162        | 2              | 3.804574  |
| P04904        | NDGSLMFQQVPMVEIDGMK                            | 0.749451827        | 2              | 4.639302  |
| P04904        | NDGSLMFQQVPMVEIDGMK+Oxidation(11)              | 0.918207664        |                |           |
| P04904        | NDGSLMFQQVPMVEIDGMK+Oxidation(17)              | 0.926054581        |                |           |
| P04904        | NDGSLMFQQVPMVEIDGMK+Oxidation(5)               | 0.908072808        |                |           |
| P04904        | SHGQDYLVGNR                                    | 0.856590242        | 2              | 3.9099    |
| P04904        | WLLAAAGVEFEEQFLK                               | 0.880430721        | 2              | 5.419931  |
| <b>P04905</b> | <b>GSTM1 Glutathione S transferase Mu 1</b>    | <b>0.79593676</b>  | <b>0.94472</b> | <b>15</b> |
| P04905        | ADIVENQVMDNR                                   | 0.958774245        | 2              | 4.293469  |
| P04905        | ADIVENQVMDNR+Oxidation(8)                      | 1.077428054        |                |           |
| P04905        | CLDAFPNLKDFLAR                                 | 0.764323397        | 2              | 2.693651  |
| P04905        | FKLGLDFPNLPYLIDGSR                             | 0.875606261        | 3              | 4.854903  |
| P04905        | HHLCGETEEER                                    | 1.099681116        | 3              | 4.43464   |
| P04905        | IRADIVENQVMDNR                                 | 0.853677665        | 2              | 3.954945  |
| P04905        | ITQSNAIMR                                      | 1.014567342        | 2              | 3.089123  |
| P04905        | ITQSNAIMR+Oxidation(7)                         | 1.221538568        |                |           |
| P04905        | KHHLCGETEEER                                   | 1.431306324        | 3              | 3.686196  |
| P04905        | KITQSNAIMR                                     | 0.776727306        | 3              | 3.764464  |
| P04905        | KITQSNAIMR+Oxidation(8)                        | 1.205510212        |                |           |

|               |                                               |                    |                |           |
|---------------|-----------------------------------------------|--------------------|----------------|-----------|
| P04905        | LGLDFPNLPYLIDGSR                              | 1.017735735        | 2              | 5.113865  |
| P04905        | MQLIMLCYNPDFEK                                | 1.38628481         | 2              | 4.494752  |
| P04905        | VTYVDFLAYDILDQYHIFEPK                         | 1.137854432        | 3              | 3.7413    |
| P04905        | YLSTPIFSK                                     | 0.96804733         | 2              | 2.708584  |
| <b>P04906</b> | <b>GSTP1 Glutathione S_transferase P</b>      | <b>0.904956741</b> | <b>0.98835</b> | <b>2</b>  |
| P04906        | EAALVDMVNDGVEDLR                              | 0.884380223        | 2              | 4.733013  |
| P04906        | STCLYGQLPK                                    | 1.068991289        | 2              | 2.948133  |
| <b>P04937</b> | <b>FINC Fibronectin</b>                       | <b>1.111389954</b> | <b>0.12417</b> | <b>4</b>  |
| P04937        | FTQVSPPTTLTAQWTAPSVK                          | 1.73643825         | 2              | 3.529043  |
| P04937        | ITYGETGGNSPVQEFTVPGSK                         | 1.033452385        | 2              | 2.655801  |
| P04937        | SSPVVIDASTAIDAPSNLR                           | 1.146186422        | 2              | 2.466382  |
| P04937        | SYTITGLQPGTDYK                                | 0.969934788        | 2              | 2.758991  |
| <b>P05065</b> | <b>ALDOA Fructose_bisphosphate aldolase A</b> | <b>0.949901488</b> | <b>1</b>       | <b>9</b>  |
| P05065        | ALANSLACQ GK                                  | 1.049081485        | 2              | 2.964607  |
| P05065        | FSNEEIAMATVTALR                               | 0.958676689        | 2              | 4.498697  |
| P05065        | GILAADESTGSIK                                 | 1.098818183        | 2              | 4.228808  |
| P05065        | GVVPLAGTNGETTTQGLDGLSER                       | 1.056297945        | 2              | 5.399199  |
| P05065        | IGEHTPSSLAIMENANVLAR                          | 1.154343504        | 2              | 4.678485  |
| P05065        | KENLKAAQEYIK                                  | 1.03586175         | 2              | 2.411307  |
| P05065        | LQSIGTENTEENR                                 | 1.343188114        | 2              | 3.80651   |
| P05065        | LQSIGTENTEENRR                                | 1.093467052        | 2              | 2.521145  |
| P05065        | RLQSIGTENTEENR                                | 1.093467052        | 2              | 4.08288   |
| <b>P05178</b> | <b>CP2C6 Cytochrome P450 2C6</b>              | <b>0.769325892</b> | <b>1.3E-08</b> | <b>9</b>  |
| P05178        | DQDFLNLMEK                                    | 0.898658941        | 2              | 2.581353  |
| P05178        | EALIDHGEEFAER                                 | 0.628226912        | 2              | 3.247572  |
| P05178        | FDYKDQDFLNLMEK                                | 0.655858115        | 3              | 4.555609  |
| P05178        | FIDLIPTNLPHAVTCDIK                            | 0.581609704        | 2              | 3.350196  |
| P05178        | GTTIITSLSSVLHDSK                              | 0.616770812        | 2              | 3.75694   |
| P05178        | LPPGPIPLPIIGNIFQLNVK                          | 0.59406931         | 3              | 3.520749  |
| P05178        | MCAGEGLAR                                     | 0.661471084        | 2              | 2.576167  |
| P05178        | NITQSLTSFSK                                   | 0.634552413        | 2              | 2.472451  |
| P05178        | TNGSPCDPTFILGCAPCNVICSIIFQNR                  | 0.856127107        | 3              | 4.718562  |
| <b>P05179</b> | <b>CP2C7 Cytochrome P450 2C7</b>              | <b>1.197399047</b> | <b>0.32555</b> | <b>7</b>  |
| P05179        | ACVGEGLAR                                     | 1.36581818         | 2              | 2.892647  |
| P05179        | FINFVPTNLPHAVTCDIK                            | 0.851683286        | 2              | 2.656708  |
| P05179        | IEEHQESLDVTNPR                                | 1.091813738        | 2              | 4.568703  |
| P05179        | KIEEHQESLDVTNPR                               | 1.627804489        | 3              | 4.668203  |
| P05179        | KLPPGPTPLPIIGNFLQIDVK                         | 1.154197616        | 3              | 5.507406  |
| P05179        | SDYFLPFSAGK                                   | 3.429294722        | 2              | 2.598929  |
| P05179        | VLTSLTSVLHDSK                                 | 1.589692137        | 2              | 3.416085  |
| <b>P05182</b> | <b>CP2E1 Cytochrome P450 2E1</b>              | <b>1.064178356</b> | <b>4.6E-14</b> | <b>14</b> |
| P05182        | AKEHLQSLDINCAR                                | 0.592955883        | 2              | 4.855285  |
| P05182        | DTVFQGYVIPK                                   | 1.561450004        | 2              | 2.820848  |
| P05182        | DVTDCLLIEMEK                                  | 1.024791294        | 2              | 3.026754  |
| P05182        | DVTDCLLIEMEKEK                                | 0.803017402        | 2              | 2.489502  |
| P05182        | EHLQSLDINCAR                                  | 1.02411978         | 2              | 3.429089  |
| P05182        | FINLVPSNLPHEATR                               | 0.685485698        | 2              | 3.822134  |
| P05182        | FKPEHFLNENGGK                                 | 0.744919474        | 2              | 2.97678   |
| P05182        | GIIFNNGPTWK                                   | 0.905649032        | 2              | 2.414363  |
| P05182        | GQPFDPFTFLIGCAPCNVIADILFNK                    | 0.927561932        |                |           |
| P05182        | GTVVIPTLDSLYDSHEFPDPEK                        | 0.761343118        | 2              | 4.885564  |
| P05182        | LDMPYMDAVVHEIQR                               | 0.788454148        | 2              | 2.671844  |
| P05182        | LHEEIDR                                       | 0.780556585        | 1              | 1.958606  |
| P05182        | VCVGEGLAR                                     | 0.905986212        | 2              | 2.38397   |
| P05182        | YGLLILMK                                      | 0.638576304        | 2              | 3.088043  |
| <b>P05183</b> | <b>CP3A2 Cytochrome P450 3A2</b>              | <b>0.896035756</b> | <b>2.9E-06</b> | <b>10</b> |
| P05183        | DIELDGLFIPK                                   | 0.732985676        | 2              | 4.140474  |

|               |                                             |                    |                |           |
|---------------|---------------------------------------------|--------------------|----------------|-----------|
| P05183        | DSIAFFQK                                    | 2.351353357        | 1              | 2.182205  |
| P05183        | EMFPPIEQYGDIIVK                             | 0.857019136        | 2              | 3.951617  |
| P05183        | KDIELDGLFIPK                                | 0.545139692        | 3              | 3.558479  |
| P05183        | KLQEEIDGALPSK                               | 0.893598643        | 2              | 3.679556  |
| P05183        | LQEEIDGALPSK                                | 0.801547373        | 2              | 4.103528  |
| P05183        | QAILEPEKPIVLK                               | 0.858443081        | 2              | 3.283657  |
| P05183        | QEAETGKPVMTK                                | 0.526318996        | 2              | 3.193538  |
| P05183        | QEAETGKPVMTK+Oxidation(10)                  | 1.429946651        |                |           |
| P05183        | VDFLQLMLNAHNNSK                             | 0.557898274        | 2              | 3.709425  |
| <b>P05197</b> | <b>EF2 Elongation factor 2</b>              | <b>1.289247702</b> | <b>9.9E-20</b> | <b>31</b> |
| P05197        | ALLELQLEPEELYQTFQR                          | 1.636252784        | 2              | 5.471809  |
| P05197        | ARPPFDGLAEDIDKGEVSAR                        | 1.294468636        | 3              | 6.160313  |
| P05197        | AYLPVNESFGFTADLR                            | 1.283853342        | 2              | 3.876123  |
| P05197        | CELLYEGPPDDEAAMGIK                          | 1.311770384        | 2              | 4.978745  |
| P05197        | CLYASVLTAQPR                                | 4.393645116        | 2              | 2.461268  |
| P05197        | DLEEDHACIPIK                                | 1.128183349        | 2              | 2.990952  |
| P05197        | DLEEDHACIPIK                                | 1.09881655         | 2              | 3.676381  |
| P05197        | EGIPALDNFLDK                                | 0.975435811        | 2              | 2.648639  |
| P05197        | EGIPALDNFLDKL                               | 3.674569372        | 2              | 3.578612  |
| P05197        | ETVSEESNVLCLSK                              | 2.27152946         | 2              | 4.058276  |
| P05197        | GEGQLGAAER                                  | 1.287181248        | 2              | 3.360289  |
| P05197        | GHVFEEQVAGTPMFVVK                           | 2.428310139        | 2              | 6.135114  |
| P05197        | GVQYLNEIK                                   | 4.930880982        | 2              | 2.342688  |
| P05197        | IWCFGPDGTGPNILTDITK                         | 1.223826588        | 2              | 5.060048  |
| P05197        | KEDLYLKPIQR                                 | 1.30950929         | 2              | 3.303408  |
| P05197        | KIWCFGPDGTGPNILTDITK                        | 1.166963753        | 2              | 4.830319  |
| P05197        | KVEDMMK+Oxidation(5)                        | 1.900783944        |                |           |
| P05197        | LDEKDKKEGKPLLK                              | 1.786052347        | 2              | 3.961259  |
| P05197        | LMEPIYLVEIQCEQVVGGIYGLVNR                   | 1.12592897         | 3              | 5.989743  |
| P05197        | NMSVIAHVDHGK                                | 1.43409096         | 2              | 3.947744  |
| P05197        | NMSVIAHVDHGK+Oxidation(1)                   | 1.517606508        |                |           |
| P05197        | STAISLFYELSENDLNFIK                         | 3.028600199        | 3              | 4.766977  |
| P05197        | STLTDSLCK                                   | 1.211665103        | 2              | 2.897322  |
| P05197        | TFCQLLDPIFK                                 | 1.709084922        | 2              | 4.199083  |
| P05197        | TGTITTFEHAHNMR                              | 1.270005007        | 2              | 3.835143  |
| P05197        | VFDAIMNFR                                   | 1.004537169        | 2              | 2.826332  |
| P05197        | VFSGVVSTGLK                                 | 1.441645482        | 2              | 3.05037   |
| P05197        | WLPAGDALLQMITIHLPSVTAQK                     | 1.181391042        | 3              | 3.652965  |
| P05197        | YEWVDAEAR                                   | 1.106821753        | 2              | 3.038956  |
| P05197        | YFDPANGK                                    | 1.247257341        | 1              | 2.037084  |
| P05197        | YVEPIEDVPCGNIVGLVGDQFLVK                    | 1.542554421        | 3              | 4.735874  |
| <b>P05369</b> | <b>FPPS Farnesyl pyrophosphate synthase</b> | <b>1.23986095</b>  | <b>0.99938</b> | <b>11</b> |
| P05369        | ALYEELDLR                                   | 1.076655729        | 2              | 3.059262  |
| P05369        | EVLEYNTVGGK                                 | 0.56681029         | 2              | 3.069732  |
| P05369        | GLTVVQTFQELVEPR                             | 1.164067484        | 3              | 3.864324  |
| P05369        | IKEVLEYNTVGGK                               | 0.904009747        | 3              | 4.167077  |
| P05369        | QILEENYGQKDPEK                              | 0.878713152        | 2              | 3.777578  |
| P05369        | QNFQHFHSQIVK                                | 1.790974498        | 2              | 3.052457  |
| P05369        | SLIEQCSAPLPPSIFLELANK                       | 0.974535377        | 3              | 5.298708  |
| P05369        | VGTDIQDNK                                   | 1.004386652        | 2              | 3.686793  |
| P05369        | VLTEDELGHPEK                                | 1.424502948        | 2              | 2.720763  |
| P05369        | VLTEDELGHPEKGDATR                           | 1.068010973        | 2              | 4.569483  |
| P05369        | YEEDSYNR                                    | 1.013817994        | 2              | 2.345772  |
| <b>P05426</b> | <b>RL7 60S ribosomal protein L7</b>         | <b>1.207282707</b> | <b>0.01815</b> | <b>6</b>  |
| P05426        | AGNFYVPAEPK                                 | 1.190907076        | 2              | 2.672065  |
| P05426        | FGIICMEDLIHEIYTVGK                          | 1.159746731        | 3              | 4.647248  |
| P05426        | IVEPYIAWGYPNLK                              | 1.496930078        | 2              | 2.951143  |

|               |                                                                   |                    |                |          |
|---------------|-------------------------------------------------------------------|--------------------|----------------|----------|
| P05426        | SVNELIYK                                                          | 1.17065655         | 2              | 2.795789 |
| P05426        | TTHFVEGGDAGNR                                                     | 1.119506298        | 2              | 3.267327 |
| P05426        | TTHFVEGGDAGNREDQINR                                               | 1.248009578        | 2              | 4.565462 |
| <b>P05544</b> | <b>SPA3L Serine protease inhibitor A3L</b>                        | <b>1.05683003</b>  | <b>0.08999</b> | <b>6</b> |
| P05544        | AVLDVDETGTEATAATGVATVIR                                           | 1.2087913          | 2              | 4.603592 |
| P05544        | DSTMEEILEGLK                                                      | 0.686338418        | 2              | 3.013456 |
| P05544        | IAELFSDLEER                                                       | 1.289692897        | 2              | 2.875906 |
| P05544        | MQQVESSLQPETLK                                                    | 0.869542038        | 2              | 4.215751 |
| P05544        | MQQVESSLQPETLK+Oxidation(0)                                       | 0.812794426        |                |          |
| P05544        | VFSQQADLSR                                                        | 1.360505081        | 2              | 2.576789 |
| <b>P05545</b> | <b>SPA3K Serine protease inhibitor A3K</b>                        | <b>1.427866229</b> | <b>0.07293</b> | <b>8</b> |
| P05545        | ALYQAEAFVADFK                                                     | 1.208252297        | 2              | 2.884836 |
| P05545        | AVLDVDETGTEGAAATAVTAALK                                           | 1.088259246        | 2              | 5.443286 |
| P05545        | FSISTDYNLEEVLPPELGR                                               | 1.235437454        | 2              | 3.486674 |
| P05545        | IAELFSELDER                                                       | 1.517008543        | 2              | 3.046522 |
| P05545        | IFSQQADLSR                                                        | 1.093547249        | 2              | 2.580773 |
| P05545        | LSQPEDQAEINTGSALFIDK                                              | 1.495926735        | 2              | 4.84718  |
| P05545        | LSQPEDQAEINTGSALFIDKEQPILSEFQEK                                   | 1.617185306        | 3              | 4.319727 |
| P05545        | NVVFSPSISAALAILSLGAK                                              | 1.05989729         |                |          |
| <b>P05765</b> | <b>RS21 40S ribosomal protein S21</b>                             | <b>1.070121033</b> | <b>0.24229</b> | <b>3</b> |
| P05765        | DHASIQMNVAEVDR                                                    | 1.336975759        | 2              | 3.838672 |
| P05765        | MGESDDSILR                                                        | 1.038043183        | 2              | 2.896264 |
| P05765        | TYGICGAIR                                                         | 1.000287047        | 2              | 2.511735 |
| <b>P06214</b> | <b>HEM2 Delta_aminolevulinic acid dehydratase</b>                 | <b>0.819096924</b> | <b>1.4E-08</b> | <b>8</b> |
| P06214        | AGADIITYFAPQLLK                                                   | 3.335370705        | 2              | 4.187796 |
| P06214        | AGCQVVPASDMMDGR                                                   | 0.895722665        | 2              | 3.463431 |
| P06214        | CVLIFGVPSR                                                        | 1.104898047        | 2              | 2.835579 |
| P06214        | DEQGSAADESDSPTIEAVR                                               | 0.746292467        | 2              | 5.506608 |
| P06214        | DIQEGADILMVKGPLYLDMVQEVK                                          | 0.886074339        | 3              | 4.583016 |
| P06214        | TAVLESMTAFR                                                       | 0.736160602        | 2              | 2.95096  |
| P06214        | VPKDEQGSAADESDSPTIEAVR                                            | 0.797512358        | 3              | 5.036238 |
| P06214        | YGVNQLEEMLRPLVEAGLR                                               | 0.808036486        | 3              | 4.589357 |
| <b>P06238</b> | <b>A2MG Alpha_2_macroglobulin</b>                                 | <b>1.034283935</b> | <b>0.01341</b> | <b>3</b> |
| P06238        | FQVNNNNQLLLQR                                                     | 6.617718418        | 2              | 3.072789 |
| P06238        | SESNMAIADVK                                                       | 1.180968522        | 2              | 2.473328 |
| P06238        | VAVQLEASPDFLAAPEEK                                                | 1.033053971        | 2              | 3.442948 |
| <b>P06302</b> | <b>PTMA Prothymosin alpha</b>                                     | <b>1.004630762</b> | <b>0.26899</b> | <b>4</b> |
| P06302        | EVVEEAENGR                                                        | 1.000536256        | 2              | 2.345241 |
| P06302        | RVAEDEDDEDDVETKK                                                  | 1.353544689        | 3              | 5.884018 |
| P06302        | VAEDEDDEDDVETK                                                    | 1.236269226        | 2              | 3.862524 |
| P06302        | VAEDEDDEDDVETKK                                                   | 0.956460781        | 2              | 4.693449 |
| <b>P06399</b> | <b>FIBA Fibrinogen alpha chain</b>                                | <b>1.122439304</b> | <b>0.58085</b> | <b>8</b> |
| P06399        | AQQIQVLQK                                                         | 1.440096555        | 2              | 2.649024 |
| P06399        | EVVTSDDGSDCGDGMGLTHSFSGR                                          | 1.26417399         | 3              | 3.769013 |
| P06399        | GDFANANNFDNTFGQVSEDLR                                             | 1.088656394        | 2              | 5.694673 |
| P06399        | GDFANANNFDNTFGQVSEDLRR                                            | 0.983787191        | 3              | 3.303046 |
| P06399        | GLIDEANQDFTNR                                                     | 1.227711916        | 2              | 3.657563 |
| P06399        | MADEAASEAHQEGDTR                                                  | 1.254447058        | 2              | 4.116182 |
| P06399        | SQLQEGPPEWK                                                       | 0.820522083        | 2              | 2.602514 |
| P06399        | TSDSDIFTDIENPSSHVPEFSSSSK                                         | 1.364718462        | 2              | 4.672547 |
| <b>P06685</b> | <b>AT1A1 Sodium/potassium_transporting ATPase subunit alpha_1</b> | <b>1.282617808</b> | <b>0.46358</b> | <b>5</b> |
| P06685        | AVAGDASESALLK                                                     | 1.251923288        | 2              | 3.160472 |
| P06685        | AVFQANQENLPILK                                                    | 1.096486025        | 2              | 3.327251 |
| P06685        | EQPLDEELKDAFQNAVLELGLGER                                          | 1.071649382        | 3              | 3.326185 |
| P06685        | LNIPVNQVNPR                                                       | 0.785412688        | 2              | 3.032294 |
| P06685        | YEPAAVSEHGDKK                                                     | 1.630168196        | 2              | 2.674323 |

|               |                                                                   |                    |                |           |
|---------------|-------------------------------------------------------------------|--------------------|----------------|-----------|
| <b>P06687</b> | <b>AT1A3 Sodium/potassium_transporting ATPase subunit alpha_3</b> | <b>1.021703014</b> | <b>0.99998</b> | <b>3</b>  |
| P06687        | DGNALTPPTTPEWVK                                                   | 1.037685362        | 2              | 2.647821  |
| P06687        | GVGIISEGNETVEDIAAR                                                | 0.996760863        | 2              | 4.688804  |
| P06687        | QGAIVAVTGDGVNDSPALK                                               | 1.036302535        | 2              | 4.797959  |
| <b>P06757</b> | <b>ADH1 Alcohol dehydrogenase 1</b>                               | <b>0.809542966</b> | <b>0.10912</b> | <b>18</b> |
| P06757        | AAVLWEPHKPFTIEDIEVAPPK                                            | 0.857486742        | 3              | 5.449578  |
| P06757        | FPLEPLITHVLPFEK                                                   | 1.229258353        | 3              | 4.512362  |
| P06757        | GAIFGGFK                                                          | 0.818996653        | 2              | 2.344639  |
| P06757        | GALLDGTSR                                                         | 0.990763926        | 2              | 2.859643  |
| P06757        | GKPIHHFISTSTFSQYTVVDDIAVAK                                        | 0.778710264        | 3              | 5.001085  |
| P06757        | HPESNLCCQTK                                                       | 1.299899304        | 2              | 3.229142  |
| P06757        | ICKHPESNLCCQTK                                                    | 2.229971384        | 3              | 4.133464  |
| P06757        | IDAAAPLDK                                                         | 0.725707807        | 2              | 2.745425  |
| P06757        | IIAVDINKDK                                                        | 0.609582826        | 2              | 2.719091  |
| P06757        | INEAFDLLR                                                         | 0.915835009        | 2              | 3.581264  |
| P06757        | KFPLEPLITHVLPFEK                                                  | 0.789775733        | 3              | 4.558144  |
| P06757        | LVADFMAK                                                          | 0.820132302        | 2              | 2.60782   |
| P06757        | MVATGVCR                                                          | 0.916966766        | 2              | 2.541071  |
| P06757        | MVATGVCR+Oxidation(0)                                             | 1.045848402        |                |           |
| P06757        | SDDHAVSGSLFTPLPAVLGHGAGIVESIGEGVTCVKPGDK                          | 1.042474672        | 4              | 7.670705  |
| P06757        | VCLIGCGFSTGYGSAVQVAK                                              | 0.784054432        | 2              | 6.181609  |
| P06757        | VIPLFSPQCGK                                                       | 0.999020088        | 2              | 2.742628  |
| P06757        | VTPGSTCAVFLGGVGLSVVIGCK                                           | 0.733017299        | 2              | 5.143275  |
| <b>P06761</b> | <b>GRP78 78 kDa glucose_regulated protein</b>                     | <b>1.025169502</b> | <b>0.81314</b> | <b>30</b> |
| P06761        | AKFEELNMDLFR                                                      | 1.002193198        | 3              | 4.246301  |
| P06761        | DAGTIAGLNVMR                                                      | 1.263457135        | 2              | 3.492731  |
| P06761        | DNHLLGTFDLTGIPPAPR                                                | 0.930032781        | 2              | 4.246787  |
| P06761        | ELEEIVQPIISK                                                      | 0.949149627        | 2              | 3.980221  |
| P06761        | FEELNMDLFR                                                        | 0.778536165        | 2              | 3.484305  |
| P06761        | FEELNMDLFR+Oxidation(5)                                           | 0.707934509        |                |           |
| P06761        | IEIESFFEGEDFSETLTR                                                | 1.12233027         | 2              | 5.272079  |
| P06761        | IEWLESHQDADIEDFK                                                  | 0.972772947        | 2              | 5.687947  |
| P06761        | IEWLESHQDADIEDFKAK                                                | 0.730029813        | 3              | 4.164316  |
| P06761        | IINEPTAAAIAYGLDKR                                                 | 1.080378676        | 2              | 4.466039  |
| P06761        | ITITNDQNR                                                         | 1.029745406        | 2              | 2.664267  |
| P06761        | ITPSYVAFTPEGGER                                                   | 1.277887091        | 2              | 4.282418  |
| P06761        | KKELEEIVQPIISK                                                    | 0.888724256        | 2              | 5.106496  |
| P06761        | KSDIDEIVLVGGSTR                                                   | 0.959686215        | 2              | 4.544512  |
| P06761        | KSQIFSTASDNQPTVTIK                                                | 1.136958327        | 2              | 5.517912  |
| P06761        | LYGSGGPPPTGEEDTSEKDEL                                             | 1.260008163        | 2              | 5.698164  |
| P06761        | MKETAEAYLGK                                                       | 0.986909404        | 2              | 2.697902  |
| P06761        | MKETAEAYLGK+Oxidation(0)                                          | 1.268414161        |                |           |
| P06761        | NELESYAYSLK                                                       | 1.32741789         | 2              | 3.670024  |
| P06761        | NQLTSNPENTVFDAK                                                   | 1.044069839        | 2              | 5.121109  |
| P06761        | SDIDEIVLVGGSTR                                                    | 0.908060413        | 1              | 3.508594  |
| P06761        | SQIFSTASDNQPTVTIK                                                 | 1.052219571        | 2              | 5.298091  |
| P06761        | TFAPEEISAMVLTK                                                    | 0.899831496        | 2              | 4.869541  |
| P06761        | TFAPEEISAMVLTK+Oxidation(9)                                       | 1.023278478        |                |           |
| P06761        | TKPYIQVDIGGGQTK                                                   | 1.07330255         | 3              | 4.631458  |
| P06761        | TWNDPSVQQDIK                                                      | 0.996582204        | 2              | 4.014555  |
| P06761        | VLEDSLK                                                           | 0.830340797        | 1              | 2.116509  |
| P06761        | VLEDSLKK                                                          | 0.911467051        | 2              | 2.359615  |
| P06761        | VTHAVVTVPAYFNDAQR                                                 | 1.006596877        | 2              | 5.056208  |
| P06761        | VYGERPLTK                                                         | 0.999884701        | 2              | 2.89851   |
| <b>P06866</b> | <b>HPT Haptoglobin</b>                                            | <b>2.378214887</b> | <b>9.9E-20</b> | <b>8</b>  |

|               |                                                                                      |                    |                |           |
|---------------|--------------------------------------------------------------------------------------|--------------------|----------------|-----------|
| P06866        | ATDLKDWVQETMAK                                                                       | 1.563814952        | 3              | 3.817987  |
| P06866        | CELHYEK                                                                              | 4.06338212         | 2              | 2.345129  |
| P06866        | GAVSPVGVQPILNK                                                                       | 2.349537034        | 2              | 4.604812  |
| P06866        | KGAVSPVGVQPILNK                                                                      | 3.78336028         | 2              | 3.100904  |
| P06866        | LQTEGDGIYTLNSEK                                                                      | 3.346730074        | 2              | 4.254277  |
| P06866        | NQLVEIEK                                                                             | 2.387563883        | 1              | 2.335609  |
| P06866        | SCAVAEYGVYVR                                                                         | 2.139102071        | 2              | 3.115407  |
| P06866        | SVVDIGLIK                                                                            | 2.033805644        | 2              | 2.762702  |
| <b>P07150</b> | <b>ANXA1 Annexin A1</b>                                                              | <b>0.857175974</b> | <b>0.86984</b> | <b>2</b>  |
| P07150        | GLGTDEDTLIEILTR                                                                      | 0.852153139        | 2              | 4.279128  |
| P07150        | GVDEATIIDLTK                                                                         | 0.986049732        | 2              | 3.125175  |
| <b>P07153</b> | <b>RPN1 Dolichyl_diphosphooligosaccharide__protein glycosyltransferase subunit 1</b> | <b>1.086970451</b> | <b>4.3E-05</b> | <b>16</b> |
| P07153        | ASSFVLALEPELESR                                                                      | 1.046976976        | 2              | 4.464863  |
| P07153        | AVTSEIAVLQSR                                                                         | 1.04894836         | 2              | 3.703603  |
| P07153        | FVDHVFDEQVIDSLTVK                                                                    | 0.779639726        | 2              | 4.142312  |
| P07153        | GEDEEDNNLEVR                                                                         | 0.848738609        | 2              | 3.73351   |
| P07153        | HFDETVNR                                                                             | 0.926670145        | 2              | 2.511789  |
| P07153        | IDHILDAL                                                                             | 1.475384804        | 2              | 2.312999  |
| P07153        | ISIVVETVYTHVLPYPTQITQSEK                                                             | 1.172686335        | 3              | 4.627875  |
| P07153        | LKTEGSDLCDR                                                                          | 0.848826319        | 3              | 3.412148  |
| P07153        | NIQVDSPYDISR                                                                         | 1.106649797        | 2              | 3.783175  |
| P07153        | NLVEQHIQDIVVHYTFNK                                                                   | 1.259989267        | 3              | 4.454648  |
| P07153        | SEDILDYGPFK                                                                          | 0.829715632        | 2              | 3.397948  |
| P07153        | TEGSDLCDR                                                                            | 0.9877805          | 2              | 2.33111   |
| P07153        | TILPAAAQDVYYR                                                                        | 1.709325505        | 2              | 3.295642  |
| P07153        | TVDLSSLAK                                                                            | 0.833966279        | 2              | 2.59989   |
| P07153        | VHYENNSPFLTITSMTR                                                                    | 1.058477843        | 2              | 3.293406  |
| P07153        | VTAEVVLAHPGGSTAR                                                                     | 1.06133303         | 2              | 4.467195  |
| <b>P07323</b> | <b>ENOG Gamma_enolase</b>                                                            | <b>1.141464393</b> | <b>0.07985</b> | <b>4</b>  |
| P07323        | AAVPSGASTGIYEALER                                                                    | 1.267298441        | 2              | 5.041862  |
| P07323        | FGANAILGVSLAVCK                                                                      | 0.959219884        | 2              | 3.509146  |
| P07323        | GNPTVEVDLHTAK                                                                        | 0.851993431        | 2              | 3.394585  |
| P07323        | SGETEDTFIADLVVGLCTGQIK                                                               | 0.990586748        | 3              | 5.528365  |
| <b>P07335</b> | <b>KCRB Creatine kinase B_type</b>                                                   | <b>0.891633752</b> | <b>0.46892</b> | <b>2</b>  |
| P07335        | FCTGLTQIETLFK                                                                        | 0.795505885        | 2              | 2.780213  |
| P07335        | GTGGVDTAAVGGVFDVSNADR                                                                | 0.940172491        | 2              | 3.937548  |
| <b>P07338</b> | <b>CTRB1 Chymotrypsinogen B</b>                                                      | <b>0.800931499</b> | <b>0.22346</b> | <b>2</b>  |
| P07338        | IVNGEDAIPGSWPWQVSLQDK                                                                | 0.552196695        | 2              | 3.258435  |
| P07338        | LQQAALPIVSEADCK                                                                      | 0.845970424        | 2              | 2.696569  |
| <b>P07340</b> | <b>AT1B1 Sodium/potassium_transporting ATPase subunit beta_1</b>                     | <b>1.183286993</b> | <b>0.03919</b> | <b>2</b>  |
| P07340        | SYEAYVLNIIIR                                                                         | 2.520220401        | 2              | 2.39268   |
| P07340        | YNPNVLPVQCTGK                                                                        | 1.102408405        | 2              | 2.604861  |
| <b>P07379</b> | <b>PCKGC Phosphoenolpyruvate carboxykinase_cytosolic [GTP]</b>                       | <b>1.147772724</b> | <b>0.99999</b> | <b>13</b> |
| P07379        | AINPENGFVAPGTSVK                                                                     | 1.027891441        | 2              | 4.712518  |
| P07379        | EEGWLAEHMLLIGITNPEGK                                                                 | 1.356326909        | 2              | 4.018726  |
| P07379        | EVEEIDKYLEDQVNADLPYEIER                                                              | 0.945123957        | 3              | 3.469648  |
| P07379        | FVEGNAQLCQPEYIHCDSGSEEEYGR                                                           | 1.048741826        | 3              | 4.941177  |
| P07379        | GLGDVNVEELFGISK                                                                      | 0.947619947        | 2              | 3.81999   |
| P07379        | IGIELTDSPPYVVASMR                                                                    | 0.784284888        | 2              | 3.60867   |
| P07379        | MGTSVLEALGDGEFIK                                                                     | 0.884462975        | 2              | 3.713335  |
| P07379        | MGTSVLEALGDGEFIK+Oxidation(0)                                                        | 1.072825614        |                |           |
| P07379        | TVIITQEQR                                                                            | 0.945340758        | 2              | 2.663221  |
| P07379        | VECVGDDIAWMK                                                                         | 0.859311354        | 2              | 2.965854  |

|               |                                                                   |                    |                |           |
|---------------|-------------------------------------------------------------------|--------------------|----------------|-----------|
| P07379        | VIQGSLSLDPQEV                                                     | 0.982568422        | 2              | 4.023687  |
| P07379        | YDNCWLALTDPR                                                      | 0.819969021        | 2              | 2.502589  |
| P07379        | YLAAAFPSACGK                                                      | 1.093946797        | 2              | 2.892146  |
| <b>P07483</b> | <b>FABPH Fatty acid binding protein_ heart</b>                    | <b>1.676652621</b> | <b>0.39709</b> | <b>3</b>  |
| P07483        | NFDDYMK                                                           | 4.546798268        | 1              | 2.131093  |
| P07483        | QVASMTPKPTTIEK                                                    | 0.504801692        | 2              | 3.407787  |
| P07483        | WDGQETTLTR                                                        | 0.84982001         | 2              | 2.874666  |
| <b>P07632</b> | <b>SODC Superoxide dismutase [Cu_Zn]</b>                          | <b>1.310795217</b> | <b>0.0333</b>  | <b>4</b>  |
| P07632        | DGVANVSIEDR                                                       | 1.186142266        | 2              | 2.984033  |
| P07632        | GDGPVQGVIIHFEQK                                                   | 1.191723226        | 2              | 3.993328  |
| P07632        | HVGDLGNVAAGK                                                      | 1.049981203        | 2              | 3.567435  |
| P07632        | VISLSGEHSIIGR                                                     | 1.074895293        | 2              | 3.260971  |
| <b>P07633</b> | <b>PCCB Propionyl CoA carboxylase beta chain_ mitochondrial</b>   | <b>0.872411254</b> | <b>1.2E-11</b> | <b>10</b> |
| P07633        | AFDNDVDALCNLR                                                     | 0.778513427        | 2              | 3.899174  |
| P07633        | AYNMLDIIHVIDER                                                    | 0.768615188        | 2              | 4.040467  |
| P07633        | GFVDDIIQPSSTR                                                     | 1.025348154        | 2              | 4.086548  |
| P07633        | HLLGDTNYAWPTAEIAVMGAK                                             | 0.90988223         | 2              | 3.118145  |
| P07633        | ICCDLEVLASK                                                       | 0.91235945         | 2              | 3.034343  |
| P07633        | IMDQAITVGAPVIGLNDSGGAR                                            | 0.624709394        | 2              | 4.458251  |
| P07633        | IQEGVESLAGYADIFLR                                                 | 0.84837644         | 2              | 4.16819   |
| P07633        | LVPELDTVVPLESSK                                                   | 0.762089854        | 2              | 3.496977  |
| P07633        | SVTNEDVTQEQLGGAK                                                  | 0.864016654        | 2              | 5.273132  |
| P07633        | TVGIVGNQPNVASGCLDINSSVK                                           | 0.735654405        | 2              | 5.178185  |
| <b>P07687</b> | <b>HYEP Epoxide hydrolase 1</b>                                   | <b>0.967592925</b> | <b>9.9E-20</b> | <b>23</b> |
| P07687        | DIELLYPYK                                                         | 0.765141409        | 2              | 2.425642  |
| P07687        | DKEETLPLGDGWWGPGSKPSAK                                            | 0.946344983        | 3              | 5.489526  |
| P07687        | EDESIRPFK                                                         | 1.265323455        | 2              | 2.671997  |
| P07687        | EDESIRPFKVVETSDEEIKDLHQR                                          | 1.026422198        | 3              | 5.635212  |
| P07687        | ELEDGGLER                                                         | 1.045078437        | 2              | 2.667474  |
| P07687        | ENLGQGIMVHK                                                       | 0.957310189        | 2              | 2.750094  |
| P07687        | ESGYLHIQATKPDVTGICALNDSPVGLAAYILEK                                | 1.23998659         | 3              | 6.227268  |
| P07687        | FHYGFNSNYMK                                                       | 0.582624019        | 2              | 2.565713  |
| P07687        | FLGYTEKDIELLYPYK                                                  | 0.719214996        | 2              | 4.687556  |
| P07687        | GGHFAAFEEPK                                                       | 0.822285989        | 2              | 3.494933  |
| P07687        | IEGLDIHFHVKPPQLPSGR                                               | 1.579703346        | 3              | 3.675234  |
| P07687        | IIPLLTDPK                                                         | 0.737359784        | 2              | 2.527847  |
| P07687        | KFVSLAELQ                                                         | 1.025190831        | 2              | 2.861175  |
| P07687        | KQVEILNQYPHFK                                                     | 0.756913333        | 3              | 4.834602  |
| P07687        | LLAQDIR                                                           | 1.070339557        | 2              | 2.518207  |
| P07687        | QVEILNQYPHFK                                                      | 0.727071898        | 2              | 3.747744  |
| P07687        | SEYRELEDGGLER                                                     | 0.934021819        | 2              | 2.375244  |
| P07687        | SFYTMTPLLGQR                                                      | 2.534725641        | 2              | 3.146075  |
| P07687        | SHGLSDEHVFEVICPSIPGYSEASSK                                        | 0.833226545        | 3              | 6.466357  |
| P07687        | TKIEGLDIHFHVKPPQLPSGR                                             | 4.531398825        | 3              | 3.882423  |
| P07687        | VETSDEEIK                                                         | 0.947189244        | 2              | 2.475019  |
| P07687        | VETSDEEIKDLHQR                                                    | 1.096524784        | 2              | 4.491154  |
| P07687        | VFVPTGFSAFPSELLHAPEK                                              | 1.109574878        | 2              | 4.739214  |
| <b>P07756</b> | <b>CPSM Carbamoyl phosphate synthase [ammonia]_ mitochondrial</b> | <b>1.187051873</b> | <b>9.9E-20</b> | <b>96</b> |
| P07756        | AADTIGYPVMIR                                                      | 1.200444796        | 2              | 4.0677    |
| P07756        | AADTIGYPVMIR+Oxidation(9)                                         | 1.542219514        |                |           |
| P07756        | AERPDGLILMGGQTALNCGVELFK                                          | 0.969648995        | 3              | 7.097282  |
| P07756        | AERPDGLILMGGQTALNCGVELFK+Oxidation(10)                            | 1.081771736        |                |           |
| P07756        | AERPDGLILMGGQTALNCGVELFKR                                         | 1.267799257        | 3              | 4.401909  |
| P07756        | AFAISGPFNVQFLVK                                                   | 0.901156696        | 2              | 5.075504  |
| P07756        | AFAMTNQLVER                                                       | 0.839670097        | 2              | 4.448738  |

|        |                                                        |                    |   |          |
|--------|--------------------------------------------------------|--------------------|---|----------|
| P07756 | AFAMTNQILVER+Oxidation(3)                              | <b>1.053411167</b> |   |          |
| P07756 | ALENNMSLDEIVK                                          | <b>0.908114836</b> | 2 | 4.58932  |
| P07756 | ALENNMSLDEIVK+Oxidation(5)                             | <b>1.033728439</b> |   |          |
| P07756 | AQTAHIVLEDGTK                                          | <b>0.912376704</b> | 2 | 4.512268 |
| P07756 | ATGYPLAFIAAK                                           | <b>0.880835619</b> | 2 | 3.061823 |
| P07756 | CEMASTGEVACFGEGEIHAFK                                  | <b>0.874998176</b> | 3 | 5.364838 |
| P07756 | CEMASTGEVACFGEGEIHAFK+Oxidation(2)                     | <b>0.992913648</b> |   |          |
| P07756 | CLGLTEAQTR                                             | <b>0.886423581</b> | 2 | 3.67824  |
| P07756 | DELGLNK                                                | <b>1.096448608</b> | 2 | 2.544711 |
| P07756 | DGSIDLVINLPNNNTK                                       | <b>1.05351477</b>  | 2 | 5.461707 |
| P07756 | DILNMDK                                                | <b>1.007235478</b> | 1 | 1.952491 |
| P07756 | EIEYEVVR                                               | <b>1.215790813</b> | 2 | 2.302987 |
| P07756 | EPLFGISTGNIITGLAAGAK                                   | <b>1.201268447</b> | 3 | 5.735453 |
| P07756 | ETLMDLGTK                                              | <b>1.174219693</b> | 1 | 2.31788  |
| P07756 | EVEMDAVGK                                              | <b>1.578262713</b> | 1 | 2.211108 |
| P07756 | FLEEATR                                                | <b>0.793409651</b> | 2 | 2.498129 |
| P07756 | FLGVAEQLHNEGFK                                         | <b>0.936484897</b> | 2 | 4.680483 |
| P07756 | FVHDNYVIR                                              | <b>0.979317475</b> | 3 | 3.432724 |
| P07756 | GAEVHLPWNHDFMQMDYDGLLIAGGPGNPALAQPLIQNVK               | <b>0.953796097</b> | 3 | 6.349681 |
| P07756 | GAEVHLPWNHDFMQMDYDGLLIAGGPGNPALAQPLIQNVK+Oxidation(15) | <b>1.191744428</b> |   |          |
| P07756 | GILIGIQSFRPR                                           | <b>0.515314872</b> | 2 | 2.533752 |
| P07756 | GLNSESVTEETLR                                          | <b>1.176634058</b> | 2 | 4.852907 |
| P07756 | GNDVLVIECNLR                                           | <b>0.862696001</b> | 2 | 4.48727  |
| P07756 | GQILTMANPIIGNGGAPDPTAR                                 | <b>0.925373718</b> | 2 | 6.268684 |
| P07756 | GQILTMANPIIGNGGAPDPTAR+Oxidation(5)                    | <b>1.078689223</b> |   |          |
| P07756 | GQILTMANPIIGNGGAPDPTARDELGLNK                          | <b>0.633670156</b> | 3 | 4.852658 |
| P07756 | GQILTMANPIIGNGGAPDPTARDELGLNK+Oxidation(5)             | <b>0.825815097</b> |   |          |
| P07756 | GQNQPVLNITNR                                           | <b>0.905728328</b> | 2 | 4.228017 |
| P07756 | GTTITSVLPKALVASR                                       | <b>0.644781361</b> | 2 | 3.483668 |
| P07756 | GYSFGHPSSVAGEVVFNTGLGGYSEALDTPAYK                      | <b>2.610780642</b> | 3 | 6.620116 |
| P07756 | HLPtleQPIIPSDYVAIK                                     | <b>1.029571197</b> | 2 | 5.619544 |
| P07756 | IALGIPLPEIK                                            | <b>1.177076652</b> | 2 | 3.277439 |
| P07756 | IAPSFAVESMEDALK                                        | <b>1.136947305</b> | 2 | 5.291159 |
| P07756 | IAPSFAVESMEDALK+Oxidation(9)                           | <b>0.936612885</b> |   |          |
| P07756 | IEFEGQSVDFVDPNK                                        | <b>0.913704567</b> | 2 | 5.163771 |
| P07756 | IEFEGQSVDFVDPNKQNLIAEVSTK                              | <b>0.905346962</b> | 3 | 5.333523 |
| P07756 | ILDYHQAECNGCIISVGGQIPNNLAVPLYK                         | <b>0.802622099</b> | 3 | 5.431993 |
| P07756 | ILES DRKEPLFGISTGNIITGLAAGAK                           | <b>0.723391867</b> | 3 | 3.697894 |
| P07756 | IMGTSPLQIDR                                            | <b>1.078584394</b> | 2 | 3.292778 |
| P07756 | IMGTSPLQIDR+Oxidation(1)                               | <b>1.392810868</b> |   |          |
| P07756 | IMGTSPLQIDRAEDR                                        | <b>0.562954897</b> | 2 | 2.588139 |
| P07756 | KEPLFGISTGNIITGLAAGAK                                  | <b>0.626107304</b> | 2 | 5.245474 |
| P07756 | KTVV VNCNPETVSTDFDEC DK                                | <b>0.1635482</b>   | 2 | 4.918505 |
| P07756 | LFAEAVQK                                               | <b>1.001965608</b> | 2 | 3.13731  |
| P07756 | LFATEATSDWLNANNVPATPVAWPSQEGQNPSLSSIR                  | <b>1.222700387</b> | 3 | 4.976204 |
| P07756 | LRDADPILR                                              | <b>1.038242384</b> | 2 | 3.230293 |
| P07756 | LTSIDKWFLYK                                            | <b>0.779245978</b> | 2 | 2.576347 |
| P07756 | LYFEELSLER                                             | <b>1.930970097</b> | 2 | 3.584599 |
| P07756 | MCHPSVDGFTPR                                           | <b>0.80790128</b>  | 3 | 4.969532 |
| P07756 | MCHPSVDGFTPR+Oxidation(0)                              | <b>1.007733888</b> |   |          |
| P07756 | MRDILNMDK                                              | <b>0.65774318</b>  | 2 | 2.461464 |
| P07756 | MRDILNMDK+Oxidation(0)                                 | <b>1.095864379</b> |   |          |
| P07756 | QADAVYFLPITPQFVTEVIK                                   | <b>3.381377484</b> | 3 | 5.233864 |
| P07756 | QIDTLAAEYPSVTNYLYVTYNGQEHDIK                           | <b>13.06482867</b> | 3 | 4.858395 |



|               |                                                    |                    |                |           |
|---------------|----------------------------------------------------|--------------------|----------------|-----------|
| P07756        | QLFSDK                                             | 1.275255581        | 1              | 1.900032  |
| P07756        | QLFSDKLNEINEK                                      | 0.895150475        | 2              | 3.729779  |
| P07756        | QNLIAEVSTK                                         | 0.914040474        | 1              | 2.799965  |
| P07756        | RFLEEATR                                           | 0.851046262        | 2              | 2.67996   |
| P07756        | RGAEVHLPWNHDFQMDYDGLLIAGGPGNPALAQPLIQNVK           | 0.962860544        | 4              | 5.015932  |
| P07756        | RTAVDSGIALLTNFQVTK                                 | 0.945037922        | 2              | 5.020787  |
| P07756        | SAYALGGLGSGICPNK                                   | 1.253100342        | 2              | 5.041698  |
| P07756        | SAYALGGLGSGICPNKETLMDLGTK                          | 0.790521245        | 2              | 4.381637  |
| P07756        | SFPFVSK                                            | 1.013263947        | 1              | 1.916722  |
| P07756        | SIFSAVLDELK                                        | 1.201079501        | 2              | 4.114195  |
| P07756        | SIFSAVLDELKVAQAPWK                                 | 0.756615471        | 3              | 4.520582  |
| P07756        | SLGQWLQEEK                                         | 0.872484685        | 2              | 3.976821  |
| P07756        | SVGEVMAIGR                                         | 0.853253983        | 2              | 3.471697  |
| P07756        | SVGEVMAIGR+Oxidation(5)                            | 1.017518939        |                |           |
| P07756        | TAVDSGIALLTNFQVTK                                  | 1.188251314        | 3              | 6.61693   |
| P07756        | TAVDSGIALLTNFQVTKLFAEAVQK                          | 0.917529585        | 3              | 4.429137  |
| P07756        | TFEESFQK                                           | 0.886396786        | 2              | 2.545689  |
| P07756        | TLGVDFIDVATK                                       | 0.851849446        | 2              | 4.220283  |
| P07756        | TSACFEPSLDYMVTK                                    | 1.067411102        | 2              | 4.78583   |
| P07756        | TSACFEPSLDYMVTK+Oxidation(11)                      | 1.239429585        |                |           |
| P07756        | TVLMNPNIASVQTNEVGLK                                | 0.780874112        | 2              | 6.407845  |
| P07756        | TVLMNPNIASVQTNEVGLK+Oxidation(3)                   | 0.880878562        |                |           |
| P07756        | TVVVNCPETVSTDFDECDK                                | 0.613559155        | 2              | 5.703702  |
| P07756        | TVVVNCPETVSTDFDECDKLYFEELSLER                      | 1.609996514        | 3              | 5.515955  |
| P07756        | VISHAISEHVEDAGVHSGDATLMLPTQTISQGAIEK               | 0.954840644        | 3              | 7.505328  |
| P07756        | VISHAISEHVEDAGVHSGDATLMLPTQTISQGAIEK+Oxidation(22) | 1.084766855        |                |           |
| P07756        | VLGTSVESIMATEDR                                    | 0.903372208        | 2              | 4.789233  |
| P07756        | VLGTSVESIMATEDR+Oxidation(9)                       | 1.040796984        |                |           |
| P07756        | VLILGSGLSIGQAGEFDYSGSQAVK                          | 0.809542217        | 2              | 5.947125  |
| P07756        | VMIGESVDEK                                         | 0.785380288        | 2              | 3.516449  |
| P07756        | VMIGESVDEK+Oxidation(1)                            | 1.047573676        |                |           |
| P07756        | VSQEHVVLTK                                         | 1.100175868        | 2              | 3.684518  |
| P07756        | VVAVDCGIK                                          | 0.918026716        | 2              | 2.599414  |
| P07756        | YMESDGIK                                           | 0.810606672        | 2              | 2.42034   |
| P07756        | YMESDGIK+Oxidation(1)                              | 0.930024733        |                |           |
| <b>P07824</b> | <b>ARGI1 Arginase_1</b>                            | <b>1.506043257</b> | <b>9.9E-20</b> | <b>16</b> |
| P07824        | ANEQLAAVVAETQK                                     | 1.38294939         | 2              | 5.192086  |
| P07824        | DHGDLAFVDVDPNDSPFQIVK                              | 1.521838429        | 2              | 6.303233  |
| P07824        | DIVYIGLR                                           | 2.758799331        | 2              | 2.386336  |
| P07824        | DVDPGEHYIK                                         | 2.079694782        | 2              | 3.361029  |
| P07824        | EGNHKPEDYLKPPK                                     | 1.913990208        | 2              | 2.689043  |
| P07824        | GKFPDVPGFVWVTPCISAK                                | 1.203058073        | 3              | 4.963168  |
| P07824        | LKETEYNVR                                          | 1.509693137        | 3              | 3.347389  |
| P07824        | NGTISVVLGGDHSMAIGSISGHAR                           | 1.095477418        | 3              | 4.418512  |
| P07824        | TGLLSGLDIMEVNPTLTK                                 | 1.33577605         | 2              | 5.853251  |
| P07824        | TGLLSGLDIMEVNPTLTK+Oxidation(9)                    | 1.006555112        |                |           |
| P07824        | TVNTAVALTLSCFGTK                                   | 1.794390886        | 2              | 5.269279  |
| P07824        | VHPDLCVIWVDAHTDINTPLTSSGNLHGQPVAFLK                | 1.728167748        | 4              | 5.560514  |
| P07824        | VMEETFSYLLGR                                       | 5.001208075        | 2              | 3.957619  |
| P07824        | VMEETFSYLLGR+Oxidation(1)                          | 5.759924831        |                |           |
| P07824        | YFSMTEVDK                                          | 1.396654399        | 2              | 2.425884  |
| P07824        | YFSMTEVDKLGIGK+Oxidation(3)                        | 1.072124161        |                |           |
| <b>P07871</b> | <b>THIKB 3_ketoacyl_CoA thiolase B_peroxisomal</b> | <b>0.672016901</b> | <b>9.9E-20</b> | <b>18</b> |
| P07871        | AEELGLPILGVLK                                      | 0.737253151        | 2              | 4.265287  |
| P07871        | AEIVPVTTTVDLDDK                                    | 0.77509407         | 2              | 4.420649  |

|               |                                                      |                    |                |           |
|---------------|------------------------------------------------------|--------------------|----------------|-----------|
| P07871        | AEIVPVTTTFLDDKGDGR                                   | 0.707794878        | 2              | 3.978006  |
| P07871        | AEIVPVTTTFLDDKGDGRK                                  | 0.599674309        | 2              | 3.614794  |
| P07871        | DCLIPMGITSENAER                                      | 1.042093546        | 2              | 2.878241  |
| P07871        | DCLIPMGITSENAER+Oxidation(5)                         | 1.034698664        |                |           |
| P07871        | DGGSTTAGNSSQVSDGAAVLLAR                              | 0.758145077        | 2              | 6.423011  |
| P07871        | GGFKDTPDELLSAVLTAVLQDVK                              | 0.511557469        |                |           |
| P07871        | IAQFLSGIPETVPLSAVNR                                  | 2.389725207        | 2              | 2.836739  |
| P07871        | LKPECLGDISVGNVLQPGAGAAMAR                            | 0.485565697        | 3              | 4.324794  |
| P07871        | QCSSGLQAVANIAGGR                                     | 0.616266624        | 2              | 5.100989  |
| P07871        | QDAFALASQQK                                          | 0.675905144        | 2              | 3.421734  |
| P07871        | QKQDAFALASQQK                                        | 0.636949715        | 2              | 4.114099  |
| P07871        | QVVTLLNELK                                           | 0.92374459         | 2              | 2.596093  |
| P07871        | SKAEELGLPLGVLR                                       | 0.623593806        | 3              | 4.446339  |
| P07871        | SYAVVGVPPDIMGIGPAYAIPAALQK                           | 0.639921792        | 3              | 4.855532  |
| P07871        | TITVSQDEGVRPSTTMEGLAK                                | 0.740434877        | 2              | 4.59334   |
| P07871        | VNPLGGAIALGHPLGCTGAR                                 | 0.590725726        | 2              | 4.778697  |
| <b>P07872</b> | <b>ACOX1 Peroxisomal acyl_coenzyme A oxidase 1</b>   | <b>0.658977754</b> | <b>9.9E-20</b> | <b>19</b> |
| P07872        | AFTTWTANAGIEECR                                      | 0.828997794        | 2              | 4.044143  |
| P07872        | ASATFNPELITHILDGSPENR                                | 0.680747912        | 2              | 4.591238  |
| P07872        | ASEAHCHYVVVK                                         | 0.780166769        | 3              | 4.211193  |
| P07872        | EIENLILNDPDFQHEDYNFLTR                               | 0.944950104        | 2              | 4.41354   |
| P07872        | EIGTHKPLPGITVGDIGPK                                  | 0.652027498        | 2              | 3.550845  |
| P07872        | EVAWNLTSDVLR                                         | 0.790698539        | 2              | 3.762223  |
| P07872        | EYGISDPEEIMWFK                                       | 0.823654859        | 2              | 3.490992  |
| P07872        | FGYEEMDNGYLK                                         | 0.610146019        | 2              | 3.441206  |
| P07872        | GGDFLEGSITGAQLSQVNAR                                 | 0.570587132        | 2              | 5.751139  |
| P07872        | GLETTATYDPK                                          | 0.771509516        | 2              | 3.20909   |
| P07872        | INESIGQGDLSPELHALTAGLK                               | 0.655395289        | 3              | 5.486875  |
| P07872        | LVEIAAK                                              | 0.814519684        | 1              | 2.060848  |
| P07872        | LVGGMVSYLNDLPSQR                                     | 1.182119454        | 2              | 3.367737  |
| P07872        | QSEPEPQILDFTQQYK                                     | 0.622765233        | 2              | 4.729783  |
| P07872        | SFLVGNAAQSLK                                         | 0.627253956        | 2              | 4.500191  |
| P07872        | TQEFILNSPTVTSIK                                      | 0.681103631        | 2              | 4.701035  |
| P07872        | TSNHAIVLAQLITQGECYGLHAFVPIR                          | 0.610129486        | 3              | 5.792662  |
| P07872        | YAQVKPDGTYVKPLSNK                                    | 2.758840306        | 3              | 3.786342  |
| P07872        | YDGNVYENLFEWAK                                       | 0.754690141        | 2              | 5.278123  |
| <b>P07895</b> | <b>SODM Superoxide dismutase [Mn]_ mitochondrial</b> | <b>0.955634066</b> | <b>0.99621</b> | <b>3</b>  |
| P07895        | AIWNVINWENVSQLR                                      | 0.965226667        | 2              | 3.606142  |
| P07895        | GDVTTQVALQPALK                                       | 0.907565775        | 2              | 3.485644  |
| P07895        | HHATYVNNLNVTTEEK                                     | 0.992309048        | 2              | 4.625066  |
| <b>P07896</b> | <b>ECHP Peroxisomal bifunctional enzyme</b>          | <b>0.924836413</b> | <b>5.6E-09</b> | <b>25</b> |
| P07896        | ELSTVDLVVEAVFEDMNLK                                  | 1.255041229        |                |           |
| P07896        | EWQSLAGPHGSK                                         | 1.672667306        | 2              | 2.903282  |
| P07896        | GGPMFYAASVGLPTVLEK                                   | 1.370607435        | 2              | 3.937281  |
| P07896        | GQGLTGPSLPPGTPVR                                     | 0.730285657        | 2              | 4.010396  |
| P07896        | GWYQYDKPLGR                                          | 0.830199746        | 2              | 2.935923  |
| P07896        | IFNKPVPSLNMDSVFAEIAK                                 | 0.679114163        | 3              | 4.068112  |
| P07896        | IGVVVGNFCYGFVGNR                                     | 0.7393092          | 2              | 3.089379  |
| P07896        | IIDKPIEPR                                            | 0.702058078        | 2              | 2.637156  |
| P07896        | KGQGLTGPSLPPGTPVR                                    | 0.670720139        | 2              | 4.58959   |
| P07896        | KQYPGLVLAPETCVR                                      | 0.52774928         | 2              | 3.759094  |
| P07896        | LCNPPVNAVSPVIR                                       | 0.727408898        | 2              | 4.338208  |
| P07896        | LGILDAVVK                                            | 0.68697414         | 2              | 2.815678  |
| P07896        | LLEVIPSR                                             | 0.670234869        | 2              | 2.382654  |
| P07896        | LVAQGSPLK                                            | 0.757617449        | 2              | 2.376482  |
| P07896        | QNPDIPLQLEPSDYLR                                     | 0.672126513        | 2              | 3.774805  |

|               |                                                                                                                    |                    |                |           |
|---------------|--------------------------------------------------------------------------------------------------------------------|--------------------|----------------|-----------|
| P07896        | QYPGVLAPETCVR                                                                                                      | 0.813508764        | 2              | 3.287457  |
| P07896        | TASAQPVSSVGLGLTGMGR                                                                                                | 1.023721233        | 2              | 5.192828  |
| P07896        | TASAQPVSSVGLGLTGMGR+Oxidation(17)                                                                                  | 1.096011082        |                |           |
| P07896        | TISKEEILER                                                                                                         | 0.671625642        | 2              | 2.684462  |
| P07896        | VGISVVAVESDPK                                                                                                      | 0.72976081         | 2              | 3.819666  |
| P07896        | VGLPEVTLGILPGAR                                                                                                    | 0.673621027        | 2              | 3.558491  |
| P07896        | VSDLAGLDVGWK                                                                                                       | 0.670265139        | 2              | 4.115533  |
| P07896        | YLSADEALR                                                                                                          | 0.830114212        | 2              | 2.657097  |
| P07896        | YSPLGDMLEAGR                                                                                                       | 0.665974323        | 2              | 4.076702  |
| P07896        | YSSPTTIATVMMSLSK                                                                                                   | 0.970117896        | 2              | 3.356931  |
| <b>P07953</b> | <b>F261 6_phosphofructo_2_kinase/fructose_2_6_biphosphatase 1</b>                                                  | <b>0.959472682</b> | <b>0.00057</b> | <b>3</b>  |
| P07953        | IGGDSGLSAR                                                                                                         | 0.580694483        | 2              | 2.391631  |
| P07953        | NYEFFRPDNTAQLIR                                                                                                    | 0.818965618        | 2              | 2.97137   |
| P07953        | TIQTAEALGVPEYQWK                                                                                                   | 1.857310324        | 2              | 2.963765  |
| <b>P08009</b> | <b>GSTM4 Glutathione S_transferase Yb_3</b>                                                                        | <b>0.841634461</b> | <b>1.2E-14</b> | <b>5</b>  |
| P08009        | LCYNPDFEK                                                                                                          | 0.819543096        | 2              | 2.810278  |
| P08009        | LLLEYTDSSYEK                                                                                                       | 1.001928444        | 2              | 4.815895  |
| P08009        | LLLEYTDSSYEKRR                                                                                                     | 0.793955905        | 2              | 3.835348  |
| P08009        | NQVFEATCLDAFPNLK                                                                                                   | 0.534729189        | 2              | 4.897267  |
| P08009        | SQWLNEK                                                                                                            | 0.985645305        | 2              | 2.651681  |
| <b>P08010</b> | <b>GSTM2 Glutathione S_transferase Mu 2</b>                                                                        | <b>0.816908542</b> | <b>0.66566</b> | <b>15</b> |
| P08010        | FLSKPIFAK                                                                                                          | 0.52039072         | 1              | 1.932747  |
| P08010        | IRVDVLENQAMDTR                                                                                                     | 0.64085985         | 3              | 4.211671  |
| P08010        | ITYVDFLVYDVLQHR                                                                                                    | 1.398640155        | 2              | 4.808164  |
| P08010        | KKPEYLEGLPEK                                                                                                       | 0.802639345        | 3              | 4.432535  |
| P08010        | KPEYLEGLPEK                                                                                                        | 0.924642675        | 2              | 3.712527  |
| P08010        | KYSMGDAPDYDR                                                                                                       | 0.616327931        | 2              | 3.585454  |
| P08010        | LFLEYDTSYEDK                                                                                                       | 0.641440173        | 2              | 5.421856  |
| P08010        | LFLEYDTSYEDKK                                                                                                      | 0.796036662        | 2              | 4.268782  |
| P08010        | LQLAMVCYSPDFER                                                                                                     | 1.036049661        | 2              | 4.804973  |
| P08010        | LQLAMVCYSPDFER+Oxidation(4)                                                                                        | 1.193965933        |                |           |
| P08010        | SQWLSEK                                                                                                            | 0.940182823        | 2              | 2.456386  |
| P08010        | VDVLENQAMDTR                                                                                                       | 0.741613415        | 2              | 4.666551  |
| P08010        | VDVLENQAMDTR+Oxidation(8)                                                                                          | 0.943650644        |                |           |
| P08010        | YSMGDAPDYDR                                                                                                        | 0.753788128        | 2              | 3.11258   |
| P08010        | YSMGDAPDYDR+Oxidation(2)                                                                                           | 0.907929424        |                |           |
| <b>P08011</b> | <b>MGST1 Microsomal glutathione S_transferase 1</b>                                                                | <b>0.931643702</b> | <b>0.90528</b> | <b>7</b>  |
| P08011        | IYHTIAYLTPLPQPNR                                                                                                   | 0.90953909         | 2              | 4.815242  |
| P08011        | MMFLSSATAFQR                                                                                                       | 1.030334089        | 2              | 3.305546  |
| P08011        | MMFLSSATAFQR+Oxidation(0)                                                                                          | 0.960079006        |                |           |
| P08011        | MMFLSSATAFQR+Oxidation(0)                                                                                          | 1.058622181        |                |           |
| P08011        | MMFLSSATAFQR+Oxidation(1)                                                                                          | 1.058622181        | 2              | 3.060802  |
| P08011        | VFANPEDCAGFGK                                                                                                      | 0.842644758        | 2              | 4.574967  |
| P08011        | VFANPEDCAGFGKGENAK                                                                                                 | 0.544380993        | 2              | 4.526186  |
| <b>P08081</b> | <b>CLCA Clathrin light chain A</b>                                                                                 | <b>1.324549594</b> | <b>0.11083</b> | <b>2</b>  |
| P08081        | LEALDANSR                                                                                                          | 1.094792754        | 2              | 2.581615  |
| P08081        | WREEQTER                                                                                                           | 1.549478233        | 2              | 2.452036  |
| <b>P08290</b> | <b>ASGR2 Asialoglycoprotein receptor 2</b>                                                                         | <b>0.925758448</b> | <b>0.90098</b> | <b>2</b>  |
| P08290        | EEQEFVK                                                                                                            | 0.97610798         | 1              | 1.948143  |
| P08290        | WVDGTEYR                                                                                                           | 0.889245812        | 2              | 2.314624  |
| <b>P08461</b> | <b>ODP2 Dihydropolyllysine_residue acetyltransferase component of pyruvate dehydrogenase complex_mitochondrial</b> | <b>1.098621602</b> | <b>0.39829</b> | <b>4</b>  |
| P08461        | AAPAAAAAPPGR                                                                                                       | 1.000398255        | 2              | 2.623331  |
| P08461        | DVPLGTPLCIIVEK                                                                                                     | 1.411271169        | 2              | 3.141072  |

|               |                                                                                |                    |                |           |
|---------------|--------------------------------------------------------------------------------|--------------------|----------------|-----------|
| P08461        | GLETIASDVVSLASK                                                                | 0.917358548        | 2              | 3.905558  |
| P08461        | VAPTPAGVFIDIPISNIR                                                             | 0.889998738        | 2              | 4.907052  |
| <b>P08503</b> | <b>ACADM Medium_chain specific acyl_CoA dehydrogenase_mitochondrial</b>        | <b>0.882272965</b> | <b>7.6E-05</b> | <b>9</b>  |
| P08503        | AFTGFIVEADTPGIHIGK                                                             | 0.777578386        | 2              | 4.295234  |
| P08503        | ANWYFVLTR                                                                      | 1.026917963        | 2              | 2.624996  |
| P08503        | EEIIPVAPDYDK                                                                   | 0.972356658        | 2              | 3.288412  |
| P08503        | GITFEDVR                                                                       | 0.842233653        | 2              | 2.434762  |
| P08503        | IYQYEGTAQIQR                                                                   | 0.902871723        | 2              | 4.972477  |
| P08503        | KGDEYVINGQK                                                                    | 0.92394404         | 2              | 4.340618  |
| P08503        | QEPGLGFSFELTEQQK                                                               | 0.847149265        | 2              | 3.20518   |
| P08503        | SGEYFPFLIK                                                                     | 0.793526191        | 2              | 2.485406  |
| P08503        | TRPTVAAGAVGLAQR                                                                | 0.63214513         | 2              | 4.462135  |
| <b>P08541</b> | <b>UD2B2 UDP_glucuronosyltransferase 2B2</b>                                   | <b>1.061548919</b> | <b>0.48843</b> | <b>10</b> |
| P08541        | DELQNHFIK                                                                      | 1.184295684        | 2              | 2.385172  |
| P08541        | FEIFSTSISK                                                                     | 1.432720158        | 2              | 2.437663  |
| P08541        | FEIFSTSISKDELQNHFIK                                                            | 1.10069848         | 2              | 4.175125  |
| P08541        | FILPPSYVPVILSGLAGK                                                             | 1.134825173        | 3              | 5.635575  |
| P08541        | GHEVTVLKPSAYFFLDPK                                                             | 1.357531634        | 2              | 4.078653  |
| P08541        | HKEWDTFYSEILGRPTTVDETMSK                                                       | 1.630085478        | 3              | 4.41874   |
| P08541        | LDFLSALEEVIDNPFYK                                                              | 1.061906216        |                |           |
| P08541        | LLDVWTYELPR                                                                    | 1.88691193         | 3              | 3.891724  |
| P08541        | NVMLLSTIHHDQPMKPLDR                                                            | 1.042877252        | 3              | 3.617476  |
| P08541        | VEIWLIR                                                                        | 1.048472391        | 2              | 2.928756  |
| <b>P08542</b> | <b>UDB17 UDP_glucuronosyltransferase 2B17</b>                                  | <b>1.078640221</b> | <b>0.98684</b> | <b>10</b> |
| P08542        | EIINNPYK                                                                       | 1.105617549        | 1              | 2.196939  |
| P08542        | FETFPTSJSKDELENYFIK                                                            | 0.882359434        | 2              | 4.075817  |
| P08542        | FSPGYKIEKSSGR                                                                  | 1.465402558        | 2              | 2.337285  |
| P08542        | KWDPFYSEILGRPTTLAETMGK                                                         | 1.002183373        | 2              | 3.950442  |
| P08542        | LVDVWTYELQR                                                                    | 1.050001258        | 2              | 3.510472  |
| P08542        | NAVWLSTIHHDQPMKPLDK                                                            | 0.836643449        | 3              | 3.308901  |
| P08542        | NAVWLSTIHHDQPMKPLDK+Oxidation(13)                                              | 1.318403634        |                |           |
| P08542        | SDLFNALKEIINNPYK                                                               | 0.908515224        | 2              | 2.328739  |
| P08542        | TPATLGPNTR                                                                     | 1.006386336        | 2              | 2.315405  |
| P08542        | WDPFYSEILGRPTTLAETMGK                                                          | 1.04575211         | 2              | 3.456259  |
| <b>P08683</b> | <b>CP2CB Cytochrome P450 2C11</b>                                              | <b>0.777814018</b> | <b>0.06356</b> | <b>17</b> |
| P08683        | DIDTTPAISGFGHLPPFYEACFIPVQR                                                    | 0.830103581        | 3              | 5.235713  |
| P08683        | EALVDLGEFEFSGR                                                                 | 0.666435076        | 2              | 4.03007   |
| P08683        | EHQESLDKDNPR                                                                   | 0.443922753        | 2              | 4.110683  |
| P08683        | FDPGHFLDER                                                                     | 0.529872801        | 2              | 2.342104  |
| P08683        | FDYKDPTFLNLMHR                                                                 | 1.028931285        | 3              | 5.037016  |
| P08683        | FNENFR                                                                         | 0.737155092        | 1              | 1.979918  |
| P08683        | GAPFDPTFILGCAPCNVICSIIFQNR                                                     | 0.819796199        | 3              | 5.247375  |
| P08683        | GTNVIVSLSSILHDDKEFPNPEK                                                        | 0.848122018        | 2              | 5.194221  |
| P08683        | ICAGEALAR                                                                      | 0.848883878        | 2              | 2.806861  |
| P08683        | LPPGPTPLPIIGNTLQIYMK                                                           | 0.663347281        | 3              | 3.850737  |
| P08683        | NYVLEK                                                                         | 1.05350459         | 1              | 1.961482  |
| P08683        | SQMPYTDVVHEIQR                                                                 | 0.757920657        | 2              | 4.255602  |
| P08683        | SQMPYTDVVHEIQR+Oxidation(2)                                                    | 0.964171376        |                |           |
| P08683        | VKEHQESLDKDNPR                                                                 | 0.986574251        | 3              | 5.026835  |
| P08683        | VQEEIER                                                                        | 0.848691053        | 2              | 2.564214  |
| P08683        | YGLLLLLK                                                                       | 0.631222549        | 2              | 3.032969  |
| P08683        | YIDLVPNTLPHLVTR                                                                | 0.508137777        | 2              | 4.177147  |
| <b>P08733</b> | <b>MLRV Myosin regulatory light chain 2_ventricular/cardiac muscle isoform</b> | <b>1.182782064</b> | <b>0.46334</b> | <b>3</b>  |
| P08733        | GADPEETILNAFK                                                                  | 0.689666022        | 2              | 3.500387  |
| P08733        | NEEIDEMIK                                                                      | 1.323924539        | 1              | 2.497734  |

|               |                                                             |                    |                |           |
|---------------|-------------------------------------------------------------|--------------------|----------------|-----------|
| P08733        | NLVHIIHTGEEKD                                               | 0.836892839        | 2              | 2.978891  |
| <b>P09006</b> | <b>SPA3N Serine protease inhibitor A3N</b>                  | <b>1.285791321</b> | <b>0.00637</b> | <b>2</b>  |
| <b>P09034</b> | <b>ASSY Argininosuccinate synthase</b>                      | <b>2.119770534</b> | <b>9.9E-20</b> | <b>15</b> |
| P09034        | APNTPDVLEIEFK                                               | 2.120002132        | 2              | 3.341692  |
| P09034        | DGTTHTSLDLFMYLNEVAGK                                        | 5.015613706        | 2              | 5.794582  |
| P09034        | EFVEEFIWPAVQSSALYEDR                                        | 1.96462244         | 3              | 5.624639  |
| P09034        | EQGYDVIAYLANIGQK                                            | 3.076588348        | 2              | 4.552794  |
| P09034        | FAELVYTGFWHSPECFVR                                          | 8.550442809        | 2              | 5.14998   |
| P09034        | FELTCYSLAPQIK                                               | 3.907345591        | 2              | 4.274148  |
| P09034        | GRNDLMEYAK                                                  | 1.653023545        | 2              | 3.060752  |
| P09034        | IDIVENR                                                     | 1.291570431        | 2              | 2.499088  |
| P09034        | KVFIEDVSK                                                   | 1.464515026        | 3              | 3.768346  |
| P09034        | NDLMEYAK                                                    | 1.217377839        | 2              | 2.645692  |
| P09034        | SPWSMDENLMHISYEAGILENPK                                     | 2.913249308        | 3              | 5.353886  |
| P09034        | TQDPAKAPNTPDVLEIEFK                                         | 1.272163951        | 2              | 4.745066  |
| P09034        | TQDPAKAPNTPDVLEIEFKK                                        | 1.115668326        | 3              | 4.287529  |
| P09034        | VFIEDVSK                                                    | 1.468199733        | 2              | 2.624222  |
| P09034        | VQVSVFK                                                     | 1.762163121        | 2              | 2.407244  |
| <b>P09041</b> | <b>PGK2 Phosphoglycerate kinase 2</b>                       | <b>1.115801818</b> | <b>0.99761</b> | <b>4</b>  |
| P09041        | FHVEEGK                                                     | 0.983475335        | 2              | 2.727597  |
| P09041        | LGDVYVNDAFGTAHR                                             | 1.07608636         | 3              | 4.076824  |
| P09041        | VDFNVPMK                                                    | 0.9189577          | 1              | 2.068894  |
| P09041        | VSHVSTGGASLELLEK                                            | 0.976023127        | 2              | 5.654178  |
| <b>P09117</b> | <b>ALDOC Fructose_bisphosphate aldolase C</b>               | <b>1.174103943</b> | <b>0.66879</b> | <b>2</b>  |
| P09117        | VLAAYYK                                                     | 1.192015669        | 2              | 2.650187  |
| P09117        | YASICQQNGIVPIVEPEILPDGDHDLKR                                | 1.240346372        | 3              | 3.621385  |
| <b>P09139</b> | <b>SPYA Serine__pyruvate aminotransferase_mitochondrial</b> | <b>1.3671771</b>   | <b>0.12797</b> | <b>2</b>  |
| P09139        | IGLLGYNATTENADR                                             | 1.543559896        | 2              | 3.32791   |
| P09139        | VLNAPPGISLISFNDK                                            | 1.362013065        | 2              | 3.049233  |
| <b>P09367</b> | <b>SDHL L_serine dehydratase/L_threonine deaminase</b>      | <b>3.508737536</b> | <b>0.00095</b> | <b>4</b>  |
| P09367        | ALGVNTVGAQTLK                                               | 2.358020491        | 2              | 3.574248  |
| P09367        | AQLGLNELLK                                                  | 7.122631218        | 1              | 2.009157  |
| P09367        | LGLPATIVVPSTTPALTIER                                        | 2.345356972        | 2              | 3.30031   |
| P09367        | MDSSQPSGSFK                                                 | 3.508161997        | 2              | 2.311677  |
| <b>P09495</b> | <b>TPM4 Tropomyosin alpha_4 chain</b>                       | <b>1.003318568</b> | <b>0.79543</b> | <b>13</b> |
| P09495        | AEGDAAALNR                                                  | 1.259066578        | 2              | 2.309447  |
| P09495        | EDKYEEEIK                                                   | 1.048005796        | 1              | 2.631262  |
| P09495        | EENVGLHQTLDTLNLNLCI                                         | 1.230688419        | 2              | 4.936319  |
| P09495        | IQALQQQADDAEDR                                              | 0.810778523        | 2              | 4.655852  |
| P09495        | IQLVEEELDR                                                  | 0.868343321        | 2              | 3.591852  |
| P09495        | IQLVEEELDRAQER                                              | 0.818405971        | 2              | 2.881613  |
| P09495        | KLVILEGELER                                                 | 1.160963304        | 2              | 3.049757  |
| P09495        | LEEAEKAADESER                                               | 0.60680554         | 2              | 4.09306   |
| P09495        | LVILEGELER                                                  | 0.955758717        | 2              | 3.334882  |
| P09495        | MEIQEMQLK                                                   | 0.735166933        | 2              | 2.658723  |
| P09495        | RIQLVEEELDR                                                 | 1.042707767        | 2              | 2.845778  |
| P09495        | YEEEIK                                                      | 0.955190376        | 1              | 1.964746  |
| P09495        | YSEKEDKYEEEIK                                               | 0.823424541        | 2              | 4.182867  |
| <b>P09527</b> | <b>RAB7A Ras_related protein Rab_7a</b>                     | <b>1.289953406</b> | <b>0.28474</b> | <b>5</b>  |
| P09527        | DPENPFVVLGNK                                                | 1.523655276        | 2              | 3.528469  |
| P09527        | EAINVEQAFQTIAR                                              | 1.245379489        | 2              | 2.810843  |
| P09527        | GADCCVLVFDVTAPNTFK                                          | 1.158592685        | 2              | 4.124101  |
| P09527        | TLDSWRDEFLIQASPR                                            | 0.605887363        | 3              | 3.742782  |
| P09527        | VIIIGDSGVGK                                                 | 1.235194193        | 2              | 2.873304  |
| <b>P09605</b> | <b>KCRS Creatine kinase S_type_mitochondrial</b>            | <b>1.141612992</b> | <b>0.46659</b> | <b>4</b>  |

|               |                                                 |                    |                |           |
|---------------|-------------------------------------------------|--------------------|----------------|-----------|
| P09605        | GTGGVDTAADVVDISNIDR                             | 0.954302689        | 2              | 4.784618  |
| P09605        | LSEMTEQDQQR                                     | 1.141569031        | 2              | 3.629936  |
| P09605        | LSEMTEQDQQR+Oxidation(3)                        | 0.650643388        |                |           |
| P09605        | SEVELVQVIDGVNYLVDCEK                            | 1.299978746        |                |           |
| <b>P09606</b> | <b>GLNA Glutamine synthetase</b>                | <b>0.840118077</b> | <b>0.00169</b> | <b>6</b>  |
| P09606        | CIEEAIDK                                        | 0.916438935        | 2              | 2.849025  |
| P09606        | ITGTNAEVMPAQWFEQIGPCEGIR                        | 1.102089876        | 3              | 4.712731  |
| P09606        | LTGFHETSNINDFSAGVANR                            | 1.262911318        | 2              | 6.077756  |
| P09606        | RLTGFHETSNINDFSAGVANR                           | 0.850432516        | 3              | 5.081582  |
| P09606        | TCLLNETGDEPFQYK                                 | 1.674851838        | 2              | 5.31174   |
| P09606        | TCLLNETGDEPFQYKN                                | 1.525904538        | 2              | 4.384977  |
| <b>P09811</b> | <b>PYGL Glycogen phosphorylase_ liver form</b>  | <b>0.848993412</b> | <b>6.2E-10</b> | <b>20</b> |
| P09811        | DFSELEPDKFQNK                                   | 0.818788292        | 2              | 3.502312  |
| P09811        | DGVGTVFDAFPDQVAIQLNDTHPALAIPELMR                | 0.766367221        | 3              | 4.714675  |
| P09811        | EGWQVEEADDWLR                                   | 0.804973584        | 2              | 3.823123  |
| P09811        | GIVGVENVAELK                                    | 0.856733277        | 2              | 3.090299  |
| P09811        | GIVGVENVAELKK                                   | 0.921494952        | 2              | 2.443712  |
| P09811        | HLQIYEINQK                                      | 0.760867558        | 2              | 3.648097  |
| P09811        | IFVDIEK                                         | 0.857532364        | 1              | 2.082982  |
| P09811        | INPSSMFDVHVK                                    | 0.704112815        | 2              | 3.069651  |
| P09811        | LHSFVGDDIFLR                                    | 0.963747414        | 2              | 2.333138  |
| P09811        | LVIDQIDNGFFSPNPDLFK                             | 0.772574849        | 2              | 4.666643  |
| P09811        | LVTSAEVVNNNDPMVGSK                              | 0.718736118        | 2              | 2.980352  |
| P09811        | TFAYTNHTVLPLEALER                               | 0.697489015        | 2              | 4.020741  |
| P09811        | VDDVAALDK                                       | 0.755408716        | 1              | 2.128051  |
| P09811        | VDDVAALDKK                                      | 0.739786646        | 2              | 3.11268   |
| P09811        | VFADYEAYVK                                      | 0.860073975        | 2              | 2.401982  |
| P09811        | VIPATDLSEQISTAGTEASGTGNMK                       | 0.660531649        | 2              | 6.121733  |
| P09811        | VLYPNDNFFEGK                                    | 0.80288681         | 2              | 3.063613  |
| P09811        | VSQLYMNQK                                       | 2.175425961        | 2              | 3.091756  |
| P09811        | WLLLCNPGGLADLIAEK                               | 1.059638481        | 2              | 5.043386  |
| P09811        | YEGIFNQK                                        | 0.831854085        | 2              | 2.569544  |
| <b>P09812</b> | <b>PYGM Glycogen phosphorylase_ muscle form</b> | <b>0.910768504</b> | <b>0.6024</b>  | <b>12</b> |
| P09812        | GLAGVENVSDLKK                                   | 0.799324664        | 2              | 3.034668  |
| P09812        | GYNAQEYYDRIPELR                                 | 0.256746731        | 2              | 2.770464  |
| P09812        | HLQIYEINQR                                      | 2.399206252        | 2              | 2.916353  |
| P09812        | IGEEYISDLQDLR                                   | 0.877438826        | 2              | 3.854689  |
| P09812        | IGEEYISDLQDLRK                                  | 1.009869007        | 2              | 2.924317  |
| P09812        | LITAIGDVVNHDPVAVGDR                             | 1.080774235        | 2              | 3.605339  |
| P09812        | NLAENISR                                        | 0.811012174        | 1              | 2.473176  |
| P09812        | QIIEQLSSGFFSPK                                  | 1.241001382        | 2              | 3.258137  |
| P09812        | TNFDAPDK                                        | 1.210451417        | 2              | 2.323047  |
| P09812        | VHINPNSLFDVQVK                                  | 0.766978792        | 2              | 2.808653  |
| P09812        | VIPAADLSEQISTAGTEASGTGNMK                       | 1.581353477        | 2              | 5.036545  |
| P09812        | WLVLCNPGLAEVIAER                                | 0.905581315        | 2              | 4.29391   |
| <b>P09875</b> | <b>UD2B1 UDP_glucuronosyltransferase 2B1</b>    | <b>0.90144344</b>  | <b>9.9E-20</b> | <b>6</b>  |
| P09875        | ANVVASALAIQPK                                   | 0.696702363        | 3              | 4.258505  |
| P09875        | FSGGLPLPPSYVPVVLSELSDR                          | 1.156957283        | 3              | 4.645263  |
| P09875        | IILNELAQR                                       | 0.862076006        | 2              | 3.022376  |
| P09875        | SDLEYSFAK                                       | 1.259892325        | 2              | 2.507524  |
| P09875        | VDFSILSTTGLLTALK                                | 0.688934966        | 2              | 4.534775  |
| P09875        | VFNEYSDVVENLCK                                  | 0.951336774        | 2              | 3.461263  |
| <b>P09895</b> | <b>RL5 60S ribosomal protein L5</b>             | <b>1.100273403</b> | <b>0.00075</b> | <b>5</b>  |
| P09895        | GAVDGGLSIPHSTK                                  | 1.11323736         | 2              | 4.376074  |
| P09895        | HIMGQNVADYMR                                    | 0.858278071        | 2              | 3.01488   |
| P09895        | NNVTPDMMMEEMYK                                  | 1.037962827        | 2              | 3.352194  |
| P09895        | RFPGYDESK                                       | 1.354879131        | 2              | 2.840241  |

|               |                                                                          |                    |                |           |
|---------------|--------------------------------------------------------------------------|--------------------|----------------|-----------|
| P09895        | YLMEEDEDAYKK                                                             | 1.1421387          | 2              | 3.253284  |
| <b>P0C0S7</b> | <b>H2AZ Histone H2A.Z</b>                                                | <b>0.466527805</b> | <b>0.18646</b> | <b>2</b>  |
| P0C0S7        | ATIAGGGVIPHIHK                                                           | 0.57027138         | 2              | 3.751095  |
| P0C0S7        | GDEELDSLK                                                                | 0.719745404        | 2              | 3.518457  |
| <b>P0C2X9</b> | <b>AL4A1 Delta_1_pyrraline_5_carboxylate dehydrogenase_mitochondrial</b> | <b>0.831047733</b> | <b>9.9E-20</b> | <b>17</b> |
| P0C2X9        | AIEAAVLAR                                                                | 0.779135378        | 2              | 2.968482  |
| P0C2X9        | ALNDLKDQTEAIPC VVGDEEVWTS DVR                                            | 0.558407083        | 3              | 5.561224  |
| P0C2X9        | DQTEAIPC VVGDEEVWTS DVR                                                  | 0.63460077         | 2              | 4.758953  |
| P0C2X9        | EAGLPPNVIQFVPADGPTFGDVTSS EHL CGINFTGSVPTFK                              | 0.872236546        | 3              | 3.749143  |
| P0C2X9        | EEIFGPVLT VYVYPDEK                                                       | 1.034873463        | 2              | 4.145845  |
| P0C2X9        | ETLQLVDSTTSYGLTGA VFAQDK                                                 | 0.901671442        | 2              | 5.184915  |
| P0C2X9        | KEWDLKPVADR                                                              | 0.758187783        | 2              | 3.341376  |
| P0C2X9        | LYVPQSLWPQIK                                                             | 0.762865834        | 2              | 3.266038  |
| P0C2X9        | NAAGNFYINDK                                                              | 1.257957174        | 2              | 3.512446  |
| P0C2X9        | NFHFVHSSADVDSV VSGTLR                                                    | 0.836271804        | 2              | 5.858699  |
| P0C2X9        | SAFEYGGQK                                                                | 0.763249961        | 2              | 2.45889   |
| P0C2X9        | SSPSLSILAGGQC NESVGYFVEPCIIESK                                           | 0.845033771        | 3              | 5.720127  |
| P0C2X9        | STG SVV GQ QPFGGAR                                                       | 0.757822335        | 2              | 4.400449  |
| P0C2X9        | TVIQAEIDAAAELIDFFR                                                       | 0.780824555        |                |           |
| P0C2X9        | VANEPILAFTQGS PER                                                        | 0.893427514        | 2              | 5.411601  |
| P0C2X9        | VGNPAEDFGTFFSAVIDAK                                                      | 3.316392858        | 2              | 4.96786   |
| P0C2X9        | YQLSPFNHG HK                                                             | 0.809913805        | 2              | 2.935117  |
| <b>P0C5H9</b> | <b>MANF Mesencephalic astrocyte_derived neurotrophic factor</b>          | <b>1.013394459</b> | <b>0.95257</b> | <b>4</b>  |
| P0C5H9        | DRDVFSPATIEEELIK                                                         | 1.006432599        | 2              | 4.711087  |
| P0C5H9        | DVTFSPATIEEELIK                                                          | 1.011703512        | 2              | 3.209631  |
| P0C5H9        | IINEVSKPLAHHIPVEK                                                        | 1.280122181        | 3              | 3.812029  |
| P0C5H9        | ILDDWGEMCK                                                               | 1.040242287        | 2              | 2.390073  |
| <b>P0C6F1</b> | <b>DYH2 Dynein heavy chain 2_axonemal</b>                                | <b>1.185106088</b> | <b>4.7E-06</b> | <b>3</b>  |
| P0C6F1        | EDSVLGLQAFASWR                                                           | 0.933234031        | 2              | 2.303156  |
| P0C6F1        | TMPLISDLR+Oxidation(1)                                                   | 1.412791745        |                |           |
| P0C6F1        | TMPLISDLRNPALR                                                           | 1.2624174          | 2              | 2.396952  |
| <b>P10111</b> | <b>PPIA Peptidyl_prolyl cis_trans isomerase A</b>                        | <b>1.10180034</b>  | <b>0.08592</b> | <b>12</b> |
| P10111        | EGMSIVEAMER                                                              | 1.140866166        | 2              | 2.990081  |
| P10111        | FEDENFILK                                                                | 1.048650852        | 2              | 3.165493  |
| P10111        | HTGPGILSMANAGPNTNGSQFFICTAK                                              | 1.05571074         | 3              | 5.952951  |
| P10111        | HTGPGILSMANAGPNTNGSQFFICTAK+Oxidation(8)                                 | 1.005480594        |                |           |
| P10111        | IIPGFMCGGDFTR                                                            | 0.956794528        | 2              | 3.32359   |
| P10111        | ITISDCGQL                                                                | 0.813075311        | 1              | 1.968194  |
| P10111        | KITISDCGQL                                                               | 1.122859747        | 2              | 3.330281  |
| P10111        | SIYGEKFEDENFILK                                                          | 0.890009559        | 2              | 4.425166  |
| P10111        | TEWLDGK                                                                  | 0.910448538        | 2              | 2.351271  |
| P10111        | VCFELFADK                                                                | 1.242553966        | 2              | 3.320732  |
| P10111        | VCFELFADKVPK                                                             | 0.937108811        | 2              | 3.857755  |
| P10111        | VKEGMSIVEAMER                                                            | 0.705709615        | 2              | 3.000339  |
| <b>P10536</b> | <b>RAB1B Ras_related protein Rab_1B</b>                                  | <b>1.091952627</b> | <b>1</b>       | <b>3</b>  |
| P10536        | MGPGAASGGERPNLK                                                          | 1.023645209        | 2              | 3.295355  |
| P10536        | NATNVEQAFMTMAAEIK+Oxidation(11)                                          | 1.097787151        |                |           |
| P10536        | NATNVEQAFMTMAAEIK+Oxidation(9)                                           | 1.104397933        |                |           |
| <b>P10633</b> | <b>CP2D1 Cytochrome P450 2D1</b>                                         | <b>0.989685486</b> | <b>0.65362</b> | <b>4</b>  |
| P10633        | LVEESLTVSGFIPEVLNTPALLR                                                  | 0.970786467        |                |           |
| P10633        | SQGVILASYGPEWR                                                           | 0.782387474        | 2              | 4.197389  |
| P10633        | TFMALLDNLLAENR                                                           | 0.883214519        | 2              | 3.502585  |
| P10633        | YGDVFLQK                                                                 | 1.1068099          | 2              | 2.84155   |
| <b>P10634</b> | <b>CP2DQ Cytochrome P450 2D26</b>                                        | <b>0.792857782</b> | <b>9.9E-20</b> | <b>17</b> |

|               |                                                     |                    |                |           |
|---------------|-----------------------------------------------------|--------------------|----------------|-----------|
| P10634        | ACLGEPLAR                                           | 0.939262877        | 2              | 2.665581  |
| P10634        | AVSNVIASLVYAR                                       | 0.682228774        | 3              | 4.463062  |
| P10634        | DMTDAFLAEMQK                                        | 0.984205433        | 2              | 3.027043  |
| P10634        | EAEHPFNPSILLSK                                      | 1.167697559        | 2              | 3.082219  |
| P10634        | ELLVTYGEDTADRPLLIPIYNHLGYGNK                        | 0.803591691        | 3              | 4.909128  |
| P10634        | FADIVPTNIPHMTSR                                     | 0.892801514        | 2              | 2.668834  |
| P10634        | FEYEDPFFNR                                          | 0.664639603        | 2              | 2.698626  |
| P10634        | FHPEHFLDAQGNFVK                                     | 0.827677052        | 2              | 4.805937  |
| P10634        | GNPESSFNDENLR                                       | 1.098623735        | 2              | 4.206139  |
| P10634        | GTTLIPNLSSVLK                                       | 0.716711033        | 2              | 2.545521  |
| P10634        | GTTLIPNLSSVLKDETVWEKPLR                             | 0.557255403        | 2              | 4.334306  |
| P10634        | GVVLAPYGPEWR                                        | 0.730038527        | 2              | 3.436186  |
| P10634        | LNSFIALVDK                                          | 1.547475985        | 2              | 2.482055  |
| P10634        | RFEYEDPFFNR                                         | 0.838645509        | 3              | 4.071996  |
| P10634        | SLEQWVTEEAGHLCDTFAK                                 | 0.837408093        | 2              | 4.965187  |
| P10634        | SWDPAQPPR                                           | 0.796226029        | 2              | 2.653176  |
| P10634        | VHEEIDEVIGQVR                                       | 0.767454534        | 2              | 4.552141  |
| <b>P10719</b> | <b>ATPB ATP synthase subunit beta_mitochondrial</b> | <b>0.917581131</b> | <b>9.9E-20</b> | <b>34</b> |
| P10719        | AGTATGQIVAVIGAVVDVQFDEGLPPILNALEVQGR                | 1.440687823        |                |           |
| P10719        | AHGGYSVFAGVGER                                      | 1.835862898        | 2              | 3.93031   |
| P10719        | AIAELGIYPAVDPLDSTSR                                 | 0.851654242        | 3              | 5.562542  |
| P10719        | DQEGQDVLFLIDNIFR                                    | 2.013856458        |                |           |
| P10719        | EGNDLYHEMIESGVINLK                                  | 0.8738677          | 2              | 5.1579    |
| P10719        | FLSQPFQVAEVFTGHMGK                                  | 1.070032206        | 2              | 4.06247   |
| P10719        | FTQAGSEVSALLGR                                      | 0.914526416        | 2              | 4.842857  |
| P10719        | GFQQILAGDYDHLPEQAFYMGPIEEAVAK                       | 1.493068811        | 3              | 4.730116  |
| P10719        | GSITSVQAIYVPADDLTDPAPATTF AHL DATTVLSR              | 2.01604741         | 3              | 4.720021  |
| P10719        | IGLFGGAGVGK                                         | 1.028057236        | 2              | 3.025123  |
| P10719        | IGLFGGAGVGKTVLIMELINNVAK                            | 0.847142763        | 3              | 3.494787  |
| P10719        | ILQDYK                                              | 0.950522757        | 1              | 2.170173  |
| P10719        | IMDPNIVGSEHYDVAR                                    | 0.749790236        | 2              | 4.818998  |
| P10719        | IMDPNIVGSEHYDVAR+Oxidation(1)                       | 1.019148676        |                |           |
| P10719        | IMNVIGEPIDER                                        | 0.841591665        | 2              | 4.170508  |
| P10719        | IMNVIGEPIDER+Oxidation(1)                           | 1.13400406         |                |           |
| P10719        | IPSAVGYQPTLATDMGTMQER                               | 1.651103851        | 2              | 4.837956  |
| P10719        | IPSAVGYQPTLATDMGTMQER+Oxidation(14)                 | 2.198542834        |                |           |
| P10719        | IPSAVGYQPTLATDMGTMQER+Oxidation(17)                 | 1.608687608        |                |           |
| P10719        | LVLEVAQHLGESTVR                                     | 0.936169884        | 2              | 4.67961   |
| P10719        | QFAPIHAEAPEFIEMSVEQEILVTGIK                         | 1.048131699        | 3              | 4.985281  |
| P10719        | SLQDIIAILGMDELSEEDKLTVSR                            | 0.690128312        | 3              | 5.441735  |
| P10719        | SLQDIIAILGMDELSEEDKLTVSR+Oxidation(10)              | 0.928734574        |                |           |
| P10719        | TIAMDGTEGLVR                                        | 0.804835401        | 2              | 3.371756  |
| P10719        | TIAMDGTEGLVR+Oxidation(3)                           | 0.948297116        |                |           |
| P10719        | TREGNDLYHEMIESGVINLK                                | 0.827281558        | 2              | 6.109365  |
| P10719        | TVLIMELINNVAK                                       | 0.893354455        | 2              | 4.571095  |
| P10719        | TVLIMELINNVAK+Oxidation(4)                          | 1.087573698        |                |           |
| P10719        | VALTGLTVAEYFR                                       | 1.597929939        | 2              | 4.072749  |
| P10719        | VALVYQMNEPPGAR                                      | 1.015796692        | 2              | 4.363111  |
| P10719        | VALVYQMNEPPGAR+Oxidation(7)                         | 1.064204329        |                |           |
| P10719        | VLD SGAPIK                                          | 0.966790219        | 2              | 3.028409  |
| P10719        | VLD SGAPIKIPVGPETLGR                                | 0.76846952         | 3              | 4.761925  |
| P10719        | VVDLLAPYAK                                          | 0.858289108        | 2              | 3.03147   |
| <b>P10760</b> | <b>SAHH Adenosylhomocysteinase</b>                  | <b>1.249424427</b> | <b>9.9E-20</b> | <b>18</b> |
| P10760        | ALDIAENEMPGLMR                                      | 1.039736216        | 2              | 4.316842  |
| P10760        | ALDIAENEMPGLMR+Oxidation(12)                        | 1.222385146        |                |           |
| P10760        | ATDVMIA GK                                          | 1.02911258         | 2              | 2.824625  |
| P10760        | DGPLNMILDDGGDLTNIHTK                                | 1.201629458        | 2              | 5.419811  |



|               |                                                              |                    |                |           |
|---------------|--------------------------------------------------------------|--------------------|----------------|-----------|
| P10760        | DGPLNMILDDGGDLTLNIHTK+Oxidation(5)                           | 1.193542418        |                |           |
| P10760        | EMYSASKPLK                                                   | 2.04407092         | 2              | 2.495085  |
| P10760        | FDNLYGCR                                                     | 1.179942556        | 2              | 2.861892  |
| P10760        | GETDEEYLWCIEQTLHFK                                           | 1.425744493        | 2              | 4.279146  |
| P10760        | GISEETTTGVHNLYK                                              | 1.166175852        | 2              | 4.13385   |
| P10760        | IILLAAGR                                                     | 1.477850476        | 2              | 2.803187  |
| P10760        | KLDEAVAEHLGK                                                 | 1.217135904        | 3              | 5.16178   |
| P10760        | LDEAVAEHLGK                                                  | 1.259845919        | 2              | 3.852326  |
| P10760        | RATDVMIAGK                                                   | 1.160292499        | 2              | 2.693585  |
| P10760        | SKFDNLYGCR                                                   | 1.254776241        | 2              | 2.876086  |
| P10760        | VAVVAGYGDVVGK                                                | 1.534940851        | 2              | 4.235604  |
| P10760        | VNIKPQVDR                                                    | 1.200785718        | 2              | 2.919374  |
| P10760        | WLNENAVEK                                                    | 1.322085556        | 2              | 3.16334   |
| P10760        | WSSCNIFSTQDHAAAAIAK                                          | 1.15281856         | 2              | 5.086745  |
| <b>P10818</b> | <b>CX6A1 Cytochrome c oxidase subunit 6A1_ mitochondrial</b> | <b>0.831916297</b> | <b>0.00014</b> | <b>2</b>  |
| P10818        | HEEHERPEFVAYPHLR                                             | 0.894986612        | 3              | 3.320403  |
| P10818        | SRHEEHERPEFVAYPHLR                                           | 0.551078016        | 3              | 3.669015  |
| <b>P10860</b> | <b>DHE3 Glutamate dehydrogenase 1_ mitochondrial</b>         | <b>0.902311003</b> | <b>0.00231</b> | <b>28</b> |
| P10860        | ALASLMTYK                                                    | 0.893566798        | 2              | 3.120529  |
| P10860        | CAVVDVPFGGAK                                                 | 1.044604445        | 2              | 3.288343  |
| P10860        | CVGVGESDGSIWNPDGIDPK                                         | 0.856640179        | 2              | 5.151681  |
| P10860        | DDGSWEVIEGYR                                                 | 1.269036615        | 2              | 4.09852   |
| P10860        | DIVHSGLAYTMER                                                | 1.380571523        | 2              | 3.319003  |
| P10860        | DIVHSGLAYTMER+Oxidation(10)                                  | 1.503571513        |                |           |
| P10860        | DSNYHLLMSVQESLER                                             | 0.84837372         | 2              | 3.698667  |
| P10860        | DSNYHLLMSVQESLER+Oxidation(7)                                | 2.080804769        |                |           |
| P10860        | EDDPNFFK                                                     | 0.699257985        | 1              | 2.06388   |
| P10860        | GASIVEDKLVEDLK                                               | 0.7642439          | 2              | 3.425748  |
| P10860        | GFIGPGIDVPAPDMSTGER                                          | 0.836506137        | 2              | 5.552316  |
| P10860        | GFIGPGIDVPAPDMSTGER+Oxidation(13)                            | 0.94997043         |                |           |
| P10860        | HGGTIPVVPTAEFQDR                                             | 0.913904028        | 2              | 4.468529  |
| P10860        | IIEGANGPTTPEADK                                              | 0.797697241        | 2              | 5.261125  |
| P10860        | IIEGANGPTTPEADKIFLER                                         | 0.879545165        | 3              | 4.6932    |
| P10860        | KGFIGPGIDVPAPDMSTGER                                         | 0.792854763        | 2              | 5.539396  |
| P10860        | KGFIGPGIDVPAPDMSTGER+Oxidation(14)                           | 0.774430691        |                |           |
| P10860        | LQHGSILGFPK                                                  | 0.773635799        | 2              | 2.722525  |
| P10860        | MVEGFFDR                                                     | 0.763812235        | 2              | 2.828782  |
| P10860        | MVEGFFDR+Oxidation(0)                                        | 0.997470086        |                |           |
| P10860        | NLNHVSYGR                                                    | 1.013168154        | 2              | 2.334039  |
| P10860        | NYTDNELEK                                                    | 0.848849691        | 2              | 2.425296  |
| P10860        | RDDGSWEVIEGYR                                                | 0.886266024        | 2              | 4.242008  |
| P10860        | TAAYVNAIEK                                                   | 1.055721311        | 2              | 3.602264  |
| P10860        | TFVVQGFVGNVGLHSMR                                            | 0.589802967        | 2              | 3.998473  |
| P10860        | VYEGSILEADCDILIPAAASEK                                       | 0.860680192        | 3              | 5.922235  |
| P10860        | YNLGLDLR                                                     | 0.920127607        | 2              | 3.129853  |
| P10860        | YSTDVSDEVK                                                   | 1.027927684        | 2              | 3.187912  |
| <b>P10867</b> | <b>GGLO L_gulonolactone oxidase</b>                          | <b>1.070552078</b> | <b>1</b>       | <b>7</b>  |
| P10867        | GDDILLSPCFQR                                                 | 1.024942713        | 1              | 2.074422  |
| P10867        | GVQFQNWAK                                                    | 1.061259773        | 2              | 2.407335  |
| P10867        | LDPTGMFLNSYLEK                                               | 0.809125139        | 2              | 4.415738  |
| P10867        | LDYWLAYETIMK                                                 | 0.993862432        | 2              | 4.368528  |
| P10867        | NADVFAAR                                                     | 0.919045156        | 2              | 2.805848  |
| P10867        | TYGCSPEVYYQPTSVEEVR                                          | 1.073643319        | 2              | 4.904958  |
| P10867        | VVAHYVPEVR                                                   | 1.047444345        | 2              | 2.796622  |
| <b>P10868</b> | <b>GAMT Guanidinoacetate N_methyltransferase</b>             | <b>1.056051841</b> | <b>0.26968</b> | <b>4</b>  |

|               |                                                                      |                    |                |           |
|---------------|----------------------------------------------------------------------|--------------------|----------------|-----------|
| P10868        | EHWIECNDGVFQR                                                        | 1.333968572        | 2              | 4.022839  |
| P10868        | WETPYMHSLAAAAASR                                                     | 1.523639885        | 2              | 3.91216   |
| P10868        | YTDITAMFEETQVPALLEAGFQR                                              | 0.990095316        | 3              | 6.55796   |
| P10868        | YYAFPQMITPLVTK                                                       | 0.996701582        | 2              | 3.481607  |
| <b>P10888</b> | <b>COX41 Cytochrome c oxidase subunit 4 isoform 1_ mitochondrial</b> | <b>0.952133402</b> | <b>1</b>       | <b>2</b>  |
| P10888        | IQFNESFAEMNK                                                         | 0.946751944        | 2              | 4.51784   |
| P10888        | SEDYALPSYVDR                                                         | 0.868701546        | 2              | 4.045376  |
| <b>P11030</b> | <b>ACBP Acyl_CoA_binding protein</b>                                 | <b>1.228829343</b> | <b>1.5E-09</b> | <b>3</b>  |
| P11030        | QATVGDVNTDRPGLLDLK                                                   | 1.36285562         | 3              | 3.652455  |
| P11030        | TQPTDEEMLFYSHFK                                                      | 8.950117081        | 2              | 4.393717  |
| P11030        | WDSWVK                                                               | 0.931194           | 1              | 2.037078  |
| <b>P11232</b> | <b>THIO Thioredoxin</b>                                              | <b>1.111396614</b> | <b>0.99793</b> | <b>2</b>  |
| P11232        | EAFQEALAAAGDK                                                        | 1.346144778        | 2              | 4.316803  |
| P11232        | VGEFSGANK                                                            | 1.027362062        | 2              | 2.959635  |
| <b>P11240</b> | <b>COX5A Cytochrome c oxidase subunit 5A_ mitochondrial</b>          | <b>0.898139693</b> | <b>7.4E-09</b> | <b>5</b>  |
| P11240        | EIYPYVIQELRPTLNELGISTPEELGLDK                                        | 0.243892421        | 3              | 6.728961  |
| P11240        | EIYPYVIQELRPTLNELGISTPEELGLDKV                                       | 1.209456678        | 3              | 6.626053  |
| P11240        | GMNTLVGYDLVPEPK                                                      | 0.797400898        | 2              | 3.662183  |
| P11240        | LNDFASAVR                                                            | 0.902801975        | 2              | 3.261882  |
| P11240        | RLNDFASAVR                                                           | 0.837883764        | 2              | 2.975237  |
| <b>P11348</b> | <b>DHPR Dihydropteridine reductase</b>                               | <b>0.840455036</b> | <b>0.02284</b> | <b>11</b> |
| P11348        | AALDGTPMIGYMAK                                                       | 1.234324019        | 2              | 3.87694   |
| P11348        | EGLLTLGAK                                                            | 0.914177251        | 2              | 3.123622  |
| P11348        | GAVHQLCQSLAGK                                                        | 1.024784792        | 3              | 4.601231  |
| P11348        | MTDSFTEQADQVTAEVGK                                                   | 0.769720155        | 2              | 5.547447  |
| P11348        | MTDSFTEQADQVTAEVGK+Oxidation(0)                                      | 0.874314771        |                |           |
| P11348        | NCDLMWK                                                              | 0.679220469        | 1              | 2.080392  |
| P11348        | NSGMPSGAAAIAVLPVTLDTPMNR                                             | 0.90572365         | 2              | 5.363461  |
| P11348        | NSGMPSGAAAIAVLPVTLDTPMNR+Oxidation(3)                                | 0.846887861        |                |           |
| P11348        | QSIWTSTISSHLATK                                                      | 0.782008841        | 2              | 3.861891  |
| P11348        | RPNSGSLIQVVTDDGK                                                     | 0.850552059        | 2              | 4.089117  |
| P11348        | VDAILCVAGGWAGGNAK                                                    | 0.795156341        | 2              | 4.489226  |
| <b>P11442</b> | <b>CLH Clathrin heavy chain 1</b>                                    | <b>1.122902943</b> | <b>0.83086</b> | <b>37</b> |
| P11442        | AFMTADLPNELIELLEK                                                    | 0.884251208        | 3              | 4.596352  |
| P11442        | AHIAQLCEK                                                            | 1.349177856        | 1              | 2.256866  |
| P11442        | ALEHFTDLYDIK                                                         | 0.766118379        | 3              | 3.876439  |
| P11442        | CNEPAVWSQLAK                                                         | 1.049445705        | 2              | 3.255463  |
| P11442        | EDKLECSSEELGDLVK                                                     | 1.008349595        | 2              | 2.716795  |
| P11442        | FDVNTSAVQVLIHIGNLDR                                                  | 0.936735213        | 3              | 3.624012  |
| P11442        | FNALFAQGNYSEAAK                                                      | 1.083573449        | 2              | 4.576741  |
| P11442        | GQCDLELINVCNENSFLK                                                   | 0.859798924        | 2              | 5.097107  |
| P11442        | GQFSTDELVAEVEK                                                       | 0.905554652        | 2              | 4.289725  |
| P11442        | GQFSTDELVAEVEKR                                                      | 0.971823749        | 2              | 3.647829  |
| P11442        | HELIEFR                                                              | 1.263450029        | 2              | 2.349464  |
| P11442        | HSSLAGCQIINYR                                                        | 0.86224356         | 2              | 2.713678  |
| P11442        | IHEGCEEPATHNALAK                                                     | 1.028183121        | 2              | 5.305377  |
| P11442        | ISGETIFVTAPHEATAGIIGVNR                                              | 1.021074422        | 2              | 5.329196  |
| P11442        | IVLDNSVFSEHR                                                         | 1.084543795        | 2              | 2.969058  |
| P11442        | IYIDSNNNPER                                                          | 0.758324865        | 2              | 3.193036  |
| P11442        | KFDVNTSAVQVLIHIGNLDR                                                 | 0.814830297        | 3              | 5.637635  |
| P11442        | KFNALFAQGNYSEAAK                                                     | 0.889491127        | 2              | 4.36682   |
| P11442        | LAELEEFINGPNNAHIQVVGDR                                               | 1.005752193        | 2              | 5.052642  |
| P11442        | LHIIIEVGPPTGNQPFK                                                    | 0.841853675        | 2              | 4.188672  |
| P11442        | LLYNNVSNFGR                                                          | 1.470445328        | 2              | 2.340869  |
| P11442        | LPVVIGLLDVDCSEDIK                                                    | 2.134945623        | 2              | 5.220828  |

|               |                                                                  |                    |                |           |
|---------------|------------------------------------------------------------------|--------------------|----------------|-----------|
| P11442        | LTDQLPLIIVCDR                                                    | 0.896919193        | 2              | 3.240528  |
| P11442        | NLQNLILLITAIK                                                    | 0.677886139        | 2              | 3.917333  |
| P11442        | NNLAGAEELFAR                                                     | 1.274001368        | 2              | 3.534899  |
| P11442        | NNRPSEGPLQTR                                                     | 0.95352951         | 3              | 4.19138   |
| P11442        | RPLIDQVVQTALSETQDPEEVSVTVK                                       | 1.098581917        | 3              | 5.737468  |
| P11442        | SVDPTLALSYYLR                                                    | 0.877541685        | 2              | 2.891626  |
| P11442        | SVNESLNNLFITEEDYQALR                                             | 1.262212172        | 3              | 5.126964  |
| P11442        | TLQIFNIEMK                                                       | 1.01609021         | 2              | 2.889971  |
| P11442        | TSIDAYDNFDNISLAQR                                                | 1.091597815        | 2              | 4.362551  |
| P11442        | VGEQAQVVIIDMNDPSNPIR                                             | 0.788319331        | 2              | 4.622175  |
| P11442        | VIQFAETGQVQK                                                     | 1.127156631        | 2              | 4.629882  |
| P11442        | VSQPIEGHAASFAQFK                                                 | 0.846676905        | 2              | 4.366082  |
| P11442        | WLLLTGISAQQNR                                                    | 0.889841565        | 2              | 3.255105  |
| P11442        | YESLECRPVLQQGR                                                   | 0.859926847        | 2              | 2.676277  |
| P11442        | YIEIYVQK                                                         | 1.065032903        | 1              | 2.369032  |
| <b>P11497</b> | <b>ACACA Acetyl_CoA carboxylase 1</b>                            | <b>1.404099635</b> | <b>9.9E-20</b> | <b>6</b>  |
| P11497        | GGSWVVIDPTINPR                                                   | 1.634023776        | 2              | 2.758224  |
| P11497        | GSVLEPEGTVEIK                                                    | 2.622724782        | 2              | 2.699714  |
| P11497        | ITSENPDGFKPSSGTVQELNFR                                           | 1.951322092        | 3              | 3.981685  |
| P11497        | TLRDPSPLELQDIMTSVSGR                                             | 1.311614943        | 3              | 3.361255  |
| P11497        | VNNADDFPNLFR                                                     | 1.522946285        | 2              | 2.41684   |
| P11497        | VQQAELHTGSLPQIQSTALR                                             | 0.923750538        | 3              | 3.541937  |
| <b>P11507</b> | <b>AT2A2 Sarcoplasmic/endoplasmic reticulum calcium ATPase 2</b> | <b>0.991478681</b> | <b>0.92083</b> | <b>9</b>  |
| P11507        | DIVPGDIVEIIVGDKVPADIR                                            | 0.632140457        | 2              | 3.539428  |
| P11507        | IGIFGQDEDVTSK                                                    | 0.684382101        | 2              | 3.386089  |
| P11507        | IRDEMVAEQER                                                      | 1.082732521        | 2              | 3.106571  |
| P11507        | LDEFGEQLSK                                                       | 1.104109243        | 2              | 2.823526  |
| P11507        | NAENAIEALK                                                       | 0.99118653         | 2              | 2.339428  |
| P11507        | NAENAIEALKEYEPEMKG                                               | 1.194555631        | 2              | 3.939089  |
| P11507        | SEIGIAMGSGTAVAK                                                  | 1.011500003        | 2              | 2.711593  |
| P11507        | TASEMVLADDNFSTIVAAVEEGR                                          | 1.013538909        | 3              | 4.803927  |
| P11507        | VDQSILTGESVSVIK                                                  | 0.930560081        | 2              | 4.636975  |
| <b>P11598</b> | <b>PDIA3 Protein disulfide isomerase A3</b>                      | <b>1.004486257</b> | <b>1.7E-15</b> | <b>25</b> |
| P11598        | DASVVGFFR                                                        | 1.01436971         | 2              | 2.700565  |
| P11598        | DGEEAGAYDGPR                                                     | 1.066077059        | 2              | 3.086436  |
| P11598        | DLLTAYYDVYDK                                                     | 1.213330529        | 2              | 3.241627  |
| P11598        | EATNPPIIQEEKPK                                                   | 1.1377572          | 2              | 3.476962  |
| P11598        | EYDDNGEGITIFRPLHLANK                                             | 1.130835552        | 2              | 4.215931  |
| P11598        | FAHTNVESLVK                                                      | 1.386079386        | 3              | 3.354488  |
| P11598        | FIQESIFGLCPHMTEDNKDLIQGK                                         | 0.798129848        | 3              | 5.034542  |
| P11598        | FISDKDASVVGFFR                                                   | 0.547768262        | 2              | 4.289568  |
| P11598        | FLQEYFDGNLK                                                      | 0.868469305        | 2              | 3.393449  |
| P11598        | FLQEYFDGNLKR                                                     | 0.775661523        | 2              | 3.09834   |
| P11598        | FVMQEEFSR                                                        | 0.943373389        | 2              | 2.5818    |
| P11598        | GFPTIYFSPANK                                                     | 3.14394765         | 2              | 2.772385  |
| P11598        | IFRDGEEAGAYDGPR                                                  | 0.624668394        | 2              | 3.647818  |
| P11598        | LAPEYAAAATR                                                      | 0.939122847        | 2              | 3.441258  |
| P11598        | LNFAVASR                                                         | 1.089993419        | 2              | 2.441781  |
| P11598        | LSKDPNIVIAK                                                      | 0.923440099        | 3              | 3.790059  |
| P11598        | MDATANDVPSPYEVK                                                  | 0.881554495        | 2              | 4.481105  |
| P11598        | MDATANDVPSPYEVK+Oxidation(0)                                     | 1.118924837        |                |           |
| P11598        | QAGPASVPLR                                                       | 2.46638155         | 2              | 2.547553  |
| P11598        | RLAPEYAAAATR                                                     | 0.843874544        | 2              | 3.549448  |
| P11598        | SEPIPETNEGPVK                                                    | 0.968470195        | 2              | 2.978814  |
| P11598        | TADGIVSHLK                                                       | 1.912845553        | 2              | 2.906025  |
| P11598        | TFSHELSDFGLESTTGEPVVAIR                                          | 1.039612964        | 2              | 6.226573  |

|               |                                                   |                    |                |           |
|---------------|---------------------------------------------------|--------------------|----------------|-----------|
| P11598        | VDCTANTNTCNK                                      | 3.793858819        | 2              | 4.245453  |
| P11598        | YGVSGYPTLK                                        | 0.979130672        | 2              | 3.202235  |
| <b>P11711</b> | <b>CP2A1 Cytochrome P450 2A1</b>                  | <b>0.822863716</b> | <b>9.9E-20</b> | <b>6</b>  |
| P11711        | GEQATYNTLFK                                       | 1.434381164        | 2              | 2.847202  |
| P11711        | GTDVFPILGSLMTPDK                                  | 0.721492659        | 2              | 3.653081  |
| P11711        | ILEEAGYLIK                                        | 0.820952592        | 2              | 2.726734  |
| P11711        | LEDINESPKPLGFTR                                   | 0.976761391        | 2              | 3.469052  |
| P11711        | TVSNVISSIVFGER                                    | 0.830062816        | 2              | 3.525805  |
| P11711        | VHEEIEQVIGR                                       | 0.903156312        | 2              | 3.209881  |
| <b>P11714</b> | <b>CP2D9 Cytochrome P450 2D9</b>                  | <b>1.058371529</b> | <b>0.95327</b> | <b>2</b>  |
| P11714        | GNPESSFNDENLLMVVR                                 | 0.802584519        | 2              | 2.34788   |
| P11714        | VQQEIDEVIGQVR                                     | 0.967261139        | 2              | 4.841065  |
| <b>P11862</b> | <b>GAS2 Growth arrest_specific protein 2</b>      | <b>1.114206215</b> | <b>0.99637</b> | <b>2</b>  |
| P11862        | EIEQEETLSAPSPSPSSK                                | 1.155635238        | 2              | 3.879451  |
| P11862        | LDNGALLCQLAATVQEK                                 | 0.96340793         | 2              | 4.086994  |
| <b>P11884</b> | <b>ALDH2 Aldehyde dehydrogenase_mitochondrial</b> | <b>0.919271656</b> | <b>3.4E-08</b> | <b>23</b> |
| P11884        | EAGFPPGVVNVPGFGPTAGAAIASHEDVDK                    | 1.019734061        | 3              | 4.583633  |
| P11884        | EEIFGPVMQILK                                      | 1.079144412        | 2              | 3.797481  |
| P11884        | EEIFGPVMQILK+Oxidation(7)                         | 1.063594663        |                |           |
| P11884        | ELGEYGLQAYTEVK                                    | 1.250886143        | 2              | 4.45975   |
| P11884        | GYFIQPTVFGDVK                                     | 1.098996401        | 2              | 4.096813  |
| P11884        | HEPVGVCQIIPWNFPLMQAWK                             | 0.858559166        | 3              | 4.190291  |
| P11884        | KTFPTVNPSTGEVICQVAEGNKEDVDK                       | 0.763436084        | 3              | 6.633285  |
| P11884        | LGPALATGNVVVMK                                    | 0.729862122        | 2              | 3.881171  |
| P11884        | LGPALATGNVVVMK+Oxidation(12)                      | 0.829992055        |                |           |
| P11884        | LLCGGAAADR                                        | 1.018469734        | 2              | 3.536341  |
| P11884        | RVTLELGGK                                         | 0.75183183         | 2              | 2.744479  |
| P11884        | TEQGPQVDETQFK                                     | 0.844757111        | 2              | 4.756463  |
| P11884        | TFPTVNPSTGEVICQVAEGNK                             | 1.074586429        | 2              | 4.97016   |
| P11884        | TFPTVNPSTGEVICQVAEGNKEDVDK                        | 0.839149877        | 2              | 4.325205  |
| P11884        | TFVQEDVYDEFVER                                    | 0.835549473        | 2              | 5.176448  |
| P11884        | TIEEVVGR                                          | 0.725725773        | 2              | 3.001751  |
| P11884        | TIPIDGFFSYTR                                      | 0.951550086        | 2              | 2.949207  |
| P11884        | VAEQTPLTALYVANLIK                                 | 1.30841735         | 3              | 5.245028  |
| P11884        | VAFTGSTEVGHLIQVAAGSSNLK                           | 0.89336778         | 2              | 6.035166  |
| P11884        | VTLELGGK                                          | 0.781571123        | 1              | 1.966558  |
| P11884        | VVGNPFDSDR                                        | 0.863471031        | 2              | 2.839046  |
| P11884        | YGLAAAVFTK                                        | 0.682892615        | 2              | 3.784074  |
| P11884        | YYAGWADK                                          | 0.802660682        | 2              | 2.577942  |
| <b>P11915</b> | <b>NLTP Non_specific lipid_transfer protein</b>   | <b>0.923668692</b> | <b>0.85123</b> | <b>24</b> |
| P11915        | ADCTITMADSDLLALMTGK                               | 0.845521165        | 2              | 5.697645  |
| P11915        | ADCTITMADSDLLALMTGK+Oxidation(15)                 | 0.955185087        |                |           |
| P11915        | ADCTITMADSDLLALMTGK+Oxidation(6)                  | 0.937136071        |                |           |
| P11915        | ANLIFK                                            | 1.010614573        | 2              | 2.363153  |
| P11915        | AVEIVAQEMVTDMPTFEEK                               | 0.878958182        | 2              | 4.274205  |
| P11915        | GHPLGATGLAQAELCWQLR                               | 0.846710677        | 3              | 3.727941  |
| P11915        | GSLVLPDSK                                         | 0.956597007        | 1              | 1.988598  |
| P11915        | GSLVLPDSK                                         | 1.067241745        | 2              | 2.628221  |
| P11915        | HIDVLINK                                          | 0.832566751        | 2              | 2.858802  |
| P11915        | HSVNNPYSQFQDEYSLEIMK                              | 0.996672868        | 3              | 6.334317  |
| P11915        | KADCTITMADSDLLALMTGK                              | 1.273294353        | 2              | 4.402377  |
| P11915        | KLEEEGEEFVK                                       | 0.98216275         | 2              | 4.491902  |
| P11915        | KLEEEGEEFVKK                                      | 0.934201571        | 3              | 4.443469  |
| P11915        | LEEEGEEFVK                                        | 0.916295354        | 2              | 2.693956  |
| P11915        | LEEEGEEFVKK                                       | 0.972252427        | 2              | 3.565766  |
| P11915        | LQSLQLQPK                                         | 1.201814984        | 2              | 3.169401  |

|               |                                                       |                    |                |           |
|---------------|-------------------------------------------------------|--------------------|----------------|-----------|
| P11915        | MGFPEAASSFR                                           | 0.87555992         | 2              | 2.995764  |
| P11915        | MNPQS AFFQ GK                                         | 0.925672859        | 2              | 3.250317  |
| P11915        | MNPQS AFFQ GK+Oxidation(0)                            | 1.069219132        |                |           |
| P11915        | SRPVDFLTVLQCCPTSDGAAAAIVSSEEFVQK                      | 0.937161173        | 3              | 5.17075   |
| P11915        | THQISAAPTSSAGDGFK                                     | 1.00586863         | 2              | 4.404951  |
| P11915        | VFVVGVGMTK                                            | 0.821829121        | 2              | 2.556144  |
| P11915        | WVINPSGGLISK                                          | 1.026660689        | 2              | 3.308452  |
| P11915        | YGMSACPFAPQLFGSAGK                                    | 1.428981497        | 2              | 3.379063  |
| <b>P11980</b> | <b>KPYM Pyruvate kinase isozymes M1/M2</b>            | <b>1.033908623</b> | <b>0.92839</b> | <b>10</b> |
| P11980        | AEGSDVANAVLDGADCIMLSGETAK                             | 0.909061546        | 2              | 4.525784  |
| P11980        | AGKPVICATQMLES MIK                                    | 0.738825097        | 3              | 3.342162  |
| P11980        | DAVLDAWAEDVDLR                                        | 0.907210203        | 2              | 4.025075  |
| P11980        | GADYLVTEVENGSLGSK                                     | 0.792260678        | 2              | 5.314896  |
| P11980        | GVNLPGAAVDLPAVSEK                                     | 1.043045432        | 2              | 3.770245  |
| P11980        | IYVDDGLISLQVK                                         | 0.96272484         | 2              | 3.697804  |
| P11980        | KGVNLPGAAVDLPAVSEK                                    | 0.940429571        | 2              | 3.643487  |
| P11980        | LDIDSAPITAR                                           | 0.749549584        | 2              | 3.20909   |
| P11980        | NTGIICTIGPASR                                         | 0.889475034        | 2              | 3.324592  |
| P11980        | VFLAQKMMIGRCNR+Oxidation(6)                           | 0.971771577        |                |           |
| <b>P12001</b> | <b>RL18 60S ribosomal protein L18</b>                 | <b>1.096382254</b> | <b>0.15621</b> | <b>5</b>  |
| P12001        | GTVLLSGPR                                             | 1.494731206        | 2              | 2.931015  |
| P12001        | ILTFDQLALESPK                                         | 1.222628695        | 2              | 4.870775  |
| P12001        | TAVVVGITITDDVR                                        | 1.13329032         | 2              | 4.523719  |
| P12001        | TNRPPLSLR                                             | 1.113280508        | 3              | 3.366225  |
| P12001        | TNSTFNQVVLK                                           | 0.958537546        | 2              | 3.176213  |
| <b>P12007</b> | <b>IVD Isovaleryl_CoA dehydrogenase_mitochondrial</b> | <b>0.740121774</b> | <b>9.9E-20</b> | <b>9</b>  |
| P12007        | AQEIDQSNDFK                                           | 0.855055844        | 2              | 3.640245  |
| P12007        | FVQENLAPK                                             | 0.74300204         | 2              | 2.650152  |
| P12007        | FWITNGPDADVLVVYAK                                     | 1.361214165        | 2              | 3.653508  |
| P12007        | GSNTCELVFEDCK                                         | 0.994509224        | 2              | 4.458799  |
| P12007        | GSNTCELVFEDCKVPAANILSQESK                             | 0.727746526        | 3              | 4.917409  |
| P12007        | GVYVLMGDLER                                           | 0.776105083        | 2              | 3.170815  |
| P12007        | IGQFQLMQGK                                            | 1.155771885        | 2              | 2.502737  |
| P12007        | LYEIGGGTSEVR                                          | 0.854343478        | 2              | 3.559751  |
| P12007        | TDLTAVPASR                                            | 0.646942278        | 2              | 2.963448  |
| <b>P12346</b> | <b>TRFE Serotransferrin</b>                           | <b>1.199723428</b> | <b>9.9E-20</b> | <b>23</b> |
| P12346        | ADRDQYELLCLDNTR                                       | 1.242708254        | 2              | 4.543229  |
| P12346        | ASDSSINWNNLK                                          | 1.47799761         | 2              | 3.270942  |
| P12346        | DGGGDVAFVK                                            | 1.152680435        | 2              | 3.113133  |
| P12346        | DLKQEDFQLLCPDGTK                                      | 0.88294343         | 2              | 4.446505  |
| P12346        | DQYELLCLDNTR                                          | 1.630409607        | 2              | 2.982026  |
| P12346        | EGVCPEGSIDSAPVK                                       | 2.086399298        | 2              | 3.489291  |
| P12346        | EGYNGYTGAFAQCLVEK                                     | 1.121931389        | 2              | 3.528948  |
| P12346        | FDEFFSQGCAPGYK                                        | 0.908466277        | 2              | 4.345944  |
| P12346        | GDKDCTGNFCLFR                                         | 1.269766353        | 2              | 3.593474  |
| P12346        | GTDQFLNQLQGK                                          | 1.388248091        | 2              | 3.122989  |
| P12346        | GYAVAVVK                                              | 1.270518695        | 2              | 2.79149   |
| P12346        | HQTVLENTNGK                                           | 1.849408941        | 2              | 2.579301  |
| P12346        | HTTIFEVLPQK                                           | 1.288631901        | 3              | 3.740234  |
| P12346        | KGTDFQLNQLQGK                                         | 1.248223811        | 2              | 3.59938   |
| P12346        | KTSYQDCIK                                             | 1.651540149        | 2              | 2.489622  |
| P12346        | LPEGTTYEYLGAEYLQAVGNIR                                | 1.172365605        | 2              | 4.675972  |
| P12346        | NGDGKEDLIWEILK                                        | 1.117288922        | 2              | 3.677605  |
| P12346        | QEDFQLLCPDGTK                                         | 1.081085458        | 2              | 3.582817  |
| P12346        | SKDFQLFGSPLGK                                         | 2.065806419        | 2              | 3.488945  |
| P12346        | TSYQDCIK                                              | 1.233900092        | 2              | 2.528939  |

|               |                                           |                    |                |           |
|---------------|-------------------------------------------|--------------------|----------------|-----------|
| P12346        | VSTVLTAAQK                                | 1.467495417        | 2              | 2.616675  |
| P12346        | WCALSHQER                                 | 1.8891208          | 2              | 3.230942  |
| P12346        | WCAVSEHENTK                               | 1.388442289        | 2              | 3.649519  |
| <b>P12711</b> | <b>ADHX Alcohol dehydrogenase class_3</b> | <b>0.829620995</b> | <b>1.3E-05</b> | <b>10</b> |
| P12711        | AAVAWEAGKPLSIEEIEVAPPQAHEVR               | 0.897186963        | 3              | 5.782949  |
| P12711        | AFDLMHSGNSIR                              | 0.831092229        | 2              | 2.502499  |
| P12711        | AGDTVIPLYIPQCGECK                         | 0.885995111        | 2              | 4.027006  |
| P12711        | EFGATECINPQDFSK                           | 1.024721102        | 2              | 4.189593  |
| P12711        | IDPSAPLDK                                 | 0.672840043        | 1              | 1.939675  |
| P12711        | IIGIDINK                                  | 0.887245242        | 2              | 2.371974  |
| P12711        | IIGIDINKDK                                | 0.574871019        | 1              | 2.430563  |
| P12711        | VCLLGCGISTGYGAAVNTAK                      | 0.749168624        | 2              | 5.521226  |
| P12711        | VDEFVTGNLSFDQINK                          | 0.74710626         | 2              | 5.130754  |
| P12711        | VEPGSTCAVFLGGVGLAVIMGCK                   | 0.810950308        | 2              | 4.143928  |
| <b>P12749</b> | <b>RL26 60S ribosomal protein L26</b>     | <b>1.126040613</b> | <b>0.58723</b> | <b>6</b>  |
| P12749        | DDEVQVVR                                  | 1.039531205        | 2              | 2.58808   |
| P12749        | FNPFVTSDR                                 | 1.090401308        | 2              | 2.363353  |
| P12749        | HFNAPSHIR                                 | 1.036646469        | 3              | 3.701633  |
| P12749        | KDDEVQVVR                                 | 1.222329459        | 2              | 3.385693  |
| P12749        | KIMSSPLSKELR+Oxidation(2)                 | 1.245293174        |                |           |
| P12749        | YVIYIER                                   | 1.125231451        | 1              | 1.919811  |
| <b>P12785</b> | <b>FAS Fatty acid synthase</b>            | <b>1.756669559</b> | <b>9.9E-20</b> | <b>44</b> |
| P12785        | ACIDTALENLSTLK                            | 1.923878054        | 2              | 4.915604  |
| P12785        | AGSDTELAAPK                               | 1.705911082        | 2              | 3.247803  |
| P12785        | CPPGVVPACHNSEDTVITISGPQAAVNEFVEQLK        | 1.597688531        | 3              | 5.73813   |
| P12785        | DANLPAGSMAAVGLSWECK                       | 1.122254347        | 2              | 3.660444  |
| P12785        | DGGFLLMHTVLK                              | 1.110301936        | 2              | 2.399549  |
| P12785        | DPETLLGYSMVGCQR                           | 0.837349839        | 2              | 3.767768  |
| P12785        | EEEEPEAMLPGAQPTLISAISK                    | 1.156249333        | 2              | 3.315189  |
| P12785        | EQGVTFPSGEAQQLIR                          | 2.155197665        | 2              | 4.119235  |
| P12785        | FDASFFGVHPK                               | 1.731169088        | 2              | 3.123435  |
| P12785        | FVFTPHVEPECLSESAILKQ                      | 2.873578539        | 2              | 4.565071  |
| P12785        | GHALGETLACLPEVQPGPSFLSQEEWESLFSR          | 2.30472687         | 3              | 4.70531   |
| P12785        | GLESIINIIHSSLAEPK                         | 1.086752698        | 2              | 4.76953   |
| P12785        | GNAGQSNYGFANSTMER                         | 1.581828455        | 2              | 4.43746   |
| P12785        | GTNTGVWVGVSSEASEALSR                      | 1.221573797        | 2              | 3.539723  |
| P12785        | GVDLVLNSLAEEK                             | 1.825083919        | 2              | 3.214894  |
| P12785        | GYDYGPHFGVYEATLEGEQK                      | 2.673904998        | 3              | 3.763916  |
| P12785        | HFQLEQDKPEEQTAHAFVNVLTR                   | 1.461511936        | 3              | 3.453434  |
| P12785        | LDPGSSELQK                                | 1.834076211        | 2              | 2.378937  |
| P12785        | LFDHPEVPIPAESVSQR                         | 1.569646963        | 2              | 4.0873    |
| P12785        | LLLPEDPLISGLLSQALK                        | 1.796286131        | 3              | 5.021595  |
| P12785        | LTPGCEAEAEAEICFFIK                        | 2.31643348         | 2              | 4.082347  |
| P12785        | MTVPGLEDLPQHGLPR                          | 1.278210098        | 2              | 3.167776  |
| P12785        | QAQLNLSILLVNPPEGPTLTR                     | 1.774779679        | 2              | 4.554855  |
| P12785        | QQEQLVPTLEK                               | 2.456945603        | 2              | 2.447166  |
| P12785        | QSPLLIGSTK                                | 2.112537532        | 1              | 2.107911  |
| P12785        | RQQEQLVPTLEK                              | 2.326940773        | 2              | 3.167008  |
| P12785        | SDEALKPLGVK                               | 1.116383971        | 2              | 3.146637  |
| P12785        | SFDDSGNGYCR                               | 1.905233532        | 2              | 3.1493    |
| P12785        | SLYQPGGVAPESLEYIEAHGTGK                   | 1.640459266        | 2              | 5.063999  |
| P12785        | SNMGHPEPASGLAALTK                         | 1.341297632        | 2              | 3.647825  |
| P12785        | SNMGHPEPASGLAALTK+Oxidation(2)            | 1.956476987        |                |           |
| P12785        | TGGTYGEDLGADYNLSQVCDGK                    | 1.488373694        | 2              | 5.068894  |
| P12785        | TMEAVQGLLEQGR                             | 1.304540956        | 2              | 3.717564  |
| P12785        | TMEAVQGLLEQGR+Oxidation(1)                | 1.00168945         |                |           |
| P12785        | VGDPQELNGITR                              | 0.973145474        | 2              | 2.558468  |

|               |                                                                               |                    |                |           |
|---------------|-------------------------------------------------------------------------------|--------------------|----------------|-----------|
| P12785        | VHLTGIDINPNALFPPVEFPVPR                                                       | 1.472694632        | 2              | 5.039025  |
| P12785        | VLEALLPLK                                                                     | 1.729494113        | 2              | 2.357012  |
| P12785        | VLESDLVMNVYR                                                                  | 0.578659327        | 2              | 3.405668  |
| P12785        | VLLSLENGVWAPNLHFHNPNEIPALLDGR                                                 | 1.167980344        | 3              | 4.056353  |
| P12785        | VSVHIIEGDHR                                                                   | 1.904426857        | 2              | 2.753283  |
| P12785        | VTAIYIDPATHLQK                                                                | 1.665042025        | 2              | 3.315601  |
| P12785        | VYATILNAGTNTDGCK                                                              | 1.379607219        | 2              | 4.87661   |
| P12785        | VYQWEDPDSK                                                                    | 2.237702841        | 2              | 3.174712  |
| P12785        | WLSTSIPEAQWQSSLAR                                                             | 1.180870425        | 2              | 2.372029  |
| <b>P12791</b> | <b>CP2BA Cytochrome P450 2B10</b>                                             | <b>0.930035158</b> | <b>0.48779</b> | <b>2</b>  |
| P12791        | IQEEAQCLVEELR                                                                 | 0.916667428        | 2              | 3.759812  |
| P12791        | IQEEAQCLVEELRK                                                                | 0.723901322        | 2              | 3.544593  |
| <b>P12847</b> | <b>MYH3 Myosin_3</b>                                                          | <b>0.996894541</b> | <b>0.98949</b> | <b>4</b>  |
| P12847        | IEAQNQPFDAK                                                                   | 0.727935421        | 2              | 2.748584  |
| P12847        | MKGTLEDQIISANPLLEAFGNAK                                                       | 0.858394216        | 3              | 6.889268  |
| P12847        | MKGTLEDQIISANPLLEAFGNAK+Oxidation(0)                                          | 1.030718369        |                |           |
| P12847        | NALAHALQSSR                                                                   | 0.792491972        | 2              | 2.618051  |
| <b>P12928</b> | <b>KPYR Pyruvate kinase isozymes R/L</b>                                      | <b>1.165559041</b> | <b>9.5E-05</b> | <b>18</b> |
| P12928        | AETSDVANAVLDGADCIMLSGETAK                                                     | 1.047561658        | 2              | 5.386181  |
| P12928        | CCAAAIIVLTK                                                                   | 0.821759407        | 2              | 2.951444  |
| P12928        | CNLAGKPVVCATQMLESMTIK                                                         | 0.869267274        | 3              | 5.062019  |
| P12928        | EATESFATSPLSYRPAIALDTK                                                        | 1.961936847        | 3              | 4.059224  |
| P12928        | EPPEAIWADDVDR                                                                 | 1.09100898         | 2              | 2.440576  |
| P12928        | EPPEAIWADDVDRR                                                                | 1.021465277        | 2              | 2.330976  |
| P12928        | GDLGIEIPAEK                                                                   | 1.035957386        | 2              | 3.103087  |
| P12928        | GSQVLVTDPK                                                                    | 1.205756114        | 2              | 2.847728  |
| P12928        | GVNLPNTEVDLPGLSEQDLLDLR                                                       | 1.15814012         | 2              | 5.44598   |
| P12928        | IGPEGLVTEVEHGGILGSR                                                           | 0.94539988         | 2              | 4.779319  |
| P12928        | IYDDGLISLVVQK                                                                 | 1.193131511        | 2              | 4.156784  |
| P12928        | KFDEILEVSDGIMVAR                                                              | 0.870487085        | 3              | 3.386325  |
| P12928        | KGVNLPNTEVDLPGLSEQDLLDLR                                                      | 1.3428816          | 3              | 4.315272  |
| P12928        | LNFSHGSHEYHAESIANIR                                                           | 1.602802104        | 3              | 4.181748  |
| P12928        | STSIIATIGPASR                                                                 | 1.026482766        | 2              | 3.579793  |
| P12928        | TGVLQGGPESEVEIVK                                                              | 1.594418546        | 2              | 4.938263  |
| P12928        | TVWVDYHNITR                                                                   | 1.385814544        | 2              | 2.510377  |
| P12928        | VQFGIESGK                                                                     | 1.068326733        | 1              | 1.982685  |
| <b>P12938</b> | <b>CP2D3 Cytochrome P450 2D3</b>                                              | <b>0.851934911</b> | <b>0.00228</b> | <b>5</b>  |
| P12938        | DLTDAFLAEIEK                                                                  | 0.94834043         | 2              | 4.142829  |
| P12938        | FDYGDPDFIK                                                                    | 0.847161681        | 2              | 2.443841  |
| P12938        | GNPESSFNDANLR                                                                 | 0.930137798        | 2              | 4.309071  |
| P12938        | RFDYGDPDFIK                                                                   | 0.646683897        | 2              | 2.829973  |
| P12938        | TWDPDQPPR                                                                     | 0.659224254        | 2              | 2.43149   |
| <b>P12939</b> | <b>CP2DA Cytochrome P450 2D10</b>                                             | <b>1.268682337</b> | <b>0.19922</b> | <b>8</b>  |
| P12939        | AVQEVLVTHGEDTADRPPVPIFK                                                       | 1.048441671        | 3              | 5.298196  |
| P12939        | FEYEDPYLIR                                                                    | 1.213381258        | 2              | 2.409207  |
| P12939        | FGDIAPLNLP                                                                    | 1.352646024        | 2              | 3.161536  |
| P12939        | ITSCDIEVQDFVIPK                                                               | 1.044369511        | 2              | 4.545211  |
| P12939        | NLTDAFLAEVEK                                                                  | 0.921114708        | 2              | 4.136254  |
| P12939        | RFEYEDPYLIR                                                                   | 1.04512773         | 3              | 3.535597  |
| P12939        | SQGVVFASYGPEWR                                                                | 3.991228691        | 2              | 3.59811   |
| P12939        | TTWDPAQPPR                                                                    | 1.230036838        | 2              | 2.433837  |
| <b>P13084</b> | <b>NPM Nucleophosmin</b>                                                      | <b>2.011700376</b> | <b>0.00237</b> | <b>3</b>  |
| P13084        | MSVQPTVSLGGFEITPPVVLR                                                         | 1.292095426        | 2              | 3.582177  |
| P13084        | MTDQEAIQDLWQWR                                                                | 1.241688399        | 2              | 3.16819   |
| P13084        | VDNDENEHQLSLR                                                                 | 1.905817111        | 2              | 3.929126  |
| <b>P13086</b> | <b>SUCA Succinyl_CoA ligase [ADP/GDP_forming] subunit alpha_mitochondrial</b> | <b>0.790350976</b> | <b>9.5E-05</b> | <b>6</b>  |

|               |                                                     |                    |                |           |
|---------------|-----------------------------------------------------|--------------------|----------------|-----------|
| P13086        | LIGPNCPGIINPGECK                                    | 0.850692221        | 2              | 4.512835  |
| P13086        | MGHAGAIAGGK                                         | 0.657798707        | 1              | 2.793092  |
| P13086        | MGHAGAIAGGK+Oxidation(0)                            | 0.972036722        |                |           |
| P13086        | NIYIDK                                              | 0.884533267        | 1              | 1.971983  |
| P13086        | QGTFFHSQQALEYGTK                                    | 0.736913781        | 2              | 2.841769  |
| P13086        | VICQGFTGK                                           | 0.777716629        | 2              | 2.308482  |
| <b>P13107</b> | <b>CP2B3 Cytochrome P450 2B3</b>                    | <b>1.247711278</b> | <b>0.40638</b> | <b>11</b> |
| P13107        | ATLDPNAPR                                           | 1.035426141        | 2              | 2.326976  |
| P13107        | CLVEELK                                             | 0.790058114        | 1              | 2.00381   |
| P13107        | DFIDTLLHMEK                                         | 1.371201696        | 2              | 3.009206  |
| P13107        | EVLDYIDHSVENHR                                      | 1.183724486        | 2              | 3.960704  |
| P13107        | FSDVSPMGLPCR                                        | 1.28642405         | 2              | 2.761684  |
| P13107        | FSDVSPMGLPCR+Oxidation(6)                           | 1.188409327        |                |           |
| P13107        | GIIAVLQPIMQEYGVSVFVNEER                             | 1.945880637        | 3              | 5.361229  |
| P13107        | LLDLLYR                                             | 1.102451156        | 2              | 2.488436  |
| P13107        | MCLGEGAR                                            | 0.764844918        | 2              | 2.693204  |
| P13107        | QSVEDQIKEAK                                         | 1.065454543        | 2              | 2.495909  |
| P13107        | SFIQLQEK                                            | 0.997474552        | 2              | 2.406467  |
| <b>P13221</b> | <b>AATC Aspartate aminotransferase_ cytoplasmic</b> | <b>2.675455813</b> | <b>9.9E-20</b> | <b>8</b>  |
| P13221        | ITWSNPPAQGAR                                        | 2.6956808          | 2              | 3.393543  |
| P13221        | IVATLSNPELFK                                        | 2.320167456        | 2              | 3.639694  |
| P13221        | NFGLYNER                                            | 3.564997057        | 1              | 1.931059  |
| P13221        | NLDYVATSINEAVTK                                     | 2.82299914         | 2              | 4.887107  |
| P13221        | SCASQLVLGDNSPALR                                    | 2.69299967         | 2              | 5.405178  |
| P13221        | TDDSQPWVLPVVR                                       | 2.172912206        | 2              | 3.524652  |
| P13221        | VGGVQSLGGTGALR                                      | 2.531183108        | 2              | 2.393139  |
| P13221        | VGNLTVVGK                                           | 0.889123768        | 2              | 2.550872  |
| <b>P13255</b> | <b>GNMT Glycine N_methyltransferase</b>             | <b>0.999576448</b> | <b>0.9986</b>  | <b>8</b>  |
| P13255        | AHMTVLDYTVQVPGAGR                                   | 0.979189451        | 2              | 4.934911  |
| P13255        | AWLLGLLR                                            | 1.120273979        | 2              | 2.789044  |
| P13255        | DITTSVLTVNNK                                        | 1.218154473        | 2              | 3.978507  |
| P13255        | LSYYPHCLASFTELQAEFGGR                               | 1.038232901        | 3              | 3.700447  |
| P13255        | NYDYILSTGCAPP GK                                    | 1.032708771        | 2              | 4.593596  |
| P13255        | SDLTKDITTSVLTVNNK                                   | 1.052056741        | 2              | 3.09809   |
| P13255        | SLGVAAEGIPDQYADGEAAR                                | 1.095227901        | 2              | 5.755338  |
| P13255        | VWQLYIGDTR                                          | 0.79198674         | 2              | 2.605269  |
| <b>P13383</b> | <b>NUCL Nucleolin</b>                               | <b>1.696734213</b> | <b>6.6E-05</b> | <b>8</b>  |
| P13383        | FGYVDFESAEDLEK                                      | 1.813095635        | 2              | 2.638528  |
| P13383        | GFGFVDFNSEEDAK                                      | 1.677395962        | 2              | 3.716178  |
| P13383        | GLSEDTTEETLK                                        | 0.763858578        | 2              | 2.904298  |
| P13383        | IEGSEPTTFFNLFIGNLNP NK                              | 1.018561151        | 2              | 3.463486  |
| P13383        | NDLAAVDVR                                           | 1.246352816        | 2              | 2.431115  |
| P13383        | NLSFNITEDELK                                        | 1.26192502         | 2              | 2.777811  |
| P13383        | SEADAENLEEK                                         | 2.38004366         | 2              | 3.060445  |
| P13383        | SVSLYYTGEK                                          | 3.642787907        | 1              | 2.024874  |
| <b>P13437</b> | <b>THIM 3_ketoacyl_CoA thiolase_ mitochondrial</b>  | <b>0.850722421</b> | <b>9.9E-20</b> | <b>22</b> |
| P13437        | AANEAGYFNEEMAPIEVK                                  | 0.781113916        | 2              | 5.24088   |
| P13437        | AANEAGYFNEEMAPIEVK+Oxidation(11)                    | 0.957242521        |                |           |
| P13437        | DAEVVLCGGTESMSQSPYSVR                               | 1.079332498        | 2              | 5.16125   |
| P13437        | DFTATDLTEFAAR                                       | 1.095616778        | 2              | 4.920811  |
| P13437        | DMDLIDVNEAFAPQFLAVQK                                | 0.972866475        | 3              | 6.501692  |
| P13437        | DMDLIDVNEAFAPQFLAVQK+Oxidation(1)                   | 1.068045533        |                |           |
| P13437        | EGTVTAGNASGMSDGAGVVIIASEDAVK                        | 0.732400222        | 3              | 5.731832  |
| P13437        | EGTVTAGNASGMSDGAGVVIIASEDAVKK                       | 0.695388634        | 3              | 4.948078  |
| P13437        | GVFIVAAK                                            | 0.806956991        | 2              | 2.583429  |
| P13437        | ITAHLVHELK                                          | 1.466755207        | 2              | 3.024678  |
| P13437        | LCGSGFQSIIVSGCQEICK                                 | 0.984489107        | 2              | 5.477032  |



|               |                                                                         |                    |                |           |
|---------------|-------------------------------------------------------------------------|--------------------|----------------|-----------|
| P13437        | LEDTLWAGLTDQHVK                                                         | 0.788059866        | 2              | 5.388068  |
| P13437        | RTPFGAYGGLLK                                                            | 0.896982409        | 2              | 2.944408  |
| P13437        | SLDLDPK                                                                 | 0.777970868        | 2              | 3.019894  |
| P13437        | TNVSGGAIALGHPLGGSGSR                                                    | 0.745202624        | 2              | 6.242382  |
| P13437        | TPFGAYGGLLK                                                             | 0.86148698         | 2              | 2.785176  |
| P13437        | VGVPETETGALTLNR                                                         | 0.815911494        | 2              | 3.69551   |
| P13437        | VPPETIDSVIVGNVMQSSSDAAYLAR                                              | 0.785397928        | 2              | 5.95532   |
| P13437        | VPPETIDSVIVGNVMQSSSDAAYLAR+Oxidation(14)                                | 0.882181228        |                |           |
| P13437        | VVGYFVSGCDPAIMGIGPVPAITGALK                                             | 0.66081049         | 3              | 5.472631  |
| P13437        | VVGYFVSGCDPAIMGIGPVPAITGALKK                                            | 0.821365767        | 3              | 3.586936  |
| P13437        | YAVGSACIGGGQGISLIQNTA                                                   | 0.705492423        | 2              | 2.477781  |
| <b>P13444</b> | <b>METK1 S_adenosylmethionine synthase isoform type_1</b>               | <b>2.047177124</b> | <b>9.9E-20</b> | <b>8</b>  |
| P13444        | FVIGGPQGDAGVTGR                                                         | 1.799711066        | 2              | 4.726541  |
| P13444        | HIGYDDSAK                                                               | 2.305241206        | 2              | 2.825247  |
| P13444        | ICDQISDAVLDAHLK                                                         | 1.833052983        | 2              | 5.156051  |
| P13444        | NEEDVGAGDQQLMGFYATDETEECMPLTIVLAHK                                      | 1.354327557        | 3              | 5.423157  |
| P13444        | SEFPWEVPK                                                               | 1.61824651         | 2              | 2.541992  |
| P13444        | SGVLPWLRPDSK                                                            | 0.945488115        | 2              | 3.107456  |
| P13444        | TCNVLVALEQQSPDIAQCVLHLD                                                 | 2.011888132        | 3              | 5.684929  |
| P13444        | TQVTVQYVQDNGAVIPVR                                                      | 2.388445289        | 2              | 5.094707  |
| <b>P13471</b> | <b>RS14 40S ribosomal protein S14</b>                                   | <b>1.123529025</b> | <b>0.01211</b> | <b>3</b>  |
| P13471        | ADRDESSPYAAMLAAQDVAQR                                                   | 1.814232436        | 2              | 5.853403  |
| P13471        | ELGITALHIK                                                              | 1.677591589        | 2              | 2.416054  |
| P13471        | IEDVTIPSDSTR                                                            | 1.030909693        | 2              | 3.992328  |
| <b>P13601</b> | <b>AL1A7 Aldehyde dehydrogenase_ cytosolic 1</b>                        | <b>0.891027222</b> | <b>0.00145</b> | <b>22</b> |
| P13601        | ANNTPYGLAAGVFTK                                                         | 1.131984639        | 2              | 4.254565  |
| P13601        | EAGFPPGVVNVVPGYGTAGAAISSHMDIDK                                          | 0.824628051        | 3              | 3.305845  |
| P13601        | EEIFGPVQQIMK                                                            | 1.010219735        | 2              | 3.81693   |
| P13601        | EMGEQGVYETELK                                                           | 1.457795908        | 2              | 3.887575  |
| P13601        | FPVINPATEEVICHVEEGDK                                                    | 0.732425275        | 3              | 4.09538   |
| P13601        | FPVINPATEEVICHVEEGDKADVDK                                               | 0.590695086        | 4              | 5.142944  |
| P13601        | GFFVQPTVFSNVTDEM                                                        | 5.203719624        | 2              | 4.312201  |
| P13601        | IAKEEIFGPVQQIMK                                                         | 0.871155733        | 2              | 3.864847  |
| P13601        | IFINNEWHNSLNGK                                                          | 1.27204641         | 2              | 3.500032  |
| P13601        | IFTHAYLLDTEVSİKALK                                                      | 1.138027491        | 2              | 2.341056  |
| P13601        | IHGQTIPSDGDVFTYTR                                                       | 1.104825312        | 2              | 4.627728  |
| P13601        | ILDLESK                                                                 | 0.762421359        | 2              | 2.729225  |
| P13601        | ILDLESK                                                                 | 0.734975974        | 3              | 3.341717  |
| P13601        | KFPVINPATEEVICHVEEGDK                                                   | 0.836600359        | 3              | 3.753911  |
| P13601        | KFPVINPATEEVICHVEEGDKADVDK                                              | 0.601143905        | 4              | 4.866906  |
| P13601        | KYVLGNPLDSGISQGPQIDKEQHAK                                               | 0.661908697        | 3              | 5.60002   |
| P13601        | LFVEESYDEFVR                                                            | 0.996055405        | 2              | 4.067123  |
| P13601        | VLLATMESMNAGK                                                           | 0.948328243        | 2              | 3.981084  |
| P13601        | VSFTGSTEVGK                                                             | 1.145615774        | 2              | 3.086549  |
| P13601        | YFAGWADK                                                                | 0.840945238        | 1              | 2.056434  |
| P13601        | YVLGNPLDSGISQGPQIDK                                                     | 0.985741357        | 2              | 4.961924  |
| P13601        | YVLGNPLDSGISQGPQIDKEQHAK                                                | 1.077257625        | 4              | 4.604517  |
| <b>P13697</b> | <b>MAOX NADP_dependent malic enzyme</b>                                 | <b>1.175564606</b> | <b>0.98501</b> | <b>5</b>  |
| P13697        | AECAEECYK                                                               | 1.06508527         | 1              | 2.810228  |
| P13697        | AIFASGSPFDPVTLDPGR                                                      | 0.88273732         | 2              | 4.257449  |
| P13697        | GHIASVLNAWPEDEVK                                                        | 1.18054461         | 2              | 3.816658  |
| P13697        | HINDSVFLTTAEVISQVSDK                                                    | 1.288282754        | 3              | 4.341857  |
| P13697        | NLEAIVQK                                                                | 1.095514677        | 1              | 2.197101  |
| <b>P13803</b> | <b>ETFA Electron transfer flavoprotein subunit alpha_ mitochondrial</b> | <b>1.024432157</b> | <b>9.9E-20</b> | <b>14</b> |
| P13803        | AAVDAGFVPMNDMQVGGQTGK                                                   | 0.767888216        | 2              | 4.772173  |

|               |                                                  |                    |                |           |
|---------------|--------------------------------------------------|--------------------|----------------|-----------|
| P13803        | AAVDAGFVPNDMQVGQTKG+Oxidation(11)                | 0.821160414        |                |           |
| P13803        | DPEAPIFQVADYGVADLTK                              | 0.953179689        | 2              | 5.355403  |
| P13803        | GLLPEELTPLILETQK                                 | 0.89679486         | 2              | 4.669336  |
| P13803        | GTSFEAAAASGGSASSEK                               | 0.95967033         | 2              | 5.340793  |
| P13803        | LGGEVSCLVAGTK                                    | 0.812048151        | 2              | 4.711003  |
| P13803        | LLYDLADQLHAAVVGASR                               | 0.755753169        | 2              | 4.643563  |
| P13803        | LNVAPVSDIIEIK                                    | 0.969564753        | 3              | 4.717721  |
| P13803        | QFSYTHICAGASAFGK                                 | 0.903525153        | 2              | 3.163802  |
| P13803        | SDRPELTGAK                                       | 0.941598411        | 3              | 3.341209  |
| P13803        | TIVAINKDPEAPIFQVADYGVADLTK                       | 0.673416823        | 3              | 7.038399  |
| P13803        | TIYAGNALCTVK                                     | 0.792471107        | 2              | 3.661068  |
| P13803        | VLVAQHDAYK                                       | 0.893799062        | 2              | 3.259243  |
| P13803        | VVQDLCK                                          | 0.891056882        | 2              | 2.751452  |
| <b>P13832</b> | <b>MRLCA Myosin regulatory light chain RLC_A</b> | <b>1.196398315</b> | <b>0.90599</b> | <b>3</b>  |
| P13832        | ATSNVFMFDQSQIQEFK                                | 1.033736577        | 2              | 4.652575  |
| P13832        | FTDEEVDELVR                                      | 1.134805517        | 2              | 3.499027  |
| P13832        | GNFNIEFTR                                        | 1.197609821        | 2              | 2.628266  |
| <b>P14046</b> | <b>A1I3 Alpha_1_inhibitor 3</b>                  | <b>0.577755401</b> | <b>9.9E-20</b> | <b>5</b>  |
| P14046        | GDPIPNEQVLK                                      | 0.579576735        | 2              | 3.181515  |
| P14046        | GMYESLPVVAVK                                     | 0.513977216        | 2              | 3.397591  |
| P14046        | ISLCHGNPTFSSEK                                   | 0.790447567        | 2              | 3.682433  |
| P14046        | QQNSYGGFSSTQDTVVALDALS                           | 0.468406347        | 2              | 4.142656  |
| P14046        | QSPGPCGSEVATVPETGR                               | 0.637907341        | 2              | 3.336217  |
| <b>P14141</b> | <b>CAH3 Carbonic anhydrase 3</b>                 | <b>0.777647641</b> | <b>9.9E-20</b> | <b>18</b> |
| P14141        | EAPFNHFDPSCLFPACR                                | 0.941308101        | 2              | 4.341764  |
| P14141        | EKGEFQILLDALDK                                   | 0.851110278        | 2              | 4.559532  |
| P14141        | EKGEFQILLDALDKIK                                 | 0.520927114        | 2              | 3.110992  |
| P14141        | EPMTVSSDQMAK                                     | 1.15337025         | 2              | 2.941079  |
| P14141        | EWGYASHNGPEHWHELYPIAK                            | 0.809062994        | 3              | 4.517257  |
| P14141        | GDNQSPIELHTK                                     | 0.687488197        | 2              | 3.764329  |
| P14141        | GEFQILLDALDK                                     | 0.838150089        | 2              | 4.664411  |
| P14141        | GEFQILLDALDKIK                                   | 0.632117885        | 2              | 3.253896  |
| P14141        | GGPLSGPYR                                        | 0.817841633        | 2              | 2.956714  |
| P14141        | GKEAPFNHFDPSCLFPACR                              | 0.573780884        | 3              | 3.525347  |
| P14141        | HDPSLQPWSVSYDPGSAK                               | 0.806565311        | 3              | 5.572367  |
| P14141        | QFHLHWGSSDDHGSEHTVDGVK                           | 0.70683273         | 2              | 4.643401  |
| P14141        | QPDGIAVVGIFLK                                    | 0.889688085        | 2              | 2.576633  |
| P14141        | SLFASAENEPVPLVGNWRPPQPIK                         | 0.788907778        | 3              | 5.701326  |
| P14141        | VVFDDTFDR                                        | 0.651713242        | 2              | 3.372337  |
| P14141        | YAAELHLVHWNPK                                    | 1.152616459        | 2              | 4.332443  |
| P14141        | YNTFGEALK                                        | 0.818845299        | 2              | 2.314709  |
| P14141        | YNTFGEALKQPDGIAVVGIFLK                           | 0.62002851         | 3              | 6.01375   |
| <b>P14173</b> | <b>DDC Aromatic_L_amino_acid decarboxylase</b>   | <b>0.921429608</b> | <b>0.98641</b> | <b>7</b>  |
| P14173        | AGEGGGVIQGSASEATLVALLAAR                         | 0.993280425        | 2              | 3.543346  |
| P14173        | ALIPTTAPQEPETYEDIIR                              | 0.894625105        | 3              | 4.096662  |
| P14173        | GSNQLNETLLQR                                     | 0.892727986        | 2              | 2.866176  |
| P14173        | HSHQDSGLITDYR                                    | 0.998257579        | 3              | 3.633439  |
| P14173        | MLELPEAFLAGR                                     | 0.816429724        | 2              | 2.770898  |
| P14173        | QLQAASPELTQAALMEK                                | 0.873033358        | 2              | 3.814373  |
| P14173        | TDLTEAFNMDPVYLR                                  | 1.005192234        | 2              | 3.676677  |
| <b>P14408</b> | <b>FUMH Fumarate hydratase_mitochondrial</b>     | <b>0.825993322</b> | <b>9.9E-20</b> | <b>15</b> |
| P14408        | AAAENVQEYGLDPK                                   | 1.209750287        | 2              | 4.467802  |
| P14408        | AIEMLGELGSK                                      | 0.810834992        | 2              | 3.507025  |
| P14408        | IEYDTFGELK                                       | 0.956457436        | 2              | 3.542608  |
| P14408        | IEYDTFGELKVPTDK                                  | 0.722641401        | 2              | 3.649869  |
| P14408        | IYELAAGGTAVGTGLNTR                               | 0.89039211         | 2              | 5.560617  |
| P14408        | KTAIELGYLTAEQFDEWVKPK                            | 0.860283442        | 3              | 3.576987  |

|               |                                                                 |                    |                |           |
|---------------|-----------------------------------------------------------------|--------------------|----------------|-----------|
| P14408        | LMNESLMLVLTALNPHIGYDK                                           | 0.818073181        | 3              | 5.647627  |
| P14408        | LMNESLMLVLTALNPHIGYDK+Oxidation(6)                              | 0.85344598         |                |           |
| P14408        | LNDHFPLVVWQTGSGTQTNMNVNEVISNR                                   | 0.809106128        | 3              | 6.411434  |
| P14408        | SGLGELILPENEPGSSIMPGK                                           | 0.719651532        | 2              | 4.37712   |
| P14408        | SGLGELILPENEPGSSIMPGK+Oxidation(17)                             | 0.995654128        |                |           |
| P14408        | SKEFAQVIK                                                       | 1.218562091        | 2              | 2.48217   |
| P14408        | SQSSNDTFPTAMHIAAALEVHQVLLPGLQK                                  | 0.735271233        | 3              | 4.20594   |
| P14408        | TAIELGYLTAEQFDEWVKPK                                            | 0.74787044         | 2              | 4.527267  |
| P14408        | THTQDAVPLTLGQFSGYVQVQYAMER                                      | 2.214922816        | 3              | 6.005599  |
| <b>P14480</b> | <b>FIBB Fibrinogen beta chain</b>                               | <b>1.68397676</b>  | <b>9.9E-20</b> | <b>10</b> |
| P14480        | AHYGGFTVQTEANK                                                  | 1.651486144        | 2              | 2.906667  |
| P14480        | DNENVINEYSILEDQK                                                | 1.330859736        | 2              | 3.269349  |
| P14480        | GFGNIATNEDTK                                                    | 1.344170537        | 2              | 2.739107  |
| P14480        | GFGNIATNEDTKK                                                   | 1.749539052        | 2              | 2.819092  |
| P14480        | IGPTELLIEMEDWK                                                  | 1.441323844        | 2              | 3.57419   |
| P14480        | LESDISAQTEYCHTPTCVNCPVVSQK                                      | 1.561559457        | 3              | 5.218724  |
| P14480        | LYIDETVNDNIPLNLR                                                | 1.266267105        | 2              | 3.006875  |
| P14480        | QTLNHERPIK                                                      | 1.977778097        | 2              | 2.747412  |
| P14480        | TENGGWTVIQNR                                                    | 1.342763364        | 2              | 3.228431  |
| P14480        | YCGLPGEYWLGNCK                                                  | 1.197496534        | 2              | 3.318062  |
| <b>P14604</b> | <b>ECHM Enoyl_CoA hydratase_mitochondrial</b>                   | <b>0.899798018</b> | <b>9.9E-20</b> | <b>8</b>  |
| P14604        | AFAAGADIK                                                       | 0.838583075        | 2              | 3.234199  |
| P14604        | AQFGQPEILLGTPGAGGTQR                                            | 0.833367982        | 2              | 5.647284  |
| P14604        | FLSHWDHITR                                                      | 0.786159226        | 2              | 3.129168  |
| P14604        | IFPVETLVEEAIQCAEK                                               | 0.741295055        | 2              | 5.81061   |
| P14604        | LFYSTFATDDR                                                     | 1.74262917         | 2              | 2.726903  |
| P14604        | NSSVGLIQLNRPK                                                   | 0.842227842        | 2              | 3.516642  |
| P14604        | SLAMEMVLTGDR                                                    | 0.63439499         | 2              | 3.384629  |
| P14604        | TFQDCYSQK                                                       | 0.877594237        | 2              | 2.788632  |
| <b>P14668</b> | <b>ANXA5 Annexin A5</b>                                         | <b>0.913273803</b> | <b>0.97174</b> | <b>3</b>  |
| P14668        | ETSGNLENLLAVVK                                                  | 0.993527836        | 2              | 3.481405  |
| P14668        | GLGTDEDSILNLLTAR                                                | 0.834521126        | 2              | 4.616629  |
| P14668        | GTVTDFSGFDGR                                                    | 0.712040475        | 2              | 2.932259  |
| <b>P14669</b> | <b>ANXA3 Annexin A3</b>                                         | <b>0.718549614</b> | <b>9.9E-20</b> | <b>5</b>  |
| P14669        | GMGTDEDTLIEILTTR                                                | 0.732890053        | 2              | 3.150109  |
| P14669        | GTINNYPGFNPSVDAEAIR                                             | 0.645142968        | 2              | 4.933701  |
| P14669        | QYQEAYEQALK                                                     | 0.717970716        | 2              | 2.551154  |
| P14669        | SEIDLLDIR                                                       | 0.822474935        | 2              | 2.617257  |
| P14669        | TLINILTR                                                        | 0.646292833        | 2              | 2.518674  |
| <b>P14685</b> | <b>PSMD3 26S proteasome non_ATPase regulatory subunit 3</b>     | <b>1.037807597</b> | <b>0.79013</b> | <b>3</b>  |
| P14685        | AIQLEYSEAR                                                      | 1.393634164        | 2              | 2.584062  |
| P14685        | LQLDSPEDAEIFIAK                                                 | 0.969250573        | 2              | 3.861351  |
| P14685        | SVFPEQANNNEWAR                                                  | 1.077427121        | 2              | 3.043399  |
| <b>P14740</b> | <b>DPP4 Dipeptidyl peptidase 4</b>                              | <b>0.874683031</b> | <b>0.00321</b> | <b>2</b>  |
| P14740        | LGTLEVEDQIEAAR                                                  | 0.875579566        | 2              | 3.906668  |
| P14740        | VLEDNSALDK                                                      | 0.914892669        | 2              | 2.860023  |
| <b>P14882</b> | <b>PCCA Propionyl_CoA carboxylase alpha chain_mitochondrial</b> | <b>0.89192051</b>  | <b>0.88258</b> | <b>12</b> |
| P14882        | FLSDVYPDGFK                                                     | 0.824016175        | 2              | 2.694512  |
| P14882        | FSSQEAASSFGDDR                                                  | 0.871884216        | 2              | 3.318769  |
| P14882        | HGNALWLNDR                                                      | 1.120402042        | 2              | 2.597135  |
| P14882        | HIEIQVLGDK                                                      | 0.887262658        | 2              | 2.397127  |
| P14882        | LHDEDHTVVASNNGPTFNVEVDGSK                                       | 0.912610593        | 3              | 6.014308  |
| P14882        | LQVEHPVTECITGLDLVQEMILIAK                                       | 1.037187223        | 3              | 3.542439  |
| P14882        | MADEAVCVGPAPTSK                                                 | 0.777510104        | 2              | 4.370352  |
| P14882        | MEDALDSYVIR                                                     | 0.946318425        | 2              | 3.107002  |

|               |                                                                       |                    |                |           |
|---------------|-----------------------------------------------------------------------|--------------------|----------------|-----------|
| P14882        | SYLNMDAIMEAIK                                                         | 0.896929074        | 2              | 3.150029  |
| P14882        | TGAQAVHPGYGFLSENK                                                     | 1.021134536        | 2              | 4.045664  |
| P14882        | TVAIHSDVDASSVHVK                                                      | 0.871084779        | 3              | 4.100473  |
| P14882        | VVEEAPSIFLDPETR                                                       | 0.738029186        | 2              | 4.150364  |
| <b>P15083</b> | <b>PIGR Polymeric immunoglobulin receptor</b>                         | <b>1.187831275</b> | <b>0.89621</b> | <b>4</b>  |
| P15083        | EIQNAGDQAQENR                                                         | 0.948632797        | 2              | 3.655425  |
| P15083        | FSVLITGLR                                                             | 1.240590376        | 2              | 2.667918  |
| P15083        | GVTGGSVAIVCPYNPK                                                      | 1.016956219        | 2              | 4.329145  |
| P15083        | NNADLQVLEPEPELLYK                                                     | 0.763727191        | 2              | 2.640825  |
| <b>P15149</b> | <b>CP2A2 Cytochrome P450 2A2</b>                                      | <b>0.631637576</b> | <b>9.9E-20</b> | <b>10</b> |
| P15149        | DVQECILEEAGYLIK                                                       | 0.65547555         | 3              | 4.597108  |
| P15149        | DVYSSITQLSER                                                          | 0.964182691        | 2              | 2.426858  |
| P15149        | FSNLAPLGIPR                                                           | 0.697805749        | 2              | 3.20416   |
| P15149        | GELPTFNILFK                                                           | 0.39876664         | 2              | 2.417119  |
| P15149        | GTDVFPPIIGSLMTEPK                                                     | 0.47594201         | 2              | 3.933875  |
| P15149        | GYGFSLSNVEQAK                                                         | 0.630969105        | 2              | 3.449176  |
| P15149        | NFIDSFLIR                                                             | 0.79195352         | 1              | 2.565989  |
| P15149        | QNHSTLDPNSPR                                                          | 0.656700311        | 2              | 3.029952  |
| P15149        | TLQGTGCGAPIDPSIYLSK                                                   | 0.554428243        | 2              | 4.209558  |
| P15149        | TVSNVINSIVFGNR                                                        | 0.68794923         | 2              | 3.530468  |
| <b>P15178</b> | <b>SYDC Aspartyl_tRNA synthetase_cytoplasmic</b>                      | <b>1.060659846</b> | <b>0.08643</b> | <b>6</b>  |
| P15178        | FQTEIQTVNK                                                            | 1.242283278        | 2              | 2.387757  |
| P15178        | GEEILSGAQR                                                            | 0.698432902        | 2              | 2.91514   |
| P15178        | LEYCEALAMLR                                                           | 0.805895917        | 2              | 2.931232  |
| P15178        | LPLQLDDAIRPEVEGEDGR                                                   | 1.699445997        | 3              | 3.89853   |
| P15178        | QMVKFAANINK+Oxidation(1)                                              | 1.149205676        |                |           |
| P15178        | SNAYLAQSPQLYK                                                         | 1.137947373        | 2              | 2.842947  |
| <b>P15429</b> | <b>ENOB Beta_enolase</b>                                              | <b>0.965745314</b> | <b>0.99999</b> | <b>7</b>  |
| P15429        | DATNVGDEGGFAPNILENNEALELK                                             | 0.860043041        | 2              | 5.692757  |
| P15429        | FMIELDGTENK                                                           | 0.982174547        | 2              | 2.341909  |
| P15429        | HIADLAGNPDVLPVPFNVINGGSHAGNK                                          | 0.721459268        | 3              | 4.629873  |
| P15429        | IEEALGDK                                                              | 0.939518542        | 1              | 2.36389   |
| P15429        | TAIQAAGYPDK                                                           | 1.01958724         | 2              | 2.682114  |
| P15429        | VNQIGSVTESIQACK                                                       | 1.098756489        | 2              | 5.042507  |
| P15429        | YNQLMRIEEALGDK                                                        | 0.954924599        | 2              | 2.492086  |
| <b>P15473</b> | <b>IBP3 Insulin_like growth factor_binding protein 3</b>              | <b>0.71550193</b>  | <b>0.04636</b> | <b>2</b>  |
| P15473        | EMEDTLNHLKFLNLVLSPR                                                   | 0.524491059        | 2              | 2.313431  |
| P15473        | MEVIIKQARDSQR                                                         | 0.976075765        | 2              | 2.312101  |
| <b>P15650</b> | <b>ACADL Long_chain specific acyl_CoA dehydrogenase_mitochondrial</b> | <b>0.821290243</b> | <b>9.9E-20</b> | <b>20</b> |
| P15650        | AFVDSCLQLHETK                                                         | 0.862179913        | 2              | 4.137933  |
| P15650        | AQDTAELFFEDVR                                                         | 0.983574578        | 2              | 4.809271  |
| P15650        | AQDTAELFFEDVRLPASALLGEENK                                             | 1.012540809        | 3              | 4.291989  |
| P15650        | CIGAIAMTEPGAGSDLQGV                                                   | 0.685068758        | 2              | 6.102579  |
| P15650        | CIGAIAMTEPGAGSDLQGV+Oxidation(6)                                      | 0.848213313        |                |           |
| P15650        | EQIEQFIPQMTAGK                                                        | 1.170717656        | 2              | 4.990434  |
| P15650        | FFQEEVIPYHEEWEK                                                       | 1.996401953        | 2              | 4.958344  |
| P15650        | GFYYLMQELPQER                                                         | 1.117657641        | 2              | 3.911878  |
| P15650        | IFSSEHDIFR                                                            | 1.071627659        | 2              | 2.987184  |
| P15650        | KFFQEEVIPYHEEWEK                                                      | 1.836703325        | 3              | 5.007729  |
| P15650        | LDSASASMAK                                                            | 0.734226863        | 2              | 2.63886   |
| P15650        | LPASALLGEENK                                                          | 0.828839675        | 2              | 3.415677  |
| P15650        | LPASALLGEENKGFYYLMQELPQER                                             | 0.950819101        | 3              | 3.626521  |
| P15650        | QGLLGINIAEK                                                           | 0.817585617        | 2              | 3.297413  |
| P15650        | RLDSASASMAK                                                           | 0.766897439        | 2              | 3.485178  |
| P15650        | RLDSASASMAK+Oxidation(8)                                              | 1.420420659        |                |           |

|               |                                                                         |                    |                |           |
|---------------|-------------------------------------------------------------------------|--------------------|----------------|-----------|
| P15650        | RSGSDWILNGSK                                                            | 1.246628161        | 2              | 2.857289  |
| P15650        | SGSDWILNGSK                                                             | 0.963777339        | 2              | 2.932576  |
| P15650        | VQPIYGGTNEIMK                                                           | 0.800029279        | 2              | 3.250186  |
| P15650        | VQPIYGGTNEIMK+Oxidation(11)                                             | 0.894506149        |                |           |
| <b>P15651</b> | <b>ACADS Short_chain specific acyl_CoA dehydrogenase_ mitochondrial</b> | <b>0.814483787</b> | <b>0.05935</b> | <b>9</b>  |
| P15651        | ASSTANLIFEDCR                                                           | 0.979621925        | 2              | 3.422934  |
| P15651        | EEGDSWVLNGTK                                                            | 0.61582046         | 2              | 2.304456  |
| P15651        | ELVPIAAQLDK                                                             | 0.823492808        | 1              | 1.956785  |
| P15651        | ELVPIAAQLDKEHLFPTSQVK                                                   | 0.803869278        | 2              | 4.037627  |
| P15651        | GISAFVPMPTPGLTLGK                                                       | 0.991138332        | 2              | 2.510096  |
| P15651        | IGCFALSEPGNGSDAGAASTTAR                                                 | 0.777754369        | 2              | 5.58182   |
| P15651        | IGIASQALGIAQASLDCAVK                                                    | 0.819828449        | 2              | 4.930885  |
| P15651        | ITEIYEGTSEIQR                                                           | 0.813447333        | 2              | 4.297855  |
| P15651        | LAASEAATAISHQAIQLGGMGYVTEMPAER                                          | 0.938169615        | 4              | 4.912566  |
| <b>P15684</b> | <b>AMPN Aminopeptidase N</b>                                            | <b>1.080355881</b> | <b>0.34783</b> | <b>5</b>  |
| P15684        | ALGDTAPAPNIDTTELVER                                                     | 0.881459431        | 2              | 3.906228  |
| P15684        | AQIHDSFNLASAGK                                                          | 1.110075338        | 2              | 3.77442   |
| P15684        | ESALVFDQSSSISNK                                                         | 1.602443717        | 2              | 2.454454  |
| P15684        | VMAVDALASSHPLSSPANEVNTPAQISELFDISITYSK                                  | 1.762124657        | 3              | 3.823935  |
| P15684        | VVATTQMQAADAR                                                           | 1.248913843        | 2              | 2.777344  |
| <b>P15709</b> | <b>ST2A1 Bile salt sulfotransferase</b>                                 | <b>1.126701648</b> | <b>0.67713</b> | <b>2</b>  |
| P15709        | GNVLYGSWFEHIR                                                           | 1.070843016        | 2              | 3.04906   |
| P15709        | NHFTVSQAEAFDK                                                           | 1.360527767        | 2              | 3.661526  |
| <b>P15978</b> | <b>HA11 Class I histocompatibility antigen_ Non_RT1.A alpha_1 chain</b> | <b>1.186273814</b> | <b>0.25198</b> | <b>2</b>  |
| P15978        | VEHEGLPEPLSQR                                                           | 1.363617669        | 2              | 3.271872  |
| P15978        | YSDAENPR                                                                | 0.934906538        | 2              | 2.722694  |
| <b>P15999</b> | <b>ATPA ATP synthase subunit alpha_ mitochondrial</b>                   | <b>1.005253113</b> | <b>9.9E-20</b> | <b>24</b> |
| P15999        | AVDSLPIGR                                                               | 0.850993679        | 2              | 3.494999  |
| P15999        | EIVTNFLAGFEP                                                            | 7.179584967        | 2              | 2.409987  |
| P15999        | EVAFAQFGSDLDAATQQLLSR                                                   | 1.056779237        | 2              | 6.775969  |
| P15999        | FESAFLSHVVSQHQSLLGNIR                                                   | 0.815510572        | 2              | 6.011279  |
| P15999        | GIRPAINVGLSVSR                                                          | 0.739999997        | 3              | 3.626514  |
| P15999        | GMSLNLEPDNVGVVFGNDK                                                     | 1.09653781         | 2              | 5.684156  |
| P15999        | GMSLNLEPDNVGVVFGNDK+Oxidation(1)                                        | 0.944489477        |                |           |
| P15999        | GYLDKLEPSK                                                              | 0.605157912        | 1              | 2.593194  |
| P15999        | ILGADTSVDLEETGR                                                         | 1.025882335        | 2              | 5.006292  |
| P15999        | LELAQYR                                                                 | 0.863537733        | 2              | 2.693234  |
| P15999        | LKEIVTNFLAGFEP                                                          | 4.556708023        | 2              | 3.256053  |
| P15999        | LTDADAMK                                                                | 0.897996922        | 2              | 2.552619  |
| P15999        | LTDADAMK+Oxidation(6)                                                   | 0.930372581        |                |           |
| P15999        | LYCIYVAIGQK                                                             | 1.543662009        | 2              | 2.409989  |
| P15999        | NVQAEEMVEFSSGLK                                                         | 1.832220956        | 2              | 4.355209  |
| P15999        | QGQYSPMAIEEQVAVIYAGVR                                                   | 1.885876869        | 3              | 5.223771  |
| P15999        | RTGAIVDVPVGDPELLGR                                                      | 0.669229807        | 2              | 2.85457   |
| P15999        | STVAQLVK                                                                | 0.823822075        | 2              | 2.39713   |
| P15999        | TGAIVDVPVGDPELLGR                                                       | 0.747709296        | 2              | 4.928999  |
| P15999        | TGTAEMSSILEER                                                           | 0.804889718        | 2              | 4.265776  |
| P15999        | TGTAEMSSILEER+Oxidation(5)                                              | 0.964986021        |                |           |
| P15999        | TSIAIDTIINQK                                                            | 0.831362458        | 2              | 4.391929  |
| P15999        | VLSIGDIAR                                                               | 0.964526316        | 2              | 3.160133  |
| P15999        | VVDALGNAIDGK                                                            | 0.86592944         | 2              | 4.185841  |
| <b>P16036</b> | <b>MPCP Phosphate carrier protein_ mitochondrial</b>                    | <b>0.855324603</b> | <b>0.99818</b> | <b>7</b>  |
| P16036        | ALYSNILGEENTYLWR                                                        | 1.037215309        | 2              | 3.331951  |
| P16036        | EEGLNAFYK                                                               | 1.116176047        | 1              | 2.318203  |
| P16036        | FGFYEVFK                                                                | 0.988282395        | 2              | 2.342442  |

|               |                                                            |                    |                |           |
|---------------|------------------------------------------------------------|--------------------|----------------|-----------|
| P16036        | GIFNGFSITLK                                                | 0.836552259        | 2              | 2.82009   |
| P16036        | GSTASQVLQR                                                 | 0.968091951        | 2              | 2.970787  |
| P16036        | IQTQPGYANTLR                                               | 1.039055892        | 2              | 3.760676  |
| P16036        | MYKEEGLNAFYK                                               | 0.885287386        | 2              | 2.88434   |
| <b>P16086</b> | <b>SPTA2 Spectrin alpha chain_ brain</b>                   | <b>0.951915037</b> | <b>0.10607</b> | <b>33</b> |
| P16086        | ALINADELANDVAGAEALLDR                                      | 0.972502343        | 2              | 5.12341   |
| P16086        | ALSSEKPYVTK                                                | 1.082036519        | 2              | 3.021644  |
| P16086        | DLSSVQTLTK                                                 | 0.972606816        | 2              | 2.781344  |
| P16086        | EAALTSEEVGADLEQVEVLQK                                      | 0.72392911         | 2              | 3.743141  |
| P16086        | GEIDAHEDSFK                                                | 0.916240963        | 2              | 2.405044  |
| P16086        | GVIDMGNSLIER                                               | 0.954973209        | 2              | 3.189369  |
| P16086        | HQAFAEELSANQSR                                             | 1.000972077        | 2              | 3.569421  |
| P16086        | HQEHKGEIDAHEDSFK                                           | 1.213114943        | 3              | 4.149324  |
| P16086        | HQLLEADISAHEDR                                             | 1.155539835        | 3              | 4.028481  |
| P16086        | KFEFQTDLAAHEER                                             | 0.984911396        | 3              | 4.819622  |
| P16086        | LFGAAEVQR                                                  | 1.084598036        | 2              | 2.582831  |
| P16086        | LGDSHDLQR                                                  | 0.976672154        | 2              | 3.187368  |
| P16086        | LGESQTLQQFSR                                               | 0.437201409        | 2              | 3.238065  |
| P16086        | LIQEQHPPEELIK                                              | 1.111800248        | 2              | 3.524149  |
| P16086        | LQQSHPLSANQIQVK                                            | 1.015405489        | 2              | 3.946393  |
| P16086        | LQTASDESYKDPTNIQSK                                         | 0.669417104        | 2              | 4.325     |
| P16086        | LQVASDENYKDPTNLQGK                                         | 0.841587819        | 2              | 4.613623  |
| P16086        | LSDDNTIGQEEIQQR                                            | 1.02683583         | 2              | 4.238682  |
| P16086        | MTLVASEDYGDTLAAIQGLLK                                      | 1.026489646        | 2              | 3.162891  |
| P16086        | NQALNTDNYGHDLASVQALQR                                      | 1.036879988        | 3              | 4.873584  |
| P16086        | NTTGVTEEALK                                                | 0.822605043        | 2              | 2.350149  |
| P16086        | QFQDAGHFDAENIKK                                            | 0.641035215        | 2              | 2.580685  |
| P16086        | REELITNWEQIR                                               | 1.187065725        | 2              | 3.451416  |
| P16086        | SADESGQALLAAGHYASDEVK                                      | 0.805766664        | 3              | 3.639349  |
| P16086        | SLQQLAEEER                                                 | 0.864858592        | 2              | 2.761007  |
| P16086        | SQLLGSAAHEVQR                                              | 0.535499543        | 2              | 3.21781   |
| P16086        | SSEEIESAFK                                                 | 1.048614462        | 2              | 2.428163  |
| P16086        | SSLSSAQADFNQLAELDR                                         | 0.913745743        | 2              | 4.939239  |
| P16086        | TATDEAYKDPSNLQGK                                           | 0.951042319        | 2              | 3.581089  |
| P16086        | TKQEEVNAAWQR                                               | 1.416447818        | 2              | 3.027998  |
| P16086        | VLETAEDIQER                                                | 0.886991723        | 2              | 3.42193   |
| P16086        | VNDVCTNGQDLIK                                              | 1.209897864        | 2              | 3.177594  |
| P16086        | VNSLGETAQR                                                 | 1.176845349        | 2              | 2.34579   |
| <b>P16232</b> | <b>DHI1 Corticosteroid 11_beta_dehydrogenase isozyme 1</b> | <b>1.252460637</b> | <b>0.15356</b> | <b>10</b> |
| P16232        | EECALEIK                                                   | 1.642300038        | 1              | 1.97235   |
| P16232        | EMAYHLSKMGAHVLTAR+Oxidation(1)                             | 0.762135369        |                |           |
| P16232        | EMAYHLSKMGAHVLTAR+Oxidation(8)                             | 0.762135369        |                |           |
| P16232        | ETSGIILSQAAPK                                              | 1.358971765        | 2              | 3.317542  |
| P16232        | FALDGFSTIR                                                 | 1.640375648        | 2              | 3.079359  |
| P16232        | KDEVYYDK                                                   | 1.038933943        | 2              | 3.00259   |
| P16232        | MGAHVLTAR                                                  | 1.096455636        | 2              | 2.919173  |
| P16232        | MTQPLIASYSASK                                              | 1.186169808        | 2              | 3.380455  |
| P16232        | MTQPLIASYSASK+Oxidation(0)                                 | 3.229444951        |                |           |
| P16232        | SSWTPLLGNPGR                                               | 1.126483894        | 2              | 3.606695  |
| <b>P16290</b> | <b>PGAM2 Phosphoglycerate mutase 2</b>                     | <b>1.320047485</b> | <b>0.18122</b> | <b>7</b>  |
| P16290        | AMEAVAAQGK                                                 | 0.917013933        | 2              | 2.795687  |
| P16290        | AMEAVAAQGK+Oxidation(1)                                    | 1.316739663        |                |           |
| P16290        | FLGDEETVR                                                  | 0.692865414        | 2              | 2.669859  |
| P16290        | HGESSWNQENR                                                | 1.206362085        | 2              | 3.63271   |
| P16290        | HNYASISK                                                   | 1.110939948        | 2              | 2.369684  |
| P16290        | HYGGLTGLNK                                                 | 1.551967184        | 1              | 2.924372  |

|               |                                                    |                    |                |           |
|---------------|----------------------------------------------------|--------------------|----------------|-----------|
| P16290        | VLIAAHGNSLR                                        | 1.053583713        | 2              | 2.827607  |
| <b>P16303</b> | <b>CES3 Carboxylesterase 3</b>                     | <b>0.842853645</b> | <b>0.00025</b> | <b>20</b> |
| P16303        | AISESGVVLTSALITTDSPKIANLIATLSGCK                   | 0.89386655         | 3              | 3.861336  |
| P16303        | AKEAAEESHVK                                        | 0.695110891        | 2              | 4.250408  |
| P16303        | DGASEEETNLSK                                       | 0.745166616        | 2              | 4.197501  |
| P16303        | EAAEESHVK                                          | 1.111313381        | 2              | 2.927894  |
| P16303        | ENIPLQFSEDCLYLVNVTADLTK                            | 9.146940951        | 2              | 4.423151  |
| P16303        | ESYPFLPTVIDGVVLPK                                  | 0.948140274        | 2              | 4.154991  |
| P16303        | FAPPQPAEPWNFVK                                     | 0.940516152        | 2              | 2.551271  |
| P16303        | IGASTQAAQR                                         | 1.315324547        | 2              | 2.852261  |
| P16303        | KENIPLQFSEDCLYLVNVTADLTK                           | 5.14316818         | 2              | 4.658246  |
| P16303        | LDLLGNPK                                           | 0.882791034        | 2              | 2.495217  |
| P16303        | QFEGWIIPTLMGYLSEK                                  | 1.487029467        | 2              | 4.090944  |
| P16303        | QKTEDELLETSLK                                      | 0.830620948        | 3              | 3.701194  |
| P16303        | SFNTVPYIVGINK                                      | 2.225028988        | 2              | 3.375175  |
| P16303        | TEDELLETSLK                                        | 0.614355478        | 2              | 3.726542  |
| P16303        | TPEEILAEK                                          | 2.646499938        | 2              | 2.342819  |
| P16303        | TTTSAVMVHCLR                                       | 0.555408935        | 2              | 2.803672  |
| P16303        | TTTSAVMVHCLR+Oxidation(6)                          | 0.92549329         |                |           |
| P16303        | TVIGDHGDELFSVFGSPFLK                               | 1.509835172        | 2              | 5.399829  |
| P16303        | YFGGTDDPAK                                         | 0.735321256        | 2              | 3.198878  |
| P16303        | YVNLEGAQPVAVFLGIPFAKPLGLSLR                        | 0.706227441        | 3              | 3.579983  |
| <b>P16332</b> | <b>MUTA Methylmalonyl_CoA mutase_mitochondrial</b> | <b>0.97794848</b>  | <b>0.4944</b>  | <b>7</b>  |
| P16332        | AAVQLDDIEK                                         | 1.731828702        | 2              | 2.620392  |
| P16332        | AHCQTSWLSLREQDPYNNIVR                              | 1.262975692        | 3              | 5.170474  |
| P16332        | GDVGMAGVAIDTVEDTK                                  | 0.780119619        | 2              | 3.069168  |
| P16332        | IDSGSEVIVGVNK                                      | 0.878036565        | 2              | 3.577084  |
| P16332        | ILFDGIPLEK                                         | 0.99467298         | 2              | 2.318594  |
| P16332        | NTQIIIQEEGIPK                                      | 0.996468983        | 2              | 3.881436  |
| P16332        | TGLQAGLTIDEFAPR                                    | 0.950086946        | 2              | 3.439996  |
| <b>P16409</b> | <b>MYL3 Myosin light chain 3</b>                   | <b>0.863541159</b> | <b>0.99289</b> | <b>6</b>  |
| P16409        | AAPAPAAAAPAAPEPERPK                                | 0.82411539         | 2              | 4.281186  |
| P16409        | ALGQNPTQAEVLR                                      | 0.931438409        | 2              | 3.976088  |
| P16409        | DTGTYEDFVEGLR                                      | 0.969127033        | 2              | 3.297331  |
| P16409        | MMDFETFLPMLQHISK                                   | 0.863323075        | 2              | 2.926264  |
| P16409        | NKDTGTYEDFVEGLR                                    | 0.793437233        | 2              | 4.133505  |
| P16409        | VFDKEGNGTVMGAELR                                   | 0.970092036        | 2              | 3.517663  |
| <b>P16617</b> | <b>PGK1 Phosphoglycerate kinase 1</b>              | <b>1.007220541</b> | <b>0.25948</b> | <b>18</b> |
| P16617        | AHSSMVGVNLPQK                                      | 0.874704849        | 3              | 4.083166  |
| P16617        | AHSSMVGVNLPQK+Oxidation(4)                         | 0.95835882         |                |           |
| P16617        | ALESPERPFLLGGAK                                    | 1.695965947        | 3              | 4.525317  |
| P16617        | DCVGSEVENACANPAAGTVILLENLR                         | 0.99004029         | 3              | 6.297062  |
| P16617        | FCLDNGAK                                           | 0.818175753        | 1              | 2.05084   |
| P16617        | GCITIIGGGDTATCCA                                   | 1.015689549        | 2              | 5.566938  |
| P16617        | IQLINMLDK                                          | 0.789736876        | 2              | 2.72171   |
| P16617        | IQLINMLDK+Oxidation(6)                             | 1.478456165        |                |           |
| P16617        | ITLPVDFVTADKFDENAK                                 | 1.005498141        | 2              | 4.905708  |
| P16617        | QIVWNGPVGVFEWEAFAR                                 | 1.018964936        | 2              | 3.100346  |
| P16617        | SVVLMSHLGRPDGVPMPDKYSLEPVAAELK                     | 1.150801499        | 4              | 4.691022  |
| P16617        | TGQATVASGIPAGWMLDCGTESSK                           | 0.948045356        | 2              | 4.736675  |
| P16617        | TGQATVASGIPAGWMLDCGTESSK                           | 0.982532389        | 3              | 4.254049  |
| P16617        | VLNNMEIGTSLYDEEGAK                                 | 0.907603717        | 2              | 5.54474   |
| P16617        | VLNNMEIGTSLYDEEGAK+Oxidation(4)                    | 0.823938476        |                |           |
| P16617        | VLPGVDALSNV                                        | 1.199853669        | 2              | 2.735156  |
| P16617        | WNTEDKVSHVSTGGASLELLEK                             | 0.765972107        | 3              | 4.855772  |
| P16617        | YSLEPVAAELK                                        | 1.019190239        | 2              | 3.618829  |

|               |                                                         |                    |                |           |
|---------------|---------------------------------------------------------|--------------------|----------------|-----------|
| <b>P16638</b> | <b>ACLY ATP_citrate synthase</b>                        | <b>1.170193709</b> | <b>0.00069</b> | <b>25</b> |
| P16638        | AFDSGIIPMEFVNK                                          | 1.219102145        | 2              | 4.132862  |
| P16638        | AFDSGIIPMEFVNK+Oxidation(8)                             | 0.824683603        |                |           |
| P16638        | DEPSVAAMVYPFTGDHK                                       | 1.269132974        | 2              | 3.228929  |
| P16638        | DGVYILDLAAK                                             | 1.199945902        | 2              | 2.982784  |
| P16638        | DLVSSLTSGLLTIGDR                                        | 1.208427674        | 2              | 3.486832  |
| P16638        | EAYPEEAYIADLDAK                                         | 1.201994027        | 2              | 3.064889  |
| P16638        | FGGALDAAK                                               | 1.06832144         | 2              | 2.458114  |
| P16638        | GAIVPAQEVPPPTVPMDSWAR                                   | 1.124199077        | 2              | 4.228379  |
| P16638        | GGPNYQEGLR                                              | 1.544598581        | 2              | 2.718846  |
| P16638        | GVTIIGPATVGGIKPGCFK                                     | 1.027202825        | 2              | 2.852841  |
| P16638        | HLLVHAPEDK                                              | 0.834255805        | 2              | 2.664155  |
| P16638        | HLLVHAPEDKK                                             | 1.398566813        | 2              | 3.564683  |
| P16638        | IGNTGGMMLDNLASK                                         | 1.055802651        | 2              | 3.65479   |
| P16638        | LGLVGVNLSLDGVK                                          | 1.074203922        | 2              | 2.830339  |
| P16638        | LNAEDIK                                                 | 1.466630847        | 1              | 1.913635  |
| P16638        | QHFPATPLLDYALEVEK                                       | 1.11886233         | 3              | 4.445997  |
| P16638        | RGGPNYQEGLR                                             | 2.010908921        | 2              | 3.176728  |
| P16638        | SFDELGEIQSVYEDLVAK                                      | 1.020305398        |                |           |
| P16638        | SGGMSNELNNIISR                                          | 1.096510435        | 2              | 3.700621  |
| P16638        | TIAIAEGIPEALTR                                          | 1.16605174         | 2              | 5.253416  |
| P16638        | TTDGVYEGVAIGGDR                                         | 1.38978788         | 2              | 3.421449  |
| P16638        | TTDGVYEGVAIGGDRYPGSTFMDHVLR                             | 0.949704582        | 3              | 4.084336  |
| P16638        | VDATADYICK                                              | 0.857874947        | 2              | 2.470526  |
| P16638        | WGDIEFPPPFGR                                            | 1.135351387        | 2              | 3.933861  |
| P16638        | YICTTSAIQNR                                             | 1.157959201        | 2              | 2.813505  |
| <b>P16970</b> | <b>ABCD3 ATP_binding cassette sub_family D member 3</b> | <b>0.903137699</b> | <b>0.01356</b> | <b>5</b>  |
| P16970        | FDHVPLATPNGDILIQDLSFEVR                                 | 0.818808003        | 2              | 2.48301   |
| P16970        | GIEGAQASPLIPGAGEIINADNIK                                | 0.731024334        | 3              | 4.97734   |
| P16970        | GYLDNVQLGHILER                                          | 0.866538208        | 2              | 3.446207  |
| P16970        | HLHSTHSELLEDYQSGR                                       | 0.903332227        | 3              | 5.156248  |
| P16970        | SGANVLICGPNCGCK                                         | 0.801705704        | 2              | 3.116311  |
| <b>P17074</b> | <b>RS19 40S ribosomal protein S19</b>                   | <b>0.993409512</b> | <b>0.88781</b> | <b>5</b>  |
| P17074        | DVNQQEFVR                                               | 0.478760726        | 2              | 2.368493  |
| P17074        | ELAPYDENWFYTR                                           | 0.596302826        | 2              | 2.484498  |
| P17074        | HKELAPYDENWFYTR                                         | 1.031645001        | 3              | 3.352571  |
| P17074        | RVLQALEGLK                                              | 1.279894372        | 3              | 3.319066  |
| P17074        | VLQALEGLK                                               | 1.049516042        | 2              | 2.717939  |
| <b>P17077</b> | <b>RL9 60S ribosomal protein L9</b>                     | <b>1.146508666</b> | <b>5.6E-05</b> | <b>8</b>  |
| P17077        | DFNHINVELSLLGK                                          | 1.347247218        | 3              | 3.752424  |
| P17077        | FLDGIYVSEK                                              | 1.089906129        | 2              | 3.201822  |
| P17077        | GTVQQPDE                                                | 1.201441588        | 1              | 2.101096  |
| P17077        | KFLDGIYVSEK                                             | 1.326254335        | 2              | 2.726167  |
| P17077        | SVYAHFPINVVIQENGLVEIR                                   | 1.173463627        | 3              | 3.74064   |
| P17077        | TGVACSVSQAQK                                            | 1.307073492        | 2              | 3.669527  |
| P17077        | TICSHVQNMNIK                                            | 0.859071429        | 2              | 2.878561  |
| P17077        | TILSNQTVDIPENVDTILK                                     | 0.876471062        | 2              | 3.154075  |
| <b>P17078</b> | <b>RL35 60S ribosomal protein L35</b>                   | <b>1.232785316</b> | <b>0.48063</b> | <b>2</b>  |
| P17078        | QLDDLKVELSCLR                                           | 0.983833985        | 2              | 2.586651  |
| P17078        | VLTVINQTQK                                              | 1.277828099        | 2              | 3.248564  |
| <b>P17178</b> | <b>CP27A Sterol 26_hydroxylase_mitochondrial</b>        | <b>1.308934416</b> | <b>6.8E-05</b> | <b>4</b>  |
| P17178        | DHESTEGPGTGQDRPR                                        | 5.071100671        | 2              | 2.52979   |
| P17178        | MLKPAEAALYTDALNEVISDFIAR                                | 1.599111076        | 3              | 4.138936  |
| P17178        | VGCLEPSIPEDTATFIR                                       | 1.450034267        | 2              | 2.884553  |
| P17178        | YEVVLSPGMGEVK                                           | 1.04995525         | 2              | 3.745264  |



|               |                                                             |                    |                |           |
|---------------|-------------------------------------------------------------|--------------------|----------------|-----------|
| <b>P17425</b> | <b>HMCS1 Hydroxymethylglutaryl_CoA synthase_cytoplasmic</b> | <b>0.982219975</b> | <b>0.99492</b> | <b>15</b> |
| P17425        | ASAELFNQK                                                   | 1.197211243        | 2              | 3.109892  |
| P17425        | DKNSIYSGLEAFGDVK                                            | 1.534462091        | 2              | 3.026466  |
| P17425        | DVGIVALEIYFSPQYVDQAELEK                                     | 0.974243911        | 3              | 3.689102  |
| P17425        | GTHMQHAYDFYKPDMLSEYPPVVDGK+Oxidation(3)                     | 0.964224948        |                |           |
| P17425        | ITASLCDLK                                                   | 0.881949828        | 1              | 1.942125  |
| P17425        | LEDTYFDRDVEK                                                | 0.843488251        | 2              | 2.920728  |
| P17425        | LPATSGEPESAVISNGEH                                          | 2.939749804        | 2              | 4.239635  |
| P17425        | MFLNDFLNDQNR                                                | 0.727225108        | 2              | 2.97792   |
| P17425        | MFLNDFLNDQNR+Oxidation(0)                                   | 0.913654452        |                |           |
| P17425        | MGFCTDREDINSLCLTVVQK                                        | 1.053031659        | 3              | 4.179461  |
| P17425        | NLSYDCIGR                                                   | 1.095648118        | 2              | 2.872298  |
| P17425        | RPSTNDHSLDEGVGLVHSNTATEHIPSPAK                              | 1.89556525         | 4              | 4.604982  |
| P17425        | TCVAPDVFAENMK                                               | 0.963765223        | 2              | 2.783931  |
| P17425        | VTQDATPGSALDK                                               | 0.827473711        | 2              | 3.805212  |
| P17425        | YTIGLGQAR                                                   | 0.937648876        | 2              | 2.688532  |
| <b>P17426</b> | <b>AP2A1 AP_2 complex subunit alpha_1</b>                   | <b>1.020383329</b> | <b>0.19954</b> | <b>2</b>  |
| P17426        | NADVELQQR                                                   | 1.196415534        | 2              | 2.807719  |
| P17426        | VGGYILGEFGNLIAGDPR                                          | 0.962710864        | 2              | 3.750861  |
| <b>P17475</b> | <b>A1AT Alpha_1_antiproteinase</b>                          | <b>1.203373451</b> | <b>9.9E-20</b> | <b>5</b>  |
| P17475        | MQHLEQTLTK                                                  | 1.723559972        | 2              | 3.007922  |
| P17475        | MQHLEQTLTK+Oxidation(0)                                     | 2.72128273         |                |           |
| P17475        | TLLSSLGITR                                                  | 2.406110039        | 2              | 3.155347  |
| P17475        | VFNNADLSGITEDAPLK                                           | 1.312283154        | 2              | 5.7359    |
| P17475        | VINDYVEK                                                    | 1.60042977         | 2              | 2.34795   |
| <b>P17702</b> | <b>RL28 60S ribosomal protein L28</b>                       | <b>1.785053311</b> | <b>2.8E-06</b> | <b>2</b>  |
| P17702        | NCSSFLIK                                                    | 1.14548158         | 2              | 2.415654  |
| P17702        | QTYSTEPNNLK                                                 | 2.165051144        | 2              | 3.01876   |
| <b>P17764</b> | <b>TH1L Acetyl_CoA acetyltransferase_mitochondrial</b>      | <b>1.00481495</b>  | <b>0.0002</b>  | <b>17</b> |
| P17764        | EEQDKYAIGSYTR                                               | 0.98348814         | 2              | 3.561487  |
| P17764        | ENGTVTAANASTLNDGAAAVVLMTEAAQR                               | 1.444022742        | 2              | 4.623279  |
| P17764        | EVYMGNVIQGGEGQAPTR                                          | 1.201290249        | 2              | 5.394138  |
| P17764        | EVYMGNVIQGGEGQAPTR+Oxidation(3)                             | 1.9958673          |                |           |
| P17764        | FANEITPITISVK                                               | 1.101243305        | 2              | 3.848681  |
| P17764        | GKPDVVVKEDEEYK                                              | 0.711705214        | 2              | 3.453354  |
| P17764        | GKPDVVVKEDEEYKR                                             | 0.996239487        | 2              | 5.075504  |
| P17764        | IAAFADAADVPIDFPLAPAYAVPK                                    | 1.248487856        | 2              | 5.742885  |
| P17764        | IHMGNCAENTAK                                                | 0.974300959        | 2              | 3.178412  |
| P17764        | IHMGNCAENTAK+Oxidation(2)                                   | 0.950066766        |                |           |
| P17764        | LEDLIVK                                                     | 0.892105146        | 2              | 2.711647  |
| P17764        | LGTIAIQGAIEK                                                | 1.071445924        | 2              | 3.293019  |
| P17764        | QATLGAGLPIATPCTTVNK                                         | 0.944112075        | 2              | 4.624789  |
| P17764        | QGEFGLASICNGGGASAVLIEK                                      | 0.834134035        | 2              | 4.942674  |
| P17764        | TPIGSFLGSLASQPATK                                           | 1.509930063        | 2              | 4.479323  |
| P17764        | VNVHGGAVSLGHPIGMSGAR                                        | 0.752841272        | 2              | 5.807877  |
| P17764        | VNVHGGAVSLGHPIGMSGAR+Oxidation(15)                          | 1.464687318        |                |           |
| <b>P17879</b> | <b>HS71B Heat shock 70 kDa protein 1B</b>                   | <b>1.456243991</b> | <b>9.9E-20</b> | <b>3</b>  |
| P17879        | QTQFTTYSDNQPGVLIQVYEGER                                     | 1.253831091        | 3              | 5.323452  |
| P17879        | TTPSYVAFTDTER                                               | 1.61298764         | 2              | 3.729563  |
| P17879        | VEIIANDQGNR                                                 | 1.049561472        | 2              | 3.77198   |
| <b>P17988</b> | <b>ST1A1 Sulfotransferase 1A1</b>                           | <b>1.79359279</b>  | <b>9.9E-20</b> | <b>6</b>  |
| P17988        | CPGVPSGLETLEETPAPR                                          | 1.906712056        | 2              | 4.797564  |
| P17988        | ILEFLGR                                                     | 2.179686401        | 2              | 2.344018  |
| P17988        | NTFTVAQNER                                                  | 1.74174143         | 2              | 3.682426  |
| P17988        | SGTTWMSEILDMIYQGGK                                          | 1.216495676        | 2              | 4.986846  |

|               |                                                           |                    |                |           |
|---------------|-----------------------------------------------------------|--------------------|----------------|-----------|
| P17988        | SLPEETVDSIVHHTSFK                                         | 1.80153867         | 2              | 4.56665   |
| P17988        | THLPLSLLPQSLLDQK                                          | 2.122643543        | 2              | 4.978549  |
| <b>P18163</b> | <b>ACSL1 Long_chain_fatty_acid_CoA ligase 1</b>           | <b>0.895120061</b> | <b>9.9E-20</b> | <b>30</b> |
| P18163        | AELSVIFADKPEK                                             | 0.806228083        | 2              | 3.141895  |
| P18163        | ALEDLGR                                                   | 1.475790879        | 2              | 2.328306  |
| P18163        | ALKPPCDLSMQSVEVTGTTEGVR                                   | 0.782791373        | 2              | 4.535008  |
| P18163        | ALKPPCDLSMQSVEVTGTTEGVR+Oxidation(9)                      | 0.989822337        |                |           |
| P18163        | CGVEIIGLK                                                 | 0.731100067        | 2              | 2.879076  |
| P18163        | DGWLHTGDIGK                                               | 1.061694954        | 2              | 3.187433  |
| P18163        | GAMVTHQNIMNDCSGFIK                                        | 1.198925131        | 2              | 4.383051  |
| P18163        | GAMVTHQNIMNDCSGFIK+Oxidation(2)                           | 1.282159684        |                |           |
| P18163        | GFQGSFEELCR                                               | 0.874914755        | 2              | 3.625499  |
| P18163        | GIAVHPELFSIDNGLLTPTLK                                     | 1.687135506        | 2              | 5.813646  |
| P18163        | GIQVSNDBGPLGSR                                            | 0.932495023        | 2              | 4.508375  |
| P18163        | IENIYLR                                                   | 0.894360709        | 2              | 2.95509   |
| P18163        | IFGQANTSVK                                                | 0.936747832        | 2              | 2.76034   |
| P18163        | IIVIMDSYDNDLVER                                           | 0.737871888        | 2              | 4.590707  |
| P18163        | LLLEGVENK                                                 | 0.956643346        | 2              | 3.334471  |
| P18163        | LLMDDLK                                                   | 0.662751464        | 2              | 2.434906  |
| P18163        | LMITGAAPVSATVLTFLR                                        | 0.714665572        | 2              | 3.52214   |
| P18163        | LVDVEDMNYQAAK                                             | 1.087279822        | 2              | 4.203762  |
| P18163        | LVDVEDMNYQAAK+Oxidation(6)                                | 1.051501831        |                |           |
| P18163        | NAGLKPFEQVK                                               | 0.826025466        | 2              | 3.831028  |
| P18163        | NNSLWDK                                                   | 0.664962001        | 2              | 2.545614  |
| P18163        | QVAEMAECIGSALIQQ                                          | 0.656641046        | 2              | 5.590154  |
| P18163        | QVAEMAECIGSALIQQ+Oxidation(4)                             | 1.189419258        |                |           |
| P18163        | SAVLEDDKLLLYYDDVR                                         | 4.222851914        | 3              | 4.165587  |
| P18163        | SQIDELYSTIK                                               | 1.219801738        | 2              | 3.657451  |
| P18163        | SQIDELYSTIKI                                              | 1.361456626        | 2              | 4.152328  |
| P18163        | TAEALDKDGLWHTGDIGK                                        | 0.867103356        | 2              | 5.108146  |
| P18163        | TKPKPPEPEDLAIICFTSGTTGNPK                                 | 15.67561443        | 3              | 5.415393  |
| P18163        | VLQPTIFPVVPR                                              | 0.793251115        | 2              | 3.500982  |
| P18163        | WLLDFASK                                                  | 0.797011273        | 2              | 2.381298  |
| <b>P18297</b> | <b>SPRE Sepiapterin reductase</b>                         | <b>0.907965492</b> | <b>0.94757</b> | <b>4</b>  |
| P18297        | ALAPQLAGLLSPGSVLLLSAR                                     | 0.847360575        | 3              | 4.81566   |
| P18297        | LLINNAGTLGDVSK                                            | 1.000333858        | 2              | 3.600589  |
| P18297        | LNSEGELVDCGTSAAK                                          | 0.99599789         | 2              | 4.78737   |
| P18297        | TVVNISSLCALQPFK                                           | 0.896512168        | 2              | 3.763449  |
| <b>P18298</b> | <b>METK2 S_adenosylmethionine synthase isoform type_2</b> | <b>2.362668279</b> | <b>9.9E-20</b> | <b>3</b>  |
| P18298        | IIVDTYGGWGAHGGGAFSGK                                      | 1.351411445        | 2              | 5.421152  |
| P18298        | KIIVDTYGGWGAHGGGAFSGK                                     | 1.995659633        | 3              | 3.46823   |
| P18298        | YLDEDTIYHLQPSGR                                           | 2.721910794        | 2              | 4.753562  |
| <b>P18418</b> | <b>CALR Calreticulin</b>                                  | <b>0.895662942</b> | <b>1</b>       | <b>19</b> |
| P18418        | AKIDDPTDSKPEDWDKPEHIPDPAK                                 | 1.007461301        | 3              | 5.440219  |
| P18418        | CKDDEFTHLYTLIVRPDNTYEVK                                   | 2.205997611        | 3              | 4.856501  |
| P18418        | DMHGDSEYNIMFGPDICGPGTK                                    | 0.734549637        | 2              | 6.398684  |
| P18418        | DMHGDSEYNIMFGPDICGPGTK+Oxidation(1)                       | 1.03199132         |                |           |
| P18418        | DMHGDSEYNIMFGPDICGPGTK+Oxidation(10)                      | 1.03199132         |                |           |
| P18418        | EQFLDGDWATNR                                              | 1.269099759        | 2              | 3.022876  |
| P18418        | FYGDQEK                                                   | 0.871785793        | 1              | 2.055975  |
| P18418        | FYGDQEKDK                                                 | 0.902994946        | 1              | 2.776472  |
| P18418        | GQTLVVQFTVK                                               | 1.119103161        | 2              | 3.255028  |
| P18418        | HEQNIDCGGGYVK                                             | 0.964631906        | 2              | 4.420838  |
| P18418        | IDDPTDSKPEDWDKPEHIPDPAK                                   | 0.724445219        | 3              | 3.916787  |
| P18418        | IDNSQVESGSLEDDWDFLPPK                                     | 0.975605611        | 2              | 5.437834  |
| P18418        | IDNSQVESGSLEDDWDFLPPK                                     | 0.873695017        | 2              | 4.899996  |

|               |                                                                  |                    |                |           |
|---------------|------------------------------------------------------------------|--------------------|----------------|-----------|
| P18418        | IKDPDAAKPEDWDER                                                  | 0.906006709        | 2              | 4.383667  |
| P18418        | KPEDWDEEMDGEWEPVVIQNPEYK                                         | 0.895645545        | 3              | 5.572803  |
| P18418        | LFPGLDQK                                                         | 0.966073485        | 1              | 2.052844  |
| P18418        | QIDNPDYK                                                         | 0.911895632        | 1              | 2.290527  |
| P18418        | SGTIFDNFLITNDEAYAEFNETWGVTK                                      | 0.950948681        | 3              | 4.883288  |
| P18418        | VHVIFNYK                                                         | 0.990620417        | 1              | 2.268359  |
| <b>P18420</b> | <b>PSA1 Proteasome subunit alpha type_1</b>                      | <b>0.995406161</b> | <b>0.00038</b> | <b>2</b>  |
| P18420        | AQPSQAADEPAEK                                                    | 1.240563048        | 2              | 3.424672  |
| P18420        | NQYDNDVTWVSPQGR                                                  | 0.955442479        | 2              | 3.629484  |
| <b>P18421</b> | <b>PSB1 Proteasome subunit beta type_1</b>                       | <b>1.009964956</b> | <b>0.05912</b> | <b>3</b>  |
| P18421        | AGGSASAMLQPLLDNQVGFK                                             | 0.863976944        | 2              | 5.028276  |
| P18421        | GAVYSFDPVGSYQR                                                   | 1.323776791        | 2              | 3.861107  |
| P18421        | NMQNVEHVPLTLDR                                                   | 0.30177593         | 2              | 3.688417  |
| <b>P18445</b> | <b>RL27A 60S ribosomal protein L27a</b>                          | <b>1.164970037</b> | <b>0.14258</b> | <b>2</b>  |
| P18445        | NQSFCPTVNLDK                                                     | 1.152837846        | 2              | 3.352818  |
| P18445        | RNQSFCPTVNLDK                                                    | 0.930457169        | 2              | 3.029666  |
| <b>P18484</b> | <b>AP2A2 AP_2 complex subunit alpha_2</b>                        | <b>0.754327927</b> | <b>0.33924</b> | <b>3</b>  |
| P18484        | LTECLETILNK                                                      | 0.764525099        | 2              | 2.73545   |
| P18484        | NNGVLFENQLLQIGLK                                                 | 0.93838641         | 2              | 3.254095  |
| P18484        | QLSNPQQEVQNIK                                                    | 0.753650992        | 2              | 3.409109  |
| <b>P18596</b> | <b>AT2A3 Sarcoplasmic/endoplasmic reticulum calcium ATPase 3</b> | <b>0.953972506</b> | <b>0.93901</b> | <b>5</b>  |
| P18596        | DIVPGDIVEVAVGDK                                                  | 1.097752582        | 2              | 2.458181  |
| P18596        | DIVPGDIVEVAVGDKVPADLR                                            | 1.562783081        | 2              | 3.760574  |
| P18596        | SLPSVETLGCTSVICSDK                                               | 0.890151902        | 2              | 4.198058  |
| P18596        | TGTLTTNQMSVCR                                                    | 0.943986753        | 2              | 2.415793  |
| P18596        | VGEATETALTCLVEK                                                  | 1.023278455        | 2              | 4.386174  |
| <b>P18757</b> | <b>CGL Cystathionine gamma_lyase</b>                             | <b>0.938606204</b> | <b>0.17575</b> | <b>18</b> |
| P18757        | AGDEVICMDEVYGGTNR                                                | 0.627829823        | 2              | 5.387766  |
| P18757        | AGDEVICMDEVYGGTNR+Oxidation(7)                                   | 0.93732373         |                |           |
| P18757        | ATLGISDTLIR                                                      | 1.002273818        | 2              | 3.54182   |
| P18757        | AVAALDGAK                                                        | 0.953581996        | 2              | 2.670032  |
| P18757        | AVVLPISLATTFK                                                    | 1.008912637        | 3              | 4.291078  |
| P18757        | DLLEDLGQALK                                                      | 0.752968973        | 2              | 2.779878  |
| P18757        | FLQNSLGAVSPFDCYLCCR                                              | 1.224818375        | 2              | 4.118407  |
| P18757        | GTLQHAQVFLK                                                      | 0.923039618        | 2              | 3.069681  |
| P18757        | LFALAESLGGYESLAELPAIMTHASVPEK                                    | 1.159988441        | 3              | 5.283734  |
| P18757        | LFALAESLGGYESLAELPAIMTHASVPEKDR                                  | 1.145798552        | 4              | 5.448231  |
| P18757        | LLEAITPQTK                                                       | 0.844555388        | 2              | 3.884803  |
| P18757        | LSVLEDEKDLLEDLGQALK                                              | 0.818912413        | 3              | 6.474934  |
| P18757        | LVWIETPTNPTLK                                                    | 0.861322358        | 2              | 3.627706  |
| P18757        | QCTGCPGMVSYFIK                                                   | 0.734394523        | 2              | 3.741347  |
| P18757        | QCTGCPGMVSYFIK+Oxidation(7)                                      | 0.964278048        |                |           |
| P18757        | QDSPGQSSGFVYSR                                                   | 0.984633022        | 2              | 3.700495  |
| P18757        | RVASEFGLK                                                        | 0.89126477         | 2              | 2.585621  |
| P18757        | VIYPGLPSHPQHELAK                                                 | 0.772826098        | 2              | 4.256135  |
| <b>P18886</b> | <b>CPT2 Carnitine O_palmitoyltransferase 2_mitochondrial</b>     | <b>0.950181541</b> | <b>0.97425</b> | <b>10</b> |
| P18886        | ATNLTVSAVR                                                       | 0.98330863         | 2              | 3.302066  |
| P18886        | ELHAHLAQDK                                                       | 1.236200059        | 2              | 3.009936  |
| P18886        | FFNEVFR                                                          | 0.919312725        | 2              | 2.30748   |
| P18886        | LIFDGNEETLK                                                      | 1.009306848        | 2              | 2.989042  |
| P18886        | QYGQTVATYESCSTAAFK                                               | 1.042915934        | 2              | 3.575184  |
| P18886        | SEYNDQLTR                                                        | 0.977397728        | 2              | 2.673007  |
| P18886        | TETIRPASIFTK                                                     | 0.944795715        | 2              | 2.583139  |
| P18886        | TLSIDSIQFQR                                                      | 0.942693402        | 2              | 3.302003  |
| P18886        | YILSDSSVPEFPVAYLTSENR                                            | 1.2267427          | 2              | 5.495711  |

|               |                                                                            |                    |                |           |
|---------------|----------------------------------------------------------------------------|--------------------|----------------|-----------|
| P18886        | YLNAQKPLLDSDQFR                                                            | 0.952961304        | 2              | 4.368109  |
| <b>P19112</b> | <b>F16P1 Fructose_1_6_bisphosphatase 1</b>                                 | <b>0.911365601</b> | <b>9.9E-20</b> | <b>18</b> |
| P19112        | AGGLATTGNEDILDIVPTEIHQK                                                    | 0.814049322        | 3              | 6.255063  |
| P19112        | AGGTGEMTQLLNSLCTAIK                                                        | 0.976019945        | 2              | 5.363754  |
| P19112        | AGGTGEMTQLLNSLCTAIK+Oxidation(6)                                           | 0.800881777        |                |           |
| P19112        | APVIMGSTEDVQEFLEIYNK                                                       | 1.463429327        | 2              | 5.246606  |
| P19112        | DFDPAINIYIQR                                                               | 1.280947308        | 2              | 3.916194  |
| P19112        | FPPDNSAPYGAR                                                               | 1.012552212        | 2              | 2.553975  |
| P19112        | GNIYSINEGYAK                                                               | 1.059533608        | 2              | 4.063055  |
| P19112        | KGNIYSINEGYAK                                                              | 1.023460663        | 2              | 3.924677  |
| P19112        | KLDILSNDLVINMLK                                                            | 0.794535361        | 2              | 6.077208  |
| P19112        | KTSANEPSEKDALQPGR                                                          | 0.801745773        | 3              | 3.639435  |
| P19112        | LDILSNDLVINMLK                                                             | 0.79493446         | 2              | 5.047803  |
| P19112        | LLYECNPIAYVMEK                                                             | 1.574156687        | 2              | 4.267875  |
| P19112        | QAGIAQLYGIAGSTNVTGDQVK                                                     | 1.036498742        | 3              | 6.084218  |
| P19112        | SRPSLPLPQSR                                                                | 0.826387525        | 2              | 3.311398  |
| P19112        | SSYATCVLVSEEDTHAIIIPEKR                                                    | 1.00489602         | 3              | 5.78229   |
| P19112        | TLVYGGIFLYPANK                                                             | 0.889706414        | 2              | 4.206293  |
| P19112        | TLVYGGIFLYPANKK                                                            | 0.770812934        | 2              | 2.33301   |
| P19112        | TSANEPSEKDALQPGR                                                           | 0.835876111        | 2              | 3.885636  |
| <b>P19123</b> | <b>TNNC1 Troponin C_ slow skeletal and cardiac muscles</b>                 | <b>1.266708235</b> | <b>0.54952</b> | <b>5</b>  |
| P19123        | AAVEQLTEEQK                                                                | 1.26255323         | 2              | 2.861987  |
| P19123        | AAVEQLTEEQKNEFK                                                            | 1.14129846         | 2              | 3.446536  |
| P19123        | GKSEELSDFLR                                                                | 0.916705988        | 2              | 2.570196  |
| P19123        | IDYDEFLEFMK                                                                | 1.267325521        | 2              | 3.178984  |
| P19123        | SEELSDFLR                                                                  | 0.916011525        | 2              | 2.930652  |
| <b>P19225</b> | <b>CP270 Cytochrome P450 2C70</b>                                          | <b>1.286161932</b> | <b>1.4E-05</b> | <b>14</b> |
| P19225        | ACIGEGLAR                                                                  | 0.905395568        | 2              | 2.789742  |
| P19225        | ASLNLSNPQDFIDYFLIK                                                         | 1.325901472        | 2              | 4.702113  |
| P19225        | EALIDRGEFSDK                                                               | 1.208003235        | 2              | 3.293825  |
| P19225        | FDPGHFLDEK                                                                 | 0.808042689        | 2              | 2.313699  |
| P19225        | FDYSDEK                                                                    | 1.271328944        | 1              | 1.99506   |
| P19225        | FILMEINR                                                                   | 0.93988405         | 2              | 2.33989   |
| P19225        | GTSVMACLTSALHDDKEFPNPEK                                                    | 0.714264659        | 3              | 3.486035  |
| P19225        | IQEEITR                                                                    | 0.953402333        | 1              | 2.000205  |
| P19225        | IQEEVVYLLEALR                                                              | 3.924774684        | 2              | 3.357499  |
| P19225        | LPPGPTPLPIFGNQLQVGK                                                        | 0.716738445        | 3              | 4.910123  |
| P19225        | SDYFMAFSAGRR+Oxidation(4)                                                  | 0.835729138        |                |           |
| P19225        | SEFTMDNLIVTIGDLFGAGTETTSSTIK                                               | 0.913432481        |                |           |
| P19225        | VSQGLGIVFSNGEIWK                                                           | 1.138254659        | 2              | 3.348341  |
| P19225        | YIDFVPIPLPR                                                                | 0.819811426        | 2              | 3.174598  |
| <b>P19234</b> | <b>NDUV2 NADH dehydrogenase [ubiquinone] flavoprotein 2_ mitochondrial</b> | <b>1.100793748</b> | <b>0.22987</b> | <b>4</b>  |
| P19234        | AAAVLPVLDLAQR                                                              | 2.613892079        | 2              | 2.355726  |
| P19234        | DIEEIIDELR                                                                 | 0.992573697        | 2              | 3.551643  |
| P19234        | DTPENNPDPFDFTPENYER                                                        | 0.997847939        | 2              | 4.397674  |
| P19234        | FCCEPAGGLTSLTEPPK                                                          | 1.147310605        | 2              | 3.746825  |
| <b>P19468</b> | <b>GSH1 Glutamate__cysteine ligase catalytic subunit</b>                   | <b>1.028846959</b> | <b>0.9862</b>  | <b>8</b>  |
| P19468        | ASGELMTVAR                                                                 | 1.046317564        | 2              | 2.696695  |
| P19468        | CNQJANELCEPELLGSGFR                                                        | 0.8731108          | 2              | 5.099301  |
| P19468        | DKNTPSPFVETFPEDDEASK                                                       | 0.942847058        | 3              | 3.43545   |
| P19468        | GYVSDIDCR                                                                  | 0.791389279        | 2              | 2.584268  |
| P19468        | NTPSPFVETFPEDDEASK                                                         | 1.234054242        | 2              | 4.776046  |
| P19468        | SLFFPDEAINK                                                                | 1.010577105        | 2              | 2.661707  |
| P19468        | VQLLLNGGDVLETLEQK                                                          | 1.01861009         | 2              | 4.72091   |

|               |                                                   |                    |                |           |
|---------------|---------------------------------------------------|--------------------|----------------|-----------|
| P19468        | WGVISASVDDR                                       | 0.696748014        | 2              | 3.256202  |
| <b>P19488</b> | <b>UDB37 UDP_glucuronosyltransferase 2B37</b>     | <b>0.949725347</b> | <b>0.91376</b> | <b>9</b>  |
| P19488        | AEMWLIR                                           | 0.798456717        | 2              | 2.918362  |
| P19488        | ANAIAWALAQIPQK                                    | 1.038219019        | 3              | 5.953065  |
| P19488        | FETFPTSFSK                                        | 0.960672712        | 1              | 2.001886  |
| P19488        | FETFPTSFSKDELEK                                   | 0.777371628        | 2              | 3.394245  |
| P19488        | GAAVTLNIR                                         | 0.933250157        | 2              | 2.511322  |
| P19488        | GHEVTVLKPSAYYVLDPK                                | 1.123706226        | 2              | 4.521748  |
| P19488        | NWDPFYTEILGRPTTLAETMGK                            | 0.967776817        | 2              | 5.012445  |
| P19488        | SDLFNALK                                          | 0.936332752        | 2              | 2.764688  |
| P19488        | TILDELVQR                                         | 0.684077901        | 2              | 3.196654  |
| <b>P19511</b> | <b>AT5F1 ATP synthase subunit b_mitochondrial</b> | <b>0.761657838</b> | <b>6.1E-12</b> | <b>10</b> |
| P19511        | HVIQSISAQEQK                                      | 0.896695841        | 2              | 3.994242  |
| P19511        | HVIQSISAQEQKETIAK                                 | 0.632572131        | 3              | 4.07216   |
| P19511        | HYLFDVQR                                          | 0.878786172        | 2              | 2.588789  |
| P19511        | LDYHISVQDMMR                                      | 0.549571158        | 3              | 4.311595  |
| P19511        | LGLIPEEFFQFLYPK                                   | 1.110492532        | 2              | 2.678539  |
| P19511        | LNEEKIAQLEEK                                      | 0.875516558        | 2              | 2.530182  |
| P19511        | NNIALALEVTYR                                      | 0.907087072        | 2              | 2.350246  |
| P19511        | QIQDAINR                                          | 0.833949861        | 1              | 2.123898  |
| P19511        | YGASIGEFIDK                                       | 1.306514657        | 2              | 2.913744  |
| P19511        | YGASIGEFIDKLNEEK                                  | 0.879546598        | 2              | 3.847262  |
| <b>P19643</b> | <b>AOFB Amine oxidase [flavin_containing] B</b>   | <b>1.199708414</b> | <b>0.52182</b> | <b>12</b> |
| P19643        | FIGGSGQVSR                                        | 0.845564474        | 2              | 3.244701  |
| P19643        | IISTTNGGQER                                       | 1.165244109        | 2              | 3.063423  |
| P19643        | IPEDIWQPEPESVDVPPARPITNTFLER                      | 1.276720387        | 3              | 4.6288    |
| P19643        | KFIGGSGQVSR                                       | 1.103682876        | 2              | 3.105097  |
| P19643        | LERPVIHIDQTGENVVVK                                | 0.83861712         | 2              | 4.49568   |
| P19643        | LLHDCGLSVVLEAR                                    | 0.933515138        | 2              | 3.440828  |
| P19643        | TLNHEIYEAK                                        | 0.942676709        | 2              | 2.814503  |
| P19643        | TMDEMGQEIPSDAPWK                                  | 0.750928949        | 2              | 4.181168  |
| P19643        | VLNSQEALQPVHYEEK                                  | 1.000872013        | 2              | 4.835337  |
| P19643        | YVDLGGSVVGPQNR                                    | 0.848474632        | 2              | 5.324489  |
| P19643        | YVISAIPPVLGMK                                     | 0.593172068        | 2              | 2.931791  |
| P19643        | YVISAIPPVLGMK+Oxidation(11)                       | 0.702307493        |                |           |
| <b>P19804</b> | <b>NDKB Nucleoside diphosphate kinase B</b>       | <b>1.121752118</b> | <b>0.99869</b> | <b>9</b>  |
| P19804        | DRPFFPGLVK                                        | 1.290395369        | 2              | 2.339988  |
| P19804        | EIGLWFKPEELIDYK                                   | 1.131257052        | 2              | 4.117491  |
| P19804        | GDFCIQVGR                                         | 1.021213506        | 2              | 3.198852  |
| P19804        | NIIHGSDSVESA EK                                   | 1.133172337        | 1              | 3.941249  |
| P19804        | TFIAIKPDGVQR                                      | 1.045079367        | 2              | 3.256384  |
| P19804        | VMLGETNPADSKPGTIR                                 | 0.956722626        | 2              | 3.896411  |
| P19804        | VMLGETNPADSKPGTIR+Oxidation(1)                    | 1.094459818        |                |           |
| P19804        | YMNSGPVVAMVWEGLNVVK                               | 0.859327157        | 2              | 5.097666  |
| P19804        | YMNSGPVVAMVWEGLNVVK+Oxidation(1)                  | 0.823994419        |                |           |
| <b>P19944</b> | <b>RLA1 60S acidic ribosomal protein P1</b>       | <b>1.075101544</b> | <b>7.4E-05</b> | <b>2</b>  |
| P19944        | AAGVNVPEFPWGLFAK                                  | 1.646659456        | 2              | 3.429322  |
| P19944        | ALANVNIGSLICNVGAGGPAPAAGAAPAGGPAPSAAAAPAEK        | 1.072663608        | 3              | 5.706236  |
| <b>P19945</b> | <b>RLA0 60S acidic ribosomal protein P0</b>       | <b>1.021294677</b> | <b>5.4E-05</b> | <b>10</b> |
| P19945        | AFLADPSAFAAAAAPVAAATTAAPAAAAAPAK                  | 1.310708104        | 2              | 6.02914   |
| P19945        | AGAIAPCEVTPAQNTGLGPEK                             | 1.084184976        | 2              | 4.54503   |
| P19945        | CFIVGADNVGSK                                      | 1.003120092        | 2              | 3.674735  |
| P19945        | GHLENNPALEK                                       | 1.086234217        | 2              | 3.695569  |
| P19945        | GNVGFVFTK                                         | 1.381488984        | 2              | 2.793194  |
| P19945        | GTIEILSDVQLIK                                     | 1.08001379         | 2              | 3.363508  |
| P19945        | IIQLDDYPK                                         | 1.468730649        | 2              | 3.639399  |

|               |                                                                  |                    |                |           |
|---------------|------------------------------------------------------------------|--------------------|----------------|-----------|
| P19945        | NVASVCLQIGYPTVASVPHSIINGYK                                       | 0.858601362        | 3              | 3.874542  |
| P19945        | TSFFQALGITTK                                                     | 1.245543111        | 2              | 4.218082  |
| P19945        | VLALSVETDYYTFPLAEK                                               | 0.985107684        | 2              | 3.940639  |
| <b>P20059</b> | <b>HEMO Hemopexin</b>                                            | <b>1.836267417</b> | <b>0.0398</b>  | <b>7</b>  |
| P20059        | ELGSPPGISLDTIDAAFSCPGSSK                                         | 1.367748713        | 2              | 4.612888  |
| P20059        | FNPVTGEVPPR                                                      | 1.157838332        | 2              | 2.46482   |
| P20059        | GECQSEGVLFFQGNR                                                  | 0.918368572        | 2              | 3.756286  |
| P20059        | GGNNLVSGYPK                                                      | 1.205149649        | 2              | 2.539176  |
| P20059        | LFQEEFPGIPYPPDAAVECHR                                            | 1.238137243        | 3              | 3.750477  |
| P20059        | SGAQATWAELSWPHEK                                                 | 1.255166441        | 3              | 3.545642  |
| P20059        | VDGALCLEK                                                        | 1.14690297         | 2              | 2.64807   |
| <b>P20070</b> | <b>NB5R3 NADH_cytochrome b5 reductase 3</b>                      | <b>0.899120007</b> | <b>0.45474</b> | <b>9</b>  |
| P20070        | AVLKDPNDHTVCYLLFANQSEK                                           | 9.809276696        | 3              | 4.702319  |
| P20070        | DILLRPELEER                                                      | 0.932288785        | 2              | 2.552075  |
| P20070        | IDGNLVIRPYTPVSSDDDKGFVDLVVK                                      | 0.58408575         | 3              | 4.961462  |
| P20070        | LIDKEIISHDTR                                                     | 0.898652852        | 2              | 3.734611  |
| P20070        | MSQYLENMNIGDTIEFR                                                | 0.86969791         | 2              | 3.5756    |
| P20070        | SSPAITLENPDIK                                                    | 0.903384732        | 2              | 3.877282  |
| P20070        | SSPAITLENPDIKYPLR                                                | 0.661827348        | 2              | 3.847224  |
| P20070        | SVGMIAGGTGITPMLQVIR                                              | 0.735066717        | 2              | 5.092463  |
| P20070        | SVGMIAGGTGITPMLQVIR+Oxidation(3)                                 | 1.019598854        |                |           |
| <b>P20280</b> | <b>RL21 60S ribosomal protein L21</b>                            | <b>1.122034406</b> | <b>0.12988</b> | <b>3</b>  |
| P20280        | KGDIVDIK                                                         | 1.382939732        | 1              | 2.243574  |
| P20280        | TNGKEPELLEPIPYEFMA                                               | 0.974415617        | 2              | 3.014197  |
| P20280        | VYNVVQHAVGIIVNK                                                  | 1.00143829         | 2              | 4.618709  |
| <b>P20650</b> | <b>PPM1A Protein phosphatase 1A</b>                              | <b>0.808286685</b> | <b>0.06873</b> | <b>2</b>  |
| P20650        | SRLEVTDDLEK                                                      | 0.561462851        | 2              | 2.316962  |
| P20650        | VCNEVVDTCLYK                                                     | 1.267100752        | 2              | 2.536309  |
| <b>P20673</b> | <b>ARLY Argininosuccinate lyase</b>                              | <b>0.980094984</b> | <b>0.01508</b> | <b>16</b> |
| P20673        | AEAECEVLFPGYTHLQR                                                | 1.233611702        | 2              | 4.595074  |
| P20673        | AEMQQILQGLDK                                                     | 0.992218741        | 2              | 4.501705  |
| P20673        | AEMQQILQGLDK+Oxidation(2)                                        | 1.295037156        |                |           |
| P20673        | AVVVAEMK                                                         | 1.199355932        | 2              | 2.380149  |
| P20673        | EFNFVQLSDAYSTGSSLMPQK                                            | 1.278041627        | 2              | 5.484978  |
| P20673        | ELIGEAAAGK                                                       | 1.82417888         | 1              | 1.932617  |
| P20673        | FNSSIAADR                                                        | 1.467781451        | 2              | 2.774706  |
| P20673        | HLWNVDLQGSK                                                      | 1.167558218        | 1              | 3.161577  |
| P20673        | INVLPPLGSGAIAGNPLGVDR                                            | 1.371827099        | 2              | 5.577091  |
| P20673        | LKELIGEAAAGK                                                     | 1.203462824        | 2              | 2.986611  |
| P20673        | LYPNDEDIHTANER                                                   | 1.19697174         | 2              | 3.882632  |
| P20673        | MAEDLILYGTK                                                      | 1.035854493        | 2              | 3.742563  |
| P20673        | MAEDLILYGTK+Oxidation(0)                                         | 1.091831834        |                |           |
| P20673        | NDQVVTDLR                                                        | 0.914559955        | 2              | 3.408863  |
| P20673        | SRNDQVVTDLR                                                      | 0.616304608        | 2              | 2.630143  |
| P20673        | VAEAWAQGIFK                                                      | 1.446550359        | 2              | 3.819015  |
| <b>P20788</b> | <b>UCRI Cytochrome b_c1 complex subunit Rieske_mitochondrial</b> | <b>0.794004179</b> | <b>3.8E-06</b> | <b>5</b>  |
| P20788        | EIDQEAAVEVSQLR                                                   | 1.069873241        | 2              | 4.250672  |
| P20788        | EIDQEAAVEVSQLRDPQHDLR                                            | 0.841888124        | 3              | 3.326869  |
| P20788        | GVAGALRPLLQSAVPATSEPPVLDVK                                       | 0.729644974        | 3              | 4.294538  |
| P20788        | LSDIPEGK                                                         | 0.924537545        | 1              | 2.021074  |
| P20788        | SGPFAPVLSATSR                                                    | 0.828067378        | 2              | 3.031933  |
| <b>P20801</b> | <b>TNNC2 Troponin C_skeletal muscle</b>                          | <b>0.855041075</b> | <b>0.98278</b> | <b>5</b>  |
| P20801        | AAFDMFDADGGDISVK                                                 | 0.685894308        | 2              | 4.173479  |
| P20801        | GKSEELAECFR                                                      | 0.678172529        | 2              | 3.613492  |
| P20801        | NADGYIDAEELAEIFR                                                 | 0.951548241        | 2              | 4.794307  |
| P20801        | SEELAECFR                                                        | 1.046988689        | 2              | 3.293289  |

|               |                                                 |                    |                |           |
|---------------|-------------------------------------------------|--------------------|----------------|-----------|
| P20801        | SYLSEEMIAEFK                                    | 0.849502775        | 2              | 2.757431  |
| <b>P20814</b> | <b>CP2CD Cytochrome P450 2C13_male_specific</b> | <b>0.909476828</b> | <b>0.07075</b> | <b>4</b>  |
| P20814        | FDYEDKDFLNLIK                                   | 0.764807533        | 3              | 4.161927  |
| P20814        | GTAVLTSLSVLHDSK                                 | 0.805437469        | 2              | 3.105676  |
| P20814        | IKEHEESLDVSNPR                                  | 0.744293923        | 3              | 4.048508  |
| P20814        | SDYFIPFSAGK                                     | 3.429294722        | 2              | 2.598929  |
| <b>P20817</b> | <b>CP4AE Cytochrome P450 4A14</b>               | <b>1.056078944</b> | <b>0.00655</b> | <b>8</b>  |
| P20817        | ACQIAHEHTDGVK                                   | 0.928908195        | 2              | 3.977923  |
| P20817        | AQLQNEEELQK                                     | 0.663842581        | 2              | 3.546     |
| P20817        | AVEDLNNTFFR                                     | 0.748099975        | 2              | 3.414963  |
| P20817        | EFQQVLTWVEK                                     | 0.841868663        | 2              | 2.656531  |
| P20817        | HLDLFDILLFAK                                    | 1.09027006         | 2              | 3.235344  |
| P20817        | MEDGKSLSEDLR                                    | 0.785418792        | 2              | 2.391694  |
| P20817        | MRKAQLQNEEELQK+Oxidation(0)                     | 0.747168222        |                |           |
| P20817        | VLLYDPDYVK                                      | 0.66984833         | 2              | 2.382238  |
| <b>P20852</b> | <b>CP2A5 Cytochrome P450 2A5</b>                | <b>0.717831244</b> | <b>0.30254</b> | <b>2</b>  |
| P20852        | DFIDSFLIR                                       | 0.612623781        | 2              | 2.662069  |
| P20852        | EALVDQAEFFSGR                                   | 0.872783092        | 2              | 3.351563  |
| <b>P21213</b> | <b>HUTH Histidine ammonia_lyase</b>             | <b>0.676442359</b> | <b>4E-05</b>   | <b>13</b> |
| P21213        | ALDYLAIGVHELAASER                               | 0.590202584        | 2              | 4.196963  |
| P21213        | DIITTELSATDNPMVFASR                             | 0.929517368        | 2              | 4.286501  |
| P21213        | GETISGGNFHGGEYPAK                               | 0.655105841        | 2              | 3.827773  |
| P21213        | GEWLAVPCQDQK                                    | 0.459995666        | 2              | 2.516691  |
| P21213        | GQJEVAFR                                        | 0.642752933        | 2              | 2.39418   |
| P21213        | LQELQVNLVR                                      | 0.630424401        | 2              | 3.256324  |
| P21213        | NKPDNGGFTSVDEVR                                 | 0.647160849        | 2              | 3.614604  |
| P21213        | QADIVAALTLEVLK                                  | 0.506393912        | 2              | 2.613843  |
| P21213        | SHSSGVGKPLSPER                                  | 0.925093179        | 2              | 3.63549   |
| P21213        | SLLSDHHPSEIAESHR                                | 0.670178002        | 3              | 4.384646  |
| P21213        | TVVYGITTFGFK                                    | 0.735991219        | 2              | 3.594153  |
| P21213        | VWEVAAPYIEK                                     | 0.920488241        | 2              | 2.875035  |
| P21213        | YIALDGDLSLSTEDLVNLGK                            | 0.608141538        | 2              | 5.177346  |
| <b>P21396</b> | <b>AOFA Amine oxidase [flavin_containing] A</b> | <b>0.828893663</b> | <b>0.00345</b> | <b>7</b>  |
| P21396        | DVPAIEITHFTLER                                  | 1.110233343        | 2              | 2.481183  |
| P21396        | IFSVTNGGQER                                     | 0.627965323        | 2              | 2.548023  |
| P21396        | INVLVLEAR                                       | 0.833997712        | 2              | 2.945532  |
| P21396        | KDIWVEEPESK                                     | 0.779918244        | 2              | 3.247698  |
| P21396        | VLGSQEALYPVHYEEK                                | 0.819102353        | 2              | 3.882811  |
| P21396        | WVDVGGAYVGPQNR                                  | 0.715398538        | 2              | 4.810678  |
| P21396        | YVISAIPPILTAK                                   | 0.788990206        | 2              | 2.905345  |
| <b>P21531</b> | <b>RL3 60S ribosomal protein L3</b>             | <b>1.398540751</b> | <b>1.9E-10</b> | <b>6</b>  |
| P21531        | AHLMEIQVNGGTVAEK                                | 0.957407719        | 2              | 5.237579  |
| P21531        | ERLEQQVPVNVQVFGQDEMIDVIGVTK                     | 1.194672226        | 3              | 5.929224  |
| P21531        | HGSLGFLPR                                       | 1.002026872        | 2              | 3.112545  |
| P21531        | LEQQVPVNVQVFGQDEMIDVIGVTK                       | 1.325449486        | 2              | 4.770232  |
| P21531        | NNASTDYDLSDK                                    | 1.286780333        | 2              | 3.225097  |
| P21531        | TVFAEHISDECK                                    | 1.423072327        | 2              | 3.690672  |
| <b>P21533</b> | <b>RL6 60S ribosomal protein L6</b>             | <b>1.13997637</b>  | <b>0.00036</b> | <b>8</b>  |
| P21533        | AVDSQILPK                                       | 1.123450306        | 2              | 2.75714   |
| P21533        | FVIATSTK                                        | 1.361359377        | 1              | 2.017998  |
| P21533        | HLTDAYFK                                        | 1.068129179        | 2              | 2.436034  |
| P21533        | HQEGEIFDTEK                                     | 1.354691847        | 2              | 3.32333   |
| P21533        | HQEGEIFDTEKEK                                   | 1.163304127        | 2              | 4.00106   |
| P21533        | QLGSGLLLVGTGPLALNR                              | 1.303094835        | 2              | 5.045406  |
| P21533        | SSITPGTVLIILTGR                                 | 1.018507394        | 2              | 3.891764  |
| P21533        | YYPTEDVPR                                       | 1.174719297        | 2              | 2.440053  |

|               |                                                                                    |                    |                |           |
|---------------|------------------------------------------------------------------------------------|--------------------|----------------|-----------|
| <b>P21571</b> | <b>ATP5J ATP synthase_coupling factor 6_mitochondrial</b>                          | <b>0.946778419</b> | <b>0.38215</b> | <b>6</b>  |
| P21571        | FEVLDKPQS                                                                          | 0.864184787        | 2              | 2.93575   |
| P21571        | GEMDKFPTNFEDPKFEVLDKPQS                                                            | 0.731445929        | 3              | 3.930324  |
| P21571        | GEMDKFPTNFEDPKFEVLDKPQS+Oxidation(2)                                               | 0.764200529        |                |           |
| P21571        | LASGGPVDTGPEYQQEVDR                                                                | 1.132791807        | 2              | 5.28316   |
| P21571        | LASGGPVDTGPEYQQEVDR                                                                | 1.299570013        | 2              | 2.799888  |
| P21571        | RLASGGPVDTGPEYQQEVDR                                                               | 1.102270231        | 3              | 4.52364   |
| <b>P21643</b> | <b>T23O Tryptophan 2_3_dioxygenase</b>                                             | <b>1.270945214</b> | <b>4.7E-05</b> | <b>2</b>  |
| P21643        | GGLIYGDYLQLEK                                                                      | 1.983347488        | 2              | 3.617439  |
| P21643        | ILNAQELQSEIK                                                                       | 1.224971001        | 2              | 3.652973  |
| <b>P21670</b> | <b>PSA4 Proteasome subunit alpha type_4</b>                                        | <b>1.575584895</b> | <b>0.17772</b> | <b>4</b>  |
| P21670        | ATCIGNNSAAAVSMLK                                                                   | 1.190914803        | 2              | 2.812556  |
| P21670        | LLDEVFFSEK                                                                         | 1.157714365        | 2              | 3.597595  |
| P21670        | LNEDMACSVAGITSDANVLTNELR                                                           | 1.22986169         | 3              | 3.446458  |
| P21670        | YLLQYQEPICEQLVLTALCDIK                                                             | 1.018517983        | 2              | 3.044539  |
| <b>P21775</b> | <b>THIKA 3_ketoacyl_CoA thiolase A_peroxisomal</b>                                 | <b>0.589945407</b> | <b>9.9E-20</b> | <b>2</b>  |
| P21775        | LKPECLGDISVGNVLEPGAGAVMAR                                                          | 0.679855389        | 3              | 5.287484  |
| P21775        | LKPECLGDISVGNVLEPGAGAVMAR+Oxidation(22)                                            | 0.788026453        |                |           |
| <b>P21913</b> | <b>DHSB Succinate dehydrogenase [ubiquinone] iron_sulfur subunit_mitochondrial</b> | <b>1.049986222</b> | <b>0.56084</b> | <b>6</b>  |
| P21913        | CGPMVLDALIKIK                                                                      | 0.806624066        | 2              | 2.4207    |
| P21913        | CHTIMNCTQTCPK                                                                      | 0.828550154        | 2              | 4.316717  |
| P21913        | CHTIMNCTQTCPK+Oxidation(4)                                                         | 1.691740419        |                |           |
| P21913        | IKNEIDSTLFR                                                                        | 0.917681647        | 2              | 2.395818  |
| P21913        | LQDPFSLYR                                                                          | 1.205814853        | 2              | 2.753863  |
| P21913        | RIDTDLGK                                                                           | 0.897060269        | 2              | 2.437272  |
| <b>P21981</b> | <b>TGM2 Protein glutamine gamma glutamyltransferase 2</b>                          | <b>0.977962163</b> | <b>0.99994</b> | <b>5</b>  |
| P21981        | CDLEIQANGR                                                                         | 0.963482293        | 2              | 2.991685  |
| P21981        | LVVNFQCDK                                                                          | 1.072551267        | 2              | 2.676165  |
| P21981        | SEGTYCCGPVSVR                                                                      | 0.878756683        | 2              | 3.694467  |
| P21981        | WDNNYGDGISPMAWIGSVDILR                                                             | 0.97658376         | 3              | 4.197842  |
| P21981        | YSGCLTESNLIK                                                                       | 0.992625525        | 2              | 3.566343  |
| <b>P22734</b> | <b>COMT Catechol O_methyltransferase</b>                                           | <b>0.855646316</b> | <b>0.9657</b>  | <b>14</b> |
| P22734        | AIYQGPSSPDK                                                                        | 1.301271976        | 2              | 2.362952  |
| P22734        | AIYQGPSSPDKS                                                                       | 0.860479832        | 2              | 3.150823  |
| P22734        | EWAMNVGDAK                                                                         | 1.117397676        | 1              | 2.769252  |
| P22734        | GQIMDAVIR                                                                          | 0.705395255        | 2              | 3.032671  |
| P22734        | GQIMDAVIR+Oxidation(3)                                                             | 0.905020603        |                |           |
| P22734        | GSSSFECTHYSSYLEYMK                                                                 | 53.28639645        | 2              | 4.563265  |
| P22734        | GTVLLADNVIVPGTPDFLAYVR                                                             | 1.025907037        | 3              | 4.868077  |
| P22734        | KGTVLLADNVIVPGTPDFLAYVR                                                            | 1.00523215         | 2              | 4.687739  |
| P22734        | KYDVDTLDMVFLDHWK                                                                   | 0.851381467        | 3              | 5.635423  |
| P22734        | VTILNGASQDLIPQLK                                                                   | 0.756817696        | 2              | 4.301364  |
| P22734        | VVDGLEK                                                                            | 0.904683504        | 2              | 2.380745  |
| P22734        | YDVTLDLMVFLDHWK                                                                    | 0.932598437        | 3              | 4.602151  |
| P22734        | YLPDTLLLEK                                                                         | 0.762703708        | 2              | 2.913932  |
| P22734        | YVQQNAKPGDPQSVLEAIDTYCTQK                                                          | 0.912713133        | 3              | 6.094255  |
| <b>P22789</b> | <b>ST2A2 Alcohol sulfotransferase A</b>                                            | <b>0.701092423</b> | <b>0.2258</b>  | <b>4</b>  |
| P22789        | EEDLILLTPK                                                                         | 0.708475883        | 2              | 2.591067  |
| P22789        | ETLQNVCKN                                                                          | 1.609661378        | 1              | 2.011793  |
| P22789        | KLEPDELDELVLK                                                                      | 1.106081671        | 3              | 4.730116  |
| P22789        | NHFTVAQAEAFDK                                                                      | 0.550326452        | 2              | 3.43943   |
| <b>P22791</b> | <b>HMC2 Hydroxymethylglutaryl_CoA synthase_mitochondrial</b>                       | <b>0.935685333</b> | <b>0.93938</b> | <b>21</b> |
| P22791        | ASLDMFNK                                                                           | 0.99900049         | 2              | 2.46946   |



|               |                                                  |                    |                |           |
|---------------|--------------------------------------------------|--------------------|----------------|-----------|
| P22791        | ASLDMFNKK                                        | 0.78152928         | 2              | 2.525005  |
| P22791        | DVGILALEVYFPAQYVDQTDLEK                          | 1.02810189         | 3              | 7.205613  |
| P22791        | GLKLEETYTNK                                      | 0.596105147        | 2              | 2.782672  |
| P22791        | GTHMENAYDFYKPNLASEYPLVDGK                        | 0.938660686        | 3              | 7.034035  |
| P22791        | GTHMENAYDFYKPNLASEYPLVDGK+Oxidation(3)           | 1.144558389        |                |           |
| P22791        | IGAFSYGSLAASFFSFR                                | 1.120052414        | 2              | 3.879208  |
| P22791        | LEETYTNK                                         | 0.893841567        | 2              | 3.021606  |
| P22791        | LEETYTNKDVDK                                     | 1.032543634        | 2              | 4.108529  |
| P22791        | LEVGTETIIDK                                      | 0.967621912        | 2              | 3.733799  |
| P22791        | LMFNDFLSSSSDK                                    | 0.707646557        | 2              | 4.421253  |
| P22791        | LMFNDFLSSSSDK+Oxidation(1)                       | 0.985540997        |                |           |
| P22791        | LSIQCYLR                                         | 0.663864292        | 2              | 2.317     |
| P22791        | LVSSVSDLPK                                       | 1.053030535        | 2              | 3.49174   |
| P22791        | MGFCSVQEDINSLCLTVVQR                             | 1.104963234        | 3              | 3.493203  |
| P22791        | MSPEEFTEIMNQR                                    | 0.85793515         | 2              | 4.656848  |
| P22791        | MSPEEFTEIMNQR+Oxidation(0)                       | 0.96628906         |                |           |
| P22791        | MSPEEFTEIMNQR+Oxidation(9)                       | 0.950255229        |                |           |
| P22791        | TKLPWDVAVGR                                      | 0.9025046          | 3              | 3.950933  |
| P22791        | VNFSPPGDTSNLPFGTWYLER                            | 0.975819902        | 2              | 5.053218  |
| P22791        | YTVGLGQTR                                        | 0.889539954        | 2              | 3.335884  |
| <b>P22985</b> | <b>XDH Xanthine dehydrogenase/oxidase</b>        | <b>1.047844331</b> | <b>0.609</b>   | <b>10</b> |
| P22985        | DEVTCVGHIIIGAVVADTPEHAQR                         | 1.418537499        | 3              | 3.848655  |
| P22985        | DPPANVQLFQEVPK                                   | 1.468220576        | 2              | 3.843398  |
| P22985        | DQTVSLSPLFNPEDFKPLDPTQEPIFPPELLR                 | 1.019326057        | 3              | 3.389107  |
| P22985        | LDPTFASATLLFQK                                   | 1.378387413        | 2              | 4.018567  |
| P22985        | NQPEPTVEEIEAFQGNLCR                              | 1.092672962        | 2              | 4.713365  |
| P22985        | QLFQLDSPATPEK                                    | 0.936565257        | 2              | 3.205284  |
| P22985        | SVASIGGNIITASPIDLNPVFMASGAK                      | 1.124547525        | 3              | 5.768322  |
| P22985        | TGTVALEVAHFSNGNTEDLSR                            | 1.018133016        | 3              | 4.624146  |
| P22985        | TLLRPEEILLSEIPIYSK                               | 1.203509104        | 3              | 4.050619  |
| P22985        | TNLPSNTAFR                                       | 0.854364026        | 1              | 2.258965  |
| <b>P23358</b> | <b>RL12 60S ribosomal protein L12</b>            | <b>1.159010797</b> | <b>0.00014</b> | <b>7</b>  |
| P23358        | CTGGEVGATSALAPK                                  | 1.213056753        | 2              | 4.083876  |
| P23358        | EILGTAQSVGCNVDGR                                 | 1.454446836        | 2              | 4.437327  |
| P23358        | HNGNITFDEIVNIAR                                  | 1.167347744        | 2              | 4.24865   |
| P23358        | HPHDIIDDINSGAVECPAS                              | 0.904266168        | 2              | 4.839104  |
| P23358        | IGPLGLSPK                                        | 0.850114972        | 2              | 2.539657  |
| P23358        | QAQIEVVPASALIIK                                  | 1.580809395        | 2              | 3.876422  |
| P23358        | VGDDIAKATGDWKGLR                                 | 0.877036768        | 2              | 2.412156  |
| <b>P23457</b> | <b>DIDH 3_alpha_hydroxysteroid dehydrogenase</b> | <b>1.195024332</b> | <b>9.9E-20</b> | <b>10</b> |
| P23457        | ALDGLNR                                          | 1.076618198        | 2              | 2.557236  |
| P23457        | ELTQVFEFQLASEDMK                                 | 1.211386658        | 2              | 3.290043  |
| P23457        | HFDSAYLYEVEEVEGQAIR                              | 2.919310528        | 2              | 6.166505  |
| P23457        | MLDYCK                                           | 0.908728332        | 1              | 1.974668  |
| P23457        | SIGVSNFNCR                                       | 1.077945893        | 2              | 3.290779  |
| P23457        | SKDIILVSYCTLGSSR                                 | 1.455773184        | 2              | 5.066266  |
| P23457        | SPVLLDDPVLCIAIK                                  | 1.797780635        | 2              | 3.925643  |
| P23457        | VALNDGNFIPVLGFGTTVPEK                            | 1.622629228        | 2              | 5.186249  |
| P23457        | YFDDHPNHPFTDE                                    | 1.176150723        | 2              | 3.745184  |
| P23457        | YKPCVNQVECHLYLNQSK                               | 5.645365944        | 2              | 4.67289   |
| <b>P23514</b> | <b>COPB Coatomer subunit beta</b>                | <b>1.051208211</b> | <b>0.40726</b> | <b>7</b>  |
| P23514        | EAGELKPEEITVGPVQK                                | 1.063124115        | 2              | 4.338065  |
| P23514        | EDIQSVMTVEVR                                     | 0.908744055        | 2              | 2.941848  |
| P23514        | NFENLIPDAPELIHDFLVNEK                            | 1.063830143        | 3              | 4.017214  |
| P23514        | TNNVSEHEDTDKYR                                   | 1.494346116        | 3              | 4.127946  |
| P23514        | VLQDLVMDILR                                      | 1.050316247        | 2              | 3.618531  |
| P23514        | VLSECSPLMNDIFNK                                  | 0.764540718        | 2              | 2.667123  |

|               |                                                        |                    |                |           |
|---------------|--------------------------------------------------------|--------------------|----------------|-----------|
| P23514        | YEAAGTLVTLSSAPTAIK                                     | 1.397077881        | 2              | 4.9897    |
| <b>P23965</b> | <b>ECI1 Enoyl_CoA delta isomerase 1_ mitochondrial</b> | <b>0.837485342</b> | <b>0.08622</b> | <b>8</b>  |
| P23965        | ALQLGTLFPPAEALK                                        | 0.743849184        | 2              | 5.413283  |
| P23965        | AVQELWLR                                               | 0.799637974        | 2              | 2.60382   |
| P23965        | DNYVNTIGHR                                             | 1.103319724        | 2              | 3.032264  |
| P23965        | GVILTSEKPGIFASGLDLMEMYGR                               | 0.783229311        | 3              | 6.201207  |
| P23965        | QREADIQNFTSFISR                                        | 0.867454854        | 2              | 2.700237  |
| P23965        | SLHVYLEK                                               | 0.875959757        | 1              | 2.312779  |
| P23965        | VGLVDEVVPEDQVHSK                                       | 0.769715286        | 2              | 4.73955   |
| P23965        | WFTIPDHSR                                              | 0.84956816         | 2              | 3.196717  |
| <b>P24049</b> | <b>RL17 60S ribosomal protein L17</b>                  | <b>1.251960496</b> | <b>1.1E-16</b> | <b>3</b>  |
| P24049        | EQIVPKPEEEVAQK                                         | 1.594476955        | 2              | 3.547131  |
| P24049        | GLDVDSLVIHIVQVNK                                       | 1.008570108        | 2              | 4.686262  |
| P24049        | YSLDPENPTK                                             | 1.128484834        | 1              | 2.764604  |
| <b>P24050</b> | <b>RS5 40S ribosomal protein S5</b>                    | <b>0.955347715</b> | <b>0.84755</b> | <b>4</b>  |
| P24050        | HAFEIHLITGENPLQVLVNAIINSQPR                            | 0.955617838        |                |           |
| P24050        | RQAVDVSPLR                                             | 1.085937483        | 2              | 2.364157  |
| P24050        | VNQAIWLLCTGAR                                          | 1.21169207         | 2              | 4.110164  |
| P24050        | WSTDDVQINDISLQDYIAVK                                   | 1.135905598        | 2              | 4.764235  |
| <b>P24063</b> | <b>ITAL Integrin alpha_L</b>                           | <b>1.106973842</b> | <b>0.88981</b> | <b>2</b>  |
| P24063        | ASEAQVLVKVDLIEK                                        | 1.013119388        | 2              | 2.400362  |
| P24063        | DFEKILEFMK                                             | 1.125677612        | 3              | 3.333261  |
| <b>P24090</b> | <b>FETUA Alpha_2_HS glycoprotein</b>                   | <b>1.215809747</b> | <b>3.7E-10</b> | <b>6</b>  |
| P24090        | AQNVFPVSTLVEFVIAATDCTGQEVTPAK                          | 0.811383332        |                |           |
| P24090        | ELACDDPETEHVALIADVLNK                                  | 1.000524649        | 2              | 4.181743  |
| P24090        | HAFSPVASVESASGEVLHSPK                                  | 1.221883955        | 3              | 5.960438  |
| P24090        | LGGEVSVACK                                             | 0.642439148        | 2              | 3.692735  |
| P24090        | VGQPGDAGAAGPVAPLCPGR                                   | 0.704620341        | 2              | 5.089277  |
| P24090        | VLHAQCHSTPDSAEDVRK                                     | 0.74013996         | 3              | 4.009344  |
| <b>P24268</b> | <b>CATD Cathepsin D</b>                                | <b>0.82575938</b>  | <b>0.00404</b> | <b>4</b>  |
| P24268        | AIGAVPLIQGEYMIPCEK                                     | 0.821398389        | 2              | 3.479833  |
| P24268        | DPTGQPGGELMLGGTDSR                                     | 0.778650248        | 2              | 4.746852  |
| P24268        | GGCEAIVDTGTSLLVGPVDEVK                                 | 1.092888992        | 2              | 4.077839  |
| P24268        | LGGQNYELHPEK                                           | 0.969249957        | 2              | 2.911747  |
| <b>P24329</b> | <b>THTR Thiosulfate sulfurtransferase</b>              | <b>0.786859915</b> | <b>2.4E-12</b> | <b>12</b> |
| P24329        | EGHPVTSEPSRPEPAVK                                      | 0.967069832        | 2              | 4.698688  |
| P24329        | FQLVDSR                                                | 0.763198561        | 2              | 2.466033  |
| P24329        | GSVNVPFMNFLETGDFEK                                     | 20.11334892        | 2              | 5.276097  |
| P24329        | HVPGASFFDIEEER                                         | 1.076048407        | 3              | 3.614053  |
| P24329        | KVDLSQPLIATCR                                          | 0.907530824        | 2              | 4.780231  |
| P24329        | RFQLVDSR                                               | 0.792940797        | 2              | 2.474419  |
| P24329        | TVSVLNGGFR                                             | 0.879850572        | 2              | 2.887061  |
| P24329        | TYEQVLENLQSK                                           | 0.789109134        | 2              | 5.085625  |
| P24329        | VDLSQPLIATCR                                           | 0.934747678        | 2              | 3.545904  |
| P24329        | VLDASWYSPGTR                                           | 0.762000108        | 2              | 3.735063  |
| P24329        | WLAESIR                                                | 0.836108091        | 2              | 2.359281  |
| P24329        | YLGTQPEPDAVGLDSGHIR                                    | 0.85094859         | 3              | 5.052375  |
| <b>P24368</b> | <b>PPIB Peptidyl_prolyl cis_trans isomerase B</b>      | <b>0.929033952</b> | <b>0.99972</b> | <b>9</b>  |
| P24368        | DKPLKDVIIIDCGK                                         | 1.070802049        | 2              | 3.641815  |
| P24368        | DTNGSQFFITTVK                                          | 1.162166081        | 2              | 3.580475  |
| P24368        | DVIIIDCGK                                              | 0.6222505          | 1              | 1.990567  |
| P24368        | HYGPGWVSMANAGK                                         | 0.913417058        | 2              | 3.234995  |
| P24368        | IEVEKPFIAIK                                            | 1.042477904        | 2              | 3.292331  |
| P24368        | IEVEKPFIAIKE                                           | 0.753432063        | 2              | 3.558626  |
| P24368        | TVDNFVALATGEK                                          | 1.055940242        | 2              | 3.755565  |
| P24368        | VLEGM DVVR                                             | 0.93228703         | 2              | 2.775417  |

|               |                                                                                      |                    |                |           |
|---------------|--------------------------------------------------------------------------------------|--------------------|----------------|-----------|
| P24368        | VYFDFQIGDEPVGR                                                                       | 0.902110311        | 2              | 4.321369  |
| <b>P24457</b> | <b>CP2DB Cytochrome P450 2D11</b>                                                    | <b>0.973514804</b> | <b>0.99598</b> | <b>2</b>  |
| P24457        | RFSVSTLR                                                                             | 0.910858568        | 2              | 2.541351  |
| P24457        | SLEEWVTK                                                                             | 0.986737848        | 2              | 2.756786  |
| <b>P24470</b> | <b>CP2CN Cytochrome P450 2C23</b>                                                    | <b>0.580603025</b> | <b>9.9E-20</b> | <b>10</b> |
| P24470        | ACVGESLAR                                                                            | 0.594518927        | 2              | 2.52792   |
| P24470        | AQPFDPFILACAPCNVICILFNDR                                                             | 0.543984462        |                |           |
| P24470        | DLDIKPITTIHINLPPPYK                                                                  | 0.54575029         | 2              | 3.717576  |
| P24470        | EALLQQGDEFLGR                                                                        | 0.974517075        | 2              | 2.581231  |
| P24470        | GTTVLPMLSSVMLDQK                                                                     | 0.639595915        | 2              | 4.008655  |
| P24470        | GYGLIFSNGER                                                                          | 0.561266643        | 2              | 3.241366  |
| P24470        | IEEEKDNLK                                                                            | 0.713792227        | 1              | 2.898257  |
| P24470        | LPPGPTPLPIIGNLLQLNLK                                                                 | 0.846517881        | 2              | 3.49408   |
| P24470        | TFLNLMDLLNK                                                                          | 0.488170632        | 2              | 3.86456   |
| P24470        | YITLLPSSLPHAVVQDTK                                                                   | 0.421967845        | 2              | 3.412023  |
| <b>P24473</b> | <b>GSTK1 Glutathione S_transferase kappa 1</b>                                       | <b>0.745556423</b> | <b>2.1E-07</b> | <b>9</b>  |
| P24473        | AGMATAQAQHLLNK                                                                       | 0.840687241        | 2              | 3.919411  |
| P24473        | AGMATAQAQHLLNK+Oxidation(2)                                                          | 0.759907373        |                |           |
| P24473        | DEDITESQNILSAAEK                                                                     | 0.94413451         | 2              | 5.743433  |
| P24473        | DSGNQPPAMVPHK                                                                        | 0.934259236        | 2              | 2.420162  |
| P24473        | FLTAVSMEQPEMLEK                                                                      | 0.629933187        | 2              | 4.188372  |
| P24473        | FLTAVSMEQPEMLEK+Oxidation(11)                                                        | 0.979129462        |                |           |
| P24473        | MELLAYLLGEK                                                                          | 1.23599174         | 2              | 4.110036  |
| P24473        | QLFQVPMSVPK                                                                          | 0.790263161        | 2              | 2.719655  |
| P24473        | YGAFGLPTTVAHVDGK                                                                     | 1.04455235         | 2              | 3.759221  |
| <b>P25093</b> | <b>FAAA Fumarylacetoacetase</b>                                                      | <b>1.002667307</b> | <b>0.45841</b> | <b>17</b> |
| P25093        | AIDVGGQQR                                                                            | 1.043361737        | 2              | 3.408475  |
| P25093        | AQEHIHGMVLMNDWSAR                                                                    | 1.12349737         | 3              | 3.693632  |
| P25093        | AQEHIHGMVLMNDWSAR+Oxidation(7)                                                       | 0.250239537        |                |           |
| P25093        | ASLQNLISASQAQLR                                                                      | 0.844582234        | 2              | 4.802083  |
| P25093        | ASLQNLISASQAQLRDDK                                                                   | 0.808971613        | 2              | 3.145474  |
| P25093        | ASSVVVSGTPIR                                                                         | 1.01636061         | 2              | 3.595053  |
| P25093        | DIQQWEYVPLGPFGLK                                                                     | 1.369963949        | 2              | 4.832111  |
| P25093        | FGPEPIISK                                                                            | 0.991087581        | 2              | 2.87535   |
| P25093        | GEGMSQAATICR                                                                         | 0.921371897        | 2              | 3.657554  |
| P25093        | GEGMSQAATICR+Oxidation(3)                                                            | 1.419123704        |                |           |
| P25093        | GKENALLPNWLHLPVGYHGR                                                                 | 1.025367425        | 3              | 3.470478  |
| P25093        | HLFTGPVLSK                                                                           | 0.996204101        | 1              | 2.707079  |
| P25093        | HQHVFDETTLNSFMGLGQAAWK                                                               | 0.887537541        | 2              | 5.374691  |
| P25093        | IGVAIGDQILDLSVIK                                                                     | 1.139198849        | 2              | 5.417109  |
| P25093        | IGVAIGDQILDLSVIKHLFTGPVLSK                                                           | 1.216743354        | 3              | 3.952735  |
| P25093        | TFLLDGDEVIIIGHCQGDGYR                                                                | 0.841353903        | 2              | 5.027973  |
| P25093        | VGFGQCAGK                                                                            | 1.259360324        | 2              | 2.385562  |
| <b>P25113</b> | <b>PGAM1 Phosphoglycerate mutase 1</b>                                               | <b>1.098899727</b> | <b>0.33525</b> | <b>7</b>  |
| P25113        | ALPFWNEEIVPQIK                                                                       | 1.532879031        | 2              | 3.936657  |
| P25113        | FSGWYDADLSPAGHEEAK                                                                   | 0.793192445        | 2              | 4.953215  |
| P25113        | HGESAWNLENR                                                                          | 1.073812138        | 2              | 3.739516  |
| P25113        | HLEGLSEEAIMELNLPTGIPIVYELDK                                                          | 0.995703303        | 3              | 3.463135  |
| P25113        | SYDVPPPPMEPDHPFYSNISK                                                                | 1.162669744        | 2              | 4.318289  |
| P25113        | YADLTEDQLPSCESLK                                                                     | 1.061119127        | 2              | 5.490339  |
| P25113        | YADLTEDQLPSCESLKDIAR                                                                 | 0.935084344        | 2              | 5.017619  |
| <b>P25235</b> | <b>RPN2 Dolichyl_diphosphooligosaccharide__protein glycosyltransferase subunit 2</b> | <b>1.130435526</b> | <b>1.3E-14</b> | <b>14</b> |
| P25235        | DLLAAVSEDSSVAQIYHAVAALSGFGLPLASHEALGALTAR                                            | 1.319413898        |                |           |
| P25235        | EDQVIQLMNTIFS                                                                        | 2.263595439        | 2              | 2.394762  |

|               |                                              |                    |                |           |
|---------------|----------------------------------------------|--------------------|----------------|-----------|
| P25235        | EETVLATVQALHTASHLSQQADLR                     | 1.014354994        | 3              | 4.313227  |
| P25235        | FELDTSER                                     | 0.904504722        | 1              | 2.048539  |
| P25235        | FPEEEAPSTVLSQNLFTP                           | 0.735592213        | 2              | 4.258036  |
| P25235        | ISTEVGITNVDLSTVDKQSIAPK                      | 0.909136197        | 2              | 4.523488  |
| P25235        | LQVSSVLSQPLAQAQAVK                           | 0.991448778        | 2              | 5.727839  |
| P25235        | LSKEETVLATVQALHTASHLSQQADLR                  | 0.787807653        | 3              | 4.536286  |
| P25235        | NFESLSEAFSVASAAAALSQNR                       | 1.049885528        | 3              | 5.480579  |
| P25235        | NIVEEIEDLVAR                                 | 0.97967234         | 3              | 4.683619  |
| P25235        | NPILWNVADVVIK                                | 1.187734084        | 2              | 3.269099  |
| P25235        | TGQEVVFAEPDNK                                | 2.856992215        | 2              | 3.90921   |
| P25235        | YHVPVVVPEGSASDTQEAILR                        | 1.08921652         | 3              | 6.531534  |
| P25235        | YIANTVELR                                    | 0.954879605        | 2              | 2.587934  |
| <b>P25409</b> | <b>ALAT1 Alanine aminotransferase 1</b>      | <b>3.188861976</b> | <b>1.9E-11</b> | <b>2</b>  |
| P25409        | LTEQVFNEAPGIR                                | 2.537207748        | 2              | 3.48034   |
| P25409        | VLCVINPGNPTGQVQTR                            | 5.841683759        | 2              | 4.639893  |
| <b>P25977</b> | <b>UBF1 Nucleolar transcription factor 1</b> | <b>0.933871737</b> | <b>0.37221</b> | <b>2</b>  |
| P25977        | AKYAKLHPEMSNDLTK                             | 0.934145969        | 2              | 2.336063  |
| P25977        | ALKAMEMTWNNMEKK+Oxidation(11)                | 0.833345836        |                |           |
| <b>P26039</b> | <b>TLN1 Talin_1</b>                          | <b>0.99421258</b>  | <b>0.07034</b> | <b>22</b> |
| P26039        | ADAEGESDLENSR                                | 1.054946729        | 2              | 2.895252  |
| P26039        | ADAEGESDLENSRK                               | 0.639087735        | 2              | 3.190112  |
| P26039        | AGALQCSPSDVYTK                               | 1.14534076         | 2              | 2.655855  |
| P26039        | ASAGPQPLLVSCK                                | 0.996350997        | 2              | 3.023999  |
| P26039        | AVAEQIPLLQGVGR                               | 0.907590793        | 2              | 3.555277  |
| P26039        | EAAEGLRMATNAAAQNAIKK                         | 0.793546854        | 2              | 2.737611  |
| P26039        | ELMEEKKDEGTGLR+Oxidation(2)                  | 1.31526441         |                |           |
| P26039        | GTEWVDPEDPTVIAENELGAAAAIEAAK                 | 0.775047738        |                |           |
| P26039        | GVGAAATAVTQALNELLQHVK                        | 0.685610395        | 3              | 3.591889  |
| P26039        | ILAQATSDLVNAIK                               | 1.180165117        | 2              | 2.623954  |
| P26039        | LGAASLGAEDPETQVVLINAVK                       | 1.281012848        | 2              | 4.412858  |
| P26039        | LLGEIAQGNENYAGIAAR                           | 0.97891709         | 2              | 4.275113  |
| P26039        | LNEAAAGLNQAATELVQASR                         | 0.819835778        | 2              | 5.238898  |
| P26039        | MVAAATNNLCEAANAQVGHASQEK                     | 0.952831901        | 3              | 3.432194  |
| P26039        | SNTSPEELGPLANQLTSDYGR                        | 0.934647544        | 2              | 4.014234  |
| P26039        | TLAESALQLLYTAK                               | 1.071373029        | 2              | 2.988723  |
| P26039        | TMLESAGGLIQTAR                               | 0.838491174        | 2              | 2.631551  |
| P26039        | VGAIPANALDDGQWSQGLISAAR                      | 0.905924231        | 2              | 4.517199  |
| P26039        | VGDDPAVWQLK                                  | 0.961175111        | 2              | 2.834435  |
| P26039        | VLGEAMTGISQNAK                               | 0.94788004         | 2              | 2.791625  |
| P26039        | VLVQNAAGSQEK                                 | 1.025557105        | 2              | 2.514229  |
| P26039        | VVAPTISSPVCQEQLVEAGR                         | 0.826052472        | 2              | 4.492325  |
| <b>P26043</b> | <b>RADI Radixin</b>                          | <b>0.858570224</b> | <b>0.91954</b> | <b>10</b> |
| P26043        | AFAAQEDLEK                                   | 1.537800159        | 2              | 2.558512  |
| P26043        | ALELEQER                                     | 0.827572754        | 1              | 1.927128  |
| P26043        | FFPEDVSEELIQEITQR                            | 0.927789137        | 3              | 4.641557  |
| P26043        | IQNWHEEHR                                    | 1.43814686         | 2              | 2.512294  |
| P26043        | KKEEEATEWQHK                                 | 1.302364049        | 3              | 3.736757  |
| P26043        | KTQNDVLHAENVK                                | 0.919702217        | 2              | 5.050867  |
| P26043        | NQEQLAAELAEFTAK                              | 0.880574237        | 2              | 5.102746  |
| P26043        | QLQALSSELAQAR                                | 0.857791786        | 2              | 3.757116  |
| P26043        | RKPDITIEVQQMK                                | 0.735521629        | 2              | 3.868768  |
| P26043        | TQNDVLHAENVK                                 | 1.069731004        | 2              | 3.942393  |
| <b>P26231</b> | <b>CTNA1 Catenin alpha_1</b>                 | <b>0.976817105</b> | <b>0.63942</b> | <b>10</b> |
| P26231        | AEVQNLGGELVSGVDSAMSLIQAQK                    | 0.857546575        | 3              | 4.156018  |
| P26231        | AHVLAASVEQATENFLEK                           | 0.486728654        | 2              | 2.36008   |
| P26231        | AVMDHVSDFSLETNVPPLLVIEAAK                    | 0.952394879        | 3              | 3.537484  |
| P26231        | LIEVANLACISINNEEGVK                          | 0.866664775        | 2              | 4.894123  |

|               |                                                                                            |                    |                |          |
|---------------|--------------------------------------------------------------------------------------------|--------------------|----------------|----------|
| P26231        | LLEPLVTQVTTLVNTNSK                                                                         | 0.90265869         | 2              | 4.011494 |
| P26231        | QIIVDPLSFSEER                                                                              | 1.144388861        | 2              | 2.683527 |
| P26231        | SAAGEFADDPCCSSVK                                                                           | 0.923226944        | 2              | 4.052165 |
| P26231        | SDALNSAIDK                                                                                 | 1.189269259        | 2              | 2.521385 |
| P26231        | TIADHCPDSACK                                                                               | 0.384951649        | 2              | 3.559316 |
| P26231        | VIHVVTSEMDNYEPGVYTEK                                                                       | 1.015607451        | 3              | 3.553701 |
| <b>P26284</b> | <b>ODPA Pyruvate dehydrogenase E1 component subunit alpha_ somatic form_ mitochondrial</b> | <b>0.958801579</b> | <b>0.10786</b> | <b>8</b> |
| P26284        | AILAELTGR                                                                                  | 0.868232667        | 2              | 2.572551 |
| P26284        | EEIQEVRSK                                                                                  | 0.626897853        | 1              | 1.934391 |
| P26284        | GFCHLCDGQEACCVGLEAGINPTDHLITAYR                                                            | 0.796812237        | 3              | 6.632319 |
| P26284        | LEEGPPVTTVLTR                                                                              | 0.862044173        | 2              | 3.486447 |
| P26284        | MVNSNLASVEELKEIDVEVR                                                                       | 0.910604165        | 2              | 3.005507 |
| P26284        | RGDFIPGLR                                                                                  | 0.962128749        | 2              | 2.708508 |
| P26284        | TREEIQEVR                                                                                  | 0.904433346        | 3              | 3.489574 |
| P26284        | VDGMDILCVR                                                                                 | 0.840766645        | 2              | 3.337078 |
| <b>P26453</b> | <b>BASI Basigin</b>                                                                        | <b>0.880612075</b> | <b>0.97578</b> | <b>7</b> |
| P26453        | GNINVEGPPR                                                                                 | 1.059770156        | 2              | 3.469563 |
| P26453        | KSEHASEGEFVK                                                                               | 1.460818227        | 2              | 2.864264 |
| P26453        | RKPDQTLDEDDPGAAPLK                                                                         | 1.068388384        | 3              | 4.149471 |
| P26453        | SEASHPPVDEWVWFK                                                                            | 1.001971562        | 3              | 3.926523 |
| P26453        | SEHASEGEFVK                                                                                | 1.149318554        | 3              | 3.543998 |
| P26453        | SGEYSCIFLPEPVGR                                                                            | 0.935534199        | 2              | 3.463887 |
| P26453        | VLQEDTLPDLQMK                                                                              | 0.880479365        | 2              | 4.353234 |
| <b>P26772</b> | <b>CH10 10 kDa heat shock protein_ mitochondrial</b>                                       | <b>0.780112857</b> | <b>0.12447</b> | <b>7</b> |
| P26772        | GGEIQPVSVK                                                                                 | 0.909278191        | 2              | 3.260054 |
| P26772        | GGIMLPEK                                                                                   | 0.854395548        | 2              | 2.330966 |
| P26772        | GGIMLPEK+Oxidation(3)                                                                      | 0.965643463        |                |          |
| P26772        | GKGGEIQPVSVK                                                                               | 0.580007179        | 2              | 3.399598 |
| P26772        | VLLPEYGGTK                                                                                 | 0.953304288        | 2              | 2.367303 |
| P26772        | VLQATVVAVGSGGK                                                                             | 0.857674831        | 2              | 5.511703 |
| P26772        | VVLDDKDYFLFR                                                                               | 0.862891245        | 3              | 3.403807 |
| <b>P27139</b> | <b>CAH2 Carbonic anhydrase 2</b>                                                           | <b>0.737910284</b> | <b>0.3561</b>  | <b>2</b> |
| P27139        | IGPASQGLQK                                                                                 | 0.744949323        | 2              | 2.541601 |
| P27139        | ITEALHSIK                                                                                  | 0.730583299        | 2              | 2.426861 |
| <b>P27321</b> | <b>ICAL Calpastatin</b>                                                                    | <b>0.750711823</b> | <b>4.3E-15</b> | <b>4</b> |
| P27321        | KGSDEVTASSAATGTSPR                                                                         | 0.7091784          | 2              | 4.842527 |
| P27321        | KVEEEVMNDQALQALSDSLGTR                                                                     | 0.745467971        | 3              | 3.571078 |
| P27321        | LSAAVSETVSQVPAPSNHTAAPPPTER                                                                | 0.99300882         | 3              | 4.182306 |
| P27321        | SQSSEPPVIHEK                                                                               | 0.460320497        | 2              | 3.226077 |
| <b>P27364</b> | <b>3BHS5 3 beta_ hydroxysteroid dehydrogenase type 5</b>                                   | <b>0.866550369</b> | <b>0.8345</b>  | <b>6</b> |
| P27364        | AVLAANGSILK                                                                                | 0.82182743         | 2              | 2.891518 |
| P27364        | ETILNDREEEHR                                                                               | 1.354954271        | 2              | 2.920848 |
| P27364        | GDIVDAQFLR                                                                                 | 0.808666213        | 2              | 2.993035 |
| P27364        | IVQMLVQEK                                                                                  | 0.876305126        | 2              | 2.660714 |
| P27364        | NGGTFHTCALR                                                                                | 0.813923133        | 2              | 3.07916  |
| P27364        | QTILDVNVK                                                                                  | 0.706278627        | 1              | 2.105358 |
| <b>P27605</b> | <b>HPRT Hypoxanthine_ guanine phosphoribosyltransferase</b>                                | <b>1.093695851</b> | <b>0.34279</b> | <b>6</b> |
| P27605        | DLNHVCVISESGK                                                                              | 1.272180931        | 2              | 3.692392 |
| P27605        | FFADLLDIK                                                                                  | 1.092625042        | 2              | 3.194604 |
| P27605        | NVLIVEDIIDTGK                                                                              | 1.042272429        | 2              | 4.105061 |
| P27605        | SVGYRPDFVGFEPDK                                                                            | 1.067121445        | 3              | 3.809477 |
| P27605        | SYCNDQSTGDIK                                                                               | 1.167236378        | 2              | 3.961218 |
| P27605        | VIGDDLSTLTGK                                                                               | 1.153676756        | 2              | 4.223195 |

|               |                                                        |                    |                |           |
|---------------|--------------------------------------------------------|--------------------|----------------|-----------|
| <b>P27653</b> | <b>C1TC C_1 tetrahydrofolate synthase_ cytoplasmic</b> | <b>1.368997653</b> | <b>8E-07</b>   | <b>21</b> |
| P27653        | ASQAPSSFQLLYDLK                                        | 1.655482967        | 2              | 4.174053  |
| P27653        | AYTEEDLDLVEK                                           | 1.128599739        | 2              | 3.028994  |
| P27653        | CTHWAEGGQGALALAAVQR                                    | 1.091627917        | 2              | 5.196739  |
| P27653        | DVDGLTSINAGK                                           | 0.987616843        | 2              | 2.433334  |
| P27653        | GEWIKPGAVVIDCGINYPDDTKPNGR                             | 1.064741168        | 3              | 5.084738  |
| P27653        | GVPTGFVLPPIR                                           | 1.73367035         | 2              | 2.528205  |
| P27653        | IFHELTQTDK                                             | 1.231711836        | 3              | 3.613856  |
| P27653        | IYGADDIELLPEAQNK                                       | 1.060476158        | 2              | 5.288408  |
| P27653        | KITIGQAPTEK                                            | 1.447776035        | 2              | 2.911438  |
| P27653        | KVVGDVAYDEAK                                           | 1.562235463        | 2              | 3.886915  |
| P27653        | LDIDPETITWQR                                           | 1.236165351        | 2              | 4.084001  |
| P27653        | MHGGGPTVTAGLPLK+Oxidation(0)                           | 1.254915112        |                |           |
| P27653        | QGFGNLPICMAK                                           | 0.91497371         | 2              | 3.162811  |
| P27653        | TADLDKEVVK                                             | 1.154167068        | 2              | 2.400633  |
| P27653        | TADLDKEVVKGDILVVATGQPEMVK                              | 1.076659012        | 3              | 4.611959  |
| P27653        | TDPAALTDDEINR                                          | 1.218262305        | 2              | 4.379691  |
| P27653        | THLSLSHNPEQK                                           | 1.45064001         | 2              | 3.832612  |
| P27653        | VLLSALDR                                               | 1.460228696        | 2              | 2.476872  |
| P27653        | VVGDVAYDEAK                                            | 1.377968097        | 2              | 3.727813  |
| P27653        | YSLQPHVVVLLVATVR                                       | 1.549694686        | 3              | 3.520746  |
| P27653        | YVVVTGITPTPLGEGK                                       | 1.334452693        | 2              | 4.88205   |
| <b>P27657</b> | <b>LIPP Pancreatic triacylglycerol lipase</b>          | <b>0.617139727</b> | <b>0.23439</b> | <b>2</b>  |
| P27657        | ATYQATQNVNR                                            | 0.533003403        | 2              | 2.520481  |
| P27657        | ITGLDAAEPYFQGTPEEVR                                    | 0.588937218        | 2              | 3.888477  |
| <b>P27661</b> | <b>H2AX Histone H2A.x</b>                              | <b>0.79791338</b>  | <b>0.011</b>   | <b>3</b>  |
| P27661        | AGLQFPVGR                                              | 0.885940439        | 2              | 3.193053  |
| P27661        | HLQLAIR                                                | 0.851595394        | 2              | 2.642278  |
| P27661        | LLGGVTIAQGGVLPNIQAVLLPK                                | 0.773551463        | 3              | 4.717062  |
| <b>P27768</b> | <b>TNNI2 Troponin I_ fast skeletal muscle</b>          | <b>0.814822704</b> | <b>0.63149</b> | <b>3</b>  |
| P27768        | IDAAEEKYDMEVK                                          | 0.511689996        | 2              | 3.716147  |
| P27768        | SVMLQIAATELEK                                          | 0.932572194        | 2              | 2.529842  |
| P27768        | SVMLQIAATELEKEESR                                      | 0.575439603        | 2              | 3.105138  |
| <b>P27867</b> | <b>DHSO Sorbitol dehydrogenase</b>                     | <b>1.011421032</b> | <b>0.00317</b> | <b>14</b> |
| P27867        | AMGASQVVVIDLSASR                                       | 0.877452294        | 2              | 4.037575  |
| P27867        | AVEAFETAK                                              | 0.76113922         | 2              | 2.990508  |
| P27867        | EVGADFTIQVAK                                           | 1.121020283        | 2              | 2.781494  |
| P27867        | GENLSLVVHGPDIR                                         | 0.958838141        | 2              | 3.973934  |
| P27867        | HSADFCYK                                               | 1.028381322        | 2              | 2.814023  |
| P27867        | IGDFVVK                                                | 0.943675147        | 2              | 2.62791   |
| P27867        | LENYPIPELGPNDVLLK                                      | 1.017087846        | 2              | 4.792784  |
| P27867        | LPDSVTFEEGALIEPLSVGIYACR                               | 1.01857557         | 2              | 4.750957  |
| P27867        | MHSVGICGSDVHYWEHGR+Oxidation(0)                        | 0.932740366        |                |           |
| P27867        | TLNVKPLVTHR                                            | 0.673223415        | 2              | 3.259476  |
| P27867        | VAIEPGVPR                                              | 1.34437595         | 2              | 2.585423  |
| P27867        | VAIEPGVPREIDFCKIGR                                     | 0.797818209        | 2              | 2.545574  |
| P27867        | VLVCGAGPIGIVTLLVAK                                     | 0.772296095        | 3              | 6.226439  |
| P27867        | YNLTPSIFFCATPPDDGNLCR                                  | 7.004895792        | 2              | 4.203186  |
| <b>P27952</b> | <b>RS2 40S ribosomal protein S2</b>                    | <b>1.184857865</b> | <b>0.74859</b> | <b>7</b>  |
| P27952        | AEDKEWIPVK                                             | 1.134735148        | 2              | 3.212702  |
| P27952        | AFVAIGDYNGHVGLGVK                                      | 1.287109792        | 2              | 3.788078  |
| P27952        | ATFDAISK                                               | 1.146152683        | 2              | 2.444848  |
| P27952        | GCTATLGNFAK                                            | 1.151974077        | 2              | 2.840331  |
| P27952        | GTGIVSAPVPK                                            | 1.143887617        | 2              | 2.449337  |
| P27952        | SLEEIYLFSLPIK                                          | 2.863213179        | 1              | 2.712297  |
| P27952        | TYSYLPDLWK                                             | 1.099257737        | 2              | 2.706529  |

|               |                                                                |                    |                |           |
|---------------|----------------------------------------------------------------|--------------------|----------------|-----------|
| <b>P28037</b> | <b>AL1L1 Cytosolic 10_formyltetrahydrofolate dehydrogenase</b> | <b>0.928852072</b> | <b>1</b>       | <b>26</b> |
| P28037        | ADPLGLEAEK                                                     | 1.014422177        | 2              | 2.822206  |
| P28037        | ANATEFGLASGVFTR                                                | 1.03475227         | 2              | 4.444672  |
| P28037        | AVQMGMSSVFFNK                                                  | 0.921490614        | 2              | 3.511725  |
| P28037        | CPQSEEGATYEGIQK                                                | 1.394382322        | 2              | 4.314612  |
| P28037        | DLGEAALNEYLR                                                   | 1.137603106        | 2              | 3.288827  |
| P28037        | ECEVLDDTVSTLYNR                                                | 1.322606366        | 2              | 5.007122  |
| P28037        | EGHEVVGVTIPDKDGK                                               | 1.083052157        | 2              | 4.511124  |
| P28037        | GNDKVPGAWTEACGQK                                               | 0.929261387        | 2              | 3.536968  |
| P28037        | GQALPEVVAK                                                     | 0.954400337        | 2              | 2.596334  |
| P28037        | GSASSDLELTAELATAEAVR                                           | 0.967251781        | 2              | 6.296675  |
| P28037        | GVVNILPGSGSLVQQR                                               | 0.925184971        | 2              | 4.944245  |
| P28037        | IGFTGSTEVGK                                                    | 1.139075242        | 2              | 3.110392  |
| P28037        | ILPNVPEVEDSTDFK                                                | 1.024788629        | 2              | 3.691142  |
| P28037        | INWDQPAEAIHNWIR                                                | 0.880048801        | 2              | 3.67751   |
| P28037        | KEGHEVVGVTIPDKDGK                                              | 1.126922437        | 3              | 3.482716  |
| P28037        | KIGFTGSTEVGK                                                   | 0.868507942        | 2              | 2.950796  |
| P28037        | KLVEYCQR                                                       | 1.25752866         | 2              | 2.535579  |
| P28037        | LFVEESIHNQFVQK                                                 | 0.85150664         | 2              | 4.598858  |
| P28037        | LIAEGTAPR                                                      | 1.053931238        | 2              | 3.134685  |
| P28037        | LQAGTVFINTYNK                                                  | 3.166633176        | 2              | 2.507685  |
| P28037        | LSDHPDVR                                                       | 1.031530695        | 1              | 2.099179  |
| P28037        | NIQLEDGK                                                       | 1.052074619        | 1              | 1.998016  |
| P28037        | TAACLAAGNTVVIKPAQVPLTALK                                       | 0.774703229        | 3              | 4.426006  |
| P28037        | TDVAAPFGGFK                                                    | 0.990109257        | 2              | 2.719699  |
| P28037        | TYNTINPTDGSVICQVSLAQVSDVDK                                     | 0.91024023         | 3              | 6.586313  |
| P28037        | VVEEVEK                                                        | 0.964597293        | 2              | 2.478464  |
| <b>P28064</b> | <b>PSB8 Proteasome subunit beta type_8</b>                     | <b>1.021886284</b> | <b>0.99873</b> | <b>3</b>  |
| P28064        | ASAGSYIATIR                                                    | 1.06915227         | 2              | 2.527466  |
| P28064        | QDLSPEEAYDLAR                                                  | 0.987455797        | 2              | 3.116903  |
| P28064        | VESTDVSDLLHK                                                   | 1.09913434         | 2              | 2.901866  |
| <b>P28480</b> | <b>TCPA T_complex protein 1 subunit alpha</b>                  | <b>1.196766375</b> | <b>0.645</b>   | <b>10</b> |
| P28480        | AFHNEAQVNPER                                                   | 1.193310863        | 2              | 3.419807  |
| P28480        | FATEAAITLR                                                     | 1.055373151        | 2              | 3.260354  |
| P28480        | HGGYENAVHSGALDD                                                | 1.396060989        | 2              | 4.228732  |
| P28480        | ICDDELILIK                                                     | 1.085941226        | 2              | 3.170019  |
| P28480        | LLEVEHPAAK                                                     | 1.127133974        | 2              | 2.39514   |
| P28480        | MLVDDIGDVTITNDGATILK                                           | 1.061982725        | 2              | 4.338411  |
| P28480        | SLHDALCVVK                                                     | 0.962432003        | 2              | 2.455453  |
| P28480        | SLLVIPNTLAVNAAQDSTDLVAK                                        | 1.100861615        | 2              | 4.637555  |
| P28480        | SQNVMAAASIANIVK                                                | 1.026813371        | 2              | 4.022607  |
| P28480        | YINENLIINTDELGR                                                | 0.948386981        | 2              | 4.484542  |
| <b>P28492</b> | <b>GLSL Glutaminase liver isoform_mitochondrial</b>            | <b>0.906004146</b> | <b>0.34197</b> | <b>3</b>  |
| P28492        | MVQESSGGLLDR                                                   | 0.630624608        | 2              | 3.222004  |
| P28492        | SNPDLWGVSLCTVDGQR                                              | 0.942455529        | 2              | 3.155111  |
| P28492        | TALHVAAAEGHIDVVK                                               | 0.829532254        | 3              | 3.5419    |
| <b>P28650</b> | <b>PURA1 Adenylosuccinate synthetase isozyme 1</b>             | <b>0.865393532</b> | <b>0.56855</b> | <b>3</b>  |
| P28650        | CQGGNNAGHTVVVDGK                                               | 0.631517281        | 2              | 3.70611   |
| P28650        | LDILDVLEIK                                                     | 0.859948728        | 2              | 3.153514  |
| P28650        | VGIGAFPTEQINEIGDLLQNR                                          | 0.879052373        | 3              | 3.803699  |
| <b>P29147</b> | <b>BDH D_beta_hydroxybutyrate dehydrogenase_mitochondrial</b>  | <b>0.858340176</b> | <b>9.9E-20</b> | <b>20</b> |
| P29147        | AVLVTGCDSGFGSLAK                                               | 0.654728183        | 2              | 5.714079  |
| P29147        | EVAEVLNLTGTVR                                                  | 1.19443072         | 2              | 2.754992  |
| P29147        | FGVEAFSDCLR                                                    | 0.799749866        | 2              | 3.706598  |
| P29147        | GFLVFAGCLLK                                                    | 0.998456083        | 2              | 3.480829  |

|               |                                                               |                    |                |           |
|---------------|---------------------------------------------------------------|--------------------|----------------|-----------|
| P29147        | KMWDELPEVVR                                                   | 0.76461493         | 2              | 2.84792   |
| P29147        | KMWDELPEVVR+Oxidation(1)                                      | 0.71570834         |                |           |
| P29147        | METYCNSGSDTSSVINAVTHALTAATPYTR                                | 1.169922021        | 3              | 5.449405  |
| P29147        | METYCNSGSDTSSVINAVTHALTAATPYTR+Oxidation(0)                   | 1.080031127        |                |           |
| P29147        | MQVMTHFPGAISDK                                                | 1.111304196        | 2              | 4.578563  |
| P29147        | MQVMTHFPGAISDK+Oxidation(0)                                   | 1.110908886        |                |           |
| P29147        | MQVMTHFPGAISDK+Oxidation(0)                                   | 0.788639724        |                |           |
| P29147        | MQVMTHFPGAISDK+Oxidation(3)                                   | 0.782643165        |                |           |
| P29147        | MWDELPEVVR                                                    | 0.431276718        | 2              | 3.080644  |
| P29147        | MWDELPEVVR+Oxidation(0)                                       | 0.699843219        |                |           |
| P29147        | TIQLNVCNSEEVEK                                                | 0.778160161        | 2              | 4.449669  |
| P29147        | VSVVEPGNFIAATSLYSER                                           | 0.81224887         | 2              | 6.10183   |
| P29147        | VVNISMLGR                                                     | 0.805693981        | 2              | 3.961768  |
| P29147        | VVNISMLGR+Oxidation(6)                                        | 0.6962298          |                |           |
| P29147        | YEMHPLGVK                                                     | 0.821940494        | 2              | 2.703852  |
| P29147        | YEMHPLGVK+Oxidation(2)                                        | 0.801872587        |                |           |
| <b>P29266</b> | <b>3HIDH 3_hydroxyisobutyrate dehydrogenase_mitochondrial</b> | <b>0.985054736</b> | <b>2.4E-10</b> | <b>8</b>  |
| P29266        | DLGLAQDSATSK                                                  | 1.021073612        | 2              | 4.0746    |
| P29266        | EAGEQVASSPADVAEK                                              | 0.867968133        | 2              | 4.741756  |
| P29266        | GSLIDSSTIDPSVSK                                               | 0.746704623        | 2              | 4.769774  |
| P29266        | HGYPLILYDVPDVCK                                               | 0.877544962        | 2              | 4.997539  |
| P29266        | KGSLIDSSTIDPSVSK                                              | 0.784409606        | 2              | 4.659856  |
| P29266        | MGAVFMDAPVSGGVGAAR                                            | 0.941444959        | 2              | 4.789086  |
| P29266        | MGAVFMDAPVSGGVGAAR+Oxidation(0)                               | 0.97728543         |                |           |
| P29266        | MGAVFMDAPVSGGVGAAR+Oxidation(5)                               | 0.97728543         |                |           |
| <b>P29314</b> | <b>RS9 40S ribosomal protein S9</b>                           | <b>1.164599718</b> | <b>0.13375</b> | <b>9</b>  |
| P29314        | IEDFLER                                                       | 1.137794754        | 2              | 2.829904  |
| P29314        | IGVLDEGK                                                      | 0.937765026        | 2              | 2.395046  |
| P29314        | KGQGGAGAGDDEEED                                               | 1.898809931        | 2              | 4.175772  |
| P29314        | LDYILGLK                                                      | 1.183512967        | 2              | 2.547796  |
| P29314        | LFEGNALLR                                                     | 1.127674702        | 2              | 2.629325  |
| P29314        | LIGEYGLR                                                      | 1.462039232        | 2              | 2.646587  |
| P29314        | QVVNIPSFIVR                                                   | 1.034977299        | 2              | 2.454194  |
| P29314        | RLQTQVFK                                                      | 1.38718884         | 2              | 2.301405  |
| P29314        | SRLDQELK                                                      | 1.089279743        | 3              | 3.315833  |
| <b>P29315</b> | <b>RINI Ribonuclease inhibitor</b>                            | <b>0.973315179</b> | <b>0.10981</b> | <b>6</b>  |
| P29315        | ASLQELDLGSNK                                                  | 0.992636862        | 2              | 2.827818  |
| P29315        | ELHLNDNPLGDEGLK                                               | 0.811305067        | 2              | 2.926205  |
| P29315        | LDDCGLTEVR                                                    | 0.852120171        | 2              | 2.926793  |
| P29315        | LENCGITSANCK                                                  | 0.9950535          | 2              | 3.330049  |
| P29315        | SAIQANPALTELSLR                                               | 1.048618489        | 2              | 4.594812  |
| P29315        | TNELGDAGVGLVLQGLQNPTCK                                        | 0.883525434        | 2              | 5.286791  |
| <b>P29410</b> | <b>KAD2 Adenylate kinase 2_mitochondrial</b>                  | <b>1.026323213</b> | <b>0.70727</b> | <b>10</b> |
| P29410        | AMVASGSELGK                                                   | 0.993191944        | 2              | 2.361654  |
| P29410        | AMVASGSELGKK                                                  | 0.964429502        | 2              | 3.138547  |
| P29410        | AVLLGPPGAGK                                                   | 0.992634329        | 2              | 2.709268  |
| P29410        | EAMKDDITGEPLIR                                                | 1.311461601        | 2              | 2.723557  |
| P29410        | GIHCAIDASQTPDVVFASILAAFSK                                     | 1.513064774        | 3              | 6.222835  |
| P29410        | LEAYHTQTTPLVEYYR                                              | 1.083219923        | 2              | 5.400816  |
| P29410        | LVSDMEMVVELIEK                                                | 0.9182419          | 2              | 4.143301  |
| P29410        | NGFLLDGFPR                                                    | 0.927283502        | 2              | 3.35506   |
| P29410        | NLETPSCK                                                      | 1.008510346        | 2              | 2.349375  |
| P29410        | SYHEEFNPPK                                                    | 0.971631224        | 3              | 3.856591  |
| <b>P29411</b> | <b>KAD3 GTP:AMP phosphotransferase_mitochondrial</b>          | <b>0.935663456</b> | <b>0.09967</b> | <b>8</b>  |



|               |                                                            |                    |                |           |
|---------------|------------------------------------------------------------|--------------------|----------------|-----------|
| P29411        | AYEAQTEPVLQYYQK                                            | 0.980891798        | 2              | 4.183173  |
| P29411        | EDDKPETVIK                                                 | 0.78622217         | 2              | 2.633277  |
| P29411        | KGVLETFSGTETNK                                             | 0.719188899        | 2              | 3.050477  |
| P29411        | NLTQCSWLLDGFPR                                             | 0.840090675        | 2              | 3.339229  |
| P29411        | TLPQAEALDR                                                 | 0.916782507        | 2              | 2.339847  |
| P29411        | TVGIDDLTGEPLIQR                                            | 0.593296033        | 2              | 3.351763  |
| P29411        | VYNIEFNPPK                                                 | 0.651907094        | 2              | 3.155336  |
| P29411        | VYQIDTVINLNVPEVIK                                          | 0.83615161         | 2              | 2.660056  |
| <b>P29419</b> | <b>ATP5I ATP synthase subunit e_mitochondrial</b>          | <b>1.090409486</b> | <b>0.99633</b> | <b>2</b>  |
| P29419        | ELAEAEDVSIFK                                               | 1.125050645        | 2              | 3.297797  |
| P29419        | YSALILGMAYGAK                                              | 0.961801089        | 2              | 4.087216  |
| <b>P30009</b> | <b>MARCS Myristoylated alanine_rich C_kinase substrate</b> | <b>1.055062669</b> | <b>6.8E-06</b> | <b>3</b>  |
| P30009        | AEDGAAPSPSSETPK                                            | 0.735229357        | 2              | 3.924316  |
| P30009        | AEEPSEAVGEK                                                | 1.030535918        | 2              | 2.78907   |
| P30009        | GEAAAERPGEAAVASSPSK                                        | 1.273043928        | 2              | 4.547205  |
| <b>P30349</b> | <b>LKHA4 Leukotriene A_4 hydrolase</b>                     | <b>0.964871939</b> | <b>0.01077</b> | <b>4</b>  |
| P30349        | EEDLNSFSIEDLK                                              | 2.326166697        | 2              | 2.668863  |
| P30349        | SLSNVIAHEISHSWTGNLVTNK                                     | 0.692499653        | 3              | 4.175377  |
| P30349        | SSALQWLTPQTSQK                                             | 1.007437633        | 2              | 2.99612   |
| P30349        | WEEAIPLALK                                                 | 1.272801244        | 2              | 2.913596  |
| <b>P30427</b> | <b>PLEC Plectin</b>                                        | <b>0.80602341</b>  | <b>0.76703</b> | <b>6</b>  |
| P30427        | AQAEAQQPVFNTLR                                             | 1.030672629        | 2              | 2.994362  |
| P30427        | AQVEQELTTLR                                                | 0.857635079        | 2              | 2.514488  |
| P30427        | LLDPEDVDVPQPDEK                                            | 0.756758366        | 2              | 3.726467  |
| P30427        | LQAE EVAQK                                                 | 0.910779179        | 2              | 2.398628  |
| P30427        | MSAAQALKKGWLYEAGQR+Oxidation(0)                            | 0.900910922        |                |           |
| P30427        | VLALPEPSPAAPTLR                                            | 0.935156105        | 2              | 2.781167  |
| <b>P30713</b> | <b>GSTT2 Glutathione S_transferase theta_2</b>             | <b>1.024899897</b> | <b>7.7E-05</b> | <b>6</b>  |
| P30713        | AQVHEYLGHADNIR                                             | 1.073575926        | 2              | 4.898557  |
| P30713        | GQHLSEQFSQVNCLK                                            | 0.990334663        | 2              | 4.794899  |
| P30713        | NSMVLALQR                                                  | 0.875256486        | 2              | 2.868994  |
| P30713        | VEAFLGAELCQEAHNPIMSVLGQAAK                                 | 1.316756786        | 3              | 4.296496  |
| P30713        | VLGPLIGVQPPEEK                                             | 0.811680063        | 2              | 3.897211  |
| P30713        | YQVADHWYPADLQAR                                            | 0.785445407        | 2              | 4.862041  |
| <b>P30835</b> | <b>K6PL 6_phosphofructokinase_liver type</b>               | <b>1.126470793</b> | <b>0.21664</b> | <b>2</b>  |
| P30835        | NEWGSLLEELVK                                               | 1.163951099        | 2              | 3.212283  |
| P30835        | VFANAPDSACVIGLR                                            | 0.385257177        | 2              | 2.403141  |
| <b>P30839</b> | <b>AL3A2 Fatty aldehyde dehydrogenase</b>                  | <b>0.816199663</b> | <b>0.07179</b> | <b>10</b> |
| P30839        | DILAAIAADLSK                                               | 0.91590694         | 2              | 3.030413  |
| P30839        | EKDILAAIAADLSK                                             | 0.977708437        | 2              | 4.115873  |
| P30839        | EKPLALYIFSHNNK                                             | 1.293509292        | 2              | 3.133023  |
| P30839        | FDHILYTGNTAVGK                                             | 1.638640688        | 2              | 3.935179  |
| P30839        | HLPVTLLELGGK                                               | 0.963557099        | 3              | 3.315098  |
| P30839        | NVEEAINFINDR                                               | 1.355632453        | 2              | 4.109665  |
| P30839        | QRFDHILYTGNTAVGK                                           | 1.142864578        | 2              | 2.833376  |
| P30839        | VMQEIEIFGPIPIVSVK                                          | 0.713630128        | 2              | 4.425926  |
| P30839        | VMQEIEIFGPIPIVSVK+Oxidation(1)                             | 0.955399096        |                |           |
| P30839        | YIAPTILTDVDPNSK                                            | 0.972590677        | 2              | 3.860017  |
| <b>P30904</b> | <b>MIF Macrophage migration inhibitory factor</b>          | <b>1.12430693</b>  | <b>0.99851</b> | <b>2</b>  |
| P30904        | LHISPDR                                                    | 0.970150014        | 1              | 2.018165  |
| P30904        | LLCGLLSDR                                                  | 1.166816841        | 2              | 2.934856  |
| <b>P30999</b> | <b>CTND1 Catenin delta_1</b>                               | <b>0.961900933</b> | <b>0.72033</b> | <b>3</b>  |
| P30999        | GYELLFQPEVVR                                               | 0.832241355        | 2              | 2.842425  |
| P30999        | QDVYGPQPQVR                                                | 0.978009014        | 2              | 2.43279   |
| P30999        | SQSSHYSDDSTLPLIDR                                          | 0.961347925        | 2              | 2.594846  |
| <b>P31000</b> | <b>VIME Vimentin</b>                                       | <b>0.765707147</b> | <b>1.7E-12</b> | <b>15</b> |

|               |                                                                                    |                    |                |           |
|---------------|------------------------------------------------------------------------------------|--------------------|----------------|-----------|
| P31000        | DGQVINETSQHDDLE                                                                    | 0.783377264        | 2              | 3.114833  |
| P31000        | FADLSEAANR                                                                         | 1.105607869        | 2              | 2.840343  |
| P31000        | ILLAELEQLK                                                                         | 0.742362602        | 2              | 3.222592  |
| P31000        | KLLEGEESR                                                                          | 0.859766418        | 2              | 2.730617  |
| P31000        | KVESLQEEIAFLK                                                                      | 0.771770599        | 2              | 3.975406  |
| P31000        | LGDLYEEEMR                                                                         | 0.567220146        | 2              | 2.336449  |
| P31000        | LLEGEESR                                                                           | 0.748017058        | 2              | 2.749329  |
| P31000        | LQEEMLQR                                                                           | 0.658706861        | 2              | 2.328545  |
| P31000        | NLQEAEEWYK                                                                         | 0.749976636        | 2              | 2.81154   |
| P31000        | QDVDNASLAR                                                                         | 0.524235949        | 2              | 2.805826  |
| P31000        | QVQSLTCEVDALK                                                                      | 0.748854022        | 2              | 3.541288  |
| P31000        | RQVDQLTNDK                                                                         | 0.810196338        | 2              | 2.516809  |
| P31000        | SLYSSPPGGAYVTR                                                                     | 1.27716286         | 2              | 2.809831  |
| P31000        | TNEKVELQELNDR                                                                      | 0.985718212        | 2              | 2.835557  |
| P31000        | VELQELNDR                                                                          | 0.679215283        | 2              | 2.587061  |
| <b>P31044</b> | <b>PEBP1 Phosphatidylethanolamine_binding protein 1</b>                            | <b>0.940476686</b> | <b>9.9E-20</b> | <b>7</b>  |
| P31044        | GNDISSGTVLSEYVGSPPK                                                                | 0.917495794        | 2              | 6.581267  |
| P31044        | KYHLGAPVAGTCFQAEWDDSVPK                                                            | 1.656772374        | 3              | 3.775324  |
| P31044        | LYTLVLTDPDAPSR                                                                     | 1.234138424        | 2              | 4.267089  |
| P31044        | VDYGGVTVDELGK                                                                      | 0.777044441        | 2              | 4.858945  |
| P31044        | VLTPQTVMNRPSSISWDGLDPGK                                                            | 0.817823749        | 3              | 5.079072  |
| P31044        | YHLGAPVAGTCFQAEWDDSVPK                                                             | 3.355344271        | 2              | 5.398308  |
| P31044        | YVWLVEQEQPLNCDEPILSNK                                                              | 1.270054568        | 2              | 5.405777  |
| <b>P31210</b> | <b>AK1D1 3_oxo_5_beta_steroid_4_dehydrogenase</b>                                  | <b>1.047656766</b> | <b>0.99863</b> | <b>19</b> |
| P31210        | DELTSLGK                                                                           | 0.9434171          | 2              | 2.862387  |
| P31210        | DIEALNK                                                                            | 1.170414223        | 1              | 2.46768   |
| P31210        | EEMKDIEALNK                                                                        | 1.108976955        | 2              | 3.385076  |
| P31210        | ENFQIFDFSLTK                                                                       | 1.220901898        | 2              | 3.027293  |
| P31210        | HIDGAYVYR                                                                          | 1.039839371        | 2              | 2.939373  |
| P31210        | IKENFQIFDFSLTK                                                                     | 1.305189842        | 3              | 4.346778  |
| P31210        | LWSTDHDPPEMVRPALER                                                                 | 0.74179631         | 3              | 3.668172  |
| P31210        | NEHEVGEAIR                                                                         | 0.847191892        | 2              | 3.07835   |
| P31210        | NPLWVNVSSPPLLK                                                                     | 1.213755238        | 2              | 4.442975  |
| P31210        | NPLWVNVSSPPLLKDELTSLGK                                                             | 0.826471254        | 3              | 5.236874  |
| P31210        | QLEVILNKPGLK                                                                       | 0.903518151        | 2              | 3.382973  |
| P31210        | REEIFYCGK                                                                          | 1.411273554        | 2              | 3.28525   |
| P31210        | RQLEVILNKPGLK                                                                      | 0.749660141        | 3              | 3.680693  |
| P31210        | SLGVSNFNR                                                                          | 0.717128848        | 2              | 2.376778  |
| P31210        | SNLCATWEALEACK                                                                     | 0.870033392        | 2              | 4.941665  |
| P31210        | SNLCATWEALEACKDAGLVK                                                               | 0.643151395        | 2              | 5.145218  |
| P31210        | TAIDEGYR                                                                           | 0.863984965        | 2              | 2.436932  |
| P31210        | TQAQIVLR                                                                           | 0.924439928        | 2              | 3.036217  |
| P31210        | YKPVTNQVECHPYFTQTK                                                                 | 1.058831475        | 2              | 5.77276   |
| <b>P31230</b> | <b>AIMP1 Aminoacyl tRNA synthase complex_interacting multifunctional protein 1</b> | <b>1.211373193</b> | <b>3.6E-07</b> | <b>2</b>  |
| P31230        | GAEADQIIEYLK                                                                       | 1.233795988        | 2              | 3.477441  |
| P31230        | KEIEELK                                                                            | 0.953402333        | 1              | 1.999019  |
| <b>P31399</b> | <b>ATP5H ATP synthase subunit d_mitochondrial</b>                                  | <b>1.087476604</b> | <b>0.5042</b>  | <b>7</b>  |
| P31399        | ANVDKPGLVDDFK                                                                      | 1.086831633        | 2              | 3.780981  |
| P31399        | KYPYWPHQPIENL                                                                      | 0.874499217        | 2              | 2.380995  |
| P31399        | NCAQFVTGSQAR                                                                       | 0.879274906        | 2              | 4.925229  |
| P31399        | NMIPFDQMTIDDLNEVPETK                                                               | 0.841733067        | 2              | 5.076017  |
| P31399        | SWNETFHTR                                                                          | 1.126896809        | 2              | 2.676055  |
| P31399        | TIDWVSFVEIMPQNQK                                                                   | 1.426880478        | 2              | 4.12896   |
| P31399        | YVALVDAEEKEDVK                                                                     | 1.129737406        | 2              | 3.638041  |

|               |                                                               |                    |                |           |
|---------------|---------------------------------------------------------------|--------------------|----------------|-----------|
| <b>P32089</b> | <b>TXTP Tricarboxylate transport protein_mitochondrial</b>    | <b>1.053375214</b> | <b>0.92342</b> | <b>6</b>  |
| P32089        | FIHDQTSSNP                                                    | 1.25341659         | 1              | 3.547732  |
| P32089        | GLSLLYGSIPK                                                   | 0.735162044        | 2              | 3.292212  |
| P32089        | GTYQGLTATVLK                                                  | 0.778249323        | 2              | 2.628208  |
| P32089        | NTLDCGVQILK                                                   | 0.915180165        | 2              | 2.497192  |
| P32089        | SHGVLGLYR                                                     | 0.477375101        | 1              | 1.914029  |
| P32089        | TQLQLDER                                                      | 0.993702181        | 2              | 2.918798  |
| <b>P32198</b> | <b>CPT1A Carnitine O_palmitoyltransferase 1_liver isoform</b> | <b>0.79519875</b>  | <b>5.8E-07</b> | <b>6</b>  |
| P32198        | ELEQQMQQILDDPSEPQGEAK                                         | 0.887731984        | 2              | 4.595607  |
| P32198        | GDTNPNIKPTR                                                   | 0.934896067        | 2              | 2.501151  |
| P32198        | LSTSQTQQQVELDFEK                                              | 2.209944517        | 2              | 2.815178  |
| P32198        | MTALAQDFAVNLGPK                                               | 0.670079328        | 2              | 3.388431  |
| P32198        | MTALAQDFAVNLGPK+Oxidation(0)                                  | 0.456994427        |                |           |
| P32198        | TSPDAFIQLALQLAHYK                                             | 0.73693748         | 2              | 3.259335  |
| <b>P32232</b> | <b>CBS Cystathionine beta_synthase</b>                        | <b>2.060861316</b> | <b>9.9E-20</b> | <b>11</b> |
| P32232        | AGTLKPGDTIIEPTSGNTGIGLALAAAVK                                 | 1.455261165        | 3              | 5.973728  |
| P32232        | ALGAEIVR                                                      | 1.920798275        | 1              | 1.970291  |
| P32232        | CVVILPDSVR                                                    | 1.4884805          | 2              | 2.467029  |
| P32232        | FDSPESHVGVAVR                                                 | 1.077695973        | 2              | 3.785591  |
| P32232        | LKNEIPNSHILDQYR                                               | 1.941807534        | 3              | 3.346921  |
| P32232        | NASNPLAHYDDTAEEILQQCDGK                                       | 1.95252162         | 2              | 5.300978  |
| P32232        | SNDDDSFAFAR                                                   | 2.097282137        | 2              | 3.32601   |
| P32232        | VDMLVASAGTGGTITGIAR                                           | 1.338642422        | 2              | 4.834332  |
| P32232        | VQELSLAPLTVLPTVTEHTIAILR                                      | 1.915083819        | 3              | 3.979408  |
| P32232        | VRPSDEVCK                                                     | 1.775340248        | 2              | 2.631969  |
| P32232        | VWISPDTPSR                                                    | 1.375412415        | 2              | 2.367357  |
| <b>P32551</b> | <b>QCR2 Cytochrome b_c1 complex subunit 2_mitochondrial</b>   | <b>0.967049714</b> | <b>0.90612</b> | <b>13</b> |
| P32551        | AVAFQNPQTR                                                    | 1.125369913        | 2              | 3.220823  |
| P32551        | AVAQGNLSSADVQAAK                                              | 0.926605314        | 2              | 4.976707  |
| P32551        | GNNTTSLLSQSVAK                                                | 0.984366971        | 2              | 4.174992  |
| P32551        | IENLHDVAYK                                                    | 1.271643363        | 2              | 3.558061  |
| P32551        | ITSEELHYFVQNHFTSAR                                            | 1.01448394         | 3              | 3.873832  |
| P32551        | LPNGLVIASLENYAPLSR                                            | 1.759175424        | 2              | 4.686533  |
| P32551        | NALANPLYCPDYR                                                 | 0.983044365        | 2              | 3.018948  |
| P32551        | RGNNTTSLLSQSVAK                                               | 0.974686088        | 2              | 3.279236  |
| P32551        | RWEVAALR                                                      | 1.091840391        | 2              | 2.410336  |
| P32551        | SMTASGNLGHTPFLDEL                                             | 0.880341544        | 2              | 3.213099  |
| P32551        | SMTASGNLGHTPFLDEL+Oxidation(1)                                | 0.948751368        |                |           |
| P32551        | TSAPGGVPLQPQLEFTK                                             | 0.873149491        | 2              | 4.216162  |
| P32551        | YENYNLGTSHLLR                                                 | 1.164471458        | 2              | 4.273424  |
| <b>P32755</b> | <b>HPPD 4_hydroxyphenylpyruvate dioxygenase</b>               | <b>1.404431405</b> | <b>9.9E-20</b> | <b>17</b> |
| P32755        | AFEEEEQALR                                                    | 1.536584807        | 2              | 3.559216  |
| P32755        | DIAFEVEDCEHIVQK                                               | 1.395856168        | 2              | 4.093562  |
| P32755        | ENMDVLEELK                                                    | 1.837848954        | 2              | 2.845803  |
| P32755        | FAVLQTYGDTTHTLVEK                                             | 1.54235509         | 2              | 4.977412  |
| P32755        | FLPGFEPTYK                                                    | 1.259150529        | 1              | 2.402299  |
| P32755        | FWSVDDTQVHTEYSSLR                                             | 3.070106439        | 2              | 5.522952  |
| P32755        | GMEFLAVPSSYYR                                                 | 1.569783149        | 2              | 3.59925   |
| P32755        | GNLTDLETNGVR                                                  | 1.57871179         | 2              | 3.72886   |
| P32755        | HNHQGFGAGNFNSLFK                                              | 1.462203752        | 3              | 5.647913  |
| P32755        | ILVDYDEK                                                      | 1.627276987        | 2              | 2.402559  |
| P32755        | IVFVLCALNPWNK                                                 | 1.388997797        | 2              | 3.657444  |
| P32755        | IVREPWVEEDKFGK                                                | 1.465405299        | 3              | 4.488583  |
| P32755        | LPSCNLEIIDHIVGNQPDQEMESASEWYLK                                | 1.621208365        | 3              | 7.771306  |

|               |                                                             |                    |                |           |
|---------------|-------------------------------------------------------------|--------------------|----------------|-----------|
| P32755        | MGFEPLAYK                                                   | 1.653270698        | 2              | 2.619258  |
| P32755        | SIVVANYEESIK                                                | 1.320801677        | 2              | 4.159398  |
| P32755        | SQIQEYVDYNGGAGVQHIALR                                       | 1.564205092        | 2              | 5.54957   |
| P32755        | TEDIITTR                                                    | 1.416327943        | 2              | 3.391608  |
| <b>P33124</b> | <b>ACSL6 Long_chain_fatty_acid__CoA ligase 6</b>            | <b>0.880400757</b> | <b>0.39724</b> | <b>2</b>  |
| P33124        | ALRPTIFPVVPR                                                | 0.801317024        | 2              | 2.979572  |
| P33124        | IENIYIR                                                     | 0.894360709        | 2              | 2.95509   |
| <b>P33273</b> | <b>CP255 Cytochrome P450 2C55</b>                           | <b>0.769648872</b> | <b>0.43796</b> | <b>4</b>  |
| P33273        | DENFLNLMEK                                                  | 1.039979807        | 2              | 2.312552  |
| P33273        | ELRHFSMLTLR                                                 | 1.117081759        | 2              | 2.365308  |
| P33273        | FDYKDENFLNLMEK                                              | 0.655858115        | 3              | 4.522217  |
| P33273        | IQEEASCLVEELR                                               | 1.208783506        | 2              | 2.719774  |
| <b>P33274</b> | <b>CP4F1 Cytochrome P450 4F1</b>                            | <b>1.30927757</b>  | <b>0.05084</b> | <b>2</b>  |
| P33274        | ACNLVHEFTDAVIR                                              | 1.234720377        | 3              | 3.738177  |
| P33274        | TLPDQGLDEFK                                                 | 1.847088494        | 2              | 2.517616  |
| <b>P34058</b> | <b>HS90B Heat shock protein HSP 90_beta</b>                 | <b>1.086039168</b> | <b>0.58774</b> | <b>25</b> |
| P34058        | ADLNNLGTIAK                                                 | 0.978928577        | 2              | 4.18483   |
| P34058        | EDQTEYLEER                                                  | 1.300661181        | 2              | 3.430418  |
| P34058        | EGLELPEDEEEK                                                | 0.425246668        | 2              | 2.541823  |
| P34058        | EGLELPEDEEEKK                                               | 1.270963165        | 2              | 3.370606  |
| P34058        | ELISNASDALDK                                                | 1.245236793        | 2              | 3.384502  |
| P34058        | EQVANSAFVER                                                 | 1.589420419        | 2              | 2.369812  |
| P34058        | GFEVVMTEPIDEYCVQQLK                                         | 2.285575443        | 2              | 4.445317  |
| P34058        | GVVDSLDPLNISR                                               | 1.011721285        | 2              | 4.912754  |
| P34058        | HFSVEGQLEFR                                                 | 1.01399068         | 2              | 2.571582  |
| P34058        | HLEINPDHPIVETLR                                             | 1.037703839        | 2              | 4.582771  |
| P34058        | HSQFIGYPITLYLEK                                             | 2.53575845         | 2              | 4.129283  |
| P34058        | IDIIPNPQER                                                  | 1.016885244        | 2              | 3.117871  |
| P34058        | KHLEINPDHPIVETLR                                            | 0.988475458        | 2              | 4.827516  |
| P34058        | LGIHEDSTNR                                                  | 1.01488291         | 2              | 3.40681   |
| P34058        | NPDDITQEEYGEFYK                                             | 1.481342914        | 2              | 4.753683  |
| P34058        | RAPFDLFENK                                                  | 1.047899873        | 2              | 2.811533  |
| P34058        | SIYYITGESK                                                  | 1.472741656        | 2              | 3.040217  |
| P34058        | SLTNDWEDHLAVK                                               | 1.029706698        | 2              | 4.017478  |
| P34058        | TLTLVDTGIGMTK                                               | 0.939529526        | 2              | 4.082806  |
| P34058        | TLTLVDTGIGMTK+Oxidation(10)                                 | 1.196655446        |                |           |
| P34058        | VILHLKEDQTEYLEER                                            | 1.139267061        | 3              | 3.719254  |
| P34058        | YESLTDPSK                                                   | 1.059424214        | 2              | 2.642702  |
| P34058        | YESLTDPSKLDGK                                               | 1.039086473        | 2              | 3.596219  |
| P34058        | YHTSQSGDEMTSLSEYVSR                                         | 1.121564134        | 2              | 5.552259  |
| P34058        | YIDQEELNK                                                   | 0.934364304        | 2              | 3.487408  |
| <b>P34064</b> | <b>PSA5 Proteasome subunit alpha type_5</b>                 | <b>0.990851323</b> | <b>0.99126</b> | <b>3</b>  |
| P34064        | AIGSASEGAQSSLQEVYHK                                         | 0.989656275        | 2              | 4.718152  |
| P34064        | EELEEVIKDI                                                  | 0.814026674        | 2              | 2.494571  |
| P34064        | GVNTFSPEGR                                                  | 1.065590823        | 2              | 3.013032  |
| <b>P34067</b> | <b>PSB4 Proteasome subunit beta type_4</b>                  | <b>0.84671025</b>  | <b>0.00922</b> | <b>3</b>  |
| P34067        | GVEIEGPLSAQTNWDIAHMISGFE                                    | 1.035530018        | 2              | 3.634493  |
| P34067        | TQNPMVTGTSVLGK                                              | 0.802402802        | 2              | 2.837394  |
| P34067        | VNDSTMLGASGDYADFQYK                                         | 0.900886729        | 2              | 4.302262  |
| <b>P35171</b> | <b>CX7A2 Cytochrome c oxidase subunit 7A2_mitochondrial</b> | <b>0.936890411</b> | <b>0.9743</b>  | <b>2</b>  |
| P35171        | GGTSDALLYR                                                  | 0.941956494        | 2              | 2.888413  |
| P35171        | LFQEDNGMPVHLK                                               | 0.889237489        | 2              | 3.616754  |
| <b>P35213</b> | <b>1433B 14_3_3 protein beta/alpha</b>                      | <b>1.149160645</b> | <b>3.6E-07</b> | <b>6</b>  |
| P35213        | AVTEQGHELSNEER                                              | 1.594734593        | 2              | 4.544152  |
| P35213        | EKIEAELQDICS DVLELLDK                                       | 0.833522004        | 3              | 3.559023  |
| P35213        | QTTVSNSQAYQEA FEISK                                         | 1.034646777        | 2              | 5.24455   |

|               |                                                                       |                    |                |           |
|---------------|-----------------------------------------------------------------------|--------------------|----------------|-----------|
| P35213        | TAFDEAIAELDTLNNEESYK                                                  | 1.002415372        | 2              | 4.837814  |
| P35213        | YLILNATHAESK                                                          | 1.149495358        | 2              | 3.207704  |
| P35213        | YLSEVASGDNK                                                           | 1.0380996          | 1              | 2.999391  |
| <b>P35278</b> | <b>RAB5C Ras_related protein Rab_5C</b>                               | <b>0.9892917</b>   | <b>0.9773</b>  | <b>2</b>  |
| P35278        | GVDLQESNPASR                                                          | 1.052715682        | 2              | 3.07112   |
| P35278        | NEPQNAAGAPGR                                                          | 0.915930109        | 2              | 2.857707  |
| <b>P35427</b> | <b>RL13A 60S ribosomal protein L13a</b>                               | <b>1.446218039</b> | <b>6.4E-12</b> | <b>2</b>  |
| P35427        | CEGINISGNFYR                                                          | 1.055038968        | 2              | 3.313946  |
| P35427        | YQAVTATLEEK                                                           | 1.223767162        | 2              | 3.434364  |
| <b>P35434</b> | <b>ATPD ATP synthase subunit delta_mitochondrial</b>                  | <b>0.904334241</b> | <b>0.28963</b> | <b>2</b>  |
| P35434        | AQSELSGADEAAR                                                         | 0.892229076        | 2              | 4.591399  |
| P35434        | IEANEALVK                                                             | 0.87108585         | 2              | 3.168806  |
| <b>P35435</b> | <b>ATPG ATP synthase subunit gamma_mitochondrial</b>                  | <b>0.920754016</b> | <b>0.00746</b> | <b>7</b>  |
| P35435        | GLCGAIHSSVAK                                                          | 1.015306233        | 2              | 3.798018  |
| P35435        | HLIIGVSSDR                                                            | 0.828536573        | 2              | 2.786877  |
| P35435        | NASDMIDK                                                              | 0.84409674         | 1              | 2.113865  |
| P35435        | NDMAALTAAGK                                                           | 0.884593223        | 2              | 3.376471  |
| P35435        | NDMAALTAAGK+Oxidation(2)                                              | 0.835169507        |                |           |
| P35435        | THSDQFLVSFK                                                           | 1.077151429        | 2              | 3.339708  |
| P35435        | VYGTGSLALYEK                                                          | 1.210218826        | 2              | 2.992851  |
| <b>P35565</b> | <b>CALX Calnexin</b>                                                  | <b>0.889905213</b> | <b>0.52562</b> | <b>9</b>  |
| P35565        | AEEDEILNR                                                             | 1.553291612        | 2              | 2.914994  |
| P35565        | KIPNPDFFEDLEPFR                                                       | 0.843616444        | 3              | 3.99702   |
| P35565        | NGKDEEEEEKLEEK                                                        | 1.097354397        | 2              | 5.21963   |
| P35565        | SDTSTPPSPK                                                            | 1.751221739        | 2              | 2.530315  |
| P35565        | TDAPQPDVK                                                             | 0.963373774        | 2              | 2.343518  |
| P35565        | TDAPQPDVKDEEGKEEEK                                                    | 0.845554486        | 2              | 3.868199  |
| P35565        | TSELNLDQFHDK                                                          | 1.221615603        | 2              | 3.883714  |
| P35565        | VVDDWANDGWGLK                                                         | 0.828665319        | 2              | 4.30863   |
| P35565        | VVDDWANDGWGLKK                                                        | 0.533866839        | 2              | 2.767107  |
| <b>P35704</b> | <b>PRDX2 Peroxiredoxin_2</b>                                          | <b>1.015939778</b> | <b>0.99352</b> | <b>4</b>  |
| P35704        | EGGLGPLNIPLLDVTK                                                      | 1.106666718        | 2              | 3.352696  |
| P35704        | KEGGLGPLNIPLLDVTK                                                     | 0.829284839        | 2              | 4.256789  |
| P35704        | NDEGIAYR                                                              | 0.940986865        | 2              | 2.392763  |
| P35704        | QITVNDLPVGR                                                           | 0.949943197        | 2              | 2.69115   |
| <b>P35738</b> | <b>ODDB 2_oxoisovalerate dehydrogenase subunit beta_mitochondrial</b> | <b>0.866196485</b> | <b>0.15581</b> | <b>5</b>  |
| P35738        | AAVEQVPVEPYK                                                          | 1.004438583        | 2              | 2.660911  |
| P35738        | GLLLSCIEDKNPCIFFEPK                                                   | 0.903597956        | 2              | 3.466292  |
| P35738        | IPLSQAEVIQEGSDVTLVAWGTQVHVIR                                          | 0.854655552        | 3              | 4.104013  |
| P35738        | MNLFQSITSALDNSLAK                                                     | 0.809532411        | 2              | 2.629858  |
| P35738        | SGDLFNCGLTIR                                                          | 0.860837044        | 2              | 2.892294  |
| <b>P35815</b> | <b>PPM1B Protein phosphatase 1B</b>                                   | <b>0.81799831</b>  | <b>0.37556</b> | <b>2</b>  |
| P35815        | IQNAGGSVMIQR                                                          | 0.778629269        | 2              | 3.083096  |
| P35815        | SGFALEPSVENVK                                                         | 1.081075933        | 2              | 3.126184  |
| <b>P36201</b> | <b>CRIP2 Cysteine_rich protein 2</b>                                  | <b>1.058037118</b> | <b>0.6383</b>  | <b>3</b>  |
| P36201        | ASSVTFTGEPNMCPR                                                       | 3.536631597        | 2              | 3.899054  |
| P36201        | GVNIGGAGSYIYEKPPTEAPQVTGPIEVPVVR                                      | 0.991380698        | 3              | 6.951923  |
| P36201        | GVNTGAVGSYIYDKDPEGTVQP                                                | 1.092039561        | 2              | 4.259221  |
| <b>P36365</b> | <b>FMO1 Dimethylaniline monooxygenase [N_oxide_forming] 1</b>         | <b>0.91600014</b>  | <b>9.9E-20</b> | <b>11</b> |
| P36365        | ALQSDYITYIDDLTTSINAKPDLR                                              | 1.246482523        | 3              | 3.499315  |
| P36365        | ASLYNSVVSNSK                                                          | 1.564837287        | 2              | 2.308056  |
| P36365        | CLEEGLEPTCFER                                                         | 0.768066076        | 2              | 4.114057  |
| P36365        | ENSVVFNNTPK                                                           | 1.916172225        | 2              | 2.554125  |
| P36365        | FTEHVEEGR                                                             | 0.664674052        | 2              | 3.131942  |

|               |                                                 |                    |                |           |
|---------------|-------------------------------------------------|--------------------|----------------|-----------|
| P36365        | NLLPTPVVSWLISK                                  | 0.601321479        | 2              | 2.466439  |
| P36365        | SCDLGGLWR                                       | 0.655658598        | 2              | 2.766515  |
| P36365        | TQLREPVLNDELPGR                                 | 0.652417807        | 3              | 4.071889  |
| P36365        | VAIVGAGVSGLASIK                                 | 1.160138165        | 2              | 2.873965  |
| P36365        | VEDGQASLYK                                      | 0.813772455        | 2              | 3.531333  |
| P36365        | VLVVGMGNSGTDIAVEASHLAK                          | 0.813109839        | 2              | 2.945758  |
| <b>P36511</b> | <b>UDB15 UDP_glucuronosyltransferase 2B15</b>   | <b>1.053034967</b> | <b>0.00717</b> | <b>7</b>  |
| P36511        | ANIIAWALAQIPQK                                  | 0.776217934        | 3              | 5.083358  |
| P36511        | FVNVWTYELPR                                     | 1.051348409        | 2              | 3.194323  |
| P36511        | FVTFPTSFSHDLNFFTR                               | 1.721871169        | 2              | 4.163317  |
| P36511        | GHEVTVLRPSAFVFLDPK                              | 1.368753533        | 3              | 3.524342  |
| P36511        | IILEELVQK                                       | 0.930649525        | 2              | 3.283202  |
| P36511        | SDLLNALEEVIDNPFYK                               | 0.954127692        | 2              | 5.231205  |
| P36511        | TLGRPTTLAEIMGK                                  | 0.917526257        | 3              | 3.614776  |
| <b>P36536</b> | <b>SAR1A GTP_binding protein SAR1a</b>          | <b>1.250348476</b> | <b>0.80284</b> | <b>2</b>  |
| P36536        | LVFLGLDNAGK                                     | 1.25104157         | 2              | 2.993917  |
| P36536        | VELNALMTDETISNVPIILGNK                          | 0.986984897        | 3              | 4.625602  |
| <b>P36972</b> | <b>APT Adenine phosphoribosyltransferase</b>    | <b>0.901658244</b> | <b>0.66201</b> | <b>3</b>  |
| P36972        | GFLFGPSLAQELGVGCVLIR                            | 0.901211787        | 2              | 3.898834  |
| P36972        | IDYIAGLSR                                       | 0.902057186        | 2              | 3.457277  |
| P36972        | SFPDFPIPGVLFRR                                  | 0.920237555        | 2              | 3.550406  |
| <b>P37397</b> | <b>CNN3 Calponin_3</b>                          | <b>0.910255812</b> | <b>0.84566</b> | <b>3</b>  |
| P37397        | AGQSVIGLQMGTKN                                  | 0.897783093        | 2              | 4.283856  |
| P37397        | VNESSLNWPQLENIGNFIK                             | 0.819868554        | 2              | 3.378146  |
| P37397        | YDQQAEDLR                                       | 1.101230456        | 2              | 3.259101  |
| <b>P38650</b> | <b>DYHC1 Cytoplasmic dynein 1 heavy chain 1</b> | <b>1.003682195</b> | <b>0.99746</b> | <b>8</b>  |
| P38650        | FGNPLLQDVESYDPLNPNVLR                           | 0.921869416        | 2              | 4.533171  |
| P38650        | GWENHVEGQK                                      | 1.111313381        | 2              | 2.878756  |
| P38650        | ILDDDTIITLLENLK                                 | 1.010518609        | 2              | 2.694302  |
| P38650        | QLQNISQAAAAGGAK                                 | 1.120646082        | 2              | 3.302531  |
| P38650        | SSLQSQCLNEVLK                                   | 0.914003627        | 2              | 2.920714  |
| P38650        | VQGLTVEQAEAVAR                                  | 0.985266122        | 2              | 3.584492  |
| P38650        | VQVALEELQDLK                                    | 0.979282218        | 2              | 2.711881  |
| P38650        | VTDFGDKVEDPTFLNQLQSGVNR                         | 0.842810304        | 3              | 4.068075  |
| <b>P38652</b> | <b>PGM1 Phosphoglucomutase_1</b>                | <b>0.792574323</b> | <b>0.15501</b> | <b>16</b> |
| P38652        | ADNFEYSDPVDGSISK                                | 0.75750392         | 2              | 4.70753   |
| P38652        | AIGGIILTASHNPGGPNDFGIK                          | 0.776573427        | 2              | 5.283345  |
| P38652        | FFGNLMDASK                                      | 0.697778377        | 2              | 2.307066  |
| P38652        | FNISNGGPAPEAITDK                                | 1.046650694        | 2              | 4.284826  |
| P38652        | INQDPQVMLAPLISIALK                              | 0.761925731        | 2              | 4.933863  |
| P38652        | KQRVEDILK                                       | 0.574871019        | 1              | 1.982547  |
| P38652        | LSGTGSAGATIR                                    | 1.008032394        | 2              | 3.631773  |
| P38652        | LSLCGEESFGTGSDBIR                               | 1.343070489        | 2              | 3.557404  |
| P38652        | LVIGQNGILSTPAVSCIIR                             | 0.787771385        | 2              | 3.736856  |
| P38652        | NIFDFNALK                                       | 0.835329438        | 1              | 1.940837  |
| P38652        | QEATLVVGGDGR                                    | 0.822187003        | 2              | 2.991833  |
| P38652        | QQFDLENK                                        | 0.846650801        | 1              | 2.155559  |
| P38652        | SGEHDFGAAFDGDGDR                                | 0.982593407        | 2              | 4.443589  |
| P38652        | TIEEYAIKPDILK                                   | 0.787475314        | 2              | 3.08145   |
| P38652        | TQAYPDQKPGTSGLR                                 | 0.895027119        | 2              | 3.362595  |
| P38652        | YDYEEVEAEGANK                                   | 0.683302689        | 2              | 5.05689   |
| <b>P38656</b> | <b>LA Lupus La protein homolog</b>              | <b>1.031053844</b> | <b>0.6626</b>  | <b>2</b>  |
| P38656        | ITDDQQESLNK                                     | 0.993563757        | 2              | 3.934011  |
| P38656        | LDEGWVPLEMIK                                    | 0.817886759        | 2              | 2.450222  |
| <b>P38659</b> | <b>PDIA4 Protein disulfide_isomerase A4</b>     | <b>0.887374886</b> | <b>3.8E-11</b> | <b>20</b> |
| P38659        | DLGLSEGEDVNAAILDESGKK                           | 0.855079828        | 2              | 5.112491  |
| P38659        | DNDPPIAVAK                                      | 0.7488017          | 2              | 2.343389  |

|               |                                                       |                    |                |          |
|---------------|-------------------------------------------------------|--------------------|----------------|----------|
| P38659        | EVSQPDWTPPEVTLTLTK                                    | 0.970429707        | 2              | 3.761898 |
| P38659        | FDVSGYPTIK                                            | 0.836606661        | 2              | 3.355823 |
| P38659        | FDVSGYPTLK                                            | 0.836606661        | 2              | 3.355823 |
| P38659        | FIDEHATK                                              | 1.099726276        | 2              | 2.63242  |
| P38659        | FIDEHATKR                                             | 1.443687276        | 2              | 2.765029 |
| P38659        | GQAVDYDGSR                                            | 0.954125924        | 2              | 2.845011 |
| P38659        | IDATSASMLASK                                          | 0.892768428        | 2              | 3.587105 |
| P38659        | IDATSASMLASK+Oxidation(7)                             | 0.806107641        |                |          |
| P38659        | KGQAVDYDGSR                                           | 2.98539007         | 2              | 2.633599 |
| P38659        | MDATANDITNDR                                          | 0.717839585        | 2              | 3.987757 |
| P38659        | MHVMDVQGSTEASAIKDYVVK                                 | 0.543604891        | 3              | 3.720118 |
| P38659        | QLEPVYTSLGK                                           | 0.870667395        | 2              | 2.556856 |
| P38659        | RFDVSGYPTLK                                           | 1.006282217        | 2              | 3.158771 |
| P38659        | RSPIPLAK                                              | 0.76755392         | 2              | 2.373942 |
| P38659        | TQEEIVAK                                              | 1.033644326        | 2              | 2.396427 |
| P38659        | VDATEQDLAK                                            | 0.955317966        | 2              | 4.046705 |
| P38659        | VEGFPTIYFAPSGDK                                       | 2.056931891        | 2              | 3.444849 |
| P38659        | YGIVDYMQSGPPSK                                        | 1.104557984        | 2              | 4.651431 |
| <b>P38918</b> | <b>ARK73 Aflatoxin B1 aldehyde reductase member 3</b> | <b>0.862623068</b> | <b>0.02156</b> | <b>7</b> |
| P38918        | EEHFNGIALVEK                                          | 1.228286739        | 2              | 3.04461  |
| P38918        | FQLETSLK                                              | 0.894289887        | 1              | 1.943807 |
| P38918        | FYAFNPLAGLLTGR                                        | 1.500622668        | 2              | 4.475383 |
| P38918        | MDVTSSASVR                                            | 0.586583131        | 2              | 3.590468 |
| P38918        | QVETELFPCLR                                           | 0.717067414        | 2              | 2.492181 |
| P38918        | RMDVTSSASVR                                           | 0.823173072        | 2              | 3.549952 |
| P38918        | TTYGPTAPSMISAAVR                                      | 0.637293413        | 2              | 3.746691 |
| <b>P38983</b> | <b>RSSA 40S ribosomal protein SA</b>                  | <b>1.095096791</b> | <b>9.9E-20</b> | <b>9</b> |
| P38983        | ADHQPLTEASYVNLPTIALCNTDSPLR                           | 1.459875557        | 3              | 5.82599  |
| P38983        | AIVAIENPADVSVSSR                                      | 1.028810969        | 2              | 5.649462 |
| P38983        | EHPWEVMPDLYFYRDPEEIEKEEQAAAEK                         | 0.410483448        | 3              | 3.756177 |
| P38983        | FAAATGATPIAGR                                         | 1.362109942        | 2              | 3.043618 |
| P38983        | FLAAGTHLGGTNLDFQMEQYIYK                               | 1.5406685          | 3              | 4.044478 |
| P38983        | FTPGFTFNQIQAAFR                                       | 0.977071738        | 2              | 4.441462 |
| P38983        | KSDGIYIINLK                                           | 0.366675357        | 2              | 3.2187   |
| P38983        | SDGIYIINLK                                            | 1.228049695        | 2              | 2.975475 |
| P38983        | YVDIAIPCNNK                                           | 1.016957588        | 1              | 3.025011 |
| <b>P39032</b> | <b>RL36 60S ribosomal protein L36</b>                 | <b>1.157851796</b> | <b>0.22355</b> | <b>2</b> |
| P39032        | EELSNVLAAMR                                           | 1.452915512        | 2              | 2.48169  |
| P39032        | KREELSNVLAAMR                                         | 0.910136785        | 2              | 3.831596 |
| <b>P39447</b> | <b>ZO1 Tight junction protein ZO_1</b>                | <b>0.667164189</b> | <b>0.21062</b> | <b>2</b> |
| P39447        | GEEVTILAQK                                            | 0.578828715        | 2              | 2.478636 |
| P39447        | GGPAEGQLQENDR                                         | 0.675555885        | 2              | 2.914105 |
| <b>P40112</b> | <b>PSB3 Proteasome subunit beta type_3</b>            | <b>0.920702042</b> | <b>0.58669</b> | <b>2</b> |
| P40112        | FGIQAQMVTTDFQK                                        | 1.243962638        | 2              | 3.4818   |
| P40112        | FGPYYTEPVIAGLDPK                                      | 0.840559543        | 2              | 3.492236 |
| <b>P40307</b> | <b>PSB2 Proteasome subunit beta type_2</b>            | <b>1.181161374</b> | <b>0.69769</b> | <b>3</b> |
| P40307        | FILNLPTFSVR                                           | 1.310123956        | 2              | 3.013951 |
| P40307        | NGYELSPTAAANFTR                                       | 1.003023925        | 2              | 3.554812 |
| P40307        | VIDKDGIHNLNENITFTK                                    | 1.169353016        | 3              | 4.734424 |
| <b>P40329</b> | <b>SYRC Arginyl_tRNA synthetase_cytoplasmic</b>       | <b>1.195089223</b> | <b>0.64458</b> | <b>2</b> |
| P40329        | LNDYVFSFK                                             | 1.122251604        | 2              | 2.704495 |
| P40329        | SDGGYTYDSDLAAIK                                       | 1.089962661        | 2              | 4.012593 |
| <b>P41034</b> | <b>TTPA Alpha_tocopherol transfer protein</b>         | <b>1.051286234</b> | <b>0.34906</b> | <b>6</b> |
| P41034        | AECPELSADLHPR                                         | 1.365070089        | 2              | 2.969157 |
| P41034        | AIFDLEGWQISHAFQITPSVAK                                | 0.748596788        | 2              | 4.617293 |
| P41034        | AQEEGVPETPQPLTDAFLLR                                  | 1.428348482        | 2              | 3.834833 |

|               |                                                                      |                    |                |           |
|---------------|----------------------------------------------------------------------|--------------------|----------------|-----------|
| P41034        | GIHLINEPVIFHAVFSMIKPFLEK                                             | 0.801466335        | 4              | 4.707664  |
| P41034        | QLNEQPDHSPLVQPLAELR                                                  | 1.041047371        | 3              | 3.960544  |
| P41034        | VSLITSELIVQEIVETQR                                                   | 1.1002934          | 3              | 3.797645  |
| <b>P41123</b> | <b>RL13 60S ribosomal protein L13</b>                                | <b>1.117533235</b> | <b>1.9E-11</b> | <b>3</b>  |
| P41123        | LATQLTGPVMPPIR                                                       | 1.118118681        | 2              | 2.952143  |
| P41123        | STESLQANVQR                                                          | 1.117652583        | 2              | 3.971032  |
| P41123        | VDTWVFNQPAR                                                          | 1.353699177        | 2              | 3.451286  |
| <b>P41498</b> | <b>PPAC Low molecular weight phosphotyrosine protein phosphatase</b> | <b>1.032100345</b> | <b>0.72736</b> | <b>3</b>  |
| P41498        | IDSAATSTYEVGNPPDYR                                                   | 0.896800088        | 2              | 3.103318  |
| P41498        | IELLSYDPQK                                                           | 0.835848234        | 2              | 3.437858  |
| P41498        | LVTDENVSDNWR                                                         | 0.836493847        | 2              | 3.796196  |
| <b>P41542</b> | <b>USO1 General vesicular transport factor p115</b>                  | <b>1.062017389</b> | <b>0.91657</b> | <b>15</b> |
| P41542        | AWFEVGDENPGWSAQK                                                     | 0.999128652        | 2              | 4.63702   |
| P41542        | CQNEQLQTAVTQQASQIQHK                                                 | 1.039481449        | 3              | 4.119624  |
| P41542        | EQDLQLEELK                                                           | 1.243042295        | 2              | 2.487828  |
| P41542        | IVAFENAFER                                                           | 1.24279783         | 2              | 2.622846  |
| P41542        | LQTENSELQQR                                                          | 1.070920149        | 2              | 3.125226  |
| P41542        | LREEIEELR                                                            | 1.079082312        | 2              | 2.47305   |
| P41542        | NDGVLLQLALTR                                                         | 1.163033892        | 2              | 3.437385  |
| P41542        | NNNSNQFFK                                                            | 0.85361997         | 2              | 2.490579  |
| P41542        | QLDSSNSTIALQTEK                                                      | 1.207059514        | 2              | 3.906002  |
| P41542        | QLGPPVQQIILVSPMGVSK                                                  | 0.817992605        | 2              | 2.387461  |
| P41542        | QSEDLGSQTFEIK                                                        | 1.251875842        | 2              | 3.539407  |
| P41542        | SQLCSQSLEITR                                                         | 1.029598919        | 2              | 3.104682  |
| P41542        | SVPVEGESELVTAAK                                                      | 1.084435628        | 2              | 3.69433   |
| P41542        | TLEQHDNIVTHYK                                                        | 1.117236534        | 2              | 3.48302   |
| P41542        | VLVSPTNPPGATSSCQK                                                    | 1.064550134        | 2              | 4.18065   |
| <b>P41562</b> | <b>IDHC Isocitrate dehydrogenase [NADP] cytoplasmic</b>              | <b>0.902748575</b> | <b>9.2E-08</b> | <b>18</b> |
| P41562        | ATDFVVPQPGK                                                          | 0.964719312        | 2              | 3.607947  |
| P41562        | CATITPDEK                                                            | 1.060611421        | 2              | 2.682965  |
| P41562        | DIFQEYDK                                                             | 0.828890294        | 1              | 2.473907  |
| P41562        | DLAACIK                                                              | 1.629583602        | 1              | 2.002927  |
| P41562        | FKDIFQEYDK                                                           | 0.823091409        | 3              | 4.118649  |
| P41562        | GQETSTNPIASIFAWSR                                                    | 1.052210487        | 2              | 4.963188  |
| P41562        | IHGGSVVEMQGDENR                                                      | 0.839764214        | 2              | 4.612719  |
| P41562        | LIDDMVAQAMK                                                          | 0.723901059        | 2              | 4.588535  |
| P41562        | LIDDMVAQAMK+Oxidation(4)                                             | 1.18630457         |                |           |
| P41562        | LILPYVELDLHSDYDLGIENR                                                | 1.067891624        | 2              | 4.69077   |
| P41562        | LVTGWVKPIIIGR                                                        | 0.826947669        | 2              | 3.214007  |
| P41562        | SDYLNTFEFMDK                                                         | 0.760674659        | 2              | 4.336756  |
| P41562        | SDYLNTFEFMDK+Oxidation(9)                                            | 0.971534427        |                |           |
| P41562        | SEGGFIWACK                                                           | 0.845942003        | 2              | 3.322345  |
| P41562        | SIEDFAHSSFQMALSK                                                     | 0.795049194        | 2              | 4.935408  |
| P41562        | TVEAEEAHGTVTR                                                        | 0.956010342        | 2              | 3.966763  |
| P41562        | VEITYTPK                                                             | 0.88925275         | 2              | 2.764072  |
| P41562        | VTYLVHDFEEGGVAMGMYNQDK                                               | 1.089520254        | 3              | 3.328084  |
| <b>P42123</b> | <b>LDHB L_lactate dehydrogenase B chain</b>                          | <b>0.935020077</b> | <b>0.10172</b> | <b>6</b>  |
| P42123        | DYSVTANSK                                                            | 1.570814591        | 2              | 2.453655  |
| P42123        | IVADKDYSVTANSK                                                       | 1.188907639        | 2              | 3.983585  |
| P42123        | LIAPVADDETAVPNNK                                                     | 1.380779296        | 2              | 2.5292    |
| P42123        | LKDDEVAQLR                                                           | 0.664948256        | 2              | 2.565563  |
| P42123        | SLADELALVDVLEDK                                                      | 0.688225546        | 2              | 3.594932  |
| P42123        | VIGSGCNLDSAR                                                         | 0.939929314        | 2              | 3.926786  |
| <b>P42676</b> | <b>NEUL Neurolysin_mitochondrial</b>                                 | <b>1.045439031</b> | <b>0.47719</b> | <b>4</b>  |
| P42676        | AELGALPDDFIDSLEK                                                     | 0.82440735         | 2              | 3.013837  |



|               |                                                                            |                    |                |           |
|---------------|----------------------------------------------------------------------------|--------------------|----------------|-----------|
| P42676        | NLILKPGGSLDGMMLQNFLQR                                                      | 1.047702668        | 3              | 3.472996  |
| P42676        | NLNEDDTSLVFSK                                                              | 0.816240158        | 2              | 3.120328  |
| P42676        | TRTEQLIAQTK                                                                | 0.944278083        | 2              | 2.754903  |
| <b>P42932</b> | <b>TCPQ T_complex protein 1 subunit theta</b>                              | <b>1.268821151</b> | <b>0.08593</b> | <b>9</b>  |
| P42932        | AIAGTGANVIVTGGK                                                            | 1.118540689        | 2              | 3.82366   |
| P42932        | AVDDGVNTFK                                                                 | 1.245649878        | 2              | 2.962775  |
| P42932        | EDGAISTIVLR                                                                | 0.890179412        | 2              | 2.660331  |
| P42932        | ELEVQHPPAAK                                                                | 1.487875239        | 2              | 2.941638  |
| P42932        | GEENLMDAQVK                                                                | 1.106512183        | 2              | 2.456546  |
| P42932        | HFSGLEEAVYR                                                                | 1.14775125         | 2              | 2.724827  |
| P42932        | NVGLDIEAEVPAVK                                                             | 1.206937207        | 2              | 3.07452   |
| P42932        | QITSYGETCPGLEQYAIK                                                         | 1.270151712        | 2              | 4.595458  |
| P42932        | TAEELMNFSK                                                                 | 0.996181875        | 2              | 2.329487  |
| <b>P43244</b> | <b>MATR3 Matrin_3</b>                                                      | <b>1.079620516</b> | <b>0.3722</b>  | <b>3</b>  |
| P43244        | GDTDQASNILASFGLSAR                                                         | 1.170976063        | 2              | 3.43647   |
| P43244        | ITPENLPQILLQLK                                                             | 0.791009602        | 2              | 3.679196  |
| P43244        | TENPAEGKEQEEK                                                              | 1.448058021        | 2              | 2.953317  |
| <b>P43274</b> | <b>H14 Histone H1.4</b>                                                    | <b>0.725721804</b> | <b>1.3E-05</b> | <b>3</b>  |
| P43274        | ALAAAGYDVEK                                                                | 0.840569791        | 2              | 3.611325  |
| P43274        | SGVSLAALK                                                                  | 0.882708524        | 2              | 2.922416  |
| P43274        | SGVSLAALKK                                                                 | 0.341651869        | 2              | 2.592466  |
| <b>P43276</b> | <b>H15 Histone H1.5</b>                                                    | <b>0.835182641</b> | <b>0.13515</b> | <b>2</b>  |
| P43276        | ALAAGGYDVEK                                                                | 0.731893231        | 2              | 2.551481  |
| P43276        | ATGPPVSELITK                                                               | 0.858665642        | 2              | 2.551647  |
| <b>P43278</b> | <b>H10 Histone H1.0</b>                                                    | <b>0.696397972</b> | <b>9.9E-20</b> | <b>2</b>  |
| P43278        | VGENADSQIK                                                                 | 0.820490538        | 2              | 3.519381  |
| P43278        | YSDMIVAAIQAEK                                                              | 0.683956082        | 2              | 3.987155  |
| <b>P45591</b> | <b>COF2 Cofilin_2</b>                                                      | <b>0.977403566</b> | <b>0.82835</b> | <b>4</b>  |
| P45591        | HEWQVNGLDDIKDR                                                             | 1.014574087        | 3              | 4.205368  |
| P45591        | KEDLVFIFWAPESAPLK                                                          | 3.187645938        | 3              | 3.570692  |
| P45591        | QIIVEEAK                                                                   | 0.908170986        | 2              | 2.355095  |
| P45591        | QILVGDIGDTVEDPYTSFK                                                        | 0.904691857        | 2              | 4.77419   |
| <b>P45592</b> | <b>COF1 Cofilin_1</b>                                                      | <b>0.994118719</b> | <b>1</b>       | <b>4</b>  |
| P45592        | EILVGDVGGTVDVDPYTFVK                                                       | 1.002515272        | 2              | 4.593636  |
| P45592        | HELQANCYEEVK                                                               | 0.994111885        | 2              | 3.475245  |
| P45592        | HELQANCYEEVKDR                                                             | 1.014521837        | 3              | 5.294194  |
| P45592        | NIILEEGKEILVGDVGGTVDVDPYTFVK                                               | 1.027741435        | 3              | 4.866737  |
| <b>P45878</b> | <b>FKBP2 Peptidyl_prolyl cis_trans isomerase FKBP2</b>                     | <b>1.173531439</b> | <b>0.53751</b> | <b>4</b>  |
| P45878        | GWDQGLLMCEGEK                                                              | 0.726307173        | 2              | 3.979692  |
| P45878        | KLVIPSELGYGER                                                              | 1.159899825        | 2              | 2.557052  |
| P45878        | LEDGTEFDSSLPQNPQPFVSLGTGQVIK                                               | 1.411525126        | 3              | 4.399527  |
| P45878        | LVIPSELGYGER                                                               | 0.955587472        | 2              | 2.659063  |
| <b>P45953</b> | <b>ACADV Very long_chain specific acyl_CoA dehydrogenase_mitochondrial</b> | <b>0.995323377</b> | <b>0.0751</b>  | <b>18</b> |
| P45953        | AMVENGGLVTSNPLR                                                            | 0.952083139        | 2              | 3.433763  |
| P45953        | AMVENGGLVTSNPLRV                                                           | 0.950498758        | 2              | 3.22963   |
| P45953        | AMVENGGLVTSNPLRV+Oxidation(1)                                              | 1.255731194        |                |           |
| P45953        | ASNTSEVYFDGK                                                               | 1.257039309        | 2              | 3.711103  |
| P45953        | ELGAFGLQVPSLEGLGLSNTQYAR                                                   | 1.006682055        | 2              | 4.81055   |
| P45953        | ENMASLQSNPQQQLFR                                                           | 1.109703352        | 2              | 4.292533  |
| P45953        | FFEEVNDPAK                                                                 | 0.84538842         | 2              | 3.128175  |
| P45953        | FFEEVNDPAKNDSLEKVEEDTLQGLK                                                 | 0.998322811        | 3              | 5.826537  |
| P45953        | GIVNEQFLQQR                                                                | 1.198949144        | 2              | 3.425009  |
| P45953        | IFEGTNDILR                                                                 | 0.970409652        | 2              | 2.670158  |
| P45953        | NDSLEKVEEDTLQGLK                                                           | 0.793337761        | 2              | 3.444993  |
| P45953        | NPLGNVGLLIGEASK                                                            | 1.432494532        | 2              | 3.46002   |
| P45953        | SFGGVTHGLPEK                                                               | 1.098432123        | 2              | 2.311799  |

|               |                                                                         |                    |                |           |
|---------------|-------------------------------------------------------------------------|--------------------|----------------|-----------|
| P45953        | SFGGVTHGLPEKK                                                           | 0.837916931        | 2              | 3.009181  |
| P45953        | SGELAVQALEQFATVVEAK                                                     | 1.000941027        | 3              | 4.776571  |
| P45953        | SLSEGYPTAQHEK                                                           | 1.041169102        | 2              | 3.325535  |
| P45953        | TGIGSGLSLSGIVHPELSR                                                     | 0.936185593        | 2              | 4.521201  |
| P45953        | VEEDTLQGLK                                                              | 0.990642614        | 2              | 2.662334  |
| <b>P46418</b> | <b>GSTA5 Glutathione S transferase alpha_5</b>                          | <b>0.920436786</b> | <b>0.99241</b> | <b>4</b>  |
| P46418        | AILNYIATK                                                               | 1.263827555        | 2              | 3.308846  |
| P46418        | SDGSLMFEQVPMVEIDGMK                                                     | 0.823926101        | 2              | 2.751177  |
| P46418        | SHGQDYLVGNK                                                             | 0.997066862        | 2              | 3.13551   |
| P46418        | VSNLPTVK                                                                | 0.904709493        | 2              | 2.892628  |
| <b>P46425</b> | <b>GSTP2 Glutathione S transferase P 2</b>                              | <b>0.746101004</b> | <b>2.7E-06</b> | <b>2</b>  |
| P46425        | ALPGHLKPFETLLSQNQGGK                                                    | 0.58908991         | 3              | 3.971177  |
| P46425        | FEDGDLTYQSNAILR                                                         | 0.775258592        | 2              | 4.711096  |
| <b>P46462</b> | <b>TERA Transitional endoplasmic reticulum ATPase</b>                   | <b>0.959472409</b> | <b>0.02807</b> | <b>28</b> |
| P46462        | AIANECQANFISIK                                                          | 3.565747987        | 2              | 3.73597   |
| P46462        | EAVCIVLSDDTCSDEK                                                        | 0.55487341         | 2              | 2.738125  |
| P46462        | ELQELVQYPVEHPDK                                                         | 0.999930012        | 2              | 4.269449  |
| P46462        | ETVVEVPQVTWEDIGGLEVDK                                                   | 0.852978898        | 2              | 3.017491  |
| P46462        | ETVVEVPQVTWEDIGGLEVDKR                                                  | 0.913302428        | 2              | 4.063055  |
| P46462        | EVDIGIPDATGR                                                            | 1.131442919        | 2              | 3.039968  |
| P46462        | GDDLSTAILK                                                              | 0.825027565        | 2              | 3.058485  |
| P46462        | GGNIGDGGGAADR                                                           | 1.253963206        | 2              | 3.975876  |
| P46462        | GILLYGPPGTGK                                                            | 1.013473006        | 2              | 3.193771  |
| P46462        | GVLFGPPGCGK                                                             | 1.449555786        | 2              | 2.507306  |
| P46462        | IVSLLTLMMDGLK                                                           | 1.23089898         | 2              | 3.058284  |
| P46462        | KYEMFAQTLQQR                                                            | 0.767231833        | 2              | 3.799582  |
| P46462        | LADDVDLEQVANETHGHVGADLAALCSEALQAIR                                      | 0.975963846        | 3              | 6.18906   |
| P46462        | LAGESESNLRKAFEEAEK                                                      | 0.822169442        | 2              | 2.605604  |
| P46462        | LDQLIYIPLPDEK                                                           | 0.95996485         | 2              | 4.471232  |
| P46462        | LEILQHTK                                                                | 0.963234764        | 2              | 2.693849  |
| P46462        | LGDVISIQPCPDVK                                                          | 0.866643357        | 2              | 4.263931  |
| P46462        | LIVDEAINEDNSVLSQPK                                                      | 0.870124964        | 2              | 5.833801  |
| P46462        | MDELQLFR                                                                | 0.753375701        | 2              | 3.037797  |
| P46462        | MDELQLFR+Oxidation(0)                                                   | 1.089561658        |                |           |
| P46462        | MTNGFSGADLTEICQR                                                        | 0.576612295        | 2              | 4.227392  |
| P46462        | MTNGFSGADLTEICQR+Oxidation(0)                                           | 1.180275025        |                |           |
| P46462        | NAPAIIFIDELDAIAPK                                                       | 1.26156776         | 2              | 5.098776  |
| P46462        | QAAPCVLFFDELDSIAK                                                       | 3.508369926        | 3              | 3.444426  |
| P46462        | QTNPSAMEVEEDDPVPEIR                                                     | 0.766660089        | 2              | 4.645095  |
| P46462        | RSVSDNDR                                                                | 0.590876862        | 2              | 2.891446  |
| P46462        | VINQILTEMDGMSTK                                                         | 0.863997948        | 2              | 4.552554  |
| P46462        | WALSQSNPSALR                                                            | 0.912727113        | 2              | 3.169538  |
| <b>P46664</b> | <b>PURA2 Adenylosuccinate synthetase isozyme 2</b>                      | <b>0.994998496</b> | <b>0.67815</b> | <b>4</b>  |
| P46664        | FIEDELQIPVK                                                             | 1.236028099        | 2              | 3.050907  |
| P46664        | LDILDMFTEIK                                                             | 1.219519533        | 2              | 3.409123  |
| P46664        | VGIGAFPTEQDNEIGELLQTR                                                   | 0.788888728        | 2              | 4.399871  |
| P46664        | VVDLLAQDADIVCR                                                          | 0.813368406        | 2              | 3.721214  |
| <b>P46720</b> | <b>SO1A1 Solute carrier organic anion transporter family member 1A1</b> | <b>1.077599987</b> | <b>0.04234</b> | <b>3</b>  |
| P46720        | ESEHTDVHGSPQVENDGELK                                                    | 1.523050379        | 3              | 3.477867  |
| P46720        | GIGETPIVPLGISYIEDFAK                                                    | 0.923806282        | 2              | 3.494571  |
| P46720        | SENSPLYIGILEMGK                                                         | 0.805661936        | 2              | 3.739497  |
| <b>P46844</b> | <b>BIEA Biliverdin reductase A</b>                                      | <b>0.801381465</b> | <b>0.49958</b> | <b>3</b>  |
| P46844        | FGVVVGVGR                                                               | 1.041750199        | 2              | 2.753653  |
| P46844        | LLDQVSAEDLAAEK                                                          | 1.107560207        | 2              | 4.371974  |
| P46844        | MTVQLETQNK                                                              | 0.799166683        | 2              | 2.740632  |
| <b>P46953</b> | <b>3HAO 3_hydroxyanthranilate 3_4_dioxygenase</b>                       | <b>1.22983349</b>  | <b>0.0035</b>  | <b>9</b>  |

|               |                                                                                           |                    |                |           |
|---------------|-------------------------------------------------------------------------------------------|--------------------|----------------|-----------|
| P46953        | AQGSVALSVTQDPACK                                                                          | 0.555055972        | 2              | 4.486174  |
| P46953        | ASFQPPVCNK                                                                                | 0.893655234        | 2              | 2.356057  |
| P46953        | DLGTQLAPIIQEFFHSEQYR                                                                      | 0.927597523        | 2              | 4.312824  |
| P46953        | FANTMGLVIER                                                                               | 0.836004337        | 2              | 2.608901  |
| P46953        | METELDGLR                                                                                 | 0.888112789        | 2              | 2.619124  |
| P46953        | QDVDVWLWQLEGSSK                                                                           | 1.278537088        | 2              | 3.890494  |
| P46953        | QGEIFLLPAR                                                                                | 1.29123306         | 2              | 3.270734  |
| P46953        | TGKPNPDQLLK                                                                               | 0.877647935        | 3              | 3.827189  |
| P46953        | YYVGDTEVDLFEK                                                                             | 1.064279627        | 2              | 4.019377  |
| <b>P46978</b> | <b>STT3A Dolichyl_diphosphooligosaccharide__protein glycosyltransferase subunit STT3A</b> | <b>1.089627209</b> | <b>0.93402</b> | <b>5</b>  |
| P46978        | FGQVYTEAK                                                                                 | 1.096058181        | 2              | 2.695893  |
| P46978        | FYSLLDPSYAK                                                                               | 1.139945055        | 2              | 2.92425   |
| P46978        | NLDIRPDKK                                                                                 | 1.17509923         | 2              | 2.797149  |
| P46978        | VGQAMASTEELK                                                                              | 1.081850772        | 2              | 3.402025  |
| P46978        | VGQAMASTEELK+Oxidation(4)                                                                 | 0.520994092        |                |           |
| <b>P47198</b> | <b>RL22 60S ribosomal protein L22</b>                                                     | <b>1.179247067</b> | <b>0.90663</b> | <b>2</b>  |
| P47198        | AGNLGGGVVTIER                                                                             | 0.915815612        | 2              | 3.527872  |
| P47198        | FTLDCTHPVEDGIMDAANFEQLQER                                                                 | 1.191504553        | 3              | 5.18702   |
| <b>P47875</b> | <b>CSRP1 Cysteine and glycine_rich protein 1</b>                                          | <b>0.950038418</b> | <b>0.49881</b> | <b>4</b>  |
| P47875        | GFGFGQGAGALVHSE                                                                           | 0.850145354        | 2              | 3.211263  |
| P47875        | GLESTTLADKDGIEYCK                                                                         | 0.88557785         | 2              | 5.188237  |
| P47875        | HEEAPGHRPTTNPANASK                                                                        | 1.539416235        | 3              | 3.810413  |
| P47875        | NLDSTTVAVHGEEIYCK                                                                         | 1.015418848        | 2              | 3.687725  |
| <b>P47942</b> | <b>DPYL2 Dihydropyrimidinase_related protein 2</b>                                        | <b>0.914404565</b> | <b>0.73975</b> | <b>2</b>  |
| P47942        | GIQEEMEALVK                                                                               | 0.745648459        | 2              | 2.800728  |
| P47942        | GLYDGPVCEVSTPK                                                                            | 0.900819138        | 2              | 3.635516  |
| <b>P48004</b> | <b>PSA7 Proteasome subunit alpha type_7</b>                                               | <b>0.968867634</b> | <b>0.2283</b>  | <b>3</b>  |
| P48004        | GRDIVVLGVEK                                                                               | 1.200685231        | 2              | 2.658012  |
| P48004        | NYTDDAIETDDLTIK                                                                           | 0.961989377        | 2              | 4.550107  |
| P48004        | YVAEIEKEKEENEK                                                                            | 0.949241805        | 2              | 5.051441  |
| <b>P48024</b> | <b>EIF1 Eukaryotic translation initiation factor 1</b>                                    | <b>1.285943602</b> | <b>1.1E-14</b> | <b>2</b>  |
| P48024        | FACNGTVIEHPEYGEVIQLQGDQR                                                                  | 1.687801799        | 3              | 5.465962  |
| P48024        | TLTTVQGIADDYDK                                                                            | 1.285842159        | 2              | 3.168539  |
| <b>P48037</b> | <b>ANXA6 Annexin A6</b>                                                                   | <b>0.780834357</b> | <b>0.00139</b> | <b>19</b> |
| P48037        | AANDFNPADAK                                                                               | 1.046625023        | 2              | 3.350109  |
| P48037        | AINEAYKEDYHK                                                                              | 0.959144349        | 2              | 3.176689  |
| P48037        | ALIEILATR                                                                                 | 0.905722784        | 2              | 3.34523   |
| P48037        | CLIEILASR                                                                                 | 0.807130336        | 2              | 2.517637  |
| P48037        | DAFVAIVQSVK                                                                               | 1.248874913        | 2              | 3.004673  |
| P48037        | DLESIIIGDTSGHFQK                                                                          | 0.416221808        | 2              | 3.860751  |
| P48037        | ENDDVVSDELVQQDVQDLYEAGELK                                                                 | 1.033804716        | 2              | 4.935554  |
| P48037        | GELSGDFEK                                                                                 | 0.825392525        | 1              | 2.101067  |
| P48037        | GFGSDKESILELITSR                                                                          | 0.780742926        | 2              | 4.219398  |
| P48037        | GIGTDEATIIDIITQR                                                                          | 1.222799026        | 2              | 4.058478  |
| P48037        | KTNYDIEHVIK                                                                               | 0.756236396        | 2              | 2.478091  |
| P48037        | QRQEICQSYK                                                                                | 0.776879645        | 2              | 4.016341  |
| P48037        | SEIDLLNIR                                                                                 | 1.036273494        | 2              | 3.281227  |
| P48037        | SEISGLAR                                                                                  | 0.882872497        | 2              | 2.360828  |
| P48037        | SELDMLDIR                                                                                 | 0.718152737        | 2              | 2.682776  |
| P48037        | SLEDALSSDTSGHFK                                                                           | 0.875440487        | 2              | 3.934227  |
| P48037        | TNEQIHQLVAAYK                                                                             | 0.819652928        | 2              | 3.982612  |
| P48037        | TNYDIEHVIK                                                                                | 0.927496317        | 2              | 3.250883  |
| P48037        | TTGKPIEASIR                                                                               | 0.757317506        | 2              | 2.501235  |
| <b>P48450</b> | <b>ERG7 Lanosterol synthase</b>                                                           | <b>0.808721584</b> | <b>0.54918</b> | <b>2</b>  |
| P48450        | ILGIGDDPDLVR                                                                              | 0.742400051        | 2              | 2.38531   |

|               |                                                           |                    |                |           |
|---------------|-----------------------------------------------------------|--------------------|----------------|-----------|
| P48450        | SVQLPDGGWGLHIEDK                                          | 0.900911796        | 2              | 2.733079  |
| <b>P48500</b> | <b>TPIS Triosephosphate isomerase</b>                     | <b>1.059149683</b> | <b>1.4E-09</b> | <b>13</b> |
| P48500        | CNVSEGVQCTR                                               | 1.117496428        | 2              | 3.708891  |
| P48500        | DLGATWVVLGHSER                                            | 1.504056381        | 2              | 3.686285  |
| P48500        | ELASQPDVDGFLVGGASLKPEFVDIINAK                             | 1.013791548        | 4              | 6.551955  |
| P48500        | HIFGESDELIGQK                                             | 1.097730122        | 2              | 4.016953  |
| P48500        | IAVAAQNCYK                                                | 2.143708127        | 2              | 2.697418  |
| P48500        | IYGGSVTGATCK                                              | 1.332408315        | 2              | 4.642459  |
| P48500        | LPADTEVVCAPPTAYIDFAR                                      | 1.794906069        | 2              | 5.048263  |
| P48500        | RHIFGESDELIGQK                                            | 1.113985535        | 2              | 3.918656  |
| P48500        | TATPQQAQEVHEK                                             | 1.570691888        | 2              | 3.741127  |
| P48500        | VNHALSEGLGVIACIGEK                                        | 0.978807261        | 2              | 5.277333  |
| P48500        | VTNGAFTGEISPGMIK                                          | 1.038880939        | 2              | 5.160472  |
| P48500        | VTNGAFTGEISPGMIK+Oxidation(13)                            | 1.070231844        |                |           |
| P48500        | VVLAYEPVWAIGTGK                                           | 1.019334931        | 3              | 4.661988  |
| <b>P48508</b> | <b>GSHO Glutamate__cysteine ligase regulatory subunit</b> | <b>0.845436696</b> | <b>0.00038</b> | <b>5</b>  |
| P48508        | ASTLHLQTGNLLNWGR                                          | 0.875093943        | 3              | 4.298683  |
| P48508        | FFPDVLECTMSHAVEK                                          | 1.000493589        | 2              | 3.725932  |
| P48508        | INPDEREEMK                                                | 0.572771144        | 2              | 2.568276  |
| P48508        | LFIVGSNSSSSTR                                             | 1.025912868        | 2              | 3.019517  |
| P48508        | TLNEWSSQISPDLVR                                           | 0.821131628        | 2              | 4.79794   |
| <b>P48675</b> | <b>DESM Desmin</b>                                        | <b>0.872300377</b> | <b>0.82981</b> | <b>3</b>  |
| P48675        | ADVDAATLAR                                                | 0.765195192        | 2              | 2.393958  |
| P48675        | FLEQQNAALAAEVNR                                           | 0.901176566        | 2              | 4.291257  |
| P48675        | VSDLTQAANK                                                | 0.911943983        | 2              | 2.988657  |
| <b>P48679</b> | <b>LMNA Prelamin_A/C</b>                                  | <b>0.832006169</b> | <b>9.9E-20</b> | <b>16</b> |
| P48679        | AAAYEALGDAR                                               | 1.149715898        | 2              | 2.957789  |
| P48679        | AQHEDQVEQYK                                               | 0.926568306        | 2              | 3.065216  |
| P48679        | AQHEDQVEQYKK                                              | 1.493486312        | 3              | 3.937302  |
| P48679        | IDSLSAQLSQLQK                                             | 0.833536022        | 2              | 3.134309  |
| P48679        | ITESEEVVSR                                                | 0.72580241         | 2              | 3.229878  |
| P48679        | LKDLEALLNSK                                               | 0.753498585        | 2              | 2.741622  |
| P48679        | LQEKEDLQELNDR                                             | 0.86592776         | 2              | 4.39889   |
| P48679        | LRDLEDLAR                                                 | 0.490925151        | 2              | 2.468886  |
| P48679        | MQQQLDEYQELLDIK                                           | 0.972769088        | 2              | 4.396125  |
| P48679        | MQQQLDEYQELLDIK+Oxidation(0)                              | 1.013887569        |                |           |
| P48679        | NSNLVGAHEELQQSR                                           | 0.864095909        | 2              | 4.365974  |
| P48679        | SGAQASSTPLSPTR                                            | 0.777338794        | 2              | 3.261025  |
| P48679        | SVGGSGGGSFGDNLVTR                                         | 0.812828068        | 2              | 3.984489  |
| P48679        | TALINATGEEVAMR                                            | 0.751759195        | 2              | 3.236383  |
| P48679        | TVLCGTCGQPADK                                             | 0.816438717        | 2              | 3.301952  |
| P48679        | VAVEEVDEEGK                                               | 1.116909258        | 2              | 2.930672  |
| <b>P48721</b> | <b>GRP75 Stress_70 protein_mitochondrial</b>              | <b>1.040887388</b> | <b>9.9E-20</b> | <b>28</b> |
| P48721        | AQFEGIVTDLIK                                              | 0.892147799        | 2              | 3.776506  |
| P48721        | ASNGDAWVEAHGK                                             | 1.044613145        | 2              | 3.740872  |
| P48721        | DAGQISGLNVLR                                              | 0.996519136        | 2              | 3.569642  |
| P48721        | EQQIVIQSSGGLSK                                            | 1.379740687        | 2              | 3.759012  |
| P48721        | EQQIVIQSSGGLSKDDIENMVK                                    | 0.842587567        | 2              | 4.436788  |
| P48721        | ERVEAVNMAEGIIHDTETK                                       | 1.009507604        | 3              | 5.767061  |
| P48721        | ETAENYLGHATAK                                             | 1.42073234         | 2              | 3.59407   |
| P48721        | GAVVGIDLGTTNSCVAVMEGK                                     | 0.834557126        | 2              | 5.629698  |
| P48721        | LLGQFTLIGIPPAPR                                           | 1.183774123        | 2              | 3.079156  |
| P48721        | MEEFKDQLPADECNK                                           | 0.862042963        | 2              | 4.770112  |
| P48721        | MEEFKDQLPADECNK+Oxidation(0)                              | 1.028138491        |                |           |
| P48721        | MKETAENYLGHATAK                                           | 0.998796142        | 2              | 4.151165  |
| P48721        | MKETAENYLGHATAK+Oxidation(0)                              | 1.000450649        |                |           |

|               |                                                                            |                    |                |           |
|---------------|----------------------------------------------------------------------------|--------------------|----------------|-----------|
| P48721        | NAVITVPAYFNDSQR                                                            | 1.159187154        | 2              | 3.569063  |
| P48721        | QAASSLQQASLK                                                               | 4.803084134        | 2              | 2.993021  |
| P48721        | QAVTNPNTFYATK                                                              | 2.338410317        | 2              | 3.781953  |
| P48721        | RYDDPEVQK                                                                  | 1.087582125        | 2              | 2.92188   |
| P48721        | RYDDPEVQKDTK                                                               | 1.207644998        | 2              | 3.766151  |
| P48721        | SDIGEVILVGGMTR                                                             | 0.84254582         | 2              | 4.318917  |
| P48721        | SQVFSTAADGQTQVEIK                                                          | 3.82863963         | 2              | 5.021915  |
| P48721        | STNGDTFLGGEDFDQALLR                                                        | 0.994382167        | 2              | 5.616467  |
| P48721        | TTPSVVAFTPDGER                                                             | 0.995844676        | 2              | 3.706936  |
| P48721        | VEAVNMAEGIIHDTETK                                                          | 0.922248429        | 2              | 4.325917  |
| P48721        | VINEPTAAALAYGLDK                                                           | 1.293114324        | 2              | 4.134956  |
| P48721        | VLENAEGAR                                                                  | 1.012310957        | 2              | 3.07982   |
| P48721        | VQQTVQDLFGR                                                                | 0.929664473        | 2              | 3.446519  |
| P48721        | YDDPEVQK                                                                   | 0.946617319        | 2              | 2.465925  |
| P48721        | YDDPEVQKDTK                                                                | 0.815391934        | 2              | 2.778764  |
| <b>P48725</b> | <b>PCNT Pericentrin</b>                                                    | <b>0.883936962</b> | <b>0.79471</b> | <b>2</b>  |
| P48725        | EEVSGGNGPCRGSPPGRSLER                                                      | 1.127278508        | 2              | 2.332365  |
| P48725        | VYQSLSTAVEGLLEMALDSSKQLEEAR                                                | 0.873025331        | 3              | 3.332243  |
| <b>P49134</b> | <b>ITB1 Integrin beta_1</b>                                                | <b>0.999636335</b> | <b>7.3E-11</b> | <b>4</b>  |
| P49134        | CNCQSHGIPASPK                                                              | 0.649837129        | 2              | 3.655881  |
| P49134        | GEFFNELVGQQR                                                               | 0.828986319        | 2              | 2.800832  |
| P49134        | RITSDFRIGFGSFVEK                                                           | 0.912006666        | 2              | 2.359382  |
| P49134        | SAVTTVNVNPK                                                                | 0.897699523        | 2              | 2.437993  |
| <b>P49242</b> | <b>RS3A 40S ribosomal protein S3a</b>                                      | <b>1.157219358</b> | <b>0.02113</b> | <b>9</b>  |
| P49242        | ACQSIPLHDVFVR                                                              | 1.246052062        | 2              | 3.968821  |
| P49242        | ADGYEPPVQESV                                                               | 1.352619011        | 2              | 2.353567  |
| P49242        | LIPDSIGKDIEK                                                               | 1.083186041        | 2              | 2.508604  |
| P49242        | LITEDVQGK                                                                  | 1.026500046        | 2              | 2.744938  |
| P49242        | LMEHLHGEGSSGK                                                              | 0.984633565        | 2              | 3.458177  |
| P49242        | LMEHLHGEGSSGK+Oxidation(1)                                                 | 1.28892793         |                |           |
| P49242        | NCLTNFHGMDLTR                                                              | 1.159917843        | 2              | 3.800273  |
| P49242        | TTDGYLLR                                                                   | 1.22834301         | 2              | 3.069434  |
| P49242        | VFEVSLADLQNEVAFR                                                           | 1.121415713        | 2              | 4.274086  |
| <b>P49432</b> | <b>ODPB Pyruvate dehydrogenase E1 component subunit beta_mitochondrial</b> | <b>0.818905825</b> | <b>0.27396</b> | <b>6</b>  |
| P49432        | EAINQGMDEELERDEK                                                           | 1.037459497        | 2              | 2.557161  |
| P49432        | ILEDNSIPQVK                                                                | 0.890703338        | 2              | 3.077391  |
| P49432        | IMEGPAFNFLDAPAVR                                                           | 0.924050599        | 2              | 4.222926  |
| P49432        | IMEGPAFNFLDAPAVR+Oxidation(1)                                              | 0.954145861        |                |           |
| P49432        | TIRPMDIEAIEASVMK                                                           | 0.747930317        | 3              | 4.404881  |
| P49432        | VLLGEEVAQYDGAAYK                                                           | 1.103304533        | 2              | 3.539786  |
| <b>P49620</b> | <b>DGKG Diacylglycerol kinase gamma</b>                                    | <b>0.882606078</b> | <b>0.64033</b> | <b>2</b>  |
| P49620        | QGERILQKFHYLLNPK                                                           | 0.882706943        | 2              | 2.496506  |
| P49620        | WGGGYEGGSLTKILK                                                            | 0.848858587        | 2              | 2.344863  |
| <b>P49717</b> | <b>MCM4 DNA replication licensing factor MCM4</b>                          | <b>0.539875506</b> | <b>0.05085</b> | <b>2</b>  |
| P49717        | GQSDTAITKDMFEEALR                                                          | 0.334135993        | 2              | 2.312626  |
| P49717        | YQQLFEDIR                                                                  | 0.743955259        | 1              | 1.979849  |
| <b>P49889</b> | <b>ST1E3 Estrogen sulfotransferase_ isoform 3</b>                          | <b>0.503701502</b> | <b>9.9E-20</b> | <b>13</b> |
| P49889        | CKEDALFNR                                                                  | 0.553911979        | 2              | 2.599116  |
| P49889        | FEEHYQQQMK                                                                 | 0.496400718        | 2              | 2.811329  |
| P49889        | FEEHYQQQMK+Oxidation(8)                                                    | 0.75039191         |                |           |
| P49889        | FMEGQVPYGSWYDHSV                                                           | 1.239324052        | 2              | 3.767872  |
| P49889        | IIQHTSFQEMK                                                                | 0.392223495        | 2              | 2.679441  |
| P49889        | LIEFLERDPSAELVDR                                                           | 0.402062452        | 3              | 5.062951  |
| P49889        | NEDLINGIK                                                                  | 0.511192088        | 2              | 2.907812  |
| P49889        | NNPCTNYSMLPETMIDLK                                                         | 0.538326423        | 2              | 4.478652  |
| P49889        | NNPCTNYSMLPETMIDLK+Oxidation(13)                                           | 0.695221099        |                |           |

|               |                                                  |                    |                |           |
|---------------|--------------------------------------------------|--------------------|----------------|-----------|
| P49889        | NNPCTNYSMLPETMIDLK+Oxidation(8)                  | 0.695221099        |                |           |
| P49889        | SFSEFVEK                                         | 0.586445988        | 2              | 2.374656  |
| P49889        | SGSTWISEIVDMIYK                                  | 0.408842005        | 2              | 4.562672  |
| P49889        | YWEDVETFLARPDDLIVTPK                             | 1.869427321        | 3              | 4.197574  |
| <b>P50137</b> | <b>TKT Transketolase</b>                         | <b>0.989965174</b> | <b>0.05168</b> | <b>23</b> |
| P50137        | AVELAANTK                                        | 0.949749291        | 1              | 1.975096  |
| P50137        | GHAAPILYAVVWAEAGFLPEALLNLR                       | 1.762842129        | 3              | 3.482074  |
| P50137        | GITGIEDK                                         | 1.017174337        | 1              | 2.330757  |
| P50137        | IIALDGTK                                         | 1.537534659        | 2              | 2.456312  |
| P50137        | ILATPPQEDAPSVDIANIR                              | 1.047356637        | 3              | 5.383316  |
| P50137        | ISSDLDGHPVPK                                     | 0.92923651         | 2              | 3.244202  |
| P50137        | KISSDLDGHPVPK                                    | 0.823513267        | 2              | 3.901942  |
| P50137        | LAVSQVPR                                         | 0.985430447        | 2              | 2.301791  |
| P50137        | LAVSQVPRSGKPAELLK                                | 1.833613598        | 2              | 2.601427  |
| P50137        | LDNLVAIFDINR                                     | 1.006593785        | 2              | 4.3408    |
| P50137        | LGQSDPAPLQHQVDVYQK                               | 1.149236338        | 2              | 4.031178  |
| P50137        | MFGIDKDAIVQAVK                                   | 0.713063523        | 2              | 4.396074  |
| P50137        | MFGIDKDAIVQAVK+Oxidation(0)                      | 0.969112734        |                |           |
| P50137        | NMAEQIIQEIYSQVQSK                                | 1.015764735        | 3              | 5.850729  |
| P50137        | NMAEQIIQEIYSQVQSK+Oxidation(1)                   | 1.619107633        |                |           |
| P50137        | NSTFSELFK                                        | 1.032730294        | 2              | 2.396109  |
| P50137        | SGKPAELLK                                        | 1.13410747         | 3              | 3.400248  |
| P50137        | SKDDQVTVIGAGVTLHEALAAEMLK                        | 0.800060336        | 3              | 4.069691  |
| P50137        | SVPMSTVFYPSDGVATEK                               | 0.912402841        | 2              | 4.290738  |
| P50137        | SVPMSTVFYPSDGVATEK+Oxidation(3)                  | 1.074955631        |                |           |
| P50137        | TSRPENAIISNNEDFQVQAK                             | 1.226212425        | 3              | 6.319445  |
| P50137        | VLDPFTIKPLDK                                     | 0.980885492        | 2              | 3.029834  |
| P50137        | VLDPFTIKPLDKK                                    | 0.838640432        | 2              | 2.734724  |
| <b>P50169</b> | <b>RDH3 Retinol dehydrogenase 3</b>              | <b>0.961527659</b> | <b>0.00055</b> | <b>10</b> |
| P50169        | AMESLVNTCSGDLSLVTDCMEHALTSCHPR                   | 0.819528678        | 3              | 5.047653  |
| P50169        | AMESLVNTCSGDLSLVTDCMEHALTSCHPR+Oxidation(1)      | 0.877439235        |                |           |
| P50169        | FQDSYMK                                          | 0.700827921        | 1              | 2.086136  |
| P50169        | GLWGLVNNAGISVPGPNEWMR                            | 0.735156453        | 2              | 3.715937  |
| P50169        | KLWDQTTEEVK                                      | 0.80656745         | 2              | 3.076902  |
| P50169        | KLWDQTTEEVKEIYGK                                 | 0.829994871        | 3              | 4.721564  |
| P50169        | LWDQTTEEVK                                       | 0.979288128        | 2              | 3.255734  |
| P50169        | LWDQTTEEVKEIYGK                                  | 0.691191543        | 2              | 5.144002  |
| P50169        | MSLVGGGYCISK                                     | 0.971451185        | 2              | 3.773761  |
| P50169        | MSLVGGGYCISK+Oxidation(0)                        | 1.319391755        |                |           |
| <b>P50237</b> | <b>ST1C1 Sulfotransferase 1C1</b>                | <b>0.826373198</b> | <b>6E-14</b>   | <b>9</b>  |
| P50237        | AGTTWTQEIVDMIQNDGDVQK                            | 0.66417597         | 2              | 5.233977  |
| P50237        | DISEEVLNK                                        | 0.94229253         | 2              | 2.636224  |
| P50237        | DLHLGEQDLQPETR                                   | 0.820213178        | 2              | 4.309466  |
| P50237        | HPFIEWTLPSPLNSGLDLANK                            | 2.339960139        | 3              | 3.322172  |
| P50237        | IWNFQAKPDDLIIATYAK                               | 0.91447379         | 3              | 3.750057  |
| P50237        | MKDLHLGEQDLQPETR                                 | 0.788221876        | 2              | 3.980995  |
| P50237        | MLPDPGTLGEYIEQFK                                 | 0.577903263        | 3              | 4.699763  |
| P50237        | MLPDPGTLGEYIEQFK+Oxidation(0)                    | 0.871466501        |                |           |
| P50237        | VLWGSWYDHVK                                      | 1.068149917        | 2              | 3.119763  |
| <b>P50298</b> | <b>ARY2 Arylamine N_acetyltransferase 2</b>      | <b>0.747341736</b> | <b>0.13424</b> | <b>2</b>  |
| P50298        | FSYKDNIDLVEFK                                    | 0.603494826        | 2              | 2.683943  |
| P50298        | SLTEEEIEDVLK                                     | 1.050187852        | 2              | 2.767169  |
| <b>P50398</b> | <b>GDIA Rab GDP dissociation inhibitor alpha</b> | <b>0.854465497</b> | <b>0.03345</b> | <b>8</b>  |
| P50398        | FDLQQDVIDFTGHALALYR                              | 1.020341197        | 3              | 4.230884  |
| P50398        | FQLLEGPPESMGR                                    | 0.853919226        | 2              | 3.548142  |
| P50398        | KQNDVFGADQ                                       | 0.933558299        | 2              | 2.635939  |

|               |                                                             |                    |                |           |
|---------------|-------------------------------------------------------------|--------------------|----------------|-----------|
| P50398        | MLLYTEVTRYLDFK                                              | 0.994525562        | 2              | 2.34705   |
| P50398        | NPYYGGESSITPLEELYK                                          | 1.141660102        | 2              | 5.448057  |
| P50398        | QLICDPSYIPDR                                                | 0.72845201         | 2              | 3.348272  |
| P50398        | TDDYLDQPCLETINR                                             | 0.808879282        | 2              | 5.167658  |
| P50398        | TFEGVDPQTSMR                                                | 0.834957083        | 2              | 2.595511  |
| <b>P50399</b> | <b>GDIB Rab GDP dissociation inhibitor beta</b>             | <b>1.12288116</b>  | <b>0.75279</b> | <b>7</b>  |
| P50399        | AYDATTHFETTCDDIK                                            | 1.840183817        | 2              | 4.772915  |
| P50399        | AYDATTHFETTCDDIKDIYK                                        | 1.011302156        | 3              | 5.506894  |
| P50399        | EIRPALELLEPIEQK                                             | 1.057189153        | 3              | 3.93112   |
| P50399        | FDLGQDVIDFTGHSLALYR                                         | 1.672479833        | 3              | 4.703263  |
| P50399        | FVSISDLFVPK                                                 | 1.214973254        | 2              | 3.141755  |
| P50399        | NTNDANSCQIIIPQNQVNR                                         | 1.062297183        | 2              | 4.221483  |
| P50399        | TDDYLDQPCCTINR                                              | 0.823114317        | 2              | 4.765975  |
| <b>P50431</b> | <b>GLYC Serine hydroxymethyltransferase_ cytosolic</b>      | <b>0.947682052</b> | <b>0.09302</b> | <b>7</b>  |
| P50431        | ALSDALTELGYK                                                | 0.921606683        | 2              | 3.998201  |
| P50431        | AVLEALGSLNNK                                                | 1.080975266        | 2              | 4.476895  |
| P50431        | GLLEEDFQK                                                   | 0.817319989        | 2              | 2.358482  |
| P50431        | ISATSIFFESMPYK                                              | 1.136513983        | 2              | 3.510657  |
| P50431        | IYQLQVLANCR                                                 | 0.705807461        | 2              | 2.690809  |
| P50431        | VLEACSIACNK                                                 | 1.044449129        | 2              | 3.92667   |
| P50431        | YSEGYPGQR                                                   | 1.39962357         | 2              | 2.772025  |
| <b>P50475</b> | <b>SYAC Alanyl_tRNA synthetase_ cytoplasmic</b>             | <b>0.888694994</b> | <b>0.97789</b> | <b>14</b> |
| P50475        | ASEWVQVSGLMDGK                                              | 1.009642333        | 2              | 4.166582  |
| P50475        | AVFDEYDPVPR                                                 | 0.893469981        | 2              | 3.268637  |
| P50475        | DIINEEVQFLK                                                 | 0.657536183        | 2              | 3.182424  |
| P50475        | GLEATDDSPK                                                  | 1.028189881        | 2              | 2.590701  |
| P50475        | ITCLCQVPQNAANR                                              | 1.004207564        | 2              | 4.588664  |
| P50475        | IVAVTGAEAQK                                                 | 1.196691836        | 2              | 2.752509  |
| P50475        | NVGCLQEALQLATSAFQLR                                         | 0.970117111        | 2              | 2.918587  |
| P50475        | QIWQNLGLDEAK                                                | 0.983038987        | 2              | 3.140088  |
| P50475        | RIVAVTGAEAQK                                                | 1.53159666         | 2              | 2.946728  |
| P50475        | SVLGDADQK                                                   | 0.805740462        | 1              | 2.199129  |
| P50475        | TEEIVNGMIEAAKPVYTLDCPLAAAK                                  | 0.865772075        | 3              | 4.02376   |
| P50475        | TITVALADGGRPDNTGR                                           | 1.094746145        | 2              | 3.0999    |
| P50475        | VDDSSDKTEFTVK                                               | 1.126989282        | 2              | 3.751496  |
| P50475        | VGAEDTDGIDMAYR                                              | 0.810219877        | 2              | 3.851568  |
| <b>P50503</b> | <b>F10A1 Hsc70_interacting protein</b>                      | <b>1.4982614</b>   | <b>9.9E-20</b> | <b>6</b>  |
| P50503        | AIDLFTDAIK                                                  | 1.286432868        | 2              | 2.900306  |
| P50503        | AIEINPDSAQPYK                                               | 1.698897479        | 2              | 3.461441  |
| P50503        | GAAIDALNDGELQK                                              | 1.415513138        | 2              | 3.666522  |
| P50503        | KGAAIDALNDGELQK                                             | 1.505265428        | 2              | 4.918941  |
| P50503        | LDYDEDASAMLR                                                | 1.211893741        | 2              | 3.564228  |
| P50503        | QDPSVLHTEEMR                                                | 1.290971025        | 2              | 2.5345    |
| <b>P50516</b> | <b>VATA V_type proton ATPase catalytic subunit A</b>        | <b>1.048868754</b> | <b>0.78477</b> | <b>3</b>  |
| P50516        | ADYAQLLEDMQNAFR                                             | 0.996560648        | 2              | 3.741143  |
| P50516        | TALVANTSNNMPVAAR                                            | 1.141749663        | 2              | 3.594894  |
| P50516        | VLDALFPCVQGTTAIPGAFGCGK                                     | 0.742030342        | 2              | 2.847148  |
| <b>P50554</b> | <b>GABT 4_aminobutyrate aminotransferase_ mitochondrial</b> | <b>0.946919101</b> | <b>0.09139</b> | <b>12</b> |
| P50554        | GNYLVDVDGNR                                                 | 0.870320015        | 1              | 2.183243  |
| P50554        | GTFCSFDPDEAIR                                               | 0.722787569        | 2              | 3.756868  |
| P50554        | GVVVLGGCGDK                                                 | 0.86433304         | 2              | 2.304727  |
| P50554        | HGCAFLVDEVQTGGGCTGK                                         | 0.983065965        | 2              | 5.863329  |
| P50554        | IDIPFDWPIAPFPR                                              | 0.671787684        | 2              | 3.742017  |
| P50554        | KHGCAFLVDEVQTGGGCTGK                                        | 0.905103746        | 3              | 3.70531   |
| P50554        | LVQQPQNASTFINRPALGILPPENFVVK                                | 0.934094646        | 3              | 3.722294  |

|               |                                                                 |                    |                |           |
|---------------|-----------------------------------------------------------------|--------------------|----------------|-----------|
| P50554        | NLLLAEVINIIK                                                    | 0.616312978        | 3              | 4.942817  |
| P50554        | REDLLNNVAHAGK                                                   | 1.237100527        | 2              | 2.360586  |
| P50554        | TLLTGLLDLQAQYPQFVSR                                             | 0.770015002        | 3              | 4.104712  |
| P50554        | TVAGIIVEPIQSEGGDNHASDDFFR                                       | 0.529958754        | 2              | 3.462449  |
| P50554        | YPLEEFVTDNQQEER                                                 | 1.043291532        | 2              | 3.006053  |
| <b>P50580</b> | <b>PA2G4 Proliferation_ associated protein 2G4</b>              | <b>1.175224639</b> | <b>0.10109</b> | <b>4</b>  |
| P50580        | HELLQPFNVLYEK                                                   | 1.086732714        | 2              | 2.964564  |
| P50580        | LVKPGNQNTQVTEAWNK                                               | 1.304203136        | 3              | 3.389173  |
| P50580        | SLVEASSGVSVLSLCEK                                               | 0.931384118        | 2              | 2.49089   |
| P50580        | TIIQNPTDQQK                                                     | 1.175796748        | 2              | 3.135452  |
| <b>P50878</b> | <b>RL4 60S ribosomal protein L4</b>                             | <b>1.780955673</b> | <b>9.9E-20</b> | <b>11</b> |
| P50878        | FCIWTESAFR                                                      | 1.000144052        | 2              | 2.528991  |
| P50878        | KLDELYGTWR                                                      | 1.197361122        | 2              | 3.157358  |
| P50878        | KLEAAAAALAAK                                                    | 1.115554763        | 3              | 4.27761   |
| P50878        | LDELYGTWR                                                       | 0.953810001        | 2              | 2.629948  |
| P50878        | LEAAAAALAAK                                                     | 1.401084479        | 2              | 3.0964    |
| P50878        | NIPGITLLNVSK                                                    | 1.262273434        | 2              | 3.293212  |
| P50878        | NVTLPVAFK                                                       | 1.284778897        | 1              | 2.003755  |
| P50878        | RGPCIIYNEDNGIIK                                                 | 1.30273757         | 2              | 3.468535  |
| P50878        | SGQGAFGNMCR                                                     | 1.08522292         | 2              | 2.378578  |
| P50878        | SNYNLPMHK                                                       | 1.249669344        | 2              | 2.562851  |
| P50878        | YAICSALAASALPALVMSK                                             | 1.635025219        | 2              | 3.499718  |
| <b>P51583</b> | <b>PUR6 Multifunctional protein ADE2</b>                        | <b>1.20953862</b>  | <b>0.22779</b> | <b>3</b>  |
| P51583        | ACGNFGIPCELR                                                    | 0.952069563        | 2              | 2.64011   |
| P51583        | AEYEGDGIPVFAVAGR                                                | 1.662140812        | 2              | 3.204171  |
| P51583        | SWLPQNCTLVDMK                                                   | 1.2321004          | 2              | 2.622981  |
| <b>P51635</b> | <b>AK1A1 Alcohol dehydrogenase [NADP_]</b>                      | <b>0.959787477</b> | <b>0.00567</b> | <b>8</b>  |
| P51635        | ALEALVAK                                                        | 0.993333845        | 2              | 2.527867  |
| P51635        | ALGLSNFSSR                                                      | 1.127284217        | 2              | 2.806605  |
| P51635        | GLEVTAYSPLGSSDR                                                 | 0.902458936        | 2              | 4.452848  |
| P51635        | HHPEDVEPAVR                                                     | 0.888620504        | 3              | 3.740552  |
| P51635        | HIDCASVYGNETEIGEALK                                             | 0.952624295        | 2              | 5.929032  |
| P51635        | HIDCASVYGNETEIGEALKESVGAGK                                      | 0.632151987        | 3              | 6.122674  |
| P51635        | HPDEPVLLLEPPVLLALAEK                                            | 1.475436707        | 3              | 6.084077  |
| P51635        | QLDALNK                                                         | 1.075859499        | 1              | 2.300743  |
| <b>P51647</b> | <b>AL1A1 Retinal dehydrogenase 1</b>                            | <b>0.668638756</b> | <b>9.9E-20</b> | <b>17</b> |
| P51647        | ANNTTYGLAAGVFTK                                                 | 0.864068371        | 2              | 3.94088   |
| P51647        | EAGFPFGVNVNIPGYGPTAGAAISSHMDVDK                                 | 0.772216674        | 3              | 3.890269  |
| P51647        | ELGEHGLYEYTELK                                                  | 0.740773505        | 2              | 3.721067  |
| P51647        | FPVLNPATEEVICHVEEGDK                                            | 0.732425275        | 3              | 4.09538   |
| P51647        | FPVLNPATEEVICHVEEGDKADVDK                                       | 0.590695086        | 4              | 5.142944  |
| P51647        | IFINNEWHDSVSGK                                                  | 0.706271671        | 2              | 4.352702  |
| P51647        | IFVEESVYDEFVR                                                   | 0.638619362        | 2              | 4.264873  |
| P51647        | IGPALSCGNTVVVKPAEQTPLTALHMASLIK                                 | 0.699878206        | 4              | 5.756516  |
| P51647        | IHGQTIPSDGDIFFTR                                                | 0.875734077        | 2              | 4.546439  |
| P51647        | KFPVLNPATEEVICHVEEGDK                                           | 0.836600359        | 3              | 3.753911  |
| P51647        | KFPVLNPATEEVICHVEEGDKADVDK                                      | 0.601143905        | 4              | 4.866906  |
| P51647        | KYVLGNPLTQGINQGPQIDKEQHDK                                       | 0.665383064        | 3              | 3.774581  |
| P51647        | LLLATIEAINGGK                                                   | 1.640707702        | 2              | 4.117346  |
| P51647        | VFANAYLSDLGGSIK                                                 | 0.856242169        | 2              | 4.558314  |
| P51647        | YCAGWADK                                                        | 0.697815476        | 1              | 2.056455  |
| P51647        | YVLGNPLTQGINQGPQIDK                                             | 0.735564618        | 2              | 5.026834  |
| P51647        | YVLGNPLTQGINQGPQIDKEQHDK                                        | 0.653040066        | 2              | 3.508366  |
| <b>P51650</b> | <b>SSDH Succinate semialdehyde dehydrogenase_ mitochondrial</b> | <b>0.621241454</b> | <b>1.2E-12</b> | <b>7</b>  |
| P51650        | EVGEVLCTDPLVSK                                                  | 1.068323459        | 2              | 3.806841  |
| P51650        | HQSGGNFFEPTLLSNVTR                                              | 0.545964538        | 2              | 3.581902  |



|               |                                                                 |                    |                |          |
|---------------|-----------------------------------------------------------------|--------------------|----------------|----------|
| P51650        | LGTVADCGVPEAR                                                   | 0.550505074        | 2              | 3.434222 |
| P51650        | VGNGFEEGTTQGPLINEK                                              | 0.769300931        | 2              | 4.312137 |
| P51650        | VYGDIIYTSAK                                                     | 1.031795081        | 2              | 2.664002 |
| P51650        | WLPTPATFPVYDPASGAK                                              | 0.646580063        | 2              | 3.764623 |
| P51650        | YGIDEYLEVK                                                      | 0.653828646        | 2              | 3.085031 |
| <b>P51869</b> | <b>CP4F4 Cytochrome P450 4F4</b>                                | <b>1.304274353</b> | <b>0.23353</b> | <b>2</b> |
| P51869        | TLDFIDVLLTK                                                     | 1.278768037        | 2              | 3.61471  |
| P51869        | WQDLASGGSAR                                                     | 1.001036347        | 2              | 2.53931  |
| <b>P51886</b> | <b>LUM Lumican</b>                                              | <b>0.956204983</b> | <b>0.96726</b> | <b>3</b> |
| P51886        | ITNIPDEYFNR                                                     | 0.798181788        | 2              | 2.333369 |
| P51886        | NNQIDHIDEK                                                      | 0.978732257        | 2              | 3.094421 |
| P51886        | SLQDLQLANNK                                                     | 0.844168051        | 2              | 2.69651  |
| <b>P52020</b> | <b>ERG1 Squalene monooxygenase</b>                              | <b>1.065307083</b> | <b>0.87093</b> | <b>2</b> |
| P52020        | DIPDLYDDAAIFQAK                                                 | 0.962882907        | 2              | 2.466207 |
| P52020        | GVLLGDAYNLR                                                     | 1.184377709        | 2              | 2.967228 |
| <b>P52296</b> | <b>IMB1 Importin subunit beta_1</b>                             | <b>0.915802903</b> | <b>0.95727</b> | <b>5</b> |
| P52296        | AAVENLPTFLVELSR                                                 | 0.676489645        | 2              | 3.41269  |
| P52296        | GALQYLVPILTQTLTK                                                | 1.061226879        | 2              | 2.446865 |
| P52296        | SNEILTAIIQGMR                                                   | 0.941908221        | 2              | 3.146467 |
| P52296        | TVSPDRLELEAAQK                                                  | 1.0094762          | 2              | 2.871838 |
| P52296        | VLANPGNSQVAR                                                    | 1.104974015        | 2              | 3.595824 |
| <b>P52303</b> | <b>AP1B1 AP_1 complex subunit beta_1</b>                        | <b>1.19122797</b>  | <b>0.63793</b> | <b>4</b> |
| P52303        | NINLIVQK                                                        | 0.919016382        | 1              | 2.212781 |
| P52303        | NSFGLAAPLQVHAPLSPNQTV EISLPLNTVGSVMK                            | 0.853351033        | 3              | 3.917299 |
| P52303        | SQPDMAIMAVNTFK                                                  | 0.839188721        | 2              | 2.602387 |
| P52303        | YNDPIYVK                                                        | 1.195400357        | 2              | 2.524617 |
| <b>P52555</b> | <b>ERP29 Endoplasmic reticulum resident protein 29</b>          | <b>0.921961295</b> | <b>0.95842</b> | <b>3</b> |
| P52555        | ILDQGEDFPASELAR                                                 | 0.882051604        | 2              | 4.81951  |
| P52555        | QGQDGLSGVK                                                      | 0.878787017        | 2              | 2.465656 |
| P52555        | SLNLTAFR                                                        | 0.871329448        | 2              | 2.811404 |
| <b>P52631</b> | <b>STAT3 Signal transducer and activator of transcription 3</b> | <b>2.663109279</b> | <b>5.6E-08</b> | <b>3</b> |
| P52631        | GLSIEQLTTLAEK                                                   | 1.74931978         | 2              | 3.080907 |
| P52631        | LLQTAATAAQGGQANHPHTAAVVTEK                                      | 2.803489227        | 3              | 3.380996 |
| P52631        | TQIQSVEPYTK                                                     | 2.141357782        | 2              | 2.638862 |
| <b>P52734</b> | <b>FGD1 FYVE_ RhoGEF and PH domain_ containing protein 1</b>    | <b>0.894835379</b> | <b>0.44041</b> | <b>2</b> |
| P52734        | SLELQARTEEEK                                                    | 1.257313656        | 2              | 2.504863 |
| P52734        | TEEEKDWWQAINSTLLK                                               | 0.887069766        | 2              | 2.353791 |
| <b>P52759</b> | <b>UK114 Ribonuclease UK114</b>                                 | <b>0.870939248</b> | <b>0.09077</b> | <b>8</b> |
| P52759        | AAGCDFTNVVK                                                     | 1.410775065        | 2              | 3.009787 |
| P52759        | AAVQVAALPK                                                      | 1.33109704         | 2              | 2.641856 |
| P52759        | APAAIGAYSQAVLVDR                                                | 1.107029769        | 2              | 3.708164 |
| P52759        | IEIEAIAVQGPFTTAGL                                               | 0.93317823         | 2              | 3.513055 |
| P52759        | NLGEILK                                                         | 1.040862889        | 2              | 2.380661 |
| P52759        | TIYVSGQIGMDPSSGQLVPGGVAEEAK                                     | 0.789832988        | 2              | 4.30302  |
| P52759        | TTVLLADINDFGTVNEIYK                                             | 1.11390132         | 2              | 4.875    |
| P52759        | TYFQGNLPAR                                                      | 1.073434145        | 2              | 3.087487 |
| <b>P52845</b> | <b>ST1E2 Estrogen sulfotransferase_ isoform 2</b>               | <b>0.698096092</b> | <b>4.3E-05</b> | <b>2</b> |
| P52845        | CKEDAIFNR                                                       | 0.553911979        | 2              | 2.599116 |
| P52845        | SGSTWIGEIVDMIYK                                                 | 0.739919059        | 2              | 3.55171  |
| <b>P52847</b> | <b>ST1B1 Sulfotransferase family cytosolic 1B member 1</b>      | <b>1.267542315</b> | <b>6.8E-11</b> | <b>8</b> |
| P52847        | DNPLVNYTHLPT EIMDHSK                                            | 1.653760204        | 2              | 5.013755 |
| P52847        | FLAGNVAYGSWFDHVK                                                | 1.278071861        | 2              | 3.503611 |
| P52847        | IEEFQSRPCDIVIPTYK                                               | 1.134033055        | 3              | 4.805368 |

|               |                                                                                                                        |                    |                |           |
|---------------|------------------------------------------------------------------------------------------------------------------------|--------------------|----------------|-----------|
| P52847        | IVHHTSFVEMK                                                                                                            | 1.612908539        | 2              | 2.915155  |
| P52847        | NYFTMTQSEK                                                                                                             | 1.084976614        | 1              | 2.71535   |
| P52847        | SGTTWLSEIVDMVLNDGNVEK                                                                                                  | 1.227008229        |                |           |
| P52847        | THLPIDLLPK                                                                                                             | 1.158569908        | 3              | 3.71345   |
| P52847        | TLDEHTLER                                                                                                              | 1.159717214        | 2              | 3.003373  |
| <b>P52873</b> | <b>PYC Pyruvate carboxylase_ mitochondrial</b>                                                                         | <b>1.014965198</b> | <b>9.9E-20</b> | <b>37</b> |
| P52873        | ADEAYLIGR                                                                                                              | 0.810779116        | 2              | 2.946749  |
| P52873        | ADFAQACQDAGVR                                                                                                          | 0.73779225         | 2              | 4.476007  |
| P52873        | AEAEAEELSFP                                                                                                            | 0.964031058        | 2              | 4.44045   |
| P52873        | AGTHILCIK                                                                                                              | 1.044234103        | 1              | 2.032533  |
| P52873        | ALAVSDLNR                                                                                                              | 0.925559254        | 2              | 2.604053  |
| P52873        | AYSEALAAFNGALFVEK                                                                                                      | 0.830471087        | 2              | 3.705422  |
| P52873        | AYVEANQMLGLIK                                                                                                          | 1.087508011        | 2              | 4.511999  |
| P52873        | DAHQSSLATR                                                                                                             | 1.537926247        | 1              | 3.117682  |
| P52873        | DFTATFGPLDSLNT                                                                                                         | 1.220288347        | 2              | 4.286073  |
| P52873        | DMAGLLKPAACTMLVSSLR                                                                                                    | 0.701032468        | 2              | 3.075082  |
| P52873        | ELIPNIPQMMLR                                                                                                           | 1.607273665        | 2              | 2.404148  |
| P52873        | ENGVDVHPGYGFLSER                                                                                                       | 1.073049389        | 2              | 3.072159  |
| P52873        | FLYECPCR                                                                                                               | 0.920215271        | 2              | 2.606937  |
| P52873        | GANAVGYTNPNDNVFK                                                                                                       | 1.594863416        | 2              | 4.332129  |
| P52873        | GLAPVQAYLHIPDIK                                                                                                        | 0.987424708        | 2              | 2.95695   |
| P52873        | GTPLDTEVPLER                                                                                                           | 0.716829125        | 2              | 3.590704  |
| P52873        | HGEEVTPEDVLSAAMPDVFAQFK                                                                                                | 0.95640837         | 2              | 5.941383  |
| P52873        | HGEEVTPEDVLSAAMPDVFAQFK+Oxidation(14)                                                                                  | 0.761012896        |                |           |
| P52873        | HIEVQILGDQYGNILHLYER                                                                                                   | 0.885162886        | 3              | 4.759448  |
| P52873        | HYFIEVNSR                                                                                                              | 0.828860646        | 2              | 2.553222  |
| P52873        | IAEEFEVELER                                                                                                            | 0.885969332        | 2              | 3.287968  |
| P52873        | IEGRPGASLPLNLK                                                                                                         | 0.745061034        | 2              | 3.610756  |
| P52873        | INGCAIQCR                                                                                                              | 1.121038062        | 2              | 2.843999  |
| P52873        | IVGDLAQFMVQNGLSR                                                                                                       | 0.943291722        | 2              | 5.297952  |
| P52873        | LDNASAFQGAVISPHYDLSLVK                                                                                                 | 0.862441215        | 3              | 5.832052  |
| P52873        | LQVEHTVTEITDVLVHAQIHVSEGR                                                                                              | 0.849358674        | 4              | 5.441233  |
| P52873        | NHQGLLLMDTTFR                                                                                                          | 1.279853503        | 2              | 3.355662  |
| P52873        | QKADEAYLIGR                                                                                                            | 0.925468725        | 3              | 3.43804   |
| P52873        | QVFFELNGQLR                                                                                                            | 1.020530046        | 2              | 2.771383  |
| P52873        | QVGYENAGTVEFLVDK                                                                                                       | 1.007864909        | 2              | 4.107854  |
| P52873        | SVVEFLQGYIGIPHGGFPEPFR                                                                                                 | 1.018579465        | 2              | 4.300785  |
| P52873        | TVAVYSEQDTGQMHR                                                                                                        | 1.145761131        | 2              | 4.34306   |
| P52873        | VFDYSEYWEGR                                                                                                            | 0.812573112        | 2              | 4.571292  |
| P52873        | VSPSPVDPIVPVPIGPPAGFR                                                                                                  | 0.731965509        | 2              | 4.461032  |
| P52873        | VVEIAPATHLDPQLR                                                                                                        | 0.788860502        | 2              | 4.116382  |
| P52873        | VVHSYEELEENYTR                                                                                                         | 0.905837558        | 2              | 5.158436  |
| P52873        | YSLEYMGLAEELVR                                                                                                         | 1.562402383        | 3              | 4.689162  |
| <b>P52944</b> | <b>PDL1 PDZ and LIM domain protein 1</b>                                                                               | <b>0.724429247</b> | <b>0.00147</b> | <b>7</b>  |
| P52944        | AAIANLCIGDLITAIIDGDTSSMTHLEAQNK                                                                                        | 0.759066361        | 3              | 4.367404  |
| P52944        | CGTGIVGVFVK                                                                                                            | 0.672845116        | 2              | 2.437644  |
| P52944        | GCVDNMTLTVSR                                                                                                           | 0.914482223        | 2              | 2.36246   |
| P52944        | GHFFVGDQIYCEK                                                                                                          | 0.858360567        | 2              | 3.517665  |
| P52944        | QSTSFLVLQEILES DGK                                                                                                     | 0.846739255        | 2              | 2.435704  |
| P52944        | TSASGEEANSRPSAQPHPSGGLIIDK                                                                                             | 0.802596771        | 3              | 3.953514  |
| P52944        | VTPPEGYDVVTVFPK                                                                                                        | 0.68969644         | 2              | 2.790221  |
| <b>P53395</b> | <b>ODB2 Lipoamide acyltransferase component of branched_chain alpha_keto acid dehydrogenase complex_ mitochondrial</b> | <b>1.028364743</b> | <b>0.93372</b> | <b>3</b>  |
| P53395        | LSDIGEGIR                                                                                                              | 0.89376389         | 2              | 2.467001  |
| P53395        | LSEVVGSGK                                                                                                              | 1.016104648        | 2              | 2.343265  |
| P53395        | SYLENPAFMLLDLK                                                                                                         | 1.188813362        | 2              | 4.640735  |

|               |                                                   |                    |                |           |
|---------------|---------------------------------------------------|--------------------|----------------|-----------|
| <b>P53987</b> | <b>MOT1 Monocarboxylate transporter 1</b>         | <b>1.19940342</b>  | <b>2.4E-09</b> | <b>5</b>  |
| P53987        | DGKEDETSTDVDEKPK                                  | 1.954815507        | 3              | 5.626783  |
| P53987        | DGKEDETSTDVDEKPKK                                 | 2.385472241        | 3              | 3.870491  |
| P53987        | EDETSTDVDEKPK                                     | 1.307209666        | 2              | 3.100295  |
| P53987        | ETQSPAPLQNSSGDPAAEEESPV                           | 0.991739923        | 2              | 4.404111  |
| P53987        | SDANTDLIGGSPK                                     | 1.068255536        | 2              | 4.050053  |
| <b>P54319</b> | <b>PLAP Phospholipase A_2_activating protein</b>  | <b>0.966766181</b> | <b>0.99995</b> | <b>4</b>  |
| P54319        | GQTLGLGNTSFSDPFTGGGR                              | 0.996864223        | 2              | 3.343384  |
| P54319        | IGDVVGSSGANQQTSGK                                 | 0.98153479         | 2              | 4.515548  |
| P54319        | TGDLGDINAEQLPGR                                   | 0.948846213        | 2              | 3.665746  |
| P54319        | YVPGTSGPSNTVQTADPFTGAGR                           | 0.96147483         | 2              | 2.871021  |
| <b>P54822</b> | <b>PUR8 Adenylosuccinate lyase</b>                | <b>1.080317643</b> | <b>0.90313</b> | <b>2</b>  |
| P54822        | KVDIEVLSVLASLGASVHK                               | 0.972506122        | 3              | 4.43676   |
| P54822        | VLSQQAAAVVK                                       | 0.79579892         | 2              | 2.3284    |
| <b>P54921</b> | <b>SNAA Alpha_soluble NSF attachment protein</b>  | <b>1.133202211</b> | <b>0.89719</b> | <b>5</b>  |
| P54921        | AIAHYEQSADYYKGEESNSSANK                           | 0.818558251        | 3              | 4.882149  |
| P54921        | HDAATCFVDAGNAFK                                   | 0.888574288        | 2              | 2.34596   |
| P54921        | IEEACEIYAR                                        | 1.133141572        | 2              | 2.711907  |
| P54921        | NSQSFFSGLFGGSSK                                   | 1.146431531        | 2              | 3.431803  |
| P54921        | YEELPFAFSDSR                                      | 0.879349163        | 2              | 2.893608  |
| <b>P55006</b> | <b>RDH7 Retinol dehydrogenase 7</b>               | <b>1.094525292</b> | <b>0.22964</b> | <b>11</b> |
| P55006        | LETVILDVTK                                        | 0.947471848        | 2              | 3.238852  |
| P55006        | TESIVAATQWVK                                      | 0.879358708        | 2              | 3.939571  |
| P55006        | TNVTNMER                                          | 0.900430949        | 2              | 2.770482  |
| P55006        | TNVTNMER+Oxidation(5)                             | 1.003081739        |                |           |
| P55006        | TSDRLETVILDVTK                                    | 0.886612132        | 3              | 4.194678  |
| P55006        | VAIIEPGGFK                                        | 1.322504831        | 2              | 2.645862  |
| P55006        | VLAACLEK                                          | 1.060590423        | 2              | 3.324537  |
| P55006        | VVNIATMGR                                         | 0.801556017        | 2              | 3.654848  |
| P55006        | VVNIATMGR+Oxidation(7)                            | 0.980853164        |                |           |
| P55006        | YGVEAFSDSLR                                       | 1.087564426        | 2              | 3.835497  |
| P55006        | YVFITGCDSGFGNLLAR                                 | 0.963117494        | 2              | 3.677321  |
| <b>P55051</b> | <b>FABP7 Fatty acid_binding protein_brain</b>     | <b>1.086161362</b> | <b>0.9985</b>  | <b>4</b>  |
| P55051        | ALGVGFATR                                         | 1.119733543        | 2              | 2.713905  |
| P55051        | LTDSQNFDEYMK                                      | 1.048750622        | 2              | 4.400812  |
| P55051        | LTDSQNFDEYMK+Oxidation(10)                        | 1.514603677        |                |           |
| P55051        | QVGNVTKPTVIISQEGGK                                | 0.973720449        | 3              | 3.837464  |
| <b>P55053</b> | <b>FABP5 Fatty acid_binding protein_epidermal</b> | <b>1.106535634</b> | <b>0.01257</b> | <b>5</b>  |
| P55053        | FDETTADGR                                         | 0.729152844        | 2              | 2.961714  |
| P55053        | KTETVCTFTDGALVQHQQ                                | 0.906866048        | 3              | 5.080284  |
| P55053        | LVESHGFEDYMK                                      | 1.073899776        | 2              | 2.62493   |
| P55053        | MVVECMNNAICTR                                     | 0.618465027        | 2              | 3.24547   |
| P55053        | TETVCTFTDGALVQHQQ                                 | 1.124511761        | 2              | 4.305476  |
| <b>P55159</b> | <b>PON1 Serum paraoxonase/arylesterase 1</b>      | <b>0.853780225</b> | <b>0.00033</b> | <b>7</b>  |
| P55159        | GIEAGAEDLEILPNGLTFSTGLK                           | 1.427013155        | 3              | 5.518301  |
| P55159        | IFFYDSENPPEGSEVLR                                 | 0.753548924        | 2              | 5.901761  |
| P55159        | IQSILSEDPK                                        | 1.07304829         | 2              | 3.088877  |
| P55159        | TITHELLPSINDIAAVGPESFYATNDHYFADPYLR               | 1.872587444        | 3              | 4.119244  |
| P55159        | VLSFDTLVDNISVDPVTGDLWVGCHPNGMR                    | 0.772891357        | 3              | 3.966547  |
| P55159        | VVADGDFDFANGIGISLDGK                              | 0.851951682        | 2              | 4.085935  |
| P55159        | YVYIAELLAHK                                       | 1.17373933         | 2              | 2.879871  |
| <b>P55260</b> | <b>ANXA4 Annexin A4</b>                           | <b>0.820883354</b> | <b>0.59225</b> | <b>5</b>  |
| P55260        | AEIDMLDIPANFK                                     | 0.891649499        | 1              | 2.213793  |
| P55260        | GAGTDEGCLIEILASR                                  | 0.898737206        | 2              | 3.410341  |
| P55260        | GLGTDEDAIIGVLACR                                  | 0.828892976        | 2              | 4.126154  |
| P55260        | INQTYQQQYGR                                       | 1.162635009        | 2              | 2.759853  |
| P55260        | SETSGSFEDALLAIVK                                  | 0.75915565         | 2              | 2.424878  |

|               |                                                            |                    |                |           |
|---------------|------------------------------------------------------------|--------------------|----------------|-----------|
| <b>P55770</b> | <b>NH2L1 NHP2_like protein 1</b>                           | <b>0.962837438</b> | <b>0.72987</b> | <b>2</b>  |
| P55770        | LLDLVQQSCNYK                                               | 0.729678097        | 2              | 2.66762   |
| P55770        | QQIQSIQQSIER                                               | 0.987739857        | 2              | 3.012279  |
| <b>P56399</b> | <b>UBP5 Ubiquitin carboxyl_terminal hydrolase 5</b>        | <b>0.909287253</b> | <b>0.67861</b> | <b>6</b>  |
| P56399        | GTGLQPGEELPDIAPPLVTPDEPK                                   | 0.754349129        | 2              | 4.222363  |
| P56399        | IFQNAPTDPTQDFSTQVAK                                        | 1.168082121        | 2              | 3.966633  |
| P56399        | IGEWELIQESGVPLKPLFGPGYTGIR                                 | 1.317074218        | 3              | 3.431857  |
| P56399        | IVILPDYLEIAR                                               | 1.013091859        | 2              | 2.623757  |
| P56399        | KQEVQAWDGEVR                                               | 1.009276732        | 2              | 3.12834   |
| P56399        | VTSAVEALLSADSASR                                           | 0.950054468        | 2              | 2.768435  |
| <b>P56522</b> | <b>ADRO NADPH:adrenodoxin oxidoreductase_mitochondrial</b> | <b>0.850452295</b> | <b>3.7E-08</b> | <b>3</b>  |
| P56522        | AVPTGDVEDLPCGLLLSSVGYK                                     | 0.836698298        | 2              | 4.420526  |
| P56522        | TATEKPGVEEAAR                                              | 0.862450874        | 2              | 3.177993  |
| P56522        | TDITEVALGVLR                                               | 0.732655188        | 2              | 4.048718  |
| <b>P56574</b> | <b>IDHP Isocitrate dehydrogenase [NADP]_mitochondrial</b>  | <b>1.020841283</b> | <b>0.84677</b> | <b>14</b> |
| P56574        | CATITPDEAR                                                 | 1.30439894         | 2              | 2.304648  |
| P56574        | DLAGCIHGLSNVK                                              | 0.767902044        | 2              | 2.856535  |
| P56574        | DQTNDQVTIDSALATQK                                          | 1.122163168        | 2              | 5.04928   |
| P56574        | FKDIFQEIFDK                                                | 0.680184308        | 2              | 3.236313  |
| P56574        | GKLDGNQDLIR                                                | 0.93271316         | 2              | 2.809859  |
| P56574        | LDGNQDLIR                                                  | 0.798993804        | 2              | 2.383461  |
| P56574        | LIDDMVAQVLK                                                | 0.72254841         | 2              | 4.314041  |
| P56574        | LNEHFLNTTDFLDTIK                                           | 1.080086013        | 2              | 4.724234  |
| P56574        | NILGGTVFR                                                  | 0.869143092        | 2              | 2.351218  |
| P56574        | SSGGFVWACK                                                 | 1.001761947        | 2              | 2.53247   |
| P56574        | TIEAEEAHGTVTR                                              | 1.165997422        | 2              | 4.098842  |
| P56574        | VCVQTVESGAMTK                                              | 0.972633059        | 2              | 3.096589  |
| P56574        | VEKPVVEMDGDDEMTR                                           | 1.020553326        | 3              | 3.64442   |
| P56574        | YFDLGLPNR                                                  | 1.220410449        | 2              | 2.535134  |
| <b>P56593</b> | <b>CP2AC Cytochrome P450 2A12</b>                          | <b>1.118313006</b> | <b>0.0254</b>  | <b>3</b>  |
| P56593        | MLQGTGAPIDPTIYLSK                                          | 1.131024011        | 2              | 3.959047  |
| P56593        | NRQPQYEDHMK                                                | 0.984886105        | 3              | 3.826875  |
| P56593        | YLPGPQQQIIK                                                | 0.55591357         | 2              | 2.444141  |
| <b>P56656</b> | <b>CP239 Cytochrome P450 2C39</b>                          | <b>0.771742059</b> | <b>4.6E-05</b> | <b>5</b>  |
| P56656        | EHQESLDVTNPR                                               | 0.887910563        | 2              | 3.381594  |
| P56656        | IKEHQESLDVTNPR                                             | 0.700711055        | 3              | 4.751965  |
| P56656        | NYLIPK                                                     | 0.990692062        | 1              | 2.191697  |
| P56656        | SDHFMPPFSAGKRVCAAGEGLAR                                    | 0.981509927        | 2              | 2.390186  |
| P56656        | VQEEIDHVIGR                                                | 0.963037941        | 2              | 3.185246  |
| <b>P57093</b> | <b>PAHX Phytyl_CoA dioxygenase_peroxisomal</b>             | <b>2.528730674</b> | <b>9.9E-20</b> | <b>8</b>  |
| P57093        | AISCHYGSSDCK                                               | 2.992766353        | 2              | 3.384495  |
| P57093        | FYEENGFLVIK                                                | 1.730856931        | 2              | 2.588346  |
| P57093        | GDTVFFHPLLIHGSGR                                           | 4.739575675        | 3              | 3.538332  |
| P57093        | IQDFQQNEELFR                                               | 1.294689214        | 2              | 4.337041  |
| P57093        | KFYEENGFLVIK                                               | 1.977350558        | 2              | 3.388309  |
| P57093        | NLVSDDDIQR                                                 | 2.237413768        | 1              | 2.865102  |
| P57093        | NNGLVVLPGTHK                                               | 2.172273247        | 2              | 2.514804  |
| P57093        | YCALPQIVK                                                  | 2.359859516        | 1              | 2.199789  |
| <b>P57113</b> | <b>MAAI Maleylacetoacetate isomerase</b>                   | <b>0.843702301</b> | <b>2.1E-10</b> | <b>13</b> |
| P57113        | AITSGFNALEK                                                | 0.922233165        | 2              | 3.292677  |
| P57113        | ALLALEAFQVSHPCR                                            | 0.827532935        | 2              | 4.283391  |
| P57113        | DGGQQFSEEFQTLNPMK                                          | 0.913032397        | 2              | 4.925333  |
| P57113        | FKVDLSPYPTISHINK                                           | 0.730539185        | 2              | 5.0818    |
| P57113        | GIDYEIVPINLIK                                              | 0.969904635        | 2              | 4.469725  |
| P57113        | IDGITIGQSLAILEYLEETRPIPR                                   | 0.844134153        | 3              | 3.965795  |

|               |                                                               |                    |                |           |
|---------------|---------------------------------------------------------------|--------------------|----------------|-----------|
| P57113        | LLPQDPQK                                                      | 1.039265953        | 1              | 2.099002  |
| P57113        | LLPQDPQKR                                                     | 0.902943848        | 2              | 2.54798   |
| P57113        | MISDLIASGIQPLQNLSVLK                                          | 0.694686591        | 2              | 4.770432  |
| P57113        | MISDLIASGIQPLQNLSVLK+Oxidation(0)                             | 0.918754333        |                |           |
| P57113        | QVGQENQMPWAQK                                                 | 0.917057165        | 2              | 3.890368  |
| P57113        | VDLSPYPTISHINK                                                | 0.873646349        | 2              | 3.469768  |
| P57113        | YCVGDEVSMADVCLAPQVANAER                                       | 0.735548592        | 3              | 6.312306  |
| <b>P57722</b> | <b>PCBP3 Poly(rC)_binding protein 3</b>                       | <b>1.077704819</b> | <b>0.98941</b> | <b>3</b>  |
| P57722        | ESTGAQVQVAGDMLPNSTER                                          | 0.954110107        | 2              | 4.876122  |
| P57722        | INISEGNCPER                                                   | 1.06130517         | 2              | 3.45471   |
| P57722        | LVVPASQCGSLIGK                                                | 1.199695858        | 2              | 2.617839  |
| <b>P58321</b> | <b>UCHL4 Ubiquitin carboxyl-terminal hydrolase isozyme L4</b> | <b>0.990689808</b> | <b>0.99898</b> | <b>3</b>  |
| P58321        | SQGQDVTSSVYFMK                                                | 0.973489713        | 2              | 2.381233  |
| P58321        | VTHETSAHEGQTEAPSIDEK                                          | 0.93435203         | 3              | 4.700929  |
| P58321        | WLPLEANPEVTNQFLK                                              | 0.998624043        | 2              | 3.48753   |
| <b>P58751</b> | <b>RELN Reelin</b>                                            | <b>1.026671755</b> | <b>0.86367</b> | <b>2</b>  |
| <b>P58775</b> | <b>TPM2 Tropomyosin beta chain</b>                            | <b>1.244616976</b> | <b>0.9949</b>  | <b>12</b> |
| P58775        | AISEELDNALNDITSL                                              | 0.805194316        | 2              | 4.401304  |
| P58775        | ATDAEADVASLNR                                                 | 0.814310331        | 2              | 4.230064  |
| P58775        | CGDLEELK                                                      | 0.829446342        | 2              | 2.39582   |
| P58775        | DAQEKLEQAEK                                                   | 0.603355148        | 2              | 2.569577  |
| P58775        | KATDAEADVASLNR                                                | 1.250977733        | 2              | 4.181209  |
| P58775        | LDKENAIDR                                                     | 1.024994441        | 2              | 2.785169  |
| P58775        | LKGTEDVEVK                                                    | 1.283613943        | 3              | 3.581951  |
| P58775        | MELQEMQLK                                                     | 0.735166933        | 2              | 2.658723  |
| P58775        | QLEEEQALQK                                                    | 0.820360086        | 2              | 3.970421  |
| P58775        | SLEAQADKYSTK                                                  | 0.815176207        | 2              | 3.347279  |
| P58775        | TIDDLEDEVVAQK                                                 | 0.619757671        | 2              | 4.065521  |
| P58775        | YSESVKDAQEK                                                   | 0.246849616        | 2              | 2.995986  |
| <b>P59242</b> | <b>CING Cingulin</b>                                          | <b>0.845297497</b> | <b>0.48644</b> | <b>2</b>  |
| P59242        | LGQEQQALNR                                                    | 1.036857517        | 2              | 2.74131   |
| P59242        | LQGLEQEAENK                                                   | 0.798310404        | 2              | 2.543168  |
| <b>P59279</b> | <b>RAB2B Ras-related protein Rab_2B</b>                       | <b>1.055415214</b> | <b>0.95295</b> | <b>2</b>  |
| P59279        | GAAGALLYDITR                                                  | 1.090669595        | 2              | 2.996588  |
| P59279        | LQIWDTAGQESFR                                                 | 1.069661248        | 2              | 3.677009  |
| <b>P59759</b> | <b>MKL2 MKL/myocardin-like protein 2</b>                      | <b>0.891250155</b> | <b>0.93548</b> | <b>2</b>  |
| P59759        | LVEVLK                                                        | 0.925677126        | 2              | 2.451511  |
| P59759        | QIEELK                                                        | 0.851133662        | 1              | 2.071705  |
| <b>P59895</b> | <b>NEK6 Serine/threonine-protein kinase Nek6</b>              | <b>1.020398327</b> | <b>0.90296</b> | <b>2</b>  |
| P59895        | QDCVKEIGLLK                                                   | 0.924642675        | 2              | 2.346838  |
| P59895        | TVALKKVQIFEMMDAK+Oxidation(11)                                | 1.060144723        |                |           |
| <b>P59999</b> | <b>ARPC4 Actin-related protein 2/3 complex subunit 4</b>      | <b>1.098918828</b> | <b>0.55507</b> | <b>2</b>  |
| P59999        | AENFFILR                                                      | 1.081788027        | 2              | 2.571273  |
| P59999        | ELLQPVITSR                                                    | 1.168510164        | 2              | 2.691309  |
| <b>P60335</b> | <b>PCBP1 Poly(rC)_binding protein 1</b>                       | <b>1.003814303</b> | <b>0.31629</b> | <b>5</b>  |
| P60335        | AITIAGVPQSVTECVK                                              | 1.150573824        | 2              | 3.201518  |
| P60335        | CSDAAGYPHATHDLEGPPLDAYSIQGQHTISPLDLAK                         | 1.092581158        | 4              | 5.41702   |
| P60335        | IITLTGPTNAIFK                                                 | 0.917012098        | 2              | 2.666085  |
| P60335        | LVVPATQCGSLIGK                                                | 1.28082383         | 2              | 3.344987  |
| P60335        | VMTIPYQPMPASSPVICAGGQDR                                       | 0.775558984        | 2              | 3.636625  |
| <b>P60843</b> | <b>IF4A1 Eukaryotic initiation factor 4A_I</b>                | <b>1.134925175</b> | <b>0.26666</b> | <b>5</b>  |
| P60843        | ATQALVLAPTR                                                   | 1.197707538        | 1              | 2.350039  |
| P60843        | GFKDQIYDIFQK                                                  | 1.094529876        | 2              | 3.521557  |
| P60843        | KEELTLEGIR                                                    | 1.290376006        | 2              | 2.50622   |
| P60843        | KGVAINMVTEDDKR                                                | 1.142154057        | 3              | 4.088434  |

|               |                                                                                         |                    |                |          |
|---------------|-----------------------------------------------------------------------------------------|--------------------|----------------|----------|
| P60843        | LQMEAPHIIVGTPGR                                                                         | 1.073975562        | 3              | 3.843683 |
| <b>P60868</b> | <b>RS20 40S ribosomal protein S20</b>                                                   | <b>0.961785909</b> | <b>0.05131</b> | <b>3</b> |
| P60868        | DTGKTPVEPEVAIHR                                                                         | 0.799373589        | 3              | 3.533911 |
| P60868        | LIDLHSPSEIVK                                                                            | 1.209443305        | 2              | 3.199862 |
| P60868        | VCADLIR                                                                                 | 1.11925818         | 2              | 2.340431 |
| <b>P60901</b> | <b>PSA6 Proteasome subunit alpha type 6</b>                                             | <b>1.218049326</b> | <b>0.24852</b> | <b>2</b> |
| P60901        | AINQGGLTSVAVR                                                                           | 1.035293807        | 2              | 3.441447 |
| P60901        | LLDSSTVTHLFK                                                                            | 1.385656506        | 2              | 2.795613 |
| <b>P61087</b> | <b>UBE2K Ubiquitin_conjugating enzyme E2 K</b>                                          | <b>1.185930262</b> | <b>0.286</b>   | <b>2</b> |
| P61087        | GEIAGPPDTPYEGGR                                                                         | 1.477210459        | 2              | 3.669807 |
| P61087        | VLDVDENFTELR                                                                            | 0.943914482        | 2              | 3.483526 |
| <b>P61107</b> | <b>RAB14 Ras_related protein Rab_14</b>                                                 | <b>0.87430387</b>  | <b>0.68715</b> | <b>5</b> |
| P61107        | IYQNIQDGLDLNAAESGVQHKPSAPQGGR                                                           | 1.019687246        | 3              | 3.682695 |
| P61107        | LTSEPQPQR                                                                               | 1.347664856        | 2              | 2.562986 |
| P61107        | NLTNPNTVILIGNK                                                                          | 0.716030153        | 2              | 3.227733 |
| P61107        | SCLLHQFTEK                                                                              | 0.86222714         | 2              | 2.967806 |
| P61107        | STYNHLSWLTDAR                                                                           | 1.039080539        | 2              | 3.284862 |
| <b>P61203</b> | <b>CSN2 COP9 signalosome complex subunit 2</b>                                          | <b>0.673245311</b> | <b>0.41605</b> | <b>2</b> |
| P61203        | NYDESGSPR                                                                               | 0.56155526         | 2              | 2.469565 |
| P61203        | WTNQLNSLNQAVVSK                                                                         | 0.764301033        | 2              | 2.980879 |
| <b>P61222</b> | <b>ABCE1 ATP_binding cassette sub_family E member 1</b>                                 | <b>0.968906418</b> | <b>0.38482</b> | <b>4</b> |
| P61222        | GTVGSILDR                                                                               | 1.267046509        | 2              | 2.328647 |
| P61222        | NTVANSPQTLLAGMNK                                                                        | 0.965150552        | 2              | 3.602403 |
| P61222        | NVEDLSGGELQR                                                                            | 1.089545723        | 2              | 2.921072 |
| P61222        | VAETANEEVVK                                                                             | 2.075974409        | 2              | 2.620749 |
| <b>P61314</b> | <b>RL15 60S ribosomal protein L15</b>                                                   | <b>1.175167759</b> | <b>2.5E-11</b> | <b>6</b> |
| P61314        | FFEVLIDPFHK                                                                             | 1.151469092        | 3              | 3.4665   |
| P61314        | GATYGKPVHVGVNQLK                                                                        | 1.791153499        | 2              | 4.368115 |
| P61314        | SLQSVAEER                                                                               | 1.130471204        | 2              | 2.688399 |
| P61314        | SLQSVAEERAGR                                                                            | 0.951126722        | 2              | 2.482018 |
| P61314        | VLNSYWVGEDSTYK                                                                          | 1.322399259        | 2              | 4.257211 |
| P61314        | YIQELWR                                                                                 | 1.252227774        | 2              | 2.665078 |
| <b>P61354</b> | <b>RL27 60S ribosomal protein L27</b>                                                   | <b>2.845207846</b> | <b>0.00084</b> | <b>2</b> |
| P61354        | NIDDGTSDRPYSHALVAGIDR                                                                   | 3.114495627        | 3              | 4.116739 |
| P61354        | YSVDIPLDK                                                                               | 1.29763219         | 2              | 2.416169 |
| <b>P61459</b> | <b>PHS Pterin_4_alpha_carbinolamine dehydratase</b>                                     | <b>1.057398619</b> | <b>0.59285</b> | <b>4</b> |
| P61459        | AVGWNELEGR                                                                              | 1.080751765        | 2              | 3.129657 |
| P61459        | DQLLPNLR                                                                                | 1.606579808        | 2              | 2.354288 |
| P61459        | LDHHPWFVFNVYNK                                                                          | 1.215244125        | 3              | 4.774946 |
| P61459        | LSAEERDQLLPNLR                                                                          | 0.997842022        | 3              | 4.01652  |
| <b>P61589</b> | <b>RHOA Transforming protein RhoA</b>                                                   | <b>1.052087372</b> | <b>0.04015</b> | <b>3</b> |
| P61589        | LVIVGDGACGK                                                                             | 0.887824835        | 2              | 2.709564 |
| P61589        | MKQEPVKPEEGR                                                                            | 1.659245365        | 3              | 3.451423 |
| P61589        | MKQEPVKPEEGR+Oxidation(0)                                                               | 1.30350079         |                |          |
| <b>P61751</b> | <b>ARF4 ADP_ribosylation factor 4</b>                                                   | <b>1.086062088</b> | <b>0.14646</b> | <b>4</b> |
| P61751        | IQEGAAVLQK                                                                              | 1.309478245        | 2              | 2.885529 |
| P61751        | LGEIVTTIPTIGFNVETVEYK                                                                   | 1.165912812        | 3              | 5.029695 |
| P61751        | NICFTVWDVGGQDK                                                                          | 0.918273368        | 2              | 4.127611 |
| P61751        | QDLPNAMAISEMTDK                                                                         | 0.858767541        | 2              | 3.772226 |
| <b>P61805</b> | <b>DAD1 Dolichyl_diphosphooligosaccharide__protein glycosyltransferase subunit DAD1</b> | <b>1.235986403</b> | <b>1</b>       | <b>2</b> |
| P61805        | ADFQGISPER                                                                              | 0.981822245        | 2              | 2.940885 |
| P61805        | FLEEYLSSTPQR                                                                            | 0.949267713        | 2              | 3.698464 |
| <b>P61972</b> | <b>NTF2 Nuclear transport factor 2</b>                                                  | <b>0.842800545</b> | <b>0.69023</b> | <b>2</b> |
| P61972        | IQHSITAQDHQPTDSCIISMVVGQLK                                                              | 0.924808418        | 3              | 4.044783 |

|               |                                                                                    |                    |                |          |
|---------------|------------------------------------------------------------------------------------|--------------------|----------------|----------|
| P61972        | NINDAWVCTNDMFR                                                                     | 0.824072263        | 2              | 3.601073 |
| <b>P61980</b> | <b>HNRPK Heterogeneous nuclear ribonucleoprotein K</b>                             | <b>1.303075881</b> | <b>0.99192</b> | <b>8</b> |
| P61980        | GSDFDCELR                                                                          | 1.049173815        | 2              | 2.602711 |
| P61980        | GSYGDLDGGPIITTVQVTIPK                                                              | 0.89794887         | 2              | 5.05323  |
| P61980        | IDEPLEGSEDR                                                                        | 0.957174748        | 2              | 3.460135 |
| P61980        | IILDLISEPIK                                                                        | 1.197091905        | 2              | 3.972289 |
| P61980        | IITITGTQDQIQNAQYLLQNSVK                                                            | 0.914418886        | 3              | 7.045339 |
| P61980        | LFQECCPHSTDR                                                                       | 1.018033823        | 2              | 3.674992 |
| P61980        | TDYNASVSPDSSGPER                                                                   | 1.077425094        | 2              | 4.231711 |
| P61980        | VVLIGGKPD                                                                          | 0.915767484        | 2              | 2.517359 |
| <b>P61983</b> | <b>1433G 14_3_3 protein gamma</b>                                                  | <b>1.028287248</b> | <b>1</b>       | <b>4</b> |
| P61983        | AYSEAHEISK                                                                         | 1.009510988        | 2              | 3.239245 |
| P61983        | NVTELNPLSNEER                                                                      | 1.053848043        | 2              | 4.937109 |
| P61983        | TAFDDAIAELDTLNEDSYK                                                                | 0.882854679        | 2              | 5.16806  |
| P61983        | YLAEVATGEK                                                                         | 1.007423282        | 2              | 2.922291 |
| <b>P62046</b> | <b>LRCH1 Leucine_rich repeat and calponin homology domain_containing protein 1</b> | <b>0.929498583</b> | <b>0.26398</b> | <b>2</b> |
| P62046        | DRELDIAMIEQLR                                                                      | 0.84764982         | 2              | 2.586196 |
| P62046        | NLESIDPQFTIRRK                                                                     | 1.014895921        | 2              | 2.319091 |
| <b>P62076</b> | <b>TIM13 Mitochondrial import inner membrane translocase subunit Tim13</b>         | <b>0.822909334</b> | <b>3.3E-16</b> | <b>5</b> |
| P62076        | CIGKPGGSLDNSEQK                                                                    | 0.843661287        | 2              | 4.043394 |
| P62076        | KCIGKPGGSLDNSEQK                                                                   | 1.232340513        | 3              | 4.540523 |
| P62076        | LDPGAIMEQVK                                                                        | 0.80466499         | 2              | 3.22487  |
| P62076        | VQIAVANAQELLQR                                                                     | 0.935865488        | 2              | 4.958214 |
| P62076        | YMDAWNTVSR                                                                         | 0.702722279        | 2              | 2.757345 |
| <b>P62078</b> | <b>TIM8B Mitochondrial import inner membrane translocase subunit Tim8 B</b>        | <b>1.016415275</b> | <b>0.3358</b>  | <b>2</b> |
| P62078        | FIDTTLAITGR                                                                        | 0.771464142        | 2              | 2.79627  |
| P62078        | TENCLSSCVDR                                                                        | 1.115388672        | 2              | 2.918724 |
| <b>P62083</b> | <b>RS7 40S ribosomal protein S7</b>                                                | <b>1.045887062</b> | <b>0.99665</b> | <b>5</b> |
| P62083        | AIIIFVVPQLK                                                                        | 1.009827043        | 2              | 3.792275 |
| P62083        | DVNFEPPEFQL                                                                        | 2.715847251        | 2              | 2.404202 |
| P62083        | IVKPNGEKPDFESGISQALLELEMNSDLK                                                      | 1.06755355         | 3              | 4.949751 |
| P62083        | KAIIFVVPQLK                                                                        | 0.743539829        | 2              | 3.807272 |
| P62083        | TLTAVHDAILEDLVFPSEIVGK                                                             | 1.11469377         | 2              | 5.099612 |
| <b>P62161</b> | <b>CALM Calmodulin</b>                                                             | <b>1.047276199</b> | <b>0.99368</b> | <b>3</b> |
| P62161        | EADIDGDGQVNYEEFVQMMTAK                                                             | 1.399923581        | 2              | 4.775527 |
| P62161        | EAFSLFDKDGDTITTK                                                                   | 1.4246709          | 2              | 4.172574 |
| P62161        | VFDKDGNGYISAAELR                                                                   | 0.980118084        | 2              | 4.886259 |
| <b>P62193</b> | <b>PRS4 26S protease regulatory subunit 4</b>                                      | <b>1.195794844</b> | <b>0.13441</b> | <b>4</b> |
| P62193        | APQETYADIGGLDNQIQEIK                                                               | 2.068825119        | 2              | 4.969431 |
| P62193        | MGQSQSGGHGPGGGK+Oxidation(0)                                                       | 1.08425212         |                |          |
| P62193        | NQEQMKPLEEK                                                                        | 1.242382408        | 2              | 3.234378 |
| P62193        | TMLELLNQLDGFDSR                                                                    | 0.905121893        | 2              | 4.048751 |
| <b>P62198</b> | <b>PRS8 26S protease regulatory subunit 8</b>                                      | <b>1.036034077</b> | <b>0.99637</b> | <b>6</b> |
| P62198        | EELQLLQEQGSYVGEVVR                                                                 | 0.964877612        | 2              | 2.487425 |
| P62198        | IAELMPGASGAEVK                                                                     | 0.839592528        | 2              | 2.429717 |
| P62198        | IEELQLIVNDK                                                                        | 1.030487306        | 2              | 3.005128 |
| P62198        | LEGSGGDSEVQR                                                                       | 1.141492751        | 2              | 3.750051 |
| P62198        | LLREELQLLQEQGSYVGEVVR                                                              | 0.858709594        | 3              | 4.049383 |
| P62198        | TMLELLNQLDGFTEATK                                                                  | 1.079829691        | 2              | 3.626887 |
| <b>P62243</b> | <b>RS8 40S ribosomal protein S8</b>                                                | <b>1.095786735</b> | <b>9.9E-20</b> | <b>8</b> |
| P62243        | ADGYVLEGK                                                                          | 1.067776617        | 2              | 2.817324 |
| P62243        | IIDVVYNASNELVR                                                                     | 2.800060327        | 2              | 4.377695 |
| P62243        | ISSLLEEQFQQGK                                                                      | 1.335714469        | 2              | 3.991194 |

|               |                                                  |                    |                |           |
|---------------|--------------------------------------------------|--------------------|----------------|-----------|
| P62243        | KYELGRPAANTK                                     | 0.976816497        | 2              | 3.317575  |
| P62243        | LDVGNFSWGSECCTR                                  | 0.966772695        | 2              | 3.792821  |
| P62243        | LTPEEEEEILNK                                     | 1.044393557        | 2              | 3.369033  |
| P62243        | NCIVLIDSTPYR                                     | 1.076038392        | 2              | 3.883613  |
| P62243        | YELGRPAANTK                                      | 0.893981769        | 2              | 2.98953   |
| <b>P62246</b> | <b>RS15A 40S ribosomal protein S15a</b>          | <b>1.245055113</b> | <b>0.00019</b> | <b>3</b>  |
| P62246        | HGYIGEFEIIDDHR                                   | 1.203931057        | 2              | 4.955499  |
| P62246        | MNVLADALK                                        | 0.957406852        | 2              | 2.343958  |
| P62246        | WQNNLLPSR                                        | 1.184827599        | 2              | 3.000891  |
| <b>P62250</b> | <b>RS16 40S ribosomal protein S16</b>            | <b>1.499263948</b> | <b>0.03913</b> | <b>5</b>  |
| P62250        | ALVAYYQK                                         | 1.580969401        | 2              | 2.390972  |
| P62250        | EIKDILIQYDR                                      | 1.017234604        | 2              | 2.42965   |
| P62250        | GGGHVAQIYAIR                                     | 1.919028069        | 2              | 3.151434  |
| P62250        | LLEPVLLLGK                                       | 1.195868049        | 2              | 3.048643  |
| P62250        | TLLVADPR                                         | 1.129438395        | 2              | 2.715634  |
| <b>P62260</b> | <b>1433E 14_3_3 protein epsilon</b>              | <b>1.109207935</b> | <b>0.90284</b> | <b>8</b>  |
| P62260        | AAFDDAIAELDTLSEESYK                              | 0.959244626        | 2              | 6.356453  |
| P62260        | AAFDDAIAELDTLSEESYKDSTLIMQLLR                    | 1.594114407        |                |           |
| P62260        | EENKGGEDKLK                                      | 1.032628993        | 2              | 2.743721  |
| P62260        | HLIPAANTGESK                                     | 0.971939199        | 1              | 3.152375  |
| P62260        | IISIEQK                                          | 1.048028569        | 2              | 2.705436  |
| P62260        | LICCDILDVLDK                                     | 1.368805897        | 2              | 4.031466  |
| P62260        | YLAEFATGNDR                                      | 0.969381806        | 2              | 2.983791  |
| P62260        | YLAEFATGNDRK                                     | 0.879367391        | 2              | 2.836806  |
| <b>P62271</b> | <b>RS18 40S ribosomal protein S18</b>            | <b>0.961527402</b> | <b>4.1E-09</b> | <b>5</b>  |
| P62271        | AGELTEDEVER                                      | 0.987888027        | 2              | 3.734788  |
| P62271        | RAGELTEDEVER                                     | 0.898129138        | 2              | 3.485244  |
| P62271        | VITIMQNPR                                        | 0.962541296        | 2              | 2.878926  |
| P62271        | VLNTNIDGR                                        | 1.056863255        | 2              | 2.893923  |
| P62271        | YSQVLANGLDNK                                     | 1.303979718        | 2              | 4.144412  |
| <b>P62278</b> | <b>RS13 40S ribosomal protein S13</b>            | <b>1.197692444</b> | <b>0.00035</b> | <b>4</b>  |
| P62278        | GLAPDLPEDLYHLIK                                  | 1.340606305        | 2              | 2.972571  |
| P62278        | GLSQSALPYR                                       | 1.144821784        | 2              | 2.638877  |
| P62278        | KGLTPSQIGVILR                                    | 0.863562319        | 3              | 4.102226  |
| P62278        | LILIESR                                          | 1.679474627        | 2              | 2.332903  |
| <b>P62332</b> | <b>ARF6 ADP_ribosylation factor 6</b>            | <b>0.72167861</b>  | <b>0.30586</b> | <b>2</b>  |
| P62332        | FNVVDVGGQDK                                      | 0.596128672        | 2              | 2.818628  |
| P62332        | LGQSVTTIPTVGFNVTVTYK                             | 1.058115649        | 2              | 3.422548  |
| <b>P62334</b> | <b>PRS10 26S protease regulatory subunit 10B</b> | <b>1.025627289</b> | <b>9E-06</b>   | <b>5</b>  |
| P62334        | ALQSVGQIVGEVLK                                   | 0.90297541         | 2              | 3.088     |
| P62334        | AVASQLDCNFLK                                     | 1.028248684        | 2              | 2.728567  |
| P62334        | EVIELPLTNPELFQR                                  | 1.502964311        | 2              | 3.398631  |
| P62334        | FSEGTSADR                                        | 1.184078445        | 2              | 2.522824  |
| P62334        | HGEIDYEAIVK                                      | 0.514375389        | 2              | 3.36691   |
| <b>P62425</b> | <b>RL7A 60S ribosomal protein L7a</b>            | <b>1.201030037</b> | <b>0.00017</b> | <b>12</b> |
| P62425        | AGVNTVTTLVENK                                    | 1.157763631        | 2              | 4.043626  |
| P62425        | AGVNTVTTLVENKK                                   | 0.928808841        | 2              | 2.857599  |
| P62425        | HWGGNVLGPK                                       | 0.767014102        | 1              | 1.979264  |
| P62425        | KVVNPLFEK                                        | 1.388977598        | 2              | 2.537223  |
| P62425        | LKVPPAINQFTQALDR                                 | 1.311205707        | 3              | 4.502523  |
| P62425        | NFGIGQDIQPK                                      | 1.127790241        | 2              | 3.47069   |
| P62425        | QTATQLLK                                         | 1.214175862        | 2              | 2.382945  |
| P62425        | TCTTVAFTQVNSDK                                   | 2.105555519        | 2              | 4.132649  |
| P62425        | TCTTVAFTQVNSDKGALAK                              | 2.565283588        | 2              | 3.93124   |
| P62425        | TNYNDRYDEIR                                      | 1.104628264        | 2              | 2.448781  |
| P62425        | VAPAPAVVK                                        | 1.362025653        | 1              | 2.162721  |
| P62425        | VPPAINQFTQALDR                                   | 1.111694368        | 2              | 3.522041  |



|               |                                                   |                    |                |           |
|---------------|---------------------------------------------------|--------------------|----------------|-----------|
| <b>P62630</b> | <b>EF1A1 Elongation factor 1_alpha 1</b>          | <b>1.178317853</b> | <b>1.3E-12</b> | <b>13</b> |
| P62630        | DGSASGTTLEALDCILPPTPTDKPLR                        | 1.094791737        | 3              | 5.326085  |
| P62630        | KDGSASGTTLEALDCILPPTPTDKPLR                       | 1.031884471        | 4              | 5.790313  |
| P62630        | MDSTEPYSQK                                        | 0.904039803        | 2              | 3.581632  |
| P62630        | MDSTEPYSQK+Oxidation(0)                           | 1.085865081        |                |           |
| P62630        | NDPPMEAGFTAQVIILNHPGQISAGYAPVLDCHTAHIACK          | 1.050818527        | 5              | 6.546849  |
| P62630        | RYEEIVK                                           | 0.937843231        | 2              | 2.612775  |
| P62630        | SGDAAIVDMVPGKPMCVESFSDYPPLGR                      | 1.184446057        | 3              | 5.107624  |
| P62630        | SGDAAIVDMVPGKPMCVESFSDYPPLGR+Oxidation(14)        | 1.251706354        |                |           |
| P62630        | SGDAAIVDMVPGKPMCVESFSDYPPLGR+Oxidation(8)         | 1.27539925         |                |           |
| P62630        | VETGVLPKGMVVTTFAPVNVTTVEK                         | 0.888122065        | 2              | 5.471049  |
| P62630        | VETGVLPKGMVVTTFAPVNVTTVEK+Oxidation(9)            | 1.128073497        |                |           |
| P62630        | YEEIVK                                            | 1.251227935        | 1              | 2.091926  |
| P62630        | YYVTIIDAPGHR                                      | 1.23943366         | 3              | 3.641772  |
| <b>P62632</b> | <b>EF1A2 Elongation factor 1_alpha 2</b>          | <b>1.147175212</b> | <b>9.9E-20</b> | <b>9</b>  |
| P62632        | EHALLAYTLGVK                                      | 1.995576993        | 3              | 4.062109  |
| P62632        | IGGIGTPVGR                                        | 1.371780804        | 2              | 3.651441  |
| P62632        | MDSTEPAYSEK                                       | 0.870259032        | 2              | 2.305096  |
| P62632        | NMITGTSQADCAVLIVAAGVGEFEAGISK                     | 0.9582687          | 3              | 4.571581  |
| P62632        | QLIVGVNK                                          | 1.367768767        | 1              | 2.771101  |
| P62632        | QTVAVGVK                                          | 1.020075771        | 1              | 2.245     |
| P62632        | STTTGHLIYK                                        | 1.11381952         | 2              | 3.250636  |
| P62632        | THINIVIGHVDSGK                                    | 1.171672666        | 2              | 5.463567  |
| P62632        | VETGILRPGMVVTTFAPVNVTTVEK                         | 1.084096491        | 3              | 3.592238  |
| <b>P62634</b> | <b>CNBP Cellular nucleic acid_binding protein</b> | <b>0.979364987</b> | <b>0.62643</b> | <b>2</b>  |
| P62634        | CGETGHVAINCCK                                     | 0.981895576        | 2              | 4.427821  |
| P62634        | CYSCGEFGHIQK                                      | 0.888042964        | 2              | 3.083513  |
| <b>P62703</b> | <b>RS4X 40S ribosomal protein S4_X isoform</b>    | <b>0.941947773</b> | <b>0.99064</b> | <b>6</b>  |
| P62703        | FDTGNLCMVTGGANLGR                                 | 0.968299296        | 2              | 4.970669  |
| P62703        | FDTGNLCMVTGGANLGR+Oxidation(7)                    | 0.488039445        |                |           |
| P62703        | GIPHLVTHDAR                                       | 1.138842579        | 2              | 2.608608  |
| P62703        | LSNIFVIGK                                         | 1.053264058        | 2              | 2.874052  |
| P62703        | TDITYPAGFMDVISIDK                                 | 1.012972517        | 2              | 4.585635  |
| P62703        | VNDTIQIDLETGK                                     | 1.085472641        | 2              | 3.755436  |
| <b>P62718</b> | <b>RL18A 60S ribosomal protein L18a</b>           | <b>1.29126675</b>  | <b>0.00177</b> | <b>2</b>  |
| P62718        | DLTTAGAVTQCYR                                     | 1.311431842        | 2              | 3.037     |
| P62718        | SSGEIVYCGQVFEKSPLR                                | 0.998727409        | 2              | 2.495971  |
| <b>P62752</b> | <b>RL23A 60S ribosomal protein L23a</b>           | <b>0.997540798</b> | <b>0.00269</b> | <b>6</b>  |
| P62752        | LAPDYDALDVANK                                     | 1.04692018         | 2              | 3.569261  |
| P62752        | LDHYAIK                                           | 1.080271809        | 2              | 2.405123  |
| P62752        | LYDIDVAK                                          | 1.069771844        | 1              | 1.921885  |
| P62752        | NKLDHYAIK                                         | 1.041632341        | 2              | 2.482819  |
| P62752        | VNTLIRPDGEK                                       | 1.206617723        | 2              | 3.084478  |
| P62752        | VNTLIRPDGEKK                                      | 1.514262363        | 2              | 2.83795   |
| <b>P62755</b> | <b>RS6 40S ribosomal protein S6</b>               | <b>1.035238811</b> | <b>0.87901</b> | <b>6</b>  |
| P62755        | DIPGLDTTVPR                                       | 0.758706679        | 2              | 2.336389  |
| P62755        | EEAAEYAKLLAK                                      | 1.017186019        | 2              | 2.398875  |
| P62755        | LIEVDDER                                          | 0.917670452        | 2              | 2.785909  |
| P62755        | LNISFPATGCQK                                      | 0.999150968        | 2              | 3.125343  |
| P62755        | MATEVAADALGEEWK                                   | 1.019479125        | 2              | 4.356373  |
| P62755        | MATEVAADALGEEWK+Oxidation(0)                      | 1.121554222        |                |           |
| <b>P62775</b> | <b>MTPN Myotrophin</b>                            | <b>1.075880412</b> | <b>0.25669</b> | <b>2</b>  |
| P62775        | GPDGLTALEATDNQAIK                                 | 1.914597715        | 2              | 3.706726  |
| P62775        | HHITPLLSAVYEGHVSCVK                               | 1.070941479        | 3              | 3.61731   |

|               |                                                             |                    |                |           |
|---------------|-------------------------------------------------------------|--------------------|----------------|-----------|
| <b>P62804</b> | <b>H4 Histone H4</b>                                        | <b>1.215690493</b> | <b>9.9E-20</b> | <b>9</b>  |
| P62804        | DAVTYTEHAK                                                  | 2.11021531         | 2              | 3.091598  |
| P62804        | DNIQGITKPAIR                                                | 1.009063425        | 2              | 3.254271  |
| P62804        | ISGLIYEETR                                                  | 1.653223973        | 2              | 3.773031  |
| P62804        | KTVTAMDVVYALK                                               | 1.215586856        | 2              | 3.023273  |
| P62804        | RISGLIYEETR                                                 | 0.775225297        | 2              | 2.307495  |
| P62804        | TLYGFGG                                                     | 0.6225752          | 1              | 1.95168   |
| P62804        | TVTAMDVVYALK                                                | 1.106626842        | 2              | 4.065288  |
| P62804        | TVTAMDVVYALK+Oxidation(4)                                   | 1.285765265        |                |           |
| P62804        | VFLENVIR                                                    | 0.863879347        | 2              | 3.015818  |
| <b>P62815</b> | <b>VATB2 V_type proton ATPase subunit B_brain isoform</b>   | <b>0.912023617</b> | <b>0.23588</b> | <b>3</b>  |
| P62815        | AVVQVFEGTSGIDAK                                             | 0.772930801        | 2              | 3.637273  |
| P62815        | IYPEEMIQTGISAIDGMNSIAR                                      | 0.734829425        | 2              | 2.450038  |
| P62815        | QIYPPINVLPSLSR                                              | 0.913283643        | 2              | 2.353211  |
| <b>P62832</b> | <b>RL23 60S ribosomal protein L23</b>                       | <b>1.57638169</b>  | <b>0.49571</b> | <b>2</b>  |
| P62832        | GSAITGPVAK                                                  | 3.245142167        | 2              | 2.38306   |
| P62832        | ISLGLPVGAVINCADNTGAK                                        | 1.063497953        | 2              | 4.896225  |
| <b>P62853</b> | <b>RS25 40S ribosomal protein S25</b>                       | <b>1.559170766</b> | <b>6.7E-05</b> | <b>2</b>  |
| P62853        | GGDAPAAGEDA                                                 | 1.280828066        | 1              | 2.019867  |
| P62853        | LNNLVLFDK                                                   | 1.559126006        | 2              | 3.052199  |
| <b>P62856</b> | <b>RS26 40S ribosomal protein S26</b>                       | <b>1.138410878</b> | <b>0.56499</b> | <b>3</b>  |
| P62856        | DISEASVFDAYVLPK                                             | 1.310172399        | 2              | 3.269862  |
| P62856        | FRPAGAAPRPPPKPM                                             | 0.777673947        | 2              | 2.352892  |
| P62856        | NIVEAAAVR                                                   | 1.118484651        | 2              | 2.92795   |
| <b>P62859</b> | <b>RS28 40S ribosomal protein S28</b>                       | <b>1.608779478</b> | <b>0.02552</b> | <b>2</b>  |
| P62859        | EGDVLTLLESER                                                | 1.591689488        | 2              | 3.234688  |
| P62859        | VEFMDDTSR                                                   | 1.703367584        | 2              | 2.597485  |
| <b>P62870</b> | <b>ELOB Transcription elongation factor B polypeptide 2</b> | <b>0.935853293</b> | <b>0.94506</b> | <b>2</b>  |
| P62870        | ADDTFEALR                                                   | 0.819520384        | 2              | 2.583726  |
| P62870        | TLGECGFTSQARQPATVGLAFR                                      | 1.003052394        | 3              | 3.421448  |
| <b>P62890</b> | <b>RL30 60S ribosomal protein L30</b>                       | <b>1.326565219</b> | <b>0.30106</b> | <b>2</b>  |
| P62890        | TGVHHYSGNIELGTACGK                                          | 1.190771051        | 2              | 5.654829  |
| P62890        | VCTLAIIDPGDSDIIR                                            | 1.331953345        | 2              | 4.219794  |
| <b>P62898</b> | <b>CYC Cytochrome c_somatic</b>                             | <b>1.075922626</b> | <b>0.99997</b> | <b>6</b>  |
| P62898        | ADLIAYLK                                                    | 1.073331618        | 2              | 2.869547  |
| P62898        | GITWGEDTLMEYLENPK                                           | 1.073791106        | 2              | 4.962444  |
| P62898        | GITWGEDTLMEYLENPKK                                          | 0.905837507        | 2              | 4.559816  |
| P62898        | KTGQAAGFSYTDANK                                             | 1.17193923         | 2              | 4.752879  |
| P62898        | TGPNLHGLFGR                                                 | 0.947121951        | 2              | 3.266914  |
| P62898        | TGQAAGFSYTDANK                                              | 1.157937175        | 2              | 4.271093  |
| <b>P62902</b> | <b>RL31 60S ribosomal protein L31</b>                       | <b>1.315298562</b> | <b>0.00085</b> | <b>2</b>  |
| P62902        | NLQTVNVVDEN                                                 | 1.864410321        | 1              | 2.527725  |
| P62902        | SAINEVVTR                                                   | 1.288414876        | 2              | 2.938576  |
| <b>P62907</b> | <b>RL10A 60S ribosomal protein L10a</b>                     | <b>1.278820272</b> | <b>4.7E-12</b> | <b>6</b>  |
| P62907        | AVDIPHMDIEALK                                               | 0.981305342        | 2              | 2.814103  |
| P62907        | AVDIPHMDIEALKK                                              | 0.97456472         | 2              | 2.603906  |
| P62907        | FSVCVLGDQQHCDEAK                                            | 1.390164386        | 2              | 4.194169  |
| P62907        | KYDAFLASESLIK                                               | 1.165022733        | 2              | 4.006351  |
| P62907        | VLCLAVAVGHVK                                                | 0.887327019        | 3              | 3.895473  |
| P62907        | YDAFLASESLIK                                                | 1.203900658        | 2              | 3.453281  |
| <b>P62909</b> | <b>RS3 40S ribosomal protein S3</b>                         | <b>1.165279755</b> | <b>9.9E-20</b> | <b>10</b> |
| P62909        | AELNEFLTR                                                   | 1.196541883        | 2              | 2.840172  |
| P62909        | DEILPTTPISEQK                                               | 1.192949433        | 2              | 3.703027  |
| P62909        | ELAEDGYSGVEVR                                               | 1.550801208        | 2              | 3.429917  |
| P62909        | ELTAVVQK                                                    | 1.321900705        | 1              | 2.077975  |

|               |                                                           |                    |                |           |
|---------------|-----------------------------------------------------------|--------------------|----------------|-----------|
| P62909        | FGFPEGSVELYAEK                                            | 2.609201006        | 2              | 4.053975  |
| P62909        | FVDGLMIHSGDPVNYVYVDTAVR                                   | 1.282938731        | 3              | 4.938177  |
| P62909        | GCEVVVSGK                                                 | 1.149814128        | 2              | 2.772482  |
| P62909        | GGKPEPPAMPQPVPPTA                                         | 1.350911862        | 2              | 3.54081   |
| P62909        | GLCAIAQAESLR                                              | 1.050861124        | 2              | 3.390461  |
| P62909        | TEIIILATR                                                 | 1.2537794          | 2              | 3.178227  |
| <b>P62912</b> | <b>RL32 60S ribosomal protein L32</b>                     | <b>1.220535891</b> | <b>1.1E-06</b> | <b>3</b>  |
| P62912        | ELEVLLMCNK                                                | 1.32190045         | 2              | 2.851244  |
| P62912        | GQILMPNIGYGSNK                                            | 1.062993658        | 2              | 2.932909  |
| P62912        | SYCAEIAHNVSSK                                             | 1.218287768        | 2              | 4.803632  |
| <b>P62914</b> | <b>RL11 60S ribosomal protein L11</b>                     | <b>1.062097894</b> | <b>1</b>       | <b>2</b>  |
| P62914        | VLEQLTGQTPVFSK                                            | 1.110286785        | 2              | 4.411545  |
| P62914        | YDGIIIPGK                                                 | 1.046257391        | 2              | 2.816654  |
| <b>P62919</b> | <b>RL8 60S ribosomal protein L8</b>                       | <b>1.082678623</b> | <b>1.8E-09</b> | <b>3</b>  |
| P62919        | ASGNYATVISHNPETK                                          | 1.35223751         | 2              | 4.673055  |
| P62919        | AVVGVVAGGGR                                               | 1.078593005        | 2              | 3.430963  |
| P62919        | KAQLNIGNVLPVGTMPGEGTIVCCLEEKPGDR                          | 0.806256777        | 3              | 4.549391  |
| <b>P62959</b> | <b>HINT1 Histidine triad nucleotide binding protein 1</b> | <b>0.899060826</b> | <b>0.07304</b> | <b>7</b>  |
| P62959        | AQVAQPGGDTIFGK                                            | 0.937123273        | 2              | 4.618267  |
| P62959        | CAADLGLK                                                  | 1.35380658         | 2              | 2.751844  |
| P62959        | CLAFHDISPQAPTHFLVIPK                                      | 1.038320111        | 3              | 4.2221    |
| P62959        | HISQISVADDDDESLLGHLMIVGK                                  | 0.760329174        | 3              | 6.730711  |
| P62959        | IIFEDDR                                                   | 0.534346264        | 2              | 2.349279  |
| P62959        | KHISQISVADDDDESLLGHLMIVGK                                 | 0.822991407        | 3              | 5.558572  |
| P62959        | MVVNEGADGGQSVYHIHLHLVGGGR                                 | 0.942741992        | 3              | 4.706339  |
| <b>P62961</b> | <b>YBOX1 Nuclease sensitive element binding protein 1</b> | <b>2.252583387</b> | <b>9.9E-20</b> | <b>7</b>  |
| P62961        | AADPPAENSAPAEAQGGAE                                       | 0.737551801        | 2              | 2.638389  |
| P62961        | EDGNEEDKENQGDETQGGQPPQR                                   | 0.962751188        | 3              | 5.125838  |
| P62961        | GAEAAANVTGPGGVPVQGSK                                      | 1.654331997        | 2              | 5.013956  |
| P62961        | NEGSESAPGQAQQR                                            | 2.715175103        | 2              | 5.307773  |
| P62961        | NYQQNYQNSSESGEK                                           | 1.997835057        | 2              | 4.167553  |
| P62961        | NYQQNYQNSSESGEKNEGSESAPGQAQQR                             | 1.354147051        | 3              | 5.04581   |
| P62961        | RPQYSNPPVQGEVMEGADNQGAGEQGRPVR                            | 1.448182025        | 4              | 4.648341  |
| <b>P62963</b> | <b>PROF1 Profilin_1</b>                                   | <b>0.983096667</b> | <b>0.93408</b> | <b>6</b>  |
| P62963        | CYEMASHLR                                                 | 0.919827579        | 2              | 2.749566  |
| P62963        | DSLLQDGEFTMDLR                                            | 0.971960437        | 2              | 3.313122  |
| P62963        | DSPSVWAAVPGK                                              | 1.407084454        | 2              | 2.935594  |
| P62963        | SSFFVNGLTGGQK                                             | 0.869373824        | 2              | 4.577405  |
| P62963        | STGGAPTFNVTMTAK                                           | 0.957439866        | 2              | 3.025207  |
| P62963        | TFVSITPAEVGLVGK                                           | 0.878863995        | 2              | 4.78787   |
| <b>P63018</b> | <b>HSP7C Heat shock cognate 71 kDa protein</b>            | <b>1.351388882</b> | <b>9.9E-20</b> | <b>28</b> |
| P63018        | ARFEELNADLFR                                              | 1.282075636        | 2              | 2.980095  |
| P63018        | CNEIISWLDK                                                | 0.714317419        | 2              | 3.059733  |
| P63018        | DAGTIAGLNVLRL                                             | 2.068710433        | 2              | 3.742252  |
| P63018        | EIAEAYLGK                                                 | 1.920172663        | 1              | 1.965855  |
| P63018        | FDDAVVQSDMK                                               | 1.073346165        | 2              | 3.937093  |
| P63018        | FEELNADLFR                                                | 1.058325851        | 2              | 3.179737  |
| P63018        | FELTGIPPAPR                                               | 1.054383587        | 2              | 3.183309  |
| P63018        | GTLDPVEK                                                  | 1.204554804        | 1              | 2.014535  |
| P63018        | HWPFMVVNDAGRPK+Oxidation(4)                               | 1.779014513        |                |           |
| P63018        | IINEPTAAAIAYGLDK                                          | 1.235026795        | 2              | 5.129612  |
| P63018        | IINEPTAAAIAYGLDKK                                         | 1.076554143        | 2              | 4.717216  |
| P63018        | LLQDFNKGK                                                 | 1.083017658        | 2              | 3.076245  |
| P63018        | MKEIAEAYLGK                                               | 0.714147883        | 2              | 2.883192  |
| P63018        | MKEIAEAYLGK+Oxidation(0)                                  | 1.374655665        |                |           |

|               |                                                      |                    |                |           |
|---------------|------------------------------------------------------|--------------------|----------------|-----------|
| P63018        | NQTAEKEEFHQK                                         | 1.600351533        | 2              | 4.88416   |
| P63018        | NQVAMNPTNTVFDK                                       | 1.077581452        | 2              | 4.988507  |
| P63018        | NQVAMNPTNTVFDK+Oxidation(4)                          | 1.370577101        |                |           |
| P63018        | NSLESYAFNMK                                          | 1.67921626         | 2              | 3.569918  |
| P63018        | QATKDAGTIAGLNVLK                                     | 0.844684991        | 2              | 2.450734  |
| P63018        | RFDDAVVQSDMK                                         | 0.958417348        | 2              | 3.578502  |
| P63018        | SFYPEEVSSMVLTK                                       | 1.061312831        | 2              | 4.940659  |
| P63018        | SFYPEEVSSMVLTK+Oxidation(9)                          | 1.076671089        |                |           |
| P63018        | SINPDEAVAYGAAVQAAILSGDK                              | 1.272557422        | 2              | 6.059334  |
| P63018        | SQIHDIIVLGGSTR                                       | 1.188343182        | 2              | 4.924558  |
| P63018        | STAGDTHLGGEDFDNR                                     | 1.216993914        | 2              | 4.248702  |
| P63018        | TVTNAVVTVPAYFNDSQR                                   | 1.104147406        | 3              | 4.360116  |
| P63018        | VCNPIITK                                             | 1.014859081        | 2              | 2.301606  |
| P63018        | VQVEYKGETK                                           | 1.282904396        | 2              | 2.55106   |
| <b>P63029</b> | <b>TCTP Translationally controlled tumor protein</b> | <b>2.063612777</b> | <b>1.5E-13</b> | <b>3</b>  |
| P63029        | DLISHDELFSDIYK                                       | 2.7908693          | 2              | 3.755276  |
| P63029        | EIADGLCLEVEGK                                        | 1.81850219         | 2              | 3.338216  |
| P63029        | TEGAIDDSLIGGNASAEQPEGEGTESTVVTGVDIVMNHHLQETSFTK      | 3.090646456        | 4              | 4.588511  |
| <b>P63036</b> | <b>DNJA1 Dnaj homolog subfamily A member 1</b>       | <b>1.16572371</b>  | <b>9.7E-06</b> | <b>6</b>  |
| P63036        | HYNGEAYEDDEHHR                                       | 1.519038489        | 3              | 5.353754  |
| P63036        | ITFHGEGDQEPGLEPGDIIVLDQK                             | 1.416996953        | 3              | 4.491005  |
| P63036        | NVVHQLSVTLLEDLYNGATR                                 | 1.113885938        | 2              | 4.116804  |
| P63036        | QISQAYEVLADSK                                        | 1.185931335        | 2              | 3.700417  |
| P63036        | TIVITSHPGQIVK                                        | 0.965638127        | 2              | 3.461507  |
| P63036        | VNFPENGFLSPDK                                        | 1.184728133        | 2              | 3.358402  |
| <b>P63039</b> | <b>CH60 60 kDa heat shock protein_ mitochondrial</b> | <b>1.11171987</b>  | <b>9.9E-20</b> | <b>33</b> |
| P63039        | AAVEEGIVLGGGCALLR                                    | 0.891234085        | 2              | 5.253572  |
| P63039        | ALMLQGVDLLADAVAVTMGPK                                | 0.55827581         | 3              | 5.283134  |
| P63039        | ALMLQGVDLLADAVAVTMGPK+Oxidation(2)                   | 0.926718232        |                |           |
| P63039        | CEFQDAYVLLSEK                                        | 1.045214426        | 2              | 4.896836  |
| P63039        | CIPALDSLKPANEDQK                                     | 0.745821303        | 2              | 3.654528  |
| P63039        | DIGNIISDAMK                                          | 0.852295232        | 2              | 3.221639  |
| P63039        | GVMLAVDAVIAELK                                       | 0.87574615         | 2              | 3.839546  |
| P63039        | GVMLAVDAVIAELKK                                      | 0.644534156        | 2              | 4.479409  |
| P63039        | GYISPYFINTSK                                         | 1.394803404        | 2              | 3.029247  |
| P63039        | IGIEIHK                                              | 0.953610067        | 2              | 2.589458  |
| P63039        | ILQSSSEVGYDAMLGDFVNMVEK                              | 0.946574099        | 2              | 4.979472  |
| P63039        | IQEITEQLDITTEYK                                      | 0.875694249        | 2              | 5.939842  |
| P63039        | IQEITEQLDITTEYKEK                                    | 0.72754118         | 2              | 5.061436  |
| P63039        | ISSVQSIVPALEIANAHR                                   | 0.83979261         | 2              | 4.255525  |
| P63039        | KISSVQSIVPALEIANAHR                                  | 1.400188382        | 3              | 4.550709  |
| P63039        | KPLVIAEDVDGEALSTLVLR                                 | 0.973765185        | 2              | 6.136534  |
| P63039        | LSDGVAVLK                                            | 1.030204857        | 2              | 3.098129  |
| P63039        | LVQDVANNTNEEAGDGTATVLR                               | 0.931354308        | 2              | 6.636322  |
| P63039        | NAGVEGSLIVEK                                         | 0.988393578        | 2              | 3.584287  |
| P63039        | QSKPVTTPPEEIAQVATISANGDK                             | 0.946901911        | 2              | 3.581943  |
| P63039        | QSKPVTTPPEEIAQVATISANGDKDIGNIISDAMK                  | 0.76000407         | 3              | 4.842977  |
| P63039        | RGVMLAVDAVIAELKK                                     | 0.623211238        | 3              | 5.770705  |
| P63039        | TALLDAAGVASLLTAEAVVTEIPK                             | 1.140761166        |                |           |
| P63039        | TALLDAAGVASLLTAEAVVTEIPKEEK                          | 0.999850038        | 3              | 5.031567  |
| P63039        | TLNDELEIIEGMK                                        | 0.73848497         | 2              | 4.659017  |
| P63039        | TLNDELEIIEGMK+Oxidation(11)                          | 0.892939022        |                |           |
| P63039        | TVIIQSWGSPK                                          | 0.905082399        | 2              | 4.378443  |
| P63039        | VGEVIVTK                                             | 0.812785275        | 2              | 2.938201  |
| P63039        | VGEVIVTKDDAMLLK                                      | 0.570840213        | 2              | 2.50118   |
| P63039        | VGGTSDVEVNEK                                         | 0.914471703        | 2              | 3.820652  |

|               |                                                                                      |                    |                |           |
|---------------|--------------------------------------------------------------------------------------|--------------------|----------------|-----------|
| P63039        | VGGTSDVEVNEKK                                                                        | 1.06954792         | 2              | 3.518459  |
| P63039        | VGLQVVAVK                                                                            | 0.882309579        | 2              | 3.282634  |
| P63039        | VTDALNATR                                                                            | 0.938081094        | 2              | 3.571726  |
| <b>P63102</b> | <b>1433Z 14_3_3 protein zeta/delta</b>                                               | <b>0.922394286</b> | <b>0.11941</b> | <b>9</b>  |
| P63102        | DICNDVLSLEK                                                                          | 1.294991965        | 3              | 3.680529  |
| P63102        | FLIPNASQPESK                                                                         | 0.937986329        | 2              | 3.36873   |
| P63102        | GIVDQSQQAYQEAFEISK                                                                   | 0.797542538        | 2              | 5.748536  |
| P63102        | GIVDQSQQAYQEAFEISKK                                                                  | 0.813014524        | 2              | 2.62193   |
| P63102        | KGIVDQSQQAYQEAFEISK                                                                  | 0.79831234         | 2              | 6.013041  |
| P63102        | SVTEQGAELSNEER                                                                       | 1.301187196        | 2              | 5.56115   |
| P63102        | TAFDEAIAELDTLSEESYK                                                                  | 1.143708833        | 2              | 5.686096  |
| P63102        | YDDMAACMK                                                                            | 0.874219532        | 2              | 2.451387  |
| P63102        | YLAEVAAGDDKK                                                                         | 0.987454186        | 2              | 3.611005  |
| <b>P63159</b> | <b>HMGB1 High mobility group protein B1</b>                                          | <b>0.801663405</b> | <b>3.7E-06</b> | <b>4</b>  |
| P63159        | GEHPGLSIGDVAK                                                                        | 0.798039593        | 2              | 3.117338  |
| P63159        | IKGEHPGLSIGDVAK                                                                      | 0.737631012        | 2              | 3.950677  |
| P63159        | KHPDASVNFSEFSK                                                                       | 1.089325262        | 2              | 4.289649  |
| P63159        | LGEMWNNNTAADDKQPYEK+Oxidation(3)                                                     | 0.960599096        |                |           |
| <b>P63174</b> | <b>RL38 60S ribosomal protein L38</b>                                                | <b>1.64294449</b>  | <b>0.00355</b> | <b>4</b>  |
| P63174        | IEEIKDFLLTAR                                                                         | 1.070803103        | 3              | 3.361184  |
| P63174        | KIEEIKDFLLTAR                                                                        | 1.146701771        | 2              | 4.108852  |
| P63174        | YLYTLVITDK                                                                           | 1.711602115        | 2              | 2.896703  |
| P63174        | YLYTLVITDKEK                                                                         | 1.885527102        | 2              | 2.708998  |
| <b>P63245</b> | <b>GBLP Guanine nucleotide_binding protein subunit beta_2_like 1</b>                 | <b>1.130301004</b> | <b>6.9E-11</b> | <b>12</b> |
| P63245        | DETNYGIPQR                                                                           | 1.312384847        | 2              | 2.940192  |
| P63245        | DGQAMLWDLNEGK                                                                        | 1.273975013        | 2              | 2.969844  |
| P63245        | FSPNSSNPIIVSCGWDK                                                                    | 1.100314556        | 2              | 4.112599  |
| P63245        | GHNGWVTQIATTPQFPDMILSASR                                                             | 0.968895456        | 3              | 4.168629  |
| P63245        | HLYTLDGDDIINALCFSPNR                                                                 | 1.397088827        | 2              | 5.901755  |
| P63245        | IIVDELKQEVISTSSK                                                                     | 0.97202602         | 2              | 4.346048  |
| P63245        | LWDLTTGTTR                                                                           | 0.754007697        | 2              | 2.589536  |
| P63245        | TNHIGHTGYLNTVTVSPDGLCASGGK                                                           | 1.276865234        | 3              | 5.536952  |
| P63245        | VWNLANCK                                                                             | 1.165817557        | 2              | 2.67961   |
| P63245        | VWQVTIGTR                                                                            | 1.166107385        | 2              | 2.736893  |
| P63245        | YTVQDESHSEWVSCVR                                                                     | 1.186454196        | 2              | 4.654795  |
| P63245        | YWLCAATGPSIK                                                                         | 0.964234395        | 2              | 2.844509  |
| <b>P63259</b> | <b>ACTG Actin_cytoplasmic 2</b>                                                      | <b>1.086860706</b> | <b>0.53487</b> | <b>8</b>  |
| P63259        | CPEALFQPSFLGMESCIGHETTFNSIMK                                                         | 2.962773047        | 3              | 4.768364  |
| P63259        | DLYANTVLSGGTTMYPGIADR                                                                | 1.140157747        | 2              | 6.086339  |
| P63259        | DLYANTVLSGGTTMYPGIADR+Oxidation(13)                                                  | 0.989968569        |                |           |
| P63259        | GYSFTTAER                                                                            | 1.007387305        | 2              | 3.353513  |
| P63259        | KDLYANTVLSGGTTMYPGIADR                                                               | 0.988278485        | 2              | 6.449868  |
| P63259        | KDLYANTVLSGGTTMYPGIADR+Oxidation(14)                                                 | 1.152025664        |                |           |
| P63259        | QEYDESGPSIVHR                                                                        | 0.976029756        | 3              | 3.422786  |
| P63259        | VAPEEHPVLLTEAPLNPK                                                                   | 1.03142738         | 3              | 4.739213  |
| <b>P63324</b> | <b>RS12 40S ribosomal protein S12</b>                                                | <b>1.091761856</b> | <b>0.12812</b> | <b>4</b>  |
| P63324        | KVVGCSVVVK                                                                           | 0.96580338         | 2              | 3.379607  |
| P63324        | LGEWVGLCK                                                                            | 1.012030683        | 2              | 2.847631  |
| P63324        | QAHLCLVLANCDEPMYVK                                                                   | 1.313889302        | 3              | 3.552733  |
| P63324        | VVGCSVVVK                                                                            | 1.258820305        | 2              | 3.238082  |
| <b>P63331</b> | <b>PP2AA Serine/threonine_protein phosphatase 2A catalytic subunit alpha isoform</b> | <b>1.00764625</b>  | <b>0.7663</b>  | <b>3</b>  |
| P63331        | CGNQAAIMELDDTLK                                                                      | 0.923065903        | 2              | 2.771279  |
| P63331        | NVVTIFSAPNYCYR                                                                       | 1.221406605        | 2              | 2.326139  |
| P63331        | YSFLQFDPAPR                                                                          | 1.008623381        | 2              | 3.419724  |
| <b>P67779</b> | <b>PHB Prohibitin</b>                                                                | <b>1.022170545</b> | <b>0.99937</b> | <b>12</b> |

|               |                                                                  |                    |                |           |
|---------------|------------------------------------------------------------------|--------------------|----------------|-----------|
| P67779        | AAELIANSLATAGDGLIELR                                             | 0.956379441        | 3              | 4.217194  |
| P67779        | AAIISAEGDSK                                                      | 1.198929139        | 2              | 2.481286  |
| P67779        | DLQNVNITLR                                                       | 1.010504971        | 2              | 3.002888  |
| P67779        | FDAGELITQR                                                       | 0.796447137        | 2              | 3.540552  |
| P67779        | FGLALAVAGGVVNSALYNVDAGHR                                         | 0.991374315        | 3              | 3.53134   |
| P67779        | GVQDIVVGEGTHFLIPVWVQKPIIFDCR                                     | 1.082468133        | 4              | 4.84002   |
| P67779        | IYTSIGEDYDER                                                     | 1.266525861        | 2              | 3.367364  |
| P67779        | KLEAAEDIAYQLSR                                                   | 1.078612103        | 2              | 4.813692  |
| P67779        | NITYLPAGQSVLLQLPQ                                                | 0.995666213        | 3              | 3.430168  |
| P67779        | NVPVITGSK                                                        | 0.969841003        | 1              | 2.277607  |
| P67779        | QVSDDLTER                                                        | 1.0373427          | 2              | 2.416462  |
| P67779        | VLPSITTEILK                                                      | 0.798363783        | 2              | 2.314491  |
| <b>P68037</b> | <b>UB2L3 Ubiquitin_conjugating enzyme E2 L3</b>                  | <b>1.081006925</b> | <b>0.06379</b> | <b>3</b>  |
| P68037        | ADLAEYYSK                                                        | 0.772519352        | 2              | 2.63813   |
| P68037        | GQVCLPVISAENWKPATK                                               | 0.952241944        | 2              | 3.764193  |
| P68037        | TDQVIQSLIALVNDPQPEHPLR                                           | 1.152285534        | 2              | 5.153215  |
| <b>P68101</b> | <b>IF2A Eukaryotic translation initiation factor 2 subunit 1</b> | <b>1.27263808</b>  | <b>0.3468</b>  | <b>3</b>  |
| P68101        | AGLNCSTETMPIK                                                    | 1.278086624        | 2              | 3.406359  |
| P68101        | TEGLSVLNQAMAVIK                                                  | 0.924395624        | 2              | 3.985758  |
| P68101        | VVTDTDETELAR                                                     | 1.284533434        | 2              | 3.305271  |
| <b>P68136</b> | <b>ACTS Actin_alpha skeletal muscle</b>                          | <b>1.363773379</b> | <b>9.9E-20</b> | <b>16</b> |
| P68136        | AGFAGDDAPR                                                       | 1.660413116        | 2              | 3.356367  |
| P68136        | AVFPSIVGRPR                                                      | 0.627144487        | 2              | 2.6985    |
| P68136        | DLYANNVMSGGTTMYPGIADR                                            | 0.769168839        | 2              | 4.663561  |
| P68136        | DSYVGDEAQS                                                       | 2.174332144        | 2              | 3.540015  |
| P68136        | EITALAPSTMK                                                      | 1.088270515        | 2              | 3.137859  |
| P68136        | EITALAPSTMK+Oxidation(9)                                         | 1.196095022        |                |           |
| P68136        | GYSFVTTAER                                                       | 1.158462921        | 2              | 3.958458  |
| P68136        | IWHHTFYNELR                                                      | 2.864273582        | 2              | 2.690291  |
| P68136        | KDLYANNVMSGGTTMYPGIADR                                           | 0.902623513        | 2              | 5.034206  |
| P68136        | KDLYANNVMSGGTTMYPGIADR+Oxidation(14)                             | 1.167628513        |                |           |
| P68136        | QEYDEAGPSIVHR                                                    | 0.886831251        | 2              | 3.163333  |
| P68136        | TTGIVLDSGDGVTHNVPIYEGYALPHAIMR                                   | 0.891245097        | 3              | 6.811887  |
| P68136        | TTGIVLDSGDGVTHNVPIYEGYALPHAIMR+Oxidation(28)                     | 1.036136905        |                |           |
| P68136        | VAPEEHPTLLTEAPLNPK                                               | 1.0352389          | 2              | 4.392037  |
| P68136        | YPIEHGIITNWDDMEK                                                 | 1.791944221        | 2              | 4.450612  |
| P68136        | YPIEHGIITNWDDMEK+Oxidation(13)                                   | 0.785802088        |                |           |
| <b>P68255</b> | <b>1433T 14_3_3 protein theta</b>                                | <b>1.04979856</b>  | <b>0.99429</b> | <b>6</b>  |
| P68255        | AVTEQGAELSNEER                                                   | 1.511518849        | 2              | 4.632949  |
| P68255        | SICTTVLELLDK                                                     | 1.188006417        | 2              | 3.100723  |
| P68255        | TAFDEAIAELDTLNEDSYK                                              | 1.020997724        | 2              | 4.80388   |
| P68255        | VISSIEQK                                                         | 1.017683396        | 2              | 3.254664  |
| P68255        | YLAEVACGDDR                                                      | 1.088167537        | 2              | 3.001915  |
| P68255        | YLIANATNPESK                                                     | 0.985399959        | 2              | 2.822546  |
| <b>P68511</b> | <b>1433F 14_3_3 protein eta</b>                                  | <b>0.791392408</b> | <b>9.9E-08</b> | <b>4</b>  |
| P68511        | AVTELNEPLSNEDR                                                   | 1.552646456        | 2              | 4.666099  |
| P68511        | ELETVCNDVLALLDK                                                  | 1.080617667        | 2              | 3.471905  |
| P68511        | NCNDFQYESKVFLK                                                   | 0.775089801        | 2              | 2.347584  |
| P68511        | NSVVEASEAAYK                                                     | 1.295787894        | 2              | 3.215416  |
| <b>P69897</b> | <b>TBB5 Tubulin beta_5 chain</b>                                 | <b>1.236742918</b> | <b>0.01044</b> | <b>3</b>  |
| P69897        | ALTVPILTQQVFDK                                                   | 1.208738318        | 2              | 3.496055  |
| P69897        | ISVYYNEATGGK                                                     | 1.493880427        | 2              | 2.942208  |
| P69897        | LTTPTYGDLNHLVSATMSGVTTCLR                                        | 0.987480745        | 2              | 5.354481  |
| <b>P70372</b> | <b>ELAV1 ELAV_like protein 1</b>                                 | <b>0.970807144</b> | <b>0.19327</b> | <b>2</b>  |
| P70372        | TNLIVNYPQNMNTQEELR                                               | 0.698110964        | 2              | 3.423189  |

|               |                                                                                 |                    |                |           |
|---------------|---------------------------------------------------------------------------------|--------------------|----------------|-----------|
| P70372        | VLVDQTTGLSR                                                                     | 1.01944553         | 2              | 2.41271   |
| <b>P70470</b> | <b>LYPA1 Acyl_protein thioesterase 1</b>                                        | <b>1.212853933</b> | <b>0.35177</b> | <b>2</b>  |
| P70470        | ASFSQGPINSANR                                                                   | 0.74794634         | 2              | 2.944511  |
| P70470        | DISVLQCHGDCDPLVPLMFGSLTVER                                                      | 1.237306242        | 3              | 4.041405  |
| <b>P70473</b> | <b>AMACR Alpha_methylacyl_CoA racemase</b>                                      | <b>0.81075722</b>  | <b>9.9E-20</b> | <b>11</b> |
| P70473        | ADVLLLEPFR                                                                      | 0.697004654        | 2              | 3.362092  |
| P70473        | AEWCQIFDGTDACVTPVLTLEEALHHQHNR                                                  | 0.648682773        | 4              | 5.201691  |
| P70473        | DYGFSEQEIHQLHSDR                                                                | 0.829017997        | 2              | 4.859573  |
| P70473        | GLGLESEELPSQMSIEDWPEMK                                                          | 0.688329881        | 3              | 4.846204  |
| P70473        | GQNLLDGGAPFYTTYK                                                                | 0.825547218        | 2              | 5.439533  |
| P70473        | GSFITDEEQHACPRPAPQLSR                                                           | 0.842038768        | 3              | 3.852139  |
| P70473        | LGSVNHPSHLAR                                                                    | 0.898056233        | 2              | 3.395815  |
| P70473        | LSGFGQSGIFSK                                                                    | 0.961175111        | 2              | 3.040418  |
| P70473        | RDPSVGEHTVEVLK                                                                  | 0.631848479        | 3              | 4.396935  |
| P70473        | TADGEFMAVGAIEPQFYTLKK                                                           | 1.325109092        | 3              | 4.134341  |
| P70473        | TQAMGLWAQPR                                                                     | 0.512576746        | 2              | 3.131624  |
| <b>P70550</b> | <b>RAB8B Ras_related protein Rab_8B</b>                                         | <b>1.263206451</b> | <b>0.38141</b> | <b>2</b>  |
| P70550        | LLIGDSGVGK                                                                      | 1.280269014        | 2              | 2.78506   |
| P70550        | NIEEHASSDVER                                                                    | 1.085372697        | 2              | 2.307937  |
| <b>P70552</b> | <b>GFRP GTP cyclohydrolase 1 feedback regulatory protein</b>                    | <b>1.144110956</b> | <b>0.99818</b> | <b>2</b>  |
| P70552        | MEVGPTMVGDEHSDPELMQQLGASK                                                       | 0.94050288         | 3              | 4.136862  |
| P70552        | VLGNNFYEYYVNDPPR                                                                | 1.155257854        | 2              | 3.368034  |
| <b>P70580</b> | <b>PGRC1 Membrane_associated progesterone receptor component 1</b>              | <b>0.965972564</b> | <b>0.37294</b> | <b>6</b>  |
| P70580        | FYGPPEGYPGVFAGR                                                                 | 0.87198907         | 2              | 4.010903  |
| P70580        | GDQPGASGDNDDEPPPLPR                                                             | 1.018639037        | 2              | 4.976551  |
| P70580        | IVRGDQPGASGDNDDEPPPLPR                                                          | 0.879855147        | 3              | 5.030583  |
| P70580        | KFYGPPEGYPGVFAGR                                                                | 0.957198364        | 2              | 3.61088   |
| P70580        | RYDGVQDPR                                                                       | 0.597587414        | 1              | 2.152603  |
| P70580        | YDGVQDPR                                                                        | 0.83787877         | 2              | 2.837738  |
| <b>P70584</b> | <b>ACDSB Short/branched chain specific acyl_CoA dehydrogenase_mitochondrial</b> | <b>0.585118114</b> | <b>9.9E-20</b> | <b>8</b>  |
| P70584        | ASSTCQLTFENVK                                                                   | 0.748217278        | 2              | 3.288247  |
| P70584        | FAQEQIAPLVSTMDENSK                                                              | 0.822169442        | 2              | 4.963452  |
| P70584        | IFDFQGLQHQAHVATQLEAAR                                                           | 0.621039297        | 3              | 6.144009  |
| P70584        | IGTIYEGTSNIQLNTIAK                                                              | 0.613552204        | 2              | 4.556328  |
| P70584        | KFAQEQIAPLVSTMDENSK                                                             | 0.570671165        | 2              | 5.804394  |
| P70584        | SGNYVINGSK                                                                      | 0.552460703        | 2              | 2.883802  |
| P70584        | VDASVALLCDIQNTVINK                                                              | 0.681896519        | 2              | 4.921355  |
| P70584        | YYASEVAGLTTSK                                                                   | 0.802974433        | 2              | 4.13797   |
| <b>P70587</b> | <b>LRRC7 Leucine_rich repeat_containing protein 7</b>                           | <b>1.666707337</b> | <b>0.10392</b> | <b>2</b>  |
| P70587        | KESTDESEVDK                                                                     | 1.900420589        | 2              | 2.371924  |
| P70587        | SREQQPYEGNINK                                                                   | 1.001688077        | 2              | 2.487029  |
| <b>P70615</b> | <b>LMNB1 Lamin_B1</b>                                                           | <b>1.028266753</b> | <b>0.00879</b> | <b>5</b>  |
| P70615        | ALYETELADAR                                                                     | 1.03795192         | 2              | 3.075354  |
| P70615        | KESDLSGAQIK                                                                     | 0.951717838        | 2              | 2.531164  |
| P70615        | LSSEMNTSTVNSAR                                                                  | 0.767309973        | 2              | 3.783771  |
| P70615        | NQNSWGTGEDVK                                                                    | 0.743156118        | 2              | 3.285865  |
| P70615        | SLEGDLEDLKDQIAQLEASLSAAK                                                        | 0.759877354        | 3              | 4.62332   |
| <b>P70694</b> | <b>DHB5 Estradiol_17_beta_dehydrogenase 5</b>                                   | <b>0.998045402</b> | <b>2.3E-07</b> | <b>2</b>  |
| P70694        | REDIFYTSK                                                                       | 1.399582589        | 2              | 3.131126  |
| P70694        | SIGVSNFNR                                                                       | 0.717128848        | 2              | 2.376778  |
| <b>P70712</b> | <b>KYNU Kynureninase</b>                                                        | <b>1.245796696</b> | <b>0.51063</b> | <b>9</b>  |
| P70712        | IATELNCDPTDER                                                                   | 0.90456339         | 2              | 3.587585  |
| P70712        | IGAYGHEVGK                                                                      | 1.352906788        | 2              | 2.839433  |
| P70712        | LLTAILDSTERN                                                                    | 1.208537864        | 2              | 3.290477  |

|               |                                                                  |                    |                |           |
|---------------|------------------------------------------------------------------|--------------------|----------------|-----------|
| P70712        | LQLIPGVNGFR                                                      | 0.961178552        | 2              | 2.524788  |
| P70712        | MEDILEVIEK                                                       | 1.115091695        | 2              | 2.588513  |
| P70712        | TYLEEELDK                                                        | 1.226539968        | 1              | 2.201579  |
| P70712        | TYLEEELDKWAK                                                     | 0.65321263         | 2              | 2.55421   |
| P70712        | VAPVPLYNSFHDVYK                                                  | 1.045073987        | 2              | 2.946423  |
| P70712        | YLNSGAGGLAGAFIHEK                                                | 1.063236856        | 2              | 4.307238  |
| <b>P80067</b> | <b>CATC Dipeptidyl peptidase 1</b>                               | <b>0.768971225</b> | <b>1.1E-16</b> | <b>6</b>  |
| P80067        | GINFVSPVR                                                        | 0.790629278        | 2              | 3.120631  |
| P80067        | GTDECAIESIAMAIIPIK                                               | 0.786386281        | 3              | 4.523062  |
| P80067        | NQESCGSCYSFASLGMLEAR                                             | 0.981163366        | 2              | 3.400318  |
| P80067        | NSWGSQWGESGYFR                                                   | 0.769052095        | 2              | 3.612549  |
| P80067        | RGTDECAIESIAMAIIPIK                                              | 0.620338485        | 2              | 3.884704  |
| P80067        | YAQDFGVVEENCFPYTATDAPCKPK                                        | 1.047026565        | 3              | 5.995942  |
| <b>P80254</b> | <b>DOPD D_dopachrome decarboxylase</b>                           | <b>1.217403281</b> | <b>0.00554</b> | <b>4</b>  |
| P80254        | FFLEPWQIGK                                                       | 1.098382384        | 2              | 2.443477  |
| P80254        | FLTEELSLDQDR                                                     | 1.073236714        | 2              | 3.868703  |
| P80254        | LCAATATILDKPEDR                                                  | 3.438090724        | 2              | 4.249262  |
| P80254        | STEPCAHLLISSIGVVGTAEQNR                                          | 1.332259763        | 2              | 5.097519  |
| <b>P80299</b> | <b>HYES Epoxide hydrolase 2</b>                                  | <b>0.96289601</b>  | <b>0.99865</b> | <b>2</b>  |
| P80299        | ATEMGGILVGTPEDPK                                                 | 0.918499545        | 2              | 3.675416  |
| P80299        | TEIQNPSVTSK                                                      | 1.03049645         | 2              | 3.139398  |
| <b>P80313</b> | <b>TCPH T_complex protein 1 subunit eta</b>                      | <b>1.049609169</b> | <b>0.73974</b> | <b>5</b>  |
| P80313        | ATISNDGATILK                                                     | 1.243415526        | 2              | 2.597908  |
| P80313        | GGAEQFMEETER                                                     | 1.262285164        | 2              | 2.978167  |
| P80313        | LLDVVHPAAK                                                       | 1.049295687        | 2              | 2.571696  |
| P80313        | QLCDNAGFDATNILNK                                                 | 0.973948603        | 2              | 3.29668   |
| P80313        | SQDAEVGDGTTSVTLAAEFLK                                            | 1.192336286        | 2              | 4.824515  |
| <b>P80317</b> | <b>TCPZ T_complex protein 1 subunit zeta</b>                     | <b>1.016947869</b> | <b>0.71159</b> | <b>8</b>  |
| P80317        | ALQFLEQVK                                                        | 1.166351057        | 2              | 2.799048  |
| P80317        | DGNVLLHEMQIHPHTASLIAK                                            | 1.031543878        | 3              | 4.370374  |
| P80317        | GIDPFSLDALAK                                                     | 1.134026738        | 2              | 2.493104  |
| P80317        | NAIDDGCVVPGAGAVEVALAEALIK                                        | 0.919539233        | 3              | 4.183879  |
| P80317        | QADLYISEGLHPR                                                    | 1.845843207        | 2              | 2.389749  |
| P80317        | TEVNSGFFYK                                                       | 1.272097214        | 2              | 2.587647  |
| P80317        | VATAQDDITGDGTTSNVLIIGELLK                                        | 1.064819436        | 2              | 5.435468  |
| P80317        | VLAQNSGFDLQETLVK                                                 | 0.93253119         | 2              | 3.982014  |
| <b>P81155</b> | <b>VDAC2 Voltage_dependent anion_selective channel protein 2</b> | <b>0.999775721</b> | <b>0.99991</b> | <b>6</b>  |
| P81155        | LTFDITTFSPNTGK                                                   | 0.916117828        | 2              | 3.205997  |
| P81155        | SNFAVGYR                                                         | 0.947187985        | 2              | 2.440187  |
| P81155        | TGDFQLHTNVNNGTEFGGSIYQK                                          | 0.949294206        | 3              | 3.332845  |
| P81155        | VNSSLIGVGYTQLTRPGVK                                              | 1.043170317        | 2              | 3.789334  |
| P81155        | WCEYGLTFTEK                                                      | 1.039458365        | 2              | 2.609626  |
| P81155        | YQLDPTASISAK                                                     | 0.982338491        | 2              | 3.235001  |
| <b>P82995</b> | <b>HS90A Heat shock protein HSP 90_alpha</b>                     | <b>0.955985104</b> | <b>0.98177</b> | <b>17</b> |
| P82995        | DQVANSFAVER                                                      | 1.133133403        | 2              | 2.548248  |
| P82995        | ELHINLIPNKQDR                                                    | 1.179087362        | 2              | 3.237441  |
| P82995        | ELISNSSDALDK                                                     | 1.166181514        | 2              | 2.801405  |
| P82995        | FYEQFSK                                                          | 1.060947234        | 1              | 2.258059  |
| P82995        | HGLEVIYMIPIPEYCVQQLK                                             | 1.432990774        | 3              | 3.479845  |
| P82995        | HIYFITGETK                                                       | 1.261566209        | 2              | 2.734051  |
| P82995        | HLEINPDHSIIETLR                                                  | 0.962593024        | 2              | 4.453443  |
| P82995        | HSQFIGYPITLFEVK                                                  | 6.820303769        | 2              | 3.751134  |
| P82995        | LGIHEDSQNR                                                       | 0.921760512        | 3              | 3.456845  |
| P82995        | NPDDITNEEYGEFYK                                                  | 1.187809759        | 2              | 5.141033  |
| P82995        | RAPFDLFENR                                                       | 1.023480734        | 2              | 2.414553  |
| P82995        | SLTNDWEEHLAVK                                                    | 0.975837856        | 2              | 4.009841  |



|               |                                                             |                    |                |          |           |
|---------------|-------------------------------------------------------------|--------------------|----------------|----------|-----------|
| P82995        | TDTGPMGR                                                    | 1.272712336        |                | 2        | 2.536737  |
| P82995        | TDTGPMGR+Oxidation(6)                                       | 1.217146191        |                |          |           |
| P82995        | TLTIVDTGIGMTK                                               | 0.939529526        |                | 2        | 4.082806  |
| P82995        | TLTIVDTGIGMTK+Oxidation(10)                                 | 1.196655446        |                |          |           |
| P82995        | YYTSASGDEMVSLLK                                             | 1.014996782        |                | 2        | 3.855253  |
| <b>P83732</b> | <b>RL24 60S ribosomal protein L24</b>                       | <b>1.050451065</b> | <b>0.22061</b> |          | <b>3</b>  |
| P83732        | AITGASLADIMAK                                               | 1.043495346        |                | 2        | 4.100321  |
| P83732        | CESAFLSK                                                    | 1.431596965        |                | 2        | 2.301211  |
| P83732        | VELCSFSGYK                                                  | 1.596756373        |                | 2        | 2.373016  |
| <b>P83868</b> | <b>TEBP Prostaglandin E synthase 3</b>                      | <b>1.359242765</b> | <b>0.04457</b> |          | <b>2</b>  |
| P83868        | HLNEIDLHFCIDPNDSK                                           | 1.752126795        |                | 3        | 3.456263  |
| P83868        | LTFSCLGGSDNFK                                               | 1.216669532        |                | 2        | 2.963548  |
| <b>P83941</b> | <b>ELOC Transcription elongation factor B polypeptide 1</b> | <b>0.9572469</b>   | <b>0.58135</b> |          | <b>2</b>  |
| P83941        | AMLSGPGQFAENETNEVNFR                                        | 0.955120257        |                | 2        | 4.484667  |
| P83941        | TYGGCEGPDAMYVK                                              | 1.200828975        |                | 2        | 2.820043  |
| <b>P84082</b> | <b>ARF2 ADP_ribosylation factor 2</b>                       | <b>0.970776538</b> |                | <b>1</b> | <b>2</b>  |
| P84082        | NISFTVWVDVGGQDK                                             | 0.889693006        |                | 2        | 4.573415  |
| P84082        | QDLPNAMNAAEITDK                                             | 0.919524709        |                | 2        | 4.238098  |
| <b>P84083</b> | <b>ARF5 ADP_ribosylation factor 5</b>                       | <b>1.151237371</b> | <b>0.15029</b> |          | <b>3</b>  |
| P84083        | DAVLLVFANK                                                  | 1.469805576        |                | 2        | 3.551579  |
| P84083        | QDMPNAMPVSELTDK                                             | 0.620635181        |                | 2        | 3.038013  |
| P84083        | VQESADELQK                                                  | 0.999684767        |                | 2        | 3.120927  |
| <b>P84089</b> | <b>ERH Enhancer of rudimentary homolog</b>                  | <b>1.048223891</b> | <b>0.99999</b> |          | <b>2</b>  |
| P84089        | ADTQTYQPYNK                                                 | 1.018719752        |                | 2        | 2.845531  |
| P84089        | TYADYESVNECEMEGVCK                                          | 1.128413806        |                | 2        | 4.376767  |
| <b>P84100</b> | <b>RL19 60S ribosomal protein L19</b>                       | <b>1.01991007</b>  | <b>0.27233</b> |          | <b>2</b>  |
| P84100        | LLADQAEAR                                                   | 1.219314061        |                | 2        | 3.25748   |
| P84100        | VWLDPNETNEIANANSR                                           | 0.913954787        |                | 2        | 5.359803  |
| <b>P84104</b> | <b>SRSF3 Serine/arginine_rich splicing factor 3</b>         | <b>1.028863085</b> | <b>0.7516</b>  |          | <b>2</b>  |
| P84104        | AFGYYGPLR                                                   | 0.950933373        |                | 2        | 2.326913  |
| P84104        | VYVGNLGNNGNK                                                | 1.062641426        |                | 2        | 2.312838  |
| <b>P84245</b> | <b>H33 Histone H3.3</b>                                     | <b>1.06016354</b>  | <b>0.99888</b> |          | <b>5</b>  |
| P84245        | DIQLAR                                                      | 0.912764156        |                | 1        | 1.954342  |
| P84245        | FQSAAGALQEASEAYLVGLFEDTNLCAIHAK                             | 1.089601326        |                | 4        | 6.475613  |
| P84245        | RVTIMPKDIQLAR+Oxidation(4)                                  | 0.998364148        |                |          |           |
| P84245        | STELLIR                                                     | 0.865800729        |                | 2        | 2.396577  |
| P84245        | YRPGTVALR                                                   | 1.005039768        |                | 2        | 2.390287  |
| <b>P84817</b> | <b>FIS1 Mitochondrial fission 1 protein</b>                 | <b>0.962889876</b> | <b>0.09754</b> |          | <b>4</b>  |
| P84817        | FQSEQAAGSVSK                                                | 0.778926706        |                | 2        | 2.661446  |
| P84817        | GIVLLELLPK                                                  | 0.845061517        |                | 2        | 2.47952   |
| P84817        | GLLQTEPQNNQAK                                               | 1.04213032         |                | 2        | 3.404764  |
| P84817        | KFQSEQAAGSVSK                                               | 0.809946015        |                | 2        | 4.3534    |
| <b>P85834</b> | <b>EFTU Elongation factor Tu_mitochondrial</b>              | <b>0.812423973</b> | <b>7.1E-10</b> |          | <b>16</b> |
| P85834        | AEAGDNLGALVR                                                | 0.822721636        |                | 2        | 3.889097  |
| P85834        | DKPHVNVGTIGHVDHGK                                           | 0.827410444        |                | 3        | 3.862269  |
| P85834        | DLEKPFLLPVESVYIPGR                                          | 1.342711545        |                | 2        | 4.01343   |
| P85834        | ELLTEFGYKGEETPVIVGSALCALEQR                                 | 1.04637875         |                | 3        | 3.830712  |
| P85834        | GDECELLGHNK                                                 | 1.015014819        |                | 2        | 2.598526  |
| P85834        | GEETPVIVGSALCALEQR                                          | 0.95919309         |                | 2        | 4.514171  |
| P85834        | GITINAAHVEYSTAAR                                            | 3.438090724        |                | 2        | 3.56819   |
| P85834        | GTVVTGTLER                                                  | 0.883460849        |                | 2        | 2.818779  |
| P85834        | HYAHTDCPGHADYVK                                             | 1.43392749         |                | 2        | 4.252855  |
| P85834        | KGDECELLGHNK                                                | 0.685755641        |                | 2        | 3.707256  |
| P85834        | KYEEIDNAPEER                                                | 1.020995581        |                | 2        | 3.770941  |
| P85834        | LLDAVDYIPVPTR                                               | 0.693474954        |                | 2        | 3.810656  |
| P85834        | QIGVEHVVVYVVK                                               | 1.100106404        |                | 2        | 2.6654    |

|               |                                                               |                    |                |           |
|---------------|---------------------------------------------------------------|--------------------|----------------|-----------|
| P85834        | TIGTGLVTDVPAMTEEDK                                            | 0.809925839        | 2              | 3.254942  |
| P85834        | TIGTGLVTDVPAMTEEDKNIK                                         | 0.825187203        | 2              | 3.503105  |
| P85834        | YEEIDNAPEER                                                   | 0.743722193        | 2              | 3.4091    |
| <b>P85968</b> | <b>6PGD 6_phosphogluconate dehydrogenase_ decarboxylating</b> | <b>1.138756178</b> | <b>0.71649</b> | <b>10</b> |
| P85968        | AGQAVDDFIEK                                                   | 1.164976239        | 2              | 3.314199  |
| P85968        | CLSSLKEER                                                     | 1.025731204        | 2              | 2.625907  |
| P85968        | FQDTDGKELLPK                                                  | 0.929039838        | 2              | 2.954648  |
| P85968        | GILFVSGVSGGEEGAR                                              | 1.84571076         | 2              | 5.384297  |
| P85968        | HEMLPANLIQAQR                                                 | 0.804873975        | 2              | 2.704418  |
| P85968        | LVPLLDTGDIIDGGNSEYR                                           | 0.884766527        | 2              | 5.130198  |
| P85968        | NPELQNLDDFFK                                                  | 1.287502745        | 2              | 4.459496  |
| P85968        | SAVDDCQDSWR                                                   | 1.14138793         | 2              | 3.109797  |
| P85968        | VGTGEPCCDWVGEAGHFVK                                           | 0.922768339        | 2              | 4.455013  |
| P85968        | YGPSLMPGGNK                                                   | 1.086106637        | 2              | 2.31253   |
| <b>P85971</b> | <b>6PGL 6_phosphogluconolactonase</b>                         | <b>1.014504449</b> | <b>0.99996</b> | <b>5</b>  |
| P85971        | DLPAATAPAGPASFR                                               | 1.067836521        | 2              | 3.196603  |
| P85971        | ILEDQESALPAAMVQPR                                             | 0.918871588        | 2              | 4.751103  |
| P85971        | LPIPDSQVLTIDPALPVEDAAEDYAR                                    | 1.088947272        | 2              | 4.655992  |
| P85971        | TGALCWFLDEAAAR                                                | 1.092121646        | 2              | 4.000999  |
| P85971        | WTLGFCDER                                                     | 0.990651533        | 2              | 2.582484  |
| <b>P85972</b> | <b>VINC Vinculin</b>                                          | <b>0.816439146</b> | <b>0.02249</b> | <b>8</b>  |
| P85972        | AQQVSQGLDVLTAQ                                                | 0.971372615        | 2              | 3.984172  |
| P85972        | AVAGNISDPGLQK                                                 | 0.891015559        | 2              | 3.106084  |
| P85972        | KIDAAQNWLADPNNGGPEGEEQIR                                      | 0.739759937        | 3              | 5.229705  |
| P85972        | QVATALQNLQTK                                                  | 0.849658207        | 2              | 2.989647  |
| P85972        | SLLDASEEAIKK                                                  | 0.895027769        | 2              | 2.379302  |
| P85972        | STVEGIQASVK                                                   | 0.874651826        | 2              | 2.444925  |
| P85972        | VDQLAAQLADLAAR                                                | 0.837831898        | 2              | 3.093156  |
| P85972        | VLQLTSWDEDAWASK                                               | 0.864047721        | 2              | 2.479235  |
| <b>P85973</b> | <b>PNPH Purine nucleoside phosphorylase</b>                   | <b>0.794066236</b> | <b>0.01211</b> | <b>11</b> |
| P85973        | ASHQEVLEAGK                                                   | 0.94781904         | 2              | 3.443137  |
| P85973        | DHINLPGFCGQNPLR                                               | 0.909283524        | 3              | 4.061932  |
| P85973        | ELQEGTYIMSAGPTFETVAESCLLR                                     | 0.898009535        | 2              | 5.300961  |
| P85973        | FEVGDIMLIR                                                    | 0.702308867        | 2              | 3.277911  |
| P85973        | HRPQVAVICGSLGGLTAK                                            | 0.728856682        | 3              | 6.021018  |
| P85973        | LTQPQAFDYNEIPNFQSTVQGHAGR                                     | 1.164375158        | 3              | 4.416514  |
| P85973        | MLGADAVGMSTVPEVIVAR                                           | 0.599646771        | 2              | 4.660902  |
| P85973        | MLGADAVGMSTVPEVIVAR+Oxidation(0)                              | 0.967549517        |                |           |
| P85973        | VFGSLITNK                                                     | 0.970441219        | 2              | 3.361583  |
| P85973        | VFHLLGVDTLVVTAAGGLNPK                                         | 0.924216341        | 2              | 5.22585   |
| P85973        | VVMDYNNLEK                                                    | 0.802862883        | 2              | 2.637196  |
| <b>P86048</b> | <b>RL10L 60S ribosomal protein L10_like</b>                   | <b>1.173019291</b> | <b>0.84784</b> | <b>5</b>  |
| P86048        | AKVDEFPLCGHMSDEYEQLSSEALEAAR                                  | 0.917828639        | 3              | 4.144639  |
| P86048        | GAFGKPGQTVAR                                                  | 1.030940829        | 2              | 2.540185  |
| P86048        | MLSCAGADR                                                     | 1.087965659        | 2              | 2.322023  |
| P86048        | VDEFPLCGHMSDEYEQLSSEALEAAR                                    | 1.358757358        | 3              | 4.983397  |
| P86048        | VHIGQVIMSIR                                                   | 0.82183528         | 2              | 2.800275  |
| <b>P86252</b> |                                                               | <b>0.821494559</b> | <b>0.02006</b> | <b>4</b>  |
| P86252        | AAGSLLTDECR                                                   | 0.997374674        | 2              | 3.063311  |
| P86252        | ADSAEYSVMTTGGQSSAK                                            | 0.739851549        | 2              | 4.037457  |
| P86252        | AEVSELPSVVR                                                   | 0.781390538        | 2              | 2.808608  |
| P86252        | AISGDLTAEHEELR                                                | 1.525515431        |                |           |
| P86252        | ALLTPVAIAAGR                                                  | 0.852299764        | 2              | 2.515415  |
| P86252        | AMQEINYGPSPDNSIKLVR+Oxidation(1)                              | 0.785272458        |                |           |
| P86252        | ASMMGQRASLLTAR+Oxidation(2)                                   | 0.812337384        |                |           |
| P86252        | AVAENQPFLIEAMTYR                                              | 0.974047147        | 2              | 4.512483  |

|               |                                                             |                    |                |          |
|---------------|-------------------------------------------------------------|--------------------|----------------|----------|
| P86252        | AVEIAHALCLTERQIK                                            | 0.856136595        |                |          |
| P86252        | DQMVKNNHFTLK+Oxidation(2)                                   | 0.740575213        |                |          |
| P86252        | EELEKMK                                                     | 0.999574806        | 1              | 2.121805 |
| P86252        | EIAGATPYITAAEEK                                             | 1.063157231        | 2              | 3.062317 |
| P86252        | EKMNKPELFGGEEK+Oxidation(2)                                 | 1.268628151        |                |          |
| P86252        | ELDSITPDITPGWK                                              | 0.704889119        | 2              | 3.436802 |
| P86252        | FFRPHFLQAPGDLTVQEGK                                         | 0.900910922        |                |          |
| P86252        | FKLINSTNIR                                                  | 0.727432135        |                |          |
| P86252        | GENLVSMTVEGPPPK                                             | 0.935338234        |                |          |
| P86252        | GIEQAVQSHAVAEER                                             | 0.988755722        | 2              | 4.984147 |
| P86252        | GNIYSLNEGYAK                                                | 1.059533608        | 2              | 4.063055 |
| P86252        | GVYAVGDVCGK                                                 | 0.661282539        | 1              | 2.256901 |
| P86252        | HLQTYGEHYPLDHFDK                                            | 1.084465681        | 3              | 3.382231 |
| P86252        | HVIHTVGPPIAVGQPTASQAAELR                                    | 0.744767491        | 3              | 4.892754 |
| P86252        | IGHHSTSDSSAYR                                               | 1.01975096         | 3              | 4.058208 |
| P86252        | KAMQEINYGSPDINSIKLVR                                        | 0.841799172        |                |          |
| P86252        | KGNIYSLNEGYAK                                               | 1.023460663        | 2              | 3.924677 |
| P86252        | KHTLIIEGATK                                                 | 1.11830044         | 2              | 2.65277  |
| P86252        | KLQHELEEAER                                                 | 1.068793275        | 2              | 3.797122 |
| P86252        | KVVSDDLVDIMSHLK                                             | 0.872058522        |                |          |
| P86252        | LEFIQPNVISGIPIYR                                            | 0.65212584         | 2              | 2.797159 |
| P86252        | LFEEQLK                                                     | 0.999574806        |                |          |
| P86252        | LGDAVEQGVINNSVLGYFIGR                                       | 0.80493809         | 2              | 4.409735 |
| P86252        | LMQVNDTLTSEDAGLR                                            | 0.634966084        |                |          |
| P86252        | LNNIYQNNLTK                                                 | 1.106599925        | 2              | 2.995801 |
| P86252        | LQHELEEAER                                                  | 0.843887317        | 2              | 3.616211 |
| P86252        | MNLQDELDLTK                                                 | 0.472908432        | 2              | 2.48876  |
| P86252        | MNLQDELDLTK+Oxidation(0)                                    | 0.97712135         |                |          |
| P86252        | MQQVEASLQPETLK+Oxidation(0)                                 | 0.869542038        |                |          |
| P86252        | NNGYAISTPTSEQYR                                             | 0.784855278        | 2              | 3.662744 |
| P86252        | QQQASAQGRAGSQGQAQGR                                         | 0.841738769        |                |          |
| P86252        | QQGIINPSEDPHLPQEEVLK                                        | 0.441966694        | 2              | 2.993174 |
| P86252        | QTCLKTVVLLTDNK                                              | 0.298849157        |                |          |
| P86252        | QTITAQNAAVQAVK                                              | 0.97803945         | 2              | 4.087745 |
| P86252        | QYLLNQGWWDDEEQEK                                            | 0.670965302        | 2              | 3.815337 |
| P86252        | RAALQAEIEELR                                                | 0.931933902        | 2              | 3.95424  |
| P86252        | SEIQAEQDR                                                   | 1.051376596        | 2              | 2.764528 |
| P86252        | SLEDALNQTATVTR                                              | 0.7850336          | 2              | 4.29333  |
| P86252        | SSSLLAKSPSK                                                 | 0.824493274        |                |          |
| P86252        | TLHVEEVVPSVIEPSFGLGR                                        | 1.031412027        | 3              | 3.684277 |
| P86252        | TSSAEMPTIPLGSAVEAIR                                         | 0.928070396        | 2              | 4.047329 |
| P86252        | TVNVVQFEPNK                                                 | 1.674835401        | 2              | 2.448723 |
| P86252        | VDDSSGSIGR                                                  | 1.258480204        | 2              | 2.619897 |
| P86252        | VDGNDVFAVYNATK                                              | 1.529135877        | 2              | 3.957363 |
| P86252        | VMEAFEQAER                                                  | 0.558925441        | 2              | 3.415471 |
| P86252        | VVSQYHELTVQAR                                               | 2.094245664        | 2              | 3.593987 |
| P86252        | YNENHQHGK                                                   | 1.029831245        |                |          |
| P86252        | YSTSSSSGVTAGK                                               | 0.911835455        | 2              | 2.562317 |
| P86252s       | DYLGDFIEHYAQLGPSQPPDLAQQAQDEPR                              | 1.305253948        | 3              | 3.802206 |
| P86252s       | LEGDLKDLELQADSAVKGR                                         | 0.430365797        |                |          |
| P86252s       | LIDDYGVVEEPAELPEGTSLTVDNKR                                  | 0.764742487        | 3              | 4.302517 |
| P86252s       | VASDAQLELDKLDGELKK                                          | 0.849392616        |                |          |
| <b>P97384</b> | <b>ANX11 Annexin A11</b>                                    | <b>0.908020169</b> | <b>0.85236</b> | <b>2</b> |
| P97384        | GFGTDEQAIIDCLGSR                                            | 0.814923764        | 2              | 4.320592 |
| P97384        | SELDDDIR                                                    | 0.822474935        | 2              | 2.617257 |
| <b>P97519</b> | <b>HMGCL Hydroxymethylglutaryl_CoA lyase_ mitochondrial</b> | <b>0.880920701</b> | <b>0.99971</b> | <b>7</b> |

|               |                                                                   |                    |                |           |
|---------------|-------------------------------------------------------------------|--------------------|----------------|-----------|
| P97519        | GFEEAVALGAK                                                       | 0.844685926        | 2              | 3.594613  |
| P97519        | GYVSCALGCPYEGK                                                    | 0.993398624        | 2              | 4.214695  |
| P97519        | KNVNCSEIESFQR                                                     | 1.086763021        | 2              | 3.293892  |
| P97519        | LIDMLSEAGLPVIEATSFVSPK                                            | 1.017765678        | 3              | 4.579722  |
| P97519        | LLEAGDFICQALNR                                                    | 0.960648203        | 2              | 4.501926  |
| P97519        | NVNCSEIESFQR                                                      | 0.995233014        | 2              | 3.655052  |
| P97519        | WVPQMADHSDVLK                                                     | 0.85673751         | 2              | 2.797295  |
| <b>P97521</b> | <b>MCAT Mitochondrial carnitine/acylcarnitine carrier protein</b> | <b>0.767782395</b> | <b>0.00441</b> | <b>7</b>  |
| P97521        | CLLQIQASSGK                                                       | 0.733783865        | 1              | 2.917691  |
| P97521        | EEGVTSLYK                                                         | 0.88807296         | 1              | 2.024671  |
| P97521        | KLYQEFQIR                                                         | 0.697245534        | 2              | 2.533414  |
| P97521        | LQTQPPSLPGQPPMYSGTIDCFR                                           | 0.89517316         | 2              | 4.041005  |
| P97521        | LYQEFQIR                                                          | 0.758649758        | 2              | 2.60825   |
| P97521        | SVHDLVPR                                                          | 0.805249885        | 2              | 2.594274  |
| P97521        | YSGTLDCAK                                                         | 0.950918274        | 2              | 2.345995  |
| <b>P97524</b> | <b>S27A2 Very long chain acyl-CoA synthetase</b>                  | <b>1.02076349</b>  | <b>0.17086</b> | <b>14</b> |
| P97524        | GEVGLLICK                                                         | 0.725717565        | 2              | 2.62281   |
| P97524        | ITELTPFFGYAGGK                                                    | 1.321849892        | 2              | 2.924391  |
| P97524        | SEVTFTTPAVYIYTSGTTGLPK                                            | 5.944581651        | 2              | 2.995711  |
| P97524        | SLLHCFQCCGAK                                                      | 0.917442026        | 2              | 2.73525   |
| P97524        | TILHVFLQAR                                                        | 0.948034913        | 3              | 3.314967  |
| P97524        | TSNTNGVDTVLKDKVGVSDPIPESWR                                        | 1.023083983        | 3              | 4.804519  |
| P97524        | TYVPMTEDIYNAIIDK                                                  | 0.997088954        | 3              | 4.141877  |
| P97524        | VDGVSADPIPESWR                                                    | 1.551498477        | 2              | 3.059649  |
| P97524        | VLLASPELHEAVEEVLP TLK                                             | 1.035343403        | 3              | 4.220395  |
| P97524        | VTLMEEGFNPSVIK                                                    | 1.265176908        | 2              | 3.992028  |
| P97524        | YDVEKDEPVR                                                        | 1.015066507        | 2              | 3.115143  |
| P97524        | YDVEKDEPVRDANGYCIK                                                | 1.233627835        | 3              | 3.612456  |
| P97524        | YLCNTPQKPNDR                                                      | 1.287291758        | 2              | 3.058653  |
| P97524        | YNATVIQYIGELLR                                                    | 0.872685394        | 2              | 4.166836  |
| <b>P97532</b> | <b>THTM 3_mercaptopyruvate sulfurtransferase</b>                  | <b>0.924850228</b> | <b>2.4E-14</b> | <b>9</b>  |
| P97532        | AFGHHSVSLDGGFR                                                    | 0.792158801        | 2              | 3.540091  |
| P97532        | ALVSAQWVAEALK                                                     | 0.783073185        | 2              | 4.239162  |
| P97532        | AQPEHVISQGR                                                       | 0.893210917        | 2              | 2.849282  |
| P97532        | DGIEPGHIPGSVNIPFTEFLTSEGLEK                                       | 1.288607062        | 3              | 6.738776  |
| P97532        | FQGTQPEPR                                                         | 0.862711858        | 2              | 2.820221  |
| P97532        | LLDASWYLPK                                                        | 0.989809874        | 2              | 3.828099  |
| P97532        | SPSEPAEFCAQLDPSFIK                                                | 0.823096175        | 2              | 3.001405  |
| P97532        | THEDILENLDR                                                       | 0.826535366        | 2              | 3.252385  |
| P97532        | YWLSQNLPISSGK                                                     | 0.786724883        | 2              | 3.75554   |
| <b>P97536</b> | <b>CAND1 Cullin-associated NEDD8-dissociated protein 1</b>        | <b>1.072829482</b> | <b>0.29449</b> | <b>8</b>  |
| P97536        | AADIDQEVK                                                         | 1.357327831        | 2              | 2.487307  |
| P97536        | EGPAVVGQFIQDVK                                                    | 1.508479599        | 2              | 3.104601  |
| P97536        | FTISDHPQPIDPLK                                                    | 1.371355401        | 2              | 2.399117  |
| P97536        | ITSEALLVTQQLVK                                                    | 0.787402304        | 2              | 2.703396  |
| P97536        | LTLIDPETLLPR                                                      | 1.197241263        | 2              | 2.801983  |
| P97536        | SVILEAFSSPSEEVK                                                   | 1.016457414        | 2              | 2.764555  |
| P97536        | TLEDPLNVR                                                         | 0.984709094        | 2              | 2.308181  |
| P97536        | TYIQCIAAIR                                                        | 0.948286472        | 2              | 2.959081  |
| <b>P97562</b> | <b>ACOX2 Peroxisomal acyl-coenzyme A oxidase 2</b>                | <b>1.279095894</b> | <b>2.7E-11</b> | <b>20</b> |
| P97562        | ATASCTYEGENTVLYLQVAR                                              | 2.070200106        | 2              | 3.932951  |
| P97562        | ATFADFCAQGAEICR                                                   | 1.441807425        | 2              | 4.969956  |
| P97562        | CSAQTAAEFR                                                        | 1.733196342        | 2              | 2.989659  |
| P97562        | DFSLLPELHALSTGMK                                                  | 0.753033588        | 2              | 2.378968  |
| P97562        | EAFLLDPLIR                                                        | 1.020321135        | 2              | 2.878322  |

|               |                                                                 |                    |                |           |
|---------------|-----------------------------------------------------------------|--------------------|----------------|-----------|
| P97562        | EELYEDAIQK                                                      | 1.303625879        | 2              | 2.367866  |
| P97562        | FAEVLDPDGTYQR                                                   | 0.89595875         | 2              | 2.753202  |
| P97562        | HSPSFSVER                                                       | 1.158626391        | 2              | 2.410936  |
| P97562        | ILEYQTQQQK                                                      | 1.087692175        | 2              | 3.814326  |
| P97562        | KVESIIQSDPVFNLK                                                 | 1.015382196        | 2              | 4.956357  |
| P97562        | LDKEPEIQR                                                       | 1.100494724        | 2              | 2.698369  |
| P97562        | LFEWAQK                                                         | 0.806464133        | 2              | 2.455192  |
| P97562        | LGTPQSNYLGMLVTR                                                 | 1.077811109        | 2              | 3.51787   |
| P97562        | LTNILDGGLPNTVLR                                                 | 1.214290352        | 2              | 4.660285  |
| P97562        | MGLEHIDNGFLQLNHVR                                               | 1.214859606        | 3              | 4.276673  |
| P97562        | SGVDQHDAWNQTTVIHLQAAK                                           | 1.310028785        | 3              | 6.127796  |
| P97562        | SLEDHTPLPGITVGDIGPK                                             | 1.090595484        | 3              | 4.6145    |
| P97562        | SLGSDEQIAK                                                      | 1.105620751        | 2              | 2.630379  |
| P97562        | VESIIQSDPVFNLK                                                  | 1.219273903        | 2              | 4.25094   |
| P97562        | VLDGNVNLSLHGVAMNAIR                                             | 0.62969815         | 2              | 3.217199  |
| <b>P97576</b> | <b>GRPE1 GrpE protein homolog 1_mitochondrial</b>               | <b>1.297927953</b> | <b>0.84732</b> | <b>3</b>  |
| P97576        | ALADTENLR                                                       | 1.034632916        | 2              | 2.652947  |
| P97576        | DLLEVADILEK                                                     | 1.455278841        | 2              | 3.208895  |
| P97576        | TLRPALVGVVK                                                     | 1.03736439         | 2              | 2.532409  |
| <b>P97584</b> | <b>PTGR1 Prostaglandin reductase 1</b>                          | <b>0.633083698</b> | <b>9.9E-20</b> | <b>5</b>  |
| P97584        | ALTDLMNWWSEGG                                                   | 0.786759214        | 2              | 4.106936  |
| P97584        | GGETVLVNAAGAVGSVVGQIAK                                          | 0.69279728         | 2              | 5.645947  |
| P97584        | HFEFGPTDSNFELR                                                  | 0.634060886        | 2              | 3.738657  |
| P97584        | TGPCPPGPSPEVIIYQQLR                                             | 1.094130768        | 2              | 4.031363  |
| P97584        | YHEYITEGFKEK                                                    | 0.622594754        | 2              | 2.835616  |
| <b>P97608</b> | <b>OPLA 5_oxoprolinase</b>                                      | <b>0.961837377</b> | <b>0.95556</b> | <b>11</b> |
| P97608        | AGDFGAAFVER                                                     | 0.893441181        | 2              | 3.01052   |
| P97608        | GGPVTVTDANLVLGR                                                 | 1.10441784         | 2              | 2.737121  |
| P97608        | GHTACADAYLTPTIQR                                                | 1.000693637        | 2              | 3.424024  |
| P97608        | GSILDPSPEAAVVGGNVLTSSQR                                         | 1.036550359        | 2              | 4.799467  |
| P97608        | ISVGAEGPSMADTR                                                  | 0.78120978         | 2              | 2.705291  |
| P97608        | ISVGAEGPSMADTR+Oxidation(9)                                     | 1.38608343         |                |           |
| P97608        | ITDPEILESR                                                      | 0.293131649        | 2              | 2.644432  |
| P97608        | LLSEDPANYADAPTEGIR                                              | 0.94000851         | 2              | 4.303636  |
| P97608        | SGLFVVGPEAGAHPPGACRY                                            | 0.701616046        | 2              | 3.774463  |
| P97608        | SGLQLEDTPK                                                      | 1.112283288        | 2              | 2.505929  |
| P97608        | TGDLLLEIQPVLDLEALR                                              | 1.015922743        | 2              | 4.335544  |
| <b>P97612</b> | <b>FAAH1 Fatty_acid amide hydrolase 1</b>                       | <b>1.09591365</b>  | <b>0.8984</b>  | <b>7</b>  |
| P97612        | FMREVEQLMTPQK+Oxidation(8)                                      | 1.153379548        |                |           |
| P97612        | GHDSTLGLSLNEGMPSESDCVVQVLK                                      | 0.852164451        | 3              | 4.687197  |
| P97612        | GTNCVTSYLTDCETQLSQAPR                                           | 1.191453903        | 2              | 4.940621  |
| P97612        | GYFGDIWDIILK                                                    | 0.879606785        | 2              | 3.012081  |
| P97612        | LQSGELSPEAVFFTYLKG                                              | 1.229899099        | 2              | 4.712319  |
| P97612        | NSVGLPVAVQCVALPWQEELCLR                                         | 1.052623136        | 2              | 4.173378  |
| P97612        | SPGGSSGGEALIGSGGSPGLGTDIGGSIR                                   | 1.315309714        | 2              | 4.759167  |
| <b>P97697</b> | <b>IMPA1 Inositol monophosphatase 1</b>                         | <b>1.089972542</b> | <b>0.03178</b> | <b>2</b>  |
| P97697        | SLLVTELGSSR                                                     | 0.801700612        | 2              | 2.370705  |
| P97697        | SSPADLVTVTDQK                                                   | 1.391642446        | 2              | 2.782658  |
| <b>P97700</b> | <b>M2OM Mitochondrial 2_oxoglutarate/malate carrier protein</b> | <b>0.766886235</b> | <b>0.0063</b>  | <b>4</b>  |
| P97700        | AVVVNAAQLASYQSQK                                                | 0.766328389        | 2              | 4.764484  |
| P97700        | GIYTGLSAGLLR                                                    | 0.722799489        | 2              | 2.838662  |
| P97700        | LGIYTVLFR                                                       | 0.81291103         | 2              | 2.725049  |
| P97700        | LTGADGTPPGFLLK                                                  | 0.930577893        | 2              | 3.152544  |
| <b>P97840</b> | <b>LEG9 Galectin_9</b>                                          | <b>2.266529077</b> | <b>9.9E-20</b> | <b>2</b>  |
| P97840        | NTQINNSWGPEER                                                   | 2.262297779        | 2              | 2.45388   |
| P97840        | SINISGVVLPDAK                                                   | 2.785785865        | 2              | 3.382073  |

|               |                                                                                                                             |                    |                |           |
|---------------|-----------------------------------------------------------------------------------------------------------------------------|--------------------|----------------|-----------|
| <b>P97852</b> | <b>DHB4 Peroxisomal multifunctional enzyme type 2</b>                                                                       | <b>0.919743848</b> | <b>0.29726</b> | <b>21</b> |
| P97852        | AVANYDSVEAGEK                                                                                                               | 1.128342419        | 2              | 4.025462  |
| P97852        | AYALFAER                                                                                                                    | 1.091177115        | 2              | 3.573151  |
| P97852        | CEAVIADILDK                                                                                                                 | 3.037654903        | 2              | 2.462658  |
| P97852        | DTTSLNQAALYR                                                                                                                | 1.509071865        | 2              | 2.474168  |
| P97852        | FVYEGSADFSCLPTEFGVIVAQK                                                                                                     | 0.704093266        | 2              | 4.482731  |
| P97852        | GALVVVNDLGGDFK                                                                                                              | 1.543320624        | 2              | 4.382337  |
| P97852        | GSSAADKVVEEIR                                                                                                               | 0.89079706         | 2              | 2.719899  |
| P97852        | HVLQQFADNDVSR                                                                                                               | 1.069964203        | 2              | 4.46525   |
| P97852        | ICDFSNASKPK                                                                                                                 | 1.167640786        | 3              | 3.767988  |
| P97852        | IDSEGISQNHGTGQVASADASGFAGVVGHK                                                                                              | 0.878923582        | 3              | 5.501728  |
| P97852        | IDVVVNNAGILR                                                                                                                | 0.840816733        | 2              | 3.404274  |
| P97852        | ISDEDWDIIQR                                                                                                                 | 0.958236864        | 2              | 3.788776  |
| P97852        | KNNIHCNTIAPNAGSR                                                                                                            | 0.987906244        | 2              | 4.858433  |
| P97852        | LNPQNAFFSGR                                                                                                                 | 1.18630457         | 2              | 2.634136  |
| P97852        | NGSGEVYQGPAAK                                                                                                               | 1.296359137        | 2              | 3.084965  |
| P97852        | NNIHCNTIAPNAGSR                                                                                                             | 1.165950153        | 2              | 4.571816  |
| P97852        | SIQESTGGIIEVLHK                                                                                                             | 0.874342931        | 2              | 4.006524  |
| P97852        | SLMSGGLAEVPGLSINFAK                                                                                                         | 0.819112386        | 2              | 3.042466  |
| P97852        | VLHGQYLELYKPLPR                                                                                                             | 0.898733849        | 2              | 4.40263   |
| P97852        | VNAVFEWHITK                                                                                                                 | 1.317127725        | 2              | 2.518687  |
| P97852        | VVLVTGAGGGLGR                                                                                                               | 0.984730965        | 2              | 3.716695  |
| <b>Q00238</b> | <b>ICAM1 Intercellular adhesion molecule 1</b>                                                                              | <b>1.005342281</b> | <b>0.99473</b> | <b>2</b>  |
| Q00238        | LDTPDLLEVGTQQK                                                                                                              | 0.941660256        | 2              | 3.083777  |
| Q00238        | VELDPLPAWQQVQK                                                                                                              | 1.030163725        | 2              | 2.946469  |
| <b>Q00438</b> | <b>PTBP1 Polypyrimidine tract binding protein 1</b>                                                                         | <b>1.021306508</b> | <b>0.99902</b> | <b>4</b>  |
| Q00438        | IAIPGLAGAGNSVLLVSNLNPGR                                                                                                     | 1.028990408        | 2              | 4.195621  |
| Q00438        | KLPSDVTGEVIGSLGLPFGK                                                                                                        | 0.940122536        | 2              | 4.71256   |
| Q00438        | LSLDGQNIYNACCTLR                                                                                                            | 1.014240564        | 2              | 3.539298  |
| Q00438        | NNQFQALLQYADPVSAQHAK                                                                                                        | 1.051269921        | 2              | 5.648084  |
| <b>Q00780</b> | <b>chain</b>                                                                                                                | <b>0.936737876</b> | <b>0.02299</b> | <b>4</b>  |
| Q00780        | AGPMGMAGPKGPMGPMGPKGIGPYGQPGPK+Oxidation(3)                                                                                 | 1.639835461        |                |           |
| Q00780        | AGPMGMAGPKGPMGPMGPKGIGPYGQPGPK+Oxidation(5)                                                                                 | 1.639835461        |                |           |
| Q00780        | GQYLEMPLPMLPMDLKGEPGPPGKPGPR+Oxidation(5)                                                                                   | 0.756198123        |                |           |
| Q00780        | GQYLEMPLPMLPMDLKGEPGPPGKPGPR+Oxidation(5)                                                                                   | 0.756198123        |                |           |
| <b>Q00P19</b> | <b>HNRL2 Heterogeneous nuclear ribonucleoprotein U-like protein 2</b>                                                       | <b>0.997694057</b> | <b>0.18352</b> | <b>3</b>  |
| Q00P19        | AVEEQGDDQDSEK                                                                                                               | 1.025270833        | 2              | 3.826132  |
| Q00P19        | EEAQPIVTKYK                                                                                                                 | 1.871612936        | 1              | 1.944967  |
| Q00P19        | SGDETPGSEAPGDK                                                                                                              | 0.757770821        | 2              | 2.854772  |
| <b>Q01177</b> | <b>PLMN Plasminogen</b>                                                                                                     | <b>0.854745496</b> | <b>0.35189</b> | <b>3</b>  |
| Q01177        | ILGSDVQQIAVTK                                                                                                               | 0.851135554        | 2              | 3.72667   |
| Q01177        | LVLEPNADIALLK                                                                                                               | 0.871885547        | 2              | 2.585154  |
| Q01177        | STELCAGHLAGGIDSCQGDSSGGLVCFEK                                                                                               | 0.869384807        | 3              | 4.320611  |
| <b>Q01205</b> | <b>ODO2 Dihydrolypoyllysine_residue succinyltransferase component of 2_oxoglutarate dehydrogenase complex_mitochondrial</b> | <b>0.980283601</b> | <b>0.00165</b> | <b>4</b>  |
| Q01205        | ASAFALQEPPVNAVIDDATK                                                                                                        | 0.894513161        | 2              | 6.318629  |
| Q01205        | NDVITVQTPAFAESVTEGDVR                                                                                                       | 0.985816558        | 2              | 5.202766  |
| Q01205        | NVETMNYADIER                                                                                                                | 1.031209904        | 2              | 3.414136  |
| Q01205        | VEGGTPLFTLR                                                                                                                 | 0.826418502        | 2              | 3.219785  |

|               |                                                                                 |                    |                |           |
|---------------|---------------------------------------------------------------------------------|--------------------|----------------|-----------|
| <b>Q01405</b> | <b>SC23A Protein transport protein Sec23A</b>                                   | <b>1.179211274</b> | <b>2.1E-06</b> | <b>4</b>  |
| Q01405        | AETEEGPDVLR                                                                     | 1.07449012         | 2              | 2.906969  |
| Q01405        | AVLNPLCQVDYR                                                                    | 1.048650314        | 2              | 2.731359  |
| Q01405        | HLLQAPVDDAQEILHSR                                                               | 1.24808205         | 3              | 5.625575  |
| Q01405        | YIDTEHGGSQAR                                                                    | 1.601515637        | 2              | 3.281142  |
| <b>Q02253</b> | <b>MMSA Methylmalonate semialdehyde dehydrogenase [acylating]_mitochondrial</b> | <b>0.952252149</b> | <b>9.9E-20</b> | <b>31</b> |
| Q02253        | AEMEAAVAACK                                                                     | 0.733054825        | 2              | 3.806141  |
| Q02253        | AEMEAAVAACK+Oxidation(2)                                                        | 0.665687063        |                |           |
| Q02253        | AFPAPWADTSILSR                                                                  | 0.816377088        | 2              | 4.002167  |
| Q02253        | AISFVGSNQAGEYIFER                                                               | 0.9987883          | 2              | 5.175509  |
| Q02253        | CMALSTAVLVGEAK                                                                  | 0.763853126        | 2              | 4.501402  |
| Q02253        | CMALSTAVLVGEAK+Oxidation(1)                                                     | 0.964181466        |                |           |
| Q02253        | EEDATLSSPAVVMPTMGR                                                              | 0.653144222        | 2              | 4.306534  |
| Q02253        | EEDATLSSPAVVMPTMGR+Oxidation(12)                                                | 0.809591341        |                |           |
| Q02253        | EEDATLSSPAVVMPTMGR+Oxidation(15)                                                | 1.033985384        |                |           |
| Q02253        | EGASILLDGR                                                                      | 0.944980124        | 2              | 2.541578  |
| Q02253        | ENTLNQLVGAAGAAGQR                                                               | 0.874003671        | 2              | 5.499629  |
| Q02253        | GDTNFGYK                                                                        | 0.886389758        | 2              | 2.444874  |
| Q02253        | GLQVVEHACSVTSLMLGETMPSITK                                                       | 0.726790433        | 2              | 5.593545  |
| Q02253        | GYENGNFVGPTIISNVKPSMTCYK                                                        | 0.760766509        | 3              | 3.931876  |
| Q02253        | IVNDNPYNGNTAIFTNGAIAR                                                           | 0.841116858        | 2              | 5.41856   |
| Q02253        | LITLEQ GK                                                                       | 0.894394327        | 2              | 2.815262  |
| Q02253        | LLQDSGAPDGLTNIHGGQHEAVNFICDHPDIK                                                | 1.878738831        | 3              | 4.297335  |
| Q02253        | NHGVVMPDANK                                                                     | 0.866455532        | 1              | 3.367598  |
| Q02253        | NHGVVMPDANK+Oxidation(5)                                                        | 1.475755717        |                |           |
| Q02253        | NHGVVMPDANKENTLNQLVGAAGAAGQR                                                    | 0.64246808         | 3              | 6.170986  |
| Q02253        | NHGVVMPDANKENTLNQLVGAAGAAGQR+Oxidation(5)                                       | 0.750915779        |                |           |
| Q02253        | QGIQFYTLK                                                                       | 1.024237476        | 2              | 2.723757  |
| Q02253        | SDKWIDIHNPATNEVVGR                                                              | 0.742671859        | 2              | 5.280058  |
| Q02253        | TITSQWK                                                                         | 0.852866008        | 2              | 2.52672   |
| Q02253        | TITSQWKEEDATLSSPAVVMPTMGR                                                       | 0.610031079        | 2              | 5.272245  |
| Q02253        | TLADAEGDVFR                                                                     | 0.615594733        | 2              | 3.487832  |
| Q02253        | VCNLIDSGAK                                                                      | 0.8543359          | 2              | 3.481856  |
| Q02253        | VNAGDQPGADLGLIPTPAK                                                             | 0.772490006        | 2              | 5.73663   |
| Q02253        | WIDIHNPATNEVVGR                                                                 | 0.715047036        | 2              | 4.919349  |
| Q02253        | WLPELVER                                                                        | 0.689063039        | 2              | 2.503947  |
| Q02253        | YAHMVDVGVQGVNVPIVPLPMFSFTGSR                                                    | 0.613028921        | 3              | 4.01954   |
| <b>Q02769</b> | <b>FDFT Squalene synthase</b>                                                   | <b>1.01118259</b>  | <b>0.62915</b> | <b>4</b>  |
| Q02769        | KLEDFVKPENVDVAVK                                                                | 0.855122647        | 3              | 4.031358  |
| Q02769        | SFAAVIQALDGDIDR                                                                 | 0.862262078        | 2              | 3.208762  |
| Q02769        | TQSLPNCQLISR                                                                    | 0.742755999        | 2              | 2.720667  |
| Q02769        | VVLEDFPTISLEFR                                                                  | 0.857131464        | 2              | 3.461503  |
| <b>Q02874</b> | <b>H2AY Core histone macro_H2A.1</b>                                            | <b>0.938469177</b> | <b>0.00115</b> | <b>3</b>  |
| Q02874        | AASADSTTEGAPTDGFTVLSTK                                                          | 1.812971407        | 2              | 4.435774  |
| Q02874        | GVTIASGGVLPNIHPELLAK                                                            | 0.824590296        | 2              | 4.139748  |
| Q02874        | NGPLEVAGAAVSAGHGLPAK                                                            | 0.722418799        | 2              | 3.318297  |
| <b>Q02974</b> | <b>KHK Ketoexokinase</b>                                                        | <b>1.27726215</b>  | <b>0.99938</b> | <b>9</b>  |
| Q02974        | FGCQVAGK                                                                        | 2.947047697        | 2              | 2.540273  |
| Q02974        | GATLICAWAEEGADALPGDQLLHSDAFPPPR                                                 | 0.968198779        | 3              | 5.735806  |
| Q02974        | GGNASNSTVLSLLGAR                                                                | 1.059719464        | 2              | 4.686769  |
| Q02974        | GNSMQEALR                                                                       | 0.905492858        | 2              | 3.038121  |
| Q02974        | GVDVSQVAWQSQGDTPCSCCIVNNSNGSR                                                   | 0.909614552        | 3              | 5.765394  |
| Q02974        | IEQYNATQPLQK                                                                    | 1.223089552        | 2              | 4.874523  |
| Q02974        | RGVDVSQVAWQSQGDTPCSCCIVNNSNGSR                                                  | 1.125009263        | 3              | 5.239995  |
| Q02974        | TIILYDTNLPDVSAK                                                                 | 0.924392596        | 2              | 5.020726  |

|               |                                                        |                    |                |           |
|---------------|--------------------------------------------------------|--------------------|----------------|-----------|
| Q02974        | VSVEIEKPR                                              | 1.091051186        | 2              | 2.374932  |
| <b>Q03248</b> | <b>BUP1 Beta_ureidopropionase</b>                      | <b>1.129449093</b> | <b>9.9E-20</b> | <b>12</b> |
| Q03248        | AHHDLGIFYGSSYVAAPDGSR                                  | 1.411836338        | 2              | 6.272588  |
| Q03248        | EKLPWTEFAESAEDGLTTR                                    | 1.024602686        | 3              | 4.716307  |
| Q03248        | ELAEAVKPNYSPIVVK                                       | 1.151905527        | 2              | 4.28682   |
| Q03248        | HNMMVVISPIER                                           | 0.592467208        | 2              | 2.940649  |
| Q03248        | HNMMVVISPIER+Oxidation(2)                              | 1.248615747        |                |           |
| Q03248        | IPLPTSAPVAEQVSALHK                                     | 1.791592665        | 3              | 4.797505  |
| Q03248        | KHNMMVVISPIER                                          | 0.894031679        | 2              | 2.932451  |
| Q03248        | KHNMMVVISPIER+Oxidation(3)                             | 0.931902717        |                |           |
| Q03248        | NAAIANHCFTCALNR                                        | 1.122944677        | 2              | 4.462059  |
| Q03248        | VGDFNESTYYMEGNLGHVPFQTQFGR                             | 1.467495537        | 3              | 5.643678  |
| Q03248        | VGQEHYPNEFTSGDGK                                       | 1.195682306        | 2              | 4.244584  |
| Q03248        | VGQEHYPNEFTSGDGKK                                      | 1.056597767        | 3              | 4.940723  |
| <b>Q03336</b> | <b>RGN Regucalcin</b>                                  | <b>0.685621179</b> | <b>9.9E-20</b> | <b>16</b> |
| Q03336        | CGESPVWEEASK                                           | 0.781766096        | 2              | 4.676763  |
| Q03336        | CLLFVDIPSK                                             | 1.000344163        | 2              | 3.32637   |
| Q03336        | DEQIPDGMCIDVEGK                                        | 0.776387865        | 2              | 4.613037  |
| Q03336        | DYSEMYVTCAR                                            | 1.328657162        | 2              | 2.767431  |
| Q03336        | FNDGKVPDAGR                                            | 0.785048965        | 2              | 2.721576  |
| Q03336        | HQGSLSLFPDHSVK                                         | 1.323936865        | 2              | 4.72393   |
| Q03336        | KYFDQVDISNGLDWSLDHK                                    | 0.861715846        | 3              | 5.688782  |
| Q03336        | LWVACYNGGR                                             | 0.968219025        | 2              | 2.983313  |
| Q03336        | MEKDEQIPDGMCIDVEGK                                     | 0.71130221         | 2              | 5.107283  |
| Q03336        | MEKDEQIPDGMCIDVEGK+Oxidation(0)                        | 0.813249678        |                |           |
| Q03336        | MEKDEQIPDGMCIDVEGK+Oxidation(10)                       | 0.818307193        |                |           |
| Q03336        | QSGGYVATIGTK                                           | 0.887094786        | 2              | 2.891176  |
| Q03336        | VGVDAPVSSVALR                                          | 0.85239572         | 2              | 3.795334  |
| Q03336        | YFAGTMAEETAPAVLER                                      | 0.815498516        | 2              | 5.590406  |
| Q03336        | YFAGTMAEETAPAVLER+Oxidation(5)                         | 0.900051854        |                |           |
| Q03336        | YFDQVDISNGLDWSLDHK                                     | 0.717884671        | 3              | 4.381349  |
| <b>Q03410</b> | <b>SYCP1 Synaptonemal complex protein 1</b>            | <b>0.792274493</b> | <b>0.08435</b> | <b>2</b>  |
| Q03410        | ISEEKLLGEVEK                                           | 1.000875638        | 2              | 2.306461  |
| Q03410        | MEQENTAILTDKK+Oxidation(0)                             | 0.770774987        |                |           |
| <b>Q03626</b> | <b>MUG1 Murinoglobulin_1</b>                           | <b>0.814699172</b> | <b>1.1E-05</b> | <b>6</b>  |
| Q03626        | EESCIHSSCTAER                                          | 0.976562428        | 2              | 3.901366  |
| Q03626        | GGEFEMMPLGVNK                                          | 0.616706401        | 2              | 3.138592  |
| Q03626        | LTAQPAPSPEDLALSMGTIK                                   | 0.638427827        | 3              | 4.647064  |
| Q03626        | NLHPLNELFLAYIEDPK                                      | 1.206091788        | 3              | 4.434322  |
| Q03626        | VQTVPLTCNNPK                                           | 0.656956565        | 2              | 2.902613  |
| Q03626        | VYHKEESSCIHSSCTAER                                     | 0.971604366        | 3              | 4.376818  |
| <b>Q04462</b> | <b>SYVC Valyl_tRNA synthetase</b>                      | <b>1.1375738</b>   | <b>0.74893</b> | <b>6</b>  |
| Q04462        | ADFPAGIPECGTDALR                                       | 1.164239067        | 2              | 2.420991  |
| Q04462        | ALNPLEEWR                                              | 1.011416563        | 2              | 2.541792  |
| Q04462        | ITPAHDQNDYEVGQR                                        | 1.162472897        | 2              | 3.35845   |
| Q04462        | LQQTAEELR                                              | 1.393136369        | 2              | 2.360418  |
| Q04462        | SVTQQPGSEITAPQK                                        | 0.898521227        | 2              | 3.157324  |
| Q04462        | VQGSDESDEEVVATTR                                       | 0.870789329        | 2              | 3.938783  |
| <b>Q05096</b> | <b>MYO1B Myosin_1b</b>                                 | <b>1.175127447</b> | <b>4.1E-05</b> | <b>2</b>  |
| Q05096        | LEDLATLIQK                                             | 0.677725717        |                |           |
| Q05096        | NAMQIVGFSDPEAESVLEVVAVLK                               | 1.177144009        |                |           |
| <b>Q05144</b> | <b>RAC2 Ras_related C3 botulinum toxin substrate 2</b> | <b>1.054429286</b> | <b>0.71938</b> | <b>2</b>  |
| Q05144        | MQAICVVVGDAVGK+Oxidation(0)                            | 0.851262294        |                |           |
| Q05144        | YLECSALTQR                                             | 1.068859041        | 2              | 2.977731  |
| <b>Q06647</b> | <b>ATPO ATP synthase subunit O_mitochondrial</b>       | <b>0.799360009</b> | <b>0.44324</b> | <b>9</b>  |
| Q06647        | FSPLTANLMNLLAENGR                                      | 1.038627052        | 3              | 4.128219  |



|               |                                                          |                    |                |           |
|---------------|----------------------------------------------------------|--------------------|----------------|-----------|
| Q06647        | GEVPCTVTTAFPLDEAVLSELK                                   | 0.882204516        | 3              | 5.819669  |
| Q06647        | GQILNLEVK                                                | 1.056416822        | 2              | 2.480382  |
| Q06647        | LGNTQGVISAFSTIMSVHR                                      | 0.892290227        | 3              | 3.331209  |
| Q06647        | LVRPPVQVYVYIEGR                                          | 2.621386758        | 3              | 3.537324  |
| Q06647        | TDPSIMGGMIVR                                             | 0.775294355        | 2              | 3.22957   |
| Q06647        | TVLNSFLSK                                                | 0.831319713        | 2              | 3.019607  |
| Q06647        | VSLAVLNPIYK                                              | 1.187413965        | 2              | 3.061923  |
| Q06647        | YATALYSAASK                                              | 7.519198722        | 2              | 3.433251  |
| <b>Q07071</b> | <b>GCKR Glucokinase regulatory protein</b>               | <b>1.16465667</b>  | <b>0.21442</b> | <b>14</b> |
| Q07071        | AAPISCHVQVAHEK                                           | 1.092193814        | 2              | 4.917322  |
| Q07071        | CLLEILR                                                  | 1.143302087        | 2              | 2.620968  |
| Q07071        | GFLIGDHSDMFNQK                                           | 1.31542113         | 2              | 3.540482  |
| Q07071        | GLGQKPLYTYLIAGGDR                                        | 3.127000023        | 2              | 3.116616  |
| Q07071        | LLGQCDAEIFQEEGQIVPTYQR                                   | 1.891864135        | 2              | 5.07553   |
| Q07071        | LYSESVLTTMLQVAGK                                         | 1.054534989        | 2              | 2.609931  |
| Q07071        | NDPIEDWR                                                 | 0.920568572        | 1              | 1.903314  |
| Q07071        | QEAFLNPAIGPEGLSGSSR                                      | 0.423948238        | 2              | 3.052136  |
| Q07071        | STQALEDPACGTLN                                           | 1.253549126        | 2              | 2.404625  |
| Q07071        | TVDQGVVSSQR                                              | 1.078127182        | 2              | 3.528949  |
| Q07071        | VIPTALLSLLR                                              | 1.169761565        | 2              | 3.557179  |
| Q07071        | VQEVLPKPDGGLVVLGGTSGR                                    | 1.202109712        | 2              | 5.32788   |
| Q07071        | WVLNTVSTGAHVLLGK                                         | 0.65024989         | 2              | 2.746226  |
| Q07071        | YQHVIETPEPGEWELSGYEAAPITEK                               | 1.249755596        | 3              | 5.562906  |
| <b>Q07116</b> | <b>SUOX Sulfite oxidase_ mitochondrial</b>               | <b>0.731736883</b> | <b>0.02153</b> | <b>7</b>  |
| Q07116        | AVDDSYNVQPDTVAPIWNLR                                     | 0.721732391        | 2              | 4.616793  |
| Q07116        | FVDLHPGGQSK                                              | 0.729677186        | 2              | 2.438539  |
| Q07116        | LCDVLAQAGHR                                              | 0.626211765        | 2              | 2.992418  |
| Q07116        | MSPPLEASDPYSNDPMR                                        | 0.691506421        | 2              | 2.676604  |
| Q07116        | NHLPVPNLDPDTYR                                           | 0.68091377         | 2              | 2.479079  |
| Q07116        | VSVSEESYSHWQR                                            | 0.926348419        | 2              | 3.742706  |
| Q07116        | VVVPGVVGAR                                               | 0.489538361        | 2              | 2.441212  |
| <b>Q07523</b> | <b>HAOX2 Hydroxyacid oxidase 2</b>                       | <b>0.680677516</b> | <b>9.9E-20</b> | <b>10</b> |
| Q07523        | ALKEEKPTQSVVSPFK                                         | 0.514258877        | 3              | 4.584561  |
| Q07523        | ALVITIDTPVLGNR                                           | 0.568627262        | 2              | 4.477938  |
| Q07523        | ASFQWNDLSLLQSITR                                         | 0.857050272        | 2              | 4.09175   |
| Q07523        | EKPPTQSVVSPFK                                            | 0.742888809        | 2              | 2.963409  |
| Q07523        | EVLDTLAEHR                                               | 0.639474335        | 2              | 3.241111  |
| Q07523        | GEDGVKEVDILTAELHR                                        | 0.664679601        | 3              | 5.187481  |
| Q07523        | HNVQGIVVSNHGGR                                           | 0.573260362        | 3              | 6.118731  |
| Q07523        | NQLNLEANILK                                              | 0.560426561        | 2              | 3.470214  |
| Q07523        | QLDEVASIDALR                                             | 0.515527739        | 2              | 3.07338   |
| Q07523        | TTIQGQEISAPICISPTAFHSIAWPDGEK                            | 1.339471628        | 3              | 4.638498  |
| <b>Q07803</b> | <b>EFGM Elongation factor G_ mitochondrial</b>           | <b>1.183853614</b> | <b>0.51359</b> | <b>3</b>  |
| Q07803        | GIIDLIEER                                                | 1.43046424         | 2              | 2.701093  |
| Q07803        | LEFSDETFGANVPK                                           | 1.031227988        | 2              | 3.698801  |
| Q07803        | YQPCSPSTQEELVNK                                          | 1.278839149        | 2              | 3.262235  |
| <b>Q07936</b> | <b>ANXA2 Annexin A2</b>                                  | <b>0.872080118</b> | <b>0.28665</b> | <b>2</b>  |
| Q07936        | GLGTDEDSLIEICSR                                          | 0.81218006         | 2              | 3.027557  |
| Q07936        | GVDEVTVNLTNR                                             | 0.871465394        | 2              | 4.110605  |
| <b>Q07984</b> | <b>SSRD Translocon_ associated protein subunit delta</b> | <b>1.065054194</b> | <b>0.26197</b> | <b>3</b>  |
| Q07984        | FFDEESYLLR                                               | 1.197938297        | 2              | 3.539228  |
| Q07984        | NNEDVSIIPPLFTVSDHR                                       | 0.993002902        | 3              | 3.918537  |
| Q07984        | VQNMALYADVSGK                                            | 1.320700672        | 2              | 3.255476  |
| <b>Q08163</b> | <b>CAP1 Adenylyl cyclase_ associated protein 1</b>       | <b>0.921403572</b> | <b>0.10846</b> | <b>8</b>  |
| Q08163        | ALLVTASQCQPAGNK                                          | 0.789165616        | 2              | 4.680972  |
| Q08163        | GAVPVVQAFDSLLANPVAEYK                                    | 1.221939991        | 3              | 3.773344  |

|                |                                                                  |                    |                |           |
|----------------|------------------------------------------------------------------|--------------------|----------------|-----------|
| Q08163         | LEAVSHTSDMHCGYGDSPSK                                             | 1.030183084        | 3              | 4.858672  |
| Q08163         | LSDLLAPISEIQIEVITFR                                              | 1.08368824         | 2              | 3.428841  |
| Q08163         | NSLDCEIVSAK                                                      | 0.974081717        | 2              | 3.08192   |
| Q08163         | SALFAQINQGESITHALK                                               | 0.690305435        | 2              | 3.81525   |
| Q08163         | SSEMNVLIPTEGGDFNEFPVPEQFK                                        | 0.867071702        | 2              | 3.668366  |
| Q08163         | VENQENSVNLVIDDELTK                                               | 0.838481431        | 2              | 4.824555  |
| <b>Q08415</b>  | <b>KAT1 Kynurenine_oxoglutarate transaminase 1_mitochondrial</b> | <b>0.979645867</b> | <b>0.94744</b> | <b>4</b>  |
| Q08415         | EQQHFGQPSSYFLQLPQAMELNR                                          | 1.086263535        | 3              | 4.904198  |
| Q08415         | ILVLNTPNPNLQK                                                    | 1.024931695        | 2              | 3.055063  |
| Q08415         | LGASNDWQLDPAELASK                                                | 0.644659342        | 2              | 3.342516  |
| Q08415         | RLDGIDQNLWVEFGK                                                  | 0.870305099        | 2              | 2.932952  |
| <b>Q09073</b>  | <b>ADT2 ADP/ATP translocase 2</b>                                | <b>1.274355461</b> | <b>0.55938</b> | <b>7</b>  |
| Q09073         | DFLAGGVAAAIK                                                     | 1.329200577        | 2              | 4.769534  |
| Q09073         | EQGVLSFWR                                                        | 2.007652125        | 1              | 1.908197  |
| Q09073         | GLGDCLVK                                                         | 0.968366724        | 2              | 2.582445  |
| Q09073         | GTDIMYTGTLDCWR                                                   | 1.247802074        | 2              | 3.633347  |
| Q09073         | KGTDIMYTGTLDCWR                                                  | 0.907324517        | 2              | 3.369285  |
| Q09073         | LLLQVQHASK                                                       | 0.788022013        | 2              | 2.74865   |
| Q09073         | QIFLGGVDK                                                        | 0.871424259        | 2              | 2.682165  |
| <b>Q0D2L3</b>  | <b>SPEB Agmatinase_mitochondrial</b>                             | <b>0.887795382</b> | <b>0.43545</b> | <b>6</b>  |
| Q0D2L3         | EESLMLGTVNPSTGALPFQSLR                                           | 0.528724875        | 2              | 3.742505  |
| Q0D2L3         | EHGPVGLVHVGHAHSNTSDKPLEDK                                        | 0.880124821        | 3              | 3.645275  |
| Q0D2L3         | IREESLMLGTVNPSTGALPFQSLR                                         | 0.995939042        | 3              | 4.635373  |
| Q0D2L3         | SVDEGLLDSK                                                       | 1.062505178        | 2              | 2.982182  |
| Q0D2L3         | SVDEGLLDSKR                                                      | 0.808486324        | 2              | 2.664193  |
| Q0D2L3         | VADLGNVNVNLYNLQDSCR                                              | 1.220127512        | 2              | 5.410556  |
| <b>Q0VAV2</b>  | <b>EXPH5 Exophilin_5</b>                                         | <b>0.710735658</b> | <b>0.4987</b>  | <b>2</b>  |
| Q0VAV2         | DMDVSVSKDEQLNK+Oxidation(1)                                      | 0.617334992        |                |           |
| Q0VAV2         | GMAKNDPMELQTPR+Oxidation(1)                                      | 0.48922017         |                |           |
| <b>Q0VVGK3</b> | <b>GLCK Glycerate kinase</b>                                     | <b>1.027774356</b> | <b>1.1E-16</b> | <b>3</b>  |
| Q0VVGK3        | AVLGMAAADELQHLVQGVISVPK                                          | 0.62383969         | 3              | 5.882719  |
| Q0VVGK3        | GATIQELNTR                                                       | 0.829378311        | 2              | 2.921111  |
| Q0VVGK3        | QLFDSAVGAVQPGPMLQR                                               | 1.033053971        | 2              | 3.81942   |
| <b>Q0ZHH6</b>  | <b>ATLA3 Atlantin_3</b>                                          | <b>1.178274896</b> | <b>0.92036</b> | <b>4</b>  |
| Q0ZHH6         | EHGHSNWLGDPEEPLTGFSWR                                            | 1.003135283        | 3              | 4.070914  |
| Q0ZHH6         | GGSDPETTGIIQWSEVFTVK                                             | 0.988801465        | 2              | 4.557232  |
| Q0ZHH6         | LAMDEIFQKPFQTLMFLVR+Oxidation(2)                                 | 1.252579236        |                |           |
| Q0ZHH6         | YQEELEEEITELYENFCK                                               | 1.148543888        | 2              | 4.759522  |
| <b>Q10758</b>  | <b>K2C8 Keratin_type II cytoskeletal 8</b>                       | <b>0.941278007</b> | <b>9.9E-20</b> | <b>25</b> |
| Q10758         | AEAETMYQIK                                                       | 0.929599542        | 2              | 3.403797  |
| Q10758         | AQYEEIANR                                                        | 0.846723893        | 2              | 3.051852  |
| Q10758         | ATLEAAIADAEQR                                                    | 0.737808209        | 2              | 4.638978  |
| Q10758         | ELQSQISDTSVVLMSMNSR                                              | 1.030962499        | 2              | 5.746842  |
| Q10758         | GSLGGFGGAGVGGITAVTVNQSLNPLK                                      | 0.788047529        | 2              | 4.486948  |
| Q10758         | LEGLTDEINFLR                                                     | 0.720379105        | 2              | 4.255579  |
| Q10758         | LESGMQNMSIHTK                                                    | 0.652453581        | 2              | 3.778391  |
| Q10758         | LEVDPNIQAVR                                                      | 0.843344513        | 2              | 3.735526  |
| Q10758         | LEVELGNMQGLVEDFK                                                 | 0.785888618        | 2              | 5.06192   |
| Q10758         | LKLEVELGNMQGLVEDFK                                               | 0.965893452        | 3              | 4.004301  |
| Q10758         | LQAEIDALK                                                        | 0.859551438        | 2              | 2.746445  |
| Q10758         | LVSESSDIMSK                                                      | 0.729056489        | 2              | 3.012508  |
| Q10758         | QHHEEIR                                                          | 0.845347444        | 1              | 2.329552  |
| Q10758         | QLEALGQEK                                                        | 0.725764283        | 1              | 2.260305  |
| Q10758         | RQLEALGQEK                                                       | 1.019443963        | 2              | 2.326897  |
| Q10758         | SKTEISEMNR                                                       | 0.790777864        | 3              | 3.435024  |
| Q10758         | SKTEISEMNR+Oxidation(7)                                          | 1.295014262        |                |           |

|               |                                                                            |                    |                |           |
|---------------|----------------------------------------------------------------------------|--------------------|----------------|-----------|
| Q10758        | SLDMDSIIAEVR                                                               | 0.710701407        | 2              | 4.583012  |
| Q10758        | SNMDNMFESYINNL                                                             | 1.335645506        | 2              | 4.085135  |
| Q10758        | SRAEAETMYQIK                                                               | 0.790996618        | 2              | 3.519465  |
| Q10758        | TEISEMNR                                                                   | 0.858309385        | 2              | 2.487784  |
| Q10758        | TEMENEFVLK                                                                 | 0.782321002        | 2              | 3.333536  |
| Q10758        | TEMENEFVLK+Oxidation(2)                                                    | 0.909468882        |                |           |
| Q10758        | WLLQQQK                                                                    | 0.968119232        | 2              | 2.915474  |
| Q10758        | YEELQTLGK                                                                  | 0.818878197        | 2              | 3.700737  |
| <b>Q148W0</b> | <b>AT8B1 Probable phospholipid_transporting ATPase IC</b>                  | <b>0.782069313</b> | <b>0.00544</b> | <b>2</b>  |
| Q148W0        | FMAASVASSNRDEALDK+Oxidation(1)                                             | 0.77554423         |                |           |
| Q148W0        | TCEVIKDRFK                                                                 | 0.782210252        | 1              | 2.209782  |
| <b>Q14DH7</b> | <b>ACSS3 Acyl_CoA synthetase short_chain family member 3_mitochondrial</b> | <b>0.910846529</b> | <b>0.01648</b> | <b>6</b>  |
| Q14DH7        | IAIYDSPVTDK                                                                | 1.028164434        | 2              | 2.43253   |
| Q14DH7        | STLSALVNGKPYK                                                              | 0.889302279        | 2              | 2.816439  |
| Q14DH7        | THFAASVADPER                                                               | 0.930082157        | 2              | 3.603552  |
| Q14DH7        | VDDVINVAGHR                                                                | 0.785990757        | 2              | 3.394854  |
| Q14DH7        | VLAEHGVAALFTAPTAIR                                                         | 0.73974241         | 2              | 3.773319  |
| Q14DH7        | VTPTIEDPSIFGHIEVLK                                                         | 0.810667026        | 2              | 3.405083  |
| <b>Q1HCL7</b> | <b>NAKD1 NAD kinase domain_containing protein 1</b>                        | <b>0.824452357</b> | <b>2.9E-14</b> | <b>12</b> |
| Q1HCL7        | ALNEVFIGESLSSR                                                             | 0.669526572        | 2              | 3.101025  |
| Q1HCL7        | ASYEISVDDGPWEK                                                             | 0.849784499        | 2              | 3.25054   |
| Q1HCL7        | LKPVIGVNTDPER                                                              | 0.786174849        | 3              | 3.598658  |
| Q1HCL7        | LYLEGTGINPSPVDLHEQQLSLNQHSR                                                | 0.725916032        | 3              | 5.227853  |
| Q1HCL7        | NVEHIIDSLRDEGIEVR                                                          | 0.637036347        | 2              | 3.463174  |
| Q1HCL7        | QGNLTPLNK                                                                  | 0.638332977        | 2              | 3.024254  |
| Q1HCL7        | SEASGPQLLPVR                                                               | 0.900947736        | 2              | 3.419453  |
| Q1HCL7        | SEGLCLPVR                                                                  | 0.738855932        | 2              | 2.345104  |
| Q1HCL7        | SSGLNLCTGTGSK                                                              | 0.714197435        | 2              | 3.592942  |
| Q1HCL7        | VTNEYNESLLYSPEEPK                                                          | 1.038940646        | 2              | 4.44559   |
| Q1HCL7        | YEFEQQR                                                                    | 0.975348657        | 2              | 2.535376  |
| Q1HCL7        | YTHSFPEALQK                                                                | 0.697581318        | 2              | 2.662583  |
| <b>Q1JU68</b> | <b>EIF3A Eukaryotic translation initiation factor 3 subunit A</b>          | <b>1.039448007</b> | <b>0.00059</b> | <b>5</b>  |
| Q1JU68        | EQPEKEPELQYVPLQNNILR                                                       | 1.484211237        | 3              | 3.472024  |
| Q1JU68        | FNVLQYVPEVK                                                                | 1.249064776        | 2              | 3.160152  |
| Q1JU68        | ILQEHEQIK                                                                  | 0.908089307        | 2              | 2.671459  |
| Q1JU68        | KGPEADSEWR                                                                 | 0.816340511        | 2              | 2.563402  |
| Q1JU68        | LLDMDGIIVEK                                                                | 0.850777598        | 2              | 2.905599  |
| <b>Q29RW1</b> | <b>MYH4 Myosin_4</b>                                                       | <b>0.823668075</b> | <b>0.70987</b> | <b>15</b> |
| Q29RW1        | AGLLGTLEEMRDEK                                                             | 0.921767167        | 2              | 2.416799  |
| Q29RW1        | ELENEVENEQK                                                                | 0.570960727        | 2              | 2.420846  |
| Q29RW1        | ELENEVENEQKR                                                               | 0.476271392        | 2              | 2.990504  |
| Q29RW1        | LINELSAQK                                                                  | 0.711274266        | 2              | 2.789417  |
| Q29RW1        | LQDAEEHVEAVNSK                                                             | 0.879390375        | 2              | 4.478714  |
| Q29RW1        | LQDLVDKLQTK                                                                | 0.785816379        | 1              | 2.103887  |
| Q29RW1        | MEGDLNEMEIQLNHANR                                                          | 0.664333959        | 2              | 4.315431  |
| Q29RW1        | MEIDDLASNMETVSK                                                            | 0.817199519        | 2              | 4.295159  |
| Q29RW1        | NAYEESLDQLETLK                                                             | 0.431473841        | 2              | 4.811811  |
| Q29RW1        | NAYEESLDQLETLKR                                                            | 0.930082358        | 2              | 3.791671  |
| Q29RW1        | QKYEETQAELEASQK                                                            | 1.29383619         | 2              | 3.587818  |
| Q29RW1        | SELQASLEEAASLEHEEGK                                                        | 0.82648331         | 2              | 4.69357   |
| Q29RW1        | SNAACAALDK                                                                 | 0.741374496        | 2              | 2.313639  |
| Q29RW1        | TLEDQLSEVK                                                                 | 0.692691768        | 2              | 2.460041  |
| Q29RW1        | VAEQELLDASER                                                               | 0.766852965        | 2              | 2.686498  |
| <b>Q2EMV9</b> | <b>PAR14 Poly [ADP_ribose] polymerase 14</b>                               | <b>0.954824607</b> | <b>0.9859</b>  | <b>2</b>  |

|               |                                                                            |                    |                |          |
|---------------|----------------------------------------------------------------------------|--------------------|----------------|----------|
| Q2EMV9        | LQEELTR                                                                    | 0.953402333        | 1              | 2.000205 |
| Q2EMV9        | VLVEFEKESLNIAGK                                                            | 0.969136229        | 2              | 2.446773 |
| <b>Q2TA68</b> | <b>OPA1 Dynamin_like 120 kDa protein_mitochondrial</b>                     | <b>0.720900684</b> | <b>0.37357</b> | <b>2</b> |
| Q2TA68        | TSVLEMIAQAR                                                                | 0.705499367        | 2              | 3.265171 |
| Q2TA68        | VIQHNALEDR                                                                 | 0.837336298        | 2              | 2.341963 |
| <b>Q2V057</b> | <b>PROD2 Probable proline dehydrogenase 2</b>                              | <b>0.839437834</b> | <b>0.07296</b> | <b>7</b> |
| Q2V057        | EDCTQPDYEATSR                                                              | 0.831848915        | 2              | 3.782402 |
| Q2V057        | GCVQQLQAIGLQPLLA VPTEEEPDSA AK                                             | 1.008964036        | 2              | 4.489268 |
| Q2V057        | NLQLSCLSTEQNQH LQASLSR                                                     | 0.738043167        | 2              | 5.577103 |
| Q2V057        | REQALLSQELWR                                                               | 0.968043873        | 2              | 3.060992 |
| Q2V057        | SIPYGCLEEVIPYLIR                                                           | 1.666813378        | 2              | 3.612137 |
| Q2V057        | SVTQLHGKEDCTQPDYEATSR                                                      | 0.643782727        | 3              | 3.729579 |
| Q2V057        | TSEAWYEGNLSAMLHCV DLSR                                                     | 0.951981322        | 2              | 2.737828 |
| <b>Q32Q06</b> | <b>AP1M1 AP_1 complex subunit mu_1</b>                                     | <b>0.866742051</b> | <b>0.54429</b> | <b>2</b> |
| Q32Q06        | HNNLYLVATSK                                                                | 1.073561453        | 2              | 2.411808 |
| Q32Q06        | MRVFLSGMPELR+Oxidation(0)                                                  | 0.803865811        |                |          |
| <b>Q3B7D0</b> | <b>HEM6 Coproporphyrinogen_III oxidase_mitochondrial</b>                   | <b>0.854388393</b> | <b>0.24289</b> | <b>4</b> |
| Q3B7D0        | AGVNI SVVHGNLSEEA NQMR                                                     | 0.774631834        | 3              | 4.691477 |
| Q3B7D0        | HCDDSYTPQDK                                                                | 1.027952894        | 2              | 3.089515 |
| Q3B7D0        | LEEDGDELAR                                                                 | 0.915653617        | 2              | 2.499826 |
| Q3B7D0        | TCAEAVVPSYVPIVK                                                            | 0.949930701        | 2              | 3.190239 |
| <b>Q3B7U9</b> | <b>FKBP8 Peptidyl_prolyl cis_trans isomerase FKBP8</b>                     | <b>0.852554628</b> | <b>1.1E-15</b> | <b>4</b> |
| Q3B7U9        | SCSQVLEHQPDNIK                                                             | 0.664848902        | 2              | 4.108989 |
| Q3B7U9        | TAEDGPDLEMLSGQER                                                           | 1.226491093        | 2              | 3.801841 |
| Q3B7U9        | VDMTCEEEEE LQLK                                                            | 0.837617564        | 2              | 4.211577 |
| Q3B7U9        | VLAQQGEYSEAIPLR                                                            | 0.617588609        | 2              | 3.131577 |
| <b>Q3KRD8</b> | <b>IF6 Eukaryotic translation initiation factor 6</b>                      | <b>0.898864544</b> | <b>0.97925</b> | <b>3</b> |
| Q3KRD8        | ASFENNCEVGCF AK                                                            | 1.151285047        | 2              | 2.843504 |
| Q3KRD8        | HGLLVPNNTTDQELQH IR                                                        | 0.868125147        | 3              | 4.840389 |
| Q3KRD8        | TSIEDQDELSSLLQVPLVAGTVNR                                                   | 0.882935725        | 2              | 3.827856 |
| <b>Q3KRE0</b> | <b>ATAD3 ATPase family AAA domain_containing protein 3</b>                 | <b>1.059109225</b> | <b>0.37985</b> | <b>2</b> |
| Q3KRE0        | GEGTGPPLPPAQP GAESGGDR                                                     | 0.744199773        | 2              | 3.244584 |
| Q3KRE0        | ISVLEALR                                                                   | 0.629983214        | 2              | 2.364279 |
| <b>Q3KRE8</b> | <b>TBB2B Tubulin beta_2B chain</b>                                         | <b>0.972560556</b> | <b>0.65279</b> | <b>2</b> |
| Q3KRE8        | ALTVP ELTQQMFDSK                                                           | 1.154707157        | 2              | 3.316341 |
| Q3KRE8        | ESESCDCLQGFQLTHSLGGGTGSGMGTLLISK                                           | 0.875395578        | 3              | 4.180816 |
| <b>Q3MIB4</b> | <b>LONP2 Lon protease homolog 2_peroxisomal</b>                            | <b>0.700492339</b> | <b>0.00053</b> | <b>2</b> |
| Q3MIB4        | MEIIQVPGYTQEEK                                                             | 0.438828428        | 2              | 3.596625 |
| Q3MIB4        | TVGVNPNVFLLEVDK                                                            | 0.755918111        | 2              | 3.608235 |
| <b>Q3MIE0</b> | <b>ECHD3 Enoyl_CoA hydratase domain_containing protein 3_mitochondrial</b> | <b>0.829248914</b> | <b>4.3E-08</b> | <b>7</b> |
| Q3MIE0        | DGQEGIEAFIQK                                                               | 0.959652222        | 2              | 3.310794 |
| Q3MIE0        | KVALEMLFTGEPISAQEALR                                                       | 1.559300294        | 3              | 3.504132 |
| Q3MIE0        | SDILHEAESEDLK                                                              | 0.837240543        | 3              | 3.739595 |
| Q3MIE0        | SSFATPGVNVGLFCSTPAVALGR                                                    | 1.065315181        | 2              | 4.646878 |
| Q3MIE0        | VALEMLFTGEPISAQEALR                                                        | 0.953324515        | 2              | 3.375892 |
| Q3MIE0        | VIIISAEGPVFSSGHDLK                                                         | 0.776254723        | 2              | 4.28749  |
| Q3MIE0        | VVPEEQLEEEATR                                                              | 0.734754655        | 2              | 4.144634 |
| <b>Q3MIF4</b> | <b>XYLB Xylulose kinase</b>                                                | <b>0.89659002</b>  | <b>0.07009</b> | <b>7</b> |
| Q3MIF4        | AFHGLAGGTGVAFSEVVK                                                         | 1.207059514        | 2              | 2.323471 |
| Q3MIF4        | CCLGWDFSTQQVK                                                              | 0.897622443        | 2              | 2.942708 |
| Q3MIF4        | FNADNMEVSAFPGDVEIR                                                         | 0.807012683        | 2              | 4.04073  |
| Q3MIF4        | IRDESASCSWNK                                                               | 0.820261556        | 2              | 4.094701 |
| Q3MIF4        | SAPQP SLAATPNPGASQVYAALLPR                                                 | 1.419876353        | 2              | 4.378472 |

|               |                                                                            |                    |                |           |
|---------------|----------------------------------------------------------------------------|--------------------|----------------|-----------|
| Q3MIF4        | VVAFTGDNPASLAGMR                                                           | 0.904466209        | 2              | 3.668159  |
| Q3MIF4        | YSPIDYSDGSGMNLQIQEK                                                        | 0.893591551        | 2              | 5.297771  |
| <b>Q3T1J1</b> | <b>IF5A1 Eukaryotic translation initiation factor 5A_1</b>                 | <b>0.931555199</b> | <b>0.21933</b> | <b>4</b>  |
| Q3T1J1        | EDLRLPEGDLGK                                                               | 0.59787663         | 2              | 2.813557  |
| Q3T1J1        | EDLRLPEGDLGKEIEQK                                                          | 0.878221312        | 3              | 4.747553  |
| Q3T1J1        | NDFQLIGIQDGYLSLLQDSGQEV                                                    | 1.159509066        | 3              | 5.738932  |
| Q3T1J1        | RNDFQLIGIQDGYLSLLQDSGQEV                                                   | 1.148839003        | 3              | 3.76142   |
| <b>Q3T1K5</b> | <b>CAZA2 F_actin_capping protein subunit alpha_2</b>                       | <b>0.870816573</b> | <b>0.43524</b> | <b>3</b>  |
| Q3T1K5        | FIIHAPPGEFNEVFNDVR                                                         | 0.897330149        | 3              | 4.580015  |
| Q3T1K5        | FTVTPSTTQVVGILK                                                            | 0.773373876        | 2              | 3.706344  |
| Q3T1K5        | LLNNDNLLR                                                                  | 1.259496201        | 2              | 2.40651   |
| <b>Q3T1L0</b> | <b>A16A1 Aldehyde dehydrogenase family 16 member A1</b>                    | <b>1.291699365</b> | <b>1.4E-09</b> | <b>2</b>  |
| Q3T1L0        | HGAAPTVAETEVELSVR                                                          | 0.839913248        | 2              | 2.398283  |
| Q3T1L0        | VQDQGQTLQVTGLR                                                             | 1.306052907        | 2              | 4.167922  |
| <b>Q3TLP5</b> | <b>ECHD2 Enoyl_CoA hydratase domain_containing protein 2_mitochondrial</b> | <b>0.829597161</b> | <b>0.00344</b> | <b>2</b>  |
| Q3TLP5        | ALALAQEILPQAPIAVR                                                          | 0.678909362        |                |           |
| Q3TLP5        | NALGNVVFVSELLEALAQLR                                                       | 0.93487253         |                |           |
| <b>Q3U2P1</b> | <b>SC24A Protein transport protein Sec24A</b>                              | <b>0.91051108</b>  | <b>0.75674</b> | <b>2</b>  |
| Q3U2P1        | CTLTSVPQTQALLNK                                                            | 0.6638936          | 2              | 3.598585  |
| Q3U2P1        | TLETQSALGPALQAAFK                                                          | 0.887349871        | 2              | 3.11167   |
| <b>Q3ULJ0</b> | <b>GPD1L Glycerol_3_phosphate dehydrogenase 1_like protein</b>             | <b>1.032646948</b> | <b>1</b>       | <b>2</b>  |
| Q3ULJ0        | GIDEGPDGLK                                                                 | 0.885060377        | 2              | 2.671374  |
| Q3ULJ0        | LGLMEMIAFAK                                                                | 1.032094604        | 2              | 3.82464   |
| <b>Q3UQ44</b> | <b>IQGA2 Ras GTPase_activating_like protein IQGAP2</b>                     | <b>1.02140774</b>  | <b>1</b>       | <b>14</b> |
| Q3UQ44        | ALVGSENPLTVIR                                                              | 1.053045759        | 2              | 3.997128  |
| Q3UQ44        | AWVNQLETQTGEASK                                                            | 1.061387794        | 2              | 5.080618  |
| Q3UQ44        | GVLLGIDDLQTNQFK                                                            | 1.120054331        | 2              | 4.791054  |
| Q3UQ44        | HTDNTVQWLR                                                                 | 1.320862555        | 2              | 2.848342  |
| Q3UQ44        | LFEGENEHLSSMNNYLETYQEFR                                                    | 1.367677683        | 3              | 4.515428  |
| Q3UQ44        | LGIAPQIQDLLGK                                                              | 1.134518208        | 2              | 2.73368   |
| Q3UQ44        | LPYDVTTEQALTYPEVK                                                          | 1.20737961         | 2              | 4.329138  |
| Q3UQ44        | LSAEEMDER                                                                  | 1.00948724         | 2              | 2.698053  |
| Q3UQ44        | NPNAVLTCVDDSLSQEYQK                                                        | 1.022883092        | 2              | 4.969876  |
| Q3UQ44        | TALEEEIK                                                                   | 0.966752254        | 1              | 2.005997  |
| Q3UQ44        | TLDTLLLPANIR                                                               | 0.887285677        | 2              | 2.55318   |
| Q3UQ44        | VDFTEEEISNMR                                                               | 0.811032632        | 2              | 3.389883  |
| Q3UQ44        | VDQVQDIVTGNPTVIK                                                           | 0.969882776        | 2              | 4.916214  |
| Q3UQ44        | YQDILNEIAK                                                                 | 0.974615338        | 2              | 2.605644  |
| <b>Q3UV17</b> | <b>K220 Keratin_type II cytoskeletal 2 oral</b>                            | <b>1.072247231</b> | <b>0.35875</b> | <b>3</b>  |
| Q3UV17        | AQYEDIAQK                                                                  | 1.695805756        | 1              | 2.129373  |
| Q3UV17        | KQNTNMQTSIAEAEQR+Oxidation(5)                                              | 0.922395626        |                |           |
| Q3UV17        | VDSLTDIEINFLR                                                              | 0.935429458        | 2              | 2.468676  |
| <b>Q3UZYO</b> | <b>SF11 Protein SF11 homolog</b>                                           | <b>1.306696365</b> | <b>0.29644</b> | <b>2</b>  |
| Q3UZYO        | EEWWVSQREWK                                                                | 1.046216733        | 2              | 2.704753  |
| Q3UZYO        | MGRAQAHHFSAQLLSR+Oxidation(0)                                              | 1.329655245        |                |           |
| <b>Q3V036</b> | <b>CCD27 Coiled_coil domain_containing protein 27</b>                      | <b>0.819240479</b> | <b>0.21473</b> | <b>2</b>  |
| Q3V036        | MDLISSERTIK+Oxidation(0)                                                   | 0.505202486        |                |           |
| Q3V036        | SSEGPPEEAAAALSRPSQSK                                                       | 0.855731179        | 2              | 2.749781  |
| <b>Q3V0K9</b> | <b>PLSI Plastin_1</b>                                                      | <b>0.856731271</b> | <b>0.53367</b> | <b>3</b>  |
| Q3V0K9        | AYFHLLNQIAPK                                                               | 0.979834934        | 2              | 2.825564  |
| Q3V0K9        | KIENCNYAVELGK                                                              | 1.139715645        | 2              | 3.923074  |

|               |                                                                |                    |                |           |
|---------------|----------------------------------------------------------------|--------------------|----------------|-----------|
| Q3V0K9        | QFVTPADVVSQNP                                                  | 0.858610784        | 2              | 3.802747  |
| <b>Q3V132</b> | <b>ADT4 ADP/ATP translocase 4</b>                              | <b>1.15175819</b>  | <b>0.65017</b> | <b>2</b>  |
| Q3V132        | GNLANVIR                                                       | 0.915116965        | 2              | 2.726654  |
| Q3V132        | YFPTQALNFAFK                                                   | 1.253014404        | 2              | 2.945507  |
| <b>Q497B0</b> | <b>NIT2 Omega_amidase NIT2</b>                                 | <b>0.952262806</b> | <b>2E-12</b>   | <b>14</b> |
| Q497B0        | AGTEETILYSDIDLK                                                | 1.419700761        | 2              | 4.27928   |
| Q497B0        | ASYVAWGHSTVVDVDPWGQVLT                                         | 0.827635432        | 2              | 4.908471  |
| Q497B0        | AVDNQVYVATASPAR                                                | 1.183416825        | 2              | 4.960291  |
| Q497B0        | AVDNQVYVATASPARDEK                                             | 1.001923655        | 2              | 3.383258  |
| Q497B0        | ENSIYLIGGSIPEDDGK                                              | 0.947573461        | 2              | 2.837044  |
| Q497B0        | ENSIYLIGGSIPEDDGKLYNTCAVFGPDGNLLVK                             | 0.836398021        | 3              | 4.478386  |
| Q497B0        | FAELAQIYAR                                                     | 1.40339346         | 2              | 3.704595  |
| Q497B0        | IHLFDIDVPGK                                                    | 1.282937815        | 2              | 2.833553  |
| Q497B0        | KIHLFDIDVPGK                                                   | 0.820233311        | 3              | 4.682935  |
| Q497B0        | LALIQLQVSSIK                                                   | 0.914625329        | 2              | 3.335123  |
| Q497B0        | LYNTCAVFGPDGNLLVK                                              | 0.85774856         | 2              | 4.455254  |
| Q497B0        | QGANIVSLPECFNSPYGTNYFPEYAEK                                    | 0.889163293        | 3              | 4.344718  |
| Q497B0        | TLSPGDSFSTFDTPYCR                                              | 1.194747241        | 2              | 4.702559  |
| Q497B0        | VGLGICYDMR                                                     | 1.067489309        | 2              | 2.744405  |
| <b>Q498D5</b> | <b>RMD2 Regulator of microtubule dynamics protein 2</b>        | <b>0.765200178</b> | <b>0.19298</b> | <b>4</b>  |
| Q498D5        | AYGDMYDLSTNTQEK                                                | 0.816647446        | 2              | 4.155301  |
| Q498D5        | FCNLALLPIVTK                                                   | 0.531621247        | 2              | 3.224146  |
| Q498D5        | LEECIQDELGVR                                                   | 0.827401976        | 2              | 3.148288  |
| Q498D5        | LNELTNVEELKEEIK                                                | 0.784155935        | 2              | 3.456348  |
| <b>Q498U4</b> | <b>SARNP SAP domain_containing ribonucleoprotein</b>           | <b>1.11995653</b>  | <b>0.52922</b> | <b>2</b>  |
| Q498U4        | EEEPPEKVVDMASEK                                                | 0.879567736        | 2              | 2.594336  |
| Q498U4        | FGIVTSSAGTGTTEDTEAK                                            | 1.113183366        | 2              | 4.130384  |
| <b>Q499N5</b> | <b>ACSF2 Acyl_CoA synthetase family member 2_mitochondrial</b> | <b>1.331097981</b> | <b>0.01902</b> | <b>10</b> |
| Q499N5        | GATLSHHNIVNNSNLIGQR                                            | 0.762995213        | 3              | 4.826545  |
| Q499N5        | GGENIYPAELEDFHFK                                               | 1.046673885        | 2              | 3.088278  |
| Q499N5        | GGVIAGSLAPPELIR                                                | 1.065759241        | 2              | 2.670899  |
| Q499N5        | LPDLTTVISVDAPLPGTLLLDEVVAAGGK                                  | 0.897014876        |                |           |
| Q499N5        | SGETTTEEEIK                                                    | 1.124135123        | 2              | 2.952603  |
| Q499N5        | TFETVGQDR                                                      | 1.178480672        | 2              | 2.514926  |
| Q499N5        | TGDIASMDEQGFCR                                                 | 1.22790738         | 2              | 3.680996  |
| Q499N5        | TVGECLDATAQR                                                   | 1.353315699        | 2              | 3.140662  |
| Q499N5        | YHQGFLSCYDPINIQFTSGTTGNPK                                      | 1.034618069        | 3              | 4.664974  |
| Q499N5        | YIVFVEGYPLTVSGK                                                | 1.428025745        | 2              | 4.652744  |
| <b>Q4AEF8</b> | <b>COPG Coatomer subunit gamma</b>                             | <b>1.006211157</b> | <b>0.06292</b> | <b>5</b>  |
| Q4AEF8        | FQAQNEEMLPSILVLLK                                              | 0.983937446        | 2              | 3.164956  |
| Q4AEF8        | QEIQEQQLAAVPEFQGLGPLFK                                         | 1.026597899        | 3              | 4.288921  |
| Q4AEF8        | SSPEPVALTESETEYVIR                                             | 1.33539393         | 2              | 3.99375   |
| Q4AEF8        | VVLEHEEVR                                                      | 1.351343887        | 2              | 2.351103  |
| Q4AEF8        | VVVVQAISALCQK                                                  | 0.838498943        | 2              | 2.306965  |
| <b>Q4FZT0</b> | <b>STML2 Stomatin_like protein 2</b>                           | <b>0.87800346</b>  | <b>0.01807</b> | <b>6</b>  |
| Q4FZT0        | AEQINQAAGEASAVLAK                                              | 0.873904869        | 2              | 4.799156  |
| Q4FZT0        | ASYGVEDPEYAVTQLAQTMR                                           | 1.060394564        | 2              | 4.997075  |
| Q4FZT0        | ATVLESEGTR                                                     | 0.954500323        | 2              | 2.770914  |
| Q4FZT0        | DVQTTDTSIEELGR                                                 | 1.077596936        | 2              | 2.82636   |
| Q4FZT0        | ILEPGLNVLIPVLDR                                                | 0.89121143         | 2              | 3.655525  |
| Q4FZT0        | NTVILFVPQQEAWVVER                                              | 1.188998654        | 2              | 3.051839  |
| <b>Q4FZT9</b> | <b>PSMD2 26S proteasome non_ATPase regulatory subunit 2</b>    | <b>1.146304205</b> | <b>0.85737</b> | <b>8</b>  |
| Q4FZT9        | DKTPVQSQPSATAPSGADEK                                           | 1.318350406        | 3              | 4.971573  |

|               |                                                                                     |                    |                |           |
|---------------|-------------------------------------------------------------------------------------|--------------------|----------------|-----------|
| Q4FZT9        | FGGSGSQVDSAR                                                                        | 1.080552096        | 2              | 3.891086  |
| Q4FZT9        | GEAIEAILAALEVSEPF                                                                   | 0.494043188        |                |           |
| Q4FZT9        | SETELKDTYAR                                                                         | 0.819401221        | 2              | 2.357594  |
| Q4FZT9        | SGALLACGIVNSGVR                                                                     | 0.96906587         | 2              | 3.677731  |
| Q4FZT9        | SSTTSMTSVPKPLK                                                                      | 0.816832402        | 2              | 2.582055  |
| Q4FZT9        | TITGFQTHHTPVLLAHGER                                                                 | 1.3470051          | 3              | 3.709084  |
| Q4FZT9        | TPVQSQQPSATAPSGADEK                                                                 | 1.174290534        | 2              | 4.440697  |
| <b>Q4FZX7</b> | <b>SRPRB Signal recognition particle receptor subunit beta</b>                      | <b>1.360980306</b> | <b>9.9E-20</b> | <b>5</b>  |
| Q4FZX7        | DTQTSITDSSAIYK                                                                      | 0.799154855        | 2              | 3.096941  |
| Q4FZX7        | GDAGSADVQDLEK                                                                       | 0.931846503        | 2              | 3.329109  |
| Q4FZX7        | GNSLTLIDLPGHESLR                                                                    | 1.135960704        | 2              | 3.491884  |
| Q4FZX7        | SAAPSTLDSSTAPAQLGK                                                                  | 2.045513618        | 2              | 4.616443  |
| Q4FZX7        | VGDGAGGAFQPYLDSL                                                                    | 1.378615492        | 2              | 3.283015  |
| <b>Q4G061</b> | <b>EIF3B Eukaryotic translation initiation factor 3 subunit B</b>                   | <b>0.992959475</b> | <b>0.51686</b> | <b>5</b>  |
| Q4G061        | AEEEGSDGSAAEAEP                                                                     | 1.036784046        | 2              | 4.84523   |
| Q4G061        | AKPAAQSEETAASPAASPTQSAQEPSAPGK                                                      | 0.209460913        | 3              | 5.91656   |
| Q4G061        | GTQGVVTFNFEIFR                                                                      | 0.950316516        | 2              | 2.819967  |
| Q4G061        | IINDYYPEEDGK                                                                        | 0.878074106        | 2              | 2.60998   |
| Q4G061        | TEDAEDAEARPEPEVR                                                                    | 0.863836023        | 3              | 3.900955  |
| <b>Q4G069</b> | <b>RMD1 Regulator of microtubule dynamics protein 1</b>                             | <b>1.077177835</b> | <b>0.97257</b> | <b>2</b>  |
| Q4G069        | IAEVLFANPPSSTYEEALK                                                                 | 0.853669368        | 2              | 2.488319  |
| Q4G069        | VLLYEALYAK                                                                          | 1.081963188        | 2              | 2.565507  |
| <b>Q4KLP0</b> | <b>DHTK1 Probable 2-oxoglutarate dehydrogenase E1 component DHTK1_mitochondrial</b> | <b>0.835686284</b> | <b>0.6128</b>  | <b>13</b> |
| Q4KLP0        | ARPSVDHGLAR                                                                         | 1.130907312        | 2              | 2.369559  |
| Q4KLP0        | LEELCPFPLDSLQQEMGK                                                                  | 0.853091303        | 2              | 5.123319  |
| Q4KLP0        | LLLESQEFDFHFLATK                                                                    | 0.973604306        | 2              | 3.409804  |
| Q4KLP0        | LSAYGGITDIIGMPHR                                                                    | 1.027336592        | 3              | 3.380409  |
| Q4KLP0        | LVTVYCEHGK                                                                          | 2.531953668        | 2              | 2.845205  |
| Q4KLP0        | NGTNLDWATAETLALGSLLAQGFNVR                                                          | 1.163306548        |                |           |
| Q4KLP0        | QWGHNELDEPFFTNPVMYK                                                                 | 1.053444016        | 3              | 3.792775  |
| Q4KLP0        | SIPDTYAEHLIASGLMTQEVSQDIK                                                           | 0.895185292        | 3              | 5.151444  |
| Q4KLP0        | SSLYSSDIGK                                                                          | 1.023399047        | 2              | 2.693988  |
| Q4KLP0        | SVEVPEELQLHSHLLK                                                                    | 0.856070659        | 2              | 3.813759  |
| Q4KLP0        | WQGLVQPAACVTTWDTGVPLELLR                                                            | 0.826773874        | 2              | 4.926007  |
| Q4KLP0        | YGGEGAESMMGFFHELLK                                                                  | 0.850332466        | 2              | 4.407415  |
| Q4KLP0        | YPVAVSTLEEMAPGTAFKPVIGDSSVDPK                                                       | 1.250802299        | 3              | 4.527272  |
| <b>Q4KLZ6</b> |                                                                                     | <b>1.098406741</b> | <b>0.31629</b> | <b>16</b> |
| Q4KLZ6        | AAPTEPAEPEATAAGGVASK                                                                | 1.236028585        | 2              | 4.532551  |
| Q4KLZ6        | AILEVLQTK                                                                           | 1.201557953        | 2              | 2.713578  |
| Q4KLZ6        | ANTDLPAWSAAMDAGLK                                                                   | 0.956493414        | 2              | 3.889141  |
| Q4KLZ6        | ASYISSAQLDQDPGAVAAAAIFR                                                             | 0.857758024        | 2              | 5.905149  |
| Q4KLZ6        | AVAQAGTAGTLLIVK                                                                     | 1.164879547        | 2              | 4.368645  |
| Q4KLZ6        | EGPTPASPAQVLSK                                                                      | 1.324967161        | 2              | 3.055923  |
| Q4KLZ6        | GLCGTILHK                                                                           | 0.96292877         | 2              | 2.321606  |
| Q4KLZ6        | GVSLTLMVDEPLLK                                                                      | 1.235327727        | 2              | 3.166383  |
| Q4KLZ6        | ISTTLIGLEEHLNALDR                                                                   | 1.413773718        | 2              | 3.941124  |
| Q4KLZ6        | LIDAETNAK                                                                           | 1.194803897        | 2              | 2.991795  |
| Q4KLZ6        | LNFLAMEQAK                                                                          | 0.875792654        | 2              | 2.489008  |
| Q4KLZ6        | LSVLLLEK                                                                            | 1.498914691        | 2              | 2.801949  |
| Q4KLZ6        | MVNSVEGCAGDALAGFVACNPDLQLLQGYR                                                      | 1.190608984        | 3              | 5.444092  |
| Q4KLZ6        | TMLDSLWAAQELQAWK                                                                    | 0.861721323        | 2              | 4.337875  |
| Q4KLZ6        | VAGALAEEMGLEEITK                                                                    | 1.200294667        | 2              | 3.692878  |
| Q4KLZ6        | VALLSGGSGHEPAHAGFIGK                                                                | 1.156019795        | 2              | 5.297269  |

|               |                                                                         |                    |                |          |
|---------------|-------------------------------------------------------------------------|--------------------|----------------|----------|
| <b>Q4KM49</b> | <b>SYYC Tyrosyl_tRNA synthetase_cytoplasmic</b>                         | <b>1.186449614</b> | <b>0.3134</b>  | <b>4</b> |
| Q4KM49        | AFCEPGNVENNGVLSFVK                                                      | 0.71164403         | 2              | 3.433717 |
| Q4KM49        | QVEPLDPPAGSAPGER                                                        | 1.115576676        | 2              | 3.170385 |
| Q4KM49        | TVVSGLVQFVPK                                                            | 1.013280763        | 2              | 3.228129 |
| Q4KM49        | VDAQFGGIDQR                                                             | 1.369659336        | 2              | 2.940107 |
| <b>Q4KM73</b> | <b>KCY UMP_CMP kinase</b>                                               | <b>1.131665491</b> | <b>0.99953</b> | <b>6</b> |
| Q4KM73        | IQTYLESTKPIIDLYEEMGK                                                    | 1.068284389        | 2              | 4.499327 |
| Q4KM73        | IVPVEITISLLK                                                            | 0.718131369        | 2              | 2.319888 |
| Q4KM73        | KNPDSQYGELIEK                                                           | 1.122211537        | 2              | 3.669565 |
| Q4KM73        | NQDNLQGWNK                                                              | 0.977259229        | 2              | 3.088647 |
| Q4KM73        | SVDEVFGDVMK                                                             | 0.858372602        | 2              | 3.071751 |
| Q4KM73        | YGYTHLSAGELLR                                                           | 0.853832453        | 3              | 4.39207  |
| <b>Q4KM74</b> | <b>SC22B Vesicle_trafficking protein SEC22b</b>                         | <b>1.314089364</b> | <b>3.1E-05</b> | <b>4</b> |
| Q4KM74        | DLQQYQSQAK                                                              | 1.234656148        | 2              | 3.297288 |
| Q4KM74        | GEALSALDSK                                                              | 1.21954398         | 2              | 2.557648 |
| Q4KM74        | NLGSINTELQDVQR                                                          | 1.187065725        | 2              | 4.204613 |
| Q4KM74        | VADGLPLAASMQEDEQSGR                                                     | 1.02858121         | 2              | 2.635653 |
| <b>Q4KMA2</b> | <b>RD23B UV excision repair protein RAD23 homolog B</b>                 | <b>0.898400901</b> | <b>0.12532</b> | <b>2</b> |
| Q4KMA2        | NFVVVMVTKPK                                                             | 0.776091939        | 2              | 2.839968 |
| Q4KMA2        | QIIQQNPSLLPALLQQIGR                                                     | 0.849684841        | 2              | 4.658129 |
| <b>Q4KSH7</b> | <b>MP2K7 Dual specificity mitogen_activated protein kinase kinase 7</b> | <b>0.981410424</b> | <b>0.66684</b> | <b>2</b> |
| Q4KSH7        | RSGNKEENK                                                               | 1.18794702         | 1              | 1.989794 |
| Q4KSH7        | YNKLEHSFIK                                                              | 0.693205046        | 1              | 1.937529 |
| <b>Q4QQS8</b> | <b>NUP85 Nuclear pore complex protein Nup85</b>                         | <b>1.054217111</b> | <b>0.04455</b> | <b>2</b> |
| Q4QQS8        | LEEELSGK                                                                | 1.057089488        |                |          |
| Q4QQS8        | RFGDAASLLLSLMTSQIAPR+Oxidation(12)                                      | 0.526712903        |                |          |
| <b>Q4QQV3</b> | <b>F162A Protein FAM162A</b>                                            | <b>0.89706887</b>  | <b>0.90889</b> | <b>2</b> |
| Q4QQV3        | EEIPIETISFEMLDAAK                                                       | 0.911512457        | 2              | 4.118657 |
| Q4QQV3        | RHESLTSNLER                                                             | 0.879040166        | 3              | 4.249256 |
| <b>Q4QQW3</b> | <b>HOT Hydroxyacid_oxoacid transhydrogenase_mitochondrial</b>           | <b>0.86693134</b>  | <b>0.00584</b> | <b>5</b> |
| Q4QQW3        | AANLYACSPHSEFLDYVNAPIGK                                                 | 1.389718222        | 3              | 3.7553   |
| Q4QQW3        | HLETAEILGANIR                                                           | 0.8619178          | 2              | 3.415718 |
| Q4QQW3        | IQDAGPVLADALR                                                           | 0.860709406        | 2              | 2.779708 |
| Q4QQW3        | NLSQLPPVQJVMDSLSK                                                       | 0.851127458        | 2              | 2.61558  |
| Q4QQW3        | VEPTDGSFMDAIEFAK                                                        | 0.840248116        | 2              | 2.668852 |
| <b>Q4QRB4</b> | <b>TBB3 Tubulin beta_3 chain</b>                                        | <b>1.220785782</b> | <b>0.13604</b> | <b>6</b> |
| Q4QRB4        | AILVDLEPGTMDSVR                                                         | 0.791895907        | 2              | 4.907288 |
| Q4QRB4        | AILVDLEPGTMDSVR+Oxidation(10)                                           | 0.960078666        |                |          |
| Q4QRB4        | EIVHIQAGQCGNQIGAK                                                       | 1.229780363        | 2              | 5.043253 |
| Q4QRB4        | IMNTFSVVPSPK                                                            | 1.162015586        | 2              | 3.418721 |
| Q4QRB4        | IMNTFSVVPSPK+Oxidation(1)                                               | 1.479058613        |                |          |
| Q4QRB4        | ISEQFTAMFR                                                              | 1.234697302        | 2              | 3.584484 |
| <b>Q4V7C7</b> | <b>ARP3 Actin_related protein 3</b>                                     | <b>0.99853127</b>  | <b>0.99986</b> | <b>5</b> |
| Q4V7C7        | KDYEEIGPSICR                                                            | 0.925970318        | 2              | 3.647529 |
| Q4V7C7        | LGYAGNTEPQFIIPSCIAIK                                                    | 1.013429181        | 2              | 3.149663 |
| Q4V7C7        | LSEELSGGR                                                               | 0.997827817        | 2              | 2.713385 |
| Q4V7C7        | TLTGTVIDSGDGVTHVIPVAEGYVIGSCK                                           | 0.978568857        | 3              | 3.668952 |
| Q4V7C7        | YSYVCPDLVK                                                              | 1.039492623        | 2              | 2.364987 |
| <b>Q4V8F9</b> | <b>HSDL2 Hydroxysteroid dehydrogenase_like protein 2</b>                | <b>0.908800317</b> | <b>0.6498</b>  | <b>3</b> |
| Q4V8F9        | DEQQINSAVEK                                                             | 1.142960759        | 2              | 3.098461 |
| Q4V8F9        | KVDIIADAAYSIFK                                                          | 0.845468825        | 2              | 2.403412 |
| Q4V8F9        | SFTGNFIIDENILK                                                          | 0.865430939        | 2              | 2.932067 |
| <b>Q4V8K1</b> | <b>STEA4 Metalloredutcase STEAP4</b>                                    | <b>0.88488657</b>  | <b>0.18253</b> | <b>2</b> |



|               |                                                                                          |                    |                |           |
|---------------|------------------------------------------------------------------------------------------|--------------------|----------------|-----------|
| Q4V8K1        | TCADFFPLTVDSSEK                                                                          | 0.825162297        | 2              | 4.587189  |
| Q4V8K1        | TLGLTPLDQGSVAAK                                                                          | 0.865005052        | 2              | 3.809314  |
| <b>Q505J8</b> | <b>SYFA Phenylalanyl_tRNA synthetase alpha chain</b>                                     | <b>0.827989827</b> | <b>1.7E-05</b> | <b>3</b>  |
| Q505J8        | LQQVQAGQAEK                                                                              | 1.150358155        | 2              | 2.513763  |
| Q505J8        | RLEVADGGLDSAELATQLGVEHQAVVGAVK                                                           | 0.848849305        | 3              | 4.930496  |
| Q505J8        | SLQALGEVIEAELR                                                                           | 0.580750325        | 2              | 3.581163  |
| <b>Q561R9</b> | <b>LACB2 Beta_lactamase_like protein 2</b>                                               | <b>0.7643751</b>   | <b>0.01188</b> | <b>4</b>  |
| Q561R9        | ANIIYPGHGPVIHNAEAK                                                                       | 0.652038802        | 2              | 4.291328  |
| Q561R9        | ILIDTGEPSPVEYISCLK                                                                       | 0.861191013        | 2              | 3.363614  |
| Q561R9        | NISNDATYCIK                                                                              | 0.856322806        | 2              | 2.474453  |
| Q561R9        | NNREEQIITVFR                                                                             | 0.527122396        | 2              | 2.541478  |
| <b>Q561S0</b> | <b>NDUAA NADH dehydrogenase [ubiquinone] 1 alpha subcomplex subunit 10_mitochondrial</b> | <b>1.291478942</b> | <b>0.89836</b> | <b>5</b>  |
| Q561S0        | LLQYSDALEHLLSTGGQGVVLER                                                                  | 1.106603916        | 3              | 3.665848  |
| Q561S0        | VITVDGNICSGK                                                                             | 0.87887619         | 2              | 2.923081  |
| Q561S0        | VVEDIEYLNYNK                                                                             | 1.387615731        | 2              | 4.201758  |
| Q561S0        | YAPGYNADVGDK                                                                             | 1.069055512        | 2              | 2.675377  |
| Q561S0        | YGLLASILGDK                                                                              | 0.816762818        | 2              | 2.947858  |
| <b>Q562C4</b> | <b>MET7B Methyltransferase_like protein 7B</b>                                           | <b>0.778458241</b> | <b>0.89448</b> | <b>5</b>  |
| Q562C4        | AQFSEVQLEWQPPPFK                                                                         | 0.832032411        | 2              | 4.897835  |
| Q562C4        | FIVAYGENMK                                                                               | 0.768760035        | 2              | 2.720356  |
| Q562C4        | HIGDGCHLTR                                                                               | 0.572401435        | 3              | 3.406351  |
| Q562C4        | VLQEVQR                                                                                  | 0.717013345        | 2              | 2.769327  |
| Q562C4        | VTCVDPNPNFEK                                                                             | 0.982132067        | 2              | 3.563125  |
| <b>Q58FK9</b> | <b>KAT3 Kynurenine__oxoglutarate transaminase 3</b>                                      | <b>0.915185036</b> | <b>1</b>       | <b>7</b>  |
| Q58FK9        | AIILNTPHNPIGK                                                                            | 0.748645846        | 2              | 3.220357  |
| Q58FK9        | DSTLDAEEIFR                                                                              | 0.935715864        | 2              | 2.946199  |
| Q58FK9        | IEGLDQNVWVEFTK                                                                           | 0.913833377        | 2              | 4.713377  |
| Q58FK9        | LAADPSVNLGQGFPDITLPSYVQEELSK                                                             | 1.102015404        | 2              | 4.058285  |
| Q58FK9        | MDDPECYFNLPK                                                                             | 0.799549025        | 2              | 3.673065  |
| Q58FK9        | RIEGLDQNVWVEFTK                                                                          | 0.874572894        | 2              | 3.940595  |
| Q58FK9        | WTSSDWFNPNQELSK                                                                          | 0.812876584        | 2              | 5.071333  |
| <b>Q5BJP3</b> | <b>UFM1 Ubiquitin_fold modifier 1</b>                                                    | <b>1.285982589</b> | <b>0.00159</b> | <b>2</b>  |
| Q5BJP3        | VLSVPESTPFTAVLK                                                                          | 3.0515471          | 2              | 2.327214  |
| Q5BJP3        | VPAATSIIITNDGIGINPAQTAGNVFLK                                                             | 1.280088776        | 3              | 4.359497  |
| <b>Q5BJY9</b> | <b>K1C18 Keratin_type I cytoskeletal 18</b>                                              | <b>0.746421217</b> | <b>9.9E-20</b> | <b>27</b> |
| Q5BJY9        | AQIFANSVDNAR                                                                             | 1.052087379        | 2              | 3.837768  |
| Q5BJY9        | AQYEQLAQK                                                                                | 0.86715459         | 2              | 3.286449  |
| Q5BJY9        | DAETTLLELR                                                                               | 1.616728887        | 2              | 2.805743  |
| Q5BJY9        | IREYLEK                                                                                  | 0.829973161        | 3              | 3.354275  |
| Q5BJY9        | KNHEEEVQGLEAQIASSGLTVEVDAPK                                                              | 0.809507874        | 3              | 4.771309  |
| Q5BJY9        | KVVDDTNITR                                                                               | 0.781424027        | 2              | 3.025656  |
| Q5BJY9        | LEAEIATYR                                                                                | 0.875895868        | 2              | 3.009181  |
| Q5BJY9        | LLEDGDDFSLNDALDSSNSMQTVQR                                                                | 0.662287247        | 3              | 4.361937  |
| Q5BJY9        | LQLETEIEALK                                                                              | 1.127455354        | 2              | 2.899629  |
| Q5BJY9        | LQLETEIEALKEELFMK                                                                        | 1.342083744        | 2              | 5.307376  |
| Q5BJY9        | NHEEEVQGLEAQIASSGLTVEVDAPK                                                               | 0.700187399        | 2              | 6.313861  |
| Q5BJY9        | NQNINLENNLGEVEAR                                                                         | 0.834475783        | 2              | 5.502141  |
| Q5BJY9        | NREELDKYWSQQIEESTTVVTTK                                                                  | 1.056479265        | 3              | 5.128973  |
| Q5BJY9        | QSVESDIHGLR                                                                              | 0.842839248        | 2              | 2.649623  |
| Q5BJY9        | QSVESDIHGLRK                                                                             | 0.827620589        | 2              | 2.650688  |
| Q5BJY9        | QTQEYEAALLNIK                                                                            | 0.810802818        | 2              | 3.452058  |
| Q5BJY9        | SVWGGSVGSAGLAGMGGVQTEK                                                                   | 0.652076502        | 2              | 5.979166  |
| Q5BJY9        | SVWGGSVGSAGLAGMGGVQTEK+Oxidation(14)                                                     | 0.93729513         |                |           |
| Q5BJY9        | TLQTLLEIDLDSMK                                                                           | 0.75313529         | 2              | 4.245171  |
| Q5BJY9        | TLQTLLEIDLDSMK+Oxidation(11)                                                             | 0.982179325        |                |           |
| Q5BJY9        | VKLEAEIATYR                                                                              | 0.868573041        | 2              | 2.921019  |

|               |                                                                                         |                    |                |          |
|---------------|-----------------------------------------------------------------------------------------|--------------------|----------------|----------|
| Q5BJY9        | VKYETELAMR                                                                              | 0.675745451        | 3              | 3.476688 |
| Q5BJY9        | VQMEQLNGVLLHLESELAQTR                                                                   | 0.860695358        | 3              | 5.1235   |
| Q5BJY9        | VRPASSAASVYAGAGGSGSR                                                                    | 1.49363735         | 2              | 5.635721 |
| Q5BJY9        | VVDDTNITR                                                                               | 0.822048287        | 2              | 3.336481 |
| Q5BJY9        | YETELAMR                                                                                | 0.745699013        | 2              | 2.751773 |
| Q5BJY9        | YWSQQIEESTTVVTTK                                                                        | 1.077391691        | 2              | 4.745063 |
| <b>Q5BK63</b> | <b>NDUA9 NADH dehydrogenase [ubiquinone] 1 alpha subcomplex subunit 9_mitochondrial</b> | <b>0.924722471</b> | <b>0.99997</b> | <b>4</b> |
| Q5BK63        | AVQHSNVVINLIGR                                                                          | 0.950681224        | 2              | 3.384199 |
| Q5BK63        | IHISDVMATDLPGLEDLGVQPTPLEK                                                              | 0.997897104        | 3              | 5.333165 |
| Q5BK63        | NDFDFDVFVNIPR                                                                           | 0.994143943        | 2              | 3.990403 |
| Q5BK63        | WLSSEIETKPAK                                                                            | 1.092866652        | 2              | 2.937504 |
| <b>Q5BK81</b> | <b>PTGR2 Prostaglandin reductase 2</b>                                                  | <b>0.929834063</b> | <b>0.95143</b> | <b>4</b> |
| Q5BK81        | AILDGNLEK                                                                               | 0.957081123        | 2              | 2.401326 |
| Q5BK81        | DVPYPPLPPAVEAIQK                                                                        | 0.834410376        | 2              | 2.694816 |
| Q5BK81        | TGNVAEQLR                                                                               | 0.891238651        | 2              | 2.631785 |
| Q5BK81        | VEEVSLPDTINEGQVR                                                                        | 0.949214599        | 2              | 4.062984 |
| <b>Q5DTT3</b> | <b>F208B Protein FAM208B</b>                                                            | <b>1.150734453</b> | <b>1E-09</b>   | <b>2</b> |
| Q5DTT3        | QGENIDKLMEYVKNK                                                                         | 3.82863963         | 2              | 2.326965 |
| Q5DTT3        | VSPSEHSENLFLFK                                                                          | 0.345864304        | 2              | 2.343685 |
| <b>Q5DW34</b> | <b>EHMT1 Histone_lysine N_methyltransferase EHMT1</b>                                   | <b>1.032719302</b> | <b>0.08692</b> | <b>2</b> |
| Q5DW34        | TPLMEAENNHLDVAVKYLK+Oxidation(3)                                                        | 1.14693737         |                |          |
| Q5DW34        | YDCVVLFLSRDSVDLTKNK                                                                     | 0.631634678        | 2              | 2.364569 |
| <b>Q5EB77</b> | <b>RAB18 Ras_related protein Rab_18</b>                                                 | <b>0.923073679</b> | <b>0.24799</b> | <b>3</b> |
| Q5EB77        | LDNWLNELETYCTR                                                                          | 1.643245495        | 2              | 2.888129 |
| Q5EB77        | NDIVNMLVGNK                                                                             | 0.690360841        | 2              | 3.08801  |
| Q5EB77        | TCDGVQCAFEELVEK                                                                         | 0.951930942        | 2              | 3.467986 |
| <b>Q5FVM4</b> | <b>NONO Non_POU domain_containing octamer_binding protein</b>                           | <b>1.677409788</b> | <b>0.0109</b>  | <b>2</b> |
| Q5FVM4        | MEELHNQEVQK                                                                             | 0.824542063        | 2              | 3.222231 |
| Q5FVM4        | MEELHNQEVQK+Oxidation(0)                                                                | 2.145803264        |                |          |
| <b>Q5FVQ4</b> | <b>MLEC Malectin</b>                                                                    | <b>0.996119217</b> | <b>0.99983</b> | <b>2</b> |
| Q5FVQ4        | KEEEEEEEYDEGSNLKR                                                                       | 1.330140814        | 3              | 5.539516 |
| Q5FVQ4        | STPEDQILYQTER                                                                           | 0.841364895        | 2              | 4.009935 |
| <b>Q5FVR2</b> | <b>TYPH Thymidine phosphorylase</b>                                                     | <b>1.271132135</b> | <b>0.00047</b> | <b>5</b> |
| Q5FVR2        | AQDTQIGAMLMAIR+Oxidation(10)                                                            | 0.646199393        |                |          |
| Q5FVR2        | AQDTQIGAMLMAIR+Oxidation(8)                                                             | 0.673529055        |                |          |
| Q5FVR2        | DVTATVDSVPLITASILSK                                                                     | 1.47241781         | 2              | 2.499779 |
| Q5FVR2        | FGGAAVFPDQEK                                                                            | 0.614919741        | 2              | 2.329409 |
| Q5FVR2        | VSLVLAPALAACGCK                                                                         | 0.799779385        | 2              | 2.515367 |
| <b>Q5FVR5</b> | <b>ACNT2 Acyl_coenzyme A amino acid N_acyltransferase 2</b>                             | <b>1.098922739</b> | <b>0.85609</b> | <b>4</b> |
| Q5FVR5        | DEKENLFQSK                                                                              | 0.848522416        | 2              | 2.501851 |
| Q5FVR5        | ILFIVGENDQCLASK                                                                         | 0.814925831        | 2              | 3.897016 |
| Q5FVR5        | IQQPGIGIVSVSK                                                                           | 0.981376977        | 2              | 3.025784 |
| Q5FVR5        | VLEEDLDYFEEAANFLAHPK                                                                    | 1.173561327        | 3              | 4.101441 |
| <b>Q5FW57</b> | <b>GLYAL Glycine N_acyltransferase_like protein</b>                                     | <b>0.695552532</b> | <b>4E-06</b>   | <b>2</b> |
| Q5FW57        | AIDQEMFK                                                                                | 0.919542461        | 1              | 1.990007 |
| Q5FW57        | SSQMLQMLESLR                                                                            | 0.54994187         | 2              | 3.754406 |
| <b>Q5HZV9</b> | <b>PP1R7 Protein phosphatase 1 regulatory subunit 7</b>                                 | <b>0.933488919</b> | <b>0.67166</b> | <b>3</b> |
| Q5HZV9        | AIENIDTLTNLESFLGK                                                                       | 0.756785816        | 2              | 3.020503 |
| Q5HZV9        | ELDLYDNQIK                                                                              | 0.984540861        | 2              | 2.357517 |
| Q5HZV9        | ELDLYDNQIKK                                                                             | 0.943523047        | 2              | 2.40515  |
| <b>Q5HZY0</b> | <b>UBXN4 UBX domain_containing protein 4</b>                                            | <b>1.667119386</b> | <b>0.0331</b>  | <b>2</b> |
| Q5HZY0        | LPDGSFTNQFPSDAPLEEAR                                                                    | 1.573570086        | 2              | 4.251848 |

|               |                                                                                |                    |                |          |
|---------------|--------------------------------------------------------------------------------|--------------------|----------------|----------|
| Q5HZY0        | NTELCETPTTSDPK                                                                 | 1.503224391        | 2              | 4.060839 |
| <b>Q5HZY2</b> | <b>SAR1B GTP_binding protein SAR1b</b>                                         | <b>0.992480901</b> | <b>0.93834</b> | <b>2</b> |
| Q5HZY2        | EELDSLMTDETIANVPILILGNK                                                        | 0.907624592        | 3              | 3.527583 |
| Q5HZY2        | IDRPEAISEER                                                                    | 1.190507424        | 2              | 2.671447 |
| <b>Q5I0C3</b> | <b>MCCA Methylcrotonoyl_CoA carboxylase subunit alpha_mitochondrial</b>        | <b>0.780097805</b> | <b>5.6E-16</b> | <b>6</b> |
| Q5I0C3        | HAPLVEFEVEEV                                                                   | 0.783630002        | 2              | 2.939146 |
| Q5I0C3        | IIEEAPAGIDPEVR                                                                 | 0.661474535        | 2              | 3.840908 |
| Q5I0C3        | IYAEDPDNNFMPGAGPLVHLSTPPDMSTR                                                  | 0.686675444        | 3              | 3.407942 |
| Q5I0C3        | SEKEFQEQLESAR                                                                  | 0.750654529        | 2              | 3.20655  |
| Q5I0C3        | TNVDFLLR                                                                       | 0.85942329         | 2              | 2.382185 |
| Q5I0C3        | YLSVSAEGTQGGTIAPMTGTIEK                                                        | 0.70519218         | 2              | 5.126723 |
| <b>Q5I0D1</b> | <b>GLOD4 Glyoxalase domain_containing protein 4</b>                            | <b>0.822702521</b> | <b>0.32117</b> | <b>3</b> |
| Q5I0D1        | ESQSILTPLVSLDTPGK                                                              | 0.810920581        | 2              | 3.571954 |
| Q5I0D1        | HEEFEEGCK                                                                      | 0.785611649        | 2              | 2.560919 |
| Q5I0D1        | VTLAVSDLQK                                                                     | 0.947265794        | 2              | 2.323287 |
| <b>Q5I0D5</b> | <b>LHPP Phospholysine phosphohistidine inorganic pyrophosphate phosphatase</b> | <b>0.761597831</b> | <b>0.00466</b> | <b>2</b> |
| Q5I0D5        | AFQVLMELNPVLISLKG                                                              | 0.808254448        | 3              | 3.789254 |
| Q5I0D5        | LGFDISEGEVTAPAPATCQILK                                                         | 0.759928459        | 2              | 4.340418 |
| <b>Q5I0D7</b> | <b>PEPD Xaa_Pro dipeptidase</b>                                                | <b>0.910826732</b> | <b>0.37139</b> | <b>2</b> |
| Q5I0D7        | GVNTDSGNVCR                                                                    | 1.150626239        | 2              | 2.417106 |
| Q5I0D7        | YAVDDVQYADEIASVLTSR                                                            | 0.874809281        | 2              | 3.950121 |
| <b>Q5I0E7</b> | <b>TMED9 Transmembrane emp24 domain_containing protein 9</b>                   | <b>0.952307554</b> | <b>0.97155</b> | <b>2</b> |
| Q5I0E7        | QLVEQVEQIQK                                                                    | 0.95246713         | 2              | 3.741625 |
| Q5I0E7        | QREEYQPATPGLGMFVEVKDPEDK                                                       | 0.960344923        | 3              | 4.08146  |
| <b>Q5I0H9</b> | <b>PDIAS Protein disulfide_isomerase A5</b>                                    | <b>0.748514602</b> | <b>0.15617</b> | <b>4</b> |
| Q5I0H9        | DKNQDLCQQESVK                                                                  | 0.97068377         | 2              | 4.20531  |
| Q5I0H9        | GPPLWEEDPGAK                                                                   | 0.884842409        | 2              | 3.173129 |
| Q5I0H9        | GQGTICWVDCGDAESR                                                               | 0.873490913        | 2              | 4.062721 |
| Q5I0H9        | NQDLCQQESVK                                                                    | 0.747984716        | 2              | 3.190464 |
| <b>Q5I0J9</b> | <b>ASPD Putative L_aspartate dehydrogenase</b>                                 | <b>0.985295535</b> | <b>0.66883</b> | <b>8</b> |
| Q5I0J9        | HANLLVGSPSALADQTTTER                                                           | 1.054081611        | 2              | 5.469194 |
| Q5I0J9        | IHESGVQILR                                                                     | 0.928800687        | 2              | 2.511107 |
| Q5I0J9        | LDAAGGLQSLR                                                                    | 0.959482096        | 2              | 3.761127 |
| Q5I0J9        | LEGPLAAAHSSGPR                                                                 | 0.892057735        | 2              | 3.35916  |
| Q5I0J9        | MAGSVPPALQLEDLTTLEER                                                           | 0.933872124        | 2              | 3.098477 |
| Q5I0J9        | NSNTMAAAAALAPSGLFDR                                                            | 0.752081811        | 2              | 4.320286 |
| Q5I0J9        | TVLYEGPVR                                                                      | 1.057845141        | 2              | 2.834515 |
| Q5I0J9        | VGVVGYGR                                                                       | 0.918408561        | 2              | 2.343987 |
| <b>Q5I0M2</b> | <b>NADC Nicotinate_nucleotide pyrophosphorylase [carboxylating]</b>            | <b>1.090667565</b> | <b>0.00648</b> | <b>5</b> |
| Q5I0M2        | CSGIASAAATAVEVATSTGWAGHVAGTR                                                   | 0.951961437        | 3              | 4.324335 |
| Q5I0M2        | DNHVVAAGSMEK                                                                   | 1.298965401        | 2              | 2.84924  |
| Q5I0M2        | EALQAAEAGADLVMLDNFKPEELHPTAATLK                                                | 1.064423917        | 3              | 6.041539 |
| Q5I0M2        | LYAEGDIPVPHAR                                                                  | 1.189891255        | 2              | 2.951888 |
| Q5I0M2        | VEVECSSLK                                                                      | 1.085661415        | 2              | 2.662642 |
| <b>Q5I0P2</b> | <b>GCSH Glycine cleavage system H protein_mitochondrial</b>                    | <b>1.012917237</b> | <b>0.81139</b> | <b>2</b> |
| Q5I0P2        | MTLSDPSELDELMSSEAYEK                                                           | 0.701365929        | 2              | 5.214109 |
| Q5I0P2        | SCYEDGWLIK                                                                     | 1.355779077        | 2              | 2.306847 |
| <b>Q5M7T9</b> | <b>THNS2 Threonine synthase_like 2</b>                                         | <b>1.12266047</b>  | <b>0.00791</b> | <b>3</b> |
| Q5M7T9        | FPEAVQAAGLTPETPAEILALEHK                                                       | 1.118762204        | 3              | 5.418866 |
| Q5M7T9        | GDFSLCEVVR                                                                     | 1.176324217        | 2              | 2.529871 |
| Q5M7T9        | MGLPISLVAVNRR                                                                  | 1.679311585        | 2              | 2.547187 |
| <b>Q5M7U6</b> | <b>ARP2 Actin_related protein 2</b>                                            | <b>1.112411011</b> | <b>0.45792</b> | <b>5</b> |

|               |                                                                          |                    |                |          |
|---------------|--------------------------------------------------------------------------|--------------------|----------------|----------|
| Q5M7U6        | GYAFNHSADFETVR                                                           | 0.910385629        | 2              | 3.77078  |
| Q5M7U6        | HLWDYTFGPEK                                                              | 0.993493392        | 2              | 3.320496 |
| Q5M7U6        | KHMFVFLGGAVLADIMK+Oxidation(2)                                           | 0.881532595        |                |          |
| Q5M7U6        | LCYVGYNIEQEYK                                                            | 1.482303154        | 2              | 2.396196 |
| Q5M7U6        | SMLEVNYPMENGIVR                                                          | 0.665028574        | 2              | 3.193145 |
| <b>Q5M7W5</b> | <b>MAP4 Microtubule associated protein 4</b>                             | <b>0.88501475</b>  | <b>0.00905</b> | <b>7</b> |
| Q5M7W5        | AAVGLTGNDIATPPNK                                                         | 0.84758762         | 2              | 3.546937 |
| Q5M7W5        | ATSPSTLVSTGSSSR                                                          | 0.841843455        | 2              | 3.649583 |
| Q5M7W5        | NTTPTGATPPAGMASTR                                                        | 0.880928385        | 2              | 2.70681  |
| Q5M7W5        | STLPVDEGSPEK                                                             | 0.832329315        | 2              | 2.402106 |
| Q5M7W5        | TEFIPLLDGDEK                                                             | 0.76910602         | 2              | 2.504158 |
| Q5M7W5        | VGSLDNVGHLPAGGTVK                                                        | 0.785897468        | 2              | 3.369494 |
| Q5M7W5        | VTEFNNVTPLSEEEVASIK                                                      | 0.866140242        | 2              | 3.169424 |
| <b>Q5M875</b> | <b>DHB13 17_beta_hydroxysteroid dehydrogenase 13</b>                     | <b>1.222820382</b> | <b>0.90241</b> | <b>7</b> |
| Q5M875        | ALTAELDTLQK                                                              | 1.301567627        | 2              | 2.828357 |
| Q5M875        | IQNIQFEAIVGHR                                                            | 1.049009179        | 3              | 3.523788 |
| Q5M875        | LWPVLEPDEVAR                                                             | 1.04879957         | 2              | 2.400387 |
| Q5M875        | NSGHIVTVASVCGHR                                                          | 1.023058621        | 2              | 4.399843 |
| Q5M875        | SLIDGILTNK                                                               | 1.262836863        | 2              | 3.324672 |
| Q5M875        | SVAGQTVLITGAGHGIGR                                                       | 1.121207385        | 2              | 4.027478 |
| Q5M875        | TSCLCPVFNVTGFTK                                                          | 1.323108009        | 2              | 3.81641  |
| <b>Q5M9G3</b> | <b>CAPR1 Caprin_1</b>                                                    | <b>1.296945688</b> | <b>0.00268</b> | <b>4</b> |
| Q5M9G3        | LNQDQLDAVSK                                                              | 1.405116527        | 2              | 3.254042 |
| Q5M9G3        | SSFSTNPNSGYTQSQFNAPR                                                     | 0.200674414        | 2              | 3.801034 |
| Q5M9G3        | TVLELQYVLDK                                                              | 1.608655747        | 2              | 2.437326 |
| Q5M9G3        | YQEVNNTLEFAK                                                             | 1.23120088         | 2              | 2.742763 |
| <b>Q5M9I5</b> | <b>QCR6 Cytochrome b_c1 complex subunit 6_mitochondrial</b>              | <b>1.096907955</b> | <b>0.56357</b> | <b>2</b> |
| Q5M9I5        | EEEEELVDPLTTVR                                                           | 0.792894894        | 2              | 2.678546 |
| Q5M9I5        | SQTEEDCTEELDFDLHAR                                                       | 1.489750646        | 2              | 4.86154  |
| <b>Q5PPL3</b> | <b>NSDHL Sterol_4_alpha_carboxylate 3_dehydrogenase_ decarboxylating</b> | <b>0.990668898</b> | <b>0.96117</b> | <b>9</b> |
| Q5PPL3        | AVLDANDPKK                                                               | 1.111396721        | 2              | 2.479386 |
| Q5PPL3        | CTVIGGSGFLGQHMVEQLLSR                                                    | 0.891865395        | 2              | 4.930092 |
| Q5PPL3        | DPQLVPVLIDAAAR                                                           | 1.110222117        | 3              | 3.405301 |
| Q5PPL3        | GQVTGTDLINEVSK                                                           | 0.917489929        | 2              | 3.785707 |
| Q5PPL3        | GVSTVFHCASPPSNNSNK                                                       | 1.432661991        | 2              | 4.786042 |
| Q5PPL3        | GYAVNVFVDR                                                               | 1.031809612        | 2              | 3.588144 |
| Q5PPL3        | ILTGLNIEAPK                                                              | 1.168200809        | 2              | 2.863304 |
| Q5PPL3        | KGQVTGTDLINEVSK                                                          | 0.88407971         | 2              | 4.079587 |
| Q5PPL3        | VQFFIGDLCNQDLYPALK                                                       | 1.119276494        | 3              | 5.26558  |
| <b>Q5PQQ2</b> | <b>WBP11 WW domain binding protein 11</b>                                | <b>0.820286377</b> | <b>0.02713</b> | <b>4</b> |
| Q5PQQ2        | KLEVEYEYK                                                                | 0.180149797        | 1              | 2.173596 |
| Q5PQQ2        | LDEMEFNVPVQQLNEKVLK+Oxidation(3)                                         | 2.200473561        |                |          |
| Q5PQQ2        | RDEDMLYSPELAQR                                                           | 0.961433146        | 2              | 2.325378 |
| Q5PQQ2        | STSSTKSGKFMNPTDQAR                                                       | 1.187935811        | 2              | 2.471763 |
| <b>Q5PQR4</b> | <b>RSRC2 Arginine/serine rich coiled_coil protein 2</b>                  | <b>0.936448492</b> | <b>0.84269</b> | <b>2</b> |
| Q5PQR4        | EKEMVEK+Oxidation(3)                                                     | 0.936546525        |                |          |
| Q5PQR4        | KEGDKSQSAEIVEK                                                           | 0.758329921        | 2              | 2.543995 |
| <b>Q5PQT3</b> | <b>GLYAT Glycine N_acyltransferase</b>                                   | <b>0.889403384</b> | <b>0.57687</b> | <b>6</b> |
| Q5PQT3        | AIQNLASIHSLQVK                                                           | 0.790678289        | 2              | 3.398991 |
| Q5PQT3        | DPENCQEFLGSSEVINWK                                                       | 0.885846074        | 2              | 5.326753 |
| Q5PQT3        | FWLFGGNER                                                                | 0.853316923        | 2              | 2.415078 |
| Q5PQT3        | GFPVYSHTDK                                                               | 1.268377517        | 2              | 2.676879 |
| Q5PQT3        | LSSLDVTHAALVVK                                                           | 1.199086566        | 2              | 3.241656 |

|               |                                                                      |                    |                |           |
|---------------|----------------------------------------------------------------------|--------------------|----------------|-----------|
| Q5PQT3        | QHLQIQSSQSHLNK                                                       | 0.849489929        | 2              | 3.480844  |
| <b>Q5RJR8</b> | <b>LRC59 Leucine_rich repeat_containing protein 59</b>               | <b>0.970285376</b> | <b>0.99973</b> | <b>6</b>  |
| Q5RJR8        | ATVLDLSCNK                                                           | 1.002071097        | 2              | 3.114544  |
| Q5RJR8        | DKLDGNELDLSLSDLNEVPVK                                                | 0.927126218        | 2              | 6.028548  |
| Q5RJR8        | HHEILQWVLQTDSQQ                                                      | 0.921728915        | 2              | 3.239959  |
| Q5RJR8        | LDGNELDLSLSDLNEVPVK                                                  | 0.966033357        | 2              | 3.92303   |
| Q5RJR8        | LQQLPADFGR                                                           | 1.133880094        | 2              | 2.354561  |
| Q5RJR8        | LSTLPSDFCGLTHLVK                                                     | 0.96780502         | 2              | 3.183544  |
| <b>Q5RKH1</b> | <b>PRP4B Serine/threonine_protein kinase PRP4 homolog</b>            | <b>0.83501916</b>  | <b>0.2064</b>  | <b>2</b>  |
| Q5RKH1        | DLLDQILMLDPAKR+Oxidation(7)                                          | 1.19626366         |                |           |
| Q5RKH1        | LAMDLGKMPNK+Oxidation(2)                                             | 0.800353706        |                |           |
| <b>Q5RKH6</b> | <b>OS9 Protein OS_9</b>                                              | <b>0.924661577</b> | <b>0.95443</b> | <b>3</b>  |
| Q5RKH6        | EQAILALTSTLDK                                                        | 1.060082356        | 2              | 2.423348  |
| Q5RKH6        | LQESQSPELVQK                                                         | 0.972604798        | 2              | 2.935137  |
| Q5RKH6        | QEQPGDDTTEAPQR                                                       | 0.843269404        | 2              | 3.091011  |
| <b>Q5RKI0</b> | <b>WDR1 WD repeat_containing protein 1</b>                           | <b>1.015087006</b> | <b>0.73761</b> | <b>3</b>  |
| Q5RKI0        | AHDGGIYAISWSPDSTHLLSASGDK                                            | 1.176925931        | 3              | 5.042492  |
| Q5RKI0        | CFSIDNPGYEPEVVAVHPGGDTVAVGGSDGNVR                                    | 0.994102906        | 3              | 4.643034  |
| Q5RKI0        | YAPSGFYIASGDISGK                                                     | 1.010502727        | 2              | 4.312936  |
| <b>Q5RKI1</b> | <b>IF4A2 Eukaryotic initiation factor 4A_II</b>                      | <b>1.191914897</b> | <b>0.00011</b> | <b>5</b>  |
| Q5RKI1        | ELAQQIQK                                                             | 1.463241895        | 1              | 2.229965  |
| Q5RKI1        | GIDVQQVSLVINYLPTNR                                                   | 1.322287581        | 2              | 3.997807  |
| Q5RKI1        | GYDVIAQAQSGTGK                                                       | 1.230551147        | 2              | 5.314204  |
| Q5RKI1        | MFVLDEADEMLSR                                                        | 1.079376402        | 2              | 4.288107  |
| Q5RKI1        | VLITTDLLAR                                                           | 1.034777046        | 2              | 3.487532  |
| <b>Q5S006</b> | <b>LRK2 Leucine_rich repeat serine/threonine_protein kinase 2</b>    | <b>0.803722078</b> | <b>0.45564</b> | <b>2</b>  |
| Q5S006        | MPRITNLDASR+Oxidation(0)                                             | 0.748211297        |                |           |
| Q5S006        | WLCKVMAQILTVK                                                        | 0.862827278        | 2              | 2.334558  |
| <b>Q5SGE0</b> | <b>LPPRC Leucine_rich PPR motif_containing protein_mitochondrial</b> | <b>1.046721556</b> | <b>0.84176</b> | <b>16</b> |
| Q5SGE0        | AALDLEQVPSELAVTR                                                     | 0.907856555        | 2              | 4.194396  |
| Q5SGE0        | CIANNQVETLEK                                                         | 1.099027482        | 2              | 2.88551   |
| Q5SGE0        | DVGEPVPFTEPPESFGFYIK                                                 | 1.017424503        | 2              | 2.966461  |
| Q5SGE0        | GLDAIELSR                                                            | 0.853002974        | 2              | 2.69324   |
| Q5SGE0        | HCVTMDTPAEK                                                          | 0.991267606        | 2              | 3.008977  |
| Q5SGE0        | HDNAEDALNLK                                                          | 1.058029986        | 2              | 3.565758  |
| Q5SGE0        | MEGANIQPNR                                                           | 0.867235549        | 2              | 2.722537  |
| Q5SGE0        | SCGSLLPELSLAER                                                       | 0.996108367        | 2              | 2.36615   |
| Q5SGE0        | SCGSLLPELSLAERTEFAHK                                                 | 1.894333448        | 2              | 2.40415   |
| Q5SGE0        | SGSPGSNQALLLR                                                        | 1.122793657        | 2              | 2.828588  |
| Q5SGE0        | SSLSSSSPSAGDTVTEK                                                    | 0.89283794         | 2              | 4.347086  |
| Q5SGE0        | SYVADKDVASAK                                                         | 0.916846716        | 2              | 2.857055  |
| Q5SGE0        | TLLELIPELR                                                           | 1.052156779        | 2              | 3.005342  |
| Q5SGE0        | TSQFTSSDLESTLEK                                                      | 1.264547675        | 2              | 3.05048   |
| Q5SGE0        | VIEEQMEPALEK                                                         | 1.159196445        | 2              | 2.92843   |
| Q5SGE0        | VYLQNEYR                                                             | 1.331667176        | 2              | 2.451252  |
| <b>Q5SNZ0</b> | <b>GRDN Girdin</b>                                                   | <b>1.269628891</b> | <b>0.66565</b> | <b>2</b>  |
| Q5SNZ0        | KVEILENEIIQEK                                                        | 1.090139403        | 2              | 2.523196  |
| Q5SNZ0        | YNQLLKQKQLEDLEK                                                      | 0.8914111          | 2              | 2.643322  |
| <b>Q5SW19</b> | <b>K0664 Protein KIAA0664</b>                                        | <b>1.170425287</b> | <b>0.00337</b> | <b>3</b>  |
| Q5SW19        | GLEMDPIDCTPPEYILPGSR                                                 | 0.886338434        | 2              | 2.93945   |
| Q5SW19        | IGIGELITR                                                            | 1.536098166        | 2              | 2.917611  |
| Q5SW19        | SVEGLQEGSVLR                                                         | 1.177639966        | 2              | 2.823326  |
| <b>Q5SX40</b> | <b>MYH1 Myosin_1</b>                                                 | <b>1.149828094</b> | <b>1</b>       | <b>95</b> |

|        |                                 |             |   |          |
|--------|---------------------------------|-------------|---|----------|
| Q5SX40 | AAYLQNLNSADLLK                  | 0.348624445 | 2 | 3.658021 |
| Q5SX40 | ADIAESQVNK                      | 0.978779848 | 2 | 4.055568 |
| Q5SX40 | AEDEEEINAELTAK                  | 0.894083347 | 2 | 4.381058 |
| Q5SX40 | AGLLGLLEEMR                     | 0.866165744 | 2 | 3.978479 |
| Q5SX40 | AGLLGLLEEMRDDK                  | 1.04104619  | 2 | 3.335037 |
| Q5SX40 | ALQEAHQQTLLDDLQAEEDK            | 1.355597495 | 2 | 5.756624 |
| Q5SX40 | ALQEAHQQTLLDDLQAEEDKVNTLTK      | 0.700472582 | 3 | 6.764009 |
| Q5SX40 | ANLLQAEIEELR                    | 0.936466195 | 2 | 3.93121  |
| Q5SX40 | ANSEVAQWR                       | 0.809620259 | 2 | 3.037319 |
| Q5SX40 | DLEEATLQHEATAATLR               | 1.120004805 | 2 | 4.96199  |
| Q5SX40 | DTQLHLDDALR                     | 1.159773218 | 1 | 3.613188 |
| Q5SX40 | EEQAEPDGTVEADK                  | 0.675708289 | 2 | 3.558584 |
| Q5SX40 | EFEMSNLQSK                      | 1.005884828 | 1 | 2.543429 |
| Q5SX40 | ELEEISER                        | 1.267267823 | 1 | 2.076466 |
| Q5SX40 | ELEGEVENEQK                     | 0.732480342 | 2 | 2.69849  |
| Q5SX40 | ELEGEVENEQKR                    | 1.249977037 | 2 | 3.285165 |
| Q5SX40 | ELTYQTEEDRK                     | 1.429248435 | 2 | 3.095385 |
| Q5SX40 | ENQSILITGESGAGK                 | 1.097674018 | 2 | 4.716943 |
| Q5SX40 | EQYEEEQEAK                      | 1.154272904 | 1 | 3.199806 |
| Q5SX40 | GQEDLKEQLAMVER                  | 0.839815989 | 2 | 4.443505 |
| Q5SX40 | GSSFQTVSALFR                    | 0.980705184 | 2 | 3.03157  |
| Q5SX40 | HADSVAEELGEQIDNLQR              | 0.905160225 | 2 | 5.959991 |
| Q5SX40 | IAEQELLDASER                    | 0.710304647 | 2 | 3.778352 |
| Q5SX40 | IEAQNKPFDAK                     | 0.727935421 | 2 | 2.748584 |
| Q5SX40 | IEDEQALGMQLQK                   | 0.619339007 | 2 | 4.865421 |
| Q5SX40 | IEDEQALGMQLQK+Oxidation(8)      | 1.121656812 |   |          |
| Q5SX40 | IEDMAMMTHLHEPAVLYNLK            | 0.650004816 | 3 | 4.340081 |
| Q5SX40 | IEELEEIEAER                     | 0.598350202 | 2 | 4.26683  |
| Q5SX40 | IKLEQQVDDLEGSLEQEK              | 1.215752306 | 2 | 5.140683 |
| Q5SX40 | IKLEQQVDDLEGSLEQEKK             | 1.059292197 | 2 | 5.21932  |
| Q5SX40 | INQQLDTK                        | 1.666561112 | 1 | 2.172988 |
| Q5SX40 | IQHELEEAER                      | 0.843887317 | 2 | 3.616211 |
| Q5SX40 | IQLELNQVK                       | 0.98281913  | 2 | 2.780883 |
| Q5SX40 | KALQEAHQQTLLDDLQAEEDKVNTLTK     | 0.667130767 | 3 | 7.394549 |
| Q5SX40 | KIAEQELLDASER                   | 0.918904042 | 2 | 3.631049 |
| Q5SX40 | KIQHELEEAER                     | 1.068793275 | 2 | 3.797122 |
| Q5SX40 | KKEFEMSNLQSK                    | 0.742917144 | 2 | 4.017015 |
| Q5SX40 | KKLETDISIQGEMEDIVQEAR           | 0.79413104  | 3 | 5.967843 |
| Q5SX40 | KLEDECSSELK                     | 0.768179636 | 2 | 3.074796 |
| Q5SX40 | KLEDECSSELK                     | 1.002510496 | 3 | 4.254461 |
| Q5SX40 | KLETDISIQGEMEDIVQEAR            | 1.010178214 | 2 | 5.557512 |
| Q5SX40 | KMEGDLNEMEIQLNHSNR              | 1.14618005  | 3 | 4.224661 |
| Q5SX40 | KMEGDLNEMEIQLNHSNR+Oxidation(1) | 0.965025362 |   |          |
| Q5SX40 | LAQESTMDVENDKQLDEK              | 0.681165269 | 2 | 4.648623 |
| Q5SX40 | LDEAEQLALK                      | 1.150637548 | 2 | 3.962439 |
| Q5SX40 | LEDECSSELK                      | 0.377332919 | 2 | 2.378723 |
| Q5SX40 | LEDECSSELK                      | 0.958780455 | 2 | 2.886516 |
| Q5SX40 | LEEAGGATSAQIEMNK                | 0.736234055 | 2 | 4.728858 |
| Q5SX40 | LEEAGGATSAQIEMNK+Oxidation(13)  | 0.783587977 |   |          |
| Q5SX40 | LEQQVDDLEGSLEQEK                | 0.805142035 | 2 | 5.633994 |
| Q5SX40 | LEQQVDDLEGSLEQEKK               | 0.94138724  | 2 | 4.511164 |
| Q5SX40 | LETDISIQGEMEDIVQEAR             | 1.000850332 | 2 | 5.562187 |
| Q5SX40 | LINELTAQR                       | 0.904273831 | 2 | 2.947413 |
| Q5SX40 | LLGSIDIDHTQYK                   | 1.812561531 | 2 | 3.481214 |
| Q5SX40 | LQDAEEHVEAVNAK                  | 1.054391459 | 2 | 4.967914 |
| Q5SX40 | LQDLVDK                         | 0.861983619 | 1 | 2.132548 |
| Q5SX40 | LQDLVDKLQSK                     | 0.996044213 | 2 | 2.583841 |

|               |                                                               |                    |                |           |
|---------------|---------------------------------------------------------------|--------------------|----------------|-----------|
| Q5SX40        | LQNEVEDLMIDVER                                                | 0.846288212        | 2              | 4.725507  |
| Q5SX40        | LQTESGEYSR                                                    | 1.11085558         | 2              | 2.525086  |
| Q5SX40        | LYEQHLGK                                                      | 1.024720068        | 2              | 2.32573   |
| Q5SX40        | MEGDLNEMEIQLNHSNR                                             | 0.501356107        | 2              | 4.659929  |
| Q5SX40        | MEIDDLASNMEVISK                                               | 0.426301348        | 2              | 5.13623   |
| Q5SX40        | MEIDDLASNMEVISK+Oxidation(0)                                  | 1.150033637        |                |           |
| Q5SX40        | MQGTLEDQIISANPLLEAFGNAK                                       | 0.85415294         | 3              | 6.71066   |
| Q5SX40        | MQGTLEDQIISANPLLEAFGNAK+Oxidation(0)                          | 1.030718369        |                |           |
| Q5SX40        | NDLQLQVQSEADSLADAEER                                          | 0.63782569         | 2              | 6.70725   |
| Q5SX40        | NKDPLNETVVGLYQK                                               | 1.006328504        | 2              | 4.822206  |
| Q5SX40        | NLQQEISDLTEQIAEGGK                                            | 1.043479441        | 2              | 6.905754  |
| Q5SX40        | NLQQEISDLTEQIAEGGKR                                           | 0.858140958        | 2              | 3.748134  |
| Q5SX40        | NLTEEMAGLDETIAK                                               | 0.868361104        | 2              | 4.854417  |
| Q5SX40        | NLTEEMAGLDETIAK+Oxidation(5)                                  | 0.648689714        |                |           |
| Q5SX40        | QAEAEQSNVNLAK                                                 | 0.968359361        | 2              | 4.537892  |
| Q5SX40        | QKYEETHAELEASQK                                               | 0.813532281        | 2              | 4.468509  |
| Q5SX40        | QLDEKDSLVSQLSR                                                | 0.894437876        | 2              | 3.07626   |
| Q5SX40        | QLEEEIK                                                       | 0.953402333        | 1              | 2.149653  |
| Q5SX40        | QREEQAEPDGTVEADK                                              | 1.083049513        | 2              | 3.97609   |
| Q5SX40        | RANLLQAEIEELR                                                 | 1.101642462        | 2              | 2.33789   |
| Q5SX40        | RDLEEATLQHEATAATLR                                            | 0.220142646        | 2              | 4.946259  |
| Q5SX40        | SAETEKEMANMK                                                  | 1.310919556        | 2              | 3.064342  |
| Q5SX40        | SAETEKEMANMKEEFEK                                             | #NUM!              | 2              | 4.918159  |
| Q5SX40        | SELQAALAEAEASLEHEEGK                                          | 0.994666797        | 2              | 6.020133  |
| Q5SX40        | SLSTELFK                                                      | 1.093562205        | 2              | 2.412401  |
| Q5SX40        | SSVFVVDK                                                      | 1.001710757        | 1              | 2.125075  |
| Q5SX40        | TKYETDAIQR                                                    | 1.102643805        | 3              | 3.493541  |
| Q5SX40        | TLEDQVSELK                                                    | 0.601753287        | 2              | 3.506889  |
| Q5SX40        | TNAACAAALDKK                                                  | 1.811273605        | 2              | 3.200219  |
| Q5SX40        | VKELTYQTEEDRK                                                 | 0.680920165        | 2              | 3.684565  |
| Q5SX40        | VLNASAIPEGQFIDSK                                              | 0.91898018         | 2              | 4.429382  |
| Q5SX40        | VQLLHTQNTSLINTK                                               | 0.675352909        | 2              | 4.620411  |
| Q5SX40        | VRELEGEVENEQKR                                                | 0.832206661        | 3              | 3.889015  |
| Q5SX40        | VVESMQSTLDAEIR                                                | 0.892088914        | 2              | 4.080634  |
| Q5SX40        | VVESMQSTLDAEIR+Oxidation(4)                                   | 1.142974241        |                |           |
| Q5SX40        | YDKIEDMAMMTHLHEPAVLYNLK                                       | 0.628209431        | 3              | 4.390036  |
| Q5SX40        | YEETHAELEASQK                                                 | 1.057967405        | 2              | 4.767837  |
| Q5SX40        | YETDAIQR                                                      | 0.940382761        | 2              | 2.578749  |
| <b>Q5U206</b> | <b>CALL3 Calmodulin_like protein 3</b>                        | <b>0.853755356</b> | <b>7.3E-06</b> | <b>5</b>  |
| Q5U206        | DTDSEEEIR                                                     | 1.347656947        | 2              | 2.707368  |
| Q5U206        | KMKDSEEEIR                                                    | 0.510738483        | 2              | 2.306405  |
| Q5U206        | KMKDSEEEIR+Oxidation(1)                                       | 2.041016806        |                |           |
| Q5U206        | MKDSEEEIR                                                     | 0.836741045        | 2              | 3.104297  |
| Q5U206        | MKDSEEEIR+Oxidation(0)                                        | 1.370771759        |                |           |
| <b>Q5U211</b> | <b>SNX3 Sorting nexin 3</b>                                   | <b>0.847474792</b> | <b>0.34773</b> | <b>2</b>  |
| Q5U211        | CLHMFLQDEIIDK                                                 | 0.67704088         | 2              | 2.37173   |
| Q5U211        | GDDGIFDDNFIEER                                                | 1.100746179        | 2              | 2.842775  |
| <b>Q5U2Q7</b> | <b>ERF1 Eukaryotic peptide chain release factor subunit 1</b> | <b>1.162733739</b> | <b>0.67023</b> | <b>3</b>  |
| Q5U2Q7        | LSVLGAITSVQQR                                                 | 0.867912815        | 2              | 2.402318  |
| Q5U2Q7        | YFDEISQDTGK                                                   | 1.191853343        | 2              | 2.682383  |
| Q5U2Q7        | YVLHCQGTETEEK                                                 | 1.273241894        | 2              | 3.63262   |
| <b>Q5U300</b> | <b>UBA1 Ubiquitin_like modifier_activating enzyme 1</b>       | <b>0.954573761</b> | <b>0.91983</b> | <b>12</b> |
| Q5U300        | AAVASLLQSVQVPEFTP                                             | 1.20042746         | 3              | 3.715683  |
| Q5U300        | AENYDISPADR                                                   | 0.921438633        | 2              | 2.99153   |
| Q5U300        | DNPGVVTCLDEAR                                                 | 1.057073123        | 2              | 3.39023   |

|               |                                                       |                    |                |           |
|---------------|-------------------------------------------------------|--------------------|----------------|-----------|
| Q5U300        | FEVQGLQPNGEEMTLK                                      | 0.929791118        | 2              | 3.892946  |
| Q5U300        | IYDDDFQNLGDGVANALDNVDAR                               | 0.808042728        | 2              | 4.449693  |
| Q5U300        | LDQPMTEIVSR                                           | 1.041775366        | 2              | 2.627829  |
| Q5U300        | MLQTSSVLVSGLR                                         | 0.957799943        | 2              | 2.372286  |
| Q5U300        | NEEDATELVTLAQAVNAR                                    | 0.84666434         | 2              | 4.557729  |
| Q5U300        | NFPNAIEHTLQWAR                                        | 1.099720371        | 2              | 3.440497  |
| Q5U300        | SLPASLAEPDFVMTDFAK                                    | 0.959898592        | 2              | 3.549592  |
| Q5U300        | SPPAVQQDNVDEDLIR                                      | 0.918824078        | 2              | 4.720029  |
| Q5U300        | VVQGHQQLDSYK                                          | 1.112995676        | 2              | 3.925257  |
| <b>Q5XFX0</b> | <b>TAGL2 Transgelin_2</b>                             | <b>0.890427376</b> | <b>0.02343</b> | <b>4</b>  |
| Q5XFX0        | DDGLFSGDPNWFPK                                        | 0.765766976        | 2              | 3.560257  |
| Q5XFX0        | QMEQISQFLQAAER                                        | 0.629647215        | 2              | 3.099038  |
| Q5XFX0        | TLMNGLGLAVAR                                          | 0.649658912        | 2              | 3.554724  |
| Q5XFX0        | YGINTTDFQTVDLWEGK                                     | 0.813786345        | 2              | 5.069996  |
| <b>Q5XHY5</b> | <b>SYTC Threonyl_tRNA synthetase_ cytoplasmic</b>     | <b>0.965319249</b> | <b>0.28495</b> | <b>11</b> |
| Q5XHY5        | AEHDSILAEK                                            | 1.160600712        | 2              | 2.597994  |
| Q5XHY5        | DQELYFFHELSPGSCFFLPK                                  | 1.57301292         | 3              | 3.418052  |
| Q5XHY5        | FLGDIEIWNQAEK                                         | 1.011610573        | 2              | 3.594064  |
| Q5XHY5        | FMVDIDLDPGCTLNK                                       | 0.643129175        | 2              | 2.976842  |
| Q5XHY5        | GFQEVVTPNIFNSR                                        | 1.105988466        | 2              | 3.122215  |
| Q5XHY5        | LKAEHDSILAEK                                          | 2.934340836        | 2              | 3.249691  |
| Q5XHY5        | NELSGALTGLTR                                          | 0.897096008        | 2              | 3.266307  |
| Q5XHY5        | QLENSLNEFGEK                                          | 1.234962944        | 2              | 3.185023  |
| Q5XHY5        | QVMVVPVGPCTCDEYAQK                                    | 0.955895446        | 2              | 3.267956  |
| Q5XHY5        | TTPYQIACGISQGLADNTVVAK                                | 1.134212091        | 2              | 4.226333  |
| Q5XHY5        | WELNPGDGAFYGPK                                        | 1.015557026        | 2              | 3.761512  |
| <b>Q5XH20</b> | <b>TRAP1 Heat shock protein 75 kDa_ mitochondrial</b> | <b>0.956845328</b> | <b>0.87608</b> | <b>13</b> |
| Q5XH20        | AFLEALQHQAEISSR                                       | 0.935894135        | 2              | 4.587068  |
| Q5XH20        | AQLLQPTLEINPR                                         | 0.821917311        | 2              | 3.477069  |
| Q5XH20        | EELVSNLGTIAR                                          | 1.005732721        | 2              | 2.55594   |
| Q5XH20        | ELISNASDALEK                                          | 1.28661011         | 2              | 3.58824   |
| Q5XH20        | FEDTSPAGER                                            | 1.014254891        | 2              | 2.767632  |
| Q5XH20        | GTITIQDTGIGMTK                                        | 0.875990439        | 2              | 3.493619  |
| Q5XH20        | GVVDESDIPLNSR                                         | 1.011721285        | 2              | 4.912754  |
| Q5XH20        | HLAEHSPYYEAMK                                         | 1.244870443        | 2              | 3.282081  |
| Q5XH20        | LDTHPAMVTVLEMGAAR                                     | 0.822326404        | 3              | 4.365638  |
| Q5XH20        | SDCKDFANESR                                           | 1.079397073        | 2              | 2.759222  |
| Q5XH20        | VCEGQVLPMEIHLQTDAAEK                                  | 1.124142626        | 3              | 3.615469  |
| Q5XH20        | YESSALPAGQLTSLSDYASR                                  | 0.902976082        | 2              | 5.707639  |
| Q5XH20        | YIAQAYDKPR                                            | 1.002730677        | 2              | 2.878207  |
| <b>Q5XI22</b> | <b>THIC Acetyl_CoA acetyltransferase_ cytosolic</b>   | <b>0.960509939</b> | <b>0.331</b>   | <b>7</b>  |
| Q5XI22        | AGHFDKEIVPVHVSSR                                      | 0.608117207        | 2              | 4.251559  |
| Q5XI22        | HGSNLEAMSK                                            | 1.316497375        | 2              | 2.778616  |
| Q5XI22        | HGSNLEAMSK+Oxidation(7)                               | 0.78996006         |                |           |
| Q5XI22        | LKPYFLDTGTGTVPANASGMNDGAAAVVLMK                       | 1.055806835        | 3              | 4.880542  |
| Q5XI22        | TAIGSFNGALSTVPVHNLGTTVIK                              | 0.866793644        | 2              | 4.888167  |
| Q5XI22        | VAPEEVSEVIFGHVLTAGCGQNPTR                             | 1.540861052        | 3              | 5.933632  |
| Q5XI22        | VNIDGGAIALGHPLGASGCR                                  | 0.906017715        | 2              | 5.820588  |
| <b>Q5XI32</b> | <b>CAPZB F_actin_capping protein subunit beta</b>     | <b>1.11928811</b>  | <b>0.8269</b>  | <b>7</b>  |
| Q5XI32        | KLEVEANNAFDQYR                                        | 0.920558701        | 2              | 4.473894  |
| Q5XI32        | LEVEANNAFDQYR                                         | 0.912418224        | 2              | 3.371792  |
| Q5XI32        | LVEDMENK                                              | 2.280204691        | 2              | 2.319997  |
| Q5XI32        | NLSDLIDLVPSLCEDLLSSVDQPLK                             | 0.87775518         |                |           |
| Q5XI32        | SGSGTMNLGGSLTR                                        | 0.910906451        | 2              | 2.868657  |
| Q5XI32        | STLNEIFYGK                                            | 0.905223202        | 2              | 2.610337  |
| Q5XI32        | YDPPLEDGAMPSAR                                        | 0.873954326        | 2              | 2.523153  |



|               |                                                                                  |                    |                |           |
|---------------|----------------------------------------------------------------------------------|--------------------|----------------|-----------|
| <b>Q5XI60</b> | <b>REEP6 Receptor expression_enhancing protein 6</b>                             | <b>1.411907582</b> | <b>0.0027</b>  | <b>3</b>  |
| Q5XI60        | ALDIAAGITR                                                                       | 1.48516776         | 2              | 3.583572  |
| Q5XI60        | HHVALDSAASQLSGR                                                                  | 1.40363325         | 2              | 4.258485  |
| Q5XI60        | NVATDALGALEAR                                                                    | 1.015543102        | 2              | 3.819297  |
| <b>Q5XI73</b> | <b>GDIR1 Rho GDP_dissociation inhibitor 1</b>                                    | <b>0.91997923</b>  | <b>0.04644</b> | <b>6</b>  |
| Q5XI73        | AEEYEFITPMEEAPK                                                                  | 0.837223301        | 2              | 4.365891  |
| Q5XI73        | LTLVCSTAPGPLEDLTGDLSEFKK                                                         | 0.862772534        | 3              | 3.312611  |
| Q5XI73        | SIQEIQELDKDDESLR                                                                 | 0.52135122         | 2              | 4.934564  |
| Q5XI73        | SIQEIQELDKDDESLRK                                                                | 0.929505807        | 2              | 4.319915  |
| Q5XI73        | TDYMGVSYGPR                                                                      | 0.903208138        | 2              | 2.67347   |
| Q5XI73        | VAVSADPNVNPVIVTR                                                                 | 1.232612247        | 2              | 4.454436  |
| <b>Q5XI78</b> | <b>ODO1 2_oxoglutarate dehydrogenase_mitochondrial</b>                           | <b>0.866315023</b> | <b>0.99996</b> | <b>15</b> |
| Q5XI78        | FGLEGCEVLIPALK                                                                   | 1.091776747        | 2              | 3.408001  |
| Q5XI78        | FLDTAFDLDAFK                                                                     | 1.173224692        | 2              | 2.468751  |
| Q5XI78        | FLDTAFDLDAFKK                                                                    | 0.989578652        | 2              | 2.83962   |
| Q5XI78        | GHHVAQLDPLGLDADLDSSVPADIISSTDK                                                   | 0.931189571        | 3              | 4.433742  |
| Q5XI78        | ICEEAFTR                                                                         | 1.167805688        | 2              | 2.440774  |
| Q5XI78        | IEQLSPFPFDLLLK                                                                   | 1.035419217        | 2              | 3.613792  |
| Q5XI78        | LEAADEGSGDMK                                                                     | 0.863408709        | 2              | 2.423432  |
| Q5XI78        | NITLSLVANPSHLEAADPVVMGK                                                          | 1.01399362         | 3              | 4.982562  |
| Q5XI78        | NTNAGAPPGTAYQSPLSLR                                                              | 1.154036563        | 2              | 4.521922  |
| Q5XI78        | SSLATMAHAQSLVEAQPNDK                                                             | 0.970261908        | 3              | 4.480308  |
| Q5XI78        | SWDIFFR                                                                          | 0.922212857        | 2              | 2.353437  |
| Q5XI78        | VIPEDGPAAQNPDK                                                                   | 1.168479041        | 2              | 3.079614  |
| Q5XI78        | VVNAPIFHVNSDDPEAVMYVCK                                                           | 1.029714775        | 3              | 4.211287  |
| Q5XI78        | YAEVVSVQGVVNPQPEYEEIEISK                                                         | 0.911303645        | 2              | 4.176691  |
| Q5XI78        | YAEVVSVQGVVNPQPEYEEIEISKYDK                                                      | 1.090168076        | 3              | 3.80502   |
| <b>Q5XI95</b> | <b>ADH6 Alcohol dehydrogenase 6</b>                                              | <b>0.928350917</b> | <b>0.00496</b> | <b>5</b>  |
| Q5XI95        | ATVLWKPGLAIEIEVAPPK                                                              | 0.472913992        | 2              | 3.88944   |
| Q5XI95        | IIAVDINK                                                                         | 0.927495929        | 2              | 2.875825  |
| Q5XI95        | MVATGVCGTDIK                                                                     | 0.722324924        | 2              | 3.224852  |
| Q5XI95        | NNICTEIR                                                                         | 0.549716855        | 2              | 2.461977  |
| Q5XI95        | TVGATDCV DPR                                                                     | 0.466129756        | 2              | 2.601793  |
| <b>Q5XIC0</b> | <b>ECI2 Enoyl_CoA delta isomerase 2_mitochondrial</b>                            | <b>0.867180697</b> | <b>0.29377</b> | <b>5</b>  |
| Q5XIC0        | ATQQDFENAMNQVK                                                                   | 0.802855301        | 2              | 4.765385  |
| Q5XIC0        | GILVTSEGGITK                                                                     | 0.853856479        | 2              | 3.844986  |
| Q5XIC0        | LHAVNEEECTTLR                                                                    | 0.848050502        | 2              | 3.651217  |
| Q5XIC0        | QNYVDLVSSLSSSEASSQ GK                                                            | 0.883849574        | 2              | 5.1551    |
| Q5XIC0        | WDAWNALGSLPK                                                                     | 0.814125871        | 2              | 3.596739  |
| <b>Q5XIE6</b> | <b>HIB3 3_hydroxyisobutyryl_CoA hydrolase_mitochondrial</b>                      | <b>0.876421715</b> | <b>0.93803</b> | <b>5</b>  |
| Q5XIE6        | AGIATHFVDSEK                                                                     | 1.044490029        | 2              | 3.386729  |
| Q5XIE6        | AGQTLSDQLFR                                                                      | 1.012032765        | 2              | 2.382031  |
| Q5XIE6        | AVLIDKDQTPK                                                                      | 0.883115265        | 2              | 2.594764  |
| Q5XIE6        | INSCFSANTVEQILENLR                                                               | 0.827217932        | 2              | 3.847363  |
| Q5XIE6        | LHVLEEELLALK                                                                     | 0.875864307        | 3              | 3.679724  |
| <b>Q5XIF3</b> | <b>NDUS4 NADH dehydrogenase [ubiquinone] iron_sulfur protein 4_mitochondrial</b> | <b>1.030833305</b> | <b>1</b>       | <b>2</b>  |
| Q5XIF3        | HGWSYDVEGR                                                                       | 1.037463165        | 2              | 2.842702  |
| Q5XIF3        | LDVPTLTGVPEEHK                                                                   | 1.005309411        | 3              | 3.608404  |
| <b>Q5XIF6</b> | <b>TBA4A Tubulin alpha_4A chain</b>                                              | <b>1.03481545</b>  | <b>0.77785</b> | <b>5</b>  |
| Q5XIF6        | AVFVDLEPTVIDEIR                                                                  | 1.042376098        | 2              | 3.760549  |
| Q5XIF6        | AYHEQLSVAEITNACFEPANQMVK                                                         | 1.071499573        | 3              | 5.324975  |
| Q5XIF6        | DVNAAIAAIK                                                                       | 1.041944437        | 2              | 2.880304  |
| Q5XIF6        | SIQFVDWCPTGFK                                                                    | 1.067795996        | 2              | 4.34043   |

|               |                                                                          |                    |                |           |
|---------------|--------------------------------------------------------------------------|--------------------|----------------|-----------|
| Q5XIF6        | TIGGGDDSFTHFFCETGAGK                                                     | 2.135267293        | 2              | 4.564332  |
| <b>Q5XIG4</b> | <b>OCAD1 OCIA domain containing protein 1</b>                            | <b>0.94409476</b>  | <b>0.99883</b> | <b>2</b>  |
| Q5XIG4        | SVPLAATSMITQGLISK                                                        | 0.845575493        | 2              | 3.996675  |
| Q5XIG4        | YDSNVSGQSFSGTSPAADNIEK                                                   | 1.007914776        | 2              | 5.894697  |
| <b>Q5XIH7</b> | <b>PHB2 Prohibitin_2</b>                                                 | <b>0.974572218</b> | <b>0.17159</b> | <b>11</b> |
| Q5XIH7        | AQVSLIR                                                                  | 0.918858576        | 2              | 2.773294  |
| Q5XIH7        | DLQMVNISLR                                                               | 1.348900864        | 2              | 3.193563  |
| Q5XIH7        | FNASQLITQR                                                               | 0.921267323        | 2              | 3.687476  |
| Q5XIH7        | IGGVQQDTILAEGLHFR                                                        | 1.059909628        | 3              | 4.425041  |
| Q5XIH7        | IPWFQYPIIYDIR                                                            | 0.974515163        | 2              | 2.953961  |
| Q5XIH7        | IVQAEGEAEAAK                                                             | 0.979474817        | 2              | 4.184361  |
| Q5XIH7        | IYLTADNLVNLQDESFTK                                                       | 1.216696914        | 2              | 4.575488  |
| Q5XIH7        | LGLDYEER                                                                 | 0.640956859        | 2              | 2.598001  |
| Q5XIH7        | LLGAGAVAYGVR                                                             | 1.528971602        | 2              | 3.493178  |
| Q5XIH7        | VLPSIVNEVLK                                                              | 0.81241701         | 2              | 2.815963  |
| Q5XIH7        | VLSRPNAQELPSMYQR                                                         | 0.964473228        | 2              | 3.836985  |
| <b>Q5XIM9</b> | <b>TCPB T_complex protein 1 subunit beta</b>                             | <b>1.368670183</b> | <b>1E-05</b>   | <b>9</b>  |
| Q5XIM9        | EALLSSAVDHGSDEVK                                                         | 1.621556759        | 2              | 4.211146  |
| Q5XIM9        | GATQQILDEAER                                                             | 1.367961732        | 2              | 3.909883  |
| Q5XIM9        | GSGNLEAIHVIK                                                             | 1.785668212        | 2              | 2.915132  |
| Q5XIM9        | HGINCFINR                                                                | 1.423387358        | 2              | 2.540056  |
| Q5XIM9        | ILIANTGMDTDK                                                             | 1.517732828        | 2              | 2.742394  |
| Q5XIM9        | LIEEVMIGEDK                                                              | 0.984565115        | 2              | 3.128077  |
| Q5XIM9        | NIGVDNPAK                                                                | 1.066116357        | 1              | 2.026639  |
| Q5XIM9        | SLHDALCVLAQTVK                                                           | 0.856242169        | 2              | 3.778103  |
| Q5XIM9        | VQDDEVGDGTTSVTVLAAELLR                                                   | 1.224688458        | 2              | 4.557994  |
| <b>Q5XIN6</b> | <b>LETM1 LETM1 and EF_hand domain containing protein 1_mitochondrial</b> | <b>0.908811005</b> | <b>0.00205</b> | <b>6</b>  |
| Q5XIN6        | AAEVEGEQVDNK                                                             | 1.009115296        | 2              | 4.005324  |
| Q5XIN6        | FLQDTIEEMALK                                                             | 0.921867435        | 2              | 2.958354  |
| Q5XIN6        | LDPAAASSPTGESVISVDELISAMK                                                | 0.702841582        | 2              | 5.473849  |
| Q5XIN6        | LEEGGPVYSPPAQVVVK                                                        | 0.798200048        | 2              | 3.09571   |
| Q5XIN6        | LFDELTLNLRPQLVALCK                                                       | 1.078706402        | 3              | 4.42701   |
| Q5XIN6        | LLELQSIGTNNFLR                                                           | 0.775423926        | 2              | 2.988791  |
| <b>Q5XIT9</b> | <b>MCCB Methylcrotonoyl_CoA carboxylase beta chain_mitochondrial</b>     | <b>0.852211363</b> | <b>0.36004</b> | <b>10</b> |
| Q5XIT9        | AATGEEVSAEDLGGADLHCR                                                     | 0.748010425        | 2              | 4.953421  |
| Q5XIT9        | ALVNQLHER                                                                | 0.923589165        | 2              | 2.587605  |
| Q5XIT9        | ALYGDTLVTGFAR                                                            | 0.920900207        | 2              | 3.679648  |
| Q5XIT9        | AQEIALQNR                                                                | 0.809023507        | 2              | 2.627568  |
| Q5XIT9        | DRIDNLIDPGSPFLEFSQFAGYK                                                  | 1.209452535        | 3              | 4.390281  |
| Q5XIT9        | KLDVTVPESEPLFPADELYGIVGANLK                                              | 0.92218431         | 3              | 4.436713  |
| Q5XIT9        | LGTQPDSGSSTYQENYEQMK                                                     | 0.725209882        | 2              | 5.084144  |
| Q5XIT9        | LWDDGIIDPVDTR                                                            | 0.638432297        | 2              | 3.265567  |
| Q5XIT9        | LYGEEVPPAGGIITGIGR                                                       | 0.766340263        | 2              | 4.380058  |
| Q5XIT9        | QGTIFLAGPPLVK                                                            | 0.826069506        | 2              | 2.46614   |
| <b>Q5XIU5</b> | <b>PSMF1 Proteasome inhibitor PI31 subunit</b>                           | <b>0.957762879</b> | <b>0.92695</b> | <b>2</b>  |
| Q5XIU5        | ALIDPSSGLPNR                                                             | 0.933407053        | 2              | 2.540231  |
| Q5XIU5        | DPLSPFAVGEDLDLPGFCQR                                                     | 0.966618881        | 2              | 2.728643  |
| <b>Q5XIU9</b> | <b>PGRC2 Membrane associated progesterone receptor component 2</b>       | <b>1.17269393</b>  | <b>0.22356</b> | <b>3</b>  |
| Q5XIU9        | FYPAGPYGIFAGR                                                            | 1.033500523        | 2              | 2.765221  |
| Q5XIU9        | GLATFCLK                                                                 | 1.184910197        | 2              | 2.848962  |
| Q5XIU9        | GLCSGPAGEESPAATLPR                                                       | 0.838580953        | 2              | 4.786752  |
| <b>Q5XKE0</b> | <b>MYPC2 Myosin binding protein C_fast_type</b>                          | <b>0.844358475</b> | <b>0.39815</b> | <b>3</b>  |
| Q5XKE0        | LVVEISDPDLPLK                                                            | 0.698491583        | 2              | 2.824512  |
| Q5XKE0        | SEDAGELDFSGLLK                                                           | 1.280410466        | 2              | 3.418824  |

|               |                                                                                |                    |                |          |
|---------------|--------------------------------------------------------------------------------|--------------------|----------------|----------|
| Q5XKE0        | TSDNSIVVVAGNK                                                                  | 0.852208439        | 2              | 2.627337 |
| <b>Q60587</b> | <b>ECHB Trifunctional enzyme subunit beta_mitochondrial</b>                    | <b>0.891137703</b> | <b>0.00941</b> | <b>7</b> |
| Q60587        | ALAMGYKPK                                                                      | 0.875257192        | 2              | 2.537009 |
| Q60587        | AQDEGHLSDIVPFK                                                                 | 1.238508903        | 2              | 3.040215 |
| Q60587        | DFIYVSQDPK                                                                     | 0.953336752        | 2              | 2.675435 |
| Q60587        | DGGQYALVAACAAGQGQHAMIVEAYPK                                                    | 0.780676458        | 3              | 4.630652 |
| Q60587        | DNGIRPSSLEQMAK                                                                 | 0.849092689        | 2              | 3.24394  |
| Q60587        | DQLLLGPTYATPK                                                                  | 1.031737908        | 2              | 3.72816  |
| Q60587        | NIVVVEGVR                                                                      | 0.919061957        | 2              | 2.859435 |
| <b>Q60598</b> | <b>SRC8 Src substrate cortactin</b>                                            | <b>0.865219723</b> | <b>0.91609</b> | <b>3</b> |
| Q60598        | ENVFQEHQTLK                                                                    | 1.286635461        | 2              | 2.305964 |
| Q60598        | NASTFEEVVQVPSAYQK                                                              | 1.546440651        | 2              | 3.476493 |
| Q60598        | VDQSAVGFYEQGK                                                                  | 0.855420802        | 2              | 3.031708 |
| <b>Q60759</b> | <b>GCDH Glutaryl_CoA dehydrogenase_mitochondrial</b>                           | <b>1.032499042</b> | <b>0.35809</b> | <b>4</b> |
| Q60759        | DILGGNGISDEYHVIR                                                               | 1.003052394        | 2              | 3.724004 |
| Q60759        | DIVYEMGELGLGPTIK                                                               | 1.119091482        | 2              | 2.378566 |
| Q60759        | GYGCAGVSSVAYGLLTR                                                              | 1.185314119        | 2              | 3.495746 |
| Q60759        | HAMNLEAVNTYEGTHDIHALILGR                                                       | 0.991618489        | 4              | 5.504468 |
| <b>Q60817</b> | <b>NACA Nascent polypeptide_associated complex subunit alpha</b>               | <b>1.178457447</b> | <b>0.23364</b> | <b>3</b> |
| Q60817        | DIELVMSQANVSR                                                                  | 1.089423212        | 2              | 3.21888  |
| Q60817        | IEDLSQQAQLAAAEK                                                                | 1.289943617        | 2              | 4.623466 |
| Q60817        | NILFVITKPDVYK                                                                  | 1.229842447        | 2              | 3.316381 |
| <b>Q60952</b> | <b>CP250 Centrosome_associated protein CEP250</b>                              | <b>0.889530238</b> | <b>0.52515</b> | <b>2</b> |
| Q60952        | AQVIESQRGQIDLK                                                                 | 0.835565974        | 2              | 2.485214 |
| Q60952        | GQIQDLKK                                                                       | 0.907294339        | 1              | 1.926622 |
| <b>Q61029</b> | <b>LAP2B Lamina_associated polypeptide 2_isoforms beta/delta/epsilon/gamma</b> | <b>0.800136617</b> | <b>3.2E-07</b> | <b>3</b> |
| Q61029        | SELVANNVTLPAGEQR                                                               | 0.772670156        | 2              | 4.318009 |
| Q61029        | SSTPLPTVSSAENR                                                                 | 0.912599677        | 2              | 2.861665 |
| Q61029        | YGVNPGPIVGTR                                                                   | 0.781664045        | 2              | 2.49091  |
| <b>Q61035</b> | <b>SYHC Histidyl_tRNA synthetase_cytoplasmic</b>                               | <b>1.088034887</b> | <b>0.97044</b> | <b>2</b> |
| Q61035        | ASAEQIEEVTK                                                                    | 1.02083256         | 2              | 3.13664  |
| Q61035        | REDLVEEIR                                                                      | 1.059062644        | 2              | 2.446332 |
| <b>Q61043</b> | <b>NIN Ninein</b>                                                              | <b>0.844061869</b> | <b>0.42082</b> | <b>2</b> |
| Q61043        | ERATAAAMKQEILER                                                                | 0.879530555        | 2              | 2.347957 |
| Q61043        | NEITTLNEEDSISNLK                                                               | 0.83985724         | 2              | 2.369422 |
| <b>Q61301</b> | <b>CTNA2 Catenin alpha_2</b>                                                   | <b>0.881166969</b> | <b>0.00558</b> | <b>3</b> |
| Q61301        | LLEPLVTQVTTLVNTSNK                                                             | 0.90265869         | 2              | 3.852325 |
| Q61301        | TSVQTEDDQLIAGQSAR                                                              | 1.463023569        | 2              | 5.11628  |
| Q61301        | WDDSGNDIIVLAK                                                                  | 0.869037757        | 2              | 3.063114 |
| <b>Q61335</b> | <b>BAP31 B_cell receptor_associated protein 31</b>                             | <b>0.763187484</b> | <b>0.51679</b> | <b>3</b> |
| Q61335        | AENEALAMQK                                                                     | 0.846477258        | 2              | 3.189856 |
| Q61335        | AENEALAMQK+Oxidation(7)                                                        | 0.899135668        |                |          |
| Q61335        | YMEENDQLK                                                                      | 0.699091838        | 2              | 2.606822 |
| <b>Q61595</b> | <b>KTN1 Kinectin</b>                                                           | <b>1.402568798</b> | <b>0.14035</b> | <b>3</b> |
| Q61595        | EKNWEAMEALASTEK                                                                | 0.645689713        | 2              | 2.303116 |
| Q61595        | TAEHEAAQQDLQSK                                                                 | 0.978212693        | 2              | 4.094522 |
| Q61595        | VEPVLVTK                                                                       | 1.477850476        | 2              | 2.391616 |
| <b>Q61656</b> | <b>DDX5 Probable ATP_dependent RNA helicase DDX5</b>                           | <b>0.923857006</b> | <b>0.0461</b>  | <b>5</b> |
| Q61656        | ELAQQVQQVAAEYCR                                                                | 1.876529625        | 2              | 3.525018 |
| Q61656        | GDPICLVLAPTR                                                                   | 0.905968446        | 2              | 3.290333 |
| Q61656        | LIDFLECGK                                                                      | 1.181060938        | 2              | 2.377806 |
| Q61656        | MLDMGFEPQIR                                                                    | 0.75837971         | 2              | 2.734263 |

|               |                                                                           |                    |                |           |
|---------------|---------------------------------------------------------------------------|--------------------|----------------|-----------|
| Q61656        | WNLDELPK                                                                  | 1.290670245        | 2              | 2.339129  |
| <b>Q61789</b> | <b>LAMA3 Laminin subunit alpha_3</b>                                      | <b>0.886850129</b> | <b>0.9343</b>  | <b>2</b>  |
| Q61789        | QLEEIK                                                                    | 0.851133662        | 1              | 2.071705  |
| Q61789        | RLQQVSPALNSLQQLTK                                                         | 0.99325752         | 2              | 2.358094  |
| <b>Q61838</b> | <b>A2M Alpha_2_macroglobulin</b>                                          | <b>0.928534112</b> | <b>0.99897</b> | <b>2</b>  |
| Q61838        | QQNSHGGFSSQTDTVVALQALSK                                                   | 0.991662301        | 3              | 3.40497   |
| Q61838        | TEVNTNHVLIYIEK                                                            | 0.919048666        | 2              | 4.017232  |
| <b>Q61941</b> | <b>transhydrogenase_mitochondrial</b>                                     | <b>1.006881088</b> | <b>0.56793</b> | <b>11</b> |
| Q61941        | EANSIVITPGYGLCAAK                                                         | 0.998395442        | 2              | 3.62171   |
| Q61941        | FGIHPVAGR                                                                 | 0.800363647        | 2              | 2.600293  |
| Q61941        | GITHIGYDLPSPR                                                             | 0.925866073        | 3              | 3.492761  |
| Q61941        | ILIVGGGVAGLASAGAAK                                                        | 0.940908335        | 2              | 4.986356  |
| Q61941        | KTTVLAMDQVPR                                                              | 0.832693477        | 2              | 3.020321  |
| Q61941        | LGGLTAAALGGAVGIMGLANGLR+Oxidation(14)                                     | 0.918689984        |                |           |
| Q61941        | MATQASTLYSNNITK                                                           | 1.575573948        | 2              | 4.302822  |
| Q61941        | QGFNVVVEGAGEASK                                                           | 1.038317873        | 2              | 3.995804  |
| Q61941        | SLGAEPLEVDLK                                                              | 0.915201809        | 2              | 3.072893  |
| Q61941        | TTVLAMDQVPR                                                               | 0.821656102        | 2              | 3.108333  |
| Q61941        | VTIAQGYDALSSMANISGYK                                                      | 0.816948522        | 2              | 5.16627   |
| <b>Q62095</b> | <b>DDX3Y ATP_dependent RNA helicase DDX3Y</b>                             | <b>1.655015392</b> | <b>2.4E-05</b> | <b>7</b>  |
| Q62095        | DLLDLLVEAK                                                                | 2.500824688        | 2              | 2.673614  |
| Q62095        | GCHLLVATPGR                                                               | 1.220083217        | 2              | 2.422241  |
| Q62095        | HVINFDLPSDIEEYVHR                                                         | 1.59684205         | 3              | 3.741286  |
| Q62095        | QYPISLVLAPTR                                                              | 1.270101327        | 2              | 2.366513  |
| Q62095        | SFLDLLNATGK                                                               | 1.394669666        | 2              | 4.648483  |
| Q62095        | VGNLGLATSFNER                                                             | 1.33926269         | 2              | 3.054713  |
| Q62095        | VGSTSENITQK                                                               | 1.655021673        | 2              | 2.719128  |
| <b>Q62261</b> | <b>SPTB2 Spectrin beta chain_brain 1</b>                                  | <b>1.067951112</b> | <b>0.92267</b> | <b>17</b> |
| Q62261        | ALVADSHPESEK                                                              | 1.112346165        | 2              | 3.214828  |
| Q62261        | EGMQLISEKPEAEVVK                                                          | 0.816669272        | 2              | 2.633162  |
| Q62261        | EIEELQSQQAALSQEGK                                                         | 1.162511292        | 2              | 4.620604  |
| Q62261        | EVDDLEQWIAER                                                              | 0.82309479         | 2              | 2.469398  |
| Q62261        | EVVAGSHELGDYEHVMTLQER                                                     | 0.679599537        | 3              | 4.185279  |
| Q62261        | HQILEQAVEDYAETVHQLSK                                                      | 0.786040162        | 3              | 4.062027  |
| Q62261        | ITDLYTDLR                                                                 | 0.943478155        | 2              | 2.601324  |
| Q62261        | IVSSNDVGHDEYSTQSLVK                                                       | 0.947699708        | 3              | 3.53696   |
| Q62261        | LSDGENYLFQAK                                                              | 0.856198979        | 2              | 2.425565  |
| Q62261        | LVSQDNFGFDLPAVEAATK                                                       | 1.219373205        | 2              | 3.226314  |
| Q62261        | LVSQDNFGFDLPAVEAATK                                                       | 1.175694395        | 2              | 3.10879   |
| Q62261        | SNAHYNLQNAFNLAEQHLGLTK                                                    | 1.100865297        | 3              | 3.701616  |
| Q62261        | SQNIITDSSSLNAEAIR                                                         | 0.976910096        | 2              | 5.182074  |
| Q62261        | TLETPAAQMEGFLNR                                                           | 1.61298562         | 2              | 3.75248   |
| Q62261        | TQTAIASEDMPNTLTAEK                                                        | 1.096300151        | 2              | 5.141212  |
| Q62261        | VIESTQDLGNDLAGVMALQR                                                      | 0.25052384         | 3              | 4.310005  |
| Q62261        | VLDNAIETEK                                                                | 0.756577272        | 2              | 2.523117  |
| <b>Q62425</b> | <b>NDUA4 NADH dehydrogenase [ubiquinone] 1 alpha subcomplex subunit 4</b> | <b>1.26579325</b>  | <b>0.00097</b> | <b>3</b>  |
| Q62425        | FYSVNVVDYSK                                                               | 1.308896042        | 2              | 2.875136  |
| Q62425        | KNNPEPWNK                                                                 | 0.91632306         | 2              | 2.46735   |
| Q62425        | LGPNEQYK                                                                  | 1.177129575        | 2              | 2.303015  |
| <b>Q62446</b> | <b>FKBP3 Peptidyl_prolyl cis_trans isomerase FKBP3</b>                    | <b>1.111542421</b> | <b>0.75584</b> | <b>2</b>  |
| Q62446        | FLQDHGSDSFLAEHK                                                           | 1.099061022        | 3              | 3.677244  |
| Q62446        | SEETLDEGPPK                                                               | 1.119315702        | 2              | 3.49318   |
| <b>Q62452</b> | <b>UD19 UDP_glucuronosyltransferase 1_9</b>                               | <b>0.826208293</b> | <b>1.7E-14</b> | <b>5</b>  |
| Q62452        | AMEIAEALGR                                                                | 0.720460723        | 2              | 3.802165  |
| Q62452        | GAGVTLNVLEMTADDLENALK                                                     | 0.712380308        | 3              | 5.544568  |
| Q62452        | GAGVTLNVLEMTADDLENALK+Oxidation(10)                                       | 1.05313379         |                |           |

|               |                                                                       |                    |                |           |
|---------------|-----------------------------------------------------------------------|--------------------|----------------|-----------|
| Q62452        | WLPQNDDLGHPK                                                          | 0.877131703        | 2              | 3.141353  |
| Q62452        | YTGTRPSNLAK                                                           | 0.907986826        | 2              | 2.621476  |
| <b>Q62465</b> | <b>VAT1 Synaptic vesicle membrane protein VAT_1 homolog</b>           | <b>0.800041917</b> | <b>2.1E-07</b> | <b>6</b>  |
| Q62465        | ACGLNFADLMGR                                                          | 0.797381879        | 2              | 3.002732  |
| Q62465        | CLVLTGFGGYDK                                                          | 1.09020416         | 2              | 3.433311  |
| Q62465        | GVDIVMDPLGGSDTAK                                                      | 0.801174315        | 2              | 4.022839  |
| Q62465        | IDSVWPF EK                                                            | 0.799672779        | 1              | 1.947339  |
| Q62465        | TVENVTVFGTASASK                                                       | 1.093668536        | 2              | 3.884974  |
| Q62465        | VLLVPGPEKET                                                           | 0.7221742          | 2              | 2.681477  |
| <b>Q62468</b> | <b>VILI Villin_1</b>                                                  | <b>1.125853032</b> | <b>0.04813</b> | <b>2</b>  |
| Q62468        | HEDCYILDQGLKIFVWK                                                     | 1.12446017         | 2              | 2.466425  |
| Q62468        | SGAMSQALNFIKAK                                                        | 1.331162709        | 2              | 2.343069  |
| <b>Q62636</b> | <b>RAP1B Ras_related protein Rap_1b</b>                               | <b>1.150304571</b> | <b>0.4574</b>  | <b>3</b>  |
| Q62636        | INVNEIFYDLVR                                                          | 1.214152168        | 2              | 3.998847  |
| Q62636        | QWSNCAFLESSAK                                                         | 1.145799161        | 2              | 2.809093  |
| Q62636        | YDPTIEDSYR                                                            | 0.459384058        | 2              | 2.369595  |
| <b>Q62651</b> | <b>ECH1 Delta(3_5)_Delta(2_4)_dienoyl_CoA isomerase_mitochondrial</b> | <b>0.751834132</b> | <b>0.04104</b> | <b>7</b>  |
| Q62651        | HVLHVQLNRPEK                                                          | 0.708713119        | 2              | 3.623407  |
| Q62651        | IPEEVSDHNYESIQTSAQK                                                   | 1.124660251        | 3              | 3.86903   |
| Q62651        | MMADEALDGLVSR                                                         | 0.927976374        | 2              | 3.596234  |
| Q62651        | MMADEALDGLVSR+Oxidation(0)                                            | 0.902771684        |                |           |
| Q62651        | MMADEALDGLVSR+Oxidation(1)                                            | 0.902771684        | 2              | 3.352635  |
| Q62651        | RIPEEVSDHNYESIQTSAQK                                                  | 0.832349569        | 3              | 5.695125  |
| Q62651        | SLVNELTFTAR                                                           | 0.745888769        | 2              | 3.470867  |
| <b>Q62717</b> | <b>CAPS1 Calcium_dependent secretion activator 1</b>                  | <b>0.823691521</b> | <b>0.47698</b> | <b>2</b>  |
| Q62717        | IDELIEETVK                                                            | 0.856286929        | 2              | 2.579759  |
| Q62717        | NCPDQDLKIK                                                            | 0.816002976        | 1              | 1.930554  |
| <b>Q62730</b> | <b>DHB2 Estradiol 17_beta_dehydrogenase 2</b>                         | <b>0.476379337</b> | <b>9.9E-20</b> | <b>4</b>  |
| Q62730        | AVLVTGADSGFGHALAK                                                     | 0.457278525        | 2              | 4.166598  |
| Q62730        | EIQENYQGQEVHTQK                                                       | 0.50529327         | 2              | 4.414559  |
| Q62730        | LSVLQMDVTKPEQIKDVHSEVAEK                                              | 0.722418799        | 3              | 4.516719  |
| Q62730        | VVTIHPGGFQTNIVGSDSWDK                                                 | 0.422494851        | 2              | 5.433097  |
| <b>Q62736</b> | <b>CALD1 Non_muscle caldesmon</b>                                     | <b>0.952508524</b> | <b>0.97282</b> | <b>12</b> |
| Q62736        | ASGDKEAEGAPQVEAGK                                                     | 0.938814663        | 2              | 4.556921  |
| Q62736        | ASGDKEAEGAPQVEAGKR                                                    | 0.891330321        | 3              | 3.881339  |
| Q62736        | EEIERR                                                                | 1.48049833         | 1              | 1.936645  |
| Q62736        | EFDPITIDGSLVPSR                                                       | 1.045400526        | 2              | 3.764091  |
| Q62736        | GETESEEF EK                                                           | 0.819970214        | 2              | 2.755527  |
| Q62736        | GGNLGENQIKDEK                                                         | 0.851393209        | 2              | 3.428121  |
| Q62736        | LEQYTNAIEGTK                                                          | 1.028609636        | 2              | 3.908771  |
| Q62736        | MQNNSAENETAEGEEKGESR                                                  | 1.108630585        | 3              | 4.421706  |
| Q62736        | MQNNSAENETAEGEEKGESR+Oxidation(0)                                     | 1.404735177        |                |           |
| Q62736        | NDDDEEEAAR                                                            | 1.253631395        | 2              | 3.356249  |
| Q62736        | RGETESEEF EK                                                          | 1.059151314        | 2              | 3.156646  |
| Q62736        | VLEEEEQR                                                              | 0.993644681        | 2              | 2.471493  |
| <b>Q62745</b> | <b>CD81 CD81 antigen</b>                                              | <b>0.911999788</b> | <b>0.95904</b> | <b>2</b>  |
| Q62745        | NSLCPSSNSFTQLLK                                                       | 0.815123836        | 2              | 2.734691  |
| Q62745        | QFYDQALQQAVMDDDANNAK                                                  | 0.819669356        | 2              | 5.214956  |
| <b>Q62785</b> | <b>HAP28 28 kDa heat_and acid_stable phosphoprotein</b>               | <b>0.872912483</b> | <b>0.83643</b> | <b>3</b>  |
| Q62785        | ANEEDQEEGGDGASGDPK                                                    | 0.916281493        | 2              | 4.265042  |
| Q62785        | GVEGLIDIENPNR                                                         | 0.920697943        | 2              | 2.859095  |
| Q62785        | KVTQLDLDPK                                                            | 1.001835047        | 2              | 2.811088  |
| <b>Q62789</b> | <b>UD2B7 UDP_glucuronosyltransferase 2B7</b>                          | <b>1.118823856</b> | <b>0.37814</b> | <b>2</b>  |
| Q62789        | IILDELVQR                                                             | 0.842423968        | 2              | 3.580021  |

|               |                                   |                    |                |           |
|---------------|-----------------------------------|--------------------|----------------|-----------|
| Q62789        | WIPQNLLGHPK                       | <b>0.877131703</b> | 2              | 3.141353  |
| <b>Q62812</b> | <b>MYH9 Myosin_9</b>              | <b>0.970537938</b> | <b>1.3E-09</b> | <b>63</b> |
| Q62812        | ALEEAMEQK                         | <b>0.781549122</b> | 2              | 3.043352  |
| Q62812        | ALELDSNLYR                        | <b>0.95960642</b>  | 2              | 3.322808  |
| Q62812        | ALEQQVEEMK                        | <b>1.018667464</b> | 2              | 2.959561  |
| Q62812        | ANLQIDQINTDLNLER                  | <b>0.79750583</b>  | 2              | 4.672554  |
| Q62812        | ASIAALEAK                         | <b>0.936986121</b> | 2              | 2.564772  |
| Q62812        | ASREEILAQAK                       | <b>1.346501806</b> | 2              | 2.888782  |
| Q62812        | CQYLQAEK                          | <b>1.064267888</b> | 2              | 2.452314  |
| Q62812        | DELADEIANSSGK                     | <b>1.447182005</b> | 2              | 2.848852  |
| Q62812        | DFSALSQLQDTQELLQEENR              | <b>0.909125143</b> | 3              | 5.59496   |
| Q62812        | DLEAHIDTANK                       | <b>1.124525446</b> | 2              | 3.227349  |
| Q62812        | DLQGRDEQSEEK                      | <b>0.459440555</b> | 2              | 3.219682  |
| Q62812        | EEILAQAK                          | <b>0.918312967</b> | 1              | 2.314359  |
| Q62812        | EEILAQAKENEK                      | <b>0.851393209</b> | 2              | 2.380374  |
| Q62812        | ELEDATETADAMNR                    | <b>1.052670226</b> | 2              | 4.125894  |
| Q62812        | ELETQISELQEDLESER                 | <b>0.841837933</b> | 2              | 3.977254  |
| Q62812        | HEAMITDLEER                       | <b>0.848198851</b> | 2              | 3.125541  |
| Q62812        | HEDELLAK                          | <b>0.946696607</b> | 2              | 2.814973  |
| Q62812        | HSQAVEELAEQLEQTK                  | <b>0.809549142</b> | 2              | 4.944811  |
| Q62812        | HSQAVEELAEQLEQTKR                 | <b>0.954676142</b> | 3              | 4.918312  |
| Q62812        | IIGLDQVAGMSETALPGAFK              | <b>1.114941566</b> | 2              | 5.328916  |
| Q62812        | IRELETQISELQEDLESER               | <b>0.995290987</b> | 3              | 3.549749  |
| Q62812        | KEEELQAALAR                       | <b>0.929837933</b> | 2              | 3.150658  |
| Q62812        | KKVEAQLQELQVK                     | <b>0.652015392</b> | 2              | 4.650298  |
| Q62812        | KLEEDQIIMEDQNCK                   | <b>1.042044374</b> | 2              | 5.908616  |
| Q62812        | KLEGDSTDLSAQIAELQAIAELK           | <b>0.868344571</b> | 2              | 5.83131   |
| Q62812        | KQELLEEICHDEAR                    | <b>0.949898545</b> | 2              | 4.495746  |
| Q62812        | KVEAQLQELQVK                      | <b>0.996096932</b> | 2              | 4.244519  |
| Q62812        | LEEDQIIMEDQNCK                    | <b>0.990409638</b> | 2              | 4.514317  |
| Q62812        | LEGDSTDLSAQIAELQAIAELK            | <b>0.845589276</b> | 2              | 3.573766  |
| Q62812        | LEVNLAQAMK                        | <b>0.977775373</b> | 2              | 2.709557  |
| Q62812        | LQEMESAVK                         | <b>0.792024214</b> | 2              | 2.543259  |
| Q62812        | LQQELDLLVLDLHQR                   | <b>0.748318252</b> | 2              | 4.783808  |
| Q62812        | LQVELDSVTGLLNQSDSK                | <b>0.863190201</b> | 2              | 5.731694  |
| Q62812        | LTEMETMQSQLMAEK                   | <b>0.915570831</b> | 2              | 3.787762  |
| Q62812        | MEDGVGCLETAEEAK                   | <b>0.930080388</b> | 2              | 4.229836  |
| Q62812        | MQQNIQELEEQLLEEEESAR              | <b>0.905822819</b> | 2              | 6.155732  |
| Q62812        | MQQNIQELEEQLLEEEESAR+Oxidation(0) | <b>0.832921732</b> |                |           |
| Q62812        | NAEFKQADK                         | <b>1.105516644</b> | 2              | 3.680455  |
| Q62812        | NLPIYSEEIVDMYK                    | <b>1.186871964</b> | 2              | 3.213697  |
| Q62812        | NMDPLNDNIATLLHQSSDK               | <b>0.944336783</b> | 2              | 4.609973  |
| Q62812        | NTDQASMPDNNTAAQK                  | <b>0.796039771</b> | 2              | 5.421165  |
| Q62812        | NTDQASMPDNNTAAQK+Oxidation(6)     | <b>1.576383063</b> |                |           |
| Q62812        | QAQQRDELADEIANSSGK                | <b>1.044390992</b> | 3              | 4.37909   |
| Q62812        | QJATLHAQVTDMAK                    | <b>0.572421552</b> | 2              | 2.801854  |
| Q62812        | QLEEAEEEAQR                       | <b>1.00203018</b>  | 2              | 3.685886  |
| Q62812        | QNKELK                            | <b>0.851133662</b> | 1              | 1.923305  |
| Q62812        | QSVSNLEK                          | <b>1.006454005</b> | 2              | 2.601386  |
| Q62812        | QTLENERGELANEVK                   | <b>0.952206901</b> | 2              | 2.913452  |
| Q62812        | RKLEGDSTDLSAQIAELQAIAELK          | <b>0.894585938</b> | 3              | 5.424296  |
| Q62812        | RQLEEAEEEAQR                      | <b>0.86603788</b>  | 2              | 4.352044  |
| Q62812        | SMEAEMIQLEELAAER                  | <b>0.954681596</b> | 2              | 4.781615  |
| Q62812        | SMEAEMIQLEELAAERAKR+Oxidation(1)  | <b>0.972149825</b> |                |           |
| Q62812        | TDLLLEPYNK                        | <b>0.824293229</b> | 2              | 2.848344  |
| Q62812        | TELEDTLSTAAQQLR                   | <b>0.813628387</b> | 2              | 5.294106  |
| Q62812        | THEAQIQEMR                        | <b>0.760061379</b> | 2              | 3.26961   |

|               |                                                        |                    |                |           |
|---------------|--------------------------------------------------------|--------------------|----------------|-----------|
| Q62812        | THEAQIQEMR+Oxidation(8)                                | 1.821104094        |                |           |
| Q62812        | TQLEELEDELQATEDAK                                      | 0.898130925        | 2              | 5.893728  |
| Q62812        | VAEFTTDLMEEEEK                                         | 0.991649442        | 2              | 4.137895  |
| Q62812        | VEAQLQELQVK                                            | 0.55591357         | 2              | 3.695632  |
| Q62812        | VEDMAELTCLNEASVLHNLK                                   | 0.943070959        | 2              | 4.46499   |
| Q62812        | VISGVLQLGNIVFK                                         | 1.002280473        | 2              | 2.851271  |
| Q62812        | VSHLLGINVTDFTFR                                        | 0.930332021        | 2              | 3.813626  |
| Q62812        | YEILTPNSIPK                                            | 0.878907227        | 2              | 3.011113  |
| <b>Q62826</b> | <b>HNRPM Heterogeneous nuclear ribonucleoprotein M</b> | <b>1.181713674</b> | <b>0.00035</b> | <b>5</b>  |
| Q62826        | ADILEDKDGK                                             | 0.865777814        | 2              | 2.699049  |
| Q62826        | AFITNIPFDVK                                            | 1.220312109        | 2              | 3.359712  |
| Q62826        | GNFGGSFAGSFGGAGGHAPGVAR                                | 0.777762105        | 2              | 4.819779  |
| Q62826        | INEILSNALK                                             | 0.79216795         | 2              | 2.69234   |
| Q62826        | MGPVMDRMTGLER+Oxidation(0)                             | 0.823999476        |                |           |
| <b>Q62871</b> | <b>DC112 Cytoplasmic dynein 1 intermediate chain 2</b> | <b>1.213997179</b> | <b>0.84224</b> | <b>2</b>  |
| Q62871        | ADAEAAAATR                                             | 0.976804616        | 2              | 3.456928  |
| Q62871        | SVSTPSEAGSQDSGDGAVGSR                                  | 1.345053535        | 2              | 3.373426  |
| <b>Q62902</b> | <b>LMAN1 Protein ERGIC_53</b>                          | <b>0.996276194</b> | <b>0.00741</b> | <b>6</b>  |
| Q62902        | GAGTPGQPGQVSQQLDVTVR                                   | 1.179522856        | 2              | 4.302756  |
| Q62902        | GHPDLQGPADDIFESIGDR                                    | 1.087461516        | 2              | 4.739892  |
| Q62902        | NNPAIVVVGNNQINVDHQNDGATQALASCQR                        | 1.300117252        | 3              | 4.969922  |
| Q62902        | RGAGTPGQPGQVSQQLDVTVR                                  | 1.055492546        | 3              | 4.417906  |
| Q62902        | YQEEFEHFQQLDK                                          | 1.255655017        | 2              | 4.730906  |
| Q62902        | YVSSLTEEISR                                            | 1.175821058        | 2              | 3.511666  |
| <b>Q62904</b> | <b>DHB7 3_keto_steroid reductase</b>                   | <b>0.883821803</b> | <b>0.90962</b> | <b>2</b>  |
| Q62904        | YATDLLNVALNR                                           | 0.883574381        | 2              | 2.648441  |
| Q62904        | YLSGTTGLGTNYVK                                         | 0.897259272        | 2              | 2.93935   |
| <b>Q62967</b> | <b>MVD1 Diphosphomevalonate decarboxylase</b>          | <b>0.798319988</b> | <b>0.00018</b> | <b>2</b>  |
| Q62967        | GLQVAPVLLSDELK                                         | 0.569439338        | 2              | 2.815267  |
| Q62967        | VYGVGDLSEVAR                                           | 0.88158452         | 2              | 3.137665  |
| <b>Q62975</b> | <b>ZPI Protein Z_dependent protease inhibitor</b>      | <b>0.724034851</b> | <b>0.01892</b> | <b>2</b>  |
| Q62975        | FKLNQRYEMHELLK                                         | 0.710771985        | 2              | 2.70348   |
| Q62975        | KMEVFFPKFK                                             | 0.785816379        | 1              | 2.060384  |
| <b>Q63041</b> | <b>A1M Alpha_1_macroglobulin</b>                       | <b>0.847992822</b> | <b>0.36775</b> | <b>10</b> |
| Q63041        | AEDITHNGIVYTPK                                         | 0.744162774        | 2              | 3.463758  |
| Q63041        | AEQGAYLGPLPYK                                          | 0.729157493        | 2              | 3.238444  |
| Q63041        | AESPVFVQTDKPIYKPGQTVK                                  | 0.751777941        | 3              | 4.738815  |
| Q63041        | DTVVKPVIVEPEGIEK                                       | 0.869036867        | 2              | 2.457087  |
| Q63041        | GSIFNSGSHVLPLEQ GK                                     | 0.634736349        | 2              | 3.75082   |
| Q63041        | LQDQSNIQR                                              | 0.78760439         | 2              | 2.916166  |
| Q63041        | QDLNDNDAYSVFQSIGLK                                     | 1.61792108         | 2              | 2.785951  |
| Q63041        | QLNYQHSDGSYTFGDR                                       | 0.976218005        | 2              | 2.645306  |
| Q63041        | YNILPEAEGEAPFTLK                                       | 0.844802289        | 2              | 4.984459  |
| Q63041        | YVVLVPSELYAGVPEK                                       | 0.929104163        | 2              | 3.074736  |
| <b>Q63060</b> | <b>GLPK Glycerol kinase</b>                            | <b>1.315270973</b> | <b>0.00767</b> | <b>11</b> |
| Q63060        | AVLGPLVGAVDQGTSSSTR                                    | 1.15632209         | 2              | 5.297806  |
| Q63060        | CVFSEHLLTTVAYK                                         | 1.177752273        | 2              | 4.015862  |
| Q63060        | DCGIPLSHLQVDGGMSTSNK                                   | 1.378560151        | 2              | 3.790442  |
| Q63060        | EILQSVYECIEK                                           | 1.413691207        | 2              | 3.635431  |
| Q63060        | FEPQINAESEIR                                           | 1.111304196        | 2              | 3.518729  |
| Q63060        | KAVLGPLVGAVDQGTSSSTR                                   | 0.93541102         | 3              | 3.337056  |
| Q63060        | KVQEAveenr                                             | 1.918010323        | 2              | 3.223442  |
| Q63060        | LGQLNIDISNIK                                           | 1.364593767        | 2              | 2.82469   |
| Q63060        | NTYGTGCFLLCNTGHK                                       | 0.988575091        | 2              | 4.149413  |
| Q63060        | TAELLSHHQVEIK                                          | 1.279537204        | 2              | 3.149246  |

|               |                                                                   |                    |                |           |
|---------------|-------------------------------------------------------------------|--------------------|----------------|-----------|
| Q63060        | VQEAVEENR                                                         | 1.280974966        | 2              | 3.041784  |
| <b>Q63081</b> | <b>PDIA6 Protein disulfide isomerase A6</b>                       | <b>0.95348804</b>  | <b>2.7E-06</b> | <b>11</b> |
| Q63081        | ALDLFSDNAPPELLEIINEDIAK                                           | 1.058876416        | 3              | 5.50354   |
| Q63081        | GESPVDYDGGR                                                       | 0.840969326        | 2              | 2.856317  |
| Q63081        | GSFSEQGINEFLR                                                     | 0.991185679        | 2              | 4.267861  |
| Q63081        | GSTAPVGGGSPFNITPR                                                 | 0.932568861        | 2              | 4.823972  |
| Q63081        | HQSLGGQYGVQGFPTIK                                                 | 0.816831132        | 2              | 5.125422  |
| Q63081        | KDVVELTDDTFDK                                                     | 0.976224598        | 2              | 4.115155  |
| Q63081        | KTCEEHQLCVAVLPHILDTGATGR                                          | 0.877218661        | 4              | 5.215255  |
| Q63081        | NLEPEWAAAATEVK                                                    | 0.868541977        | 2              | 4.081563  |
| Q63081        | NSYLEVLLK                                                         | 0.869717646        | 2              | 2.72928   |
| Q63081        | TCEEHQLCVAVLPHILDTGATGR                                           | 0.788173382        | 3              | 4.550593  |
| Q63081        | TGEAIVDAALSALR                                                    | 0.874889595        | 3              | 4.58711   |
| <b>Q63083</b> | <b>NUCB1 Nucleobindin_1</b>                                       | <b>1.196292122</b> | <b>0.15741</b> | <b>4</b>  |
| Q63083        | ADTGADVPVAPAGDQK                                                  | 1.199807907        | 2              | 3.463319  |
| Q63083        | ELQQAVLQMEQR                                                      | 1.465730107        | 2              | 2.64502   |
| Q63083        | LSQETEALGR                                                        | 1.079833841        | 2              | 2.82318   |
| Q63083        | VNVPGSQAQLK                                                       | 0.943736796        | 2              | 2.550505  |
| <b>Q63089</b> | <b>S22A1 Solute carrier family 22 member 1</b>                    | <b>1.180154237</b> | <b>0.96913</b> | <b>2</b>  |
| Q63089        | ENTIYLVQVTGK                                                      | 0.963732181        | 2              | 2.317788  |
| Q63089        | GVALPETIEEAENLGR                                                  | 1.037381721        | 2              | 3.10419   |
| <b>Q63108</b> | <b>EST3 Liver carboxylesterase 3</b>                              | <b>0.771597065</b> | <b>2.4E-06</b> | <b>7</b>  |
| Q63108        | DFNTVPYIVGINK                                                     | 2.838530197        | 2              | 2.677123  |
| Q63108        | GGTSKEEINLSK                                                      | 0.739818569        | 2              | 3.540097  |
| Q63108        | LDPMTATSLK                                                        | 0.906803996        | 2              | 2.521205  |
| Q63108        | MKPSTVVGDPHGDEIYSVFGAPILR                                         | 0.972199377        | 3              | 3.887483  |
| Q63108        | QKTEEELLETTK                                                      | 0.824075408        | 2              | 3.574369  |
| Q63108        | SSFLLNLPEEAIPVAEK                                                 | 0.771625682        | 2              | 4.645937  |
| Q63108        | TEEELLETTK                                                        | 0.851866051        | 2              | 2.499465  |
| <b>Q63120</b> | <b>MRP2 Canalicular multispecific organic anion transporter 1</b> | <b>1.299209987</b> | <b>0.00243</b> | <b>6</b>  |
| Q63120        | ACALLPDLEILPGDMAEIGEK                                             | 1.596323494        | 2              | 3.498795  |
| Q63120        | ISEYINVENEAPWVTDK                                                 | 1.529844687        | 2              | 3.79597   |
| Q63120        | IVEYGSPEELLSNR                                                    | 0.946001085        | 2              | 3.41682   |
| Q63120        | QSQSQDVLVLEAK                                                     | 1.144368101        | 2              | 3.266795  |
| Q63120        | YFAWEPSFQEQVQGIR                                                  | 1.333266634        | 2              | 4.646604  |
| Q63120        | YRPELDLVK                                                         | 1.818626781        | 2              | 2.399018  |
| <b>Q63150</b> | <b>DPYS Dihydropyrimidinase</b>                                   | <b>0.934817863</b> | <b>0.84203</b> | <b>9</b>  |
| Q63150        | DQTCTPIVK                                                         | 1.169030142        | 2              | 2.448888  |
| Q63150        | EIGAIAQVHAENDLIAEGAK                                              | 1.114908346        | 2              | 4.997487  |
| Q63150        | FVAVTSTNAAK                                                       | 0.980808997        | 2              | 3.211935  |
| Q63150        | GEVITLKPR                                                         | 0.93253884         | 2              | 2.399349  |
| Q63150        | GSSLIEAFETWR                                                      | 0.937254           | 2              | 3.06013   |
| Q63150        | MLALGITGPEGHELCPAEVAEATLR                                         | 0.771679537        | 3              | 3.627389  |
| Q63150        | VVNDDFSQVADVLVEDGVVR                                              | 0.930380977        | 2              | 5.589057  |
| Q63150        | VVYEAGVFDVTAGHGK                                                  | 1.095933176        | 2              | 3.865458  |
| Q63150        | VVYGEPIAAGLGTGTQYWNK                                              | 0.929692573        | 2              | 5.477098  |
| <b>Q63270</b> | <b>ACOC Cytoplasmic aconitate hydratase</b>                       | <b>0.816929526</b> | <b>1.7E-07</b> | <b>16</b> |
| Q63270        | AVEAGLNVKPYVK                                                     | 0.7870147          | 2              | 3.255152  |
| Q63270        | AVLAESYER                                                         | 0.856404193        | 2              | 2.370706  |
| Q63270        | FVEFFGPGVAQLSIADR                                                 | 1.282241827        | 2              | 5.201436  |
| Q63270        | GFQVAPDHNDHK                                                      | 2.652147425        | 2              | 3.251628  |
| Q63270        | IDFEKEPLGVNAQQQVFLK                                               | 0.947449339        | 3              | 4.687419  |
| Q63270        | KNDIENILNWSIMQHK                                                  | 0.813076301        | 3              | 4.652308  |
| Q63270        | NCDEFLVK                                                          | 0.940442133        | 1              | 2.048974  |
| Q63270        | NQDLEFER                                                          | 0.720682921        | 2              | 2.479582  |
| Q63270        | QAPQTVHLPSGETLDVFDAAER                                            | 0.483249442        | 3              | 3.701478  |



|               |                                                         |                    |                |           |
|---------------|---------------------------------------------------------|--------------------|----------------|-----------|
| Q63270        | SIEVPFKPAR                                              | 0.971830809        | 2              | 2.589269  |
| Q63270        | SIVDAYVLLNLGDSVTTDHISPAGNIAR                            | 1.081689697        | 3              | 5.093326  |
| Q63270        | SPPFFESLTLDLQPPK                                        | 1.172773094        | 3              | 3.88698   |
| Q63270        | SWNALAAPSEK                                             | 0.89599186         | 1              | 2.325432  |
| Q63270        | TSLSPGSGVVTYYLR                                         | 1.021829971        | 2              | 3.470172  |
| Q63270        | VILQDFTGVPVAVVDFAMR                                     | 1.277594253        | 3              | 4.483238  |
| Q63270        | YQQAGLPLIVLAGK                                          | 0.740670491        | 2              | 3.539708  |
| <b>Q63276</b> | <b>BAAT Bile acid_CoA:amino acid N_acyltransferase</b>  | <b>1.181522112</b> | <b>0.00029</b> | <b>17</b> |
| Q63276        | AHGHLFVVGEDDKNLNSK                                      | 1.861430624        | 2              | 5.835223  |
| Q63276        | ASEVGEVDLER                                             | 1.01604592         | 2              | 3.869868  |
| Q63276        | DDKGNLFNSQAFYR                                          | 0.901941124        | 2              | 3.298659  |
| Q63276        | GNLFNSQAFYR                                             | 1.08816689         | 2              | 3.048615  |
| Q63276        | LCHPYFPVEGK                                             | 0.855862994        | 2              | 2.656939  |
| Q63276        | LTAVPLSALVDEPVHIR                                       | 0.942633482        | 2              | 4.111654  |
| Q63276        | NWTLLSYPGAGHLIEPPYSPLCSASR                              | 1.645856128        | 2              | 4.057826  |
| Q63276        | QHNLNPGFNSQL                                            | 1.064215256        | 2              | 3.547451  |
| Q63276        | QITATVLLINGPNFVSSNPVHYR                                 | 0.934696611        | 3              | 5.248504  |
| Q63276        | TFEETADK                                                | 1.159577112        | 1              | 1.975335  |
| Q63276        | TFEETADKDSK                                             | 1.049046672        | 2              | 3.926252  |
| Q63276        | VDLEYFEEGVFLLR                                          | 1.297139038        | 3              | 4.795879  |
| Q63276        | VFQPTPCSEEFVTTNALGLVEFYR                                | 1.062653134        | 2              | 5.307502  |
| Q63276        | VISSLDSLILER                                            | 0.264819011        | 2              | 3.537139  |
| Q63276        | VTGLTPFQVVLQASLK                                        | 1.215499325        | 3              | 5.327432  |
| Q63276        | WYVAPGVTR                                               | 0.831604105        | 2              | 2.65423   |
| Q63276        | YCFPIEK                                                 | 1.01697267         | 2              | 2.595945  |
| <b>Q63342</b> | <b>M2GD Dimethylglycine dehydrogenase_mitochondrial</b> | <b>1.065578371</b> | <b>0.94622</b> | <b>24</b> |
| Q63342        | ADIINIVNGPITYSPDILPMVGP HQGVR                           | 0.869974978        | 3              | 5.970218  |
| Q63342        | AWGSEMNCDTNPLEAGLDYFIK                                  | 0.901385711        | 2              | 4.50319   |
| Q63342        | DGLLFGPYESQEK                                           | 1.119038254        | 2              | 2.61695   |
| Q63342        | EGQESPPSPPEWK                                           | 1.023164553        | 2              | 2.676322  |
| Q63342        | GGYDVEIR                                                | 0.739005852        | 2              | 2.306157  |
| Q63342        | GQDSTQLLDHLCANVIPK                                      | 0.814694189        | 2              | 4.022426  |
| Q63342        | IMNAGQEEGIDNFGTYALNALR                                  | 0.801838565        | 2              | 4.875884  |
| Q63342        | ISDIPVTAIR                                              | 0.864370751        | 2              | 3.232371  |
| Q63342        | ITEHVEAAMEMVPVLK                                        | 0.917894466        | 2              | 3.927021  |
| Q63342        | KADIINIVNGPITYSPDILPMVGP HQGVR                          | 0.813446146        | 3              | 5.173427  |
| Q63342        | LEEETGQVVGFHQPGSIR                                      | 0.82221005         | 2              | 4.767273  |
| Q63342        | LNKPADFTGK                                              | 1.018593693        | 2              | 2.636228  |
| Q63342        | LTSEDLSDDVFK                                            | 0.82449212         | 2              | 4.147946  |
| Q63342        | NITDELGVLGVAGPYAR                                       | 0.760385434        | 2              | 4.831796  |
| Q63342        | NYPATIIQEPLVLTPEPTR                                     | 0.926987644        | 2              | 4.1668    |
| Q63342        | REDSAALYER                                              | 0.786397634        | 2              | 3.230521  |
| Q63342        | SLAFAYVPVELSEVQQVEVELL GK                               | 1.458699174        | 3              | 4.972811  |
| Q63342        | TNWHATEQYIIIEPEK                                        | 1.18751916         | 2              | 4.153389  |
| Q63342        | VGFTNISHMLTPR                                           | 1.181567962        | 2              | 2.402288  |
| Q63342        | VGVIDLSPFGK                                             | 0.737743895        | 2              | 3.399476  |
| Q63342        | VIGNTTSGSYSYSIQK                                        | 1.069380368        | 2              | 4.334137  |
| Q63342        | WIEEAAVR                                                | 1.124252857        | 2              | 2.761974  |
| Q63342        | WTTTQYTEAK                                              | 0.889024023        | 2              | 2.81355   |
| Q63342        | YLSDWILHGEPFDLIEIDPNR                                   | 0.787940764        | 3              | 4.346085  |
| <b>Q63347</b> | <b>PR57 26S protease regulatory subunit 7</b>           | <b>1.071892083</b> | <b>0.95961</b> | <b>8</b>  |
| Q63347        | ALDEGDIALLK                                             | 1.060919397        | 2              | 3.094614  |
| Q63347        | ESDTGLAPPALWDLAADK                                      | 1.023337582        | 2              | 2.508094  |
| Q63347        | FDDGAGGDNEVQR                                           | 1.096544819        | 2              | 4.175218  |
| Q63347        | FVVDLSQVAPTDIEEGMR                                      | 0.809589742        | 2              | 3.856356  |

|               |                                                                           |                    |                |           |
|---------------|---------------------------------------------------------------------------|--------------------|----------------|-----------|
| Q63347        | IINADSEDPK                                                                | 1.02496961         | 2              | 3.047869  |
| Q63347        | QTLQSEQPLQVAR                                                             | 0.979188113        | 2              | 4.001585  |
| Q63347        | QVEDDIQQLLK                                                               | 0.962966338        | 2              | 2.441735  |
| Q63347        | TMLELINQLDGFDP                                                            | 0.808952837        | 2              | 2.964977  |
| <b>Q63355</b> | <b>MYO1C Myosin Ic</b>                                                    | <b>0.449245719</b> | <b>0.04838</b> | <b>2</b>  |
| Q63355        | MSLLQLVEILR                                                               | 0.428850996        | 2              | 2.511883  |
| Q63355        | YMDVQDFDKGAPVGGHILSYLLEK+Oxidation(1)                                     | 0.690365499        |                |           |
| <b>Q63362</b> | <b>NDUA5 NADH dehydrogenase [ubiquinone] 1 alpha subcomplex subunit 5</b> | <b>1.038027301</b> | <b>0.99914</b> | <b>4</b>  |
| Q63362        | KLELLQGGEVEEVILQAEK                                                       | 1.022839789        | 2              | 6.6786    |
| Q63362        | KYTEQITSEK                                                                | 0.969244764        | 2              | 2.426236  |
| Q63362        | TTGLVGLAVCDTPHER                                                          | 1.027977438        | 2              | 3.476041  |
| Q63362        | YTEQITSEK                                                                 | 1.086307401        | 2              | 2.452557  |
| <b>Q63413</b> | <b>DX39B Spliceosome RNA helicase Ddx39b</b>                              | <b>0.739694388</b> | <b>0.30234</b> | <b>2</b>  |
| Q63413        | AIVDCGFEPHSEVQHCEPICQAILGMDVLCQAK                                         | 0.529673341        | 3              | 3.799471  |
| Q63413        | NCPHIVVGTPGR                                                              | 0.869503826        | 2              | 3.049633  |
| <b>Q63429</b> | <b>UBC Polyubiquitin_C</b>                                                | <b>1.046506035</b> | <b>0.86426</b> | <b>3</b>  |
| Q63429        | ESTLHLVLR                                                                 | 1.60296961         | 2              | 2.427556  |
| Q63429        | TITLEVEPSDTIENVK                                                          | 1.041554259        | 2              | 4.717163  |
| Q63429        | TLSDYNIQK                                                                 | 1.017611848        | 2              | 2.548782  |
| <b>Q63448</b> | <b>ACOX3 Peroxisomal acyl_coenzyme A oxidase 3</b>                        | <b>0.968981304</b> | <b>0.013</b>   | <b>10</b> |
| Q63448        | ADWLDSEAPLAAYR                                                            | 0.876993946        | 2              | 4.247795  |
| Q63448        | DDAVALVDIAIAPSDFVLGSPIGR                                                  | 0.838375337        | 3              | 4.142456  |
| Q63448        | EIHALASAGKPLASWTAQR                                                       | 0.706685637        | 2              | 4.096396  |
| Q63448        | GGYISGEQTGK                                                               | 0.939662334        | 2              | 2.920685  |
| Q63448        | NLWAAVLQSGVLER                                                            | 0.84312952         | 2              | 4.46384   |
| Q63448        | QFGPTDKKEIPVLEYPLQQWR                                                     | 0.832447963        | 3              | 3.502545  |
| Q63448        | TIFLDLIELQR                                                               | 1.01295583         | 2              | 3.38361   |
| Q63448        | TIFSTLENDPLFARPFPGADLPLEK                                                 | 0.823822747        | 3              | 4.512849  |
| Q63448        | TTAHYDPATQEFILHSPDFEAAK                                                   | 1.095430972        | 3              | 4.542653  |
| Q63448        | TVNFLEAYPGILGQK                                                           | 1.099789807        | 2              | 4.615621  |
| <b>Q63507</b> | <b>RL14 60S ribosomal protein L14</b>                                     | <b>1.319415425</b> | <b>0.99203</b> | <b>3</b>  |
| Q63507        | ALVDGPCTR                                                                 | 1.094792754        | 2              | 2.415944  |
| Q63507        | CMQLTDFILK                                                                | 0.852002025        | 2              | 2.551852  |
| Q63507        | LVAIVDVIDQNR                                                              | 0.996773835        | 2              | 4.126261  |
| <b>Q63524</b> | <b>TMED2 Transmembrane emp24 domain_containing protein 2</b>              | <b>1.053879658</b> | <b>0.98735</b> | <b>3</b>  |
| Q63524        | GQDMETEAHQNKLEEMINELAVAMTAVK                                              | 0.919126937        | 3              | 5.36974   |
| Q63524        | HEQEYMEVR                                                                 | 1.071155736        | 2              | 3.33628   |
| Q63524        | HEQEYMEVR+Oxidation(5)                                                    | 0.934787416        |                |           |
| <b>Q63525</b> | <b>NUDC Nuclear migration protein nudC</b>                                | <b>1.150364776</b> | <b>0.65724</b> | <b>4</b>  |
| Q63525        | GQAPVIDGELYNEVK                                                           | 1.154966248        | 2              | 3.454822  |
| Q63525        | LSDLSETR                                                                  | 1.031453044        | 2              | 2.665147  |
| Q63525        | LVTSDPEINTK                                                               | 1.143503957        | 2              | 2.395669  |
| Q63525        | VEESSWLIEDGK                                                              | 0.936281392        | 2              | 3.01153   |
| <b>Q63569</b> | <b>PRS6A 26S protease regulatory subunit 6A</b>                           | <b>1.081143314</b> | <b>0.46305</b> | <b>5</b>  |
| Q63569        | AMEVDERPTEQYSIDIGGLDK                                                     | 1.473896012        | 3              | 3.656654  |
| Q63569        | CTDDFNGAQCK                                                               | 0.889465209        | 2              | 3.332251  |
| Q63569        | MNVSPDVNYEELAR                                                            | 1.072062729        | 2              | 3.309615  |
| Q63569        | MSTEEIVQR                                                                 | 0.999919607        | 2              | 2.404523  |
| Q63569        | QTYFLPVIGLVDAEK                                                           | 1.206694506        | 2              | 2.730999  |
| <b>Q63570</b> | <b>PRS6B 26S protease regulatory subunit 6B</b>                           | <b>1.234347504</b> | <b>0.12256</b> | <b>4</b>  |
| Q63570        | GVLMYGPPGCGK+Oxidation(3)                                                 | 1.449555786        |                |           |
| Q63570        | IQDEIPALSVSRPQTGLSFLGPEPEDLDLYSR                                          | 1.671573012        | 3              | 5.442052  |
| Q63570        | KDEQEHEFYK                                                                | 1.286723538        | 2              | 2.956087  |
| Q63570        | RFDAQTGADR                                                                | 1.099776524        | 2              | 2.609976  |

|               |                                                               |                    |                |           |
|---------------|---------------------------------------------------------------|--------------------|----------------|-----------|
| <b>Q63584</b> | <b>TMEDA Transmembrane emp24 domain_containing protein 10</b> | <b>0.987897418</b> | <b>0.99939</b> | <b>4</b>  |
| Q63584        | ITDSAGHILYAK                                                  | 1.028245036        | 2              | 3.314518  |
| Q63584        | LEDLSEIVNDFAYMK                                               | 0.966649357        | 2              | 2.92805   |
| Q63584        | NYEEIAK                                                       | 1.021727486        | 1              | 2.266356  |
| Q63584        | RLEDLSEIVNDFAYMK                                              | 0.948032911        | 2              | 3.829109  |
| <b>Q63598</b> | <b>PLST Plastin_3</b>                                         | <b>0.807572058</b> | <b>0.81047</b> | <b>11</b> |
| Q63598        | AESMLQQADK                                                    | 0.906198869        | 2              | 2.879221  |
| Q63598        | ATDDIIVNWVNGTLSEAGK                                           | 0.769763364        | 3              | 4.949576  |
| Q63598        | AVGDGIVLCK                                                    | 1.083749509        | 1              | 1.951555  |
| Q63598        | HVIPMNPNTDDLK                                                 | 0.742480577        | 2              | 2.782761  |
| Q63598        | IDINMSGFNETDDLK                                               | 0.849405019        | 2              | 4.337924  |
| Q63598        | INNFSAIDK                                                     | 1.178670926        | 2              | 2.578387  |
| Q63598        | KLENCNYAVELGK                                                 | 1.139715645        | 2              | 3.923074  |
| Q63598        | NEALAALLR                                                     | 1.005945045        | 2              | 2.745475  |
| Q63598        | VYALPEDLVEVKPK                                                | 0.951761763        | 2              | 2.961497  |
| Q63598        | YPALTKPENQDIDWTLLEGETR                                        | 0.910990216        | 3              | 5.177026  |
| Q63598        | YTLNVMEDLGEGQK                                                | 1.233282043        | 2              | 3.698828  |
| <b>Q63610</b> | <b>TPM3 Tropomyosin alpha_3 chain</b>                         | <b>0.985622772</b> | <b>0.93371</b> | <b>8</b>  |
| Q63610        | EQAEAEVASLNR                                                  | 1.395068763        | 2              | 2.865719  |
| Q63610        | IQVLQQQADDAEER                                                | 0.971951071        | 2              | 5.12711   |
| Q63610        | KIQVLQQQADDAEER                                               | 1.043290205        | 2              | 5.410338  |
| Q63610        | KLVIIEGDLER                                                   | 0.965291869        | 2              | 2.77177   |
| Q63610        | LVIIIEGDLER                                                   | 0.853797338        | 2              | 2.482031  |
| Q63610        | MELQEIQLK                                                     | 0.985217119        | 2              | 3.021322  |
| Q63610        | TIDDLKDLK                                                     | 0.714652064        | 2              | 2.861605  |
| Q63610        | YSQKEDKYEEIK                                                  | 0.920229659        | 2              | 4.677725  |
| <b>Q63617</b> | <b>HYOU1 Hypoxia up_regulated protein 1</b>                   | <b>1.060900201</b> | <b>0.00307</b> | <b>16</b> |
| Q63617        | AANSLEAFIFETQDK                                               | 0.865270806        | 2              | 3.303391  |
| Q63617        | DAVITVPAFFNQAER                                               | 0.970900413        | 2              | 2.333813  |
| Q63617        | EGETPDEKESGDKSEAQKPNK                                         | 1.550392947        | 3              | 3.770401  |
| Q63617        | ESGDKSEAQKPNK                                                 | 0.821844983        | 2              | 2.348613  |
| Q63617        | FLGDSAAGMAIK                                                  | 0.845000448        | 2              | 2.647946  |
| Q63617        | LEDLTR                                                        | 1.023061089        | 2              | 2.373968  |
| Q63617        | LGNTISSLFGGTSSDAK                                             | 0.749103252        | 2              | 3.302428  |
| Q63617        | LIPEMDQIFTDVEMTTLEK                                           | 0.944160699        | 2              | 2.782573  |
| Q63617        | LYQPEYQEVSTEEQR                                               | 1.490865124        | 2              | 5.059073  |
| Q63617        | NINADEAAAMGAVYQAAALSK                                         | 1.146479017        | 2              | 2.993598  |
| Q63617        | SLAEDFAEQPIK                                                  | 1.13477278         | 2              | 2.735234  |
| Q63617        | SLAEDFAEQPIKDAVITVPAFFNQAER                                   | 0.892220865        | 3              | 3.91786   |
| Q63617        | TLGGLEMLR                                                     | 0.85611828         | 2              | 2.306415  |
| Q63617        | VEFEELCADLFDR                                                 | 0.866577146        | 2              | 3.89708   |
| Q63617        | VESVFETLVEDSPEEESTLTK                                         | 1.504571037        | 2              | 4.21553   |
| Q63617        | VLQLINDNTATALSYGVFR                                           | 1.189228608        | 2              | 2.947274  |
| <b>Q63692</b> | <b>CDC37 Hsp90 co_chaperone Cdc37</b>                         | <b>0.885781063</b> | <b>0.87591</b> | <b>2</b>  |
| Q63692        | EGEEAGGDPDLEAVPK                                              | 0.950261317        | 2              | 3.577682  |
| Q63692        | LGPGGLDPVEVYESLPEELQK                                         | 1.029633647        | 2              | 2.685598  |
| <b>Q63716</b> | <b>PRDX1 Peroxiredoxin_1</b>                                  | <b>1.139888418</b> | <b>8E-08</b>   | <b>15</b> |
| Q63716        | ADEGISFR                                                      | 1.037488956        | 2              | 3.06872   |
| Q63716        | ATAVMPDGQFK                                                   | 0.973680711        | 2              | 2.943845  |
| Q63716        | DISLSDYK                                                      | 1.943713007        | 2              | 2.505138  |
| Q63716        | HGEVCPAGWKPGSDTIKPDVVK                                        | 1.013416054        | 4              | 6.228096  |
| Q63716        | IGHPAPSK                                                      | 2.218505044        | 1              | 1.932111  |
| Q63716        | KLNCQVIGASVDSHFCHLAWINTPK                                     | 9.047404299        | 4              | 4.572121  |
| Q63716        | KQGGLGPMNIPLVSDPK                                             | 0.885778079        | 2              | 4.135698  |
| Q63716        | LNCQVIGASVDSHFCHLAWINTPK                                      | 1.302013798        | 3              | 3.653662  |
| Q63716        | LVQAFQFTDK                                                    | 2.068270604        | 2              | 3.532369  |

|               |                                                           |                    |                |           |
|---------------|-----------------------------------------------------------|--------------------|----------------|-----------|
| Q63716        | QGGGLGPMNIPLVSDPK                                         | 0.582517491        | 2              | 3.479512  |
| Q63716        | QGGGLGPMNIPLVSDPK+Oxidation(6)                            | 1.082828394        |                |           |
| Q63716        | QITINDLPVGR                                               | 0.958007309        | 2              | 3.308394  |
| Q63716        | RTIAQDYGVLK                                               | 1.025038195        | 2              | 2.532115  |
| Q63716        | SVDEILR                                                   | 0.891832373        | 2              | 2.699282  |
| Q63716        | TIAQDYGVLK                                                | 1.064552536        | 2              | 3.247339  |
| <b>Q63768</b> | <b>CRK Adapter molecule crk</b>                           | <b>1.03740205</b>  | <b>0.71996</b> | <b>2</b>  |
| Q63768        | IGDQEFDSLPALEFYK                                          | 0.900773919        | 2              | 3.292372  |
| Q63768        | VPNAYDKTALALEVGELVK                                       | 1.169420492        | 2              | 2.317183  |
| <b>Q63797</b> | <b>PSME1 Proteasome activator complex subunit 1</b>       | <b>0.928564484</b> | <b>1.1E-06</b> | <b>10</b> |
| Q63797        | EPALNEANLSNLK                                             | 0.860166251        | 2              | 2.400531  |
| Q63797        | ISELDAFLK                                                 | 0.928572956        | 2              | 2.819068  |
| Q63797        | ISELDAFLKEPALNEANLSNLK                                    | 0.746431094        | 3              | 6.055887  |
| Q63797        | KGDEDDKGPCCGPNVNCNEK                                      | 0.904545747        | 3              | 4.801366  |
| Q63797        | KISELDAFLKEPALNEANLSNLK                                   | 0.850545704        | 3              | 5.733959  |
| Q63797        | LEGFQTQISK                                                | 1.042677861        | 2              | 3.01388   |
| Q63797        | NAYAVLYDIILK                                              | 1.773361083        | 2              | 2.883824  |
| Q63797        | QLVHELDEAEYQEIR                                           | 0.949880783        | 3              | 4.660054  |
| Q63797        | TENLLGSYFPK                                               | 0.937176947        | 2              | 3.60702   |
| Q63797        | VDVFREDLCSK                                               | 0.79548186         | 2              | 2.387007  |
| <b>Q63798</b> | <b>PSME2 Proteasome activator complex subunit 2</b>       | <b>1.0768253</b>   | <b>0.8922</b>  | <b>6</b>  |
| Q63798        | AFYAELHHIISNLEK                                           | 1.008559382        | 2              | 3.978549  |
| Q63798        | IEDGNDFGVAIQEK                                            | 0.853195321        | 2              | 4.24792   |
| Q63798        | IISLSQLLQEDSLNVADLSSLR                                    | 1.429727039        | 2              | 2.33724   |
| Q63798        | KIISLSQLLQEDSLNVADLSSLR                                   | 0.926930888        | 3              | 3.445489  |
| Q63798        | TKVEAFQTAISK                                              | 0.997354245        | 2              | 3.455294  |
| Q63798        | VEAFQTAISK                                                | 1.126077672        | 2              | 2.612056  |
| <b>Q63836</b> | <b>SBP2 Selenium_binding protein 2</b>                    | <b>0.963231143</b> | <b>0.12221</b> | <b>5</b>  |
| Q63836        | GGSVQVLEDQELTCQPEPLVVK                                    | 1.045825456        | 3              | 5.46247   |
| Q63836        | GFSVLLDGETFEVK                                            | 0.935122975        | 2              | 2.446326  |
| Q63836        | IYVVDVGSEPR                                               | 0.887640635        | 2              | 3.959319  |
| Q63836        | LNPNFLVDFGK                                               | 0.733377321        | 2              | 2.730465  |
| Q63836        | LNPNFLVDFGKEPLGALAEHLR                                    | 0.748404588        | 3              | 4.310116  |
| <b>Q63945</b> | <b>SET Protein SET</b>                                    | <b>1.016497616</b> | <b>0.74475</b> | <b>3</b>  |
| Q63945        | IDFYFDENPYFENK                                            | 1.016497628        | 2              | 3.856183  |
| Q63945        | LNEQASEEILK                                               | 0.972305165        | 2              | 2.725482  |
| Q63945        | VEVTEFEDIK                                                | 0.660572431        | 2              | 2.567454  |
| <b>Q63965</b> | <b>SFXN1 Sideroflexin_1</b>                               | <b>1.182662572</b> | <b>0.00513</b> | <b>6</b>  |
| Q63965        | MSGEVPPNINIKEPR+Oxidation(0)                              | 0.858239394        |                |           |
| Q63965        | NILLTNEQLENAR                                             | 0.816939           | 2              | 4.475253  |
| Q63965        | QAITQVVISR                                                | 0.851227322        | 2              | 2.43131   |
| Q63965        | QGIVPAGLTENELWR                                           | 0.404607787        | 2              | 2.972429  |
| Q63965        | WDQSTFIGR                                                 | 1.061069248        | 2              | 2.833481  |
| Q63965        | YAYDSAFHPDTGEK                                            | 1.16024532         | 2              | 4.07131   |
| <b>Q64057</b> | <b>AL7A1 Alpha_aminoadipic semialdehyde dehydrogenase</b> | <b>0.860750216</b> | <b>9.9E-20</b> | <b>17</b> |
| Q64057        | AWNIIWADIPAPK                                             | 0.719605845        | 2              | 3.94756   |
| Q64057        | EDNEGVFNNGSWGGR                                           | 0.871707896        | 2              | 3.637798  |
| Q64057        | EGGTVVYGGK                                                | 1.08741823         | 2              | 2.454009  |
| Q64057        | FKNEEEVFEWNNNEVK                                          | 0.717040274        | 2              | 5.458163  |
| Q64057        | GAPTTSLVSIIVTK                                            | 0.542363853        | 2              | 4.213446  |
| Q64057        | GEVITYCPANNEPIAR                                          | 0.767759243        | 2              | 5.085406  |
| Q64057        | GSDCGIVNVNIPTSGAEIGGAFGGKEK                               | 0.68772596         | 2              | 5.649642  |
| Q64057        | LFLHESIHDVVDR                                             | 0.839893973        | 2              | 4.218174  |
| Q64057        | NEEEVFEWNNNEVK                                            | 0.809055117        | 2              | 4.541942  |
| Q64057        | QAVSMFVQAVEEAK                                            | 0.84089447         | 2              | 3.084381  |
| Q64057        | QLSSSIFTK                                                 | 0.770521208        | 2              | 2.567421  |

|               |                                                                                            |                    |                |          |
|---------------|--------------------------------------------------------------------------------------------|--------------------|----------------|----------|
| Q64057        | QVALMVQER                                                                                  | 0.661894581        | 2              | 2.302101 |
| Q64057        | STCTINYSTALPLAQGIK                                                                         | 1.980679108        | 2              | 4.678034 |
| Q64057        | VGNPWDPNILYGPLHTK                                                                          | 0.972606169        | 3              | 4.141422 |
| Q64057        | VMDHPGNYVEPTIVTGLVHDAPIVHK                                                                 | 0.672239081        | 3              | 6.092217 |
| Q64057        | VMDHPGNYVEPTIVTGLVHDAPIVHK+Oxidation(1)                                                    | 0.746255699        |                |          |
| Q64057        | VNLLSFTGSTQVGK                                                                             | 1.221766783        | 2              | 4.875194 |
| <b>Q640L5</b> | <b>CCD18 Coiled_coil domain containing protein 18</b>                                      | <b>0.866489645</b> | <b>0.7401</b>  | <b>2</b> |
| Q640L5        | EVIDLGQELR                                                                                 | 0.749549584        | 2              | 2.355314 |
| Q640L5        | SMQLSQLDMVLDQTKTELEKTTNSVK                                                                 | 0.873025331        | 3              | 3.601153 |
| <b>Q64119</b> | <b>MYL6 Myosin light polypeptide 6</b>                                                     | <b>0.842509984</b> | <b>0.11428</b> | <b>6</b> |
| Q64119        | DQGTIEDYVEGLR                                                                              | 1.001161799        | 2              | 3.351062 |
| Q64119        | HVLVTLGEK                                                                                  | 0.906195678        | 1              | 2.293932 |
| Q64119        | ILYSQCGDVMR                                                                                | 1.185605985        | 2              | 2.688288 |
| Q64119        | NKDQGTIEDYVEGLR                                                                            | 0.891201944        | 2              | 4.194821 |
| Q64119        | VFDKEGNGTVMGAEIR                                                                           | 0.970092036        | 2              | 3.517663 |
| Q64119        | VLDFEHFLPMLQTVAK                                                                           | 0.814465388        | 2              | 4.943352 |
| <b>Q64122</b> | <b>MYL9 Myosin regulatory light polypeptide 9</b>                                          | <b>0.89846189</b>  | <b>0.16635</b> | <b>2</b> |
| Q64122        | DGFIDKEDLHDMLASLGK                                                                         | 0.810241401        | 2              | 4.722607 |
| Q64122        | LNGTDPEDVIR                                                                                | 1.07643433         | 2              | 2.886698 |
| <b>Q64176</b> | <b>EST22 Liver carboxylesterase 22</b>                                                     | <b>0.764806407</b> | <b>9.9E-20</b> | <b>4</b> |
| Q64176        | AISESGVALTAGLVK                                                                            | 0.781593479        | 2              | 3.887493 |
| Q64176        | EGYLQIGATTQQAQK                                                                            | 0.77384127         | 2              | 4.587856 |
| Q64176        | LDQMTAMSLK+Oxidation(3)                                                                    | 0.776582795        |                |          |
| Q64176        | NFNTVPYIVGINK                                                                              | 2.991926069        | 2              | 3.455234 |
| <b>Q641Y0</b> | <b>OST48 Dolichyl_diphosphooligosaccharide__protein glycosyltransferase 48 kDa subunit</b> | <b>0.826736182</b> | <b>0.85826</b> | <b>9</b> |
| Q641Y0        | ELGSECGIEFDEEK                                                                             | 1.02138879         | 2              | 3.523845 |
| Q641Y0        | GVMVADPDNPLVLDILTGSSTSYFFDPKPITQYPHAVGR                                                    | 1.892189906        | 4              | 6.983397 |
| Q641Y0        | NLLIAGLQAR                                                                                 | 0.965312407        | 2              | 3.819304 |
| Q641Y0        | SSLNPILFR                                                                                  | 1.604032006        | 2              | 2.411361 |
| Q641Y0        | TADDPSSLIK                                                                                 | 0.73248569         | 2              | 2.714213 |
| Q641Y0        | TAVIDHHNYDVSDLGQHTLIVADTENLLK                                                              | 1.01748277         | 4              | 6.546318 |
| Q641Y0        | TLVLLDNLNVR                                                                                | 0.951216182        | 2              | 3.846589 |
| Q641Y0        | WVPFDGDDIQLEFVR                                                                            | 0.926343095        | 2              | 2.734822 |
| Q641Y0        | YSQTGNELAVLSR                                                                              | 0.957128764        | 2              | 3.453722 |
| <b>Q641Y2</b> | <b>NDUS2 NADH dehydrogenase [ubiquinone] iron_sulfur protein 2_ mitochondrial</b>          | <b>0.82874557</b>  | <b>0.96964</b> | <b>5</b> |
| Q641Y2        | GSGIQWDLR                                                                                  | 0.95482871         | 2              | 2.547239 |
| Q641Y2        | IDEVEEMLTNNR                                                                               | 0.860186562        | 2              | 3.631346 |
| Q641Y2        | IIEQCLNK                                                                                   | 0.888836044        | 2              | 2.883131 |
| Q641Y2        | LYTEGYQVPPGATYTAIEAPK                                                                      | 1.162099019        | 2              | 2.946365 |
| Q641Y2        | TQPYDVYDQVEFDVPIGSR                                                                        | 1.120665439        | 2              | 3.992386 |
| <b>Q641Y8</b> | <b>DDX1 ATP_dependent RNA helicase DDX1</b>                                                | <b>1.09821277</b>  | <b>0.17613</b> | <b>3</b> |
| Q641Y8        | GDVRFLECTDVAAR                                                                             | 1.104322496        | 2              | 2.34389  |
| Q641Y8        | GHVDILAPTVQELAALEK                                                                         | 0.99264387         | 3              | 3.880937 |
| Q641Y8        | GSAFAIGSDGLCCQSR                                                                           | 1.219477925        | 2              | 3.700125 |
| <b>Q64232</b> | <b>TECR Trans_2_3_enoyl_CoA reductase</b>                                                  | <b>0.80207872</b>  | <b>0.01487</b> | <b>4</b> |
| Q64232        | HYEVEIR                                                                                    | 0.80310215         | 2              | 2.311956 |
| Q64232        | LCFLDKVEPQATISEIK                                                                          | 0.808392094        | 2              | 4.690748 |
| Q64232        | SLKDEDVLQK                                                                                 | 0.787330556        | 2              | 3.338138 |
| Q64232        | VEPQATISEIK                                                                                | 0.941662287        | 2              | 2.373876 |
| <b>Q64240</b> | <b>AMBP Protein AMBP</b>                                                                   | <b>0.75766764</b>  | <b>9.9E-20</b> | <b>3</b> |
| Q64240        | AFAELWAFDAAQ GK                                                                            | 0.85701645         | 2              | 3.526134 |
| Q64240        | AVLPQENEGSGSEPLITGLK                                                                       | 0.829291106        | 2              | 4.844437 |

|               |                                                              |                    |                |           |
|---------------|--------------------------------------------------------------|--------------------|----------------|-----------|
| Q64240        | TIAACNLPIVQGPCR                                              | 0.706765176        | 2              | 3.263431  |
| <b>Q642G4</b> | <b>PEX14 Peroxisomal membrane protein PEX14</b>              | <b>1.838283264</b> | <b>8.3E-09</b> | <b>2</b>  |
| Q642G4        | GGDQINEQVEK                                                  | 1.894816746        | 2              | 3.136687  |
| Q642G4        | LLGPQEEGEGVVDVK                                              | 1.127721849        | 2              | 3.42698   |
| <b>Q64303</b> | <b>PAK2 Serine/threonine_protein kinase PAK 2</b>            | <b>0.863751052</b> | <b>0.97075</b> | <b>2</b>  |
| Q64303        | NKIISFSSTEK                                                  | 0.851544532        | 2              | 2.805637  |
| Q64303        | SVIDPIPAPVGDNSVDSGAK                                         | 0.970820679        | 2              | 2.832949  |
| <b>Q64380</b> | <b>SARDH Sarcosine dehydrogenase_mitochondrial</b>           | <b>1.09325893</b>  | <b>9.9E-20</b> | <b>19</b> |
| Q64380        | AYGIESHVLSPAETK                                              | 0.78072804         | 2              | 4.588248  |
| Q64380        | DGTMDPAGTCTTLTR                                              | 0.893321524        | 2              | 4.071686  |
| Q64380        | DILQDVLADALSNEAFPSTHQLVR                                     | 0.97006523         | 3              | 5.652499  |
| Q64380        | DLYPLMNVDLYGTLYVPR                                           | 0.771551339        | 2              | 2.564961  |
| Q64380        | EAAQGASVVPQGPSQLPSTANVVVIGGSLGCQTLYHLAK                      | 0.748557344        | 3              | 3.592457  |
| Q64380        | FHSLTDHPR                                                    | 1.486147081        | 2              | 2.652392  |
| Q64380        | FYLLGADAR                                                    | 0.926943858        | 2              | 2.683296  |
| Q64380        | GAQVIENCAVTGIR                                               | 1.056623168        | 2              | 4.177184  |
| Q64380        | HGLVNAGYR                                                    | 0.82149185         | 2              | 2.575393  |
| Q64380        | IEGIQNMPNVR                                                  | 0.640149759        | 2              | 3.324223  |
| Q64380        | LQGDALSVGGYEANPIFWDEVSDK                                     | 0.514188134        | 2              | 4.458218  |
| Q64380        | NGDYALER                                                     | 1.068005323        | 2              | 2.310163  |
| Q64380        | NYSVVFPHDEPLAGR                                              | 0.660393596        | 2              | 3.984923  |
| Q64380        | QVVDHLEETGLHTGWIQNGGLFIASNQQR                                | 0.620160852        | 3              | 4.655502  |
| Q64380        | RDPLHEELLGQGCVFQER                                           | 0.666590582        | 3              | 5.591014  |
| Q64380        | SDDSPLEAGLAFTCK                                              | 1.141929585        | 2              | 2.657634  |
| Q64380        | STVCGPESFTPDKPLMGEAPELR                                      | 0.657427878        | 3              | 4.378253  |
| Q64380        | STVCGPESFTPDKPLMGEAPELR+Oxidation(16)                        | 0.850805675        |                |           |
| Q64380        | VTAVETQHGSIQTPCVVNCAGVWASSVGR                                | 0.695140019        | 3              | 5.090612  |
| <b>Q64428</b> | <b>ECHA Trifunctional enzyme subunit alpha_mitochondrial</b> | <b>0.902630895</b> | <b>9.9E-20</b> | <b>29</b> |
| Q64428        | ADMVIEAVFEDLAVK                                              | 0.731168713        | 2              | 3.967575  |
| Q64428        | ALMGLYNGQVLCK                                                | 0.869231962        | 2              | 3.308134  |
| Q64428        | DSIFSNLIGQLDYK                                               | 1.482748729        | 2              | 3.478514  |
| Q64428        | DTTASAVAVGLK                                                 | 1.021240686        | 2              | 3.639003  |
| Q64428        | EVESVTPEHCIFASNTSALPINQIAAVSQRPEK                            | 1.28217709         | 3              | 5.405834  |
| Q64428        | EVQSEFVEVMNEIWANDQIR                                         | 0.924420222        | 3              | 4.221745  |
| Q64428        | FGELALTK                                                     | 0.902860674        | 2              | 3.015374  |
| Q64428        | FGGGSVELLK                                                   | 0.945306601        | 2              | 3.06003   |
| Q64428        | FVDLYGAQK                                                    | 0.928149764        | 2              | 2.916451  |
| Q64428        | GFYIYQSGSK                                                   | 1.40759158         | 2              | 2.835433  |
| Q64428        | ILQEGVDPK                                                    | 0.802347631        | 2              | 3.290217  |
| Q64428        | KLDALTTGFGFPVGAATLADEVGIDVAQHVAEDLGK                         | 0.788852887        | 4              | 5.096561  |
| Q64428        | KTVLGVPEVLLGILPGAGGTQR                                       | 0.828689458        | 2              | 4.316564  |
| Q64428        | KYESAYGTQFTPCQLLR                                            | 0.934057705        | 2              | 5.012655  |
| Q64428        | LDALTTGFGFPVGAATLADEVGIDVAQHVAEDLGK                          | 0.938070149        |                |           |
| Q64428        | LPAKPEVSSDEDIQYR                                             | 1.698258873        | 2              | 4.406058  |
| Q64428        | MGLVDQLVDPLGPGIK                                             | 0.737782496        | 2              | 5.015884  |
| Q64428        | MGLVDQLVDPLGPGIK+Oxidation(0)                                | 0.87776552         |                |           |
| Q64428        | MQLLEIITDK                                                   | 0.730058964        | 2              | 3.931868  |
| Q64428        | MQLLEIITDK+Oxidation(0)                                      | 0.87132044         |                |           |
| Q64428        | MVGVPAAAFDMMLTGR                                             | 0.822404493        | 2              | 3.256285  |
| Q64428        | NLNSEIDNILVNL                                                | 0.861696192        | 2              | 4.710977  |
| Q64428        | SAVLISKPGCFVAGADINMLASCTTPQEAAAR                             | 0.74556901         | 3              | 3.909349  |
| Q64428        | SPKPVVAAISGSCLGGLELAIACQYR                                   | 0.919249005        | 3              | 3.641849  |
| Q64428        | TGLEQGNDAGYLAESEK                                            | 1.0033062          | 2              | 4.991644  |
| Q64428        | TIEYLEEVAVNFAK                                               | 0.939623818        | 3              | 4.20218   |
| Q64428        | TVLGVPEVLLGILPGAGGTQR                                        | 0.742492328        | 3              | 5.119709  |

|               |                                                                   |                    |                |           |
|---------------|-------------------------------------------------------------------|--------------------|----------------|-----------|
| Q64428        | TVQQLAILGAGLMGAGIAQVSVDK                                          | 0.730729695        | 3              | 6.421921  |
| Q64428        | YESAYGTQFTPCQLLR                                                  | 0.871378481        | 2              | 4.808635  |
| <b>Q64458</b> | <b>CP2CT Cytochrome P450 2C29</b>                                 | <b>0.800519767</b> | <b>0.00012</b> | <b>6</b>  |
| Q64458        | EHKESLDVTNPR                                                      | 0.887910563        | 2              | 3.291539  |
| Q64458        | IKEHKESLDVTNPR                                                    | 0.65535438         | 3              | 5.073951  |
| Q64458        | LPPGPTPLPIIGNFLQIDVK                                              | 1.027132893        | 2              | 4.004734  |
| Q64458        | VQEEAQCLVEELR                                                     | 1.644052485        | 2              | 4.387594  |
| Q64458        | VQEEAQCLVEELRK                                                    | 1.224549856        | 2              | 3.858618  |
| Q64458        | VQEEIDR                                                           | 0.911983556        | 2              | 2.410247  |
| <b>Q64481</b> | <b>CP3AG Cytochrome P450 3A16</b>                                 | <b>2.533094857</b> | <b>0.26452</b> | <b>3</b>  |
| Q64481        | EMFPVIEQYGDILVK                                                   | 2.797247262        | 2              | 3.031672  |
| Q64481        | GSIDPYVYLPFGNGPR                                                  | 2.159387167        | 2              | 3.931224  |
| Q64481        | VLQNFSPQCK                                                        | 2.610681195        | 2              | 2.78399   |
| <b>Q64541</b> | <b>AT1A4 Sodium/potassium_transporting ATPase subunit alpha_4</b> | <b>0.929011277</b> | <b>0.80905</b> | <b>2</b>  |
| Q64541        | LIIVEGCQR                                                         | 0.927632055        | 2              | 2.678524  |
| Q64541        | NLEAVETLGSTSTICSDK                                                | 0.94349035         | 2              | 3.080789  |
| <b>Q64550</b> | <b>UD11 UDP_glucuronosyltransferase 1_1</b>                       | <b>0.847892861</b> | <b>0.86657</b> | <b>5</b>  |
| Q64550        | GHEVVVIAPEASIIHK                                                  | 0.649426627        | 2              | 4.889272  |
| Q64550        | LLVIPIDGSHWLSMLGVIQQLQK                                           | 0.768450566        | 3              | 4.470123  |
| Q64550        | NMIIALTENFLCR                                                     | 0.860858983        | 2              | 4.349101  |
| Q64550        | SVFDQDPFLLR                                                       | 0.861882656        | 2              | 3.184846  |
| Q64550        | VVYSPYGLATEILQK                                                   | 0.895206013        | 2              | 5.125023  |
| <b>Q64560</b> | <b>TPP2 Tripeptidyl_peptidase 2</b>                               | <b>0.86365226</b>  | <b>0.912</b>   | <b>3</b>  |
| Q64560        | ACVDSNENGD LGK                                                    | 0.877177445        | 2              | 3.433127  |
| Q64560        | DPVQVAAPSDHGVGIEVPFENTENSEK                                       | 0.961645939        | 3              | 3.848384  |
| Q64560        | GTLIEAFPVLGGK                                                     | 0.836513196        | 2              | 2.601735  |
| <b>Q64563</b> | <b>ADH4 Alcohol dehydrogenase 4</b>                               | <b>0.909862017</b> | <b>0.00018</b> | <b>12</b> |
| Q64563        | AAVDCTVVGWGSCTVVGAK                                               | 0.528222616        | 2              | 3.864539  |
| Q64563        | ALFPVVLGHECAGIVESVGPVTFNKPGDK                                     | 0.567605044        | 3              | 5.246053  |
| Q64563        | ALGATDCLNPR                                                       | 0.711377574        | 2              | 3.218276  |
| Q64563        | FDDL LVT HALPFDK                                                  | 0.701600923        | 3              | 4.313217  |
| Q64563        | INDAIDL MNQ GK                                                    | 0.736509482        | 2              | 3.396684  |
| Q64563        | KFDL LVT HALPFDK                                                  | 0.660779728        | 3              | 4.829554  |
| Q64563        | SVDSV PNLVTDYK                                                    | 0.576079275        | 2              | 4.373028  |
| Q64563        | TDSPLCIEEIEVSPPK                                                  | 0.98620068         | 2              | 3.785296  |
| Q64563        | VCLIGCGFTSGYGAAINTAK                                              | 0.469519077        | 2              | 3.670304  |
| Q64563        | VDDEANLER                                                         | 0.688203709        | 2              | 2.82535   |
| Q64563        | VDEMNISTVDMILGR                                                   | 0.63099365         | 2              | 3.480024  |
| Q64563        | VIATCVCPDINATNPK                                                  | 0.598690984        | 2              | 4.754181  |
| <b>Q64565</b> | <b>AGT2 Alanine_glyoxylate aminotransferase 2_mitochondrial</b>   | <b>0.813556083</b> | <b>6.6E-13</b> | <b>13</b> |
| Q64565        | AYSNHTDIISFR                                                      | 0.965233642        | 2              | 3.370985  |
| Q64565        | GGNFSQTFR                                                         | 0.879045736        | 2              | 2.504953  |
| Q64565        | GGVCI ADEVQTGFGR                                                  | 0.767847957        | 2              | 4.354096  |
| Q64565        | GINGFPMAAVVTTPEIASSLAK                                            | 0.721991893        | 2              | 4.637915  |
| Q64565        | LRDEFDIVGDVR                                                      | 0.805868213        | 2              | 2.883657  |
| Q64565        | LSALLPEPLK                                                        | 1.027962841        | 2              | 2.781003  |
| Q64565        | NSQEVGTYMLLK                                                      | 0.452862275        | 2              | 2.85787   |
| Q64565        | SALTQHMER                                                         | 0.898691903        | 2              | 2.530699  |
| Q64565        | SALTQHMER+Oxidation(6)                                            | 1.026736462        |                |           |
| Q64565        | TEVNQIHEDCK                                                       | 0.816664412        | 2              | 2.997313  |
| Q64565        | TEVNQIHEDCKDMGLLVGR                                               | 0.535359006        | 2              | 5.521994  |
| Q64565        | VIFLVNSGSEANDLAMVMAR                                              | 0.810042614        | 2              | 4.695429  |
| Q64565        | YIEQFK                                                            | 0.695121326        | 1              | 2.15976   |
| <b>Q64578</b> | <b>AT2A1 Sarcoplasmic/endoplasmic reticulum calcium ATPase 1</b>  | <b>0.841282176</b> | <b>0.95108</b> | <b>8</b>  |

|               |                                                                           |                    |                |           |
|---------------|---------------------------------------------------------------------------|--------------------|----------------|-----------|
| Q64578        | AVGIVATTGVSTEIGK                                                          | 0.775326027        | 2              | 3.473829  |
| Q64578        | DIVPGDIVEVAVGDKVPADIR                                                     | 1.562783081        | 2              | 3.760574  |
| Q64578        | DQMAATEQDKTPLQKQ                                                          | 9.195704499        | 2              | 3.942774  |
| Q64578        | EFDDLPLAEQR                                                               | 0.718559416        | 2              | 2.685803  |
| Q64578        | IGIFSENEEVADR                                                             | 0.920611102        | 2              | 3.041716  |
| Q64578        | IRDQMAATEQDKTPLQKQ                                                        | 0.712303481        | 3              | 3.715467  |
| Q64578        | TGTLTTNQMSVCK                                                             | 0.833449488        | 2              | 2.876467  |
| Q64578        | VGEATETALTTLVEK                                                           | 1.088090631        | 2              | 4.784593  |
| <b>Q64581</b> | <b>CP3A1 Cytochrome P450 3A18</b>                                         | <b>2.211494165</b> | <b>0.40931</b> | <b>5</b>  |
| Q64581        | AITMSEDEEWKR                                                              | 1.029567894        | 2              | 2.311385  |
| Q64581        | EEAKGEPINMK                                                               | 2.566748118        | 2              | 2.336759  |
| Q64581        | LAVIGVLQNFNIQPCEK                                                         | 1.067813022        | 3              | 3.320505  |
| Q64581        | NPEYWLEPEEFNPER                                                           | 1.12026822         | 2              | 4.133575  |
| Q64581        | TILSPTFTSGK                                                               | 1.156794817        | 1              | 1.937561  |
| <b>Q64591</b> | <b>DECR 2_4_dienoyl_CoA reductase_mitochondrial</b>                       | <b>1.048255138</b> | <b>9.9E-20</b> | <b>12</b> |
| Q64591        | ATAEEITSK                                                                 | 1.064515208        | 2              | 2.906292  |
| Q64591        | CDVRDPDMVHNTVLELIK                                                        | 0.578560891        | 4              | 4.873317  |
| Q64591        | DPDMVHNTVLELIK                                                            | 0.885658929        | 3              | 3.74667   |
| Q64591        | EEWDVIEGLIR                                                               | 0.860503475        | 2              | 3.740566  |
| Q64591        | FDGGEEVFLSGEFNSLKK                                                        | 0.823566467        | 2              | 2.939223  |
| Q64591        | FNIIQPGPIK                                                                | 0.677141244        | 2              | 2.670853  |
| Q64591        | LGTVEELANLATFLCSDYASWINGAVIR                                              | 1.21904131         |                |           |
| Q64591        | NIDVLK                                                                    | 0.675659927        | 1              | 2.090248  |
| Q64591        | SLAAEWGR                                                                  | 0.751761796        | 2              | 2.670436  |
| Q64591        | VAFITGGGTGLGK                                                             | 1.000812463        | 2              | 2.78525   |
| Q64591        | VAGHPDVVINNAAGNFISPSE                                                     | 0.908578499        | 2              | 6.101136  |
| Q64591        | VTKEEWDVIEGLIR                                                            | 0.599716008        | 3              | 4.784861  |
| <b>Q64602</b> | <b>AADAT Kynurenine/alpha_aminoadipate aminotransferase_mitochondrial</b> | <b>0.949576636</b> | <b>0.54515</b> | <b>10</b> |
| Q64602        | ASFSQVTPAQMDLVFQR                                                         | 0.832478331        | 2              | 4.207116  |
| Q64602        | DIISLAPGSPNPK                                                             | 1.040785069        | 2              | 3.050683  |
| Q64602        | EILLVPGNSFFVDNSAPSSFFR                                                    | 1.00979961         | 2              | 3.586128  |
| Q64602        | FLTATSLAR                                                                 | 0.658734739        | 2              | 2.406299  |
| Q64602        | FLYTIPNGNNPTGNSLTGDR                                                      | 0.915938993        | 2              | 4.011209  |
| Q64602        | GLAEWHVPK                                                                 | 0.963980632        | 2              | 2.449018  |
| Q64602        | LHNPPTVNYSPNEGQMDLCITSGCQDGLCK                                            | 0.91148197         | 3              | 5.774458  |
| Q64602        | SAVFTVENGSTIR                                                             | 0.941552728        | 2              | 3.436837  |
| Q64602        | VGFITGPK                                                                  | 1.021391038        | 1              | 1.910192  |
| Q64602        | VLSQWKPEDSKDPTKR                                                          | 0.92575737         | 3              | 3.659276  |
| <b>Q64611</b> | <b>CSAD Cysteine sulfinic acid decarboxylase</b>                          | <b>1.140050467</b> | <b>0.98984</b> | <b>11</b> |
| Q64611        | AQGGQGLEWR                                                                | 1.117621917        | 2              | 3.213446  |
| Q64611        | CHGSQASYLFQQDK                                                            | 1.89315399         | 2              | 4.352719  |
| Q64611        | FFNQLFSGLDPHALAGR                                                         | 2.044449177        | 3              | 4.201155  |
| Q64611        | FYNVALDTGDK                                                               | 0.922561053        | 2              | 3.268161  |
| Q64611        | GAAFLGLGTDsvr                                                             | 0.018497687        | 2              | 3.076898  |
| Q64611        | IDQAFALTR                                                                 | 1.246615965        | 2              | 3.061519  |
| Q64611        | MVVANPILVQADIDFLLGELER                                                    | 1.066163911        |                |           |
| Q64611        | QLLDLELQSQGESR                                                            | 0.759841334        | 2              | 3.837628  |
| Q64611        | TLDGDPVAVEALLR                                                            | 0.905850769        | 2              | 4.500065  |
| Q64611        | VCEWKEPEELK                                                               | 1.06198065         | 3              | 3.697585  |
| Q64611        | YLVEEIK                                                                   | 1.278091087        | 1              | 2.391475  |
| <b>Q64638</b> | <b>UD15 UDP_glucuronosyltransferase 1_5</b>                               | <b>0.876776739</b> | <b>0.80058</b> | <b>3</b>  |
| Q64638        | GHQAVVLAPEVTVHIK                                                          | 0.710662612        | 3              | 3.502925  |
| Q64638        | VVFETGNYVK                                                                | 0.760335116        | 2              | 2.356892  |
| Q64638        | YESLASELLQR                                                               | 0.923999699        | 2              | 3.197192  |
| <b>Q64640</b> | <b>ADK Adenosine kinase</b>                                               | <b>1.110468936</b> | <b>9.9E-20</b> | <b>12</b> |



|               |                                                         |                    |                |           |
|---------------|---------------------------------------------------------|--------------------|----------------|-----------|
| Q64640        | AADAHVDAHYYEQNEQPTGTCAACITGGNR                          | 1.422857756        | 3              | 6.765608  |
| Q64640        | AATFFGCIGIDK                                            | 0.571838567        | 2              | 3.045069  |
| Q64640        | AGHYAASVIIR                                             | 0.974805667        | 3              | 3.578603  |
| Q64640        | FGEILK                                                  | 1.169843392        | 2              | 2.427885  |
| Q64640        | FKVEYHAGGSTQNSMK                                        | 1.308937292        | 2              | 3.026518  |
| Q64640        | HKELFDELVK                                              | 1.191535232        | 3              | 3.790277  |
| Q64640        | HLDLENNWMLVEK                                           | 1.076232259        | 2              | 3.788278  |
| Q64640        | SLVANLAAANCYK                                           | 1.094214045        | 2              | 4.737859  |
| Q64640        | VEAPEALSENVLFMGNPLLDISAVVDKDFLDK                        | 0.78596085         |                |           |
| Q64640        | VEYHAGGSTQNSMK                                          | 1.31549386         | 2              | 4.050841  |
| Q64640        | VEYHAGGSTQNSMK+Oxidation(12)                            | 3.080015008        |                |           |
| Q64640        | YSLKPNQILAEDK                                           | 1.250614422        | 3              | 4.959095  |
| <b>Q64654</b> | <b>CP51A Lanosterol 14_alpha demethylase</b>            | <b>0.692689065</b> | <b>0.4185</b>  | <b>7</b>  |
| Q64654        | EPAEDILQTLDDSTYK                                        | 0.936327448        | 2              | 3.919968  |
| Q64654        | GVAYDVPNAVFLQK                                          | 0.868620833        | 2              | 3.226981  |
| Q64654        | NEDLNAEEVYGR                                            | 0.806256018        | 2              | 4.106766  |
| Q64654        | SGLNIAHFK                                               | 0.960692905        | 2              | 2.966093  |
| Q64654        | TPQTVAGYTIPPGHQVCVSPTVNQR                               | 0.864218661        | 3              | 3.94804   |
| Q64654        | TVCGEDLPPLTYEQLK                                        | 0.567706317        | 2              | 4.072863  |
| Q64654        | YLQDNPASGEK                                             | 0.686860908        | 2              | 2.61559   |
| <b>Q65CL1</b> | <b>CTNA3 Catenin alpha_3</b>                            | <b>1.063001857</b> | <b>0.42125</b> | <b>2</b>  |
| Q65CL1        | MISESGSRMDVLAR+Oxidation(0)                             | 1.219102145        |                |           |
| Q65CL1        | NLMNAVVTQTVK                                            | 0.612288712        | 2              | 2.888613  |
| <b>Q66H12</b> | <b>NAGAB Alpha_N_acetylgalactosaminidase</b>            | <b>1.01235857</b>  | <b>0.48347</b> | <b>3</b>  |
| Q66H12        | CNINCEEDPK                                              | 0.565162544        | 2              | 2.711522  |
| Q66H12        | INQDPLGIQGR                                             | 0.723878761        | 2              | 3.109276  |
| Q66H12        | TISPQNIDILQNPLLIK                                       | 1.013952738        | 2              | 2.357762  |
| <b>Q66H15</b> | <b>RMD3 Regulator of microtubule dynamics protein 3</b> | <b>0.770584004</b> | <b>0.07889</b> | <b>3</b>  |
| Q66H15        | AEELQPGFSK                                              | 0.860376842        | 2              | 2.655945  |
| Q66H15        | AIELQPEDPR                                              | 0.799785803        | 2              | 2.342432  |
| Q66H15        | SLQGLAGEIVGEVR                                          | 0.669157821        | 2              | 2.755211  |
| <b>Q66H80</b> | <b>COPD Coatomer subunit delta</b>                      | <b>1.075127603</b> | <b>0.99485</b> | <b>5</b>  |
| Q66H80        | GVQLQTHPNVDKK                                           | 1.180253084        | 2              | 3.434421  |
| Q66H80        | LFTAESLIGLK                                             | 1.225872585        | 2              | 2.823047  |
| Q66H80        | NSNILEDLETLR                                            | 1.050603267        | 2              | 3.076531  |
| Q66H80        | NTLEWCLPVIDAK                                           | 0.924953377        | 2              | 2.858103  |
| Q66H80        | VTQVDGNPSPVR                                            | 1.134901745        | 2              | 2.939242  |
| <b>Q66HA8</b> | <b>HS105 Heat shock protein 105 kDa</b>                 | <b>1.124928712</b> | <b>0.1318</b>  | <b>9</b>  |
| Q66HA8        | AGGIETIANEFSDR                                          | 1.309423129        | 2              | 2.851369  |
| Q66HA8        | FQEAERPR                                                | 0.741159911        | 2              | 2.480205  |
| Q66HA8        | FVVQNVSAQK                                              | 0.963379432        | 2              | 2.387136  |
| Q66HA8        | IARFFGKDVSTTLNADEAVAR                                   | 0.671378323        | 2              | 2.317001  |
| Q66HA8        | NQQITHANNTVSSFK                                         | 1.252217479        | 2              | 4.570228  |
| Q66HA8        | SVLDAAQIVGLNCLR                                         | 0.954275685        | 2              | 3.456195  |
| Q66HA8        | TEEVSAIEIVGGATR                                         | 0.799810196        | 2              | 3.408049  |
| Q66HA8        | VLGTAFDPPFLGGK                                          | 1.016773866        | 2              | 3.098852  |
| Q66HA8        | YNHIDEMKKEK                                             | 0.708304399        | 2              | 2.612902  |
| <b>Q66HD0</b> | <b>ENPL Endoplasmic</b>                                 | <b>1.090951645</b> | <b>0.24053</b> | <b>28</b> |
| Q66HD0        | DISTNYYASQK                                             | 2.608858204        | 2              | 2.997864  |
| Q66HD0        | EATEKEFEPLLNWMK                                         | 1.015623441        | 2              | 2.830895  |
| Q66HD0        | EEASDYLELDTIK                                           | 0.890481967        | 2              | 4.207668  |
| Q66HD0        | EEEAIQLDGLNASQIR                                        | 0.714604859        | 2              | 4.398885  |
| Q66HD0        | EFEPPLNWMK                                              | 1.32201862         | 2              | 2.347774  |
| Q66HD0        | EVEEDEYK                                                | 1.032547789        | 1              | 2.658949  |
| Q66HD0        | FQSSHSTDITSLDQYVER                                      | 1.110268635        | 3              | 5.646537  |
| Q66HD0        | GLFDEYGSK                                               | 0.793711812        | 2              | 2.463858  |

|               |                                                                          |                    |                |           |
|---------------|--------------------------------------------------------------------------|--------------------|----------------|-----------|
| Q66HD0        | GVVDSDDLPLNVSR                                                           | 0.929681309        | 2              | 4.920107  |
| Q66HD0        | GVEVIVLTEPVDEYCIQALPEFDGKR                                               | 2.26630665         | 3              | 3.963573  |
| Q66HD0        | KEAESSPFVER                                                              | 1.115931446        | 2              | 3.173807  |
| Q66HD0        | LGVIEDHSNR                                                               | 1.136804315        | 2              | 3.358554  |
| Q66HD0        | LISLTDENALAGNEELTVK                                                      | 0.922928935        | 2              | 5.50101   |
| Q66HD0        | LTESPCALVASQYGWWSGNMER                                                   | 0.964479231        | 2              | 5.476592  |
| Q66HD0        | LTESPCALVASQYGWWSGNMER+Oxidation(18)                                     | 0.89002386         |                |           |
| Q66HD0        | NLLHVTDGTGVMTR                                                           | 1.058618226        | 2              | 3.98749   |
| Q66HD0        | NLLHVTDGTGVMTR+Oxidation(11)                                             | 1.1446661          |                |           |
| Q66HD0        | SGTSEFLNK                                                                | 1.076018177        | 2              | 3.201717  |
| Q66HD0        | SGYLLPDTK                                                                | 1.034915429        | 2              | 3.216391  |
| Q66HD0        | SILFVPTSAPR                                                              | 1.084783236        | 2              | 3.28606   |
| Q66HD0        | TDDEVVQR                                                                 | 0.984944169        | 2              | 3.312746  |
| Q66HD0        | TDDEVVQREEEAIQDLGNASQIR                                                  | 0.902449151        | 3              | 5.450044  |
| Q66HD0        | TETVEEPLLEETAQEEK                                                        | 2.736042927        | 2              | 5.23895   |
| Q66HD0        | TFEINPR                                                                  | 1.031130857        | 2              | 2.402784  |
| Q66HD0        | TVVDWELMNDIKPIWQRPSK                                                     | 0.979571234        | 3              | 3.17456   |
| Q66HD0        | VFITDDFHDMMPK                                                            | 0.851061418        | 2              | 3.840754  |
| Q66HD0        | YNDTFWK                                                                  | 1.022836029        | 1              | 2.101287  |
| Q66HD0        | YSQFINFPIYVWSSK                                                          | 0.71436567         | 2              | 3.32529   |
| <b>Q66HD3</b> | <b>NASP Nuclear autoantigenic sperm protein</b>                          | <b>1.026049092</b> | <b>0.60413</b> | <b>2</b>  |
| Q66HD3        | LSETKDGASVEEVK                                                           | 1.025777862        | 2              | 2.430129  |
| Q66HD3        | QDTLMKVVEIEAIEIDSEVK+Oxidation(4)                                        | 1.163763482        |                |           |
| <b>Q66HF1</b> | <b>NDUS1 NADH_ubiquinone oxidoreductase 75 kDa subunit_mitochondrial</b> | <b>1.197519843</b> | <b>0.52694</b> | <b>11</b> |
| Q66HF1        | ALSEIAGITLPYDTLDQVR                                                      | 0.970207616        | 2              | 5.15308   |
| Q66HF1        | AVTEGAQAVEEPSIC                                                          | 0.970740486        | 2              | 3.185316  |
| Q66HF1        | DDGAAILAAVSSIAQK                                                         | 0.823464818        | 2              | 4.513566  |
| Q66HF1        | FASEIAGVDDLGTTR                                                          | 1.4551068          | 2              | 4.085585  |
| Q66HF1        | FEAPLFNAR                                                                | 0.984228485        | 2              | 2.660874  |
| Q66HF1        | GLLYTYSWEDALSR                                                           | 0.945108423        | 2              | 3.590138  |
| Q66HF1        | ILQDIASGNHEFSK                                                           | 1.231552817        | 2              | 4.192792  |
| Q66HF1        | LGEVSPNLVR                                                               | 1.024642006        | 2              | 2.961337  |
| Q66HF1        | LVDQEFLADPLVPPQLTIK                                                      | 0.973356842        | 2              | 3.110144  |
| Q66HF1        | VSDTLCTEEIFPNEGAGTDLR                                                    | 1.024123147        | 2              | 4.287465  |
| Q66HF1        | YDHLGDSPK                                                                | 1.013109025        | 2              | 2.576717  |
| <b>Q66HF8</b> | <b>AL1B1 Aldehyde dehydrogenase X_mitochondrial</b>                      | <b>0.617215229</b> | <b>5.7E-08</b> | <b>11</b> |
| Q66HF8        | EEIFGPVQPLFK                                                             | 1.082802001        | 2              | 3.039147  |
| Q66HF8        | KVGNPFELDTQQGPQVDKEQFEK                                                  | 0.50974372         | 3              | 3.456821  |
| Q66HF8        | LAPALATGNTVVMK                                                           | 0.826768091        | 2              | 3.299885  |
| Q66HF8        | TFPTVNPTTGEVIGHVAEGDR                                                    | 0.623372076        | 2              | 4.794425  |
| Q66HF8        | TFVEESYHEFLER                                                            | 0.65066617         | 2              | 3.741059  |
| Q66HF8        | VAEQTPLSALYLASLIK                                                        | 1.559296876        | 2              | 3.606155  |
| Q66HF8        | VAFTGSTEVGHLIQK                                                          | 0.655166242        | 2              | 3.271901  |
| Q66HF8        | VGNPFELDTQQGPQVDK                                                        | 0.977347859        | 2              | 3.796599  |
| Q66HF8        | VGNPFELDTQQGPQVDKEQFEK                                                   | 0.577232239        | 2              | 4.495793  |
| Q66HF8        | YGLAAAVFTR                                                               | 0.710776716        | 2              | 3.084833  |
| Q66HF8        | YNQLFINNEWHDAVSK                                                         | 0.980889925        | 2              | 3.536329  |
| <b>Q66HG4</b> | <b>GALM Aldose 1_epimerase</b>                                           | <b>0.813585671</b> | <b>9.9E-20</b> | <b>3</b>  |
| Q66HG4        | ASDVVLGF AELEGYLQK                                                       | 0.742268777        | 2              | 4.37411   |
| Q66HG4        | TVFGELPSGGGAVEK                                                          | 0.711845504        | 2              | 3.677706  |
| Q66HG4        | VSPDGEEGYPGELK                                                           | 0.786074198        | 2              | 3.925192  |
| <b>Q66X93</b> | <b>SND1 Staphylococcal nuclease domain_containing protein 1</b>          | <b>1.365503924</b> | <b>2.9E-05</b> | <b>20</b> |
| Q66X93        | ADDADEFGYSR                                                              | 2.708704921        | 2              | 2.549358  |
| Q66X93        | ALLLPDHVLTVMMLSGIK                                                       | 0.849537604        | 3              | 4.24561   |

|               |                                                 |                    |                |           |
|---------------|-------------------------------------------------|--------------------|----------------|-----------|
| Q66X93        | DIQNTQCLLNVEHLSASCPHVTLQFADSK                   | 1.012605493        | 3              | 4.316439  |
| Q66X93        | DTNGENIAESLVAEGLASR                             | 1.080001339        | 2              | 5.025278  |
| Q66X93        | ETDGSETPEPFAAEAK                                | 1.399196744        | 2              | 3.806101  |
| Q66X93        | GDVGLGLVK                                       | 1.139213638        | 2              | 2.43039   |
| Q66X93        | HFVDSHHQKPVNAIEHVHR                             | 0.81045528         | 3              | 4.056577  |
| Q66X93        | LEGDNIQDK                                       | 1.152091164        | 2              | 2.860885  |
| Q66X93        | NLPGLVQEGEPFSEATLFTK                            | 1.539848862        | 2              | 5.536663  |
| Q66X93        | SAYYKPLLSAEEAAK                                 | 1.155042485        | 2              | 3.223134  |
| Q66X93        | SDISSHPPVEGAYAPR                                | 1.083572152        | 3              | 4.724852  |
| Q66X93        | SEAVVEYVFSGSR                                   | 1.644365851        | 2              | 3.347418  |
| Q66X93        | SSHYDELLAAEAR                                   | 1.201561792        | 2              | 3.529833  |
| Q66X93        | TCATVTIGGINIAEALVSK                             | 0.839325644        | 2              | 3.512292  |
| Q66X93        | TDAVDSVVR                                       | 1.250297794        | 2              | 2.680137  |
| Q66X93        | VADISGDTQK                                      | 1.086754319        | 2              | 2.480506  |
| Q66X93        | VITEYLNAQESAK                                   | 1.452742053        | 2              | 3.843806  |
| Q66X93        | VMQVLNADAIVVK                                   | 1.027105006        | 2              | 2.878518  |
| Q66X93        | VSVTVDIRPASPATETVPAFSEK                         | 1.106654873        | 3              | 5.622403  |
| Q66X93        | VVAHYEEQPVVEVMPVLEEK                            | 1.265892181        | 3              | 3.982018  |
| <b>Q68FP2</b> | <b>PON3 Serum paraoxonase/lactonase 3</b>       | <b>0.801517264</b> | <b>1.5E-05</b> | <b>8</b>  |
| Q68FP2        | HELFESVNDIVVLGPEQFYATR                          | 1.440931927        | 3              | 3.777817  |
| Q68FP2        | HNNWDLTPVK                                      | 0.741119489        | 2              | 2.977453  |
| Q68FP2        | IFLMDLNPEYPK                                    | 0.812298859        | 2              | 3.19641   |
| Q68FP2        | IQDPLSDNPR                                      | 0.881214594        | 2              | 3.127307  |
| Q68FP2        | LLIYNPEDPPGSEVLR                                | 0.862498033        | 2              | 4.058468  |
| Q68FP2        | VIQLGLVDNLTVDPATGDILAGCHPNPMK                   | 0.873990819        | 3              | 4.768847  |
| Q68FP2        | VVAQGFSSANGITVSLDQK                             | 0.626801628        | 2              | 3.367835  |
| Q68FP2        | YVYVADVAK                                       | 0.877249434        | 1              | 3.0049    |
| <b>Q68FQ0</b> | <b>TCPE T_complex protein 1 subunit epsilon</b> | <b>1.172117817</b> | <b>0.35215</b> | <b>6</b>  |
| Q68FQ0        | GSNDMQYQHVIETLIGK                               | 1.352262774        | 2              | 3.139063  |
| Q68FQ0        | HKLDVTSVEDYK                                    | 0.80356531         | 2              | 3.201262  |
| Q68FQ0        | ISDNVLVDINNPEPLIQTAK                            | 1.224109077        | 2              | 5.188832  |
| Q68FQ0        | LDVTSVEDYK                                      | 1.01294205         | 2              | 2.371968  |
| Q68FQ0        | SLHDALCVIR                                      | 0.846390782        | 2              | 2.481982  |
| Q68FQ0        | WVGPEIELIAIATGGR                                | 1.146052963        | 2              | 3.903633  |
| <b>Q68FR6</b> | <b>EF1G Elongation factor 1_gamma</b>           | <b>0.887507185</b> | <b>3.5E-08</b> | <b>9</b>  |
| Q68FR6        | AAAPAPEEEMDECEQALAAEPK                          | 1.015747065        | 2              | 5.139385  |
| Q68FR6        | ALIAAQYSGAQIR                                   | 1.473333034        | 2              | 3.712908  |
| Q68FR6        | GQDLAFPLSPDWQVDYESYTWK                          | 1.564493945        | 2              | 4.251281  |
| Q68FR6        | ILGLLDTHLK                                      | 1.063555381        | 2              | 2.769705  |
| Q68FR6        | KAAAPAPEEEMDECEQALAAEPK                         | 1.146063998        | 3              | 3.806649  |
| Q68FR6        | KLDPGSEETQTLVR                                  | 1.182086305        | 2              | 3.863262  |
| Q68FR6        | LDPGSEETQTLVR                                   | 0.961787656        | 2              | 3.653568  |
| Q68FR6        | STFVLDEFKR                                      | 1.05335417         | 2              | 2.479879  |
| Q68FR6        | WFLTCINQPQFR                                    | 0.889800436        | 2              | 3.139211  |
| <b>Q68FR9</b> | <b>EF1D Elongation factor 1_delta</b>           | <b>0.957004927</b> | <b>0.99846</b> | <b>6</b>  |
| Q68FR9        | ATAPQTQHVSPMR                                   | 0.786938661        | 2              | 3.562022  |
| Q68FR9        | FYEQMNGPVTAGSR                                  | 1.058303077        | 2              | 4.418282  |
| Q68FR9        | GVVQDLQQAISK                                    | 1.057589752        | 2              | 3.754268  |
| Q68FR9        | SIQLDGLVWGASK                                   | 0.94019504         | 2              | 3.266758  |
| Q68FR9        | SLAGSSGPGASSGPGDHSDLIVR                         | 1.060484513        | 2              | 5.518403  |
| Q68FR9        | VGTDLLEEEITK                                    | 1.106402692        | 2              | 3.484912  |
| <b>Q68FS2</b> | <b>CSN4 COP9 signalosome complex subunit 4</b>  | <b>0.868538978</b> | <b>0.32661</b> | <b>3</b>  |
| Q68FS2        | NAAQVLVGIPIETGQK                                | 0.47928109         | 2              | 2.691726  |
| Q68FS2        | QDLAQLMNSSGSHK                                  | 0.771717278        | 2              | 2.391995  |
| Q68FS2        | VISFEEQVASIR                                    | 0.871443901        | 2              | 2.425801  |
| <b>Q68FS4</b> | <b>AMPL Cytosol aminopeptidase</b>              | <b>0.896406889</b> | <b>9.9E-20</b> | <b>18</b> |
| Q68FS4        | ADMGGAATICSIVSAAK                               | 0.747434782        | 2              | 5.504634  |

|               |                                                                                       |                    |                |           |
|---------------|---------------------------------------------------------------------------------------|--------------------|----------------|-----------|
| Q68FS4        | ADMGGAATICSIAIVSAAK+Oxidation(2)                                                      | <b>0.961785712</b> |                |           |
| Q68FS4        | DKDDDVDPQFTSAGENFNK                                                                   | <b>0.95916871</b>  | 2              | 4.939332  |
| Q68FS4        | GITFDSGGISIK                                                                          | <b>0.983824216</b> | 2              | 3.304582  |
| Q68FS4        | GSEEPVFLEIHYTGSPNATEAPLVFVGK                                                          | <b>1.575363848</b> | 3              | 5.805487  |
| Q68FS4        | GVLFASGQNLAR                                                                          | <b>0.950098665</b> | 2              | 3.291774  |
| Q68FS4        | LFEASVETGDR                                                                           | <b>0.949642918</b> | 2              | 3.374507  |
| Q68FS4        | LHGSGDLEAWEK                                                                          | <b>0.841224371</b> | 2              | 3.650855  |
| Q68FS4        | LILADALCYAHTFNPK                                                                      | <b>1.240728842</b> | 2              | 3.985195  |
| Q68FS4        | LNLPINIIGLAPLCENMPSGK                                                                 | <b>1.161632121</b> | 2              | 5.039613  |
| Q68FS4        | QLMESPANEMTPTR                                                                        | <b>0.768570237</b> | 2              | 3.783976  |
| Q68FS4        | QVIDCQLADVNNLQK                                                                       | <b>0.758138177</b> | 2              | 4.979078  |
| Q68FS4        | SAGACTAAAFRL                                                                          | <b>0.956124118</b> | 2              | 3.502427  |
| Q68FS4        | SAGVDDQENWHEGK                                                                        | <b>0.923631159</b> | 2              | 3.748395  |
| Q68FS4        | SWIEEQEMGSFLSVAK                                                                      | <b>0.841097971</b> | 2              | 5.368445  |
| Q68FS4        | TFYGLHQDFPSVVVGLGK                                                                    | <b>0.731962619</b> | 2              | 5.416978  |
| Q68FS4        | TIQVDNTDAEGR                                                                          | <b>0.834635008</b> | 2              | 3.795482  |
| Q68FS4        | TLIEFLLR                                                                              | <b>0.877753968</b> | 2              | 2.598734  |
| <b>Q68FT1</b> | <b>COQ9 Ubiquinone biosynthesis protein COQ9_mitochondrial</b>                        | <b>0.796995797</b> | <b>0.00192</b> | <b>4</b>  |
| Q68FT1        | INDAMNMGHTAK                                                                          | <b>0.501682325</b> | 2              | 3.035889  |
| Q68FT1        | LNHVLEEEQK                                                                            | <b>0.828563151</b> | 3              | 3.434418  |
| Q68FT1        | STGEALVQGLMGAAVTLK                                                                    | <b>0.814195683</b> | 2              | 3.00385   |
| Q68FT1        | YTDQSGEEEEYEESEIQHR                                                                   | <b>0.866805192</b> | 3              | 4.689087  |
| <b>Q68FT3</b> | <b>PYRD2 Pyridine nucleotide_disulfide oxidoreductase domain_containing protein 2</b> | <b>0.720644479</b> | <b>0.05008</b> | <b>7</b>  |
| Q68FT3        | HVIGGAAVTEIIPGFK                                                                      | <b>0.712934221</b> | 2              | 3.570796  |
| Q68FT3        | ISQLDTQSPVTK                                                                          | <b>0.855237313</b> | 2              | 3.420857  |
| Q68FT3        | SLLLGTDAENQK                                                                          | <b>0.647339224</b> | 2              | 3.939502  |
| Q68FT3        | TLGAQLPQYYEVLTAPIK                                                                    | <b>0.647170744</b> | 2              | 4.260234  |
| Q68FT3        | VFDCIEAYAPGFK                                                                         | <b>0.767956066</b> | 2              | 2.853969  |
| Q68FT3        | VLDQWFEESEPLK                                                                         | <b>0.79948126</b>  | 2              | 2.849102  |
| Q68FT3        | VQGVVLQGGEEVR                                                                         | <b>0.725039767</b> | 2              | 3.592483  |
| <b>Q68FT5</b> | <b>BHMT2 Betaine_homocysteine S_methyltransferase 2</b>                               | <b>1.232800365</b> | <b>9.9E-20</b> | <b>10</b> |
| Q68FT5        | AGADVLQFTFSAAEER                                                                      | <b>3.657756338</b> | 2              | 2.655468  |
| Q68FT5        | AGANIIGVNCR                                                                           | <b>1.085295187</b> | 2              | 3.478096  |
| Q68FT5        | AGLWTPAEAVVEYPSAVR                                                                    | <b>1.283667842</b> | 2              | 3.445393  |
| Q68FT5        | AIAEELAPER                                                                            | <b>2.123600737</b> | 2              | 3.778363  |
| Q68FT5        | DAGLQAHLMVQCLGFHTPDCGK                                                                | <b>1.01380623</b>  | 3              | 4.462389  |
| Q68FT5        | EVGAPVAVTMCIGPEGDMHGVTGCEAVR                                                          | <b>0.976323507</b> | 3              | 4.075529  |
| Q68FT5        | FGPWTSLQTMK                                                                           | <b>0.877331275</b> | 2              | 2.814073  |
| Q68FT5        | GGFVDLPEYFPGLEPR                                                                      | <b>1.117188214</b> | 2              | 4.104311  |
| Q68FT5        | LDSGEVVVDGGFLFTLEK                                                                    | <b>0.694211344</b> | 2              | 3.922539  |
| Q68FT5        | YIGGCCGFEPYHIR                                                                        | <b>3.683229134</b> | 2              | 4.710752  |
| <b>Q68FT9</b> | <b>SCLY Selenocysteine lyase</b>                                                      | <b>1.089354458</b> | <b>0.01096</b> | <b>4</b>  |
| Q68FT9        | AEVDLIVQDLK                                                                           | <b>0.841919361</b> | 2              | 3.883864  |
| Q68FT9        | NFRPGTENTPMIAGLGK                                                                     | <b>0.7015674</b>   | 2              | 3.349958  |
| Q68FT9        | RVDVEDLGVDLFTIVGHK                                                                    | <b>1.365316027</b> | 3              | 5.547755  |
| Q68FT9        | VLVHTDAAQALGK                                                                         | <b>0.841950945</b> | 2              | 2.473229  |
| <b>Q68FU3</b> | <b>ETFB Electron transfer flavoprotein subunit beta</b>                               | <b>0.822893761</b> | <b>0.00038</b> | <b>11</b> |
| Q68FU3        | AGDLGVDLTSK                                                                           | <b>0.80867219</b>  | 2              | 3.636026  |
| Q68FU3        | EIIAVSCGPPQCQETIR                                                                     | <b>1.042580342</b> | 2              | 4.782104  |
| Q68FU3        | GIHVEVPGAEAEENGLPLQVAR                                                                | <b>0.510994311</b> | 2              | 6.043542  |
| Q68FU3        | HSMNPFCEIAVEEAVR                                                                      | <b>0.864328165</b> | 2              | 5.254708  |
| Q68FU3        | HSMNPFCEIAVEEAVR+Oxidation(2)                                                         | <b>1.0952742</b>   |                |           |
| Q68FU3        | QAIDDDCNQTGMQTAGLLDWPQGTAFASQVTLEGDKVK                                                | <b>0.695727752</b> | 3              | 5.085751  |

|               |                                                                    |                    |                |          |
|---------------|--------------------------------------------------------------------|--------------------|----------------|----------|
| Q68FU3        | RVIDFAVK                                                           | 0.796368121        | 2              | 2.804606 |
| Q68FU3        | VDLLFLGK                                                           | 1.179461926        | 2              | 2.80443  |
| Q68FU3        | VETTEDLVAK                                                         | 0.793719453        | 2              | 3.357481 |
| Q68FU3        | VIDFAVK                                                            | 0.954453329        | 2              | 2.412454 |
| Q68FU3        | VSVISVEEPPQR                                                       | 0.903150992        | 2              | 3.454462 |
| <b>Q68FY0</b> | <b>QCR1 Cytochrome b_c1 complex subunit 1_mitochondrial</b>        | <b>1.042685174</b> | <b>0.00022</b> | <b>9</b> |
| Q68FY0        | HQQLDLAQDHFSSVQVVEEDAVPSITPCR                                      | 0.781855669        | 3              | 5.630429 |
| Q68FY0        | IEEVDAQMVR                                                         | 0.832702811        | 2              | 3.606245 |
| Q68FY0        | LCTSATESEVTR                                                       | 1.022191281        | 2              | 3.277986 |
| Q68FY0        | NALISHLDGTTVCEDIGR                                                 | 0.785545415        | 2              | 4.513545 |
| Q68FY0        | NNGAGYFLEHLAFK                                                     | 0.749846954        | 2              | 3.371237 |
| Q68FY0        | RIPLAEWESR                                                         | 0.909885975        | 2              | 2.604239 |
| Q68FY0        | TDLTDYLSR                                                          | 0.734622305        | 2              | 2.820077 |
| Q68FY0        | VVELLADIVQNISLEDSQIEK                                              | 0.881800917        | 3              | 6.90851  |
| Q68FY0        | YFYDQCPAVAGYGPQIEQLSDYNR                                           | 1.056413948        | 2              | 4.962695 |
| <b>Q68G31</b> | <b>PBLD Phenazine biosynthesis_like domain_containing protein</b>  | <b>0.92986174</b>  | <b>0.87976</b> | <b>7</b> |
| Q68G31        | AAIGDTTVQDIQYSPDTR                                                 | 0.779693235        | 2              | 4.670763 |
| Q68G31        | AEDGIVLDFPLYPTFPQDFHEVK                                            | 0.927733238        | 3              | 3.924644 |
| Q68G31        | GESGGQTPPYDFYSR                                                    | 1.026047385        | 2              | 3.963842 |
| Q68G31        | LQPTDSFSQSSCFGLR                                                   | 0.555224479        | 2              | 3.668367 |
| Q68G31        | NVNSTLTFVTLGELK                                                    | 1.022524672        | 2              | 4.288925 |
| Q68G31        | RAEDGIVLDFPLYPTFPQDFHEVK                                           | 0.883042638        | 3              | 6.268124 |
| Q68G31        | VNTEPLPGIEK                                                        | 1.083002058        | 2              | 2.412276 |
| <b>Q69Z23</b> | <b>DYH17 Dynein heavy chain 17_axonemal</b>                        | <b>0.782455086</b> | <b>0.77191</b> | <b>2</b> |
| Q69Z23        | MNILTNEMRRLK+Oxidation(0)                                          | 0.723829878        |                |          |
| Q69Z23        | YFIDLLMEK                                                          | 0.859993936        | 1              | 2.141696 |
| <b>Q69ZH9</b> | <b>RHG23 Rho GTPase_activating protein 23</b>                      | <b>1.050839773</b> | <b>0.057</b>   | <b>2</b> |
| Q69ZH9        | LEPMDTIFVKNVK                                                      | 0.703878833        | 2              | 2.43207  |
| Q69ZH9        | SRAEAEKPGAGTARACPR                                                 | 1.157077891        | 2              | 2.380046 |
| <b>Q6A0A9</b> | <b>F120A Constitutive coactivator of PPAR_gamma_like protein 1</b> | <b>0.918665819</b> | <b>0.54566</b> | <b>2</b> |
| Q6A0A9        | SQGGVQPIPSQGGK                                                     | 0.71113138         | 2              | 3.095812 |
| Q6A0A9        | VEGSSTASSGSQLAEGK                                                  | 1.041323388        | 2              | 4.280548 |
| <b>Q6AXM8</b> | <b>PON2 Serum paraoxonase/arylesterase 2</b>                       | <b>1.043088309</b> | <b>0.00163</b> | <b>3</b> |
| Q6AXM8        | FQEEENSLHLK                                                        | 0.482999268        | 2              | 2.715732 |
| Q6AXM8        | LFVYDPNHPPSSEVLR                                                   | 0.693518203        | 2              | 2.491378 |
| Q6AXM8        | WANVVVYSPPEVK                                                      | 3.333862154        | 2              | 3.553181 |
| <b>Q6AXN3</b> | <b>TMED5 Transmembrane emp24 domain_containing protein 5</b>       | <b>0.768794927</b> | <b>0.96417</b> | <b>2</b> |
| Q6AXN3        | LEDILESINSIK                                                       | 1.059517899        | 2              | 3.850768 |
| Q6AXN3        | LEDILESINSIKSR                                                     | 0.912511982        | 2              | 2.50144  |
| <b>Q6AXS5</b> | <b>PAIRB Plasminogen activator inhibitor 1 RNA_binding protein</b> | <b>0.889845054</b> | <b>0.95193</b> | <b>3</b> |
| Q6AXS5        | EETQPPVALKK                                                        | 1.020938256        | 2              | 2.389626 |
| Q6AXS5        | FDQLFDESPPFEVLK                                                    | 1.047409998        | 2              | 4.3778   |
| Q6AXS5        | SAAQAAAQTNNAAGK                                                    | 1.495401372        | 2              | 4.432777 |
| <b>Q6AXY0</b> | <b>GSTA6 Glutathione S_transferase A6</b>                          | <b>0.858116969</b> | <b>0.33144</b> | <b>2</b> |
| Q6AXY0        | FLQPGSQR                                                           | 0.856837351        | 2              | 2.420994 |
| Q6AXY0        | YFPAFEK                                                            | 0.910391774        | 1              | 1.918532 |
| <b>Q6AY09</b> | <b>HNRH2 Heterogeneous nuclear ribonucleoprotein H2</b>            | <b>0.988080177</b> | <b>0.15789</b> | <b>3</b> |
| Q6AY09        | ATENDIYNFFSPLNPMR                                                  | 1.203873926        | 2              | 2.689776 |
| Q6AY09        | HTGPNPDTANDGFVR                                                    | 0.956806051        | 2              | 4.401614 |
| Q6AY09        | STGEAFVQFASQEIAEK                                                  | 1.555116092        | 2              | 4.386896 |
| <b>Q6AY30</b> | <b>SCPDH Probable saccharopine dehydrogenase</b>                   | <b>0.863702791</b> | <b>0.66367</b> | <b>6</b> |

|               |                                                                |                    |                |          |
|---------------|----------------------------------------------------------------|--------------------|----------------|----------|
| Q6AY30        | ACIENGTSICDICGEPQFLELMHVK                                      | 1.008370929        | 3              | 4.399938 |
| Q6AY30        | ATLVLCVGPYR                                                    | 0.959079164        | 2              | 2.613501 |
| Q6AY30        | GGGVFTPGAAFSR                                                  | 0.863766665        | 2              | 2.434473 |
| Q6AY30        | GVYIIGSSGFDSIPADLGVLYTR                                        | 0.828151502        | 2              | 4.231153 |
| Q6AY30        | LQQVLEK                                                        | 0.982002892        | 1              | 2.015729 |
| Q6AY30        | SVSNLKPVPVIGSK                                                 | 0.718996663        | 2              | 3.835439 |
| <b>Q6AY56</b> | <b>TBA8 Tubulin alpha_8 chain</b>                              | <b>1.057883706</b> | <b>0.92097</b> | <b>7</b> |
| Q6AY56        | AVCMLSNTTAIAEAWAR                                              | 0.932903684        | 2              | 4.75739  |
| Q6AY56        | FDGALNVDLTFQTNLVPYPR                                           | 1.044554739        | 2              | 4.999843 |
| Q6AY56        | LISQIVSSITASLR                                                 | 0.95391142         | 2              | 3.415795 |
| Q6AY56        | NLDIERPTYTNLNR                                                 | 1.060803391        | 2              | 3.190492 |
| Q6AY56        | QLFHPEQLITGK                                                   | 0.792044926        | 2              | 2.417712 |
| Q6AY56        | TIQFVDWCPTGFK                                                  | 1.217874003        | 2              | 3.786335 |
| Q6AY56        | VGINYQPPTVPPGGDLAK                                             | 0.922947444        | 2              | 4.529583 |
| <b>Q6AY80</b> | <b>NQO2 Ribosylidihyronicotinamide dehydrogenase [quinone]</b> | <b>0.947653334</b> | <b>0.99868</b> | <b>3</b> |
| Q6AY80        | NDVTGALSNEPVFK                                                 | 0.830642603        | 2              | 3.854708 |
| Q6AY80        | VLAPQISFGPEVSSSEQR                                             | 0.938496875        | 2              | 4.37001  |
| Q6AY80        | VLCQGFAFDVPGFYDSGFLK                                           | 1.053063865        | 2              | 3.490055 |
| <b>Q6AYG5</b> | <b>ECHD1 Enoyl_CoA hydratase domain_containing protein 1</b>   | <b>0.88650142</b>  | <b>0.45014</b> | <b>4</b> |
| Q6AYG5        | DVLETLWGGPANLEIAIK                                             | 0.808934337        | 2              | 3.023892 |
| Q6AYG5        | ILEQFPGGSIDLQK                                                 | 0.757646646        | 2              | 3.135883 |
| Q6AYG5        | NTFCSGSDLNAVK                                                  | 0.816481474        | 2              | 2.587861 |
| Q6AYG5        | VIELENWTEGK                                                    | 0.978042175        | 2              | 2.948895 |
| <b>Q6AYH5</b> | <b>DCTN2 Dynactin subunit 2</b>                                | <b>1.159471991</b> | <b>0.78636</b> | <b>3</b> |
| Q6AYH5        | ASVEDADTQNK                                                    | 1.348063612        | 2              | 2.342033 |
| Q6AYH5        | VNALDLAVLDQVEAR                                                | 1.175348221        | 2              | 2.814499 |
| Q6AYH5        | WSPVASTLPELVQR                                                 | 1.091918203        | 2              | 2.995299 |
| <b>Q6AYM2</b> | <b>TEKT2 Tektin_2</b>                                          | <b>0.403788344</b> | <b>0.19399</b> | <b>1</b> |
| Q6AYM2        | RLEEDLR                                                        | 0.988244943        | 1              | 1.947017 |
| Q6AYM2        | TNTMLLDTKCMDIR+Oxidation(3)                                    | 0.293541909        |                |          |
| <b>Q6AYQ8</b> | <b>FAHD1 Acylpyruvase FAHD1_mitochondrial</b>                  | <b>0.745737431</b> | <b>9.9E-20</b> | <b>3</b> |
| Q6AYQ8        | IITLEEGDLITGTPK                                                | 0.600250202        | 2              | 4.493897 |
| Q6AYQ8        | NLHHEVELGVLLGR                                                 | 0.816839001        | 3              | 4.135174 |
| Q6AYQ8        | SFTSSCPVSAFVPK                                                 | 0.630731497        | 2              | 4.080788 |
| <b>Q6AYR8</b> | <b>SCRN2 Secernin_2</b>                                        | <b>0.823609863</b> | <b>0.01898</b> | <b>2</b> |
| Q6AYR8        | GLLTGEQTPAPQELGSLFQAFVER                                       | 1.779727221        | 3              | 4.153685 |
| Q6AYR8        | QEQSLEQEGLEALR                                                 | 0.79756418         | 2              | 4.008386 |
| <b>Q6AYS7</b> | <b>ACY1A Aminoacylase_1A</b>                                   | <b>2.940586991</b> | <b>0.00487</b> | <b>2</b> |
| Q6AYS7        | EMNLTLEPEIFPAATDSR                                             | 1.040332888        | 2              | 4.701358 |
| Q6AYS7        | ICTVQPNPDYGSAVTFLEER                                           | 2.013898276        | 2              | 4.517102 |
| <b>Q6AYS8</b> | <b>DHB11 Estradiol 17_beta_dehydrogenase 11</b>                | <b>0.829074624</b> | <b>0.49414</b> | <b>4</b> |
| Q6AYS8        | ALTDELAALGCTGVR                                                | 0.715418028        | 2              | 3.731156 |
| Q6AYS8        | FDAVVGK                                                        | 1.092851878        | 1              | 2.229856 |
| Q6AYS8        | MIFVPGSIALLTVLR                                                | 0.763236976        | 2              | 2.767705 |
| Q6AYS8        | SVAGEIVLITGAGHGIGR                                             | 0.792970778        | 2              | 3.983209 |
| <b>Q6AYT9</b> | <b>ACSM5 Acyl_coenzyme A synthetase ACSM5_mitochondrial</b>    | <b>0.801241543</b> | <b>0.87285</b> | <b>4</b> |
| Q6AYT9        | AFIVLSPAYVSHDPEALTR                                            | 0.56836601         | 2              | 4.369028 |
| Q6AYT9        | ASPPYDVQIVDEEGNVLPPEGK                                         | 0.68884059         | 2              | 3.79195  |
| Q6AYT9        | NDDVINSSYR                                                     | 0.830145007        | 2              | 2.588251 |
| Q6AYT9        | TGVVMIPGISQLTQK                                                | 0.810274847        | 2              | 2.444242 |
| <b>Q6AYZ1</b> | <b>TBA1C Tubulin alpha_1C chain</b>                            | <b>1.150548786</b> | <b>0.39858</b> | <b>5</b> |
| Q6AYZ1        | AVFVDLEPTVIDEVR                                                | 1.154564316        | 2              | 5.030551 |
| Q6AYZ1        | DVNAAIATIK                                                     | 1.030745591        | 2              | 3.061604 |
| Q6AYZ1        | IHFPLATYAPVISA EK                                              | 0.974165194        | 2              | 3.413831 |

|               |                                                                     |                    |                |           |
|---------------|---------------------------------------------------------------------|--------------------|----------------|-----------|
| Q6AYZ1        | TIGGGDDSFNTFFSETGAGK                                                | 1.337464768        | 2              | 5.396956  |
| Q6AYZ1        | VGINYQPPTVPPGGDLAR                                                  | 1.182685552        | 2              | 4.837774  |
| <b>Q6DGG1</b> | <b>ABHEB Abhydrolase domain_containing protein 14B</b>              | <b>1.160255922</b> | <b>3.5E-08</b> | <b>7</b>  |
| Q6DGG1        | AVAILPGLGR                                                          | 0.862423191        | 2              | 3.487673  |
| Q6DGG1        | FSSETWQNLGTLHR                                                      | 0.990707789        | 2              | 3.45856   |
| Q6DGG1        | FSVLLHGIR                                                           | 1.094138058        | 2              | 2.6252    |
| Q6DGG1        | GYVPVAPICTDK                                                        | 0.814462623        | 1              | 2.68742   |
| Q6DGG1        | INAADYAR                                                            | 0.933415528        | 2              | 2.461321  |
| Q6DGG1        | TPTLIVYGDQDPMGSSSFQHLK                                              | 1.368416961        | 2              | 4.987156  |
| Q6DGG1        | TPTLIVYGDQDPMGSSSFQHLK+Oxidation(12)                                | 1.46482647         |                |           |
| <b>Q6EDY6</b> | <b>LR16A Leucine_rich repeat_containing protein 16A</b>             | <b>0.894339245</b> | <b>0.57857</b> | <b>2</b>  |
| Q6EDY6        | IENYLLR                                                             | 0.894360709        | 2              | 2.52352   |
| Q6EDY6        | SSDAHELGEDEKKK                                                      | 0.874680361        | 2              | 2.359173  |
| <b>Q6EJB6</b> | <b>UT14B U3 small nucleolar RNA_associated protein 14 homolog B</b> | <b>0.95758274</b>  | <b>0.15128</b> | <b>2</b>  |
| Q6EJB6        | ARMTERMSLK+Oxidation(2)                                             | 0.993366629        |                |           |
| Q6EJB6        | EAAFSKTSQMLSR+Oxidation(9)                                          | 0.380657774        |                |           |
| <b>Q6GQP4</b> | <b>RAB31 Ras_related protein Rab_31</b>                             | <b>0.62469207</b>  | <b>0.00112</b> | <b>2</b>  |
| Q6GQP4        | CDLSDIREVPLK                                                        | 0.555130426        | 2              | 2.391659  |
| Q6GQP4        | CDLSDIREVPLKDAK                                                     | 0.79654167         | 2              | 2.737571  |
| <b>Q6GQT1</b> | <b>A2MP Alpha_2_macroglobulin_P</b>                                 | <b>7.186929045</b> | <b>7E-05</b>   | <b>2</b>  |
| Q6GQT1        | IQEEGTGVEETGK                                                       | 7.289577113        | 2              | 3.796557  |
| Q6GQT1        | QLSFP LSSEPTQGSYK                                                   | 1.677015304        | 2              | 2.817775  |
| <b>Q6GQT9</b> | <b>NOMO1 Nodal modulator 1</b>                                      | <b>0.922295289</b> | <b>0.9669</b>  | <b>2</b>  |
| Q6GQT9        | SSIDSEPALVLGPLK                                                     | 0.923945823        | 2              | 3.058939  |
| Q6GQT9        | VQVVVPEAETR                                                         | 0.919950155        | 2              | 2.484355  |
| <b>Q6I7R3</b> | <b>ISOC1 Isochorismatase domain_containing protein 1</b>            | <b>0.737525607</b> | <b>0.9254</b>  | <b>3</b>  |
| Q6I7R3        | GLGSTVQEIDLTGVK                                                     | 0.86493214         | 2              | 4.141586  |
| Q6I7R3        | ILGIPVIITEQYPK                                                      | 0.875980055        | 2              | 3.054214  |
| Q6I7R3        | YFGDIISVGQR                                                         | 0.952055732        | 2              | 2.864285  |
| <b>Q6IE47</b> | <b>ISK6 Serine protease inhibitor Kazal_type 6</b>                  | <b>0.93882775</b>  | <b>0.94156</b> | <b>2</b>  |
| Q6IE47        | CAFCKALEK                                                           | 1.029831245        | 1              | 1.980058  |
| Q6IE47        | LFQINCGEFRDPK                                                       | 0.907736334        | 2              | 2.410531  |
| <b>Q6IE52</b> | <b>MUG2 Murinoglobulin_2</b>                                        | <b>0.683723995</b> | <b>7.8E-14</b> | <b>14</b> |
| Q6IE52        | AHFSVMGDILSSAIK                                                     | 0.670079328        | 2              | 3.501241  |
| Q6IE52        | HTSSWLVTPK                                                          | 0.541806311        | 2              | 2.674901  |
| Q6IE52        | LPSSEEEESLDINIEGAK                                                  | 0.828645612        | 2              | 4.660444  |
| Q6IE52        | MLIYITLPDGEVIADSVK                                                  | 0.783733985        | 2              | 3.812035  |
| Q6IE52        | MLSGFIPLKPTVK+Oxidation(0)                                          | 0.892391036        |                |           |
| Q6IE52        | MNRIMQWQDVK+Oxidation(0)                                            | 0.478308501        |                |           |
| Q6IE52        | NLYPLKELVQDPK                                                       | 0.778121285        | 1              | 2.079934  |
| Q6IE52        | QLSFSLSAEPIQGPK                                                     | 0.67136564         | 2              | 4.087656  |
| Q6IE52        | QQNSHGGFSSTQDTVVALDASK                                              | 0.823003911        | 3              | 3.521737  |
| Q6IE52        | VHLSFSPSQSLPASQTHMR                                                 | 0.530780309        | 3              | 3.414121  |
| Q6IE52        | VKTVPLTCNNPK                                                        | 0.651147239        | 2              | 2.902613  |
| Q6IE52        | VTASPSLCLGLR                                                        | 0.735655112        | 2              | 2.886737  |
| Q6IE52        | YMVVLPVPSQLYTETPEK                                                  | 0.6397755          | 2              | 3.577462  |
| Q6IE52        | YMVVLPVPSQLYTETPEK+Oxidation(1)                                     | 0.761605421        |                |           |
| <b>Q6IFW6</b> | <b>K1C10 Keratin_type I cytoskeletal 10</b>                         | <b>0.899534913</b> | <b>0.41615</b> | <b>2</b>  |
| Q6IFW6        | LENEIQTYR                                                           | 1.370182512        | 2              | 2.517452  |
| Q6IFW6        | QSLEASLAETEGR                                                       | 0.555883597        | 2              | 2.756063  |
| <b>Q6IMF3</b> | <b>K2C1 Keratin_type II cytoskeletal 1</b>                          | <b>0.797889004</b> | <b>0.16112</b> | <b>4</b>  |
| Q6IMF3        | TNAENEFVTIK                                                         | 1.133571781        | 2              | 2.952923  |
| Q6IMF3        | TNAENEFVTIK                                                         | 0.300295858        | 2              | 2.426961  |

|               |                                                                 |                    |                |          |
|---------------|-----------------------------------------------------------------|--------------------|----------------|----------|
| Q6IMF3        | WELLQQVDTSTR                                                    | 0.824738861        | 2              | 3.626365 |
| Q6IMF3        | YEELQITAGK                                                      | 0.823610667        | 2              | 3.470391 |
| <b>Q6IRK9</b> | <b>PGCP Plasma glutamate carboxypeptidase</b>                   | <b>0.808817057</b> | <b>0.25932</b> | <b>5</b> |
| Q6IRK9        | AIQIMYQNLQQDGLENVHLEQVR                                         | 0.941453213        | 3              | 5.379867 |
| Q6IRK9        | GEESAVMVVPR                                                     | 0.688578196        | 2              | 2.420935 |
| Q6IRK9        | IVVYNQPYTDY GK                                                  | 1.865465822        | 2              | 3.371046 |
| Q6IRK9        | TYPDTDSFNTVAEITGSK                                              | 0.86892419         | 2              | 3.797605 |
| Q6IRK9        | VGAVASLIR                                                       | 0.702819671        | 2              | 2.516366 |
| <b>Q6KCD5</b> | <b>NIPBL Nipped_B_like protein</b>                              | <b>0.739791547</b> | <b>0.4647</b>  | <b>2</b> |
| Q6KCD5        | AFLISLLNLFDDTAK                                                 | 0.804663039        | 2              | 2.598496 |
| Q6KCD5        | QNNTRSENTKARPETPK                                               | 0.539427378        | 2              | 2.566816 |
| <b>Q6MGB5</b> | <b>DHB8 Estradiol 17_beta_dehydrogenase 8</b>                   | <b>0.878429915</b> | <b>0.35418</b> | <b>4</b> |
| Q6MGB5        | AGVIGLTQTAAR                                                    | 0.786440276        | 2              | 3.334717 |
| Q6MGB5        | GSIIINISSIVGK                                                   | 0.693697797        | 2              | 2.581352 |
| Q6MGB5        | SALALVTGAGSGIGR                                                 | 1.060819248        | 2              | 3.157082 |
| Q6MGB5        | VGNIGQTNVYASSK                                                  | 1.464833373        | 2              | 2.366945 |
| <b>Q6NS46</b> | <b>RRP5 Protein RRP5 homolog</b>                                | <b>0.836385426</b> | <b>0.47523</b> | <b>2</b> |
| Q6NS46        | GKQTKSTEVPR                                                     | 0.821656102        | 2              | 2.678293 |
| Q6NS46        | IIDYSQMDELALLSLR                                                | 0.961597533        | 2              | 2.370475 |
| <b>Q6NSR8</b> | <b>PEPL1 Probable aminopeptidase NPEPL1</b>                     | <b>0.965181388</b> | <b>0.04623</b> | <b>2</b> |
| Q6NSR8        | HNSPSAHFITR                                                     | 0.973571507        | 3              | 3.557373 |
| Q6NSR8        | TVEINNTDAEGR                                                    | 0.670940946        | 2              | 2.693942 |
| <b>Q6NYB7</b> | <b>RAB1A Ras_related protein Rab_1A</b>                         | <b>1.311026652</b> | <b>0.22527</b> | <b>3</b> |
| Q6NYB7        | EFADSLGIPFLESAK                                                 | 1.316545471        | 2              | 3.616446 |
| Q6NYB7        | MGPATAGGAEK                                                     | 2.149298297        | 2              | 2.92138  |
| Q6NYB7        | NATNVEQSFMTMAAEIK                                               | 1.134973363        | 2              | 4.619451 |
| <b>Q6NZJ6</b> | <b>IF4G1 Eukaryotic translation initiation factor 4 gamma 1</b> | <b>0.902522448</b> | <b>1.8E-07</b> | <b>9</b> |
| Q6NZJ6        | DLDFAKAKPRMDQYFNQMEK+Oxidation(10)                              | 0.8808238          |                |          |
| Q6NZJ6        | GLPLVDDGGWNTVPISK                                               | 0.971126108        | 2              | 2.949481 |
| Q6NZJ6        | GSSGGSGAKPSDTASEATRPATLNR                                       | 1.170494116        | 3              | 3.472805 |
| Q6NZJ6        | IHNAENIQPGEQK                                                   | 1.220044419        | 2              | 4.175091 |
| Q6NZJ6        | ITKPGSIDSNNQLFAPGGR                                             | 1.456105089        | 3              | 3.58037  |
| Q6NZJ6        | LGIESTLER                                                       | 1.041885226        | 2              | 2.373941 |
| Q6NZJ6        | LKEELEEAR                                                       | 1.15888686         | 2              | 2.673569 |
| Q6NZJ6        | QVTQLAIDTEER                                                    | 1.273743038        | 2              | 2.854519 |
| Q6NZJ6        | TASTPTPPQTGGSLPQPNGESPQVAVIIRPDDR                               | 0.761718605        | 3              | 4.776618 |
| <b>Q6P0K8</b> | <b>PLAK Junction plakoglobin</b>                                | <b>0.864046758</b> | <b>0.38999</b> | <b>2</b> |
| Q6P0K8        | LLNDEDPVVTK                                                     | 0.856343815        | 2              | 2.979309 |
| Q6P0K8        | NLALCPANHAPLQEAIVPR                                             | 1.118628923        | 3              | 3.684323 |
| <b>Q6P502</b> | <b>TCPG T_complex protein 1 subunit gamma</b>                   | <b>1.088212546</b> | <b>0.01187</b> | <b>8</b> |
| Q6P502        | GISDLAQHYLMR                                                    | 1.087491593        | 2              | 2.378875 |
| Q6P502        | IVLLDSLEYK                                                      | 1.077635248        | 2              | 2.679242 |
| Q6P502        | IVSRPEELREDDVGTGAGLLEIK                                         | 1.12483079         | 3              | 3.686874 |
| Q6P502        | KGESQTDIEITR                                                    | 1.422925964        | 2              | 3.182367 |
| Q6P502        | NLQDAMQVCR                                                      | 1.12371736         | 2              | 2.802642 |
| Q6P502        | TAVETAVLLLR                                                     | 1.175169532        | 2              | 3.385841 |
| Q6P502        | TLIQNCGASTIR                                                    | 1.325873671        | 2              | 2.936961 |
| Q6P502        | WSSLACNIALDAVK                                                  | 1.038861933        | 2              | 3.883981 |
| <b>Q6P5D3</b> | <b>DHX57 Putative ATP_dependent RNA helicase DHX57</b>          | <b>0.97685357</b>  | <b>0.97909</b> | <b>2</b> |
| Q6P5D3        | ARHNRTAQEEVEEDLR                                                | 0.994780359        | 2              | 2.304696 |
| Q6P5D3        | QEETLALKSICGEK                                                  | 0.969634576        | 2              | 2.324683 |
| Q6P6M7        | EMFVYLSTQLKK+Oxidation(1)                                       | 0.574017228        |                |          |
| Q6P6M7        | SGDISAVQPK                                                      | 1.113094829        | 2              | 2.305707 |
| Q6P6M7        | SMVTAGFEPVVIENVLEDELRL                                          | 1.119328912        | 2              | 3.998195 |



|               |                                                               |                    |                |           |
|---------------|---------------------------------------------------------------|--------------------|----------------|-----------|
| <b>Q6P6R2</b> | <b>DLDH Dihydropolyl dehydrogenase_ mitochondrial</b>         | <b>0.800492336</b> | <b>0.0083</b>  | <b>12</b> |
| Q6P6R2        | ALTGGIAHLFK                                                   | 0.846389004        | 2              | 2.696993  |
| Q6P6R2        | EANLAASFGKPINF                                                | 0.824279004        | 1              | 2.056696  |
| Q6P6R2        | IDVSVEAASGGK                                                  | 0.821298448        | 2              | 3.659001  |
| Q6P6R2        | ILGAHILGPGAGEMVNEAALALEYGASCEDVAR                             | 0.825188385        | 3              | 4.130208  |
| Q6P6R2        | IPNIFAIGDVVAGPMLAHK                                           | 1.71389008         | 3              | 3.417117  |
| Q6P6R2        | NETLGGTCLNVGCIPSK                                             | 0.83985724         | 2              | 5.345018  |
| Q6P6R2        | NQVTATTADGSTQVIGTK                                            | 0.835008328        | 2              | 5.649474  |
| Q6P6R2        | RPFTQNLGLEELGIELDPK                                           | 1.124006153        | 3              | 4.214916  |
| Q6P6R2        | SEEQLKEEGVEFK                                                 | 0.877374641        | 3              | 4.12924   |
| Q6P6R2        | TNADTDGMVK                                                    | 0.78319327         | 2              | 2.824356  |
| Q6P6R2        | TNADTDGMVK+Oxidation(7)                                       | 1.085124286        |                |           |
| Q6P6R2        | VCHAHPTLSEAFR                                                 | 0.693296216        | 3              | 3.80575   |
| <b>Q6P6S9</b> | <b>ENTP5 Ectonucleoside triphosphate diphosphohydrolase 5</b> | <b>0.867310023</b> | <b>0.66716</b> | <b>7</b>  |
| Q6P6S9        | AAETHLIDYEK                                                   | 0.81987171         | 2              | 2.461366  |
| Q6P6S9        | AQTLLEVEEIFK                                                  | 0.868694222        | 2              | 3.8696    |
| Q6P6S9        | GQETVGTLDLGASTQITFLPQLEK                                      | 1.114778124        | 2              | 4.732957  |
| Q6P6S9        | QGAETVQELLEVAK                                                | 0.853059468        | 2              | 3.313205  |
| Q6P6S9        | TSGQLPFLEGEIFDSVKPGLSAFVDQPK                                  | 0.884787435        | 3              | 3.851656  |
| Q6P6S9        | VEDFERKAR                                                     | 0.764695652        | 2              | 2.442626  |
| Q6P6S9        | WLEAEWIFGGVK                                                  | 0.830404317        | 2              | 3.082896  |
| <b>Q6P6V0</b> | <b>G6PI Glucose_6_phosphate isomerase</b>                     | <b>1.095475742</b> | <b>0.60155</b> | <b>8</b>  |
| Q6P6V0        | DVMPEVNKVLDK+Oxidation(2)                                     | 0.509762106        |                |           |
| Q6P6V0        | HFVALSTNTDK                                                   | 1.107157238        | 2              | 2.721133  |
| Q6P6V0        | KIEPELDGSSAVTSHDSSTNGLIGFIK                                   | 1.007462967        | 3              | 5.439646  |
| Q6P6V0        | MIPCDFLIPVQTHPIR                                              | 0.63919351         | 2              | 3.133447  |
| Q6P6V0        | TFTTQETITNAETAK                                               | 1.156435175        | 2              | 5.115226  |
| Q6P6V0        | TLANLNPESSLFIIASK                                             | 1.108973825        | 3              | 4.964591  |
| Q6P6V0        | VFEGNRPTNSIVFTK                                               | 1.115223515        | 2              | 3.392012  |
| Q6P6V0        | VWVFSNIDGTHIAK                                                | 0.969593929        | 2              | 3.464535  |
| <b>Q6P7B0</b> | <b>SYWC Tryptophanyl_tRNA synthetase_ cytoplasmic</b>         | <b>1.058849477</b> | <b>0.97149</b> | <b>2</b>  |
| Q6P7B0        | ASEDFVDPWTVR                                                  | 1.08008908         | 2              | 2.694035  |
| Q6P7B0        | TLIDVLQPLIAEHQAR                                              | 0.89179066         | 3              | 3.314078  |
| <b>Q6P7Q4</b> | <b>LGUL Lactoylglutathione lyase</b>                          | <b>1.185669654</b> | <b>0.01228</b> | <b>6</b>  |
| Q6P7Q4        | ATLELTHNWGTEDDETQSYHNGNSDPR                                   | 1.45573362         | 3              | 3.982593  |
| Q6P7Q4        | DFLLQQTMLR                                                    | 1.158838241        | 2              | 3.317003  |
| Q6P7Q4        | FEELGVK                                                       | 0.900902573        | 1              | 1.91717   |
| Q6P7Q4        | GFGHIGIAVPDVEACK                                              | 1.018105091        | 2              | 3.455763  |
| Q6P7Q4        | GLAFVQDPDGYWIEILPNK                                           | 0.972548328        | 2              | 5.643552  |
| Q6P7Q4        | RFEELGVK                                                      | 1.162804025        | 2              | 2.648204  |
| <b>Q6P7R8</b> | <b>DHB12 Estradiol 17_beta_dehydrogenase 12</b>               | <b>1.162943083</b> | <b>0.19269</b> | <b>2</b>  |
| Q6P7R8        | GIFVQSVLPFFVATK                                               | 1.14247536         | 2              | 3.300225  |
| Q6P7R8        | LGEWAVVTGGTDGIGK                                              | 1.228634174        | 2              | 4.03946   |
| <b>Q6P9T8</b> | <b>TBB2C Tubulin beta_2C chain</b>                            | <b>0.907928886</b> | <b>7.8E-06</b> | <b>13</b> |
| Q6P9T8        | AVLVDLEPGTMDSVR                                               | 0.93655098         | 2              | 4.682413  |
| Q6P9T8        | AVLVDLEPGTMDSVR+Oxidation(10)                                 | 1.040673174        |                |           |
| Q6P9T8        | EAESCDCLQGFQLTHSLGGGTGSGMGTLISK                               | 1.109101522        | 3              | 5.302368  |
| Q6P9T8        | EIVHLQAGQCGNQIGAK                                             | 1.229780363        | 2              | 5.043253  |
| Q6P9T8        | EVDEQMLNVQNK                                                  | 1.223276305        | 2              | 4.069465  |
| Q6P9T8        | FWEVISDEHGIDPTGYHGSDQLQLER                                    | 1.052016141        | 3              | 5.632992  |
| Q6P9T8        | INVYYNEATGGK                                                  | 1.430228909        | 2              | 3.468115  |
| Q6P9T8        | KEAESCDCLQGFQLTHSLGGGTGSGMGTLISK                              | 0.971338277        | 3              | 5.342913  |
| Q6P9T8        | LHFFMPGFAPLTSR                                                | 1.505887827        | 2              | 2.700942  |
| Q6P9T8        | MSATFIGNSTAIQELFK                                             | 1.143236011        | 2              | 3.974575  |

|               |                                                                                    |                    |                |           |
|---------------|------------------------------------------------------------------------------------|--------------------|----------------|-----------|
| Q6P9T8        | SGPFGQIFRPDNFVFGQSGAGNNWAK                                                         | 0.904384322        | 3              | 4.662916  |
| Q6P9T8        | TAVCDIPPR                                                                          | 0.862522116        | 2              | 2.500931  |
| Q6P9T8        | YLTVAAVFR                                                                          | 0.911403388        | 2              | 2.469502  |
| <b>Q6P9U8</b> | <b>EIF3H Eukaryotic translation initiation factor 3 subunit H</b>                  | <b>1.382934584</b> | <b>7.1E-09</b> | <b>2</b>  |
| Q6P9U8        | ANITFEHMFEEVPIVIK                                                                  | 1.066740287        | 3              | 4.351461  |
| Q6P9U8        | EGTGSTATSSSTGGAVGK                                                                 | 1.410549347        | 2              | 4.13056   |
| <b>Q6PA06</b> | <b>ATLA2 Atlastin_2</b>                                                            | <b>1.124061065</b> | <b>0.01458</b> | <b>5</b>  |
| Q6PA06        | AGLTDQVSHHAR                                                                       | 0.899051283        | 2              | 3.34998   |
| Q6PA06        | NLVPLLLAPENLVEK                                                                    | 1.496868709        | 2              | 2.892005  |
| Q6PA06        | QNQHEELQNVN                                                                        | 1.142301459        | 2              | 2.731601  |
| Q6PA06        | SMEQVCGGDKPYIAPSDLER                                                               | 1.487423611        | 3              | 3.485745  |
| Q6PA06        | SMLQATAEANNLAAVAGAR                                                                | 1.049435107        | 2              | 4.490577  |
| <b>Q6PCL9</b> | <b>polymerase gamma</b>                                                            | <b>1.065204373</b> | <b>0.46653</b> | <b>4</b>  |
| Q6PCL9        | ATDITPIPMSEGGISDMPKR                                                               | 1.248009578        |                |           |
| Q6PCL9        | LTEILK                                                                             | 0.821815249        |                |           |
| Q6PCL9        | QANNINMLKDGMK                                                                      | 0.891649499        |                |           |
| Q6PCL9        | WEMDDPRPIAKAER                                                                     | 1.094746145        |                |           |
| <b>Q6PDM2</b> | <b>SRSF1 Serine/arginine_rich splicing factor 1</b>                                | <b>1.299148575</b> | <b>0.27167</b> | <b>2</b>  |
| Q6PDM2        | SHEGETAYIR                                                                         | 1.299159826        | 2              | 2.640331  |
| Q6PDM2        | VVVSGLPPSGSWQDLK                                                                   | 1.050317331        | 2              | 2.310523  |
| <b>Q6PDN3</b> | <b>MYLK Myosin light chain kinase_ smooth muscle</b>                               | <b>1.277784346</b> | <b>0.63548</b> | <b>2</b>  |
| Q6PDN3        | LIDFGLAR                                                                           | 1.296755375        | 2              | 2.373367  |
| Q6PDN3        | VSMSEKNGMQILEIRGVTR                                                                | 0.785272458        | 2              | 2.444653  |
| <b>Q6PEC1</b> | <b>TBCA Tubulin_specific chaperone A</b>                                           | <b>1.060638896</b> | <b>0.00172</b> | <b>3</b>  |
| Q6PEC1        | LEAAYTDLR                                                                          | 1.165153058        | 2              | 3.178392  |
| Q6PEC1        | QILESEKDLEEAEEYKEAR                                                                | 1.328580348        | 3              | 3.835938  |
| Q6PEC1        | RLEAAYTDLR                                                                         | 1.042788392        | 2              | 2.347981  |
| <b>Q6PEC4</b> | <b>SKP1 S_phase kinase_associated protein 1</b>                                    | <b>1.174625652</b> | <b>0.88343</b> | <b>3</b>  |
| Q6PEC4        | NDFTEEEEAQVR                                                                       | 1.397857237        | 2              | 3.461069  |
| Q6PEC4        | TDDIPVWDQEFK                                                                       | 1.099204904        | 2              | 3.122371  |
| Q6PEC4        | TVANMIKGTPEEIR+Oxidation(4)                                                        | 1.11166815         |                |           |
| <b>Q6Q0N1</b> | <b>CNDP2 Cytosolic non_specific dipeptidase</b>                                    | <b>1.256216806</b> | <b>1.4E-08</b> | <b>6</b>  |
| Q6Q0N1        | AVFQYIDENQDR                                                                       | 0.525690692        | 2              | 3.008107  |
| Q6Q0N1        | EGGSIPVTLTFQEATGK                                                                  | 1.470262884        | 2              | 2.612732  |
| Q6Q0N1        | LGGSVELVDIGK                                                                       | 1.357592561        | 2              | 3.731147  |
| Q6Q0N1        | LVPDMIPEVVSEQVSSYLSK                                                               | 0.91285442         | 2              | 2.634509  |
| Q6Q0N1        | MTEAAAADVQR                                                                        | 1.238121474        | 2              | 2.602796  |
| Q6Q0N1        | TVFGVEPDLTR                                                                        | 1.142807538        | 2              | 2.547685  |
| <b>Q6SKG1</b> | <b>ACSM3 Acyl_coenzyme A synthetase ACSM3_mitochondrial</b>                        | <b>0.735729911</b> | <b>0.23831</b> | <b>3</b>  |
| Q6SKG1        | AFIVLNPDYK                                                                         | 0.749359546        | 2              | 2.790596  |
| Q6SKG1        | FDSTSILQTLK                                                                        | 0.755283538        | 2              | 3.127405  |
| Q6SKG1        | TGTVLIPGTTQLTQK                                                                    | 0.694706884        | 2              | 2.935618  |
| <b>Q6TUG0</b> | <b>DJB11 DnaJ homolog subfamily B member 11</b>                                    | <b>0.993821045</b> | <b>0.98703</b> | <b>4</b>  |
| Q6TUG0        | FQDLGAAYEVLSDSEK                                                                   | 0.913313976        | 2              | 4.513122  |
| Q6TUG0        | FQMTQEVVCECPNVK                                                                    | 1.068539269        | 2              | 5.165411  |
| Q6TUG0        | KGEGLPNFDNNNIK                                                                     | 1.141366574        | 2              | 2.752147  |
| Q6TUG0        | TLEVEIEPGVR                                                                        | 0.952621706        | 2              | 3.227964  |
| <b>Q6UPE1</b> | <b>ETFD Electron transfer flavoprotein_ubiquinone oxidoreductase_mitochondrial</b> | <b>0.845441734</b> | <b>2.1E-07</b> | <b>16</b> |
| Q6UPE1        | AAQIGAHTLSGACLDPAAFK                                                               | 0.931333996        | 2              | 4.313604  |
| Q6UPE1        | ALNEGGLQSIK                                                                        | 0.91599465         | 2              | 3.159334  |
| Q6UPE1        | ASCDATYIGLGLK                                                                      | 0.980803153        | 2              | 3.68383   |
| Q6UPE1        | FCPAGVYEFVPLEQGDGFR                                                                | 0.741348976        | 2              | 4.946673  |
| Q6UPE1        | GAPLNTPVTEDR                                                                       | 0.844769122        | 2              | 3.449286  |
| Q6UPE1        | GIATNDVGIQK                                                                        | 0.831882939        | 2              | 3.562947  |

|               |                                                                        |                    |                |          |
|---------------|------------------------------------------------------------------------|--------------------|----------------|----------|
| Q6UPE1        | HHPSIRPTLEGGK                                                          | 0.735967444        | 2              | 2.424297 |
| Q6UPE1        | LQINAQNCVHCK                                                           | 0.92761424         | 2              | 3.729051 |
| Q6UPE1        | NLSYDGPEQR                                                             | 0.876253367        | 2              | 3.21672  |
| Q6UPE1        | QLAAEQEKDIR                                                            | 0.767469133        | 2              | 2.804508 |
| Q6UPE1        | QLTSENLOSK                                                             | 0.793671997        | 2              | 2.462073 |
| Q6UPE1        | SGSLAAEAIFK                                                            | 0.767580988        | 2              | 3.355657 |
| Q6UPE1        | TAGLHVTEYEDNLK                                                         | 0.87100077         | 2              | 3.880151 |
| Q6UPE1        | TCDIKDPSQINWVWVPEGGGGPAYNGM                                            | 0.878493225        | 2              | 3.703534 |
| Q6UPE1        | VDHTVGWPLDR                                                            | 0.785731695        | 2              | 2.646851 |
| Q6UPE1        | VTIFAEGCHGLAK                                                          | 0.564103748        | 2              | 3.383801 |
| <b>Q6URK4</b> | <b>ROA3 Heterogeneous nuclear ribonucleoprotein A3</b>                 | <b>0.878755391</b> | <b>0.01246</b> | <b>7</b> |
| Q6URK4        | EDSVKPGAHLTVK                                                          | 0.82397743         | 2              | 3.369654 |
| Q6URK4        | EDTEEYNLR                                                              | 0.875935142        | 2              | 2.342645 |
| Q6URK4        | GFAFVTFDDHDTVDK                                                        | 0.665337751        | 2              | 4.251501 |
| Q6URK4        | IETIEVMEDR                                                             | 0.834196142        | 2              | 3.391518 |
| Q6URK4        | SSGSPYGGYGSGGGGYGSR                                                    | 1.016450323        | 2              | 4.976744 |
| Q6URK4        | WGTLTDCVVMR                                                            | 0.84572987         | 2              | 2.30274  |
| Q6URK4        | YHTINGHNCEVK                                                           | 1.76732362         | 2              | 3.574183 |
| <b>Q6URW6</b> | <b>MYH14 Myosin_14</b>                                                 | <b>1.223097788</b> | <b>0.92724</b> | <b>4</b> |
| Q6URW6        | EDQSILCTGESGAGK                                                        | 1.24878319         | 2              | 4.497694 |
| Q6URW6        | FDQLLAEEK                                                              | 0.935381891        | 2              | 2.33667  |
| Q6URW6        | KFDQLLAEEK                                                             | 0.929574065        | 2              | 2.579592 |
| Q6URW6        | QLLQANPILEAFGNAK                                                       | 0.870512048        | 2              | 4.332239 |
| <b>Q6XQN1</b> | <b>PNCB Nicotinate phosphoribosyltransferase</b>                       | <b>0.560720801</b> | <b>2.9E-05</b> | <b>5</b> |
| Q6XQN1        | GSEVNVIGIGTNVVTCPK                                                     | 0.422621818        | 2              | 4.118571 |
| Q6XQN1        | LDSGDLLQQAQK                                                           | 0.931065885        | 2              | 2.949369 |
| Q6XQN1        | LYLQQGQPYEPLPSLEESR                                                    | 0.377153285        | 2              | 4.483629 |
| Q6XQN1        | QLQNPVAVYQValsek                                                       | 0.607581133        | 2              | 3.823194 |
| Q6XQN1        | VWLQGAQEPCTVKPAQVEPLLR                                                 | 0.345423256        | 3              | 3.648148 |
| <b>Q6Y7W8</b> | <b>PERQ2 PERQ amino acid_rich with GYF domain_containing protein 2</b> | <b>0.720441477</b> | <b>0.07026</b> | <b>2</b> |
| Q6Y7W8        | AEEENRSENSLSAKVPSR                                                     | 0.704740488        | 2              | 2.419723 |
| Q6Y7W8        | KDEPKAEQVEK                                                            | 0.977452035        | 2              | 2.517178 |
| <b>Q6ZPJ3</b> | <b>UBE2O Ubiquitin_conjugating enzyme E2 O</b>                         | <b>0.901418918</b> | <b>0.49903</b> | <b>2</b> |
| Q6ZPJ3        | FRTTDIVIR                                                              | 0.900801765        | 2              | 2.451537 |
| Q6ZPJ3        | NCAQEGESMAKKVK                                                         | 1.127156631        | 2              | 2.563106 |
| <b>Q6ZPY5</b> | <b>ZN507 Zinc finger protein 507</b>                                   | <b>1.139790313</b> | <b>0.40759</b> | <b>2</b> |
| Q6ZPY5        | CSLCGYVCSHPPSLK                                                        | 1.212420201        | 2              | 2.341023 |
| Q6ZPY5        | ISSSPNK                                                                | 0.898978129        | 2              | 2.352312 |
| <b>Q704S8</b> | <b>CACP Carnitine O_acetyltransferase</b>                              | <b>0.963888076</b> | <b>0.70311</b> | <b>3</b> |
| Q704S8        | ALQPIVSEEEWAHTK                                                        | 0.946376755        | 2              | 2.495661 |
| Q704S8        | DKVNRRESVNSIQK                                                         | 1.237520502        | 2              | 2.333611 |
| Q704S8        | FNITPEIKNDIEK                                                          | 0.904755769        | 2              | 3.187848 |
| <b>Q711G3</b> | <b>IAH1 Isoamyl acetate_hydrolyzing esterase 1 homolog</b>             | <b>1.121651783</b> | <b>0.96371</b> | <b>5</b> |
| Q711G3        | DCGTDVLDLWTLMQK                                                        | 1.155516541        | 2              | 3.87297  |
| Q711G3        | DVEETKPELSLLGDGDH                                                      | 0.954390121        | 2              | 3.449936 |
| Q711G3        | LNVAVGEYAK                                                             | 1.144402502        | 2              | 3.027585 |
| Q711G3        | QHVPLDEYSANLR                                                          | 0.919220723        | 2              | 2.562931 |
| Q711G3        | VILITPPPLCEAAWEK                                                       | 0.824485592        | 2              | 2.646211 |
| <b>Q71TY3</b> | <b>RS27 40S ribosomal protein S27</b>                                  | <b>1.377268777</b> | <b>0.22376</b> | <b>2</b> |
| Q71TY3        | DLLHPSPEEEK                                                            | 1.377391269        | 2              | 2.327085 |
| Q71TY3        | LVQSPNSYFMDVK                                                          | 1.342100986        | 2              | 2.86871  |
| <b>Q75N33</b> | <b>SC16B Protein transport protein Sec16B</b>                          | <b>0.970365828</b> | <b>0.68167</b> | <b>2</b> |
| Q75N33        | NLLTGEIPLNVDTPAQIVEK                                                   | 0.277075664        | 2              | 3.800258 |
| Q75N33        | VLEPDWLVLQLR                                                           | 0.987183464        | 2              | 2.506728 |

|               |                                                                                               |                    |                |           |
|---------------|-----------------------------------------------------------------------------------------------|--------------------|----------------|-----------|
| <b>Q75Q39</b> | <b>TOM70 Mitochondrial import receptor subunit TOM70</b>                                      | <b>0.967797748</b> | <b>0.13573</b> | <b>3</b>  |
| Q75Q39        | NADLSTFYQNR                                                                                   | 0.988249249        | 2              | 2.573889  |
| Q75Q39        | NREPLMPSPQFIK                                                                                 | 0.875516558        | 2              | 2.548639  |
| Q75Q39        | SDEKDKKEGEALEVK                                                                               | 1.349262453        | 2              | 4.165979  |
| <b>Q75WE7</b> | <b>VWASA von Willebrand factor A domain_containing protein 5A</b>                             | <b>0.932062416</b> | <b>0.52586</b> | <b>2</b>  |
| Q75WE7        | YTQETIEEAVER                                                                                  | 1.002033793        | 2              | 2.552592  |
| Q75WE7        | YVQELPLESDGALR                                                                                | 0.611045224        | 2              | 2.611122  |
| <b>Q76MZ3</b> | <b>2AAA Serine/threonine_protein phosphatase 2A 65 kDa regulatory subunit A alpha isoform</b> | <b>0.937614447</b> | <b>0.14114</b> | <b>7</b>  |
| Q76MZ3        | AISHEHSPDLEAHFVPLVK                                                                           | 1.087238055        | 3              | 4.354185  |
| Q76MZ3        | DNTIEHLLPLFLAQLKDECEVVR                                                                       | 1.161138184        | 3              | 3.376251  |
| Q76MZ3        | IGPILDNSTLQSEVKPILEK                                                                          | 0.943022903        | 2              | 4.528924  |
| Q76MZ3        | LTQDQDQDVK                                                                                    | 1.307700171        | 2              | 2.886872  |
| Q76MZ3        | QLSQSLLPAIVELAEDAK                                                                            | 0.988367713        | 3              | 3.834573  |
| Q76MZ3        | SALASVIMGLSPILGK                                                                              | 0.786430301        | 2              | 3.083025  |
| Q76MZ3        | SEIIPMFNSNLASDEQDSVR                                                                          | 0.719514347        | 2              | 3.855789  |
| <b>Q78P75</b> | <b>DYL2 Dynein light chain 2_cytoplasmic</b>                                                  | <b>0.899415681</b> | <b>0.97295</b> | <b>3</b>  |
| Q78P75        | NADMSEDMQQDAVDCATQAMEK                                                                        | 0.700719419        | 2              | 5.674018  |
| Q78P75        | NFGSYVTHETK                                                                                   | 0.950634127        | 2              | 2.710826  |
| Q78P75        | YNPTWHCIVGR                                                                                   | 0.872686645        | 2              | 2.721489  |
| <b>Q791V5</b> | <b>MTCH2 Mitochondrial carrier homolog 2</b>                                                  | <b>0.909162666</b> | <b>0.47467</b> | <b>5</b>  |
| Q791V5        | EEGIVGFFAGLIPR                                                                                | 1.700676477        | 2              | 3.596333  |
| Q791V5        | GLFTGLTPR                                                                                     | 0.902965631        | 2              | 2.801613  |
| Q791V5        | LCSGVLGTVVHGK                                                                                 | 0.794241908        | 3              | 3.354568  |
| Q791V5        | VLIQVGYEPLPPTIGR                                                                              | 0.883501723        | 2              | 4.165522  |
| Q791V5        | YCGLCDSIVTIYR                                                                                 | 1.10826701         | 2              | 2.932106  |
| <b>Q794E4</b> | <b>HNRPF Heterogeneous nuclear ribonucleoprotein F</b>                                        | <b>1.15110047</b>  | <b>0.28941</b> | <b>4</b>  |
| Q794E4        | ATENDIYNFFSPLNPVR                                                                             | 1.357346281        | 3              | 4.899892  |
| Q794E4        | HSGPNSADSANDGFVR                                                                              | 1.024114955        | 2              | 4.180212  |
| Q794E4        | ITGEAFVQFASQELAEK                                                                             | 0.70954974         | 2              | 3.867411  |
| Q794E4        | VHIEIGPDGR                                                                                    | 0.969317988        | 2              | 2.742947  |
| <b>Q7M0E3</b> | <b>DEST Dextrin</b>                                                                           | <b>1.188759018</b> | <b>3.6E-05</b> | <b>2</b>  |
| Q7M0E3        | HEYQANGPEDLNR                                                                                 | 1.273103022        | 2              | 4.373701  |
| Q7M0E3        | KEELMFFLWAPQAPLK                                                                              | 0.875592619        | 2              | 3.834273  |
| <b>Q7TMA5</b> | <b>APOB Apolipoprotein B_100</b>                                                              | <b>0.953740627</b> | <b>0.09046</b> | <b>12</b> |
| Q7TMA5        | GFEPTLEALFGK                                                                                  | 1.033439112        | 2              | 2.900756  |
| Q7TMA5        | GGINQVGLAFESTK                                                                                | 1.098551058        | 2              | 2.473005  |
| Q7TMA5        | IEGNLVFDPSSYLPK                                                                               | 0.942838814        | 2              | 3.489512  |
| Q7TMA5        | IEIDIPLPLGGK                                                                                  | 1.658575909        | 2              | 3.085059  |
| Q7TMA5        | ITDNDVLIALDSAK                                                                                | 0.811424049        | 2              | 3.20563   |
| Q7TMA5        | KGTVATEMSTER                                                                                  | 0.381839731        | 2              | 2.643985  |
| Q7TMA5        | LLQWEQSEQVK                                                                                   | 0.844318236        | 2              | 2.433946  |
| Q7TMA5        | LSISEQNAQR                                                                                    | 1.125736942        | 2              | 2.580496  |
| Q7TMA5        | NFVASHIANILNSEELYVQDLK                                                                        | 1.169326691        | 3              | 3.645085  |
| Q7TMA5        | NSVSTALEHTLSALLTPAEQTSSWK                                                                     | 0.756794691        | 3              | 3.35974   |
| Q7TMA5        | SVGFHLPSEQEQIPTFTIPK                                                                          | 0.709191498        | 3              | 3.525585  |
| Q7TMA5        | TILFDTFVNDVAPVEK                                                                              | 0.976352252        | 2              | 3.475433  |
| <b>Q7TNG8</b> | <b>LDHD Probable D_lactate dehydrogenase_mitochondrial</b>                                    | <b>0.853414257</b> | <b>0.0515</b>  | <b>4</b>  |
| Q7TNG8        | AVVGSPHVSTASAVR                                                                               | 0.510670141        | 2              | 2.375283  |
| Q7TNG8        | AYSTDVCPISR                                                                                   | 0.852284211        | 2              | 3.702007  |
| Q7TNG8        | GSQGGLSQDFVEALK                                                                               | 1.021307268        | 2              | 3.741249  |
| Q7TNG8        | QLLQEEVGPVGVETMR                                                                              | 0.568943812        | 2              | 2.694601  |

|               |                                                           |                    |                |           |
|---------------|-----------------------------------------------------------|--------------------|----------------|-----------|
| <b>Q7TP47</b> | <b>HNRPQ Heterogeneous nuclear ribonucleoprotein Q</b>    | <b>1.086314525</b> | <b>0.24794</b> | <b>2</b>  |
| Q7TP47        | DLFEDELVPLFEK                                             | 1.460964208        | 2              | 3.06382   |
| Q7TP47        | NLANTVTEEILEK                                             | 1.012098918        | 2              | 3.680556  |
| <b>Q7TP48</b> | <b>APMAP Adipocyte plasma membrane-associated protein</b> | <b>0.982911176</b> | <b>0.01562</b> | <b>4</b>  |
| Q7TP48        | LENGEIETIAR                                               | 0.988663373        | 2              | 3.319412  |
| Q7TP48        | LFENQLNGPESIVNIGDVLFTGTADGR                               | 1.139617195        | 3              | 3.358104  |
| Q7TP48        | LLEYDVTVK                                                 | 0.936082358        | 2              | 2.358764  |
| Q7TP48        | LLLSSETPIEGK                                              | 2.061485189        | 2              | 2.989513  |
| <b>Q7TP52</b> | <b>CMBL Carboxymethylenebutenolidase homolog</b>          | <b>0.82202863</b>  | <b>0.00062</b> | <b>7</b>  |
| Q7TP52        | AGVSVYGIIR                                                | 1.025190831        | 2              | 2.393999  |
| Q7TP52        | EDCSPADKPYIEEAR                                           | 0.916069372        | 2              | 3.540596  |
| Q7TP52        | KREDCSPADKPYIEEAR                                         | 0.84659243         | 2              | 4.624423  |
| Q7TP52        | LDYGGMGQEVQVEHIK                                          | 0.7015674          | 2              | 4.417758  |
| Q7TP52        | LKEHCIVNYQVK                                              | 0.863554589        | 2              | 3.824452  |
| Q7TP52        | NLIEWLNK                                                  | 0.841648731        | 2              | 2.452743  |
| Q7TP52        | TFSGQTHGFVHR                                              | 0.720973288        | 2              | 3.603651  |
| <b>Q7TPB1</b> | <b>TCPD T-complex protein 1 subunit delta</b>             | <b>0.831447746</b> | <b>9.9E-20</b> | <b>11</b> |
| Q7TPB1        | ALIAGGGAPEIELALR                                          | 1.023511379        | 2              | 4.126056  |
| Q7TPB1        | DIEREDIEFICK                                              | 1.589529848        | 2              | 2.380545  |
| Q7TPB1        | ETLLNSATSLNSK                                             | 1.306824992        | 2              | 3.556609  |
| Q7TPB1        | GDVTITNDGATILK                                            | 0.655384725        | 2              | 3.287564  |
| Q7TPB1        | GIHPTIISESFQK                                             | 1.267468906        | 2              | 2.636964  |
| Q7TPB1        | IDDVVNTR                                                  | 1.005760412        | 2              | 2.375369  |
| Q7TPB1        | LVIEEAER                                                  | 1.327826983        | 1              | 1.946073  |
| Q7TPB1        | MIQDGKGDVTITNDGATILK+Oxidation(0)                         | 0.87333294         |                |           |
| Q7TPB1        | SIHDALCVIR                                                | 0.846390782        | 2              | 2.481982  |
| Q7TPB1        | TGCNVLLIQK                                                | 0.81279708         | 2              | 2.502972  |
| Q7TPB1        | VIDPATATSVDLR                                             | 1.081374267        | 2              | 3.38237   |
| <b>Q7TPJ0</b> | <b>SSRA Translocon-associated protein subunit alpha</b>   | <b>1.129895239</b> | <b>0.79155</b> | <b>2</b>  |
| Q7TPJ0        | GEDFPANNIVK                                               | 1.07859048         | 2              | 3.022465  |
| Q7TPJ0        | GTEDFIVESLDASFR                                           | 1.104603904        | 2              | 4.092875  |
| <b>Q7TQM4</b> | <b>SOAT2 Sterol O-acyltransferase 2</b>                   | <b>1.103604196</b> | <b>0.46853</b> | <b>2</b>  |
| Q7TQM4        | QDRPLPSTASDSTR                                            | 0.9172552          | 2              | 3.185305  |
| Q7TQM4        | TQCLEQAQR                                                 | 1.091894384        | 2              | 3.019858  |
| <b>Q80TV8</b> | <b>CLAP1 CLIP-associating protein 1</b>                   | <b>1.127128837</b> | <b>0.89552</b> | <b>2</b>  |
| Q80TV8        | MESCLAQVLQK                                               | 0.869503826        | 2              | 2.498413  |
| Q80TV8        | MGADLLGSVQAKVQK+Oxidation(0)                              | 1.18019088         |                |           |
| <b>Q80W21</b> | <b>GSTM7 Glutathione S-transferase Mu 7</b>               | <b>0.89131408</b>  | <b>1.8E-10</b> | <b>11</b> |
| Q80W21        | CLDAFPNLK                                                 | 0.782007485        | 2              | 3.183004  |
| Q80W21        | CLDAFPNLKDFIAR                                            | 0.764323397        | 2              | 2.693651  |
| Q80W21        | FKLGLDFPNLPYLIDGSHK                                       | 0.85347492         | 3              | 4.137031  |
| Q80W21        | HNLCGETEEER                                               | 0.938382986        | 2              | 3.825125  |
| Q80W21        | ITQSNAILR                                                 | 0.95812866         | 2              | 3.149814  |
| Q80W21        | KHNLCGETEEER                                              | 0.790116262        | 3              | 4.447618  |
| Q80W21        | LFLEYDSSYEK                                               | 0.642022134        | 2              | 3.974284  |
| Q80W21        | LGLDFPNLPYLIDGSHK                                         | 0.949439229        | 2              | 4.7105    |
| Q80W21        | LKPGYLEQLPGMMR                                            | 0.258646858        | 2              | 2.619989  |
| Q80W21        | LYSEFLGK                                                  | 1.053652137        | 2              | 2.314208  |
| Q80W21        | VDILENQLMDNR                                              | 0.511526008        | 2              | 3.693533  |
| <b>Q80X50</b> | <b>UBP2L Ubiquitin-associated protein 2-like</b>          | <b>0.809651225</b> | <b>4.6E-06</b> | <b>2</b>  |
| Q80X50        | IDLAVLLGK                                                 | 0.812290922        | 2              | 3.387492  |
| Q80X50        | QRPQATAEQIR                                               | 0.79674814         | 2              | 2.33472   |
| <b>Q80X90</b> | <b>FLNB Filamin B</b>                                     | <b>0.981449665</b> | <b>0.82296</b> | <b>9</b>  |
| Q80X90        | ADIEMPFDPK                                                | 1.140479764        | 2              | 2.335035  |

|               |                                                                  |                    |                |           |
|---------------|------------------------------------------------------------------|--------------------|----------------|-----------|
| Q80X90        | AHGPGLEGGLVGKPAEFTIDTK                                           | 0.989720532        | 3              | 3.496061  |
| Q80X90        | GAGIGGLGITVEGPSESK                                               | 0.979893896        | 2              | 3.55208   |
| Q80X90        | GFLDGVYSEYYPSTPGK                                                | 1.973936745        | 2              | 3.188443  |
| Q80X90        | IGNLQTDLSDGLR                                                    | 1.128568945        | 2              | 2.38394   |
| Q80X90        | ILAQDGEQPIDIQMK                                                  | 0.981304592        | 2              | 3.852266  |
| Q80X90        | VDIQTEDLEDGTCK                                                   | 0.918093607        | 2              | 3.917562  |
| Q80X90        | VGEPGILCVDCSEAGPGLGLEAVSDSGAK                                    | 1.227742439        | 3              | 3.900689  |
| Q80X90        | VTASGPGLSAYGVPASLPVEFAIDAR                                       | 1.112839591        | 2              | 3.887513  |
| <b>Q80YR5</b> | <b>SAFB2 Scaffold attachment factor B2</b>                       | <b>1.001918274</b> | <b>0.44167</b> | <b>2</b>  |
| Q80YR5        | GSKMEEEGSEDNGLEEDSR                                              | 0.733340665        | 2              | 2.393886  |
| Q80YR5        | SEPVKEEGSELEQPFQAQATSSVGPDR                                      | 1.25583799         | 3              | 4.219013  |
| <b>Q80Z25</b> | <b>OFD1 Oral_facial_digital syndrome 1 protein homolog</b>       | <b>1.234812757</b> | <b>0.99929</b> | <b>2</b>  |
| Q80Z25        | ELEQEAERLEK                                                      | 1.242382408        | 2              | 2.939034  |
| Q80Z25        | MIEESLK+Oxidation(0)                                             | 1.114344388        |                |           |
| <b>Q80Z29</b> | <b>NAMPT Nicotinamide phosphoribosyltransferase</b>              | <b>1.353091568</b> | <b>0.00035</b> | <b>4</b>  |
| Q80Z29        | STEAPLIIRPDSGNPLDTVLK                                            | 1.375146861        | 2              | 3.935778  |
| Q80Z29        | TPAGTFVTL EEGGDLEEYGHLLHTVFK                                     | 2.459075286        | 5              | 4.608683  |
| Q80Z29        | VIQGDGVDINTLQIEVEGMK                                             | 1.09683744         | 2              | 4.45121   |
| Q80Z29        | YLLETSGNLDGLEYK                                                  | 1.234117048        | 2              | 4.222397  |
| <b>Q80Z36</b> | <b>ZHX3 Zinc fingers and homeoboxes protein 3</b>                | <b>0.93216535</b>  | <b>0.92715</b> | <b>2</b>  |
| Q80Z36        | FPYPTKAELCYLTVVTK                                                | 0.762135369        | 2              | 2.729569  |
| Q80Z36        | YPPEQLK                                                          | 1.038977955        | 2              | 2.33479   |
| <b>Q80ZF0</b> | <b>chain</b>                                                     | <b>0.975049063</b> | <b>0.87775</b> | <b>2</b>  |
| <b>Q810B6</b> | <b>ANFY1 Ankyrin repeat and FYVE domain_containing protein 1</b> | <b>1.005094384</b> | <b>0.3149</b>  | <b>2</b>  |
| Q810B6        | QLDLELK                                                          | 1.074832562        | 1              | 2.257823  |
| Q810B6        | RESGAAEQVDNKGR                                                   | 0.480942312        | 1              | 1.925182  |
| <b>Q811D2</b> | <b>ANR26 Ankyrin repeat domain_containing protein 26</b>         | <b>0.806121832</b> | <b>0.68645</b> | <b>2</b>  |
| Q811D2        | AQEDFDK                                                          | 0.763059445        | 1              | 1.949182  |
| Q811D2        | LNMLSSKLDNEKQNK                                                  | 0.842554488        | 2              | 2.336043  |
| <b>Q811X6</b> | <b>CRYL1 Lambda_crystallin homolog</b>                           | <b>0.614816411</b> | <b>0.40301</b> | <b>3</b>  |
| Q811X6        | EMKSLEQSGSLK+Oxidation(1)                                        | 0.782210252        |                |           |
| Q811X6        | IVDDQVILSSSSCLLPSK                                               | 0.961280169        | 2              | 2.731198  |
| Q811X6        | TFGPVPEFSGDTVEK                                                  | 0.466813073        | 2              | 3.012004  |
| <b>Q8BFZ3</b> | <b>ACTBL Beta_actin_like protein 2</b>                           | <b>0.990160299</b> | <b>0.65197</b> | <b>10</b> |
| Q8BFZ3        | CDVDIR                                                           | 0.779329916        | 1              | 2.001956  |
| Q8BFZ3        | DLTDYLMK                                                         | 0.738120389        | 1              | 2.07498   |
| Q8BFZ3        | HQGVMVGMGQK                                                      | 0.846695985        | 3              | 3.90187   |
| Q8BFZ3        | HQGVMVGMGQK+Oxidation(4)                                         | 1.508234074        |                |           |
| Q8BFZ3        | HQGVMVGMGQK+Oxidation(4)                                         | 1.002329615        |                |           |
| Q8BFZ3        | HQGVMVGMGQK+Oxidation(7)                                         | 0.968087311        |                |           |
| Q8BFZ3        | SYELPDGQVITIGNER                                                 | 0.991697927        | 3              | 5.169834  |
| Q8BFZ3        | TTGIVMDSGDGVTHTVPIYEGYALPHAILR                                   | 1.012290329        | 3              | 6.937174  |
| Q8BFZ3        | TTGIVMDSGDGVTHTVPIYEGYALPHAILR+Oxidation(5)                      | 1.224323106        |                |           |
| Q8BFZ3        | VAPDEHPILLTEAPLNPK                                               | 1.034078848        | 3              | 4.210713  |
| <b>Q8BG32</b> | <b>PSD11 26S proteasome non_ATPase regulatory subunit 11</b>     | <b>0.953488957</b> | <b>0.76286</b> | <b>5</b>  |
| Q8BG32        | LYDNLLEQNLR                                                      | 0.876178652        | 2              | 3.650634  |
| Q8BG32        | TGQAAELGGLK                                                      | 1.151233142        | 2              | 2.474134  |
| Q8BG32        | TTANAIYCPK                                                       | 1.130981396        | 2              | 3.076473  |
| Q8BG32        | TYEAALETIQNMSK                                                   | 0.953771249        | 2              | 3.262693  |
| Q8BG32        | VQIEHISSLIK                                                      | 0.825066682        | 2              | 3.159459  |
| <b>Q8BG79</b> | <b>C19L2 CWF19_like protein 2</b>                                | <b>0.710334599</b> | <b>0.03301</b> | <b>2</b>  |
| Q8BG79        | KNQDSSGNLRSK                                                     | 0.651336718        | 2              | 2.392182  |

|               |                                                                             |                    |                |          |
|---------------|-----------------------------------------------------------------------------|--------------------|----------------|----------|
| Q8BG79        | MWPVSSPRETLDMKAER+Oxidation(12)                                             | <b>0.871690663</b> |                |          |
| <b>Q8BGC4</b> | <b>ZADH2 Zinc_binding alcohol dehydrogenase domain_containing protein 2</b> | <b>0.724721146</b> | <b>0.70942</b> | <b>2</b> |
| Q8BGC4        | DCPVPLPGDGLLVR                                                              | <b>0.690457963</b> | 2              | 2.343935 |
| Q8BGC4        | FVGINASDINYSAGR                                                             | <b>1.20438201</b>  | 2              | 3.814173 |
| <b>Q8BGT5</b> | <b>ALAT2 Alanine aminotransferase 2</b>                                     | <b>0.929827283</b> | <b>9.9E-20</b> | <b>3</b> |
| Q8BGT5        | ILTLESMNPQVK                                                                | <b>0.905782189</b> | 2              | 2.604494 |
| Q8BGT5        | LLEETGICVVPGSFGQR                                                           | <b>0.972540714</b> | 2              | 3.769341 |
| Q8BGT5        | VLCIINPGNPTGQVQSR                                                           | <b>1.623887869</b> | 2              | 4.51233  |
| <b>Q8BGY2</b> | <b>IF5A2 Eukaryotic translation initiation factor 5A_2</b>                  | <b>1.074130428</b> | <b>1</b>       | <b>4</b> |
| Q8BGY2        | KYEDICPSTHNMDVPNIK                                                          | <b>1.032467949</b> | 3              | 4.350031 |
| Q8BGY2        | KYEDICPSTHNMDVPNIK+Oxidation(11)                                            | <b>1.054407671</b> |                |          |
| Q8BGY2        | VHLVGIDIFTGK                                                                | <b>1.048486425</b> | 1              | 3.36391  |
| Q8BGY2        | YEDICPSTHNMDVPNIK                                                           | <b>0.956601372</b> | 2              | 4.045334 |
| <b>Q8BGY3</b> | <b>LUZP2 Leucine zipper protein 2</b>                                       | <b>0.829234418</b> | <b>0.01901</b> | <b>2</b> |
| Q8BGY3        | DLQENKSLK                                                                   | <b>0.856286929</b> | 2              | 2.312989 |
| Q8BGY3        | SLQEALQNQLK                                                                 | <b>0.467717637</b> | 2              | 2.477481 |
| <b>Q8BH00</b> | <b>AL8A1 Aldehyde dehydrogenase family 8 member A1</b>                      | <b>1.035661807</b> | <b>7.4E-15</b> | <b>9</b> |
| Q8BH00        | ELLMLEFIGGK                                                                 | <b>1.473122822</b> | 2              | 3.387634 |
| Q8BH00        | ELNLPGGGMK                                                                  | <b>1.052317657</b> | 1              | 2.232169 |
| Q8BH00        | FLPCNSYIDSYDPSTGEVYCK                                                       | <b>1.028307706</b> | 3              | 5.092261 |
| Q8BH00        | ILCGEGVDQLSLPLR                                                             | <b>1.033244657</b> | 2              | 4.385639 |
| Q8BH00        | ITQLSAPHCK                                                                  | <b>1.269089771</b> | 2              | 2.94709  |
| Q8BH00        | KLSLELGGK                                                                   | <b>0.70556921</b>  | 1              | 2.004368 |
| Q8BH00        | NPAlIFEDANLEECIPATVR                                                        | <b>0.927155626</b> | 3              | 5.344548 |
| Q8BH00        | SSFANQGEICLCTSR                                                             | <b>3.155665909</b> | 2              | 4.445076 |
| Q8BH00        | TPVGIAGLISPWNLPLYLLTWK                                                      | <b>1.058280463</b> |                |          |
| <b>Q8BH69</b> | <b>SPS1 Selenide_water dikinase 1</b>                                       | <b>0.6963467</b>   | <b>0.14833</b> | <b>2</b> |
| Q8BH69        | IIEVAPQVATQNVNPTPGATS                                                       | <b>0.814512513</b> | 2              | 3.680098 |
| Q8BH69        | YEGHQAWIIGIVEK                                                              | <b>0.63108414</b>  | 2              | 2.364937 |
| <b>Q8BHN3</b> | <b>GANAB Neutral alpha_glucosidase AB</b>                                   | <b>0.912837124</b> | <b>0.9719</b>  | <b>8</b> |
| Q8BHN3        | AEKDEPGAWEEFK                                                               | <b>0.945001674</b> | 2              | 3.427011 |
| Q8BHN3        | DDNSVELTVAEGPYK                                                             | <b>1.260999303</b> | 2              | 3.638777 |
| Q8BHN3        | MLDYLQGSGETPQTDIR                                                           | <b>0.796746666</b> | 2              | 4.764602 |
| Q8BHN3        | MLDYLQGSGETPQTDIR+Oxidation(0)                                              | <b>1.1223557</b>   |                |          |
| Q8BHN3        | REPWLLASQYQDAIR                                                             | <b>0.835274372</b> | 3              | 3.755299 |
| Q8BHN3        | SGGIERPFVLSR                                                                | <b>0.978121961</b> | 2              | 2.527569 |
| Q8BHN3        | SLLLSVNAR                                                                   | <b>0.987371503</b> | 2              | 2.420121 |
| Q8BHN3        | VTEGGEPYR                                                                   | <b>0.912195545</b> | 2              | 2.536797 |
| <b>Q8BI84</b> | <b>MIA3 Melanoma inhibitory activity protein 3</b>                          | <b>0.813707156</b> | <b>0.3289</b>  | <b>2</b> |
| Q8BI84        | LQLESEREQNVK                                                                | <b>0.21614526</b>  | 2              | 2.342728 |
| Q8BI84        | TQTAVSIVEEDLK                                                               | <b>0.915669338</b> | 2              | 2.619912 |
| <b>Q8BIJ6</b> | <b>SYIM Isoleucyl_tRNA synthetase_mitochondrial</b>                         | <b>0.730218127</b> | <b>9.4E-08</b> | <b>2</b> |
| Q8BIJ6        | DTVLLPQTSFPMK                                                               | <b>0.891649499</b> | 1              | 2.230632 |
| Q8BIJ6        | SCQTALAEILDVLR                                                              | <b>0.687568033</b> | 2              | 3.898237 |
| <b>Q8BIJ7</b> | <b>RUFY1 RUN and FYVE domain_containing protein 1</b>                       | <b>0.854998959</b> | <b>0.06058</b> | <b>2</b> |
| Q8BIJ7        | EKDTSCLLQTELQQVEGLK                                                         | <b>0.867993897</b> | 2              | 2.446253 |
| Q8BIJ7        | ELQDEKAELRK                                                                 | <b>0.651149208</b> | 2              | 2.445209 |
| <b>Q8BJ64</b> | <b>CHDH Choline dehydrogenase_mitochondrial</b>                             | <b>0.863269298</b> | <b>0.00264</b> | <b>7</b> |
| Q8BJ64        | ADSAYHPSTCK                                                                 | <b>3.897893631</b> | 2              | 3.403724 |
| Q8BJ64        | AEVQTLVSR                                                                   | <b>0.963525272</b> | 2              | 2.75354  |
| Q8BJ64        | ELQPGSHVQSDK                                                                | <b>1.112037286</b> | 2              | 2.5352   |
| Q8BJ64        | ELQPGSHVQSDKEIDAFVR                                                         | <b>0.832232906</b> | 2              | 4.11539  |
| Q8BJ64        | SRPGVPHPDIQHFLPSQVIDHGR                                                     | <b>0.96169435</b>  | 5              | 4.860238 |

|               |                                                              |                    |                |          |
|---------------|--------------------------------------------------------------|--------------------|----------------|----------|
| Q8BJ64        | TNHPLHQAFLOAAR                                               | 0.740339075        | 3              | 4.677282 |
| Q8BJ64        | VLLLEAGPK                                                    | 0.890257873        | 2              | 2.930708 |
| <b>Q8BJY1</b> | <b>PSMD5 26S proteasome non_ATPase regulatory subunit 5</b>  | <b>0.898663849</b> | <b>0.18422</b> | <b>2</b> |
| Q8BJY1        | GLTHPDDSVK                                                   | 0.881729431        | 2              | 2.487785 |
| Q8BJY1        | TVAEIFGNSNYLR                                                | 1.450511461        | 2              | 3.076345 |
| <b>Q8BL97</b> | <b>SRSF7 Serine/arginine_rich splicing factor 7</b>          | <b>1.024688314</b> | <b>1</b>       | <b>2</b> |
| Q8BL97        | NPPGFAFVEFEDPR                                               | 1.026841653        | 2              | 3.482625 |
| Q8BL97        | VYVGNLGTGAGK                                                 | 0.995980114        | 2              | 2.359843 |
| <b>Q8BMJ2</b> | <b>SYLC Leucyl_tRNA synthetase_cytoplasmic</b>               | <b>1.048965192</b> | <b>0.70783</b> | <b>3</b> |
| Q8BMJ2        | QTGEGVGPQEYTLVK                                              | 1.137270385        | 2              | 2.366236 |
| Q8BMJ2        | SFITTDVNPYYDSFVR                                             | 1.046209353        | 2              | 3.315366 |
| Q8BMJ2        | STGNFLTLSQAVDK                                               | 0.773195938        | 2              | 2.974211 |
| <b>Q8BTM8</b> | <b>FLNA Filamin_A</b>                                        | <b>0.887146664</b> | <b>0.78649</b> | <b>5</b> |
| Q8BTM8        | AFGPGLGGNAGSPAR                                              | 0.832721997        | 2              | 3.789589 |
| Q8BTM8        | ANLPQSFQVDTSK                                                | 0.987123611        | 2              | 2.465197 |
| Q8BTM8        | GAGTGGGLGLAVEGPSEAK                                          | 0.887424048        | 2              | 3.685926 |
| Q8BTM8        | IVSPSGAAVPCK                                                 | 0.88687034         | 2              | 2.456903 |
| Q8BTM8        | VTAQGGPLEPSGNIANK                                            | 0.942057984        | 2              | 3.940563 |
| <b>Q8BTZ7</b> | <b>GMPPB Mannose_1_phosphate guanyltransferase beta</b>      | <b>1.14547927</b>  | <b>0.90802</b> | <b>2</b> |
| Q8BTZ7        | HHGQEGSILVTK                                                 | 1.053828774        | 3              | 3.756291 |
| Q8BTZ7        | YGVVCEADTGR                                                  | 1.13813893         | 2              | 3.255346 |
| <b>Q8BU33</b> | <b>ILVBL Acetolactate synthase_like protein</b>              | <b>0.965126368</b> | <b>0.88501</b> | <b>3</b> |
| Q8BU33        | AAVETLGVPCFLGGMSR                                            | 1.015488471        | 2              | 2.420279 |
| Q8BU33        | LPNSLMGR+Oxidation(5)                                        | 0.82322699         |                |          |
| Q8BU33        | NAQVAQSPVLLLGGAASLLQK                                        | 0.953470659        | 2              | 4.582908 |
| <b>Q8BWQ1</b> | <b>UD2A3 UDP_glucuronosyltransferase 2A3</b>                 | <b>1.092162679</b> | <b>0.14272</b> | <b>2</b> |
| Q8BWQ1        | ADIWLIR                                                      | 0.804809652        | 2              | 2.536914 |
| Q8BWQ1        | IHHQDPVKPLDR                                                 | 1.206249821        | 3              | 3.50576  |
| <b>Q8BX70</b> | <b>VP13C Vacuolar protein sorting_associated protein 13C</b> | <b>1.141593804</b> | <b>1.2E-05</b> | <b>2</b> |
| Q8BX70        | ENALSELDVPFKVK                                               | 1.217304284        | 2              | 2.902301 |
| Q8BX70        | TVLQADSPQHDEILKPVNMLLCIQR+Oxidation(19)                      | 0.800172874        |                |          |
| <b>Q8C7X2</b> | <b>K0090 Uncharacterized protein KIAA0090</b>                | <b>1.496686494</b> | <b>6.5E-10</b> | <b>2</b> |
| Q8C7X2        | FNVEDGEIVQQVR                                                | 1.043748101        | 2              | 3.270266 |
| Q8C7X2        | VMGDRSVLYK+Oxidation(1)                                      | 2.430761696        |                |          |
| <b>Q8C8R3</b> | <b>ANK2 Ankyrin_2</b>                                        | <b>1.051227339</b> | <b>3.4E-08</b> | <b>2</b> |
| Q8C8R3        | STSSSRPGTSPPTRESR                                            | 0.708304399        | 2              | 2.43608  |
| Q8C8R3        | TSTDFSEVIKQLELDNDK                                           | 1.549965022        | 2              | 2.613098 |
| <b>Q8CC88</b> | <b>K0564 Uncharacterized protein KIAA0564 homolog</b>        | <b>1.246118793</b> | <b>0.64239</b> | <b>4</b> |
| Q8CC88        | HQATGELDDAK                                                  | 1.246185374        | 2              | 3.385847 |
| Q8CC88        | IILDNLQAK                                                    | 0.999628035        | 2              | 2.302537 |
| Q8CC88        | NLADQGIINYPYSTR                                              | 1.400304448        | 2              | 3.190962 |
| Q8CC88        | VSSDQLSSENLTSAVGQK                                           | 0.762032641        | 2              | 3.489278 |
| <b>Q8CDM4</b> | <b>CCD73 Coiled_coil domain_containing protein 73</b>        | <b>1.074536112</b> | <b>0.12469</b> | <b>2</b> |
| Q8CDM4        | MEEESIDLIKEQK                                                | 1.144101394        | 2              | 2.39728  |
| Q8CDM4        | VTCQHKMEEESDIIK                                              | 0.715696703        | 2              | 2.37989  |
| <b>Q8CFN2</b> | <b>CDC42 Cell division control protein 42 homolog</b>        | <b>1.010561881</b> | <b>0.73834</b> | <b>3</b> |
| Q8CFN2        | NVFDEAIIAALPEPEPK                                            | 0.876263553        | 3              | 4.998273 |
| Q8CFN2        | WVPEITHHCPK                                                  | 0.902631225        | 2              | 2.406111 |
| Q8CFN2        | YVECSALTQK                                                   | 1.124440378        | 2              | 3.052529 |
| <b>Q8CFW1</b> | <b>ANO2 Anoctamin_2</b>                                      | <b>1.134049364</b> | <b>0.24977</b> | <b>2</b> |
| Q8CFW1        | TEQTFEERLILK                                                 | 1.335714469        | 2              | 2.368721 |
| Q8CFW1        | TKDIGIWFIDILSGIGK                                            | 0.929104163        | 2              | 2.339453 |



|               |                                                             |                    |                |           |
|---------------|-------------------------------------------------------------|--------------------|----------------|-----------|
| <b>Q8CG45</b> | <b>ARK72 Aflatoxin B1 aldehyde reductase member 2</b>       | <b>1.144744823</b> | <b>0.00077</b> | <b>10</b> |
| Q8CG45        | AVSGAPLRPGTVLGTMEMGR                                        | 0.60065556         | 2              | 2.893334  |
| Q8CG45        | EHHFEAIALVEK                                                | 1.668075186        | 2              | 2.345078  |
| Q8CG45        | FFGNSWSETYR                                                 | 0.933400628        | 2              | 2.817085  |
| Q8CG45        | FYAYNPLAGLLTGK                                              | 1.111145432        | 2              | 4.537042  |
| Q8CG45        | MDASASAATVR                                                 | 0.913509732        | 2              | 3.673352  |
| Q8CG45        | MDASASAATVR+Oxidation(0)                                    | 0.876161119        |                |           |
| Q8CG45        | QVETELLPLCR                                                 | 0.915617364        | 2              | 2.962501  |
| Q8CG45        | RMDASASAATVR                                                | 1.306412702        | 2              | 2.760439  |
| Q8CG45        | TTYGTSAPSM TSAALR                                           | 0.929765878        | 2              | 4.211116  |
| Q8CG45        | VDLFYLHAPDHGTPIVETLQACQLHQEGK                               | 1.725498455        | 3              | 5.550289  |
| <b>Q8CG48</b> | <b>SMC2 Structural maintenance of chromosomes protein 2</b> | <b>0.934551113</b> | <b>0.96241</b> | <b>2</b>  |
| Q8CG48        | EELLEK                                                      | 0.953402333        | 1              | 1.965779  |
| Q8CG48        | IKALNCEIEELER                                               | 0.861063743        | 2              | 2.464792  |
| <b>Q8CGC7</b> | <b>SYEP Bifunctional aminoacyl_tRNA synthetase</b>          | <b>1.15541052</b>  | <b>9.6E-06</b> | <b>10</b> |
| Q8CGC7        | AIQGATSHHLGQNF SK                                           | 1.197467167        | 2              | 4.479011  |
| Q8CGC7        | DQDVEPGAPSMGAK                                              | 0.956957387        | 2              | 3.14168   |
| Q8CGC7        | DQVDSAVQELLQ LK                                             | 0.93854016         | 2              | 3.728001  |
| Q8CGC7        | GDVSISVEEGKENLLR                                            | 1.370944143        | 2              | 3.47736   |
| Q8CGC7        | KEENLAEWYSQVITK                                             | 1.233404776        | 2              | 4.356993  |
| Q8CGC7        | KGDIQLQR                                                    | 1.042922068        | 2              | 2.657011  |
| Q8CGC7        | SLCIPFNPLCELQPGAMCVCGK                                      | 1.123767466        | 2              | 4.380905  |
| Q8CGC7        | SQGSGLSSGGAGEGQGPK                                          | 1.350964589        | 2              | 4.633912  |
| Q8CGC7        | TELAEP AI RPTSETVMYPAYAK                                    | 1.051730554        | 3              | 3.47725   |
| Q8CGC7        | VYEELLAIPVVR                                                | 1.28993025         | 2              | 3.032671  |
| <b>Q8CHM7</b> | <b>HACL1 2_hydroxyacyl_CoA lyase 1</b>                      | <b>1.211785422</b> | <b>7E-05</b>   | <b>9</b>  |
| Q8CHM7        | DTSKPCLINIMIEPQSTR                                          | 0.94520858         | 2              | 3.494121  |
| Q8CHM7        | GAAAYSHAEDSIR                                               | 2.598060684        | 2              | 3.43655   |
| Q8CHM7        | GVVPDNHNPNCVGAAR                                            | 1.553769353        | 2              | 3.364092  |
| Q8CHM7        | GYFVQTPEELQDSL R                                            | 1.056064917        | 2              | 4.051752  |
| Q8CHM7        | LVELCNLPFLPTPMGK                                            | 1.173388147        | 2              | 4.265065  |
| Q8CHM7        | NCFIVSEGANTMDIGR                                            | 1.140969945        | 2              | 4.907655  |
| Q8CHM7        | NQEAMGAFQEFPPQEACR                                          | 1.299685331        | 2              | 6.103219  |
| Q8CHM7        | SSYGRPGACYIDVPADLVTLQESTTSIK                                | 1.045075349        | 3              | 4.140991  |
| Q8CHM7        | YKECCMPPLSLAETS AVR                                         | 0.587694078        | 2              | 2.369579  |
| <b>Q8CI17</b> | <b>MB213 Protein mab_21_like 3</b>                          | <b>0.944144592</b> | <b>0.83127</b> | <b>2</b>  |
| Q8CI17        | QQISQTMEEVQK+Oxidation(6)                                   | 0.976912626        |                |           |
| Q8CI17        | RQQISQTMEEVQK                                               | 0.925012964        | 2              | 2.3575    |
| <b>Q8CIB5</b> | <b>FERM2 Fermitin family homolog 2</b>                      | <b>0.752659283</b> | <b>0.01498</b> | <b>3</b>  |
| Q8CIB5        | GCEVTPDVNISGQK                                              | 0.730258523        | 2              | 3.165857  |
| Q8CIB5        | INQLYEQAK                                                   | 0.878586773        | 2              | 2.969903  |
| Q8CIB5        | TSTILGDITSIPELADYIK                                         | 0.821496611        | 2              | 2.898173  |
| <b>Q8CIE6</b> | <b>COPA Coatomer subunit alpha</b>                          | <b>1.131070416</b> | <b>0.09762</b> | <b>7</b>  |
| Q8CIE6        | ASNLENSTYDLYTIPK                                            | 1.529805144        | 2              | 3.797963  |
| Q8CIE6        | DADSQNPDAPEGK                                               | 1.096623217        | 2              | 3.2413    |
| Q8CIE6        | GITGVDLFGTTDAVVK                                            | 1.104322496        | 2              | 3.995919  |
| Q8CIE6        | GVNWAAFHPTMPLIVSGADDR                                       | 0.856167425        | 2              | 3.641241  |
| Q8CIE6        | LLELGPKEVAQQTR                                              | 1.126972382        | 2              | 3.470856  |
| Q8CIE6        | SILLSVPLLVDNK                                               | 1.133962455        | 2              | 3.5948    |
| Q8CIE6        | TLDLPIYVTR                                                  | 1.166892563        | 2              | 2.672677  |
| <b>Q8CJ40</b> | <b>CROCC Rootletin</b>                                      | <b>0.879831491</b> | <b>0.88292</b> | <b>4</b>  |
| Q8CJ40        | DLLQLGGELVRTSR                                              | 1.005972484        | 2              | 2.47817   |
| Q8CJ40        | ELEERTGNLGRQR                                               | 1.672041894        | 2              | 2.307867  |
| Q8CJ40        | LQEERRLLQER                                                 | 0.870760109        | 2              | 2.359333  |
| Q8CJ40        | QQQAEHATTMAVEK+Oxidation(9)                                 | 0.912296979        |                |           |

|               |                                                                                  |                    |                |           |
|---------------|----------------------------------------------------------------------------------|--------------------|----------------|-----------|
| <b>Q8JZN5</b> | <b>ACAD9 Acyl CoA dehydrogenase family member 9_mitochondrial</b>                | <b>1.01817219</b>  | <b>0.88036</b> | <b>3</b>  |
| Q8JZN5        | GSNTCEVHFENTR                                                                    | 1.092650807        | 2              | 4.359045  |
| Q8JZN5        | NLSEFGLIQEK                                                                      | 0.913819129        | 2              | 3.107225  |
| Q8JZN5        | SGNVTTVMETIGR                                                                    | 1.02547234         | 2              | 2.505223  |
| <b>Q8K009</b> | <b>AL1L2 Mitochondrial 10_formyltetrahydrofolate dehydrogenase</b>               | <b>1.035583407</b> | <b>0.02895</b> | <b>16</b> |
| Q8K009        | ADPLALAAEK                                                                       | 0.971400478        | 2              | 2.639571  |
| Q8K009        | AGFSVFWADDGLDTGPILLQR                                                            | 0.895124193        | 2              | 3.867094  |
| Q8K009        | AMVEAVQLIADGK                                                                    | 0.798088805        | 2              | 3.769438  |
| Q8K009        | ANNTEYGLASGVFTR                                                                  | 0.795308588        | 2              | 4.734161  |
| Q8K009        | DLGEEALNEYLK                                                                     | 0.942149838        | 2              | 3.232624  |
| Q8K009        | EESFGPIIMVISK                                                                    | 1.083395712        | 2              | 2.40331   |
| Q8K009        | FLFPEGIK                                                                         | 0.881746585        | 2              | 2.402335  |
| Q8K009        | FQNGDIDGVLQR                                                                     | 0.906987163        | 2              | 2.911394  |
| Q8K009        | GVINIIPGSGGVAGQR                                                                 | 0.805726973        | 2              | 3.957973  |
| Q8K009        | HGSIIYHPSLLPR                                                                    | 0.912699881        | 2              | 4.178293  |
| Q8K009        | LEAGTVFINTYNK                                                                    | 1.2592886          | 2              | 3.081229  |
| Q8K009        | NLQFEDGK                                                                         | 0.740681487        | 1              | 2.128599  |
| Q8K009        | SAACLAAGNTLVLPKPAQVPLTALK                                                        | 0.733194797        | 3              | 3.709913  |
| Q8K009        | SCDVKPNDTVDSLNR                                                                  | 1.002013686        | 2              | 4.433568  |
| Q8K009        | TPQPEEGATYEGIQK                                                                  | 1.081018512        | 2              | 3.200745  |
| Q8K009        | VGVFTVPDKDGK                                                                     | 0.871890999        | 2              | 3.137646  |
| <b>Q8K1S6</b> | <b>SPIR2 Protein spire homolog 2</b>                                             | <b>1.383696395</b> | <b>0.10032</b> | <b>2</b>  |
| Q8K1S6        | ALFVETLELR                                                                       | 1.622256173        | 2              | 2.312166  |
| Q8K1S6        | DTADILLRR                                                                        | 1.036273494        | 2              | 2.424882  |
| <b>Q8K2F0</b> | <b>BRD3 Bromodomain containing protein 3</b>                                     | <b>0.820439509</b> | <b>0.70385</b> | <b>2</b>  |
| Q8K2F0        | LNLDPYHKIK                                                                       | 1.355917393        | 2              | 2.459141  |
| Q8K2F0        | QLSLDINRLPGEK                                                                    | 0.820438854        | 2              | 2.453372  |
| <b>Q8K3J1</b> | <b>NDUS8 NADH dehydrogenase [ubiquinone] iron_sulfur protein 8_mitochondrial</b> | <b>0.875835384</b> | <b>0.81972</b> | <b>2</b>  |
| Q8K3J1        | LCEAICPAQAITEAEPR                                                                | 0.880149963        | 2              | 4.369447  |
| Q8K3J1        | YVKNKEQESEVDMK                                                                   | 0.902437032        | 2              | 2.317082  |
| <b>Q8K440</b> | <b>ABC8B ATP binding cassette sub_family A member 8_B</b>                        | <b>0.950549036</b> | <b>0.85667</b> | <b>3</b>  |
| Q8K440        | GEILGLLGHNGAGKSTSLK                                                              | 0.849112861        | 2              | 2.313141  |
| Q8K440        | LMEMEQLSSLRETEK+Oxidation(1)                                                     | 1.187065409        |                |           |
| Q8K440        | LMEMEQLSSLRETEK+Oxidation(3)                                                     | 1.185668333        |                |           |
| <b>Q8K442</b> | <b>ABC8A ATP binding cassette sub_family A member 8_A</b>                        | <b>0.912268192</b> | <b>0.87508</b> | <b>5</b>  |
| Q8K442        | GQITAILGHSGAGK                                                                   | 1.494939952        | 2              | 3.506877  |
| Q8K442        | IDDFIHSLEQQNIALEVDAFGTR                                                          | 0.914216311        | 3              | 3.541419  |
| Q8K442        | LTGVCPQCENVQDFDLTVR                                                              | 1.302655026        | 2              | 2.814696  |
| Q8K442        | NTQNILVQNLGGQK                                                                   | 0.90714207         | 2              | 3.425331  |
| Q8K442        | STLLNVLSGLCVPTK                                                                  | 0.961381167        | 2              | 3.722986  |
| <b>Q8K4C0</b> | <b>FMO5 Dimethylaniline monooxygenase [N_oxide_forming] 5</b>                    | <b>0.785827422</b> | <b>9.9E-20</b> | <b>9</b>  |
| Q8K4C0        | FDHEMFGLPKK                                                                      | 0.808300692        | 2              | 2.921404  |
| Q8K4C0        | GYPIDILLSSR                                                                      | 0.774464332        | 2              | 3.06238   |
| Q8K4C0        | HSALGQHPTINDDLPNR                                                                | 0.710187792        | 2              | 4.999358  |
| Q8K4C0        | IAVIGSGASGLTCIK                                                                  | 0.797294421        | 2              | 4.029736  |
| Q8K4C0        | KLPSQSEMMAEINK                                                                   | 0.773208443        | 2              | 3.820664  |
| Q8K4C0        | KQPDFSTSGQWQVVTEHEGK                                                             | 0.769088452        | 3              | 4.587523  |
| Q8K4C0        | KTILTTEDR                                                                        | 0.74262732         | 2              | 2.560853  |
| Q8K4C0        | QQVDVFDGVLVCTGHHTDPHPLDLPFGIEK                                                   | 0.603527353        | 3              | 4.066142  |
| Q8K4C0        | SDDIGGLWR                                                                        | 0.662716721        | 2              | 2.813447  |
| <b>Q8K4G6</b> |                                                                                  | <b>0.828108616</b> | <b>3.9E-06</b> | <b>56</b> |

|               |                                                                     |                    |                |          |
|---------------|---------------------------------------------------------------------|--------------------|----------------|----------|
| <b>Q8K4T4</b> | <b>FLIP1 Filamin_A_interacting protein 1</b>                        | <b>1.260272252</b> | <b>0.10865</b> | <b>2</b> |
| Q8K4T4        | FQPRAETQSMKIELK+Oxidation(9)                                        | 1.595478011        |                |          |
| Q8K4T4        | IEEEETNKSLOK                                                        | 1.216745005        | 2              | 2.406459 |
| <b>Q8K4Z3</b> | <b>AIBP Apolipoprotein A_I_binding protein</b>                      | <b>0.782614383</b> | <b>0.00032</b> | <b>2</b> |
| Q8K4Z3        | GNPSGIQPDLLISLTAPK                                                  | 0.920569753        | 2              | 4.19953  |
| Q8K4Z3        | SPPTVLVICGPGNNGDGLVCAR                                              | 0.77052926         | 2              | 5.983057 |
| <b>Q8K586</b> | <b>RANT GTP_binding nuclear protein Ran_testis_specific isoform</b> | <b>1.216003252</b> | <b>2.4E-05</b> | <b>3</b> |
| Q8K586        | FNVWDTAGQEK                                                         | 1.03637909         | 2              | 3.033225 |
| Q8K586        | NLQYYDISAK                                                          | 1.195261867        | 1              | 2.215826 |
| Q8K586        | VCENIPIVLCGNK                                                       | 1.325708433        | 2              | 3.828304 |
| <b>Q8QZY1</b> | <b>EIF3L Eukaryotic translation initiation factor 3 subunit L</b>   | <b>1.199705784</b> | <b>0.62856</b> | <b>2</b> |
| Q8QZY1        | KSEGEMDFLRSNPK                                                      | 0.953544712        | 2              | 2.312369 |
| Q8QZY1        | VFSDEVQQQAQLSTIR                                                    | 1.200835551        | 2              | 3.875024 |
| <b>Q8R066</b> | <b>C1QT4 Complement C1q tumor necrosis factor_related protein 4</b> | <b>1.536957791</b> | <b>0.04548</b> | <b>2</b> |
| Q8R066        | NRDEVQAMIYDDGASRR                                                   | 1.129559207        | 2              | 2.326402 |
| Q8R066        | TLSVKLMKNR                                                          | 1.538007979        | 2              | 2.413723 |
| <b>Q8R081</b> | <b>HNRPL Heterogeneous nuclear ribonucleoprotein L</b>              | <b>0.926154703</b> | <b>0.00018</b> | <b>5</b> |
| Q8R081        | ASLNGADIYSGCCTLK                                                    | 1.398394244        | 2              | 3.317305 |
| Q8R081        | NDQDTWDYTNPNLSGGDPSNPNKR                                            | 0.922734395        | 3              | 5.179823 |
| Q8R081        | SDALETLGFLNHQYMK                                                    | 0.724023251        | 2              | 2.988459 |
| Q8R081        | SSSGLLEWDSK                                                         | 0.649081005        | 2              | 2.833583 |
| Q8R081        | TENAGDQHGGGGGGGGAAGGGGGENYDDPHK                                     | 0.848482327        | 3              | 7.479366 |
| <b>Q8R0F9</b> | <b>S14L4 SEC14_like protein 4</b>                                   | <b>1.106906325</b> | <b>0.54997</b> | <b>6</b> |
| Q8R0F9        | FDNTYSLHTK                                                          | 1.258163945        | 2              | 3.068027 |
| Q8R0F9        | GSSHQVENEILFPGCVLR                                                  | 0.869853986        | 2              | 5.072796 |
| Q8R0F9        | VCEMLLHECELQSQK                                                     | 0.77208304         | 2              | 4.637535 |
| Q8R0F9        | VCEMLLHECELQSQK+Oxidation(3)                                        | 0.903766432        |                |          |
| Q8R0F9        | VGYTAEVLLPK                                                         | 1.058595522        | 2              | 2.695363 |
| Q8R0F9        | VGYTAEVLLPKACEEK                                                    | 0.652183023        | 2              | 2.743185 |
| <b>Q8R164</b> | <b>BPHL Valacyclovir hydrolase</b>                                  | <b>0.691100992</b> | <b>0.27792</b> | <b>3</b> |
| Q8R164        | FADEFNR                                                             | 0.818598333        | 2              | 2.49064  |
| Q8R164        | QVSLLGWSDGGITALIAAAK                                                | 0.748011395        | 2              | 3.436995 |
| Q8R164        | TDFAPQLQSLNK                                                        | 0.814983499        | 2              | 3.547161 |
| <b>Q8R1V4</b> | <b>TMED4 Transmembrane emp24 domain_containing protein 4</b>        | <b>0.959952326</b> | <b>0.99998</b> | <b>2</b> |
| Q8R1V4        | CFIEEIPDETMVIGNYR                                                   | 1.020310497        | 2              | 3.550782 |
| Q8R1V4        | QLLDQVEQIQK                                                         | 0.95246713         | 2              | 3.146686 |
| <b>Q8R3Q6</b> | <b>CCD58 Coiled_coil domain_containing protein 58</b>               | <b>0.895576217</b> | <b>0.28186</b> | <b>2</b> |
| Q8R3Q6        | IVHELNTTVPTASFAGK                                                   | 0.976860568        | 2              | 4.195305 |
| Q8R3Q6        | NCIAQTSAVVK                                                         | 0.868855159        | 2              | 2.661136 |
| <b>Q8R491</b> | <b>EHD3 EH domain_containing protein 3</b>                          | <b>0.913343752</b> | <b>0.85341</b> | <b>5</b> |
| Q8R491        | ADQIETQQLMR                                                         | 0.785869324        | 2              | 2.79187  |
| Q8R491        | LDISDEFSEVIK                                                        | 0.934438667        | 2              | 3.138056 |
| Q8R491        | LFEAEEQDLFK                                                         | 0.840739439        | 2              | 3.6      |
| Q8R491        | MQDQLQAQDFSK                                                        | 1.057863041        | 2              | 3.81479  |
| Q8R491        | QEETQRPVQMVK                                                        | 0.784702432        | 2              | 2.529147 |
| <b>Q8VBU2</b> | <b>NDRG2 Protein NDRG2</b>                                          | <b>0.86533573</b>  | <b>3.4E-07</b> | <b>7</b> |
| Q8VBU2        | CPVMLVVGDAQPHEDAVVECNSK                                             | 0.755100013        | 3              | 4.767313 |
| Q8VBU2        | CPVMLVVGDAQPHEDAVVECNSK+Oxidation(3)                                | 0.843730602        |                |          |
| Q8VBU2        | LDPTQTSFLK                                                          | 0.570171783        | 1              | 1.909294 |
| Q8VBU2        | MADSGGQPQLTQPGK                                                     | 1.493580833        | 2              | 3.85656  |
| Q8VBU2        | SLITHAPNLENIELYWNSYNNR                                              | 0.99482346         | 3              | 4.776059 |

|               |                                                          |                    |                |           |
|---------------|----------------------------------------------------------|--------------------|----------------|-----------|
| Q8VBU2        | TASLTSAAIDGSR                                            | 1.429336077        | 2              | 3.109354  |
| Q8VBU2        | TLSQSSSEGTLPSPGPPGHTMEVSC                                | 0.999771829        | 2              | 4.424169  |
| <b>Q8VC12</b> | <b>HUTU Urocanate hydratase</b>                          | <b>0.859021409</b> | <b>0.00485</b> | <b>7</b>  |
| Q8VC12        | HQLVVSQAR                                                | 0.87135034         | 2              | 3.096704  |
| Q8VC12        | LLALEFAQELR                                              | 0.96920184         | 2              | 3.781817  |
| Q8VC12        | LQYMDNIR                                                 | 0.941606645        | 2              | 2.35022   |
| Q8VC12        | LVITNGMVIPNYSSR                                          | 0.756528813        | 2              | 3.353469  |
| Q8VC12        | VAIAVAIQAIASGK                                           | 1.299994298        | 2              | 3.664294  |
| Q8VC12        | VFVTSGLGGMSGAAQAK                                        | 0.69453647         | 2              | 4.50862   |
| Q8VC12        | VFVTSGLGGMSGAAQAK+Oxidation(9)                           | 0.790431471        |                |           |
| <b>Q8VDG5</b> | <b>PPCS Phosphopantothenate__cysteine ligase</b>         | <b>1.394918831</b> | <b>0.05319</b> | <b>2</b>  |
| Q8VDG5        | FLDNFSSGR                                                | 1.293240151        | 2              | 2.483594  |
| Q8VDG5        | LETDPDIISR                                               | 1.407513587        | 2              | 3.169044  |
| <b>Q8VED5</b> | <b>K2C79 Keratin_type II cytoskeletal 79</b>             | <b>0.879038585</b> | <b>0.02217</b> | <b>4</b>  |
| Q8VED5        | NKYEDEINK                                                | 0.749568368        | 2              | 2.761595  |
| Q8VED5        | NKYEDEINKR                                               | 0.7847122          | 3              | 3.440344  |
| Q8VED5        | NLDLDSIIAEVK                                             | 0.893144418        | 2              | 3.849866  |
| Q8VED5        | YEDEINK                                                  | 1.086360644        | 1              | 2.480872  |
| <b>Q8VEK3</b> | <b>HNRPU Heterogeneous nuclear ribonucleoprotein U</b>   | <b>1.136763558</b> | <b>0.20086</b> | <b>9</b>  |
| Q8VEK3        | EKPYFPIPEDCTFIQNVPLEDR                                   | 1.119610015        | 3              | 4.495188  |
| Q8VEK3        | GYFEYIEENK                                               | 1.028128599        | 2              | 3.266571  |
| Q8VEK3        | LLEQYKEESK                                               | 1.318409847        | 2              | 3.166838  |
| Q8VEK3        | LLEQYKEESKK                                              | 1.161702739        | 2              | 3.383716  |
| Q8VEK3        | LQAALDNEAGGRPAMEPGNGSLDLGGDAAGR                          | 0.805552542        | 3              | 5.08896   |
| Q8VEK3        | NFILDQTNVSAQAQR                                          | 0.76726865         | 2              | 4.528125  |
| Q8VEK3        | TCNCETEDYGEK                                             | 1.099279783        | 2              | 3.385928  |
| Q8VEK3        | VSELKEELKK                                               | 0.98308385         | 2              | 2.42955   |
| Q8VEK3        | YNILGNTNTIMDK                                            | 0.865069392        | 2              | 3.575292  |
| <b>Q8VHE9</b> | <b>RETST All_trans_retinol 13_14_reductase</b>           | <b>0.743629831</b> | <b>1.3E-05</b> | <b>7</b>  |
| Q8VHE9        | ATVQSVLLDSAGR                                            | 0.856716066        | 2              | 3.539473  |
| Q8VHE9        | FLPLPLTQLLNK                                             | 0.756216829        | 2              | 2.857179  |
| Q8VHE9        | GATYGADHDLAR                                             | 1.073666374        | 2              | 3.173579  |
| Q8VHE9        | NLYSDLQALGSK                                             | 0.700128729        | 2              | 2.919394  |
| Q8VHE9        | RPPEPLVTDK                                               | 0.811568124        | 2              | 2.618397  |
| Q8VHE9        | VLVLEQHTK                                                | 0.763652379        | 2              | 2.387858  |
| Q8VHE9        | VVAHGVSHAILLK                                            | 0.621113753        | 2              | 2.420338  |
| <b>Q8VHT6</b> | <b>AS3MT Arsenite methyltransferase</b>                  | <b>1.586178714</b> | <b>9.9E-20</b> | <b>4</b>  |
| Q8VHT6        | DCYVLSQLVGQK                                             | 1.406996547        | 2              | 2.967536  |
| Q8VHT6        | ILDGSGSGR                                                | 0.848692789        | 2              | 2.688855  |
| Q8VHT6        | SLQNVHEEVISR                                             | 2.219191657        | 2              | 3.216307  |
| Q8VHT6        | TSADLQTNACVTPAK                                          | 1.958897346        | 2              | 3.84688   |
| <b>Q8VHX6</b> | <b>FLNC Filamin_C</b>                                    | <b>0.946894403</b> | <b>0.43566</b> | <b>3</b>  |
| Q8VHX6        | AFPGLEGGLVNK                                             | 1.073844905        | 2              | 2.600145  |
| Q8VHX6        | GAGTGGLGLTVEGPCEAK                                       | 0.936722801        | 2              | 3.895885  |
| Q8VHX6        | LIALLEVLSQK                                              | 1.481632905        | 2              | 2.698955  |
| <b>Q8VI04</b> | <b>ASGL1 L_asparaginase</b>                              | <b>0.830353526</b> | <b>0.17816</b> | <b>3</b>  |
| Q8VI04        | FAADMGIPQTPAEK                                           | 1.243453827        | 2              | 2.711102  |
| Q8VI04        | GNLAYATSTGGIVNK                                          | 0.888890367        | 2              | 4.287473  |
| Q8VI04        | TVDEAATLALDYMK                                           | 0.759611509        | 2              | 2.656144  |
| <b>Q8VID1</b> | <b>DHRS4 Dehydrogenase/reductase SDR family member 4</b> | <b>0.998757835</b> | <b>0.22591</b> | <b>4</b>  |
| Q8VID1        | AVATLQGEGLSVTVGVCHVGK                                    | 0.647922131        | 2              | 4.466636  |
| Q8VID1        | LAEDGAHVVISSR                                            | 2.120228188        | 2              | 3.700807  |
| Q8VID1        | NFAAELAPK                                                | 0.935900955        | 2              | 2.517546  |
| Q8VID1        | VNCLAPGLIK                                               | 1.044657781        | 2              | 2.540972  |
| <b>Q8VIF7</b> | <b>SBP1 Selenium_binding protein 1</b>                   | <b>0.846161555</b> | <b>0.5427</b>  | <b>10</b> |

|               |                                                                    |                    |                |          |
|---------------|--------------------------------------------------------------------|--------------------|----------------|----------|
| Q8VIF7        | CGPGYATPLEAMK                                                      | 0.844555406        | 2              | 3.467742 |
| Q8VIF7        | FLHDPDATQGFVGCALSSNIQR                                             | 1.028786962        | 2              | 4.957894 |
| Q8VIF7        | GGFVLLDGETFEVK                                                     | 0.910543549        | 2              | 4.192704 |
| Q8VIF7        | GTWEKPGGEAPMGYDFWYQPR                                              | 0.806063137        | 2              | 4.33114  |
| Q8VIF7        | HEIIQLQMK                                                          | 0.938340955        | 2              | 2.641031 |
| Q8VIF7        | HNIMVSTEWAAPNVFK                                                   | 0.865618059        | 2              | 4.299456 |
| Q8VIF7        | LTGQIFLGGSIK                                                       | 0.68632595         | 2              | 3.003609 |
| Q8VIF7        | NEGGTWSVEK                                                         | 0.871540102        | 2              | 2.886699 |
| Q8VIF7        | NTGIEAPDYLATVDVDPK                                                 | 0.912417407        | 2              | 5.206403 |
| Q8VIF7        | VIEPNEIHAK                                                         | 0.76598106         | 2              | 2.54865  |
| <b>Q8VIJ6</b> | <b>SFPQ Splicing factor_ proline_ and glutamine rich</b>           | <b>1.029829843</b> | <b>0.63777</b> | <b>3</b> |
| Q8VIJ6        | FGQGGAGPVGGQGP                                                     | 0.976009606        | 2              | 2.827186 |
| Q8VIJ6        | NLSPYVSNELLEAFSQFGPIER                                             | 0.968926243        | 2              | 3.53484  |
| Q8VIJ6        | YGEPGEVFIN                                                         | 1.179571484        | 2              | 2.798023 |
| <b>Q91VA0</b> | <b>ACSM1 Acyl_coenzyme A synthetase ACSM1_ mitochondrial</b>       | <b>0.788194621</b> | <b>0.79634</b> | <b>6</b> |
| Q91VA0        | AFIVLNPEFLSHDQEQLIK                                                | 0.797104507        | 2              | 5.577048 |
| Q91VA0        | AILPFDLQIIDEK                                                      | 0.818292911        | 2              | 3.773881 |
| Q91VA0        | GNILPPNTEGYIGIR                                                    | 0.789172314        | 2              | 3.009643 |
| Q91VA0        | HNQGLAFR                                                           | 0.875979292        | 2              | 2.323281 |
| Q91VA0        | KVEFVSELPK                                                         | 0.912960219        | 2              | 2.873079 |
| Q91VA0        | NKEFGQL                                                            | 0.874468988        | 1              | 2.108725 |
| <b>Q91VM5</b> | <b>RBMXL Heterogeneous nuclear ribonucleoprotein G_ like 1</b>     | <b>1.023286571</b> | <b>0.82044</b> | <b>2</b> |
| Q91VM5        | LFIGLNTETNEK                                                       | 1.154471486        | 2              | 3.151284 |
| Q91VM5        | VEQATKPSFESGR                                                      | 1.019481317        | 2              | 3.522907 |
| <b>Q91VM9</b> | <b>IPYR2 Inorganic pyrophosphatase 2_ mitochondrial</b>            | <b>0.944185591</b> | <b>0.94437</b> | <b>2</b> |
| Q91VM9        | IIAINVNDPEAEK                                                      | 0.93999533         | 2              | 3.251032 |
| Q91VM9        | MEIATEEPLNPIK                                                      | 1.128820846        | 2              | 3.867111 |
| <b>Q91W43</b> | <b>GCSP Glycine dehydrogenase [decarboxylating]_ mitochondrial</b> | <b>0.866274495</b> | <b>0.59824</b> | <b>4</b> |
| Q91W43        | AGHQLQHDLFFDTLK                                                    | 0.876606985        | 2              | 2.411082 |
| Q91W43        | NLLENSGWVTQYTPYQPEVSQGR                                            | 0.838161372        | 2              | 4.082502 |
| Q91W43        | VSFQPNSGAQGEYAGLATIR                                               | 0.857979617        | 2              | 4.778082 |
| Q91W43        | YGNIDVAHLK                                                         | 0.838429677        | 3              | 3.490403 |
| <b>Q91W90</b> | <b>TXND5 Thioredoxin domain_ containing protein 5</b>              | <b>1.129608447</b> | <b>0.00194</b> | <b>2</b> |
| Q91W90        | SFEDTIAQGITFK                                                      | 0.888119432        | 2              | 3.558086 |
| Q91W90        | VDCTQHAYAVCSEHQVR                                                  | 1.458424782        | 3              | 4.390991 |
| <b>Q91WL5</b> | <b>CP4CA Cytochrome P450 4A12A</b>                                 | <b>1.017973323</b> | <b>0.26761</b> | <b>3</b> |
| Q91WL5        | FELLDPDTR                                                          | 0.650730058        | 2              | 2.396487 |
| Q91WL5        | IQLQDEEELEK                                                        | 1.242382408        | 2              | 2.35265  |
| Q91WL5        | VAVALTLLR                                                          | 1.304827285        | 2              | 2.599054 |
| <b>Q91X77</b> | <b>CY250 Cytochrome P450 2C50</b>                                  | <b>0.769066071</b> | <b>1.9E-15</b> | <b>3</b> |
| Q91X77        | IKEHEESLDVTIPR                                                     | 0.741990479        | 3              | 3.601666 |
| Q91X77        | NFLEK                                                              | 0.497808922        | 1              | 2.107804 |
| Q91X77        | YALLLLK                                                            | 0.780068264        | 2              | 2.820367 |
| <b>Q91X78</b> | <b>ERLN1 Erlin_1</b>                                               | <b>0.95426392</b>  | <b>0.90377</b> | <b>2</b> |
| Q91X78        | ISEIEDAAFLAR                                                       | 0.950300903        | 2              | 2.785827 |
| Q91X78        | SVQTTLQTDEVK                                                       | 0.997265546        | 2              | 3.215433 |
| <b>Q91XE8</b> | <b>TM205 Transmembrane protein 205</b>                             | <b>0.841831482</b> | <b>0.97446</b> | <b>2</b> |
| Q91XE8        | HTFGLVQSK                                                          | 0.840876149        | 2              | 2.48441  |
| Q91XE8        | MEKGEDPGSLIK+Oxidation(0)                                          | 0.987389649        |                |          |
| <b>Q91XQ0</b> | <b>DYH8 Dynein heavy chain 8_ axonemal</b>                         | <b>0.871821746</b> | <b>0.4592</b>  | <b>2</b> |
| Q91XQ0        | FRPEICDMVGNLVSISR+Oxidation(7)                                     | 1.014777627        |                |          |

|               |                                                                           |                    |                |           |
|---------------|---------------------------------------------------------------------------|--------------------|----------------|-----------|
| Q91XQ0        | SMTGIPNLQETLKEKQAR                                                        | 0.527301244        | 2              | 2.585173  |
| <b>Q91XR8</b> | <b>GPX42 Phospholipid hydroperoxide glutathione peroxidase_nuclear</b>    | <b>0.903690434</b> | <b>0.50624</b> | <b>2</b>  |
| Q91XR8        | TDVNYTQLVDLHAR                                                            | 0.748766942        | 3              | 3.442171  |
| Q91XR8        | YGPMEEPQVIEK                                                              | 0.995556101        | 2              | 2.519012  |
| <b>Q91Y81</b> | <b>SEPT2 Septin_2</b>                                                     | <b>0.663894869</b> | <b>0.00023</b> | <b>2</b>  |
| Q91Y81        | ASIPFSVVGSNQLIEAK                                                         | 0.807811675        | 2              | 3.384167  |
| Q91Y81        | LTVVDTPGYGDAINSR                                                          | 0.655081168        | 2              | 4.060359  |
| <b>Q91YE2</b> | <b>EGLN2 Egl nine homolog 2</b>                                           | <b>0.701685872</b> | <b>0.02973</b> | <b>2</b>  |
| Q91YE2        | ERAAARDK                                                                  | 0.811012174        | 1              | 2.038808  |
| Q91YE2        | YQLASGQK                                                                  | 0.48250898         | 1              | 1.943258  |
| <b>Q91YP0</b> | <b>L2HDH L_2_hydroxyglutarate dehydrogenase_mitochondrial</b>             | <b>0.9190226</b>   | <b>0.56532</b> | <b>2</b>  |
| Q91YP0        | ISELGNCNPDQIVPFR                                                          | 0.957865559        | 2              | 3.158764  |
| Q91YP0        | NAPSPAATSSLAISR                                                           | 0.910862269        | 2              | 3.44049   |
| <b>Q91YT0</b> | <b>NDUV1 NADH dehydrogenase [ubiquinone] flavoprotein 1_mitochondrial</b> | <b>0.948390506</b> | <b>0.99533</b> | <b>9</b>  |
| Q91YT0        | GAGAYICGEETALIESIEGK                                                      | 0.769143851        | 2              | 3.312476  |
| Q91YT0        | GDARPAEIDSLWEISK                                                          | 0.906835629        | 2              | 3.21349   |
| Q91YT0        | GEFYNEASNLQVAIR                                                           | 1.023726807        | 2              | 3.505469  |
| Q91YT0        | KTSFGSLKDEDR                                                              | 1.027139789        | 2              | 3.271385  |
| Q91YT0        | LKPPFPADVGVFGCPTTVANVETVAVSPTICR                                          | 0.989821587        | 3              | 3.825422  |
| Q91YT0        | LVEGCLVGGR                                                                | 1.056800604        | 2              | 2.59467   |
| Q91YT0        | QIEGHTICALGDGAAWPVQGLIR                                                   | 0.800782828        | 3              | 3.540077  |
| Q91YT0        | TSFGSLKDEDR                                                               | 1.124396137        | 2              | 2.614883  |
| Q91YT0        | YLVVNADEGEPGTCK                                                           | 0.984204215        | 2              | 5.062545  |
| <b>Q91Z53</b> | <b>GRHPR Glyoxylate reductase/hydroxypyruvate reductase</b>               | <b>0.739963346</b> | <b>0.26234</b> | <b>6</b>  |
| Q91Z53        | GDVVNQEDLYQALASGQIAAAGLDVTTPEPLPPSHPLTLK                                  | 0.869272823        | 3              | 6.880455  |
| Q91Z53        | LLDAAGANLR                                                                | 0.922252668        | 2              | 3.152913  |
| Q91Z53        | NCVILPHIGSATYK                                                            | 0.638141073        | 2              | 3.619254  |
| Q91Z53        | NTMSLLAANNLLAGLR                                                          | 0.794873867        | 2              | 4.523881  |
| Q91Z53        | RLPEAIEEVK                                                                | 0.764586862        | 2              | 2.459644  |
| Q91Z53        | VISTLSVGVVDHLALDEIK                                                       | 1.028287321        | 2              | 4.234691  |
| <b>Q91ZJ5</b> | <b>UGPA UTP__glucose_1_phosphate uridylyltransferase</b>                  | <b>0.554091116</b> | <b>9.9E-20</b> | <b>14</b> |
| Q91ZJ5        | AMSQDGASQFQEVILQELESVK                                                    | 0.700211892        | 3              | 4.776452  |
| Q91ZJ5        | FVQDLSK                                                                   | 0.489497676        | 1              | 1.990381  |
| Q91ZJ5        | GGTLTQYEGK                                                                | 0.625624809        | 2              | 2.543858  |
| Q91ZJ5        | GLPDNISSVLNK                                                              | 0.600815995        | 2              | 3.876582  |
| Q91ZJ5        | GTVIIIANHGDR                                                              | 0.558670031        | 2              | 3.043601  |
| Q91ZJ5        | IDIPPGAVLENK                                                              | 0.624248595        | 2              | 3.036104  |
| Q91ZJ5        | IQRPPEDSIQPYEK                                                            | 0.614258869        | 3              | 4.487566  |
| Q91ZJ5        | LNGGLGTSMGCK                                                              | 0.665077277        | 2              | 3.127034  |
| Q91ZJ5        | LQEQNAIDMEIIVNPK                                                          | 1.255186878        | 2              | 2.489109  |
| Q91ZJ5        | LVEIAQVPK                                                                 | 0.622838841        | 2              | 3.35483   |
| Q91ZJ5        | NENTFLDLTVQQIEHLNK                                                        | 0.534641184        | 2              | 5.244436  |
| Q91ZJ5        | SFENSLGINVPR                                                              | 0.609005621        | 2              | 3.22864   |
| Q91ZJ5        | TLDGGLNVIQLETAVGAAIK                                                      | 0.569160431        | 3              | 5.508804  |
| Q91ZJ5        | TYNTDVPLVLMNSFNTDEDTKK                                                    | 0.784025811        | 2              | 4.605159  |
| <b>Q91ZX7</b> | <b>LRP1 Prolow_density lipoprotein receptor_related protein 1</b>         | <b>1.137347212</b> | <b>0.35499</b> | <b>7</b>  |
| Q91ZX7        | AVTDEEPFLIFANR                                                            | 1.112181391        | 2              | 2.499593  |
| Q91ZX7        | CLQGACVVNK                                                                | 1.342329263        | 2              | 2.335465  |
| Q91ZX7        | GCHVNECLSR                                                                | 0.923665401        | 2              | 2.629994  |
| Q91ZX7        | IETAAMDGTLR                                                               | 1.334430833        | 2              | 2.327921  |

|               |                                                                                     |                    |                |           |
|---------------|-------------------------------------------------------------------------------------|--------------------|----------------|-----------|
| Q91ZX7        | ILQEDFTCR                                                                           | 0.896040632        | 2              | 2.55975   |
| Q91ZX7        | LDGLCIPLR                                                                           | 1.191452437        | 2              | 2.458098  |
| Q91ZX7        | MYDAQQQVGTNK                                                                        | 1.110264498        | 2              | 4.3498    |
| <b>Q920A6</b> | <b>RISC Retinoid_inducible serine carboxypeptidase</b>                              | <b>1.082948273</b> | <b>0.24869</b> | <b>3</b>  |
| Q920A6        | DLDTVASDMMVLLK                                                                      | 0.902892071        | 2              | 3.320173  |
| Q920A6        | GLAEVSDIAEQVLNAVNK                                                                  | 0.815285594        | 3              | 4.870239  |
| Q920A6        | NTDGVNFYNIITK                                                                       | 1.539848402        | 2              | 2.944644  |
| <b>Q920D2</b> | <b>DYR Dihydrofolate reductase</b>                                                  | <b>0.910324177</b> | <b>0.52965</b> | <b>4</b>  |
| Q920D2        | IMQEFESDTFFPEIDLEK                                                                  | 0.798354237        | 2              | 4.390249  |
| Q920D2        | LIEQPELASK                                                                          | 0.819067141        | 2              | 2.521969  |
| Q920D2        | LLPEYPGVLSEIQEEK                                                                    | 0.993298757        | 2              | 3.67855   |
| Q920D2        | NGDLPWPLLR                                                                          | 0.906656985        | 2              | 3.038924  |
| <b>Q920F5</b> | <b>DCMC Malonyl_CoA decarboxylase_mitochondrial</b>                                 | <b>0.959176821</b> | <b>0.99992</b> | <b>4</b>  |
| Q920F5        | ADLLEAQALK                                                                          | 1.062044452        | 2              | 2.312699  |
| Q920F5        | EIAEVTGDPVHESLK                                                                     | 0.979285242        | 2              | 2.971857  |
| Q920F5        | ISECEAVHPVK                                                                         | 0.916396954        | 2              | 3.344306  |
| Q920F5        | WLLGLLNVQ GK                                                                        | 1.020435106        | 2              | 3.616333  |
| <b>Q920L2</b> | <b>DHSA Succinate dehydrogenase [ubiquinone] flavoprotein subunit_mitochondrial</b> | <b>0.928684498</b> | <b>9.9E-20</b> | <b>19</b> |
| Q920L2        | ACALSIAESCRPGDK                                                                     | 0.97726112         | 2              | 3.148103  |
| Q920L2        | AGLPCQDLEFVQFHPTGIYGAGCLITEGCR                                                      | 0.792628424        | 3              | 4.823573  |
| Q920L2        | ANAGEESVMNLDK                                                                       | 0.864108475        | 2              | 4.005419  |
| Q920L2        | GEGGILINSQGER                                                                       | 0.784986076        | 2              | 4.334742  |
| Q920L2        | GSDWLGDQDAIHYMTEQAPASVVELENYGMPFSR                                                  | 2.768249865        | 3              | 5.011825  |
| Q920L2        | GVIALCIEDGSIHR                                                                      | 0.999419455        | 2              | 3.499012  |
| Q920L2        | HTLSYVDTK                                                                           | 1.251867173        | 1              | 2.257205  |
| Q920L2        | HVNGQDQIVPGLYACGEAACASVHGANR                                                        | 0.731084898        | 3              | 6.994025  |
| Q920L2        | IDEYDYSKPIEGQQK                                                                     | 0.613309671        | 2              | 4.544931  |
| Q920L2        | KHTLSYVDTK                                                                          | 1.223585964        | 2              | 2.605049  |
| Q920L2        | LGANSLDLVVFGR                                                                       | 1.070396636        | 2              | 3.403199  |
| Q920L2        | NTIIATGGYGR                                                                         | 0.872421446        | 2              | 2.80642   |
| Q920L2        | TGHSLHHTLYGR                                                                        | 0.720114821        | 2              | 2.343961  |
| Q920L2        | TLNEADCATVPPAIR                                                                     | 0.815209436        | 2              | 3.617169  |
| Q920L2        | TYFSCTSAHTSTGDGTAMVTR                                                               | 1.112433706        | 3              | 3.426553  |
| Q920L2        | VGSVLQEGCEK                                                                         | 0.891254917        | 2              | 3.472378  |
| Q920L2        | VSDAISTQYPVVDHEFDVAVVGAGGAGLR                                                       | 0.716353469        | 3              | 4.009187  |
| Q920L2        | VSQLYGDLQHLK                                                                        | 0.672669578        | 3              | 3.451027  |
| Q920L2        | VTLDYRPIVDK                                                                         | 0.932980394        | 2              | 3.336547  |
| <b>Q920P0</b> | <b>DCXR L_xylulose reductase</b>                                                    | <b>0.896187557</b> | <b>1.9E-06</b> | <b>6</b>  |
| Q920P0        | AVVQVSQIVAR                                                                         | 0.755668433        | 2              | 2.997207  |
| Q920P0        | GVPGAIVNVSSQASQR                                                                    | 0.830764633        | 2              | 5.490012  |
| Q920P0        | SSMTTGSALPVDGGFLAT                                                                  | 0.902592992        | 2              | 2.871311  |
| Q920P0        | STVLALQAAGAQQVAVSR                                                                  | 1.240266879        | 2              | 4.404534  |
| Q920P0        | TREDLSLVR                                                                           | 0.751272925        | 2              | 3.042619  |
| Q920P0        | VNAVNPVVMTPMGR                                                                      | 0.908230797        | 2              | 2.845801  |
| <b>Q921F2</b> | <b>TADBP TAR DNA_binding protein 43</b>                                             | <b>0.904225384</b> | <b>2E-07</b>   | <b>4</b>  |
| Q921F2        | FGGNPGGFGNQGGFGNSR                                                                  | 0.811406979        | 2              | 4.071534  |
| Q921F2        | FTEYETQVK                                                                           | 0.929529977        | 2              | 2.674551  |
| Q921F2        | GISVHISNAEPK                                                                        | 0.970993442        | 2              | 2.664879  |
| Q921F2        | TSDLIVLGLPWK                                                                        | 1.324663995        | 2              | 3.12147   |
| <b>Q922F4</b> | <b>TBB6 Tubulin beta_6 chain</b>                                                    | <b>1.042646379</b> | <b>0.75468</b> | <b>5</b>  |
| Q922F4        | ALTVPELTQQMFDAK                                                                     | 1.219513242        | 2              | 4.139413  |
| Q922F4        | GHYTEGAELVDSVLDVVR                                                                  | 0.98340527         | 2              | 6.669033  |
| Q922F4        | IREEYPDR                                                                            | 0.873637278        | 2              | 2.96996   |
| Q922F4        | MASTFIGNSTAIQELFK                                                                   | 1.143236011        | 2              | 3.833952  |

|               |                                                                               |                    |                |           |
|---------------|-------------------------------------------------------------------------------|--------------------|----------------|-----------|
| Q922F4        | NSSYFVEWIPNNVK                                                                | 1.112965891        | 2              | 4.782595  |
| <b>Q922J3</b> | <b>CLIP1 CAP_Gly domain_containing linker protein 1</b>                       | <b>0.999356444</b> | <b>0.41292</b> | <b>2</b>  |
| Q922J3        | EMETMQAKLMK+Oxidation(4)                                                      | 0.999664385        |                |           |
| Q922J3        | HEEILQNLQKMLADTEDK                                                            | 0.832232906        | 2              | 2.564286  |
| <b>Q923D2</b> |                                                                               | <b>0.867954541</b> | <b>0.27203</b> | <b>3</b>  |
| Q923D2        | LQDVTDDHIR                                                                    | 0.954611261        | 2              | 3.364575  |
| Q923D2        | TGLTTLAQAVQAGYEVTVLVR                                                         | 0.756153571        | 3              | 4.281244  |
| Q923D2        | YVAVMPPHIGDQPLTGAYVTLDGR                                                      | 0.939937245        | 3              | 4.542738  |
| <b>Q923J6</b> | <b>DYH12 Dynein heavy chain 12_ axonemal</b>                                  | <b>0.888417414</b> | <b>0.89329</b> | <b>2</b>  |
| Q923J6        | FFFLSNDEMLEILSETKDPLR                                                         | 0.894645611        | 2              | 2.412905  |
| Q923J6        | LEFLTNDLIK                                                                    | 0.727432135        | 1              | 2.099626  |
| <b>Q923K9</b> | <b>A1CF APOBEC1 complementation factor</b>                                    | <b>0.908652333</b> | <b>0.93763</b> | <b>2</b>  |
| Q923K9        | LAPQILEEICQK                                                                  | 1.011096349        | 2              | 2.33733   |
| Q923K9        | VTEGVVDVIVYPSAADK                                                             | 0.840058499        | 2              | 3.581791  |
| <b>Q923M1</b> | <b>MSRA Mitochondrial peptide methionine sulfoxide reductase</b>              | <b>0.85994103</b>  | <b>1.1E-05</b> | <b>2</b>  |
| Q923M1        | SAVYPTSAVQMEAAALK                                                             | 0.710365627        | 2              | 3.812218  |
| Q923M1        | VISAEEALPGR                                                                   | 0.841764852        | 2              | 3.128269  |
| <b>Q923V8</b> | <b>SEP15 15 kDa selenoprotein</b>                                             | <b>0.999962367</b> | <b>0.74303</b> | <b>3</b>  |
| Q923V8        | GCCQEEAQFETK                                                                  | 0.902109344        | 2              | 3.891757  |
| Q923V8        | LLDDNGNIAEELSILK                                                              | 1.108819427        | 2              | 4.218528  |
| Q923V8        | WNTDSVEEFLSEK                                                                 | 0.964768317        | 2              | 2.954593  |
| <b>Q924C3</b> | <b>ENPP1 Ectonucleotide pyrophosphatase/phosphodiesterase family member 1</b> | <b>0.92509709</b>  | <b>0.48478</b> | <b>5</b>  |
| Q924C3        | AEYLHTWGGLLPVISK                                                              | 0.817581224        | 3              | 3.951748  |
| Q924C3        | GQPIWVTANHQEVR                                                                | 0.941147141        | 2              | 2.925019  |
| Q924C3        | IEPLTFYLDPPQWQLALNPSER                                                        | 1.216344353        | 2              | 2.427873  |
| Q924C3        | SGTYFWPGSDVEIDGILPDIYK                                                        | 0.778135061        | 2              | 3.438065  |
| Q924C3        | SVSSDLGCTCDPSIVPIMDFEK                                                        | 0.840511582        | 2              | 2.754629  |
| <b>Q924S5</b> | <b>LONM Lon protease homolog_ mitochondrial</b>                               | <b>0.940253049</b> | <b>0.7057</b>  | <b>13</b> |
| Q924S5        | AGVTCIILPAENR                                                                 | 0.996446801        | 2              | 2.623525  |
| Q924S5        | AQLSATVLTLLIK                                                                 | 1.356553545        | 2              | 3.864212  |
| Q924S5        | AQSVLEEDHYGMEDVK                                                              | 1.031267536        | 2              | 4.259191  |
| Q924S5        | EHQEALAVER                                                                    | 0.828917986        | 2              | 2.877724  |
| Q924S5        | EVGDELGAKPQLEMVTEATSDTSK                                                      | 1.739531586        | 3              | 3.453974  |
| Q924S5        | HVMDVVDEELSK                                                                  | 0.791900628        | 2              | 3.212523  |
| Q924S5        | IVSGEAQTVHVTENLQDFVGKPVFTVER                                                  | 1.041698399        | 3              | 6.188807  |
| Q924S5        | MEMINVSQYVAQEK                                                                | 1.169817873        | 2              | 2.543144  |
| Q924S5        | NYLDWLTSIPWGR                                                                 | 0.742768633        | 2              | 2.883768  |
| Q924S5        | QLEVEPEGLEPEAENK                                                              | 0.919190716        | 2              | 4.258727  |
| Q924S5        | QSDENLDLAR                                                                    | 0.712226617        | 2              | 2.818621  |
| Q924S5        | TENPLVLIDEVDK                                                                 | 0.875894465        | 2              | 2.778177  |
| Q924S5        | VLEFIAVSQLR                                                                   | 0.906221368        | 2              | 3.088209  |
| <b>Q924W5</b> | <b>SMC6 Structural maintenance of chromosomes protein 6</b>                   | <b>0.954806791</b> | <b>0.35808</b> | <b>2</b>  |
| Q924W5        | ELDMKEKELQEK+Oxidation(3)                                                     | 1.04809778         |                |           |
| Q924W5        | TKEQINQGEERLTELK                                                              | 0.765199708        | 2              | 2.455998  |
| <b>Q99020</b> | <b>ROAA Heterogeneous nuclear ribonucleoprotein A/B</b>                       | <b>0.985589223</b> | <b>5.3E-07</b> | <b>3</b>  |
| Q99020        | EYFGQFGEIEAIELPIDPK                                                           | 1.239113234        | 2              | 2.95541   |
| Q99020        | FGEVVDCTIK                                                                    | 0.658706046        | 2              | 2.761502  |
| Q99020        | IFVGGLNPEATEEK                                                                | 1.301583187        | 2              | 4.035909  |
| <b>Q99068</b> | <b>AMRP Alpha_2_macroglobulin receptor_associated protein</b>                 | <b>0.988668818</b> | <b>0.15052</b> | <b>3</b>  |
| Q99068        | EELKHFEAKIEK                                                                  | 1.030838124        | 2              | 2.427901  |



|               |                                                                         |                    |                |          |
|---------------|-------------------------------------------------------------------------|--------------------|----------------|----------|
| Q99068        | HLQDLSSR                                                                | 0.798917681        | 2              | 2.337855 |
| Q99068        | HVESIGDPEHISR                                                           | 1.914411385        | 3              | 3.373267 |
| <b>Q99JI4</b> | <b>PSMD6 26S proteasome non_ATPase regulatory subunit 6</b>             | <b>0.838195913</b> | <b>0.08949</b> | <b>4</b> |
| Q99JI4        | GAEILEVLHSLPAVR                                                         | 1.073939219        | 2              | 2.35956  |
| Q99JI4        | LDEELEDAEK                                                              | 1.147875506        | 2              | 2.397714 |
| Q99JI4        | RLDEELEDAEK                                                             | 1.036214085        | 2              | 2.910735 |
| Q99JI4        | VNEIVETNRPDSK                                                           | 1.295588134        | 2              | 3.589453 |
| <b>Q99KN9</b> | <b>EPN4 Clathrin interactor 1</b>                                       | <b>1.016926222</b> | <b>0.92811</b> | <b>2</b> |
| Q99KN9        | GEFKDEEETVTK                                                            | 1.101027356        | 2              | 3.05005  |
| Q99KN9        | HIHITQATETTTTR                                                          | 0.993581183        | 3              | 3.387228 |
| <b>Q99L04</b> | <b>DHRS1 Dehydrogenase/reductase SDR family member 1</b>                | <b>0.860485652</b> | <b>0.92942</b> | <b>2</b> |
| Q99L04        | ATAQEAQSLGGR                                                            | 0.828150903        | 2              | 3.64541  |
| Q99L04        | CVPVVCDSSESEVK                                                          | 0.904240537        | 2              | 3.399817 |
| <b>Q99LF4</b> | <b>RTCB tRNA_splicing ligase RtcB homolog</b>                           | <b>1.005743545</b> | <b>0.80613</b> | <b>4</b> |
| Q99LF4        | GLGHQVATDALVAMEK                                                        | 0.650332992        | 2              | 3.972651 |
| Q99LF4        | NVTDVVNTCHDAGISK                                                        | 1.095857447        | 2              | 4.468873 |
| Q99LF4        | NYNDELQFLDK                                                             | 1.069706324        | 2              | 2.920885 |
| Q99LF4        | TNLDESVDQPVK                                                            | 0.92793654         | 2              | 3.316954 |
| <b>Q99LH1</b> | <b>NOG2 Nucleolar GTP_binding protein 2</b>                             | <b>1.163763482</b> | <b>0.29598</b> | <b>2</b> |
| Q99LH1        | GGEPDMLTVSKMVLNDWQR+Oxidation(11)                                       | 1.163763482        |                |          |
| Q99LH1        | GGEPDMLTVSKMVLNDWQR+Oxidation(5)                                        | 1.163763482        |                |          |
| <b>Q99ML5</b> | <b>PCYOX Prenylcysteine oxidase</b>                                     | <b>0.979848725</b> | <b>0.76084</b> | <b>3</b> |
| Q99ML5        | ELGLSSVPASGGLVGVYNGK                                                    | 0.776965033        | 2              | 2.518651 |
| Q99ML5        | NFDPPIEEFNDPYQLVTTLIK                                                   | 1.01069789         | 3              | 4.483006 |
| Q99ML5        | YQSHDYAFSSVEK                                                           | 0.975082685        | 2              | 2.882505 |
| <b>Q99MS0</b> | <b>S14L2 SEC14_like protein 2</b>                                       | <b>0.881312374</b> | <b>0.99533</b> | <b>5</b> |
| Q99MS0        | AGEMTEVLPNQR                                                            | 0.833783219        | 2              | 2.975658 |
| Q99MS0        | CGYDLDGCPVWYDIIGPLDAK                                                   | 0.939541212        | 2              | 3.191858 |
| Q99MS0        | HISPDQLPVEYGGTMTDPDGNPK                                                 | 0.842928679        | 3              | 4.807725 |
| Q99MS0        | INYGGDIPK                                                               | 0.95738793         | 2              | 2.504065 |
| Q99MS0        | QQYEHSVQISR                                                             | 1.075283984        | 2              | 2.478615 |
| <b>Q99MW1</b> | <b>STK31 Serine/threonine_protein kinase 31</b>                         | <b>1.089929799</b> | <b>0.37791</b> | <b>2</b> |
| Q99MW1        | EVLLENYKALELK                                                           | 0.572850067        | 2              | 2.304487 |
| Q99MW1        | QDQKLIENEK                                                              | 1.242382408        | 2              | 2.588887 |
| <b>Q99MZ8</b> | <b>LASP1 LIM and SH3 domain protein 1</b>                               | <b>0.894586203</b> | <b>0.32148</b> | <b>7</b> |
| Q99MZ8        | GFSVVADTPELQR                                                           | 0.897638422        | 2              | 3.381973 |
| Q99MZ8        | MGPSGGEGIEPER                                                           | 0.933016381        | 2              | 3.194432 |
| Q99MZ8        | QQSELQSQVR                                                              | 0.928619795        | 2              | 2.431894 |
| Q99MZ8        | QSFTMVADTPENLR                                                          | 0.881289729        | 2              | 3.302576 |
| Q99MZ8        | TQDQISNIK                                                               | 1.144311725        | 2              | 2.659462 |
| Q99MZ8        | YHEEFEK                                                                 | 0.770626469        | 1              | 2.215444 |
| Q99MZ8        | YKEEFEK                                                                 | 0.600474497        | 1              | 2.325076 |
| <b>Q99NA5</b> | <b>IDH3A Isocitrate dehydrogenase [NAD] subunit alpha_mitochondrial</b> | <b>1.308409568</b> | <b>0.67493</b> | <b>2</b> |
| Q99NA5        | IEAACFATIK                                                              | 1.322383335        | 2              | 2.315682 |
| Q99NA5        | NVTAIQGGPGK                                                             | 1.014952918        | 2              | 2.437847 |
| <b>Q99NB7</b> | <b>ACO12 Acyl_coenzyme A thioesterase 12</b>                            | <b>0.934038671</b> | <b>0.99767</b> | <b>3</b> |
| Q99NB7        | GSISNTNVEALK                                                            | 1.046900298        | 2              | 2.856956 |
| Q99NB7        | KGSISNTNVEALK                                                           | 0.781965101        | 2              | 3.169024 |
| Q99NB7        | VHLKPVLLQTEQEVEHR                                                       | 1.036133565        | 3              | 3.845462 |
| <b>Q99PF5</b> | <b>FUBP2 Far upstream element_binding protein 2</b>                     | <b>0.902118432</b> | <b>0.30456</b> | <b>8</b> |
| Q99PF5        | AINQQTGAFVEISR                                                          | 0.911646792        | 2              | 3.685945 |
| Q99PF5        | GGGGPGGGGGGGASGGPSQPPGGGGPGIR                                           | 0.803635591        | 2              | 6.111699 |
| Q99PF5        | IGGDAATTVNNNTPDFGFGGQK                                                  | 0.921921051        | 2              | 4.655235 |
| Q99PF5        | IGQQPQQPGAPPQQDYTK                                                      | 1.010913686        | 2              | 3.685757 |

|               |                                                                                            |                    |                |           |
|---------------|--------------------------------------------------------------------------------------------|--------------------|----------------|-----------|
| Q99PF5        | IINDLLQSLR                                                                                 | 0.83894379         | 2              | 2.696557  |
| Q99PF5        | SVSLTGAPESVQK                                                                              | 0.852372187        | 2              | 3.309307  |
| Q99PF5        | VGGGIDVPVPR                                                                                | 0.821605732        | 2              | 2.879406  |
| Q99PF5        | VQISPDGGLPER                                                                               | 1.032821325        | 2              | 2.566416  |
| <b>Q99PL5</b> | <b>RRBP1 Ribosome binding protein 1</b>                                                    | <b>1.190836408</b> | <b>0.00013</b> | <b>21</b> |
| Q99PL5        | DALNQATSQVESK                                                                              | 1.387906647        | 2              | 3.758504  |
| Q99PL5        | EAEETQNSLQAECQYR                                                                           | 1.342775524        | 2              | 5.467913  |
| Q99PL5        | EEITQLK                                                                                    | 0.42500871         | 1              | 1.977029  |
| Q99PL5        | EHTSHLEAELEK                                                                               | 1.245567961        | 2              | 3.317014  |
| Q99PL5        | EQEIAAVQAR                                                                                 | 1.375529629        | 2              | 2.379784  |
| Q99PL5        | ETSYEEALANQR                                                                               | 1.723171702        | 2              | 2.740476  |
| Q99PL5        | GELESSDQVR                                                                                 | 1.3473972          | 2              | 3.153927  |
| Q99PL5        | HLEDIVEK                                                                                   | 1.157875948        | 2              | 2.544025  |
| Q99PL5        | HMAAASAECQNYAK                                                                             | 0.713585538        | 2              | 4.461192  |
| Q99PL5        | HMAAASAECQNYAK+Oxidation(1)                                                                | 1.826742176        |                |           |
| Q99PL5        | IQEELEK                                                                                    | 0.953402333        | 1              | 2.14268   |
| Q99PL5        | LKELESQVSCLEK                                                                              | 0.89392198         | 2              | 4.059691  |
| Q99PL5        | LLATEQEDAATAK                                                                              | 1.148009451        | 2              | 4.539742  |
| Q99PL5        | LQQENSILR                                                                                  | 1.002429747        | 2              | 2.829821  |
| Q99PL5        | LQSSEVEVK                                                                                  | 0.949828225        | 2              | 2.524143  |
| Q99PL5        | LREAEETQNSLQAECQYR                                                                         | 0.905218087        | 3              | 5.125143  |
| Q99PL5        | QLHLAEAQTK                                                                                 | 1.185866259        | 2              | 2.327596  |
| Q99PL5        | TILAETEGMLK                                                                                | 1.009695326        | 2              | 3.038155  |
| Q99PL5        | TLQEQLENGPNTQLAR                                                                           | 0.865227474        | 2              | 4.824466  |
| Q99PL5        | TLVSTVGSVMVFSEGEAQR                                                                        | 1.222738869        | 3              | 4.837025  |
| Q99PL5        | VEPAVSSIVNSIQVLASK                                                                         | 1.148240238        | 2              | 4.981925  |
| <b>Q99PV0</b> | <b>PRP8 Pre_mRNA_processing splicing factor 8</b>                                          | <b>0.7015674</b>   | <b>1E-05</b>   | <b>2</b>  |
| Q99PV0        | AAVMHDILDMMPGK+Oxidation(3)                                                                | 0.7015674          |                |           |
| Q99PV0        | AAVMHDILDMMPGK+Oxidation(3)                                                                | 0.7015674          |                |           |
| <b>Q9CPQ1</b> | <b>COX6C Cytochrome c oxidase subunit 6C</b>                                               | <b>0.941704473</b> | <b>0.99081</b> | <b>2</b>  |
| Q9CPQ1        | FGVAEPR                                                                                    | 0.953675164        | 2              | 2.345819  |
| Q9CPQ1        | NYDSMKDFEEMR                                                                               | 0.706129924        | 2              | 3.545067  |
| <b>Q9CQS8</b> | <b>SC61B Protein transport protein Sec61 subunit beta</b>                                  | <b>1.213717121</b> | <b>0.76202</b> | <b>2</b>  |
| Q9CQS8        | FYTEDSPGLK                                                                                 | 1.202628816        | 2              | 2.331386  |
| Q9CQS8        | TTSAGTGMWR                                                                                 | 0.905772361        | 2              | 2.3868    |
| <b>Q9CRB8</b> | <b>MTFP1 Mitochondrial fission process protein 1</b>                                       | <b>0.995391373</b> | <b>0.75792</b> | <b>2</b>  |
| Q9CRB8        | SVDFLDSSLR                                                                                 | 0.894899394        | 2              | 2.799437  |
| Q9CRB8        | YLGYANEVGEAFR                                                                              | 1.064941936        | 2              | 2.718529  |
| <b>Q9CRB9</b> | <b>CHCH3 Coiled_coil_helix_coiled_coil_helix domain-containing protein 3_mitochondrial</b> | <b>1.236844178</b> | <b>0.00255</b> | <b>2</b>  |
| Q9CRB9        | VAEELALEQAK                                                                                | 1.251070732        | 2              | 3.572165  |
| Q9CRB9        | YEYHPVCADLQTK                                                                              | 0.990775723        | 2              | 3.661733  |
| <b>Q9CW42</b> | <b>MOSC1 MOSC domain-containing protein 1_mitochondrial</b>                                | <b>0.750620794</b> | <b>9.9E-05</b> | <b>3</b>  |
| Q9CW42        | DLLLPIPPATNPLLQCR                                                                          | 0.867708082        | 2              | 4.14524   |
| Q9CW42        | GLSVSEAECTAMGLR                                                                            | 0.718647965        | 2              | 3.313146  |
| Q9CW42        | LQQVGTVAQLWIYPIK                                                                           | 0.745080332        | 2              | 2.945435  |
| <b>Q9CWH6</b> | <b>PSA7L Proteasome subunit alpha type_7_like</b>                                          | <b>1.084744807</b> | <b>0.00937</b> | <b>3</b>  |
| Q9CWH6        | AITVFSPDGHLFQVEYAQAVK                                                                      | 1.285669237        | 2              | 4.488051  |
| Q9CWH6        | ALLEVVQSGGK                                                                                | 0.959482096        | 2              | 3.431706  |
| Q9CWH6        | LTVEDPVTVEYITR                                                                             | 1.191508048        | 2              | 3.902525  |
| <b>Q9CWK8</b> | <b>SNX2 Sorting nexin_2</b>                                                                | <b>0.954980206</b> | <b>0.37535</b> | <b>4</b>  |
| Q9CWK8        | AVNTQALSGAGILR                                                                             | 0.873196846        | 2              | 3.189193  |
| Q9CWK8        | QQQFENLDQQLR                                                                               | 0.843077675        | 2              | 2.818141  |
| Q9CWK8        | WEDAQITLLK                                                                                 | 0.968949267        | 2              | 2.788138  |
| Q9CWK8        | YWEAFLPEAK                                                                                 | 1.209972567        | 2              | 2.53179   |

|               |                                                                               |                    |                |           |
|---------------|-------------------------------------------------------------------------------|--------------------|----------------|-----------|
| <b>Q9CXS4</b> | <b>CENPV Centromere protein V</b>                                             | <b>0.939126497</b> | <b>0.77733</b> | <b>2</b>  |
| Q9CXS4        | LLLDTFEYQGLVK                                                                 | 0.94001446         | 2              | 3.939583  |
| Q9CXS4        | SVVTEEFNGSDWER                                                                | 0.918094561        | 2              | 3.769433  |
| <b>Q9CYN2</b> | <b>SPCS2 Signal peptidase complex subunit 2</b>                               | <b>1.032763075</b> | <b>0.99999</b> | <b>2</b>  |
| Q9CYN2        | LHDSLATER                                                                     | 1.047163197        | 2              | 2.419529  |
| Q9CYN2        | YVENFGLIDGR                                                                   | 1.02000853         | 2              | 2.736593  |
| <b>Q9CYW4</b> | <b>HDHD3 Haloacid dehalogenase_like hydrolase domain_containing protein 3</b> | <b>0.979881131</b> | <b>0.01385</b> | <b>2</b>  |
| Q9CYW4        | LEDILTGLGLR                                                                   | 0.624497051        | 2              | 4.23748   |
| Q9CYW4        | RLEDILTGLGLR                                                                  | 2.587974235        | 2              | 3.281152  |
| <b>Q9CZY3</b> | <b>UB2V1 Ubiquitin_conjugating enzyme E2 variant 1</b>                        | <b>1.042634904</b> | <b>0.7559</b>  | <b>2</b>  |
| Q9CZY3        | LLEELEEGQK                                                                    | 1.008967427        | 2              | 2.749477  |
| Q9CZY3        | VNMSGVSSNGVVDPR                                                               | 1.246065282        | 2              | 2.61564   |
| <b>Q9D0M3</b> | <b>CY1 Cytochrome c1_heme protein_mitochondrial</b>                           | <b>1.036207609</b> | <b>1.8E-05</b> | <b>4</b>  |
| Q9D0M3        | GLLSSLDHTSIR                                                                  | 0.917659372        | 2              | 3.196044  |
| Q9D0M3        | HGGEDYVFSLLTGYCEPPTGVSLR                                                      | 1.476889986        | 3              | 5.915704  |
| Q9D0M3        | HLVGVCYTEEEAK                                                                 | 1.036324717        | 2              | 3.734705  |
| Q9D0M3        | LSDYFPKYPNPEAAR                                                               | 1.050961067        | 3              | 3.633964  |
| <b>Q9D0S9</b> | <b>HINT2 Histidine triad nucleotide_binding protein 2_mitochondrial</b>       | <b>1.161817198</b> | <b>0.00033</b> | <b>3</b>  |
| Q9D0S9        | DVAPQAPVHFLVIPR                                                               | 0.964782824        | 2              | 2.823217  |
| Q9D0S9        | ISQAEDDQQLLGHLLLVAK                                                           | 0.953506545        | 2              | 5.156553  |
| Q9D0S9        | SLPADILYEDQQCLVFR                                                             | 0.79270308         | 2              | 3.498697  |
| <b>Q9D172</b> | <b>ES1 ES1 protein homolog_mitochondrial</b>                                  | <b>0.91799459</b>  | <b>0.9989</b>  | <b>4</b>  |
| Q9D172        | GVEVTVGHEQEEGK                                                                | 0.986643126        | 2              | 3.801411  |
| Q9D172        | ITSLAQLNAANHDAIFPGGFGAAK                                                      | 0.867415507        | 2              | 4.62831   |
| Q9D172        | NLSTFAVDGK                                                                    | 1.006870574        | 1              | 2.622995  |
| Q9D172        | NVLAESAR                                                                      | 0.928858416        | 1              | 1.930207  |
| <b>Q9D180</b> | <b>WDR65 WD repeat_containing protein 65</b>                                  | <b>0.878767039</b> | <b>0.50276</b> | <b>2</b>  |
| Q9D180        | KNQELEK                                                                       | 0.953402333        | 1              | 2.122219  |
| Q9D180        | QIEPRENEIK                                                                    | 0.618439668        | 1              | 1.982005  |
| <b>Q9D1Q6</b> | <b>ERP44 Endoplasmic reticulum resident protein 44</b>                        | <b>0.894078886</b> | <b>9.9E-20</b> | <b>4</b>  |
| Q9D1Q6        | MNPAVFLSLADLR+Oxidation(0)                                                    | 3.444410806        |                |           |
| Q9D1Q6        | NIIGYFEQK                                                                     | 0.808248018        | 1              | 2.084002  |
| Q9D1Q6        | SNPVHEIQSLDEVTNLDR                                                            | 0.849594063        | 2              | 5.255363  |
| Q9D1Q6        | VDCDQHS DIAQR                                                                 | 1.023978937        | 2              | 3.631815  |
| <b>Q9D2U9</b> | <b>H2B3A Histone H2B type 3_A</b>                                             | <b>0.996472926</b> | <b>0.11078</b> | <b>6</b>  |
| Q9D2U9        | AMGIMNSFVNDIFER                                                               | 0.854858576        | 2              | 4.8175    |
| Q9D2U9        | AMGIMNSFVNDIFER+Oxidation(1)                                                  | 0.921303513        |                |           |
| Q9D2U9        | AMGIMNSFVNDIFER+Oxidation(1)                                                  | 0.997937874        |                |           |
| Q9D2U9        | AMGIMNSFVNDIFER+Oxidation(4)                                                  | 0.987918196        |                |           |
| Q9D2U9        | LLPGELAK                                                                      | 0.961037882        | 2              | 2.640281  |
| Q9D2U9        | QVHPDTGISSK                                                                   | 0.981600243        | 2              | 2.37401   |
| <b>Q9D6M3</b> | <b>GHC1 Mitochondrial glutamate carrier 1</b>                                 | <b>1.498283063</b> | <b>0.26529</b> | <b>3</b>  |
| Q9D6M3        | GAAVNLTIVTPEK                                                                 | 1.267351623        | 2              | 3.113856  |
| Q9D6M3        | GVNEDTYSGLDCAR                                                                | 1.368599987        | 2              | 4.846322  |
| Q9D6M3        | NHGIAGLYK                                                                     | 1.746869268        | 1              | 2.047149  |
| <b>Q9D6Y9</b> | <b>GLGB 1_4_alpha_glucan_branching enzyme</b>                                 | <b>1.031936422</b> | <b>0.96974</b> | <b>10</b> |
| Q9D6Y9        | CSDGGIYCK                                                                     | 0.902504183        | 1              | 2.085543  |
| Q9D6Y9        | CVAYAESHDAQLVGDK                                                              | 0.919577908        | 2              | 5.011642  |
| Q9D6Y9        | EFKDEDWNMGNIIVYTLTNR                                                          | 1.440515016        | 3              | 3.409191  |
| Q9D6Y9        | GTHDLWDSR                                                                     | 0.630286752        | 2              | 2.563571  |
| Q9D6Y9        | GYESFGIHR                                                                     | 0.972600575        | 2              | 2.45794   |
| Q9D6Y9        | IVLSDAAEYGGHQQR                                                               | 0.764312912        | 2              | 4.534115  |

|               |                                                                                   |                    |                |          |
|---------------|-----------------------------------------------------------------------------------|--------------------|----------------|----------|
| Q9D6Y9        | IYESHVGISSHEGK                                                                    | 1.065300634        | 2              | 4.405342 |
| Q9D6Y9        | NSEDGLNMFDTGDCYFHSQPR                                                             | 1.051761603        | 3              | 3.363416 |
| Q9D6Y9        | QFNLTDDLLR                                                                        | 0.772308514        | 2              | 2.494174 |
| Q9D6Y9        | RQFNLTDDLLR                                                                       | 1.038848002        | 2              | 2.590854 |
| <b>Q9D7B6</b> | <b>ACAD8 Isobutyryl_CoA dehydrogenase_ mitochondrial</b>                          | <b>0.989215623</b> | <b>0.05756</b> | <b>3</b> |
| Q9D7B6        | AVIFEDCAVPVANR                                                                    | 0.976392875        | 2              | 4.067587 |
| Q9D7B6        | FASYCLTEPGSGSDAASLLTSAK                                                           | 0.868523479        | 2              | 4.376923 |
| Q9D7B6        | VHQILEGSNEVMR                                                                     | 1.544323653        | 2              | 2.589013 |
| <b>Q9D7S7</b> | <b>RL22L 60S ribosomal protein L22_like 1</b>                                     | <b>2.023477947</b> | <b>0.0002</b>  | <b>2</b> |
| Q9D7S7        | FHLDLTHPVEDGIFDSGNFEQFLR                                                          | 1.692580641        | 3              | 3.788766 |
| Q9D7S7        | TGNLGNVVHIER                                                                      | 4.054903688        | 2              | 2.476783 |
| <b>Q9D7W5</b> | <b>MED8 Mediator of RNA polymerase II transcription subunit 8</b>                 | <b>1.541197038</b> | <b>0.0182</b>  | <b>2</b> |
| Q9D7W5        | NQVIPLVLSRDELDLNR+Oxidation(17)                                                   | 1.263982968        |                |          |
| Q9D7W5        | QIQSLNKMCSNLLEK+Oxidation(7)                                                      | 1.816165798        |                |          |
| <b>Q9D7X8</b> | <b>GGCT Gamma_glutamylcyclotransferase</b>                                        | <b>0.954839318</b> | <b>0.0003</b>  | <b>2</b> |
| Q9D7X8        | ISDEMEDIK                                                                         | 0.757896515        | 2              | 2.959699 |
| Q9D7X8        | SNISLDEQEGVK                                                                      | 1.003299221        | 2              | 3.056067 |
| <b>Q9D819</b> | <b>IPYR Inorganic pyrophosphatase</b>                                             | <b>0.855166916</b> | <b>0.76688</b> | <b>5</b> |
| Q9D819        | GISCNMTTVSESPFK                                                                   | 0.838559102        | 2              | 4.502737 |
| Q9D819        | GQYISPFHDVPIYADK                                                                  | 1.347731434        | 2              | 3.77724  |
| Q9D819        | VLGILAMIDEGETDVK                                                                  | 1.000040222        | 2              | 4.000464 |
| Q9D819        | YKVPDGKPENEFANAEFK                                                                | 1.064169513        | 2              | 3.641628 |
| Q9D819        | YVANLFPYK                                                                         | 1.076287183        | 1              | 1.93985  |
| <b>Q9D880</b> | <b>TIM50 Mitochondrial import inner membrane translocase subunit TIM50</b>        | <b>0.673022996</b> | <b>0.83597</b> | <b>2</b> |
| Q9D880        | TIALNQVEDVR                                                                       | 0.655778928        | 2              | 2.934498 |
| Q9D880        | TVLEHYALEDDPLEAFK                                                                 | 1.016672793        | 2              | 5.039001 |
| <b>Q9DBA8</b> | <b>HUTI Probable imidazolonepropionase</b>                                        | <b>0.805945647</b> | <b>0.199</b>   | <b>4</b> |
| Q9DBA8        | AGTTLVECK                                                                         | 0.810406443        | 2              | 2.600883 |
| Q9DBA8        | GVFDLDTTR                                                                         | 0.920279865        | 2              | 2.303739 |
| Q9DBA8        | QGDIIIINASR                                                                       | 0.732415246        | 2              | 2.671376 |
| Q9DBA8        | SGYGLNLETLEK                                                                      | 0.797501033        | 2              | 2.36286  |
| <b>Q9DBH5</b> | <b>LMAN2 Vesicular integral_membrane protein VIP36</b>                            | <b>1.032969092</b> | <b>0.11834</b> | <b>3</b> |
| Q9DBH5        | LPTGYFAGSAGTGDSLNDHDIISK                                                          | 1.514789641        | 3              | 4.624665 |
| Q9DBH5        | TPEEESIDWTK                                                                       | 0.951762283        | 2              | 2.42645  |
| Q9DBH5        | WSELAGCTADFR                                                                      | 1.012920451        | 2              | 3.172407 |
| <b>Q9DC70</b> | <b>NDU57 NADH dehydrogenase [ubiquinone] iron_sulfur protein 7_ mitochondrial</b> | <b>0.813087424</b> | <b>0.61444</b> | <b>2</b> |
| Q9DC70        | LDDLINWAR                                                                         | 0.72681036         | 2              | 2.990906 |
| Q9DC70        | QADVMIAGTLTNK                                                                     | 1.009610196        | 2              | 3.313989 |
| <b>Q9DCH4</b> | <b>EIF3F Eukaryotic translation initiation factor 3 subunit F</b>                 | <b>1.170798116</b> | <b>0.27945</b> | <b>2</b> |
| Q9DCH4        | IQDALSTVLQYAEVLSGK                                                                | 1.100783767        |                |          |
| Q9DCH4        | VIGLSSDLQQVGGASAR                                                                 | 1.161059326        |                |          |
| <b>Q9DCM0</b> | <b>ETHE1 Protein ETHE1_ mitochondrial</b>                                         | <b>0.947941126</b> | <b>0.83501</b> | <b>2</b> |
| Q9DCM0        | SLLPGCQSVISR                                                                      | 0.884514933        | 2              | 3.202382 |
| Q9DCM0        | TDFQQGCAK                                                                         | 1.087278135        | 2              | 2.363618 |
| <b>Q9DCS9</b> | <b>NDUBA NADH dehydrogenase [ubiquinone] 1 beta subcomplex subunit 10</b>         | <b>0.939226744</b> | <b>0.11165</b> | <b>2</b> |
| Q9DCS9        | AYDLVVDWPVTLVR                                                                    | 0.925024376        | 2              | 4.678904 |
| Q9DCS9        | TPAPSPQTSLPNPITYLTK                                                               | 1.430398735        | 2              | 3.350693 |
| <b>Q9DCT2</b> | <b>NDU3 NADH dehydrogenase [ubiquinone] iron_sulfur protein 3_ mitochondrial</b>  | <b>0.942503208</b> | <b>0.00011</b> | <b>5</b> |
| Q9DCT2        | FDLNSPWEAFPAYR                                                                    | 0.941838024        | 2              | 2.781314 |

|               |                                                                       |                    |                |           |
|---------------|-----------------------------------------------------------------------|--------------------|----------------|-----------|
| Q9DCT2        | ILTDYGFEGHPFR                                                         | 0.693742244        | 2              | 2.639343  |
| Q9DCT2        | KFDLNSPWAEFPAYR                                                       | 0.840104208        | 2              | 3.633706  |
| Q9DCT2        | SLADLTAVDVPTR                                                         | 0.911269713        | 2              | 3.562822  |
| Q9DCT2        | VVAEPVELAQEFR                                                         | 0.402795034        | 2              | 3.311777  |
| <b>Q9DCU9</b> | <b>HOGA1 Probable 4_hydroxy_2_oxoglutarate aldolase_mitochondrial</b> | <b>0.870471558</b> | <b>1.1E-05</b> | <b>3</b>  |
| Q9DCU9        | GFVVQGSTGEFPFLTSLR                                                    | 0.802170689        | 2              | 5.19591   |
| Q9DCU9        | LIEPNTAVTR                                                            | 0.870935788        | 2              | 3.306714  |
| Q9DCU9        | TMDWFGYGGPCR                                                          | 1.141911215        | 2              | 3.402372  |
| <b>Q9EP75</b> | <b>CP4FE Leukotriene_B4 omega_hydroxylase 3</b>                       | <b>1.505898193</b> | <b>0.21864</b> | <b>2</b>  |
| Q9EP75        | DEDGKELSEDIR                                                          | 2.626126939        | 2              | 2.713569  |
| Q9EP75        | IFNDSTNIMHAK                                                          | 1.504660998        | 2              | 3.303768  |
| <b>Q9EP89</b> | <b>LACTB Serine beta_lactamase_like protein LACTB_mitochondrial</b>   | <b>0.633898668</b> | <b>8.3E-05</b> | <b>10</b> |
| Q9EP89        | FENSIESLR                                                             | 0.823802841        | 2              | 2.828457  |
| Q9EP89        | GIIVSIICNMQSVGLNSTALK                                                 | 0.746393355        | 3              | 3.732419  |
| Q9EP89        | IFHDLMLTTVQEENEPVIYNR                                                 | 0.81064508         | 3              | 4.018808  |
| Q9EP89        | IKDEVGAPGIVVGVSDGK                                                    | 0.578728835        | 2              | 5.023402  |
| Q9EP89        | KNDFEQGELYLK                                                          | 0.968494258        | 2              | 3.799617  |
| Q9EP89        | LDLDPVQHYVPEFPEK                                                      | 0.786436655        | 2              | 3.133782  |
| Q9EP89        | LDLDPVQHYVPEFPEKEYEGEK                                                | 1.082381437        | 3              | 3.666809  |
| Q9EP89        | LVNTPYVDNSYK                                                          | 1.366409482        | 2              | 3.22032   |
| Q9EP89        | NDFEQGELYLK                                                           | 1.201147171        | 2              | 2.911693  |
| Q9EP89        | WAGGGFLSTVGDLLK                                                       | 0.940811818        | 2              | 4.316546  |
| <b>Q9EPH2</b> | <b>MRP MARCKS_related protein</b>                                     | <b>0.809676709</b> | <b>0.41247</b> | <b>2</b>  |
| Q9EPH2        | AAATPESQEPQAK                                                         | 1.150156899        | 2              | 2.77378   |
| Q9EPH2        | GDVTAEEAAGASPAK                                                       | 0.786406697        | 2              | 3.416121  |
| <b>Q9EPH8</b> | <b>PABP1 Polyadenylate_binding protein 1</b>                          | <b>1.14742428</b>  | <b>0.00201</b> | <b>13</b> |
| Q9EPH8        | ALDTMNFQVIK                                                           | 1.226022756        | 2              | 3.303414  |
| Q9EPH8        | ALYDTFSAFGNILSCK                                                      | 1.916612315        | 2              | 2.595096  |
| Q9EPH8        | FSPAGPILSIR                                                           | 0.745435604        | 2              | 2.315148  |
| Q9EPH8        | GFGFVCFSSPEEATK                                                       | 17.00060762        | 2              | 4.003506  |
| Q9EPH8        | GFGFVSFER                                                             | 1.06428449         | 2              | 2.784455  |
| Q9EPH8        | GYGFVHFETQAAAER                                                       | 1.507418604        | 2              | 3.121152  |
| Q9EPH8        | ITGMILLEIDNSELLHMLESPESLR                                             | 1.153989738        | 3              | 3.652498  |
| Q9EPH8        | KEFSPFGTITSAK                                                         | 0.978013413        | 2              | 2.878023  |
| Q9EPH8        | NLDDGIDDER                                                            | 0.82249807         | 2              | 2.848306  |
| Q9EPH8        | SGVGNIFIK                                                             | 1.318771727        | 2              | 2.757515  |
| Q9EPH8        | SKVDEAVAVLQAHQAK                                                      | 1.111213858        | 2              | 5.239744  |
| Q9EPH8        | SLGYAYVNFQQPADAER                                                     | 1.259295676        | 2              | 3.651202  |
| Q9EPH8        | VDEAVAVLQAHQAK                                                        | 1.389377949        | 2              | 3.149306  |
| <b>Q9EQ76</b> | <b>FMO3 Dimethylaniline monooxygenase [N_oxide_forming] 3</b>         | <b>1.900361647</b> | <b>9.9E-20</b> | <b>12</b> |
| Q9EQ76        | ASIQSVFTNSSK                                                          | 1.090633007        | 2              | 3.178519  |
| Q9EQ76        | GTCILPSVNDMMDDIDEK                                                    | 1.455622135        | 2              | 3.594205  |
| Q9EQ76        | ILCGTVSIKPNVK                                                         | 0.962518503        | 2              | 2.995908  |
| Q9EQ76        | KEPVFNDELPAR                                                          | 1.091862725        | 2              | 3.221512  |
| Q9EQ76        | LQEYITSFATEK                                                          | 3.02202122         | 2              | 4.073552  |
| Q9EQ76        | NNEVTLYK                                                              | 3.223010145        | 2              | 2.452675  |
| Q9EQ76        | NNLPTAISDWWYMK                                                        | 1.811154482        | 2              | 2.910594  |
| Q9EQ76        | SCLEEGLEPTCFER                                                        | 1.448249438        | 2              | 4.589561  |
| Q9EQ76        | SDDVGGGLWK                                                            | 2.031804195        | 2              | 2.771746  |
| Q9EQ76        | VLVIGLGNSGCDIAAELSHVAQQVISSR                                          | 1.723878694        | 3              | 5.19264   |
| Q9EQ76        | VWNDGYPWDMVVITR                                                       | 1.264652657        | 2              | 4.133258  |
| Q9EQ76        | YIQFETLVTR                                                            | 2.485982938        | 2              | 3.305302  |
| <b>Q9EQH3</b> | <b>VPS35 Vacuolar protein sorting_associated protein 35</b>           | <b>0.952630089</b> | <b>0.9084</b>  | <b>6</b>  |

|               |                                                                              |                    |                |           |
|---------------|------------------------------------------------------------------------------|--------------------|----------------|-----------|
| Q9EQH3        | ACAELHQNVNVK                                                                 | 1.036659836        | 2              | 3.704721  |
| Q9EQH3        | IREDLPNLESSEETEIQNK                                                          | 1.108164098        | 3              | 3.848196  |
| Q9EQH3        | LNLEHIATSSAVSK                                                               | 0.791888984        | 2              | 3.521428  |
| Q9EQH3        | LSQLEGVNVER                                                                  | 1.0473152          | 2              | 2.980165  |
| Q9EQH3        | NIIIALIDR                                                                    | 0.805739812        | 2              | 2.318205  |
| Q9EQH3        | VLETTVEIFNK                                                                  | 0.933995599        | 2              | 2.707417  |
| <b>Q9EQH7</b> | <b>NDST3 Bifunctional heparan sulfate N_deacetylase/N_sulfotransferase 3</b> | <b>0.807877629</b> | <b>0.34389</b> | <b>2</b>  |
| Q9EQH7        | KFALEHGIPDMGYAVSPHHSVYPVHVQLYEAWKK                                           | 0.648816833        | 3              | 3.349104  |
| Q9EQH7        | TTPATVMDEVQK+Oxidation(6)                                                    | 0.893676541        |                |           |
| <b>Q9EQN5</b> | <b>SMBP2 DNA_binding protein SMUBP_2</b>                                     | <b>0.703814232</b> | <b>0.228</b>   | <b>2</b>  |
| Q9EQN5        | CPTTSVRKPASAQESRQEAR                                                         | 0.66440897         | 2              | 2.363061  |
| Q9EQN5        | KPSEKPLGSQVQPQHSSK                                                           | 0.709832321        | 2              | 2.349717  |
| <b>Q9EQS0</b> | <b>TALDO Transaldolase</b>                                                   | <b>0.832398183</b> | <b>0.39091</b> | <b>7</b>  |
| Q9EQS0        | ALAGCDFLTISPK                                                                | 0.835541913        | 2              | 3.480733  |
| Q9EQS0        | EAGISKDRILIK                                                                 | 0.822371864        | 2              | 2.348685  |
| Q9EQS0        | ILDWHVANTDKK                                                                 | 0.93117284         | 2              | 3.206593  |
| Q9EQS0        | LGGPQEEQIK                                                                   | 1.07972477         | 2              | 3.0213    |
| Q9EQS0        | LSSTWEGIQAGK                                                                 | 1.113618255        | 2              | 2.837765  |
| Q9EQS0        | SYEPQEDPGVK                                                                  | 0.890084494        | 2              | 2.893496  |
| Q9EQS0        | WLHNEDQMAVEK                                                                 | 0.88481983         | 3              | 3.321831  |
| <b>Q9EQX9</b> | <b>UBE2N Ubiquitin_conjugating enzyme E2 N</b>                               | <b>1.062273652</b> | <b>0.09687</b> | <b>3</b>  |
| Q9EQX9        | LELFLPEEYPMMAAPK                                                             | 0.953608671        | 2              | 3.44018   |
| Q9EQX9        | SNEAQAIETAR                                                                  | 1.099564715        | 2              | 3.656157  |
| Q9EQX9        | YFHVVIAGPQDSPFEGGTFK                                                         | 1.322033489        | 3              | 4.342836  |
| <b>Q9ER34</b> | <b>ACON Aconitate hydratase_mitochondrial</b>                                | <b>1.034768606</b> | <b>0.00354</b> | <b>23</b> |
| Q9ER34        | ADIANLAEFEK                                                                  | 1.237013487        | 2              | 3.482643  |
| Q9ER34        | CTTDHISAAGPWLK                                                               | 1.062050718        | 2              | 4.316233  |
| Q9ER34        | DINQEVYNFLATAGAK                                                             | 0.872095915        | 2              | 4.141652  |
| Q9ER34        | DLEDLQILIK                                                                   | 1.712410368        | 2              | 2.503135  |
| Q9ER34        | FKLEAPDADELPR                                                                | 1.022918082        | 3              | 4.274623  |
| Q9ER34        | FNPETDFLTGK                                                                  | 0.948700278        | 1              | 2.424444  |
| Q9ER34        | GHLDNISNLLIGAINIENGK                                                         | 0.903509826        | 2              | 5.606589  |
| Q9ER34        | IVYGHLDPANQEIER                                                              | 1.815268711        | 2              | 4.952315  |
| Q9ER34        | LEAPDADELPR                                                                  | 1.359136675        | 2              | 2.591181  |
| Q9ER34        | LNRPLTLSEK                                                                   | 1.257299008        | 2              | 2.44747   |
| Q9ER34        | LQLLEPFDKWDGKDLEDLQILIK                                                      | 1.01543831         | 3              | 3.680157  |
| Q9ER34        | LTGTLGWTSPK                                                                  | 1.132720618        | 2              | 2.58896   |
| Q9ER34        | NAVTFEGPVPDPTAR                                                              | 1.015529104        | 2              | 4.557825  |
| Q9ER34        | NDANPETHAFVTSPEIVTALAIAGTLK                                                  | 1.1041568          | 3              | 4.41255   |
| Q9ER34        | NTIVTSYNR                                                                    | 1.252577238        | 2              | 2.376795  |
| Q9ER34        | QGLLPLTFADPSDYNK                                                             | 1.09626401         | 2              | 3.443295  |
| Q9ER34        | SDFDPGQDQTYQHPPK                                                             | 1.094858309        | 2              | 2.455174  |
| Q9ER34        | SQFTITPGSEQIR                                                                | 0.943511891        | 2              | 3.452129  |
| Q9ER34        | VAMQDATAQMAMLQFISSGLPK                                                       | 1.097493451        | 2              | 2.373071  |
| Q9ER34        | VAVPSTIHCDHLIEAQLGGEK                                                        | 1.461961672        | 2              | 4.916017  |
| Q9ER34        | VDVSPTSQR                                                                    | 1.058101053        | 2              | 2.40706   |
| Q9ER34        | VGLIGSCTNSSYEDMGR                                                            | 0.966856928        | 2              | 4.367917  |
| Q9ER34        | WVVGIDENYEGESSR                                                              | 0.977203196        | 2              | 4.51262   |
| <b>Q9ES21</b> | <b>SAC1 Phosphatidylinositide phosphatase SAC1</b>                           | <b>0.924395615</b> | <b>0.99857</b> | <b>3</b>  |
| Q9ES21        | LEEQDEFEK                                                                    | 0.94058185         | 2              | 2.818766  |
| Q9ES21        | TNVIQSLAR                                                                    | 1.099461572        | 2              | 2.339262  |
| Q9ES21        | TQLGLVMDGFNSLLR                                                              | 0.955729964        | 2              | 3.780588  |
| <b>Q9ES38</b> | <b>S27A5 Bile acyl_CoA synthetase</b>                                        | <b>1.069159993</b> | <b>0.95346</b> | <b>13</b> |
| Q9ES38        | ACQAAWALK                                                                    | 1.077118897        | 2              | 2.536236  |
| Q9ES38        | ADVWENFQQR                                                                   | 1.041683438        | 2              | 3.01327   |
| Q9ES38        | EGFDVGVIAADPLYILDNK                                                          | 1.125812365        | 2              | 5.338932  |

|               |                                                                            |                    |                |           |
|---------------|----------------------------------------------------------------------------|--------------------|----------------|-----------|
| Q9ES38        | GATAILVLPK                                                                 | 1.053979722        | 2              | 2.68855   |
| Q9ES38        | IQDSLEITNTYK                                                               | 1.190995025        | 2              | 3.73132   |
| Q9ES38        | LKEATIQEDK                                                                 | 1.236654825        | 2              | 2.607008  |
| Q9ES38        | LLAENIR                                                                    | 1.070339557        | 2              | 2.398221  |
| Q9ES38        | MLTPELVQFDIETAEPVRDK                                                       | 0.897926012        | 2              | 4.282512  |
| Q9ES38        | QGFCIPVETGKPGLLLTK                                                         | 0.884272966        | 3              | 3.666495  |
| Q9ES38        | SISALSVFLGLAK                                                              | 0.393329518        | 2              | 3.4069    |
| Q9ES38        | SLMPDVYQAVCEGTWK                                                           | 1.361962221        | 2              | 3.956059  |
| Q9ES38        | YLCNVPGQPEDK                                                               | 1.202772699        | 2              | 3.328959  |
| Q9ES38        | YLCNVPGQPEDKK                                                              | 0.895273034        | 2              | 2.494618  |
| <b>Q9ES53</b> | <b>UFD1 Ubiquitin fusion degradation protein 1 homolog</b>                 | <b>0.878745983</b> | <b>0.23884</b> | <b>2</b>  |
| Q9ES53        | FQPQSPDFLDITNPK                                                            | 0.868017154        | 2              | 2.49985   |
| Q9ES53        | FVAFSGEGQSLRKK                                                             | 0.680862317        | 2              | 2.583275  |
| <b>Q9EST6</b> | <b>AN32B Acidic leucine_rich nuclear phosphoprotein 32 family member B</b> | <b>0.920002984</b> | <b>0.20512</b> | <b>2</b>  |
| Q9EST6        | SLDLFGCEVTNR                                                               | 0.910606007        | 2              | 3.098548  |
| Q9EST6        | TPAAVQELVLDNCK                                                             | 1.099645218        | 2              | 3.456145  |
| <b>Q9ESV1</b> | <b>LUZP1 Leucine zipper protein 1</b>                                      | <b>0.847696125</b> | <b>0.13587</b> | <b>2</b>  |
| Q9ESV1        | EKLEEEENLTR                                                                | 0.904994491        | 2              | 2.87248   |
| Q9ESV1        | RMADLEKLEEALSR                                                             | 0.719832495        | 2              | 2.531142  |
| <b>Q9ESW0</b> | <b>DDB1 DNA damage_binding protein 1</b>                                   | <b>1.155876246</b> | <b>0.95601</b> | <b>4</b>  |
| Q9ESW0        | IEVQDTSGGTALRPSASTQALSSSVSSK                                               | 1.159045918        | 3              | 6.021239  |
| Q9ESW0        | KTEPATGFIDGDLIESFLDISRPK                                                   | 1.14568511         | 3              | 3.961372  |
| Q9ESW0        | QGQGLVTCSGAFK                                                              | 0.970427705        | 2              | 2.899868  |
| Q9ESW0        | VTLGTQPTVLR                                                                | 0.903337829        | 2              | 2.633499  |
| <b>Q9HB97</b> | <b>PARVA Alpha_parvin</b>                                                  | <b>0.962591061</b> | <b>0.95074</b> | <b>2</b>  |
| Q9HB97        | DLAEDLYDGQVLQK                                                             | 1.197424471        | 2              | 3.101923  |
| Q9HB97        | LNVAEVTQSEIAQK                                                             | 0.932085885        | 2              | 4.336986  |
| <b>Q9JHL4</b> | <b>DBNL Drebrin_like protein</b>                                           | <b>0.898330499</b> | <b>0.00014</b> | <b>4</b>  |
| Q9JHL4        | AMSTTSVSSSQPGK                                                             | 0.646406421        | 2              | 2.585805  |
| Q9JHL4        | ERAMSTTSVSSSQPKLR+Oxidation(3)                                             | 0.249775579        |                |           |
| Q9JHL4        | TGELEQEVVSR                                                                | 1.060753536        | 2              | 3.341404  |
| Q9JHL4        | VAGTGEGGLEELVEELNSGK                                                       | 0.737434643        | 2              | 2.865452  |
| <b>Q9JI85</b> | <b>NUCB2 Nucleobindin_2</b>                                                | <b>1.083538706</b> | <b>0.45897</b> | <b>4</b>  |
| Q9JI85        | FQQGIAPSGPAGELK                                                            | 1.437682197        | 2              | 2.733264  |
| Q9JI85        | QEYQQAVQQLQEQK                                                             | 1.0871034          | 2              | 4.3223    |
| Q9JI85        | QVIEVLETPHFR                                                               | 0.911143878        | 2              | 2.669342  |
| Q9JI85        | VHNVEPVESAR                                                                | 1.062990642        | 2              | 2.918343  |
| <b>Q9JI91</b> | <b>ACTN2 Alpha_actinin_2</b>                                               | <b>1.241148396</b> | <b>0.82844</b> | <b>11</b> |
| Q9JI91        | DQSLQEELAR                                                                 | 1.051486384        | 2              | 2.612214  |
| Q9JI91        | ETADTDTAEQVIASFR                                                           | 0.722956248        | 2              | 3.933638  |
| Q9JI91        | GYEEWLLNEIR                                                                | 1.282367868        | 3              | 3.371127  |
| Q9JI91        | HRPDLIDYSK                                                                 | 0.753735162        | 2              | 2.394802  |
| Q9JI91        | HTNYTMEHIR                                                                 | 1.787058401        | 3              | 3.40227   |
| Q9JI91        | HTNYTMEHIR+Oxidation(5)                                                    | 1.460473261        |                |           |
| Q9JI91        | KHEAFESDLAAHQDR                                                            | 0.889584653        | 2              | 5.367726  |
| Q9JI91        | LEGDHQLIQEGLVFDNK                                                          | 0.862590149        | 3              | 4.948175  |
| Q9JI91        | MLDAEDIVNTPKPDER                                                           | 0.739323375        | 2              | 3.889498  |
| Q9JI91        | QSILAIQNEVEK                                                               | 1.063375637        | 2              | 2.971831  |
| Q9JI91        | TINEVETQILTR                                                               | 1.095895157        | 2              | 2.530003  |
| <b>Q9JJ19</b> | <b>NHRF1 Na(_)/H(_) exchange regulatory cofactor NHE_RF1</b>               | <b>1.079965042</b> | <b>0.52392</b> | <b>7</b>  |
| Q9JJ19        | AVDPDSPAEEASGLR                                                            | 1.335247811        | 2              | 3.683422  |
| Q9JJ19        | IVEVNGVCMEGK                                                               | 1.034666835        | 2              | 3.225758  |
| Q9JJ19        | LLVDPETDEQLKK                                                              | 1.082580315        | 2              | 2.474663  |
| Q9JJ19        | LVEPGSPAEEK                                                                | 1.152827656        | 2              | 2.526153  |

|               |                                                                 |                    |                |           |
|---------------|-----------------------------------------------------------------|--------------------|----------------|-----------|
| Q9JJ19        | LVEVNGENVEK                                                     | 2.236656791        | 2              | 2.793793  |
| Q9JJ19        | SEHTEPPAAADTK                                                   | 0.691613033        | 2              | 3.033579  |
| Q9JJ19        | VTPSQEHLDGPLPEPFSNGEIQK                                         | 1.069366832        | 3              | 3.674628  |
| <b>Q9JJ22</b> | <b>ERAP1 Endoplasmic reticulum aminopeptidase 1</b>             | <b>1.002990725</b> | <b>0.83922</b> | <b>2</b>  |
| Q9JJ22        | ASLINNAFQLVSIQK                                                 | 1.051793221        | 2              | 2.522066  |
| Q9JJ22        | TQEFPHILTLIGR                                                   | 0.884522547        | 2              | 2.578067  |
| <b>Q9JJ40</b> | <b>NHRF3 Na( )/H( ) exchange regulatory cofactor NHE_RF3</b>    | <b>1.136250939</b> | <b>0.97039</b> | <b>3</b>  |
| Q9JJ40        | GVFLTDITPQGVAMK                                                 | 1.008186198        | 2              | 2.415186  |
| Q9JJ40        | NGGDQTTLLVLDK                                                   | 1.000875638        | 2              | 2.454234  |
| Q9JJ40        | SGNSVTLVLDGDSYEK                                                | 1.168141373        | 2              | 4.384834  |
| <b>Q9JJ46</b> | <b>EBP 3_beta_hydroxysteroid_Delta(8)_Delta(7)_isomerase</b>    | <b>1.032833089</b> | <b>0.02582</b> | <b>3</b>  |
| Q9JJ46        | HLTNAQSMLDNK                                                    | 0.739088909        | 2              | 3.52705   |
| Q9JJ46        | HLTNAQSMLDNK+Oxidation(7)                                       | 1.030765173        |                |           |
| Q9JJ46        | VSVVPLGTGR                                                      | 0.871810111        | 2              | 2.52231   |
| <b>Q9JJ54</b> | <b>HNRPD Heterogeneous nuclear ribonucleoprotein D0</b>         | <b>1.063889363</b> | <b>0.63839</b> | <b>3</b>  |
| Q9JJ54        | FGDVVDCTLK                                                      | 0.873373304        | 2              | 2.987431  |
| Q9JJ54        | IFVGGLSPDTPEEK                                                  | 1.005656922        | 2              | 4.201118  |
| Q9JJ54        | IFVGGLSPDTPEEKIR                                                | 1.329535434        | 2              | 2.507551  |
| <b>Q9JJ79</b> | <b>DYHC2 Cytoplasmic dynein 2 heavy chain 1</b>                 | <b>1.080302006</b> | <b>0.41664</b> | <b>5</b>  |
| Q9JJ79        | ASDLKDLNSR                                                      | 1.082302045        | 2              | 2.321454  |
| Q9JJ79        | ELMLERETLLAR+Oxidation(2)                                       | 1.541952446        |                |           |
| Q9JJ79        | NCLEEWTKAAGLEK                                                  | 0.82001682         | 2              | 2.420096  |
| Q9JJ79        | TVLRGSGNLLR                                                     | 1.175169532        | 2              | 2.436831  |
| Q9JJ79        | YVVQIGDK                                                        | 0.885455782        | 1              | 2.072972  |
| <b>Q9JJM9</b> | <b>SEPT5 Septin_5</b>                                           | <b>0.969133217</b> | <b>0.94876</b> | <b>2</b>  |
| Q9JJM9        | LIRMKDEELR                                                      | 0.961700093        | 2              | 2.47511   |
| Q9JJM9        | MQEMLQKMK+Oxidation(3)                                          | 1.166539143        |                |           |
| <b>Q9JJU8</b> | <b>SH3L1 SH3 domain_binding glutamic acid_rich_like protein</b> | <b>0.96978918</b>  | <b>0.99939</b> | <b>2</b>  |
| Q9JJU8        | GDYDAFFEAR                                                      | 0.760344767        | 2              | 2.486322  |
| Q9JJU8        | QQDVLFCLEANK                                                    | 1.00008017         | 2              | 3.280272  |
| <b>Q9JK11</b> | <b>RTN4 Reticulon_4</b>                                         | <b>1.089034236</b> | <b>0.23084</b> | <b>2</b>  |
| Q9JK11        | VDRKCLEDSELEQK                                                  | 1.089223031        | 2              | 2.346146  |
| Q9JK11        | YSNSALGHVNSTIK                                                  | 0.562622052        | 2              | 2.698704  |
| <b>Q9JK38</b> | <b>GNA1 Glucosamine 6_phosphate N_acetyltransferase</b>         | <b>1.23448971</b>  | <b>0.99398</b> | <b>3</b>  |
| Q9JK38        | ITLECLPQNVGFYK                                                  | 1.159871007        | 2              | 3.030867  |
| Q9JK38        | VEDVVVSDECR                                                     | 0.977922572        | 2              | 3.536087  |
| Q9JK38        | VLGQLTETGVVSPEQFMK                                              | 0.98167779         | 2              | 4.170403  |
| <b>Q9JK72</b> | <b>CCS Copper chaperone for superoxide dismutase</b>            | <b>1.02540329</b>  | <b>0.89157</b> | <b>2</b>  |
| Q9JK72        | GDLGNVHAEASGR                                                   | 1.102012724        | 2              | 2.770985  |
| Q9JK72        | SLVVDEGEDDLGR                                                   | 1.020877406        | 2              | 2.304827  |
| <b>Q9JKS4</b> | <b>LDB3 LIM domain_binding protein 3</b>                        | <b>0.728706745</b> | <b>0.72703</b> | <b>2</b>  |
| Q9JKS4        | GAPAYNPTGPQVTPLAR                                               | 0.982140367        | 2              | 3.930653  |
| Q9JKS4        | TQSKPEDEADEWAR                                                  | 0.540669683        | 2              | 3.546019  |
| <b>Q9JLA3</b> | <b>UGGG1 UDP_glucose:glycoprotein glucosyltransferase 1</b>     | <b>0.860915606</b> | <b>0.92977</b> | <b>12</b> |
| Q9JLA3        | AIWAALQTQTSNSAK                                                 | 1.984490251        | 2              | 3.624517  |
| Q9JLA3        | FLFVDADQIVR                                                     | 1.073529071        | 2              | 2.90383   |
| Q9JLA3        | FLSPLQQNLLK                                                     | 0.951511141        | 2              | 2.385851  |
| Q9JLA3        | GQYQGLSQDPNSLSNLDQDLPNNMIHQVPIK                                 | 0.952029766        | 3              | 6.338928  |
| Q9JLA3        | IEYQFFEDK                                                       | 1.147211161        | 2              | 2.520868  |
| Q9JLA3        | IVPEWQDYDQEIK                                                   | 0.839020863        | 2              | 3.289206  |



|               |                                                                      |                    |                |           |
|---------------|----------------------------------------------------------------------|--------------------|----------------|-----------|
| Q9JLA3        | LNIQPSETDYAVDIR                                                      | 0.962716043        | 2              | 3.947537  |
| Q9JLA3        | TAAIANSMNYLTK                                                        | 0.951080582        | 2              | 2.553551  |
| Q9JLA3        | VDALLSAQPK                                                           | 0.929868118        | 2              | 3.003724  |
| Q9JLA3        | VEEDVASDLVMK                                                         | 0.686931965        | 2              | 3.505897  |
| Q9JLA3        | VWQLQDLSFQTAAR                                                       | 0.980708697        | 2              | 4.416657  |
| Q9JLA3        | YVLEPEISFTADNSFAK                                                    | 1.159566858        | 2              | 3.714201  |
| <b>Q9JLH7</b> | <b>CK5P3 CDK5 regulatory subunit_associated protein 3</b>            | <b>0.734719446</b> | <b>0.28328</b> | <b>3</b>  |
| Q9JLH7        | GSDALTLLLEYPETR                                                      | 0.822689934        | 2              | 2.47365   |
| Q9JLH7        | KEEEGQAGAAEMR+Oxidation(11)                                          | 0.840314393        |                |           |
| Q9JLH7        | QYGITGDNVRELLALVK                                                    | 0.795745157        | 2              | 2.372433  |
| <b>Q9JLJ3</b> | <b>AL9A1 4_trimethylaminobutyraldehyde dehydrogenase</b>             | <b>1.003632224</b> | <b>0.65185</b> | <b>19</b> |
| Q9JLJ3        | AGAPNGLFNVVQGGAAATGQFLCQHR                                           | 0.897988643        | 2              | 4.330059  |
| Q9JLJ3        | ANDTTFLAAGVFTR                                                       | 1.093942279        | 2              | 4.617095  |
| Q9JLJ3        | CQVLLEAAR                                                            | 1.019004041        | 2              | 3.51146   |
| Q9JLJ3        | EQGATVLCGGEPYAPEDPK                                                  | 1.025923659        | 2              | 4.632158  |
| Q9JLJ3        | EQGATVLCGGEPYAPEDPKLK                                                | 0.956725584        | 3              | 3.355614  |
| Q9JLJ3        | EVNLAVENAK                                                           | 1.184950662        | 1              | 2.949497  |
| Q9JLJ3        | GALLANFLTQQGVCCNGTR                                                  | 1.06958716         | 2              | 5.380242  |
| Q9JLJ3        | GIKPITLLEGGK                                                         | 1.068876595        | 3              | 3.972119  |
| Q9JLJ3        | HGYMTPCILNCTDDMTCVK                                                  | 0.958928209        | 3              | 3.605326  |
| Q9JLJ3        | IGDPLLEDTR                                                           | 0.955038731        | 2              | 4.013814  |
| Q9JLJ3        | MGPLINAPHLER                                                         | 1.073738445        | 2              | 3.122439  |
| Q9JLJ3        | MGPLINAPHLER+Oxidation(0)                                            | 1.072319993        |                |           |
| Q9JLJ3        | RDEIAIMETINNGK                                                       | 1.064301671        | 2              | 5.36157   |
| Q9JLJ3        | SAPALACGNAMIFKPSFPTVSALLAEIYTK                                       | 0.9337961          | 3              | 3.459284  |
| Q9JLJ3        | SPLIIFSDCNMK                                                         | 1.235452855        | 2              | 2.554181  |
| Q9JLJ3        | VEPVDASGTEK                                                          | 0.798364277        | 1              | 2.24513   |
| Q9JLJ3        | VSFTGSVPTGMK                                                         | 1.007759983        | 2              | 3.574542  |
| Q9JLJ3        | VSFTGSVPTGMK+Oxidation(10)                                           | 1.099593171        |                |           |
| Q9JLJ3        | VTIEYYSQLK                                                           | 2.593396642        | 2              | 3.126212  |
| <b>Q9JLQ0</b> | <b>CD2AP CD2_associated protein</b>                                  | <b>0.800970657</b> | <b>0.14363</b> | <b>2</b>  |
| Q9JLQ0        | LQEEGWLEGELNGR                                                       | 0.874680361        | 2              | 2.338794  |
| Q9JLQ0        | SNLEVEIAK                                                            | 0.646385144        | 1              | 1.90647   |
| <b>Q9JLR1</b> | <b>S61A2 Protein transport protein Sec61 subunit alpha isoform 2</b> | <b>1.075667117</b> | <b>0.15898</b> | <b>3</b>  |
| Q9JLR1        | GTLMELGISPIVTSGLIMQLLAGAK                                            | 0.884567445        |                |           |
| Q9JLR1        | IIEVGDTPK                                                            | 0.843077062        | 2              | 2.440527  |
| Q9JLR1        | TWIEVSGSSAK                                                          | 1.284387433        | 2              | 2.667454  |
| <b>Q9JLTO</b> | <b>MYH10 Myosin_10</b>                                               | <b>0.975672814</b> | <b>0.476</b>   | <b>2</b>  |
| Q9JLTO        | AGVLAHLEER                                                           | 1.085525679        | 2              | 3.572839  |
| Q9JLTO        | KFDQLLAEKGISAR                                                       | 0.685637913        | 2              | 2.409313  |
| <b>Q9JLZ1</b> | <b>GLRX3 Glutaredoxin_3</b>                                          | <b>0.795640529</b> | <b>0.63471</b> | <b>2</b>  |
| Q9JLZ1        | ELEASEELDTICPK                                                       | 0.789903211        | 2              | 3.107807  |
| Q9JLZ1        | LEAEAVPEVSEK                                                         | 0.828915239        | 2              | 2.494289  |
| <b>Q9JLZ3</b> | <b>AUHM Methylglutaconyl_CoA hydratase_mitochondrial</b>             | <b>0.812440312</b> | <b>1.7E-06</b> | <b>4</b>  |
| Q9JLZ3        | AVGLISHVLEQNQEGDAAYR                                                 | 0.752446364        | 2              | 5.713046  |
| Q9JLZ3        | AVGLISHVLEQNQEGDAAYRK                                                | 0.735081155        | 3              | 4.365326  |
| Q9JLZ3        | GIVVLGINR                                                            | 0.757439107        | 2              | 2.852493  |
| Q9JLZ3        | SEVPGIFCAGADLK                                                       | 0.873262758        | 2              | 2.937486  |
| <b>Q9JM53</b> | <b>AIFM1 Apoptosis_inducing factor 1_mitochondrial</b>               | <b>0.856835651</b> | <b>9.6E-13</b> | <b>15</b> |
| Q9JM53        | AIASAAEGGSVPPIR                                                      | 0.967410956        | 2              | 3.161554  |
| Q9JM53        | CLIATGGTPR                                                           | 0.7555654          | 2              | 2.583949  |
| Q9JM53        | DGEQHEDLNEVAK                                                        | 1.014658304        | 3              | 3.593656  |

|               |                                                                |                    |                |           |
|---------------|----------------------------------------------------------------|--------------------|----------------|-----------|
| Q9JM53        | ILPEYLSNWTMEK                                                  | 0.923862625        | 2              | 3.104879  |
| Q9JM53        | KSQASGIEVIQLFPEK                                               | 0.950806597        | 2              | 3.847722  |
| Q9JM53        | KVETDHIVTAVGLEPNVELAK                                          | 0.880053046        | 2              | 6.305777  |
| Q9JM53        | LNDGSQITFEK                                                    | 0.801749868        | 2              | 3.346531  |
| Q9JM53        | SITVIGGGFLGSELACALGR                                           | 0.712232413        | 2              | 3.335269  |
| Q9JM53        | SQASGIEVIQLFPEK                                                | 0.855039678        | 2              | 4.461123  |
| Q9JM53        | TGGLEIDSDFGGFR                                                 | 0.885693426        | 2              | 4.566465  |
| Q9JM53        | VETDHIVTAVGLEPNVELAK                                           | 0.774542517        | 2              | 5.21568   |
| Q9JM53        | VLIVSEDPPELYMRPPLSK                                            | 0.867744935        | 3              | 3.741368  |
| Q9JM53        | VMPNAIVQSVGVSGGK                                               | 0.748850803        | 2              | 4.041173  |
| Q9JM53        | VMPNAIVQSVGVSGGK+Oxidation(1)                                  | 0.972648254        |                |           |
| Q9JM53        | VNAELQAR                                                       | 0.817533378        | 2              | 2.486544  |
| <b>Q9JMA1</b> | <b>UBP14 Ubiquitin carboxyl terminal hydrolase 14</b>          | <b>0.745274407</b> | <b>0.81218</b> | <b>2</b>  |
| Q9JMA1        | CTESEEVEVTK                                                    | 0.942687755        | 2              | 3.621925  |
| Q9JMA1        | EKESVNAKVLK                                                    | 0.513926848        | 2              | 2.315269  |
| <b>Q9JMD3</b> | <b>PCTL PCTL_like protein</b>                                  | <b>0.943380804</b> | <b>0.9584</b>  | <b>6</b>  |
| Q9JMD3        | AVSIQTGYLIQSTGPK                                               | 0.914326106        | 2              | 4.894949  |
| Q9JMD3        | ESVQVPDDQDFR                                                   | 1.554292876        | 2              | 2.362798  |
| Q9JMD3        | MECCDVPAETLYDVLHDIEYR                                          | 1.12285185         | 3              | 4.597589  |
| Q9JMD3        | MECCDVPAETLYDVLHDIEYR+Oxidation(0)                             | 1.205135106        |                |           |
| Q9JMD3        | SCVITYLAQVDPK                                                  | 1.870395156        | 2              | 3.148957  |
| Q9JMD3        | WDSNVITFDIAR                                                   | 1.012132578        | 2              | 4.318172  |
| <b>Q9QVC8</b> | <b>FKBP4 Peptidyl prolyl cis trans isomerase FKBP4</b>         | <b>1.026733566</b> | <b>0.60045</b> | <b>5</b>  |
| Q9QVC8        | GEPNNVAGNQAQVK                                                 | 1.030321807        | 2              | 4.135672  |
| Q9QVC8        | TEVAAGDHPTDAEMK                                                | 0.794629564        | 2              | 2.958541  |
| Q9QVC8        | TQLAVCQQR                                                      | 0.896891741        | 2              | 2.493568  |
| Q9QVC8        | VAENGAQSAPLPLEGVDISPK                                          | 0.941344255        | 2              | 4.122159  |
| Q9QVC8        | VGEVCHITCKPEYAYGSAGSPPK                                        | 0.732938601        | 3              | 5.068828  |
| <b>Q9QWN8</b> | <b>SPTN2 Spectrin beta chain brain 2</b>                       | <b>0.901972037</b> | <b>0.9874</b>  | <b>2</b>  |
| Q9QWN8        | ALAQEDQSAGEVER                                                 | 0.919099659        | 2              | 3.926124  |
| Q9QWN8        | VGELTQEANALAAGHPAQAPAINTR                                      | 0.892648889        | 3              | 4.347451  |
| <b>Q9QX74</b> | <b>SHAN2 SH3 and multiple ankyrin repeat domains protein 2</b> | <b>0.493813002</b> | <b>0.08001</b> | <b>2</b>  |
| Q9QX74        | KNMLINIVDTAQQK+Oxidation(2)                                    | 1.177606474        |                |           |
| Q9QX74        | SSPASPENYVHPLTGR                                               | 0.49983655         | 2              | 2.590291  |
| <b>Q9QX79</b> | <b>FETUB Fetuin_B</b>                                          | <b>1.019934408</b> | <b>0.98259</b> | <b>2</b>  |
| Q9QX79        | GSIQHLPEQEEPESDKGK                                             | 1.04742256         | 3              | 3.667366  |
| Q9QX79        | NTAPTSSSITAPR                                                  | 1.016731926        | 2              | 3.599302  |
| <b>Q9QXG4</b> | <b>ACSA Acetyl coenzyme A synthetase cytoplasmic</b>           | <b>0.961490164</b> | <b>0.62675</b> | <b>3</b>  |
| Q9QXG4        | AELGMNDSPSQSPPVK                                               | 0.8053517          | 2              | 3.721881  |
| Q9QXG4        | GATTNICYNVLDLDR                                                | 2.189143599        | 2              | 2.567111  |
| Q9QXG4        | IGPIATPDYIQNAPGLPK                                             | 1.028143828        | 2              | 3.047927  |
| <b>Q9QXH4</b> | <b>ITAX Integrin alpha_X</b>                                   | <b>0.801771784</b> | <b>0.48261</b> | <b>2</b>  |
| Q9QXH4        | GGSQMTFLVTFDVSPK+Oxidation(4)                                  | 0.952206901        |                |           |
| Q9QXH4        | MLDFVKAVMSQLQRPSTR                                             | 0.772099106        | 2              | 2.396969  |
| <b>Q9QXK3</b> | <b>COPG2 Coatomer subunit gamma_2</b>                          | <b>1.031195224</b> | <b>1</b>       | <b>2</b>  |
| Q9QXK3        | SIATLAITLLK                                                    | 0.971532872        | 2              | 3.450824  |
| Q9QXK3        | SSEPVLTEAETEFVFR                                               | 1.050291772        | 2              | 3.633356  |
| <b>Q9QXQ0</b> | <b>ACTN4 Alpha actinin_4</b>                                   | <b>0.967552373</b> | <b>0.83078</b> | <b>27</b> |
| Q9QXQ0        | ACLISLGYDVENDR                                                 | 1.05909548         | 2              | 4.069881  |
| Q9QXQ0        | AGTQIENIDEDFR                                                  | 1.159328535        | 2              | 3.54526   |
| Q9QXQ0        | AGTQIENIDEDFRDGLK                                              | 1.076967461        | 2              | 4.207278  |
| Q9QXQ0        | ASFNFHFKDHGGALGPEEFK                                           | 1.273470007        | 3              | 3.547238  |
| Q9QXQ0        | ASIHEAWTDGK                                                    | 1.117031029        | 1              | 2.291869  |
| Q9QXQ0        | DDPVTNLNNAFEVAEK                                               | 0.859582502        | 2              | 3.080803  |
| Q9QXQ0        | ETTDTDADQVIASFK                                                | 0.897095122        | 2              | 4.461416  |

|               |                                                                   |                    |                |           |
|---------------|-------------------------------------------------------------------|--------------------|----------------|-----------|
| Q9QXQ0        | GISQEQMQEFR                                                       | 1.151623776        | 2              | 3.158813  |
| Q9QXQ0        | HRDYETATLSDIK                                                     | 1.244168917        | 2              | 3.519663  |
| Q9QXQ0        | HRPELIEYDK                                                        | 1.012774957        | 3              | 4.139844  |
| Q9QXQ0        | HTNYTMEHLR                                                        | 1.787058401        | 3              | 3.40227   |
| Q9QXQ0        | HTNYTMEHLR+Oxidation(5)                                           | 1.460473261        |                |           |
| Q9QXQ0        | ICDQWDNLGSLTHSR                                                   | 0.978729741        | 2              | 4.374999  |
| Q9QXQ0        | KDDPVTNLNNAFEVAEK                                                 | 0.931275727        | 2              | 4.513169  |
| Q9QXQ0        | LSGSNPYTSVTPQIINSK                                                | 1.436198717        | 2              | 4.867167  |
| Q9QXQ0        | LVSIGAEIIVDGNK                                                    | 1.074628312        | 2              | 3.236647  |
| Q9QXQ0        | MAPYQGPDAAPGALDYK                                                 | 0.904440091        | 2              | 4.62986   |
| Q9QXQ0        | MAPYQGPDAAPGALDYK+Oxidation(0)                                    | 1.180575247        |                |           |
| Q9QXQ0        | MLDAEDIVNTARPDEK                                                  | 0.84113588         | 2              | 3.708212  |
| Q9QXQ0        | QFASQANMVGPIWQTK                                                  | 0.932481276        | 2              | 3.828565  |
| Q9QXQ0        | QLETIDQLHLEYAK                                                    | 0.877890838        | 2              | 2.964627  |
| Q9QXQ0        | RDHALLEEQSK                                                       | 1.078652596        | 3              | 3.952373  |
| Q9QXQ0        | SIVDYKPNLDLLEQQHQLIQEALIFDNK                                      | 1.064395123        | 3              | 5.32006   |
| Q9QXQ0        | TINEVENQILTR                                                      | 1.145429868        | 2              | 3.677704  |
| Q9QXQ0        | VEQIAAIAQELNELDYDSDHNVNTR                                         | 1.426798737        | 3              | 5.398366  |
| Q9QXQ0        | VGWEQLLTTIAR                                                      | 0.884936434        | 2              | 4.047909  |
| Q9QXQ0        | VLAVNQENEHLMEDYER                                                 | 1.253481011        | 2              | 5.049682  |
| <b>Q9QXT0</b> | <b>CNPY2 Protein canopy homolog 2</b>                             | <b>0.911221875</b> | <b>0.86966</b> | <b>5</b>  |
| Q9QXT0        | ALVDELEWEIAR                                                      | 0.757822002        | 2              | 3.554797  |
| Q9QXT0        | IDSISGTLK                                                         | 0.815858736        | 2              | 2.319111  |
| Q9QXT0        | INPDGSQSVVEVPYAR                                                  | 0.928217788        | 2              | 4.00082   |
| Q9QXT0        | RTDLCDHALHR                                                       | 1.047618797        | 3              | 3.429007  |
| Q9QXT0        | TDLCDHALHR                                                        | 1.001616612        | 2              | 2.862922  |
| <b>Q9QXX4</b> | <b>CMC2 Calcium_binding mitochondrial carrier protein Aralar2</b> | <b>0.891258113</b> | <b>1.9E-12</b> | <b>16</b> |
| Q9QXX4        | ASFANEDGQVSPGSLLAGAIAAGMPAASLVTPADVIK                             | 1.038862689        | 3              | 4.904266  |
| Q9QXX4        | ASGDAARPFLLQLAESAYR                                               | 1.261197586        | 2              | 3.558573  |
| Q9QXX4        | DGSVPLLAEIFAGGCAGGSQVIFTNPLEIVK                                   | 1.061957122        |                |           |
| Q9QXX4        | DVEVTKEEFALAAQK                                                   | 0.845551829        | 2              | 4.388765  |
| Q9QXX4        | FGLGSIAGAVGATAVYPIDLK                                             | 0.628167472        | 2              | 5.580944  |
| Q9QXX4        | GLLPQLLGVAPK                                                      | 0.844496027        | 2              | 2.995626  |
| Q9QXX4        | IAPLEEGMLPFNLAEAR                                                 | 1.289067457        | 2              | 5.060184  |
| Q9QXX4        | ITLPAPNPDHVGQYK                                                   | 0.933234031        | 2              | 2.346985  |
| Q9QXX4        | KDVEVTKEEFALAAQK                                                  | 0.839513114        | 2              | 4.777228  |
| Q9QXX4        | LQVAGEITGPR                                                       | 0.851913223        | 2              | 3.503073  |
| Q9QXX4        | LTVNDFVR                                                          | 0.635323503        | 2              | 2.434569  |
| Q9QXX4        | NGEFFMSPHDFVTR                                                    | 0.905991417        | 2              | 3.661848  |
| Q9QXX4        | SSPQFGVTLTYELLQR                                                  | 1.394076681        | 2              | 3.966285  |
| Q9QXX4        | STGSFVGELMYK                                                      | 0.711304165        | 2              | 2.463364  |
| Q9QXX4        | TVELLSGVVDQTK                                                     | 0.987443756        | 2              | 4.298398  |
| Q9QXX4        | YLNIFGESQPNPK                                                     | 0.867955679        | 2              | 4.405842  |
| <b>Q9QYU2</b> | <b>EFTS Elongation factor Ts_mitochondrial</b>                    | <b>0.906591852</b> | <b>0.99914</b> | <b>2</b>  |
| Q9QYU2        | ALETGGDLK                                                         | 0.870520598        | 2              | 2.420243  |
| Q9QYU2        | YGALVICQTPEQITNLEEVR                                              | 0.964121517        | 2              | 4.676792  |
| <b>Q9QYU4</b> | <b>CRYM Thiomorpholine_carboxylate dehydrogenase</b>              | <b>0.773799635</b> | <b>0.01037</b> | <b>4</b>  |
| Q9QYU4        | GFLGVMPAYSAAEDALTTK                                               | 0.896195548        | 2              | 3.723191  |
| Q9QYU4        | RAPAFLSADEVQDHLR                                                  | 0.671044098        | 3              | 4.63598   |
| Q9QYU4        | SLGMAVEDLVAAK                                                     | 0.773693747        | 2              | 3.143306  |
| Q9QYU4        | SSLLIPPLEAALANFSK                                                 | 0.463764482        | 2              | 3.088178  |
| <b>Q9QZ76</b> | <b>MYG Myoglobin</b>                                              | <b>1.284375691</b> | <b>0.9922</b>  | <b>5</b>  |
| Q9QZ76        | GQHAAEIQLAQSHATK                                                  | 0.956845712        | 2              | 4.88546   |
| Q9QZ76        | HGCTVLTALGTILK                                                    | 0.714996631        | 2              | 3.535485  |
| Q9QZ76        | KGQHAAEIQLAQSHATK                                                 | 0.865890836        | 3              | 5.712786  |

|               |                                                                         |                    |                |          |
|---------------|-------------------------------------------------------------------------|--------------------|----------------|----------|
| Q9QZ76        | VEGDLAGHGQEVLSLFLK                                                      | 1.189692112        | 3              | 4.915684 |
| Q9QZ76        | YSGDFGADAQGAMSK                                                         | 0.817328899        | 2              | 4.750554 |
| <b>Q9QZA2</b> | <b>PDC6I Programmed cell death 6_interacting protein</b>                | <b>0.97889249</b>  | <b>0.99914</b> | <b>9</b> |
| Q9QZA2        | ATLVKPTPVNVPISQK                                                        | 0.942322111        | 2              | 3.703234 |
| Q9QZA2        | DTIALLCCKPEPELNAAIPSANPAK                                               | 1.031286467        | 2              | 3.538852 |
| Q9QZA2        | FYNELTEILVR                                                             | 0.828706247        | 2              | 2.943046 |
| Q9QZA2        | LLDEEEATDNDLR                                                           | 1.137935434        | 2              | 3.466552 |
| Q9QZA2        | MVPVSVQQSLAVFSQR                                                        | 1.088974446        | 2              | 2.676082 |
| Q9QZA2        | NIQVSHQEFK                                                              | 1.219462302        | 2              | 3.357834 |
| Q9QZA2        | NLATAYDNFVELVANLK                                                       | 1.105346258        | 3              | 4.168279 |
| Q9QZA2        | STAVVEQGGIQTVDQLIK                                                      | 0.969405949        | 2              | 4.235548 |
| Q9QZA2        | YYDQICSIEPK                                                             | 0.980590583        | 2              | 2.345001 |
| <b>Q9QZD8</b> | <b>DIC Mitochondrial dicarboxylate carrier</b>                          | <b>0.790015573</b> | <b>0.10149</b> | <b>5</b> |
| Q9QZD8        | GALVTVGQLSCYDQAK                                                        | 0.913587764        | 2              | 4.869442 |
| Q9QZD8        | NYSHALDGLYR                                                             | 1.034293191        | 2              | 2.907637 |
| Q9QZD8        | VHLQTQQEVK                                                              | 0.768369953        | 1              | 3.011795 |
| Q9QZD8        | VLLGGISGLTGGFVGTADLVNVR                                                 | 0.808866249        | 2              | 5.651291 |
| Q9QZD8        | WYFGGLASCGAACCTHPLDLLK                                                  | 0.81255231         | 3              | 3.399382 |
| <b>Q9QZH8</b> | <b>AAAD Arylacetamide deacetylase</b>                                   | <b>0.907051615</b> | <b>0.99678</b> | <b>2</b> |
| Q9QZH8        | LDVVVSTDYGLAPK                                                          | 1.004647996        | 2              | 4.119337 |
| Q9QZH8        | WFLQEDILEK                                                              | 0.906218769        | 2              | 3.349015 |
| <b>Q9QZK2</b> | <b>BCAR3 Breast cancer anti_estrogen resistance protein 3</b>           | <b>0.974575059</b> | <b>0.66277</b> | <b>2</b> |
| Q9QZK2        | EGSLAEGRPDVVKR                                                          | 0.929703827        | 2              | 2.649199 |
| Q9QZK2        | FSSDARTGEALR                                                            | 1.307904077        | 2              | 2.317252 |
| <b>Q9QZU7</b> | <b>BODG Gamma_butyrobetaine dioxygenase</b>                             | <b>1.849522307</b> | <b>2.7E-08</b> | <b>6</b> |
| Q9QZU7        | IDANNVAYTTGK                                                            | 1.606979586        | 2              | 3.338987 |
| Q9QZU7        | IIELDKQGVVR                                                             | 1.574688069        | 2              | 2.543926 |
| Q9QZU7        | LLLEALDVNIR                                                             | 1.356838891        | 2              | 2.857077 |
| Q9QZU7        | MNPGDVITFDNWR                                                           | 1.334231764        | 2              | 3.172843 |
| Q9QZU7        | QTVTGGDSEIVDGFNVQCQK                                                    | 1.123651095        | 2              | 4.499276 |
| Q9QZU7        | SYEAGTEISR                                                              | 1.749322135        | 2              | 2.836032 |
| <b>Q9QZX8</b> | <b>SO1B2 Solute carrier organic anion transporter family member 1B2</b> | <b>0.823936325</b> | <b>0.83786</b> | <b>3</b> |
| Q9QZX8        | GIGETPIVPLGISYLDDFAK                                                    | 1.044967475        | 2              | 3.048605 |
| Q9QZX8        | QEEQDPSNMTGFRL                                                          | 1.236627954        | 2              | 2.354832 |
| Q9QZX8        | QFTDEGNPDSVNK                                                           | 0.840555308        | 2              | 3.422201 |
| <b>Q9R063</b> | <b>PRDX5 Peroxiredoxin_5_mitochondrial</b>                              | <b>0.983222119</b> | <b>2.3E-14</b> | <b>8</b> |
| Q9R063        | ALNVEPDGTGLTCSLAPNILSQL                                                 | 1.611822253        | 2              | 4.088025 |
| Q9R063        | ETDLLLDDSLVSLFGNR                                                       | 0.961131474        | 2              | 4.151052 |
| Q9R063        | GVLFGVPGAFTPGCSK                                                        | 0.816581957        | 2              | 4.193405 |
| Q9R063        | THLPGFVEQAGALK                                                          | 0.734012071        | 3              | 4.748904 |
| Q9R063        | VGDTIPSVEVFEGEPGK                                                       | 0.939617181        | 2              | 3.758513 |
| Q9R063        | VGDTIPSVEVFEGEPGKK                                                      | 0.802167151        | 2              | 3.754559 |
| Q9R063        | VNLAELEFK                                                               | 0.846104707        | 2              | 2.852062 |
| Q9R063        | VQLLADPTGAFGK                                                           | 0.768971423        | 2              | 3.996456 |
| <b>Q9R0N0</b> | <b>GALK1 Galactokinase</b>                                              | <b>0.929066989</b> | <b>0.99949</b> | <b>6</b> |
| Q9R0N0        | AEHSFAGVPCGIMDQIALLGQK                                                  | 0.941448099        | 3              | 4.378198 |
| Q9R0N0        | QCEEVAQALGK                                                             | 0.934777579        | 2              | 2.463462 |
| Q9R0N0        | RQCEEVAQALGK                                                            | 0.853542665        | 2              | 3.03592  |
| Q9R0N0        | SLETSLVPLSPDK                                                           | 0.900282894        | 2              | 3.204306 |
| Q9R0N0        | TDGLVSLTTSK                                                             | 1.01000175         | 2              | 3.433484 |
| Q9R0N0        | VEELLAEAR                                                               | 0.932038921        | 2              | 3.157166 |
| <b>Q9ROT3</b> | <b>DNJC3 Dnaj homolog subfamily C member 3</b>                          | <b>0.871560067</b> | <b>0.97149</b> | <b>6</b> |
| Q9ROT3        | AEPSVAEYTVR                                                             | 0.90512395         | 2              | 2.743583 |
| Q9ROT3        | FDDGEDPLDAETQQGGGNSPFHR                                                 | 0.864823357        | 3              | 3.659253 |

|               |                                                                  |                    |                |           |
|---------------|------------------------------------------------------------------|--------------------|----------------|-----------|
| Q9R0T3        | ICSEVLQLEPDNVNALK                                                | 1.063064301        | 2              | 5.405903  |
| Q9R0T3        | KFDDGEDPLDAETQQGGGSPNFHR                                         | 0.880551765        | 3              | 5.490442  |
| Q9R0T3        | LIGSAEELIR                                                       | 0.830490656        | 2              | 2.378122  |
| Q9R0T3        | SNPSENEEKEAQSQVLK                                                | 0.848641512        | 2              | 5.015873  |
| <b>Q9R112</b> | <b>SQRD Sulfide:quinone oxidoreductase_mitochondrial</b>         | <b>1.066048765</b> | <b>0.83328</b> | <b>4</b>  |
| Q9R112        | EGNALFTFPNTPVK                                                   | 1.25894843         | 2              | 2.707342  |
| Q9R112        | STLSVIPSGVQWIQDR                                                 | 0.940293859        | 2              | 2.549031  |
| Q9R112        | TAAAVAAQSGILDR                                                   | 1.118014319        | 2              | 2.791556  |
| Q9R112        | VGAENVAIVEPSE                                                    | 0.995485889        | 2              | 2.867388  |
| <b>Q9R1T3</b> | <b>CATZ Cathepsin Z</b>                                          | <b>1.006079623</b> | <b>1</b>       | <b>2</b>  |
| Q9R1T3        | HGIPDETCNNYQAK                                                   | 0.997336596        | 2              | 3.794746  |
| Q9R1T3        | VGDYGSLSGR                                                       | 0.992672824        | 2              | 2.64976   |
| <b>Q9R1Z0</b> | <b>VDAC3 Voltage_dependent anion_selective channel protein 3</b> | <b>1.26685736</b>  | <b>0.18338</b> | <b>5</b>  |
| Q9R1Z0        | LCQNNFALGYK                                                      | 1.47232967         | 2              | 2.526619  |
| Q9R1Z0        | LTLSALVDGK                                                       | 1.602905243        | 2              | 2.720363  |
| Q9R1Z0        | LTVDTIFVPNTGK                                                    | 1.034807327        | 2              | 3.499559  |
| Q9R1Z0        | VNNASLIGLGYTQSLRPGVK                                             | 0.957010844        | 2              | 4.110036  |
| Q9R1Z0        | WNTDNTLGTEISWENK                                                 | 1.059934946        | 2              | 2.896702  |
| <b>Q9R1Z8</b> | <b>VINEX Vinexin</b>                                             | <b>0.936306903</b> | <b>0.78104</b> | <b>2</b>  |
| Q9R1Z8        | LSAELDKDLR                                                       | 0.897036383        | 3              | 3.522681  |
| Q9R1Z8        | MPDLQLDWTLEDPPK+Oxidation(0)                                     | 1.10726101         |                |           |
| <b>Q9R257</b> | <b>HEBP1 Heme_binding protein 1</b>                              | <b>1.10416094</b>  | <b>0.08701</b> | <b>2</b>  |
| Q9R257        | FATVEVTDKPVDEALR                                                 | 1.106845527        | 2              | 3.528544  |
| Q9R257        | NSLFGSVETWPWQVLSTGGK                                             | 1.256481746        | 2              | 3.863076  |
| <b>Q9WTT6</b> | <b>GUAD Guanine deaminase</b>                                    | <b>1.010840632</b> | <b>0.01229</b> | <b>10</b> |
| Q9WTT6        | EIGNFEVKGKDFDALLINPR                                             | 0.971919395        | 2              | 3.565097  |
| Q9WTT6        | ETTEESVKETER                                                     | 1.529067252        | 2              | 3.253301  |
| Q9WTT6        | FQSTDVAEEVYTR                                                    | 1.06057556         | 2              | 4.313101  |
| Q9WTT6        | FSLSCTETLMSELGNIK                                                | 1.035933783        | 2              | 4.127766  |
| Q9WTT6        | GTFVHSTWTCMEVLR                                                  | 0.669048623        | 2              | 3.132769  |
| Q9WTT6        | IVFLEESSQKEK                                                     | 1.47647953         | 2              | 3.919569  |
| Q9WTT6        | NIEEVYVGGK                                                       | 1.131269062        | 1              | 2.790273  |
| Q9WTT6        | NYTDVYDKNNLLTNK                                                  | 0.649395433        | 2              | 4.412564  |
| Q9WTT6        | THDLYIQSHISENREEIAVK                                             | 1.315292446        | 3              | 3.755657  |
| Q9WTT6        | VCMDLNNTVPEYK                                                    | 0.728526961        | 2              | 3.978439  |
| <b>Q9WTV5</b> | <b>PSMD9 26S proteasome non_ATPase regulatory subunit 9</b>      | <b>0.923169081</b> | <b>0.90665</b> | <b>2</b>  |
| Q9WTV5        | ADVDLYQVR                                                        | 1.170665873        | 2              | 2.705196  |
| Q9WTV5        | RKEEIEAQIK                                                       | 1.045874995        | 3              | 3.916663  |
| <b>Q9WU19</b> | <b>HAOX1 Hydroxyacid oxidase 1</b>                               | <b>0.879652977</b> | <b>3.9E-05</b> | <b>9</b>  |
| Q9WU19        | AIFVTVDTPYLGNR                                                   | 1.060741635        | 2              | 4.592975  |
| Q9WU19        | AVFVGRPIIWGLAFQGEK                                               | 0.897824869        | 3              | 4.129823  |
| Q9WU19        | GVQDVLEILK                                                       | 0.79386573         | 2              | 2.912539  |
| Q9WU19        | GVQDVLEILKEEFR                                                   | 0.676840053        | 2              | 3.956644  |
| Q9WU19        | HGVDGILVSNHGAR                                                   | 0.814597085        | 3              | 5.21556   |
| Q9WU19        | MKNFETNDLAFSPK+Oxidation(0)                                      | 0.839095236        |                |           |
| Q9WU19        | NFETNDLAFSPK                                                     | 0.825923046        | 2              | 3.410523  |
| Q9WU19        | NVADIDLSTSVLQQR                                                  | 0.862704452        | 2              | 4.907847  |
| Q9WU19        | VEVFLDGGVR                                                       | 0.963304157        | 2              | 2.95267   |
| <b>Q9WU49</b> | <b>CHSP1 Calcium_regulated heat stable protein 1</b>             | <b>0.884865644</b> | <b>0.32393</b> | <b>2</b>  |
| Q9WU49        | GNVVPSPPTR                                                       | 0.651465038        | 2              | 2.462003  |
| Q9WU49        | LQAVEVVITHLAPGTK                                                 | 0.91182722         | 2              | 3.991714  |
| <b>Q9WU65</b> | <b>GLPK2 Glycerol kinase 2</b>                                   | <b>1.033374584</b> | <b>0.66113</b> | <b>2</b>  |
| Q9WU65        | GIICGLTQFTNK                                                     | 1.031437016        | 2              | 3.463225  |
| Q9WU65        | TGLPLSTYFSAVK                                                    | 4.643059594        | 2              | 2.617165  |

|               |                                                                          |                    |                |           |
|---------------|--------------------------------------------------------------------------|--------------------|----------------|-----------|
| <b>Q9WU82</b> | <b>CTNB1 Catenin beta_1</b>                                              | <b>0.893520144</b> | <b>0.04137</b> | <b>3</b>  |
| Q9WU82        | HQEEMAQNAVR                                                              | 0.764847311        | 2              | 3.357732  |
| Q9WU82        | LLNDEDQVVVVK                                                             | 1.029799458        | 2              | 3.253192  |
| Q9WU82        | TMQNTNDVETAR                                                             | 0.880851284        | 2              | 3.417847  |
| <b>Q9WUC4</b> | <b>ATOX1 Copper transport protein ATOX1</b>                              | <b>0.978754802</b> | <b>4.1E-05</b> | <b>3</b>  |
| Q9WUC4        | LGGVEFNIDLPNK                                                            | 0.796938739        | 2              | 2.852182  |
| Q9WUC4        | LGGVEFNIDLPNKK                                                           | 1.102190474        | 2              | 3.457079  |
| Q9WUC4        | VCIESEHSSDILLATLNK                                                       | 1.134800644        | 2              | 5.705632  |
| <b>Q9WUH4</b> | <b>FHL1 Four and a half LIM domains protein 1</b>                        | <b>1.077215675</b> | <b>0.89375</b> | <b>2</b>  |
| Q9WUH4        | FCANTCVECR                                                               | 1.071749173        | 2              | 2.999619  |
| Q9WUH4        | FVFHNEQVYCPDCAK                                                          | 1.197688796        | 2              | 4.135421  |
| <b>Q9WUI1</b> | <b>MK11 Mitogen_activated protein kinase 11</b>                          | <b>1.295081723</b> | <b>0.51283</b> | <b>2</b>  |
| Q9WUI1        | ILDFGLAR                                                                 | 1.296755375        | 2              | 2.373367  |
| Q9WUI1        | QELNKTVWEVPQR                                                            | 0.587431941        | 2              | 2.345996  |
| <b>Q9WUS0</b> | <b>KAD4 Adenylate kinase isoenzyme 4_ mitochondrial</b>                  | <b>0.916937985</b> | <b>0.06026</b> | <b>6</b>  |
| Q9WUS0        | AVILGPPGSGK                                                              | 0.788970081        | 2              | 2.520515  |
| Q9WUS0        | GLLVDPDHVITR                                                             | 0.778334742        | 2              | 2.498282  |
| Q9WUS0        | GVLHQFSGTETNR                                                            | 0.921940764        | 2              | 3.619946  |
| Q9WUS0        | TLVQAEALDR                                                               | 0.812862902        | 2              | 2.901691  |
| Q9WUS0        | VYNLDFNPPQVLGVDDITGEPLVQEQEDDKPEALAAAR                                   | 1.150142543        | 3              | 5.072241  |
| Q9WUS0        | YKDAAKPVIELYK                                                            | 0.594836477        | 2              | 2.536824  |
| <b>Q9WV97</b> | <b>TIM9 Mitochondrial import inner membrane translocase subunit Tim9</b> | <b>0.8835623</b>   | <b>0.06782</b> | <b>2</b>  |
| Q9WV97        | FQEYHIQQNEALAAK                                                          | 0.859949991        | 2              | 4.868166  |
| Q9WV97        | LTETCFLDCVK                                                              | 1.007291832        | 2              | 2.385885  |
| <b>Q9WVC0</b> | <b>SEPT7 Septin_7</b>                                                    | <b>0.945508552</b> | <b>0.71634</b> | <b>2</b>  |
| Q9WVC0        | ADTLTPEECQFK                                                             | 0.991064805        | 2              | 3.356287  |
| Q9WVC0        | NLEGVYGFANLPNQVYR                                                        | 0.759061498        | 2              | 2.30755   |
| <b>Q9WVD5</b> | <b>ORNT1 Mitochondrial ornithine transporter 1</b>                       | <b>1.310557753</b> | <b>4.8E-06</b> | <b>4</b>  |
| Q9WVD5        | DGPLGFYHGLSSTLLR                                                         | 1.393703505        | 2              | 3.076921  |
| Q9WVD5        | LQTMYEMETSGK                                                             | 1.687590234        | 2              | 2.377356  |
| Q9WVD5        | NEGITALYSLKPTMIR                                                         | 0.826205695        | 2              | 3.577058  |
| Q9WVD5        | SNPAIQAAIDLTAGAAGGTACVLTGQPFDTMK                                         | 1.697329992        | 3              | 4.556772  |
| <b>Q9WVK3</b> | <b>PECR Peroxisomal trans_2_ enoyl_ CoA reductase</b>                    | <b>0.961202816</b> | <b>9.2E-12</b> | <b>13</b> |
| Q9WVK3        | AGVYNLTK                                                                 | 0.989728856        | 2              | 2.411403  |
| Q9WVK3        | ASQPPSSSTQVTAIQCNIR                                                      | 0.862686707        | 2              | 5.47989   |
| Q9WVK3        | DHGGSIVNIIVLLNNGFPPTAAHSGAAR                                             | 0.834249212        | 3              | 6.884837  |
| Q9WVK3        | ELLHLGCNVVIASR                                                           | 1.037385842        | 2              | 3.852978  |
| Q9WVK3        | INFLVNNAGGQFMAPAEDITAK                                                   | 1.03957261         | 2              | 5.240016  |
| Q9WVK3        | INFLVNNAGGQFMAPAEDITAK+Oxidation(12)                                     | 1.241411329        |                |           |
| Q9WVK3        | KEEEVNNLVK                                                               | 0.864487826        | 3              | 4.183327  |
| Q9WVK3        | LTAAVDELK                                                                | 1.170917601        | 2              | 3.131771  |
| Q9WVK3        | NFTIPDHDNWPVGAGDSSFIK                                                    | 0.754637983        | 2              | 5.012838  |
| Q9WVK3        | NFTIPDHDNWPVGAGDSSFIKK                                                   | 0.749817916        | 3              | 3.334849  |
| Q9WVK3        | SGQSYLAAGLLQNQVAVVTGGATGIGK                                              | 0.850952412        | 2              | 6.327176  |
| Q9WVK3        | TMALTWASSGVR                                                             | 0.694435728        | 2              | 3.897732  |
| Q9WVK3        | TMALTWASSGVR+Oxidation(1)                                                | 0.961815913        |                |           |
| <b>Q9WVK7</b> | <b>HCDH Hydroxyacyl_coenzyme A dehydrogenase_ mitochondrial</b>          | <b>0.806786327</b> | <b>0.00273</b> | <b>14</b> |
| Q9WVK7        | AADEFVEK                                                                 | 0.936196094        | 2              | 3.132052  |
| Q9WVK7        | EDIDTAMK                                                                 | 0.939441584        | 1              | 1.983415  |
| Q9WVK7        | FAAEHTIFASNTSSLQITNIANATTR                                               | 1.218269549        | 2              | 5.541116  |
| Q9WVK7        | FILDGWHMDPENPLFQPSMNNLVAQK                                               | 0.824646161        | 3              | 5.373808  |
| Q9WVK7        | GDASKEDIDTAMK                                                            | 0.759018826        | 3              | 3.850496  |
| Q9WVK7        | GDASKEDIDTAMK+Oxidation(11)                                              | 0.863245739        |                |           |
| Q9WVK7        | HVTVIGGLMGAGIAQVAAATGHTVVLVDQTEDILAK                                     | 0.728489567        | 3              | 7.517247  |

|               |                                                                           |                    |                |           |
|---------------|---------------------------------------------------------------------------|--------------------|----------------|-----------|
| Q9WVK7        | KGIEESLK                                                                  | 0.993094323        | 1              | 2.137823  |
| Q9WVK7        | KGIEESLKR                                                                 | 0.815014115        | 2              | 2.348249  |
| Q9WVK7        | LKNELFQR                                                                  | 0.807183346        | 2              | 2.694453  |
| Q9WVK7        | LLVPYLIEAIR                                                               | 0.969650447        | 2              | 2.555841  |
| Q9WVK7        | LVEVIK                                                                    | 0.925677126        | 2              | 2.451511  |
| Q9WVK7        | TFESLVDFCK                                                                | 0.852179883        | 2              | 3.441023  |
| Q9WVK7        | TLSSLSTSTDAASVVHSTDLVVEAIVENLK                                            | 0.788560843        | 3              | 6.204538  |
| <b>Q9Z0N2</b> | <b>IF2H Eukaryotic translation initiation factor 2 subunit 3_Y_linked</b> | <b>1.254293658</b> | <b>0.22826</b> | <b>3</b>  |
| Q9Z0N2        | IVLTNPVCTEVGEK                                                            | 1.280463215        | 2              | 3.306947  |
| Q9Z0N2        | SFDVNKPGCEVDDLK                                                           | 1.154722101        | 2              | 3.454753  |
| Q9Z0N2        | VGQEIEVRPGIVSK                                                            | 1.263483957        | 2              | 3.10233   |
| <b>Q9Z0U5</b> | <b>ADO Aldehyde oxidase</b>                                               | <b>0.818416838</b> | <b>0.92352</b> | <b>17</b> |
| Q9Z0U5        | CGLSPEQVR                                                                 | 0.926591003        | 2              | 2.48427   |
| Q9Z0U5        | CTGYRPIIDACK                                                              | 0.599777435        | 2              | 2.621097  |
| Q9Z0U5        | DLEPLILTIEEAIQHK                                                          | 0.715724117        | 2              | 3.289575  |
| Q9Z0U5        | EFQPLDPTQELIFPELMR                                                        | 0.906180377        | 2              | 3.069865  |
| Q9Z0U5        | ELSILYGGVGPPTIGAK                                                         | 0.971089369        | 2              | 3.496761  |
| Q9Z0U5        | GEDMLITGGR                                                                | 1.124349625        | 2              | 2.36863   |
| Q9Z0U5        | GTSTETVPNTNASGGSVVADLNLGLAVK                                              | 0.906137143        | 2              | 4.614176  |
| Q9Z0U5        | GYESNINWEK                                                                | 0.852151637        | 2              | 2.828918  |
| Q9Z0U5        | HIQDIVAATLK                                                               | 0.8435997          | 2              | 2.447212  |
| Q9Z0U5        | HLSDLNPLLA VG NCTLNLLSK                                                   | 0.771315092        | 2              | 4.594275  |
| Q9Z0U5        | KCPDSDLKPQEVLVSVNIPCSR                                                    | 0.846966292        | 3              | 3.380001  |
| Q9Z0U5        | KLECGNVDEAFK                                                              | 0.833924593        | 2              | 3.549228  |
| Q9Z0U5        | LVLDEVTLGASAPGGK                                                          | 0.751191616        | 2              | 3.534112  |
| Q9Z0U5        | MTWISPVTLEELVEAK                                                          | 1.096416363        | 2              | 3.203017  |
| Q9Z0U5        | NHPEPSLDQLTDALGGNLCR                                                      | 0.61492849         | 2              | 3.722775  |
| Q9Z0U5        | RLEPIISK                                                                  | 0.646033416        | 2              | 2.436527  |
| Q9Z0U5        | VVENNVDPPEMMLLPYLR                                                        | 0.75246472         | 2              | 3.864388  |
| <b>Q9Z0V5</b> | <b>PRDX4 Peroxiredoxin_4</b>                                              | <b>0.999939417</b> | <b>3.4E-05</b> | <b>4</b>  |
| Q9Z0V5        | ENECHFYAGGQVYPGEVSR                                                       | 2.692280403        | 2              | 5.433118  |
| Q9Z0V5        | GLFIIDDK                                                                  | 0.968113613        | 2              | 2.978997  |
| Q9Z0V5        | QITLNDLPVGR                                                               | 0.958007309        | 2              | 3.308394  |
| Q9Z0V5        | TRENECHFYAGGQVYPGEVSR                                                     | 1.446587582        | 3              | 6.021302  |
| <b>Q9Z0V6</b> | <b>PRDX3 Thioredoxin_dependent peroxide reductase_mitochondrial</b>       | <b>0.992092634</b> | <b>0.29986</b> | <b>6</b>  |
| Q9Z0V6        | AFQFVETHGEVCPANWTPESPTIKPSPTASK                                           | 0.859298615        | 3              | 5.999172  |
| Q9Z0V6        | GLFIIDPNGVIK                                                              | 0.880874875        | 2              | 3.068291  |
| Q9Z0V6        | GTAVVNGEFK                                                                | 0.931685021        | 2              | 2.453907  |
| Q9Z0V6        | HLSVNDLPVGR                                                               | 0.763002303        | 2              | 2.87021   |
| Q9Z0V6        | NGGLGHMNITLLSDLTK                                                         | 0.979159039        | 2              | 2.817187  |
| Q9Z0V6        | SVEEPLRLVK                                                                | 1.272801244        | 2              | 2.488593  |
| <b>Q9Z142</b> | <b>TMM33 Transmembrane protein 33</b>                                     | <b>1.150214682</b> | <b>0.79389</b> | <b>2</b>  |
| Q9Z142        | ALLANALTSALR                                                              | 1.015729479        | 2              | 3.72164   |
| Q9Z142        | LSTNQQNILK                                                                | 1.250395441        | 2              | 2.468726  |
| <b>Q9Z1A6</b> | <b>VIGLN Vigilin</b>                                                      | <b>1.264180779</b> | <b>0.00985</b> | <b>22</b> |
| Q9Z1A6        | ASVITQVFHVPLEER                                                           | 1.470903062        | 2              | 2.88712   |
| Q9Z1A6        | DKFPEVIINFDPDAQK                                                          | 1.245832498        | 3              | 4.04574   |
| Q9Z1A6        | DLANIAEVEVSIPAK                                                           | 1.089396313        | 2              | 3.74732   |
| Q9Z1A6        | EALEALVPVTIEVEVPFDLHR                                                     | 1.009816374        | 3              | 3.519886  |
| Q9Z1A6        | ELQAEQEDR                                                                 | 1.487686269        | 2              | 2.50733   |
| Q9Z1A6        | GNSLQEILER                                                                | 1.018933486        | 2              | 2.524348  |
| Q9Z1A6        | HEVLLISAEQDKR                                                             | 1.634913735        | 3              | 4.274891  |
| Q9Z1A6        | IDLPAENSNSSETIVITGK                                                       | 0.944013251        | 2              | 4.628772  |
| Q9Z1A6        | IEGDPQGVQQAQK                                                             | 1.083311932        | 2              | 3.178707  |
| Q9Z1A6        | IIFPAAEDKQDLITIIGK                                                        | 1.12165584         | 2              | 3.236438  |

|               |                                                                           |                    |                |           |
|---------------|---------------------------------------------------------------------------|--------------------|----------------|-----------|
| Q9Z1A6        | ITLEGPTEDVNVAQEIQEGMVK                                                    | 0.984827716        | 2              | 4.309167  |
| Q9Z1A6        | IVGELEQMVSEDPVLDHR                                                        | 0.931936896        | 2              | 4.52848   |
| Q9Z1A6        | LGQALTEVYAK                                                               | 1.5923168          | 2              | 3.205396  |
| Q9Z1A6        | LQDLELK                                                                   | 1.074832562        | 1              | 2.320713  |
| Q9Z1A6        | LQTQASATVPIPK                                                             | 0.917458189        | 2              | 3.530967  |
| Q9Z1A6        | LVGEIMQETGTR                                                              | 0.86869399         | 2              | 3.385951  |
| Q9Z1A6        | MDYVEINIDHK                                                               | 0.982151097        | 2              | 3.225439  |
| Q9Z1A6        | MVADLVENSYSIVPIFK                                                         | 1.03019156         | 2              | 2.988643  |
| Q9Z1A6        | RCDIIVISGR                                                                | 1.122942589        | 2              | 2.776778  |
| Q9Z1A6        | TEIVFTGEKEQLAQAVAR                                                        | 1.320046659        | 2              | 4.179046  |
| Q9Z1A6        | TKDLIEQR                                                                  | 0.951633795        | 2              | 2.525235  |
| Q9Z1A6        | VKELQAEQEDR                                                               | 0.93384858         | 2              | 3.015939  |
| <b>Q9Z1J8</b> | <b>S14L3 SEC14_like protein 3</b>                                         | <b>0.902876025</b> | <b>0.92713</b> | <b>3</b>  |
| Q9Z1J8        | ENVQDVLPALPNPDDYFLLR                                                      | 0.933549555        | 3              | 3.857328  |
| Q9Z1J8        | FRENVQDVLPALPNPDDYFLLR                                                    | 0.923531095        | 3              | 3.815496  |
| Q9Z1J8        | GSSHQVEYEILFPGCVLR                                                        | 0.802865647        | 2              | 4.619497  |
| <b>Q9Z1N1</b> | <b>F16P2 Fructose_1_6_bisphosphatase isozyme 2</b>                        | <b>0.96254784</b>  | <b>0.52447</b> | <b>2</b>  |
| Q9Z1N1        | YVGSMVADVHR                                                               | 0.860295068        | 2              | 2.318095  |
| Q9Z1N1        | YVGSMVADVHR+Oxidation(4)                                                  | 0.967805033        |                |           |
| <b>Q9Z1P2</b> | <b>ACTN1 Alpha_actinin_1</b>                                              | <b>1.123966453</b> | <b>0.00836</b> | <b>3</b>  |
| Q9Z1P2        | DYETATLSEIK                                                               | 1.259150529        | 1              | 2.080388  |
| Q9Z1P2        | ICDQWDNLGALTQK                                                            | 0.636235212        | 2              | 3.898709  |
| Q9Z1P2        | KDDPLTNLNTAFDVAER                                                         | 2.038670836        | 2              | 2.663866  |
| <b>Q9Z1W6</b> | <b>LYRIC Protein LYRIC</b>                                                | <b>0.949722856</b> | <b>0.01004</b> | <b>3</b>  |
| Q9Z1W6        | SWQDELAQQAEEGSAR                                                          | 0.595632734        | 2              | 5.390511  |
| Q9Z1W6        | TELGDLGLEPK                                                               | 0.805987817        | 2              | 2.797747  |
| Q9Z1W6        | TLPPAISAEPVTLISK                                                          | 0.792688639        | 2              | 3.161659  |
| <b>Q9Z1Y3</b> | <b>CADH2 Cadherin_2</b>                                                   | <b>0.731279251</b> | <b>1.6E-06</b> | <b>2</b>  |
| Q9Z1Y3        | IDPVNGQITTIIVLDR                                                          | 0.7244733          | 2              | 3.495197  |
| Q9Z1Y3        | YSVTGPGADQPPTGIFIINPISGQLSVTKPLDR                                         | 0.888215979        | 3              | 3.387642  |
| <b>Q9Z270</b> | <b>VAPA Vesicle_associated membrane protein_associated protein A</b>      | <b>0.884957348</b> | <b>0.07522</b> | <b>3</b>  |
| Q9Z270        | FKGPFDTVVTNLK                                                             | 0.86227838         | 2              | 2.602382  |
| Q9Z270        | HEQILVLDPPSDLK                                                            | 0.897591396        | 2              | 4.187204  |
| Q9Z270        | QDGPLPKPHSVSLNDTETR                                                       | 0.823541229        | 3              | 3.351138  |
| <b>Q9Z2C8</b> | <b>YBOX2 Y_box_binding protein 2</b>                                      | <b>1.161438426</b> | <b>0.58437</b> | <b>2</b>  |
| Q9Z2C8        | NDTKEDVVFVHQTAIK                                                          | 0.844985214        | 2              | 3.421593  |
| Q9Z2C8        | SVGGETVEFDVVEGEK                                                          | 1.217605549        | 2              | 3.689335  |
| <b>Q9Z2I8</b> | <b>SUCB2 Succinyl_CoA ligase [GDP_forming] subunit beta_mitochondrial</b> | <b>0.831620412</b> | <b>9.9E-20</b> | <b>10</b> |
| Q9Z2I8        | DIFAMDDKSENEPIEENAAAR                                                     | 0.76035817         | 2              | 4.563154  |
| Q9Z2I8        | GKGVFNGLK                                                                 | 0.694537073        | 2              | 2.312438  |
| Q9Z2I8        | IDATQVEVNPFGETPEGQVVCFDAK                                                 | 1.551619126        | 3              | 4.77351   |
| Q9Z2I8        | INFDDNAEFR                                                                | 0.849761803        | 2              | 3.207994  |
| Q9Z2I8        | LEGTNVQEAQNILK                                                            | 0.875516558        | 2              | 5.226037  |
| Q9Z2I8        | SENEPIEENAAAR                                                             | 0.964383655        | 2              | 4.052405  |
| Q9Z2I8        | SHNGPVIVGSPQGGVDIEEVAASSPELIFK                                            | 0.744629682        | 2              | 5.999477  |
| Q9Z2I8        | SSGLPITSAVDLEDAAK                                                         | 0.747755903        | 2              | 4.538201  |
| Q9Z2I8        | SSGLPITSAVDLEDAAKK                                                        | 1.550919803        | 2              | 2.952747  |
| Q9Z2I8        | VMVAEALDISR                                                               | 0.831487264        | 2              | 3.318779  |
| <b>Q9Z2I9</b> | <b>SUCB1 Succinyl_CoA ligase [ADP_forming] subunit beta_mitochondrial</b> | <b>0.810600875</b> | <b>0.26386</b> | <b>8</b>  |
| Q9Z2I9        | ALIADSGLK                                                                 | 0.703841632        | 1              | 2.08293   |
| Q9Z2I9        | ICNQVLVCER                                                                | 1.028503366        | 2              | 2.861273  |
| Q9Z2I9        | ILACDDLDEAAK                                                              | 0.824365893        | 2              | 3.392226  |
| Q9Z2I9        | INFDSNSAYR                                                                | 0.789815357        | 2              | 2.837421  |
| Q9Z2I9        | LSEIVTLAK                                                                 | 0.902815956        | 2              | 2.50533   |



|               |                                                                  |                    |                |           |
|---------------|------------------------------------------------------------------|--------------------|----------------|-----------|
| Q9Z2I9        | MGFPSNIVDSAAENMIK                                                | 0.789970916        | 2              | 2.828672  |
| Q9Z2I9        | SSDEAYAIAK                                                       | 0.821616081        | 2              | 3.503048  |
| Q9Z2I9        | VQAILVNIFFGIMR                                                   | 0.582006154        | 2              | 3.837887  |
| <b>Q9Z2L0</b> | <b>VDAC1 Voltage_dependent anion_selective channel protein 1</b> | <b>0.959346307</b> | <b>0.92104</b> | <b>11</b> |
| Q9Z2L0        | KLETAVNLAWTAGNSNTR                                               | 0.874151416        | 2              | 5.814874  |
| Q9Z2L0        | LTFDSSFSPNTGK                                                    | 0.834067169        | 2              | 3.601147  |
| Q9Z2L0        | LTFDSSFSPNTGKK                                                   | 0.831200424        | 2              | 2.553809  |
| Q9Z2L0        | LTLSALLD GK                                                      | 1.450529815        | 2              | 2.493484  |
| Q9Z2L0        | SENGLEFTSSGSANTETTK                                              | 1.193977605        | 2              | 4.596782  |
| Q9Z2L0        | TDEFQLHTNVNDGTEFGGSIYQK                                          | 0.892049235        | 3              | 5.105243  |
| Q9Z2L0        | VNSSLIGLGYTQTLKPGIK                                              | 0.901433811        | 2              | 4.438754  |
| Q9Z2L0        | VTQSNFAVGYK                                                      | 1.008849493        | 2              | 3.132606  |
| Q9Z2L0        | WNTDNTLGTEITVEDQLAR                                              | 0.782332994        | 2              | 4.545949  |
| Q9Z2L0        | WTEYGLTFTEK                                                      | 1.092281117        | 2              | 2.902601  |
| Q9Z2L0        | YQVDPDACFSAK                                                     | 0.995660142        | 2              | 3.553422  |
| <b>Q9Z2M4</b> | <b>DECR2 Peroxisomal 2_4_dienoyl_CoA reductase</b>               | <b>0.672591001</b> | <b>0.82841</b> | <b>4</b>  |
| Q9Z2M4        | GQVLQLHAGAAK                                                     | 0.760251723        | 2              | 3.187414  |
| Q9Z2M4        | HLAVEWGPQNIR                                                     | 0.822093837        | 2              | 3.269214  |
| Q9Z2M4        | VNSLAPGAISGTEGLR                                                 | 0.890046616        | 2              | 3.931054  |
| Q9Z2M4        | VPPAVMAAVDQALK                                                   | 0.695030387        | 2              | 3.169947  |
| <b>Q9Z2M7</b> | <b>PMM2 Phosphomannomutase 2</b>                                 | <b>1.024652862</b> | <b>0.3691</b>  | <b>4</b>  |
| Q9Z2M7        | IGVVGGSDFEK                                                      | 1.513948877        | 2              | 2.376433  |
| Q9Z2M7        | LQEQLGNDVVEK                                                     | 1.202023245        | 2              | 3.491516  |
| Q9Z2M7        | TVGYVTAPEDTR                                                     | 1.041668408        | 2              | 2.519665  |
| Q9Z2M7        | YDYVFPENGLVAYK                                                   | 0.82021905         | 2              | 3.340096  |
| <b>Q9Z2Q1</b> | <b>SC31A Protein transport protein Sec31A</b>                    | <b>1.043228121</b> | <b>0.99806</b> | <b>14</b> |
| Q9Z2Q1        | AQDGSNPLSLQDLIEK                                                 | 0.90667282         | 2              | 4.183478  |
| Q9Z2Q1        | AVQLTQALDNTV GALLAEK                                             | 0.936232937        | 2              | 4.623977  |
| Q9Z2Q1        | CLSSATDPQTK                                                      | 0.986231946        | 2              | 2.623059  |
| Q9Z2Q1        | DQTLSP TIISGLHSIAR                                               | 0.820062353        | 2              | 3.423858  |
| Q9Z2Q1        | GGPGPLAGHPQVSR                                                   | 0.932288609        | 2              | 3.098453  |
| Q9Z2Q1        | IDASQTDFEK                                                       | 0.882768678        | 2              | 2.494619  |
| Q9Z2Q1        | IIAGDKEVIAQK                                                     | 1.259765677        | 2              | 2.537663  |
| Q9Z2Q1        | KIDASQTDFEK                                                      | 0.961763976        | 2              | 3.043903  |
| Q9Z2Q1        | LVTFENV TGQPQQGAEQPR                                             | 1.135123533        | 2              | 5.171887  |
| Q9Z2Q1        | QVQHILASASPSGR                                                   | 0.961223318        | 2              | 2.912612  |
| Q9Z2Q1        | SSYEGQPLPK                                                       | 0.917503272        | 2              | 2.477648  |
| Q9Z2Q1        | TQPPEDISCI AWNR                                                  | 0.911520976        | 2              | 2.673215  |
| Q9Z2Q1        | TFEDLIQR                                                         | 0.906065546        | 2              | 2.34945   |
| Q9Z2Q1        | VYSIMGGSIDGLR                                                    | 1.321890215        | 2              | 2.619166  |
| <b>Q9Z2Z8</b> | <b>DHCR7 7_dehydrocholesterol reductase</b>                      | <b>0.849001411</b> | <b>0.99903</b> | <b>3</b>  |
| Q9Z2Z8        | AIECSYTSADGLK                                                    | 1.055643077        | 2              | 3.996382  |
| Q9Z2Z8        | ASLADIWAK                                                        | 0.968866624        | 2              | 2.651257  |
| Q9Z2Z8        | FLPGYVGGVQEGAITPAGIVNK                                           | 0.828393566        | 2              | 5.473073  |
| <b>Q9Z339</b> | <b>GSTO1 Glutathione S_transferase omega_1</b>                   | <b>0.724064674</b> | <b>0.25424</b> | <b>5</b>  |
| Q9Z339        | GSAPPGPVPEGQIR                                                   | 0.869016419        | 2              | 3.326944  |
| Q9Z339        | LEALELNECIDHTPK                                                  | 0.481265441        | 2              | 4.331292  |
| Q9Z339        | LEEAMANK                                                         | 0.876029525        | 1              | 1.997001  |
| Q9Z339        | LEEAMANK+Oxidation(4)                                            | 0.901988134        |                |           |
| Q9Z339        | LFPDDPYEKACQK                                                    | 0.573307857        | 2              | 2.423779  |

Time point 30 hours

| Accession number | Protein DESCRIPTION                                       | Protein Ratio (30 h) | P-value (30 h)  | Peptide number (30 h) |
|------------------|-----------------------------------------------------------|----------------------|-----------------|-----------------------|
| Accession number | Peptide sequence                                          | Peptide Ratio (30 h) | Charge state    | Xcorr                 |
| <b>A0FKI7</b>    | <b>ACBD5 Acyl_CoA_binding domain_containing protein 5</b> | <b>1.233493631</b>   | <b>0.374245</b> | <b>3</b>              |
| A0FKI7           | LQEDMQNVLQR                                               | 1.362416334          | 2               | 2.58537               |
| A0FKI7           | RGGESEDISGVR                                              | 0.810416735          | 2               | 2.62446               |
| A0FKI7           | SSDLTSDLGNVLTSSNAK                                        | 0.937875476          | 2               | 3.25847               |
| <b>A2AAE1</b>    | <b>K1109 Uncharacterized protein KIAA1109</b>             | <b>0.93954708</b>    | <b>0.916348</b> | <b>2</b>              |
| A2AAE1           | SSRSLDQDSPSK                                              | 1.109327688          | 2               | 2.66062               |
| A2AAE1           | TVDGNVNSMKRK                                              | 0.93813753           | 2               | 2.3111                |
| <b>A2ADY9</b>    | <b>DDI2 Protein DDI1 homolog 2</b>                        | <b>1.042710034</b>   | <b>0.000789</b> | <b>3</b>              |
| A2ADY9           | IDFSSIAVPGTSPNPQQR                                        | 1.070928465          | 2               | 3.24353               |
| A2ADY9           | NPPLAEALLSGDLEK                                           | 0.811907222          | 2               | 3.42677               |
| A2ADY9           | VLVEQQQDR                                                 | 0.87215474           | 2               | 2.46965               |
| <b>A2AGT5</b>    | <b>CKAP5 Cytoskeleton_associated protein 5</b>            | <b>0.133495128</b>   | <b>3.61E-05</b> | <b>2</b>              |
| A2AGT5           | DQVLAMLEKAKANMPSPKPAAPAK+Oxidation(13)                    | 0.042441998          |                 |                       |
| A2AGT5           | IGSKENTKEGLAELYEYK                                        | 0.490131439          | 2               | 2.54842               |
| <b>A2AQP0</b>    | <b>MYH7B Myosin_7B</b>                                    | <b>1.009209047</b>   | <b>6.26E-05</b> | <b>13</b>             |
| A2AQP0           | AITDAAMMAEELK                                             | 0.830789138          | 2               | 2.93084               |
| A2AQP0           | AITDAAMMAEELKK                                            | 0.369399251          | 2               | 3.53363               |
| A2AQP0           | AITDAAMMAEELKK+Oxidation(6)                               | 1.009933756          |                 |                       |
| A2AQP0           | AITDAAMMAEELKK+Oxidation(7)                               | 1.009933756          | 2               | 2.92241               |
| A2AQP0           | CNGVLEGIR                                                 | 0.684060364          | 2               | 2.56169               |
| A2AQP0           | DIDDLLETLAK                                               | 0.123793864          | 2               | 3.79537               |
| A2AQP0           | ELEELSER                                                  | 0.047080241          | 1               | 2.07647               |
| A2AQP0           | EQDTSAHLER                                                | 1.032917024          | 2               | 2.49111               |
| A2AQP0           | KDIDDLLETLAK                                              | 1.070588276          | 2               | 2.37454               |
| A2AQP0           | SIQELEK                                                   | 0.98278714           | 2               | 2.39353               |
| A2AQP0           | TEELEEK                                                   | 0.109643871          | 2               | 2.36494               |
| A2AQP0           | VEDEQLVGVQLQK                                             | 0.094536383          | 2               | 2.32004               |
| A2AQP0           | VGNEYVTK                                                  | 0.633873801          | 2               | 3.03588               |
| <b>A2ASS6</b>    | <b>TITIN Titin</b>                                        | <b>0.495520316</b>   | <b>0.012054</b> | <b>32</b>             |
| A2ASS6           | ACDALYPPGPPSNPK                                           | 0.822524262          | 2               | 2.53571               |
| A2ASS6           | AENRFGIGPPAETIQRRTAR                                      | 0.896281099          | 2               | 2.57158               |
| A2ASS6           | AGEDVQLLIPFK                                              | 1.06633351           | 2               | 2.5868                |
| A2ASS6           | APPIEPAPTPIAAPVTAPVVGK                                    | 0.077393223          | 2               | 4.50648               |
| A2ASS6           | ATGLIEGLDYQFR                                             | 0.574741775          | 2               | 2.99019               |
| A2ASS6           | ATLTWTPPLEDGGSPIK                                         | 0.951820817          | 2               | 2.31673               |
| A2ASS6           | ATNEVGSCTCACTVK                                           | 0.079617973          | 2               | 4.2124                |
| A2ASS6           | DGQELQIADRIKIQK                                           | 1.196146556          | 2               | 2.78806               |
| A2ASS6           | DPFDKPSQPGELEILSISK                                       | 1.213828559          | 3               | 3.67113               |
| A2ASS6           | GQSDPVTIGPLTVK                                            | 0.917537205          | 2               | 2.83899               |
| A2ASS6           | GYDEIPLPNDKTEILK                                          | 0.389085494          | 2               | 2.41961               |
| A2ASS6           | IEALPSDISIDEGK                                            | 0.175781923          | 2               | 2.4207                |
| A2ASS6           | KDGTQLACKVTGTPIK                                          | 0.031752067          | 2               | 2.67103               |
| A2ASS6           | NAADNFSEPSESSGAIAR                                        | 0.360687648          | 2               | 3.98461               |
| A2ASS6           | NAADSVSEPESTGPITVK                                        | 0.323413092          | 2               | 2.34291               |
| A2ASS6           | NAADSVSEPESTGPITVKDDVEAPR                                 | 1.168465638          | 3               | 3.44918               |
| A2ASS6           | NAAGVFSEPESTGAIAR                                         | 1.460359484          | 2               | 4.28796               |
| A2ASS6           | QEKIEGLDRAMLK+Oxidation(10)                               | 0.357498675          |                 |                       |
| A2ASS6           | QETEEIAASMVVATAK                                          | 1.176219598          | 2               | 2.31108               |
| A2ASS6           | SAANLIVEEEDLR                                             | 0.515691834          | 2               | 2.59686               |

|               |                                                                      |                    |                 |           |
|---------------|----------------------------------------------------------------------|--------------------|-----------------|-----------|
| A2ASS6        | VFAENEYIGIDPGETR                                                     | 0.074800878        | 2               | 3.59525   |
| A2ASS6        | VGTGEPVETDSPVEAR                                                     | 0.074692782        | 2               | 4.02984   |
| A2ASS6        | VIGSPNTPEGPLEYDDIQAR                                                 | 1.360815275        | 2               | 3.60706   |
| A2ASS6        | VLACNAGGPGPAEVPGETVK                                                 | 0.136171828        | 2               | 3.04132   |
| A2ASS6        | VLAENEIGIGPCETTEPVK                                                  | 0.822524262        | 2               | 3.7803    |
| A2ASS6        | VLAENEYIGLPAETAESVK                                                  | 0.404532452        | 2               | 3.502     |
| A2ASS6        | VLDRPGPPEGPLAVSDVTSEK                                                | 0.895997466        | 3               | 3.59803   |
| A2ASS6        | VNAESTENNSLLTIK                                                      | 0.595612046        | 2               | 3.73606   |
| A2ASS6        | VSGENEFVGVPAETK                                                      | 1.123206539        | 2               | 3.67602   |
| A2ASS6        | VSNVAGDNACSGILTVK                                                    | 1.238715741        | 2               | 2.93279   |
| A2ASS6        | VSVLDVPGPPGPIEISNVSAEK                                               | 0.665914937        | 2               | 2.7203    |
| A2ASS6        | YGIGELDSEPETAR                                                       | 0.694097015        | 2               | 3.2207    |
| <b>A2AU37</b> | <b>RD21L Double_strand_break repair protein rad21_like protein 1</b> | <b>1.286273387</b> | <b>0.307271</b> | <b>2</b>  |
| A2AU37        | MKMTFRPGLVDLPK                                                       | 0.512638137        | 1               | 2.06561   |
| A2AU37        | RGGVDMLLSTATQDLINDELK                                                | 1.302621251        | 2               | 2.36152   |
| <b>A2AWA9</b> | <b>RBGP1 Rab GTPase activating protein 1</b>                         | <b>0.610049492</b> | <b>0.069283</b> | <b>2</b>  |
| A2AWA9        | IVICVQQTANKELAIER                                                    | 0.603158824        | 2               | 2.34707   |
| A2AWA9        | RLMELACNTKISQK+Oxidation(2)                                          | 0.705389357        |                 |           |
| <b>A2VCW9</b> | <b>AASS Alpha_aminoadipic semialdehyde synthase_mitochondrial</b>    | <b>1.353747872</b> | <b>9.9E-20</b>  | <b>11</b> |
| A2VCW9        | AEGIVFNTQSTIK                                                        | 1.954368594        | 2               | 2.7553    |
| A2VCW9        | AGGILQEDITEACLILGVK                                                  | 1.006474307        | 2               | 3.92313   |
| A2VCW9        | AQEANMSLLDEVLK                                                       | 1.396689154        | 2               | 4.38646   |
| A2VCW9        | GAQEVFNELPCEYVEPHELK                                                 | 1.427664045        | 2               | 4.81432   |
| A2VCW9        | KTDGVYDPVEYKYPER                                                     | 1.396279467        | 3               | 3.9124    |
| A2VCW9        | KYDINTVNVTVGK                                                        | 1.678511909        | 2               | 4.09332   |
| A2VCW9        | LQSLVESQDLVISLPPVYVLPVVAK                                            | 1.915164567        | 3               | 4.09074   |
| A2VCW9        | QDAQSLLVPVK                                                          | 1.178686783        | 2               | 2.6665    |
| A2VCW9        | REDVNAWER                                                            | 1.712085833        | 2               | 3.0881    |
| A2VCW9        | SSVVPVEGCPPELPHK                                                     | 1.564824937        | 2               | 2.82878   |
| A2VCW9        | YDINTVNVTVGK                                                         | 1.355986043        | 2               | 2.45822   |
| <b>A6H584</b> | <b>chain</b>                                                         | <b>0.852076289</b> | <b>0.029862</b> | <b>7</b>  |
| A6H584        | FVNRAVFRMANGIDR+Oxidation(8)                                         | 0.975439617        |                 |           |
| A6H584        | NEHSFQVVGIQVR                                                        | 0.850963103        |                 |           |
| A6H584        | QGDPGIEGPIGFPGPK                                                     | 1.138985404        |                 |           |
| A6H584        | RGTQGYGPIGYDGQK                                                      | 1.953601173        |                 |           |
| A6H584        | TMNPAFMGLDRATR+Oxidation(1)                                          | 1.481114698        |                 |           |
| A6H584        | YDVTDAVKVLK                                                          | 0.997345107        |                 |           |
| A6H584        | YLIVVTDGHPLGYKEPCGGLEDAVNEAK                                         | 0.617405993        |                 |           |
| <b>A7VJC2</b> | <b>ROA2 Heterogeneous nuclear ribonucleoproteins A2/B1</b>           | <b>0.964172263</b> | <b>1.92E-05</b> | <b>12</b> |
| A7VJC2        | GFGFVTFDDHDPVVK                                                      | 1.006512515        | 2               | 3.11347   |
| A7VJC2        | GGGGNFGPGPGSNFR                                                      | 1.147431494        | 2               | 3.52915   |
| A7VJC2        | GGNFGFGDSR                                                           | 1.182890887        | 2               | 2.48153   |
| A7VJC2        | IDTIEIITDR                                                           | 0.920680334        | 2               | 4.10405   |
| A7VJC2        | LFIGLSFETTEESLR                                                      | 1.970746869        | 2               | 3.87323   |
| A7VJC2        | LTDCVVMR                                                             | 0.678993611        | 2               | 2.53139   |
| A7VJC2        | NMGGPYGGNYGPGSGSGGYGGR                                               | 0.935279587        | 2               | 6.31184   |
| A7VJC2        | NYEQWGK                                                              | 1.013687242        | 1               | 2.43816   |
| A7VJC2        | QEMQEVQSSR                                                           | 0.811449718        | 2               | 3.01444   |
| A7VJC2        | QEMQEVQSSR+Oxidation(2)                                              | 1.203599516        |                 |           |
| A7VJC2        | TLETVPLER                                                            | 1.365372743        | 2               | 2.31637   |
| A7VJC2        | YHTINGHNAEVR                                                         | 1.479921318        | 2               | 3.44342   |
| <b>B0BN93</b> | <b>PSD13 26S proteasome non_ATPase regulatory subunit 13</b>         | <b>1.096444392</b> | <b>0.922462</b> | <b>2</b>  |
| B0BN93        | QMTDPNVALTFLEK                                                       | 1.09774679         | 2               | 2.61394   |

|               |                                                                        |                    |                 |          |
|---------------|------------------------------------------------------------------------|--------------------|-----------------|----------|
| B0BN93        | SAWQQPDLAANEALLR                                                       | 0.991171804        | 2               | 4.05594  |
| <b>B0BN94</b> | <b>F136A Protein FAM136A</b>                                           | <b>1.250206289</b> | <b>0.999136</b> | <b>2</b> |
| B0BN94        | CHAPLAQAQALVTSELER                                                     | 0.929928243        | 2               | 3.15553  |
| B0BN94        | CSANCCEDNQASMQVHQCIER                                                  | 1.037552834        | 3               | 4.88723  |
| <b>B0BNE5</b> | <b>ESTD S_formylglutathione hydrolase</b>                              | <b>1.082804575</b> | <b>1.52E-13</b> | <b>9</b> |
| B0BNE5        | AFNGYLGPDQSK                                                           | 1.368509797        | 2               | 3.45444  |
| B0BNE5        | AYDATCLVK                                                              | 1.113883066        | 2               | 2.49289  |
| B0BNE5        | FAIYLPPQAESAK                                                          | 1.684448534        | 2               | 3.34819  |
| B0BNE5        | LQEGYDHSYYFIATFITDHIR                                                  | 1.792444061        | 3               | 3.80758  |
| B0BNE5        | MYSYVTEELPQLINANFPVDPQR                                                | 1.014661029        | 3               | 5.43004  |
| B0BNE5        | SGCQQAASEHGLVVIAPDTSR                                                  | 1.049688503        | 2               | 5.70926  |
| B0BNE5        | SVSAFAPICNPVLCPPWGK                                                    | 1.122189102        | 2               | 4.04184  |
| B0BNE5        | SYSGPQIDILIDQGGK                                                       | 1.098170141        | 2               | 3.62574  |
| B0BNE5        | VFEHSSVELK                                                             | 1.152933671        | 2               | 2.59602  |
| <b>B0BNN3</b> | <b>CAH1 Carbonic anhydrase 1</b>                                       | <b>0.523068439</b> | <b>0.302661</b> | <b>4</b> |
| B0BNN3        | ADGLAIIGVLMK                                                           | 0.55817952         | 2               | 3.15503  |
| B0BNN3        | GLLSSAEGEPAVPVLSNHRPPQLK                                               | 0.181566395        | 3               | 3.38408  |
| B0BNN3        | HDSSLKPVSVSYNPATAK                                                     | 0.902631531        | 3               | 4.41899  |
| B0BNN3        | VGPANPNLQK                                                             | 0.412293651        | 2               | 2.92307  |
| <b>B0K020</b> | <b>CISD1 CDGSH iron_sulfur domain_containing protein 1</b>             | <b>0.899493773</b> | <b>0.998891</b> | <b>3</b> |
| B0K020        | AMVNLQIQK                                                              | 0.906006113        | 2               | 2.36063  |
| B0K020        | HNEETGDNVGPLIK                                                         | 1.059681131        | 2               | 5.49959  |
| B0K020        | VVHAFDMEDLGDK                                                          | 0.869984417        | 3               | 3.47449  |
| <b>B2GUY2</b> | <b>TFR2 Transferrin receptor protein 2</b>                             | <b>1.536683675</b> | <b>0.059819</b> | <b>2</b> |
| B2GUY2        | MEQRWGLLRK                                                             | 1.550852876        | 2               | 2.30701  |
| B2GUY2        | SAVGTAILELVR                                                           | 1.248079705        | 2               | 2.4406   |
| <b>B2GV24</b> | <b>UFL1 E3 UFM1_protein ligase 1</b>                                   | <b>1.106049964</b> | <b>0.779027</b> | <b>2</b> |
| B2GV24        | TYDLPGDFTLQALTQR                                                       | 1.055765995        | 2               | 3.17073  |
| B2GV24        | VNIVDLQQVINVDLTHIENR                                                   | 1.052833144        | 3               | 3.33381  |
| <b>B2RX88</b> | <b>CSPP1 Centrosome and spindle pole associated protein 1</b>          | <b>0.833122177</b> | <b>0.920364</b> | <b>2</b> |
| B2RX88        | SISSVNVDQVRMRNEDR                                                      | 0.807604596        | 2               | 2.6603   |
| B2RX88        | SISSVNVDQVRMRNEDR+Oxidation(11)                                        | 0.98874865         |                 |          |
| <b>B2RYW9</b> | <b>FAHD2 Fumarylacetoacetate hydrolase domain_containing protein 2</b> | <b>0.936591149</b> | <b>0.634788</b> | <b>6</b> |
| B2RYW9        | ALAAQLPLIPR                                                            | 0.94593879         | 2               | 2.40873  |
| B2RYW9        | ATDVMAYVAGFTVAHDVSAR                                                   | 1.163284629        | 3               | 3.82516  |
| B2RYW9        | GETALSVAR                                                              | 0.925039984        | 2               | 2.42439  |
| B2RYW9        | KGDEVQCEIEELGVIINK                                                     | 0.86857019         | 2               | 5.30075  |
| B2RYW9        | TFDTFCPLGPALVTK                                                        | 0.932257693        | 2               | 4.60813  |
| B2RYW9        | VNGEIVQSSNTNQMVFK                                                      | 0.969187413        | 2               | 2.63537  |
| <b>B3DMA2</b> | <b>ACD11 Acyl_CoA dehydrogenase family member 11</b>                   | <b>1.052428832</b> | <b>0.998541</b> | <b>4</b> |
| B3DMA2        | AVLTVTQYR                                                              | 1.011456395        | 2               | 2.52828  |
| B3DMA2        | LDNIVFHPK                                                              | 1.006031034        | 2               | 2.45293  |
| B3DMA2        | NLPDSDNEECLVHGDFK                                                      | 1.103765825        | 2               | 3.16352  |
| B3DMA2        | SGQSNPTFFLQK                                                           | 1.154860524        | 2               | 2.7946   |
| <b>B3GNI6</b> | <b>SEP11 Septin_11</b>                                                 | <b>1.18197436</b>  | <b>0.779837</b> | <b>3</b> |
| B3GNI6        | AAAQLLQSQAAQSGAQQTK                                                    | 1.079029452        | 3               | 3.42321  |
| B3GNI6        | FESDPATHNEPGVR                                                         | 1.440662578        | 2               | 3.34141  |
| B3GNI6        | SYELQESNVR                                                             | 0.952044917        | 2               | 3.00715  |
| <b>B5DFC8</b> | <b>EIF3C Eukaryotic translation initiation factor 3 subunit C</b>      | <b>1.17574591</b>  | <b>0.022219</b> | <b>3</b> |
| B5DFC8        | GTEITHAVVIK                                                            | 1.059208961        | 2               | 2.37089  |
| B5DFC8        | GTTEEICQIYLR                                                           | 1.124524409        | 2               | 2.36632  |
| B5DFC8        | TEPTAQQNLALQLAEK                                                       | 1.197362971        | 2               | 4.94246  |

|               |                                                                      |                    |                 |           |
|---------------|----------------------------------------------------------------------|--------------------|-----------------|-----------|
| <b>D3ZTX0</b> | <b>TMED7 Transmembrane emp24 domain_containing protein 7</b>         | <b>1.101086307</b> | <b>0.08158</b>  | <b>2</b>  |
| D3ZTX0        | QCFYEDITQGTK                                                         | 0.774703195        | 2               | 2.48706   |
| D3ZTX0        | SVIDYQTHFR                                                           | 1.282415138        | 2               | 2.50577   |
| <b>D3ZW55</b> | <b>ITPA Inosine triphosphate pyrophosphatase</b>                     | <b>1.141452398</b> | <b>0.732141</b> | <b>4</b>  |
| D3ZW55        | IDLPEYQGEPEISIQK                                                     | 1.01721701         | 2               | 4.67356   |
| D3ZW55        | KLEEVILGDKFPCTLVAQK                                                  | 1.054531088        | 3               | 4.06857   |
| D3ZW55        | LKPEGLYQLLAGFEDK                                                     | 1.691602863        | 3               | 3.52354   |
| D3ZW55        | LQEYFGVTDGAGDH                                                       | 1.268693869        | 2               | 3.56453   |
| <b>D3ZZL9</b> | <b>GCC2 GRIP and coiled_coil domain_containing protein 2</b>         | <b>1.235609577</b> | <b>0.079694</b> | <b>2</b>  |
| D3ZZL9        | ELNQKLTNKNSK                                                         | 1.179883111        | 2               | 2.3759    |
| D3ZZL9        | IKCLQEESVVQCEELR                                                     | 1.237110574        | 2               | 2.3554    |
| <b>D4A4T9</b> | <b>CHRD1 Cysteine and histidine_rich domain_containing protein 1</b> | <b>1.218179278</b> | <b>0.011423</b> | <b>2</b>  |
| D4A4T9        | KEEDSDEIKIGTSCK                                                      | 1.31537508         | 2               | 2.31747   |
| D4A4T9        | LSSGNEEDKKEEDSDEIK                                                   | 1.205629435        | 3               | 4.32774   |
| <b>E9Q557</b> | <b>DESP Desmoplakin</b>                                              | <b>0.835044732</b> | <b>0.167606</b> | <b>2</b>  |
| E9Q557        | KQVQTSQKNLTR                                                         | 1.180906704        | 1               | 2.11367   |
| E9Q557        | SQCTQVVQER                                                           | 0.679045684        | 2               | 2.31605   |
| <b>F6YLP3</b> | <b>selenium transferase</b>                                          | <b>0.260334699</b> | <b>0.4188</b>   | <b>3</b>  |
| <b>O08557</b> | <b>DDAH1 N(G)_N(G)_dimethylarginine dimethylaminohydrolase 1</b>     | <b>1.271239092</b> | <b>9.9E-20</b>  | <b>8</b>  |
| O08557        | DENATLDGGDVLFTGR                                                     | 0.792449198        | 2               | 3.3439    |
| O08557        | DYAVSTVPVADSLHLK                                                     | 1.341691696        | 2               | 3.65431   |
| O08557        | GAEILADTFK                                                           | 1.153808577        | 2               | 2.42515   |
| O08557        | GAEILADTFKDYAVSTVPVADSLHLK                                           | 1.079734434        | 3               | 3.7154    |
| O08557        | SFCSMAGPNLIAIGSSESAQK                                                | 0.842602092        | 2               | 4.94653   |
| O08557        | SGGEEVDFAR                                                           | 1.18894073         | 2               | 2.82503   |
| O08557        | TPEEYPESAK                                                           | 3.106857558        | 2               | 2.82332   |
| O08557        | VDGLLTCCSVFINK                                                       | 1.560224182        | 2               | 3.50141   |
| <b>O08583</b> | <b>THOC4 THO complex subunit 4</b>                                   | <b>0.782337241</b> | <b>2.05E-07</b> | <b>2</b>  |
| O08583        | QQLSAEELDAQLDAYNAR                                                   | 0.705781804        | 2               | 5.05844   |
| O08583        | SLGTADVHFER                                                          | 1.000650105        | 2               | 2.51204   |
| <b>O08601</b> | <b>MTP Microsomal triglyceride transfer protein large subunit</b>    | <b>1.32095983</b>  | <b>1.54E-13</b> | <b>13</b> |
| O08601        | EDTTMYLLALK                                                          | 0.826556276        | 2               | 2.36863   |
| O08601        | EFYSYENEPVGIENLK                                                     | 1.379777565        | 2               | 4.14763   |
| O08601        | GCPSLAEHWKSIR                                                        | 1.2883043          | 2               | 3.73204   |
| O08601        | GSFASNDIR                                                            | 1.189168466        | 2               | 2.50625   |
| O08601        | MLSASGDPVSVVK                                                        | 1.087356381        | 2               | 3.05082   |
| O08601        | MLSASGDPVSVVK+Oxidation(0)                                           | 1.111867302        |                 |           |
| O08601        | NALLPEGIPLLLK                                                        | 1.176930561        | 1               | 2.37919   |
| O08601        | NILLSIGELPK                                                          | 1.136986961        | 2               | 3.57962   |
| O08601        | REEILQILK                                                            | 1.108351631        | 3               | 3.54571   |
| O08601        | SDSSIILQER                                                           | 1.24012625         | 2               | 3.29804   |
| O08601        | SGSSSAYTGYVER                                                        | 1.317058312        | 2               | 3.4231    |
| O08601        | SNLNIFQYIGK                                                          | 3.445220696        | 2               | 3.61238   |
| O08601        | VKEFYSYENEPVGIENLK                                                   | 1.194363523        | 2               | 2.8796    |
| <b>O08795</b> | <b>GLU2B Glucosidase 2 subunit beta</b>                              | <b>0.907597605</b> | <b>0.861406</b> | <b>6</b>  |
| O08795        | ETVVTSTTEPSR                                                         | 1.143909317        | 2               | 3.10963   |
| O08795        | KLWEEQQAQAAK                                                         | 0.905724686        | 2               | 2.92125   |
| O08795        | LWEEQQAQAAK                                                          | 1.051243171        | 2               | 3.33171   |
| O08795        | MPPYDEETQAIIDAAQEAR                                                  | 0.916652056        | 2               | 3.1281    |
| O08795        | SLEDQVETLR                                                           | 1.26964912         | 2               | 3.26087   |
| O08795        | YEQGTGCWQGPNR                                                        | 1.079727167        | 2               | 4.04044   |

|               |                                                                    |                    |                 |           |
|---------------|--------------------------------------------------------------------|--------------------|-----------------|-----------|
| <b>O08810</b> | <b>U5S1 116 kDa U5 small nuclear ribonucleoprotein component</b>   | <b>1.198738349</b> | <b>0.74022</b>  | <b>2</b>  |
| O08810        | GGGQIIPAR                                                          | 1.227321622        | 2               | 2.63274   |
| O08810        | GLAEDIENEVVQITWNR                                                  | 0.971352497        | 3               | 3.56997   |
| <b>O09158</b> | <b>CP3AP Cytochrome P450 3A25</b>                                  | <b>1.76203603</b>  | <b>0.096184</b> | <b>3</b>  |
| O09158        | DVEINGVFIPK                                                        | 1.851295404        | 2               | 3.15358   |
| O09158        | TLLSPTFTSGK                                                        | 1.137495428        | 1               | 1.93756   |
| O09158        | VDFLQLMMNTQNSK                                                     | 1.4451854          | 2               | 2.83952   |
| <b>O09171</b> | <b>BHMT1 Betaine__homocysteine S_methyltransferase 1</b>           | <b>2.395749784</b> | <b>9.9E-20</b>  | <b>16</b> |
| O09171        | AGAAIVGVNCHFDPSTSLQTIK                                             | 1.740223987        | 2               | 5.84023   |
| O09171        | AGPWTPEAAVEHPEAVR                                                  | 2.148905257        | 2               | 5.08275   |
| O09171        | AGSNVMQFTFFYASEDK                                                  | 1.663238817        | 2               | 2.91907   |
| O09171        | AGSNVMQFTFFYASEDKLENR                                              | 4.140952136        | 2               | 4.50672   |
| O09171        | EATTEQQLR                                                          | 1.23956357         | 2               | 2.40755   |
| O09171        | GAAELMQQK                                                          | 1.901055226        | 2               | 3.57105   |
| O09171        | GAAELMQQK+Oxidation(5)                                             | 2.465898778        |                 |           |
| O09171        | HGSWGSGLDMHTKPWIR                                                  | 1.245537849        | 3               | 3.70591   |
| O09171        | IFHQQLLEVFMK                                                       | 1.484482547        | 2               | 2.75668   |
| O09171        | KEYWQNLN                                                           | 1.759769014        | 3               | 3.80548   |
| O09171        | LNAGEVVIGDGGFVFALEK                                                | 1.89606887         | 3               | 6.24291   |
| O09171        | QGFIDLPEFPFGLER                                                    | 1.678504576        | 2               | 5.35192   |
| O09171        | QVADEGDALVAGGVSQTPSYLSCK                                           | 2.111869083        | 3               | 6.35508   |
| O09171        | TSGKPIAATMCIGPEGDLHGVSPGEC AVR                                     | 1.677487081        | 3               | 6.55271   |
| O09171        | TSGKPIAATMCIGPEGDLHGVSPGEC AVR+Oxidation(9)                        | 2.511136543        |                 |           |
| O09171        | VNEAACDIAR                                                         | 1.743404503        | 2               | 4.03569   |
| <b>O09173</b> | <b>HGD Homogentisate 1_2_dioxygenase</b>                           | <b>1.304510081</b> | <b>1.33E-15</b> | <b>10</b> |
| O09173        | CFYNSDGDFLIVPQK                                                    | 1.370859196        | 2               | 2.94767   |
| O09173        | FSVDVFEETR                                                         | 1.472247468        | 2               | 3.18825   |
| O09173        | GYILEVYGVHFEPLDLGPIGANLANPR                                        | 1.311682705        | 3               | 5.98862   |
| O09173        | LLIYTEFGK                                                          | 1.939443816        | 1               | 2.05452   |
| O09173        | NCMSEFMGLIK                                                        | 1.240393782        | 2               | 3.41313   |
| O09173        | QDVSPFNVAWHGNYTPYK                                                 | 1.514582057        | 2               | 3.64792   |
| O09173        | QGGFLPGGSLHSAMTPHGPADCFEK                                          | 1.141488337        | 3               | 3.72045   |
| O09173        | SLRPGVAIADFVIFPPR                                                  | 1.092593509        | 2               | 3.54394   |
| O09173        | TFRPPYYHR                                                          | 1.775571904        | 3               | 3.34012   |
| O09173        | YISGFGNECASEDPR                                                    | 1.878110521        | 2               | 3.99237   |
| <b>O35077</b> | <b>GPDA Glycerol_3_phosphate dehydrogenase [NAD_]_ cytoplasmic</b> | <b>1.016461225</b> | <b>2.49E-07</b> | <b>19</b> |
| O35077        | ANTIGISLIK                                                         | 1.082950709        | 2               | 3.1733    |
| O35077        | DPAQGQLLK                                                          | 1.777318182        | 2               | 2.41275   |
| O35077        | ELHSILQHK                                                          | 1.305011933        | 1               | 2.95003   |
| O35077        | FCETTIGCK                                                          | 1.113137069        | 2               | 2.62951   |
| O35077        | FCETTIGCKDPAQGQLLK                                                 | 1.073460794        | 2               | 5.0546    |
| O35077        | GIDEGPNGLK                                                         | 0.984925484        | 2               | 2.96492   |
| O35077        | GLVDKFPLFTAVYK                                                     | 1.533995919        | 3               | 3.60747   |
| O35077        | ICDQLKGHLK                                                         | 0.768940152        | 3               | 3.35961   |
| O35077        | ITVVQEVDTVEICGALK                                                  | 0.814698229        | 3               | 4.4243    |
| O35077        | IVGSNASQLAHFDPR                                                    | 1.688239683        | 2               | 3.14367   |
| O35077        | KLTEIINTQHENVK                                                     | 0.957434754        | 2               | 5.10387   |
| O35077        | LISEVIGESLGIPMSVLMGANIASEVAEEK                                     | 0.812517598        |                 |           |
| O35077        | LPPNVVAVPDVVQAATGADILVFVPHQFIGK                                    | 1.559477622        | 3               | 5.10066   |
| O35077        | LTEIINTQHENVK                                                      | 0.943210745        | 2               | 4.51603   |
| O35077        | NIVAVGAGFCDGLGFGDNTK                                               | 1.050529971        | 2               | 5.42573   |
| O35077        | SIEQLEK                                                            | 0.98278714         | 2               | 2.4705    |
| O35077        | VCIVGSGNWGSAIAK                                                    | 1.046211443        | 2               | 4.707     |

|               |                                                                              |                    |                 |           |
|---------------|------------------------------------------------------------------------------|--------------------|-----------------|-----------|
| O35077        | VCYEGQPVGEFICCLQNHPEHM                                                       | 1.048044892        | 2               | 3.92244   |
| O35077        | VTMWVFEEDIGGR                                                                | 1.275575177        | 2               | 3.46768   |
| <b>O35078</b> | <b>OXDA D_amino_acid oxidase</b>                                             | <b>1.077444615</b> | <b>0.975563</b> | <b>2</b>  |
| O35078        | GQIIQVEAPWIK                                                                 | 0.883930785        | 2               | 3.20743   |
| O35078        | SCCQLEPTLK                                                                   | 1.108423666        | 2               | 2.42752   |
| <b>O35094</b> | <b>TIM44 Mitochondrial import inner membrane translocase subunit TIM44</b>   | <b>0.964660987</b> | <b>0.99993</b>  | <b>2</b>  |
| O35094        | KLEESDALQEAR                                                                 | 0.935947176        | 2               | 3.35451   |
| O35094        | TEMSEVLTEILR                                                                 | 1.037584184        | 2               | 3.56669   |
| <b>O35142</b> | <b>COPB2 Coatomer subunit beta_</b>                                          | <b>1.02274495</b>  | <b>0.807017</b> | <b>4</b>  |
| O35142        | AAESLADPTEYENLFPGLK                                                          | 1.188143207        | 2               | 3.36393   |
| O35142        | FELALQLGELK                                                                  | 1.021291896        | 2               | 3.0438    |
| O35142        | GSNNVALGYDEGSIIVK                                                            | 1.206563154        | 2               | 3.58758   |
| O35142        | TFEVCDLPVR                                                                   | 0.932559489        | 2               | 2.77056   |
| <b>O35244</b> | <b>PRDX6 Peroxiredoxin_6</b>                                                 | <b>1.104550189</b> | <b>0.006052</b> | <b>10</b> |
| O35244        | DINAYNGAAPTEK                                                                | 1.099148887        | 2               | 3.94456   |
| O35244        | DLAILLGMLDPAEKDEK                                                            | 1.037018511        | 2               | 4.31831   |
| O35244        | FHDFLGDSWGILFSHPR                                                            | 1.012390031        | 3               | 3.84112   |
| O35244        | GESVMVLPTLPEEEAK                                                             | 0.922074486        | 2               | 3.18174   |
| O35244        | KGESVMVLPTLPEEEAK                                                            | 0.922838745        | 2               | 4.87444   |
| O35244        | KGESVMVLPTLPEEEAK+Oxidation(5)                                               | 1.155218921        |                 |           |
| O35244        | LSILYPATTGR                                                                  | 1.420294628        | 2               | 2.87687   |
| O35244        | NFDEILR                                                                      | 0.846637493        | 2               | 2.4402    |
| O35244        | VVDSLQLTASNVPVATPVDWK                                                        | 0.971068993        | 3               | 5.76442   |
| O35244        | VVFIFGPDKK                                                                   | 1.828973397        | 2               | 2.3859    |
| <b>O35469</b> | <b>3BHS6 3 beta_hydroxysteroid dehydrogenase/Delta 5__4_isomerase type 6</b> | <b>1.151277359</b> | <b>0.987976</b> | <b>2</b>  |
| O35469        | DLGYEPLVSWEAK                                                                | 1.379937406        | 2               | 4.22585   |
| O35469        | TSEWIGTLVEQHR                                                                | 1.003291086        | 2               | 3.48581   |
| <b>O35509</b> | <b>RB11B Ras_related protein Rab_11B</b>                                     | <b>1.055670496</b> | <b>0.601745</b> | <b>5</b>  |
| O35509        | AQIWDTAGQER                                                                  | 0.983073742        | 2               | 2.84259   |
| O35509        | GAVGALLVYDIAK                                                                | 1.040853757        | 2               | 4.21682   |
| O35509        | HLTYENVER                                                                    | 0.941427267        | 2               | 3.01022   |
| O35509        | NEFNLESK                                                                     | 1.216281756        | 1               | 2.14975   |
| O35509        | VVLIGDSGVGK                                                                  | 1.255314062        | 2               | 2.70465   |
| <b>O35547</b> | <b>ACSL4 Long_chain_fatty_acid_CoA ligase 4</b>                              | <b>0.816561206</b> | <b>0.122324</b> | <b>2</b>  |
| O35547        | LERFEIPIK                                                                    | 0.817134643        | 2               | 2.67969   |
| O35547        | LSPEPWTPETGLVTDFAK                                                           | 0.389248153        | 2               | 2.72854   |
| <b>O35567</b> | <b>PUR9 Bifunctional purine biosynthesis protein PURH</b>                    | <b>1.013532838</b> | <b>0.171356</b> | <b>8</b>  |
| O35567        | AEVSNAIDQYVTGTIGEGEDLVK                                                      | 0.927146668        | 2               | 4.40875   |
| O35567        | ALFEEVPELLTEAEK                                                              | 1.189103938        | 2               | 3.77446   |
| O35567        | DGQVIGIGAGQQSR                                                               | 0.990547346        | 2               | 3.16803   |
| O35567        | EVSDGIVAPGYEEALK                                                             | 0.951393227        | 2               | 4.17112   |
| O35567        | HVSPAGAAVGVPLSEDEAR                                                          | 1.46666345         | 2               | 3.51036   |
| O35567        | RAEVSNAIDQYVTGTIGEGEDLVK                                                     | 1.21839164         | 3               | 3.74148   |
| O35567        | SGVAYIVAPSGSTADK                                                             | 1.151255906        | 2               | 3.09706   |
| O35567        | VTVCEPEDYGAVAAEMQSGGNK                                                       | 0.779833935        | 2               | 5.27819   |
| <b>O35593</b> | <b>PSDE 26S proteasome non_ATPase regulatory subunit 14</b>                  | <b>1.104914689</b> | <b>0.075304</b> | <b>2</b>  |
| O35593        | AVAVVVDPIQSVK                                                                | 1.110185477        | 2               | 2.71278   |
| O35593        | VIDVFAMPQSGTGVSVAEVDPVFQAK                                                   | 0.403307006        | 2               | 3.74656   |
| <b>O35660</b> | <b>GSTM6 Glutathione S_transferase Mu 6</b>                                  | <b>1.057648086</b> | <b>0.982535</b> | <b>2</b>  |
| O35660        | RYAMGDAPDYDR                                                                 | 0.958855253        | 2               | 3.131     |
| O35660        | YAMGDAPDYDR+Oxidation(2)                                                     | 1.380557964        |                 |           |
| <b>O35760</b> | <b>IDI1 Isopentenyl_diphosphate Delta_isomerase 1</b>                        | <b>0.577796804</b> | <b>0.137159</b> | <b>3</b>  |

|               |                                                                                          |                    |                 |          |
|---------------|------------------------------------------------------------------------------------------|--------------------|-----------------|----------|
| O35760        | AELGIPLLEVDLNEMNYLTR                                                                     | 0.63648493         | 2               | 4.26437  |
| O35760        | NCHLNENIDK                                                                               | 0.499172302        | 2               | 2.98886  |
| O35760        | NVTLNPDNEIK                                                                              | 0.56801018         | 2               | 2.89706  |
| <b>O35763</b> | <b>MOES Moesin</b>                                                                       | <b>1.001792701</b> | <b>0.679269</b> | <b>2</b> |
| O35763        | ALTSELANAR                                                                               | 0.999249706        | 2               | 3.17051  |
| O35763        | FYPEDVSEELIQDITQR                                                                        | 0.7649495          | 2               | 4.40084  |
| <b>O35783</b> | <b>CALU Calumenin</b>                                                                    | <b>0.969021522</b> | <b>0.978341</b> | <b>2</b> |
| O35783        | HLVYESDQDKDGK                                                                            | 0.981560914        | 2               | 4.04578  |
| O35783        | VHNDAQNFYDHDHDAFLGAEAAK                                                                  | 0.820007619        | 3               | 4.15033  |
| <b>O35796</b> | <b>C1QBP Complement component 1 Q subcomponent_binding protein_mitochondrial</b>         | <b>1.342746801</b> | <b>1.43E-08</b> | <b>4</b> |
| O35796        | AEEQEPELTSTPNFVVEVTK                                                                     | 1.039026251        | 2               | 4.69842  |
| O35796        | AFVEFLTDEIK                                                                              | 1.275684088        | 2               | 3.62587  |
| O35796        | AFVEFLTDEIKEEK                                                                           | 1.052940796        | 2               | 3.57241  |
| O35796        | TLVLDCHYPEDEIGHDEAESEDFSIK                                                               | 1.730255856        | 3               | 5.77035  |
| <b>O35814</b> | <b>STIP1 Stress_induced_phosphoprotein 1</b>                                             | <b>1.079279688</b> | <b>0.843488</b> | <b>6</b> |
| O35814        | ALDLSSCK                                                                                 | 1.244369854        | 2               | 2.36604  |
| O35814        | ALSAGNIDDALQCYSEAIK                                                                      | 1.037267689        | 2               | 5.29577  |
| O35814        | DCEECIQLEPTFIK                                                                           | 0.964675838        | 2               | 3.93301  |
| O35814        | ELIEQLQNKPSDLGTK                                                                         | 1.113373558        | 2               | 3.8667   |
| O35814        | LDPQNHVLYSNR                                                                             | 2.44697274         | 2               | 2.61357  |
| O35814        | LMDVGLIAIR                                                                               | 1.032836536        | 2               | 2.45177  |
| <b>O35820</b> | <b>RCL Deoxyribonucleoside 5__monophosphate N_glycosidase</b>                            | <b>1.055918911</b> | <b>0.894824</b> | <b>2</b> |
| O35820        | GGREDQALYAR                                                                              | 0.900082513        | 2               | 2.559    |
| O35820        | YFEAYLPQK                                                                                | 1.061779515        | 2               | 2.33407  |
| <b>O35821</b> | <b>MBB1A Myb_binding protein 1A</b>                                                      | <b>1.089703417</b> | <b>0.969959</b> | <b>2</b> |
| O35821        | ALDLIEVLVTK                                                                              | 1.092075613        | 2               | 3.05526  |
| O35821        | NVANVTPLTAQQR                                                                            | 0.952884585        | 2               | 3.02762  |
| <b>O35824</b> | <b>DNJA2 Dnaj homolog subfamily A member 2</b>                                           | <b>1.07583383</b>  | <b>0.198217</b> | <b>2</b> |
| O35824        | FDVQFPENNWINPK                                                                           | 0.555872143        | 2               | 3.29125  |
| O35824        | NVLCSACSGQGK                                                                             | 1.076484553        | 2               | 3.27264  |
| <b>O35826</b> | <b>GLCNE Bifunctional UDP_N_acetylglucosamine 2_epimerase/N_acetylmannosamine kinase</b> | <b>1.04163181</b>  | <b>0.74186</b>  | <b>8</b> |
| O35826        | DEAVGALHLIQAAC                                                                           | 1.05920049         | 2               | 3.47456  |
| O35826        | EVGAFGTPVINLGR                                                                           | 1.16095603         | 2               | 2.86446  |
| O35826        | GEDEAMVESVGLALVK                                                                         | 1.139593919        | 2               | 2.45338  |
| O35826        | IYGDGNAVPR                                                                               | 0.917967272        | 2               | 2.57769  |
| O35826        | SIDLQEPLQK                                                                               | 1.077302274        | 2               | 2.3736   |
| O35826        | TLVLFNIDAGSK                                                                             | 0.886566514        | 2               | 3.09776  |
| O35826        | TPLSDTLHLPVWVDNDGNCAAMAER                                                                | 0.853573937        | 3               | 5.23593  |
| O35826        | VNPQEGVVLHSTK                                                                            | 1.280336086        | 2               | 2.54779  |
| <b>O35913</b> | <b>SO1A4 Solute carrier organic anion transporter family member 1A4</b>                  | <b>0.875837851</b> | <b>0.058043</b> | <b>5</b> |
| O35913        | EGLQENVGTENAK                                                                            | 1.052741085        | 2               | 3.66849  |
| O35913        | GASFVPAFFILR                                                                             | 1.354504697        | 2               | 2.69905  |
| O35913        | ILAGIPAPIYFGALIDR                                                                        | 1.979186648        | 2               | 2.41566  |
| O35913        | SLSGTYMNSMLTQIER                                                                         | 0.778648049        | 2               | 4.25926  |
| O35913        | SQTLNPTQDPSECVK                                                                          | 0.874940101        | 2               | 4.1755   |
| <b>O35923</b> | <b>BRCA2 Breast cancer type 2 susceptibility protein homolog</b>                         | <b>0.741550678</b> | <b>0.026724</b> | <b>2</b> |
| O35923        | AMKLFSDIENISEPSTK                                                                        | 0.71804696         | 2               | 2.55222  |
| O35923        | SLLNEFDRIIESK GK                                                                         | 0.675847885        | 2               | 2.4239   |
| <b>O35952</b> | <b>GLO2 Hydroxyacylglutathione hydrolase_mitochondrial</b>                               | <b>0.916047838</b> | <b>0.999999</b> | <b>8</b> |
| O35952        | ALLEVLGR                                                                                 | 1.004935913        | 2               | 3.12064  |



|               |                                                                    |                    |                 |          |
|---------------|--------------------------------------------------------------------|--------------------|-----------------|----------|
| O35952        | FYEGTADEMYK                                                        | 0.894604037        | 2               | 2.51641  |
| O35952        | HVEPGNTAVQEK                                                       | 1.232512384        | 2               | 4.05564  |
| O35952        | LTTVLTHHHWDHAGGNEK                                                 | 1.302812451        | 3               | 3.91359  |
| O35952        | NAIGEPTVPSTLAEFTYNPFR                                              | 1.017292011        | 2               | 3.54778  |
| O35952        | TVQQHAGETDPVTTMR                                                   | 0.956132301        | 2               | 5.10413  |
| O35952        | TVQQHAGETDPVTTMR+Oxidation(14)                                     | 1.043256245        |                 |          |
| O35952        | VTHLSTLEVGSLSVK                                                    | 1.123774525        | 2               | 2.88358  |
| <b>O35987</b> | <b>NSF1C NSF1 cofactor p47</b>                                     | <b>0.972953102</b> | <b>2.27E-05</b> | <b>6</b> |
| O35987        | ASSSILINEAEPPTNIQIR                                                | 0.945056791        | 2               | 5.33631  |
| O35987        | EANLLNAVIVQR                                                       | 1.419873452        | 2               | 3.3703   |
| O35987        | LGAAPPEESAYVAGER                                                   | 1.112535634        | 2               | 4.02134  |
| O35987        | LGSTAPQVLNTSSPAQQAENEAK                                            | 1.289569037        | 2               | 3.96866  |
| O35987        | RGEVPAELR                                                          | 2.93578189         | 2               | 2.47108  |
| O35987        | SYQDPSNAQFLESIR                                                    | 1.056907271        | 2               | 4.48866  |
| <b>O54753</b> | <b>H17B6 17_beta_hydroxysteroid dehydrogenase type 6</b>           | <b>1.608165101</b> | <b>0.035772</b> | <b>3</b> |
| O54753        | CSTNLSLVTDCMEHALTSK                                                | 1.73279515         | 3               | 3.3951   |
| O54753        | TWEATPEHIR                                                         | 1.580446626        | 2               | 2.31051  |
| O54753        | YGVEAFSDVLR                                                        | 1.438534949        | 2               | 2.72709  |
| <b>O54975</b> | <b>XPP1 Xaa_Pro aminopeptidase 1</b>                               | <b>1.117571001</b> | <b>0.316197</b> | <b>2</b> |
| O54975        | GSLTFEPLTLVPIQTK                                                   | 1.12149705         | 2               | 4.04187  |
| O54975        | IENVVLVPAK                                                         | 0.971668129        | 2               | 2.89517  |
| <b>O55012</b> | <b>PICA Phosphatidylinositol_binding clathrin assembly protein</b> | <b>1.058419562</b> | <b>0.274915</b> | <b>5</b> |
| O55012        | ATTLSNAVSSLASTGLSLTK                                               | 0.947900417        | 2               | 3.83908  |
| O55012        | ITAAQHSVTGSVAVSK                                                   | 1.464593615        | 2               | 4.30268  |
| O55012        | NLFLNLSNFLDK                                                       | 1.074558155        | 2               | 2.54018  |
| O55012        | SGLQGYDMSTFIR                                                      | 1.211884291        | 2               | 2.36162  |
| O55012        | STNVAVDVSGGGLLKPTVASQNSLPAK                                        | 0.94436296         | 3               | 5.65878  |
| <b>O55096</b> | <b>DPP3 Dipeptidyl peptidase 3</b>                                 | <b>1.026808474</b> | <b>0.014799</b> | <b>6</b> |
| O55096        | AGLLALEFYTPETANWR                                                  | 1.219149414        | 2               | 3.92276  |
| O55096        | GEFEGFVAMVVK                                                       | 1.112191455        | 2               | 3.07586  |
| O55096        | LASVLNTEPALDSELTSK                                                 | 2.163195737        | 2               | 3.38428  |
| O55096        | NVSLGNVLAVAYATK                                                    | 1.023353606        | 2               | 2.38712  |
| O55096        | SYEFQGNHFQVTR                                                      | 1.239055023        | 2               | 3.81956  |
| O55096        | VLEAGEGLVTVPTTGSDDRPAK                                             | 1.02826569         | 3               | 3.40217  |
| <b>O55125</b> | <b>NIPS1 Protein NipSnap homolog 1</b>                             | <b>1.173629315</b> | <b>1.29E-09</b> | <b>4</b> |
| O55125        | AGPNIYELR                                                          | 1.071694409        | 2               | 3.04349  |
| O55125        | FSGGYPALMDCMVK                                                     | 1.10699748         | 2               | 3.13302  |
| O55125        | GWDEVVYTVPLVR                                                      | 1.682188822        | 2               | 3.45838  |
| O55125        | IQFHNVKPECLDAYNSLTAFLPK                                            | 1.741790454        | 3               | 4.36804  |
| <b>O55171</b> | <b>ACOT2 Acyl_coenzyme A thioesterase 2_mitochondrial</b>          | <b>1.141346279</b> | <b>0.989002</b> | <b>6</b> |
| O55171        | ADAGGELDLAR                                                        | 0.93081466         | 2               | 3.27675  |
| O55171        | DGLLDVVEALQSPVLDK                                                  | 1.159437979        | 2               | 5.07103  |
| O55171        | DVQKPYVVELEVLDGHEPDGGQR                                            | 0.909676326        | 3               | 4.46677  |
| O55171        | GGELGLAMASFLK                                                      | 1.076762348        | 2               | 3.84753  |
| O55171        | IEYFEEAVNYLR                                                       | 1.114116537        | 2               | 4.19181  |
| O55171        | SCWDEPLSITVR                                                       | 0.965385003        | 2               | 3.49113  |
| <b>O70127</b> | <b>ABCBB Bile salt export pump</b>                                 | <b>1.411652578</b> | <b>6.91E-07</b> | <b>8</b> |
| O70127        | AGQITSEALSNIK                                                      | 1.275414383        | 2               | 3.28838  |
| O70127        | AGSIADVLSIR                                                        | 1.522557619        | 2               | 2.63903  |
| O70127        | ILDNLSMVIKPGETTALVGSSGAGK                                          | 1.413868306        | 3               | 4.16927  |
| O70127        | ILLDEATSALDTESEK                                                   | 1.60718601         | 2               | 4.18128  |
| O70127        | KFGEENHAFESDGSNNDDK                                                | 1.056350766        | 3               | 3.93335  |
| O70127        | KPPINVYSEAGEK                                                      | 2.292530983        | 2               | 3.31695  |
| O70127        | STALQLIQR                                                          | 1.495465874        | 2               | 2.35064  |

|               |                                                                                    |                    |                 |           |
|---------------|------------------------------------------------------------------------------------|--------------------|-----------------|-----------|
| O70127        | YETNVGIQGSQLSR                                                                     | 1.156610491        | 2               | 3.46657   |
| <b>O70133</b> | <b>DHX9 ATP_dependent RNA helicase A</b>                                           | <b>0.783378743</b> | <b>0.000131</b> | <b>2</b>  |
| O70133        | KMTPAYEIRAVGNK                                                                     | 0.532097388        | 2               | 2.56552   |
| O70133        | YSPFFVFGKIR                                                                        | 1.041470411        | 2               | 2.5007    |
| <b>O70199</b> | <b>UGDH UDP_glucose 6_dehydrogenase</b>                                            | <b>1.134439018</b> | <b>9.9E-20</b>  | <b>11</b> |
| O70199        | EQIVVDLSHPGVSADDQVSR                                                               | 1.044536324        | 2               | 5.6714    |
| O70199        | IFDANTKPNLNLQVLSNPEFLAEGTAIK                                                       | 1.374974718        | 3               | 5.21124   |
| O70199        | IIDSLFNTVTDK                                                                       | 1.078538347        | 2               | 2.87754   |
| O70199        | IIDSLFNTVTDKK                                                                      | 1.11681453         | 2               | 3.54353   |
| O70199        | ILTTNTWSSSELSK                                                                     | 1.668849302        | 2               | 3.34286   |
| O70199        | INAWNSPTLPIYEPGLK                                                                  | 1.377335121        | 2               | 3.72862   |
| O70199        | NLFFSTNIDDAIR                                                                      | 1.365677505        | 2               | 3.14745   |
| O70199        | VLDGLHNELQTIGFQIETIGK                                                              | 1.05004829         | 2               | 5.3351    |
| O70199        | VLIGGDETPEGQR                                                                      | 1.116920137        | 2               | 3.61672   |
| O70199        | VTVVDVNEAR                                                                         | 0.995708599        | 2               | 3.36335   |
| O70199        | YWQQVIDMNDYQR                                                                      | 0.925731235        | 2               | 4.83384   |
| <b>O70251</b> | <b>EF1B Elongation factor 1_beta</b>                                               | <b>1.109462111</b> | <b>0.001282</b> | <b>4</b>  |
| O70251        | SIQADGLVWGSSK                                                                      | 1.124069374        | 2               | 3.76508   |
| O70251        | SSILLDVKPWDEDEDMTK                                                                 | 0.950548539        | 2               | 4.20245   |
| O70251        | SSILLDVKPWDEDEDMTKLEECVR                                                           | 0.945444015        | 3               | 5.13022   |
| O70251        | TPAGLQVLNDYLADK                                                                    | 1.77731112         | 2               | 4.09576   |
| <b>O70351</b> | <b>HCD2 3_hydroxyacyl_CoA dehydrogenase type_2</b>                                 | <b>1.138528732</b> | <b>9.9E-20</b>  | <b>16</b> |
| O70351        | GGIVGMTLPIAR                                                                       | 0.83034066         | 2               | 3.35658   |
| O70351        | GLVAVITGGASGLGLSTAK                                                                | 1.035266154        | 2               | 4.69011   |
| O70351        | GVIINTASVAAFEGQVQQAAYSASK                                                          | 1.319436015        | 3               | 4.10047   |
| O70351        | IDVAVNCAGIAVAIK                                                                    | 0.903098756        | 2               | 3.97747   |
| O70351        | KLGGNCIFAPANVTSEK                                                                  | 1.145014568        | 2               | 4.46895   |
| O70351        | KNQVHTLEDFQR                                                                       | 1.077271469        | 2               | 4.11424   |
| O70351        | LGDPAEYAHLVQMVIENPFLNGEVIR                                                         | 1.259930164        | 3               | 4.31589   |
| O70351        | LGGNCIFAPANVTSEK                                                                   | 1.436572992        | 2               | 3.48617   |
| O70351        | LVAGVMGQNEPDQGGQR                                                                  | 1.315032253        | 2               | 5.22759   |
| O70351        | LVAGVMGQNEPDQGGQR+Oxidation(5)                                                     | 1.065335978        |                 |           |
| O70351        | LVGQGATAVLLDVPNSEGETEAK                                                            | 1.766103936        | 2               | 5.67453   |
| O70351        | NFLASQVPPFSR                                                                       | 1.008959037        | 2               | 4.55929   |
| O70351        | NQVHTLEDFQR                                                                        | 1.020272158        | 2               | 3.31039   |
| O70351        | RLVGQGATAVLLDVPNSEGETEAK                                                           | 1.165444979        | 2               | 5.04043   |
| O70351        | VINVNLIGTFNVIR                                                                     | 1.159453813        | 2               | 3.79679   |
| O70351        | VVTIAPGLFATPLLTTLPDK                                                               | 1.234711674        | 2               | 5.42001   |
| <b>O70456</b> | <b>1433S 14_3_3 protein sigma</b>                                                  | <b>1.09202373</b>  | <b>1.05E-08</b> | <b>3</b>  |
| O70456        | DSTLIMQLLR                                                                         | 1.386113183        | 2               | 3.4124    |
| O70456        | DSTLIMQLLR+Oxidation(5)                                                            | 1.406006181        |                 |           |
| O70456        | VLSSIEQK                                                                           | 1.095836557        | 2               | 3.25466   |
| <b>O70593</b> | <b>SGTA Small glutamine_rich tetratricopeptide repeat_containing protein alpha</b> | <b>1.236628682</b> | <b>0.10566</b>  | <b>2</b>  |
| O70593        | AIELNPANAVYFCNR                                                                    | 1.552103322        | 2               | 3.00236   |
| O70593        | TPPSEEDSAEAER                                                                      | 1.193826847        | 2               | 2.71005   |
| <b>O88202</b> | <b>LPP60 60 kDa lysophospholipase</b>                                              | <b>1.050194728</b> | <b>0.044655</b> | <b>2</b>  |
| O88202        | AAGAHLSPELEDVGTCLCR                                                                | 1.164322368        | 3               | 3.69083   |
| O88202        | GVDVDACNEDGQSPLLAVR                                                                | 1.158537285        | 2               | 5.22409   |
| <b>O88428</b> | <b>PAPS2 Bifunctional 3__phosphoadenosine 5__phosphosulfate synthase 2</b>         | <b>0.915158767</b> | <b>0.995972</b> | <b>5</b>  |
| O88428        | GCTVWLTGLSGAGK                                                                     | 0.915037145        | 2               | 2.84848   |
| O88428        | GIHELFPENK                                                                         | 1.030698954        | 2               | 2.61167   |
| O88428        | NLGFSAGDREENIR                                                                     | 1.014312024        | 2               | 3.36161   |
| O88428        | STNVVYQAHHVSR                                                                      | 1.209724943        | 2               | 3.47406   |
| O88428        | VLSMAPGLTSVEIIPFR                                                                  | 0.851268436        | 2               | 3.31625   |

|               |                                                                                       |                    |                 |           |
|---------------|---------------------------------------------------------------------------------------|--------------------|-----------------|-----------|
| <b>O88491</b> | <b>NSD1 Histone_lysine N_methyltransferase_H3 lysine_36 and H4 lysine_20 specific</b> | <b>0.527041429</b> | <b>4.04E-06</b> | <b>2</b>  |
| O88491        | ENSEGAFGVLLPADAVQKAR                                                                  | 0.45617646         | 2               | 2.34428   |
| O88491        | SGKGEGKLLNNMHEK                                                                       | 1.657438563        | 2               | 2.90662   |
| <b>O88600</b> | <b>HSP74 Heat shock 70 kDa protein 4</b>                                              | <b>0.885656652</b> | <b>0.35649</b>  | <b>14</b> |
| O88600        | AESEEMETSQAGSK                                                                        | 0.853260696        | 2               | 4.51478   |
| O88600        | AGGIETIANEYSDR                                                                        | 1.059196641        | 2               | 3.46386   |
| O88600        | FQESEERPCK                                                                            | 0.527861241        | 2               | 2.3281    |
| O88600        | GCALQCAILSPAFK                                                                        | 0.98496649         | 2               | 4.04677   |
| O88600        | HAEQNGPVDGQDNPQTAAEHGADTAVPSDGDK                                                      | 1.267650601        | 3               | 5.23913   |
| O88600        | LKETAESVLK                                                                            | 0.769515566        | 2               | 2.46405   |
| O88600        | MIMQDKLEK+Oxidation(0)                                                                | 0.923436278        |                 |           |
| O88600        | MQVDQEEPHTTEQQPQTPAENK                                                                | 1.224375726        | 3               | 4.74823   |
| O88600        | NFTTEQVTAMLLSK                                                                        | 0.929885681        | 2               | 3.70579   |
| O88600        | SNLAYDIVQLPTGLTGIK                                                                    | 1.099035445        | 2               | 4.94582   |
| O88600        | SVM DATQIAGLNCLR                                                                      | 0.948054201        | 2               | 2.88958   |
| O88600        | TSTVDLPESQLLWQLDR                                                                     | 0.965028703        | 2               | 3.8491    |
| O88600        | VLATAFDTTLGGR                                                                         | 1.098423123        | 2               | 3.4794    |
| O88600        | WNSPAEEGSSDCEVFPK                                                                     | 0.800595833        | 2               | 3.41448   |
| <b>O88618</b> | <b>FTCD Formimidoyltransferase_cyclodeaminase</b>                                     | <b>1.26529763</b>  | <b>9.9E-20</b>  | <b>21</b> |
| O88618        | AFAACLGAIK                                                                            | 0.979497979        | 2               | 2.88968   |
| O88618        | AGEYEALPEK                                                                            | 1.174736366        | 2               | 2.86383   |
| O88618        | ALLDAAAFYCDK                                                                          | 1.374366893        | 2               | 3.46717   |
| O88618        | ALLDAAAFYCKEK                                                                         | 0.878009286        | 2               | 3.33453   |
| O88618        | EAQELNLPVVGSQLVGLVPLK                                                                 | 1.462756055        | 3               | 4.04388   |
| O88618        | GVSMDECVLCAK                                                                          | 1.167980036        | 2               | 3.90697   |
| O88618        | IIEYLVPSGPEQSLLDASLR                                                                  | 1.238992702        | 2               | 5.13328   |
| O88618        | ISSLLQEAKE                                                                            | 1.682225339        | 2               | 2.71139   |
| O88618        | LAEELNVPVYLGEEAQMPSR                                                                  | 1.605478106        | 2               | 4.97521   |
| O88618        | LAETVSQLWPALQELAQCGNLSCLSDLQVAAK                                                      | 1.617788076        | 4               | 5.01257   |
| O88618        | LFVLEEEHR                                                                             | 0.663479076        | 2               | 2.76659   |
| O88618        | LGLDSLAPFPDK                                                                          | 1.253402195        | 2               | 3.64034   |
| O88618        | LIPFFHAASAQLTSLVDADAR                                                                 | 1.611456723        | 3               | 3.55482   |
| O88618        | MGALDVCFPIVPR                                                                         | 0.972224744        | 2               | 3.79445   |
| O88618        | MGALDVCFPIVPR+Oxidation(0)                                                            | 0.929093885        |                 |           |
| O88618        | NLAQVSTNLLDFEVTALHTVYEEAR                                                             | 1.442938265        | 3               | 4.50577   |
| O88618        | QAEWVPDFGPPSFPVSWGATVTGAR                                                             | 1.388626809        | 2               | 4.15659   |
| O88618        | TCALQEGLR                                                                             | 1.567167636        | 2               | 2.87365   |
| O88618        | TQAALVLGSLER                                                                          | 1.05647854         | 2               | 5.06596   |
| O88618        | TVYTFVGQPECVVEGALSAAR                                                                 | 2.43314298         | 2               | 4.85422   |
| O88618        | VQGIGWYLEEK                                                                           | 1.198670513        | 2               | 3.18291   |
| <b>O88637</b> | <b>PCY2 Ethanolamine_phosphate cytidyltransferase</b>                                 | <b>1.214693286</b> | <b>0.005601</b> | <b>5</b>  |
| O88637        | GPPVFTQEER                                                                            | 1.147930144        | 2               | 2.73447   |
| O88637        | HKGPPVFTQEER                                                                          | 1.105811992        | 2               | 2.62439   |
| O88637        | TQGVSTDLVGR                                                                           | 1.138494211        | 2               | 2.77142   |
| O88637        | WVDEVVPAAPYVTTLETLDK                                                                  | 1.267597853        | 2               | 3.14246   |
| O88637        | YVSEVVIGAPYSVTAELLNHFK                                                                | 1.150274202        | 3               | 3.42552   |
| <b>O88656</b> | <b>ARC1B Actin_related protein 2/3 complex subunit 1B</b>                             | <b>0.915028906</b> | <b>0.966104</b> | <b>2</b>  |
| O88656        | ASSEGGAATGAGLDSLHK                                                                    | 0.915010245        | 2               | 4.38491   |
| O88656        | NSVSQISVLSGGK                                                                         | 0.950521921        | 2               | 2.44763   |
| <b>O88696</b> | <b>CLPP Putative ATP_dependent Clp protease proteolytic subunit_mitochondrial</b>     | <b>0.957760336</b> | <b>0.628432</b> | <b>2</b>  |
| O88696        | GQATDIAIQAEIIMK                                                                       | 1.001256771        | 2               | 3.61874   |
| O88696        | VLVHPPQDGEDEPELVQK                                                                    | 1.078529077        | 3               | 4.49923   |
| <b>O88746</b> | <b>TOM1 Target of Myb protein 1</b>                                                   | <b>1.045535399</b> | <b>0.646704</b> | <b>3</b>  |

|               |                                                                     |                    |                 |           |
|---------------|---------------------------------------------------------------------|--------------------|-----------------|-----------|
| O88746        | GDSLQHATPLPTPAVLPGDSPTPTPEQIGK                                      | 0.893015125        | 3               | 5.87624   |
| O88746        | QQSTGAIPATQAR                                                       | 1.066424064        | 2               | 2.61495   |
| O88746        | YEAPQTTDGLAGALDAR                                                   | 1.063262619        | 2               | 4.19948   |
| <b>O88761</b> | <b>PSMD1 26S proteasome non_ATPase regulatory subunit 1</b>         | <b>1.612473989</b> | <b>0.022862</b> | <b>4</b>  |
| O88761        | DTSEDIIEELVEPVAAHGPK                                                | 0.901131259        | 2               | 3.81846   |
| O88761        | QCVENADLPEGEK                                                       | 1.051571239        | 2               | 2.50199   |
| O88761        | TPEQCPSVVLLSESYNPHVR                                                | 1.614824592        | 3               | 4.43877   |
| O88761        | TVGTPIASVPGSTNTGTVPGPEK                                             | 1.086563799        | 2               | 3.73329   |
| <b>O88767</b> | <b>PARK7 Protein DJ_1</b>                                           | <b>0.967810718</b> | <b>0.045308</b> | <b>6</b>  |
| O88767        | DVVICPDTSLEEAK                                                      | 1.465147142        | 2               | 3.31286   |
| O88767        | GAEEMETVIPVDIMR                                                     | 0.893431646        | 2               | 4.05      |
| O88767        | GAEEMETVIPVDIMR+Oxidation(13)                                       | 0.711491626        |                 |           |
| O88767        | GLIAAICAGPTALLAHEVGFCK                                              | 0.990304297        | 2               | 4.89735   |
| O88767        | TQGPYDVVVLPGGNLGAQNLSESALVK                                         | 0.994979091        | 2               | 4.7234    |
| O88767        | VTVAGLAGKDPVQCSR                                                    | 0.828937678        | 2               | 4.44527   |
| <b>O88794</b> | <b>PNPO Pyridoxine 5__phosphate oxidase</b>                         | <b>1.231261037</b> | <b>0.174264</b> | <b>2</b>  |
| O88794        | KKNEELGQLYR                                                         | 1.408270961        | 2               | 2.77987   |
| O88794        | SSQIGAVVSR                                                          | 0.87208974         | 2               | 2.89101   |
| <b>O88801</b> | <b>HOME2 Homer protein homolog 2</b>                                | <b>0.90339461</b>  | <b>0.043642</b> | <b>2</b>  |
| O88801        | EKEMELK                                                             | 0.967277009        | 1               | 2.10689   |
| O88801        | EKNTQLK                                                             | 0.39734663         | 1               | 2.02013   |
| <b>O88813</b> | <b>ACSL5 Long_chain_fatty_acid__CoA ligase 5</b>                    | <b>0.935312038</b> | <b>5.66E-15</b> | <b>15</b> |
| O88813        | AILEDLQK                                                            | 0.966799316        | 1               | 2.4232    |
| O88813        | ATMLIENVEK                                                          | 0.978532365        | 2               | 2.37086   |
| O88813        | ATMLIENVEKDLTPGLK                                                   | 1.139076829        | 2               | 2.45119   |
| O88813        | ATMLIENVEKDLTPGLK+Oxidation(2)                                      | 0.91721163         |                 |           |
| O88813        | FFQTQIK                                                             | 0.760990978        | 1               | 1.99106   |
| O88813        | GLAVSDNGPCLGYR                                                      | 0.882819823        | 2               | 3.81037   |
| O88813        | GSFEELCQNQCVK                                                       | 0.952703892        | 2               | 4.28746   |
| O88813        | IGFFQGDIR                                                           | 1.581841934        | 2               | 3.32143   |
| O88813        | LVQGVIFSCGGK                                                        | 1.804070857        | 2               | 2.86649   |
| O88813        | NNDLILYYFSDAK                                                       | 0.928966447        | 2               | 3.72462   |
| O88813        | SFLIGVVVPDPELSPFAAK                                                 | 0.817355119        | 2               | 4.33025   |
| O88813        | SIFVHPEPFSIENLLTPTLK                                                | 1.620397594        | 2               | 3.03253   |
| O88813        | SRPILQVFVHGESLR                                                     | 1.845436224        | 3               | 3.86181   |
| O88813        | TQEVLDKDGWLHTGDIGR                                                  | 0.769712708        | 3               | 4.39194   |
| O88813        | TVILMDPFDDLMK                                                       | 0.715331996        | 2               | 3.12883   |
| <b>O88867</b> | <b>KMO Kynurenine 3_monooxygenase</b>                               | <b>0.973761795</b> | <b>0.407914</b> | <b>4</b>  |
| O88867        | AVGLEDQIVSK                                                         | 0.884654972        | 2               | 2.65423   |
| O88867        | DLLTAVESYPNAK                                                       | 1.009585248        | 2               | 2.79264   |
| O88867        | NFPDAIPLMGEQALMR                                                    | 1.081203466        | 2               | 2.86232   |
| O88867        | NFQVDVYEAR                                                          | 0.940607118        | 2               | 2.88841   |
| <b>O88941</b> | <b>MOGS Mannosyl_oligosaccharide glucosidase</b>                    | <b>1.284789253</b> | <b>8.92E-06</b> | <b>4</b>  |
| O88941        | DLALPTLLNPK                                                         | 1.122761716        | 2               | 2.52993   |
| O88941        | DQASEQLVGGQLTR                                                      | 1.267416527        | 2               | 2.9052    |
| O88941        | LGPLLDVLADSR                                                        | 1.311057268        | 2               | 3.29382   |
| O88941        | MDPSLFPVPLFSGVPSR                                                   | 1.094270067        | 2               | 2.71819   |
| <b>O88986</b> | <b>KBL 2_ amino_3_ketobutyrate coenzyme A ligase_ mitochondrial</b> | <b>1.017591602</b> | <b>0.607502</b> | <b>2</b>  |
| O88986        | GTDELLGVMDQVTIINSTLKG                                               | 1.055643897        | 2               | 3.31637   |
| O88986        | HLDMADLEAK                                                          | 0.788628707        | 2               | 2.3152    |
| <b>O88989</b> | <b>MDHC Malate dehydrogenase_ cytoplasmic</b>                       | <b>1.21859756</b>  | <b>9.9E-20</b>  | <b>8</b>  |
| O88989        | DLDVAVLVGSMPR                                                       | 1.513174255        | 3               | 4.05575   |
| O88989        | ELTEEKETAFFLSSA                                                     | 2.590805296        | 2               | 3.70394   |
| O88989        | EVGVYEALKDDSWLK                                                     | 1.418949667        | 2               | 3.7522    |
| O88989        | FVEGLPINDFSR                                                        | 1.107967707        | 2               | 3.63088   |

|               |                                                             |                    |                 |           |
|---------------|-------------------------------------------------------------|--------------------|-----------------|-----------|
| O88989        | GEFITTVQQR                                                  | 1.207270934        | 2               | 4.27014   |
| O88989        | LGVTADDVK                                                   | 1.420812608        | 2               | 2.85596   |
| O88989        | NVIWGNHSSTQYPDVNHAK                                         | 1.317991938        | 2               | 5.61903   |
| O88989        | VIVVGNPANTNCLTASK                                           | 1.362235095        | 2               | 5.38911   |
| <b>O88990</b> | <b>ACTN3 Alpha_actinin_3</b>                                | <b>1.096579154</b> | <b>4.45E-13</b> | <b>12</b> |
| O88990        | AGTQIENIEEFR                                                | 0.87822979         | 2               | 3.57939   |
| O88990        | CQAICDQWDNLGLTLQK                                           | 0.390751406        | 2               | 5.16803   |
| O88990        | CQLEINFNTLQTK                                               | 1.131147027        | 2               | 4.11822   |
| O88990        | FAIQDISVEETSAK                                              | 0.686511146        | 2               | 3.66422   |
| O88990        | GKEEMLNQHDYESASLQEV                                         | 1.012315637        | 3               | 4.78458   |
| O88990        | GLSQEQLNEFR                                                 | 0.323125269        | 2               | 2.60865   |
| O88990        | HEAFESDLAAHQDR                                              | 0.786391282        | 3               | 4.49843   |
| O88990        | RHEAFESDLAAHQDR                                             | 0.09175148         | 3               | 4.79857   |
| O88990        | SGNPYITLSSQDINN                                             | 0.798392683        | 2               | 3.80295   |
| O88990        | VEHIAALAEQLNELDYHEAASVNSR                                   | 1.336864508        | 3               | 4.12423   |
| O88990        | VGWEQLLSIAR                                                 | 0.815814535        | 2               | 2.56304   |
| O88990        | VLAVNQENEK                                                  | 0.144924968        | 2               | 2.4908    |
| <b>O88994</b> | <b>MOSC2 MOSC domain_containing protein 2_mitochondrial</b> | <b>0.716641017</b> | <b>0.529983</b> | <b>2</b>  |
| O88994        | CVLTTVDPDTGIIDR                                             | 0.71420254         | 2               | 4.11147   |
| O88994        | RQLQQVGTVSK                                                 | 0.745204585        | 2               | 2.50264   |
| <b>O89000</b> | <b>DPYD Dihydropyrimidine dehydrogenase [NADP_]</b>         | <b>1.047611567</b> | <b>0.55128</b>  | <b>7</b>  |
| O89000        | EGGADGVTATNTVSGMLGLK                                        | 0.895995969        | 2               | 3.8297    |
| O89000        | GAVIVLGAGDTAFDCATSALR                                       | 1.420081761        | 2               | 2.31492   |
| O89000        | GMGLACGQDPELVR                                              | 1.138537127        | 2               | 3.18841   |
| O89000        | GTTSGPLYGPGQSSFLNIEISEK                                     | 1.368991956        | 2               | 3.51943   |
| O89000        | LTPNVTDIVSIAR                                               | 1.468129763        | 2               | 2.34979   |
| O89000        | QEYVGGSTSEIPQFR                                             | 1.034451187        | 2               | 3.62112   |
| O89000        | TEQDETGNWVEDEEQIVR                                          | 1.023755135        | 2               | 4.71943   |
| <b>O89032</b> | <b>SPD2A SH3 and PX domain_containing protein 2A</b>        | <b>1.241436323</b> | <b>0.325688</b> | <b>2</b>  |
| O89032        | DDSDINTSKTGEVSKR                                            | 1.392997292        | 2               | 2.54739   |
| O89032        | EGWAPASYIDKRK                                               | 1.026880815        | 1               | 1.97345   |
| <b>O89046</b> | <b>COR1B Coronin_1B</b>                                     | <b>1.235096068</b> | <b>1.16E-07</b> | <b>3</b>  |
| O89046        | NDQCYEDIR                                                   | 0.941630915        | 2               | 2.82929   |
| O89046        | NVLSDSKPAGYSR                                               | 1.278097043        | 2               | 3.12985   |
| O89046        | SGVSTATAITDIPSGNLAGSGEAGK                                   | 0.596673147        | 2               | 3.81456   |
| <b>O89049</b> | <b>TRXR1 Thioredoxin reductase 1_cytoplasmic</b>            | <b>1.239425581</b> | <b>0.059684</b> | <b>6</b>  |
| O89049        | IEQIEAGTPGR                                                 | 0.978294174        | 2               | 3.42082   |
| O89049        | IEQIEAGTPGRLK                                               | 0.924742019        | 2               | 2.45242   |
| O89049        | LELTPVAIQAGR                                                | 1.194920023        | 2               | 2.66957   |
| O89049        | STNSEETIEDEFNTVLLAVGR                                       | 1.155547987        | 2               | 4.22869   |
| O89049        | VVGFHVLGPNAGEVTQGFAAALK                                     | 0.967422146        | 3               | 4.03513   |
| O89049        | WGLGGTCVNVGCIPK                                             | 0.78848918         | 2               | 2.92206   |
| <b>P00173</b> | <b>CYB5 Cytochrome b5</b>                                   | <b>1.007457734</b> | <b>0.999996</b> | <b>6</b>  |
| P00173        | EQAGGDATENFEDVGHSTDAR                                       | 1.056220013        | 2               | 5.4402    |
| P00173        | FLEEHPGGEEVLR                                               | 0.985002787        | 2               | 4.33106   |
| P00173        | STWVILHHK                                                   | 0.931797279        | 2               | 2.79306   |
| P00173        | TYIIGELHPDDR                                                | 1.018828437        | 2               | 4.24473   |
| P00173        | VYDLTK                                                      | 0.954186212        | 1               | 2.13506   |
| P00173        | YTLLEIQK                                                    | 1.039063104        | 2               | 3.01781   |
| <b>P00388</b> | <b>N CPR NADPH_cytochrome P450 reductase</b>                | <b>2.32817399</b>  | <b>9.9E-20</b>  | <b>12</b> |
| P00388        | DGALTQLNVAFSR                                               | 0.748372451        | 2               | 2.41812   |
| P00388        | DVQNTFYDIVAEFGPMEHTQAVDYVK                                  | 1.689625908        | 3               | 4.79523   |
| P00388        | FAVFGNGK                                                    | 2.170571585        | 2               | 2.50869   |
| P00388        | GMSADPEEYDLADLSSLPEIDK                                      | 1.328371862        | 2               | 5.05551   |

|               |                                                         |                    |                 |           |
|---------------|---------------------------------------------------------|--------------------|-----------------|-----------|
| P00388        | GVATSWLR                                                | 1.624050511        | 2               | 2.33693   |
| P00388        | LEQLGAQR                                                | 1.607323423        | 2               | 2.64041   |
| P00388        | NIIVFYGSQTGTAEFFANR                                     | 2.459279961        | 2               | 3.17912   |
| P00388        | RSDEDYLYR                                               | 1.295663107        | 2               | 3.36437   |
| P00388        | SDEDYLYR                                                | 1.604062066        | 2               | 2.6083    |
| P00388        | SYENQKPPFDAK                                            | 1.666356645        | 2               | 3.25428   |
| P00388        | TALTYLDITNPPR                                           | 1.302804245        | 2               | 2.50623   |
| P00388        | TNVLYELAQYASEPSEQEHLHK                                  | 2.376665122        | 3               | 3.68566   |
| <b>P00406</b> | <b>COX2 Cytochrome c oxidase subunit 2</b>              | <b>1.126193869</b> | <b>0.022216</b> | <b>5</b>  |
| P00406        | ILYMMDEINNPVLTVK                                        | 0.557097266        | 2               | 2.30773   |
| P00406        | LLEVDNR                                                 | 1.349301256        | 2               | 2.52598   |
| P00406        | MLISSEDLHWSWAIPSLGLK                                    | 0.500055332        | 2               | 3.57027   |
| P00406        | VVLPMEPIR                                               | 1.051283476        | 2               | 2.68075   |
| P00406        | VVLPMEPIR+Oxidation(4)                                  | 1.546664376        |                 |           |
| <b>P00481</b> | <b>OTC Ornithine carbamoyltransferase_mitochondrial</b> | <b>0.968478266</b> | <b>2.03E-09</b> | <b>16</b> |
| P00481        | FGMHLQAATPK                                             | 1.041204897        | 3               | 4.12962   |
| P00481        | GEYPLLLQGK                                              | 0.877568094        | 2               | 3.21105   |
| P00481        | GGNVLITDTWISMGQEDEK                                     | 1.354117583        | 2               | 4.99595   |
| P00481        | GGNVLITDTWISMGQEDEKK                                    | 1.476837308        | 2               | 4.64028   |
| P00481        | GLTLSWIGDGNLHLSIMMSAAK                                  | 1.397339796        | 2               | 4.19529   |
| P00481        | GYEPDPNIVK                                              | 0.988238231        | 2               | 2.69013   |
| P00481        | KPEEVDDDEVFYSR                                          | 3.262545503        | 2               | 3.52652   |
| P00481        | LQAFQGYQVTMK                                            | 1.620546512        | 2               | 3.83999   |
| P00481        | LSTETGFALLGGHPSFLTQDIHLGVNESLDTAR                       | 1.242414162        | 3               | 5.76135   |
| P00481        | QKGEYPLLLQGK                                            | 1.162584341        | 2               | 2.9941    |
| P00481        | SLGMIFEK                                                | 0.757714382        | 2               | 2.4414    |
| P00481        | SLVFPEAENR                                              | 1.070681708        | 2               | 2.64933   |
| P00481        | SLVFPEAENRK                                             | 1.102807769        | 2               | 2.95112   |
| P00481        | VLSSMTDAVLAR                                            | 0.975960879        | 2               | 3.9806    |
| P00481        | VLSSMTDAVLAR+Oxidation(4)                               | 1.34416321         |                 |           |
| P00481        | YGKPVQSQVQLK                                            | 0.310169973        | 2               | 3.00472   |
| <b>P00502</b> | <b>GSTA1 Glutathione S transferase alpha_1</b>          | <b>0.889531422</b> | <b>1</b>        | <b>2</b>  |
| P00502        | FIQSPEDLEK                                              | 0.697253224        | 2               | 2.58729   |
| P00502        | WLLAAAGVEFDEK                                           | 0.782122783        | 2               | 4.32668   |
| <b>P00507</b> | <b>AATM Aspartate aminotransferase_mitochondrial</b>    | <b>1.071401982</b> | <b>7.77E-16</b> | <b>18</b> |
| P00507        | ASAELALGENSEVLK                                         | 1.100581871        | 2               | 4.69834   |
| P00507        | DAGMQLQGYR                                              | 1.454926767        | 2               | 3.03907   |
| P00507        | DDNGKPYVLPVSR                                           | 1.143568366        | 2               | 2.74083   |
| P00507        | EGSSHNVQHITDQIGMFCFTGLKPEQVER                           | 2.164076177        | 3               | 5.41396   |
| P00507        | EYLPIGGLADFCK                                           | 1.13908381         | 2               | 2.81936   |
| P00507        | FVTVQTISGTGALR                                          | 0.971082711        | 2               | 5.03945   |
| P00507        | HFIEQGINVCLCQSYAK                                       | 0.987004727        | 2               | 4.52258   |
| P00507        | IAATILTSPDLR                                            | 3.362646075        | 2               | 3.09374   |
| P00507        | IPEQSVLLLHACAHNPTGVDPREPWK                              | 1.985367243        | 3               | 4.31031   |
| P00507        | ISVAGVTSGNVGYLAHAIHQVTK                                 | 1.30326586         | 2               | 4.78293   |
| P00507        | KQWLQEVK                                                | 0.97870118         | 1               | 2.13861   |
| P00507        | MNLGVGAYR                                               | 0.931526501        | 2               | 2.9346    |
| P00507        | NLDKEYLPIGGLADFCK                                       | 1.069751909        | 2               | 5.33837   |
| P00507        | NMGLYGER                                                | 0.933683952        | 2               | 2.5068    |
| P00507        | TCGFDFSGALEDISK                                         | 1.169391234        | 2               | 4.8215    |
| P00507        | TQLVSNLK                                                | 0.977634933        | 2               | 2.96101   |
| P00507        | VGAFTVVCK                                               | 1.13839158         | 2               | 3.36723   |
| P00507        | VGASFLQR                                                | 1.405710082        | 2               | 3.00444   |
| <b>P00564</b> | <b>KCRM Creatine kinase M_type</b>                      | <b>0.757251259</b> | <b>9.9E-20</b>  | <b>11</b> |
| P00564        | DLPDPIIQR                                               | 0.825048982        | 2               | 2.49012   |

|               |                                               |                    |                 |           |
|---------------|-----------------------------------------------|--------------------|-----------------|-----------|
| P00564        | FEEILTR                                       | 0.096886286        | 2               | 2.46994   |
| P00564        | GGDDLDPNYVLSSR                                | 0.095616615        | 2               | 4.79852   |
| P00564        | GQSIDDMIPAQK                                  | 0.022094855        | 2               | 3.37611   |
| P00564        | GTGGVDTAAVGAVFDISNADR                         | 0.081733294        | 2               | 6.06708   |
| P00564        | LGSSEVEQVQLVVDGVK                             | 0.124564155        | 2               | 4.91821   |
| P00564        | LSVEALNSLTGEFK                                | 0.204146082        | 2               | 4.33885   |
| P00564        | RGTGGVDTAAVAVFDISNADR                         | 0.109891318        | 2               | 5.88377   |
| P00564        | SMTEQEQQLIDHFLFDKPVSPLLASGMAR                 | 0.101164572        | 3               | 5.87281   |
| P00564        | SMTEQEQQLIDHFLFDKPVSPLLASGMAR+Oxidation(1)    | 0.173413785        |                 |           |
| P00564        | TDLNHENLK                                     | 0.528970444        | 2               | 2.52915   |
| <b>P00787</b> | <b>CATB Cathepsin B</b>                       | <b>1.189942824</b> | <b>0.002645</b> | <b>5</b>  |
| P00787        | GENHCGIESEIVAGIPR                             | 1.156148789        | 2               | 4.52138   |
| P00787        | HEAGDVMGGHAIR                                 | 1.037447715        | 3               | 3.56083   |
| P00787        | HEAGDVMGGHAIR+Oxidation(6)                    | 1.828301615        |                 |           |
| P00787        | MCEAGYSTSYKEDK                                | 1.196359924        | 2               | 3.88089   |
| P00787        | NGPVEGAFTVFSDFLTYK                            | 1.546199669        | 2               | 3.26154   |
| <b>P00884</b> | <b>ALDOB Fructose_bisphosphate aldolase B</b> | <b>1.25176293</b>  | <b>9.9E-20</b>  | <b>19</b> |
| P00884        | ALQASALAAWGGK                                 | 1.293584383        | 2               | 4.8602    |
| P00884        | ATQEAFMK                                      | 1.181162478        | 2               | 2.60943   |
| P00884        | ATQEAFMK+Oxidation(6)                         | 1.799296586        |                 |           |
| P00884        | ELLFSVDNSISQSIGGVILFHETLYQK                   | 2.241439678        | 3               | 3.79471   |
| P00884        | ELSEIAQR                                      | 3.203456624        | 1               | 2.11532   |
| P00884        | ETTIQGLDGLSER                                 | 1.401499599        | 2               | 4.0252    |
| P00884        | GILAADESVGTMGNR                               | 1.139110949        | 2               | 5.58412   |
| P00884        | GILAADESVGTMGNR+Oxidation(11)                 | 1.48777494         |                 |           |
| P00884        | GIVVGIKLDQGGAPLAGTNK                          | 1.194803567        | 2               | 3.46573   |
| P00884        | IKVENTEENR                                    | 1.499772529        | 2               | 2.4781    |
| P00884        | IKVENTEENRR                                   | 1.267741598        | 2               | 2.9236    |
| P00884        | ISDQCPSLAIQENANALAR                           | 1.17555975         | 2               | 6.21831   |
| P00884        | KELSEIAQR                                     | 0.591359401        | 2               | 2.84368   |
| P00884        | KYTPEQVAMATVTALHR                             | 1.031249434        | 3               | 5.70602   |
| P00884        | KYTPEQVAMATVTALHR+Oxidation(8)                | 1.341647793        |                 |           |
| P00884        | LDQGGAPLAGTNK                                 | 1.2336705          | 2               | 4.59691   |
| P00884        | YASICQQNGLVPIVEEVLDPGDHDLHCQYVSEK             | 2.088994786        | 3               | 4.99949   |
| P00884        | YTPEQVAMATVTALHR                              | 1.062488712        | 2               | 4.5543    |
| P00884        | YTPEQVAMATVTALHR+Oxidation(7)                 | 0.809841709        |                 |           |
| <b>P01015</b> | <b>ANGT Angiotensinogen</b>                   | <b>1.031415572</b> | <b>0.467465</b> | <b>3</b>  |
| P01015        | GSYNLQDLAQAQK                                 | 1.009585248        | 2               | 2.80368   |
| P01015        | SLDLSTDPVLAAQK                                | 1.049680419        | 2               | 3.31712   |
| P01015        | STCAQLENPSVETLPEPTFEPVPIQAK                   | 0.243682552        | 2               | 3.91577   |
| <b>P01026</b> | <b>CO3 Complement C3</b>                      | <b>1.099496295</b> | <b>0.356344</b> | <b>17</b> |
| P01026        | AAVFNHFISDGVK                                 | 1.22940009         | 2               | 2.35479   |
| P01026        | ACEPGVDYVYK                                   | 0.871163597        | 2               | 2.57538   |
| P01026        | ADIGCTPGSGK                                   | 0.984395737        | 2               | 2.8417    |
| P01026        | DSCVGTLVVKG DPR                               | 0.808250319        | 2               | 2.40944   |
| P01026        | EYVLPSEFVLVEPTEK                              | 0.942212868        | 2               | 3.25405   |
| P01026        | IFTVDNLLPVGK                                  | 0.931226291        | 2               | 3.10525   |
| P01026        | IGLQEVEVK                                     | 1.131859479        | 2               | 2.38234   |
| P01026        | RVPVVTQGSDAQALQTQDDGVAK                       | 1.166708358        | 3               | 5.53011   |
| P01026        | SGIPIVTSPIYQIHFTK                             | 1.516371106        | 2               | 3.20962   |
| P01026        | SGSDEVQAGQER                                  | 1.293918483        | 2               | 4.08483   |
| P01026        | SSVAVPYVIVPLK                                 | 1.649342992        | 2               | 3.15132   |
| P01026        | TVLTGATGHLNR                                  | 1.075865142        | 2               | 3.09662   |
| P01026        | VELKPGDNLNVNFHLR                              | 1.160891613        | 3               | 5.34108   |
| P01026        | VHQFFNVGLIQPGSVK                              | 1.585876303        | 3               | 3.97146   |
| P01026        | VLIEDGSGEAVLSR                                | 1.074145817        | 2               | 4.53024   |

|               |                                             |                    |                 |           |
|---------------|---------------------------------------------|--------------------|-----------------|-----------|
| P01026        | VPVVTQGSDAQALTQDDGVAK                       | 1.273705585        | 2               | 5.9039    |
| P01026        | VTIKPAPETAK                                 | 0.986932504        | 2               | 2.53537   |
| <b>P01048</b> | <b>KNT1 T_kininogen 1</b>                   | <b>0.57883875</b>  | <b>0.3504</b>   | <b>2</b>  |
| P01048        | FSVATQICNITPGK                              | 0.623690738        | 2               | 2.84336   |
| P01048        | TELTADCETK                                  | 0.332211177        | 2               | 2.37923   |
| <b>P01946</b> | <b>HBA Hemoglobin subunit alpha_1/2</b>     | <b>0.53023819</b>  | <b>7.46E-12</b> | <b>9</b>  |
| P01946        | AADHVEDLPGALSTLSDLHAHK                      | 0.450847031        | 3               | 7.32668   |
| P01946        | FLASVSTVLTSK                                | 0.373500995        | 2               | 3.90276   |
| P01946        | FLSHCLLVTLACHHPGDFTPAMHASLDK                | 0.46613773         | 4               | 4.65393   |
| P01946        | FLSHCLLVTLACHHPGDFTPAMHASLDKFLASVSTVLTSK    | 0.453926576        | 4               | 6.33036   |
| P01946        | IGGHGGEYGEEALQR                             | 0.344973636        | 3               | 4.87089   |
| P01946        | LRVDPVNFK                                   | 0.565622853        | 2               | 2.58322   |
| P01946        | MFAAFPTTK                                   | 0.479367214        | 2               | 2.74522   |
| P01946        | MFAAFPTTK+Oxidation(0)                      | 0.397118027        |                 |           |
| P01946        | TYFSHIDVSPGSAQVK                            | 0.497237771        | 2               | 5.17535   |
| <b>P02089</b> | <b>HBB2 Hemoglobin subunit beta_2</b>       | <b>0.36749882</b>  | <b>2.85E-06</b> | <b>4</b>  |
| P02089        | GTFASLSELHCDK                               | 0.42569313         | 2               | 3.17864   |
| P02089        | LHVDPENFR                                   | 0.445806385        | 2               | 2.63354   |
| P02089        | YFDSFGDLSSASAIMGNPK                         | 0.338193842        | 2               | 6.34342   |
| P02089        | YFDSFGDLSSASAIMGNPK+Oxidation(14)           | 0.292200669        |                 |           |
| <b>P02091</b> | <b>HBB1 Hemoglobin subunit beta_1</b>       | <b>0.519341304</b> | <b>0.000244</b> | <b>9</b>  |
| P02091        | AAVNLWGK                                    | 0.770967069        | 2               | 2.59375   |
| P02091        | EFTPCAQAAFQK                                | 0.460018932        | 2               | 2.99166   |
| P02091        | GTFASLSELHCDK                               | 0.507268649        | 2               | 4.27486   |
| P02091        | GTFASLSELHCDKLHVDPENFR                      | 0.436553553        | 3               | 3.48348   |
| P02091        | KVINAFNDGLK                                 | 0.460522845        | 3               | 3.68183   |
| P02091        | LLGNMIVIVLGHHLGK                            | 0.506376984        | 4               | 4.79843   |
| P02091        | VINAFNDGLK                                  | 0.450843537        | 2               | 2.89435   |
| P02091        | VNPDDVGGEALGR                               | 0.312721903        | 2               | 4.02789   |
| P02091        | VVAGVASALAHK                                | 0.49849401         | 2               | 3.61392   |
| <b>P02401</b> | <b>RLA2 60S acidic ribosomal protein P2</b> | <b>1.396641139</b> | <b>9.9E-20</b>  | <b>6</b>  |
| P02401        | ILDSVGIEADDER                               | 1.408270706        | 2               | 4.59749   |
| P02401        | KILDSVGIEADDER                              | 1.473566327        | 2               | 3.83042   |
| P02401        | LASVPAGGAVAVSAAPGSAAPAAGSAPAAAAEEK          | 1.470287791        | 3               | 6.3062    |
| P02401        | NIEDVIAQGVGK                                | 1.130240782        | 2               | 4.72221   |
| P02401        | VISELNGK                                    | 1.211178188        | 1               | 2.05421   |
| P02401        | YVASYLALGGNSNPSAK                           | 1.512823934        | 2               | 4.93025   |
| <b>P02563</b> | <b>MYH6 Myosin_6</b>                        | <b>0.721770191</b> | <b>0.117644</b> | <b>3</b>  |
| P02563        | DTQLQLDDAVR                                 | 0.929548779        | 2               | 2.67683   |
| P02563        | VKLEQQVDDLEGSLEQEK                          | 0.311258303        | 2               | 5.15723   |
| P02563        | VKLEQQVDDLEGSLEQEKK                         | 0.253008924        | 3               | 3.49429   |
| <b>P02564</b> | <b>MYH7 Myosin_7</b>                        | <b>0.406781096</b> | <b>9.9E-20</b>  | <b>42</b> |
| P02564        | ALQEAHQALDDLQAEEDKVNTLTK                    | 0.055520002        | 3               | 6.34464   |
| P02564        | ANDDLKENIAIVER                              | 0.286848929        | 2               | 3.52503   |
| P02564        | AQLEFNQIK                                   | 0.176394886        | 1               | 1.95812   |
| P02564        | DLEEATLQHEATAAALR                           | 0.250198736        | 2               | 5.20258   |
| P02564        | DTQIQLDDAVR                                 | 0.929548779        | 2               | 2.67683   |
| P02564        | EDQVMQNPVK                                  | 0.595808942        | 2               | 3.24456   |
| P02564        | ELENELEAQKR                                 | 0.299564229        | 2               | 2.88208   |
| P02564        | EQYEEETK                                    | 0.257216453        | 1               | 3.03225   |
| P02564        | GQNVQVAVYAGALAK                             | 0.369337329        | 2               | 3.7596    |
| P02564        | GTLEDQIQANPALEAFGNAK                        | 0.577596457        | 2               | 5.24874   |
| P02564        | IEDEQALGSQQLK                               | 0.246845055        | 2               | 4.53707   |
| P02564        | IEEEEELEAER                                 | 0.05757179         | 2               | 4.26683   |
| P02564        | ILNPAAIPEGQFIDSR                            | 0.201283378        | 2               | 2.54741   |
| P02564        | KLAEKDEEMEQAK                               | 0.192113206        | 2               | 3.77528   |



|               |                                                             |                    |                 |           |
|---------------|-------------------------------------------------------------|--------------------|-----------------|-----------|
| P02564        | KLAEQELIETSER                                               | 0.434726838        | 2               | 3.5342    |
| P02564        | KLEDECSELKR                                                 | 0.215966486        | 3               | 3.4455    |
| P02564        | KVQHELDEAEER                                                | 0.092361136        | 2               | 3.54145   |
| P02564        | LAEQELIETSER                                                | 0.582678314        | 2               | 3.79983   |
| P02564        | LDEAEQIALK                                                  | 0.146736204        | 2               | 3.96244   |
| P02564        | LEEAGGATSVQIEMNK                                            | 0.853511142        | 2               | 4.3692    |
| P02564        | LELDDVTSNMEQIIK                                             | 0.712751047        | 2               | 4.07054   |
| P02564        | LELQSALEEAASLEHEEGK                                         | 0.932517329        | 2               | 4.13805   |
| P02564        | LLGSLDIDHNQYK                                               | 0.380525593        | 2               | 3.6617    |
| P02564        | LQDAEEAVEAVNAK                                              | 0.428640638        | 2               | 3.96466   |
| P02564        | LQNEIEDLMVDVER                                              | 0.267132975        | 2               | 3.89675   |
| P02564        | LTQESIMDLENDKQQLDER                                         | 0.179173466        | 2               | 4.5516    |
| P02564        | MDADLSQLQTEVEEAVQECR                                        | 0.720001348        | 2               | 5.23518   |
| P02564        | NDLQLQVQAEQDNLADAEER                                        | 0.312275687        | 2               | 5.46321   |
| P02564        | NLQEEISDLTEQLGSGTK                                          | 0.244788628        | 2               | 5.92942   |
| P02564        | NLTEEMAGLDEIIVK                                             | 1.364368423        | 2               | 4.75056   |
| P02564        | NNLLQAELEELR                                                | 0.418814141        | 2               | 3.38818   |
| P02564        | QAEEAEEQANTNLSK                                             | 0.052101974        | 2               | 4.9751    |
| P02564        | QKYEESQSELESSQK                                             | 0.492618133        | 2               | 3.39453   |
| P02564        | QREEQAEPDGTTEEADK                                           | 0.155720804        | 2               | 2.93157   |
| P02564        | QREEQAEPDGTTEEADKSAYLMGLNSADLLK                             | 0.276702963        | 3               | 4.91141   |
| P02564        | SAYLMGLNSADLLK                                              | 0.613918006        | 2               | 2.54576   |
| P02564        | TLEDQMNEHR                                                  | 0.435296831        | 2               | 2.65105   |
| P02564        | VQHELDEAEER                                                 | 0.969960172        | 2               | 3.0625    |
| P02564        | VQHELDEAEERADIAESQVNK                                       | 0.441911039        | 3               | 3.58708   |
| P02564        | VQLLHSQNTSLINQK                                             | 0.057587288        | 2               | 3.98746   |
| P02564        | VRELENELEAEQKR                                              | 0.486417252        | 3               | 3.83671   |
| P02564        | VVDSLQTSLDAETR                                              | 0.311394007        | 2               | 4.19334   |
| <b>P02600</b> | <b>MYL1 Myosin light chain 1/3_ skeletal muscle isoform</b> | <b>0.340949566</b> | <b>5.22E-15</b> | <b>13</b> |
| P02600        | ALGTNPTNAEVK                                                | 0.085109028        | 2               | 3.53679   |
| P02600        | ALGTNPTNAEVKK                                               | 0.154107615        | 2               | 3.30477   |
| P02600        | DQGGYEDFVEGLR                                               | 0.083122802        | 2               | 3.56032   |
| P02600        | EQQEEFKEAFLLFDR                                             | 1.391007807        | 2               | 3.58199   |
| P02600        | IEFEQFLPMMQAISSNK                                           | 0.315316716        | 3               | 3.91804   |
| P02600        | ITLSQVGDVLR                                                 | 0.113391631        | 2               | 3.23915   |
| P02600        | KIEFEQFLPMMQAISSNK                                          | 0.293411066        | 2               | 5.66763   |
| P02600        | KIEFEQFLPMMQAISSNKDQGGYEDFVEGLR                             | 0.391091258        | 4               | 5.26677   |
| P02600        | KPAAAAPAPAPAPAPAPAKPK                                       | #NUM!              | 3               | 4.33093   |
| P02600        | KVLGNPSNEEMNAK                                              | 0.026885005        | 2               | 3.3167    |
| P02600        | KVLGNPSNEEMNAK+Oxidation(10)                                | #NUM!              |                 |           |
| P02600        | VLGNPSNEEMNAK                                               | 0.066378376        | 2               | 3.68934   |
| P02600        | VLGNPSNEEMNAK+Oxidation(9)                                  | 0.171291866        |                 |           |
| <b>P02625</b> | <b>PRVA Parvalbumin alpha</b>                               | <b>0.327890243</b> | <b>1.62E-05</b> | <b>5</b>  |
| P02625        | AIGAFTAADSFHDK                                              | 0.24323789         | 2               | 3.38144   |
| P02625        | KVFHILDKDK                                                  | 0.303487383        | 2               | 2.30184   |
| P02625        | SGFIEEDELGSILK                                              | 0.225962215        | 2               | 4.86067   |
| P02625        | TLMAAGDKDGDGK                                               | 0.117273558        | 2               | 3.18317   |
| P02625        | TLMAAGDKDGDGK+Oxidation(2)                                  | 0.454948741        |                 |           |
| <b>P02650</b> | <b>APOE Apolipoprotein E</b>                                | <b>1.315143202</b> | <b>0.534639</b> | <b>11</b> |
| P02650        | ELEEQLGPVAEETR                                              | 1.188575809        | 2               | 4.29276   |
| P02650        | GRLEEVGNQAR                                                 | 1.113027098        | 2               | 3.51283   |
| P02650        | GWFEPLVEDMQR                                                | 1.044390736        | 2               | 3.44329   |
| P02650        | LEEVGNQAR                                                   | 1.042977987        | 2               | 2.48384   |
| P02650        | LGADMEDLR                                                   | 0.934882123        | 2               | 2.74216   |
| P02650        | LGPLVEQGR                                                   | 1.377495179        | 2               | 2.76663   |
| P02650        | MEEQTQQIR                                                   | 0.818197096        | 2               | 3.15394   |

|               |                                               |                    |                 |           |
|---------------|-----------------------------------------------|--------------------|-----------------|-----------|
| P02650        | NEVNTMLGQSTEELR                               | 1.041278717        | 2               | 4.37572   |
| P02650        | SKMEEQTQQIR                                   | 0.837996389        | 2               | 3.23008   |
| P02650        | SKMEEQTQQIR+Oxidation(2)                      | 1.566698199        |                 |           |
| P02650        | TANLGAGAAQPLR                                 | 1.054991533        | 2               | 3.67759   |
| <b>P02651</b> | <b>APOA4 Apolipoprotein A_IV</b>              | <b>0.753025404</b> | <b>0.285178</b> | <b>2</b>  |
| P02651        | TDVTQQLNLFQDK                                 | 0.654076268        | 2               | 4.37629   |
| P02651        | VSTNIDQLQK                                    | 0.950733198        | 2               | 2.31064   |
| <b>P02680</b> | <b>FIBG Fibrinogen gamma chain</b>            | <b>0.984179062</b> | <b>0.686481</b> | <b>5</b>  |
| P02680        | LSIGDGQQHMGGSK                                | 0.673214267        | 2               | 2.7167    |
| P02680        | VAQLEAQCQEPCK                                 | 1.617732338        | 2               | 3.50944   |
| P02680        | VGPESDKYR                                     | 0.963264474        | 2               | 2.7844    |
| P02680        | YEALLTHESSIR                                  | 0.985569585        | 2               | 3.89451   |
| P02680        | YLQDIYTSNK                                    | 1.079425942        | 2               | 2.44202   |
| <b>P02692</b> | <b>FABPL Fatty acid_binding protein_liver</b> | <b>1.103633238</b> | <b>4.76E-13</b> | <b>11</b> |
| P02692        | AMGLPEDLIQK                                   | 0.917629087        | 2               | 3.7251    |
| P02692        | AMGLPEDLIQK+Oxidation(1)                      | 1.15271137         |                 |           |
| P02692        | GVSEIVHEGK                                    | 0.977388031        | 2               | 3.41016   |
| P02692        | GVSEIVHEGKK                                   | 0.979474301        | 2               | 3.22319   |
| P02692        | SVTEFNGDTITNTMTLGDIVYK                        | 1.021725521        | 2               | 5.53266   |
| P02692        | SVTEFNGDTITNTMTLGDIVYK+Oxidation(13)          | 1.039685764        |                 |           |
| P02692        | SVTEFNGDTITNTMTLGDIVYKR                       | 0.770956132        | 2               | 3.63219   |
| P02692        | VIHNEFTLGEECELETMTGEK                         | 1.00993871         | 3               | 6.10976   |
| P02692        | VIHNEFTLGEECELETMTGEK+Oxidation(16)           | 1.180633018        |                 |           |
| P02692        | YQVQSQENFEPFMK                                | 1.163373857        | 2               | 5.81941   |
| P02692        | YQVQSQENFEPFMK+Oxidation(12)                  | 1.446352886        |                 |           |
| <b>P02696</b> | <b>RET1 Retinol_binding protein 1</b>         | <b>0.942057803</b> | <b>0.049225</b> | <b>5</b>  |
| P02696        | ALDVNVALR                                     | 0.782072483        | 2               | 3.31329   |
| P02696        | CMTTVSWDGDKLQCQVK                             | 0.5016474          | 2               | 4.67222   |
| P02696        | EFEEDLTGIDDR                                  | 0.679848462        | 2               | 2.46823   |
| P02696        | MLSNNFEEYLR                                   | 0.543126498        | 2               | 3.90598   |
| P02696        | MLSNNFEEYLR+Oxidation(0)                      | 0.960254084        |                 |           |
| <b>P02706</b> | <b>ASGR1 Asialoglycoprotein receptor 1</b>    | <b>1.136133582</b> | <b>0.571854</b> | <b>6</b>  |
| P02706        | DYQDFQHLDNENDHHQLQR                           | 1.623704183        | 3               | 4.24623   |
| P02706        | FVQQHMGPLNTWIGLTDQNGPWK                       | 1.338407714        | 3               | 3.50004   |
| P02706        | LVESQLEK                                      | 1.234916579        | 2               | 2.49492   |
| P02706        | SLSCQMAALR                                    | 0.900946802        | 2               | 2.70007   |
| P02706        | WVCETELGK                                     | 0.897203892        | 2               | 2.35827   |
| P02706        | WVDGTDYETGFK                                  | 0.954828292        | 2               | 3.17373   |
| <b>P02770</b> | <b>ALBU Serum albumin</b>                     | <b>1.044314935</b> | <b>5.31E-12</b> | <b>24</b> |
| P02770        | AADKDNCFATEGPNLVAR                            | 1.533050004        | 2               | 4.97209   |
| P02770        | AETFTFHSDICTLPDKEK                            | 2.655643403        | 2               | 4.5045    |
| P02770        | CCAEGDPPACYGTVLAEFQPLVEEPK                    | 0.801096665        | 3               | 5.27084   |
| P02770        | CCSGSLVER                                     | 0.700430461        | 2               | 3.29453   |
| P02770        | CCTLPEAQR                                     | 0.657343396        | 2               | 3.19926   |
| P02770        | ECCHGDILLECADDR                               | 0.769475882        | 2               | 3.62666   |
| P02770        | ECCHGDILLECADDRAELAK                          | 0.660522916        | 2               | 5.18949   |
| P02770        | FKDLGEQHFQK                                   | 0.816848134        | 3               | 4.29038   |
| P02770        | GLVLIAFSQYLQK                                 | 1.043626824        | 2               | 4.14364   |
| P02770        | INKECCHGDILLECADDRAELAK                       | 0.381417           | 3               | 4.70576   |
| P02770        | KQTALAEVVK                                    | 0.820162769        | 3               | 4.08257   |
| P02770        | KYEATLEK                                      | 0.585321071        | 1               | 2.70703   |
| P02770        | LQACCDKPVQLQK                                 | 0.845882954        | 2               | 4.32312   |
| P02770        | LVQEVTFQAK                                    | 0.730323611        | 2               | 3.5895    |
| P02770        | RHPDYSVSLLR                                   | 0.770258835        | 3               | 5.34222   |
| P02770        | SIHTLFGDK                                     | 0.741118573        | 1               | 2.53731   |
| P02770        | TCVADENAENCDK                                 | 0.811235262        | 2               | 4.49672   |
| P02770        | TNCELYEK                                      | 0.838309435        | 2               | 2.89605   |

|               |                                                        |                    |                 |           |
|---------------|--------------------------------------------------------|--------------------|-----------------|-----------|
| P02770        | TVMGDFAQFVVK                                           | 0.575734083        | 2               | 3.72881   |
| P02770        | TVMGDFAQFVVK+Oxidation(2)                              | 0.801306884        |                 |           |
| P02770        | YEATLEK                                                | 0.615578947        | 1               | 1.93876   |
| P02770        | YMCENQATISSK                                           | 0.661009048        | 2               | 4.09582   |
| P02770        | YMCENQATISSK+Oxidation(1)                              | 0.869423086        |                 |           |
| P02770        | YNEVLTQCCTESDK                                         | 0.751392639        | 2               | 5.92113   |
| <b>P02803</b> | <b>MT1 Metallothionein_1</b>                           | <b>4.256216337</b> | <b>9.9E-20</b>  | <b>2</b>  |
| P02803        | MDPNCSCSTGGSCSCSSCGCK                                  | 2.778829284        | 2               | 5.28428   |
| P02803        | SCCSCCPVGCSK                                           | 4.036206351        | 2               | 3.90349   |
| <b>P04041</b> | <b>GPX1 Glutathione peroxidase 1</b>                   | <b>0.798883024</b> | <b>1.12E-05</b> | <b>10</b> |
| P04041        | FLVGPDGVVPR                                            | 0.821668001        | 2               | 3.48274   |
| P04041        | GLVVLGFPCNQFGHQENGK                                    | 0.912085967        | 2               | 4.36598   |
| P04041        | GLVVLGFPCNQFGHQENGNKNEEILNSLK                          | 0.819357239        | 3               | 3.99589   |
| P04041        | NALPAPSDDPALMTDPK                                      | 0.7786429          | 2               | 3.11904   |
| P04041        | NALPAPSDDPALMTDPK+Oxidation(13)                        | 1.212273944        |                 |           |
| P04041        | NDISWNFEK                                              | 0.767831384        | 2               | 2.94232   |
| P04041        | NEEILNSLK                                              | 0.887857816        | 1               | 2.38829   |
| P04041        | TIDIEPDIEALLSK                                         | 0.99037764         | 3               | 4.57769   |
| P04041        | YIIWSPVCR                                              | 0.819022121        | 2               | 3.1103    |
| P04041        | YVRPGGGFEPNFTLFEK                                      | 0.789330039        | 3               | 4.85664   |
| <b>P04167</b> | <b>CP2B2 Cytochrome P450 2B2</b>                       | <b>1.260078964</b> | <b>0.062912</b> | <b>2</b>  |
| P04167        | GTIAVIEPIFK                                            | 1.261168877        | 2               | 2.71393   |
| P04167        | NLQEILDYIGHIVEK                                        | 1.258631096        | 2               | 3.72097   |
| <b>P04176</b> | <b>PH4H Phenylalanine_4_hydroxylase</b>                | <b>2.250472863</b> | <b>9.9E-20</b>  | <b>18</b> |
| P04176        | AYGAGLLSSFGEIQYCLSDKPK                                 | 3.079409497        | 2               | 4.18598   |
| P04176        | EDNIPQLEDVSQLTCTGFR                                    | 2.309157925        | 3               | 4.95246   |
| P04176        | FANQILSYGAELDADHPGFK                                   | 2.853175088        | 3               | 3.53092   |
| P04176        | FANQILSYGAELDADHPGFKDPVYR                              | 1.485652535        | 4               | 5.03737   |
| P04176        | ILADSINSEVGILCNALQK                                    | 0.874819009        | 3               | 6.64431   |
| P04176        | LNKDEYEFFTYLDK                                         | 12.10942275        | 2               | 3.60405   |
| P04176        | LNKDEYEFFTYLDKR                                        | 2.039078133        | 3               | 3.81891   |
| P04176        | LRPVAGLLSSR                                            | 2.180388581        | 2               | 2.33952   |
| P04176        | NDIGATVHELRS                                           | 1.616435751        | 2               | 3.61536   |
| P04176        | NTVPWFPR                                               | 1.265873692        | 2               | 2.50124   |
| P04176        | QFADIAYNYR                                             | 1.532989225        | 2               | 2.54549   |
| P04176        | SFAQFSQEIGLASLGAPDEYIEK                                | 1.91386243         | 2               | 5.01675   |
| P04176        | TACQEYSVTEFQPLYVAESFSDAK                               | 4.841320338        | 2               | 4.73385   |
| P04176        | THACYEHNHIFLLEK                                        | 1.612225418        | 2               | 4.66712   |
| P04176        | VEVLDNTQQLK                                            | 1.357285328        | 2               | 3.89568   |
| P04176        | VEYTEEEK                                               | 1.315260609        | 2               | 2.60328   |
| P04176        | VEYTEEEKQTWGTVFR                                       | 1.200401005        | 2               | 4.44799   |
| P04176        | YCGFREDNIPQLEDVSQLTCTGFR                               | 1.776581594        | 3               | 4.71625   |
| <b>P04182</b> | <b>OAT Ornithine aminotransferase_ mitochondrial</b>   | <b>0.910067209</b> | <b>0.975711</b> | <b>8</b>  |
| P04182        | AFYNNVLGEYEEYITK                                       | 1.05935258         | 2               | 4.43028   |
| P04182        | DNGLLAKPTHGDIIR                                        | 1.058833923        | 2               | 2.58157   |
| P04182        | GLLNAIVIR                                              | 0.928971655        | 2               | 3.34798   |
| P04182        | KTEQGPPSSEYIFER                                        | 1.120977892        | 2               | 4.12294   |
| P04182        | TEQGPPSSEYIFER                                         | 0.971487029        | 2               | 4.14938   |
| P04182        | VLPMNTGVEAGETACK                                       | 0.777734331        | 2               | 4.29622   |
| P04182        | WLAVDHENVRPDIVLLGK                                     | 0.64424682         | 2               | 4.05955   |
| P04182        | YGAHNYHPLPVALER                                        | 0.679193117        | 2               | 3.61423   |
| <b>P04256</b> | <b>ROA1 Heterogeneous nuclear ribonucleoprotein A1</b> | <b>1.017317449</b> | <b>0.007537</b> | <b>5</b>  |
| P04256        | EDSQRPGAHLTVK                                          | 1.017380943        | 2               | 3.05306   |
| P04256        | GFAFVTFDDHDSVVK                                        | 1.102014029        | 2               | 2.90256   |
| P04256        | IEVIEIMTDR                                             | 0.900961035        | 2               | 3.40857   |

|               |                                                                     |                    |                 |           |
|---------------|---------------------------------------------------------------------|--------------------|-----------------|-----------|
| P04256        | NQGGYGGSSSSSYGSGR                                                   | 1.333547727        | 2               | 4.93642   |
| P04256        | SESPKEPEQLR                                                         | 1.041228611        | 2               | 2.36209   |
| <b>P04276</b> | <b>VTDB Vitamin D_binding protein</b>                               | <b>1.146322757</b> | <b>0.243526</b> | <b>3</b>  |
| P04276        | SCESDAPFPVHPGTSECCTK                                                | 0.961189272        | 2               | 4.85132   |
| P04276        | VPTANLEDVPLAEDLTEILSR                                               | 1.227272493        |                 |           |
| P04276        | YCSSQIDAEMR                                                         | 1.009355647        | 2               | 2.46543   |
| <b>P04355</b> | <b>MT2 Metallothionein_2</b>                                        | <b>3.14521159</b>  | <b>9.9E-20</b>  | <b>3</b>  |
| P04355        | CSQGCICKEASDKSCCA                                                   | 2.151272709        | 3               | 3.63271   |
| P04355        | MDPNCSCATDGSCCAGSCK                                                 | 1.297532565        | 2               | 6.38693   |
| P04355        | SCCSCCPVGCAK                                                        | 7.54359113         | 2               | 4.21647   |
| <b>P04466</b> | <b>MLRS Myosin regulatory light chain 2_skeletal muscle isoform</b> | <b>0.143829276</b> | <b>5.36E-12</b> | <b>9</b>  |
| P04466        | AAAEGSSNVFSMFDQTQIQEFK                                              | 0.414718107        | 3               | 4.91573   |
| P04466        | GADPEDVITGAFK                                                       | 0.084671802        | 2               | 4.34515   |
| P04466        | KQFLELLTTQCDR                                                       | 0.155757402        | 2               | 3.81738   |
| P04466        | LKGADPEDVITGAFK                                                     | 0.266161733        | 2               | 3.76552   |
| P04466        | NEELDAMMK                                                           | 0.02367322         | 1               | 2.32236   |
| P04466        | NICYVITHGDAK                                                        | 0.273405101        | 2               | 3.07375   |
| P04466        | NICYVITHGDAKDQE                                                     | 0.11329065         | 2               | 3.9808    |
| P04466        | NMWAAFPDPVGGNVNDYK                                                  | 0.275834466        | 2               | 2.91571   |
| P04466        | QFLELLTTQCDR                                                        | 0.163555996        | 2               | 4.00528   |
| <b>P04550</b> | <b>PTMS Parathyrosin</b>                                            | <b>1.142292878</b> | <b>2.98E-09</b> | <b>4</b>  |
| P04550        | RTAEEDEADPKR                                                        | 1.355335071        | 3               | 4.40865   |
| P04550        | SVEAAAELSAK                                                         | 1.136462143        | 2               | 4.20507   |
| P04550        | TAEDEADPK                                                           | 1.044309143        | 2               | 3.71464   |
| P04550        | TAEDEADPKR                                                          | 1.311523237        | 3               | 3.74064   |
| <b>P04636</b> | <b>MDHM Malate dehydrogenase_mitochondrial</b>                      | <b>1.163387337</b> | <b>9.9E-20</b>  | <b>17</b> |
| P04636        | AGAGSATLSMAYAGAR                                                    | 1.174213312        | 2               | 4.75795   |
| P04636        | AGAGSATLSMAYAGAR+Oxidation(9)                                       | 1.7635472          |                 |           |
| P04636        | ANTFVAELK                                                           | 1.192692932        | 2               | 2.7388    |
| P04636        | EGVIECSFVQSK                                                        | 1.317925864        | 1               | 3.0601    |
| P04636        | ETECTYFSTPLLLGK                                                     | 3.528177467        | 2               | 3.75804   |
| P04636        | FVFSLVDAMNGK                                                        | 1.136384578        | 2               | 4.29024   |
| P04636        | GCDVVVIPAGVPR                                                       | 1.092202824        | 2               | 4.26367   |
| P04636        | GYLGPEQLPDCLK                                                       | 1.030961848        | 2               | 4.30757   |
| P04636        | IFGVTTLDIVR                                                         | 1.381819138        | 2               | 3.4528    |
| P04636        | IQEAGTEVVK                                                          | 1.002777004        | 2               | 2.86749   |
| P04636        | LTLYDIAHTPGVAADLSHIETR                                              | 1.165083774        | 3               | 6.70767   |
| P04636        | MIAEAIPELK                                                          | 0.886709638        | 2               | 3.05672   |
| P04636        | MIAEAIPELK+Oxidation(0)                                             | 1.323072682        |                 |           |
| P04636        | TIIP LISQCTPK                                                       | 1.678869251        | 2               | 3.71031   |
| P04636        | VAVLGASGGIGQPLSLLLK                                                 | 1.357284078        | 2               | 5.99747   |
| P04636        | VDFPQDQLATLTGR                                                      | 0.882325982        | 2               | 4.7601    |
| P04636        | VNVPVIGGHAGK                                                        | 1.161633919        | 2               | 3.61838   |
| <b>P04639</b> | <b>APOA1 Apolipoprotein A_I</b>                                     | <b>1.039454444</b> | <b>0.991291</b> | <b>5</b>  |
| P04639        | LQEQ LGPVTQEFWANLEK                                                 | 1.320081078        | 2               | 4.08985   |
| P04639        | NEMNKDLENVK                                                         | 0.913297359        | 2               | 3.16358   |
| P04639        | QLNLNLLDNWDTLGSTVGR                                                 | 1.025363379        | 2               | 4.29887   |
| P04639        | VKDFATVYVDAVK                                                       | 1.176640837        | 2               | 2.83214   |
| P04639        | WNEEVEAYR                                                           | 0.9883429          | 2               | 2.59856   |
| <b>P04642</b> | <b>LDHA L_lactate dehydrogenase A chain</b>                         | <b>1.068400441</b> | <b>5.15E-10</b> | <b>21</b> |
| P04642        | DLADELALVDVIEDK                                                     | 1.074357596        | 2               | 5.45794   |
| P04642        | DQLIVNLLK                                                           | 1.185417912        | 2               | 2.92863   |
| P04642        | DQLIVNLLKEEQVPQNK                                                   | 0.947469915        | 2               | 4.57769   |
| P04642        | EDVFLSVPCILGQNGISDVVK                                               | 1.3323684          | 2               | 4.66096   |
| P04642        | FIIPNVVK                                                            | 0.883678889        | 2               | 2.38255   |
| P04642        | GEMMDLQHGSFLK                                                       | 0.785731002        | 2               | 3.94008   |

|               |                                           |                    |                 |           |
|---------------|-------------------------------------------|--------------------|-----------------|-----------|
| P04642        | GEMMDLQHGSFLK+Oxidation(2)                | 1.821556626        |                 |           |
| P04642        | GEMMDLQHGSFLK+Oxidation(2)                | 1.141579734        |                 |           |
| P04642        | GEMMDLQHGSFLK+Oxidation(3)                | 1.152474717        | 2               | 3.48728   |
| P04642        | KSADTLWGIQK                               | 1.21920039         | 2               | 3.31845   |
| P04642        | LLIVSNPVDILTYAWK                          | 1.53029756         | 2               | 4.86301   |
| P04642        | NVNIFK                                    | 1.121059331        | 1               | 2.08244   |
| P04642        | QVVD SAYEVIK                              | 1.037464246        | 2               | 3.50287   |
| P04642        | RVHPITMIK                                 | 1.159273813        | 2               | 2.51971   |
| P04642        | RVHPITMIK+Oxidation(7)                    | 1.15207831         |                 |           |
| P04642        | SADTLWGIQK                                | 1.136223055        | 2               | 3.93491   |
| P04642        | SLNPQLGTDADK                              | 1.098983586        | 1               | 2.32285   |
| P04642        | SLNPQLGTDADKEQWK                          | 1.20851561         | 2               | 4.85702   |
| P04642        | SLNPQLGTDADKEQWKDVHK                      | 0.989402682        | 3               | 3.43116   |
| P04642        | VHPITMIK+Oxidation(6)                     | 1.893072866        |                 |           |
| P04642        | VTLTPDEEAR                                | 1.126613555        | 2               | 2.74138   |
| <b>P04644</b> | <b>RS17 40S ribosomal protein S17</b>     | <b>1.371167421</b> | <b>0.296442</b> | <b>2</b>  |
| P04644        | LLDFGSLSNLQVTQPTVGMNFK                    | 1.302994516        | 2               | 4.27876   |
| P04644        | VCEEIAIIPSK                               | 1.104881853        | 2               | 2.86604   |
| <b>P04692</b> | <b>TPM1 Tropomyosin alpha_1 chain</b>     | <b>0.457827681</b> | <b>2.25E-08</b> | <b>11</b> |
| P04692        | AISEELDHALNDMTSI                          | 0.310507183        | 2               | 2.80001   |
| P04692        | GTEDELDKYSEALK                            | 0.453365367        | 2               | 3.64558   |
| P04692        | GTEDELDKYSEALKDAQEK                       | 0.426542887        | 2               | 4.10842   |
| P04692        | KLVIIESDLER                               | 0.574348777        | 2               | 3.46125   |
| P04692        | LDKENALDR                                 | 0.130832287        | 2               | 2.78517   |
| P04692        | LKGTEDELDK                                | 0.199768969        | 2               | 2.76881   |
| P04692        | LVIIESDLER                                | 0.599054411        | 2               | 2.4582    |
| P04692        | MEIQEIQLK                                 | 0.761633797        | 2               | 3.02132   |
| P04692        | QLEDELVSLQK                               | 0.174645451        | 2               | 2.85571   |
| P04692        | SIDDLEDELYAQK                             | 0.021948099        | 2               | 4.23555   |
| P04692        | SKQLEDELVSLQK                             | 1.194185739        | 2               | 3.33574   |
| <b>P04694</b> | <b>ATTY Tyrosine aminotransferase</b>     | <b>1.137569532</b> | <b>0.808444</b> | <b>5</b>  |
| P04694        | ILGPCTIVQGALK                             | 1.64573741         | 2               | 2.6726    |
| P04694        | IQEFCEQHYHCAEGSQEEDCK                     | 1.070351263        | 3               | 4.45188   |
| P04694        | TACLVVNNPSNPCGSVFSK                       | 0.674869036        | 2               | 4.93305   |
| P04694        | WDVRPSDMSNK                               | 0.983234627        | 2               | 2.36815   |
| P04694        | YEPLANLSTNVPIKSCGLAK                      | 1.33418286         | 2               | 3.42955   |
| <b>P04762</b> | <b>CATA Catalase</b>                      | <b>0.990602047</b> | <b>9.9E-20</b>  | <b>32</b> |
| P04762        | APQKPDVLTGGGNPIGDK                        | 5.624901778        | 2               | 4.63802   |
| P04762        | DAMLFPSFIHSQK+Oxidation(2)                | 1.869836949        |                 |           |
| P04762        | DAQLFIQR                                  | 1.047616399        | 2               | 2.99743   |
| P04762        | DGPMCMHDNQGGAPNYPNSFSAPEQQGSALEHHSQCSADVK | 0.671636069        | 4               | 4.56745   |
| P04762        | DPASDQMK                                  | 0.788639829        | 1               | 2.25792   |
| P04762        | DPASDQMK+Oxidation(6)                     | 1.620780919        |                 |           |
| P04762        | DYPLIPVGK                                 | 0.766933216        | 1               | 2.24485   |
| P04762        | EAETFPFNPFDLTK                            | 1.031366525        | 2               | 3.96058   |
| P04762        | FNSANEDNVTQVR                             | 0.831262601        | 2               | 4.55893   |
| P04762        | FSTVAGESGSADTVR                           | 0.819534406        | 2               | 5.28058   |
| P04762        | FSTVAGESGSADTVRDPR                        | 0.488632893        | 2               | 2.30734   |
| P04762        | FYTEDGNWDLVGNNTPIFFIR                     | 1.37716776         | 3               | 5.46329   |
| P04762        | GAGAFGYFEVTHDITR                          | 0.748143704        | 2               | 4.78374   |
| P04762        | GPLLQDQVVFTDEMAHFDR                       | 1.563254252        | 2               | 5.47609   |
| P04762        | HMNGYGSHTFK                               | 0.725896046        | 3               | 4.1081    |
| P04762        | HMNGYGSHTFK+Oxidation(1)                  | 0.957509101        |                 |           |
| P04762        | LAQEDPDYGLR                               | 1.018984533        | 2               | 2.72948   |
| P04762        | LCENIANHLK                                | 0.789231152        | 3               | 3.78386   |
| P04762        | LFAYPDTHR                                 | 1.091916244        | 2               | 2.9141    |

|               |                                                     |                    |                |           |
|---------------|-----------------------------------------------------|--------------------|----------------|-----------|
| P04762        | LGPNYLQIPVNCYPYR                                    | 1.024721359        | 3              | 4.05297   |
| P04762        | LNIMTAGPR                                           | 0.861234299        | 2              | 3.14564   |
| P04762        | LNIMTAGPR+Oxidation(3)                              | 1.258884214        |                |           |
| P04762        | LVNANGEAVYCK                                        | 1.100444903        | 2              | 3.89432   |
| P04762        | NAIHTYVQAGSHIAAK                                    | 0.703657227        | 3              | 5.89861   |
| P04762        | NFTDVHPDYGAR                                        | 0.878468285        | 2              | 4.14073   |
| P04762        | NLPVEEAGR                                           | 0.771313619        | 1              | 2.32301   |
| P04762        | NPANYFAEVEQMAFDPSNMPPGIEPSPDK                       | 2.072787832        | 3              | 5.67714   |
| P04762        | RFNSANEDNVTQVR                                      | 0.722670547        | 2              | 4.52122   |
| P04762        | VFEHIGK                                             | 0.899645962        | 2              | 2.47616   |
| P04762        | VFEHIGKR                                            | 0.632338562        | 2              | 2.36905   |
| P04762        | VQALLDQYNSQPKP                                      | 0.846782204        | 2              | 4.9403    |
| P04762        | VWPHKDYPLIPVGK                                      | 0.611204838        | 2              | 3.48107   |
| <b>P04764</b> | <b>ENOA Alpha_enolase</b>                           | <b>1.053611317</b> | <b>9.9E-20</b> | <b>14</b> |
| P04764        | AGYTDQVVIGMDVAASEFYR                                | 0.951035743        | 2              | 4.52052   |
| P04764        | DATNVGDEGGFAPNILENK                                 | 1.098709818        | 2              | 5.78088   |
| P04764        | FTATAGIQVVGDDLTVTNPK                                | 1.171684032        | 2              | 5.30646   |
| P04764        | GNPTVEVDLYTAK                                       | 1.519825573        | 2              | 4.07855   |
| P04764        | HIADLAGNPEVILPVPAFNVINGGSHAGNK                      | 1.023763249        | 3              | 6.15002   |
| P04764        | IDQLMIEMDGTENK                                      | 0.984982505        | 2              | 4.48169   |
| P04764        | IEEELGSK                                            | 1.070351263        | 2              | 2.3214    |
| P04764        | IGAEVYHNLK                                          | 2.309547264        | 2              | 3.20941   |
| P04764        | KLNVVEQEK                                           | 0.48819134         | 2              | 2.54551   |
| P04764        | LNVVEQEK                                            | 1.165215577        | 2              | 3.10239   |
| P04764        | LNVVEQEKIDQLMIEMDGTENK                              | 1.026569131        | 3              | 4.64871   |
| P04764        | SCNCLLK                                             | 1.163758182        | 2              | 2.98189   |
| P04764        | VNQIGSVTESLQACK                                     | 0.809959656        | 2              | 5.04251   |
| P04764        | YITPDQLADLYK                                        | 1.001315651        | 2              | 3.47057   |
| <b>P04785</b> | <b>PDIA1 Protein disulfide_isomerase</b>            | <b>1.054969489</b> | <b>9.9E-20</b> | <b>25</b> |
| P04785        | DGVVLFK                                             | 1.158649022        | 2              | 2.44027   |
| P04785        | DHENIVIAK                                           | 1.257697325        | 2              | 2.75662   |
| P04785        | EADDIVNWLK                                          | 1.239775964        | 2              | 2.30877   |
| P04785        | HNQLPLVIEFTEQTAPK                                   | 1.116920481        | 3              | 5.68664   |
| P04785        | IKPHLMSQELPEDWQKQPVK                                | 1.134349096        | 4              | 4.66079   |
| P04785        | IKPHLMSQELPEDWQKQPVK+Oxidation(5)                   | 1.579324902        |                |           |
| P04785        | ILEFFGLK                                            | 1.222059462        | 2              | 3.07407   |
| P04785        | ILFIFIDSDHTDNQR                                     | 1.015074775        | 2              | 2.37653   |
| P04785        | LGETYKDHENIVIAK                                     | 1.110546974        | 3              | 4.73626   |
| P04785        | LITLEEEMTK                                          | 0.976178513        | 2              | 3.56582   |
| P04785        | LITLEEEMTK+Oxidation(7)                             | 1.351345847        |                |           |
| P04785        | LKAEGSEIR                                           | 0.960650936        | 1              | 2.09642   |
| P04785        | MDSTANEVEAVK                                        | 0.969177913        | 2              | 4.11655   |
| P04785        | MDSTANEVEAVK+Oxidation(0)                           | 1.233858212        |                |           |
| P04785        | NFEEVAFDEK                                          | 1.102305192        | 1              | 3.35772   |
| P04785        | NFEEVAFDEKK                                         | 1.128972461        | 2              | 3.73687   |
| P04785        | NNFEGEITK                                           | 0.978572117        | 2              | 2.53414   |
| P04785        | QFLAAEAVDDIPFGITNSDVFSK                             | 1.178066771        | 3              | 6.63211   |
| P04785        | TGPAATTLSDTAAAESLVDSEVTVIGFFK                       | 1.077837034        | 3              | 6.39074   |
| P04785        | THILLFLPK                                           | 1.182929875        | 2              | 2.77799   |
| P04785        | TVIDYNGER                                           | 0.976756244        | 2              | 2.56507   |
| P04785        | VDATEESDLAQYQYGVYR                                  | 1.072427596        | 2              | 5.62558   |
| P04785        | VHSFPTLK                                            | 1.020962878        | 1              | 1.92066   |
| P04785        | YKPESDELTAEK                                        | 1.132756515        | 3              | 4.58609   |
| P04785        | YQLDKDGVVLFK                                        | 1.029257208        | 2              | 3.93673   |
| <b>P04797</b> | <b>G3P Glyceraldehyde_3_phosphate dehydrogenase</b> | <b>0.958823635</b> | <b>9.9E-20</b> | <b>16</b> |
| P04797        | GAAQNIIPASTGAAK                                     | 1.198504464        | 2              | 4.27335   |

|               |                                                |                    |                 |           |
|---------------|------------------------------------------------|--------------------|-----------------|-----------|
| P04797        | IVSNASCTTNCLAPLAK                              | 1.260447021        | 2               | 4.76496   |
| P04797        | LISWYDNEYGYSNR                                 | 2.094238293        | 2               | 4.06103   |
| P04797        | LVINGKPITIFQER                                 | 2.16908592         | 3               | 3.72088   |
| P04797        | RVIISAPSADAPMFVMGVNHEK                         | 1.440297115        | 3               | 5.28576   |
| P04797        | RVIISAPSADAPMFVMGVNHEK+Oxidation(12)           | 1.078349729        |                 |           |
| P04797        | VGVNGFGR                                       | 1.303283118        | 2               | 2.57837   |
| P04797        | VIHDNFGIVEGLMTTVHAITATQK                       | 1.09622391         | 3               | 7.493     |
| P04797        | VIHDNFGIVEGLMTTVHAITATQK+Oxidation(12)         | 1.406547733        |                 |           |
| P04797        | VIISAPSADAPMFVMGVNHEK                          | 0.895433214        | 2               | 4.64743   |
| P04797        | VIISAPSADAPMFVMGVNHEK+Oxidation(11)            | 1.170342547        |                 |           |
| P04797        | VIISAPSADAPMFVMGVNHEK+Oxidation(14)            | 1.163409121        |                 |           |
| P04797        | VPTPNVSVVDLTCR                                 | 4.229550015        | 2               | 3.77434   |
| P04797        | VVDLMAYMASK                                    | 3.252594959        | 2               | 3.80551   |
| P04797        | VVDLMAYMASKE                                   | 3.110256575        | 2               | 2.767     |
| P04797        | WGDAGAEYVVESTGVFTTMEK                          | 1.115479379        | 2               | 5.56722   |
| <b>P04799</b> | <b>CP1A2 Cytochrome P450 1A2</b>               | <b>1.045830254</b> | <b>0.894987</b> | <b>6</b>  |
| P04799        | DFVENVTSGNAVDFFPVLR                            | 1.018150588        | 2               | 3.76072   |
| P04799        | IGSTPVVVLGSLNTIK                               | 1.266493664        | 2               | 3.05979   |
| P04799        | NSIQDITGALFK                                   | 0.761656849        | 2               | 3.47552   |
| P04799        | SMTFNPDSGPVWAAR                                | 1.759259694        | 2               | 3.15539   |
| P04799        | TCEHVQAWPR                                     | 0.629036385        | 2               | 2.87164   |
| P04799        | TVQEHYQDFNK                                    | 0.915471071        | 2               | 3.45886   |
| <b>P04800</b> | <b>CP3A1 Cytochrome P450 3A1</b>               | <b>3.148515806</b> | <b>0.32378</b>  | <b>2</b>  |
| P04800        | KLQEEIDR                                       | 0.761542332        | 2               | 2.31223   |
| P04800        | QGLLQPTKPIILK                                  | 3.440994238        | 2               | 2.38771   |
| <b>P04903</b> | <b>GSTA2 Glutathione S_transferase alpha_2</b> | <b>1.265492639</b> | <b>0.023221</b> | <b>10</b> |
| P04903        | DGNLMFDQVPMVEIDGMK                             | 0.620037772        | 2               | 4.91763   |
| P04903        | DGNLMFDQVPMVEIDGMK+Oxidation(10)               | 0.887183258        |                 |           |
| P04903        | DGNLMFDQVPMVEIDGMK+Oxidation(16)               | 0.922741837        |                 |           |
| P04903        | DGNLMFDQVPMVEIDGMK+Oxidation(4)                | 0.877138526        |                 |           |
| P04903        | KDGNLMFDQVPMVEIDGMK                            | 0.7247424          | 2               | 4.3956    |
| P04903        | LIQSPEDLEK                                     | 1.2424338          | 2               | 3.11657   |
| P04903        | LKKDGNLMFDQVPMVEIDGMK                          | 1.290698242        | 2               | 2.69273   |
| P04903        | WLLAAAGVEFEEK                                  | 1.018604393        | 2               | 3.87026   |
| P04903        | YDLYGK                                         | 0.699503948        | 1               | 1.93957   |
| P04903        | YLPAFEK                                        | 0.85406805         | 1               | 2.00214   |
| <b>P04904</b> | <b>GSTA3 Glutathione S_transferase alpha_3</b> | <b>0.910092328</b> | <b>5.22E-13</b> | <b>9</b>  |
| P04904        | ADVYLQVLYHVEELDPSALANFPLK                      | 1.279053383        | 3               | 5.29591   |
| P04904        | ALIDMYAEGVADLDEIVLHYPYIPGGEK                   | 1.660906985        | 4               | 7.90485   |
| P04904        | LRNDGSLMFQQVPMVEIDGMK                          | 1.234883415        | 2               | 3.80457   |
| P04904        | NDGSLMFQQVPMVEIDGMK                            | 0.793572459        | 2               | 4.6393    |
| P04904        | NDGSLMFQQVPMVEIDGMK+Oxidation(11)              | 0.970194559        |                 |           |
| P04904        | NDGSLMFQQVPMVEIDGMK+Oxidation(17)              | 0.97285218         |                 |           |
| P04904        | NDGSLMFQQVPMVEIDGMK+Oxidation(5)               | 0.964162197        |                 |           |
| P04904        | SHGQDYLVGNR                                    | 0.907698355        | 2               | 3.9099    |
| P04904        | WLLAAAGVEFEEQFLK                               | 0.996314755        | 2               | 5.41993   |
| <b>P04905</b> | <b>GSTM1 Glutathione S_transferase Mu 1</b>    | <b>1.249857347</b> | <b>9.9E-20</b>  | <b>15</b> |
| P04905        | ADIVENQVMDNR                                   | 0.900941657        | 2               | 4.29347   |
| P04905        | ADIVENQVMDNR+Oxidation(8)                      | 1.144370523        |                 |           |
| P04905        | CLDAFPNLKDFLAR                                 | 0.973881502        | 2               | 2.69365   |
| P04905        | FKLGLDFPNLPYLIDGSR                             | 0.998684075        | 3               | 4.8549    |
| P04905        | HHLCGETEEER                                    | 1.111420481        | 3               | 4.43464   |
| P04905        | IRADIVENQVMDNR                                 | 1.034036522        | 2               | 3.95495   |
| P04905        | ITQSNAIMR                                      | 1.069152481        | 2               | 3.08912   |
| P04905        | ITQSNAIMR+Oxidation(7)                         | 1.430199175        |                 |           |
| P04905        | KHHLCGETEEER                                   | 1.34810337         | 3               | 3.6862    |
| P04905        | KITQSNAIMR                                     | 0.871333371        | 3               | 3.76446   |

|               |                                               |                    |                 |           |
|---------------|-----------------------------------------------|--------------------|-----------------|-----------|
| P04905        | KITQSNAIMR+Oxidation(8)                       | <b>0.92986218</b>  |                 |           |
| P04905        | LGLDFPNLPYLIDGSR                              | <b>1.367645022</b> | 2               | 5.11387   |
| P04905        | MQLIMLCYNPDFEK                                | <b>1.59779523</b>  | 2               | 4.49475   |
| P04905        | VTYVDFLAYDILDQYHIFEPK                         | <b>1.139535757</b> | 3               | 3.7413    |
| P04905        | YLSTPIFSK                                     | <b>1.006612106</b> | 2               | 2.70858   |
| <b>P04906</b> | <b>GSTP1 Glutathione S_transferase P</b>      | <b>1.08330181</b>  | <b>0.973791</b> | <b>2</b>  |
| P04906        | EAALVDMVNDGVEDLR                              | <b>1.073444697</b> | 2               | 4.73301   |
| P04906        | STCLYGQLPK                                    | <b>1.083790067</b> | 2               | 2.94813   |
| <b>P04937</b> | <b>FINC Fibronectin</b>                       | <b>0.962018935</b> | <b>0.928739</b> | <b>4</b>  |
| P04937        | FTQVSPTTLTAQWTAPSVK                           | <b>1.332355893</b> | 2               | 3.52904   |
| P04937        | ITYGETGGNSPVQEFTVPGSK                         | <b>0.964982964</b> | 2               | 2.6558    |
| P04937        | SSPVVIDASTAIDAPSNLR                           | <b>0.907780843</b> | 2               | 2.46638   |
| P04937        | SYTITGLQPGTDYK                                | <b>0.933423169</b> | 2               | 2.75899   |
| <b>P05065</b> | <b>ALDOA Fructose_bisphosphate aldolase A</b> | <b>0.469668781</b> | <b>9.9E-20</b>  | <b>9</b>  |
| P05065        | ALANSLACQ GK                                  | <b>0.435167211</b> | 2               | 2.96461   |
| P05065        | FSNEEIAMATVTALR                               | <b>0.374960526</b> | 2               | 4.4987    |
| P05065        | GILAADESTGSI AK                               | <b>0.341414629</b> | 2               | 4.22881   |
| P05065        | GVVPLAGTNGETTTQGLDLSER                        | <b>0.492019778</b> | 2               | 5.3992    |
| P05065        | IGEHTPSSLAIMENANVLAR                          | <b>0.362453302</b> | 2               | 4.67849   |
| P05065        | KENLKA AQEEYIK                                | <b>1.240761883</b> | 2               | 2.41131   |
| P05065        | LQSIGTENTEENR                                 | <b>0.424511322</b> | 2               | 3.80651   |
| P05065        | LQSIGTENTEENRR                                | <b>0.34133662</b>  | 2               | 2.52114   |
| P05065        | RLQSIGTENTEENR                                | <b>0.34133662</b>  | 2               | 4.08288   |
| <b>P05178</b> | <b>CP2C6 Cytochrome P450 2C6</b>              | <b>0.743236991</b> | <b>0.004037</b> | <b>9</b>  |
| P05178        | DQDFLNLMEK                                    | <b>0.643900362</b> | 2               | 2.58135   |
| P05178        | EALIDHGEEFAER                                 | <b>1.174031844</b> | 2               | 3.24757   |
| P05178        | FDYKDQDFLNLMEK                                | <b>0.85343156</b>  | 3               | 4.55561   |
| P05178        | FIDLIPTNLPHAVTCDIK                            | <b>0.658418121</b> | 2               | 3.3502    |
| P05178        | GTTIITSLSSVLHDSK                              | <b>0.789263068</b> | 2               | 3.75694   |
| P05178        | LPPGPIPLPIIGNIFQLNVK                          | <b>0.888561195</b> | 3               | 3.52075   |
| P05178        | MCAGEGLAR                                     | <b>0.643531909</b> | 2               | 2.57617   |
| P05178        | NITQSLTSFSK                                   | <b>0.904607151</b> | 2               | 2.47245   |
| P05178        | TNGSPCDPTFILGCAPCNVICSIIFQNR                  | <b>0.953713443</b> | 3               | 4.71856   |
| <b>P05179</b> | <b>CP2C7 Cytochrome P450 2C7</b>              | <b>0.99691467</b>  | <b>0.888304</b> | <b>7</b>  |
| P05179        | ACVGEGLAR                                     | <b>1.133772511</b> | 2               | 2.89265   |
| P05179        | FINFVPTNLPHAVTCDIK                            | <b>0.777431403</b> | 2               | 2.65671   |
| P05179        | IEEHQESLDVTNPR                                | <b>0.931826844</b> | 2               | 4.5687    |
| P05179        | KIEEHQESLDVTNPR                               | <b>1.339651372</b> | 3               | 4.6682    |
| P05179        | KLPPGPTPLPIIGNFLQIDVK                         | <b>1.11323076</b>  | 3               | 5.50741   |
| P05179        | SDYFLPFSAGK                                   | <b>1.666031759</b> | 2               | 2.59893   |
| P05179        | VLTSLSVLHDSK                                  | <b>1.368430617</b> | 2               | 3.41608   |
| <b>P05182</b> | <b>CP2E1 Cytochrome P450 2E1</b>              | <b>0.971859969</b> | <b>0.067899</b> | <b>14</b> |
| P05182        | AKEHLQSLDINCAR                                | <b>0.701165072</b> | 2               | 4.85529   |
| P05182        | DTVFQGYVIPK                                   | <b>1.396765848</b> | 2               | 2.82085   |
| P05182        | DVTDCLLIEMEK                                  | <b>1.001541319</b> | 2               | 3.02675   |
| P05182        | DVTDCLLIEMEKEK                                | <b>0.965543539</b> | 2               | 2.4895    |
| P05182        | EHLQSLDINCAR                                  | <b>1.153115576</b> | 2               | 3.42909   |
| P05182        | FINLVPSNLPHEATR                               | <b>0.790115878</b> | 2               | 3.82213   |
| P05182        | FKPEHFLNENGK                                  | <b>0.869127979</b> | 2               | 2.97678   |
| P05182        | GIIFNNGPTWK                                   | <b>1.092563549</b> | 2               | 2.41436   |
| P05182        | GQPFDPFTFLIGCAPCNVIADILFNK                    | <b>0.989719659</b> |                 |           |
| P05182        | GTVVIPTLDSLSDSHEFPDPEK                        | <b>0.861797637</b> | 2               | 4.88556   |
| P05182        | LDMPYMDAVVHEIQR                               | <b>0.853122217</b> | 2               | 2.67184   |
| P05182        | LHEEIDR                                       | <b>0.867897599</b> | 1               | 1.95861   |
| P05182        | VCVGEGLAR                                     | <b>1.072994676</b> | 2               | 2.38397   |
| P05182        | YGLLILMK                                      | <b>0.762321777</b> | 2               | 3.08804   |
| <b>P05183</b> | <b>CP3A2 Cytochrome P450 3A2</b>              | <b>1.060390421</b> | <b>0.295697</b> | <b>10</b> |



|               |                                             |                    |                 |           |
|---------------|---------------------------------------------|--------------------|-----------------|-----------|
| P05183        | DIELDGLFIPK                                 | 1.320279742        | 2               | 4.14047   |
| P05183        | DSIAFFQK                                    | 2.192463982        | 1               | 2.18221   |
| P05183        | EMFPIIEQYGDIIVK                             | 1.05434216         | 2               | 3.95162   |
| P05183        | KDIELDGLFIPK                                | 0.892477872        | 3               | 3.55848   |
| P05183        | KLQEEIDGALPSK                               | 1.1133718          | 2               | 3.67956   |
| P05183        | LQEEIDGALPSK                                | 1.075763685        | 2               | 4.10353   |
| P05183        | QAILEPEKPIVLK                               | 1.093310138        | 2               | 3.28366   |
| P05183        | QEAETGKPVMTK                                | 0.664421177        | 2               | 3.19354   |
| P05183        | QEAETGKPVMTK+Oxidation(10)                  | 1.422880866        |                 |           |
| P05183        | VDFLQLMLNAHNNSK                             | 0.803834955        | 2               | 3.70943   |
| <b>P05197</b> | <b>EF2 Elongation factor 2</b>              | <b>1.250913187</b> | <b>9.9E-20</b>  | <b>31</b> |
| P05197        | ALLELQLEPEELYQTFQR                          | 1.596886147        | 2               | 5.47181   |
| P05197        | ARPFDPGLAEDIDKGEVSAR                        | 1.279234273        | 3               | 6.16031   |
| P05197        | AYLPVNESFGFTADLR                            | 1.186227698        | 2               | 3.87612   |
| P05197        | CELLYEGPPDDEAAMGIK                          | 0.836185773        | 2               | 4.97875   |
| P05197        | CLYASVLTQPR                                 | 2.773320216        | 2               | 2.46127   |
| P05197        | DLEEDHACIPIK                                | 1.059082849        | 2               | 2.99095   |
| P05197        | DLEEDHACIPIK                                | 1.036903495        | 2               | 3.67638   |
| P05197        | EGIPALDNFLDK                                | 0.847330614        | 2               | 2.64864   |
| P05197        | EGIPALDNFLDKL                               | 4.022166534        | 2               | 3.57861   |
| P05197        | ETVSEESNVLCLSK                              | 1.863968321        | 2               | 4.05828   |
| P05197        | GEGQLGAAER                                  | 1.260658929        | 2               | 3.36029   |
| P05197        | GHVFEEQVAGTPMFVVK                           | 2.285101857        | 2               | 6.13511   |
| P05197        | GVQYLNEIK                                   | 4.537289495        | 2               | 2.34269   |
| P05197        | IWCFGPDGTGPNILTDITK                         | 1.436180106        | 2               | 5.06005   |
| P05197        | KEDLYLKPIQR                                 | 1.191195905        | 2               | 3.30341   |
| P05197        | KIWCFGPDGTGPNILTDITK                        | 1.269496417        | 2               | 4.83032   |
| P05197        | KVEDMMK+Oxidation(5)                        | 1.91768676         |                 |           |
| P05197        | LSEDKDKEGKPLLK                              | 1.453465456        | 2               | 3.96126   |
| P05197        | LMEPIYLVEIQCEQVVGIIYGLVNR                   | 1.151719234        | 3               | 5.98974   |
| P05197        | NMSVIAHVDHGK                                | 1.462100521        | 2               | 3.94774   |
| P05197        | NMSVIAHVDHGK+Oxidation(1)                   | 1.251117017        |                 |           |
| P05197        | STAISLFYELSENDLNFIK                         | 2.57013685         | 3               | 4.76698   |
| P05197        | STLTDSLCK                                   | 1.175140935        | 2               | 2.89732   |
| P05197        | TFCQLLDPIFK                                 | 1.40921015         | 2               | 4.19908   |
| P05197        | TGTITTFEHAHNMR                              | 1.385860583        | 2               | 3.83514   |
| P05197        | VFDAIMNFR                                   | 0.740278105        | 2               | 2.82633   |
| P05197        | VFSGVVSTGLK                                 | 1.441558104        | 2               | 3.05037   |
| P05197        | WLPAGDALLQMITIHLPSVTAQK                     | 1.337800638        | 3               | 3.65297   |
| P05197        | YEWVVAEAR                                   | 1.17342185         | 2               | 3.03896   |
| P05197        | YFDPANGK                                    | 1.219294382        | 1               | 2.03708   |
| P05197        | YVEPIEDVPCGNIVGLVGDQFLVK                    | 1.616262823        | 3               | 4.73587   |
| <b>P05369</b> | <b>FPPS Farnesyl pyrophosphate synthase</b> | <b>1.051651434</b> | <b>0.999685</b> | <b>11</b> |
| P05369        | ALYEELDLR                                   | 0.998179925        | 2               | 3.05926   |
| P05369        | EVLEYNTVGGK                                 | 1.101098881        | 2               | 3.06973   |
| P05369        | GLTVVQTFQELVEPR                             | 1.234955995        | 3               | 3.86432   |
| P05369        | IKEVLEYNTVGGK                               | 0.94162653         | 3               | 4.16708   |
| P05369        | QILEENYQKDPEK                               | 0.914321616        | 2               | 3.77758   |
| P05369        | QNFIQHFSQIVK                                | 2.204771659        | 2               | 3.05246   |
| P05369        | SLIEQCSAPLPPSIFLELANK                       | 0.883731163        | 3               | 5.29871   |
| P05369        | VGTDIQDNK                                   | 0.969526898        | 2               | 3.68679   |
| P05369        | VLTEDELGHPEK                                | 1.127147598        | 2               | 2.72076   |
| P05369        | VLTEDELGHPEKGDAITR                          | 1.046462518        | 2               | 4.56948   |
| P05369        | YEEDSYNR                                    | 0.953320804        | 2               | 2.34577   |
| <b>P05426</b> | <b>RL7 60S ribosomal protein L7</b>         | <b>1.290401504</b> | <b>9.9E-20</b>  | <b>6</b>  |
| P05426        | AGNFYVPAEPK                                 | 1.325732022        | 2               | 2.67206   |
| P05426        | FGIICMEDLIHIYTVGK                           | 1.398140232        | 3               | 4.64725   |

|               |                                                                   |                    |                 |          |
|---------------|-------------------------------------------------------------------|--------------------|-----------------|----------|
| P05426        | IVEPYIAWGYPNLK                                                    | 1.481842498        | 2               | 2.95143  |
| P05426        | SVNELIYK                                                          | 1.189621564        | 2               | 2.79579  |
| P05426        | TTHFVEGGDAGNR                                                     | 1.467123868        | 2               | 3.26733  |
| P05426        | TTHFVEGGDAGNREDQINR                                               | 1.41700664         | 2               | 4.56546  |
| <b>P05544</b> | <b>SPA3L Serine protease inhibitor A3L</b>                        | <b>1.188722862</b> | <b>0.000722</b> | <b>6</b> |
| P05544        | AVLDVDETGTEATAATGVATVIR                                           | 1.073505012        | 2               | 4.60359  |
| P05544        | DSTMEEILEGLK                                                      | 1.028059823        | 2               | 3.01346  |
| P05544        | IAELFSDLEER                                                       | 1.303434701        | 2               | 2.87591  |
| P05544        | MQQVESSLQPETLK                                                    | 0.792684697        | 2               | 4.21575  |
| P05544        | MQQVESSLQPETLK+Oxidation(0)                                       | 0.759554282        |                 |          |
| P05544        | VFSQQADLSR                                                        | 1.573478536        | 2               | 2.57679  |
| <b>P05545</b> | <b>SPA3K Serine protease inhibitor A3K</b>                        | <b>1.553211027</b> | <b>5.66E-05</b> | <b>8</b> |
| P05545        | ALYQAEAFVADFK                                                     | 1.494697227        | 2               | 2.88484  |
| P05545        | AVLDVDETGTEGAAATAVTAALK                                           | 1.161218513        | 2               | 5.44329  |
| P05545        | FSISTDYNLEEVLPGLGIR                                               | 1.358526099        | 2               | 3.48667  |
| P05545        | IAELFSELDER                                                       | 1.625369491        | 2               | 3.04652  |
| P05545        | IFSQQADLSR                                                        | 1.181454574        | 2               | 2.58077  |
| P05545        | LSQPEDQAEINTGSALFIDK                                              | 1.691844837        | 2               | 4.84718  |
| P05545        | LSQPEDQAEINTGSALFIDKEQPILSEFQEK                                   | 2.443602434        | 3               | 4.31973  |
| P05545        | NVVFSPSISAALAILSLGAK                                              | 1.41088802         |                 |          |
| <b>P05765</b> | <b>RS21 40S ribosomal protein S21</b>                             | <b>1.032794957</b> | <b>0.999395</b> | <b>3</b> |
| P05765        | DHASIQMNVAEVDK                                                    | 1.054343288        | 2               | 3.83867  |
| P05765        | MGESDDLSLR                                                        | 1.075053016        | 2               | 2.89626  |
| P05765        | TYGICGAIR                                                         | 1.042351336        | 2               | 2.51174  |
| <b>P06214</b> | <b>HEM2 Delta_aminolevulinic acid dehydratase</b>                 | <b>0.934216002</b> | <b>0.070982</b> | <b>8</b> |
| P06214        | AGADIIITYFAPQLLK                                                  | 1.684321256        | 2               | 4.1878   |
| P06214        | AGCQVAVPSDMMMDGR                                                  | 0.898882442        | 2               | 3.46343  |
| P06214        | CVLIFGVPSR                                                        | 1.210912849        | 2               | 2.83558  |
| P06214        | DEQGSAADESDSPTIEAVR                                               | 0.979817083        | 2               | 5.50661  |
| P06214        | DIQEGADILMVKPLPYLDMVQEVK                                          | 0.954323183        | 3               | 4.58302  |
| P06214        | TAVLESMTAFR                                                       | 0.815266974        | 2               | 2.95096  |
| P06214        | VPKDEQGSAADESDSPTIEAVR                                            | 0.88543855         | 3               | 5.03624  |
| P06214        | YGVNQLEEMLRPLVEAGLR                                               | 0.911848202        | 3               | 4.58936  |
| <b>P06238</b> | <b>A2MG Alpha_2_macroglobulin</b>                                 | <b>1.063923661</b> | <b>0.050995</b> | <b>3</b> |
| P06238        | FQVNNNNQLLLQR                                                     | 3.1801399          | 2               | 3.07279  |
| P06238        | SESNMAIADVK                                                       | 1.301857174        | 2               | 2.47333  |
| P06238        | VAVQLEASPDFLAAPEEK                                                | 0.789482421        | 2               | 3.44295  |
| <b>P06302</b> | <b>PTMA Prothymosin alpha</b>                                     | <b>0.821003464</b> | <b>0.685637</b> | <b>4</b> |
| P06302        | EVVEEAENGR                                                        | 1.028491863        | 2               | 2.34524  |
| P06302        | RVAEDEDDEDDVETKK                                                  | 0.968466969        | 3               | 5.88402  |
| P06302        | VAEDEDDEDDVETK                                                    | 0.911827394        | 2               | 3.86252  |
| P06302        | VAEDEDDEDDVETKK                                                   | 0.73787585         | 2               | 4.69345  |
| <b>P06399</b> | <b>FIBA Fibrinogen alpha chain</b>                                | <b>0.724926243</b> | <b>0.004001</b> | <b>8</b> |
| P06399        | AQQIQVLQK                                                         | 0.828325589        | 2               | 2.64902  |
| P06399        | EVVTSDDGSDCGDGMGLTHSFSGR                                          | 0.696500784        | 3               | 3.76901  |
| P06399        | GDFANANNFDNTFGQVSEDLR                                             | 0.725892057        | 2               | 5.69467  |
| P06399        | GDFANANNFDNTFGQVSEDLRR                                            | 0.696132349        | 3               | 3.30305  |
| P06399        | GLIDEANQDFTNR                                                     | 1.103029329        | 2               | 3.65756  |
| P06399        | MADEAASEAHQEGDTR                                                  | 0.616877584        | 2               | 4.11618  |
| P06399        | SQLQEGPPEWK                                                       | 0.497559786        | 2               | 2.60251  |
| P06399        | TSDSDIFTDIENPSSHVPEFSSSSK                                         | 0.527960297        | 2               | 4.67255  |
| <b>P06685</b> | <b>AT1A1 Sodium/potassium_transporting ATPase subunit alpha_1</b> | <b>1.298205934</b> | <b>9.97E-14</b> | <b>5</b> |
| P06685        | AVAGDASESALLK                                                     | 1.405929133        | 2               | 3.16047  |
| P06685        | AVFQANQENLPILK                                                    | 1.174230906        | 2               | 3.32725  |
| P06685        | EQPLDEELKDAFQAYLELGLGER                                           | 1.292826375        | 3               | 3.32619  |
| P06685        | LNIPVNVQVNR                                                       | 1.334764313        | 2               | 3.03229  |

|               |                                                                   |                    |                |           |
|---------------|-------------------------------------------------------------------|--------------------|----------------|-----------|
| P06685        | YEPAAVSEHGDKK                                                     | 1.432321178        | 2              | 2.67432   |
| <b>P06687</b> | <b>AT1A3 Sodium/potassium_transporting ATPase subunit alpha_3</b> | <b>1.129015396</b> | <b>0.10987</b> | <b>3</b>  |
| P06687        | DGNALTPPTTPEWVK                                                   | 0.997390758        | 2              | 2.64782   |
| P06687        | GVGIIEGNETVEDIAAR                                                 | 1.147725303        | 2              | 4.6888    |
| P06687        | QGAIVAVTGDGVNDSPALK                                               | 1.145870861        | 2              | 4.79796   |
| <b>P06757</b> | <b>ADH1 Alcohol dehydrogenase 1</b>                               | <b>0.814794245</b> | <b>1</b>       | <b>18</b> |
| P06757        | AAVLWEPHKPFTIEDIEVAPPK                                            | 0.962157899        | 3              | 5.44958   |
| P06757        | FPLEPLITHVLPFEK                                                   | 1.326034797        | 3              | 4.51236   |
| P06757        | GAIFGGFK                                                          | 0.835522121        | 2              | 2.34464   |
| P06757        | GALLDGTSR                                                         | 1.013384607        | 2              | 2.85964   |
| P06757        | GKPIHHFISTSTFSQYTVVDDIAVAK                                        | 1.237357058        | 3              | 5.00109   |
| P06757        | HPESNLCCQTK                                                       | 3.143547944        | 2              | 3.22914   |
| P06757        | ICKHPESNLCCQTK                                                    | 1.412943716        | 3              | 4.13346   |
| P06757        | IDAAAPLDK                                                         | 0.824370514        | 2              | 2.74542   |
| P06757        | IIAVDINKDK                                                        | 0.794170247        | 2              | 2.71909   |
| P06757        | INEAFDLLR                                                         | 0.998744242        | 2              | 3.58126   |
| P06757        | KFPLEPLITHVLPFEK                                                  | 0.859188492        | 3              | 4.55814   |
| P06757        | LVADFMAK                                                          | 0.993899889        | 2              | 2.60782   |
| P06757        | MVATGVCR                                                          | 0.803252896        | 2              | 2.54107   |
| P06757        | MVATGVCR+Oxidation(0)                                             | 1.000047696        |                |           |
| P06757        | SDDHAVSGSLFTPLPAVLGHGAGIVESIGEGVTCVKPGDK                          | 0.9331557          | 4              | 7.6707    |
| P06757        | VCLIGCGFSTGYGSAVQVAK                                              | 0.893056603        | 2              | 6.18161   |
| P06757        | VIPLFSPQCGK                                                       | 0.990060935        | 2              | 2.74263   |
| P06757        | VTPGSTCAVFLGGVGLSVVIGCK                                           | 0.791399032        | 2              | 5.14327   |
| <b>P06761</b> | <b>GRP78 78 kDa glucose_regulated protein</b>                     | <b>1.113400061</b> | <b>9.9E-20</b> | <b>30</b> |
| P06761        | AKFEELNMDLFR                                                      | 1.083623924        | 3              | 4.2463    |
| P06761        | DAGTIAGLNVMR                                                      | 1.112219426        | 2              | 3.49273   |
| P06761        | DNHLLGTFDLTGIPPAPR                                                | 1.069833423        | 2              | 4.24679   |
| P06761        | ELEEIVQPIISK                                                      | 0.982232223        | 2              | 3.98022   |
| P06761        | FEELNMDLFR                                                        | 0.857471596        | 2              | 3.48431   |
| P06761        | FEELNMDLFR+Oxidation(5)                                           | 0.780014597        |                |           |
| P06761        | IEIESFFEGEDFSETLTR                                                | 0.99504038         | 2              | 5.27208   |
| P06761        | IEWLESHQDADIEDFK                                                  | 0.906986543        | 2              | 5.68795   |
| P06761        | IEWLESHQDADIEDFKAK                                                | 0.771135767        | 3              | 4.16432   |
| P06761        | IINEPTAAAIAYGLDKR                                                 | 1.258722198        | 2              | 4.46604   |
| P06761        | ITITNDQNR                                                         | 1.09243547         | 2              | 2.66427   |
| P06761        | ITPSYVAFTPEGER                                                    | 1.329210264        | 2              | 4.28242   |
| P06761        | KKELEEIVQPIISK                                                    | 1.056284358        | 2              | 5.1065    |
| P06761        | KSDIDEIVLVGGSTR                                                   | 1.092483774        | 2              | 4.54451   |
| P06761        | KSQIFSTASDNQPTVTIK                                                | 1.121945087        | 2              | 5.51791   |
| P06761        | LYGSGGPPPTGEEDTSEKDEL                                             | 1.804959339        | 2              | 5.69816   |
| P06761        | MKETAEAYLGK                                                       | 1.013070398        | 2              | 2.6979    |
| P06761        | MKETAEAYLGK+Oxidation(0)                                          | 1.489289777        |                |           |
| P06761        | NELESYAYSLK                                                       | 1.664998104        | 2              | 3.67002   |
| P06761        | NQLTSNPENTVFDK                                                    | 1.101374096        | 2              | 5.12111   |
| P06761        | SDIDEIVLVGGSTR                                                    | 1.033930009        | 1              | 3.50859   |
| P06761        | SQIFSTASDNQPTVTIK                                                 | 1.113300991        | 2              | 5.29809   |
| P06761        | TFAPEEISAMVLTK                                                    | 0.928940019        | 2              | 4.86954   |
| P06761        | TFAPEEISAMVLTK+Oxidation(9)                                       | 1.272756476        |                |           |
| P06761        | TKPYIQVDIGGGQTK                                                   | 1.306363845        | 3              | 4.63146   |
| P06761        | TWNPSPVQQDIK                                                      | 1.047375641        | 2              | 4.01456   |
| P06761        | VLEDSLK                                                           | 1.052099508        | 1              | 2.11651   |
| P06761        | VLEDSLKK                                                          | 0.919383576        | 2              | 2.35961   |
| P06761        | VTHAVVTVPAYFNDAQR                                                 | 1.139155305        | 2              | 5.05621   |
| P06761        | VYEGERPLTK                                                        | 1.037675493        | 2              | 2.89851   |

|               |                                                                                      |                    |                 |           |
|---------------|--------------------------------------------------------------------------------------|--------------------|-----------------|-----------|
| <b>P06866</b> | <b>HPT Haptoglobin</b>                                                               | <b>1.582577035</b> | <b>1.39E-11</b> | <b>8</b>  |
| P06866        | ATDLKDWVQETMAK                                                                       | 1.218739153        | 3               | 3.81799   |
| P06866        | CELHYEK                                                                              | 1.751492102        | 2               | 2.34513   |
| P06866        | GAVSPVGVQPILNK                                                                       | 1.199463844        | 2               | 4.60481   |
| P06866        | KGAVSPVGVQPILNK                                                                      | 2.109910583        | 2               | 3.1009    |
| P06866        | LQTEGDGIYTLNSEK                                                                      | 1.666221099        | 2               | 4.25428   |
| P06866        | NQLVEIEK                                                                             | 1.297524617        | 1               | 2.33561   |
| P06866        | SCAVAEYGVYVR                                                                         | 1.362416334        | 2               | 3.11541   |
| P06866        | SVVDIGLIK                                                                            | 1.079164965        | 2               | 2.7627    |
| <b>P07150</b> | <b>ANXA1 Annexin A1</b>                                                              | <b>0.990966468</b> | <b>0.985938</b> | <b>2</b>  |
| P07150        | GLGTDEDTLIEILTTR                                                                     | 0.983805458        | 2               | 4.27913   |
| P07150        | GVDEATIIDLTK                                                                         | 1.155197586        | 2               | 3.12517   |
| <b>P07153</b> | <b>RPN1 Dolichyl_diphosphooligosaccharide__protein glycosyltransferase subunit 1</b> | <b>1.567512656</b> | <b>8.43E-10</b> | <b>16</b> |
| P07153        | ASSFVLALEPELESR                                                                      | 1.249048396        | 2               | 4.46486   |
| P07153        | AVTSEIAVLQSR                                                                         | 0.045741544        | 2               | 3.7036    |
| P07153        | FVDHVFDEQVIDSLTVK                                                                    | 1.010961609        | 2               | 4.14231   |
| P07153        | GEDEEDNNLEVR                                                                         | 1.237846912        | 2               | 3.73351   |
| P07153        | HFDETVNR                                                                             | 1.029539642        | 2               | 2.51179   |
| P07153        | IDHILDAL                                                                             | 2.348307121        | 2               | 2.313     |
| P07153        | ISIVVETVYTHVLHPYPTQITQSEK                                                            | 1.409342162        | 3               | 4.62788   |
| P07153        | LKTEGSDLCDR                                                                          | 1.176551962        | 3               | 3.41215   |
| P07153        | NIQVDSPYDISR                                                                         | 1.324807547        | 2               | 3.78317   |
| P07153        | NLVEQHIQDIVVHYTFNK                                                                   | 1.551546064        | 3               | 4.45465   |
| P07153        | SEDILDYGPFK                                                                          | 1.200456195        | 2               | 3.39795   |
| P07153        | TEGSDLCDR                                                                            | 1.209316518        | 2               | 2.33111   |
| P07153        | TILPAAAQDVYYR                                                                        | 2.211828           | 2               | 2.29564   |
| P07153        | TVDLSSHLAK                                                                           | 1.012473           | 2               | 2.59989   |
| P07153        | VHYENNSPFLTITSMTR                                                                    | 1.208649314        | 2               | 3.29341   |
| P07153        | VTAEVVLAHPGGSTAR                                                                     | 1.278501156        | 2               | 4.4672    |
| <b>P07323</b> | <b>ENOG Gamma_enolase</b>                                                            | <b>1.197612961</b> | <b>0.189461</b> | <b>4</b>  |
| P07323        | AAVPSGASTGIYEALELR                                                                   | 1.192006033        | 2               | 5.04186   |
| P07323        | FGANAILGVSLAVCK                                                                      | 1.021963902        | 2               | 3.50915   |
| P07323        | GNPTVEVDLHTAK                                                                        | 0.433042992        | 2               | 3.39459   |
| P07323        | SGETEDTFIADLVVGLCTGQIK                                                               | 1.096420431        | 3               | 5.52837   |
| <b>P07335</b> | <b>KCRB Creatine kinase B_type</b>                                                   | <b>1.029123755</b> | <b>0.35392</b>  | <b>2</b>  |
| P07335        | FCTGLTQIETLFK                                                                        | 0.755049139        | 2               | 2.78021   |
| P07335        | GTGGVDTAAGGVFVDSNADR                                                                 | 1.040453748        | 2               | 3.93755   |
| <b>P07338</b> | <b>CTRB1 Chymotrypsinogen B</b>                                                      | <b>1.285254751</b> | <b>0.076747</b> | <b>2</b>  |
| P07338        | IVNGEDAIPGSWPVQVSLQDK                                                                | 0.555899378        | 2               | 3.25844   |
| P07338        | LQQAALPIVSEADCK                                                                      | 1.312458649        | 2               | 2.69657   |
| <b>P07340</b> | <b>AT1B1 Sodium/potassium_transporting ATPase subunit beta_1</b>                     | <b>1.127540693</b> | <b>0.010932</b> | <b>2</b>  |
| P07340        | SYEAYVLNIIR                                                                          | 2.406910031        | 2               | 2.39268   |
| P07340        | YNPNVLPVQCTGK                                                                        | 1.002355012        | 2               | 2.60486   |
| <b>P07379</b> | <b>PCKGC Phosphoenolpyruvate carboxykinase_cytosolic [GTP]</b>                       | <b>1.174929828</b> | <b>0.999903</b> | <b>13</b> |
| P07379        | AINPENGGFVAPGTSVK                                                                    | 1.066602485        | 2               | 4.71252   |
| P07379        | EEGWLAEHMLILGITNPEGK                                                                 | 1.549663376        | 2               | 4.01873   |
| P07379        | EVEEIDKYLEDDQVNADLPYEIER                                                             | 0.81386427         | 3               | 3.46965   |
| P07379        | FVEGNAQLCQPEYIHCDSSEEEYGR                                                            | 0.959693541        | 3               | 4.94118   |
| P07379        | GLGDVNVEELFGISK                                                                      | 1.174605075        | 2               | 3.81999   |
| P07379        | IGIELTDSPIVVASMR                                                                     | 0.875744992        | 2               | 3.60867   |
| P07379        | MGTSLVLEALGDGEFIK                                                                    | 0.904352452        | 2               | 3.71333   |
| P07379        | MGTSLVLEALGDGEFIK+Oxidation(0)                                                       | 1.22511994         |                 |           |
| P07379        | TVIITQEQR                                                                            | 1.047156105        | 2               | 2.66322   |

|               |                                                                   |                    |                 |           |
|---------------|-------------------------------------------------------------------|--------------------|-----------------|-----------|
| P07379        | VECVGDDIAWMK                                                      | 0.970697497        | 2               | 2.96585   |
| P07379        | VIQGSLDLSPQEVK                                                    | 1.124553832        | 2               | 4.02369   |
| P07379        | YDNCWLALDPR                                                       | 0.991582827        | 2               | 2.50259   |
| P07379        | YLAFAFSAACGK                                                      | 1.186816655        | 2               | 2.89215   |
| <b>P07483</b> | <b>FABPH Fatty acid binding protein_ heart</b>                    | <b>0.377527882</b> | <b>0.048016</b> | <b>3</b>  |
| P07483        | NFDDYMK                                                           | 2.548197589        | 1               | 2.13109   |
| P07483        | QVASMTPKPTTIEK                                                    | 0.011993677        | 2               | 3.40779   |
| P07483        | WDGQETTLTR                                                        | 0.759587535        | 2               | 2.87467   |
| <b>P07632</b> | <b>SODC Superoxide dismutase [Cu_Zn]</b>                          | <b>1.155620349</b> | <b>1.52E-14</b> | <b>4</b>  |
| P07632        | DGVANVSIEDR                                                       | 1.331034426        | 2               | 2.98403   |
| P07632        | GDGPVQGVIIHFEQK                                                   | 1.348846895        | 2               | 3.99333   |
| P07632        | HVGD LGNVAAGK                                                     | 1.169080969        | 2               | 3.56743   |
| P07632        | VISLSGEHSIIGR                                                     | 1.38090984         | 2               | 3.26097   |
| <b>P07633</b> | <b>PCCB Propionyl CoA carboxylase beta chain_ mitochondrial</b>   | <b>1.108165081</b> | <b>3.11E-05</b> | <b>10</b> |
| P07633        | AFDNDVDALCNLR                                                     | 1.330584247        | 2               | 3.89917   |
| P07633        | AYNMLDIHHAVIDER                                                   | 1.093458397        | 2               | 4.04047   |
| P07633        | GFVDDIIQPSSTR                                                     | 1.609026016        | 2               | 4.08655   |
| P07633        | HLLGDTNYAWPTAEIAVMGAK                                             | 1.005204227        | 2               | 3.11814   |
| P07633        | ICCDLEVLASK                                                       | 1.23904184         | 2               | 3.03434   |
| P07633        | IMDQAITVGAPVIGLNDSGGAR                                            | 0.841720403        | 2               | 4.45825   |
| P07633        | IQEGVESLAGYADIFLR                                                 | 1.198514441        | 2               | 4.16819   |
| P07633        | LVPELDTVVPLESSK                                                   | 1.123369889        | 2               | 3.49698   |
| P07633        | SVTNEDVTQEQLGGAK                                                  | 1.305790377        | 2               | 5.27313   |
| P07633        | TVGIVGNQPNVASGCLDINSSVK                                           | 0.99200433         | 2               | 5.17818   |
| <b>P07687</b> | <b>HYEP Epoxide hydrolase 1</b>                                   | <b>1.321025181</b> | <b>1.11E-16</b> | <b>23</b> |
| P07687        | DIELLYPYK                                                         | 0.812547537        | 2               | 2.42564   |
| P07687        | DKEETLPLGDGWWGPGSKPSAK                                            | 1.10097334         | 3               | 5.48953   |
| P07687        | EDESIRPFK                                                         | 1.343796305        | 2               | 2.672     |
| P07687        | EDESIRPFKVETSDEEIKDLHQR                                           | 1.177489456        | 3               | 5.63521   |
| P07687        | ELEDGGLER                                                         | 1.186150904        | 2               | 2.66747   |
| P07687        | ENLGQGIMVHK                                                       | 0.980458826        | 2               | 2.75009   |
| P07687        | ESGYLHIQATKPDVTGICALNDSPVGLAAYILEK                                | 1.635213669        | 3               | 6.22727   |
| P07687        | FHYGFNSNYMK                                                       | 1.02238413         | 2               | 2.56571   |
| P07687        | FLGYTEKDIELLYPYK                                                  | 0.885477975        | 2               | 4.68756   |
| P07687        | GGHFAAFEPK                                                        | 0.976086367        | 2               | 3.49493   |
| P07687        | IEGLDIHFHVKPPQLPSGR                                               | 1.90146409         | 3               | 3.67523   |
| P07687        | IPLLLDPK                                                          | 0.976202808        | 2               | 2.52785   |
| P07687        | KFVSLAELQ                                                         | 1.326164217        | 2               | 2.86118   |
| P07687        | KQVEILNQYPHFK                                                     | 0.83709081         | 3               | 4.8346    |
| P07687        | LLAQDIR                                                           | 1.170106651        | 2               | 2.51821   |
| P07687        | QVEILNQYPHFK                                                      | 0.863625795        | 2               | 3.74774   |
| P07687        | SEYRELEDGGLER                                                     | 1.583681089        | 2               | 2.37524   |
| P07687        | SFYTMTPLLGQR                                                      | 2.312410968        | 2               | 3.14608   |
| P07687        | SHGLSDEHVFEVICPSIPGYGYSEASSK                                      | 0.959131312        | 3               | 6.46636   |
| P07687        | TKIEGLDIHFHVKPPQLPSGR                                             | 3.619310122        | 3               | 3.88242   |
| P07687        | VETSDEEIK                                                         | 0.881869584        | 2               | 2.47502   |
| P07687        | VETSDEEIKDLHQR                                                    | 1.083955545        | 2               | 4.49115   |
| P07687        | VFVPTGFSAPSELLHAPEK                                               | 1.17363291         | 2               | 4.73921   |
| <b>P07756</b> | <b>CPSM Carbamoyl phosphate synthase [ammonia]_ mitochondrial</b> | <b>1.543538199</b> | <b>9.9E-20</b>  | <b>96</b> |
| P07756        | AADTIGYPVMIR                                                      | 1.485941195        | 2               | 4.0677    |
| P07756        | AADTIGYPVMIR+Oxidation(9)                                         | 2.164753672        |                 |           |
| P07756        | AERPDGLILGMGGQTALNCGVELFK                                         | 1.262710368        | 3               | 7.09728   |
| P07756        | AERPDGLILGMGGQTALNCGVELFK+Oxidation(10)                           | 1.361495261        |                 |           |
| P07756        | AERPDGLILGMGGQTALNCGVELFKR                                        | 1.799437517        | 3               | 4.40191   |

|        |                                                       |             |   |         |
|--------|-------------------------------------------------------|-------------|---|---------|
| P07756 | AFAISGPFNVQFLVK                                       | 1.112799198 | 2 | 5.0755  |
| P07756 | AFAMTNQLVER                                           | 1.03725565  | 2 | 4.44874 |
| P07756 | AFAMTNQLVER+Oxidation(3)                              | 1.374711538 |   |         |
| P07756 | ALENNMSLDEIVK                                         | 1.050029262 | 2 | 4.58932 |
| P07756 | ALENNMSLDEIVK+Oxidation(5)                            | 1.278277366 |   |         |
| P07756 | AQTAHIVLEDGTK                                         | 0.979727603 | 2 | 4.51227 |
| P07756 | ATGYPLAFIAAK                                          | 2.231977895 | 2 | 3.06182 |
| P07756 | CEMASTGEVACFGEGIHATAFLK                               | 1.125013204 | 3 | 5.36484 |
| P07756 | CEMASTGEVACFGEGIHATAFLK+Oxidation(2)                  | 1.299942549 |   |         |
| P07756 | CLGLTEAQR                                             | 1.005303001 | 2 | 3.67824 |
| P07756 | DELGLNK                                               | 1.255793311 | 2 | 2.54471 |
| P07756 | DGSIDLVINLPNNNTK                                      | 1.280131006 | 2 | 5.46171 |
| P07756 | DILNMDK                                               | 1.196017632 | 1 | 1.95249 |
| P07756 | EIEYEVVR                                              | 1.380784626 | 2 | 2.30299 |
| P07756 | EPLFGISTGNIITGLAAGAK                                  | 1.509510373 | 3 | 5.73545 |
| P07756 | ETLMDLGTK                                             | 1.2036278   | 1 | 2.31788 |
| P07756 | EVEMDAVGK                                             | 1.508984275 | 1 | 2.21111 |
| P07756 | FLEEATR                                               | 0.945470699 | 2 | 2.49813 |
| P07756 | FLGVAEQLHNEGFK                                        | 1.249427926 | 2 | 4.68048 |
| P07756 | FVHDNYVIR                                             | 1.569393118 | 3 | 3.43272 |
| P07756 | GAEVHLPWNHDFQMDYDGLLIAGGPGNPALAQPLIQNVK               | 1.193104927 | 3 | 6.34968 |
| P07756 | GAEVHLPWNHDFQMDYDGLLIAGGPGNPALAQPLIQNVK+Oxidation(15) | 1.607886145 |   |         |
| P07756 | GILIGIQSFRPR                                          | 0.505471251 | 2 | 2.53375 |
| P07756 | GLNSESVTEETLR                                         | 1.282183297 | 2 | 4.85291 |
| P07756 | GNDVLVIECNLR                                          | 1.087986765 | 2 | 4.48727 |
| P07756 | GQILTMANPIIINGGAPDPTAR                                | 0.988619321 | 2 | 6.26868 |
| P07756 | GQILTMANPIIINGGAPDPTAR+Oxidation(5)                   | 1.328202615 |   |         |
| P07756 | GQILTMANPIIINGGAPDPTARDELGLNK                         | 0.825356356 | 3 | 4.85266 |
| P07756 | GQILTMANPIIINGGAPDPTARDELGLNK+Oxidation(5)            | 1.092573365 |   |         |
| P07756 | GQNQPVLNITNR                                          | 1.102197124 | 2 | 4.22802 |
| P07756 | GTTITSVLPKALVASR                                      | 0.970174515 | 2 | 3.48367 |
| P07756 | GYSFGHPSSVAGEVVFNTGLGGYSEALTDPAYK                     | 2.602456205 | 3 | 6.62012 |
| P07756 | HLPTLEQPIIPSDYVAIK                                    | 1.179418739 | 2 | 5.61954 |
| P07756 | IALGIPLPEIK                                           | 1.839165063 | 2 | 3.27744 |
| P07756 | IAPSFAVESMEDALK                                       | 1.850411155 | 2 | 5.29116 |
| P07756 | IAPSFAVESMEDALK+Oxidation(9)                          | 1.007165488 |   |         |
| P07756 | IEFEGQSVDFVDPNK                                       | 1.010587508 | 2 | 5.16377 |
| P07756 | IEFEGQSVDFVDPNKQNLIAEVSTK                             | 1.278014012 | 3 | 5.33352 |
| P07756 | ILDYHQEACNGCIISVGGQIPNNLAVPLYK                        | 1.167212715 | 3 | 5.43199 |
| P07756 | ILESDRKEPLFGISTGNIITGLAAGAK                           | 1.180929732 | 3 | 3.69789 |
| P07756 | IMGTSPLQIDR                                           | 1.847158947 | 2 | 3.29278 |
| P07756 | IMGTSPLQIDR+Oxidation(1)                              | 2.599361085 |   |         |
| P07756 | IMGTSPLQIDRAEDR                                       | 0.600331971 | 2 | 2.58814 |
| P07756 | KEPLFGISTGNIITGLAAGAK                                 | 0.833198774 | 2 | 5.24547 |
| P07756 | KTVVVNCPETVSTDFDECDK                                  | 0.274410796 | 2 | 4.91851 |
| P07756 | LFAEAVQK                                              | 1.170917394 | 2 | 3.13731 |
| P07756 | LFATEATSDWLNANNVPATPVAWPSQEQNPSSLSSIR                 | 1.676310027 | 3 | 4.9762  |
| P07756 | LRDADPILR                                             | 1.374530621 | 2 | 3.23029 |
| P07756 | LTSIDKWFLYK                                           | 0.816295894 | 2 | 2.57635 |
| P07756 | LYFEELSLR                                             | 1.637410238 | 2 | 3.5846  |
| P07756 | MCHPSVDGFTPR                                          | 0.865789971 | 3 | 4.96953 |
| P07756 | MCHPSVDGFTPR+Oxidation(0)                             | 1.280902196 |   |         |
| P07756 | MRDILNMDK                                             | 0.725544773 | 2 | 2.46146 |

|               |                                                    |                    |                |           |
|---------------|----------------------------------------------------|--------------------|----------------|-----------|
| P07756        | MRDILNMDK+Oxidation(0)                             | <b>1.394598795</b> |                |           |
| P07756        | QADAVYFLPITPQFVTEVIK                               | <b>2.692853354</b> | 3              | 5.23386   |
| P07756        | QIDTLAAEYPSVTNYLYVYNGQEHDIK                        | <b>6.897428515</b> | 3              | 4.8584    |
| P07756        | QLFSDK                                             | <b>1.280368969</b> | 1              | 1.90003   |
| P07756        | QLFSDKLNEINEK                                      | <b>1.194592635</b> | 2              | 3.72978   |
| P07756        | QNLIAEVSTK                                         | <b>1.199887369</b> | 1              | 2.79997   |
| P07756        | RFLEEATR                                           | <b>1.21581384</b>  | 2              | 2.67996   |
| P07756        | RGAEVHLVPWNHDFQMDYDGLLIAGGPGNPALAQPLIQNVK          | <b>1.303365393</b> | 4              | 5.01593   |
| P07756        | RTAVDSGIALLTNfqvTK                                 | <b>1.314486982</b> | 2              | 5.02079   |
| P07756        | SAYALGGLSGGICPNK                                   | <b>1.476817426</b> | 2              | 5.0417    |
| P07756        | SAYALGGLSGGICPNKETLMDLGTK                          | <b>1.07893769</b>  | 2              | 4.38164   |
| P07756        | SFPFVSK                                            | <b>1.313911006</b> | 1              | 1.91672   |
| P07756        | SIFSAVLDELK                                        | <b>1.427375351</b> | 2              | 4.11419   |
| P07756        | SIFSAVLDELKVAQAPWK                                 | <b>1.419703908</b> | 3              | 4.52058   |
| P07756        | SLGQWLQEEK                                         | <b>1.095523969</b> | 2              | 3.97682   |
| P07756        | SVGEVMAIGR                                         | <b>1.058671519</b> | 2              | 3.4717    |
| P07756        | SVGEVMAIGR+Oxidation(5)                            | <b>1.363755922</b> |                |           |
| P07756        | TAVDSGIALLTNfqvTK                                  | <b>1.597131151</b> | 3              | 6.61693   |
| P07756        | TAVDSGIALLTNfqvTKLFAEAVQK                          | <b>1.215197709</b> | 3              | 4.42914   |
| P07756        | TFEESFQK                                           | <b>1.108768709</b> | 2              | 2.54569   |
| P07756        | TLGVDFIDVATK                                       | <b>1.138200246</b> | 2              | 4.22028   |
| P07756        | TSACFEPSLDYMVTK                                    | <b>1.123697014</b> | 2              | 4.78583   |
| P07756        | TSACFEPSLDYMVTK+Oxidation(11)                      | <b>1.426508805</b> |                |           |
| P07756        | TVLMNPNIASVQTNEVGLK                                | <b>0.908550986</b> | 2              | 6.40784   |
| P07756        | TVLMNPNIASVQTNEVGLK+Oxidation(3)                   | <b>1.133448545</b> |                |           |
| P07756        | TVVVNCNPETVSTDFEDECCK                              | <b>0.469651228</b> | 2              | 5.7037    |
| P07756        | TVVVNCNPETVSTDFEDECCKLYFEELSLEK                    | <b>1.752311275</b> | 3              | 5.51595   |
| P07756        | VISHAISEHVEDAGVHSGDATLMLPTQTISQGAIEK               | <b>1.102321269</b> | 3              | 7.50533   |
| P07756        | VISHAISEHVEDAGVHSGDATLMLPTQTISQGAIEK+Oxidation(22) | <b>1.390696386</b> |                |           |
| P07756        | VLGTSVESIMATEDR                                    | <b>1.138528988</b> | 2              | 4.78923   |
| P07756        | VLGTSVESIMATEDR+Oxidation(9)                       | <b>1.398834367</b> |                |           |
| P07756        | VLILSGGSLSIGQAGFDYSGSQAVK                          | <b>1.069280347</b> | 2              | 5.94713   |
| P07756        | VMIGESVDEK                                         | <b>0.929083227</b> | 2              | 3.51645   |
| P07756        | VMIGESVDEK+Oxidation(1)                            | <b>1.361816927</b> |                |           |
| P07756        | VSQEHVVLTK                                         | <b>1.212408768</b> | 2              | 3.68452   |
| P07756        | VVAVDCGIK                                          | <b>1.064400129</b> | 2              | 2.59941   |
| P07756        | YMESDGIK                                           | <b>1.035438722</b> | 2              | 2.42034   |
| P07756        | YMESDGIK+Oxidation(1)                              | <b>1.285737769</b> |                |           |
| <b>P07824</b> | <b>ARG1 Arginase_1</b>                             | <b>1.244517199</b> | <b>9.9E-20</b> | <b>16</b> |
| P07824        | ANEQLAAVVAETQK                                     | <b>1.369564603</b> | 2              | 5.19209   |
| P07824        | DHGDLAFVDVNPDPFQIVK                                | <b>1.569381987</b> | 2              | 6.30323   |
| P07824        | DIVYIGLR                                           | <b>2.793190301</b> | 2              | 2.38634   |
| P07824        | DVDPGEHYIK                                         | <b>1.959096123</b> | 2              | 3.36103   |
| P07824        | EGNHKPETDYLKPPK                                    | <b>1.748389561</b> | 2              | 2.68904   |
| P07824        | GKFPDVPGFVWTPCISAK                                 | <b>1.453137597</b> | 3              | 4.96317   |
| P07824        | LKETEYNVR                                          | <b>1.555722536</b> | 3              | 3.34739   |
| P07824        | NGTISVVLGGDHSMAIGSISGHAR                           | <b>1.16862812</b>  | 3              | 4.41851   |
| P07824        | TGLLSGLDIMEVNPTLGK                                 | <b>1.411357715</b> | 2              | 5.85325   |
| P07824        | TGLLSGLDIMEVNPTLGK+Oxidation(9)                    | <b>1.078117082</b> |                |           |
| P07824        | TVNTAVALTLSCFGTK                                   | <b>1.619532053</b> | 2              | 5.26928   |
| P07824        | VHPDLCVIWVDAHTDINTPLTSSGNLHGQPVAFLK                | <b>2.009972144</b> | 4              | 5.56051   |
| P07824        | VMEETFVYLLGR                                       | <b>5.007591296</b> | 2              | 3.95762   |
| P07824        | VMEETFVYLLGR+Oxidation(1)                          | <b>4.715682659</b> |                |           |
| P07824        | YFSMTEVDK                                          | <b>1.402595628</b> | 2              | 2.42588   |

|               |                                                     |                    |                 |           |
|---------------|-----------------------------------------------------|--------------------|-----------------|-----------|
| P07824        | YFSMTEVDKLGIGK+Oxidation(3)                         | <b>1.128605717</b> |                 |           |
| <b>P07871</b> | <b>THIKB 3_ketoacyl_CoA thiolase B_peroxisomal</b>  | <b>0.794063594</b> | <b>9.9E-20</b>  | <b>18</b> |
| P07871        | AEELGLPILGVL                                        | <b>0.857715422</b> | 2               | 4.26529   |
| P07871        | AEIVPVTTTVLDDK                                      | <b>0.822799871</b> | 2               | 4.42065   |
| P07871        | AEIVPVTTTVLDDKGR                                    | <b>0.749056045</b> | 2               | 3.97801   |
| P07871        | AEIVPVTTTVLDDKGRK                                   | <b>0.763637826</b> | 2               | 3.61479   |
| P07871        | DCLIPMGITSENAER                                     | <b>1.060152733</b> | 2               | 2.87824   |
| P07871        | DCLIPMGITSENAER+Oxidation(5)                        | <b>0.919466249</b> |                 |           |
| P07871        | DGGSTTAGNSSQVSDGAAAVLLAR                            | <b>0.885641016</b> | 2               | 6.42301   |
| P07871        | GGFKDTPDELLSAVLTAVLQDVK                             | <b>0.815416886</b> |                 |           |
| P07871        | IAQFLSGIPETVPLSAVNR                                 | <b>2.996945707</b> | 2               | 2.83674   |
| P07871        | LKPECLGDISVGNVLPQGAGAAMAR                           | <b>0.640166983</b> | 3               | 4.32479   |
| P07871        | QCSSGLQAVANIAGGIR                                   | <b>0.71355524</b>  | 2               | 5.10099   |
| P07871        | QDAFALASQQK                                         | <b>0.764842328</b> | 2               | 3.42173   |
| P07871        | QKQDAFALASQQK                                       | <b>0.657190956</b> | 2               | 4.1141    |
| P07871        | QVVTLLNELK                                          | <b>1.135562099</b> | 2               | 2.59609   |
| P07871        | SKAEELGLPILGVL                                      | <b>0.634879818</b> | 3               | 4.44634   |
| P07871        | SYAVVGVPPDIMGIGPAYAIPAALQK                          | <b>0.731038489</b> | 3               | 4.85553   |
| P07871        | TITVSQDEGVRPSTTMEGLAK                               | <b>0.71549921</b>  | 2               | 4.59334   |
| P07871        | VNPLGGAIALGHPLGCTGAR                                | <b>0.677651035</b> | 2               | 4.7787    |
| <b>P07872</b> | <b>ACOX1 Peroxisomal acyl_coenzyme A oxidase 1</b>  | <b>0.863062877</b> | <b>9.9E-20</b>  | <b>19</b> |
| P07872        | AFTTWTANAGIEECR                                     | <b>0.701436522</b> | 2               | 4.04414   |
| P07872        | ASATFNPELITHILDGSPENTR                              | <b>0.748349146</b> | 2               | 4.59124   |
| P07872        | ASEAHCHYVVVK                                        | <b>0.887964985</b> | 3               | 4.21119   |
| P07872        | EIENLILNDPDFQHEDYNFLTR                              | <b>0.960384545</b> | 2               | 4.41354   |
| P07872        | EIGTHKPLPGITVGDIGPK                                 | <b>0.744767344</b> | 2               | 3.55084   |
| P07872        | EVAWNLTSVDLVR                                       | <b>0.632168354</b> | 2               | 3.76222   |
| P07872        | EYGISDPEEIMWFK                                      | <b>0.787801112</b> | 2               | 3.49099   |
| P07872        | FGYEEMDNGYVK                                        | <b>0.682687712</b> | 2               | 3.44121   |
| P07872        | GGDFLEGSITGAQLSQVNAR                                | <b>0.691729098</b> | 2               | 5.75114   |
| P07872        | GLETTATYDPK                                         | <b>0.776299984</b> | 2               | 3.20909   |
| P07872        | INESIGQGDLSPELHALTAGLK                              | <b>0.77135101</b>  | 3               | 5.48688   |
| P07872        | LVEIAAK                                             | <b>0.798120467</b> | 1               | 2.06085   |
| P07872        | LVGGMVSYLNDLPSQR                                    | <b>1.322835032</b> | 2               | 3.36774   |
| P07872        | QSEPEPQLDFQYQQYK                                    | <b>0.66145615</b>  | 2               | 4.72978   |
| P07872        | SFLVGNAAQSLSK                                       | <b>0.729890503</b> | 2               | 4.50019   |
| P07872        | TQEFILNSPTVTSIK                                     | <b>0.732814068</b> | 2               | 4.70104   |
| P07872        | TSNHAIVLAQLITQGECYGLHAFVPIR                         | <b>0.7019441</b>   | 3               | 5.79266   |
| P07872        | YAQVKPDGTYVKPLSNK                                   | <b>2.579217825</b> | 3               | 3.78634   |
| P07872        | YDGNVYENLFEWAK                                      | <b>0.728659055</b> | 2               | 5.27812   |
| <b>P07895</b> | <b>SODM Superoxide dismutase [Mn]_mitochondrial</b> | <b>1.070111553</b> | <b>0.937554</b> | <b>3</b>  |
| P07895        | AIWNVINWENVSR                                       | <b>1.062992124</b> | 2               | 3.60614   |
| P07895        | GDVTTQVALQPALK                                      | <b>0.957977417</b> | 2               | 3.48564   |
| P07895        | HHATVYNNLNVTEEK                                     | <b>1.167978534</b> | 2               | 4.62507   |
| <b>P07896</b> | <b>ECHP Peroxisomal bifunctional enzyme</b>         | <b>0.988080038</b> | <b>9.9E-20</b>  | <b>25</b> |
| P07896        | ELSTVDLVVEAVFEDMNLK                                 | <b>1.325901704</b> |                 |           |
| P07896        | EWQSLAGPHGSK                                        | <b>1.653148236</b> | 2               | 2.90328   |
| P07896        | GGPMFYAASVGLPTVLEK                                  | <b>1.018135118</b> | 2               | 3.93728   |
| P07896        | GQGLTGPSLPPGTPVR                                    | <b>0.568890082</b> | 2               | 4.0104    |
| P07896        | GWYQYDKPLGR                                         | <b>0.648891515</b> | 2               | 2.93592   |
| P07896        | IFNKPVPSLPNMDSVFAEIAIK                              | <b>0.839525817</b> | 3               | 4.06811   |
| P07896        | IGVVVGNCYGFVGNR                                     | <b>0.972736711</b> | 2               | 3.08938   |
| P07896        | IIDKPIEPR                                           | <b>0.811962333</b> | 2               | 2.63716   |
| P07896        | KGQGLTGPSLPPGTPVR                                   | <b>0.578338469</b> | 2               | 4.58959   |
| P07896        | KQYPGV LAPETCVR                                     | <b>0.42920983</b>  | 2               | 3.75909   |
| P07896        | LCNPPVNAVSPVIR                                      | <b>0.801922484</b> | 2               | 4.33821   |



|               |                                                                 |                    |                 |           |
|---------------|-----------------------------------------------------------------|--------------------|-----------------|-----------|
| P07896        | LGILDAVVK                                                       | 0.750158242        | 2               | 2.81568   |
| P07896        | LLEVIPSR                                                        | 0.74207523         | 2               | 2.38265   |
| P07896        | LVAQGSPLK                                                       | 0.872273867        | 2               | 2.37648   |
| P07896        | QNPDIQLEPSDYLR                                                  | 0.469852239        | 2               | 3.7748    |
| P07896        | QYPGVLAPETCVR                                                   | 0.655280632        | 2               | 3.28746   |
| P07896        | TASAQPVSSVGLGLGTMGR                                             | 0.763563022        | 2               | 5.19283   |
| P07896        | TASAQPVSSVGLGLGTMGR+Oxidation(17)                               | 1.010960311        |                 |           |
| P07896        | TISKEEILER                                                      | 0.569725846        | 2               | 2.68446   |
| P07896        | VGISVVAVESDPK                                                   | 0.623262171        | 2               | 3.81967   |
| P07896        | VGLPEVTLGILPGAR                                                 | 0.590586444        | 2               | 3.55849   |
| P07896        | VSDLAGLDVGVWK                                                   | 0.628523905        | 2               | 4.11553   |
| P07896        | YLSADEALR                                                       | 0.79316483         | 2               | 2.6571    |
| P07896        | YSPLGDMICEAGR                                                   | 0.507931186        | 2               | 4.0767    |
| P07896        | YSSPTTIATVMLSLK                                                 | 1.129316465        | 2               | 3.35693   |
| <b>P07953</b> | <b>F261 6_phosphofructo_2_kinase/fructose_2_6_biphosphate 1</b> | <b>1.054215415</b> | <b>0.256437</b> | <b>3</b>  |
| P07953        | IGDSDGLSAR                                                      | 0.775998756        | 2               | 2.39163   |
| P07953        | NYEFFRPDNTAQLIR                                                 | 1.015642712        | 2               | 2.97137   |
| P07953        | TIQTAEALGVPEQWK                                                 | 1.539332698        | 2               | 2.96376   |
| <b>P08009</b> | <b>GSTM4 Glutathione S_transferase Yb_3</b>                     | <b>1.331778525</b> | <b>1.18E-07</b> | <b>5</b>  |
| P08009        | LCYNPDFEK                                                       | 1.760803147        | 2               | 2.81028   |
| P08009        | LLLEYTDSSYEK                                                    | 1.205176363        | 2               | 4.8159    |
| P08009        | LLLEYTDSSYEKRR                                                  | 1.096608582        | 2               | 3.83535   |
| P08009        | NQVFEATCLDAFPNLK                                                | 0.796241877        | 2               | 4.89727   |
| P08009        | SQWLNEK                                                         | 1.073401153        | 2               | 2.65168   |
| <b>P08010</b> | <b>GSTM2 Glutathione S_transferase Mu 2</b>                     | <b>1.819324936</b> | <b>9.9E-20</b>  | <b>15</b> |
| P08010        | FLSKPIFAK                                                       | 1.243399397        | 1               | 1.93275   |
| P08010        | IRVDVLENQAMDTR                                                  | 1.105752126        | 3               | 4.21167   |
| P08010        | ITYVDFLVYDVLQHR                                                 | 1.940522504        | 2               | 4.80816   |
| P08010        | KKPEYLEGLPEK                                                    | 1.078362521        | 3               | 4.43253   |
| P08010        | KPEYLEGLPEK                                                     | 1.829472172        | 2               | 3.71253   |
| P08010        | KYSMGDAPDYDR                                                    | 1.103474637        | 2               | 3.58545   |
| P08010        | LFLEYDTSYEDK                                                    | 1.250069326        | 2               | 5.42186   |
| P08010        | LFLEYDTSYEDKK                                                   | 1.336264847        | 2               | 4.26878   |
| P08010        | LQLAMVCYSPDFER                                                  | 1.966733368        | 2               | 4.80497   |
| P08010        | LQLAMVCYSPDFER+Oxidation(4)                                     | 1.95836109         |                 |           |
| P08010        | SQWLSEK                                                         | 1.183318151        | 2               | 2.45639   |
| P08010        | VDVLENQAMDTR                                                    | 1.060281789        | 2               | 4.66655   |
| P08010        | VDVLENQAMDTR+Oxidation(8)                                       | 1.333320489        |                 |           |
| P08010        | YSMGDAPDYDR                                                     | 1.431936409        | 2               | 3.11258   |
| P08010        | YSMGDAPDYDR+Oxidation(2)                                        | 1.480042038        |                 |           |
| <b>P08011</b> | <b>MGST1 Microsomal glutathione S_transferase 1</b>             | <b>0.960009986</b> | <b>0.075086</b> | <b>7</b>  |
| P08011        | IYHTIAYLTPLPQNR                                                 | 1.535911013        | 2               | 4.81524   |
| P08011        | MMFLSSATAFQR                                                    | 1.147126511        | 2               | 3.30555   |
| P08011        | MMFLSSATAFQR+Oxidation(0)                                       | 0.971719471        |                 |           |
| P08011        | MMFLSSATAFQR+Oxidation(0)                                       | 1.42679367         |                 |           |
| P08011        | MMFLSSATAFQR+Oxidation(1)                                       | 1.42679367         | 2               | 3.0608    |
| P08011        | VFANPEDCAGFGK                                                   | 0.995329782        | 2               | 4.57497   |
| P08011        | VFANPEDCAGFGKGENAK                                              | 0.800788303        | 2               | 4.52619   |
| <b>P08081</b> | <b>CLCA Clathrin light chain A</b>                              | <b>1.222579828</b> | <b>0.56836</b>  | <b>2</b>  |
| P08081        | LEALDANSR                                                       | 1.145883048        | 2               | 2.58161   |
| P08081        | WREEQTER                                                        | 1.337667801        | 2               | 2.45204   |
| <b>P08290</b> | <b>ASGR2 Asialoglycoprotein receptor 2</b>                      | <b>1.05595524</b>  | <b>0.954546</b> | <b>2</b>  |
| P08290        | EEQEFVVK                                                        | 1.063410829        | 1               | 1.94814   |
| P08290        | WVDGTEYR                                                        | 1.032561655        | 2               | 2.31462   |

|               |                                                                                                                     |                    |                 |           |
|---------------|---------------------------------------------------------------------------------------------------------------------|--------------------|-----------------|-----------|
| <b>P08461</b> | <b>ODP2 Dihydrolipoyllysine_residue acetyltransferase component of pyruvate dehydrogenase complex_mitochondrial</b> | <b>1.08074206</b>  | <b>0.007451</b> | <b>4</b>  |
| P08461        | AAPAAAAAPPGPR                                                                                                       | 0.993138582        | 2               | 2.62333   |
| P08461        | DVPLGTPLCIIVEK                                                                                                      | 1.400026751        | 2               | 3.14107   |
| P08461        | GLETIASDVVSLASK                                                                                                     | 1.033983228        | 2               | 3.90556   |
| P08461        | VAPTPAGVFIDIPISNIR                                                                                                  | 1.107988045        | 2               | 4.90705   |
| <b>P08503</b> | <b>ACADM Medium_chain specific acyl_CoA dehydrogenase_mitochondrial</b>                                             | <b>0.903982001</b> | <b>0.014391</b> | <b>9</b>  |
| P08503        | AFTGFIVEADTPGIHIGK                                                                                                  | 0.862546804        | 2               | 4.29523   |
| P08503        | ANWYFVLR                                                                                                            | 1.122930094        | 2               | 2.625     |
| P08503        | EEIIPVAPDYDK                                                                                                        | 1.021753988        | 2               | 3.28841   |
| P08503        | GITFEDVR                                                                                                            | 1.015854912        | 2               | 2.43476   |
| P08503        | IYQIYEGTAQIQR                                                                                                       | 1.168865198        | 2               | 4.97248   |
| P08503        | KGDEYVINGQK                                                                                                         | 1.02552038         | 2               | 4.34062   |
| P08503        | QEPGLGFSFELTEQQK                                                                                                    | 0.876784296        | 2               | 3.20518   |
| P08503        | SGEYFPFLIK                                                                                                          | 0.859283949        | 2               | 2.48541   |
| P08503        | TRPTVAAGAVGLAQR                                                                                                     | 0.828214531        | 2               | 4.46213   |
| <b>P08541</b> | <b>UD2B2 UDP_glucuronosyltransferase 2B2</b>                                                                        | <b>2.398625022</b> | <b>2.63E-10</b> | <b>10</b> |
| P08541        | DELQNHFIK                                                                                                           | 1.541307701        | 2               | 2.38517   |
| P08541        | FEIFSTSISK                                                                                                          | 1.399558555        | 2               | 2.43766   |
| P08541        | FEIFSTSISKDELQNHFIK                                                                                                 | 1.056122319        | 2               | 4.17513   |
| P08541        | FILPPSYVPVILSGLAGK                                                                                                  | 1.628620726        | 3               | 5.63558   |
| P08541        | GHEVTVLKPSAYFFLDPK                                                                                                  | 2.971325518        | 2               | 4.07865   |
| P08541        | HKEWDTFYSEILGRPTTVDETMSK                                                                                            | 1.666468292        | 3               | 4.41874   |
| P08541        | LDFLSALEEVIDNPFYK                                                                                                   | 1.338963371        |                 |           |
| P08541        | LLDVWTYELPR                                                                                                         | 2.54838404         | 3               | 3.89172   |
| P08541        | NVMMLSTIHHDQPMKPLDR                                                                                                 | 1.082289973        | 3               | 3.61748   |
| P08541        | VEIWLIR                                                                                                             | 1.111228799        | 2               | 2.92876   |
| <b>P08542</b> | <b>UDB17 UDP_glucuronosyltransferase 2B17</b>                                                                       | <b>1.194956725</b> | <b>0.000367</b> | <b>10</b> |
| P08542        | EIINNPFYK                                                                                                           | 1.306057939        | 1               | 2.19694   |
| P08542        | FETFPTSFSKDELENYFIK                                                                                                 | 1.1257167          | 2               | 4.07582   |
| P08542        | FSPGYKIEKSSGR                                                                                                       | 1.106900883        | 2               | 2.33728   |
| P08542        | KWDPFYSEILGRPTTLAETMGK                                                                                              | 1.077681003        | 2               | 3.95044   |
| P08542        | LVDVWTYELQR                                                                                                         | 1.443948542        | 2               | 3.51047   |
| P08542        | NAVWLSTIHHDQPMKPLDK                                                                                                 | 1.529639092        | 3               | 3.3089    |
| P08542        | NAVWLSTIHHDQPMKPLDK+Oxidation(13)                                                                                   | 1.731055938        |                 |           |
| P08542        | SDLFNALKEIINNPFYK                                                                                                   | 0.784706432        | 2               | 2.32874   |
| P08542        | TPATLGPNTR                                                                                                          | 1.082213384        | 2               | 2.31541   |
| P08542        | WDPFYSEILGRPTTLAETMGK                                                                                               | 1.320184286        | 2               | 3.45626   |
| <b>P08683</b> | <b>CP2CB Cytochrome P450 2C11</b>                                                                                   | <b>0.724938661</b> | <b>5.47E-13</b> | <b>17</b> |
| P08683        | DIDTTPAISGFGHLPPFYEACFIPVQR                                                                                         | 0.83125868         | 3               | 5.23571   |
| P08683        | EALVDLGEFSGR                                                                                                        | 0.746953523        | 2               | 4.03007   |
| P08683        | EHQESLDKDNPR                                                                                                        | 0.263283695        | 2               | 4.11068   |
| P08683        | FDPGHFLDER                                                                                                          | 0.597908891        | 2               | 2.3421    |
| P08683        | FDYKDPTFLNLMHR                                                                                                      | 0.874026434        | 3               | 5.03702   |
| P08683        | FNENFR                                                                                                              | 0.715556166        | 1               | 1.97992   |
| P08683        | GAPFDPTFILGCAPCNVICSIIFQNR                                                                                          | 1.001358595        | 3               | 5.24738   |
| P08683        | GTNVIVLSSILHDDKEFPNPEK                                                                                              | 0.942203454        | 2               | 5.19422   |
| P08683        | ICAGEALAR                                                                                                           | 0.958554128        | 2               | 2.80686   |
| P08683        | LPPGPTPLPIIGNTLQIYMK                                                                                                | 1.282415295        | 3               | 3.85074   |
| P08683        | NYVLEK                                                                                                              | 0.844246473        | 1               | 1.96148   |
| P08683        | SQMPYTDVAVVHEIQR                                                                                                    | 0.709988522        | 2               | 4.2556    |
| P08683        | SQMPYTDVAVVHEIQR+Oxidation(2)                                                                                       | 1.067823431        |                 |           |
| P08683        | VKEHQESLDKDNPR                                                                                                      | 0.703585634        | 3               | 5.02683   |
| P08683        | VQEEIER                                                                                                             | 0.808907551        | 2               | 2.56421   |
| P08683        | YGLLLLLL                                                                                                            | 0.864838962        | 2               | 3.03297   |

|               |                                                                                 |                    |                 |           |
|---------------|---------------------------------------------------------------------------------|--------------------|-----------------|-----------|
| P08683        | YIDLVPNTLPHLVTR                                                                 | 0.582001723        | 2               | 4.17715   |
| <b>P08733</b> | <b>MLRV Myosin regulatory light chain 2_ ventricular/cardiac muscle isoform</b> | <b>0.752599469</b> | <b>0.122483</b> | <b>3</b>  |
| P08733        | GADPEETILNAFK                                                                   | 0.788782619        | 2               | 3.50039   |
| P08733        | NEEIDEMIK                                                                       | 1.319103907        | 1               | 2.49773   |
| P08733        | NLVHIITHGEEKD                                                                   | 0.064246963        | 2               | 2.97889   |
| <b>P09006</b> | <b>SPA3N Serine protease inhibitor A3N</b>                                      | <b>0.88683301</b>  | <b>0.656843</b> | <b>2</b>  |
| <b>P09034</b> | <b>ASSY Argininosuccinate synthase</b>                                          | <b>2.940243244</b> | <b>9.9E-20</b>  | <b>15</b> |
| P09034        | APNTPDVLEIEFK                                                                   | 3.118899971        | 2               | 3.34169   |
| P09034        | DGTTHTSLDLFMYLNEVAGK                                                            | 6.464044743        | 2               | 5.79458   |
| P09034        | EFVEEfiWPAVQSSALYEDR                                                            | 2.701458608        | 3               | 5.62464   |
| P09034        | EQGYDVIAYLANIGQK                                                                | 2.89308192         | 2               | 4.55279   |
| P09034        | FAELVYTGFWHSPECFVR                                                              | 4.943831879        | 2               | 5.14998   |
| P09034        | FELTCYSLAPQIK                                                                   | 4.855056138        | 2               | 4.27415   |
| P09034        | GRNDLMEYAK                                                                      | 2.096862546        | 2               | 3.06075   |
| P09034        | IDIVENR                                                                         | 1.608097469        | 2               | 2.49909   |
| P09034        | KVFIEDVSK                                                                       | 1.884436175        | 3               | 3.76835   |
| P09034        | NDLMEYAK                                                                        | 1.369717487        | 2               | 2.64569   |
| P09034        | SPWSMDENLMHISYEAGILENPK                                                         | 3.996593895        | 3               | 5.35389   |
| P09034        | TQDPAKAPNTPDVLEIEFK                                                             | 1.739317766        | 2               | 4.74507   |
| P09034        | TQDPAKAPNTPDVLEIEFKK                                                            | 1.694365643        | 3               | 4.28753   |
| P09034        | VFIEDVSK                                                                        | 1.979590951        | 2               | 2.62422   |
| P09034        | VQVSVFK                                                                         | 2.177774482        | 2               | 2.40724   |
| <b>P09041</b> | <b>PGK2 Phosphoglycerate kinase 2</b>                                           | <b>1.149630849</b> | <b>0.000129</b> | <b>4</b>  |
| P09041        | FHVEEKG                                                                         | 0.962319448        | 2               | 2.7276    |
| P09041        | LGDVYVNDAFGTAHR                                                                 | 1.156050477        | 3               | 4.07682   |
| P09041        | VDFNVPMK                                                                        | 1.008024921        | 1               | 2.06889   |
| P09041        | VSHVSTGGASLELLEGG                                                               | 0.97677208         | 2               | 5.65418   |
| <b>P09117</b> | <b>ALDOC Fructose_bisphosphate aldolase C</b>                                   | <b>1.284612821</b> | <b>0.000117</b> | <b>2</b>  |
| P09117        | VLAAYK                                                                          | 1.301773089        | 2               | 2.65019   |
| P09117        | YASICQQNGIVPIVEPEILPDGDHDLKR                                                    | 0.202390857        | 3               | 3.62138   |
| <b>P09139</b> | <b>SPYA Serine__pyruvate aminotransferase_mitochondrial</b>                     | <b>1.83229075</b>  | <b>0.001221</b> | <b>2</b>  |
| P09139        | IGLLGYNATTENADR                                                                 | 1.809865342        | 2               | 3.32791   |
| P09139        | VLNAPPGISLISFNCK                                                                | 1.832905219        | 2               | 3.04923   |
| <b>P09367</b> | <b>SDHL L_serine dehydratase/L_threonine deaminase</b>                          | <b>10.38315206</b> | <b>8.43E-06</b> | <b>4</b>  |
| P09367        | ALGVNTVGAQTLK                                                                   | 7.218248837        | 2               | 3.57425   |
| P09367        | AQLGLNELLK                                                                      | 22.90820989        | 1               | 2.00916   |
| P09367        | LGLPATIVVPSTTPALTIER                                                            | 5.858267091        | 2               | 3.30031   |
| P09367        | MDSSQPSGSFK                                                                     | 8.955643638        | 2               | 2.31168   |
| <b>P09495</b> | <b>TPM4 Tropomyosin alpha_4 chain</b>                                           | <b>0.552307659</b> | <b>9.9E-20</b>  | <b>13</b> |
| P09495        | AEGDAAALNR                                                                      | 1.108365916        | 2               | 2.30945   |
| P09495        | EDKYEIEIK                                                                       | 0.422831267        | 1               | 2.63126   |
| P09495        | EENVGLHQTLDTLNLNLCI                                                             | 1.938026691        | 2               | 4.93632   |
| P09495        | IQALQQADDAEDR                                                                   | 1.288750347        | 2               | 4.65585   |
| P09495        | IQLVEEELDR                                                                      | 0.553576122        | 2               | 3.59185   |
| P09495        | IQLVEEELDRAQER                                                                  | 0.674804888        | 2               | 2.88161   |
| P09495        | KLVILEGELER                                                                     | 0.38355685         | 2               | 3.04976   |
| P09495        | LEEAEKAADESER                                                                   | 0.399966918        | 2               | 4.09306   |
| P09495        | LVILEGELER                                                                      | 0.419257243        | 2               | 3.33488   |
| P09495        | MEIQEMQLK                                                                       | 0.261431617        | 2               | 2.65872   |
| P09495        | RIQLVEEELDR                                                                     | 0.631573829        | 2               | 2.84578   |
| P09495        | YEEIEIK                                                                         | 0.618500123        | 1               | 1.96475   |
| P09495        | YSEKEDKYEIEIK                                                                   | 0.951775625        | 2               | 4.18287   |
| <b>P09527</b> | <b>RAB7A Ras_related protein Rab_7a</b>                                         | <b>1.151236224</b> | <b>0.027802</b> | <b>5</b>  |
| P09527        | DPENPFVVLGNK                                                                    | 1.476750408        | 2               | 3.52847   |

|               |                                                  |                    |                 |           |
|---------------|--------------------------------------------------|--------------------|-----------------|-----------|
| P09527        | EAINVEQAFQTIAR                                   | 0.560451592        | 2               | 2.81084   |
| P09527        | GADCCVLVFDVTAPNTFK                               | 1.211251808        | 2               | 4.1241    |
| P09527        | TLDSWRDEFLIQASPR                                 | 0.684082476        | 3               | 3.74278   |
| P09527        | VIILGDSGVGK                                      | 1.074265691        | 2               | 2.8733    |
| <b>P09605</b> | <b>KCRS Creatine kinase S_type_mitochondrial</b> | <b>0.755281917</b> | <b>0.093876</b> | <b>4</b>  |
| P09605        | GTGGVDTAADVVDISNDR                               | 0.735558389        | 2               | 4.78462   |
| P09605        | LSEMTEQDQQR                                      | 0.444210813        | 2               | 3.62994   |
| P09605        | LSEMTEQDQQR+Oxidation(3)                         | 0.755936656        |                 |           |
| P09605        | SEVELVQIVIDGVNYLVDCEK                            | 0.616922099        |                 |           |
| <b>P09606</b> | <b>GLNA Glutamine synthetase</b>                 | <b>1.236431054</b> | <b>1.52E-13</b> | <b>6</b>  |
| P09606        | CIEEAIDK                                         | 1.066981074        | 2               | 2.84903   |
| P09606        | ITGTNAEVMPAQWEFQIGPCEGIR                         | 1.108405906        | 3               | 4.71273   |
| P09606        | LTGFHETSNINDFSAGVANR                             | 1.38378552         | 2               | 6.07776   |
| P09606        | RLTGFHETSNINDFSAGVANR                            | 0.979611444        | 3               | 5.08158   |
| P09606        | TCLLNETGDEPFQYK                                  | 1.498427068        | 2               | 5.31174   |
| P09606        | TCLLNETGDEPFQYKN                                 | 1.9821986          | 2               | 4.38498   |
| <b>P09811</b> | <b>PYGL Glycogen phosphorylase_liver form</b>    | <b>1.251044888</b> | <b>0.008588</b> | <b>20</b> |
| P09811        | DFSELEPDKFQNK                                    | 1.335921735        | 2               | 3.50231   |
| P09811        | DGVGTVFDAPFDQVAIQLNDTHPALAIPELMR                 | 1.041126949        | 3               | 4.71468   |
| P09811        | EGWQVEEADDWLR                                    | 1.055903894        | 2               | 3.82312   |
| P09811        | GIVGVENVAELK                                     | 1.023896369        | 2               | 3.0903    |
| P09811        | GIVGVENVAELKK                                    | 1.824238743        | 2               | 2.44371   |
| P09811        | HLQIYEINQK                                       | 0.912176612        | 2               | 3.6481    |
| P09811        | IFVDIEK                                          | 1.133073901        | 1               | 2.08298   |
| P09811        | INPSSMFDVHVK                                     | 0.950645559        | 2               | 3.06965   |
| P09811        | LHSFVGDDIFLR                                     | 2.012653661        | 2               | 2.33314   |
| P09811        | LVIDQIDNGFFSPNPDLFK                              | 1.211244226        | 2               | 4.66664   |
| P09811        | LVTSAEVVNNNDPMVGSK                               | 0.897211722        | 2               | 2.98035   |
| P09811        | TFAYTNHTVLPREALER                                | 1.043599991        | 2               | 4.02074   |
| P09811        | VDDVAALDK                                        | 1.083830909        | 1               | 2.12805   |
| P09811        | VDDVAALDKK                                       | 1.060153005        | 2               | 3.11268   |
| P09811        | VFADYEAYVK                                       | 1.256690362        | 2               | 2.40198   |
| P09811        | VIPATDLSEQISTAGTEASGTGNMK                        | 0.927807641        | 2               | 6.12173   |
| P09811        | VLYPNDNFFEGK                                     | 0.943633774        | 2               | 3.06361   |
| P09811        | VSQLYMNQK                                        | 2.348456212        | 2               | 3.09176   |
| P09811        | WLLLCNPGLADLIAEK                                 | 1.299169336        | 2               | 5.04339   |
| P09811        | YEYGIFNQK                                        | 1.096956227        | 2               | 2.56954   |
| <b>P09812</b> | <b>PYGM Glycogen phosphorylase_muscle form</b>   | <b>0.3513872</b>   | <b>0.294345</b> | <b>12</b> |
| P09812        | GLAGVENVSDLKK                                    | 0.779345176        | 2               | 3.03467   |
| P09812        | GYNAQEYYDRIPELR                                  | #NUM!              | 2               | 2.77046   |
| P09812        | HLQIYEINQR                                       | 1.517431791        | 2               | 2.91635   |
| P09812        | IGEEYISDLQDLR                                    | 0.595137507        | 2               | 3.85469   |
| P09812        | IGEEYISDLQDLRK                                   | 0.758802042        | 2               | 2.92432   |
| P09812        | LITAIGDVVNHDPAVGDR                               | 0.350494657        | 2               | 3.60534   |
| P09812        | NLAENISR                                         | 0.889638535        | 1               | 2.47318   |
| P09812        | QIIEQLSSGFFSPK                                   | 0.61787135         | 2               | 3.25814   |
| P09812        | TNFDAPDK                                         | 0.090670343        | 2               | 2.32305   |
| P09812        | VHINPNSLFDVQVK                                   | 0.884236892        | 2               | 2.80865   |
| P09812        | VIPAADLSEQISTAGTEASGTGNMK                        | 0.553352305        | 2               | 5.03654   |
| P09812        | WLVLCNPGLAEVIAER                                 | 0.862846941        | 2               | 4.29391   |
| <b>P09875</b> | <b>UD2B1 UDP_glucuronosyltransferase 2B1</b>     | <b>1.119221568</b> | <b>3.44E-06</b> | <b>6</b>  |
| P09875        | ANVVASALAQIPQK                                   | 0.914315312        | 3               | 4.25851   |
| P09875        | FSGGLPLPPSYVPVLSLSDR                             | 1.868185964        | 3               | 4.64526   |
| P09875        | IILNELAQR                                        | 1.287892379        | 2               | 3.02238   |
| P09875        | SDLEYSFAK                                        | 1.415450601        | 2               | 2.50752   |
| P09875        | VDFSILSTTGLLTALK                                 | 1.009672448        | 2               | 4.53477   |
| P09875        | VFNEYSDVVENLCK                                   | 1.127499516        | 2               | 3.46126   |

|               |                                                                          |                    |                 |           |
|---------------|--------------------------------------------------------------------------|--------------------|-----------------|-----------|
| <b>P09895</b> | <b>RL5 60S ribosomal protein L5</b>                                      | <b>1.15035306</b>  | <b>1.24E-06</b> | <b>5</b>  |
| P09895        | GAVDGGLSIPHSTK                                                           | 1.127199171        | 2               | 4.37607   |
| P09895        | HIMGQNVADYMR                                                             | 0.775048487        | 2               | 3.01488   |
| P09895        | NNVTPDMMEEYK                                                             | 0.987130234        | 2               | 3.35219   |
| P09895        | RFPGYDSESK                                                               | 1.349919467        | 2               | 2.84024   |
| P09895        | YLMEEDEDAYKK                                                             | 1.271452496        | 2               | 3.25328   |
| <b>POC0S7</b> | <b>H2AZ Histone H2A.Z</b>                                                | <b>0.86006473</b>  | <b>0.730578</b> | <b>2</b>  |
| POC0S7        | ATIAGGGVIPHIHK                                                           | 0.862048258        | 2               | 3.75109   |
| POC0S7        | GDEELDSLK                                                                | 0.771973823        | 2               | 3.51846   |
| <b>POC2X9</b> | <b>AL4A1 Delta_1_pyrroline_5_carboxylate dehydrogenase_mitochondrial</b> | <b>1.112522878</b> | <b>9.9E-20</b>  | <b>17</b> |
| POC2X9        | AIEAAVLAR                                                                | 0.996653142        | 2               | 2.96848   |
| POC2X9        | ALNDLKDQTEAIPC VVGDEEVWTS DVR                                            | 1.026960745        | 3               | 5.56122   |
| POC2X9        | DQTEAIPC VVGDEEVWTS DVR                                                  | 1.044479958        | 2               | 4.75895   |
| POC2X9        | EAGLPPNVIQFVPADGPTFGDVTSS EHL CGINFTG VSVPTFK                            | 1.156654355        | 3               | 3.74914   |
| POC2X9        | EEIFGPVLT VYVYPDEK                                                       | 1.058305306        | 2               | 4.14585   |
| POC2X9        | ETLQLVDSTTSYGLTGAVFAQDK                                                  | 1.057774538        | 2               | 5.18492   |
| POC2X9        | KEWDLKPVADR                                                              | 0.997543768        | 2               | 3.34138   |
| POC2X9        | LYVPQSLWPQIK                                                             | 1.655612032        | 2               | 3.26604   |
| POC2X9        | NAAGNFYINDK                                                              | 1.708220156        | 2               | 3.51245   |
| POC2X9        | NFHFVHSSADVDSV VSGTLR                                                    | 1.31187237         | 2               | 5.8587    |
| POC2X9        | SAFEYGGQK                                                                | 1.140182105        | 2               | 2.45889   |
| POC2X9        | SSPSLSILAGGQC NESVGFV EPCIESK                                            | 1.125798032        | 3               | 5.72013   |
| POC2X9        | STGSVVGQ QPFGGAR                                                         | 1.014190664        | 2               | 4.40045   |
| POC2X9        | TVIQAEIDAAAELIDFFR                                                       | 0.937478707        |                 |           |
| POC2X9        | VANEPILAFTQGS PER                                                        | 1.224136535        | 2               | 5.4116    |
| POC2X9        | VGNPAEDFGTFFSAVIDAK                                                      | 2.151079977        | 2               | 4.96786   |
| POC2X9        | YQLSPFNHG HK                                                             | 1.611747923        | 2               | 2.93512   |
| <b>POC5H9</b> | <b>MANF Mesencephalic astrocyte_derived neurotrophic factor</b>          | <b>1.093115286</b> | <b>0.124954</b> | <b>4</b>  |
| POC5H9        | DRDVT FSPATIEELIK                                                        | 1.079700813        | 2               | 4.71109   |
| POC5H9        | DVT FSPATIEELIK                                                          | 1.093648593        | 2               | 3.20963   |
| POC5H9        | IINEVSKPLAHHIPVEK                                                        | 1.248219379        | 3               | 3.81203   |
| POC5H9        | ILDDWGEMCK                                                               | 1.061838944        | 2               | 2.39007   |
| <b>POC6F1</b> | <b>DYH2 Dynein heavy chain 2_axonemal</b>                                | <b>1.346849151</b> | <b>0.002473</b> | <b>3</b>  |
| POC6F1        | EDSVLGLQAFASWR                                                           | 1.280323467        | 2               | 2.30316   |
| POC6F1        | TMPLISDLR+Oxidation(1)                                                   | 1.606802515        |                 |           |
| POC6F1        | TMPLISDLRNPALR                                                           | 1.296876687        | 2               | 2.39695   |
| <b>P10111</b> | <b>PPIA Peptidyl_prolyl cis_trans isomerase A</b>                        | <b>1.278943029</b> | <b>2.02E-08</b> | <b>12</b> |
| P10111        | EGMSIVEAMER                                                              | 1.154733723        | 2               | 2.99008   |
| P10111        | FEDENFILK                                                                | 1.084965327        | 2               | 3.16549   |
| P10111        | HTGPGILSMANAGPNTNGSQFFICTAK                                              | 1.527582814        | 3               | 5.95295   |
| P10111        | HTGPGILSMANAGPNTNGSQFFICTAK+Oxidation(8)                                 | 1.203456308        |                 |           |
| P10111        | IIPGFM CQGGDFTR                                                          | 1.045536597        | 2               | 3.32359   |
| P10111        | ITISDCGQL                                                                | 1.124886536        | 1               | 1.96819   |
| P10111        | KITISDCGQL                                                               | 1.37810485         | 2               | 3.33028   |
| P10111        | SIYGEKFEDENFILK                                                          | 0.906003397        | 2               | 4.42517   |
| P10111        | TEWLDGK                                                                  | 1.023279483        | 2               | 2.35127   |
| P10111        | VCFELFADK                                                                | 1.304466435        | 2               | 3.32073   |
| P10111        | VCFELFADKVPK                                                             | 1.16519037         | 2               | 3.85775   |
| P10111        | VKEGMSIVEAMER                                                            | 1.007687892        | 2               | 3.00034   |
| <b>P10536</b> | <b>RAB1B Ras_related protein Rab_1B</b>                                  | <b>1.134643446</b> | <b>0.985491</b> | <b>3</b>  |
| P10536        | MGPGAASGGERPNLK                                                          | 0.836669284        | 2               | 3.29535   |
| P10536        | NATNVEQAFMTMAAEIK+Oxidation(11)                                          | 1.121139879        |                 |           |
| P10536        | NATNVEQAFMTMAAEIK+Oxidation(9)                                           | 1.126100422        |                 |           |

|               |                                                      |                    |                 |           |
|---------------|------------------------------------------------------|--------------------|-----------------|-----------|
| <b>P10633</b> | <b>CP2D1 Cytochrome P450 2D1</b>                     | <b>0.974649729</b> | <b>0.249665</b> | <b>4</b>  |
| P10633        | LVEESLTVSGFIPEVLNFTFALLR                             | <b>0.949586744</b> |                 |           |
| P10633        | SQGVILASYGPEWR                                       | <b>1.054737344</b> | 2               | 4.19739   |
| P10633        | TFMALLDNLLAENR                                       | <b>0.862440132</b> | 2               | 3.50258   |
| P10633        | YGDVFSLQK                                            | <b>0.967668941</b> | 2               | 2.84155   |
| <b>P10634</b> | <b>CP2DQ Cytochrome P450 2D26</b>                    | <b>0.986080778</b> | <b>0.000282</b> | <b>17</b> |
| P10634        | ACLGEPLAR                                            | <b>1.000143274</b> | 2               | 2.66558   |
| P10634        | AVSNVIASLVYAR                                        | <b>0.92545627</b>  | 3               | 4.46306   |
| P10634        | DMTDAFLAEMQK                                         | <b>1.171054908</b> | 2               | 3.02704   |
| P10634        | EAEHPFNPSILLSK                                       | <b>1.122175625</b> | 2               | 3.08222   |
| P10634        | ELLVTYGEDTADRPLLIYHNLGYGNK                           | <b>0.9343876</b>   | 3               | 4.90913   |
| P10634        | FADIVPTNIPHMTSR                                      | <b>0.863677658</b> | 2               | 2.66883   |
| P10634        | FEYEDPFFNR                                           | <b>0.834254024</b> | 2               | 2.69863   |
| P10634        | FHPEHFLDAQGNFVK                                      | <b>0.874403105</b> | 2               | 4.80594   |
| P10634        | GNPESSFNDENLR                                        | <b>0.97241554</b>  | 2               | 4.20614   |
| P10634        | GTTLIPNLSVLK                                         | <b>0.887621178</b> | 2               | 2.54552   |
| P10634        | GTTLIPNLSVLKDETVWEKPLR                               | <b>0.638348375</b> | 2               | 4.33431   |
| P10634        | GVVLAPYGPEWR                                         | <b>0.840238564</b> | 2               | 3.43619   |
| P10634        | LNSFIALVDK                                           | <b>2.693027979</b> | 2               | 2.48206   |
| P10634        | RFEYEDPFFNR                                          | <b>0.953913583</b> | 3               | 4.072     |
| P10634        | SLEQWVTEEAGHLCDTFAK                                  | <b>1.012864456</b> | 2               | 4.96519   |
| P10634        | SWDPAQPPR                                            | <b>0.895534439</b> | 2               | 2.65318   |
| P10634        | VHEEIDEVIGQVR                                        | <b>0.915211073</b> | 2               | 4.55214   |
| <b>P10719</b> | <b>ATPB ATP synthase subunit beta_ mitochondrial</b> | <b>1.123465896</b> | <b>9.9E-20</b>  | <b>34</b> |
| P10719        | AGTATGQIVAVIGAVVDVQFDEGLPPIILNALEVQGR                | <b>1.337632218</b> |                 |           |
| P10719        | AHGGYSVFAGVGER                                       | <b>2.088258895</b> | 2               | 3.93031   |
| P10719        | AIAELGIYPAVDPLDSTSR                                  | <b>0.998147434</b> | 3               | 5.56254   |
| P10719        | DQEGQDVLIFIDNIFR                                     | <b>6.285313546</b> |                 |           |
| P10719        | EGNDLYHEMIESGVINLK                                   | <b>1.063379188</b> | 2               | 5.1579    |
| P10719        | FLSQPFQVAEVFTGHMGK                                   | <b>1.516238846</b> | 2               | 4.06247   |
| P10719        | FTQAGSEVSALLGR                                       | <b>1.101257822</b> | 2               | 4.84286   |
| P10719        | GFQQILAGDYDHLPEQAFYVMVGPIEEAVAK                      | <b>2.072493505</b> | 3               | 4.73012   |
| P10719        | GSITSVQAIYVPADDLTDPAATTFHAHLDATTVLSR                 | <b>3.757446388</b> | 3               | 4.72002   |
| P10719        | IGLFGGAGVGK                                          | <b>1.568404306</b> | 2               | 3.02512   |
| P10719        | IGLFGGAGVGKTVLIMELINNVAK                             | <b>1.105204409</b> | 3               | 3.49479   |
| P10719        | ILQDYK                                               | <b>1.146543862</b> | 1               | 2.17017   |
| P10719        | IMDPNIVGSEHYDVAR                                     | <b>1.022778228</b> | 2               | 4.819     |
| P10719        | IMDPNIVGSEHYDVAR+Oxidation(1)                        | <b>1.715485771</b> |                 |           |
| P10719        | IMNVIGEPIDER                                         | <b>1.299489335</b> | 2               | 4.17051   |
| P10719        | IMNVIGEPIDER+Oxidation(1)                            | <b>1.807651362</b> |                 |           |
| P10719        | IPSAVGYQPTLATDMGMTQER                                | <b>1.765664113</b> | 2               | 4.83796   |
| P10719        | IPSAVGYQPTLATDMGMTQER+Oxidation(14)                  | <b>2.345008716</b> |                 |           |
| P10719        | IPSAVGYQPTLATDMGMTQER+Oxidation(17)                  | <b>1.868478335</b> |                 |           |
| P10719        | LVLEVAQHLGESTVR                                      | <b>1.250594729</b> | 2               | 4.67961   |
| P10719        | QFAPIHAEAPEFIEMSVEQEILVTGIK                          | <b>1.156701602</b> | 3               | 4.98528   |
| P10719        | SLQDIIAILGMDELSEEDKLTVSR                             | <b>1.001101178</b> | 3               | 5.44174   |
| P10719        | SLQDIIAILGMDELSEEDKLTVSR+Oxidation(10)               | <b>1.10684848</b>  |                 |           |
| P10719        | TIAMDGTEGLVR                                         | <b>0.988149097</b> | 2               | 3.37176   |
| P10719        | TIAMDGTEGLVR+Oxidation(3)                            | <b>1.326862748</b> |                 |           |
| P10719        | TREGNDLYHEMIESGVINLK                                 | <b>0.991329882</b> | 2               | 6.10936   |
| P10719        | TVLIMELINNVAK                                        | <b>0.978096402</b> | 2               | 4.5711    |
| P10719        | TVLIMELINNVAK+Oxidation(4)                           | <b>1.264381322</b> |                 |           |
| P10719        | VALTGLTVAEYFR                                        | <b>2.441307832</b> | 2               | 4.07275   |
| P10719        | VALVYQMNEPPGAR                                       | <b>1.006382616</b> | 2               | 4.36311   |
| P10719        | VALVYQMNEPPGAR+Oxidation(7)                          | <b>1.272810067</b> |                 |           |
| P10719        | VLDSGAPIK                                            | <b>1.105450158</b> | 2               | 3.02841   |

|               |                                                              |                    |                 |           |
|---------------|--------------------------------------------------------------|--------------------|-----------------|-----------|
| P10719        | VLDSGAPIKIPVGPETLGR                                          | 1.018699011        | 3               | 4.76193   |
| P10719        | VVDLLAPYAK                                                   | 1.036179833        | 2               | 3.03147   |
| <b>P10760</b> | <b>SAHH Adenosylhomocysteinase</b>                           | <b>1.268481768</b> | <b>9.9E-20</b>  | <b>18</b> |
| P10760        | ALDIAENEMPGLMR                                               | 1.003570859        | 2               | 4.31684   |
| P10760        | ALDIAENEMPGLMR+Oxidation(12)                                 | 1.346617616        |                 |           |
| P10760        | ATDVMIA GK                                                   | 1.090644592        | 2               | 2.82463   |
| P10760        | DGPLNMILDDGGDLTNLIHTK                                        | 1.452963179        | 2               | 5.41981   |
| P10760        | DGPLNMILDDGGDLTNLIHTK+Oxidation(5)                           | 1.331151189        |                 |           |
| P10760        | EMYSASKPLK                                                   | 1.818729541        | 2               | 2.49508   |
| P10760        | FDNLYGCR                                                     | 1.292737775        | 2               | 2.86189   |
| P10760        | GETDEEYLWCIEQTLHFK                                           | 1.657245838        | 2               | 4.27915   |
| P10760        | GISEETTTGVHNLYK                                              | 1.265667877        | 2               | 4.13385   |
| P10760        | IILLAEGR                                                     | 1.993760062        | 2               | 2.80319   |
| P10760        | KLDEAVAEHLGK                                                 | 1.326222433        | 3               | 5.16178   |
| P10760        | LDEAVAEHLGK                                                  | 1.27526148         | 2               | 3.85233   |
| P10760        | RATDVMIA GK                                                  | 1.201787504        | 2               | 2.69358   |
| P10760        | SKFDNLYGCR                                                   | 1.417662478        | 2               | 2.87609   |
| P10760        | VAVVAGYGDVVGK                                                | 1.618199852        | 2               | 4.2356    |
| P10760        | VNIKPQVDR                                                    | 1.317033318        | 2               | 2.91937   |
| P10760        | WLNENAVEK                                                    | 1.338282624        | 2               | 3.16334   |
| P10760        | WSSCNIFSTQDHAAAAIAK                                          | 1.357844097        | 2               | 5.08674   |
| <b>P10818</b> | <b>CX6A1 Cytochrome c oxidase subunit 6A1_ mitochondrial</b> | <b>0.888914236</b> | <b>0.681125</b> | <b>2</b>  |
| P10818        | HEEHERPEFVAYPHLR                                             | 1.058929637        | 3               | 3.3204    |
| P10818        | SRHEEHERPEFVAYPHLR                                           | 0.877775328        | 3               | 3.66902   |
| <b>P10860</b> | <b>DHE3 Glutamate dehydrogenase 1_ mitochondrial</b>         | <b>1.10623</b>     | <b>9.9E-20</b>  | <b>28</b> |
| P10860        | ALASLMTYK                                                    | 1.295828506        | 2               | 3.12053   |
| P10860        | CAVVDPVPGGAK                                                 | 1.25423348         | 2               | 3.28834   |
| P10860        | CVGVGESDGSIWNPDGIDPK                                         | 0.863050606        | 2               | 5.15168   |
| P10860        | DDGSWEVIEGYR                                                 | 1.489837308        | 2               | 4.09852   |
| P10860        | DIVHSGLAYTMER                                                | 1.427871156        | 2               | 3.319     |
| P10860        | DIVHSGLAYTMER+Oxidation(10)                                  | 1.582065131        |                 |           |
| P10860        | DSNYHLLMSVQESLER                                             | 0.92797736         | 2               | 3.69867   |
| P10860        | DSNYHLLMSVQESLER+Oxidation(7)                                | 1.983568958        |                 |           |
| P10860        | EDDPNFFK                                                     | 1.170926126        | 1               | 2.06388   |
| P10860        | GASIVEDKLVEDLK                                               | 1.219132729        | 2               | 3.42575   |
| P10860        | GFIGPGIDVPAPDMSTGER                                          | 0.950944926        | 2               | 5.55232   |
| P10860        | GFIGPGIDVPAPDMSTGER+Oxidation(13)                            | 0.940816127        |                 |           |
| P10860        | HGGTIPVPTAEFQDR                                              | 1.093254256        | 2               | 4.46853   |
| P10860        | IIAEGANGPTTPEADK                                             | 1.051662995        | 2               | 5.26113   |
| P10860        | IIAEGANGPTTPEADKIFLER                                        | 1.091835805        | 3               | 4.6932    |
| P10860        | KGFIGPGIDVPAPDMSTGER                                         | 0.943206344        | 2               | 5.5394    |
| P10860        | KGFIGPGIDVPAPDMSTGER+Oxidation(14)                           | 0.972416379        |                 |           |
| P10860        | LQHGSILGFPK                                                  | 1.348184868        | 2               | 2.72253   |
| P10860        | MVEGFFDR                                                     | 0.935106891        | 2               | 2.82878   |
| P10860        | MVEGFFDR+Oxidation(0)                                        | 1.431976959        |                 |           |
| P10860        | NLNHVSYGR                                                    | 0.485388419        | 2               | 2.33404   |
| P10860        | NYTDNELEK                                                    | 1.119110952        | 2               | 2.4253    |
| P10860        | RDDGSWEVIEGYR                                                | 1.299061484        | 2               | 4.24201   |
| P10860        | TAAYVNAIEK                                                   | 1.323140889        | 2               | 3.60226   |
| P10860        | TFVVQGFQGNVGLHSMR                                            | 0.679151636        | 2               | 3.99847   |
| P10860        | VYEGSILEADCDILIPAASEK                                        | 1.108221984        | 3               | 5.92223   |
| P10860        | YNLGLDLR                                                     | 1.146669           | 2               | 3.12985   |
| P10860        | YSTDVSVDEVK                                                  | 1.381710499        | 2               | 3.18791   |
| <b>P10867</b> | <b>GGLO L_gulonolactone oxidase</b>                          | <b>0.746338753</b> | <b>3.57E-11</b> | <b>7</b>  |
| P10867        | GDDILLSPCFQR                                                 | 0.839746343        | 1               | 2.07442   |

|               |                                                                     |                    |                 |           |
|---------------|---------------------------------------------------------------------|--------------------|-----------------|-----------|
| P10867        | GVQFQNWAK                                                           | 1.210024           | 2               | 2.40734   |
| P10867        | LDPTGMFLNSYLEK                                                      | 0.683709015        | 2               | 4.41574   |
| P10867        | LDYWLAYETIMK                                                        | 0.935017541        | 2               | 4.36853   |
| P10867        | NADVFAQAR                                                           | 0.72899776         | 2               | 2.80585   |
| P10867        | TYGCSPEVYYQPTSVEEVR                                                 | 0.784663522        | 2               | 4.90496   |
| P10867        | VVAHYPEVR                                                           | 0.830914423        | 2               | 2.79662   |
| <b>P10868</b> | <b>GAMT Guanidinoacetate N_methyltransferase</b>                    | <b>0.869072243</b> | <b>0.145975</b> | <b>4</b>  |
| P10868        | EHWIECNDGVFQR                                                       | 1.060563861        | 2               | 4.02284   |
| P10868        | WETPYMHSLAAAAASR                                                    | 1.648747079        | 2               | 3.91216   |
| P10868        | YTDITAMFEETQVPALLEAGFQR                                             | 1.101437329        | 3               | 6.55796   |
| P10868        | YYAFPQMITPLVTK                                                      | 0.866583172        | 2               | 3.48161   |
| <b>P10888</b> | <b>COX41 Cytochrome c oxidase subunit 4 isoform 1_mitochondrial</b> | <b>1.245537203</b> | <b>7.9E-07</b>  | <b>2</b>  |
| P10888        | IQFNESFAEMNK                                                        | 1.255896448        | 2               | 4.51784   |
| P10888        | SEDYALPSYVDR                                                        | 1.292723707        | 2               | 4.04538   |
| <b>P11030</b> | <b>ACBP Acyl_CoA_binding protein</b>                                | <b>1.579267249</b> | <b>9.9E-20</b>  | <b>3</b>  |
| P11030        | QATVGDVNTDRPGLLDLK                                                  | 1.521786342        | 3               | 3.65245   |
| P11030        | TQPTDEEMLFYSHFK                                                     | 7.441122412        | 2               | 4.39372   |
| P11030        | WDSWNK                                                              | 1.063773763        | 1               | 2.03708   |
| <b>P11232</b> | <b>THIO Thioredoxin</b>                                             | <b>1.186785643</b> | <b>0.014447</b> | <b>2</b>  |
| P11232        | EAFQEALAAAGDK                                                       | 1.630245905        | 2               | 4.3168    |
| P11232        | VGEFSGANK                                                           | 1.045030735        | 2               | 2.95964   |
| <b>P11240</b> | <b>COX5A Cytochrome c oxidase subunit 5A_mitochondrial</b>          | <b>0.96439652</b>  | <b>4.56E-12</b> | <b>5</b>  |
| P11240        | EIYPYVIQELRPTLNELGISTPEELGLDK                                       | 0.194573476        | 3               | 6.72896   |
| P11240        | EIYPYVIQELRPTLNELGISTPEELGLDKV                                      | 2.065732351        | 3               | 6.62605   |
| P11240        | GMNTLVGYDLVPEPK                                                     | 0.899110697        | 2               | 3.66218   |
| P11240        | LNDFASAVR                                                           | 1.019948572        | 2               | 3.26188   |
| P11240        | RLNDFASAVR                                                          | 1.017220755        | 2               | 2.97524   |
| <b>P11348</b> | <b>DHPR Dihydropteridine reductase</b>                              | <b>1.124110119</b> | <b>0.000884</b> | <b>11</b> |
| P11348        | AALDGTGPMIGYMAK                                                     | 1.232725328        | 2               | 3.87694   |
| P11348        | EGLLTLGAK                                                           | 1.157282768        | 2               | 3.12362   |
| P11348        | GAVHQLCQSLAGK                                                       | 1.17537585         | 3               | 4.60123   |
| P11348        | MTDSFTEQADQVTAEVGK                                                  | 1.049681857        | 2               | 5.54745   |
| P11348        | MTDSFTEQADQVTAEVGK+Oxidation(0)                                     | 1.261430441        |                 |           |
| P11348        | NCDLMWK                                                             | 0.812584555        | 1               | 2.08039   |
| P11348        | NSGMPSGAAAIAVLPVTLDTPMNR                                            | 0.994181975        | 2               | 5.36346   |
| P11348        | NSGMPSGAAAIAVLPVTLDTPMNR+Oxidation(3)                               | 1.226540367        |                 |           |
| P11348        | QSIWTSTISSHLATK                                                     | 0.927048275        | 2               | 3.86189   |
| P11348        | RPNSGSLIQVTTDVK                                                     | 1.003117063        | 2               | 4.08912   |
| P11348        | VDAILCVAGGWAGGNAK                                                   | 0.932769503        | 2               | 4.48923   |
| <b>P11442</b> | <b>CLH Clathrin heavy chain 1</b>                                   | <b>0.972999309</b> | <b>1.1E-07</b>  | <b>37</b> |
| P11442        | AFMTADLPNELIELLEK                                                   | 1.039330528        | 3               | 4.59635   |
| P11442        | AHIAQLCEK                                                           | 0.97065037         | 1               | 2.25687   |
| P11442        | ALEHFTDLYDIK                                                        | 0.971712558        | 3               | 3.87644   |
| P11442        | CNEPAVWSQLAK                                                        | 1.055860295        | 2               | 3.25546   |
| P11442        | EDKLECSEELGDLVK                                                     | 0.959989564        | 2               | 2.71679   |
| P11442        | FDVNTSAVQVLIHIGNLDR                                                 | 1.048612289        | 3               | 3.62401   |
| P11442        | FNALFAQGNYSEAAK                                                     | 1.154907713        | 2               | 4.57674   |
| P11442        | GQCDELINVCNENSLFK                                                   | 0.894526018        | 2               | 5.09711   |
| P11442        | GQFSTDELVAEVEK                                                      | 0.93348066         | 2               | 4.28972   |
| P11442        | GQFSTDELVAEVEKR                                                     | 1.008114354        | 2               | 3.64783   |
| P11442        | HELIEFR                                                             | 1.540635651        | 2               | 2.34946   |
| P11442        | HSSLAGCQIINYR                                                       | 0.972496366        | 2               | 2.71368   |
| P11442        | IHEGCEEPATHNALAK                                                    | 1.155060194        | 2               | 5.30538   |
| P11442        | ISGETIFVTAPHEATAGIIGVNR                                             | 1.164164454        | 2               | 5.3292    |
| P11442        | IVLDNSVFSEHR                                                        | 1.586409607        | 2               | 2.96906   |



|               |                                                                  |                    |                 |           |
|---------------|------------------------------------------------------------------|--------------------|-----------------|-----------|
| P11442        | IYDSNNNPER                                                       | 1.249410716        | 2               | 3.19304   |
| P11442        | KFDVNTSAVQVLIHIGNLDR                                             | 0.906802542        | 3               | 5.63764   |
| P11442        | KFNALFAQGNYSEAAK                                                 | 1.246260213        | 2               | 4.36682   |
| P11442        | LAELEEFINGPNNNAHIQQVGDR                                          | 0.91466234         | 2               | 5.05264   |
| P11442        | LHIIEVGTPPTGNQPPFK                                               | 0.953753435        | 2               | 4.18867   |
| P11442        | LLYNNVSNFGR                                                      | 1.591952435        | 2               | 2.34087   |
| P11442        | LPVVIGLLDVIDCEDVIK                                               | 1.522221328        | 2               | 5.22083   |
| P11442        | LTDQLPLIIVCDR                                                    | 0.971336857        | 2               | 3.24053   |
| P11442        | NLQNLLILTAIK                                                     | 0.792844838        | 2               | 3.91733   |
| P11442        | NNLAGAEELFAR                                                     | 1.26880539         | 2               | 3.5349    |
| P11442        | NNRPSEGPLQTR                                                     | 0.996646984        | 3               | 4.19138   |
| P11442        | RPLIDQVVQTALSETQDPEEVSVTVK                                       | 1.196395792        | 3               | 5.73747   |
| P11442        | SVDPTLALSYYLR                                                    | 0.969449115        | 2               | 2.89163   |
| P11442        | SVNESLNNLFITEEDYQALR                                             | 1.44772793         | 3               | 5.12696   |
| P11442        | TLQIFNIEMK                                                       | 0.983083788        | 2               | 2.88997   |
| P11442        | TSIDAYDNFDNISLAQR                                                | 0.968772755        | 2               | 4.36255   |
| P11442        | VGEQAQVVIIDMNDPSNPIR                                             | 0.918840546        | 2               | 4.62218   |
| P11442        | VIQFAETGQVQK                                                     | 1.162815747        | 2               | 4.62988   |
| P11442        | VSQPIEGHAASFAQFK                                                 | 1.0745069          | 2               | 4.36608   |
| P11442        | WLLLTGISAQQNR                                                    | 1.068145848        | 2               | 3.25511   |
| P11442        | YESLELCRPVLQQGR                                                  | 0.551504749        | 2               | 2.67628   |
| P11442        | YIEIYVQK                                                         | 1.289529861        | 1               | 2.36903   |
| <b>P11497</b> | <b>ACACA Acetyl_CoA carboxylase 1</b>                            | <b>1.547311588</b> | <b>3.99E-09</b> | <b>6</b>  |
| P11497        | GGSWVVIDPTINPR                                                   | 1.54733896         | 2               | 2.75822   |
| P11497        | GSVLEPEGTVEIK                                                    | 1.830824699        | 2               | 2.69971   |
| P11497        | ITSENPDDEGFKPSSGTVQELNFR                                         | 1.572063998        | 3               | 3.98168   |
| P11497        | TLRDPSPLELQDIMTSVSGR                                             | 1.337103327        | 3               | 3.36126   |
| P11497        | VNNADDFPNLFR                                                     | 1.270076571        | 2               | 2.41684   |
| P11497        | VQQAELHTGSLPQIQSTALR                                             | 0.854348685        | 3               | 3.54194   |
| <b>P11507</b> | <b>AT2A2 Sarcoplasmic/endoplasmic reticulum calcium ATPase 2</b> | <b>0.818492491</b> | <b>7.93E-05</b> | <b>9</b>  |
| P11507        | DIVPGDIVEIAVGDKVPADIR                                            | 0.626462604        | 2               | 3.53943   |
| P11507        | IGIFGQDEDVTSK                                                    | 0.923520458        | 2               | 3.38609   |
| P11507        | IRDEMVATEQER                                                     | 1.022815696        | 2               | 3.10657   |
| P11507        | LDEFGEQLSK                                                       | 0.903936392        | 2               | 2.82353   |
| P11507        | NAENAIEALK                                                       | 0.606535677        | 2               | 2.33943   |
| P11507        | NAENAIEALKEYPEPMGK                                               | 0.75490214         | 2               | 3.93909   |
| P11507        | SEIGIAMGSGTAVAK                                                  | 1.027067075        | 2               | 2.71159   |
| P11507        | TASEMVLADDNFSTIVAAVEEGR                                          | 0.693773478        | 3               | 4.80393   |
| P11507        | VDQSILTGESVSVIK                                                  | 0.510702382        | 2               | 4.63697   |
| <b>P11598</b> | <b>PDIA3 Protein disulfide isomerase A3</b>                      | <b>1.183497102</b> | <b>9.9E-20</b>  | <b>25</b> |
| P11598        | DASVVGFFR                                                        | 1.24358327         | 2               | 2.70056   |
| P11598        | DGEEAGAYDGPR                                                     | 1.364548456        | 2               | 3.08644   |
| P11598        | DLLTAYYVDVYEK                                                    | 1.36917592         | 2               | 3.24163   |
| P11598        | EATNPPIIQEELPK                                                   | 1.174444757        | 2               | 3.47696   |
| P11598        | EYDDNGEGITIFRPLHLANK                                             | 1.065544017        | 2               | 4.21593   |
| P11598        | FAHTNVESLVK                                                      | 1.208391692        | 3               | 3.35449   |
| P11598        | FIQESIFGLCPHMTEDNKDLIQGK                                         | 0.845156274        | 3               | 5.03454   |
| P11598        | FISDKDASVVGFFR                                                   | 1.492026575        | 2               | 4.28957   |
| P11598        | FLQEYFDGNLK                                                      | 0.948784522        | 2               | 3.39345   |
| P11598        | FLQEYFDGNLKR                                                     | 1.003978775        | 2               | 3.09834   |
| P11598        | FVMQEEFSR                                                        | 1.251342724        | 2               | 2.5818    |
| P11598        | GFPTIYFSPANK                                                     | 2.326950462        | 2               | 2.77238   |
| P11598        | IFRDGEEAGAYDGPR                                                  | 0.91057948         | 2               | 3.64782   |
| P11598        | LAPEYAAAATR                                                      | 1.105420715        | 2               | 3.44126   |
| P11598        | LNFVASR                                                          | 1.527178346        | 2               | 2.44178   |
| P11598        | LSKDPNIVIAK                                                      | 1.191129352        | 3               | 3.79006   |

|               |                                                   |                    |                 |           |
|---------------|---------------------------------------------------|--------------------|-----------------|-----------|
| P11598        | MDATANDVPSPYEVK                                   | 0.952172857        | 2               | 4.48111   |
| P11598        | MDATANDVPSPYEVK+Oxidation(0)                      | 1.282921139        |                 |           |
| P11598        | QAGPASVPLR                                        | 2.228502974        | 2               | 2.54755   |
| P11598        | RLAPEYEAATR                                       | 0.993965967        | 2               | 3.54945   |
| P11598        | SEPIPETNEGPVK                                     | 1.065382505        | 2               | 2.97881   |
| P11598        | TADGIVSHLK                                        | 2.406329206        | 2               | 2.90603   |
| P11598        | TFSHELSDFGLESTTGEIPVVAIR                          | 1.288796851        | 2               | 6.22657   |
| P11598        | VDCTANTNTCNK                                      | 3.241778022        | 2               | 4.24545   |
| P11598        | YGVSGYPTLK                                        | 1.143568769        | 2               | 3.20224   |
| <b>P11711</b> | <b>CP2A1 Cytochrome P450 2A1</b>                  | <b>0.862692881</b> | <b>2.17E-05</b> | <b>6</b>  |
| P11711        | GEQATYNTLFK                                       | 1.202579621        | 2               | 2.8472    |
| P11711        | GTDVFPILGSLMTDPK                                  | 0.749465051        | 2               | 3.65308   |
| P11711        | ILEEAGYLIK                                        | 0.8771372          | 2               | 2.72673   |
| P11711        | LEDINESPKPLGFTR                                   | 0.969236557        | 2               | 3.46905   |
| P11711        | TVSNVISSIVFGER                                    | 0.886972092        | 2               | 3.5258    |
| P11711        | VHEEIEQVIGR                                       | 0.862468197        | 2               | 3.20988   |
| <b>P11714</b> | <b>CP2D9 Cytochrome P450 2D9</b>                  | <b>0.844243947</b> | <b>1.76E-10</b> | <b>2</b>  |
| P11714        | GNPESSFNDENLLMVVR                                 | 0.826757279        | 2               | 2.34788   |
| P11714        | VQQEIDEVIGQVR                                     | 0.851055           | 2               | 4.84107   |
| <b>P11862</b> | <b>GAS2 Growth arrest specific protein 2</b>      | <b>1.156093843</b> | <b>0.779964</b> | <b>2</b>  |
| P11862        | EIEQEETLSAPSPSPSSK                                | 1.23395424         | 2               | 3.87945   |
| P11862        | LDNGALLCQLAATVQEK                                 | 1.093531402        | 2               | 4.08699   |
| <b>P11884</b> | <b>ALDH2 Aldehyde dehydrogenase mitochondrial</b> | <b>1.016152759</b> | <b>9.9E-20</b>  | <b>23</b> |
| P11884        | EAGFPPGVVNIIVPGFGPTAGAAIASHEDVDK                  | 0.587101704        | 3               | 4.58363   |
| P11884        | EEIFGPVMQILK                                      | 1.106227749        | 2               | 3.79748   |
| P11884        | EEIFGPVMQILK+Oxidation(7)                         | 1.125699387        |                 |           |
| P11884        | ELGEYGLQAYTEVK                                    | 1.323363597        | 2               | 4.45975   |
| P11884        | GYFIQPTVFGDVK                                     | 1.305765552        | 2               | 4.09681   |
| P11884        | HEPVGVCQIIPWNFPLMQAWK                             | 0.989744953        | 3               | 4.19029   |
| P11884        | KTFPTVNPSTGEVICQVAEGNKEDVDK                       | 0.922631949        | 3               | 6.63329   |
| P11884        | LGPALATGNVVVMK                                    | 0.985645224        | 2               | 3.88117   |
| P11884        | LGPALATGNVVVMK+Oxidation(12)                      | 1.491613646        |                 |           |
| P11884        | LLCGGAAADR                                        | 1.371063052        | 2               | 3.53634   |
| P11884        | RVTLELGGK                                         | 0.909494799        | 2               | 2.74448   |
| P11884        | TEQGPQVDETQFK                                     | 0.990413205        | 2               | 4.75646   |
| P11884        | TFPTVNPSTGEVICQVAEGNK                             | 1.017990675        | 2               | 4.97016   |
| P11884        | TFPTVNPSTGEVICQVAEGNKEDVDK                        | 0.916522603        | 2               | 4.32521   |
| P11884        | TFVQEDVYDEFVER                                    | 1.0291148          | 2               | 5.17645   |
| P11884        | TIEEVVGR                                          | 0.908160683        | 2               | 3.00175   |
| P11884        | TIPIDGDFSYTR                                      | 1.215455189        | 2               | 2.94921   |
| P11884        | VAEQPLTALYVANLIK                                  | 1.641156622        | 3               | 5.24503   |
| P11884        | VAFTGSTEVGHLIQVAAGSSNLK                           | 1.125585166        | 2               | 6.03517   |
| P11884        | VTLELGGK                                          | 0.898362231        | 1               | 1.96656   |
| P11884        | VVGPNFDSR                                         | 1.003989671        | 2               | 2.83905   |
| P11884        | YGLAAAVFTK                                        | 0.95624304         | 2               | 3.78407   |
| P11884        | YYAGWADK                                          | 0.99404439         | 2               | 2.57794   |
| <b>P11915</b> | <b>NLTP Non specific lipid transfer protein</b>   | <b>0.8343029</b>   | <b>4.44E-16</b> | <b>24</b> |
| P11915        | ADCTITMADSDLLALMTGK                               | 1.142042071        | 2               | 5.69764   |
| P11915        | ADCTITMADSDLLALMTGK+Oxidation(15)                 | 1.115075471        |                 |           |
| P11915        | ADCTITMADSDLLALMTGK+Oxidation(6)                  | 1.113203847        |                 |           |
| P11915        | ANLIFK                                            | 1.176170197        | 2               | 2.36315   |
| P11915        | AVEIVAQEMVTDMPTFEEK                               | 0.955907948        | 2               | 4.2742    |
| P11915        | GHPLGATGLAQCAELCWQLR                              | 0.909879054        | 3               | 3.72794   |
| P11915        | GSVLPDSDK                                         | 1.037795661        | 1               | 1.9886    |
| P11915        | GSVLPDSDKK                                        | 1.139514401        | 2               | 2.62822   |
| P11915        | HIDVLINK                                          | 0.87349564         | 2               | 2.8588    |

|               |                                                       |                    |                 |           |
|---------------|-------------------------------------------------------|--------------------|-----------------|-----------|
| P11915        | HSVNNPYSQFQDEYSLDEIMK                                 | 0.929337306        | 3               | 6.33432   |
| P11915        | KADCTITMADSDLLALMTGK                                  | 1.643680582        | 2               | 4.40238   |
| P11915        | KLEEEGEEFVK                                           | 1.188976459        | 2               | 4.4919    |
| P11915        | KLEEEGEEFVKK                                          | 1.156161707        | 3               | 4.44347   |
| P11915        | LEEEGEEFVK                                            | 1.201688237        | 2               | 2.69396   |
| P11915        | LEEEGEEFVKK                                           | 1.221465191        | 2               | 3.56577   |
| P11915        | LQSLQLQPK                                             | 1.654321722        | 2               | 3.1694    |
| P11915        | MGFPEAASSFR                                           | 0.990056432        | 2               | 2.99576   |
| P11915        | MNPQSAFFQK                                            | 1.077616615        | 2               | 3.25032   |
| P11915        | MNPQSAFFQK+Oxidation(0)                               | 1.279813454        |                 |           |
| P11915        | SRPVDFLTVLQCCPTSDGAAAAIVSSEEFVK                       | 1.199723175        | 3               | 5.17075   |
| P11915        | THQISAAPTSSAGDGFK                                     | 1.08691653         | 2               | 4.40495   |
| P11915        | VFVVGVMGTMK                                           | 1.017433788        | 2               | 2.55614   |
| P11915        | WVINPSGGLISK                                          | 1.131766672        | 2               | 3.30845   |
| P11915        | YGMSACPFAPQLFGSAGK                                    | 1.304732364        | 2               | 3.37906   |
| <b>P11980</b> | <b>KPYM Pyruvate kinase isozymes M1/M2</b>            | <b>0.598891147</b> | <b>0.00016</b>  | <b>10</b> |
| P11980        | AEGLDVANAVLDGADCIMLSGETAK                             | 0.581837233        | 2               | 4.52578   |
| P11980        | AGKPVICATQMLESNIK                                     | 0.713608382        | 3               | 3.34216   |
| P11980        | DAVLDAWAEDVDLR                                        | 0.898381054        | 2               | 4.02507   |
| P11980        | GADYLVTEVENGSLGSK                                     | 0.782128085        | 2               | 5.3149    |
| P11980        | GVNLPGAAVDLPAVSEK                                     | 0.981257156        | 2               | 3.77025   |
| P11980        | IYVDDGLISLQVK                                         | 0.427875062        | 2               | 3.6978    |
| P11980        | KGVNLPGAAVDLPAVSEK                                    | 0.652418368        | 2               | 3.64349   |
| P11980        | LDIDSAPITAR                                           | 0.574795623        | 2               | 3.20909   |
| P11980        | NTGIICIGPASR                                          | 0.471039948        | 2               | 3.32459   |
| P11980        | VFLAQKMMIGRCNR+Oxidation(6)                           | 1.246801721        |                 |           |
| <b>P12001</b> | <b>RL18 60S ribosomal protein L18</b>                 | <b>1.437307182</b> | <b>1.11E-16</b> | <b>5</b>  |
| P12001        | GTVLLSGPR                                             | 1.433050438        | 2               | 2.93101   |
| P12001        | ILTFDQLALESPK                                         | 1.436336385        | 2               | 4.87078   |
| P12001        | TAVVVGITDDVR                                          | 1.30900529         | 2               | 4.52372   |
| P12001        | TNRPPLSLR                                             | 1.307015259        | 3               | 3.36622   |
| P12001        | TNSTFNQVVLK                                           | 1.152078577        | 2               | 3.17621   |
| <b>P12007</b> | <b>IVD Isovaleryl-CoA dehydrogenase_mitochondrial</b> | <b>1.002657321</b> | <b>2.12E-13</b> | <b>9</b>  |
| P12007        | AQEIDQSNDFK                                           | 0.235447544        | 2               | 3.64025   |
| P12007        | FVQENLAPK                                             | 1.031299464        | 2               | 2.65015   |
| P12007        | FWITNGPDADVLVVYAK                                     | 1.615891729        | 2               | 3.65351   |
| P12007        | GSNTCELVFEDCK                                         | 1.347855583        | 2               | 4.4588    |
| P12007        | GSNTCELVFEDCKVPAANILSQESK                             | 1.121892503        | 3               | 4.91741   |
| P12007        | GVYVLMISGLDLER                                        | 1.075428012        | 2               | 3.17081   |
| P12007        | IGQFQLMQGK                                            | 1.159379503        | 2               | 2.50274   |
| P12007        | LYEIGGGTSEVR                                          | 1.180038655        | 2               | 3.55975   |
| P12007        | TDLTAVPASR                                            | 1.018995           | 2               | 2.96345   |
| <b>P12346</b> | <b>TRFE Serotransferrin</b>                           | <b>1.048892766</b> | <b>6.97E-13</b> | <b>23</b> |
| P12346        | ADRDQYELLCLDNTR                                       | 1.132444541        | 2               | 4.54323   |
| P12346        | ASDSSINWNNLK                                          | 1.159459162        | 2               | 3.27094   |
| P12346        | DGGGDVAFVK                                            | 1.269473737        | 2               | 3.11313   |
| P12346        | DLKQEDFQLLCPDGTK                                      | 0.853740393        | 2               | 4.4465    |
| P12346        | DQYELLCLDNTR                                          | 0.512028983        | 2               | 2.98203   |
| P12346        | EGVCPEGSIDSAPVK                                       | 1.553845232        | 2               | 3.48929   |
| P12346        | EGYNGYTGAFLQCLVEK                                     | 1.060218357        | 2               | 3.52895   |
| P12346        | FDEFFSQGCAPGYK                                        | 0.992335249        | 2               | 4.34594   |
| P12346        | GDKDCTGNFCLFR                                         | 0.933968779        | 2               | 3.59347   |
| P12346        | GTFQLNQLQGK                                           | 1.020880008        | 2               | 3.12299   |
| P12346        | GYAVAVVK                                              | 1.071307193        | 2               | 2.79149   |
| P12346        | HQTVLENTNGK                                           | 0.603587986        | 2               | 2.5793    |
| P12346        | HTTIFEVLQPK                                           | 1.001603576        | 3               | 3.74023   |

|               |                                           |                    |                 |           |
|---------------|-------------------------------------------|--------------------|-----------------|-----------|
| P12346        | KGTDQFLNQLQ GK                            | 1.070129123        | 2               | 3.59938   |
| P12346        | KTSYQDCIK                                 | 1.212644874        | 2               | 2.48962   |
| P12346        | LPEGTTYEYLGAEYLQAVGNIR                    | 1.132666864        | 2               | 4.67597   |
| P12346        | NGDGKEDLIWEILK                            | 0.909377722        | 2               | 3.67761   |
| P12346        | QEDFQLLCPDGTK                             | 1.158211917        | 2               | 3.58282   |
| P12346        | SKDFQLFGSPLGK                             | 1.436210427        | 2               | 3.48895   |
| P12346        | TSYQDCIK                                  | 1.037197277        | 2               | 2.52894   |
| P12346        | VSTVLTAAK                                 | 0.956062907        | 2               | 2.61668   |
| P12346        | WCALSHQER                                 | 1.729764951        | 2               | 3.23094   |
| P12346        | WCAVSEHENTK                               | 1.120263539        | 2               | 3.64952   |
| <b>P12711</b> | <b>ADHX Alcohol dehydrogenase class_3</b> | <b>0.814875191</b> | <b>0.999991</b> | <b>10</b> |
| P12711        | AAVAWEAGKPLSIEEIVAPPQAHEVR                | 0.960161371        | 3               | 5.78295   |
| P12711        | AFDLMHSGNSIR                              | 0.953847307        | 2               | 2.5025    |
| P12711        | AGDTVIPLYIPQCGECK                         | 0.974282805        | 2               | 4.02701   |
| P12711        | EFGATECINPQDFSK                           | 1.064513779        | 2               | 4.18959   |
| P12711        | IDPSAPLDK                                 | 0.85666436         | 1               | 1.93967   |
| P12711        | IIGIDINK                                  | 1.004820814        | 2               | 2.37197   |
| P12711        | IIGIDINKDK                                | 0.752315339        | 1               | 2.43056   |
| P12711        | VCLLGGISTGYGAAVNTAK                       | 1.014551396        | 2               | 5.52123   |
| P12711        | VDEFVTGNLSFDQINK                          | 0.852078873        | 2               | 5.13075   |
| P12711        | VEPGSTCAVFLGGVGLAVIMGCK                   | 0.903502925        | 2               | 4.14393   |
| <b>P12749</b> | <b>RL26 60S ribosomal protein L26</b>     | <b>1.387992183</b> | <b>0.018027</b> | <b>6</b>  |
| P12749        | DDEVQVVR                                  | 1.428795173        | 2               | 2.58808   |
| P12749        | FNPFVTSR                                  | 1.165679446        | 2               | 2.36335   |
| P12749        | HFNAPSHIR                                 | 1.164612727        | 3               | 3.70163   |
| P12749        | KDDEVQVVR                                 | 1.159473853        | 2               | 3.38569   |
| P12749        | KIMSSPLSKELR+Oxidation(2)                 | 1.507016162        |                 |           |
| P12749        | YVIYIER                                   | 1.280967601        | 1               | 1.91981   |
| <b>P12785</b> | <b>FAS Fatty acid synthase</b>            | <b>1.518284687</b> | <b>9.9E-20</b>  | <b>44</b> |
| P12785        | ACIDTALENLSTLK                            | 1.851439422        | 2               | 4.9156    |
| P12785        | AGSDTELAAPK                               | 1.559856385        | 2               | 3.2478    |
| P12785        | CPPGVVPACHNSEDTVITISGPQAAVNEFVEQLK        | 1.394477584        | 3               | 5.73813   |
| P12785        | DANLPAGSMAAVGLSWEECK                      | 0.882781412        | 2               | 3.66044   |
| P12785        | DGGFLLMHTVLK                              | 1.334726016        | 2               | 2.39955   |
| P12785        | DPETLLGYSMVGCQR                           | 0.685546173        | 2               | 3.76777   |
| P12785        | EEEEPEAMLPGAQPTLISAISK                    | 1.17919687         | 2               | 3.31519   |
| P12785        | EQGVTFPSGEAQEQLIR                         | 1.952780038        | 2               | 4.11924   |
| P12785        | FDASFFGVHPK                               | 1.519799486        | 2               | 3.12343   |
| P12785        | FVFTPHVEPECLSESAILQK                      | 2.640009605        | 2               | 4.56507   |
| P12785        | GHALGETLACLPSVQPGPSFLSQEEWESLFSR          | 1.947623575        | 3               | 4.70531   |
| P12785        | GLESIINIIHSSLAEP                          | 1.361246862        | 2               | 4.76953   |
| P12785        | GNAGQSNYGFANSTMER                         | 1.379698437        | 2               | 4.43746   |
| P12785        | GTNTGVWVGSGSEASEALSR                      | 1.094173977        | 2               | 3.53972   |
| P12785        | GVDLVLNSLAEEK                             | 1.562654437        | 2               | 3.21489   |
| P12785        | GYDYGPHFQGVYEATLEGEQ GK                   | 1.66730917         | 3               | 3.76392   |
| P12785        | HFQLEQDKPEEQTAHAFVNVLTR                   | 1.677066201        | 3               | 3.45343   |
| P12785        | LDPGSSELQK                                | 1.767328765        | 2               | 2.37894   |
| P12785        | LFDHPEVPIPAESVSR                          | 1.261214552        | 2               | 4.0873    |
| P12785        | LLLPEDPLISGLLNSQALK                       | 2.476806655        | 3               | 5.02159   |
| P12785        | LTPGCEAEAEAEICFFIK                        | 2.803680401        | 2               | 4.08235   |
| P12785        | MTVPGLLEDLPQHGLPR                         | 1.24581403         | 2               | 3.16778   |
| P12785        | QAQLNLSILLVNPGEPTLTR                      | 1.760120276        | 2               | 4.55486   |
| P12785        | QQEQLVPTLEK                               | 1.730230802        | 2               | 2.44717   |
| P12785        | QSPLIGSTK                                 | 1.727305981        | 1               | 2.10791   |
| P12785        | RQQEQLVPTLEK                              | 1.474747066        | 2               | 3.16701   |
| P12785        | SDEALKPLGVK                               | 1.043547038        | 2               | 3.14664   |
| P12785        | SFDDSGNGYCR                               | 2.048994996        | 2               | 3.1493    |

|               |                                          |                    |                 |           |
|---------------|------------------------------------------|--------------------|-----------------|-----------|
| P12785        | SLYQPGGVAPESLEYIEAHGTGTK                 | 1.520198018        | 2               | 5.064     |
| P12785        | SNMGHPEPASGLAALTK                        | 1.136931584        | 2               | 3.64783   |
| P12785        | SNMGHPEPASGLAALTK+Oxidation(2)           | 1.768371345        |                 |           |
| P12785        | TGGTYGEDLGADYNLSQVCDGK                   | 1.471704964        | 2               | 5.06889   |
| P12785        | TMEAVQGLLEQGR                            | 1.073786779        | 2               | 3.71756   |
| P12785        | TMEAVQGLLEQGR+Oxidation(1)               | 1.318444833        |                 |           |
| P12785        | VGDPQELNGITR                             | 1.277800722        | 2               | 2.55847   |
| P12785        | VHLTGIDINPNALFPPVEFPVPR                  | 1.398993242        | 2               | 5.03902   |
| P12785        | VLEALLPLK                                | 1.584411606        | 2               | 2.35701   |
| P12785        | VLESDLVMNVYR                             | 1.155519652        | 2               | 3.40567   |
| P12785        | VLLSLENGVWAPNLHFHNPPEIPALLDGR            | 1.257073657        | 3               | 4.05635   |
| P12785        | VSVHIEGDHR                               | 1.751662451        | 2               | 2.75328   |
| P12785        | VTAIYIDPATHLQK                           | 1.507050669        | 2               | 3.3156    |
| P12785        | VYATILNAGTNTDGGK                         | 1.236103663        | 2               | 4.87661   |
| P12785        | VYQWEDPDSK                               | 1.641244006        | 2               | 3.17471   |
| P12785        | WLSTSIPEAQWQSSLR                         | 1.170940698        | 2               | 2.37203   |
| <b>P12791</b> | <b>CP2BA Cytochrome P450 2B10</b>        | <b>0.720107138</b> | <b>1E-11</b>    | <b>2</b>  |
| P12791        | IQEEAQCLVEELR                            | 0.773891442        | 2               | 3.75981   |
| P12791        | IQEEAQCLVEELRK                           | 0.739730359        | 2               | 3.54459   |
| <b>P12847</b> | <b>MYH3 Myosin_3</b>                     | <b>0.214323417</b> | <b>8.2E-09</b>  | <b>4</b>  |
| P12847        | IEAQNQPFDAK                              | 0.146298106        | 2               | 2.74858   |
| P12847        | MKGTLEDQIISANPLLEAFGNAK                  | 0.124544241        | 3               | 6.88927   |
| P12847        | MKGTLEDQIISANPLLEAFGNAK+Oxidation(0)     | 0.278469011        |                 |           |
| P12847        | NALAHALQSSR                              | 0.327352583        | 2               | 2.61805   |
| <b>P12928</b> | <b>KPYR Pyruvate kinase isozymes R/L</b> | <b>1.214028182</b> | <b>9.9E-20</b>  | <b>18</b> |
| P12928        | AETSDVANAVLDGADCIMLSGETAK                | 1.106388019        | 2               | 5.38618   |
| P12928        | CCAAAIIVLTK                              | 0.834064783        | 2               | 2.95144   |
| P12928        | CNLAGKPVVCATQMLESMTIK                    | 1.001912586        | 3               | 5.06202   |
| P12928        | EATESFATSPLSYRPAIALDTK                   | 1.834648087        | 3               | 4.05922   |
| P12928        | EPPEAIWADDVDR                            | 1.154794194        | 2               | 2.44058   |
| P12928        | EPPEAIWADDVDRR                           | 1.228036089        | 2               | 2.33098   |
| P12928        | GDLGIEIPAEK                              | 0.81251215         | 2               | 3.10309   |
| P12928        | GSQVLVTVDPK                              | 1.20438475         | 2               | 2.84773   |
| P12928        | GVNLPNTEVDLPGLSEQDLLDLR                  | 1.193732256        | 2               | 5.44598   |
| P12928        | IGPEGLVTEVEHGGILGSR                      | 1.021961017        | 2               | 4.77932   |
| P12928        | IYIDDGLISLVVQK                           | 1.243613906        | 2               | 4.15678   |
| P12928        | KFDEILEVSDGIMVAR                         | 0.953625462        | 3               | 3.38633   |
| P12928        | KGVNLPNTEVDLPGLSEQDLLDLR                 | 1.394615404        | 3               | 4.31527   |
| P12928        | LNFSHGSHEYHAESIENIR                      | 2.230631786        | 3               | 4.18175   |
| P12928        | STSIIATIGPASR                            | 0.023228198        | 2               | 3.57979   |
| P12928        | TGVLQGGPESEVEIVK                         | 1.106133246        | 2               | 4.93826   |
| P12928        | TVWVDYHNITR                              | 1.976630072        | 2               | 2.51038   |
| P12928        | VQFGIESGK                                | 1.051233523        | 1               | 1.98269   |
| <b>P12938</b> | <b>CP2D3 Cytochrome P450 2D3</b>         | <b>1.177156804</b> | <b>0.244595</b> | <b>5</b>  |
| P12938        | DLTDAFLAEIEK                             | 0.894226091        | 2               | 4.14283   |
| P12938        | FDYGDPDFIK                               | 0.602990445        | 2               | 2.44384   |
| P12938        | GNPESSFNDANLR                            | 0.992679695        | 2               | 4.30907   |
| P12938        | RFDYGDPDFIK                              | 0.81032097         | 2               | 2.82997   |
| P12938        | TWDPDQPPR                                | 0.669186904        | 2               | 2.43149   |
| <b>P12939</b> | <b>CP2DA Cytochrome P450 2D10</b>        | <b>0.874060372</b> | <b>9.9E-20</b>  | <b>8</b>  |
| P12939        | AVQEVLVTHGEDTADRPPVPIFK                  | 0.746103703        | 3               | 5.2982    |
| P12939        | FEYEDPYLIR                               | 0.804194678        | 2               | 2.40921   |
| P12939        | FGDIAPLNLP                               | 1.062669705        | 2               | 3.16154   |
| P12939        | ITSCDIEVQDFVIPK                          | 0.849226034        | 2               | 4.54521   |
| P12939        | NLTDAFLAEVEK                             | 0.872677911        | 2               | 4.13625   |
| P12939        | RFEYEDPYLIR                              | 0.845819274        | 3               | 3.5356    |
| P12939        | SQGVVFASYGPEWR                           | 0.960579513        | 2               | 3.59811   |

|               |                                                                               |                    |                 |           |
|---------------|-------------------------------------------------------------------------------|--------------------|-----------------|-----------|
| P12939        | TTWDPAAQPPR                                                                   | 0.77586371         | 2               | 2.43384   |
| <b>P13084</b> | <b>NPM Nucleophosmin</b>                                                      | <b>1.996039722</b> | <b>0.000109</b> | <b>3</b>  |
| P13084        | MSVQPTVSLGGFEITPPVVLR                                                         | 1.388571858        | 2               | 3.58218   |
| P13084        | MTDQEAIQDLWQWR                                                                | 1.122590976        | 2               | 3.16819   |
| P13084        | VDNDENEHQLSLR                                                                 | 1.968585431        | 2               | 3.92913   |
| <b>P13086</b> | <b>SUCA Succinyl_CoA ligase [ADP/GDP_forming] subunit alpha_mitochondrial</b> | <b>1.21935178</b>  | <b>1.66E-10</b> | <b>6</b>  |
| P13086        | LIGPNCPIIIPGECK                                                               | 1.297833621        | 2               | 4.51283   |
| P13086        | MGHAGAIAGGK                                                                   | 0.773331898        | 1               | 2.79309   |
| P13086        | MGHAGAIAGGK+Oxidation(0)                                                      | 0.807300085        |                 |           |
| P13086        | NIYIDK                                                                        | 1.114584962        | 1               | 1.97198   |
| P13086        | QGTFFHSQQALEYGTK                                                              | 0.896522053        | 2               | 2.84177   |
| P13086        | VICQGFYTK                                                                     | 0.993945965        | 2               | 2.30848   |
| <b>P13107</b> | <b>CP2B3 Cytochrome P450 2B3</b>                                              | <b>1.21340678</b>  | <b>2.99E-06</b> | <b>11</b> |
| P13107        | ATLDPNAPR                                                                     | 0.932514301        | 2               | 2.32698   |
| P13107        | CLVEELK                                                                       | 0.795441871        | 1               | 2.00381   |
| P13107        | DFIDTFLHMEK                                                                   | 1.313461211        | 2               | 3.00921   |
| P13107        | EVLDYIDHSVENHR                                                                | 1.104304256        | 2               | 3.9607    |
| P13107        | FSDVSPMGLPCR                                                                  | 1.117580742        | 2               | 2.76168   |
| P13107        | FSDVSPMGLPCR+Oxidation(6)                                                     | 1.209257785        |                 |           |
| P13107        | GIIAVLQPIMQEYGVSVFVNEER                                                       | 2.31690718         | 3               | 5.36123   |
| P13107        | LLDLLYR                                                                       | 0.858962033        | 2               | 2.48844   |
| P13107        | MCLGEGAR                                                                      | 0.669395985        | 2               | 2.6932    |
| P13107        | QSVEDQIKKEAK                                                                  | 0.951444464        | 2               | 2.49591   |
| P13107        | SFIQLQEK                                                                      | 1.30890939         | 2               | 2.40647   |
| <b>P13221</b> | <b>AATC Aspartate aminotransferase_cytoplasmic</b>                            | <b>3.274003528</b> | <b>9.9E-20</b>  | <b>8</b>  |
| P13221        | ITWSNPPAQGAR                                                                  | 3.54452953         | 2               | 3.39354   |
| P13221        | IVATLSNPELFK                                                                  | 3.340336066        | 2               | 3.63969   |
| P13221        | NFLYNER                                                                       | 3.660673322        | 1               | 1.93106   |
| P13221        | NLDYVATSINEAVTK                                                               | 3.300773501        | 2               | 4.88711   |
| P13221        | SCASQLVLGDNSPALR                                                              | 3.368405441        | 2               | 5.40518   |
| P13221        | TDDSQPWVLPVVR                                                                 | 2.189259845        | 2               | 3.52465   |
| P13221        | VGGVQSLGGTGALR                                                                | 1.31216157         | 2               | 2.39314   |
| P13221        | VGNLTVVGK                                                                     | 1.157345311        | 2               | 2.55087   |
| <b>P13255</b> | <b>GNMT Glycine N_methyltransferase</b>                                       | <b>1.310199567</b> | <b>1.53E-06</b> | <b>8</b>  |
| P13255        | AHMVTLDYTVQVPGAGR                                                             | 1.178280983        | 2               | 4.93491   |
| P13255        | AWLLGLLR                                                                      | 1.353705831        | 2               | 2.78904   |
| P13255        | DITTSVLTVNNK                                                                  | 1.522118108        | 2               | 3.97851   |
| P13255        | LSYYPHCLASFTELQVQAFGGR                                                        | 1.468020941        | 3               | 3.70045   |
| P13255        | NYDYILSTGCAPPK                                                                | 1.460406686        | 2               | 4.5936    |
| P13255        | SDLTKDITTSVLTVNNK                                                             | 1.149025141        | 2               | 3.09809   |
| P13255        | SLGVAAEGIPDQYADGEAAR                                                          | 1.352167615        | 2               | 5.75534   |
| P13255        | VWQLYIGDTR                                                                    | 1.10905156         | 2               | 2.60527   |
| <b>P13383</b> | <b>NUCL Nucleolin</b>                                                         | <b>1.231794983</b> | <b>0.005411</b> | <b>8</b>  |
| P13383        | FGYVDFESAEDLEK                                                                | 1.506229929        | 2               | 2.63853   |
| P13383        | GFGFVDFNSEEDAK                                                                | 1.683261997        | 2               | 3.71618   |
| P13383        | GLSEDTTEETLK                                                                  | 0.775941671        | 2               | 2.9043    |
| P13383        | IEGSEPTTFFNLFIGNLNPKN                                                         | 1.086869461        | 2               | 3.46349   |
| P13383        | NDLAAVDVR                                                                     | 1.045410964        | 2               | 2.43111   |
| P13383        | NLSFNITEDELK                                                                  | 1.141750794        | 2               | 2.77781   |
| P13383        | SEADAENLEEK                                                                   | 1.203380855        | 2               | 3.06045   |
| P13383        | SVSLYYTGEK                                                                    | 4.079851877        | 1               | 2.02487   |
| <b>P13437</b> | <b>THIM 3_ketoacyl_CoA thiolase_mitochondrial</b>                             | <b>0.964885645</b> | <b>9.9E-20</b>  | <b>22</b> |
| P13437        | AANEAGYFNEEMAPIEVK                                                            | 0.900897412        | 2               | 5.24088   |
| P13437        | AANEAGYFNEEMAPIEVK+Oxidation(11)                                              | 1.259571623        |                 |           |
| P13437        | DAEVVLCGGTESMSQSPYSVR                                                         | 1.241477846        | 2               | 5.16125   |
| P13437        | DFTATDLTEFAAR                                                                 | 1.670712365        | 2               | 4.92081   |

|               |                                                           |                    |                 |           |
|---------------|-----------------------------------------------------------|--------------------|-----------------|-----------|
| P13437        | DMDLIDVNEAFAPQFLAVQK                                      | 1.423033167        | 3               | 6.50169   |
| P13437        | DMDLIDVNEAFAPQFLAVQK+Oxidation(1)                         | 1.307901487        |                 |           |
| P13437        | EGTVTAGNASGMSDGAGVVIASEDAVK                               | 0.87422693         | 3               | 5.73183   |
| P13437        | EGTVTAGNASGMSDGAGVVIASEDAVKK                              | 0.888568671        | 3               | 4.94808   |
| P13437        | GVFIVAAK                                                  | 0.928536874        | 2               | 2.58343   |
| P13437        | ITAHLVHELK                                                | 2.517833415        | 2               | 3.02468   |
| P13437        | LCGSGFQSVSGCQEICK                                         | 1.565909049        | 2               | 5.47703   |
| P13437        | LEDTLWAGLTDQHVK                                           | 1.006689841        | 2               | 5.38807   |
| P13437        | RTPFGAYGGLL                                               | 1.60399455         | 2               | 2.94441   |
| P13437        | SLDLPSK                                                   | 1.027952413        | 2               | 3.01989   |
| P13437        | TNVSOGAIALGHPLGGSGR                                       | 0.864679231        | 2               | 6.24238   |
| P13437        | TPFGAYGGLL                                                | 0.957405657        | 2               | 2.78518   |
| P13437        | VGPVTETGALTNR                                             | 1.028766639        | 2               | 3.69551   |
| P13437        | VPPETIDSVIVGNVMQSSDAAYLAR                                 | 1.019509047        | 2               | 5.95532   |
| P13437        | VPPETIDSVIVGNVMQSSDAAYLAR+Oxidation(14)                   | 1.164844272        |                 |           |
| P13437        | VVGYFVSGCDPAIMGIGPVPAITGALK                               | 1.086775348        | 3               | 5.47263   |
| P13437        | VVGYFVSGCDPAIMGIGPVPAITGALKK                              | 0.713147898        | 3               | 3.58694   |
| P13437        | YAVGSACIGGGQGISLIQNTA                                     | 0.834328649        | 2               | 2.47778   |
| <b>P13444</b> | <b>METK1 S_adenosylmethionine synthase isoform type_1</b> | <b>2.250517263</b> | <b>9.9E-20</b>  | <b>8</b>  |
| P13444        | FVIGGPQGDAGVTGR                                           | 1.693303055        | 2               | 4.72654   |
| P13444        | HIGYDDSAK                                                 | 1.959052248        | 2               | 2.82525   |
| P13444        | ICDQSDAVLDAHLK                                            | 1.834823702        | 2               | 5.15605   |
| P13444        | NEEDVGAGDQGLMFGYATDETEECMPLTIVLAHK                        | 0.89936968         | 3               | 5.42316   |
| P13444        | SEFPWEVPK                                                 | 1.543103994        | 2               | 2.54199   |
| P13444        | SGVLPWLRPDSK                                              | 1.08770169         | 2               | 3.10746   |
| P13444        | TCNVLVALEQQSPDIAQCIVHLDR                                  | 1.945856907        | 3               | 5.68493   |
| P13444        | TQVTVQYVQDNGAVIPVR                                        | 2.322227563        | 2               | 5.09471   |
| <b>P13471</b> | <b>RS14 40S ribosomal protein S14</b>                     | <b>1.355097077</b> | <b>0.009091</b> | <b>3</b>  |
| P13471        | ADRDESSPYAAMLAAQDVAQR                                     | 1.680727018        | 2               | 5.8534    |
| P13471        | ELGITALHIK                                                | 1.675602614        | 2               | 2.41605   |
| P13471        | IEDVTPIPSDSTR                                             | 1.294856786        | 2               | 3.99233   |
| <b>P13601</b> | <b>AL1A7 Aldehyde dehydrogenase_ cytosolic 1</b>          | <b>1.16094965</b>  | <b>2.22E-16</b> | <b>22</b> |
| P13601        | ANNTPYGLAAGVFTK                                           | 0.601582097        | 2               | 4.25457   |
| P13601        | EAGFPVGVVNVVPGYSTAGAAISSHMDIDK                            | 0.463608903        | 3               | 3.30585   |
| P13601        | EEIFGPVQQIMK                                              | 0.734566788        | 2               | 3.81693   |
| P13601        | EMGEQGVVEYTELK                                            | 0.375882791        | 2               | 3.88757   |
| P13601        | FPVINPATEEVICHVEEGDK                                      | 0.996983204        | 3               | 4.09538   |
| P13601        | FPVINPATEEVICHVEEGDKADVDK                                 | 0.73894982         | 4               | 5.14294   |
| P13601        | GFFVQPTVFSNVTDENR                                         | 2.256466442        | 2               | 4.3122    |
| P13601        | IAKEEIFGPVQQIMK                                           | 0.779966703        | 2               | 3.86485   |
| P13601        | IFINNEWHNSLNGK                                            | 1.437562595        | 2               | 3.50003   |
| P13601        | IFTHAYLLDTEVSİKALK                                        | 1.422570576        | 2               | 2.34106   |
| P13601        | IHGQTIPSDGDVFTYTR                                         | 0.701060259        | 2               | 4.62773   |
| P13601        | ILDIESGK                                                  | 0.575867636        | 2               | 2.72922   |
| P13601        | ILDIESGKK                                                 | 0.687191791        | 3               | 3.34172   |
| P13601        | KFPVINPATEEVICHVEEGDK                                     | 0.970585947        | 3               | 3.75391   |
| P13601        | KFPVINPATEEVICHVEEGDKADVDK                                | 0.644086349        | 4               | 4.86691   |
| P13601        | KYVLGNPLDSGISQGPQIDKEQHAK                                 | 0.267596138        | 3               | 5.60002   |
| P13601        | LFVEESIYDEFVR                                             | 0.489323593        | 2               | 4.06712   |
| P13601        | VLLATMESMNAGK                                             | 0.453338107        | 2               | 3.98108   |
| P13601        | VSFTGSTEVGK                                               | 0.578761208        | 2               | 3.08655   |
| P13601        | YFAGWADK                                                  | 0.785405504        | 1               | 2.05643   |
| P13601        | YVLGNPLDSGISQGPQIDK                                       | 0.440691726        | 2               | 4.96192   |
| P13601        | YVLGNPLDSGISQGPQIDKEQHAK                                  | 0.453555109        | 4               | 4.60452   |
| <b>P13697</b> | <b>MAOX NADP_ dependent malic enzyme</b>                  | <b>1.279822936</b> | <b>0.644327</b> | <b>5</b>  |

|               |                                                                         |                    |                 |           |
|---------------|-------------------------------------------------------------------------|--------------------|-----------------|-----------|
| P13697        | AECSAEECYK                                                              | 1.572535967        | 1               | 2.81023   |
| P13697        | AIFASGSPFDPVTLPDGR                                                      | 1.051594328        | 2               | 4.25745   |
| P13697        | GHIASVLNAWPEDEVVK                                                       | 0.980702894        | 2               | 3.81666   |
| P13697        | HINDSVFLTTAEVISQQVSDK                                                   | 1.301627862        | 3               | 4.34186   |
| P13697        | NLEAIVQK                                                                | 1.415441455        | 1               | 2.1971    |
| <b>P13803</b> | <b>ETFA Electron transfer flavoprotein subunit alpha_ mitochondrial</b> | <b>1.025188004</b> | <b>8.15E-10</b> | <b>14</b> |
| P13803        | AAVDAGFVPNDMQVGQTGK                                                     | 0.953674272        | 2               | 4.77217   |
| P13803        | AAVDAGFVPNDMQVGQTGK+Oxidation(11)                                       | 1.081790992        |                 |           |
| P13803        | DPEAPIFQVADYGIVADLFK                                                    | 1.162751774        | 2               | 5.3554    |
| P13803        | GLLPEELTPLILETQK                                                        | 1.098425021        | 2               | 4.66934   |
| P13803        | GTSFEAAAASGGSASSEK                                                      | 1.28774512         | 2               | 5.34079   |
| P13803        | LGGEVSVCLVAGTK                                                          | 1.015517402        | 2               | 4.711     |
| P13803        | LLYDLADQLHAAVGSAR                                                       | 1.220208321        | 2               | 4.64356   |
| P13803        | LNVAAPVSDIIEIK                                                          | 1.391606917        | 3               | 4.71772   |
| P13803        | QFSYTHICAGASAFGK                                                        | 1.525676335        | 2               | 3.1638    |
| P13803        | SDRPELTGAK                                                              | 0.935864557        | 3               | 3.34121   |
| P13803        | TIVAINKDPEAPIFQVADYGIVADLFK                                             | 0.986717058        | 3               | 7.0384    |
| P13803        | TIYAGNALCTVK                                                            | 1.146336628        | 2               | 3.66107   |
| P13803        | VLVAQHDAYK                                                              | 1.126207591        | 2               | 3.25924   |
| P13803        | VVQDLCK                                                                 | 0.954867731        | 2               | 2.75145   |
| <b>P13832</b> | <b>MRLCA Myosin regulatory light chain RLC_A</b>                        | <b>1.248159131</b> | <b>3.93E-06</b> | <b>3</b>  |
| P13832        | ATSNVFMFDQSQIQEFK                                                       | 1.24789488         | 2               | 4.65257   |
| P13832        | FTDEEVDELYR                                                             | 0.982720846        | 2               | 3.49903   |
| P13832        | GNFNIEFTR                                                               | 1.377550717        | 2               | 2.62827   |
| <b>P14046</b> | <b>A1I3 Alpha_1_inhibitor 3</b>                                         | <b>0.707957331</b> | <b>1.07E-05</b> | <b>5</b>  |
| P14046        | GDPIPNEQVLK                                                             | 0.711340077        | 2               | 3.18152   |
| P14046        | GMYESLPVVAVK                                                            | 0.692238353        | 2               | 3.39759   |
| P14046        | ISLCHGNPTFSSETK                                                         | 1.113896858        | 2               | 3.68243   |
| P14046        | QQNSYGGFSSTQDTVVVALDASK                                                 | 0.674239673        | 2               | 4.14266   |
| P14046        | QSPGPGSEVATVPETGR                                                       | 0.7094303          | 2               | 3.33622   |
| <b>P14141</b> | <b>CAH3 Carbonic anhydrase 3</b>                                        | <b>1.038103059</b> | <b>0.265292</b> | <b>18</b> |
| P14141        | EAPFNHFDPSCLFPACR                                                       | 1.112706271        | 2               | 4.34176   |
| P14141        | EKGFEQILLDALDK                                                          | 0.97815569         | 2               | 4.55953   |
| P14141        | EKGFEQILLDALDKIK                                                        | 0.618769288        | 2               | 3.11099   |
| P14141        | EPMTVSSDQMAK                                                            | 1.742699402        | 2               | 2.94108   |
| P14141        | EWGYASHNGPEHWHELYPIAK                                                   | 0.962901749        | 3               | 4.51726   |
| P14141        | GDNQSPIELHTK                                                            | 0.991345103        | 2               | 3.76433   |
| P14141        | GEFQILLDALDK                                                            | 0.975043647        | 2               | 4.66441   |
| P14141        | GEFQILLDALDKIK                                                          | 0.868060206        | 2               | 3.2539    |
| P14141        | GGPLSGPYR                                                               | 0.972326959        | 2               | 2.95671   |
| P14141        | GKEAPFNHFDPSCLFPACR                                                     | 0.80060859         | 3               | 3.52535   |
| P14141        | HDPSLQPWSVSYDPGSAK                                                      | 1.043616745        | 3               | 5.57237   |
| P14141        | QFHLHWGSSDDHGSEHTVDGVK                                                  | 0.864279509        | 2               | 4.6434    |
| P14141        | QPDGIAVVGIFLK                                                           | 1.462138016        | 2               | 2.57663   |
| P14141        | SLFASAENEPVPLVGNWRPPQPIK                                                | 0.946098316        | 3               | 5.70133   |
| P14141        | VVFDDTFDR                                                               | 0.513108245        | 2               | 3.37234   |
| P14141        | YAAELHLVHWNPK                                                           | 1.51974003         | 2               | 4.33244   |
| P14141        | YNTFGEALK                                                               | 0.994614485        | 2               | 2.31471   |
| P14141        | YNTFGEALKQPDGIAVVGIFLK                                                  | 0.920657636        | 3               | 6.01375   |
| <b>P14173</b> | <b>DDC Aromatic_L_amino_acid decarboxylase</b>                          | <b>1.078424008</b> | <b>0.076798</b> | <b>7</b>  |
| P14173        | AGEGGVIQGSASEATLVALLAAR                                                 | 0.998826248        | 2               | 3.54335   |
| P14173        | ALIPTTAPQEPETYEDIIR                                                     | 0.968255325        | 3               | 4.09666   |
| P14173        | GSNQLNETLLQR                                                            | 1.158580146        | 2               | 2.86618   |
| P14173        | HSHQDSGLITDYR                                                           | 1.041211601        | 3               | 3.63344   |
| P14173        | MLELPEAFLAGR                                                            | 0.918546303        | 2               | 2.7709    |
| P14173        | QLQAASPELTQAALMEK                                                       | 0.947115319        | 2               | 3.81437   |



|               |                                                                  |                    |                 |           |
|---------------|------------------------------------------------------------------|--------------------|-----------------|-----------|
| P14173        | TDLTEAFNMDPVYLR                                                  | 1.144419961        | 2               | 3.67668   |
| <b>P14408</b> | <b>FUMH Fumarate hydratase_ mitochondrial</b>                    | <b>1.137272471</b> | <b>4.44E-16</b> | <b>15</b> |
| P14408        | AAAEVNQEYGLDPK                                                   | 1.39348379         | 2               | 4.4678    |
| P14408        | AIEMLGELGSK                                                      | 0.921830298        | 2               | 3.50702   |
| P14408        | IEYDTFGELK                                                       | 1.027472559        | 2               | 3.54261   |
| P14408        | IEYDTFGELKVPTDK                                                  | 1.130464694        | 2               | 3.64987   |
| P14408        | IYELAAGGTAVGTGLNTR                                               | 1.002059682        | 2               | 5.56062   |
| P14408        | KTAIELGYLTAEQFDEWVKPK                                            | 1.089554889        | 3               | 3.57699   |
| P14408        | LMNESMLVLTALNPHIGYDK                                             | 1.239945836        | 3               | 5.64763   |
| P14408        | LMNESMLVLTALNPHIGYDK+Oxidation(6)                                | 1.421816848        |                 |           |
| P14408        | LNDHFPLVWQTGSGTQTNMNVNEVISNR                                     | 1.115853756        | 3               | 6.41143   |
| P14408        | SGLGELILPENEPGSSIMPGK                                            | 0.91079349         | 2               | 4.37712   |
| P14408        | SGLGELILPENEPGSSIMPGK+Oxidation(17)                              | 1.060742018        |                 |           |
| P14408        | SKEFAQVIK                                                        | 1.112926657        | 2               | 2.48217   |
| P14408        | SQSSNDTFPTAMHIAAALEVHQVLLPGLQK                                   | 0.902228904        | 3               | 4.20594   |
| P14408        | TAIELGYLTAEQFDEWVKPK                                             | 0.933737723        | 2               | 4.52727   |
| P14408        | THTQDAVPLTLGQEFSGYVQQVQYAMER                                     | 2.213035           | 3               | 6.0056    |
| <b>P14480</b> | <b>FIBB Fibrinogen beta chain</b>                                | <b>1.200567939</b> | <b>0.731238</b> | <b>10</b> |
| P14480        | AHYGGFTVQTEANK                                                   | 0.871154231        | 2               | 2.90667   |
| P14480        | DNENVINEYSSILEDQK                                                | 1.349555138        | 2               | 3.26935   |
| P14480        | GFGNIATNEDTK                                                     | 1.107483955        | 2               | 2.73911   |
| P14480        | GFGNIATNEDTKK                                                    | 1.070245452        | 2               | 2.81909   |
| P14480        | IGPTELLIEMEDWK                                                   | 0.949000013        | 2               | 3.57419   |
| P14480        | LESDISAQTEYCHTPCTVNCNIPVVS GK                                    | 0.943218657        | 3               | 5.21872   |
| P14480        | LYIDETVNDNIPLNLR                                                 | 0.950412316        | 2               | 3.00687   |
| P14480        | QTLNHERPIK                                                       | 1.013155155        | 2               | 2.74741   |
| P14480        | TENGGWTVIQNR                                                     | 0.887178995        | 2               | 3.22843   |
| P14480        | YCGLPGEYWLGN DK                                                  | 0.779483672        | 2               | 3.31806   |
| <b>P14604</b> | <b>ECHM Enoyl_CoA hydratase_ mitochondrial</b>                   | <b>1.069103158</b> | <b>2.81E-07</b> | <b>8</b>  |
| P14604        | AFAAGADIK                                                        | 1.142087326        | 2               | 3.2342    |
| P14604        | AQFGQPEILLGTIPGAGGTQR                                            | 0.994202219        | 2               | 5.64728   |
| P14604        | FLSHWDHITR                                                       | 1.044089712        | 2               | 3.12917   |
| P14604        | IFPVETLVEEAIQCAEK                                                | 1.224050836        | 2               | 5.81061   |
| P14604        | LFYSTFATDDR                                                      | 1.593658849        | 2               | 2.7269    |
| P14604        | NSSVGLIQLNRPK                                                    | 1.161344792        | 2               | 3.51664   |
| P14604        | SLAMEMVLTGDR                                                     | 0.763313649        | 2               | 3.38463   |
| P14604        | TFQDCYSGK                                                        | 1.166692386        | 2               | 2.78863   |
| <b>P14668</b> | <b>ANXA5 Annexin A5</b>                                          | <b>1.050597773</b> | <b>0.998332</b> | <b>3</b>  |
| P14668        | ETSGNLENLLAVVK                                                   | 1.053757943        | 2               | 3.48141   |
| P14668        | GLGTDEDSILNLLTAR                                                 | 0.935573128        | 2               | 4.61663   |
| P14668        | GTVTDFSGFDGR                                                     | 0.86475472         | 2               | 2.93226   |
| <b>P14669</b> | <b>ANXA3 Annexin A3</b>                                          | <b>0.697713044</b> | <b>9.9E-20</b>  | <b>5</b>  |
| P14669        | GMGTDEDTLIEILTTR                                                 | 0.834282129        | 2               | 3.15011   |
| P14669        | GTINNYPGFNPSVDAEAIR                                              | 0.640678515        | 2               | 4.9337    |
| P14669        | QYQEAYEQALK                                                      | 0.723618593        | 2               | 2.55115   |
| P14669        | SEIDLLDIR                                                        | 0.708381388        | 2               | 2.61726   |
| P14669        | TLINILTER                                                        | 0.754014758        | 2               | 2.51867   |
| <b>P14685</b> | <b>PSMD3 26S proteasome non_ATPase regulatory subunit 3</b>      | <b>1.078594589</b> | <b>6.44E-05</b> | <b>3</b>  |
| P14685        | AIQLEYSEAR                                                       | 1.032268526        | 2               | 2.58406   |
| P14685        | LQLDSPEDAEIFIVAK                                                 | 1.072519478        | 2               | 3.86135   |
| P14685        | SVFPEQANNNEWAR                                                   | 1.210083562        | 2               | 3.0434    |
| <b>P14740</b> | <b>DPP4 Dipeptidyl peptidase 4</b>                               | <b>0.976221051</b> | <b>1</b>        | <b>2</b>  |
| P14740        | LGTLEVEDQIEAAR                                                   | 0.9383111          | 2               | 3.90667   |
| P14740        | VLEDNSALDK                                                       | 1.154362323        | 2               | 2.86002   |
| <b>P14882</b> | <b>PCCA Propionyl_CoA carboxylase alpha chain_ mitochondrial</b> | <b>1.216953815</b> | <b>4.62E-05</b> | <b>12</b> |

|               |                                                                       |                    |                 |           |
|---------------|-----------------------------------------------------------------------|--------------------|-----------------|-----------|
| P14882        | FLSDVYPDGFK                                                           | 1.122204562        | 2               | 2.69451   |
| P14882        | FSSQEAASSFGDDR                                                        | 1.318630574        | 2               | 3.31877   |
| P14882        | HGNALWLNER                                                            | 1.434423966        | 2               | 2.59714   |
| P14882        | HIEIQVLGDK                                                            | 1.189482543        | 2               | 2.39713   |
| P14882        | LHDEDHTVVASNNGPTFNVEVDGSK                                             | 1.079717337        | 3               | 6.01431   |
| P14882        | LQVEHPVTECITGLDLVQEMILVAK                                             | 1.236352613        | 3               | 3.54244   |
| P14882        | MADEAVCVGPAPTSK                                                       | 0.998180862        | 2               | 4.37035   |
| P14882        | MEDALDSYVIR                                                           | 1.20588414         | 2               | 3.107     |
| P14882        | SYLNMDAIMEAIK                                                         | 1.262917738        | 2               | 3.15003   |
| P14882        | TGAQAVHPGYGFLENK                                                      | 1.344281731        | 2               | 4.04566   |
| P14882        | TVAIHSVDVASSVHVK                                                      | 1.182112444        | 3               | 4.10047   |
| P14882        | VVEEAPSIFLDPETR                                                       | 0.953339769        | 2               | 4.15036   |
| <b>P15083</b> | <b>PIGR Polymeric immunoglobulin receptor</b>                         | <b>1.105328951</b> | <b>0.143748</b> | <b>4</b>  |
| P15083        | EIQNAGDQAQENR                                                         | 1.079103067        | 2               | 3.65543   |
| P15083        | FSVLITGLR                                                             | 1.400391728        | 2               | 2.66792   |
| P15083        | GVTGGSSVAIVCPYNPK                                                     | 1.109575641        | 2               | 4.32915   |
| P15083        | NNADLQVLEPEPELLYK                                                     | 0.603158824        | 2               | 2.64082   |
| <b>P15149</b> | <b>CP2A2 Cytochrome P450 2A2</b>                                      | <b>0.703041173</b> | <b>9.9E-20</b>  | <b>10</b> |
| P15149        | DVQECILEEAGYLIK                                                       | 0.695713949        | 3               | 4.59711   |
| P15149        | DVYSSITQLSER                                                          | 1.236834344        | 2               | 2.42686   |
| P15149        | FSNLAPLGIPR                                                           | 0.707863234        | 2               | 3.20416   |
| P15149        | GELPTFNILFK                                                           | 0.501835126        | 2               | 2.41712   |
| P15149        | GTDVFPPIIGSLMTEPK                                                     | 0.524985404        | 2               | 3.93387   |
| P15149        | GYGFSLSNVEQAK                                                         | 0.732351214        | 2               | 3.44918   |
| P15149        | NFIDSFLIR                                                             | 0.746761469        | 1               | 2.56599   |
| P15149        | QNHSTLDPNSPR                                                          | 0.712324076        | 2               | 3.02995   |
| P15149        | TLQGTGAPIDPSIYLSK                                                     | 0.602316279        | 2               | 4.20956   |
| P15149        | TVSNVINSIVFGNR                                                        | 0.728243333        | 2               | 3.53047   |
| <b>P15178</b> | <b>SYDC Aspartyl_tRNA synthetase_cytoplasmic</b>                      | <b>1.267283986</b> | <b>8.85E-06</b> | <b>6</b>  |
| P15178        | FQTEIQTVNK                                                            | 1.119908838        | 2               | 2.38776   |
| P15178        | GEEILSGAQR                                                            | 0.87961836         | 2               | 2.91514   |
| P15178        | LEYCEALAMLR                                                           | 0.795794415        | 2               | 2.93123   |
| P15178        | LPLQLDDAIRPEVEGEDGR                                                   | 1.248554064        | 3               | 3.89853   |
| P15178        | QMVKFAANINK+Oxidation(1)                                              | 1.507859139        |                 |           |
| P15178        | SNAYLAQSPQLYK                                                         | 1.332145879        | 2               | 2.84295   |
| <b>P15429</b> | <b>ENOB Beta_enolase</b>                                              | <b>1.00745795</b>  | <b>6.01E-07</b> | <b>7</b>  |
| P15429        | DATNVGDEGGFAPNILENNEALELLK                                            | 0.419401073        | 2               | 5.69276   |
| P15429        | FMIELDGTENK                                                           | 0.431240758        | 2               | 2.34191   |
| P15429        | HIADLAGNPDVLPVPAFNVINGGSHAGNK                                         | 0.354334329        | 3               | 4.62987   |
| P15429        | IEEALGDK                                                              | 0.068413783        | 1               | 2.36389   |
| P15429        | TAIQAAGYPDK                                                           | 0.174534009        | 2               | 2.68211   |
| P15429        | VNQIGSVTESIQACK                                                       | 0.809959656        | 2               | 5.04251   |
| P15429        | YNQLMRIEALGDK                                                         | 1.505069535        | 2               | 2.49209   |
| <b>P15473</b> | <b>IBP3 Insulin_like growth factor_binding protein 3</b>              | <b>0.77186931</b>  | <b>0.296606</b> | <b>2</b>  |
| P15473        | EMEDTLNHLKFLNVLSPR                                                    | 0.762227247        | 2               | 2.31343   |
| P15473        | MEVIKQARDSQR                                                          | 1.110110001        | 2               | 2.3121    |
| <b>P15650</b> | <b>ACADL Long_chain specific acyl_CoA dehydrogenase_mitochondrial</b> | <b>1.122948701</b> | <b>9.9E-20</b>  | <b>20</b> |
| P15650        | AFVDSCLQLHETK                                                         | 1.087492353        | 2               | 4.13793   |
| P15650        | AQDTAELFFEDVVR                                                        | 1.119596599        | 2               | 4.80927   |
| P15650        | AQDTAELFFEDVRLPASALLGEENK                                             | 1.140661206        | 3               | 4.29199   |
| P15650        | CIGAIAMTEPGAGSDLQGVVR                                                 | 0.721362826        | 2               | 6.10258   |
| P15650        | CIGAIAMTEPGAGSDLQGVVR+Oxidation(6)                                    | 1.064669855        |                 |           |
| P15650        | EQIEQFIPQMTAGK                                                        | 1.190422576        | 2               | 4.99043   |
| P15650        | FFQEEVIPYHEEWEK                                                       | 2.479823591        | 2               | 4.95834   |
| P15650        | GFYYLMQELPQER                                                         | 1.169183313        | 2               | 3.91188   |

|               |                                                                        |                    |                 |           |
|---------------|------------------------------------------------------------------------|--------------------|-----------------|-----------|
| P15650        | IFSSEHDIFR                                                             | 1.41962977         | 2               | 2.98718   |
| P15650        | KFFQEEVIPYHEEWEK                                                       | 2.232379667        | 3               | 5.00773   |
| P15650        | LDSASASMAK                                                             | 0.832704298        | 2               | 2.63886   |
| P15650        | LPASALLGEENK                                                           | 1.472192426        | 2               | 3.41568   |
| P15650        | LPASALLGEENKGFYYLMQELPQER                                              | 1.303057454        | 3               | 3.62652   |
| P15650        | QGLLGINIAEK                                                            | 0.950595206        | 2               | 3.29741   |
| P15650        | RLDSASASMAK                                                            | 0.828810727        | 2               | 3.48518   |
| P15650        | RLDSASASMAK+Oxidation(8)                                               | 1.121046142        |                 |           |
| P15650        | RSGSDWILNGSK                                                           | 1.477360366        | 2               | 2.85729   |
| P15650        | SGSDWILNGSK                                                            | 1.062010482        | 2               | 2.93258   |
| P15650        | VQPIYGGTNEIMK                                                          | 0.912708059        | 2               | 3.25019   |
| P15650        | VQPIYGGTNEIMK+Oxidation(11)                                            | 1.073567749        |                 |           |
| <b>P15651</b> | <b>ACADS Short_chain specific acyl_CoA dehydrogenase_mitochondrial</b> | <b>1.161222697</b> | <b>0.000316</b> | <b>9</b>  |
| P15651        | ASSTANLIFEDCR                                                          | 0.932778475        | 2               | 3.42293   |
| P15651        | EEGDSWVLNGTK                                                           | 0.869163017        | 2               | 2.30446   |
| P15651        | ELVPIAAQLDK                                                            | 1.038085047        | 1               | 1.95679   |
| P15651        | ELVPIAAQLDKHEHLFPTSQVK                                                 | 0.537116292        | 2               | 4.03763   |
| P15651        | GISAFVPMPTPGLTLGK                                                      | 1.082305821        | 2               | 2.5101    |
| P15651        | IGCFALSEPGNGSDAGAASTTAR                                                | 1.24571827         | 2               | 5.58182   |
| P15651        | IGIASQALGIAQASLDCAVK                                                   | 1.187489756        | 2               | 4.93089   |
| P15651        | ITEIYEGTSEIQR                                                          | 0.980064524        | 2               | 4.29785   |
| P15651        | LAASEAATAISHQAIQILGGMGYVTEMPAER                                        | 1.319061002        | 4               | 4.91257   |
| <b>P15684</b> | <b>AMPN Aminopeptidase N</b>                                           | <b>1.322115411</b> | <b>0.03746</b>  | <b>5</b>  |
| P15684        | ALGDTPAPNIDTTELVER                                                     | 0.8480968          | 2               | 3.90623   |
| P15684        | AQIIHDSFNLASAGK                                                        | 1.294822323        | 2               | 3.77442   |
| P15684        | ESALVFDPPQSSSISNK                                                      | 1.605608346        | 2               | 2.45445   |
| P15684        | VMAVDALASSHPLSSPANEVNTPAQISELFDISITYSK                                 | 1.531248205        | 3               | 3.82394   |
| P15684        | VVATTQMQAADAR                                                          | 1.32384355         | 2               | 2.77734   |
| <b>P15709</b> | <b>ST2A1 Bile salt sulfotransferase</b>                                | <b>1.356145153</b> | <b>0.764152</b> | <b>2</b>  |
| P15709        | GNVLYGSWFHIR                                                           | 1.183074192        | 2               | 3.04906   |
| P15709        | NHFTVSQAEAFDK                                                          | 1.497615454        | 2               | 3.66153   |
| <b>P15978</b> | <b>HA11 Class I histocompatibility antigen_Non_RT1.A alpha_1 chain</b> | <b>1.110128288</b> | <b>0.996401</b> | <b>2</b>  |
| P15978        | VEHEGLPEPLSQR                                                          | 1.103088849        | 2               | 3.27187   |
| P15978        | YSDAENPR                                                               | 1.115689201        | 2               | 2.72269   |
| <b>P15999</b> | <b>ATPA ATP synthase subunit alpha_mitochondrial</b>                   | <b>1.109540853</b> | <b>9.9E-20</b>  | <b>24</b> |
| P15999        | AVDSLPIGR                                                              | 1.048909201        | 2               | 3.495     |
| P15999        | EIVTNFLAGFEP                                                           | 7.553209576        | 2               | 2.40999   |
| P15999        | EVAFAQFGSDLDAATQQLSR                                                   | 1.693930875        | 2               | 6.77597   |
| P15999        | FESAFLSHVVSQHQSLGNIR                                                   | 1.251124524        | 2               | 6.01128   |
| P15999        | GIRPAINVGLSVSR                                                         | 1.266479192        | 3               | 3.62651   |
| P15999        | GMSLNLEPDNVGVVFGNDK                                                    | 1.401469296        | 2               | 5.68416   |
| P15999        | GMSLNLEPDNVGVVFGNDK+Oxidation(1)                                       | 1.263907592        |                 |           |
| P15999        | GYLDKLEPSK                                                             | 0.770583739        | 1               | 2.59319   |
| P15999        | ILGADTSVDLEETGR                                                        | 1.36703226         | 2               | 5.00629   |
| P15999        | LELAQYR                                                                | 1.115303361        | 2               | 2.69323   |
| P15999        | LKEIVTNFLAGFEP                                                         | 3.824898159        | 2               | 3.25605   |
| P15999        | LTDADAMK                                                               | 0.955294339        | 2               | 2.55262   |
| P15999        | LTDADAMK+Oxidation(6)                                                  | 1.312519197        |                 |           |
| P15999        | LYCIYVAIGQK                                                            | 1.406119762        | 2               | 2.40999   |
| P15999        | NVQAEMVEFSSGLK                                                         | 1.757894226        | 2               | 4.35521   |
| P15999        | QGQYSPMAIEEQVAVIYAGVR                                                  | 2.026812193        | 3               | 5.22377   |
| P15999        | RTGAIVDVPVGDELLGR                                                      | 0.809966899        | 2               | 2.85457   |
| P15999        | STVAQLVK                                                               | 1.033013921        | 2               | 2.39713   |
| P15999        | TGAIVDVPVGDELLGR                                                       | 0.908099859        | 2               | 4.929     |

|               |                                                            |                    |                 |           |
|---------------|------------------------------------------------------------|--------------------|-----------------|-----------|
| P15999        | TGTAEMSSILEER                                              | 0.873978022        | 2               | 4.26578   |
| P15999        | TGTAEMSSILEER+Oxidation(5)                                 | 1.034150278        |                 |           |
| P15999        | TSIAIDTIINQK                                               | 1.007375163        | 2               | 4.39193   |
| P15999        | VLSIGDGIAR                                                 | 1.071677682        | 2               | 3.16013   |
| P15999        | VVDALGNAIDGK                                               | 1.168281438        | 2               | 4.18584   |
| <b>P16036</b> | <b>MPCP Phosphate carrier protein_mitochondrial</b>        | <b>1.221596076</b> | <b>1.11E-16</b> | <b>7</b>  |
| P16036        | ALYSNILGEENTYLWR                                           | 1.232244749        | 2               | 3.33195   |
| P16036        | EEGLNAFYK                                                  | 1.229338425        | 1               | 2.3182    |
| P16036        | FGFYEVFK                                                   | 1.021675405        | 2               | 2.34244   |
| P16036        | GIFNGFSITLK                                                | 1.050200138        | 2               | 2.82009   |
| P16036        | GSTASQVLQR                                                 | 1.082064773        | 2               | 2.97079   |
| P16036        | IQTQPGYANTLR                                               | 1.269102174        | 2               | 3.76068   |
| P16036        | MYKEEGLNAFYK                                               | 1.086549574        | 2               | 2.88434   |
| <b>P16086</b> | <b>SPTA2 Spectrin alpha chain_brain</b>                    | <b>1.006854687</b> | <b>0.073277</b> | <b>33</b> |
| P16086        | ALINADELANDVAGAEALLDR                                      | 1.159141274        | 2               | 5.12341   |
| P16086        | ALSSEGKPYVTK                                               | 1.322025406        | 2               | 3.02164   |
| P16086        | DLSSVQTLTK                                                 | 1.038468183        | 2               | 2.78134   |
| P16086        | EAALTSEEVGADLEQVEVLQK                                      | 0.940118835        | 2               | 3.74314   |
| P16086        | GEIDAHEDSFK                                                | 1.081265222        | 2               | 2.40504   |
| P16086        | GVIDMGNSLIER                                               | 0.988547773        | 2               | 3.18937   |
| P16086        | HQAFAELSANQSR                                              | 1.135978673        | 2               | 3.56942   |
| P16086        | HQEHKGEIDAHEDSFK                                           | 1.154847069        | 3               | 4.14932   |
| P16086        | HQLLEADISAHEDR                                             | 1.122743726        | 3               | 4.02848   |
| P16086        | KFEFQTDLAAHEER                                             | 1.145997982        | 3               | 4.81962   |
| P16086        | LFGAAEVQR                                                  | 1.249388677        | 2               | 2.58283   |
| P16086        | LGDSHDLQR                                                  | 1.091879505        | 2               | 3.18737   |
| P16086        | LGESQTLQQFSR                                               | 0.841656898        | 2               | 3.23806   |
| P16086        | LIQEQHPPEELIK                                              | 1.341181147        | 2               | 3.52415   |
| P16086        | LQSSHPLSANQIQVK                                            | 1.713638729        | 2               | 3.94639   |
| P16086        | LQTASDESYPDPTNIQSK                                         | 1.075013277        | 2               | 4.325     |
| P16086        | LQVASDENYKDPTNLQGK                                         | 1.462379489        | 2               | 4.61362   |
| P16086        | LSDDNTIGQEEIQQR                                            | 1.140559267        | 2               | 4.23868   |
| P16086        | MTLVASEDYGDTLAAIQGLLK                                      | 0.996019825        | 2               | 3.16289   |
| P16086        | NQALNTDNYGHDLASVQALQR                                      | 1.113247322        | 3               | 4.87358   |
| P16086        | NTTGVTEEALK                                                | 1.064072023        | 2               | 2.35015   |
| P16086        | QFQDAGHFDAENIKK                                            | 0.808943351        | 2               | 2.58068   |
| P16086        | REELITNWEQIR                                               | 1.183033935        | 2               | 3.45142   |
| P16086        | SADESGQALLAAGHYASDEVV                                      | 0.83867358         | 3               | 3.63935   |
| P16086        | SLQQLAEER                                                  | 1.011709288        | 2               | 2.76101   |
| P16086        | SQLLGSAHEVQR                                               | 1.414107457        | 2               | 3.21781   |
| P16086        | SSEEIESAFR                                                 | 0.930245721        | 2               | 2.42816   |
| P16086        | SSLSSAQADFNQLAELDR                                         | 1.004042306        | 2               | 4.93924   |
| P16086        | TATDEAYKDPSNLQGK                                           | 1.18838095         | 2               | 3.58109   |
| P16086        | TKQEEVNAAWQR                                               | 0.839169355        | 2               | 3.028     |
| P16086        | VLETAEDIQER                                                | 1.015618471        | 2               | 3.42193   |
| P16086        | VNDVCTNGQDLIK                                              | 1.12975086         | 2               | 3.17759   |
| P16086        | VNSLGETAQR                                                 | 1.233010961        | 2               | 2.34579   |
| <b>P16232</b> | <b>DHI1 Corticosteroid 11_beta_dehydrogenase isozyme 1</b> | <b>1.28168956</b>  | <b>9.9E-20</b>  | <b>10</b> |
| P16232        | EECALEIIK                                                  | 1.816365544        | 1               | 1.97235   |
| P16232        | EMAYHLSKMGAHVVLTAR+Oxidation(1)                            | 0.986888411        |                 |           |
| P16232        | EMAYHLSKMGAHVVLTAR+Oxidation(8)                            | 0.986888411        |                 |           |
| P16232        | ETSGIILSQAAPK                                              | 1.334428722        | 2               | 3.31754   |
| P16232        | FALDGFSTIR                                                 | 1.668591049        | 2               | 3.07936   |
| P16232        | KDEVYYDK                                                   | 1.101372055        | 2               | 3.00259   |
| P16232        | MGAHVLTAR                                                  | 1.21517904         | 2               | 2.91917   |

|               |                                                     |                    |                 |           |
|---------------|-----------------------------------------------------|--------------------|-----------------|-----------|
| P16232        | MTQPLIASYSASK                                       | 1.935311302        | 2               | 3.38045   |
| P16232        | MTQPLIASYSASK+Oxidation(0)                          | 3.818748307        |                 |           |
| P16232        | SSWTPLLLGNPGR                                       | 1.320753536        | 2               | 3.60669   |
| <b>P16290</b> | <b>PGAM2 Phosphoglycerate mutase 2</b>              | <b>1.288622443</b> | <b>4.74E-10</b> | <b>7</b>  |
| P16290        | AMEAVAAQ GK                                         | 0.870062923        | 2               | 2.79569   |
| P16290        | AMEAVAAQ GK+Oxidation(1)                            | 1.320030742        |                 |           |
| P16290        | FLGDEETVR                                           | 0.593474195        | 2               | 2.66986   |
| P16290        | HGESSWNQENR                                         | 0.50773264         | 2               | 3.63271   |
| P16290        | HNYIASISK                                           | 0.259024037        | 2               | 2.36968   |
| P16290        | HYGGLTGLNK                                          | 1.512400191        | 1               | 2.92437   |
| P16290        | VLIAAHGNSLR                                         | 1.330659287        | 2               | 2.82761   |
| <b>P16303</b> | <b>CES3 Carboxylesterase 3</b>                      | <b>1.069297223</b> | <b>9.9E-20</b>  | <b>20</b> |
| P16303        | AISEGVVLTSAIITDSKPIANLIATLSGCK                      | 1.000793583        | 3               | 3.86134   |
| P16303        | AKEAAEESHWK                                         | 0.824344774        | 2               | 4.25041   |
| P16303        | DGASEEETNSK                                         | 1.09943646         | 2               | 4.1975    |
| P16303        | EAAEESHWK                                           | 1.360061495        | 2               | 2.92789   |
| P16303        | ENIPLQFSEDCLYLNVTYPADLTK                            | 5.067960175        | 2               | 4.42315   |
| P16303        | ESYPFLPTVIDGVVLPK                                   | 1.113859556        | 2               | 4.15499   |
| P16303        | FAPPQPAEPWNFVK                                      | 1.143382355        | 2               | 2.55127   |
| P16303        | IGASTQAAQR                                          | 1.069872778        | 2               | 2.85226   |
| P16303        | KENIPLQFSEDCLYLNVTYPADLTK                           | 3.767519069        | 2               | 4.65825   |
| P16303        | LDLLGNPK                                            | 1.049680348        | 2               | 2.49522   |
| P16303        | QFEGWIIPTLMGYPLSEK                                  | 1.515989756        | 2               | 4.09094   |
| P16303        | QKTEDELLETSK                                        | 1.036288767        | 3               | 3.70119   |
| P16303        | SFNTVPYIVGINK                                       | 2.493958093        | 2               | 3.37518   |
| P16303        | TEDELLETSK                                          | 0.764195258        | 2               | 3.72654   |
| P16303        | TPEEILAEK                                           | 3.657654191        | 2               | 2.34282   |
| P16303        | TTTSAVMVHCLR                                        | 1.028611898        | 2               | 2.80367   |
| P16303        | TTTSAVMVHCLR+Oxidation(6)                           | 0.972552897        |                 |           |
| P16303        | TVIGDHGDELFSVFGSPFLK                                | 1.946940815        | 2               | 5.39983   |
| P16303        | YFGGTDDPAK                                          | 1.009463767        | 2               | 3.19888   |
| P16303        | YVNLEGFAQPVAVFLGIPFAKPLGSLR                         | 0.956600888        | 3               | 3.57998   |
| <b>P16332</b> | <b>MUTA Methylmalonyl_CoA mutase_ mitochondrial</b> | <b>1.150293493</b> | <b>1.28E-07</b> | <b>7</b>  |
| P16332        | AAVQLDDIEK                                          | 2.047482854        | 2               | 2.62039   |
| P16332        | AHCQTSGWSLTEQDPYNNIVR                               | 1.296198635        | 3               | 5.17047   |
| P16332        | GDVGMAGVAIDTVEDTK                                   | 0.952564778        | 2               | 3.06917   |
| P16332        | IDSGSEVIVGVNK                                       | 1.225390323        | 2               | 3.57708   |
| P16332        | ILFDGIPLEK                                          | 1.246721367        | 2               | 2.31859   |
| P16332        | NTQIIIQEESGIPK                                      | 1.224868428        | 2               | 3.88144   |
| P16332        | TGLQAGLTIDEFAPR                                     | 0.907013622        | 2               | 3.44      |
| <b>P16409</b> | <b>MYL3 Myosin light chain 3</b>                    | <b>0.486082377</b> | <b>1.7E-05</b>  | <b>6</b>  |
| P16409        | AAPAPAAAAPAAPEPERPK                                 | 0.041861104        | 2               | 4.28119   |
| P16409        | ALGQNPTQAEVLR                                       | 0.047638842        | 2               | 3.97609   |
| P16409        | DTGTIEDFVEGLR                                       | 0.701299507        | 2               | 3.29733   |
| P16409        | MMDFETFLPMLQHISK                                    | 0.771983863        | 2               | 2.92626   |
| P16409        | NKDTGTIEDFVEGLR                                     | 0.605274855        | 2               | 4.1335    |
| P16409        | VFDKEGNGTVMGAELR                                    | 0.263571228        | 2               | 3.51766   |
| <b>P16617</b> | <b>PGK1 Phosphoglycerate kinase 1</b>               | <b>1.165894754</b> | <b>9.9E-20</b>  | <b>18</b> |
| P16617        | AHSSMVGVNLPQK                                       | 1.055783789        | 3               | 4.08317   |
| P16617        | AHSSMVGVNLPQK+Oxidation(4)                          | 0.902005313        |                 |           |
| P16617        | ALESPERPFLLAILGGAK                                  | 2.156343705        | 3               | 4.52532   |
| P16617        | DCVGSEVENACANPAAGTVILLENLR                          | 1.119654671        | 3               | 6.29706   |
| P16617        | FCLDNGAK                                            | 0.843522521        | 1               | 2.05084   |
| P16617        | GCITIIGGGDTATCCAK                                   | 1.068772577        | 2               | 5.56694   |
| P16617        | IQLINNMLDK                                          | 0.882006893        | 2               | 2.72171   |
| P16617        | IQLINNMLDK+Oxidation(6)                             | 1.954702108        |                 |           |

|               |                                                         |                    |                 |           |
|---------------|---------------------------------------------------------|--------------------|-----------------|-----------|
| P16617        | ITLPVDFVTADKFDENAK                                      | 1.426385675        | 2               | 4.90571   |
| P16617        | QIVVWNGPVGVEWEAFAR                                      | 1.180546075        | 2               | 3.10035   |
| P16617        | SVVLMSHLGRPDGVPMPDKYSLEPVAELK                           | 1.165987981        | 4               | 4.69102   |
| P16617        | TGQATVASGIPAGWMGLDCGTESSK                               | 0.853170307        | 2               | 4.73668   |
| P16617        | TGQATVASGIPAGWMGLDCGTESSKK                              | 0.88697081         | 3               | 4.25405   |
| P16617        | VLNNMEIGTSLYDEEGAK                                      | 0.995550016        | 2               | 5.54474   |
| P16617        | VLNNMEIGTSLYDEEGAK+Oxidation(4)                         | 1.048079375        |                 |           |
| P16617        | VLPGVDALSNV                                             | 1.236310503        | 2               | 2.73516   |
| P16617        | WNTEDKVSHVSTGGGASLELLEGG                                | 0.889048741        | 3               | 4.85577   |
| P16617        | YSLEPVAELK                                              | 1.023369652        | 2               | 3.61883   |
| <b>P16638</b> | <b>ACLY ATP_citrate synthase</b>                        | <b>1.336584569</b> | <b>3.11E-15</b> | <b>25</b> |
| P16638        | AFDSGIIPMEFVNK                                          | 1.399948068        | 2               | 4.13286   |
| P16638        | AFDSGIIPMEFVNK+Oxidation(8)                             | 0.939970417        |                 |           |
| P16638        | DEPSVAAMVYPFTGDHK                                       | 1.3091288          | 2               | 3.22893   |
| P16638        | DGVYILDAAK                                              | 1.030747684        | 2               | 2.98278   |
| P16638        | DLVSSLTSGLLTIGDR                                        | 1.115513344        | 2               | 3.48683   |
| P16638        | EAYPEEAYIADLDAK                                         | 1.164764539        | 2               | 3.06489   |
| P16638        | FGGALDAAK                                               | 1.161935264        | 2               | 2.45811   |
| P16638        | GAIVPAQEVPPPTVPMDSWAR                                   | 1.191667236        | 2               | 4.22838   |
| P16638        | GGPNYQEGLR                                              | 1.498204413        | 2               | 2.71885   |
| P16638        | GVTIIGPATVGGIKPGCFK                                     | 1.229183754        | 2               | 2.85284   |
| P16638        | HLLVHAPEDK                                              | 1.049260671        | 2               | 2.66416   |
| P16638        | HLLVHAPEDKK                                             | 1.191706846        | 2               | 3.56468   |
| P16638        | IGNTGGMLDNILASK                                         | 1.341027625        | 2               | 3.65479   |
| P16638        | LGLVGVNLSLDGVK                                          | 1.793470697        | 2               | 2.83034   |
| P16638        | LNAEDIK                                                 | 1.509021368        | 1               | 1.91364   |
| P16638        | QHFPATPLLDYALEVEK                                       | 1.155340351        | 3               | 4.446     |
| P16638        | RGGPNYQEGLR                                             | 2.144712848        | 2               | 3.17673   |
| P16638        | SFDELGEIIQSVYEDLVAK                                     | 1.166842043        |                 |           |
| P16638        | SGGMSNELNNIISR                                          | 1.304461685        | 2               | 3.70062   |
| P16638        | TIAIAEGIPEALTR                                          | 1.145958822        | 2               | 5.25342   |
| P16638        | TTDGVYEGVAIGGDR                                         | 1.317646274        | 2               | 3.42145   |
| P16638        | TTDGVYEGVAIGGDRYPGSTFMDHVLR                             | 0.99202485         | 3               | 4.08434   |
| P16638        | VDATADYICK                                              | 0.941676254        | 2               | 2.47053   |
| P16638        | WGDIEFPPPFGR                                            | 1.253862948        | 2               | 3.93386   |
| P16638        | YICTTSAIQNR                                             | 1.274843556        | 2               | 2.8135    |
| <b>P16970</b> | <b>ABCD3 ATP_binding cassette sub_family D member 3</b> | <b>0.826602541</b> | <b>2.69E-11</b> | <b>5</b>  |
| P16970        | FDHVPLATPNGDILIQDLSFEVR                                 | 0.80922831         | 2               | 2.48301   |
| P16970        | GIEGAQASPLIPGAGEIINADNIK                                | 0.750335635        | 3               | 4.97734   |
| P16970        | GYLDNVQLGHILER                                          | 0.823876304        | 2               | 3.44621   |
| P16970        | HLHSTHSELLEDYYSQGR                                      | 0.840337926        | 3               | 5.15625   |
| P16970        | SGANVLICGPNCGK                                          | 0.847861567        | 2               | 3.11631   |
| <b>P17074</b> | <b>RS19 40S ribosomal protein S19</b>                   | <b>1.100632984</b> | <b>0.746691</b> | <b>5</b>  |
| P17074        | DVNQQEFVR                                               | 0.402950565        | 2               | 2.36849   |
| P17074        | ELAPYDENWFYTR                                           | 0.600205197        | 2               | 2.4845    |
| P17074        | HKELAPYDENWFYTR                                         | 1.080197201        | 3               | 3.35257   |
| P17074        | RVLQALEGLK                                              | 1.201840992        | 3               | 3.31907   |
| P17074        | VLQALEGLK                                               | 1.167343041        | 2               | 2.71794   |
| <b>P17077</b> | <b>RL9 60S ribosomal protein L9</b>                     | <b>1.162805105</b> | <b>8.71E-08</b> | <b>8</b>  |
| P17077        | DFNHINVELSLLGK                                          | 0.038880998        | 3               | 3.75242   |
| P17077        | FLDGIVSEK                                               | 1.156451942        | 2               | 3.20182   |
| P17077        | GTVQQPDE                                                | 1.399451086        | 1               | 2.1011    |
| P17077        | KFLDGIVSEK                                              | 1.382255515        | 2               | 2.72617   |
| P17077        | SVYAHFPINVVIIQENGLSVEIR                                 | 1.460094734        | 3               | 3.74064   |
| P17077        | TGVACSVSQAQK                                            | 1.161184455        | 2               | 3.66953   |
| P17077        | TICSHVQNMIIK                                            | 0.827190222        | 2               | 2.87856   |

|               |                                                             |                    |                 |           |
|---------------|-------------------------------------------------------------|--------------------|-----------------|-----------|
| P17077        | TILSNQTVDIPENVDTLK                                          | 0.978009009        | 2               | 3.15407   |
| <b>P17078</b> | <b>RL35 60S ribosomal protein L35</b>                       | <b>1.273007452</b> | <b>0.178145</b> | <b>2</b>  |
| P17078        | QLDDLKVELSCLR                                               | 1.043512654        | 2               | 2.58665   |
| P17078        | VLTVINQTQK                                                  | 1.275375723        | 2               | 3.24856   |
| <b>P17178</b> | <b>CP27A Sterol 26_hydroxylase_mitochondrial</b>            | <b>0.902540499</b> | <b>2.62E-05</b> | <b>4</b>  |
| P17178        | DHESTEGPGTGQDRPR                                            | 3.632317883        | 2               | 2.52979   |
| P17178        | MLKPAAEALYTDALNEVISDFIAR                                    | 1.324434609        | 3               | 4.13894   |
| P17178        | VGCLEPSIPEDTATFIR                                           | 1.414002958        | 2               | 2.88455   |
| P17178        | YEVVLSPGMGEVK                                               | 1.141875651        | 2               | 3.74526   |
| <b>P17425</b> | <b>HMCS1 Hydroxymethylglutaryl_CoA synthase_cytoplasmic</b> | <b>0.484625667</b> | <b>1.47E-05</b> | <b>15</b> |
| P17425        | ASAELFNQK                                                   | 0.554613123        | 2               | 3.10989   |
| P17425        | DKNSIYSGLEAFGDVK                                            | 1.158349416        | 2               | 3.02647   |
| P17425        | DVGIVALEIYFPSQYVDQAELEK                                     | 1.327398136        | 3               | 3.6891    |
| P17425        | GTHMQHAYDFYKPDMLSEYPVVDGK+Oxidation(3)                      | 0.495673171        |                 |           |
| P17425        | ITASLCDLK                                                   | 0.935235408        | 1               | 1.94212   |
| P17425        | LEDTYFDRDVEK                                                | 0.551692753        | 2               | 2.92073   |
| P17425        | LPATSGEPESAVISNGEH                                          | 0.913436368        | 2               | 4.23964   |
| P17425        | MFLNDFLNDQNR                                                | 0.523420203        | 2               | 2.97792   |
| P17425        | MFLNDFLNDQNR+Oxidation(0)                                   | 0.550625057        |                 |           |
| P17425        | MGFCTDREDINSLCLTVVQK                                        | 0.518022103        | 3               | 4.17946   |
| P17425        | NLSYDCIGR                                                   | 0.501529468        | 2               | 2.8723    |
| P17425        | RPSTNDHSLDEGVGLVHSNTATEHIPSPAK                              | 1.141530387        | 4               | 4.60498   |
| P17425        | TCVAPDVFAENMK                                               | 0.466101712        | 2               | 2.78393   |
| P17425        | VTQDATPGSALDK                                               | 0.449274435        | 2               | 3.80521   |
| P17425        | YTIGLGQAR                                                   | 0.428931655        | 2               | 2.68853   |
| <b>P17426</b> | <b>AP2A1 AP_2 complex subunit alpha_1</b>                   | <b>1.269614148</b> | <b>8.66E-07</b> | <b>2</b>  |
| P17426        | NADVELQQR                                                   | 1.264819164        | 2               | 2.80772   |
| P17426        | VGGYILGEFGNLIAGDPR                                          | 1.270946981        | 2               | 3.75086   |
| <b>P17475</b> | <b>A1AT Alpha_1_antiproteinase</b>                          | <b>0.932760743</b> | <b>0.293689</b> | <b>5</b>  |
| P17475        | MQHLEQTLTK                                                  | 0.949202756        | 2               | 3.00792   |
| P17475        | MQHLEQTLTK+Oxidation(0)                                     | 1.514843602        |                 |           |
| P17475        | TLLSSLGITR                                                  | 1.074159911        | 2               | 3.15535   |
| P17475        | VFNNADADLSGITEDAPLK                                         | 0.947647218        | 2               | 5.7359    |
| P17475        | VINDYVEK                                                    | 1.070527143        | 2               | 2.34795   |
| <b>P17702</b> | <b>RL28 60S ribosomal protein L28</b>                       | <b>1.912941852</b> | <b>9.9E-20</b>  | <b>2</b>  |
| P17702        | NCSSFLIK                                                    | 1.167488117        | 2               | 2.41565   |
| P17702        | QTYSTEPNNLK                                                 | 2.342227861        | 2               | 3.01876   |
| <b>P17764</b> | <b>THIL Acetyl_CoA acetyltransferase_mitochondrial</b>      | <b>1.203683686</b> | <b>9.9E-20</b>  | <b>17</b> |
| P17764        | EEQDKYAIGSYTR                                               | 1.198247046        | 2               | 3.56149   |
| P17764        | ENGTVTAANASTLNDGAAAVLMTAEAAQR                               | 1.707106055        | 2               | 4.62328   |
| P17764        | EVYMGNVIQGGEGQAPTR                                          | 1.579390066        | 2               | 5.39414   |
| P17764        | EVYMGNVIQGGEGQAPTR+Oxidation(3)                             | 2.426941099        |                 |           |
| P17764        | FANEITPITISVK                                               | 1.153690913        | 2               | 3.84868   |
| P17764        | GKPDVVVKEDEEYK                                              | 0.980411117        | 2               | 3.45335   |
| P17764        | GKPDVVVKEDEEYKR                                             | 1.02544511         | 2               | 5.0755    |
| P17764        | IAAFADAAVDPIDFPLAPAYAVPK                                    | 2.196116579        | 2               | 5.74289   |
| P17764        | IHMGNCAENTAK                                                | 1.27344277         | 2               | 3.17841   |
| P17764        | IHMGNCAENTAK+Oxidation(2)                                   | 1.247297731        |                 |           |
| P17764        | LEDLIVK                                                     | 1.08856773         | 2               | 2.71165   |
| P17764        | LGTIAIQGAIEK                                                | 1.617609686        | 2               | 3.29302   |
| P17764        | QATLGAGLPIATPCTTVNK                                         | 1.060155416        | 2               | 4.62479   |
| P17764        | QGEFGLASICNGGGGASAVLIEK                                     | 1.04219662         | 2               | 4.94267   |
| P17764        | TPIGSFLGSLASQPATK                                           | 1.700537569        | 2               | 4.47932   |
| P17764        | VNVHGGAVSLGHPIGMSGAR                                        | 0.733457987        | 2               | 5.80788   |

|               |                                                           |                    |                 |           |
|---------------|-----------------------------------------------------------|--------------------|-----------------|-----------|
| P17764        | VNVHGGAVSLGHPIGMSGAR+Oxidation(15)                        | <b>1.673706209</b> |                 |           |
| <b>P17879</b> | <b>HS71B Heat shock 70 kDa protein 1B</b>                 | <b>1.601451708</b> | <b>9.9E-20</b>  | <b>3</b>  |
| P17879        | QTQFTTYSDNQPGVLIQVYEGER                                   | <b>1.322787911</b> | 3               | 5.32345   |
| P17879        | TTPSYVAFTDTER                                             | <b>1.637763691</b> | 2               | 3.72956   |
| P17879        | VEIANDQGNR                                                | <b>1.160590515</b> | 2               | 3.77198   |
| <b>P17988</b> | <b>ST1A1 Sulfotransferase 1A1</b>                         | <b>1.742022933</b> | <b>9.9E-20</b>  | <b>6</b>  |
| P17988        | CPGVPSGLETLEETPAPR                                        | <b>1.937209213</b> | 2               | 4.79756   |
| P17988        | ILEFLGR                                                   | <b>2.18567723</b>  | 2               | 2.34402   |
| P17988        | NTFTVAQNER                                                | <b>1.828178476</b> | 2               | 3.68243   |
| P17988        | SGTTWMSEILDMIYQGGK                                        | <b>1.262380334</b> | 2               | 4.98685   |
| P17988        | SLPEETVDSIVHHTSFK                                         | <b>1.949014423</b> | 2               | 4.56665   |
| P17988        | THLPLSLLPQSLLDQK                                          | <b>1.957899408</b> | 2               | 4.97855   |
| <b>P18163</b> | <b>ACSL1 Long_chain_fatty_acid_CoA ligase 1</b>           | <b>1.138998416</b> | <b>9.9E-20</b>  | <b>30</b> |
| P18163        | AELSVIFADKPEK                                             | <b>1.011406758</b> | 2               | 3.14189   |
| P18163        | ALEDLGR                                                   | <b>1.943748043</b> | 2               | 2.32831   |
| P18163        | ALKPPCDLSMQSVEVTGTTEGVR                                   | <b>0.924760014</b> | 2               | 4.53501   |
| P18163        | ALKPPCDLSMQSVEVTGTTEGVR+Oxidation(9)                      | <b>1.230299905</b> |                 |           |
| P18163        | CGVEIIGLK                                                 | <b>0.898627199</b> | 2               | 2.87908   |
| P18163        | DGWLHTGDIGK                                               | <b>1.100110072</b> | 2               | 3.18743   |
| P18163        | GAMVTHQNIMNDCSGFIK                                        | <b>1.210681102</b> | 2               | 4.38305   |
| P18163        | GAMVTHQNIMNDCSGFIK+Oxidation(2)                           | <b>1.508710995</b> |                 |           |
| P18163        | GFQGSFEELCR                                               | <b>1.014089933</b> | 2               | 3.6255    |
| P18163        | GIAVHPELFSIDNGLLPTLK                                      | <b>2.134928017</b> | 2               | 5.81365   |
| P18163        | GIQVSNLGPCLGSR                                            | <b>0.998637194</b> | 2               | 4.50838   |
| P18163        | IENIYLR                                                   | <b>0.963498534</b> | 2               | 2.95509   |
| P18163        | IFGQANTSVK                                                | <b>1.084983899</b> | 2               | 2.76034   |
| P18163        | IIVIMDSYDNDLVER                                           | <b>0.998551972</b> | 2               | 4.59071   |
| P18163        | LLLEGVENK                                                 | <b>1.131758204</b> | 2               | 3.33447   |
| P18163        | LLMDDLK                                                   | <b>1.00841596</b>  | 2               | 2.43491   |
| P18163        | LMITGAAPVSATVLTFLR                                        | <b>1.147058864</b> | 2               | 3.52214   |
| P18163        | LVDVEDMNYQAAK                                             | <b>0.96063502</b>  | 2               | 4.20376   |
| P18163        | LVDVEDMNYQAAK+Oxidation(6)                                | <b>1.460769334</b> |                 |           |
| P18163        | NAGLKPFEQVK                                               | <b>1.108701621</b> | 2               | 3.83103   |
| P18163        | NNSLWDK                                                   | <b>0.814360687</b> | 2               | 2.54561   |
| P18163        | QVAEMAECIGSALIQK                                          | <b>0.824419522</b> | 2               | 5.59015   |
| P18163        | QVAEMAECIGSALIQK+Oxidation(4)                             | <b>1.3493284</b>   |                 |           |
| P18163        | SAVLEDDKLLYYDDVDR                                         | <b>5.173535749</b> | 3               | 4.16559   |
| P18163        | SQIDELYSTIK                                               | <b>1.441842134</b> | 2               | 3.65745   |
| P18163        | SQIDELYSTIKI                                              | <b>1.69341447</b>  | 2               | 4.15233   |
| P18163        | TAEALDKDGLWHTGDIGK                                        | <b>1.114966683</b> | 2               | 5.10815   |
| P18163        | TKPKPPEPEDLAICFTSGTTGNPK                                  | <b>7.217752933</b> | 3               | 5.41539   |
| P18163        | VLQPTIFPVVPR                                              | <b>1.031221978</b> | 2               | 3.50098   |
| P18163        | WLLDFASK                                                  | <b>0.955552201</b> | 2               | 2.3813    |
| <b>P18297</b> | <b>SPRE Sepiapterin reductase</b>                         | <b>0.993289502</b> | <b>0.000299</b> | <b>4</b>  |
| P18297        | ALAPQLAGLLSPGSVLLLSAR                                     | <b>1.07256505</b>  | 3               | 4.81566   |
| P18297        | LLLINNAGTLGDVSK                                           | <b>1.099914261</b> | 2               | 3.60059   |
| P18297        | LNSEGELVDCGTSQAK                                          | <b>1.294393482</b> | 2               | 4.78737   |
| P18297        | TVVNISSCALQPFK                                            | <b>1.047070094</b> | 2               | 3.76345   |
| <b>P18298</b> | <b>METK2 S_adenosylmethionine synthase isoform type_2</b> | <b>2.175216584</b> | <b>9.9E-20</b>  | <b>3</b>  |
| P18298        | IIVDTYGGWGAHGGGAFSGK                                      | <b>1.624590352</b> | 2               | 5.42115   |
| P18298        | KIIVDTYGGWGAHGGGAFSGK                                     | <b>2.529147281</b> | 3               | 3.46823   |
| P18298        | YLDEDTIYHLQPSGR                                           | <b>2.400722269</b> | 2               | 4.75356   |
| <b>P18418</b> | <b>CALR Calreticulin</b>                                  | <b>0.960942897</b> | <b>0.00734</b>  | <b>19</b> |
| P18418        | AKIDDPTDSKPEDWDKPEHIPDDAK                                 | <b>1.389477511</b> | 3               | 5.44022   |
| P18418        | CKDDEFTHLYTLIVRPDNTYEVK                                   | <b>2.433021556</b> | 3               | 4.8565    |
| P18418        | DMHGDSEYNIMFGPDICGPGTK                                    | <b>0.829539217</b> | 2               | 6.39868   |



|               |                                                                  |                    |                 |           |
|---------------|------------------------------------------------------------------|--------------------|-----------------|-----------|
| P18418        | DMHGDSEYNIMFGPDICGPGTK+Oxidation(1)                              | 1.111599001        |                 |           |
| P18418        | DMHGDSEYNIMFGPDICGPGTK+Oxidation(10)                             | 1.111599001        |                 |           |
| P18418        | EQFLDGDWATNR                                                     | 0.920506086        | 2               | 3.02288   |
| P18418        | FYGDQEK                                                          | 0.954782696        | 1               | 2.05597   |
| P18418        | FYGDQEKDK                                                        | 0.971874319        | 1               | 2.77647   |
| P18418        | GQTLVVQFTVK                                                      | 1.287082201        | 1               | 3.25503   |
| P18418        | HEQNIDCGGGYVK                                                    | 0.967274473        | 2               | 4.42084   |
| P18418        | IDDPTDSKPEDWDKPEHIPDPAK                                          | 0.845340887        | 3               | 3.91679   |
| P18418        | IDNSQVESGSLEDDWDFLPPK                                            | 0.950835717        | 2               | 5.43783   |
| P18418        | IDNSQVESGSLEDDWDFLPPK                                            | 0.931804445        | 2               | 4.9       |
| P18418        | IKDPDAAKPEDWDER                                                  | 1.164020642        | 2               | 4.38367   |
| P18418        | KPEDWDEEMDGEWEPPIQNPEYK                                          | 0.874979417        | 3               | 5.5728    |
| P18418        | LFGGLDQK                                                         | 1.252636007        | 1               | 2.05284   |
| P18418        | QIDNPDYK                                                         | 0.998621729        | 1               | 2.29053   |
| P18418        | SGTIFDNFLITNDEAYAEFGNETWGVTK                                     | 1.179568935        | 3               | 4.88329   |
| P18418        | VHVIFNYK                                                         | 1.176964015        | 1               | 2.26836   |
| <b>P18420</b> | <b>PSA1 Proteasome subunit alpha type_1</b>                      | <b>1.063607691</b> | <b>0.004156</b> | <b>2</b>  |
| P18420        | AQPSQAADPEPAK                                                    | 1.263993698        | 2               | 3.42467   |
| P18420        | NQYDNDVTWVSPQGR                                                  | 1.001713811        | 2               | 3.62948   |
| <b>P18421</b> | <b>PSB1 Proteasome subunit beta type_1</b>                       | <b>1.162577762</b> | <b>0.009167</b> | <b>3</b>  |
| P18421        | AGGSASAMLQPLLDNQVGFK                                             | 1.004129728        | 2               | 5.02828   |
| P18421        | GAVYSFDPVGSYQR                                                   | 1.407533181        | 2               | 3.86107   |
| P18421        | NMQNVEHVPLTLDR                                                   | 0.279847441        | 2               | 3.68842   |
| <b>P18445</b> | <b>RL27A 60S ribosomal protein L27a</b>                          | <b>1.310738401</b> | <b>3.65E-07</b> | <b>2</b>  |
| P18445        | NQSFCPTVNLDK                                                     | 1.272061152        | 2               | 3.35282   |
| P18445        | RNQSFCPTVNLDK                                                    | 0.854907115        | 2               | 3.02967   |
| <b>P18484</b> | <b>AP2A2 AP_2 complex subunit alpha_2</b>                        | <b>0.705058575</b> | <b>1.43E-08</b> | <b>3</b>  |
| P18484        | LTECLEILNK                                                       | 0.95650714         | 2               | 2.73545   |
| P18484        | NNGVLFENQLLQJLQK                                                 | 0.877544021        | 2               | 3.2541    |
| P18484        | QLSNPQQEVQNIK                                                    | 0.477219119        | 2               | 3.40911   |
| <b>P18596</b> | <b>AT2A3 Sarcoplasmic/endoplasmic reticulum calcium ATPase 3</b> | <b>0.87341681</b>  | <b>0.000963</b> | <b>5</b>  |
| P18596        | DIVPGDIVEVAVGDK                                                  | 0.980986949        | 2               | 2.45818   |
| P18596        | DIVPGDIVEVAVGDKVPADLR                                            | 1.597758322        | 2               | 3.76057   |
| P18596        | SLPSVETLGCTSVICS DK                                              | 0.482881894        | 2               | 4.19806   |
| P18596        | TGTLTTNQMSVCR                                                    | 1.175904422        | 2               | 2.41579   |
| P18596        | VGEATETALTCLVEK                                                  | 0.89745144         | 2               | 4.38617   |
| <b>P18757</b> | <b>CGL Cystathionine gamma_lyase</b>                             | <b>0.943196339</b> | <b>0.000689</b> | <b>18</b> |
| P18757        | AGDEVICMDEVYGGTNR                                                | 0.522278899        | 2               | 5.38777   |
| P18757        | AGDEVICMDEVYGGTNR+Oxidation(7)                                   | 0.947159893        |                 |           |
| P18757        | ATLGISDTLIR                                                      | 1.017704622        | 2               | 3.54182   |
| P18757        | AVAALDGAK                                                        | 0.819609364        | 2               | 2.67003   |
| P18757        | AVVLPISLATTFK                                                    | 1.153224977        | 3               | 4.29108   |
| P18757        | DLLEDLGQALK                                                      | 0.529096866        | 2               | 2.77988   |
| P18757        | FLQNSLGAVSPFDCYLCCR                                              | 1.501855631        | 2               | 4.11841   |
| P18757        | GTLQHAQVFLK                                                      | 0.977840445        | 2               | 3.06968   |
| P18757        | LFALAESLGGYESLAELPAIMTHASVPEK                                    | 1.467810822        | 3               | 5.28373   |
| P18757        | LFALAESLGGYESLAELPAIMTHASVPEKDR                                  | 1.514233983        | 4               | 5.44823   |
| P18757        | LLEAAITPQTK                                                      | 0.888566015        | 2               | 3.8848    |
| P18757        | LSVGLDEKDLLEDLGQALK                                              | 0.919247464        | 3               | 6.47493   |
| P18757        | LVWIETPTNPTLK                                                    | 0.923798083        | 2               | 3.62771   |
| P18757        | QCTGCPGMVSFYIK                                                   | 0.849349185        | 2               | 3.74135   |
| P18757        | QCTGCPGMVSFYIK+Oxidation(7)                                      | 1.22688687         |                 |           |
| P18757        | QDSPGQSSGFVYSR                                                   | 1.236550568        | 2               | 3.7005    |
| P18757        | RVASEFGLK                                                        | 1.06038741         | 2               | 2.58562   |
| P18757        | VIYPGLPSHPQHELAK                                                 | 0.810306523        | 2               | 4.25614   |

|               |                                                                           |                    |                 |           |
|---------------|---------------------------------------------------------------------------|--------------------|-----------------|-----------|
| <b>P18886</b> | <b>CPT2 Carnitine O_palmitoyltransferase 2_mitochondrial</b>              | <b>1.305144869</b> | <b>7.92E-08</b> | <b>10</b> |
| P18886        | ATNLTVSAVR                                                                | 1.184647776        | 2               | 3.30207   |
| P18886        | ELHAHLLAQDK                                                               | 1.456197337        | 2               | 3.00994   |
| P18886        | FFNEVFR                                                                   | 1.115667074        | 2               | 2.30748   |
| P18886        | LIFDGNEETLK                                                               | 1.129951243        | 2               | 2.98904   |
| P18886        | QYGQTVATYESCSTAAFK                                                        | 1.425511641        | 2               | 3.57518   |
| P18886        | SEYNDQLTR                                                                 | 1.295329465        | 2               | 2.67301   |
| P18886        | TETIRPASIFTK                                                              | 1.404257849        | 2               | 2.58314   |
| P18886        | TLSIDSIQFQR                                                               | 1.191352548        | 2               | 3.302     |
| P18886        | YILSDSSPVPEFPVAYLTSENR                                                    | 1.683263972        | 2               | 5.49571   |
| P18886        | YLNAQKPLLDSSQFR                                                           | 1.122340815        | 2               | 4.36811   |
| <b>P19112</b> | <b>F16P1 Fructose 1_6_bisphosphatase 1</b>                                | <b>1.075895143</b> | <b>9.9E-20</b>  | <b>18</b> |
| P19112        | AGGLATTGNEDILDIVPTEIHQK                                                   | 0.96826533         | 3               | 6.25506   |
| P19112        | AGGTGEMTQLLSLCTAIK                                                        | 1.13293783         | 2               | 5.36375   |
| P19112        | AGGTGEMTQLLSLCTAIK+Oxidation(6)                                           | 1.060869042        |                 |           |
| P19112        | APVIMGSTEDVQEFLEIYNK                                                      | 1.736309243        | 2               | 5.24661   |
| P19112        | DFDPAINIYIQR                                                              | 1.169800325        | 2               | 3.91619   |
| P19112        | FPPDNSAPYGAR                                                              | 1.115765156        | 2               | 2.55398   |
| P19112        | GNIYSINEGYAK                                                              | 1.209333133        | 2               | 4.06306   |
| P19112        | KGNIYSINEGYAK                                                             | 1.225402057        | 2               | 3.92468   |
| P19112        | KLDILSNDLVINMLK                                                           | 0.962131771        | 2               | 6.07721   |
| P19112        | KTSANEPSEKDALQPGR                                                         | 1.054062205        | 3               | 3.63943   |
| P19112        | LDILSNDLVINMLK                                                            | 1.021724613        | 2               | 5.0478    |
| P19112        | LLYECNPIAYVMEK                                                            | 2.031882181        | 2               | 4.26788   |
| P19112        | QAGIAQLYGIAGSTNVTGDQVK                                                    | 1.15724285         | 3               | 6.08422   |
| P19112        | SRPSLPLPQSR                                                               | 0.99390814         | 2               | 3.3114    |
| P19112        | SSYATCVLVSEEDTHAIIIEPEKR                                                  | 1.21370261         | 3               | 5.78229   |
| P19112        | TLVYGGIFLYPANK                                                            | 1.014263828        | 2               | 4.20629   |
| P19112        | TLVYGGIFLYPANKK                                                           | 0.823536097        | 2               | 2.33301   |
| P19112        | TSANEPSEKDALQPGR                                                          | 1.022048697        | 2               | 3.88564   |
| <b>P19123</b> | <b>TNNC1 Troponin C_slow skeletal and cardiac muscles</b>                 | <b>1.117277412</b> | <b>0.313683</b> | <b>5</b>  |
| P19123        | AAVEQLTEEQK                                                               | 1.108676035        | 2               | 2.86199   |
| P19123        | AAVEQLTEEQKNEFK                                                           | 1.275515652        | 2               | 3.44654   |
| P19123        | GKSEELSDFLR                                                               | 1.113396546        | 2               | 2.5702    |
| P19123        | IDYDEFLEFMK                                                               | 0.830588654        | 2               | 3.17898   |
| P19123        | SEEELSDFLR                                                                | 0.493499925        | 2               | 2.93065   |
| <b>P19225</b> | <b>CP270 Cytochrome P450 2C70</b>                                         | <b>0.883285083</b> | <b>9.9E-20</b>  | <b>14</b> |
| P19225        | ACIGEGLAR                                                                 | 0.838964175        | 2               | 2.78974   |
| P19225        | ASLNLSNPQDFIDYFLIK                                                        | 1.28355179         | 2               | 4.70211   |
| P19225        | EALIDRGEEFSDK                                                             | 1.425613379        | 2               | 3.29382   |
| P19225        | FDPGHFLDEK                                                                | 0.818529947        | 2               | 2.3137    |
| P19225        | FDYSDEK                                                                   | 1.148358376        | 1               | 1.99506   |
| P19225        | FILMEINR                                                                  | 0.828418565        | 2               | 2.33989   |
| P19225        | GTSVMACTLSALHDDKEFPNPEK                                                   | 0.739857205        | 3               | 3.48604   |
| P19225        | IQEEITR                                                                   | 0.829165347        | 1               | 2.0002    |
| P19225        | IQEEVVYLLEALR                                                             | 2.880222135        | 2               | 3.3575    |
| P19225        | LPPGPTPLPIFGNILQVGVK                                                      | 0.869541807        | 3               | 4.91012   |
| P19225        | SDYFMAFSAGRR+Oxidation(4)                                                 | 0.888906188        |                 |           |
| P19225        | SEFTMDNLIIVTIGDLFGAGTETTSSTIK                                             | 0.892118686        |                 |           |
| P19225        | VSQGLGIVFSNGEIWK                                                          | 1.455657329        | 2               | 3.34834   |
| P19225        | YIDFVPIPLPR                                                               | 0.916399172        | 2               | 3.1746    |
| <b>P19234</b> | <b>NDUV2 NADH dehydrogenase [ubiquinone] flavoprotein 2_mitochondrial</b> | <b>1.322969694</b> | <b>0.134125</b> | <b>4</b>  |
| P19234        | AAAVLPVLDLAQR                                                             | 2.801044469        | 2               | 2.35573   |
| P19234        | DIEEIIDELRL                                                               | 1.307015055        | 2               | 3.55164   |

|               |                                                          |                    |                 |           |
|---------------|----------------------------------------------------------|--------------------|-----------------|-----------|
| P19234        | DTPENNPDPFDFTPENYER                                      | 1.168545702        | 2               | 4.39767   |
| P19234        | FCCEPAGGLTSLTEPPK                                        | 1.442178288        | 2               | 3.74682   |
| <b>P19468</b> | <b>GSH1 Glutamate__cysteine ligase catalytic subunit</b> | <b>1.056805478</b> | <b>0.049585</b> | <b>8</b>  |
| P19468        | ASGELMTVAR                                               | 1.165167997        | 2               | 2.6967    |
| P19468        | CNQIANELCEPELLGSGFR                                      | 0.842490898        | 2               | 5.0993    |
| P19468        | DKNTPSPFVETFPPEDEEASK                                    | 0.838511911        | 3               | 3.43545   |
| P19468        | GYVSDIDCR                                                | 0.991990696        | 2               | 2.58427   |
| P19468        | NTPSPFVETFPPEDEEASK                                      | 1.079914009        | 2               | 4.77605   |
| P19468        | SLFFPDEAINK                                              | 0.953175414        | 2               | 2.66171   |
| P19468        | VQLLLNGGDVLETLQEK                                        | 1.061185578        | 2               | 4.72091   |
| P19468        | WGVISASVDDR                                              | 0.792192485        | 2               | 3.2562    |
| <b>P19488</b> | <b>UDB37 UDP__glucuronosyltransferase 2B37</b>           | <b>1.174623722</b> | <b>1.11E-07</b> | <b>9</b>  |
| P19488        | AEMWLIR                                                  | 0.930162204        | 2               | 2.91836   |
| P19488        | ANAIAWALAQIPQK                                           | 1.152581698        | 3               | 5.95307   |
| P19488        | FETFPTS VK                                               | 1.170151293        | 1               | 2.00189   |
| P19488        | FETFPTS VKDELEK                                          | 0.971259846        | 2               | 3.39425   |
| P19488        | GAAVTLNIR                                                | 1.179871117        | 2               | 2.51132   |
| P19488        | GHEVTVLKPSAYYVLDPK                                       | 1.509146187        | 2               | 4.52175   |
| P19488        | NWDPFYTEILGRPTTLAETMGK                                   | 1.08199653         | 2               | 5.01245   |
| P19488        | SDLFNALK                                                 | 1.109961619        | 2               | 2.76469   |
| P19488        | TILDELVQR                                                | 1.050255167        | 2               | 3.19665   |
| <b>P19511</b> | <b>AT5F1 ATP synthase subunit b__mitochondrial</b>       | <b>0.953659311</b> | <b>0.000268</b> | <b>10</b> |
| P19511        | HVIQSISAQ QEK                                            | 1.097629123        | 2               | 3.99424   |
| P19511        | HVIQSISAQ QEKETIAK                                       | 0.925118634        | 3               | 4.07216   |
| P19511        | HYLFDVQR                                                 | 0.989513745        | 2               | 2.58879   |
| P19511        | LDYHISVQDMMR                                             | 0.665274747        | 3               | 4.31159   |
| P19511        | LGLIPEEFFQFLYPK                                          | 1.737923621        | 2               | 2.67854   |
| P19511        | LNEEKIAQLEEK                                             | 1.070428607        | 2               | 2.53018   |
| P19511        | NNIALALEVTYR                                             | 1.047004066        | 2               | 2.35025   |
| P19511        | QQQDAINR                                                 | 1.047606518        | 1               | 2.1239    |
| P19511        | YGASIGEFIDK                                              | 1.392898759        | 2               | 2.91374   |
| P19511        | YGASIGEFIDKLNEEK                                         | 1.211155584        | 2               | 3.84726   |
| <b>P19643</b> | <b>AOFB Amine oxidase [flavin__containing] B</b>         | <b>1.025153774</b> | <b>3.31E-08</b> | <b>12</b> |
| P19643        | FIGGSGQVSER                                              | 1.123554725        | 2               | 3.2447    |
| P19643        | IISTTNGGQER                                              | 1.377015009        | 2               | 3.06342   |
| P19643        | IPEDIWQPEPESVDVPPARPITNTFLER                             | 1.261102186        | 3               | 4.6288    |
| P19643        | KFIGGSGQVSER                                             | 1.404531247        | 2               | 3.1051    |
| P19643        | LERPVIHIDQTGENVVVK                                       | 1.068089369        | 2               | 4.49568   |
| P19643        | LLHDCGLSVVLEAR                                           | 1.399988295        | 2               | 3.44083   |
| P19643        | TLNHEIYEAK                                               | 1.173589568        | 2               | 2.8145    |
| P19643        | TMDEMGQEIPSDAPWK                                         | 0.808788828        | 2               | 4.18117   |
| P19643        | VLNSQEALQPVHYEEK                                         | 1.214611803        | 2               | 4.83534   |
| P19643        | YVDLGGSYVGPQNR                                           | 1.197137445        | 2               | 5.32449   |
| P19643        | YVISAIPPVLGMK                                            | 0.741507296        | 2               | 2.93179   |
| P19643        | YVISAIPPVLGMK+Oxidation(11)                              | 0.955177624        |                 |           |
| <b>P19804</b> | <b>NDKB Nucleoside diphosphate kinase B</b>              | <b>1.175015051</b> | <b>9.9E-20</b>  | <b>9</b>  |
| P19804        | DRPFFPGLVK                                               | 1.41134867         | 2               | 2.33999   |
| P19804        | EIGLWFKPEELIDYK                                          | 1.247675963        | 2               | 4.11749   |
| P19804        | GDFCIQVGR                                                | 1.120430855        | 2               | 3.19885   |
| P19804        | NIIHGSDSVESA EK                                          | 1.248158796        | 1               | 3.94125   |
| P19804        | TFIAIKPDGVQR                                             | 1.23447472         | 2               | 3.25638   |
| P19804        | VMLGETNPADSKPGTIR                                        | 1.074085214        | 2               | 3.89641   |
| P19804        | VMLGETNPADSKPGTIR+Oxidation(1)                           | 1.165046148        |                 |           |
| P19804        | YMNSGPVVAMVWVWGLNVVK                                     | 1.266015116        | 2               | 5.09767   |
| P19804        | YMNSGPVVAMVWVWGLNVVK+Oxidation(1)                        | 0.712244601        |                 |           |
| <b>P19944</b> | <b>RLA1 60S acidic ribosomal protein P1</b>              | <b>1.041499956</b> | <b>0.00789</b>  | <b>2</b>  |

|               |                                             |                    |                 |           |
|---------------|---------------------------------------------|--------------------|-----------------|-----------|
| P19944        | AAGVNVPEFPWPLFAK                            | 2.002242518        | 2               | 3.42932   |
| P19944        | ALANVNIQSLICNVGAGGPAPAAGAAPAGGPAPSAAAAAPAEK | 1.047769309        | 3               | 5.70624   |
| <b>P19945</b> | <b>RLA0 60S acidic ribosomal protein P0</b> | <b>1.281289473</b> | <b>9.9E-20</b>  | <b>10</b> |
| P19945        | AFLADPSAFAAAAAPVAAATTAAPAAAAAPAK            | 1.296351429        | 2               | 6.02914   |
| P19945        | AGAIAPCEVTVPAQNTGLGPEK                      | 1.005375888        | 2               | 4.54503   |
| P19945        | CFIVGADNVGSK                                | 1.102568129        | 2               | 3.67474   |
| P19945        | GHLENNPALEK                                 | 1.105652973        | 2               | 3.69557   |
| P19945        | GNVGFVFTK                                   | 1.872004913        | 2               | 2.79319   |
| P19945        | GTIEILSDVQLIK                               | 1.297141482        | 2               | 3.36351   |
| P19945        | IIQLLDDYPK                                  | 1.909678089        | 2               | 3.6394    |
| P19945        | NVASVCLQIGYPTVASVPHSIINGYK                  | 1.258388945        | 3               | 3.87454   |
| P19945        | TSFFQALGITTK                                | 1.303646682        | 2               | 4.21808   |
| P19945        | VLALSVETDYTFPLAEK                           | 0.92857749         | 2               | 3.94064   |
| <b>P20059</b> | <b>HEMO Hemopexin</b>                       | <b>0.864752891</b> | <b>0.300135</b> | <b>7</b>  |
| P20059        | ELGSPPGISLDTIDAAFSCPGSSK                    | 1.080610814        | 2               | 4.61289   |
| P20059        | FNPVTGEVPPR                                 | 0.755885132        | 2               | 2.46482   |
| P20059        | GECQSEGVLFFQGNR                             | 0.875884493        | 2               | 3.75629   |
| P20059        | GGNNLVSGYPK                                 | 0.711894348        | 2               | 2.53918   |
| P20059        | LFQEEFPGIPYPPDAAVECHR                       | 0.824093041        | 3               | 3.75048   |
| P20059        | SGAQATWAELSWPHEK                            | 1.016064799        | 3               | 3.54564   |
| P20059        | VDGALCLEK                                   | 0.876926264        | 2               | 2.64807   |
| <b>P20070</b> | <b>NB5R3 NADH_cytochrome b5 reductase 3</b> | <b>1.062811925</b> | <b>0.255548</b> | <b>9</b>  |
| P20070        | AVLKDPNDHTVCYLLFANQSEK                      | 2.436438816        | 3               | 4.70232   |
| P20070        | DILLRPELEELR                                | 0.845354569        | 2               | 2.55208   |
| P20070        | IDGNLVIRPYTPVSSDDDKGFVDLVVK                 | 0.838430539        | 3               | 4.96146   |
| P20070        | LIDKEIISHDTR                                | 0.943131773        | 2               | 3.73461   |
| P20070        | MSQYLENMNIGDTIEFR                           | 1.082423946        | 2               | 3.5756    |
| P20070        | SSPAITLENPDIK                               | 0.966455983        | 2               | 3.87728   |
| P20070        | SSPAITLENPDIKYPLR                           | 0.713375358        | 2               | 3.84722   |
| P20070        | SVGMIAGGTGITPMLQVIR                         | 0.774854258        | 2               | 5.09246   |
| P20070        | SVGMIAGGTGITPMLQVIR+Oxidation(3)            | 1.182952132        |                 |           |
| <b>P20280</b> | <b>RL21 60S ribosomal protein L21</b>       | <b>1.495423188</b> | <b>2.83E-08</b> | <b>3</b>  |
| P20280        | KGDIVDIK                                    | 1.571462235        | 1               | 2.24357   |
| P20280        | TNGKEPELLEPIPYEFMA                          | 1.002491583        | 2               | 3.0142    |
| P20280        | VYNVTQHAVGIIVNK                             | 1.094975865        | 2               | 4.61871   |
| <b>P20650</b> | <b>PPM1A Protein phosphatase 1A</b>         | <b>0.87811021</b>  | <b>0.030112</b> | <b>2</b>  |
| P20650        | SRLEVTDDLEK                                 | 0.62830381         | 2               | 2.31696   |
| P20650        | VCNEVVDTCLYK                                | 1.399658549        | 2               | 2.53631   |
| <b>P20673</b> | <b>ARLY Argininosuccinate lyase</b>         | <b>1.36066593</b>  | <b>9.9E-20</b>  | <b>16</b> |
| P20673        | AEAECVLFPGYTHLQR                            | 1.271060254        | 2               | 4.59507   |
| P20673        | AEMQQILQGLDK                                | 1.064120528        | 2               | 4.5017    |
| P20673        | AEMQQILQGLDK+Oxidation(2)                   | 1.513327016        |                 |           |
| P20673        | AVVVAEMK                                    | 1.244963493        | 2               | 2.38015   |
| P20673        | EFNFVQLSDAYSTGSSLMPQK                       | 1.324259371        | 2               | 5.48498   |
| P20673        | ELIGEAAAGK                                  | 2.400093942        | 1               | 1.93262   |
| P20673        | FNSSIAADR                                   | 1.81780063         | 2               | 2.77471   |
| P20673        | HLWNVDLQGSK                                 | 1.250621512        | 1               | 3.16158   |
| P20673        | INVPLPGSGAIAGNPLGVDR                        | 1.377482143        | 2               | 5.57709   |
| P20673        | LKELIGEAAAGK                                | 1.359315008        | 2               | 2.98661   |
| P20673        | LYPNDEDIHTANER                              | 1.405534166        | 2               | 3.88263   |
| P20673        | MAEDLILYGTK                                 | 1.195422607        | 2               | 3.74256   |
| P20673        | MAEDLILYGTK+Oxidation(0)                    | 1.182850632        |                 |           |
| P20673        | NDQVVTDLR                                   | 1.101152524        | 2               | 3.40886   |
| P20673        | SRNDQVVTDLR                                 | 1.182470982        | 2               | 2.63014   |
| P20673        | VAEWAQGIFK                                  | 1.580851483        | 2               | 3.81901   |

|               |                                                                  |                    |                 |           |
|---------------|------------------------------------------------------------------|--------------------|-----------------|-----------|
| <b>P20788</b> | <b>UCRI Cytochrome b_c1 complex subunit Rieske_mitochondrial</b> | <b>1.118565734</b> | <b>0.887636</b> | <b>5</b>  |
| P20788        | EIDQEAAVEVSQLR                                                   | 1.1272284          | 2               | 4.25067   |
| P20788        | EIDQEAAVEVSQLRDPQHDLR                                            | 0.974230965        | 3               | 3.32687   |
| P20788        | GVAGALRPLLQSAVPATSEPPVLDVK                                       | 1.106583984        | 3               | 4.29454   |
| P20788        | LSDIPEGK                                                         | 1.166656408        | 1               | 2.02107   |
| P20788        | SGPFAPVLSATSR                                                    | 1.052460848        | 2               | 3.03193   |
| <b>P20801</b> | <b>TNNC2 Troponin C_skeletal muscle</b>                          | <b>0.490033944</b> | <b>0.008984</b> | <b>5</b>  |
| P20801        | AAFDMFDADGGDISVK                                                 | 0.620055571        | 2               | 4.17348   |
| P20801        | GKSEELAECFR                                                      | 0.470715686        | 2               | 3.61349   |
| P20801        | NADGYIDAEELAEIFR                                                 | 0.440555124        | 2               | 4.79431   |
| P20801        | SEELAECFR                                                        | 0.136584548        | 2               | 3.29329   |
| P20801        | SYLSEEMIAEFK                                                     | 0.808596085        | 2               | 2.75743   |
| <b>P20814</b> | <b>CP2CD Cytochrome P450 2C13_male_specific</b>                  | <b>0.980399486</b> | <b>0.60236</b>  | <b>4</b>  |
| P20814        | FDYEDKDFLNLIK                                                    | 0.996575189        | 3               | 4.16193   |
| P20814        | GTAVLTSLSVLHDSK                                                  | 1.021264383        | 2               | 3.10568   |
| P20814        | IKEHEESLDVSNPR                                                   | 0.922350865        | 3               | 4.04851   |
| P20814        | SDYFIPFSAGK                                                      | 1.666031759        | 2               | 2.59893   |
| <b>P20817</b> | <b>CP4AE Cytochrome P450 4A14</b>                                | <b>0.976646715</b> | <b>0.99541</b>  | <b>8</b>  |
| P20817        | ACQIAHEHTDGVK                                                    | 1.015681321        | 2               | 3.97792   |
| P20817        | AQLQNEELQK                                                       | 0.87752011         | 2               | 3.546     |
| P20817        | AVEDLNNTFFR                                                      | 0.935303057        | 2               | 3.41496   |
| P20817        | EFQQVLTWVEK                                                      | 0.839596034        | 2               | 2.65653   |
| P20817        | HLDLFDILLFAK                                                     | 1.18206487         | 2               | 3.23534   |
| P20817        | MEDGKLSDEDLR                                                     | 0.742850785        | 2               | 2.39169   |
| P20817        | MRKAQLQNEELQK+Oxidation(0)                                       | 0.995097407        |                 |           |
| P20817        | VLLYDPDYVK                                                       | 0.917503526        | 2               | 2.38224   |
| <b>P20852</b> | <b>CP2A5 Cytochrome P450 2A5</b>                                 | <b>1.009505275</b> | <b>0.999479</b> | <b>2</b>  |
| P20852        | DFIDSLIR                                                         | 0.956054509        | 2               | 2.66207   |
| P20852        | EALVDQAEFSGR                                                     | 0.991903894        | 2               | 3.35156   |
| <b>P21213</b> | <b>HUTH Histidine ammonia_lyase</b>                              | <b>1.02296085</b>  | <b>0.997054</b> | <b>13</b> |
| P21213        | ALDYLAIGVHELAAISER                                               | 0.949220134        | 2               | 4.19696   |
| P21213        | DIITTELSATDNPMVFASR                                              | 1.443953176        | 2               | 4.2865    |
| P21213        | GETISGGNFHGEYPAK                                                 | 0.96390764         | 2               | 3.82777   |
| P21213        | GEWLAVPCQDGK                                                     | 0.659258338        | 2               | 2.51669   |
| P21213        | GQIEVAFR                                                         | 0.388560755        | 2               | 2.39418   |
| P21213        | LQELQVNLVR                                                       | 1.096690003        | 2               | 3.25632   |
| P21213        | NKPDNGGFTSVDEVR                                                  | 1.070324318        | 2               | 3.6146    |
| P21213        | QADIVAALTLEVLK                                                   | 0.976148677        | 2               | 2.61384   |
| P21213        | SHSSGVGKPLSPER                                                   | 1.056097256        | 2               | 3.63549   |
| P21213        | SLLSDHHPSEIAESHR                                                 | 0.837350196        | 3               | 4.38465   |
| P21213        | TVVYGITTFGK                                                      | 1.058561861        | 2               | 3.59415   |
| P21213        | VVEVAAPYIEK                                                      | 1.231381004        | 2               | 2.87503   |
| P21213        | YIALDGDLSLSTEDLVNLGK                                             | 1.089660983        | 2               | 5.17735   |
| <b>P21396</b> | <b>AOFA Amine oxidase [flavin_containing] A</b>                  | <b>1.051459951</b> | <b>0.111777</b> | <b>7</b>  |
| P21396        | DVPAIEITHFLER                                                    | 1.35661283         | 2               | 2.48118   |
| P21396        | IFSVTNGGQER                                                      | 0.748617284        | 2               | 2.54802   |
| P21396        | INVLVLEAR                                                        | 1.064152625        | 2               | 2.94553   |
| P21396        | KDIWVEEPESK                                                      | 0.756730186        | 2               | 3.2477    |
| P21396        | VLGSQEALYPVHYEEK                                                 | 0.998778383        | 2               | 3.88281   |
| P21396        | WVDVGGAYVGPTQNR                                                  | 0.889791956        | 2               | 4.81068   |
| P21396        | YVISAIPPILAK                                                     | 0.996953772        | 2               | 2.90534   |
| <b>P21531</b> | <b>RL3 60S ribosomal protein L3</b>                              | <b>1.113595873</b> | <b>0.091209</b> | <b>6</b>  |
| P21531        | AHLMEIQVNGGTVAEK                                                 | 0.953100012        | 2               | 5.23758   |
| P21531        | ERLEQQVPVNQVFGQDEMIDVIGVTK                                       | 1.086350759        | 3               | 5.92922   |
| P21531        | HGSLGFLPR                                                        | 1.072210246        | 2               | 3.11254   |
| P21531        | LEQQVPVNQVFGQDEMIDVIGVTK                                         | 1.230277125        | 2               | 4.77023   |

|               |                                                                                    |                    |                 |           |
|---------------|------------------------------------------------------------------------------------|--------------------|-----------------|-----------|
| P21531        | NNASTDYDLSDK                                                                       | 1.231308554        | 2               | 3.2251    |
| P21531        | TVFAEHISDECK                                                                       | 1.276340759        | 2               | 3.69067   |
| <b>P21533</b> | <b>RL6 60S ribosomal protein L6</b>                                                | <b>1.259392758</b> | <b>0.001157</b> | <b>8</b>  |
| P21533        | AVDSQILPK                                                                          | 1.119945033        | 2               | 2.75714   |
| P21533        | FVIATSTK                                                                           | 1.262020108        | 1               | 2.018     |
| P21533        | HLTDAYFK                                                                           | 1.118338293        | 2               | 2.43603   |
| P21533        | HQEGEIFDTEK                                                                        | 1.347139646        | 2               | 3.32333   |
| P21533        | HQEGEIFDTEKEK                                                                      | 1.109412999        | 2               | 4.00106   |
| P21533        | QLGSGLLLVTPALNLR                                                                   | 1.300166603        | 2               | 5.04541   |
| P21533        | SSITPGTVLIILTGR                                                                    | 1.189019838        | 2               | 3.89176   |
| P21533        | YYPTEDVPR                                                                          | 1.277207978        | 2               | 2.44005   |
| <b>P21571</b> | <b>ATP5J ATP synthase_coupling factor 6_mitochondrial</b>                          | <b>1.099255846</b> | <b>3.51E-12</b> | <b>6</b>  |
| P21571        | FEVLDPKQS                                                                          | 1.116503165        | 2               | 2.93575   |
| P21571        | GEMDKFPTNFEDPKFEVLDPKQS                                                            | 1.108243038        | 3               | 3.93032   |
| P21571        | GEMDKFPTNFEDPKFEVLDPKQS+Oxidation(2)                                               | 0.921148411        |                 |           |
| P21571        | LASGGPVDTGPEYQQEVDR                                                                | 2.339526192        | 2               | 5.28316   |
| P21571        | LASGGPVDTGPEYQQEVDRLEFK                                                            | 1.746409279        | 2               | 2.79989   |
| P21571        | RLASGGPVDTGPEYQQEVDR                                                               | 1.191955919        | 3               | 4.52364   |
| <b>P21643</b> | <b>T23O Tryptophan 2_3_dioxygenase</b>                                             | <b>1.394779991</b> | <b>0.0008</b>   | <b>2</b>  |
| P21643        | GGLIYGDYLQLEK                                                                      | 1.347433037        | 2               | 3.61744   |
| P21643        | ILNAQELQSEIK                                                                       | 1.442069364        | 2               | 3.65297   |
| <b>P21670</b> | <b>PSA4 Proteasome subunit alpha type_4</b>                                        | <b>1.656361573</b> | <b>0.000736</b> | <b>4</b>  |
| P21670        | ATCIGNNSAAAVSMLK                                                                   | 1.595829708        | 2               | 2.81256   |
| P21670        | LLDEVFFSEK                                                                         | 1.610948033        | 2               | 3.59759   |
| P21670        | LNEDMACSVAGITSDANVLTNELR                                                           | 1.3005079          | 3               | 3.44646   |
| P21670        | YLLQYQEPICEQLVLTALCDIK                                                             | 1.210706599        | 2               | 3.04454   |
| <b>P21775</b> | <b>THIKA 3_ketoacyl_CoA thiolase A_peroxisomal</b>                                 | <b>0.724668657</b> | <b>9.9E-20</b>  | <b>2</b>  |
| P21775        | LKPECLGDISVGNVLEPGAGAVMAR                                                          | 0.756200003        | 3               | 5.28748   |
| P21775        | LKPECLGDISVGNVLEPGAGAVMAR+Oxidation(22)                                            | 0.96363961         |                 |           |
| <b>P21913</b> | <b>DHSB Succinate dehydrogenase [ubiquinone] iron_sulfur subunit_mitochondrial</b> | <b>1.360332715</b> | <b>3.28E-10</b> | <b>6</b>  |
| P21913        | CGPMVLDALIKIK                                                                      | 0.725384567        | 2               | 2.4207    |
| P21913        | CHTIMNCTQTCPK                                                                      | 0.894585687        | 2               | 4.31672   |
| P21913        | CHTIMNCTQTCPK+Oxidation(4)                                                         | 1.568667632        |                 |           |
| P21913        | IKNEIDSTLTFR                                                                       | 1.360598567        | 2               | 2.39582   |
| P21913        | LQDPFSLYR                                                                          | 1.635638278        | 2               | 2.75386   |
| P21913        | RIDTDLGK                                                                           | 1.138731993        | 2               | 2.43727   |
| <b>P21981</b> | <b>TGM2 Protein glutamine gamma glutamyltransferase 2</b>                          | <b>1.269043723</b> | <b>0.014809</b> | <b>5</b>  |
| P21981        | CDLEIQANGR                                                                         | 1.045204915        | 2               | 2.99168   |
| P21981        | LVVNFQCDK                                                                          | 1.976999402        | 2               | 2.67616   |
| P21981        | SEGTYCCGPVSVR                                                                      | 1.071319707        | 2               | 3.69447   |
| P21981        | WDNNYGDGISPMAWIGSVDILR                                                             | 1.532449638        | 3               | 4.19784   |
| P21981        | YSGCLTESNLIK                                                                       | 1.279619818        | 2               | 3.56634   |
| <b>P22734</b> | <b>COMT Catechol O_methyltransferase</b>                                           | <b>0.912667239</b> | <b>0.987366</b> | <b>14</b> |
| P22734        | AIYQGPSSPDK                                                                        | 1.349209936        | 2               | 2.36295   |
| P22734        | AIYQGPSSPDKS                                                                       | 0.986667133        | 2               | 3.15082   |
| P22734        | EWAMNVGDAK                                                                         | 0.928817469        | 1               | 2.76925   |
| P22734        | GQIMDAVIR                                                                          | 0.707223488        | 2               | 3.03267   |
| P22734        | GQIMDAVIR+Oxidation(3)                                                             | 1.097704912        |                 |           |
| P22734        | GSSSFECTHYSSYLEYMK                                                                 | 10.01197199        | 2               | 4.56326   |
| P22734        | GTVLLADNVIVPGTPDFLAYVR                                                             | 1.277380402        | 3               | 4.86808   |
| P22734        | KGTVLLADNVIVPGTPDFLAYVR                                                            | 1.246449977        | 2               | 4.68774   |
| P22734        | KYDVDTLDMVFLDHWK                                                                   | 0.87138034         | 3               | 5.63542   |
| P22734        | VTILNGASQDLIPQLK                                                                   | 0.815038322        | 2               | 4.30136   |

|               |                                                               |                    |                 |           |
|---------------|---------------------------------------------------------------|--------------------|-----------------|-----------|
| P22734        | VVDGLEK                                                       | 0.93350772         | 2               | 2.38074   |
| P22734        | YDVTLDMMVFLDHWK                                               | 0.929574028        | 3               | 4.60215   |
| P22734        | YLPDTLLLEK                                                    | 0.745028866        | 2               | 2.91393   |
| P22734        | YVQQNAKPGDPQSVLEAIDTYCTQK                                     | 0.966738512        | 3               | 6.09426   |
| <b>P22789</b> | <b>ST2A2 Alcohol sulfotransferase A</b>                       | <b>0.697184977</b> | <b>0.69204</b>  | <b>4</b>  |
| P22789        | EEDLILLTPK                                                    | 0.843335422        | 2               | 2.59107   |
| P22789        | ETLQNVCK                                                      | 1.378639815        | 1               | 2.01179   |
| P22789        | KLEPDELDELVK                                                  | 0.925832654        | 3               | 4.73012   |
| P22789        | NHFTVAQAEAFDK                                                 | 0.61936031         | 2               | 3.43943   |
| <b>P22791</b> | <b>HMCS2 Hydroxymethylglutaryl_CoA synthase_mitochondrial</b> | <b>1.260671288</b> | <b>9.9E-20</b>  | <b>21</b> |
| P22791        | ASLDMFNK                                                      | 1.047630703        | 2               | 2.46946   |
| P22791        | ASLDMFNKK                                                     | 0.914354233        | 2               | 2.52501   |
| P22791        | DVGILALEVYFPAQYVDQTDLEK                                       | 1.147262173        | 3               | 7.20561   |
| P22791        | GLKLEETYTNK                                                   | 0.936977039        | 2               | 2.78267   |
| P22791        | GTHMENAYDFYKPNLASEYPLVDGK                                     | 0.938290291        | 3               | 7.03403   |
| P22791        | GTHMENAYDFYKPNLASEYPLVDGK+Oxidation(3)                        | 1.204145877        |                 |           |
| P22791        | IGAFSYGSGLAASFFSFR                                            | 1.337318736        | 2               | 3.87921   |
| P22791        | LEETYTNK                                                      | 1.149213069        | 2               | 3.02161   |
| P22791        | LEETYTNKDVK                                                   | 1.220926644        | 2               | 4.10853   |
| P22791        | LEVGTETIIDK                                                   | 1.100647261        | 2               | 3.7338    |
| P22791        | LMFNDFLSSSSDK                                                 | 1.58347167         | 2               | 4.42125   |
| P22791        | LMFNDFLSSSSDK+Oxidation(1)                                    | 1.822713703        |                 |           |
| P22791        | LSIQCYLR                                                      | 1.999099173        | 2               | 2.317     |
| P22791        | LVSSVSDLPK                                                    | 1.275073151        | 2               | 3.49174   |
| P22791        | MGFCSVQEDINSLCLTVVQR                                          | 1.557541622        | 3               | 3.4932    |
| P22791        | MSPEEFTEIMNQR                                                 | 0.946690141        | 2               | 4.65685   |
| P22791        | MSPEEFTEIMNQR+Oxidation(0)                                    | 1.101088948        |                 |           |
| P22791        | MSPEEFTEIMNQR+Oxidation(9)                                    | 1.181356716        |                 |           |
| P22791        | TKLPWDAVGR                                                    | 1.113635708        | 3               | 3.95093   |
| P22791        | VNFSPPGDTSNLFPGTWYLER                                         | 1.236611261        | 2               | 5.05322   |
| P22791        | YTVGLGQTR                                                     | 1.088096338        | 2               | 3.33588   |
| <b>P22985</b> | <b>XDH Xanthine dehydrogenase/oxidase</b>                     | <b>1.32479003</b>  | <b>9.9E-20</b>  | <b>10</b> |
| P22985        | DEVTCVGHIGAVVADTPEHAQR                                        | 1.141669087        | 3               | 3.84866   |
| P22985        | DPPANVQLFQEVPK                                                | 1.467764679        | 2               | 3.8434    |
| P22985        | DQTVLSLSPSLFNPEDFKPLDPTQEIPPELLR                              | 1.126268872        | 3               | 3.38911   |
| P22985        | LDPTFASATLLFQK                                                | 1.618796843        | 2               | 4.01857   |
| P22985        | NQPEPTVEEIEENAFQGNLCR                                         | 0.81697529         | 2               | 4.71336   |
| P22985        | QLFQLDSPATPEK                                                 | 1.026873296        | 2               | 3.20528   |
| P22985        | SVASIGGNIITASPIDLNPFVFMASGAK                                  | 1.35509128         | 3               | 5.76832   |
| P22985        | TGTVVALEVAHFSNGGNTEDLSR                                       | 1.147640279        | 3               | 4.62415   |
| P22985        | TLLRPEEILLSIEIPYSK                                            | 1.373370612        | 3               | 4.05062   |
| P22985        | TNLPSENTAFR                                                   | 0.824943261        | 1               | 2.25897   |
| <b>P23358</b> | <b>RL12 60S ribosomal protein L12</b>                         | <b>1.108820957</b> | <b>0.048484</b> | <b>7</b>  |
| P23358        | CTGGEVGATSALAPK                                               | 1.125314878        | 2               | 4.08388   |
| P23358        | EILGTAQSVGCNVDR                                               | 1.414886801        | 2               | 4.43733   |
| P23358        | HNGNITFDEIVNIAR                                               | 1.124850855        | 2               | 4.24865   |
| P23358        | HPHDIIDDINSGAVECPAS                                           | 1.013939083        | 2               | 4.8391    |
| P23358        | IGPLGLSPK                                                     | 1.490418583        | 2               | 2.53966   |
| P23358        | QAQIEVVPSASALIK                                               | 1.383604281        | 2               | 3.87642   |
| P23358        | VGDDIAKATGDWKGRL                                              | 0.938537663        | 2               | 2.41216   |
| <b>P23457</b> | <b>DIDH 3_alpha_hydroxysteroid dehydrogenase</b>              | <b>4.943423064</b> | <b>9.9E-20</b>  | <b>10</b> |
| P23457        | ALDGLNR                                                       | 1.131631023        | 2               | 2.55724   |
| P23457        | ELTQVFEFLASEDMK                                               | 1.385477256        | 2               | 3.29004   |
| P23457        | HFDSAYLYEVEEVEGQAIR                                           | 3.683268832        | 2               | 6.1665    |
| P23457        | MLDYCK                                                        | 1.036521724        | 1               | 1.97467   |
| P23457        | SIGVSNFNCR                                                    | 1.176188493        | 2               | 3.29078   |

|               |                                                        |                    |                 |           |
|---------------|--------------------------------------------------------|--------------------|-----------------|-----------|
| P23457        | SKDIILVSYCTLGSSR                                       | 1.599379637        | 2               | 5.06627   |
| P23457        | SPVLLDDPVLCIAIAK                                       | 2.771584797        | 2               | 3.92564   |
| P23457        | VALNDGNFIPVLGFGTTVPEK                                  | 2.000437819        | 2               | 5.18625   |
| P23457        | YFDDHPNHPFTDE                                          | 1.97376703         | 2               | 3.74518   |
| P23457        | YKPVCNQVECHLYLNQSK                                     | 5.479153618        | 2               | 4.67289   |
| <b>P23514</b> | <b>COPB Coatomer subunit beta</b>                      | <b>1.066053945</b> | <b>0.002993</b> | <b>7</b>  |
| P23514        | EAGELKPEEEITVGPVQK                                     | 1.180025405        | 2               | 4.33807   |
| P23514        | EDIQSVMTVEVR                                           | 1.021180431        | 2               | 2.94185   |
| P23514        | NFENLIPDAPELIHDFLVNEK                                  | 1.121105474        | 3               | 4.01721   |
| P23514        | TNNVSEHEDTDKYR                                         | 1.262186452        | 3               | 4.12795   |
| P23514        | VLQDLVMDILR                                            | 1.016020465        | 2               | 3.61853   |
| P23514        | VLSECSPLMNDIFNK                                        | 0.81928935         | 2               | 2.66712   |
| P23514        | YEAAGTLVTLSSAPTAIK                                     | 1.653500274        | 2               | 4.9897    |
| <b>P23965</b> | <b>ECI1 Enoyl_CoA delta isomerase 1_ mitochondrial</b> | <b>1.071193009</b> | <b>0.996054</b> | <b>8</b>  |
| P23965        | ALQLGTLFPPAEALK                                        | 0.880295462        | 2               | 5.41328   |
| P23965        | AVQELWLR                                               | 0.974206218        | 2               | 2.60382   |
| P23965        | DNYVNTIGHR                                             | 1.166936244        | 2               | 3.03226   |
| P23965        | GVILTSEKPGIFAGLDLMEMYGR                                | 1.05979382         | 3               | 6.20121   |
| P23965        | QREADIQNFTSFISR                                        | 1.219431657        | 2               | 2.70024   |
| P23965        | SLHVYLEK                                               | 1.114145892        | 1               | 2.31278   |
| P23965        | VGLVDEVVPEDQVHSK                                       | 1.013507512        | 2               | 4.73955   |
| P23965        | WFTIPDHSR                                              | 0.899115443        | 2               | 3.19672   |
| <b>P24049</b> | <b>RL17 60S ribosomal protein L17</b>                  | <b>1.055400121</b> | <b>9.28E-09</b> | <b>3</b>  |
| P24049        | EQIVPKPEEEVAQK                                         | 1.46179289         | 2               | 3.54713   |
| P24049        | GLDVDSLVIHQVQNK                                        | 1.105911673        | 2               | 4.68626   |
| P24049        | YSLDPENPTK                                             | 1.0209424          | 1               | 2.7646    |
| <b>P24050</b> | <b>RS5 40S ribosomal protein S5</b>                    | <b>1.233669511</b> | <b>0.001232</b> | <b>4</b>  |
| P24050        | HAFEIHLTGENPLQVLVNAIINSGPR                             | 0.911496467        |                 |           |
| P24050        | RQAVDVSPLR                                             | 1.17957038         | 2               | 2.36416   |
| P24050        | VNQAIWLLCTGAR                                          | 1.328107029        | 2               | 4.11016   |
| P24050        | WSTDDVQINDISLQDYIAVK                                   | 1.487873004        | 2               | 4.76424   |
| <b>P24063</b> | <b>ITAL Integrin alpha_L</b>                           | <b>1.122431026</b> | <b>0.355694</b> | <b>2</b>  |
| P24063        | ASEAQVLVKVDLIHEK                                       | 1.109432001        | 2               | 2.40036   |
| P24063        | DFEKILEFMK                                             | 1.300017901        | 3               | 3.33326   |
| <b>P24090</b> | <b>FETUA Alpha_2_HS glycoprotein</b>                   | <b>0.749071166</b> | <b>9.9E-20</b>  | <b>6</b>  |
| P24090        | AQNVPFVSTLVEFVIAATDCTGQEVTPAK                          | 0.770573072        |                 |           |
| P24090        | ELACDDPETEHVALIADVLYNK                                 | 1.168228602        | 2               | 4.18174   |
| P24090        | HAFSPVASVESASGEVLHSPK                                  | 0.813325409        | 3               | 5.96044   |
| P24090        | LGGEVSVACK                                             | 0.557085879        | 2               | 3.69273   |
| P24090        | VGQPGDAGAAGPVAPLCPGR                                   | 0.539482043        | 2               | 5.08928   |
| P24090        | VLHAQCHSTPDSAEDVRK                                     | 0.811649205        | 3               | 4.00934   |
| <b>P24268</b> | <b>CATD Cathepsin D</b>                                | <b>1.124464024</b> | <b>0.000389</b> | <b>4</b>  |
| P24268        | AIGAVPLIQGEYMIPCEK                                     | 0.970116433        | 2               | 3.47983   |
| P24268        | DPTGQPGGELMLGGTDSR                                     | 0.951859422        | 2               | 4.74685   |
| P24268        | GGCEAIVDTGTSLLVGPVDEVK                                 | 1.258178654        | 2               | 4.07784   |
| P24268        | LGGQNYELHPEK                                           | 1.451734153        | 2               | 2.91175   |
| <b>P24329</b> | <b>THTR Thiosulfate sulfurtransferase</b>              | <b>1.03031041</b>  | <b>3.33E-16</b> | <b>12</b> |
| P24329        | EGHPVTSEPSRPEPAVK                                      | 1.206236705        | 2               | 4.69869   |
| P24329        | FQLVDSR                                                | 1.029970692        | 2               | 2.46603   |
| P24329        | GSVNVPFMNFLETEDGFKEK                                   | 9.062795605        | 2               | 5.2761    |
| P24329        | HVPGASFFDIEECR                                         | 1.313501934        | 3               | 3.61405   |
| P24329        | KVDLSQPLIATCR                                          | 1.101186129        | 2               | 4.78023   |
| P24329        | RFQLVDSR                                               | 1.195018617        | 2               | 2.47442   |
| P24329        | TVSVLNGGFR                                             | 1.023476518        | 2               | 2.88706   |
| P24329        | TYEQVLENLQSK                                           | 1.022612326        | 2               | 5.08563   |
| P24329        | VDLSQPLIATCR                                           | 1.098475245        | 2               | 3.5459    |



|               |                                                   |                    |                 |           |
|---------------|---------------------------------------------------|--------------------|-----------------|-----------|
| P24329        | VLDASWYSPGTR                                      | 0.990946293        | 2               | 3.73506   |
| P24329        | WLAESIR                                           | 1.051750196        | 2               | 2.35928   |
| P24329        | YLGTPQPEPDAVGLDSGHIR                              | 1.06361912         | 3               | 5.05237   |
| <b>P24368</b> | <b>PPIB Peptidyl_prolyl cis_trans isomerase B</b> | <b>1.139334983</b> | <b>0.000138</b> | <b>9</b>  |
| P24368        | DKPLKDVIIVDCGK                                    | 1.114005989        | 2               | 3.64182   |
| P24368        | DTNGSQFFITTVK                                     | 1.323903476        | 2               | 3.58047   |
| P24368        | DVIIVDCGK                                         | 1.173057436        | 1               | 1.99057   |
| P24368        | HYPGWVSMANAGK                                     | 1.008141286        | 2               | 3.235     |
| P24368        | IEVEKPFAIAK                                       | 1.144290292        | 2               | 3.29233   |
| P24368        | IEVEKPFAIAKE                                      | 1.201722924        | 2               | 3.55863   |
| P24368        | TVDNFVALATGK                                      | 1.314324166        | 2               | 3.75557   |
| P24368        | VLEGM DVVR                                        | 1.045446738        | 2               | 2.77542   |
| P24368        | VYFDFQIGDEPVGR                                    | 1.102169251        | 2               | 4.32137   |
| <b>P24457</b> | <b>CP2DB Cytochrome P450 2D11</b>                 | <b>0.937578817</b> | <b>0.902315</b> | <b>2</b>  |
| P24457        | RFSVSTLR                                          | 1.025261049        | 2               | 2.54135   |
| P24457        | SLEEWVTK                                          | 0.910472508        | 2               | 2.75679   |
| <b>P24470</b> | <b>CP2CN Cytochrome P450 2C23</b>                 | <b>0.583177838</b> | <b>9.9E-20</b>  | <b>10</b> |
| P24470        | ACVGESLAR                                         | 0.683381772        | 2               | 2.52792   |
| P24470        | AQPFDPFTILACAPCNVICILFNDR                         | 0.844395076        |                 |           |
| P24470        | DLDIKPITGGIINLPPPYK                               | 0.598774094        | 2               | 3.71758   |
| P24470        | EALLQQGDEFLGR                                     | 0.757905756        | 2               | 2.58123   |
| P24470        | GTTVLPMLSSVMLDQK                                  | 0.633288549        | 2               | 4.00865   |
| P24470        | GYGLIFSNGER                                       | 0.716746139        | 2               | 3.24137   |
| P24470        | IEEEKDNLK                                         | 0.738624315        | 1               | 2.89826   |
| P24470        | LPPGPTPLPIIGNLLQLNLK                              | 0.797642652        | 2               | 3.49408   |
| P24470        | TFLNLM DLLNK                                      | 0.526168582        | 2               | 3.86456   |
| P24470        | YITLLPSSLPHAVVQDTK                                | 0.4881478          | 2               | 3.41202   |
| <b>P24473</b> | <b>GSTK1 Glutathione S transferase kappa 1</b>    | <b>0.754023725</b> | <b>2.2E-14</b>  | <b>9</b>  |
| P24473        | AGMATAQAQHLLNK                                    | 0.977009316        | 2               | 3.91941   |
| P24473        | AGMATAQAQHLLNK+Oxidation(2)                       | 1.124173395        |                 |           |
| P24473        | DEDITESQNILSAAEK                                  | 0.914489499        | 2               | 5.74343   |
| P24473        | DSGNQPPAMVPHK                                     | 0.961322911        | 2               | 2.42016   |
| P24473        | FLTAVSMEQPEMLEK                                   | 0.716402872        | 2               | 4.18837   |
| P24473        | FLTAVSMEQPEMLEK+Oxidation(11)                     | 1.032513506        |                 |           |
| P24473        | MELLAYLLGEK                                       | 1.78608601         | 2               | 4.11004   |
| P24473        | QLFQVPMSVPK                                       | 0.945577108        | 2               | 2.71966   |
| P24473        | YGAFGLPTTVAVHDGK                                  | 1.20621172         | 2               | 3.75922   |
| <b>P25093</b> | <b>FAAA Fumarylacetoacetase</b>                   | <b>1.109736205</b> | <b>9.9E-20</b>  | <b>17</b> |
| P25093        | AIDVGGQQR                                         | 1.077975931        | 2               | 3.40848   |
| P25093        | AQEHIFGMVLMNDWSAR                                 | 1.169546878        | 3               | 3.69363   |
| P25093        | AQEHIFGMVLMNDWSAR+Oxidation(7)                    | 0.191588941        |                 |           |
| P25093        | ASLQNLLSASQAQLR                                   | 0.917661017        | 2               | 4.80208   |
| P25093        | ASLQNLLSASQAQLRDDK                                | 0.83402054         | 2               | 3.14547   |
| P25093        | ASSVVVSGTPIR                                      | 1.085004937        | 2               | 3.59505   |
| P25093        | DIQQWEYVPLGPFLGK                                  | 1.485660947        | 2               | 4.83211   |
| P25093        | FGPIPIPK                                          | 1.066420526        | 2               | 2.87535   |
| P25093        | GEGMSQAATICR                                      | 1.033158627        | 2               | 3.65755   |
| P25093        | GEGMSQAATICR+Oxidation(3)                         | 1.728344222        |                 |           |
| P25093        | GKENALLPNWLHLPVGYHGR                              | 1.962366646        | 3               | 3.47048   |
| P25093        | HFTGPVLSK                                         | 1.143063219        | 1               | 2.70708   |
| P25093        | HQHVFDETTLSFMGLGQAQAWK                            | 1.113899683        | 2               | 5.37469   |
| P25093        | IGVAIGDQJLDLSVIK                                  | 1.615531929        | 2               | 5.41711   |
| P25093        | IGVAIGDQJLDLSVIKHLFTGPVLSK                        | 1.024248148        | 3               | 3.95273   |
| P25093        | TFLLDGDEVIIITGHCGDGYR                             | 0.890999497        | 2               | 5.02797   |
| P25093        | VGFGQCAGK                                         | 1.108153904        | 2               | 2.38556   |
| <b>P25113</b> | <b>PGAM1 Phosphoglycerate mutase 1</b>            | <b>1.09456108</b>  | <b>9.9E-20</b>  | <b>7</b>  |
| P25113        | ALPFWNEEIVPQIK                                    | 2.041917421        | 2               | 3.93666   |

|               |                                                                                      |                    |                 |           |
|---------------|--------------------------------------------------------------------------------------|--------------------|-----------------|-----------|
| P25113        | FSGWYDADLSPAGHEEAK                                                                   | 0.94235131         | 2               | 4.95321   |
| P25113        | HGESAWNLENR                                                                          | 1.183241652        | 2               | 3.73952   |
| P25113        | HLEGLSEEAIMELNLTGPIVYELDK                                                            | 1.111940398        | 3               | 3.46314   |
| P25113        | SYDVPPPPMEPDHPFYSNISK                                                                | 1.323021514        | 2               | 4.31829   |
| P25113        | YADLTEDQLPSCESLK                                                                     | 1.21402303         | 2               | 5.49034   |
| P25113        | YADLTEDQLPSCESLKDITAR                                                                | 1.061310151        | 2               | 5.01762   |
| <b>P25235</b> | <b>RPN2 Dolichyl_diphosphooligosaccharide__protein glycosyltransferase subunit 2</b> | <b>1.118479758</b> | <b>9.9E-20</b>  | <b>14</b> |
| P25235        | DLLLAAVSESSVAQIYHAVAALSGFGLPLASHEALGALTAR                                            | 1.696288001        |                 |           |
| P25235        | EDQVIQLMNTIFSK                                                                       | 2.334843058        | 2               | 2.39476   |
| P25235        | EETVLATVQALHTASHLSQQADLR                                                             | 1.099182293        | 3               | 4.31323   |
| P25235        | FELDTSER                                                                             | 1.005464437        | 1               | 2.04854   |
| P25235        | FPEEEAPSTVLSQNLFTP                                                                   | 0.846528721        | 2               | 4.25804   |
| P25235        | ISTEVGITNVDLSTVDKQSIAPK                                                              | 1.156764817        | 2               | 4.52349   |
| P25235        | LQVSSVLSQPLAQAQAVK                                                                   | 1.43569606         | 2               | 5.72784   |
| P25235        | LSKEETVLATVQALHTASHLSQQADLR                                                          | 0.955131898        | 3               | 4.53629   |
| P25235        | NFESLSEAFSVASAAAALSQNR                                                               | 1.205098317        | 3               | 5.48058   |
| P25235        | NIVEEIEDLVAR                                                                         | 1.1259139          | 3               | 4.68362   |
| P25235        | NPILWNVADVVIK                                                                        | 1.353709883        | 2               | 3.2691    |
| P25235        | TGQEVVFAEPDNK                                                                        | 2.541222637        | 2               | 3.90921   |
| P25235        | YHVPVVVPEGSASDTQEAILR                                                                | 1.283338675        | 3               | 6.53153   |
| P25235        | YIANTVELR                                                                            | 1.098392187        | 2               | 2.58793   |
| <b>P25409</b> | <b>ALAT1 Alanine aminotransferase 1</b>                                              | <b>5.036209807</b> | <b>4.79E-13</b> | <b>2</b>  |
| P25409        | LTEQVFNEAPGIR                                                                        | 3.781844008        | 2               | 3.48034   |
| P25409        | VLCVINPGNPTGQVQTR                                                                    | 9.333101519        | 2               | 4.63989   |
| <b>P25977</b> | <b>UBF1 Nucleolar transcription factor 1</b>                                         | <b>1.072911087</b> | <b>0.883958</b> | <b>2</b>  |
| P25977        | AKYAKLHPEMSNDLTK                                                                     | 1.072995221        | 2               | 2.33606   |
| P25977        | ALKAMEMTWNNMEKK+Oxidation(11)                                                        | 0.994301647        |                 |           |
| <b>P26039</b> | <b>TLN1 Talin_1</b>                                                                  | <b>0.981033453</b> | <b>1.16E-11</b> | <b>22</b> |
| P26039        | ADAEGESDLENSR                                                                        | 1.028733437        | 2               | 2.89525   |
| P26039        | ADAEGESDLENSRK                                                                       | 1.005626325        | 2               | 3.19011   |
| P26039        | AGALQCSPSDVYTK                                                                       | 1.101938773        | 2               | 2.65585   |
| P26039        | ASAGPQPLLVSCK                                                                        | 0.946409365        | 2               | 3.024     |
| P26039        | AVAEQIPLLQGV                                                                         | 0.862476179        | 2               | 3.55528   |
| P26039        | EAAEGLRMAATNAAQNAIKK                                                                 | 0.861645462        | 2               | 2.73761   |
| P26039        | ELMEKKDEGTGLR+Oxidation(2)                                                           | 1.392997292        |                 |           |
| P26039        | GTEWVDPEDPTVIAENELLGAAAAIEAAK                                                        | 0.76269553         |                 |           |
| P26039        | GVGAAATAVTQALNELLQHVK                                                                | 0.799429584        | 3               | 3.59189   |
| P26039        | ILAQATSDLVNAIK                                                                       | 1.706297405        | 2               | 2.62395   |
| P26039        | LGAASLGAEDPETQVVLINAVK                                                               | 1.522199849        | 2               | 4.41286   |
| P26039        | LLGEIAQGNENYAGIAR                                                                    | 1.284762865        | 2               | 4.27511   |
| P26039        | LNEAAAGLNQAATELVQASR                                                                 | 0.865042774        | 2               | 5.2389    |
| P26039        | MVAAATNNLCEAANAQVGHASQEK                                                             | 0.988037108        | 3               | 3.43219   |
| P26039        | SNTSPEELGPLANQLTSDYGR                                                                | 0.984675442        | 2               | 4.01423   |
| P26039        | TLAESALQLLYTAK                                                                       | 1.159786911        | 2               | 2.98872   |
| P26039        | TMLESAGGLIQTAR                                                                       | 0.512895482        | 2               | 2.63155   |
| P26039        | VGAIPANALDDGQWSQGLISAAR                                                              | 0.929716806        | 2               | 4.5172    |
| P26039        | VGDDPAVWQLK                                                                          | 1.430026994        | 2               | 2.83443   |
| P26039        | VLGEAMTGISQNAK                                                                       | 0.788163975        | 2               | 2.79163   |
| P26039        | VLVQNAAGSQEK                                                                         | 0.992482061        | 2               | 2.51423   |
| P26039        | VVAPTISPVCQEQLVEAGR                                                                  | 0.818363454        | 2               | 4.49232   |
| <b>P26043</b> | <b>RADI Radixin</b>                                                                  | <b>1.095838324</b> | <b>0.646099</b> | <b>10</b> |
| P26043        | AFAAQEDLEK                                                                           | 1.461374718        | 2               | 2.55851   |
| P26043        | ALELEQER                                                                             | 0.936823133        | 1               | 1.92713   |
| P26043        | FFPEDVSEELIQEITQR                                                                    | 1.130202285        | 3               | 4.64156   |

|               |                                                                                          |                    |                 |           |
|---------------|------------------------------------------------------------------------------------------|--------------------|-----------------|-----------|
| P26043        | IQNWHEEHR                                                                                | 0.741091114        | 2               | 2.51229   |
| P26043        | KKEEEATEWQHK                                                                             | 0.851406545        | 3               | 3.73676   |
| P26043        | KTQNDVLHAENVK                                                                            | 1.080204958        | 2               | 5.05087   |
| P26043        | NQEQLAAELAEFTAK                                                                          | 1.077016938        | 2               | 5.10275   |
| P26043        | QLQALSSELAQAR                                                                            | 0.988363672        | 2               | 3.75712   |
| P26043        | RKPDITIEVQQMK                                                                            | 0.828975797        | 2               | 3.86877   |
| P26043        | TQNDVLHAENVK                                                                             | 1.166051118        | 2               | 3.94239   |
| <b>P26231</b> | <b>CTNA1 Catenin alpha_1</b>                                                             | <b>0.981181148</b> | <b>0.001317</b> | <b>10</b> |
| P26231        | AEVQNLGGELVSGVDSAMSLIQAQK                                                                | 1.050317231        | 3               | 4.15602   |
| P26231        | AHVLAASVEQATENFLEK                                                                       | 0.65363364         | 2               | 2.36008   |
| P26231        | AVMDHVSDFSLETNPVLLVLEAAK                                                                 | 1.205451209        | 3               | 3.53748   |
| P26231        | LIEVANLACISNNEEGVK                                                                       | 0.974464834        | 2               | 4.89412   |
| P26231        | LLEPLVTQVTTLVNTNSK                                                                       | 1.033009067        | 2               | 4.01149   |
| P26231        | QIIVDPLSFSEER                                                                            | 1.213133103        | 2               | 2.68353   |
| P26231        | SAAGEFADDPCCSVK                                                                          | 1.238249182        | 2               | 4.05216   |
| P26231        | SDALNSAIDK                                                                               | 1.265299217        | 2               | 2.52139   |
| P26231        | TIADHCPDSACK                                                                             | 0.688648569        | 2               | 3.55932   |
| P26231        | VIHVVTSEMDNYEPGVYTEK                                                                     | 1.053461811        | 3               | 3.5537    |
| <b>P26284</b> | <b>ODPA Pyruvate dehydrogenase E1 component subunit alpha_somatic form_mitochondrial</b> | <b>1.051461478</b> | <b>0.969915</b> | <b>8</b>  |
| P26284        | AILAELTGR                                                                                | 0.972291069        | 2               | 2.57255   |
| P26284        | EEIQEVRSK                                                                                | 0.672532097        | 1               | 1.93439   |
| P26284        | GFCHLCDGQEACCVGLEAGINPTDHLITAYR                                                          | 0.992455674        | 3               | 6.63232   |
| P26284        | LEEGPPVTVLTR                                                                             | 0.943618114        | 2               | 3.48645   |
| P26284        | MVNSNLASVEELKEIDVEVR                                                                     | 0.539919468        | 2               | 3.00551   |
| P26284        | RGDFIPGLR                                                                                | 1.129285772        | 2               | 2.70851   |
| P26284        | TREEIQEVR                                                                                | 1.063407655        | 3               | 3.48957   |
| P26284        | VDGMDILCVR                                                                               | 0.893576355        | 2               | 3.33708   |
| <b>P26453</b> | <b>BASI Basigin</b>                                                                      | <b>1.108383304</b> | <b>0.103231</b> | <b>7</b>  |
| P26453        | GNINVEGPPR                                                                               | 1.160013335        | 2               | 3.46956   |
| P26453        | KSEHASEGEFVK                                                                             | 1.157163042        | 2               | 2.86426   |
| P26453        | RKPDQTLDEDDPGAAPLK                                                                       | 1.221326897        | 3               | 4.14947   |
| P26453        | SEASHPPVDEWVWFK                                                                          | 1.015823687        | 3               | 3.92652   |
| P26453        | SEHASEGEFVK                                                                              | 1.235886162        | 3               | 3.544     |
| P26453        | SGEYSCIFLPEPVGR                                                                          | 1.078735925        | 2               | 3.46389   |
| P26453        | VLQEDTLPDLQMK                                                                            | 0.892285372        | 2               | 4.35323   |
| <b>P26772</b> | <b>CH10 10 kDa heat shock protein_mitochondrial</b>                                      | <b>1.202958931</b> | <b>0.918987</b> | <b>7</b>  |
| P26772        | GGEIQPVSVK                                                                               | 1.05835306         | 2               | 3.26005   |
| P26772        | GGIMLPEK                                                                                 | 0.814851031        | 2               | 2.33097   |
| P26772        | GGIMLPEK+Oxidation(3)                                                                    | 1.397032779        |                 |           |
| P26772        | GKGGEIQPVSVK                                                                             | 0.920509083        | 2               | 3.3996    |
| P26772        | VLLPEYGGTK                                                                               | 1.14170716         | 2               | 2.3673    |
| P26772        | VLQATVVAVGSGGK                                                                           | 1.082673404        | 2               | 5.5117    |
| P26772        | VVLDDKDYFLFR                                                                             | 1.0985239          | 3               | 3.40381   |
| <b>P27139</b> | <b>CAH2 Carbonic anhydrase 2</b>                                                         | <b>0.842844217</b> | <b>0.587593</b> | <b>2</b>  |
| P27139        | IGPASQGLQK                                                                               | 0.818693963        | 2               | 2.5416    |
| P27139        | ITEALHSIK                                                                                | 0.845206998        | 2               | 2.42686   |
| <b>P27321</b> | <b>ICAL Calpastatin</b>                                                                  | <b>0.835281055</b> | <b>8.99E-13</b> | <b>4</b>  |
| P27321        | KGSDEVTASSAATGTSPR                                                                       | 0.825667494        | 2               | 4.84253   |
| P27321        | KVEEEVMNDQALQALSDSLGTR                                                                   | 0.741471817        | 3               | 3.57108   |
| P27321        | LSAAVSETVSQVPAPSNTAAPPPTER                                                               | 1.262297393        | 3               | 4.18231   |
| P27321        | SQSSEPPVIHEK                                                                             | 0.430020555        | 2               | 3.22608   |
| <b>P27364</b> | <b>3BHS5 3 beta_hydroxysteroid dehydrogenase type 5</b>                                  | <b>1.083510505</b> | <b>0.988885</b> | <b>6</b>  |
| P27364        | AVLAANGSILK                                                                              | 1.107820818        | 2               | 2.89152   |
| P27364        | ETILNDREEEHR                                                                             | 1.245273315        | 2               | 2.92085   |

|               |                                                            |                    |                 |           |
|---------------|------------------------------------------------------------|--------------------|-----------------|-----------|
| P27364        | GDIVDAQFLR                                                 | 1.041670253        | 2               | 2.99304   |
| P27364        | IVQMLVQEK                                                  | 1.319263261        | 2               | 2.66071   |
| P27364        | NGGTFHTCALR                                                | 1.010318994        | 2               | 3.07916   |
| P27364        | QTILDVNVK                                                  | 0.973695144        | 1               | 2.10536   |
| <b>P27605</b> | <b>HPRT Hypoxanthine_guanine phosphoribosyltransferase</b> | <b>0.924061891</b> | <b>0.000267</b> | <b>6</b>  |
| P27605        | DLNHVCVISESGK                                              | 1.260375037        | 2               | 3.69239   |
| P27605        | FFADLLDYIK                                                 | 1.268175403        | 2               | 3.1946    |
| P27605        | NVLIVEDIIDTGK                                              | 1.209624298        | 2               | 4.10506   |
| P27605        | SVGYRPDFVGFEPDK                                            | 0.930141848        | 3               | 3.80948   |
| P27605        | SYCNDQSTGDIK                                               | 1.273956401        | 2               | 3.96122   |
| P27605        | VIGDDLSTLTGK                                               | 1.174133518        | 2               | 4.22319   |
| <b>P27653</b> | <b>C1TC C_1_tetrahydrofolate synthase_cytoplasmic</b>      | <b>1.55640674</b>  | <b>9.9E-20</b>  | <b>21</b> |
| P27653        | ASQAPSSFQLLYDLK                                            | 1.85660266         | 2               | 4.17405   |
| P27653        | AYTEEDLDLVEK                                               | 1.126001939        | 2               | 3.02899   |
| P27653        | CTHWAEGGQALALAAQAVQR                                       | 1.13168488         | 2               | 5.19674   |
| P27653        | DVDGLTSINAGK                                               | 1.004553714        | 2               | 2.43333   |
| P27653        | GEWIKPGAVVIDCGINYPDDTKPNGR                                 | 1.055254075        | 3               | 5.08474   |
| P27653        | GVPTGFVLPPIR                                               | 1.688359707        | 2               | 2.52821   |
| P27653        | IFHELTQTDK                                                 | 1.357019508        | 3               | 3.61386   |
| P27653        | IYGADDIELLPEAQNK                                           | 1.399975681        | 2               | 5.28841   |
| P27653        | KITIGQAPTEK                                                | 1.749552284        | 2               | 2.91144   |
| P27653        | KVVGDVAYDEAK                                               | 1.706364735        | 2               | 3.88691   |
| P27653        | LDIDPETITWQR                                               | 1.314023268        | 2               | 4.084     |
| P27653        | MHGGGPTVTAGLPLPK+Oxidation(0)                              | 1.533765021        |                 |           |
| P27653        | QGFGNLPICMAK                                               | 0.942411115        | 2               | 3.16281   |
| P27653        | TADLDKEVVK                                                 | 1.569590047        | 2               | 2.40063   |
| P27653        | TADLDKEVVKGDILVVATGQPEMVK                                  | 1.108813402        | 3               | 4.61196   |
| P27653        | TDPAALTDDEINR                                              | 1.287024219        | 2               | 4.37969   |
| P27653        | THLSLSHNPEQK                                               | 1.398411664        | 2               | 3.83261   |
| P27653        | VLLSALDR                                                   | 1.549573996        | 2               | 2.47687   |
| P27653        | VVGDVAYDEAK                                                | 1.449932896        | 2               | 3.72781   |
| P27653        | YSQLQPHVVVLVATVR                                           | 2.400753642        | 3               | 3.52075   |
| P27653        | YVVVTGITPTPLGEGK                                           | 1.422147792        | 2               | 4.88205   |
| <b>P27657</b> | <b>LIPP Pancreatic triacylglycerol lipase</b>              | <b>0.738851755</b> | <b>0.129291</b> | <b>2</b>  |
| P27657        | ATYTQATQNVK                                                | 0.472238113        | 2               | 2.52048   |
| P27657        | ITGLDAAEPYFQGTPEEVR                                        | 0.293134274        | 2               | 3.88848   |
| <b>P27661</b> | <b>H2AX Histone H2A.x</b>                                  | <b>1.256704126</b> | <b>0.999674</b> | <b>3</b>  |
| P27661        | AGLQFPVGR                                                  | 0.993742237        | 2               | 3.19305   |
| P27661        | HLQLAIR                                                    | 0.999146568        | 2               | 2.64228   |
| P27661        | LLGGVTIAQGGVLPNIQAVLLPK                                    | 1.106964536        | 3               | 4.71706   |
| <b>P27768</b> | <b>TNNI2 Troponin I_fast skeletal muscle</b>               | <b>0.443320035</b> | <b>0.408236</b> | <b>3</b>  |
| P27768        | IDAAEEKYDMEVK                                              | 0.25891202         | 2               | 3.71615   |
| P27768        | SVMLQIAATELEK                                              | 0.854565256        | 2               | 2.52984   |
| P27768        | SVMLQIAATELEKEESR                                          | 0.646061144        | 2               | 3.10514   |
| <b>P27867</b> | <b>DHSO Sorbitol dehydrogenase</b>                         | <b>0.965446695</b> | <b>1.45E-10</b> | <b>14</b> |
| P27867        | AMGASQVVVIDLSASR                                           | 0.8358365          | 2               | 4.03758   |
| P27867        | AVEAFETAK                                                  | 0.94128947         | 2               | 2.99051   |
| P27867        | EVGADFTIQVAK                                               | 1.013299724        | 2               | 2.78149   |
| P27867        | GENLSLVVHGPDIR                                             | 0.975212614        | 2               | 3.97393   |
| P27867        | HSADFCYK                                                   | 0.984808661        | 2               | 2.81402   |
| P27867        | IGDFVVK                                                    | 0.948059112        | 2               | 2.62791   |
| P27867        | LENYPIPELGPNDVLLK                                          | 0.990643094        | 2               | 4.79278   |
| P27867        | LPDSVTFEEGALIEPLSVGIYACR                                   | 1.114643841        | 2               | 4.75096   |
| P27867        | MHSVIGCGSDVHYWEHGR+Oxidation(0)                            | 1.145933951        |                 |           |
| P27867        | TLNVKPLVTHR                                                | 0.956333912        | 2               | 3.25948   |

|               |                                                                |                    |                 |           |
|---------------|----------------------------------------------------------------|--------------------|-----------------|-----------|
| P27867        | VAIEPGVPR                                                      | 1.470945799        | 2               | 2.58542   |
| P27867        | VAIEPGVPREIDFCKIGR                                             | 0.770932617        | 2               | 2.54557   |
| P27867        | VLVCGAGPIGIVTLLVAK                                             | 1.159371099        | 3               | 6.22644   |
| P27867        | YNLTPSIFFCATPPDDGNLCR                                          | 2.977344105        | 2               | 4.20319   |
| <b>P27952</b> | <b>RS2 40S ribosomal protein S2</b>                            | <b>1.177752904</b> | <b>0.317749</b> | <b>7</b>  |
| P27952        | AEDKEWIPVTK                                                    | 1.201587222        | 2               | 3.2127    |
| P27952        | AFVAIGDYNGHVGLGVK                                              | 1.354857991        | 2               | 3.78808   |
| P27952        | ATFDAISK                                                       | 1.155458704        | 2               | 2.44485   |
| P27952        | GCTATLGNFAK                                                    | 1.227728226        | 2               | 2.84033   |
| P27952        | GTGIVSAPVPK                                                    | 1.212020345        | 2               | 2.44934   |
| P27952        | SLEEIYLFSLPIK                                                  | 0.821699855        | 1               | 2.7123    |
| P27952        | TYSYLPDLWK                                                     | 1.095021443        | 2               | 2.70653   |
| <b>P28037</b> | <b>AL1L1 Cytosolic 10_formyltetrahydrofolate dehydrogenase</b> | <b>0.915736489</b> | <b>0.059894</b> | <b>26</b> |
| P28037        | ADPLGLEAEK                                                     | 1.040276829        | 2               | 2.82221   |
| P28037        | ANATEFGLASGVFTR                                                | 1.031962561        | 2               | 4.44467   |
| P28037        | AVQMGMSSVFFNK                                                  | 1.024965762        | 2               | 3.51173   |
| P28037        | CPQSEEGATYEGIQK                                                | 1.431139577        | 2               | 4.31461   |
| P28037        | DLGEAALNEYLR                                                   | 1.152842955        | 2               | 3.28883   |
| P28037        | ECEVLDDTVSTLYNR                                                | 1.006711146        | 2               | 5.00712   |
| P28037        | EGHEVVGVTIPDKDGK                                               | 1.050216563        | 2               | 4.51124   |
| P28037        | GNDKVPGAWTEACGQK                                               | 0.896333561        | 2               | 3.53697   |
| P28037        | GQALPEVVAK                                                     | 0.918446074        | 2               | 2.59633   |
| P28037        | GSASSDLELTAELATAEAVR                                           | 0.899811811        | 2               | 6.29668   |
| P28037        | GVVNILPGSGSLVGQR                                               | 0.908668751        | 2               | 4.94424   |
| P28037        | IGFTGSTEVGK                                                    | 1.240464524        | 2               | 3.11039   |
| P28037        | ILPNVPEVEDSTDFK                                                | 1.212955138        | 2               | 3.69114   |
| P28037        | INWDQPAEAIHNWIR                                                | 0.916458666        | 2               | 3.67751   |
| P28037        | KEGHEVVGVTIPDKDGK                                              | 0.998609179        | 3               | 3.48272   |
| P28037        | KIGFTGSTEVGK                                                   | 0.783279931        | 2               | 2.9508    |
| P28037        | KLVEYCQR                                                       | 1.365660598        | 2               | 2.53558   |
| P28037        | LFVEESIHNQFVQK                                                 | 0.932386323        | 2               | 4.59886   |
| P28037        | LIAEGTAPR                                                      | 1.021380344        | 2               | 3.13468   |
| P28037        | LQAGTVFINTYNK                                                  | 1.888010153        | 2               | 2.50769   |
| P28037        | LSDHPDVR                                                       | 0.911481743        | 1               | 2.09918   |
| P28037        | NIQLEDGK                                                       | 1.084974624        | 1               | 1.99802   |
| P28037        | TAACLAAGNTVVIKPAQVPLTALK                                       | 1.05375164         | 3               | 4.42601   |
| P28037        | TDVAAPFGGFK                                                    | 0.909670567        | 2               | 2.7197    |
| P28037        | TYNTINPTDGSVICQVSLAQVSDVDK                                     | 1.003354728        | 3               | 6.58631   |
| P28037        | VVEEVEK                                                        | 1.110737237        | 2               | 2.47846   |
| <b>P28064</b> | <b>PSB8 Proteasome subunit beta type_8</b>                     | <b>1.243193037</b> | <b>0.975496</b> | <b>3</b>  |
| P28064        | ASAGSYIATIR                                                    | 1.219763342        | 2               | 2.52747   |
| P28064        | QDLSPEEAYDLAR                                                  | 0.888278938        | 2               | 3.1169    |
| P28064        | VESTDVS DLLHK                                                  | 0.956414394        | 2               | 2.90187   |
| <b>P28480</b> | <b>TCPA T_complex protein 1 subunit alpha</b>                  | <b>1.317524541</b> | <b>0.009759</b> | <b>10</b> |
| P28480        | AFHNEAQVNPER                                                   | 1.357803385        | 2               | 3.41981   |
| P28480        | FATEAAITILR                                                    | 0.969782093        | 2               | 3.26035   |
| P28480        | HGGYENAVHSGALDD                                                | 1.344152286        | 2               | 4.22873   |
| P28480        | ICDDELILIK                                                     | 0.903422424        | 2               | 3.17002   |
| P28480        | LLEVEHPAAK                                                     | 0.988026426        | 2               | 2.39514   |
| P28480        | MLVDDIGDVTITNDGATILK                                           | 1.170146396        | 2               | 4.33841   |
| P28480        | SLHDALCVVK                                                     | 0.918721317        | 2               | 2.45545   |
| P28480        | SLLVIPNTLAVNAAQDSTDLVAK                                        | 1.103600318        | 2               | 4.63755   |
| P28480        | SQNVMAAASIANIVK                                                | 0.963679792        | 2               | 4.02261   |
| P28480        | YINENLIINTDELGR                                                | 0.913941378        | 2               | 4.48454   |
| <b>P28492</b> | <b>GLSL Glutaminase liver isoform_mitochondrial</b>            | <b>0.902965769</b> | <b>0.984144</b> | <b>3</b>  |
| P28492        | MVQESSGGLLDR                                                   | 0.991190039        | 2               | 3.222     |

|               |                                                               |                    |                 |           |
|---------------|---------------------------------------------------------------|--------------------|-----------------|-----------|
| P28492        | SNPDLWGVSLCTVDGQR                                             | 0.885726002        | 2               | 3.15511   |
| P28492        | TALHVAAAEGHIDVVK                                              | 0.985295328        | 3               | 3.5419    |
| <b>P28650</b> | <b>PURA1 Adenylosuccinate synthetase isozyme 1</b>            | <b>0.717797367</b> | <b>0.006552</b> | <b>3</b>  |
| P28650        | CQGGNNAGHTVVVDGK                                              | 0.523382952        | 2               | 3.70611   |
| P28650        | LDILDVLEIK                                                    | 0.666057417        | 2               | 3.15351   |
| P28650        | VGIGAFPTEQINEIGDLLQNR                                         | 0.963950745        | 3               | 3.8037    |
| <b>P29147</b> | <b>BDH D_beta_hydroxybutyrate dehydrogenase_mitochondrial</b> | <b>1.145809554</b> | <b>9.9E-20</b>  | <b>20</b> |
| P29147        | AVLVTGCDSGFGFLAK                                              | 0.939095398        | 2               | 5.71408   |
| P29147        | EVAEVLWGTVR                                                   | 1.125134366        | 2               | 2.75499   |
| P29147        | FGVEAFSDCLR                                                   | 1.328997356        | 2               | 3.7066    |
| P29147        | GFLVFAGCLLK                                                   | 1.704012183        | 2               | 3.48083   |
| P29147        | KMWDELPEVVR                                                   | 1.013716067        | 2               | 2.84792   |
| P29147        | KMWDELPEVVR+Oxidation(1)                                      | 1.094406383        |                 |           |
| P29147        | METCYNSGSTDSSVINAVTHALTAATPYTR                                | 2.522632588        | 3               | 5.4494    |
| P29147        | METCYNSGSTDSSVINAVTHALTAATPYTR+Oxidation(0)                   | 2.255727659        |                 |           |
| P29147        | MQVMTHFPGAISDK                                                | 1.247490366        | 2               | 4.57856   |
| P29147        | MQVMTHFPGAISDK+Oxidation(0)                                   | 1.290040093        |                 |           |
| P29147        | MQVMTHFPGAISDK+Oxidation(0)                                   | 1.177866236        |                 |           |
| P29147        | MQVMTHFPGAISDK+Oxidation(3)                                   | 1.422074468        |                 |           |
| P29147        | MWDELPEVVR                                                    | 0.564266843        | 2               | 3.08064   |
| P29147        | MWDELPEVVR+Oxidation(0)                                       | 0.997451213        |                 |           |
| P29147        | TIQLNVCNSEEVEK                                                | 1.02823351         | 2               | 4.44967   |
| P29147        | VSVVEPGNFIAATSLYSER                                           | 1.026673178        | 2               | 6.10183   |
| P29147        | VVNISMLGR                                                     | 1.099191396        | 2               | 3.96177   |
| P29147        | VVNISMLGR+Oxidation(6)                                        | 1.089412289        |                 |           |
| P29147        | YEMHPLGVK                                                     | 0.965326654        | 2               | 2.70385   |
| P29147        | YEMHPLGVK+Oxidation(2)                                        | 1.250567721        |                 |           |
| <b>P29266</b> | <b>3HIDH 3_hydroxyisobutyrate dehydrogenase_mitochondrial</b> | <b>0.998390101</b> | <b>4.59E-05</b> | <b>8</b>  |
| P29266        | DLGLAQDSATSK                                                  | 1.296294979        | 2               | 4.0746    |
| P29266        | EAGEQVASSPADVAEK                                              | 1.154748835        | 2               | 4.74176   |
| P29266        | GSLIDSSTIDPSVSK                                               | 0.858967677        | 2               | 4.76977   |
| P29266        | HGYPLILYDVFPDVCK                                              | 1.109767087        | 2               | 4.99754   |
| P29266        | KGSLIDSSTIDPSVSK                                              | 0.946519636        | 2               | 4.65986   |
| P29266        | MGAVFMDAPVSGGVGAAR                                            | 0.769949214        | 2               | 4.78909   |
| P29266        | MGAVFMDAPVSGGVGAAR+Oxidation(0)                               | 1.164878456        |                 |           |
| P29266        | MGAVFMDAPVSGGVGAAR+Oxidation(5)                               | 1.164878456        |                 |           |
| <b>P29314</b> | <b>RS9 40S ribosomal protein S9</b>                           | <b>1.686369559</b> | <b>1.67E-07</b> | <b>9</b>  |
| P29314        | IEDFLER                                                       | 1.179187979        | 2               | 2.8299    |
| P29314        | IGVLDEGK                                                      | 1.043342424        | 2               | 2.39505   |
| P29314        | KGQGGAGAGDDEEED                                               | 3.142467519        | 2               | 4.17577   |
| P29314        | LDYILGLK                                                      | 1.205060293        | 2               | 2.5478    |
| P29314        | LFEGNALLR                                                     | 1.198016953        | 2               | 2.62933   |
| P29314        | LIGEYGLR                                                      | 1.6974016          | 2               | 2.64659   |
| P29314        | QVVNIPSFIVR                                                   | 0.981896037        | 2               | 2.45419   |
| P29314        | RLQTQVFK                                                      | 0.641956773        | 2               | 2.3014    |
| P29314        | SRLDQELK                                                      | 1.161822125        | 3               | 3.31583   |
| <b>P29315</b> | <b>RINI Ribonuclease inhibitor</b>                            | <b>0.943477061</b> | <b>0.602259</b> | <b>6</b>  |
| P29315        | ASLQELDLGSNK                                                  | 0.56103435         | 2               | 2.82782   |
| P29315        | ELHLNDNPLGDEGLK                                               | 0.853488796        | 2               | 2.9262    |
| P29315        | LDDCGLTEVR                                                    | 0.769173122        | 2               | 2.92679   |
| P29315        | LENCGITSANCK                                                  | 0.943520601        | 2               | 3.33005   |
| P29315        | SAIQANPALTELSLR                                               | 0.977387343        | 2               | 4.59481   |
| P29315        | TNELGDAGVGLVLQGLQNPTCK                                        | 0.916967696        | 2               | 5.28679   |
| <b>P29410</b> | <b>KAD2 Adenylate kinase 2_mitochondrial</b>                  | <b>1.12560595</b>  | <b>1.83E-13</b> | <b>10</b> |

|               |                                                            |                    |                 |           |
|---------------|------------------------------------------------------------|--------------------|-----------------|-----------|
| P29410        | AMVASGSELGK                                                | 1.026231725        | 2               | 2.36165   |
| P29410        | AMVASGSELGKK                                               | 0.98238005         | 2               | 3.13855   |
| P29410        | AVLLGPPGAGK                                                | 1.089368508        | 2               | 2.70927   |
| P29410        | EAMKDDITGEPLIR                                             | 1.526461632        | 2               | 2.72356   |
| P29410        | GIHCAIDASQTPDVVFASILAAFSK                                  | 1.863698976        | 3               | 6.22284   |
| P29410        | LEAYHTQTTPLVEYYR                                           | 1.242871979        | 2               | 5.40082   |
| P29410        | LVSDVMVVELIEK                                              | 1.079287768        | 2               | 4.1433    |
| P29410        | NGFLLDGFPR                                                 | 0.947014649        | 2               | 3.35506   |
| P29410        | NLETPSCK                                                   | 1.013237365        | 2               | 2.34937   |
| P29410        | SYHEEFNPPK                                                 | 0.978435107        | 3               | 3.85659   |
| <b>P29411</b> | <b>KAD3 GTP:AMP phosphotransferase_mitochondrial</b>       | <b>1.033299364</b> | <b>0.527361</b> | <b>8</b>  |
| P29411        | AYEAQTEPVLQYYQK                                            | 1.180418731        | 2               | 4.18317   |
| P29411        | EDDKPETVIK                                                 | 0.790327959        | 2               | 2.63328   |
| P29411        | KGVLETFSGTETNK                                             | 0.841300624        | 2               | 3.05048   |
| P29411        | NLTQCSWLLDGFPR                                             | 0.914786438        | 2               | 3.33923   |
| P29411        | TLPQAEALDR                                                 | 1.065268033        | 2               | 2.33985   |
| P29411        | TVGIDDLTGEPLIQR                                            | 0.753493318        | 2               | 3.35176   |
| P29411        | VYNIEFNPPK                                                 | 0.858847231        | 2               | 3.15534   |
| P29411        | VYQIDTVINLNVPEVIK                                          | 1.010967909        | 2               | 2.66006   |
| <b>P29419</b> | <b>ATP5I ATP synthase subunit e_mitochondrial</b>          | <b>1.274241931</b> | <b>0.357289</b> | <b>2</b>  |
| P29419        | ELAEAEDVSIFK                                               | 1.216268945        | 2               | 3.2978    |
| P29419        | YSALILGMAYGAK                                              | 1.105247821        | 2               | 4.08722   |
| <b>P30009</b> | <b>MARCS Myristoylated alanine_rich C_kinase substrate</b> | <b>0.988450157</b> | <b>0.912252</b> | <b>3</b>  |
| P30009        | AEDGAAPSPSETPK                                             | 0.8975259          | 2               | 3.92432   |
| P30009        | AEEPSEAVGEK                                                | 1.074149986        | 2               | 2.78907   |
| P30009        | GEAAAERPGEAAVASSPSK                                        | 0.982369729        | 2               | 4.5472    |
| <b>P30349</b> | <b>LKHA4 Leukotriene A_4 hydrolase</b>                     | <b>0.906849476</b> | <b>0.521034</b> | <b>4</b>  |
| P30349        | EEDLNSFSIEDLK                                              | 1.653405978        | 2               | 2.66886   |
| P30349        | SLSNVIAHEISHSWTGNLVTNK                                     | 0.709079149        | 3               | 4.17538   |
| P30349        | SSALQWLTPPEQTSVK                                           | 0.952767417        | 2               | 2.99612   |
| P30349        | WEEAIPLALK                                                 | 0.937375828        | 2               | 2.9136    |
| <b>P30427</b> | <b>PLEC Plectin</b>                                        | <b>0.979060823</b> | <b>0.981512</b> | <b>6</b>  |
| P30427        | AQAEAQQPVFNTLR                                             | 1.046340967        | 2               | 2.99436   |
| P30427        | AQVEQELTTLR                                                | 0.991315414        | 2               | 2.51449   |
| P30427        | LLDPEDVDVPQPDEK                                            | 0.919475183        | 2               | 3.72647   |
| P30427        | LQAEVAQKQ                                                  | 1.074215124        | 2               | 2.39863   |
| P30427        | MSAAQALKKGWLYEAGQR+Oxidation(0)                            | 1.080698275        |                 |           |
| P30427        | VLALPEPSPAATLR                                             | 0.928067116        | 2               | 2.78117   |
| <b>P30713</b> | <b>GSTT2 Glutathione S_transferase theta_2</b>             | <b>0.948508332</b> | <b>1.8E-09</b>  | <b>6</b>  |
| P30713        | AQVHEYLGWHADNIR                                            | 1.297204179        | 2               | 4.89856   |
| P30713        | GQHLSEQFSQVNCLK                                            | 1.090321858        | 2               | 4.7949    |
| P30713        | NSMVLALQR                                                  | 0.93151252         | 2               | 2.86899   |
| P30713        | VEAFLGAELCQEAHNPIMSVLGQAAK                                 | 1.54918766         | 3               | 4.2965    |
| P30713        | VLGPLIGVQVPEEK                                             | 0.952301119        | 2               | 3.89721   |
| P30713        | YQVADHWYPADLQAR                                            | 0.79733099         | 2               | 4.86204   |
| <b>P30835</b> | <b>K6PL 6_phosphofructokinase_liver type</b>               | <b>0.93681811</b>  | <b>0.437109</b> | <b>2</b>  |
| P30835        | NEWGSLLEELVK                                               | 0.958498622        | 2               | 3.21228   |
| P30835        | VFANAPDSACVIGLR                                            | 0.353976784        | 2               | 2.40314   |
| <b>P30839</b> | <b>AL3A2 Fatty aldehyde dehydrogenase</b>                  | <b>1.113548506</b> | <b>7.45E-07</b> | <b>10</b> |
| P30839        | DILAAIAADLSK                                               | 1.073618902        | 2               | 3.03041   |
| P30839        | EKDILAAIAADLSK                                             | 1.005812523        | 2               | 4.11587   |
| P30839        | EKPLALYIFSHNNK                                             | 0.913257502        | 2               | 3.13302   |
| P30839        | FDHILYTGNTAVGK                                             | 1.726486218        | 2               | 3.93518   |
| P30839        | HLTPVTLELGGK                                               | 1.003863399        | 3               | 3.3151    |
| P30839        | NVEEAINFINDR                                               | 1.817240472        | 2               | 4.10967   |

|               |                                                         |                    |                 |           |
|---------------|---------------------------------------------------------|--------------------|-----------------|-----------|
| P30839        | QRFDHILYTGNTAVGK                                        | 1.874810105        | 2               | 2.83376   |
| P30839        | VMQEIEIFGPIPIVSVK                                       | 0.78245227         | 2               | 4.42593   |
| P30839        | VMQEIEIFGPIPIVSVK+Oxidation(1)                          | 1.118995435        |                 |           |
| P30839        | YIAPTILTDVDPNSK                                         | 0.989081848        | 2               | 3.86002   |
| <b>P30904</b> | <b>MIF Macrophage migration inhibitory factor</b>       | <b>1.405306983</b> | <b>7.89E-08</b> | <b>2</b>  |
| P30904        | LHISPR                                                  | 0.999517403        | 1               | 2.01816   |
| P30904        | LLCGLLSDR                                               | 1.855014977        | 2               | 2.93486   |
| <b>P30999</b> | <b>CTND1 Catenin delta_1</b>                            | <b>1.180587482</b> | <b>0.883368</b> | <b>3</b>  |
| P30999        | GYELLFQPEVVR                                            | 0.997844038        | 2               | 2.84242   |
| P30999        | QDVYGPQPQVR                                             | 1.180587918        | 2               | 2.43279   |
| P30999        | SQSSHSYDDSTLPLIDR                                       | 1.076699096        | 2               | 2.59485   |
| <b>P31000</b> | <b>VIME Vimentin</b>                                    | <b>1.144115168</b> | <b>6.7E-13</b>  | <b>15</b> |
| P31000        | DGQVINETSQHDDLE                                         | 0.824208636        | 2               | 3.11483   |
| P31000        | FADLSEAANR                                              | 1.206098647        | 2               | 2.84034   |
| P31000        | ILLAELEQLK                                              | 0.815748841        | 2               | 3.22259   |
| P31000        | KLEGEESR                                                | 0.896433887        | 2               | 2.73062   |
| P31000        | KVESLQEEIAFLK                                           | 0.797865278        | 2               | 3.97541   |
| P31000        | LGDLYEEEMR                                              | 0.647249553        | 2               | 2.33645   |
| P31000        | LLEGEESR                                                | 0.846493734        | 2               | 2.74933   |
| P31000        | LQEMLQR                                                 | 0.536835051        | 2               | 2.32855   |
| P31000        | NLQEAEEWYK                                              | 0.716210955        | 2               | 2.81154   |
| P31000        | QDVDNAFLAR                                              | 0.631053095        | 2               | 2.80583   |
| P31000        | QVQSLTCEVDALK                                           | 0.908971595        | 2               | 3.54129   |
| P31000        | RQVDQLTNDK                                              | 0.696145573        | 2               | 2.51681   |
| P31000        | SLYSSSPGGAYVTR                                          | 1.598565944        | 2               | 2.80983   |
| P31000        | TNEKVELQELNDR                                           | 0.893575312        | 2               | 2.83556   |
| P31000        | VELQELNDR                                               | 0.625560376        | 2               | 2.58706   |
| <b>P31044</b> | <b>PEBP1 Phosphatidylethanolamine_binding protein 1</b> | <b>1.035538204</b> | <b>9.9E-20</b>  | <b>7</b>  |
| P31044        | GNDISSGTVLSEYVGSPPK                                     | 1.025811188        | 2               | 6.58127   |
| P31044        | KYHLGAPVAGTCFQAEWDDSVPK                                 | 1.12153684         | 3               | 3.77532   |
| P31044        | LYTLVLTDPDAPSR                                          | 1.51291284         | 2               | 4.26709   |
| P31044        | VDYGGVTVDDELGK                                          | 0.885979736        | 2               | 4.85895   |
| P31044        | VLTPTQVMNRPSISWDGLDPGK                                  | 0.887328635        | 3               | 5.07907   |
| P31044        | YHLGAPVAGTCFQAEWDDSVPK                                  | 2.233888883        | 2               | 5.39831   |
| P31044        | YVWLVEEQEQLNCDEPILSNK                                   | 1.326883441        | 2               | 5.40578   |
| <b>P31210</b> | <b>AK1D1 3_oxo_5_beta_steroid 4_dehydrogenase</b>       | <b>1.753343632</b> | <b>8.51E-08</b> | <b>19</b> |
| P31210        | DELLTSLGK                                               | 1.580361402        | 2               | 2.86239   |
| P31210        | DIEALNK                                                 | 1.41153355         | 1               | 2.46768   |
| P31210        | EEMKDIEALNK                                             | 1.157905857        | 2               | 3.38508   |
| P31210        | ENFQIFDFSLTK                                            | 1.220749099        | 2               | 3.02729   |
| P31210        | HIDGAYVYR                                               | 1.324950569        | 2               | 2.93937   |
| P31210        | IKENFQIFDFSLTK                                          | 2.287756849        | 3               | 4.34678   |
| P31210        | LWSTDHDPEMVRPALER                                       | 1.250239516        | 3               | 3.66817   |
| P31210        | NEHEVGEAIR                                              | 1.143514967        | 2               | 3.07835   |
| P31210        | NPLWVNVSSPPLK                                           | 1.526913266        | 2               | 4.44298   |
| P31210        | NPLWVNVSSPPLKDELLETSLGK                                 | 1.177550079        | 3               | 5.23687   |
| P31210        | QLEVILNKPLGK                                            | 1.285029943        | 2               | 3.38297   |
| P31210        | REEIFYCGK                                               | 1.636623271        | 2               | 3.28525   |
| P31210        | RQLEVILNKPLGK                                           | 1.103742608        | 3               | 3.68069   |
| P31210        | SLGVSFNFR                                               | 0.823623608        | 2               | 2.37678   |
| P31210        | SNLCATWEALEACK                                          | 0.887964939        | 2               | 4.94167   |
| P31210        | SNLCATWEALEACKDAGLVK                                    | 0.77047026         | 2               | 5.14522   |
| P31210        | TAIDEGYR                                                | 1.205900493        | 2               | 2.43693   |
| P31210        | TQAQIVLR                                                | 1.195955033        | 2               | 3.03622   |
| P31210        | YKPVTNQVECHPYFTQTK                                      | 1.568235532        | 2               | 5.77276   |



|               |                                                                                    |                    |                 |           |
|---------------|------------------------------------------------------------------------------------|--------------------|-----------------|-----------|
| <b>P31230</b> | <b>AIMP1 Aminoacyl tRNA synthase complex_interacting multifunctional protein 1</b> | <b>1.236051746</b> | <b>0.000441</b> | <b>2</b>  |
| P31230        | GAEADQIIEYLK                                                                       | 1.245078906        | 2               | 3.47744   |
| P31230        | KEIEELK                                                                            | 0.829165347        | 1               | 1.99902   |
| <b>P31399</b> | <b>ATP5H ATP synthase subunit d_mitochondrial</b>                                  | <b>1.400959747</b> | <b>3.24E-12</b> | <b>7</b>  |
| P31399        | ANVDKPGLVDDFK                                                                      | 1.147375265        | 2               | 3.78098   |
| P31399        | KYPYWPHQPIENL                                                                      | 1.161153561        | 2               | 2.381     |
| P31399        | NCAQFVTGSQAR                                                                       | 1.077722326        | 2               | 4.92523   |
| P31399        | NMIPFDQMTIDDLNEVPETK                                                               | 1.048089202        | 2               | 5.07602   |
| P31399        | SWNETFHTR                                                                          | 1.192928           | 2               | 2.67606   |
| P31399        | TIDWVSFVEIMPQNK                                                                    | 1.948205458        | 2               | 4.12896   |
| P31399        | YTALVDAEEKEDVK                                                                     | 1.415593864        | 2               | 3.63804   |
| <b>P32089</b> | <b>TXTP Tricarboxylate transport protein_mitochondrial</b>                         | <b>1.052847554</b> | <b>0.412215</b> | <b>6</b>  |
| P32089        | FIHDQTSSNPK                                                                        | 1.261791471        | 1               | 3.54773   |
| P32089        | GLSSLLYGSIPK                                                                       | 0.916870225        | 2               | 3.29221   |
| P32089        | GTYQGLTATVLK                                                                       | 1.084948217        | 2               | 2.62821   |
| P32089        | NTLDCGVQILK                                                                        | 1.13557196         | 2               | 2.49719   |
| P32089        | SHGVLGLYR                                                                          | 0.871478156        | 1               | 1.91403   |
| P32089        | TQLQLDER                                                                           | 1.09375005         | 2               | 2.9188    |
| <b>P32198</b> | <b>CPT1A Carnitine O_palmitoyltransferase 1_liver isoform</b>                      | <b>0.814176647</b> | <b>0.00028</b>  | <b>6</b>  |
| P32198        | ELEQQMQQILDDPSEPQGEAK                                                              | 0.783425028        | 2               | 4.59561   |
| P32198        | GDTNPNIPKPTR                                                                       | 1.015165852        | 2               | 2.50115   |
| P32198        | LSTSQTPQQVELDFEK                                                                   | 3.176275898        | 2               | 2.81518   |
| P32198        | MTALAQDFAVNLGPK                                                                    | 0.737815733        | 2               | 3.38843   |
| P32198        | MTALAQDFAVNLGPK+Oxidation(0)                                                       | 0.482860376        |                 |           |
| P32198        | TSPDAFIQLALQLAHYK                                                                  | 0.792645447        | 2               | 3.25934   |
| <b>P32232</b> | <b>CBS Cystathionine beta_synthase</b>                                             | <b>1.424705906</b> | <b>9.9E-20</b>  | <b>11</b> |
| P32232        | AGTLKPGDTIIEPTSGNTGIGLALAAAVK                                                      | 1.501670829        | 3               | 5.97373   |
| P32232        | ALGAEIVR                                                                           | 1.696460841        | 1               | 1.97029   |
| P32232        | CVVILPDSVR                                                                         | 1.432354644        | 2               | 2.46703   |
| P32232        | FDSPESHVGVAVR                                                                      | 1.380080502        | 2               | 3.78559   |
| P32232        | LKNEIPNSHILDQYR                                                                    | 2.646204616        | 3               | 3.34692   |
| P32232        | NASNPLAHYDDTAEIILQQCDGK                                                            | 1.799974263        | 2               | 5.30098   |
| P32232        | SNDDDSFAFAR                                                                        | 2.288582781        | 2               | 3.32601   |
| P32232        | VDMLVASAGTGGTITGIAR                                                                | 1.302910902        | 2               | 4.83433   |
| P32232        | VQELSLSAPLTVLPTVTCHEHTAILR                                                         | 2.13829661         | 3               | 3.97941   |
| P32232        | VRPSDEVCK                                                                          | 1.569677834        | 2               | 2.63197   |
| P32232        | VWISPDTPSR                                                                         | 1.491373311        | 2               | 2.36736   |
| <b>P32551</b> | <b>QCR2 Cytochrome b_c1 complex subunit 2_mitochondrial</b>                        | <b>1.149732056</b> | <b>5.55E-16</b> | <b>13</b> |
| P32551        | AVAFQNPQTR                                                                         | 1.464649126        | 2               | 3.22082   |
| P32551        | AVAQGNLSSADVQAAK                                                                   | 1.126317573        | 2               | 4.97671   |
| P32551        | GNNTSLLSQSVAK                                                                      | 1.327578571        | 2               | 4.17499   |
| P32551        | IENLHDVAYK                                                                         | 1.577796499        | 2               | 3.55806   |
| P32551        | ITSEELHYFVQNHFTSAR                                                                 | 1.217414356        | 3               | 3.87383   |
| P32551        | LPNGLVIASLENYAPLSR                                                                 | 2.027149499        | 2               | 4.68653   |
| P32551        | NALANPLYCPDYR                                                                      | 0.675943276        | 2               | 3.01895   |
| P32551        | RGNNTSLLSQSVAK                                                                     | 1.048880853        | 2               | 3.27924   |
| P32551        | RWEVAALR                                                                           | 1.151966609        | 2               | 2.41034   |
| P32551        | SMTASGNLGHPTFLDEL                                                                  | 1.158158294        | 2               | 3.2131    |
| P32551        | SMTASGNLGHPTFLDEL+Oxidation(1)                                                     | 1.243355794        |                 |           |
| P32551        | TSAPGGVPLQPQLEFTK                                                                  | 1.027222254        | 2               | 4.21616   |
| P32551        | YENYNYLGTSHLLR                                                                     | 2.055367982        | 2               | 4.27342   |
| <b>P32755</b> | <b>HPPD 4_hydroxyphenylpyruvate dioxygenase</b>                                    | <b>1.921392042</b> | <b>9.9E-20</b>  | <b>17</b> |
| P32755        | AFEEEEQLR                                                                          | 1.618334633        | 2               | 3.55922   |

|               |                                                  |                    |                 |           |
|---------------|--------------------------------------------------|--------------------|-----------------|-----------|
| P32755        | DIAFEVEDCEHIVQK                                  | 1.365182132        | 2               | 4.09356   |
| P32755        | ENMDVLEELK                                       | 1.991451013        | 2               | 2.8458    |
| P32755        | FAVLQTYGDTTHTLVEK                                | 1.671892101        | 2               | 4.97741   |
| P32755        | FLPGFEAPTYK                                      | 1.404721676        | 1               | 2.4023    |
| P32755        | FWSVDDTQVHTEYSSLR                                | 3.430592051        | 2               | 5.52295   |
| P32755        | GMEFLAVPSSYYR                                    | 1.905145868        | 2               | 3.59925   |
| P32755        | GNLTDLETNGVR                                     | 1.58174356         | 2               | 3.72886   |
| P32755        | HNHQGFAGNFNSLFK                                  | 1.83249683         | 3               | 5.64791   |
| P32755        | ILVDYDEK                                         | 1.875790541        | 2               | 2.40256   |
| P32755        | IVFVLCALNPWNK                                    | 1.642872034        | 2               | 3.65744   |
| P32755        | IVREPWVEEDKFGK                                   | 1.813631382        | 3               | 4.48858   |
| P32755        | LPSCNLEIIDHIVGNQPDQEMESASEWYLK                   | 1.857905843        | 3               | 7.77131   |
| P32755        | MGFEPLAYK                                        | 1.872824556        | 2               | 2.61926   |
| P32755        | SIVVANYEESIK                                     | 1.534677671        | 2               | 4.1594    |
| P32755        | SQIQEYVDYNGGAGVQHIALR                            | 1.829604653        | 2               | 5.54957   |
| P32755        | TEDIITIR                                         | 1.610932646        | 2               | 3.39161   |
| <b>P33124</b> | <b>ACSL6 Long_chain_fatty_acid__CoA ligase 6</b> | <b>0.964803966</b> | <b>1</b>        | <b>2</b>  |
| P33124        | ALRPITFPVVR                                      | 1.025262677        | 2               | 2.97957   |
| P33124        | IENIYIR                                          | 0.963498534        | 2               | 2.95509   |
| <b>P33273</b> | <b>CP255 Cytochrome P450 2C55</b>                | <b>1.38493716</b>  | <b>0.121878</b> | <b>4</b>  |
| P33273        | DENFLNLMEK                                       | 1.123085108        | 2               | 2.31255   |
| P33273        | ELRHFSMLTLR                                      | 1.275130515        | 2               | 2.36531   |
| P33273        | FDYKDENFLNLMEK                                   | 0.85343156         | 3               | 4.52222   |
| P33273        | IQEEASCLVEELR                                    | 1.450211475        | 2               | 2.71977   |
| <b>P33274</b> | <b>CP4F1 Cytochrome P450 4F1</b>                 | <b>1.449199909</b> | <b>0.000249</b> | <b>2</b>  |
| P33274        | ACNLVHEFTDAVIR                                   | 1.417315994        | 3               | 3.73818   |
| P33274        | TLPDQGLDEFK                                      | 1.929312353        | 2               | 2.51762   |
| <b>P34058</b> | <b>HS90B Heat shock protein HSP 90_beta</b>      | <b>1.27458827</b>  | <b>6E-14</b>    | <b>25</b> |
| P34058        | ADLNNLGTIAK                                      | 1.016945315        | 2               | 4.18483   |
| P34058        | EDQTEYLEER                                       | 1.31260608         | 2               | 3.43042   |
| P34058        | EGLELPEDEEEK                                     | 0.716657704        | 2               | 2.54182   |
| P34058        | EGLELPEDEEEKK                                    | 1.155254689        | 2               | 3.37061   |
| P34058        | ELISNASDALDK                                     | 1.461506156        | 2               | 3.3845    |
| P34058        | EQVANSAFVER                                      | 1.340892319        | 2               | 2.36981   |
| P34058        | GFEVYMTPEIDYCVQQLK                               | 0.943238582        | 2               | 4.44532   |
| P34058        | GVVDSDELPLNISR                                   | 1.03388055         | 2               | 4.91275   |
| P34058        | HFSVEGQLEFR                                      | 1.127693567        | 2               | 2.57158   |
| P34058        | HLEINPDHPIVETLR                                  | 1.013573107        | 2               | 4.58277   |
| P34058        | HSQFIGYPITLYLEK                                  | 3.843154529        | 2               | 4.12928   |
| P34058        | IDIIPNPQER                                       | 0.975785212        | 2               | 3.11787   |
| P34058        | KHLEINPDHPIVETLR                                 | 1.073524648        | 2               | 4.82752   |
| P34058        | LGIHEDSTNR                                       | 1.116963379        | 2               | 3.40681   |
| P34058        | NPDDITQEEYGEFYK                                  | 1.350742605        | 2               | 4.75368   |
| P34058        | RAPFDLFENK                                       | 0.994580564        | 2               | 2.81153   |
| P34058        | SIYYITGESK                                       | 1.749392398        | 2               | 3.04022   |
| P34058        | SLTNDWEDHLAVK                                    | 0.991730071        | 2               | 4.01748   |
| P34058        | TLTLVDTGIGMTK                                    | 0.837169641        | 2               | 4.08281   |
| P34058        | TLTLVDTGIGMTK+Oxidation(10)                      | 1.166992983        |                 |           |
| P34058        | VILHLKEDQTEYLEER                                 | 1.252196203        | 3               | 3.71925   |
| P34058        | YESLTDPSK                                        | 1.122902439        | 2               | 2.6427    |
| P34058        | YESLTDPSKLD5GK                                   | 1.174184772        | 2               | 3.59622   |
| P34058        | YHTSQSGDEMTSLSEYVSR                              | 1.163135866        | 2               | 5.55226   |
| P34058        | YIDQEELNK                                        | 0.956804198        | 2               | 3.48741   |
| <b>P34064</b> | <b>PSA5 Proteasome subunit alpha type_5</b>      | <b>1.065971237</b> | <b>0.821661</b> | <b>3</b>  |
| P34064        | AIGSASEGAQSSLQEVYHK                              | 1.062134066        | 2               | 4.71815   |
| P34064        | EELEEVIKDI                                       | 0.757358137        | 2               | 2.49457   |
| P34064        | GVNTFSPEGR                                       | 1.066002586        | 2               | 3.01303   |

|               |                                                                      |                    |                 |          |
|---------------|----------------------------------------------------------------------|--------------------|-----------------|----------|
| <b>P34067</b> | <b>PSB4 Proteasome subunit beta type_4</b>                           | <b>1.276876407</b> | <b>0.846499</b> | <b>3</b> |
| P34067        | GVEIEGPLSAQTNWDIAHMISGFE                                             | 1.188059712        | 2               | 3.63449  |
| P34067        | TQNPMVTGTSVLGVK                                                      | 0.90393345         | 2               | 2.83739  |
| P34067        | VNDSTMLGASGDYADFQYLK                                                 | 1.044465441        | 2               | 4.30226  |
| <b>P35171</b> | <b>CX7A2 Cytochrome c oxidase subunit 7A2_mitochondrial</b>          | <b>1.035040071</b> | <b>0.01316</b>  | <b>2</b> |
| P35171        | GGTSDALLYR                                                           | 1.198280751        | 2               | 2.88841  |
| P35171        | LFQEDNGMPVHLK                                                        | 1.120117168        | 2               | 3.61675  |
| <b>P35213</b> | <b>1433B 14_3_3 protein beta/alpha</b>                               | <b>1.020371028</b> | <b>0.934824</b> | <b>6</b> |
| P35213        | AVTEQGHLSNEER                                                        | 1.256429993        | 2               | 4.54415  |
| P35213        | EKIEAELQDICSVDLELLDK                                                 | 1.03341666         | 3               | 3.55902  |
| P35213        | QTTVSNSQQAYQEAFEISK                                                  | 0.946595416        | 2               | 5.24455  |
| P35213        | TAFDEAIAELDTLNEESYK                                                  | 1.060024272        | 2               | 4.83781  |
| P35213        | YLILNATHAESK                                                         | 0.811702151        | 2               | 3.2077   |
| P35213        | YLSEVASGDNK                                                          | 1.064987258        | 1               | 2.99939  |
| <b>P35278</b> | <b>RAB5C Ras_related protein Rab_5C</b>                              | <b>0.979628458</b> | <b>0.709349</b> | <b>2</b> |
| P35278        | GVDLQESNPASR                                                         | 1.026451672        | 2               | 3.07112  |
| P35278        | NEPQNAAGAPGR                                                         | 0.869973529        | 2               | 2.85771  |
| <b>P35427</b> | <b>RL13A 60S ribosomal protein L13a</b>                              | <b>1.293340383</b> | <b>3.93E-14</b> | <b>2</b> |
| P35427        | CEGINISGNFYR                                                         | 1.06520565         | 2               | 3.31395  |
| P35427        | YQAVTATLEEK                                                          | 1.288246568        | 2               | 3.43436  |
| <b>P35434</b> | <b>ATPD ATP synthase subunit delta_mitochondrial</b>                 | <b>1.039243463</b> | <b>1</b>        | <b>2</b> |
| P35434        | AQSLSGAADEAAR                                                        | 1.066652712        | 2               | 4.5914   |
| P35434        | IEANEALVK                                                            | 0.984508502        | 2               | 3.16881  |
| <b>P35435</b> | <b>ATPG ATP synthase subunit gamma_mitochondrial</b>                 | <b>1.178993484</b> | <b>1.21E-06</b> | <b>7</b> |
| P35435        | GLCGAIHSSVAK                                                         | 1.147240304        | 2               | 3.79802  |
| P35435        | HLIIGVSSDR                                                           | 1.031655663        | 2               | 2.78688  |
| P35435        | NASDMIDK                                                             | 1.042435481        | 1               | 2.11387  |
| P35435        | NDMAALTAAGK                                                          | 0.951942145        | 2               | 3.37647  |
| P35435        | NDMAALTAAGK+Oxidation(2)                                             | 1.136144175        |                 |          |
| P35435        | THSDQFLVSFK                                                          | 1.828381533        | 2               | 3.33971  |
| P35435        | VYGTGSLALYEK                                                         | 1.732998591        | 2               | 2.99285  |
| <b>P35565</b> | <b>CALX Calnexin</b>                                                 | <b>0.930414324</b> | <b>0.945319</b> | <b>9</b> |
| P35565        | AEDEILNR                                                             | 0.871211895        | 2               | 2.91499  |
| P35565        | KIPNPdffedLEPFR                                                      | 0.916910326        | 3               | 3.99702  |
| P35565        | NGGDEEEEEKLEEK                                                       | 1.049722829        | 2               | 5.21963  |
| P35565        | SDTSTPPSPK                                                           | 0.94731679         | 2               | 2.53032  |
| P35565        | TDAPQPDVK                                                            | 0.918222377        | 2               | 2.34352  |
| P35565        | TDAPQPDVKDEEGKEEK                                                    | 0.883045645        | 2               | 3.8682   |
| P35565        | TSELNLDQFHDK                                                         | 1.142180647        | 2               | 3.88371  |
| P35565        | VVDDWANDGWGLK                                                        | 0.92191258         | 2               | 4.30863  |
| P35565        | VVDDWANDGWGLKK                                                       | 1.088212503        | 2               | 2.76711  |
| <b>P35704</b> | <b>PRDX2 Peroxiredoxin_2</b>                                         | <b>1.019619747</b> | <b>0.498063</b> | <b>4</b> |
| P35704        | EGGLGPLNIPLLDVTK                                                     | 1.142598797        | 2               | 3.3527   |
| P35704        | KEGGLGPLNIPLLDVTK                                                    | 0.901948656        | 2               | 4.25679  |
| P35704        | NDEGIAYR                                                             | 0.996492078        | 2               | 2.39276  |
| P35704        | QITVNDLPVGR                                                          | 0.903881917        | 2               | 2.69115  |
| <b>P35738</b> | <b>ODDB2_oxoisovalerate dehydrogenase subunit beta_mitochondrial</b> | <b>0.970590809</b> | <b>0.796843</b> | <b>5</b> |
| P35738        | AAVEQVPVEPYK                                                         | 0.96208587         | 2               | 2.66091  |
| P35738        | GLLLSCIEDKNPCIFFEPK                                                  | 0.759900702        | 2               | 3.46629  |
| P35738        | IPLSQAQAEVIQEGSDVTLVAWGTQVHVIR                                       | 0.994521862        | 3               | 4.10401  |
| P35738        | MNLFQSITSALDNSLAK                                                    | 0.86068145         | 2               | 2.62986  |
| P35738        | SGDLFNCGLTIR                                                         | 0.975406554        | 2               | 2.89229  |
| <b>P35815</b> | <b>PPM1B Protein phosphatase 1B</b>                                  | <b>1.161124384</b> | <b>0.064956</b> | <b>2</b> |

|               |                                                               |                    |                 |           |
|---------------|---------------------------------------------------------------|--------------------|-----------------|-----------|
| P35815        | IQNAGGSVMIQR                                                  | 0.828980951        | 2               | 3.0831    |
| P35815        | SGFALEPSVENVK                                                 | 1.199249865        | 2               | 3.12618   |
| <b>P36201</b> | <b>CRIP2 Cysteine_rich protein 2</b>                          | <b>1.343478852</b> | <b>0.000249</b> | <b>3</b>  |
| P36201        | ASSVTTFTGEPNMCPR                                              | 3.925137561        | 2               | 3.89905   |
| P36201        | GVNIGGAGSYYEKPPTEAPQVTGPIEVPVVR                               | 1.319107978        | 3               | 6.95192   |
| P36201        | GVNTGAVGSYYDKDPEGTVPQ                                         | 1.348325304        | 2               | 4.25922   |
| <b>P36365</b> | <b>FMO1 Dimethylaniline monooxygenase [N_oxide_forming] 1</b> | <b>0.915175626</b> | <b>0.013245</b> | <b>11</b> |
| P36365        | ALQSDYITYIDDLTISINAKPDLR                                      | 1.588780044        | 3               | 3.49931   |
| P36365        | ASLYNSVVSNSK                                                  | 1.851639775        | 2               | 2.30806   |
| P36365        | CLEEGLEPTCFER                                                 | 0.763835977        | 2               | 4.11406   |
| P36365        | ENSVVFNNTPK                                                   | 1.59766289         | 2               | 2.55412   |
| P36365        | FTEHVEEGR                                                     | 0.916151723        | 2               | 3.13194   |
| P36365        | NLLPTPVVSWLISK                                                | 0.866911255        | 2               | 2.46644   |
| P36365        | SCDLGGLWR                                                     | 0.762354573        | 2               | 2.76652   |
| P36365        | TQLREPVLNDELPGR                                               | 0.897557105        | 3               | 4.07189   |
| P36365        | VAIVGAGVSGLASIK                                               | 1.452099593        | 2               | 2.87397   |
| P36365        | VEDGQASLYK                                                    | 0.885102344        | 2               | 3.53133   |
| P36365        | VLVVGMGNSGTDIAVEASHLAK                                        | 0.940190077        | 2               | 2.94576   |
| <b>P36511</b> | <b>UDB15 UDP_glucuronosyltransferase 2B15</b>                 | <b>1.258702293</b> | <b>1.67E-05</b> | <b>7</b>  |
| P36511        | ANIIAWALAIQPK                                                 | 1.244755997        | 3               | 5.08336   |
| P36511        | FVNVWTYELPR                                                   | 1.090713559        | 2               | 3.19432   |
| P36511        | FVTFPTSFSHDLNFFTR                                             | 1.928606798        | 2               | 4.16332   |
| P36511        | GHEVTVLRPSAFVFLDPK                                            | 1.77180349         | 3               | 3.52434   |
| P36511        | IILEELVQK                                                     | 1.017944611        | 2               | 3.2832    |
| P36511        | SDLLNALEEVIDNPFYK                                             | 1.075703933        | 2               | 5.23121   |
| P36511        | TLGRPTTLAEIMGK                                                | 0.987329941        | 3               | 3.61478   |
| <b>P36536</b> | <b>SAR1A GTP_binding protein SAR1a</b>                        | <b>1.761925751</b> | <b>0.020785</b> | <b>2</b>  |
| P36536        | LVFLGLDNAGK                                                   | 1.762812601        | 2               | 2.99392   |
| P36536        | VELNALMTDETISNVPILILGNK                                       | 1.219833821        | 3               | 4.6256    |
| <b>P36972</b> | <b>APT Adenine phosphoribosyltransferase</b>                  | <b>1.219785162</b> | <b>1.32E-05</b> | <b>3</b>  |
| P36972        | GFLFGPSLAQELGVGCVLIR                                          | 0.91280822         | 2               | 3.89883   |
| P36972        | IDYIAGLSR                                                     | 0.929689843        | 2               | 3.45728   |
| P36972        | SFPDFPIPGVLFRR                                                | 1.221331005        | 2               | 3.55041   |
| <b>P37397</b> | <b>CNN3 Calponin_3</b>                                        | <b>0.925354347</b> | <b>0.011634</b> | <b>3</b>  |
| P37397        | AGQSVIGLQMGTKN                                                | 0.853000458        | 2               | 4.28386   |
| P37397        | VNESSLNWPQLNENIGNFIK                                          | 0.753598871        | 2               | 3.37815   |
| P37397        | YDQQAEDLR                                                     | 0.694367306        | 2               | 3.2591    |
| <b>P38650</b> | <b>DYHC1 Cytoplasmic dynein 1 heavy chain 1</b>               | <b>0.959325912</b> | <b>0.873134</b> | <b>8</b>  |
| P38650        | FGNPLLQDVEYDPVLPVNLNR                                         | 1.035333426        | 2               | 4.53317   |
| P38650        | GWENHVEGQK                                                    | 1.360061495        | 2               | 2.87876   |
| P38650        | ILDDDTIITLLENLK                                               | 0.878547357        | 2               | 2.6943    |
| P38650        | QLQNISQAAAAGGAK                                               | 0.896754641        | 2               | 3.30253   |
| P38650        | SSLQSQCLNEVLK                                                 | 1.040859241        | 2               | 2.92071   |
| P38650        | VQGLTVEQAEAVAR                                                | 0.99173421         | 2               | 3.58449   |
| P38650        | VQVALEELQDLK                                                  | 1.032743992        | 2               | 2.71188   |
| P38650        | VDFGDKVEDPTFLNQLQSGVNR                                        | 0.884285506        | 3               | 4.06808   |
| <b>P38652</b> | <b>PGM1 Phosphoglucomutase_1</b>                              | <b>1.152762056</b> | <b>0.98277</b>  | <b>16</b> |
| P38652        | ADNFEYSDPVDGSISK                                              | 0.881870637        | 2               | 4.70753   |
| P38652        | AIGGIILTASHNPGGPNDFGIK                                        | 0.952138541        | 2               | 5.28334   |
| P38652        | FFGNLMDASK                                                    | 0.886115485        | 2               | 2.30707   |
| P38652        | FNISNGGPAPEAITDK                                              | 1.158717901        | 2               | 4.28483   |
| P38652        | INQDPQVMLAPLISIALK                                            | 1.061364727        | 2               | 4.93386   |
| P38652        | KQRVEDILK                                                     | 0.752315339        | 1               | 1.98255   |
| P38652        | LSGTGSAGATIR                                                  | 1.377069767        | 2               | 3.63177   |
| P38652        | LSLCGEESFGTGDHIR                                              | 1.572082061        | 2               | 3.5574    |
| P38652        | LVIGQNGILSTPAVSCIIR                                           | 1.178553782        | 2               | 3.73686   |

|               |                                                       |                    |                 |           |
|---------------|-------------------------------------------------------|--------------------|-----------------|-----------|
| P38652        | NIFDFNALK                                             | 0.911216295        | 1               | 1.94084   |
| P38652        | QEATLVVGGDGR                                          | 1.04751969         | 2               | 2.99183   |
| P38652        | QQFDLENK                                              | 0.929042838        | 1               | 2.15556   |
| P38652        | SGEHDFGAAFDGDGDR                                      | 1.027913173        | 2               | 4.44359   |
| P38652        | TIEEYAICPDLK                                          | 0.984124704        | 2               | 3.08145   |
| P38652        | TQAYPDQKPGTSGLR                                       | 0.995437007        | 2               | 3.3626    |
| P38652        | YDYEEVEAEGANK                                         | 0.698111296        | 2               | 5.05689   |
| <b>P38656</b> | <b>LA Lupus La protein homolog</b>                    | <b>1.163120544</b> | <b>0.171502</b> | <b>2</b>  |
| P38656        | ITDDQQESLNK                                           | 1.141128195        | 2               | 3.93401   |
| P38656        | LDEGWVPLETMIK                                         | 0.67959655         | 2               | 2.45022   |
| <b>P38659</b> | <b>PDIA4 Protein disulfide_isomerase A4</b>           | <b>0.836639303</b> | <b>0.000555</b> | <b>20</b> |
| P38659        | DLGLSESGEDVNAAILDESGKK                                | 0.979153349        | 2               | 5.11249   |
| P38659        | DNDPPIAVAK                                            | 0.747662726        | 2               | 2.34339   |
| P38659        | EVSQPDWTPPPEVTLTLTK                                   | 1.112803652        | 2               | 3.7619    |
| P38659        | FDVSGYPTIK                                            | 0.946752943        | 2               | 3.35582   |
| P38659        | FDVSGYPTLK                                            | 0.946752943        | 2               | 3.35582   |
| P38659        | FIDEHATK                                              | 1.094202487        | 2               | 2.63242   |
| P38659        | FIDEHATKR                                             | 1.309858366        | 2               | 2.76503   |
| P38659        | GQAVDYDGSR                                            | 1.085157589        | 2               | 2.84501   |
| P38659        | IDATSASMLASK                                          | 1.154834137        | 2               | 3.5871    |
| P38659        | IDATSASMLASK+Oxidation(7)                             | 1.197292755        |                 |           |
| P38659        | KGQAVDYDGSR                                           | 2.118959951        | 2               | 2.6336    |
| P38659        | MDATANDITNDR                                          | 0.897208774        | 2               | 3.98776   |
| P38659        | MHVMDVQGSTEAIAIKDYVVK                                 | 0.822630758        | 3               | 3.72012   |
| P38659        | QLEPVYTSLGK                                           | 1.050409964        | 2               | 2.55686   |
| P38659        | RFDVSGYPTLK                                           | 1.170934207        | 2               | 3.15877   |
| P38659        | RSPPIPLAK                                             | 1.187965894        | 2               | 2.37394   |
| P38659        | TQEEIVAK                                              | 1.019898462        | 2               | 2.39643   |
| P38659        | VDATEQTDLAK                                           | 1.142108651        | 2               | 4.0467    |
| P38659        | VEGFPTIYFAPSGDK                                       | 1.549629313        | 2               | 3.44485   |
| P38659        | YGIVDYMVEQSGPPSK                                      | 1.757308205        | 2               | 4.65143   |
| <b>P38918</b> | <b>ARK73 Aflatoxin B1 aldehyde reductase member 3</b> | <b>0.686281488</b> | <b>9.9E-20</b>  | <b>7</b>  |
| P38918        | EEHFNGIALVEK                                          | 0.963848039        | 2               | 3.04461   |
| P38918        | FQLETSLK                                              | 1.00221383         | 1               | 1.94381   |
| P38918        | FYAFNPLAGLLTGR                                        | 1.809134963        | 2               | 4.47538   |
| P38918        | MDVTSSASVR                                            | 0.744091409        | 2               | 3.59047   |
| P38918        | QVETELFPCLR                                           | 0.742711844        | 2               | 2.49218   |
| P38918        | RMDVTSSASVR                                           | 0.686132944        | 2               | 3.54995   |
| P38918        | TTYGPTAPSMISAAVR                                      | 0.564167298        | 2               | 3.74669   |
| <b>P38983</b> | <b>RSSA 40S ribosomal protein SA</b>                  | <b>1.060699118</b> | <b>9.9E-20</b>  | <b>9</b>  |
| P38983        | ADHQPLTEASYVNLPTIALCNTDSPLR                           | 1.463856704        | 3               | 5.82599   |
| P38983        | AIVAIENPADVSVISSR                                     | 1.088169377        | 2               | 5.64946   |
| P38983        | EHPWEVMPDLYFYRDPEEIEKEEQAAAEK                         | 0.709575839        | 3               | 3.75618   |
| P38983        | FAAATGATPIAGR                                         | 1.452332234        | 2               | 3.04362   |
| P38983        | FLAAGTHLGGTNLDFQMEQYIYK                               | 1.971483289        | 3               | 4.04448   |
| P38983        | FTPGFTNQJQAAFR                                        | 0.95068694         | 2               | 4.44146   |
| P38983        | KSDGIYIINLK                                           | 0.447891566        | 2               | 3.2187    |
| P38983        | SDGIYIINLK                                            | 1.105723061        | 2               | 2.97548   |
| P38983        | YVDIAIPCNNK                                           | 1.30666838         | 1               | 3.02501   |
| <b>P39032</b> | <b>RL36 60S ribosomal protein L36</b>                 | <b>1.127374324</b> | <b>0.736208</b> | <b>2</b>  |
| P39032        | EELSNVLAAMR                                           | 0.866933254        | 2               | 2.48169   |
| P39032        | KREELSNVLAAMR                                         | 1.169237909        | 2               | 3.8316    |
| <b>P39447</b> | <b>ZO1 Tight junction protein ZO_1</b>                | <b>0.64302424</b>  | <b>0.020366</b> | <b>2</b>  |
| P39447        | GEEVTILAQK                                            | 0.622014843        | 2               | 2.47864   |
| P39447        | GGPAEGQLQENDR                                         | 0.649026947        | 2               | 2.91411   |
| <b>P40112</b> | <b>PSB3 Proteasome subunit beta type_3</b>            | <b>1.069493332</b> | <b>0.511469</b> | <b>2</b>  |

|               |                                                                      |                    |                 |           |
|---------------|----------------------------------------------------------------------|--------------------|-----------------|-----------|
| P40112        | FGIQAQMVTTDFQK                                                       | 1.203625367        | 2               | 3.4818    |
| P40112        | FGPYYTEPVIAGLDPK                                                     | 1.062495192        | 2               | 3.49224   |
| <b>P40307</b> | <b>PSB2 Proteasome subunit beta type_2</b>                           | <b>1.140669969</b> | <b>0.649241</b> | <b>3</b>  |
| P40307        | FILNLPTFSVR                                                          | 1.337191547        | 2               | 3.01395   |
| P40307        | NGYELSPTAAANFTR                                                      | 1.091315246        | 2               | 3.55481   |
| P40307        | VIDKDGIIHNLENITFTK                                                   | 1.170833172        | 3               | 4.73442   |
| <b>P40329</b> | <b>SYRC Arginyl_tRNA synthetase_cytoplasmic</b>                      | <b>1.188331879</b> | <b>0.045845</b> | <b>2</b>  |
| P40329        | LNDYVFSFDK                                                           | 1.289069393        | 2               | 2.7045    |
| P40329        | SDGGYTYDTSDLAAIK                                                     | 1.043521306        | 2               | 4.01259   |
| <b>P41034</b> | <b>TTPA Alpha_tocopherol transfer protein</b>                        | <b>1.273750148</b> | <b>0.00019</b>  | <b>6</b>  |
| P41034        | AECPELSADLHPR                                                        | 1.511565902        | 2               | 2.96916   |
| P41034        | AIFDLEGWQISHAFQITPSVAK                                               | 0.507894166        | 2               | 4.61729   |
| P41034        | AQEEGVPETPQLTDAFLLR                                                  | 1.4639685          | 2               | 3.83483   |
| P41034        | GIHLINPEVIFHAVFSMIKPFLEK                                             | 1.140375662        | 4               | 4.70766   |
| P41034        | QLNEQPDHSPVLVQPLAELR                                                 | 1.024912901        | 3               | 3.96054   |
| P41034        | VSLITSELIVQEVEVTR                                                    | 1.150090094        | 3               | 3.79764   |
| <b>P41123</b> | <b>RL13 60S ribosomal protein L13</b>                                | <b>1.21655366</b>  | <b>8.07E-07</b> | <b>3</b>  |
| P41123        | LATQLTGPVMPIR                                                        | 1.229761956        | 2               | 2.95214   |
| P41123        | STESLQANVQR                                                          | 1.139279177        | 2               | 3.97103   |
| P41123        | VDTWFNQPAR                                                           | 1.459202144        | 2               | 3.45129   |
| <b>P41498</b> | <b>PPAC Low molecular weight phosphotyrosine protein phosphatase</b> | <b>0.798630977</b> | <b>0.797136</b> | <b>3</b>  |
| P41498        | IDSAATSTYEVGNPPDYR                                                   | 1.180231251        | 2               | 3.10332   |
| P41498        | IELLSYDPQK                                                           | 0.899890609        | 2               | 3.43786   |
| P41498        | LVTDENVSDNWR                                                         | 0.869953353        | 2               | 3.7962    |
| <b>P41542</b> | <b>USO1 General vesicular transport factor p115</b>                  | <b>1.126546064</b> | <b>0.000513</b> | <b>15</b> |
| P41542        | AWFEVGDENPGWSAQK                                                     | 0.93235824         | 2               | 4.63702   |
| P41542        | CQNEQLQTAVTQQASIQQHK                                                 | 1.08964476         | 3               | 4.11962   |
| P41542        | EQDLQLEELK                                                           | 1.227744329        | 2               | 2.48783   |
| P41542        | IVAFENAFER                                                           | 1.456315427        | 2               | 2.62285   |
| P41542        | LQTENSELQQR                                                          | 1.102707649        | 2               | 3.12523   |
| P41542        | LREEIEELR                                                            | 1.07571057         | 2               | 2.47305   |
| P41542        | NDGVLLQLALTR                                                         | 1.259461237        | 2               | 3.43739   |
| P41542        | NNNSNQNFVK                                                           | 0.942375531        | 2               | 2.49058   |
| P41542        | QLDSSNSTIALQTEK                                                      | 1.010670628        | 2               | 3.906     |
| P41542        | QLGPPVQQIILVSPMGVSK                                                  | 0.736836108        | 2               | 2.38746   |
| P41542        | QSEDLGSQFTEIFIK                                                      | 1.2734304          | 2               | 3.53941   |
| P41542        | SQLCSQSLEITR                                                         | 1.106617879        | 2               | 3.10468   |
| P41542        | SVPVEGESELVTAAK                                                      | 1.112682           | 2               | 3.69433   |
| P41542        | TLEQHDNIVTHYK                                                        | 1.174171772        | 2               | 3.48302   |
| P41542        | VLVSPTNPPGATSSCQK                                                    | 1.119641899        | 2               | 4.18065   |
| <b>P41562</b> | <b>IDHC Isocitrate dehydrogenase [NADP] cytoplasmic</b>              | <b>1.003943384</b> | <b>2.22E-16</b> | <b>18</b> |
| P41562        | ATDFVVPQPGK                                                          | 1.160225435        | 2               | 3.60795   |
| P41562        | CATITPDEK                                                            | 1.231912374        | 2               | 2.68297   |
| P41562        | DIFQEYDK                                                             | 0.985373746        | 1               | 2.47391   |
| P41562        | DLAACIK                                                              | 1.774170801        | 1               | 2.00293   |
| P41562        | FKDIFQEYDK                                                           | 0.993552607        | 3               | 4.11865   |
| P41562        | GQETSTNPIASIFAWSR                                                    | 1.306922564        | 2               | 4.96319   |
| P41562        | IHGGSVEMQGDENMTR                                                     | 0.987164422        | 2               | 4.61272   |
| P41562        | LIDDMVAQAMK                                                          | 0.819606716        | 2               | 4.58853   |
| P41562        | LIDDMVAQAMK+Oxidation(4)                                             | 1.524558431        |                 |           |
| P41562        | LILPYVELDLHSYDLGIENR                                                 | 1.621144646        | 2               | 4.69077   |
| P41562        | LVTGWVKPIIIGR                                                        | 1.306741149        | 2               | 3.21401   |
| P41562        | SDYLNTFEFMDK                                                         | 0.906282752        | 2               | 4.33676   |
| P41562        | SDYLNTFEFMDK+Oxidation(9)                                            | 1.186615261        |                 |           |
| P41562        | SEGFIWACK                                                            | 0.932545194        | 2               | 3.32235   |

|               |                                                        |                    |                 |          |
|---------------|--------------------------------------------------------|--------------------|-----------------|----------|
| P41562        | SIEDFAHSSSQMALS                                        | 1.058949857        | 2               | 4.93541  |
| P41562        | TVEAEAAHGTVTR                                          | 1.052313067        | 2               | 3.96676  |
| P41562        | VEITYTPK                                               | 1.076138435        | 2               | 2.76407  |
| P41562        | VTYLVHDFEEGGVAMGMYNQDK                                 | 1.4790168          | 3               | 3.32808  |
| <b>P42123</b> | <b>LDHB L_lactate dehydrogenase B chain</b>            | <b>1.085315121</b> | <b>0.000125</b> | <b>6</b> |
| P42123        | DYSVTANSK                                              | 1.407245961        | 2               | 2.45365  |
| P42123        | IVADKDYSVTANSK                                         | 0.295516123        | 2               | 3.98358  |
| P42123        | LIAPVADDETAVPNNK                                       | 0.568063041        | 2               | 2.5292   |
| P42123        | LKDDEVAQLR                                             | 0.272204697        | 2               | 2.56556  |
| P42123        | SLADELALVDVLEDK                                        | 0.485258725        | 2               | 3.59493  |
| P42123        | VIGSGCNLDSAR                                           | 1.11838995         | 2               | 3.92679  |
| <b>P42676</b> | <b>NEUL Neurolysin_mitochondrial</b>                   | <b>1.124358455</b> | <b>0.600318</b> | <b>4</b> |
| P42676        | AELGALPDDFIDSLEK                                       | 0.898133992        | 2               | 3.01384  |
| P42676        | NLILKPGGSLDGMMLQNFQR                                   | 1.146175243        | 3               | 3.473    |
| P42676        | NLNEDDTSLVFSK                                          | 0.992350184        | 2               | 3.12033  |
| P42676        | TRTEQLIAQTK                                            | 1.269937723        | 2               | 2.7549   |
| <b>P42932</b> | <b>TCPQ T_complex protein 1 subunit theta</b>          | <b>1.097839649</b> | <b>0.001181</b> | <b>9</b> |
| P42932        | AIAGTGANVIVTGK                                         | 1.029246456        | 2               | 3.82366  |
| P42932        | AVDDGVNTFK                                             | 1.138080425        | 2               | 2.96277  |
| P42932        | EDGAISTIVLR                                            | 0.867664943        | 2               | 2.66033  |
| P42932        | ELEVQHPAAK                                             | 1.309334521        | 2               | 2.94164  |
| P42932        | GEENLMDAQVK                                            | 0.92297774         | 2               | 2.45655  |
| P42932        | HFSGLEEAVYR                                            | 1.164679372        | 2               | 2.72483  |
| P42932        | NVGLDIEAEVPAVK                                         | 1.248125419        | 2               | 3.07452  |
| P42932        | QITSYGETCPGLEQYAIK                                     | 1.241861433        | 2               | 4.59546  |
| P42932        | TAEELMNFSK                                             | 1.133723936        | 2               | 2.32949  |
| <b>P43244</b> | <b>MATR3 Matrin_3</b>                                  | <b>1.140425165</b> | <b>0.98897</b>  | <b>3</b> |
| P43244        | GDTDQASNILASFGLSAR                                     | 1.116511838        | 2               | 3.43647  |
| P43244        | ITPENLPQILLQK                                          | 0.963317088        | 2               | 3.6792   |
| P43244        | TENPAEGKEQEEK                                          | 1.303086426        | 2               | 2.95332  |
| <b>P43274</b> | <b>H14 Histone H1.4</b>                                | <b>0.962477687</b> | <b>1</b>        | <b>3</b> |
| P43274        | ALAAAGYDVEK                                            | 0.940891113        | 2               | 3.61133  |
| P43274        | SGVSLAALK                                              | 1.159153296        | 2               | 2.92242  |
| P43274        | SGVSLAALKK                                             | 0.91425697         | 2               | 2.59247  |
| <b>P43276</b> | <b>H15 Histone H1.5</b>                                | <b>0.876776983</b> | <b>0.358746</b> | <b>2</b> |
| P43276        | ALAAAGYDVEK                                            | 0.760622465        | 2               | 2.55148  |
| P43276        | ATGPPVSELITK                                           | 0.984184457        | 2               | 2.55165  |
| <b>P43278</b> | <b>H10 Histone H1.0</b>                                | <b>0.882568927</b> | <b>3.12E-08</b> | <b>2</b> |
| P43278        | VGENADSQIK                                             | 0.911517049        | 2               | 3.51938  |
| P43278        | YSDMIVAAIQAEK                                          | 0.811157954        | 2               | 3.98716  |
| <b>P45591</b> | <b>COF2 Cofilin_2</b>                                  | <b>1.51272871</b>  | <b>0.360731</b> | <b>4</b> |
| P45591        | HEWQVNGLDDIKDR                                         | 1.068188302        | 3               | 4.20537  |
| P45591        | KEDLVFIFWAPESAPLK                                      | 2.672900195        | 3               | 3.57069  |
| P45591        | QIIVEEAK                                               | 0.935035551        | 2               | 2.3551   |
| P45591        | QILVGDIGDTVEDPYTSFVK                                   | 1.026638658        | 2               | 4.77419  |
| <b>P45592</b> | <b>COF1 Cofilin_1</b>                                  | <b>1.010719893</b> | <b>0.934144</b> | <b>4</b> |
| P45592        | EILVGDVGTVDPPYTFVK                                     | 1.003931997        | 2               | 4.59364  |
| P45592        | HELQANCYEEVK                                           | 1.003755317        | 2               | 3.47524  |
| P45592        | HELQANCYEEVKDR                                         | 1.149730634        | 3               | 5.29419  |
| P45592        | NIILEEGKEILVGDVGTVDPPYTFVK                             | 1.190885322        | 3               | 4.86674  |
| <b>P45878</b> | <b>FKBP2 Peptidyl_prolyl cis_trans isomerase FKBP2</b> | <b>1.40978632</b>  | <b>0.003356</b> | <b>4</b> |
| P45878        | GWDQGLLMCEGEGK                                         | 0.708465548        | 2               | 3.97969  |
| P45878        | KLVIPSELGYGER                                          | 1.452041979        | 2               | 2.55705  |
| P45878        | LEDGTEFDSSLPQNPVFSGLTGQVIK                             | 1.49844606         | 3               | 4.39953  |
| P45878        | LVIPSELGYGER                                           | 1.270331352        | 2               | 2.65906  |

|               |                                                                            |                    |                 |           |
|---------------|----------------------------------------------------------------------------|--------------------|-----------------|-----------|
| <b>P45953</b> | <b>ACADV Very long_chain specific acyl_CoA dehydrogenase_mitochondrial</b> | <b>1.219105818</b> | <b>9.9E-20</b>  | <b>18</b> |
| P45953        | AMVENGGVTSNPLR                                                             | 1.050374986        | 2               | 3.43376   |
| P45953        | AMVENGGVTSNPLRV                                                            | 1.135580676        | 2               | 3.22963   |
| P45953        | AMVENGGVTSNPLRV+Oxidation(1)                                               | 1.38569516         |                 |           |
| P45953        | ASNTSEVYFDGVK                                                              | 1.901121938        | 2               | 3.7111    |
| P45953        | ELGAFGLQVPSELGGLSNTQYAR                                                    | 1.206620974        | 2               | 4.81055   |
| P45953        | ENMASLQSNPQQQLFR                                                           | 1.230426593        | 2               | 4.29253   |
| P45953        | FFEEVNDPAK                                                                 | 0.973423086        | 2               | 3.12818   |
| P45953        | FFEEVNDPAKNDLSLEKVEEDTLQGLK                                                | 1.012924242        | 3               | 5.82654   |
| P45953        | GIVNEQFLQR                                                                 | 1.550852876        | 2               | 3.42501   |
| P45953        | IFEGTNDILR                                                                 | 1.215362558        | 2               | 2.67016   |
| P45953        | NDSLEKVEEDTLQGLK                                                           | 0.945445095        | 2               | 3.44499   |
| P45953        | NPLGNVGLLIGEASK                                                            | 1.445203414        | 2               | 3.46002   |
| P45953        | SFGGVTHGLPEK                                                               | 1.229819632        | 2               | 2.3118    |
| P45953        | SFGGVTHGLPEKK                                                              | 0.998887654        | 2               | 3.00918   |
| P45953        | SGELAVQALEQFATVVEAK                                                        | 1.278791916        | 3               | 4.77657   |
| P45953        | SSEGYPTAQHEK                                                               | 1.234175201        | 2               | 3.32553   |
| P45953        | TGIGSGLSLGIVHPELSR                                                         | 1.200810509        | 2               | 4.5212    |
| P45953        | VEEDTLQGLK                                                                 | 1.053390404        | 2               | 2.66233   |
| <b>P46418</b> | <b>GSTA5 Glutathione S_transferase alpha_5</b>                             | <b>0.953249722</b> | <b>0.19233</b>  | <b>4</b>  |
| P46418        | AILNYIATK                                                                  | 2.901834247        | 2               | 3.30885   |
| P46418        | SDGSLMFEQVPMVEIDGMK                                                        | 0.824859334        | 2               | 2.75118   |
| P46418        | SHGQDYLVGNK                                                                | 0.858449567        | 2               | 3.13551   |
| P46418        | VSNLPTVK                                                                   | 0.929136485        | 2               | 2.89263   |
| <b>P46425</b> | <b>GSTP2 Glutathione S_transferase P 2</b>                                 | <b>0.895666352</b> | <b>0.005804</b> | <b>2</b>  |
| P46425        | ALPGHLKPFETLLSQNGGK                                                        | 0.651202093        | 3               | 3.97118   |
| P46425        | FEDGDLTYQSNAILR                                                            | 0.911996699        | 2               | 4.7111    |
| <b>P46462</b> | <b>TERA Transitional endoplasmic reticulum ATPase</b>                      | <b>1.093312501</b> | <b>9.9E-20</b>  | <b>28</b> |
| P46462        | AIANECQANFISIK                                                             | 4.062615923        | 2               | 3.73597   |
| P46462        | EAVCIVLSDDTCSDEK                                                           | 0.484935617        | 2               | 2.73813   |
| P46462        | ELQELVQYPVEHPDK                                                            | 1.06685762         | 2               | 4.26945   |
| P46462        | ETVVEVPQVTWEDIGGLEVDK                                                      | 0.899194015        | 2               | 3.01749   |
| P46462        | ETVVEVPQVTWEDIGGLEVDKR                                                     | 0.917441602        | 2               | 4.06306   |
| P46462        | EVDIGIPDATGR                                                               | 1.083050685        | 2               | 3.03997   |
| P46462        | GDDLSTAILK                                                                 | 0.904181256        | 2               | 3.05848   |
| P46462        | GGNIGDGGGAADR                                                              | 1.366159474        | 2               | 3.97588   |
| P46462        | GILLYGPPGTGK                                                               | 1.088891158        | 2               | 3.19377   |
| P46462        | GVLFGPPGCGK                                                                | 1.530226612        | 2               | 2.50731   |
| P46462        | IVSLLTLMGDK                                                                | 1.573719714        | 2               | 3.05828   |
| P46462        | KYEMFAQTLQQR                                                               | 0.641030454        | 2               | 3.79958   |
| P46462        | LADDVDLEQVANETHGHVGADLAALCSEAAQAIR                                         | 1.134319155        | 3               | 6.18906   |
| P46462        | LAGESESNLRKAFEEAEK                                                         | 0.902875305        | 2               | 2.6056    |
| P46462        | LDQLIYIPLPEK                                                               | 1.090043003        | 2               | 4.47123   |
| P46462        | LEILQHTK                                                                   | 1.19793898         | 2               | 2.69385   |
| P46462        | LGDISIQPCPDVK                                                              | 1.072750888        | 2               | 4.26393   |
| P46462        | LIVDEAINEDNSVLSLQPK                                                        | 0.9592869          | 2               | 5.8338    |
| P46462        | MDELQLFR                                                                   | 0.854945034        | 2               | 3.0378    |
| P46462        | MDELQLFR+Oxidation(0)                                                      | 1.279568646        |                 |           |
| P46462        | MTNGFSGADLTEICQR                                                           | 0.577955996        | 2               | 4.22739   |
| P46462        | MTNGFSGADLTEICQR+Oxidation(0)                                              | 1.489171978        |                 |           |
| P46462        | NAPAIIFIDELDAIAPK                                                          | 1.868504274        | 2               | 5.09878   |
| P46462        | QAAPCVLFFDELDSIAK                                                          | 3.971127831        | 3               | 3.44443   |
| P46462        | QTNPSAMEVEEDDPVEIR                                                         | 0.812294763        | 2               | 4.6451    |
| P46462        | RSVSDNDR                                                                   | 0.580568821        | 2               | 2.89145   |
| P46462        | VINQLTEMDGMSTK                                                             | 0.941030365        | 2               | 4.55255   |



|               |                                                                                           |                    |                 |           |
|---------------|-------------------------------------------------------------------------------------------|--------------------|-----------------|-----------|
| P46462        | WALSQSNPSALR                                                                              | 1.050985966        | 2               | 3.16954   |
| <b>P46664</b> | <b>PURA2 Adenylosuccinate synthetase isozyme 2</b>                                        | <b>0.909525916</b> | <b>0.784498</b> | <b>4</b>  |
| P46664        | FIDELQIPVK                                                                                | 1.095566776        | 2               | 3.05091   |
| P46664        | LDILDMFTEIK                                                                               | 1.101818681        | 2               | 3.40912   |
| P46664        | VGIGAFPTEQDNEIGELLQTR                                                                     | 0.968654135        | 2               | 4.39987   |
| P46664        | VVDLLAQDADIVCR                                                                            | 0.820948839        | 2               | 3.72121   |
| <b>P46720</b> | <b>SO1A1 Solute carrier organic anion transporter family member 1A1</b>                   | <b>0.921317789</b> | <b>0.041317</b> | <b>3</b>  |
| P46720        | ESEHTDVHGSPQVENDGELK                                                                      | 1.424179343        | 3               | 3.47787   |
| P46720        | GIGETPIVPLGISYIEDFAK                                                                      | 1.148531429        | 2               | 3.49457   |
| P46720        | SENSPLYIGILEMGK                                                                           | 0.886235153        | 2               | 3.7395    |
| <b>P46844</b> | <b>BIEA Biliverdin reductase A</b>                                                        | <b>0.794194079</b> | <b>0.331156</b> | <b>3</b>  |
| P46844        | FGVVVGVGR                                                                                 | 1.072300724        | 2               | 2.75365   |
| P46844        | LLDQVSAEDLAAEK                                                                            | 0.724667148        | 2               | 4.37197   |
| P46844        | MTVQLETQNK                                                                                | 0.79229578         | 2               | 2.74063   |
| <b>P46953</b> | <b>3HAO 3_hydroxyanthranilate 3_4_dioxygenase</b>                                         | <b>0.94181372</b>  | <b>0.973189</b> | <b>9</b>  |
| P46953        | AQGSVALSVTQDPACK                                                                          | 0.385567782        | 2               | 4.48617   |
| P46953        | ASFQPPVCNK                                                                                | 0.938555169        | 2               | 2.35606   |
| P46953        | DLGTQLAPIIQEFFHSEQYR                                                                      | 1.043126882        | 2               | 4.31282   |
| P46953        | FANTMGLVIER                                                                               | 1.036187831        | 2               | 2.6089    |
| P46953        | METELDGLR                                                                                 | 0.894886355        | 2               | 2.61912   |
| P46953        | QDQDVVWLWQLEGSSK                                                                          | 1.244287534        | 2               | 3.89049   |
| P46953        | QGEIFLLPAR                                                                                | 0.959845132        | 2               | 3.27073   |
| P46953        | TGKPNPDQLLK                                                                               | 0.889274233        | 3               | 3.82719   |
| P46953        | YYVGDTEVDLFEK                                                                             | 0.965013823        | 2               | 4.01938   |
| <b>P46978</b> | <b>STT3A Dolichyl_diphosphooligosaccharide__protein glycosyltransferase subunit STT3A</b> | <b>1.296401562</b> | <b>0.075798</b> | <b>5</b>  |
| P46978        | FGQVYTEAK                                                                                 | 1.3265264          | 2               | 2.69589   |
| P46978        | FYLLDPSYAK                                                                                | 1.307789046        | 2               | 2.92425   |
| P46978        | NLDIRPDKK                                                                                 | 1.503675051        | 2               | 2.79715   |
| P46978        | VGQAMASTEELK                                                                              | 1.324437212        | 2               | 3.40203   |
| P46978        | VGQAMASTEELK+Oxidation(4)                                                                 | 0.512516861        |                 |           |
| <b>P47198</b> | <b>RL22 60S ribosomal protein L22</b>                                                     | <b>1.49993244</b>  | <b>0.001688</b> | <b>2</b>  |
| P47198        | AGNLGGGVVTIER                                                                             | 1.059150965        | 2               | 3.52787   |
| P47198        | FTLDCTHPVEDGIMDAANFEQLQER                                                                 | 1.529300182        | 3               | 5.18702   |
| <b>P47875</b> | <b>CSRP1 Cysteine and glycine rich protein 1</b>                                          | <b>0.917229956</b> | <b>0.618361</b> | <b>4</b>  |
| P47875        | GFGFGQGAGALVHSE                                                                           | 0.883886631        | 2               | 3.21126   |
| P47875        | GLESTTLADKDGIEYCK                                                                         | 1.085297399        | 2               | 5.18824   |
| P47875        | HEEAPGHRPTTNPASK                                                                          | 0.92636226         | 3               | 3.81041   |
| P47875        | NLDSTTVAVHGEEIYCK                                                                         | 1.114828098        | 2               | 3.68772   |
| <b>P47942</b> | <b>DPYL2 Dihydropyrimidinase related protein 2</b>                                        | <b>0.878042852</b> | <b>0.87026</b>  | <b>2</b>  |
| P47942        | GIQEEMEALVK                                                                               | 0.848854498        | 2               | 2.80073   |
| P47942        | GLYDGPVCEVSVTPK                                                                           | 0.878241661        | 2               | 3.63552   |
| <b>P48004</b> | <b>PSA7 Proteasome subunit alpha type 7</b>                                               | <b>1.124052381</b> | <b>0.789713</b> | <b>3</b>  |
| P48004        | GRDIVVLGVEK                                                                               | 1.150160859        | 2               | 2.65801   |
| P48004        | NYTDDAIETDLTIK                                                                            | 0.960418291        | 2               | 4.55011   |
| P48004        | YVAEIEKEEENEK                                                                             | 1.12883683         | 2               | 5.05144   |
| <b>P48024</b> | <b>EIF1 Eukaryotic translation initiation factor 1</b>                                    | <b>0.941842979</b> | <b>0.007366</b> | <b>2</b>  |
| P48024        | FACNGTVIEHPEYGEVIQLQGDQR                                                                  | 1.378128602        | 3               | 5.46596   |
| P48024        | TLTTVQGIADDDYDK                                                                           | 0.93929246         | 2               | 3.16854   |
| <b>P48037</b> | <b>ANXA6 Annexin A6</b>                                                                   | <b>0.883610336</b> | <b>0.996932</b> | <b>19</b> |
| P48037        | AANDFNPADAK                                                                               | 1.403245845        | 2               | 3.35011   |
| P48037        | AINEAYKEDYHK                                                                              | 1.06904435         | 2               | 3.17669   |
| P48037        | ALIEILATR                                                                                 | 1.017458563        | 2               | 3.34523   |
| P48037        | CLIEILASR                                                                                 | 1.126099717        | 2               | 2.51764   |
| P48037        | DAFVAIVQSVK                                                                               | 1.490744597        | 2               | 3.00467   |

|               |                                                           |                    |                 |           |
|---------------|-----------------------------------------------------------|--------------------|-----------------|-----------|
| P48037        | DLESDIIGDTSGHFQK                                          | 0.645083682        | 2               | 3.86075   |
| P48037        | ENDDVVSEDLVQQDVQDLYEAGELK                                 | 1.263331991        | 2               | 4.93555   |
| P48037        | GELSGDFEK                                                 | 0.882611785        | 1               | 2.10107   |
| P48037        | GFGSDKESILEITSR                                           | 0.944782646        | 2               | 4.2194    |
| P48037        | GIGTDEATIIDIITQR                                          | 1.289691217        | 2               | 4.05848   |
| P48037        | KTNYDIEHVIK                                               | 0.931127558        | 2               | 2.47809   |
| P48037        | QRQEICQSYK                                                | 1.024183544        | 2               | 4.01634   |
| P48037        | SEIDLLNIR                                                 | 1.225994123        | 2               | 3.28123   |
| P48037        | SEISGDLAR                                                 | 1.024439227        | 2               | 2.36083   |
| P48037        | SELDMLDIR                                                 | 0.74037328         | 2               | 2.68278   |
| P48037        | SLEDALSSDTSGHFK                                           | 1.076500814        | 2               | 3.93423   |
| P48037        | TNEQIHQLVAAYK                                             | 0.985280665        | 2               | 3.98261   |
| P48037        | TNYDIEHVIK                                                | 0.984838604        | 2               | 3.25088   |
| P48037        | TTGKPIEASIR                                               | 1.057219097        | 2               | 2.50123   |
| <b>P48450</b> | <b>ERG7 Lanosterol synthase</b>                           | <b>1.184289341</b> | <b>0.470089</b> | <b>2</b>  |
| P48450        | ILGIGPDDPDLVR                                             | 0.897449783        | 2               | 2.38531   |
| P48450        | SVQLPDGGWGLHIEDK                                          | 2.318539945        | 2               | 2.73308   |
| <b>P48500</b> | <b>TPIS Triosephosphate isomerase</b>                     | <b>1.137497926</b> | <b>9.9E-20</b>  | <b>13</b> |
| P48500        | CNVSEGVAQCTR                                              | 1.035096383        | 2               | 3.70889   |
| P48500        | DLGATWVVLGHSER                                            | 1.340864189        | 2               | 3.68629   |
| P48500        | ELASQPDVDGFLVGGASLKPEFVDIINAK                             | 0.958063479        | 4               | 6.55196   |
| P48500        | HIFGESDELIGQK                                             | 1.020548211        | 2               | 4.01695   |
| P48500        | IAVAAQNCYK                                                | 2.057419088        | 2               | 2.69742   |
| P48500        | IYGGSVTGATCK                                              | 1.387734503        | 2               | 4.64246   |
| P48500        | LPADTEVVCAPPTAYIDFAR                                      | 1.465909541        | 2               | 5.04826   |
| P48500        | RHIFGESDELIGQK                                            | 1.163735033        | 2               | 3.91866   |
| P48500        | TATPQQAQEVHEK                                             | 1.479159881        | 2               | 3.74113   |
| P48500        | VNHALSEGLGVIACIGEK                                        | 0.981122305        | 2               | 5.27733   |
| P48500        | VTNGAFTGEISPGMIK                                          | 1.082066862        | 2               | 5.16047   |
| P48500        | VTNGAFTGEISPGMIK+Oxidation(13)                            | 1.270863555        |                 |           |
| P48500        | VVLAYEPVWAIGTGK                                           | 1.010486019        | 3               | 4.66199   |
| <b>P48508</b> | <b>GSH0 Glutamate__cysteine ligase regulatory subunit</b> | <b>0.80355606</b>  | <b>0.005328</b> | <b>5</b>  |
| P48508        | ASTLHLQTGNNLNWGR                                          | 0.835608148        | 3               | 4.29868   |
| P48508        | FFPDVLECTMSHAVEK                                          | 1.232030381        | 2               | 3.72593   |
| P48508        | INPDEREEMK                                                | 0.566525319        | 2               | 2.56828   |
| P48508        | LFIVGSNSSSSTR                                             | 0.926100342        | 2               | 3.01952   |
| P48508        | TLNEWSSQISPDLVR                                           | 0.81555604         | 2               | 4.79794   |
| <b>P48675</b> | <b>DESM Desmin</b>                                        | <b>0.548989567</b> | <b>0.014302</b> | <b>3</b>  |
| P48675        | ADVDAATLAR                                                | 0.801514595        | 2               | 2.39396   |
| P48675        | FLEQQNAALAAEVNR                                           | 0.589749728        | 2               | 4.29126   |
| P48675        | VSDLTQAANK                                                | 0.355639494        | 2               | 2.98866   |
| <b>P48679</b> | <b>LMNA Prelamin_A/C</b>                                  | <b>0.955529705</b> | <b>4.33E-15</b> | <b>16</b> |
| P48679        | AAYEAELGDAR                                               | 1.278864376        | 2               | 2.95779   |
| P48679        | AQHEDQVEQYK                                               | 0.99340813         | 2               | 3.06522   |
| P48679        | AQHEDQVEQYK                                               | 0.920256113        | 3               | 3.9373    |
| P48679        | IDSLSAQLSQLQK                                             | 0.934953394        | 2               | 3.13431   |
| P48679        | ITESEEVVSR                                                | 0.744777319        | 2               | 3.22988   |
| P48679        | LKDLEALLNSK                                               | 0.745626206        | 2               | 2.74162   |
| P48679        | LQEKEDLQELNDR                                             | 0.966712999        | 2               | 4.39889   |
| P48679        | LRDLEDLAR                                                 | 0.65324837         | 2               | 2.46889   |
| P48679        | MQQQLDEYQELLDIK                                           | 1.110680393        | 2               | 4.39612   |
| P48679        | MQQQLDEYQELLDIK+Oxidation(0)                              | 1.044078537        |                 |           |
| P48679        | NSNLVGAAHEELQQSR                                          | 0.826193984        | 2               | 4.36597   |
| P48679        | SGAQASSTPLSPTR                                            | 0.807296772        | 2               | 3.26103   |
| P48679        | SVGGSGGSGFDNLVTR                                          | 1.093142635        | 2               | 3.98449   |
| P48679        | TALINATGEEVAMR                                            | 0.819923013        | 2               | 3.23638   |

|               |                                                                            |                    |                 |           |
|---------------|----------------------------------------------------------------------------|--------------------|-----------------|-----------|
| P48679        | TVLCGTCGQPADK                                                              | 0.836459478        | 2               | 3.30195   |
| P48679        | VAVEEVDEEGK                                                                | 1.232519751        | 2               | 2.93067   |
| <b>P48721</b> | <b>GRP75 Stress_70 protein_mitochondrial</b>                               | <b>1.925393702</b> | <b>9.9E-20</b>  | <b>28</b> |
| P48721        | AQFEGIVTDLIK                                                               | 1.048546778        | 2               | 3.77651   |
| P48721        | ASNGDAWVEAHGK                                                              | 1.242637112        | 2               | 3.74087   |
| P48721        | DAGQISGLNVLR                                                               | 1.055607319        | 2               | 3.56964   |
| P48721        | EQQIVIQSSGGLSK                                                             | 1.367382846        | 2               | 3.75901   |
| P48721        | EQQIVIQSSGGLSKDDIENMVK                                                     | 1.056657916        | 2               | 4.43679   |
| P48721        | ERVEAVNMAEGIIHDTETK                                                        | 1.080766211        | 3               | 5.76706   |
| P48721        | ETAENYLGHATAK                                                              | 1.435479527        | 2               | 3.59407   |
| P48721        | GAVVGIDLGTTNSCVAVMEGK                                                      | 0.855150273        | 2               | 5.6297    |
| P48721        | LLGQFTLIGIPPAPR                                                            | 1.819704551        | 2               | 3.07916   |
| P48721        | MEEFKDQLPADECNK                                                            | 0.937554876        | 2               | 4.77011   |
| P48721        | MEEFKDQLPADECNK+Oxidation(0)                                               | 1.429195058        |                 |           |
| P48721        | MKETAENYLGHATAK                                                            | 1.041599104        | 2               | 4.15117   |
| P48721        | MKETAENYLGHATAK+Oxidation(0)                                               | 1.318507968        |                 |           |
| P48721        | NAVITVPAYFNDSQR                                                            | 1.283742007        | 2               | 3.56906   |
| P48721        | QAASSLQQASK                                                                | 6.865283564        | 2               | 2.99302   |
| P48721        | QAVTNPNTFYATK                                                              | 2.438808149        | 2               | 3.78195   |
| P48721        | RYDDPEVQK                                                                  | 1.202803167        | 2               | 2.92188   |
| P48721        | RYDDPEVQKDTK                                                               | 1.240503407        | 2               | 3.76615   |
| P48721        | SDIGEVILVGGMTR                                                             | 0.922617386        | 2               | 4.31892   |
| P48721        | SQVFSTAADGQTQVEIK                                                          | 2.415297203        | 2               | 5.02191   |
| P48721        | STNGDTFLGGEDFDQALLR                                                        | 1.14467192         | 2               | 5.61647   |
| P48721        | TTPSVVAFTPDGER                                                             | 1.104914051        | 2               | 3.70694   |
| P48721        | VEAVNMAEGIIHDTETK                                                          | 0.894597153        | 2               | 4.32592   |
| P48721        | VINEPTAAALAYGLDK                                                           | 1.39852499         | 2               | 4.13496   |
| P48721        | VLENAEGAR                                                                  | 1.097651071        | 2               | 3.07982   |
| P48721        | VQQTVQDLFGR                                                                | 1.078783399        | 2               | 3.44652   |
| P48721        | YDDPEVQK                                                                   | 1.065955519        | 2               | 2.46592   |
| P48721        | YDDPEVQKDTK                                                                | 1.054996133        | 2               | 2.77876   |
| <b>P48725</b> | <b>PCNT Pericentrin</b>                                                    | <b>1.07263168</b>  | <b>0.080687</b> | <b>2</b>  |
| P48725        | EEVSGGNGPCRGSPLER                                                          | 1.194363523        | 2               | 2.33237   |
| P48725        | VYQSLSTAVEGGLLEMALDSSKQLEEAR                                               | 0.037594831        | 3               | 3.33224   |
| <b>P49134</b> | <b>ITB1 Integrin beta_1</b>                                                | <b>0.836013387</b> | <b>3.1E-05</b>  | <b>4</b>  |
| P49134        | CNCQSHGIPASPK                                                              | 0.769187758        | 2               | 3.65588   |
| P49134        | GEFFNELVGQQR                                                               | 0.749001287        | 2               | 2.80083   |
| P49134        | RITSDFRIGFGSFVEK                                                           | 1.183866983        | 2               | 2.35938   |
| P49134        | SAVTTVNPVK                                                                 | 0.991477142        | 2               | 2.43799   |
| <b>P49242</b> | <b>RS3A 40S ribosomal protein S3a</b>                                      | <b>1.29711819</b>  | <b>3.08E-08</b> | <b>9</b>  |
| P49242        | ACQSIYPLHDVFR                                                              | 1.327342302        | 2               | 3.96882   |
| P49242        | ADGYEPPVQESV                                                               | 1.283008789        | 2               | 2.35357   |
| P49242        | LIPDSIGKDIEK                                                               | 1.196063171        | 2               | 2.5086    |
| P49242        | LITEDVQVK                                                                  | 1.024204621        | 2               | 2.74494   |
| P49242        | LMELHGEFGSSGK                                                              | 0.941267015        | 2               | 3.45818   |
| P49242        | LMELHGEFGSSGK+Oxidation(1)                                                 | 1.401930639        |                 |           |
| P49242        | NCLTNFHGMDLTR                                                              | 1.317220813        | 2               | 3.80027   |
| P49242        | TTDGYLLR                                                                   | 1.21026181         | 2               | 3.06943   |
| P49242        | VFEVSLADLQNDVAFR                                                           | 1.186218263        | 2               | 4.27409   |
| <b>P49432</b> | <b>ODPB Pyruvate dehydrogenase E1 component subunit beta_mitochondrial</b> | <b>0.870921154</b> | <b>0.78134</b>  | <b>6</b>  |
| P49432        | EAINQGMDEELERDEK                                                           | 0.868628511        | 2               | 2.55716   |
| P49432        | ILEDNSIPQVK                                                                | 1.130153492        | 2               | 3.07739   |
| P49432        | IMEGPAFNFLDAPAVR                                                           | 1.004723984        | 2               | 4.22293   |
| P49432        | IMEGPAFNFLDAPAVR+Oxidation(1)                                              | 1.087246502        |                 |           |
| P49432        | TIRPMDIEAIEASVMK                                                           | 0.83853127         | 3               | 4.40488   |
| P49432        | VLLGEEVAQYDGAYK                                                            | 1.038757765        | 2               | 3.53979   |

|               |                                                   |                    |                 |           |
|---------------|---------------------------------------------------|--------------------|-----------------|-----------|
| <b>P49620</b> | <b>DGKG Diacylglycerol kinase gamma</b>           | <b>0.380511433</b> | <b>0.115121</b> | <b>2</b>  |
| P49620        | QGERILQKFHYLLNPK                                  | 0.202805104        | 2               | 2.49651   |
| P49620        | WGGGYEGGSLTKILK                                   | 0.956246735        | 2               | 2.34486   |
| <b>P49717</b> | <b>MCM4 DNA replication licensing factor MCM4</b> | <b>0.745029369</b> | <b>0.003847</b> | <b>2</b>  |
| P49717        | GQSDTAITKDMFEEALR                                 | 0.70797129         | 2               | 2.31263   |
| P49717        | YQQLFEDIR                                         | 0.745048268        | 1               | 1.97985   |
| <b>P49889</b> | <b>ST1E3 Estrogen sulfotransferase_ isoform 3</b> | <b>0.684218515</b> | <b>9.9E-20</b>  | <b>13</b> |
| P49889        | CKEDALFNR                                         | 0.421995697        | 2               | 2.59912   |
| P49889        | FEEHYQQQMK                                        | 0.482706743        | 2               | 2.81133   |
| P49889        | FEEHYQQQMK+Oxidation(8)                           | 0.726265352        |                 |           |
| P49889        | FMEGQVPYGSWYDHVK                                  | 1.150708081        | 2               | 3.76787   |
| P49889        | IIQHTSFQEMK                                       | 0.57627299         | 2               | 2.67944   |
| P49889        | LIEFLERDPSAELVDR                                  | 0.416516305        | 3               | 5.06295   |
| P49889        | NEDLINGIK                                         | 0.50656451         | 2               | 2.90781   |
| P49889        | NNPCTNYSMLPETMIDLK                                | 0.468612914        | 2               | 4.47865   |
| P49889        | NNPCTNYSMLPETMIDLK+Oxidation(13)                  | 0.656147986        |                 |           |
| P49889        | NNPCTNYSMLPETMIDLK+Oxidation(8)                   | 0.656147986        |                 |           |
| P49889        | SFSEFVEK                                          | 0.551974494        | 2               | 2.37466   |
| P49889        | SGSTWISEIVDMIYK                                   | 0.391983328        | 2               | 4.56267   |
| P49889        | YWEDVETFLARPDDLIVTPK                              | 1.408939393        | 3               | 4.19757   |
| <b>P50137</b> | <b>TKT Transketolase</b>                          | <b>0.866030541</b> | <b>3.33E-12</b> | <b>23</b> |
| P50137        | AVELAANTK                                         | 0.972694622        | 1               | 1.9751    |
| P50137        | GHAAPILYAVVWAEAGFLPEALLNLR                        | 1.432886196        | 3               | 3.48207   |
| P50137        | GITGIEDK                                          | 1.025444704        | 1               | 2.33076   |
| P50137        | IIALDGDTK                                         | 1.513186192        | 2               | 2.45631   |
| P50137        | ILATPPQEDAPSVDIANIR                               | 1.134785848        | 3               | 5.38332   |
| P50137        | ISSDLDGHPVPK                                      | 0.924994399        | 2               | 3.2442    |
| P50137        | KISSDLDGHPVPK                                     | 0.934473339        | 2               | 3.90194   |
| P50137        | LAVSQVPR                                          | 1.071805859        | 2               | 2.30179   |
| P50137        | LAVSQVPRSGKPAELLK                                 | 1.547887734        | 2               | 2.60143   |
| P50137        | LDNLVAIFDINR                                      | 0.932724159        | 2               | 4.3408    |
| P50137        | LGQSDPAPLQHQVDVYQK                                | 1.269104045        | 2               | 4.03118   |
| P50137        | MFGIDKDAIVQAVK                                    | 0.681205152        | 2               | 4.39607   |
| P50137        | MFGIDKDAIVQAVK+Oxidation(0)                       | 1.077297655        |                 |           |
| P50137        | NMAEQIIQEIYSQVQSK                                 | 1.118477712        | 3               | 5.85073   |
| P50137        | NMAEQIIQEIYSQVQSK+Oxidation(1)                    | 1.36234777         |                 |           |
| P50137        | NSTFSELFK                                         | 0.930823167        | 2               | 2.39611   |
| P50137        | SGKPAELLK                                         | 0.620631876        | 3               | 3.40025   |
| P50137        | SKDDQVTVIGAGVTLHEALAAEMLK                         | 0.865364326        | 3               | 4.06969   |
| P50137        | SVPMSTVFYPSDGVATEK                                | 0.798678304        | 2               | 4.29074   |
| P50137        | SVPMSTVFYPSDGVATEK+Oxidation(3)                   | 1.139168745        |                 |           |
| P50137        | TSRPENAIYSNNEFDVQVQAK                             | 1.311272289        | 3               | 6.31945   |
| P50137        | VLDPFTIKPLDK                                      | 1.064829297        | 2               | 3.02983   |
| P50137        | VLDPFTIKPLDKK                                     | 0.910123605        | 2               | 2.73472   |
| <b>P50169</b> | <b>RDH3 Retinol dehydrogenase 3</b>               | <b>0.902390149</b> | <b>4.64E-10</b> | <b>10</b> |
| P50169        | AMESLVNTCSGDLSLVTDCMEHALTSCHPR                    | 0.699270186        | 3               | 5.04765   |
| P50169        | AMESLVNTCSGDLSLVTDCMEHALTSCHPR+Oxidation(1)       | 0.926571903        |                 |           |
| P50169        | FQDSYMK                                           | 0.719949664        | 1               | 2.08614   |
| P50169        | GLWGLVNNAGISVPGPNEWMR                             | 0.970870588        | 2               | 3.71594   |
| P50169        | KLWDQTTEEVK                                       | 0.727048186        | 2               | 3.0769    |
| P50169        | KLWDQTTEEVKEIYGEK                                 | 0.794933948        | 3               | 4.72156   |
| P50169        | LWDQTTEEVK                                        | 0.845778161        | 2               | 3.25573   |
| P50169        | LWDQTTEEVKEIYGEK                                  | 0.833238283        | 2               | 5.144     |
| P50169        | MSLVGGGYCISK                                      | 0.892501305        | 2               | 3.77376   |
| P50169        | MSLVGGGYCISK+Oxidation(0)                         | 0.988079792        |                 |           |
| <b>P50237</b> | <b>ST1C1 Sulfotransferase 1C1</b>                 | <b>1.016742644</b> | <b>1.37E-09</b> | <b>9</b>  |

|               |                                                       |                    |                 |           |
|---------------|-------------------------------------------------------|--------------------|-----------------|-----------|
| P50237        | AGTTWTQEIVDMIQNDGDVQK                                 | 0.782001924        | 2               | 5.23398   |
| P50237        | DISEEVLNK                                             | 1.063213565        | 2               | 2.63622   |
| P50237        | DLHLGEQDLQPETR                                        | 1.145338065        | 2               | 4.30947   |
| P50237        | HPFIEWTLPSPLNSGLDLANK                                 | 0.376888074        | 3               | 3.32217   |
| P50237        | IWNFQAKPDDLLIATYAK                                    | 1.589745645        | 3               | 3.75006   |
| P50237        | MKDLHLGEQDLQPETR                                      | 0.884720043        | 2               | 3.98099   |
| P50237        | MLPDPGTLGEYIEQFK                                      | 0.770915595        | 3               | 4.69976   |
| P50237        | MLPDPGTLGEYIEQFK+Oxidation(0)                         | 1.156396709        |                 |           |
| P50237        | VLWGSWYDHVK                                           | 1.089443005        | 2               | 3.11976   |
| <b>P50298</b> | <b>ARY2 Arylamine N_acetyltransferase 2</b>           | <b>0.904994015</b> | <b>0.669495</b> | <b>2</b>  |
| P50298        | FSYKDNIDLVEFK                                         | 0.796960694        | 2               | 2.68394   |
| P50298        | SLTEEEIEDVLK                                          | 0.961093702        | 2               | 2.76717   |
| <b>P50398</b> | <b>GDIA Rab GDP dissociation inhibitor alpha</b>      | <b>0.876032216</b> | <b>0.001883</b> | <b>8</b>  |
| P50398        | FDLGQDVIDFTGHALALYR                                   | 1.426344225        | 3               | 4.23088   |
| P50398        | FQLLEGPPESMGR                                         | 0.842487114        | 2               | 3.54814   |
| P50398        | KQNDVFGAEDQ                                           | 0.874184341        | 2               | 2.63594   |
| P50398        | MLLYTEVTRYLDFK                                        | 1.358082552        | 2               | 2.34705   |
| P50398        | NPYYGGESSITPLEELYK                                    | 1.24025153         | 2               | 5.44806   |
| P50398        | QLICDPSYIPDR                                          | 0.869907895        | 2               | 3.34827   |
| P50398        | TDDYLDQPCLETINR                                       | 1.029513567        | 2               | 5.16766   |
| P50398        | TFEGVDPQTTSMR                                         | 0.938515854        | 2               | 2.59551   |
| <b>P50399</b> | <b>GDIB Rab GDP dissociation inhibitor beta</b>       | <b>0.982825914</b> | <b>1.99E-07</b> | <b>7</b>  |
| P50399        | AYDATTHFETTCDDIK                                      | 1.296167239        | 2               | 4.77291   |
| P50399        | AYDATTHFETTCDDIKDIYK                                  | 1.084756204        | 3               | 5.50689   |
| P50399        | EIRPALELLEPIEQK                                       | 0.992325281        | 3               | 3.93112   |
| P50399        | FDLGQDVIDFTGHSLALYR                                   | 1.898011521        | 3               | 4.70326   |
| P50399        | FVSISDLFVPK                                           | 1.273325552        | 2               | 3.14176   |
| P50399        | NTNDANSCQIIIPQNQVNR                                   | 1.000958092        | 2               | 4.22148   |
| P50399        | TDDYLDQPC CETINR                                      | 1.131560194        | 2               | 4.76597   |
| <b>P50431</b> | <b>GLYC Serine hydroxymethyltransferase_cytosolic</b> | <b>1.04760277</b>  | <b>6.57E-08</b> | <b>7</b>  |
| P50431        | ALSDALTELYK                                           | 0.990828721        | 2               | 3.9982    |
| P50431        | AVLEALGSLNKN                                          | 1.169212097        | 2               | 4.47689   |
| P50431        | GLLEEDFQK                                             | 0.886167397        | 2               | 2.35848   |
| P50431        | ISATSIFFESMPYK                                        | 1.66297881         | 2               | 3.51066   |
| P50431        | IYQLQVLANCR                                           | 0.745112883        | 2               | 2.69081   |
| P50431        | VLEACSIACNK                                           | 1.1101358          | 2               | 3.92667   |
| P50431        | YSEGYPGQR                                             | 0.84327464         | 2               | 2.77202   |
| <b>P50475</b> | <b>SYAC Alanyl_tRNA synthetase_cytoplasmic</b>        | <b>0.972429415</b> | <b>0.930049</b> | <b>14</b> |
| P50475        | ASEWVQQVSGLMDGK                                       | 0.921328415        | 2               | 4.16658   |
| P50475        | AVFDETYDPVPR                                          | 1.046514047        | 2               | 3.26864   |
| P50475        | DIINEEEVQFLK                                          | 0.644188601        | 2               | 3.18242   |
| P50475        | GLEATDDSPK                                            | 1.023211176        | 2               | 2.5907    |
| P50475        | ITCLCQVPQNAANR                                        | 0.971268263        | 2               | 4.58866   |
| P50475        | IVAVTGAEAQK                                           | 1.254071252        | 2               | 2.75251   |
| P50475        | NVGCLQEALQLATSFAQLR                                   | 1.016727888        | 2               | 2.91859   |
| P50475        | QIWQNLGLDEAK                                          | 0.973979721        | 2               | 3.14009   |
| P50475        | RIVAVTGAEAQK                                          | 1.189081879        | 2               | 2.94673   |
| P50475        | SVLGDADQK                                             | 0.866373852        | 1               | 2.19913   |
| P50475        | TEEIVNGMIEAAKPVYTLDCPLAAAK                            | 1.031532155        | 3               | 4.02376   |
| P50475        | TITVALADGGRPDNTGR                                     | 1.04725548         | 2               | 3.0999    |
| P50475        | VDDSSSEDKTEFTVK                                       | 1.551119584        | 2               | 3.7515    |
| P50475        | VGAEDTDGIDMAYR                                        | 0.894553544        | 2               | 3.85157   |
| <b>P50503</b> | <b>F10A1 Hsc70_interacting protein</b>                | <b>1.327262475</b> | <b>9.9E-20</b>  | <b>6</b>  |
| P50503        | AIDLFTDAIK                                            | 1.273482567        | 2               | 2.90031   |
| P50503        | AIEINPDSAQPYK                                         | 1.567135493        | 2               | 3.46144   |
| P50503        | GAAIDALNDGELQK                                        | 1.46081746         | 2               | 3.66652   |

|               |                                                             |                    |                 |           |
|---------------|-------------------------------------------------------------|--------------------|-----------------|-----------|
| P50503        | KGAAIDALNDGELQK                                             | 1.462850824        | 2               | 4.91894   |
| P50503        | LDYDEDASAMLR                                                | 0.966138307        | 2               | 3.56423   |
| P50503        | QDPSVLHTEEMR                                                | 1.163215779        | 2               | 2.5345    |
| <b>P50516</b> | <b>VATA V_type proton ATPase catalytic subunit A</b>        | <b>1.068298255</b> | <b>0.973462</b> | <b>3</b>  |
| P50516        | ADYAQLLEDMQNAFR                                             | 0.872629324        | 2               | 3.74114   |
| P50516        | TALVANTSNPVVAAR                                             | 1.018856056        | 2               | 3.59489   |
| P50516        | VLDALFPCVQGGTTAIPGAFGCGK                                    | 0.977392213        | 2               | 2.84715   |
| <b>P50554</b> | <b>GABT 4_aminobutyrate aminotransferase_ mitochondrial</b> | <b>1.715667953</b> | <b>8.61E-06</b> | <b>12</b> |
| P50554        | GNYLVDVDGNR                                                 | 1.460612209        | 1               | 2.18324   |
| P50554        | GTFCSFDPDEAIR                                               | 1.702378492        | 2               | 3.75687   |
| P50554        | GVVLGGCGDK                                                  | 1.292408954        | 2               | 2.30473   |
| P50554        | HGCAFLVDEVQTGGGCTGK                                         | 1.435554514        | 2               | 5.86333   |
| P50554        | IDIPSFDPWPIAPFR                                             | 1.277115746        | 2               | 3.74202   |
| P50554        | KHGCAFLVDEVQTGGGCTGK                                        | 1.601497379        | 3               | 3.70531   |
| P50554        | LVQQPQNASTFINRPALGILPPENFVVK                                | 2.053631635        | 3               | 3.72229   |
| P50554        | NLLLAEVINIK                                                 | 1.221162936        | 3               | 4.94282   |
| P50554        | REDLLNNVAHAGK                                               | 1.440296862        | 2               | 2.36059   |
| P50554        | TLLTGLLDLQAQYPQFVSR                                         | 1.360087172        | 3               | 4.10471   |
| P50554        | TVAGIIVEPIQSEGGDNHASDDFFR                                   | 0.948458227        | 2               | 3.46245   |
| P50554        | YPLEEFVTDNQEEAR                                             | 1.122240835        | 2               | 3.00605   |
| <b>P50580</b> | <b>PA2G4 Proliferation_associated protein 2G4</b>           | <b>1.157395493</b> | <b>0.036727</b> | <b>4</b>  |
| P50580        | HELLQPFNVLYEK                                               | 1.139482978        | 2               | 2.96456   |
| P50580        | LVKPGNQNTQVTEAWNK                                           | 1.467118085        | 3               | 3.38917   |
| P50580        | SLVEASSGVSVLSLCEK                                           | 1.187454798        | 2               | 2.49089   |
| P50580        | TIIQNPTDQK                                                  | 1.148276519        | 2               | 3.13545   |
| <b>P50878</b> | <b>RL4 60S ribosomal protein L4</b>                         | <b>1.334499764</b> | <b>9.9E-20</b>  | <b>11</b> |
| P50878        | FCIWTESAFR                                                  | 1.035278527        | 2               | 2.52899   |
| P50878        | KLDELYGTWR                                                  | 1.214454264        | 2               | 3.15736   |
| P50878        | KLEAAAAALAAK                                                | 1.216054549        | 3               | 4.27761   |
| P50878        | LDELYGTWR                                                   | 0.946314523        | 2               | 2.62995   |
| P50878        | LEAAAAALAAK                                                 | 1.359116816        | 2               | 3.0964    |
| P50878        | NIPGITLLNVSK                                                | 1.428833118        | 2               | 3.29321   |
| P50878        | NVTLPVAFK                                                   | 1.32702152         | 1               | 2.00375   |
| P50878        | RGPCIYNEDNGIHK                                              | 1.322080653        | 2               | 3.46853   |
| P50878        | SGQGAFGNMCR                                                 | 1.073447204        | 2               | 2.37858   |
| P50878        | SNYNLPMHK                                                   | 1.279185053        | 2               | 2.56285   |
| P50878        | YAICSALAASALPALVMSK                                         | 1.747958298        | 2               | 3.49972   |
| <b>P51583</b> | <b>PUR6 Multifunctional protein ADE2</b>                    | <b>0.977859865</b> | <b>0.88342</b>  | <b>3</b>  |
| P51583        | ACGNFGIPCELR                                                | 0.977456019        | 2               | 2.64011   |
| P51583        | AEYEGDGIPTVFVAVAGR                                          | 1.259264513        | 2               | 3.20417   |
| P51583        | SWLPQNCTLVDMK                                               | 1.077566619        | 2               | 2.62298   |
| <b>P51635</b> | <b>AK1A1 Alcohol dehydrogenase [NADP_]</b>                  | <b>1.077873403</b> | <b>4.59E-14</b> | <b>8</b>  |
| P51635        | ALEALVAK                                                    | 1.102650881        | 2               | 2.52787   |
| P51635        | ALGLSNFSSR                                                  | 1.573253193        | 2               | 2.80661   |
| P51635        | GLEVTAYSPLGSSDR                                             | 1.042294267        | 2               | 4.45285   |
| P51635        | HHPEDVEPAVR                                                 | 1.072949889        | 3               | 3.74055   |
| P51635        | HIDCASVYGNETEIGEALK                                         | 1.078018627        | 2               | 5.92903   |
| P51635        | HIDCASVYGNETEIGEALKESVGAGK                                  | 1.184240901        | 3               | 6.12267   |
| P51635        | HPDEPVLLLEPVVLALEK                                          | 1.85510489         | 3               | 6.08408   |
| P51635        | QLDALNK                                                     | 1.143871478        | 1               | 2.30074   |
| <b>P51647</b> | <b>AL1A1 Retinal dehydrogenase 1</b>                        | <b>1.139650198</b> | <b>9.9E-20</b>  | <b>17</b> |
| P51647        | ANNTTYGLAAGVFTK                                             | 1.022892632        | 2               | 3.94088   |
| P51647        | EAGFPPGVVNVIPGYPTAGAAISSHMDVVK                              | 0.986296394        | 3               | 3.89027   |
| P51647        | ELGEHGLYEYTELK                                              | 1.055735426        | 2               | 3.72107   |
| P51647        | FPVLNPATEEVICHVEEGDK                                        | 0.996983204        | 3               | 4.09538   |
| P51647        | FPVLNPATEEVICHVEEGDKADVVK                                   | 0.73894982         | 4               | 5.14294   |

|               |                                                                 |                    |                 |          |
|---------------|-----------------------------------------------------------------|--------------------|-----------------|----------|
| P51647        | IFINNEWHDSVSGK                                                  | 1.296128563        | 2               | 4.3527   |
| P51647        | IFVEESVYDEFVR                                                   | 0.949791281        | 2               | 4.26487  |
| P51647        | IGPALSCGNTVVVKAPEQTPLTALHMASLIK                                 | 1.240580363        | 4               | 5.75652  |
| P51647        | IHGQTIPSDGDIFFTR                                                | 1.338064978        | 2               | 4.54644  |
| P51647        | KFPVLNPATEEVICHVEEGDK                                           | 0.970585947        | 3               | 3.75391  |
| P51647        | KFPVLNPATEEVICHVEEGDKADVDK                                      | 0.644086349        | 4               | 4.86691  |
| P51647        | KYVLGNPLTQGINQGPQJDKQEQHDK                                      | 0.997315345        | 3               | 3.77458  |
| P51647        | LLLATIEAINGGK                                                   | 4.84896386         | 2               | 4.11735  |
| P51647        | VFANAYLSDLGGSIK                                                 | 1.363206659        | 2               | 4.55831  |
| P51647        | YCAGWADK                                                        | 0.945011853        | 1               | 2.05645  |
| P51647        | YVLGNPLTQGINQGPQIDK                                             | 0.931357939        | 2               | 5.02683  |
| P51647        | YVLGNPLTQGINQGPQIDKEQHDK                                        | 0.941222073        | 2               | 3.50837  |
| <b>P51650</b> | <b>SSDH Succinate semialdehyde dehydrogenase mitochondrial</b>  | <b>0.959935038</b> | <b>7.82E-07</b> | <b>7</b> |
| P51650        | EVGEVLCTDPLVSK                                                  | 1.620016792        | 2               | 3.80684  |
| P51650        | HQSGGNFFTEPLLSNVTR                                              | 1.082719929        | 2               | 3.5819   |
| P51650        | LGTVADCGVPEAR                                                   | 0.954994963        | 2               | 3.43422  |
| P51650        | VGNFEEGTTQGPLINEK                                               | 0.989698938        | 2               | 4.31214  |
| P51650        | VYGDIIYTSK                                                      | 1.525986933        | 2               | 2.664    |
| P51650        | WLPTPATFPVYDPASGAK                                              | 0.944591953        | 2               | 3.76462  |
| P51650        | YGIDEYLEVK                                                      | 0.804551799        | 2               | 3.08503  |
| <b>P51869</b> | <b>CP4F4 Cytochrome P450 4F4</b>                                | <b>1.330601732</b> | <b>7.01E-05</b> | <b>2</b> |
| P51869        | TLDFIDVLLTK                                                     | 1.395937287        | 2               | 3.61471  |
| P51869        | WQDLASGGSAR                                                     | 1.214558431        | 2               | 2.53931  |
| <b>P51886</b> | <b>LUM Lumican</b>                                              | <b>0.628655273</b> | <b>0.00064</b>  | <b>3</b> |
| P51886        | ITNIPDEFNR                                                      | 0.550607331        | 2               | 2.33337  |
| P51886        | NNQIDHIDEK                                                      | 0.626064147        | 2               | 3.09442  |
| P51886        | SLQDLQLANNK                                                     | 0.997914247        | 2               | 2.69651  |
| <b>P52020</b> | <b>ERG1 Squalene monooxygenase</b>                              | <b>0.938626557</b> | <b>0.907443</b> | <b>2</b> |
| P52020        | DIPDLYDDAAIFQAK                                                 | 1.064587289        | 2               | 2.46621  |
| P52020        | GVLLGDAYNLR                                                     | 0.87987063         | 2               | 2.96723  |
| <b>P52296</b> | <b>IMB1 Importin subunit beta_1</b>                             | <b>1.249087323</b> | <b>0.003521</b> | <b>5</b> |
| P52296        | AAVENLPTFLVELSR                                                 | 0.570768038        | 2               | 3.41269  |
| P52296        | GALQYLVPILTQTLTK                                                | 0.92282253         | 2               | 2.44686  |
| P52296        | SNEILTAIIQGMR                                                   | 0.99398967         | 2               | 3.14647  |
| P52296        | TVSPDRLELEAAQK                                                  | 1.105475425        | 2               | 2.87184  |
| P52296        | VLANPGNSQVAR                                                    | 1.251385259        | 2               | 3.59582  |
| <b>P52303</b> | <b>AP1B1 AP_1 complex subunit beta_1</b>                        | <b>1.122238669</b> | <b>0.365218</b> | <b>4</b> |
| P52303        | NINLIVQK                                                        | 0.742160291        | 1               | 2.21278  |
| P52303        | NSFGLAPAAPLQVHAPLSPNQTEVISLPLNTVGSVMK                           | 0.862140512        | 3               | 3.9173   |
| P52303        | SQPDMAIMAVNTFVK                                                 | 1.076723628        | 2               | 2.60239  |
| P52303        | YNDPIYVK                                                        | 1.685804269        | 2               | 2.52462  |
| <b>P52555</b> | <b>ERP29 Endoplasmic reticulum resident protein 29</b>          | <b>1.057611976</b> | <b>0.990743</b> | <b>3</b> |
| P52555        | ILDQGEDFPASELAR                                                 | 1.055530708        | 2               | 4.81951  |
| P52555        | QGQDGLSGVK                                                      | 0.922350504        | 2               | 2.46566  |
| P52555        | SLNILTAFR                                                       | 1.005285071        | 2               | 2.8114   |
| <b>P52631</b> | <b>STAT3 Signal transducer and activator of transcription 3</b> | <b>1.713420251</b> | <b>1.99E-05</b> | <b>3</b> |
| P52631        | GLSIEQLTTLAEK                                                   | 1.349688481        | 2               | 3.08091  |
| P52631        | LLQTAATAAQGGQANHPTAAVVTEK                                       | 2.06980918         | 3               | 3.381    |
| P52631        | TQIQSVPEYTK                                                     | 2.32815347         | 2               | 2.63886  |
| <b>P52734</b> | <b>FGD1 FYVE_RhoGEF and PH domain containing protein 1</b>      | <b>1.219979486</b> | <b>0.483166</b> | <b>2</b> |
| P52734        | SLELQARTEEEKK                                                   | 1.353556018        | 2               | 2.50486  |
| P52734        | TEEEKDWWQAINSTLLK                                               | 1.121365474        | 2               | 2.35379  |
| <b>P52759</b> | <b>UK114 Ribonuclease UK114</b>                                 | <b>1.077327673</b> | <b>0.002928</b> | <b>8</b> |

|               |                                                            |                    |                |           |
|---------------|------------------------------------------------------------|--------------------|----------------|-----------|
| P52759        | AAGCDFTNVVK                                                | 1.943570427        | 2              | 3.00979   |
| P52759        | AAVQVAALPK                                                 | 1.346133737        | 2              | 2.64186   |
| P52759        | APAAIGAYSQAVLVDR                                           | 1.260249316        | 2              | 3.70816   |
| P52759        | IEIEAIAVQGPFTTAGL                                          | 1.155284001        | 2              | 3.51306   |
| P52759        | NLGEILK                                                    | 1.103054009        | 2              | 2.38066   |
| P52759        | TIYVSGQIGMDPSSGQLVPGGVAAEEAK                               | 1.035466463        | 2              | 4.30302   |
| P52759        | TTVLLADINDFGTVNEIYK                                        | 1.224425526        | 2              | 4.875     |
| P52759        | TYFQGNLPAR                                                 | 1.113913309        | 2              | 3.08749   |
| <b>P52845</b> | <b>ST1E2 Estrogen sulfotransferase_ isoform 2</b>          | <b>0.757124044</b> | <b>4.4E-05</b> | <b>2</b>  |
| P52845        | CKEDAIFNR                                                  | 0.421995697        | 2              | 2.59912   |
| P52845        | SGSTWIGEIVDMIYK                                            | 0.743419078        | 2              | 3.55171   |
| <b>P52847</b> | <b>ST1B1 Sulfotransferase family cytosolic 1B member 1</b> | <b>1.370216635</b> | <b>9.9E-20</b> | <b>8</b>  |
| P52847        | DNPLVNYTHLPTEIMDHSK                                        | 1.918828193        | 2              | 5.01376   |
| P52847        | FLAGNVAYGSWFDHVK                                           | 1.623823617        | 2              | 3.50361   |
| P52847        | IEEFQSRPCDIVIPTYPK                                         | 1.238680192        | 3              | 4.80537   |
| P52847        | IVHHTSFEVMK                                                | 1.735361212        | 2              | 2.91515   |
| P52847        | NYFTMTQSEK                                                 | 1.103324404        | 1              | 2.71535   |
| P52847        | SGTTWLSEIVDMVLNDGNVEK                                      | 1.365729679        |                |           |
| P52847        | THLPIDLLPK                                                 | 1.214310589        | 3              | 3.71345   |
| P52847        | TLDEHTLER                                                  | 1.17511507         | 2              | 3.00337   |
| <b>P52873</b> | <b>PYC Pyruvate carboxylase_ mitochondrial</b>             | <b>1.055871018</b> | <b>9.9E-20</b> | <b>37</b> |
| P52873        | ADEAYLIGR                                                  | 0.97988554         | 2              | 2.94675   |
| P52873        | ADFAQACQDAGVR                                              | 0.957235741        | 2              | 4.47601   |
| P52873        | AEAEAQAELSFR                                               | 1.072541955        | 2              | 4.44045   |
| P52873        | AGTHILCIK                                                  | 1.461200358        | 1              | 2.03253   |
| P52873        | ALAVSDLNR                                                  | 1.021562069        | 2              | 2.60405   |
| P52873        | AYSEALAAFNGALFVEK                                          | 1.02903254         | 2              | 3.70542   |
| P52873        | AYVEANQMLGDLIK                                             | 1.21534792         | 2              | 4.512     |
| P52873        | DAHQSLATR                                                  | 1.530718961        | 1              | 3.11768   |
| P52873        | DFTATFGPLDSLNR                                             | 1.271331501        | 2              | 4.28607   |
| P52873        | DMAGLLKPAACTMLVSSLR                                        | 1.055763451        | 2              | 3.07508   |
| P52873        | ELIPNIPFQMLLR                                              | 1.83858389         | 2              | 2.40415   |
| P52873        | ENGVDVHHPGYGFLSER                                          | 1.395361977        | 2              | 3.07216   |
| P52873        | FLYECPCR                                                   | 1.061123111        | 2              | 2.60694   |
| P52873        | GANAVGYTNYPDNVVFK                                          | 2.609389812        | 2              | 4.33213   |
| P52873        | GLAPVQAYLHIPDIK                                            | 1.323257607        | 2              | 2.95695   |
| P52873        | GTPLDTEVPLR                                                | 0.831416722        | 2              | 3.5907    |
| P52873        | HGEEVTPEDVLSAAMYPDVFAQFK                                   | 1.206182487        | 2              | 5.94138   |
| P52873        | HGEEVTPEDVLSAAMYPDVFAQFK+Oxidation(14)                     | 1.080259829        |                |           |
| P52873        | HIEVQILGDQYGNILHLYR                                        | 1.090204425        | 3              | 4.75945   |
| P52873        | HYFIEVNSR                                                  | 1.027787722        | 2              | 2.55322   |
| P52873        | IAEAFEVELER                                                | 1.011309844        | 2              | 3.28797   |
| P52873        | IEGRPGASLPLNLK                                             | 1.018617724        | 2              | 3.61076   |
| P52873        | INGCAIQCR                                                  | 1.322346725        | 2              | 2.844     |
| P52873        | IVGDLAQFMVQNGLSR                                           | 1.306347881        | 2              | 5.29795   |
| P52873        | LDNASAFQGAVISPHYDSSLVK                                     | 0.966312773        | 3              | 5.83205   |
| P52873        | LQVEHTVTEITDVDLVHAQIHVSEGR                                 | 0.964595514        | 4              | 5.44123   |
| P52873        | NHQGLLLMDTTFR                                              | 1.511395319        | 2              | 3.35566   |
| P52873        | QKADEAYLIGR                                                | 1.152252717        | 3              | 3.43804   |
| P52873        | QVFFELNGQLR                                                | 1.314313426        | 2              | 2.77138   |
| P52873        | QVGYENAGTVEFLVDK                                           | 1.215844237        | 2              | 4.10785   |
| P52873        | SVVEFLQGYIGIPHGGFPEPFR                                     | 1.408671303        | 2              | 4.30079   |
| P52873        | TVAVYSEQDTGQMHR                                            | 1.288885079        | 2              | 4.34306   |
| P52873        | VFDYSEYWEGR                                                | 0.931572603        | 2              | 4.57129   |
| P52873        | VSPSPVDPIVVPVIGPPPAGFR                                     | 0.898412207        | 2              | 4.46103   |
| P52873        | VVEIAPATHLDPQLR                                            | 0.936863875        | 2              | 4.11638   |



|               |                                                                                                                      |                    |                 |           |
|---------------|----------------------------------------------------------------------------------------------------------------------|--------------------|-----------------|-----------|
| P52873        | VVHSYEELEENYTR                                                                                                       | 1.060406422        | 2               | 5.15844   |
| P52873        | YSLEYMGLAEELVR                                                                                                       | 2.110564159        | 3               | 4.68916   |
| <b>P52944</b> | <b>PDL1 PDZ and LIM domain protein 1</b>                                                                             | <b>0.917696625</b> | <b>0.739287</b> | <b>7</b>  |
| P52944        | AAIANLCIGDLITAIIDGEDTSSMTHLEAQNK                                                                                     | 0.957114869        | 3               | 4.3674    |
| P52944        | CGTGIVGVFVK                                                                                                          | 0.857959219        | 2               | 2.43764   |
| P52944        | GCVDNMTLTVSR                                                                                                         | 0.954028465        | 2               | 2.36246   |
| P52944        | GHFFVGDQIYCEK                                                                                                        | 1.028500108        | 2               | 3.51767   |
| P52944        | QSTSFLVLQEILESDGK                                                                                                    | 1.034705014        | 2               | 2.4357    |
| P52944        | TSASGEEANSRPSAQPHPSGGLIIDK                                                                                           | 0.900686353        | 3               | 3.95351   |
| P52944        | VTPPEGYDVVTVFPK                                                                                                      | 0.814400777        | 2               | 2.79022   |
| <b>P53395</b> | <b>ODB2 Lipamide acyltransferase component of branched_chain alpha_keto acid dehydrogenase complex_mitochondrial</b> | <b>1.555990905</b> | <b>9.61E-07</b> | <b>3</b>  |
| P53395        | LSDIGEGIR                                                                                                            | 1.237588494        | 2               | 2.467     |
| P53395        | LSEVVGSGK                                                                                                            | 1.05012332         | 2               | 2.34327   |
| P53395        | SYLENPAFMLLDLK                                                                                                       | 1.553568711        | 2               | 4.64073   |
| <b>P53987</b> | <b>MOT1 Monocarboxylate transporter 1</b>                                                                            | <b>0.970257278</b> | <b>0.000164</b> | <b>5</b>  |
| P53987        | DGKEDETSTDVDEKPK                                                                                                     | 1.489253379        | 3               | 5.62678   |
| P53987        | DGKEDETSTDVDEKPKK                                                                                                    | 2.274681796        | 3               | 3.87049   |
| P53987        | EDETSTDVDEKPK                                                                                                        | 1.289179769        | 2               | 3.10029   |
| P53987        | ETQSPAPLQNSSGDPAAEESPV                                                                                               | 0.946464708        | 2               | 4.40411   |
| P53987        | SDANTDLIGGSPK                                                                                                        | 1.099398086        | 2               | 4.05005   |
| <b>P54319</b> | <b>PLAP Phospholipase A_2 activating protein</b>                                                                     | <b>1.120919323</b> | <b>0.337191</b> | <b>4</b>  |
| P54319        | GQTLGLGNTSFSDPFTGGGR                                                                                                 | 0.860291417        | 2               | 3.34338   |
| P54319        | IGDVVGSSEGANQQTSGK                                                                                                   | 1.123513272        | 2               | 4.51555   |
| P54319        | TGDLGDINAEQLPGR                                                                                                      | 1.025791205        | 2               | 3.66575   |
| P54319        | YVPGTSGPSNTVQTADPFTGAGR                                                                                              | 0.89372202         | 2               | 2.87102   |
| <b>P54822</b> | <b>PUR8 Adenylosuccinate lyase</b>                                                                                   | <b>0.961095991</b> | <b>0.945656</b> | <b>2</b>  |
| P54822        | KVDIEVLSVLASLGASVHK                                                                                                  | 0.971385001        | 3               | 4.43676   |
| P54822        | VLSQAAAIVVK                                                                                                          | 0.826724137        | 2               | 2.3284    |
| <b>P54921</b> | <b>SNAA Alpha_soluble NSF attachment protein</b>                                                                     | <b>1.255506507</b> | <b>1.2E-14</b>  | <b>5</b>  |
| P54921        | AIAHYEQSADYYKGEESNSSANK                                                                                              | 0.957593289        | 3               | 4.88215   |
| P54921        | HDAATCFVDAGNAFK                                                                                                      | 1.08612384         | 2               | 2.34596   |
| P54921        | IEEACEIYAR                                                                                                           | 0.976897276        | 2               | 2.71191   |
| P54921        | NSQSFSGLFGGSSK                                                                                                       | 1.260417975        | 2               | 3.4318    |
| P54921        | YEELPFAFSDSR                                                                                                         | 0.90144342         | 2               | 2.89361   |
| <b>P55006</b> | <b>RDH7 Retinol dehydrogenase 7</b>                                                                                  | <b>0.940784918</b> | <b>0.000701</b> | <b>11</b> |
| P55006        | LETVILDVTK                                                                                                           | 0.916202364        | 2               | 3.23885   |
| P55006        | TESIVAATQWVK                                                                                                         | 0.93526536         | 2               | 3.93957   |
| P55006        | TNVTNMER                                                                                                             | 0.809682621        | 2               | 2.77048   |
| P55006        | TNVTNMER+Oxidation(5)                                                                                                | 0.75204507         |                 |           |
| P55006        | TSDRLETVILDVTK                                                                                                       | 0.915006173        | 3               | 4.19468   |
| P55006        | VAIIEPGGFK                                                                                                           | 1.265470506        | 2               | 2.64586   |
| P55006        | VLAACLEK                                                                                                             | 1.085290543        | 2               | 3.32454   |
| P55006        | VVNIASTMGR                                                                                                           | 0.874915599        | 2               | 3.65485   |
| P55006        | VVNIASTMGR+Oxidation(7)                                                                                              | 1.089370947        |                 |           |
| P55006        | YGVEAFSDSLR                                                                                                          | 1.097667783        | 2               | 3.8355    |
| P55006        | YVFITGCDSGFGNLLAR                                                                                                    | 1.183867796        | 2               | 3.67732   |
| <b>P55051</b> | <b>FABP7 Fatty acid binding protein_brain</b>                                                                        | <b>1.158195664</b> | <b>0.410452</b> | <b>4</b>  |
| P55051        | ALGVGFATR                                                                                                            | 1.262468505        | 2               | 2.71391   |
| P55051        | LTDSQNFDEYMK                                                                                                         | 1.148281979        | 2               | 4.40081   |
| P55051        | LTDSQNFDEYMK+Oxidation(10)                                                                                           | 1.673272931        |                 |           |
| P55051        | QVGNVTKPTVIISQEGGK                                                                                                   | 0.910358894        | 3               | 3.83746   |
| <b>P55053</b> | <b>FABP5 Fatty acid binding protein_epidermal</b>                                                                    | <b>1.196538014</b> | <b>0.136928</b> | <b>5</b>  |
| P55053        | FDETTADGR                                                                                                            | 1.154392797        | 2               | 2.96171   |
| P55053        | KTETVCTFTDGALVQHQQ                                                                                                   | 1.289649532        | 3               | 5.08028   |
| P55053        | LVESHGFEDYMK                                                                                                         | 1.228325153        | 2               | 2.62493   |

|               |                                                           |                    |                 |           |
|---------------|-----------------------------------------------------------|--------------------|-----------------|-----------|
| P55053        | MVVECMNNAICTR                                             | 0.928182364        | 2               | 3.24547   |
| P55053        | TETVCTFTDGALVQHKK                                         | 1.541942066        | 2               | 4.30548   |
| <b>P55159</b> | <b>PON1 Serum paraoxonase/arylesterase 1</b>              | <b>1.377676015</b> | <b>9.9E-20</b>  | <b>7</b>  |
| P55159        | GIEAGAEDLEILPNGLTFFSTGLK                                  | 1.872531807        | 3               | 5.5183    |
| P55159        | IFFYDSENPPGSEVLR                                          | 0.971389376        | 2               | 5.90176   |
| P55159        | IQSILSEDPK                                                | 1.257781098        | 2               | 3.08888   |
| P55159        | TITHELLPSINDIAAVGPESFYATNDHYFADPYLR                       | 1.971327883        | 3               | 4.11924   |
| P55159        | VLSFDTLVDNISVDPVTGDLWVGCHPNGMR                            | 1.010397196        | 3               | 3.96655   |
| P55159        | VVADGDFDFANGIGISLDGK                                      | 0.947222463        | 2               | 4.08594   |
| P55159        | YVYIAELLAHK                                               | 1.546034008        | 2               | 2.87987   |
| <b>P55260</b> | <b>ANXA4 Annexin A4</b>                                   | <b>0.899385094</b> | <b>0.333809</b> | <b>5</b>  |
| P55260        | AEIDMLDIPANFK                                             | 0.914470555        | 1               | 2.21379   |
| P55260        | GAGTDEGLIEILASR                                           | 1.054331522        | 2               | 3.41034   |
| P55260        | GLGTDEDAIIGVLACR                                          | 0.903903035        | 2               | 4.12615   |
| P55260        | INQTYQQQYGR                                               | 1.912586831        | 2               | 2.75985   |
| P55260        | SETSGSFEDALLAIVK                                          | 0.944111069        | 2               | 2.42488   |
| <b>P55770</b> | <b>NH2L1 NHP2_like protein 1</b>                          | <b>1.02604295</b>  | <b>0.997577</b> | <b>2</b>  |
| P55770        | LLDLVQQSCNYK                                              | 1.032985515        | 2               | 2.66762   |
| P55770        | QQIQSIQQSIER                                              | 1.025931862        | 2               | 3.01228   |
| <b>P56399</b> | <b>UBP5 Ubiquitin carboxyl terminal hydrolase 5</b>       | <b>1.070803361</b> | <b>0.01056</b>  | <b>6</b>  |
| P56399        | GTGLQPGEELPDIAPPLVTPDEPK                                  | 0.900203442        | 2               | 4.22236   |
| P56399        | IFQNAPTDPTQDFSTQVAK                                       | 1.457936522        | 2               | 3.96663   |
| P56399        | IGEWELIQESGVPLKPLFGPGYTGR                                 | 1.135324616        | 3               | 3.43186   |
| P56399        | IVILPDYLEIAR                                              | 1.202972115        | 2               | 2.62376   |
| P56399        | KQEVQAWDGEVR                                              | 1.090971639        | 2               | 3.12834   |
| P56399        | VTSAVEALLSADSASR                                          | 1.361788658        | 2               | 2.76844   |
| <b>P56522</b> | <b>ADRO NADPH:adenodoxin oxidoreductase_mitochondrial</b> | <b>0.94344934</b>  | <b>0.003155</b> | <b>3</b>  |
| P56522        | AVPTGDVEDLPCGLLLSSVGYK                                    | 1.446320032        | 2               | 4.42053   |
| P56522        | TATEKPGVEEAR                                              | 1.027672234        | 2               | 3.17799   |
| P56522        | TDITEVALGVLR                                              | 0.926215776        | 2               | 4.04872   |
| <b>P56574</b> | <b>IDHP Isocitrate dehydrogenase [NADP]_mitochondrial</b> | <b>1.158905482</b> | <b>0.060697</b> | <b>14</b> |
| P56574        | CATITPDEAR                                                | 1.377239951        | 2               | 2.30465   |
| P56574        | DLAGCIHGLSNVK                                             | 1.055192084        | 2               | 2.85653   |
| P56574        | DQTNDQVTIDSALATQK                                         | 1.163423688        | 2               | 5.04928   |
| P56574        | FKDIFQEIFDK                                               | 0.837123395        | 2               | 3.23631   |
| P56574        | GKLDGNQDLIR                                               | 1.118436064        | 2               | 2.80986   |
| P56574        | LDGNQDLIR                                                 | 1.023494642        | 2               | 2.38346   |
| P56574        | LIDDMVAQVLK                                               | 0.84833966         | 2               | 4.31404   |
| P56574        | LNEHFLNTTDFLDTIK                                          | 1.363932629        | 2               | 4.72423   |
| P56574        | NILGGTVFR                                                 | 1.051627019        | 2               | 2.35122   |
| P56574        | SSGGFVWACK                                                | 1.185521587        | 2               | 2.53247   |
| P56574        | TIEAAAHGTVTR                                              | 1.044527799        | 2               | 4.09884   |
| P56574        | VCVQTVESGAMTK                                             | 1.057083127        | 2               | 3.09659   |
| P56574        | VEKPVVEMDGDDEMTR                                          | 1.040919726        | 3               | 3.64442   |
| P56574        | YFDLGLPNR                                                 | 1.602967854        | 2               | 2.53513   |
| <b>P56593</b> | <b>CP2AC Cytochrome P450 2A12</b>                         | <b>1.06804975</b>  | <b>0.364695</b> | <b>3</b>  |
| P56593        | MLQGTGAPIDPTIYLSK                                         | 1.076769315        | 2               | 3.95905   |
| P56593        | NRQPQYEDHMK                                               | 1.108317389        | 3               | 3.82688   |
| P56593        | YLPGPQQQIIK                                               | 0.715254725        | 2               | 2.44414   |
| <b>P56656</b> | <b>CP239 Cytochrome P450 2C39</b>                         | <b>0.909941053</b> | <b>0.483113</b> | <b>5</b>  |
| P56656        | EHQESLDVTNPR                                              | 0.869286138        | 2               | 3.38159   |
| P56656        | IKEHQESLDVTNPR                                            | 0.823873164        | 3               | 4.75197   |
| P56656        | NYLIPK                                                    | 0.890117001        | 1               | 2.1917    |
| P56656        | SDHFMPFSAGKRVKAGEGLAR                                     | 1.273182557        | 2               | 2.39019   |
| P56656        | VQEEIDHVIGR                                               | 1.241333898        | 2               | 3.18525   |

|               |                                                               |                    |                 |           |
|---------------|---------------------------------------------------------------|--------------------|-----------------|-----------|
| <b>P57093</b> | <b>PAHX Phytanoyl_CoA dioxygenase_peroxisomal</b>             | <b>1.245401057</b> | <b>0.011706</b> | <b>8</b>  |
| P57093        | AISCHYGSSDCK                                                  | 0.998148787        | 2               | 3.3845    |
| P57093        | FYEENGFLVIK                                                   | 1.100287658        | 2               | 2.58835   |
| P57093        | GDTVFFHPLIHGSGR                                               | 2.234020245        | 3               | 3.53833   |
| P57093        | IQDFQQNEELFR                                                  | 1.353592743        | 2               | 4.33704   |
| P57093        | KFYEENGFLVIK                                                  | 1.192086015        | 2               | 3.38831   |
| P57093        | NLVSDDDIQR                                                    | 1.318321599        | 1               | 2.8651    |
| P57093        | NNGCLVVLPGTHK                                                 | 0.914243934        | 2               | 2.5148    |
| P57093        | YCALPQIVK                                                     | 1.426771627        | 1               | 2.19979   |
| <b>P57113</b> | <b>MAAI Maleylacetoacetate isomerase</b>                      | <b>1.121063909</b> | <b>1.88E-12</b> | <b>13</b> |
| P57113        | AITSGFNALEK                                                   | 1.119172901        | 2               | 3.29268   |
| P57113        | ALLALEAFQVSHPCR                                               | 1.045548881        | 2               | 4.28339   |
| P57113        | DGGQQFSEEFQTLNPMK                                             | 1.088815291        | 2               | 4.92533   |
| P57113        | FKVDLSPYPTISHINK                                              | 0.912005249        | 2               | 5.0818    |
| P57113        | GIDYEIVPINLIK                                                 | 1.094944956        | 2               | 4.46973   |
| P57113        | IDGITIGQSLAILEYLEETRPIPR                                      | 1.023784388        | 3               | 3.9658    |
| P57113        | LLPQDPQK                                                      | 1.237270203        | 1               | 2.099     |
| P57113        | LLPQDPQKR                                                     | 1.284572597        | 2               | 2.54798   |
| P57113        | MISDLIASGIQPLQNLSVLK                                          | 1.021455819        | 2               | 4.77043   |
| P57113        | MISDLIASGIQPLQNLSVLK+Oxidation(0)                             | 1.283306121        |                 |           |
| P57113        | QVGQENQMPWAQK                                                 | 1.144809211        | 2               | 3.89037   |
| P57113        | VDLSPYPTISHINK                                                | 1.074965697        | 2               | 3.46977   |
| P57113        | YCVGDEVSMADVCLAPQVANAER                                       | 0.879070834        | 3               | 6.31231   |
| <b>P57722</b> | <b>PCBP3 Poly(rC)_binding protein 3</b>                       | <b>1.151391488</b> | <b>0.000906</b> | <b>3</b>  |
| P57722        | ESTGAQVQVAGDMLPNSTER                                          | 1.060028454        | 2               | 4.87612   |
| P57722        | INISEGNCPER                                                   | 1.15102381         | 2               | 3.45471   |
| P57722        | LVPASQCGSLIGK                                                 | 1.416528311        | 2               | 2.61784   |
| <b>P58321</b> | <b>UCHL4 Ubiquitin carboxyl_terminal hydrolase isozyme L4</b> | <b>0.982331452</b> | <b>0.99889</b>  | <b>3</b>  |
| P58321        | SQGQDVTSSVYFMK                                                | 1.026522733        | 2               | 2.38123   |
| P58321        | VTHETSAHEGQTEAPSIDEK                                          | 1.005870377        | 3               | 4.70093   |
| P58321        | WLPLEANPEVTNQFLK                                              | 0.9572978          | 2               | 3.48753   |
| <b>P58751</b> | <b>RELN Reelin</b>                                            | <b>0.91001487</b>  | <b>0.836367</b> | <b>2</b>  |
| <b>P58775</b> | <b>TPM2 Tropomyosin beta chain</b>                            | <b>0.288700157</b> | <b>4.4E-13</b>  | <b>12</b> |
| P58775        | AISEELDNALNDITSL                                              | 0.279447912        | 2               | 4.4013    |
| P58775        | ATDAEADVASLNR                                                 | 0.143889009        | 2               | 4.23006   |
| P58775        | CGDLEELK                                                      | 0.134115015        | 2               | 2.39582   |
| P58775        | DAQEKLEQAEK                                                   | 0.410795398        | 2               | 2.56958   |
| P58775        | KATDAEADVASLNR                                                | 0.331099522        | 2               | 4.18121   |
| P58775        | LDKENAIDR                                                     | 0.130832287        | 2               | 2.78517   |
| P58775        | LKGTEDEVEK                                                    | 0.20085829         | 3               | 3.58195   |
| P58775        | MELQEMQLK                                                     | 0.261431617        | 2               | 2.65872   |
| P58775        | QLEEEQQALQK                                                   | 0.121283005        | 2               | 3.97042   |
| P58775        | SLEAQADKYSTK                                                  | 0.065570772        | 2               | 3.34728   |
| P58775        | TIDDLEDEVYAQK                                                 | 0.019097428        | 2               | 4.06552   |
| P58775        | YSESVKDAQEK                                                   | 0.161170423        | 2               | 2.99599   |
| <b>P59242</b> | <b>CING Cingulin</b>                                          | <b>0.918145881</b> | <b>0.080859</b> | <b>2</b>  |
| P59242        | LGQEQQALNR                                                    | 1.202883039        | 2               | 2.74131   |
| P59242        | LQGLEQEAENK                                                   | 0.903486604        | 2               | 2.54317   |
| <b>P59279</b> | <b>RAB2B Ras_related protein Rab_2B</b>                       | <b>1.006362784</b> | <b>0.999873</b> | <b>2</b>  |
| P59279        | GAAGALLYVDITR                                                 | 1.006275472        | 2               | 2.99659   |
| P59279        | LQIWDTAGQESFR                                                 | 1.002839051        | 2               | 3.67701   |
| <b>P59759</b> | <b>MKL2 MKL/myocardin_like protein 2</b>                      | <b>1.090500438</b> | <b>0.84948</b>  | <b>2</b>  |
| P59759        | LVEVLK                                                        | 1.17131375         | 2               | 2.45151   |
| P59759        | QIEELK                                                        | 0.947690672        | 1               | 2.0717    |
| <b>P59895</b> | <b>NEK6 Serine/threonine_protein kinase Nek6</b>              | <b>1.160197151</b> | <b>0.500035</b> | <b>2</b>  |

|               |                                                          |                    |                 |          |
|---------------|----------------------------------------------------------|--------------------|-----------------|----------|
| P59895        | QDCVKEIGLLK                                              | 1.829472172        | 2               | 2.34684  |
| P59895        | TVALKKVQIFEMMDAK+Oxidation(11)                           | 1.160194357        |                 |          |
| <b>P59999</b> | <b>ARPC4 Actin_related protein 2/3 complex subunit 4</b> | <b>1.096410131</b> | <b>0.790329</b> | <b>2</b> |
| P59999        | AENFFILR                                                 | 1.126473978        | 2               | 2.57127  |
| P59999        | ELLLQPVVISR                                              | 1.08394101         | 2               | 2.69131  |
| <b>P60335</b> | <b>PCBP1 Poly(rC)_binding protein 1</b>                  | <b>1.147770971</b> | <b>9.9E-20</b>  | <b>5</b> |
| P60335        | AITIAGVPQSVTECVK                                         | 1.108338998        | 2               | 3.20152  |
| P60335        | CSDAAGYPHATHDLEGPPLDAYSIQGQHTISPLDLAK                    | 1.173388505        | 4               | 5.41702  |
| P60335        | IITLTGPTNAIFK                                            | 1.433267742        | 2               | 2.66608  |
| P60335        | LVVPATQCGSLIGK                                           | 1.51068185         | 2               | 3.34499  |
| P60335        | VMTIPYQMPASSPVICAGGQDR                                   | 0.62580303         | 2               | 3.63662  |
| <b>P60843</b> | <b>IF4A1 Eukaryotic initiation factor 4A_I</b>           | <b>1.186452311</b> | <b>0.748468</b> | <b>5</b> |
| P60843        | ATQALVLAPTR                                              | 1.183336381        | 1               | 2.35004  |
| P60843        | GFKDQYDIFQK                                              | 1.042332442        | 2               | 3.52156  |
| P60843        | KEELTLEGIR                                               | 1.178920788        | 2               | 2.50622  |
| P60843        | KGVAINMVTEEDKR                                           | 0.978466551        | 3               | 4.08843  |
| P60843        | LQMEAPHIIVGTPGR                                          | 1.221128383        | 3               | 3.84368  |
| <b>P60868</b> | <b>RS20 40S ribosomal protein S20</b>                    | <b>1.297798941</b> | <b>0.000555</b> | <b>3</b> |
| P60868        | DTGKTPVEPEVAIHR                                          | 0.929736062        | 3               | 3.53391  |
| P60868        | LIDLHSPSEIVK                                             | 1.36725004         | 2               | 3.19986  |
| P60868        | VCADLIR                                                  | 1.201787042        | 2               | 2.34043  |
| <b>P60901</b> | <b>PSA6 Proteasome subunit alpha type_6</b>              | <b>1.228545621</b> | <b>0.095942</b> | <b>2</b> |
| P60901        | AINQGGLTSVAVR                                            | 1.176093349        | 2               | 3.44145  |
| P60901        | LLDSSTVTHLFK                                             | 1.423723863        | 2               | 2.79561  |
| <b>P61087</b> | <b>UBE2K Ubiquitin_conjugating enzyme E2 K</b>           | <b>1.129031119</b> | <b>0.020841</b> | <b>2</b> |
| P61087        | GEIAGPPDTPYEGGR                                          | 1.510413796        | 2               | 3.66981  |
| P61087        | VDLVDENFTELR                                             | 1.11703315         | 2               | 3.48353  |
| <b>P61107</b> | <b>RAB14 Ras_related protein Rab_14</b>                  | <b>0.859264307</b> | <b>0.701855</b> | <b>5</b> |
| P61107        | IYQNIQDGSLDLNAAESGVQHKPSAPQGGR                           | 1.26313951         | 3               | 3.6827   |
| P61107        | LTSEPPQQR                                                | 1.184493084        | 2               | 2.56299  |
| P61107        | NLTNPNTVILIGNK                                           | 1.101089152        | 2               | 3.22773  |
| P61107        | SCLLHQFTEK                                               | 0.854929123        | 2               | 2.96781  |
| P61107        | STYNHLSSWLTDR                                            | 1.026455734        | 2               | 3.28486  |
| <b>P61203</b> | <b>CSN2 COP9 signalosome complex subunit 2</b>           | <b>0.550418874</b> | <b>0.175769</b> | <b>2</b> |
| P61203        | NYDESGSPR                                                | 0.397589643        | 2               | 2.46957  |
| P61203        | WTNQLNSLNQAVVSK                                          | 0.626991804        | 2               | 2.98088  |
| <b>P61222</b> | <b>ABCE1 ATP_binding cassette sub_family E member 1</b>  | <b>1.113420014</b> | <b>0.423653</b> | <b>4</b> |
| P61222        | GTVGSILDR                                                | 1.135808074        | 2               | 2.32865  |
| P61222        | NTVANSPQTLLAGMNK                                         | 0.998609143        | 2               | 3.6024   |
| P61222        | NVEDLSGGELQR                                             | 0.972718053        | 2               | 2.92107  |
| P61222        | VAETANEEVKK                                              | 2.264270006        | 2               | 2.62075  |
| <b>P61314</b> | <b>RL15 60S ribosomal protein L15</b>                    | <b>1.261150995</b> | <b>4.52E-06</b> | <b>6</b> |
| P61314        | FFEVLIDPFHK                                              | 0.995214005        | 3               | 3.4665   |
| P61314        | GATYGKPVHGVNQLK                                          | 1.480171286        | 2               | 4.36812  |
| P61314        | SLQSVAEER                                                | 1.192066436        | 2               | 2.6884   |
| P61314        | SLQSVAEERAGR                                             | 1.075634409        | 2               | 2.48202  |
| P61314        | VLNSYWVGEDSTYK                                           | 1.346693744        | 2               | 4.25721  |
| P61314        | YIQELWR                                                  | 1.233610008        | 2               | 2.66508  |
| <b>P61354</b> | <b>RL27 60S ribosomal protein L27</b>                    | <b>2.549156094</b> | <b>8.29E-10</b> | <b>2</b> |
| P61354        | NIDDGTSRDPYSHALVAGIDR                                    | 2.5039423          | 3               | 4.11674  |
| P61354        | YSVDIPLDK                                                | 2.304064745        | 2               | 2.41617  |
| <b>P61459</b> | <b>PHS Pterin_4_alpha_carbinolamine dehydratase</b>      | <b>1.338861819</b> | <b>1.09E-13</b> | <b>4</b> |
| P61459        | AVGWNELEGR                                               | 1.093332935        | 2               | 3.12966  |
| P61459        | DQLPLNLR                                                 | 1.118898133        | 2               | 2.35429  |

|               |                                                                                         |                    |                 |          |
|---------------|-----------------------------------------------------------------------------------------|--------------------|-----------------|----------|
| P61459        | LDHHPWFVNVYK                                                                            | 1.33227989         | 3               | 4.77495  |
| P61459        | LSAEERDQLLPNLR                                                                          | 1.056256195        | 3               | 4.01652  |
| <b>P61589</b> | <b>RHOA Transforming protein RhoA</b>                                                   | <b>1.271765838</b> | <b>0.000748</b> | <b>3</b> |
| P61589        | LVIVGDGACGK                                                                             | 1.123069771        | 2               | 2.70956  |
| P61589        | MKQEPVKPEEGR                                                                            | 1.547809129        | 3               | 3.45142  |
| P61589        | MKQEPVKPEEGR+Oxidation(0)                                                               | 1.381440514        |                 |          |
| <b>P61751</b> | <b>ARF4 ADP_ribosylation factor 4</b>                                                   | <b>1.179064635</b> | <b>3.23E-06</b> | <b>4</b> |
| P61751        | IQEGAAVLQK                                                                              | 1.189097353        | 2               | 2.88553  |
| P61751        | LGEIVTTIPTIGFNVETVEYK                                                                   | 1.213350186        | 3               | 5.0297   |
| P61751        | NICFTVWDVGGQDK                                                                          | 1.089771803        | 2               | 4.12761  |
| P61751        | QDLPNAMAISEMTDK                                                                         | 0.848559729        | 2               | 3.77223  |
| <b>P61805</b> | <b>DAD1 Dolichyl_diphosphooligosaccharide__protein glycosyltransferase subunit DAD1</b> | <b>1.198699774</b> | <b>0.999486</b> | <b>2</b> |
| P61805        | ADFQGISPER                                                                              | 1.132674118        | 2               | 2.94088  |
| P61805        | FLEEYLSSTPQR                                                                            | 1.248791784        | 2               | 3.69846  |
| <b>P61972</b> | <b>NTF2 Nuclear transport factor 2</b>                                                  | <b>0.874029703</b> | <b>0.975146</b> | <b>2</b> |
| P61972        | IQHSITAQDHQPTPDSICISMVVGQLK                                                             | 0.895292511        | 3               | 4.04478  |
| P61972        | NINDAWVCTNDMFR                                                                          | 0.878378368        | 2               | 3.60107  |
| <b>P61980</b> | <b>HNRPK Heterogeneous nuclear ribonucleoprotein K</b>                                  | <b>1.115797108</b> | <b>2.06E-05</b> | <b>8</b> |
| P61980        | GSDFDCELR                                                                               | 1.24093953         | 2               | 2.60271  |
| P61980        | GSYGDLDGGPIITQVTIPK                                                                     | 0.914194816        | 2               | 5.05323  |
| P61980        | IDEPLEGSEDR                                                                             | 1.202466625        | 2               | 3.46014  |
| P61980        | IILDLISEPIK                                                                             | 1.18712594         | 2               | 3.97229  |
| P61980        | IITITGTQDQIQNAQYLLQNSVK                                                                 | 1.102050598        | 3               | 7.04534  |
| P61980        | LFQECCPHSTDR                                                                            | 1.29520127         | 2               | 3.67499  |
| P61980        | TDYNASVSPDSSGPER                                                                        | 1.25877924         | 2               | 4.23171  |
| P61980        | VVLIGGKPDR                                                                              | 0.965437161        | 2               | 2.51736  |
| <b>P61983</b> | <b>1433G 14_3_3 protein gamma</b>                                                       | <b>0.925887743</b> | <b>0.999993</b> | <b>4</b> |
| P61983        | AYSEAHEISK                                                                              | 0.991148198        | 2               | 3.23924  |
| P61983        | NVTELENEPLSNEER                                                                         | 1.075341827        | 2               | 4.93711  |
| P61983        | TAFDDAIAELDTLNEDSYK                                                                     | 0.960358807        | 2               | 5.16806  |
| P61983        | YLAEVATGEK                                                                              | 1.090567418        | 2               | 2.92229  |
| <b>P62046</b> | <b>LRCH1 Leucine_rich repeat and calponin homology domain_containing protein 1</b>      | <b>0.909771435</b> | <b>0.165355</b> | <b>2</b> |
| P62046        | DRELDIAMIEQLR                                                                           | 0.910318888        | 2               | 2.5862   |
| P62046        | NLESIDPQFTIRRK                                                                          | 0.853197987        | 2               | 2.31909  |
| <b>P62076</b> | <b>TIM13 Mitochondrial import inner membrane translocase subunit Tim13</b>              | <b>1.071473543</b> | <b>0.054095</b> | <b>5</b> |
| P62076        | CIGKPGGSLDNSEQK                                                                         | 0.974699443        | 2               | 4.04339  |
| P62076        | KCIGKPGGSLDNSEQK                                                                        | 1.407705347        | 3               | 4.54052  |
| P62076        | LDPGAIMEQVK                                                                             | 0.966998859        | 2               | 3.22487  |
| P62076        | VQJAVANAQELLQR                                                                          | 1.109643045        | 2               | 4.95821  |
| P62076        | YMDAWNTVSR                                                                              | 0.85303024         | 2               | 2.75734  |
| <b>P62078</b> | <b>TIM8B Mitochondrial import inner membrane translocase subunit Tim8 B</b>             | <b>1.457619947</b> | <b>3.49E-11</b> | <b>2</b> |
| P62078        | FIDTTLAITGR                                                                             | 0.91418252         | 2               | 2.79627  |
| P62078        | TENCLSSCVDR                                                                             | 1.736624877        | 2               | 2.91872  |
| <b>P62083</b> | <b>RS7 40S ribosomal protein S7</b>                                                     | <b>1.197305701</b> | <b>0.683498</b> | <b>5</b> |
| P62083        | AIIIFVVPQLK                                                                             | 1.004404946        | 2               | 3.79227  |
| P62083        | DVNFEFPEFQL                                                                             | 3.734053285        | 2               | 2.4042   |
| P62083        | IVKPNGEKPDEFESGISQALLELEMNSDLK                                                          | 1.157132287        | 3               | 4.94975  |
| P62083        | KAIIFVVPQLK                                                                             | 1.166429105        | 2               | 3.80727  |
| P62083        | TLTAVHDAILEDLVFPSEIVGK                                                                  | 1.153716457        | 2               | 5.09961  |
| <b>P62161</b> | <b>CALM Calmodulin</b>                                                                  | <b>1.212748502</b> | <b>0.085415</b> | <b>3</b> |
| P62161        | EADIDGDGQVNYEEFVQMMTAK                                                                  | 1.385954413        | 2               | 4.77553  |

|               |                                                  |                    |                 |          |
|---------------|--------------------------------------------------|--------------------|-----------------|----------|
| P62161        | EAFSLFDKDGDTITTK                                 | 1.453238814        | 2               | 4.17257  |
| P62161        | VFDKDGNGYISAAELR                                 | 1.165533523        | 2               | 4.88626  |
| <b>P62193</b> | <b>PRS4 26S protease regulatory subunit 4</b>    | <b>1.058280849</b> | <b>0.301036</b> | <b>4</b> |
| P62193        | APQETYADIGGLDNQIQEIK                             | 1.818892437        | 2               | 4.96943  |
| P62193        | MGQSQSGGHGPGGGK+Oxidation(0)                     | 0.982417098        |                 |          |
| P62193        | NQEQMKPLEEK                                      | 1.489921744        | 2               | 3.23438  |
| P62193        | TMLELLNQLDGFDSR                                  | 0.991281282        | 2               | 4.04875  |
| <b>P62198</b> | <b>PRS8 26S protease regulatory subunit 8</b>    | <b>1.130995391</b> | <b>0.137876</b> | <b>6</b> |
| P62198        | EELQLLEQGSYVGEVVR                                | 1.080408804        | 2               | 2.48743  |
| P62198        | IAELMPGASGAEVK                                   | 0.163485812        | 2               | 2.42972  |
| P62198        | IEELQLIVNDK                                      | 1.062612895        | 2               | 3.00513  |
| P62198        | LEGSGGDSEVQR                                     | 1.181133493        | 2               | 3.75005  |
| P62198        | LLREELQLLEQGSYVGEVVR                             | 1.150462693        | 3               | 4.04938  |
| P62198        | TMLELLNQLDGFPEATK                                | 1.058309333        | 2               | 3.62689  |
| <b>P62243</b> | <b>RS8 40S ribosomal protein S8</b>              | <b>1.151352885</b> | <b>9.9E-20</b>  | <b>8</b> |
| P62243        | ADGYVLEGK                                        | 1.1182142          | 2               | 2.81732  |
| P62243        | IIDVVYNASNNEVLR                                  | 2.132850714        | 2               | 4.37769  |
| P62243        | ISSLLEEQFQQGK                                    | 1.596693818        | 2               | 3.99119  |
| P62243        | KYELGRPAANTK                                     | 1.083246           | 2               | 3.31757  |
| P62243        | LDVGNFSWGSECCTR                                  | 1.05857029         | 2               | 3.79282  |
| P62243        | LTPEEEEILNK                                      | 1.164459906        | 2               | 3.36903  |
| P62243        | NCIVLIDSTPYR                                     | 1.124818789        | 2               | 3.88361  |
| P62243        | YELGRPAANTK                                      | 0.924176169        | 2               | 2.98953  |
| <b>P62246</b> | <b>RS15A 40S ribosomal protein S15a</b>          | <b>1.174965419</b> | <b>0.136512</b> | <b>3</b> |
| P62246        | HGYIGEFEIIDDHR                                   | 1.154373575        | 2               | 4.9555   |
| P62246        | MNVLADALK                                        | 0.929030618        | 2               | 2.34396  |
| P62246        | WQNNLLPSR                                        | 1.252900199        | 2               | 3.00089  |
| <b>P62250</b> | <b>RS16 40S ribosomal protein S16</b>            | <b>1.474372091</b> | <b>4.22E-07</b> | <b>5</b> |
| P62250        | ALVAYYQK                                         | 1.711579775        | 2               | 2.39097  |
| P62250        | EIKDILIQYDR                                      | 1.143566823        | 2               | 2.42965  |
| P62250        | GGGHVAQIYAIR                                     | 1.806057827        | 2               | 3.15143  |
| P62250        | LLEPVLLGK                                        | 1.323562934        | 2               | 3.04864  |
| P62250        | TLLVADPR                                         | 1.117941774        | 2               | 2.71563  |
| <b>P62260</b> | <b>1433E 14_3_3 protein epsilon</b>              | <b>1.090464032</b> | <b>3.77E-15</b> | <b>8</b> |
| P62260        | AAFDDAIAELDTLSEESYK                              | 1.009218338        | 2               | 6.35645  |
| P62260        | AAFDDAIAELDTLSEESYKDSLIMQLLR                     | 1.77899134         |                 |          |
| P62260        | EENKGGEDKLK                                      | 0.97913698         | 2               | 2.74372  |
| P62260        | HLIPAANTGESK                                     | 0.975708327        | 1               | 3.15237  |
| P62260        | IISSIEQK                                         | 1.230390154        | 2               | 2.70544  |
| P62260        | LICCDILDVLDK                                     | 2.027126757        | 2               | 4.03147  |
| P62260        | YLAEFATGNDR                                      | 1.001522299        | 2               | 2.98379  |
| P62260        | YLAEFATGNDRK                                     | 1.029538395        | 2               | 2.83681  |
| <b>P62271</b> | <b>RS18 40S ribosomal protein S18</b>            | <b>1.024350605</b> | <b>5.55E-16</b> | <b>5</b> |
| P62271        | AGELTEDEVER                                      | 1.008371175        | 2               | 3.73479  |
| P62271        | RAGELTEDEVER                                     | 0.283623736        | 2               | 3.48524  |
| P62271        | VITIMQNPR                                        | 0.620553961        | 2               | 2.87893  |
| P62271        | VLNTNIDGR                                        | 1.296176163        | 2               | 2.89392  |
| P62271        | YSQVLANGLDNK                                     | 1.243798119        | 2               | 4.14412  |
| <b>P62278</b> | <b>RS13 40S ribosomal protein S13</b>            | <b>1.241157226</b> | <b>0.002674</b> | <b>4</b> |
| P62278        | GLAPDLPEDLYHLIK                                  | 1.474710879        | 2               | 2.97257  |
| P62278        | GLSQSALPYR                                       | 1.015001473        | 2               | 2.63888  |
| P62278        | KGLTPSQIGVILR                                    | 1.299244032        | 3               | 4.10223  |
| P62278        | LILIESR                                          | 2.058289263        | 2               | 2.3329   |
| <b>P62332</b> | <b>ARF6 ADP_ribosylation factor 6</b>            | <b>1.104921522</b> | <b>0.096601</b> | <b>2</b> |
| P62332        | FNVWDVGGQDK                                      | 0.84109932         | 2               | 2.81863  |
| P62332        | LGQSVTTIPTVGFNVETVYK                             | 1.147571705        | 2               | 3.42255  |
| <b>P62334</b> | <b>PRS10 26S protease regulatory subunit 10B</b> | <b>0.851274987</b> | <b>0.000194</b> | <b>5</b> |

|               |                                                   |                    |                 |           |
|---------------|---------------------------------------------------|--------------------|-----------------|-----------|
| P62334        | ALQSVGQIVGEVLK                                    | 0.936435859        | 2               | 3.088     |
| P62334        | AVASQLDCNFLK                                      | 0.776148233        | 2               | 2.72857   |
| P62334        | EVIELPTNPELFQR                                    | 1.428929604        | 2               | 3.39863   |
| P62334        | FSEGTSADR                                         | 1.096377834        | 2               | 2.52282   |
| P62334        | HGEIDYEAIVK                                       | 0.447825478        | 2               | 3.36691   |
| <b>P62425</b> | <b>RL7A 60S ribosomal protein L7a</b>             | <b>1.227489481</b> | <b>2.22E-16</b> | <b>12</b> |
| P62425        | AGVNTVTTLVENK                                     | 1.222578134        | 2               | 4.04363   |
| P62425        | AGVNTVTTLVENKK                                    | 0.977669362        | 2               | 2.8576    |
| P62425        | HWGGNVLGPK                                        | 0.964981193        | 1               | 1.97926   |
| P62425        | KVVNPLFEK                                         | 1.529968329        | 2               | 2.53722   |
| P62425        | LKVPPAINQFTQALDR                                  | 1.600695838        | 3               | 4.50252   |
| P62425        | NFGIGQDIQPK                                       | 1.172165949        | 2               | 3.47069   |
| P62425        | QTATQLLK                                          | 1.136903532        | 2               | 2.38295   |
| P62425        | TCTTVAFTQVNSDK                                    | 2.424487624        | 2               | 4.13265   |
| P62425        | TCTTVAFTQVNSDKGALAK                               | 3.5211451          | 2               | 3.93124   |
| P62425        | TNYNDRYDEIR                                       | 1.27048651         | 2               | 2.44878   |
| P62425        | VAPAPAVVK                                         | 1.384538998        | 1               | 2.16272   |
| P62425        | VPPAINQFTQALDR                                    | 1.269275696        | 2               | 3.52204   |
| <b>P62630</b> | <b>EF1A1 Elongation factor 1_alpha 1</b>          | <b>1.214738381</b> | <b>9.9E-20</b>  | <b>13</b> |
| P62630        | DGSASGTTLLEALDCILPPTPTDKPLR                       | 1.131754515        | 3               | 5.32608   |
| P62630        | KDGSASGTTLLEALDCILPPTPTDKPLR                      | 1.060451198        | 4               | 5.79031   |
| P62630        | MDSTEPPYSQK                                       | 0.891969076        | 2               | 3.58163   |
| P62630        | MDSTEPPYSQK+Oxidation(0)                          | 1.10251218         |                 |           |
| P62630        | NDPPMEAAGFTAQVIILNHPGQISAGYAPVLDCHTAHIACK         | 1.207896413        | 5               | 6.54685   |
| P62630        | RYEEIVK                                           | 0.892795376        | 2               | 2.61278   |
| P62630        | SGDAAIVDMVPGKPMCVEFSFYPLGR                        | 1.286894281        | 3               | 5.10762   |
| P62630        | SGDAAIVDMVPGKPMCVEFSFYPLGR+Oxidation(14)          | 1.334972569        |                 |           |
| P62630        | SGDAAIVDMVPGKPMCVEFSFYPLGR+Oxidation(8)           | 1.345599079        |                 |           |
| P62630        | VETGVLKPGMVVTFAPVNVVTEVK                          | 0.912543866        | 2               | 5.47105   |
| P62630        | VETGVLKPGMVVTFAPVNVVTEVK+Oxidation(9)             | 1.212866791        |                 |           |
| P62630        | YEEIVK                                            | 1.286502193        | 1               | 2.09193   |
| P62630        | YYVTIIDAPGHR                                      | 1.219644306        | 3               | 3.64177   |
| <b>P62632</b> | <b>EF1A2 Elongation factor 1_alpha 2</b>          | <b>1.085601997</b> | <b>9.9E-20</b>  | <b>9</b>  |
| P62632        | EHALLAYTLGVK                                      | 1.766749681        | 3               | 4.06211   |
| P62632        | IGGIGTVPVGR                                       | 1.621767182        | 2               | 3.65144   |
| P62632        | MDSTEPAYSEK                                       | 0.339446656        | 2               | 2.3051    |
| P62632        | NMITGTSQADCAVLIVAAGVGEFEAGISK                     | 1.048122967        | 3               | 4.57158   |
| P62632        | QLIVGVNK                                          | 1.42276466         | 1               | 2.7711    |
| P62632        | QTVAVGVK                                          | 1.224715605        | 1               | 2.245     |
| P62632        | STTTGHLYK                                         | 1.095708362        | 2               | 3.25064   |
| P62632        | THINIVVIGHVDSGK                                   | 1.183095045        | 2               | 5.46357   |
| P62632        | VETGILRPGMVVTFAPVNVITTEVK                         | 0.229386536        | 3               | 3.59224   |
| <b>P62634</b> | <b>CNBP Cellular nucleic acid_binding protein</b> | <b>1.065027126</b> | <b>0.949702</b> | <b>2</b>  |
| P62634        | CGETGHVAINCSK                                     | 1.058499082        | 2               | 4.42782   |
| P62634        | CYSCGEFGHIQK                                      | 1.05330331         | 2               | 3.08351   |
| <b>P62703</b> | <b>RS4X 40S ribosomal protein S4_X isoform</b>    | <b>1.071856324</b> | <b>0.055567</b> | <b>6</b>  |
| P62703        | FDTGNLCMVTGGANLGR                                 | 0.960922024        | 2               | 4.97067   |
| P62703        | FDTGNLCMVTGGANLGR+Oxidation(7)                    | 0.308953183        |                 |           |
| P62703        | GIPHLVTHDAR                                       | 1.130481408        | 2               | 2.60861   |
| P62703        | LSNIFVIGK                                         | 1.580849212        | 2               | 2.87405   |
| P62703        | TDITYPAGFMDVISIDK                                 | 1.010524425        | 2               | 4.58564   |
| P62703        | VNDTIQIDLETGK                                     | 1.201467023        | 2               | 3.75544   |
| <b>P62718</b> | <b>RL18A 60S ribosomal protein L18a</b>           | <b>1.434377602</b> | <b>0.00037</b>  | <b>2</b>  |
| P62718        | DLTTAGAVTQCYR                                     | 1.447009669        | 2               | 3.037     |

|               |                                                             |                    |                 |          |
|---------------|-------------------------------------------------------------|--------------------|-----------------|----------|
| P62718        | SSGEIVYCGQVFEKSPLR                                          | 1.162832149        | 2               | 2.49597  |
| <b>P62752</b> | <b>RL23A 60S ribosomal protein L23a</b>                     | <b>1.138859348</b> | <b>4.5E-12</b>  | <b>6</b> |
| P62752        | LAPDYDALDVANK                                               | 1.145943017        | 2               | 3.56926  |
| P62752        | LDHYAIK                                                     | 1.115693901        | 2               | 2.40512  |
| P62752        | LYDIDVAK                                                    | 1.139076829        | 1               | 1.92189  |
| P62752        | NKLDHYAIK                                                   | 1.319037728        | 2               | 2.48282  |
| P62752        | VNTLIRPDGEK                                                 | 1.431910308        | 2               | 3.08448  |
| P62752        | VNTLIRPDGEKK                                                | 1.526936418        | 2               | 2.83795  |
| <b>P62755</b> | <b>RS6 40S ribosomal protein S6</b>                         | <b>1.043444839</b> | <b>0.840172</b> | <b>6</b> |
| P62755        | DIPGLDTTVPR                                                 | 0.810330921        | 2               | 2.33639  |
| P62755        | EEAAEYAKLLAK                                                | 1.189543452        | 2               | 2.39887  |
| P62755        | LIEVDDER                                                    | 1.008230845        | 2               | 2.78591  |
| P62755        | LNISFPATGCQK                                                | 1.125597127        | 2               | 3.12534  |
| P62755        | MATEVAADALGEEWK                                             | 1.043332748        | 2               | 4.35637  |
| P62755        | MATEVAADALGEEWK+Oxidation(0)                                | 1.191732185        |                 |          |
| <b>P62775</b> | <b>MTPN Myotrophin</b>                                      | <b>1.37452291</b>  | <b>0.000611</b> | <b>2</b> |
| P62775        | GPDGLTALEATDNQAIK                                           | 2.064910144        | 2               | 3.70673  |
| P62775        | HHITPLLSAVYEGHVSCVK                                         | 1.225015884        | 3               | 3.61731  |
| <b>P62804</b> | <b>H4 Histone H4</b>                                        | <b>1.047847029</b> | <b>9.9E-20</b>  | <b>9</b> |
| P62804        | DAVTYTEHAK                                                  | 1.832369846        | 2               | 3.0916   |
| P62804        | DNIQGITKPAIR                                                | 1.014053685        | 2               | 3.25427  |
| P62804        | ISGLIYEETR                                                  | 2.009334047        | 2               | 3.77303  |
| P62804        | KTVTAMDVVYALK                                               | 0.937358167        | 2               | 3.02327  |
| P62804        | RISGLIYEETR                                                 | 0.919568834        | 2               | 2.30749  |
| P62804        | TLYGFGG                                                     | 1.06287128         | 1               | 1.95168  |
| P62804        | TVTAMDVVYALK                                                | 0.97719542         | 2               | 4.06529  |
| P62804        | TVTAMDVVYALK+Oxidation(4)                                   | 1.248908469        |                 |          |
| P62804        | VFLENVIR                                                    | 0.98307482         | 2               | 3.01582  |
| <b>P62815</b> | <b>VATB2 V_type proton ATPase subunit B_brain isoform</b>   | <b>0.912919967</b> | <b>0.096223</b> | <b>3</b> |
| P62815        | AVVQVFEGTSGIDAK                                             | 0.935215916        | 2               | 3.63727  |
| P62815        | IYPEEMIQTGISAIDGMNSIAR                                      | 0.586124296        | 2               | 2.45004  |
| P62815        | QIYPPINVLPSLSR                                              | 0.929737934        | 2               | 2.35321  |
| <b>P62832</b> | <b>RL23 60S ribosomal protein L23</b>                       | <b>1.389025511</b> | <b>9.9E-20</b>  | <b>2</b> |
| P62832        | GSAITGPVAK                                                  | 0.354571425        | 2               | 2.38306  |
| P62832        | ISLGLPVGAVINCADNTGAK                                        | 1.329311577        | 2               | 4.89623  |
| <b>P62853</b> | <b>RS25 40S ribosomal protein S25</b>                       | <b>2.118621769</b> | <b>9.9E-20</b>  | <b>2</b> |
| P62853        | GGDAPAAGEDA                                                 | 1.705456598        | 1               | 2.01987  |
| P62853        | LNNLVLFDK                                                   | 2.153419006        | 2               | 3.0522   |
| <b>P62856</b> | <b>RS26 40S ribosomal protein S26</b>                       | <b>1.0693746</b>   | <b>0.202385</b> | <b>3</b> |
| P62856        | DISEASVFDAYVLPK                                             | 1.392111513        | 2               | 3.26986  |
| P62856        | FRPAGAAPRPPPKPM                                             | 0.660309437        | 2               | 2.35289  |
| P62856        | NIVEAAVR                                                    | 1.097592433        | 2               | 2.92795  |
| <b>P62859</b> | <b>RS28 40S ribosomal protein S28</b>                       | <b>1.693632523</b> | <b>3.95E-07</b> | <b>2</b> |
| P62859        | EGDVLTLLESER                                                | 1.553768083        | 2               | 3.23469  |
| P62859        | VEFMDDTSR                                                   | 1.391765066        | 2               | 2.59748  |
| <b>P62870</b> | <b>ELOB Transcription elongation factor B polypeptide 2</b> | <b>0.932915941</b> | <b>0.932125</b> | <b>2</b> |
| P62870        | ADDTFEALR                                                   | 0.930838525        | 2               | 2.58373  |
| P62870        | TLGECGFTSQTRPQAPATVGLAFR                                    | 0.945344509        | 3               | 3.42145  |
| <b>P62890</b> | <b>RL30 60S ribosomal protein L30</b>                       | <b>1.472096409</b> | <b>7.99E-07</b> | <b>2</b> |
| P62890        | TGVHHYSGNNIELGTACGK                                         | 1.246322893        | 2               | 5.65483  |
| P62890        | VCTLAIDPGDSDIIR                                             | 1.476698674        | 2               | 4.21979  |
| <b>P62898</b> | <b>CYC Cytochrome c_somatic</b>                             | <b>1.153346858</b> | <b>2.43E-08</b> | <b>6</b> |
| P62898        | ADLIAYLK                                                    | 1.193456257        | 2               | 2.86955  |
| P62898        | GITWGEDTLMEYLENPK                                           | 1.127158427        | 2               | 4.96244  |
| P62898        | GITWGEDTLMEYLENPKK                                          | 1.009232338        | 2               | 4.55982  |



|               |                                                           |                    |                 |           |
|---------------|-----------------------------------------------------------|--------------------|-----------------|-----------|
| P62898        | KTGQAAGFSYTDANK                                           | 1.398157285        | 2               | 4.75288   |
| P62898        | TGPNLHGLFGR                                               | 1.171627768        | 2               | 3.26691   |
| P62898        | TGQAAGFSYTDANK                                            | 1.318119678        | 2               | 4.27109   |
| <b>P62902</b> | <b>RL31 60S ribosomal protein L31</b>                     | <b>2.675894142</b> | <b>1.1E-14</b>  | <b>2</b>  |
| P62902        | NLQTVNVVDEN                                               | 2.643409951        | 1               | 2.52772   |
| P62902        | SAINEVVTR                                                 | 1.337750185        | 2               | 2.93858   |
| <b>P62907</b> | <b>RL10A 60S ribosomal protein L10a</b>                   | <b>1.360612439</b> | <b>6.29E-09</b> | <b>6</b>  |
| P62907        | AVDIPHMDIEALK                                             | 1.145791681        | 2               | 2.8141    |
| P62907        | AVDIPHMDIEALKK                                            | 1.082413564        | 2               | 2.60391   |
| P62907        | FSVCVLGDQQHCDEAK                                          | 1.444916374        | 2               | 4.19417   |
| P62907        | KYDAFLASESLIK                                             | 1.195779011        | 2               | 4.00635   |
| P62907        | VLCLAVAVGHVK                                              | 1.240981859        | 3               | 3.89547   |
| P62907        | YDAFLASESLIK                                              | 1.291111327        | 2               | 3.45328   |
| <b>P62909</b> | <b>RS3 40S ribosomal protein S3</b>                       | <b>1.210815427</b> | <b>9.9E-20</b>  | <b>10</b> |
| P62909        | AELNEFLTR                                                 | 1.223264168        | 2               | 2.84017   |
| P62909        | DEILPTPISEQK                                              | 1.281485422        | 2               | 3.70303   |
| P62909        | ELAEDGYSGVEVR                                             | 1.631864922        | 2               | 3.42992   |
| P62909        | ELTAVVQK                                                  | 1.310416864        | 1               | 2.07797   |
| P62909        | FGFPEGSVELYAEK                                            | 2.873774095        | 2               | 4.05397   |
| P62909        | FVDGLMIHSGDPVNYVDTAVR                                     | 1.245101636        | 3               | 4.93818   |
| P62909        | GCEVVVSGK                                                 | 1.111682805        | 2               | 2.77248   |
| P62909        | GGKPEPPAMPQPVPPTA                                         | 1.475968724        | 2               | 3.54081   |
| P62909        | GLCAIAQAESLR                                              | 1.079143549        | 2               | 3.39046   |
| P62909        | TEIILATR                                                  | 1.224086616        | 2               | 3.17823   |
| <b>P62912</b> | <b>RL32 60S ribosomal protein L32</b>                     | <b>1.203107874</b> | <b>0.053763</b> | <b>3</b>  |
| P62912        | ELEVLLMCNK                                                | 1.214795936        | 2               | 2.85124   |
| P62912        | GQILMPNIGYGSNK                                            | 1.322792165        | 2               | 2.93291   |
| P62912        | SYCAEIAHNVSSK                                             | 1.171413293        | 2               | 4.80363   |
| <b>P62914</b> | <b>RL11 60S ribosomal protein L11</b>                     | <b>1.140032575</b> | <b>0.451809</b> | <b>2</b>  |
| P62914        | VLEQLTGQTPVFSK                                            | 1.132736786        | 2               | 4.41155   |
| P62914        | YDGIILPGK                                                 | 1.144384845        | 2               | 2.81665   |
| <b>P62919</b> | <b>RL8 60S ribosomal protein L8</b>                       | <b>1.230243749</b> | <b>2.96E-10</b> | <b>3</b>  |
| P62919        | ASGNYATVISHNPETK                                          | 1.337184739        | 2               | 4.67305   |
| P62919        | AVVGVVAGGGR                                               | 1.069530069        | 2               | 3.43096   |
| P62919        | KAQLNIGNVLPVGTMPGTVCCLEEKPGDR                             | 0.727679519        | 3               | 4.54939   |
| <b>P62959</b> | <b>HINT1 Histidine triad nucleotide_binding protein 1</b> | <b>1.093260153</b> | <b>0.029461</b> | <b>7</b>  |
| P62959        | AQVAQPGGDTIFGK                                            | 1.06040815         | 2               | 4.61827   |
| P62959        | CAADLGLK                                                  | 1.341678202        | 2               | 2.75184   |
| P62959        | CLAFHDISPQAPTHFLVIPK                                      | 1.154040963        | 3               | 4.2221    |
| P62959        | HISQISVADDDDESLLGHLMIVGK                                  | 0.738445645        | 3               | 6.73071   |
| P62959        | IIFEDDR                                                   | 0.670689691        | 2               | 2.34928   |
| P62959        | KHISQISVADDDDESLLGHLMIVGK                                 | 0.695072588        | 3               | 5.55857   |
| P62959        | MVVNEGADGGQSVYHIHLHLVGGRR                                 | 1.073176462        | 3               | 4.70634   |
| <b>P62961</b> | <b>YBOX1 Nuclease_sensitive element_binding protein 1</b> | <b>1.402187792</b> | <b>7.35E-10</b> | <b>7</b>  |
| P62961        | AADPPAENSSAPEAEQGGAE                                      | 0.693529504        | 2               | 2.63839   |
| P62961        | EDGNEEDKENQGDETQQGQPPQR                                   | 1.043295979        | 3               | 5.12584   |
| P62961        | GAEAAANVTGPGGVPVQGSK                                      | 1.317985137        | 2               | 5.01396   |
| P62961        | NEGSESAPEGQAQQR                                           | 1.417052367        | 2               | 5.30777   |
| P62961        | NYQQNYQNSSESGEK                                           | 2.192645367        | 2               | 4.16755   |
| P62961        | NYQQNYQNSSESGEKNEGSESAPEGQAQQR                            | 1.502083134        | 3               | 5.04581   |
| P62961        | RPQYSNPPVQGEVMEGADNQGAGEQGRPVV                            | 1.245372353        | 4               | 4.64834   |
| <b>P62963</b> | <b>PROF1 Profilin_1</b>                                   | <b>1.048260348</b> | <b>0.797993</b> | <b>6</b>  |
| P62963        | CYEMASHLR                                                 | 0.836531362        | 2               | 2.74957   |
| P62963        | DSLLQDGEFTMDLR                                            | 1.029114544        | 2               | 3.31312   |
| P62963        | DSPSVWAAVPGK                                              | 1.524071663        | 2               | 2.93559   |

|               |                                                      |                    |                 |           |
|---------------|------------------------------------------------------|--------------------|-----------------|-----------|
| P62963        | SSFFVNGLTLGGQK                                       | 0.996025541        | 2               | 4.57741   |
| P62963        | STGGAPTFNVTMTAK                                      | 0.999675884        | 2               | 3.02521   |
| P62963        | TFVSITPAEVGVLVGG                                     | 0.79400484         | 2               | 4.78787   |
| <b>P63018</b> | <b>HSP7C Heat shock cognate 71 kDa protein</b>       | <b>1.257482862</b> | <b>9.9E-20</b>  | <b>28</b> |
| P63018        | ARFEELNADLFR                                         | 1.164653268        | 2               | 2.98009   |
| P63018        | CNEIISWLDK                                           | 0.776200704        | 2               | 3.05973   |
| P63018        | DAGTIAGLNVLR                                         | 1.59715915         | 2               | 3.74225   |
| P63018        | EIAEAYLGK                                            | 1.638770812        | 1               | 1.96586   |
| P63018        | FDDAVVQSDMK                                          | 1.000950066        | 2               | 3.93709   |
| P63018        | FEELNADLFR                                           | 0.975071984        | 2               | 3.17974   |
| P63018        | FELTGIPPAPR                                          | 0.85209508         | 2               | 3.18331   |
| P63018        | GTLDPVEK                                             | 1.146826113        | 1               | 2.01453   |
| P63018        | HWPFMVVNDAGRPK+Oxidation(4)                          | 1.88102939         |                 |           |
| P63018        | IINEPTAAAIYGLDK                                      | 1.311323778        | 2               | 5.12961   |
| P63018        | IINEPTAAAIYGLDKK                                     | 1.066771949        | 2               | 4.71722   |
| P63018        | LLQDFNGK                                             | 1.342590303        | 2               | 3.07625   |
| P63018        | MKEIAEAYLGK                                          | 0.874054888        | 2               | 2.88319   |
| P63018        | MKEIAEAYLGK+Oxidation(0)                             | 1.619463062        |                 |           |
| P63018        | NQTAEKEEFHQK                                         | 1.318350054        | 2               | 4.88416   |
| P63018        | NQVAMNPTNTVFDK                                       | 1.02174591         | 2               | 4.98851   |
| P63018        | NQVAMNPTNTVFDK+Oxidation(4)                          | 1.360006659        |                 |           |
| P63018        | NSLESYAFNMK                                          | 1.701403023        | 2               | 3.56992   |
| P63018        | QATKDAGTIAGLNVLR                                     | 1.032100459        | 2               | 2.45073   |
| P63018        | RFDDAVVQSDMK                                         | 0.997019842        | 2               | 3.5785    |
| P63018        | SFYPEEVSSMVLTK                                       | 0.958197139        | 2               | 4.94066   |
| P63018        | SFYPEEVSSMVLTK+Oxidation(9)                          | 1.018853346        |                 |           |
| P63018        | SINPDEAVAYGAAVQAAILSGDK                              | 1.384102362        | 2               | 6.05933   |
| P63018        | SQIHDIIVLGGSTR                                       | 1.181190953        | 2               | 4.92456   |
| P63018        | STAGDTHLGGEDFDNR                                     | 1.238506769        | 2               | 4.2487    |
| P63018        | TVTNAVVTVPAYFNDSQR                                   | 1.104017146        | 3               | 4.36012   |
| P63018        | VCNPIITK                                             | 1.071879782        | 2               | 2.30161   |
| P63018        | VQVEYKGETK                                           | 1.220790502        | 2               | 2.55106   |
| <b>P63029</b> | <b>TCTP Translationally controlled tumor protein</b> | <b>1.585789652</b> | <b>1.06E-05</b> | <b>3</b>  |
| P63029        | DLISHDELFSDIYK                                       | 2.167843329        | 2               | 3.75528   |
| P63029        | EIADGLCLEVEGK                                        | 1.428289919        | 2               | 3.33822   |
| P63029        | TEGAIDDSLIGGNASAEPEGEGTSTVVTGVDIVMNHHLQETSFTK        | 1.950471717        | 4               | 4.58851   |
| <b>P63036</b> | <b>DNJA1 Dnaj homolog subfamily A member 1</b>       | <b>1.11272639</b>  | <b>0.001129</b> | <b>6</b>  |
| P63036        | HYNGEAYEDDEHHR                                       | 1.544012083        | 3               | 5.35375   |
| P63036        | ITFHGEDQEPGLEPGDIIVLDQK                              | 1.336746403        | 3               | 4.49101   |
| P63036        | NVVHQLSVTLEDLYNGATR                                  | 1.085946595        | 2               | 4.1168    |
| P63036        | QISQAYEVLADSK                                        | 1.152841416        | 2               | 3.70042   |
| P63036        | TIVITSHPGQIVK                                        | 0.988771611        | 2               | 3.46151   |
| P63036        | VNFPENGFLSPDK                                        | 1.111964333        | 2               | 3.3584    |
| <b>P63039</b> | <b>CH60 60 kDa heat shock protein_mitochondrial</b>  | <b>1.249933038</b> | <b>9.9E-20</b>  | <b>33</b> |
| P63039        | AAVEEGIVLGGGCALLR                                    | 1.058687502        | 2               | 5.25357   |
| P63039        | ALMLQGVDLLADAVTMGPK                                  | 1.177641303        | 3               | 5.28313   |
| P63039        | ALMLQGVDLLADAVTMGPK+Oxidation(2)                     | 1.111291083        |                 |           |
| P63039        | CEFQDAYVLLSEK                                        | 1.115010613        | 2               | 4.89684   |
| P63039        | CIPALDSLKPANEDQK                                     | 0.978924019        | 2               | 3.65453   |
| P63039        | DIGNIISDAMK                                          | 1.006441011        | 2               | 3.22164   |
| P63039        | GVMLAVDAVIAELK                                       | 1.049403481        | 2               | 3.83955   |
| P63039        | GVMLAVDAVIAELKK                                      | 0.904372922        | 2               | 4.47941   |
| P63039        | GYISPYFINTSK                                         | 1.601581847        | 2               | 3.02925   |
| P63039        | IGIEIK                                               | 1.158501458        | 2               | 2.58946   |
| P63039        | ILQSSSEVGYDAMLGDFVNMVEK                              | 1.559640578        | 2               | 4.97947   |

|               |                                                                      |                    |                 |           |
|---------------|----------------------------------------------------------------------|--------------------|-----------------|-----------|
| P63039        | IQEITEQLDITTSEYEK                                                    | 0.938291384        | 2               | 5.93984   |
| P63039        | IQEITEQLDITTSEYEKEK                                                  | 0.903319157        | 2               | 5.06144   |
| P63039        | ISSVQSIVPALEIANAHR                                                   | 1.338303989        | 2               | 4.25552   |
| P63039        | KISSVQSIVPALEIANAHR                                                  | 1.342376376        | 3               | 4.55071   |
| P63039        | KPLVIAEDVDGEALSTLVLNR                                                | 1.313207522        | 2               | 6.13653   |
| P63039        | LSDGVAVLK                                                            | 1.233272618        | 2               | 3.09813   |
| P63039        | LVQDVANNTNEEAGDGTATVLR                                               | 1.259101386        | 2               | 6.63632   |
| P63039        | NAGVEGSLIVEK                                                         | 1.216665674        | 2               | 3.58429   |
| P63039        | QSKPVTTPPEEIAQVATISANGDK                                             | 1.01399751         | 2               | 3.58194   |
| P63039        | QSKPVTTPPEEIAQVATISANGDKDIGNIISDAMK                                  | 0.987831861        | 3               | 4.84298   |
| P63039        | RGVMLAVDAVIAELKK                                                     | 0.875338186        | 3               | 5.7707    |
| P63039        | TALLDAAGVASLLTAEAVVTEIPK                                             | 1.196282743        |                 |           |
| P63039        | TALLDAAGVASLLTAEAVVTEIPKEEK                                          | 1.114826423        | 3               | 5.03157   |
| P63039        | TLNDELEIIEGMK                                                        | 0.887779685        | 2               | 4.65902   |
| P63039        | TLNDELEIIEGMK+Oxidation(11)                                          | 1.124704445        |                 |           |
| P63039        | TVIIEQSWGSPK                                                         | 1.126460517        | 2               | 4.37844   |
| P63039        | VGEVIVTK                                                             | 1.065387372        | 2               | 2.9382    |
| P63039        | VGEVIVTKDDAMLLK                                                      | 0.599197946        | 2               | 2.50118   |
| P63039        | VGGTSDVEVNEK                                                         | 1.127712518        | 2               | 3.82065   |
| P63039        | VGGTSDVEVNEKK                                                        | 1.300095442        | 2               | 3.51846   |
| P63039        | VGLQVVAVK                                                            | 1.244569462        | 2               | 3.28263   |
| P63039        | VTDALNATR                                                            | 1.050371554        | 2               | 3.57173   |
| <b>P63102</b> | <b>1433Z 14_3_3 protein zeta/delta</b>                               | <b>1.299313964</b> | <b>0.767437</b> | <b>9</b>  |
| P63102        | DICNDVLSLLEK                                                         | 1.510646161        | 3               | 3.68053   |
| P63102        | FLIPNASQPESK                                                         | 1.064293721        | 2               | 3.36873   |
| P63102        | GIVDQSQAYQEAFAEISK                                                   | 0.849475041        | 2               | 5.74854   |
| P63102        | GIVDQSQAYQEAFAEISKK                                                  | 1.019483911        | 2               | 2.62193   |
| P63102        | KGIVDQSQAYQEAFAEISK                                                  | 0.980707131        | 2               | 6.01304   |
| P63102        | SVTEQGAELSNEER                                                       | 1.206808292        | 2               | 5.56115   |
| P63102        | TAFDEAIAELDTLSEESYK                                                  | 1.237943777        | 2               | 5.6861    |
| P63102        | YDDMAACMK                                                            | 0.886132379        | 2               | 2.45139   |
| P63102        | YLAEVAAGDDKK                                                         | 1.169660982        | 2               | 3.611     |
| <b>P63159</b> | <b>HMGB1 High mobility group protein B1</b>                          | <b>0.992183127</b> | <b>0.004304</b> | <b>4</b>  |
| P63159        | GEHPGLSIGDVAK                                                        | 0.917068162        | 2               | 3.11734   |
| P63159        | IKGEHPGLSIGDVAK                                                      | 0.998554029        | 2               | 3.95068   |
| P63159        | KHPDASVNFSEFSK                                                       | 1.246840438        | 2               | 4.28965   |
| P63159        | LGEMWNNTAADKQPYEK+Oxidation(3)                                       | 1.217175887        |                 |           |
| <b>P63174</b> | <b>RL38 60S ribosomal protein L38</b>                                | <b>1.296118877</b> | <b>0.001476</b> | <b>4</b>  |
| P63174        | IEEIKDFLLTAR                                                         | 0.96233855         | 3               | 3.36118   |
| P63174        | KIEEIKDFLLTAR                                                        | 1.197796783        | 2               | 4.10885   |
| P63174        | YLYTLVITDK                                                           | 1.35338924         | 2               | 2.8967    |
| P63174        | YLYTLVITDKEK                                                         | 1.810211723        | 2               | 2.709     |
| <b>P63245</b> | <b>GBLP Guanine nucleotide_binding protein subunit beta_2_like 1</b> | <b>1.018247566</b> | <b>5.98E-05</b> | <b>12</b> |
| P63245        | DETNYGIPQR                                                           | 1.777445897        | 2               | 2.94019   |
| P63245        | DGQAMLWDLNEGK                                                        | 1.254977539        | 2               | 2.96984   |
| P63245        | FSPNSSNPIIVSCGWDK                                                    | 1.041631836        | 2               | 4.1126    |
| P63245        | GHNGWVTQIATTPQFPDMILSASR                                             | 0.938821689        | 3               | 4.16863   |
| P63245        | HLYTLGGDIINALCFSPNR                                                  | 1.457728902        | 2               | 5.90175   |
| P63245        | IIVDELKQEVISTSSK                                                     | 1.054704479        | 2               | 4.34605   |
| P63245        | LWDLTTGTTTR                                                          | 1.032383892        | 2               | 2.58954   |
| P63245        | TNHIGHTGYLNTVTVSPDGLCASGGK                                           | 1.403665253        | 3               | 5.53695   |
| P63245        | VWNLANCK                                                             | 1.122314264        | 2               | 2.67961   |
| P63245        | VWQVTIGTR                                                            | 1.181895657        | 2               | 2.73689   |
| P63245        | YTVQDESHSEWVSCVR                                                     | 1.303851936        | 2               | 4.65479   |
| P63245        | YWLCAATGPSIK                                                         | 0.880075838        | 2               | 2.84451   |
| <b>P63259</b> | <b>ACTG Actin_cytoplasmic 2</b>                                      | <b>1.128400712</b> | <b>0.009066</b> | <b>8</b>  |

|               |                                                                                      |                    |                 |           |
|---------------|--------------------------------------------------------------------------------------|--------------------|-----------------|-----------|
| P63259        | CPEALFQPSFLGMESCGIHETTFNSIMK                                                         | 4.29578862         | 3               | 4.76836   |
| P63259        | DLYANTVLSGGTTMYPGIADR                                                                | 1.178986254        | 2               | 6.08634   |
| P63259        | DLYANTVLSGGTTMYPGIADR+Oxidation(13)                                                  | 1.012272844        |                 |           |
| P63259        | GYSFTTAER                                                                            | 1.043069537        | 2               | 3.35351   |
| P63259        | KDLYANTVLSGGTTMYPGIADR                                                               | 0.96316569         | 2               | 6.44987   |
| P63259        | KDLYANTVLSGGTTMYPGIADR+Oxidation(14)                                                 | 1.239726552        |                 |           |
| P63259        | QEYDESGPSIVHR                                                                        | 0.901153847        | 3               | 3.42279   |
| P63259        | VAPEEHPVLLTEAPLNPK                                                                   | 1.103812677        | 3               | 4.73921   |
| <b>P63324</b> | <b>RS12 40S ribosomal protein S12</b>                                                | <b>1.178504301</b> | <b>0.384839</b> | <b>4</b>  |
| P63324        | KVVGCSVVVK                                                                           | 1.097461838        | 2               | 3.37961   |
| P63324        | LGEWVGLCK                                                                            | 1.12650475         | 2               | 2.84763   |
| P63324        | QAHLCVLASNCDEPMYVK                                                                   | 1.249894147        | 3               | 3.55273   |
| P63324        | VVGCSCVVVK                                                                           | 1.119952592        | 2               | 3.23808   |
| <b>P63331</b> | <b>PP2AA Serine/threonine_protein phosphatase 2A catalytic subunit alpha isoform</b> | <b>1.084605135</b> | <b>0.328932</b> | <b>3</b>  |
| P63331        | CGNQAAIMELDDTLK                                                                      | 0.935541969        | 2               | 2.77128   |
| P63331        | NVVTIFSAPNYCYR                                                                       | 0.782406243        | 2               | 2.32614   |
| P63331        | YSFLQFDPAPR                                                                          | 1.086338128        | 2               | 3.41972   |
| <b>P67779</b> | <b>PHB Prohibitin</b>                                                                | <b>1.003776048</b> | <b>0.024323</b> | <b>12</b> |
| P67779        | AAELIANSLATAGDGLIELR                                                                 | 0.968682284        | 3               | 4.21719   |
| P67779        | AAIISAEGDSK                                                                          | 1.231208236        | 2               | 2.48129   |
| P67779        | DLQNVNITLR                                                                           | 1.041532467        | 2               | 3.00289   |
| P67779        | FDAGELITQR                                                                           | 0.833648843        | 2               | 3.54055   |
| P67779        | FGLALAVAGGVNSALYNVDAGHR                                                              | 1.024537529        | 3               | 3.53134   |
| P67779        | GVQDIVVVEGTHFLIPVWVQKPIIFDCR                                                         | 1.173417972        | 4               | 4.84002   |
| P67779        | IYTSIGEDYDER                                                                         | 2.143905845        | 2               | 3.36736   |
| P67779        | KLEAAEDIAYQLSR                                                                       | 1.14384705         | 2               | 4.81369   |
| P67779        | NITYLPAGQSVLLQLPQ                                                                    | 1.063916305        | 3               | 3.43017   |
| P67779        | NVPVITGSK                                                                            | 0.907230375        | 1               | 2.27761   |
| P67779        | QVSDDLTER                                                                            | 0.96185425         | 2               | 2.41646   |
| P67779        | VLPSITTEILK                                                                          | 0.819406396        | 2               | 2.31449   |
| <b>P68037</b> | <b>UB2L3 Ubiquitin_conjugating enzyme E2 L3</b>                                      | <b>1.314929471</b> | <b>4.52E-08</b> | <b>3</b>  |
| P68037        | ADLAEYSK                                                                             | 0.839523806        | 2               | 2.63813   |
| P68037        | GQVCLPVISAENWKPATK                                                                   | 0.906718893        | 2               | 3.76419   |
| P68037        | TDQVIQSLIALVNDPQPEHPLR                                                               | 1.27609653         | 2               | 5.15322   |
| <b>P68101</b> | <b>IF2A Eukaryotic translation initiation factor 2 subunit 1</b>                     | <b>1.293134321</b> | <b>0.031783</b> | <b>3</b>  |
| P68101        | AGLNCSTETMPIK                                                                        | 1.288367277        | 2               | 3.40636   |
| P68101        | TEGLSVLNQAMAVIK                                                                      | 0.914766624        | 2               | 3.98576   |
| P68101        | VVTDTEDELAR                                                                          | 1.279264758        | 2               | 3.30527   |
| <b>P68136</b> | <b>ACTS Actin_alpha skeletal muscle</b>                                              | <b>1.09760797</b>  | <b>9.9E-20</b>  | <b>16</b> |
| P68136        | AGFAGDDAPR                                                                           | 1.428330045        | 2               | 3.35637   |
| P68136        | AVFPSIVGRPR                                                                          | 0.83930766         | 2               | 2.6985    |
| P68136        | DLYANNVMSGGTTMYPGIADR                                                                | 0.291774294        | 2               | 4.66356   |
| P68136        | DSYVGDEAQSK                                                                          | 1.629058901        | 2               | 3.54001   |
| P68136        | EITALAPSTMK                                                                          | 0.880478758        | 2               | 3.13786   |
| P68136        | EITALAPSTMK+Oxidation(9)                                                             | 1.042216602        |                 |           |
| P68136        | GYSFVTTAER                                                                           | 0.135106059        | 2               | 3.95846   |
| P68136        | IWHHTFYNELR                                                                          | 3.643422957        | 2               | 2.69029   |
| P68136        | KDLYANNVMSGGTTMYPGIADR                                                               | 0.114270137        | 2               | 5.03421   |
| P68136        | KDLYANNVMSGGTTMYPGIADR+Oxidation(14)                                                 | 0.44973999         |                 |           |
| P68136        | QEYDEAGPSIVHR                                                                        | 0.14447372         | 2               | 3.16333   |
| P68136        | TTGIVLDSGDGVTHNVPIYEGYALPHAIMR                                                       | 0.094722873        | 3               | 6.81189   |
| P68136        | TTGIVLDSGDGVTHNVPIYEGYALPHAIMR+Oxidation(28)                                         | 0.188902796        |                 |           |
| P68136        | VAPEEHPTLLTEAPLNPK                                                                   | 0.098658494        | 2               | 4.39204   |
| P68136        | YPIEHGIITNWDDMEK                                                                     | 1.757715799        | 2               | 4.45061   |

|               |                                                                                 |                    |                 |           |
|---------------|---------------------------------------------------------------------------------|--------------------|-----------------|-----------|
| P68136        | YPIEHGIITNWDDMEK+Oxidation(13)                                                  | <b>0.935747316</b> |                 |           |
| <b>P68255</b> | <b>1433T 14_3_3 protein theta</b>                                               | <b>1.058297798</b> | <b>0.998768</b> | <b>6</b>  |
| P68255        | AVTEQGAELSNEER                                                                  | <b>0.946121467</b> | 2               | 4.63295   |
| P68255        | SICTTVLELLDK                                                                    | <b>1.178792518</b> | 2               | 3.10072   |
| P68255        | TAFDEAIAELDTLINEDSYK                                                            | <b>0.958385644</b> | 2               | 4.80388   |
| P68255        | VISSIEQK                                                                        | <b>1.095836557</b> | 2               | 3.25466   |
| P68255        | YLAEVACGDDR                                                                     | <b>0.784341786</b> | 2               | 3.00191   |
| P68255        | YLIANATNPESK                                                                    | <b>0.959961592</b> | 2               | 2.82255   |
| <b>P68511</b> | <b>1433F 14_3_3 protein eta</b>                                                 | <b>0.835727697</b> | <b>0.432008</b> | <b>4</b>  |
| P68511        | AVTELNEPLSNEDR                                                                  | <b>1.361264153</b> | 2               | 4.6661    |
| P68511        | ELETVCNDVLALLDK                                                                 | <b>1.107974942</b> | 2               | 3.4719    |
| P68511        | NCNDFQYESKVFYLK                                                                 | <b>0.829655821</b> | 2               | 2.34758   |
| P68511        | NSVVEASEAAYK                                                                    | <b>1.26819552</b>  | 2               | 3.21542   |
| <b>P69897</b> | <b>TBB5 Tubulin beta_5 chain</b>                                                | <b>1.582232063</b> | <b>2.5E-09</b>  | <b>3</b>  |
| P69897        | ALTVPELTQQVFDAK                                                                 | <b>1.272072215</b> | 2               | 3.49605   |
| P69897        | ISVYYNEATGGK                                                                    | <b>1.745745189</b> | 2               | 2.94221   |
| P69897        | LTPPTYGDLNHLVSATMSGVTTCLR                                                       | <b>1.373849905</b> | 2               | 5.35448   |
| <b>P70372</b> | <b>ELAV1 ELAV_like protein 1</b>                                                | <b>0.872107413</b> | <b>0.783528</b> | <b>2</b>  |
| P70372        | TNLIVNYLPQNMTQEELR                                                              | <b>0.847109615</b> | 2               | 3.42319   |
| P70372        | VLVDQTTGLSR                                                                     | <b>0.962735112</b> | 2               | 2.41271   |
| <b>P70470</b> | <b>LYPA1 Acyl_protein thioesterase 1</b>                                        | <b>1.31734052</b>  | <b>0.010047</b> | <b>2</b>  |
| P70470        | ASFSQGPINSANR                                                                   | <b>2.221440086</b> | 2               | 2.94451   |
| P70470        | DISVLQCHGDCDPLVPLMFGSLTVER                                                      | <b>1.294997659</b> | 3               | 4.0414    |
| <b>P70473</b> | <b>AMACR Alpha_methylacyl_CoA racemase</b>                                      | <b>0.950478982</b> | <b>6.87E-11</b> | <b>11</b> |
| P70473        | ADVLLPEFR                                                                       | <b>0.815214404</b> | 2               | 3.36209   |
| P70473        | AEWCQIFDGTDACVTPVLTLEEALHHQHNR                                                  | <b>0.766061084</b> | 4               | 5.20169   |
| P70473        | DYGFSQEEIHQLHSDR                                                                | <b>0.989640502</b> | 2               | 4.85957   |
| P70473        | GLGLESEELPSQMSIEDWPEMK                                                          | <b>0.720853233</b> | 3               | 4.8462    |
| P70473        | GQNLLDGGAPFYTTYK                                                                | <b>0.818114358</b> | 2               | 5.43953   |
| P70473        | GSFITDEEQHACPRPAPQLSR                                                           | <b>0.933918729</b> | 3               | 3.85214   |
| P70473        | LGSVNHPSHLAR                                                                    | <b>1.324871751</b> | 2               | 3.39581   |
| P70473        | LSGFGQSGIFSK                                                                    | <b>1.430026994</b> | 2               | 3.04042   |
| P70473        | RDPSVGEHTVEVLK                                                                  | <b>0.784096076</b> | 3               | 4.39693   |
| P70473        | TADGEFMAVGAIEPQFYTLCLK                                                          | <b>1.562766771</b> | 3               | 4.13434   |
| P70473        | TQAMGLWAQPR                                                                     | <b>0.702876837</b> | 2               | 3.13162   |
| <b>P70550</b> | <b>RAB8B Ras_related protein Rab_8B</b>                                         | <b>1.117869063</b> | <b>9.9E-20</b>  | <b>2</b>  |
| P70550        | LLIGDSGVGK                                                                      | <b>1.599899891</b> | 2               | 2.78506   |
| P70550        | NIEEHASSDVER                                                                    | <b>0.789943159</b> | 2               | 2.30794   |
| <b>P70552</b> | <b>GFRP GTP cyclohydrolase 1 feedback regulatory protein</b>                    | <b>0.87419546</b>  | <b>0.015819</b> | <b>2</b>  |
| P70552        | MEVGPTMVGDEHSDPELMQQLGASK                                                       | <b>0.568556868</b> | 3               | 4.13686   |
| P70552        | VLGNNFYEYVNDPPR                                                                 | <b>0.901875299</b> | 2               | 3.36803   |
| <b>P70580</b> | <b>PGRC1 Membrane_associated progesterone receptor component 1</b>              | <b>1.138249827</b> | <b>0.551866</b> | <b>6</b>  |
| P70580        | FYGPEGYPYGVFAGR                                                                 | <b>1.092994039</b> | 2               | 4.0109    |
| P70580        | GDQPGASGDNDDEPPPLPR                                                             | <b>1.098345042</b> | 2               | 4.97655   |
| P70580        | IVRGDQPGASGDNDDEPPPLPR                                                          | <b>1.135237782</b> | 3               | 5.03058   |
| P70580        | KFYGPEGYPYGVFAGR                                                                | <b>1.186951052</b> | 2               | 3.61088   |
| P70580        | RYDGVQDPR                                                                       | <b>0.757044201</b> | 1               | 2.1526    |
| P70580        | YDGVQDPR                                                                        | <b>0.903034107</b> | 2               | 2.83774   |
| <b>P70584</b> | <b>ACDSB Short/branched chain specific acyl_CoA dehydrogenase_mitochondrial</b> | <b>0.914480358</b> | <b>9.9E-20</b>  | <b>8</b>  |
| P70584        | ASSTCQLTFENVK                                                                   | <b>1.100513468</b> | 2               | 3.28825   |
| P70584        | FAQEQIAPLVSTMDENSK                                                              | <b>0.902875305</b> | 2               | 4.96345   |
| P70584        | IFDFQGLQHVAHVATQLEAAR                                                           | <b>0.96085005</b>  | 3               | 6.14401   |
| P70584        | IGTIYEGTSNIQLNTIAK                                                              | <b>0.890809417</b> | 2               | 4.55633   |
| P70584        | KFAQEQIAPLVSTMDENSK                                                             | <b>0.66988264</b>  | 2               | 5.80439   |

|               |                                                       |                    |                 |          |
|---------------|-------------------------------------------------------|--------------------|-----------------|----------|
| P70584        | SGNYVINGSK                                            | 0.812220049        | 2               | 2.8838   |
| P70584        | VDASVALLCDIQNTVINK                                    | 0.275570165        | 2               | 4.92136  |
| P70584        | YYASEVAGLTTSK                                         | 1.059234064        | 2               | 4.13797  |
| <b>P70587</b> | <b>LRRC7 Leucine_rich repeat_containing protein 7</b> | <b>0.861182391</b> | <b>0.31781</b>  | <b>2</b> |
| P70587        | KESTDESEVDK                                           | 1.612996463        | 2               | 2.37192  |
| P70587        | SREQQPYEGNINK                                         | 0.840936821        | 2               | 2.48703  |
| <b>P70615</b> | <b>LMNB1 Lamin_B1</b>                                 | <b>0.842150096</b> | <b>0.256055</b> | <b>5</b> |
| P70615        | ALYETELADAR                                           | 1.137216415        | 2               | 3.07535  |
| P70615        | KESDLGAQIK                                            | 0.995503832        | 2               | 2.53116  |
| P70615        | LSSEMNTSTVNSAR                                        | 0.836700916        | 2               | 3.78377  |
| P70615        | NQNSWGTGEDVK                                          | 0.721843545        | 2               | 3.28587  |
| P70615        | SLEGDLEDLKDQIAQLEASLSAAK                              | 0.87044781         | 3               | 4.62332  |
| <b>P70694</b> | <b>DHB5 Estradiol 17 beta_dehydrogenase 5</b>         | <b>1.170120593</b> | <b>2.98E-11</b> | <b>2</b> |
| P70694        | REDIFYTSK                                             | 1.40102464         | 2               | 3.13113  |
| P70694        | SIGVSNFNR                                             | 0.823623608        | 2               | 2.37678  |
| <b>P70712</b> | <b>KYNU Kynureninase</b>                              | <b>1.158324437</b> | <b>9.66E-10</b> | <b>9</b> |
| P70712        | IATELNCDPTDER                                         | 0.802601921        | 2               | 3.58759  |
| P70712        | IGAYGHEVGK                                            | 1.508540728        | 2               | 2.83943  |
| P70712        | LLTAILDSTERN                                          | 1.519147835        | 2               | 3.29048  |
| P70712        | LQLIPGVNGFR                                           | 1.275429449        | 2               | 2.52479  |
| P70712        | MEDILEVIEK                                            | 1.061195565        | 2               | 2.58851  |
| P70712        | TYLEEELDK                                             | 1.425827559        | 1               | 2.20158  |
| P70712        | TYLEEELDKWAK                                          | 0.876154918        | 2               | 2.55421  |
| P70712        | VAPVPLYNSFHDVYK                                       | 1.160426786        | 2               | 2.94642  |
| P70712        | YLNSGAGGLAGAFIHEK                                     | 0.56221618         | 2               | 4.30724  |
| <b>P80067</b> | <b>CATC Dipeptidyl peptidase 1</b>                    | <b>1.15023159</b>  | <b>1.36E-07</b> | <b>6</b> |
| P80067        | GINFVSPVR                                             | 1.312786639        | 2               | 3.12063  |
| P80067        | GTDECAIESIAMAAIPIK                                    | 1.20628439         | 3               | 4.52306  |
| P80067        | NQESCGSCYSFASLGMLEAR                                  | 1.56206449         | 2               | 3.40032  |
| P80067        | NSWGSQWGESGYFR                                        | 1.135318718        | 2               | 3.61255  |
| P80067        | RGTDECAIESIAMAAIPIK                                   | 0.956185975        | 2               | 3.8847   |
| P80067        | YAQDFGVEENCFPYATDAPCKPK                               | 1.722645044        | 3               | 5.99594  |
| <b>P80254</b> | <b>DOPD D_dopachrome decarboxylase</b>                | <b>1.252589562</b> | <b>3.33E-16</b> | <b>4</b> |
| P80254        | FFLEPWQIGK                                            | 1.223549721        | 2               | 2.44348  |
| P80254        | FLTEELSLDQDR                                          | 1.182549822        | 2               | 3.8687   |
| P80254        | LCAATATILDKPEDR                                       | 3.202989809        | 2               | 4.24926  |
| P80254        | STEPCAHLLISSIGVVGTAEQNR                               | 1.169957726        | 2               | 5.09752  |
| <b>P80299</b> | <b>HYES Epoxide hydrolase 2</b>                       | <b>1.130173812</b> | <b>0.979637</b> | <b>2</b> |
| P80299        | ATEMGGILVGTPEDPK                                      | 0.859561413        | 2               | 3.67542  |
| P80299        | TEIQNPSVTSK                                           | 1.083269801        | 2               | 3.1394   |
| <b>P80313</b> | <b>TCPH T_complex protein 1 subunit eta</b>           | <b>1.201991322</b> | <b>0.046132</b> | <b>5</b> |
| P80313        | ATISNDGATILK                                          | 1.125250141        | 2               | 2.59791  |
| P80313        | GGAEQFMEETER                                          | 1.312113201        | 2               | 2.97817  |
| P80313        | LLDVVHPAAK                                            | 1.102660262        | 2               | 2.5717   |
| P80313        | QLCDNAGFDATNILNK                                      | 0.961935659        | 2               | 3.29668  |
| P80313        | SQDAEVGDGTTSVTLAAEFLK                                 | 1.447644955        | 2               | 4.82451  |
| <b>P80317</b> | <b>TCPZ T_complex protein 1 subunit zeta</b>          | <b>1.245140693</b> | <b>0.214187</b> | <b>8</b> |
| P80317        | ALQFLEQVK                                             | 1.176526927        | 2               | 2.79905  |
| P80317        | DGNVLLHEMQIQHPTASLIK                                  | 0.984933394        | 3               | 4.37037  |
| P80317        | GIDPFSLDALAK                                          | 1.260399331        | 2               | 2.4931   |
| P80317        | NAIDDGCVVPGAGAVEVALAEALIK                             | 1.041265532        | 3               | 4.18388  |
| P80317        | QADLYISEGLHPR                                         | 2.360480686        | 2               | 2.38975  |
| P80317        | TEVNSGFFYK                                            | 1.347059423        | 2               | 2.58765  |
| P80317        | VATAQDDITGDGTTSNVLIIGELLK                             | 1.031141477        | 2               | 5.43547  |
| P80317        | VLAQNSGFDLQETLVK                                      | 1.03341314         | 2               | 3.98201  |

|               |                                                                  |                    |                 |           |
|---------------|------------------------------------------------------------------|--------------------|-----------------|-----------|
| <b>P81155</b> | <b>VDAC2 Voltage_dependent anion_selective channel protein 2</b> | <b>1.072065159</b> | <b>0.733024</b> | <b>6</b>  |
| P81155        | LTFDTTFSPNTGK                                                    | 1.07182143         | 2               | 3.206     |
| P81155        | SNFAVGYR                                                         | 1.074421633        | 2               | 2.44019   |
| P81155        | TGDFQLHTNVNNGTEFGGSIYQK                                          | 1.049828849        | 3               | 3.33285   |
| P81155        | VNSSLIGVGYTQTLRPGVK                                              | 0.997302777        | 2               | 3.78933   |
| P81155        | WCEYGLTFTEK                                                      | 1.07213418         | 2               | 2.60963   |
| P81155        | YQLDPTASISAK                                                     | 1.201041153        | 2               | 3.235     |
| <b>P82995</b> | <b>HS90A Heat shock protein HSP 90_alpha</b>                     | <b>1.155406675</b> | <b>1.78E-11</b> | <b>17</b> |
| P82995        | DQVANSAFVER                                                      | 1.144077911        | 2               | 2.54825   |
| P82995        | ELHINLIPNKQDR                                                    | 1.405644758        | 2               | 3.23744   |
| P82995        | ELISNSSDALDK                                                     | 1.169092929        | 2               | 2.8014    |
| P82995        | FYEQFSK                                                          | 1.201498339        | 1               | 2.25806   |
| P82995        | HGLEVIYMIEPIDEYCVQQLK                                            | 1.440649316        | 3               | 3.47984   |
| P82995        | HIYFITGETK                                                       | 1.560488834        | 2               | 2.73405   |
| P82995        | HLEINPDHSIETLR                                                   | 0.945140607        | 2               | 4.45344   |
| P82995        | HSQFIGYPITLFVEK                                                  | 7.759776629        | 2               | 3.75113   |
| P82995        | LGIHEDSQNR                                                       | 1.031194836        | 3               | 3.45684   |
| P82995        | NPDDITNEEYGEFYK                                                  | 1.367365626        | 2               | 5.14103   |
| P82995        | RAPFDLFENR                                                       | 1.173410769        | 2               | 2.41455   |
| P82995        | SLTNDWEEHLAVK                                                    | 1.011211513        | 2               | 4.00984   |
| P82995        | TDTGEPMGR                                                        | 1.15025613         | 2               | 2.53674   |
| P82995        | TDTGEPMGR+Oxidation(6)                                           | 1.435047579        |                 |           |
| P82995        | TLTIVDTGIGMTK                                                    | 0.837169641        | 2               | 4.08281   |
| P82995        | TLTIVDTGIGMTK+Oxidation(10)                                      | 1.166992983        |                 |           |
| P82995        | YYTSASGDEMVSJK                                                   | 1.099699219        | 2               | 3.85525   |
| <b>P83732</b> | <b>RL24 60S ribosomal protein L24</b>                            | <b>1.060808585</b> | <b>0.076301</b> | <b>3</b>  |
| P83732        | AITGASLADIMAK                                                    | 1.044714762        | 2               | 4.10032   |
| P83732        | CESAFLSK                                                         | 1.468590387        | 2               | 2.30121   |
| P83732        | VELCSFSGYK                                                       | 2.369091579        | 2               | 2.37302   |
| <b>P83868</b> | <b>TEBP Prostaglandin E synthase 3</b>                           | <b>1.902330777</b> | <b>1.03E-07</b> | <b>2</b>  |
| P83868        | HLNEIDLHFCIDPNDSK                                                | 3.672095919        | 3               | 3.45626   |
| P83868        | LTFSCGGSDNFK                                                     | 1.750328865        | 2               | 2.96355   |
| <b>P83941</b> | <b>ELOC Transcription elongation factor B polypeptide 1</b>      | <b>1.020144594</b> | <b>0.900795</b> | <b>2</b>  |
| P83941        | AMLSGPGQFAENETNEVNFR                                             | 0.965426207        | 2               | 4.48467   |
| P83941        | TYGGCEGPDAMYVK                                                   | 1.075849212        | 2               | 2.82004   |
| <b>P84082</b> | <b>ARF2 ADP_ribosylation factor 2</b>                            | <b>0.983513315</b> | <b>1</b>        | <b>2</b>  |
| P84082        | NISFTVWDVGGQDK                                                   | 0.219304258        | 2               | 4.57342   |
| P84082        | QDLPNAMNAAEITDK                                                  | 1.018617787        | 2               | 4.2381    |
| <b>P84083</b> | <b>ARF5 ADP_ribosylation factor 5</b>                            | <b>1.035740846</b> | <b>2.33E-07</b> | <b>3</b>  |
| P84083        | DAVLLVFANK                                                       | 1.931995808        | 2               | 3.55158   |
| P84083        | QDMPNAMPVSELTDK                                                  | 0.580303156        | 2               | 3.03801   |
| P84083        | VQESADELQK                                                       | 1.092442095        | 2               | 3.12093   |
| <b>P84089</b> | <b>ERH Enhancer of rudimentary homolog</b>                       | <b>1.380442787</b> | <b>0.168141</b> | <b>2</b>  |
| P84089        | ADTQTYQPYNK                                                      | 1.465627833        | 2               | 2.84553   |
| P84089        | TYADYESVNECMGVCK                                                 | 1.236721165        | 2               | 4.37677   |
| <b>P84100</b> | <b>RL19 60S ribosomal protein L19</b>                            | <b>1.061182987</b> | <b>0.01606</b>  | <b>2</b>  |
| P84100        | LLADQAEAR                                                        | 1.292205077        | 2               | 3.25748   |
| P84100        | VWLDPNETNEIANANSR                                                | 1.056301015        | 2               | 5.3598    |
| <b>P84104</b> | <b>SRSF3 Serine/arginine_rich splicing factor 3</b>              | <b>1.096692169</b> | <b>0.380847</b> | <b>2</b>  |
| P84104        | AFGYYGPLR                                                        | 1.192364478        | 2               | 2.32691   |
| P84104        | VYVGNLGNNGNK                                                     | 1.083440848        | 2               | 2.31284   |
| <b>P84245</b> | <b>H33 Histone H3.3</b>                                          | <b>1.116253463</b> | <b>0.914941</b> | <b>5</b>  |
| P84245        | DIQLAR                                                           | 1.164935663        | 1               | 1.95434   |
| P84245        | FQSAAIGALQEASEAYLVGLFEDTNLCAIHAHAK                               | 1.174905679        | 4               | 6.47561   |
| P84245        | RVTIMPKDIQLAR+Oxidation(4)                                       | 1.14286161         |                 |           |

|               |                                                               |                    |                 |           |
|---------------|---------------------------------------------------------------|--------------------|-----------------|-----------|
| P84245        | STELLIR                                                       | 1.035924274        | 2               | 2.39658   |
| P84245        | YRPGTVALR                                                     | 1.122311667        | 2               | 2.39029   |
| <b>P84817</b> | <b>FIS1 Mitochondrial fission 1 protein</b>                   | <b>0.988766101</b> | <b>0.082856</b> | <b>4</b>  |
| P84817        | FQSEQAAGSVSK                                                  | 0.764312039        | 2               | 2.66145   |
| P84817        | GIVLLELLPK                                                    | 0.98135013         | 2               | 2.47952   |
| P84817        | GLLQTEPQNNQAK                                                 | 1.120828423        | 2               | 3.40476   |
| P84817        | KFQSEQAAGSVSK                                                 | 0.927020804        | 2               | 4.3534    |
| <b>P85834</b> | <b>EFTU Elongation factor Tu_ mitochondrial</b>               | <b>1.132978776</b> | <b>9.9E-20</b>  | <b>16</b> |
| P85834        | AEAGDNLGALVR                                                  | 1.083023782        | 2               | 3.8891    |
| P85834        | DKPHVNVGTIGHVDHGK                                             | 0.75451429         | 3               | 3.86227   |
| P85834        | DLEKPFLLPVESVYSIPGR                                           | 1.507764041        | 2               | 4.01343   |
| P85834        | ELLTEFGYKGEETPVIVGSALCALEQR                                   | 1.119177254        | 3               | 3.83071   |
| P85834        | GDECELLGHNK                                                   | 1.160476569        | 2               | 2.59853   |
| P85834        | GEETPVIVGSALCALEQR                                            | 1.142440133        | 2               | 4.51417   |
| P85834        | GITINAAHVEYSTAAR                                              | 3.202989809        | 2               | 3.56819   |
| P85834        | GTVVTGTLER                                                    | 1.201732896        | 2               | 2.81878   |
| P85834        | HYAHTDCPGHADYVK                                               | 1.56861631         | 2               | 4.25285   |
| P85834        | KGDECELLGHNK                                                  | 1.050813578        | 2               | 3.70726   |
| P85834        | KYEEIDNAPEER                                                  | 1.558936282        | 2               | 3.77094   |
| P85834        | LLDAVDYIPVPTR                                                 | 0.99315655         | 2               | 3.81066   |
| P85834        | QIGVEHVVVYVVK                                                 | 1.00854967         | 2               | 2.6654    |
| P85834        | TIGTGLVTDVPAMTEEDK                                            | 0.920473171        | 2               | 3.25494   |
| P85834        | TIGTGLVTDVPAMTEEDKNIK                                         | 0.603993667        | 2               | 3.50311   |
| P85834        | YEEIDNAPEER                                                   | 1.282736934        | 2               | 3.4091    |
| <b>P85968</b> | <b>6PGD 6_phosphogluconate dehydrogenase_ decarboxylating</b> | <b>1.016322891</b> | <b>9.9E-20</b>  | <b>10</b> |
| P85968        | AGQAVDDFIEK                                                   | 1.342163695        | 2               | 3.3142    |
| P85968        | CLSSLKEER                                                     | 1.066405024        | 2               | 2.62591   |
| P85968        | FQDTDGKELLPK                                                  | 1.117486047        | 2               | 2.95465   |
| P85968        | GILFVSGVSGGEEGAR                                              | 1.812420276        | 2               | 5.3843    |
| P85968        | HEMLPANLIQAQR                                                 | 0.816657912        | 2               | 2.70442   |
| P85968        | LVPLLDTGDIIDGGNSEYR                                           | 1.366862175        | 2               | 5.1302    |
| P85968        | NPELQNLDDDFK                                                  | 1.669282667        | 2               | 4.4595    |
| P85968        | SAVDDCQDSWR                                                   | 1.271915586        | 2               | 3.1098    |
| P85968        | VGTGEPCCDWVGDGAGHFVK                                          | 0.980612695        | 2               | 4.45501   |
| P85968        | YGPSLMPGGNK                                                   | 1.070568208        | 2               | 2.31253   |
| <b>P85971</b> | <b>6PGL 6_phosphogluconolactonase</b>                         | <b>1.160108346</b> | <b>0.148283</b> | <b>5</b>  |
| P85971        | DLPAATAPAGPASFAR                                              | 1.098433547        | 2               | 3.1966    |
| P85971        | ILEDQESALPAAMVQPR                                             | 1.036938341        | 2               | 4.7511    |
| P85971        | LPIPSQVLTIDPALPVEDAEDYAR                                      | 1.245410258        | 2               | 4.65599   |
| P85971        | TGALCWFLDEAAAR                                                | 1.059941981        | 2               | 4.001     |
| P85971        | WTLGFCDER                                                     | 1.137057455        | 2               | 2.58248   |
| <b>P85972</b> | <b>VINC Vinculin</b>                                          | <b>1.034436844</b> | <b>0.001246</b> | <b>8</b>  |
| P85972        | AQQVSQGLDLTAK                                                 | 1.035010081        | 2               | 3.98417   |
| P85972        | AVAGNISDPGLQK                                                 | 1.040523969        | 2               | 3.10608   |
| P85972        | KIDAAQNWLADPNGGPEGEEQIR                                       | 0.784789179        | 3               | 5.2297    |
| P85972        | QVATALQNLQTK                                                  | 0.928071023        | 2               | 2.98965   |
| P85972        | SLLDASEEAIKK                                                  | 1.049439136        | 2               | 2.3793    |
| P85972        | STVEGIQASVK                                                   | 0.934985453        | 2               | 2.44492   |
| P85972        | VDQLAAQLADLAAR                                                | 0.820355778        | 2               | 3.09316   |
| P85972        | VLQLTSWDEDAWASK                                               | 1.28005522         | 2               | 2.47923   |
| <b>P85973</b> | <b>PNPH Purine nucleoside phosphorylase</b>                   | <b>0.930376317</b> | <b>8.55E-11</b> | <b>11</b> |
| P85973        | ASHQEVLEAGK                                                   | 0.953093964        | 2               | 3.44314   |
| P85973        | DHINLPGFCGQNPLR                                               | 1.000005443        | 3               | 4.06193   |
| P85973        | ELQEGTYIMSAGPTFETVAESCLLR                                     | 1.019558278        | 2               | 5.30096   |
| P85973        | FEVGDIMLIR                                                    | 0.787546692        | 2               | 3.27791   |
| P85973        | HRPQVAVICGSLGGLTAK                                            | 0.894082384        | 3               | 6.02102   |



|               |                                             |                    |                 |          |
|---------------|---------------------------------------------|--------------------|-----------------|----------|
| P85973        | LTQPQAFDYNEIPNFPQSTVQGHAGR                  | 1.517442541        | 3               | 4.41651  |
| P85973        | MLGADAVGMSTVPEVIVAR                         | 0.691172941        | 2               | 4.6609   |
| P85973        | MLGADAVGMSTVPEVIVAR+Oxidation(0)            | 0.996653283        |                 |          |
| P85973        | VFGFSLITNK                                  | 1.174380133        | 2               | 3.36158  |
| P85973        | VFHLLGVDTLVVNTAAGGLNPK                      | 1.141190245        | 2               | 5.22585  |
| P85973        | VVMDYNNLEK                                  | 0.904669611        | 2               | 2.6372   |
| <b>P86048</b> | <b>RL10L 60S ribosomal protein L10_like</b> | <b>1.222927782</b> | <b>0.292994</b> | <b>5</b> |
| P86048        | AKVDEFPLCGHMSDEYEQLSSEALEAAR                | 0.951369275        | 3               | 4.14464  |
| P86048        | GAFGKPGQTVAR                                | 1.239872817        | 2               | 2.54019  |
| P86048        | MLSCAGADR                                   | 0.924733425        | 2               | 2.32202  |
| P86048        | VDEFPLCGHMSDEYEQLSSEALEAAR                  | 1.309060511        | 3               | 4.9834   |
| P86048        | VHIGQVIMSIR                                 | 0.966918334        | 2               | 2.80028  |
| <b>P86252</b> |                                             | <b>1.126217012</b> | <b>0.066766</b> | <b>4</b> |
| P86252        | AAGSLTDECR                                  | 1.1185871          | 2               | 3.06331  |
| P86252        | ADSAEYSVMTTGGQSSAK                          | 0.240965479        | 2               | 4.03746  |
| P86252        | AEVSELPVVR                                  | 0.890049754        | 2               | 2.80861  |
| P86252        | AISGDLTAEELER                               | 0.961382309        |                 |          |
| P86252        | ALLTPVAIAAGR                                | 0.821235657        | 2               | 2.51542  |
| P86252        | AMQEINYGPSPDNSIKLVR+Oxidation(1)            | 0.761359239        |                 |          |
| P86252        | ASMMGQRASLLTAR+Oxidation(2)                 | 1.029955017        |                 |          |
| P86252        | AVAENQPFLIEAMTYR                            | 0.997456351        | 2               | 4.51248  |
| P86252        | AVEIAHALCLTERQIK                            | 0.973251469        |                 |          |
| P86252        | DQMVKNNHFTLK+Oxidation(2)                   | 0.855441582        |                 |          |
| P86252        | EELEKMK                                     | 0.967277009        | 1               | 2.1218   |
| P86252        | EIAGATPYITAAEEK                             | 1.098780799        | 2               | 3.06232  |
| P86252        | EKMNKPELFGNGEK+Oxidation(2)                 | 1.499552925        |                 |          |
| P86252        | ELDSITPDITPGWK                              | 0.879408868        | 2               | 3.4368   |
| P86252        | FFRPHFLQAPGDLTVQEGK                         | 1.080698275        |                 |          |
| P86252        | FKLINSTNIR                                  | 0.870845632        |                 |          |
| P86252        | GENLVSMTEGPPPK                              | 1.014566383        |                 |          |
| P86252        | GIEQAVQSHAVAEELER                           | 1.16986166         | 2               | 4.98415  |
| P86252        | GNIYSLNEGYAK                                | 1.209333133        | 2               | 4.06306  |
| P86252        | GVYAVGDVCGK                                 | 0.467855173        | 1               | 2.2569   |
| P86252        | HLQTYGEHYPLDHFDK                            | 0.358503272        | 3               | 3.38223  |
| P86252        | HVIHTVGPVAVGQPTASQAAELR                     | 0.91622006         | 3               | 4.89275  |
| P86252        | IGHHSTSDSSAYR                               | 0.981401429        | 3               | 4.05821  |
| P86252        | KAMQEINYGPSPDNSIKLVR                        | 1.137274722        |                 |          |
| P86252        | KGNIYSLNEGYAK                               | 1.225402057        | 2               | 3.92468  |
| P86252        | KHTLIIEGATK                                 | #NUM!              | 2               | 2.65277  |
| P86252        | KLQHELEEAER                                 | 0.136135018        | 2               | 3.79712  |
| P86252        | KVVSDDLVDVIMSHLK                            | 1.078986878        |                 |          |
| P86252        | LEFIQPNVISGIPIYR                            | 0.740195542        | 2               | 2.79716  |
| P86252        | LFEEQLK                                     | 0.967277009        |                 |          |
| P86252        | LGDAVEQGVINNSVLGYFIGR                       | 1.078183176        | 2               | 4.40974  |
| P86252        | LMQVNDTLTSEDAGLR                            | 0.545961113        |                 |          |
| P86252        | LNNIYQNNLTK                                 | 1.037038687        | 2               | 2.9958   |
| P86252        | LQHELEEAER                                  | 0.052687648        | 2               | 3.61621  |
| P86252        | MNLQDELDELK                                 | 0.866268377        | 2               | 2.48876  |
| P86252        | MNLQDELDELK+Oxidation(0)                    | 1.241181567        |                 |          |
| P86252        | MQQVEASLQPETLK+Oxidation(0)                 | 0.792684697        |                 |          |
| P86252        | NNGYAIPTSEQYR                               | 0.898558603        | 2               | 3.66274  |
| P86252        | QGCASAQGRAGSQGQAQGR                         | 0.998451209        |                 |          |
| P86252        | QGQIINPSEDPHLPQEEVLK                        | 0.533932355        | 2               | 2.99317  |
| P86252        | QTCLKTVVLLTDNK                              | 0.512638137        |                 |          |
| P86252        | QTITAQNAAVQAVK                              | 1.083622663        | 2               | 4.08774  |
| P86252        | QYLLNQGWWDDEEQEK                            | 0.458780737        | 2               | 3.81534  |
| P86252        | RAALQAEIEELR                                | 0.053541218        | 2               | 3.95424  |

|               |                                                                   |                    |                 |           |
|---------------|-------------------------------------------------------------------|--------------------|-----------------|-----------|
| P86252        | SEIQAEQDR                                                         | 1.166163626        | 2               | 2.76453   |
| P86252        | SLEDALNQTATVTR                                                    | 1.142753995        | 2               | 4.29333   |
| P86252        | SSSLLAKSPSK                                                       | 0.985825165        |                 |           |
| P86252        | TLHVEEVVPSVIEPSFGLGR                                              | 1.025569241        | 3               | 3.68428   |
| P86252        | TSSAEMPTIPLGSAVEAIR                                               | 1.003601219        | 2               | 4.04733   |
| P86252        | TVNVVQFEPNK                                                       | 2.060424564        | 2               | 2.44872   |
| P86252        | VDDSSGSIQR                                                        | 1.265944106        | 2               | 2.6199    |
| P86252        | VDGNDVFAVYNATK                                                    | 1.448263696        | 2               | 3.95736   |
| P86252        | VMEAFEQAER                                                        | 0.653043313        | 2               | 3.41547   |
| P86252        | VVSQYHELVVQAR                                                     | 1.756738018        | 2               | 3.59399   |
| P86252        | YNENHQHGK                                                         | 1.238458384        |                 |           |
| P86252        | YSTSSSGVTAGK                                                      | 0.695944909        | 2               | 2.56232   |
| P86252s       | DYLGDFIEHYAQLGPSQPPDLAQAQDEPR                                     | 1.052219044        | 3               | 3.80221   |
| P86252s       | LEGDLKDLELQADSAVKGK                                               | 0.482065954        |                 |           |
| P86252s       | LIDDYGVVEEPAELPEGTSLTVDNKR                                        | 0.769219983        | 3               | 4.30252   |
| P86252s       | VASDAQLELDKLDGELKK                                                | 1.134462381        |                 |           |
| <b>P97384</b> | <b>ANX11 Annexin A11</b>                                          | <b>0.833422059</b> | <b>0.344878</b> | <b>2</b>  |
| P97384        | GFGTDEQAIIIDCLGSR                                                 | 0.878984567        | 2               | 4.32059   |
| P97384        | SELDLLDIR                                                         | 0.708381388        | 2               | 2.61726   |
| <b>P97519</b> | <b>HMGCL Hydroxymethylglutaryl_CoA lyase_ mitochondrial</b>       | <b>1.162589327</b> | <b>0.046095</b> | <b>7</b>  |
| P97519        | GFEEAVAAGAK                                                       | 1.149735046        | 2               | 3.59461   |
| P97519        | GYVSCALGCPYEGK                                                    | 1.163266671        | 2               | 4.21469   |
| P97519        | KNVNCIEESFQR                                                      | 1.289559315        | 2               | 3.29389   |
| P97519        | LIDMLSEAGLPVIEATSFVSPK                                            | 1.283848239        | 3               | 4.57972   |
| P97519        | LLEAGDFICQALNR                                                    | 1.32306409         | 2               | 4.50193   |
| P97519        | NVNCIEESFQR                                                       | 1.133562508        | 2               | 3.65505   |
| P97519        | WVPQMADHSDVLK                                                     | 0.87184533         | 2               | 2.7973    |
| <b>P97521</b> | <b>MCAT Mitochondrial carnitine/acylcarnitine carrier protein</b> | <b>1.131776671</b> | <b>0.033167</b> | <b>7</b>  |
| P97521        | CLLQIQASSGK                                                       | 0.938444793        | 1               | 2.91769   |
| P97521        | EEGVTSLYK                                                         | 0.899421487        | 1               | 2.02467   |
| P97521        | KLYQEFQIR                                                         | 1.096656153        | 2               | 2.53341   |
| P97521        | LQTQPPSLPGQPPMYSGTIDCFR                                           | 1.195371445        | 2               | 4.04101   |
| P97521        | LYQEFQIR                                                          | 1.209768553        | 2               | 2.60825   |
| P97521        | SVHDLVPR                                                          | 1.011117709        | 2               | 2.59427   |
| P97521        | YSGTLDCAK                                                         | 1.126300614        | 2               | 2.34599   |
| <b>P97524</b> | <b>S27A2 Very long_chain acyl_CoA synthetase</b>                  | <b>1.117404688</b> | <b>0.463889</b> | <b>14</b> |
| P97524        | GEVGLLICK                                                         | 0.92064823         | 2               | 2.62281   |
| P97524        | ITELTPFFGYAGGK                                                    | 1.510551746        | 2               | 2.92439   |
| P97524        | SEVTFTTNAVYIYTSGTTGLPK                                            | 3.358391889        | 2               | 2.99571   |
| P97524        | SLLHCFQCCGAK                                                      | 1.127436851        | 2               | 2.73525   |
| P97524        | TILHVFLQAR                                                        | 0.973051998        | 3               | 3.31497   |
| P97524        | TSNTNGVDTVLDKVDGVSADPIPESWR                                       | 0.942243248        | 3               | 4.80452   |
| P97524        | TYVPMTEDIYNAIIDK                                                  | 1.122851629        | 3               | 4.14188   |
| P97524        | VDGVSADPIPESWR                                                    | 1.193771705        | 2               | 3.05965   |
| P97524        | VLLASPELHEAVEEVLPTLK                                              | 1.096316001        | 3               | 4.22039   |
| P97524        | VTLMEEGFNPSVIK                                                    | 1.103251784        | 2               | 3.99203   |
| P97524        | YDVEKDEPVR                                                        | 1.09156874         | 2               | 3.11514   |
| P97524        | YDVEKDEPVRDANGYCIK                                                | 0.960328141        | 3               | 3.61246   |
| P97524        | YLCNTPQKPNDK                                                      | 1.122463237        | 2               | 3.05865   |
| P97524        | YNATVIQYIGELLR                                                    | 1.921995785        | 2               | 4.16684   |
| <b>P97532</b> | <b>THTM 3_mercaptopyruvate sulfurtransferase</b>                  | <b>1.210165035</b> | <b>1.17E-13</b> | <b>9</b>  |
| P97532        | AFGHHSVSLLDGGFR                                                   | 1.028324887        | 2               | 3.54009   |
| P97532        | ALVSAQWVAEALK                                                     | 1.13068441         | 2               | 4.23916   |
| P97532        | AQPEHVISQGR                                                       | 0.937798082        | 2               | 2.84928   |
| P97532        | DGIEPGHIPGSVNIPFTEFLTSEGLEK                                       | 1.627428165        | 3               | 6.73878   |

|               |                                                            |                    |                 |           |
|---------------|------------------------------------------------------------|--------------------|-----------------|-----------|
| P97532        | FQGTQPEPR                                                  | 1.034778298        | 2               | 2.82022   |
| P97532        | LLDASWYLPK                                                 | 1.284801824        | 2               | 3.8281    |
| P97532        | SPSEPAEFCAQLDPSFIK                                         | 0.539851764        | 2               | 3.00141   |
| P97532        | THEDILENLDR                                                | 1.045004387        | 2               | 3.25239   |
| P97532        | YWLSQNLPISSGK                                              | 0.997350274        | 2               | 3.75554   |
| <b>P97536</b> | <b>CAND1 Cullin-associated NEDD8-dissociated protein 1</b> | <b>1.09296203</b>  | <b>0.185445</b> | <b>8</b>  |
| P97536        | AADIDQEVK                                                  | 1.451800673        | 2               | 2.48731   |
| P97536        | EGPAVVGQFIQDVK                                             | 1.949395127        | 2               | 3.1046    |
| P97536        | FTISDHPQPIDPLLK                                            | 1.261318063        | 2               | 2.39912   |
| P97536        | ITSEALLVTQQLVK                                             | 0.990605013        | 2               | 2.7034    |
| P97536        | LTIDPETLLPR                                                | 1.516112531        | 2               | 2.80198   |
| P97536        | SVILEAFSSPSEEVK                                            | 0.98445327         | 2               | 2.76456   |
| P97536        | TLEDPLNVR                                                  | 1.02766982         | 2               | 2.30818   |
| P97536        | TYIQCIAISR                                                 | 1.043646189        | 2               | 2.95908   |
| <b>P97562</b> | <b>ACOX2 Peroxisomal acyl-coenzyme A oxidase 2</b>         | <b>1.232975088</b> | <b>8.77E-10</b> | <b>20</b> |
| P97562        | ATASCTYEGENTVLYLQVAR                                       | 1.730821387        | 2               | 3.93295   |
| P97562        | ATFADFCAQGAEICR                                            | 1.382652947        | 2               | 4.96996   |
| P97562        | CSAQTAADFR                                                 | 1.675343526        | 2               | 2.98966   |
| P97562        | DFSLLPELHALSTGMK                                           | 0.681880556        | 2               | 2.37897   |
| P97562        | EAFDLLPLIR                                                 | 1.121012762        | 2               | 2.87832   |
| P97562        | EELYEDAIQK                                                 | 1.046980227        | 2               | 2.36787   |
| P97562        | FAEVLDPDGTQYR                                              | 0.865572548        | 2               | 2.7532    |
| P97562        | HSPSFSVER                                                  | 1.066618126        | 2               | 2.41094   |
| P97562        | ILEYQTQQQK                                                 | 1.085295212        | 2               | 3.81433   |
| P97562        | KVESIIQSDPVFNLK                                            | 0.874803001        | 2               | 4.95636   |
| P97562        | LDKEPEIQR                                                  | 1.08090055         | 2               | 2.69837   |
| P97562        | LFEWAQK                                                    | 0.866597256        | 2               | 2.45519   |
| P97562        | LGTPQSNYLGMLVTR                                            | 1.269343273        | 2               | 3.51787   |
| P97562        | LTNILDGGLPNTVLR                                            | 1.248275094        | 2               | 4.66028   |
| P97562        | MGLEHIDNGFLQLNHVR                                          | 1.00191479         | 3               | 4.27667   |
| P97562        | SGVDQHDAWNQTTVIHLQAAK                                      | 1.022017909        | 3               | 6.1278    |
| P97562        | SLEDHTPLPGITVGDIGPK                                        | 0.931529238        | 3               | 4.6145    |
| P97562        | SLGSDEQIAK                                                 | 1.052335708        | 2               | 2.63038   |
| P97562        | VESIIQSDPVFNLK                                             | 0.939698706        | 2               | 4.25094   |
| P97562        | VLGDNVNLHLHGVMNAIR                                         | 0.764427561        | 2               | 3.2172    |
| <b>P97576</b> | <b>GRPE1 GrpE protein homolog 1_mitochondrial</b>          | <b>1.37617021</b>  | <b>0.11852</b>  | <b>3</b>  |
| P97576        | ALADTENLR                                                  | 1.167846827        | 2               | 2.65295   |
| P97576        | DLLEVADILEK                                                | 1.519240443        | 2               | 3.2089    |
| P97576        | TLRPALVGVVK                                                | 1.223478124        | 2               | 2.53241   |
| <b>P97584</b> | <b>PTGR1 Prostaglandin reductase 1</b>                     | <b>0.951165689</b> | <b>1.01E-06</b> | <b>5</b>  |
| P97584        | ALTDLMNWVSEGK                                              | 1.099590801        | 2               | 4.10694   |
| P97584        | GGETVLVNAAGAVGVSVDGQIAK                                    | 0.938868989        | 2               | 5.64595   |
| P97584        | HFEGFPTDSNFELR                                             | 0.788886208        | 2               | 3.73866   |
| P97584        | TGPCPPGPSPEVIYQQLR                                         | 1.516590557        | 2               | 4.03136   |
| P97584        | YHEYITEGFEK                                                | 0.827583191        | 2               | 2.83562   |
| <b>P97608</b> | <b>OPLA 5_oxoprolinase</b>                                 | <b>0.993653213</b> | <b>0.74092</b>  | <b>11</b> |
| P97608        | AGDFGAAFVER                                                | 1.050851087        | 2               | 3.01052   |
| P97608        | GGPVTVDANLVLGR                                             | 1.02221086         | 2               | 2.73712   |
| P97608        | GHTACADAYLTPTIQR                                           | 1.102866391        | 2               | 3.42402   |
| P97608        | GSILDPSPEAAVGGNVLTSSQR                                     | 0.975525104        | 2               | 4.79947   |
| P97608        | ISVGAEGPSMADTR                                             | 1.041799047        | 2               | 2.70529   |
| P97608        | ISVGAEGPSMADTR+Oxidation(9)                                | 1.303131483        |                 |           |
| P97608        | ITDPEILESR                                                 | 0.207872677        | 2               | 2.64443   |
| P97608        | LLSEDPANYADAPTEGIR                                         | 1.066408155        | 2               | 4.30364   |
| P97608        | SGLFVVGPEAGAHPPACYR                                        | 0.599528172        | 2               | 3.77446   |
| P97608        | SGLQLEDTPK                                                 | 1.206217288        | 2               | 2.50593   |

|               |                                                                 |                    |                 |           |
|---------------|-----------------------------------------------------------------|--------------------|-----------------|-----------|
| P97608        | TGDILLEIQQPVDLEALR                                              | 0.893849411        | 2               | 4.33554   |
| <b>P97612</b> | <b>FAAH1 Fatty acid amide hydrolase 1</b>                       | <b>1.221023922</b> | <b>0.00017</b>  | <b>7</b>  |
| P97612        | FMREVEQLMTPQK+Oxidation(8)                                      | 1.302456565        |                 |           |
| P97612        | GHDSTLGLSLNEGMPSESDCVVVQVLK                                     | 0.890521543        | 3               | 4.6872    |
| P97612        | GTNCVTSYLTDCETQLSQAPR                                           | 1.3641199          | 2               | 4.94062   |
| P97612        | GYFGDIWDIILK                                                    | 1.011518493        | 2               | 3.01208   |
| P97612        | LQSGELSPAVFFTYLKG                                               | 1.613149706        | 2               | 4.71232   |
| P97612        | NSVGLPVAVQCVALPWQEELCLR                                         | 1.159550295        | 2               | 4.17338   |
| P97612        | SPGGSSGGEGALIGSGGSPGLGTDIGGSIR                                  | 1.660416265        | 2               | 4.75917   |
| <b>P97697</b> | <b>IMPA1 Inositol monophosphatase 1</b>                         | <b>1.371528743</b> | <b>0.798969</b> | <b>2</b>  |
| P97697        | SLLVTELGSSR                                                     | 1.026933738        | 2               | 2.3707    |
| P97697        | SSPADLVTVDQK                                                    | 1.45527029         | 2               | 2.78266   |
| <b>P97700</b> | <b>M2OM Mitochondrial 2_oxoglutarate/malate carrier protein</b> | <b>0.971744018</b> | <b>0.360231</b> | <b>4</b>  |
| P97700        | AVVVNAAQLASYSQSK                                                | 0.929429493        | 2               | 4.76448   |
| P97700        | GIYGLSAGLLR                                                     | 0.900972443        | 2               | 2.83866   |
| P97700        | LGIYTVLFR                                                       | 0.856293597        | 2               | 2.72505   |
| P97700        | LTGADGTPPGFLK                                                   | 1.134448866        | 2               | 3.15254   |
| <b>P97840</b> | <b>LEG9 Galectin_9</b>                                          | <b>2.686499158</b> | <b>0.000243</b> | <b>2</b>  |
| P97840        | NTQINNSWGPEER                                                   | 2.059743145        | 2               | 2.45388   |
| P97840        | SINISGVVLPDAK                                                   | 2.69454812         | 2               | 3.38207   |
| <b>P97852</b> | <b>DHB4 Peroxisomal multifunctional enzyme type 2</b>           | <b>1.013016789</b> | <b>9.86E-08</b> | <b>21</b> |
| P97852        | AVANYDSVEAGEK                                                   | 1.334185094        | 2               | 4.02546   |
| P97852        | AYALFAER                                                        | 1.299941163        | 2               | 3.57315   |
| P97852        | CEAVIADILDK                                                     | 1.015442434        | 2               | 2.46266   |
| P97852        | DTTSLNQAAALYR                                                   | 1.5299694          | 2               | 2.47417   |
| P97852        | FVYEGSADFSCLPFTFGVIVAQK                                         | 0.837520173        | 2               | 4.48273   |
| P97852        | GALVVVNDLGGDFK                                                  | 1.434078601        | 2               | 4.8234    |
| P97852        | GSSAADKVVEEIR                                                   | 1.025982431        | 2               | 2.7199    |
| P97852        | HVLQQFADNDVSR                                                   | 1.092751297        | 2               | 4.46525   |
| P97852        | ICDFSNASKPK                                                     | 1.336385847        | 3               | 3.76799   |
| P97852        | IDSEGISQNHGTGQVASADASGFAGVVGHK                                  | 0.98737909         | 3               | 5.50173   |
| P97852        | IDVVVNNAGILR                                                    | 0.917070918        | 2               | 3.40427   |
| P97852        | ISDEDWDIIQR                                                     | 0.8334273          | 2               | 3.78878   |
| P97852        | KNNIHCNTIAPNAGSR                                                | 0.819603842        | 2               | 4.85843   |
| P97852        | LNPQN AFFSGR                                                    | 1.524558431        | 2               | 2.63414   |
| P97852        | NGSGEVYQGPAPK                                                   | 1.439620113        | 2               | 3.08497   |
| P97852        | NNIHCNTIAPNAGSR                                                 | 1.031855875        | 2               | 4.57182   |
| P97852        | SIQESTGGIIEVLHK                                                 | 0.854489815        | 2               | 4.00652   |
| P97852        | SLMSGGLAEVPGLSINFAK                                             | 0.933231254        | 2               | 3.04247   |
| P97852        | VLHGEQYLELYKPLPR                                                | 1.012576966        | 2               | 4.40263   |
| P97852        | VNAVFEWHITK                                                     | 1.649722148        | 2               | 2.51869   |
| P97852        | VVLVTGAGGGLGR                                                   | 0.974706926        | 2               | 3.71669   |
| <b>Q00238</b> | <b>ICAM1 Intercellular adhesion molecule 1</b>                  | <b>0.817197211</b> | <b>0.303633</b> | <b>2</b>  |
| Q00238        | LDTPDLLEVGTQQK                                                  | 1.016695269        | 2               | 3.08378   |
| Q00238        | VELDPLPAWQQVGK                                                  | 0.811923848        | 2               | 2.94647   |
| <b>Q00438</b> | <b>PTBP1 Polypyrimidine tract binding protein 1</b>             | <b>1.1403604</b>   | <b>0.003503</b> | <b>4</b>  |
| Q00438        | IAIPGLAGAGNSVLLVSNLNPFR                                         | 1.526076763        | 2               | 4.19562   |
| Q00438        | KLP5DVTEGEVISLGLPFGK                                            | 1.06283075         | 2               | 4.71256   |
| Q00438        | LSDGQNIYNACCTLR                                                 | 1.015228506        | 2               | 3.5393    |
| Q00438        | NNQFQALLQYADPVSAQHAK                                            | 1.176056487        | 2               | 5.64808   |
| <b>Q00780</b> | <b>chain</b>                                                    | <b>0.922418917</b> | <b>0.011088</b> | <b>4</b>  |
| Q00780        | AGPMGMAGPKGPMGPMGPKGIGPYGQPGPK+Oxidation(3)                     | 2.1635855          |                 |           |
| Q00780        | AGPMGMAGPKGPMGPMGPKGIGPYGQPGPK+Oxidation(5)                     | 2.1635855          |                 |           |

|               |                                                                                                                             |                    |                 |           |
|---------------|-----------------------------------------------------------------------------------------------------------------------------|--------------------|-----------------|-----------|
| Q00780        | GQYLEMPLPMLPMDLKGEPGPPGKPGPR+Oxidation(5)                                                                                   | <b>0.863219625</b> |                 |           |
| Q00780        | GQYLEMPLPMLPMDLKGEPGPPGKPGPR+Oxidation(5)                                                                                   | <b>0.863219625</b> |                 |           |
| <b>Q00P19</b> | <b>HNRL2 Heterogeneous nuclear ribonucleoprotein U_like protein 2</b>                                                       | <b>1.541407217</b> | <b>0.170865</b> | <b>3</b>  |
| Q00P19        | AVEEQGDDQDSEK                                                                                                               | <b>1.139290326</b> | 2               | 3.82613   |
| Q00P19        | EAAQPIVTKYK                                                                                                                 | <b>2.322612529</b> | 1               | 1.94497   |
| Q00P19        | SGDETPGSEAPGDK                                                                                                              | <b>1.180478459</b> | 2               | 2.85477   |
| <b>Q01177</b> | <b>PLMN Plasminogen</b>                                                                                                     | <b>1.108598699</b> | <b>0.781332</b> | <b>3</b>  |
| Q01177        | ILGSDVQQIAVTK                                                                                                               | <b>1.115671728</b> | 2               | 3.72667   |
| Q01177        | LVLEPNDADIALLK                                                                                                              | <b>0.994196571</b> | 2               | 2.58515   |
| Q01177        | STELCAGHLAGGIDSCQGDSSGGLVCFEK                                                                                               | <b>0.816448316</b> | 3               | 4.32061   |
| <b>Q01205</b> | <b>ODO2 Dihydropolyllysine_residue succinyltransferase component of 2_oxoglutarate dehydrogenase complex_ mitochondrial</b> | <b>1.116785642</b> | <b>0.975177</b> | <b>4</b>  |
| Q01205        | ASAFALQEQPVVNAVIDDATK                                                                                                       | <b>1.108247405</b> | 2               | 6.31863   |
| Q01205        | NDVITVQTPAFAESVTEGDVR                                                                                                       | <b>1.137315077</b> | 2               | 5.20277   |
| Q01205        | NVETMNYADIER                                                                                                                | <b>1.322201289</b> | 2               | 3.41414   |
| Q01205        | VEGGTPLFTLR                                                                                                                 | <b>1.089224355</b> | 2               | 3.21978   |
| <b>Q01405</b> | <b>SC23A Protein transport protein Sec23A</b>                                                                               | <b>1.12112462</b>  | <b>1.26E-11</b> | <b>4</b>  |
| Q01405        | AETEEGPDVLR                                                                                                                 | <b>1.079975967</b> | 2               | 2.90697   |
| Q01405        | AVLNPLCQVDYR                                                                                                                | <b>1.118217452</b> | 2               | 2.73136   |
| Q01405        | HLLQAPVDDAQEILHSR                                                                                                           | <b>1.23974541</b>  | 3               | 5.62557   |
| Q01405        | YIDTEHGGSQAR                                                                                                                | <b>1.613267507</b> | 2               | 3.28114   |
| <b>Q02253</b> | <b>MMSA Methylmalonate_semialdehyde dehydrogenase [acylating]_ mitochondrial</b>                                            | <b>0.919779589</b> | <b>9.9E-20</b>  | <b>31</b> |
| Q02253        | AEMEAAVAACK                                                                                                                 | <b>0.888601848</b> | 2               | 3.80614   |
| Q02253        | AEMEAAVAACK+Oxidation(2)                                                                                                    | <b>1.184711083</b> |                 |           |
| Q02253        | AFPAWADTSILSR                                                                                                               | <b>1.0364832</b>   | 2               | 4.00217   |
| Q02253        | AISFVGSNQAGEYIFER                                                                                                           | <b>1.336111594</b> | 2               | 5.17551   |
| Q02253        | CMALSTAVLVGEAK                                                                                                              | <b>0.865314462</b> | 2               | 4.5014    |
| Q02253        | CMALSTAVLVGEAK+Oxidation(1)                                                                                                 | <b>1.289554859</b> |                 |           |
| Q02253        | EEDATLSSPAVVMPTMGR                                                                                                          | <b>0.709971286</b> | 2               | 4.30653   |
| Q02253        | EEDATLSSPAVVMPTMGR+Oxidation(12)                                                                                            | <b>0.775777778</b> |                 |           |
| Q02253        | EEDATLSSPAVVMPTMGR+Oxidation(15)                                                                                            | <b>1.3278745</b>   |                 |           |
| Q02253        | EGASILLDGR                                                                                                                  | <b>0.727106164</b> | 2               | 2.54158   |
| Q02253        | ENTLNQLVGAFFGAAGQR                                                                                                          | <b>0.996723376</b> | 2               | 5.49963   |
| Q02253        | GDTNFGYK                                                                                                                    | <b>1.070042554</b> | 2               | 2.44487   |
| Q02253        | GLQVVEHACSVTSLMLGETMPSITK                                                                                                   | <b>0.901866446</b> | 2               | 5.59355   |
| Q02253        | GYENGNFVGPTIISNVKPSMTCYK                                                                                                    | <b>0.787334736</b> | 3               | 3.93188   |
| Q02253        | IVNDNPYNGNTAIFTTNGAIAR                                                                                                      | <b>1.182610507</b> | 2               | 5.41856   |
| Q02253        | LITLEQK                                                                                                                     | <b>1.166523494</b> | 2               | 2.81526   |
| Q02253        | LLQDSGAPDGTLNIIHGQHEAVNFICDHPDIK                                                                                            | <b>3.273005395</b> | 3               | 4.29733   |
| Q02253        | NHGVVMPDANK                                                                                                                 | <b>0.967584675</b> | 1               | 3.3676    |
| Q02253        | NHGVVMPDANK+Oxidation(5)                                                                                                    | <b>1.205069056</b> |                 |           |
| Q02253        | NHGVVMPDANKENTLNQLVGAFFGAAGQR                                                                                               | <b>0.823993119</b> | 3               | 6.17099   |
| Q02253        | NHGVVMPDANKENTLNQLVGAFFGAAGQR+Oxidation(5)                                                                                  | <b>1.078677792</b> |                 |           |
| Q02253        | QGIQFYTQLK                                                                                                                  | <b>1.440464981</b> | 2               | 2.72376   |
| Q02253        | SDKWIDIHNPATNEVVGR                                                                                                          | <b>1.091108751</b> | 2               | 5.28006   |
| Q02253        | TITSQWK                                                                                                                     | <b>0.976429562</b> | 2               | 2.52672   |
| Q02253        | TITSQWKEEDATLSSPAVVMPTMGR                                                                                                   | <b>0.650743953</b> | 2               | 5.27224   |
| Q02253        | TLADAEGDVFR                                                                                                                 | <b>0.874937824</b> | 2               | 3.48783   |
| Q02253        | VCNLIDSGAK                                                                                                                  | <b>1.009362519</b> | 2               | 3.48186   |
| Q02253        | VNAGDQPGADLGLIIPQAK                                                                                                         | <b>0.899536693</b> | 2               | 5.73663   |

|               |                                             |                    |                 |           |
|---------------|---------------------------------------------|--------------------|-----------------|-----------|
| Q02253        | WIDIHNPATNEVVGR                             | 0.956270845        | 2               | 4.91935   |
| Q02253        | WLPELVER                                    | 0.815406891        | 2               | 2.50395   |
| Q02253        | YAHMVDVGVQVGNVPIVPLPMFSFTGSR                | 1.089470553        | 3               | 4.01954   |
| <b>Q02769</b> | <b>FDFI Squalene synthase</b>               | <b>0.907541218</b> | <b>0.086693</b> | <b>4</b>  |
| Q02769        | KLEDFVKPENVDVAVK                            | 0.66432978         | 3               | 4.03136   |
| Q02769        | SFAAVIQALDGDIR                              | 0.704149376        | 2               | 3.20876   |
| Q02769        | TQSLPNCQLISR                                | 0.598667403        | 2               | 2.72067   |
| Q02769        | VVLEDFPTISLEFR                              | 0.905142317        | 2               | 3.4615    |
| <b>Q02874</b> | <b>H2AY Core histone macro_H2A.1</b>        | <b>0.93471462</b>  | <b>0.272436</b> | <b>3</b>  |
| Q02874        | AASADSTTEGAPTDGFTVLSTK                      | 1.551703497        | 2               | 4.43577   |
| Q02874        | GVTIASGGVLPNIHPELLAK                        | 0.906771758        | 2               | 4.13975   |
| Q02874        | NGPLEVAGAAVSAGHGLPAK                        | 0.844788666        | 2               | 3.3183    |
| <b>Q02974</b> | <b>KHK Ketohexokinase</b>                   | <b>1.033023887</b> | <b>0.536251</b> | <b>9</b>  |
| Q02974        | FGCQVAGK                                    | 1.123786162        | 2               | 2.54027   |
| Q02974        | GATLICAWAEEGADALGPDGQLLHSDAFPPPR            | 1.000562884        | 3               | 5.73581   |
| Q02974        | GGNASNSCTVLSLLGAR                           | 1.041819617        | 2               | 4.68677   |
| Q02974        | GNSMQEALR                                   | 0.941510546        | 2               | 3.03812   |
| Q02974        | GVDVSQVAWQSQGDTPCSCCIVNNSNGSR               | 0.978388248        | 3               | 5.76539   |
| Q02974        | IEQYNATQPLQKQ                               | 1.325666618        | 2               | 4.87452   |
| Q02974        | RGVDVSQVAWQSQGDTPCSCCIVNNSNGSR              | 1.028740555        | 3               | 5.23999   |
| Q02974        | TIILYDTNLPDVSAK                             | 0.944797045        | 2               | 5.02073   |
| Q02974        | VSVEIEKPR                                   | 1.10318589         | 2               | 2.37493   |
| <b>Q03248</b> | <b>BUP1 Beta_ureidopropionase</b>           | <b>1.225702188</b> | <b>9.9E-20</b>  | <b>12</b> |
| Q03248        | AHHDLYFYGSSYVAAPDGSR                        | 1.460698667        | 2               | 6.27259   |
| Q03248        | EKLPWTEFAESAEDGLTTR                         | 1.051810663        | 3               | 4.71631   |
| Q03248        | ELAEAVKPNYSPIVK                             | 1.209603737        | 2               | 4.28682   |
| Q03248        | HNMVVISPILER                                | 1.170703487        | 2               | 2.94065   |
| Q03248        | HNMVVISPILER+Oxidation(2)                   | 1.430694499        |                 |           |
| Q03248        | IPLPTSAPVAEQVSALHK                          | 1.715730925        | 3               | 4.7975    |
| Q03248        | KHNMMVVISPILER                              | 0.142927623        | 2               | 2.93245   |
| Q03248        | KHNMMVVISPILER+Oxidation(3)                 | 1.230022494        |                 |           |
| Q03248        | NAAIANHCFTCALNR                             | 1.229511769        | 2               | 4.46206   |
| Q03248        | VGDFNESTYYMEGNLGHVPVFTQFGR                  | 1.394144525        | 3               | 5.64368   |
| Q03248        | VGQEHYPNEFTSGDGK                            | 1.10585445         | 2               | 4.24458   |
| Q03248        | VGQEHYPNEFTSGDGKK                           | 1.049796114        | 3               | 4.94072   |
| <b>Q03336</b> | <b>RGN Regucalcin</b>                       | <b>0.982514739</b> | <b>2.49E-13</b> | <b>16</b> |
| Q03336        | CGESPVWEEASK                                | 0.982252747        | 2               | 4.67676   |
| Q03336        | CLLFVDIPSK                                  | 1.241910149        | 2               | 3.32637   |
| Q03336        | DEQIPDGMCIDVEGK                             | 0.870691768        | 2               | 4.61304   |
| Q03336        | DYSEMYVTCAR                                 | 1.345905073        | 2               | 2.76743   |
| Q03336        | FNDGKVDPAGR                                 | 0.932362715        | 2               | 2.72158   |
| Q03336        | HQGSLSLFPDHSVK                              | 1.382745088        | 2               | 4.72393   |
| Q03336        | KYFDQVDISNGLDWSLDHK                         | 1.085941649        | 3               | 5.68878   |
| Q03336        | LWVACYNGGR                                  | 1.341115484        | 2               | 2.98331   |
| Q03336        | MEKDEQIPDGMCIDVEGK                          | 0.863007916        | 2               | 5.10728   |
| Q03336        | MEKDEQIPDGMCIDVEGK+Oxidation(0)             | 1.13461793         |                 |           |
| Q03336        | MEKDEQIPDGMCIDVEGK+Oxidation(10)            | 1.134354035        |                 |           |
| Q03336        | QSGGYVATIGTK                                | 0.985724965        | 2               | 2.89118   |
| Q03336        | VGVDAPVSSVALR                               | 0.928426876        | 2               | 3.79533   |
| Q03336        | YFAGTMAEETAPAVLER                           | 0.841658894        | 2               | 5.59041   |
| Q03336        | YFAGTMAEETAPAVLER+Oxidation(5)              | 1.025428867        |                 |           |
| Q03336        | YFDQVDISNGLDWSLDHK                          | 0.90770395         | 3               | 4.38135   |
| <b>Q03410</b> | <b>SYCP1 Synaptonemal complex protein 1</b> | <b>1.065649863</b> | <b>0.005612</b> | <b>2</b>  |
| Q03410        | ISEEKLLGEVEK                                | 1.070588276        | 2               | 2.30646   |
| Q03410        | MEQENTAILTDKK+Oxidation(0)                  | 0.555119579        |                 |           |
| <b>Q03626</b> | <b>MUG1 Murinoglobulin_1</b>                | <b>0.883103259</b> | <b>0.000358</b> | <b>6</b>  |
| Q03626        | EESSCIHSSCTAER                              | 1.085306851        | 2               | 3.90137   |

|               |                                                        |                    |                 |           |
|---------------|--------------------------------------------------------|--------------------|-----------------|-----------|
| Q03626        | GGEFEMMPLGVNK                                          | 0.487059899        | 2               | 3.13859   |
| Q03626        | LTAQPAPSPEDLALSMGTIK                                   | 0.904884401        | 3               | 4.64706   |
| Q03626        | NLHPLNELFPLAYIEDPK                                     | 1.467334918        | 3               | 4.43432   |
| Q03626        | VQTVPLTCNNPK                                           | 0.840069613        | 2               | 2.90261   |
| Q03626        | VYHKEESSCIHSSCTAER                                     | 1.187643315        | 3               | 4.37682   |
| <b>Q04462</b> | <b>SYVC Valyl_tRNA synthetase</b>                      | <b>1.27730106</b>  | <b>0.335167</b> | <b>6</b>  |
| Q04462        | ADFPAGIPECGTDALR                                       | 1.335057337        | 2               | 2.42099   |
| Q04462        | ALNPLEEWLR                                             | 1.049538004        | 2               | 2.54179   |
| Q04462        | ITPAHDQNDYEVGQR                                        | 1.400921515        | 2               | 3.35845   |
| Q04462        | LQQTEAELR                                              | 1.480903748        | 2               | 2.36042   |
| Q04462        | SVTQQPGSEITAPQK                                        | 0.977391028        | 2               | 3.15732   |
| Q04462        | VQGSDESDEEVVATTR                                       | 0.903899736        | 2               | 3.93878   |
| <b>Q05096</b> | <b>MYO1B Myosin Ib</b>                                 | <b>0.772004637</b> | <b>0.004116</b> | <b>2</b>  |
| Q05096        | LEDLATLIQK                                             | 0.708611743        |                 |           |
| Q05096        | NAMQIVGFSDEAESVLEVVAAVLK                               | 1.158110369        |                 |           |
| <b>Q05144</b> | <b>RAC2 Ras_related C3 botulinum toxin substrate 2</b> | <b>1.170588703</b> | <b>0.578415</b> | <b>2</b>  |
| Q05144        | MQAIKCVVVDGAVGK+Oxidation(0)                           | 0.877566221        |                 |           |
| Q05144        | YLECSALTQR                                             | 1.150257368        | 2               | 2.97773   |
| <b>Q06647</b> | <b>ATPO ATP synthase subunit O_mitochondrial</b>       | <b>1.069789734</b> | <b>0.000649</b> | <b>9</b>  |
| Q06647        | FSPLTANLMNLLAENGR                                      | 1.430915365        | 3               | 4.12822   |
| Q06647        | GEVPCTVTTAFPLDEAVLSELK                                 | 1.059815162        | 3               | 5.81967   |
| Q06647        | GQILNLEVK                                              | 1.442240327        | 2               | 2.48038   |
| Q06647        | LGNTQGVISAFSTIMSVHR                                    | 1.592390403        | 3               | 3.33121   |
| Q06647        | LVRPPVQVYGIEGR                                         | 3.026757103        | 3               | 3.53732   |
| Q06647        | TDPSIMGGMIVR                                           | 0.758294879        | 2               | 3.22957   |
| Q06647        | TVLNSFLSK                                              | 1.1759052          | 2               | 3.01961   |
| Q06647        | VSLAVLNPIYIK                                           | 1.644811634        | 2               | 3.06192   |
| Q06647        | YATALYSAASK                                            | 3.145191925        | 2               | 3.43325   |
| <b>Q07071</b> | <b>GCKR Glucokinase regulatory protein</b>             | <b>1.274211107</b> | <b>4.22E-07</b> | <b>14</b> |
| Q07071        | AAPISCHVQVAHEK                                         | 1.305615632        | 2               | 4.91732   |
| Q07071        | CLLEILR                                                | 1.370120987        | 2               | 2.62097   |
| Q07071        | GFLIGDHSDMFNQK                                         | 1.360255014        | 2               | 3.54048   |
| Q07071        | GLGQKPLYTYLIAGGDR                                      | 3.873878899        | 2               | 3.11662   |
| Q07071        | LLGQCDAEIFQEEGQIVPTYQR                                 | 2.997405834        | 2               | 5.07553   |
| Q07071        | LYSESVLTTMLQVAGK                                       | 1.592592762        | 2               | 2.60993   |
| Q07071        | NDPIEDWR                                               | 1.256469057        | 1               | 1.90331   |
| Q07071        | QEAFLNPAIGPEGLSGSSR                                    | 2.125976048        | 2               | 3.05214   |
| Q07071        | STQALEDPACGTLN                                         | 1.301942899        | 2               | 2.40463   |
| Q07071        | TVDQGVVSSQR                                            | 1.256886583        | 2               | 3.52895   |
| Q07071        | VIPTALLSLLLR                                           | 1.375825891        | 2               | 3.55718   |
| Q07071        | VQEVLKEPDGGLVVLSSGGTSGR                                | 1.443609681        | 2               | 5.32788   |
| Q07071        | WVLNTVSTGAHVLLGK                                       | 0.97503468         | 2               | 2.74623   |
| Q07071        | YQHVIETPEPGEWELSGYEAAPITEK                             | 1.286041168        | 3               | 5.56291   |
| <b>Q07116</b> | <b>SUOX Sulfite oxidase_mitochondrial</b>              | <b>1.04352799</b>  | <b>0.97387</b>  | <b>7</b>  |
| Q07116        | AVDDSYNVQPDTVAPIWNLR                                   | 1.040205636        | 2               | 4.61679   |
| Q07116        | FVDLHPGGQSK                                            | 1.198245582        | 2               | 2.43854   |
| Q07116        | LCDVLAQAGHR                                            | 0.896954889        | 2               | 2.99242   |
| Q07116        | MSPPLEASDPYSNDPMR                                      | 0.760978937        | 2               | 2.6766    |
| Q07116        | NHLPVPLNDPDTYR                                         | 0.982395976        | 2               | 2.47908   |
| Q07116        | VSVSEESYSHWQR                                          | 1.100412838        | 2               | 3.74271   |
| Q07116        | VVVPGVVGAR                                             | 0.863556492        | 2               | 2.44121   |
| <b>Q07523</b> | <b>HAOX2 Hydroxyacid oxidase 2</b>                     | <b>1.244445584</b> | <b>9.9E-20</b>  | <b>10</b> |
| Q07523        | ALKEEKPTQSVPVSPFK                                      | 0.604720849        | 3               | 4.58456   |
| Q07523        | ALVITIDTPVLGNR                                         | 0.708573671        | 2               | 4.47794   |
| Q07523        | ASFCWNDLSLLQSITR                                       | 1.101752681        | 2               | 4.09175   |
| Q07523        | EKPTQSVPVSPFK                                          | 0.901197559        | 2               | 2.96341   |

|               |                                                                  |                    |                 |          |
|---------------|------------------------------------------------------------------|--------------------|-----------------|----------|
| Q07523        | EVLDILTAELHR                                                     | 0.829290405        | 2               | 3.24111  |
| Q07523        | GEDGVKEVLDILTAELHR                                               | 0.805182891        | 3               | 5.18748  |
| Q07523        | HNVQGIVVSNHGGR                                                   | 0.707940207        | 3               | 6.11873  |
| Q07523        | NQLNLEANILLK                                                     | 0.708617779        | 2               | 3.47021  |
| Q07523        | QLDEVSASIDALR                                                    | 0.703587942        | 2               | 3.07338  |
| Q07523        | TTIQGQEISAPICISPTAFHSIAWPDGEK                                    | 1.908464557        | 3               | 4.6385   |
| <b>Q07803</b> | <b>EFGM Elongation factor G_mitochondrial</b>                    | <b>1.170889203</b> | <b>0.045423</b> | <b>3</b> |
| Q07803        | GIIDLIEER                                                        | 1.492559537        | 2               | 2.70109  |
| Q07803        | LEFSDETFGANVPK                                                   | 1.148592092        | 2               | 3.6988   |
| Q07803        | YQPCSPSTQEELVNK                                                  | 1.171656941        | 2               | 3.26223  |
| <b>Q07936</b> | <b>ANXA2 Annexin A2</b>                                          | <b>1.119152217</b> | <b>0.00626</b>  | <b>2</b> |
| Q07936        | GLGTDEDSLIEICSR                                                  | 0.798163596        | 2               | 3.02756  |
| Q07936        | GVDEVTVNILTNR                                                    | 0.811115993        | 2               | 4.11061  |
| <b>Q07984</b> | <b>SSRD Translocon-associated protein subunit delta</b>          | <b>1.220540907</b> | <b>0.058573</b> | <b>3</b> |
| Q07984        | FFDEESYLLR                                                       | 1.254537186        | 2               | 3.53923  |
| Q07984        | NNEDVSIIPLFTVSDHR                                                | 1.178379343        | 3               | 3.91854  |
| Q07984        | VQNMALYADVSGK                                                    | 1.168138442        | 2               | 3.25548  |
| <b>Q08163</b> | <b>CAP1 Adenylyl cyclase-associated protein 1</b>                | <b>0.829454502</b> | <b>0.000198</b> | <b>8</b> |
| Q08163        | ALLVTASQCQQPAGNK                                                 | 0.741373624        | 2               | 4.68097  |
| Q08163        | GAVPYVQAFDSLLANPVAEYLK                                           | 1.096987518        | 3               | 3.77334  |
| Q08163        | LEAVSHTSDMHCGYGDSPSK                                             | 0.94584785         | 3               | 4.85867  |
| Q08163        | LSDLLAPISEQIQEVITFR                                              | 1.192806673        | 2               | 3.42884  |
| Q08163        | NSLDCEIVSAK                                                      | 0.972789285        | 2               | 3.08192  |
| Q08163        | SALFAQINQGESITHALK                                               | 0.432587022        | 2               | 3.81525  |
| Q08163        | SSEMNVLIPTEGGDFNEFPVPEQFK                                        | 0.972467593        | 2               | 3.66837  |
| Q08163        | VENQENVSNLVIDDELTK                                               | 0.842683798        | 2               | 4.82456  |
| <b>Q08415</b> | <b>KAT1 Kynurenine-oxoglutarate transaminase 1_mitochondrial</b> | <b>1.293359737</b> | <b>0.046879</b> | <b>4</b> |
| Q08415        | EQQHFGQPSSYFLQPQAMELNR                                           | 1.142103202        | 3               | 4.9042   |
| Q08415        | ILVLNTPNNPLGK                                                    | 1.297295493        | 2               | 3.05506  |
| Q08415        | LGASNDWQLDPAELASK                                                | 0.421953839        | 2               | 3.34252  |
| Q08415        | RLDGIDQNLWVEFGK                                                  | 1.01696224         | 2               | 2.93295  |
| <b>Q09073</b> | <b>ADT2 ADP/ATP translocase 2</b>                                | <b>1.131891877</b> | <b>1.22E-10</b> | <b>7</b> |
| Q09073        | DFLAGGVAAAIK                                                     | 1.382225892        | 2               | 4.76953  |
| Q09073        | EQGVLSFWR                                                        | 1.779613281        | 1               | 1.9082   |
| Q09073        | GLGDCLVK                                                         | 1.059063685        | 2               | 2.58245  |
| Q09073        | GTDIMYGTLDLCWR                                                   | 1.381221761        | 2               | 3.63335  |
| Q09073        | KGTDIMYGTLDLCWR                                                  | 1.066989496        | 2               | 3.36929  |
| Q09073        | LLLQVQHASK                                                       | 1.48687944         | 2               | 2.74865  |
| Q09073        | QIFLGGVDK                                                        | 0.982821634        | 2               | 2.68216  |
| <b>Q0D2L3</b> | <b>SPEB Agmatinase_mitochondrial</b>                             | <b>1.256106772</b> | <b>2.07E-05</b> | <b>6</b> |
| Q0D2L3        | EESLMLGTVNPSTGALPFQSLR                                           | 0.968446528        | 2               | 3.74251  |
| Q0D2L3        | EHGPVGLVHVGASNTSDKPLEDK                                          | 0.971972699        | 3               | 3.64527  |
| Q0D2L3        | IREESLMLGTVNPSTGALPFQSLR                                         | 1.327413061        | 3               | 4.63537  |
| Q0D2L3        | SVDEGLLDSK                                                       | 1.212899087        | 2               | 2.98218  |
| Q0D2L3        | SVDEGLLDSKR                                                      | 1.174547635        | 2               | 2.66419  |
| Q0D2L3        | VADLGNVNVNLYNLQDSCR                                              | 1.325023757        | 2               | 5.41056  |
| <b>Q0VAV2</b> | <b>EXPH5 Exophilin_5</b>                                         | <b>0.828281823</b> | <b>0.978205</b> | <b>2</b> |
| Q0VAV2        | DMDVSVSKDEQLNK+Oxidation(1)                                      | 1.154331001        |                 |          |
| Q0VAV2        | GMAKNPMEQLQTPR+Oxidation(1)                                      | 0.809131804        |                 |          |
| <b>Q0VGK3</b> | <b>GLCK Glycerate kinase</b>                                     | <b>0.843557537</b> | <b>0.004855</b> | <b>3</b> |
| Q0VGK3        | AVLGMAAAADELLGQHLVQGVISVPK                                       | 0.779800392        | 3               | 5.88272  |
| Q0VGK3        | GATIQELNTR                                                       | 1.016536073        | 2               | 2.92111  |
| Q0VGK3        | QLFDSAVGAVQPGPMLQR                                               | 0.789482421        | 2               | 3.81942  |
| <b>Q0ZHH6</b> | <b>ATLA3 Atlantin_3</b>                                          | <b>0.938673343</b> | <b>0.528128</b> | <b>4</b> |
| Q0ZHH6        | EHGHSNWLGDPEEPLTGFSWR                                            | 0.900539503        | 3               | 4.07091  |



|               |                                                                            |                    |                 |           |
|---------------|----------------------------------------------------------------------------|--------------------|-----------------|-----------|
| Q0ZHH6        | GGSDPETTGIQWSEVFTVK                                                        | 1.119851527        | 2               | 4.55723   |
| Q0ZHH6        | LAMDEIFQKPFQTLMFLVR+Oxidation(2)                                           | 1.272731857        |                 |           |
| Q0ZHH6        | YQEELEEEITELYENFCK                                                         | 1.167744287        | 2               | 4.75952   |
| <b>Q10758</b> | <b>K2C8 Keratin_type II cytoskeletal 8</b>                                 | <b>1.120155227</b> | <b>0.000145</b> | <b>25</b> |
| Q10758        | AEAETMYQIK                                                                 | 0.928906739        | 2               | 3.4038    |
| Q10758        | AQYEEIANR                                                                  | 0.922508643        | 2               | 3.05185   |
| Q10758        | ATLEAAIADAEQR                                                              | 0.868894912        | 2               | 4.63898   |
| Q10758        | ELQSQISDTSVVLSDNSR                                                         | 0.991073381        | 2               | 5.74684   |
| Q10758        | GSLGGFGGAGVGGITAVTVNQSLNPLK                                                | 1.005792277        | 2               | 4.48695   |
| Q10758        | LEGLTDEINFLR                                                               | 0.883825801        | 2               | 4.25558   |
| Q10758        | LESGMQNMSIHTK                                                              | 0.688475368        | 2               | 3.77839   |
| Q10758        | LEVDPNIQAVR                                                                | 1.008837941        | 2               | 3.73553   |
| Q10758        | LEVELGNMQGLVEDFK                                                           | 0.950022196        | 2               | 5.06192   |
| Q10758        | LKLEVELGNMQGLVEDFK                                                         | 1.271520228        | 3               | 4.0043    |
| Q10758        | LQAEIDALK                                                                  | 1.021429448        | 2               | 2.74644   |
| Q10758        | LVSESSDIMSK                                                                | 0.90577985         | 2               | 3.01251   |
| Q10758        | QIHEEEIR                                                                   | 0.895938362        | 1               | 2.32955   |
| Q10758        | QLEALGQEK                                                                  | 0.788019687        | 1               | 2.26031   |
| Q10758        | RQLEALGQEK                                                                 | 1.197675979        | 2               | 2.3269    |
| Q10758        | SKTEISEMNR                                                                 | 0.91486181         | 3               | 3.43502   |
| Q10758        | SKTEISEMNR+Oxidation(7)                                                    | 0.845226005        |                 |           |
| Q10758        | SLDMSIIAEVR                                                                | 0.87708913         | 2               | 4.58301   |
| Q10758        | SNMDNMFESYINNLR                                                            | 1.649348922        | 2               | 4.08514   |
| Q10758        | SRAEAETMYQIK                                                               | 0.998542297        | 2               | 3.51947   |
| Q10758        | TEISEMNR                                                                   | 0.846278801        | 2               | 2.48778   |
| Q10758        | TEMENEFVLK                                                                 | 0.852426113        | 2               | 3.33354   |
| Q10758        | TEMENEFVLK+Oxidation(2)                                                    | 0.946791822        |                 |           |
| Q10758        | WSLLQQQK                                                                   | 1.068743562        | 2               | 2.91547   |
| Q10758        | YEELQTLAGK                                                                 | 0.877296902        | 2               | 3.70074   |
| <b>Q148W0</b> | <b>AT8B1 Probable phospholipid_transporting ATPase IC</b>                  | <b>0.869559382</b> | <b>0.384883</b> | <b>2</b>  |
| Q148W0        | FMAASVASSNRDEALDK+Oxidation(1)                                             | 0.540143221        |                 |           |
| Q148W0        | TCEVIKDRFK                                                                 | 0.882806323        | 1               | 2.20978   |
| <b>Q14DH7</b> | <b>ACSS3 Acyl_CoA synthetase short_chain family member 3_mitochondrial</b> | <b>0.911799167</b> | <b>0.224391</b> | <b>6</b>  |
| Q14DH7        | IAIYDSPVTDTK                                                               | 1.537202219        | 2               | 2.43253   |
| Q14DH7        | STLSALVNGKPYK                                                              | 0.901516979        | 2               | 2.81644   |
| Q14DH7        | THFAASVADPER                                                               | 1.080695347        | 2               | 3.60355   |
| Q14DH7        | VDDVINVAGHR                                                                | 1.064079158        | 2               | 3.39485   |
| Q14DH7        | VLAEHGVAALFTAPTAIR                                                         | 1.189806235        | 2               | 3.77332   |
| Q14DH7        | VTPTIEDPSIFGHIEVLK                                                         | 0.909159056        | 2               | 3.40508   |
| <b>Q1HCL7</b> | <b>NAKD1 NAD kinase domain_containing protein 1</b>                        | <b>0.813933321</b> | <b>5.04E-07</b> | <b>12</b> |
| Q1HCL7        | ALNEVFIGESLSSR                                                             | 0.641892156        | 2               | 3.10102   |
| Q1HCL7        | ASYEISVDDGPWEK                                                             | 1.018244004        | 2               | 3.25054   |
| Q1HCL7        | LKPVIGVNTDPER                                                              | 1.099108645        | 3               | 3.59866   |
| Q1HCL7        | LYLEGTGINPSPVDLHEQQLSLNQHSR                                                | 0.873534346        | 3               | 5.22785   |
| Q1HCL7        | NVEHIIDSLRDEGIEVR                                                          | 0.733944359        | 2               | 3.46317   |
| Q1HCL7        | QGNLTLPLNK                                                                 | 0.894884306        | 2               | 3.02425   |
| Q1HCL7        | SEASGPQLLPVR                                                               | 0.948043381        | 2               | 3.41945   |
| Q1HCL7        | SEGLLCLPVR                                                                 | 0.907717667        | 2               | 2.3451    |
| Q1HCL7        | SSGLNLCTGTGSK                                                              | 0.819151887        | 2               | 3.59294   |
| Q1HCL7        | VTNEYNESLLYSPEEPK                                                          | 1.085574679        | 2               | 4.44559   |
| Q1HCL7        | YEFEQQR                                                                    | 1.133199167        | 2               | 2.53538   |
| Q1HCL7        | YTHSFPEALQK                                                                | 1.076104471        | 2               | 2.66258   |
| <b>Q1JU68</b> | <b>EIF3A Eukaryotic translation initiation factor 3 subunit A</b>          | <b>1.110932596</b> | <b>2.84E-11</b> | <b>5</b>  |

|               |                                                            |                    |                 |           |
|---------------|------------------------------------------------------------|--------------------|-----------------|-----------|
| Q1JU68        | EQPEKEPELQQYVPLQNNTILR                                     | 1.22606734         | 3               | 3.47202   |
| Q1JU68        | FNVLQYVVPEVK                                               | 1.244705625        | 2               | 3.16015   |
| Q1JU68        | ILQEHEQIK                                                  | 0.873032991        | 2               | 2.67146   |
| Q1JU68        | KGPEADSEWR                                                 | 0.809181623        | 2               | 2.5634    |
| Q1JU68        | LLDMDGIIVEK                                                | 0.799441387        | 2               | 2.9056    |
| <b>Q29RW1</b> | <b>MYH4 Myosin_4</b>                                       | <b>0.214947341</b> | <b>0.003937</b> | <b>15</b> |
| Q29RW1        | AGLLGTLEEMRDEK                                             | 0.803451786        | 2               | 2.4168    |
| Q29RW1        | ELENEVENEQK                                                | 0.851190822        | 2               | 2.42085   |
| Q29RW1        | ELENEVENEQKR                                               | 0.118726977        | 2               | 2.9905    |
| Q29RW1        | LINELSAQK                                                  | 0.738776045        | 2               | 2.78942   |
| Q29RW1        | LQDAEEHVEAVNSK                                             | 0.234461516        | 2               | 4.47871   |
| Q29RW1        | LQDLVDKLQTK                                                | 0.86453421         | 1               | 2.10389   |
| Q29RW1        | MEGDLNEMEIQLNHANR                                          | 0.344853227        | 2               | 4.31543   |
| Q29RW1        | MEIDDLASNMETVSK                                            | 0.557268528        | 2               | 4.29516   |
| Q29RW1        | NAYEESLDQLETLK                                             | 0.103473164        | 2               | 4.81181   |
| Q29RW1        | NAYEESLDQLETLKR                                            | 0.069013163        | 2               | 3.79167   |
| Q29RW1        | QKYEETQAELEASQK                                            | 0.596945739        | 2               | 3.58782   |
| Q29RW1        | SELQASLEEAESLEHEEGK                                        | 0.299066494        | 2               | 4.69357   |
| Q29RW1        | SNAACAALDK                                                 | 0.685646851        | 2               | 2.31364   |
| Q29RW1        | TLEDQLSEVK                                                 | 0.446125411        | 2               | 2.46004   |
| Q29RW1        | VAEQELLDASER                                               | 0.766929055        | 2               | 2.6865    |
| <b>Q2EMV9</b> | <b>PAR14 Poly [ADP_ribose] polymerase 14</b>               | <b>0.83254781</b>  | <b>0.564355</b> | <b>2</b>  |
| Q2EMV9        | LQEELTR                                                    | 0.829165347        | 1               | 2.0002    |
| Q2EMV9        | VLVEFEKESLNIAGK                                            | 0.903381279        | 2               | 2.44677   |
| <b>Q2TA68</b> | <b>OPA1 Dynamin_like 120 kDa protein_mitochondrial</b>     | <b>1.199333257</b> | <b>0.084823</b> | <b>2</b>  |
| Q2TA68        | TSVLEMIAQAR                                                | 0.598393559        | 2               | 3.26517   |
| Q2TA68        | VIQHNALEDR                                                 | 1.201058389        | 2               | 2.34196   |
| <b>Q2V057</b> | <b>PROD2 Probable proline dehydrogenase 2</b>              | <b>1.151412583</b> | <b>4.45E-06</b> | <b>7</b>  |
| Q2V057        | EDCTQPDYEATSR                                              | 1.059331241        | 2               | 3.7824    |
| Q2V057        | GCVQQLQAIGLQPLLAVPTEEEPDSAAC                               | 1.306738949        | 2               | 4.48927   |
| Q2V057        | NLQLSCLSTEQNQHQLQASLSR                                     | 1.049441876        | 2               | 5.5771    |
| Q2V057        | REQALLSQELWR                                               | 1.161891864        | 2               | 3.06099   |
| Q2V057        | SIPYGCLEEVIPYLIR                                           | 2.412472268        | 2               | 3.61214   |
| Q2V057        | SVTQLHGKEDCTQPDYEATSR                                      | 0.840330532        | 3               | 3.72958   |
| Q2V057        | TSEAWYEGNLSAMLHCVDLSR                                      | 0.926264963        | 2               | 2.73783   |
| <b>Q32Q06</b> | <b>AP1M1 AP_1 complex subunit mu_1</b>                     | <b>1.114443002</b> | <b>0.377636</b> | <b>2</b>  |
| Q32Q06        | HNNLYLVATSK                                                | 1.271951215        | 2               | 2.41181   |
| Q32Q06        | MRVFLSGMPELR+Oxidation(0)                                  | 1.088777135        |                 |           |
| <b>Q3B7D0</b> | <b>HEM6 Coproporphyrinogen_III oxidase_mitochondrial</b>   | <b>1.133527807</b> | <b>0.977789</b> | <b>4</b>  |
| Q3B7D0        | AGVNISVVHGNLSEEAANQMR                                      | 1.077005117        | 3               | 4.69148   |
| Q3B7D0        | HCDSYTPQDK                                                 | 0.997855148        | 2               | 3.08951   |
| Q3B7D0        | LEEDGDELAR                                                 | 1.146491814        | 2               | 2.49983   |
| Q3B7D0        | TCAEAVVPSYVPIVK                                            | 1.166966188        | 2               | 3.19024   |
| <b>Q3B7U9</b> | <b>FKBP8 Peptidyl_prolyl cis_trans isomerase FKBP8</b>     | <b>1.008909915</b> | <b>3.36E-10</b> | <b>4</b>  |
| Q3B7U9        | SCSQVLEHQPDNIK                                             | 0.760375834        | 2               | 4.10899   |
| Q3B7U9        | TAEDGPDLEMLSGQER                                           | 1.444323456        | 2               | 3.80184   |
| Q3B7U9        | VDMTCEEEEELLQK                                             | 0.888988984        | 2               | 4.21158   |
| Q3B7U9        | VLAQQGEYSEAIPILR                                           | 0.718861743        | 2               | 3.13158   |
| <b>Q3KRD8</b> | <b>IF6 Eukaryotic translation initiation factor 6</b>      | <b>1.116667076</b> | <b>0.353232</b> | <b>3</b>  |
| Q3KRD8        | ASFENNCEVGCFK                                              | 1.17483404         | 2               | 2.8435    |
| Q3KRD8        | HGLLVPNNTTDQELQHIR                                         | 1.089233238        | 3               | 4.84039   |
| Q3KRD8        | TSIEDQDELSSLLQVPLVAGTVNR                                   | 0.761430649        | 2               | 3.82786   |
| <b>Q3KRE0</b> | <b>ATAD3 ATPase family AAA domain_containing protein 3</b> | <b>0.449457065</b> | <b>0.346307</b> | <b>2</b>  |

|               |                                                                             |                    |                 |           |
|---------------|-----------------------------------------------------------------------------|--------------------|-----------------|-----------|
| Q3KRE0        | GEGTGPPLPLPPAQPGAESGGDR                                                     | 0.820923146        | 2               | 3.24458   |
| Q3KRE0        | ISVLEALR                                                                    | 0.810863977        | 2               | 2.36428   |
| <b>Q3KRE8</b> | <b>TBB2B Tubulin beta_2B chain</b>                                          | <b>0.994237855</b> | <b>7.16E-10</b> | <b>2</b>  |
| Q3KRE8        | ALTVPQLTQQMFDSK                                                             | 1.431256312        | 2               | 3.31634   |
| Q3KRE8        | ESESCDCLQGFQLTHSLGGGTGSGMGTLISK                                             | 1.005732741        | 3               | 4.18082   |
| <b>Q3MIB4</b> | <b>LONP2 Lon protease homolog 2_ peroxisomal</b>                            | <b>0.572274536</b> | <b>0.000782</b> | <b>2</b>  |
| Q3MIB4        | MEIIQVPGYTQEEK                                                              | 0.572907486        | 2               | 3.59663   |
| Q3MIB4        | TVGVNNPVFLLEDEVDK                                                           | 0.559484381        | 2               | 3.60823   |
| <b>Q3MIE0</b> | <b>ECHD3 Enoyl_CoA hydratase domain_containing protein 3_ mitochondrial</b> | <b>1.068047652</b> | <b>0.00015</b>  | <b>7</b>  |
| Q3MIE0        | DGQEGIEAFIQK                                                                | 1.081370887        | 2               | 3.31079   |
| Q3MIE0        | KVALEMLFTGEPISAQEALR                                                        | 2.188506147        | 3               | 3.50413   |
| Q3MIE0        | SDILHEAESEDLK                                                               | 1.173200385        | 3               | 3.7396    |
| Q3MIE0        | SSFATPGVNVGLFCSTPAVALGR                                                     | 1.687058582        | 2               | 4.64688   |
| Q3MIE0        | VALEMLFTGEPISAQEALR                                                         | 1.017394507        | 2               | 3.37589   |
| Q3MIE0        | VIIISAEQPVFSSGHDLK                                                          | 0.966946311        | 2               | 4.28749   |
| Q3MIE0        | VVPEEQLEEEATR                                                               | 1.052626771        | 2               | 4.14463   |
| <b>Q3MIF4</b> | <b>XYLB Xylulose kinase</b>                                                 | <b>0.923718994</b> | <b>0.749507</b> | <b>7</b>  |
| Q3MIF4        | AFHGLAGGTGVAFSEVVK                                                          | 1.010670628        | 2               | 2.32347   |
| Q3MIF4        | CCLGWDFSTQQVK                                                               | 0.999362904        | 2               | 2.94271   |
| Q3MIF4        | FNADNMEVSAFPQDVEIR                                                          | 0.904860608        | 2               | 4.04073   |
| Q3MIF4        | IRDESASCSWNK                                                                | 0.901438921        | 2               | 4.0947    |
| Q3MIF4        | SAPQPSLAATPNPGASQVYAALLPR                                                   | 0.99827188         | 2               | 4.37847   |
| Q3MIF4        | VVAFTGDNPASLAGMR                                                            | 1.04302396         | 2               | 3.66816   |
| Q3MIF4        | YSPIDYSDGSGMNLQIQEK                                                         | 1.13013775         | 2               | 5.29777   |
| <b>Q3T1J1</b> | <b>IF5A1 Eukaryotic translation initiation factor 5A_1</b>                  | <b>1.31457535</b>  | <b>0.084888</b> | <b>4</b>  |
| Q3T1J1        | EDLRLPEGDLGK                                                                | 0.967114277        | 2               | 2.81356   |
| Q3T1J1        | EDLRLPEGDLGKEIEQK                                                           | 1.006363607        | 3               | 4.74755   |
| Q3T1J1        | NDFQLIGIQDGYLSLLQDSGEVR                                                     | 1.331647925        | 3               | 5.73893   |
| Q3T1J1        | RNDFQLIGIQDGYLSLLQDSGEVR                                                    | 1.374182375        | 3               | 3.76142   |
| <b>Q3T1K5</b> | <b>CAZA2 F_actin_capping protein subunit alpha_2</b>                        | <b>1.164566169</b> | <b>0.390583</b> | <b>3</b>  |
| Q3T1K5        | FIHAPPGEFNEVFNDVR                                                           | 1.000021469        | 3               | 4.58001   |
| Q3T1K5        | FTVTPSTTQVVGILK                                                             | 0.807654719        | 2               | 3.70634   |
| Q3T1K5        | LLLNNDNLLR                                                                  | 1.354296085        | 2               | 2.40651   |
| <b>Q3T1L0</b> | <b>A16A1 Aldehyde dehydrogenase family 16 member A1</b>                     | <b>1.219678886</b> | <b>0.000236</b> | <b>2</b>  |
| Q3T1L0        | HGAAPTVAEVEVELSVR                                                           | 0.910043015        | 2               | 2.39828   |
| Q3T1L0        | VQDQGQTLQVTGLR                                                              | 1.220765678        | 2               | 4.16792   |
| <b>Q3TLP5</b> | <b>ECHD2 Enoyl_CoA hydratase domain_containing protein 2_ mitochondrial</b> | <b>1.065472278</b> | <b>0.842244</b> | <b>2</b>  |
| Q3TLP5        | ALALAEIILPQAPIAVR                                                           | 0.950977879        |                 |           |
| Q3TLP5        | NALGNVVFVSELLEALAQLR                                                        | 1.139623718        |                 |           |
| <b>Q3U2P1</b> | <b>SC24A Protein transport protein Sec24A</b>                               | <b>0.992105904</b> | <b>0.561423</b> | <b>2</b>  |
| Q3U2P1        | CTLTSVPQTQALLNK                                                             | 0.509288289        | 2               | 3.59858   |
| Q3U2P1        | TLETQSALGPALQAAFK                                                           | 1.001178829        | 2               | 3.11167   |
| <b>Q3ULJ0</b> | <b>GPD1L Glycerol_3_phosphate dehydrogenase 1_like protein</b>              | <b>0.967664335</b> | <b>0.015267</b> | <b>2</b>  |
| Q3ULJ0        | GIDEGPDGLK                                                                  | 0.908999796        | 2               | 2.67137   |
| Q3ULJ0        | LGLMEMIAFAK                                                                 | 1.364262184        | 2               | 3.82464   |
| <b>Q3UQ44</b> | <b>IQGA2 Ras GTPase_activating_like protein IQGAP2</b>                      | <b>1.143569089</b> | <b>1.03E-07</b> | <b>14</b> |
| Q3UQ44        | ALVGSNPPLTVIR                                                               | 1.100143934        | 2               | 3.99713   |
| Q3UQ44        | AWVNVQLETQTGEASK                                                            | 1.127891504        | 2               | 5.08062   |
| Q3UQ44        | GVLLGIDDLQTNQFK                                                             | 1.258107711        | 2               | 4.79105   |
| Q3UQ44        | HTDNTVQWLR                                                                  | 1.507170068        | 2               | 2.84834   |

|               |                                                                |                    |                 |           |
|---------------|----------------------------------------------------------------|--------------------|-----------------|-----------|
| Q3UQ44        | LFEGENEHLSSMNNYLSEYQEFR                                        | 1.949031715        | 3               | 4.51543   |
| Q3UQ44        | LGIAPQIQDLLGK                                                  | 1.724474936        | 2               | 2.73368   |
| Q3UQ44        | LPYDVTTEQALTYPEVK                                              | 1.189684044        | 2               | 4.32914   |
| Q3UQ44        | LSAEEMDER                                                      | 1.095101133        | 2               | 2.69805   |
| Q3UQ44        | NPNAVLTCVDDSLSQEYQK                                            | 1.020534105        | 2               | 4.96988   |
| Q3UQ44        | TALEEEIK                                                       | 1.12237965         | 1               | 2.006     |
| Q3UQ44        | TLDTLLPTANIR                                                   | 0.923201739        | 2               | 2.55318   |
| Q3UQ44        | VDFTEEEISNMR                                                   | 0.972718323        | 2               | 3.38988   |
| Q3UQ44        | VDQVQDIVTGNPTVIK                                               | 1.01841597         | 2               | 4.91621   |
| Q3UQ44        | YQDILNEIAK                                                     | 1.140738356        | 2               | 2.60564   |
| <b>Q3UV17</b> | <b>K220 Keratin_ type II cytoskeletal 2 oral</b>               | <b>1.124450634</b> | <b>0.236414</b> | <b>3</b>  |
| Q3UV17        | AQYEDIAQK                                                      | 0.464137594        | 1               | 2.12937   |
| Q3UV17        | KQNTNMQTSIAEAEQR+Oxidation(5)                                  | 1.081922799        |                 |           |
| Q3UV17        | VDSLTDIEINFLR                                                  | 1.042181647        | 2               | 2.46868   |
| <b>Q3UZY0</b> | <b>SFI1 Protein SFI1 homolog</b>                               | <b>1.201045188</b> | <b>0.28911</b>  | <b>2</b>  |
| Q3UZY0        | EEWWVSQREWK                                                    | 0.785733889        | 2               | 2.70475   |
| Q3UZY0        | MGRAQA AHFHSAQLLSR+Oxidation(0)                                | 1.525527382        |                 |           |
| <b>Q3V036</b> | <b>CCD27 Coiled_coil domain_containing protein 27</b>          | <b>0.905206761</b> | <b>0.41755</b>  | <b>2</b>  |
| Q3V036        | MDLISSERTIK+Oxidation(0)                                       | 0.626943989        |                 |           |
| Q3V036        | SSEGPPEEAAA AKLSRPSQSK                                         | 0.944248148        | 2               | 2.74978   |
| <b>Q3V0K9</b> | <b>PLSI Plastin_1</b>                                          | <b>0.955202176</b> | <b>0.997877</b> | <b>3</b>  |
| Q3V0K9        | AYFHLLNQIAPK                                                   | 1.055795565        | 2               | 2.82556   |
| Q3V0K9        | KIENCNYAVELGK                                                  | 1.012253907        | 2               | 3.92307   |
| Q3V0K9        | QFVTPADVVSIGNPK                                                | 0.911456375        | 2               | 3.80275   |
| <b>Q3V132</b> | <b>ADT4 ADP/ATP translocase 4</b>                              | <b>1.253770622</b> | <b>0.00611</b>  | <b>2</b>  |
| Q3V132        | GNLANVIR                                                       | 1.135697023        | 2               | 2.72665   |
| Q3V132        | YFPTQALNFAFK                                                   | 1.501722444        | 2               | 2.94551   |
| <b>Q497B0</b> | <b>NIT2 Omega_amidase NIT2</b>                                 | <b>1.074159484</b> | <b>2.19E-06</b> | <b>14</b> |
| Q497B0        | AGTEETILYSDIDLK                                                | 1.354138466        | 2               | 4.27928   |
| Q497B0        | ASYVAWGHSTVVDPWGQVLTK                                          | 1.086640072        | 2               | 4.90847   |
| Q497B0        | AVDNQVYVATASPAR                                                | 1.304495096        | 2               | 4.96029   |
| Q497B0        | AVDNQVYVATASPARDEK                                             | 1.195258721        | 2               | 3.38326   |
| Q497B0        | ENSIYLIGGSIPEDDGK                                              | 0.956601608        | 2               | 2.83704   |
| Q497B0        | ENSIYLIGGSIPEDDGKLYNTCAVFGPDGNLLVK                             | 0.897099193        | 3               | 4.47839   |
| Q497B0        | FAELAQIYAR                                                     | 1.504261032        | 2               | 3.70459   |
| Q497B0        | IHLFDIDVPGK                                                    | 1.616796893        | 2               | 2.83355   |
| Q497B0        | KIHLFDIDVPGK                                                   | 0.879465117        | 3               | 4.68294   |
| Q497B0        | LALIQLQVSSIK                                                   | 1.219618117        | 2               | 3.33512   |
| Q497B0        | LYNTCAVFGPDGNLLVK                                              | 0.948070652        | 2               | 4.45525   |
| Q497B0        | QGANIVSLPECFNSPYGTNYFPEYAEK                                    | 1.006899129        | 3               | 4.34472   |
| Q497B0        | TLSPGDSFSTFDTPYCR                                              | 1.319265346        | 2               | 4.70256   |
| Q497B0        | VGLGICYDMR                                                     | 1.094727856        | 2               | 2.74441   |
| <b>Q498D5</b> | <b>RMD2 Regulator of microtubule dynamics protein 2</b>        | <b>0.872673866</b> | <b>0.748507</b> | <b>4</b>  |
| Q498D5        | AYGDMYDLSTNTQEK                                                | 0.876794937        | 2               | 4.1553    |
| Q498D5        | FCNLALLPIVTK                                                   | 0.587364265        | 2               | 3.22415   |
| Q498D5        | LEECIQDELGVR                                                   | 0.96852542         | 2               | 3.14829   |
| Q498D5        | LNELLTNVEELKEEK                                                | 0.807451043        | 2               | 3.45635   |
| <b>Q498U4</b> | <b>SARNP SAP domain_containing ribonucleoprotein</b>           | <b>1.132368021</b> | <b>0.320881</b> | <b>2</b>  |
| Q498U4        | EEEPPEKVVDMASEK                                                | 0.900418989        | 2               | 2.59434   |
| Q498U4        | FGIVTSSAGTGTTEDTEAK                                            | 1.213701865        | 2               | 4.13038   |
| <b>Q499N5</b> | <b>ACSF2 Acyl_CoA synthetase family member 2_mitochondrial</b> | <b>1.610344692</b> | <b>2.78E-15</b> | <b>10</b> |
| Q499N5        | GATLSHHNIVNNSNLIGQR                                            | 0.714318448        | 3               | 4.82655   |
| Q499N5        | GGENIYPAELEDFHFK                                               | 1.260964156        | 2               | 3.08828   |

|               |                                                                   |                    |                 |           |
|---------------|-------------------------------------------------------------------|--------------------|-----------------|-----------|
| Q499N5        | GGVIAGSLAPPELIR                                                   | 1.255612121        | 2               | 2.6709    |
| Q499N5        | LPDLTTVISVDAPLPGTLLLDEVVAAGGK                                     | 1.32772256         |                 |           |
| Q499N5        | SGETTTEEEIK                                                       | 1.096734907        | 2               | 2.9526    |
| Q499N5        | TFETVGQDR                                                         | 1.340301334        | 2               | 2.51493   |
| Q499N5        | TGDIASMDEQGFRCR                                                   | 1.568714195        | 2               | 3.681     |
| Q499N5        | TVGECLDATAQR                                                      | 1.404360881        | 2               | 3.14066   |
| Q499N5        | YHQGFLSCYDPINIQTSGTTGNPK                                          | 1.518086579        | 3               | 4.66497   |
| Q499N5        | YIVFVEGYPLTVSGK                                                   | 1.704095542        | 2               | 4.65274   |
| <b>Q4AEF8</b> | <b>COPG Coatomer subunit gamma</b>                                | <b>1.093664699</b> | <b>0.477036</b> | <b>5</b>  |
| Q4AEF8        | FGAQNEEMLPSILVLLK                                                 | 0.942014991        | 2               | 3.16496   |
| Q4AEF8        | QEIFQEQLAAVPEFQGLGPLFK                                            | 1.126877507        | 3               | 4.28892   |
| Q4AEF8        | SSPEPVALTESETEVVIR                                                | 1.15246602         | 2               | 3.99375   |
| Q4AEF8        | VVLEHEEVR                                                         | 1.354118383        | 2               | 2.35103   |
| Q4AEF8        | VVVVQAISALCQK                                                     | 0.720423943        | 2               | 2.30696   |
| <b>Q4FZT0</b> | <b>STML2 Stomatin_like protein 2</b>                              | <b>1.097573172</b> | <b>0.008283</b> | <b>6</b>  |
| Q4FZT0        | AEQINQAAGEASAVLAK                                                 | 1.060705381        | 2               | 4.79916   |
| Q4FZT0        | ASYGVEDPEYAVTQLAQTTMR                                             | 1.166804325        | 2               | 4.99707   |
| Q4FZT0        | ATVLESEGTR                                                        | 1.15684726         | 2               | 2.77091   |
| Q4FZT0        | DVQTTDTSIEELGR                                                    | 0.813253651        | 2               | 2.82636   |
| Q4FZT0        | ILEPGLNVLPVLDR                                                    | 1.161692624        | 2               | 3.65553   |
| Q4FZT0        | NTVILFVPQQEAWVVER                                                 | 1.425576898        | 2               | 3.05184   |
| <b>Q4FZT9</b> | <b>PSMD2 26S proteasome non_ATPase regulatory subunit 2</b>       | <b>1.078220235</b> | <b>1.11E-08</b> | <b>8</b>  |
| Q4FZT9        | DKTPVQSQQPSATAPSGADEK                                             | 1.614782577        | 3               | 4.97157   |
| Q4FZT9        | FGGSGSQVDSAR                                                      | 1.260276734        | 2               | 3.89109   |
| Q4FZT9        | GEAIEAIIAAALEVVSEPF                                               | 0.9899007          |                 |           |
| Q4FZT9        | SETELKDTYAR                                                       | 0.848195276        | 2               | 2.35759   |
| Q4FZT9        | SGALLACGIVNSGVR                                                   | 1.086896746        | 2               | 3.67773   |
| Q4FZT9        | SSTSMTSVPKPLK                                                     | 1.063935131        | 2               | 2.58205   |
| Q4FZT9        | TITGFQTHHTPVLLAHGER                                               | 1.484769674        | 3               | 3.70908   |
| Q4FZT9        | TPVQSQQPSATAPSGADEK                                               | 1.284516776        | 2               | 4.4407    |
| <b>Q4FZX7</b> | <b>SRPRB Signal recognition particle receptor subunit beta</b>    | <b>1.538078478</b> | <b>9.9E-20</b>  | <b>5</b>  |
| Q4FZX7        | DTQTSITDSSAIYK                                                    | 1.074217631        | 2               | 3.09694   |
| Q4FZX7        | GDAGSADVQDLEK                                                     | 1.203893974        | 2               | 3.32911   |
| Q4FZX7        | GNSLTLIDLPGHESLR                                                  | 1.257630957        | 2               | 3.49188   |
| Q4FZX7        | SAAPSTLSSSTAPAQLGK                                                | 1.858918423        | 2               | 4.61644   |
| Q4FZX7        | VGDGAGGAFQPYLDSL                                                  | 1.515139366        | 2               | 3.28302   |
| <b>Q4G061</b> | <b>EIF3B Eukaryotic translation initiation factor 3 subunit B</b> | <b>1.078195789</b> | <b>0.003362</b> | <b>5</b>  |
| Q4G061        | AEEEGSDGSAAEAEP                                                   | 0.780473141        | 2               | 4.84523   |
| Q4G061        | AKPAAQSEETAASPAASPTPQSAQEPSAPGK                                   | 0.143643228        | 3               | 5.91656   |
| Q4G061        | GTQGVVTFNFEIFR                                                    | 1.087548954        | 2               | 2.81997   |
| Q4G061        | IINDYYPEEDGK                                                      | 0.657746431        | 2               | 2.60998   |
| Q4G061        | TEDAEDAEARPEPEVR                                                  | 0.231405549        | 3               | 3.90095   |
| <b>Q4G069</b> | <b>RMD1 Regulator of microtubule dynamics protein 1</b>           | <b>1.082043834</b> | <b>0.939863</b> | <b>2</b>  |
| Q4G069        | IAEVLFANPPSSTYEEALK                                               | 1.255148879        | 2               | 2.48832   |
| Q4G069        | VLLYEALYAK                                                        | 1.081885566        | 2               | 2.56551   |
| <b>Q4KLP0</b> | <b>DHTK1 Probable 2_oxoglutarate dehydrogenase E1 component</b>   |                    |                 |           |
| <b>Q4KLP0</b> | <b>DHKT1_mitochondrial</b>                                        | <b>1.485234404</b> | <b>1.47E-09</b> | <b>13</b> |
| Q4KLP0        | ARPSVDHGLAR                                                       | 0.834711076        | 2               | 2.36956   |
| Q4KLP0        | LEELCPFPLDSLQQEMGK                                                | 1.121404197        | 2               | 5.12332   |
| Q4KLP0        | LLLESQEFDFHFLATK                                                  | 1.493754328        | 2               | 3.4098    |
| Q4KLP0        | LSAYGGITDIIIGMPHR                                                 | 1.557352879        | 3               | 3.38041   |
| Q4KLP0        | LVTVYCEHGK                                                        | 3.662906907        | 2               | 2.8452    |

|               |                                                                         |                    |                 |           |
|---------------|-------------------------------------------------------------------------|--------------------|-----------------|-----------|
| Q4KLP0        | NGTNLDWATAETLALGSLLAQGFNVR                                              | 1.235485772        |                 |           |
| Q4KLP0        | QWGHNELDEPFFTNPVMYK                                                     | 1.227597663        | 3               | 3.79277   |
| Q4KLP0        | SIPDTYAEHLIASGLMTQEEVSDIK                                               | 1.152965948        | 3               | 5.15144   |
| Q4KLP0        | SSLYSSDIGK                                                              | 1.431985368        | 2               | 2.69399   |
| Q4KLP0        | SVEVPEELQLHSHLLK                                                        | 1.206779731        | 2               | 3.81376   |
| Q4KLP0        | WQGLVQPAACVTTWDTGVPLELLR                                                | 1.264040578        | 2               | 4.92601   |
| Q4KLP0        | YGGEGAESMMGFFHELLK                                                      | 1.019202287        | 2               | 4.40741   |
| Q4KLP0        | YPVAVSTLEEMAPGTAFKPVIGDSSVDPK                                           | 1.469170255        | 3               | 4.52727   |
| <b>Q4KLZ6</b> |                                                                         | <b>1.241693679</b> | <b>4.02E-08</b> | <b>16</b> |
| Q4KLZ6        | AAPTEPAEPEATAAGGVASK                                                    | 1.130503634        | 2               | 4.53255   |
| Q4KLZ6        | AILEVLQTK                                                               | 1.247918653        | 2               | 2.71358   |
| Q4KLZ6        | ANTDLPAWSAAMDAGLK                                                       | 1.135126752        | 2               | 3.88914   |
| Q4KLZ6        | ASYISSAQLDQPPGAVAAAAIFR                                                 | 1.012009841        | 2               | 5.90515   |
| Q4KLZ6        | AVAQAGTAGTLIVK                                                          | 1.250605079        | 2               | 4.36865   |
| Q4KLZ6        | EGPTPASPAQVLSK                                                          | 1.29224374         | 2               | 3.05592   |
| Q4KLZ6        | GLCGTILHK                                                               | 1.099546164        | 2               | 2.32161   |
| Q4KLZ6        | GVSLLMLVDEPLK                                                           | 1.144046303        | 2               | 3.16638   |
| Q4KLZ6        | ISTTLIGLEEHLNALDR                                                       | 2.081548664        | 2               | 3.94112   |
| Q4KLZ6        | LIDAETNAK                                                               | 1.144385666        | 2               | 2.9918    |
| Q4KLZ6        | LNFLAMEQAK                                                              | 0.846708962        | 2               | 2.48901   |
| Q4KLZ6        | LSVLLLEK                                                                | 1.873828434        | 2               | 2.80195   |
| Q4KLZ6        | MVNSVEGCAGDALAGFVACNPDLQLLQGYR                                          | 1.234321882        | 3               | 5.44409   |
| Q4KLZ6        | TMLDSLWAAQELQAWK                                                        | 1.064028222        | 2               | 4.33787   |
| Q4KLZ6        | VAGALAEEMGLLEEITK                                                       | 1.439960394        | 2               | 3.69288   |
| Q4KLZ6        | VALLSGGGSGHEPAHAGFIGK                                                   | 1.349589744        | 2               | 5.29727   |
| <b>Q4KM49</b> | <b>SYYC Tyrosyl_tRNA synthetase_cytoplasmic</b>                         | <b>0.943984059</b> | <b>0.774882</b> | <b>4</b>  |
| Q4KM49        | AFCEPGNVENNGVLSFVK                                                      | 0.934579518        | 2               | 3.43372   |
| Q4KM49        | QVEPLDPPAGSAPGER                                                        | 1.083618807        | 2               | 3.17038   |
| Q4KM49        | TVVSGLVQFVVK                                                            | 0.900193076        | 2               | 3.22813   |
| Q4KM49        | VDAQFGGIDQR                                                             | 1.284692843        | 2               | 2.94011   |
| <b>Q4KM73</b> | <b>KCY UMP_CMP kinase</b>                                               | <b>0.980297753</b> | <b>0.000445</b> | <b>6</b>  |
| Q4KM73        | IQTYLESTKPIIDLIEEMGK                                                    | 1.278091419        | 2               | 4.49933   |
| Q4KM73        | IVPVEITISLLK                                                            | 0.940497119        | 2               | 2.31989   |
| Q4KM73        | KNPDSQYGELIEK                                                           | 1.065156343        | 2               | 3.66957   |
| Q4KM73        | NQDNLQGWNK                                                              | 0.969140058        | 2               | 3.08865   |
| Q4KM73        | SVDEVFGDVMK                                                             | 0.874774507        | 2               | 3.07175   |
| Q4KM73        | YGYTHLSAGELLR                                                           | 0.855399051        | 3               | 4.39207   |
| <b>Q4KM74</b> | <b>SC22B Vesicle_trafficking protein SEC22b</b>                         | <b>1.184466839</b> | <b>1.2E-05</b>  | <b>4</b>  |
| Q4KM74        | DLQQYQSQAK                                                              | 1.424624762        | 2               | 3.29729   |
| Q4KM74        | GEALSALDSK                                                              | 1.316125792        | 2               | 2.55765   |
| Q4KM74        | NLGSINTELQDVQR                                                          | 1.183033935        | 2               | 4.20461   |
| Q4KM74        | VADGLPLAASMQEDEQSGR                                                     | 0.719115035        | 2               | 2.63565   |
| <b>Q4KMA2</b> | <b>RD23B UV excision repair protein RAD23 homolog B</b>                 | <b>1.007057619</b> | <b>0.999715</b> | <b>2</b>  |
| Q4KMA2        | NFVVVMVTKPK                                                             | 0.800215544        | 2               | 2.83997   |
| Q4KMA2        | QIIQQNPSSLPLALLQQIGR                                                    | 0.927523192        | 2               | 4.65813   |
| <b>Q4KSH7</b> | <b>MP2K7 Dual specificity mitogen_activated protein kinase kinase 7</b> | <b>0.964992875</b> | <b>0.11814</b>  | <b>2</b>  |
| Q4KSH7        | RSGNKEENK                                                               | 1.323758938        | 1               | 1.98979   |
| Q4KSH7        | YNKLEHSFIK                                                              | 0.109529384        | 1               | 1.93753   |
| <b>Q4QQS8</b> | <b>NUP85 Nuclear pore complex protein Nup85</b>                         | <b>1.07436098</b>  | <b>0.950745</b> | <b>2</b>  |
| Q4QQS8        | LEEELSGK                                                                | 1.080162134        |                 |           |
| Q4QQS8        | RFGDAASLLLSLMTSQIAPR+Oxidation(12)                                      | 0.862714592        |                 |           |
| <b>Q4QQV3</b> | <b>F162A Protein FAM162A</b>                                            | <b>1.215316301</b> | <b>0.970475</b> | <b>2</b>  |
| Q4QQV3        | EEEIPETISFEMLDAAK                                                       | 1.133676754        | 2               | 4.11866   |
| Q4QQV3        | RHESLTSNLER                                                             | 1.065065846        | 3               | 4.24926   |

|               |                                                                                          |                    |                 |          |
|---------------|------------------------------------------------------------------------------------------|--------------------|-----------------|----------|
| <b>Q4QQW3</b> | <b>HOT Hydroxyacid_oxoacid transhydrogenase_mitochondrial</b>                            | <b>1.10874963</b>  | <b>0.694023</b> | <b>5</b> |
| Q4QQW3        | AANLYACSPHSEFLDYVNAPIGK                                                                  | 1.668086781        | 3               | 3.7553   |
| Q4QQW3        | HLETAEILGANIR                                                                            | 0.739275561        | 2               | 3.41572  |
| Q4QQW3        | IQDAGPVLADALR                                                                            | 1.035492705        | 2               | 2.77971  |
| Q4QQW3        | NLSQLPPVQIVMDSLSK                                                                        | 1.074993265        | 2               | 2.61558  |
| Q4QQW3        | VEPTDGSFMDAIEFAK                                                                         | 1.02134482         | 2               | 2.66885  |
| <b>Q4QRB4</b> | <b>TBB3 Tubulin beta_3 chain</b>                                                         | <b>1.220692142</b> | <b>9.9E-20</b>  | <b>6</b> |
| Q4QRB4        | AILVDLEPGTMDSVR                                                                          | 0.761875194        | 2               | 4.90729  |
| Q4QRB4        | AILVDLEPGTMDSVR+Oxidation(10)                                                            | 1.147194362        |                 |          |
| Q4QRB4        | EIVHIQAGQCGNQIGAK                                                                        | 1.213909466        | 2               | 5.04325  |
| Q4QRB4        | IMNTFSVVPSPK                                                                             | 1.74175998         | 2               | 3.41872  |
| Q4QRB4        | IMNTFSVVPSPK+Oxidation(1)                                                                | 2.064781091        |                 |          |
| Q4QRB4        | ISEQFTAMFR                                                                               | 1.582226055        | 2               | 3.58448  |
| <b>Q4V7C7</b> | <b>ARP3 Actin_related protein 3</b>                                                      | <b>1.103410695</b> | <b>0.113482</b> | <b>5</b> |
| Q4V7C7        | KDYEEIGPSICR                                                                             | 1.027833819        | 2               | 3.64753  |
| Q4V7C7        | LGYAGNTEPQFIIPSCIAIK                                                                     | 1.366885412        | 2               | 3.14966  |
| Q4V7C7        | LSEELSGGR                                                                                | 1.144070491        | 2               | 2.71338  |
| Q4V7C7        | TLTGTVIDSGDGVTHVIPVAEGYVIGSCK                                                            | 0.967607991        | 3               | 3.66895  |
| Q4V7C7        | YSYVCPDLVK                                                                               | 1.422784025        | 2               | 2.36499  |
| <b>Q4V8F9</b> | <b>HSDL2 Hydroxysteroid dehydrogenase_like protein 2</b>                                 | <b>1.048997431</b> | <b>0.934748</b> | <b>3</b> |
| Q4V8F9        | DEQQINSAVEK                                                                              | 1.051484556        | 2               | 3.09846  |
| Q4V8F9        | KVDIIADAAYSIFK                                                                           | 0.962255624        | 2               | 2.40341  |
| Q4V8F9        | SFTGNFIIDENILK                                                                           | 0.870630991        | 2               | 2.93207  |
| <b>Q4V8K1</b> | <b>STEAP4 Metalloredutase STEAP4</b>                                                     | <b>0.81904082</b>  | <b>0.004879</b> | <b>2</b> |
| Q4V8K1        | TCADEFPLTVDSSEK                                                                          | 0.929829749        | 2               | 4.58719  |
| Q4V8K1        | TLGLTPLDQGSLSVAAK                                                                        | 0.78868587         | 2               | 3.80931  |
| <b>Q505J8</b> | <b>SYFA Phenylalanyl_tRNA synthetase alpha chain</b>                                     | <b>1.008239187</b> | <b>0.018872</b> | <b>3</b> |
| Q505J8        | LQQVQAGQAEK                                                                              | 1.285148681        | 2               | 2.51376  |
| Q505J8        | RLEVADGGLDSAELATQLGVEHQAVVGAVK                                                           | 0.935539678        | 3               | 4.9305   |
| Q505J8        | SLQALGEVIEAELR                                                                           | 0.790524151        | 2               | 3.58163  |
| <b>Q561R9</b> | <b>LACB2 Beta_lactamase_like protein 2</b>                                               | <b>0.939383417</b> | <b>0.770799</b> | <b>4</b> |
| Q561R9        | ANIIYPGHGPIVHNAEAK                                                                       | 0.713773312        | 2               | 4.29133  |
| Q561R9        | ILIDTGEPSPVEYISCLK                                                                       | 0.988478867        | 2               | 3.36361  |
| Q561R9        | NISNDATYCIK                                                                              | 1.054767068        | 2               | 2.47445  |
| Q561R9        | NNREEQIITVFR                                                                             | 0.74776345         | 2               | 2.54148  |
| <b>Q561S0</b> | <b>NDUAA NADH dehydrogenase [ubiquinone] 1 alpha subcomplex subunit 10_mitochondrial</b> | <b>0.979322709</b> | <b>2.17E-05</b> | <b>5</b> |
| Q561S0        | LLQYSDALEHLLSTGQGVVLER                                                                   | 0.778867405        | 3               | 3.66585  |
| Q561S0        | VITVDGNICSGK                                                                             | 1.010688231        | 2               | 2.92308  |
| Q561S0        | VVEDIEYLNYNK                                                                             | 1.949683706        | 2               | 4.20176  |
| Q561S0        | YAPGYNADVGDK                                                                             | 1.664466499        | 2               | 2.67538  |
| Q561S0        | YGLLASILGDK                                                                              | 1.228715984        | 2               | 2.94786  |
| <b>Q562C4</b> | <b>MET7B Methyltransferase_like protein 7B</b>                                           | <b>0.911632573</b> | <b>0.989557</b> | <b>5</b> |
| Q562C4        | AQFSEVQLEWQPPFFK                                                                         | 1.250267807        | 2               | 4.89783  |
| Q562C4        | FIVAYGENMK                                                                               | 1.158482249        | 2               | 2.72036  |
| Q562C4        | HIGDGCHLTR                                                                               | 1.27261786         | 3               | 3.40635  |
| Q562C4        | VLQEVQR                                                                                  | 0.936979679        | 2               | 2.76933  |
| Q562C4        | VTCVDPNPNFEK                                                                             | 1.369262112        | 2               | 3.56313  |
| <b>Q58FK9</b> | <b>KAT3 Kynurenine__oxoglutarate transaminase 3</b>                                      | <b>1.203142204</b> | <b>0.994024</b> | <b>7</b> |
| Q58FK9        | AIILNTPHNPIGK                                                                            | 1.509210647        | 2               | 3.22036  |
| Q58FK9        | DSTLDAEEIFR                                                                              | 1.260205859        | 2               | 2.9462   |
| Q58FK9        | IEGLDQNVWVEFTK                                                                           | 1.199827181        | 2               | 4.71338  |
| Q58FK9        | LAADPSVVNLGQGFPDITLPSYVQEELSK                                                            | 1.642289312        | 2               | 4.05828  |

|               |                                                                                         |                    |                 |           |
|---------------|-----------------------------------------------------------------------------------------|--------------------|-----------------|-----------|
| Q58FK9        | MDDPECYFNLSLPK                                                                          | 1.088647307        | 2               | 3.67307   |
| Q58FK9        | RIEGLDQNVWVEFTK                                                                         | 1.105355492        | 2               | 3.9406    |
| Q58FK9        | WTSSDWTWTFNPQELESK                                                                      | 1.08120583         | 2               | 5.07133   |
| <b>Q5BJP3</b> | <b>UFM1 Ubiquitin_fold modifier 1</b>                                                   | <b>2.712981495</b> | <b>3.38E-06</b> | <b>2</b>  |
| Q5BJP3        | VLSVPESTPFTAVLK                                                                         | 2.761068142        | 2               | 2.32721   |
| Q5BJP3        | VPAATSAAITNDGIGINPAQTAGNVFLK                                                            | 1.251162106        | 3               | 4.3595    |
| <b>Q5BJY9</b> | <b>K1C18 Keratin_type I cytoskeletal 18</b>                                             | <b>0.985092554</b> | <b>9.9E-20</b>  | <b>27</b> |
| Q5BJY9        | AQIFANSVDNAR                                                                            | 1.224735811        | 2               | 3.83777   |
| Q5BJY9        | AQYEQLAQK                                                                               | 0.957497578        | 2               | 3.28645   |
| Q5BJY9        | DAETTLLELR                                                                              | 1.338440065        | 2               | 2.80574   |
| Q5BJY9        | IREYLEK                                                                                 | 0.984277283        | 3               | 3.35428   |
| Q5BJY9        | KNHEEEVQGLEAQIASSGLTVEVDAPK                                                             | 0.818823587        | 3               | 4.77131   |
| Q5BJY9        | KVVDDTNITR                                                                              | 0.891400061        | 2               | 3.02566   |
| Q5BJY9        | LEAEIATYR                                                                               | 0.920830917        | 2               | 3.00918   |
| Q5BJY9        | LLEDGDDFSLNDALDSSNSMQTVQR                                                               | 0.711339167        | 3               | 4.36194   |
| Q5BJY9        | LQLETEIEALK                                                                             | 1.138769196        | 2               | 2.89963   |
| Q5BJY9        | LQLETEIEALKEELLFMK                                                                      | 1.693807676        | 2               | 5.30738   |
| Q5BJY9        | NHEEEVQGLEAQIASSGLTVEVDAPK                                                              | 0.830552501        | 2               | 6.31386   |
| Q5BJY9        | NQNINLENNLGEVEAR                                                                        | 0.869548715        | 2               | 5.50214   |
| Q5BJY9        | NREELDKYWSQQIEESTTVVTTK                                                                 | 1.341767107        | 3               | 5.12897   |
| Q5BJY9        | QSVESDIHGLR                                                                             | 0.87981196         | 2               | 2.64962   |
| Q5BJY9        | QSVESDIHGLRK                                                                            | 1.035032596        | 2               | 2.65069   |
| Q5BJY9        | QTQEYEALLNIK                                                                            | 0.860002677        | 2               | 3.45206   |
| Q5BJY9        | SVWGGSVGSAGLAGMGGVQTEK                                                                  | 0.657811858        | 2               | 5.97917   |
| Q5BJY9        | SVWGGSVGSAGLAGMGGVQTEK+Oxidation(14)                                                    | 1.090644421        |                 |           |
| Q5BJY9        | TLQTEIDLDSMK                                                                            | 0.820079144        | 2               | 4.24517   |
| Q5BJY9        | TLQTEIDLDSMK+Oxidation(11)                                                              | 1.075483999        |                 |           |
| Q5BJY9        | VKLEAEIATYR                                                                             | 1.058967701        | 2               | 2.92102   |
| Q5BJY9        | VKYETELAMR                                                                              | 0.776583005        | 3               | 3.47669   |
| Q5BJY9        | VQMEQLNGVLLHLESELAQTR                                                                   | 1.012501515        | 3               | 5.1235    |
| Q5BJY9        | VRPASSAASVYAGAGGSGSR                                                                    | 1.567841443        | 2               | 5.63572   |
| Q5BJY9        | VVDDTNITR                                                                               | 0.881226157        | 2               | 3.33648   |
| Q5BJY9        | YETELAMR                                                                                | 0.761857345        | 2               | 2.75177   |
| Q5BJY9        | YWSQQIEESTTVVTTK                                                                        | 1.190246061        | 2               | 4.74506   |
| <b>Q5BK63</b> | <b>NDUA9 NADH dehydrogenase [ubiquinone] 1 alpha subcomplex subunit 9_mitochondrial</b> | <b>1.196899928</b> | <b>0.048212</b> | <b>4</b>  |
| Q5BK63        | AVQHSNVVINLIGR                                                                          | 1.101011866        | 2               | 3.3842    |
| Q5BK63        | IHISDVMATDLPGLLEDLVQPTPLELK                                                             | 1.332787602        | 3               | 5.33316   |
| Q5BK63        | NFDFEDVFNIPR                                                                            | 1.227284573        | 2               | 3.9904    |
| Q5BK63        | WLSSEIETKPAK                                                                            | 1.426335285        | 2               | 2.9375    |
| <b>Q5BK81</b> | <b>PTGR2 Prostaglandin reductase 2</b>                                                  | <b>0.955917917</b> | <b>0.84207</b>  | <b>4</b>  |
| Q5BK81        | AILDGNLEK                                                                               | 1.151097607        | 2               | 2.40133   |
| Q5BK81        | DVPYPPPLPPAVEAIQK                                                                       | 0.958498082        | 2               | 2.69482   |
| Q5BK81        | TGNVAEQLR                                                                               | 0.934237498        | 2               | 2.63178   |
| Q5BK81        | VEEVSLPDTINEGQVR                                                                        | 0.872931315        | 2               | 4.06298   |
| <b>Q5DTT3</b> | <b>F208B Protein FAM208B</b>                                                            | <b>0.890929246</b> | <b>0.00533</b>  | <b>2</b>  |
| Q5DTT3        | QGENIDKLMMEYVKNK                                                                        | 2.415297203        | 2               | 2.32696   |
| Q5DTT3        | VSPSEHSENLSFLEK                                                                         | 0.328636542        | 2               | 2.34369   |
| <b>Q5DW34</b> | <b>EHMT1 Histone_lysine N_methyltransferase EHMT1</b>                                   | <b>1.156284231</b> | <b>0.300483</b> | <b>2</b>  |
| Q5DW34        | TPLMEAENNHLDVAVKYLIK+Oxidation(3)                                                       | 1.602089311        |                 |           |
| Q5DW34        | YDCVFLSRSDVTLKNK                                                                        | 1.046803411        | 2               | 2.36457   |
| <b>Q5EB77</b> | <b>RAB18 Ras_related protein Rab_18</b>                                                 | <b>0.819270395</b> | <b>0.006462</b> | <b>3</b>  |
| Q5EB77        | LDNWLNELETYCTR                                                                          | 1.893377189        | 2               | 2.88813   |
| Q5EB77        | NDIVNMLVGNK                                                                             | 0.719140688        | 2               | 3.08801   |
| Q5EB77        | TCDGVQCAFEELVEK                                                                         | 0.826410664        | 2               | 3.46799   |



|               |                                                                                |                    |                 |          |
|---------------|--------------------------------------------------------------------------------|--------------------|-----------------|----------|
| <b>Q5FVM4</b> | <b>NONO Non_POU domain_containing octamer_binding protein</b>                  | <b>1.779271588</b> | <b>0.008856</b> | <b>2</b> |
| Q5FVM4        | MEELHNQEVQK                                                                    | 0.824719711        | 2               | 3.22223  |
| Q5FVM4        | MEELHNQEVQK+Oxidation(0)                                                       | 2.082294366        |                 |          |
| <b>Q5FVQ4</b> | <b>MLEC Malectin</b>                                                           | <b>1.28205231</b>  | <b>0.974873</b> | <b>2</b> |
| Q5FVQ4        | KEEEEEEEYDEGSNLKR                                                              | 1.441761831        | 3               | 5.53952  |
| Q5FVQ4        | STPEDQLYQTER                                                                   | 1.057573507        | 2               | 4.00993  |
| <b>Q5FVR2</b> | <b>TYPH Thymidine phosphorylase</b>                                            | <b>0.711172473</b> | <b>0.004629</b> | <b>5</b> |
| Q5FVR2        | AQDTQIGAMLMAIR+Oxidation(10)                                                   | 0.714669725        |                 |          |
| Q5FVR2        | AQDTQIGAMLMAIR+Oxidation(8)                                                    | 0.722850293        |                 |          |
| Q5FVR2        | DVTATVDSVPLITASILSK                                                            | 1.458356888        | 2               | 2.49978  |
| Q5FVR2        | FGGAAVFPDQEK                                                                   | 0.887910393        | 2               | 2.32941  |
| Q5FVR2        | VSLVLAPALAACGCK                                                                | 0.744023903        | 2               | 2.51537  |
| <b>Q5FVR5</b> | <b>ACNT2 Acyl_coenzyme A amino acid N_acyltransferase 2</b>                    | <b>1.449263744</b> | <b>0.008884</b> | <b>4</b> |
| Q5FVR5        | DEKENLFQSK                                                                     | 0.930472279        | 2               | 2.50185  |
| Q5FVR5        | ILFIVGENDQCLASK                                                                | 0.947710289        | 2               | 3.89702  |
| Q5FVR5        | IQQPGIGVISVSK                                                                  | 1.287582064        | 2               | 3.02578  |
| Q5FVR5        | VLEEDLDYFEEAANFLLAHPK                                                          | 1.530227754        | 3               | 4.10144  |
| <b>Q5FW57</b> | <b>GLYAL Glycine N_acyltransferase_like protein</b>                            | <b>0.883039967</b> | <b>0.956273</b> | <b>2</b> |
| Q5FW57        | AIDQEMFK                                                                       | 1.05152549         | 1               | 1.99001  |
| Q5FW57        | SSQMLQMLESSLR                                                                  | 0.83942162         | 2               | 3.75441  |
| <b>Q5HZV9</b> | <b>PP1R7 Protein phosphatase 1 regulatory subunit 7</b>                        | <b>0.72275347</b>  | <b>0.037465</b> | <b>3</b> |
| Q5HZV9        | AIENIDTLTNLESFLGK                                                              | 0.760623759        | 2               | 3.0205   |
| Q5HZV9        | ELDLYDNQIK                                                                     | 0.214176242        | 2               | 2.35752  |
| Q5HZV9        | ELDLYDNQIKK                                                                    | 0.059073363        | 2               | 2.40515  |
| <b>Q5HZY0</b> | <b>UBXN4 UBX domain_containing protein 4</b>                                   | <b>1.392091764</b> | <b>0.000893</b> | <b>2</b> |
| Q5HZY0        | LPDGSSFTNQFPSDAPLEEAR                                                          | 1.480206846        | 2               | 4.25185  |
| Q5HZY0        | NTELCETPTSDPK                                                                  | 1.53312678         | 2               | 4.06084  |
| <b>Q5HZY2</b> | <b>SAR1B GTP_binding protein SAR1b</b>                                         | <b>1.149610177</b> | <b>0.809604</b> | <b>2</b> |
| Q5HZY2        | EELDSLMTDETIANVPILIGNK                                                         | 1.149234084        | 3               | 3.52758  |
| Q5HZY2        | IDRPEAISEER                                                                    | 1.15692961         | 2               | 2.67145  |
| <b>Q5I0C3</b> | <b>MCCA Methylcrotonoyl_CoA carboxylase subunit alpha_mitochondrial</b>        | <b>1.003540367</b> | <b>0.843366</b> | <b>6</b> |
| Q5I0C3        | HAPLVEFEVEEV                                                                   | 0.914117161        | 2               | 2.93915  |
| Q5I0C3        | IIEEAPAPGIDPEVR                                                                | 0.90159523         | 2               | 3.84091  |
| Q5I0C3        | IYAEDPDNNFMPGAGPLVHLSTPPDMSTR                                                  | 0.771571762        | 3               | 3.40794  |
| Q5I0C3        | SEKEFQEQLSAR                                                                   | 1.176489101        | 2               | 3.20655  |
| Q5I0C3        | TNVDLLR                                                                        | 1.16679271         | 2               | 2.38219  |
| Q5I0C3        | YLSVSAEGTQGGTIAPMTGTIEK                                                        | 0.879640189        | 2               | 5.12672  |
| <b>Q5I0D1</b> | <b>GLOD4 Glyoxalase domain_containing protein 4</b>                            | <b>0.838782069</b> | <b>0.416405</b> | <b>3</b> |
| Q5I0D1        | ESQSILTPLVSLDTPGK                                                              | 0.786004497        | 2               | 3.57195  |
| Q5I0D1        | HEEFEEGCK                                                                      | 0.896753973        | 2               | 2.56092  |
| Q5I0D1        | VTLAVSDLQK                                                                     | 0.807460683        | 2               | 2.32329  |
| <b>Q5I0D5</b> | <b>LHPP Phospholysine phosphohistidine inorganic pyrophosphate phosphatase</b> | <b>0.898085599</b> | <b>0.568092</b> | <b>2</b> |
| Q5I0D5        | AFQVLMELNPVLISLGK                                                              | 1.116687238        | 3               | 3.78925  |
| Q5I0D5        | LGFDISEGEVTAPATCQILK                                                           | 0.894803256        | 2               | 4.34042  |
| <b>Q5I0D7</b> | <b>PEPD Xaa_Pro dipeptidase</b>                                                | <b>1.014733608</b> | <b>0.425607</b> | <b>2</b> |
| Q5I0D7        | GVNTDSGNVCR                                                                    | 1.237188203        | 2               | 2.41711  |
| Q5I0D7        | YAVDDVQYADEIASVLTSR                                                            | 1.036358488        | 2               | 3.95012  |
| <b>Q5I0E7</b> | <b>TMED9 Transmembrane emp24 domain_containing protein 9</b>                   | <b>1.009443182</b> | <b>0.323239</b> | <b>2</b> |
| Q5I0E7        | QLVEQVEQIQK                                                                    | 1.08296257         | 2               | 3.74162  |
| Q5I0E7        | QREEQPATPGLGMFVEVKDPEDK                                                        | 1.186251833        | 3               | 4.08146  |

|               |                                                                     |                    |                 |          |
|---------------|---------------------------------------------------------------------|--------------------|-----------------|----------|
| <b>Q5I0H9</b> | <b>PDIA5 Protein disulfide_isomerase A5</b>                         | <b>0.959878788</b> | <b>0.410653</b> | <b>4</b> |
| Q5I0H9        | DKNQDLCQQESVK                                                       | 1.041994553        | 2               | 4.20531  |
| Q5I0H9        | GPPLWEEDPGAK                                                        | 1.032148272        | 2               | 3.17313  |
| Q5I0H9        | GQGTICWVDCGDAESR                                                    | 1.150321965        | 2               | 4.06272  |
| Q5I0H9        | NQDLCQQESVK                                                         | 0.757970748        | 2               | 3.19046  |
| <b>Q5I0J9</b> | <b>ASPD Putative L_aspartate dehydrogenase</b>                      | <b>1.035061219</b> | <b>0.002516</b> | <b>8</b> |
| Q5I0J9        | HANLLVGSPSALADQTTER                                                 | 1.156079553        | 2               | 5.46919  |
| Q5I0J9        | IHESGVQILR                                                          | 1.019412638        | 2               | 2.51111  |
| Q5I0J9        | LDAAGGLQSLR                                                         | 1.208201673        | 2               | 3.76113  |
| Q5I0J9        | LEGPLAAHSSGPR                                                       | 0.847273876        | 2               | 3.35916  |
| Q5I0J9        | MAGSVPPALQLEDLTTLEER                                                | 1.260871456        | 2               | 3.09848  |
| Q5I0J9        | NSNTMAAAALAAPSLGFDR                                                 | 0.74401459         | 2               | 4.32029  |
| Q5I0J9        | TVLYEGPVR                                                           | 1.052110659        | 2               | 2.83451  |
| Q5I0J9        | VGVVGYGR                                                            | 1.034478988        | 2               | 2.34399  |
| <b>Q5I0M2</b> | <b>NADC Nicotinate_nucleotide pyrophosphorylase [carboxylating]</b> | <b>1.006024607</b> | <b>0.974002</b> | <b>5</b> |
| Q5I0M2        | CSGIASAAATAVEVATSTGWAGHVAGTR                                        | 0.97093418         | 3               | 4.32434  |
| Q5I0M2        | DNHVVAAGSMEK                                                        | 1.068753823        | 2               | 2.84924  |
| Q5I0M2        | EALQAAEAGADLVMLDNFKPEELHPTAATLK                                     | 1.002423223        | 3               | 6.04154  |
| Q5I0M2        | LYAEGDIPVPHAR                                                       | 1.038892444        | 2               | 2.95189  |
| Q5I0M2        | VEVECSSLK                                                           | 1.054532807        | 2               | 2.66264  |
| <b>Q5I0P2</b> | <b>GCSH Glycine cleavage system H protein_mitochondrial</b>         | <b>0.816446912</b> | <b>0.912482</b> | <b>2</b> |
| Q5I0P2        | MTLSDPSELDELMSEEAYEK                                                | 0.816223449        | 2               | 5.21411  |
| Q5I0P2        | SCYEDGWLIK                                                          | 0.909155481        | 2               | 2.30685  |
| <b>Q5M7T9</b> | <b>THNS2 Threonine synthase_like 2</b>                              | <b>1.274464218</b> | <b>0.000544</b> | <b>3</b> |
| Q5M7T9        | FPEAVQAAGLTPETPAEILALEHK                                            | 1.279912522        | 3               | 5.41887  |
| Q5M7T9        | GDFSLCEVVR                                                          | 1.193545935        | 2               | 2.52987  |
| Q5M7T9        | MGLPISLVVAVNR                                                       | 1.368185792        | 2               | 2.54719  |
| <b>Q5M7U6</b> | <b>ARP2 Actin_related protein 2</b>                                 | <b>0.955554699</b> | <b>0.636547</b> | <b>5</b> |
| Q5M7U6        | GYAFNHSADFETVR                                                      | 1.033347189        | 2               | 3.77078  |
| Q5M7U6        | HLWDYTFGPEK                                                         | 1.135633865        | 2               | 3.3205   |
| Q5M7U6        | KHMFVFLGGAVLADIMK+Oxidation(2)                                      | 0.920150964        |                 |          |
| Q5M7U6        | LCYVGYNIEQEQK                                                       | 1.460636326        | 2               | 2.3962   |
| Q5M7U6        | SMLEVNYPMENGIVR                                                     | 0.811904858        | 2               | 3.19314  |
| <b>Q5M7W5</b> | <b>MAP4 Microtubule_associated protein 4</b>                        | <b>0.920222329</b> | <b>5.47E-07</b> | <b>7</b> |
| Q5M7W5        | AAVGLTGNDIATPPNK                                                    | 0.889739238        | 2               | 3.54694  |
| Q5M7W5        | ATSPSTLVSTGSSSR                                                     | 0.823200455        | 2               | 3.64958  |
| Q5M7W5        | NTTPTGATPPAGMASTR                                                   | 0.937692201        | 2               | 2.70681  |
| Q5M7W5        | STLPVDEGSPEK                                                        | 0.904576833        | 2               | 2.40211  |
| Q5M7W5        | TEFIPLLDGDEK                                                        | 0.587190147        | 2               | 2.50416  |
| Q5M7W5        | VGSLDNVGHLPAGGTVK                                                   | 0.849286415        | 2               | 3.36949  |
| Q5M7W5        | VTEFNNVTPLEEEVASIK                                                  | 1.17271529         | 2               | 3.16942  |
| <b>Q5M875</b> | <b>DHB13 17_beta_hydroxysteroid dehydrogenase 13</b>                | <b>1.338424399</b> | <b>0.235297</b> | <b>7</b> |
| Q5M875        | ALTAELDTLGK                                                         | 1.333294617        | 2               | 2.82836  |
| Q5M875        | IQNIQFEAIVGHR                                                       | 1.55428943         | 3               | 3.52379  |
| Q5M875        | LWPVLEPDEVAR                                                        | 1.264507668        | 2               | 2.40039  |
| Q5M875        | NSGHIVTVASVCGHR                                                     | 1.135795195        | 2               | 4.39984  |
| Q5M875        | SLIDGILTNK                                                          | 1.330514515        | 2               | 3.32467  |
| Q5M875        | SVAGQTVLITGAGHGIGR                                                  | 1.443208869        | 2               | 4.02748  |
| Q5M875        | TSCLCPVFNVTGFTK                                                     | 1.347810963        | 2               | 3.81641  |
| <b>Q5M9G3</b> | <b>CAPR1 Caprin_1</b>                                               | <b>1.092866113</b> | <b>0.112434</b> | <b>4</b> |
| Q5M9G3        | LNQDQLDAVSK                                                         | 1.122157744        | 2               | 3.25404  |
| Q5M9G3        | SSFSNTPNSGYTQSQFNAPR                                                | 0.204131774        | 2               | 3.80103  |
| Q5M9G3        | TVLELQVVLDK                                                         | 1.294360675        | 2               | 2.43733  |
| Q5M9G3        | YQEVTTNNLEFAK                                                       | 1.110502481        | 2               | 2.74276  |

|               |                                                                         |                    |                 |          |
|---------------|-------------------------------------------------------------------------|--------------------|-----------------|----------|
| <b>Q5M9I5</b> | <b>QCR6 Cytochrome b_c1 complex subunit 6_mitochondrial</b>             | <b>0.799411443</b> | <b>2.87E-05</b> | <b>2</b> |
| Q5M9I5        | EEEEELVDPLTTVR                                                          | 0.680096508        | 2               | 2.67855  |
| Q5M9I5        | SQTEEDCTEELDFDLHAR                                                      | 2.284605224        | 2               | 4.86154  |
| <b>Q5PPL3</b> | <b>NSDHL Sterol_4_alpha_carboxylate 3_dehydrogenase_decarboxylating</b> | <b>0.945421135</b> | <b>2.61E-14</b> | <b>9</b> |
| Q5PPL3        | AVLDANDPKK                                                              | 0.822677841        | 2               | 2.47939  |
| Q5PPL3        | CTVIGSGFLGQHMVEQLLSR                                                    | 0.904930592        | 2               | 4.93009  |
| Q5PPL3        | DPQLVPVLIDAAAR                                                          | 0.925692889        | 3               | 3.4053   |
| Q5PPL3        | GQVTGTDLINEVSK                                                          | 0.91235788         | 2               | 3.78571  |
| Q5PPL3        | GVSTVFHCASPPSNSNNK                                                      | 1.570338253        | 2               | 4.78604  |
| Q5PPL3        | GYAVNVFDVR                                                              | 1.130191376        | 2               | 3.58814  |
| Q5PPL3        | ILTGLNVEAPK                                                             | 1.281501858        | 2               | 2.8633   |
| Q5PPL3        | KGQVTGTDLINEVSK                                                         | 0.976561118        | 2               | 4.07959  |
| Q5PPL3        | VQFFIGDLCNQDLYPALK                                                      | 1.265120976        | 3               | 5.26558  |
| <b>Q5PQQ2</b> | <b>WBP11 WW domain_binding protein 11</b>                               | <b>0.774828435</b> | <b>0.041173</b> | <b>4</b> |
| Q5PQQ2        | KLEVEYEK                                                                | 0.122798162        | 1               | 2.1736   |
| Q5PQQ2        | LDEMEFNVPVQPPQLNEKVLK+Oxidation(3)                                      | 2.8794979          |                 |          |
| Q5PQQ2        | RDEDMLYSPELAQR                                                          | 1.35151292         | 2               | 2.32538  |
| Q5PQQ2        | STSSTKSGKFMNPTDQAR                                                      | 0.754211878        | 2               | 2.47176  |
| <b>Q5PQR4</b> | <b>RSRC2 Arginine/serine_rich coiled_coil protein 2</b>                 | <b>1.275475684</b> | <b>0.000335</b> | <b>2</b> |
| Q5PQR4        | EKEMVEK+Oxidation(3)                                                    | 1.275496284        |                 |          |
| Q5PQR4        | KEGDKSQSAEIWEK                                                          | 0.582875041        | 2               | 2.54399  |
| <b>Q5PQT3</b> | <b>GLYAT Glycine_N_acyltransferase</b>                                  | <b>1.449703359</b> | <b>3.35E-09</b> | <b>6</b> |
| Q5PQT3        | AIQNLASIHSLQVK                                                          | 0.988248998        | 2               | 3.39899  |
| Q5PQT3        | DPENCQEFLGSSEVINWK                                                      | 1.131545226        | 2               | 5.32675  |
| Q5PQT3        | FWLFGGNER                                                               | 1.106296196        | 2               | 2.41508  |
| Q5PQT3        | GFPVYSHTDK                                                              | 1.470020746        | 2               | 2.67688  |
| Q5PQT3        | LSSLDVTHAALVNK                                                          | 1.858161896        | 2               | 3.24166  |
| Q5PQT3        | QHLQIQSSQSHLNK                                                          | 1.15054726         | 2               | 3.48084  |
| <b>Q5RJR8</b> | <b>LRC59 Leucine_rich repeat_containing protein 59</b>                  | <b>1.082655191</b> | <b>0.169321</b> | <b>6</b> |
| Q5RJR8        | ATVLDLSCNK                                                              | 1.04142297         | 2               | 3.11454  |
| Q5RJR8        | DKLDGNELDLSDLENEVPVK                                                    | 1.134782731        | 2               | 6.02855  |
| Q5RJR8        | HHEILQWVLQTDSSQ                                                         | 1.180782461        | 2               | 3.23996  |
| Q5RJR8        | LDGNELDLSDLENEVPVK                                                      | 1.013427135        | 2               | 3.92303  |
| Q5RJR8        | LQQLPADFGR                                                              | 1.710704602        | 2               | 2.35456  |
| Q5RJR8        | LSTLPSDFCGLTHLVK                                                        | 1.042709229        | 2               | 3.18354  |
| <b>Q5RKH1</b> | <b>PRP4B Serine/threonine_protein kinase PRP4 homolog</b>               | <b>1.037451266</b> | <b>0.484149</b> | <b>2</b> |
| Q5RKH1        | DLLDQILMLDPAKR+Oxidation(7)                                             | 1.026540499        |                 |          |
| Q5RKH1        | LAMDKLGKMPNK+Oxidation(2)                                               | 0.96635821         |                 |          |
| <b>Q5RKH6</b> | <b>OS9 Protein OS_9</b>                                                 | <b>1.194694622</b> | <b>0.044471</b> | <b>3</b> |
| Q5RKH6        | EQAILALTSTLDK                                                           | 1.133484775        | 2               | 2.42335  |
| Q5RKH6        | LQESQSPELVQK                                                            | 1.246199377        | 2               | 2.93514  |
| Q5RKH6        | QECPGDDTTEAPQR                                                          | 1.388332065        | 2               | 3.09101  |
| <b>Q5RKI0</b> | <b>WDR1 WD repeat_containing protein 1</b>                              | <b>0.978359743</b> | <b>0.940541</b> | <b>3</b> |
| Q5RKI0        | AHDGGIYAISWSPDSTHLLSASGDK                                               | 0.903020749        | 3               | 5.04249  |
| Q5RKI0        | CFSIDNPGYEPEVVAVHPGGDTVAVGGSDGNVR                                       | 0.840298418        | 3               | 4.64303  |
| Q5RKI0        | YAPSGFYIASGDISGK                                                        | 1.040645999        | 2               | 4.31294  |
| <b>Q5RKI1</b> | <b>IF4A2 Eukaryotic initiation factor 4A_II</b>                         | <b>1.134626348</b> | <b>0.007594</b> | <b>5</b> |
| Q5RKI1        | ELAQQIQK                                                                | 1.261271263        | 1               | 2.22996  |
| Q5RKI1        | GIDVQVSLVINYLPTNR                                                       | 1.127568048        | 2               | 3.99781  |
| Q5RKI1        | GYDVIAQAQSGTGK                                                          | 1.081221179        | 2               | 5.3142   |
| Q5RKI1        | MFVLDEADEMLSR                                                           | 1.12439139         | 2               | 4.28811  |
| Q5RKI1        | VLITTDLLAR                                                              | 0.906250817        | 2               | 3.48753  |

|               |                                                                      |                    |                 |           |
|---------------|----------------------------------------------------------------------|--------------------|-----------------|-----------|
| <b>Q5S006</b> | <b>LRRK2 Leucine_rich repeat serine/threonine_protein kinase 2</b>   | <b>0.901098948</b> | <b>0.394095</b> | <b>2</b>  |
| Q5S006        | MPRITNLDASR+Oxidation(0)                                             | <b>1.060768902</b> |                 |           |
| Q5S006        | WLCKVMAQILTVK                                                        | <b>0.900512072</b> | 2               | 2.33456   |
| <b>Q5SGE0</b> | <b>LPPRC Leucine_rich PPR motif_containing protein_mitochondrial</b> | <b>1.037826122</b> | <b>0.000691</b> | <b>16</b> |
| Q5SGE0        | AALDLEQVPSELAVTR                                                     | <b>1.033929903</b> | 2               | 4.1944    |
| Q5SGE0        | CIANNQVETLEK                                                         | <b>1.03564529</b>  | 2               | 2.88551   |
| Q5SGE0        | DVGEPVPFTEPPESFGFYIK                                                 | <b>1.378733174</b> | 2               | 2.96646   |
| Q5SGE0        | GLDAIELSR                                                            | <b>0.972642095</b> | 2               | 2.69324   |
| Q5SGE0        | HCVTMDTPAEK                                                          | <b>1.130882949</b> | 2               | 3.00898   |
| Q5SGE0        | HDNAEDALNLK                                                          | <b>1.236147565</b> | 2               | 3.56576   |
| Q5SGE0        | MEGANIQPNR                                                           | <b>0.970156549</b> | 2               | 2.72254   |
| Q5SGE0        | SCGSLLPELSLAER                                                       | <b>1.048982703</b> | 2               | 2.36615   |
| Q5SGE0        | SCGSLLPELSLAERTEFAHK                                                 | <b>0.899853871</b> | 2               | 2.40415   |
| Q5SGE0        | SGSPGSNQALLLR                                                        | <b>1.474647377</b> | 2               | 2.82859   |
| Q5SGE0        | SSLSSSSPSAGDTVTEK                                                    | <b>0.979742591</b> | 2               | 4.34709   |
| Q5SGE0        | SYVADKDVASAK                                                         | <b>1.144696577</b> | 2               | 2.85706   |
| Q5SGE0        | TLLELIPELR                                                           | <b>1.14616679</b>  | 2               | 3.00534   |
| Q5SGE0        | TSQFTSSDLESTLEK                                                      | <b>1.403519322</b> | 2               | 3.05048   |
| Q5SGE0        | VIEEQMEPALEK                                                         | <b>1.184711293</b> | 2               | 2.92843   |
| Q5SGE0        | VYLQNEYR                                                             | <b>1.556431057</b> | 2               | 2.45125   |
| <b>Q5SNZ0</b> | <b>GRDN Girdin</b>                                                   | <b>1.155108035</b> | <b>0.414025</b> | <b>2</b>  |
| Q5SNZ0        | KVEILENEIIQEK                                                        | <b>1.175570957</b> | 2               | 2.5232    |
| Q5SNZ0        | YNQLLKQKQLEDLEK                                                      | <b>1.051290811</b> | 2               | 2.64332   |
| <b>Q5SW19</b> | <b>K0664 Protein KIAA0664</b>                                        | <b>1.100186924</b> | <b>3.65E-07</b> | <b>3</b>  |
| Q5SW19        | GLEMDPIDCTPPEYILPGSR                                                 | <b>0.667464803</b> | 2               | 2.93945   |
| Q5SW19        | IGIGELITR                                                            | <b>1.644552632</b> | 2               | 2.91761   |
| Q5SW19        | SVEGLQEGSVLR                                                         | <b>1.213174549</b> | 2               | 2.82333   |
| <b>Q5SX40</b> | <b>MYH1 Myosin_1</b>                                                 | <b>0.362067268</b> | <b>9.9E-20</b>  | <b>95</b> |
| Q5SX40        | AAYLQNLNSADLLK                                                       | <b>0.050277683</b> | 2               | 3.65802   |
| Q5SX40        | ADIAESQVNK                                                           | <b>0.109136572</b> | 2               | 4.05557   |
| Q5SX40        | AEDEEEINAELTAK                                                       | <b>0.338228949</b> | 2               | 4.38106   |
| Q5SX40        | AGLLGLLEEMR                                                          | <b>0.075781505</b> | 2               | 3.97848   |
| Q5SX40        | AGLLGLLEEMRDDK                                                       | <b>0.773579245</b> | 2               | 3.33504   |
| Q5SX40        | ALQEAHQQLDDLQAEEDK                                                   | <b>1.284724061</b> | 2               | 5.75662   |
| Q5SX40        | ALQEAHQQLDDLQAEEDKVNTLTK                                             | <b>0.033869197</b> | 3               | 6.76401   |
| Q5SX40        | ANLLQAEIEELR                                                         | <b>0.050116452</b> | 2               | 3.93121   |
| Q5SX40        | ANSEVAQWR                                                            | <b>0.460522008</b> | 2               | 3.03732   |
| Q5SX40        | DLEEATLQHEATAATLR                                                    | <b>0.084313598</b> | 2               | 4.96199   |
| Q5SX40        | DTQLHLDDALR                                                          | <b>0.69841731</b>  | 1               | 3.61319   |
| Q5SX40        | EEQAEPDGTEVADK                                                       | <b>0.075460254</b> | 2               | 3.55858   |
| Q5SX40        | EFEMSNLQSK                                                           | <b>0.711383947</b> | 1               | 2.54343   |
| Q5SX40        | ELEEISER                                                             | <b>0.047080241</b> | 1               | 2.07647   |
| Q5SX40        | ELEGEVENEQK                                                          | <b>0.186344741</b> | 2               | 2.69849   |
| Q5SX40        | ELEGEVENEQKR                                                         | <b>0.057264667</b> | 2               | 3.28517   |
| Q5SX40        | ELTYQTEEDRK                                                          | <b>0.328212564</b> | 2               | 3.09538   |
| Q5SX40        | ENQSILITGESGAGK                                                      | <b>0.220640748</b> | 2               | 4.71694   |
| Q5SX40        | EQYEEEQEAK                                                           | <b>0.093712955</b> | 1               | 3.19981   |
| Q5SX40        | GQEDLKEQLAMVER                                                       | <b>0.346874213</b> | 2               | 4.44351   |
| Q5SX40        | GSSFQTVSALFR                                                         | <b>0.600732091</b> | 2               | 3.03157   |
| Q5SX40        | HADSVAEELGEQIDNLQR                                                   | <b>0.082460666</b> | 2               | 5.95999   |
| Q5SX40        | IAEQELLDASER                                                         | <b>0.113346848</b> | 2               | 3.77835   |
| Q5SX40        | IEAQNKPFDAK                                                          | <b>0.146298106</b> | 2               | 2.74858   |
| Q5SX40        | IEDEQALGMQLQK                                                        | <b>0.012006654</b> | 2               | 4.86542   |
| Q5SX40        | IEDEQALGMQLQK+Oxidation(8)                                           | <b>0.268954495</b> |                 |           |
| Q5SX40        | IEDMAMMTHLHEPAVLYNLK                                                 | <b>0.584065656</b> | 3               | 4.34008   |

|        |                                      |             |   |         |
|--------|--------------------------------------|-------------|---|---------|
| Q5SX40 | IEEEEEIEAER                          | 0.05757179  | 2 | 4.26683 |
| Q5SX40 | IKLEQQVDDLEGSLEQEK                   | 0.036480146 | 2 | 5.14068 |
| Q5SX40 | IKLEQQVDDLEGSLEQEKK                  | 0.083391034 | 2 | 5.21932 |
| Q5SX40 | INQQLDTK                             | #NUM!       | 1 | 2.17299 |
| Q5SX40 | IQHELEEAER                           | 0.052687648 | 2 | 3.61621 |
| Q5SX40 | IQLELNQVK                            | 0.384812516 | 2 | 2.78088 |
| Q5SX40 | KALQEAHQQTLDLQAEEDKVNTLTK            | 0.447385541 | 3 | 7.39455 |
| Q5SX40 | KIAEQELLDASER                        | 0.260519789 | 2 | 3.63105 |
| Q5SX40 | KIQHELEEAER                          | 0.136135018 | 2 | 3.79712 |
| Q5SX40 | KKEFEMSNLQSK                         | #NUM!       | 2 | 4.01701 |
| Q5SX40 | KKLETDISQIQGEMEDIVQEAR               | 0.377512107 | 3 | 5.96784 |
| Q5SX40 | KLEDECSELK                           | 0.403114042 | 2 | 3.0748  |
| Q5SX40 | KLEDECSELKK                          | 0.073054056 | 3 | 4.25446 |
| Q5SX40 | KLETDISQIQGEMEDIVQEAR                | 0.158956363 | 2 | 5.55751 |
| Q5SX40 | KMEGDLNEMEIQLNHSNR                   | 0.108001364 | 3 | 4.22466 |
| Q5SX40 | KMEGDLNEMEIQLNHSNR+Oxidation(1)      | 1.430277031 |   |         |
| Q5SX40 | LAQESTMDVENDKQQLDEK                  | 0.042915091 | 2 | 4.64862 |
| Q5SX40 | LDEAEQLALK                           | 0.146736204 | 2 | 3.96244 |
| Q5SX40 | LEDECSELK                            | 0.270754866 | 2 | 2.37872 |
| Q5SX40 | LEDECSELKK                           | 0.208763259 | 2 | 2.88652 |
| Q5SX40 | LEEAGGATSAQIEMNK                     | 0.591918619 | 2 | 4.72886 |
| Q5SX40 | LEEAGGATSAQIEMNK+Oxidation(13)       | 0.411794186 |   |         |
| Q5SX40 | LEQQVDDLEGSLEQEK                     | 0.081417847 | 2 | 5.63399 |
| Q5SX40 | LEQQVDDLEGSLEQEKK                    | 0.214566878 | 2 | 4.51116 |
| Q5SX40 | LETDISQIQGEMEDIVQEAR                 | 0.306184504 | 2 | 5.56219 |
| Q5SX40 | LINELTAQR                            | 0.129257621 | 2 | 2.94741 |
| Q5SX40 | LLGSIDIDHTQYK                        | 0.152230993 | 2 | 3.48121 |
| Q5SX40 | LQDAEEHVAVNAK                        | 0.096642476 | 2 | 4.96791 |
| Q5SX40 | LQDLVDK                              | 0.065583388 | 1 | 2.13255 |
| Q5SX40 | LQDLVDKLSK                           | 1.080376921 | 2 | 2.58384 |
| Q5SX40 | LQNEVEDLMIDVER                       | 0.167386523 | 2 | 4.72551 |
| Q5SX40 | LQTESGEYSR                           | 0.12437485  | 2 | 2.52509 |
| Q5SX40 | LYEQHLGK                             | 0.49384284  | 2 | 2.32573 |
| Q5SX40 | MEGDLNEMEIQLNHSNR                    | 0.109766367 | 2 | 4.65993 |
| Q5SX40 | MEIDDLASNMEVISK                      | 0.165973895 | 2 | 5.13623 |
| Q5SX40 | MEIDDLASNMEVISK+Oxidation(0)         | 0.647794499 |   |         |
| Q5SX40 | MQGTLEDQIISANPLLEAFGNAK              | 0.124716712 | 3 | 6.71066 |
| Q5SX40 | MQGTLEDQIISANPLLEAFGNAK+Oxidation(0) | 0.278469011 |   |         |
| Q5SX40 | NDLQLQVQSEADSLADAER                  | 0.055049798 | 2 | 6.70725 |
| Q5SX40 | NKDPLNETVVGLYQK                      | 0.069830452 | 2 | 4.82221 |
| Q5SX40 | NLQQEISDLTEQIAEGGK                   | 0.197303272 | 2 | 6.90575 |
| Q5SX40 | NLQQEISDLTEQIAEGGKR                  | 0.155032236 | 2 | 3.74813 |
| Q5SX40 | NLTEEMAGLDETIK                       | 0.055375398 | 2 | 4.85442 |
| Q5SX40 | NLTEEMAGLDETIK+Oxidation(5)          | 0.213927411 |   |         |
| Q5SX40 | QAEEAEEQSNVNLAK                      | 0.067489446 | 2 | 4.53789 |
| Q5SX40 | QKYEETHAELEASQK                      | 0.065752071 | 2 | 4.46851 |
| Q5SX40 | QLDEKDSLVSQLSR                       | 0.442744656 | 2 | 3.07626 |
| Q5SX40 | QLEEEIK                              | 0.829165347 | 1 | 2.14965 |
| Q5SX40 | QREEQAEPDGTEVADK                     | 0.050620473 | 2 | 3.97609 |
| Q5SX40 | RANLLQAEIEELR                        | 0.109289086 | 2 | 2.33789 |
| Q5SX40 | RDLEEATLQHEATAATLR                   | 0.101790586 | 2 | 4.94626 |
| Q5SX40 | SAETEKEMANMK                         | 0.922711533 | 2 | 3.06434 |
| Q5SX40 | SAETEKEMANMKKEFEK                    | #NUM!       | 2 | 4.91816 |
| Q5SX40 | SELQAALAEAEASLEHEEGK                 | 0.142903968 | 2 | 6.02013 |
| Q5SX40 | SLSTELFK                             | 0.065371971 | 2 | 2.4124  |
| Q5SX40 | SSVFVVDK                             | 0.073693431 | 1 | 2.12507 |
| Q5SX40 | TKYETDAIQR                           | 0.133450028 | 3 | 3.49354 |

|               |                                                               |                    |                 |           |
|---------------|---------------------------------------------------------------|--------------------|-----------------|-----------|
| Q5SX40        | TLEDQVSELK                                                    | 0.47041251         | 2               | 3.50689   |
| Q5SX40        | TNAACAAALDKK                                                  | 0.091089859        | 2               | 3.20022   |
| Q5SX40        | VKELTYQTEEDRK                                                 | 0.581743935        | 2               | 3.68456   |
| Q5SX40        | VLNASAIPEGQFIDSK                                              | 0.071310856        | 2               | 4.42938   |
| Q5SX40        | VQLLHTQNTSLINTK                                               | 0.002908265        | 2               | 4.62041   |
| Q5SX40        | VRELEGEVENEQKR                                                | 0.29637152         | 3               | 3.88902   |
| Q5SX40        | VVESMQSTLDAEIR                                                | 0.121649262        | 2               | 4.08063   |
| Q5SX40        | VVESMQSTLDAEIR+Oxidation(4)                                   | 0.908374473        |                 |           |
| Q5SX40        | YDKIEDMAMMTHLHEPAVLYNLK                                       | 0.599734838        | 3               | 4.39004   |
| Q5SX40        | YEETHAELEASQK                                                 | 0.058102235        | 2               | 4.76784   |
| Q5SX40        | YETDAIQR                                                      | 0.279890336        | 2               | 2.57875   |
| <b>Q5U206</b> | <b>CALL3 Calmodulin_like protein 3</b>                        | <b>1.035245213</b> | <b>1.07E-10</b> | <b>5</b>  |
| Q5U206        | DTDSEEEIR                                                     | 1.37096718         | 2               | 2.70737   |
| Q5U206        | KMKDTSDEEEIR                                                  | 0.4708499          | 2               | 2.3064    |
| Q5U206        | KMKDTSDEEEIR+Oxidation(1)                                     | 1.85070942         |                 |           |
| Q5U206        | MKDTSDEEEIR                                                   | 0.91836162         | 2               | 3.1043    |
| Q5U206        | MKDTSDEEEIR+Oxidation(0)                                      | 1.684536188        |                 |           |
| <b>Q5U211</b> | <b>SNX3 Sorting nexin_3</b>                                   | <b>1.105592849</b> | <b>0.959114</b> | <b>2</b>  |
| Q5U211        | CLHMFLQDEIIDK                                                 | 0.90509958         | 2               | 2.37173   |
| Q5U211        | GDDGIFDDNFIEER                                                | 0.967629045        | 2               | 2.84278   |
| <b>Q5U2Q7</b> | <b>ERF1 Eukaryotic peptide chain release factor subunit 1</b> | <b>1.314053971</b> | <b>2.89E-08</b> | <b>3</b>  |
| Q5U2Q7        | LSVLGAITSVQQR                                                 | 1.142222674        | 2               | 2.40232   |
| Q5U2Q7        | YFDEISQDTGK                                                   | 1.165297861        | 2               | 2.68238   |
| Q5U2Q7        | YVLHCQGTEEEK                                                  | 1.315486234        | 2               | 3.63262   |
| <b>Q5U300</b> | <b>UBA1 Ubiquitin_like modifier_activating enzyme 1</b>       | <b>1.236986518</b> | <b>0.001454</b> | <b>12</b> |
| Q5U300        | AAVASLLQSVQVPEFTPK                                            | 1.124690598        | 3               | 3.71568   |
| Q5U300        | AENYDISPADR                                                   | 0.988838452        | 2               | 2.99153   |
| Q5U300        | DNPGVVTCLDEAR                                                 | 1.21027056         | 2               | 3.39023   |
| Q5U300        | FEVQGLQPNGEEMTLK                                              | 0.994231165        | 2               | 3.89295   |
| Q5U300        | IYDDDFQNLGDGVANALDNVDAR                                       | 0.922449416        | 2               | 4.44969   |
| Q5U300        | LDQPMTEIVSR                                                   | 0.929058956        | 2               | 2.62783   |
| Q5U300        | MLQTSVSVLSGLR                                                 | 0.836678325        | 2               | 2.37229   |
| Q5U300        | NEEDATELVTLAQAVNAR                                            | 0.924733278        | 2               | 4.55773   |
| Q5U300        | NFPNAIEHTLQWAR                                                | 1.122412595        | 2               | 3.4405    |
| Q5U300        | SLPASLAEPDFVMTDFAK                                            | 0.976977054        | 2               | 3.54959   |
| Q5U300        | SPPAVQQDNVDEDLIR                                              | 0.917293914        | 2               | 4.72003   |
| Q5U300        | VVQGHQQLDSYK                                                  | 1.302538903        | 2               | 3.92526   |
| <b>Q5XFX0</b> | <b>TAGL2 Transgelin_2</b>                                     | <b>0.892454702</b> | <b>0.350254</b> | <b>4</b>  |
| Q5XFX0        | DDGLFSGDPNWFPK                                                | 0.936694509        | 2               | 3.56026   |
| Q5XFX0        | QMEQISQFLQAAER                                                | 0.905467628        | 2               | 3.09904   |
| Q5XFX0        | TLMNLGGLAVAR                                                  | 0.58840428         | 2               | 3.55472   |
| Q5XFX0        | YGINTTDFIQTVDLWEGK                                            | 0.874543354        | 2               | 5.07      |
| <b>Q5XH5</b>  | <b>SYTC Threonyl_tRNA synthetase_cytoplasmic</b>              | <b>0.976410885</b> | <b>0.141291</b> | <b>11</b> |
| Q5XH5         | AEHDSILAEK                                                    | 0.912069723        | 2               | 2.59799   |
| Q5XH5         | DQELYFFHELSPGSCFFLPK                                          | 1.521151277        | 3               | 3.41805   |
| Q5XH5         | FLGDIEIWNQAEK                                                 | 0.854797179        | 2               | 3.59406   |
| Q5XH5         | FMVDIDLDPGCTLNK                                               | 0.562633269        | 2               | 2.97684   |
| Q5XH5         | GFQEVVTPNIFNSR                                                | 0.392668656        | 2               | 3.12222   |
| Q5XH5         | LKAEHDSILAEK                                                  | 2.882100228        | 2               | 3.24969   |
| Q5XH5         | NELSGALTGLTR                                                  | 1.110366807        | 2               | 3.26631   |
| Q5XH5         | QLENSLNEFGEK                                                  | 0.976410334        | 2               | 3.18502   |
| Q5XH5         | QVMVVPVGPTCDEYAQK                                             | 0.929983574        | 2               | 3.26796   |
| Q5XH5         | TTPYQIACGISQGLADNTVVAK                                        | 0.962575916        | 2               | 4.22633   |
| Q5XH5         | WELNPGDGAFFYGPK                                               | 0.829109893        | 2               | 3.76151   |

|               |                                                        |                    |                 |           |
|---------------|--------------------------------------------------------|--------------------|-----------------|-----------|
| <b>Q5XH20</b> | <b>TRAP1 Heat shock protein 75 kDa_mitochondrial</b>   | <b>1.073938135</b> | <b>0.002446</b> | <b>13</b> |
| Q5XH20        | AFLEALQHQAEISSR                                        | 1.188476953        | 2               | 4.58707   |
| Q5XH20        | AQLLQPTLEINPR                                          | 1.082069603        | 2               | 3.47707   |
| Q5XH20        | EELVSNLGTIAR                                           | 0.87800675         | 2               | 2.55594   |
| Q5XH20        | ELISNASDALEK                                           | 1.272594138        | 2               | 3.58824   |
| Q5XH20        | FEDTSPAGER                                             | 1.219374982        | 2               | 2.76763   |
| Q5XH20        | GTITIQDTGIGMTK                                         | 1.119332618        | 2               | 3.49362   |
| Q5XH20        | GVVDESDIPLNSR                                          | 1.03388055         | 2               | 4.91275   |
| Q5XH20        | HLAEHSPYYEAMK                                          | 1.335091219        | 2               | 3.28208   |
| Q5XH20        | LDTHPAMVTVLEMGAAR                                      | 0.910982824        | 3               | 4.36564   |
| Q5XH20        | SDCKDFANESR                                            | 1.255638971        | 2               | 2.75922   |
| Q5XH20        | VCEGQVLPMEIHLQTDAAK                                    | 1.16858022         | 3               | 3.61547   |
| Q5XH20        | YESSALPAGQLTSLSDYASR                                   | 1.165405082        | 2               | 5.70764   |
| Q5XH20        | YIAQAYDKPR                                             | 1.380622279        | 2               | 2.87821   |
| <b>Q5XI22</b> | <b>THIC Acetyl_CoA acetyltransferase_cytosolic</b>     | <b>1.119518484</b> | <b>2.71E-10</b> | <b>7</b>  |
| Q5XI22        | AGHFDKEIVPVHVSSR                                       | 0.589765812        | 2               | 4.25156   |
| Q5XI22        | HGSNLEAMSK                                             | 1.100792365        | 2               | 2.77862   |
| Q5XI22        | HGSNLEAMSK+Oxidation(7)                                | 0.191688031        |                 |           |
| Q5XI22        | LKPYFLTDGTGTVPANASGMNDGAAAVVLMK                        | 1.29999142         | 3               | 4.88054   |
| Q5XI22        | TAIGSFNGALSTVPVHNLGTTVIK                               | 0.885985094        | 2               | 4.88817   |
| Q5XI22        | VAPEEVSEVIFGHVLTAGCGQNPTK                              | 1.603979617        | 3               | 5.93363   |
| Q5XI22        | VNIDGGAIALGHPLGASGCR                                   | 0.908448515        | 2               | 5.82059   |
| <b>Q5XI32</b> | <b>CAPZB F_actin_capping protein subunit beta</b>      | <b>1.16738762</b>  | <b>0.614958</b> | <b>7</b>  |
| Q5XI32        | KLEVEANNAFDQYR                                         | 0.975457475        | 2               | 4.47389   |
| Q5XI32        | LEVEANNAFDQYR                                          | 1.085144893        | 2               | 3.37179   |
| Q5XI32        | LVEDMENK                                               | 1.7688468          | 2               | 2.32      |
| Q5XI32        | NLSDLIDLVPISLCELDLSSVDQPLK                             | 1.126054376        |                 |           |
| Q5XI32        | SGSGTMNLGSLTR                                          | 0.89451603         | 2               | 2.86866   |
| Q5XI32        | STLNEIFYGK                                             | 1.129370779        | 2               | 2.61034   |
| Q5XI32        | YDPPLLEDGAMPSAR                                        | 0.790157803        | 2               | 2.52315   |
| <b>Q5XI60</b> | <b>REEP6 Receptor expression_enhancing protein 6</b>   | <b>1.370259373</b> | <b>2.23E-08</b> | <b>3</b>  |
| Q5XI60        | ALDIAAGITR                                             | 1.288666907        | 2               | 3.58357   |
| Q5XI60        | HHVALDSAASQLSGR                                        | 1.401423           | 2               | 4.25848   |
| Q5XI60        | NVATDALGALEAR                                          | 1.125694076        | 2               | 3.8193    |
| <b>Q5XI73</b> | <b>GDIR1 Rho GDP_dissociation inhibitor 1</b>          | <b>1.247723438</b> | <b>1.22E-12</b> | <b>6</b>  |
| Q5XI73        | AEEYFLTPMEEAPK                                         | 0.740596353        | 2               | 4.36589   |
| Q5XI73        | LTLVCSTAPGPLELDLTGDLESFKK                              | 1.13037047         | 3               | 3.31261   |
| Q5XI73        | SIQEIQELDKDDESLR                                       | 0.518708115        | 2               | 4.93456   |
| Q5XI73        | SIQEIQELDKDDESLRK                                      | 0.907741101        | 2               | 4.31992   |
| Q5XI73        | TDYMVGSYGPR                                            | 0.875114779        | 2               | 2.67347   |
| Q5XI73        | VAVSADPNVNVIVTR                                        | 1.2703621          | 2               | 4.45444   |
| <b>Q5XI78</b> | <b>ODO1 2_oxoglutarate dehydrogenase_mitochondrial</b> | <b>1.132559644</b> | <b>1.05E-09</b> | <b>15</b> |
| Q5XI78        | FGLEGCEVLIPALK                                         | 1.135883088        | 2               | 3.408     |
| Q5XI78        | FLDTAFDLDAFK                                           | 1.112365176        | 2               | 2.46875   |
| Q5XI78        | FLDTAFDLDAFKK                                          | 0.983255533        | 2               | 2.83962   |
| Q5XI78        | GHHVAQLDPLGILDADLDSSVPADIISSTDK                        | 0.974121199        | 3               | 4.43374   |
| Q5XI78        | ICEEAFTR                                               | 1.182144517        | 2               | 2.44077   |
| Q5XI78        | IEQLSPFPFDLLK                                          | 1.19346494         | 2               | 3.61379   |
| Q5XI78        | LEAADEGSGDMK                                           | 0.781759897        | 2               | 2.42343   |
| Q5XI78        | NITLSLVANPSHLEAADPVVMGK                                | 0.993394683        | 3               | 4.98256   |
| Q5XI78        | NTNAGAPPGTAYQSPLSLR                                    | 1.243444486        | 2               | 4.52192   |
| Q5XI78        | SSLATMAHAQSLVEAQPNDK                                   | 1.01757259         | 3               | 4.48031   |
| Q5XI78        | SWDIFFR                                                | 1.018326093        | 2               | 2.35344   |
| Q5XI78        | VIPEDGPAAQNPDK                                         | 1.276423488        | 2               | 3.07961   |

|               |                                                                                   |                    |                 |           |
|---------------|-----------------------------------------------------------------------------------|--------------------|-----------------|-----------|
| Q5XI78        | VVNAPIFHVNSDDPEAVMYVCK                                                            | 1.181624146        | 3               | 4.21129   |
| Q5XI78        | YAELLVSQGVVNQPEYEEIISK                                                            | 0.83722485         | 2               | 4.17669   |
| Q5XI78        | YAELLVSQGVVNQPEYEEIISKYDK                                                         | 0.989703488        | 3               | 3.80502   |
| <b>Q5XI95</b> | <b>ADH6 Alcohol dehydrogenase 6</b>                                               | <b>1.023249671</b> | <b>0.885002</b> | <b>5</b>  |
| Q5XI95        | ATVLWKPGAPLAIIEIEVAPPK                                                            | 0.666168135        | 2               | 3.88944   |
| Q5XI95        | IIAVDINK                                                                          | 0.992343959        | 2               | 2.87583   |
| Q5XI95        | MVATGVCGTDIK                                                                      | 0.706550474        | 2               | 3.22485   |
| Q5XI95        | NNICTEIR                                                                          | 0.927084751        | 2               | 2.46198   |
| Q5XI95        | TVGATDCVDPDR                                                                      | 0.823372055        | 2               | 2.60179   |
| <b>Q5XIC0</b> | <b>ECI2 Enoyl_CoA delta isomerase 2_ mitochondrial</b>                            | <b>1.114192691</b> | <b>0.999982</b> | <b>5</b>  |
| Q5XIC0        | ATQQDFENAMNQVK                                                                    | 0.987998981        | 2               | 4.76539   |
| Q5XIC0        | GILVTSEGGITK                                                                      | 1.099342115        | 2               | 3.84499   |
| Q5XIC0        | LHAVNEEECTTLR                                                                     | 1.165525498        | 2               | 3.65122   |
| Q5XIC0        | QNYVDLVSSLSSSEASSQGK                                                              | 1.134362996        | 2               | 5.1551    |
| Q5XIC0        | WDAWNALGSLPK                                                                      | 0.942353594        | 2               | 3.59674   |
| <b>Q5XIE6</b> | <b>HIBCH 3_hydroxyisobutyryl_CoA hydrolase_ mitochondrial</b>                     | <b>1.294014321</b> | <b>0.017346</b> | <b>5</b>  |
| Q5XIE6        | AGIATHFVDSEK                                                                      | 1.110609386        | 2               | 3.38673   |
| Q5XIE6        | AGQTLSDQLFR                                                                       | 1.120424135        | 2               | 2.38203   |
| Q5XIE6        | AVLIDKDQTPK                                                                       | 1.197007055        | 2               | 2.59476   |
| Q5XIE6        | INSCFSANTVEQILENLR                                                                | 1.238448511        | 2               | 3.84736   |
| Q5XIE6        | LHVLEEELLALK                                                                      | 1.296246376        | 3               | 3.67972   |
| <b>Q5XIF3</b> | <b>NDUS4 NADH dehydrogenase [ubiquinone] iron_sulfur protein 4_ mitochondrial</b> | <b>1.155669528</b> | <b>3.98E-05</b> | <b>2</b>  |
| Q5XIF3        | HGWSYDVEGR                                                                        | 1.179065513        | 2               | 2.8427    |
| Q5XIF3        | LDVTPLTGVPEEHK                                                                    | 1.13929762         | 3               | 3.6084    |
| <b>Q5XIF6</b> | <b>TBA4A Tubulin alpha_4A chain</b>                                               | <b>1.168062729</b> | <b>2.51E-05</b> | <b>5</b>  |
| Q5XIF6        | AVFVDLEPTVIDEIR                                                                   | 1.186294994        | 2               | 3.76055   |
| Q5XIF6        | AYHEQLSVAEITNACFEPANQMVK                                                          | 1.032227265        | 3               | 5.32497   |
| Q5XIF6        | DVNAAIAAIK                                                                        | 1.264011416        | 2               | 2.8803    |
| Q5XIF6        | SIQFVDWCPTGFK                                                                     | 1.182840605        | 2               | 4.34043   |
| Q5XIF6        | TIGGGDDSFITFCETGAGK                                                               | 3.565485705        | 2               | 4.56433   |
| <b>Q5XIG4</b> | <b>OCAD1 OCIA domain_containing protein 1</b>                                     | <b>0.845167712</b> | <b>0.93048</b>  | <b>2</b>  |
| Q5XIG4        | SVPLAATSMLITQGLISK                                                                | 0.776783629        | 2               | 3.99668   |
| Q5XIG4        | YDSNVSGQSSFQSPAADNIEK                                                             | 1.028334804        | 2               | 5.8947    |
| <b>Q5XIH7</b> | <b>PHB2 Prohibitin_2</b>                                                          | <b>1.096555534</b> | <b>1.36E-07</b> | <b>11</b> |
| Q5XIH7        | AQVLLIR                                                                           | 1.072516115        | 2               | 2.77329   |
| Q5XIH7        | DLQMVNISLR                                                                        | 1.433294633        | 2               | 3.19356   |
| Q5XIH7        | FNASQLITQR                                                                        | 1.001728342        | 2               | 3.68748   |
| Q5XIH7        | IGGVQQDTILAEGHLFR                                                                 | 1.153985476        | 3               | 4.42504   |
| Q5XIH7        | IPWFQYPIIYDIR                                                                     | 0.975443209        | 2               | 2.95396   |
| Q5XIH7        | IVQAEGEAEAAK                                                                      | 0.981630341        | 2               | 4.18436   |
| Q5XIH7        | IYLTADNLVNLQDESFTFR                                                               | 1.605149843        | 2               | 4.57549   |
| Q5XIH7        | LGLDYEER                                                                          | 0.624604542        | 2               | 2.598     |
| Q5XIH7        | LLGAGAVAYGVR                                                                      | 2.044926459        | 2               | 3.49318   |
| Q5XIH7        | VLPSIVNEVLK                                                                       | 0.928941563        | 2               | 2.81596   |
| Q5XIH7        | VLSRPNAQELPSMYQR                                                                  | 1.170356619        | 2               | 3.83698   |
| <b>Q5XIM9</b> | <b>TCPB T_complex protein 1 subunit beta</b>                                      | <b>1.381471742</b> | <b>9.9E-20</b>  | <b>9</b>  |
| Q5XIM9        | EALLSSAVDHGSDEVK                                                                  | 1.356870447        | 2               | 4.21115   |
| Q5XIM9        | GATQQILDEAER                                                                      | 1.287435809        | 2               | 3.90988   |
| Q5XIM9        | GSGNLEAIHVIK                                                                      | 1.55436599         | 2               | 2.91513   |
| Q5XIM9        | HGINCFINR                                                                         | 1.724937506        | 2               | 2.54006   |
| Q5XIM9        | ILIAN TGMDTDK                                                                     | 1.852864578        | 2               | 2.74239   |
| Q5XIM9        | LIEVMIGEDK                                                                        | 1.151692593        | 2               | 3.12808   |
| Q5XIM9        | NIGVDNPAAK                                                                        | 1.052633984        | 1               | 2.02664   |
| Q5XIM9        | SLHDALCVLAQTVK                                                                    | 1.363206659        | 2               | 3.7781    |



|               |                                                                          |                    |                 |           |
|---------------|--------------------------------------------------------------------------|--------------------|-----------------|-----------|
| Q5XIM9        | VQDDEVGDGTTSTVLAAELLR                                                    | 1.238411576        | 2               | 4.55799   |
| <b>Q5XIN6</b> | <b>LETM1 LETM1 and EF_hand domain_containing protein 1_mitochondrial</b> | <b>1.268275846</b> | <b>0.000231</b> | <b>6</b>  |
| Q5XIN6        | AAEVEGEQVDNK                                                             | 1.32586952         | 2               | 4.00532   |
| Q5XIN6        | FLQDTIEEMALK                                                             | 1.072506137        | 2               | 2.95835   |
| Q5XIN6        | LDPAAASSPTGESVISVDELISAMK                                                | 0.923714817        | 2               | 5.47385   |
| Q5XIN6        | LEEGGPVYSPAQVVVK                                                         | 0.957898407        | 2               | 3.09571   |
| Q5XIN6        | LFDELTLNLRPQLVALCK                                                       | 1.39137696         | 3               | 4.42701   |
| Q5XIN6        | LLELQSIGTNNFLR                                                           | 0.926153771        | 2               | 2.98879   |
| <b>Q5XIT9</b> | <b>MCCB Methylcrotonoyl_CoA carboxylase beta chain_mitochondrial</b>     | <b>1.099379212</b> | <b>0.987347</b> | <b>10</b> |
| Q5XIT9        | AATGEEVSAEDLGGADLHCR                                                     | 1.090534694        | 2               | 4.95342   |
| Q5XIT9        | ALVNQLHER                                                                | 1.16239902         | 2               | 2.5876    |
| Q5XIT9        | ALYGDTLVTGFAR                                                            | 1.043522172        | 2               | 3.67965   |
| Q5XIT9        | AQEIALQNR                                                                | 1.132876797        | 2               | 2.62757   |
| Q5XIT9        | DRIDNLIDPGSPFLEFSQFAGYK                                                  | 1.25329391         | 3               | 4.39028   |
| Q5XIT9        | KLDVTVEPSEELFPADELYGIVGANLK                                              | 1.086821036        | 3               | 4.43671   |
| Q5XIT9        | LGTQPDSGSSTYQENYEQMK                                                     | 1.205185313        | 2               | 5.08414   |
| Q5XIT9        | LWDDGIIDPVDTR                                                            | 0.867566655        | 2               | 3.26557   |
| Q5XIT9        | LYGEEVPAGGIITGIGR                                                        | 1.035648284        | 2               | 4.38006   |
| Q5XIT9        | QGTIFLAGPPLVK                                                            | 2.424755086        | 2               | 2.46614   |
| <b>Q5XIU5</b> | <b>PSMF1 Proteasome inhibitor PI31 subunit</b>                           | <b>1.059533712</b> | <b>0.867511</b> | <b>2</b>  |
| Q5XIU5        | ALIDPSSGLPNR                                                             | 1.074671999        | 2               | 2.54023   |
| Q5XIU5        | DPLSPFAVGGEDLDPFGCQR                                                     | 0.931637235        | 2               | 2.72864   |
| <b>Q5XIU9</b> | <b>PGRC2 Membrane_associated progesterone receptor component 2</b>       | <b>0.916214974</b> | <b>6.97E-07</b> | <b>3</b>  |
| Q5XIU9        | FYGPAGPYGIFAGR                                                           | 1.122699515        | 2               | 2.76522   |
| Q5XIU9        | GLATFCLK                                                                 | 1.353092899        | 2               | 2.84896   |
| Q5XIU9        | GLCSGPGAGEESPAATLPR                                                      | 0.913346779        | 2               | 4.78675   |
| <b>Q5XKE0</b> | <b>MYPC2 Myosin_binding protein C_fast_type</b>                          | <b>0.911666357</b> | <b>0.9294</b>   | <b>3</b>  |
| Q5XKE0        | LVVEISDPDLPLK                                                            | 0.893763964        | 2               | 2.82451   |
| Q5XKE0        | SEDAGELDFSGLLK                                                           | 0.946018234        | 2               | 3.41882   |
| Q5XKE0        | TSDNSIVVAGNK                                                             | 0.92557865         | 2               | 2.62734   |
| <b>Q60587</b> | <b>ECHB Trifunctional enzyme subunit beta_mitochondrial</b>              | <b>1.084744456</b> | <b>0.719696</b> | <b>7</b>  |
| Q60587        | ALAMGYKPK                                                                | 0.814894675        | 2               | 2.53701   |
| Q60587        | AQDEGHLSDIVPFK                                                           | 1.266163954        | 2               | 3.04021   |
| Q60587        | DFIYVSQDPK                                                               | 1.143942142        | 2               | 2.67543   |
| Q60587        | DGGQYALVAACAAGGQGHAMIVEAYPK                                              | 0.892114272        | 3               | 4.63065   |
| Q60587        | DNGIRPSSLEQMAK                                                           | 1.055852658        | 2               | 3.24394   |
| Q60587        | DQLLLGPTYATPK                                                            | 1.100880576        | 2               | 3.72816   |
| Q60587        | NIVVVEGVR                                                                | 1.029288213        | 2               | 2.85943   |
| <b>Q60598</b> | <b>SRC8 Src substrate cortactin</b>                                      | <b>0.996045319</b> | <b>0.202409</b> | <b>3</b>  |
| Q60598        | ENVFQEHQTLK                                                              | 1.807751563        | 2               | 2.30596   |
| Q60598        | NASTFEEVVQVPSAYQK                                                        | 1.164526599        | 2               | 3.47649   |
| Q60598        | VDQSAVGFEYQGK                                                            | 0.991181375        | 2               | 3.03171   |
| <b>Q60759</b> | <b>GCDH Glutaryl_CoA dehydrogenase_mitochondrial</b>                     | <b>1.219395008</b> | <b>2.97E-07</b> | <b>4</b>  |
| Q60759        | DILGGNGISDEYHVIR                                                         | 0.945344509        | 2               | 3.724     |
| Q60759        | DIVYEMGELGVLGPTIK                                                        | 1.354223463        | 2               | 2.37857   |
| Q60759        | GYGCAGVSSVAYGLLTR                                                        | 1.078940706        | 2               | 3.49575   |
| Q60759        | HAMNLEAVNTYEGTHDIHALILGR                                                 | 1.219458888        | 4               | 5.50447   |
| <b>Q60817</b> | <b>NACA Nascent polypeptide_associated complex subunit alpha</b>         | <b>1.19776234</b>  | <b>1.88E-06</b> | <b>3</b>  |
| Q60817        | DIELVMSQANVSR                                                            | 1.22721629         | 2               | 3.21888   |
| Q60817        | IEDLSQQAQLAAAEK                                                          | 1.293102388        | 2               | 4.62347   |
| Q60817        | NILFVITKPDVYK                                                            | 1.302252639        | 2               | 3.31638   |

|               |                                                                                 |                    |                 |           |
|---------------|---------------------------------------------------------------------------------|--------------------|-----------------|-----------|
| <b>Q60952</b> | <b>CP250 Centrosome-associated protein CEP250</b>                               | <b>0.942597208</b> | <b>0.806042</b> | <b>2</b>  |
| Q60952        | AQVIESQRGQIQDLK                                                                 | 0.90025944         | 2               | 2.48521   |
| Q60952        | GQIQDLKK                                                                        | 0.966799316        | 1               | 1.92662   |
| <b>Q61029</b> | <b>LAP2B Lamina-associated polypeptide 2_ isoforms beta/delta/epsilon/gamma</b> | <b>0.89549068</b>  | <b>0.84898</b>  | <b>3</b>  |
| Q61029        | SELVANNVTLPAGEQR                                                                | 0.895401453        | 2               | 4.31801   |
| Q61029        | SSTPLPTVSSSAENTR                                                                | 0.911207693        | 2               | 2.86167   |
| Q61029        | YGVNPGPIVGTRR                                                                   | 0.863831401        | 2               | 2.49091   |
| <b>Q61035</b> | <b>SYHC Histidyl_tRNA synthetase_cytoplasmic</b>                                | <b>1.071813199</b> | <b>0.053893</b> | <b>2</b>  |
| Q61035        | ASAEQIEEEVTK                                                                    | 1.001966347        | 2               | 3.13664   |
| Q61035        | REDLVEEIR                                                                       | 1.484302658        | 2               | 2.44633   |
| <b>Q61043</b> | <b>NIN Ninein</b>                                                               | <b>0.901242101</b> | <b>0.324759</b> | <b>2</b>  |
| Q61043        | ERATAAAMKQEQEILER                                                               | 0.364327326        | 2               | 2.34796   |
| Q61043        | NEITTLNEEDSISNLK                                                                | 0.974839087        | 2               | 2.36942   |
| <b>Q61301</b> | <b>CTNA2 Catenin alpha_2</b>                                                    | <b>1.181010768</b> | <b>0.504254</b> | <b>3</b>  |
| Q61301        | LLEPLVTQVTTLVNNTSNK                                                             | 1.033009067        | 2               | 3.85232   |
| Q61301        | TSVQTEDDQLIAGQSAR                                                               | 1.345232253        | 2               | 5.11628   |
| Q61301        | WDDSGNDIIVLAK                                                                   | 0.92749058         | 2               | 3.06311   |
| <b>Q61335</b> | <b>BAP31 B_cell receptor-associated protein 31</b>                              | <b>0.971197983</b> | <b>0.997068</b> | <b>3</b>  |
| Q61335        | AENEALAMQK                                                                      | 0.987234957        | 2               | 3.18986   |
| Q61335        | AENEALAMQK+Oxidation(7)                                                         | 1.040648835        |                 |           |
| Q61335        | YMEENDQLK                                                                       | 1.087679341        | 2               | 2.60682   |
| <b>Q61595</b> | <b>KTN1 Kinectin</b>                                                            | <b>1.117847115</b> | <b>0.015579</b> | <b>3</b>  |
| Q61595        | EKNWEAMEALASTEK                                                                 | 0.617982904        | 2               | 2.30312   |
| Q61595        | TAEHEAAQQDLQSK                                                                  | 1.133699297        | 2               | 4.09452   |
| Q61595        | VEPVLVTK                                                                        | 1.993760062        | 2               | 2.39162   |
| <b>Q61656</b> | <b>DDX5 Probable ATP_dependent RNA helicase DDX5</b>                            | <b>0.849219147</b> | <b>0.005294</b> | <b>5</b>  |
| Q61656        | ELAQQVQVAAEYCR                                                                  | 1.640290159        | 2               | 3.52502   |
| Q61656        | GDBGICLVLAPTR                                                                   | 0.833303265        | 2               | 3.29033   |
| Q61656        | LIDFLECGK                                                                       | 1.025346259        | 2               | 2.37781   |
| Q61656        | MLDMGFEPQIR                                                                     | 0.77111283         | 2               | 2.73426   |
| Q61656        | WNLDELPK                                                                        | 1.160908456        | 2               | 2.33913   |
| <b>Q61789</b> | <b>LAMA3 Laminin subunit alpha_3</b>                                            | <b>0.92759088</b>  | <b>0.615076</b> | <b>2</b>  |
| Q61789        | QLEEIK                                                                          | 0.947690672        | 1               | 2.0717    |
| Q61789        | RLQQVSPALNSLQQLTK                                                               | 0.921828953        | 2               | 2.35809   |
| <b>Q61838</b> | <b>A2M Alpha_2_macroglobulin</b>                                                | <b>1.039571481</b> | <b>0.986774</b> | <b>2</b>  |
| Q61838        | QQNSHGGFSTQDTVVALQALSK                                                          | 0.945719226        | 3               | 3.40497   |
| Q61838        | TEVNTNHVLIYIEK                                                                  | 1.05639716         | 2               | 4.01723   |
| <b>Q61941</b> | <b>transhydrogenase_mitochondrial</b>                                           | <b>1.057092293</b> | <b>0.706392</b> | <b>11</b> |
| Q61941        | EANSIVITPGYGLCAAK                                                               | 1.05407803         | 2               | 3.62171   |
| Q61941        | FGIHPVAGR                                                                       | 0.969757872        | 2               | 2.60029   |
| Q61941        | GITHIGYDLPSR                                                                    | 0.949212144        | 3               | 3.49276   |
| Q61941        | ILIVGGGVAGLASAGAAK                                                              | 1.353021974        | 2               | 4.98636   |
| Q61941        | KTTVLAMDQVPR                                                                    | 0.975156908        | 2               | 3.02032   |
| Q61941        | LGGLTAALGGAVGIMGLANGLR+Oxidation(14)                                            | 0.944868692        |                 |           |
| Q61941        | MATQASTLYSNNITK                                                                 | 1.553733385        | 2               | 4.30282   |
| Q61941        | QGFNVVVEGAGEASK                                                                 | 1.114689453        | 2               | 3.9958    |
| Q61941        | SLGAEPLEVDLK                                                                    | 1.065491515        | 2               | 3.07289   |
| Q61941        | TTVLAMDQVPR                                                                     | 0.937933502        | 2               | 3.10833   |
| Q61941        | VTIAQGYDALSSMANISGYK                                                            | 0.96509285         | 2               | 5.16627   |
| <b>Q62095</b> | <b>DDX3Y ATP_dependent RNA helicase DDX3Y</b>                                   | <b>1.164387502</b> | <b>0.138331</b> | <b>7</b>  |
| Q62095        | DLLDLLVEAK                                                                      | 2.214351319        | 2               | 2.67361   |
| Q62095        | GCHLLVATPGR                                                                     | 1.20808322         | 2               | 2.42224   |
| Q62095        | HVINFDLPSDIEEYVHR                                                               | 1.290650759        | 3               | 3.74129   |
| Q62095        | QYPISLVLAPTR                                                                    | 0.963394607        | 2               | 2.36651   |
| Q62095        | SFLDLLLNATGK                                                                    | 1.092572116        | 2               | 4.64848   |

|               |                                                                           |                    |                 |           |
|---------------|---------------------------------------------------------------------------|--------------------|-----------------|-----------|
| Q62095        | VGNLGLATSFNER                                                             | 1.556115132        | 2               | 3.05471   |
| Q62095        | VGSTSENIQK                                                                | 1.440013238        | 2               | 2.71913   |
| <b>Q62261</b> | <b>SPTB2 Spectrin beta chain_ brain 1</b>                                 | <b>1.141986569</b> | <b>0.568433</b> | <b>17</b> |
| Q62261        | ALVADSHPESEK                                                              | 1.156430926        | 2               | 3.21483   |
| Q62261        | EGMQLISEKPEAVEVK                                                          | 0.940774754        | 2               | 2.63316   |
| Q62261        | EIEELQSQALSQEGK                                                           | 1.220068278        | 2               | 4.6206    |
| Q62261        | EVDDLEQWIAER                                                              | 0.802771872        | 2               | 2.4694    |
| Q62261        | EVVAGSHELQDYEHVMTLQER                                                     | 0.854149315        | 3               | 4.18528   |
| Q62261        | HQILEQAVEDYAETVHQLSK                                                      | 0.818488633        | 3               | 4.06203   |
| Q62261        | ITDLYTDLR                                                                 | 1.108082099        | 2               | 2.60132   |
| Q62261        | IVSSNDVGHDEYSTQSLVK                                                       | 1.257620733        | 3               | 3.53696   |
| Q62261        | LSDGNEYLFQAK                                                              | 1.079034392        | 2               | 2.42557   |
| Q62261        | LVSDGNINSDR                                                               | 1.175629703        | 2               | 3.22631   |
| Q62261        | LVSQDNFGFDLPAVEAATK                                                       | 1.120646904        | 2               | 3.10879   |
| Q62261        | SNAHYNLQNAFNLAEQHLGLTK                                                    | 1.273237055        | 3               | 3.70162   |
| Q62261        | SQNIITDSSSLNAEAIR                                                         | 0.952222698        | 2               | 5.18207   |
| Q62261        | TLETAAQMEGFLNR                                                            | 1.6016895          | 2               | 3.75248   |
| Q62261        | TQTAIAISEDMPNTLTAEAK                                                      | 1.089798435        | 2               | 5.14121   |
| Q62261        | VIESTQDLGNLAGVMALQR                                                       | 0.294072858        | 3               | 4.31      |
| Q62261        | VLDNAIETEK                                                                | 0.767187371        | 2               | 2.52312   |
| <b>Q62425</b> | <b>NDUA4 NADH dehydrogenase [ubiquinone] 1 alpha subcomplex subunit 4</b> | <b>1.623768249</b> | <b>9.9E-20</b>  | <b>3</b>  |
| Q62425        | FYSVNVVDYSK                                                               | 1.637917323        | 2               | 2.87514   |
| Q62425        | KNNPEPWNK                                                                 | 0.801245267        | 2               | 2.46735   |
| Q62425        | LGPNEQYK                                                                  | 1.565177152        | 2               | 2.30301   |
| <b>Q62446</b> | <b>FKBP3 Peptidyl_prolyl cis_trans isomerase FKBP3</b>                    | <b>1.297667774</b> | <b>0.155412</b> | <b>2</b>  |
| Q62446        | FLQDHGSDSFLAEHK                                                           | 1.306463657        | 3               | 3.67724   |
| Q62446        | SEETLDEGPPK                                                               | 1.155654921        | 2               | 3.49318   |
| <b>Q62452</b> | <b>UD19 UDP glucuronosyltransferase 1_9</b>                               | <b>1.23763669</b>  | <b>0.012848</b> | <b>5</b>  |
| Q62452        | AMEIAEALGR                                                                | 0.900823705        | 2               | 3.80217   |
| Q62452        | GAGVTLNVLEMTADDLENALK                                                     | 0.978698337        | 3               | 5.54457   |
| Q62452        | GAGVTLNVLEMTADDLENALK+Oxidation(10)                                       | 1.373021329        |                 |           |
| Q62452        | WLPQNDLLGHPK                                                              | 1.049555488        | 2               | 3.14135   |
| Q62452        | YTGRPSNLAK                                                                | 0.5997532          | 2               | 2.62148   |
| <b>Q62465</b> | <b>VAT1 Synaptic vesicle membrane protein VAT_1 homolog</b>               | <b>1.174187986</b> | <b>0.369392</b> | <b>6</b>  |
| Q62465        | ACGLNFADLMGR                                                              | 0.957397227        | 2               | 3.00273   |
| Q62465        | CLVLTGFGGYDK                                                              | 1.145120817        | 2               | 3.43331   |
| Q62465        | GVDIVMDPLGGSDTAK                                                          | 0.896726771        | 2               | 4.02284   |
| Q62465        | IDSVWPFKEK                                                                | 0.876499098        | 1               | 1.94734   |
| Q62465        | TVENVTVFGTASASK                                                           | 1.257126191        | 2               | 3.88497   |
| Q62465        | VLLVPGPEKET                                                               | 0.920398097        | 2               | 2.68148   |
| <b>Q62468</b> | <b>VILI Villin_1</b>                                                      | <b>1.227665304</b> | <b>0.00968</b>  | <b>2</b>  |
| Q62468        | HEDCYILDQGGKIFVWK                                                         | 1.226300097        | 2               | 2.46643   |
| Q62468        | SGAMSQALNFIKAK                                                            | 1.573757049        | 2               | 2.34307   |
| <b>Q62636</b> | <b>RAP1B Ras_related protein Rap_1b</b>                                   | <b>1.28189281</b>  | <b>0.176812</b> | <b>3</b>  |
| Q62636        | INVNEIFYDLVR                                                              | 1.583922978        | 2               | 3.99885   |
| Q62636        | QWSNCAFLESSAK                                                             | 1.18671919         | 2               | 2.80909   |
| Q62636        | YDPTIEDSYR                                                                | 0.663734634        | 2               | 2.3696    |
| <b>Q62651</b> | <b>ECH1 Delta(3_5)_Delta(2_4)_dienoyl_CoA isomerase_mitochondrial</b>     | <b>1.00113669</b>  | <b>0.997838</b> | <b>7</b>  |
| Q62651        | HVLHVQLNRPEK                                                              | 0.996300221        | 2               | 3.62341   |
| Q62651        | IPEEVSDHNYESIQTSAQK                                                       | 1.311696794        | 3               | 3.86903   |
| Q62651        | MMADEALDGLVSR                                                             | 1.038316244        | 2               | 3.59623   |
| Q62651        | MMADEALDGLVSR+Oxidation(0)                                                | 1.070193807        |                 |           |
| Q62651        | MMADEALDGLVSR+Oxidation(1)                                                | 1.070193807        | 2               | 3.35263   |

|               |                                                         |                    |                 |           |
|---------------|---------------------------------------------------------|--------------------|-----------------|-----------|
| Q62651        | RIPEEVSDHNYESIQTSAQK                                    | 0.928589982        | 3               | 5.69513   |
| Q62651        | SLVNELTFTAR                                             | 0.989632787        | 2               | 3.47087   |
| <b>Q62717</b> | <b>CAPS1 Calcium_dependent secretion activator 1</b>    | <b>1.201890612</b> | <b>0.530993</b> | <b>2</b>  |
| Q62717        | IDELIEETVK                                              | 1.138487596        | 2               | 2.57976   |
| Q62717        | NCPDQDLKIK                                              | 1.279470627        | 1               | 1.93055   |
| <b>Q62730</b> | <b>DHB2 Estradiol 17_beta_dehydrogenase 2</b>           | <b>0.66496509</b>  | <b>9.27E-14</b> | <b>4</b>  |
| Q62730        | AVLVTGADSGFGHALAK                                       | 0.531128265        | 2               | 4.1666    |
| Q62730        | EIQENYGGQEVHTQK                                         | 0.706423442        | 2               | 4.41456   |
| Q62730        | LSVLQMDVTKPEQIKDVHSEVAEK                                | 0.844788666        | 3               | 4.51672   |
| Q62730        | VVTIHPGGFQTNIVGSQDSWDK                                  | 0.413803702        | 2               | 5.4331    |
| <b>Q62736</b> | <b>CALD1 Non_muscle caldesmon</b>                       | <b>1.004024102</b> | <b>0.005372</b> | <b>12</b> |
| Q62736        | ASGDKEAEGAPQVEAGK                                       | 0.969619174        | 2               | 4.55692   |
| Q62736        | ASGDKEAEGAPQVEAGKR                                      | 1.166445507        | 3               | 3.88134   |
| Q62736        | EEIERR                                                  | 1.464631589        | 1               | 1.93664   |
| Q62736        | EFDPTITDGSLVPSR                                         | 1.020327538        | 2               | 3.76409   |
| Q62736        | GETESEFEK                                               | 1.142462604        | 2               | 2.75553   |
| Q62736        | GGNLGENQIKDEK                                           | 1.139538442        | 2               | 3.42812   |
| Q62736        | LEQYTNAIEGK                                             | 1.415881238        | 2               | 3.90877   |
| Q62736        | MQNNSAENETAEGEEKGESR                                    | 1.026611632        | 3               | 4.42171   |
| Q62736        | MQNNSAENETAEGEEKGESR+Oxidation(0)                       | 1.473166227        |                 |           |
| Q62736        | NDDDEEEAAR                                              | 1.774855768        | 2               | 3.35625   |
| Q62736        | RGETESEFEK                                              | 1.239818044        | 2               | 3.15665   |
| Q62736        | VLEEEQR                                                 | 1.130070877        | 2               | 2.47149   |
| <b>Q62745</b> | <b>CD81 CD81 antigen</b>                                | <b>0.743287677</b> | <b>0.618716</b> | <b>2</b>  |
| Q62745        | NSLCPSSNSFTQLLK                                         | 0.811851682        | 2               | 2.73469   |
| Q62745        | QFYDQALQQAVMDDDANNAK                                    | 0.732615834        | 2               | 5.21496   |
| <b>Q62785</b> | <b>HAP28 28 kDa heat_and acid_stable phosphoprotein</b> | <b>1.000972949</b> | <b>0.573456</b> | <b>3</b>  |
| Q62785        | ANEDEQEEGDGASGDPK                                       | 0.881039791        | 2               | 4.26504   |
| Q62785        | GVEGLIDIENPNR                                           | 1.131218545        | 2               | 2.8591    |
| Q62785        | KVTQLDLDGPK                                             | 1.241587451        | 2               | 2.81109   |
| <b>Q62789</b> | <b>UD2B7 UDP_glucuronosyltransferase 2B7</b>            | <b>1.076199614</b> | <b>0.999906</b> | <b>2</b>  |
| Q62789        | IILDELVQR                                               | 1.057066474        | 2               | 3.58002   |
| Q62789        | WIPQNDLLGHPK                                            | 1.049555488        | 2               | 3.14135   |
| <b>Q62812</b> | <b>MYH9 Myosin_9</b>                                    | <b>0.927304591</b> | <b>0.00517</b>  | <b>63</b> |
| Q62812        | ALEEAMEQK                                               | 0.926075043        | 2               | 3.04335   |
| Q62812        | ALELDSNLYR                                              | 1.002723432        | 2               | 3.32281   |
| Q62812        | ALEQQVEEMK                                              | 0.911364626        | 2               | 2.95956   |
| Q62812        | ANLQIDQINTDLNLER                                        | 0.885772711        | 2               | 4.67255   |
| Q62812        | ASIAALEAK                                               | 1.038008889        | 2               | 2.56477   |
| Q62812        | ASREEILAQAK                                             | 1.273126072        | 2               | 2.88878   |
| Q62812        | CQYLQAEK                                                | 1.068930626        | 2               | 2.45231   |
| Q62812        | DELADEIANSSGK                                           | 1.141261161        | 2               | 2.84885   |
| Q62812        | DFSALSQLQDTQELLQEENR                                    | 1.06111674         | 3               | 5.59496   |
| Q62812        | DLEAHIDTANK                                             | 1.174913252        | 2               | 3.22735   |
| Q62812        | DLQGRDEQSEEK                                            | 0.470712638        | 2               | 3.21968   |
| Q62812        | EEILAQAK                                                | 1.041881531        | 1               | 2.31436   |
| Q62812        | EEILAQAKENEK                                            | 1.139538442        | 2               | 2.38037   |
| Q62812        | ELEDATETADAMNR                                          | 1.038473724        | 2               | 4.12589   |
| Q62812        | ELETQISELQEDLESER                                       | 0.940134435        | 2               | 3.97725   |
| Q62812        | HEAMITDLEER                                             | 0.921796727        | 2               | 3.12554   |
| Q62812        | HEDELLAK                                                | 0.902498922        | 2               | 2.81497   |
| Q62812        | HSQAVEELAEQLEQTK                                        | 0.878497171        | 2               | 4.94481   |
| Q62812        | HSQAVEELAEQLEQTKR                                       | 1.068428209        | 3               | 4.91831   |
| Q62812        | IIGLDQVAGMSETALPGAFAK                                   | 1.071561457        | 2               | 5.32892   |
| Q62812        | IRELETQISELQEDLESER                                     | 1.036464316        | 3               | 3.54975   |

|               |                                                        |                    |                 |          |
|---------------|--------------------------------------------------------|--------------------|-----------------|----------|
| Q62812        | KEEELQAALAR                                            | 1.024643493        | 2               | 3.15066  |
| Q62812        | KKVEAQLQELQVK                                          | 0.753502844        | 2               | 4.6503   |
| Q62812        | KLEEDQIIMEDQNCK                                        | 0.97809756         | 2               | 5.90862  |
| Q62812        | KLEGDSTDLSAQIAELQAIAELK                                | 0.966530421        | 2               | 5.83131  |
| Q62812        | KQELLEEICHDLER                                         | 1.030747122        | 2               | 4.49575  |
| Q62812        | KVEAQLQELQVK                                           | 1.175860155        | 2               | 4.24452  |
| Q62812        | LEEDQIIMEDQNCK                                         | 1.103626036        | 2               | 4.51432  |
| Q62812        | LEGDSTDLSAQIAELQAIAELK                                 | 0.934697321        | 2               | 3.57377  |
| Q62812        | LEVNLAQAMK                                             | 1.024716919        | 2               | 2.70956  |
| Q62812        | LQEMESAVK                                              | 0.910080379        | 2               | 2.54326  |
| Q62812        | LQQELDDLLVDLDHQR                                       | 0.911652427        | 2               | 4.78381  |
| Q62812        | LQVELDSVTGLLNQSDSK                                     | 0.996177832        | 2               | 5.73169  |
| Q62812        | LTEMETMQSQLMAEK                                        | 0.703018438        | 2               | 3.78776  |
| Q62812        | MEDGVGCLETAEEAK                                        | 1.032443689        | 2               | 4.22984  |
| Q62812        | MQQNIQELEEQLSEESAR                                     | 0.823571628        | 2               | 6.15573  |
| Q62812        | MQQNIQELEEQLSEESAR+Oxidation(0)                        | 0.74489128         |                 |          |
| Q62812        | NAEFKQADK                                              | 1.38280406         | 2               | 3.68046  |
| Q62812        | NLPIYSEEIVDMYK                                         | 1.346323165        | 2               | 3.2137   |
| Q62812        | NMDPLNDNIATLLHQSSDK                                    | 0.912089317        | 2               | 4.60997  |
| Q62812        | NTDQASMPDNTAAQK                                        | 0.939853174        | 2               | 5.42116  |
| Q62812        | NTDQASMPDNTAAQK+Oxidation(6)                           | 1.911045851        |                 |          |
| Q62812        | QAQQRDELAEIANSSGK                                      | 1.100530048        | 3               | 4.37909  |
| Q62812        | QIATLHAQVTDMK                                          | 0.779082792        | 2               | 2.80185  |
| Q62812        | QLEEAEEEAQR                                            | 1.076390434        | 2               | 3.68589  |
| Q62812        | QNKELK                                                 | 0.947690672        | 1               | 1.92331  |
| Q62812        | QSVSNLEK                                               | 1.085741139        | 2               | 2.60139  |
| Q62812        | QTLENERGELANEVK                                        | 1.196283187        | 2               | 2.91345  |
| Q62812        | RKLEGDSTDLSAQIAELQAIAELK                               | 0.950286604        | 3               | 5.4243   |
| Q62812        | RQLEEAEEEAQR                                           | 0.978180677        | 2               | 4.35204  |
| Q62812        | SMEAEMIQLEELAAER                                       | 1.046432826        | 2               | 4.78161  |
| Q62812        | SMEAEMIQLEELAAERAKR+Oxidation(1)                       | 1.177115716        |                 |          |
| Q62812        | TDLLLEPYNK                                             | 0.923639569        | 2               | 2.84834  |
| Q62812        | TELEDTLDSTAAQQLR                                       | 0.88859186         | 2               | 5.29411  |
| Q62812        | THEAQIQEMR                                             | 0.737563154        | 2               | 3.26961  |
| Q62812        | THEAQIQEMR+Oxidation(8)                                | 1.634061766        |                 |          |
| Q62812        | TQLEEELEDELQATEDAK                                     | 0.818899401        | 2               | 5.89373  |
| Q62812        | VAEFTTDLMEEEEK                                         | 0.97795747         | 2               | 4.1379   |
| Q62812        | VEAQLQELQVK                                            | 0.715254725        | 2               | 3.69563  |
| Q62812        | VEDMAELTCLNEASVLHNLK                                   | 1.0994942          | 2               | 4.46499  |
| Q62812        | VISGVLQLGNIVFK                                         | 1.126958954        | 2               | 2.85127  |
| Q62812        | VSHLLGINVTDFTFR                                        | 1.074592732        | 2               | 3.81363  |
| Q62812        | YEILTPNSIPK                                            | 0.909184644        | 2               | 3.01111  |
| <b>Q62826</b> | <b>HNRPM Heterogeneous nuclear ribonucleoprotein M</b> | <b>0.981720587</b> | <b>1.26E-06</b> | <b>5</b> |
| Q62826        | ADILEDKDGK                                             | 0.886746678        | 2               | 2.69905  |
| Q62826        | AFITNIPFDVK                                            | 1.363750001        | 2               | 3.35971  |
| Q62826        | GNFGGSFAGSFGGAGGHAPGVAR                                | 1.022138766        | 2               | 4.81978  |
| Q62826        | INEILSNALK                                             | 0.986823559        | 2               | 2.69234  |
| Q62826        | MGPVMDRMTGLER+Oxidation(0)                             | 0.963552021        |                 |          |
| <b>Q62871</b> | <b>DC112 Cytoplasmic dynein 1 intermediate chain 2</b> | <b>1.201490189</b> | <b>0.180177</b> | <b>2</b> |
| Q62871        | ADAEAAAATR                                             | 1.201407198        | 2               | 3.45693  |
| Q62871        | SVSTPSEAGSQSDGDAVGSR                                   | 1.37848491         | 2               | 3.37343  |
| <b>Q62902</b> | <b>LMAN1 Protein ERGIC_53</b>                          | <b>1.104343979</b> | <b>7.26E-06</b> | <b>6</b> |
| Q62902        | GAGTPGQPGQVSSQQLDVTVR                                  | 1.064862538        | 2               | 4.30276  |
| Q62902        | GHPDLQGQPADDIFESIGDR                                   | 1.025632827        | 2               | 4.73989  |
| Q62902        | NNPAIVVVGNNQINVDHQNDGATQALASCQR                        | 1.27072139         | 3               | 4.96992  |

|               |                                                   |                    |                 |           |
|---------------|---------------------------------------------------|--------------------|-----------------|-----------|
| Q62902        | RGAGTPGQPQVVSQQELDTVVR                            | 1.41031625         | 3               | 4.41791   |
| Q62902        | YQEEFEHFQQELDK                                    | 1.294988279        | 2               | 4.73091   |
| Q62902        | YVSSLTEEISR                                       | 1.172319652        | 2               | 3.51167   |
| <b>Q62904</b> | <b>DHB7 3_keto_steroid reductase</b>              | <b>0.703840979</b> | <b>0.048345</b> | <b>2</b>  |
| Q62904        | YATDLLNVALNR                                      | 0.635870123        | 2               | 2.64844   |
| Q62904        | YLSGTTGLGTNYVK                                    | 1.263879134        | 2               | 2.93935   |
| <b>Q62967</b> | <b>MVD1 Diphosphomevalonate decarboxylase</b>     | <b>0.850064565</b> | <b>0.000808</b> | <b>2</b>  |
| Q62967        | GLQVAPVLLSDELK                                    | 0.709868645        | 2               | 2.81527   |
| Q62967        | VYGVGDLSEVAR                                      | 0.855927504        | 2               | 3.13766   |
| <b>Q62975</b> | <b>ZPI Protein Z_dependent protease inhibitor</b> | <b>0.875434316</b> | <b>0.677822</b> | <b>2</b>  |
| Q62975        | FKLNQRYEMHELLK                                    | 0.888540245        | 2               | 2.70348   |
| Q62975        | KMEVFFPKFK                                        | 0.86453421         | 1               | 2.06038   |
| <b>Q63041</b> | <b>A1M Alpha_1_macroglobulin</b>                  | <b>0.711131553</b> | <b>5.13E-07</b> | <b>10</b> |
| Q63041        | AEDITHNGIVYTPK                                    | 0.63596513         | 2               | 3.46376   |
| Q63041        | AEQGAYLGPLYK                                      | 0.595715707        | 2               | 3.23844   |
| Q63041        | AESPVFVQTDKPIYKPGQTVK                             | 0.689966084        | 3               | 4.73882   |
| Q63041        | DTVVKPVIVEPEGIEK                                  | 0.66893146         | 2               | 2.45709   |
| Q63041        | GSI FNSGSHVLPLEQ GK                               | 0.761298735        | 2               | 3.75082   |
| Q63041        | LQDQSNQR                                          | 0.686043126        | 2               | 2.91617   |
| Q63041        | QDLNDNDAYSVFQSIGLK                                | 1.694365607        | 2               | 2.78595   |
| Q63041        | QLNYQHSDGSYSTFGDR                                 | 1.038404494        | 2               | 2.64531   |
| Q63041        | YNILPEAEGEAPFTLK                                  | 0.707033727        | 2               | 4.98446   |
| Q63041        | YVVLVPSELYAGVPEK                                  | 0.815434332        | 2               | 3.07474   |
| <b>Q63060</b> | <b>GLPK Glycerol kinase</b>                       | <b>1.330701455</b> | <b>7.4E-11</b>  | <b>11</b> |
| Q63060        | AVLGPLVGAVDQGTSSTR                                | 1.283960005        | 2               | 5.29781   |
| Q63060        | CVFSEHLLTTVAYK                                    | 1.06006695         | 2               | 4.01586   |
| Q63060        | DCGIPLSHLQVDGGMSTSNK                              | 1.459679869        | 2               | 3.79044   |
| Q63060        | EILQSVYECIEK                                      | 1.301441069        | 2               | 3.63543   |
| Q63060        | FEPQINAESEISR                                     | 1.247490366        | 2               | 3.51873   |
| Q63060        | KAVLGPLVGAVDQGTSSTR                               | 1.158123496        | 3               | 3.33706   |
| Q63060        | KVQEA VEENR                                       | 1.479820018        | 2               | 3.22344   |
| Q63060        | LGQLNIDISNIK                                      | 1.774353804        | 2               | 2.82469   |
| Q63060        | NTYGTGCFLLCNTGHK                                  | 1.393287959        | 2               | 4.14941   |
| Q63060        | TAELLSHHQVEIK                                     | 1.297263937        | 2               | 3.14925   |
| Q63060        | VQEA VEENR                                        | 1.090848225        | 2               | 3.04178   |
| <b>Q63081</b> | <b>PDIA6 Protein disulfide_isomerase A6</b>       | <b>0.995914565</b> | <b>0.010157</b> | <b>11</b> |
| Q63081        | ALDLFSDNAPPELLEIINEDIAK                           | 1.238167635        | 3               | 5.50354   |
| Q63081        | GESPVDYDGGR                                       | 1.058549501        | 2               | 2.85632   |
| Q63081        | GSFSEQGINEFLR                                     | 1.08798968         | 2               | 4.26786   |
| Q63081        | GSTAPVGGGSPNITPR                                  | 1.034762191        | 2               | 4.82397   |
| Q63081        | HQSLGGQYGVQGFPTIK                                 | 0.945358762        | 2               | 5.12542   |
| Q63081        | KDVVELTDDTFDK                                     | 0.986479072        | 2               | 4.11515   |
| Q63081        | KTCEEHQLCVAVLPHILDTGATGR                          | 0.980157242        | 4               | 5.21526   |
| Q63081        | NLEPEWAAAATEVK                                    | 0.966069625        | 2               | 4.08156   |
| Q63081        | NSYLEVLLK                                         | 0.99399948         | 2               | 2.72928   |
| Q63081        | TCEEHQLCVAVLPHILDTGATGR                           | 0.891002799        | 3               | 4.55059   |
| Q63081        | TGEAIVDAALSALR                                    | 0.986236628        | 3               | 4.58711   |
| <b>Q63083</b> | <b>NUCB1 Nucleobindin_1</b>                       | <b>1.138049109</b> | <b>0.938128</b> | <b>4</b>  |
| Q63083        | ADTGDAPVPAPAGDQK                                  | 1.203973919        | 2               | 3.46332   |
| Q63083        | ELQQAVLQMEQR                                      | 1.184656913        | 2               | 2.64502   |
| Q63083        | LSQETEALGR                                        | 1.09442029         | 2               | 2.82832   |
| Q63083        | VNVPGSQAQLK                                       | 0.942072232        | 2               | 2.55051   |
| <b>Q63089</b> | <b>S22A1 Solute carrier family 22 member 1</b>    | <b>0.906248366</b> | <b>0.300789</b> | <b>2</b>  |
| Q63089        | ENTIYLQVQTGK                                      | 1.103011051        | 2               | 2.31779   |
| Q63089        | GVALPETIEEAENLGR                                  | 0.953226853        | 2               | 3.10419   |
| <b>Q63108</b> | <b>EST3 Liver carboxylesterase 3</b>              | <b>0.906022874</b> | <b>9.9E-20</b>  | <b>7</b>  |
| Q63108        | DFNTVPYIVGINK                                     | 2.403451171        | 2               | 2.67712   |

|               |                                                                   |                    |                 |           |
|---------------|-------------------------------------------------------------------|--------------------|-----------------|-----------|
| Q63108        | GGTSKEEINLSK                                                      | 0.797772241        | 2               | 3.5401    |
| Q63108        | LDPMTATSLLK                                                       | 0.786896924        | 2               | 2.5212    |
| Q63108        | MKPSTVVGDDHGDEIYSVFGAPILR                                         | 0.95997082         | 3               | 3.88748   |
| Q63108        | QKTEEELLETLK                                                      | 0.921761836        | 2               | 3.57437   |
| Q63108        | SSFLLNLPEEAIPVAVEK                                                | 0.736743052        | 2               | 4.64594   |
| Q63108        | TEEELLETLK                                                        | 0.848878707        | 2               | 2.49946   |
| <b>Q63120</b> | <b>MRP2 Canalicular multispecific organic anion transporter 1</b> | <b>1.044950643</b> | <b>1.11E-16</b> | <b>6</b>  |
| Q63120        | ACALLPDLEILPGDMAEIGEK                                             | 1.489249986        | 2               | 3.49879   |
| Q63120        | ISEYINVENEAPWVTDK                                                 | 1.362551364        | 2               | 3.79597   |
| Q63120        | IVEYGSPEELLSNR                                                    | 1.094673993        | 2               | 3.41682   |
| Q63120        | QSQSQDVLVLEEAK                                                    | 1.033091602        | 2               | 3.26679   |
| Q63120        | YFAWEPSFQEQVQGIR                                                  | 1.239340755        | 2               | 4.6466    |
| Q63120        | YRPELDLVK                                                         | 1.857960795        | 2               | 2.39902   |
| <b>Q63150</b> | <b>DPYS Dihydropyrimidinase</b>                                   | <b>0.989615052</b> | <b>0.597851</b> | <b>9</b>  |
| Q63150        | DQTCTPIPVK                                                        | 1.44393001         | 2               | 2.44889   |
| Q63150        | EIGAIAQVHAENGLIAEGAK                                              | 1.046236652        | 2               | 4.99749   |
| Q63150        | FVAVTSTNAAK                                                       | 1.071801156        | 2               | 3.21194   |
| Q63150        | GEVITLKPR                                                         | 1.129750797        | 2               | 2.39935   |
| Q63150        | GSSLIEAFETWR                                                      | 1.016736833        | 2               | 3.06013   |
| Q63150        | MLALGITGPEGHELCPAEVAAEATLR                                        | 0.846979098        | 3               | 3.62739   |
| Q63150        | VVNDDFSQVADVLVEDGVVR                                              | 1.041150707        | 2               | 5.58906   |
| Q63150        | VVYEAGVFDVTAGHGK                                                  | 1.200254608        | 2               | 3.86546   |
| Q63150        | VVYGEPIAAGLGTDTQYWNK                                              | 1.018940126        | 2               | 5.4771    |
| <b>Q63270</b> | <b>ACOC Cytoplasmic aconitate hydratase</b>                       | <b>1.02980423</b>  | <b>7.11E-13</b> | <b>16</b> |
| Q63270        | AVEAGLNKPYVK                                                      | 1.025423828        | 2               | 3.25515   |
| Q63270        | AVLAESYER                                                         | 1.029653299        | 2               | 2.37071   |
| Q63270        | FVEFFGPGVAQLSIADR                                                 | 1.393921422        | 2               | 5.20144   |
| Q63270        | GFQVAPDHHNDHK                                                     | 3.004894579        | 2               | 3.25163   |
| Q63270        | IDFEKEPLGVNAQQQVFLK                                               | 0.937890146        | 3               | 4.68742   |
| Q63270        | KNDIENILNWSIMQHK                                                  | 0.900339674        | 3               | 4.65231   |
| Q63270        | NCDEFLVK                                                          | 0.979463349        | 1               | 2.04897   |
| Q63270        | NQDLEFER                                                          | 0.874355279        | 2               | 2.47958   |
| Q63270        | QAPQTVHLPSGETLDVFDAAER                                            | 0.736465966        | 3               | 3.70148   |
| Q63270        | SIEVPFKPAR                                                        | 1.079956752        | 2               | 2.58927   |
| Q63270        | SIVDAYVLLNLGDSVTTDHPAGNIAR                                        | 1.373068057        | 3               | 5.09333   |
| Q63270        | SPPFFESLTLDLQPPK                                                  | 1.325500813        | 3               | 3.88698   |
| Q63270        | SWNALAAPSEK                                                       | 1.019380674        | 1               | 2.32543   |
| Q63270        | TSLSPGSGVVTYYLR                                                   | 1.769523168        | 2               | 3.47017   |
| Q63270        | VILQDFTGVPVAVVDFAAAMR                                             | 1.504837585        | 3               | 4.48324   |
| Q63270        | YQQAGLPLIVLAGK                                                    | 1.052292811        | 2               | 3.53971   |
| <b>Q63276</b> | <b>BAAT Bile acid_CoA:amino acid N_acyltransferase</b>            | <b>1.022527891</b> | <b>4.03E-09</b> | <b>17</b> |
| Q63276        | AHGHLFVVGEDDKNLNSK                                                | 2.649855987        | 2               | 5.83522   |
| Q63276        | ASEVGEVDLER                                                       | 0.939020222        | 2               | 3.86987   |
| Q63276        | DDKGNLFNSQAFYR                                                    | 1.030466668        | 2               | 3.29866   |
| Q63276        | GNLFNSQAFYR                                                       | 1.151683325        | 2               | 3.04861   |
| Q63276        | LCHPYFPVEGK                                                       | 1.315148695        | 2               | 2.65694   |
| Q63276        | LTAVPLSALVDEPVHIR                                                 | 1.376884934        | 2               | 4.11165   |
| Q63276        | NWTLLSYPGAGHLIEPPYSPLCSASR                                        | 1.666311591        | 2               | 4.05783   |
| Q63276        | QHNLNPGFNSQL                                                      | 1.125875483        | 2               | 3.54745   |
| Q63276        | QITATVLINGPNFVSSNPVYR                                             | 0.9515338          | 3               | 5.2485    |
| Q63276        | TFEETADK                                                          | 0.993861214        | 1               | 1.97533   |
| Q63276        | TFEETADKDSK                                                       | 1.00249207         | 2               | 3.92625   |
| Q63276        | VDLEYFEEGVFLLR                                                    | 1.349434593        | 3               | 4.79588   |
| Q63276        | VFQPTPCSEEFVTTNALGLVEFYR                                          | 1.145050719        | 2               | 5.3075    |
| Q63276        | VISSSLDSLILR                                                      | 0.656779649        | 2               | 3.53714   |

|               |                                                                           |                    |                 |           |
|---------------|---------------------------------------------------------------------------|--------------------|-----------------|-----------|
| Q63276        | VTGLTPFQVVLQASLK                                                          | 1.479140333        | 3               | 5.32743   |
| Q63276        | WYVAPGVTR                                                                 | 0.754198595        | 2               | 2.65423   |
| Q63276        | YCFPIEK                                                                   | 1.076826781        | 2               | 2.59594   |
| <b>Q63342</b> | <b>M2GD Dimethylglycine dehydrogenase_mitochondrial</b>                   | <b>1.024997922</b> | <b>0.756094</b> | <b>24</b> |
| Q63342        | ADIINIVNGPITYSPDILPMVGP HQGVR                                             | 0.949861826        | 3               | 5.97022   |
| Q63342        | AWGSEMNCDTNPLEAGLDYFIK                                                    | 1.113354016        | 2               | 4.50319   |
| Q63342        | DGLLFGPYESQEK                                                             | 1.175825363        | 2               | 2.61695   |
| Q63342        | EGQESPPSPPEWK                                                             | 1.028843961        | 2               | 2.67632   |
| Q63342        | GGYDVEIR                                                                  | 0.882802481        | 2               | 2.30616   |
| Q63342        | GQDSTQLLDHLCANVIPK                                                        | 0.978878403        | 2               | 4.02243   |
| Q63342        | IMNAGQEEGIDNFGTYALNALR                                                    | 1.209648903        | 2               | 4.87588   |
| Q63342        | ISDIPVTAIR                                                                | 1.100057427        | 2               | 3.23237   |
| Q63342        | ITEHVEAAMEMVPVLK                                                          | 0.979049321        | 2               | 3.92702   |
| Q63342        | KADIINIVNGPITYSPDILPMVGP HQGVR                                            | 1.031005228        | 3               | 5.17343   |
| Q63342        | LEETGQVVGFHQPGSIR                                                         | 1.047355488        | 2               | 4.76727   |
| Q63342        | LNKPADFTGK                                                                | 1.35996773         | 2               | 2.63623   |
| Q63342        | LTSELSDDVFK                                                               | 1.265817249        | 2               | 4.14795   |
| Q63342        | NITDELGLVGVAGPYAR                                                         | 0.980722102        | 2               | 4.8318    |
| Q63342        | NYPATIIQEPLVLTPTER                                                        | 1.19462959         | 2               | 4.1668    |
| Q63342        | REDSAALYER                                                                | 1.668259765        | 2               | 3.23052   |
| Q63342        | SLAFAYVPVSEVGGQQVEVELL GK                                                 | 1.854616845        | 3               | 4.97281   |
| Q63342        | TNWHATEQYIIIEPEK                                                          | 1.339511682        | 2               | 4.15339   |
| Q63342        | VGFTNISHMLTPR                                                             | 1.243957095        | 2               | 2.40229   |
| Q63342        | VGVIDLSPFGK                                                               | 0.949687842        | 2               | 3.39948   |
| Q63342        | VIGNTTSGSYSYSIQK                                                          | 1.336059029        | 2               | 4.33414   |
| Q63342        | WIEEA AVR                                                                 | 1.331371414        | 2               | 2.76197   |
| Q63342        | WTTTQYTEAK                                                                | 0.980375509        | 2               | 2.81355   |
| Q63342        | YLSDWILHGEPDFLIELDPNR                                                     | 1.126619466        | 3               | 4.34608   |
| <b>Q63347</b> | <b>PRS7 26S protease regulatory subunit 7</b>                             | <b>1.038576935</b> | <b>0.835927</b> | <b>8</b>  |
| Q63347        | ALDEGDIALLK                                                               | 1.015837261        | 2               | 3.09461   |
| Q63347        | ESDTGLAPPALWDLAADK                                                        | 1.247246           | 2               | 2.50809   |
| Q63347        | FDDGAGGDNEVQR                                                             | 1.120452177        | 2               | 4.17522   |
| Q63347        | FVVDLSQVAPTDIEEGMR                                                        | 1.194966264        | 2               | 3.85636   |
| Q63347        | IINADSEDPK                                                                | 1.002667214        | 2               | 3.04787   |
| Q63347        | QTLQSEQPLQVAR                                                             | 0.951622147        | 2               | 4.00159   |
| Q63347        | QVEDDIQQLLK                                                               | 1.075268921        | 2               | 2.44174   |
| Q63347        | TMLELINQLDGF DPR                                                          | 0.803564416        | 2               | 2.96498   |
| <b>Q63355</b> | <b>MYO1C Myosin_1c</b>                                                    | <b>0.202673745</b> | <b>0.459599</b> | <b>2</b>  |
| Q63355        | MSLLQLVEILR                                                               | 0.90501781         | 2               | 2.51188   |
| Q63355        | YMDVQFDFKGPVGGHILSYLLEK+Oxidation(1)                                      | 0.180934128        |                 |           |
| <b>Q63362</b> | <b>NDUA5 NADH dehydrogenase [ubiquinone] 1 alpha subcomplex subunit 5</b> | <b>1.164570028</b> | <b>1.54E-05</b> | <b>4</b>  |
| Q63362        | KLENLLQGGEVEEVILQAEK                                                      | 1.224363935        | 2               | 6.6786    |
| Q63362        | KYTEQITSEK                                                                | 1.077239092        | 2               | 2.42624   |
| Q63362        | TTGLVGLAVCDTPHER                                                          | 1.112023953        | 2               | 3.47604   |
| Q63362        | YTEQITSEK                                                                 | 1.220539179        | 2               | 2.45256   |
| <b>Q63413</b> | <b>DX39B Spliceosome RNA helicase Ddx39b</b>                              | <b>1.080111025</b> | <b>0.284286</b> | <b>2</b>  |
| Q63413        | AIVDCGFHPSEVQHCEPICAILGMDVLCQAK                                           | 0.41378103         | 3               | 3.79947   |
| Q63413        | NCPHIVGTPGR                                                               | 1.127516315        | 2               | 3.04963   |
| <b>Q63429</b> | <b>UBC Polyubiquitin_C</b>                                                | <b>1.017894729</b> | <b>0.606206</b> | <b>3</b>  |
| Q63429        | ESTLHLVLR                                                                 | 1.417797618        | 2               | 2.42756   |
| Q63429        | TITLEVEPSDTIENVK                                                          | 1.017577279        | 2               | 4.71716   |
| Q63429        | TLSDYNIQK                                                                 | 1.163137369        | 2               | 2.54878   |
| <b>Q63448</b> | <b>ACOX3 Peroxisomal acyl_coenzyme A oxidase 3</b>                        | <b>1.037206121</b> | <b>0.153752</b> | <b>10</b> |
| Q63448        | ADWLDSEAPLAAYR                                                            | 0.962373394        | 2               | 4.2478    |
| Q63448        | DDAVALVDAIAPSDFVLGSPIGR                                                   | 1.039997582        | 3               | 4.14246   |



|               |                                                               |                    |                 |           |
|---------------|---------------------------------------------------------------|--------------------|-----------------|-----------|
| Q63448        | EIHALASAGKPLASWTAQR                                           | 0.757806795        | 2               | 4.0964    |
| Q63448        | GGYISGEQTGK                                                   | 0.930859147        | 2               | 2.92069   |
| Q63448        | NLWAAVLQQSGVLER                                               | 0.921313324        | 2               | 4.46384   |
| Q63448        | QFGPTDKEEIPVLEYPLQQWR                                         | 0.883597148        | 3               | 3.50254   |
| Q63448        | TIFLDLIELQR                                                   | 1.033695566        | 2               | 3.38361   |
| Q63448        | TIFSTLENDPLFARPPFGADLPLEK                                     | 0.971766612        | 3               | 4.51285   |
| Q63448        | TTAHYDPATQEFILHSPDFEAAK                                       | 1.109303653        | 3               | 4.54265   |
| Q63448        | TVNFLEAYPGILGQK                                               | 1.122920896        | 2               | 4.61562   |
| <b>Q63507</b> | <b>RL14 60S ribosomal protein L14</b>                         | <b>1.375813368</b> | <b>0.000407</b> | <b>3</b>  |
| Q63507        | ALVDGPCTR                                                     | 1.145883048        | 2               | 2.41594   |
| Q63507        | CMQLTDFILK                                                    | 0.828632725        | 2               | 2.55185   |
| Q63507        | LVAIVDVIDQNR                                                  | 1.410016344        | 2               | 4.12626   |
| <b>Q63524</b> | <b>TMED2 Transmembrane emp24 domain_containing protein 2</b>  | <b>1.087774636</b> | <b>0.92542</b>  | <b>3</b>  |
| Q63524        | GQDMETEAHQNKLEEMINELAVAMTAVK                                  | 1.003295619        | 3               | 5.36974   |
| Q63524        | HEQEYMEVR                                                     | 1.025969035        | 2               | 3.33628   |
| Q63524        | HEQEYMEVR+Oxidation(5)                                        | 1.166829191        |                 |           |
| <b>Q63525</b> | <b>NUDC Nuclear migration protein nudC</b>                    | <b>1.124576806</b> | <b>0.080337</b> | <b>4</b>  |
| Q63525        | GQAPVIDGELYNEVK                                               | 1.124756089        | 2               | 3.45482   |
| Q63525        | LSDLSETR                                                      | 0.233850352        | 2               | 2.66515   |
| Q63525        | LVTSDPEINTK                                                   | 1.161677188        | 2               | 2.39567   |
| Q63525        | VESSWLIEDGK                                                   | 0.91510045         | 2               | 3.01153   |
| <b>Q63569</b> | <b>PRS6A 26S protease regulatory subunit 6A</b>               | <b>0.984697439</b> | <b>0.018466</b> | <b>5</b>  |
| Q63569        | AMEVDERPTEQYSDIGGLDK                                          | 1.561062556        | 3               | 3.65665   |
| Q63569        | CTDDFNGAQCK                                                   | 0.956724358        | 2               | 3.33225   |
| Q63569        | MNVSPDVNYEELAR                                                | 1.04897765         | 2               | 3.30961   |
| Q63569        | MSTEEIVQR                                                     | 0.886564059        | 2               | 2.40452   |
| Q63569        | QTYFLPVIGLVDAEK                                               | 1.18577896         | 2               | 2.731     |
| <b>Q63570</b> | <b>PRS6B 26S protease regulatory subunit 6B</b>               | <b>1.487607611</b> | <b>0.036543</b> | <b>4</b>  |
| Q63570        | GVLMYGPPGCGK+Oxidation(3)                                     | 1.530226612        |                 |           |
| Q63570        | IQDEIPALSVSRPQTGLSFLGPEPEDLDLYSR                              | 1.651532602        | 3               | 5.44205   |
| Q63570        | KDEQEHEFYK                                                    | 1.323974021        | 2               | 2.95609   |
| Q63570        | RFDAQTGADR                                                    | 1.239859598        | 2               | 2.60998   |
| <b>Q63584</b> | <b>TMEDA Transmembrane emp24 domain_containing protein 10</b> | <b>0.992092707</b> | <b>0.000685</b> | <b>4</b>  |
| Q63584        | ITDSAGHILYAK                                                  | 1.521712112        | 2               | 3.31452   |
| Q63584        | LEDLSESIVNDFAYMK                                              | 1.084645114        | 2               | 2.92805   |
| Q63584        | NYEEIAK                                                       | 0.981795465        | 1               | 2.26636   |
| Q63584        | RLEDLSESIVNDFAYMK                                             | 1.030035437        | 2               | 3.82911   |
| <b>Q63598</b> | <b>PLST Plastin_3</b>                                         | <b>0.958929505</b> | <b>0.79533</b>  | <b>11</b> |
| Q63598        | AESMLQQADK                                                    | 0.971694594        | 2               | 2.87922   |
| Q63598        | ATDDIIVNWVNGTLSEAGK                                           | 0.951297124        | 3               | 4.94958   |
| Q63598        | AVGDGIVLCK                                                    | 1.026870319        | 1               | 1.95156   |
| Q63598        | HVIPMNPNTDDLK                                                 | 0.764747919        | 2               | 2.78276   |
| Q63598        | IDINMSGFNETDDLKR                                              | 0.944283359        | 2               | 4.33792   |
| Q63598        | INNFSA DIK                                                    | 1.461436116        | 2               | 2.57839   |
| Q63598        | KLENCNYAVELGK                                                 | 1.012253907        | 2               | 3.92307   |
| Q63598        | NEALAALLR                                                     | 0.976409484        | 2               | 2.74548   |
| Q63598        | VYALPEDLVEVKPK                                                | 0.944023157        | 2               | 2.9615    |
| Q63598        | YPALTKPENQDIDWTLLEGETR                                        | 0.959426709        | 3               | 5.17703   |
| Q63598        | YTLNVMEDLGEQK                                                 | 1.07666669         | 2               | 3.69883   |
| <b>Q63610</b> | <b>TPM3 Tropomyosin alpha_3 chain</b>                         | <b>1.314428243</b> | <b>9.9E-20</b>  | <b>8</b>  |
| Q63610        | EQAEAEVASLNR                                                  | 1.58011329         | 2               | 2.86572   |
| Q63610        | IQVLQQQADDAEER                                                | 1.321276707        | 2               | 5.12711   |
| Q63610        | KIQVLQQQADDAEER                                               | 1.317609731        | 2               | 5.41034   |
| Q63610        | KLVIIEGDLR                                                    | 1.010374262        | 2               | 2.77177   |
| Q63610        | LVIIEGDLR                                                     | 0.85378103         | 2               | 2.48203   |

|               |                                                     |                    |                 |           |
|---------------|-----------------------------------------------------|--------------------|-----------------|-----------|
| Q63610        | MELQEIQLK                                           | 0.761633797        | 2               | 3.02132   |
| Q63610        | TIDDLKDLK                                           | 1.185609351        | 2               | 2.86161   |
| Q63610        | YSQKEDKYEEIK                                        | 0.757057189        | 2               | 4.67772   |
| <b>Q63617</b> | <b>HYOU1 Hypoxia up_regulated protein 1</b>         | <b>0.985094027</b> | <b>8.41E-05</b> | <b>16</b> |
| Q63617        | AANSLEAFIFETQDK                                     | 0.983104276        | 2               | 3.30339   |
| Q63617        | DAVITVPAFFNQAER                                     | 1.120666047        | 2               | 2.33381   |
| Q63617        | EGETPDEKESGDKSEAQKPNK                               | 1.606382853        | 3               | 3.7704    |
| Q63617        | ESGDKSEAQKPNK                                       | 0.896016797        | 2               | 2.34861   |
| Q63617        | FLGDSAAGMAIK                                        | 1.017306572        | 2               | 2.64795   |
| Q63617        | LEDLTR                                              | 1.080353625        | 2               | 2.37397   |
| Q63617        | LGNTISSLFGGGTSSDAK                                  | 1.094909973        | 2               | 3.30243   |
| Q63617        | LIPEMDQIFTDVEMTTLEK                                 | 0.993809686        | 2               | 2.78257   |
| Q63617        | LYQPEYQEVSTEEQR                                     | 1.679869812        | 2               | 5.05907   |
| Q63617        | NINADEAAAAMGAVYQAAALSK                              | 1.100771468        | 2               | 2.9936    |
| Q63617        | SLAEDFAEQPIK                                        | 1.174514702        | 2               | 2.73523   |
| Q63617        | SLAEDFAEQPIKDAVITVPAFFNQAER                         | 1.021268187        | 3               | 3.91786   |
| Q63617        | TLGGLEMLR                                           | 1.045469139        | 2               | 2.30642   |
| Q63617        | VEFEELCADLFDR                                       | 0.769953929        | 2               | 3.89708   |
| Q63617        | VESVFETLVEDSPEEESTLTK                               | 1.216042916        | 2               | 4.21553   |
| Q63617        | VLQLINDNTATALSYGVFR                                 | 1.451339389        | 2               | 2.94727   |
| <b>Q63692</b> | <b>CDC37 Hsp90 co_chaperone Cdc37</b>               | <b>1.013002412</b> | <b>0.122706</b> | <b>2</b>  |
| Q63692        | EGEEAGPGDPLLEAVPK                                   | 0.833596694        | 2               | 3.57768   |
| Q63692        | LGPGGLDPVEVYESLPEELQK                               | 0.908776732        | 2               | 2.6856    |
| <b>Q63716</b> | <b>PRDX1 Peroxiredoxin_1</b>                        | <b>1.221949736</b> | <b>9.9E-20</b>  | <b>15</b> |
| Q63716        | ADEGISFR                                            | 1.188304645        | 2               | 3.06872   |
| Q63716        | ATAVMPDGQFK                                         | 0.971626957        | 2               | 2.94384   |
| Q63716        | DISLSDYK                                            | 1.621735593        | 2               | 2.50514   |
| Q63716        | HGEVCPAGWKPGSDTIKPDVNK                              | 1.12869737         | 4               | 6.2281    |
| Q63716        | IGHPAPSK                                            | 3.171498014        | 1               | 1.93211   |
| Q63716        | KLNCQVIGASVDSHFCHLAWINTPK                           | 5.063921637        | 4               | 4.57212   |
| Q63716        | KQGGLGPMNIPLVSDPK                                   | 1.341239919        | 2               | 4.1357    |
| Q63716        | LNCQVIGASVDSHFCHLAWINTPK                            | 1.684779751        | 3               | 3.65366   |
| Q63716        | LVQAFQFTDK                                          | 3.45460511         | 2               | 3.53237   |
| Q63716        | QGGLGPMNIPLVSDPK                                    | 0.738928727        | 2               | 3.47951   |
| Q63716        | QGGLGPMNIPLVSDPK+Oxidation(6)                       | 1.403742824        |                 |           |
| Q63716        | QITINDLPVGR                                         | 1.019713037        | 2               | 3.30839   |
| Q63716        | RTIAQDYGVLK                                         | 1.192999444        | 2               | 2.53211   |
| Q63716        | SVDEILR                                             | 1.072757696        | 2               | 2.69928   |
| Q63716        | TIAQDYGVLK                                          | 1.143738341        | 2               | 3.24734   |
| <b>Q63768</b> | <b>CRK Adapter molecule crk</b>                     | <b>1.120516025</b> | <b>0.207031</b> | <b>2</b>  |
| Q63768        | IGDQEFDSLALLEFYK                                    | 1.063090531        | 2               | 3.29237   |
| Q63768        | VPNAYDKTALALEVGELVK                                 | 1.343974699        | 2               | 2.31718   |
| <b>Q63797</b> | <b>PSME1 Proteasome activator complex subunit 1</b> | <b>1.214852228</b> | <b>3.09E-13</b> | <b>10</b> |
| Q63797        | EPALNEANLSNLK                                       | 0.565041253        | 2               | 2.40053   |
| Q63797        | ISELDAFLK                                           | 0.873605246        | 2               | 2.81907   |
| Q63797        | ISELDAFLKEPALNEANLSNLK                              | 0.842032942        | 3               | 6.05589   |
| Q63797        | KGDEDDKGPCCGVPVNCNEK                                | 0.952392863        | 3               | 4.80137   |
| Q63797        | KISELDAFLKEPALNEANLSNLK                             | 0.987725068        | 3               | 5.73396   |
| Q63797        | LEGFQTQISK                                          | 0.985662538        | 2               | 3.01388   |
| Q63797        | NAYAVLYDIILK                                        | 1.548149915        | 2               | 2.88382   |
| Q63797        | QLVHELDEAEYQEIR                                     | 0.964557004        | 3               | 4.66005   |
| Q63797        | TENLLGSYFPK                                         | 0.870819647        | 2               | 3.60702   |
| Q63797        | VDFVREDLCSK                                         | 0.92466143         | 2               | 2.38701   |
| <b>Q63798</b> | <b>PSME2 Proteasome activator complex subunit 2</b> | <b>1.036953593</b> | <b>0.539433</b> | <b>6</b>  |
| Q63798        | AFYAELHHIISSNLEK                                    | 1.196629802        | 2               | 3.97855   |

|               |                                                           |                    |                 |           |
|---------------|-----------------------------------------------------------|--------------------|-----------------|-----------|
| Q63798        | IEDGNDFGVAIQEK                                            | 0.928218606        | 2               | 4.24792   |
| Q63798        | IISLSQLLQEDSLNVADLSSLR                                    | 1.654536979        | 2               | 2.33724   |
| Q63798        | KIISLSQLLQEDSLNVADLSSLR                                   | 1.050150064        | 3               | 3.44549   |
| Q63798        | TKVEAFQTAISK                                              | 0.959595144        | 2               | 3.45529   |
| Q63798        | VEAFQTAISK                                                | 0.96940484         | 2               | 2.61206   |
| <b>Q63836</b> | <b>SBP2 Selenium_binding protein 2</b>                    | <b>1.233698344</b> | <b>1.44E-05</b> | <b>5</b>  |
| Q63836        | GGSVQVLEDQELTCQPEPLVVK                                    | 1.279747394        | 3               | 5.46247   |
| Q63836        | GSFVLLDGETFEVK                                            | 1.135999166        | 2               | 2.44633   |
| Q63836        | IYVVDVGSEPR                                               | 1.198570741        | 2               | 3.95932   |
| Q63836        | LNPNFLVDFGK                                               | 1.022884927        | 2               | 2.73046   |
| Q63836        | LNPNFLVDFGKEPLGALAEHLR                                    | 1.206295169        | 3               | 4.31012   |
| <b>Q63945</b> | <b>SET Protein SET</b>                                    | <b>1.041084504</b> | <b>0.677577</b> | <b>3</b>  |
| Q63945        | IDFYFDENPYFENK                                            | 1.095148288        | 2               | 3.85618   |
| Q63945        | LNEQASEEILK                                               | 1.040881867        | 2               | 2.72548   |
| Q63945        | VEVTEFEDIK                                                | 0.654028281        | 2               | 2.56745   |
| <b>Q63965</b> | <b>SFXN1 Sideroflexin_1</b>                               | <b>1.172702454</b> | <b>0.072232</b> | <b>6</b>  |
| Q63965        | MSGVPPNINIKEPR+Oxidation(0)                               | 0.80857193         |                 |           |
| Q63965        | NILLTNEQLENAR                                             | 1.039322802        | 2               | 4.47525   |
| Q63965        | QAITQVVISR                                                | 0.795345856        | 2               | 2.43131   |
| Q63965        | QGIVPAGLTENELWR                                           | 0.590096334        | 2               | 2.97243   |
| Q63965        | WDQSTFIGR                                                 | 1.44121792         | 2               | 2.83348   |
| Q63965        | YAYDSAFHPDTGEK                                            | 1.375238198        | 2               | 4.07131   |
| <b>Q64057</b> | <b>AL7A1 Alpha_aminoadipic semialdehyde dehydrogenase</b> | <b>0.905111676</b> | <b>9.9E-20</b>  | <b>17</b> |
| Q64057        | AWNIIWADIPAPK                                             | 0.892103686        | 2               | 3.94756   |
| Q64057        | EDNEGVFNGSWGGR                                            | 0.961934397        | 2               | 3.6378    |
| Q64057        | EGGTVVYGGK                                                | 1.424575637        | 2               | 2.45401   |
| Q64057        | FKNEEEVFEWNNVEVK                                          | 1.020347548        | 2               | 5.45816   |
| Q64057        | GAPTTSLVSIATVK                                            | 0.865108188        | 2               | 4.21345   |
| Q64057        | GEVITTYCPANNEPIAR                                         | 1.027086724        | 2               | 5.08541   |
| Q64057        | GSDCGIVNVNIPITSGAEIGGAFGGK                                | 0.901212679        | 2               | 5.64964   |
| Q64057        | LFLHESIHDVVDR                                             | 1.482967362        | 2               | 4.21817   |
| Q64057        | NEEEVFEWNNVEVK                                            | 0.883825304        | 2               | 4.54194   |
| Q64057        | QAVSMFVQAVEEAK                                            | 1.048209737        | 2               | 3.08438   |
| Q64057        | QGLSSSIFTK                                                | 1.137583247        | 2               | 2.56742   |
| Q64057        | QVALMVQER                                                 | 0.815419898        | 2               | 2.3021    |
| Q64057        | STCTINYSTALPLAQGIK                                        | 2.32334905         | 2               | 4.67803   |
| Q64057        | VGNPWDPNIIYGLPLHTK                                        | 1.179852472        | 3               | 4.14142   |
| Q64057        | VMDHPGNYVEPTIVTGLVHDAPIVHK                                | 0.791743491        | 3               | 6.09222   |
| Q64057        | VMDHPGNYVEPTIVTGLVHDAPIVHK+Oxidation(1)                   | 0.890157286        |                 |           |
| Q64057        | VNLLSFTGSTQVGK                                            | 1.711225176        | 2               | 4.87519   |
| <b>Q640L5</b> | <b>CCD18 Coiled_coil domain_containing protein 18</b>     | <b>0.455681889</b> | <b>0.089025</b> | <b>2</b>  |
| Q640L5        | EVIDLGQELR                                                | 0.574795623        | 2               | 2.35531   |
| Q640L5        | SMQLSQLDMVLDQTKTELEKTTNSVK                                | 0.037594831        | 3               | 3.60115   |
| <b>Q64119</b> | <b>MYL6 Myosin light polypeptide 6</b>                    | <b>1.039915158</b> | <b>0.280748</b> | <b>6</b>  |
| Q64119        | DQGTIEDYVEGLR                                             | 1.380945541        | 2               | 3.35106   |
| Q64119        | HVLVTLGEK                                                 | 0.970094518        | 1               | 2.29393   |
| Q64119        | ILYSQCGDVMR                                               | 1.660893736        | 2               | 2.68829   |
| Q64119        | NKDQGTIEDYVEGLR                                           | 0.941982871        | 2               | 4.19482   |
| Q64119        | VFDKEGNGTVMGAEIR                                          | 0.263571228        | 2               | 3.51766   |
| Q64119        | VLDFEHFLPMLQTVAK                                          | 0.941141341        | 2               | 4.94335   |
| <b>Q64122</b> | <b>MYL9 Myosin regulatory light polypeptide 9</b>         | <b>0.843552657</b> | <b>0.922666</b> | <b>2</b>  |
| Q64122        | DGFIDKEDLHDMLASLGK                                        | 0.872685719        | 2               | 4.72261   |
| Q64122        | LNGTDPEDVIR                                               | 1.110382013        | 2               | 2.8867    |
| <b>Q64176</b> | <b>EST22 Liver carboxylesterase 22</b>                    | <b>0.796763387</b> | <b>9.9E-20</b>  | <b>4</b>  |

|               |                                                                                            |                    |                 |           |
|---------------|--------------------------------------------------------------------------------------------|--------------------|-----------------|-----------|
| Q64176        | AISESGVALTAGLVK                                                                            | 0.727611824        | 2               | 3.88749   |
| Q64176        | EGYLQIGATTQQAQK                                                                            | 0.977822249        | 2               | 4.58786   |
| Q64176        | LDQMTAMSLK+Oxidation(3)                                                                    | 0.699318721        |                 |           |
| Q64176        | NFNTVPYIVGINK                                                                              | 2.665034265        | 2               | 3.45523   |
| <b>Q641Y0</b> | <b>OST48 Dolichyl_diphosphooligosaccharide__protein glycosyltransferase 48 kDa subunit</b> | <b>1.120951655</b> | <b>0.442756</b> | <b>9</b>  |
| Q641Y0        | ELGSECGIEFDEEK                                                                             | 1.355372797        | 2               | 3.52384   |
| Q641Y0        | GVMVADPDNPLVLDILTSSTSYFFDPKPITQYPHAVGR                                                     | 3.370244939        | 4               | 6.9834    |
| Q641Y0        | NLLIAGLQAR                                                                                 | 1.151744625        | 2               | 3.8193    |
| Q641Y0        | SSLNPILFR                                                                                  | 1.783483129        | 2               | 2.41136   |
| Q641Y0        | TADDPSSLIK                                                                                 | 0.913738338        | 2               | 2.71421   |
| Q641Y0        | TAVIDHHNYDVSDLGQHTLIVADTENLLK                                                              | 1.149474239        | 4               | 6.54632   |
| Q641Y0        | TLVLLDNLNVR                                                                                | 1.109591684        | 2               | 3.84659   |
| Q641Y0        | WVPFDGDDIQLEFVR                                                                            | 1.000533933        | 2               | 2.73482   |
| Q641Y0        | YSQTGNVELAVALSR                                                                            | 1.029918505        | 2               | 3.45372   |
| <b>Q641Y2</b> | <b>NDUS2 NADH dehydrogenase [ubiquinone] iron_sulfur protein 2_ mitochondrial</b>          | <b>1.206948733</b> | <b>0.353863</b> | <b>5</b>  |
| Q641Y2        | GSGIQWDLR                                                                                  | 1.041555104        | 2               | 2.54724   |
| Q641Y2        | IDEVEEMLTNNR                                                                               | 1.126749575        | 2               | 3.63135   |
| Q641Y2        | IIEQCLNK                                                                                   | 1.232186474        | 2               | 2.88313   |
| Q641Y2        | LYTEGYQVPPGATYTAIEAPK                                                                      | 1.885252249        | 2               | 2.94636   |
| Q641Y2        | TQPYDVYDQVEFDVPIGSR                                                                        | 1.37809616         | 2               | 3.99239   |
| <b>Q641Y8</b> | <b>DDX1 ATP_dependent RNA helicase DDX1</b>                                                | <b>1.047863226</b> | <b>0.580783</b> | <b>3</b>  |
| Q641Y8        | GDVRFLECTDVAAR                                                                             | 1.038962803        | 2               | 2.34389   |
| Q641Y8        | GHDILAPTVQELAALEK                                                                          | 0.99346814         | 3               | 3.88094   |
| Q641Y8        | GSAFAIGSDGLCCQSR                                                                           | 1.1656615          | 2               | 3.70012   |
| <b>Q64232</b> | <b>TECR Trans_2_3_enoyl_CoA reductase</b>                                                  | <b>1.172186836</b> | <b>0.010436</b> | <b>4</b>  |
| Q64232        | HYEVEIR                                                                                    | 0.712364119        | 2               | 2.31196   |
| Q64232        | LCFLDKVEPQATISEIK                                                                          | 0.98451433         | 2               | 4.69075   |
| Q64232        | SLKDEDVLQK                                                                                 | 0.913374595        | 2               | 3.33814   |
| Q64232        | VEPQATISEIK                                                                                | 0.932305124        | 2               | 2.37388   |
| <b>Q64240</b> | <b>AMBP Protein AMBP</b>                                                                   | <b>1.005218702</b> | <b>0.995145</b> | <b>3</b>  |
| Q64240        | AFAELWAFDAAQ GK                                                                            | 1.097385761        | 2               | 3.52613   |
| Q64240        | AVLPQENEGSGSEPLITGLK                                                                       | 1.008394864        | 2               | 4.84444   |
| Q64240        | TIAACNLPIVQGPCR                                                                            | 0.890588806        | 2               | 3.26343   |
| <b>Q642G4</b> | <b>PEX14 Peroxisomal membrane protein PEX14</b>                                            | <b>1.600859328</b> | <b>1.44E-10</b> | <b>2</b>  |
| Q642G4        | GGDGQINEQVEK                                                                               | 1.611829914        | 2               | 3.13669   |
| Q642G4        | LLGPQEEGEGVV DVK                                                                           | 1.307402375        | 2               | 3.42698   |
| <b>Q64303</b> | <b>PAK2 Serine/threonine_protein kinase PAK 2</b>                                          | <b>1.020901152</b> | <b>0.990145</b> | <b>2</b>  |
| Q64303        | NKIISIFSSTEK                                                                               | 1.021291228        | 2               | 2.80564   |
| Q64303        | SVIDPIAPVGD SNVDSGAK                                                                       | 0.953089589        | 2               | 2.83295   |
| <b>Q64380</b> | <b>SARDH Sarcosine dehydrogenase_ mitochondrial</b>                                        | <b>1.106395551</b> | <b>0.477462</b> | <b>19</b> |
| Q64380        | AYGIESHVLSPAETK                                                                            | 1.012916533        | 2               | 4.58825   |
| Q64380        | DGTMDPAGTCTTLTR                                                                            | 1.258764776        | 2               | 4.07169   |
| Q64380        | DILQDVLDADLSNEAFPSTHQLVR                                                                   | 1.398509271        | 3               | 5.6525    |
| Q64380        | DLYPLMNVDLYGTLYVPR                                                                         | 0.93221961         | 2               | 2.56496   |
| Q64380        | EEAQGASVVPQGPSQLPSTANVVVIGGSLGCQTYHLAK                                                     | 1.058701502        | 3               | 3.59246   |
| Q64380        | FHHSLTDHPR                                                                                 | 0.945457316        | 2               | 2.65239   |
| Q64380        | FYLLGADAR                                                                                  | 1.121809665        | 2               | 2.6833    |
| Q64380        | GAQVIENCAVTGIR                                                                             | 1.353891852        | 2               | 4.17718   |
| Q64380        | HGLVNAGYR                                                                                  | 1.06434193         | 2               | 2.57539   |
| Q64380        | IEGIQNPVNR                                                                                 | 0.863615869        | 2               | 3.32422   |
| Q64380        | LQGDALSVGGYEANPIFWDEVSDK                                                                   | 0.740618642        | 2               | 4.45822   |

|               |                                                                   |                    |                 |           |
|---------------|-------------------------------------------------------------------|--------------------|-----------------|-----------|
| Q64380        | NGDYALER                                                          | 1.036028074        | 2               | 2.31016   |
| Q64380        | NYSVVFPHDEPLAGR                                                   | 0.931894787        | 2               | 3.98492   |
| Q64380        | QVVDHLEETGLHTGWIQNGGLFIASNQQR                                     | 0.883024472        | 3               | 4.6555    |
| Q64380        | RDPLHEELLGQGCVFQER                                                | 0.934672468        | 3               | 5.59101   |
| Q64380        | SDDSPLEAGLAFTCK                                                   | 1.324421351        | 2               | 2.65763   |
| Q64380        | STVCGPESFTPDKPLMGEAPELR                                           | 0.833860169        | 3               | 4.37825   |
| Q64380        | STVCGPESFTPDKPLMGEAPELR+Oxidation(16)                             | 1.181483498        |                 |           |
| Q64380        | VTAVETQHGSIQTPCVVNCAGVWASSVGR                                     | 0.898296027        | 3               | 5.09061   |
| <b>Q64428</b> | <b>ECHA Trifunctional enzyme subunit alpha_mitochondrial</b>      | <b>1.192626319</b> | <b>0.004225</b> | <b>29</b> |
| Q64428        | ADMVIEAVFEDLAVK                                                   | 0.820936026        | 2               | 3.96758   |
| Q64428        | ALMGLYNGQVLCK                                                     | 0.968114051        | 2               | 3.30813   |
| Q64428        | DSIFSNLIGQLDYK                                                    | 1.644773955        | 2               | 3.47851   |
| Q64428        | DTTASAVAVGLK                                                      | 1.163531352        | 2               | 3.639     |
| Q64428        | EVESVTPEHCIFASNTSALPINQIAAVSQRPEK                                 | 1.568553534        | 3               | 5.40583   |
| Q64428        | EVQSEFVEVMNEIWANDQIR                                              | 1.14648902         | 3               | 4.22174   |
| Q64428        | FGELALTK                                                          | 1.062479812        | 2               | 3.01537   |
| Q64428        | FGGGSVELLK                                                        | 1.250881122        | 2               | 3.06003   |
| Q64428        | FVDLYGAQK                                                         | 1.167414768        | 2               | 2.91645   |
| Q64428        | GFYIYQSGSK                                                        | 2.300338361        | 2               | 2.83543   |
| Q64428        | ILQEGVDPK                                                         | 1.034413953        | 2               | 3.29022   |
| Q64428        | KLDALTTGFGFPVGAATLADEVGIDVAQHVAEDLGK                              | 1.026003492        | 4               | 5.09656   |
| Q64428        | KTVLGVPEVLLGILPGAGGTQR                                            | 1.059366769        | 2               | 4.31656   |
| Q64428        | KYESAYGTQFTPCQLLR                                                 | 1.073525444        | 2               | 5.01266   |
| Q64428        | LDALTTGFGFPVGAATLADEVGIDVAQHVAEDLGK                               | 1.152592688        |                 |           |
| Q64428        | LPAKPEVSSDEDIQYR                                                  | 2.153582456        | 2               | 4.40606   |
| Q64428        | MGLVDQLVDPLGPGIK                                                  | 0.844546789        | 2               | 5.01588   |
| Q64428        | MGLVDQLVDPLGPGIK+Oxidation(0)                                     | 1.056572949        |                 |           |
| Q64428        | MQLLEIITDK                                                        | 0.844793443        | 2               | 3.93187   |
| Q64428        | MQLLEIITDK+Oxidation(0)                                           | 1.097941319        |                 |           |
| Q64428        | MVGVPAAFDMMMLTGR                                                  | 0.962845511        | 2               | 3.25629   |
| Q64428        | NLNSEIDNILVNL                                                     | 1.039256416        | 2               | 4.71098   |
| Q64428        | SAVLISSKPGCFVAGADINMLASCTTPQEAAAR                                 | 0.922460633        | 3               | 3.90935   |
| Q64428        | SPKPVVAISGSLGGLELAIAACQYR                                         | 1.192851293        | 3               | 3.64185   |
| Q64428        | TGLEQGNDAGYLAESEK                                                 | 1.163882334        | 2               | 4.99164   |
| Q64428        | TIEYLEEVAVNFAK                                                    | 1.139556375        | 3               | 4.20218   |
| Q64428        | TVLGVPEVLLGILPGAGGTQR                                             | 1.009565923        | 3               | 5.11971   |
| Q64428        | TVQQLAILGAGLMGAGIAQVSVDK                                          | 0.956104449        | 3               | 6.42192   |
| Q64428        | YESAYGTQFTPCQLLR                                                  | 1.116724293        | 2               | 4.80864   |
| <b>Q64458</b> | <b>CP2CT Cytochrome P450 2C29</b>                                 | <b>0.953346647</b> | <b>0.314954</b> | <b>6</b>  |
| Q64458        | EHKESLDVTNPR                                                      | 0.869286138        | 2               | 3.29154   |
| Q64458        | IKEHKESLDVTNPR                                                    | 0.782828699        | 3               | 5.07395   |
| Q64458        | LPPGPTPLPIIGNFLQIDVK                                              | 1.017327084        | 2               | 4.00473   |
| Q64458        | VQEEAQCLVEELR                                                     | 1.016294176        | 2               | 4.38759   |
| Q64458        | VQEEAQCLVEELRK                                                    | 1.118909327        | 2               | 3.85862   |
| Q64458        | VQEEIDR                                                           | 0.901812743        | 2               | 2.41025   |
| <b>Q64481</b> | <b>CP3AG Cytochrome P450 3A16</b>                                 | <b>2.86945485</b>  | <b>0.000257</b> | <b>3</b>  |
| Q64481        | EMFPVIEQYGDILVK                                                   | 2.290617708        | 2               | 3.03167   |
| Q64481        | GSIDPYVYLPFGNGPR                                                  | 2.886167937        | 2               | 3.93122   |
| Q64481        | VLQNFSPQPK                                                        | 3.625279025        | 2               | 2.78399   |
| <b>Q64541</b> | <b>AT1A4 Sodium/potassium_transporting ATPase subunit alpha_4</b> | <b>1.208885949</b> | <b>0.195273</b> | <b>2</b>  |
| Q64541        | LIIVEGCQR                                                         | 1.208892614        | 2               | 2.67852   |
| Q64541        | NLEAVETLGSTSTICSDK                                                | 1.200944207        | 2               | 3.08079   |
| <b>Q64550</b> | <b>UD11 UDP_glucuronosyltransferase 1_1</b>                       | <b>1.167806002</b> | <b>0.100582</b> | <b>5</b>  |
| Q64550        | GHEVVVIAPEASIIHK                                                  | 1.222423387        | 2               | 4.88927   |
| Q64550        | LLVIPIDGSHWLSMLGVIQQLQK                                           | 1.379389227        | 3               | 4.47012   |

|               |                                                                   |                    |                 |           |
|---------------|-------------------------------------------------------------------|--------------------|-----------------|-----------|
| Q64550        | NMIIALTENFLCR                                                     | 1.150159617        | 2               | 4.3491    |
| Q64550        | SVFDQDPFLLR                                                       | 1.261767058        | 2               | 3.18485   |
| Q64550        | VVYSPYGLATEILQK                                                   | 1.455689254        | 2               | 5.12502   |
| <b>Q64560</b> | <b>TPP2 Tripeptidyl_ peptidase 2</b>                              | <b>0.681540784</b> | <b>0.962264</b> | <b>3</b>  |
| Q64560        | ACVDSNENGLGK                                                      | 0.828200153        | 2               | 3.43313   |
| Q64560        | DPVQVAAPSDHGVGIEVPFENTENSEK                                       | 0.756211381        | 3               | 3.84838   |
| Q64560        | GTLIEAFPVLGGK                                                     | 0.975854905        | 2               | 2.60173   |
| <b>Q64563</b> | <b>ADH4 Alcohol dehydrogenase 4</b>                               | <b>0.87417127</b>  | <b>0.967533</b> | <b>12</b> |
| Q64563        | AAVDCTVVGWGSCTVVGAK                                               | 1.088804121        | 2               | 3.86454   |
| Q64563        | ALFPVVLGHECAGIVESVGPVTFNFKPGDK                                    | 0.731569014        | 3               | 5.24605   |
| Q64563        | ALGATDCLNPR                                                       | 0.839900899        | 2               | 3.21828   |
| Q64563        | FDLDDLVTALPFDK                                                    | 0.866128827        | 3               | 4.31322   |
| Q64563        | INDAIDLMNQGK                                                      | 0.966759874        | 2               | 3.39668   |
| Q64563        | KFDLDDLVTALPFDK                                                   | 0.852295447        | 3               | 4.82955   |
| Q64563        | SVDSVPLNLTVDYK                                                    | 0.642715619        | 2               | 4.37303   |
| Q64563        | TDSPLCIEIEVSPPK                                                   | 1.104200694        | 2               | 3.7853    |
| Q64563        | VCLIGCGFTSGYGAAINTAK                                              | 0.855020777        | 2               | 3.6703    |
| Q64563        | VDDEANLER                                                         | 0.889407454        | 2               | 2.82535   |
| Q64563        | VDEMNISTVDMILGR                                                   | 0.70664067         | 2               | 3.48002   |
| Q64563        | VIATCVCPDINATNPK                                                  | 0.756347177        | 2               | 4.75418   |
| <b>Q64565</b> | <b>AGT2 Alanine_ glyoxylate aminotransferase 2_ mitochondrial</b> | <b>0.956921862</b> | <b>2.7E-08</b>  | <b>13</b> |
| Q64565        | AYSNHTDIISFR                                                      | 1.142137124        | 2               | 3.37099   |
| Q64565        | GGNFSQTFR                                                         | 1.063293768        | 2               | 2.50495   |
| Q64565        | GGVCIADDEVQTFGR                                                   | 1.027947405        | 2               | 4.3541    |
| Q64565        | GIGNGFMAAAVVTTPPEIASSLAK                                          | 1.010515218        | 2               | 4.63791   |
| Q64565        | LRDEFDIVGDVR                                                      | 1.082876061        | 2               | 2.88366   |
| Q64565        | LSALLPEPLK                                                        | 1.866409542        | 2               | 2.781     |
| Q64565        | NSQEVGTYMMLLK                                                     | 0.331452307        | 2               | 2.85787   |
| Q64565        | SALTQHMER                                                         | 1.518109768        | 2               | 2.5307    |
| Q64565        | SALTQHMER+Oxidation(6)                                            | 1.302458071        |                 |           |
| Q64565        | TEVNQIHEDCK                                                       | 1.092094759        | 2               | 2.99731   |
| Q64565        | TEVNQIHEDCKDMGLLVGR                                               | 0.93857903         | 2               | 5.52199   |
| Q64565        | VIFLVNSGSEANDLAMVMAR                                              | 1.04616358         | 2               | 4.69543   |
| Q64565        | YIEQFK                                                            | 0.816458409        | 1               | 2.15976   |
| <b>Q64578</b> | <b>AT2A1 Sarcoplasmic/endoplasmic reticulum calcium ATPase 1</b>  | <b>0.563811743</b> | <b>0.004195</b> | <b>8</b>  |
| Q64578        | AVGIVATTGVSTEIGK                                                  | 0.059722112        | 2               | 3.47383   |
| Q64578        | DIVPGDIVEVAVGDKVPADIR                                             | 1.597758322        | 2               | 3.76057   |
| Q64578        | DQMAATEQDKTPLQKQ                                                  | #NUM!              | 2               | 3.94277   |
| Q64578        | EFDDLPLAEQR                                                       | 1.077791664        | 2               | 2.6858    |
| Q64578        | IGIFSENEEVADR                                                     | 0.483927336        | 2               | 3.04172   |
| Q64578        | IRDQMAATEQDKTPLQKQ                                                | #NUM!              | 3               | 3.71547   |
| Q64578        | TGTLTTNQMSVCK                                                     | 0.224780076        | 2               | 2.87647   |
| Q64578        | VGEATETALTTLVEK                                                   | 0.191478967        | 2               | 4.78459   |
| <b>Q64581</b> | <b>CP3A1 Cytochrome P450 3A18</b>                                 | <b>1.60428494</b>  | <b>7E-07</b>    | <b>5</b>  |
| Q64581        | AITMSEDEEWKR                                                      | 1.24028888         | 2               | 2.31139   |
| Q64581        | EEAKGEPINMK                                                       | 1.854275647        | 2               | 2.33676   |
| Q64581        | LAVIGVLQNFNIQPCEK                                                 | 1.489051679        | 3               | 3.32051   |
| Q64581        | NPEYWLEPEEFNPER                                                   | 1.641389696        | 2               | 4.13357   |
| Q64581        | TILSPTFTSGK                                                       | 1.137495428        | 1               | 1.93756   |
| <b>Q64591</b> | <b>DECR 2_4_dienoyl_ CoA reductase_ mitochondrial</b>             | <b>0.835065559</b> | <b>0.09237</b>  | <b>12</b> |
| Q64591        | ATAEEITSK                                                         | 0.838119959        | 2               | 2.90629   |
| Q64591        | CDVRDPDMVHNTVLELIK                                                | 0.755633144        | 4               | 4.87332   |
| Q64591        | DPDMVHNTVLELIK                                                    | 0.858685831        | 3               | 3.74667   |
| Q64591        | EEWDVIEGLIR                                                       | 1.127825553        | 2               | 3.74057   |

|               |                                                                            |                    |                 |           |
|---------------|----------------------------------------------------------------------------|--------------------|-----------------|-----------|
| Q64591        | FDGGEEVFLSGEFNSLKK                                                         | 1.357682749        | 2               | 2.93922   |
| Q64591        | FNIIQPGPIK                                                                 | 1.268165323        | 2               | 2.67085   |
| Q64591        | LGTVEELANLATFLCSYASWINGAVIR                                                | 1.812782995        |                 |           |
| Q64591        | NIDVLK                                                                     | 1.047287433        | 1               | 2.09025   |
| Q64591        | SLAAEWGR                                                                   | 0.988371123        | 2               | 2.67044   |
| Q64591        | VAFITGGGTGLGK                                                              | 1.189290805        | 2               | 2.78525   |
| Q64591        | VAGHPDVVINNAAGNFISPSER                                                     | 2.666574981        | 2               | 6.10114   |
| Q64591        | VTKEEWDVIEGLIR                                                             | 0.854206724        | 3               | 4.78486   |
| <b>Q64602</b> | <b>AADAT Kynurenine/alpha_aminoadipate aminotransferase_ mitochondrial</b> | <b>1.356492718</b> | <b>2.55E-15</b> | <b>10</b> |
| Q64602        | ASFSQVTPAQMDLVFQR                                                          | 1.176044347        | 2               | 4.20712   |
| Q64602        | DIISLAPGSPNPK                                                              | 1.419659588        | 2               | 3.05068   |
| Q64602        | EILLVPGNSFFVDNSAPSSFFR                                                     | 1.200941398        | 2               | 3.58613   |
| Q64602        | FLTATSLAR                                                                  | 0.913654059        | 2               | 2.4063    |
| Q64602        | FLYTIPNGNNTGNSLTGDR                                                        | 1.350950684        | 2               | 4.01121   |
| Q64602        | GLAEWHVPK                                                                  | 1.309059285        | 2               | 2.44902   |
| Q64602        | LHNPPTVNYSNPEGQMDLCSGCQDGLCK                                               | 1.330291           | 3               | 5.77446   |
| Q64602        | SAVFTVENGSTIR                                                              | 1.378625827        | 2               | 3.43684   |
| Q64602        | VGFITGPK                                                                   | 1.495211925        | 1               | 1.91019   |
| Q64602        | VLSQWKPEDSKDPTKR                                                           | 1.361295382        | 3               | 3.65928   |
| <b>Q64611</b> | <b>CSAD Cysteine sulfinic acid decarboxylase</b>                           | <b>0.891750199</b> | <b>0.091017</b> | <b>11</b> |
| Q64611        | AQGGQGLEWR                                                                 | 0.890657846        | 2               | 3.21345   |
| Q64611        | CHGSQASYLFQQDK                                                             | 2.003345489        | 2               | 4.35272   |
| Q64611        | FFNQLFSGLDPHALAGR                                                          | 2.043497273        | 3               | 4.20116   |
| Q64611        | FYNVALDTGDK                                                                | 1.165638079        | 2               | 3.26816   |
| Q64611        | GAAFLGLGTDSVR                                                              | 0.479466808        | 2               | 3.0769    |
| Q64611        | IDQAFALTR                                                                  | 0.998946892        | 2               | 3.06152   |
| Q64611        | MVVANPILVQADIDFLGELER                                                      | 0.983831765        |                 |           |
| Q64611        | QLLDLELQSQGESR                                                             | 0.82087764         | 2               | 3.83763   |
| Q64611        | TLDGDPVAVEALLR                                                             | 0.857209275        | 2               | 4.50006   |
| Q64611        | VCEWKEPEELK                                                                | 0.790510735        | 3               | 3.69759   |
| Q64611        | YLVEEIK                                                                    | 0.922497671        | 1               | 2.39147   |
| <b>Q64638</b> | <b>UD15 UDP_glucuronosyltransferase 1_5</b>                                | <b>1.074153678</b> | <b>0.997957</b> | <b>3</b>  |
| Q64638        | GHQAVVLAPEVTVHIK                                                           | 0.997257429        | 3               | 3.50293   |
| Q64638        | VVFETGNYVK                                                                 | 1.048320476        | 2               | 2.35689   |
| Q64638        | YESLASELLQR                                                                | 1.090808056        | 2               | 3.19719   |
| <b>Q64640</b> | <b>ADK Adenosine kinase</b>                                                | <b>1.184043357</b> | <b>9.9E-20</b>  | <b>12</b> |
| Q64640        | AADAHVDAHYYEQNEQPTGCAACITGGNR                                              | 1.632003634        | 3               | 6.76561   |
| Q64640        | AATFFGCIGIDK                                                               | 0.603499996        | 2               | 3.04507   |
| Q64640        | AGHYAASVIIR                                                                | 1.084576464        | 3               | 3.5786    |
| Q64640        | FGEILK                                                                     | 1.116232601        | 2               | 2.42788   |
| Q64640        | FKVEYHAGGSTQNSMK                                                           | 1.224840487        | 2               | 3.02652   |
| Q64640        | HKELFDELVK                                                                 | 1.316259621        | 3               | 3.79028   |
| Q64640        | HLDLENNWMLVEK                                                              | 1.075543734        | 2               | 3.78828   |
| Q64640        | SLVANLAAANCYK                                                              | 1.182203528        | 2               | 4.73786   |
| Q64640        | VEAPEALSENVLFMGMPNLLDISAVVDKDFLDK                                          | 0.891384594        |                 |           |
| Q64640        | VEYHAGGSTQNSMK                                                             | 1.288212822        | 2               | 4.05084   |
| Q64640        | VEYHAGGSTQNSMK+Oxidation(12)                                               | 1.862085895        |                 |           |
| Q64640        | YSLKPNQILAEDK                                                              | 1.326373473        | 3               | 4.9591    |
| <b>Q64654</b> | <b>CP51A Lanosterol 14_alpha demethylase</b>                               | <b>0.816702597</b> | <b>2.01E-07</b> | <b>7</b>  |
| Q64654        | EPAEDILQTLLDSTYK                                                           | 0.870990766        | 2               | 3.91997   |
| Q64654        | GVAYDVPNAVFLQK                                                             | 0.717383681        | 2               | 3.22698   |
| Q64654        | NEDLNAAEEVYGR                                                              | 0.707754598        | 2               | 4.10677   |
| Q64654        | SGLNIAHFK                                                                  | 1.029586418        | 2               | 2.96609   |
| Q64654        | TPQTVAGYTIPPGHQVCVPTVNQR                                                   | 0.667063853        | 3               | 3.94804   |
| Q64654        | TVCGEDLPPLTYEQLK                                                           | 0.45344429         | 2               | 4.07286   |
| Q64654        | YLQDNPASGEK                                                                | 0.477258939        | 2               | 2.61559   |

|               |                                                         |                    |                 |           |
|---------------|---------------------------------------------------------|--------------------|-----------------|-----------|
| <b>Q65CL1</b> | <b>CTNA3 Catenin alpha_3</b>                            | <b>1.216584694</b> | <b>0.12984</b>  | <b>2</b>  |
| Q65CL1        | MISESGSRMDVLAR+Oxidation(0)                             | 1.399948068        |                 |           |
| Q65CL1        | NLMNAVVTQTVK                                            | 0.765130613        | 2               | 2.88861   |
| <b>Q66H12</b> | <b>NAGAB Alpha_N_acetylgalactosaminidase</b>            | <b>1.083067804</b> | <b>0.99617</b>  | <b>3</b>  |
| Q66H12        | CNINCEEDPK                                              | 0.957710495        | 2               | 2.71152   |
| Q66H12        | INQDPLGIQGR                                             | 1.128538393        | 2               | 3.10928   |
| Q66H12        | TISPQNIDILQNPLLIK                                       | 1.072779658        | 2               | 2.35776   |
| <b>Q66H15</b> | <b>RMD3 Regulator of microtubule dynamics protein 3</b> | <b>0.817165022</b> | <b>0.80773</b>  | <b>3</b>  |
| Q66H15        | AEELQPGFSK                                              | 0.941485137        | 2               | 2.65595   |
| Q66H15        | AIELQPEDPR                                              | 0.979940377        | 2               | 2.34243   |
| Q66H15        | SLQLGAGEIVGEVR                                          | 0.750706177        | 2               | 2.75521   |
| <b>Q66H80</b> | <b>COPD Coatomer subunit delta</b>                      | <b>1.015648384</b> | <b>4.42E-05</b> | <b>5</b>  |
| Q66H80        | GVQLQTHPNVDKK                                           | 1.162188503        | 2               | 3.43442   |
| Q66H80        | LFTAESLIGLK                                             | 1.300833599        | 2               | 2.82305   |
| Q66H80        | NSNILELETLR                                             | 1.133803352        | 2               | 3.07653   |
| Q66H80        | NTLEWCLPVIDAK                                           | 0.85940388         | 2               | 2.8581    |
| Q66H80        | VTQVDGNSPVR                                             | 0.564204332        | 2               | 2.93924   |
| <b>Q66HA8</b> | <b>HS105 Heat shock protein 105 kDa</b>                 | <b>1.078810602</b> | <b>0.583046</b> | <b>9</b>  |
| Q66HA8        | AGGIETIANEFSDR                                          | 1.077300535        | 2               | 2.85137   |
| Q66HA8        | FQEAERPR                                                | 0.788566243        | 2               | 2.4802    |
| Q66HA8        | FVVQNVSAQK                                              | 0.947796407        | 2               | 2.38714   |
| Q66HA8        | IARFFGKDVSTTLNADEAVAR                                   | 0.740776776        | 2               | 2.317     |
| Q66HA8        | NQQITHANNTVSSFK                                         | 1.333661963        | 2               | 4.57023   |
| Q66HA8        | SVLDAAQIVGLNCLR                                         | 1.013074564        | 2               | 3.4562    |
| Q66HA8        | TEEVSAIEIVGGATR                                         | 0.763221941        | 2               | 3.40805   |
| Q66HA8        | VLGTAFDPFLGGK                                           | 1.020854254        | 2               | 3.09885   |
| Q66HA8        | YNHIDESEMKKVEK                                          | 0.857132708        | 2               | 2.6129    |
| <b>Q66HD0</b> | <b>ENPL Endoplasmin</b>                                 | <b>1.068949444</b> | <b>5.34E-09</b> | <b>28</b> |
| Q66HD0        | DISTNYASQK                                              | 1.82666932         | 2               | 2.99786   |
| Q66HD0        | EATEKEFEPLLNWMK                                         | 1.419217596        | 2               | 2.83089   |
| Q66HD0        | EEASDYLELDTIK                                           | 0.94602412         | 2               | 4.20767   |
| Q66HD0        | EEEAIQLDGLNASQIR                                        | 0.629445416        | 2               | 4.39888   |
| Q66HD0        | EFPELLNWMK                                              | 1.215936571        | 2               | 2.34777   |
| Q66HD0        | EVEEDEYK                                                | 1.073034547        | 1               | 2.65895   |
| Q66HD0        | FQSSHSTDTISLDQYVER                                      | 1.26995761         | 3               | 5.64654   |
| Q66HD0        | GLFDEYGSK                                               | 1.084683562        | 2               | 2.46386   |
| Q66HD0        | GVVSDDLPLNVSR                                           | 0.98206329         | 2               | 4.92011   |
| Q66HD0        | GVEVIYLTEPVDEYCIQALPEFDGKR                              | 1.701758505        | 3               | 3.96357   |
| Q66HD0        | KEAESSPFVER                                             | 1.187090753        | 2               | 3.17381   |
| Q66HD0        | LGVIEDHSNR                                              | 1.140830764        | 2               | 3.35855   |
| Q66HD0        | LISLTDENALAGNEELTVK                                     | 1.230150614        | 2               | 5.50101   |
| Q66HD0        | LETSPCALVASQYGWSGNMER                                   | 1.043075408        | 2               | 5.47659   |
| Q66HD0        | LETSPCALVASQYGWSGNMER+Oxidation(18)                     | 1.455782394        |                 |           |
| Q66HD0        | NLLHVTDGTGVGMTR                                         | 0.972555974        | 2               | 3.98749   |
| Q66HD0        | NLLHVTDGTGVGMTR+Oxidation(11)                           | 1.219361327        |                 |           |
| Q66HD0        | SGTSEFLNK                                               | 1.143696064        | 2               | 3.20172   |
| Q66HD0        | SGYLLPDTK                                               | 1.102245658        | 2               | 3.21639   |
| Q66HD0        | SILFVPTSAPR                                             | 0.982593483        | 2               | 3.28606   |
| Q66HD0        | TDDEVVQR                                                | 1.057761673        | 2               | 3.31275   |
| Q66HD0        | TDDEVVQREEEAIQLDGLNASQIR                                | 0.831878511        | 3               | 5.45004   |
| Q66HD0        | TETVEEPLLEETAQEEK                                       | 1.503085554        | 2               | 5.23895   |
| Q66HD0        | TFEINPR                                                 | 1.086776951        | 2               | 2.40278   |
| Q66HD0        | TVWDWELMNDIKPIWQRPSK                                    | 1.156532116        | 3               | 3.31746   |
| Q66HD0        | VFITDDFHDMMMPK                                          | 0.955889034        | 2               | 3.84075   |
| Q66HD0        | YNDTFWK                                                 | 1.175156884        | 1               | 2.10129   |
| Q66HD0        | YSQFINFPIYVWSSK                                         | 0.69545046         | 2               | 3.32529   |



|               |                                                                          |                    |                 |           |
|---------------|--------------------------------------------------------------------------|--------------------|-----------------|-----------|
| <b>Q66HD3</b> | <b>NASP Nuclear autoantigenic sperm protein</b>                          | <b>1.21793927</b>  | <b>0.207094</b> | <b>2</b>  |
| Q66HD3        | LSETKDGASVEEVK                                                           | 1.210675622        | 2               | 2.43013   |
| Q66HD3        | QDTLMKVVEIEAIDSEVK+Oxidation(4)                                          | 1.259272035        |                 |           |
| <b>Q66HF1</b> | <b>NDUS1 NADH_ubiquinone oxidoreductase 75 kDa subunit_mitochondrial</b> | <b>1.20456748</b>  | <b>3.94E-08</b> | <b>11</b> |
| Q66HF1        | ALSEIAGITLPYDQLDQVR                                                      | 1.202698784        | 2               | 5.15308   |
| Q66HF1        | AVTEGAQAVEEPSIC                                                          | 1.1988135          | 2               | 3.18532   |
| Q66HF1        | DDGAAILAAVSSIAQK                                                         | 1.065128517        | 2               | 4.51357   |
| Q66HF1        | FASEIAGVDDLGTGR                                                          | 1.538867412        | 2               | 4.08559   |
| Q66HF1        | FEAPLFNAR                                                                | 1.08110616         | 2               | 2.66087   |
| Q66HF1        | GLLTYTSWEDALSR                                                           | 1.186573762        | 2               | 3.59014   |
| Q66HF1        | ILQDIASGNHEFSK                                                           | 1.393810506        | 2               | 4.19279   |
| Q66HF1        | LGEVSPNLVR                                                               | 1.484850043        | 2               | 2.96134   |
| Q66HF1        | LVDQEFLADPLVPPQLTIK                                                      | 1.109582127        | 2               | 3.11014   |
| Q66HF1        | VSDTLCTEEIFPNEGAGTDLR                                                    | 0.927073686        | 2               | 4.28746   |
| Q66HF1        | YDHLGDSPK                                                                | 1.411021471        | 2               | 2.57672   |
| <b>Q66HF8</b> | <b>AL1B1 Aldehyde dehydrogenase X_mitochondrial</b>                      | <b>1.567632229</b> | <b>1.45E-05</b> | <b>11</b> |
| Q66HF8        | EEIFGPVQPLFK                                                             | 1.108148196        | 2               | 3.03915   |
| Q66HF8        | KVGNPFELDTQQGPQVDKEQFEK                                                  | 1.444862708        | 3               | 3.45682   |
| Q66HF8        | LAPALATGNTVVMK                                                           | 1.514966371        | 2               | 3.29989   |
| Q66HF8        | TFPTVNPPTTGEVIGHVAEGDR                                                   | 1.302678945        | 2               | 4.79442   |
| Q66HF8        | TFVEESYHEFLER                                                            | 0.980820593        | 2               | 3.74106   |
| Q66HF8        | VAEQTPLSALYLASLIK                                                        | 3.60237015         | 2               | 3.60616   |
| Q66HF8        | VAFTGSTEVGHLIQK                                                          | 2.638105499        | 2               | 3.2719    |
| Q66HF8        | VGNPFELDTQQGPQVDK                                                        | 0.992282253        | 2               | 3.7966    |
| Q66HF8        | VGNPFELDTQQGPQVDKEQFEK                                                   | 1.313597553        | 2               | 4.49579   |
| Q66HF8        | YGLAAAVFTR                                                               | 1.064990566        | 2               | 3.08483   |
| Q66HF8        | YNQLFINNEWHDAVSK                                                         | 2.169825166        | 2               | 3.53633   |
| <b>Q66HG4</b> | <b>GALM Aldose 1_epimerase</b>                                           | <b>0.739887426</b> | <b>9.9E-20</b>  | <b>3</b>  |
| Q66HG4        | ASDVVLGFAELEGYLQK                                                        | 0.799086062        | 2               | 4.37411   |
| Q66HG4        | TVFGELPSGGGAVEK                                                          | 0.739616464        | 2               | 3.67771   |
| Q66HG4        | VSPDGEEGYPGELK                                                           | 0.872722337        | 2               | 3.92519   |
| <b>Q66X93</b> | <b>SND1 Staphylococcal nuclease domain_containing protein 1</b>          | <b>1.393495333</b> | <b>9.9E-20</b>  | <b>20</b> |
| Q66X93        | ADDADEFGYSR                                                              | 2.148005836        | 2               | 2.54936   |
| Q66X93        | ALLLPDHYLVTVMLSGIK                                                       | 1.007044325        | 3               | 4.24561   |
| Q66X93        | DIQNTQCLLNVHLSASCPHVTLQFADSK                                             | 1.208055835        | 3               | 4.31644   |
| Q66X93        | DTNGENIAESLVAEGLASR                                                      | 1.148837861        | 2               | 5.02528   |
| Q66X93        | ETDGSSETPEPFAAEAK                                                        | 1.726663148        | 2               | 3.8061    |
| Q66X93        | GDVGLGLVK                                                                | 1.26194591         | 2               | 2.43039   |
| Q66X93        | HFVDSHHQKPVNAIEHVR                                                       | 1.124456753        | 3               | 4.05658   |
| Q66X93        | LEGDNIQDK                                                                | 1.122515213        | 2               | 2.86089   |
| Q66X93        | NLPGLVQEGEPFSEATLFTK                                                     | 1.881528312        | 2               | 5.53666   |
| Q66X93        | SAYYKPLLSAEAAK                                                           | 1.421382408        | 2               | 3.22313   |
| Q66X93        | SDISSHPPVEGAYAPR                                                         | 1.017644763        | 3               | 4.72485   |
| Q66X93        | SEAVVEYVFSGSR                                                            | 1.929613878        | 2               | 3.34742   |
| Q66X93        | SSHYDELLAAEAR                                                            | 1.350443069        | 2               | 3.52983   |
| Q66X93        | TCATVTIGGINIAEALVSK                                                      | 0.897305871        | 2               | 3.51229   |
| Q66X93        | TDAVDSVVR                                                                | 1.196870788        | 2               | 2.68014   |
| Q66X93        | VADISGDTQK                                                               | 0.72148834         | 2               | 2.48051   |
| Q66X93        | VITEYLNAQESAK                                                            | 1.583523685        | 2               | 3.84381   |
| Q66X93        | VMQVLNADAIIVK                                                            | 1.098810994        | 2               | 2.87852   |
| Q66X93        | VSVTVDYIRPASPATETVPAFSEK                                                 | 1.325311862        | 3               | 5.6224    |
| Q66X93        | VWAHYEEQPVEEVMPLVEEK                                                     | 1.116708477        | 3               | 3.98202   |
| <b>Q68FP2</b> | <b>PON3 Serum paraoxonase/lactonase 3</b>                                | <b>0.939089706</b> | <b>4.25E-06</b> | <b>8</b>  |
| Q68FP2        | HELFESVNDIVVLGPEQFYATR                                                   | 1.683173749        | 3               | 3.77782   |

|               |                                                                |                    |                 |           |
|---------------|----------------------------------------------------------------|--------------------|-----------------|-----------|
| Q68FP2        | HNNWDLTPVK                                                     | 0.910679624        | 2               | 2.97745   |
| Q68FP2        | IFLMDLNPEYPK                                                   | 0.90189384         | 2               | 3.19641   |
| Q68FP2        | IQDPLSDNPR                                                     | 1.105438067        | 2               | 3.12731   |
| Q68FP2        | LLIYNPEDPPGSEVLR                                               | 1.272457819        | 2               | 4.05847   |
| Q68FP2        | VIQLGLVDNLTVDPATGDILAGCHPNPMK                                  | 1.098899152        | 3               | 4.76885   |
| Q68FP2        | VVAQGFSSANGITVSLDQK                                            | 0.688490519        | 2               | 3.36783   |
| Q68FP2        | YVYVADVTAKE                                                    | 0.933763413        | 1               | 3.0049    |
| <b>Q68FQ0</b> | <b>TCPE T_complex protein 1 subunit epsilon</b>                | <b>1.074532307</b> | <b>9.85E-05</b> | <b>6</b>  |
| Q68FQ0        | GSNDMQYQHVIETLIGK                                              | 1.480554006        | 2               | 3.13906   |
| Q68FQ0        | HKLDVTSVEDYK                                                   | 0.683496629        | 2               | 3.20126   |
| Q68FQ0        | ISDNVLVDINNPEPLIQTAKE                                          | 1.251236899        | 2               | 5.18883   |
| Q68FQ0        | LDVTSVEDYK                                                     | 1.041601389        | 2               | 2.37197   |
| Q68FQ0        | SLHDALCVIR                                                     | 1.047024807        | 2               | 2.48198   |
| Q68FQ0        | WVGGPEIELIAIATGGR                                              | 1.219764615        | 2               | 3.90363   |
| <b>Q68FR6</b> | <b>EF1G Elongation factor 1_gamma</b>                          | <b>1.179073422</b> | <b>5.08E-13</b> | <b>9</b>  |
| Q68FR6        | AAAPAPEEEMDECEQALAAEPK                                         | 0.963222235        | 2               | 5.13939   |
| Q68FR6        | ALIAAQYSGAQIR                                                  | 1.51339343         | 2               | 3.71291   |
| Q68FR6        | GQDLAFPLSPDWQVDYESYTWRE                                        | 1.663453216        | 2               | 4.25128   |
| Q68FR6        | ILGLLDTHLK                                                     | 1.332475033        | 2               | 2.7697    |
| Q68FR6        | KAAAPAPEEEMDECEQALAAEPK                                        | 1.278795227        | 3               | 3.80665   |
| Q68FR6        | KLDPGSEETQLVRE                                                 | 1.177989861        | 2               | 3.86326   |
| Q68FR6        | LDPGSEETQLVRE                                                  | 1.139945614        | 2               | 3.65357   |
| Q68FR6        | STFVLDEFKR                                                     | 1.103266548        | 2               | 2.47988   |
| Q68FR6        | WFLTCINQPQFR                                                   | 1.112202786        | 2               | 3.13921   |
| <b>Q68FR9</b> | <b>EF1D Elongation factor 1_delta</b>                          | <b>1.091122484</b> | <b>1.95E-06</b> | <b>6</b>  |
| Q68FR9        | ATAPQTQHVSPMR                                                  | 1.109674373        | 2               | 3.56202   |
| Q68FR9        | FYEQMNGPVTAGSR                                                 | 1.108966298        | 2               | 4.41828   |
| Q68FR9        | GVVQDLQQAISK                                                   | 1.120860993        | 2               | 3.75427   |
| Q68FR9        | SIQLDGLVWGASK                                                  | 1.056628486        | 2               | 3.26676   |
| Q68FR9        | SLAGSSGPGASSGPGGDHSDLVRE                                       | 1.230818908        | 2               | 5.5184    |
| Q68FR9        | VGTDLLEEEITK                                                   | 1.242345407        | 2               | 3.48491   |
| <b>Q68FS2</b> | <b>CSN4 COP9 signalosome complex subunit 4</b>                 | <b>1.013052745</b> | <b>0.648993</b> | <b>3</b>  |
| Q68FS2        | NAAQVLVGIPLGTGQK                                               | 0.504993609        | 2               | 2.69173   |
| Q68FS2        | QDLAQLMNSSGSHK                                                 | 1.305023876        | 2               | 2.392     |
| Q68FS2        | VISFEEQVASIR                                                   | 1.015856142        | 2               | 2.4258    |
| <b>Q68FS4</b> | <b>AMPL Cytosol aminopeptidase</b>                             | <b>1.054274745</b> | <b>9.9E-20</b>  | <b>18</b> |
| Q68FS4        | ADMGGAATICSIAVSAAK                                             | 0.809407971        | 2               | 5.50463   |
| Q68FS4        | ADMGGAATICSIAVSAAK+Oxidation(2)                                | 1.002950256        |                 |           |
| Q68FS4        | DKDDDVPQFTSAGENFNK                                             | 1.218512412        | 2               | 4.93933   |
| Q68FS4        | GITFDSGGISIK                                                   | 1.1682508          | 2               | 3.30458   |
| Q68FS4        | GSEEPVFLIHYTGSPNATEAPLVFVGK                                    | 1.755599058        | 3               | 5.80549   |
| Q68FS4        | GVLFASGQNLAR                                                   | 2.107805416        | 2               | 3.29177   |
| Q68FS4        | LFEASVETGDR                                                    | 1.048260769        | 2               | 3.37451   |
| Q68FS4        | LHGSGDLEAWEK                                                   | 0.981635311        | 2               | 3.65086   |
| Q68FS4        | LILADALCYAHTFNPK                                               | 1.483611291        | 2               | 3.98519   |
| Q68FS4        | LNLPINIIGLAPLCENMPGSK                                          | 1.697205117        | 2               | 5.03961   |
| Q68FS4        | QLMESPANEMTPTR                                                 | 0.797859049        | 2               | 3.78398   |
| Q68FS4        | QVIDCQLADVNNLGGK                                               | 0.945814678        | 2               | 4.97908   |
| Q68FS4        | SAGACTAAAFLE                                                   | 1.085034844        | 2               | 3.50243   |
| Q68FS4        | SAGVDDQENWHEGK                                                 | 1.107726782        | 2               | 3.74839   |
| Q68FS4        | SWIEEQEMGSFSLVAK                                               | 0.995465469        | 2               | 5.36845   |
| Q68FS4        | TFYGLHQDFPSVVVGLGK                                             | 0.918967408        | 2               | 5.41698   |
| Q68FS4        | TIQVDNTDAEGR                                                   | 0.998451931        | 2               | 3.79548   |
| Q68FS4        | TLIEFLLE                                                       | 1.005758635        | 2               | 2.59873   |
| <b>Q68FT1</b> | <b>COQ9 Ubiquinone biosynthesis protein COQ9_mitochondrial</b> | <b>1.133163903</b> | <b>0.221794</b> | <b>4</b>  |
| Q68FT1        | INDAMNMGHTAK                                                   | 0.117034936        | 2               | 3.03589   |

|               |                                                                                       |                    |                 |           |
|---------------|---------------------------------------------------------------------------------------|--------------------|-----------------|-----------|
| Q68FT1        | LNHVLEEEQK                                                                            | 1.133990391        | 3               | 3.43442   |
| Q68FT1        | STGEALVQGLMGAAVTLK                                                                    | 1.059225212        | 2               | 3.00385   |
| Q68FT1        | YTDQSGEEEEDEYEESEQIHR                                                                 | 1.066846418        | 3               | 4.68909   |
| <b>Q68FT3</b> | <b>PYRD2 Pyridine nucleotide_disulfide oxidoreductase domain_containing protein 2</b> | <b>1.112653184</b> | <b>0.062155</b> | <b>7</b>  |
| Q68FT3        | HVIGGAAVTEIIPGFK                                                                      | 1.322208336        | 2               | 3.5708    |
| Q68FT3        | ISQLDTQSPVTK                                                                          | 1.53148603         | 2               | 3.42086   |
| Q68FT3        | SLLLGTDVAENQK                                                                         | 1.262067651        | 2               | 3.9395    |
| Q68FT3        | TLGAQLPQYYEVLTAISK                                                                    | 1.117748745        | 2               | 4.26023   |
| Q68FT3        | VFDCIEAYAPGFK                                                                         | 1.051811968        | 2               | 2.85397   |
| Q68FT3        | VLDQWFSEPLK                                                                           | 0.929093885        | 2               | 2.8491    |
| Q68FT3        | VQGVVLQGGEEVR                                                                         | 1.385817079        | 2               | 3.59248   |
| <b>Q68FT5</b> | <b>BHMT2 Betaine_homocysteine S_methyltransferase 2</b>                               | <b>1.325870993</b> | <b>9.9E-20</b>  | <b>10</b> |
| Q68FT5        | AGADVLQTFFSAAEDR                                                                      | 5.102560172        | 2               | 2.65547   |
| Q68FT5        | AGANIIGVNCR                                                                           | 1.114283678        | 2               | 3.4781    |
| Q68FT5        | AGLWTPEAVVEYPSAVR                                                                     | 1.2040235          | 2               | 3.44539   |
| Q68FT5        | AIAEELAPER                                                                            | 1.915442637        | 2               | 3.77836   |
| Q68FT5        | DAGLQAHLMVQCLGFHTPCGK                                                                 | 1.324921861        | 3               | 4.46239   |
| Q68FT5        | EVGAPVAVTCIGPEGMDHGVTPGEC AVR                                                         | 1.012588529        | 3               | 4.07553   |
| Q68FT5        | FGPWTSLQTMK                                                                           | 0.94441685         | 2               | 2.81407   |
| Q68FT5        | GGFVDLPEYPPGLEPR                                                                      | 1.129559347        | 2               | 4.10431   |
| Q68FT5        | LDSGEVVVDGGFLFTLEK                                                                    | 0.884028058        | 2               | 3.92254   |
| Q68FT5        | YIGGCCGFEPYHIR                                                                        | 4.027528661        | 2               | 4.71075   |
| <b>Q68FT9</b> | <b>SCLY Selenocysteine lyase</b>                                                      | <b>0.925618562</b> | <b>1.61E-10</b> | <b>4</b>  |
| Q68FT9        | AEVDLIVQDLK                                                                           | 0.773394132        | 2               | 3.88386   |
| Q68FT9        | NFRPGTENTPMIAGLGK                                                                     | 0.940823635        | 2               | 3.34996   |
| Q68FT9        | RVDVEDLGVDLFTIVGHK                                                                    | 1.28950368         | 3               | 5.54775   |
| Q68FT9        | VLVHTDAAQALGK                                                                         | 0.915410626        | 2               | 2.47323   |
| <b>Q68FU3</b> | <b>ETFB Electron transfer flavoprotein subunit beta</b>                               | <b>0.979794116</b> | <b>8.2E-10</b>  | <b>11</b> |
| Q68FU3        | AGDLGVDLTSK                                                                           | 1.130890814        | 2               | 3.63603   |
| Q68FU3        | EIIAVSCGPPQCQETIR                                                                     | 1.220929775        | 2               | 4.7821    |
| Q68FU3        | GIHVEVPGAEENLGPLQVAR                                                                  | 1.140987621        | 2               | 6.04354   |
| Q68FU3        | HSMNPFCEIAVEEAVR                                                                      | 0.939336993        | 2               | 5.25471   |
| Q68FU3        | HSMNPFCEIAVEEAVR+Oxidation(2)                                                         | 1.318235544        |                 |           |
| Q68FU3        | QAIDDDCNQTGQMTAGLLDWPGTFASQVTLGDKVK                                                   | 0.948947233        | 3               | 5.08575   |
| Q68FU3        | RVIDFAVK                                                                              | 1.028431496        | 2               | 2.80461   |
| Q68FU3        | VDLLFLGK                                                                              | 1.547324913        | 2               | 2.80443   |
| Q68FU3        | VETTEDLVAK                                                                            | 0.947936475        | 2               | 3.35748   |
| Q68FU3        | VIDFAVK                                                                               | 1.144361924        | 2               | 2.41245   |
| Q68FU3        | VSVISVEEPPQR                                                                          | 1.11813816         | 2               | 3.45446   |
| <b>Q68FY0</b> | <b>QCR1 Cytochrome b_c1 complex subunit 1_mitochondrial</b>                           | <b>1.413974288</b> | <b>0.000406</b> | <b>9</b>  |
| Q68FY0        | HQQLDLAQDHFSSVSQVVEEDAVPSITPCR                                                        | 1.168473476        | 3               | 5.63043   |
| Q68FY0        | IEEVDAQMVR                                                                            | 0.941505295        | 2               | 3.60625   |
| Q68FY0        | LCTSATESEVTR                                                                          | 1.49682898         | 2               | 3.27799   |
| Q68FY0        | NALISHLDGTTTPCEDIGR                                                                   | 1.024618376        | 2               | 4.51354   |
| Q68FY0        | NNGAGYFLEHLAFK                                                                        | 1.069371462        | 2               | 3.37124   |
| Q68FY0        | RIPLAEWESR                                                                            | 1.361103732        | 2               | 2.60424   |
| Q68FY0        | TDLTDYLSR                                                                             | 1.345854059        | 2               | 2.82008   |
| Q68FY0        | VVELLADIVQNISLEDSQIEK                                                                 | 1.237003999        | 3               | 6.90851   |
| Q68FY0        | YFYDQCPAVAGYPIEQLSDYNR                                                                | 1.342019341        | 2               | 4.9627    |
| <b>Q68G31</b> | <b>PBLD Phenazine biosynthesis_like domain_containing protein</b>                     | <b>0.972872997</b> | <b>0.384377</b> | <b>7</b>  |
| Q68G31        | AAIGDTTVQDIQYSPDTR                                                                    | 1.028449171        | 2               | 4.67076   |

|               |                                                                    |                    |                 |          |
|---------------|--------------------------------------------------------------------|--------------------|-----------------|----------|
| Q68G31        | AEDGIVLDFPLYPTFPQDFHEVK                                            | 0.94210418         | 3               | 3.92464  |
| Q68G31        | GESGGQTPPYDFYSR                                                    | 1.431586413        | 2               | 3.96384  |
| Q68G31        | LQPTDSFSQSSCFGLR                                                   | 0.735155599        | 2               | 3.66837  |
| Q68G31        | NVNSTLTFVTLSEGLK                                                   | 1.26289768         | 2               | 4.28893  |
| Q68G31        | RAEDGIVLDFPLYPTFPQDFHEVK                                           | 0.912890244        | 3               | 6.26812  |
| Q68G31        | VNTEPLPGIEK                                                        | 1.267598286        | 2               | 2.41228  |
| <b>Q69Z23</b> | <b>DYH17 Dynein heavy chain 17_ axonemal</b>                       | <b>1.15144757</b>  | <b>0.439698</b> | <b>2</b> |
| Q69Z23        | MNILTNEMRRLK+Oxidation(0)                                          | 0.629929042        |                 |          |
| Q69Z23        | YFIDLLMEK                                                          | 1.31544975         | 1               | 2.1417   |
| <b>Q69ZH9</b> | <b>RHG23 Rho GTPase_activating protein 23</b>                      | <b>1.041330326</b> | <b>0.094063</b> | <b>2</b> |
| Q69ZH9        | LEPMDTIFVKNVK                                                      | 0.783048054        | 2               | 2.43207  |
| Q69ZH9        | SRAEAEKPGAGTARACPR                                                 | 1.050297794        | 2               | 2.38005  |
| <b>Q6A0A9</b> | <b>F120A Constitutive coactivator of PPAR_gamma_like protein 1</b> | <b>1.140649583</b> | <b>0.019052</b> | <b>2</b> |
| Q6A0A9        | SQGGVQPIPSQGGK                                                     | 1.190586036        | 2               | 3.09581  |
| Q6A0A9        | VEGSSTASSGSQLAEGK                                                  | 1.138591886        | 2               | 4.28055  |
| <b>Q6AXM8</b> | <b>PON2 Serum paraoxonase/arylesterase 2</b>                       | <b>1.673156576</b> | <b>0.003706</b> | <b>3</b> |
| Q6AXM8        | FQEEENSLHLK                                                        | 0.512764122        | 2               | 2.71573  |
| Q6AXM8        | LFVYDPNHPPSSEVLR                                                   | 1.037667716        | 2               | 2.49138  |
| Q6AXM8        | WANVVVYSPEEVK                                                      | 5.197907331        | 2               | 3.55318  |
| <b>Q6AXN3</b> | <b>TMED5 Transmembrane emp24 domain_containing protein 5</b>       | <b>1.148792829</b> | <b>0.580115</b> | <b>2</b> |
| Q6AXN3        | LEDILESINSIK                                                       | 1.631123691        | 2               | 3.85077  |
| Q6AXN3        | LEDILESINSIKSR                                                     | 0.855009157        | 2               | 2.50144  |
| <b>Q6AXS5</b> | <b>PAIRB Plasminogen activator inhibitor 1 RNA_binding protein</b> | <b>0.814260182</b> | <b>0.426127</b> | <b>3</b> |
| Q6AXS5        | EETQPPVALKK                                                        | 0.780160608        | 2               | 2.38963  |
| Q6AXS5        | FDQLFDDSDPFVFLK                                                    | 0.806010993        | 2               | 4.3778   |
| Q6AXS5        | SAAQAAAQTNSNAAGK                                                   | 0.627515217        | 2               | 4.43278  |
| <b>Q6AXY0</b> | <b>GSTA6 Glutathione S_transferase A6</b>                          | <b>0.889608152</b> | <b>0.501227</b> | <b>2</b> |
| Q6AXY0        | FLQPGSQR                                                           | 0.886002236        | 2               | 2.42099  |
| Q6AXY0        | YFPAFEK                                                            | 0.904864977        | 1               | 1.91853  |
| <b>Q6AY09</b> | <b>HNRH2 Heterogeneous nuclear ribonucleoprotein H2</b>            | <b>1.195530102</b> | <b>0.070116</b> | <b>3</b> |
| Q6AY09        | ATENDIYNFFSPLNPMR                                                  | 1.372948095        | 2               | 2.68978  |
| Q6AY09        | HTGPNPDTANDGFVR                                                    | 1.045288514        | 2               | 4.40161  |
| Q6AY09        | STGEAFVQFASQIEAEK                                                  | 1.319330964        | 2               | 4.3869   |
| <b>Q6AY30</b> | <b>SCPDH Probable saccharopine dehydrogenase</b>                   | <b>1.127888247</b> | <b>0.307267</b> | <b>6</b> |
| Q6AY30        | ACIENGTSICDIGEPQFLELMHVK                                           | 1.096295133        | 3               | 4.39994  |
| Q6AY30        | ATLVNLCVGPYR                                                       | 1.128702004        | 2               | 2.6135   |
| Q6AY30        | GGGVFTPGAASFR                                                      | 0.924534531        | 2               | 2.43447  |
| Q6AY30        | GVYIIGSSGFDSIPADLGLVLYTR                                           | 1.060777398        | 2               | 4.23115  |
| Q6AY30        | LQQVLEK                                                            | 1.240967014        | 1               | 2.01573  |
| Q6AY30        | SVSNLKPVPVIGSK                                                     | 0.97147194         | 2               | 3.83544  |
| <b>Q6AY56</b> | <b>TBA8 Tubulin alpha_8 chain</b>                                  | <b>1.167498382</b> | <b>3.87E-08</b> | <b>7</b> |
| Q6AY56        | AVCMLSNTTAAEAWAR                                                   | 1.116849726        | 2               | 4.75739  |
| Q6AY56        | FDGALNVDLTFEQTNLVPYPR                                              | 1.345034408        | 2               | 4.99984  |
| Q6AY56        | LISQIVSSITASLR                                                     | 1.334548226        | 2               | 3.41579  |
| Q6AY56        | NLDIERPTYTNLNR                                                     | 1.228374834        | 2               | 3.19049  |
| Q6AY56        | QLFHPEQLITGK                                                       | 0.870027128        | 2               | 2.41771  |
| Q6AY56        | TIQFVDWCPTGFK                                                      | 1.359761612        | 2               | 3.78633  |
| Q6AY56        | VGINYQPPTVPPGGDLAK                                                 | 1.018043452        | 2               | 4.52958  |
| <b>Q6AY80</b> | <b>NQO2 Ribosyldihyronicotinamide dehydrogenase [quinone]</b>      | <b>1.326906917</b> | <b>0.879107</b> | <b>3</b> |
| Q6AY80        | NDVTGALSNEVFK                                                      | 1.138980597        | 2               | 3.85471  |
| Q6AY80        | VLAPQISFGPEVSSEEQR                                                 | 1.411363792        | 2               | 4.37001  |
| Q6AY80        | VLCQGAFDVPGFYDSGLFK                                                | 1.188656628        | 2               | 3.49006  |

|               |                                                                     |                    |                 |          |
|---------------|---------------------------------------------------------------------|--------------------|-----------------|----------|
| <b>Q6AYG5</b> | <b>ECHD1 Enoyl_CoA hydratase domain_containing protein 1</b>        | <b>0.856586554</b> | <b>0.700621</b> | <b>4</b> |
| Q6AYG5        | DVLETLWGGPANLEIAIK                                                  | 0.91150826         | 2               | 3.02389  |
| Q6AYG5        | ILEQFPGGSIDLQK                                                      | 0.837252586        | 2               | 3.13588  |
| Q6AYG5        | NTFCSGSDLNAVK                                                       | 0.855561807        | 2               | 2.58786  |
| Q6AYG5        | VIELENWTEGK                                                         | 1.247062014        | 2               | 2.94889  |
| <b>Q6AYH5</b> | <b>DCTN2 Dynactin subunit 2</b>                                     | <b>0.947801334</b> | <b>0.590732</b> | <b>3</b> |
| Q6AYH5        | ASVEDADTQNK                                                         | 0.727909526        | 2               | 2.34203  |
| Q6AYH5        | VNALDLAVLDQVEAR                                                     | 1.194927369        | 2               | 2.8145   |
| Q6AYH5        | WSPVASTLPELVQR                                                      | 0.878966583        | 2               | 2.9953   |
| <b>Q6AYM2</b> | <b>TEKT2 Tektin_2</b>                                               | <b>0.572479873</b> | <b>0.150719</b> | <b>2</b> |
| Q6AYM2        | RLEEDLR                                                             | 1.282155155        | 1               | 1.94702  |
| Q6AYM2        | TNTMLLDTKCMDIR+Oxidation(3)                                         | 0.555951432        |                 |          |
| <b>Q6AYQ8</b> | <b>FAHD1 Acylpyruvase FAHD1_mitochondrial</b>                       | <b>0.981356959</b> | <b>1</b>        | <b>3</b> |
| Q6AYQ8        | IITLEEGDLITGTPK                                                     | 0.934438649        | 2               | 4.4939   |
| Q6AYQ8        | NLHHEVELGVLLGR                                                      | 1.039873238        | 3               | 4.13517  |
| Q6AYQ8        | SFTSSCPVSAFVPK                                                      | 0.912048236        | 2               | 4.08079  |
| <b>Q6AYR8</b> | <b>SCRN2 Secernin_2</b>                                             | <b>0.881132181</b> | <b>0.066854</b> | <b>2</b> |
| Q6AYR8        | GLLTGEQTPAPQELGSLFQAFVER                                            | 1.46773961         | 3               | 4.15368  |
| Q6AYR8        | QEQQSLEQEGLEALR                                                     | 0.862749312        | 2               | 4.00839  |
| <b>Q6AYS7</b> | <b>ACY1A Aminoacylase_1A</b>                                        | <b>1.393735592</b> | <b>6.02E-08</b> | <b>2</b> |
| Q6AYS7        | EMNLTLEPEIFPAATDSR                                                  | 0.965268287        | 2               | 4.70136  |
| Q6AYS7        | ICTVQPNPDYGSAVTFLEER                                                | 2.650892285        | 2               | 4.5171   |
| <b>Q6AYS8</b> | <b>DHB11 Estradiol 17_beta_dehydrogenase 11</b>                     | <b>1.240828366</b> | <b>7.33E-05</b> | <b>4</b> |
| Q6AYS8        | ALTDELAALGCTGVR                                                     | 0.972807689        | 2               | 3.73116  |
| Q6AYS8        | FDAVVGYS                                                            | 1.308155077        | 1               | 2.22986  |
| Q6AYS8        | MIFVPGSIALTLVLR                                                     | 1.124450123        | 2               | 2.76771  |
| Q6AYS8        | SVAGEIVLITGAGHGIGR                                                  | 0.975119969        | 2               | 3.98321  |
| <b>Q6AYT9</b> | <b>ACSM5 Acyl_coenzyme A synthetase ACSM5_mitochondrial</b>         | <b>0.415182549</b> | <b>0.132387</b> | <b>4</b> |
| Q6AYT9        | AFIVLSPAYVSHDPEALTR                                                 | 0.408411358        | 2               | 4.36903  |
| Q6AYT9        | ASPPYDVQIVDEEGNVLPFGK                                               | 0.365955183        | 2               | 3.79195  |
| Q6AYT9        | NDDVINSSYSR                                                         | 0.657783889        | 2               | 2.58825  |
| Q6AYT9        | TGVVMIPGISQLTQK                                                     | 0.701764105        | 2               | 2.44424  |
| <b>Q6AYZ1</b> | <b>TBA1C Tubulin alpha_1C chain</b>                                 | <b>1.314054233</b> | <b>9.9E-20</b>  | <b>5</b> |
| Q6AYZ1        | AVFVDLEPTVIDEVR                                                     | 1.283390529        | 2               | 5.03055  |
| Q6AYZ1        | DVNAAIATIK                                                          | 1.179290311        | 2               | 3.0616   |
| Q6AYZ1        | IHFPLATYAPVISA EK                                                   | 1.480092284        | 2               | 3.41383  |
| Q6AYZ1        | TIGGGDDSFNTFFSETGAGK                                                | 1.604084041        | 2               | 5.39696  |
| Q6AYZ1        | VGINYQPPTVPGGDLAR                                                   | 1.307142979        | 2               | 4.83777  |
| <b>Q6DGG1</b> | <b>ABHEB Abhydrolase domain_containing protein 14B</b>              | <b>1.300974382</b> | <b>5.93E-11</b> | <b>7</b> |
| Q6DGG1        | AVAILPLGLGR                                                         | 0.943813503        | 2               | 3.48767  |
| Q6DGG1        | FSSETWQNLGTLHR                                                      | 1.143804924        | 2               | 3.45856  |
| Q6DGG1        | FSVLLHGIR                                                           | 1.091141424        | 2               | 2.6252   |
| Q6DGG1        | GYVPVAPICTDK                                                        | 0.924237003        | 1               | 2.68742  |
| Q6DGG1        | INAADYAR                                                            | 1.046604631        | 2               | 2.46132  |
| Q6DGG1        | TPTLIVYGDQDPMGSSSFQHLK                                              | 1.581360173        | 2               | 4.98716  |
| Q6DGG1        | TPTLIVYGDQDPMGSSSFQHLK+Oxidation(12)                                | 1.841805928        |                 |          |
| <b>Q6EDY6</b> | <b>LR16A Leucine_rich repeat_containing protein 16A</b>             | <b>0.963631091</b> | <b>0.996816</b> | <b>2</b> |
| Q6EDY6        | IENYLLR                                                             | 0.963498534        | 2               | 2.52352  |
| Q6EDY6        | SSDAHELGEKDEKKK                                                     | 0.977987836        | 2               | 2.35917  |
| <b>Q6EJB6</b> | <b>UT14B U3 small nucleolar RNA_associated protein 14 homolog B</b> | <b>0.925859851</b> | <b>0.805017</b> | <b>2</b> |
| Q6EJB6        | ARMTERMSLK+Oxidation(2)                                             | 0.931944877        |                 |          |
| Q6EJB6        | EAAFSKTSQMLSR+Oxidation(9)                                          | 0.85760159         |                 |          |

|               |                                                        |                    |                 |           |
|---------------|--------------------------------------------------------|--------------------|-----------------|-----------|
| <b>Q6GQP4</b> | <b>RAB31 Ras_related protein Rab_31</b>                | <b>0.690412277</b> | <b>0.044707</b> | <b>2</b>  |
| Q6GQP4        | CDLSDIREVPLK                                           | 0.689231268        | 2               | 2.39166   |
| Q6GQP4        | CDLSDIREVPLKDAK                                        | 1.060319268        | 2               | 2.73757   |
| <b>Q6GQT1</b> | <b>A2MP Alpha_2_macroglobulin_P</b>                    | <b>3.114525902</b> | <b>1.91E-05</b> | <b>2</b>  |
| Q6GQT1        | IQEEGTGVEETGK                                          | 3.922209309        | 2               | 3.79656   |
| Q6GQT1        | QLSFPLSSEPTQGSYK                                       | 1.416579966        | 2               | 2.81778   |
| <b>Q6GQT9</b> | <b>NOMO1 Nodal modulator 1</b>                         | <b>1.061544625</b> | <b>0.99121</b>  | <b>2</b>  |
| Q6GQT9        | SSIDSEPALVLGPLK                                        | 1.081741522        | 2               | 3.05894   |
| Q6GQT9        | VQVVVPEAETR                                            | 1.03635184         | 2               | 2.48435   |
| <b>Q6I7R3</b> | <b>ISOC1 Isochromatase domain_containing protein 1</b> | <b>0.883739185</b> | <b>8.13E-07</b> | <b>3</b>  |
| Q6I7R3        | GLGSTVQEIDLTGVK                                        | 0.882224948        | 2               | 4.14159   |
| Q6I7R3        | ILGIPVIITEQYPK                                         | 1.538382875        | 2               | 3.05421   |
| Q6I7R3        | YFGDIISVGQR                                            | 1.005421974        | 2               | 2.86428   |
| <b>Q6IE47</b> | <b>ISK6 Serine protease inhibitor Kazal_type 6</b>     | <b>1.214369185</b> | <b>0.415613</b> | <b>2</b>  |
| Q6IE47        | CAFCKALEK                                              | 1.238458384        | 1               | 1.98006   |
| Q6IE47        | LFQINGGEFRDPK                                          | 0.915279278        | 2               | 2.41053   |
| <b>Q6IE52</b> | <b>MUG2 Murinoglobulin_2</b>                           | <b>0.846239368</b> | <b>0.003086</b> | <b>14</b> |
| Q6IE52        | AHFSVMGDILSSAIK                                        | 0.737815733        | 2               | 3.50124   |
| Q6IE52        | HTSSWLTPK                                              | 0.782131702        | 2               | 2.6749    |
| Q6IE52        | LPSSEEEESLDINIEGAK                                     | 1.015378295        | 2               | 4.66044   |
| Q6IE52        | MLIYTILPDGEVIADSVK                                     | 0.849154556        | 2               | 3.81204   |
| Q6IE52        | MLSGFIPLKPTVK+Oxidation(0)                             | 1.177315302        |                 |           |
| Q6IE52        | MNRIMQWQDVK+Oxidation(0)                               | 0.301964985        |                 |           |
| Q6IE52        | NLYPLKELVQDPK                                          | 0.890030738        | 1               | 2.07993   |
| Q6IE52        | QLSFSLSAEPIQGPK                                        | 0.873939826        | 2               | 4.08766   |
| Q6IE52        | QQNSHGGFSSTQDVTVALDALS                                 | 0.981741466        | 3               | 3.52174   |
| Q6IE52        | VHLSFSPSQLPASQTHMR                                     | 0.847079811        | 3               | 3.41412   |
| Q6IE52        | VKTVP LTCNNPK                                          | 0.835599432        | 2               | 2.90261   |
| Q6IE52        | VTASPSQLCGLR                                           | 0.937124722        | 2               | 2.88674   |
| Q6IE52        | YMLVPSQLYTETPEK                                        | 0.69298586         | 2               | 3.57746   |
| Q6IE52        | YMLVPSQLYTETPEK+Oxidation(1)                           | 0.813637702        |                 |           |
| <b>Q6IFW6</b> | <b>K1C10 Keratin_type I cytoskeletal 10</b>            | <b>1.139090649</b> | <b>0.393062</b> | <b>2</b>  |
| Q6IFW6        | LENEIQTYR                                              | 1.476408595        | 2               | 2.51745   |
| Q6IFW6        | QSLEASLAETGR                                           | 0.902620515        | 2               | 2.75606   |
| <b>Q6IMF3</b> | <b>K2C1 Keratin_type II cytoskeletal 1</b>             | <b>0.875814539</b> | <b>0.035201</b> | <b>4</b>  |
| Q6IMF3        | TNAENEFVTIK                                            | 0.527446829        | 2               | 2.95292   |
| Q6IMF3        | TNAENEFVIKK                                            | 0.096985362        | 2               | 2.42696   |
| Q6IMF3        | WELLQQVDTSTR                                           | 0.706859363        | 2               | 3.62636   |
| Q6IMF3        | YEELQITAGK                                             | 0.882965169        | 2               | 3.47039   |
| <b>Q6IRK9</b> | <b>PGCP Plasma glutamate carboxypeptidase</b>          | <b>0.991825199</b> | <b>0.617332</b> | <b>5</b>  |
| Q6IRK9        | AIQIMYQNLQQDGLNVHLEQVR                                 | 1.051543839        | 3               | 5.37987   |
| Q6IRK9        | GEESAVMVVPR                                            | 0.783643558        | 2               | 2.42094   |
| Q6IRK9        | IVVYNQPYTDYK                                           | 1.570196483        | 2               | 3.37105   |
| Q6IRK9        | TYPDTDSFNTVAEITGSK                                     | 0.99375996         | 2               | 3.79761   |
| Q6IRK9        | VGAVASLIR                                              | 0.890473906        | 2               | 2.51637   |
| <b>Q6KCD5</b> | <b>NIPBL Nipped_B_like protein</b>                     | <b>0.929268941</b> | <b>0.239422</b> | <b>2</b>  |
| Q6KCD5        | AFLISLLNLFDDTAK                                        | 1.723559944        | 2               | 2.5985    |
| Q6KCD5        | QNNTRSENTKARPETPK                                      | 0.529069814        | 2               | 2.56682   |
| <b>Q6MGB5</b> | <b>DHB8 Estradiol_17_beta_dehydrogenase 8</b>          | <b>0.932278328</b> | <b>0.142074</b> | <b>4</b>  |
| Q6MGB5        | AGVIGLTQTAAR                                           | 0.922671385        | 2               | 3.33472   |
| Q6MGB5        | GSIINISSIVGK                                           | 1.076378192        | 2               | 2.58135   |
| Q6MGB5        | SALALVTGAGSGIGR                                        | 1.26376336         | 2               | 3.15708   |
| Q6MGB5        | VGNIGQTNYASSK                                          | 2.451410665        | 2               | 2.36694   |
| <b>Q6NS46</b> | <b>RRP5 Protein RRP5 homolog</b>                       | <b>0.989466669</b> | <b>0.80087</b>  | <b>2</b>  |
| Q6NS46        | GKQTKSTEVPR                                            | 0.937933502        | 2               | 2.67829   |
| Q6NS46        | IIDYSQMDELALLSLR                                       | 1.193760946        | 2               | 2.37047   |

|               |                                                                 |                    |                 |           |
|---------------|-----------------------------------------------------------------|--------------------|-----------------|-----------|
| <b>Q6NSR8</b> | <b>PEPL1 Probable aminopeptidase NPEPL1</b>                     | <b>1.179046472</b> | <b>0.55102</b>  | <b>2</b>  |
| Q6NSR8        | HNPSAAHFITR                                                     | 0.753075341        | 3               | 3.55737   |
| Q6NSR8        | TVEINNTDAEGR                                                    | 0.83743817         | 2               | 2.69394   |
| <b>Q6NYB7</b> | <b>RAB1A Ras_related protein Rab_1A</b>                         | <b>1.348870774</b> | <b>0.456471</b> | <b>3</b>  |
| Q6NYB7        | EFADSLGIPFLETSK                                                 | 1.654372413        | 2               | 3.61645   |
| Q6NYB7        | MGPATAGGAEK                                                     | 0.807886943        | 2               | 2.92138   |
| Q6NYB7        | NATNVEQSFMTMAAEIK                                               | 1.152880455        | 2               | 4.61945   |
| <b>Q6NZJ6</b> | <b>IF4G1 Eukaryotic translation initiation factor 4 gamma 1</b> | <b>1.137217952</b> | <b>6.53E-06</b> | <b>9</b>  |
| Q6NZJ6        | DLDFAKAKPRMDQYFNQMEK+Oxidation(10)                              | 0.798899686        |                 |           |
| Q6NZJ6        | GLPLVDDGGWNTVPISK                                               | 0.982591229        | 2               | 2.94948   |
| Q6NZJ6        | GSSGGSGAKPSDTASEATRPATLNR                                       | 1.289529845        | 3               | 3.4728    |
| Q6NZJ6        | IHNAENIQPGQEK                                                   | 1.179075072        | 2               | 4.17509   |
| Q6NZJ6        | ITKPGSIDSNNQLFAPGGR                                             | 1.365782182        | 3               | 3.58037   |
| Q6NZJ6        | LGIESTLER                                                       | 0.992433172        | 2               | 2.37394   |
| Q6NZJ6        | LKEELEEAR                                                       | 1.095286759        | 2               | 2.67357   |
| Q6NZJ6        | QVTQLAIDTEER                                                    | 1.22229513         | 2               | 2.85452   |
| Q6NZJ6        | TASTPTPPQTGGSLPQPNGESPQVAVIIRPDDR                               | 0.837363822        | 3               | 4.77662   |
| <b>Q6P0K8</b> | <b>PLAK Junction plakoglobin</b>                                | <b>0.948398458</b> | <b>0.822338</b> | <b>2</b>  |
| Q6P0K8        | LLNDEDPVVVTK                                                    | 0.947436377        | 2               | 2.97931   |
| Q6P0K8        | NLALCPANHAPLQEAIVIPR                                            | 1.329225128        | 3               | 3.68432   |
| <b>Q6P502</b> | <b>TCPG T_complex protein 1 subunit gamma</b>                   | <b>1.088423796</b> | <b>6.96E-11</b> | <b>8</b>  |
| Q6P502        | GISDLAQHYLMR                                                    | 1.080381918        | 2               | 2.37887   |
| Q6P502        | IVLLDSSLEYK                                                     | 1.369433034        | 2               | 2.67924   |
| Q6P502        | IVSRPEELREDDVGTGAGLLEIK                                         | 1.520259973        | 3               | 3.68687   |
| Q6P502        | KGESQTDIEITR                                                    | 1.254969333        | 2               | 3.18237   |
| Q6P502        | NLQDAMQVCR                                                      | 1.362429737        | 2               | 2.80264   |
| Q6P502        | TAVETAVLLLR                                                     | 1.225254914        | 2               | 3.38584   |
| Q6P502        | TLIQNGGASTIR                                                    | 1.211623447        | 2               | 2.93696   |
| Q6P502        | WSSLACNIALDAVK                                                  | 1.1280813          | 2               | 3.88398   |
| <b>Q6P5D3</b> | <b>DHX57 Putative ATP_dependent RNA helicase DHX57</b>          | <b>1.08171337</b>  | <b>0.44522</b>  | <b>2</b>  |
| Q6P5D3        | ARHNRTAQEEVEEDLR                                                | 1.082679323        | 2               | 2.3047    |
| Q6P5D3        | QEETLALKSICGEK                                                  | 0.830660141        | 2               | 2.32468   |
| Q6P6M7        | EMFVYLSTQLKK+Oxidation(1)                                       | 0.011652527        |                 |           |
| Q6P6M7        | SGDISAVQPK                                                      | 1.522267232        | 2               | 2.30571   |
| Q6P6M7        | SMVTAGFEPVVIENVLEGDELRL                                         | 1.010382979        | 2               | 3.99819   |
| <b>Q6P6R2</b> | <b>DLDH Dihydrolipoyl dehydrogenase_mitochondrial</b>           | <b>1.061712144</b> | <b>2.86E-06</b> | <b>12</b> |
| Q6P6R2        | ALTGGIAHLFK                                                     | 1.214407411        | 2               | 2.69699   |
| Q6P6R2        | EANLAASFGKPINF                                                  | 0.927266938        | 1               | 2.0567    |
| Q6P6R2        | IDVSVEAASGGK                                                    | 1.101705274        | 2               | 3.659     |
| Q6P6R2        | ILGAHILGPGAGEMVNEAALALEYGASCEDVAR                               | 1.150714037        | 3               | 4.13021   |
| Q6P6R2        | IPNIFAIGDVVAGPMLAHLK                                            | 1.955776414        | 3               | 3.41712   |
| Q6P6R2        | NETLGGTCLNVGCIPSK                                               | 0.974839087        | 2               | 5.34502   |
| Q6P6R2        | NQVTATTADGSTQVIGTK                                              | 1.193179015        | 2               | 5.64947   |
| Q6P6R2        | RPFTQNLGLEELGIELDPK                                             | 1.43685115         | 3               | 4.21492   |
| Q6P6R2        | SEEQLKEEGVEFK                                                   | 1.002053116        | 3               | 4.12924   |
| Q6P6R2        | TNADTDGMVK                                                      | 0.836785436        | 2               | 2.82436   |
| Q6P6R2        | TNADTDGMVK+Oxidation(7)                                         | 1.139977569        |                 |           |
| Q6P6R2        | VCHAHPITLSEAFR                                                  | 1.330230067        | 3               | 3.80575   |
| <b>Q6P6S9</b> | <b>ENTP5 Ectonucleoside triphosphate diphosphohydrolase 5</b>   | <b>0.917862707</b> | <b>0.00845</b>  | <b>7</b>  |
| Q6P6S9        | AAETHLIDYEK                                                     | 1.193000166        | 2               | 2.46137   |
| Q6P6S9        | AQTLLEVEEIFK                                                    | 0.973584244        | 2               | 3.8696    |
| Q6P6S9        | GQETVGTLDLGGASTQITFLPQLEK                                       | 0.906818268        | 2               | 4.73296   |
| Q6P6S9        | QGAETVQELLEVAK                                                  | 0.750870563        | 2               | 3.31321   |

|               |                                                                   |                    |                 |           |
|---------------|-------------------------------------------------------------------|--------------------|-----------------|-----------|
| Q6P6S9        | TSGQLPFLEGEIFDSVKPGLSAFVDQPK                                      | 1.006207507        | 3               | 3.85166   |
| Q6P6S9        | VEDFERKAR                                                         | 0.986122136        | 2               | 2.44263   |
| Q6P6S9        | WLEAEWIFGGVK                                                      | 0.798132862        | 2               | 3.0829    |
| <b>Q6P6V0</b> | <b>G6PI Glucose_6_phosphate isomerase</b>                         | <b>0.89537961</b>  | <b>0.353484</b> | <b>8</b>  |
| Q6P6V0        | DVMPEVNKVLDK+Oxidation(2)                                         | 0.802736062        |                 |           |
| Q6P6V0        | HFVALSTNTDK                                                       | 1.241266392        | 2               | 2.72113   |
| Q6P6V0        | KIEPELDGSSAVTSHDSSTNGLIGFIK                                       | 0.894521275        | 3               | 5.43965   |
| Q6P6V0        | MIPCDFLIPVQTQHPPIR                                                | 0.661475456        | 2               | 3.13345   |
| Q6P6V0        | TFTTQETITNAETAK                                                   | 1.094832349        | 2               | 5.11523   |
| Q6P6V0        | TLANLNPESSLFIASK                                                  | 1.28004165         | 3               | 4.96459   |
| Q6P6V0        | VFEGNRPTNSIVFTK                                                   | 1.356420595        | 2               | 3.39201   |
| Q6P6V0        | VWVFSNIDGTHIAK                                                    | 1.171175933        | 2               | 3.46453   |
| <b>Q6P7B0</b> | <b>SYWC Tryptophanyl_tRNA synthetase_cytoplasmic</b>              | <b>1.042814447</b> | <b>0.994996</b> | <b>2</b>  |
| Q6P7B0        | ASEDFVDPWTVR                                                      | 1.043576194        | 2               | 2.69403   |
| Q6P7B0        | TLIDVLQPLIAEHQAR                                                  | 0.946995198        | 3               | 3.31408   |
| <b>Q6P7Q4</b> | <b>LGUL Lactoylglutathione lyase</b>                              | <b>1.119203128</b> | <b>8.52E-07</b> | <b>6</b>  |
| Q6P7Q4        | ATLELTHNWGTEDDETQSYHNGNSDPR                                       | 1.357499216        | 3               | 3.98259   |
| Q6P7Q4        | DFLLQQTMLR                                                        | 1.260626544        | 2               | 3.317     |
| Q6P7Q4        | FEELGVK                                                           | 0.841559896        | 1               | 1.91717   |
| Q6P7Q4        | GFGHIGIAVPDVEACK                                                  | 1.231177162        | 2               | 3.45576   |
| Q6P7Q4        | GLAFVQDPDGYWIEILNPNK                                              | 1.08712715         | 2               | 5.64355   |
| Q6P7Q4        | RFEELGVK                                                          | 1.162667016        | 2               | 2.6482    |
| <b>Q6P7R8</b> | <b>DHB12 Estradiol 17_beta_dehydrogenase 12</b>                   | <b>1.324815339</b> | <b>6.25E-05</b> | <b>2</b>  |
| Q6P7R8        | GIFVQSVLPFFVATK                                                   | 1.801324724        | 2               | 3.30023   |
| Q6P7R8        | LGEWAVVTGGTDGIGK                                                  | 1.322924038        | 2               | 4.03946   |
| <b>Q6P9T8</b> | <b>TBB2C Tubulin beta_2C chain</b>                                | <b>1.779395366</b> | <b>9.9E-20</b>  | <b>13</b> |
| Q6P9T8        | AVLVDLEPGTMDSVR                                                   | 0.980558719        | 2               | 4.68241   |
| Q6P9T8        | AVLVDLEPGTMDSVR+Oxidation(10)                                     | 1.247811335        |                 |           |
| Q6P9T8        | EAESCDCLQGFLTHSLGGGTGSGMGTLISK                                    | 1.287430331        | 3               | 5.30237   |
| Q6P9T8        | EIVHLQAGQCGNQIGAK                                                 | 1.213909466        | 2               | 5.04325   |
| Q6P9T8        | EVDEQMLNVQNK                                                      | 1.188270002        | 2               | 4.06947   |
| Q6P9T8        | FWEVISDEHGIDPTGTYHGSDSLQLER                                       | 1.276366534        | 3               | 5.63299   |
| Q6P9T8        | INVYYNEATGGK                                                      | 1.746761966        | 2               | 3.46812   |
| Q6P9T8        | KEAESCDCLQGFLTHSLGGGTGSGMGTLISK                                   | 1.201028466        | 3               | 5.34291   |
| Q6P9T8        | LHFFMPGFAPLTSR                                                    | 2.237979137        | 2               | 2.70094   |
| Q6P9T8        | MSATFIGNSTAIQELFK                                                 | 1.62655944         | 2               | 3.97457   |
| Q6P9T8        | SGPFGQIFRPDNFVFGQSGAGNNWAK                                        | 1.767923454        | 3               | 4.66292   |
| Q6P9T8        | TAVCDIPPR                                                         | 1.039394093        | 2               | 2.50093   |
| Q6P9T8        | YLTVAAVFR                                                         | 1.09162861         | 2               | 2.4695    |
| <b>Q6P9U8</b> | <b>EIF3H Eukaryotic translation initiation factor 3 subunit H</b> | <b>1.196013817</b> | <b>5.36E-05</b> | <b>2</b>  |
| Q6P9U8        | ANITFEHMFEEVPIVIK                                                 | 1.345266105        | 3               | 4.35146   |
| Q6P9U8        | EGTGSTATSSSTGGAVGK                                                | 1.194069879        | 2               | 4.13056   |
| <b>Q6PA06</b> | <b>ATLA2 Atlastin_2</b>                                           | <b>1.196714929</b> | <b>0.373826</b> | <b>5</b>  |
| Q6PA06        | AGLTDQVSHHAR                                                      | 1.022694319        | 2               | 3.34998   |
| Q6PA06        | NLVPLLLAPENLVEK                                                   | 1.290349279        | 2               | 2.892     |
| Q6PA06        | QNQHEELQNVN                                                       | 1.003376901        | 2               | 2.7316    |
| Q6PA06        | SMEQVCGGDKPYIAPSDLER                                              | 1.280326904        | 3               | 3.48575   |
| Q6PA06        | SMLQATAEANNLAAVAGAR                                               | 1.129223385        | 2               | 4.49058   |
| <b>Q6PCL9</b> | <b>polymerase gamma</b>                                           | <b>0.922722113</b> | <b>0.582133</b> | <b>4</b>  |
| Q6PCL9        | ATDITPIMSEGGISDMPKR                                               | 1.41700664         |                 |           |
| Q6PCL9        | LTEILK                                                            | 1.092495256        |                 |           |
| Q6PCL9        | QANNINMLKDGMIK                                                    | 0.914470555        |                 |           |
| Q6PCL9        | WEMDDPRPIAKAER                                                    | 1.04725548         |                 |           |
| <b>Q6PDM2</b> | <b>SRSF1 Serine/arginine_rich splicing factor 1</b>               | <b>1.273308982</b> | <b>0.023228</b> | <b>2</b>  |
| Q6PDM2        | SHEGETAYIR                                                        | 1.364030339        | 2               | 2.64033   |



|               |                                                                                       |                    |                 |           |
|---------------|---------------------------------------------------------------------------------------|--------------------|-----------------|-----------|
| Q6PDM2        | VVVSGLPPSGSWQDLK                                                                      | 1.263831743        | 2               | 2.31052   |
| <b>Q6PDN3</b> | <b>MYLK Myosin light chain kinase_ smooth muscle</b>                                  | <b>1.004543125</b> | <b>0.493154</b> | <b>2</b>  |
| Q6PDN3        | LIDFGLAR                                                                              | 1.391616697        | 2               | 2.37337   |
| Q6PDN3        | VSMSEKNGMQILEIRGVTR                                                                   | 0.761359239        | 2               | 2.44465   |
| <b>Q6PEC1</b> | <b>TBCA Tubulin_ specific chaperone A</b>                                             | <b>1.218909259</b> | <b>2.6E-08</b>  | <b>3</b>  |
| Q6PEC1        | LEAAYTDLR                                                                             | 1.187802329        | 2               | 3.17839   |
| Q6PEC1        | QILESEKDLEEAEYKEAR                                                                    | 1.501720312        | 3               | 3.83594   |
| Q6PEC1        | RLEAAYTDLR                                                                            | 1.11475289         | 2               | 2.34798   |
| <b>Q6PEC4</b> | <b>SKP1 S_phase kinase_ associated protein 1</b>                                      | <b>1.254204172</b> | <b>0.00224</b>  | <b>3</b>  |
| Q6PEC4        | NDFTEEEAQVR                                                                           | 1.495253509        | 2               | 3.46107   |
| Q6PEC4        | TDDIPVWDQFLK                                                                          | 1.194707184        | 2               | 3.12237   |
| Q6PEC4        | TVANMIKGTPEEIR+Oxidation(4)                                                           | 1.237471265        |                 |           |
| <b>Q6Q0N1</b> | <b>CNDP2 Cytosolic non_ specific dipeptidase</b>                                      | <b>1.251929504</b> | <b>3.89E-07</b> | <b>6</b>  |
| Q6Q0N1        | AVFQYIDENQDR                                                                          | 0.683431798        | 2               | 3.00811   |
| Q6Q0N1        | EGGSIPVTLTFQEATGK                                                                     | 1.315753626        | 2               | 2.61273   |
| Q6Q0N1        | LGGSVELVDIGK                                                                          | 1.330223138        | 2               | 3.73115   |
| Q6Q0N1        | LVPDMIPEVSEQVSSYLSK                                                                   | 1.181797654        | 2               | 2.63451   |
| Q6Q0N1        | MTEAAAADVQR                                                                           | 1.098531399        | 2               | 2.6028    |
| Q6Q0N1        | TVFGVEPDLTR                                                                           | 1.074081152        | 2               | 2.54768   |
| <b>Q6SKG1</b> | <b>ACSM3 Acyl_ coenzyme A synthetase ACSM3_ mitochondrial</b>                         | <b>0.920353903</b> | <b>0.040108</b> | <b>3</b>  |
| Q6SKG1        | AFIVLNPDYK                                                                            | 0.864068727        | 2               | 2.7906    |
| Q6SKG1        | FDSTSILQTLK                                                                           | 1.033256673        | 2               | 3.1274    |
| Q6SKG1        | TGTVLIPGTTQLTQK                                                                       | 0.982685342        | 2               | 2.93562   |
| <b>Q6TUG0</b> | <b>DJB11 DnaJ homolog subfamily B member 11</b>                                       | <b>1.316185705</b> | <b>1.38E-08</b> | <b>4</b>  |
| Q6TUG0        | FQDLGAAYEVLSDSEK                                                                      | 1.161866085        | 2               | 4.51312   |
| Q6TUG0        | FQMTQEVCDECPNVK                                                                       | 1.324578752        | 2               | 5.16541   |
| Q6TUG0        | KGEGLPNFDNNIK                                                                         | 1.316083666        | 2               | 2.75215   |
| Q6TUG0        | TLEVEIEPGVR                                                                           | 1.06867526         | 2               | 3.22796   |
| <b>Q6UPE1</b> | <b>ETFDF Electron transfer flavoprotein_ ubiquinone oxidoreductase_ mitochondrial</b> | <b>0.942633224</b> | <b>0.792996</b> | <b>16</b> |
| Q6UPE1        | AAQIGAHTLSGACLDPAAFK                                                                  | 1.233156671        | 2               | 4.3136    |
| Q6UPE1        | ALNEGGLQSIK                                                                           | 1.102811322        | 2               | 3.15933   |
| Q6UPE1        | ASCDATYIGLTK                                                                          | 1.204489801        | 2               | 3.68383   |
| Q6UPE1        | FCPAGVYEFVPLEQGDGFR                                                                   | 0.949261189        | 2               | 4.94667   |
| Q6UPE1        | GAPLNTPVTEDR                                                                          | 0.992254122        | 2               | 3.44929   |
| Q6UPE1        | GIATNDVGIQK                                                                           | 1.021565357        | 2               | 3.56295   |
| Q6UPE1        | HHPSIRPTLEGGK                                                                         | 0.967993254        | 2               | 2.4243    |
| Q6UPE1        | LQINAQNCVHCK                                                                          | 1.280008894        | 2               | 3.72905   |
| Q6UPE1        | NLSYDGPEQR                                                                            | 1.046105879        | 2               | 3.21672   |
| Q6UPE1        | QLAAEQEKDIR                                                                           | 1.108779381        | 2               | 2.80451   |
| Q6UPE1        | QLTSENLOSK                                                                            | 0.980397985        | 2               | 2.46207   |
| Q6UPE1        | SGSLAAEAIFK                                                                           | 0.855636874        | 2               | 3.35566   |
| Q6UPE1        | TAGLHVTEYEDNLK                                                                        | 1.088083599        | 2               | 3.88015   |
| Q6UPE1        | TCDIKDPSQINWVWVPEGGGPAYNGM                                                            | 1.051192009        | 2               | 3.70353   |
| Q6UPE1        | VDHTVGWPLDR                                                                           | 0.998624516        | 2               | 2.64685   |
| Q6UPE1        | VTIFAEGCHGLAK                                                                         | 0.781966101        | 2               | 3.3838    |
| <b>Q6URK4</b> | <b>ROA3 Heterogeneous nuclear ribonucleoprotein A3</b>                                | <b>0.958240653</b> | <b>0.244071</b> | <b>7</b>  |
| Q6URK4        | EDSVKPGAHLTVK                                                                         | 0.970864772        | 2               | 3.36965   |
| Q6URK4        | EDTEEYNLR                                                                             | 1.102264984        | 2               | 2.34265   |
| Q6URK4        | GFAFVTFDDHDTVDK                                                                       | 0.330090239        | 2               | 4.2515    |
| Q6URK4        | IETIEVMEDR                                                                            | 0.927932953        | 2               | 3.39152   |
| Q6URK4        | SSGSPYGGYGGGGGGYGSR                                                                   | 1.10781345         | 2               | 4.97674   |
| Q6URK4        | WGTLTDCVVMR                                                                           | 0.921241903        | 2               | 2.30274   |

|               |                                                                                               |                    |                 |          |
|---------------|-----------------------------------------------------------------------------------------------|--------------------|-----------------|----------|
| Q6URK4        | YHTINGHNCEVK                                                                                  | 1.672082177        | 2               | 3.57418  |
| <b>Q6URW6</b> | <b>MYH14 Myosin_14</b>                                                                        | <b>1.081014418</b> | <b>0.999987</b> | <b>4</b> |
| Q6URW6        | EDQSILCTGESGAGK                                                                               | 0.978772002        | 2               | 4.49769  |
| Q6URW6        | FDQLLAEEK                                                                                     | 0.983119795        | 2               | 2.33667  |
| Q6URW6        | KFDQLLAEEK                                                                                    | 1.050680297        | 2               | 2.57959  |
| Q6URW6        | QLLQANPILEAFGNAK                                                                              | 0.944024351        | 2               | 4.33224  |
| <b>Q6XQN1</b> | <b>PNCB Nicotinate phosphoribosyltransferase</b>                                              | <b>0.993265943</b> | <b>0.517495</b> | <b>5</b> |
| Q6XQN1        | GSEVNVIGIGTNVVTCPK                                                                            | 0.746655887        | 2               | 4.11857  |
| Q6XQN1        | LDSGDLLQQAQK                                                                                  | 1.130459538        | 2               | 2.94937  |
| Q6XQN1        | LYLQQGQPYEPLPSLEESR                                                                           | 1.665710042        | 2               | 4.48363  |
| Q6XQN1        | QLQNPAVYQVALSEK                                                                               | 1.345105738        | 2               | 3.82319  |
| Q6XQN1        | VWLQGAQEPCTVKAQVEPLLR                                                                         | 1.222994129        | 3               | 3.64815  |
| <b>Q6Y7W8</b> | <b>PERQ2 PERQ amino acid_rich with GYF domain_containing protein 2</b>                        | <b>0.811241163</b> | <b>0.2546</b>   | <b>2</b> |
| Q6Y7W8        | AEEENRSENSLSAKVPSR                                                                            | 0.755533798        | 2               | 2.41972  |
| Q6Y7W8        | KDEPKAEQVEK                                                                                   | 0.902090887        | 2               | 2.51718  |
| <b>Q6ZPJ3</b> | <b>UBE2O Ubiquitin_conjugating enzyme E2 O</b>                                                | <b>1.141420929</b> | <b>0.012722</b> | <b>2</b> |
| Q6ZPJ3        | FRTTDIVIR                                                                                     | 0.813534578        | 2               | 2.45154  |
| Q6ZPJ3        | NCAQGEESMAKKVK                                                                                | 1.162815747        | 2               | 2.56311  |
| <b>Q6ZPY5</b> | <b>ZN507 Zinc finger protein 507</b>                                                          | <b>1.039498297</b> | <b>0.113589</b> | <b>2</b> |
| Q6ZPY5        | CSLCGYVCSHPPSLK                                                                               | 1.439752063        | 2               | 2.34102  |
| Q6ZPY5        | IISSPNK                                                                                       | 1.037445614        | 2               | 2.35231  |
| <b>Q704S8</b> | <b>CACP Carnitine O_acetyltransferase</b>                                                     | <b>1.203940035</b> | <b>0.018987</b> | <b>3</b> |
| Q704S8        | ALQPIVSEEEWAHTK                                                                               | 0.729168966        | 2               | 2.49566  |
| Q704S8        | DKVNRRESVNSIQK                                                                                | 1.194185739        | 2               | 2.33361  |
| Q704S8        | FNITPEIKNDIEK                                                                                 | 1.388417115        | 2               | 3.18785  |
| <b>Q711G3</b> | <b>IAH1 Isoamyl acetate_hydrolyzing esterase 1 homolog</b>                                    | <b>1.085626711</b> | <b>0.949333</b> | <b>5</b> |
| Q711G3        | DCGTDVLDLWTLMQK                                                                               | 1.227249905        | 2               | 3.87297  |
| Q711G3        | DVEETKPELSLLGDGDH                                                                             | 1.003209588        | 2               | 3.44994  |
| Q711G3        | LNVAVGGEYAK                                                                                   | 1.107487279        | 2               | 3.02758  |
| Q711G3        | QHVPLDEYSANLR                                                                                 | 1.126831509        | 2               | 2.56293  |
| Q711G3        | VILITPPPLCEAAWEK                                                                              | 0.798295023        | 2               | 2.64621  |
| <b>Q71TY3</b> | <b>RS27 40S ribosomal protein S27</b>                                                         | <b>1.538103734</b> | <b>4.55E-06</b> | <b>2</b> |
| Q71TY3        | DLLHPSPEEEK                                                                                   | 1.223107145        | 2               | 2.32708  |
| Q71TY3        | LVQSPNSYFMDVK                                                                                 | 1.753885518        | 2               | 2.86871  |
| <b>Q75N33</b> | <b>SC16B Protein transport protein Sec16B</b>                                                 | <b>1.016220119</b> | <b>0.911192</b> | <b>2</b> |
| Q75N33        | NLLTGEIPLNVDTPAQIVEK                                                                          | 1.424169347        | 2               | 3.80026  |
| Q75N33        | VLEPDWLVLQLR                                                                                  | 1.009892727        | 2               | 2.50673  |
| <b>Q75Q39</b> | <b>TOM70 Mitochondrial import receptor subunit TOM70</b>                                      | <b>1.084653308</b> | <b>0.45912</b>  | <b>3</b> |
| Q75Q39        | NADLSTFYQNR                                                                                   | 1.343777828        | 2               | 2.57389  |
| Q75Q39        | NREPLMPSPQFIK                                                                                 | 1.070428607        | 2               | 2.54864  |
| Q75Q39        | SDEKDKKEGEALEVK                                                                               | 1.262910448        | 2               | 4.16598  |
| <b>Q75WE7</b> | <b>VWA5A von Willebrand factor A domain_containing protein 5A</b>                             | <b>0.90116096</b>  | <b>0.38214</b>  | <b>2</b> |
| Q75WE7        | YTQETIEEAVER                                                                                  | 0.965742721        | 2               | 2.55259  |
| Q75WE7        | YVQELPLESDGALR                                                                                | 0.594609114        | 2               | 2.61122  |
| <b>Q76MZ3</b> | <b>2AAA Serine/threonine_protein phosphatase 2A 65 kDa regulatory subunit A alpha isoform</b> | <b>1.026264398</b> | <b>0.980058</b> | <b>7</b> |
| Q76MZ3        | AISHEHSPDLEAHFVPLVK                                                                           | 1.032548556        | 3               | 4.35419  |
| Q76MZ3        | DNTIEHLLPLFLAQLKDECEVR                                                                        | 1.213658377        | 3               | 3.37625  |
| Q76MZ3        | IGPILDNSTLQSEVKPILEK                                                                          | 1.056229614        | 2               | 4.52892  |
| Q76MZ3        | LTQDQDVDVK                                                                                    | 0.896427514        | 2               | 2.88687  |
| Q76MZ3        | QLSQSLLPAIVELAEDAK                                                                            | 1.034646554        | 3               | 3.83457  |
| Q76MZ3        | SALASVIMGLSPILGK                                                                              | 0.864185377        | 2               | 3.08302  |
| Q76MZ3        | SEIIPMFSNLSDEQDSVR                                                                            | 0.827823405        | 2               | 3.85579  |

|               |                                                             |                    |                 |           |
|---------------|-------------------------------------------------------------|--------------------|-----------------|-----------|
| <b>Q78P75</b> | <b>DYL2 Dynein light chain 2_ cytoplasmic</b>               | <b>0.714641032</b> | <b>0.999847</b> | <b>3</b>  |
| Q78P75        | NADMSEDMQQDAVDCATQAMEK                                      | 0.642281342        | 2               | 5.67402   |
| Q78P75        | NFGSYVTHETK                                                 | 0.910000698        | 2               | 2.71083   |
| Q78P75        | YNPTWHCIVGR                                                 | 1.084418541        | 2               | 2.72149   |
| <b>Q791V5</b> | <b>MTCH2 Mitochondrial carrier homolog 2</b>                | <b>0.984548803</b> | <b>1.27E-06</b> | <b>5</b>  |
| Q791V5        | EEGIVGFFAGLIPR                                              | 1.785774383        | 2               | 3.59633   |
| Q791V5        | GLFTGLTPR                                                   | 0.972686753        | 2               | 2.80161   |
| Q791V5        | LCSGVLGTVVHGK                                               | 1.513048787        | 3               | 3.35457   |
| Q791V5        | VLIQVGYEPLPPTIGR                                            | 1.017729888        | 2               | 4.16552   |
| Q791V5        | YCGLCDSIVTIYR                                               | 1.166300983        | 2               | 2.93211   |
| <b>Q794E4</b> | <b>HNRPF Heterogeneous nuclear ribonucleoprotein F</b>      | <b>1.498606859</b> | <b>8.05E-05</b> | <b>4</b>  |
| Q794E4        | ATENDIYNFFSPLNPVR                                           | 1.571718029        | 3               | 4.89989   |
| Q794E4        | HSGPNSADSANDGFVR                                            | 1.085998294        | 2               | 4.18021   |
| Q794E4        | ITGEAFVQFASQELAEK                                           | 0.926396624        | 2               | 3.86741   |
| Q794E4        | VHIEIGPDGR                                                  | 1.088056682        | 2               | 2.74295   |
| <b>Q7M0E3</b> | <b>DEST Destrin</b>                                         | <b>1.299207831</b> | <b>1.56E-13</b> | <b>2</b>  |
| Q7M0E3        | HEYQANGPEDLNR                                               | 1.357448605        | 2               | 4.3737    |
| Q7M0E3        | KEELMFFLWAPEQAPLK                                           | 0.917873006        | 2               | 3.83427   |
| <b>Q7TMA5</b> | <b>APOB Apolipoprotein B_100</b>                            | <b>0.909923927</b> | <b>8.4E-08</b>  | <b>12</b> |
| Q7TMA5        | GFEPTLEALFGK                                                | 0.883021799        | 2               | 2.90076   |
| Q7TMA5        | GGINQVGLAFESTK                                              | 1.05769721         | 2               | 2.473     |
| Q7TMA5        | IEGNLVFDPSSYLPK                                             | 0.749348135        | 2               | 3.48951   |
| Q7TMA5        | IEIDIPLPLGGK                                                | 0.964677188        | 2               | 3.08506   |
| Q7TMA5        | ITDNDVLIALDSAK                                              | 1.040996905        | 2               | 3.20563   |
| Q7TMA5        | KGTVATEMSTER                                                | 0.436195674        | 2               | 2.64399   |
| Q7TMA5        | LLQWEQSEQVK                                                 | 0.967498262        | 2               | 2.43395   |
| Q7TMA5        | LSISEQNAQR                                                  | 1.06364654         | 2               | 2.5805    |
| Q7TMA5        | NFVASHIANILNSEEELYVQDLK                                     | 0.874852211        | 3               | 3.64509   |
| Q7TMA5        | NSVSTALEHTLSALLTPAEQTSSWK                                   | 0.754171218        | 3               | 3.35974   |
| Q7TMA5        | SVGFHLPSQEVQIPTFTIPK                                        | 0.638684471        | 3               | 3.52559   |
| Q7TMA5        | TILFDTFVNDVAPVEK                                            | 0.824739262        | 2               | 3.47543   |
| <b>Q7TNG8</b> | <b>LDHD Probable D_lactate dehydrogenase_ mitochondrial</b> | <b>1.161248147</b> | <b>0.000765</b> | <b>4</b>  |
| Q7TNG8        | AVVGSPHVSTASAVR                                             | 0.87136462         | 2               | 2.37528   |
| Q7TNG8        | AYSTDVCPISR                                                 | 1.390567408        | 2               | 3.70201   |
| Q7TNG8        | GSQGGLSQDFVEALK                                             | 1.163587824        | 2               | 3.74125   |
| Q7TNG8        | QLLQEEVGPVGVETMR                                            | 0.953693236        | 2               | 2.6946    |
| <b>Q7TP47</b> | <b>HNRPQ Heterogeneous nuclear ribonucleoprotein Q</b>      | <b>0.912372131</b> | <b>0.026075</b> | <b>2</b>  |
| Q7TP47        | DLFEDELVPLFEK                                               | 1.565739727        | 2               | 3.06382   |
| Q7TP47        | NLANTVTEEILEK                                               | 0.86683563         | 2               | 3.68056   |
| <b>Q7TP48</b> | <b>APMAP Adipocyte plasma membrane_associated protein</b>   | <b>1.091232989</b> | <b>0.265881</b> | <b>4</b>  |
| Q7TP48        | LENGEIETIAR                                                 | 1.097537545        | 2               | 3.31941   |
| Q7TP48        | LFENQLNGPESIVNIGDVLFTGTADGR                                 | 1.095782087        | 3               | 3.3581    |
| Q7TP48        | LLEYDVTVK                                                   | 1.018920852        | 2               | 2.35876   |
| Q7TP48        | LLSSETPIEGK                                                 | 1.923571554        | 2               | 2.98951   |
| <b>Q7TP52</b> | <b>CMBL Carboxymethylenebutenolidase homolog</b>            | <b>1.015038786</b> | <b>0.942294</b> | <b>7</b>  |
| Q7TP52        | AGVSVYGIIR                                                  | 1.326164217        | 2               | 2.394     |
| Q7TP52        | EDCSPADKPYIEEAR                                             | 1.182896533        | 2               | 3.5406    |
| Q7TP52        | KREDCSPADKPYIEEAR                                           | 1.018945175        | 2               | 4.62442   |
| Q7TP52        | LDYGGMGQEVQVEHIK                                            | 0.940823635        | 2               | 4.41776   |
| Q7TP52        | LKEHCIVNYQVK                                                | 1.547977548        | 2               | 3.82445   |
| Q7TP52        | NLIEWLNK                                                    | 1.008217688        | 2               | 2.45274   |
| Q7TP52        | TFSGQTHGFVHR                                                | 1.073523785        | 2               | 3.60365   |

|               |                                                            |                    |                 |           |
|---------------|------------------------------------------------------------|--------------------|-----------------|-----------|
| <b>Q7TPB1</b> | <b>TCPD T_complex protein 1 subunit delta</b>              | <b>1.108595636</b> | <b>6.55E-09</b> | <b>11</b> |
| Q7TPB1        | ALIAGGGAPEIELALR                                           | 1.129882354        | 2               | 4.12606   |
| Q7TPB1        | DIEREDIEFICK                                               | 1.386188884        | 2               | 2.38054   |
| Q7TPB1        | ETLLNSATTSLNSK                                             | 1.253140198        | 2               | 3.55661   |
| Q7TPB1        | GDVTITNDGATILK                                             | 0.730980146        | 2               | 3.28756   |
| Q7TPB1        | GIHPTIISESFQK                                              | 1.084510408        | 2               | 2.63696   |
| Q7TPB1        | IDDVVNTR                                                   | 1.166089942        | 2               | 2.37537   |
| Q7TPB1        | LVIEEAER                                                   | 1.394145917        | 1               | 1.94607   |
| Q7TPB1        | MIQDGKGDVTITNDGATILK+Oxidation(0)                          | 0.864815833        |                 |           |
| Q7TPB1        | SIHDALCVIR                                                 | 1.047024807        | 2               | 2.48198   |
| Q7TPB1        | TGCNVLLIQK                                                 | 0.854382248        | 2               | 2.50297   |
| Q7TPB1        | VIDPATATSVDLR                                              | 1.156775364        | 2               | 3.38237   |
| <b>Q7TPJ0</b> | <b>SSRA Translocon_associated protein subunit alpha</b>    | <b>1.309201401</b> | <b>1.15E-10</b> | <b>2</b>  |
| Q7TPJ0        | GEDFPANNIVK                                                | 1.285394973        | 2               | 3.02246   |
| Q7TPJ0        | GTEDFIVESLDASFR                                            | 1.294489574        | 2               | 4.09288   |
| <b>Q7TQM4</b> | <b>SOAT2 Sterol O_acyltransferase 2</b>                    | <b>1.018273719</b> | <b>0.97323</b>  | <b>2</b>  |
| Q7TQM4        | QDRPLPSTASDSTR                                             | 0.981354935        | 2               | 3.18531   |
| Q7TQM4        | TQCLEQAQR                                                  | 0.969282034        | 2               | 3.01986   |
| <b>Q80TV8</b> | <b>CLAP1 CLIP_associating protein 1</b>                    | <b>1.51936609</b>  | <b>0.059455</b> | <b>2</b>  |
| Q80TV8        | MESCLAQVLQK                                                | 1.127516315        | 2               | 2.49841   |
| Q80TV8        | MGADLLGSVQAKVQK+Oxidation(0)                               | 1.530296976        |                 |           |
| <b>Q80W21</b> | <b>GSTM7 Glutathione S_transferase Mu 7</b>                | <b>0.978978844</b> | <b>9.9E-20</b>  | <b>11</b> |
| Q80W21        | CLDAFPNLK                                                  | 0.920094454        | 2               | 3.183     |
| Q80W21        | CLDAFPNLKDFIAR                                             | 0.973881502        | 2               | 2.69365   |
| Q80W21        | FKLGLDFPNLPYLIDGSHK                                        | 0.93613923         | 3               | 4.13703   |
| Q80W21        | HNLCGETEEER                                                | 1.038401705        | 2               | 3.82512   |
| Q80W21        | ITQSNAILR                                                  | 1.314285639        | 2               | 3.14981   |
| Q80W21        | KHNLCGETEEER                                               | 0.42042139         | 3               | 4.44762   |
| Q80W21        | LFLEYDSSYEK                                                | 1.237447739        | 2               | 3.97428   |
| Q80W21        | LGLDFPNLPYLIDGSHK                                          | 1.368120615        | 2               | 4.7105    |
| Q80W21        | LKPGYLEQLPGMMR                                             | 0.716324965        | 2               | 2.61999   |
| Q80W21        | LYSEFLGK                                                   | 1.278307734        | 2               | 2.31421   |
| Q80W21        | VDILENQLMDNR                                               | 0.68381413         | 2               | 3.69353   |
| <b>Q80X50</b> | <b>UBP2L Ubiquitin_associated protein 2_like</b>           | <b>1.029815619</b> | <b>0.900193</b> | <b>2</b>  |
| Q80X50        | IDLAVLLGK                                                  | 1.035308746        | 2               | 3.38749   |
| Q80X50        | QRPQATAEQIR                                                | 0.899608116        | 2               | 2.33472   |
| <b>Q80X90</b> | <b>FLNB Filamin_B</b>                                      | <b>1.2284177</b>   | <b>6.01E-05</b> | <b>9</b>  |
| Q80X90        | ADIEMPFDPK                                                 | 1.145897732        | 2               | 2.33503   |
| Q80X90        | AHGPGLEGGLVGKPAEFTIDTK                                     | 1.067937783        | 3               | 3.49606   |
| Q80X90        | GAGIGGLGITVEGPSESK                                         | 1.153842028        | 2               | 3.55208   |
| Q80X90        | GFLDGVYSFEYYPSTPGK                                         | 1.827605559        | 2               | 3.18844   |
| Q80X90        | IGNLQTDLSDGLR                                              | 1.351560452        | 2               | 2.38394   |
| Q80X90        | ILAQDGEGQPIDIQMK                                           | 0.977761067        | 2               | 3.85227   |
| Q80X90        | VDIQTEDLEDGTCK                                             | 1.094027106        | 2               | 3.91756   |
| Q80X90        | VGEPGILCVCSEAGPTLGLAVSDSGAK                                | 1.210374561        | 3               | 3.90069   |
| Q80X90        | VTASGPGLSAYGVASLPVEFAIDAR                                  | 1.478458745        | 2               | 3.88751   |
| <b>Q80YR5</b> | <b>SAFB2 Scaffold attachment factor B2</b>                 | <b>0.879430823</b> | <b>0.621996</b> | <b>2</b>  |
| Q80YR5        | GSKMEEEGSEDNGLLEDSR                                        | 0.786058669        | 2               | 2.39389   |
| Q80YR5        | SEPVKEEGSELEQPFQAQATSSVGPDR                                | 1.163323065        | 3               | 4.21901   |
| <b>Q80Z25</b> | <b>OFD1 Oral_facial_digital syndrome 1 protein homolog</b> | <b>1.408294363</b> | <b>0.830793</b> | <b>2</b>  |
| Q80Z25        | ELEQEAERLEK                                                | 1.489921744        | 2               | 2.93903   |
| Q80Z25        | MIEESLK+Oxidation(0)                                       | 1.233596647        |                 |           |
| <b>Q80Z29</b> | <b>NAMPT Nicotinamide phosphoribosyltransferase</b>        | <b>1.096632814</b> | <b>0.714746</b> | <b>4</b>  |
| Q80Z29        | STEAPLIIRPDSGNPLDVLK                                       | 1.079851835        | 2               | 3.93578   |

|               |                                                                             |                    |                 |           |
|---------------|-----------------------------------------------------------------------------|--------------------|-----------------|-----------|
| Q80Z29        | TPAGTFVTLEEGKGDLEEYGHDLHTVFK                                                | 2.320353458        | 5               | 4.60868   |
| Q80Z29        | VIQGDGVDINTLQEIIVEGMK                                                       | 1.039597604        | 2               | 4.45121   |
| Q80Z29        | YLLETSGNLDGLEYK                                                             | 1.044725661        | 2               | 4.2224    |
| <b>Q80Z36</b> | <b>ZHX3 Zinc fingers and homeoboxes protein 3</b>                           | <b>1.010227226</b> | <b>0.999999</b> | <b>2</b>  |
| Q80Z36        | FPYPTKAELCYLTVVTK                                                           | 0.986888411        | 2               | 2.72957   |
| Q80Z36        | YPEEQLK                                                                     | 1.003459123        | 2               | 2.33479   |
| <b>Q80ZF0</b> | <b>chain</b>                                                                | <b>1.033148753</b> | <b>0.594973</b> | <b>2</b>  |
| <b>Q810B6</b> | <b>ANFY1 Ankyrin repeat and FYVE domain_containing protein 1</b>            | <b>1.095358368</b> | <b>0.280933</b> | <b>2</b>  |
| Q810B6        | QLDLELK                                                                     | 1.105622809        | 1               | 2.25782   |
| Q810B6        | RESGAAEQVDNKGK                                                              | 0.484811635        | 1               | 1.92518   |
| <b>Q811D2</b> | <b>ANR26 Ankyrin repeat domain_containing protein 26</b>                    | <b>1.112811535</b> | <b>0.951338</b> | <b>2</b>  |
| Q811D2        | AQEDFDK                                                                     | 1.116754655        | 1               | 1.94918   |
| Q811D2        | LNMLSSKLDNEKQNK                                                             | 1.078152913        | 2               | 2.33604   |
| <b>Q811X6</b> | <b>CRYL1 Lambda_crystallin homolog</b>                                      | <b>0.718089908</b> | <b>0.795091</b> | <b>3</b>  |
| Q811X6        | EMKSLEQSGSLK+Oxidation(1)                                                   | 0.882806323        |                 |           |
| Q811X6        | IVDDQVILSSSSCLLPK                                                           | 1.091017115        | 2               | 2.7312    |
| Q811X6        | TFGPVPEFSGDTVEK                                                             | 0.487141168        | 2               | 3.012     |
| <b>Q8BFZ3</b> | <b>ACTBL Beta_actin_like protein 2</b>                                      | <b>1.115226228</b> | <b>1.38E-13</b> | <b>10</b> |
| Q8BFZ3        | CDVDIR                                                                      | 0.846851895        | 1               | 2.00196   |
| Q8BFZ3        | DLTDYLMK                                                                    | 0.855605198        | 1               | 2.07498   |
| Q8BFZ3        | HQGVVMVGMGQK                                                                | 0.684350817        | 3               | 3.90187   |
| Q8BFZ3        | HQGVVMVGMGQK+Oxidation(4)                                                   | 1.00838872         |                 |           |
| Q8BFZ3        | HQGVVMVGMGQK+Oxidation(4)                                                   | 0.825829919        |                 |           |
| Q8BFZ3        | HQGVVMVGMGQK+Oxidation(7)                                                   | 0.821128163        |                 |           |
| Q8BFZ3        | SYELPDGQVITIGNER                                                            | 0.869423876        | 3               | 5.16983   |
| Q8BFZ3        | TTGIVMDSGDGVTHTVPIYEGYALPHAILR                                              | 0.94073454         | 3               | 6.93717   |
| Q8BFZ3        | TTGIVMDSGDGVTHTVPIYEGYALPHAILR+Oxidation(5)                                 | 1.152488441        |                 |           |
| Q8BFZ3        | VAPDEHPILLTEAPLNPK                                                          | 1.108324671        | 3               | 4.21071   |
| <b>Q8BG32</b> | <b>PSD11 26S proteasome non_ATPase regulatory subunit 11</b>                | <b>0.939825226</b> | <b>0.053554</b> | <b>5</b>  |
| Q8BG32        | LYDNLLEQNLR                                                                 | 0.891454119        | 2               | 3.65063   |
| Q8BG32        | TGQAAELGGLK                                                                 | 1.268484756        | 2               | 2.47413   |
| Q8BG32        | TTANAICPPK                                                                  | 1.203206697        | 2               | 3.07647   |
| Q8BG32        | TYEAALETIQNMSK                                                              | 1.039163938        | 2               | 3.26269   |
| Q8BG32        | VQIEHISSLIK                                                                 | 0.899651872        | 2               | 3.15946   |
| <b>Q8BG79</b> | <b>C19L2 CWF19_like protein 2</b>                                           | <b>0.673782658</b> | <b>0.056234</b> | <b>2</b>  |
| Q8BG79        | KNQDSSGNLRK                                                                 | 0.622771744        | 2               | 2.39218   |
| Q8BG79        | MWPVSSPRETLDMKAER+Oxidation(12)                                             | 1.022310983        |                 |           |
| <b>Q8BGC4</b> | <b>ZADH2 Zinc_binding alcohol dehydrogenase domain_containing protein 2</b> | <b>0.713221405</b> | <b>0.509442</b> | <b>2</b>  |
| Q8BGC4        | DCPVPLPGDGLLVR                                                              | 0.94601266         | 2               | 2.34394   |
| Q8BGC4        | FVGINASDINYSAGR                                                             | 0.378549751        | 2               | 3.81417   |
| <b>Q8BGT5</b> | <b>ALAT2 Alanine aminotransferase 2</b>                                     | <b>1.35416347</b>  | <b>0.000147</b> | <b>3</b>  |
| Q8BGT5        | ILTLESMNPQVK                                                                | 1.063729789        | 2               | 2.60449   |
| Q8BGT5        | LLEETGICVVPGSFGQR                                                           | 1.24939834         | 2               | 3.76934   |
| Q8BGT5        | VLCIINPGNPTGQVQSR                                                           | 1.371805025        | 2               | 4.51233   |
| <b>Q8BGY2</b> | <b>IF5A2 Eukaryotic translation initiation factor 5A_2</b>                  | <b>1.182798755</b> | <b>0.236961</b> | <b>4</b>  |
| Q8BGY2        | KYEDICPSTHNMDVPNIK                                                          | 1.099230531        | 3               | 4.35003   |
| Q8BGY2        | KYEDICPSTHNMDVPNIK+Oxidation(11)                                            | 1.188544326        |                 |           |
| Q8BGY2        | VHLVGIDIFTGK                                                                | 1.151897364        | 1               | 3.36391   |
| Q8BGY2        | YEDICPSTHNMDVPNIK                                                           | 0.931826158        | 2               | 4.04533   |
| <b>Q8BGY3</b> | <b>LUZP2 Leucine zipper protein 2</b>                                       | <b>0.599340809</b> | <b>0.035169</b> | <b>2</b>  |
| Q8BGY3        | DLQENKSLK                                                                   | 1.138487596        | 2               | 2.31299   |

|               |                                                             |                    |                 |          |
|---------------|-------------------------------------------------------------|--------------------|-----------------|----------|
| Q8BGY3        | SLQEALQNQLK                                                 | 0.548366834        | 2               | 2.47748  |
| <b>Q8BH00</b> | <b>AL8A1 Aldehyde dehydrogenase family 8 member A1</b>      | <b>1.129428418</b> | <b>9.9E-20</b>  | <b>9</b> |
| Q8BH00        | ELLMLENFIGGK                                                | 1.483877237        | 2               | 3.38763  |
| Q8BH00        | ELNLPFGGMK                                                  | 0.706727141        | 1               | 2.23217  |
| Q8BH00        | FLPCNSYIDSYDPSTGEVYCK                                       | 1.243105842        | 3               | 5.09226  |
| Q8BH00        | ILCGEGVDQLSLPLR                                             | 1.141364962        | 2               | 4.38564  |
| Q8BH00        | ITQLSAPHCK                                                  | 1.345702271        | 2               | 2.94709  |
| Q8BH00        | KLSLELGGK                                                   | 0.822318075        | 1               | 2.00437  |
| Q8BH00        | NPAlIFEDANLEECIPATVR                                        | 1.039536903        | 3               | 5.34455  |
| Q8BH00        | SSFANQGEICLCTSR                                             | 3.466373848        | 2               | 4.44508  |
| Q8BH00        | TPVGIAGLISPWNLPLYLLTWK                                      | 1.202804654        |                 |          |
| <b>Q8BH69</b> | <b>SPS1 Selenide_ water dikinase 1</b>                      | <b>0.931885214</b> | <b>0.35169</b>  | <b>2</b> |
| Q8BH69        | IIEVAPQVATQNVNPTGATS                                        | 1.015984112        | 2               | 3.6801   |
| Q8BH69        | YGEHQAWIIGIVEK                                              | 0.623223535        | 2               | 2.36494  |
| <b>Q8BHN3</b> | <b>GANAB Neutral alpha_glucosidase AB</b>                   | <b>1.052445629</b> | <b>0.846992</b> | <b>8</b> |
| Q8BHN3        | AEKDEPGAWEEFK                                               | 1.147535198        | 2               | 3.42701  |
| Q8BHN3        | DDNSVELTVAEGPYK                                             | 1.420568991        | 2               | 3.63878  |
| Q8BHN3        | MLDYLQGSGETPQTDIR                                           | 0.855538076        | 2               | 4.7646   |
| Q8BHN3        | MLDYLQGSGETPQTDIR+Oxidation(0)                              | 1.245439931        |                 |          |
| Q8BHN3        | REPWLLASQYQDAIR                                             | 0.988018503        | 3               | 3.7553   |
| Q8BHN3        | SGGIERPFVLSR                                                | 1.046120976        | 2               | 2.52757  |
| Q8BHN3        | SLLSVNAR                                                    | 1.172532104        | 2               | 2.42012  |
| Q8BHN3        | VTEGGEPYR                                                   | 1.029190402        | 2               | 2.5368   |
| <b>Q8BI84</b> | <b>MIA3 Melanoma inhibitory activity protein 3</b>          | <b>0.112853548</b> | <b>0.264135</b> | <b>2</b> |
| Q8BI84        | LQLESEREQNVK                                                | 0.050949539        | 2               | 2.34273  |
| Q8BI84        | TQTAVSIVEEDLK                                               | 0.921161157        | 2               | 2.61991  |
| <b>Q8BIJ6</b> | <b>SYIM Isoleucyl_tRNA synthetase_ mitochondrial</b>        | <b>0.888336992</b> | <b>0.007918</b> | <b>2</b> |
| Q8BIJ6        | DTVLLPQTSFPMK                                               | 0.914470555        | 1               | 2.23063  |
| Q8BIJ6        | SCQTALAEILDVLR                                              | 0.779270478        | 2               | 3.89824  |
| <b>Q8BIJ7</b> | <b>RUFY1 RUN and FYVE domain_ containing protein 1</b>      | <b>0.903766833</b> | <b>0.503628</b> | <b>2</b> |
| Q8BIJ7        | EKDTSCLLQTELQVVEGLK                                         | 1.028381992        | 2               | 2.44625  |
| Q8BIJ7        | ELQDEKAELRK                                                 | 0.831018542        | 2               | 2.44521  |
| <b>Q8BJ64</b> | <b>CHDH Choline dehydrogenase_ mitochondrial</b>            | <b>1.026466658</b> | <b>0.135179</b> | <b>7</b> |
| Q8BJ64        | ADSAYHPSTCK                                                 | 3.014344099        | 2               | 3.40372  |
| Q8BJ64        | AEVQTLVSR                                                   | 0.950578158        | 2               | 2.75354  |
| Q8BJ64        | ELQPGSHVQSDK                                                | 1.179783927        | 2               | 2.5352   |
| Q8BJ64        | ELQPGSHVQSDKEIDAFVR                                         | 1.042910847        | 2               | 4.11539  |
| Q8BJ64        | SRPGVPHPDQHFHFLPSQVIDHGR                                    | 2.497027589        | 5               | 4.86024  |
| Q8BJ64        | TNHPLHQAFQAAR                                               | 0.901059085        | 3               | 4.67728  |
| Q8BJ64        | VLLLEAGPK                                                   | 1.044815875        | 2               | 2.93071  |
| <b>Q8BJY1</b> | <b>PSMD5 26S proteasome non_ATPase regulatory subunit 5</b> | <b>1.10958997</b>  | <b>0.004991</b> | <b>2</b> |
| Q8BJY1        | GLTHPDDSVK                                                  | 0.971850815        | 2               | 2.48779  |
| Q8BJY1        | TVAEIFGNSNYLR                                               | 2.354621366        | 2               | 3.07635  |
| <b>Q8BL97</b> | <b>SRSF7 Serine/arginine_rich splicing factor 7</b>         | <b>1.107932458</b> | <b>0.693728</b> | <b>2</b> |
| Q8BL97        | NPPGFAFVEFEDPR                                              | 1.117290365        | 2               | 3.48263  |
| Q8BL97        | VYVGNLGTGAGK                                                | 1.057801804        | 2               | 2.35984  |
| <b>Q8BMJ2</b> | <b>SYLC Leucyl_tRNA synthetase_ cytoplasmic</b>             | <b>0.889338842</b> | <b>0.089506</b> | <b>3</b> |
| Q8BMJ2        | QTGEGVGPQEYTLVK                                             | 1.482220343        | 2               | 2.36624  |
| Q8BMJ2        | SFITDVNPPYDSFVR                                             | 0.891864573        | 2               | 3.31537  |
| Q8BMJ2        | STGNFLTSQAVDK                                               | 0.705055744        | 2               | 2.97421  |
| <b>Q8BTM8</b> | <b>FLNA Filamin_A</b>                                       | <b>0.935041761</b> | <b>0.207545</b> | <b>5</b> |
| Q8BTM8        | AFGPGLQGGNAGSPAR                                            | 0.724858978        | 2               | 3.78959  |
| Q8BTM8        | ANLPQSFQVDTSK                                               | 0.934862383        | 2               | 2.4652   |

|               |                                                              |                    |                 |           |
|---------------|--------------------------------------------------------------|--------------------|-----------------|-----------|
| Q8BTM8        | GAGTGGLGLAVEGPSEAK                                           | 0.937954789        | 2               | 3.68593   |
| Q8BTM8        | IVSPSGAAVPCK                                                 | 1.11854937         | 2               | 2.4569    |
| Q8BTM8        | VTAQGPGLPEPSGNIANK                                           | 1.016384925        | 2               | 3.94056   |
| <b>Q8BTZ7</b> | <b>GMPPB Mannose_1_phosphate guanyltransferase beta</b>      | <b>1.096337807</b> | <b>0.005911</b> | <b>2</b>  |
| Q8BTZ7        | HHGQEGSILVTK                                                 | 1.009681984        | 3               | 3.75629   |
| Q8BTZ7        | YGVVCEADTGR                                                  | 1.331998278        | 2               | 3.25535   |
| <b>Q8BU33</b> | <b>ILVBL Acetolactate synthase_like protein</b>              | <b>1.034218519</b> | <b>0.822034</b> | <b>3</b>  |
| Q8BU33        | AAVETLVPCFLGGMSR                                             | 1.109271899        | 2               | 2.42028   |
| Q8BU33        | LPNSLMGR+Oxidation(5)                                        | 0.973071245        |                 |           |
| Q8BU33        | NAQVAQSPVLLGGAASTLLQK                                        | 1.167530146        | 2               | 4.58291   |
| <b>Q8BWQ1</b> | <b>UD2A3 UDP_glucuronosyltransferase 2A3</b>                 | <b>0.987241062</b> | <b>0.476844</b> | <b>2</b>  |
| Q8BWQ1        | ADIWLIR                                                      | 0.977452159        | 2               | 2.53691   |
| Q8BWQ1        | IHHDQPVKPLDR                                                 | 1.387201102        | 3               | 3.50576   |
| <b>Q8BX70</b> | <b>VP13C Vacuolar protein sorting_associated protein 13C</b> | <b>0.955500719</b> | <b>0.927443</b> | <b>2</b>  |
| Q8BX70        | ENALSELDVPEFKVK                                              | 0.93996531         | 2               | 2.9023    |
| Q8BX70        | TVLQADSPQHDVEILKPVNMLLCIQR+Oxidation(19)                     | 1.105757338        |                 |           |
| <b>Q8C7X2</b> | <b>K0090 Uncharacterized protein KIAA0090</b>                | <b>1.161774178</b> | <b>9.9E-20</b>  | <b>2</b>  |
| Q8C7X2        | FNVEDGEIVQQVR                                                | 1.053664556        | 2               | 3.27027   |
| Q8C7X2        | VMGDRSVLYK+Oxidation(1)                                      | 3.656667491        |                 |           |
| <b>Q8C8R3</b> | <b>ANK2 Ankyrin_2</b>                                        | <b>1.101689219</b> | <b>0.000847</b> | <b>2</b>  |
| Q8C8R3        | STSSSGRPGTSPTRESR                                            | 0.857132708        | 2               | 2.43608   |
| Q8C8R3        | TSTDFSEVIKQELDNDK                                            | 1.415673886        | 2               | 2.6131    |
| <b>Q8CC88</b> | <b>K0564 Uncharacterized protein KIAA0564 homolog</b>        | <b>1.492575467</b> | <b>0.003157</b> | <b>4</b>  |
| Q8CC88        | HQATGELDDAK                                                  | 1.563253899        | 2               | 3.38585   |
| Q8CC88        | IILDNLQAK                                                    | 1.103326411        | 2               | 2.30254   |
| Q8CC88        | NLADQGIINYPYSTR                                              | 1.468551191        | 2               | 3.19096   |
| Q8CC88        | VSSDQLSSENLTSAVGQK                                           | 0.773915357        | 2               | 3.48928   |
| <b>Q8CDM4</b> | <b>CCD73 Coiled_coil domain_containing protein 73</b>        | <b>0.856139661</b> | <b>0.215327</b> | <b>2</b>  |
| Q8CDM4        | MEEESIDLIKEQK                                                | 0.699941815        | 2               | 2.39728   |
| Q8CDM4        | VTCQHKMEEESIDLIK                                             | 0.865445451        | 2               | 2.37989   |
| <b>Q8CFN2</b> | <b>CDC42 Cell division control protein 42 homolog</b>        | <b>1.217583529</b> | <b>0.000282</b> | <b>3</b>  |
| Q8CFN2        | NVFDEAILAALPEPEPK                                            | 1.112408264        | 3               | 4.99827   |
| Q8CFN2        | WVPEITHHCPK                                                  | 0.969145516        | 2               | 2.40611   |
| Q8CFN2        | YVECSALTQK                                                   | 1.216936818        | 2               | 3.05253   |
| <b>Q8CFW1</b> | <b>ANO2 Anoctamin_2</b>                                      | <b>1.152441779</b> | <b>0.026165</b> | <b>2</b>  |
| Q8CFW1        | TEQTFEERLIK                                                  | 1.596693818        | 2               | 2.36872   |
| Q8CFW1        | TKDIGIWFIDILSGIGK                                            | 0.815434332        | 2               | 2.33945   |
| <b>Q8CG45</b> | <b>ARK72 Aflatoxin B1 aldehyde reductase member 2</b>        | <b>1.250185975</b> | <b>2.71E-14</b> | <b>10</b> |
| Q8CG45        | AVSGAPLRPGTVLGTMEMGR                                         | 0.627391007        | 2               | 2.89333   |
| Q8CG45        | EHHFEAIALVEK                                                 | 1.729049363        | 2               | 2.34508   |
| Q8CG45        | FFGNSWSETYR                                                  | 0.982862465        | 2               | 2.81709   |
| Q8CG45        | FYAYNPLAGLLTGK                                               | 1.599324773        | 2               | 4.53704   |
| Q8CG45        | MDASASAATVR                                                  | 1.009318623        | 2               | 3.67335   |
| Q8CG45        | MDASASAATVR+Oxidation(0)                                     | 1.225494035        |                 |           |
| Q8CG45        | QVETELLPLCR                                                  | 1.072987471        | 2               | 2.9625    |
| Q8CG45        | RMDASASAATVR                                                 | 1.162486317        | 2               | 2.76044   |
| Q8CG45        | TTYGTSAPSMTSAAALR                                            | 0.975455469        | 2               | 4.21112   |
| Q8CG45        | VDLFYLHAPDHGTPIVETLQACQLHQEGK                                | 1.944101041        | 3               | 5.55029   |
| <b>Q8CG48</b> | <b>SMC2 Structural maintenance of chromosomes protein 2</b>  | <b>0.716348579</b> | <b>0.036353</b> | <b>2</b>  |

|               |                                                                    |                    |                 |           |
|---------------|--------------------------------------------------------------------|--------------------|-----------------|-----------|
| Q8CG48        | EKLLLEK                                                            | 0.829165347        | 1               | 1.96578   |
| Q8CG48        | IKALNCEIEELER                                                      | 0.739455667        | 2               | 2.46479   |
| <b>Q8CGC7</b> | <b>SYEP Bifunctional aminoacyl_tRNA synthetase</b>                 | <b>1.285744777</b> | <b>8.13E-10</b> | <b>10</b> |
| Q8CGC7        | AIQGATSHHLGQNFSK                                                   | 1.315727193        | 2               | 4.47901   |
| Q8CGC7        | DQDVEPGAPSMGAK                                                     | 1.271752109        | 2               | 3.14168   |
| Q8CGC7        | DQVDSAVQELLQLK                                                     | 1.192159457        | 2               | 3.728     |
| Q8CGC7        | GDVSVSVEEGKENLLR                                                   | 1.218783384        | 2               | 3.47736   |
| Q8CGC7        | KEENLAEWYSQVITK                                                    | 0.977141456        | 2               | 4.35699   |
| Q8CGC7        | KGDIIQLQR                                                          | 1.491054984        | 2               | 2.65701   |
| Q8CGC7        | SLCIPFNPLCELQPGAMCVCGK                                             | 1.252073068        | 2               | 4.38091   |
| Q8CGC7        | SQGSGLSSGGAGEGQGP                                                  | 1.322882638        | 2               | 4.63391   |
| Q8CGC7        | TELAEPPIAIRPTSETVMYPAYAK                                           | 1.075087553        | 3               | 3.47725   |
| Q8CGC7        | VYEELLAIPVVR                                                       | 1.232726381        | 2               | 3.03267   |
| <b>Q8CHM7</b> | <b>HACL1 2_hydroxyacyl_CoA lyase 1</b>                             | <b>1.236758795</b> | <b>0.115556</b> | <b>9</b>  |
| Q8CHM7        | DTSKPCLINIMIEPQSTR                                                 | 0.912274069        | 2               | 3.49412   |
| Q8CHM7        | GAAYSHAEDSIR                                                       | 0.608904204        | 2               | 3.43655   |
| Q8CHM7        | GVPDPNHPNCVGAAR                                                    | 1.357374629        | 2               | 3.36409   |
| Q8CHM7        | GYFVQTPEELQDSL                                                     | 1.15886737         | 2               | 4.05175   |
| Q8CHM7        | LVELCNLPFLPTPMGK                                                   | 1.361327851        | 2               | 4.26507   |
| Q8CHM7        | NCFIVSEGANTMDIGR                                                   | 1.068847984        | 2               | 4.90765   |
| Q8CHM7        | NQEAMGAFQEFPPQVEACR                                                | 1.083917067        | 2               | 6.10322   |
| Q8CHM7        | SSYGRPGACYIDVPADLVTLQESTTSIK                                       | 0.9886117          | 3               | 4.14099   |
| Q8CHM7        | YKECCMPPLSLAETSAVR                                                 | 0.65599677         | 2               | 2.36958   |
| <b>Q8CI17</b> | <b>MB213 Protein mab_21_like 3</b>                                 | <b>0.875124962</b> | <b>0.281417</b> | <b>2</b>  |
| Q8CI17        | QQISQTMEEVQK+Oxidation(6)                                          | 1.22913744         |                 |           |
| Q8CI17        | RQQISQTMEEVQK                                                      | 0.874495556        | 2               | 2.3575    |
| <b>Q8CIB5</b> | <b>FERM2 Fermitin family homolog 2</b>                             | <b>0.869573686</b> | <b>0.813422</b> | <b>3</b>  |
| Q8CIB5        | GCEVTPDVNISGQK                                                     | 0.819978773        | 2               | 3.16586   |
| Q8CIB5        | INQLYEQAK                                                          | 1.030840067        | 2               | 2.9699    |
| Q8CIB5        | TSTILGDITSIPELADYIK                                                | 0.908197486        | 2               | 2.89817   |
| <b>Q8CIE6</b> | <b>COPA Coatomer subunit alpha</b>                                 | <b>1.226356336</b> | <b>0.000503</b> | <b>7</b>  |
| Q8CIE6        | ASNLENSTYDLYTIPK                                                   | 1.509274482        | 2               | 3.79796   |
| Q8CIE6        | DADSQNPDAPEGK                                                      | 1.275103213        | 2               | 3.2413    |
| Q8CIE6        | GITGVDFGTTDAVVK                                                    | 1.038962803        | 2               | 3.99592   |
| Q8CIE6        | GVNWAAFHPTMPLIVSGADDR                                              | 0.857353563        | 2               | 3.64124   |
| Q8CIE6        | LLELGPKEVAQQTR                                                     | 1.238046402        | 2               | 3.47086   |
| Q8CIE6        | SILLSVPLLVDNK                                                      | 1.221390752        | 2               | 3.5948    |
| Q8CIE6        | TLDLPIYVTR                                                         | 1.030773952        | 2               | 2.67268   |
| <b>Q8CJ40</b> | <b>CROCC Rootletin</b>                                             | <b>1.000007837</b> | <b>0.771018</b> | <b>4</b>  |
| Q8CJ40        | DLLQLGGELVRTSR                                                     | 1.137970647        | 2               | 2.47817   |
| Q8CJ40        | ELEERTGNLGRQR                                                      | 1.688396498        | 2               | 2.30787   |
| Q8CJ40        | LQEERRLLQER                                                        | 0.897311765        | 2               | 2.35933   |
| Q8CJ40        | QQQAEHATTMAVEK+Oxidation(9)                                        | 1.0082515          |                 |           |
| <b>Q8JZN5</b> | <b>ACAD9 Acyl_CoA dehydrogenase family member 9_mitochondrial</b>  | <b>1.346263924</b> | <b>9.9E-20</b>  | <b>3</b>  |
| Q8JZN5        | GSNTCEVHFENTR                                                      | 1.349216967        | 2               | 4.35905   |
| Q8JZN5        | NLSEFGLIQEK                                                        | 1.036683594        | 2               | 3.10723   |
| Q8JZN5        | SGNVTTVMETIGR                                                      | 0.862597773        | 2               | 2.50522   |
| <b>Q8K009</b> | <b>AL1L2 Mitochondrial 10_formyltetrahydrofolate dehydrogenase</b> | <b>0.928900131</b> | <b>0.977764</b> | <b>16</b> |
| Q8K009        | ADPLALAAEK                                                         | 1.1696277          | 2               | 2.63957   |
| Q8K009        | AGFSVFWADDGLDTPILLQR                                               | 1.251245118        | 2               | 3.86709   |
| Q8K009        | AMVEAVQLIADGK                                                      | 1.037127466        | 2               | 3.76944   |
| Q8K009        | ANNTEYGLASGVFTR                                                    | 0.855394224        | 2               | 4.73416   |
| Q8K009        | DLGEEALNEYLK                                                       | 1.060620196        | 2               | 3.23262   |
| Q8K009        | EESFGPIMVISK                                                       | 1.050124721        | 2               | 2.40331   |
| Q8K009        | FLFPEGIK                                                           | 0.906433903        | 2               | 2.40233   |



|               |                                                                                  |                    |                 |           |
|---------------|----------------------------------------------------------------------------------|--------------------|-----------------|-----------|
| Q8K009        | FQNGDIDGVLQR                                                                     | 1.068506107        | 2               | 2.91139   |
| Q8K009        | GVINIIPGSGGVAGQR                                                                 | 0.921505072        | 2               | 3.95797   |
| Q8K009        | HGSIIYHPSLLPR                                                                    | 1.006725922        | 2               | 4.17829   |
| Q8K009        | LEAGTVFINTYNK                                                                    | 1.209711256        | 2               | 3.08123   |
| Q8K009        | NLQFEDGK                                                                         | 0.912885444        | 1               | 2.1286    |
| Q8K009        | SAACLAAGNTLVLPKPAQVPTLTALK                                                       | 0.996695168        | 3               | 3.70991   |
| Q8K009        | SCDVKNPNDTVDSLNR                                                                 | 1.086984412        | 2               | 4.43357   |
| Q8K009        | TPQPEEGATYEGIQK                                                                  | 1.472096608        | 2               | 3.20075   |
| Q8K009        | VVGFTVPDKDGK                                                                     | 1.059593706        | 2               | 3.13765   |
| <b>Q8K1S6</b> | <b>SPIR2 Protein spire homolog 2</b>                                             | <b>1.418151882</b> | <b>0.126231</b> | <b>2</b>  |
| Q8K1S6        | ALFVETLELR                                                                       | 1.421628136        | 2               | 2.31217   |
| Q8K1S6        | DTADILLRR                                                                        | 1.225994123        | 2               | 2.42488   |
| <b>Q8K2F0</b> | <b>BRD3 Bromodomain_containing protein 3</b>                                     | <b>0.560758325</b> | <b>0.001194</b> | <b>2</b>  |
| Q8K2F0        | LNLDPYHKKIK                                                                      | 0.159099914        | 2               | 2.45914   |
| Q8K2F0        | QLSLDINRLPGEK                                                                    | 0.560765573        | 2               | 2.45337   |
| <b>Q8K3J1</b> | <b>NDUS8 NADH dehydrogenase [ubiquinone] iron_sulfur protein 8_mitochondrial</b> | <b>1.007291314</b> | <b>0.969744</b> | <b>2</b>  |
| Q8K3J1        | LCEAICPAQAITIEAEPK                                                               | 1.017733662        | 2               | 4.36945   |
| Q8K3J1        | YVNKKEQSEVDMK                                                                    | 0.758919562        | 2               | 2.31708   |
| <b>Q8K440</b> | <b>ABC8B ATP_binding cassette sub_family A member 8_B</b>                        | <b>1.001644413</b> | <b>0.975549</b> | <b>3</b>  |
| Q8K440        | GEILGLLGHNGAGKSTSLK                                                              | 1.023089962        | 2               | 2.31314   |
| Q8K440        | LMEMEQTLSSLRETEK+Oxidation(1)                                                    | 0.728752226        |                 |           |
| Q8K440        | LMEMEQTLSSLRETEK+Oxidation(3)                                                    | 0.822384261        |                 |           |
| <b>Q8K442</b> | <b>ABC8A ATP_binding cassette sub_family A member 8_A</b>                        | <b>1.066123213</b> | <b>0.990789</b> | <b>5</b>  |
| Q8K442        | GQITAILGHSGAGK                                                                   | 1.2519217          | 2               | 3.50688   |
| Q8K442        | IDDFIHSLEQQNIALEVDAFGTR                                                          | 1.059239985        | 3               | 3.54142   |
| Q8K442        | LTGVCPQCNVQDFLTVR                                                                | 1.153898722        | 2               | 2.8147    |
| Q8K442        | NTQNILVQNLGGQK                                                                   | 1.002223226        | 2               | 3.42533   |
| Q8K442        | STLLNVLSGLCVPTK                                                                  | 1.107628777        | 2               | 3.72299   |
| <b>Q8K4C0</b> | <b>FMO5 Dimethylaniline monooxygenase [N_oxide_forming] 5</b>                    | <b>0.753643814</b> | <b>8.77E-15</b> | <b>9</b>  |
| Q8K4C0        | FDHEMFGLKPK                                                                      | 0.600192792        | 2               | 2.9214    |
| Q8K4C0        | GYPIDILLSSR                                                                      | 0.76401865         | 2               | 3.06238   |
| Q8K4C0        | HSALGQHPTINDDLPNR                                                                | 0.777179016        | 2               | 4.99936   |
| Q8K4C0        | IAVIGSGASGLTICK                                                                  | 1.296534983        | 2               | 4.02974   |
| Q8K4C0        | KLPSQSEMMAEINK                                                                   | 0.777403336        | 2               | 3.82066   |
| Q8K4C0        | KQPDFSTSGQWQVVEHEGK                                                              | 0.837674463        | 3               | 4.58752   |
| Q8K4C0        | KTILTTEDR                                                                        | 0.757503141        | 2               | 2.56085   |
| Q8K4C0        | QQVDVFDGVLVCTGHHTDPHPLDSFPGIEK                                                   | 0.638367655        | 3               | 4.06614   |
| Q8K4C0        | SDDIGGLWR                                                                        | 0.747376034        | 2               | 2.81345   |
| <b>Q8K4G6</b> |                                                                                  | <b>0.829061948</b> | <b>1.56E-09</b> | <b>56</b> |
| <b>Q8K4T4</b> | <b>FLIP1 Filamin_A_interacting protein 1</b>                                     | <b>1.316864849</b> | <b>0.069627</b> | <b>2</b>  |
| Q8K4T4        | FQPRAETQSMKIELK+Oxidation(9)                                                     | 1.247455415        |                 |           |
| Q8K4T4        | IEELEETNKSLLQK                                                                   | 1.324398071        | 2               | 2.40646   |
| <b>Q8K4Z3</b> | <b>AIBP Apolipoprotein A_I_binding protein</b>                                   | <b>0.980492724</b> | <b>0.002618</b> | <b>2</b>  |
| Q8K4Z3        | GNPSGIQPDLLISLTAPK                                                               | 1.110027988        | 2               | 4.19953   |
| Q8K4Z3        | SPPTVLVICGPGNNGDGLVCAR                                                           | 0.915094022        | 2               | 5.98306   |
| <b>Q8K586</b> | <b>RANT GTP_binding nuclear protein Ran_testis_specific isoform</b>              | <b>1.207985974</b> | <b>0.000296</b> | <b>3</b>  |
| Q8K586        | FNVWDTAGQEK                                                                      | 1.285496711        | 2               | 3.03322   |
| Q8K586        | NLQYYDISAK                                                                       | 1.503761657        | 1               | 2.21583   |
| Q8K586        | VCENIPIVLCGNK                                                                    | 1.187823982        | 2               | 3.8283    |
| <b>Q8QZY1</b> | <b>EIF3L Eukaryotic translation initiation factor 3 subunit L</b>                | <b>1.196296617</b> | <b>0.533472</b> | <b>2</b>  |
| Q8QZY1        | KSEGEMDFLRSNPK                                                                   | 0.964353088        | 2               | 2.31237   |

|               |                                                                     |                    |                 |          |
|---------------|---------------------------------------------------------------------|--------------------|-----------------|----------|
| Q8QZY1        | VFSDEVQQAQLSTIR                                                     | 1.200170216        | 2               | 3.87502  |
| <b>Q8R066</b> | <b>C1QT4 Complement C1q tumor necrosis factor_related protein 4</b> | <b>1.277121695</b> | <b>0.13065</b>  | <b>2</b> |
| Q8R066        | NRDEVQAMIYDDGASRR                                                   | 1.066861899        | 2               | 2.3264   |
| Q8R066        | TLSVKLMKNR                                                          | 1.369678758        | 2               | 2.41372  |
| <b>Q8R081</b> | <b>HNRPL Heterogeneous nuclear ribonucleoprotein L</b>              | <b>1.152633356</b> | <b>8.82E-10</b> | <b>5</b> |
| Q8R081        | ASLNGADIYSGCCTLK                                                    | 1.738025897        | 2               | 3.31731  |
| Q8R081        | NDQDTWDYTNPNLSGGDPGSPNPKR                                           | 1.030890787        | 3               | 5.17982  |
| Q8R081        | SDALETLGFLNHYQMK                                                    | 0.952966767        | 2               | 2.98846  |
| Q8R081        | SSSGLLEWDSK                                                         | 0.706466294        | 2               | 2.83358  |
| Q8R081        | TENAGDQHGGGGGGGAAGGGGGENYDDPHK                                      | 0.740606441        | 3               | 7.47937  |
| <b>Q8R0F9</b> | <b>S14L4 SEC14 like protein 4</b>                                   | <b>1.09158152</b>  | <b>9.36E-07</b> | <b>6</b> |
| Q8R0F9        | FDNTYSLHTK                                                          | 1.592170255        | 2               | 3.06803  |
| Q8R0F9        | GSSHQVENEILFPGCVLR                                                  | 0.960460793        | 2               | 5.0728   |
| Q8R0F9        | VCEMLLHECELQSQK                                                     | 0.902447384        | 2               | 4.63753  |
| Q8R0F9        | VCEMLLHECELQSQK+Oxidation(3)                                        | 1.590943361        |                 |          |
| Q8R0F9        | VGYTAEVLLPDK                                                        | 1.113319898        | 2               | 2.69536  |
| Q8R0F9        | VGYTAEVLLPDKACEEK                                                   | 0.749555387        | 2               | 2.74318  |
| <b>Q8R164</b> | <b>BPHL Valacyclovir hydrolase</b>                                  | <b>1.014628328</b> | <b>0.951831</b> | <b>3</b> |
| Q8R164        | FADEFNR                                                             | 1.006463148        | 2               | 2.49064  |
| Q8R164        | QVSLLGWSDGGITALIAAAK                                                | 0.975937869        | 2               | 3.437    |
| Q8R164        | TDFAPQLQSLNK                                                        | 1.069695451        | 2               | 3.54716  |
| <b>Q8R1V4</b> | <b>TMED4 Transmembrane emp24 domain_containing protein 4</b>        | <b>1.033635613</b> | <b>0.977436</b> | <b>2</b> |
| Q8R1V4        | CFIEEIPDETMVIGNYR                                                   | 0.939387539        | 2               | 3.55078  |
| Q8R1V4        | QLLDQVEQIQK                                                         | 1.08296257         | 2               | 3.14669  |
| <b>Q8R3Q6</b> | <b>CCD58 Coiled_coil domain_containing protein 58</b>               | <b>1.042965757</b> | <b>0.659921</b> | <b>2</b> |
| Q8R3Q6        | IVHELNTTVPTASFAGK                                                   | 1.234612297        | 2               | 4.1953   |
| Q8R3Q6        | NCIAQTSAVVK                                                         | 1.042497273        | 2               | 2.66114  |
| <b>Q8R491</b> | <b>EHD3 EH domain_containing protein 3</b>                          | <b>0.971590658</b> | <b>0.999996</b> | <b>5</b> |
| Q8R491        | ADQIETQQLMR                                                         | 0.870267763        | 2               | 2.79187  |
| Q8R491        | LDISDEFSEVIK                                                        | 1.357091937        | 2               | 3.13806  |
| Q8R491        | LFEAEEQDLFK                                                         | 0.963505293        | 2               | 3.6      |
| Q8R491        | MQDQLQAQDFSK                                                        | 0.942265933        | 2               | 3.81479  |
| Q8R491        | QEETQRPVQMVK                                                        | 0.992156458        | 2               | 2.52915  |
| <b>Q8VBU2</b> | <b>NDRG2 Protein NDRG2</b>                                          | <b>0.985453164</b> | <b>3.47E-06</b> | <b>7</b> |
| Q8VBU2        | CPVMLVVGDQAPHEDAVVECNSK                                             | 0.780134836        | 3               | 4.76731  |
| Q8VBU2        | CPVMLVVGDQAPHEDAVVECNSK+Oxidation(3)                                | 0.892170069        |                 |          |
| Q8VBU2        | LDPTQTSFLK                                                          | 0.813810796        | 1               | 1.90929  |
| Q8VBU2        | MADSGGQPQLTQPGK                                                     | 1.32567221         | 2               | 3.85656  |
| Q8VBU2        | SLITHAPNLENIELYWNSYNRR                                              | 1.499911362        | 3               | 4.77606  |
| Q8VBU2        | TASLTSASIDGSR                                                       | 1.585154701        | 2               | 3.10935  |
| Q8VBU2        | TLSQSSESGTLPSPGPPGHTMEVSC                                           | 0.993915792        | 2               | 4.42417  |
| <b>Q8VC12</b> | <b>HUTU Urocanate hydratase</b>                                     | <b>1.118253058</b> | <b>8.17E-11</b> | <b>7</b> |
| Q8VC12        | HQLVVGSQLR                                                          | 0.979302889        | 2               | 3.0967   |
| Q8VC12        | LLALEFAQELR                                                         | 1.7164658          | 2               | 3.78182  |
| Q8VC12        | LQYMDNIR                                                            | 1.273460733        | 2               | 2.35022  |
| Q8VC12        | LVITNGMVIPNYSSR                                                     | 1.308804362        | 2               | 3.35347  |
| Q8VC12        | VAIAVAINQAIASGK                                                     | 1.378411483        | 2               | 3.66429  |
| Q8VC12        | VFVTSGLGGMSGAAQAK                                                   | 0.995601191        | 2               | 4.50862  |
| Q8VC12        | VFVTSGLGGMSGAAQAK+Oxidation(9)                                      | 1.206713589        |                 |          |
| <b>Q8VDG5</b> | <b>PPCS Phosphopantothenate__cysteine ligase</b>                    | <b>1.430248874</b> | <b>0.000154</b> | <b>2</b> |
| Q8VDG5        | FLDNFSSGR                                                           | 1.453558988        | 2               | 2.48359  |
| Q8VDG5        | LETDPDIISR                                                          | 1.423274348        | 2               | 3.16904  |
| <b>Q8VED5</b> | <b>K2C79 Keratin_type II cytoskeletal 79</b>                        | <b>0.826093422</b> | <b>1.82E-05</b> | <b>4</b> |

|               |                                                          |                    |                 |           |
|---------------|----------------------------------------------------------|--------------------|-----------------|-----------|
| Q8VED5        | NKYEDEINK                                                | 0.817039539        | 2               | 2.7616    |
| Q8VED5        | NKYEDEINKR                                               | 0.85057223         | 3               | 3.44034   |
| Q8VED5        | NLDLDSIIAEVK                                             | 0.702199516        | 2               | 3.84987   |
| Q8VED5        | YEDEINK                                                  | 1.026876447        | 1               | 2.48087   |
| <b>Q8VEK3</b> | <b>HNRPU Heterogeneous nuclear ribonucleoprotein U</b>   | <b>1.075305245</b> | <b>3.8E-07</b>  | <b>9</b>  |
| Q8VEK3        | EKPYFPIPEDCTFIQNVPLEDR                                   | 1.231823104        | 3               | 4.49519   |
| Q8VEK3        | GYFEYIEENK                                               | 0.883666614        | 2               | 3.26657   |
| Q8VEK3        | LLEQYKEESK                                               | 1.318620312        | 2               | 3.16684   |
| Q8VEK3        | LLEQYKEESKK                                              | 1.163739854        | 2               | 3.38372   |
| Q8VEK3        | LQAALDNEAGGRPAMEPGNGSLDLGGDAAGR                          | 1.002141954        | 3               | 5.08896   |
| Q8VEK3        | NFIELDQTNVSAQAQR                                         | 0.839542798        | 2               | 4.52812   |
| Q8VEK3        | TCNCETEDYGEK                                             | 1.239761715        | 2               | 3.38593   |
| Q8VEK3        | VSELKEELKK                                               | 1.190329476        | 2               | 2.42955   |
| Q8VEK3        | YNILGTNTIMDK                                             | 0.85659825         | 2               | 3.57529   |
| <b>Q8VHE9</b> | <b>RETST All_trans_retinol_13_14_reductase</b>           | <b>0.654433767</b> | <b>2.65E-10</b> | <b>7</b>  |
| Q8VHE9        | ATVQSVLLDSAGR                                            | 0.784144131        | 2               | 3.53947   |
| Q8VHE9        | FLPLPLTQLLNK                                             | 0.884953261        | 2               | 2.85718   |
| Q8VHE9        | GATYGADHDLAR                                             | 1.164995158        | 2               | 3.17358   |
| Q8VHE9        | NLYSDLQALGSK                                             | 0.728529167        | 2               | 2.91939   |
| Q8VHE9        | RPPEPLVTDK                                               | 0.771251946        | 2               | 2.6184    |
| Q8VHE9        | VLVLEQHTK                                                | 0.856611287        | 2               | 2.38786   |
| Q8VHE9        | VVAHGVSHAILLK                                            | 0.857311862        | 2               | 2.42034   |
| <b>Q8VHT6</b> | <b>AS3MT Arsenite methyltransferase</b>                  | <b>1.639858967</b> | <b>1.21E-12</b> | <b>4</b>  |
| Q8VHT6        | DCYVLSQLVGQK                                             | 1.378893764        | 2               | 2.96754   |
| Q8VHT6        | ILDGSGSGR                                                | 0.445435997        | 2               | 2.68886   |
| Q8VHT6        | SLQNVHEEVISR                                             | 1.68144728         | 2               | 3.21631   |
| Q8VHT6        | TSADLQTNACVTPAK                                          | 1.651861122        | 2               | 3.84688   |
| <b>Q8VHX6</b> | <b>FLNC Filamin_C</b>                                    | <b>0.957549975</b> | <b>0.532259</b> | <b>3</b>  |
| Q8VHX6        | AFGPGLEGGLVNK                                            | 1.091716909        | 2               | 2.60014   |
| Q8VHX6        | GAGTGGLGLTVEGPCEAK                                       | 0.957498924        | 2               | 3.89588   |
| Q8VHX6        | LIALLEVLVSQK                                             | 1.541380421        | 2               | 2.69896   |
| <b>Q8VI04</b> | <b>ASGL1 L_asparaginase</b>                              | <b>1.009323446</b> | <b>0.571922</b> | <b>3</b>  |
| Q8VI04        | FAADMGIPQTPAEK                                           | 1.266588814        | 2               | 2.7111    |
| Q8VI04        | GNLAYATSTGGIVNK                                          | 0.966705857        | 2               | 4.28747   |
| Q8VI04        | TVDEAATLALDYMK                                           | 1.025854617        | 2               | 2.65614   |
| <b>Q8VID1</b> | <b>DHRS4 Dehydrogenase/reductase SDR family member 4</b> | <b>1.042854225</b> | <b>0.309281</b> | <b>4</b>  |
| Q8VID1        | AVATLQGEGLSVTVGVCHVGK                                    | 0.986106544        | 2               | 4.46664   |
| Q8VID1        | LAEDGAHVVISSR                                            | 2.470862848        | 2               | 3.70081   |
| Q8VID1        | NFAAELAPK                                                | 1.010132221        | 2               | 2.51755   |
| Q8VID1        | VNCLAPGLIK                                               | 0.659782352        | 2               | 2.54097   |
| <b>Q8VIF7</b> | <b>SBP1 Selenium_binding protein 1</b>                   | <b>1.034486672</b> | <b>0.889006</b> | <b>10</b> |
| Q8VIF7        | CGPGYATPLEAMK                                            | 0.969307503        | 2               | 3.46774   |
| Q8VIF7        | FLHDPDATQGFGCALSSNIQR                                    | 1.304516123        | 2               | 4.95789   |
| Q8VIF7        | GGFVLLDGETFEVK                                           | 1.056992578        | 2               | 4.1927    |
| Q8VIF7        | GTWEKPGGEAPMGYDFWYQPR                                    | 0.822703943        | 2               | 4.33114   |
| Q8VIF7        | HEIIQTLQMK                                               | 1.053025902        | 2               | 2.64103   |
| Q8VIF7        | HNIMVSTEWAAPNVFK                                         | 0.874014685        | 2               | 4.29946   |
| Q8VIF7        | LTGQIFLGGSIK                                             | 1.054311971        | 2               | 3.00361   |
| Q8VIF7        | NEGGTWSVEK                                               | 1.146722881        | 2               | 2.8867    |
| Q8VIF7        | NTGIEAPDYLATVDVDPK                                       | 1.150739893        | 2               | 5.2064    |
| Q8VIF7        | VIENIEHAK                                                | 0.888843442        | 2               | 2.54865   |
| <b>Q8VIJ6</b> | <b>SFPQ Splicing factor_proline_and glutamine_rich</b>   | <b>1.109708918</b> | <b>0.850908</b> | <b>3</b>  |
| Q8VIJ6        | FGQGGAGPVGQGPGR                                          | 1.000354029        | 2               | 2.82719   |
| Q8VIJ6        | NLSPYVSNELLEAFSQFPIER                                    | 0.936470287        | 2               | 3.53484   |

|               |                                                                        |                    |                 |          |
|---------------|------------------------------------------------------------------------|--------------------|-----------------|----------|
| Q8VIJ6        | YGEPGEVFIN                                                             | 1.317024808        | 2               | 2.79802  |
| <b>Q91VA0</b> | <b>ACSM1 Acyl-coenzyme A synthetase ACSM1_mitochondrial</b>            | <b>0.791748321</b> | <b>0.920392</b> | <b>6</b> |
| Q91VA0        | AFIVLNPEFLSHDQEQLIK                                                    | 0.887853057        | 2               | 5.57705  |
| Q91VA0        | AILPFDLQIIDEK                                                          | 0.842718873        | 2               | 3.77388  |
| Q91VA0        | GNILPPNTEGYIGIR                                                        | 0.846104333        | 2               | 3.00964  |
| Q91VA0        | HNQGLAFR                                                               | 0.605429759        | 2               | 2.32328  |
| Q91VA0        | KVEFVSELPK                                                             | 1.100698422        | 2               | 2.87308  |
| Q91VA0        | NKEFGQL                                                                | 0.897414803        | 1               | 2.10873  |
| <b>Q91VM5</b> | <b>RBMXL Heterogeneous nuclear ribonucleoprotein G_like 1</b>          | <b>1.110993338</b> | <b>0.002179</b> | <b>2</b> |
| Q91VM5        | LFIGLNTETNEK                                                           | 1.624566271        | 2               | 3.15128  |
| Q91VM5        | VEQATKPSFESGR                                                          | 1.109327772        | 2               | 3.52291  |
| <b>Q91VM9</b> | <b>IPYR2 Inorganic pyrophosphatase 2_mitochondrial</b>                 | <b>1.205081641</b> | <b>0.062323</b> | <b>2</b> |
| Q91VM9        | IIAINVNDPEAEK                                                          | 1.238954227        | 2               | 3.25103  |
| Q91VM9        | MEIATEEPLNPIK                                                          | 1.129761054        | 2               | 3.86711  |
| <b>Q91W43</b> | <b>GCSF Glycine dehydrogenase [decarboxylating]_mitochondrial</b>      | <b>1.002166973</b> | <b>0.942004</b> | <b>4</b> |
| Q91W43        | AGHQLQHDLFFDTLK                                                        | 1.117309528        | 2               | 2.41108  |
| Q91W43        | NLLENSGWVTQYTPYQPEVSQGR                                                | 0.973120569        | 2               | 4.0825   |
| Q91W43        | VSFQPNSGAQGEYAGLATIR                                                   | 0.947779725        | 2               | 4.77808  |
| Q91W43        | YGNIDVAHLK                                                             | 0.993940628        | 3               | 3.4904   |
| <b>Q91W90</b> | <b>TXND5 Thioredoxin domain-containing protein 5</b>                   | <b>1.092797548</b> | <b>0.578129</b> | <b>2</b> |
| Q91W90        | SFEDTIAQGITVFK                                                         | 1.058754232        | 2               | 3.55809  |
| Q91W90        | VDCTQHAYAVCSEHQVR                                                      | 1.101092829        | 3               | 4.39099  |
| <b>Q91WL5</b> | <b>CP4CA Cytochrome P450 4A12A</b>                                     | <b>0.95080438</b>  | <b>0.458983</b> | <b>3</b> |
| Q91WL5        | FELLPDPT                                                               | 0.791839228        | 2               | 2.39649  |
| Q91WL5        | IQLQDEEELEK                                                            | 1.489921744        | 2               | 2.35265  |
| Q91WL5        | VAVALTLR                                                               | 1.295023265        | 2               | 2.59905  |
| <b>Q91X77</b> | <b>CY250 Cytochrome P450 2C50</b>                                      | <b>0.784215308</b> | <b>1.54E-08</b> | <b>3</b> |
| Q91X77        | IKEHEESLDVTIPR                                                         | 0.887466246        | 3               | 3.60167  |
| Q91X77        | NFLLEK                                                                 | 0.582662677        | 1               | 2.1078   |
| Q91X77        | YALLLLK                                                                | 0.970444444        | 2               | 2.82037  |
| <b>Q91X78</b> | <b>ERLN1 Erlin_1</b>                                                   | <b>1.217723409</b> | <b>0.151478</b> | <b>2</b> |
| Q91X78        | ISEIEDAAFLAR                                                           | 0.857163407        | 2               | 2.78583  |
| Q91X78        | SVQTTLQTDEVK                                                           | 1.239441487        | 2               | 3.21543  |
| <b>Q91XE8</b> | <b>TM205 Transmembrane protein 205</b>                                 | <b>0.873508517</b> | <b>0.93777</b>  | <b>2</b> |
| Q91XE8        | HTFGLVQSK                                                              | 0.872681443        | 2               | 2.48441  |
| Q91XE8        | MEKGEDPGSLIK+Oxidation(0)                                              | 0.903278306        |                 |          |
| <b>Q91XQ0</b> | <b>DYH8 Dynein heavy chain 8_axonemal</b>                              | <b>0.940664024</b> | <b>0.562531</b> | <b>2</b> |
| Q91XQ0        | FRPEICDMVGNLVSRS+Oxidation(7)                                          | 0.9406694          |                 |          |
| Q91XQ0        | SMTGIPNLQETLKEQAR                                                      | 0.682161447        | 2               | 2.58517  |
| <b>Q91XR8</b> | <b>GPX42 Phospholipid hydroperoxide glutathione peroxidase_nuclear</b> | <b>1.011709887</b> | <b>0.988524</b> | <b>2</b> |
| Q91XR8        | TDVNYTQLVDLHAR                                                         | 1.111563459        | 3               | 3.44217  |
| Q91XR8        | YGPMEEPQVIEK                                                           | 1.010594765        | 2               | 2.51901  |
| <b>Q91Y81</b> | <b>SEPT2 Septin_2</b>                                                  | <b>0.846430547</b> | <b>0.756645</b> | <b>2</b> |
| Q91Y81        | ASIPFSVVGSNQLIEAK                                                      | 1.090907992        | 2               | 3.38417  |
| Q91Y81        | LTVVDTPGYGDAINSR                                                       | 0.790522187        | 2               | 4.06036  |
| <b>Q91YE2</b> | <b>EGLN2 Egl nine homolog 2</b>                                        | <b>0.650914042</b> | <b>0.025183</b> | <b>2</b> |
| Q91YE2        | ERAAARDK                                                               | 0.889638535        | 1               | 2.03881  |
| Q91YE2        | YQLASGQK                                                               | 0.508328141        | 1               | 1.94326  |
| <b>Q91YP0</b> | <b>L2HDH L_2_hydroxyglutarate dehydrogenase_mitochondrial</b>          | <b>1.050765692</b> | <b>0.694911</b> | <b>2</b> |
| Q91YP0        | ISELSGCNPDQIVPFR                                                       | 0.859469177        | 2               | 3.15876  |

|               |                                                                           |                    |                 |           |
|---------------|---------------------------------------------------------------------------|--------------------|-----------------|-----------|
| Q91YP0        | NAPSPAATSSLAISR                                                           | 1.059091496        | 2               | 3.44049   |
| <b>Q91YT0</b> | <b>NDUV1 NADH dehydrogenase [ubiquinone] flavoprotein 1_mitochondrial</b> | <b>1.015046576</b> | <b>0.403368</b> | <b>9</b>  |
| Q91YT0        | GAGAYICGEETALIESIEGK                                                      | 1.045518867        | 2               | 3.31248   |
| Q91YT0        | GDARPAEIDSLWEISK                                                          | 1.040194327        | 2               | 3.21349   |
| Q91YT0        | GEFYNEASNQVAIR                                                            | 1.143098449        | 2               | 3.50547   |
| Q91YT0        | KTSFGSLKDEDR                                                              | 1.121564536        | 2               | 3.27139   |
| Q91YT0        | LKPPFPADVGVFGCPTTVANVETVAVSPTICR                                          | 1.507456841        | 3               | 3.82542   |
| Q91YT0        | LVEGCLVGGR                                                                | 1.376765           | 2               | 2.59467   |
| Q91YT0        | QIEGHTICALGDGAAWPVQGLIR                                                   | 0.958498979        | 3               | 3.54008   |
| Q91YT0        | TSGSLKDEDR                                                                | 1.216018824        | 2               | 2.61488   |
| Q91YT0        | YLVVNADEGEPGTCK                                                           | 1.204992078        | 2               | 5.06254   |
| <b>Q91Z53</b> | <b>GRHPR Glyoxylate reductase/hydroxypyruvate reductase</b>               | <b>1.012697823</b> | <b>0.019884</b> | <b>6</b>  |
| Q91Z53        | GDVVNQEDLYQALASGQIAAAGLDVTTPELPPSHPLTLK                                   | 1.109111254        | 3               | 6.88045   |
| Q91Z53        | LLDAAGANLR                                                                | 0.968252054        | 2               | 3.15291   |
| Q91Z53        | NCVILPHIGSATYK                                                            | 1.049939636        | 2               | 3.61925   |
| Q91Z53        | NTMSLLAANNLLAGLR                                                          | 0.962774323        | 2               | 4.52388   |
| Q91Z53        | RLPEAIEEVK                                                                | 0.825833891        | 2               | 2.45964   |
| Q91Z53        | VISTLSVGDHHLALDEIK                                                        | 1.362559068        | 2               | 4.23469   |
| <b>Q91ZJ5</b> | <b>UGPA UTP__glucose_1_phosphate uridylyltransferase</b>                  | <b>0.754456219</b> | <b>9.9E-20</b>  | <b>14</b> |
| Q91ZJ5        | AMSQDGASQFQEVILQELELSVK                                                   | 0.953728637        | 3               | 4.77645   |
| Q91ZJ5        | FVQDLK                                                                    | 0.683256853        | 1               | 1.99038   |
| Q91ZJ5        | GGTLTQYEGK                                                                | 0.894756576        | 2               | 2.54386   |
| Q91ZJ5        | GLPDNISSVLNK                                                              | 0.794913229        | 2               | 3.87658   |
| Q91ZJ5        | GTVIIIANHGDR                                                              | 0.816647896        | 2               | 3.0436    |
| Q91ZJ5        | IDIPPGAVLENK                                                              | 0.805138746        | 2               | 3.0361    |
| Q91ZJ5        | IQRPPEDSIQPYEK                                                            | 0.836114008        | 3               | 4.48757   |
| Q91ZJ5        | LNGGLGTSMGCK                                                              | 0.936840071        | 2               | 3.12703   |
| Q91ZJ5        | LQEQNAIDMEIIVNPK                                                          | 1.588227789        | 2               | 2.48911   |
| Q91ZJ5        | LVEIAQVPK                                                                 | 0.840965676        | 2               | 3.35483   |
| Q91ZJ5        | NENTFLDLTVQQIEHLNK                                                        | 0.787947664        | 2               | 5.24444   |
| Q91ZJ5        | SFENSLGINVPR                                                              | 0.854891842        | 2               | 3.22864   |
| Q91ZJ5        | TLDGLNVIQLETAVGAAIK                                                       | 0.77591316         | 3               | 5.5088    |
| Q91ZJ5        | TYNTDVPLVLMNSFNTEDETKK                                                    | 1.172716335        | 2               | 4.60516   |
| <b>Q91ZX7</b> | <b>LRP1 Prolow_density lipoprotein receptor_related protein 1</b>         | <b>0.938186361</b> | <b>0.759825</b> | <b>7</b>  |
| Q91ZX7        | AVTDEEPFLIFANR                                                            | 1.281892937        | 2               | 2.49959   |
| Q91ZX7        | CLQGACVVNK                                                                | 0.986436493        | 2               | 2.33547   |
| Q91ZX7        | GCHVNECLSR                                                                | 0.933884716        | 2               | 2.62999   |
| Q91ZX7        | IETAAMDGTLR                                                               | 1.017763744        | 2               | 2.32792   |
| Q91ZX7        | ILQEDFTCR                                                                 | 0.982189           | 2               | 2.55975   |
| Q91ZX7        | LDGLCIPLR                                                                 | 1.178477802        | 2               | 2.4581    |
| Q91ZX7        | MYDAQQQVGTNK                                                              | 0.973937925        | 2               | 4.3498    |
| <b>Q920A6</b> | <b>RISC Retinoid_inducible serine carboxypeptidase</b>                    | <b>1.129892061</b> | <b>8.28E-07</b> | <b>3</b>  |
| Q920A6        | DLDTVASDMMVLLK                                                            | 1.238669165        | 2               | 3.32017   |
| Q920A6        | GLAEVSDIAEQVLNAVNK                                                        | 1.035148425        | 3               | 4.87024   |
| Q920A6        | NTDGVNFYNILTK                                                             | 1.869815068        | 2               | 2.94464   |
| <b>Q920D2</b> | <b>DYR Dihydrofolate reductase</b>                                        | <b>1.050698927</b> | <b>0.06787</b>  | <b>4</b>  |
| Q920D2        | IMQEFESDTFFPEIDLEK                                                        | 0.817833751        | 2               | 4.39025   |
| Q920D2        | LIEQPELASK                                                                | 0.889556031        | 2               | 2.52197   |
| Q920D2        | LLPEYPGLSEIQEEK                                                           | 1.169613221        | 2               | 3.67855   |
| Q920D2        | NGDLPWPLLR                                                                | 0.827449922        | 2               | 3.03892   |

|               |                                                                                     |                    |                 |           |
|---------------|-------------------------------------------------------------------------------------|--------------------|-----------------|-----------|
| <b>Q920F5</b> | <b>DCMC Malonyl_CoA decarboxylase_mitochondrial</b>                                 | <b>0.96669215</b>  | <b>0.992803</b> | <b>4</b>  |
| Q920F5        | ADLLEAQALK                                                                          | 1.127847422        | 2               | 2.3127    |
| Q920F5        | EIAEVTGDPVHESLK                                                                     | 0.923800125        | 2               | 2.97186   |
| Q920F5        | ISECEAVHPVK                                                                         | 1.025960528        | 2               | 3.34431   |
| Q920F5        | WLLGLLNQVGK                                                                         | 1.104374592        | 2               | 3.61633   |
| <b>Q920L2</b> | <b>DHSA Succinate dehydrogenase [ubiquinone] flavoprotein subunit_mitochondrial</b> | <b>1.190619029</b> | <b>0.00481</b>  | <b>19</b> |
| Q920L2        | ACALSIAESCRPGDK                                                                     | 1.194236603        | 2               | 3.1481    |
| Q920L2        | AGLPCQDLFVQFHPTGIYGAGCLITEGCR                                                       | 1.123559317        | 3               | 4.82357   |
| Q920L2        | ANAGEESVMNLDK                                                                       | 0.966581162        | 2               | 4.00542   |
| Q920L2        | GEGGILINSQGER                                                                       | 0.974084109        | 2               | 4.33474   |
| Q920L2        | GSDWLGDQDAIHYTEQAPASVVELENYGMPFSR                                                   | 2.584853193        | 3               | 5.01183   |
| Q920L2        | GVIALCIEDGSIHR                                                                      | 1.292998258        | 2               | 3.49901   |
| Q920L2        | HTLSYVDTK                                                                           | 1.445003783        | 1               | 2.2572    |
| Q920L2        | HVNGQDQIVPGLYACGEAACASVHGANKR                                                       | 1.028474816        | 3               | 6.99403   |
| Q920L2        | IDEYDYSKPIEGQQK                                                                     | 1.067935639        | 2               | 4.54493   |
| Q920L2        | KHTLSYVDTK                                                                          | 1.069998289        | 2               | 2.60505   |
| Q920L2        | LGANSLDLVVFGR                                                                       | 1.420072461        | 2               | 3.4032    |
| Q920L2        | NTIIATGGYGR                                                                         | 0.973256142        | 2               | 2.80642   |
| Q920L2        | TGHSLHLTYGR                                                                         | 0.809254385        | 2               | 2.34396   |
| Q920L2        | TLNEADCATVPPAIR                                                                     | 0.992137803        | 2               | 3.61717   |
| Q920L2        | TYFSCSAHTSTGDGTAMVTR                                                                | 1.279455497        | 3               | 3.42655   |
| Q920L2        | VGSVLQEGCEK                                                                         | 1.104045695        | 2               | 3.47238   |
| Q920L2        | VSDAISTQYPVVDHEFDVAVVVGAGGAGLR                                                      | 0.897974122        | 3               | 4.00919   |
| Q920L2        | VSQLYGDLQHLK                                                                        | 1.089827307        | 3               | 3.45103   |
| Q920L2        | VTLDYRPVIDK                                                                         | 1.192031758        | 2               | 3.33655   |
| <b>Q920P0</b> | <b>DCXR L_xylulose reductase</b>                                                    | <b>0.945980991</b> | <b>0.999999</b> | <b>6</b>  |
| Q920P0        | AVVQVSQIVAR                                                                         | 1.04271509         | 2               | 2.99721   |
| Q920P0        | GVPGAIVNVSSQASQR                                                                    | 0.977066418        | 2               | 5.49001   |
| Q920P0        | SSMTTGSALPVDGGFLAT                                                                  | 1.014535751        | 2               | 2.87131   |
| Q920P0        | STVLALQAAGAQQVAVSR                                                                  | 0.968490836        | 2               | 4.40453   |
| Q920P0        | TREDLDSLVR                                                                          | 0.902580931        | 2               | 3.04262   |
| Q920P0        | VNAVNPVTVMTPMGR                                                                     | 0.878140486        | 2               | 2.8458    |
| <b>Q921F2</b> | <b>TADBP TAR DNA_binding protein 43</b>                                             | <b>0.960610696</b> | <b>0.17567</b>  | <b>4</b>  |
| Q921F2        | FGGNPQGGFGNQGGFGNSR                                                                 | 0.949075615        | 2               | 4.07153   |
| Q921F2        | FTEYETQVK                                                                           | 1.094222937        | 2               | 2.67455   |
| Q921F2        | GISVHISNAEPK                                                                        | 1.101260089        | 2               | 2.66488   |
| Q921F2        | TSDLIVLGLPWK                                                                        | 1.248079705        | 2               | 3.12147   |
| <b>Q922F4</b> | <b>TBB6 Tubulin beta_6 chain</b>                                                    | <b>1.054588814</b> | <b>9.9E-20</b>  | <b>5</b>  |
| Q922F4        | ALTVPELTQQMFDQAK                                                                    | 1.490701701        | 2               | 4.13941   |
| Q922F4        | GHYTEGAELVDSVLDVVR                                                                  | 1.103263074        | 2               | 6.66903   |
| Q922F4        | IREEYPDR                                                                            | 1.002330808        | 2               | 2.96996   |
| Q922F4        | MASTFIGNSTAIQELFK                                                                   | 1.62655944         | 2               | 3.83395   |
| Q922F4        | NSSYFVEWIPNNVK                                                                      | 1.108090381        | 2               | 4.78259   |
| <b>Q922J3</b> | <b>CLIP1 CAP_Gly domain_containing linker protein 1</b>                             | <b>1.080781237</b> | <b>0.699165</b> | <b>2</b>  |
| Q922J3        | EMETMQAKLMK+Oxidation(4)                                                            | 1.109067164        |                 |           |
| Q922J3        | HEEILQNLQKMLADTEDK                                                                  | 1.042910847        | 2               | 2.56429   |
| <b>Q923D2</b> |                                                                                     | <b>1.053470445</b> | <b>0.997878</b> | <b>3</b>  |
| Q923D2        | LQDVTDDHIR                                                                          | 0.963684827        | 2               | 3.36458   |
| Q923D2        | TGLTTLAQAVQAGYEVTVLVR                                                               | 0.936043686        | 3               | 4.28124   |
| Q923D2        | YVAVMPPHIGDQLPTGAYTVTLDGR                                                           | 1.101727601        | 3               | 4.54274   |
| <b>Q923J6</b> | <b>DYH12 Dynein heavy chain 12_axonemal</b>                                         | <b>0.938685924</b> | <b>0.984779</b> | <b>2</b>  |
| Q923J6        | FFFLSNDEMLEILSETKDPLR                                                               | 0.94475463         | 2               | 2.4129    |
| Q923J6        | LEFLTNDIK                                                                           | 0.870845632        | 1               | 2.09963   |
| <b>Q923K9</b> | <b>A1CF APOBEC1 complementation factor</b>                                          | <b>1.269367365</b> | <b>0.066195</b> | <b>2</b>  |

|               |                                                                               |                    |                 |           |
|---------------|-------------------------------------------------------------------------------|--------------------|-----------------|-----------|
| Q923K9        | LAPQILEEICQK                                                                  | 1.270736327        | 2               | 2.33733   |
| Q923K9        | VTEGVVDVIVYPSAADK                                                             | 0.693697687        | 2               | 3.58179   |
| <b>Q923M1</b> | <b>MSRA Mitochondrial peptide methionine sulfoxide reductase</b>              | <b>0.907582586</b> | <b>0.832215</b> | <b>2</b>  |
| Q923M1        | SAVYPTSAVQMEAAALK                                                             | 0.828455237        | 2               | 3.81222   |
| Q923M1        | VISAEEALPGR                                                                   | 0.962326288        | 2               | 3.12827   |
| <b>Q923V8</b> | <b>SEP15 15 kDa selenoprotein</b>                                             | <b>1.185888763</b> | <b>0.001265</b> | <b>3</b>  |
| Q923V8        | GCCQEEAQFETK                                                                  | 1.102248777        | 2               | 3.89176   |
| Q923V8        | LLDDNGNIAEELSILK                                                              | 1.253301628        | 2               | 4.21853   |
| Q923V8        | WNTDSVEEFLSEK                                                                 | 1.175092965        | 2               | 2.95459   |
| <b>Q924C3</b> | <b>ENPP1 Ectonucleotide pyrophosphatase/phosphodiesterase family member 1</b> | <b>0.986987557</b> | <b>0.930626</b> | <b>5</b>  |
| Q924C3        | AEYLHTWGGLLPVISK                                                              | 1.07579838         | 3               | 3.95175   |
| Q924C3        | GQPIWVTANHQEVR                                                                | 0.972824259        | 2               | 2.92502   |
| Q924C3        | IEPLTFYLDPQWQLALNPSE                                                          | 1.332405367        | 2               | 2.42787   |
| Q924C3        | SGTYFWPGSDVEIDGILPDIYK                                                        | 0.943987169        | 2               | 3.43807   |
| Q924C3        | SVSSDLGCTDPSIVPIMDFEK                                                         | 0.972346218        | 2               | 2.75463   |
| <b>Q924S5</b> | <b>LONM Lon protease homolog_ mitochondrial</b>                               | <b>1.15414832</b>  | <b>0.594825</b> | <b>13</b> |
| Q924S5        | AGVTCIILPAENR                                                                 | 1.036166622        | 2               | 2.62353   |
| Q924S5        | AQLSATVLTLLIK                                                                 | 0.844477665        | 2               | 3.86421   |
| Q924S5        | AQSVLEEDHYGMEDVK                                                              | 1.09301763         | 2               | 4.25919   |
| Q924S5        | EHQEALAVER                                                                    | 0.947808028        | 2               | 2.87772   |
| Q924S5        | EVGDELGAKPQLEMVTEATSDTSK                                                      | 1.399720457        | 3               | 3.45397   |
| Q924S5        | HVMDVVDEELSK                                                                  | 1.071375531        | 2               | 3.21252   |
| Q924S5        | IVSGEAQTVHVTENLQDFVGKPVFTVER                                                  | 1.292595438        | 3               | 6.18881   |
| Q924S5        | MEMINVSQYVAQEK                                                                | 1.477910734        | 2               | 2.54314   |
| Q924S5        | NYLDWLTSIPWGR                                                                 | 0.905608554        | 2               | 2.88377   |
| Q924S5        | QLEVEPEGLEPEAENK                                                              | 1.007005337        | 2               | 4.25873   |
| Q924S5        | QSDENLDLAR                                                                    | 0.95254272         | 2               | 2.81862   |
| Q924S5        | TENPLVLIDEVDK                                                                 | 1.045403414        | 2               | 2.77818   |
| Q924S5        | VLEFIAVSQLR                                                                   | 1.338832033        | 2               | 3.08821   |
| <b>Q924W5</b> | <b>SMC6 Structural maintenance of chromosomes protein 6</b>                   | <b>0.932773285</b> | <b>0.950973</b> | <b>2</b>  |
| Q924W5        | ELDMKEKELQEK+Oxidation(3)                                                     | 1.049044365        |                 |           |
| Q924W5        | TKEQINQGEERLTELK                                                              | 0.929976676        | 2               | 2.456     |
| <b>Q99020</b> | <b>ROAA Heterogeneous nuclear ribonucleoprotein A/B</b>                       | <b>1.080326754</b> | <b>9.9E-20</b>  | <b>3</b>  |
| Q99020        | EYFGQFGEIEAIELPIDPK                                                           | 1.166277765        | 2               | 2.95541   |
| Q99020        | FGEVVDCTIK                                                                    | 0.609602946        | 2               | 2.7615    |
| Q99020        | IFVGGLNPEATEEK                                                                | 1.661558973        | 2               | 4.03591   |
| <b>Q99068</b> | <b>AMRP Alpha_2_macroglobulin receptor_associated protein</b>                 | <b>1.130018204</b> | <b>0.138202</b> | <b>3</b>  |
| Q99068        | EELKHFEAKIEK                                                                  | 1.125128897        | 2               | 2.4279    |
| Q99068        | HLQDLSSR                                                                      | 0.895619597        | 2               | 2.33785   |
| Q99068        | HVESIGDPEHISR                                                                 | 2.004114032        | 3               | 3.37327   |
| <b>Q99J14</b> | <b>PSMD6 26S proteasome non_ATPase regulatory subunit 6</b>                   | <b>1.151619863</b> | <b>0.446368</b> | <b>4</b>  |
| Q99J14        | GAEILEVLHSLPAVR                                                               | 1.045525495        | 2               | 2.35956   |
| Q99J14        | LDEELEDAEK                                                                    | 1.385397474        | 2               | 2.39771   |
| Q99J14        | RLDEELEDAEK                                                                   | 1.207910644        | 2               | 2.91073   |
| Q99J14        | VNEIVETNRPDSK                                                                 | 1.116171438        | 2               | 3.58945   |
| <b>Q99KN9</b> | <b>EPN4 Clathrin interactor 1</b>                                             | <b>1.316701598</b> | <b>0.233003</b> | <b>2</b>  |
| Q99KN9        | GEFKDEEETVTTK                                                                 | 1.321553108        | 2               | 3.05005   |
| Q99KN9        | HIHITQATETTTTR                                                                | 1.048787574        | 3               | 3.38723   |
| <b>Q99L04</b> | <b>DHRS1 Dehydrogenase/reductase SDR family member 1</b>                      | <b>0.966306722</b> | <b>0.933715</b> | <b>2</b>  |

|               |                                                                         |                    |                 |           |
|---------------|-------------------------------------------------------------------------|--------------------|-----------------|-----------|
| Q99L04        | ATAQEAQSLGGR                                                            | 0.891041987        | 2               | 3.64541   |
| Q99L04        | CVPVCDSSQESEVK                                                          | 0.990828646        | 2               | 3.39982   |
| <b>Q99LF4</b> | <b>RTCB tRNA_splicing ligase RtcB homolog</b>                           | <b>1.012991891</b> | <b>0.879826</b> | <b>4</b>  |
| Q99LF4        | GLGHQVATDALVAMEK                                                        | 0.667490801        | 2               | 3.97265   |
| Q99LF4        | NVTDVVNTCHDAGISK                                                        | 1.138887766        | 2               | 4.46887   |
| Q99LF4        | NYNDELQFLDK                                                             | 1.109342879        | 2               | 2.92088   |
| Q99LF4        | TNLDESVDQPVK                                                            | 1.071796524        | 2               | 3.31695   |
| <b>Q99LH1</b> | <b>NOG2 Nucleolar GTP_binding protein 2</b>                             | <b>1.259272035</b> | <b>0.176633</b> | <b>2</b>  |
| Q99LH1        | GGEPDMLTVSKMVLNDWQR+Oxidation(11)                                       | 1.259272035        |                 |           |
| Q99LH1        | GGEPDMLTVSKMVLNDWQR+Oxidation(5)                                        | 1.259272035        |                 |           |
| <b>Q99ML5</b> | <b>PCYOX Prenylcysteine oxidase</b>                                     | <b>1.11829301</b>  | <b>0.595663</b> | <b>3</b>  |
| Q99ML5        | ELGLSSVPASGGLVGVYNGK                                                    | 1.021773792        | 2               | 2.51865   |
| Q99ML5        | NFDPPIEEFNDPYQLVTTLIK                                                   | 1.092787782        | 3               | 4.48301   |
| Q99ML5        | YQSHDYAFSSVEK                                                           | 1.260716731        | 2               | 2.88251   |
| <b>Q99MS0</b> | <b>S14L2 SEC14_like protein 2</b>                                       | <b>1.148877279</b> | <b>0.179519</b> | <b>5</b>  |
| Q99MS0        | AGEMTEVLPNQR                                                            | 0.927511729        | 2               | 2.97566   |
| Q99MS0        | CGYDLDGCPVWYDIIGPLDAK                                                   | 0.803749509        | 2               | 3.19186   |
| Q99MS0        | HISPDQLPVEYGGTMDPDGNPK                                                  | 1.149772385        | 3               | 4.80772   |
| Q99MS0        | INYGGDIPK                                                               | 1.442974883        | 2               | 2.50406   |
| Q99MS0        | QQYEHSVQISR                                                             | 1.054768588        | 2               | 2.47861   |
| <b>Q99MW1</b> | <b>STK31 Serine/threonine_protein kinase 31</b>                         | <b>0.954055941</b> | <b>0.753699</b> | <b>2</b>  |
| Q99MW1        | EVLLENYKALELK                                                           | 0.847578098        | 2               | 2.30449   |
| Q99MW1        | QDQKLIENEK                                                              | 1.489921744        | 2               | 2.58889   |
| <b>Q99MZ8</b> | <b>LASP1 LIM and SH3 domain protein 1</b>                               | <b>0.902672765</b> | <b>0.565355</b> | <b>7</b>  |
| Q99MZ8        | GFSVVADTPELQR                                                           | 0.899713065        | 2               | 3.38197   |
| Q99MZ8        | MGPSGGEGIEPER                                                           | 0.852320251        | 2               | 3.19443   |
| Q99MZ8        | QQSELQSQVR                                                              | 1.047565757        | 2               | 2.43189   |
| Q99MZ8        | QSFTMVADTPENLR                                                          | 1.010957117        | 2               | 3.30258   |
| Q99MZ8        | TQDQISNIK                                                               | 1.211630856        | 2               | 2.65946   |
| Q99MZ8        | YHEEFEK                                                                 | 1.008735683        | 1               | 2.21544   |
| Q99MZ8        | YKEEFEK                                                                 | 0.802346736        | 1               | 2.32508   |
| <b>Q99NA5</b> | <b>IDH3A Isocitrate dehydrogenase [NAD] subunit alpha_mitochondrial</b> | <b>1.06152519</b>  | <b>0.672487</b> | <b>2</b>  |
| Q99NA5        | IEAACFATIK                                                              | 1.365347272        | 2               | 2.31568   |
| Q99NA5        | NVTAIQPGGK                                                              | 1.041940028        | 2               | 2.43785   |
| <b>Q99NB7</b> | <b>ACO12 Acyl_coenzyme A thioesterase 12</b>                            | <b>1.23739648</b>  | <b>0.385368</b> | <b>3</b>  |
| Q99NB7        | GSISNTNVEALK                                                            | 1.147515009        | 2               | 2.85696   |
| Q99NB7        | KGSISNTNVEALK                                                           | 0.986998412        | 2               | 3.16902   |
| Q99NB7        | VHLKPVLLQTEQEVEHR                                                       | 1.314921528        | 3               | 3.84546   |
| <b>Q99PF5</b> | <b>FUBP2 Far upstream element_binding protein 2</b>                     | <b>1.048559322</b> | <b>0.305848</b> | <b>8</b>  |
| Q99PF5        | AINQQTGAFVEISR                                                          | 0.398125577        | 2               | 3.68595   |
| Q99PF5        | GGGGPGGGGPGGGGASGGPSQPPGGGGPGIR                                         | 0.926893725        | 2               | 6.1117    |
| Q99PF5        | IGGDAATTVNNNTPDFGFGGQK                                                  | 1.154194422        | 2               | 4.65524   |
| Q99PF5        | IGQQPQQPGAPPQQDYTK                                                      | 1.434956282        | 2               | 3.68576   |
| Q99PF5        | IINDLLQSLR                                                              | 1.031506721        | 2               | 2.69656   |
| Q99PF5        | SVSLTGAPESVQK                                                           | 0.916027781        | 2               | 3.30931   |
| Q99PF5        | VGGGIDVPVPR                                                             | 1.025219054        | 2               | 2.87941   |
| Q99PF5        | VQISPDSSGLPER                                                           | 0.941966581        | 2               | 2.56642   |
| <b>Q99PL5</b> | <b>RRBP1 Ribosome_binding protein 1</b>                                 | <b>1.321191427</b> | <b>9.9E-20</b>  | <b>21</b> |
| Q99PL5        | DALNQATSQVESK                                                           | 1.534804726        | 2               | 3.7585    |
| Q99PL5        | EAEETQNSLQAECDQYR                                                       | 1.404310115        | 2               | 5.46791   |
| Q99PL5        | EEITQLK                                                                 | 0.39734663         | 1               | 1.97703   |
| Q99PL5        | EHTSHLEAELEK                                                            | 1.35406359         | 2               | 3.31701   |
| Q99PL5        | EQEIAAVQAR                                                              | 1.45323786         | 2               | 2.37978   |
| Q99PL5        | ETSYEEALANQR                                                            | 1.532417643        | 2               | 2.74048   |
| Q99PL5        | GELESSDQVR                                                              | 1.514229574        | 2               | 3.15393   |



|        |                                                                                     |             |          |         |
|--------|-------------------------------------------------------------------------------------|-------------|----------|---------|
| Q99PL5 | HLEDIVEK                                                                            | 1.207014419 | 2        | 2.54403 |
| Q99PL5 | HMAAASAECQNYAK                                                                      | 0.954576501 | 2        | 4.46119 |
| Q99PL5 | HMAAASAECQNYAK+Oxidation(1)                                                         | 1.922204432 |          |         |
| Q99PL5 | IQEELEK                                                                             | 0.829165347 | 1        | 2.14268 |
| Q99PL5 | LKELESQVSCLEK                                                                       | 2.069263066 | 2        | 4.05969 |
| Q99PL5 | LLATEQEEDAAVAK                                                                      | 1.359117966 | 2        | 4.53974 |
| Q99PL5 | LQQENSILR                                                                           | 1.338045133 | 2        | 2.82982 |
| Q99PL5 | LQSSEVEVK                                                                           | 1.206483973 | 2        | 2.52414 |
| Q99PL5 | LREAEETQNSLQAECDQYR                                                                 | 1.203869032 | 3        | 5.12514 |
| Q99PL5 | QLHLAEAQTK                                                                          | 1.087073993 | 2        | 2.3276  |
| Q99PL5 | TILAETEGMLK                                                                         | 1.053719127 | 2        | 3.03816 |
| Q99PL5 | TLQEQLENGPNTQLAR                                                                    | 1.219011203 | 2        | 4.82447 |
| Q99PL5 | TLVSTVGSMVFSEGEAQR                                                                  | 1.731868932 | 3        | 4.83702 |
| Q99PL5 | VEPAVSSIVNSIQVLASK                                                                  | 1.339281919 | 2        | 4.98192 |
| Q99PV0 | PRP8 Pre_mRNA_processing splicing factor 8                                          | 0.940823635 | 0.999966 | 2       |
| Q99PV0 | AAVMHDILDMMPEGIK+Oxidation(3)                                                       | 0.940823635 |          |         |
| Q99PV0 | AAVMHDILDMMPEGIK+Oxidation(3)                                                       | 0.940823635 |          |         |
| Q9CPQ1 | COX6C Cytochrome c oxidase subunit 6C                                               | 1.058651206 | 0.991218 | 2       |
| Q9CPQ1 | FGVAEPR                                                                             | 1.061566223 | 2        | 2.34582 |
| Q9CPQ1 | NYDSMKDFEEMR                                                                        | 0.96744036  | 2        | 3.54507 |
| Q9CQS8 | SC61B Protein transport protein Sec61 subunit beta                                  | 1.292093496 | 0.487528 | 2       |
| Q9CQS8 | FYTEDSPGLK                                                                          | 1.279124213 | 2        | 2.33139 |
| Q9CQS8 | TTSAGTGMWR                                                                          | 0.89155591  | 2        | 2.3868  |
| Q9CRB8 | MTFP1 Mitochondrial fission process protein 1                                       | 1.001276879 | 0.996282 | 2       |
| Q9CRB8 | SVDFLLDSSLR                                                                         | 1.027849329 | 2        | 2.79944 |
| Q9CRB8 | YLGYANEVGEAFR                                                                       | 0.940114874 | 2        | 2.71853 |
| Q9CRB9 | CHCH3 Coiled_coil_helix_coiled_coil_helix domain_containing protein 3_mitochondrial | 1.168867726 | 0.512607 | 2       |
| Q9CRB9 | VAEELALEQAK                                                                         | 1.290874867 | 2        | 3.57217 |
| Q9CRB9 | YEYHPVCADLQTK                                                                       | 1.1152258   | 2        | 3.66173 |
| Q9CW42 | MOSC1 MOSC domain_containing protein 1_mitochondrial                                | 1.033664625 | 0.877255 | 3       |
| Q9CW42 | DLLLPIPPATNPLLQCR                                                                   | 1.122290822 | 2        | 4.14524 |
| Q9CW42 | GLSVSEAECTAMGLR                                                                     | 0.938304207 | 2        | 3.31315 |
| Q9CW42 | LQQVGTVAQLWIYPIK                                                                    | 0.732169885 | 2        | 2.94543 |
| Q9CWH6 | PSA7L Proteasome subunit alpha type_7_like                                          | 1.238750314 | 9.9E-20  | 3       |
| Q9CWH6 | AITVFPDGHFLFQVEYAQEAVK                                                              | 1.18466191  | 2        | 4.48805 |
| Q9CWH6 | ALLEVVQSGGK                                                                         | 1.208201673 | 2        | 3.43171 |
| Q9CWH6 | LTVEDPVTVEYITR                                                                      | 1.390856494 | 2        | 3.90252 |
| Q9CWK8 | SNX2 Sorting nexin_2                                                                | 1.117528658 | 0.954291 | 4       |
| Q9CWK8 | AVNTQALSGAGILR                                                                      | 1.050738235 | 2        | 3.18919 |
| Q9CWK8 | QQQFENLDQQLR                                                                        | 0.85248031  | 2        | 2.81814 |
| Q9CWK8 | WEDAQITLLK                                                                          | 1.035678455 | 2        | 2.78814 |
| Q9CWK8 | YWEAFLPEAK                                                                          | 1.182157171 | 2        | 2.53179 |
| Q9CXS4 | CENPV Centromere protein V                                                          | 1.151742725 | 0.71955  | 2       |
| Q9CXS4 | LLLDTFEYQGLVK                                                                       | 1.185235779 | 2        | 3.93958 |
| Q9CXS4 | SVVTEEFNGSDWER                                                                      | 0.925667718 | 2        | 3.76943 |
| Q9CYN2 | SPCS2 Signal peptidase complex subunit 2                                            | 1.205592965 | 0.000623 | 2       |
| Q9CYN2 | LHDSLATER                                                                           | 0.91655104  | 2        | 2.41953 |
| Q9CYN2 | YVENFLIDGR                                                                          | 1.208675454 | 2        | 2.73659 |
| Q9CYW4 | HDHD3 Haloacid dehalogenase_like hydrolase domain_containing protein 3              | 0.810504529 | 0.364743 | 2       |
| Q9CYW4 | LEDILTGLGLR                                                                         | 0.817999293 | 2        | 4.23748 |
| Q9CYW4 | RLEDILTGLGLR                                                                        | 2.100582175 | 2        | 3.28115 |
| Q9CZY3 | UB2V1 Ubiquitin_conjugating enzyme E2 variant 1                                     | 1.183513753 | 0.782872 | 2       |

|               |                                                                         |                    |                 |           |
|---------------|-------------------------------------------------------------------------|--------------------|-----------------|-----------|
| Q9CZY3        | LLEELEEGQK                                                              | 1.310207588        | 2               | 2.74948   |
| Q9CZY3        | VNMSGVSSSNGVVDPR                                                        | 1.125693818        | 2               | 2.61564   |
| <b>Q9D0M3</b> | <b>CY1 Cytochrome c1_heme protein_mitochondrial</b>                     | <b>1.087824698</b> | <b>9.9E-20</b>  | <b>4</b>  |
| Q9D0M3        | GLLSSLDHTSIR                                                            | 1.261228944        | 2               | 3.19604   |
| Q9D0M3        | HGGEDYVFSLLTGYCEPPTGVSLR                                                | 2.146677002        | 3               | 5.9157    |
| Q9D0M3        | HLVGVCYTEEEAK                                                           | 1.257547335        | 2               | 3.73471   |
| Q9D0M3        | LSDYFPKYPNPEAAR                                                         | 1.445861327        | 3               | 3.63396   |
| <b>Q9D0S9</b> | <b>HINT2 Histidine triad nucleotide binding protein 2_mitochondrial</b> | <b>1.254855625</b> | <b>1.42E-10</b> | <b>3</b>  |
| Q9D0S9        | DVAPQAPVHFLVIPR                                                         | 1.130315187        | 2               | 2.82322   |
| Q9D0S9        | ISQAEEDDQQLLGHLLLVAK                                                    | 1.34842937         | 2               | 5.15655   |
| Q9D0S9        | SLPADILYEDQQCLVFR                                                       | 1.000039528        | 2               | 3.4987    |
| <b>Q9D172</b> | <b>ES1 ES1 protein homolog_mitochondrial</b>                            | <b>1.170750924</b> | <b>5.61E-05</b> | <b>4</b>  |
| Q9D172        | GVEVTVGHEQEEGGK                                                         | 1.143976914        | 2               | 3.80141   |
| Q9D172        | ITSLAQLNAANHDAIFPGGFGAAK                                                | 1.375693107        | 2               | 4.62831   |
| Q9D172        | NLSTFAVDGK                                                              | 1.297676021        | 1               | 2.62299   |
| Q9D172        | NVLAESAR                                                                | 0.998966729        | 1               | 1.93021   |
| <b>Q9D180</b> | <b>WDR65 WD repeat_containing protein 65</b>                            | <b>0.481077864</b> | <b>0.087689</b> | <b>2</b>  |
| Q9D180        | KNQELEK                                                                 | 0.829165347        | 1               | 2.12222   |
| Q9D180        | QIEPRENEIK                                                              | 0.464102523        | 1               | 1.98201   |
| <b>Q9D1Q6</b> | <b>ERP44 Endoplasmic reticulum resident protein 44</b>                  | <b>1.178298025</b> | <b>7.77E-16</b> | <b>4</b>  |
| Q9D1Q6        | MNPAVFLSLADLR+Oxidation(0)                                              | 5.277154927        |                 |           |
| Q9D1Q6        | NIIGYFEQK                                                               | 0.996837195        | 1               | 2.084     |
| Q9D1Q6        | SNPVHEIQSLDEVTNLDR                                                      | 0.922276986        | 2               | 5.25536   |
| Q9D1Q6        | VDCDQHS DIAQR                                                           | 1.048435433        | 2               | 3.63182   |
| <b>Q9D2U9</b> | <b>H2B3A Histone H2B type 3_A</b>                                       | <b>1.06965058</b>  | <b>0.014693</b> | <b>6</b>  |
| Q9D2U9        | AMGIMNSFVNDIFER                                                         | 1.021381341        | 2               | 4.8175    |
| Q9D2U9        | AMGIMNSFVNDIFER+Oxidation(1)                                            | 1.132997552        |                 |           |
| Q9D2U9        | AMGIMNSFVNDIFER+Oxidation(1)                                            | 1.177141297        |                 |           |
| Q9D2U9        | AMGIMNSFVNDIFER+Oxidation(4)                                            | 1.165337224        |                 |           |
| Q9D2U9        | LLLPGELAK                                                               | 1.135232071        | 2               | 2.64028   |
| Q9D2U9        | QVHPDTGISSK                                                             | 0.964224986        | 2               | 2.37401   |
| <b>Q9D6M3</b> | <b>GHC1 Mitochondrial glutamate carrier 1</b>                           | <b>1.32343352</b>  | <b>0.00666</b>  | <b>3</b>  |
| Q9D6M3        | GAAVNLTLVTPK                                                            | 1.431474301        | 2               | 3.11386   |
| Q9D6M3        | GVNEDTYSGLDCAR                                                          | 1.606705101        | 2               | 4.84632   |
| Q9D6M3        | NHGIAGLYK                                                               | 2.161818281        | 1               | 2.04715   |
| <b>Q9D6Y9</b> | <b>GLGB 1_4_alpha_glucan_branching enzyme</b>                           | <b>0.948756125</b> | <b>0.790566</b> | <b>10</b> |
| Q9D6Y9        | CSDGGIYCK                                                               | 0.904503116        | 1               | 2.08554   |
| Q9D6Y9        | CVAYAESHDAQLVGDK                                                        | 0.990775217        | 2               | 5.01164   |
| Q9D6Y9        | EFKDEDWNMGNIIVYTLTNR                                                    | 1.695594608        | 3               | 3.40919   |
| Q9D6Y9        | GTHDLWDSR                                                               | 0.870627131        | 2               | 2.56357   |
| Q9D6Y9        | GYESFGIHR                                                               | 0.978684454        | 2               | 2.45794   |
| Q9D6Y9        | IVLSDAAEYGGHQR                                                          | 1.207897114        | 2               | 4.53412   |
| Q9D6Y9        | IYESHVGISSHEGK                                                          | 1.022616473        | 2               | 4.40534   |
| Q9D6Y9        | NSEDGLNMFDTGDCYFHS GPR                                                  | 2.12272163         | 3               | 3.36342   |
| Q9D6Y9        | QFNLTDDDLLR                                                             | 0.803413027        | 2               | 2.49417   |
| Q9D6Y9        | RQFNLTDDDLLR                                                            | 1.320983961        | 2               | 2.59085   |
| <b>Q9D7B6</b> | <b>ACAD8 Isobutyryl_CoA dehydrogenase_mitochondrial</b>                 | <b>1.009972664</b> | <b>0.231854</b> | <b>3</b>  |
| Q9D7B6        | AVIFEDCAVPVANR                                                          | 1.009770656        | 2               | 4.06759   |
| Q9D7B6        | FASYCLTEPGSGSDAASLLTSAK                                                 | 0.859021318        | 2               | 4.37692   |
| Q9D7B6        | VHQILEGSNEVMR                                                           | 1.39607229         | 2               | 2.58901   |
| <b>Q9D7S7</b> | <b>RL22L 60S ribosomal protein L22_like 1</b>                           | <b>1.312332999</b> | <b>0.003395</b> | <b>2</b>  |
| Q9D7S7        | FHLDLTHPVEDGIFDSGNFEQFLR                                                | 1.216138306        | 3               | 3.78877   |
| Q9D7S7        | TGNLGNVVHIER                                                            | 2.841984426        | 2               | 2.47678   |

|               |                                                                                  |                    |                 |          |
|---------------|----------------------------------------------------------------------------------|--------------------|-----------------|----------|
| <b>Q9D7W5</b> | <b>MED8 Mediator of RNA polymerase II transcription subunit 8</b>                | <b>1.575929217</b> | <b>1.21E-06</b> | <b>2</b> |
| Q9D7W5        | NQVIPLVLSRDEDLMR+Oxidation(17)                                                   | 1.490227616        |                 |          |
| Q9D7W5        | QIQLNKMCSNLEK+Oxidation(7)                                                       | 1.266305212        |                 |          |
| <b>Q9D7X8</b> | <b>GGCT Gamma_glutamylcyclotransferase</b>                                       | <b>0.932473701</b> | <b>0.007413</b> | <b>2</b> |
| Q9D7X8        | ISDEMEDIK                                                                        | 0.78266724         | 2               | 2.9597   |
| Q9D7X8        | SNISLDEQEGVK                                                                     | 0.950035255        | 2               | 3.05607  |
| <b>Q9D819</b> | <b>IPYR Inorganic pyrophosphatase</b>                                            | <b>0.966394352</b> | <b>0.000306</b> | <b>5</b> |
| Q9D819        | GISCMNTTVSESPFK                                                                  | 0.940924085        | 2               | 4.50274  |
| Q9D819        | GQYISPFHDVPIYADK                                                                 | 1.323298139        | 2               | 3.77724  |
| Q9D819        | VLGILAMIDEGETDWK                                                                 | 1.47983984         | 2               | 4.00046  |
| Q9D819        | YKVPDGGKPENEFAFNAEFK                                                             | 1.05462047         | 2               | 3.64163  |
| Q9D819        | YVANLFPYK                                                                        | 0.840984693        | 1               | 1.93985  |
| <b>Q9D880</b> | <b>TIM50 Mitochondrial import inner membrane translocase subunit TIM50</b>       | <b>1.098084738</b> | <b>0.837314</b> | <b>2</b> |
| Q9D880        | TIALNQVEDVR                                                                      | 1.180912519        | 2               | 2.9345   |
| Q9D880        | TVLEHYALEDDPLEAFK                                                                | 1.072092377        | 2               | 5.039    |
| <b>Q9DBA8</b> | <b>HUTI Probable imidazolonepropionase</b>                                       | <b>0.90538641</b>  | <b>0.519636</b> | <b>4</b> |
| Q9DBA8        | AGTTLVECK                                                                        | 1.121122523        | 2               | 2.60088  |
| Q9DBA8        | GVFDLDTTR                                                                        | 0.816799024        | 2               | 2.30374  |
| Q9DBA8        | QGDIIIINASR                                                                      | 1.197336478        | 2               | 2.67138  |
| Q9DBA8        | SGYGLNLETELK                                                                     | 1.100813359        | 2               | 2.36286  |
| <b>Q9DBH5</b> | <b>LMAN2 Vesicular integral_membrane protein VIP36</b>                           | <b>1.206778668</b> | <b>0.005478</b> | <b>3</b> |
| Q9DBH5        | LPTGYYFGASAGTGDSLNDHDIISIK                                                       | 1.660533058        | 3               | 4.62467  |
| Q9DBH5        | TPEEESIDWTK                                                                      | 1.262214836        | 2               | 2.42645  |
| Q9DBH5        | WSELAGCTADFR                                                                     | 1.195890903        | 2               | 3.17241  |
| <b>Q9DC70</b> | <b>NDU57 NADH dehydrogenase [ubiquinone] iron_sulfur protein 7_mitochondrial</b> | <b>1.162490829</b> | <b>0.570292</b> | <b>2</b> |
| Q9DC70        | LDDLINWAR                                                                        | 0.870678433        | 2               | 2.99091  |
| Q9DC70        | QADVMIVAGTLTNK                                                                   | 1.259005878        | 2               | 3.31399  |
| <b>Q9DCH4</b> | <b>EIF3F Eukaryotic translation initiation factor 3 subunit F</b>                | <b>1.032628393</b> | <b>0.007593</b> | <b>2</b> |
| Q9DCH4        | IQDALSTVLQYAEDVLSGK                                                              | 1.115985599        |                 |          |
| Q9DCH4        | VIGLSSDLQVGGASAR                                                                 | 1.075519572        |                 |          |
| <b>Q9DCM0</b> | <b>ETHE1 Protein ETHE1_mitochondrial</b>                                         | <b>1.119468381</b> | <b>0.622275</b> | <b>2</b> |
| Q9DCM0        | SLLPGCQSVISR                                                                     | 1.126120428        | 2               | 3.20238  |
| Q9DCM0        | TDFQQGCAK                                                                        | 1.291571435        | 2               | 2.36362  |
| <b>Q9DCS9</b> | <b>NDUBA NADH dehydrogenase [ubiquinone] 1 beta subcomplex subunit 10</b>        | <b>1.407456549</b> | <b>0.00063</b>  | <b>2</b> |
| Q9DCS9        | AYDLVVDWVPVTLVR                                                                  | 1.078296076        | 2               | 4.6789   |
| Q9DCS9        | TPAPSPQTSLPNPITYLTK                                                              | 1.817724502        | 2               | 3.35069  |
| <b>Q9DCT2</b> | <b>NDU3 NADH dehydrogenase [ubiquinone] iron_sulfur protein 3_mitochondrial</b>  | <b>0.975432699</b> | <b>2.01E-10</b> | <b>5</b> |
| Q9DCT2        | FDLNSPWEAFPAYR                                                                   | 0.970767052        | 2               | 2.78131  |
| Q9DCT2        | ILTDYGFEGHPFR                                                                    | 0.724520923        | 2               | 2.63934  |
| Q9DCT2        | KFDLNSPWEAFPAYR                                                                  | 1.036392587        | 2               | 3.63371  |
| Q9DCT2        | SLADLTAVDVPTR                                                                    | 1.247216165        | 2               | 3.56282  |
| Q9DCT2        | VVAEPVELAQEFR                                                                    | 0.703815061        | 2               | 3.31178  |
| <b>Q9DCU9</b> | <b>HOGA1 Probable 4_hydroxy_2_oxoglutarate aldolase_mitochondrial</b>            | <b>1.132046338</b> | <b>5.61E-09</b> | <b>3</b> |
| Q9DCU9        | GFVVQGSGTEFPFLTSLER                                                              | 1.306796494        | 2               | 5.19591  |
| Q9DCU9        | LIEPNTAVTR                                                                       | 1.095022803        | 2               | 3.30671  |
| Q9DCU9        | TMDWFGYGGPCR                                                                     | 1.720840045        | 2               | 3.40237  |
| <b>Q9EP75</b> | <b>CP4FE Leukotriene_B4 omega_hydroxylase 3</b>                                  | <b>1.530854732</b> | <b>0.014659</b> | <b>2</b> |
| Q9EP75        | DEDGKELSDDIR                                                                     | 0.998095981        | 2               | 2.71357  |
| Q9EP75        | IFNDSTNIMHAK                                                                     | 1.59072219         | 2               | 3.30377  |

|               |                                                                              |                    |                 |           |
|---------------|------------------------------------------------------------------------------|--------------------|-----------------|-----------|
| <b>Q9EP89</b> | <b>LACTB Serine beta_lactamase_like protein LACTB_mitochondrial</b>          | <b>1.090640292</b> | <b>3.53E-14</b> | <b>10</b> |
| Q9EP89        | FENSIESLR                                                                    | 1.022323383        | 2               | 2.82846   |
| Q9EP89        | GIIVSIICNMQSVGLNSTALK                                                        | 1.054570898        | 3               | 3.73242   |
| Q9EP89        | IFHDLDMLTTVQEENEPVIYNR                                                       | 0.986881935        | 3               | 4.01881   |
| Q9EP89        | IKDEVGAPGIVVGVSDGK                                                           | 0.877645202        | 2               | 5.0234    |
| Q9EP89        | KNDFEQGELYLK                                                                 | 1.435397833        | 2               | 3.79962   |
| Q9EP89        | LDLDPVQHYVPEFPEK                                                             | 1.23535473         | 2               | 3.13378   |
| Q9EP89        | LDLDPVQHYVPEFPEKEYEGEK                                                       | 1.197743062        | 3               | 3.66681   |
| Q9EP89        | LVNTPYVDNSYK                                                                 | 2.555831446        | 2               | 3.22032   |
| Q9EP89        | NDFEQGELYLK                                                                  | 1.628527575        | 2               | 2.91169   |
| Q9EP89        | WAGGGFLSTVGDLLK                                                              | 1.077183868        | 2               | 4.31655   |
| <b>Q9EPH2</b> | <b>MRP MARCKS_related protein</b>                                            | <b>1.255062861</b> | <b>0.001181</b> | <b>2</b>  |
| Q9EPH2        | AAATPESQEPQAK                                                                | 1.263017714        | 2               | 2.77378   |
| Q9EPH2        | GDVTAEAAAGASPAK                                                              | 0.786984985        | 2               | 3.41612   |
| <b>Q9EPH8</b> | <b>PABP1 Polyadenylate_binding protein 1</b>                                 | <b>2.278805831</b> | <b>0.000241</b> | <b>13</b> |
| Q9EPH8        | ALDTMNFQVVK                                                                  | 1.076054266        | 2               | 3.30341   |
| Q9EPH8        | ALYDTFSAFGNILSCK                                                             | 2.322055721        | 2               | 2.5951    |
| Q9EPH8        | FSPAGPILSIR                                                                  | 0.774941392        | 2               | 2.31515   |
| Q9EPH8        | GFGFVCFSSPEEATK                                                              | 3.896913363        | 2               | 4.00351   |
| Q9EPH8        | GFGFVFSER                                                                    | 1.115761704        | 2               | 2.78446   |
| Q9EPH8        | GYGFVHFETQAAAER                                                              | 1.400711691        | 2               | 3.12115   |
| Q9EPH8        | ITGMILLEIDNSELLHMLSPESLR                                                     | 1.296917934        | 3               | 3.6525    |
| Q9EPH8        | KEFSPFGTITSAK                                                                | 1.036867199        | 2               | 2.87802   |
| Q9EPH8        | NLDDGIDDER                                                                   | 0.742107914        | 2               | 2.84831   |
| Q9EPH8        | SGVGNIFIK                                                                    | 1.153770273        | 2               | 2.75752   |
| Q9EPH8        | SKVDEAVAVLQAHQAK                                                             | 1.259653338        | 2               | 5.23974   |
| Q9EPH8        | SLGYAYVNFQQPADAER                                                            | 1.515427149        | 2               | 3.6512    |
| Q9EPH8        | VDEAVAVLQAHQAK                                                               | 1.125046251        | 2               | 3.14931   |
| <b>Q9EQ76</b> | <b>FMO3 Dimethylaniline monooxygenase [N_oxide_forming] 3</b>                | <b>1.57911832</b>  | <b>9.9E-20</b>  | <b>12</b> |
| Q9EQ76        | ASIQSVFTNSSK                                                                 | 1.514556744        | 2               | 3.17852   |
| Q9EQ76        | GTCILPSVNDMMDDIDEK                                                           | 1.969143484        | 2               | 3.5942    |
| Q9EQ76        | ILCGTVSIKPNVK                                                                | 1.508098081        | 2               | 2.99591   |
| Q9EQ76        | KEPVFNDELPAK                                                                 | 1.608323677        | 2               | 3.22151   |
| Q9EQ76        | LQEYITSFATEK                                                                 | 4.160085703        | 2               | 4.07355   |
| Q9EQ76        | NNEVTLYK                                                                     | 3.271585017        | 2               | 2.45267   |
| Q9EQ76        | NNLPTAISDWWYMK                                                               | 2.008906469        | 2               | 2.91059   |
| Q9EQ76        | SCLEEGLEPTCFER                                                               | 1.027385647        | 2               | 4.58956   |
| Q9EQ76        | SDDVGGGLWK                                                                   | 2.935103522        | 2               | 2.77175   |
| Q9EQ76        | VLVIGLGNCGDIAAELSHVAQQVIISR                                                  | 2.311074901        | 3               | 5.19264   |
| Q9EQ76        | VWNDGYPWDMVVITR                                                              | 1.640235265        | 2               | 4.13326   |
| Q9EQ76        | YIQFETLVTR                                                                   | 3.056859826        | 2               | 3.3053    |
| <b>Q9EQH3</b> | <b>VPS35 Vacuolar protein sorting_associated protein 35</b>                  | <b>1.263547071</b> | <b>0.555995</b> | <b>6</b>  |
| Q9EQH3        | ACAELHQNVNVK                                                                 | 0.937806727        | 2               | 3.70472   |
| Q9EQH3        | IREDLPNLESSEETEIQINK                                                         | 1.189667922        | 3               | 3.8482    |
| Q9EQH3        | LNLEHIATSSAVSK                                                               | 0.981990704        | 2               | 3.52143   |
| Q9EQH3        | LSQLEGVNVER                                                                  | 1.181643269        | 2               | 2.98017   |
| Q9EQH3        | NIIIALIDR                                                                    | 0.936425427        | 2               | 2.31821   |
| Q9EQH3        | VLETTVEIFNK                                                                  | 1.145568025        | 2               | 2.70742   |
| <b>Q9EQH7</b> | <b>NDST3 Bifunctional heparan sulfate N_deacetylase/N_sulfotransferase 3</b> | <b>1.055767759</b> | <b>0.554285</b> | <b>2</b>  |
| Q9EQH7        | KFALEHGIPDMGYAVSPHHSVYVPHVQLYEAWKK                                           | 1.36465723         | 3               | 3.3491    |
| Q9EQH7        | TTPATVMDEVQK+Oxidation(6)                                                    | 0.931281029        |                 |           |
| <b>Q9EQN5</b> | <b>SMBP2 DNA_binding protein SMUBP_2</b>                                     | <b>0.635579268</b> | <b>0.578354</b> | <b>2</b>  |
| Q9EQN5        | CPTTSVRKPASAQESRQEAR                                                         | 0.878754475        | 2               | 2.36306   |

|               |                                                            |                    |                 |           |
|---------------|------------------------------------------------------------|--------------------|-----------------|-----------|
| Q9EQN5        | KPSEKPLGSQVQPQHSSK                                         | 0.550584163        | 2               | 2.34972   |
| <b>Q9EQS0</b> | <b>TALDO Transaldolase</b>                                 | <b>1.199268353</b> | <b>7.91E-11</b> | <b>7</b>  |
| Q9EQS0        | ALAGCDFLTISPK                                              | 1.001552761        | 2               | 3.48073   |
| Q9EQS0        | EAGISKDRILIK                                               | 0.994506132        | 2               | 2.34868   |
| Q9EQS0        | ILDWHVANTDKK                                               | 1.074382331        | 2               | 3.20659   |
| Q9EQS0        | LGGPQEEQIK                                                 | 1.302269455        | 2               | 3.0213    |
| Q9EQS0        | LSSTWEGIQAGK                                               | 1.303283253        | 2               | 2.83777   |
| Q9EQS0        | SYEPQEDPGVK                                                | 0.946490971        | 2               | 2.8935    |
| Q9EQS0        | WLHNEDQMAVEK                                               | 0.832620967        | 3               | 3.32183   |
| <b>Q9EQX9</b> | <b>UBE2N Ubiquitin_conjugating enzyme E2 N</b>             | <b>1.125758593</b> | <b>0.001627</b> | <b>3</b>  |
| Q9EQX9        | LELFLPEEYPMAPK                                             | 0.910580383        | 2               | 3.44018   |
| Q9EQX9        | SNEAQAIETAR                                                | 1.127234428        | 2               | 3.65616   |
| Q9EQX9        | YFHVVIAGPQDSPFEGGTFK                                       | 1.241977603        | 3               | 4.34284   |
| <b>Q9ER34</b> | <b>ACON Aconitate hydratase_mitochondrial</b>              | <b>1.15246287</b>  | <b>1.05E-12</b> | <b>23</b> |
| Q9ER34        | ADIANLAEFEK                                                | 1.089195681        | 2               | 3.48264   |
| Q9ER34        | CTTDHISAAGPWLK                                             | 1.030648243        | 2               | 4.31623   |
| Q9ER34        | DINQEVYNFLATAGAK                                           | 1.48817157         | 2               | 4.14165   |
| Q9ER34        | DLEDLQILIK                                                 | 1.618001419        | 2               | 2.50314   |
| Q9ER34        | FKLEAPDADELPR                                              | 1.088471955        | 3               | 4.27462   |
| Q9ER34        | FNPETDFLTGK                                                | 1.105183954        | 1               | 2.42444   |
| Q9ER34        | GHLDNISNLLIGAINIENGK                                       | 1.037291894        | 2               | 5.60659   |
| Q9ER34        | IVYGHLDSPANQEIER                                           | 2.206679916        | 2               | 4.95232   |
| Q9ER34        | LEAPDADELPR                                                | 1.225190457        | 2               | 2.59118   |
| Q9ER34        | LNRPLTLEK                                                  | 1.492326373        | 2               | 2.44747   |
| Q9ER34        | LQLLEPFDKWDGKDLEDLQILIK                                    | 1.183335033        | 3               | 3.68016   |
| Q9ER34        | LTGTLGWTSPK                                                | 1.1627162          | 2               | 2.58896   |
| Q9ER34        | NAVTFEGPVPDPTAR                                            | 1.104065288        | 2               | 4.55782   |
| Q9ER34        | NDANPETHAFVTSPEIVTALAIAGTLK                                | 1.43398722         | 3               | 4.41255   |
| Q9ER34        | NTIVTSYNR                                                  | 1.181177002        | 2               | 2.3768    |
| Q9ER34        | QGLLPLTFADPSDYNK                                           | 1.126226123        | 2               | 3.4433    |
| Q9ER34        | SDFDPGQDQTYQHPPK                                           | 1.156725879        | 2               | 2.45517   |
| Q9ER34        | SQFTITPGSEQIR                                              | 0.983963968        | 2               | 3.45213   |
| Q9ER34        | VAMQDATAQMAMLQFISSGLPK                                     | 1.705716463        | 2               | 2.37307   |
| Q9ER34        | VAVPSTIHC DHLIEAQLGGEK                                     | 1.573182749        | 2               | 4.91602   |
| Q9ER34        | VDVSPTSQR                                                  | 1.146589654        | 2               | 2.40706   |
| Q9ER34        | VGLIGSCTNSSYEDMGR                                          | 0.954676088        | 2               | 4.36792   |
| Q9ER34        | WVIGDENYEGESSR                                             | 1.147283993        | 2               | 4.51262   |
| <b>Q9ES21</b> | <b>SAC1 Phosphatidylinositide phosphatase SAC1</b>         | <b>0.973872249</b> | <b>0.999689</b> | <b>3</b>  |
| Q9ES21        | LEEQDEFEK                                                  | 0.988270617        | 2               | 2.81877   |
| Q9ES21        | TNVIQSLAR                                                  | 1.048071573        | 2               | 2.33926   |
| Q9ES21        | TQLGLVMDGFNSLLR                                            | 0.973871336        | 2               | 3.78059   |
| <b>Q9ES38</b> | <b>S27A5 Bile acyl_CoA synthetase</b>                      | <b>1.136301659</b> | <b>0.294097</b> | <b>13</b> |
| Q9ES38        | ACQAAWALK                                                  | 1.112334025        | 2               | 2.53624   |
| Q9ES38        | ADVWENFQQR                                                 | 1.13907996         | 2               | 3.01327   |
| Q9ES38        | EGFDVGVIAADPLYILDNK                                        | 1.209353074        | 2               | 5.33893   |
| Q9ES38        | GATAILVLPK                                                 | 1.132663041        | 2               | 2.68855   |
| Q9ES38        | IQDSLEITNTYK                                               | 1.094267971        | 2               | 3.73132   |
| Q9ES38        | LKEATIQEDK                                                 | 1.247277595        | 2               | 2.60701   |
| Q9ES38        | LLAENIR                                                    | 1.170106651        | 2               | 2.39822   |
| Q9ES38        | MLTPLELVQFDIETAEPVRDK                                      | 0.909435095        | 2               | 4.28251   |
| Q9ES38        | QGFCIPVETGKPGLLLTGK                                        | 0.859566233        | 3               | 3.6665    |
| Q9ES38        | SISALSVFLGLAK                                              | 0.780532415        | 2               | 3.4069    |
| Q9ES38        | SLMPDVYQAVCEGTWK                                           | 1.510730832        | 2               | 3.95606   |
| Q9ES38        | YLCNVPGQPEDK                                               | 1.146213783        | 2               | 3.32896   |
| Q9ES38        | YLCNVPGQPEDKK                                              | 0.982773675        | 2               | 2.49462   |
| <b>Q9ES53</b> | <b>UFD1 Ubiquitin fusion degradation protein 1 homolog</b> | <b>1.084575399</b> | <b>0.297163</b> | <b>2</b>  |

|               |                                                                            |                    |                 |           |
|---------------|----------------------------------------------------------------------------|--------------------|-----------------|-----------|
| Q9ES53        | FQPQSPDFLDITNPK                                                            | 1.112369902        | 2               | 2.49985   |
| Q9ES53        | FVAFSGEGQSLRKK                                                             | 0.772868849        | 2               | 2.58327   |
| <b>Q9EST6</b> | <b>AN32B Acidic leucine_rich nuclear phosphoprotein 32 family member B</b> | <b>0.99264803</b>  | <b>0.818442</b> | <b>2</b>  |
| Q9EST6        | SLDLFGCEVTNR                                                               | 0.955619665        | 2               | 3.09855   |
| Q9EST6        | TPAAVQELVLDNCK                                                             | 1.166606016        | 2               | 3.45614   |
| <b>Q9ESV1</b> | <b>LUZP1 Leucine zipper protein 1</b>                                      | <b>0.811104898</b> | <b>0.053156</b> | <b>2</b>  |
| Q9ESV1        | EKLEEEENLTR                                                                | 0.999598211        | 2               | 2.87248   |
| Q9ESV1        | RMADLEKLEEALSR                                                             | 0.72657335         | 2               | 2.53114   |
| <b>Q9ESW0</b> | <b>DDB1 DNA damage_binding protein 1</b>                                   | <b>0.986849489</b> | <b>2.67E-06</b> | <b>4</b>  |
| Q9ESW0        | IEVQDTSGGTTALRPSASTQALSSSVSSK                                              | 1.294310417        | 3               | 6.02124   |
| Q9ESW0        | KTEPATGFIDGDLIESFLDISRPK                                                   | 1.500537306        | 3               | 3.96137   |
| Q9ESW0        | QGQGQLVTCGAFK                                                              | 1.265982851        | 2               | 2.89987   |
| Q9ESW0        | VTLGTQPTVLR                                                                | 1.016330016        | 2               | 2.6335    |
| <b>Q9HB97</b> | <b>PARVA Alpha_parvin</b>                                                  | <b>0.876704856</b> | <b>0.445874</b> | <b>2</b>  |
| Q9HB97        | DLAEDLYDGQVLQK                                                             | 0.676516115        | 2               | 3.10192   |
| Q9HB97        | LNVAEVTQSEIAQK                                                             | 0.877952687        | 2               | 4.33699   |
| <b>Q9JHL4</b> | <b>DBNL Drebrin_like protein</b>                                           | <b>0.988970471</b> | <b>0.01746</b>  | <b>4</b>  |
| Q9JHL4        | AMSTTSVSSSQPGK                                                             | 0.774977323        | 2               | 2.58581   |
| Q9JHL4        | ERAMSTTSVSSSQPGKLR+Oxidation(3)                                            | 0.133149914        |                 |           |
| Q9JHL4        | TGELEQEVVSR                                                                | 1.201405802        | 2               | 3.3414    |
| Q9JHL4        | VAGTGEGGLEELVEELNSGK                                                       | 1.051696053        | 2               | 2.86545   |
| <b>Q9JI85</b> | <b>NUCB2 Nucleobindin_2</b>                                                | <b>1.25051023</b>  | <b>3E-13</b>    | <b>4</b>  |
| Q9JI85        | FQQGIAPSGPAGELK                                                            | 1.464684744        | 2               | 2.73326   |
| Q9JI85        | QEYQQAVQQLQK                                                               | 1.260839001        | 2               | 4.3223    |
| Q9JI85        | QVIEVLETPHFR                                                               | 0.990583056        | 2               | 2.66934   |
| Q9JI85        | VHNVEPVESAR                                                                | 1.253177584        | 2               | 2.91834   |
| <b>Q9JI91</b> | <b>ACTN2 Alpha_actinin_2</b>                                               | <b>0.958877068</b> | <b>0.032255</b> | <b>11</b> |
| Q9JI91        | DQSLQEELAR                                                                 | 1.669762759        | 2               | 2.61221   |
| Q9JI91        | ETADTDTAEQVIASFR                                                           | 0.617732094        | 2               | 3.93364   |
| Q9JI91        | GYEELLNEIR                                                                 | 1.081338357        | 3               | 3.37113   |
| Q9JI91        | HRPDLIDYSK                                                                 | 1.825754028        | 2               | 2.3948    |
| Q9JI91        | HTNYTMEHIR                                                                 | 0.956589421        | 3               | 3.40227   |
| Q9JI91        | HTNYTMEHIR+Oxidation(5)                                                    | 1.487652903        |                 |           |
| Q9JI91        | KHEAFESDLAAHQDR                                                            | 0.647090543        | 2               | 5.36773   |
| Q9JI91        | LEGDHQLIQEGLVFDNK                                                          | 0.785910906        | 3               | 4.94817   |
| Q9JI91        | MLDAEDIVNTPKPEDER                                                          | 1.110472152        | 2               | 3.8895    |
| Q9JI91        | QSILAIQNEVEK                                                               | 0.196346129        | 2               | 2.97183   |
| Q9JI91        | TINEVETQILTR                                                               | 0.699251341        | 2               | 2.53      |
| <b>Q9JJ19</b> | <b>NHRF1 Na( )/H( ) exchange regulatory cofactor NHE_RF1</b>               | <b>0.976321403</b> | <b>0.782355</b> | <b>7</b>  |
| Q9JJ19        | AVDPDSPAASGLR                                                              | 1.017492311        | 2               | 3.68342   |
| Q9JJ19        | IVEVNGVCMGK                                                                | 0.948138366        | 2               | 3.22576   |
| Q9JJ19        | LLVDPETDEQLKK                                                              | 1.282811966        | 2               | 2.47466   |
| Q9JJ19        | LVEPGSPAOK                                                                 | 0.97744519         | 2               | 2.52615   |
| Q9JJ19        | LVEVNGENVEK                                                                | 2.664821997        | 2               | 2.79379   |
| Q9JJ19        | SEHTEPPAAADTK                                                              | 0.389911811        | 2               | 3.03358   |
| Q9JJ19        | VTPSQEHLDGPLPEPFSNGEIQK                                                    | 0.822500848        | 3               | 3.67463   |
| <b>Q9JJ22</b> | <b>ERAP1 Endoplasmic reticulum aminopeptidase 1</b>                        | <b>1.11332784</b>  | <b>0.773183</b> | <b>2</b>  |
| Q9JJ22        | ASLINNAFQLVLSIGK                                                           | 1.171159035        | 2               | 2.52207   |
| Q9JJ22        | TQEFPHILTIGR                                                               | 1.06864635         | 2               | 2.57807   |
| <b>Q9JJ40</b> | <b>NHRF3 Na( )/H( ) exchange regulatory cofactor NHE_RF3</b>               | <b>1.075684233</b> | <b>0.190226</b> | <b>3</b>  |
| Q9JJ40        | GVFLTDITPQGVAMK                                                            | 1.016307563        | 2               | 2.41519   |
| Q9JJ40        | NGGDQTTLLVLDK                                                              | 1.070588276        | 2               | 2.45423   |
| Q9JJ40        | SGNSVTLLVLDGDSYEK                                                          | 1.376380502        | 2               | 4.38483   |

|               |                                                                 |                    |                 |           |
|---------------|-----------------------------------------------------------------|--------------------|-----------------|-----------|
| <b>Q9JJ46</b> | <b>EBP 3_beta_hydroxysteroid_Delta(8)_Delta(7)_isomerase</b>    | <b>0.842317559</b> | <b>0.05096</b>  | <b>3</b>  |
| Q9JJ46        | HLTNAQSMLDNK                                                    | <b>0.84313863</b>  | 2               | 3.52705   |
| Q9JJ46        | HLTNAQSMLDNK+Oxidation(7)                                       | <b>1.248406406</b> |                 |           |
| Q9JJ46        | VSVVPLGTGR                                                      | <b>1.186345655</b> | 2               | 2.52231   |
| <b>Q9JJ54</b> | <b>HNRPD Heterogeneous nuclear ribonucleoprotein D0</b>         | <b>1.410083253</b> | <b>0.005733</b> | <b>3</b>  |
| Q9JJ54        | FGDVVDCTLK                                                      | <b>0.984556744</b> | 2               | 2.98743   |
| Q9JJ54        | IFVGGLSPDTPEEK                                                  | <b>1.235331756</b> | 2               | 4.20112   |
| Q9JJ54        | IFVGGLSPDTPEEKIR                                                | <b>1.472532728</b> | 2               | 2.50755   |
| <b>Q9JJ79</b> | <b>DYHC2 Cytoplasmic dynein 2 heavy chain 1</b>                 | <b>1.188054532</b> | <b>0.341905</b> | <b>5</b>  |
| Q9JJ79        | ASDLKDLNSR                                                      | <b>1.107392416</b> | 2               | 2.32145   |
| Q9JJ79        | ELMLERETLLAR+Oxidation(2)                                       | <b>1.869712434</b> |                 |           |
| Q9JJ79        | NCLEEWTKAAGLEK                                                  | <b>1.126028833</b> | 2               | 2.4201    |
| Q9JJ79        | TVLRGSGNLLR                                                     | <b>1.225254914</b> | 2               | 2.43683   |
| Q9JJ79        | YVVQIGDK                                                        | <b>0.917744714</b> | 1               | 2.07297   |
| <b>Q9JJM9</b> | <b>SEPT5 Septin_5</b>                                           | <b>0.888964662</b> | <b>0.01683</b>  | <b>2</b>  |
| Q9JJM9        | LIRMKDEELR                                                      | <b>1.70145891</b>  | 2               | 2.47511   |
| Q9JJM9        | MQEMLQKMK+Oxidation(3)                                          | <b>0.464459156</b> |                 |           |
| <b>Q9JJU8</b> | <b>SH3L1 SH3 domain_binding glutamic acid_rich_like protein</b> | <b>1.27424174</b>  | <b>0.588277</b> | <b>2</b>  |
| Q9JJU8        | GDYDAFFEAR                                                      | <b>0.910816208</b> | 2               | 2.48632   |
| Q9JJU8        | QQDVLFCLEANK                                                    | <b>1.07546863</b>  | 2               | 3.28027   |
| <b>Q9JK11</b> | <b>RTN4 Reticulon_4</b>                                         | <b>1.232922995</b> | <b>0.009923</b> | <b>2</b>  |
| Q9JK11        | VDRKCLEDSEQK                                                    | <b>1.262201434</b> | 2               | 2.34615   |
| Q9JK11        | YSNSALGHVNSTIK                                                  | <b>0.469202024</b> | 2               | 2.6987    |
| <b>Q9JK38</b> | <b>GNA1 Glucosamine 6_phosphate N_acetyltransferase</b>         | <b>1.163772296</b> | <b>0.287479</b> | <b>3</b>  |
| Q9JK38        | ITLECLPQNVGFYK                                                  | <b>1.666556102</b> | 2               | 3.03087   |
| Q9JK38        | VEDVVVSDECR                                                     | <b>1.189970226</b> | 2               | 3.53609   |
| Q9JK38        | VLGQLTETGVVSPEQFMK                                              | <b>1.214559247</b> | 2               | 4.1704    |
| <b>Q9JK72</b> | <b>CCS Copper chaperone for superoxide dismutase</b>            | <b>1.411033451</b> | <b>0.034231</b> | <b>2</b>  |
| Q9JK72        | GDLGNVHAEASGR                                                   | <b>1.414550681</b> | 2               | 2.77098   |
| Q9JK72        | SLVVDEGEDDLGR                                                   | <b>1.350782854</b> | 2               | 2.30483   |
| <b>Q9JKS4</b> | <b>LDB3 LIM domain_binding protein 3</b>                        | <b>0.233531254</b> | <b>0.139929</b> | <b>2</b>  |
| Q9JKS4        | GAPAYNPTGPQVTPRAR                                               | <b>0.130477821</b> | 2               | 3.93065   |
| Q9JKS4        | TQSKPEDEADEWAR                                                  | <b>0.27969417</b>  | 2               | 3.54602   |
| <b>Q9JLA3</b> | <b>UGGG1 UDP_glucose:glycoprotein glucosyltransferase 1</b>     | <b>1.305665881</b> | <b>0.093708</b> | <b>12</b> |
| Q9JLA3        | AIWAALQTQTSNSAK                                                 | <b>1.630205854</b> | 2               | 3.62452   |
| Q9JLA3        | FLFVDADQIVR                                                     | <b>1.178251058</b> | 2               | 2.90383   |
| Q9JLA3        | FLSPLQQNLLK                                                     | <b>1.070146183</b> | 2               | 2.38585   |
| Q9JLA3        | GQYQGLSQDPNSLSNLDQDLPNMIIHQVPIK                                 | <b>1.138687209</b> | 3               | 6.33893   |
| Q9JLA3        | IEYQFFEDK                                                       | <b>1.125488951</b> | 2               | 2.52087   |
| Q9JLA3        | IVPEWQDYDQEIK                                                   | <b>0.930726886</b> | 2               | 3.28921   |
| Q9JLA3        | LNIQPSETDYAVDIR                                                 | <b>1.103744473</b> | 2               | 3.94754   |
| Q9JLA3        | TAAIANSMNYLTK                                                   | <b>1.216697617</b> | 2               | 2.55355   |
| Q9JLA3        | VDALLSAQPK                                                      | <b>1.159874508</b> | 2               | 3.00372   |
| Q9JLA3        | VEEDVASDLVMK                                                    | <b>0.839216213</b> | 2               | 3.5059    |
| Q9JLA3        | VWQLQDLSFQTAAR                                                  | <b>1.177224711</b> | 2               | 4.41666   |
| Q9JLA3        | YVLEPEISFTADNSFAK                                               | <b>1.489606125</b> | 2               | 3.7142    |
| <b>Q9JLH7</b> | <b>CK5P3 CDK5 regulatory subunit_associated protein 3</b>       | <b>0.814533468</b> | <b>0.212403</b> | <b>3</b>  |
| Q9JLH7        | GSDALTLLLEYPETR                                                 | <b>0.923711383</b> | 2               | 2.47365   |
| Q9JLH7        | KEEEGQAGAAEMR+Oxidation(11)                                     | <b>0.711201091</b> |                 |           |

|               |                                                                      |                    |                 |           |
|---------------|----------------------------------------------------------------------|--------------------|-----------------|-----------|
| Q9JLH7        | QYGITGDNVRRELLALVK                                                   | 0.997859154        | 2               | 2.37243   |
| <b>Q9JLJ3</b> | <b>AL9A1 4_trimethylaminobutyraldehyde dehydrogenase</b>             | <b>1.255452234</b> | <b>9.9E-20</b>  | <b>19</b> |
| Q9JLJ3        | AGAPNGLFNVVQGAATGQFLCQHR                                             | 1.059424506        | 2               | 4.33006   |
| Q9JLJ3        | ANDTTFLAAGVFTR                                                       | 1.112440499        | 2               | 4.61709   |
| Q9JLJ3        | CQVLEAAR                                                             | 1.015573954        | 2               | 3.51146   |
| Q9JLJ3        | EQGATVLCGGEPYAPEDPK                                                  | 1.147356057        | 2               | 4.63216   |
| Q9JLJ3        | EQGATVLCGGEPYAPEDPKLK                                                | 1.095591813        | 3               | 3.35561   |
| Q9JLJ3        | EVNLAVENAK                                                           | 1.124399577        | 1               | 2.9495    |
| Q9JLJ3        | GALLANFLTQGGVCCNGTR                                                  | 1.182281982        | 2               | 5.38024   |
| Q9JLJ3        | GIKPITLLEGGK                                                         | 1.357317307        | 3               | 3.97212   |
| Q9JLJ3        | HGYMTPCILNCTDDMTCVK                                                  | 0.806049245        | 3               | 3.60533   |
| Q9JLJ3        | IGDPLEDTR                                                            | 1.137683487        | 2               | 4.01381   |
| Q9JLJ3        | MGPLINAPHLER                                                         | 1.067483904        | 2               | 3.12244   |
| Q9JLJ3        | MGPLINAPHLER+Oxidation(0)                                            | 1.204915503        |                 |           |
| Q9JLJ3        | RDEIAIMETINNGK                                                       | 1.118586734        | 2               | 5.36157   |
| Q9JLJ3        | SAPALACGNAMIFKPSFPTVSALLAEIYTK                                       | 1.094126341        | 3               | 3.45928   |
| Q9JLJ3        | SPLIIFSDCNMK                                                         | 1.042491637        | 2               | 2.55418   |
| Q9JLJ3        | VEPVDASGTEK                                                          | 1.044686846        | 1               | 2.24513   |
| Q9JLJ3        | VSFTGSVPTGMK                                                         | 1.170635101        | 2               | 3.57454   |
| Q9JLJ3        | VSFTGSVPTGMK+Oxidation(10)                                           | 1.405166065        |                 |           |
| Q9JLJ3        | VTIEYSQLK                                                            | 3.00613188         | 2               | 3.12621   |
| <b>Q9JLQ0</b> | <b>CD2AP CD2_associated protein</b>                                  | <b>1.07749025</b>  | <b>0.737269</b> | <b>2</b>  |
| Q9JLQ0        | LQEEGWLEGELNGR                                                       | 0.977987836        | 2               | 2.33879   |
| Q9JLQ0        | SNLEVEIAK                                                            | 1.117237135        | 1               | 1.90647   |
| <b>Q9JLR1</b> | <b>S61A2 Protein transport protein Sec61 subunit alpha isoform 2</b> | <b>1.037688051</b> | <b>0.587304</b> | <b>3</b>  |
| Q9JLR1        | GTLMELGISPIVTSGLIMQLLAGAK                                            | 1.176690598        |                 |           |
| Q9JLR1        | IIEVGDTPK                                                            | 0.88333768         | 2               | 2.44053   |
| Q9JLR1        | TWIEVSGSSAK                                                          | 1.21605344         | 2               | 2.66745   |
| <b>Q9JLTO</b> | <b>MYH10 Myosin_10</b>                                               | <b>1.116699414</b> | <b>7.58E-08</b> | <b>2</b>  |
| Q9JLTO        | AGVLAHLEER                                                           | 1.165810017        | 2               | 3.57284   |
| Q9JLTO        | KFDQLLAEKGISAR                                                       | 0.574962279        | 2               | 2.40931   |
| <b>Q9JLZ1</b> | <b>GLRX3 Glutaredoxin_3</b>                                          | <b>0.748476736</b> | <b>0.271255</b> | <b>2</b>  |
| Q9JLZ1        | ELEASEELDTICPK                                                       | 0.753829684        | 2               | 3.10781   |
| Q9JLZ1        | LEAEAVPEVSEK                                                         | 0.195840715        | 2               | 2.49429   |
| <b>Q9JLZ3</b> | <b>AUHM Methylglutaconyl_CoA hydratase_mitochondrial</b>             | <b>0.922062531</b> | <b>0.158081</b> | <b>4</b>  |
| Q9JLZ3        | AVGLISHVLEQNQEGDAAYR                                                 | 0.860984568        | 2               | 5.71305   |
| Q9JLZ3        | AVGLISHVLEQNQEGDAAYRK                                                | 0.917822701        | 3               | 4.36533   |
| Q9JLZ3        | GIVVLGINR                                                            | 0.982881384        | 2               | 2.85249   |
| Q9JLZ3        | SEVPGIFCAGADLK                                                       | 0.940213535        | 2               | 2.93749   |
| <b>Q9JM53</b> | <b>AIFM1 Apoptosis_inducing factor 1_mitochondrial</b>               | <b>1.009306519</b> | <b>0.920498</b> | <b>15</b> |
| Q9JM53        | AIASAAEGGSVPPIR                                                      | 1.120738332        | 2               | 3.16155   |
| Q9JM53        | CLIATGGTPR                                                           | 0.814359608        | 2               | 2.58395   |
| Q9JM53        | DGEQHEDLNEVAK                                                        | 1.425485092        | 3               | 3.59366   |
| Q9JM53        | ILPEYLSNWTMEK                                                        | 1.064552314        | 2               | 3.10488   |
| Q9JM53        | KSQASGIEVIQLFPEK                                                     | 1.200707252        | 2               | 3.84772   |
| Q9JM53        | KVETDHIVTAVGLEPNVELAK                                                | 0.979159008        | 2               | 6.30578   |
| Q9JM53        | LNDGSQITFEK                                                          | 1.025564263        | 2               | 3.34653   |
| Q9JM53        | SITVIGGGFLGSELACALGR                                                 | 0.840436636        | 2               | 3.33527   |
| Q9JM53        | SQASGIEVIQLFPEK                                                      | 0.96645551         | 2               | 4.46112   |
| Q9JM53        | TGGLEIDSDFGGFR                                                       | 1.126706544        | 2               | 4.56646   |
| Q9JM53        | VETDHIVTAVGLEPNVELAK                                                 | 0.978824324        | 2               | 5.21568   |
| Q9JM53        | VLIVSEDPPELYMRPPLSK                                                  | 1.007078213        | 3               | 3.74137   |
| Q9JM53        | VMPNAIVQSVGVSGGK                                                     | 0.874786476        | 2               | 4.04117   |



|               |                                                                |                    |                 |           |
|---------------|----------------------------------------------------------------|--------------------|-----------------|-----------|
| Q9JM53        | VMPNAIVQSVGVSGGK+Oxidation(1)                                  | 1.270167067        |                 |           |
| Q9JM53        | VNAELQAR                                                       | 1.056412894        | 2               | 2.48654   |
| <b>Q9JMA1</b> | <b>UBP14 Ubiquitin carboxyl_terminal hydrolase 14</b>          | <b>0.92123082</b>  | <b>0.82396</b>  | <b>2</b>  |
| Q9JMA1        | CTESEEEVTK                                                     | 0.900555009        | 2               | 3.62192   |
| Q9JMA1        | EKESVNAKVLK                                                    | 0.668751951        | 2               | 2.31527   |
| <b>Q9JMD3</b> | <b>PCTL PCTP_like protein</b>                                  | <b>1.130547886</b> | <b>0.009933</b> | <b>6</b>  |
| Q9JMD3        | AVSIQTGYLIQSTGPK                                               | 1.04313409         | 2               | 4.89495   |
| Q9JMD3        | ESVQVPDDQDFR                                                   | 2.004426017        | 2               | 2.3628    |
| Q9JMD3        | MECCDVPAETLYDVLHDIEYR                                          | 1.218823013        | 3               | 4.59759   |
| Q9JMD3        | MECCDVPAETLYDVLHDIEYR+Oxidation(0)                             | 1.255144715        |                 |           |
| Q9JMD3        | SCVITYLAQVDPK                                                  | 1.530867366        | 2               | 3.14896   |
| Q9JMD3        | WDSNVIETFDIAR                                                  | 1.221299105        | 2               | 4.31817   |
| <b>Q9QVC8</b> | <b>FKBP4 Peptidyl_prolyl cis_trans isomerase FKBP4</b>         | <b>0.937262379</b> | <b>0.144601</b> | <b>5</b>  |
| Q9QVC8        | GEPNNVAGNQAVK                                                  | 0.972488792        | 2               | 4.13567   |
| Q9QVC8        | TEVAAGDHPPTDAEMK                                               | 0.712637289        | 2               | 2.95854   |
| Q9QVC8        | TQLAVCQQR                                                      | 0.780363706        | 2               | 2.49357   |
| Q9QVC8        | VAENGAQSAPLPLEGVDISPK                                          | 0.852020838        | 2               | 4.12216   |
| Q9QVC8        | VGEVCHITCKPEYAYGSAGSPPK                                        | 0.908585651        | 3               | 5.06883   |
| <b>Q9QWN8</b> | <b>SPTN2 Spectrin beta chain_brain 2</b>                       | <b>1.083567774</b> | <b>0.348306</b> | <b>2</b>  |
| Q9QWN8        | ALAQEDQSAGEVER                                                 | 1.219463447        | 2               | 3.92612   |
| Q9QWN8        | VGELTQEANALAAGHPAQAPAINTR                                      | 1.034979405        | 3               | 4.34745   |
| <b>Q9QX74</b> | <b>SHAN2 SH3 and multiple ankyrin repeat domains protein 2</b> | <b>0.372356858</b> | <b>0.013859</b> | <b>2</b>  |
| Q9QX74        | KNMLINIVDTAQK+Oxidation(2)                                     | 1.202452424        |                 |           |
| Q9QX74        | SSSPASPENYVHPLTGR                                              | 0.415411857        | 2               | 2.59029   |
| <b>Q9QX79</b> | <b>FETUB Fetuin_B</b>                                          | <b>0.909057479</b> | <b>0.558011</b> | <b>2</b>  |
| Q9QX79        | GSIQHLPEQEPEDESKGK                                             | 0.814022854        | 3               | 3.66737   |
| Q9QX79        | NTAPTSSPSITAPR                                                 | 0.929298886        | 2               | 3.5993    |
| <b>Q9QXG4</b> | <b>ACSA Acetyl_coenzyme A synthetase_cytoplasmic</b>           | <b>0.977849238</b> | <b>0.038844</b> | <b>3</b>  |
| Q9QXG4        | AELGMNDSPSQSPPVK                                               | 0.887729352        | 2               | 3.72188   |
| Q9QXG4        | GATTNICYNVLDLDR                                                | 2.580117396        | 2               | 2.56711   |
| Q9QXG4        | IGPIATPDYIQNAPGLPK                                             | 1.342750065        | 2               | 3.04793   |
| <b>Q9QXH4</b> | <b>ITAX Integrin alpha_X</b>                                   | <b>0.909389804</b> | <b>0.631572</b> | <b>2</b>  |
| Q9QXH4        | GGSQMTFLVTFDVSFK+Oxidation(4)                                  | 1.196283187        |                 |           |
| Q9QXH4        | MLDFVKAVMSQLQRPSTR                                             | 0.89543945         | 2               | 2.39697   |
| <b>Q9QXK3</b> | <b>COPG2 Coatomer subunit gamma_2</b>                          | <b>0.925633403</b> | <b>0.95297</b>  | <b>2</b>  |
| Q9QXK3        | SIATLAITLLK                                                    | 1.114573603        | 2               | 3.45082   |
| Q9QXK3        | SSEPVLTEAETEYFVR                                               | 0.920406639        | 2               | 3.63336   |
| <b>Q9QXQ0</b> | <b>ACTN4 Alpha_actinin_4</b>                                   | <b>1.161579201</b> | <b>2.43E-09</b> | <b>27</b> |
| Q9QXQ0        | ACLISLGYDVENDR                                                 | 1.062287677        | 2               | 4.06988   |
| Q9QXQ0        | AGTQIENIDEDFR                                                  | 1.066873655        | 2               | 3.54526   |
| Q9QXQ0        | AGTQIENIDEDFRDGLK                                              | 1.047679449        | 2               | 4.20728   |
| Q9QXQ0        | ASFNFHFDKDHGGALGPPEEFK                                         | 1.322711246        | 3               | 3.54724   |
| Q9QXQ0        | ASIHEAWTDGK                                                    | 0.858412609        | 1               | 2.29187   |
| Q9QXQ0        | DDPVTNLNNAFEVAEK                                               | 1.06348255         | 2               | 3.0808    |
| Q9QXQ0        | ETTDTDADQVIASF                                                 | 0.963323919        | 2               | 4.46142   |
| Q9QXQ0        | GISQEQMQEFR                                                    | 1.16165349         | 2               | 3.15881   |
| Q9QXQ0        | HRDYETATLSDIK                                                  | 1.405770377        | 2               | 3.51966   |
| Q9QXQ0        | HRPELIEYDK                                                     | 1.166868095        | 3               | 4.13984   |
| Q9QXQ0        | HTNYTMEHLR                                                     | 0.956589421        | 3               | 3.40227   |
| Q9QXQ0        | HTNYTMEHLR+Oxidation(5)                                        | 1.487652903        |                 |           |
| Q9QXQ0        | ICDQWDNLGSLTHSR                                                | 1.014532901        | 2               | 4.375     |
| Q9QXQ0        | KDDPVTNLNNAFEVAEK                                              | 0.93698146         | 2               | 4.51317   |
| Q9QXQ0        | LSGSPYTSVTPQIINSK                                              | 1.664428537        | 2               | 4.86717   |

|               |                                                                   |                    |                 |           |
|---------------|-------------------------------------------------------------------|--------------------|-----------------|-----------|
| Q9QXQ0        | LVSIGAEIIVDGNK                                                    | 1.368625168        | 2               | 3.23665   |
| Q9QXQ0        | MAPYQGPDAAPGALDYK                                                 | 0.896513202        | 2               | 4.62986   |
| Q9QXQ0        | MAPYQGPDAAPGALDYK+Oxidation(0)                                    | 1.29569818         |                 |           |
| Q9QXQ0        | MLDAEDIVNTARPDEK                                                  | 0.914190715        | 2               | 3.70821   |
| Q9QXQ0        | QFASQANMVGPPWIQTK                                                 | 0.979964246        | 2               | 3.82857   |
| Q9QXQ0        | QLETIDQLHLEYAK                                                    | 0.99393142         | 2               | 2.96463   |
| Q9QXQ0        | RDHALLEEQSK                                                       | 1.11524653         | 3               | 3.95237   |
| Q9QXQ0        | SIVDYKPNLDLLEQQHQLIQEALIFDNK                                      | 1.14846245         | 3               | 5.32006   |
| Q9QXQ0        | TINEVENQILTR                                                      | 1.099364629        | 2               | 3.6777    |
| Q9QXQ0        | VEQIAAIAQELNELDYDSSHNVNTR                                         | 1.443205542        | 3               | 5.39837   |
| Q9QXQ0        | VGWEQLLTIAR                                                       | 1.022882957        | 2               | 4.04791   |
| Q9QXQ0        | VLAVNQENEHLMEDYER                                                 | 1.327581841        | 2               | 5.04968   |
| <b>Q9QXT0</b> | <b>CNPY2 Protein canopy homolog 2</b>                             | <b>0.874705071</b> | <b>0.981909</b> | <b>5</b>  |
| Q9QXT0        | ALVDELEWEIAR                                                      | 0.836446004        | 2               | 3.5548    |
| Q9QXT0        | IDSDISGTLK                                                        | 0.858016238        | 2               | 2.31911   |
| Q9QXT0        | INPDGSQSVVEVPYAR                                                  | 1.00996004         | 2               | 4.00082   |
| Q9QXT0        | RTDLCDHALHR                                                       | 1.027682388        | 3               | 3.42901   |
| Q9QXT0        | TDLCDHALHR                                                        | 1.049439647        | 2               | 2.86292   |
| <b>Q9QXX4</b> | <b>CMC2 Calcium_binding mitochondrial carrier protein Aralar2</b> | <b>0.94184759</b>  | <b>0.009042</b> | <b>16</b> |
| Q9QXX4        | ASFANEDGQVSPGSLLAGAIGMPAASLVTPADVIK                               | 1.206561628        | 3               | 4.90427   |
| Q9QXX4        | ASGDAARPFLLQLAESAYR                                               | 1.228817909        | 2               | 3.55857   |
| Q9QXX4        | DGSVPLLAEIFAGGCAGGSQVIFTNPLEIVK                                   | 1.250702697        |                 |           |
| Q9QXX4        | DVEVTKEEFALAAQK                                                   | 1.012824931        | 2               | 4.38876   |
| Q9QXX4        | FGLGSIAGAVGATAVYPIDLK                                             | 0.89689806         | 2               | 5.58094   |
| Q9QXX4        | GLLPQLLGVAPEK                                                     | 1.034031898        | 2               | 2.99563   |
| Q9QXX4        | IAPLEEGMLPFNLAEAR                                                 | 1.439698121        | 2               | 5.06018   |
| Q9QXX4        | ITLPAPNPDHVGQYK                                                   | 1.280323467        | 2               | 2.34699   |
| Q9QXX4        | KDVEVTKEEFALAAQK                                                  | 0.942372773        | 2               | 4.77723   |
| Q9QXX4        | LQVAGEITTGPR                                                      | 1.061265706        | 2               | 3.50307   |
| Q9QXX4        | LTVNDFVR                                                          | 0.920714865        | 2               | 2.43457   |
| Q9QXX4        | NGEFFMSPHDFVTR                                                    | 0.927112159        | 2               | 3.66185   |
| Q9QXX4        | SSPQFGVTLTYELLQR                                                  | 2.104293242        | 2               | 3.96628   |
| Q9QXX4        | STGSFVGELMYK                                                      | 0.889123734        | 2               | 2.46336   |
| Q9QXX4        | TVELLSGVVDQTK                                                     | 1.142338133        | 2               | 4.2984    |
| Q9QXX4        | YLNIFGESQPNPK                                                     | 1.044800241        | 2               | 4.40584   |
| <b>Q9QYU2</b> | <b>EFTS Elongation factor Ts_mitochondrial</b>                    | <b>0.861808692</b> | <b>0.530172</b> | <b>2</b>  |
| Q9QYU2        | ALETCGGDLK                                                        | 1.009746952        | 2               | 2.42024   |
| Q9QYU2        | YGALVICQTPSEQITNLEEVGR                                            | 0.800905632        | 2               | 4.67679   |
| <b>Q9QYU4</b> | <b>CRYM Thiomorpholine_carboxylate dehydrogenase</b>              | <b>0.810036113</b> | <b>0.370272</b> | <b>4</b>  |
| Q9QYU4        | GFLGVMPAYSAAEDALTTK                                               | 0.967584657        | 2               | 3.72319   |
| Q9QYU4        | RAPAFLSADEVQDHLR                                                  | 0.797358063        | 3               | 4.63598   |
| Q9QYU4        | SLGMAVEDLVAAK                                                     | 0.658742807        | 2               | 3.14331   |
| Q9QYU4        | SSSLIPPLEAALANFSK                                                 | 0.839483902        | 2               | 3.08818   |
| <b>Q9QZ76</b> | <b>MYG Myoglobin</b>                                              | <b>0.159669858</b> | <b>5.21E-07</b> | <b>5</b>  |
| Q9QZ76        | GQHAAEIQLAQSHATK                                                  | 0.295959155        | 2               | 4.88546   |
| Q9QZ76        | HGCTVLTALGTILK                                                    | 0.405111147        | 2               | 3.53548   |
| Q9QZ76        | KGQHAAEIQLAQSHATK                                                 | 0.031700795        | 3               | 5.71279   |
| Q9QZ76        | VEGDLAGHGQEVLSLFK                                                 | 0.171341446        | 3               | 4.91568   |
| Q9QZ76        | YSGDFGADAQGAMSK                                                   | 0.045681138        | 2               | 4.75055   |
| <b>Q9QZA2</b> | <b>PDC6I Programmed cell death 6_interacting protein</b>          | <b>1.054461962</b> | <b>0.043201</b> | <b>9</b>  |
| Q9QZA2        | ATLVKPTPVNVPISQK                                                  | 0.946505919        | 2               | 3.70323   |
| Q9QZA2        | DTIALLCPEPELNAAIPSANPAK                                           | 0.975750492        | 2               | 3.53885   |
| Q9QZA2        | FYNELTEILVR                                                       | 0.749635599        | 2               | 2.94305   |
| Q9QZA2        | LLDEEATDNDLR                                                      | 1.273103118        | 2               | 3.46655   |

|               |                                                                         |                    |                 |          |
|---------------|-------------------------------------------------------------------------|--------------------|-----------------|----------|
| Q9QZA2        | MVPVSVQQSLAVFSQR                                                        | 1.157913668        | 2               | 2.67608  |
| Q9QZA2        | NIQVSHQEFSK                                                             | 1.321868548        | 2               | 3.35783  |
| Q9QZA2        | NLATAYDNFVELVANLK                                                       | 1.196601702        | 3               | 4.16828  |
| Q9QZA2        | STAVVEQGGIQTVDQLIK                                                      | 0.975930048        | 2               | 4.23555  |
| Q9QZA2        | YYDQICSIEPK                                                             | 1.033761233        | 2               | 2.345    |
| <b>Q9QZD8</b> | <b>DIC Mitochondrial dicarboxylate carrier</b>                          | <b>1.001391807</b> | <b>0.873083</b> | <b>5</b> |
| Q9QZD8        | GALVTVGQLSCYDQAK                                                        | 0.981417616        | 2               | 4.86944  |
| Q9QZD8        | NYSHALDGLYR                                                             | 1.157484019        | 2               | 2.90764  |
| Q9QZD8        | VHLQTQQEVK                                                              | 0.864012684        | 1               | 3.0118   |
| Q9QZD8        | VLLGGISGLTGGFVGTADLVNVR                                                 | 1.053812411        | 2               | 5.65129  |
| Q9QZD8        | WYFGLASCGAACCTHPLDLLK                                                   | 0.980759286        | 3               | 3.39938  |
| <b>Q9QZH8</b> | <b>AAAD Arylacetamide deacetylase</b>                                   | <b>0.877790886</b> | <b>0.861778</b> | <b>2</b> |
| Q9QZH8        | LDVVVSTDYGLAPK                                                          | 1.04604297         | 2               | 4.11934  |
| Q9QZH8        | WFLQEDILEK                                                              | 0.87689034         | 2               | 3.34902  |
| <b>Q9QZK2</b> | <b>BCAR3 Breast cancer anti_estrogen resistance protein 3</b>           | <b>0.844291571</b> | <b>0.000826</b> | <b>2</b> |
| Q9QZK2        | EGSLAEGRPDVVKR                                                          | 0.853730409        | 2               | 2.6492   |
| Q9QZK2        | FSSDARTGEALR                                                            | 1.229223954        | 2               | 2.31725  |
| <b>Q9QZU7</b> | <b>BODG Gamma_butyrobetaine dioxygenase</b>                             | <b>1.411471385</b> | <b>8.86E-11</b> | <b>6</b> |
| Q9QZU7        | IDANNVAYTTGK                                                            | 1.925619589        | 2               | 3.33899  |
| Q9QZU7        | IILEDKQVVR                                                              | 1.629998022        | 2               | 2.54393  |
| Q9QZU7        | LLLEALDVNIR                                                             | 1.304457407        | 2               | 2.85708  |
| Q9QZU7        | MNPGDVITFDNWR                                                           | 1.286116715        | 2               | 3.17284  |
| Q9QZU7        | QTVTGGDSEIVDGFNVCCQK                                                    | 1.032045453        | 2               | 4.49928  |
| Q9QZU7        | SYEAGTEISR                                                              | 1.543777725        | 2               | 2.83603  |
| <b>Q9QZX8</b> | <b>SO1B2 Solute carrier organic anion transporter family member 1B2</b> | <b>1.57954112</b>  | <b>0.000541</b> | <b>3</b> |
| Q9QZX8        | GIGETPIVPLGISYLDLDFAK                                                   | 0.999015083        | 2               | 3.0486   |
| Q9QZX8        | QEEQDPSNMTGFLR                                                          | 1.335376835        | 2               | 2.35483  |
| Q9QZX8        | QFTDEGNPDSVNK                                                           | 0.976586618        | 2               | 3.4222   |
| <b>Q9R063</b> | <b>PRDX5 Peroxiredoxin_5_mitochondrial</b>                              | <b>0.929069485</b> | <b>9.9E-20</b>  | <b>8</b> |
| Q9R063        | ALNVEPDGTGLTCSLAPNILSQL                                                 | 2.243469116        | 2               | 4.08803  |
| Q9R063        | ETDLLLDDSLVSLFGNR                                                       | 1.201847174        | 2               | 4.15105  |
| Q9R063        | GVLFGVPGAFTPGCSK                                                        | 0.898322196        | 2               | 4.19341  |
| Q9R063        | THLPGFVEQAGALK                                                          | 0.883667697        | 3               | 4.7489   |
| Q9R063        | VGDTIPSVEVFEGEPGK                                                       | 0.959665399        | 2               | 3.75851  |
| Q9R063        | VGDTIPSVEVFEGEPGKK                                                      | 0.893858786        | 2               | 3.75456  |
| Q9R063        | VNLAELFK                                                                | 0.941881864        | 2               | 2.85206  |
| Q9R063        | VQLLADPTGAFGK                                                           | 0.999499758        | 2               | 3.99646  |
| <b>Q9R0N0</b> | <b>GALK1 Galactokinase</b>                                              | <b>1.086662962</b> | <b>0.999996</b> | <b>6</b> |
| Q9R0N0        | AEHSFAGVPCGIMDQLIALLGQK                                                 | 1.090636479        | 3               | 4.3782   |
| Q9R0N0        | QCEEVAQALGK                                                             | 1.029408332        | 2               | 2.46346  |
| Q9R0N0        | RQCEEVAQALGK                                                            | 1.097968175        | 2               | 3.03592  |
| Q9R0N0        | SLETSLVPLSDPK                                                           | 1.021186641        | 2               | 3.20431  |
| Q9R0N0        | TDGLVSLTTSK                                                             | 1.060195739        | 2               | 3.43348  |
| Q9R0N0        | VEELLAEAR                                                               | 1.0879993          | 2               | 3.15717  |
| <b>Q9R0T3</b> | <b>DNJC3 Dnaj homolog subfamily C member 3</b>                          | <b>1.378658362</b> | <b>8.26E-07</b> | <b>6</b> |
| Q9R0T3        | AEPSVAEYTVR                                                             | 1.083322106        | 2               | 2.74358  |
| Q9R0T3        | FDDGEDPLDAETQQGGSNPFHR                                                  | 1.030604703        | 3               | 3.65925  |
| Q9R0T3        | ICSEVLQLEPDNVNALK                                                       | 1.429865981        | 2               | 5.4059   |
| Q9R0T3        | KFDDGEDPLDAETQQGGSNPFHR                                                 | 1.069975873        | 3               | 5.49044  |
| Q9R0T3        | LIGSAEELIR                                                              | 1.182447178        | 2               | 2.37812  |
| Q9R0T3        | SNPSENEEKEAQSQVLK                                                       | 1.118656577        | 2               | 5.01587  |
| <b>Q9R112</b> | <b>SQRD Sulfide:quinone oxidoreductase_mitochondrial</b>                | <b>1.328499319</b> | <b>0.109674</b> | <b>4</b> |
| Q9R112        | EGNALFTFPNTPVK                                                          | 1.404858605        | 2               | 2.70734  |
| Q9R112        | STLSVIPSGVQWIQDR                                                        | 1.069314815        | 2               | 2.54903  |

|               |                                                                  |                    |                 |           |
|---------------|------------------------------------------------------------------|--------------------|-----------------|-----------|
| Q9R112        | TAAAVAAQSGILDR                                                   | 1.30096816         | 2               | 2.79156   |
| Q9R112        | VGAENVAIVEPSE                                                    | 1.146842228        | 2               | 2.86739   |
| <b>Q9R1T3</b> | <b>CATZ Cathepsin Z</b>                                          | <b>1.087543838</b> | <b>0.999985</b> | <b>2</b>  |
| Q9R1T3        | HGIPDETCNNYQAK                                                   | 1.096206798        | 2               | 3.79475   |
| Q9R1T3        | VG DYGSLSGR                                                      | 1.089670823        | 2               | 2.64976   |
| <b>Q9R1Z0</b> | <b>VDAC3 Voltage_dependent anion_selective channel protein 3</b> | <b>1.09059002</b>  | <b>6.24E-08</b> | <b>5</b>  |
| Q9R1Z0        | LCQNNFALGYK                                                      | 1.746096032        | 2               | 2.52662   |
| Q9R1Z0        | LTLSALVDGK                                                       | 2.351925895        | 2               | 2.72036   |
| Q9R1Z0        | LTVDTIFVPNTGK                                                    | 1.128195859        | 2               | 3.49956   |
| Q9R1Z0        | VNNASLIGLGYTQSLRPGVK                                             | 1.193393845        | 2               | 4.11004   |
| Q9R1Z0        | WNTDNTLGTSEISWENK                                                | 0.946290571        | 2               | 2.8967    |
| <b>Q9R1Z8</b> | <b>VINEX Vinexin</b>                                             | <b>0.994297787</b> | <b>0.472788</b> | <b>2</b>  |
| Q9R1Z8        | LSAELDKDLR                                                       | 0.9918582          | 3               | 3.52268   |
| Q9R1Z8        | MPDLQLDWTLEDPPK+Oxidation(0)                                     | 1.707305526        |                 |           |
| <b>Q9R257</b> | <b>HEBP1 Heme_binding protein 1</b>                              | <b>1.191684688</b> | <b>0.001954</b> | <b>2</b>  |
| Q9R257        | FATVEVTDKPVDEALR                                                 | 1.194869528        | 2               | 3.52854   |
| Q9R257        | NSLFGSVETWPWQVLSTGGK                                             | 1.249928778        | 2               | 3.86308   |
| <b>Q9WTT6</b> | <b>GUAD Guanine deaminase</b>                                    | <b>1.328117896</b> | <b>2.15E-08</b> | <b>10</b> |
| Q9WTT6        | EIGNFEVGKDFDALLNPR                                               | 1.114628851        | 2               | 3.5651    |
| Q9WTT6        | ETTEESVKETER                                                     | 1.349358151        | 2               | 3.2533    |
| Q9WTT6        | FQSTDVAEEVYTR                                                    | 1.33648219         | 2               | 4.3131    |
| Q9WTT6        | FSLSCTETLMSELGNIK                                                | 1.258165124        | 2               | 4.12777   |
| Q9WTT6        | GTFVHSTWTCMPMEVLR                                                | 0.642040484        | 2               | 3.13277   |
| Q9WTT6        | IVFLEESSQEK                                                      | 1.687459582        | 2               | 3.91957   |
| Q9WTT6        | NIEEVYVGGK                                                       | 1.244847541        | 1               | 2.79027   |
| Q9WTT6        | NYTDVYDKNNLLTNK                                                  | 0.611927324        | 2               | 4.41256   |
| Q9WTT6        | THDLYIQSHISENREEIEAVK                                            | 1.543276904        | 3               | 3.75566   |
| Q9WTT6        | VCMDLNNTVPEYK                                                    | 0.950964978        | 2               | 3.97844   |
| <b>Q9WTV5</b> | <b>PSMD9 26S proteasome non_ATPase regulatory subunit 9</b>      | <b>1.386986441</b> | <b>0.202408</b> | <b>2</b>  |
| Q9WTV5        | ADVDLYQVR                                                        | 1.407829392        | 2               | 2.7052    |
| Q9WTV5        | RKEEIEAQIK                                                       | 1.027874877        | 3               | 3.91666   |
| <b>Q9WU19</b> | <b>HAOX1 Hydroxyacid oxidase 1</b>                               | <b>0.81122868</b>  | <b>2.25E-12</b> | <b>9</b>  |
| Q9WU19        | AIFVTVDTPYLGNR                                                   | 1.071991105        | 2               | 4.59297   |
| Q9WU19        | AVFVGRPIIWGLAFQGEK                                               | 1.197634392        | 3               | 4.12982   |
| Q9WU19        | GVQDVLEILK                                                       | 0.82943696         | 2               | 2.91254   |
| Q9WU19        | GVQDVLEILKEEFR                                                   | 0.731109117        | 2               | 3.95664   |
| Q9WU19        | HGVDGILVSNHGAR                                                   | 0.806447267        | 3               | 5.21556   |
| Q9WU19        | MKNFETNDLAFSPK+Oxidation(0)                                      | 0.935967762        |                 |           |
| Q9WU19        | NFETNDLAFSPK                                                     | 0.797968501        | 2               | 3.41052   |
| Q9WU19        | NVADIDLSTSVLGQR                                                  | 0.863650922        | 2               | 4.90785   |
| Q9WU19        | VEVFLDGGVR                                                       | 1.009442978        | 2               | 2.95267   |
| <b>Q9WU49</b> | <b>CHSP1 Calcium_regulated heat stable protein 1</b>             | <b>0.997952301</b> | <b>0.815857</b> | <b>2</b>  |
| Q9WU49        | GNVVPSPPTR                                                       | 0.85149735         | 2               | 2.462     |
| Q9WU49        | LQAVEVVITHLAPGTK                                                 | 1.022367395        | 2               | 3.99171   |
| <b>Q9WU65</b> | <b>GLPK2 Glycerol kinase 2</b>                                   | <b>1.26504781</b>  | <b>0.012139</b> | <b>2</b>  |
| Q9WU65        | GIICGLTQFTNK                                                     | 1.167682313        | 2               | 3.46323   |
| Q9WU65        | TGLPLSTYFSAVK                                                    | 3.452101204        | 2               | 2.61716   |
| <b>Q9WU82</b> | <b>CTNB1 Catenin beta_1</b>                                      | <b>0.91221282</b>  | <b>0.181471</b> | <b>3</b>  |
| Q9WU82        | HQEAEMAQNAVR                                                     | 0.86301471         | 2               | 3.35773   |
| Q9WU82        | LLNDEDQVVVNK                                                     | 1.109340556        | 2               | 3.25319   |
| Q9WU82        | TMQNTNDVETAR                                                     | 0.862172972        | 2               | 3.41785   |
| <b>Q9WUC4</b> | <b>ATOX1 Copper transport protein ATOX1</b>                      | <b>1.337282252</b> | <b>9.9E-20</b>  | <b>3</b>  |
| Q9WUC4        | LGGVEFNIDLPNK                                                    | 1.01074104         | 2               | 2.85218   |
| Q9WUC4        | LGGVEFNIDLPNKK                                                   | 1.241346464        | 2               | 3.45708   |
| Q9WUC4        | VCIESEHSSDILLATLNK                                               | 1.404993105        | 2               | 5.70563   |

|               |                                                                          |                    |                 |           |
|---------------|--------------------------------------------------------------------------|--------------------|-----------------|-----------|
| <b>Q9WUH4</b> | <b>FHL1 Four and a half LIM domains protein 1</b>                        | <b>0.158976376</b> | <b>0.089785</b> | <b>2</b>  |
| Q9WUH4        | FCANTCVECR                                                               | 0.15862014         | 2               | 2.99962   |
| Q9WUH4        | FVFHNEQVYCPDCAK                                                          | 0.606317664        | 2               | 4.13542   |
| <b>Q9WUI1</b> | <b>MK11 Mitogen_activated protein kinase 11</b>                          | <b>1.313880909</b> | <b>0.666404</b> | <b>2</b>  |
| Q9WUI1        | ILDFGLAR                                                                 | 1.391616697        | 2               | 2.37337   |
| Q9WUI1        | QELNKTVWEVPQR                                                            | 0.743524834        | 2               | 2.346     |
| <b>Q9WUS0</b> | <b>KAD4 Adenylate kinase isoenzyme 4_mitochondrial</b>                   | <b>1.11577441</b>  | <b>0.004563</b> | <b>6</b>  |
| Q9WUS0        | AVILGPPGSGK                                                              | 0.851204869        | 2               | 2.52052   |
| Q9WUS0        | GLLVPDHVITR                                                              | 0.893599094        | 2               | 2.49828   |
| Q9WUS0        | GVLHQFSGTETNR                                                            | 1.365170132        | 2               | 3.61995   |
| Q9WUS0        | TLVQAEALDR                                                               | 0.927796452        | 2               | 2.90169   |
| Q9WUS0        | VYNLDFNPPQVLGVDDITGEPLVQQEDDKPEALAAR                                     | 1.156105856        | 3               | 5.07224   |
| Q9WUS0        | YKDAAKPVIELYK                                                            | 0.752367516        | 2               | 2.53682   |
| <b>Q9WV97</b> | <b>TIM9 Mitochondrial import inner membrane translocase subunit Tim9</b> | <b>0.974298204</b> | <b>0.933679</b> | <b>2</b>  |
| Q9WV97        | FQEYHIQQNEALAAK                                                          | 0.931204816        | 2               | 4.86817   |
| Q9WV97        | LTETCFDLCVK                                                              | 0.974752979        | 2               | 2.38588   |
| <b>Q9WVC0</b> | <b>SEPT7 Septin_7</b>                                                    | <b>1.103632161</b> | <b>0.988745</b> | <b>2</b>  |
| Q9WVC0        | ADTLTPEECQQFK                                                            | 1.109013878        | 2               | 3.35629   |
| Q9WVC0        | NLEGYVGFANLPNQVYR                                                        | 1.064601171        | 2               | 2.30755   |
| <b>Q9WVD5</b> | <b>ORNT1 Mitochondrial ornithine transporter 1</b>                       | <b>1.453356868</b> | <b>4.94E-08</b> | <b>4</b>  |
| Q9WVD5        | DGPLGFYHGLSSTLLR                                                         | 1.462056708        | 2               | 3.07692   |
| Q9WVD5        | LQTMYEMETSGK                                                             | 1.777033112        | 2               | 2.37736   |
| Q9WVD5        | NEGITALYSLKPTMIR                                                         | 0.875519373        | 2               | 3.57706   |
| Q9WVD5        | SNPAIQAAIDLTAGAAGGTACVLTGQPFDTMK                                         | 1.699886285        | 3               | 4.55677   |
| <b>Q9WVK3</b> | <b>PECR Peroxisomal trans_2_enoyl_CoA reductase</b>                      | <b>0.888897183</b> | <b>9.9E-20</b>  | <b>13</b> |
| Q9WVK3        | AGVYNLTK                                                                 | 0.938478037        | 2               | 2.4114    |
| Q9WVK3        | ASQPSSSTQVTAIQCNIR                                                       | 0.892358908        | 2               | 5.47989   |
| Q9WVK3        | DHGGSVNIIVLLNNGFPTAAHSGAAR                                               | 1.070915387        | 3               | 6.88484   |
| Q9WVK3        | ELLHLGCNVVIASR                                                           | 0.973690568        | 2               | 3.85298   |
| Q9WVK3        | INFLVNNAGGQFMAPAEDITAK                                                   | 1.270370987        | 2               | 5.24002   |
| Q9WVK3        | INFLVNNAGGQFMAPAEDITAK+Oxidation(12)                                     | 1.811348982        |                 |           |
| Q9WVK3        | KEEEVNNLVK                                                               | 0.869373085        | 3               | 4.18333   |
| Q9WVK3        | LTAAVDELRL                                                               | 1.330827477        | 2               | 3.13177   |
| Q9WVK3        | NFTIPDHDNWPVGAGDSSFIK                                                    | 0.857226292        | 2               | 5.01284   |
| Q9WVK3        | NFTIPDHDNWPVGAGDSSFIK                                                    | 0.811762037        | 3               | 3.33485   |
| Q9WVK3        | SGQSYLAAGLLQNQVAVVTGGATGIGK                                              | 0.943351121        | 2               | 6.32718   |
| Q9WVK3        | TMALTWASSGVR                                                             | 0.820250741        | 2               | 3.89773   |
| Q9WVK3        | TMALTWASSGVR+Oxidation(1)                                                | 1.317460435        |                 |           |
| <b>Q9WVK7</b> | <b>HCDH Hydroxyacyl_coenzyme A dehydrogenase_mitochondrial</b>           | <b>1.095339277</b> | <b>9.9E-20</b>  | <b>14</b> |
| Q9WVK7        | AADEFVEK                                                                 | 1.25343869         | 2               | 3.13205   |
| Q9WVK7        | EDIDTAMK                                                                 | 1.069641123        | 1               | 1.98342   |
| Q9WVK7        | FAAEHTIFASNTSSLQITNIANATTR                                               | 1.811921651        | 2               | 5.54112   |
| Q9WVK7        | FILDGWHEMDPENFLFQPSMNNLVAQK                                              | 1.141111154        | 3               | 5.37381   |
| Q9WVK7        | GDASKEDIDTAMK                                                            | 1.081577854        | 3               | 3.8505    |
| Q9WVK7        | GDASKEDIDTAMK+Oxidation(11)                                              | 1.172378713        |                 |           |
| Q9WVK7        | HVTVIGGGLMGAGIAQVAAATGHTVVLVDQTEDILAK                                    | 0.902697768        | 3               | 7.51725   |
| Q9WVK7        | KGIEESLK                                                                 | 1.300255524        | 1               | 2.13782   |
| Q9WVK7        | KGIEESLKR                                                                | 1.154618069        | 2               | 2.34825   |
| Q9WVK7        | LKNELFQR                                                                 | 1.337528093        | 2               | 2.69445   |
| Q9WVK7        | LLVPYLIEAIR                                                              | 1.548474968        | 2               | 2.55584   |
| Q9WVK7        | LVEVIK                                                                   | 1.17131375         | 2               | 2.45151   |
| Q9WVK7        | TFESLVDFCK                                                               | 1.148603234        | 2               | 3.44102   |

|               |                                                                           |                    |                 |           |
|---------------|---------------------------------------------------------------------------|--------------------|-----------------|-----------|
| Q9WVK7        | TLSSLSTSDAASVHSTDLVVEAIVENLK                                              | 1.10757259         | 3               | 6.20454   |
| <b>Q9Z0N2</b> | <b>IF2H Eukaryotic translation initiation factor 2 subunit 3_Y_linked</b> | <b>1.239596673</b> | <b>3.74E-06</b> | <b>3</b>  |
| Q9Z0N2        | IVLTNPVCTEVGEK                                                            | 1.424845239        | 2               | 3.30695   |
| Q9Z0N2        | SFDVNKPGCEVDDLK                                                           | 0.937979316        | 2               | 3.45475   |
| Q9Z0N2        | VGQEIEVRPGIVSK                                                            | 1.265399092        | 2               | 3.10233   |
| <b>Q9Z0U5</b> | <b>ADO Aldehyde oxidase</b>                                               | <b>0.279999004</b> | <b>0.000653</b> | <b>17</b> |
| Q9Z0U5        | CGLSPEQVR                                                                 | 0.807892157        | 2               | 2.48427   |
| Q9Z0U5        | CTGYRPIIDACK                                                              | 0.435608717        | 2               | 2.6211    |
| Q9Z0U5        | DLEPLILTIEEAIQHK                                                          | 0.620679578        | 2               | 3.28957   |
| Q9Z0U5        | EFQPLDPTQELIFPELMR                                                        | 0.818326758        | 2               | 3.06986   |
| Q9Z0U5        | ELSILYGGVGPPTIGAK                                                         | 0.907518889        | 2               | 3.49676   |
| Q9Z0U5        | GEDMLITGGR                                                                | 0.795848831        | 2               | 2.36863   |
| Q9Z0U5        | GTSTETVPNTNASGGSVVADLNLAVK                                                | 0.865056611        | 2               | 4.61418   |
| Q9Z0U5        | GYESNINWEK                                                                | 0.597508525        | 2               | 2.82892   |
| Q9Z0U5        | HIQDIVAATLK                                                               | 0.613112133        | 2               | 2.44721   |
| Q9Z0U5        | HLSDSLNPLLAVGNCTLNLLSK                                                    | 0.667919358        | 2               | 4.59427   |
| Q9Z0U5        | KCPDSDLKPQEVLSVNI PCSR                                                    | 0.582136417        | 3               | 3.38      |
| Q9Z0U5        | KLECGNVDEAFK                                                              | 0.617509226        | 2               | 3.54923   |
| Q9Z0U5        | LVLDEVTLAGSAPGGK                                                          | 0.509072248        | 2               | 3.53411   |
| Q9Z0U5        | MTWISPVTLLELVEAK                                                          | 1.045840015        | 2               | 3.20302   |
| Q9Z0U5        | NHPEPSLDQLTDALGGNLCR                                                      | 0.274763716        | 2               | 3.72277   |
| Q9Z0U5        | RLEPIISK                                                                  | 0.325867285        | 2               | 2.43653   |
| Q9Z0U5        | VVENNVDPPEMMLLPYLR                                                        | 0.716439566        | 2               | 3.86439   |
| <b>Q9Z0V5</b> | <b>PRDX4 Peroxiredoxin_4</b>                                              | <b>1.146359038</b> | <b>0.050801</b> | <b>4</b>  |
| Q9Z0V5        | ENECHFYAGGQVYPGEVSR                                                       | 1.985889578        | 2               | 5.43312   |
| Q9Z0V5        | GLFIIDDK                                                                  | 1.049269778        | 2               | 2.979     |
| Q9Z0V5        | QITLNDLPVGR                                                               | 1.019713037        | 2               | 3.30839   |
| Q9Z0V5        | TRENECHFYAGGQVYPGEVSR                                                     | 1.198273694        | 3               | 6.0213    |
| <b>Q9Z0V6</b> | <b>PRDX3 Thioredoxin_dependent peroxide reductase_mitochondrial</b>       | <b>1.105752121</b> | <b>0.990989</b> | <b>6</b>  |
| Q9Z0V6        | AFQFVETHGEVCPANWTPESPTIKPSPTASK                                           | 1.008327361        | 3               | 5.99917   |
| Q9Z0V6        | GLFIIDPNGVIK                                                              | 1.101155926        | 2               | 3.06829   |
| Q9Z0V6        | GTAVVNGEFK                                                                | 1.163500698        | 2               | 2.45391   |
| Q9Z0V6        | HLSVNDLPVGR                                                               | 1.010963793        | 2               | 2.87021   |
| Q9Z0V6        | NGGLGHMNITLLSDLTK                                                         | 1.037471397        | 2               | 2.81719   |
| Q9Z0V6        | SVEEPLRLVK                                                                | 0.937375828        | 2               | 2.48859   |
| <b>Q9Z142</b> | <b>TMM33 Transmembrane protein 33</b>                                     | <b>1.253800445</b> | <b>0.010213</b> | <b>2</b>  |
| Q9Z142        | ALLANALTSALR                                                              | 1.324510184        | 2               | 3.72164   |
| Q9Z142        | LSTNQQNILK                                                                | 1.732289515        | 2               | 2.46873   |
| <b>Q9Z1A6</b> | <b>VIGLN Vigilin</b>                                                      | <b>1.666456835</b> | <b>9.9E-20</b>  | <b>22</b> |
| Q9Z1A6        | ASVITQVFHVPLEER                                                           | 1.370280592        | 2               | 2.88712   |
| Q9Z1A6        | DKFPEVIINFDPDAQK                                                          | 1.500338944        | 3               | 4.04574   |
| Q9Z1A6        | DLANIAEVEVSIPAK                                                           | 1.338417776        | 2               | 3.74732   |
| Q9Z1A6        | EALEALVPVTIEVEVPFDLHR                                                     | 1.192817354        | 3               | 3.51989   |
| Q9Z1A6        | ELQAEQEDR                                                                 | 1.084777842        | 2               | 2.50733   |
| Q9Z1A6        | GNSLQEILER                                                                | 1.001375986        | 2               | 2.52435   |
| Q9Z1A6        | HEVLLISAEQDKR                                                             | 1.879071098        | 3               | 4.27489   |
| Q9Z1A6        | IDLPAENSNSSETIVTGK                                                        | 1.006790556        | 2               | 4.62877   |
| Q9Z1A6        | IEGDPQGVQQAQ                                                              | 1.133000622        | 2               | 3.17871   |
| Q9Z1A6        | IIFPAAEDKQDLITIIGK                                                        | 1.224610029        | 2               | 3.23644   |
| Q9Z1A6        | ITLEGPTEDVNVAQEQIEGMVK                                                    | 1.316985604        | 2               | 4.30917   |
| Q9Z1A6        | IVGELEQMVEDVPLDHR                                                         | 0.988695303        | 2               | 4.52848   |
| Q9Z1A6        | LGQALTEVYAK                                                               | 2.161942514        | 2               | 3.2054    |
| Q9Z1A6        | LQDLELK                                                                   | 1.105622809        | 1               | 2.32071   |
| Q9Z1A6        | LQTQASATVPIPK                                                             | 1.050276497        | 2               | 3.53097   |
| Q9Z1A6        | LVGEIMQETGTR                                                              | 1.031916416        | 2               | 3.38595   |

|               |                                                                           |                    |                 |           |
|---------------|---------------------------------------------------------------------------|--------------------|-----------------|-----------|
| Q9Z1A6        | MDYVEINIDHK                                                               | 0.939872323        | 2               | 3.22544   |
| Q9Z1A6        | MVADLVENSYSISVPIFK                                                        | 1.187495375        | 2               | 2.98864   |
| Q9Z1A6        | RCDIIVISGR                                                                | 0.962394597        | 2               | 2.77678   |
| Q9Z1A6        | TEIVFTGEKEQLAQAVAR                                                        | 1.433894039        | 2               | 4.17905   |
| Q9Z1A6        | TKDLIIQR                                                                  | 1.157784966        | 2               | 2.52524   |
| Q9Z1A6        | VKELQAEQEDR                                                               | 1.160386287        | 2               | 3.01594   |
| <b>Q9Z1J8</b> | <b>S14L3 SEC14_like protein 3</b>                                         | <b>0.964391445</b> | <b>0.773652</b> | <b>3</b>  |
| Q9Z1J8        | ENVQDVLPALPNDDYFLLR                                                       | 1.065413135        | 3               | 3.85733   |
| Q9Z1J8        | FRENVQDVLPALPNDDYFLLR                                                     | 1.122689099        | 3               | 3.8155    |
| Q9Z1J8        | GSSHQVEYEIFPGCVLR                                                         | 0.820120747        | 2               | 4.6195    |
| <b>Q9Z1N1</b> | <b>F16P2 Fructose_1_6_bisphosphatase isozyme 2</b>                        | <b>1.267462831</b> | <b>0.034873</b> | <b>2</b>  |
| Q9Z1N1        | YVGSMAVDVHR                                                               | 0.709649482        | 2               | 2.31809   |
| Q9Z1N1        | YVGSMAVDVHR+Oxidation(4)                                                  | 1.3002999          |                 |           |
| <b>Q9Z1P2</b> | <b>ACTN1 Alpha_actinin_1</b>                                              | <b>0.995760514</b> | <b>0.56658</b>  | <b>3</b>  |
| Q9Z1P2        | DYETATLSEIK                                                               | 1.404721676        | 1               | 2.08039   |
| Q9Z1P2        | ICDQWDNLGALTQK                                                            | 0.832190841        | 2               | 3.89871   |
| Q9Z1P2        | KDDPLTNLNTAFDVAER                                                         | 0.861175774        | 2               | 2.66387   |
| <b>Q9Z1W6</b> | <b>LYRIC Protein LYRIC</b>                                                | <b>0.960971364</b> | <b>0.999194</b> | <b>3</b>  |
| Q9Z1W6        | SWQDELAQQAEEGSAR                                                          | 0.875552839        | 2               | 5.39051   |
| Q9Z1W6        | TEGLDLGLEPK                                                               | 0.947948019        | 2               | 2.79775   |
| Q9Z1W6        | TLPPAISAEPVTLTK                                                           | 0.974503988        | 2               | 3.16166   |
| <b>Q9Z1Y3</b> | <b>CADH2 Cadherin_2</b>                                                   | <b>0.736643604</b> | <b>2.96E-07</b> | <b>2</b>  |
| Q9Z1Y3        | IDPVNGQITTIIVLDR                                                          | 0.73640533         | 2               | 3.4952    |
| Q9Z1Y3        | YSVTGPGADQPPTGIFIINPISGQLSVTKPLDR                                         | 0.919385642        | 3               | 3.38764   |
| <b>Q9Z270</b> | <b>VAPA Vesicle_associated membrane protein_associated protein A</b>      | <b>0.877957225</b> | <b>0.297139</b> | <b>3</b>  |
| Q9Z270        | FKGPFTDVVTTNLK                                                            | 0.862734631        | 2               | 2.60238   |
| Q9Z270        | HEQILVLDPPSDLK                                                            | 0.943221182        | 2               | 4.1872    |
| Q9Z270        | QDGPLPKPHSVSLNDTETR                                                       | 0.866102617        | 3               | 3.35114   |
| <b>Q9Z2C8</b> | <b>YBOX2 Y_box_binding protein 2</b>                                      | <b>1.006468415</b> | <b>0.988932</b> | <b>2</b>  |
| Q9Z2C8        | NDTKEDVVFHQTAIK                                                           | 1.029278504        | 2               | 3.42159   |
| Q9Z2C8        | SVGDGETVEFDVVEGK                                                          | 0.994295672        | 2               | 3.68933   |
| <b>Q9Z2I8</b> | <b>SUCB2 Succinyl_CoA ligase [GDP_forming] subunit beta_mitochondrial</b> | <b>1.025293076</b> | <b>0.138831</b> | <b>10</b> |
| Q9Z2I8        | DIFAMDDKSENEPIEAAAR                                                       | 0.806956796        | 2               | 4.56315   |
| Q9Z2I8        | GKGVFNGLK                                                                 | 0.709159725        | 2               | 2.31244   |
| Q9Z2I8        | IDATQVEVNPFGGETPEGQVVCFDAK                                                | 1.652515437        | 3               | 4.77351   |
| Q9Z2I8        | INFDDNAEFR                                                                | 1.208862421        | 2               | 3.20799   |
| Q9Z2I8        | LEGTNVQEAQNILK                                                            | 1.070428607        | 2               | 5.22604   |
| Q9Z2I8        | SENEPIEAAAR                                                               | 1.222237019        | 2               | 4.05241   |
| Q9Z2I8        | SHNGPVIVGSPQGGVDIEEVAASSPELIFK                                            | 0.991727442        | 2               | 5.99948   |
| Q9Z2I8        | SSGLPITSAVDLEDAAK                                                         | 0.930511641        | 2               | 4.5382    |
| Q9Z2I8        | SSGLPITSAVDLEDAAKK                                                        | 1.172207321        | 2               | 2.95275   |
| Q9Z2I8        | VMVAEALDISR                                                               | 0.7987979          | 2               | 3.31878   |
| <b>Q9Z2I9</b> | <b>SUCB1 Succinyl_CoA ligase [ADP_forming] subunit beta_mitochondrial</b> | <b>1.083103914</b> | <b>0.029864</b> | <b>8</b>  |
| Q9Z2I9        | ALIADSGLK                                                                 | 0.998342814        | 1               | 2.08293   |
| Q9Z2I9        | ICNQVLVCER                                                                | 1.553651116        | 2               | 2.86127   |
| Q9Z2I9        | ILACDDLDEAAK                                                              | 1.272089611        | 2               | 3.39223   |
| Q9Z2I9        | INFDSNSAYR                                                                | 1.303173869        | 2               | 2.83742   |
| Q9Z2I9        | LSEIVTLAK                                                                 | 1.261647582        | 2               | 2.50533   |
| Q9Z2I9        | MGFPSNIVDSAAENMIK                                                         | 1.105752409        | 2               | 2.82867   |
| Q9Z2I9        | SSDEAYAIK                                                                 | 1.116086526        | 2               | 3.50305   |
| Q9Z2I9        | VQAILVNIFGGIMR                                                            | 0.689383447        | 2               | 3.83789   |
| <b>Q9Z2L0</b> | <b>VDAC1 Voltage_dependent anion_selective channel protein 1</b>          | <b>1.034800438</b> | <b>0.000378</b> | <b>11</b> |
| Q9Z2L0        | KLETAVNLAWTAGNSNTR                                                        | 1.087434219        | 2               | 5.81487   |

|               |                                                    |                    |                 |           |
|---------------|----------------------------------------------------|--------------------|-----------------|-----------|
| Q9Z2L0        | LTFDSSFSPNTGK                                      | 1.18824356         | 2               | 3.60115   |
| Q9Z2L0        | LTFDSSFSPNTGKK                                     | 1.140050826        | 2               | 2.55381   |
| Q9Z2L0        | LTLALLDGK                                          | 2.2544649          | 2               | 2.49348   |
| Q9Z2L0        | SENGLEFTSSGSANTETTK                                | 1.072663767        | 2               | 4.59678   |
| Q9Z2L0        | TDEFQLHTNVNDGTEFGGSIYQK                            | 0.973483086        | 3               | 5.10524   |
| Q9Z2L0        | VNNSLIGLGYTQTLKPGIK                                | 0.97446329         | 2               | 4.43875   |
| Q9Z2L0        | VTQSNFAVGK                                         | 1.226293607        | 2               | 3.13261   |
| Q9Z2L0        | WNTDNTLGTEITVEDQLAR                                | 0.831717644        | 2               | 4.54595   |
| Q9Z2L0        | WTEYGLTFTEK                                        | 1.115568148        | 2               | 2.9026    |
| Q9Z2L0        | YQVDPDACFSAK                                       | 1.124200975        | 2               | 3.55342   |
| <b>Q9Z2M4</b> | <b>DECR2 Peroxisomal 2_4_dienoyl_CoA reductase</b> | <b>0.847029943</b> | <b>0.49754</b>  | <b>4</b>  |
| Q9Z2M4        | GQVLQLHAGAAK                                       | 0.774209709        | 2               | 3.18741   |
| Q9Z2M4        | HLAVEWGPQNIR                                       | 0.831380876        | 2               | 3.26921   |
| Q9Z2M4        | VNSLAPGAISGTEGLR                                   | 0.918118381        | 2               | 3.93105   |
| Q9Z2M4        | VPPAVMAAVDQALK                                     | 0.659492151        | 2               | 3.16995   |
| <b>Q9Z2M7</b> | <b>PMM2 Phosphomannomutase 2</b>                   | <b>1.147663267</b> | <b>0.266612</b> | <b>4</b>  |
| Q9Z2M7        | IGVVGGSDFEK                                        | 1.526345063        | 2               | 2.37643   |
| Q9Z2M7        | LQEQLGNDVVEK                                       | 1.181008294        | 2               | 3.49152   |
| Q9Z2M7        | TVGYVTAPEDTR                                       | 1.200814018        | 2               | 2.51966   |
| Q9Z2M7        | YDYVFPENGLVAYK                                     | 0.942790767        | 2               | 3.3401    |
| <b>Q9Z2Q1</b> | <b>SC31A Protein transport protein Sec31A</b>      | <b>0.926117928</b> | <b>0.000152</b> | <b>14</b> |
| Q9Z2Q1        | AQDGSNPLSLQDLIEK                                   | 0.82982271         | 2               | 4.18348   |
| Q9Z2Q1        | AVQLTQALDNTVIGALLAEK                               | 0.986404714        | 2               | 4.62398   |
| Q9Z2Q1        | CLSSATDPQTK                                        | 1.437138259        | 2               | 2.62306   |
| Q9Z2Q1        | DQTLSPTIISGLHSIAR                                  | 0.762775878        | 2               | 3.42386   |
| Q9Z2Q1        | GGPGPLAGHPQVSR                                     | 1.364835172        | 2               | 3.09845   |
| Q9Z2Q1        | IDASQTDFEK                                         | 1.000786738        | 2               | 2.49462   |
| Q9Z2Q1        | IIAGDKEVVIAQK                                      | 1.499294391        | 2               | 2.53766   |
| Q9Z2Q1        | KIDASQTDFEK                                        | 1.083429493        | 2               | 3.0439    |
| Q9Z2Q1        | LVTFENVTGQPQQGAEQPR                                | 1.50894219         | 2               | 5.17189   |
| Q9Z2Q1        | QVQHILASASPSGR                                     | 0.774852494        | 2               | 2.91261   |
| Q9Z2Q1        | SSYEGQPLPK                                         | 1.064402188        | 2               | 2.47765   |
| Q9Z2Q1        | TQPPEDISCIAWNRR                                    | 0.915521947        | 2               | 2.67321   |
| Q9Z2Q1        | TFEDLIQR                                           | 0.997626609        | 2               | 2.34945   |
| Q9Z2Q1        | VYSIMGGSIDGLR                                      | 1.06967857         | 2               | 2.61917   |
| <b>Q9Z2Z8</b> | <b>DHCR7 7_dehydrocholesterol reductase</b>        | <b>0.913657862</b> | <b>0.830674</b> | <b>3</b>  |
| Q9Z2Z8        | AIECSYTSADGLK                                      | 1.124631783        | 2               | 3.99638   |
| Q9Z2Z8        | ASLADIWAK                                          | 1.131021571        | 2               | 2.65126   |
| Q9Z2Z8        | FLPGYVGGVQEGAITPAGIVNK                             | 0.924999227        | 2               | 5.47307   |
| <b>Q9Z339</b> | <b>GSTO1 Glutathione S_transferase omega_1</b>     | <b>0.977677149</b> | <b>0.363332</b> | <b>5</b>  |
| Q9Z339        | GSAPPGPVPEGQIR                                     | 0.995925282        | 2               | 3.32694   |
| Q9Z339        | LEALELNECIDHTPK                                    | 0.528538489        | 2               | 4.33129   |
| Q9Z339        | LEEAMANK                                           | 0.82395151         | 1               | 1.997     |
| Q9Z339        | LEEAMANK+Oxidation(4)                              | 0.780747785        |                 |           |
| Q9Z339        | LFPDDPYEKACQK                                      | 0.698230128        | 2               | 2.42378   |



Time point 48 hours

| Accession number | Protein DESCRIPTION                                                  | Protein Ratio (48 h) | P-value (48 h) | Peptide number (48 h) |
|------------------|----------------------------------------------------------------------|----------------------|----------------|-----------------------|
| Accession number | Peptide sequence                                                     | Peptide Ratio (48 h) | Charge state   | Xcorr                 |
| <b>A0JPQ8</b>    | <b>ALKMO Alkylglycerol monooxygenase</b>                             | <b>0.782783733</b>   | <b>1.8E-05</b> | <b>2</b>              |
| A0JPQ8           | LDDILTSMSAGVVSR                                                      | 0.888046972          | 2              | 3.103714              |
| A0JPQ8           | SITHLASGSWK                                                          | 0.748284777          | 2              | 2.597277              |
| <b>A2ADY9</b>    | <b>DDI2 Protein DDI1 homolog 2</b>                                   | <b>0.790122049</b>   | <b>0.19342</b> | <b>2</b>              |
| A2ADY9           | NPPLAEALLSGDLEK                                                      | 0.987819156          | 2              | 2.802645              |
| A2ADY9           | VLVEQQQDR                                                            | 0.782319224          | 2              | 2.473169              |
| <b>A2AJL3</b>    | <b>FGGY FGGY carbohydrate kinase domain_ containing protein</b>      | <b>0.89747444</b>    | <b>0.02815</b> | <b>3</b>              |
| A2AJL3           | GHGLTCEGQPVTSR                                                       | 0.88890454           | 2              | 3.513079              |
| A2AJL3           | MSKVGKVVFEHADK                                                       | 0.793626702          | 2              | 2.39486               |
| A2AJL3           | YQVFLRMVEHQK                                                         | 1.022906621          | 2              | 2.355281              |
| <b>A2AL36</b>    | <b>CNTRL Centriolin</b>                                              | <b>0.881711725</b>   | <b>0.7279</b>  | <b>2</b>              |
| A2AL36           | LEVLNLSYNLIVK                                                        | 0.882930261          | 2              | 2.434449              |
| A2AL36           | NQDKLNK                                                              | 0.784436213          | 1              | 1.981636              |
| <b>A2APV2</b>    | <b>FMNL2 Formin_ like protein 2</b>                                  | <b>1.123235367</b>   | <b>4.8E-07</b> | <b>2</b>              |
| A2APV2           | QAEENELRKK                                                           | 0.888549395          | 2              | 2.314742              |
| A2APV2           | QEQALMEK                                                             | 2.423063848          | 1              | 2.011945              |
| <b>A2AQP0</b>    | <b>MYH7B Myosin_7B</b>                                               | <b>0.877121314</b>   | <b>0.64728</b> | <b>6</b>              |
| A2AQP0           | AITDAAMMAEELKK                                                       | 0.979923998          | 2              | 3.03906               |
| A2AQP0           | DIDDLELTLAK                                                          | 0.605412737          | 2              | 3.715271              |
| A2AQP0           | ELEELSER                                                             | 0.670878278          | 1              | 2.061783              |
| A2AQP0           | HDCDLLR                                                              | 0.503184494          | 2              | 2.386008              |
| A2AQP0           | TEELEEK                                                              | 0.861303647          | 2              | 2.635581              |
| A2AQP0           | VGNEYVTK                                                             | 0.522255052          | 2              | 2.447743              |
| <b>A2ASS6</b>    | <b>TITIN Titin</b>                                                   | <b>1.077369979</b>   | <b>0.91544</b> | <b>3</b>              |
| A2ASS6           | AENRFGIGPPAETIQRRTAR                                                 | 0.989987795          | 2              | 2.684622              |
| A2ASS6           | APPIEPAPTPIAAPVTAPVVGK                                               | 0.732489639          | 2              | 3.892599              |
| A2ASS6           | RAPEPKPEFHVHEPGK                                                     | 1.06404207           | 2              | 2.335221              |
| <b>A2AWL7</b>    | <b>MGAP MAX gene_ associated protein</b>                             | <b>0.727299466</b>   | <b>0.01454</b> | <b>3</b>              |
| A2AWL7           | ADVSLTLLTAQASLK                                                      | 0.814115494          | 1              | 2.094304              |
| A2AWL7           | ELIEDLKSLR                                                           | 0.726236223          | 2              | 2.393612              |
| A2AWL7           | TDQGILVTNRDARALLSR                                                   | 1.002968983          | 2              | 2.425015              |
| <b>A2VCW9</b>    | <b>AASS Alpha_ amino adipic semialdehyde synthase_ mitochondrial</b> | <b>0.791974414</b>   | <b>0.5961</b>  | <b>10</b>             |
| A2VCW9           | AEGIVFNTQSTIK                                                        | 0.959152213          | 2              | 2.554884              |
| A2VCW9           | AGGILQEDITEACLILGVK                                                  | 0.706057391          | 2              | 2.723447              |
| A2VCW9           | AQEANMSLLDEVLK                                                       | 0.966319332          | 2              | 3.453885              |
| A2VCW9           | GAQEVFNELPCEYVEPELHK                                                 | 0.843644187          | 2              | 4.532718              |

|               |                                                                   |                    |                |           |
|---------------|-------------------------------------------------------------------|--------------------|----------------|-----------|
| A2VCW9        | KTDGVYDPVEYEKYPER                                                 | 0.920144314        | 3              | 3.403803  |
| A2VCW9        | KYDINTVNVTVGK                                                     | 0.834114105        | 2              | 3.70572   |
| A2VCW9        | QDAQSLLVPVK                                                       | 0.948042843        | 2              | 2.695295  |
| A2VCW9        | REDVNAWER                                                         | 0.962745761        | 2              | 2.776835  |
| A2VCW9        | SSVVPVEGCPELPHK                                                   | 1.208145809        | 2              | 2.872846  |
| A2VCW9        | YDINTVNVTVGK                                                      | 0.471231735        | 2              | 2.748539  |
| <b>A6H584</b> | <b>chain</b>                                                      | <b>0.831944876</b> | <b>6.6E-05</b> | <b>2</b>  |
| A6H584        | FVNRVFRMANGIDR+Oxidation(8)                                       | 0.761688435        | 2              | 2.594594  |
| A6H584        | NEHSFQVVGQVR                                                      | 0.829780604        | 2              | 2.512545  |
| <b>A6N6J5</b> | <b>WDR35 WD repeat_containing protein 35</b>                      | <b>0.911526527</b> | <b>0.05089</b> | <b>2</b>  |
| A6N6J5        | LMYKIADEEAKK+Oxidation(1)                                         | 0.934926771        | 1              | 2.063617  |
| A6N6J5        | MYLDMDRRDLAIGLR+Oxidation(0)                                      | 0.698304716        |                | 2.339869  |
| <b>A7VJC2</b> | <b>ROA2 Heterogeneous nuclear ribonucleoproteins A2/B1</b>        | <b>1.073066422</b> | <b>9.9E-20</b> | <b>10</b> |
| A7VJC2        | GFGFVTFDDHDPVDK                                                   | 1.130809333        | 2              | 3.842601  |
| A7VJC2        | GGGGNFGPGPGSNFR                                                   | 0.921043398        | 2              | 2.646938  |
| A7VJC2        | GGNFGFGDSR                                                        | 1.112834907        | 2              | 2.503038  |
| A7VJC2        | IDTIEIITDR                                                        | 0.88774095         | 2              | 3.669585  |
| A7VJC2        | LTDCVVMR                                                          | 0.51809589         | 2              | 2.433177  |
| A7VJC2        | NMGGPYGGGNYGPGSGGGGGYGGGR                                         | 1.345458108        | 2              | 5.335678  |
| A7VJC2        | NYEQWGK                                                           | 0.851413137        | 2              | 2.347835  |
| A7VJC2        | QEMQEVQSSR                                                        | 0.784636061        | 2              | 3.406555  |
| A7VJC2        | QEMQEVQSSR+Oxidation(2)                                           | 0.999412941        | 2              | 2.683985  |
| A7VJC2        | YHTINGHNAEVR                                                      | 1.186140944        | 2              | 3.531202  |
| <b>B0BN93</b> | <b>PSD13 26S proteasome non_ATPase regulatory subunit 13</b>      | <b>0.997386475</b> | <b>0.95914</b> | <b>2</b>  |
| B0BN93        | QMTDPNVALTFLEK                                                    | 1.065942583        | 2              | 2.714635  |
| B0BN93        | SAWQQPDLAANEQQLR                                                  | 0.989499735        | 2              | 3.926875  |
| <b>B0BNA7</b> | <b>EIF3I Eukaryotic translation initiation factor 3 subunit I</b> | <b>1.094140759</b> | <b>0.36459</b> | <b>3</b>  |
| B0BNA7        | HVLTGSADNSCR                                                      | 0.816652011        | 2              | 3.058871  |
| B0BNA7        | MKPILLQGHERSITQIK+Oxidation(0)                                    | 1.471154596        | 2              | 2.366361  |
| B0BNA7        | SYSSGGEDGYVR                                                      | 0.049200948        | 2              | 2.652438  |
| <b>B0BNE5</b> | <b>ESTD S_formylglutathione hydrolase</b>                         | <b>1.202652941</b> | <b>9.9E-20</b> | <b>9</b>  |
| B0BNE5        | AFNGYLGPDQSK                                                      | 1.046438843        | 2              | 2.916703  |
| B0BNE5        | AYDATCLVK                                                         | 0.982445768        | 2              | 2.583571  |
| B0BNE5        | FAIYLPPQAESAK                                                     | 1.273821051        | 2              | 2.893025  |
| B0BNE5        | MYSYVTEELPQLINANFPVDPQR                                           | 0.902812911        | 3              | 5.243639  |
| B0BNE5        | MYSYVTEELPQLINANFPVDPQR+Oxidation(0)                              | 0.759048327        | 3              | 3.467616  |
| B0BNE5        | SGCQQAASEHGLVVIAPDTSR                                             | 0.873714309        | 2              | 5.552814  |
| B0BNE5        | SVSAFAPICNPVLCPWGK                                                | 0.867580926        | 2              | 4.51576   |
| B0BNE5        | SYSGPQIDILIDQGGKDFLSNGQLLPDNFIAAECTK                              | 1.037358963        | 3              | 4.875159  |
| B0BNE5        | VFEHSSVELK                                                        | 0.852161613        | 2              | 2.465598  |
| <b>B0BNN3</b> | <b>CAH1 Carbonic anhydrase 1</b>                                  | <b>0.661909792</b> | <b>0.29289</b> | <b>2</b>  |

|               |                                                                        |                    |                |          |
|---------------|------------------------------------------------------------------------|--------------------|----------------|----------|
| B0BNN3        | HDSSLKPVSVSYPATAK                                                      | 0.697856732        | 3              | 4.369028 |
| B0BNN3        | VGPANPNLQK                                                             | 0.631695038        | 2              | 3.027961 |
| <b>B0K020</b> | <b>CISD1 CDGSH iron_sulfur domain_containing protein 1</b>             | <b>0.875251096</b> | <b>8.7E-08</b> | <b>2</b> |
| B0K020        | HNEETGDNVGPLIK                                                         | 0.875155713        | 2              | 5.542022 |
| B0K020        | VVHAFDMEDLGDK                                                          | 0.897207822        | 3              | 4.252344 |
| <b>B2GUZ5</b> | <b>CAZA1 F_actin_capping protein subunit alpha_1</b>                   | <b>0.875399022</b> | <b>0.10294</b> | <b>2</b> |
| B2GUZ5        | EASDPQPEDVDGGLK                                                        | 0.895951342        | 2              | 3.455634 |
| B2GUZ5        | FTITPPTAQVGVLK                                                         | 0.875337745        | 2              | 2.742404 |
| <b>B2RX88</b> | <b>CSPP1 Centrosome and spindle pole associated protein 1</b>          | <b>1.054745167</b> | <b>0.76229</b> | <b>2</b> |
| B2RX88        | SISSVNVDQVRMRNEDR                                                      | 1.038182327        | 2              | 2.492404 |
| B2RX88        | SISSVNVDQVRMRNEDR+Oxidation(11)                                        | 1.165334899        | 2              | 2.315852 |
| <b>B2RYW9</b> | <b>FAHD2 Fumarylacetoacetate hydrolase domain_containing protein 2</b> | <b>0.878828432</b> | <b>4.3E-05</b> | <b>2</b> |
| B2RYW9        | KGDEVQCEIEELGVIINK                                                     | 0.887375034        | 2              | 4.624022 |
| B2RYW9        | TFDTFCPLGPALVTK                                                        | 0.888498533        | 2              | 4.502189 |
| <b>B3DMA2</b> | <b>ACD11 Acyl_CoA dehydrogenase family member 11</b>                   | <b>1.106327496</b> | <b>0.09847</b> | <b>3</b> |
| B3DMA2        | NLPDSDNEECLVHGDFK                                                      | 1.211679192        | 2              | 3.132008 |
| B3DMA2        | RGQEVLTRVK                                                             | 0.911541821        | 1              | 1.944883 |
| B3DMA2        | SLEAYLNQHLPFGSDHR                                                      | 1.165328273        | 3              | 3.307983 |
| <b>D3ZW55</b> | <b>ITPA Inosine triphosphate pyrophosphatase</b>                       | <b>0.979709146</b> | <b>0.93043</b> | <b>4</b> |
| D3ZW55        | IDLPEYQGEPEISIQK                                                       | 0.982469698        | 2              | 4.382393 |
| D3ZW55        | KLEEVILGDKFPCTLVAQK                                                    | 1.062729561        | 3              | 3.474637 |
| D3ZW55        | LKPEGLYQLLAGFEDK                                                       | 1.100920151        | 3              | 3.526954 |
| D3ZW55        | LQEYFGVTDGAGDH                                                         | 0.896876584        | 2              | 2.586045 |
| <b>E9Q557</b> | <b>DESP Desmoplakin</b>                                                | <b>0.668250887</b> | <b>0.00016</b> | <b>2</b> |
| E9Q557        | KQVQTSQKNTLR                                                           | 0.632173664        | 1              | 1.975029 |
| E9Q557        | SQCTQVVQER                                                             | 0.66960768         | 2              | 2.584484 |
| <b>O08557</b> | <b>DDAH1 N(G)_N(G)_dimethylarginine dimethylaminohydrolase 1</b>       | <b>0.737820186</b> | <b>9.9E-20</b> | <b>9</b> |
| O08557        | DENATLDGGDVLFTGR                                                       | 0.773748956        | 2              | 3.200306 |
| O08557        | DYAVSTVPVADSLHLK                                                       | 0.714582016        | 2              | 3.480199 |
| O08557        | GAEILADTFK                                                             | 0.903438565        | 1              | 2.28705  |
| O08557        | GAEILADTFKDYAVSTVPVADSLHLK                                             | 0.844612119        | 3              | 3.89538  |
| O08557        | KEVDMMK+Oxidation(5)                                                   | 0.529985306        | 1              | 1.985766 |
| O08557        | SFCSMAGPNLIAIGSSSAQK                                                   | 0.71275277         | 2              | 4.443517 |
| O08557        | SQGEEVDFAR                                                             | 0.6947175          | 2              | 2.932321 |
| O08557        | TPEEYPESAK                                                             | 2.494234835        | 2              | 2.639826 |
| O08557        | VDGLLTCCSVFINK                                                         | 1.182434862        | 2              | 3.017703 |
| <b>O08583</b> | <b>THOC4 THO complex subunit 4</b>                                     | <b>0.738810053</b> | <b>0.01004</b> | <b>2</b> |
| O08583        | QQLSAEELDAQDAYNAR                                                      | 0.806617706        | 2              | 4.45257  |
| O08583        | SLGTADVHFER                                                            | 0.830676869        | 2              | 2.535738 |

|               |                                                                   |                    |                |           |
|---------------|-------------------------------------------------------------------|--------------------|----------------|-----------|
| <b>O08601</b> | <b>MTP Microsomal triglyceride transfer protein large subunit</b> | <b>1.256500085</b> | <b>9.9E-20</b> | <b>14</b> |
| O08601        | EFYSYENEPVGIENLK                                                  | 1.358055445        | 2              | 4.345022  |
| O08601        | GCPSLAEHWKSIR                                                     | 1.193467618        | 2              | 3.54183   |
| O08601        | GHTTGLSLNNER                                                      | 1.004251321        | 2              | 2.572468  |
| O08601        | GSFASNDIR                                                         | 1.158492672        | 2              | 2.341599  |
| O08601        | MLSASGDPVSVVK                                                     | 1.301708436        | 2              | 2.828194  |
| O08601        | NALLPEGIPLLLK                                                     | 1.419660756        | 2              | 2.996096  |
| O08601        | NILLSIGELPK                                                       | 1.044612429        | 2              | 4.041634  |
| O08601        | REEILQILK                                                         | 1.14707874         | 2              | 2.519599  |
| O08601        | SDSSIILQER                                                        | 1.064633149        | 2              | 3.022267  |
| O08601        | SGSSSAYTGYVER                                                     | 1.23368329         | 2              | 3.536287  |
| O08601        | SNLNIFQYIGK                                                       | 2.459060238        | 2              | 3.366102  |
| O08601        | VKEFYSYENEPVGIENLK                                                | 1.328574966        | 2              | 3.084463  |
| O08601        | YAEAGEGPVSHLATTVLQR                                               | 0.932190761        | 2              | 3.057607  |
| O08601        | YMLTVVQDILHFEMPASK+Oxidation(1)                                   | 1.088787772        | 2              | 2.428269  |
| <b>O08795</b> | <b>GLU2B Glucosidase 2 subunit beta</b>                           | <b>0.951352021</b> | <b>0.76258</b> | <b>6</b>  |
| O08795        | ETVVTSTTEPSR                                                      | 0.869888085        | 2              | 2.585464  |
| O08795        | KLWEEQQAANK                                                       | 0.891177711        | 2              | 3.314636  |
| O08795        | LWEEQQAANK                                                        | 0.954126926        | 2              | 3.06576   |
| O08795        | MPPYDEETQAIIDAAQEAR                                               | 0.92500894         | 2              | 4.31299   |
| O08795        | SLEDQVETLR                                                        | 0.90009068         | 2              | 2.71696   |
| O08795        | YEQGTGCWQGPNR                                                     | 0.994491487        | 2              | 3.874403  |
| <b>O08810</b> | <b>U5S1 116 kDa U5 small nuclear ribonucleoprotein component</b>  | <b>1.163411369</b> | <b>5E-05</b>   | <b>2</b>  |
| O08810        | GGGQIIPTAR                                                        | 1.175340011        | 2              | 2.785345  |
| O08810        | GLAEDIENEVVQITWNR                                                 | 0.982263618        | 2              | 2.571165  |
| <b>O09171</b> | <b>BHMT1 Betaine__homocysteine S_methyltransferase 1</b>          | <b>2.133514567</b> | <b>9.9E-20</b> | <b>11</b> |
| O09171        | AGAAIVGVNCHFDPSTSLQTIK                                            | 1.719804516        | 2              | 5.991273  |
| O09171        | AGPWTPEAAVEHPEAVR                                                 | 1.978128423        | 2              | 5.073842  |
| O09171        | GAAELMQQK                                                         | 1.795116383        | 2              | 3.7103    |
| O09171        | GAAELMQQK+Oxidation(5)                                            | 2.058612321        | 2              | 2.852686  |
| O09171        | KEYWQNLN                                                          | 1.816404934        | 3              | 3.644898  |
| O09171        | LNAGEVVIGDGGFVFALEK                                               | 1.894738766        | 3              | 6.398526  |
| O09171        | QGFIDLPEFPFPLEPR                                                  | 1.515439461        | 2              | 4.981332  |
| O09171        | QVADEGDALVAGGVQTPSYLSCK                                           | 1.799037037        | 3              | 6.089988  |
| O09171        | TSGKPIAATMCIGPEGDLHGVSPGEC AVR                                    | 2.028981263        | 3              | 6.485535  |
| O09171        | TSGKPIAATMCIGPEGDLHGVSPGEC AVR+Oxidation(9)                       | 1.776898556        | 4              | 6.060964  |
| O09171        | VNEAACDIAR                                                        | 1.48032656         | 2              | 4.051086  |
| <b>O09173</b> | <b>HGD Homogentisate 1_2_dioxygenase</b>                          | <b>1.155726252</b> | <b>9.9E-20</b> | <b>8</b>  |
| O09173        | CFYNSDGDFLIVPQK                                                   | 1.636010231        | 2              | 3.612749  |
| O09173        | FSVDVFEETR                                                        | 1.127167556        | 2              | 3.344777  |
| O09173        | GYILEVYGVHFEPLDLP IGANLANPR                                       | 1.132043961        | 3              | 5.003122  |

|               |                                                                            |                    |                |           |
|---------------|----------------------------------------------------------------------------|--------------------|----------------|-----------|
| O09173        | NCMSEFMGLIK                                                                | 1.509064335        | 2              | 3.069097  |
| O09173        | QDVSPFNVAWHGNYTPYK                                                         | 1.475176502        | 2              | 3.37068   |
| O09173        | SLRPGVAIADFVIFPPR                                                          | 1.105206816        | 3              | 3.513262  |
| O09173        | WKPFEIPK                                                                   | 1.231897253        | 2              | 2.416594  |
| O09173        | YISGFGNECASEDPR                                                            | 2.205032093        | 2              | 4.403421  |
| <b>O35077</b> | <b>GPDA Glycerol_3_phosphate dehydrogenase [NAD_]_ cytoplasmic</b>         | <b>1.147469392</b> | <b>1.3E-15</b> | <b>17</b> |
| O35077        | ANTIGISLIK                                                                 | 1.108184195        | 2              | 3.043336  |
| O35077        | DPAQGQLLK                                                                  | 2.438130474        | 2              | 2.776202  |
| O35077        | ELHSILQHK                                                                  | 0.980148983        | 2              | 2.7721    |
| O35077        | FCETTIGCK                                                                  | 1.048233107        | 2              | 2.649421  |
| O35077        | FCETTIGCKDPAQGQLLK                                                         | 1.185931486        | 2              | 4.936999  |
| O35077        | GIDEGPNGLK                                                                 | 1.109227761        | 2              | 2.339913  |
| O35077        | GLVDKFPLFTAVYK                                                             | 1.775614941        | 2              | 2.83968   |
| O35077        | ICDQLKGHLK                                                                 | 0.734757181        | 2              | 2.568439  |
| O35077        | ITVVQEVDTVEICGALK                                                          | 0.939223604        | 2              | 3.303079  |
| O35077        | IVGSNASQLAHFDPR                                                            | 1.435357173        | 2              | 3.078059  |
| O35077        | KLTEIINTQHENVK                                                             | 1.162397           | 2              | 5.001655  |
| O35077        | LTEIINTQHENVK                                                              | 1.093494481        | 2              | 4.699396  |
| O35077        | NIVAVGAGFCDGLGFGDNTK                                                       | 1.14164969         | 2              | 4.347475  |
| O35077        | SIEQLEK                                                                    | 1.019161032        | 2              | 2.327023  |
| O35077        | VCIVGSGNWGSAIAK                                                            | 1.03489373         | 2              | 4.056345  |
| O35077        | VCYEQPVGEFICCLQNHPEHM                                                      | 1.198692842        | 2              | 3.820814  |
| O35077        | VTMWVFEEDIGGR                                                              | 1.374914295        | 2              | 3.456358  |
| <b>O35078</b> | <b>OXDA D_amino_acid oxidase</b>                                           | <b>0.548939744</b> | <b>4.6E-07</b> | <b>2</b>  |
| O35078        | GQIIQVEAPWIK                                                               | 0.476607774        | 2              | 2.9603    |
| O35078        | SCCQLEPTLK                                                                 | 0.672880649        | 2              | 2.36446   |
| <b>O35094</b> | <b>TIM44 Mitochondrial import inner membrane translocase subunit TIM44</b> | <b>0.913386484</b> | <b>0.83216</b> | <b>3</b>  |
| O35094        | ILDISNVDLAMGK                                                              | 0.968121191        | 2              | 2.886078  |
| O35094        | KLEESDALQEAR                                                               | 0.908425493        | 2              | 3.413502  |
| O35094        | TEMSEVLTEILR                                                               | 0.930094138        | 2              | 3.071975  |
| <b>O35142</b> | <b>COPB2 Coatomer subunit beta_</b>                                        | <b>1.148833213</b> | <b>1.1E-16</b> | <b>3</b>  |
| O35142        | AAESLADPTEYENLFPGLK                                                        | 1.400092166        | 2              | 3.931186  |
| O35142        | FELALQLGELK                                                                | 0.986342968        | 2              | 3.173294  |
| O35142        | GSNNVALGYDEGSIIVK                                                          | 0.967371272        | 2              | 3.083227  |
| <b>O35244</b> | <b>PRDX6 Peroxiredoxin_6</b>                                               | <b>0.923504506</b> | <b>0.13968</b> | <b>10</b> |
| O35244        | DFTPVCTTELGR                                                               | 0.764936744        | 2              | 2.310607  |
| O35244        | DINAYNGAAPTEK                                                              | 1.042484127        | 2              | 3.917353  |
| O35244        | DLAILLGMLDPAEKDEK                                                          | 0.818627869        | 2              | 3.800843  |
| O35244        | GESVMVLPTLPEEEAK                                                           | 1.05144318         | 2              | 3.034328  |
| O35244        | KGESVMVLPTLPEEEAK                                                          | 1.013583801        | 2              | 4.926247  |
| O35244        | KGESVMVLPTLPEEEAK+Oxidation(5)                                             | 0.722439078        | 2              | 3.066444  |
| O35244        | LSILYPATTGR                                                                | 1.009571058        | 2              | 2.436024  |

|               |                                                                                          |                    |                |          |
|---------------|------------------------------------------------------------------------------------------|--------------------|----------------|----------|
| O35244        | NFDEILR                                                                                  | 0.904214896        | 1              | 2.04712  |
| O35244        | VVDSLQLTASNVPVATPVDWK                                                                    | 0.910002744        | 2              | 5.015574 |
| O35244        | VVFIFGPDKK                                                                               | 1.239057394        | 2              | 2.342576 |
| <b>O35469</b> | <b>3BHS6 3 beta_hydroxysteroid dehydrogenase/Delta 5__4_isomerase type 6</b>             | <b>0.637227165</b> | <b>8.9E-16</b> | <b>2</b> |
| O35469        | DLGYEPLVSWEAK                                                                            | 0.627796245        | 2              | 4.20855  |
| O35469        | TSEWIGTLVEQHR                                                                            | 0.647038894        | 2              | 3.472775 |
| <b>O35509</b> | <b>RB11B Ras_related protein Rab_11B</b>                                                 | <b>1.048966761</b> | <b>0.64533</b> | <b>4</b> |
| O35509        | AQIWDTAGQER                                                                              | 0.961817887        | 2              | 2.747673 |
| O35509        | GAVGALLVYDIK                                                                             | 1.063655032        | 2              | 3.745607 |
| O35509        | NEFNLESK                                                                                 | 0.869383945        | 1              | 2.138716 |
| O35509        | VVLIGDSGVGK                                                                              | 0.913348397        | 2              | 2.402392 |
| <b>O35567</b> | <b>PUR9 Bifunctional purine biosynthesis protein PURH</b>                                | <b>0.903269317</b> | <b>0.09801</b> | <b>7</b> |
| O35567        | AEVSNAIDQYVTGTIGEGEDLVK                                                                  | 0.928734556        | 2              | 3.300903 |
| O35567        | ALFEVPELLTEAK                                                                            | 0.943294114        | 2              | 3.600438 |
| O35567        | DGQVIGIGAGQQSR                                                                           | 0.289765737        | 2              | 3.344449 |
| O35567        | EVSDGIVAPGYEEALK                                                                         | 0.967894692        | 2              | 3.719402 |
| O35567        | HVSPAGAAVGVPLSEDEAR                                                                      | 0.895463517        | 2              | 4.173394 |
| O35567        | SGVAYIVAPSGSTADK                                                                         | 1.007850953        | 2              | 2.794787 |
| O35567        | VTVVCEPEDYGAVAAEMQSGGNK                                                                  | 0.746681191        | 2              | 5.161515 |
| <b>O35760</b> | <b>IDL1 Isopentenyl_diphosphate Delta_isomerase 1</b>                                    | <b>0.379024902</b> | <b>1.1E-05</b> | <b>3</b> |
| O35760        | AELGIPLLEVDLNEMNYLTR                                                                     | 0.315420568        | 2              | 4.356061 |
| O35760        | NCHLNENIDK                                                                               | 0.210371979        | 2              | 3.005208 |
| O35760        | NVTLNPDPEIK                                                                              | 0.46937728         | 2              | 3.356026 |
| <b>O35763</b> | <b>MOES Moesin</b>                                                                       | <b>0.887259556</b> | <b>0.21388</b> | <b>2</b> |
| O35763        | ALTSELANAR                                                                               | 0.878827613        | 2              | 2.773598 |
| O35763        | FYPEDVSEELIQDITQR                                                                        | 0.982323349        | 2              | 2.871101 |
| <b>O35796</b> | <b>C1QBP Complement component 1 Q subcomponent_binding protein_mitochondrial</b>         | <b>1.075057481</b> | <b>0.23275</b> | <b>4</b> |
| O35796        | AEEQEPELTSTPNFVVEVTK                                                                     | 0.981988003        | 2              | 4.763177 |
| O35796        | AFVEFLTDEIK                                                                              | 0.890625996        | 2              | 2.612067 |
| O35796        | AFVEFLTDEIKEEK                                                                           | 1.079674424        | 2              | 3.542451 |
| O35796        | TLVLDCHYPEDEIGHDEAESDIFSIK                                                               | 1.536387422        | 3              | 5.098336 |
| <b>O35814</b> | <b>STIP1 Stress_induced_phosphoprotein 1</b>                                             | <b>0.909170467</b> | <b>0.56506</b> | <b>3</b> |
| O35814        | ALSAGNIDDALQCYSEAIK                                                                      | 0.997415989        | 2              | 5.097708 |
| O35814        | DCEECIQLEPTFIK                                                                           | 0.901185739        | 2              | 4.123972 |
| O35814        | ELIEQLQNKPSDLGTK                                                                         | 0.909151624        | 2              | 4.201553 |
| <b>O35824</b> | <b>DNJA2 Dnaj homolog subfamily A member 2</b>                                           | <b>0.914711753</b> | <b>0.79646</b> | <b>2</b> |
| O35824        | FDVQFPENNWINPDK                                                                          | 0.961507685        | 2              | 3.322567 |
| O35824        | NVLCACSQGGGK                                                                             | 0.913905029        | 2              | 3.073852 |
| <b>O35826</b> | <b>GLCNE Bifunctional UDP_N_acetylglucosamine 2_epimerase/N_acetylmannosamine kinase</b> | <b>1.3045819</b>   | <b>0.01258</b> | <b>5</b> |
| O35826        | DEAVGALHLIQAQK                                                                           | 1.189443524        | 2              | 2.8906   |

|               |                                                                         |                    |                |          |
|---------------|-------------------------------------------------------------------------|--------------------|----------------|----------|
| O35826        | IYGDGNAVPR                                                              | 1.165236268        | 2              | 2.331684 |
| O35826        | SIDLQEPLQK                                                              | 1.092054821        | 2              | 2.567137 |
| O35826        | TLVLFPNIDAGSK                                                           | 1.121294528        | 2              | 3.030975 |
| O35826        | TPLSDTLHLPVWVDNDGNCAAMAER                                               | 1.340157462        | 3              | 4.703054 |
| <b>O35913</b> | <b>SO1A4 Solute carrier organic anion transporter family member 1A4</b> | <b>0.412396807</b> | <b>9.9E-20</b> | <b>3</b> |
| O35913        | EGLQENVDTENAK                                                           | 0.348113724        | 2              | 3.1736   |
| O35913        | SLSGYMNSMLTQIER                                                         | 0.86400873         | 2              | 3.078519 |
| O35913        | SQTLNPTQDPSECVK                                                         | 0.400972996        | 2              | 4.190156 |
| <b>O35952</b> | <b>GLO2 Hydroxyacylglutathione hydrolase_mitochondrial</b>              | <b>0.972990384</b> | <b>0.07581</b> | <b>7</b> |
| O35952        | ALLEVLGR                                                                | 0.922358236        | 2              | 2.902776 |
| O35952        | FYEGTADEMYK                                                             | 1.030570706        | 2              | 2.494801 |
| O35952        | HVEPGNTAVQEK                                                            | 0.95972816         | 3              | 3.865855 |
| O35952        | LTTVLTHHHWDHAGGNEK                                                      | 1.066126676        | 3              | 3.462862 |
| O35952        | NAIGEPTVPSTLAEFTYNPFR                                                   | 1.006929046        | 2              | 3.8837   |
| O35952        | TVQQHAGETDPVTMR                                                         | 0.824999488        | 2              | 4.674879 |
| O35952        | TVQQHAGETDPVTMR+Oxidation(14)                                           | 0.909485956        | 2              | 3.419782 |
| <b>O35987</b> | <b>NSF1C NSF1 cofactor p47</b>                                          | <b>0.877207112</b> | <b>8.5E-08</b> | <b>4</b> |
| O35987        | ASSSILINEAEPPTNIQIR                                                     | 0.800048197        | 2              | 5.176984 |
| O35987        | EANLLNAVIVQR                                                            | 0.973610042        | 2              | 3.168115 |
| O35987        | LGAAPPEESAYVAGER                                                        | 0.920791458        | 2              | 4.011843 |
| O35987        | SYQDPSNAQFLESIR                                                         | 0.915686644        | 2              | 3.99571  |
| <b>O54753</b> | <b>H17B6 17_beta_hydroxysteroid dehydrogenase type 6</b>                | <b>1.306157557</b> | <b>0.1596</b>  | <b>2</b> |
| O54753        | TWEATPEHIR                                                              | 1.341222416        | 2              | 2.63641  |
| O54753        | YGVEAFSDVLR                                                             | 1.275678696        | 2              | 2.658061 |
| <b>O55012</b> | <b>PICA Phosphatidylinositol_binding clathrin assembly protein</b>      | <b>1.061426122</b> | <b>0.1205</b>  | <b>5</b> |
| O55012        | ATTLNAVSSLASTGLSLTK                                                     | 1.297083739        | 2              | 3.741146 |
| O55012        | ITAAQHSVTGSAVSK                                                         | 1.004942882        | 2              | 4.19213  |
| O55012        | LVSDDLSSLANLVGNLIGIGNTTK                                                | 0.805644808        | 3              | 3.978628 |
| O55012        | NTLFNLSNFLDK                                                            | 1.137227908        | 2              | 2.773794 |
| O55012        | STNVAVDSGGLLKPTVASQNQLPVAK                                              | 1.029432044        | 3              | 4.797277 |
| <b>O55096</b> | <b>DPP3 Dipeptidyl peptidase 3</b>                                      | <b>0.986083923</b> | <b>0.15966</b> | <b>4</b> |
| O55096        | AGLLALEFYTPETANWR                                                       | 1.130310034        | 2              | 4.366669 |
| O55096        | LASVLNTEPALDSELSK                                                       | 1.3280734          | 2              | 4.123619 |
| O55096        | NVSLGNVLAVAYATK                                                         | 1.079894575        | 2              | 2.455905 |
| O55096        | SYEFQGNHFQVTR                                                           | 0.948198399        | 2              | 3.557676 |
| <b>O55125</b> | <b>NIPS1 Protein NipSnap homolog 1</b>                                  | <b>0.969180812</b> | <b>2.1E-07</b> | <b>3</b> |
| O55125        | AGPNIEYLR                                                               | 0.858300753        | 2              | 3.047142 |
| O55125        | GWDEVVYTVPLVR                                                           | 1.473291748        | 2              | 3.002901 |
| O55125        | IQFHNVKPECLDAYNSLTEAVLPK                                                | 1.069690208        | 3              | 4.677287 |
| <b>O55148</b> | <b>GAS7 Growth arrest_specific protein 7</b>                            | <b>0.677467653</b> | <b>0.0011</b>  | <b>2</b> |
| O55148        | EMSEFIRERIK                                                             | 0.677082147        | 2              | 2.370407 |

|               |                                                           |                    |                |           |
|---------------|-----------------------------------------------------------|--------------------|----------------|-----------|
| O55148        | QKDLEMKTQQLEIK+Oxidation(5)                               | 0.892278822        | 2              | 2.482962  |
| <b>O55171</b> | <b>ACOT2 Acyl_coenzyme A thioesterase 2_mitochondrial</b> | <b>1.015618095</b> | <b>0.02893</b> | <b>6</b>  |
| O55171        | ADAGGELDLAR                                               | 1.150953518        | 2              | 2.353116  |
| O55171        | DGLLDVVEALQSPVLDKK                                        | 0.794073055        | 2              | 5.491057  |
| O55171        | DVQKPYVVELEVLDGHEPDGGQR                                   | 1.025955662        | 3              | 4.412811  |
| O55171        | GGELGLAMASFLK                                             | 0.81326556         | 2              | 3.634328  |
| O55171        | IEYFEEAVNYLR                                              | 1.0540763          | 2              | 4.026573  |
| O55171        | SCWDEPLSITVR                                              | 0.92621105         | 2              | 3.483399  |
| <b>O70127</b> | <b>ABCBB Bile salt export pump</b>                        | <b>1.053255038</b> | <b>0.48691</b> | <b>4</b>  |
| O70127        | AGQITSEALSNIR                                             | 1.050443378        | 2              | 3.328748  |
| O70127        | AGSIADDEVLSIR                                             | 1.034590501        | 2              | 2.620444  |
| O70127        | ILDNLMSVVIKPGETTALVGSSGAGK                                | 1.249616142        | 3              | 3.433631  |
| O70127        | ILLDEATSALDTESEK                                          | 0.996911891        | 2              | 3.856109  |
| <b>O70133</b> | <b>DHX9 ATP_dependent RNA helicase A</b>                  | <b>0.971608196</b> | <b>0.00022</b> | <b>2</b>  |
| O70133        | KMTPAYEIRAVGNK                                            | 0.535536991        | 2              | 2.456806  |
| O70133        | YSPFFVFGKIR                                               | 1.078298133        | 2              | 2.510429  |
| <b>O70199</b> | <b>UGDH UDP_glucose 6_dehydrogenase</b>                   | <b>0.832155706</b> | <b>9.9E-20</b> | <b>11</b> |
| O70199        | EQIVVDLSHPGVSADDQVSR                                      | 0.842055779        | 2              | 5.703694  |
| O70199        | IFDANTKPNLNLQVLSNPEFLAEGTAIK                              | 0.881357943        | 3              | 6.006451  |
| O70199        | IIDSLFNTVTDK                                              | 0.860848473        | 2              | 2.712534  |
| O70199        | IIDSLFNTVTDKK                                             | 0.913242918        | 2              | 3.002607  |
| O70199        | ILTTNTWSSELSK                                             | 1.027295107        | 2              | 3.036883  |
| O70199        | INAWNSPTLPIYEPGLK                                         | 0.958461385        | 2              | 3.573433  |
| O70199        | NLFFSTNIDDAIR                                             | 1.054945411        | 2              | 3.184908  |
| O70199        | VLDGLHNELQTIGFQIETIGK                                     | 0.899179488        | 2              | 5.593967  |
| O70199        | VLIGGETPEGQR                                              | 0.795854335        | 2              | 2.974247  |
| O70199        | VTVVDVNEAR                                                | 0.783824243        | 2              | 3.117615  |
| O70199        | YWQQVIDMNDYQR                                             | 0.781777783        | 2              | 4.336303  |
| <b>O70251</b> | <b>EF1B Elongation factor 1_beta</b>                      | <b>1.102658151</b> | <b>2.2E-16</b> | <b>4</b>  |
| O70251        | SIQADGLVWGSSK                                             | 1.024596254        | 2              | 3.660266  |
| O70251        | SSILLDVKPWDDETDMTK                                        | 1.074923911        | 2              | 4.175203  |
| O70251        | SSILLDVKPWDDETDMTKLEECVR                                  | 0.996359368        | 3              | 4.29966   |
| O70251        | TPAGLQVLNDYLADK                                           | 1.857233008        | 2              | 3.955662  |
| <b>O70351</b> | <b>HCD2 3_hydroxyacyl_CoA dehydrogenase type_2</b>        | <b>0.855909505</b> | <b>9.9E-20</b> | <b>18</b> |
| O70351        | EVQAALTAK                                                 | 0.820929214        | 2              | 2.538556  |
| O70351        | GGIVGMTLPIAR                                              | 0.915322481        | 2              | 3.458628  |
| O70351        | GGIVGMTLPIAR+Oxidation(5)                                 | 0.674557695        | 2              | 3.152612  |
| O70351        | GLVAVITGGASGLGLSTAK                                       | 0.892604427        | 2              | 4.581475  |
| O70351        | GVIINTASVAAFEGQVQAAYSASK                                  | 1.474501079        | 2              | 3.718291  |
| O70351        | IDVAVNCAGIAVAIK                                           | 0.872147932        | 2              | 3.133094  |
| O70351        | KLGGNCIFAPANVTSEK                                         | 0.903193598        | 2              | 4.475845  |
| O70351        | KNQVHTLEDFQR                                              | 0.829835184        | 2              | 3.97714   |



|               |                                                                            |                    |                |           |
|---------------|----------------------------------------------------------------------------|--------------------|----------------|-----------|
| O70351        | LGGNCIFAPANVTSEK                                                           | 0.919767297        | 2              | 3.3499    |
| O70351        | LGGNCIFAPANVTSEKEVQAALTAK                                                  | 1.265771512        | 3              | 3.416527  |
| O70351        | LVAGVMGQNEPDQGGQR                                                          | 0.952697607        | 2              | 5.195188  |
| O70351        | LVGGGATAVLLDVPNSEGETEAK                                                    | 1.105892008        | 2              | 4.822373  |
| O70351        | NFLASQVPFPSR                                                               | 0.832963417        | 2              | 4.469247  |
| O70351        | NQVHTLEDFQR                                                                | 0.823662885        | 3              | 3.41504   |
| O70351        | RLVGQGATAVLLDVPNSEGETEAK                                                   | 0.975745861        | 3              | 5.05846   |
| O70351        | RLVGQGATAVLLDVPNSEGETEAKK                                                  | 0.883437943        | 3              | 3.556714  |
| O70351        | VINVNLIGTFNVIR                                                             | 1.069697129        | 2              | 3.348824  |
| O70351        | VVTIAPGLFATPLLTLPDK                                                        | 0.918979088        | 2              | 3.335507  |
| <b>O70456</b> | <b>1433S 14_3_3 protein sigma</b>                                          | <b>0.925783575</b> | <b>0.91858</b> | <b>4</b>  |
| O70456        | DSTLIMQLLR                                                                 | 1.067570891        | 2              | 3.275568  |
| O70456        | DSTLIMQLLR+Oxidation(5)                                                    | 0.816109132        | 2              | 2.830377  |
| O70456        | VLSSIEQK                                                                   | 0.924561712        | 2              | 2.326001  |
| O70456        | YEDMAAFMKSAVEK+Oxidation(3)                                                | 0.938682203        |                | 2.33081   |
| <b>O88202</b> | <b>LPP60 60 kDa lysophospholipase</b>                                      | <b>0.964007107</b> | <b>0.89226</b> | <b>3</b>  |
| O88202        | AAGAHLSPQELEDVGTCLCR                                                       | 0.960960955        | 3              | 3.908411  |
| O88202        | DYSGQTPLHVAAR                                                              | 1.120907324        | 2              | 2.658682  |
| O88202        | GVDVDACNEDGQSPLLAVR                                                        | 0.901098225        | 2              | 4.969258  |
| <b>O88428</b> | <b>PAPS2 Bifunctional 3__phosphoadenosine 5__phosphosulfate synthase 2</b> | <b>0.794320175</b> | <b>2.7E-05</b> | <b>3</b>  |
| O88428        | GCTVWLTGLSGAGK                                                             | 0.738522578        | 2              | 2.937469  |
| O88428        | IHESAGLPFFEIFVDAPLNICESR                                                   | 1.059918088        | 3              | 3.768689  |
| O88428        | NLGFSAGDREENIR                                                             | 0.794309741        | 2              | 3.011832  |
| <b>O88600</b> | <b>HSP74 Heat shock 70 kDa protein 4</b>                                   | <b>0.893659238</b> | <b>0.09384</b> | <b>15</b> |
| O88600        | AESEEMETSQAGSK                                                             | 0.84651757         | 2              | 4.483815  |
| O88600        | AESEEMETSQAGSK+Oxidation(5)                                                | 1.242359916        | 2              | 3.917899  |
| O88600        | AFSDPFVEAEK                                                                | 0.928896491        | 2              | 2.525365  |
| O88600        | AGGIETIANEYSDR                                                             | 0.873735313        | 2              | 3.487802  |
| O88600        | EFSITDVVPYISLR                                                             | 0.925577374        | 2              | 2.52834   |
| O88600        | ELSTTLNADEAVTR                                                             | 0.850744699        | 2              | 2.351924  |
| O88600        | GCALQCAILSPAfk                                                             | 0.918200797        | 2              | 3.429054  |
| O88600        | HAEQNGPVDGQGDNPQTAAEHGADTAVPSDGDK                                          | 0.911441553        | 3              | 4.69788   |
| O88600        | MIMQDKLEK+Oxidation(0)                                                     | 0.933287083        | 2              | 2.399258  |
| O88600        | NFTTEQVTAMLLSK                                                             | 0.968090215        | 2              | 3.455726  |
| O88600        | NKEDQYEHDAADMTK                                                            | 0.98328986         | 3              | 3.488273  |
| O88600        | SNLAYDIVQLPTGLTGIK                                                         | 0.874642373        | 2              | 4.433111  |
| O88600        | TSTVDLPIESQLLWQLDR                                                         | 0.982678648        | 2              | 4.16192   |
| O88600        | VLATAFDTTLGGR                                                              | 0.864978337        | 2              | 3.384554  |
| O88600        | WNSPAEEGSSDCEVFPK                                                          | 0.922850156        | 2              | 3.408425  |
| <b>O88618</b> | <b>FTCD Formimidoyltransferase_cyclodeaminase</b>                          | <b>1.202164393</b> | <b>9.9E-20</b> | <b>20</b> |
| O88618        | AFAACLGAIK                                                                 | 1.287897008        | 2              | 2.74629   |
| O88618        | AGEYEALPEK                                                                 | 1.182985883        | 2              | 2.92188   |

|               |                                                             |                    |                |          |
|---------------|-------------------------------------------------------------|--------------------|----------------|----------|
| O88618        | ALLDAAAFYCDK                                                | 1.337275999        | 2              | 3.932776 |
| O88618        | ALLDAAAFYCDKEK                                              | 0.843271476        | 2              | 3.828817 |
| O88618        | EAQELNLPVVGSQLVGLVPLK                                       | 1.176606298        | 3              | 4.36034  |
| O88618        | GVSMDECVLCAK                                                | 1.380283929        | 2              | 3.835449 |
| O88618        | IIEYLVPDSGPEQSLLDASLR                                       | 1.187673155        | 2              | 4.950724 |
| O88618        | ISSLLQEAK                                                   | 1.288817397        | 1              | 2.103034 |
| O88618        | KVQGIGWYLEEK                                                | 1.195705179        | 2              | 2.636844 |
| O88618        | LAEELNVPVLYGEEAQMPSR                                        | 1.629096151        | 2              | 5.020977 |
| O88618        | LFVLEEEHR                                                   | 1.170360347        | 2              | 2.808884 |
| O88618        | LGLDSLAPFPDK                                                | 1.356031442        | 2              | 3.810372 |
| O88618        | MGALDVCPFIPVR                                               | 1.564772568        | 2              | 3.357251 |
| O88618        | MGALDVCPFIPVR+Oxidation(0)                                  | 1.334281254        | 2              | 2.673084 |
| O88618        | NLAQVSTNLLDFEVTALHTVYEEAR                                   | 1.344107217        | 3              | 4.293399 |
| O88618        | QAEWVPDFGSSFVPSWGATVTGAR                                    | 1.286027682        | 2              | 3.910404 |
| O88618        | TCALQEGLR                                                   | 1.454084934        | 2              | 2.742219 |
| O88618        | TQAALVLSLEAR                                                | 1.118191766        | 2              | 5.055916 |
| O88618        | TVYTFVGQPECVVEGALSAAR                                       | 2.018302164        | 2              | 4.336102 |
| O88618        | VQGIGWYLEEK                                                 | 1.157113912        | 2              | 3.421891 |
| <b>O88637</b> | <b>PCY2 Ethanolamine_phosphate cytidyltransferase</b>       | <b>1.253722402</b> | <b>0.15235</b> | <b>6</b> |
| O88637        | GPPVFTQEER                                                  | 0.953698983        | 2              | 2.555979 |
| O88637        | HKGPPVFTQEER                                                | 0.99257761         | 2              | 3.018238 |
| O88637        | TEIVPDRDGSDPYEEPK                                           | 1.18560299         | 2              | 2.751698 |
| O88637        | TQGVSTDLVGR                                                 | 0.950395431        | 2              | 2.927661 |
| O88637        | WVDEVVPAAPYVTTLETLDK                                        | 1.293021903        | 2              | 2.939858 |
| O88637        | YVSEVVIGAPYSVTAELLNHFK                                      | 1.359662257        | 3              | 3.323131 |
| <b>O88746</b> | <b>TOM1 Target of Myb protein 1</b>                         | <b>0.956025502</b> | <b>0.80117</b> | <b>2</b> |
| O88746        | GDLSQHATPLPTPAVLPGDSPITPTPEQIGK                             | 0.946671858        | 3              | 5.489599 |
| O88746        | QQSTGAIPATQAR                                               | 1.487570301        | 2              | 2.396017 |
| <b>O88761</b> | <b>PSMD1 26S proteasome non_ATPase regulatory subunit 1</b> | <b>0.953603372</b> | <b>0.45314</b> | <b>2</b> |
| O88761        | DTSEDIEELVEPVAAHGPK                                         | 0.993242004        | 2              | 3.394719 |
| O88761        | TVGTPIASVPGSTNTGTVPGPEK                                     | 0.921288763        | 2              | 3.185826 |
| <b>O88767</b> | <b>PARK7 Protein DJ_1</b>                                   | <b>0.965912139</b> | <b>0.01841</b> | <b>6</b> |
| O88767        | DVICPDTSLEEAK                                               | 1.046915559        | 2              | 3.046035 |
| O88767        | GAEEMETVIPVDIMR                                             | 1.125929509        | 2              | 4.128756 |
| O88767        | GAEEMETVIPVDIMR+Oxidation(13)                               | 0.874557073        | 2              | 2.961041 |
| O88767        | GLIAAICAGPTALLAHEVGFQCK                                     | 0.610306191        | 2              | 4.94179  |
| O88767        | TQGPYDVVVLPGGNLGAQNLSESALVK                                 | 0.840123475        | 2              | 4.540389 |
| O88767        | VTVAGLAGKDPVQCSR                                            | 0.990429977        | 2              | 3.952677 |
| <b>O88813</b> | <b>ACSL5 Long_chain_fatty_acid_CoA ligase 5</b>             | <b>1.269905259</b> | <b>9.9E-20</b> | <b>8</b> |
| O88813        | AILEDLQK                                                    | 0.734569554        | 1              | 1.91715  |
| O88813        | GLAVSDNGPCLGYR                                              | 0.867926979        | 2              | 2.992224 |
| O88813        | GSFEELCQNQCVK                                               | 0.818157693        | 2              | 4.384674 |

|               |                                                                   |                    |                |          |
|---------------|-------------------------------------------------------------------|--------------------|----------------|----------|
| O88813        | IGFFQGDIR                                                         | 1.13209992         | 2              | 2.667367 |
| O88813        | SFLIGVVVPDPESLPSFAAK                                              | 0.705543273        | 2              | 3.873984 |
| O88813        | SIFVHPEPFSIENGLLTPTLK                                             | 1.330827362        | 3              | 3.7044   |
| O88813        | SRPILQVFBVHGESLR                                                  | 1.216920783        | 3              | 3.789805 |
| O88813        | TQEVLDKDGWLHTGDIGR                                                | 0.829397952        | 3              | 3.328365 |
| <b>O88867</b> | <b>KMO Kynurenine 3_monooxygenase</b>                             | <b>0.566040856</b> | <b>9.9E-20</b> | <b>4</b> |
| O88867        | AVGLEDQIVSK                                                       | 0.618730711        | 1              | 2.467244 |
| O88867        | FNNDLSVCLPEFSR                                                    | 0.966302383        | 2              | 3.629586 |
| O88867        | NFPDAIPLMGEQALMR                                                  | 0.913893085        | 2              | 2.517786 |
| O88867        | NFQVDVYEAR                                                        | 0.70945661         | 2              | 2.58554  |
| <b>O88941</b> | <b>MOGS Mannosyl_oligosaccharide glucosidase</b>                  | <b>0.855837174</b> | <b>0.15378</b> | <b>3</b> |
| O88941        | DLALPTLLNPK                                                       | 0.819501246        | 2              | 2.300483 |
| O88941        | LGPLLDVLADSR                                                      | 0.891481542        | 2              | 2.796738 |
| O88941        | MDPSLFPPVPLFSGVPSR                                                | 0.854717091        | 2              | 2.480091 |
| <b>O88986</b> | <b>KBL 2_amino_3_ketobutyrate coenzyme A ligase_mitochondrial</b> | <b>0.883355702</b> | <b>0.65487</b> | <b>2</b> |
| O88986        | GTDELLGVMDQVTIINSTLGK                                             | 0.919361584        | 2              | 3.388648 |
| O88986        | VQISAVHSEEDIDR                                                    | 1.038617079        | 2              | 3.542248 |
| <b>O88989</b> | <b>MDHC Malate dehydrogenase_cytoplasmic</b>                      | <b>1.179478535</b> | <b>9.9E-20</b> | <b>8</b> |
| O88989        | DLDVAVLVGSMPR                                                     | 1.126029273        | 3              | 3.972061 |
| O88989        | ELTEEKETAFLSSA                                                    | 1.095454861        | 2              | 3.727441 |
| O88989        | EVGVYEALKDDSWLK                                                   | 1.19879789         | 2              | 3.820338 |
| O88989        | FVEGLPINDFSR                                                      | 1.1616238          | 2              | 3.29685  |
| O88989        | GEFITTVQQR                                                        | 1.142416718        | 2              | 3.988533 |
| O88989        | LGVTADDVK                                                         | 1.178537343        | 2              | 2.815489 |
| O88989        | NVWIWGNHSSTQYPDVNHAK                                              | 1.231455434        | 2              | 5.757    |
| O88989        | VIVVGNPANTNCLTASK                                                 | 1.172968893        | 2              | 5.171251 |
| <b>O88990</b> | <b>ACTN3 Alpha_actinin_3</b>                                      | <b>0.904749739</b> | <b>0.56675</b> | <b>5</b> |
| O88990        | AGTQIENIEEDFR                                                     | 0.620695739        | 2              | 3.064051 |
| O88990        | CQLEINFNTLQTK                                                     | 0.960506789        | 2              | 4.113487 |
| O88990        | FAIQDISVEETSAK                                                    | 0.866633941        | 2              | 4.190232 |
| O88990        | GLSQEQLNEFR                                                       | 0.517570853        | 2              | 2.415922 |
| O88990        | HEAFESDLAAHQDR                                                    | 1.00269941         | 3              | 4.298998 |
| <b>O88994</b> | <b>MOSC2 MOSC domain_containing protein 2_mitochondrial</b>       | <b>0.739452008</b> | <b>7.1E-05</b> | <b>2</b> |
| O88994        | CVLTTVDPDTGIIDR                                                   | 0.742018657        | 2              | 4.302613 |
| O88994        | QLQQVGTVSK                                                        | 0.743348429        | 2              | 2.365731 |
| <b>O89000</b> | <b>DPYD Dihydropyrimidine dehydrogenase [NADP_]</b>               | <b>0.944880335</b> | <b>0.00326</b> | <b>5</b> |
| O89000        | EGGADGVTATNTVSGLMGLK                                              | 0.785620246        | 2              | 2.706854 |
| O89000        | GTTSGLYGPQGSSFLNIEISEK                                            | 1.432806108        | 2              | 4.059982 |
| O89000        | LTPNVTDIVSIAR                                                     | 0.526615428        | 2              | 2.551821 |
| O89000        | QEYVGGLSTSEIPQFR                                                  | 0.892872703        | 2              | 3.520966 |
| O89000        | TEQDETGNWVEDEEQIVR                                                | 1.033961658        | 2              | 4.562162 |

|               |                                                         |                    |                |           |
|---------------|---------------------------------------------------------|--------------------|----------------|-----------|
| <b>O89032</b> | <b>SPD2A SH3 and PX domain_containing protein 2A</b>    | <b>0.894402476</b> | <b>0.00805</b> | <b>2</b>  |
| O89032        | EGWAPASYIDKRRK                                          | 0.687311457        | 1              | 1.963272  |
| O89032        | MLAYCVQDATVVVDEK                                        | 1.073968717        | 2              | 2.455116  |
| <b>O89046</b> | <b>COR1B Coronin_1B</b>                                 | <b>0.908303235</b> | <b>0.0203</b>  | <b>2</b>  |
| O89046        | NDQCYEDIR                                               | 0.893375622        | 2              | 3.014926  |
| O89046        | NVLSDSKPAGYSR                                           | 0.983142089        | 2              | 3.323968  |
| <b>O89049</b> | <b>TRXR1 Thioredoxin reductase 1_cytoplasmic</b>        | <b>0.831458407</b> | <b>1.4E-05</b> | <b>5</b>  |
| O89049        | IEQIEAGTPGR                                             | 0.871987353        | 2              | 3.358     |
| O89049        | IEQIEAGTPGRLK                                           | 2.071222196        | 2              | 2.371856  |
| O89049        | LELTPVAIQAGR                                            | 0.92614829         | 2              | 2.740657  |
| O89049        | STNSEETIEDEFNTVLLAVGR                                   | 1.136601606        | 3              | 3.442827  |
| O89049        | WGLGGTCVNVGCIPK                                         | 0.806451961        | 2              | 3.069563  |
| <b>P00173</b> | <b>CYB5 Cytochrome b5</b>                               | <b>0.656144453</b> | <b>9.9E-20</b> | <b>6</b>  |
| P00173        | EQAGGDATENFEDVGHSTDR                                    | 0.581924595        | 2              | 5.380463  |
| P00173        | FLEEHPGGEEVLR                                           | 0.651389877        | 2              | 4.176721  |
| P00173        | STWVILHHK                                               | 0.703628378        | 2              | 2.737279  |
| P00173        | TYIIGELHPDDR                                            | 0.720338515        | 2              | 3.875772  |
| P00173        | VYDLTK                                                  | 0.634628251        | 1              | 2.132261  |
| P00173        | YYTLEEIQK                                               | 0.672409451        | 2              | 3.096185  |
| <b>P00388</b> | <b>NCPR NADPH_cytochrome P450 reductase</b>             | <b>1.196431224</b> | <b>1E-06</b>   | <b>7</b>  |
| P00388        | DVQNTFYDIVAEFGPMEHTQAVDYVK                              | 1.167729568        | 3              | 4.976091  |
| P00388        | GMSADPEEYDLADLSSLPEIDK                                  | 1.339712115        | 2              | 4.67908   |
| P00388        | LEQLGAQR                                                | 1.142010079        | 2              | 2.328925  |
| P00388        | RSDEDLYR                                                | 1.210627186        | 2              | 3.232828  |
| P00388        | SDEDLYR                                                 | 1.121142289        | 2              | 2.38762   |
| P00388        | SYENQKPPFDAK                                            | 1.167383457        | 2              | 3.016846  |
| P00388        | TNVLYELAQYASEPSEQEHLHK                                  | 1.346413954        | 3              | 3.58361   |
| <b>P00406</b> | <b>COX2 Cytochrome c oxidase subunit 2</b>              | <b>1.017545835</b> | <b>0.91969</b> | <b>2</b>  |
| P00406        | LLEVDNR                                                 | 0.977819292        | 2              | 2.549215  |
| P00406        | VVLPMELPIR                                              | 1.036538003        | 2              | 2.333756  |
| <b>P00481</b> | <b>OTC Ornithine carbamoyltransferase_mitochondrial</b> | <b>0.887781467</b> | <b>9.9E-20</b> | <b>14</b> |
| P00481        | FGMHLQAATPK                                             | 0.844055848        | 3              | 3.457302  |
| P00481        | GEYLPLLQGK                                              | 0.792893547        | 2              | 3.048455  |
| P00481        | GGNVLITDTWISMGQEDEK                                     | 1.128015723        | 2              | 4.531702  |
| P00481        | GGNVLITDTWISMGQEDEKK                                    | 1.192687752        | 2              | 4.63328   |
| P00481        | GLTLSWIGDGNILHSIMMSAAK                                  | 1.106899775        | 2              | 4.128619  |
| P00481        | GYEPDPNIVK                                              | 0.816951247        | 2              | 2.755304  |
| P00481        | LQAFQGYQVTMK                                            | 1.144049715        | 2              | 3.417808  |
| P00481        | LSTETGFALLGGHPSFLTQDIHLGVNESLTDAR                       | 1.127401922        | 3              | 5.728715  |
| P00481        | QKGEYLPLLQGK                                            | 0.846629557        | 2              | 3.19065   |
| P00481        | SLVFPEAENR                                              | 0.823558061        | 2              | 2.472008  |
| P00481        | SLVFPEAENRK                                             | 0.825778093        | 2              | 2.886991  |

|               |                                                      |                    |                |           |
|---------------|------------------------------------------------------|--------------------|----------------|-----------|
| P00481        | VLSSMTDAVLAR                                         | 0.90763888         | 2              | 3.718466  |
| P00481        | VLSSMTDAVLAR+Oxidation(4)                            | 0.897547104        | 2              | 2.771189  |
| P00481        | YGKPVQSQVQLK                                         | 0.392464316        | 2              | 2.816904  |
| <b>P00502</b> | <b>GSTA1 Glutathione S_transferase alpha_1</b>       | <b>0.683941773</b> | <b>0.00164</b> | <b>2</b>  |
| P00502        | FIQSPEDLEK                                           | 0.639520849        | 2              | 2.787801  |
| P00502        | WLLAAAGVEFDEK                                        | 0.724604259        | 2              | 4.417922  |
| <b>P00507</b> | <b>AATM Aspartate aminotransferase_mitochondrial</b> | <b>0.810756723</b> | <b>9.9E-20</b> | <b>17</b> |
| P00507        | ASAEALGENSEVLK                                       | 0.881828221        | 2              | 4.827941  |
| P00507        | DAGMQLQGYR                                           | 0.812049225        | 2              | 2.318431  |
| P00507        | DDNGKPYVLPVSR                                        | 0.857287626        | 2              | 3.32851   |
| P00507        | DDNGKPYVLPVSRKAEAQIAGK                               | 0.794816236        | 2              | 2.383237  |
| P00507        | EGSSHNWQHITDQIGMFCFTGLKPEQVER                        | 1.449517068        | 3              | 4.835541  |
| P00507        | FVTVQTISGTGALR                                       | 0.895301977        | 2              | 5.156823  |
| P00507        | HFIEQGINVCLCQSYAK                                    | 0.842379836        | 2              | 3.690485  |
| P00507        | IAATILTSPDLR                                         | 2.494150096        | 2              | 3.057026  |
| P00507        | IPEQSVLLLHACAHNPTGVDPRPEQWK                          | 1.432944728        | 3              | 4.326439  |
| P00507        | KQWLQEVK                                             | 0.942888196        | 1              | 2.113429  |
| P00507        | MNLGVGAYR                                            | 0.936578961        | 2              | 2.931424  |
| P00507        | NLDKEYLPIGGLADFCK                                    | 0.815154258        | 2              | 5.364047  |
| P00507        | NMGLYGER                                             | 0.853354552        | 1              | 2.19264   |
| P00507        | TCGFDFSGALEDISK                                      | 0.871848112        | 2              | 4.694676  |
| P00507        | TQLVSNLK                                             | 0.77836168         | 2              | 2.681593  |
| P00507        | VGAFTVCK                                             | 0.956202319        | 2              | 3.125698  |
| P00507        | VGASFLQR                                             | 1.127098682        | 2              | 2.972824  |
| <b>P00564</b> | <b>KCRM Creatine kinase M_type</b>                   | <b>0.722411411</b> | <b>0.25945</b> | <b>11</b> |
| P00564        | DLFDPIIQDR                                           | 0.685400324        | 2              | 2.474128  |
| P00564        | FEEILTR                                              | 0.955079303        | 2              | 2.447623  |
| P00564        | GGDDLDPNYVLSSR                                       | 0.523451133        | 2              | 4.179605  |
| P00564        | GQSIDDMIPAQK                                         | 0.561534989        | 2              | 2.862451  |
| P00564        | GTGGVDTAAVGAVFDISNADR                                | 0.54773613         | 2              | 5.894311  |
| P00564        | LGSSEVEQVQLVVDGVK                                    | 0.623884153        | 2              | 3.651853  |
| P00564        | LSVEALNSLTGEFK                                       | 0.62723141         | 2              | 3.74195   |
| P00564        | RGTGGVDTAAVGAVFDISNADR                               | 0.440356193        | 2              | 4.173407  |
| P00564        | SMTEQEQQQLIDHFLFDKPVSPLLASGMAR                       | 0.65875494         | 3              | 6.009603  |
| P00564        | SMTEQEQQQLIDHFLFDKPVSPLLASGMAR+Oxidation(1)          | 0.5428977          | 4              | 4.558091  |
| P00564        | TDLNHENLK                                            | 0.57480519         | 2              | 2.638885  |
| <b>P00787</b> | <b>CATB Cathepsin B</b>                              | <b>1.11070883</b>  | <b>0.00102</b> | <b>4</b>  |
| P00787        | GENHCGIESEIVAGIPR                                    | 1.108936361        | 2              | 4.23511   |
| P00787        | HEAGDVMGGHAIR                                        | 1.040237514        | 3              | 3.887353  |
| P00787        | MCEAGYSTSYKEDK                                       | 1.044215055        | 2              | 3.726816  |
| P00787        | NGPVEGAFTVFSDFLTYK                                   | 1.407259516        | 2              | 3.620009  |
| <b>P00884</b> | <b>ALDOB Fructose_bisphosphate aldolase B</b>        | <b>1.326175357</b> | <b>9.9E-20</b> | <b>18</b> |

|               |                                         |                    |                |           |
|---------------|-----------------------------------------|--------------------|----------------|-----------|
| P00884        | ALQASALAAWGGK                           | 1.38269549         | 2              | 4.720711  |
| P00884        | ATQEAFMK                                | 1.11453451         | 2              | 2.674007  |
| P00884        | ATQEAFMK+Oxidation(6)                   | 1.817438177        | 1              | 2.216407  |
| P00884        | ELLSVSDNSISQSIGGVILFHETLYQK             | 2.265081793        | 3              | 4.121828  |
| P00884        | ELSEIAQR                                | 1.055735688        | 1              | 2.175398  |
| P00884        | ETTIQGLDGLSER                           | 1.175470534        | 2              | 3.702198  |
| P00884        | GILAADESVGTMGNR                         | 1.252892588        | 2              | 5.43682   |
| P00884        | GILAADESVGTMGNR+Oxidation(11)           | 1.359542215        | 2              | 5.102598  |
| P00884        | IKVENTEENR                              | 1.176906067        | 2              | 3.155527  |
| P00884        | IKVENTEENRR                             | 0.986501143        | 2              | 3.163885  |
| P00884        | ISDQCPSSLAIQENANALAR                    | 1.311426976        | 2              | 6.46809   |
| P00884        | KELSEIAQR                               | 1.387751553        | 3              | 3.5845    |
| P00884        | KYTPEQVAMATVTALHR                       | 1.59297331         | 3              | 6.008464  |
| P00884        | KYTPEQVAMATVTALHR+Oxidation(8)          | 1.08323583         | 3              | 4.797522  |
| P00884        | LDQGGAPLAGTNK                           | 1.235552691        | 2              | 4.56857   |
| P00884        | YASICQQNGLVPIVEPEVLPDGDHDLHCQYVSEK      | 1.94335856         | 3              | 5.047423  |
| P00884        | YTPEQVAMATVTALHR                        | 1.520837368        | 2              | 4.71481   |
| P00884        | YTPEQVAMATVTALHR+Oxidation(7)           | 1.101418378        | 2              | 4.170346  |
| <b>P01015</b> | <b>ANGT Angiotensinogen</b>             | <b>0.891044615</b> | <b>0.1169</b>  | <b>2</b>  |
| P01015        | GSYNLQDLLAQAK                           | 0.648657453        | 2              | 2.340241  |
| P01015        | SLDLSTDPVLAQAQK                         | 1.470753596        | 2              | 2.691788  |
| <b>P01026</b> | <b>CO3 Complement C3</b>                | <b>0.915827526</b> | <b>0.02127</b> | <b>12</b> |
| P01026        | ADIGCTPGSGK                             | 0.87097673         | 2              | 2.412773  |
| P01026        | DSCVGTLVVKGDPK                          | 0.915480882        | 2              | 2.360075  |
| P01026        | EYVLPSEFVLVEPTEK                        | 1.071646562        | 2              | 4.084051  |
| P01026        | IFTVDNLLPVGK                            | 1.015617808        | 2              | 2.768405  |
| P01026        | RVPVVTQGSDAQALTQDDGVAK                  | 0.897249933        | 2              | 4.88799   |
| P01026        | SGSDEVQAGQER                            | 1.394831929        | 2              | 4.232399  |
| P01026        | SSVAVPYVIVPLK                           | 1.679084423        | 2              | 2.451176  |
| P01026        | TVLTGATGHLNR                            | 1.015973826        | 2              | 2.754661  |
| P01026        | VELKPGDNLNVNFHLR                        | 1.062015343        | 3              | 4.973259  |
| P01026        | VHQFFNVGLIQPGSVK                        | 1.462491399        | 3              | 3.570119  |
| P01026        | VLIEDGSGEAVLSR                          | 1.110039133        | 2              | 3.524881  |
| P01026        | VLMDGVRPSSPEALVGK                       | 1.091569767        | 2              | 2.648866  |
| <b>P01946</b> | <b>HBA Hemoglobin subunit alpha_1/2</b> | <b>0.80880026</b>  | <b>0.93054</b> | <b>8</b>  |
| P01946        | AADHVEDLPGALSTLSLHAHK                   | 0.874854707        | 3              | 7.351187  |
| P01946        | FLASVSTVLTSK                            | 0.703761224        | 2              | 3.998177  |
| P01946        | FLSHCLLVTLACHHPGDFTPAMHASLDFLASVSTVLTSK | 1.046168084        | 6              | 4.989113  |
| P01946        | IGGHGGEYGEEALQR                         | 0.831421971        | 3              | 5.073644  |
| P01946        | LRVDPVNFK                               | 0.960309828        | 2              | 2.466158  |
| P01946        | MFAAFPTTK                               | 0.99488251         | 2              | 2.492434  |
| P01946        | MFAAFPTTK+Oxidation(0)                  | 0.558380777        | 2              | 2.698089  |

|               |                                             |                    |                |           |
|---------------|---------------------------------------------|--------------------|----------------|-----------|
| P01946        | TYFSHIDVSPGSAQVK                            | 0.862136951        | 2              | 5.197578  |
| <b>P02089</b> | <b>HBB2 Hemoglobin subunit beta_2</b>       | <b>0.591430637</b> | <b>0.97259</b> | <b>4</b>  |
| P02089        | GTFASLSELHCDK                               | 0.749892385        | 2              | 3.219352  |
| P02089        | LHVDPENFR                                   | 0.707408625        | 2              | 2.49771   |
| P02089        | YFDSFGDLSSASAIMGNPK                         | 0.684958203        | 2              | 6.628827  |
| P02089        | YFDSFGDLSSASAIMGNPK+Oxidation(14)           | 0.700097551        | 2              | 5.571102  |
| <b>P02091</b> | <b>HBB1 Hemoglobin subunit beta_1</b>       | <b>0.924719059</b> | <b>0.32843</b> | <b>9</b>  |
| P02091        | AAVNLWGK                                    | 5.896612401        | 2              | 2.768222  |
| P02091        | EFTPCAQAAFQK                                | 0.645177428        | 2              | 3.1865    |
| P02091        | GTFAPLSELHCDK                               | 0.800993219        | 2              | 4.261004  |
| P02091        | GTFAPLSELHCDKLHVDPENFR                      | 0.847350634        | 3              | 3.838347  |
| P02091        | KVINAFNDGLK                                 | 0.749126039        | 3              | 3.87784   |
| P02091        | LLGNMIVIVLGHHLGK                            | 0.997479581        | 2              | 2.705111  |
| P02091        | VINAFNDGLK                                  | 0.738364759        | 2              | 2.924035  |
| P02091        | VNPDDVGGEALGR                               | 0.746758033        | 2              | 4.073515  |
| P02091        | VVAGVASALAHK                                | 0.699010005        | 2              | 3.487201  |
| <b>P02401</b> | <b>RLA2 60S acidic ribosomal protein P2</b> | <b>1.023754342</b> | <b>6.9E-11</b> | <b>6</b>  |
| P02401        | ILDSVGIEADDER                               | 1.169178762        | 2              | 4.746322  |
| P02401        | KILDSVGIEADDER                              | 0.950275784        | 2              | 3.847073  |
| P02401        | LASVPAGGAVAVSAAPGSAAPAAGSAPAAAAEEK          | 0.937877597        | 3              | 5.837322  |
| P02401        | NIEDVIAQGVGK                                | 1.013753227        | 2              | 4.606312  |
| P02401        | VISELNGK                                    | 1.053955146        | 1              | 2.011276  |
| P02401        | YVASYLLAALGGNSNPSAK                         | 1.323692984        | 2              | 5.091392  |
| <b>P02563</b> | <b>MYH6 Myosin_6</b>                        | <b>1.050516672</b> | <b>0.9269</b>  | <b>2</b>  |
| P02563        | DTQLQLDDAVR                                 | 1.054400281        | 2              | 2.630583  |
| P02563        | VKLEQQVDDLEGSLEQEKK                         | 0.865620688        | 3              | 3.693087  |
| <b>P02564</b> | <b>MYH7 Myosin_7</b>                        | <b>0.99446024</b>  | <b>5.1E-06</b> | <b>32</b> |
| P02564        | ALQEAHQALDDLQAEEDKVNTLTK                    | 0.623222235        | 3              | 4.514825  |
| P02564        | ANDDLKENIAIVER                              | 0.716933153        | 2              | 3.468239  |
| P02564        | DLEEATLQHEATAAALR                           | 0.47065913         | 2              | 4.960937  |
| P02564        | DTQIQLDDAVR                                 | 1.054400281        | 2              | 2.630583  |
| P02564        | DVFPDDKEEFVK                                | 1.650520843        | 2              | 2.586309  |
| P02564        | ELENELEAEQK                                 | 1.176900432        | 2              | 2.33688   |
| P02564        | EQYEEETAK                                   | 0.576108295        | 2              | 2.386412  |
| P02564        | GQNVQQVAYAIGALAK                            | 0.885060078        | 2              | 3.430654  |
| P02564        | GTLEDQIIQANPALEAFGNAK                       | 0.808023786        | 2              | 5.284353  |
| P02564        | IEDEQALGSQLQK                               | 0.57414946         | 2              | 4.413587  |
| P02564        | IEEEEELEAER                                 | 0.667633219        | 2              | 3.778149  |
| P02564        | ILNPAAIPEGQFIDSR                            | 0.649640163        | 2              | 2.835299  |
| P02564        | KLEDECSELKR                                 | 0.589844696        | 3              | 3.494481  |
| P02564        | KVQHELDEAEER                                | 0.646221274        | 2              | 3.602796  |
| P02564        | LAEQELIETSER                                | 0.668563234        | 2              | 3.214802  |
| P02564        | LDEAEQIALK                                  | 0.646495347        | 2              | 3.592026  |

|               |                                                            |                    |                |           |
|---------------|------------------------------------------------------------|--------------------|----------------|-----------|
| P02564        | LELDDVTSNMEQIIK                                            | 0.855437224        | 2              | 3.785596  |
| P02564        | LQDAEEAVEAVNAK                                             | 0.846278548        | 2              | 4.40889   |
| P02564        | LQNEIEDLMVDVER                                             | 0.832761595        | 2              | 2.971473  |
| P02564        | LTQESIMDLENDKQQLDER                                        | 0.986736552        | 3              | 3.585778  |
| P02564        | MDADLSQLQTEVEEAVQECR                                       | 0.847951007        | 2              | 4.245785  |
| P02564        | NAYEESLEHLETFK                                             | 0.735828284        | 2              | 2.850118  |
| P02564        | NLQEEISDLTEQLGSGTK                                         | 0.695405197        | 2              | 5.525924  |
| P02564        | NLTEEMAGLDEIIVK                                            | 1.036092638        | 2              | 3.703064  |
| P02564        | NNLLQAELEELR                                               | 0.686246034        | 2              | 3.453353  |
| P02564        | QAEEAEEQANTNLSK                                            | 0.645699149        | 2              | 4.896638  |
| P02564        | QKYEESQSELESSQK                                            | 0.822115564        | 2              | 3.415476  |
| P02564        | TLEDQMNEHR                                                 | 0.602925386        | 2              | 2.643172  |
| P02564        | VKEMTERLEDEEEMNAELTAK                                      | 0.539132546        | 2              | 2.322104  |
| P02564        | VQHELDEAEER                                                | 0.980477258        | 3              | 3.38028   |
| P02564        | VQLLHSQNTSLINQK                                            | 0.713167557        | 2              | 3.943206  |
| P02564        | VVDSLQTSLDAETR                                             | 0.669758716        | 2              | 3.643353  |
| <b>P02600</b> | <b>MYL1 Myosin light chain 1/3_skeletal muscle isoform</b> | <b>0.826955312</b> | <b>0.82494</b> | <b>11</b> |
| P02600        | ALGTNPTNAEVK                                               | 0.589733349        | 2              | 3.272845  |
| P02600        | ALGTNPTNAEVKK                                              | 0.625123303        | 2              | 3.038026  |
| P02600        | DQGGYEDFVEGLR                                              | 0.574504882        | 2              | 3.97068   |
| P02600        | IDLSAIK                                                    | 0.552316526        | 2              | 2.328373  |
| P02600        | IEFEQFLPMMQAISSNK                                          | 0.944271306        | 2              | 3.650124  |
| P02600        | ITLSQVGDVLR                                                | 0.759886504        | 2              | 3.509644  |
| P02600        | KIEFEQFLPMMQAISSNK                                         | 0.667283222        | 2              | 5.380936  |
| P02600        | KPAAAAPAPAPAPAPAKPK                                        | 8.420704119        | 3              | 3.368535  |
| P02600        | KVLGNPSNEEMNAK                                             | 0.805008349        | 2              | 3.280922  |
| P02600        | VLGNPSNEEMNAK                                              | 0.588970715        | 2              | 3.570217  |
| P02600        | VLGNPSNEEMNAK+Oxidation(9)                                 | 0.622412034        | 2              | 2.807169  |
| <b>P02625</b> | <b>PRVA Parvalbumin alpha</b>                              | <b>0.680013868</b> | <b>0.05208</b> | <b>4</b>  |
| P02625        | AIGAFTAADSFCHK                                             | 0.696656645        | 2              | 2.418355  |
| P02625        | SGFIEEDELGSILK                                             | 0.469080056        | 2              | 3.936534  |
| P02625        | TLMAAGDKDGDGK                                              | 0.444549565        | 2              | 2.916943  |
| P02625        | TLMAAGDKDGDGK+Oxidation(2)                                 | 0.657615935        | 2              | 3.023445  |
| <b>P02650</b> | <b>APOE Apolipoprotein E</b>                               | <b>1.20305418</b>  | <b>0.01971</b> | <b>12</b> |
| P02650        | ELEEQLGPVAEETR                                             | 1.207350966        | 2              | 4.597376  |
| P02650        | GRLEEVGNQAR                                                | 1.005151208        | 2              | 3.622802  |
| P02650        | GWFEPLVEDMQR                                               | 1.02410494         | 2              | 3.141609  |
| P02650        | LEEVGNQAR                                                  | 0.997627729        | 2              | 2.813071  |
| P02650        | LGADMEDLR                                                  | 1.187949514        | 2              | 2.606182  |
| P02650        | LGPLVEQGR                                                  | 1.238405129        | 2              | 2.444969  |
| P02650        | LQAEIFQAR                                                  | 1.726698564        | 2              | 2.321469  |
| P02650        | MEEQTQQIR                                                  | 0.997795039        | 2              | 2.542813  |



|               |                                               |                    |                |           |
|---------------|-----------------------------------------------|--------------------|----------------|-----------|
| P02650        | NEVNTMLGQSTEELR                               | 1.091757471        | 2              | 4.403859  |
| P02650        | SKMEEQTQQIR                                   | 0.936749981        | 2              | 3.396561  |
| P02650        | SKMEEQTQQIR+Oxidation(2)                      | 1.47519696         | 2              | 2.96943   |
| P02650        | TANLGAGAAQPLR                                 | 1.338474121        | 2              | 3.192875  |
| <b>P02680</b> | <b>FIBG Fibrinogen gamma chain</b>            | <b>0.902001522</b> | <b>0.00746</b> | <b>4</b>  |
| P02680        | VAQLEAQCQEPCK                                 | 2.396936359        | 2              | 2.751341  |
| P02680        | VGPESDKYR                                     | 0.353516587        | 2              | 2.841702  |
| P02680        | YEALLTHESSIR                                  | 1.176309534        | 2              | 3.545323  |
| P02680        | YLQDIYTSNK                                    | 0.833241163        | 2              | 2.444826  |
| <b>P02692</b> | <b>FABPL Fatty acid binding protein_liver</b> | <b>1.226062955</b> | <b>9.9E-20</b> | <b>12</b> |
| P02692        | AMGLPEDLIQK                                   | 1.194503581        | 2              | 3.60376   |
| P02692        | AMGLPEDLIQK+Oxidation(1)                      | 1.083962114        | 2              | 3.746587  |
| P02692        | GVSEIVHEGK                                    | 1.010246338        | 2              | 3.32548   |
| P02692        | GVSEIVHEGKK                                   | 1.011818097        | 2              | 3.203617  |
| P02692        | MVTFK+Oxidation(0)                            | 1.101088852        | 1              | 1.995837  |
| P02692        | SVTEFNGDTITNTMTLGDIVYK                        | 1.148424229        | 3              | 5.727576  |
| P02692        | SVTEFNGDTITNTMTLGDIVYK+Oxidation(13)          | 1.272436463        | 2              | 5.240052  |
| P02692        | SVTEFNGDTITNTMTLGDIVYKR                       | 1.229096292        | 2              | 3.57648   |
| P02692        | VIHNEFTLGEECELETMTGEK                         | 1.100752618        | 3              | 6.170149  |
| P02692        | VIHNEFTLGEECELETMTGEK+Oxidation(16)           | 1.039054654        | 3              | 5.800786  |
| P02692        | YQVQSQENFEPFMK                                | 1.213667835        | 2              | 5.80917   |
| P02692        | YQVQSQENFEPFMK+Oxidation(12)                  | 1.37853711         | 2              | 5.223806  |
| <b>P02696</b> | <b>RET1 Retinol binding protein 1</b>         | <b>0.812167166</b> | <b>0.46066</b> | <b>6</b>  |
| P02696        | ALDVNVALR                                     | 0.908604741        | 2              | 3.025125  |
| P02696        | CMTTVSWDGDKLQCQVK                             | 1.331455235        | 2              | 3.762113  |
| P02696        | EFEEDLTGIDDR                                  | 0.770480519        | 2              | 2.472834  |
| P02696        | EFEEDLTGIDDRK                                 | 0.751692824        | 2              | 2.854273  |
| P02696        | MLSNENFEEYLR                                  | 1.048541253        | 2              | 3.328781  |
| P02696        | MLSNENFEEYLR+Oxidation(0)                     | 0.819629272        | 2              | 3.18666   |
| <b>P02706</b> | <b>ASGR1 Asialoglycoprotein receptor 1</b>    | <b>1.160099367</b> | <b>1.5E-07</b> | <b>4</b>  |
| P02706        | DYQDFQHLNENDHHQLQR                            | 1.597352468        | 3              | 4.487172  |
| P02706        | LVESQLEK                                      | 1.044983921        | 2              | 2.472374  |
| P02706        | SLSCQMAALR                                    | 1.21626297         | 2              | 2.636677  |
| P02706        | WVDGTDYETGFK                                  | 0.928480899        | 2              | 3.029561  |
| <b>P02770</b> | <b>ALBU Serum albumin</b>                     | <b>1.226742568</b> | <b>2.2E-08</b> | <b>22</b> |
| P02770        | AADKDNCFATEGPNLVAR                            | 3.017738229        | 2              | 4.315941  |
| P02770        | AETFTFHSDICTLPDKEK                            | 4.621938841        | 2              | 4.11612   |
| P02770        | CCAEGDPPACYGTVLAEFQPLVEEPK                    | 1.173581772        | 2              | 5.148039  |
| P02770        | CCSGSLVER                                     | 0.898387761        | 2              | 2.704192  |
| P02770        | CCTLPEAQR                                     | 1.142470916        | 2              | 3.029857  |
| P02770        | ECCHGDILLECADDR                               | 1.403051023        | 2              | 3.676816  |
| P02770        | ECCHGDILLECADDRAEK                            | 1.285640049        | 2              | 5.085512  |
| P02770        | FKDLGEQHFK                                    | 1.099875148        | 3              | 4.184365  |

|               |                                         |                    |                |           |
|---------------|-----------------------------------------|--------------------|----------------|-----------|
| P02770        | GLVLIAFSQYLQK                           | 1.476191082        | 2              | 3.644505  |
| P02770        | KQTALAEVLK                              | 1.24776651         | 3              | 4.133866  |
| P02770        | KYEATLEK                                | 1.668142648        | 1              | 2.969912  |
| P02770        | LQACCDKPVLLQK                           | 1.104723998        | 2              | 4.164047  |
| P02770        | LVQEVTDFAK                              | 1.281045362        | 2              | 3.271222  |
| P02770        | RHPDYSVSLLLR                            | 1.424489978        | 3              | 5.089334  |
| P02770        | SIHTLFGDK                               | 1.164827562        | 1              | 2.361022  |
| P02770        | TCVADENAENCDK                           | 0.980960553        | 2              | 4.416258  |
| P02770        | TNCELYEK                                | 1.115280423        | 2              | 2.757627  |
| P02770        | TVMGDFAQFVDK                            | 1.147178147        | 2              | 2.893559  |
| P02770        | TVMGDFAQFVDK+Oxidation(2)               | 0.64012046         | 2              | 2.440962  |
| P02770        | YMCENQATISSK                            | 1.117469434        | 2              | 4.211557  |
| P02770        | YMCENQATISSK+Oxidation(1)               | 1.142731284        | 2              | 3.545055  |
| P02770        | YNEVLTQCCTESDK                          | 1.286337454        | 2              | 5.671119  |
| <b>P02803</b> | <b>MT1 Metallothionein_1</b>            | <b>2.231205543</b> | <b>9.9E-20</b> | <b>2</b>  |
| <b>P04041</b> | <b>GPX1 Glutathione peroxidase 1</b>    | <b>0.832531284</b> | <b>9.9E-20</b> | <b>9</b>  |
| P04041        | FLVGPDGVVPR                             | 0.753561278        | 2              | 3.521695  |
| P04041        | GLVVLGFPCNQFGHQENGK                     | 0.817454843        | 2              | 4.207802  |
| P04041        | NALPAPSDPTALMTDPK                       | 0.892481987        | 2              | 3.254999  |
| P04041        | NALPAPSDPTALMTDPK+Oxidation(13)         | 0.762654185        | 2              | 2.701529  |
| P04041        | NDISWNFEK                               | 0.776718673        | 2              | 2.777018  |
| P04041        | NEEILNSLK                               | 0.785158643        | 2              | 2.475482  |
| P04041        | TIDIEPDIEALLSK                          | 0.96516444         | 3              | 4.35711   |
| P04041        | YIIWSPVCR                               | 0.956489498        | 2              | 2.467424  |
| P04041        | YVRPGGGFEPNFTLFEK                       | 0.820266744        | 3              | 4.412416  |
| <b>P04167</b> | <b>CP2B2 Cytochrome P450 2B2</b>        | <b>0.452373384</b> | <b>9.9E-20</b> | <b>2</b>  |
| P04167        | GTIAVIEPIFK                             | 0.301692883        | 2              | 2.61487   |
| P04167        | NLQEILDYIGHIVEK                         | 0.56644012         | 2              | 3.802533  |
| <b>P04176</b> | <b>PH4H Phenylalanine_4_hydroxylase</b> | <b>1.040439533</b> | <b>1.4E-05</b> | <b>14</b> |
| P04176        | AYGAGLLSSFGEIQYCLSDKPK                  | 1.567883375        | 3              | 3.509964  |
| P04176        | EDNIPQLEDVSQLQCTGFR                     | 1.108986679        | 3              | 4.76325   |
| P04176        | FANQILSYGAELDADHPGFKDPVYR               | 1.565172331        | 3              | 4.492066  |
| P04176        | ILADSINSEVGILCNALQK                     | 0.899195367        | 2              | 5.058584  |
| P04176        | LRPVAGLLSSR                             | 1.693083539        | 2              | 2.500345  |
| P04176        | NDIGATVHELRS                            | 0.950372819        | 2              | 3.690542  |
| P04176        | QFADIAYNYR                              | 0.986204614        | 2              | 2.48142   |
| P04176        | SFAQFSQEIGLASLGAPDEYIEK                 | 1.097753316        | 2              | 4.38874   |
| P04176        | TACQEYSVTEFQPLYVAESFSDAK                | 2.552232846        | 2              | 4.999586  |
| P04176        | THACYEHNHIFPILLEK                       | 1.000227206        | 2              | 4.497329  |
| P04176        | VEVLDNTQQLK                             | 0.944694858        | 2              | 3.546311  |
| P04176        | VEYTEEEK                                | 0.926297129        | 2              | 2.738826  |
| P04176        | VEYTEEEKQWTGTVFR                        | 0.980863715        | 2              | 3.762657  |
| P04176        | YCGFREDNIPQLEDVSQLQCTGFR                | 1.125509909        | 3              | 3.553357  |

|               |                                                        |                    |                |           |
|---------------|--------------------------------------------------------|--------------------|----------------|-----------|
| <b>P04182</b> | <b>OAT Ornithine aminotransferase_mitochondrial</b>    | <b>0.699794436</b> | <b>0.67593</b> | <b>6</b>  |
| P04182        | AFYNNVLGEYEEYITK                                       | 0.96467925         | 2              | 4.36976   |
| P04182        | GLLNAIVIR                                              | 0.835073059        | 2              | 2.790879  |
| P04182        | KTEQGPPSSEYIFER                                        | 0.922768345        | 2              | 3.934419  |
| P04182        | TEQGPPSSEYIFER                                         | 0.880811955        | 2              | 3.553824  |
| P04182        | VLPMNTGVEAGETACK                                       | 0.790561439        | 2              | 4.93869   |
| P04182        | WLAVDHENVRPDIVLLGK                                     | 0.684011254        | 2              | 4.381255  |
| <b>P04256</b> | <b>ROA1 Heterogeneous nuclear ribonucleoprotein A1</b> | <b>0.724546084</b> | <b>2.1E-11</b> | <b>5</b>  |
| P04256        | EDSQRPGAHLTVK                                          | 0.721098161        | 2              | 3.326706  |
| P04256        | IEVIEIMTDR                                             | 0.844915759        | 2              | 3.410411  |
| P04256        | MSKSESPKEPEQLR                                         | 0.982517937        | 2              | 2.398291  |
| P04256        | NQGGYGGSSSSSYGSGR                                      | 0.953808425        | 2              | 4.695726  |
| P04256        | SESPKEPEQLR                                            | 0.846296744        | 2              | 2.513839  |
| <b>P04355</b> | <b>MT2 Metallothionein_2</b>                           | <b>1.650888106</b> | <b>9.9E-20</b> | <b>2</b>  |
| <b>P04462</b> |                                                        | <b>0.80486731</b>  | <b>9.9E-20</b> | <b>53</b> |
| P04462        | AEVSELPSVVR                                            | 0.780952032        | 2              | 2.896098  |
| P04462        | ALLTPVAIAAGR                                           | 0.534242928        | 2              | 2.333061  |
| P04462        | ASMMGQRASLLTAR+Oxidation(2)                            | 0.93720808         |                | 2.391548  |
| P04462        | AVAENQPFLIEAMTYR                                       | 0.877830497        | 2              | 3.972772  |
| P04462        | AVDEAADALLK                                            | 0.943851009        | 2              | 2.313546  |
| P04462        | AVEIAHALCLTERQIK                                       | 0.935016935        | 2              | 2.495136  |
| P04462        | DEELSCSVLELK                                           | 1.260761396        | 2              | 2.718766  |
| P04462        | DQMVKNNHFTLK+Oxidation(2)                              | 0.721224304        | 2              | 2.445719  |
| P04462        | EELEKMK                                                | 0.866839663        | 1              | 1.909279  |
| P04462        | EIAGATPYITAAEEK                                        | 1.074088974        | 2              | 2.761628  |
| P04462        | EKMNKPELFNGGEKK                                        | 0.905775815        | 2              | 2.353093  |
| P04462        | ELDSITPDITPGWK                                         | 0.805980602        | 2              | 2.581837  |
| P04462        | FDQPKLKPSPDK                                           | 0.914918753        | 2              | 2.301082  |
| P04462        | FFRPHFLQAPGDLTVQEGK                                    | 0.956967957        | 2              | 2.815243  |
| P04462        | FKLINSTNIR                                             | 0.741061577        | 1              | 1.908701  |
| P04462        | GIEQAVQSHAVAEPEAR                                      | 0.943952153        | 2              | 4.835969  |
| P04462        | GNIYSLNEGYAK                                           | 0.970721687        | 2              | 4.136878  |
| P04462        | GVYSEETLR                                              | 0.862872142        | 2              | 2.316339  |
| P04462        | HLQTYGEHYPLDHFVK                                       | 0.674523262        | 3              | 3.563968  |
| P04462        | HVIHTVGPIAVGQPTASQAAELR                                | 0.739873931        | 3              | 4.171026  |
| P04462        | IEEMEKMLK+Oxidation(3)                                 | 0.673962983        |                | 1.983708  |
| P04462        | IGHHSTSDSSAYR                                          | 1.051037794        | 3              | 4.201075  |
| P04462        | KAMQEINYGSPDNSIKLVR                                    | 1.04716337         | 2              | 2.506249  |
| P04462        | KGNIYSLNEGYAK                                          | 1.110916279        | 2              | 4.005682  |
| P04462        | KLQHELEEAER                                            | 0.729169944        | 3              | 4.042257  |
| P04462        | KVSDLDVIMSHLK                                          | 0.933117125        | 2              | 2.613068  |
| P04462        | LEFIQPNVISGIPIYR                                       | 0.839223448        | 2              | 2.609355  |

|               |                                                                     |                    |                |           |
|---------------|---------------------------------------------------------------------|--------------------|----------------|-----------|
| P04462        | LGDAVEQGVINNSVLGYFIGR                                               | 0.785570455        | 2              | 3.638799  |
| P04462        | LKLVMNFIYQTK                                                        | 1.029904788        | 2              | 2.42867   |
| P04462        | LNNIYQNNLTK                                                         | 0.645088684        | 2              | 3.044884  |
| P04462        | LQHELEEAER                                                          | 0.599819255        | 2              | 3.572844  |
| P04462        | MNLQDELDELK                                                         | 0.689111308        | 2              | 2.550207  |
| P04462        | MNLQDELDELK+Oxidation(0)                                            | 0.914669931        | 2              | 2.535447  |
| P04462        | NNGYAISTPTSEQYR                                                     | 0.683778182        | 2              | 3.766916  |
| P04462        | QGQIINPSEDPHLPQEEVLK                                                | 0.479717828        | 2              | 2.555086  |
| P04462        | QRAEQETKLIK                                                         | 0.825473493        | 1              | 1.933957  |
| P04462        | QTITAQNAAVQAVK                                                      | 0.855519646        | 2              | 4.554351  |
| P04462        | QYLLNQGWWDDEEQEK                                                    | 0.61583425         | 2              | 3.395736  |
| P04462        | RAALQAEIEELR                                                        | 0.564380789        | 2              | 3.884     |
| P04462        | SEIQAEQDR                                                           | 0.998694949        | 2              | 2.81657   |
| P04462        | SLEDALNQTATVTR                                                      | 0.893258256        | 2              | 3.768177  |
| P04462        | SSLLAKSPSK                                                          | 1.144638373        | 2              | 2.352131  |
| P04462        | SVDEVNYWDK                                                          | 0.757772093        | 2              | 2.535414  |
| P04462        | TNTGEDGQYFLK                                                        | 0.690002291        | 2              | 2.316733  |
| P04462        | TSSAEMPTIPLGSAVEAIR                                                 | 1.013083138        | 2              | 2.764965  |
| P04462        | TVNVVQFEPNK                                                         | 0.792271298        | 2              | 2.378318  |
| P04462        | VDDSSGSIGR                                                          | 1.24491141         | 2              | 2.670649  |
| P04462        | VDGNDVFAVYNATK                                                      | 0.807079283        | 2              | 2.333353  |
| P04462        | VMEAFEQAER                                                          | 0.634328737        | 2              | 3.053269  |
| P04462        | VSCSDNEFTQALTAIIPPELTR                                              | 1.087099285        | 2              | 2.707381  |
| P04462        | VVSQYHELVVQAR                                                       | 1.000793416        | 2              | 3.398304  |
| P04462        | YNENHQHGK                                                           | 0.84284156         | 1              | 1.944025  |
| P04462        | YSTSSSGVTAGK                                                        | 0.453937595        | 2              | 2.864262  |
| <b>P04466</b> | <b>MLRS Myosin regulatory light chain 2_skeletal muscle isoform</b> | <b>1.053022009</b> | <b>0.89888</b> | <b>7</b>  |
| P04466        | AAAEGSSNVFSMFDQTQIQEFK                                              | 1.092332063        | 2              | 4.804173  |
| P04466        | GADPEDVITGAFK                                                       | 0.821298549        | 2              | 4.064617  |
| P04466        | KQFLELLTTQCDR                                                       | 0.502078077        | 2              | 3.56261   |
| P04466        | LKGADPEDVITGAFK                                                     | 0.703875469        | 2              | 2.970653  |
| P04466        | NEELDAMMK                                                           | 0.539438396        | 1              | 1.962136  |
| P04466        | NICYVITHGDAK                                                        | 0.840230134        | 2              | 2.748763  |
| P04466        | QFLELLTTQCDR                                                        | 0.634319775        | 2              | 3.344339  |
| <b>P04550</b> | <b>PTMS Parathyrosin</b>                                            | <b>1.03695269</b>  | <b>1</b>       | <b>4</b>  |
| P04550        | RTAEEDEADPKR                                                        | 0.984904178        | 3              | 4.261044  |
| P04550        | SVEAAAELSAK                                                         | 0.970313926        | 2              | 3.703344  |
| P04550        | TAEDEADPK                                                           | 0.984558175        | 2              | 3.671567  |
| P04550        | TAEDEADPKR                                                          | 0.856604282        | 2              | 3.693547  |
| <b>P04636</b> | <b>MDHM Malate dehydrogenase_mitochondrial</b>                      | <b>0.884897843</b> | <b>9.9E-20</b> | <b>18</b> |
| P04636        | AGAGSATLSMAYAGAR                                                    | 1.181148142        | 2              | 4.690838  |
| P04636        | AGAGSATLSMAYAGAR+Oxidation(9)                                       | 1.044787635        | 2              | 3.679585  |

|               |                                             |                    |                |           |
|---------------|---------------------------------------------|--------------------|----------------|-----------|
| P04636        | ANTFVAELK                                   | 1.029337774        | 2              | 2.644075  |
| P04636        | EGVIECSFVQSK                                | 0.90749781         | 2              | 3.213264  |
| P04636        | ETECTYFSTPLLLGK                             | 1.496530241        | 2              | 4.086312  |
| P04636        | FVFSLVDAMNGK                                | 0.97856923         | 2              | 4.395347  |
| P04636        | GCDVVVIPAGVPR                               | 0.892739582        | 2              | 4.376228  |
| P04636        | GYLGPEQLPDCLK                               | 0.889687542        | 2              | 4.118331  |
| P04636        | IFGVTTLDIVR                                 | 1.086434688        | 2              | 3.698292  |
| P04636        | IQEAGTEVVK                                  | 0.864880419        | 2              | 2.962223  |
| P04636        | ITPFEEK                                     | 0.978039834        | 1              | 2.038932  |
| P04636        | LTLYDIAHTPGVAADLSHIETR                      | 1.034821477        | 3              | 6.652123  |
| P04636        | MIAEAIPELK                                  | 1.198884332        | 2              | 2.721385  |
| P04636        | MIAEAIPELK+Oxidation(0)                     | 0.808071867        | 2              | 2.922395  |
| P04636        | TIIP LISQCTPK                               | 1.398930901        | 2              | 3.304041  |
| P04636        | VAVLGASGGIGQPLSLLK                          | 1.748381648        | 2              | 6.152614  |
| P04636        | VDFPQDQLATLTGR                              | 0.874120178        | 2              | 4.605517  |
| P04636        | VNVPVIGGHAGK                                | 0.777314245        | 1              | 2.294416  |
| <b>P04639</b> | <b>APOA1 Apolipoprotein A_I</b>             | <b>1.047103893</b> | <b>0.22825</b> | <b>6</b>  |
| P04639        | AKPALDDLQGLMPVLEAWK                         | 0.91121377         | 2              | 3.665092  |
| P04639        | LQEQLGPVTQEFWANLEK                          | 1.462182492        | 2              | 4.550619  |
| P04639        | MRVNADALR+Oxidation(0)                      | 0.890618297        | 2              | 2.52142   |
| P04639        | NEMNKDLENVK                                 | 1.146439763        | 2              | 3.238451  |
| P04639        | QLNLNLLDNWDTLGSTVGR                         | 1.260618152        | 2              | 3.695431  |
| P04639        | WNEEVEAYR                                   | 1.359445283        | 2              | 2.794666  |
| <b>P04642</b> | <b>LDHA L_lactate dehydrogenase A chain</b> | <b>1.738830371</b> | <b>9.9E-20</b> | <b>16</b> |
| P04642        | DLADELALVDVIEDK                             | 1.138365324        | 2              | 5.270331  |
| P04642        | DLADELALVDVIEDKLK                           | 1.114931184        | 2              | 3.357955  |
| P04642        | DQLIVNLLK                                   | 1.143129921        | 2              | 3.083397  |
| P04642        | DQLIVNLLKEEQVPQNK                           | 1.426737138        | 2              | 4.861084  |
| P04642        | EDVFLSVPCILGQNGISDVVK                       | 1.298473276        | 2              | 4.757306  |
| P04642        | FIIPNVVK                                    | 1.159069511        | 2              | 2.441001  |
| P04642        | GEMMDLQHGSFLK                               | 1.978859596        | 2              | 3.295779  |
| P04642        | GEMMDLQHGSFLK+Oxidation(2)                  | 1.360785372        | 2              | 2.317598  |
| P04642        | KSADTLWGIQK                                 | 1.504432402        | 2              | 3.08222   |
| P04642        | NVNIFK                                      | 1.153392009        | 1              | 2.200892  |
| P04642        | QVVD SAYEVIK                                | 1.117555621        | 2              | 3.276128  |
| P04642        | RVHP ISTMIK+Oxidation(7)                    | 1.170424165        | 2              | 2.574553  |
| P04642        | SADTLWGIQK                                  | 1.134856799        | 2              | 3.829739  |
| P04642        | SLNPQLGTDADK                                | 1.281169327        | 2              | 2.530431  |
| P04642        | SLNPQLGTDADKEQWK                            | 1.080452779        | 2              | 4.835642  |
| P04642        | VTLTPDEEAR                                  | 1.087756176        | 2              | 2.876729  |
| <b>P04644</b> | <b>RS17 40S ribosomal protein S17</b>       | <b>1.055945665</b> | <b>0.00016</b> | <b>2</b>  |
| P04644        | LLDFGSLSNLQVTQPTVGMNFK                      | 0.767225145        | 2              | 3.691715  |
| P04644        | VCEEIAIPSK                                  | 1.057089498        | 2              | 2.94859   |

|               |                                            |                    |                |           |
|---------------|--------------------------------------------|--------------------|----------------|-----------|
| <b>P04692</b> | <b>TPM1 Tropomyosin alpha_1 chain</b>      | <b>0.98786497</b>  | <b>0.50384</b> | <b>9</b>  |
| P04692        | AISELDHALNDMTSI                            | 0.843235461        | 2              | 2.978607  |
| P04692        | GTEDELDKYSEALK                             | 0.683254715        | 2              | 3.734473  |
| P04692        | KLVIIESDLER                                | 0.756934434        | 2              | 3.125696  |
| P04692        | LDKENALDR                                  | 0.562523675        | 1              | 2.07886   |
| P04692        | LKGTEDELDK                                 | 0.750010256        | 2              | 2.760479  |
| P04692        | LVIIIESDLER                                | 0.765555523        | 2              | 2.661328  |
| P04692        | MEIQEIQLK                                  | 1.143859348        | 2              | 3.095226  |
| P04692        | QLEDELVSLQK                                | 0.700938924        | 2              | 2.815211  |
| P04692        | SIDDELELYAQK                               | 0.621143127        | 2              | 4.125755  |
| <b>P04694</b> | <b>ATTY Tyrosine aminotransferase</b>      | <b>1.047281926</b> | <b>0.46216</b> | <b>2</b>  |
| <b>P04762</b> | <b>CATA Catalase</b>                       | <b>0.811494756</b> | <b>9.9E-20</b> | <b>30</b> |
| P04762        | APQKPDVLTGGGNPIGDK                         | 30.92664287        | 2              | 4.500637  |
| P04762        | DAMLFPSFIHSQK+Oxidation(2)                 | 0.758601345        | 2              | 2.73084   |
| P04762        | DAQLFIQR                                   | 0.727285186        | 2              | 2.999761  |
| P04762        | DGPMCMHDNQGGAPNYYPNSFSAPEQQGSALEHHSQCSADVK | 0.921671881        | 4              | 4.963597  |
| P04762        | DPASDQMK                                   | 1.026844423        | 1              | 2.033577  |
| P04762        | DPASDQMK+Oxidation(6)                      | 1.590644317        | 2              | 2.498649  |
| P04762        | DYPLIPVGK                                  | 0.593615947        | 1              | 2.220763  |
| P04762        | EAETFPFNPFDLTK                             | 0.684512604        | 2              | 4.295611  |
| P04762        | FNSANEDNVTQVR                              | 0.742580627        | 2              | 4.709685  |
| P04762        | FSTVAGESGSADTVR                            | 0.707773768        | 2              | 5.172873  |
| P04762        | FSTVAGESGSADTVRDP                          | 0.709458608        | 2              | 2.387699  |
| P04762        | FYTEDGNWDLVGNNTPIFFIR                      | 1.023379226        | 3              | 5.883046  |
| P04762        | GAGAFGYFEVTHDITR                           | 0.77276061         | 2              | 4.966301  |
| P04762        | GPLLQDQVFTDEMAHFDR                         | 1.67703876         | 2              | 5.740359  |
| P04762        | HMNGYGSHTFK                                | 0.732834207        | 3              | 4.35929   |
| P04762        | HMNGYGSHTFK+Oxidation(1)                   | 0.549764131        | 3              | 3.371254  |
| P04762        | LCENIANHLK                                 | 0.75373725         | 3              | 3.715064  |
| P04762        | LFAYPDTHR                                  | 0.770494094        | 2              | 2.90744   |
| P04762        | LGPNYLQIPVNCYPYR                           | 0.793253087        | 2              | 4.220779  |
| P04762        | LNIMTAGPR                                  | 0.770434814        | 2              | 3.082374  |
| P04762        | LNIMTAGPR+Oxidation(3)                     | 0.970178631        | 2              | 2.343095  |
| P04762        | LVNANGEAVYCK                               | 0.881894154        | 2              | 3.710603  |
| P04762        | NAIHTYVQAGSHIAAK                           | 0.751329974        | 3              | 5.575508  |
| P04762        | NFTDVHPDYGAR                               | 0.689618322        | 2              | 3.966133  |
| P04762        | NLPVEEAGR                                  | 0.62882095         | 1              | 2.260276  |
| P04762        | NPANYFAEVEQMAFDPSNMPPGIEPSPDK              | 0.913106764        | 3              | 5.153251  |
| P04762        | RFNSANEDNVTQVR                             | 0.70333201         | 2              | 4.574307  |
| P04762        | VFEHIGK                                    | 0.721446639        | 2              | 2.337086  |
| P04762        | VQALLDQYNSQPKP                             | 0.726395063        | 2              | 4.945196  |
| P04762        | VWPHKDYPLIPVGK                             | 0.678879681        | 2              | 3.707886  |

|               |                                                     |                    |                |           |
|---------------|-----------------------------------------------------|--------------------|----------------|-----------|
| <b>P04764</b> | <b>ENOA Alpha_enolase</b>                           | <b>1.11866896</b>  | <b>9.9E-20</b> | <b>14</b> |
| P04764        | AGYTDQVVIGMDVAASEFYR                                | 1.088782593        | 2              | 4.92137   |
| P04764        | DATNVGDEGGFAPNILENK                                 | 1.153535459        | 2              | 5.932173  |
| P04764        | FTATAGIQVVGDDLTVTNPK                                | 1.222445811        | 2              | 4.792741  |
| P04764        | GNPTVEVDLYTAK                                       | 1.261354471        | 2              | 3.732408  |
| P04764        | HIADLAGNPEVILPVPAFNVINGGSHAGNK                      | 1.093200279        | 3              | 6.473549  |
| P04764        | IDQLMIEMDGTENK                                      | 1.051719166        | 2              | 4.08548   |
| P04764        | IEEELGSK                                            | 1.029679477        | 2              | 2.498997  |
| P04764        | IGAEVYHNLK                                          | 2.275045082        | 2              | 3.091447  |
| P04764        | KLNVVEQEKIDQLMIEMDGTENK                             | 1.010558882        | 3              | 4.750028  |
| P04764        | LNVVEQEK                                            | 1.030216903        | 2              | 2.373953  |
| P04764        | LNVVEQEKIDQLMIEMDGTENK                              | 1.105955533        | 3              | 4.531311  |
| P04764        | SCNCLLLK                                            | 1.215563068        | 2              | 2.7912    |
| P04764        | VNQIGSVTESLQACK                                     | 1.01769791         | 2              | 5.138294  |
| P04764        | YITPDQLADLYK                                        | 1.017283718        | 2              | 3.458865  |
| <b>P04785</b> | <b>PDIA1 Protein disulfide_isomerase</b>            | <b>1.031297744</b> | <b>0.00024</b> | <b>24</b> |
| P04785        | DHENIVIAK                                           | 0.884523512        | 2              | 2.903607  |
| P04785        | EADDIVNWLK                                          | 0.899823926        | 2              | 2.550138  |
| P04785        | HNQLPLVIEFTEQTAPK                                   | 1.030928082        | 2              | 5.355382  |
| P04785        | IKPHLMSQELPEDWDKQPVK                                | 1.567062767        | 3              | 4.098238  |
| P04785        | IKPHLMSQELPEDWDKQPVK+Oxidation(5)                   | 0.943913868        | 3              | 3.511862  |
| P04785        | ILEFFGLK                                            | 1.237755034        | 2              | 2.808483  |
| P04785        | LGETYKDHENIVIAK                                     | 0.955760102        | 3              | 4.901206  |
| P04785        | LITLEEEMTK                                          | 1.071318134        | 2              | 3.55391   |
| P04785        | LITLEEEMTK+Oxidation(7)                             | 0.888468543        | 2              | 2.555605  |
| P04785        | LKAEGSEIR                                           | 0.952413981        | 1              | 2.029341  |
| P04785        | LLDFIK                                              | 1.039243018        | 2              | 2.318328  |
| P04785        | MDSTANEVEAVK                                        | 0.927280809        | 2              | 4.130782  |
| P04785        | MDSTANEVEAVK+Oxidation(0)                           | 0.924703265        | 2              | 3.793992  |
| P04785        | NFEEVAFDEK                                          | 0.897847875        | 2              | 3.011442  |
| P04785        | NFEEVAFDEKK                                         | 1.048302532        | 2              | 3.836338  |
| P04785        | NNFEGEITK                                           | 0.914561368        | 2              | 2.541124  |
| P04785        | QFLAAEAVDDIPFGITNSDVFVK                             | 1.057685171        | 3              | 6.620689  |
| P04785        | SVSDYDGK                                            | 2.136513688        | 1              | 1.901072  |
| P04785        | TGPAATTLSDTAAAESLVDSSEVTVIGFFK                      | 1.067441886        | 3              | 6.359739  |
| P04785        | THILLFLPK                                           | 1.174996003        | 2              | 2.655397  |
| P04785        | TVIDYNGER                                           | 0.971994337        | 2              | 2.639384  |
| P04785        | VDATEESDLAQQYGVR                                    | 0.922011935        | 2              | 5.721469  |
| P04785        | YKPESDELTAEK                                        | 0.930909717        | 3              | 3.935783  |
| P04785        | YQLDKDGVVLFK                                        | 1.045004059        | 2              | 3.979755  |
| <b>P04797</b> | <b>G3P Glyceraldehyde_3_phosphate dehydrogenase</b> | <b>1.283494586</b> | <b>9.9E-20</b> | <b>16</b> |
| P04797        | GAAQNIIPASTGAAK                                     | 1.349641359        | 2              | 3.97963   |

|               |                                                |                    |                |           |
|---------------|------------------------------------------------|--------------------|----------------|-----------|
| P04797        | GILGYTEDQVVSCDFNSNSHSSTFDAGAGIALNDNFVK         | 1.066476777        | 3              | 3.961292  |
| P04797        | IVSNASCTTNCLAPLAK                              | 1.143002449        | 2              | 4.76052   |
| P04797        | LISWYDNEYGYSNR                                 | 1.791217827        | 2              | 4.002328  |
| P04797        | LVINGKPITIFQER                                 | 1.639816122        | 3              | 4.524602  |
| P04797        | RVIISAPSADAPMFVMGVNHEK                         | 1.501148121        | 3              | 5.016223  |
| P04797        | RVIISAPSADAPMFVMGVNHEK+Oxidation(12)           | 1.051330916        | 3              | 3.334367  |
| P04797        | VGVNGFGR                                       | 1.212369444        | 2              | 2.555681  |
| P04797        | VIHDNFGIVEGLMTTVHAITATQK                       | 1.230837356        | 3              | 7.995553  |
| P04797        | VIHDNFGIVEGLMTTVHAITATQK+Oxidation(12)         | 1.010638385        | 3              | 5.515219  |
| P04797        | VIISAPSADAPMFVMGVNHEK                          | 1.461405249        | 2              | 4.440995  |
| P04797        | VIISAPSADAPMFVMGVNHEK+Oxidation(11)            | 1.032862459        | 2              | 3.773929  |
| P04797        | VIISAPSADAPMFVMGVNHEK+Oxidation(14)            | 1.032862459        | 2              | 3.58297   |
| P04797        | VPTPNVSVVDLTCR                                 | 5.817299599        | 2              | 3.134006  |
| P04797        | VVDLMAYMASK                                    | 1.943688268        | 2              | 3.149484  |
| P04797        | WGDAGAEYVVESTGVFTTMEK                          | 1.278745757        | 2              | 5.464219  |
| <b>P04799</b> | <b>CP1A2 Cytochrome P450 1A2</b>               | <b>0.841863737</b> | <b>9.9E-20</b> | <b>4</b>  |
| P04799        | DFVENVTSGNAVDFFPVLR                            | 1.013034002        | 2              | 3.114676  |
| P04799        | NSIQDITGALFK                                   | 0.676857005        | 2              | 3.349116  |
| P04799        | TVQEHYQDFNK                                    | 0.724737236        | 2              | 3.145325  |
| P04799        | VDLTPSYGLTMKPR                                 | 1.010801055        | 2              | 2.696079  |
| <b>P04903</b> | <b>GSTA2 Glutathione S transferase alpha_2</b> | <b>0.642969792</b> | <b>9.9E-20</b> | <b>11</b> |
| P04903        | DGNLMFDQVPMVEIDGMK                             | 0.538303746        | 2              | 4.69398   |
| P04903        | DGNLMFDQVPMVEIDGMK+Oxidation(10)               | 0.591953855        | 2              | 4.149191  |
| P04903        | DGNLMFDQVPMVEIDGMK+Oxidation(10)               | 0.629937186        |                | 3.267055  |
| P04903        | DGNLMFDQVPMVEIDGMK+Oxidation(16)               | 0.602257238        | 2              | 3.539623  |
| P04903        | DGNLMFDQVPMVEIDGMK+Oxidation(4)                | 0.586148819        | 2              | 4.345055  |
| P04903        | DGNLMFDQVPMVEIDGMK+Oxidation(4)                | 0.617556401        |                | 2.386288  |
| P04903        | DGNLMFDQVPMVEIDGMK+Oxidation(4)                | 0.62511169         |                | 3.067009  |
| P04903        | KDGNLMFDQVPMVEIDGMK                            | 0.811801309        | 2              | 4.007364  |
| P04903        | LIQSPEDLEK                                     | 0.521880394        | 2              | 2.834623  |
| P04903        | WLLAAAGVEFEEK                                  | 0.604339877        | 2              | 3.453865  |
| P04903        | YLPAFEK                                        | 0.600284819        | 1              | 1.992623  |
| <b>P04904</b> | <b>GSTA3 Glutathione S transferase alpha_3</b> | <b>0.860261129</b> | <b>9.9E-20</b> | <b>8</b>  |
| P04904        | ALIDMYAEGVADLDEIVLHYPYIPPGKE+Oxidation(4)      | 1.01395715         | 3              | 4.012702  |
| P04904        | NDGSLMFQQVPMVEIDGMK                            | 0.913292584        | 2              | 4.790801  |
| P04904        | NDGSLMFQQVPMVEIDGMK+Oxidation(11)              | 0.915451074        | 2              | 4.203456  |
| P04904        | NDGSLMFQQVPMVEIDGMK+Oxidation(11)              | 1.034820441        |                | 2.30344   |
| P04904        | NDGSLMFQQVPMVEIDGMK+Oxidation(17)              | 0.9426707          | 2              | 3.563113  |
| P04904        | NDGSLMFQQVPMVEIDGMK+Oxidation(5)               | 0.900421155        | 2              | 4.342117  |
| P04904        | SHGQDYLVGNR                                    | 0.658753285        | 2              | 4.152242  |
| P04904        | WLLAAAGVEFEEQFLK                               | 0.859732668        | 2              | 5.496327  |
| <b>P04905</b> | <b>GSTM1 Glutathione S transferase Mu 1</b>    | <b>0.911036416</b> | <b>9.9E-20</b> | <b>15</b> |
| P04905        | ADIVENQVMDNR                                   | 0.769756663        | 2              | 4.201423  |



|               |                                               |                    |                |           |
|---------------|-----------------------------------------------|--------------------|----------------|-----------|
| P04905        | ADIVENQVMDNR+Oxidation(8)                     | 0.691402371        | 2              | 3.801505  |
| P04905        | CLDAFPNLKDFLAR                                | 1.007894266        | 2              | 3.252597  |
| P04905        | FKLGLDFPNLPYLIDGSR                            | 1.295068519        | 3              | 4.251013  |
| P04905        | HHLCGETEEER                                   | 0.748361826        | 3              | 4.251129  |
| P04905        | IRADIVENQVMDNR                                | 0.935327248        | 2              | 3.830147  |
| P04905        | ITQSNAIMR                                     | 0.729820081        | 2              | 3.029274  |
| P04905        | ITQSNAIMR+Oxidation(7)                        | 0.832005821        | 2              | 2.791954  |
| P04905        | KHHLCGETEEER                                  | 0.887662307        | 3              | 3.393924  |
| P04905        | KITQSNAIMR                                    | 0.573925942        | 3              | 3.394994  |
| P04905        | KITQSNAIMR+Oxidation(8)                       | 0.767448869        | 3              | 3.426098  |
| P04905        | LGLDFPNLPYLIDGSR                              | 0.874547497        | 2              | 5.021028  |
| P04905        | MQLIMLCYNPDFEK                                | 1.408877829        | 2              | 3.943282  |
| P04905        | VTYVDFLAYDILDQYHIFEPK                         | 1.010280102        | 2              | 2.358567  |
| P04905        | YLSTPIFSK                                     | 0.872855131        | 2              | 2.659886  |
| <b>P05065</b> | <b>ALDOA Fructose_bisphosphate aldolase A</b> | <b>0.747309836</b> | <b>9.6E-05</b> | <b>7</b>  |
| P05065        | ALANSLACQGK                                   | 0.601709546        | 2              | 2.804791  |
| P05065        | FSNEEIAMATVTALR                               | 0.587772671        | 2              | 4.306746  |
| P05065        | GILAADESTGSIK                                 | 0.595050137        | 2              | 3.769952  |
| P05065        | GVVPLAGTNGETTTQGLDGLSER                       | 0.805234403        | 2              | 5.347676  |
| P05065        | IGEHTPSSLAIMENANVLAR                          | 0.355551365        | 2              | 4.546356  |
| P05065        | LQSIGTENTEENR                                 | 0.699181782        | 2              | 3.644312  |
| P05065        | RLQSIGTENTEENRR                               | 0.596967819        | 3              | 3.420047  |
| <b>P05178</b> | <b>CP2C6 Cytochrome P450 2C6</b>              | <b>0.544653602</b> | <b>9.9E-20</b> | <b>6</b>  |
| P05178        | EALIDHGEEFAER                                 | 0.51768954         | 2              | 3.191398  |
| P05178        | FFPDPEIFDPGHFLDGNKG                           | 0.564805973        | 2              | 2.531093  |
| P05178        | FDYKDQDFLNLMEK                                | 0.656937497        | 3              | 3.583379  |
| P05178        | FIDLIPTNLPHAVTCDIK                            | 0.512389119        | 2              | 3.144115  |
| P05178        | GTTIITSLSSVLHDSK                              | 0.562899855        | 2              | 3.326177  |
| P05178        | NITQSLTFSK                                    | 0.477102496        | 2              | 2.71881   |
| <b>P05179</b> | <b>CP2C7 Cytochrome P450 2C7</b>              | <b>2.824244557</b> | <b>9.9E-20</b> | <b>6</b>  |
| P05179        | ACVGEGLAR                                     | 2.052748365        | 2              | 2.916955  |
| P05179        | FINFVPTNLPHAVTCDIK                            | 2.885770796        | 2              | 2.735643  |
| P05179        | IEEHQESLDVTNPR                                | 2.754793235        | 2              | 4.59598   |
| P05179        | KIEEHQESLDVTNPR                               | 2.735669132        | 2              | 4.981664  |
| P05179        | KLPPGPTPLPIIGNFLQIDVK                         | 1.111371182        | 3              | 4.914122  |
| P05179        | VLTSLSVLHDSK                                  | 3.263563543        | 2              | 2.95063   |
| <b>P05182</b> | <b>CP2E1 Cytochrome P450 2E1</b>              | <b>0.598010147</b> | <b>9.9E-20</b> | <b>12</b> |
| P05182        | AKEHLQSLDINCAR                                | 0.517211498        | 2              | 4.361197  |
| P05182        | DIDLSPVTVGFGSIPPQFK                           | 0.457932877        | 2              | 3.000239  |
| P05182        | DRLDMPYMDAVVHEIQR                             | 0.660158287        | 3              | 4.822714  |
| P05182        | DVTDCLLIEMEKEK                                | 0.824054802        | 2              | 3.072663  |
| P05182        | EHLQSLDINCAR                                  | 0.685965596        | 2              | 3.079947  |
| P05182        | FINLVPSNLPHEATR                               | 0.519703015        | 2              | 3.792022  |

|               |                                  |                    |                |           |
|---------------|----------------------------------|--------------------|----------------|-----------|
| P05182        | FKPEHFLNENGK                     | 0.580269932        | 2              | 2.82957   |
| P05182        | GTVVIPTLDSLLYDSHEFPDPEK          | 0.532126642        | 2              | 4.595514  |
| P05182        | LHEEIDR                          | 0.392279836        | 1              | 1.968576  |
| P05182        | VCVGEGLAR                        | 0.452221655        | 2              | 2.654427  |
| P05182        | YGLLILMK                         | 0.420585845        | 2              | 2.891523  |
| P05182        | YSDYFK                           | 0.448789445        | 1              | 1.909776  |
| <b>P05183</b> | <b>CP3A2 Cytochrome P450 3A2</b> | <b>0.533911268</b> | <b>9.9E-20</b> | <b>10</b> |
| P05183        | AVSVAKDEEWK                      | 0.608714015        | 2              | 2.533993  |
| P05183        | DIELDGLFIPK                      | 0.435890165        | 2              | 3.211535  |
| P05183        | EMFPIIEQYGDLVK                   | 0.514712983        | 2              | 3.840974  |
| P05183        | KDIELDGLFIPK                     | 0.43613064         | 3              | 3.319833  |
| P05183        | KLQEEIDGALPSK                    | 0.519450967        | 2              | 2.332375  |
| P05183        | LQEEIDGALPSK                     | 0.557902977        | 2              | 3.616447  |
| P05183        | QAILEPEKPIVLK                    | 0.732364003        | 2              | 2.707572  |
| P05183        | QEAETGKPVMTK                     | 0.427091697        | 2              | 3.488245  |
| P05183        | QEAETGKPVMTK+Oxidation(10)       | 0.439759709        | 2              | 3.038292  |
| P05183        | VDFLQLMLNAHNNSK                  | 0.799218755        | 2              | 3.272521  |
| <b>P05197</b> | <b>EF2 Elongation factor 2</b>   | <b>1.181017857</b> | <b>9.9E-20</b> | <b>26</b> |
| P05197        | ALLELQLEPEELYQTFQR               | 1.475803388        | 3              | 5.219496  |
| P05197        | ARPPFDGLAEDIDKGEVSAR             | 1.199279842        | 3              | 6.457891  |
| P05197        | AYLPVNESFGFTADLR                 | 1.224149081        | 2              | 3.797352  |
| P05197        | CELLYEGPPDDEAAMGIK               | 1.111659541        | 2              | 3.331444  |
| P05197        | DLEEDHACIPIK                     | 0.887747727        | 2              | 3.394294  |
| P05197        | DLEEDHACIPIKK                    | 0.799878846        | 2              | 3.232989  |
| P05197        | EGIPALDNFLDK                     | 0.674034834        | 2              | 2.579429  |
| P05197        | EGIPALDNFLDKL                    | 1.267475388        | 2              | 3.762114  |
| P05197        | ETVSEESNVLCLSK                   | 1.255107384        | 2              | 3.945892  |
| P05197        | GEGQLGAAER                       | 1.105179176        | 2              | 3.248317  |
| P05197        | GHVFEESQVAGTPMFVVK               | 2.142594001        | 2              | 5.28469   |
| P05197        | IWCFGPDGTGPNILTDITK              | 0.882355083        | 2              | 4.981177  |
| P05197        | KEDLYLKPIQR                      | 1.592028271        | 2              | 3.118764  |
| P05197        | KIWCFGPDGTGPNILTDITK             | 1.068796761        | 2              | 4.651132  |
| P05197        | KVEDMMK+Oxidation(4)             | 1.317965085        | 2              | 2.319535  |
| P05197        | KVEDMMK+Oxidation(5)             | 1.152040043        | 2              | 2.499585  |
| P05197        | LDSEDKDKEGKPLLK                  | 1.084825987        | 2              | 3.408827  |
| P05197        | NMSVIAHVDHGK                     | 0.996089008        | 2              | 3.170857  |
| P05197        | NMSVIAHVDHGK+Oxidation(1)        | 1.030900357        | 2              | 3.329734  |
| P05197        | STLTDSLCK                        | 1.032734731        | 2              | 2.880196  |
| P05197        | TFCQLLDPIFK                      | 1.137086335        | 2              | 3.962596  |
| P05197        | VFSGVVSTGLK                      | 1.127397681        | 2              | 2.428678  |
| P05197        | WLPAGDALLQMITIHLPSVTAQK          | 1.046604448        | 2              | 4.039077  |
| P05197        | YEWVVAEAR                        | 1.077315859        | 2              | 3.001606  |
| P05197        | YFDPANGK                         | 1.119270826        | 1              | 1.93718   |

|               |                                                   |                    |                |           |
|---------------|---------------------------------------------------|--------------------|----------------|-----------|
| P05197        | YVEPIEDVPCGNIVGLVGDQFLVK                          | 1.392172173        | 2              | 4.512369  |
| <b>P05369</b> | <b>FPPS Farnesyl pyrophosphate synthase</b>       | <b>1.177196647</b> | <b>9.9E-20</b> | <b>11</b> |
| P05369        | ALYEELDLR                                         | 0.56621436         | 2              | 2.807233  |
| P05369        | EVLEYNTVGGK                                       | 0.424256128        | 2              | 2.821494  |
| P05369        | GLTVVQTFQELVEPR                                   | 0.539610186        | 2              | 3.816673  |
| P05369        | IKEVLEYNTVGGK                                     | 0.42206665         | 3              | 4.128438  |
| P05369        | QILEENYGQK                                        | 0.477552057        | 2              | 2.325033  |
| P05369        | QILEENYGQKDPEK                                    | 0.711251449        | 2              | 3.887293  |
| P05369        | QNFQHFQIVK                                        | 1.627852277        | 2              | 2.615097  |
| P05369        | SLIEQCSAPLPPSIFLELANK                             | 0.489093382        | 3              | 5.140446  |
| P05369        | VGTDIQDNK                                         | 0.51529892         | 2              | 3.74066   |
| P05369        | VLTEDELGHPEK                                      | 0.434602455        | 2              | 2.650776  |
| P05369        | VLTEDELGHPEKGDATR                                 | 0.445585199        | 2              | 4.682343  |
| <b>P05426</b> | <b>RL7 60S ribosomal protein L7</b>               | <b>1.139700261</b> | <b>1.8E-08</b> | <b>5</b>  |
| P05426        | AGNFYVPAEPK                                       | 1.193591039        | 2              | 2.710742  |
| P05426        | FGIICMEDLIHEIYTVGK                                | 1.195564818        | 2              | 4.472468  |
| P05426        | KKVPAVPETLK                                       | 0.916653592        | 2              | 2.852211  |
| P05426        | TTHFVEGGDAGNR                                     | 1.283603481        | 2              | 2.856936  |
| P05426        | TTHFVEGGDAGNREDQINR                               | 1.207342526        | 2              | 4.646428  |
| <b>P05544</b> | <b>SPA3L Serine protease inhibitor A3L</b>        | <b>0.902055218</b> | <b>9.9E-20</b> | <b>5</b>  |
| P05544        | AVLDVDETGTEATAATGVATVIR                           | 2.101472319        | 2              | 4.975397  |
| P05544        | DSTMEEILEGLK                                      | 1.265762862        | 2              | 2.945675  |
| P05544        | IAELFSDLEER                                       | 0.644547697        | 2              | 2.72042   |
| P05544        | MQQVESSLQPETLK                                    | 0.484207681        | 2              | 2.580659  |
| P05544        | VFSQQADLSR                                        | 1.259559276        | 2              | 2.486998  |
| <b>P05545</b> | <b>SPA3K Serine protease inhibitor A3K</b>        | <b>1.696470177</b> | <b>9.9E-20</b> | <b>4</b>  |
| P05545        | ALYQAEAFVADFK                                     | 1.376898718        | 2              | 3.263059  |
| P05545        | AVLDVDETGTEGAAATVTAALK                            | 1.669812655        | 2              | 5.447422  |
| P05545        | FSISTDYNLEEVLPGLGIR                               | 1.736418251        | 2              | 3.139796  |
| P05545        | IAELFSELDER                                       | 2.300012155        | 2              | 3.035587  |
| <b>P05765</b> | <b>RS21 40S ribosomal protein S21</b>             | <b>1.065644726</b> | <b>0.90961</b> | <b>3</b>  |
| P05765        | DHASIQMNVAEVDK                                    | 0.881465814        | 2              | 3.314806  |
| P05765        | MGESDDSLR                                         | 1.09542077         | 2              | 2.979936  |
| P05765        | TYGICGAIR                                         | 0.96450828         | 2              | 3.055099  |
| <b>P06214</b> | <b>HEM2 Delta_aminolevulinic acid dehydratase</b> | <b>0.91912573</b>  | <b>9.9E-20</b> | <b>5</b>  |
| P06214        | AGCQVVAPSDMMDGR                                   | 0.858800029        | 2              | 3.135767  |
| P06214        | DEQGSAAEDSPTIEAVR                                 | 0.724004281        | 2              | 5.837516  |
| P06214        | DIQEGADILMVKPLPYLDMVQEVK                          | 0.74486838         | 3              | 4.646149  |
| P06214        | VPKDEQGSAAEDSPTIEAVR                              | 0.899486573        | 2              | 5.730658  |
| P06214        | YGVNQLEEMLRPLVEAGLR                               | 0.777182253        | 3              | 4.402484  |
| <b>P06302</b> | <b>PTMA Prothymosin alpha</b>                     | <b>0.723596486</b> | <b>0.00017</b> | <b>3</b>  |
| P06302        | RVAEDEDVETTK                                      | 0.715008625        | 2              | 5.029138  |
| P06302        | VAEDEDVETK                                        | 0.791181575        | 2              | 3.484566  |

|               |                                                                   |                    |                |           |
|---------------|-------------------------------------------------------------------|--------------------|----------------|-----------|
| P06302        | VAEDEDDEDDVETKK                                                   | 0.722557984        | 2              | 4.58238   |
| <b>P06399</b> | <b>FIBA Fibrinogen alpha chain</b>                                | <b>0.868894583</b> | <b>0.5093</b>  | <b>6</b>  |
| P06399        | EVVTSDDGSDCGDGMGLTHSFSGR                                          | 0.776383347        | 3              | 3.873089  |
| P06399        | GDFANANNFDNTFGQVSEDLR                                             | 0.925639172        | 2              | 5.696483  |
| P06399        | GDKELLIGNEK                                                       | 0.798606337        | 2              | 2.610721  |
| P06399        | GLIDEANQDFTNR                                                     | 0.992013226        | 2              | 3.149817  |
| P06399        | MADEAASEAHQEGDTR                                                  | 0.619773942        | 2              | 4.165961  |
| P06399        | SQLQEGPPEWK                                                       | 0.804000363        | 2              | 2.814613  |
| <b>P06685</b> | <b>AT1A1 Sodium/potassium_transporting ATPase subunit alpha_1</b> | <b>1.204727729</b> | <b>0.00375</b> | <b>4</b>  |
| P06685        | AVAGDASESALLK                                                     | 1.104633703        | 2              | 3.005242  |
| P06685        | AVFQANQENLPILK                                                    | 1.255187015        | 2              | 3.744137  |
| P06685        | EQPLDEELKDAFQAYLELGGGLGER                                         | 1.079722792        | 3              | 3.598522  |
| P06685        | LNIPVNQVNPR                                                       | 1.0651028          | 2              | 3.032067  |
| <b>P06687</b> | <b>AT1A3 Sodium/potassium_transporting ATPase subunit alpha_3</b> | <b>1.11335881</b>  | <b>0.78208</b> | <b>3</b>  |
| P06687        | DGNALTPPPTTPEVVK                                                  | 1.113742743        | 2              | 2.775795  |
| P06687        | GVGIISEGNETVEDIAAR                                                | 1.045700442        | 2              | 4.460113  |
| P06687        | QGAIVAVTGDGVNDSPALK                                               | 1.02980814         | 2              | 4.809303  |
| <b>P06757</b> | <b>ADH1 Alcohol dehydrogenase 1</b>                               | <b>1.036543024</b> | <b>1.5E-09</b> | <b>16</b> |
| P06757        | AAVLWEPHKPFTIEDIEVAPPK                                            | 1.05384762         | 3              | 5.584548  |
| P06757        | FPLEPLITHVLPFEK                                                   | 1.565695331        | 3              | 4.604165  |
| P06757        | GAIFGGFK                                                          | 1.013452541        | 2              | 2.571701  |
| P06757        | GALLDGTSR                                                         | 1.012389062        | 2              | 2.846235  |
| P06757        | HPESNLCCQTK                                                       | 0.914358604        | 2              | 3.48851   |
| P06757        | IDAAAPLDK                                                         | 0.813340415        | 2              | 2.803414  |
| P06757        | IIAVDINKDK                                                        | 0.855930381        | 2              | 2.82971   |
| P06757        | INEAFDLLR                                                         | 0.879927044        | 2              | 3.66088   |
| P06757        | KFPLEPLITHVLPFEK                                                  | 0.954516423        | 3              | 4.759876  |
| P06757        | KFPLEPLITHVLPFEKINEAFDLLR                                         | 1.511420977        | 4              | 4.651751  |
| P06757        | MVATGVCR                                                          | 0.836270244        | 2              | 2.490382  |
| P06757        | MVATGVCR+Oxidation(0)                                             | 0.750806287        | 2              | 2.364064  |
| P06757        | SDDHAVSGSLFTPLPAVLGHEGAGIVESIGEGVTCVKPGDK                         | 1.011275509        | 4              | 8.223295  |
| P06757        | VCLIGCGFSTGYGSAVQVAK                                              | 0.958127683        | 2              | 6.304361  |
| P06757        | VIPLFSPQCGK                                                       | 0.922307858        | 2              | 2.627984  |
| P06757        | VTPGSTCAVFLGGVGLSVVIGCK                                           | 1.033369563        | 2              | 5.246611  |
| <b>P06761</b> | <b>GRP78 78 kDa glucose_regulated protein</b>                     | <b>0.972407264</b> | <b>9.9E-20</b> | <b>30</b> |
| P06761        | AKFEELNMDLFR                                                      | 1.1789131          | 3              | 4.000876  |
| P06761        | DAGTIAGLNVMR                                                      | 0.864618986        | 2              | 3.539682  |
| P06761        | DAGTIAGLNVMR+Oxidation(10)                                        | 1.241580705        | 2              | 2.876609  |
| P06761        | DNHLLGTFDLTGIPPAPR                                                | 0.97216682         | 2              | 4.745848  |
| P06761        | ELEEIVQPIISK                                                      | 0.93352152         | 2              | 4.292752  |
| P06761        | FEELNMDLFR                                                        | 0.989800578        | 2              | 3.583015  |

|               |                                                                                      |                    |                |           |
|---------------|--------------------------------------------------------------------------------------|--------------------|----------------|-----------|
| P06761        | IEIESFFEGEDFSETLTR                                                                   | 1.124932791        | 2              | 5.094069  |
| P06761        | IEWLESHQDADIEDFK                                                                     | 1.041811572        | 2              | 5.497417  |
| P06761        | IEWLESHQDADIEDFKAK                                                                   | 1.132994657        | 2              | 2.319761  |
| P06761        | IINEPTAAAIYGLDKR                                                                     | 1.24064212         | 2              | 4.230218  |
| P06761        | ITITNDQNR                                                                            | 0.979111784        | 2              | 2.584057  |
| P06761        | ITPSYVAFTPEGER                                                                       | 1.306142682        | 2              | 3.82739   |
| P06761        | KKELEEIVQPIISK                                                                       | 0.96767068         | 2              | 4.576622  |
| P06761        | KSDIDEIVLVGGSTR                                                                      | 1.135538521        | 2              | 4.275836  |
| P06761        | KSQIFSTASDNQPTVTIK                                                                   | 1.168762192        | 2              | 5.160884  |
| P06761        | LTPEEIER                                                                             | 0.970200779        | 1              | 1.921797  |
| P06761        | LYGSGGPPPTGEEDTSEKDEL                                                                | 1.17000003         | 2              | 5.206133  |
| P06761        | MKETAEAYLGK                                                                          | 1.099280589        | 2              | 3.15425   |
| P06761        | MKETAEAYLGK+Oxidation(0)                                                             | 1.055309334        | 2              | 2.718362  |
| P06761        | NELESYAYSLK                                                                          | 1.519753419        | 2              | 3.620304  |
| P06761        | NQLTSNPENTVFDAK                                                                      | 1.048962152        | 2              | 5.224015  |
| P06761        | SDIDEIVLVGGSTR                                                                       | 1.026273203        | 2              | 3.790836  |
| P06761        | SQIFSTASDNQPTVTIK                                                                    | 1.120150817        | 2              | 5.463784  |
| P06761        | TFAPEEISAMVLTK                                                                       | 1.046026339        | 2              | 4.78528   |
| P06761        | TFAPEEISAMVLTK+Oxidation(9)                                                          | 0.789150844        | 2              | 3.497714  |
| P06761        | TKPYIQVDIGGGQTK                                                                      | 1.236156019        | 3              | 4.150956  |
| P06761        | TWNDPSVQQDIK                                                                         | 0.919493604        | 2              | 3.875259  |
| P06761        | VLEDSLK                                                                              | 0.944889493        | 2              | 2.399711  |
| P06761        | VTHAVVTVPAYFNDAQR                                                                    | 1.042409587        | 2              | 4.913645  |
| P06761        | VYGERPLTK                                                                            | 0.936787602        | 2              | 2.983136  |
| <b>P06866</b> | <b>HPT Haptoglobin</b>                                                               | <b>0.97187965</b>  | <b>0.06596</b> | <b>6</b>  |
| P06866        | ATDLKDWVQETMAK                                                                       | 1.185540829        | 2              | 2.794498  |
| P06866        | CELHYEK                                                                              | 1.082562045        | 2              | 2.360535  |
| P06866        | GAVSPGVQPILNK                                                                        | 1.172718551        | 2              | 3.992347  |
| P06866        | LQTEGDGIYTLNSEK                                                                      | 1.308740589        | 2              | 4.313381  |
| P06866        | NQLVEIEK                                                                             | 0.97187782         | 1              | 2.706881  |
| P06866        | SCAVAEYGVYVR                                                                         | 0.65786868         | 2              | 3.060879  |
| <b>P07153</b> | <b>RPN1 Dolichyl_diphosphooligosaccharide__protein glycosyltransferase subunit 1</b> | <b>1.119970359</b> | <b>9.9E-20</b> | <b>10</b> |
| P07153        | ASSFVLALEPELESR                                                                      | 1.151594314        | 2              | 4.230242  |
| P07153        | AVTSEIAVLQSR                                                                         | 1.39021375         | 2              | 3.844038  |
| P07153        | FVDHVFDEQVIDSLTVK                                                                    | 1.057914482        | 2              | 4.620297  |
| P07153        | GEDEEDNNLEVR                                                                         | 1.037533702        | 2              | 3.593437  |
| P07153        | HFDENVNR                                                                             | 0.925143277        | 2              | 2.756773  |
| P07153        | LKTEGSDLCDR                                                                          | 0.996047931        | 3              | 3.332665  |
| P07153        | NIQVDSPYDISR                                                                         | 1.239756464        | 2              | 3.379521  |
| P07153        | NLVEQHIQDIVVHYTFNK                                                                   | 1.442130018        | 3              | 4.884934  |
| P07153        | SEDILDYGPFK                                                                          | 1.081405851        | 2              | 3.437104  |

|               |                                                                  |                    |                |           |
|---------------|------------------------------------------------------------------|--------------------|----------------|-----------|
| P07153        | VTAEVVLAHPPGGSTAR                                                | 1.00064833         | 2              | 4.662031  |
| <b>P07323</b> | <b>ENOG Gamma_enolase</b>                                        | <b>1.152158358</b> | <b>9.9E-20</b> | <b>3</b>  |
| P07323        | AAVPSGASTGIYEALERL                                               | 1.419786985        | 2              | 5.053947  |
| P07323        | GNPTVEVDLHTAK                                                    | 0.560798582        | 2              | 2.768125  |
| P07323        | SGETEDTFIADLVVGLCTGQIK                                           | 1.075075902        | 3              | 4.838418  |
| <b>P07340</b> | <b>AT1B1 Sodium/potassium_transporting ATPase subunit beta_1</b> | <b>1.415631541</b> | <b>0.01681</b> | <b>2</b>  |
| P07340        | SYEAYVLNIIR                                                      | 2.027484508        | 2              | 2.647027  |
| P07340        | VAPPGLTQIPQIQK                                                   | 0.977566039        | 2              | 2.462261  |
| <b>P07379</b> | <b>PCKGC Phosphoenolpyruvate carboxykinase_cytosolic [GTP]</b>   | <b>1.059650215</b> | <b>0.99967</b> | <b>11</b> |
| P07379        | AINPENGGFVAPGTSVK                                                | 0.865115668        | 2              | 3.495231  |
| P07379        | FVEGNAQLCQPEYIHICDGSEEEYGR                                       | 1.045328941        | 3              | 4.411446  |
| P07379        | GLGDVNVEELFGISK                                                  | 1.141158158        | 2              | 3.965836  |
| P07379        | IGIELTDSPLYVVASMR                                                | 1.100160674        | 2              | 3.354997  |
| P07379        | MGTSVLEALGDGEFIK                                                 | 1.06840261         | 2              | 3.555865  |
| P07379        | MGTSVLEALGDGEFIK+Oxidation(0)                                    | 0.868234227        | 2              | 3.858835  |
| P07379        | TVIITQEQR                                                        | 1.056221223        | 2              | 2.51903   |
| P07379        | VECVGDDIAWMK                                                     | 1.005088103        | 2              | 2.709002  |
| P07379        | VIQGSLSLDPQEV                                                    | 1.038054554        | 2              | 4.142714  |
| P07379        | YLAAAFPSACGK                                                     | 0.868592322        | 2              | 2.782071  |
| P07379        | YLEDQVNADLPYEIER                                                 | 0.696347675        | 2              | 2.824774  |
| <b>P07632</b> | <b>SODC Superoxide dismutase [Cu_Zn]</b>                         | <b>1.106696364</b> | <b>0.0472</b>  | <b>4</b>  |
| P07632        | DGVANVSIEDR                                                      | 0.848759237        | 1              | 2.790324  |
| P07632        | GDGPVQGVHFEQK                                                    | 1.045333454        | 2              | 3.611964  |
| P07632        | HVGDLGNVAAGK                                                     | 0.866719829        | 2              | 3.921211  |
| P07632        | VISLSGEHSIIGR                                                    | 1.107480474        | 2              | 3.291776  |
| <b>P07633</b> | <b>PCCB Propionyl_CoA carboxylase beta chain_mitochondrial</b>   | <b>0.838086785</b> | <b>9.9E-20</b> | <b>9</b>  |
| P07633        | AFDNDVDALCNLR                                                    | 0.942463394        | 2              | 3.667088  |
| P07633        | AYNMLDIIHAVIDER                                                  | 0.857820635        | 2              | 3.719673  |
| P07633        | GFVDDIIQPSSTR                                                    | 0.928297225        | 2              | 3.372567  |
| P07633        | ICCDLEVLASK                                                      | 0.786010021        | 2              | 2.851033  |
| P07633        | IMDQAITVGAPVIGLNDSSGAR                                           | 0.827346599        | 2              | 3.999461  |
| P07633        | IQEGVESLAGYADIFLR                                                | 0.854936668        | 2              | 4.286613  |
| P07633        | LVPELDTVVPLESSK                                                  | 0.821847277        | 2              | 3.790625  |
| P07633        | SVTNEDVTQEQLGGAK                                                 | 0.799992317        | 2              | 4.810746  |
| P07633        | TVGIVGNQPNVASGCLDINSSVK                                          | 0.765504046        | 2              | 4.496482  |
| <b>P07687</b> | <b>HYEP Epoxide hydrolase 1</b>                                  | <b>0.552723526</b> | <b>9.9E-20</b> | <b>19</b> |
| P07687        | DIELLYPYK                                                        | 0.442016451        | 1              | 2.358648  |
| P07687        | DKEETLPLGDGWWGPGSKPSAK                                           | 0.576163676        | 3              | 5.292636  |
| P07687        | EDESIRPFK                                                        | 0.528338911        | 2              | 2.608094  |
| P07687        | EDESIRPFKVETSDEEIKDLHQR                                          | 0.667778487        | 3              | 5.760001  |
| P07687        | ENLGQGIMVHK                                                      | 0.612792804        | 2              | 2.472392  |

|               |                                                                  |                    |                |           |
|---------------|------------------------------------------------------------------|--------------------|----------------|-----------|
| P07687        | ESGYLHIQATKPDTVGCALNDSPVGLAAYILEK                                | 1.127823503        | 3              | 6.627189  |
| P07687        | FLGYTEK                                                          | 0.502580574        | 1              | 1.956717  |
| P07687        | FLGYTEKDIELLYPYK                                                 | 0.59431837         | 3              | 4.553707  |
| P07687        | GGHFAAFEEPK                                                      | 0.590092948        | 2              | 3.467359  |
| P07687        | IIPLLTDPK                                                        | 0.616483904        | 2              | 2.410017  |
| P07687        | KFVSLAELQ                                                        | 0.702574214        | 2              | 2.731006  |
| P07687        | KQVEILNQYPHFK                                                    | 0.531853912        | 3              | 4.617214  |
| P07687        | LLAQDIR                                                          | 0.732314252        | 2              | 2.416731  |
| P07687        | QVEILNQYPHFK                                                     | 0.529554645        | 3              | 3.636613  |
| P07687        | SEYRELEDGGLER                                                    | 0.734687429        | 3              | 3.533217  |
| P07687        | SHGLSDEHVFEVICPSIPGYGYSEASSK                                     | 0.612861364        | 3              | 6.292448  |
| P07687        | VETSDEEIK                                                        | 0.592803828        | 2              | 2.469301  |
| P07687        | VETSDEEIKDLHQR                                                   | 0.473482953        | 2              | 4.614288  |
| P07687        | VFVPTGFSAFPSELLHAPEK                                             | 0.785185162        | 2              | 4.369045  |
| <b>P07756</b> | <b>CPSM Carbamoyl_phosphate synthase [ammonia]_mitochondrial</b> | <b>0.996368563</b> | <b>9.9E-20</b> | <b>87</b> |
| P07756        | AADTIGYPVMIR                                                     | 1.935705144        | 2              | 3.680625  |
| P07756        | AADTIGYPVMIR+Oxidation(9)                                        | 2.062428341        | 2              | 3.20642   |
| P07756        | AERPDGLILGMGGQTALNCGVELFK                                        | 0.923273946        | 3              | 6.517022  |
| P07756        | AERPDGLILGMGGQTALNCGVELFK+Oxidation(10)                          | 0.873770602        | 3              | 4.976897  |
| P07756        | AFAISGPFNVQFLVK                                                  | 1.407588809        | 2              | 4.983434  |
| P07756        | AFAMTNQILVER                                                     | 1.026847983        | 2              | 4.268549  |
| P07756        | AFAMTNQILVER+Oxidation(3)                                        | 0.922974101        | 2              | 3.758468  |
| P07756        | ALENNMSLDEIVK                                                    | 0.95750965         | 2              | 4.662439  |
| P07756        | ALENNMSLDEIVK+Oxidation(5)                                       | 1.008064692        | 2              | 3.920368  |
| P07756        | AQTAHIVLEDGTK                                                    | 0.917126532        | 2              | 4.268498  |
| P07756        | ATGYPLAFIAAK                                                     | 2.178990172        | 2              | 3.306113  |
| P07756        | CEMASTGEVACFGEGIHATAFLK                                          | 0.985989476        | 3              | 4.869245  |
| P07756        | CEMASTGEVACFGEGIHATAFLK+Oxidation(2)                             | 0.902428024        | 3              | 5.680539  |
| P07756        | CLGLTEAQTR                                                       | 0.863029274        | 2              | 3.629699  |
| P07756        | DELGLNK                                                          | 0.81084367         | 1              | 2.22431   |
| P07756        | DGSIDLVINLPNNNTK                                                 | 0.997814169        | 2              | 5.477794  |
| P07756        | DILNMDK                                                          | 0.891990819        | 1              | 1.94096   |
| P07756        | EIEYEVVR                                                         | 0.931803868        | 1              | 2.17758   |
| P07756        | EPLFGISTGNIITGLAAGAK                                             | 1.62972151         | 2              | 5.763889  |
| P07756        | ETLMDLGTK                                                        | 0.958912579        | 1              | 2.180815  |
| P07756        | EVEMDAVGK                                                        | 0.836691089        | 1              | 2.075444  |
| P07756        | FLEEATR                                                          | 0.948690667        | 2              | 2.609583  |
| P07756        | FLGVAEQLHNEGFK                                                   | 1.070421009        | 2              | 4.738251  |
| P07756        | FVHDNYVIR                                                        | 1.454879381        | 3              | 3.497327  |
| P07756        | GAEVHLPWNHDFQMDYDGLLIAGGPGNPALAQPLIQNVK                          | 1.080355888        | 3              | 5.972341  |
| P07756        | GAEVHLPWNHDFQMDYDGLLIAGGPGNPALAQPLIQNVK+Oxidation(15)            | 1.173667937        | 4              | 5.223215  |

|        |                                       |             |   |          |
|--------|---------------------------------------|-------------|---|----------|
| P07756 | GILIGIQSFRPR                          | 1.110042827 | 2 | 2.397679 |
| P07756 | GLNSESVTEETLR                         | 1.0223895   | 2 | 4.907218 |
| P07756 | GNDVLVIECNLR                          | 0.920085209 | 2 | 4.24574  |
| P07756 | GQILTMANPIINGGAPDPTAR                 | 0.998824193 | 2 | 5.985503 |
| P07756 | GQILTMANPIINGGAPDPTAR+Oxidation(5)    | 0.946809478 | 2 | 5.423976 |
| P07756 | GQILTMANPIINGGAPDPTARDELGLNK          | 0.97037282  | 3 | 4.161013 |
| P07756 | GQNQPVLNITNR                          | 0.926499726 | 2 | 4.321795 |
| P07756 | GTTITSVLPKALVASR                      | 1.108293755 | 2 | 3.25384  |
| P07756 | GYSFGHPSSVAGEVVFNTGLGGYSEALDTPAYK     | 1.885956639 | 3 | 6.388122 |
| P07756 | HLPTLEQPIIPSDYVAIK                    | 1.07461924  | 2 | 5.594483 |
| P07756 | IAPSFAVESMEDALK                       | 1.192800709 | 2 | 5.045006 |
| P07756 | IAPSFAVESMEDALK+Oxidation(9)          | 0.875111101 | 2 | 2.608332 |
| P07756 | IEFEGQSVDFVDPNK                       | 1.00384314  | 2 | 5.2604   |
| P07756 | IEFEGQSVDFVDPNKQNLIAEVSTK             | 1.092829057 | 3 | 5.282569 |
| P07756 | ILDYHQEACNGCIISVGGQIPNNLAVPLYK        | 1.051199852 | 3 | 5.73916  |
| P07756 | IMGTSPLQIDR                           | 1.574153968 | 2 | 2.654036 |
| P07756 | IMGTSPLQIDR+Oxidation(1)              | 1.054429816 | 2 | 2.965294 |
| P07756 | IMGTSPLQIDRAEDR                       | 0.671975793 | 2 | 2.420063 |
| P07756 | KEPLFGISTGNIITGLAAGAK                 | 0.952261342 | 2 | 5.483893 |
| P07756 | KTVVVNCNPETVSTDFDECDK                 | 0.290520172 | 2 | 4.652337 |
| P07756 | LFAEAVQK                              | 0.974315222 | 2 | 2.893215 |
| P07756 | LFATEATSDWLNANNVPATPVAWPSQEGQNPSLSSIR | 1.085199271 | 4 | 4.88679  |
| P07756 | LRDADPILR                             | 1.038862623 | 2 | 3.017129 |
| P07756 | LTSIDKWFLYK                           | 0.830404699 | 2 | 2.769411 |
| P07756 | LYFEELSLER                            | 1.319183286 | 2 | 3.535903 |
| P07756 | MCHPSVDGFTPR                          | 1.299607383 | 3 | 4.752268 |
| P07756 | MCHPSVDGFTPR+Oxidation(0)             | 0.837507354 | 3 | 4.039312 |
| P07756 | QADAVYFLPITPQFVTEVIK                  | 2.262636315 | 3 | 5.01443  |
| P07756 | QLFSDKLNEINEK                         | 1.025004824 | 2 | 3.655469 |
| P07756 | QNLIAEVSTK                            | 1.022073768 | 2 | 2.792892 |
| P07756 | RFLEEATR                              | 0.885738548 | 2 | 2.807172 |
| P07756 | RTAVDSGIALLTNFQVTK                    | 0.806488119 | 2 | 4.169274 |
| P07756 | SAYALGGLGSGICPNK                      | 1.571781823 | 2 | 4.938928 |
| P07756 | SAYALGGLGSGICPNKETLMDLGTK             | 1.227971232 | 2 | 4.220071 |
| P07756 | SFPFVSK                               | 1.131820627 | 1 | 2.069431 |
| P07756 | SIFSAVLDELK                           | 1.050952835 | 2 | 3.978276 |
| P07756 | SIFSAVLDELKVAQAPWK                    | 1.723471782 | 3 | 3.53515  |
| P07756 | SLGQWLQEEK                            | 1.018749951 | 2 | 4.102468 |
| P07756 | SVGEVMAIGR                            | 0.96019306  | 2 | 3.7593   |
| P07756 | SVGEVMAIGR+Oxidation(5)               | 0.918244009 | 2 | 2.999075 |
| P07756 | TAVDSGIALLTNFQVTK                     | 1.193699063 | 3 | 6.090451 |
| P07756 | TAVDSGIALLTNFQVTKLFAEAVQK             | 1.59795572  | 3 | 4.010033 |
| P07756 | TFEESFQK                              | 0.937535979 | 2 | 2.52637  |



|               |                                                    |                    |                |           |
|---------------|----------------------------------------------------|--------------------|----------------|-----------|
| P07756        | TLGVDFIDVATK                                       | 1.111374962        | 2              | 4.108807  |
| P07756        | TSACFEPGLDYMVTK                                    | 1.186290749        | 2              | 4.76156   |
| P07756        | TSACFEPGLDYMVTK+Oxidation(11)                      | 1.199125143        | 2              | 3.979743  |
| P07756        | TVLMNPNIASVQTNEVGLK                                | 1.012692281        | 2              | 6.304126  |
| P07756        | TVLMNPNIASVQTNEVGLK+Oxidation(3)                   | 0.983193407        | 2              | 6.057572  |
| P07756        | TVVVNCPETVSTDFDECDK                                | 0.469113002        | 2              | 5.781158  |
| P07756        | TVVVNCPETVSTDFDECDKLYFEELSLEK                      | 1.235413676        | 3              | 5.225307  |
| P07756        | VISHAISEHVEDAGVHSGDATLMLPTQTISQGAIEK               | 1.092220618        | 3              | 7.247942  |
| P07756        | VISHAISEHVEDAGVHSGDATLMLPTQTISQGAIEK+Oxidation(22) | 0.998894279        | 3              | 6.767986  |
| P07756        | VLGTSVESIMATEDR                                    | 0.997866893        | 2              | 4.828372  |
| P07756        | VLGTSVESIMATEDR+Oxidation(9)                       | 0.969742918        | 2              | 4.342385  |
| P07756        | VLILGSGGLSIGQAGEFDYSGSQAVK                         | 0.981315263        | 2              | 5.322717  |
| P07756        | VMIGESVDEK                                         | 0.99163063         | 2              | 3.486611  |
| P07756        | VMIGESVDEK+Oxidation(1)                            | 0.94048051         | 2              | 3.037011  |
| P07756        | VSQEHVPLTK                                         | 1.033963204        | 2              | 3.90386   |
| P07756        | VVAVDGCIK                                          | 0.917071904        | 2              | 2.39105   |
| P07756        | YMESDGIK                                           | 0.859766508        | 2              | 2.714977  |
| P07756        | YMESDGIK+Oxidation(1)                              | 0.975666261        | 1              | 2.240093  |
| <b>P07824</b> | <b>ARGI1 Arginase_1</b>                            | <b>1.182970156</b> | <b>9.9E-20</b> | <b>15</b> |
| P07824        | ANEQLAAVVAETQK                                     | 1.334592706        | 2              | 5.331029  |
| P07824        | DHGDLAFVDVDPNSPFQIVK                               | 1.337002055        | 2              | 6.87653   |
| P07824        | DIVYIGLR                                           | 1.980459187        | 2              | 2.730463  |
| P07824        | DVDPGEHYIK                                         | 1.5366364          | 2              | 3.097352  |
| P07824        | EGLYITEIYK                                         | 1.331126637        | 2              | 2.448736  |
| P07824        | EGNHKPEVDYKPKK                                     | 1.43510413         | 2              | 2.800012  |
| P07824        | GKFPDVPGFVWVTPCISAK                                | 1.299034165        | 3              | 4.703111  |
| P07824        | LKETEYNVR                                          | 1.4173107          | 3              | 3.665861  |
| P07824        | NGTISVVLGGDHSMAIGSISGHAR                           | 1.553371839        | 3              | 4.400733  |
| P07824        | TGLLSGLDIMEVNPTLGK                                 | 1.311922368        | 2              | 5.808201  |
| P07824        | TGLLSGLDIMEVNPTLGK+Oxidation(9)                    | 1.121086659        | 2              | 4.683285  |
| P07824        | TVNTAVALTLSCFGTK                                   | 1.281911017        | 2              | 4.7521    |
| P07824        | VMEETFSYLLGR                                       | 4.212936344        | 2              | 3.254689  |
| P07824        | YFSMTEVDK                                          | 1.415934885        | 1              | 2.271957  |
| P07824        | YFSMTEVDKLGIGK+Oxidation(3)                        | 1.190073731        | 2              | 2.461653  |
| <b>P07871</b> | <b>THIKB 3_ketoacyl_CoA thiolase B_peroxisomal</b> | <b>0.761294626</b> | <b>9.9E-20</b> | <b>15</b> |
| P07871        | AEELGLPILGVLR                                      | 0.752505365        | 2              | 4.44025   |
| P07871        | AEIVPVTTTVLDDK                                     | 0.777013003        | 2              | 4.127613  |
| P07871        | AEIVPVTTTVLDDKGDGR                                 | 0.796147228        | 2              | 4.026548  |
| P07871        | AEIVPVTTTVLDDKGDGRK                                | 0.819618943        | 2              | 3.594028  |
| P07871        | DCLIPMGITSENVAER                                   | 0.77927032         | 2              | 3.586517  |
| P07871        | DCLIPMGITSENVAER+Oxidation(5)                      | 0.688426265        | 2              | 2.93319   |
| P07871        | DGGSTTAGNSSQVSDGAAAVLLAR                           | 0.737891335        | 2              | 6.097786  |

|               |                                                      |                    |                |           |
|---------------|------------------------------------------------------|--------------------|----------------|-----------|
| P07871        | IAQFLSGIPETVPLSAVNR                                  | 1.910515319        | 2              | 2.60835   |
| P07871        | QCSSGLQAVANIAGGIR                                    | 0.671975793        | 2              | 4.323938  |
| P07871        | QDAFALASQQK                                          | 0.648353078        | 2              | 3.332845  |
| P07871        | QKQDAFALASQQK                                        | 0.682938481        | 2              | 4.120291  |
| P07871        | SKAEELGLPILGVLR                                      | 0.731301026        | 3              | 4.248923  |
| P07871        | SYAVVGVPPDIMGIGPAYAIPAALQK                           | 0.662496921        | 2              | 4.314189  |
| P07871        | TITVSQDEGVRPSTTMEGLAK                                | 0.812502179        | 2              | 4.274511  |
| P07871        | VNPLGGAIALGHPLGCTGAR                                 | 0.693007777        | 2              | 4.961459  |
| <b>P07872</b> | <b>ACOX1 Peroxisomal acyl_coenzyme A oxidase 1</b>   | <b>0.604936181</b> | <b>9.9E-20</b> | <b>16</b> |
| P07872        | AFTTWTANAGIEECR                                      | 0.637237596        | 2              | 4.101248  |
| P07872        | ASATFNPELITHILDGSPENTR                               | 0.607044162        | 2              | 4.748636  |
| P07872        | ASEAHCHYVVVK                                         | 0.717270229        | 3              | 4.156458  |
| P07872        | EIENLILNDPDFQHEDYNFLTR                               | 0.735646792        | 2              | 4.455253  |
| P07872        | EIGTHKPLPGITVGDIGPK                                  | 0.525257427        | 3              | 4.113584  |
| P07872        | EVAWNLTSDVLR                                         | 0.633426182        | 2              | 3.40482   |
| P07872        | EYGISDPPEIIMWFK                                      | 0.730519468        | 2              | 3.361959  |
| P07872        | FGYEEMDNGYLK                                         | 0.615352967        | 2              | 3.598197  |
| P07872        | GGDFLEGSITGAQLSQVNAR                                 | 0.647818242        | 2              | 5.157513  |
| P07872        | GLETTATYDPK                                          | 0.575832473        | 2              | 3.399365  |
| P07872        | INESIGQGDLSPELHALTAGLK                               | 0.582995322        | 3              | 5.308318  |
| P07872        | LVEIAAK                                              | 0.644252367        | 1              | 2.024047  |
| P07872        | QSEPEPQILDFTQQYK                                     | 0.579186076        | 2              | 4.76811   |
| P07872        | SFLVGNAAQSLK                                         | 0.546559383        | 2              | 3.853845  |
| P07872        | TQEFILNSPTVTSIK                                      | 0.60374175         | 2              | 4.890968  |
| P07872        | YDGNVYENLFEWAK                                       | 0.530360764        | 2              | 4.628086  |
| <b>P07895</b> | <b>SODM Superoxide dismutase [Mn]_ mitochondrial</b> | <b>0.681899248</b> | <b>1.1E-16</b> | <b>3</b>  |
| P07895        | AIWNVINWENVSQR                                       | 0.966565894        | 2              | 3.905118  |
| P07895        | GDVTTQVALQPALK                                       | 0.743608303        | 2              | 3.442553  |
| P07895        | HHATVYNNLNVTEEK                                      | 0.974799812        | 2              | 4.214888  |
| <b>P07896</b> | <b>ECHP Peroxisomal bifunctional enzyme</b>          | <b>0.679837814</b> | <b>9.9E-20</b> | <b>21</b> |
| P07896        | GQGLTGPSLPPGTPVR                                     | 0.433809784        | 2              | 4.07126   |
| P07896        | GWYQYDKPLGR                                          | 0.464387643        | 2              | 2.747777  |
| P07896        | IFNKPVPSLPNMDSVFAEIAIK                               | 0.558611926        | 3              | 3.579067  |
| P07896        | IGVVVGNCYGFVGNR                                      | 0.751071607        | 2              | 2.436362  |
| P07896        | IIDKPIEPR                                            | 0.422682601        | 2              | 2.424396  |
| P07896        | KGQGLTGPSLPPGTPVR                                    | 0.518196876        | 2              | 3.895568  |
| P07896        | KQYPGV LAPETCVR                                      | 0.489668283        | 2              | 3.732141  |
| P07896        | LCNPPVNAVSPVIR                                       | 0.405864507        | 2              | 4.303395  |
| P07896        | LGILDAVVK                                            | 0.579572745        | 2              | 2.912469  |
| P07896        | LLEVIPSR                                             | 0.508866823        | 2              | 2.728523  |
| P07896        | QNPDIQLEPSDYLR                                       | 0.441397963        | 2              | 3.800498  |
| P07896        | QYPGV LAPETCVR                                       | 0.460783106        | 2              | 3.592969  |

|               |                                                     |                    |                |           |
|---------------|-----------------------------------------------------|--------------------|----------------|-----------|
| P07896        | TASAQPVSSVGLGLTGMGR                                 | 0.821874567        | 2              | 4.612984  |
| P07896        | TASAQPVSSVGLGLTGMGR+Oxidation(17)                   | 0.583434727        | 2              | 4.032934  |
| P07896        | TISKEILER                                           | 0.426773314        | 2              | 2.867023  |
| P07896        | VGISVVAVESDPK                                       | 0.478394868        | 2              | 3.330619  |
| P07896        | VGLPEVTLGILPGAR                                     | 0.525736669        | 2              | 3.348469  |
| P07896        | VSDLAGLDVGVWK                                       | 0.443433843        | 2              | 4.216769  |
| P07896        | YLSADEALR                                           | 0.612234306        | 2              | 2.551209  |
| P07896        | YSPLGDMLEAGR                                        | 0.403474257        | 2              | 4.309145  |
| P07896        | YSSPTTIATVMLSLK                                     | 1.143168453        | 2              | 3.43817   |
| <b>P08009</b> | <b>GSTM4 Glutathione S_transferase Yb_3</b>         | <b>0.788252295</b> | <b>9.9E-20</b> | <b>5</b>  |
| P08009        | LCYNPDFEK                                           | 0.860065038        | 2              | 2.790956  |
| P08009        | LLLEYDSSYEK                                         | 0.8015663          | 2              | 4.840567  |
| P08009        | LLLEYDSSYEKR                                        | 0.83159951         | 2              | 3.827513  |
| P08009        | NQVFATCLDAFPNLK                                     | 0.471053936        | 2              | 4.525417  |
| P08009        | SQWLNEK                                             | 0.846043298        | 2              | 2.638976  |
| <b>P08010</b> | <b>GSTM2 Glutathione S_transferase Mu 2</b>         | <b>1.037283692</b> | <b>9.9E-20</b> | <b>15</b> |
| P08010        | CLDAFPNLKDFVAR                                      | 1.142536977        | 2              | 2.454325  |
| P08010        | IRVDVLENQAMDTR                                      | 0.902046557        | 3              | 4.282445  |
| P08010        | ITYVDFLVYDVLDQHR                                    | 1.409434449        | 2              | 5.045181  |
| P08010        | KKPEYLEGLPEK                                        | 0.767399815        | 3              | 4.417502  |
| P08010        | KPEYLEGLPEK                                         | 1.614704325        | 2              | 3.48164   |
| P08010        | KYSMGDAPDYDR                                        | 0.700066078        | 2              | 3.328475  |
| P08010        | LFLEYDTSYEDK                                        | 0.843911852        | 2              | 5.117995  |
| P08010        | LFLEYDTSYEDKK                                       | 0.793453042        | 2              | 4.403938  |
| P08010        | LQLAMVCYSPDFER                                      | 0.759454214        | 2              | 3.519673  |
| P08010        | LQLAMVCYSPDFER+Oxidation(4)                         | 0.740979276        | 2              | 3.345862  |
| P08010        | SQWLSEK                                             | 0.897934947        | 2              | 2.418023  |
| P08010        | VDVLENQAMDTR                                        | 0.734824003        | 2              | 4.481347  |
| P08010        | VDVLENQAMDTR+Oxidation(8)                           | 0.788149113        | 2              | 4.034321  |
| P08010        | YSMGDAPDYDR                                         | 0.924619466        | 2              | 2.942543  |
| P08010        | YSMGDAPDYDR+Oxidation(2)                            | 1.09744256         | 2              | 2.717192  |
| <b>P08011</b> | <b>MGST1 Microsomal glutathione S_transferase 1</b> | <b>0.951125745</b> | <b>0.00082</b> | <b>4</b>  |
| P08011        | IYHTIAYLTPQPNR                                      | 1.280040597        | 2              | 5.720207  |
| P08011        | MMFLSSATAFQR+Oxidation(0)                           | 0.886872937        |                | 2.551465  |
| P08011        | VFANPEDCAGFGK                                       | 0.905478718        | 2              | 4.692748  |
| P08011        | VFANPEDCAGFGGENAK                                   | 0.875474574        | 2              | 4.422501  |
| <b>P08122</b> | <b>chain</b>                                        | <b>1.488027044</b> | <b>0.01205</b> | <b>3</b>  |
| P08122        | DEKSLAYPEGK                                         | 1.739482986        | 2              | 2.415499  |
| P08122        | DGAPGFPGTGAKGNRGFPGLR                               | 1.539824089        | 2              | 2.327391  |
| P08122        | GPAGRFGPDGPPQPGIEGLAGPLGR                           | 0.532498413        | 2              | 2.506688  |
| <b>P08290</b> | <b>ASGR2 Asialoglycoprotein receptor 2</b>          | <b>1.005387085</b> | <b>0.99479</b> | <b>2</b>  |
| P08290        | DFQDIQLDSEENDHQLIGDEEQGSHVQNLN                      | 1.027587672        | 3              | 6.282168  |
| P08290        | EEQEFVVK                                            | 0.976915054        | 1              | 1.934371  |

|               |                                                                                                                     |                    |                |           |
|---------------|---------------------------------------------------------------------------------------------------------------------|--------------------|----------------|-----------|
| <b>P08461</b> | <b>ODP2 Dihydrolipoyllysine_residue acetyltransferase component of pyruvate dehydrogenase complex_mitochondrial</b> | <b>1.102635825</b> | <b>0.00714</b> | <b>5</b>  |
| P08461        | AAPAAAAAPPGR                                                                                                        | 0.953930073        | 2              | 3.043614  |
| P08461        | DVPLGTPLCIIVEK                                                                                                      | 1.028665641        | 2              | 3.02493   |
| P08461        | DVPVGSIICTVEKPDIEAFK                                                                                                | 1.388877322        | 2              | 4.096044  |
| P08461        | GLETIASDVVSLASK                                                                                                     | 1.067448359        | 2              | 4.202191  |
| P08461        | VAPTPAGVFIDIPIISNIR                                                                                                 | 1.118909777        | 2              | 4.787501  |
| <b>P08503</b> | <b>ACADM Medium_chain specific acyl_CoA dehydrogenase_mitochondrial</b>                                             | <b>0.85170936</b>  | <b>9.9E-20</b> | <b>7</b>  |
| P08503        | AFTGFIVEADTPGIHIGK                                                                                                  | 0.913258503        | 2              | 4.224313  |
| P08503        | EEIIPVAPDYDK                                                                                                        | 0.84818542         | 2              | 3.041528  |
| P08503        | IYQYEGTAQIQR                                                                                                        | 0.956280686        | 2              | 4.951216  |
| P08503        | KGDEYVINGQK                                                                                                         | 0.843949165        | 2              | 3.615403  |
| P08503        | QEPGLGFSFELTEQQK                                                                                                    | 0.843282065        | 2              | 2.6851    |
| P08503        | SGEYPPFLIK                                                                                                          | 0.884702661        | 2              | 2.577549  |
| P08503        | TRPTVAAGAVGLAQR                                                                                                     | 0.888168828        | 2              | 4.177897  |
| <b>P08541</b> | <b>UD2B2 UDP_glucuronosyltransferase 2B2</b>                                                                        | <b>1.782670548</b> | <b>9.9E-20</b> | <b>9</b>  |
| P08541        | DELQNHFIK                                                                                                           | 1.500182403        | 2              | 2.641715  |
| P08541        | FEIFSTSISKDELQNHFIK                                                                                                 | 1.8143857          | 3              | 3.555882  |
| P08541        | FILPPSYVPVILSGLAGK                                                                                                  | 1.857221612        | 3              | 5.915164  |
| P08541        | GAAVSLNIR                                                                                                           | 4.564188519        | 2              | 2.376905  |
| P08541        | GHEVTVLKPSAYFFLDPK                                                                                                  | 3.415224096        | 3              | 4.328868  |
| P08541        | HKEWDTFYSEILGRPTTVDETMSK                                                                                            | 2.034429502        | 3              | 4.633792  |
| P08541        | LLDVWTYELPR                                                                                                         | 2.874620196        | 2              | 3.849134  |
| P08541        | SYWDLK                                                                                                              | 1.48043887         | 2              | 2.333124  |
| P08541        | VEIWLIR                                                                                                             | 1.463835824        | 2              | 2.762574  |
| <b>P08542</b> | <b>UDB17 UDP_glucuronosyltransferase 2B17</b>                                                                       | <b>1.225538456</b> | <b>0.09267</b> | <b>6</b>  |
| P08542        | EIINNPYK                                                                                                            | 0.754630735        | 1              | 2.102288  |
| P08542        | FETFPTSIVSKDELENYFIK                                                                                                | 0.877710457        | 2              | 4.066194  |
| P08542        | KWDPFYSEILGRPTTLAETMGK                                                                                              | 1.052224494        | 2              | 4.043206  |
| P08542        | LVDVWTYELQR                                                                                                         | 1.132872709        | 2              | 3.346584  |
| P08542        | NAVWLSTIHHDQPMKPLDK                                                                                                 | 1.374882727        | 3              | 3.679787  |
| P08542        | WDPFYSEILGRPTTLAETMGK                                                                                               | 1.015304456        | 2              | 4.084558  |
| <b>P08649</b> | <b>CO4 Complement C4</b>                                                                                            | <b>1.522679874</b> | <b>0.00412</b> | <b>2</b>  |
| P08649        | SLEIPGSSDPNVIPDGFSSFVR                                                                                              | 1.496175256        | 2              | 3.15712   |
| P08649        | VTASEPLETLGSEGALSPGGVASLLR                                                                                          | 1.373478686        | 2              | 2.96551   |
| <b>P08661</b> | <b>MBL2 Mannose_binding protein C</b>                                                                               | <b>1.276486457</b> | <b>8.5E-07</b> | <b>2</b>  |
| P08661        | ALCSELQGTVATPR                                                                                                      | 0.507119458        | 2              | 2.540499  |
| P08661        | TENVFEDLTGNR                                                                                                        | 1.307751482        | 2              | 2.778531  |
| <b>P08683</b> | <b>CP2CB Cytochrome P450 2C11</b>                                                                                   | <b>0.854340891</b> | <b>9.9E-20</b> | <b>14</b> |
| P08683        | DIDTTPAISGFGHLPFYEACFIPVQR                                                                                          | 0.652385169        | 3              | 4.986457  |
| P08683        | EALVDLGEFSGR                                                                                                        | 0.900287041        | 2              | 3.715386  |
| P08683        | EHQESLDKDNPR                                                                                                        | 0.448360259        | 2              | 3.995445  |

|               |                                                                                |                    |                |           |
|---------------|--------------------------------------------------------------------------------|--------------------|----------------|-----------|
| P08683        | FDYKDPTFLNLMHR                                                                 | 1.015424609        | 3              | 4.861142  |
| P08683        | GTNVIVSLSSILHDDKEFPNPEK                                                        | 0.793217513        | 2              | 5.097614  |
| P08683        | ICAGEALAR                                                                      | 0.668503141        | 2              | 3.120892  |
| P08683        | LPPGPTPLPIIGNTLQIYMK                                                           | 1.050614526        | 2              | 3.282207  |
| P08683        | NYVLEK                                                                         | 0.569887586        | 1              | 2.064391  |
| P08683        | SQMPYTDVVHEIQR                                                                 | 0.86163382         | 2              | 3.94216   |
| P08683        | SQMPYTDVVHEIQR+Oxidation(2)                                                    | 0.564244453        | 2              | 3.698865  |
| P08683        | VKEHQESLKDKNPR                                                                 | 0.6371402          | 3              | 5.024151  |
| P08683        | VQEEIER                                                                        | 0.653457387        | 2              | 2.626162  |
| P08683        | YGLLLLLK                                                                       | 0.789005661        | 2              | 3.188956  |
| P08683        | YIDLVPNTLPHLVTR                                                                | 0.689350129        | 2              | 4.036538  |
| <b>P08733</b> | <b>MLRV Myosin regulatory light chain 2_ventricular/cardiac muscle isoform</b> | <b>0.691271133</b> | <b>0.53312</b> | <b>2</b>  |
| P08733        | GADPEETILNAFK                                                                  | 0.745391906        | 2              | 2.589054  |
| P08733        | NLVHIITHGEEKD                                                                  | 0.572257306        | 2              | 3.34575   |
| <b>P09034</b> | <b>ASSY Argininosuccinate synthase</b>                                         | <b>1.566916746</b> | <b>9.9E-20</b> | <b>16</b> |
| P09034        | APNTPDVLEIEFK                                                                  | 4.109606077        | 2              | 3.470396  |
| P09034        | DGTTHTSLDLFMYLNEVAGK                                                           | 4.255113394        | 2              | 5.926031  |
| P09034        | EFVEEFIWPAVQSSALYEDR                                                           | 1.828746266        | 3              | 5.715837  |
| P09034        | EQGYDVIAYLANIGQK                                                               | 1.974363665        | 2              | 2.338559  |
| P09034        | FAELVYTGFWHSPECFVR                                                             | 2.654553403        | 2              | 4.042085  |
| P09034        | FELTCYSLAPQIK                                                                  | 2.741540782        | 2              | 4.260776  |
| P09034        | GRNDLMEYAK                                                                     | 1.780932881        | 2              | 3.017917  |
| P09034        | GRNDLMEYAK+Oxidation(5)                                                        | 1.514410692        | 2              | 2.580156  |
| P09034        | IDIVENR                                                                        | 1.397041579        | 2              | 2.407131  |
| P09034        | KVFIEDVSK                                                                      | 1.356582003        | 3              | 3.3453    |
| P09034        | NDLMEYAK                                                                       | 1.572782883        | 2              | 2.535101  |
| P09034        | SPWSMDENLMHISYEAGILENPK                                                        | 3.069702968        | 3              | 5.76887   |
| P09034        | TQDPAKAPNTPDVLEIEFK                                                            | 1.874610979        | 2              | 4.880405  |
| P09034        | TQDPAKAPNTPDVLEIEFKK                                                           | 2.224905           | 3              | 4.427262  |
| P09034        | VFIEDVSK                                                                       | 1.385324165        | 2              | 2.915686  |
| P09034        | VQVSVFK                                                                        | 1.896706495        | 1              | 2.054684  |
| <b>P09041</b> | <b>PGK2 Phosphoglycerate kinase 2</b>                                          | <b>0.99724231</b>  | <b>0.73185</b> | <b>3</b>  |
| P09041        | FHVEEEGK                                                                       | 0.902061697        | 1              | 2.437882  |
| P09041        | LGDVVYVNDAFGTAHR                                                               | 1.065865862        | 3              | 4.282952  |
| P09041        | VSHVSTGGGASLELLEGGK                                                            | 1.039059135        | 2              | 5.660918  |
| <b>P09117</b> | <b>ALDOC Fructose_bisphosphate aldolase C</b>                                  | <b>1.314408715</b> | <b>7.8E-06</b> | <b>2</b>  |
| P09117        | VLAAYK                                                                         | 1.280599156        | 2              | 2.642177  |
| P09117        | YSPEEIAMATVTALR                                                                | 0.587772671        | 2              | 2.432623  |
| <b>P09139</b> | <b>SPYA Serine_pyruvate aminotransferase_mitochondrial</b>                     | <b>1.395241324</b> | <b>6.2E-10</b> | <b>2</b>  |
| P09139        | IGLLGYNATTENADR                                                                | 1.220565094        | 2              | 3.363694  |
| P09139        | VLNAPPGISLISFNDK                                                               | 1.724614162        | 2              | 2.799011  |

|               |                                                                           |                    |                |           |
|---------------|---------------------------------------------------------------------------|--------------------|----------------|-----------|
| <b>P09367</b> | <b>SDHL L_serine dehydratase/L_threonine deaminase</b>                    | <b>3.779887845</b> | <b>2.1E-06</b> | <b>3</b>  |
| <b>P09456</b> | <b>KAP0 cAMP_dependent protein kinase type I_alpha regulatory subunit</b> | <b>0.823707309</b> | <b>0.57762</b> | <b>2</b>  |
| P09456        | FERVLGPCSDILK                                                             | 0.464468959        | 2              | 2.378657  |
| P09456        | LTVADALEPVQFEDGQK                                                         | 0.987227373        | 2              | 3.832369  |
| <b>P09495</b> | <b>TPM4 Tropomyosin alpha_4 chain</b>                                     | <b>0.876507581</b> | <b>8.1E-09</b> | <b>13</b> |
| P09495        | AEGDAAALNR                                                                | 0.698785256        | 2              | 2.374294  |
| P09495        | EDKYEEEIK                                                                 | 0.673962983        | 1              | 2.929529  |
| P09495        | EENVGLHQTLDQTLNELNCI                                                      | 0.996396108        | 2              | 4.957961  |
| P09495        | IQALQQQADDAEDR                                                            | 0.870386598        | 2              | 4.400271  |
| P09495        | IQLVEEELDR                                                                | 0.807569943        | 2              | 3.422169  |
| P09495        | IQLVEEELDRAQER                                                            | 0.790868451        | 2              | 2.689069  |
| P09495        | KLVILEGELER                                                               | 0.605479824        | 3              | 3.483312  |
| P09495        | LEEAEKAADESER                                                             | 0.788165399        | 2              | 3.91638   |
| P09495        | LVILEGELER                                                                | 0.672429097        | 2              | 2.7667    |
| P09495        | MEIQEMQLK                                                                 | 0.555694174        | 2              | 2.62533   |
| P09495        | RIQLVEEELDR                                                               | 0.752517055        | 2              | 2.714399  |
| P09495        | YEEEIK                                                                    | 0.945818772        | 1              | 1.920169  |
| P09495        | YSEKEDKYEEEIK                                                             | 0.644556315        | 2              | 4.203413  |
| <b>P09527</b> | <b>RAB7A Ras_related protein Rab_7a</b>                                   | <b>1.002344674</b> | <b>1.2E-07</b> | <b>3</b>  |
| P09527        | GADCCVLVFDVTAPNTFK                                                        | 1.34259613         | 2              | 4.524641  |
| P09527        | TLDSWRDEFLIQASPR                                                          | 0.914207111        | 2              | 2.362259  |
| P09527        | VIIIGDSGVGK                                                               | 0.943911122        | 2              | 2.711331  |
| <b>P09605</b> | <b>KCRS Creatine kinase S_type_mitochondrial</b>                          | <b>1.025333849</b> | <b>0.99936</b> | <b>2</b>  |
| P09605        | GTGGVDTAAVADVVDISNDR                                                      | 1.025228289        | 2              | 3.999739  |
| P09605        | LSEMTEQDQQR                                                               | 1.096369423        | 2              | 2.874059  |
| <b>P09606</b> | <b>GLNA Glutamine synthetase</b>                                          | <b>1.094338038</b> | <b>0.27379</b> | <b>5</b>  |
| P09606        | CIEEAIDK                                                                  | 0.694119014        | 2              | 2.527206  |
| P09606        | ITGTNAEVMPAQWEFQIGPCEGIR                                                  | 0.857739638        | 2              | 4.375358  |
| P09606        | LTGFHETSNINDFSAGVANR                                                      | 0.900354651        | 2              | 5.788212  |
| P09606        | TCLLNETGDEPFQYK                                                           | 0.884341497        | 2              | 4.971614  |
| P09606        | TCLLNETGDEPFQYKN                                                          | 1.286935644        | 2              | 4.625268  |
| <b>P09811</b> | <b>PYGL Glycogen phosphorylase_liver form</b>                             | <b>1.056557407</b> | <b>0.02283</b> | <b>19</b> |
| P09811        | DFSELEPKFQNK                                                              | 1.144050408        | 2              | 3.505346  |
| P09811        | DGVGTVFDAFPDQVAIQLNDRHPALAIPELMR                                          | 1.157781069        | 3              | 4.938773  |
| P09811        | DLSQLTK                                                                   | 0.903073482        | 1              | 2.098884  |
| P09811        | EGWQVEEADDWLR                                                             | 1.033457055        | 2              | 3.320076  |
| P09811        | GIVGVENVAELK                                                              | 1.005668157        | 2              | 3.06156   |
| P09811        | GIVGVENVAELKK                                                             | 1.483857966        | 2              | 2.888785  |
| P09811        | HLQIYEINQK                                                                | 1.016050661        | 2              | 3.447671  |
| P09811        | INPSSMFDVHVK                                                              | 1.397571522        | 2              | 2.696436  |
| P09811        | LVIDQIDNGFFSPNQPDFK                                                       | 1.055872077        | 3              | 4.572525  |
| P09811        | LVTSAEVVNNNDPMTGSK                                                        | 0.97552475         | 2              | 2.812567  |

|               |                                                                          |                    |                |           |
|---------------|--------------------------------------------------------------------------|--------------------|----------------|-----------|
| P09811        | MSLIEEEGGKR                                                              | 1.053770237        | 2              | 2.746151  |
| P09811        | TFAYTNHTVLPEALER                                                         | 1.154879191        | 2              | 3.722688  |
| P09811        | VDDVAALDK                                                                | 0.944536274        | 2              | 2.348524  |
| P09811        | VDDVAALDKK                                                               | 0.957610194        | 3              | 3.46648   |
| P09811        | VFADYEAYVK                                                               | 1.15781619         | 1              | 2.222671  |
| P09811        | VIPATDLSEQISTAGTEASGTGNMK                                                | 1.096113407        | 2              | 6.075753  |
| P09811        | VLYPNDNFFEGK                                                             | 0.970806268        | 2              | 3.109377  |
| P09811        | WLLLCNPGLADLIAEK                                                         | 1.037735924        | 3              | 4.911973  |
| P09811        | YEYGFNQK                                                                 | 1.102638583        | 1              | 2.453062  |
| <b>P09812</b> | <b>PYGM Glycogen phosphorylase_muscle form</b>                           | <b>0.903007682</b> | <b>0.80443</b> | <b>2</b>  |
| P09812        | NLAENISR                                                                 | 0.955053174        | 1              | 2.530401  |
| P09812        | QIEQLSSGFFSPK                                                            | 0.845900956        | 2              | 3.639601  |
| <b>P09875</b> | <b>UD2B1 UDP_gluconosyltransferase 2B1</b>                               | <b>0.589053395</b> | <b>9.9E-20</b> | <b>6</b>  |
| P09875        | ANVVASALAIQPK                                                            | 0.532794706        | 3              | 4.091683  |
| P09875        | ESSINFEIYSVPLSK                                                          | 1.174186482        | 2              | 2.705749  |
| P09875        | FSGGLPLPPSYVPVLSSELSDR                                                   | 1.089837081        | 3              | 4.734142  |
| P09875        | IILNELAQR                                                                | 0.527426279        | 2              | 2.856291  |
| P09875        | SDLEYSFAK                                                                | 0.542471221        | 2              | 2.395199  |
| P09875        | VDFSILSTTGLLTALK                                                         | 0.604005109        | 2              | 4.404573  |
| <b>P09895</b> | <b>RL5 60S ribosomal protein L5</b>                                      | <b>1.114649018</b> | <b>0.00013</b> | <b>4</b>  |
| P09895        | GAVDGGLSIPHSTK                                                           | 1.217465264        | 2              | 4.19612   |
| P09895        | NNVTPDMMEEMYK                                                            | 0.951699712        | 2              | 2.960209  |
| P09895        | RFPGYDSESK                                                               | 1.230822514        | 2              | 2.701289  |
| P09895        | YLMEEDEDAYKK                                                             | 1.020543388        | 2              | 3.067264  |
| <b>POC057</b> | <b>H2AZ Histone H2A.Z</b>                                                | <b>0.738606273</b> | <b>9.9E-20</b> | <b>2</b>  |
| POC057        | ATIAGGGVIPHIHK                                                           | 0.737014078        | 2              | 3.202504  |
| POC057        | GDEELSLIK                                                                | 0.77213337         | 2              | 3.062839  |
| <b>POC2X9</b> | <b>AL4A1 Delta_1_pyrroline_5_carboxylate dehydrogenase_mitochondrial</b> | <b>0.879250179</b> | <b>9.9E-20</b> | <b>15</b> |
| POC2X9        | AIEAAVLAR                                                                | 0.820239255        | 2              | 2.352923  |
| POC2X9        | ALNDLKDQTEAIPCVDGDEEVWTS DVR                                             | 0.790304642        | 3              | 5.343075  |
| POC2X9        | DQTEAIPCVDGDEEVWTS DVR                                                   | 0.726862615        | 2              | 4.437436  |
| POC2X9        | EAGLPPNVIQFVPADGPTFGDVTSSSEHLGINTGVSVPTEK                                | 0.854668598        | 3              | 3.734577  |
| POC2X9        | EEIFGPVLTVVYVPDEK                                                        | 0.59993192         | 2              | 3.140964  |
| POC2X9        | ETLQLVDSTTSYGLTGAVFAQDK                                                  | 0.901757238        | 2              | 5.176111  |
| POC2X9        | KEWDLKPVADR                                                              | 0.696543629        | 2              | 3.050462  |
| POC2X9        | LYVPQSLWPQIK                                                             | 1.044972148        | 2              | 3.338728  |
| POC2X9        | NAAGNFYINDK                                                              | 2.096271692        | 2              | 2.880473  |
| POC2X9        | NFHVHSSADVDSVSGTLR                                                       | 1.128782114        | 2              | 5.136427  |
| POC2X9        | SAFEYGGQK                                                                | 0.8670243          | 2              | 2.538263  |
| POC2X9        | SSPSLSILAGGQCNE SVGYFVEPCIIESK                                           | 0.81504009         | 3              | 5.119821  |
| POC2X9        | STGSVVGQQPFGGAR                                                          | 0.785367671        | 2              | 4.450132  |
| POC2X9        | VANEPILAFTQGSPER                                                         | 1.049003534        | 2              | 5.37271   |

|               |                                                                 |                    |                |           |
|---------------|-----------------------------------------------------------------|--------------------|----------------|-----------|
| P0C2X9        | YQLSPFNHGK                                                      | 1.324228791        | 2              | 2.923884  |
| <b>P0C5H9</b> | <b>MANF Mesencephalic astrocyte_derived neurotrophic factor</b> | <b>1.113682085</b> | <b>0.63138</b> | <b>5</b>  |
| P0C5H9        | DRDVTFSPATIEEELIK                                               | 0.988966025        | 2              | 4.510808  |
| P0C5H9        | DVTFSPATIEEELIK                                                 | 0.989830296        | 2              | 3.17285   |
| P0C5H9        | IINEVSKPLAHHIPVEK                                               | 1.019826818        | 3              | 3.657366  |
| P0C5H9        | ILDDWGEMCK                                                      | 0.882331275        | 2              | 2.978632  |
| P0C5H9        | QIDLSTVDLKK                                                     | 0.82952972         | 2              | 2.881731  |
| <b>P10111</b> | <b>PPIA Peptidyl_prolyl cis_trans isomerase A</b>               | <b>0.89547846</b>  | <b>9.9E-20</b> | <b>10</b> |
| P10111        | EGMSIVEAMER                                                     | 0.858531463        | 2              | 2.636749  |
| P10111        | FEDENFILK                                                       | 0.87848946         | 2              | 3.355982  |
| P10111        | HTGPGILSMANAGPNTNGSQFFICTAK                                     | 1.158363082        | 3              | 6.148696  |
| P10111        | IIPGFMCQGGDFTR                                                  | 1.001327126        | 2              | 2.596653  |
| P10111        | KITISDCGQL                                                      | 1.252274021        | 2              | 3.193159  |
| P10111        | SIYGEKFEDENFILK                                                 | 0.960069801        | 2              | 4.399764  |
| P10111        | TEWLDGK                                                         | 0.860240629        | 2              | 2.31304   |
| P10111        | VCFELFADK                                                       | 1.158124925        | 2              | 3.410765  |
| P10111        | VCFELFADKVPK                                                    | 1.040393486        | 3              | 3.827482  |
| P10111        | VKEGMSIVEAMER                                                   | 1.218900433        | 2              | 2.81733   |
| <b>P10536</b> | <b>RAB1B Ras_related protein Rab_1B</b>                         | <b>1.102898197</b> | <b>1.3E-06</b> | <b>3</b>  |
| P10536        | MGPGAASGGERPNLK                                                 | 0.623081938        | 2              | 3.372909  |
| P10536        | NATNVEQAFMTMAAEIK+Oxidation(11)                                 | 1.146795883        | 2              | 3.436903  |
| P10536        | NATNVEQAFMTMAAEIK+Oxidation(9)                                  | 1.146795883        | 2              | 3.864061  |
| <b>P10633</b> | <b>CP2D1 Cytochrome P450 2D1</b>                                | <b>0.806783761</b> | <b>9.9E-20</b> | <b>3</b>  |
| P10633        | SQGVILASYGPEWR                                                  | 0.280392792        | 2              | 4.284493  |
| P10633        | TFMALLDNLLAENR                                                  | 0.85721592         | 2              | 3.540455  |
| P10633        | YGDVFSLQK                                                       | 0.815009473        | 2              | 2.794618  |
| <b>P10634</b> | <b>CP2DQ Cytochrome P450 2D26</b>                               | <b>0.886817519</b> | <b>9.9E-20</b> | <b>17</b> |
| P10634        | ACLGEPLAR                                                       | 0.911802629        | 2              | 2.427033  |
| P10634        | AVSNVIASLVYAR                                                   | 0.871792262        | 2              | 4.104393  |
| P10634        | DMTDAFLAEMQK                                                    | 0.850322628        | 2              | 4.188449  |
| P10634        | EAEHPFNPSILLSK                                                  | 0.774876534        | 2              | 2.325527  |
| P10634        | ELLVTYGEDTADRPLLPIYNHLGYGNK                                     | 0.905660818        | 3              | 5.507686  |
| P10634        | FADIVPTNIPHMTSR                                                 | 0.951987888        | 2              | 3.651089  |
| P10634        | FEYEDPFFNR                                                      | 0.739300138        | 2              | 2.544244  |
| P10634        | FHPEHFLDAQGNFVK                                                 | 0.870692409        | 2              | 4.282539  |
| P10634        | GNPESSFNDENLR                                                   | 1.059803097        | 2              | 4.275727  |
| P10634        | GTTLIPNLSSVLK                                                   | 0.625265288        | 2              | 2.31188   |
| P10634        | GTTLIPNLSSVLKDETVWEKPLR                                         | 0.727795085        | 2              | 4.028404  |
| P10634        | GVVLPAPYGPWEWR                                                  | 0.686493048        | 2              | 3.504254  |
| P10634        | LNSFIALVDK                                                      | 1.167611713        | 2              | 2.872913  |
| P10634        | RFEYEDPFFNR                                                     | 0.836888246        | 3              | 3.30915   |
| P10634        | SLEQWVTEEAGHLCDTFAK                                             | 0.837182834        | 2              | 4.550595  |



|               |                                                      |                    |                |           |
|---------------|------------------------------------------------------|--------------------|----------------|-----------|
| P10634        | SWDPAQPPR                                            | 0.801415731        | 2              | 2.502202  |
| P10634        | VHEEIDEVIGQVR                                        | 0.761421398        | 2              | 4.197106  |
| <b>P10719</b> | <b>ATPB ATP synthase subunit beta_ mitochondrial</b> | <b>0.984520327</b> | <b>9.9E-20</b> | <b>30</b> |
| P10719        | AHGGYSVFAGVGER                                       | 1.432177019        | 2              | 4.065657  |
| P10719        | AIAELGIYPAVDPLDSTSR                                  | 0.981135294        | 2              | 4.975537  |
| P10719        | EGNDLYHEMIESGVINLK                                   | 0.966294563        | 2              | 4.918588  |
| P10719        | FLSQPFQVAEVFTGHMGK                                   | 1.380293337        | 2              | 3.847488  |
| P10719        | FTQAGSEVSALLGR                                       | 0.981272721        | 2              | 4.665462  |
| P10719        | GFQQILAGDYDHLPEQAFYVMVGPIEEAVAK                      | 1.520606609        | 3              | 5.209855  |
| P10719        | IGLFGGAGVGK                                          | 0.918301557        | 2              | 2.918162  |
| P10719        | ILQDYK                                               | 0.940211573        | 1              | 2.187932  |
| P10719        | IMDPNIVGSEHYDVAR                                     | 1.28506572         | 2              | 4.603392  |
| P10719        | IMDPNIVGSEHYDVAR+Oxidation(1)                        | 0.795434334        | 2              | 4.095851  |
| P10719        | IMNVIGEPIDER                                         | 1.219945817        | 2              | 3.491669  |
| P10719        | IMNVIGEPIDER+Oxidation(1)                            | 0.876901749        | 2              | 3.415983  |
| P10719        | IPSAVGYQPTLATDMGTMQER                                | 2.797998277        | 2              | 5.111052  |
| P10719        | IPSAVGYQPTLATDMGTMQER+Oxidation(14)                  | 2.177110908        | 2              | 3.608154  |
| P10719        | IPSAVGYQPTLATDMGTMQER+Oxidation(17)                  | 2.177110908        | 2              | 4.286513  |
| P10719        | LVLEVAQHLGESTVR                                      | 0.995605924        | 2              | 4.672349  |
| P10719        | QFAPIHAEAPEFIEMSVEQEILVTGIK                          | 1.006419193        | 3              | 4.665442  |
| P10719        | SLQDIIAILGMDELSEEDKLTVSR                             | 0.978801354        | 4              | 5.212303  |
| P10719        | SLQDIIAILGMDELSEEDKLTVSR+Oxidation(10)               | 0.981955286        | 3              | 4.015153  |
| P10719        | TIAMDGTEGLVR                                         | 0.996224468        | 2              | 3.406317  |
| P10719        | TIAMDGTEGLVR+Oxidation(3)                            | 0.810236505        | 2              | 3.015239  |
| P10719        | TREGNDLYHEMIESGVINLK                                 | 1.038173278        | 2              | 6.026246  |
| P10719        | TVLIMELINNVAK                                        | 0.98449298         | 2              | 4.684461  |
| P10719        | TVLIMELINNVAK+Oxidation(4)                           | 0.767365076        | 2              | 3.20977   |
| P10719        | VALTGLTVAEYFR                                        | 2.474423692        | 2              | 3.786068  |
| P10719        | VALVYQMNEPPGAR                                       | 0.977994079        | 2              | 4.220304  |
| P10719        | VALVYQMNEPPGAR+Oxidation(7)                          | 0.816945725        | 2              | 2.857463  |
| P10719        | VLDSGAPIK                                            | 0.910596446        | 2              | 2.831918  |
| P10719        | VLDSGAPIKIPVGPETLGR                                  | 0.9604924          | 3              | 5.111969  |
| P10719        | VVDLLAPYAK                                           | 0.987240215        | 2              | 3.106712  |
| <b>P10760</b> | <b>SAHH Adenosylhomocysteinase</b>                   | <b>1.088440701</b> | <b>9.9E-20</b> | <b>16</b> |
| P10760        | ALDIAENEMPGLMR                                       | 1.27891187         | 2              | 4.341905  |
| P10760        | ATDVMIAAGK                                           | 0.904747767        | 1              | 1.903281  |
| P10760        | DGPLNMILDGGDLTNLIHTK                                 | 1.151644375        | 2              | 5.656613  |
| P10760        | DGPLNMILDGGDLTNLIHTK+Oxidation(5)                    | 0.986210891        | 3              | 4.402835  |
| P10760        | FDNLYGCR                                             | 1.07042746         | 2              | 2.686306  |
| P10760        | GETDEEYLWCIEQTLHFK                                   | 1.366113794        | 2              | 4.415736  |
| P10760        | GISETTTGVHNLYK                                       | 1.060137105        | 2              | 4.166504  |
| P10760        | IILLAAGR                                             | 1.326821332        | 2              | 2.407276  |
| P10760        | KLDEAVAEHLGK                                         | 1.060032359        | 3              | 4.995537  |

|               |                                                     |                    |                |           |
|---------------|-----------------------------------------------------|--------------------|----------------|-----------|
| P10760        | LDEAVAEHLGK                                         | 1.12847927         | 2              | 3.796467  |
| P10760        | RATDVMIAGK                                          | 1.253074634        | 2              | 2.664023  |
| P10760        | SKFDNLYGCR                                          | 1.192580218        | 2              | 2.863877  |
| P10760        | VAVVAGYGDVVK                                        | 1.43567503         | 2              | 3.681723  |
| P10760        | VNIKPQVDR                                           | 0.949308815        | 2              | 2.749049  |
| P10760        | WLNENAVEK                                           | 1.137965509        | 2              | 2.826216  |
| P10760        | WSSCNIFSTQDHAAAAIAK                                 | 1.515164442        | 2              | 5.056983  |
| <b>P10860</b> | <b>DHE3 Glutamate dehydrogenase 1_mitochondrial</b> | <b>1.188724036</b> | <b>9.9E-20</b> | <b>29</b> |
| P10860        | ALASLMTYK                                           | 1.172161398        | 2              | 3.065789  |
| P10860        | CAVVDVPPFGGAK                                       | 1.134008047        | 2              | 3.000407  |
| P10860        | CVGVGESDGSIWNPDGIDPK                                | 0.812891666        | 2              | 5.176046  |
| P10860        | DDGSWEVIEGYR                                        | 0.850004078        | 2              | 3.892668  |
| P10860        | DIVHSGLAYTMER                                       | 1.00866955         | 2              | 3.375663  |
| P10860        | DIVHSGLAYTMER+Oxidation(10)                         | 0.978417108        | 2              | 2.427266  |
| P10860        | DSNYHLLMSVQESLER                                    | 0.94420026         | 2              | 3.107387  |
| P10860        | EDDPNFFK                                            | 1.219127657        | 1              | 2.125179  |
| P10860        | GASIVEDKLVEDLK                                      | 1.248131143        | 2              | 3.133823  |
| P10860        | GFIGPGIDVPAPDMSTGER                                 | 0.926049255        | 2              | 5.333733  |
| P10860        | GFIGPGIDVPAPDMSTGER+Oxidation(13)                   | 0.96634359         | 2              | 4.891709  |
| P10860        | HGGTIPVVPTAEFQDR                                    | 0.959648041        | 2              | 4.668546  |
| P10860        | IIEGANGPTTPEADK                                     | 0.870457319        | 2              | 5.121608  |
| P10860        | IIEGANGPTTPEADKIFLER                                | 0.88225997         | 2              | 4.643274  |
| P10860        | KGFIGPGIDVPAPDMSTGER                                | 0.910651742        | 2              | 4.980026  |
| P10860        | KGFIGPGIDVPAPDMSTGER+Oxidation(14)                  | 0.721050426        | 2              | 4.141381  |
| P10860        | LQHGSILGFPK                                         | 0.737202259        | 2              | 2.739726  |
| P10860        | MVEGFFDR                                            | 1.221434383        | 2              | 2.718354  |
| P10860        | MVEGFFDR+Oxidation(0)                               | 0.849486742        | 2              | 2.742622  |
| P10860        | NLNHVSYGR                                           | 1.087139058        | 2              | 2.367163  |
| P10860        | NYTDNELEK                                           | 0.870864071        | 2              | 2.487782  |
| P10860        | RDDGSWEVIEGYR                                       | 1.000181888        | 2              | 4.263594  |
| P10860        | RFTMELAK                                            | 0.944383099        | 2              | 2.320582  |
| P10860        | TAAYVNAIEK                                          | 1.313244097        | 2              | 3.337825  |
| P10860        | TFVVQGFQGNVGLHSMR                                   | 1.212094444        | 2              | 4.02515   |
| P10860        | TFVVQGFQGNVGLHSMR+Oxidation(14)                     | 0.858095351        | 2              | 2.86318   |
| P10860        | VYEGSILEADCDILIPAASEK                               | 0.950959248        | 3              | 6.09714   |
| P10860        | YNLGLDLR                                            | 0.934086819        | 2              | 3.250304  |
| P10860        | YSTDVSDEVK                                          | 1.160937858        | 2              | 3.554041  |
| <b>P10867</b> | <b>GGLO L_gulonolactone oxidase</b>                 | <b>0.920802348</b> | <b>4.1E-10</b> | <b>6</b>  |
| P10867        | GDDILLSPCFQR                                        | 0.794705594        | 1              | 2.016634  |
| P10867        | LDPTGMFLNSYLEK                                      | 0.782547026        | 2              | 4.23529   |
| P10867        | LDYWLAYETIMK                                        | 1.036322907        | 2              | 3.978343  |
| P10867        | NADVFAQAR                                           | 0.960306259        | 2              | 2.753819  |

|               |                                                                      |                    |                |           |
|---------------|----------------------------------------------------------------------|--------------------|----------------|-----------|
| P10867        | TYGCSPEVYYQPTSVEEVR                                                  | 0.875214986        | 2              | 4.83521   |
| P10867        | VVAHYPVEVR                                                           | 0.84759204         | 2              | 2.777461  |
| <b>P10868</b> | <b>GAMT Guanidinoacetate N_methyltransferase</b>                     | <b>0.993669401</b> | <b>0.3888</b>  | <b>4</b>  |
| P10868        | EHWIECNDGVFQR                                                        | 0.879033397        | 2              | 4.501667  |
| P10868        | ENICTEVMALVPPADCR                                                    | 1.034415746        | 2              | 2.364018  |
| P10868        | YTDITAMFEETQVPALLEAGFQR                                              | 1.051981739        | 3              | 4.620678  |
| P10868        | YYAFPQMITPLVTK                                                       | 0.651269115        | 2              | 2.74588   |
| <b>P10888</b> | <b>COX41 Cytochrome c oxidase subunit 4 isoform 1_ mitochondrial</b> | <b>0.937586126</b> | <b>0.00011</b> | <b>4</b>  |
| P10888        | DYPLPDVAHVK                                                          | 0.811842268        | 2              | 2.559607  |
| P10888        | IQFNESFAEMNK                                                         | 1.088850449        | 2              | 3.635572  |
| P10888        | SEDYALPSYVDR                                                         | 0.974640114        | 2              | 3.797805  |
| P10888        | VNPIQGFSK                                                            | 1.075383982        | 1              | 1.952887  |
| <b>P11030</b> | <b>ACBP Acyl_CoA_binding protein</b>                                 | <b>1.980955908</b> | <b>9.9E-20</b> | <b>4</b>  |
| P11030        | QATVGDVNTDRPGLLDLK                                                   | 2.138729162        | 2              | 3.490846  |
| P11030        | TQPTDEEMLFYSHFK                                                      | 5.816601365        | 2              | 4.208907  |
| P11030        | TYVEKVEELK                                                           | 1.188415672        | 2              | 2.32323   |
| P11030        | WDSWVK                                                               | 1.147920272        | 1              | 2.045096  |
| <b>P11232</b> | <b>THIO Thioredoxin</b>                                              | <b>0.99751479</b>  | <b>0.55871</b> | <b>2</b>  |
| P11232        | EAFQEALAAAGDK                                                        | 0.916815056        | 2              | 4.004786  |
| P11232        | VGEFSGANK                                                            | 1.178565137        | 2              | 2.777322  |
| <b>P11240</b> | <b>COX5A Cytochrome c oxidase subunit 5A_ mitochondrial</b>          | <b>0.915967332</b> | <b>0.03314</b> | <b>5</b>  |
| P11240        | EIYPYVIQELRPTLNELGISTPEELGLDK                                        | 0.333672467        | 3              | 6.361889  |
| P11240        | EIYPYVIQELRPTLNELGISTPEELGLDKV                                       | 1.071824103        | 3              | 7.085     |
| P11240        | GMNTLVGYDLVPEPK                                                      | 0.952316372        | 2              | 3.678948  |
| P11240        | LNDFASAVR                                                            | 0.856569315        | 2              | 3.213717  |
| P11240        | RLNDFASAVR                                                           | 0.904996057        | 2              | 2.736662  |
| <b>P11348</b> | <b>DHPR Dihydropteridine reductase</b>                               | <b>1.070902412</b> | <b>9.9E-20</b> | <b>10</b> |
| P11348        | AALDGTPGMIGYMAK                                                      | 1.191479408        | 2              | 3.553158  |
| P11348        | EGLLTLGAK                                                            | 0.901005165        | 2              | 2.729009  |
| P11348        | GAVHQLCQSLAGK                                                        | 1.427750096        | 2              | 3.859145  |
| P11348        | MTDSFTEQADQVTAEVGK                                                   | 1.077337284        | 2              | 5.362756  |
| P11348        | MTDSFTEQADQVTAEVGK+Oxidation(0)                                      | 0.765734052        | 2              | 5.750066  |
| P11348        | NSGMPSGAAAIAVLPVTLDTPMNR                                             | 0.978531195        | 2              | 5.519856  |
| P11348        | NSGMPSGAAAIAVLPVTLDTPMNR+Oxidation(3)                                | 0.770576526        | 2              | 3.925415  |
| P11348        | QSIWTSTISSHLATK                                                      | 0.944944383        | 2              | 3.472125  |
| P11348        | RPNSGSLIQVVTDDGK                                                     | 1.815210089        | 2              | 3.710833  |
| P11348        | VDAILCVAGGWAGGNAK                                                    | 0.87121291         | 2              | 4.051018  |
| <b>P11442</b> | <b>CLH Clathrin heavy chain 1</b>                                    | <b>1.030742368</b> | <b>9.9E-20</b> | <b>31</b> |
| P11442        | AHIAQLCEK                                                            | 0.863934348        | 1              | 2.225108  |
| P11442        | ALEHFTDLYDIK                                                         | 0.925448973        | 3              | 3.993561  |
| P11442        | AVDVFFPPEAQNDPVMQISEK                                                | 0.863168605        | 2              | 2.670698  |
| P11442        | FDVNTSAVQVLIHIGNLDR                                                  | 0.954675897        | 3              | 4.110577  |

|               |                                                                  |                    |                |           |
|---------------|------------------------------------------------------------------|--------------------|----------------|-----------|
| P11442        | FNALFAQGNYSEAAK                                                  | 0.967617953        | 2              | 4.359346  |
| P11442        | GQCDELEINVCNENSLEK                                               | 0.903014845        | 2              | 5.226171  |
| P11442        | GQFSTDELVAEVEK                                                   | 0.849323745        | 2              | 4.152606  |
| P11442        | GQFSTDELVAEVEKR                                                  | 0.944987286        | 2              | 3.466628  |
| P11442        | IHEGCEEPATHNALAK                                                 | 0.885199364        | 2              | 5.201392  |
| P11442        | ISGETIFVTAPHEATAGIIGVNR                                          | 1.109180767        | 2              | 5.213744  |
| P11442        | IYIDSNNNPER                                                      | 1.068313018        | 2              | 3.234654  |
| P11442        | KFDVNTSAVQVLIHIGNLDR                                             | 0.989273368        | 3              | 5.845061  |
| P11442        | KFNALFAQGNYSEAAK                                                 | 1.028484343        | 2              | 4.171444  |
| P11442        | LAELEEFINGPNNAHIQQVGDR                                           | 1.020356059        | 2              | 4.959493  |
| P11442        | LHIIIEVGTPTGNQPFK                                                | 1.039398167        | 2              | 4.297172  |
| P11442        | LPVVIGLLDVDCSEDIK                                                | 1.218047317        | 2              | 4.082672  |
| P11442        | LTDQLPLIIVCDR                                                    | 0.963286725        | 2              | 3.094154  |
| P11442        | MAVRNNLAGAEELFARK+Oxidation(0)                                   | 1.12538154         | 2              | 2.321327  |
| P11442        | NLQNLLILTAIK                                                     | 0.927165348        | 2              | 4.212542  |
| P11442        | NNLAGAEELFAR                                                     | 0.938083555        | 2              | 4.02265   |
| P11442        | NNRPSEGPLQTR                                                     | 0.844568717        | 3              | 4.098942  |
| P11442        | RPLIDQVVQTALSETQDPEEVSIVTK                                       | 1.111748543        | 3              | 6.500882  |
| P11442        | SVDPTLALSIVLR                                                    | 1.028058128        | 2              | 2.989966  |
| P11442        | SVNESLNNLFITEEDYQALR                                             | 1.399513669        | 2              | 4.496438  |
| P11442        | TLQIFNIEMK                                                       | 1.174469571        | 2              | 2.79051   |
| P11442        | TSIDAYDNFDNISLAQR                                                | 0.986487035        | 2              | 4.244446  |
| P11442        | VDKLDASESLR                                                      | 0.923719797        | 2              | 2.451727  |
| P11442        | VGEQAQVVIIDMNDPSNPIR                                             | 0.921676337        | 2              | 4.076597  |
| P11442        | VIQCFIETGQVQK                                                    | 0.971266584        | 2              | 4.102799  |
| P11442        | VSQPIEGHAASFAQFK                                                 | 1.22690617         | 2              | 4.236613  |
| P11442        | WLLLTGISAQQNR                                                    | 1.10909362         | 2              | 2.963931  |
| <b>P11497</b> | <b>ACACA Acetyl_CoA carboxylase 1</b>                            | <b>1.859106486</b> | <b>9.9E-20</b> | <b>5</b>  |
| P11497        | GGSWVVIDPTINPR                                                   | 2.188642243        | 2              | 2.932549  |
| P11497        | GSVLEPEGTVEIK                                                    | 2.22555038         | 2              | 2.648114  |
| P11497        | ITSENPDEGFKPSSGTVQELNFR                                          | 1.986277705        | 3              | 4.01538   |
| P11497        | TLRDPSLPLELQDIMTSVSGR                                            | 1.74628239         | 3              | 3.953701  |
| P11497        | VQQAELHTGSLPQIQSTALR                                             | 0.608984125        | 3              | 3.620199  |
| <b>P11507</b> | <b>AT2A2 Sarcoplasmic/endoplasmic reticulum calcium ATPase 2</b> | <b>0.880110811</b> | <b>0.01588</b> | <b>6</b>  |
| P11507        | DIVPGDIVEIAVGDKVPADIR                                            | 1.132530869        | 2              | 2.799578  |
| P11507        | IGIFGQDEDVTSK                                                    | 0.95424416         | 2              | 2.971655  |
| P11507        | IRDEMVAEQER                                                      | 0.822532517        | 2              | 3.15128   |
| P11507        | LDEFGEQLSK                                                       | 0.769792282        | 2              | 2.328009  |
| P11507        | TASEMVLADDFSTIVAAVEEGR                                           | 0.780673436        | 3              | 3.712789  |
| P11507        | VDQSILTGESVSVIK                                                  | 0.659306655        | 2              | 4.106581  |
| <b>P11598</b> | <b>PDIA3 Protein disulfide_isomerase A3</b>                      | <b>0.891620342</b> | <b>9.9E-20</b> | <b>25</b> |
| P11598        | DASVVGFFR                                                        | 0.876592116        | 2              | 2.375275  |

|               |                                                    |                    |                |           |
|---------------|----------------------------------------------------|--------------------|----------------|-----------|
| P11598        | DGEEAGAYDGPR                                       | 0.77584288         | 2              | 3.303884  |
| P11598        | DLFSDGHSEFLK                                       | 0.923138774        | 2              | 2.512794  |
| P11598        | EATNPPIIQEEKPK                                     | 0.853887129        | 2              | 3.656388  |
| P11598        | ELNDFISYLQR                                        | 0.905113195        | 2              | 2.653127  |
| P11598        | EYDDNGEGITIFRPLHLANK                               | 0.975902168        | 2              | 4.478251  |
| P11598        | FAHTNVESLVK                                        | 2.381635076        | 2              | 2.696245  |
| P11598        | FIQESIFGLCPHMTEDNKDLIQGK                           | 1.003885506        | 3              | 4.865358  |
| P11598        | FISDKDASVVGFFR                                     | 0.85230316         | 2              | 4.226071  |
| P11598        | FLQEYFDGNLK                                        | 0.871281577        | 2              | 3.50307   |
| P11598        | FLQEYFDGNLKR                                       | 1.025013291        | 2              | 3.137863  |
| P11598        | FVMQEEFSR                                          | 1.343699662        | 2              | 2.679884  |
| P11598        | IFRDGEEAGAYDGPR                                    | 0.862874601        | 2              | 3.278626  |
| P11598        | LAPEYAAAATR                                        | 0.90098829         | 2              | 3.231463  |
| P11598        | LNFAVASR                                           | 1.243013198        | 2              | 2.449139  |
| P11598        | LSKDPNIVIAK                                        | 0.815059355        | 3              | 4.016501  |
| P11598        | MDATANDVPSPYEVK                                    | 1.126185161        | 2              | 4.288888  |
| P11598        | MDATANDVPSPYEVK+Oxidation(0)                       | 0.935065935        | 2              | 4.161642  |
| P11598        | QAGPASVPLRTEDEFK                                   | 1.443709178        | 2              | 2.45539   |
| P11598        | RLAPEYAAAATR                                       | 0.807998649        | 2              | 3.823626  |
| P11598        | SEPIPETNEGPVK                                      | 0.952447524        | 2              | 3.184956  |
| P11598        | TFLDAGHK                                           | 0.884456666        | 2              | 2.591974  |
| P11598        | TFSHELSDFGLESTTGEIPVVAIR                           | 1.163187269        | 2              | 5.957503  |
| P11598        | VDCTANTNTCNK                                       | 1.021441983        | 2              | 4.254447  |
| P11598        | YGVSGYPTLK                                         | 0.874063876        | 2              | 3.078152  |
| <b>P11610</b> | <b>CD1D2 Antigen_presenting glycoprotein CD1d2</b> | <b>0.686258212</b> | <b>0.00466</b> | <b>2</b>  |
| P11610        | DIQELVKMMSPK+Oxidation(7)                          | 0.686258212        | 2              | 2.577317  |
| P11610        | DIQELVKMMSPK+Oxidation(8)                          | 0.686258212        | 2              | 2.446759  |
| <b>P11711</b> | <b>CP2A1 Cytochrome P450 2A1</b>                   | <b>0.985180527</b> | <b>9.9E-20</b> | <b>6</b>  |
| P11711        | GEQATYNTLFK                                        | 1.07691559         | 2              | 2.626914  |
| P11711        | GTDVFPILGSLMTDPK                                   | 0.777622036        | 2              | 3.343952  |
| P11711        | ILEEAGYLIK                                         | 0.738948249        | 2              | 2.31033   |
| P11711        | LEDINESPKPLGFTR                                    | 1.068014665        | 2              | 3.505904  |
| P11711        | TVSNVISSIVFGER                                     | 0.803872388        | 2              | 3.580146  |
| P11711        | VHEEIEQVIGR                                        | 0.739123226        | 2              | 3.021977  |
| <b>P11714</b> | <b>CP2D9 Cytochrome P450 2D9</b>                   | <b>0.824055216</b> | <b>9.9E-20</b> | <b>2</b>  |
| P11714        | GNPESSFNDENLLMVVR                                  | 0.94420026         | 2              | 2.675455  |
| P11714        | VQQEIDEVIGQVR                                      | 0.821312154        | 2              | 4.8384    |
| <b>P11862</b> | <b>GAS2 Growth arrest_specific protein 2</b>       | <b>0.824901674</b> | <b>8.6E-06</b> | <b>2</b>  |
| P11862        | EIEQEETLSAPSPSPSSK                                 | 1.11256323         | 2              | 4.0178    |
| P11862        | LDNGALLCQLAATVQEK                                  | 0.804826697        | 2              | 3.864927  |
| <b>P11884</b> | <b>ALDH2 Aldehyde dehydrogenase_mitochondrial</b>  | <b>0.916336704</b> | <b>9.9E-20</b> | <b>24</b> |
| P11884        | EAGFPPGVVNIVPGFGPTAGAAIASHEDVDK                    | 0.905146538        | 3              | 4.275989  |

|               |                                                 |                    |                |           |
|---------------|-------------------------------------------------|--------------------|----------------|-----------|
| P11884        | EEIFGPVMQILK                                    | 0.842568585        | 2              | 3.422286  |
| P11884        | EEIFGPVMQILK+Oxidation(7)                       | 0.635843057        | 2              | 2.85709   |
| P11884        | ELGEYGLQAYTEVK                                  | 0.910450753        | 2              | 4.4711    |
| P11884        | GYFIQPTVFGDVK                                   | 0.973638754        | 2              | 4.077297  |
| P11884        | KTFPTVNPSTGEVICQVAEGNKEDVDK                     | 0.892759629        | 3              | 6.42725   |
| P11884        | LGPALATGNVVVMK                                  | 1.015805454        | 2              | 3.415183  |
| P11884        | LGPALATGNVVVMK+Oxidation(12)                    | 0.748698854        | 2              | 3.623517  |
| P11884        | LLCGGAAADR                                      | 0.898887639        | 2              | 3.321157  |
| P11884        | RVTLELGGK                                       | 0.704691305        | 2              | 2.782523  |
| P11884        | TEQGPQVDETQFK                                   | 0.808862032        | 2              | 4.575071  |
| P11884        | TEQGPQVDETQFKK                                  | 0.908385624        | 2              | 2.914654  |
| P11884        | TFPTVNPSTGEVICQVAEGNK                           | 1.055914624        | 2              | 5.100505  |
| P11884        | TFPTVNPSTGEVICQVAEGNKEDVDK                      | 0.864250204        | 2              | 4.254928  |
| P11884        | TFVQEDVYDEFVER                                  | 0.845128831        | 2              | 5.242601  |
| P11884        | TIEEVVGR                                        | 0.774115903        | 2              | 2.916169  |
| P11884        | TIPIDGFFSYTR                                    | 0.966864081        | 2              | 2.795919  |
| P11884        | VAEQTPLTALYVANLIK                               | 1.900196667        | 3              | 4.935835  |
| P11884        | VAFTGSTEVGHLIQVAAGSSNLK                         | 1.240073646        | 2              | 6.182978  |
| P11884        | VAFTGSTEVGHLIQVAAGSSNLKR                        | 2.089505247        | 3              | 3.44299   |
| P11884        | VTLELGGK                                        | 0.755936681        | 1              | 1.970304  |
| P11884        | VVGPNFDSR                                       | 0.863980318        | 2              | 2.823668  |
| P11884        | YGLAAAVFTK                                      | 0.914225371        | 2              | 3.548285  |
| P11884        | YYAGWADK                                        | 0.841008721        | 1              | 1.949049  |
| <b>P11915</b> | <b>NLTP Non_specific_lipid_transfer_protein</b> | <b>1.285107112</b> | <b>0.00013</b> | <b>19</b> |
| P11915        | ADCTITMADSDLLALMTGK                             | 1.07817013         | 2              | 5.559618  |
| P11915        | ADCTITMADSDLLALMTGK+Oxidation(15)               | 1.105977196        | 2              | 2.756225  |
| P11915        | ADCTITMADSDLLALMTGK+Oxidation(6)                | 1.114501001        | 2              | 4.308211  |
| P11915        | ANLIFK                                          | 1.088969319        | 2              | 2.34476   |
| P11915        | GSVLPDSDKK                                      | 1.803560417        | 2              | 2.505759  |
| P11915        | HIDVLINK                                        | 0.823725808        | 2              | 2.749436  |
| P11915        | HSVNNPYSQFQDEYSLDEIMK                           | 1.032164232        | 2              | 5.439923  |
| P11915        | KADCTITMADSDLLALMTGK                            | 1.237971314        | 2              | 3.96418   |
| P11915        | KLEEEGEEFVK                                     | 1.068355076        | 2              | 4.335941  |
| P11915        | KLEEEGEEFVKK                                    | 1.043387934        | 3              | 4.562216  |
| P11915        | LEEEGEEFVK                                      | 1.060048428        | 1              | 2.315851  |
| P11915        | LEEEGEEFVKK                                     | 1.094042916        | 2              | 3.482084  |
| P11915        | LQSLQLQPK                                       | 1.131952765        | 2              | 3.415481  |
| P11915        | MNPQSAFFQGK                                     | 1.281916649        | 2              | 3.237615  |
| P11915        | MNPQSAFFQGK+Oxidation(0)                        | 0.886981695        | 2              | 3.086328  |
| P11915        | SRPVDFLTVLQCCPTSDGAAAAIVSSEEFVQK                | 1.153581805        | 3              | 5.733031  |
| P11915        | THQISAAPTSSAGDGFK                               | 0.957251425        | 2              | 4.436141  |
| P11915        | WVINPSGGLISK                                    | 1.04667962         | 2              | 2.887324  |
| P11915        | YGMSACPFAPQLFGSAGK                              | 1.249353664        | 2              | 2.810792  |

|               |                                                                               |                    |                |           |
|---------------|-------------------------------------------------------------------------------|--------------------|----------------|-----------|
| <b>P11980</b> | <b>KPYM Pyruvate kinase isozymes M1/M2</b>                                    | <b>0.945636846</b> | <b>7.4E-05</b> | <b>3</b>  |
| P11980        | GVNLPGAAVDLPAVSEK                                                             | 0.947054868        | 2              | 3.701762  |
| P11980        | LDIDSAPITAR                                                                   | 0.825163796        | 2              | 2.959845  |
| P11980        | NTGIICTIGPASR                                                                 | 0.594398835        | 2              | 3.307356  |
| <b>P12001</b> | <b>RL18 60S ribosomal protein L18</b>                                         | <b>1.142625056</b> | <b>5.1E-13</b> | <b>5</b>  |
| P12001        | GTVLLSGPR                                                                     | 1.714261998        | 2              | 2.458262  |
| P12001        | ILTFDQLALESPK                                                                 | 1.165080868        | 2              | 4.994026  |
| P12001        | TAVVVGITDDVDR                                                                 | 1.137501553        | 2              | 4.343031  |
| P12001        | TNRPPLSLR                                                                     | 0.959927044        | 3              | 3.447801  |
| P12001        | TNSTFNQVVVK                                                                   | 1.157090807        | 2              | 2.804724  |
| <b>P12007</b> | <b>IVD Isovaleryl_CoA dehydrogenase_ mitochondrial</b>                        | <b>1.005203961</b> | <b>0.24995</b> | <b>8</b>  |
| P12007        | AQEIDQSNDFK                                                                   | 0.678166813        | 2              | 3.351934  |
| P12007        | FVQENLAPK                                                                     | 0.874850897        | 2              | 2.753386  |
| P12007        | FWITNGPDADVLVVYAK                                                             | 1.172110531        | 2              | 3.743194  |
| P12007        | GSNTCELVFEDCK                                                                 | 1.093689357        | 2              | 4.426341  |
| P12007        | GSNTCELVFEDCKVPAANILSQESK                                                     | 1.007508816        | 3              | 5.050405  |
| P12007        | GVYVLMGLDLER                                                                  | 1.048878256        | 2              | 3.100017  |
| P12007        | LYEIGGGTSEVR                                                                  | 0.930346314        | 2              | 3.549193  |
| P12007        | TDLTAVPASR                                                                    | 0.968655955        | 2              | 3.05182   |
| <b>P12336</b> | <b>GTR2 Solute carrier family 2_ facilitated glucose transporter member 2</b> | <b>0.958613038</b> | <b>0.4989</b>  | <b>2</b>  |
| P12336        | SFDEIAAEFR                                                                    | 0.956485096        | 2              | 3.018036  |
| P12336        | VSVIQLFTDPNYR                                                                 | 1.107998511        | 2              | 2.379023  |
| <b>P12346</b> | <b>TRFE Serotransferrin</b>                                                   | <b>0.860290852</b> | <b>1.5E-05</b> | <b>21</b> |
| P12346        | ADRDQYELLCLDNTR                                                               | 1.174370286        | 2              | 4.40271   |
| P12346        | ASDSSINWNNLK                                                                  | 1.151457872        | 2              | 3.294673  |
| P12346        | DGGGDVAFVK                                                                    | 1.009701282        | 2              | 2.987252  |
| P12346        | DLKQEDFQLLCDGK                                                                | 0.847020497        | 2              | 4.123101  |
| P12346        | EGVCPEGSIDSAPVK                                                               | 1.095585037        | 2              | 3.429128  |
| P12346        | EGYNGYTGAFAQCLVEK                                                             | 0.861381749        | 2              | 2.949091  |
| P12346        | FDEFFSQGCAPGYK                                                                | 1.020912148        | 2              | 4.198772  |
| P12346        | GDKDCTGNFCLFR                                                                 | 1.071547497        | 3              | 3.556913  |
| P12346        | GTFDFQLNQLQGK                                                                 | 1.075123739        | 2              | 3.108733  |
| P12346        | GYAVAVVK                                                                      | 1.157531546        | 2              | 3.295123  |
| P12346        | HTTIFEVLPQK                                                                   | 1.130419863        | 3              | 3.629882  |
| P12346        | KGTFDFQLNQLQGK                                                                | 0.974870052        | 3              | 3.943759  |
| P12346        | KTSYQDCIK                                                                     | 1.179724531        | 2              | 2.59595   |
| P12346        | LPEGTTYEYLGAEYLQAVGNIR                                                        | 1.003916294        | 2              | 4.711076  |
| P12346        | NGDGKEDLIWEILK                                                                | 1.250846322        | 2              | 3.660434  |
| P12346        | QEDFQLLCDGK                                                                   | 0.9368152          | 2              | 2.818405  |
| P12346        | SKDFQLFGSPLGK                                                                 | 1.402013599        | 2              | 2.910552  |
| P12346        | TSYQDCIK                                                                      | 1.0657996          | 2              | 2.449548  |
| P12346        | VSTVLTAAK                                                                     | 1.006573701        | 2              | 2.73783   |

|               |                                                                            |                    |                |           |
|---------------|----------------------------------------------------------------------------|--------------------|----------------|-----------|
| P12346        | WCALSHQER                                                                  | 1.269727438        | 2              | 2.951264  |
| P12346        | WCAVSEHENTK                                                                | 1.004446086        | 2              | 3.584677  |
| <b>P12368</b> | <b>KAP2 cAMP_dependent protein kinase type II_alpha regulatory subunit</b> | <b>1.005966304</b> | <b>0.06633</b> | <b>2</b>  |
| P12368        | NISHYEEQLVK                                                                | 0.832763164        | 2              | 2.692959  |
| P12368        | NLDQEQLSQVLDAMFEK                                                          | 1.049490499        | 2              | 4.106575  |
| <b>P12711</b> | <b>ADHX Alcohol dehydrogenase class 3</b>                                  | <b>0.879368863</b> | <b>9.9E-20</b> | <b>9</b>  |
| P12711        | AAVAWEAGKPLSIEIEVAPPQAHEVR                                                 | 0.990675519        | 3              | 5.694255  |
| P12711        | AGDTVIPLYIPQCGECK                                                          | 0.94420026         | 2              | 3.926112  |
| P12711        | AKEFGATECINPQDFSK                                                          | 0.861493878        | 2              | 3.872194  |
| P12711        | EFGATECINPQDFSK                                                            | 0.753040043        | 2              | 4.631954  |
| P12711        | IDPSAPLDK                                                                  | 0.825863935        | 1              | 2.06998   |
| P12711        | IIGIDINK                                                                   | 0.83191972         | 1              | 2.0943    |
| P12711        | IIGIDINKDK                                                                 | 0.863145493        | 2              | 2.557337  |
| P12711        | VLLGCGISTGYGAAVNTAK                                                        | 1.061545634        | 2              | 5.676191  |
| P12711        | VDEFVTGNLSFDQINK                                                           | 0.806920057        | 2              | 4.892179  |
| <b>P12749</b> | <b>RL26 60S ribosomal protein L26</b>                                      | <b>1.045084336</b> | <b>0.41942</b> | <b>5</b>  |
| P12749        | DDEVQVVR                                                                   | 1.112239448        | 2              | 2.52155   |
| P12749        | FNPFVTSR                                                                   | 1.01285158         | 2              | 2.663767  |
| P12749        | HFNAPSHIR                                                                  | 1.235046237        | 3              | 3.726597  |
| P12749        | KDDEVQVVR                                                                  | 0.962345137        | 2              | 3.171065  |
| P12749        | KIMSSPLSKELR+Oxidation(2)                                                  | 1.16157581         | 2              | 2.47963   |
| <b>P12785</b> | <b>FAS Fatty acid synthase</b>                                             | <b>1.623226243</b> | <b>9.9E-20</b> | <b>42</b> |
| P12785        | ACIDTALENLSTLK                                                             | 2.022986488        | 2              | 4.567935  |
| P12785        | AEAVVAVLLTK                                                                | 2.173127188        | 2              | 3.179349  |
| P12785        | AGSDTELAAPK                                                                | 1.308582028        | 2              | 3.618582  |
| P12785        | CPPGVVPACHNSEDTVITISGPQAAVNEFVEQLK                                         | 1.692550421        | 3              | 5.675735  |
| P12785        | DHKDNLEFFLTNLGK                                                            | 1.004061833        | 2              | 2.599478  |
| P12785        | DPETLLGYSMVGCQR                                                            | 1.379971412        | 2              | 2.802916  |
| P12785        | EEEEPEAMLPGAQPTLISAISK                                                     | 1.156594308        | 2              | 3.875578  |
| P12785        | EQGVTFPSGEAQQLIR                                                           | 2.105996149        | 2              | 4.220711  |
| P12785        | FDASFFGVHPK                                                                | 1.674957741        | 2              | 3.215391  |
| P12785        | FVFTPHVEPECLSESAILQK                                                       | 1.893860654        | 2              | 4.428057  |
| P12785        | GHALGETLACLPSVQPGPSFLSQEEWESLFSR                                           | 1.772955458        | 3              | 5.994374  |
| P12785        | GLSIIIIHSSLAEPK                                                            | 1.168928395        | 2              | 4.303549  |
| P12785        | GNAGQSNYGFANSTMER                                                          | 2.111173825        | 2              | 4.32393   |
| P12785        | GVDLVLSLAEEK                                                               | 2.028070093        | 2              | 3.670864  |
| P12785        | GYDYGPHFQGVYEATLEGEQK                                                      | 2.573001082        | 3              | 3.571103  |
| P12785        | LDPGSSELQK                                                                 | 1.630450161        | 2              | 2.54974   |
| P12785        | LFDHPEVPIPAESVSR                                                           | 2.233395           | 2              | 4.032842  |
| P12785        | LLLPEDPLISGLLSQALK                                                         | 2.238066667        | 3              | 4.889594  |
| P12785        | LTPGCEAEAEAEICFFIK                                                         | 1.624809166        | 2              | 3.92684   |
| P12785        | MTVPGLEDLPQHGLPR                                                           | 1.882759906        | 2              | 3.501285  |



|               |                                          |                    |                |           |
|---------------|------------------------------------------|--------------------|----------------|-----------|
| P12785        | QAQLNLSILLVNPEGPTLTR                     | 2.298720957        | 2              | 4.502846  |
| P12785        | QFVDAEHSK                                | 0.612388284        | 2              | 2.367275  |
| P12785        | QQEQLVPTLEK                              | 2.149835918        | 2              | 2.438782  |
| P12785        | RQQEQLVPTLEK                             | 2.622188696        | 2              | 2.920692  |
| P12785        | RVYATILNAGTNTDGCK                        | 0.461050572        | 2              | 2.482786  |
| P12785        | SDEALKPLGVK                              | 2.143358779        | 2              | 3.055589  |
| P12785        | SFDDSGNGYCR                              | 1.879925016        | 2              | 2.34025   |
| P12785        | SLSLSLEETPVVFENVTFHQATILPR               | 1.689722047        | 3              | 4.473696  |
| P12785        | SLYQPGGVAPESLEYIEAHGTGTK                 | 1.9761019          | 2              | 5.397772  |
| P12785        | SNMGHPEPASGLAALTK                        | 1.87714995         | 2              | 2.964784  |
| P12785        | SNMGHPEPASGLAALTK+Oxidation(2)           | 1.330429794        | 2              | 3.261074  |
| P12785        | TGGTYGEDLGADYNLSQVCDGK                   | 1.978988723        | 2              | 4.993083  |
| P12785        | TMEAVQGLLEQGR                            | 1.768706608        | 2              | 3.776312  |
| P12785        | TMEAVQGLLEQGR+Oxidation(1)               | 1.026837293        | 2              | 3.412564  |
| P12785        | VGDPQELNGITR                             | 1.337685244        | 2              | 3.44143   |
| P12785        | VHLTGDINPNALFPPVEFPVPR                   | 1.798320632        | 2              | 4.635872  |
| P12785        | VLEALLPLK                                | 2.174244734        | 2              | 2.824419  |
| P12785        | VLESDLVMNVYR                             | 0.417461464        | 2              | 2.991359  |
| P12785        | VSVHIEGDHR                               | 1.98894113         | 2              | 2.796365  |
| P12785        | VTAIYIDPATHLQK                           | 2.048703573        | 2              | 3.415653  |
| P12785        | VYATILNAGTNTDGCK                         | 1.342037717        | 2              | 4.135136  |
| P12785        | VYQWEDPDSK                               | 2.021268899        | 2              | 2.944968  |
| <b>P12791</b> | <b>CP2BA Cytochrome P450 2B10</b>        | <b>0.652443866</b> | <b>9.9E-20</b> | <b>2</b>  |
| P12791        | IQEEAQCLVEELR                            | 0.562422039        | 2              | 4.399037  |
| P12791        | IQEEAQCLVEELRK                           | 0.658032857        | 2              | 3.638347  |
| <b>P12847</b> | <b>MYH3 Myosin_3</b>                     | <b>0.660260447</b> | <b>0.38035</b> | <b>4</b>  |
| P12847        | GTLEDQIISANPLLEAFGNAK                    | 0.654221588        | 2              | 2.985037  |
| P12847        | MKGTLEDQIISANPLLEAFGNAK                  | 0.601457787        | 3              | 6.321391  |
| P12847        | MKGTLEDQIISANPLLEAFGNAK+Oxidation(0)     | 0.638321372        | 3              | 4.847859  |
| P12847        | NLTEELAGLDETIK                           | 0.769172734        | 2              | 2.35153   |
| <b>P12928</b> | <b>KPYR Pyruvate kinase isozymes R/L</b> | <b>1.700969368</b> | <b>9.9E-20</b> | <b>18</b> |
| P12928        | AAVIAVTR                                 | 2.959103014        | 2              | 2.556177  |
| P12928        | AETSDVANAVLDGADCIMLSGETAK                | 1.828839062        | 2              | 5.585162  |
| P12928        | CCAAAIIVLTK                              | 1.040665309        | 2              | 2.54685   |
| P12928        | CNLAGKPVVCATQMLESMTK                     | 1.432588949        | 3              | 4.973665  |
| P12928        | EATESFATSPLSYRPVIAIALDTK                 | 2.438996799        | 2              | 4.367115  |
| P12928        | EPPEAIWADDVDRR                           | 1.943606927        | 2              | 2.450483  |
| P12928        | GDLGIEIPAEK                              | 1.517727993        | 2              | 2.783844  |
| P12928        | GSQVLVTVDPK                              | 1.854812313        | 2              | 3.141994  |
| P12928        | GVNLPNTEVDLPGLSEQDLLDLR                  | 1.996107543        | 2              | 5.024025  |
| P12928        | IGPEGLVTEVEHGGLGSR                       | 1.955440576        | 2              | 5.255551  |
| P12928        | IYIDDGLISLVVQK                           | 2.054829607        | 2              | 4.394081  |
| P12928        | KGVNLPNTEVDLPGLSEQDLLDLR                 | 2.292007951        | 3              | 4.636216  |

|               |                                                                               |                    |                |          |
|---------------|-------------------------------------------------------------------------------|--------------------|----------------|----------|
| P12928        | RVQFGIESGK                                                                    | 0.941493249        | 2              | 2.404479 |
| P12928        | STSIIATIGPASR                                                                 | 1.163841796        | 2              | 3.722901 |
| P12928        | TGVLQGGPESEVEIVK                                                              | 2.080255296        | 2              | 4.759411 |
| P12928        | TVWVDYHNITR                                                                   | 1.55204257         | 2              | 2.417079 |
| P12928        | VGDLVIVVTGWRPGSGYTNIMR                                                        | 1.559300406        | 3              | 3.592625 |
| P12928        | VQFGIESGK                                                                     | 1.87556739         | 1              | 1.995212 |
| <b>P12938</b> | <b>CP2D3 Cytochrome P450 2D3</b>                                              | <b>0.685978444</b> | <b>9.9E-20</b> | <b>4</b> |
| P12938        | DLTDAFLAEIEK                                                                  | 0.715367923        | 2              | 4.418019 |
| P12938        | FDYGDPDFIK                                                                    | 0.586992393        | 2              | 2.573801 |
| P12938        | GNPESFNANLR                                                                   | 0.749043936        | 2              | 4.395343 |
| P12938        | RFDYGDPDFIK                                                                   | 0.690002291        | 2              | 2.882139 |
| <b>P12939</b> | <b>CP2DA Cytochrome P450 2D10</b>                                             | <b>1.563517955</b> | <b>3.9E-11</b> | <b>8</b> |
| P12939        | ALCNVIASLIFAR                                                                 | 1.066522401        | 2              | 2.393466 |
| P12939        | AVQEVLVTHGEDTADRPPVPIFK                                                       | 1.189582257        | 3              | 5.430445 |
| P12939        | FEYEDPYLIR                                                                    | 1.210690132        | 2              | 3.15457  |
| P12939        | FGDIAPLNLPR                                                                   | 1.564478156        | 2              | 3.287056 |
| P12939        | ITSCDIEVQDFVIPK                                                               | 1.094308211        | 2              | 4.189401 |
| P12939        | NLTDAFLAEVEK                                                                  | 0.969360177        | 2              | 4.177208 |
| P12939        | RFEYEDPYLIR                                                                   | 1.076661289        | 3              | 3.654486 |
| P12939        | TTWDPAQPPR                                                                    | 1.133390234        | 2              | 2.765743 |
| <b>P13084</b> | <b>NPM Nucleophosmin</b>                                                      | <b>0.952660231</b> | <b>0.9929</b>  | <b>2</b> |
| P13084        | MTDQEAIQDLWQWR                                                                | 0.932076034        | 2              | 2.979163 |
| P13084        | VDNDENEHQLSLR                                                                 | 1.115235025        | 2              | 3.988224 |
| <b>P13086</b> | <b>SUCA Succinyl_CoA ligase [ADP/GDP_forming] subunit alpha_mitochondrial</b> | <b>0.968848126</b> | <b>0.05767</b> | <b>3</b> |
| P13086        | LIGPNCPGIINPGECK                                                              | 1.062343736        | 2              | 4.147032 |
| P13086        | MGHAGAIAGGK                                                                   | 0.562281223        | 2              | 2.800292 |
| P13086        | QGTFHSQQALEYGTK                                                               | 0.860223992        | 2              | 2.824051 |
| <b>P13107</b> | <b>CP2B3 Cytochrome P450 2B3</b>                                              | <b>1.313689253</b> | <b>1.3E-09</b> | <b>7</b> |
| P13107        | DFIDTLLHMEK                                                                   | 1.178012278        | 2              | 3.227979 |
| P13107        | EIDQVIGSQR                                                                    | 0.802755753        | 2              | 2.348132 |
| P13107        | EVLIDYIDHSVENHR                                                               | 0.890936892        | 2              | 3.74617  |
| P13107        | FSDVSPMGLPCR+Oxidation(6)                                                     | 1.079554604        | 2              | 2.504637 |
| P13107        | GIIAVLQPIMQEYGVSVNEER                                                         | 1.788028738        | 3              | 6.515994 |
| P13107        | QSVEDQIKEAK                                                                   | 0.980606105        | 2              | 2.684267 |
| P13107        | SFIQLQEK                                                                      | 1.026379397        | 2              | 2.552451 |
| <b>P13221</b> | <b>AATC Aspartate aminotransferase_cytoplasmic</b>                            | <b>1.344056375</b> | <b>9.9E-20</b> | <b>6</b> |
| P13221        | ITWSNPPAQGAR                                                                  | 1.245114532        | 2              | 3.563991 |
| P13221        | IVATTLSNPELFK                                                                 | 1.49175641         | 2              | 3.42102  |
| P13221        | NLDYVATSINEAVTK                                                               | 1.441087611        | 2              | 4.615786 |
| P13221        | SCASQLVLGDNSPALR                                                              | 2.037513985        | 2              | 4.449885 |
| P13221        | TDDSQPWVLPVVR                                                                 | 1.641332465        | 2              | 3.439863 |
| P13221        | VGGVQSLGGTGALR                                                                | 2.282680313        | 2              | 2.601021 |

|               |                                                           |                    |                |           |
|---------------|-----------------------------------------------------------|--------------------|----------------|-----------|
| <b>P13255</b> | <b>GNMT Glycine N_methyltransferase</b>                   | <b>0.851029377</b> | <b>1.7E-05</b> | <b>7</b>  |
| P13255        | AHMVTLDYTVQVPGAGR                                         | 1.075559024        | 2              | 4.604633  |
| P13255        | AWLLGLLR                                                  | 1.280901422        | 2              | 2.625663  |
| P13255        | DITTSVLTVNNK                                              | 0.866228415        | 2              | 3.786759  |
| P13255        | NIASMVRPGLLVIDHR+Oxidation(4)                             | 0.762088395        | 3              | 3.855249  |
| P13255        | NYDYILSTGCAPP GK                                          | 0.855894865        | 2              | 4.506861  |
| P13255        | SDLTKDITTSVLTVNNK                                         | 0.918830462        | 2              | 2.980359  |
| P13255        | SLGVAAEGIPDQYADGEAAR                                      | 0.85729024         | 2              | 5.395795  |
| <b>P13383</b> | <b>NUCL Nucleolin</b>                                     | <b>1.040633482</b> | <b>0.00018</b> | <b>4</b>  |
| P13383        | GFGFVDFNSEEDAK                                            | 1.075149303        | 2              | 3.38593   |
| P13383        | GLSEDTTEETLK                                              | 0.820398633        | 2              | 2.895458  |
| P13383        | IEGSEPTTFFNLFIGNLNPNK                                     | 0.746322082        | 2              | 2.738306  |
| P13383        | SEADAENLEEK                                               | 1.111383695        | 2              | 3.019146  |
| <b>P13437</b> | <b>THIM 3_ketoacyl_CoA thiolase_mitochondrial</b>         | <b>0.673166051</b> | <b>9.9E-20</b> | <b>21</b> |
| P13437        | AANEAGYFNEEMAPIEVK                                        | 0.722122156        | 2              | 5.320649  |
| P13437        | AANEAGYFNEEMAPIEVK+Oxidation(11)                          | 0.70182412         | 2              | 5.116405  |
| P13437        | DAEVVLCGGTESMSQSPYSVR                                     | 0.735925619        | 2              | 5.069211  |
| P13437        | DAEVVLCGGTESMSQSPYSVR+Oxidation(12)                       | 1.134465846        | 2              | 3.187351  |
| P13437        | DFTATDLTEFAAR                                             | 0.649366026        | 2              | 4.038708  |
| P13437        | DMDLIDVNEAFAPQFLAVQK                                      | 0.770799372        | 3              | 6.025092  |
| P13437        | DMDLIDVNEAFAPQFLAVQK+Oxidation(1)                         | 0.761821325        | 2              | 4.510396  |
| P13437        | EGTVTAGNASGMSDGAGVVIASEDAVK                               | 0.618186085        | 2              | 5.597886  |
| P13437        | EGTVTAGNASGMSDGAGVVIASEDAVKK                              | 0.565093126        | 3              | 4.512787  |
| P13437        | EGTVTAGNASGMSDGAGVVIASEDAVKK+Oxidation(11)                | 0.543988888        | 3              | 3.536056  |
| P13437        | FGLDLK                                                    | 0.691118139        | 2              | 2.342524  |
| P13437        | GVFIVA AK                                                 | 0.718738815        | 2              | 2.466823  |
| P13437        | ITAHLVHEL R                                               | 1.197299628        | 2              | 2.97402   |
| P13437        | LCGSGFQSI VSGCQEICK                                       | 0.739209357        | 2              | 5.140188  |
| P13437        | LEDTLWAGLTDQHVK                                           | 0.655267881        | 2              | 5.061839  |
| P13437        | RTPFGAYGGLLK                                              | 1.099372073        | 2              | 2.532732  |
| P13437        | SLDLPSK                                                   | 0.658557953        | 2              | 2.896674  |
| P13437        | TNVSGGAI ALGHPLGGSGSR                                     | 0.63013327         | 2              | 6.089171  |
| P13437        | VGVPTETGALTLNR                                            | 0.701867709        | 2              | 3.781097  |
| P13437        | VPPETIDSVIVGNVMQSSDAAYLAR                                 | 0.591179413        | 2              | 6.129364  |
| P13437        | VVG YFVSGCDPAIMGIGPVPAITGALK                              | 0.576524758        | 3              | 4.847097  |
| <b>P13444</b> | <b>METK1 S_adenosylmethionine synthase isoform type_1</b> | <b>1.186336515</b> | <b>9.9E-20</b> | <b>8</b>  |
| P13444        | FVIGGPQGDAGVTGR                                           | 1.178112664        | 2              | 4.819842  |
| P13444        | HIGYDDSAK                                                 | 1.482643722        | 2              | 2.784954  |
| P13444        | ICDQISDAVLDAHLK                                           | 1.25207034         | 3              | 5.106026  |
| P13444        | NEEDVGAGDQQLMFGYATDETEECMPLTIVLAHK                        | 0.764693863        | 3              | 6.60046   |
| P13444        | SEFPWEVPK                                                 | 1.21379382         | 2              | 2.45008   |
| P13444        | SGVLPWLRPDSK                                              | 1.095093653        | 2              | 2.91682   |

|               |                                                                         |                    |                |           |
|---------------|-------------------------------------------------------------------------|--------------------|----------------|-----------|
| P13444        | TCNVLVALEQQSPDIAQC VH LDR                                               | 1.477338779        | 3              | 5.009028  |
| P13444        | TQVTVQYVQDNGAVIPVR                                                      | 1.734630341        | 2              | 4.753774  |
| <b>P13471</b> | <b>RS14 40S ribosomal protein S14</b>                                   | <b>0.950331062</b> | <b>4E-10</b>   | <b>4</b>  |
| P13471        | ADRDESSPYAAMLAADVAQR                                                    | 1.356169761        | 2              | 5.671414  |
| P13471        | DESSPYAAMLAADVAQR                                                       | 1.41844539         | 2              | 3.34797   |
| P13471        | ELGITALHIK                                                              | 1.321274854        | 2              | 2.468617  |
| P13471        | IEDVTPIPSDSTR                                                           | 0.947355973        | 2              | 3.741135  |
| <b>P13601</b> | <b>AL1A7 Aldehyde dehydrogenase_ cytosolic 1</b>                        | <b>0.856396522</b> | <b>9.9E-20</b> | <b>15</b> |
| P13601        | EEIFGPVQIMK                                                             | 0.539773904        | 2              | 3.427416  |
| P13601        | EMGEQGVVEYTELK                                                          | 0.578330149        | 2              | 3.301206  |
| P13601        | FPVINPATEEVICHVEEGKADVDK                                                | 0.567921631        | 4              | 5.153451  |
| P13601        | IAKEEIFGPVQIMK                                                          | 0.804505497        | 2              | 3.111602  |
| P13601        | IHGQTIPSDGDVFTYTR                                                       | 0.842530249        | 2              | 3.818355  |
| P13601        | ILD LIESGK                                                              | 0.529256313        | 2              | 3.254489  |
| P13601        | ILD LIESGKK                                                             | 0.582374893        | 3              | 3.543305  |
| P13601        | KFPVINPATEEVICHVEEGKADVDK                                               | 0.646699853        | 3              | 3.639653  |
| P13601        | KYVLGNPLDSGISQGPQIDKEQHAK                                               | 0.38254716         | 3              | 4.515509  |
| P13601        | LFVEESIYDEFVR                                                           | 0.600734856        | 2              | 3.725007  |
| P13601        | VLLATMESMNAGK                                                           | 0.892359893        | 2              | 2.861511  |
| P13601        | VSFTGSTEVGK                                                             | 0.478586084        | 2              | 2.355322  |
| P13601        | YFAGWADK                                                                | 0.666926181        | 1              | 2.091618  |
| P13601        | YVLGNPLDSGISQGPQIDK                                                     | 0.537677496        | 2              | 4.852623  |
| P13601        | YVLGNPLDSGISQGPQIDKEQHAK                                                | 0.495491054        | 2              | 4.208746  |
| <b>P13697</b> | <b>MAOX NADP_ dependent malic enzyme</b>                                | <b>1.123189154</b> | <b>0.26808</b> | <b>5</b>  |
| P13697        | AESAECEYK                                                               | 1.234809332        | 2              | 3.034678  |
| P13697        | AIFASGSPFDPVTLPDGR                                                      | 1.117495899        | 2              | 4.281984  |
| P13697        | GHIASVLNAWPEDVVK                                                        | 1.082783951        | 2              | 2.842623  |
| P13697        | HINDSVFLTTAEVISQVSDK                                                    | 1.093528439        | 3              | 4.09601   |
| P13697        | ILGLDGLGCNGMGPVVK                                                       | 0.682602827        | 2              | 2.385633  |
| <b>P13803</b> | <b>ETFA Electron transfer flavoprotein subunit alpha_ mitochondrial</b> | <b>0.919274499</b> | <b>9.9E-20</b> | <b>13</b> |
| P13803        | AAVDAGFVPNDMQVGQTGK                                                     | 0.953396589        | 2              | 4.388618  |
| P13803        | AAVDAGFVPNDMQVGQTGK+Oxidation(11)                                       | 0.824846805        | 2              | 3.848487  |
| P13803        | GLLPEELTPLILETQK                                                        | 0.982067088        | 2              | 4.514587  |
| P13803        | GTSFEAAAASGGSASSEK                                                      | 0.89801427         | 2              | 5.165604  |
| P13803        | LGGEVSLVAGTK                                                            | 0.877500108        | 2              | 4.511054  |
| P13803        | LLYDLADQLHAAVGASR                                                       | 0.960249213        | 2              | 5.123318  |
| P13803        | LNVAPVSDIIEIK                                                           | 1.073812863        | 3              | 4.649651  |
| P13803        | QFSYTHICAGASAFGK                                                        | 1.144487022        | 2              | 2.853104  |
| P13803        | SDRPELTGAK                                                              | 0.804201928        | 3              | 3.402157  |
| P13803        | TIVAINKDPEAPIFQVADYIVADLFK                                              | 0.866376628        | 3              | 7.171578  |
| P13803        | TIYAGNALCTVK                                                            | 0.942545905        | 2              | 3.519764  |
| P13803        | VLVAQHDAYK                                                              | 0.856302851        | 2              | 3.373696  |

|               |                                                  |                    |                |           |
|---------------|--------------------------------------------------|--------------------|----------------|-----------|
| P13803        | VVQDLCK                                          | 0.835837324        | 2              | 2.617921  |
| <b>P13832</b> | <b>MRLCA Myosin regulatory light chain RLC_A</b> | <b>1.061059179</b> | <b>0.80662</b> | <b>3</b>  |
| P13832        | ATSNVFAMFDQSQIQEFK                               | 1.113440917        | 2              | 4.967342  |
| P13832        | FTDEEVDELYR                                      | 1.066484896        | 2              | 3.428142  |
| P13832        | GNFNYIEFTR                                       | 1.007929809        | 2              | 2.524019  |
| <b>P14046</b> | <b>A1I3 Alpha_1_inhibitor 3</b>                  | <b>1.068968731</b> | <b>0.35047</b> | <b>7</b>  |
| P14046        | FSIDTNGISDYSLNK                                  | 1.532973753        | 2              | 2.319447  |
| P14046        | GDPIPNEQVLK                                      | 0.983773673        | 2              | 2.48965   |
| P14046        | GMYESLPVAVK                                      | 0.93966102         | 2              | 3.092848  |
| P14046        | GMYESLPVAVK+Oxidation(1)                         | 0.718511298        | 2              | 2.80014   |
| P14046        | ISLCHGNPTFSSETK                                  | 1.689488088        | 2              | 3.183662  |
| P14046        | QQNSYGGFSSTQDQTVVALDALS                          | 1.238286159        | 2              | 4.10768   |
| P14046        | QSPGPCGSEVATVPETGR                               | 1.02655486         | 2              | 3.606339  |
| <b>P14141</b> | <b>CAH3 Carbonic anhydrase 3</b>                 | <b>0.742825401</b> | <b>9.9E-20</b> | <b>17</b> |
| P14141        | EAPFNHFDPSCLFPACR                                | 0.696659865        | 2              | 4.100217  |
| P14141        | EKGEFQILLDALDK                                   | 0.695316511        | 2              | 4.344332  |
| P14141        | EPMTVSSDQMAK                                     | 2.051864778        | 2              | 2.640788  |
| P14141        | EWGYASHNGPEHWHELYPIAK                            | 0.627888613        | 3              | 4.798904  |
| P14141        | GDNQSPIELHTK                                     | 0.720962115        | 2              | 3.510344  |
| P14141        | GEFQILLDALDK                                     | 0.666996776        | 2              | 4.750772  |
| P14141        | GEFQILLDALDKIK                                   | 0.808646504        | 2              | 3.009718  |
| P14141        | GGPLSGPYR                                        | 0.746688992        | 2              | 2.979345  |
| P14141        | GKEAPFNHFDPSCLFPACR                              | 0.948322421        | 2              | 3.885133  |
| P14141        | HDPSLQPWSVSYDPGSAK                               | 0.822137496        | 3              | 5.333054  |
| P14141        | QFHLHWGSSDDHGSEHTVDGVK                           | 0.58250057         | 2              | 4.545606  |
| P14141        | QPDGIAVVGIFLK                                    | 1.101297387        | 2              | 2.695477  |
| P14141        | SLFASAENEPPVPLVGNWRPPQPIK                        | 0.67665215         | 3              | 5.762795  |
| P14141        | VVFDDTFDR                                        | 0.720169557        | 2              | 3.278795  |
| P14141        | YAAELHLVHWNPK                                    | 1.302148527        | 2              | 4.10161   |
| P14141        | YNTFGEALK                                        | 0.68911862         | 2              | 2.520147  |
| P14141        | YNTFGEALKQPDGIAVVGIFLK                           | 0.662343948        | 3              | 5.951661  |
| <b>P14173</b> | <b>DDC Aromatic_L_amino_acid decarboxylase</b>   | <b>0.887234697</b> | <b>0.38895</b> | <b>7</b>  |
| P14173        | AGEGGGVIQGSASEATLVALLAAR                         | 1.08907129         | 2              | 5.286902  |
| P14173        | ALIPTTAPQEPETYEDIIR                              | 0.886742356        | 2              | 3.482483  |
| P14173        | GSNQLNETLLQR                                     | 0.905041365        | 2              | 2.884965  |
| P14173        | HSHQDSGLITDYR                                    | 1.013207591        | 3              | 3.682444  |
| P14173        | MLELPEAFLAGR                                     | 1.244914156        | 2              | 2.630818  |
| P14173        | QLQAASPELTQAALMEK                                | 0.953805513        | 2              | 3.703033  |
| P14173        | TDLTEAFNMDPVYLR                                  | 1.070739444        | 2              | 3.543494  |
| <b>P14408</b> | <b>FUMH Fumarate hydratase_mitochondrial</b>     | <b>1.062664856</b> | <b>9.9E-20</b> | <b>11</b> |
| P14408        | AAAENVQEYGLDPK                                   | 1.197859764        | 2              | 4.286795  |
| P14408        | AIEMLGELGSK                                      | 0.807230805        | 2              | 3.942955  |
| P14408        | IEYDTFGELKVPTDK                                  | 1.17708116         | 2              | 3.038985  |

|               |                                                                 |                    |                |           |
|---------------|-----------------------------------------------------------------|--------------------|----------------|-----------|
| P14408        | IYELAAGGTAVGTGLNTR                                              | 0.765691525        | 2              | 5.519475  |
| P14408        | LNDHFPLVVWQTGSGTQTNMNVNEVISNR                                   | 0.734893237        | 3              | 5.992123  |
| P14408        | SGLGELILPENEPGSSIMPGK                                           | 0.701151876        | 2              | 4.608185  |
| P14408        | SGLGELILPENEPGSSIMPGK+Oxidation(17)                             | 0.604421323        | 2              | 3.069037  |
| P14408        | SQSSNDTFPTAMHIAAALEVHQVLLPGLQK                                  | 0.866032709        | 3              | 4.381575  |
| P14408        | TAIELGYLTAEQFDEWVKPK                                            | 0.783192149        | 2              | 4.936927  |
| P14408        | THTQDAVPLTLGQFSGYVQVQYAMER                                      | 1.309849664        | 3              | 6.252834  |
| P14408        | YYGAQTVR                                                        | 0.73670688         | 2              | 2.503474  |
| <b>P14480</b> | <b>FIBB Fibrinogen beta chain</b>                               | <b>1.127207348</b> | <b>0.97811</b> | <b>6</b>  |
| P14480        | AHYGGFTVQTEANK                                                  | 1.019681405        | 2              | 2.368666  |
| P14480        | GFGNIATNEDTKK                                                   | 0.96099159         | 2              | 2.922162  |
| P14480        | LESDISAQTEYCHTPTVNCNIPVVS GK                                    | 1.270321845        | 3              | 4.756452  |
| P14480        | LYIDETVNDNIPLNLR                                                | 1.14412982         | 2              | 2.547414  |
| P14480        | TENGGWTVIQNR                                                    | 1.017010216        | 2              | 3.484118  |
| P14480        | YCGLPGEYWLGN DK                                                 | 0.990189316        | 2              | 3.244504  |
| <b>P14604</b> | <b>ECHM Enoyl_CoA hydratase_mitochondrial</b>                   | <b>0.710224648</b> | <b>9.9E-20</b> | <b>7</b>  |
| P14604        | AFAAGADIK                                                       | 0.820836778        | 2              | 3.132133  |
| P14604        | AQFGQPEILLGTIPGAGGTQR                                           | 0.88397276         | 2              | 5.729046  |
| P14604        | FLSHWDHITR                                                      | 0.866272766        | 2              | 3.012297  |
| P14604        | IFPVETLVEEAIQCAEK                                               | 0.822171843        | 2              | 5.632178  |
| P14604        | NSSVGLIQLNRPK                                                   | 0.9186589          | 2              | 3.513586  |
| <b>P14668</b> | <b>ANXA5 Annexin A5</b>                                         | <b>0.795990247</b> | <b>3.8E-06</b> | <b>5</b>  |
| P14668        | EFRKNFATSLYSMIK                                                 | 0.941097683        | 2              | 2.39026   |
| P14668        | ETSGNLELLLAVVK                                                  | 0.746245593        | 2              | 3.33549   |
| P14668        | GAGTDDHTLIR                                                     | 0.804482355        | 2              | 2.714598  |
| P14668        | GLGTDEDSILNLLTAR                                                | 0.778488253        | 2              | 3.956472  |
| P14668        | GTVTDFSGFDGR                                                    | 0.815928734        | 2              | 2.568354  |
| <b>P14669</b> | <b>ANXA3 Annexin A3</b>                                         | <b>0.678757998</b> | <b>9.9E-20</b> | <b>6</b>  |
| P14669        | GMGTDEDTLIEILTTR                                                | 0.69698552         | 2              | 3.128846  |
| P14669        | GTINNYPGFNPSVDAE AIR                                            | 0.65260223         | 2              | 4.623111  |
| P14669        | KDAQTLYDAGEKK                                                   | 0.537733937        | 3              | 3.763871  |
| P14669        | QYQEAYEQALK                                                     | 0.609154901        | 2              | 2.781823  |
| P14669        | SEIDLLDIR                                                       | 0.833213639        | 2              | 2.996954  |
| P14669        | WGTDEDKFTEILCLR                                                 | 0.851218816        | 3              | 3.485553  |
| <b>P14685</b> | <b>PSMD3 26S proteasome non_ATPase regulatory subunit 3</b>     | <b>0.950023039</b> | <b>0.99023</b> | <b>2</b>  |
| P14685        | LQLDSPEDA EFIVAK                                                | 0.945501703        | 2              | 4.041518  |
| P14685        | SVFPEQANNNEWAR                                                  | 1.037391665        | 2              | 3.144493  |
| <b>P14740</b> | <b>DPP4 Dipeptidyl peptidase 4</b>                              | <b>1.068954153</b> | <b>0.00368</b> | <b>3</b>  |
| P14740        | FRPAEPHFTSDGSSFYK                                               | 0.900272976        | 2              | 2.723209  |
| P14740        | LGTLEVEDQIEAAR                                                  | 1.091040022        | 2              | 3.550217  |
| P14740        | VLEDNSALDK                                                      | 1.188568884        | 2              | 2.689943  |
| <b>P14882</b> | <b>PCCA Propionyl_CoA carboxylase alpha chain_mitochondrial</b> | <b>0.797462156</b> | <b>9.9E-20</b> | <b>11</b> |

|               |                                                                       |                    |                |           |
|---------------|-----------------------------------------------------------------------|--------------------|----------------|-----------|
| P14882        | EIGYPVMIKASAGGGK+Oxidation(6)                                         | 0.886344257        | 2              | 2.40752   |
| P14882        | FLSDVYPDGFK                                                           | 0.871170071        | 2              | 2.927598  |
| P14882        | FSSQEAASSFQDDR                                                        | 1.095287828        | 2              | 2.918512  |
| P14882        | HGNALWLNER                                                            | 1.268862473        | 2              | 2.932504  |
| P14882        | HKQEDIPISGWAVECR                                                      | 0.822924843        | 3              | 3.520111  |
| P14882        | MADEAVCVGPAPTSK                                                       | 1.061196846        | 2              | 3.967639  |
| P14882        | MEDALDSYVIR                                                           | 0.852011095        | 2              | 3.033719  |
| P14882        | SYLNMDAIMEAIK                                                         | 0.825321036        | 2              | 2.336533  |
| P14882        | TGAQAVHPGYGFLSENK                                                     | 0.916236535        | 2              | 4.035578  |
| P14882        | TVAIHSVDVDASSVHVK                                                     | 0.882211586        | 3              | 3.441371  |
| P14882        | VVEEAPSIFLDPETR                                                       | 0.788200958        | 2              | 3.535632  |
| <b>P14942</b> | <b>GSTA4 Glutathione S_transferase alpha_4</b>                        | <b>0.689471303</b> | <b>4.7E-09</b> | <b>2</b>  |
| P14942        | KPPPDGHYVDVVR                                                         | 0.689000689        | 2              | 2.70752   |
| P14942        | YFPVFEK                                                               | 0.727904769        | 1              | 1.917878  |
| <b>P15083</b> | <b>PIGR Polymeric immunoglobulin receptor</b>                         | <b>0.959109012</b> | <b>0.79686</b> | <b>3</b>  |
| P15083        | EIQNAGDQAQENR                                                         | 1.027857468        | 2              | 3.988016  |
| P15083        | GVTGGSVAIVCPYNPK                                                      | 1.074075819        | 2              | 3.744797  |
| P15083        | NNADLQVLEPEPELLYK                                                     | 0.819054683        | 2              | 3.005404  |
| <b>P15149</b> | <b>CP2A2 Cytochrome P450 2A2</b>                                      | <b>0.590829885</b> | <b>9.9E-20</b> | <b>10</b> |
| P15149        | DVQECILEEAGYLIK                                                       | 0.54191649         | 3              | 5.151561  |
| P15149        | DVYSSITQLSER                                                          | 0.84735425         | 2              | 3.068344  |
| P15149        | FSNLAPLGIPR                                                           | 0.709663657        | 2              | 3.200616  |
| P15149        | GELPTFNILFK                                                           | 0.481827301        | 2              | 2.704638  |
| P15149        | GTDVFPPIIGSLMTEPK                                                     | 0.508852443        | 3              | 3.723542  |
| P15149        | GYGFSLSNVEQAK                                                         | 0.542276912        | 2              | 3.437746  |
| P15149        | NFIDSFLIR                                                             | 0.733679678        | 2              | 2.456583  |
| P15149        | QNHSTLDPNSPR                                                          | 0.629955012        | 2              | 2.967593  |
| P15149        | TLQGTGCGAPIDPSIYLSK                                                   | 0.60043735         | 2              | 4.725547  |
| P15149        | TVSNVINSIVFGNR                                                        | 0.672029687        | 2              | 3.465978  |
| <b>P15178</b> | <b>SYDC Aspartyl_tRNA synthetase_cytoplasmic</b>                      | <b>0.966950951</b> | <b>0.11715</b> | <b>2</b>  |
| P15178        | GEEILSGAQR                                                            | 0.914096124        | 2              | 2.731855  |
| P15178        | QMVKFAANINK+Oxidation(1)                                              | 1.193242781        | 2              | 2.354814  |
| <b>P15429</b> | <b>ENOB Beta_enolase</b>                                              | <b>1.015669513</b> | <b>0.23402</b> | <b>5</b>  |
| P15429        | DATNVGDEGGFAPNILENNEALELLK                                            | 0.681931365        | 2              | 4.984734  |
| P15429        | HIADLAGNPDVLPVPAFNVINGGSHAGNK                                         | 0.576002977        | 3              | 5.20497   |
| P15429        | IEEALGDK                                                              | 0.473754588        | 1              | 2.115771  |
| P15429        | TAIQAAGYPDK                                                           | 0.668758455        | 2              | 2.748728  |
| P15429        | VNQIGSVTESIQACK                                                       | 1.01769791         | 2              | 5.138294  |
| <b>P15650</b> | <b>ACADL Long_chain specific acyl_CoA dehydrogenase_mitochondrial</b> | <b>0.914624514</b> | <b>9.9E-20</b> | <b>21</b> |
| P15650        | AFVDSCLQLHETK                                                         | 1.048179896        | 2              | 4.120894  |
| P15650        | AQDTAELFFEDVR                                                         | 1.20958844         | 2              | 4.868296  |
| P15650        | AQDTAELFFEDVRLPASALLGEENK                                             | 1.175214362        | 3              | 4.400803  |

|               |                                                                        |                    |                |           |
|---------------|------------------------------------------------------------------------|--------------------|----------------|-----------|
| P15650        | CIGAIAMTEPGAGSDLQGVR                                                   | 0.946059392        | 2              | 6.15964   |
| P15650        | CIGAIAMTEPGAGSDLQGVR+Oxidation(6)                                      | 0.873464194        | 2              | 5.639467  |
| P15650        | EQIEQFIPQMTAGK                                                         | 0.880007249        | 2              | 5.021329  |
| P15650        | FFQEEVIPYHEEWEK                                                        | 1.697928515        | 2              | 4.744329  |
| P15650        | GFYYLMQELPQER                                                          | 1.168343866        | 2              | 2.976159  |
| P15650        | GFYYLMQELPQER+Oxidation(5)                                             | 0.989065508        | 2              | 2.654932  |
| P15650        | IFSSEHDIFR                                                             | 1.091833506        | 2              | 2.841255  |
| P15650        | KFFQEEVIPYHEEWEK                                                       | 1.693111829        | 2              | 4.771874  |
| P15650        | LDSASASMAK                                                             | 0.747497021        | 2              | 2.419462  |
| P15650        | LDSASASMAK+Oxidation(7)                                                | 1.017473467        | 2              | 2.441253  |
| P15650        | LPASALLGEENK                                                           | 1.948224187        | 2              | 3.335713  |
| P15650        | LPASALLGEENKGFYYLMQELPQER                                              | 3.231819738        | 3              | 3.968267  |
| P15650        | QGLLGINIAEK                                                            | 0.964543997        | 2              | 3.282512  |
| P15650        | RLDSASASMAK                                                            | 0.841388269        | 2              | 2.968098  |
| P15650        | RLDSASASMAK+Oxidation(8)                                               | 0.948508037        | 2              | 2.792291  |
| P15650        | SGSDWILNGSK                                                            | 1.01109904         | 2              | 2.978194  |
| P15650        | VQPIYGGTNEIMK                                                          | 1.05086051         | 2              | 3.55062   |
| P15650        | VQPIYGGTNEIMK+Oxidation(11)                                            | 0.952000287        | 2              | 3.060328  |
| <b>P15651</b> | <b>ACADS Short_chain specific acyl_CoA dehydrogenase_mitochondrial</b> | <b>0.976995753</b> | <b>7.2E-11</b> | <b>7</b>  |
| P15651        | ASSTANLIFEDCR                                                          | 1.127575139        | 2              | 3.427588  |
| P15651        | EEGDSWVLNGTK                                                           | 0.780373982        | 2              | 2.719931  |
| P15651        | ELVPIAAQLDKEHLFPTSQVK                                                  | 0.834905648        | 2              | 4.545294  |
| P15651        | IGCFALSEPGNGSDAGAASTAR                                                 | 1.153810975        | 2              | 5.904689  |
| P15651        | IGIASQALGIAQASLDCAVK                                                   | 1.049448844        | 2              | 4.640051  |
| P15651        | ITEIYEGTSEIQR                                                          | 0.842888537        | 2              | 4.286483  |
| P15651        | LAASEAATAISHQAIQLGGMGYVTEMPAER                                         | 1.002430836        | 4              | 4.808429  |
| <b>P15684</b> | <b>AMPN Aminopeptidase N</b>                                           | <b>0.774880843</b> | <b>0.03253</b> | <b>3</b>  |
| P15684        | ALGDTPAPNIDTTELVER                                                     | 1.011384783        | 2              | 3.738566  |
| P15684        | AQIHDSFNLASAGK                                                         | 0.709270646        | 2              | 3.4102    |
| P15684        | VVATTQMQAADAR                                                          | 0.759507896        | 2              | 3.267232  |
| <b>P15709</b> | <b>ST2A1 Bile salt sulfotransferase</b>                                | <b>0.922164842</b> | <b>1.9E-08</b> | <b>2</b>  |
| P15709        | GNVLYGSWFEHIR                                                          | 0.799080632        | 2              | 2.979803  |
| P15709        | NHFTVSQAEAFDK                                                          | 1.735466704        | 2              | 3.691901  |
| <b>P15999</b> | <b>ATPA ATP synthase subunit alpha_mitochondrial</b>                   | <b>1.283060406</b> | <b>9.9E-20</b> | <b>23</b> |
| P15999        | AVDSLVIPIGR                                                            | 0.956840042        | 2              | 3.483189  |
| P15999        | EVAFAQFGSDLDAAATQQLSR                                                  | 1.347060613        | 2              | 6.425317  |
| P15999        | FESAFLSHVVSQHQSLLGNIR                                                  | 1.30275723         | 3              | 5.923397  |
| P15999        | GIRPAINVGLSVSR                                                         | 1.15532929         | 2              | 3.028062  |
| P15999        | GMSLNLEPDNVGVVVFVFNNDK                                                 | 1.530124332        | 2              | 4.958539  |
| P15999        | GMSLNLEPDNVGVVVFVFNNDK+Oxidation(1)                                    | 1.031587185        | 2              | 3.553315  |
| P15999        | GYLDKLEPSK                                                             | 0.880064776        | 2              | 2.443049  |
| P15999        | HALIYDDLK                                                              | 2.37469691         | 2              | 2.469416  |



|               |                                                     |                    |                |           |
|---------------|-----------------------------------------------------|--------------------|----------------|-----------|
| P15999        | ILGADTSVDLEETGR                                     | 1.129222374        | 2              | 5.076817  |
| P15999        | LELAQYR                                             | 1.001345883        | 2              | 2.741239  |
| P15999        | LKEIVTNFLAGFEP                                      | 1.675408992        | 2              | 2.361426  |
| P15999        | LYCIYVAIGQK                                         | 0.993860331        | 2              | 2.495288  |
| P15999        | NVQAEEMVEFSSGLK                                     | 1.797686379        | 2              | 4.414446  |
| P15999        | QGQYSPMAIEEQVAVIYAGVR                               | 1.545193931        | 3              | 4.951071  |
| P15999        | RLTDADAMK                                           | 0.769629685        | 2              | 2.335885  |
| P15999        | RTGAIVDVPVGDPELLGR                                  | 1.129490306        | 2              | 3.097045  |
| P15999        | STVAQLVK                                            | 0.929811362        | 2              | 2.32218   |
| P15999        | TGAIVDVPVGDPELLGR                                   | 0.941215557        | 2              | 4.58103   |
| P15999        | TGTAEMSSILEER                                       | 1.012809832        | 2              | 4.267123  |
| P15999        | TGTAEMSSILEER+Oxidation(5)                          | 0.918046463        | 2              | 3.368952  |
| P15999        | TSIAIDTIINQK                                        | 0.948717077        | 2              | 4.340858  |
| P15999        | VLSIGDGIAR                                          | 1.027812396        | 2              | 3.242816  |
| P15999        | VVDALGNAIDGK                                        | 0.97615578         | 2              | 4.311783  |
| <b>P16036</b> | <b>MPCP Phosphate carrier protein_mitochondrial</b> | <b>1.038044811</b> | <b>0.66851</b> | <b>8</b>  |
| P16036        | ALYSNILGEENTYLWR                                    | 1.054799988        | 2              | 2.720075  |
| P16036        | EEGLNAFYK                                           | 1.021288601        | 1              | 2.080782  |
| P16036        | EKGSTASQVLQR                                        | 1.018703959        | 2              | 3.086685  |
| P16036        | FGFYEVFK                                            | 1.032038234        | 1              | 1.99456   |
| P16036        | GIFNGFSITLK                                         | 1.248713195        | 2              | 2.693912  |
| P16036        | GSTASQVLQR                                          | 0.934022777        | 2              | 3.043684  |
| P16036        | IQTQPGYANTLR                                        | 1.051926253        | 2              | 3.262573  |
| P16036        | MYKEEGLNAFYK+Oxidation(0)                           | 0.840310218        | 2              | 2.675498  |
| <b>P16086</b> | <b>SPTA2 Spectrin alpha chain_brain</b>             | <b>0.886579538</b> | <b>9.9E-20</b> | <b>28</b> |
| P16086        | ALINADELANDVAGAEALLDR                               | 0.882412865        | 3              | 4.296778  |
| P16086        | ALSSEGKPYVTK                                        | 0.8813243          | 2              | 3.245813  |
| P16086        | CNSLEEIKALREAHDAFR                                  | 1.778565359        | 2              | 2.580237  |
| P16086        | DVTGAEALLER                                         | 1.50702113         | 2              | 2.526131  |
| P16086        | GVIDMGNSLIER                                        | 0.818584048        | 2              | 2.942995  |
| P16086        | HQALQAEIAGHEPR                                      | 0.760587826        | 3              | 3.430938  |
| P16086        | KFEEFQTDLAAHEER                                     | 0.794802595        | 2              | 4.444002  |
| P16086        | LFGAAEVQR                                           | 0.810351555        | 2              | 2.352936  |
| P16086        | LGDSHDLQR                                           | 0.774061937        | 2              | 3.01277   |
| P16086        | LGESQTLQQFSR                                        | 0.963128978        | 2              | 3.248273  |
| P16086        | LIQEQHPPEELIK                                       | 0.979566296        | 2              | 2.851206  |
| P16086        | LQQSHPLSANQIQVK                                     | 0.919495825        | 2              | 3.670163  |
| P16086        | LQTASDESYKDPTNIQSK                                  | 0.791672762        | 2              | 5.07851   |
| P16086        | LQVASDENYKDPTNLQGK                                  | 0.81100252         | 2              | 4.902934  |
| P16086        | LSDDNTIGQEEIQR                                      | 0.618459693        | 2              | 4.335981  |
| P16086        | MQHNLEQQIQR+Oxidation(0)                            | 0.64352731         | 2              | 2.622746  |
| P16086        | NQALNTDNYGHDLASVQALQR                               | 0.902611616        | 2              | 5.815003  |
| P16086        | NTTGVTEEALK                                         | 0.933308425        | 2              | 2.414636  |

|               |                                                            |                    |                |           |
|---------------|------------------------------------------------------------|--------------------|----------------|-----------|
| P16086        | QFQDAGHFDAENIKK                                            | 0.827021079        | 2              | 2.517598  |
| P16086        | SADESGQALLAAGHYASDEVR                                      | 1.086095134        | 2              | 5.218959  |
| P16086        | SLQQLAEER                                                  | 0.881078643        | 2              | 2.612935  |
| P16086        | SLLGSAHEVQR                                                | 0.849604743        | 2              | 3.259055  |
| P16086        | SSLSSAQADFNQLAELDR                                         | 0.88506767         | 2              | 5.19909   |
| P16086        | TATDEAYKDPSNLQGK                                           | 0.820144503        | 2              | 3.813399  |
| P16086        | TKQEEVNAAWQR                                               | 1.104723998        | 2              | 3.067427  |
| P16086        | VLETAEDIQER                                                | 0.900599314        | 2              | 2.832828  |
| P16086        | VNDVCTNGQDLIK                                              | 0.907924742        | 2              | 2.661409  |
| P16086        | VNSLGETAQR                                                 | 0.772659091        | 2              | 2.592139  |
| <b>P16232</b> | <b>DHI1 Corticosteroid 11_beta_dehydrogenase isozyme 1</b> | <b>0.597168319</b> | <b>9.9E-20</b> | <b>6</b>  |
| P16232        | EECALEIHK                                                  | 0.564957043        | 1              | 2.280206  |
| P16232        | ETSGIILSQAAPK                                              | 0.527132783        | 2              | 3.553055  |
| P16232        | FALDGGFFSTIR                                               | 1.243871426        | 2              | 2.726427  |
| P16232        | KDEVYYDK                                                   | 0.485799448        | 1              | 2.554527  |
| P16232        | MTQPLIASYSASK                                              | 1.329064817        | 2              | 2.555568  |
| P16232        | SSWTPLLLGNPGR                                              | 0.502088923        | 2              | 3.50762   |
| <b>P16290</b> | <b>PGAM2 Phosphoglycerate mutase 2</b>                     | <b>0.996794854</b> | <b>1.4E-05</b> | <b>4</b>  |
| P16290        | AMEAVAAQ GK                                                | 0.807778256        | 2              | 2.501416  |
| P16290        | AMEAVAAQ GK+Oxidation(1)                                   | 0.729048652        | 2              | 3.032785  |
| P16290        | HYGGLTGLNK                                                 | 1.397372882        | 1              | 2.834015  |
| P16290        | VLIAAHGNSLR                                                | 0.918612658        | 2              | 2.509124  |
| <b>P16303</b> | <b>CES3 Carboxylesterase 3</b>                             | <b>0.584636642</b> | <b>9.9E-20</b> | <b>13</b> |
| P16303        | AKEAAEESHWK                                                | 0.547626793        | 2              | 3.94873   |
| P16303        | DGASEEETNLSK                                               | 0.510931306        | 2              | 4.300706  |
| P16303        | ESYPFLPTVIDGVVLPK                                          | 0.501750383        | 2              | 4.295737  |
| P16303        | LDLLGNPK                                                   | 0.628867014        | 2              | 2.394383  |
| P16303        | MIPVVAEK                                                   | 0.531078626        | 1              | 1.945731  |
| P16303        | QFEGWIIPTLMGYPLSEK                                         | 0.884258769        | 2              | 3.86512   |
| P16303        | QKTEDELLETSLK                                              | 0.474100615        | 2              | 3.44549   |
| P16303        | SFNTVPYIVGINK                                              | 1.149379262        | 2              | 2.593274  |
| P16303        | TEDELLETSLK                                                | 0.509440319        | 2              | 3.628978  |
| P16303        | TPEEILAEK                                                  | 1.598745532        | 2              | 2.331626  |
| P16303        | TTTSAVMVHCLR                                               | 0.638977446        | 2              | 2.495851  |
| P16303        | TVIGDHGDELFSVFGSPFLK                                       | 0.779458727        | 2              | 5.554857  |
| P16303        | YFGGTDDPAK                                                 | 0.489861892        | 2              | 3.07163   |
| <b>P16332</b> | <b>MUTA Methylmalonyl_CoA mutase_mitochondrial</b>         | <b>1.066770784</b> | <b>0.53058</b> | <b>4</b>  |
| P16332        | AHCQTSGWSLTEQDPYNNIVR                                      | 1.286032489        | 3              | 4.286276  |
| P16332        | IDSGSEVIVGVNK                                              | 1.07867268         | 2              | 3.52451   |
| P16332        | NTQIIQEESGIPK                                              | 1.069113906        | 2              | 3.882507  |
| P16332        | TGLQAGLTIDEFAPR                                            | 0.989764249        | 2              | 3.046561  |
| <b>P16409</b> | <b>MYL3 Myosin light chain 3</b>                           | <b>0.764664853</b> | <b>0.59748</b> | <b>6</b>  |

|               |                                       |                    |                |           |
|---------------|---------------------------------------|--------------------|----------------|-----------|
| P16409        | AAPAPAAAPEPERPK                       | 0.628221783        | 2              | 4.312579  |
| P16409        | ALGQNPTQAEVLR                         | 0.571841189        | 2              | 3.855235  |
| P16409        | DTGTYEDFVEGLR                         | 0.61442519         | 2              | 3.066713  |
| P16409        | IEFTPEQIEEFK                          | 0.771097097        | 2              | 2.467093  |
| P16409        | NKDTGTYEDFVEGLR                       | 0.90331797         | 2              | 3.401169  |
| P16409        | VFDKEGNGTVMGAELR                      | 0.617977076        | 2              | 3.817748  |
| <b>P16617</b> | <b>PGK1 Phosphoglycerate kinase 1</b> | <b>1.002165852</b> | <b>9.9E-20</b> | <b>19</b> |
| P16617        | AHSSMVGVNLPQK                         | 1.028517599        | 2              | 3.507665  |
| P16617        | AHSSMVGVNLPQK+Oxidation(4)            | 0.769377159        | 2              | 2.815743  |
| P16617        | ALESPERPFLLGGAK                       | 1.765940629        | 3              | 4.454042  |
| P16617        | DCVGSEVENACANPAAGTVILLENLR            | 1.038299744        | 3              | 5.924394  |
| P16617        | FCLDNGAK                              | 0.859683365        | 1              | 2.02842   |
| P16617        | GCITIIGGGDTATCCAK                     | 0.97215405         | 2              | 5.307636  |
| P16617        | IQLINMLDK                             | 0.971024319        | 2              | 2.334903  |
| P16617        | IQLINMLDK+Oxidation(6)                | 1.480632174        | 2              | 2.456831  |
| P16617        | ITLPVDFVTADK                          | 1.081852342        | 2              | 2.338421  |
| P16617        | ITLPVDFVTADKFDENAK                    | 1.464093226        | 2              | 4.660302  |
| P16617        | QVWNGPVGVEWEAFAR                      | 0.759245897        | 2              | 3.046033  |
| P16617        | SVVLMSHLRPDPVMPDKYSLEPVAELK           | 1.733870254        | 4              | 4.705709  |
| P16617        | TGQATVASGIPAGWMGLDCGTESSK             | 1.000832174        | 2              | 4.72055   |
| P16617        | TGQATVASGIPAGWMGLDCGTESSK             | 1.062270633        | 3              | 4.142533  |
| P16617        | VLNNMEIGTSLYDEEGAK                    | 1.179088364        | 2              | 4.841942  |
| P16617        | VLNNMEIGTSLYDEEGAK+Oxidation(4)       | 0.773517771        | 2              | 2.670293  |
| P16617        | VLPGVDAALNV                           | 1.135423064        | 2              | 2.402672  |
| P16617        | WNTEDKVSHVSTGGGASLELLEGG              | 1.133710354        | 3              | 4.544102  |
| P16617        | YSLEPVAELK                            | 0.990758912        | 2              | 2.974669  |
| <b>P16638</b> | <b>ACLY ATP_citrate synthase</b>      | <b>1.476541905</b> | <b>9.9E-20</b> | <b>20</b> |
| P16638        | AFDSGIIPMEFVNK                        | 1.494591037        | 2              | 3.475564  |
| P16638        | AFDSGIIPMEFVNK+Oxidation(8)           | 0.776565195        | 2              | 3.198521  |
| P16638        | DEPSVAAMVYPFTGDHK                     | 1.406448973        | 2              | 3.526136  |
| P16638        | DGVYILDAAK                            | 1.253686335        | 2              | 2.329798  |
| P16638        | DLVSSLTSGLLTIGDR                      | 1.286271626        | 2              | 3.744618  |
| P16638        | EAYPEEAYIADLDAK                       | 1.426970892        | 2              | 3.246348  |
| P16638        | FGGALDAAK                             | 1.290080966        | 2              | 2.725577  |
| P16638        | GAIVPAQEVPPPTVPMDDYSWAR               | 1.483577339        | 2              | 4.050598  |
| P16638        | GGPNYQEGLR                            | 1.714729698        | 2              | 2.955005  |
| P16638        | GVTIIGPATVGGIKPGCFK                   | 1.295416349        | 2              | 3.400007  |
| P16638        | IGNTGGMMLDNILASK                      | 1.296423466        | 2              | 3.594409  |
| P16638        | LGLVGVNLSLDGVK                        | 1.486538583        | 2              | 2.499125  |
| P16638        | LLVGVDEK                              | 1.458244101        | 2              | 2.316245  |
| P16638        | RGGPNYQEGLR                           | 2.315043174        | 2              | 3.296581  |
| P16638        | SGGMSNELNNIISR                        | 1.150462148        | 2              | 3.332389  |
| P16638        | TIAIIAEGIPEALTR                       | 1.375696049        | 2              | 4.547411  |

|               |                                                             |                    |                |           |
|---------------|-------------------------------------------------------------|--------------------|----------------|-----------|
| P16638        | TTDGVYEGVAIGGDR                                             | 1.427745711        | 2              | 2.817966  |
| P16638        | TTDGVYEGVAIGGDRYPGSTFMDHVLR                                 | 1.551546115        | 3              | 3.649698  |
| P16638        | WGDIEFPPPFGR                                                | 1.097340835        | 2              | 3.9985    |
| P16638        | YICTSAIQNR                                                  | 1.460286364        | 2              | 2.998045  |
| <b>P16970</b> | <b>ABCD3 ATP_binding cassette sub_family D member 3</b>     | <b>0.951455559</b> | <b>0.03992</b> | <b>7</b>  |
| P16970        | EGGWDSVQDWMDVLSGGEK                                         | 0.974750566        | 2              | 3.994806  |
| P16970        | FDHVPLATPNGDILIQDLSFEVR                                     | 1.211830128        | 3              | 4.00784   |
| P16970        | GIEGAQASPLIPGAGEIINADNIIK                                   | 0.936486793        | 3              | 4.559751  |
| P16970        | GYLDNVQLGHILER                                              | 0.942568852        | 2              | 3.372169  |
| P16970        | HLHSTHSELLEDYYQSGR                                          | 0.857877018        | 3              | 4.73919   |
| P16970        | IANPDQLLTQDVEK                                              | 1.090643503        | 2              | 3.170719  |
| P16970        | SGANVLICGPNGCGK                                             | 0.924361049        | 2              | 3.454221  |
| <b>P17077</b> | <b>RL9 60S ribosomal protein L9</b>                         | <b>0.985923207</b> | <b>0.00049</b> | <b>7</b>  |
| P17077        | FLDGIYVSEK                                                  | 1.048512786        | 2              | 3.36401   |
| P17077        | GTVQQPDE                                                    | 1.067093382        | 1              | 2.050989  |
| P17077        | KFLDGIYVSEK                                                 | 1.120452924        | 2              | 2.477501  |
| P17077        | SVYAHFPINVVIIQENGLSVEIR                                     | 1.105458973        | 3              | 3.385095  |
| P17077        | TGVACSVSQAQK                                                | 0.911502378        | 2              | 3.086485  |
| P17077        | TICSHVQNMIIK                                                | 0.8499735          | 2              | 2.912883  |
| P17077        | TILSNQTVDIPENVDTLTK                                         | 0.865871762        | 2              | 3.928612  |
| <b>P17078</b> | <b>RL35 60S ribosomal protein L35</b>                       | <b>1.019808608</b> | <b>0.98813</b> | <b>2</b>  |
| P17078        | QLDDLKVELSCLR                                               | 0.95617888         | 2              | 2.415821  |
| P17078        | VLTVINQTQK                                                  | 1.029791775        | 2              | 2.976694  |
| <b>P17178</b> | <b>CP27A Sterol 26_hydroxylase_mitochondrial</b>            | <b>1.375055895</b> | <b>1.2E-05</b> | <b>3</b>  |
| P17178        | MLKPAAALYTDALNEVISDFIAR                                     | 1.536736807        | 3              | 3.718913  |
| P17178        | VGCLEPSIPEDTATFIR                                           | 1.430809859        | 2              | 3.063416  |
| P17178        | YEVVLSPGMGEVK                                               | 1.098943707        | 2              | 3.234018  |
| <b>P17425</b> | <b>HMCS1 Hydroxymethylglutaryl_CoA synthase_cytoplasmic</b> | <b>0.23690726</b>  | <b>9.9E-20</b> | <b>10</b> |
| P17425        | ASAELFNQK                                                   | 0.271354603        | 2              | 3.010036  |
| P17425        | GTHMQHAYDFYKPDMLSEYPVVDGK+Oxidation(3)                      | 0.142919393        | 3              | 4.794155  |
| P17425        | LEDTYFDRDVEK                                                | 0.209526773        | 2              | 2.828492  |
| P17425        | MFLNDFLNDQNR                                                | 0.362858953        | 2              | 2.619775  |
| P17425        | MFLNDFLNDQNR+Oxidation(0)                                   | 0.186142175        | 2              | 3.408628  |
| P17425        | NSLSYDCIGR                                                  | 0.198935138        | 2              | 2.674054  |
| P17425        | RPSTNDHSLDEGVGLVHSNTATEHIPSPAK                              | 0.537459474        | 4              | 4.652402  |
| P17425        | TCVAPDVFAENMK                                               | 0.256749039        | 2              | 2.468074  |
| P17425        | VTQDATPGSALDK                                               | 0.243946677        | 2              | 3.925191  |
| P17425        | YTIGLGQAR                                                   | 0.249144095        | 2              | 2.61365   |
| <b>P17426</b> | <b>AP2A1 AP_2 complex subunit alpha_1</b>                   | <b>0.977787509</b> | <b>0.3818</b>  | <b>3</b>  |
| P17426        | FVCKNSGVLFENQLLQIGVK                                        | 2.120858885        | 2              | 2.30254   |
| P17426        | NADVELQQR                                                   | 1.062237565        | 2              | 2.643287  |
| P17426        | VGGYILGEFGNLIAGDPR                                          | 0.869584068        | 2              | 3.426387  |

|               |                                                        |                    |                |           |
|---------------|--------------------------------------------------------|--------------------|----------------|-----------|
| <b>P17475</b> | <b>A1AT Alpha_1_antiproteinase</b>                     | <b>1.357697188</b> | <b>0.00123</b> | <b>6</b>  |
| P17475        | IVDLMK+Oxidation(4)                                    | 1.153392009        | 1              | 2.05017   |
| P17475        | MQHLEQLTK                                              | 0.974961094        | 2              | 2.317177  |
| P17475        | NNYHSEAFSVNFADSEEAkk                                   | 1.973347017        | 3              | 4.351598  |
| P17475        | TLLSSLGITR                                             | 1.418790285        | 2              | 2.988697  |
| P17475        | VFNNADLSGITEDAPLK                                      | 1.430947304        | 2              | 5.460659  |
| P17475        | VINDYVEK                                               | 1.399578729        | 1              | 2.190601  |
| <b>P17712</b> | <b>HXK4 Glucokinase</b>                                | <b>1.298333019</b> | <b>0.00423</b> | <b>4</b>  |
| P17712        | ASGAEGNNIVGLLR                                         | 1.442578795        | 2              | 2.905324  |
| P17712        | LETHEEASVK                                             | 1.005452951        | 2              | 2.516607  |
| P17712        | STPEGSEVGDFLSLDLGGTNFR                                 | 1.300352159        | 2              | 4.221118  |
| P17712        | VGEGEAGQWSVK                                           | 1.219810316        | 2              | 3.033377  |
| <b>P17764</b> | <b>TH1L Acetyl_CoA acetyltransferase_mitochondrial</b> | <b>1.018874546</b> | <b>9.9E-20</b> | <b>16</b> |
| P17764        | EEQDKYAIGSYTR                                          | 0.811544552        | 2              | 3.54635   |
| P17764        | ENGTVTAANASTLNDGAAAVLMTAEAAQR                          | 1.125624077        | 3              | 3.389439  |
| P17764        | EVYMGVNIQGGEGQAPTR                                     | 1.098094595        | 2              | 4.751221  |
| P17764        | FANEITPITISVK                                          | 1.279713472        | 2              | 3.718861  |
| P17764        | GKPDVVVKEDEEYK                                         | 0.893675606        | 2              | 3.238362  |
| P17764        | GKPDVVVKEDEEYKR                                        | 0.845554923        | 2              | 4.575419  |
| P17764        | IAAFADAAVDPIDFLAPAYAVPK                                | 1.318977721        | 2              | 3.887921  |
| P17764        | IHMGNCAENTAK                                           | 0.529326774        | 2              | 3.197745  |
| P17764        | IHMGNCAENTAK+Oxidation(2)                              | 0.979259757        | 2              | 3.029543  |
| P17764        | LEDLIVK                                                | 0.781749815        | 1              | 2.186316  |
| P17764        | LGTIAIQGAIEK                                           | 1.021776552        | 2              | 2.886348  |
| P17764        | QATLGAGLPIATPCTTVNK                                    | 0.910497082        | 2              | 4.639103  |
| P17764        | QGEFGLASICNGGGGASAVLIEK                                | 0.843289435        | 2              | 4.761388  |
| P17764        | TPIGSFLGLASQPATK                                       | 2.782148171        | 2              | 3.997275  |
| P17764        | VNVHGGAVSLGHPIGMSGAR                                   | 0.00611849         | 3              | 3.649167  |
| P17764        | VNVHGGAVSLGHPIGMSGAR+Oxidation(15)                     | 0.747868291        | 3              | 3.311255  |
| <b>P17879</b> | <b>HS71B Heat shock 70 kDa protein 1B</b>              | <b>1.292500545</b> | <b>9.9E-20</b> | <b>3</b>  |
| P17879        | QTQFTTYSDNQPGVLIQVYEGER                                | 1.163638599        | 3              | 4.659195  |
| P17879        | TTPSYVAFTDTER                                          | 1.502801667        | 2              | 3.697904  |
| P17879        | VEIANDQGNR                                             | 1.035450822        | 2              | 3.804797  |
| <b>P17988</b> | <b>ST1A1 Sulfotransferase 1A1</b>                      | <b>1.794669421</b> | <b>9.9E-20</b> | <b>4</b>  |
| P17988        | CPGVPSGLETLEETPAPR                                     | 1.842224035        | 2              | 4.924014  |
| P17988        | NTFTVAQNER                                             | 1.872008757        | 2              | 3.46223   |
| P17988        | SLPEETVDSIVHHTSFK                                      | 1.903932331        | 2              | 4.345303  |
| P17988        | THLPLSLLPQSLLDQK                                       | 2.013438996        | 2              | 4.724508  |
| <b>P18163</b> | <b>ACSL1 Long_chain_fatty_acid_CoA ligase 1</b>        | <b>0.897364938</b> | <b>9.9E-20</b> | <b>23</b> |
| P18163        | AELSIVFADKPEK                                          | 0.938772262        | 2              | 3.355863  |
| P18163        | ALKPPCDLSMQSVEVTGTTEGVR                                | 0.905747344        | 2              | 4.492323  |
| P18163        | ALKPPCDLSMQSVEVTGTTEGVR+Oxidation(9)                   | 0.672625553        | 3              | 3.657052  |

|               |                                                           |                    |                |           |
|---------------|-----------------------------------------------------------|--------------------|----------------|-----------|
| P18163        | CGVEIIGLK                                                 | 0.814026231        | 2              | 3.078706  |
| P18163        | DGWLHTGDIGK                                               | 0.75876791         | 2              | 2.870425  |
| P18163        | GAMVTHQNMNDCSGFIK+Oxidation(2)                            | 1.74187799         | 3              | 3.737926  |
| P18163        | GFQGSFEELCR                                               | 0.987293783        | 2              | 3.200496  |
| P18163        | GIAVHPELFSIDNGLLTPTLK                                     | 1.836531564        | 2              | 5.668026  |
| P18163        | GIQVSNDGPCLGSR                                            | 0.866900614        | 2              | 4.577071  |
| P18163        | IENIYLR                                                   | 0.87230799         | 2              | 2.844885  |
| P18163        | IFGQANTSVK                                                | 0.995569304        | 2              | 2.403597  |
| P18163        | IIVIMDSYDNDLVER                                           | 0.92732573         | 2              | 4.295888  |
| P18163        | LLLEGVENK                                                 | 0.859972807        | 2              | 3.229224  |
| P18163        | LVDVEDMNYQAAK                                             | 1.052032256        | 2              | 4.505102  |
| P18163        | LVDVEDMNYQAAK+Oxidation(6)                                | 0.869328575        | 2              | 3.408411  |
| P18163        | NAGLKPFEQVK                                               | 0.919276391        | 2              | 3.573082  |
| P18163        | NNSLWDK                                                   | 0.877099824        | 2              | 2.6721    |
| P18163        | QVAEMAECIGSALIQK                                          | 0.829049128        | 2              | 5.345551  |
| P18163        | SQIDELYSTIK                                               | 0.970071533        | 2              | 3.579922  |
| P18163        | SQIDELYSTIKI                                              | 1.139707447        | 2              | 3.953763  |
| P18163        | TAEALDKDGLHTGDIGK                                         | 1.10494462         | 2              | 5.248548  |
| P18163        | VLQPTIFPVVPR                                              | 0.880213385        | 2              | 3.635252  |
| P18163        | WLLDFASK                                                  | 0.923522249        | 2              | 2.331704  |
| <b>P18297</b> | <b>SPRE Sepiapterin reductase</b>                         | <b>0.880919756</b> | <b>2.7E-13</b> | <b>4</b>  |
| P18297        | ALAPQLAGLLSPGSVLLLSAR                                     | 0.902618634        | 3              | 4.804233  |
| P18297        | LNSEGELVDCGTSAAK                                          | 0.878356823        | 2              | 4.74238   |
| P18297        | TVVNISLALQPFK                                             | 1.180277831        | 2              | 2.699671  |
| P18297        | VLSYAPGPLDTNMQQLAR                                        | 0.863349879        | 2              | 2.489656  |
| <b>P18298</b> | <b>METK2 S_adenosylmethionine synthase isoform type_2</b> | <b>1.732696686</b> | <b>9.9E-20</b> | <b>2</b>  |
| P18298        | IIVDTYGGWGAHGGGAFSGK                                      | 0.926663647        | 2              | 5.277245  |
| P18298        | YLDEDTIYHLQPSGR                                           | 1.749557335        | 2              | 4.526864  |
| <b>P18418</b> | <b>CALR Calreticulin</b>                                  | <b>0.95903948</b>  | <b>1.2E-05</b> | <b>19</b> |
| P18418        | AKIDDPDTSKPEDWDKPEHIPDPAK                                 | 0.876926036        | 3              | 5.909367  |
| P18418        | CKDDEFTHLYTLIVRPDNTYEVK                                   | 2.293685809        | 4              | 4.899911  |
| P18418        | DMHGDSEYNIMFGPDICGPGTK                                    | 1.046601436        | 2              | 5.851804  |
| P18418        | DMHGDSEYNIMFGPDICGPGTK+Oxidation(1)                       | 0.962226078        | 3              | 3.706678  |
| P18418        | DMHGDSEYNIMFGPDICGPGTK+Oxidation(10)                      | 0.962226078        | 3              | 3.4793    |
| P18418        | EQFLDGDWATNR                                              | 0.909026826        | 2              | 3.085924  |
| P18418        | FYGDQEK                                                   | 1.017568825        | 1              | 1.956502  |
| P18418        | FYGDQEKDK                                                 | 0.93799377         | 1              | 2.911206  |
| P18418        | GQTLVVQFTVK                                               | 1.194277785        | 2              | 3.328699  |
| P18418        | HEQNIDCGGGYVK                                             | 0.921790348        | 2              | 4.507418  |
| P18418        | IDDPDTSKPEDWDKPEHIPDPAK                                   | 1.115406725        | 3              | 4.041546  |
| P18418        | IDNSQVESGSLEDDWDFLPPK                                     | 0.890853927        | 2              | 5.156468  |
| P18418        | IDNSQVESGSLEDDWDFLPPKK                                    | 0.987252126        | 2              | 4.713474  |

|               |                                                                  |                    |                |           |
|---------------|------------------------------------------------------------------|--------------------|----------------|-----------|
| P18418        | IKDPDAAKPEDWDER                                                  | 0.944460705        | 2              | 4.244777  |
| P18418        | KPEDWDEEMDGEWEPPIQNPEYK                                          | 0.961231565        | 3              | 4.973885  |
| P18418        | LFPGLDQK                                                         | 1.00026129         | 1              | 2.188573  |
| P18418        | QIDNPDYK                                                         | 0.923942613        | 1              | 2.174539  |
| P18418        | SGTIFDNFLITNDEAYAEFNETWGVTK                                      | 0.998540368        | 3              | 5.726543  |
| P18418        | VHVIFNYK                                                         | 1.484431731        | 1              | 2.323422  |
| <b>P18420</b> | <b>PSA1 Proteasome subunit alpha type_1</b>                      | <b>1.124316938</b> | <b>0.01664</b> | <b>3</b>  |
| P18420        | AQPSQAADEPAEK                                                    | 0.960592593        | 2              | 3.734879  |
| P18420        | ETLPAEQDLTK                                                      | 0.992326831        | 2              | 2.429116  |
| P18420        | NQYDNDVTWVSPQGR                                                  | 1.14780841         | 2              | 3.650851  |
| <b>P18421</b> | <b>PSB1 Proteasome subunit beta type_1</b>                       | <b>1.037594147</b> | <b>1.9E-05</b> | <b>2</b>  |
| P18421        | AGGSASAMLQPLLDNQVGFK                                             | 1.115015773        | 3              | 4.45752   |
| P18421        | GAVYSFDPVGSYQR                                                   | 0.823615793        | 2              | 3.662261  |
| <b>P18445</b> | <b>RL27A 60S ribosomal protein L27a</b>                          | <b>0.892730456</b> | <b>0.57801</b> | <b>2</b>  |
| P18445        | NGVAPIIDVVR                                                      | 1.101428207        | 2              | 2.648369  |
| P18445        | NQSFCTVNLDK                                                      | 1.013053064        | 2              | 2.979494  |
| <b>P18484</b> | <b>AP2A2 AP_2 complex subunit alpha_2</b>                        | <b>1.018622392</b> | <b>0.40817</b> | <b>5</b>  |
| P18484        | FVNLFPEVK                                                        | 0.905421408        | 2              | 2.75243   |
| P18484        | KGPSTVTDLEETKR                                                   | 1.032215214        | 3              | 3.398864  |
| P18484        | NNGVLFENQLLQIGLK                                                 | 1.156754227        | 2              | 3.264172  |
| P18484        | QLSNPQQEVQNIKF                                                   | 0.703730574        | 2              | 3.386905  |
| P18484        | THIETVINALK                                                      | 0.898491798        | 2              | 2.313368  |
| <b>P18596</b> | <b>AT2A3 Sarcoplasmic/endoplasmic reticulum calcium ATPase 3</b> | <b>0.86350277</b>  | <b>0.1123</b>  | <b>3</b>  |
| P18596        | DIVPGDIVEVAVGDKVPADLR                                            | 0.504793526        | 2              | 3.056824  |
| P18596        | SLPSVETLGCTSVICSDK                                               | 0.749778563        | 2              | 4.127248  |
| P18596        | VGEATETALTCLVEK                                                  | 0.883899059        | 2              | 4.184026  |
| <b>P18757</b> | <b>CGL Cystathionine gamma_lyase</b>                             | <b>0.809682328</b> | <b>9.9E-20</b> | <b>16</b> |
| P18757        | AGDEVICMDEVYGGTNR                                                | 0.680028342        | 2              | 5.110285  |
| P18757        | AGDEVICMDEVYGGTNR+Oxidation(7)                                   | 0.509689372        | 2              | 3.875361  |
| P18757        | ATLGISDTLIR                                                      | 0.954918672        | 2              | 3.614049  |
| P18757        | AVAALDGAK                                                        | 1.220244815        | 2              | 2.354638  |
| P18757        | AVVLPISLATTFK                                                    | 0.855714976        | 3              | 4.006486  |
| P18757        | FLQNSLGAVPSPFDCYLCCR                                             | 0.946640166        | 2              | 3.392103  |
| P18757        | GTLQHAQVFLK                                                      | 0.792609627        | 2              | 2.757927  |
| P18757        | LFALAESLGGYESLAELPAIMTHASVPEK                                    | 1.006064855        | 3              | 4.275409  |
| P18757        | LFALAESLGGYESLAELPAIMTHASVPEKDR                                  | 0.893907457        | 4              | 4.960689  |
| P18757        | LLEAAITPQTK                                                      | 0.68147935         | 2              | 3.876265  |
| P18757        | LSVLEDEKDLLEDLGQALK                                              | 0.783488597        | 3              | 6.233472  |
| P18757        | LVWIETPTNPTLK                                                    | 0.772869327        | 2              | 3.674063  |
| P18757        | QCTGCPGMVSFYIK                                                   | 0.903825917        | 2              | 3.756606  |
| P18757        | QDSPGQSSGFVYSR                                                   | 0.928918459        | 2              | 3.906448  |
| P18757        | RVASEFGLK                                                        | 0.719484214        | 2              | 2.624012  |

|               |                                                              |                    |                |           |
|---------------|--------------------------------------------------------------|--------------------|----------------|-----------|
| P18757        | VIYPLPSHPQHELAK                                              | 0.67266255         | 2              | 3.89286   |
| <b>P18886</b> | <b>CPT2 Carnitine O_palmitoyltransferase 2_mitochondrial</b> | <b>1.011075526</b> | <b>0.11384</b> | <b>11</b> |
| P18886        | ATNLTVSAVR                                                   | 1.079724702        | 2              | 3.174745  |
| P18886        | ELHAHLLAQDK                                                  | 1.187461848        | 2              | 2.862761  |
| P18886        | LIFDGN EETLK                                                 | 1.064796414        | 2              | 2.686887  |
| P18886        | QKLIFDGN EETLKK                                              | 0.990105301        | 2              | 2.400264  |
| P18886        | QYGQTVATYESCSTAAFK                                           | 1.060374512        | 2              | 4.113565  |
| P18886        | SEYNDQLTR                                                    | 1.227518712        | 2              | 2.846058  |
| P18886        | TETIRPASIFTK                                                 | 1.179963021        | 2              | 2.456772  |
| P18886        | TLQAGLLEPEV FHLNPSK                                          | 6.786883246        | 2              | 3.467111  |
| P18886        | TLSIDSIQFQR                                                  | 1.102700803        | 2              | 3.167564  |
| P18886        | YILSDSSPVPEFPVAYLTSENR                                       | 1.098834805        | 2              | 5.204724  |
| P18886        | YLNAQKPLLDSDQFR                                              | 0.985431562        | 2              | 3.833109  |
| <b>P19112</b> | <b>F16P1 Fructose 1_6_bisphosphatase 1</b>                   | <b>1.026676397</b> | <b>1.9E-15</b> | <b>18</b> |
| P19112        | AGGLATTGNEDILDIVPEIHQK                                       | 0.943808783        | 3              | 6.205876  |
| P19112        | AGGTGEMTQLLNSLCTAIK                                          | 1.044832312        | 2              | 5.324265  |
| P19112        | AGGTGEMTQLLNSLCTAIK+Oxidation(6)                             | 0.96937903         | 2              | 3.365777  |
| P19112        | APVIMGSTEDVQEFLEIYNK                                         | 1.670407225        | 2              | 5.043897  |
| P19112        | APVIMGSTEDVQEFLEIYNKDK                                       | 1.427919503        | 3              | 3.673533  |
| P19112        | DFDPAIN EYIQR                                                | 0.913150887        | 2              | 3.826979  |
| P19112        | FPPDNSAPYGAR                                                 | 1.027598157        | 2              | 2.599811  |
| P19112        | GNIYSIN EGYAK                                                | 0.970721687        | 2              | 4.136878  |
| P19112        | KGNIYSIN EGYAK                                               | 1.110916279        | 2              | 4.005682  |
| P19112        | KLDILSNDLVINMLK                                              | 1.006377105        | 2              | 5.296142  |
| P19112        | KTSANEPSEKDALQPGR                                            | 0.97999279         | 3              | 4.054168  |
| P19112        | LDILSNDLVINMLK                                               | 0.889759625        | 2              | 4.916448  |
| P19112        | LLYECNPIAYVMEK                                               | 1.549740441        | 2              | 4.132447  |
| P19112        | QAGIAQLYGIAGSTNVTGDQVK                                       | 1.13299001         | 3              | 5.948756  |
| P19112        | SRPSLPLQSR                                                   | 0.89510283         | 2              | 3.412651  |
| P19112        | SSYATCVLVSEEDTHAIII EPEKR                                    | 1.052608733        | 3              | 5.305854  |
| P19112        | TLVYGGIFLYPANK                                               | 0.992437339        | 2              | 3.763001  |
| P19112        | TSANEPSEKDALQPGR                                             | 0.974947088        | 2              | 3.707755  |
| <b>P19225</b> | <b>CP270 Cytochrome P450 2C70</b>                            | <b>0.595596909</b> | <b>9.9E-20</b> | <b>9</b>  |
| P19225        | ACIG EGLAR                                                   | 0.478304501        | 2              | 2.609738  |
| P19225        | ASLNLSNPQDFIDYFLIK                                           | 1.051187137        | 2              | 3.836382  |
| P19225        | EALIDRG EEFSDK                                               | 0.840310218        | 2              | 3.022806  |
| P19225        | IQEEVVYLLEALR                                                | 1.225558471        | 2              | 2.782215  |
| P19225        | KLPPGPTPLPIFGNILQVGVK                                        | 0.781914825        | 3              | 3.490888  |
| P19225        | KTTQDVEFR                                                    | 0.63364385         | 2              | 2.329356  |
| P19225        | LPPGPTPLPIFGNILQVGVK                                         | 0.599441307        | 2              | 4.955725  |
| P19225        | SDYFMAFSAGRR+Oxidation(4)                                    | 1.03943125         | 1              | 1.960647  |
| P19225        | YIDFVPIPLPR                                                  | 0.588749059        | 2              | 3.09975   |



|               |                                                                            |                    |                |           |
|---------------|----------------------------------------------------------------------------|--------------------|----------------|-----------|
| <b>P19234</b> | <b>NDUV2 NADH dehydrogenase [ubiquinone] flavoprotein 2_ mitochondrial</b> | <b>0.944161546</b> | <b>0.09007</b> | <b>4</b>  |
| P19234        | DIEEIIDELR                                                                 | 0.868241142        | 2              | 3.417425  |
| P19234        | DTPENNPDPDFDTPENYER                                                        | 1.237591223        | 2              | 4.255522  |
| P19234        | FCCEPAGGLTSLTEPPK                                                          | 1.061039012        | 2              | 2.859828  |
| P19234        | YHIQVCTTTPCMLR                                                             | 0.867814687        | 2              | 2.470977  |
| <b>P19468</b> | <b>GSH1 Glutamate__cysteine ligase catalytic subunit</b>                   | <b>0.894976625</b> | <b>6.5E-05</b> | <b>6</b>  |
| P19468        | CNQJANELCEPELLGSGFR                                                        | 0.786301263        | 2              | 5.12767   |
| P19468        | EATSVLGEHQALCTITSFPR                                                       | 0.729441736        | 2              | 3.726954  |
| P19468        | LDFLIPLSKVDENMK                                                            | 0.80305042         | 2              | 2.465782  |
| P19468        | NTPSPFVETFPEDDEEASK                                                        | 0.896879777        | 2              | 4.421264  |
| P19468        | SLFFPDDEAINK                                                               | 0.775027692        | 2              | 2.62129   |
| P19468        | VQLLLNGGDVLETQEK                                                           | 0.924331746        | 2              | 4.816894  |
| <b>P19488</b> | <b>UDB37 UDP_glucuronosyltransferase 2B37</b>                              | <b>1.277722308</b> | <b>9.9E-20</b> | <b>7</b>  |
| P19488        | ANAIAWALAQIPQK                                                             | 1.284237251        | 3              | 6.17779   |
| P19488        | EVINNPFYK                                                                  | 0.698080133        | 1              | 2.293064  |
| P19488        | FETFPTSFSKDELEK                                                            | 0.505058659        | 2              | 3.871589  |
| P19488        | GHEVTVLKPSAYYVLDPK                                                         | 1.243881502        | 3              | 4.398683  |
| P19488        | NWDPFYTEILGRPTTLAETMGK                                                     | 1.052224494        | 2              | 4.819016  |
| P19488        | SDLFNALK                                                                   | 0.765694725        | 2              | 2.792472  |
| P19488        | TILDELVQR                                                                  | 0.852375046        | 2              | 3.154758  |
| <b>P19511</b> | <b>AT5F1 ATP synthase subunit b_ mitochondrial</b>                         | <b>0.952646783</b> | <b>9.9E-20</b> | <b>8</b>  |
| P19511        | HVIQSISAQKEK                                                               | 0.875761403        | 2              | 3.883437  |
| P19511        | HVIQSISAQKEKETIAK                                                          | 1.092972903        | 3              | 4.015398  |
| P19511        | HLYFDVQR                                                                   | 0.887609474        | 2              | 2.448481  |
| P19511        | LDYHISVQDMMR                                                               | 0.867951613        | 3              | 3.99332   |
| P19511        | LNEEKIAQLEEIK                                                              | 0.838744386        | 2              | 2.691797  |
| P19511        | RKEGEHMINWVEK                                                              | 0.587053537        | 2              | 2.522641  |
| P19511        | YGASIGEFIDK                                                                | 1.186303014        | 2              | 2.91781   |
| P19511        | YGASIGEFIDKLNEEK                                                           | 1.013774783        | 2              | 3.603116  |
| <b>P19643</b> | <b>AOFB Amine oxidase [flavin_containing] B</b>                            | <b>0.941430173</b> | <b>0.13179</b> | <b>11</b> |
| P19643        | FIGGSGQVSR                                                                 | 0.955520577        | 2              | 3.213182  |
| P19643        | IISTTNGGQER                                                                | 1.024532476        | 2              | 2.826758  |
| P19643        | IPEDEIWQPEPESVDVPARPITNTFLER                                               | 1.072037235        | 3              | 5.007388  |
| P19643        | KFIGGSGQVSR                                                                | 0.970871055        | 2              | 2.957022  |
| P19643        | LERPVIHIDQTGENVVVK                                                         | 0.890881428        | 3              | 5.090734  |
| P19643        | TLNHEIYEAK                                                                 | 0.854061813        | 2              | 2.991459  |
| P19643        | TMDMGQEIPSDAPWK                                                            | 0.840378243        | 2              | 3.219276  |
| P19643        | VLNSQEALQPVHYEEK                                                           | 0.83411875         | 2              | 4.567133  |
| P19643        | YVDLGGSYVGPQNR                                                             | 0.96487515         | 2              | 4.191937  |
| P19643        | YVISAIPVLMGK                                                               | 0.838568882        | 2              | 3.154932  |
| P19643        | YVISAIPVLMGK+Oxidation(11)                                                 | 0.828698859        | 2              | 2.445378  |

|               |                                                              |                    |                |          |
|---------------|--------------------------------------------------------------|--------------------|----------------|----------|
| <b>P19686</b> | <b>GCYA3 Guanylate cyclase soluble subunit alpha_3</b>       | <b>0.838367506</b> | <b>0.00098</b> | <b>2</b> |
| P19686        | DLAILQLNGIR                                                  | 0.867752991        | 2              | 2.707774 |
| P19686        | MMELSNEVMSPHGEPIK+Oxidation(8)                               | 0.813308089        | 2              | 2.725073 |
| <b>P19804</b> | <b>NDKB Nucleoside diphosphate kinase B</b>                  | <b>0.903082203</b> | <b>0.05815</b> | <b>8</b> |
| P19804        | DRPFFPGLVK                                                   | 0.847305671        | 2              | 2.425309 |
| P19804        | EIGLWFKPEELIDYK                                              | 0.960118634        | 2              | 3.92629  |
| P19804        | GDFCIQVGR                                                    | 0.924380689        | 2              | 3.35049  |
| P19804        | NIIHGSDSVESA EK                                              | 0.906732098        | 1              | 3.903108 |
| P19804        | TFIAIKPDGVQR                                                 | 1.037262423        | 2              | 2.888211 |
| P19804        | VMLGETNPADSKPGTIR                                            | 1.062651856        | 2              | 4.021312 |
| P19804        | VMLGETNPADSKPGTIR+Oxidation(1)                               | 0.875613042        | 2              | 4.237875 |
| P19804        | YMNSGPVVMVWEGLNVVK                                           | 1.237466133        | 2              | 4.930645 |
| <b>P19944</b> | <b>RLA1 60S acidic ribosomal protein P1</b>                  | <b>1.441047372</b> | <b>3.6E-08</b> | <b>2</b> |
| P19944        | AAGVNVPEFPWPLFAK                                             | 3.437601421        | 2              | 2.75832  |
| P19944        | ALANVNIGSLICNVGAGGPAPAAGAAPAGGPAPSAAAAPAE EK                 | 1.041655493        | 4              | 6.738688 |
| <b>P19945</b> | <b>RLA0 60S acidic ribosomal protein P0</b>                  | <b>1.597441307</b> | <b>9.9E-20</b> | <b>9</b> |
| P19945        | AFLADPSAFAAAAAPVAAATTAAPAAAAAPAK                             | 1.169334773        | 2              | 5.7766   |
| P19945        | AGAIAPCEVTVPAQNTGLGPEK                                       | 1.025165892        | 3              | 4.389659 |
| P19945        | CFIVGADNVGSK                                                 | 0.99406959         | 2              | 3.240243 |
| P19945        | GHLENNPALEK                                                  | 0.955102387        | 2              | 3.544275 |
| P19945        | GNVGFVFTK                                                    | 1.613631793        | 2              | 2.714267 |
| P19945        | GTIEILSDVQLIK                                                | 1.184123092        | 2              | 3.061765 |
| P19945        | IIQLDDYPK                                                    | 0.848457658        | 2              | 3.829477 |
| P19945        | TSFFQALGITTK                                                 | 1.265331847        | 2              | 3.998346 |
| P19945        | VLALSVETDYYTFLAEK                                            | 1.368363159        | 2              | 2.458873 |
| <b>P20059</b> | <b>HEMO Hemopexin</b>                                        | <b>0.987369074</b> | <b>0.99868</b> | <b>6</b> |
| P20059        | ELGSPPGISLDTIDAAFSCPGSSK                                     | 0.965482975        | 2              | 4.417696 |
| P20059        | FNPVTGEVPPR                                                  | 1.015890448        | 2              | 2.458191 |
| P20059        | GECQSEGVLFFQGNR                                              | 0.920199081        | 2              | 3.786537 |
| P20059        | GGNNLVSGYPK                                                  | 1.046497564        | 2              | 2.37534  |
| P20059        | LFQEEFPGIPYPPDAAVECHR                                        | 0.980846533        | 3              | 3.653296 |
| P20059        | SGAQATWAELSWPHEK                                             | 0.857975477        | 3              | 3.481474 |
| <b>P20069</b> | <b>MPPA Mitochondrial_processing peptidase subunit alpha</b> | <b>1.01716962</b>  | <b>0.76833</b> | <b>2</b> |
| P20069        | HGGICDCQTSR                                                  | 1.191303395        | 2              | 2.809563 |
| P20069        | LTDEEIMTR                                                    | 0.857886455        | 2              | 2.948157 |
| <b>P20070</b> | <b>NB5R3 NADH_cytochrome b5 reductase 3</b>                  | <b>0.738927082</b> | <b>9.9E-20</b> | <b>8</b> |
| P20070        | DILLRPELEELR                                                 | 0.751070535        | 2              | 2.555241 |
| P20070        | IDGNLVIRPYTPVSSDDDKGFVDLVVK                                  | 0.955631831        | 3              | 5.77773  |
| P20070        | LIDKEIISHDTR                                                 | 0.747340137        | 3              | 3.510535 |
| P20070        | MSQYLENMNIGDTIEFR                                            | 1.07326684         | 2              | 3.922734 |
| P20070        | SSPAITLENPDIK                                                | 0.85956318         | 2              | 4.063457 |

|               |                                                                  |                    |                |           |
|---------------|------------------------------------------------------------------|--------------------|----------------|-----------|
| P20070        | SSPAITLENPDIKYPLR                                                | 0.965527703        | 2              | 3.401949  |
| P20070        | SVGMIAGGTGITPMLQVIR                                              | 0.924397418        | 2              | 4.375447  |
| P20070        | SVGMIAGGTGITPMLQVIR+Oxidation(3)                                 | 0.826046401        | 2              | 2.445809  |
| <b>P20280</b> | <b>RL21 60S ribosomal protein L21</b>                            | <b>0.961602269</b> | <b>0.19972</b> | <b>3</b>  |
| P20280        | KGDIVDIK                                                         | 1.027625432        | 1              | 1.902305  |
| P20280        | TNGKEPELLEPIPYEFMA                                               | 0.711100166        | 2              | 2.941762  |
| P20280        | VYNVTQHAVGIIVNK                                                  | 1.01768805         | 2              | 4.299368  |
| <b>P20673</b> | <b>ARLY Argininosuccinate lyase</b>                              | <b>0.842978524</b> | <b>9.9E-20</b> | <b>15</b> |
| P20673        | AEAECEVLFPGYTHLQR                                                | 0.993590521        | 2              | 4.250517  |
| P20673        | AEMQQILQLGDK                                                     | 0.867261701        | 2              | 3.796751  |
| P20673        | AEMQQILQLGDK+Oxidation(2)                                        | 0.693965659        | 2              | 3.152582  |
| P20673        | EFNFVQLSDAYSTGSSLMPQK                                            | 0.865312135        | 2              | 5.648998  |
| P20673        | FNSSIAYDR                                                        | 1.256558156        | 2              | 2.594378  |
| P20673        | HLWNVDLQGSK                                                      | 0.821375207        | 1              | 3.219474  |
| P20673        | INVLPPLGSGAIAGNPLGVDR                                            | 0.820432432        | 2              | 4.918809  |
| P20673        | KNPDSLELIR                                                       | 0.852787892        | 2              | 2.437332  |
| P20673        | LKELIGEAAAGK                                                     | 0.817366221        | 2              | 2.816648  |
| P20673        | LYPNDEDIHTANER                                                   | 0.809803777        | 2              | 3.830434  |
| P20673        | MAEDLILYGTK                                                      | 0.896095925        | 2              | 3.499142  |
| P20673        | MAEDLILYGTK+Oxidation(0)                                         | 0.767304362        | 2              | 2.462548  |
| P20673        | NDQVVTDLR                                                        | 0.852167289        | 2              | 3.438023  |
| P20673        | SRNDQVVTDLR                                                      | 0.806868009        | 2              | 2.774558  |
| P20673        | VAEEWAQGIFK                                                      | 1.576295927        | 2              | 3.292243  |
| <b>P20788</b> | <b>UCRI Cytochrome b_c1 complex subunit Rieske_mitochondrial</b> | <b>0.94662274</b>  | <b>0.93803</b> | <b>3</b>  |
| P20788        | EIDQEAHAVEVSQLR                                                  | 1.078298133        | 2              | 4.344078  |
| P20788        | GVAGALRPLLQSAVPATSEPPVLDVK                                       | 0.89714199         | 3              | 4.560709  |
| P20788        | SGPFAPVLSATSR                                                    | 0.960854883        | 2              | 2.951125  |
| <b>P20801</b> | <b>TNNC2 Troponin C_skeletal muscle</b>                          | <b>0.737540365</b> | <b>0.04414</b> | <b>3</b>  |
| P20801        | GKSEELAECFR                                                      | 1.263776074        | 2              | 3.045792  |
| P20801        | NADGYIDAEELAEIFR                                                 | 0.535053775        | 2              | 4.487903  |
| P20801        | SEELAECFR                                                        | 0.589020119        | 2              | 2.834992  |
| <b>P20814</b> | <b>CP2CD Cytochrome P450 2C13_male_specific</b>                  | <b>1.143357386</b> | <b>0.46952</b> | <b>3</b>  |
| P20814        | FDYEDKDFLNLIK                                                    | 1.144811358        | 3              | 3.6812    |
| P20814        | GTAVLTSLSVLHDSK                                                  | 1.101231286        | 2              | 3.312654  |
| P20814        | IKEHEESLDVSNPR                                                   | 1.099192945        | 3              | 3.851848  |
| <b>P20817</b> | <b>CP4AE Cytochrome P450 4A14</b>                                | <b>0.52264498</b>  | <b>9.9E-20</b> | <b>6</b>  |
| P20817        | ACQIAHEHTDGVK                                                    | 0.296858334        | 2              | 3.812618  |
| P20817        | AQLQNEEELQK                                                      | 0.346712437        | 2              | 3.390829  |
| P20817        | AVEDLNLTFFR                                                      | 0.579757762        | 2              | 3.261478  |
| P20817        | EFQQVLTWVEK                                                      | 0.434667249        | 2              | 2.708119  |
| P20817        | MRKAQLQNEEELQK+Oxidation(0)                                      | 0.692493415        | 2              | 2.911014  |
| P20817        | VLLYDPDYVK                                                       | 0.287884804        | 2              | 2.830228  |

|               |                                                           |                    |                |           |
|---------------|-----------------------------------------------------------|--------------------|----------------|-----------|
| <b>P20852</b> | <b>CP2A5 Cytochrome P450 2A5</b>                          | <b>0.85740009</b>  | <b>0.00917</b> | <b>2</b>  |
| P20852        | DFIDSLIR                                                  | 1.395241817        | 2              | 2.503233  |
| P20852        | EALVDQAEFFSGR                                             | 0.85214124         | 2              | 3.405679  |
| <b>P21213</b> | <b>HUTH Histidine ammonia_lyase</b>                       | <b>0.829715958</b> | <b>0.01547</b> | <b>10</b> |
| P21213        | DIITTELSATDNPMVFASR                                       | 1.15414476         | 2              | 2.984238  |
| P21213        | GETISGGNFHGEYPAK                                          | 0.815493044        | 2              | 3.872245  |
| P21213        | LQELQVNLVR                                                | 0.810773738        | 2              | 3.047903  |
| P21213        | NKPDNGGFTSVDEVR                                           | 0.843210639        | 2              | 3.415476  |
| P21213        | SHSSGVGKPLSPER                                            | 0.796920629        | 2              | 4.093087  |
| P21213        | SLLSDHHPSEIAESHR                                          | 0.800734836        | 3              | 4.532636  |
| P21213        | TVVYGITTFGFK                                              | 0.967124898        | 2              | 2.900258  |
| P21213        | VQDAYTLR                                                  | 0.677398754        | 2              | 2.382204  |
| P21213        | VWEVAAPYIEK                                               | 0.871412941        | 2              | 2.363071  |
| P21213        | YIALDGDLSLSTEDLVNLGK                                      | 0.808782758        | 2              | 4.672546  |
| <b>P21396</b> | <b>AOFA Amine oxidase [flavin_containing] A</b>           | <b>0.867248702</b> | <b>0.05422</b> | <b>6</b>  |
| P21396        | DVPAIEIHTFLER                                             | 0.970815807        | 2              | 3.175891  |
| P21396        | INVLVLEAR                                                 | 1.094981439        | 2              | 3.143784  |
| P21396        | KDIWVEEPESK                                               | 0.938635251        | 2              | 3.257481  |
| P21396        | VLGSQEALYPVHYEEK                                          | 0.816898874        | 2              | 3.902416  |
| P21396        | WVDVGGAYVGPQNR                                            | 0.962058379        | 2              | 4.235851  |
| P21396        | YVISAIPPILTAK                                             | 0.939454263        | 2              | 2.539017  |
| <b>P21531</b> | <b>RL3 60S ribosomal protein L3</b>                       | <b>1.175997285</b> | <b>0.00067</b> | <b>6</b>  |
| P21531        | AHLMEIQVNGGTVAEK                                          | 1.443996622        | 2              | 3.868234  |
| P21531        | ERLEQQVPVNQVFGQDEMIDVIGVTK                                | 1.139981992        | 3              | 5.461251  |
| P21531        | HGSLGFLPR                                                 | 1.224444923        | 2              | 2.690915  |
| P21531        | LEQQVPVNQVFGQDEMIDVIGVTK                                  | 1.136221021        | 2              | 4.055512  |
| P21531        | NNASTDYDLSDK                                              | 0.993381183        | 2              | 3.308354  |
| P21531        | TVFAEHISDECK                                              | 1.120368017        | 2              | 3.121855  |
| <b>P21533</b> | <b>RL6 60S ribosomal protein L6</b>                       | <b>1.115553792</b> | <b>0.91989</b> | <b>6</b>  |
| P21533        | HQEGEIFDTEK                                               | 1.081895339        | 2              | 3.254101  |
| P21533        | HQEGEIFDTEKEK                                             | 1.073744802        | 2              | 3.92587   |
| P21533        | HQEGEIFDTEKEKYEITEQR                                      | 1.054360904        | 3              | 3.790874  |
| P21533        | QLGSGLLLVGTGPLALNR                                        | 1.131481867        | 2              | 4.894071  |
| P21533        | SSITPGTVLIILTGR                                           | 1.105406443        | 2              | 4.068552  |
| P21533        | YYPTEDVPR                                                 | 1.020774987        | 1              | 2.097651  |
| <b>P21571</b> | <b>ATP5J ATP synthase_coupling factor 6_mitochondrial</b> | <b>1.337138065</b> | <b>3.6E-07</b> | <b>6</b>  |
| P21571        | FEVLDKPQS                                                 | 1.090521007        | 2              | 3.110434  |
| P21571        | GEMDKFPTFNFDPK                                            | 1.270089397        | 3              | 3.706997  |
| P21571        | GEMDKFPTFNFDPKFEVLDKPQS                                   | 1.215656329        | 3              | 3.425504  |
| P21571        | LASGGPVDTGPEYQQEVDR                                       | 1.349831684        | 2              | 5.132745  |
| P21571        | LASGGPVDTGPEYQQEVDRLEFK                                   | 1.048672708        | 2              | 2.481417  |
| P21571        | RLASGGPVDTGPEYQQEVDR                                      | 1.006861512        | 3              | 4.111584  |

|               |                                                                                    |                    |                |           |
|---------------|------------------------------------------------------------------------------------|--------------------|----------------|-----------|
| <b>P21643</b> | <b>T23O Tryptophan 2_3_dioxygenase</b>                                             | <b>0.991106726</b> | <b>0.68465</b> | <b>2</b>  |
| <b>P21775</b> | <b>THIKA 3_ketoacyl_CoA thiolase A_peroxisomal</b>                                 | <b>0.740688706</b> | <b>9.9E-20</b> | <b>2</b>  |
| P21775        | LKPECLGDISVGNVLEPGAGAVMAR                                                          | 0.80518205         | 3              | 5.876086  |
| P21775        | LKPECLGDISVGNVLEPGAGAVMAR+Oxidation(22)                                            | 0.63733672         | 3              | 4.064589  |
| <b>P21913</b> | <b>DHSB Succinate dehydrogenase [ubiquinone] iron_sulfur subunit_mitochondrial</b> | <b>0.95183037</b>  | <b>2.4E-14</b> | <b>7</b>  |
| P21913        | CGPMVLDALIKIK                                                                      | 0.874757754        | 2              | 2.420953  |
| P21913        | CHTIMNCTQTCPK                                                                      | 0.670774102        | 2              | 4.29317   |
| P21913        | CHTIMNCTQTCPK+Oxidation(4)                                                         | 0.932675017        | 2              | 3.799774  |
| P21913        | IKNEIDSTLTFR                                                                       | 0.958531193        | 2              | 2.441281  |
| P21913        | LQDPFSLYR                                                                          | 1.254499543        | 2              | 2.600857  |
| P21913        | NEIDSTLTFR                                                                         | 0.907085132        | 2              | 2.356488  |
| P21913        | RIDTDLGK                                                                           | 0.921995945        | 2              | 2.542453  |
| <b>P21981</b> | <b>TGM2 Protein_glutamine gamma_glutamyltransferase 2</b>                          | <b>1.08957124</b>  | <b>9.9E-20</b> | <b>4</b>  |
| P21981        | CDLEIQANGR                                                                         | 1.029108506        | 2              | 3.265766  |
| P21981        | DLYLENPEIK                                                                         | 0.938330824        | 2              | 2.698296  |
| P21981        | SEGTYCCGPVSVR                                                                      | 1.199598312        | 2              | 3.559674  |
| P21981        | YSGCLTESNLIK                                                                       | 1.456864173        | 2              | 3.056011  |
| <b>P22734</b> | <b>COMT Catechol O_methyltransferase</b>                                           | <b>1.030519304</b> | <b>0.82543</b> | <b>12</b> |
| P22734        | AIYQGPSSPDKS                                                                       | 0.987941154        | 2              | 2.976692  |
| P22734        | EWAMNVGDAK                                                                         | 1.164350259        | 1              | 2.622914  |
| P22734        | GQIMDAVIR                                                                          | 0.997342689        | 2              | 2.33831   |
| P22734        | GQIMDAVIR+Oxidation(3)                                                             | 0.748888784        | 2              | 2.549821  |
| P22734        | GTVLLADNVIVPGTPDFLAYVR                                                             | 1.056670286        | 3              | 4.706006  |
| P22734        | KGTVLLADNVIVPGTPDFLAYVR                                                            | 1.108574561        | 2              | 4.686999  |
| P22734        | KYDVDTLDMVFLDHWK                                                                   | 1.127852706        | 3              | 4.872995  |
| P22734        | VTILNGASQDLIPQLK                                                                   | 0.796274646        | 2              | 4.35623   |
| P22734        | VVDGLEK                                                                            | 0.841398088        | 2              | 2.439012  |
| P22734        | YDVDTLDMVFLDHWK                                                                    | 0.954396207        | 3              | 4.28956   |
| P22734        | YLPDTLLEK                                                                          | 0.798524498        | 1              | 2.671151  |
| P22734        | YVQQNAKPGDPQSVLEAIDTYCTQK                                                          | 1.075523575        | 3              | 5.968641  |
| <b>P22789</b> | <b>ST2A2 Alcohol sulfotransferase A</b>                                            | <b>1.781909139</b> | <b>9.9E-20</b> | <b>4</b>  |
| P22789        | EEDLILLTPK                                                                         | 1.678736248        | 2              | 2.32095   |
| P22789        | ETLQNVCK                                                                           | 1.781169086        | 1              | 2.278391  |
| P22789        | KLEPDELVLVK                                                                        | 2.044622592        | 3              | 3.908028  |
| P22789        | NHFTVAQAEAFDK                                                                      | 1.869986101        | 2              | 3.714982  |
| <b>P22791</b> | <b>HMCS2 Hydroxymethylglutaryl_CoA synthase_mitochondrial</b>                      | <b>1.065604966</b> | <b>9.9E-20</b> | <b>19</b> |
| P22791        | ASLDMFNK                                                                           | 0.973301164        | 2              | 2.900562  |
| P22791        | ASLDMFNKK                                                                          | 1.003085282        | 2              | 2.516715  |
| P22791        | GLKLEETYTNK                                                                        | 1.125191204        | 2              | 2.99163   |
| P22791        | GTHMENAYDFYKPNLASEYPLVDGK                                                          | 1.143328538        | 3              | 6.625047  |
| P22791        | GTHMENAYDFYKPNLASEYPLVDGK+Oxidation(3)                                             | 0.874049364        | 3              | 5.792192  |

|               |                                                  |                    |                |          |
|---------------|--------------------------------------------------|--------------------|----------------|----------|
| P22791        | IGAFSYGSLAASFFSFR                                | 1.170793095        | 2              | 3.081395 |
| P22791        | LEETYTNK                                         | 1.009548069        | 2              | 2.876606 |
| P22791        | LEETYTNKDVDK                                     | 1.0557844          | 2              | 4.315097 |
| P22791        | LEVGTETIIDK                                      | 0.936236662        | 2              | 3.730953 |
| P22791        | LMFNDFLSSSSDK                                    | 1.56228794         | 2              | 4.133887 |
| P22791        | LMFNDFLSSSSDK+Oxidation(1)                       | 0.986983997        | 2              | 4.027191 |
| P22791        | LVSSVSDLPK                                       | 1.016437417        | 2              | 3.617191 |
| P22791        | MGFCSVQEDINSLCLTVVQR                             | 1.22843942         | 2              | 3.115784 |
| P22791        | MSPEEFTEIMNQR                                    | 0.999979596        | 2              | 4.830764 |
| P22791        | MSPEEFTEIMNQR+Oxidation(0)                       | 0.914100299        | 2              | 4.046988 |
| P22791        | MSPEEFTEIMNQR+Oxidation(9)                       | 0.896488743        | 2              | 3.320335 |
| P22791        | TKLPWDAVGR                                       | 0.928454916        | 3              | 4.027096 |
| P22791        | VNFSPPGDTSNLFPGTWYLER                            | 0.96810801         | 2              | 5.051207 |
| P22791        | YTVGLGQTR                                        | 0.952979046        | 2              | 3.297619 |
| <b>P22985</b> | <b>XDH Xanthine dehydrogenase/oxidase</b>        | <b>0.960802667</b> | <b>4.5E-06</b> | <b>8</b> |
| P22985        | DEVTCVGHIIGAVVADTPEHAQR                          | 0.692096662        | 3              | 3.67183  |
| P22985        | ITSIDTSEAK                                       | 1.010387413        | 1              | 1.901069 |
| P22985        | LDPTFASATLLFQK                                   | 1.287037892        | 2              | 3.834048 |
| P22985        | NQPEPTVEEIEENAFQGNLCR                            | 0.655356751        | 2              | 4.903424 |
| P22985        | QLFQLDSPATPEK                                    | 0.946909264        | 2              | 3.002655 |
| P22985        | SVASIGGNIITASPIDLNPVFMASGAK                      | 1.061547126        | 3              | 5.622664 |
| P22985        | TGTVVALEVAHFSNGGNTEDLSR                          | 1.194941201        | 3              | 4.899419 |
| P22985        | TNLPSNTAFR                                       | 0.673482069        | 1              | 2.074683 |
| <b>P23358</b> | <b>RL12 60S ribosomal protein L12</b>            | <b>1.143974367</b> | <b>9.9E-20</b> | <b>5</b> |
| P23358        | CTGGEVGATSALAPK                                  | 0.924026681        | 2              | 3.826294 |
| P23358        | EILGTAQSVGCNVNDR                                 | 0.889631679        | 2              | 4.811029 |
| P23358        | HNGNITFDEIVNIAR                                  | 1.076265132        | 2              | 4.095088 |
| P23358        | HPHDIIDDINSGAVECPAS                              | 1.229581707        | 2              | 4.104812 |
| P23358        | QAQIEVVPSASALIIK                                 | 1.854347379        | 2              | 3.920141 |
| <b>P23457</b> | <b>DIDH 3_alpha_hydroxysteroid dehydrogenase</b> | <b>1.82745496</b>  | <b>9.9E-20</b> | <b>8</b> |
| P23457        | ALDGLNR                                          | 1.163426813        | 2              | 2.438368 |
| P23457        | ELTQVFEFQLASEDMK                                 | 1.399436368        | 2              | 3.493985 |
| P23457        | HFDSAYLYVEVEEVGQAIR                              | 2.2898546          | 2              | 5.92174  |
| P23457        | MLDYCK                                           | 1.098640874        | 1              | 1.912286 |
| P23457        | SIGVSNFNCR                                       | 1.196585876        | 2              | 3.468887 |
| P23457        | SPVLLDDPVLCIAIK                                  | 4.566406681        | 2              | 4.037699 |
| P23457        | VALNDGNFIPVLGFGTTVPEK                            | 3.262043029        | 2              | 4.853246 |
| P23457        | YFDDHPNHPFTDE                                    | 2.392578018        | 2              | 4.194535 |
| <b>P23514</b> | <b>COPB Coatomer subunit beta</b>                | <b>1.369201902</b> | <b>0.00115</b> | <b>5</b> |
| P23514        | EAGELKPEEEITVGPVQK                               | 1.047962736        | 2              | 4.515505 |
| P23514        | NFENLIPDAPELIHDFLVNEK                            | 1.002150945        | 3              | 4.453954 |
| P23514        | TNNVSEHEDTDKYR                                   | 1.42775313         | 2              | 4.329954 |
| P23514        | VLQDLVMDILR                                      | 1.063904541        | 2              | 3.000511 |

|               |                                                       |                    |                |           |
|---------------|-------------------------------------------------------|--------------------|----------------|-----------|
| P23514        | YEAGTLVTLSSAPTAIK                                     | 1.359938665        | 2              | 4.795408  |
| <b>P23591</b> | <b>FCL GDP_L_fucose synthase</b>                      | <b>1.109595578</b> | <b>0.02753</b> | <b>2</b>  |
| P23591        | DADLTDAAQQTALFQK                                      | 1.004508123        | 2              | 3.370487  |
| P23591        | VVADGAGLPGEEWVVFSSK                                   | 1.112246734        | 2              | 3.738948  |
| <b>P23965</b> | <b>ECI1 Enoyl_CoA delta isomerase 1_mitochondrial</b> | <b>0.863503665</b> | <b>3.3E-11</b> | <b>7</b>  |
| P23965        | ALQLGTLFPPAEALK                                       | 0.802074425        | 2              | 4.767969  |
| P23965        | DNYVNTIGHR                                            | 0.870467441        | 2              | 2.761271  |
| P23965        | GVILTSEKPGIFSAGLDLMEMYGR                              | 0.902055424        | 3              | 5.552876  |
| P23965        | QREADIQNFTSFISR                                       | 0.981167434        | 2              | 2.664509  |
| P23965        | SLHVYLEK                                              | 0.787947577        | 2              | 2.317596  |
| P23965        | VGLVDEVVPEDQVHSK                                      | 0.860537966        | 2              | 4.537124  |
| P23965        | WFTIPDHSR                                             | 0.904770747        | 2              | 3.175083  |
| <b>P24049</b> | <b>RL17 60S ribosomal protein L17</b>                 | <b>1.032803697</b> | <b>1.1E-16</b> | <b>3</b>  |
| P24049        | EQIVPKPEEEVAQK                                        | 1.038684942        | 2              | 3.656812  |
| P24049        | GLDVDSLVIHQVQNK                                       | 1.048673762        | 2              | 4.557854  |
| P24049        | YSLDPENPTK                                            | 0.738684966        | 1              | 2.731305  |
| <b>P24090</b> | <b>FETUA Alpha_2_HS glycoprotein</b>                  | <b>1.123560192</b> | <b>0.14542</b> | <b>6</b>  |
| P24090        | ELACDDPETEHVALIAVDYLNK                                | 1.383368237        | 2              | 4.732122  |
| P24090        | HAFSPVASVESASGEVLHSPK                                 | 1.329784628        | 3              | 5.555621  |
| P24090        | LGGEVSVACK                                            | 0.996748354        | 2              | 3.379126  |
| P24090        | QQAHEHAVEGDCDFHILK                                    | 1.249298671        | 3              | 3.350752  |
| P24090        | VGQPGDAGAAGPVAPLCPGR                                  | 1.009612192        | 2              | 4.789919  |
| P24090        | VLHAQCHSTPDAEDVRK                                     | 0.785191179        | 3              | 3.469405  |
| <b>P24268</b> | <b>CATD Cathepsin D</b>                               | <b>1.296919618</b> | <b>6.4E-14</b> | <b>3</b>  |
| P24268        | AIGAVPLIQGEYMIPCEK                                    | 1.097568084        | 2              | 3.126006  |
| P24268        | DPTGQPGGELMLGGTDSR                                    | 1.224078458        | 2              | 3.821466  |
| P24268        | LGGQNYELHPEK                                          | 1.373320329        | 2              | 2.992856  |
| <b>P24329</b> | <b>THTR Thiosulfate sulfurtransferase</b>             | <b>0.916339206</b> | <b>9.9E-20</b> | <b>12</b> |
| P24329        | EGHPVTSEPSRPEPAVFK                                    | 0.759065762        | 2              | 4.902783  |
| P24329        | FQLVDSR                                               | 0.899057466        | 2              | 2.615088  |
| P24329        | GSVNVPFMFLTEDGFKEK                                    | 3.101697705        | 2              | 3.526677  |
| P24329        | HVPGASFFDIEECSR                                       | 1.09689438         | 2              | 3.435706  |
| P24329        | KVDLSQPLIATCR                                         | 0.923716869        | 2              | 4.1364    |
| P24329        | RFQLVDSR                                              | 0.961685109        | 2              | 2.378201  |
| P24329        | TVSVLNGGFR                                            | 0.919201469        | 2              | 3.164131  |
| P24329        | TYEQVLENLQSK                                          | 0.848948547        | 2              | 5.030221  |
| P24329        | VDLSQPLIATCR                                          | 0.965902056        | 2              | 3.835733  |
| P24329        | VLDASWYSPGTR                                          | 0.881672051        | 2              | 3.726613  |
| P24329        | WLAESIR                                               | 0.830756095        | 2              | 2.3667    |
| P24329        | YLGTPQPEPDAVGLDSGHIR                                  | 0.917893434        | 3              | 4.784273  |
| <b>P24368</b> | <b>PIIB Peptidyl_prolyl cis_trans isomerase B</b>     | <b>1.042697663</b> | <b>0.38104</b> | <b>8</b>  |
| P24368        | DKPLKDVIIIDCGK                                        | 0.950951051        | 2              | 3.778208  |

|               |                                                |                    |                |           |
|---------------|------------------------------------------------|--------------------|----------------|-----------|
| P24368        | DTNGSQFFITTVK                                  | 0.896030354        | 2              | 4.035002  |
| P24368        | HYGPGWVSMANAGK                                 | 0.976869997        | 2              | 3.272851  |
| P24368        | IEVEKPFAIAK                                    | 0.952490733        | 2              | 3.182014  |
| P24368        | IEVEKPFAIAKE                                   | 0.704033162        | 2              | 3.05273   |
| P24368        | TVDNFVALATGEK                                  | 1.103626123        | 2              | 3.548785  |
| P24368        | VLEGM DVVR                                     | 0.992121084        | 2              | 2.676821  |
| P24368        | VYFDFQIGDEPVGR                                 | 0.957522286        | 2              | 3.809759  |
| <b>P24457</b> | <b>CP2DB Cytochrome P450 2D11</b>              | <b>0.957532224</b> | <b>0.45646</b> | <b>2</b>  |
| P24457        | RFSVSTLR                                       | 0.9398215          | 2              | 2.827209  |
| P24457        | SLEEVVTK                                       | 1.192843165        | 2              | 2.65561   |
| <b>P24470</b> | <b>CP2CN Cytochrome P450 2C23</b>              | <b>0.566110907</b> | <b>9.9E-20</b> | <b>7</b>  |
| P24470        | ACVGESLAR                                      | 0.390516483        | 2              | 2.462858  |
| P24470        | DLDIKPITGGIHLPPPYK                             | 0.434274836        | 3              | 3.783337  |
| P24470        | EALLQQGDEFLGR                                  | 0.474776056        | 2              | 2.554503  |
| P24470        | GYGLIFSNGER                                    | 0.538130366        | 2              | 3.616805  |
| P24470        | IEEEKDNLK                                      | 0.516254355        | 1              | 2.924379  |
| P24470        | TFLNLMDLLNK                                    | 0.495313776        | 2              | 3.605686  |
| P24470        | YITLLPSSLPHAVVQDTK                             | 0.43431959         | 2              | 3.168617  |
| <b>P24473</b> | <b>GSTK1 Glutathione S_transferase kappa 1</b> | <b>0.98796306</b>  | <b>9.9E-20</b> | <b>7</b>  |
| P24473        | AGMATAQAQHLLNK                                 | 1.097260969        | 2              | 3.884553  |
| P24473        | DEDITESQNILSAAEK                               | 1.006856066        | 2              | 5.431086  |
| P24473        | DSGNQPPAMVPHK                                  | 0.783996618        | 2              | 2.32207   |
| P24473        | FLTAVSMEQPEMLEK                                | 0.808666122        | 2              | 3.986013  |
| P24473        | IWSRDEDITESQNILSAAEK                           | 0.95766211         | 3              | 3.432733  |
| P24473        | MELLAYLLGEK                                    | 1.562497765        | 2              | 3.946337  |
| P24473        | YGAFGLPTTVAHVVDGK                              | 1.253367472        | 2              | 3.820304  |
| <b>P25093</b> | <b>FAAA Fumarylacetoacetase</b>                | <b>0.948790216</b> | <b>2.4E-14</b> | <b>14</b> |
| P25093        | AIDVGGQTR                                      | 0.950105643        | 2              | 3.544541  |
| P25093        | ASLQNLLSASQAQLR                                | 1.132864375        | 2              | 4.662778  |
| P25093        | ASLQNLLSASQAQLRDDK                             | 1.191048477        | 2              | 3.00562   |
| P25093        | ASSVVVSGTPIR                                   | 1.063224346        | 2              | 3.444203  |
| P25093        | DIQQWEYVPLGPFLGK                               | 0.945286738        | 2              | 4.641189  |
| P25093        | FGPEPIISK                                      | 1.048965063        | 2              | 2.8973    |
| P25093        | GEGMSQAATICR                                   | 0.925257364        | 2              | 3.610839  |
| P25093        | GEGMSQAATICR+Oxidation(3)                      | 0.89982806         | 2              | 2.902142  |
| P25093        | GKENALLPNWLHLPVGYHGR                           | 2.422531843        | 3              | 3.332737  |
| P25093        | HLFTGPVLSK                                     | 0.91216727         | 1              | 2.471161  |
| P25093        | HQHVFDETTLNSFMGLGQAAWK                         | 1.153047519        | 2              | 5.510929  |
| P25093        | IGVAIGDQILDLSVIK                               | 1.102464401        | 2              | 5.532544  |
| P25093        | TFLLDGDEVIITGHCQGDGYR                          | 0.982762183        | 2              | 5.016442  |
| P25093        | VGFGQCAGK                                      | 1.10314418         | 1              | 1.938651  |
| <b>P25113</b> | <b>PGAM1 Phosphoglycerate mutase 1</b>         | <b>1.086651147</b> | <b>9.9E-20</b> | <b>6</b>  |
| P25113        | ALPFWNEEIVPQIK                                 | 1.671620458        | 2              | 3.885508  |



|               |                                                                                      |                    |                |           |
|---------------|--------------------------------------------------------------------------------------|--------------------|----------------|-----------|
| P25113        | FSGWYDADLSPAGHEEAK                                                                   | 1.102499086        | 2              | 4.730966  |
| P25113        | HGESAWNLENR                                                                          | 0.991124265        | 2              | 3.787521  |
| P25113        | SYDVPPPPMEPDHPFYSNISK                                                                | 1.349003442        | 2              | 4.296752  |
| P25113        | YADLTEDQLPSCESLK                                                                     | 1.085928475        | 2              | 5.347072  |
| P25113        | YADLTEDQLPSCESLKDTIAR                                                                | 1.08169221         | 2              | 5.011707  |
| <b>P25235</b> | <b>RPN2 Dolichyl_diphosphooligosaccharide__protein glycosyltransferase subunit 2</b> | <b>1.078126216</b> | <b>9.9E-20</b> | <b>13</b> |
| P25235        | EDQVIQLMNTIFSK                                                                       | 1.194259566        | 2              | 3.260694  |
| P25235        | EETVLATVQALHTASHLSQQADLR                                                             | 1.035548517        | 3              | 5.238063  |
| P25235        | FELDTSER                                                                             | 0.998888544        | 1              | 2.006508  |
| P25235        | FPEEEAPSTVLSQNLFTPQ                                                                  | 0.719956622        | 2              | 3.908512  |
| P25235        | ISTEVGITNVDLSTVDKQSIAPK                                                              | 1.057319598        | 2              | 4.62573   |
| P25235        | LQVSSVLSQPLAQAAVK                                                                    | 1.126846099        | 2              | 4.861084  |
| P25235        | LSKEETVLATVQALHTASHLSQQADLR                                                          | 1.208953185        | 3              | 5.428406  |
| P25235        | NFESLSEAFSVASAAAALSQNR                                                               | 1.138683124        | 3              | 4.314542  |
| P25235        | NIVEEIEDLVAR                                                                         | 0.927653156        | 3              | 4.727786  |
| P25235        | NPILWNVADVVIK                                                                        | 1.565856292        | 2              | 2.375684  |
| P25235        | TGQEVVFAEPDNK                                                                        | 1.661212141        | 2              | 3.878228  |
| P25235        | YHVPVVVVPEGSASDTQEQAIRL                                                              | 1.27489091         | 3              | 5.422436  |
| P25235        | YIANTVELR                                                                            | 0.976456489        | 2              | 2.660456  |
| <b>P25318</b> | <b>chain</b>                                                                         | <b>0.830551839</b> | <b>0.0758</b>  | <b>2</b>  |
| P25318        | GQYLEMPLPMLPMDLKGEPGPPGKPGPR+Oxidation(5)                                            | 0.831396322        |                | 2.549597  |
| P25318        | GQYLEMPLPMLPMDLKGEPGPPGKPGPR+Oxidation(5)                                            | 0.831396322        |                | 2.656323  |
| <b>P25409</b> | <b>ALAT1 Alanine aminotransferase 1</b>                                              | <b>2.839443038</b> | <b>9.9E-20</b> | <b>3</b>  |
| P25409        | AWALDIAELR                                                                           | 2.741784653        | 2              | 2.566194  |
| P25409        | LTEQVFNEAPGIR                                                                        | 2.836109535        | 2              | 3.577941  |
| P25409        | VLCVINPGNPTGQVQTR                                                                    | 11.34879176        | 2              | 4.273516  |
| <b>P26039</b> | <b>TLN1 Talin_1</b>                                                                  | <b>1.095272959</b> | <b>9.9E-20</b> | <b>14</b> |
| P26039        | AGALQCSPSDVYTK                                                                       | 0.831196522        | 2              | 2.631141  |
| P26039        | AQEACGPLEMDSALSVVQNLEK                                                               | 0.895914376        | 2              | 3.791391  |
| P26039        | ASAGPQPLLVSCK                                                                        | 0.98680767         | 2              | 2.53924   |
| P26039        | AVAEQIPLLQGVV                                                                        | 0.830115363        | 2              | 3.405003  |
| P26039        | EAAEGLRMATNAAAQNAIKK                                                                 | 0.899195367        | 2              | 2.80724   |
| P26039        | GVGAAATAVTQALNELLQHVK                                                                | 0.847512123        | 3              | 4.448515  |
| P26039        | LGAASLGAEDPETQVVLINAVK                                                               | 1.024101986        | 2              | 3.583176  |
| P26039        | LLGEIAQGNENYAGIAAR                                                                   | 0.942220518        | 2              | 3.791129  |
| P26039        | LNEAAAGLNQAATELVQASR                                                                 | 0.80548062         | 2              | 5.264231  |
| P26039        | SNTSPEELGPLANQLTSDYGR                                                                | 0.98806422         | 2              | 3.966097  |
| P26039        | VGAIPANALDDGQWSQGLISAAR                                                              | 0.732298616        | 2              | 4.508985  |
| P26039        | VGDDPAVWQLK                                                                          | 0.805918064        | 2              | 3.131146  |
| P26039        | VLVQNAAGSQEK                                                                         | 0.819643934        | 2              | 2.837111  |

|               |                                                                                          |                    |                |           |
|---------------|------------------------------------------------------------------------------------------|--------------------|----------------|-----------|
| P26039        | VVAPTISSPVCQEQLVEAGR                                                                     | 0.757930693        | 2              | 4.751945  |
| <b>P26043</b> | <b>RADI Radixin</b>                                                                      | <b>0.929838264</b> | <b>1.6E-07</b> | <b>10</b> |
| P26043        | AFAAQEDLEK                                                                               | 0.978590635        | 2              | 2.364146  |
| P26043        | ALELEQER                                                                                 | 0.87723358         | 1              | 1.95868   |
| P26043        | FFPEDVSEELIQEITQR                                                                        | 0.88343833         | 3              | 4.111061  |
| P26043        | KKEEEATEWQHK                                                                             | 1.448011863        | 3              | 4.274758  |
| P26043        | KTQNDVLHAENVK                                                                            | 0.85291472         | 2              | 4.926212  |
| P26043        | NQEQLAAELAEFTAK                                                                          | 0.888384461        | 2              | 4.915983  |
| P26043        | QLQALSSELAQAR                                                                            | 0.893988231        | 2              | 3.362348  |
| P26043        | RKPDITIEVQQMK                                                                            | 0.775346622        | 2              | 3.707477  |
| P26043        | RKPDITIEVQQMK+Oxidation(10)                                                              | 1.043734275        | 2              | 2.481065  |
| P26043        | TQNDVLHAENVK                                                                             | 0.946035398        | 2              | 3.586342  |
| <b>P26231</b> | <b>CTNA1 Catenin alpha_1</b>                                                             | <b>1.272413151</b> | <b>0.02017</b> | <b>7</b>  |
| P26231        | AVMDHVSDFSLETNPVLLVIEAAK                                                                 | 0.861733679        | 3              | 3.645379  |
| P26231        | IAEQVASFQEEK                                                                             | 1.560483962        | 2              | 2.650308  |
| P26231        | LIEVANLACSISNNEEGVK                                                                      | 0.922232806        | 2              | 3.859952  |
| P26231        | LLEPLVTQVTTLVNTNSK                                                                       | 0.9256918          | 2              | 3.725083  |
| P26231        | QIIVDPLSFSEER                                                                            | 0.871428027        | 2              | 2.48735   |
| P26231        | SAAGEFADDPCCSVK                                                                          | 0.964442744        | 2              | 4.018402  |
| P26231        | TIADHCPDSACK                                                                             | 0.185626318        | 2              | 3.07811   |
| <b>P26284</b> | <b>ODPA Pyruvate dehydrogenase E1 component subunit alpha_somatic form_mitochondrial</b> | <b>1.084405253</b> | <b>0.01005</b> | <b>7</b>  |
| P26284        | AILAELTGR                                                                                | 1.166519532        | 2              | 2.625057  |
| P26284        | EEIQEVRSK                                                                                | 0.454121802        | 1              | 1.96172   |
| P26284        | GFCHLCDGQEACCVGLEAGINPTDHLITAYR                                                          | 0.977507631        | 3              | 6.477973  |
| P26284        | LEEGPPVTTVLTR                                                                            | 0.925553922        | 2              | 3.605208  |
| P26284        | RGDFIPGLR                                                                                | 1.076676011        | 2              | 2.703109  |
| P26284        | TREEIQEVR                                                                                | 1.144809684        | 2              | 2.887303  |
| P26284        | VDGMDILCVR                                                                               | 0.911587861        | 2              | 3.258418  |
| <b>P26453</b> | <b>BASI Basigin</b>                                                                      | <b>1.053346044</b> | <b>5.8E-10</b> | <b>6</b>  |
| P26453        | GNINVEGPPR                                                                               | 1.062649968        | 2              | 3.349427  |
| P26453        | RKPDQTLDEDDPGAAPLK                                                                       | 1.145303686        | 3              | 3.755076  |
| P26453        | SEASHPPVDEWVWFK                                                                          | 1.108738272        | 3              | 3.895804  |
| P26453        | SEHASEGEFVK                                                                              | 1.08351109         | 2              | 3.006014  |
| P26453        | SGEYSCIFLPEPVGR                                                                          | 1.184842232        | 2              | 3.158765  |
| P26453        | VLQEDTLPDLQMK                                                                            | 0.853391415        | 2              | 4.106281  |
| <b>P26772</b> | <b>CH10 10 kDa heat shock protein_mitochondrial</b>                                      | <b>1.086190147</b> | <b>9.9E-20</b> | <b>6</b>  |
| P26772        | GGEIQPVSVK                                                                               | 0.915821217        | 2              | 3.378433  |
| P26772        | GGIMLPEK+Oxidation(3)                                                                    | 0.886507231        | 2              | 2.462898  |
| P26772        | GKGGEIQPVSVK                                                                             | 0.886468445        | 2              | 3.086954  |
| P26772        | VLLPEYGGTK                                                                               | 0.966840888        | 1              | 2.106637  |
| P26772        | VLQATVVAVGSGGK                                                                           | 0.853911526        | 2              | 5.086327  |
| P26772        | VVLDDKDYFLFR                                                                             | 1.086388229        | 3              | 3.629462  |

|               |                                                            |                    |                |           |
|---------------|------------------------------------------------------------|--------------------|----------------|-----------|
| <b>P27139</b> | <b>CAH2 Carbonic anhydrase 2</b>                           | <b>0.966355146</b> | <b>0.94867</b> | <b>2</b>  |
| P27139        | AVQHPDGLAVLGIFLK                                           | 1.060168842        | 2              | 3.225291  |
| P27139        | IGPASQGLQK                                                 | 0.785728652        | 2              | 3.130773  |
| <b>P27321</b> | <b>ICAL Calpastatin</b>                                    | <b>0.872731758</b> | <b>3.9E-07</b> | <b>3</b>  |
| P27321        | KGSDEVTASSAATGTSPR                                         | 0.757823561        | 2              | 5.018596  |
| P27321        | LSAAVSETVSQVPAPSNHTAAPPPTGTER                              | 0.898691624        | 3              | 4.317224  |
| P27321        | SQSSEPPVIHEK                                               | 0.883419123        | 2              | 3.173701  |
| <b>P27364</b> | <b>3BHS5 3 beta_hydroxysteroid dehydrogenase type 5</b>    | <b>0.729428645</b> | <b>9.9E-20</b> | <b>5</b>  |
| P27364        | AVLAANGSILK                                                | 0.620009809        | 2              | 2.738403  |
| P27364        | ETILNDREEEHR                                               | 0.566984695        | 2              | 2.73543   |
| P27364        | GDIVDAQFLR                                                 | 0.680284899        | 2              | 3.126318  |
| P27364        | NGGTFHTCALR                                                | 0.76352499         | 2              | 2.573438  |
| P27364        | QTILDVNVK                                                  | 0.594004425        | 1              | 2.178942  |
| <b>P27605</b> | <b>HPRT Hypoxanthine_guanine phosphoribosyltransferase</b> | <b>0.918194051</b> | <b>9.9E-20</b> | <b>6</b>  |
| P27605        | DLNHVCVISESGK                                              | 0.759700727        | 2              | 3.508493  |
| P27605        | FFADLLDIK                                                  | 0.783834801        | 2              | 3.455498  |
| P27605        | NVLIVEDIIDTGG                                              | 0.895052209        | 2              | 3.797857  |
| P27605        | SVGYRPFVGFPEIPDK                                           | 0.748314906        | 3              | 3.572189  |
| P27605        | SYCNDQSTGDIK                                               | 0.772999889        | 2              | 3.959823  |
| P27605        | VIGGDDLSTLTGK                                              | 1.547164028        | 2              | 3.18914   |
| <b>P27653</b> | <b>C1TC C_1 tetrahydrofolate synthase_cytoplasmic</b>      | <b>0.896947624</b> | <b>9.9E-20</b> | <b>17</b> |
| P27653        | ASQAPSSFQLLYDLK                                            | 1.612934965        | 2              | 4.304605  |
| P27653        | AYTEEDLDLVEK                                               | 0.956665279        | 2              | 2.506304  |
| P27653        | GEWIKPGAVVIDCGINYPDDTKPNGR                                 | 0.976607503        | 3              | 3.778933  |
| P27653        | IFHELTQTDK                                                 | 0.834015383        | 2              | 2.848661  |
| P27653        | ITIGQAPTEK                                                 | 0.847840507        | 2              | 2.478407  |
| P27653        | IYGADDIELLPEAQNK                                           | 1.196019323        | 2              | 5.256581  |
| P27653        | KITIGQAPTEK                                                | 0.899931108        | 2              | 3.180773  |
| P27653        | KVVGDVAYDEAK                                               | 0.900082348        | 2              | 3.819021  |
| P27653        | LDIDPETITWQR                                               | 0.973372621        | 2              | 3.634663  |
| P27653        | MHGGGPTVTAGLPLK+Oxidation(0)                               | 0.751167621        | 2              | 3.622405  |
| P27653        | QGFGNLPICMAK                                               | 0.777365211        | 2              | 3.272857  |
| P27653        | TADLDKEVKNKGDILVVATGQPEMVK                                 | 1.042572355        | 3              | 4.162988  |
| P27653        | TDPAALTDDEINR                                              | 0.890257477        | 2              | 4.335786  |
| P27653        | THLSLSHNPEQK                                               | 0.781364178        | 2              | 3.818975  |
| P27653        | VVGDVAYDEAK                                                | 0.757001327        | 2              | 3.356091  |
| P27653        | YSQLQPHVVVLVATVR                                           | 1.095653994        | 3              | 3.306831  |
| P27653        | YVVVTGITPTPLGEGK                                           | 0.900951584        | 2              | 4.213294  |
| <b>P27657</b> | <b>LIPP Pancreatic triacylglycerol lipase</b>              | <b>0.507067687</b> | <b>0.03487</b> | <b>2</b>  |
| P27657        | ATYTQATQNVN                                                | 0.330026655        | 2              | 2.498478  |
| P27657        | ITGLDAAEPYFQGTPEEVR                                        | 0.534083446        | 2              | 2.510916  |

|               |                                                                |                    |                |           |
|---------------|----------------------------------------------------------------|--------------------|----------------|-----------|
| <b>P27661</b> | <b>H2AX Histone H2A.x</b>                                      | <b>0.811734458</b> | <b>0.0051</b>  | <b>3</b>  |
| P27661        | AGLQFPVGR                                                      | 0.943603573        | 2              | 3.232769  |
| P27661        | HLQLAIR                                                        | 0.898633237        | 2              | 2.606043  |
| P27661        | LLGGVTIAQGGVLPNIQAVLLPK                                        | 0.795035564        | 3              | 4.100216  |
| <b>P27867</b> | <b>DHSO Sorbitol dehydrogenase</b>                             | <b>0.841593799</b> | <b>9.9E-20</b> | <b>13</b> |
| P27867        | AMGASQVVVIDLSASR                                               | 0.982448744        | 2              | 4.117572  |
| P27867        | AVEAFETAK                                                      | 0.737699685        | 2              | 3.017348  |
| P27867        | EVGADFTIQVAK                                                   | 0.818387223        | 2              | 2.64929   |
| P27867        | GENLSLVVHGPDIR                                                 | 0.78183454         | 3              | 3.80431   |
| P27867        | HSADFCYK                                                       | 0.879559875        | 2              | 2.849999  |
| P27867        | IGDFVVK                                                        | 0.851077334        | 2              | 2.543508  |
| P27867        | LENYPIPELGPNDVLLK                                              | 0.856554645        | 2              | 4.854634  |
| P27867        | LPDSVTFEEGALIEPLSVGIYACR                                       | 1.445580709        | 2              | 4.725988  |
| P27867        | MHSVIGICSDVHYWEHGR+Oxidation(0)                                | 0.753241734        | 3              | 3.885855  |
| P27867        | TLNVKPLVTHR                                                    | 0.809254524        | 2              | 3.171689  |
| P27867        | VAIEPGVPR                                                      | 1.804454292        | 2              | 2.40722   |
| P27867        | VAIEPGVPREIDFCKIGR                                             | 0.802940096        | 2              | 2.346937  |
| P27867        | VLVCGAGPIGIVTLLVAK                                             | 1.09227872         | 2              | 5.423267  |
| <b>P27952</b> | <b>RS2 40S ribosomal protein S2</b>                            | <b>1.081133434</b> | <b>0.75856</b> | <b>5</b>  |
| P27952        | AEDKEWIPVTK                                                    | 1.065372388        | 3              | 3.351241  |
| P27952        | AFVAIGDYNGHVGLGVK                                              | 1.222700823        | 2              | 4.068855  |
| P27952        | GCTATLGNFAK                                                    | 1.046443205        | 2              | 2.80629   |
| P27952        | GTGIVSAPVPK                                                    | 1.074099759        | 2              | 2.777031  |
| P27952        | TYSYLPDLWK                                                     | 0.929893587        | 2              | 2.592995  |
| <b>P28037</b> | <b>AL1L1 Cytosolic 10_formyltetrahydrofolate dehydrogenase</b> | <b>0.9577316</b>   | <b>9.9E-20</b> | <b>25</b> |
| P28037        | ADPLGLEAEK                                                     | 0.740998059        | 2              | 2.537892  |
| P28037        | ANATEFGLASGVFTR                                                | 0.834976373        | 2              | 4.166287  |
| P28037        | AVQMGMSSVFFNK                                                  | 0.976065806        | 2              | 2.86603   |
| P28037        | CPQSEEGATYEGIQK                                                | 6.761375896        | 2              | 4.593695  |
| P28037        | DLGEAALNEYLR                                                   | 0.61059925         | 2              | 3.65357   |
| P28037        | ECEVLDDTVSTLYNR                                                | 0.917679609        | 2              | 3.884767  |
| P28037        | EGHEVVGVTIPDKDGK                                               | 0.760410244        | 2              | 4.851215  |
| P28037        | GNDKVPGAWTEACGQK                                               | 0.692337035        | 2              | 3.554529  |
| P28037        | GQALPEVVAK                                                     | 0.743211391        | 2              | 2.522965  |
| P28037        | GSASSDLELTAELATAEAVR                                           | 0.738264447        | 2              | 6.496266  |
| P28037        | GVVNLPGSGSLVGQR                                                | 0.754578199        | 2              | 4.847268  |
| P28037        | IGFTGSTEVGK                                                    | 0.830625638        | 2              | 3.001848  |
| P28037        | ILPNVPEVEDSTDFK                                                | 0.853713876        | 2              | 3.851798  |
| P28037        | INWDQPAEAIHNWIR                                                | 0.679464607        | 2              | 3.830847  |
| P28037        | IQGATIPINQARPNR                                                | 0.737596238        | 2              | 2.338132  |
| P28037        | KEGHEVVGVTIPDKDGK                                              | 0.714822174        | 3              | 3.377346  |
| P28037        | KIGFTGSTEVGK                                                   | 0.770697668        | 2              | 2.822243  |

|               |                                                               |                    |                |           |
|---------------|---------------------------------------------------------------|--------------------|----------------|-----------|
| P28037        | KLVEYCQR                                                      | 0.915205291        | 2              | 2.424565  |
| P28037        | LFVEESIHNQFVQK                                                | 0.742667032        | 2              | 4.41216   |
| P28037        | LIAEGTAPR                                                     | 0.747452511        | 2              | 2.494098  |
| P28037        | LSDHPDVR                                                      | 0.602017117        | 1              | 2.126725  |
| P28037        | NIQLEDGK                                                      | 0.742042962        | 1              | 2.324163  |
| P28037        | TAACLAAGNTVVIKPAQVPLTALK                                      | 0.829903432        | 3              | 4.181655  |
| P28037        | TDVAAPFGGFK                                                   | 0.698442276        | 2              | 3.014616  |
| P28037        | TYNTINPTDGSVICQVSLAQVSDVDK                                    | 0.787584431        | 2              | 5.165753  |
| <b>P28064</b> | <b>PSB8 Proteasome subunit beta type_8</b>                    | <b>1.196124716</b> | <b>0.0193</b>  | <b>3</b>  |
| P28064        | ASAGSYIATIR                                                   | 1.091159372        | 2              | 2.871835  |
| P28064        | QDLSPEEAYDLAR                                                 | 1.195489531        | 2              | 2.907834  |
| P28064        | VESTDVSDLLHK                                                  | 1.338056938        | 2              | 2.391079  |
| <b>P28480</b> | <b>TCPA T_complex protein 1 subunit alpha</b>                 | <b>1.031113174</b> | <b>0.92427</b> | <b>8</b>  |
| P28480        | AFHNEAQVNPER                                                  | 0.918648807        | 2              | 3.47714   |
| P28480        | FATEAAITILR                                                   | 0.986122662        | 2              | 2.725515  |
| P28480        | HGGYENAVHSGALDD                                               | 1.03659766         | 2              | 3.717347  |
| P28480        | ICDDELILIK                                                    | 1.013908335        | 2              | 2.553008  |
| P28480        | LLEVEHPAAK                                                    | 0.994775905        | 2              | 2.467425  |
| P28480        | SLLVIPNTLAVNAAQDSTDLVAK                                       | 0.964112296        | 2              | 4.153254  |
| P28480        | SQNVMAAASIANIVK                                               | 1.178899825        | 2              | 3.53311   |
| P28480        | YINENLIINTDELGR                                               | 1.056031653        | 2              | 4.68646   |
| <b>P28492</b> | <b>GLSL Glutaminase liver isoform_mitochondrial</b>           | <b>0.700509764</b> | <b>0.00625</b> | <b>3</b>  |
| P28492        | ATGLQTS DPR                                                   | 0.585129922        | 2              | 2.446856  |
| P28492        | LSLNEEGIPHPMNVNAGAI VSSLIK                                    | 0.822286217        | 3              | 4.755651  |
| P28492        | SNPDLWGVSLCTVDGQR                                             | 0.759861262        | 2              | 2.585394  |
| <b>P29147</b> | <b>BDH D_beta_hydroxybutyrate dehydrogenase_mitochondrial</b> | <b>0.838832515</b> | <b>9.9E-20</b> | <b>16</b> |
| P29147        | AVLVTGCDSGFGFLAK                                              | 0.713416358        | 2              | 5.554809  |
| P29147        | FGVEAFSDCLR                                                   | 0.969897198        | 2              | 3.360998  |
| P29147        | GFLVFAGCLLK                                                   | 1.113850394        | 2              | 3.253101  |
| P29147        | KMWDELPEVVR                                                   | 0.986078753        | 2              | 2.486331  |
| P29147        | MANPARSPYCITK+Oxidation(0)                                    | 0.769736825        | 2              | 2.419892  |
| P29147        | METYCNSGSTD TSSVINAVTHALTAATPYTR                              | 2.042626456        | 3              | 4.856522  |
| P29147        | METYCNSGSTD TSSVINAVTHALTAATPYTR+Oxidation(0)                 | 1.579203405        | 3              | 4.830182  |
| P29147        | MQVMTHFPGAISDK                                                | 1.34774363         | 2              | 3.575988  |
| P29147        | MQVMTHFPGAISDK+Oxidation(0)                                   | 0.967453592        | 2              | 2.789985  |
| P29147        | MQVMTHFPGAISDK+Oxidation(3)                                   | 0.967453592        | 2              | 2.969607  |
| P29147        | MWDELPEVVR                                                    | 0.758621422        | 2              | 2.469376  |
| P29147        | MWDELPEVVR+Oxidation(0)                                       | 0.583075587        | 2              | 3.227258  |
| P29147        | TIQLNVCNSEEVEK                                                | 0.78786716         | 2              | 4.425793  |
| P29147        | VSVVEPGNFIAATSLYSER                                           | 0.864945241        | 2              | 6.258769  |
| P29147        | VVNISMLGR                                                     | 0.797462028        | 2              | 3.755153  |
| P29147        | YEMHPLGVK                                                     | 0.989020932        | 2              | 2.541778  |

|               |                                                               |                    |                |           |
|---------------|---------------------------------------------------------------|--------------------|----------------|-----------|
| <b>P29266</b> | <b>3HIDH 3_hydroxyisobutyrate dehydrogenase_mitochondrial</b> | <b>0.658606761</b> | <b>9.9E-20</b> | <b>8</b>  |
| P29266        | DLGLAQDSATSTK                                                 | 0.635679804        | 2              | 3.853251  |
| P29266        | EAGEQVASSPADVAEK                                              | 0.623870605        | 2              | 4.755892  |
| P29266        | GSLIDSSTIDPSVSK                                               | 0.643343792        | 2              | 4.462354  |
| P29266        | HGYPLILYDVFPDVCK                                              | 0.870824093        | 2              | 5.174333  |
| P29266        | KGSLIDSSTIDPSVSK                                              | 0.787035098        | 2              | 4.369253  |
| P29266        | MGAVFMDAPVSGGVGAAR                                            | 0.736496601        | 2              | 4.601884  |
| P29266        | MGAVFMDAPVSGGVGAAR+Oxidation(0)                               | 0.7108454          | 2              | 4.194208  |
| P29266        | MGAVFMDAPVSGGVGAAR+Oxidation(5)                               | 0.7108454          | 2              | 3.241668  |
| <b>P29314</b> | <b>RS9 40S ribosomal protein S9</b>                           | <b>1.047064079</b> | <b>0.15353</b> | <b>5</b>  |
| P29314        | IEDFLER                                                       | 1.042784853        | 2              | 2.367025  |
| P29314        | KGQGGAGAGDDEEED                                               | 1.680426224        | 2              | 3.59923   |
| P29314        | LDYILGLK                                                      | 1.108249789        | 2              | 2.655722  |
| P29314        | LFEGNALLR                                                     | 1.03996786         | 2              | 2.967017  |
| P29314        | SRLDQELK                                                      | 1.060605975        | 2              | 2.367792  |
| <b>P29315</b> | <b>RINI Ribonuclease inhibitor</b>                            | <b>0.854193457</b> | <b>0.00268</b> | <b>5</b>  |
| P29315        | ASLQELDLGSNK                                                  | 0.995644001        | 2              | 2.486231  |
| P29315        | LDDCGLTEVR                                                    | 0.878383067        | 2              | 3.147821  |
| P29315        | LENCGITSANCK                                                  | 0.906957289        | 2              | 3.021734  |
| P29315        | SAIQANPALTELSLR                                               | 0.989866265        | 2              | 4.202729  |
| P29315        | TNELGDAGVGLVLQGLQNPTCK                                        | 0.870603556        | 2              | 5.245348  |
| <b>P29410</b> | <b>KAD2 Adenylate kinase 2_mitochondrial</b>                  | <b>0.827604827</b> | <b>0.00135</b> | <b>10</b> |
| P29410        | AMVASGSELGK                                                   | 0.89593243         | 2              | 2.628889  |
| P29410        | AMVASGSELGKK                                                  | 0.756444655        | 2              | 2.626502  |
| P29410        | AVLLGPPGAGK                                                   | 0.920338195        | 2              | 2.463969  |
| P29410        | EAMKDDITGEPLIR                                                | 1.689066461        | 2              | 2.434501  |
| P29410        | GIHCAIDASQTPDVVFASILAAFSK                                     | 1.479239115        | 3              | 4.303236  |
| P29410        | LEAYHTQTTPLEYYR                                               | 1.091029301        | 2              | 4.824097  |
| P29410        | LVSDVMVELIEK                                                  | 1.055561972        | 2              | 4.344147  |
| P29410        | NGFLLDGFPR                                                    | 0.918336214        | 2              | 2.989437  |
| P29410        | NLETPSCK                                                      | 0.821245972        | 1              | 2.011531  |
| P29410        | SYHEEFNPPK                                                    | 1.135021018        | 3              | 3.319961  |
| <b>P29411</b> | <b>KAD3 GTP:AMP phosphotransferase_mitochondrial</b>          | <b>0.874145247</b> | <b>1.7E-12</b> | <b>4</b>  |
| P29411        | AYEAQTEPVLQYYQK                                               | 1.005113015        | 2              | 5.003166  |
| P29411        | EDDKPETVIK                                                    | 0.69161679         | 2              | 2.602765  |
| P29411        | TVGIDDLTGEPLIQR                                               | 0.875265607        | 2              | 3.526627  |
| P29411        | VYNIEFNPPK                                                    | 1.232713933        | 2              | 2.670184  |
| <b>P29419</b> | <b>ATP5I ATP synthase subunit e_mitochondrial</b>             | <b>1.187138434</b> | <b>0.49894</b> | <b>2</b>  |
| P29419        | ELAEAEDVSIFK                                                  | 0.927445688        | 1              | 3.322429  |
| P29419        | YSALILGMAYGAK                                                 | 1.189203635        | 2              | 3.441234  |
| <b>P30009</b> | <b>MARCS Myristoylated alanine_rich C_kinase substrate</b>    | <b>0.978576527</b> | <b>1.4E-06</b> | <b>2</b>  |

|               |                                                   |                    |                |           |
|---------------|---------------------------------------------------|--------------------|----------------|-----------|
| P30009        | AEDGAAPSPSSETPK                                   | 0.78000016         | 2              | 3.614277  |
| P30009        | GEAAAERPGEAAVASSPSK                               | 0.976660808        | 2              | 4.379532  |
| <b>P30276</b> | <b>CCNB2 G2/mitotic_specific cyclin_B2</b>        | <b>0.82724477</b>  | <b>0.0419</b>  | <b>2</b>  |
| P30276        | AVLEEIGNK                                         | 0.906655563        | 1              | 2.067325  |
| P30276        | FELGRPLPLHFLRR                                    | 0.686261777        | 2              | 2.473225  |
| <b>P30349</b> | <b>LKHA4 Leukotriene A_4 hydrolase</b>            | <b>0.912127932</b> | <b>0.00075</b> | <b>2</b>  |
| P30349        | SLSNVIAHEISHSWTGNLVTNK                            | 0.925679255        | 3              | 4.445697  |
| P30349        | SSALQWLTPSEQTSGK                                  | 0.808738321        | 2              | 3.212433  |
| <b>P30427</b> | <b>PLEC Plectin</b>                               | <b>0.853883907</b> | <b>0.01547</b> | <b>6</b>  |
| P30427        | AQVEQELTTLR                                       | 0.823691839        | 2              | 2.671062  |
| P30427        | LLDPEDVDVPQPDEK                                   | 0.805618658        | 2              | 3.320221  |
| P30427        | MSAAQALKKGWLYEAGQR+Oxidation(0)                   | 0.956967957        | 2              | 2.398796  |
| P30427        | SDQLTGLSLLPSEK                                    | 0.858755053        | 2              | 2.842379  |
| P30427        | SQVEEELFSVR                                       | 1.57946168         | 2              | 2.342756  |
| P30427        | YLYGTGSVAGVYLPGSR                                 | 1.310530787        | 2              | 2.548097  |
| <b>P30713</b> | <b>GSTT2 Glutathione S_transferase theta_2</b>    | <b>0.802434938</b> | <b>9.9E-20</b> | <b>5</b>  |
| P30713        | AQVHEYLGHADNIR                                    | 0.616672463        | 2              | 4.520831  |
| P30713        | GQHLSEQFSQVNCLK                                   | 0.807089691        | 2              | 4.767452  |
| P30713        | VEAFLGAELCQEAHPIMSVLGQAAK                         | 0.699737912        | 3              | 3.411608  |
| P30713        | VLGPLIGVQVPEEK                                    | 0.719178016        | 2              | 3.932847  |
| P30713        | YQVADHWYPADLQAR                                   | 0.640189849        | 2              | 4.563135  |
| <b>P30839</b> | <b>AL3A2 Fatty aldehyde dehydrogenase</b>         | <b>0.717258663</b> | <b>9.9E-20</b> | <b>9</b>  |
| P30839        | DILAAIAADLSK                                      | 0.618073212        | 2              | 2.672379  |
| P30839        | EKDILAAIAADLSK                                    | 0.691270832        | 2              | 3.696078  |
| P30839        | FDHILYTGNTAVGK                                    | 1.039072532        | 2              | 3.502771  |
| P30839        | HLTPVTLELGGK                                      | 0.747206859        | 2              | 2.926935  |
| P30839        | NVEEAINFINDR                                      | 1.352212913        | 2              | 3.958345  |
| P30839        | QRFDHILYTGNTAVGK                                  | 1.388255738        | 2              | 3.036983  |
| P30839        | VMQEEIFGPILPIVSVK                                 | 0.688409907        | 3              | 4.321095  |
| P30839        | VMQEEIFGPILPIVSVK+Oxidation(1)                    | 0.681041994        | 2              | 4.660519  |
| P30839        | YIAPTILTDVDPNSK                                   | 0.791666663        | 2              | 4.326329  |
| <b>P30904</b> | <b>MIF Macrophage migration inhibitory factor</b> | <b>0.889333852</b> | <b>0.11651</b> | <b>2</b>  |
| P30904        | LHISPDR                                           | 0.587056689        | 1              | 2.044309  |
| P30904        | LLCGLLSDR                                         | 0.918006319        | 2              | 2.545451  |
| <b>P31000</b> | <b>VIME Vimentin</b>                              | <b>0.772417409</b> | <b>9.9E-20</b> | <b>14</b> |
| P31000        | DGQVINETSQHDDLE                                   | 0.786420128        | 2              | 3.242346  |
| P31000        | ETNLESLPLVDTHSK                                   | 0.746175207        | 2              | 2.628909  |
| P31000        | FADLSEAA NR                                       | 1.040280145        | 2              | 2.734737  |
| P31000        | KLLEGEESR                                         | 0.777850428        | 2              | 2.663265  |
| P31000        | KVESLQEEIAFLK                                     | 0.762964671        | 2              | 3.768827  |
| P31000        | LGDLYEEEMR                                        | 0.632378327        | 2              | 2.365065  |
| P31000        | LLEGEESR                                          | 0.735464475        | 2              | 2.65074   |
| P31000        | NLQEAEEWYK                                        | 0.656801906        | 2              | 2.788474  |

|               |                                                            |                    |                |           |
|---------------|------------------------------------------------------------|--------------------|----------------|-----------|
| P31000        | QVDNASLAR                                                  | 0.696814398        | 2              | 2.536479  |
| P31000        | QVQSLTCEVDALK                                              | 0.751452216        | 2              | 3.32225   |
| P31000        | RQVDQLTNDK                                                 | 0.485562149        | 2              | 2.661426  |
| P31000        | SLYSSSPGGAYVTR                                             | 1.023284234        | 2              | 2.379948  |
| P31000        | TNEKVELQELNDR                                              | 0.730197654        | 2              | 2.444677  |
| P31000        | VELQELNDR                                                  | 0.600143187        | 2              | 2.715927  |
| <b>P31044</b> | <b>PEBP1 Phosphatidylethanolamine_binding protein 1</b>    | <b>0.901210087</b> | <b>9.9E-20</b> | <b>6</b>  |
| P31044        | GNDISSGTVLSEYVGSPPK                                        | 0.870502955        | 2              | 6.045561  |
| P31044        | LYTLVLTDPDAPSR                                             | 1.071335246        | 2              | 4.438648  |
| P31044        | VDYGGVTVDELGK                                              | 0.852086559        | 2              | 4.49212   |
| P31044        | VLTPQVMNRPSSISWDGLDPGK                                     | 0.809024789        | 3              | 4.849732  |
| P31044        | YHLGAPVAGTCFQAEWDDSVPK                                     | 1.334561821        | 2              | 5.339462  |
| P31044        | YVWLVEQEQPLNCDEPILSNK                                      | 1.00752023         | 2              | 5.233539  |
| <b>P31210</b> | <b>AK1D1 3_oxo_5_beta_steroid 4_dehydrogenase</b>          | <b>0.596396778</b> | <b>9.9E-20</b> | <b>17</b> |
| P31210        | DELLTSLGK                                                  | 0.50627741         | 2              | 2.58049   |
| P31210        | DIEALNK                                                    | 0.434136487        | 1              | 2.473548  |
| P31210        | EEMKDIEALNK                                                | 0.72373088         | 2              | 3.369206  |
| P31210        | ENFQIFDFSLTK                                               | 0.814524814        | 2              | 3.191303  |
| P31210        | HIDGAYVYR                                                  | 0.733745015        | 2              | 3.212218  |
| P31210        | IKENFQIFDFSLTK                                             | 0.923894803        | 2              | 3.900281  |
| P31210        | NEHEVGEAIR                                                 | 0.616165557        | 2              | 3.092601  |
| P31210        | NPLWVNVSSPPLLK                                             | 0.870855045        | 2              | 4.308712  |
| P31210        | NPLWVNVSSPPLLKDELLTSLGK                                    | 0.729812711        | 3              | 4.685515  |
| P31210        | QLEVILNKPGLK                                               | 0.522757864        | 2              | 3.322124  |
| P31210        | REEIFYCGK                                                  | 0.663634054        | 2              | 2.962653  |
| P31210        | SLGVSFNFR                                                  | 0.601113186        | 2              | 2.583139  |
| P31210        | SNLCATWEALEACK                                             | 0.559406881        | 2              | 4.387854  |
| P31210        | SNLCATWEALEACKDAGLVK                                       | 0.587985257        | 2              | 4.710383  |
| P31210        | TAIDEGYR                                                   | 0.694180565        | 2              | 2.615649  |
| P31210        | TQAQIVLR                                                   | 0.651783184        | 2              | 3.086223  |
| P31210        | YKPVTNQVECHPYFTQTK                                         | 0.971393311        | 2              | 5.051595  |
| <b>P31399</b> | <b>ATP5H ATP synthase subunit d_mitochondrial</b>          | <b>0.931448372</b> | <b>8.2E-12</b> | <b>8</b>  |
| P31399        | ANVDKPGLVDDFK                                              | 0.931629021        | 2              | 3.520016  |
| P31399        | NCAQFVTGSQAR                                               | 0.982156778        | 2              | 4.753046  |
| P31399        | NMIPFDQMTIDDLNEVPETK                                       | 0.856676467        | 2              | 4.98344   |
| P31399        | NMIPFDQMTIDDLNEVPETK+Oxidation(1)                          | 0.919124583        | 2              | 4.069884  |
| P31399        | NMIPFDQMTIDDLNEVPETK+Oxidation(7)                          | 1.003814379        | 2              | 3.937582  |
| P31399        | SWNETFHTR                                                  | 0.949066013        | 2              | 2.606356  |
| P31399        | TIDWVSFVEIMPQNQK                                           | 1.629507704        | 3              | 3.514287  |
| P31399        | YTALVDAEEKEDVK                                             | 1.221230653        | 2              | 3.4593    |
| <b>P32089</b> | <b>TXTP Tricarboxylate transport protein_mitochondrial</b> | <b>1.028373061</b> | <b>0.62981</b> | <b>5</b>  |
| P32089        | FIHDQTSSNP                                                 | 1.014522565        | 1              | 3.601469  |



|               |                                                                |                    |                |           |
|---------------|----------------------------------------------------------------|--------------------|----------------|-----------|
| P32089        | GLSSLLYGSIPK                                                   | 1.133045683        | 2              | 3.065092  |
| P32089        | GTYQGLTATVLK                                                   | 0.910197131        | 2              | 2.439975  |
| P32089        | SHGVLGLYR                                                      | 0.971751651        | 1              | 2.097722  |
| P32089        | TQLQLDER                                                       | 1.069624658        | 2              | 2.617077  |
| <b>P32198</b> | <b>CPT1A Carnitine O_palmitoyltransferase 1_ liver isoform</b> | <b>0.966494512</b> | <b>0.51174</b> | <b>4</b>  |
| P32198        | ELEQQMQQILDDPSEPQGEAK                                          | 0.999488091        | 2              | 4.372175  |
| P32198        | GDTNPNIKPTR                                                    | 0.97756986         | 2              | 2.493103  |
| P32198        | MTALAQDFAVNLGPK                                                | 0.893043815        | 2              | 3.257622  |
| P32198        | MTALAQDFAVNLGPK+Oxidation(0)                                   | 0.475946355        | 2              | 3.76634   |
| <b>P32232</b> | <b>CBS Cystathionine beta_synthase</b>                         | <b>1.085576415</b> | <b>9.9E-20</b> | <b>8</b>  |
| P32232        | AGTLKPGDTIIEPTSGNTGIGLALAAVK                                   | 1.332336754        | 3              | 5.924621  |
| P32232        | FDSPEHVGVAVWR                                                  | 1.001090945        | 2              | 3.468556  |
| P32232        | LKNEIPNSHILDQYR                                                | 1.088456427        | 3              | 3.4666    |
| P32232        | NASNPLAHYDDTAEEILQQCDGK                                        | 1.563261622        | 2              | 5.384356  |
| P32232        | SNDDDSFAFAR                                                    | 1.426665526        | 2              | 3.369449  |
| P32232        | VDMLVASAGTGGTTIGAR                                             | 1.219047058        | 2              | 4.329044  |
| P32232        | VQELSLAPLTVLPTVCEHTAILR                                        | 1.565834958        | 3              | 4.195805  |
| P32232        | VRPSDEVCK                                                      | 1.557849261        | 2              | 2.50546   |
| <b>P32551</b> | <b>QCR2 Cytochrome b_c1 complex subunit 2_ mitochondrial</b>   | <b>0.947286759</b> | <b>9.9E-20</b> | <b>10</b> |
| P32551        | AVAFQNPQTR                                                     | 1.736076459        | 2              | 2.795251  |
| P32551        | AVAQGNLSSADVQAAK                                               | 0.938632697        | 2              | 4.782523  |
| P32551        | GNNTTSLLSQSVAK                                                 | 1.073287751        | 2              | 4.215866  |
| P32551        | IENLHDVAYK                                                     | 0.991766812        | 2              | 3.696033  |
| P32551        | LPNGLVIASLENYAPLSR                                             | 0.960920164        | 3              | 3.429788  |
| P32551        | RGNNTTSLLSQSVAK                                                | 0.827365499        | 2              | 2.962132  |
| P32551        | SMTASGNLGHPTFLDEL                                              | 1.192313398        | 2              | 3.16481   |
| P32551        | SMTASGNLGHPTFLDEL+Oxidation(1)                                 | 0.846990844        | 2              | 3.374429  |
| P32551        | TSAPGGVPLQPQLEFTK                                              | 0.924636043        | 2              | 3.575655  |
| P32551        | YENYNLGTSHLLR                                                  | 1.704388965        | 2              | 4.000422  |
| <b>P32755</b> | <b>HPPD 4_hydroxyphenylpyruvate dioxygenase</b>                | <b>1.047379965</b> | <b>9.9E-20</b> | <b>16</b> |
| P32755        | AFEEEEQALR                                                     | 1.291062299        | 2              | 3.364861  |
| P32755        | DIAFEVEDCEHIVQK                                                | 1.271329492        | 2              | 3.294794  |
| P32755        | FAVLQTYGDTTHTLVEK                                              | 1.452375259        | 2              | 5.073117  |
| P32755        | FLPGFEPTYK                                                     | 1.248940328        | 2              | 2.513811  |
| P32755        | FWSVDDTQVHTEYSSLR                                              | 2.061090106        | 2              | 5.547904  |
| P32755        | GMEFLAVPSSYYR                                                  | 1.276603855        | 2              | 3.045526  |
| P32755        | GNLTDLETNGVR                                                   | 1.13098371         | 2              | 3.61468   |
| P32755        | HNHQGFGAGNFNSLFK                                               | 1.372228319        | 3              | 4.997241  |
| P32755        | ILVDYDEK                                                       | 1.167016365        | 2              | 2.872032  |
| P32755        | IVFVLCALNPWNK                                                  | 1.247270921        | 2              | 3.05992   |
| P32755        | IVREPWVEEDKFGK                                                 | 1.263886816        | 3              | 4.246857  |
| P32755        | LPSCNLEIIDHIVGNQPDQEMESASEWYLK                                 | 1.468417478        | 3              | 7.495541  |

|               |                                                             |                    |                |           |
|---------------|-------------------------------------------------------------|--------------------|----------------|-----------|
| P32755        | MGFEPLAYK                                                   | 2.148512642        | 2              | 2.343648  |
| P32755        | SIVVANYEESIK                                                | 1.331344782        | 2              | 4.151486  |
| P32755        | SQIQEYVDYNGGAGVQHIALR                                       | 1.447740888        | 2              | 5.488542  |
| P32755        | TEDIITTIR                                                   | 1.241221489        | 2              | 3.402628  |
| <b>P33124</b> | <b>ACSL6 Long_chain_fatty_acid__CoA ligase 6</b>            | <b>0.877421127</b> | <b>7.6E-10</b> | <b>2</b>  |
| P33124        | ALRPTIFPVVPR                                                | 0.885446946        | 2              | 3.077216  |
| P33124        | IENIYIR                                                     | 0.87230799         | 2              | 2.844885  |
| <b>P33273</b> | <b>CP255 Cytochrome P450 2C55</b>                           | <b>0.876281048</b> | <b>0.00172</b> | <b>2</b>  |
| P33273        | ELRHFSMLTLR                                                 | 0.987893666        | 2              | 2.317363  |
| P33273        | FDYKDENFLNLM EK                                             | 0.656937497        | 3              | 3.544454  |
| <b>P34058</b> | <b>HS90B Heat shock protein HSP 90_beta</b>                 | <b>1.061094461</b> | <b>9.9E-20</b> | <b>24</b> |
| P34058        | ADLNNLGTIAK                                                 | 0.901563149        | 2              | 4.10553   |
| P34058        | EDQTEYLEER                                                  | 0.986141101        | 2              | 3.341141  |
| P34058        | EGLELPEDEEEKK                                               | 0.873689246        | 2              | 3.142198  |
| P34058        | ELISNASDALDK                                                | 0.830038877        | 2              | 3.637251  |
| P34058        | ELISNASDALDKIR                                              | 0.46416099         | 2              | 2.986531  |
| P34058        | GVDSEDLPLNISR                                               | 0.970841494        | 2              | 4.749973  |
| P34058        | HLEINPDHPIVETLR                                             | 0.905352745        | 2              | 4.418153  |
| P34058        | HSQFIGYPITLYLEK                                             | 2.197809083        | 2              | 3.801575  |
| P34058        | IDIIPNPQER                                                  | 0.871023839        | 2              | 2.967128  |
| P34058        | KHLEINPDHPIVETLR                                            | 0.920739881        | 2              | 3.266825  |
| P34058        | LGIHEDSTNR                                                  | 0.813608362        | 2              | 3.296876  |
| P34058        | NPDDITQEEYGEFYK                                             | 1.537208602        | 2              | 4.884945  |
| P34058        | RAPFDLFENK                                                  | 1.076144059        | 2              | 2.91025   |
| P34058        | RAPFDLFENKK                                                 | 0.689831425        | 2              | 2.33402   |
| P34058        | SIYYITGESK                                                  | 1.446356002        | 2              | 3.095205  |
| P34058        | SLTNDWEDHLAVK                                               | 1.113949235        | 2              | 3.89272   |
| P34058        | TLTLVDTGIGMTK                                               | 0.966270251        | 2              | 3.865714  |
| P34058        | TLTLVDTGIGMTK+Oxidation(10)                                 | 0.75674364         | 2              | 3.918484  |
| P34058        | VFIMDSCDELIPEYLN FIR                                        | 1.399981311        | 2              | 2.859722  |
| P34058        | VILHLKEDQTEYLEER                                            | 0.836009351        | 3              | 4.219722  |
| P34058        | YESLTDPSK                                                   | 0.964237289        | 2              | 2.846514  |
| P34058        | YESLTDPSKLD SGK                                             | 0.959894241        | 2              | 3.66766   |
| P34058        | YHTSQSGDEMTSLSEYVSR                                         | 1.066763288        | 2              | 5.429961  |
| P34058        | YIDQEELNK                                                   | 0.928217347        | 2              | 3.631156  |
| <b>P34067</b> | <b>PSB4 Proteasome subunit beta type_4</b>                  | <b>0.999618029</b> | <b>0.32812</b> | <b>3</b>  |
| P34067        | GVEIEGPLSAQTNWDIAHMISGFE                                    | 1.033963905        | 2              | 3.442951  |
| P34067        | TQNPMVTGTSVLGVK                                             | 0.891601924        | 2              | 2.542739  |
| P34067        | VNDSTMLGASGDYADFQYLK                                        | 1.107332167        | 2              | 4.18301   |
| <b>P35171</b> | <b>CX7A2 Cytochrome c oxidase subunit 7A2_mitochondrial</b> | <b>1.061434269</b> | <b>0.15944</b> | <b>3</b>  |
| P35171        | GGTSDALLYR                                                  | 0.946367621        | 2              | 3.280332  |
| P35171        | LFQEDNGMPVHLK                                               | 1.181086954        | 2              | 3.831196  |

|               |                                                              |                    |                |          |
|---------------|--------------------------------------------------------------|--------------------|----------------|----------|
| P35171        | LFQEDNGMPVHLK+Oxidation(7)                                   | 0.796796511        | 2              | 2.694282 |
| <b>P35213</b> | <b>1433B 14_3_3 protein beta/alpha</b>                       | <b>0.930465886</b> | <b>0.99963</b> | <b>5</b> |
| P35213        | AVTEQGHELSNEER                                               | 1.133714979        | 2              | 4.567863 |
| P35213        | EKIEAELQDICSVDVLELLDK                                        | 1.038094658        | 3              | 4.375509 |
| P35213        | QTTVSNSQQAYQEAFEISK                                          | 0.938165006        | 2              | 5.247869 |
| P35213        | TAFDEAIAELDTLNEESYK                                          | 0.959808221        | 2              | 5.310199 |
| P35213        | YLSEVASGDNK                                                  | 0.93849232         | 1              | 3.129529 |
| <b>P35233</b> | <b>PTN2 Tyrosine_protein phosphatase non_receptor type 2</b> | <b>0.849277469</b> | <b>0.45382</b> | <b>2</b> |
| P35233        | CAQYWPTDDREMVFK+Oxidation(11)                                | 1.066677167        | 2              | 2.362753 |
| P35233        | KRWLYWQPILTK                                                 | 0.814115494        | 1              | 2.099688 |
| <b>P35278</b> | <b>RAB5C Ras_related protein Rab_5C</b>                      | <b>0.892347778</b> | <b>0.01824</b> | <b>2</b> |
| P35278        | FEIWDTAGQER                                                  | 0.944581542        | 2              | 2.665885 |
| P35278        | GVDLQESNPASR                                                 | 0.86566173         | 2              | 2.903585 |
| <b>P35427</b> | <b>RL13A 60S ribosomal protein L13a</b>                      | <b>1.006595692</b> | <b>1</b>       | <b>2</b> |
| P35427        | CEGINISGNFYR                                                 | 0.965726342        | 2              | 2.716946 |
| P35427        | YQAVTATLEEK                                                  | 0.977023497        | 2              | 2.984513 |
| <b>P35434</b> | <b>ATPD ATP synthase subunit delta_mitochondrial</b>         | <b>0.903503401</b> | <b>0.00101</b> | <b>2</b> |
| P35434        | AQSELSGAADEAAR                                               | 0.894770586        | 2              | 4.638041 |
| P35434        | IEANEALVK                                                    | 0.941149915        | 2              | 3.304008 |
| <b>P35435</b> | <b>ATPG ATP synthase subunit gamma_mitochondrial</b>         | <b>0.955067501</b> | <b>6.2E-06</b> | <b>6</b> |
| P35435        | GLCGAIHSSVAK                                                 | 0.952494555        | 2              | 3.697511 |
| P35435        | HLIIGVSSDR                                                   | 0.921036591        | 2              | 2.912915 |
| P35435        | NASDMIDK                                                     | 0.943594092        | 1              | 2.103876 |
| P35435        | NDMAALTAAGK                                                  | 1.013813885        | 2              | 3.343344 |
| P35435        | THSDQFLVSFK                                                  | 1.489143582        | 2              | 3.129928 |
| P35435        | VYGTGSLALYEK                                                 | 1.339777091        | 2              | 2.874933 |
| <b>P35565</b> | <b>CALX Calnexin</b>                                         | <b>1.104828246</b> | <b>9.9E-20</b> | <b>8</b> |
| P35565        | AEDEILNR                                                     | 0.793722083        | 2              | 2.593971 |
| P35565        | GSLSGWILSK                                                   | 0.685096584        | 2              | 2.311165 |
| P35565        | KIPNPDFFEDLEPFR                                              | 1.062646054        | 3              | 4.4728   |
| P35565        | NKGDEEEEEKLEEK                                               | 0.8844703          | 2              | 4.701201 |
| P35565        | TDAPQPDVKDEEGKEEEK                                           | 0.79821724         | 3              | 3.755375 |
| P35565        | TSELNLDQFHDK                                                 | 0.721419208        | 2              | 3.647979 |
| P35565        | VVDDWANDGWGLK                                                | 0.733254734        | 2              | 3.884987 |
| P35565        | VVDDWANDGWGLKK                                               | 0.827433075        | 2              | 3.454346 |
| <b>P35704</b> | <b>PRDX2 Peroxiredoxin_2</b>                                 | <b>0.862294664</b> | <b>0.00047</b> | <b>5</b> |
| P35704        | EGGLGPLNIPLLDVTK                                             | 0.872066978        | 2              | 2.897059 |
| P35704        | KEGGLGPLNIPLLDVTK                                            | 0.850841311        | 2              | 4.292226 |
| P35704        | NDEGIAYR                                                     | 0.875588576        | 1              | 2.075346 |
| P35704        | QITVNDLPVGR                                                  | 0.863383082        | 2              | 2.804196 |
| P35704        | SLSQNYGVVK                                                   | 0.764135067        | 2              | 2.413411 |

|               |                                                                        |                    |                |           |
|---------------|------------------------------------------------------------------------|--------------------|----------------|-----------|
| <b>P35738</b> | <b>ODDB 2_oxoisovalerate dehydrogenase subunit beta_ mitochondrial</b> | <b>0.711227476</b> | <b>0.00337</b> | <b>2</b>  |
| P35738        | AAVEQVPVEPYK                                                           | 0.722386455        | 2              | 2.31245   |
| P35738        | GLLLSCIEDKNPCIFFEPK                                                    | 0.497504535        | 2              | 2.817338  |
| <b>P36201</b> | <b>CRIP2 Cysteine_rich protein 2</b>                                   | <b>1.222036235</b> | <b>0.21551</b> | <b>3</b>  |
| P36201        | GVNIGGAGSYIYEKPPTEAPQVTGPIEVPVVR                                       | 1.133577462        | 3              | 6.76126   |
| P36201        | GVNTGAVGSYIYDKDPEGTVQP                                                 | 1.236830332        | 2              | 4.431647  |
| P36201        | VYFAEKVTSLGK                                                           | 0.89198005         | 2              | 2.46953   |
| <b>P36365</b> | <b>FMO1 Dimethylaniline monooxygenase [N_oxide_forming] 1</b>          | <b>0.6355393</b>   | <b>9.9E-20</b> | <b>9</b>  |
| P36365        | ALQSDYITYIDLLTSINAKPDLR                                                | 1.243434469        | 3              | 3.734042  |
| P36365        | ASLYNSVVSNSK                                                           | 1.097882043        | 2              | 2.977118  |
| P36365        | ENSVVFNNTPK                                                            | 0.829261515        | 2              | 2.457228  |
| P36365        | FTEHVEEGR                                                              | 0.533960558        | 2              | 2.888665  |
| P36365        | NLLPTPVVSWLISK                                                         | 0.568612937        | 2              | 2.303929  |
| P36365        | SCDLGGLWR                                                              | 0.553906638        | 2              | 2.828578  |
| P36365        | TQLREPVLNDELPGR                                                        | 0.967745529        | 2              | 2.943776  |
| P36365        | VEDGQASLYK                                                             | 0.643229702        | 2              | 3.304549  |
| P36365        | VLVVGMGNSGTDIAVEASHLAK                                                 | 0.899512469        | 2              | 2.480818  |
| <b>P36511</b> | <b>UDB15 UDP_glucuronosyltransferase 2B15</b>                          | <b>0.789217867</b> | <b>9.9E-20</b> | <b>6</b>  |
| P36511        | ANIIAWALAIQPK                                                          | 1.010681218        | 3              | 4.376067  |
| P36511        | FVNVWTYELPR                                                            | 1.212575305        | 2              | 2.781586  |
| P36511        | FVTFPTSFSSHDLENFFTR                                                    | 1.727318944        | 2              | 3.88148   |
| P36511        | GHEVTVLRPSAFVFLDPK                                                     | 1.674688401        | 2              | 2.961723  |
| P36511        | IILEELVQK                                                              | 0.785027591        | 2              | 3.401037  |
| P36511        | TLGRPTTLAEIMGK                                                         | 0.96403099         | 2              | 2.582662  |
| <b>P36972</b> | <b>APT Adenine phosphoribosyltransferase</b>                           | <b>0.810217757</b> | <b>3.5E-05</b> | <b>3</b>  |
| P36972        | GFLFGPSLAQELGVGCVLIR                                                   | 0.831458433        | 2              | 2.781977  |
| P36972        | IDYIAGLSR                                                              | 0.966367318        | 1              | 2.294043  |
| P36972        | SFPDFPIPGVLFRR                                                         | 0.804292595        | 2              | 3.144978  |
| <b>P38650</b> | <b>DYHC1 Cytoplasmic dynein 1 heavy chain 1</b>                        | <b>0.862763779</b> | <b>0.19974</b> | <b>7</b>  |
| P38650        | EALELTDGLLSGSEER                                                       | 0.851310001        | 2              | 2.408808  |
| P38650        | FGNPLLQDVEYDPVLPVLPVLR                                                 | 1.107018938        | 3              | 3.392615  |
| P38650        | ILDDDTIITLENLK                                                         | 1.136510804        | 2              | 2.352604  |
| P38650        | QLQNISQAAAAGGAK                                                        | 1.051945309        | 2              | 2.80931   |
| P38650        | SSLQSQCNEVLK                                                           | 0.835052229        | 2              | 3.112075  |
| P38650        | VQGLTVEQAEAVAR                                                         | 1.002526677        | 2              | 3.092907  |
| P38650        | VQVALEELQDLK                                                           | 0.845434847        | 2              | 2.64115   |
| <b>P38652</b> | <b>PGM1 Phosphoglucomutase_1</b>                                       | <b>0.761708222</b> | <b>9.9E-20</b> | <b>16</b> |
| P38652        | ADNFEYSDPVDGSISK                                                       | 0.893737315        | 2              | 4.863481  |
| P38652        | AIGGIILTASHNPGGPNDFGIK                                                 | 0.996175504        | 2              | 5.27492   |
| P38652        | FNISGGPAPEAITDK                                                        | 1.039668516        | 2              | 4.241812  |
| P38652        | IDAMHGTVVGPYVK                                                         | 0.418340426        | 2              | 3.118982  |
| P38652        | INQDPQVMLAPLISIALK                                                     | 1.089548212        | 2              | 4.728986  |

|               |                                                       |                    |                |           |
|---------------|-------------------------------------------------------|--------------------|----------------|-----------|
| P38652        | KQRVEDILK                                             | 0.871919262        | 1              | 2.053016  |
| P38652        | LSGTGSAGATIR                                          | 0.755375589        | 2              | 2.67467   |
| P38652        | LSLCGEESFGTGS DHIR                                    | 1.8061292          | 2              | 3.243306  |
| P38652        | LVIGQNGILSTPAVSCIIR                                   | 1.042817471        | 2              | 3.554147  |
| P38652        | NIFDFNALK                                             | 0.854653325        | 1              | 2.10787   |
| P38652        | QEATLVVGGDGR                                          | 0.848604858        | 2              | 3.020263  |
| P38652        | SFVGKQFSANDK                                          | 1.01088209         | 1              | 2.061254  |
| P38652        | SGEHDFGAAFDGDGDR                                      | 0.866915997        | 2              | 4.39383   |
| P38652        | TIEEYAICPDLK                                          | 0.852688669        | 2              | 2.92078   |
| P38652        | TQAYPDQKPGTSGLR                                       | 0.689846865        | 2              | 3.706978  |
| P38652        | YDYEEVEAEGANK                                         | 1.014160652        | 2              | 4.936046  |
| <b>P38656</b> | <b>LA Lupus La protein homolog</b>                    | <b>0.854576919</b> | <b>0.7358</b>  | <b>3</b>  |
| P38656        | GSIFAVFDSIQSAK                                        | 0.994809856        | 2              | 2.355625  |
| P38656        | ITDDQQESLNK                                           | 0.808033704        | 2              | 3.98058   |
| P38656        | LDEGWVPLETMIK                                         | 1.436754111        | 2              | 2.94786   |
| <b>P38659</b> | <b>PDIA4 Protein disulfide_isomerase A4</b>           | <b>1.050004762</b> | <b>9.9E-20</b> | <b>18</b> |
| P38659        | DLGLSESGEDVNAAILDESGKK                                | 1.266762402        | 2              | 4.996846  |
| P38659        | EVSQPDWTPPEVTLTLTK                                    | 1.051020037        | 2              | 3.436537  |
| P38659        | FDVSGYPTIK                                            | 1.048373202        | 2              | 3.294147  |
| P38659        | FDVSGYPTLK                                            | 1.048373202        | 2              | 3.294147  |
| P38659        | FIDEHATK                                              | 1.116343845        | 2              | 2.471492  |
| P38659        | FIDEHATKR                                             | 1.464476444        | 2              | 2.572917  |
| P38659        | GQAVDYDGSR                                            | 0.587993427        | 2              | 2.425307  |
| P38659        | GRPFDYNGPR                                            | 1.089027252        | 2              | 2.928123  |
| P38659        | IDATSASMLASK                                          | 1.076454335        | 2              | 3.497406  |
| P38659        | IDATSASMLASK+Oxidation(7)                             | 1.153935672        | 2              | 3.211757  |
| P38659        | KGQAVDYDGSR                                           | 1.549389289        | 2              | 2.432132  |
| P38659        | MDATANDITNDR                                          | 1.087642227        | 2              | 3.830023  |
| P38659        | QLEPVYTSLGK                                           | 0.944766889        | 2              | 2.466219  |
| P38659        | RFDVSGYPTLK                                           | 1.261302879        | 2              | 3.064691  |
| P38659        | RSPIPLAK                                              | 1.415549993        | 2              | 2.489756  |
| P38659        | VDATEQTDLAK                                           | 1.035747189        | 2              | 3.952965  |
| P38659        | VEGFPTIYFAPSGDK                                       | 1.12352125         | 2              | 3.234595  |
| P38659        | YGIVDYMVEQSGPPSK                                      | 1.640956276        | 2              | 4.401173  |
| <b>P38918</b> | <b>ARK73 Aflatoxin B1 aldehyde reductase member 3</b> | <b>0.472749262</b> | <b>9.9E-20</b> | <b>4</b>  |
| P38918        | FYAFNPLAGLLTGR                                        | 0.722301032        | 2              | 4.32189   |
| P38918        | MDVTSSASVR                                            | 0.413360163        | 2              | 3.494018  |
| P38918        | RMDVTSSASVR                                           | 0.47256532         | 2              | 2.923885  |
| P38918        | TTYGPTAPSMISAAVR                                      | 0.618925131        | 2              | 3.539783  |
| <b>P38983</b> | <b>RSSA 40S ribosomal protein SA</b>                  | <b>1.168906413</b> | <b>9.9E-20</b> | <b>6</b>  |
| P38983        | ADHQLPTEASYVNLPTIALCNTDSPLR                           | 1.258088221        | 3              | 5.735627  |
| P38983        | AIVAIENPADVSVISSR                                     | 1.012500293        | 2              | 5.555783  |

|               |                                                                      |                    |                |           |
|---------------|----------------------------------------------------------------------|--------------------|----------------|-----------|
| P38983        | FTPGFTNQIQAADR                                                       | 1.177759807        | 2              | 4.701433  |
| P38983        | KSDGIYIINLK                                                          | 1.816223922        | 2              | 2.86672   |
| P38983        | SDGIYIINLK                                                           | 0.995416383        | 2              | 2.92307   |
| P38983        | YVDIAIPCNNK                                                          | 1.230625686        | 2              | 3.330445  |
| <b>P40307</b> | <b>PSB2 Proteasome subunit beta type_2</b>                           | <b>0.959610391</b> | <b>0.03431</b> | <b>2</b>  |
| P40307        | FILNLPFVSFR                                                          | 1.296383546        | 2              | 2.639387  |
| P40307        | NGYELSPTAAANFTR                                                      | 0.954471334        | 2              | 3.289738  |
| <b>P40329</b> | <b>SYRC Arginyl_tRNA synthetase_cytoplasmic</b>                      | <b>0.943809963</b> | <b>0.00091</b> | <b>2</b>  |
| P40329        | EENLKLK                                                              | 1.188478976        | 1              | 1.945611  |
| P40329        | SDGGYTYDTSDLAAIK                                                     | 0.863091937        | 2              | 3.691032  |
| <b>P41034</b> | <b>TTPA Alpha_tocopherol transfer protein</b>                        | <b>1.097577084</b> | <b>3.4E-05</b> | <b>6</b>  |
| P41034        | AECPELSADLHPR                                                        | 0.958609723        | 2              | 2.48415   |
| P41034        | AIFDLEGWQISHAFQITPSVAK                                               | 1.126726904        | 2              | 4.575449  |
| P41034        | AQEEGVPETPQPLTDAFLLR                                                 | 1.340198709        | 2              | 3.387881  |
| P41034        | QLNEQPDPHSPLVQPLAELR                                                 | 1.089564094        | 3              | 3.394094  |
| P41034        | SEDYLSISSETIQ                                                        | 1.528838835        | 2              | 2.320954  |
| P41034        | VSLITSELIVQEVETQR                                                    | 1.254725878        | 2              | 3.539463  |
| <b>P41123</b> | <b>RL13 60S ribosomal protein L13</b>                                | <b>1.051846794</b> | <b>0.00641</b> | <b>3</b>  |
| P41123        | LATQLTGPMPIR                                                         | 1.450243223        | 2              | 2.460745  |
| P41123        | STESLQANVQR                                                          | 0.953423065        | 2              | 3.925001  |
| P41123        | VDTWFNQPAR                                                           | 1.044099679        | 2              | 3.551446  |
| <b>P41498</b> | <b>PPAC Low molecular weight phosphotyrosine protein phosphatase</b> | <b>1.029102741</b> | <b>9.7E-09</b> | <b>3</b>  |
| P41498        | IDSAATSTYEVGNPPDYR                                                   | 1.029205948        | 2              | 4.773513  |
| P41498        | IELLGSYDPQK                                                          | 0.822205178        | 2              | 3.738861  |
| P41498        | LVTDENVSDNWR                                                         | 0.821936933        | 2              | 3.450277  |
| <b>P41542</b> | <b>USO1 General vesicular transport factor p115</b>                  | <b>1.00378872</b>  | <b>0.61231</b> | <b>13</b> |
| P41542        | AWFEVGDENPGWSAQK                                                     | 0.889878059        | 2              | 4.029699  |
| P41542        | CQNEQLQTAVTQQASQIQQHK                                                | 0.915246572        | 3              | 4.865631  |
| P41542        | EQDDLVLVLLADQDQK                                                     | 1.135533991        | 2              | 2.685091  |
| P41542        | LQTENSELQQR                                                          | 1.022748988        | 2              | 2.818101  |
| P41542        | LREEIEELR                                                            | 0.923387648        | 2              | 2.413286  |
| P41542        | NDGVLLQALTR                                                          | 1.185521482        | 2              | 3.841659  |
| P41542        | NNNSNQNFFK                                                           | 0.981707283        | 2              | 2.519103  |
| P41542        | QLDSSNSTIAILQTEK                                                     | 0.971781845        | 2              | 3.483702  |
| P41542        | QSEDLGSQFTEFIK                                                       | 1.021467326        | 2              | 3.196417  |
| P41542        | SQLCSQSLEITR                                                         | 1.030413394        | 2              | 3.122802  |
| P41542        | SVPVEGESELVTAAK                                                      | 1.004716359        | 2              | 3.754909  |
| P41542        | TLEQHDNIVTHYK                                                        | 0.919044935        | 2              | 3.23454   |
| P41542        | VLVSPTNPPGATSSCQK                                                    | 0.980971649        | 2              | 3.267832  |
| <b>P41562</b> | <b>IDHC Isocitrate dehydrogenase [NADP] cytoplasmic</b>              | <b>0.920930206</b> | <b>1.4E-13</b> | <b>16</b> |
| P41562        | ATDFVWPGGK                                                           | 1.026018325        | 2              | 3.371049  |
| P41562        | CATITPDEK                                                            | 1.269056016        | 2              | 2.586768  |

|               |                                               |                    |                |          |
|---------------|-----------------------------------------------|--------------------|----------------|----------|
| P41562        | DIFQEYDK                                      | 0.80730674         | 1              | 2.461578 |
| P41562        | FKDIFQEYDK                                    | 0.952347124        | 3              | 4.430447 |
| P41562        | GQETSTNPIASIFAWSR                             | 1.300744149        | 2              | 5.114202 |
| P41562        | IIWELIK                                       | 1.009571101        | 2              | 2.565112 |
| P41562        | LIDDMVAQAMK                                   | 0.957906126        | 2              | 3.525281 |
| P41562        | LIDDMVAQAMK+Oxidation(9)                      | 0.822626481        | 2              | 2.333398 |
| P41562        | LILPYVELDLHSYDLGIENR                          | 1.382507601        | 3              | 3.663644 |
| P41562        | LVTGWVKPIIIGR                                 | 1.236536028        | 3              | 4.029403 |
| P41562        | SDYLNTFEFMDK                                  | 0.954676625        | 2              | 4.081991 |
| P41562        | SDYLNTFEFMDK+Oxidation(9)                     | 0.756879045        | 2              | 2.984837 |
| P41562        | SEGGFIWACK                                    | 0.906580429        | 2              | 3.31787  |
| P41562        | SIEDFAHSSFQMALS                               | 1.032038042        | 2              | 4.400452 |
| P41562        | TVEAAAHGTVTR                                  | 0.864989056        | 2              | 3.549238 |
| P41562        | VEITYTPK                                      | 0.99115264         | 2              | 2.537252 |
| <b>P42123</b> | <b>LDHB L_lactate dehydrogenase B chain</b>   | <b>1.104937168</b> | <b>0.93777</b> | <b>4</b> |
| P42123        | DYSVTANSK                                     | 1.188974691        | 2              | 2.657978 |
| P42123        | LIAPVADDEAVPNNK                               | 0.832617854        | 2              | 3.368857 |
| P42123        | SLADELALVDVLEDK                               | 0.990256075        | 2              | 3.423537 |
| P42123        | VIGSGCNLDSAR                                  | 1.053708351        | 2              | 3.751447 |
| <b>P42676</b> | <b>NEUL Neurolysin_mitochondrial</b>          | <b>1.151188465</b> | <b>0.27259</b> | <b>2</b> |
| P42676        | AELGALPDDFIDSLEK                              | 0.917526254        | 2              | 2.411804 |
| P42676        | TRTEQLIAQTK                                   | 1.239954594        | 2              | 3.176306 |
| <b>P42932</b> | <b>TCPQ T_complex protein 1 subunit theta</b> | <b>1.028263765</b> | <b>6E-14</b>   | <b>6</b> |
| P42932        | AIAGTGANVIVTGGK                               | 0.916777909        | 2              | 4.0802   |
| P42932        | AVDDGVNTFK                                    | 1.237558845        | 2              | 2.82986  |
| P42932        | ELEVQHPAAK                                    | 0.935650923        | 2              | 2.792686 |
| P42932        | GEENLMDAQVK                                   | 0.942580451        | 2              | 3.011295 |
| P42932        | NVGLDIEAEVPAVK                                | 1.013700033        | 2              | 3.987832 |
| P42932        | QITSYGETCPGLEQYAIK                            | 0.890961874        | 2              | 4.780943 |
| <b>P43244</b> | <b>MATR3 Matrin_3</b>                         | <b>0.922713908</b> | <b>0.38329</b> | <b>3</b> |
| P43244        | GNLGAGNGNLQGPR                                | 0.8035721          | 2              | 2.364426 |
| P43244        | ITPENLPQILLQLK                                | 0.923165907        | 2              | 3.461252 |
| P43244        | TEEGPTLSYGR                                   | 0.951443785        | 2              | 2.474397 |
| <b>P43274</b> | <b>H14 Histone H1.4</b>                       | <b>0.771620762</b> | <b>9.9E-20</b> | <b>3</b> |
| P43274        | ALAAAGYDVEK                                   | 0.823475222        | 2              | 3.529053 |
| P43274        | SGVSLAALK                                     | 0.768749198        | 2              | 3.148955 |
| P43274        | SGVSLAALKK                                    | 0.702477156        | 2              | 2.665961 |
| <b>P43276</b> | <b>H15 Histone H1.5</b>                       | <b>0.795327341</b> | <b>0.02004</b> | <b>2</b> |
| P43276        | ALAAGGYDVEK                                   | 1.033821173        | 2              | 2.350067 |
| P43276        | ATGPPVSELITK                                  | 0.670955516        | 2              | 2.349495 |
| <b>P43278</b> | <b>H10 Histone H1.0</b>                       | <b>0.802863931</b> | <b>2E-15</b>   | <b>2</b> |
| P43278        | VGENADSQIK                                    | 0.781376884        | 2              | 3.525041 |
| P43278        | YSDMIVAAIQAEK                                 | 0.831912384        | 2              | 3.523097 |

|               |                                                                            |                    |                |           |
|---------------|----------------------------------------------------------------------------|--------------------|----------------|-----------|
| <b>P45591</b> | <b>COF2 Cofilin_2</b>                                                      | <b>0.873314401</b> | <b>0.00015</b> | <b>2</b>  |
| P45591        | HEWQVNGLDDIKDR                                                             | 0.878390578        | 3              | 4.240893  |
| P45591        | QILVGDIGDTVEDPYTSFVK                                                       | 0.881533155        | 2              | 4.529437  |
| <b>P45592</b> | <b>COF1 Cofilin_1</b>                                                      | <b>0.960187524</b> | <b>0.98424</b> | <b>3</b>  |
| P45592        | EILVGDVGQTVDDPYTTFVK                                                       | 1.03288569         | 2              | 4.651553  |
| P45592        | HELQANCYEEVKDR                                                             | 0.899618037        | 3              | 4.697182  |
| P45592        | NIILEEGKEILVGDVGQTVDDPYTTFVK                                               | 1.031168968        | 3              | 3.663724  |
| <b>P45878</b> | <b>FKBP2 Peptidyl_prolyl cis_trans isomerase FKBP2</b>                     | <b>0.917879364</b> | <b>0.09268</b> | <b>4</b>  |
| P45878        | GWDQQLGMCCEGEK                                                             | 0.909727528        | 2              | 3.932311  |
| P45878        | KLVIPSELGYGER                                                              | 1.237615679        | 2              | 2.568548  |
| P45878        | LEDGTEFDSSLPQNQPFVSLGTGQVIK                                                | 1.253971784        | 3              | 4.288064  |
| P45878        | LVIPSELGYGER                                                               | 0.866100647        | 2              | 2.538596  |
| <b>P45953</b> | <b>ACADV Very long_chain specific acyl_CoA dehydrogenase_mitochondrial</b> | <b>1.694816715</b> | <b>9.9E-20</b> | <b>17</b> |
| P45953        | AMVENGGGLVTSNPLR                                                           | 1.267234216        | 2              | 2.644194  |
| P45953        | AMVENGGGLVTSNPLRV                                                          | 1.374067545        | 2              | 3.191954  |
| P45953        | ASNTSEVYFDGVK                                                              | 1.741770041        | 2              | 4.164312  |
| P45953        | ELGAFGLQVPSELGGLSNTQYAR                                                    | 1.036428329        | 2              | 4.906074  |
| P45953        | ENMASLQSNPQQQLFR                                                           | 0.855278505        | 2              | 4.452009  |
| P45953        | FFEEVNDPAK                                                                 | 1.628194239        | 2              | 2.425761  |
| P45953        | FFEEVNDPAKNDSLEKVEEDTLQGLK                                                 | 1.064592704        | 3              | 6.283577  |
| P45953        | GIVNEQFLQR                                                                 | 1.418215345        | 2              | 2.983571  |
| P45953        | IFEGTNDILR                                                                 | 1.054551071        | 2              | 2.804143  |
| P45953        | NDSLEKVEEDTLQGLK                                                           | 1.072412898        | 2              | 3.597562  |
| P45953        | NPLGNVGLLIGEASK                                                            | 3.406102131        | 2              | 3.554903  |
| P45953        | SFGGVTHGLPEK                                                               | 1.015364796        | 2              | 2.898193  |
| P45953        | SFGGVTHGLPEKK                                                              | 1.357053495        | 2              | 2.80309   |
| P45953        | SGELAVQALEQFATVVEAK                                                        | 1.244453868        | 3              | 5.000384  |
| P45953        | SLSEGYPTAQHEK                                                              | 1.183582821        | 2              | 3.24165   |
| P45953        | TGIGSGLSLGIVHPELSR                                                         | 1.091966793        | 3              | 4.582042  |
| P45953        | VEEDTLQGLK                                                                 | 1.021642484        | 2              | 2.622389  |
| <b>P46418</b> | <b>GSTA5 Glutathione S_transferase alpha_5</b>                             | <b>0.788855555</b> | <b>1.7E-06</b> | <b>3</b>  |
| P46418        | AILNYIATK                                                                  | 1.27221254         | 2              | 3.088582  |
| P46418        | SHGQDYLVGNK                                                                | 0.480068699        | 2              | 3.000169  |
| P46418        | VSNLPTVK                                                                   | 0.887554309        | 2              | 2.602988  |
| <b>P46425</b> | <b>GSTP2 Glutathione S_transferase P 2</b>                                 | <b>0.749808172</b> | <b>4.9E-07</b> | <b>2</b>  |
| P46425        | ALPGHLKPFETLLSQNQGGK                                                       | 0.756821831        | 3              | 3.988088  |
| P46425        | FEDGDLTYQSNAILR                                                            | 0.697986455        | 2              | 4.071139  |
| <b>P46462</b> | <b>TERA Transitional endoplasmic reticulum ATPase</b>                      | <b>0.962688527</b> | <b>9.9E-20</b> | <b>23</b> |
| P46462        | AIANECQANFISIK                                                             | 0.711343575        | 2              | 3.107888  |
| P46462        | ELQELVQYPVEHPDK                                                            | 0.959934854        | 2              | 4.370066  |
| P46462        | ETVVEVPQVTWEDIGLEDVK                                                       | 0.868047028        | 2              | 3.183033  |



|               |                                                                                           |                    |                |          |
|---------------|-------------------------------------------------------------------------------------------|--------------------|----------------|----------|
| P46462        | ETVVEVPQVTWEDIGGLEDVKR                                                                    | 0.951580822        | 2              | 4.288118 |
| P46462        | EVDIGIPDATGR                                                                              | 0.773123374        | 2              | 2.644801 |
| P46462        | GDDLSTAILK                                                                                | 0.939063832        | 2              | 3.025616 |
| P46462        | GGNIGDGGGAADR                                                                             | 0.961922496        | 2              | 3.323622 |
| P46462        | GILLYGPPGTGK                                                                              | 0.849712169        | 2              | 3.177064 |
| P46462        | LADDVDLEQVANETHGHVGADLAALCSEALQAIR                                                        | 1.095818547        | 3              | 6.838257 |
| P46462        | LAGESESNLRKAFEEAEK                                                                        | 0.641347428        | 2              | 2.347341 |
| P46462        | LDQLIYIPLPEK                                                                              | 0.891972953        | 2              | 4.265564 |
| P46462        | LEILQIHTK                                                                                 | 0.908469784        | 1              | 2.338802 |
| P46462        | LGDVISIQPCPDVK                                                                            | 0.829227394        | 2              | 4.103157 |
| P46462        | LIVDEAINEDNSVVLSQPK                                                                       | 0.885388146        | 2              | 5.61971  |
| P46462        | MDELQLFR                                                                                  | 0.874257011        | 2              | 2.488086 |
| P46462        | MTNGFSGADLTEICQR+Oxidation(0)                                                             | 0.88884492         | 2              | 3.871679 |
| P46462        | NAPAIIFIDELDAIAPK                                                                         | 1.007692403        | 2              | 4.68887  |
| P46462        | QAAPCVLFFDELDSIAK                                                                         | 2.110208185        | 2              | 3.46075  |
| P46462        | QTNPSAMEVEEDDPVPEIR                                                                       | 0.889195892        | 2              | 4.405373 |
| P46462        | RSVSDNDIR                                                                                 | 0.890618297        | 2              | 2.929654 |
| P46462        | VINQILTEMDGMSTK                                                                           | 0.925501438        | 2              | 3.543642 |
| P46462        | VINQILTEMDGMSTK+Oxidation(8)                                                              | 0.544606486        | 2              | 2.371827 |
| P46462        | WALSQSNPSALR                                                                              | 1.467193598        | 2              | 3.000924 |
| <b>P46664</b> | <b>PURA2 Adenylosuccinate synthetase isozyme 2</b>                                        | <b>0.882769727</b> | <b>0.00126</b> | <b>4</b> |
| P46664        | FIEDELQIPVK                                                                               | 0.796059258        | 2              | 3.074489 |
| P46664        | LDILDMFTEIK                                                                               | 0.862119055        | 2              | 3.706762 |
| P46664        | VGIGAFPTEQDNEIGELLQTR                                                                     | 3.221570886        | 2              | 4.044451 |
| P46664        | VVDLLAQDADIVCR                                                                            | 1.048471897        | 2              | 3.733903 |
| <b>P46720</b> | <b>SO1A1 Solute carrier organic anion transporter family member 1A1</b>                   | <b>0.989270659</b> | <b>0.68804</b> | <b>3</b> |
| P46720        | ESEHTDVHGSPQVENDGELK                                                                      | 0.799558152        | 3              | 3.442421 |
| P46720        | GIGETPIVPLGISYIEDFAK                                                                      | 0.997767861        | 2              | 3.360147 |
| P46720        | SENSPLYIGILEMGK                                                                           | 1.020929506        | 2              | 2.917818 |
| <b>P46953</b> | <b>3HAO 3_hydroxyanthranilate 3_4_dioxygenase</b>                                         | <b>1.01950422</b>  | <b>0.00751</b> | <b>6</b> |
| P46953        | AQGSVALSVTQDPACK                                                                          | 0.437921094        | 2              | 4.242898 |
| P46953        | DLGTQLAPIIQEFFHSEQYR                                                                      | 1.071921587        | 2              | 3.985065 |
| P46953        | QDVDVWLWQLEGSSK                                                                           | 0.891935457        | 2              | 3.473176 |
| P46953        | QGEIFLLPAR                                                                                | 1.045472195        | 2              | 3.036579 |
| P46953        | TGKPNPDQLLK                                                                               | 0.799219893        | 3              | 3.797587 |
| P46953        | YYVGDTEDEVLF EK                                                                           | 0.869032294        | 2              | 3.572612 |
| <b>P46978</b> | <b>STT3A Dolichyl_diphosphooligosaccharide__protein glycosyltransferase subunit STT3A</b> | <b>1.268586071</b> | <b>3.8E-10</b> | <b>6</b> |
| P46978        | FESVIHEFDPYFN YR                                                                          | 1.219231983        | 3              | 3.823313 |
| P46978        | FGQVYTEAK                                                                                 | 1.262719898        | 2              | 2.417142 |
| P46978        | FYSLLDPSYAK                                                                               | 1.183757372        | 2              | 3.287693 |
| P46978        | NLDISRPDKK                                                                                | 1.158185547        | 2              | 2.54968  |

|               |                                                        |                    |                |           |
|---------------|--------------------------------------------------------|--------------------|----------------|-----------|
| P46978        | VGQAMASTEEL                                            | 0.953078702        | 2              | 3.243232  |
| P46978        | VGQAMASTEEL+Oxidation(4)                               | 1.753442582        | 2              | 3.256992  |
| <b>P47198</b> | <b>RL22 60S ribosomal protein L22</b>                  | <b>1.099779315</b> | <b>0.14885</b> | <b>2</b>  |
| P47198        | AGNLGGGVVTIER                                          | 0.969788248        | 2              | 2.974918  |
| P47198        | FTLDCTHPVEDGIMDAANFEQLQER                              | 1.262388672        | 3              | 5.092321  |
| <b>P47875</b> | <b>CSRP1 Cysteine and glycine_rich protein 1</b>       | <b>1.076071065</b> | <b>2.7E-06</b> | <b>3</b>  |
| P47875        | GFGFGQGAGALVHSE                                        | 0.766936           | 2              | 3.154712  |
| P47875        | GLESTTLADKDGEIYCK                                      | 1.061113509        | 2              | 4.748627  |
| P47875        | NLDSTTVAVHGEEIYCK                                      | 1.161675846        | 2              | 4.802594  |
| <b>P47942</b> | <b>DPYL2 Dihydropyrimidinase_related protein 2</b>     | <b>0.872145528</b> | <b>9.9E-20</b> | <b>2</b>  |
| P47942        | GLYDGPVCEVSVTPK                                        | 0.736847628        | 2              | 3.093186  |
| P47942        | SITIANQTNCPYVTK                                        | 0.792497016        | 2              | 3.285084  |
| <b>P48004</b> | <b>PSA7 Proteasome subunit alpha type_7</b>            | <b>1.22417055</b>  | <b>1.5E-05</b> | <b>3</b>  |
| P48004        | GRDIVVLGVEK                                            | 1.224190457        | 2              | 2.658371  |
| P48004        | NYTDDAIETDDLTIK                                        | 1.114795184        | 2              | 3.898742  |
| P48004        | YVAEIEKEKEENEK                                         | 0.545527031        | 2              | 4.991709  |
| <b>P48024</b> | <b>EIF1 Eukaryotic translation initiation factor 1</b> | <b>0.862243761</b> | <b>0.11159</b> | <b>2</b>  |
| P48024        | FACNGTVIEHPEYGEVIQLQGDQR                               | 1.028892818        | 3              | 4.827719  |
| P48024        | TLTTVQGIADDYDK                                         | 0.832014102        | 2              | 3.23139   |
| <b>P48037</b> | <b>ANXA6 Annexin A6</b>                                | <b>0.754015544</b> | <b>9.9E-20</b> | <b>15</b> |
| P48037        | AANDFNPADADAK                                          | 1.008263848        | 2              | 3.017251  |
| P48037        | AINEAYKEDYHK                                           | 0.865523677        | 2              | 3.124152  |
| P48037        | DAFVAIVQSVK                                            | 0.483144338        | 2              | 2.893611  |
| P48037        | DLESDIIGDTSGHFQK                                       | 0.77767666         | 2              | 4.106172  |
| P48037        | ENDDVVEDLVQQDVQDLYEAGELK                               | 0.594336275        | 2              | 4.670141  |
| P48037        | GELSGDFEK                                              | 0.78831508         | 1              | 2.066452  |
| P48037        | GFGSDKESILELITSR                                       | 0.823183124        | 2              | 3.964816  |
| P48037        | GIGTDEATIIDIITQR                                       | 0.677422401        | 2              | 4.325992  |
| P48037        | QRQEICQSYK                                             | 0.48369419         | 2              | 2.950975  |
| P48037        | SEIDLLNIR                                              | 0.908159854        | 2              | 3.122379  |
| P48037        | SEISGDLAR                                              | 0.76120121         | 2              | 2.358965  |
| P48037        | SLEDALSSDTSGHFK                                        | 0.819442719        | 2              | 3.819912  |
| P48037        | TNEQIHQLVAAYK                                          | 0.788249971        | 2              | 4.021069  |
| P48037        | TNYDIEHVIK                                             | 0.706437495        | 2              | 3.291972  |
| P48037        | TTGKPIEASIR                                            | 0.743313327        | 2              | 2.627642  |
| <b>P48500</b> | <b>TPIS Triosephosphate isomerase</b>                  | <b>1.15006292</b>  | <b>2.3E-05</b> | <b>12</b> |
| P48500        | CNVSEGVAQCTR                                           | 0.928755224        | 2              | 3.618832  |
| P48500        | DLGATWVVLGHSER                                         | 0.919770419        | 2              | 3.137172  |
| P48500        | ELASQPDVDGFLVGGASLKPEFVDIINAK                          | 1.014905044        | 4              | 6.585271  |
| P48500        | HIFGESDELIGQK                                          | 1.077050818        | 2              | 4.071792  |
| P48500        | IYGGSVTGATCK                                           | 1.009404244        | 2              | 3.885525  |
| P48500        | LPADTEVVCAPPTAYIDFAR                                   | 5.047593397        | 2              | 5.215746  |
| P48500        | RHIFGESDELIGQK                                         | 0.998556938        | 2              | 3.306357  |

|               |                                                           |                    |                |           |
|---------------|-----------------------------------------------------------|--------------------|----------------|-----------|
| P48500        | TATPQQAQEVHEK                                             | 1.025617208        | 2              | 3.74413   |
| P48500        | VNHALSEGLGVIACIGEK                                        | 1.081929518        | 2              | 5.461014  |
| P48500        | VTNGAFTGEISPGMIK                                          | 1.038595235        | 2              | 4.798406  |
| P48500        | VTNGAFTGEISPGMIK+Oxidation(13)                            | 0.792453771        | 2              | 3.605269  |
| P48500        | VVLAYEPVWAIGTGK                                           | 1.029304013        | 2              | 3.815034  |
| <b>P48508</b> | <b>GSH0 Glutamate__cysteine ligase regulatory subunit</b> | <b>0.675051156</b> | <b>9.9E-20</b> | <b>5</b>  |
| P48508        | ASTLHLQTGNLLNWGR                                          | 0.850783094        | 3              | 4.032835  |
| P48508        | EFPDVLECTMSHAVEK                                          | 0.629572893        | 2              | 3.144341  |
| P48508        | INPDEREEMK+Oxidation(8)                                   | 0.019488896        | 2              | 2.325667  |
| P48508        | QFDIQLLTHNDPK                                             | 0.80915358         | 2              | 3.050974  |
| P48508        | TLNEWSSQISPDLVR                                           | 0.673444009        | 2              | 5.12403   |
| <b>P48675</b> | <b>DESM Desmin</b>                                        | <b>0.551993108</b> | <b>0.01376</b> | <b>2</b>  |
| P48675        | TSGGAGGLGSLR                                              | 0.553288703        | 2              | 2.414954  |
| P48675        | VSDLTQAANK                                                | 0.537162658        | 2              | 2.921501  |
| <b>P48679</b> | <b>LMNA Prelamin_A/C</b>                                  | <b>0.660164712</b> | <b>9.9E-20</b> | <b>16</b> |
| P48679        | AASGGAQVGGSSISSGASSVTVTR                                  | 0.924629416        | 2              | 3.671845  |
| P48679        | AA YEAE LGDAR                                             | 1.200634887        | 2              | 2.624554  |
| P48679        | AQHEDQVEQYKK                                              | 0.986162884        | 2              | 3.912194  |
| P48679        | GSHCSSGDPAEYNLR                                           | 0.994058098        | 2              | 4.053654  |
| P48679        | IDSLSAQLSLQK                                              | 0.65749394         | 2              | 3.087513  |
| P48679        | ITESEEVVSR                                                | 0.772039075        | 2              | 3.15237   |
| P48679        | LKDLEALLNSK                                               | 0.906990535        | 2              | 2.796626  |
| P48679        | LQEKEDLQELNDR                                             | 0.791705542        | 2              | 4.151368  |
| P48679        | MQQQLDEYQELLDIK                                           | 1.015246799        | 2              | 4.5597    |
| P48679        | MQQQLDEYQELLDIK+Oxidation(0)                              | 0.898293571        | 2              | 4.325635  |
| P48679        | NSNLVGAAHEELQQSR                                          | 0.953498819        | 2              | 3.740095  |
| P48679        | SGAQASSTPLSPTR                                            | 0.71144503         | 2              | 3.02487   |
| P48679        | SVGGSGGSGFDNLVTR                                          | 0.890335713        | 2              | 3.541551  |
| P48679        | TALINATGEEVAMR                                            | 0.896040402        | 2              | 3.193204  |
| P48679        | TLEGELHDLR                                                | 0.891429769        | 2              | 2.547167  |
| P48679        | TVLCGTCGQPADK                                             | 0.801005091        | 2              | 3.277341  |
| <b>P48721</b> | <b>GRP75 Stress_70 protein_mitochondrial</b>              | <b>0.950447644</b> | <b>9.9E-20</b> | <b>26</b> |
| P48721        | AQFEGIVTDLIK                                              | 0.923737644        | 2              | 3.774691  |
| P48721        | ASNGDAWVEAHGK                                             | 1.072446955        | 2              | 3.859415  |
| P48721        | DAGQISGLNVLR                                              | 1.054708487        | 2              | 3.703007  |
| P48721        | EQQIVIQSSGGLSK                                            | 0.931401932        | 2              | 4.047725  |
| P48721        | ERVEAVNMAEGIIHDTETK                                       | 1.073837467        | 3              | 4.912172  |
| P48721        | ETAENYLGHATAK                                             | 0.865712365        | 2              | 3.363572  |
| P48721        | GAVVGIDLGTNSCVAVMEGK                                      | 0.909635818        | 2              | 4.480857  |
| P48721        | LLGQFTLIGIPPAPR                                           | 1.175283103        | 2              | 3.151826  |
| P48721        | MEEFKDQLPADECNK                                           | 1.100866418        | 2              | 4.160893  |
| P48721        | MEEFKDQLPADECNK+Oxidation(0)                              | 0.889733187        | 2              | 3.611344  |

|               |                                                                            |                    |                |           |
|---------------|----------------------------------------------------------------------------|--------------------|----------------|-----------|
| P48721        | MKETAENYLGHATAK                                                            | 0.983052691        | 3              | 3.635689  |
| P48721        | MKETAENYLGHATAK+Oxidation(0)                                               | 1.053179017        | 2              | 3.818745  |
| P48721        | NAVITVPAYFNDSQR                                                            | 0.990121565        | 2              | 3.474062  |
| P48721        | QAASSLQQASLK                                                               | 10.72971584        | 2              | 2.44278   |
| P48721        | QAVTNPNTFYATK                                                              | 2.338679879        | 2              | 3.574663  |
| P48721        | RYDDPEVQK                                                                  | 0.904907264        | 2              | 2.519009  |
| P48721        | RYDDPEVQKDTK                                                               | 1.270379103        | 2              | 3.761296  |
| P48721        | SDIGEVILVGGMTR                                                             | 0.901822493        | 2              | 3.92496   |
| P48721        | SQVFSTAADGQTQVEIK                                                          | 1.587126825        | 2              | 4.809871  |
| P48721        | STNGDFTLGGEDFDQALLR                                                        | 1.006688213        | 2              | 5.63714   |
| P48721        | TTPSVVAFTPDGER                                                             | 0.966753606        | 2              | 3.780604  |
| P48721        | VEAVNMAEGIIHDTETK                                                          | 0.943017997        | 2              | 4.539736  |
| P48721        | VINEPTAAALAYGLDK                                                           | 1.115910548        | 2              | 3.396526  |
| P48721        | VLENAEGAR                                                                  | 0.878514525        | 2              | 3.029504  |
| P48721        | VQQTQVQDLFGR                                                               | 0.964284735        | 2              | 3.855745  |
| P48721        | YDDPEVQKDTK                                                                | 0.809583365        | 2              | 2.823376  |
| <b>P49134</b> | <b>ITB1 Integrin beta_1</b>                                                | <b>0.858338878</b> | <b>1.2E-12</b> | <b>4</b>  |
| P49134        | CNCQSHGIPASPK                                                              | 0.712699501        | 2              | 3.541617  |
| P49134        | GEFFNELVGQQR                                                               | 0.869733435        | 2              | 2.876316  |
| P49134        | RITSDFRIGFGSFVEK                                                           | 1.221584243        | 2              | 2.436207  |
| P49134        | SAVTTVVNPK                                                                 | 0.869529879        | 2              | 2.533628  |
| <b>P49242</b> | <b>RS3A 40S ribosomal protein S3a</b>                                      | <b>0.832333817</b> | <b>4.4E-07</b> | <b>8</b>  |
| P49242        | ACQSIYPLHDVFR                                                              | 1.259005752        | 2              | 3.648771  |
| P49242        | ADGYEPPVQESV                                                               | 1.300226663        | 1              | 1.927423  |
| P49242        | LITEDVQGK                                                                  | 1.087390759        | 2              | 2.713486  |
| P49242        | LMELHGEGGSSGK                                                              | 0.934785714        | 2              | 3.472215  |
| P49242        | LMELHGEGGSSGK+Oxidation(1)                                                 | 1.138714622        | 2              | 3.344761  |
| P49242        | NCLTNFHGMDLTR                                                              | 1.300759388        | 2              | 3.24013   |
| P49242        | TTDGYLLR                                                                   | 1.057048012        | 2              | 2.678319  |
| P49242        | VFEVSLADLQNDVAFR                                                           | 1.142534056        | 2              | 4.102216  |
| <b>P49432</b> | <b>ODPB Pyruvate dehydrogenase E1 component subunit beta_mitochondrial</b> | <b>0.973854603</b> | <b>0.31724</b> | <b>5</b>  |
| P49432        | ILEDNSIPQVK                                                                | 1.01421684         | 2              | 3.548146  |
| P49432        | IMEGPAFNFLDAPAVR                                                           | 0.999968642        | 2              | 4.309427  |
| P49432        | IMEGPAFNFLDAPAVR+Oxidation(1)                                              | 0.843553084        | 2              | 3.159256  |
| P49432        | TIRPMDIEAIEASVMK                                                           | 1.250410692        | 3              | 4.084547  |
| P49432        | VLLGEEVAQYDGAYK                                                            | 1.02510506         | 2              | 3.581576  |
| <b>P49889</b> | <b>ST1E3 Estrogen sulfotransferase_ isoform 3</b>                          | <b>0.735161929</b> | <b>9.9E-20</b> | <b>12</b> |
| P49889        | CKEDALFNR                                                                  | 0.632797969        | 2              | 2.675025  |
| P49889        | FEEHYQQQMK                                                                 | 0.503427964        | 2              | 2.640038  |
| P49889        | FMEGQVPYGSWYDHSV                                                           | 1.027149441        | 2              | 3.460742  |
| P49889        | IIQHTSFQEMK                                                                | 0.759507896        | 2              | 2.770547  |
| P49889        | LIEFLER                                                                    | 0.574537056        | 2              | 2.500275  |

|               |                                             |                    |                |           |
|---------------|---------------------------------------------|--------------------|----------------|-----------|
| P49889        | LIEFLERDPSAELVDR                            | 0.591985192        | 3              | 5.067487  |
| P49889        | NEDLINGIK                                   | 0.695083916        | 2              | 3.060859  |
| P49889        | NNPCTNYSMLPETMIDLK                          | 0.802122373        | 2              | 5.616404  |
| P49889        | NNPCTNYSMLPETMIDLK+Oxidation(13)            | 0.697129441        | 2              | 3.532263  |
| P49889        | NNPCTNYSMLPETMIDLK+Oxidation(8)             | 0.697743058        | 2              | 4.641748  |
| P49889        | SFSEFVEK                                    | 0.706390693        | 2              | 2.343769  |
| P49889        | SGSTWISEIVDMIYK                             | 0.789420777        | 3              | 4.737951  |
| <b>P50137</b> | <b>TKT Transketolase</b>                    | <b>1.084581008</b> | <b>9.9E-20</b> | <b>20</b> |
| P50137        | AVELAANTK                                   | 0.966966288        | 1              | 1.990582  |
| P50137        | GHAAPILYAVVWAEAGFLPEAELLNLR                 | 1.085112277        | 3              | 3.386425  |
| P50137        | GITGIEDK                                    | 0.86127832         | 1              | 2.502842  |
| P50137        | IIALDGDTK                                   | 0.948543879        | 2              | 2.749874  |
| P50137        | ILATPPQEDAPSVDIANIR                         | 0.965959688        | 2              | 4.655358  |
| P50137        | ISSDLDGHPVPK                                | 0.964964647        | 2              | 3.208534  |
| P50137        | KISSDLDGHPVPK                               | 0.927801382        | 2              | 4.507701  |
| P50137        | LAVSQVPRSGKPAELLK                           | 1.760726701        | 2              | 2.687505  |
| P50137        | LDNLVAIFDINR                                | 0.887787268        | 2              | 3.643674  |
| P50137        | LGQSDPAPLQHQVDVYQK                          | 1.072175771        | 2              | 4.093204  |
| P50137        | MFGIDKDAIVQAVK                              | 1.110016161        | 2              | 3.792723  |
| P50137        | MFGIDKDAIVQAVK+Oxidation(0)                 | 0.767073645        | 2              | 4.540049  |
| P50137        | NMAEQIIQEIYSQVQSK                           | 1.013417427        | 3              | 6.019146  |
| P50137        | NMAEQIIQEIYSQVQSK+Oxidation(1)              | 1.136020485        | 3              | 3.808042  |
| P50137        | SKDDQVTVIGAGVTLHEALAAEMLK                   | 0.920109726        | 4              | 5.049379  |
| P50137        | SVPMSTVFYPSDGVATEK                          | 1.016707527        | 2              | 4.517802  |
| P50137        | SVPMSTVFYPSDGVATEK+Oxidation(3)             | 0.754373691        | 2              | 3.420105  |
| P50137        | TSRPENAIISNNEDFQVGQAK                       | 1.265549875        | 3              | 5.640935  |
| P50137        | VLDPFTIKPLDK                                | 0.927732851        | 2              | 3.202904  |
| P50137        | VLDPFTIKPLDKK                               | 1.010452281        | 2              | 2.84944   |
| <b>P50169</b> | <b>RDH3 Retinol dehydrogenase 3</b>         | <b>0.966551174</b> | <b>9.9E-20</b> | <b>9</b>  |
| P50169        | AMESLVNTCSGDLSLVTDCMEHALTSCHPR              | 0.892975454        | 3              | 5.588794  |
| P50169        | AMESLVNTCSGDLSLVTDCMEHALTSCHPR+Oxidation(1) | 0.771826991        | 4              | 5.061027  |
| P50169        | FQDSYMK                                     | 0.865810193        | 1              | 1.943887  |
| P50169        | KLWDQTTEEVK                                 | 0.889943947        | 2              | 3.06398   |
| P50169        | KLWDQTTEEVKEIYGEK                           | 0.836402792        | 3              | 4.003571  |
| P50169        | LWDQTTEEVK                                  | 0.760812927        | 2              | 3.160588  |
| P50169        | LWDQTTEEVKEIYGEK                            | 0.836001862        | 2              | 4.882746  |
| P50169        | MSLVGGGYCISK                                | 1.042511173        | 2              | 3.437164  |
| P50169        | MSLVGGGYCISK+Oxidation(0)                   | 0.745883746        | 2              | 2.630288  |
| <b>P50237</b> | <b>ST1C1 Sulfotransferase 1C1</b>           | <b>0.699999504</b> | <b>9.9E-20</b> | <b>6</b>  |
| P50237        | AGTTWTQEIVDMIQNDGDVQK                       | 0.729592135        | 2              | 5.319674  |
| P50237        | DISEEVLNK                                   | 0.65117787         | 1              | 2.493851  |
| P50237        | DLHLGEQDLQPETR                              | 0.608295574        | 2              | 4.453965  |

|               |                                                        |                    |                |           |
|---------------|--------------------------------------------------------|--------------------|----------------|-----------|
| P50237        | MLPDPGTLGEYIEQFK                                       | 0.68940165         | 3              | 4.957333  |
| P50237        | MLPDPGTLGEYIEQFK+Oxidation(0)                          | 0.675165341        | 2              | 3.01235   |
| P50237        | VLWGSWYDHVK                                            | 0.721543529        | 2              | 2.684813  |
| <b>P50398</b> | <b>GDIA Rab GDP dissociation inhibitor alpha</b>       | <b>0.901200683</b> | <b>4E-14</b>   | <b>7</b>  |
| P50398        | FDLGQDVIDFTGHALALYR                                    | 1.040661301        | 3              | 4.637975  |
| P50398        | FQLLEGPPEMGR                                           | 1.087828175        | 2              | 3.092113  |
| P50398        | KQNDVFGAEDQ                                            | 0.894549696        | 2              | 2.667857  |
| P50398        | NPYYGGESSITPLEELYK                                     | 1.299934409        | 2              | 5.317774  |
| P50398        | QLICDPSYIPDR                                           | 0.816315691        | 2              | 3.116746  |
| P50398        | TDDYLDQPCLETINR                                        | 0.945199748        | 2              | 4.476079  |
| P50398        | TFEGVDPQTSMR                                           | 0.91060377         | 2              | 2.468359  |
| <b>P50399</b> | <b>GDIB Rab GDP dissociation inhibitor beta</b>        | <b>1.222190973</b> | <b>6.9E-11</b> | <b>6</b>  |
| P50399        | AYDATTHFETTCDDIKDIYK                                   | 1.149043932        | 3              | 5.264831  |
| P50399        | EIRPALELLEPIEQK                                        | 1.066003136        | 3              | 3.684567  |
| P50399        | FDLGQDVIDFTGHSLALYR                                    | 1.193723133        | 3              | 4.212861  |
| P50399        | FVSISDLFVPK                                            | 1.37998643         | 2              | 3.578496  |
| P50399        | NTNDANSCQIIPQNVNR                                      | 1.034354625        | 2              | 4.148934  |
| P50399        | TDDYLDQPCCTINR                                         | 1.265889692        | 2              | 4.829153  |
| <b>P50431</b> | <b>GLYC Serine hydroxymethyltransferase_ cytosolic</b> | <b>1.104657806</b> | <b>6.5E-05</b> | <b>5</b>  |
| P50431        | ALSDALTELYK                                            | 1.097811769        | 2              | 3.727576  |
| P50431        | AVLEALGSLNNK                                           | 1.132155745        | 2              | 3.978404  |
| P50431        | GLLEEDFQK                                              | 1.064627015        | 1              | 2.024469  |
| P50431        | NLDYAR                                                 | 1.55118253         | 1              | 1.91591   |
| P50431        | VLEACSIACNK                                            | 1.0523858          | 2              | 3.222268  |
| <b>P50475</b> | <b>SYAC Alanyl_tRNA synthetase_ cytoplasmic</b>        | <b>0.908653741</b> | <b>9.9E-20</b> | <b>14</b> |
| P50475        | ASEWVQVSGLMDDGK                                        | 0.927294137        | 2              | 4.025017  |
| P50475        | AVFDEYTPDPVR                                           | 0.956506892        | 2              | 3.449162  |
| P50475        | DIINEEVQFLK                                            | 0.875184263        | 2              | 3.231427  |
| P50475        | ESDGVLKPLPK                                            | 0.614670083        | 2              | 2.490954  |
| P50475        | GLEATDDSPK                                             | 0.905960039        | 1              | 2.022873  |
| P50475        | ITCLCQVPQNAANR                                         | 0.946132314        | 2              | 4.364578  |
| P50475        | IVAVTGAEAQK                                            | 0.85300023         | 2              | 2.599305  |
| P50475        | NVGCLQEALQLATSFAQLR                                    | 0.818390051        | 2              | 3.89468   |
| P50475        | RIVAVTGAEAQK                                           | 0.82400778         | 2              | 3.120742  |
| P50475        | SVLGDADQK                                              | 0.662066131        | 1              | 2.14714   |
| P50475        | TEEIVNGMIEAAKPVYTLDCPLAAAK                             | 0.753460386        | 3              | 3.504322  |
| P50475        | TITVALADGGRPDNTGR                                      | 0.997771832        | 2              | 2.962601  |
| P50475        | VDDSSSEDKTEFTVK                                        | 1.771171658        | 2              | 3.317425  |
| P50475        | VGAEDTDGIDMAYR                                         | 0.993521687        | 2              | 3.362617  |
| <b>P50503</b> | <b>F10A1 Hsc70_interacting protein</b>                 | <b>1.493834548</b> | <b>9.9E-20</b> | <b>4</b>  |
| P50503        | AIDLFTDAIK                                             | 1.120243174        | 1              | 2.155436  |
| P50503        | AIEINPDSAQPYK                                          | 1.494410724        | 2              | 2.806139  |

|               |                                                            |                    |                |           |
|---------------|------------------------------------------------------------|--------------------|----------------|-----------|
| P50503        | GAAIDALNDGELQK                                             | 1.347012267        | 2              | 3.756278  |
| P50503        | KGAAIDALNDGELQK                                            | 1.475634816        | 2              | 4.472068  |
| <b>P50554</b> | <b>GABT 4_aminobutyrate aminotransferase_mitochondrial</b> | <b>0.984133606</b> | <b>0.47849</b> | <b>9</b>  |
| P50554        | GNYLVDVDGNR                                                | 1.074790874        | 1              | 2.123013  |
| P50554        | GTFCSDTPDEAIR                                              | 0.808649204        | 2              | 3.424258  |
| P50554        | HGCAFLVDEVQTGGGCTGK                                        | 1.613922125        | 2              | 4.551401  |
| P50554        | IDIPSFWDWPIAPFPR                                           | 0.979599693        | 2              | 3.735508  |
| P50554        | NLLLAEVINIIK                                               | 0.97145096         | 3              | 4.543061  |
| P50554        | REDLLNVAHAGK                                               | 0.888044183        | 2              | 2.459017  |
| P50554        | TLLTGLLDLQAQYPQFVSR                                        | 1.106367528        | 3              | 4.103565  |
| P50554        | TVAGIIVEPIQSEGGDNHASDDFFR                                  | 1.234934686        | 2              | 3.763388  |
| P50554        | VDFEFDYDGPLMK                                              | 0.147244174        | 2              | 2.472927  |
| <b>P50580</b> | <b>PA2G4 Proliferation_associated protein 2G4</b>          | <b>1.017208076</b> | <b>0.81971</b> | <b>2</b>  |
| P50580        | HELLQPFNVLYEK                                              | 1.121824015        | 2              | 2.709095  |
| P50580        | TIQNPTDQQK                                                 | 1.009361247        | 2              | 3.093803  |
| <b>P50878</b> | <b>RL4 60S ribosomal protein L4</b>                        | <b>1.196807681</b> | <b>0.02304</b> | <b>7</b>  |
| P50878        | KLDELYGTWR                                                 | 1.061758506        | 2              | 2.624     |
| P50878        | KLEAAAAALAAK                                               | 1.079455711        | 2              | 3.140327  |
| P50878        | LDELYGTWR                                                  | 0.975606829        | 2              | 2.63756   |
| P50878        | LEAAAAALAAK                                                | 1.083420944        | 2              | 3.056212  |
| P50878        | NIPGITLLNVSK                                               | 1.126997649        | 1              | 2.559685  |
| P50878        | RGPCIYNEDNGIIK                                             | 1.285191886        | 2              | 3.177149  |
| P50878        | SGQGAFGNMCR                                                | 0.914374487        | 2              | 2.871396  |
| <b>P51635</b> | <b>AK1A1 Alcohol dehydrogenase [NADP_]</b>                 | <b>0.866058234</b> | <b>9.9E-20</b> | <b>7</b>  |
| P51635        | ALEALVAK                                                   | 0.930568083        | 2              | 2.599603  |
| P51635        | GLEVTAYSPLGSSDR                                            | 0.881840097        | 2              | 3.991508  |
| P51635        | HHPEDVEPAVR                                                | 0.819947128        | 3              | 3.747267  |
| P51635        | HIDCASVYGNETEIGEALK                                        | 1.063442384        | 2              | 5.983953  |
| P51635        | HIDCASVYGNETEIGEALKESVGAGK                                 | 0.55317655         | 3              | 5.31116   |
| P51635        | HPDEPVLLEEPVVLALAEK                                        | 1.419316889        | 3              | 5.813315  |
| P51635        | YIVPMITVDGK                                                | 0.852908909        | 2              | 2.303903  |
| <b>P51647</b> | <b>AL1A1 Retinal dehydrogenase 1</b>                       | <b>0.684159042</b> | <b>9.9E-20</b> | <b>14</b> |
| P51647        | ANNTTYGLAAGVFTK                                            | 0.75171431         | 2              | 4.584049  |
| P51647        | EAGFPPGVVNVPGYGPTAGAAISSHMDVDK                             | 0.663613989        | 3              | 3.976219  |
| P51647        | ELGEHGLYEYTELK                                             | 0.665277027        | 2              | 3.464188  |
| P51647        | FPVLNPATEEVICHVEEGDKADVDK                                  | 0.567921631        | 4              | 5.153451  |
| P51647        | IFINNEWHDSVSGK                                             | 0.716338231        | 2              | 4.259348  |
| P51647        | IFVEESVYDEFVR                                              | 0.679788625        | 2              | 4.160798  |
| P51647        | IGPALSCGNTVVVKAPEQTPLTALHMASLIK                            | 0.721303713        | 3              | 4.807703  |
| P51647        | IHQQTIPSDGDIFFTR                                           | 0.806843865        | 2              | 3.832752  |
| P51647        | KFPVLNPATEEVICHVEEGDKADVDK                                 | 0.646699853        | 3              | 3.639653  |
| P51647        | LLLATIEAINGGK                                              | 1.757718054        | 2              | 3.321141  |

|               |                                                                |                    |                |          |
|---------------|----------------------------------------------------------------|--------------------|----------------|----------|
| P51647        | VFANAYLSDLGGSIK                                                | 0.714629862        | 2              | 4.133256 |
| P51647        | YCAGWADK                                                       | 0.566096104        | 1              | 1.959455 |
| P51647        | YVLGNPLTQGINQGPPQIDK                                           | 0.56555094         | 2              | 4.880556 |
| P51647        | YVLGNPLTQGINQGPPQIDKEQHDK                                      | 0.68300981         | 2              | 3.724341 |
| <b>P51650</b> | <b>SSDH Succinate semialdehyde dehydrogenase mitochondrial</b> | <b>0.950053078</b> | <b>9.9E-20</b> | <b>9</b> |
| P51650        | EVGEVLCTDPLVSK                                                 | 0.773386434        | 2              | 3.826193 |
| P51650        | GIHDSFVTK                                                      | 0.748637847        | 1              | 1.928905 |
| P51650        | HQSGGNFFEPTLLSNVTR                                             | 1.234497211        | 2              | 3.628136 |
| P51650        | IITAESGKPLK                                                    | 0.839989561        | 2              | 2.456952 |
| P51650        | LGTVADCGVPEAR                                                  | 0.73707893         | 2              | 3.294676 |
| P51650        | VGNGFEETTQGPLINEK                                              | 0.826447628        | 2              | 4.743298 |
| P51650        | VYGDIIYTSK                                                     | 0.864520638        | 2              | 2.545814 |
| P51650        | WLPTPATFPVYDPASGAK                                             | 0.730631597        | 2              | 2.788122 |
| P51650        | YGIDEYLEVK                                                     | 0.79775655         | 2              | 2.944673 |
| <b>P51869</b> | <b>CP4F4 Cytochrome P450 4F4</b>                               | <b>1.104489685</b> | <b>0.56427</b> | <b>4</b> |
| P51869        | ALPSQHEDDILK                                                   | 1.044656399        | 2              | 2.652307 |
| P51869        | NISLMTLDSLQK                                                   | 0.917027076        | 2              | 2.902648 |
| P51869        | TLDFIDVLLTK                                                    | 1.283910474        | 2              | 2.870393 |
| P51869        | WQDLASGGSAR                                                    | 1.065491601        | 2              | 2.551827 |
| <b>P51886</b> | <b>LUM Lumican</b>                                             | <b>0.666805086</b> | <b>3.2E-08</b> | <b>2</b> |
| P51886        | NNQIDHIDEK                                                     | 0.66618448         | 2              | 3.321613 |
| P51886        | SLQDLQLANNK                                                    | 0.676715244        | 2              | 3.090912 |
| <b>P52296</b> | <b>IMB1 Importin subunit beta_1</b>                            | <b>0.886714969</b> | <b>0.14399</b> | <b>4</b> |
| P52296        | AAVENLPTFLVELSR                                                | 0.889717374        | 2              | 2.59822  |
| P52296        | SNEILTAIQGMR                                                   | 0.881671381        | 2              | 2.729624 |
| P52296        | TVSPDRLELEAAQK                                                 | 0.885779434        | 2              | 2.528145 |
| P52296        | VLANPGNSQVAR                                                   | 0.926544709        | 2              | 3.188617 |
| <b>P52303</b> | <b>AP1B1 AP_1 complex subunit beta_1</b>                       | <b>1.103674967</b> | <b>0.49035</b> | <b>3</b> |
| P52303        | NINLIVQK                                                       | 1.092727863        | 1              | 2.214321 |
| P52303        | NSFGLAAPLQVHAPLSPNQTVESLPLNTVGSVMK                             | 0.961857036        | 3              | 4.008987 |
| P52303        | YNDPIYVK                                                       | 1.13461766         | 2              | 2.489667 |
| <b>P52555</b> | <b>ERP29 Endoplasmic reticulum resident protein 29</b>         | <b>0.896979277</b> | <b>0.08951</b> | <b>3</b> |
| P52555        | ILDQGEDFPASELAR                                                | 0.890355099        | 2              | 4.530788 |
| P52555        | QGQDGLSGVK                                                     | 0.953199715        | 2              | 2.463145 |
| P52555        | SLNILTAFR                                                      | 0.94248848         | 2              | 2.767022 |
| <b>P52759</b> | <b>UK114 Ribonuclease UK114</b>                                | <b>1.384794867</b> | <b>9.9E-20</b> | <b>7</b> |
| P52759        | AAGCDFTNVVK                                                    | 4.471955866        | 2              | 2.816199 |
| P52759        | APAAIGAYSQAVLVDR                                               | 1.599718418        | 2              | 3.940127 |
| P52759        | IEIEAIAVQGPFTTAGL                                              | 1.414215956        | 1              | 3.480948 |
| P52759        | NLGEILK                                                        | 1.099632852        | 1              | 2.2241   |
| P52759        | TIYVSGQIGMDPSSGQLVPGGVAEEAK                                    | 1.26026377         | 2              | 3.924372 |
| P52759        | TTVLLADINDFGTVNEIYK                                            | 1.337426469        | 2              | 5.191224 |



|               |                                                            |                    |                |           |
|---------------|------------------------------------------------------------|--------------------|----------------|-----------|
| P52759        | TYFQGNLPAR                                                 | 1.066596841        | 2              | 2.975194  |
| <b>P52845</b> | <b>ST1E2 Estrogen sulfotransferase_ isoform 2</b>          | <b>1.033681117</b> | <b>0.0017</b>  | <b>2</b>  |
| P52845        | CKEDAIFNR                                                  | 0.632797969        | 2              | 2.675025  |
| P52845        | SGSTWIGEIVDMIYK                                            | 1.035994141        | 2              | 4.485991  |
| <b>P52847</b> | <b>ST1B1 Sulfotransferase family cytosolic 1B member 1</b> | <b>1.011465304</b> | <b>2E-05</b>   | <b>6</b>  |
| P52847        | DNPLVNYTHLPTIIMDHKS                                        | 1.60912746         | 2              | 4.162657  |
| P52847        | FLAGNVAYGSWFDHVK                                           | 1.145558766        | 2              | 2.590621  |
| P52847        | IEEFQSRPCDIVIPTYK                                          | 0.976668011        | 3              | 4.40213   |
| P52847        | NYFTMTQSEK                                                 | 0.984094413        | 1              | 2.682984  |
| P52847        | THLPIDLLPK                                                 | 1.052014685        | 3              | 3.403651  |
| P52847        | TLDEHTLER                                                  | 0.986999752        | 2              | 2.978592  |
| <b>P52873</b> | <b>PYC Pyruvate carboxylase_ mitochondrial</b>             | <b>1.251078217</b> | <b>9.9E-20</b> | <b>32</b> |
| P52873        | ADEAYLIGR                                                  | 1.248009687        | 2              | 2.84      |
| P52873        | ADFAQACQDAGVR                                              | 1.094696996        | 2              | 4.147135  |
| P52873        | AEAEAEAEELSFPFR                                            | 1.099521881        | 2              | 4.389189  |
| P52873        | AGTHILCIK                                                  | 1.597404777        | 2              | 2.666861  |
| P52873        | ALAVSDLNR                                                  | 1.074722202        | 2              | 2.747462  |
| P52873        | AYSEALAAFNGALFVEK                                          | 1.310166015        | 2              | 4.018583  |
| P52873        | AYVEANQMLGLDIK                                             | 1.142336924        | 2              | 4.586826  |
| P52873        | DAHQSSLATR                                                 | 1.095684288        | 1              | 3.140144  |
| P52873        | DFTATFGPLDSLNTNR                                           | 0.937447218        | 2              | 4.263984  |
| P52873        | DMAGLLKPAACTMLVSSLR                                        | 1.283638943        | 2              | 2.965591  |
| P52873        | ELIPNIPFQMLLR                                              | 2.150124761        | 2              | 2.342536  |
| P52873        | ENGVDVHVPYGFSLER                                           | 1.176130573        | 2              | 2.864562  |
| P52873        | FLYECPPWR                                                  | 1.353423507        | 1              | 2.14017   |
| P52873        | GANAVGYTNPYDNVVFVK                                         | 1.787215994        | 2              | 4.378192  |
| P52873        | GTPLDTEVPLER                                               | 1.053417402        | 2              | 3.598784  |
| P52873        | HGEEVTPEDVLSAAMYPDVFAQFK                                   | 1.244737737        | 2              | 5.651723  |
| P52873        | HIEVQILGDQYGNILHLYER                                       | 1.327352555        | 3              | 5.405817  |
| P52873        | HYFIEVNSR                                                  | 1.284600275        | 2              | 2.721821  |
| P52873        | IAEEFEVELER                                                | 1.028981388        | 2              | 3.249185  |
| P52873        | IEGRPGASLPLNLK                                             | 1.104029228        | 2              | 3.601726  |
| P52873        | INGCAIQCR                                                  | 1.214257819        | 2              | 2.436433  |
| P52873        | IVGDLAQFMVQNGLSR                                           | 1.235915775        | 2              | 4.012462  |
| P52873        | LDNASAFQGAVISPHYDSSLVK                                     | 1.17298164         | 3              | 5.610799  |
| P52873        | LQVEHTVTEEITDVDLVHAQIHVSEGR                                | 1.125419535        | 4              | 4.612874  |
| P52873        | QVGYENAGTVEFLVVK                                           | 1.276998922        | 2              | 3.76786   |
| P52873        | SVVEFLQGYIGIPHGPFPEFR                                      | 1.627454291        | 2              | 4.178076  |
| P52873        | TVAVYSEQDTGQMHR                                            | 1.110662948        | 2              | 4.050876  |
| P52873        | VFDYSEYWEGAR                                               | 1.109259713        | 2              | 4.57888   |
| P52873        | VSPSPVDPIPVVPIGPPAGFR                                      | 1.020605343        | 2              | 4.328311  |
| P52873        | VVEIAPATHLDPQLR                                            | 1.217549423        | 2              | 4.871254  |

|               |                                                                                                                       |                    |                |           |
|---------------|-----------------------------------------------------------------------------------------------------------------------|--------------------|----------------|-----------|
| P52873        | VVHSYEELEENYTR                                                                                                        | 1.238082994        | 2              | 5.107137  |
| P52873        | YSLEYMGLAEELVR                                                                                                        | 1.315436021        | 3              | 4.436421  |
| <b>P52944</b> | <b>PDL1 PDZ and LIM domain protein 1</b>                                                                              | <b>0.808505674</b> | <b>7.8E-06</b> | <b>4</b>  |
| P52944        | GHFFVGDQIYCEK                                                                                                         | 0.743524907        | 2              | 3.484726  |
| P52944        | QSTSFLVLQEILES DGK                                                                                                    | 1.03732223         | 2              | 2.357588  |
| P52944        | TSASGEEANSRPSAQPSPGGLIIDK                                                                                             | 0.719582995        | 3              | 4.285783  |
| P52944        | VTPPEGYDVVTVFPK                                                                                                       | 0.741523488        | 2              | 2.732184  |
| <b>P53395</b> | <b>ODB2 Lipoamide acyltransferase component of branched_chain alpha_keto acid dehydrogenase complex_mitochondrial</b> | <b>1.003757511</b> | <b>0.42079</b> | <b>3</b>  |
| P53395        | LSDIGEGIR                                                                                                             | 1.170181591        | 2              | 2.359381  |
| P53395        | LSEVVGS GK                                                                                                            | 1.707790108        | 1              | 2.035837  |
| P53395        | SYLENPAFMLLDLK                                                                                                        | 1.096981732        | 2              | 4.02904   |
| <b>P53987</b> | <b>MOT1 Monocarboxylate transporter 1</b>                                                                             | <b>1.213000573</b> | <b>2.2E-11</b> | <b>4</b>  |
| P53987        | DGKEDETSTDVDEKPK                                                                                                      | 1.412946278        | 3              | 5.227687  |
| P53987        | DGKEDETSTDVDEKPKK                                                                                                     | 1.125912012        | 3              | 3.695066  |
| P53987        | ETQSPAPLQNSSGDPAAEEESPV                                                                                               | 1.090018988        | 2              | 4.738933  |
| P53987        | SDANTDLIGGSPK                                                                                                         | 1.313335881        | 2              | 3.755585  |
| <b>P54319</b> | <b>PLAP Phospholipase A_2_activating protein</b>                                                                      | <b>0.947881948</b> | <b>0.83996</b> | <b>4</b>  |
| P54319        | GQTLGLGNTSFSDPFTGGGR                                                                                                  | 0.90343702         | 2              | 3.289221  |
| P54319        | IGDVVGS SGANQQTSGK                                                                                                    | 0.958353841        | 2              | 4.176491  |
| P54319        | TGDLGDINAEQLPGR                                                                                                       | 0.696831282        | 2              | 3.798121  |
| P54319        | YVPGTSGPSNTVQTADPFTGAGR                                                                                               | 0.964265101        | 2              | 3.300346  |
| <b>P54921</b> | <b>SNAA Alpha_soluble NSF attachment protein</b>                                                                      | <b>0.987990022</b> | <b>0.38847</b> | <b>5</b>  |
| P54921        | AIAHYEQSADYYKGEESNSSANK                                                                                               | 1.034923304        | 3              | 3.738202  |
| P54921        | AIDIYEQVGT SAMDSPLLK                                                                                                  | 1.044617972        | 2              | 3.402037  |
| P54921        | HDAATCFVDAGNAFK                                                                                                       | 0.927381009        | 2              | 2.519862  |
| P54921        | NSQFFSGLFGGSSK                                                                                                        | 1.009893893        | 2              | 3.248611  |
| P54921        | YEELFPAFSDSR                                                                                                          | 0.921961244        | 2              | 2.617752  |
| <b>P55006</b> | <b>RDH7 Retinol dehydrogenase 7</b>                                                                                   | <b>0.813217577</b> | <b>9.9E-20</b> | <b>11</b> |
| P55006        | LETVILDVTK                                                                                                            | 0.845865874        | 2              | 2.95732   |
| P55006        | TESIVAATQWVK                                                                                                          | 0.759375113        | 2              | 3.960156  |
| P55006        | TNVTNMER                                                                                                              | 0.799694832        | 2              | 2.307278  |
| P55006        | TNVTNMER+Oxidation(5)                                                                                                 | 0.951975723        | 2              | 2.451325  |
| P55006        | TSDRLETVILDVTK                                                                                                        | 0.929012402        | 3              | 4.423671  |
| P55006        | VAIIPEGGFK                                                                                                            | 1.913887477        | 2              | 2.340947  |
| P55006        | VLAACLEK                                                                                                              | 0.999899516        | 2              | 2.795191  |
| P55006        | VVNIASTMGR                                                                                                            | 0.8128587          | 2              | 3.49625   |
| P55006        | VVNIASTMGR+Oxidation(7)                                                                                               | 0.76916688         | 2              | 2.670018  |
| P55006        | YGVEAFSDSLR                                                                                                           | 0.998198705        | 2              | 3.487123  |
| P55006        | YVFITGCD SGFGNLLAR                                                                                                    | 0.935663472        | 2              | 3.777071  |
| <b>P55051</b> | <b>FABP7 Fatty acid_binding protein_brain</b>                                                                         | <b>0.953529079</b> | <b>0.05521</b> | <b>2</b>  |
| P55051        | LTDSQNFDEYMK                                                                                                          | 0.547179722        | 2              | 4.029449  |

|               |                                                             |                    |                |           |
|---------------|-------------------------------------------------------------|--------------------|----------------|-----------|
| P55051        | QVGNVTKPTVIISQEGGK                                          | 0.79641804         | 3              | 3.866259  |
| <b>P55053</b> | <b>FABP5 Fatty acid binding protein_ epidermal</b>          | <b>1.181914097</b> | <b>2E-08</b>   | <b>4</b>  |
| P55053        | KTETVCTFTDGALVQHQQ                                          | 1.146636864        | 3              | 4.391692  |
| P55053        | LVESHGFEDYMK                                                | 1.087862567        | 2              | 2.831761  |
| P55053        | MGAMAKPCDIITLDGNNLTVK                                       | 1.05605074         | 3              | 3.339383  |
| P55053        | TETVCTFTDGALVQHQQ                                           | 1.259841679        | 2              | 4.515117  |
| <b>P55159</b> | <b>PON1 Serum paraoxonase/arylesterase 1</b>                | <b>0.909783916</b> | <b>9.9E-20</b> | <b>6</b>  |
| P55159        | GIEAGAEDLEILPNGLTFFSTGLK                                    | 1.625895127        | 3              | 5.337626  |
| P55159        | IFFYDSENPPEGSEVLR                                           | 0.72252364         | 2              | 5.41295   |
| P55159        | IQSILSEDPK                                                  | 0.72824268         | 2              | 3.127617  |
| P55159        | TITHELLPSINDIAAVGPESFYATNDHYFADPYLR                         | 1.073971179        | 3              | 4.074294  |
| P55159        | VVADGDFDFANGIGISLDGK                                        | 0.679285706        | 2              | 4.61414   |
| P55159        | YVYIAELLAHK                                                 | 1.060144052        | 2              | 2.950297  |
| <b>P55260</b> | <b>ANXA4 Annexin A4</b>                                     | <b>0.965428945</b> | <b>0.0005</b>  | <b>6</b>  |
| P55260        | AEIDMLDIPANFK                                               | 1.034169968        | 1              | 2.135097  |
| P55260        | GAGTDEGLIEILASR                                             | 1.020201061        | 2              | 3.608621  |
| P55260        | GLGTDDSTLIR                                                 | 0.845618066        | 2              | 2.897763  |
| P55260        | GLGTDEDAIIGVLACR                                            | 0.843096557        | 2              | 3.246096  |
| P55260        | KAMKGLGTDEDAIIGVLACR+Oxidation(2)                           | 0.719956622        | 2              | 2.443936  |
| P55260        | SETSGSFEDALLAIVK                                            | 0.741224525        | 2              | 2.771432  |
| <b>P55770</b> | <b>NH2L1 NHP2_like protein 1</b>                            | <b>0.859695357</b> | <b>1E-07</b>   | <b>2</b>  |
| P55770        | LLDLVQQSCNYK                                                | 0.822483158        | 2              | 3.002731  |
| P55770        | QQIQSIQQSIER                                                | 0.868093945        | 2              | 2.728797  |
| <b>P56399</b> | <b>UBP5 Ubiquitin carboxyl terminal hydrolase 5</b>         | <b>1.057400319</b> | <b>0.44216</b> | <b>3</b>  |
| P56399        | GTGLQPGEELPDIAPPLVTPDEPK                                    | 1.006548057        | 2              | 4.514318  |
| P56399        | IFQNAPTDPTQDFSTQVAK                                         | 1.062683597        | 2              | 3.631502  |
| P56399        | IGEWELIQESGVPLKPLFGPGYTGIR                                  | 1.109930462        | 3              | 4.091649  |
| <b>P56522</b> | <b>ADRO NADPH:adrenodoxin oxidoreductase_ mitochondrial</b> | <b>0.933541768</b> | <b>4.1E-05</b> | <b>4</b>  |
| P56522        | AVPTGDVEDLPCGLLLSSVGYK                                      | 1.480552526        | 2              | 4.13537   |
| P56522        | NVINTFTQTAR                                                 | 1.142336814        | 2              | 2.527487  |
| P56522        | TATEKPGVEEAAR                                               | 0.860513619        | 2              | 3.124709  |
| P56522        | TDITEVALGVLR                                                | 0.862631261        | 2              | 3.461328  |
| <b>P56574</b> | <b>IDHP Isocitrate dehydrogenase [NADP]_ mitochondrial</b>  | <b>0.970876094</b> | <b>0.28102</b> | <b>10</b> |
| P56574        | ATDFVDR                                                     | 1.073344648        | 2              | 2.579669  |
| P56574        | CATITPDEAR                                                  | 1.145831711        | 2              | 2.333228  |
| P56574        | DQTNDQVTIDSALATQK                                           | 1.062157583        | 2              | 5.504167  |
| P56574        | GKLDGNQDLIR                                                 | 0.88421504         | 2              | 3.107996  |
| P56574        | LDGNQDLIR                                                   | 0.760496052        | 2              | 2.354269  |
| P56574        | LIDDMVAQVLK                                                 | 0.907781115        | 2              | 4.076313  |
| P56574        | LNEHFLNTTDFLDTIK                                            | 1.021549092        | 3              | 3.493211  |
| P56574        | NILGGTVFR                                                   | 0.88771622         | 2              | 2.503284  |
| P56574        | SSGGFVWACK                                                  | 0.908636693        | 2              | 2.524999  |

|               |                                                                |                    |                |           |
|---------------|----------------------------------------------------------------|--------------------|----------------|-----------|
| P56574        | TIEAEEAHGTVTR                                                  | 0.847074614        | 2              | 3.851521  |
| <b>P56593</b> | <b>CP2AC Cytochrome P450 2A12</b>                              | <b>0.987743373</b> | <b>0.13718</b> | <b>3</b>  |
| P56593        | MLQGTGAPIDPTIYLSK                                              | 1.020122688        | 2              | 3.941405  |
| P56593        | MLQGTGAPIDPTIYLSK+Oxidation(0)                                 | 0.961674638        | 2              | 3.070265  |
| P56593        | NRQPQYEDHMK                                                    | 0.510292272        | 3              | 3.414096  |
| <b>P56656</b> | <b>CP239 Cytochrome P450 2C39</b>                              | <b>0.624902786</b> | <b>9.9E-20</b> | <b>5</b>  |
| P56656        | EHQESLDVTNPR                                                   | 0.415292638        | 2              | 3.374147  |
| P56656        | IKEHQESLDVTNPR                                                 | 0.447152703        | 2              | 5.080953  |
| P56656        | NYLIPK                                                         | 1.258822163        | 1              | 1.984186  |
| P56656        | VCAGEGLAR                                                      | 2.052748365        | 2              | 2.395042  |
| P56656        | VQEEIDHVIGR                                                    | 0.882004527        | 2              | 2.704765  |
| <b>P57093</b> | <b>PAHX Phytanoyl_CoA dioxygenase_ peroxisomal</b>             | <b>0.924443923</b> | <b>0.00373</b> | <b>3</b>  |
| P57093        | AISCHYGSSDCK                                                   | 0.95453047         | 2              | 3.075678  |
| P57093        | IQDFQQNEELFR                                                   | 0.989724155        | 2              | 4.037259  |
| P57093        | NLVSDDDIQR                                                     | 0.746032505        | 1              | 2.509339  |
| <b>P57113</b> | <b>MAAI Maleylacetoacetate isomerase</b>                       | <b>0.937069622</b> | <b>0.94034</b> | <b>12</b> |
| P57113        | AITSGFNALEK                                                    | 0.937753142        | 2              | 3.321912  |
| P57113        | ALLALEAFQVSHPCR                                                | 1.123560277        | 2              | 4.438662  |
| P57113        | DGGQQFSEEFQTLNPMK                                              | 0.864609333        | 2              | 4.853898  |
| P57113        | DGGQQFSEEFQTLNPMK+Oxidation(15)                                | 1.052756196        | 2              | 2.388199  |
| P57113        | FKVDLSPYPTISHINK                                               | 0.920516503        | 3              | 4.894072  |
| P57113        | GIDYEIVPINLIK                                                  | 0.954740919        | 2              | 4.254309  |
| P57113        | IDGITIGQSLAILEYLEETRPIPR                                       | 1.012404989        | 3              | 3.833765  |
| P57113        | MISDLIASGIQPLQNLSVLK                                           | 0.932236698        | 2              | 4.552726  |
| P57113        | MISDLIASGIQPLQNLSVLK+Oxidation(0)                              | 0.963270083        | 2              | 5.442207  |
| P57113        | QVGQENQMPWAQK                                                  | 0.960450097        | 2              | 3.621455  |
| P57113        | VDLSPYPTISHINK                                                 | 0.933117125        | 2              | 3.729605  |
| P57113        | YCVGDEVSMADVCLAPQVANAER                                        | 0.954556743        | 2              | 5.953649  |
| <b>P57722</b> | <b>PCBP3 Poly(rC)_binding protein 3</b>                        | <b>0.959646004</b> | <b>0.2671</b>  | <b>2</b>  |
| P57722        | ESTGAQVQVAGDMLPNSTER                                           | 0.877419749        | 2              | 4.827143  |
| P57722        | INISEGNCPER                                                    | 0.959868344        | 2              | 3.359262  |
| <b>P58321</b> | <b>UCHL4 Ubiquitin carboxyl_ terminal hydrolase isozyme L4</b> | <b>0.913760413</b> | <b>0.00073</b> | <b>2</b>  |
| P58321        | VTHETSAHEGQTEAPSIDEK                                           | 0.849491628        | 2              | 4.409287  |
| P58321        | WLPLEANPEVTNQFLK                                               | 0.848790445        | 2              | 3.534853  |
| <b>P58751</b> | <b>RELN Reelin</b>                                             | <b>0.91912573</b>  | <b>0.74673</b> | <b>2</b>  |
| <b>P58775</b> | <b>TPM2 Tropomyosin beta chain</b>                             | <b>0.5581202</b>   | <b>0.63456</b> | <b>10</b> |
| P58775        | AISEELDNALNDITSL                                               | 0.55895368         | 2              | 4.330544  |
| P58775        | ATDAEADVASLNR                                                  | 0.661025492        | 2              | 3.800955  |
| P58775        | CGDLEELK                                                       | 0.560867532        | 2              | 2.829835  |
| P58775        | KATDAEADVASLNR                                                 | 0.599682777        | 2              | 4.325458  |
| P58775        | LDKENAIDR                                                      | 0.562523675        | 1              | 2.07886   |
| P58775        | LKGTEDEVEK                                                     | 0.685573634        | 3              | 3.548062  |

|               |                                                         |                    |                |          |
|---------------|---------------------------------------------------------|--------------------|----------------|----------|
| P58775        | MELQEMQLK                                               | 0.555694174        | 2              | 2.62533  |
| P58775        | QLEEEQALQK                                              | 0.561075153        | 2              | 3.973254 |
| P58775        | SLEAQADKYSTK                                            | 0.504681714        | 2              | 3.141567 |
| P58775        | TIDDLEDEVYAQK                                           | 0.6815055          | 2              | 3.713794 |
| <b>P59279</b> | <b>RAB2B Ras_related protein Rab_2B</b>                 | <b>1.115561087</b> | <b>6.3E-06</b> | <b>2</b> |
| P59279        | LQIWDTAGQESFR                                           | 1.048804242        | 2              | 3.15208  |
| P59279        | SYRGAAGALLVYDITR                                        | 2.07125417         | 2              | 2.799156 |
| <b>P60335</b> | <b>PCBP1 Poly(rC)_binding protein 1</b>                 | <b>0.885269827</b> | <b>0.05154</b> | <b>2</b> |
| P60335        | AITIAGVPQSVTECVK                                        | 0.899941012        | 2              | 3.131236 |
| P60335        | LVVPATQCGSLIGK                                          | 0.856271692        | 2              | 3.075226 |
| <b>P60843</b> | <b>IF4A1 Eukaryotic initiation factor 4A_I</b>          | <b>0.978879627</b> | <b>0.778</b>   | <b>4</b> |
| P60843        | ATQALVLAPTR                                             | 0.959286562        | 1              | 2.280616 |
| P60843        | GFKDQYDIFQK                                             | 0.995562676        | 2              | 3.336825 |
| P60843        | KGVAINMVTEEDKR                                          | 1.251180145        | 3              | 3.479564 |
| P60843        | LQMEAPHIIVGTPGR                                         | 1.05959203         | 3              | 3.392213 |
| <b>P60868</b> | <b>RS20 40S ribosomal protein S20</b>                   | <b>1.127253968</b> | <b>0.00037</b> | <b>2</b> |
| P60868        | DTGKTPVEPEVAIHR                                         | 0.685780547        | 3              | 4.153121 |
| P60868        | LIDLHSPSEIVK                                            | 1.108871433        | 2              | 3.01281  |
| <b>P60901</b> | <b>PSA6 Proteasome subunit alpha type_6</b>             | <b>1.044219518</b> | <b>0.27749</b> | <b>2</b> |
| P60901        | AINQGGLTSVAVR                                           | 1.04318341         | 2              | 3.506802 |
| P60901        | LLDSSTVTHLFK                                            | 1.377183808        | 2              | 2.568946 |
| <b>P61087</b> | <b>UBE2K Ubiquitin_conjugating enzyme E2 K</b>          | <b>1.079748539</b> | <b>0.30744</b> | <b>2</b> |
| P61087        | GEIAGPPDTPYEGGR                                         | 1.096294339        | 2              | 3.526207 |
| P61087        | VLDVDENFTELK                                            | 1.043417646        | 2              | 2.600815 |
| <b>P61107</b> | <b>RAB14 Ras_related protein Rab_14</b>                 | <b>1.13874612</b>  | <b>0.40672</b> | <b>3</b> |
| P61107        | NLTNPNTVILIGNK                                          | 1.13040164         | 2              | 3.901582 |
| P61107        | SCLLHQFTEK                                              | 1.456618997        | 2              | 2.937956 |
| P61107        | STYNHLSSWLTDAR                                          | 0.936180211        | 2              | 2.547968 |
| <b>P61222</b> | <b>ABCE1 ATP_binding cassette sub_family E member 1</b> | <b>1.097207602</b> | <b>0.5637</b>  | <b>2</b> |
| P61222        | NTVANSPTLLAGMNK                                         | 1.131439438        | 2              | 2.889657 |
| P61222        | NVEDLSGGELQR                                            | 0.961130352        | 2              | 2.935363 |
| <b>P61314</b> | <b>RL15 60S ribosomal protein L15</b>                   | <b>0.979161786</b> | <b>0.99798</b> | <b>5</b> |
| P61314        | FFEVLIDPFHK                                             | 1.086729787        | 3              | 3.832217 |
| P61314        | GATYGKPVHHGVNQLK                                        | 1.058250782        | 2              | 4.288197 |
| P61314        | SLQSVAEER                                               | 0.958748507        | 2              | 2.900325 |
| P61314        | VLNSYWVGEDSTYK                                          | 1.05796756         | 2              | 3.176862 |
| P61314        | YIQELWR                                                 | 0.991800828        | 2              | 2.322099 |
| <b>P61459</b> | <b>PHS Pterin_4_alpha_carbinolamine dehydratase</b>     | <b>0.976216569</b> | <b>0.08609</b> | <b>3</b> |
| P61459        | AVGWNELEGR                                              | 0.909986972        | 2              | 2.810389 |
| P61459        | LDHHPWFNVYNK                                            | 0.99101426         | 3              | 4.894184 |
| P61459        | LSAEERDQLLPNLR                                          | 1.035487123        | 3              | 4.089849 |
| <b>P61589</b> | <b>RHOA Transforming protein RhoA</b>                   | <b>0.561119036</b> | <b>0.02794</b> | <b>2</b> |

|               |                                                                                         |                    |                |          |
|---------------|-----------------------------------------------------------------------------------------|--------------------|----------------|----------|
| P61589        | MKQEPVKPEEGR                                                                            | 0.550989316        | 3              | 3.570173 |
| P61589        | MKQEPVKPEEGR+Oxidation(0)                                                               | 0.62519636         | 2              | 2.968805 |
| <b>P61751</b> | <b>ARF4 ADP_ribosylation factor 4</b>                                                   | <b>1.085128735</b> | <b>0.35451</b> | <b>3</b> |
| P61751        | IQEGA AVLQK                                                                             | 1.103297664        | 2              | 2.487654 |
| P61751        | LGEIVTTIPTIGFNVETVEYK                                                                   | 1.045095763        | 3              | 4.825347 |
| P61751        | NICFTVWDVGGQDK                                                                          | 1.292267485        | 2              | 3.550783 |
| <b>P61805</b> | <b>DAD1 Dolichyl_diphosphooligosaccharide__protein glycosyltransferase subunit DAD1</b> | <b>1.135127258</b> | <b>4.7E-06</b> | <b>2</b> |
| P61805        | ADFQGISPER                                                                              | 1.103580374        | 2              | 2.659112 |
| P61805        | FLEEYLSSTPQR                                                                            | 1.169951545        | 2              | 3.697941 |
| <b>P61924</b> | <b>COPZ1 Coatomer subunit zeta_1</b>                                                    | <b>1.068105803</b> | <b>0.00055</b> | <b>2</b> |
| P61924        | GEDVPLTEQTVSQVLQSAK                                                                     | 1.123900726        | 2              | 3.793215 |
| P61924        | YYDDTYPVK                                                                               | 0.954177678        | 2              | 2.778639 |
| <b>P61980</b> | <b>HNRPK Heterogeneous nuclear ribonucleoprotein K</b>                                  | <b>0.865981966</b> | <b>9.9E-20</b> | <b>7</b> |
| P61980        | GSDFDCELR                                                                               | 0.927117636        | 2              | 2.636313 |
| P61980        | GSYDGLGGPIITTQVTIPK                                                                     | 0.859819062        | 2              | 4.77486  |
| P61980        | IDEPLEGSEDR                                                                             | 0.824506754        | 2              | 3.353453 |
| P61980        | IILD LISEPIK                                                                            | 0.864229068        | 2              | 4.13629  |
| P61980        | IITITGTQDQIQNAQYLLQNSVK                                                                 | 0.904643878        | 3              | 5.279976 |
| P61980        | LFQECCPHSTDR                                                                            | 1.001308255        | 2              | 3.455653 |
| P61980        | TDYNASVSPDSSGPER                                                                        | 0.997253699        | 2              | 4.407461 |
| <b>P61983</b> | <b>1433G 14_3_3 protein gamma</b>                                                       | <b>0.959227699</b> | <b>0.00042</b> | <b>4</b> |
| P61983        | AYSEAHEISK                                                                              | 0.701995916        | 2              | 3.420109 |
| P61983        | NVTE LNEPLSNEER                                                                         | 0.845684504        | 2              | 4.89528  |
| P61983        | TAFDDAIAELDTLNEDSYK                                                                     | 0.885305833        | 2              | 4.363809 |
| P61983        | YLA EVATGEK                                                                             | 1.110112359        | 2              | 2.812194 |
| <b>P62076</b> | <b>TIM13 Mitochondrial import inner membrane translocase subunit Tim13</b>              | <b>0.80241771</b>  | <b>9.9E-20</b> | <b>4</b> |
| P62076        | CIGKPGGSLDNSEQK                                                                         | 0.715151299        | 2              | 3.951298 |
| P62076        | KCIGKPGGSLDNSEQK                                                                        | 0.805360583        | 3              | 3.960309 |
| P62076        | LDPGAIMEQVK                                                                             | 0.81592225         | 2              | 2.842101 |
| P62076        | VQI AVANAQELLQR                                                                         | 0.875261375        | 2              | 4.204293 |
| <b>P62083</b> | <b>RS7 40S ribosomal protein S7</b>                                                     | <b>1.213289765</b> | <b>1.4E-08</b> | <b>3</b> |
| P62083        | AIIIFVPVQLK                                                                             | 1.119814645        | 2              | 3.730995 |
| P62083        | KAIIFVPVQLK                                                                             | 1.109963263        | 2              | 3.730429 |
| P62083        | TLTAVHDAILEDLVFPSEIVGK                                                                  | 1.066255505        | 2              | 5.252037 |
| <b>P62161</b> | <b>CALM Calmodulin</b>                                                                  | <b>1.218574289</b> | <b>9.9E-20</b> | <b>3</b> |
| P62161        | EADIDGGQVNYEEFVQMMTAK                                                                   | 1.50167548         | 2              | 4.766891 |
| P62161        | EAFSLFDKDGDTITTK                                                                        | 1.480839978        | 2              | 4.053777 |
| P62161        | VFDKDGNGYISAAELR                                                                        | 1.099644756        | 2              | 4.872018 |
| <b>P62198</b> | <b>PRS8 26S protease regulatory subunit 8</b>                                           | <b>0.945368941</b> | <b>0.82146</b> | <b>3</b> |
| P62198        | IEELQLIVNDK                                                                             | 1.099546228        | 2              | 2.74543  |

|               |                                                  |                    |                |          |
|---------------|--------------------------------------------------|--------------------|----------------|----------|
| P62198        | LEGGSGGDSEVQR                                    | 0.936737585        | 2              | 3.444813 |
| P62198        | TMLELLNQLDGFATK                                  | 1.080653466        | 2              | 3.124863 |
| <b>P62243</b> | <b>RS8 40S ribosomal protein S8</b>              | <b>1.087074171</b> | <b>7.1E-14</b> | <b>9</b> |
| P62243        | ADGYVLEGK                                        | 0.997570961        | 2              | 2.825637 |
| P62243        | IIDVVYNASNELVR                                   | 1.333077792        | 2              | 3.630523 |
| P62243        | ISSLLEEQFQQGK                                    | 1.43426168         | 2              | 3.625464 |
| P62243        | KYELGRPAANTK                                     | 0.884653709        | 2              | 3.51506  |
| P62243        | LDVGNFSWGSECCTR                                  | 1.120821844        | 2              | 3.431524 |
| P62243        | LTPEEEEEILNK                                     | 0.977367602        | 2              | 3.142258 |
| P62243        | NCIVLIDSTPYR                                     | 1.087864822        | 2              | 3.130186 |
| P62243        | QWYESHYALPLGR                                    | 1.213154778        | 2              | 2.338182 |
| P62243        | YELGRPAANTK                                      | 0.937966049        | 2              | 2.771123 |
| <b>P62246</b> | <b>RS15A 40S ribosomal protein S15a</b>          | <b>1.227432855</b> | <b>9.9E-20</b> | <b>3</b> |
| P62246        | HGYIGEFEIIDDHR                                   | 1.210785401        | 3              | 4.614569 |
| P62246        | IVVNLTR                                          | 1.142876947        | 2              | 2.463518 |
| P62246        | WQNNLLPSR                                        | 1.084450613        | 2              | 2.588881 |
| <b>P62250</b> | <b>RS16 40S ribosomal protein S16</b>            | <b>1.564675295</b> | <b>1.4E-11</b> | <b>4</b> |
| P62250        | ALVAYYQK                                         | 1.441108401        | 1              | 2.00934  |
| P62250        | GGGHVAQIYAIR                                     | 1.569701084        | 2              | 3.048078 |
| P62250        | LLEPVLLLGK                                       | 1.210283176        | 2              | 2.754758 |
| P62250        | TLLVADPR                                         | 1.050349374        | 2              | 2.462845 |
| <b>P62260</b> | <b>1433E 14_3_3 protein epsilon</b>              | <b>1.241168813</b> | <b>0.01421</b> | <b>4</b> |
| P62260        | AAFDDAIAELDTLSEESYK                              | 1.043545477        | 2              | 5.830258 |
| P62260        | HLIPAANTGESK                                     | 0.846715352        | 2              | 2.347728 |
| P62260        | LICCDILDVLDK                                     | 1.264813616        | 2              | 3.575559 |
| P62260        | YLAEFATGNDRK                                     | 1.025170883        | 2              | 2.656211 |
| <b>P62271</b> | <b>RS18 40S ribosomal protein S18</b>            | <b>1.004517051</b> | <b>0.90305</b> | <b>5</b> |
| P62271        | AGELTEDEVER                                      | 1.018416324        | 2              | 3.224936 |
| P62271        | LREDLER                                          | 0.909288259        | 1              | 2.007337 |
| P62271        | RAGELTEDEVER                                     | 1.152176311        | 2              | 3.316751 |
| P62271        | VLNTNIDGR                                        | 1.034068365        | 2              | 2.825207 |
| P62271        | YSQVLANGLDNK                                     | 1.077590168        | 1              | 3.509498 |
| <b>P62278</b> | <b>RS13 40S ribosomal protein S13</b>            | <b>1.063521034</b> | <b>3.5E-05</b> | <b>4</b> |
| P62278        | GLAPDLPEDLYHLIK                                  | 1.29398648         | 2              | 2.912847 |
| P62278        | GLSQSALPYR                                       | 1.376156995        | 1              | 2.03685  |
| P62278        | GLTPSQIGVILR                                     | 1.060852861        | 2              | 2.547945 |
| P62278        | KGLTPSQIGVILR                                    | 1.09900628         | 2              | 2.664007 |
| <b>P62332</b> | <b>ARF6 ADP_ribosylation factor 6</b>            | <b>0.889339651</b> | <b>0.84859</b> | <b>2</b> |
| P62332        | FNVWDVGGQDK                                      | 0.889314422        | 2              | 3.058421 |
| P62332        | LGQSVTTIPTVGFNVETVYK                             | 1.14166532         | 2              | 2.508281 |
| <b>P62334</b> | <b>PRS10 26S protease regulatory subunit 10B</b> | <b>0.847767833</b> | <b>0.04895</b> | <b>4</b> |
| P62334        | ALQSVGQIVGEVLK                                   | 1.249154728        | 2              | 3.435363 |
| P62334        | EVIELPLTNPELFQR                                  | 1.103694319        | 2              | 3.3984   |

|               |                                                |                    |                |           |
|---------------|------------------------------------------------|--------------------|----------------|-----------|
| P62334        | HGEIDYEAIVK                                    | 0.733663064        | 2              | 2.527072  |
| P62334        | IHIDLPEQAR                                     | 0.831830371        | 2              | 2.43277   |
| <b>P62425</b> | <b>RL7A 60S ribosomal protein L7a</b>          | <b>1.030597115</b> | <b>5.4E-09</b> | <b>9</b>  |
| P62425        | AGVNTVTTLVENK                                  | 0.994218556        | 2              | 4.150034  |
| P62425        | AGVNTVTTLVENKK                                 | 1.098591768        | 2              | 2.919873  |
| P62425        | NFGIGQDIQPK                                    | 1.057272002        | 2              | 3.540219  |
| P62425        | TCTTVAFTQVNSEDK                                | 2.251072893        | 2              | 3.852014  |
| P62425        | TCTTVAFTQVNSEDKGALAK                           | 3.011234067        | 2              | 4.344961  |
| P62425        | TNYNDRYDEIR                                    | 1.010961151        | 2              | 2.319822  |
| P62425        | VAPAPAVVK                                      | 1.063639145        | 1              | 1.959166  |
| P62425        | VPPAINQFTQALDR                                 | 1.140579852        | 2              | 3.791949  |
| P62425        | VVNPLFEK                                       | 1.79122781         | 1              | 1.906892  |
| <b>P62630</b> | <b>EF1A1 Elongation factor 1_alpha 1</b>       | <b>1.092031522</b> | <b>9.9E-20</b> | <b>13</b> |
| P62630        | DGSASGTTLEALDCILPPTTRPTDKPLR                   | 1.048406583        | 3              | 4.87193   |
| P62630        | KDGSASGTTLEALDCILPPTTRPTDKPLR                  | 1.172303956        | 4              | 5.139885  |
| P62630        | MDSTEPYSQK                                     | 0.696533777        | 2              | 3.812725  |
| P62630        | MDSTEPYSQK+Oxidation(0)                        | 0.764946175        | 2              | 3.037074  |
| P62630        | NDPPMEAAGFTAQVIILNHPGQISAGYAPVLDCHTAHIACK      | 1.205738016        | 5              | 6.666904  |
| P62630        | RYEEIVK                                        | 0.77789691         | 2              | 2.379981  |
| P62630        | SGDAAIVDMVPGKPMCVESFSDYPPLGR                   | 1.227126998        | 3              | 5.267326  |
| P62630        | SGDAAIVDMVPGKPMCVESFSDYPPLGR+Oxidation(14)     | 1.223519283        | 3              | 4.483494  |
| P62630        | SGDAAIVDMVPGKPMCVESFSDYPPLGR+Oxidation(8)      | 1.304252778        | 3              | 4.080794  |
| P62630        | VETGVLPKGMVVTAFVNVNTEVK                        | 1.032046856        | 2              | 5.370109  |
| P62630        | VETGVLPKGMVVTAFVNVNTEVK+Oxidation(9)           | 0.978365268        | 3              | 5.045857  |
| P62630        | YEEIVK                                         | 0.998978855        | 1              | 2.17746   |
| P62630        | YYVTIIDAPGHR                                   | 1.010709356        | 3              | 3.617086  |
| <b>P62632</b> | <b>EF1A2 Elongation factor 1_alpha 2</b>       | <b>1.049213767</b> | <b>5E-15</b>   | <b>8</b>  |
| P62632        | EHALLAYTLGVK                                   | 1.274386361        | 1              | 3.541148  |
| P62632        | IGGIGTVPVGR                                    | 1.310945888        | 2              | 3.508736  |
| P62632        | NMITGTSQADCAVLIVAAGVGEFEAGISK                  | 1.079090864        | 3              | 5.187576  |
| P62632        | QLIVGVNK                                       | 0.962156351        | 1              | 2.770817  |
| P62632        | QTVAVGVK                                       | 0.931997593        | 1              | 2.064388  |
| P62632        | STTTGHLYK                                      | 0.884411798        | 2              | 2.89936   |
| P62632        | THINIVIGHVDSGK                                 | 1.024235052        | 2              | 4.844553  |
| P62632        | VETGILRPGMVVTFAPVNITTEVK                       | 1.356955568        | 3              | 3.668497  |
| <b>P62703</b> | <b>RS4X 40S ribosomal protein S4_X isoform</b> | <b>0.9658268</b>   | <b>0.10776</b> | <b>6</b>  |
| P62703        | FDTGNLCMVTGGANLGR                              | 0.891219329        | 2              | 4.629406  |
| P62703        | FDTGNLCMVTGGANLGR+Oxidation(7)                 | 0.417072259        | 2              | 4.258345  |
| P62703        | GIPHLVTHDAR                                    | 1.064262218        | 2              | 2.489572  |
| P62703        | LSNIFVIGK                                      | 0.881092989        | 2              | 2.465869  |
| P62703        | TDITYPAGFMDVISIDK                              | 0.94669545         | 2              | 3.833196  |



|               |                                                            |                    |                |          |
|---------------|------------------------------------------------------------|--------------------|----------------|----------|
| P62703        | VNDTIQIDLETGK                                              | 1.071512123        | 2              | 3.771943 |
| <b>P62718</b> | <b>RL18A 60S ribosomal protein L18a</b>                    | <b>0.945534021</b> | <b>0.97849</b> | <b>2</b> |
| P62718        | DLTTAGAVTQCYR                                              | 0.905747797        | 2              | 3.01477  |
| P62718        | SSGEIVYCGQVFEKSPLR                                         | 1.008490367        | 2              | 2.468338 |
| <b>P62752</b> | <b>RL23A 60S ribosomal protein L23a</b>                    | <b>1.094821612</b> | <b>0.98666</b> | <b>5</b> |
| P62752        | LAPDYDALDVANK                                              | 1.002301971        | 2              | 3.853549 |
| P62752        | LDHYAIK                                                    | 0.992166661        | 2              | 2.644187 |
| P62752        | NKLDHYAIK                                                  | 1.089627294        | 2              | 2.799782 |
| P62752        | VNTLIRPDGEK                                                | 1.076408494        | 2              | 2.819718 |
| P62752        | VNTLIRPDGEKK                                               | 1.148203206        | 2              | 2.868132 |
| <b>P62755</b> | <b>RS6 40S ribosomal protein S6</b>                        | <b>0.93331041</b>  | <b>0.03349</b> | <b>5</b> |
| P62755        | DIPGLTDTTVPR                                               | 0.885806864        | 2              | 2.636167 |
| P62755        | LIEVDDER                                                   | 1.036065631        | 2              | 2.735853 |
| P62755        | LNISFPATGCQK                                               | 0.966060696        | 2              | 2.997941 |
| P62755        | MATEVAADALGEEWK                                            | 1.25098659         | 2              | 3.750048 |
| P62755        | MATEVAADALGEEWK+Oxidation(0)                               | 0.832311112        | 2              | 4.359123 |
| <b>P62804</b> | <b>H4 Histone H4</b>                                       | <b>0.77436451</b>  | <b>9.9E-20</b> | <b>7</b> |
| P62804        | DAVTYTEHAK                                                 | 0.750863772        | 2              | 3.033608 |
| P62804        | DNIQGITKPAIR                                               | 0.715281694        | 2              | 3.422492 |
| P62804        | ISGLIYEETR                                                 | 2.049203029        | 2              | 3.327663 |
| P62804        | RISGLIYEETR                                                | 0.984261833        | 2              | 2.418411 |
| P62804        | TVTAMDVVYALK                                               | 0.984855294        | 2              | 3.989232 |
| P62804        | TVTAMDVVYALK+Oxidation(4)                                  | 0.734805           | 2              | 3.227666 |
| P62804        | VFLENVIR                                                   | 0.821132772        | 2              | 3.250706 |
| <b>P62815</b> | <b>VATB2 V_type proton ATPase subunit B_ brain isoform</b> | <b>0.76432275</b>  | <b>0.0418</b>  | <b>2</b> |
| P62815        | AVVQVFEGTSGIDAK                                            | 0.603506325        | 2              | 3.220275 |
| P62815        | QIYPPINVLP石榴SR                                             | 1.465504429        | 2              | 2.385887 |
| <b>P62853</b> | <b>RS25 40S ribosomal protein S25</b>                      | <b>1.204359237</b> | <b>0.10947</b> | <b>2</b> |
| P62853        | GGDAPAAGEDA                                                | 0.951755342        | 1              | 2.022215 |
| P62853        | LNNLVLFDK                                                  | 1.231224194        | 2              | 2.808513 |
| <b>P62856</b> | <b>RS26 40S ribosomal protein S26</b>                      | <b>1.002017743</b> | <b>0.90366</b> | <b>2</b> |
| P62856        | DISEASVFDAYVLPK                                            | 1.085082691        | 2              | 3.402821 |
| P62856        | NIVEAAAVR                                                  | 0.997161831        | 2              | 2.879097 |
| <b>P62890</b> | <b>RL30 60S ribosomal protein L30</b>                      | <b>1.171612693</b> | <b>0.00107</b> | <b>2</b> |
| P62890        | TGVHHYSGNNIELGTACGK                                        | 1.101247259        | 2              | 5.557289 |
| P62890        | VCTLAIDPGDSDIIR                                            | 1.194344022        | 2              | 3.717555 |
| <b>P62898</b> | <b>CYC Cytochrome c_somatic</b>                            | <b>1.084687834</b> | <b>0.00038</b> | <b>6</b> |
| P62898        | ADLIAYLK                                                   | 1.048094088        | 2              | 2.777083 |
| P62898        | GITWGEDTLMEYLENPK                                          | 1.025102804        | 2              | 4.882487 |
| P62898        | GITWGEDTLMEYLENPKK                                         | 1.000532708        | 2              | 4.334102 |
| P62898        | KTGQAAGFSYTDANK                                            | 1.329070871        | 2              | 4.891124 |
| P62898        | TGPNLHGLFGR                                                | 1.035883547        | 2              | 3.253972 |

|               |                                                           |                    |                |           |
|---------------|-----------------------------------------------------------|--------------------|----------------|-----------|
| P62898        | TGQAAGFSYTDANK                                            | 1.153415438        | 2              | 4.15838   |
| <b>P62902</b> | <b>RL31 60S ribosomal protein L31</b>                     | <b>1.093276291</b> | <b>3E-11</b>   | <b>2</b>  |
| P62902        | NLQTVNVDEN                                                | 2.486806853        | 1              | 2.291409  |
| P62902        | SAINEVVTR                                                 | 1.064005079        | 2              | 3.117265  |
| <b>P62907</b> | <b>RL10A 60S ribosomal protein L10a</b>                   | <b>1.03991103</b>  | <b>0.94457</b> | <b>5</b>  |
| P62907        | AVDIPHMDIEALK                                             | 0.961139122        | 2              | 2.328678  |
| P62907        | AVDIPHMDIEALKK                                            | 1.024867514        | 2              | 2.630583  |
| P62907        | FSVCVLGDQQHCDEAK                                          | 1.051685274        | 2              | 3.922549  |
| P62907        | KYDAFLASESLIK                                             | 1.101924775        | 2              | 3.713563  |
| P62907        | YDAFLASESLIK                                              | 1.191375204        | 2              | 3.747255  |
| <b>P62909</b> | <b>RS3 40S ribosomal protein S3</b>                       | <b>1.187617798</b> | <b>9.9E-20</b> | <b>10</b> |
| P62909        | AELNEFLTR                                                 | 1.092988732        | 2              | 2.86139   |
| P62909        | DEILPTTPISEQK                                             | 0.979584401        | 2              | 3.755286  |
| P62909        | ELAEDGYSGVEVR                                             | 0.969464721        | 2              | 3.424266  |
| P62909        | ELTAVVQK                                                  | 0.920860047        | 2              | 2.31501   |
| P62909        | FGFPEGSVELYAEK                                            | 1.881697947        | 2              | 3.344488  |
| P62909        | FVDGLMIHSGDPVNYVDTAVR                                     | 1.293938407        | 3              | 4.015665  |
| P62909        | GCEVVVSGK                                                 | 1.151974659        | 2              | 2.496615  |
| P62909        | GGKPEPPAMPQPVPPTA                                         | 1.289321271        | 2              | 3.735763  |
| P62909        | GLCAIAQAESLR                                              | 1.100286681        | 2              | 3.160312  |
| P62909        | TEIILATR                                                  | 1.136449566        | 2              | 2.796017  |
| <b>P62912</b> | <b>RL32 60S ribosomal protein L32</b>                     | <b>1.117896165</b> | <b>0.55639</b> | <b>2</b>  |
| P62912        | ELEVLLMCNK                                                | 1.163092512        | 2              | 2.53029   |
| P62912        | SYCAEIAHNVSSK                                             | 1.096760379        | 2              | 4.365849  |
| <b>P62914</b> | <b>RL11 60S ribosomal protein L11</b>                     | <b>0.997827767</b> | <b>1</b>       | <b>2</b>  |
| P62914        | VLEQLTGQTPVFSK                                            | 1.026346763        | 2              | 4.050513  |
| P62914        | YDGILPGK                                                  | 0.997422677        | 2              | 2.923451  |
| <b>P62919</b> | <b>RL8 60S ribosomal protein L8</b>                       | <b>1.150784988</b> | <b>6.1E-09</b> | <b>3</b>  |
| P62919        | ASGNATVISHNPETK                                           | 1.203815714        | 2              | 4.458452  |
| P62919        | AVVGVVAGGGR                                               | 1.018179161        | 2              | 3.559927  |
| P62919        | KAQLNIGNVLPVGTMPGTVCCLEEKPGDR                             | 1.146870798        | 3              | 4.887388  |
| <b>P62959</b> | <b>HINT1 Histidine triad nucleotide_binding protein 1</b> | <b>0.914673028</b> | <b>1.8E-07</b> | <b>3</b>  |
| P62959        | AQVAQPGGDTIFGK                                            | 0.911609298        | 2              | 4.586193  |
| P62959        | CLAFHDISPQAPTHFLVIPK                                      | 1.080407289        | 3              | 4.566719  |
| P62959        | KHISQISVADDDDESLLGHLMIVGK                                 | 0.889170799        | 3              | 4.151852  |
| <b>P62961</b> | <b>YBOX1 Nuclease_sensitive element_binding protein 1</b> | <b>0.918837394</b> | <b>1.1E-07</b> | <b>4</b>  |
| P62961        | EDGNEEDKENQGDETQQQPPQR                                    | 0.915646512        | 3              | 5.166607  |
| P62961        | GAEAAVNTGPGGVVQVQGSK                                      | 1.133403046        | 2              | 5.049645  |
| P62961        | NEGSESAPEGQAQQR                                           | 1.062346232        | 2              | 4.989835  |
| P62961        | NYQQNYQNSGESGKNEGSESAPEGQAQQR                             | 1.707420297        | 3              | 5.495861  |
| <b>P62963</b> | <b>PROF1 Profilin_1</b>                                   | <b>0.961062573</b> | <b>0.77842</b> | <b>4</b>  |
| P62963        | DSPSVWAAVPGK                                              | 1.130875073        | 1              | 2.205153  |

|               |                                                      |                    |                |           |
|---------------|------------------------------------------------------|--------------------|----------------|-----------|
| P62963        | SSFFVNGLTLGGQK                                       | 0.949231214        | 2              | 4.52821   |
| P62963        | STGGAPTFNVTVTMTAK                                    | 0.862616675        | 2              | 2.630649  |
| P62963        | TFVSITPAEVGVLVVK                                     | 0.96309425         | 2              | 4.500277  |
| <b>P63018</b> | <b>HSP7C Heat shock cognate 71 kDa protein</b>       | <b>1.218548072</b> | <b>9.9E-20</b> | <b>22</b> |
| P63018        | ARFEELNADLFR                                         | 1.080645137        | 3              | 3.623376  |
| P63018        | CNEIISWLDK                                           | 0.858577622        | 2              | 3.137303  |
| P63018        | DAGTIAGLNVLR                                         | 0.935617664        | 2              | 3.597985  |
| P63018        | FDDAVVQSDMK                                          | 0.934728551        | 2              | 3.706823  |
| P63018        | FEELNADLFR                                           | 0.8789756          | 2              | 3.100222  |
| P63018        | FELTGIPPAPR                                          | 0.702896306        | 2              | 3.134699  |
| P63018        | IINEPTAAAIAYGLDK                                     | 1.140822008        | 2              | 4.749603  |
| P63018        | IINEPTAAAIAYGLDKK                                    | 1.293230787        | 2              | 4.554169  |
| P63018        | LLQDFFNKG                                            | 1.181134187        | 2              | 2.676929  |
| P63018        | NQTAEKEEFHQK                                         | 0.896574185        | 2              | 5.247122  |
| P63018        | NQVAMNPTNTVFDK                                       | 1.067013445        | 2              | 4.506462  |
| P63018        | NQVAMNPTNTVFDK+Oxidation(4)                          | 0.903024884        | 2              | 4.271168  |
| P63018        | NSLESYAFNMK                                          | 1.952559232        | 2              | 3.245868  |
| P63018        | QATKDAGTIAGLNVLR                                     | 0.930846734        | 2              | 2.441626  |
| P63018        | RFDDAVVQSDMK                                         | 0.943379758        | 2              | 2.749187  |
| P63018        | SFYPEEVSSMLTK                                        | 1.00287981         | 2              | 4.13757   |
| P63018        | SFYPEEVSSMLTK+Oxidation(9)                           | 0.790028724        | 2              | 2.898052  |
| P63018        | SINPDEAVAYGAAVQAAILSGDK                              | 1.405769198        | 2              | 6.276466  |
| P63018        | SQIHDIVLVGGSTR                                       | 0.98285541         | 2              | 4.961404  |
| P63018        | STAGDTHLGGEDFDNR                                     | 0.943165667        | 2              | 4.426495  |
| P63018        | TVTNAVVTVPAYFNDSQR                                   | 0.912344622        | 2              | 4.084924  |
| P63018        | VCNPIITK                                             | 1.034636397        | 2              | 2.402173  |
| <b>P63029</b> | <b>TCTP Translationally controlled tumor protein</b> | <b>1.396882099</b> | <b>3.2E-12</b> | <b>2</b>  |
| P63029        | DLISHDELFSDIYK                                       | 1.396980456        | 2              | 3.55469   |
| P63029        | EIADGLCLEVEGK                                        | 1.112730199        | 2              | 3.257479  |
| <b>P63036</b> | <b>DNJA1 Dnaj homolog subfamily A member 1</b>       | <b>1.02302458</b>  | <b>0.1698</b>  | <b>6</b>  |
| P63036        | HYNGEAYEDDEHHR                                       | 1.15187404         | 3              | 4.903773  |
| P63036        | ITFHGEGDQEPGLEPGDIIVLDQK                             | 1.041193636        | 3              | 3.763417  |
| P63036        | NVVHQLSVTLEDLYNGATR                                  | 1.061309207        | 2              | 5.875858  |
| P63036        | QISQAYEVLADSK                                        | 0.828887053        | 2              | 3.607974  |
| P63036        | TIVITSHPGQIVK                                        | 1.025997189        | 2              | 2.927377  |
| P63036        | VNFPENGLFSPDK                                        | 0.99165195         | 2              | 2.93688   |
| <b>P63039</b> | <b>CH60 60 kDa heat shock protein_mitochondrial</b>  | <b>1.174059414</b> | <b>9.9E-20</b> | <b>28</b> |
| P63039        | AAVEEGIVLGGGCALLR                                    | 0.979374134        | 3              | 5.979507  |
| P63039        | ALMLQGVDLLADAVAVTMGPK+Oxidation(17)                  | 1.02119806         | 3              | 3.316453  |
| P63039        | CEFQDAYVLLSEK                                        | 1.400345275        | 2              | 4.692977  |
| P63039        | CIPALDSLKPANEDQK                                     | 0.901626056        | 2              | 3.313151  |
| P63039        | DDAMLLKGGDK+Oxidation(3)                             | 1.201329803        | 2              | 2.409225  |
| P63039        | DIGNIISDAMK                                          | 0.896520717        | 2              | 3.61682   |

|               |                                                                              |                    |                |          |
|---------------|------------------------------------------------------------------------------|--------------------|----------------|----------|
| P63039        | GVMLAVDAVIAELKK                                                              | 0.941472141        | 2              | 4.303885 |
| P63039        | GYISPYFINTSK                                                                 | 1.241885591        | 2              | 3.636939 |
| P63039        | ILQSSSEVGYDAMLGDFVNMVEK                                                      | 1.062798819        | 2              | 4.968976 |
| P63039        | IQEITEQLDITTSEYEK                                                            | 0.908506073        | 2              | 5.602526 |
| P63039        | IQEITEQLDITTSEYEKEK                                                          | 0.784301467        | 2              | 5.163188 |
| P63039        | ISSVQSIVPALEIANAHR                                                           | 1.064237895        | 2              | 4.091499 |
| P63039        | KISSVQSIVPALEIANAHR                                                          | 1.77562915         | 3              | 3.309232 |
| P63039        | KPLVIAEDVDGEALSTLVLNR                                                        | 1.428948765        | 2              | 5.915522 |
| P63039        | LSDGVAVLK                                                                    | 1.099389291        | 2              | 2.698312 |
| P63039        | LVQDVANNTNEEAGDGTATVLR                                                       | 0.93867291         | 2              | 6.638293 |
| P63039        | NAGVEGSLIVEK                                                                 | 1.051112458        | 2              | 3.466503 |
| P63039        | QSKPVTTPPEEIAQVATISANGDK                                                     | 0.959495289        | 2              | 3.82041  |
| P63039        | QSKPVTTPPEEIAQVATISANGDKDIGNIISDAMK                                          | 1.006285049        | 3              | 5.26728  |
| P63039        | RGVMLAVDAVIAELKK                                                             | 1.173205896        | 3              | 4.546206 |
| P63039        | TLNDELEIIEGMK                                                                | 0.92493467         | 2              | 4.584354 |
| P63039        | TLNDELEIIEGMK+Oxidation(11)                                                  | 0.850618864        | 2              | 3.494438 |
| P63039        | TVIIQSWGSPK                                                                  | 0.873237316        | 2              | 4.458215 |
| P63039        | VGEVIVTK                                                                     | 0.892397866        | 2              | 2.981123 |
| P63039        | VGGTSDVEVNEK                                                                 | 0.94859429         | 2              | 3.840807 |
| P63039        | VGGTSDVEVNEKK                                                                | 1.2467311          | 2              | 3.070491 |
| P63039        | VGLQVAVK                                                                     | 0.945354208        | 2              | 3.452997 |
| P63039        | VTDALNATR                                                                    | 0.828384748        | 2              | 3.477735 |
| <b>P63088</b> | <b>PP1G Serine/threonine_protein phosphatase PP1_gamma catalytic subunit</b> | <b>0.919054508</b> | <b>0.14239</b> | <b>2</b> |
| P63088        | EIFLSQPILLEEAPLK                                                             | 1.277062155        | 2              | 3.069157 |
| P63088        | TFTDCFNCLPIAAIVDEK                                                           | 0.89086918         | 2              | 3.346401 |
| <b>P63095</b> | <b>subunit alpha isoforms short</b>                                          | <b>1.24244723</b>  | <b>0.01452</b> | <b>2</b> |
| P63095        | AFEPFYDEIKSKGALVK                                                            | 1.184491295        | 2              | 2.79722  |
| P63095        | YTPPEDATPEPGEDPR                                                             | 1.234253713        | 2              | 2.930989 |
| <b>P63102</b> | <b>1433Z 14_3_3 protein zeta/delta</b>                                       | <b>0.887078207</b> | <b>0.00152</b> | <b>7</b> |
| P63102        | DICNDVLSLLEK                                                                 | 0.935714887        | 3              | 3.909975 |
| P63102        | FLIPNASQPESK                                                                 | 0.902966295        | 2              | 3.024502 |
| P63102        | GIVDQSQAYQEAIFEISK                                                           | 0.870247316        | 2              | 5.716891 |
| P63102        | KGIVDQSQAYQEAIFEISK                                                          | 0.918521015        | 2              | 5.324616 |
| P63102        | SVTEQGAELSNEER                                                               | 1.013273237        | 2              | 4.96664  |
| P63102        | TAFDEAIAELDTLSEESYK                                                          | 0.926492686        | 2              | 5.780411 |
| P63102        | YLAEVAAGDDKK                                                                 | 0.977358334        | 2              | 2.927513 |
| <b>P63159</b> | <b>HMGB1 High mobility group protein B1</b>                                  | <b>0.790584994</b> | <b>3.9E-09</b> | <b>3</b> |
| P63159        | GEHPGLSIGDVAK                                                                | 0.858788151        | 2              | 3.055941 |
| P63159        | IKGEHPGLSIGDVAK                                                              | 0.777578685        | 3              | 3.715823 |
| P63159        | KHPDASVNFSEFSK                                                               | 0.854161258        | 2              | 3.878653 |
| <b>P63174</b> | <b>RL38 60S ribosomal protein L38</b>                                        | <b>0.960324492</b> | <b>0.03229</b> | <b>2</b> |
| P63174        | KIEEIKDFLLTAR                                                                | 0.969582039        | 3              | 3.977749 |

|               |                                                                      |                    |                |           |
|---------------|----------------------------------------------------------------------|--------------------|----------------|-----------|
| P63174        | YLYTLVITDKEK                                                         | 1.576993416        | 2              | 2.324197  |
| <b>P63245</b> | <b>GBLP Guanine nucleotide_binding protein subunit beta_2_like 1</b> | <b>1.061449076</b> | <b>5.8E-07</b> | <b>8</b>  |
| P63245        | DGQAMLWDLNEGK                                                        | 1.088303722        | 2              | 2.420337  |
| P63245        | FSPNSSNPIIVSCGWDK                                                    | 1.05725437         | 2              | 4.539513  |
| P63245        | HLYTLDDGGDIINALCFSPNR                                                | 1.048322731        | 2              | 5.68484   |
| P63245        | IIVDELKQEVISTSSK                                                     | 1.056515966        | 2              | 4.002417  |
| P63245        | LWDLTTGTTR                                                           | 1.114032078        | 1              | 2.155001  |
| P63245        | TNHIGHTGYLNTVTVSPDGLCASGGK                                           | 1.227805825        | 3              | 5.232193  |
| P63245        | VWQVTIGTR                                                            | 1.205217296        | 2              | 2.740269  |
| P63245        | YTVQDESHSEWVSCVR                                                     | 1.142538816        | 2              | 4.208179  |
| <b>P63259</b> | <b>ACTG Actin_cytoplasmic 2</b>                                      | <b>0.940974064</b> | <b>9.9E-20</b> | <b>8</b>  |
| P63259        | CPEALFQPSFLGMESCGIHETTFNSIMK                                         | 2.612616132        | 3              | 4.296569  |
| P63259        | DLYANTVLSGGTTMYPGIADR                                                | 0.909133564        | 2              | 5.75515   |
| P63259        | DLYANTVLSGGTTMYPGIADR+Oxidation(13)                                  | 0.779209117        | 2              | 4.154263  |
| P63259        | GYSFTTTAER                                                           | 0.944210526        | 2              | 3.226637  |
| P63259        | KDLYANTVLSGGTTMYPGIADR                                               | 0.981168704        | 2              | 5.747538  |
| P63259        | KDLYANTVLSGGTTMYPGIADR+Oxidation(14)                                 | 0.775248025        | 3              | 4.135125  |
| P63259        | QEYDESGPSIVHR                                                        | 0.813477244        | 3              | 3.515571  |
| P63259        | VAPEEHPVLLTEAPLNPK                                                   | 0.915041494        | 2              | 4.488511  |
| <b>P63324</b> | <b>RS12 40S ribosomal protein S12</b>                                | <b>1.012615424</b> | <b>0.99878</b> | <b>3</b>  |
| P63324        | KVVGCSVVVK                                                           | 0.970082938        | 2              | 2.720434  |
| P63324        | LGEWVGLCK                                                            | 1.080373745        | 1              | 2.251585  |
| P63324        | VVGCSVVVK                                                            | 0.982163273        | 2              | 2.358621  |
| <b>P67779</b> | <b>PHB Prohibitin</b>                                                | <b>1.020200179</b> | <b>9.9E-20</b> | <b>9</b>  |
| P67779        | AAELIANSLATAGDGLIELR                                                 | 0.947053932        | 3              | 5.031523  |
| P67779        | AAIISAEGDSK                                                          | 1.702452757        | 2              | 2.455832  |
| P67779        | DLQNVNITLR                                                           | 0.903718032        | 2              | 3.269057  |
| P67779        | FDAGELITQR                                                           | 0.869108203        | 2              | 3.833949  |
| P67779        | GVQDIVVGEGTHFLIPWVQKPIIFDCR                                          | 1.214771391        | 3              | 4.148261  |
| P67779        | IYTSIGEDYDER                                                         | 1.406661376        | 2              | 3.078731  |
| P67779        | KLEAAEDIAYQLSR                                                       | 0.842308536        | 2              | 4.402473  |
| P67779        | NVPVITGSK                                                            | 0.84614277         | 1              | 2.205909  |
| P67779        | VLPSITTEILK                                                          | 0.940552853        | 2              | 2.34398   |
| <b>P68037</b> | <b>UB2L3 Ubiquitin_conjugating enzyme E2 L3</b>                      | <b>1.103866029</b> | <b>0.00232</b> | <b>3</b>  |
| P68037        | ADLAEEYSK                                                            | 0.978182333        | 2              | 2.562334  |
| P68037        | GQVCLPVisaENWKPATK                                                   | 1.06733618         | 2              | 3.007381  |
| P68037        | TDQVIQSLIALVNDPQPEHPLR                                               | 1.129817435        | 2              | 4.950209  |
| <b>P68101</b> | <b>IF2A Eukaryotic translation initiation factor 2 subunit 1</b>     | <b>1.032251107</b> | <b>0.64082</b> | <b>3</b>  |
| P68101        | HAVSDPSILDSLNLNEDEREVLININR                                          | 0.779626697        | 3              | 3.446582  |
| P68101        | TEGLSVLNQAMAVIK                                                      | 1.075511179        | 2              | 3.869827  |
| P68101        | VVTDTDETELAR                                                         | 1.022197578        | 2              | 2.384977  |
| <b>P68136</b> | <b>ACTS Actin_alpha skeletal muscle</b>                              | <b>0.753069839</b> | <b>9.9E-20</b> | <b>15</b> |

|               |                                              |                    |                |          |
|---------------|----------------------------------------------|--------------------|----------------|----------|
| P68136        | AGFAGDDAPR                                   | 1.210729853        | 2              | 3.215099 |
| P68136        | AVFPSIVGRPR                                  | 0.852466795        | 2              | 2.534182 |
| P68136        | DLYANNVMSGGTTMYPGIADR                        | 0.719953849        | 2              | 4.446043 |
| P68136        | DSYVGDEAQSK                                  | 0.723795224        | 2              | 3.620298 |
| P68136        | EITALAPSTMK                                  | 0.768210768        | 2              | 3.009278 |
| P68136        | EITALAPSTMK+Oxidation(9)                     | 0.685226247        | 2              | 2.858631 |
| P68136        | GYSFVTTAER                                   | 0.773535696        | 2              | 3.37831  |
| P68136        | KDLYANNVMSGGTTMYPGIADR                       | 0.609287938        | 2              | 5.461151 |
| P68136        | KDLYANNVMSGGTTMYPGIADR+Oxidation(14)         | 0.795115831        | 3              | 3.684181 |
| P68136        | QEYDEAGPSIVHR                                | 0.54887948         | 2              | 2.957687 |
| P68136        | TTGIVLDSGDGVTHNVPIYEGYALPHAIMR               | 0.646560814        | 3              | 6.362449 |
| P68136        | TTGIVLDSGDGVTHNVPIYEGYALPHAIMR+Oxidation(28) | 0.609871217        | 3              | 4.602742 |
| P68136        | VAPEEHPTLLTEAPLNPK                           | 0.603069503        | 2              | 4.435998 |
| P68136        | YPIEHGIITNWDDMEK                             | 2.099104326        | 2              | 4.566063 |
| P68136        | YPIEHGIITNWDDMEK+Oxidation(13)               | 0.914459278        | 2              | 3.459258 |
| <b>P68255</b> | <b>1433T 14_3_3 protein theta</b>            | <b>0.925783577</b> | <b>0.99697</b> | <b>4</b> |
| P68255        | AVTEQGAELSNEER                               | 1.055080618        | 2              | 4.713728 |
| P68255        | SICTTVLELLDK                                 | 1.097415578        | 2              | 3.252977 |
| P68255        | TAFDEAIAELDTLNEDSYK                          | 0.926859732        | 2              | 4.265424 |
| P68255        | VISSIEQK                                     | 0.924561712        | 2              | 2.326001 |
| <b>P68511</b> | <b>1433F 14_3_3 protein eta</b>              | <b>1.202074082</b> | <b>0.0002</b>  | <b>3</b> |
| P68511        | AVTELNEPLSNEDR                               | 1.194031581        | 2              | 4.50381  |
| P68511        | ELETVCNDVLALLDK                              | 1.1999923          | 2              | 3.276484 |
| P68511        | NSVVEASEAAYK                                 | 1.251330774        | 2              | 2.634066 |
| <b>P69735</b> |                                              | <b>1.037448504</b> | <b>0.01231</b> | <b>6</b> |
| P69735        | AKMEENPPVK+Oxidation(2)                      | 0.955269385        | 1              | 1.944668 |
| P69735        | DYLGDFIEHYAQLGPSQPPDLAQQAQDEPR               | 0.903874418        | 3              | 3.74464  |
| P69735        | EDEVQLLVEK                                   | 0.770468782        | 1              | 1.911271 |
| P69735        | GEPKLPAMDKPGGK+Oxidation(7)                  | 1.032649155        | 2              | 2.312405 |
| P69735        | LIDDYGVEEPAELPEGTSLTVDNKR                    | 0.837870485        | 3              | 4.684844 |
| P69735        | QFDKMQAQLK                                   | 1.075324395        | 2              | 2.564309 |
| <b>P69897</b> | <b>TBB5 Tubulin beta_5 chain</b>             | <b>1.379116064</b> | <b>0.00012</b> | <b>3</b> |
| P69897        | ALTVPELTQQVFDK                               | 1.175515987        | 2              | 2.305296 |
| P69897        | ISVYNEATGGK                                  | 1.387412852        | 2              | 2.895912 |
| P69897        | LTTPTYGDLNHLVSATMSGVTTCLR                    | 1.300864464        | 2              | 4.921106 |
| <b>P70372</b> | <b>ELAV1 ELAV_like protein 1</b>             | <b>0.852089263</b> | <b>0.03018</b> | <b>3</b> |
| P70372        | SLFSSIGEVESAK                                | 0.903019281        | 2              | 3.548909 |
| P70372        | TNLIVNYLPQNMTQEELR                           | 1.255914324        | 2              | 2.981827 |
| P70372        | VLVDQTTGLSR                                  | 0.845762703        | 2              | 2.815492 |
| <b>P70470</b> | <b>LYPA1 Acyl_protein thioesterase 1</b>     | <b>1.10027816</b>  | <b>6.2E-11</b> | <b>2</b> |
| P70470        | ASFSQGPINSANR                                | 0.20142522         | 2              | 2.809319 |
| P70470        | DISVLQCHGDCDPLVPLMFGSLTVER                   | 1.111004634        | 3              | 3.534775 |

|               |                                                                                 |                    |                |           |
|---------------|---------------------------------------------------------------------------------|--------------------|----------------|-----------|
| <b>P70473</b> | <b>AMACR Alpha_methylacyl_CoA racemase</b>                                      | <b>0.926738777</b> | <b>9.9E-20</b> | <b>12</b> |
| P70473        | ADVLLLEPFR                                                                      | 0.686864905        | 2              | 3.403222  |
| P70473        | AEWCQIFDGTDACVTPVLTLEEALHHQHNR                                                  | 0.68966912         | 5              | 5.02812   |
| P70473        | DYGFSQEEIHLHSDR                                                                 | 0.592071932        | 2              | 4.88701   |
| P70473        | GLGLESEELPSQMSIEDWPEMK                                                          | 0.601438233        | 3              | 4.702718  |
| P70473        | GQNLLDGGAPFYTTYK                                                                | 0.703530114        | 2              | 4.894444  |
| P70473        | LGSVNHPSHLAR                                                                    | 0.841568689        | 2              | 2.850481  |
| P70473        | LQLGPETLR                                                                       | 0.66842412         | 2              | 2.30093   |
| P70473        | LSGFGQSGIFSK                                                                    | 0.992503626        | 2              | 2.417526  |
| P70473        | RDPSVGEHTVEVLK                                                                  | 0.603642525        | 3              | 4.293209  |
| P70473        | RDPSVGEHTVEVLKDYGFSQEEIHLHSDR                                                   | 0.762314482        | 5              | 4.788177  |
| P70473        | TADGEFMAVGAIEPQFYTLKK                                                           | 1.245505372        | 3              | 3.965599  |
| P70473        | TQAMGLWAQPR                                                                     | 0.753520422        | 2              | 2.810474  |
| <b>P70552</b> | <b>GFRP GTP cyclohydrolase 1 feedback regulatory protein</b>                    | <b>0.901817983</b> | <b>0.98064</b> | <b>2</b>  |
| P70552        | MEVGPTMVGDEHSDPELMQQLGASK                                                       | 0.860048758        | 3              | 3.703463  |
| P70552        | VLGNNFYEYYVNDPPR                                                                | 1.044979933        | 2              | 3.888212  |
| <b>P70580</b> | <b>PGRC1 Membrane_associated progesterone receptor component 1</b>              | <b>0.774561181</b> | <b>9.9E-20</b> | <b>7</b>  |
| P70580        | EGEPTVYSDDEEPKDEAAR                                                             | 0.607831245        | 2              | 4.241246  |
| P70580        | FYGPEGPYGVFAGR                                                                  | 0.867036801        | 2              | 3.586624  |
| P70580        | GDQPGASGDNDDEPPPLPR                                                             | 0.641577337        | 2              | 4.952713  |
| P70580        | IVRGDQPGASGDNDDEPPPLPR                                                          | 0.723674085        | 3              | 4.237782  |
| P70580        | KFYGPEGPYGVFAGR                                                                 | 0.982571703        | 2              | 3.744595  |
| P70580        | RYDGVQDPR                                                                       | 0.586173567        | 1              | 2.328986  |
| P70580        | YDGVQDPR                                                                        | 0.714932567        | 2              | 2.544315  |
| <b>P70584</b> | <b>ACDSB Short/branched chain specific acyl_CoA dehydrogenase_mitochondrial</b> | <b>0.544170063</b> | <b>9.9E-20</b> | <b>8</b>  |
| P70584        | ASSTCQLTFENVK                                                                   | 0.58988148         | 2              | 3.128057  |
| P70584        | FAQEIQIAPLVSTMDENSK                                                             | 0.641347428        | 2              | 4.062275  |
| P70584        | IFDFQGLQHVAHVATQLEAAR                                                           | 0.522387015        | 3              | 6.086495  |
| P70584        | IGTIYEGTSNIQLNTIAK                                                              | 0.58564462         | 2              | 4.336423  |
| P70584        | KFAQEIQIAPLVSTMDENSK                                                            | 0.648274107        | 2              | 5.470951  |
| P70584        | SGNYVINGSK                                                                      | 0.500521654        | 2              | 3.121269  |
| P70584        | VDASVALLCDIQNTVINK                                                              | 0.510900275        | 2              | 4.673234  |
| P70584        | YYASEVAGLTTSK                                                                   | 0.594320235        | 2              | 3.57634   |
| <b>P70615</b> | <b>LMNB1 Lamin_B1</b>                                                           | <b>0.720796226</b> | <b>0.00955</b> | <b>3</b>  |
| P70615        | ALYETELADAR                                                                     | 0.871550551        | 2              | 3.113181  |
| P70615        | LSSEMNTSTVNSAR                                                                  | 0.691271318        | 2              | 2.702589  |
| P70615        | MLSDKEREMAEIR+Oxidation(0)                                                      | 0.990307941        |                | 2.380429  |
| <b>P70694</b> | <b>DHB5 Estradiol 17 beta_dehydrogenase 5</b>                                   | <b>0.924951032</b> | <b>9.9E-20</b> | <b>2</b>  |
| P70694        | REDIFYTSK                                                                       | 1.411030209        | 2              | 2.979534  |
| P70694        | SIGVSNFNR                                                                       | 0.601113186        | 2              | 2.583139  |
| <b>P70712</b> | <b>KYNU Kynureninase</b>                                                        | <b>1.690377062</b> | <b>9.9E-20</b> | <b>8</b>  |

|               |                                                                  |                    |                |          |
|---------------|------------------------------------------------------------------|--------------------|----------------|----------|
| P70712        | IATELNCDPTDER                                                    | 0.913655687        | 2              | 3.821668 |
| P70712        | IGAYGHEVGK                                                       | 1.528134546        | 2              | 2.490699 |
| P70712        | LDEEDKLR                                                         | 1.279935248        | 2              | 2.515281 |
| P70712        | LLTAILDSTERN                                                     | 1.203610681        | 2              | 3.295213 |
| P70712        | TYLEEELDK                                                        | 1.291040822        | 1              | 2.038702 |
| P70712        | TYLEEELDKWAK                                                     | 1.294077146        | 2              | 2.403753 |
| P70712        | VAPVPLYNSFHDVYK                                                  | 1.88651099         | 2              | 3.105412 |
| P70712        | YLNSGAGGLAGAFIHEK                                                | 1.676340902        | 2              | 4.078792 |
| <b>P80067</b> | <b>CATC Dipeptidyl peptidase 1</b>                               | <b>0.962419223</b> | <b>1.4E-11</b> | <b>4</b> |
| P80067        | GTDECAIESIAMAIIPIK                                               | 0.942911638        | 3              | 4.953782 |
| P80067        | NSWGSQWGESGYFR                                                   | 0.875777593        | 2              | 3.494132 |
| P80067        | RGTDECAIESIAMAIIPIK                                              | 0.968997064        | 2              | 3.657653 |
| P80067        | YAQDFGVVEENCFPYTATDAPCKPK                                        | 1.508779095        | 3              | 4.700295 |
| <b>P80254</b> | <b>DOPD D_dopachrome decarboxylase</b>                           | <b>0.436777385</b> | <b>9.9E-20</b> | <b>4</b> |
| P80254        | FFPLEPWQIGK                                                      | 0.480815936        | 2              | 2.519263 |
| P80254        | FLTEELSLDQDR                                                     | 0.429927045        | 2              | 3.545529 |
| P80254        | LCAATATILDKPEDR                                                  | 0.941930335        | 2              | 4.564787 |
| P80254        | STEPCAHLLISSIGVVGTAEQNR                                          | 0.477010689        | 2              | 5.317988 |
| <b>P80299</b> | <b>HYES Epoxide hydrolase 2</b>                                  | <b>0.862868648</b> | <b>0.03472</b> | <b>2</b> |
| P80299        | GHIEDCGHWTQIEKPAEVDNQLIK                                         | 0.935714447        | 3              | 4.837795 |
| P80299        | TEIQNPSVTSK                                                      | 0.861602691        | 2              | 2.913949 |
| <b>P80313</b> | <b>TCPH T_complex protein 1 subunit eta</b>                      | <b>1.093241197</b> | <b>0.00218</b> | <b>6</b> |
| P80313        | ATISNDGATILK                                                     | 0.949630816        | 2              | 2.545905 |
| P80313        | EGTDSSQGIPQLVSNISACQVIAEAVR                                      | 0.959265943        | 3              | 3.729476 |
| P80313        | GGAEQFMEETER                                                     | 1.114747562        | 2              | 2.906068 |
| P80313        | LLDVVHPAAK                                                       | 1.008257371        | 2              | 2.322724 |
| P80313        | QLCDNAGFDATNINLK                                                 | 0.874735125        | 2              | 3.917185 |
| P80313        | SQDAEVDGTTSVTLAAEFLK                                             | 1.183677226        | 2              | 5.250331 |
| <b>P80317</b> | <b>TCPZ T_complex protein 1 subunit zeta</b>                     | <b>1.032669075</b> | <b>0.47795</b> | <b>8</b> |
| P80317        | ALQFLEQVK                                                        | 1.050573871        | 2              | 2.737882 |
| P80317        | DGNVLLHEMQIQHPTASLIAK                                            | 1.101904198        | 3              | 4.114798 |
| P80317        | GIDPFSLDALAK                                                     | 1.140144388        | 2              | 2.430478 |
| P80317        | HKSETDTSLR                                                       | 0.980445641        | 2              | 2.300486 |
| P80317        | NAIDDGCVVPGAGAVEVALAEALIK                                        | 0.902492368        | 3              | 5.683143 |
| P80317        | TEVNSGFFYK                                                       | 1.233905087        | 2              | 2.488636 |
| P80317        | VATAQDDITGDGTTSNVLIIGELLK                                        | 1.075476176        | 2              | 4.929206 |
| P80317        | VLAQNSGFDLQETLVK                                                 | 0.996693036        | 2              | 3.877496 |
| <b>P81155</b> | <b>VDAC2 Voltage_dependent anion_selective channel protein 2</b> | <b>0.936195455</b> | <b>0.00123</b> | <b>4</b> |
| P81155        | LTFDITTFSPNTGK                                                   | 0.833775535        | 2              | 3.17595  |
| P81155        | TGDFQLHTNVNNGTEFGGSIYQK                                          | 1.000744204        | 3              | 3.545638 |
| P81155        | VNSSLIGVGYTQLTRPGVK                                              | 0.949607274        | 2              | 3.622474 |
| P81155        | YQLDPTASISAK                                                     | 0.923853086        | 1              | 3.00689  |



|               |                                                |                    |                |           |
|---------------|------------------------------------------------|--------------------|----------------|-----------|
| <b>P82995</b> | <b>HS90A Heat shock protein HSP 90_alpha</b>   | <b>0.976628376</b> | <b>9.9E-20</b> | <b>13</b> |
| P82995        | ELHINLIPNKQDR                                  | 0.978857173        | 2              | 3.032042  |
| P82995        | ELINSSDALDK                                    | 0.939486096        | 2              | 2.835321  |
| P82995        | HIYFITGETK                                     | 1.261558585        | 2              | 2.404857  |
| P82995        | HLEINPDHSIETLR                                 | 0.90728155         | 2              | 4.003802  |
| P82995        | HSQFIGYPITLFVEK                                | 4.371271955        | 2              | 2.904588  |
| P82995        | LGIHEDSQNR                                     | 0.185901849        | 3              | 3.470865  |
| P82995        | NPDDITNEEYGEFYK                                | 1.657525797        | 2              | 4.723327  |
| P82995        | RAPFDLFENR                                     | 1.142845304        | 2              | 2.921669  |
| P82995        | SLTNDWEEHLAVK                                  | 1.125276301        | 2              | 4.105975  |
| P82995        | TLTIVDTGIGMTK                                  | 0.966270251        | 2              | 3.865714  |
| P82995        | TLTIVDTGIGMTK+Oxidation(10)                    | 0.75674364         | 2              | 3.918484  |
| P82995        | VFIMDNCEELIPEYLFIR                             | 1.420260633        | 3              | 3.487977  |
| P82995        | YYTSASGDEMVSLEK                                | 1.039131949        | 2              | 3.292574  |
| <b>P83868</b> | <b>TEBP Prostaglandin E synthase 3</b>         | <b>1.219575058</b> | <b>0.02227</b> | <b>2</b>  |
| P83868        | HLNEIDLFCIDPNDK                                | 1.875941856        | 3              | 3.527152  |
| P83868        | LTFSCGGSDNFK                                   | 1.004500307        | 2              | 2.528601  |
| <b>P83883</b> | <b>RL36A 60S ribosomal protein L36a</b>        | <b>1.013134209</b> | <b>0.74647</b> | <b>2</b>  |
| P83883        | HFELGGDK                                       | 0.891636683        | 1              | 2.020567  |
| P83883        | LECVENCR                                       | 1.055296304        | 2              | 2.528824  |
| <b>P84082</b> | <b>ARF2 ADP_ribosylation factor 2</b>          | <b>1.021566738</b> | <b>0.99809</b> | <b>2</b>  |
| P84082        | NISFTVWDVGGQDK                                 | 1.032798976        | 2              | 3.989875  |
| P84082        | QDLPNAMNAEITDK                                 | 0.944720595        | 2              | 4.20974   |
| <b>P84083</b> | <b>ARF5 ADP_ribosylation factor 5</b>          | <b>0.936179223</b> | <b>0.00018</b> | <b>3</b>  |
| P84083        | DAVLLVFANK                                     | 1.764792249        | 2              | 3.058684  |
| P84083        | QDMPNAMPVSELTDK+Oxidation(2)                   | 1.143795952        |                | 2.717098  |
| P84083        | VQESADELQK                                     | 0.828354751        | 2              | 2.59998   |
| <b>P84100</b> | <b>RL19 60S ribosomal protein L19</b>          | <b>1.020426515</b> | <b>1</b>       | <b>2</b>  |
| P84100        | LLADQAEAR                                      | 1.017090805        | 2              | 3.335081  |
| P84100        | VWLDPNETNEIANANSR                              | 1.020641413        | 2              | 5.162014  |
| <b>P84245</b> | <b>H33 Histone H3.3</b>                        | <b>0.878439185</b> | <b>0.00566</b> | <b>4</b>  |
| P84245        | DIQLAR                                         | 0.706925801        | 1              | 1.976937  |
| P84245        | FQSAAIGALQEASEAYLVGLFEDTNLCAIHAK               | 0.728423882        | 3              | 6.785794  |
| P84245        | RVTIMPKDIQLAR+Oxidation(4)                     | 0.97532219         | 1              | 1.915773  |
| P84245        | STELLIR                                        | 0.887553176        | 2              | 2.457721  |
| <b>P84817</b> | <b>FIS1 Mitochondrial fission 1 protein</b>    | <b>0.906275717</b> | <b>0.00062</b> | <b>4</b>  |
| P84817        | FQSEQAAGSVSK                                   | 0.680352984        | 2              | 2.549486  |
| P84817        | GIVLLELLPK                                     | 0.906270191        | 2              | 2.658628  |
| P84817        | GLLQTEPQNNQAK                                  | 0.971259782        | 2              | 3.539327  |
| P84817        | KFQSEQAAGSVSK                                  | 1.065461805        | 2              | 3.499165  |
| <b>P85834</b> | <b>EFTU Elongation factor Tu_mitochondrial</b> | <b>0.875300278</b> | <b>0.01419</b> | <b>14</b> |
| P85834        | AEAGDNLGALVR                                   | 0.962325651        | 2              | 3.413235  |
| P85834        | DKPHVNVGTIGHVDHGK                              | 0.698659485        | 2              | 3.494962  |

|               |                                                               |                    |                |           |
|---------------|---------------------------------------------------------------|--------------------|----------------|-----------|
| P85834        | DLEKPFLLPVESVYSIPGR                                           | 1.22231496         | 2              | 4.129338  |
| P85834        | GDECELLGHNK                                                   | 0.926585026        | 2              | 2.575683  |
| P85834        | GEETPVIVGSALCALEQR                                            | 1.040185899        | 2              | 4.288355  |
| P85834        | GITINAAHVEYSTAAR                                              | 0.941930335        | 2              | 4.019041  |
| P85834        | GTVVVTGLER                                                    | 0.932551105        | 2              | 2.645546  |
| P85834        | HYAHTDCPGHADYVK                                               | 1.436806061        | 2              | 4.116796  |
| P85834        | KGDECELLGHNK                                                  | 0.914979198        | 3              | 3.86336   |
| P85834        | KYEEIDNAPEER                                                  | 1.055706094        | 2              | 3.667236  |
| P85834        | LLDAVDTYIPVPTR                                                | 0.917430829        | 2              | 3.227089  |
| P85834        | TIGTGLVTDVPAMTEEDK                                            | 0.929348241        | 2              | 3.403549  |
| P85834        | TIGTGLVTDVPAMTEEDKNIK                                         | 1.074761274        | 2              | 4.004584  |
| P85834        | YEEIDNAPEER                                                   | 1.029899249        | 2              | 3.331055  |
| <b>P85968</b> | <b>6PGD 6_phosphogluconate dehydrogenase_ decarboxylating</b> | <b>1.29732584</b>  | <b>9.9E-20</b> | <b>8</b>  |
| P85968        | AGQAVDDFIEK                                                   | 1.384446724        | 2              | 3.103558  |
| P85968        | CLSSLKEER                                                     | 1.089918934        | 2              | 2.423365  |
| P85968        | FQDTDGKELLPK                                                  | 1.151320404        | 2              | 3.030175  |
| P85968        | GILFVSGVSGGEEGAR                                              | 1.535144864        | 2              | 4.725883  |
| P85968        | LVPLLDTGDIIDGGNSEYR                                           | 1.215145786        | 2              | 5.26126   |
| P85968        | NPELQNLLDDFFK                                                 | 2.099421679        | 2              | 4.66022   |
| P85968        | SAVDDCQDSWR                                                   | 1.15356943         | 2              | 2.506865  |
| P85968        | VGTGEPCCDWVGEDEGAGHFVK                                        | 1.126547338        | 3              | 4.650394  |
| <b>P85971</b> | <b>6PGL 6_phosphogluconolactonase</b>                         | <b>1.020777561</b> | <b>0.00066</b> | <b>5</b>  |
| P85971        | DLPAATAPAGPASFAR                                              | 0.829780604        | 2              | 2.545995  |
| P85971        | ILEDQESALPAAMVQPR                                             | 0.984565019        | 2              | 4.233101  |
| P85971        | LPIPDSQVLTIDPALPVEDAAEDYAR                                    | 1.208025209        | 2              | 4.756588  |
| P85971        | TGALCWFLDEAAAR                                                | 1.129383813        | 2              | 3.85347   |
| P85971        | WTLGFCDER                                                     | 1.195805155        | 2              | 2.493023  |
| <b>P85972</b> | <b>VINC Vinculin</b>                                          | <b>0.903962435</b> | <b>9.9E-20</b> | <b>6</b>  |
| P85972        | ALASQLQDSLK                                                   | 0.78605164         | 2              | 2.322105  |
| P85972        | AQQVSQGLDLTAK                                                 | 0.887128532        | 2              | 4.203481  |
| P85972        | AVAGNISDPGLQK                                                 | 0.753336564        | 2              | 3.268168  |
| P85972        | KIDAAQNWLADPNGGPEGEEQIR                                       | 0.762503839        | 3              | 5.293891  |
| P85972        | QVATALQNLQTK                                                  | 1.00017853         | 2              | 3.118102  |
| P85972        | WIDNPTVDDR                                                    | 0.749877558        | 2              | 2.729185  |
| <b>P85973</b> | <b>PNPH Purine nucleoside phosphorylase</b>                   | <b>0.85719183</b>  | <b>9.9E-20</b> | <b>10</b> |
| P85973        | ASHQEVLEAGK                                                   | 0.817430789        | 2              | 3.805377  |
| P85973        | DHINLPGFCGQNPLR                                               | 0.770182418        | 2              | 3.52973   |
| P85973        | ELQEGTYIMSAGPTFETVAESCLLR                                     | 0.914817822        | 2              | 5.170015  |
| P85973        | HRPQVAVICGSLGGLTAK                                            | 0.73480193         | 3              | 5.794366  |
| P85973        | LTQPQAFDYNEIPNPQSTVQGHAGR                                     | 1.145657185        | 3              | 4.307453  |
| P85973        | MLGADAVGMSTVPEVIVAR                                           | 0.844198633        | 2              | 4.222852  |
| P85973        | MLGADAVGMSTVPEVIVAR+Oxidation(0)                              | 0.877014084        | 2              | 5.281503  |

|               |                                                                   |                    |                |           |
|---------------|-------------------------------------------------------------------|--------------------|----------------|-----------|
| P85973        | MLGADAVGMSTVPEVIVAR+Oxidation(8)                                  | 0.877014084        | 2              | 3.416082  |
| P85973        | VFGFSLITNK                                                        | 1.217640471        | 2              | 2.472141  |
| P85973        | VFHLLGVDTLVVVTAAGGLNPK                                            | 0.896046383        | 2              | 4.924625  |
| <b>P86048</b> | <b>RL10L 60S ribosomal protein L10_like</b>                       | <b>1.214506915</b> | <b>0.00049</b> | <b>2</b>  |
| P86048        | AKVDEFPLCGHMVSDEYEQLSSEALEAAR                                     | 1.195562778        | 3              | 6.149157  |
| P86048        | VDEFPLCGHMVSDEYEQLSSEALEAAR                                       | 1.282186827        | 3              | 4.872549  |
| <b>P97313</b> | <b>PRKDC DNA_dependent protein kinase catalytic subunit</b>       | <b>0.90108229</b>  | <b>0.83702</b> | <b>2</b>  |
| P97313        | FHGVMKTLCLEVVLCR+Oxidation(4)                                     | 0.911698658        | 2              | 2.307758  |
| P97313        | LCHDAFTENMVGESQLLEK                                               | 0.781520375        | 2              | 2.55094   |
| <b>P97384</b> | <b>ANX11 Annexin A11</b>                                          | <b>0.879271166</b> | <b>0.03592</b> | <b>2</b>  |
| P97384        | GFGTDEQAIDCLGSR                                                   | 0.89698519         | 2              | 3.615065  |
| P97384        | SELDLLDIR                                                         | 0.833213639        | 2              | 2.996954  |
| <b>P97519</b> | <b>HMGCL Hydroxymethylglutaryl_CoA lyase_mitochondrial</b>        | <b>1.040539757</b> | <b>0.14285</b> | <b>7</b>  |
| P97519        | EVSIFGAASELFTR                                                    | 0.943953416        | 2              | 2.976622  |
| P97519        | GFEEAVAAGAK                                                       | 0.921053921        | 2              | 3.453538  |
| P97519        | GYVSCALGCPYEGK                                                    | 0.978272668        | 2              | 4.112865  |
| P97519        | KNVNCSIEESFQR                                                     | 1.076982202        | 2              | 3.457658  |
| P97519        | LLEAGDFICQALNR                                                    | 1.068028194        | 2              | 4.46894   |
| P97519        | NVNCSIEESFQR                                                      | 0.824506366        | 2              | 3.62254   |
| P97519        | WVPQMADHSDVLK                                                     | 0.949936757        | 2              | 2.315388  |
| <b>P97521</b> | <b>MCAT Mitochondrial carnitine/acylcarnitine carrier protein</b> | <b>0.852191242</b> | <b>3.5E-05</b> | <b>4</b>  |
| P97521        | CLLQIQASSGK                                                       | 0.753943459        | 2              | 3.040649  |
| P97521        | LQTQPPSLPGQPPMYSGTIDCFR                                           | 0.853454961        | 2              | 3.700874  |
| P97521        | SVHDLVPR                                                          | 0.813081653        | 2              | 2.354771  |
| P97521        | YSGTLDCAK                                                         | 0.945300661        | 2              | 2.453932  |
| <b>P97524</b> | <b>S27A2 Very long_chain acyl_CoA synthetase</b>                  | <b>0.866301572</b> | <b>0.23151</b> | <b>11</b> |
| P97524        | GEVGLLICK                                                         | 0.719651264        | 2              | 2.340047  |
| P97524        | IQDTIEITGTFK                                                      | 1.035266361        | 2              | 2.811436  |
| P97524        | TILHVFLQAR                                                        | 0.883279629        | 2              | 2.943198  |
| P97524        | TSNTNGVDTVLDK                                                     | 0.944585154        | 2              | 2.706554  |
| P97524        | TSNTNGVDTVLDKVDGVSADPIPESWR                                       | 0.965554742        | 3              | 4.738248  |
| P97524        | TYVPMTEDIYNAIIDK                                                  | 1.031851316        | 2              | 2.785213  |
| P97524        | VLLASPELHEAVEEVLP TLK                                             | 0.86745687         | 3              | 4.212831  |
| P97524        | VTLMEEGFNPSVIK                                                    | 1.05320129         | 2              | 3.952802  |
| P97524        | YDVEKDEPVR                                                        | 0.974186104        | 2              | 2.744646  |
| P97524        | YLCNTPQKPNDR                                                      | 1.006637172        | 2              | 2.826348  |
| P97524        | YNATVIQYIGELLR                                                    | 2.022633643        | 2              | 3.582401  |
| <b>P97532</b> | <b>THTM 3_mercaptopyruvate sulfurtransferase</b>                  | <b>0.996545585</b> | <b>9.9E-20</b> | <b>9</b>  |
| P97532        | AFGHHSVSLLDGGFR                                                   | 0.910263552        | 2              | 3.222543  |
| P97532        | ALVSAQWVAEALK                                                     | 1.189419243        | 2              | 3.222246  |
| P97532        | AQPEHVISQGR                                                       | 0.754287435        | 1              | 2.677281  |

|               |                                                            |                    |                |           |
|---------------|------------------------------------------------------------|--------------------|----------------|-----------|
| P97532        | DGIEPGHIPGSVNIPFTEFLTSEGLEK                                | 0.992524876        | 3              | 6.650425  |
| P97532        | FQGTQPEPR                                                  | 0.803842068        | 2              | 3.337012  |
| P97532        | LLDASWYLPK                                                 | 1.114499987        | 2              | 3.353261  |
| P97532        | SPSEPAEFCAQLDPSFIK                                         | 0.707616035        | 2              | 2.845774  |
| P97532        | THEDILENLDR                                                | 0.809923975        | 2              | 3.673381  |
| P97532        | YWLSQNLPISSGK                                              | 0.821632875        | 2              | 3.394027  |
| <b>P97536</b> | <b>CAND1 Cullin-associated NEDD8-dissociated protein 1</b> | <b>0.944678619</b> | <b>0.00041</b> | <b>5</b>  |
| P97536        | AADIDQEVK                                                  | 1.540341098        | 2              | 2.445155  |
| P97536        | AVAALLTIPEAEK                                              | 0.985181066        | 2              | 2.982876  |
| P97536        | EGPAVVGQFIQDVK                                             | 0.95931605         | 2              | 2.412363  |
| P97536        | ITSEALLVTQQLVK                                             | 0.930059026        | 2              | 2.634743  |
| P97536        | SVILEAFSSPSEEVK                                            | 1.104102972        | 2              | 2.473804  |
| <b>P97562</b> | <b>ACOX2 Peroxisomal acyl-coenzyme A oxidase 2</b>         | <b>1.173013517</b> | <b>9.9E-20</b> | <b>17</b> |
| P97562        | ATFADFCQAQAEICR                                            | 1.30033743         | 2              | 4.850674  |
| P97562        | CSAQTAADFR                                                 | 2.123765545        | 2              | 3.085899  |
| P97562        | DFSLLPELHALSTGMK                                           | 1.198094814        | 2              | 2.340362  |
| P97562        | EAFLLDLLPLIR                                               | 1.146038578        | 2              | 2.727204  |
| P97562        | FAEVLDPDGTQR                                               | 2.995724707        | 2              | 2.453399  |
| P97562        | HSPSFSVER                                                  | 1.017219603        | 2              | 2.428501  |
| P97562        | ILEYQTQQQK                                                 | 1.090596042        | 2              | 3.83991   |
| P97562        | KVESIIQSDPVFNLK                                            | 1.130275348        | 2              | 4.786794  |
| P97562        | LDKEPEIQR                                                  | 1.002136328        | 2              | 3.244909  |
| P97562        | LGTPQSNYLGMLVTR                                            | 1.164414569        | 2              | 2.535848  |
| P97562        | LTNILDGGLPNTVLR                                            | 1.179555391        | 2              | 4.597988  |
| P97562        | MGLEHIDNGFLQLNHVR                                          | 1.359997695        | 3              | 4.828183  |
| P97562        | MGLEHIDNGFLQLNHVR+Oxidation(0)                             | 0.946576505        | 3              | 3.619441  |
| P97562        | SGVDQHDAWNQTIVHLQAAK                                       | 1.199846535        | 3              | 6.059176  |
| P97562        | SLEDHTPLPGITVGDIGPK                                        | 1.061032926        | 3              | 4.702854  |
| P97562        | SLGSDEQIAK                                                 | 1.016569559        | 2              | 3.049968  |
| P97562        | VESIIQSDPVFNLK                                             | 1.034682039        | 2              | 4.591491  |
| <b>P97576</b> | <b>GRPE1 GrpE protein homolog 1_mitochondrial</b>          | <b>1.000661625</b> | <b>0.98195</b> | <b>2</b>  |
| P97576        | ATQSVPKKEEVSNNPHLK                                         | 0.950478911        | 3              | 3.407987  |
| P97576        | DLLEVADILEK                                                | 1.00071109         | 2              | 3.055806  |
| <b>P97584</b> | <b>PTGR1 Prostaglandin reductase 1</b>                     | <b>0.753406402</b> | <b>9.9E-20</b> | <b>5</b>  |
| P97584        | ALTDLMNWVSEGK                                              | 0.688873092        | 2              | 4.130702  |
| P97584        | GGETVLVNAAAGAVGSVVGQIAK                                    | 0.789938419        | 2              | 5.008087  |
| P97584        | HFEGFPTDSNFELR                                             | 0.67931574         | 2              | 3.695263  |
| P97584        | TGPCPPGPSPEVIYQQLR                                         | 1.212212469        | 2              | 4.300282  |
| P97584        | YHEYITEGF EK                                               | 0.654999776        | 2              | 2.851187  |
| <b>P97608</b> | <b>OPLA 5_oxoprolinase</b>                                 | <b>1.241491925</b> | <b>3.6E-09</b> | <b>7</b>  |
| P97608        | AGDFGAAFVER                                                | 1.043888206        | 2              | 3.00888   |
| P97608        | GSILDPSPEAAVGGNVLTSQR                                      | 0.79675399         | 2              | 4.885572  |

|               |                                                                 |                    |                |           |
|---------------|-----------------------------------------------------------------|--------------------|----------------|-----------|
| P97608        | ISVGAEGPSMADTR                                                  | 0.739346518        | 2              | 2.714082  |
| P97608        | ISVGAEGPSMADTR+Oxidation(9)                                     | 1.145378079        | 2              | 2.466193  |
| P97608        | LEEQCVDALQVQGFP                                                 | 1.197877121        | 2              | 3.049272  |
| P97608        | LLSEDPANYADAPTEGIR                                              | 1.032336387        | 2              | 2.839118  |
| P97608        | TGDILLEIQQPVLDLEALR                                             | 0.796309168        | 2              | 4.829195  |
| <b>P97612</b> | <b>FAAH1 Fatty_acid amide hydrolase 1</b>                       | <b>1.165028561</b> | <b>0.00056</b> | <b>4</b>  |
| P97612        | GHDSTLGLSLNEGMPSEDCVQVVLK                                       | 1.10073339         | 3              | 3.591303  |
| P97612        | GTNCVTSYLTDCETQLSQAPR                                           | 1.181689096        | 2              | 4.879849  |
| P97612        | NSVGLPVAVQCVALPWQEELCLR                                         | 1.123332481        | 2              | 4.063348  |
| P97612        | SPGGSSGGEGALIGSGGSPGLGTDIGGSIR                                  | 2.194512676        | 2              | 4.87486   |
| <b>P97700</b> | <b>M2OM Mitochondrial 2_oxoglutarate/malate carrier protein</b> | <b>0.808221103</b> | <b>9.9E-20</b> | <b>3</b>  |
| P97700        | AVVVNAAQLASYSQSK                                                | 0.782329618        | 2              | 4.311816  |
| P97700        | GIYTGLSAGLLR                                                    | 0.851653067        | 2              | 2.622166  |
| P97700        | LTGADGTTPPGFLLK                                                 | 0.851150032        | 2              | 3.422353  |
| <b>P97840</b> | <b>LEG9 Galectin_9</b>                                          | <b>1.867885111</b> | <b>9.9E-20</b> | <b>3</b>  |
| P97840        | FEEGGYVCNTK                                                     | 0.88951295         | 2              | 3.237333  |
| P97840        | NTQJNNSWGPEER                                                   | 2.876304485        | 2              | 2.723046  |
| P97840        | SINISGVVLPDAK                                                   | 2.547201767        | 2              | 3.433416  |
| <b>P97852</b> | <b>DHB4 Peroxisomal multifunctional enzyme type 2</b>           | <b>0.960654875</b> | <b>9.9E-20</b> | <b>18</b> |
| P97852        | AVANYDSVEAGEK                                                   | 1.022125279        | 2              | 3.929727  |
| P97852        | AYALFAER                                                        | 1.061715701        | 2              | 3.263891  |
| P97852        | DTTSLNQAALYR                                                    | 0.866941176        | 2              | 3.229864  |
| P97852        | FVYEGSADFCLPTFGVIVAQK                                           | 0.890091146        | 2              | 2.947545  |
| P97852        | GALVVVNDLGGDFK                                                  | 1.607178649        | 2              | 4.200909  |
| P97852        | GSSAADKVVEEIR                                                   | 0.865927186        | 2              | 2.397472  |
| P97852        | HVLQQFADNDVSR                                                   | 0.855237179        | 2              | 4.407331  |
| P97852        | ICDFSNASKPK                                                     | 0.890602858        | 2              | 3.254502  |
| P97852        | IDSEGISQNHGTQVASADASGFAGVVGHK                                   | 0.903224721        | 3              | 5.58683   |
| P97852        | IDVVVNNAGILR                                                    | 0.87153721         | 2              | 3.944085  |
| P97852        | ISDEDWDIIQR                                                     | 0.751114833        | 2              | 4.123106  |
| P97852        | KNNIHCNTIAPNAGSR                                                | 0.743379334        | 2              | 4.658937  |
| P97852        | NGSGEVYQGP                                                      | 1.209471386        | 2              | 3.576514  |
| P97852        | NNIHCNTIAPNAGSR                                                 | 0.764262884        | 2              | 4.358411  |
| P97852        | SIQESTGGIIEVLHK                                                 | 0.979628644        | 2              | 4.30546   |
| P97852        | SLMSGGLAEVPLSINFAK                                              | 0.807996299        | 2              | 3.511303  |
| P97852        | VLHGQYLELYKPLPR                                                 | 1.151453873        | 2              | 3.994061  |
| P97852        | VVLVTGAGGGLGR                                                   | 0.887174325        | 2              | 3.597025  |
| <b>Q00438</b> | <b>PTBP1 Polypyrimidine tract_binding protein 1</b>             | <b>1.122217687</b> | <b>0.83777</b> | <b>3</b>  |
| Q00438        | KLPSDVTEGEVISLGLPFGK                                            | 1.018437297        | 2              | 4.227991  |
| Q00438        | LSLDGQNIYNACCTLR                                                | 1.099326225        | 2              | 3.753609  |
| Q00438        | NNQFQALLQYADPVSAQHAK                                            | 1.079044609        | 2              | 5.375885  |

|               |                                                                                                                             |                    |                |           |
|---------------|-----------------------------------------------------------------------------------------------------------------------------|--------------------|----------------|-----------|
| <b>Q00PI9</b> | <b>HNRL2 Heterogeneous nuclear ribonucleoprotein U_like protein 2</b>                                                       | <b>0.96868927</b>  | <b>1.5E-09</b> | <b>2</b>  |
| Q00PI9        | AVEEQGDDQDSEK                                                                                                               | 0.429011366        | 2              | 3.897223  |
| Q00PI9        | EEAQPIVTKYK                                                                                                                 | 1.766051501        | 1              | 1.984461  |
| <b>Q01177</b> | <b>PLMN Plasminogen</b>                                                                                                     | <b>0.931964384</b> | <b>0.1213</b>  | <b>3</b>  |
| Q01177        | CTTPPPPPGPTYQCLK                                                                                                            | 0.881478701        | 2              | 2.537731  |
| Q01177        | ILGSDVQQIAVTK                                                                                                               | 0.94172605         | 2              | 3.478179  |
| Q01177        | LVLEPNDADIALLK                                                                                                              | 1.157513906        | 2              | 2.814899  |
| <b>Q01205</b> | <b>ODO2 Dihydrolypoyllysine_residue succinyltransferase component of 2_oxoglutarate dehydrogenase complex_mitochondrial</b> | <b>1.090941339</b> | <b>6.7E-16</b> | <b>4</b>  |
| Q01205        | ASAFALQEQPVVNAVIDDATK                                                                                                       | 0.950681962        | 2              | 6.292093  |
| Q01205        | NDVITVQTPAFAESVTEGDVR                                                                                                       | 1.089614812        | 2              | 5.237657  |
| Q01205        | NVETMNYADIER                                                                                                                | 1.102437125        | 2              | 3.539021  |
| Q01205        | VEGGTPLFTLR                                                                                                                 | 1.008539122        | 2              | 3.126445  |
| <b>Q01279</b> | <b>EGFR Epidermal growth factor receptor</b>                                                                                | <b>1.00839656</b>  | <b>0.61034</b> | <b>2</b>  |
| Q01279        | NLQEILIGAVR                                                                                                                 | 1.018697771        | 2              | 3.523454  |
| Q01279        | NYVVTDHGSCVR                                                                                                                | 0.657220616        | 2              | 2.721021  |
| <b>Q01405</b> | <b>SC23A Protein transport protein Sec23A</b>                                                                               | <b>1.234105675</b> | <b>2.6E-05</b> | <b>4</b>  |
| Q01405        | AETEEGPDVLR                                                                                                                 | 0.517541848        | 2              | 3.104984  |
| Q01405        | AVLNPLCQVDYR                                                                                                                | 1.023095842        | 2              | 2.917633  |
| Q01405        | HLLQAPVDDAQEILHSR                                                                                                           | 1.224957997        | 3              | 5.489069  |
| Q01405        | YIDTEHGGSQAR                                                                                                                | 1.355807623        | 2              | 3.128011  |
| <b>Q02253</b> | <b>MMSA Methylmalonate_semialdehyde dehydrogenase [acylating]_mitochondrial</b>                                             | <b>0.790799584</b> | <b>9.9E-20</b> | <b>29</b> |
| Q02253        | AEMEAAVAACK                                                                                                                 | 0.822756999        | 2              | 3.756109  |
| Q02253        | AEMEAAVAACK+Oxidation(2)                                                                                                    | 0.878156451        | 2              | 2.369361  |
| Q02253        | AEMEAAVAACKR                                                                                                                | 0.931620684        | 2              | 2.441915  |
| Q02253        | AFPAWADTSILSR                                                                                                               | 0.906198595        | 2              | 4.043441  |
| Q02253        | AISFVGSNQAGEYIFER                                                                                                           | 1.02807779         | 2              | 5.210232  |
| Q02253        | CMALSTAVLVGEAK                                                                                                              | 0.972755426        | 2              | 4.284485  |
| Q02253        | CMALSTAVLVGEAK+Oxidation(1)                                                                                                 | 0.721024979        | 2              | 3.390106  |
| Q02253        | EEDATLSSPAVVMPTMGR                                                                                                          | 0.658541859        | 2              | 4.364034  |
| Q02253        | EEDATLSSPAVVMPTMGR+Oxidation(12)                                                                                            | 0.680062655        | 2              | 2.658854  |
| Q02253        | EEDATLSSPAVVMPTMGR+Oxidation(15)                                                                                            | 0.680062655        | 2              | 2.994363  |
| Q02253        | EGASILLDGR                                                                                                                  | 0.609139695        | 2              | 2.5253    |
| Q02253        | ENTLNQLVGAAFGAAGQR                                                                                                          | 0.706009437        | 2              | 5.265094  |
| Q02253        | GLQVVEHACSVTSLMLGETMPSITK                                                                                                   | 0.920943206        | 2              | 3.128989  |
| Q02253        | IVNDNPYNGNTAIFTNGAIAR                                                                                                       | 1.011512093        | 2              | 5.46838   |
| Q02253        | LFIDGK                                                                                                                      | 0.802269111        | 1              | 1.98009   |
| Q02253        | LITLEQGK                                                                                                                    | 0.834583183        | 2              | 2.542436  |
| Q02253        | LLQDSGAPDGTLNIIHGQHEAVNFICDHPDIK                                                                                            | 1.812536861        | 3              | 4.534876  |
| Q02253        | NHGVMMPDANK                                                                                                                 | 0.666982321        | 1              | 3.37557   |
| Q02253        | NHGVMMPDANK+Oxidation(5)                                                                                                    | 0.869560902        | 2              | 3.133326  |

|               |                                            |                    |                |           |
|---------------|--------------------------------------------|--------------------|----------------|-----------|
| Q02253        | NHGVVMPDANKENTLNQLVGAAFGAAGQR              | 0.747787933        | 3              | 5.583002  |
| Q02253        | NHGVVMPDANKENTLNQLVGAAFGAAGQR+Oxidation(5) | 0.654853869        | 3              | 4.536937  |
| Q02253        | QGIQFYTLK                                  | 1.381239275        | 2              | 2.633466  |
| Q02253        | SDKWIDIHNPATNEVVGR                         | 0.934817455        | 2              | 5.003437  |
| Q02253        | TITSQWKEEDATLSSPAVVMPTMGR                  | 0.720331112        | 2              | 5.229124  |
| Q02253        | TLADAEGDVFR                                | 0.797394144        | 2              | 3.557268  |
| Q02253        | VCNLIDSGAK                                 | 0.775203517        | 2              | 3.419867  |
| Q02253        | VNAGDQPGADLGLIPTQAK                        | 0.78538064         | 2              | 5.872653  |
| Q02253        | WIDIHNPATNEVVGR                            | 0.854945724        | 2              | 4.806534  |
| Q02253        | WLPELVER                                   | 0.707701586        | 1              | 2.047425  |
| <b>Q02769</b> | <b>FDFT Squalene synthase</b>              | <b>1.038306616</b> | <b>0.00034</b> | <b>3</b>  |
| Q02769        | KLEDFVKPENVDVAVK                           | 1.179240347        | 2              | 4.008185  |
| Q02769        | TQSLPNCQLSR                                | 0.260756416        | 2              | 2.373805  |
| Q02769        | VVLEDFPTISLEFR                             | 0.482053553        | 2              | 3.191253  |
| <b>Q02874</b> | <b>H2AY Core histone macro_H2A.1</b>       | <b>1.045474004</b> | <b>4.4E-13</b> | <b>2</b>  |
| Q02874        | AASADSTTEGAPTDGFTVLSTK                     | 1.462722517        | 2              | 3.90074   |
| Q02874        | GVTIASGGVLPNIHPELLAK                       | 0.839483799        | 2              | 3.725696  |
| <b>Q02974</b> | <b>KHK Ketoheokinase</b>                   | <b>1.068689603</b> | <b>4E-13</b>   | <b>7</b>  |
| Q02974        | CGLQFGDGIV                                 | 1.086639411        | 1              | 1.931799  |
| Q02974        | GATLICAWAEEGADALGPDGQLLHSDAFPPPR           | 1.030959808        | 3              | 5.789862  |
| Q02974        | GGNASNSCTVLSLLGAR                          | 1.274109199        | 2              | 4.769522  |
| Q02974        | GNSMQEALR                                  | 0.896208819        | 2              | 2.796444  |
| Q02974        | GVDVSQVAWQSQGDTPCSCCIVNNSNGSR              | 1.076385592        | 3              | 5.776125  |
| Q02974        | IEQYNATQPLQKQ                              | 1.22017294         | 2              | 4.823329  |
| Q02974        | TIILYDTNLPDVSAK                            | 1.057888466        | 2              | 4.160303  |
| <b>Q03070</b> | <b>CHIO Beta_chimaerin</b>                 | <b>0.765428659</b> | <b>2.3E-06</b> | <b>2</b>  |
| <b>Q03248</b> | <b>BUP1 Beta_ureidopropionase</b>          | <b>0.970909297</b> | <b>9.9E-20</b> | <b>12</b> |
| Q03248        | AHHDLYFYGSSVVAAPDGSR                       | 1.137221058        | 2              | 6.31155   |
| Q03248        | EDLVLPSSG                                  | 0.780898314        | 1              | 2.16939   |
| Q03248        | EKLPWTEFAESAEDGLTTR                        | 0.865451288        | 3              | 5.420652  |
| Q03248        | ELAEAVKPNYSPNIVK                           | 0.806367987        | 2              | 3.999628  |
| Q03248        | ELAEAVKPNYSPNIVKEDLVLPSSG                  | 0.829364435        | 3              | 3.450475  |
| Q03248        | HNMVVISPILER+Oxidation(2)                  | 0.759577473        | 3              | 3.323118  |
| Q03248        | IPLPTSAPVAEQVSALHK                         | 2.327940296        | 3              | 4.736858  |
| Q03248        | KHNMVVISPILER+Oxidation(3)                 | 0.789175991        | 2              | 2.854398  |
| Q03248        | NAAIANHCFTCALNR                            | 1.116599573        | 2              | 4.615192  |
| Q03248        | VGDFNESTYYMEGNLGHVPFQTQFGR                 | 1.312718004        | 3              | 4.766819  |
| Q03248        | VGQEHYPNEFTSGDGK                           | 1.093395904        | 2              | 4.202857  |
| Q03248        | VGQEHYPNEFTSGDGKK                          | 1.000462983        | 3              | 4.390571  |
| <b>Q03336</b> | <b>RGN Regucalcin</b>                      | <b>0.785329189</b> | <b>9.9E-20</b> | <b>16</b> |
| Q03336        | CGESPVWEEASK                               | 0.837209433        | 2              | 4.634557  |
| Q03336        | CLLFVDIPSK                                 | 1.089598939        | 2              | 3.587068  |

|               |                                                        |                    |                |          |
|---------------|--------------------------------------------------------|--------------------|----------------|----------|
| Q03336        | DEQIPDGMCIDVEGK                                        | 0.86032315         | 2              | 3.844223 |
| Q03336        | DYSEMYVTCAR                                            | 0.855820491        | 2              | 3.533961 |
| Q03336        | FNDGKVDPAGR                                            | 0.927783754        | 2              | 3.094414 |
| Q03336        | HQGSLSLFPDHSVK                                         | 1.186305911        | 2              | 4.67337  |
| Q03336        | KYFDQVDISNGLDWSLDHK                                    | 0.758245017        | 3              | 5.102449 |
| Q03336        | LWVACYNGGR                                             | 1.628194239        | 2              | 2.36953  |
| Q03336        | MEKDEQIPDGMCIDVEGK                                     | 1.151179734        | 2              | 4.941734 |
| Q03336        | MEKDEQIPDGMCIDVEGK+Oxidation(0)                        | 0.818526183        | 2              | 4.421831 |
| Q03336        | MEKDEQIPDGMCIDVEGK+Oxidation(10)                       | 0.813069756        | 2              | 2.582642 |
| Q03336        | QSGGYVATIGTK                                           | 0.843776624        | 2              | 2.832511 |
| Q03336        | VGVDAPVSSVALR                                          | 0.947335316        | 2              | 3.732556 |
| Q03336        | YFAGTMAEETAPAVLER                                      | 0.958344117        | 2              | 5.615844 |
| Q03336        | YFAGTMAEETAPAVLER+Oxidation(5)                         | 0.869205346        | 2              | 5.258267 |
| Q03336        | YFDQVDISNGLDWSLDHK                                     | 0.832720789        | 3              | 4.203415 |
| <b>Q03626</b> | <b>MUG1 Murinoglobulin_1</b>                           | <b>1.007067407</b> | <b>5.7E-08</b> | <b>7</b> |
| Q03626        | EESSCIHSSCTAER                                         | 0.956202458        | 2              | 4.015704 |
| Q03626        | FQVDNSNR                                               | 0.93198053         | 1              | 2.28701  |
| Q03626        | GGEFEMMPLGVNK                                          | 0.96339725         | 2              | 2.409217 |
| Q03626        | LTAQPAPSPEDLALSMGTIK                                   | 1.167240894        | 2              | 3.480268 |
| Q03626        | NLHPLNELFPLAYIEDPK                                     | 1.755197776        | 3              | 4.353296 |
| Q03626        | VQTVPLTCNNPK                                           | 1.045953132        | 2              | 3.028707 |
| Q03626        | VYHKEESSCIHSSCTAER                                     | 0.795025959        | 3              | 4.322114 |
| <b>Q04462</b> | <b>SYVC Valyl_tRNA synthetase</b>                      | <b>0.866259068</b> | <b>1.5E-05</b> | <b>2</b> |
| Q04462        | ALNPLEEWLR                                             | 0.977083663        | 2              | 2.618196 |
| Q04462        | SVTQQPGSEITAPQK                                        | 0.861431186        | 2              | 3.727619 |
| <b>Q05144</b> | <b>RAC2 Ras_related C3 botulinum toxin substrate 2</b> | <b>0.878741432</b> | <b>0.00216</b> | <b>2</b> |
| Q05144        | MQAIKCVVVGDAVGK+Oxidation(0)                           | 0.872380797        | 2              | 2.594978 |
| Q05144        | YLECSALTQR                                             | 0.927145315        | 2              | 2.628647 |
| <b>Q06647</b> | <b>ATPO ATP synthase subunit O_mitochondrial</b>       | <b>1.027446984</b> | <b>0.24158</b> | <b>5</b> |
| Q06647        | FSPLTANLMNLLAENGR                                      | 1.252820232        | 3              | 3.963166 |
| Q06647        | GEVPCTVTTAFPLDEAVLSELK                                 | 0.987110883        | 3              | 5.991828 |
| Q06647        | GQILNLEVK                                              | 1.03221577         | 2              | 2.615952 |
| Q06647        | LGNTQGVISAFSTIMSVHR                                    | 1.393121057        | 3              | 3.541844 |
| Q06647        | TDPSIMGGMIVR                                           | 0.96531454         | 2              | 2.301752 |
| <b>Q07071</b> | <b>GCKR Glucokinase regulatory protein</b>             | <b>1.359502652</b> | <b>9.9E-20</b> | <b>8</b> |
| Q07071        | AAPISCHVQVAHEK                                         | 1.326297725        | 2              | 4.98641  |
| Q07071        | LLGQCDAEIFQEEGQIVPTYQR                                 | 2.238377865        | 2              | 2.985001 |
| Q07071        | QEAFVLNPAIGPEGLSGSSR                                   | 1.455430294        | 2              | 4.102199 |
| Q07071        | STQALEDPPACGTLN                                        | 1.409127538        | 2              | 2.646906 |
| Q07071        | TVDQGVVSSQR                                            | 1.258875487        | 2              | 3.20456  |
| Q07071        | VIPTALLSLLLR                                           | 1.453318013        | 2              | 2.589844 |
| Q07071        | VQEVLKEPDGGLVVLSSGGTSGR                                | 1.331735417        | 2              | 5.320509 |



|               |                                                                  |                    |                |           |
|---------------|------------------------------------------------------------------|--------------------|----------------|-----------|
| Q07071        | YQHVIETPEPGEWELSGYEAAPITEK                                       | 1.413431066        | 3              | 5.388371  |
| <b>Q07116</b> | <b>SUOX Sulfite oxidase_mitochondrial</b>                        | <b>1.014664031</b> | <b>0.19413</b> | <b>6</b>  |
| Q07116        | AVDDSYNVQPDTVAPIWNLR                                             | 0.925596257        | 2              | 4.816015  |
| Q07116        | FVDLHPGGQSK                                                      | 1.200633903        | 2              | 2.821556  |
| Q07116        | IGELNPEDR                                                        | 0.942905359        | 2              | 2.325684  |
| Q07116        | LHVVGAPGGQSLSLDDLHK                                              | 0.900526043        | 3              | 3.886066  |
| Q07116        | NHLPVPLNDPDTYR                                                   | 0.871757083        | 2              | 2.47862   |
| Q07116        | VSESEESYSHWQR                                                    | 0.986586164        | 2              | 3.830728  |
| <b>Q07523</b> | <b>HAOX2 Hydroxyacid oxidase 2</b>                               | <b>0.817014129</b> | <b>9.9E-20</b> | <b>11</b> |
| Q07523        | ALKEEKPTQSVPVSPFK                                                | 0.631303873        | 2              | 4.133059  |
| Q07523        | ALVITIDTPVLGNR                                                   | 0.691749819        | 2              | 4.480488  |
| Q07523        | ASFCWNDLSLLQSITR                                                 | 0.891950319        | 2              | 4.316896  |
| Q07523        | E EKPTQSVPVSPFK                                                  | 0.670689475        | 2              | 3.173342  |
| Q07523        | EVL DILTAELHR                                                    | 0.742187321        | 2              | 3.358614  |
| Q07523        | GEDGVKEVLDILTAELHR                                               | 0.748449743        | 3              | 5.201115  |
| Q07523        | HNVQGIVVSNHGGR                                                   | 0.687211225        | 3              | 5.9516    |
| Q07523        | NQLNLEANILLK                                                     | 0.773696824        | 2              | 3.470469  |
| Q07523        | QLDEVASIDALR                                                     | 0.602678571        | 2              | 3.484373  |
| Q07523        | TSWDFIEGEADDGITYSENIAAFK                                         | 0.786970759        | 3              | 3.543399  |
| Q07523        | TTIQGQEISAPICISPTAFHSIAWPDGEK                                    | 1.407574824        | 3              | 3.989794  |
| <b>Q07936</b> | <b>ANXA2 Annexin A2</b>                                          | <b>0.642364641</b> | <b>4.9E-10</b> | <b>2</b>  |
| Q07936        | GLGTDEDSLIEICSR                                                  | 0.777802093        | 2              | 2.932078  |
| Q07936        | GVDEVTVINILTNR                                                   | 0.617834998        | 2              | 3.449976  |
| <b>Q07984</b> | <b>SSRD Translocon_associated protein subunit delta</b>          | <b>1.172128195</b> | <b>1.6E-06</b> | <b>2</b>  |
| Q07984        | FFDEESYLLR                                                       | 1.31384182         | 2              | 3.224594  |
| Q07984        | NNEDVSIIPPLFTVSDHR                                               | 1.138907077        | 3              | 3.842327  |
| <b>Q08163</b> | <b>CAP1 Adenylyl cyclase_associated protein 1</b>                | <b>0.992723242</b> | <b>0.00565</b> | <b>5</b>  |
| Q08163        | ALLVTASQCQPAGNK                                                  | 0.745910074        | 2              | 4.613036  |
| Q08163        | LEAVSHTSDMHCGYGDSPSK                                             | 0.887540337        | 3              | 4.2197    |
| Q08163        | SALFAQINQGESITHALK                                               | 1.045078375        | 2              | 4.037986  |
| Q08163        | SSEMNVLIPTEGGDFNEFPVPEQFK                                        | 0.972296832        | 2              | 3.930781  |
| Q08163        | VENQENVSNLVIDDELK                                                | 0.889019505        | 2              | 4.953146  |
| <b>Q08415</b> | <b>KAT1 Kynurenine_oxoglutarate transaminase 1_mitochondrial</b> | <b>1.177434169</b> | <b>0.10025</b> | <b>3</b>  |
| Q08415        | EQQHFGQPSSYFLQLPQAMELNR                                          | 1.128908612        | 3              | 4.526573  |
| Q08415        | ILVLNTPNNPLGK                                                    | 1.380558708        | 2              | 2.832564  |
| Q08415        | LGASNDWQLDPAELASK                                                | 0.496295577        | 2              | 3.293769  |
| <b>Q09073</b> | <b>ADT2 ADP/ATP translocase 2</b>                                | <b>1.31088002</b>  | <b>5.5E-05</b> | <b>7</b>  |
| Q09073        | AAAYFGIYDTAK                                                     | 1.57583845         | 2              | 2.480694  |
| Q09073        | DFLAGGVAAAIK                                                     | 0.976730823        | 2              | 4.675204  |
| Q09073        | GLGDCLVK                                                         | 1.038139276        | 2              | 2.623147  |
| Q09073        | GTDIMYTGTLDCWR                                                   | 1.308052615        | 2              | 3.479454  |
| Q09073        | LLLQVQHASK                                                       | 1.303791136        | 2              | 2.476515  |

|               |                                                           |                    |                |           |
|---------------|-----------------------------------------------------------|--------------------|----------------|-----------|
| Q09073        | QIFLGGVDK                                                 | 1.269088091        | 2              | 2.503343  |
| Q09073        | QIFLGGVDKR                                                | 1.494616499        | 2              | 2.571011  |
| <b>Q09199</b> | <b>B4GN2 Beta_1_4 N_acetylgalactosaminyltransferase 2</b> | <b>0.874724497</b> | <b>0.26393</b> | <b>2</b>  |
| Q09199        | MKYKFQDAYNQK+Oxidation(0)                                 | 0.968515127        | 2              | 3.007985  |
| Q09199        | QQTVPKLYDPGPER                                            | 0.872768475        | 2              | 2.309048  |
| <b>Q0D2L3</b> | <b>SPEB Agmatinase_mitochondrial</b>                      | <b>0.950346898</b> | <b>2.8E-15</b> | <b>5</b>  |
| Q0D2L3        | EHGVPGLVHVGHSNTSDKPLEDK                                   | 0.755563291        | 3              | 3.741223  |
| Q0D2L3        | IREESLMLGTVNPSTGALPFQSLR                                  | 1.003938841        | 3              | 3.913607  |
| Q0D2L3        | SVDEGLLDSK                                                | 0.715955408        | 1              | 1.903493  |
| Q0D2L3        | SVDEGLLDSKR                                               | 0.884400418        | 2              | 2.748976  |
| Q0D2L3        | VADLGNVNVNLYNLQDSCR                                       | 1.41137168         | 2              | 5.483888  |
| <b>Q0VGK3</b> | <b>GLCTK Glycerate kinase</b>                             | <b>0.781099065</b> | <b>0.01554</b> | <b>4</b>  |
| Q0VGK3        | AVLGMAAADELLGQHLVQGVISVPK                                 | 0.720132054        | 3              | 5.455039  |
| Q0VGK3        | GATIQELNTR                                                | 0.938271914        | 2              | 3.501949  |
| Q0VGK3        | QLFDSAVGAVQPGPMLQR                                        | 0.884890447        | 2              | 2.399611  |
| Q0VGK3        | VAAACLSSTAERPLEEAK                                        | 1.055576811        | 3              | 3.379326  |
| <b>Q0ZHH6</b> | <b>ATLA3 Atlastin_3</b>                                   | <b>1.016480792</b> | <b>0.51165</b> | <b>4</b>  |
| Q0ZHH6        | EHGHSNWLGDPEEPLTGFSWR                                     | 1.035058655        | 3              | 4.163634  |
| Q0ZHH6        | EQLQTLIPYVNLPSK                                           | 1.176936779        | 2              | 2.875535  |
| Q0ZHH6        | GGSDPETTGIIQWSEVFTVK                                      | 0.876413323        | 2              | 4.574502  |
| Q0ZHH6        | YQEELEEITELYENFCK                                         | 1.024699851        | 2              | 5.473967  |
| <b>Q10758</b> | <b>K2C8 Keratin_type II cytoskeletal 8</b>                | <b>0.767122829</b> | <b>9.9E-20</b> | <b>23</b> |
| Q10758        | AEAETMYQIK                                                | 0.744304658        | 2              | 3.217112  |
| Q10758        | AQYEEIANR                                                 | 0.797289582        | 2              | 3.317327  |
| Q10758        | ATLEAAIADAEQR                                             | 0.796992864        | 2              | 4.673237  |
| Q10758        | ELQSQISDTSVVLMSDNSR                                       | 0.846276947        | 2              | 6.021467  |
| Q10758        | GSLGGFGGAGVGGITAVTVNQSLNPLK                               | 0.745339132        | 2              | 4.456502  |
| Q10758        | LEGLTDEINFLR                                              | 0.845309521        | 2              | 4.172653  |
| Q10758        | LESGMQNMSIHTK                                             | 0.775685192        | 2              | 3.791135  |
| Q10758        | LEVDPNIQAVR                                               | 0.800382548        | 2              | 3.754794  |
| Q10758        | LEVELGNMQGLVEDFK                                          | 0.738204618        | 2              | 4.838166  |
| Q10758        | LKLEVELGNMQGLVEDFK                                        | 0.978312267        | 3              | 3.924508  |
| Q10758        | LQAEIDALK                                                 | 0.760016852        | 2              | 2.71283   |
| Q10758        | LVSESSDIMSK                                               | 0.748383117        | 2              | 3.276882  |
| Q10758        | QIHEEEIR                                                  | 0.676612362        | 1              | 2.260443  |
| Q10758        | RQLEALGQEK                                                | 0.65625577         | 2              | 2.342144  |
| Q10758        | SKTEISEMNR                                                | 0.703806761        | 3              | 3.435878  |
| Q10758        | SKTEISEMNR+Oxidation(7)                                   | 0.79369188         | 3              | 3.316963  |
| Q10758        | SLDMSIIAEVR                                               | 0.788229019        | 2              | 4.385111  |
| Q10758        | SNMDNMFESYINNLNLR                                         | 1.726074577        | 2              | 3.930996  |
| Q10758        | SRAEAETMYQIK                                              | 0.791870098        | 2              | 3.419209  |
| Q10758        | TEMENEFVLIK                                               | 0.792065392        | 2              | 3.704112  |

|               |                                                                            |                    |                |           |
|---------------|----------------------------------------------------------------------------|--------------------|----------------|-----------|
| Q10758        | TEMENEFVLIK+Oxidation(2)                                                   | 0.611201823        | 2              | 2.607109  |
| Q10758        | WLLQQQK                                                                    | 0.747025744        | 2              | 2.621778  |
| Q10758        | YEELQTLGK                                                                  | 0.733966358        | 2              | 3.533819  |
| <b>Q14DH7</b> | <b>ACSS3 Acyl_CoA synthetase short_chain family member 3_mitochondrial</b> | <b>0.770541955</b> | <b>9.9E-20</b> | <b>4</b>  |
| Q14DH7        | STLSALVNGKPYK                                                              | 0.806612282        | 2              | 2.8071    |
| Q14DH7        | THFAASVADPER                                                               | 0.747531015        | 2              | 3.363013  |
| Q14DH7        | VDDVINVAGHR                                                                | 0.503049104        | 2              | 3.013592  |
| Q14DH7        | VTPTIEDPSIFGHIEEVK                                                         | 1.001907391        | 2              | 3.448131  |
| <b>Q1HCL7</b> | <b>NAKD1 NAD kinase domain_containing protein 1</b>                        | <b>0.642119726</b> | <b>9.9E-20</b> | <b>10</b> |
| Q1HCL7        | ALNEVFIGESLSSR                                                             | 0.730319126        | 2              | 2.597473  |
| Q1HCL7        | ASYEISVDDGPWEK                                                             | 0.998427741        | 2              | 3.469481  |
| Q1HCL7        | LKPVIGVNTDPER                                                              | 0.808762956        | 2              | 2.842851  |
| Q1HCL7        | LYLEGTGINPSPVDLHEQQSLNQHSR                                                 | 0.818743174        | 3              | 3.944955  |
| Q1HCL7        | NVEHIIDSLRDEGIEVR                                                          | 0.696306815        | 2              | 2.637195  |
| Q1HCL7        | QGNLTLPLNK                                                                 | 0.641627412        | 2              | 2.576342  |
| Q1HCL7        | SEASGPQLLPVR                                                               | 0.823374377        | 2              | 3.095424  |
| Q1HCL7        | SEGHLCPLVR                                                                 | 0.522830313        | 2              | 2.406078  |
| Q1HCL7        | SSGLNLCTGTGSK                                                              | 0.630946687        | 2              | 3.354122  |
| Q1HCL7        | VTNEYNESLLYSPEEPK                                                          | 0.870770234        | 2              | 4.72075   |
| <b>Q1JU68</b> | <b>EIF3A Eukaryotic translation initiation factor 3 subunit A</b>          | <b>1.005942164</b> | <b>0.01403</b> | <b>5</b>  |
| Q1JU68        | EEEEQRRAEEQMLK                                                             | 0.863835455        | 2              | 2.594255  |
| Q1JU68        | EQPEKEPELQYVVPQLQNNILR                                                     | 0.944222203        | 3              | 3.709209  |
| Q1JU68        | FNVLQYVPEVK                                                                | 1.276900435        | 2              | 3.468587  |
| Q1JU68        | ILQEHEQIK                                                                  | 0.96163498         | 2              | 2.484971  |
| Q1JU68        | MPAYFQRPENALK                                                              | 1.186506212        | 2              | 2.501138  |
| <b>Q29RW1</b> | <b>MYH4 Myosin_4</b>                                                       | <b>0.961384371</b> | <b>0.06128</b> | <b>5</b>  |
| Q29RW1        | LQDAEEHVEAVNSK                                                             | 0.102146639        | 2              | 4.558672  |
| Q29RW1        | NAYEESLDQLETLK                                                             | 0.886350217        | 2              | 4.672459  |
| Q29RW1        | NAYEESLDQLETLKR                                                            | 0.605426467        | 2              | 3.788425  |
| Q29RW1        | TLEDQLSEVK                                                                 | 0.599293994        | 1              | 1.938447  |
| Q29RW1        | VKNLTEEMAGLDENIVKLTk+Oxidation(7)                                          | 1.138007295        | 2              | 2.487515  |
| <b>Q2V057</b> | <b>PROD2 Probable proline dehydrogenase 2</b>                              | <b>1.007801815</b> | <b>0.08682</b> | <b>5</b>  |
| Q2V057        | EDCTQPDYEATSR                                                              | 0.966330431        | 2              | 3.190851  |
| Q2V057        | GCVQQLQAIGLQPLAVPTEEEPDSAAK                                                | 1.194252835        | 3              | 3.583256  |
| Q2V057        | NLQLSCLSTEQNQHLLQASLSR                                                     | 1.187823411        | 2              | 5.547729  |
| Q2V057        | REQALLSQELWR                                                               | 0.989259339        | 2              | 3.067287  |
| Q2V057        | SIPYGCLEEVIPYLIR                                                           | 1.717088296        | 2              | 2.365288  |
| <b>Q3B7D0</b> | <b>HEM6 Coproporphyrinogen_III oxidase_mitochondrial</b>                   | <b>1.062069834</b> | <b>0.51385</b> | <b>3</b>  |
| Q3B7D0        | AGVNISVVHGNLSEEAANQMR                                                      | 1.101910657        | 3              | 3.806794  |
| Q3B7D0        | HCDDSYTPQDK                                                                | 1.406912041        | 2              | 2.985642  |
| Q3B7D0        | LEEDGDELAR                                                                 | 1.032338442        | 2              | 2.450053  |

|               |                                                                            |                    |                |          |
|---------------|----------------------------------------------------------------------------|--------------------|----------------|----------|
| <b>Q3B7U9</b> | <b>FKBP8 Peptidyl_prolyl cis_trans isomerase FKBP8</b>                     | <b>0.844934976</b> | <b>9.9E-20</b> | <b>4</b> |
| Q3B7U9        | SCSQVLEHQPDNIK                                                             | 0.594153035        | 2              | 3.929116 |
| Q3B7U9        | TAEDGPDLEMLSGQER                                                           | 0.845044723        | 2              | 3.198392 |
| Q3B7U9        | VDMTCEEEEEELLQLK                                                           | 0.971919623        | 2              | 3.349041 |
| Q3B7U9        | VLAQQGEYSEAIPILR                                                           | 0.712287272        | 2              | 3.627445 |
| <b>Q3KRD8</b> | <b>IF6 Eukaryotic translation initiation factor 6</b>                      | <b>0.89042755</b>  | <b>0.02415</b> | <b>2</b> |
| Q3KRD8        | HGLLVPNNTTDQELQHIR                                                         | 0.886153874        | 3              | 4.528344 |
| Q3KRD8        | TSIEDQDELSLLQVPLVAGTVNR                                                    | 1.023453534        | 3              | 4.264246 |
| <b>Q3KRE0</b> | <b>ATAD3 ATPase family AAA domain_containing protein 3</b>                 | <b>1.131687497</b> | <b>0.17772</b> | <b>2</b> |
| Q3KRE0        | GEGTGPPLPPAQPGAESGGDR                                                      | 1.213142373        | 2              | 3.390961 |
| Q3KRE0        | QEESVQKQEAIRR                                                              | 0.931985111        | 2              | 2.44646  |
| <b>Q3KRE8</b> | <b>TBB2B Tubulin beta_2B chain</b>                                         | <b>1.340398952</b> | <b>4.6E-11</b> | <b>2</b> |
| Q3KRE8        | ALTVPELTQQMFDSK                                                            | 1.27483158         | 2              | 3.126923 |
| Q3KRE8        | EESCDCLQGFQLTHSLGGGTGSGMGTLLISK                                            | 1.232332016        | 3              | 4.442835 |
| <b>Q3MIE0</b> | <b>ECHD3 Enoyl_CoA hydratase domain_containing protein 3_mitochondrial</b> | <b>0.902278656</b> | <b>9.9E-20</b> | <b>5</b> |
| Q3MIE0        | DGQEGIEAFIQK                                                               | 0.848550887        | 2              | 3.315477 |
| Q3MIE0        | SDILHEAESEDLK                                                              | 0.791151178        | 2              | 3.217865 |
| Q3MIE0        | SSFATPGVNVGLFCSTPAVALGR                                                    | 1.260024109        | 2              | 4.293262 |
| Q3MIE0        | VIIISAEGPVFSSGHDLK                                                         | 0.943647935        | 2              | 4.24602  |
| Q3MIE0        | VVPEEQLEEEATR                                                              | 0.707504542        | 2              | 3.862801 |
| <b>Q3MIF4</b> | <b>XYLB Xylulose kinase</b>                                                | <b>0.76417672</b>  | <b>4.7E-09</b> | <b>6</b> |
| Q3MIF4        | DLPEFGTQGGVHVHK                                                            | 0.965906685        | 2              | 2.580442 |
| Q3MIF4        | FNADNMEVSAFP GDVEIR                                                        | 0.864214757        | 2              | 3.543281 |
| Q3MIF4        | IRDESASCWKN                                                                | 0.754593835        | 2              | 4.038109 |
| Q3MIF4        | VVAFTGDNPASLAGMR                                                           | 1.004279965        | 2              | 3.41045  |
| Q3MIF4        | VWSQAACLDACAPHLK                                                           | 1.071421336        | 2              | 3.482405 |
| Q3MIF4        | YSPIDYSDGSGMNLQIQEK                                                        | 0.950955022        | 2              | 5.232971 |
| <b>Q3T1J1</b> | <b>IF5A1 Eukaryotic translation initiation factor 5A_1</b>                 | <b>1.102526291</b> | <b>0.00555</b> | <b>4</b> |
| Q3T1J1        | EDLRLPEGDLGK                                                               | 0.89198005         | 2              | 2.930072 |
| Q3T1J1        | EDLRLPEGDLGKEIEQK                                                          | 1.188463995        | 2              | 3.861861 |
| Q3T1J1        | NDFQLIGIQDGYLSLLQDSGEVR                                                    | 1.122402635        | 3              | 5.472258 |
| Q3T1J1        | RNDFQLIGIQDGYLSLLQDSGEVR                                                   | 1.143835713        | 3              | 3.902327 |
| <b>Q3T1K5</b> | <b>CAZA2 F_actin_capping protein subunit alpha_2</b>                       | <b>1.021521549</b> | <b>0.69733</b> | <b>2</b> |
| Q3T1K5        | FIHAPPGEFNEVFNDVR                                                          | 1.079592379        | 3              | 3.792885 |
| Q3T1K5        | FTVTPSTTQVVGILK                                                            | 0.965755201        | 2              | 3.448036 |
| <b>Q3U2P1</b> | <b>SC24A Protein transport protein Sec24A</b>                              | <b>0.965588725</b> | <b>0.8582</b>  | <b>2</b> |
| Q3U2P1        | SVTASLSDAR                                                                 | 0.956644169        | 2              | 2.603142 |
| Q3U2P1        | TLETQSALGPALQAAFK                                                          | 1.036580399        | 2              | 3.101465 |
| <b>Q3UHR0</b> | <b>BAHC1 BAH and coiled_coil domain_containing protein 1</b>               | <b>1.00225234</b>  | <b>0.99794</b> | <b>2</b> |
| Q3UHR0        | MQILQRKDTWAPK+Oxidation(0)                                                 | 1.009236588        | 2              | 2.321075 |

|               |                                                                |                    |                |           |
|---------------|----------------------------------------------------------------|--------------------|----------------|-----------|
| Q3UHR0        | NLEEPGLLSR                                                     | 1.002136328        | 2              | 2.323716  |
| <b>Q3ULJ0</b> | <b>GPD1L Glycerol_3_phosphate dehydrogenase 1_like protein</b> | <b>1.078451143</b> | <b>0.20655</b> | <b>2</b>  |
| Q3ULJ0        | GIDEGPDGLK                                                     | 1.033421521        | 2              | 2.679812  |
| Q3ULJ0        | LGLMEMIAFAK                                                    | 1.300475555        | 2              | 3.309729  |
| <b>Q3UQ44</b> | <b>IQGA2 Ras GTPase_activating_like protein IQGAP2</b>         | <b>1.169547842</b> | <b>9.9E-20</b> | <b>13</b> |
| Q3UQ44        | ALVGSNPPLTVIR                                                  | 1.154367175        | 2              | 3.418619  |
| Q3UQ44        | AWVQNLETQTGEASK                                                | 0.995300741        | 2              | 5.008138  |
| Q3UQ44        | GVLLGIDDLQTNQFK                                                | 1.198669087        | 2              | 4.802857  |
| Q3UQ44        | HTDNTVQWLR                                                     | 0.919400156        | 2              | 2.322217  |
| Q3UQ44        | LFEGENEHLSSMNNYSETYQEFR                                        | 1.520151916        | 3              | 4.136055  |
| Q3UQ44        | LGIAPQIQDLLGK                                                  | 1.375845717        | 2              | 2.56322   |
| Q3UQ44        | LPYDVTTEQALTYPEVK                                              | 1.070460467        | 2              | 4.874897  |
| Q3UQ44        | LSAEEMDER                                                      | 1.17495013         | 2              | 2.67249   |
| Q3UQ44        | NPNAVLTCVDDSLSEQYQK                                            | 1.291561503        | 2              | 4.945505  |
| Q3UQ44        | TALEEEIK                                                       | 1.025688327        | 1              | 1.909055  |
| Q3UQ44        | TLDTLLLPTANIR                                                  | 1.002218256        | 2              | 2.733276  |
| Q3UQ44        | VDQVQDIVTGNPTVIK                                               | 1.117587169        | 2              | 5.287315  |
| Q3UQ44        | YQDILNEIAK                                                     | 1.077531291        | 2              | 2.58773   |
| <b>Q3UU35</b> | <b>OVOS Ovostatin homolog</b>                                  | <b>0.370256018</b> | <b>0.04455</b> | <b>2</b>  |
| Q3UU35        | EQQAKSLLSILDK                                                  | 0.362899242        | 2              | 2.37259   |
| Q3UU35        | FSGPNNTPLVDK                                                   | 0.625601028        | 2              | 2.364866  |
| <b>Q3V0K9</b> | <b>PLSI Plastin_1</b>                                          | <b>0.929146114</b> | <b>9.9E-20</b> | <b>3</b>  |
| Q3V0K9        | AYFHLLNQIAPK                                                   | 1.309203768        | 2              | 2.663215  |
| Q3V0K9        | KIENCNYAVELGK                                                  | 0.755916056        | 2              | 3.589231  |
| Q3V0K9        | QFVTPADVVSIGNPK                                                | 0.734893119        | 2              | 3.499646  |
| <b>Q3V132</b> | <b>ADT4 ADP/ATP translocase 4</b>                              | <b>0.925422083</b> | <b>0.40608</b> | <b>2</b>  |
| Q3V132        | GNLANVIR                                                       | 0.919303444        | 2              | 2.646248  |
| Q3V132        | YFPTQALNFAFK                                                   | 1.550145795        | 2              | 2.502429  |
| <b>Q497B0</b> | <b>NIT2 Omega_amidase NIT2</b>                                 | <b>1.128264047</b> | <b>9.9E-20</b> | <b>14</b> |
| Q497B0        | ADLYSVESK                                                      | 1.194491268        | 2              | 3.008034  |
| Q497B0        | AGTEETILYSDIDLK                                                | 1.408572707        | 2              | 3.699649  |
| Q497B0        | ASYVAWGHSTVVPWGQVLTGK                                          | 0.920295484        | 2              | 4.762712  |
| Q497B0        | AVDNQVYVATASPAR                                                | 1.297726721        | 2              | 4.74165   |
| Q497B0        | AVDNQVYVATASPARDEK                                             | 1.269964813        | 2              | 3.292629  |
| Q497B0        | ENSIYLIGGSIPEDDGK                                              | 0.925051386        | 2              | 2.586455  |
| Q497B0        | ENSIYLIGGSIPEDDGKLYNTCAVFGPDGNLLVK                             | 1.101254552        | 3              | 4.024076  |
| Q497B0        | FAELAQIYAR                                                     | 1.822768224        | 2              | 3.688807  |
| Q497B0        | IHLFDIDVPGK                                                    | 1.113752823        | 2              | 2.809039  |
| Q497B0        | KIHLFDIDVPGK                                                   | 1.113875184        | 3              | 4.679057  |
| Q497B0        | LALIQLQVSSIK                                                   | 1.271735112        | 2              | 3.060254  |
| Q497B0        | LYNTCAVFGPDGNLLVK                                              | 0.957869175        | 2              | 4.117814  |
| Q497B0        | QGANIVSLPECFNSPYGTNYFPEYAEK                                    | 1.178908756        | 2              | 4.250361  |

|               |                                                                                       |                    |                |          |
|---------------|---------------------------------------------------------------------------------------|--------------------|----------------|----------|
| Q497B0        | TLSPGDSFSTFDTPYCR                                                                     | 1.486410747        | 2              | 4.699053 |
| <b>Q499N5</b> | <b>ACSF2 Acyl_CoA synthetase family member 2_ mitochondrial</b>                       | <b>1.335222646</b> | <b>1.6E-13</b> | <b>7</b> |
| Q499N5        | GATLSHHNIVNNSNLIGQR                                                                   | 1.227215254        | 2              | 4.682648 |
| Q499N5        | GGENIYPAELEDFHFK                                                                      | 1.126491104        | 2              | 2.742203 |
| Q499N5        | GGVIAGSLAPPELIR                                                                       | 1.207661971        | 2              | 2.785322 |
| Q499N5        | SGETTTEEEIK                                                                           | 0.939675623        | 2              | 3.294297 |
| Q499N5        | TGDIASMDEQGFCR                                                                        | 1.230367923        | 2              | 3.372527 |
| Q499N5        | TVGECLDATAQR                                                                          | 1.221254326        | 2              | 2.631075 |
| Q499N5        | YIVFVEGYPLTVSGK                                                                       | 1.366543055        | 2              | 4.147549 |
| <b>Q4AEF8</b> | <b>COPG Coatomer subunit gamma</b>                                                    | <b>1.387856716</b> | <b>0.0003</b>  | <b>4</b> |
| Q4AEF8        | FGAQNEEMLPSILVLLK                                                                     | 1.092442159        | 2              | 4.009438 |
| Q4AEF8        | QEIFQEQLAAVPEFQGLGPLFK                                                                | 1.456109424        | 2              | 3.801677 |
| Q4AEF8        | SSPEPVALTESETEYVIR                                                                    | 1.165623356        | 2              | 3.881681 |
| Q4AEF8        | TLEEAVGNIVK                                                                           | 0.845818962        | 2              | 2.43452  |
| <b>Q4FZT0</b> | <b>STML2 Stomatin_like protein 2</b>                                                  | <b>0.896381936</b> | <b>1.4E-12</b> | <b>7</b> |
| Q4FZT0        | AEQINQAAGEASAVLAK                                                                     | 0.85419056         | 2              | 5.218204 |
| Q4FZT0        | ASYGVEDPEYAVTQLAQTMR                                                                  | 1.113994208        | 2              | 4.073671 |
| Q4FZT0        | ATVLESEGTR                                                                            | 1.072888241        | 2              | 2.572175 |
| Q4FZT0        | DVQTTDTSIEELGR                                                                        | 1.75876585         | 2              | 2.917351 |
| Q4FZT0        | ESLNANIVDAINQAADCWGIR                                                                 | 0.96530357         | 2              | 3.014851 |
| Q4FZT0        | ILEPGLNLVLPVLDLDR                                                                     | 0.857555891        | 2              | 2.651004 |
| Q4FZT0        | NTVILFVPQQEAWVVER                                                                     | 0.897364584        | 2              | 3.309701 |
| <b>Q4FZT9</b> | <b>PSMD2 26S proteasome non_ATPase regulatory subunit 2</b>                           | <b>0.915096062</b> | <b>0.00018</b> | <b>5</b> |
| Q4FZT9        | DKTPVQSQQPSATAPSGADEK                                                                 | 0.804161715        | 3              | 4.879641 |
| Q4FZT9        | FGSGSQVDSAR                                                                           | 0.892543392        | 2              | 3.545676 |
| Q4FZT9        | SGALLACGIVNSGVR                                                                       | 0.904980537        | 2              | 3.538701 |
| Q4FZT9        | TPVQSQQPSATAPSGADEK                                                                   | 0.986243909        | 2              | 4.180166 |
| Q4FZT9        | VGQAVDVVGQAGKPK                                                                       | 1.360887293        | 2              | 2.717344 |
| <b>Q4FZX7</b> | <b>SRPRB Signal recognition particle receptor subunit beta</b>                        | <b>1.88580809</b>  | <b>9.9E-20</b> | <b>4</b> |
| Q4FZX7        | GDAGSADVQDLEK                                                                         | 1.204766199        | 2              | 3.076029 |
| Q4FZX7        | GNSLTLIDLPGHESLR                                                                      | 1.126703059        | 2              | 3.208313 |
| Q4FZX7        | SAAPSTLSSSTAPAQLGK                                                                    | 1.891170532        | 2              | 4.373162 |
| Q4FZX7        | VGDGAGGAFQPYLDSLRL                                                                    | 1.159320489        | 2              | 3.320086 |
| <b>Q4G061</b> | <b>EIF3B Eukaryotic translation initiation factor 3 subunit B</b>                     | <b>0.997812822</b> | <b>0.44079</b> | <b>3</b> |
| Q4G061        | AEEEGSDGSAEAEPR                                                                       | 0.856892556        | 2              | 4.599443 |
| Q4G061        | AKPAAQSEEETAASPAASPTPQSAQEPSAPGK                                                      | 0.404183332        | 3              | 5.275448 |
| Q4G061        | GTQGVVTNFEIFR                                                                         | 0.983076451        | 2              | 3.065531 |
| <b>Q4KLP0</b> | <b>DHTK1 Probable 2_oxoglutarate dehydrogenase E1 component DHKTD1_ mitochondrial</b> | <b>1.062343277</b> | <b>2E-08</b>   | <b>9</b> |
| Q4KLP0        | KSIPDTYAEHLIASGLMTQEEVSDIK                                                            | 1.08247087         | 3              | 4.865601 |
| Q4KLP0        | LEELCPFPLDSLQEMGK                                                                     | 0.954626748        | 2              | 4.992385 |

|               |                                                                                        |                    |                |           |
|---------------|----------------------------------------------------------------------------------------|--------------------|----------------|-----------|
| Q4KLP0        | LLLESQEFDFHFLATK                                                                       | 1.085063766        | 2              | 3.371296  |
| Q4KLP0        | LVTVYCEHGHK                                                                            | 1.235688565        | 2              | 2.367546  |
| Q4KLP0        | SIPDTYAEHLIASGLMTQEEVSDIK                                                              | 1.041435345        | 3              | 5.054205  |
| Q4KLP0        | SSLYSSDIGK                                                                             | 1.145076981        | 1              | 2.062884  |
| Q4KLP0        | SVEVPEELQLHSHLLK                                                                       | 1.163101868        | 2              | 3.52528   |
| Q4KLP0        | YGGEGAESMMGFFHELLK                                                                     | 1.282180263        | 3              | 4.722781  |
| Q4KLP0        | YPVAVSTLEEMAPGTAFKPVIGDSSVDPK                                                          | 0.97851018         | 3              | 4.712882  |
| <b>Q4KLZ6</b> |                                                                                        | <b>1.209426991</b> | <b>9.9E-20</b> | <b>12</b> |
| Q4KLZ6        | AAPTEPAEPEATAAGGVASK                                                                   | 1.193582579        | 2              | 5.051637  |
| Q4KLZ6        | AILEVLQTK                                                                              | 1.667234945        | 2              | 3.141289  |
| Q4KLZ6        | ANTDLPAWSAAMDAGLK                                                                      | 1.207756639        | 2              | 3.147828  |
| Q4KLZ6        | ASYISSAQLDQPDGAVAAAAIFR                                                                | 1.085488645        | 2              | 5.352194  |
| Q4KLZ6        | AVAQAGTAGTLLIVK                                                                        | 1.624436033        | 2              | 3.992459  |
| Q4KLZ6        | EGPTPASPAQVLSK                                                                         | 1.250347254        | 1              | 3.086317  |
| Q4KLZ6        | ISTTLIGLEEHLNALDR                                                                      | 1.782213041        | 2              | 3.044081  |
| Q4KLZ6        | LIDAETNAK                                                                              | 1.249189014        | 2              | 2.538576  |
| Q4KLZ6        | LNFLAMEQAK                                                                             | 0.580745001        | 2              | 2.756873  |
| Q4KLZ6        | LSVLLLEK                                                                               | 2.019691107        | 2              | 2.381109  |
| Q4KLZ6        | MVNSVEGCAGDALAGFVACNPDLQLLQGYR                                                         | 1.324788721        | 3              | 5.413909  |
| Q4KLZ6        | VAGALAEEMGLEEITK                                                                       | 1.95162309         | 2              | 4.002456  |
| <b>Q4KM49</b> | <b>SYYC Tyrosyl_tRNA synthetase_cytoplasmic</b>                                        | <b>1.077761078</b> | <b>0.00355</b> | <b>6</b>  |
| Q4KM49        | AFCEPGNVENNGVLSFVK                                                                     | 0.961674638        | 2              | 3.160332  |
| Q4KM49        | IDVGAEPR                                                                               | 1.113711285        | 2              | 2.331782  |
| Q4KM49        | QVEHPLLSGLLYPGLQALDEEYK                                                                | 1.180157041        | 3              | 3.43755   |
| Q4KM49        | QVEPLDPPAGSAPGER                                                                       | 0.880078714        | 2              | 2.731626  |
| Q4KM49        | TVVSGLVQFVPK                                                                           | 1.035221014        | 2              | 2.93474   |
| Q4KM49        | VDAQFGGIDQR                                                                            | 1.188770221        | 2              | 3.163657  |
| <b>Q4KM73</b> | <b>KCY UMP_CMP kinase</b>                                                              | <b>1.00739412</b>  | <b>8.7E-05</b> | <b>6</b>  |
| Q4KM73        | EMDQTMANAQAQ+Oxidation(1)                                                              | 0.716010355        |                | 2.546498  |
| Q4KM73        | IQTYLESTKPIIDLYEEMGK                                                                   | 1.100589476        | 2              | 4.265735  |
| Q4KM73        | KNPDSQYGELIEK                                                                          | 1.125080617        | 2              | 4.059239  |
| Q4KM73        | NQDNLQGWNK                                                                             | 1.016211686        | 2              | 3.003123  |
| Q4KM73        | SVDEVFGDVMK                                                                            | 1.056704951        | 1              | 2.380033  |
| Q4KM73        | YGYTHLSAGELLR                                                                          | 1.135633044        | 3              | 4.363742  |
| <b>Q4KM74</b> | <b>SC22B Vesicle_trafficking protein SEC22b</b>                                        | <b>1.064520638</b> | <b>0.65341</b> | <b>3</b>  |
| Q4KM74        | DLQQYQSQAK                                                                             | 1.147263411        | 2              | 3.044678  |
| Q4KM74        | GEALSALDSK                                                                             | 1.005953067        | 2              | 2.943116  |
| Q4KM74        | NLGSINTELQDVQR                                                                         | 0.981155366        | 2              | 4.12268   |
| <b>Q4KMA2</b> | <b>RD23B UV excision repair protein RAD23 homolog B</b>                                | <b>0.907611509</b> | <b>0.00921</b> | <b>2</b>  |
| Q4KMA2        | IDIDPEETVK                                                                             | 0.955269385        | 1              | 2.552562  |
| Q4KMA2        | QIIQQNPSLLPALLQQIGR                                                                    | 0.871477441        | 2              | 4.851447  |
| <b>Q4LDD4</b> | <b>ARAP1 Arf_GAP with Rho_GAP domain_ANK repeat and PH domain_containing protein 1</b> | <b>1.160073589</b> | <b>0.07884</b> | <b>2</b>  |

|               |                                                                                          |                    |                |          |
|---------------|------------------------------------------------------------------------------------------|--------------------|----------------|----------|
| Q4LDD4        | LLDSLQDAR                                                                                | 0.608461012        | 2              | 2.353717 |
| Q4LDD4        | LSSASVLGVRGSEQPDR                                                                        | 1.194344022        | 2              | 2.469859 |
| <b>Q4QQV3</b> | <b>F162A Protein FAM162A</b>                                                             | <b>1.007622704</b> | <b>0.96662</b> | <b>2</b> |
| Q4QQV3        | EEEIPETISFEMLDAAK                                                                        | 0.937798324        | 2              | 3.691034 |
| Q4QQV3        | RHESLTSNLER                                                                              | 1.029422281        | 3              | 3.913064 |
| <b>Q4QQW3</b> | <b>HOT Hydroxyacid_oxoacid transhydrogenase_mitochondrial</b>                            | <b>0.877226553</b> | <b>0.09815</b> | <b>3</b> |
| Q4QQW3        | HLETAELGANIR                                                                             | 0.813892712        | 2              | 2.340286 |
| Q4QQW3        | NLSQLPPVQJVMDSLK                                                                         | 0.856157346        | 2              | 2.713561 |
| Q4QQW3        | VEPTDGSFMDAIEFAK                                                                         | 0.962299625        | 2              | 3.162513 |
| <b>Q4QRB4</b> | <b>TBB3 Tubulin beta_3 chain</b>                                                         | <b>1.09590979</b>  | <b>1.3E-15</b> | <b>4</b> |
| Q4QRB4        | AILVDLEPGTMDSVR                                                                          | 1.014012681        | 2              | 3.54907  |
| Q4QRB4        | AILVDLEPGTMDSVR+Oxidation(10)                                                            | 1.009891706        | 2              | 3.759681 |
| Q4QRB4        | EIVHIQAGQCGNQIGAK                                                                        | 1.053556716        | 2              | 5.062567 |
| Q4QRB4        | ISEQFTAMFR                                                                               | 1.519435926        | 2              | 3.349626 |
| <b>Q4V7C7</b> | <b>ARP3 Actin_related protein 3</b>                                                      | <b>0.804760951</b> | <b>0.01232</b> | <b>4</b> |
| Q4V7C7        | KDYEEIGPSICR                                                                             | 0.931592729        | 2              | 3.179635 |
| Q4V7C7        | LGYAGNTEPQFIIPSCIAIK                                                                     | 1.343477662        | 2              | 2.619276 |
| Q4V7C7        | LSEELSGGR                                                                                | 0.800694875        | 2              | 2.447011 |
| Q4V7C7        | YSYVCPDLVK                                                                               | 1.263887489        | 2              | 2.421438 |
| <b>Q4V8K1</b> | <b>STE4 Metalloreductase STEAP4</b>                                                      | <b>0.804855425</b> | <b>7.2E-12</b> | <b>3</b> |
| Q4V8K1        | MNQYPESNAEYLAQLVPGAHVVK+Oxidation(0)                                                     | 0.793687787        | 3              | 3.37502  |
| Q4V8K1        | SDVIVLAVHR                                                                               | 1.04023108         | 2              | 2.300995 |
| Q4V8K1        | TCADFPLTVDSSEK                                                                           | 0.803032457        | 2              | 4.508103 |
| <b>Q505J8</b> | <b>SYFA Phenylalanyl_tRNA synthetase alpha chain</b>                                     | <b>0.782849521</b> | <b>0.05997</b> | <b>2</b> |
| Q505J8        | LQQVQAGQAEK                                                                              | 0.782722456        | 2              | 2.700526 |
| Q505J8        | SLQALGEVIEAELR                                                                           | 0.824250244        | 2              | 3.162968 |
| <b>Q561R9</b> | <b>LACB2 Beta_lactamase_like protein 2</b>                                               | <b>0.937800381</b> | <b>0.03221</b> | <b>3</b> |
| Q561R9        | ANIIYPGHGPVIHNAEAK                                                                       | 1.094227732        | 2              | 4.073836 |
| Q561R9        | ILIDTGEPVPEYISCLK                                                                        | 0.787770615        | 2              | 3.591895 |
| Q561R9        | NISNDATYCIK                                                                              | 0.927559407        | 2              | 2.508695 |
| <b>Q561S0</b> | <b>NDUAA NADH dehydrogenase [ubiquinone] 1 alpha subcomplex subunit 10_mitochondrial</b> | <b>1.025448926</b> | <b>0.00037</b> | <b>3</b> |
| Q561S0        | VITVDGNICSGK                                                                             | 0.994537719        | 2              | 3.297762 |
| Q561S0        | VVEDIEYLNYNK                                                                             | 1.327144225        | 2              | 3.91076  |
| Q561S0        | YGLLASILGDK                                                                              | 1.074295075        | 2              | 3.63839  |
| <b>Q562C4</b> | <b>MET7B Methyltransferase_like protein 7B</b>                                           | <b>0.762116187</b> | <b>0.6255</b>  | <b>4</b> |
| Q562C4        | AQFSEVQLEWQPPPFK                                                                         | 0.762125259        | 2              | 4.928831 |
| Q562C4        | HIGDGCHLTR                                                                               | 0.749127728        | 3              | 3.3981   |
| Q562C4        | VLQEVQR                                                                                  | 0.617633279        | 1              | 1.904199 |
| Q562C4        | VTCVDPNPNFEK                                                                             | 0.855713625        | 2              | 3.530564 |
| <b>Q562C9</b> | <b>MTND 1_2_dihydroxy_3_keto_5_methylthiopentene dioxygenase</b>                         | <b>0.917935445</b> | <b>0.59556</b> | <b>2</b> |



|               |                                                                                          |                    |                |           |
|---------------|------------------------------------------------------------------------------------------|--------------------|----------------|-----------|
| Q562C9        | LDADKYENDPELEQIR                                                                         | 0.939053547        | 2              | 3.771639  |
| Q562C9        | LDADKYENDPELEQIRK                                                                        | 0.899556274        | 3              | 3.791579  |
| <b>Q58FK9</b> | <b>KAT3 Kynurenine__oxoglutarate transaminase 3</b>                                      | <b>0.946152555</b> | <b>1</b>       | <b>8</b>  |
| Q58FK9        | AILNTPHNPIGK                                                                             | 0.878662511        | 2              | 3.31121   |
| Q58FK9        | ALSCLYGK                                                                                 | 0.887567284        | 1              | 2.001167  |
| Q58FK9        | DSTLDAEEIFR                                                                              | 0.806836153        | 2              | 3.075975  |
| Q58FK9        | IEGLDQNVWVEFTK                                                                           | 0.961508918        | 2              | 4.024992  |
| Q58FK9        | LAADPSVVNLGQGFPDITLPSYVQEELSK                                                            | 1.048943327        | 3              | 5.253339  |
| Q58FK9        | MDDPECFYNSLPK                                                                            | 1.016116455        | 2              | 3.726789  |
| Q58FK9        | RIEGLDQNVWVEFTK                                                                          | 0.943094016        | 2              | 4.387062  |
| Q58FK9        | WTSSDWTFNPQELESK                                                                         | 0.883613121        | 2              | 5.096912  |
| <b>Q5BJQ0</b> | <b>ADCK3 Chaperone activity of bc1 complex_like_ mitochondrial</b>                       | <b>1.362544715</b> | <b>9.9E-20</b> | <b>3</b>  |
| Q5BJQ0        | AVLDSSPFLSEANAER                                                                         | 1.372093295        | 2              | 4.842834  |
| Q5BJQ0        | MGGFLICSKLK+Oxidation(0)                                                                 | 1.191375204        | 2              | 2.326127  |
| Q5BJQ0        | TLNNDLGPVHR                                                                              | 1.195360611        | 2              | 2.412748  |
| <b>Q5BJY9</b> | <b>K1C18 Keratin_ type I cytoskeletal 18</b>                                             | <b>0.788267555</b> | <b>9.9E-20</b> | <b>21</b> |
| Q5BJY9        | AQIFANSVDNAR                                                                             | 0.902349706        | 2              | 3.212051  |
| Q5BJY9        | AQYEQLAQK                                                                                | 0.755034579        | 2              | 3.086969  |
| Q5BJY9        | DAETTLLELR                                                                               | 0.702176648        | 2              | 3.57211   |
| Q5BJY9        | KVDDTNITR                                                                                | 0.781890662        | 2              | 3.023956  |
| Q5BJY9        | LEAEIATYR                                                                                | 0.725938671        | 2              | 2.958278  |
| Q5BJY9        | LLEDGDDFSLNDALDSSNSMQTVQR                                                                | 0.44099336         | 2              | 3.584319  |
| Q5BJY9        | LQLETEIEALK                                                                              | 0.71520487         | 2              | 2.334069  |
| Q5BJY9        | LQLETEIEALKEELFMK                                                                        | 1.083966528        | 2              | 4.95938   |
| Q5BJY9        | NHEEEVQGLEAQIASSGLTVEVDAPK                                                               | 0.760161899        | 2              | 5.931715  |
| Q5BJY9        | NQNINLENNLGEVEAR                                                                         | 0.807981189        | 2              | 5.395996  |
| Q5BJY9        | NREELDKYWSQQIEESTTVVTTK                                                                  | 1.180416089        | 3              | 4.903996  |
| Q5BJY9        | QSVESDIHGLR                                                                              | 0.75960906         | 2              | 2.754449  |
| Q5BJY9        | QTQEYEALLNIK                                                                             | 0.79461647         | 2              | 3.818381  |
| Q5BJY9        | SVWGGSVGSAGLAGMGGVQTEK                                                                   | 0.65260223         | 2              | 6.068655  |
| Q5BJY9        | SVWGGSVGSAGLAGMGGVQTEK+Oxidation(14)                                                     | 0.923800505        | 2              | 4.624505  |
| Q5BJY9        | TLQTLIDLDMSK                                                                             | 0.763629899        | 2              | 4.187773  |
| Q5BJY9        | VKLEAEIATYR                                                                              | 0.805107086        | 2              | 2.893545  |
| Q5BJY9        | VQMEQLNGVLLHLESELAQTR                                                                    | 0.857521406        | 2              | 5.028546  |
| Q5BJY9        | VRPASSAASVYAGAGGSGSR                                                                     | 1.530898053        | 2              | 4.959877  |
| Q5BJY9        | VVDDTNITR                                                                                | 0.758982939        | 2              | 3.512539  |
| Q5BJY9        | YWSQQIEESTTVVTTK                                                                         | 0.99583832         | 2              | 4.240804  |
| <b>Q5BK63</b> | <b>NDUA9 NADH dehydrogenase [ubiquinone] 1 alpha subcomplex subunit 9_ mitochondrial</b> | <b>1.036730471</b> | <b>0.14877</b> | <b>3</b>  |
| Q5BK63        | IHISDVMATDLPGLLEDLGVQPTPLELK                                                             | 1.243073901        | 3              | 4.822174  |
| Q5BK63        | NDFEDVFNIPR                                                                              | 0.990534944        | 2              | 4.039148  |
| Q5BK63        | WLSSEIETKPAK                                                                             | 1.180711619        | 2              | 2.549127  |
| <b>Q5BK81</b> | <b>PTGR2 Prostaglandin reductase 2</b>                                                   | <b>0.907667026</b> | <b>0.25437</b> | <b>2</b>  |

|               |                                                                         |                    |                |          |
|---------------|-------------------------------------------------------------------------|--------------------|----------------|----------|
| Q5BK81        | VEEVSLPDTINEGQVR                                                        | 0.907687381        | 2              | 4.297467 |
| <b>Q5EB77</b> | <b>RAB18 Ras_related protein Rab_18</b>                                 | <b>0.929459568</b> | <b>0.49487</b> | <b>2</b> |
| Q5EB77        | LDNWLNELEYCTR                                                           | 0.901980668        | 2              | 3.127669 |
| Q5EB77        | NDIVNMLVGNK                                                             | 0.939250924        | 2              | 3.270662 |
| <b>Q5FVM6</b> | <b>MTMRC Myotubularin_related protein 12</b>                            | <b>0.801231685</b> | <b>3.4E-06</b> | <b>3</b> |
| Q5FVM6        | IVSGIIHHTQSPK                                                           | 0.75649451         | 2              | 2.577226 |
| Q5FVM6        | LLEMMEEVQSLQEK+Oxidation(3)                                             | 7.303153383        | 2              | 2.730121 |
| Q5FVM6        | LLEMMEEVQSLQEK+Oxidation(4)                                             | 7.303153383        | 2              | 2.676554 |
| <b>Q5FVN1</b> | <b>STBD1 Starch_binding domain_containing protein 1</b>                 | <b>0.815059967</b> | <b>0.36916</b> | <b>3</b> |
| Q5FVN1        | DGGAEPLKDAPPGEAAAPGGGPGGGGSGGLSPEPSDR                                   | 0.839417322        | 3              | 5.407667 |
| Q5FVN1        | DLGNLTEAQR                                                              | 0.758421258        | 2              | 2.491595 |
| Q5FVN1        | NSLVGGGWVVDGK                                                           | 0.923074799        | 2              | 2.396076 |
| <b>Q5FVQ4</b> | <b>MLEC Malectin</b>                                                    | <b>0.974827485</b> | <b>0.9992</b>  | <b>2</b> |
| Q5FVQ4        | KEEEEEEEYDEGSNLKR                                                       | 0.976147758        | 3              | 5.364247 |
| Q5FVQ4        | STPEDQILYQTER                                                           | 0.968515127        | 2              | 2.934954 |
| <b>Q5FVR2</b> | <b>TYPH Thymidine phosphorylase</b>                                     | <b>0.867432681</b> | <b>0.68438</b> | <b>2</b> |
| Q5FVR2        | AQDTQIGAMLMAIR+Oxidation(10)                                            | 0.866891887        | 2              | 2.667907 |
| Q5FVR2        | AQDTQIGAMLMAIR+Oxidation(8)                                             | 0.871672313        | 2              | 2.406847 |
| <b>Q5FVR5</b> | <b>ACNT2 Acyl_coenzyme A amino acid N_acyltransferase 2</b>             | <b>1.154430421</b> | <b>0.97447</b> | <b>3</b> |
| Q5FVR5        | DEKENLFQSK                                                              | 1.104635095        | 2              | 2.509888 |
| Q5FVR5        | ILFIVGENDQCLASK                                                         | 1.102516029        | 2              | 3.519517 |
| Q5FVR5        | IQQPGIGVISVSK                                                           | 1.198140754        | 2              | 2.765305 |
| <b>Q5FW57</b> | <b>GLYAL Glycine N_acyltransferase_like protein</b>                     | <b>0.95604689</b>  | <b>0.87236</b> | <b>2</b> |
| Q5FW57        | AIDQEMFK                                                                | 0.915133038        | 2              | 2.451717 |
| Q5FW57        | SSQMLQMLESSLR                                                           | 0.956454796        | 2              | 3.603118 |
| <b>Q5HZV9</b> | <b>PP1R7 Protein phosphatase 1 regulatory subunit 7</b>                 | <b>1.016711155</b> | <b>0.43647</b> | <b>2</b> |
| Q5HZV9        | AIENIDTLTNLESFLGK                                                       | 1.034311686        | 2              | 2.587089 |
| Q5HZV9        | ELDLYDNQIKK                                                             | 0.448089444        | 2              | 2.517656 |
| <b>Q5HZY0</b> | <b>UBXN4 UBX domain_containing protein 4</b>                            | <b>0.90582657</b>  | <b>0.12304</b> | <b>2</b> |
| Q5HZY0        | LPDGSSFTNQFPSDAPLEEAR                                                   | 1.10332075         | 2              | 4.452279 |
| Q5HZY0        | NTELCETPTTSDPK                                                          | 0.896842841        | 2              | 3.906864 |
| <b>Q5I0C3</b> | <b>MCCA Methylcrotonoyl_CoA carboxylase subunit alpha_mitochondrial</b> | <b>0.774215745</b> | <b>1.1E-16</b> | <b>4</b> |
| Q5I0C3        | HAPLVEFEVEEV                                                            | 0.878942621        | 2              | 2.60123  |
| Q5I0C3        | IIEEAPAPGIDPEVR                                                         | 0.753198379        | 2              | 3.803097 |
| Q5I0C3        | SEKEFQEQLSAR                                                            | 0.8536159          | 2              | 3.137144 |
| Q5I0C3        | YLSPVSAEGTQGGTIAPMTGTIEK                                                | 0.957998678        | 2              | 5.250779 |
| <b>Q5I0D1</b> | <b>GLOD4 Glyoxalase domain_containing protein 4</b>                     | <b>0.808682123</b> | <b>0.00032</b> | <b>2</b> |
| Q5I0D1        | ESQSILTPLVSLDTPGK                                                       | 0.805552935        | 2              | 3.625353 |
| Q5I0D1        | HEEFEEGCK                                                               | 0.847174243        | 2              | 2.580274 |

|               |                                                                     |                    |                |          |
|---------------|---------------------------------------------------------------------|--------------------|----------------|----------|
| <b>Q5I0E7</b> | <b>TMED9 Transmembrane emp24 domain_containing protein 9</b>        | <b>0.833756233</b> | <b>0.00337</b> | <b>2</b> |
| Q5I0E7        | QLVEQVEQIQK                                                         | 0.852294307        | 2              | 3.775221 |
| Q5I0E7        | QREEYQPATPGLGMFVEVKDPEDK                                            | 0.769861068        | 3              | 3.45501  |
| <b>Q5I0H9</b> | <b>PDIAS Protein disulfide_isomerase A5</b>                         | <b>0.790293499</b> | <b>0.00107</b> | <b>7</b> |
| Q5I0H9        | DKNQDLCQQESVK                                                       | 0.777390497        | 2              | 4.364689 |
| Q5I0H9        | DVVHIDSEKDFR                                                        | 0.720583145        | 2              | 2.411297 |
| Q5I0H9        | GPPLWEEDPGAK                                                        | 0.861862417        | 2              | 2.991781 |
| Q5I0H9        | GQGTICWVDCGDAESR                                                    | 1.026637429        | 2              | 3.933275 |
| Q5I0H9        | NPQPPQPVPETPWADEGGSVYHLTDEDFDQFVK                                   | 1.365704238        | 3              | 3.495957 |
| Q5I0H9        | NQDLCQQESVK                                                         | 0.85834996         | 2              | 3.273687 |
| Q5I0H9        | TELGFTSFIR                                                          | 1.237356957        | 2              | 2.815834 |
| <b>Q5I0J9</b> | <b>ASPD Putative L_aspartate dehydrogenase</b>                      | <b>0.860441004</b> | <b>1.8E-07</b> | <b>6</b> |
| Q5I0J9        | HANLLVGSPSALADQTTTER                                                | 1.143850078        | 2              | 5.255484 |
| Q5I0J9        | LDAAGGLQSLR                                                         | 0.984450021        | 2              | 3.734359 |
| Q5I0J9        | LEGPLAAAHSSGPR                                                      | 0.858400802        | 2              | 3.401618 |
| Q5I0J9        | MAGSVPPALQLEDLTTLEER                                                | 1.161323001        | 2              | 3.6543   |
| Q5I0J9        | NSNTMAAAAALAPSLGFDR                                                 | 0.921633974        | 2              | 4.027501 |
| Q5I0J9        | NSNTMAAAAALAPSLGFDR+Oxidation(4)                                    | 0.803867431        | 2              | 2.830415 |
| <b>Q5I0M2</b> | <b>NADC Nicotinate_nucleotide pyrophosphorylase [carboxylating]</b> | <b>1.210452615</b> | <b>0.00702</b> | <b>3</b> |
| Q5I0M2        | DNHVVAAGSMEK                                                        | 0.978982006        | 2              | 2.52527  |
| Q5I0M2        | EALQAAEAGADLVMLDNFKPEELHPTAATLK                                     | 1.047977741        | 3              | 4.903224 |
| Q5I0M2        | LYAEGDIPVPHAR                                                       | 1.213128925        | 2              | 3.497058 |
| <b>Q5I0P2</b> | <b>GCSH Glycine cleavage system H protein_mitochondrial</b>         | <b>1.302727476</b> | <b>0.00472</b> | <b>2</b> |
| Q5I0P2        | MTLSDPSELDELMSEEAYEK                                                | 1.291834564        | 2              | 4.969545 |
| Q5I0P2        | SCYEDGWLIK                                                          | 1.969843944        | 2              | 2.601657 |
| <b>Q5M7U6</b> | <b>ARP2 Actin_related protein 2</b>                                 | <b>0.881244426</b> | <b>0.0012</b>  | <b>3</b> |
| Q5M7U6        | GYAFNHSADFETVR                                                      | 0.959757902        | 2              | 3.553263 |
| Q5M7U6        | HLWDYTFGPEK                                                         | 0.917445248        | 2              | 3.086746 |
| Q5M7U6        | KVVVCDNGTGFVK                                                       | 0.569582638        | 2              | 2.481131 |
| <b>Q5M7W5</b> | <b>MAP4 Microtubule_associated protein 4</b>                        | <b>0.676994209</b> | <b>9.9E-20</b> | <b>7</b> |
| Q5M7W5        | AAVGLTGNDIATPPNK                                                    | 0.695774366        | 2              | 3.340347 |
| Q5M7W5        | ATSPSTLVSTGSSSR                                                     | 0.677082147        | 2              | 3.850222 |
| Q5M7W5        | NTAPPTEETVPGK                                                       | 0.781352508        | 2              | 2.465443 |
| Q5M7W5        | NTTPTGATPPAGMASTR                                                   | 0.580070209        | 2              | 2.775645 |
| Q5M7W5        | STLPVDEGSPEK                                                        | 0.790268667        | 2              | 2.50582  |
| Q5M7W5        | VGSLDNVGHLPAGGTVK                                                   | 0.734268293        | 2              | 3.650003 |
| Q5M7W5        | VTEFNNVTPLSEEEVASIK                                                 | 0.856870746        | 2              | 3.579927 |
| <b>Q5M875</b> | <b>DHB13 17_beta_hydroxysteroid dehydrogenase 13</b>                | <b>1.416271219</b> | <b>9.9E-20</b> | <b>6</b> |
| Q5M875        | ALTAELDTLTK                                                         | 1.36873791         | 1              | 2.009573 |
| Q5M875        | IQNIQFEAIVGHR                                                       | 1.779236678        | 3              | 3.427271 |
| Q5M875        | LWPVLEPDEVAR                                                        | 1.219305602        | 2              | 2.750591 |

|               |                                                                          |                    |                |           |
|---------------|--------------------------------------------------------------------------|--------------------|----------------|-----------|
| Q5M875        | NSGHIVTVASVCGHR                                                          | 1.034863752        | 2              | 2.891394  |
| Q5M875        | SVAGQTVLITGAGHGIGR                                                       | 1.47104676         | 2              | 4.071236  |
| Q5M875        | TSCLCPVFVNTGFTK                                                          | 1.256948008        | 2              | 3.548834  |
| <b>Q5M9G3</b> | <b>CAPR1 Caprin_1</b>                                                    | <b>0.95608408</b>  | <b>0.99574</b> | <b>2</b>  |
| Q5M9G3        | LNQDQLDAVSK                                                              | 0.944851679        | 2              | 3.384257  |
| Q5M9G3        | YQEVTTNNLEFAK                                                            | 0.998746119        | 2              | 2.470774  |
| <b>Q5PPL3</b> | <b>NSDHL Sterol_4_alpha_carboxylate 3_dehydrogenase_ decarboxylating</b> | <b>0.790884008</b> | <b>2.9E-14</b> | <b>8</b>  |
| Q5PPL3        | AVLDANDPKK                                                               | 0.556629604        | 2              | 2.31806   |
| Q5PPL3        | CTVIGGSGFLGQHMVEQLLSR                                                    | 0.673152219        | 2              | 4.76149   |
| Q5PPL3        | GQVTGTDLINEVSK                                                           | 0.606673389        | 2              | 3.782432  |
| Q5PPL3        | GVSTVFHCASPPSNNK                                                         | 0.853842062        | 2              | 3.942226  |
| Q5PPL3        | GYAVNVFDVR                                                               | 0.740352802        | 2              | 3.430586  |
| Q5PPL3        | ILTGLNYEAPK                                                              | 0.572289894        | 2              | 2.786599  |
| Q5PPL3        | KGQVTGTDLINEVSK                                                          | 0.578162464        | 2              | 4.616582  |
| Q5PPL3        | VQFFIGDLCNQQDLYPALK                                                      | 0.874246808        | 2              | 5.284945  |
| <b>Q5PQT3</b> | <b>GLYAT Glycine N_acyltransferase</b>                                   | <b>1.087095982</b> | <b>6.4E-13</b> | <b>4</b>  |
| Q5PQT3        | AIQNLASIHSLQVK                                                           | 1.073584587        | 2              | 3.013428  |
| Q5PQT3        | DPENCQEFLGSSEVINWK                                                       | 1.103392913        | 2              | 4.737935  |
| Q5PQT3        | LSSLDVTHAALVNK                                                           | 1.794668796        | 2              | 3.05235   |
| Q5PQT3        | QHLQIQSSQSHLNK                                                           | 0.667756451        | 2              | 3.550527  |
| <b>Q5RJR2</b> | <b>TWF1 Twinfilin_1</b>                                                  | <b>0.947811606</b> | <b>0.43652</b> | <b>2</b>  |
| Q5RJR2        | HQTLQGVAFPISR                                                            | 1.067787047        | 2              | 2.343112  |
| Q5RJR2        | YLLSQSSPAPLTAEEELR                                                       | 1.045295334        | 2              | 3.589548  |
| <b>Q5RJR8</b> | <b>LRC59 Leucine_rich repeat_containing protein 59</b>                   | <b>0.862881802</b> | <b>0.01562</b> | <b>5</b>  |
| Q5RJR8        | ATVLDLSCNK                                                               | 0.879884679        | 2              | 2.693558  |
| Q5RJR8        | DKLDGNELDLSLDLNEVPVK                                                     | 0.868166577        | 2              | 5.996643  |
| Q5RJR8        | LDGNELDLSLDLNEVPVK                                                       | 1.046636458        | 2              | 3.12499   |
| Q5RJR8        | LQQLPADFGR                                                               | 1.00217615         | 2              | 2.631027  |
| Q5RJR8        | LSTLPSDFCGLTHLVK                                                         | 1.111640734        | 2              | 2.397697  |
| <b>Q5RK10</b> | <b>WDR1 WD repeat_containing protein 1</b>                               | <b>0.965190467</b> | <b>0.9651</b>  | <b>3</b>  |
| Q5RK10        | AHDGGIYAIWSPDSTHLLSASGDK                                                 | 1.101914862        | 3              | 4.83996   |
| Q5RK10        | CFSIDNPGYEPEVVAVHPGGDTVAVGGSDGNVR                                        | 1.010186525        | 3              | 4.407589  |
| Q5RK10        | YAPSGFYIASGDISGK                                                         | 0.993769529        | 2              | 4.414797  |
| <b>Q5RK11</b> | <b>IF4A2 Eukaryotic initiation factor 4A_II</b>                          | <b>0.995189931</b> | <b>9.3E-05</b> | <b>4</b>  |
| Q5RK11        | ELAQQIQK                                                                 | 0.835188171        | 1              | 2.1123    |
| Q5RK11        | GIDVQQVSLVINYLPTNR                                                       | 1.209716062        | 2              | 4.482565  |
| Q5RK11        | GYDVIAQAQSGTGK                                                           | 0.981238269        | 2              | 5.122459  |
| Q5RK11        | MFVLDEADEMLSR                                                            | 1.179143481        | 2              | 3.713569  |
| <b>Q5SGE0</b> | <b>LPPRC Leucine_rich PPR motif_containing protein_mitochondrial</b>     | <b>0.879228434</b> | <b>0.06059</b> | <b>11</b> |
| Q5SGE0        | AALDLEQVPSELAVTR                                                         | 0.986795908        | 2              | 3.787923  |
| Q5SGE0        | CIANNQVETLEK                                                             | 0.894558574        | 2              | 2.865988  |

|               |                           |                    |                |           |
|---------------|---------------------------|--------------------|----------------|-----------|
| Q5SGE0        | GLDAIELSR                 | 0.954328628        | 2              | 2.447499  |
| Q5SGE0        | HCVTMDTPAEK               | 0.485077195        | 2              | 3.0397    |
| Q5SGE0        | HDNAEDALNLK               | 0.877813036        | 2              | 3.427001  |
| Q5SGE0        | MEGANIQPNR                | 0.943819135        | 2              | 2.653864  |
| Q5SGE0        | SCGSLPELSLAER             | 1.039800116        | 2              | 2.491825  |
| Q5SGE0        | SGSPGSNQALLLR             | 1.003202535        | 2              | 2.803065  |
| Q5SGE0        | SSLSSSSPSAGDTVTEK         | 0.847629473        | 2              | 4.045105  |
| Q5SGE0        | SYVADKDVASAK              | 0.792199392        | 2              | 2.457317  |
| Q5SGE0        | TLLELIPELR                | 0.874057691        | 2              | 2.732244  |
| <b>Q5SNZ0</b> | <b>GRDN Girdin</b>        | <b>1.20258312</b>  | <b>0.0708</b>  | <b>2</b>  |
| Q5SNZ0        | KVEILENEIQEK              | 1.255187015        | 2              | 2.522902  |
| Q5SNZ0        | LEMENQSLTKTVEELR          | 0.948659451        | 2              | 2.364224  |
| <b>Q5SX40</b> | <b>MYH1 Myosin_1</b>      | <b>0.691186428</b> | <b>0.36181</b> | <b>69</b> |
| Q5SX40        | AAYLQNLNSADLLK            | 0.464468959        | 2              | 4.368195  |
| Q5SX40        | ADIAESQVNK                | 0.535020147        | 2              | 3.509636  |
| Q5SX40        | AEDEEEINAELTAK            | 0.582706638        | 2              | 4.013975  |
| Q5SX40        | AGLLGLEEMR                | 0.631591837        | 2              | 3.427724  |
| Q5SX40        | AGLLGLEEMRDDK             | 0.929118669        | 2              | 3.17781   |
| Q5SX40        | ALQEAHQQLDDLQAEEDKVNTLTK  | 0.603332258        | 3              | 6.304634  |
| Q5SX40        | ANLLQAEIEELR              | 0.568112329        | 2              | 3.877061  |
| Q5SX40        | ANSEVAQWR                 | 0.604273639        | 2              | 3.157691  |
| Q5SX40        | DLEEATLQHEATAATLR         | 0.633380714        | 2              | 4.855207  |
| Q5SX40        | DTQLHLDDALR               | 0.639288773        | 2              | 3.198178  |
| Q5SX40        | EEQAEPDGTVEADK            | 0.579252674        | 2              | 3.296257  |
| Q5SX40        | ELEEISER                  | 0.670878278        | 1              | 2.061783  |
| Q5SX40        | ELEGEVENEQK               | 0.601489774        | 2              | 2.548838  |
| Q5SX40        | ELEGEVENEQKR              | 0.50333817         | 2              | 3.281485  |
| Q5SX40        | ELTYQTEEDRK               | 0.766573913        | 2              | 3.078153  |
| Q5SX40        | ENQSILITGESGAGK           | 0.598245468        | 2              | 4.181929  |
| Q5SX40        | EQYEEEQEAK                | 0.490011694        | 1              | 3.344578  |
| Q5SX40        | GQEDLKEQLAMVER            | 0.66612348         | 2              | 4.118229  |
| Q5SX40        | GSSFQTVSALFR              | 0.789627114        | 2              | 3.082216  |
| Q5SX40        | HADSVAEELGEQIDNLQR        | 0.616691572        | 2              | 5.586379  |
| Q5SX40        | IAEQELLDASER              | 0.828152971        | 2              | 3.24455   |
| Q5SX40        | IEDEQALGMQLQK             | 0.56050939         | 2              | 4.091157  |
| Q5SX40        | IEEEEEIEAER               | 0.667633219        | 2              | 3.778149  |
| Q5SX40        | IKLEQQVDDLEGSLEQEK        | 0.689093831        | 2              | 5.024045  |
| Q5SX40        | IQHELEEAER                | 0.599819255        | 2              | 3.572844  |
| Q5SX40        | IQLELNQVK                 | 0.624582191        | 2              | 2.881454  |
| Q5SX40        | KALQEAHQQLDDLQAEEDKVNTLTK | 0.57124329         | 3              | 6.363937  |
| Q5SX40        | KIAEQELLDASER             | 0.58105111         | 2              | 3.764159  |
| Q5SX40        | KIQHELEEAER               | 0.729169944        | 3              | 4.042257  |
| Q5SX40        | KKLETDISQIQGEMEDIVQEAR    | 0.684417035        | 3              | 4.505655  |

|               |                                        |                    |                |          |
|---------------|----------------------------------------|--------------------|----------------|----------|
| Q5SX40        | KLEDECSELK                             | 0.575211164        | 2              | 2.719396 |
| Q5SX40        | KLEDECSELKK                            | 0.470774491        | 3              | 4.916778 |
| Q5SX40        | KLETDISIQGEMEDIVQEAR                   | 0.621972475        | 2              | 5.625667 |
| Q5SX40        | LAQESTMDVENDKQQLDEK                    | 0.781520375        | 2              | 4.905185 |
| Q5SX40        | LDEAEQLALK                             | 0.646495347        | 2              | 3.592026 |
| Q5SX40        | LEEAGGATSAQIEMNK                       | 1.060137105        | 2              | 3.566289 |
| Q5SX40        | LEQQVDDLEGSLEQEK                       | 0.703751184        | 2              | 5.023464 |
| Q5SX40        | LEQQVDDLEGSLEQEKK                      | 0.549892775        | 2              | 3.911954 |
| Q5SX40        | LETDISIQGEMEDIVQEAR                    | 0.656430471        | 2              | 5.370902 |
| Q5SX40        | LINELTAQR                              | 0.628276175        | 2              | 3.130297 |
| Q5SX40        | LQDAEEHVEAVNAK                         | 0.56273153         | 2              | 4.684793 |
| Q5SX40        | LQDLVDK                                | 0.548316705        | 1              | 2.010559 |
| Q5SX40        | LQNEVEDLMIDVER                         | 0.64892765         | 2              | 3.969707 |
| Q5SX40        | LQTESGEYSR                             | 0.633634929        | 2              | 2.359988 |
| Q5SX40        | MEIDDLASNMEVISK                        | 0.71001729         | 2              | 4.626048 |
| Q5SX40        | MEIDDLASNMEVISKSGNLEK                  | 0.970533883        | 2              | 2.312638 |
| Q5SX40        | MQGTLEDQIISANPLLEAFGNAK                | 0.602710267        | 3              | 6.0546   |
| Q5SX40        | MQGTLEDQIISANPLLEAFGNAK+Oxidation(0)   | 0.638321372        | 3              | 4.774293 |
| Q5SX40        | NDLQLQVQSEADSLADAER                    | 0.594548657        | 2              | 6.228336 |
| Q5SX40        | NKDPLNETVVGlyQK                        | 0.589027102        | 2              | 4.197359 |
| Q5SX40        | NLQQEISDLTEQIAEGGK                     | 0.494116954        | 2              | 5.72428  |
| Q5SX40        | NLQQEISDLTEQIAEGGKR                    | 0.658707964        | 2              | 4.700225 |
| Q5SX40        | NLTEEMAGLDETIK                         | 0.640347535        | 2              | 4.402757 |
| Q5SX40        | QAEEAEQSNVNLAK                         | 0.522383196        | 2              | 4.414633 |
| Q5SX40        | QKYEETHAELEASQK                        | 0.599273695        | 2              | 4.124084 |
| Q5SX40        | QLDEKDSLVSQLSR                         | 0.732243937        | 2              | 3.128924 |
| Q5SX40        | QREEQAEPDGTVEADK                       | 0.51371621         | 2              | 3.992642 |
| Q5SX40        | SELQAALAEAEASLEHEEGK                   | 0.718516659        | 2              | 5.396703 |
| Q5SX40        | SSVFVVDK                               | 0.518635934        | 2              | 2.690304 |
| Q5SX40        | TKYETDAIQR                             | 0.545283011        | 3              | 3.586549 |
| Q5SX40        | TLEDQVSELK                             | 0.653196618        | 2              | 2.866839 |
| Q5SX40        | TNAACAALDK                             | 0.953391349        | 2              | 2.905536 |
| Q5SX40        | TNAACAALDKK                            | 0.747128344        | 2              | 2.96631  |
| Q5SX40        | VLNASAIPEGQFIDSK                       | 0.576238212        | 2              | 3.648799 |
| Q5SX40        | VQLLHTQNTSLINTK                        | 0.615254843        | 2              | 4.968987 |
| Q5SX40        | VRELEGEVENEQK                          | 1.048609081        | 2              | 2.58607  |
| Q5SX40        | VRELEGEVENEQKR                         | 0.556663148        | 3              | 3.512467 |
| Q5SX40        | VVESMQSTLDAEIR                         | 0.699531835        | 2              | 3.970633 |
| Q5SX40        | YETDAIQR                               | 0.777464675        | 2              | 2.30081  |
| <b>Q5U206</b> | <b>CALL3 Calmodulin_like protein 3</b> | <b>1.116416188</b> | <b>0.00089</b> | <b>3</b> |
| Q5U206        | DTDSEEEIR                              | 1.034965206        | 2              | 2.85672  |
| Q5U206        | MKDTDSEEEIR                            | 0.879181627        | 3              | 3.901918 |
| Q5U206        | MKDTDSEEEIR+Oxidation(0)               | 1.483079674        | 2              | 3.656955 |

|               |                                                               |                    |                |           |
|---------------|---------------------------------------------------------------|--------------------|----------------|-----------|
| <b>Q5U211</b> | <b>SNX3 Sorting nexin_3</b>                                   | <b>0.840884413</b> | <b>0.0754</b>  | <b>2</b>  |
| Q5U211        | CLHMFLQDEIIDK                                                 | 0.724877889        | 2              | 2.512612  |
| Q5U211        | GDDGIFDDNFIEER                                                | 0.974356651        | 2              | 2.747305  |
| <b>Q5U2Q7</b> | <b>ERF1 Eukaryotic peptide chain release factor subunit 1</b> | <b>1.020779379</b> | <b>1</b>       | <b>3</b>  |
| Q5U2Q7        | GFGGIGGILR                                                    | 0.984503931        | 2              | 2.726184  |
| Q5U2Q7        | YFDEISQDTGK                                                   | 1.002762454        | 2              | 3.002523  |
| Q5U2Q7        | YVLHCQGTEEEK                                                  | 1.056720824        | 2              | 3.457814  |
| <b>Q5U2Z3</b> | <b>NP1L4 Nucleosome assembly protein 1_like 4</b>             | <b>1.106427122</b> | <b>0.00116</b> | <b>2</b>  |
| Q5U2Z3        | LDNVSHTPSSYIETLPK                                             | 1.103008491        | 3              | 3.518448  |
| Q5U2Z3        | TYKMKSEPK                                                     | 2.232011314        | 1              | 2.307105  |
| <b>Q5U300</b> | <b>UBA1 Ubiquitin_like modifier_activating enzyme 1</b>       | <b>0.888995066</b> | <b>7.8E-09</b> | <b>10</b> |
| Q5U300        | AAVASLLQSVQVPEFTPK                                            | 1.11140578         | 3              | 3.663842  |
| Q5U300        | AENYDISPADR                                                   | 0.887482472        | 2              | 3.152476  |
| Q5U300        | DNPGVVTCLDEAR                                                 | 0.878606156        | 2              | 3.134188  |
| Q5U300        | IYDDFFQNLQDGVANALDNVDAR                                       | 1.007152965        | 3              | 4.483192  |
| Q5U300        | LDQPMTEIVSR                                                   | 1.174753723        | 2              | 2.745057  |
| Q5U300        | NEEDATELVTLAQAVNAR                                            | 1.058967123        | 2              | 4.585142  |
| Q5U300        | NFPNAIEHTLQWAR                                                | 1.250994938        | 2              | 2.329084  |
| Q5U300        | SLPASLAEPDFVMTDFAK                                            | 0.958252569        | 2              | 3.868164  |
| Q5U300        | SPPAVQQDNVDEDLIR                                              | 0.830151674        | 2              | 4.676074  |
| Q5U300        | VVQGHQQLDSYK                                                  | 0.883451099        | 2              | 3.247773  |
| <b>Q5U312</b> | <b>RAI14 Ankyrborin</b>                                       | <b>0.978751666</b> | <b>0.03899</b> | <b>2</b>  |
| Q5U312        | ISQDADLKTPTK                                                  | 0.611323465        | 2              | 2.351519  |
| Q5U312        | MHLLYAVQGMDEVDVQKVLK                                          | 1.240747617        | 2              | 2.524441  |
| <b>Q5U315</b> | <b>RNA polymerase GLD2</b>                                    | <b>1.102144335</b> | <b>0.92229</b> | <b>3</b>  |
| Q5U315        | KLDSAQQQCTEFLELIQQSLKDK                                       | 1.134417561        | 3              | 3.891707  |
| Q5U315        | QANNINMLKDGGMK                                                | 1.034169968        | 1              | 2.101375  |
| Q5U315        | WEMDDPRPIAKAER                                                | 0.997771832        | 2              | 2.418452  |
| <b>Q5XFW8</b> | <b>SEC13 Protein SEC13 homolog</b>                            | <b>0.962744437</b> | <b>0.98382</b> | <b>2</b>  |
| Q5XFW8        | DVAWAPSIGLPTSTIASCSQDGR                                       | 0.926964564        | 2              | 3.583376  |
| Q5XFW8        | NGGQILIADLR                                                   | 1.063609411        | 2              | 2.930642  |
| <b>Q5XFX0</b> | <b>TAGL2 Transgelin_2</b>                                     | <b>0.885599367</b> | <b>9.9E-20</b> | <b>3</b>  |
| Q5XFX0        | DDGLFSGDPNWFPK                                                | 0.668791614        | 2              | 3.694493  |
| Q5XFX0        | NFSDNQLQEGK                                                   | 0.756962983        | 2              | 2.939384  |
| Q5XFX0        | YGINTTDFQTVDLWEGK                                             | 0.780638477        | 2              | 4.764005  |
| <b>Q5XHYS</b> | <b>SYTC Threonyl_tRNA synthetase_cytoplasmic</b>              | <b>1.031636804</b> | <b>8.7E-10</b> | <b>7</b>  |
| Q5XHYS        | AEHDSILAEK                                                    | 0.902478159        | 2              | 2.757436  |
| Q5XHYS        | FLGDIEIWNQAEK                                                 | 0.979449201        | 2              | 3.652484  |
| Q5XHYS        | GFQEVVTPNIFNSR                                                | 0.689313561        | 2              | 3.176931  |
| Q5XHYS        | QLENSLNEFGEK                                                  | 1.044763039        | 2              | 3.057342  |
| Q5XHYS        | TTPYQIACGISQGLADNTVVAK                                        | 1.093640185        | 2              | 4.136822  |
| Q5XHYS        | VVWDLDRPLETDCTLELLK                                           | 1.882109575        | 2              | 3.955368  |

|               |                                                        |                    |                |           |
|---------------|--------------------------------------------------------|--------------------|----------------|-----------|
| Q5XH5         | WELNPGDGAFYGPK                                         | 1.197493607        | 2              | 3.826979  |
| <b>Q5XH20</b> | <b>TRAP1 Heat shock protein 75 kDa_mitochondrial</b>   | <b>1.09448057</b>  | <b>0.29737</b> | <b>11</b> |
| Q5XH20        | AFLEALQHQAEISSR                                        | 1.032252934        | 2              | 4.424129  |
| Q5XH20        | AQLLQPTLEINPR                                          | 0.967207611        | 2              | 3.769161  |
| Q5XH20        | EELVSNLGTIAR                                           | 0.948956228        | 2              | 2.380356  |
| Q5XH20        | FEDTSPAGER                                             | 0.987056558        | 2              | 2.828673  |
| Q5XH20        | GTITIQDTGIGMTK                                         | 0.848143698        | 2              | 3.354754  |
| Q5XH20        | GVVDESEDIPLNSR                                         | 0.970841494        | 2              | 4.749973  |
| Q5XH20        | HLAEHSPYYEAMK                                          | 0.963908958        | 2              | 2.338017  |
| Q5XH20        | LDTHPAMVTVLEMGAAR                                      | 1.047859929        | 3              | 3.744412  |
| Q5XH20        | SDCKDFANESR                                            | 1.002005021        | 2              | 2.911949  |
| Q5XH20        | YESSALPAGQLTSLSDYASR                                   | 1.224527565        | 2              | 4.794215  |
| Q5XH20        | YIAQAYDKPR                                             | 1.030959018        | 2              | 2.602846  |
| <b>Q5XI22</b> | <b>THIC Acetyl_CoA acetyltransferase_cytosolic</b>     | <b>0.713993778</b> | <b>0.01229</b> | <b>5</b>  |
| Q5XI22        | AGHFDKEIVPVHVSSR                                       | 0.632054509        | 2              | 3.864826  |
| Q5XI22        | LKPYFLTDGTGTVPANASGMNDGAAAVLMK                         | 0.781691506        | 3              | 4.468885  |
| Q5XI22        | TAIGSFNGALSTVPVHNLGTTVIK                               | 0.688371162        | 2              | 5.002166  |
| Q5XI22        | VAPEEVSEVIFGHVLTAGCGQNPTK                              | 0.850864357        | 3              | 4.572478  |
| Q5XI22        | VNIDGGAIALGHPLGASGCR                                   | 0.706240431        | 2              | 5.471931  |
| <b>Q5XI32</b> | <b>CAPZB F_actin_capping protein subunit beta</b>      | <b>0.892107694</b> | <b>0.18297</b> | <b>4</b>  |
| Q5XI32        | GCWDSIHVVEVQEK                                         | 0.733385861        | 2              | 3.061206  |
| Q5XI32        | KLEVEANNAFDQYR                                         | 0.889749843        | 2              | 4.07821   |
| Q5XI32        | LEVEANNAFDQYR                                          | 0.859381562        | 2              | 3.366152  |
| Q5XI32        | STLNEIYFGK                                             | 1.049541626        | 2              | 2.404682  |
| <b>Q5XI60</b> | <b>REEP6 Receptor expression_enhancing protein 6</b>   | <b>0.979453252</b> | <b>0.29144</b> | <b>3</b>  |
| Q5XI60        | ALDIAAGITR                                             | 0.745188709        | 2              | 3.055067  |
| Q5XI60        | HHVALDSAASQLSGR                                        | 1.22837105         | 2              | 3.62374   |
| Q5XI60        | NVATDALGALEAR                                          | 0.677204062        | 2              | 4.190222  |
| <b>Q5XI73</b> | <b>GDIR1 Rho GDP_dissociation inhibitor 1</b>          | <b>1.027542736</b> | <b>5.9E-09</b> | <b>3</b>  |
| Q5XI73        | AEEYELTPMEEAPK                                         | 0.944649379        | 2              | 4.381744  |
| Q5XI73        | SIQEIQELDKDDESLR                                       | 0.960660975        | 2              | 4.688811  |
| Q5XI73        | VAVSADPNVNVIVTR                                        | 1.240422453        | 2              | 4.140522  |
| <b>Q5XI78</b> | <b>ODO1 2_oxoglutarate dehydrogenase_mitochondrial</b> | <b>1.170588092</b> | <b>1.5E-12</b> | <b>11</b> |
| Q5XI78        | FGLEGCEVLIPALK                                         | 0.817974358        | 2              | 3.339713  |
| Q5XI78        | FLDTAFDLDAFKK                                          | 0.8227183          | 2              | 2.813032  |
| Q5XI78        | GHHVAQLDPLGILDADLDSSVPADIISSTDK                        | 0.817426839        | 3              | 4.39293   |
| Q5XI78        | ICEEAFTR                                               | 1.151355615        | 2              | 2.631347  |
| Q5XI78        | IEQLSPFPFDLLLK                                         | 1.069549915        | 2              | 3.813109  |
| Q5XI78        | LEAADEGSGDMK                                           | 0.88476365         | 2              | 3.323728  |
| Q5XI78        | LNVLNVIR                                               | 0.467052083        | 2              | 2.322634  |
| Q5XI78        | NITLSLVANPSHLEAADPVVMGK                                | 1.260322889        | 3              | 4.674477  |



|               |                                                                                   |                    |                |          |
|---------------|-----------------------------------------------------------------------------------|--------------------|----------------|----------|
| Q5XI78        | NTNAGAPPGTAYQSPLSLR                                                               | 1.039256802        | 2              | 4.117846 |
| Q5XI78        | VIPEDGPAAQNPDK                                                                    | 0.93430133         | 2              | 3.188186 |
| Q5XI78        | YAELLSVQGVVNQPEYEEEISK                                                            | 1.166305523        | 2              | 4.324884 |
| <b>Q5XI95</b> | <b>ADH6 Alcohol dehydrogenase 6</b>                                               | <b>0.635525086</b> | <b>1.7E-06</b> | <b>4</b> |
| Q5XI95        | ATVLWKPGAPLAIEEIEVAPPK                                                            | 0.772420574        | 2              | 3.944797 |
| Q5XI95        | IIAVDINK                                                                          | 0.841817628        | 2              | 2.782745 |
| Q5XI95        | NNICTEIR                                                                          | 0.635211933        | 2              | 2.315088 |
| Q5XI95        | TVGATDCV DPR                                                                      | 0.549520326        | 2              | 2.721371 |
| <b>Q5XIC0</b> | <b>ECI2 Enoyl_CoA delta isomerase 2_ mitochondrial</b>                            | <b>0.931264563</b> | <b>0.00136</b> | <b>5</b> |
| Q5XIC0        | ATQQDFENAMNQVK                                                                    | 0.927125591        | 2              | 4.659765 |
| Q5XIC0        | GILVTSEGGITK                                                                      | 0.93274453         | 2              | 3.945824 |
| Q5XIC0        | LHAVNEEECTTLR                                                                     | 0.936496482        | 2              | 3.727828 |
| Q5XIC0        | QNYVDLVSSLSSSEASSQ GK                                                             | 0.939358668        | 2              | 4.540031 |
| Q5XIC0        | WDAWNALGSLPK                                                                      | 0.66274198         | 2              | 3.720134 |
| <b>Q5XIC1</b> | <b>GMPPA Mannose_1_phosphate guanylttransferase alpha</b>                         | <b>0.988147739</b> | <b>0.9587</b>  | <b>2</b> |
| Q5XIC1        | NQQDQGLEESPGSWPGAGTIR                                                             | 1.047195025        | 2              | 4.445496 |
| Q5XIC1        | VEGTPNDPNPN DPR                                                                   | 0.987753448        | 2              | 3.211919 |
| <b>Q5XIE6</b> | <b>HIBCH 3_hydroxyisobutyryl_CoA hydrolase_ mitochondrial</b>                     | <b>0.845031802</b> | <b>0.00875</b> | <b>4</b> |
| Q5XIE6        | AGIATHFVDSEK                                                                      | 0.821889868        | 2              | 3.386203 |
| Q5XIE6        | AGQTLSDLFR                                                                        | 0.997104569        | 2              | 2.641332 |
| Q5XIE6        | AVLIDKDQTPK                                                                       | 0.786104907        | 2              | 2.390782 |
| Q5XIE6        | INSCFSANTVEQILENLR                                                                | 0.904021434        | 2              | 4.054471 |
| <b>Q5XIF3</b> | <b>NDUS4 NADH dehydrogenase [ubiquinone] iron_sulfur protein 4_ mitochondrial</b> | <b>1.037768687</b> | <b>1</b>       | <b>2</b> |
| Q5XIF3        | HGWSYDVEGR                                                                        | 1.09236609         | 2              | 2.730582 |
| Q5XIF3        | LDVTPLTGVPEEHK                                                                    | 1.037477226        | 2              | 3.477461 |
| <b>Q5XIF6</b> | <b>TBA4A Tubulin alpha_4A chain</b>                                               | <b>1.081246748</b> | <b>0.00431</b> | <b>5</b> |
| Q5XIF6        | AVFVDLEPTVIDEIR                                                                   | 1.042693019        | 2              | 3.903751 |
| Q5XIF6        | AYHEQLSVAEITNACFEPANQMVK                                                          | 1.05343831         | 3              | 4.694045 |
| Q5XIF6        | DVNAAIAAIK                                                                        | 1.091499055        | 2              | 2.870887 |
| Q5XIF6        | SIQFVDWCPTGFK                                                                     | 0.954086314        | 2              | 3.779676 |
| Q5XIF6        | TIGGGDDSF TFFCETGAGK                                                              | 2.945608922        | 2              | 3.979545 |
| <b>Q5XIG4</b> | <b>OCAD1 OCIA domain_containing protein 1</b>                                     | <b>0.912577692</b> | <b>0.54503</b> | <b>3</b> |
| Q5XIG4        | SVPLAATSMLITQGLISK                                                                | 0.86374566         | 2              | 3.562135 |
| Q5XIG4        | YDSNVSGQSSFGTSPAADNIEK                                                            | 0.918595461        | 2              | 5.299726 |
| Q5XIG4        | YDSNVSGQSSFGTSPAADNIEKETLPR                                                       | 0.929924803        | 3              | 3.842464 |
| <b>Q5XIH7</b> | <b>PHB2 Prohibitin_2</b>                                                          | <b>0.917414006</b> | <b>1.1E-16</b> | <b>7</b> |
| Q5XIH7        | DLQMVNISLR                                                                        | 2.355503822        | 2              | 2.914345 |
| Q5XIH7        | FNASQLITQR                                                                        | 0.937017921        | 2              | 3.941186 |
| Q5XIH7        | IGGVQDDTLAEGHLHFR                                                                 | 1.370052428        | 3              | 4.669503 |
| Q5XIH7        | IVQAEGEAEAAK                                                                      | 0.856489848        | 2              | 4.236224 |
| Q5XIH7        | IYLTADNLVNLQDESFTFR                                                               | 1.346195477        | 2              | 3.980792 |

|               |                                                                          |                    |                |          |
|---------------|--------------------------------------------------------------------------|--------------------|----------------|----------|
| Q5XIH7        | LGLDYEER                                                                 | 1.048417039        | 1              | 2.509454 |
| Q5XIH7        | VLPSIVNEVLK                                                              | 0.954359736        | 2              | 2.625473 |
| <b>Q5XIM9</b> | <b>TCPB T_complex protein 1 subunit beta</b>                             | <b>1.081805347</b> | <b>3.2E-05</b> | <b>6</b> |
| Q5XIM9        | EALLSSAVDHGSDEVK                                                         | 1.098498023        | 2              | 4.034527 |
| Q5XIM9        | GATQQILDEAER                                                             | 1.065707585        | 2              | 3.935396 |
| Q5XIM9        | GSGNLEAIHVIK                                                             | 1.047642279        | 2              | 2.647833 |
| Q5XIM9        | NIGVDNPAAK                                                               | 0.937885093        | 1              | 2.019505 |
| Q5XIM9        | SLHDALCVLAQTVK                                                           | 0.71212259         | 2              | 3.246514 |
| Q5XIM9        | VQDDEVGDGTTSVTLAAELLR                                                    | 1.202492635        | 2              | 4.551359 |
| <b>Q5XIN6</b> | <b>LETM1 LETM1 and EF_hand domain_containing protein 1_mitochondrial</b> | <b>1.178414044</b> | <b>1.5E-05</b> | <b>8</b> |
| Q5XIN6        | AAEVEGEQVDNK                                                             | 1.263948363        | 2              | 3.739089 |
| Q5XIN6        | DIQPEVAEATVPRPGAELQPK                                                    | 0.99753418         | 2              | 4.535973 |
| Q5XIN6        | FLQDTIEEMALK                                                             | 0.891017151        | 2              | 2.945608 |
| Q5XIN6        | LDPAASSPTGESVISVDELISAMK                                                 | 0.869750977        | 2              | 5.347606 |
| Q5XIN6        | LEEGGPVYSPPAQVVVK                                                        | 0.946326438        | 2              | 2.750551 |
| Q5XIN6        | LFEDELTDNLTRPQLVALCK                                                     | 1.072786795        | 3              | 4.064218 |
| Q5XIN6        | LLELQSIGTNNFLR                                                           | 0.43302274         | 2              | 2.463132 |
| Q5XIN6        | STLQTLPEIVAK                                                             | 0.958255159        | 2              | 2.31867  |
| <b>Q5XIT9</b> | <b>MCCB Methylcrotonoyl_CoA carboxylase beta chain_mitochondrial</b>     | <b>0.848558246</b> | <b>9.9E-20</b> | <b>8</b> |
| Q5XIT9        | AATGEEVSAEDLGGADLHCR                                                     | 0.87406684         | 2              | 4.724031 |
| Q5XIT9        | ALYGDTLVTGFAR                                                            | 0.897636498        | 2              | 3.403098 |
| Q5XIT9        | AQEIALQNR                                                                | 0.78519908         | 2              | 2.854755 |
| Q5XIT9        | DRIDNLIDPGSPFLEFSQFAGYK                                                  | 1.435673893        | 3              | 4.576054 |
| Q5XIT9        | KLDVTVPESEELFPADELYGIVGANLK                                              | 1.201213253        | 3              | 4.919759 |
| Q5XIT9        | LGTQPDSGSSTYQENYEQMK                                                     | 1.063330737        | 2              | 5.123445 |
| Q5XIT9        | LWDDGIIDPVDTR                                                            | 1.01834942         | 2              | 3.269868 |
| Q5XIT9        | LYGEEVPAGGIITGIGR                                                        | 0.809438639        | 2              | 4.309294 |
| <b>Q5XIU9</b> | <b>PGRC2 Membrane_associated progesterone receptor component 2</b>       | <b>0.919766835</b> | <b>0.67657</b> | <b>2</b> |
| Q5XIU9        | GLATFCLDK                                                                | 0.995395457        | 2              | 2.73602  |
| Q5XIU9        | GLCSGPGAGEESPAATLPR                                                      | 0.90740958         | 2              | 4.021212 |
| <b>Q60587</b> | <b>ECHB Trifunctional enzyme subunit beta_mitochondrial</b>              | <b>0.792058428</b> | <b>9.9E-20</b> | <b>6</b> |
| Q60587        | AQDEGHLSDIVPFK                                                           | 1.14688981         | 2              | 3.189871 |
| Q60587        | DFIYVSQDPK                                                               | 0.939675065        | 2              | 2.941574 |
| Q60587        | DGGQYALVAACAAGGQGHAMIVEAYPK                                              | 0.890548771        | 3              | 4.119853 |
| Q60587        | DNGIRPSSLEQMAK                                                           | 0.893322998        | 2              | 2.790373 |
| Q60587        | DQLLLGPTYATPK                                                            | 0.773997247        | 2              | 3.408303 |
| Q60587        | NIVVVEGVR                                                                | 0.821253824        | 2              | 2.838452 |
| <b>Q60759</b> | <b>GCDH Glutaryl_CoA dehydrogenase_mitochondrial</b>                     | <b>0.809460186</b> | <b>8.7E-13</b> | <b>4</b> |
| Q60759        | DILGGNGISDEYHVIR                                                         | 0.786904229        | 2              | 4.070438 |
| Q60759        | DIVYEMGELGVLGPTIK                                                        | 0.768581319        | 2              | 3.513539 |

|               |                                                                                 |                    |                |          |
|---------------|---------------------------------------------------------------------------------|--------------------|----------------|----------|
| Q60759        | GYGCAGVSSVAYGLLTR                                                               | 1.465899102        | 2              | 3.352454 |
| Q60759        | HAMNLEAVNTYEGTHDIHALILGR                                                        | 1.236139977        | 4              | 5.064039 |
| <b>Q61029</b> | <b>LAP2B Lamina_associated polypeptide 2_ isoforms beta/delta/epsilon/gamma</b> | <b>0.797732484</b> | <b>6.7E-16</b> | <b>2</b> |
| Q61029        | SELVANNVTLPAGEQR                                                                | 0.797686595        | 2              | 4.07399  |
| Q61029        | SSTPLPTVSSSAENR                                                                 | 0.826170204        | 2              | 2.933791 |
| <b>Q61035</b> | <b>SYHC Histidyl_tRNA synthetase_ cytoplasmic</b>                               | <b>0.98580232</b>  | <b>0.59102</b> | <b>2</b> |
| Q61035        | ASAEQIEEEVTK                                                                    | 0.9856063          | 2              | 3.250256 |
| Q61035        | REDLVEEIR                                                                       | 1.186757306        | 2              | 2.355532 |
| <b>Q61092</b> | <b>LAMC2 Laminin subunit gamma_2</b>                                            | <b>0.913412623</b> | <b>0.0036</b>  | <b>3</b> |
| Q61092        | DRRQTSQQLSR                                                                     | 1.103434633        | 2              | 2.414355 |
| Q61092        | LDDLKMTAER+Oxidation(5)                                                         | 0.596899534        | 2              | 2.534703 |
| Q61092        | TKSLSQQLSLEGTQADIEADR                                                           | 1.184093169        | 2              | 2.476654 |
| <b>Q61301</b> | <b>CTNA2 Catenin alpha_2</b>                                                    | <b>0.966085861</b> | <b>0.92627</b> | <b>3</b> |
| Q61301        | LLEPLVTQVTTLVNTSNK                                                              | 0.9256918          | 2              | 3.571844 |
| Q61301        | TSVQTEDDQLIAGQSAR                                                               | 0.994590961        | 2              | 4.741488 |
| Q61301        | WDDSGNDIIVLAK                                                                   | 0.953615411        | 2              | 3.107732 |
| <b>Q61335</b> | <b>BAP31 B_cell receptor_associated protein 31</b>                              | <b>0.729625367</b> | <b>2.2E-16</b> | <b>4</b> |
| Q61335        | AENEALAMQK                                                                      | 0.722940759        | 2              | 3.474051 |
| Q61335        | AENEALAMQK+Oxidation(7)                                                         | 0.832452673        | 2              | 2.302967 |
| Q61335        | KYMEENDQLKK+Oxidation(2)                                                        | 0.346317311        | 3              | 3.774623 |
| Q61335        | YMEENDQLKK+Oxidation(1)                                                         | 1.115407454        | 2              | 2.453544 |
| <b>Q61550</b> | <b>RAD21 Double_strand_break repair protein rad21 homolog</b>                   | <b>1.244337408</b> | <b>0.20214</b> | <b>2</b> |
| Q61550        | KLMMWKETGGVEK                                                                   | 1.244351979        | 2              | 2.333039 |
| Q61550        | TTIEESAMPPPPQGVK+Oxidation(7)                                                   | 0.908394944        | 2              | 2.38721  |
| <b>Q61595</b> | <b>KTN1 Kinectin</b>                                                            | <b>0.977846653</b> | <b>0.96774</b> | <b>2</b> |
| Q61595        | TAEHEAAQQDLQSK                                                                  | 0.995942401        | 2              | 3.309375 |
| Q61595        | VEPVLVTK                                                                        | 0.91169656         | 2              | 2.39416  |
| <b>Q61941</b> | <b>transhydrogenase_mitochondrial</b>                                           | <b>0.956791973</b> | <b>0.86335</b> | <b>9</b> |
| Q61941        | AISPKDNFHFVEK                                                                   | 1.010204527        | 2              | 3.53288  |
| Q61941        | EANSIVTPGYGLCAAK                                                                | 1.011114301        | 2              | 3.647742 |
| Q61941        | FGIHPVAGR                                                                       | 1.0233359          | 2              | 2.30262  |
| Q61941        | GITHIGYDLPSR                                                                    | 1.065873798        | 2              | 3.65284  |
| Q61941        | KTTVLAMDQVPR                                                                    | 1.024289541        | 2              | 2.471188 |
| Q61941        | QGFNVVVEGAGEASK                                                                 | 0.951504649        | 2              | 4.350517 |
| Q61941        | SLGAEPLEVDLK                                                                    | 1.026132007        | 2              | 2.615309 |
| Q61941        | TTVLAMDQVPR                                                                     | 0.997240452        | 2              | 2.822897 |
| Q61941        | VTIAQGYDALSSMANISGYK                                                            | 0.865567647        | 2              | 5.435009 |
| <b>Q62095</b> | <b>DDX3Y ATP_dependent RNA helicase DDX3Y</b>                                   | <b>1.160381551</b> | <b>0.70865</b> | <b>3</b> |
| Q62095        | SFLDLLNATGK                                                                     | 1.007038281        | 2              | 4.173364 |
| Q62095        | VGNLGLATSFNER                                                                   | 1.372368222        | 2              | 2.346039 |
| Q62095        | VGSTSENITQK                                                                     | 1.172598328        | 2              | 3.030791 |
| <b>Q62261</b> | <b>SPTB2 Spectrin beta chain_brain 1</b>                                        | <b>0.854315107</b> | <b>1.1E-16</b> | <b>8</b> |

|               |                                                                           |                    |                |          |
|---------------|---------------------------------------------------------------------------|--------------------|----------------|----------|
| Q62261        | ALVADSHPESE                                                               | 0.924223033        | 2              | 3.098406 |
| Q62261        | EAEKLESEHPDQAQAILSR                                                       | 0.872979883        | 3              | 3.454188 |
| Q62261        | HLLGVEDLLQK                                                               | 0.930886943        | 2              | 2.726887 |
| Q62261        | HQLEQAVEDYAETVHQLSK                                                       | 0.745263773        | 3              | 4.118104 |
| Q62261        | LVSDGNINSDR                                                               | 0.949380463        | 2              | 3.203244 |
| Q62261        | SQNIITDSSSLNAEAIR                                                         | 0.79999093         | 2              | 5.260499 |
| Q62261        | TLETPAAQMEGFLNR                                                           | 0.95644352         | 2              | 3.54291  |
| Q62261        | VIESTQDLGNDLAGVMALQR                                                      | 0.669707164        | 2              | 3.339828 |
| <b>Q62425</b> | <b>NDUA4 NADH dehydrogenase [ubiquinone] 1 alpha subcomplex subunit 4</b> | <b>1.252626141</b> | <b>1.2E-07</b> | <b>2</b> |
| Q62425        | FYSVNVVDSK                                                                | 1.254254131        | 1              | 2.776693 |
| Q62425        | LGPNEQYK                                                                  | 1.194536948        | 2              | 2.373135 |
| <b>Q62452</b> | <b>UD19 UDP-glucuronosyltransferase 1_9</b>                               | <b>0.843224396</b> | <b>9.9E-20</b> | <b>5</b> |
| Q62452        | AMEIAEALGR                                                                | 0.598582062        | 2              | 3.270575 |
| Q62452        | GAGVTLNVLEMTADDLENALK                                                     | 0.565857653        | 3              | 6.273658 |
| Q62452        | GAGVTLNVLEMTADDLENALK+Oxidation(10)                                       | 0.86423313         | 2              | 4.250556 |
| Q62452        | WLPQNDLLGHPK                                                              | 0.849883666        | 2              | 2.968227 |
| Q62452        | YTGTRPSNLAK                                                               | 0.513239063        | 2              | 2.797021 |
| <b>Q62465</b> | <b>VAT1 Synaptic vesicle membrane protein VAT_1 homolog</b>               | <b>0.937138388</b> | <b>1.5E-10</b> | <b>6</b> |
| Q62465        | ACGLNFADLMGR                                                              | 0.86927048         | 2              | 2.843266 |
| Q62465        | CLVLTGFGGYDK                                                              | 1.054062038        | 2              | 2.580568 |
| Q62465        | ENGVTHPIDYHTTDYVDEIKK                                                     | 0.840352993        | 3              | 3.478638 |
| Q62465        | GVDIVMDPLGSDTAK                                                           | 0.756694286        | 2              | 4.321064 |
| Q62465        | TVENVTVFGTASASK                                                           | 0.997293249        | 2              | 3.253728 |
| Q62465        | VLLVPGPEKET                                                               | 0.802781646        | 2              | 2.514323 |
| <b>Q62468</b> | <b>VILI Villin_1</b>                                                      | <b>1.236505231</b> | <b>5E-07</b>   | <b>2</b> |
| Q62468        | HEDCYILDQGLKIFVWK                                                         | 1.115749882        | 2              | 2.442375 |
| Q62468        | SGAMSQALNFIKAK                                                            | 1.247998317        | 2              | 2.826864 |
| <b>Q62636</b> | <b>RAP1B Ras-related protein Rap_1b</b>                                   | <b>1.038049237</b> | <b>9.9E-20</b> | <b>2</b> |
| Q62636        | INVNEIFYDLVR                                                              | 2.330074777        | 2              | 4.085283 |
| Q62636        | VVGKEQGQNLAR                                                              | 0.661618392        | 2              | 2.480749 |
| <b>Q62638</b> | <b>GSLG1 Golgi apparatus protein 1</b>                                    | <b>1.052183495</b> | <b>0.10244</b> | <b>2</b> |
| Q62638        | LNDRIEMWSYAAK                                                             | 1.196207171        | 2              | 2.35153  |
| Q62638        | NSELMDPKCKQMITK+Oxidation(4)                                              | 0.748887527        | 2              | 2.345784 |
| <b>Q62651</b> | <b>ECH1 Delta(3_5)_Delta(2_4)_dienoyl_CoA isomerase_mitochondrial</b>     | <b>0.700065492</b> | <b>9.9E-20</b> | <b>5</b> |
| Q62651        | EVDVGLAADVGTQR                                                            | 0.627133877        | 2              | 3.486306 |
| Q62651        | HVLHVQLNRPEK                                                              | 0.709740555        | 2              | 2.991192 |
| Q62651        | IPEEVDHNYESIQTSAQK                                                        | 1.026013582        | 3              | 4.516869 |
| Q62651        | RIPEEVDHNYESIQTSAQK                                                       | 0.663663572        | 3              | 4.822699 |
| Q62651        | SLVNELTFTAR                                                               | 0.744700324        | 2              | 3.262189 |
| <b>Q62730</b> | <b>DHB2 Estradiol 17_beta_dehydrogenase 2</b>                             | <b>0.709342508</b> | <b>0.01354</b> | <b>5</b> |
| Q62730        | AVLVTGADSGFGHALAK                                                         | 0.572406619        | 2              | 4.346628 |

|               |                                                         |                    |                |           |
|---------------|---------------------------------------------------------|--------------------|----------------|-----------|
| Q62730        | EIQENYGGQEVVHTQK                                        | 0.870994466        | 2              | 4.256638  |
| Q62730        | LSVLQMDVTKPEQIK                                         | 0.851412276        | 2              | 2.853634  |
| Q62730        | LSVLQMDVTKPEQIKDVHSEVAEK                                | 1.033218197        | 3              | 5.207445  |
| Q62730        | VVTIHPGGFQTNIVGSQDSWDK                                  | 0.674767813        | 2              | 5.410758  |
| <b>Q62736</b> | <b>CALD1 Non_muscle caldesmon</b>                       | <b>1.096652518</b> | <b>0.00062</b> | <b>10</b> |
| Q62736        | ASGDKEAEGAPQVEAGKR                                      | 0.903013878        | 3              | 4.066496  |
| Q62736        | EFDPTITDGSLSVPSR                                        | 0.863549846        | 2              | 3.426904  |
| Q62736        | GETESEEFK                                               | 1.49570455         | 2              | 2.36579   |
| Q62736        | GGNLGENQIKDEK                                           | 0.945151774        | 2              | 3.272888  |
| Q62736        | LEQYTNAIEGTK                                            | 1.14922159         | 2              | 3.265606  |
| Q62736        | MQNNSAENETAEGEEKGESR                                    | 1.004731136        | 3              | 4.6323    |
| Q62736        | MQNNSAENETAEGEEKGESR+Oxidation(0)                       | 1.264342153        | 3              | 4.788664  |
| Q62736        | NDDDEEEAAR                                              | 1.433775344        | 2              | 3.409209  |
| Q62736        | RGETESEEFK                                              | 1.096944054        | 2              | 3.128067  |
| Q62736        | VLEEEEQR                                                | 0.992221999        | 1              | 1.957137  |
| <b>Q62745</b> | <b>CD81 CD81 antigen</b>                                | <b>0.891626762</b> | <b>0.48367</b> | <b>2</b>  |
| Q62745        | NSLCPSSNSFTQLLK                                         | 0.945313969        | 2              | 2.832131  |
| Q62745        | QFYDQALQAVMDDDANNAK                                     | 0.894174235        | 2              | 4.5501    |
| <b>Q62769</b> | <b>UN13B Protein unc_13 homolog B</b>                   | <b>0.897215235</b> | <b>0.00135</b> | <b>2</b>  |
| Q62769        | DHVMREETRNLTPK                                          | 0.644806852        | 2              | 2.483716  |
| Q62769        | SNDEVAREFVK                                             | 0.899206456        | 1              | 1.990039  |
| <b>Q62785</b> | <b>HAP28 28 kDa heat_and acid_stable phosphoprotein</b> | <b>1.09329615</b>  | <b>0.53532</b> | <b>3</b>  |
| Q62785        | ANEEDQEEGDGASGDPK                                       | 0.794423779        | 2              | 4.125019  |
| Q62785        | GVEGLIDIENPNR                                           | 0.930072557        | 2              | 2.966767  |
| Q62785        | QYTSPEEIDAQLQAEK                                        | 1.109429597        | 2              | 3.377122  |
| <b>Q62789</b> | <b>UD2B7 UDP_glucuronosyltransferase 2B7</b>            | <b>0.927739081</b> | <b>9.9E-20</b> | <b>2</b>  |
| Q62789        | IILDELVQR                                               | 1.552056474        | 2              | 3.509172  |
| Q62789        | WIPQNDLLGHPK                                            | 0.849883666        | 2              | 2.968227  |
| <b>Q62812</b> | <b>MYH9 Myosin_9</b>                                    | <b>0.87539372</b>  | <b>9.9E-20</b> | <b>57</b> |
| Q62812        | ALEEAMEQK                                               | 0.839325449        | 2              | 2.961576  |
| Q62812        | ALELDSNLYR                                              | 0.920737737        | 2              | 3.400318  |
| Q62812        | ALEQQVEEMK                                              | 0.886109176        | 2              | 2.937216  |
| Q62812        | ANLQIDQINTDLNLER                                        | 0.910102835        | 2              | 5.016233  |
| Q62812        | ASIAALEAK                                               | 0.864042293        | 2              | 2.602819  |
| Q62812        | ASREEILAQAK                                             | 1.064947918        | 2              | 2.706984  |
| Q62812        | CQYLQAEK                                                | 0.865381008        | 2              | 2.529243  |
| Q62812        | DFSALESQLQDTQELLQEENR                                   | 0.870521264        | 3              | 5.975073  |
| Q62812        | DLEAHIDTANK                                             | 0.837289307        | 2              | 3.415653  |
| Q62812        | DLQGRDEQSEEK                                            | 1.629258252        | 2              | 2.568952  |
| Q62812        | EEILAQAK                                                | 0.901014592        | 1              | 2.199077  |
| Q62812        | ELEDATETADAMNR                                          | 0.811376824        | 2              | 3.69872   |
| Q62812        | ELETQISELQEDLESER                                       | 0.800320245        | 2              | 3.899051  |

|        |                                   |             |   |          |
|--------|-----------------------------------|-------------|---|----------|
| Q62812 | HEDELLAK                          | 0.806395153 | 2 | 3.100676 |
| Q62812 | HSQAVEELAEQLEQTK                  | 0.883618017 | 2 | 4.962539 |
| Q62812 | HSQAVEELAEQLEQTKR                 | 0.797560811 | 3 | 5.546907 |
| Q62812 | IAQLEEQLDNETK                     | 0.996526705 | 2 | 4.016231 |
| Q62812 | IIGLDQVAGMSETALPGAFK              | 0.894885265 | 2 | 3.78374  |
| Q62812 | IRELETQISELQEDLESER               | 0.950980445 | 3 | 3.835921 |
| Q62812 | KEEELQAALAR                       | 0.844272078 | 2 | 3.100376 |
| Q62812 | KKVEAQLQELQVK                     | 0.835685457 | 2 | 4.661884 |
| Q62812 | KLEEDQIIMEDQNCK                   | 0.87927825  | 2 | 5.658192 |
| Q62812 | KLEGDSTDLSQIAELQAQIAELK           | 0.832968423 | 2 | 6.291564 |
| Q62812 | KQELEEICHDLER                     | 0.947749237 | 2 | 4.281878 |
| Q62812 | KVEAQLQELQVK                      | 0.916256453 | 2 | 4.211732 |
| Q62812 | LEEDQIIMEDQNCK                    | 0.842297282 | 2 | 3.814162 |
| Q62812 | LEGDSTDLSQIAELQAQIAELK            | 0.928357502 | 2 | 4.918293 |
| Q62812 | LQQELDDLVDLDHQR                   | 0.912971431 | 2 | 4.851518 |
| Q62812 | LQVELDSVTGLLNQSDSK                | 0.930592159 | 2 | 5.964386 |
| Q62812 | LTEMETMQSQLMAEK                   | 1.038423159 | 2 | 3.324635 |
| Q62812 | MQQNIQELEEQLLEEEESAR              | 1.001129591 | 2 | 6.003347 |
| Q62812 | MQQNIQELEEQLLEEEESAR+Oxidation(0) | 0.735840794 | 2 | 4.652771 |
| Q62812 | NAEQFKDQADK                       | 1.198695225 | 2 | 3.689645 |
| Q62812 | NLPIYSEEIVDMYK                    | 1.04761212  | 2 | 3.776233 |
| Q62812 | NMDPLNDNIATLLHQSSDK               | 0.971658327 | 2 | 4.427688 |
| Q62812 | NTDQASMPDNTAAQK                   | 0.830544751 | 2 | 5.277442 |
| Q62812 | NTDQASMPDNTAAQK+Oxidation(6)      | 0.852670686 | 2 | 5.073442 |
| Q62812 | QAQQRDELADLANSSGK                 | 1.007167678 | 3 | 4.120313 |
| Q62812 | QIATLHAQVTDK                      | 1.224007983 | 2 | 2.680901 |
| Q62812 | QLEEAEEEEAQR                      | 0.920724628 | 2 | 3.270162 |
| Q62812 | QNKELK                            | 0.958514551 | 1 | 2.191375 |
| Q62812 | QSVSNLEK                          | 0.872384572 | 2 | 2.587089 |
| Q62812 | QTLNERGELANEVK                    | 1.021903974 | 2 | 3.296558 |
| Q62812 | RGDMPFVVTR                        | 0.853665823 | 2 | 2.330957 |
| Q62812 | RKLEGDSTDLSQIAELQAQIAELK          | 0.920009128 | 3 | 5.60279  |
| Q62812 | RQLEEAEEEEAQR                     | 0.87030987  | 2 | 4.41887  |
| Q62812 | SMEAEMIQLEELAAAER                 | 0.925526633 | 2 | 4.255435 |
| Q62812 | SMEAEMIQLEELAAAERAKR+Oxidation(1) | 1.137640173 |   | 2.30145  |
| Q62812 | TDLLLEPYNK                        | 1.00090775  | 2 | 3.193748 |
| Q62812 | TELEDTLDSTAAQQLR                  | 0.948659451 | 2 | 4.911375 |
| Q62812 | THEAQIQEMR                        | 0.711326687 | 2 | 3.151373 |
| Q62812 | THEAQIQEMR+Oxidation(8)           | 0.945053862 | 2 | 3.400297 |
| Q62812 | TQLEEELEDELQATEDAK                | 0.86240593  | 2 | 6.109765 |
| Q62812 | VEAQLQELQVK                       | 0.661813184 | 2 | 3.240036 |
| Q62812 | VEDMAELTCLNEASVLHNLK              | 0.936743535 | 2 | 4.395519 |
| Q62812 | VSHLLGINVTDFTFR                   | 1.046560005 | 2 | 3.709194 |

|               |                                                        |                    |                |           |
|---------------|--------------------------------------------------------|--------------------|----------------|-----------|
| Q62812        | YEILTPNSIPK                                            | 0.95538062         | 2              | 2.804184  |
| <b>Q62826</b> | <b>HNRPM Heterogeneous nuclear ribonucleoprotein M</b> | <b>1.091334012</b> | <b>0.4145</b>  | <b>4</b>  |
| Q62826        | ADILEDKDGK                                             | 0.793777158        | 2              | 2.308204  |
| Q62826        | AFITNIPFDVK                                            | 1.185106945        | 2              | 3.198852  |
| Q62826        | GNFGGSFAGSFGGAGGHAPGVAR                                | 0.881319255        | 2              | 3.862215  |
| Q62826        | MGPVMDRMTGLER+Oxidation(0)                             | 0.989544529        | 2              | 2.931424  |
| <b>Q62868</b> | <b>ROCK2 Rho-associated protein kinase 2</b>           | <b>0.618660369</b> | <b>0.0281</b>  | <b>2</b>  |
| Q62868        | EENEETKLCK                                             | 0.375298421        | 2              | 2.367384  |
| Q62868        | LAEIMNRK+Oxidation(4)                                  | 0.629795611        | 1              | 2.053685  |
| <b>Q62871</b> | <b>DC112 Cytoplasmic dynein 1 intermediate chain 2</b> | <b>0.967720585</b> | <b>0.91642</b> | <b>2</b>  |
| Q62871        | ADAEAAAATR                                             | 0.967737373        | 2              | 3.278523  |
| Q62871        | SVSTPSEAGSQSDGDGAVGSR                                  | 0.910182586        | 2              | 4.732947  |
| <b>Q62902</b> | <b>LMAN1 Protein ERGIC_53</b>                          | <b>1.199639086</b> | <b>1.1E-16</b> | <b>6</b>  |
| Q62902        | GAGTPGQPQVSQQLDVTVR                                    | 1.16317772         | 2              | 4.226358  |
| Q62902        | GHPDLQGPADDIFESIGDR                                    | 1.010088205        | 2              | 4.890192  |
| Q62902        | NNPAIVVVGNNQINVDHQNDGATQALASCQR                        | 1.440162613        | 3              | 5.005457  |
| Q62902        | RGAGTPGQPQVSQQLDVTVR                                   | 0.887669505        | 3              | 5.043847  |
| Q62902        | YQEEFEHFQQLDK                                          | 1.142348498        | 2              | 5.1436    |
| Q62902        | YVSSLTEISR                                             | 0.921711953        | 2              | 3.400393  |
| <b>Q63041</b> | <b>A1M Alpha_1_macroglobulin</b>                       | <b>0.832186559</b> | <b>2E-05</b>   | <b>8</b>  |
| Q63041        | AEDITHNGIVYTPK                                         | 0.765094973        | 2              | 3.528978  |
| Q63041        | AEQGAYLGPLYK                                           | 0.885518884        | 2              | 3.337096  |
| Q63041        | DTVVKPVIVEPEGIEK                                       | 0.956109847        | 2              | 3.123286  |
| Q63041        | GSIFNSGSHVLPLEQGK                                      | 0.79979351         | 2              | 3.697152  |
| Q63041        | LQDQSNIQR                                              | 0.760300173        | 2              | 3.068413  |
| Q63041        | QDLNDNDAYSVFQSIGLK                                     | 1.162157192        | 2              | 3.234031  |
| Q63041        | YNILPEAEGEAPFTLK                                       | 0.911944785        | 2              | 3.919297  |
| Q63041        | YVVLVPSSELYAGVPEK                                      | 0.954116343        | 2              | 3.312874  |
| <b>Q63060</b> | <b>GLPK Glycerol kinase</b>                            | <b>1.360197182</b> | <b>9.9E-20</b> | <b>10</b> |
| Q63060        | AVLGPLVGAVDQGTSSSTR                                    | 1.447209194        | 2              | 5.32653   |
| Q63060        | DCGIPLSHLQVDGGMTSNK                                    | 1.784081421        | 2              | 3.265332  |
| Q63060        | EILQSVYECIEK                                           | 1.287989652        | 2              | 3.872813  |
| Q63060        | FEPQINAESEIR                                           | 1.501235012        | 2              | 3.483125  |
| Q63060        | KAVLGPLVGAVDQGTSSSTR                                   | 0.857455123        | 3              | 3.501194  |
| Q63060        | KVQEAveenr                                             | 1.156083267        | 2              | 3.320334  |
| Q63060        | LGQLNIDISNIK                                           | 1.425502067        | 2              | 3.029816  |
| Q63060        | NTYGTGCFLLCNTGHK                                       | 1.129520928        | 2              | 3.916847  |
| Q63060        | TAELLSHHQVEIK                                          | 1.377099633        | 2              | 3.170953  |
| Q63060        | VQEAveenr                                              | 0.906049843        | 2              | 3.060728  |
| <b>Q63081</b> | <b>PDIA6 Protein disulfide_isomerase A6</b>            | <b>0.95973911</b>  | <b>5.6E-16</b> | <b>9</b>  |
| Q63081        | GESPVDYDGR                                             | 0.916390176        | 2              | 2.944207  |
| Q63081        | GSFSEQGINEFLR                                          | 0.988568303        | 2              | 3.62426   |

|               |                                                                   |                    |                |           |
|---------------|-------------------------------------------------------------------|--------------------|----------------|-----------|
| Q63081        | GSTAPVGGGSPNITPR                                                  | 0.959599242        | 2              | 4.28021   |
| Q63081        | HQSLGGQYGVQGFPTIK                                                 | 0.806781124        | 2              | 5.043689  |
| Q63081        | KTCEEHQLCVVAVLPHILDTGATGR                                         | 1.161534359        | 3              | 4.084782  |
| Q63081        | NLEPEWAAAATEVK                                                    | 0.929629526        | 2              | 3.907022  |
| Q63081        | NSYLEVLLK                                                         | 0.963411117        | 2              | 2.912807  |
| Q63081        | TCEEHQLCVVAVLPHILDTGATGR                                          | 1.179583604        | 3              | 4.690395  |
| Q63081        | TGEAIVDAALSALR                                                    | 1.007373624        | 3              | 4.68916   |
| <b>Q63108</b> | <b>EST3 Liver carboxylesterase 3</b>                              | <b>0.815228833</b> | <b>9.9E-20</b> | <b>5</b>  |
| Q63108        | DFNTVPYIVGINK                                                     | 1.695748872        | 2              | 2.629604  |
| Q63108        | GGTSKEEINLSK                                                      | 0.672956459        | 2              | 3.492644  |
| Q63108        | LDPMTATSLK                                                        | 0.776333523        | 2              | 3.059147  |
| Q63108        | QKTEEELETTLK                                                      | 0.81548542         | 2              | 3.580623  |
| Q63108        | SSFLLNPEEAIPVAVEK                                                 | 0.637815409        | 2              | 4.657144  |
| <b>Q63120</b> | <b>MRP2 Canalicular multispecific organic anion transporter 1</b> | <b>0.855173685</b> | <b>0.38465</b> | <b>2</b>  |
| Q63120        | ACALLPDLEILPGDMAEIGEK                                             | 0.9569102          | 2              | 2.965484  |
| Q63120        | YFAWEPSFQEQVQGIR                                                  | 0.992174456        | 2              | 3.743453  |
| <b>Q63150</b> | <b>DPYS Dihydropyrimidinase</b>                                   | <b>0.767337541</b> | <b>9.9E-20</b> | <b>10</b> |
| Q63150        | ALGKDDFTK                                                         | 0.844672649        | 2              | 2.620963  |
| Q63150        | DQTCTPIPVK                                                        | 0.687461619        | 1              | 2.120382  |
| Q63150        | DQTCTPIPVKR                                                       | 0.734942114        | 2              | 2.633752  |
| Q63150        | EIGAIAQVHAENGDLIAEGAK                                             | 0.986517616        | 2              | 5.484122  |
| Q63150        | FVAVTSTNAAK                                                       | 0.745865427        | 2              | 3.110895  |
| Q63150        | GEVITLKPR                                                         | 0.789823575        | 2              | 2.314631  |
| Q63150        | GSSLIEAFETWR                                                      | 0.759459089        | 2              | 2.994756  |
| Q63150        | VVNDDFSQVADVLVEDGVVR                                              | 0.689144788        | 2              | 5.240556  |
| Q63150        | VVYEAGVFDVTAGHGK                                                  | 0.861868847        | 2              | 3.860447  |
| Q63150        | VVYGEPIAAGLTDGTQYWNK                                              | 0.791476467        | 2              | 5.627224  |
| <b>Q63270</b> | <b>ACOC Cytoplasmic aconitate hydratase</b>                       | <b>0.852533392</b> | <b>1.2E-09</b> | <b>16</b> |
| Q63270        | AVEAGLNVPYVK                                                      | 1.03155477         | 2              | 3.144447  |
| Q63270        | AVLAESYER                                                         | 0.954245763        | 2              | 2.861386  |
| Q63270        | FVEFFGPGVAQLSIADR                                                 | 1.189200499        | 2              | 4.411954  |
| Q63270        | GFQVAPDHHNDHK                                                     | 0.637562248        | 2              | 3.037085  |
| Q63270        | IDFEKEPLGVNAQQQVFLK                                               | 1.053108993        | 3              | 4.609636  |
| Q63270        | KNDIENILNWSIMQHK                                                  | 1.202690824        | 3              | 3.82754   |
| Q63270        | NDIENILNWSIMQHK                                                   | 1.103535822        | 2              | 2.457944  |
| Q63270        | NQDLEFER                                                          | 0.863806295        | 2              | 2.373795  |
| Q63270        | QAPQTVHLPSGETLDVFDAAER                                            | 0.943032328        | 3              | 3.953301  |
| Q63270        | SIEVPFKPAR                                                        | 1.003408194        | 2              | 2.428619  |
| Q63270        | SIVDAYVLLNLGDSVTTDHISPAGNIAR                                      | 1.14756955         | 3              | 4.800594  |
| Q63270        | SPPFFESLTLDLQPPK                                                  | 1.108256395        | 2              | 2.681449  |
| Q63270        | SWNALAAPSEK                                                       | 0.85510574         | 1              | 2.604376  |
| Q63270        | TSLSPGSGVVYYLR                                                    | 1.313800989        | 2              | 2.912296  |



|               |                                                         |                    |                |           |
|---------------|---------------------------------------------------------|--------------------|----------------|-----------|
| Q63270        | VILQDFTGVPVAVVDFAAAMR                                   | 0.785449463        | 3              | 4.063266  |
| Q63270        | YQQAGLPLIVLAGK                                          | 0.920291508        | 2              | 3.213481  |
| <b>Q63276</b> | <b>BAAT Bile acid_CoA:amino acid N_acyltransferase</b>  | <b>1.058847476</b> | <b>9.9E-20</b> | <b>13</b> |
| Q63276        | AHGHLFVVGEDDKNLNSK                                      | 2.08161357         | 2              | 5.967214  |
| Q63276        | ASEVGEVDLER                                             | 0.955244718        | 2              | 3.973317  |
| Q63276        | DDKGNLFNSQAFYR                                          | 0.961290675        | 3              | 3.421368  |
| Q63276        | GNLFNSQAFYR                                             | 1.179641159        | 2              | 2.760852  |
| Q63276        | LTAVPLSALVDEPVHIR                                       | 1.872169011        | 3              | 3.433373  |
| Q63276        | QHLNPGFNSQL                                             | 1.038602751        | 2              | 3.519397  |
| Q63276        | QITATVLINGPNFVSSNPVYR                                   | 0.95256505         | 3              | 4.945737  |
| Q63276        | TFEETADKDSK                                             | 0.809682645        | 2              | 3.792937  |
| Q63276        | VFQPTPCSEEFVTTNALGLVEFYR                                | 1.057801372        | 2              | 5.234632  |
| Q63276        | VISSLDSLILER                                            | 0.960141597        | 2              | 3.941213  |
| Q63276        | VTGLTPFQVVCLQASLK                                       | 1.215655385        | 3              | 3.647864  |
| Q63276        | WYVAPGVTR                                               | 0.63557938         | 2              | 2.74042   |
| Q63276        | YCFPIEK                                                 | 0.896202013        | 2              | 2.541563  |
| <b>Q63279</b> | <b>K1C19 Keratin_type I cytoskeletal 19</b>             | <b>0.857087147</b> | <b>0.02464</b> | <b>2</b>  |
| Q63279        | IVLQIDNAR                                               | 0.849585301        | 2              | 2.96024   |
| Q63279        | TIEDLRDKILGATIENSK                                      | 1.124281511        | 2              | 2.322479  |
| <b>Q63342</b> | <b>M2GD Dimethylglycine dehydrogenase_mitochondrial</b> | <b>0.726805363</b> | <b>9.9E-20</b> | <b>20</b> |
| Q63342        | ADIINIVNGPITYSPDILPMVGP HQGVR                           | 0.876548525        | 3              | 5.460544  |
| Q63342        | AWGSEMNCDTNPLEAGLDYFIK                                  | 0.902664931        | 2              | 4.50589   |
| Q63342        | EGQESPPSPPEWK                                           | 0.674449041        | 2              | 2.664611  |
| Q63342        | GQDSTQLLDHLCANVIPK                                      | 0.904207412        | 2              | 4.087729  |
| Q63342        | IMNAGQEEGIDNFGTYALNALR                                  | 1.765853079        | 2              | 4.735649  |
| Q63342        | ISDIPVTAIR                                              | 0.811505383        | 2              | 3.034938  |
| Q63342        | KADIINIVNGPITYSPDILPMVGP HQGVR                          | 0.880387785        | 3              | 6.029374  |
| Q63342        | LEEETGQVVGFGHQPGSIR                                     | 0.722975192        | 2              | 4.586476  |
| Q63342        | LNKPADFTGK                                              | 0.746625053        | 1              | 2.530071  |
| Q63342        | LTSELDSDVFK                                             | 0.782158384        | 2              | 3.309136  |
| Q63342        | NITDELGVLGVAGPYAR                                       | 0.816973543        | 2              | 4.238839  |
| Q63342        | NYPATIIQEPLVLEPTR                                       | 0.836217646        | 3              | 4.339882  |
| Q63342        | REDSAALYER                                              | 1.69564794         | 2              | 2.966743  |
| Q63342        | TNWHATEQYIIIEPEK                                        | 1.008901317        | 2              | 4.071054  |
| Q63342        | VGVIDLSPFGK                                             | 0.846599525        | 2              | 3.630837  |
| Q63342        | VIGNTTSGSYSYSIQK                                        | 0.931831173        | 2              | 4.268919  |
| Q63342        | VYAELTVSHQSPGEFLLITGSGSELHDLR                           | 0.774766896        | 3              | 4.255466  |
| Q63342        | WIEEA AVR                                               | 0.748407616        | 2              | 2.704669  |
| Q63342        | WTTTQYTEAK                                              | 0.815185229        | 2              | 2.307     |
| Q63342        | YLSDWILHGEPFDLIELDPNR                                   | 0.622822606        | 3              | 4.064415  |
| <b>Q63347</b> | <b>PRS7 26S protease regulatory subunit 7</b>           | <b>0.89070306</b>  | <b>1.7E-05</b> | <b>6</b>  |
| Q63347        | ALDEGDIALLK                                             | 0.868435727        | 2              | 2.810462  |

|               |                                                                           |                    |                |          |
|---------------|---------------------------------------------------------------------------|--------------------|----------------|----------|
| Q63347        | FDDGAGGDNEVQR                                                             | 0.859568591        | 2              | 3.575914 |
| Q63347        | IINADSEDPK                                                                | 0.881487803        | 2              | 2.536339 |
| Q63347        | QTLQSEQPLQVAR                                                             | 0.914954926        | 2              | 4.103676 |
| Q63347        | QVEDDIQQLLK                                                               | 0.89299836         | 2              | 2.617951 |
| Q63347        | TMLELINQLDGF DPR                                                          | 0.95621944         | 2              | 2.670878 |
| <b>Q63362</b> | <b>NDUA5 NADH dehydrogenase [ubiquinone] 1 alpha subcomplex subunit 5</b> | <b>0.943968353</b> | <b>0.81448</b> | <b>3</b> |
| Q63362        | KLELLQGGEVEEVILQAEK                                                       | 0.925128913        | 2              | 4.675454 |
| Q63362        | TTGLVGLAVCDTPHER                                                          | 0.945634661        | 2              | 4.07293  |
| Q63362        | YTEQITSEK                                                                 | 1.109994022        | 2              | 2.435438 |
| <b>Q63429</b> | <b>UBC Polyubiquitin_C</b>                                                | <b>0.96013455</b>  | <b>0.9946</b>  | <b>3</b> |
| Q63429        | ESTLHLVLR                                                                 | 1.062381857        | 2              | 2.340466 |
| Q63429        | TITLEVEPSDTIENVK                                                          | 0.95769122         | 2              | 4.723439 |
| Q63429        | TLSDYNIQK                                                                 | 1.005148088        | 2              | 2.496317 |
| <b>Q63448</b> | <b>ACOX3 Peroxisomal acyl_coenzyme A oxidase 3</b>                        | <b>1.032123287</b> | <b>6.8E-07</b> | <b>9</b> |
| Q63448        | ADWLDSEAPLAAYR                                                            | 0.977505377        | 2              | 4.538589 |
| Q63448        | EIHALASAGKPLASWTAQR                                                       | 0.741125125        | 2              | 4.218229 |
| Q63448        | GGYISGEQTGK                                                               | 0.93190522         | 1              | 2.383697 |
| Q63448        | NLWAAVLQSGVLER                                                            | 1.110526592        | 2              | 4.0974   |
| Q63448        | QFGPTDKEEIPVLEYPLQQWR                                                     | 0.994979999        | 3              | 5.088423 |
| Q63448        | TIFLDLIELQR                                                               | 1.01366447         | 2              | 3.467716 |
| Q63448        | TIFSTLENDPLFARPFADLPLEK                                                   | 1.029305414        | 3              | 4.336917 |
| Q63448        | TTAHYDPATQEFILHSPDFEAAK                                                   | 1.285037157        | 3              | 4.353027 |
| Q63448        | TVNFLEAYPGILGQK                                                           | 1.065579285        | 2              | 4.949403 |
| <b>Q63493</b> | <b>CD1D Antigen_presenting glycoprotein CD1d</b>                          | <b>1.273821051</b> | <b>0.00243</b> | <b>2</b> |
| Q63493        | DIKEIVKMMSPK+Oxidation(7)                                                 | 1.273821051        | 2              | 2.625995 |
| Q63493        | DIKEIVKMMSPK+Oxidation(8)                                                 | 1.273821051        | 2              | 2.470165 |
| <b>Q63505</b> | <b>TF3C1 General transcription factor 3C polypeptide 1</b>                | <b>0.968925965</b> | <b>0.00131</b> | <b>2</b> |
| Q63505        | NPNLEIPDTLQELFAKYR                                                        | 1.308368722        | 2              | 2.547085 |
| Q63505        | YEEIDLETGILESRR                                                           | 0.511500715        | 2              | 2.740065 |
| <b>Q63524</b> | <b>TMED2 Transmembrane emp24 domain_containing protein 2</b>              | <b>0.934381037</b> | <b>0.23093</b> | <b>2</b> |
| Q63524        | GQDMETEAHQNKLEEMINELAVAMTAVK                                              | 1.103181836        | 3              | 5.033961 |
| Q63524        | HEQEYMEVR                                                                 | 0.877392834        | 2              | 2.811748 |
| <b>Q63525</b> | <b>NUDC Nuclear migration protein nudC</b>                                | <b>0.942543266</b> | <b>0.70129</b> | <b>3</b> |
| Q63525        | GQAPVIDGELYNEVK                                                           | 0.944562199        | 2              | 3.080175 |
| Q63525        | LSLDSETR                                                                  | 0.588050036        | 2              | 2.508842 |
| Q63525        | VESSWLIEDGK                                                               | 0.92178368         | 2              | 2.808433 |
| <b>Q63569</b> | <b>PRS6A 26S protease regulatory subunit 6A</b>                           | <b>1.103711078</b> | <b>0.05381</b> | <b>7</b> |
| Q63569        | AMEVDERPTEQYSDIGGLDK                                                      | 1.384327327        | 3              | 3.903711 |
| Q63569        | CTDDFNGAQCK                                                               | 0.978209621        | 2              | 2.731547 |
| Q63569        | DSYLILETLPTFYDSR                                                          | 1.086313587        | 2              | 3.403019 |
| Q63569        | MNVSPDVNYEELAR                                                            | 1.011774033        | 2              | 3.032847 |

|               |                                                               |                    |                |           |
|---------------|---------------------------------------------------------------|--------------------|----------------|-----------|
| Q63569        | QTYFLPVIGLVDAEK                                               | 1.097244221        | 2              | 2.697615  |
| Q63569        | TMLELLNQLDGFQPNQVK                                            | 0.630679659        | 2              | 2.548872  |
| Q63569        | VDILDPLLRR                                                    | 0.900170618        | 2              | 2.392989  |
| <b>Q63584</b> | <b>TMEDA Transmembrane emp24 domain_containing protein 10</b> | <b>1.158043213</b> | <b>0.00012</b> | <b>4</b>  |
| Q63584        | ITDSAGHILYAK                                                  | 1.182157122        | 2              | 3.577688  |
| Q63584        | LEDLSESIVNDFAYMK                                              | 0.996929643        | 2              | 3.55448   |
| Q63584        | NYEEIAK                                                       | 0.859625678        | 1              | 2.233616  |
| Q63584        | RLEDLSESIVNDFAYMK                                             | 0.866513701        | 2              | 4.041759  |
| <b>Q63598</b> | <b>PLST Plastin_3</b>                                         | <b>0.772963924</b> | <b>9.9E-20</b> | <b>8</b>  |
| Q63598        | AESMLQQADK                                                    | 0.738921026        | 2              | 2.731967  |
| Q63598        | ATDDIIVNWVNGTLSEAGK                                           | 0.856616532        | 2              | 4.556378  |
| Q63598        | IDINMSGFNETDDLKR                                              | 0.950375487        | 2              | 3.489283  |
| Q63598        | KLENCNYAVELGK                                                 | 0.755916056        | 2              | 3.589231  |
| Q63598        | VDLNSNGFICDYELHELK                                            | 1.00612261         | 2              | 4.036258  |
| Q63598        | VYALPEDLVEVKPK                                                | 0.906330709        | 2              | 3.189458  |
| Q63598        | YPALTKPENQDIDWTLEGETR                                         | 0.709213668        | 3              | 5.640592  |
| Q63598        | YTLNVMEDLGEGQK                                                | 0.860351518        | 2              | 3.3985    |
| <b>Q63610</b> | <b>TPM3 Tropomyosin alpha_3 chain</b>                         | <b>1.075856364</b> | <b>3.1E-10</b> | <b>8</b>  |
| Q63610        | EQAAEAVASLNR                                                  | 0.887293148        | 2              | 2.925125  |
| Q63610        | IQVLQQQADDAEER                                                | 1.180267328        | 2              | 4.820776  |
| Q63610        | KIQVLQQQADDAEER                                               | 1.050121083        | 2              | 5.400838  |
| Q63610        | KLVIIEGDLER                                                   | 1.036809374        | 2              | 2.304484  |
| Q63610        | LVIIEGDLER                                                    | 0.869619466        | 2              | 2.69653   |
| Q63610        | MELQEIQLK                                                     | 1.143859348        | 2              | 3.095226  |
| Q63610        | TIDDEDKLK                                                     | 0.945849123        | 2              | 2.679843  |
| Q63610        | YSQKEDKYEEIK                                                  | 0.896608573        | 2              | 4.479173  |
| <b>Q63617</b> | <b>HYOU1 Hypoxia up_regulated protein 1</b>                   | <b>1.102060954</b> | <b>2.6E-10</b> | <b>13</b> |
| Q63617        | AANSLEAFIFETQDK                                               | 1.175758179        | 2              | 3.985163  |
| Q63617        | DAVITVPAFFNQAER                                               | 1.077332651        | 2              | 2.46626   |
| Q63617        | EGETPDEKESGDKSEAQKPNK                                         | 0.986053396        | 3              | 3.869456  |
| Q63617        | FLGDSAAGMAIK                                                  | 1.04012277         | 2              | 2.373202  |
| Q63617        | GQAGPEGVPPAPEEEKK                                             | 0.763001314        | 2              | 3.225506  |
| Q63617        | LGNTISSLFGGTSSDAK                                             | 1.123492113        | 2              | 3.251617  |
| Q63617        | LYQPEYQEVSTEEQR                                               | 1.423393423        | 2              | 4.609168  |
| Q63617        | NINADEAAAAMGAVYQAAALSK                                        | 1.147701805        | 2              | 4.64856   |
| Q63617        | SLAEDFAEQPIK                                                  | 1.093691122        | 2              | 2.75734   |
| Q63617        | SLAEDFAEQPIKDAVITVPAFFNQAER                                   | 1.103216887        | 3              | 3.80923   |
| Q63617        | VEFEELCADLFDR                                                 | 1.042923915        | 2              | 3.391126  |
| Q63617        | VESVFETLVEDSPEEESTLTK                                         | 0.960347608        | 3              | 4.179318  |
| Q63617        | VLQLINDNTATALSYGVFR                                           | 1.122374237        | 2              | 4.001079  |
| <b>Q63692</b> | <b>CDC37 Hsp90 co_chaperone Cdc37</b>                         | <b>0.926889964</b> | <b>8.7E-05</b> | <b>2</b>  |
| Q63692        | EGEEAGPGDPLLEAVPK                                             | 0.685918527        | 2              | 3.824945  |

|               |                                                                    |                    |                |           |
|---------------|--------------------------------------------------------------------|--------------------|----------------|-----------|
| Q63692        | LGPGGLDPVEVYESLPEELQK                                              | 1.076469898        | 2              | 2.775415  |
| <b>Q63716</b> | <b>PRDX1 Peroxiredoxin_1</b>                                       | <b>0.906323566</b> | <b>9.9E-20</b> | <b>15</b> |
| Q63716        | ADEGISFR                                                           | 0.923166441        | 2              | 3.137064  |
| Q63716        | ATAVMPDGQFK                                                        | 0.932717957        | 2              | 2.775047  |
| Q63716        | ATAVMPDGQFK+Oxidation(4)                                           | 1.011031812        | 2              | 2.336777  |
| Q63716        | DISLSDYK                                                           | 0.778630992        | 1              | 2.047317  |
| Q63716        | HGEVCPAGWKPGSDTIKPDVNK                                             | 0.909400067        | 3              | 6.00501   |
| Q63716        | IGHPAPSFK                                                          | 3.364138837        | 1              | 2.04062   |
| Q63716        | KQGGLGPMNIPLVSDPK                                                  | 1.215347356        | 2              | 3.263965  |
| Q63716        | KQGGLGPMNIPLVSDPK+Oxidation(7)                                     | 1.104420692        | 2              | 2.546925  |
| Q63716        | LVQAFQFTDK                                                         | 2.067701264        | 2              | 2.895708  |
| Q63716        | QGGLGPMNIPLVSDPK                                                   | 0.716982867        | 2              | 3.835082  |
| Q63716        | QGGLGPMNIPLVSDPK+Oxidation(6)                                      | 0.790310529        | 2              | 3.256541  |
| Q63716        | QITINDLPVGR                                                        | 0.834129924        | 2              | 3.085922  |
| Q63716        | RTIAQDYGVLK                                                        | 0.895711588        | 2              | 2.572249  |
| Q63716        | SVDEILR                                                            | 0.891276293        | 2              | 2.37259   |
| Q63716        | TIAQDYGVLK                                                         | 0.890498161        | 2              | 3.392761  |
| <b>Q63787</b> | <b>P85A Phosphatidylinositol 3_kinase regulatory subunit alpha</b> | <b>0.663236114</b> | <b>0.01395</b> | <b>2</b>  |
| Q63787        | MHGDYTLTLRKGGNK+Oxidation(0)                                       | 0.613189423        | 2              | 2.30273   |
| Q63787        | SRISEIISR                                                          | 1.230492482        | 1              | 2.038541  |
| <b>Q63797</b> | <b>PSME1 Proteasome activator complex subunit 1</b>                | <b>0.893408657</b> | <b>9.9E-20</b> | <b>8</b>  |
| Q63797        | ISELDAFLKEPALNEANLSNLK                                             | 0.843887699        | 2              | 5.316459  |
| Q63797        | KGDEDDKGPCCGPVNCNEK                                                | 0.864924241        | 3              | 4.315633  |
| Q63797        | KISELDAFLKEPALNEANLSNLK                                            | 0.896322794        | 3              | 4.833234  |
| Q63797        | LEGFQTQISK                                                         | 0.8778904          | 2              | 2.741705  |
| Q63797        | NAYAVLYDIILK                                                       | 1.948746169        | 2              | 4.119957  |
| Q63797        | QLVHELDEAEYQEIR                                                    | 0.622047027        | 2              | 4.091653  |
| Q63797        | TENLLGSYFPK                                                        | 0.89938539         | 2              | 3.420146  |
| Q63797        | VDFVREDLCSK                                                        | 0.892367749        | 2              | 2.641342  |
| <b>Q63798</b> | <b>PSME2 Proteasome activator complex subunit 2</b>                | <b>0.97057775</b>  | <b>0.13777</b> | <b>4</b>  |
| Q63798        | AFYAELHHIISNLEK                                                    | 0.920953476        | 3              | 3.500704  |
| Q63798        | IEDGNDFGVAIQEK                                                     | 0.91082474         | 2              | 4.387158  |
| Q63798        | TKVEAFQTAISK                                                       | 1.01687911         | 2              | 3.180129  |
| Q63798        | VEAFQTAISK                                                         | 0.803990929        | 2              | 2.308157  |
| <b>Q63836</b> | <b>SBP2 Selenium_binding protein 2</b>                             | <b>0.892918068</b> | <b>0.01091</b> | <b>4</b>  |
| Q63836        | GGSVQVLEDQELTCQPEPLVVK                                             | 0.983851549        | 3              | 5.653489  |
| Q63836        | IYVVDVGSEPR                                                        | 0.852037002        | 2              | 3.227777  |
| Q63836        | LNPFLVDFGK                                                         | 0.320750897        | 2              | 2.410395  |
| Q63836        | LNPFLVDFGKEPLGALAEHLR                                              | 0.873636606        | 3              | 4.400791  |
| <b>Q63965</b> | <b>SFXN1 Sideroflexin_1</b>                                        | <b>1.169376375</b> | <b>9.9E-20</b> | <b>6</b>  |
| Q63965        | MSGEVPPNINIK+Oxidation(0)                                          | 0.955277127        | 1              | 1.929551  |
| Q63965        | NILLTNEQLENAR                                                      | 0.914918753        | 2              | 4.629127  |

|               |                                                           |                    |                |           |
|---------------|-----------------------------------------------------------|--------------------|----------------|-----------|
| Q63965        | QAITQVVISR                                                | 1.893736554        | 2              | 2.611428  |
| Q63965        | QGIVPAGLTENELWR                                           | 0.931683846        | 2              | 2.904779  |
| Q63965        | WDQSTFIGR                                                 | 0.881390334        | 2              | 2.574814  |
| Q63965        | YAYDSAFHPDTGEK                                            | 1.276901893        | 2              | 4.029942  |
| <b>Q64057</b> | <b>AL7A1 Alpha_aminoadipic semialdehyde dehydrogenase</b> | <b>0.884839721</b> | <b>9.9E-20</b> | <b>16</b> |
| Q64057        | AWNIWADIPAPK                                              | 0.818380452        | 2              | 3.657171  |
| Q64057        | EDNEGVFNQSWGGR                                            | 0.810723501        | 2              | 3.541548  |
| Q64057        | FKNEEEVFEWNNEVK                                           | 1.04517947         | 2              | 5.351759  |
| Q64057        | GAPTTSLVSIATK                                             | 0.985403872        | 2              | 4.531024  |
| Q64057        | GEVITTYCPANNEPIAR                                         | 0.996763248        | 2              | 5.23091   |
| Q64057        | GSDCGIVNVNIPTSGAIEGGAFGGK                                 | 1.027570183        | 2              | 5.731015  |
| Q64057        | LFLHESIHDEVVDR                                            | 0.960352323        | 2              | 2.861395  |
| Q64057        | NEEEVFEWNNEVK                                             | 1.029687062        | 2              | 4.374395  |
| Q64057        | QAVSMFVQAVEEAK                                            | 1.46042191         | 2              | 2.921363  |
| Q64057        | QGLSSSIFTK                                                | 1.233716236        | 2              | 2.567116  |
| Q64057        | QVALMVQER                                                 | 0.9969406          | 2              | 2.460257  |
| Q64057        | STCTINYSTALPLAQGIK                                        | 1.843063408        | 2              | 3.989538  |
| Q64057        | VGNPWPDPNILYGPLHTK                                        | 1.687614548        | 3              | 3.644227  |
| Q64057        | VMDHPGNYVEPTIVTGLVHDAPIVHK                                | 1.295179274        | 3              | 5.514498  |
| Q64057        | VMDHPGNYVEPTIVTGLVHDAPIVHK+Oxidation(1)                   | 0.871933107        | 3              | 5.978415  |
| Q64057        | VNLLSFTGSTQVQVK                                           | 1.645868886        | 2              | 4.538757  |
| <b>Q64060</b> | <b>DDX4 Probable ATP_dependent RNA helicase DDX4</b>      | <b>0.850322628</b> | <b>0.26566</b> | <b>2</b>  |
| Q64060        | MLDMGFGPEMKK+Oxidation(0)                                 | 0.850322628        | 2              | 2.429097  |
| Q64060        | MLDMGFGPEMKK+Oxidation(3)                                 | 0.850322628        | 2              | 2.323558  |
| <b>Q64119</b> | <b>MYL6 Myosin light polypeptide 6</b>                    | <b>0.821233603</b> | <b>9.9E-20</b> | <b>5</b>  |
| Q64119        | DQGTIEDYVEGLR                                             | 0.807263595        | 2              | 3.353909  |
| Q64119        | HVLVTLGEK                                                 | 0.839958585        | 2              | 2.390612  |
| Q64119        | NKDQGTIEDYVEGLR                                           | 0.887322784        | 2              | 4.31594   |
| Q64119        | VFDKEGNGTVMGAEIR                                          | 0.617977076        | 2              | 3.817748  |
| Q64119        | VLDFEHFLPMLQTVAK                                          | 0.857013587        | 3              | 4.493151  |
| <b>Q64122</b> | <b>MYL9 Myosin regulatory light polypeptide 9</b>         | <b>0.863277402</b> | <b>0.00089</b> | <b>2</b>  |
| Q64122        | DGFIDKEDLHDMLASLGK                                        | 0.84995077         | 2              | 4.822315  |
| Q64122        | LNGTDPEDVIR                                               | 0.8687169          | 2              | 2.601902  |
| <b>Q64176</b> | <b>EST22 Liver carboxylesterase 22</b>                    | <b>0.573884289</b> | <b>9.9E-20</b> | <b>4</b>  |
| Q64176        | AISESGVALTAGLVK                                           | 0.64274869         | 2              | 4.237696  |
| Q64176        | EGYLQIGATTQQAQK                                           | 0.529189582        | 2              | 4.318136  |
| Q64176        | LDQMTAMSLK+Oxidation(3)                                   | 0.60720067         |                | 2.517842  |
| Q64176        | NFNTVPYIVGINK                                             | 1.703743459        | 2              | 2.69482   |
| <b>Q641K1</b> | <b>CBPC1 Cytosolic carboxypeptidase 1</b>                 | <b>1.603653178</b> | <b>0.0134</b>  | <b>2</b>  |
| Q641K1        | GTLEYLMSNSPTAQSRLR                                        | 1.608344396        | 2              | 2.337497  |
| Q641K1        | KDFGLPLTVLSCTK                                            | 1.551181402        | 2              | 2.378782  |

|               |                                                                                            |                    |                |           |
|---------------|--------------------------------------------------------------------------------------------|--------------------|----------------|-----------|
| <b>Q641Y0</b> | <b>OST48 Dolichyl_diphosphooligosaccharide__protein glycosyltransferase 48 kDa subunit</b> | <b>0.996425261</b> | <b>0.07889</b> | <b>8</b>  |
| Q641Y0        | ELGSECGIEFDEEK                                                                             | 1.066930751        | 2              | 2.380695  |
| Q641Y0        | GFELTFK                                                                                    | 0.966768992        | 2              | 2.546202  |
| Q641Y0        | NLLIAGLQAR                                                                                 | 1.043539836        | 2              | 3.613231  |
| Q641Y0        | SSLNPILFR                                                                                  | 1.335748982        | 2              | 2.562171  |
| Q641Y0        | TAVIDHHNYDVSDDLQHTLIVADTENLLK                                                              | 1.189235734        | 3              | 6.583608  |
| Q641Y0        | TLVLLDNLNVR                                                                                | 0.922272689        | 2              | 3.461147  |
| Q641Y0        | WVVPFDGDDIQLEFVR                                                                           | 0.976993998        | 2              | 3.254752  |
| Q641Y0        | YSQTGNYELAVALSR                                                                            | 1.02041397         | 2              | 3.221334  |
| <b>Q641Y2</b> | <b>NDUS2 NADH dehydrogenase [ubiquinone] iron_sulfur protein 2_ mitochondrial</b>          | <b>0.885679783</b> | <b>0.0002</b>  | <b>3</b>  |
| Q641Y2        | IDEVEEMLTNNR                                                                               | 0.884928541        | 2              | 3.380239  |
| Q641Y2        | IIEQCLNK                                                                                   | 0.899567765        | 2              | 2.361413  |
| Q641Y2        | TQPYPDYDQVEFDVPIGSR                                                                        | 1.265356967        | 2              | 4.099835  |
| <b>Q641Y8</b> | <b>DDX1 ATP_dependent RNA helicase DDX1</b>                                                | <b>0.950038293</b> | <b>0.94349</b> | <b>2</b>  |
| Q641Y8        | GHVDILAPTVQELAALEK                                                                         | 0.937780019        | 3              | 3.461784  |
| Q641Y8        | GSFAIGSDGLCCQSR                                                                            | 1.03546672         | 2              | 3.201665  |
| <b>Q641Z6</b> | <b>EHD1 EH domain_containing protein 1</b>                                                 | <b>1.031821592</b> | <b>0.88521</b> | <b>2</b>  |
| Q641Z6        | KEMPNVFGKESK+Oxidation(2)                                                                  | 1.031647885        | 2              | 2.311286  |
| Q641Z6        | LLDTVDDMLANDIAR                                                                            | 1.043253801        | 2              | 2.670396  |
| <b>Q64232</b> | <b>TECR Trans_2_3_enoyl_CoA reductase</b>                                                  | <b>0.756567609</b> | <b>0.0001</b>  | <b>3</b>  |
| Q64232        | LCFLDKVEPQATISEIK                                                                          | 0.929437927        | 2              | 4.085227  |
| Q64232        | SLKDEDVLQK                                                                                 | 0.727410336        | 2              | 2.900389  |
| Q64232        | THPQWYPAR                                                                                  | 0.741766378        | 2              | 2.529253  |
| <b>Q64240</b> | <b>AMBP Protein AMBP</b>                                                                   | <b>1.061760752</b> | <b>9.8E-07</b> | <b>3</b>  |
| Q64240        | AFAELWAFDAAQGK                                                                             | 1.061766763        | 2              | 3.825056  |
| Q64240        | AVLPQENEGSGSEPLITGLK                                                                       | 0.74838038         | 2              | 4.345257  |
| Q64240        | TIAACNLPIVQGPCR                                                                            | 0.560396765        | 2              | 3.541959  |
| <b>Q64380</b> | <b>SARDH Sarcosine dehydrogenase_ mitochondrial</b>                                        | <b>1.008818761</b> | <b>9.9E-20</b> | <b>19</b> |
| Q64380        | AIDSLSIEK                                                                                  | 0.823911371        | 2              | 2.579655  |
| Q64380        | AYGIESHVLSPAETK                                                                            | 0.679267243        | 2              | 4.658861  |
| Q64380        | DGTMDPAGTCTTLTR                                                                            | 0.742937074        | 2              | 3.78573   |
| Q64380        | DILQDVLADLSNEAFPSTHQLVR                                                                    | 0.980556053        | 3              | 5.715693  |
| Q64380        | DLYPLMNVDDLYGTYLVPK                                                                        | 0.841632267        | 2              | 2.618006  |
| Q64380        | EEAQGASVVPQGPSQLPSTANVVVIGGSLGCQTYHLAK                                                     | 0.922281297        | 3              | 4.303577  |
| Q64380        | FHHSITDHPK                                                                                 | 0.996826814        | 2              | 2.354779  |
| Q64380        | FYLLGADAR                                                                                  | 0.835947331        | 2              | 2.840936  |
| Q64380        | GAQVIENCAVTGIR                                                                             | 1.688173255        | 2              | 4.328825  |
| Q64380        | HGLVNAGYR                                                                                  | 0.845873561        | 2              | 2.515912  |
| Q64380        | IEGIQNPVNR                                                                                 | 0.6424503          | 2              | 2.808984  |
| Q64380        | LQGDALSVGGYEANPIFWDEVSDK                                                                   | 0.536637843        | 2              | 4.575271  |

|               |                                                              |                    |                |           |
|---------------|--------------------------------------------------------------|--------------------|----------------|-----------|
| Q64380        | NYSVVFPHDEPLAGR                                              | 0.873847409        | 2              | 4.440866  |
| Q64380        | QVVDHLEEEETGLHTGWIQNGGLFIASNQQR                              | 0.861158779        | 3              | 4.749776  |
| Q64380        | RDPLHEELLGQGCVFQER                                           | 0.934883055        | 3              | 5.387558  |
| Q64380        | SDDSPLEAGLAFTCK                                              | 0.932746143        | 2              | 4.049664  |
| Q64380        | STVCGPESFTPDHKPLMGEAPELR                                     | 1.041000673        | 3              | 4.088438  |
| Q64380        | STVCGPESFTPDHKPLMGEAPELR+Oxidation(16)                       | 0.647777135        | 3              | 3.937767  |
| Q64380        | VTAVETQHGSIQTPCVVNCAGVWASSVGR                                | 0.883650318        | 3              | 4.938793  |
| <b>Q64428</b> | <b>ECHA Trifunctional enzyme subunit alpha_mitochondrial</b> | <b>0.885707538</b> | <b>9.9E-20</b> | <b>26</b> |
| Q64428        | ADMVIEAVFEDLAVK                                              | 0.782301376        | 3              | 4.257564  |
| Q64428        | ADMVIEAVFEDLAVK+Oxidation(2)                                 | 0.658782854        | 2              | 2.660729  |
| Q64428        | ALMGLYNGQVLCK                                                | 0.926759991        | 2              | 2.647489  |
| Q64428        | DSIFSNLIGQLDYK                                               | 1.136867349        | 2              | 2.780998  |
| Q64428        | DTTASAVAVGLK                                                 | 0.780751589        | 2              | 3.392498  |
| Q64428        | DTTDTGLGR                                                    | 0.739007205        | 2              | 2.923759  |
| Q64428        | EVESVTPEHCIFASNTSALPINQIAAVSQRPEK                            | 1.333962458        | 3              | 5.401702  |
| Q64428        | EVQSEFVEVMNEIWANDQIR                                         | 0.808839232        | 3              | 5.767252  |
| Q64428        | FGELALTK                                                     | 0.866604096        | 2              | 2.766047  |
| Q64428        | FGGGSVELLK                                                   | 0.9033283          | 2              | 2.952074  |
| Q64428        | FVDLYGAQK                                                    | 0.89711236         | 2              | 2.905365  |
| Q64428        | GFYIYQSGSK                                                   | 1.425724967        | 1              | 2.113665  |
| Q64428        | ILQEGVDPK                                                    | 0.844507846        | 2              | 2.659649  |
| Q64428        | KTVLGVPEVLLGILPGAGGTQR                                       | 0.977523059        | 2              | 3.766523  |
| Q64428        | LPAKPEVSSDEDIQYR                                             | 3.979567832        | 2              | 4.456141  |
| Q64428        | MGLVDQLVDPLGPGIK                                             | 0.833067129        | 2              | 4.5254    |
| Q64428        | MGLVDQLVDPLGPGIK+Oxidation(0)                                | 0.692713547        | 2              | 4.199664  |
| Q64428        | MQLLEIITDK                                                   | 0.904820692        | 2              | 3.89846   |
| Q64428        | MQLLEIITDK+Oxidation(0)                                      | 0.635230674        | 2              | 2.916704  |
| Q64428        | MVGVPAAFDMMMLTGR                                             | 0.91306684         | 2              | 2.885501  |
| Q64428        | NLNSEIDNILVNLR                                               | 0.893998254        | 2              | 4.575799  |
| Q64428        | SAVLISKPGCFVAGADINMLASCTTPQEAAAR                             | 1.111738418        | 3              | 3.861304  |
| Q64428        | TGLEQNDAGYLAESEK                                             | 0.956896846        | 2              | 5.074549  |
| Q64428        | TIEYLEEVAVNFAK                                               | 0.871917484        | 2              | 3.437444  |
| Q64428        | TVLGVPEVLLGILPGAGGTQR                                        | 0.891368121        | 3              | 4.910021  |
| Q64428        | TVQQLAILGAGLMGAGIAQVSVDK                                     | 0.867313987        | 3              | 5.376739  |
| <b>Q64458</b> | <b>CP2CT Cytochrome P450 2C29</b>                            | <b>1.313572933</b> | <b>9.9E-20</b> | <b>5</b>  |
| Q64458        | EHKESLDVTNPR                                                 | 0.415292638        | 2              | 3.374147  |
| Q64458        | IKEHKESLDVTNPR                                               | 0.440799485        | 3              | 5.176611  |
| Q64458        | LPPGPTPLPIIGNFLQIDVK                                         | 2.410388868        | 3              | 4.461015  |
| Q64458        | VQEEAQCLVEELR                                                | 2.481281736        | 2              | 4.228667  |
| Q64458        | VQEEAQCLVEELRK                                               | 2.980590012        | 2              | 3.699624  |
| <b>Q64464</b> | <b>CP3AD Cytochrome P450 3A13</b>                            | <b>0.553370858</b> | <b>9.1E-11</b> | <b>2</b>  |
| Q64464        | ALLSPTFTSGR                                                  | 0.535026246        | 2              | 2.706029  |

|               |                                                                  |                    |                |           |
|---------------|------------------------------------------------------------------|--------------------|----------------|-----------|
| Q64464        | LQDEIDAALPNK                                                     | 0.550203077        | 2              | 2.539172  |
| <b>Q64550</b> | <b>UD11 UDP-glucuronosyltransferase 1_1</b>                      | <b>1.037409205</b> | <b>9.9E-20</b> | <b>4</b>  |
| Q64550        | GHEVVVIAPEASIIHK                                                 | 0.457063439        | 2              | 4.548394  |
| Q64550        | NMIIALTENFLCR                                                    | 0.646667017        | 2              | 3.996836  |
| Q64550        | SVFDQDPFLLR                                                      | 0.620619727        | 2              | 3.463125  |
| Q64550        | VVYSPYGLATEILQK                                                  | 0.55765552         | 3              | 4.38318   |
| <b>Q64560</b> | <b>TPP2 Tripeptidyl-peptidase 2</b>                              | <b>1.076016436</b> | <b>0.05798</b> | <b>4</b>  |
| Q64560        | ACVDSNENGDGK                                                     | 0.764143359        | 2              | 2.668589  |
| Q64560        | DPVQVAAPSDHGVGIEPVFPENTENSEK                                     | 1.464383428        | 3              | 4.169252  |
| Q64560        | GTLIEAFPVLGGK                                                    | 1.07602762         | 2              | 3.035309  |
| Q64560        | HEQJSDLDR                                                        | 1.457283334        | 2              | 2.364944  |
| <b>Q64563</b> | <b>ADH4 Alcohol dehydrogenase 4</b>                              | <b>0.875256569</b> | <b>9.9E-20</b> | <b>13</b> |
| Q64563        | AAVDCTVVGWGSCSTVVGAK                                             | 0.397753677        | 2              | 2.837254  |
| Q64563        | ALFPVVLGHECAGIVESVGPVGNFKPGDK                                    | 0.475524676        | 3              | 4.209719  |
| Q64563        | ALGATDCLNPR                                                      | 0.505855624        | 2              | 3.323163  |
| Q64563        | DLDKPVQDVITELTGGGVDFSLDCAGTAQTLK                                 | 0.587060937        | 3              | 3.962494  |
| Q64563        | FDLDLLVTHALPFDK                                                  | 0.85253759         | 2              | 3.949098  |
| Q64563        | INDAIDLMNQGK                                                     | 0.725684402        | 2              | 3.809342  |
| Q64563        | KFDLDLLVTHALPFDK                                                 | 0.457352928        | 3              | 5.118972  |
| Q64563        | SVDSVPLNLTVDYK                                                   | 0.477775225        | 2              | 3.698997  |
| Q64563        | TDSPLCIEIEVSPPK                                                  | 0.516201497        | 2              | 4.000423  |
| Q64563        | VCLIGCGFTSGYGAAINTAK                                             | 0.618795595        | 2              | 4.414731  |
| Q64563        | VDDEANLER                                                        | 0.472833862        | 2              | 2.611444  |
| Q64563        | VDEMNIQVDMILGR                                                   | 0.552010071        | 2              | 3.653559  |
| Q64563        | VIATCVCPDTINATNPK                                                | 0.473722831        | 2              | 4.615272  |
| <b>Q64565</b> | <b>AGT2 Alanine-glyoxylate aminotransferase 2_mitochondrial</b>  | <b>1.008399747</b> | <b>0.0054</b>  | <b>11</b> |
| Q64565        | AYSNHTDIISFR                                                     | 1.008149846        | 2              | 2.884983  |
| Q64565        | GGVCIADDEVQTGFGR                                                 | 0.822213327        | 2              | 4.103835  |
| Q64565        | GIGNGFMAAVVTTPEIASLAK                                            | 1.027340071        | 2              | 4.281126  |
| Q64565        | HNMPPCDFSPEK                                                     | 0.973512946        | 2              | 2.35069   |
| Q64565        | LRDEFDIVGDVR                                                     | 1.025641677        | 2              | 2.444882  |
| Q64565        | LSALLPEPLK                                                       | 1.166277689        | 2              | 3.19558   |
| Q64565        | SALTQHMER                                                        | 1.36093273         | 2              | 2.661439  |
| Q64565        | SALTQHMER+Oxidation(6)                                           | 0.879993174        | 2              | 2.692121  |
| Q64565        | TEVNQIHEDCK                                                      | 0.90518862         | 2              | 2.923719  |
| Q64565        | TEVNQIHEDCKDMGLLVGR                                              | 0.954249815        | 2              | 5.304208  |
| Q64565        | YIEQFK                                                           | 0.831810836        | 1              | 2.030674  |
| <b>Q64578</b> | <b>AT2A1 Sarcoplasmic/endoplasmic reticulum calcium ATPase 1</b> | <b>0.827091315</b> | <b>0.38964</b> | <b>4</b>  |
| Q64578        | DIVPGDIVEVAVGDKVPADIR                                            | 0.504793526        | 2              | 3.056824  |
| Q64578        | IGIFSENEEVADR                                                    | 0.734151986        | 2              | 2.792675  |
| Q64578        | VGEATETALTTLVEK                                                  | 0.823426608        | 2              | 4.404289  |
| Q64578        | YGPNELPAEEGK                                                     | 0.782762085        | 2              | 2.782587  |



|               |                                                                           |                    |                |           |
|---------------|---------------------------------------------------------------------------|--------------------|----------------|-----------|
| <b>Q64591</b> | <b>DECR 2_4_dienoyl_CoA reductase_mitochondrial</b>                       | <b>0.785304127</b> | <b>9.9E-20</b> | <b>8</b>  |
| Q64591        | ATAEEITSK                                                                 | 0.510971164        | 2              | 2.850521  |
| Q64591        | CDVRDPDMVHNTVLELIK                                                        | 0.77559234         | 4              | 4.584389  |
| Q64591        | EEWDVIEGLIR                                                               | 0.65157786         | 2              | 3.900975  |
| Q64591        | FNIIQPGPIK                                                                | 1.12410104         | 2              | 2.755941  |
| Q64591        | NIDVLK                                                                    | 0.740947361        | 1              | 1.98223   |
| Q64591        | SLAAEWGR                                                                  | 0.830746059        | 2              | 2.648813  |
| Q64591        | VAGHPDVVINNAAGNFISPSER                                                    | 0.893778327        | 2              | 6.153069  |
| Q64591        | VTKEEWDVIEGLIR                                                            | 0.825699017        | 3              | 4.525304  |
| <b>Q64602</b> | <b>AADAT Kynurenine/alpha_aminoadipate aminotransferase_mitochondrial</b> | <b>0.957391272</b> | <b>0.99999</b> | <b>7</b>  |
| Q64602        | ASFSQVTPAQMDLVFQR                                                         | 1.01361253         | 2              | 4.613951  |
| Q64602        | DIISLAPGSPNPK                                                             | 1.038850574        | 2              | 3.049299  |
| Q64602        | EILLVPGNSFFVDNSAPSSFFR                                                    | 0.95555813         | 3              | 3.503779  |
| Q64602        | FLYTIPNGNPTGNSLTGDR                                                       | 1.078437512        | 2              | 4.069632  |
| Q64602        | LHNPPTVNYSPNEGQMDLCITSGCQDGLCK                                            | 0.980200214        | 3              | 5.654724  |
| Q64602        | SAVFTVENGSTIR                                                             | 1.009524724        | 2              | 3.257262  |
| Q64602        | VLSQWKPEDSKDPTKR                                                          | 0.72128705         | 3              | 4.20015   |
| <b>Q64604</b> | <b>PTPRF Receptor_type tyrosine_protein phosphatase F</b>                 | <b>0.694847894</b> | <b>0.00208</b> | <b>2</b>  |
| Q64604        | DHPPPIPDLADNIERLK                                                         | 0.672763042        | 2              | 2.311084  |
| Q64604        | RADEARPNTIDFGK                                                            | 0.694981097        | 2              | 2.36615   |
| <b>Q64611</b> | <b>CSAD Cysteine sulfinic acid decarboxylase</b>                          | <b>1.074408725</b> | <b>5.9E-08</b> | <b>11</b> |
| Q64611        | AQGGQGLEWR                                                                | 0.945243676        | 2              | 2.950967  |
| Q64611        | CHGSQASYLFQQDK                                                            | 1.847828876        | 2              | 4.934774  |
| Q64611        | DVFGIVVDEAIR                                                              | 1.196056749        | 2              | 3.261277  |
| Q64611        | FFNQLFSGLDPHALAGR                                                         | 1.81412036         | 3              | 3.9409    |
| Q64611        | FYNVALDTGDK                                                               | 1.143067759        | 2              | 2.872342  |
| Q64611        | GAAFLGLGTDVSR                                                             | 1.357353785        | 2              | 3.105682  |
| Q64611        | IDQAFALTR                                                                 | 1.095577072        | 2              | 3.173863  |
| Q64611        | QLLDLELQSQGESR                                                            | 0.906173863        | 2              | 4.215693  |
| Q64611        | TLDGDPVAVEALLR                                                            | 1.04961828         | 2              | 4.513156  |
| Q64611        | VCEWKEPEELK                                                               | 1.112833412        | 3              | 3.460104  |
| Q64611        | YLVEEIK                                                                   | 0.912104754        | 1              | 2.292148  |
| <b>Q64640</b> | <b>ADK Adenosine kinase</b>                                               | <b>1.216668541</b> | <b>9.9E-20</b> | <b>10</b> |
| Q64640        | AADAHVDAHYYEQNEQPTGTCAACITGGNR                                            | 1.397244492        | 3              | 7.077675  |
| Q64640        | AATFFGCIGIDK                                                              | 0.720735032        | 2              | 2.956191  |
| Q64640        | AGHYAASVIIR                                                               | 1.321311198        | 2              | 2.877637  |
| Q64640        | FGEILK                                                                    | 1.108928632        | 2              | 2.339075  |
| Q64640        | HKELFDELVK                                                                | 1.091425027        | 3              | 3.548214  |
| Q64640        | HLDLENNWMLVEK                                                             | 1.19143829         | 2              | 3.325822  |
| Q64640        | SLVANLAAANCYK                                                             | 1.068533478        | 2              | 4.680538  |
| Q64640        | VEYHAGGSTQNSMK                                                            | 1.029522819        | 2              | 3.783481  |

|               |                                              |                    |                |           |
|---------------|----------------------------------------------|--------------------|----------------|-----------|
| Q64640        | VEYHAGGSTQNSMK+Oxidation(12)                 | 1.109772754        | 2              | 4.034286  |
| Q64640        | YSLKPNQILAEDK                                | 1.254035053        | 3              | 4.247656  |
| <b>Q64654</b> | <b>CP51A Lanosterol 14_alpha demethylase</b> | <b>0.282869942</b> | <b>9.9E-20</b> | <b>5</b>  |
| Q64654        | EPAEDILQTLDDSTYK                             | 0.517728041        | 2              | 3.142445  |
| Q64654        | GVAYDVPNAVFLQK                               | 0.391151015        | 2              | 3.279834  |
| Q64654        | NEDLNAEEVYGR                                 | 0.325500833        | 2              | 4.035079  |
| Q64654        | TVCGEDLPPLTYEQLK                             | 0.25332945         | 2              | 4.147206  |
| Q64654        | YLQDNPASGEK                                  | 0.238694991        | 2              | 2.44868   |
| <b>Q64725</b> | <b>KSYK Tyrosine_protein kinase SYK</b>      | <b>0.92495437</b>  | <b>0.58656</b> | <b>2</b>  |
| Q64725        | GMKGSEVTAMLEKGER+Oxidation(1)                | 0.92495437         | 2              | 2.413657  |
| Q64725        | GMKGSEVTAMLEKGER+Oxidation(9)                | 0.92495437         | 2              | 2.445394  |
| <b>Q65240</b> | <b>WAPL Wings apart_like protein homolog</b> | <b>0.868317255</b> | <b>0.03993</b> | <b>2</b>  |
| Q65240        | EKSISRIPEDNANK                               | 0.862591647        | 2              | 2.472019  |
| Q65240        | LGQKRPNFKPDIQEIPK                            | 1.471154596        | 2              | 2.84779   |
| <b>Q66H12</b> | <b>NAGAB Alpha_N_acetylglactosaminidase</b>  | <b>0.751211779</b> | <b>3.8E-05</b> | <b>2</b>  |
| Q66H12        | INQDPLGIQGR                                  | 0.751196011        | 2              | 3.380789  |
| Q66H12        | TISPNIDILQNPLLIK                             | 0.860257839        | 2              | 2.469929  |
| <b>Q66H80</b> | <b>COPD Coatomer subunit delta</b>           | <b>0.893207433</b> | <b>0.4089</b>  | <b>5</b>  |
| Q66H80        | GVQLQTHPNVDKK                                | 0.888541215        | 2              | 3.546849  |
| Q66H80        | IEGLLAFFPK                                   | 0.825343477        | 2              | 2.425005  |
| Q66H80        | NSNILEDLETLR                                 | 0.94768035         | 2              | 3.345227  |
| Q66H80        | NTLEWCLPVIDAK                                | 0.974586088        | 2              | 2.988647  |
| Q66H80        | VTQVDGNSPVR                                  | 0.785405168        | 2              | 2.907519  |
| <b>Q66HA8</b> | <b>HS105 Heat shock protein 105 kDa</b>      | <b>0.948258271</b> | <b>0.00038</b> | <b>6</b>  |
| Q66HA8        | AGGIETIANEFSDR                               | 1.189850705        | 2              | 3.484196  |
| Q66HA8        | NQQITHANNTVSSFK                              | 1.042571329        | 2              | 4.554781  |
| Q66HA8        | SVLDAAQIVGLNCLR                              | 1.049139475        | 2              | 2.953448  |
| Q66HA8        | TEEVSAIEIVGGATR                              | 0.915498856        | 2              | 2.915113  |
| Q66HA8        | VLGTAFDPFLGGK                                | 1.023021946        | 2              | 3.077864  |
| Q66HA8        | YNHIDSEMKKVEK                                | 0.751430136        | 2              | 2.323487  |
| <b>Q66HD0</b> | <b>ENPL Endoplasmic</b>                      | <b>1.012086225</b> | <b>0.00052</b> | <b>22</b> |
| Q66HD0        | DISTNYYASQK                                  | 1.487635423        | 2              | 3.080345  |
| Q66HD0        | EATEKEFEPLLNWMK                              | 0.93240181         | 2              | 3.68222   |
| Q66HD0        | EEASDYLEDTIK                                 | 0.969499228        | 2              | 4.126424  |
| Q66HD0        | EEEAIQLDGLNASQIR                             | 1.01757748         | 2              | 4.338768  |
| Q66HD0        | EVEEDEYK                                     | 0.87382254         | 1              | 2.548784  |
| Q66HD0        | FQSSHSTDTISLDQYVER                           | 1.022875872        | 2              | 5.877343  |
| Q66HD0        | GVVDSDDLPLNVSR                               | 1.001654664        | 2              | 4.422697  |
| Q66HD0        | GYEVIYLTEPVDEYCIQALPEFDGKR                   | 1.437870611        | 3              | 3.710856  |
| Q66HD0        | KEAESSPFVER                                  | 1.082406718        | 2              | 3.024749  |
| Q66HD0        | LGVIEDHSNR                                   | 1.005765321        | 2              | 2.86495   |
| Q66HD0        | LISLTDENALAGNEELTVK                          | 1.13763431         | 2              | 4.989111  |
| Q66HD0        | LTESPCALVASQYGSNGMER                         | 0.98918481         | 2              | 5.477437  |

|               |                                                                          |                    |                |           |
|---------------|--------------------------------------------------------------------------|--------------------|----------------|-----------|
| Q66HD0        | NLLHVTDTGVGMTR                                                           | 1.125095           | 2              | 3.450425  |
| Q66HD0        | NLLHVTDTGVGMTR+Oxidation(11)                                             | 0.767494029        | 2              | 3.222033  |
| Q66HD0        | SGTSEFLNK                                                                | 1.070486901        | 2              | 3.149558  |
| Q66HD0        | SGYLLPDTK                                                                | 0.992277755        | 2              | 3.222081  |
| Q66HD0        | SILFVPTSAPR                                                              | 1.052683625        | 2              | 3.480984  |
| Q66HD0        | TDDEVVQR                                                                 | 0.947541188        | 2              | 3.286403  |
| Q66HD0        | TDDEVVQREEEAIQLDGLNASQIR                                                 | 0.942705885        | 3              | 4.965813  |
| Q66HD0        | TVWDWELMNDIKPIWQRPSK                                                     | 1.072721351        | 3              | 3.440368  |
| Q66HD0        | VFITDDFHDMMMPK                                                           | 0.930074829        | 2              | 2.754229  |
| Q66HD0        | YNDTFWK                                                                  | 0.888159138        | 1              | 2.135209  |
| <b>Q66HF1</b> | <b>NDUS1 NADH_ubiquinone oxidoreductase 75 kDa subunit_mitochondrial</b> | <b>1.041236998</b> | <b>1.9E-15</b> | <b>10</b> |
| Q66HF1        | ALSEIAGITLPYDTLDQVR                                                      | 0.87475679         | 2              | 4.925811  |
| Q66HF1        | DDGAAILAAVSSIAQK                                                         | 0.895351198        | 2              | 4.883525  |
| Q66HF1        | FASEIAGVDDLGTTR                                                          | 1.579940164        | 2              | 4.182716  |
| Q66HF1        | GLLYTYSWEDALSR                                                           | 1.180464707        | 2              | 3.863503  |
| Q66HF1        | ILQDIASGNHEFSK                                                           | 1.00629049         | 2              | 3.804357  |
| Q66HF1        | LGEVSPNLVR                                                               | 1.114402829        | 2              | 2.589068  |
| Q66HF1        | LVDQEFLADPLVPPQLTIK                                                      | 0.975581947        | 3              | 3.589544  |
| Q66HF1        | SATYVNTEGR                                                               | 0.999505355        | 2              | 2.344866  |
| Q66HF1        | VSDTLCTEEIFPNEGAGTDLR                                                    | 0.836682945        | 2              | 4.096296  |
| Q66HF1        | YDHLGDSPK                                                                | 0.971602532        | 2              | 2.334139  |
| <b>Q66HF8</b> | <b>AL1B1 Aldehyde dehydrogenase X_mitochondrial</b>                      | <b>0.8790273</b>   | <b>6.7E-16</b> | <b>10</b> |
| Q66HF8        | EAGFPPGVVNIITGYGPTAGAAIAQHMDVVK                                          | 1.060186864        | 3              | 3.30618   |
| Q66HF8        | EEIFGPVQPLFK                                                             | 0.847426773        | 2              | 2.984644  |
| Q66HF8        | KTFPTVNPTTGEVIGHVAEGDR                                                   | 1.033570654        | 3              | 4.187212  |
| Q66HF8        | KVGNPFELDTQQGPQVDKEQFEK                                                  | 1.112643124        | 3              | 3.372763  |
| Q66HF8        | TFPTVNPTTGEVIGHVAEGDR                                                    | 1.300538241        | 2              | 4.389889  |
| Q66HF8        | TFVEESYHEFLER                                                            | 1.179934359        | 2              | 3.877968  |
| Q66HF8        | VAEQTPLSALYLASLIK                                                        | 3.156066193        | 2              | 3.06982   |
| Q66HF8        | VAFTGSTEVGHLIQK                                                          | 3.530446154        | 2              | 3.010205  |
| Q66HF8        | VGNPFELDTQQGPQVDKEQFEK                                                   | 1.056700241        | 2              | 4.422997  |
| Q66HF8        | YGLAAAVFTR                                                               | 0.757403789        | 2              | 2.678922  |
| <b>Q66HG4</b> | <b>GALM Aldose 1_epimerase</b>                                           | <b>0.701144414</b> | <b>9.9E-20</b> | <b>3</b>  |
| Q66HG4        | ASDVVLGFAELEGYLQK                                                        | 0.795724515        | 2              | 3.565742  |
| Q66HG4        | TVFGELPSGGGAVEK                                                          | 0.711916391        | 2              | 3.633665  |
| Q66HG4        | VSPDGEEGYPGELK                                                           | 0.677999457        | 2              | 3.713943  |
| <b>Q66HG9</b> | <b>MAVS Mitochondrial antiviral_signaling protein</b>                    | <b>0.929487823</b> | <b>0.60015</b> | <b>2</b>  |
| Q66HG9        | ICELPGLAEQVTR                                                            | 1.003771244        | 2              | 2.656504  |
| Q66HG9        | STAATPSTVPTNIAPSK                                                        | 0.936801332        | 2              | 2.384379  |
| <b>Q66X93</b> | <b>SND1 Staphylococcal nuclease domain_containing protein 1</b>          | <b>1.156418324</b> | <b>9.9E-20</b> | <b>18</b> |
| Q66X93        | ALLLPDHYLVTVMLSGIK                                                       | 0.857809539        | 3              | 3.846434  |

|               |                                                 |                    |                |          |
|---------------|-------------------------------------------------|--------------------|----------------|----------|
| Q66X93        | DIQNTQCLLNVEHLSASCPHVTLQFADSK                   | 1.147744868        | 3              | 5.459379 |
| Q66X93        | DTNGENIAESLVAEGLASR                             | 1.100910638        | 2              | 5.080517 |
| Q66X93        | DVQIILESCHNQNILGTILHPNGNITELLLK                 | 1.116056515        | 3              | 6.256713 |
| Q66X93        | ETDGSETPEPFAAEAK                                | 1.533275988        | 2              | 3.47693  |
| Q66X93        | GDVGLGLVK                                       | 1.128286674        | 2              | 2.473064 |
| Q66X93        | LEGDNIQDK                                       | 1.118749947        | 2              | 2.603733 |
| Q66X93        | NLPGLVQEGEPFSEETLFTK                            | 2.457875531        | 2              | 5.638911 |
| Q66X93        | SAYYKPLLSAEAAK                                  | 1.310995186        | 2              | 3.119321 |
| Q66X93        | SDISSHPPVEGAYAPR                                | 0.966880097        | 3              | 4.065368 |
| Q66X93        | SEAVVEYVFSGSR                                   | 1.394305305        | 2              | 2.615828 |
| Q66X93        | SSHYDELLAAEAR                                   | 1.166455365        | 2              | 3.61264  |
| Q66X93        | TCATVTIGGINIAEALVSK                             | 0.885501949        | 2              | 3.91251  |
| Q66X93        | TDAVDSVVR                                       | 1.074692563        | 2              | 2.512062 |
| Q66X93        | VADISGDTQK                                      | 0.810298868        | 2              | 2.412401 |
| Q66X93        | VITEYLNAQESAK                                   | 1.253661836        | 2              | 4.204988 |
| Q66X93        | VSVTVDYIRPASPATETVPAFSEK                        | 1.278005039        | 3              | 4.683604 |
| Q66X93        | VVAHYEEQPVEEMPVLEEK                             | 0.940236346        | 3              | 3.822192 |
| <b>Q68FP2</b> | <b>PON3 Serum paraoxonase/lactonase 3</b>       | <b>0.823357789</b> | <b>9.9E-20</b> | <b>8</b> |
| Q68FP2        | EIKPTEPQNCHLIEGLENGSEDIDILPSGLAFISTGLK          | 1.217027452        | 3              | 4.453087 |
| Q68FP2        | HELFESVNDIVVLGPEQFYATR                          | 1.279095782        | 3              | 3.34134  |
| Q68FP2        | HNNWDLTPVK                                      | 0.695610671        | 2              | 3.00581  |
| Q68FP2        | IFLMDLNPEYPK                                    | 0.860193085        | 2              | 2.822454 |
| Q68FP2        | IQDPLSDNPR                                      | 0.748987926        | 2              | 2.888701 |
| Q68FP2        | LLIYNPEDPPGSEVLR                                | 0.874345324        | 2              | 3.911717 |
| Q68FP2        | VVAQGFSSANGITVSLDQK                             | 0.78159519         | 2              | 3.561879 |
| Q68FP2        | YVYVADVTAK                                      | 0.678757758        | 1              | 2.96802  |
| <b>Q68FQ0</b> | <b>TCPE T_complex protein 1 subunit epsilon</b> | <b>0.912952418</b> | <b>0.7291</b>  | <b>3</b> |
| Q68FQ0        | HKLDVTSVEDYK                                    | 0.902506849        | 2              | 3.560824 |
| Q68FQ0        | ISDNVLVDINNPEPLIQTAK                            | 1.018973241        | 2              | 5.372161 |
| Q68FQ0        | WVGPEIELIAIATGGR                                | 1.059407272        | 2              | 3.523529 |
| <b>Q68FR6</b> | <b>EF1G Elongation factor 1_gamma</b>           | <b>1.339720055</b> | <b>0.0013</b>  | <b>6</b> |
| Q68FR6        | AAAPAPEEEMDECEQALAAEPK                          | 1.165878954        | 2              | 5.328891 |
| Q68FR6        | ALIAAQYSGAQIR                                   | 1.137772155        | 2              | 3.82993  |
| Q68FR6        | GQDLAFPLSPDWQVDYESYTWK                          | 1.78263039         | 2              | 3.983253 |
| Q68FR6        | KAAAPAPEEEMDECEQALAAEPK                         | 1.011430517        | 3              | 3.741212 |
| Q68FR6        | KLDPGSEETQTLVR                                  | 1.106022367        | 2              | 4.249683 |
| Q68FR6        | LDPGSEETQTLVR                                   | 1.108394377        | 2              | 3.326427 |
| <b>Q68FR9</b> | <b>EF1D Elongation factor 1_delta</b>           | <b>0.993416969</b> | <b>0.71337</b> | <b>6</b> |
| Q68FR9        | ATAPQTQHVSPMR                                   | 0.869548997        | 2              | 3.254453 |
| Q68FR9        | FYEQMNGPVTAGSR                                  | 1.004520592        | 2              | 4.044384 |
| Q68FR9        | GVVQDLQQAISK                                    | 0.998824883        | 2              | 3.941365 |
| Q68FR9        | SIQLDGLVWGASK                                   | 0.923954553        | 2              | 3.069548 |
| Q68FR9        | SLAGSSGPGASSGPGGDHSDLIVR                        | 0.943960778        | 2              | 5.431731 |

|               |                                                                                       |                    |                |           |
|---------------|---------------------------------------------------------------------------------------|--------------------|----------------|-----------|
| Q68FR9        | VGTDLLEEEITK                                                                          | 1.164897813        | 2              | 3.060036  |
| <b>Q68FS2</b> | <b>CSN4 COP9 signalosome complex subunit 4</b>                                        | <b>0.66492463</b>  | <b>0.58228</b> | <b>2</b>  |
| Q68FS2        | NAAQVLVGIPLGTGQK                                                                      | 0.664961917        | 2              | 3.09318   |
| Q68FS2        | QDLAQLMNSSGSHK                                                                        | 0.596161635        | 2              | 2.850771  |
| <b>Q68FS4</b> | <b>AMPL Cytosol aminopeptidase</b>                                                    | <b>0.900039401</b> | <b>9.9E-20</b> | <b>19</b> |
| Q68FS4        | ADMGGAATICSIVSAAK                                                                     | 0.894748879        | 2              | 4.936948  |
| Q68FS4        | ADMGGAATICSIVSAAK+Oxidation(2)                                                        | 0.774819166        | 2              | 4.231163  |
| Q68FS4        | DKDDVPQFTSAGENFNK                                                                     | 0.884119748        | 2              | 4.221     |
| Q68FS4        | GITFDSGGISIK                                                                          | 0.922672952        | 2              | 2.782814  |
| Q68FS4        | GLVLGIYSK                                                                             | 0.761267382        | 1              | 2.075235  |
| Q68FS4        | GSEPPVFLEIHYTGSPNATEAPLVFVGK                                                          | 1.311568275        | 3              | 6.037287  |
| Q68FS4        | GVLFASGQNLAR                                                                          | 1.325142445        | 2              | 3.067957  |
| Q68FS4        | LFEASVETGDR                                                                           | 0.885923993        | 2              | 2.742795  |
| Q68FS4        | LHGSGDLEAWEK                                                                          | 0.841826987        | 2              | 2.808017  |
| Q68FS4        | LNLPINIIGLAPLCENMPGSK                                                                 | 1.138344548        | 2              | 4.573497  |
| Q68FS4        | QLMESPANEMTPTR                                                                        | 0.81714182         | 2              | 3.887852  |
| Q68FS4        | QVIDCQLADVNNLKG                                                                       | 0.841807431        | 2              | 4.653482  |
| Q68FS4        | SAGACTAAAFRL                                                                          | 1.065124667        | 2              | 3.387338  |
| Q68FS4        | SAGVDDQENWHEGK                                                                        | 0.886115811        | 2              | 3.813685  |
| Q68FS4        | SAGVDDQENWHEGKENIR                                                                    | 1.085188661        | 3              | 3.410938  |
| Q68FS4        | SWIEEQEMGSFSLVAK                                                                      | 0.95028154         | 2              | 5.256531  |
| Q68FS4        | TFYGLHQDFPSVVVGLGK                                                                    | 0.766983244        | 2              | 4.167919  |
| Q68FS4        | TIQVDNTDAEGR                                                                          | 0.861410711        | 2              | 3.817404  |
| Q68FS4        | TLIEFLLR                                                                              | 1.032940429        | 2              | 2.630566  |
| <b>Q68FT1</b> | <b>COQ9 Ubiquinone biosynthesis protein COQ9_mitochondrial</b>                        | <b>0.891448649</b> | <b>0.00184</b> | <b>3</b>  |
| Q68FT1        | LNHVLEEEQK                                                                            | 0.872814368        | 2              | 3.194156  |
| Q68FT1        | STGEALVQGLMGAAVTLK                                                                    | 0.901949898        | 2              | 3.251091  |
| Q68FT1        | YTDQSGEEEDYESEEQIQR                                                                   | 0.91064168         | 3              | 4.994508  |
| <b>Q68FT3</b> | <b>PYRD2 Pyridine nucleotide_disulfide oxidoreductase domain_containing protein 2</b> | <b>0.66048639</b>  | <b>3.1E-07</b> | <b>6</b>  |
| Q68FT3        | ISQLDTQSPVTK                                                                          | 0.611323465        | 2              | 3.365757  |
| Q68FT3        | SLLLGTDAENQK                                                                          | 0.659344866        | 2              | 3.491945  |
| Q68FT3        | TLGAQLPQYEVLTAPISK                                                                    | 0.680419487        | 2              | 3.983496  |
| Q68FT3        | VFDCIEAYAPGFK                                                                         | 0.763705537        | 2              | 2.46249   |
| Q68FT3        | VLDQWFSEPLK                                                                           | 0.837172584        | 2              | 3.104494  |
| Q68FT3        | VQGVVLQGGEEVR                                                                         | 0.630581621        | 2              | 3.371186  |
| <b>Q68FT5</b> | <b>BHMT2 Betaine_homocysteine S_methyltransferase 2</b>                               | <b>1.276098002</b> | <b>9.9E-20</b> | <b>10</b> |
| Q68FT5        | AGANIIGVNCR                                                                           | 1.226169447        | 2              | 3.750299  |
| Q68FT5        | AGLWTPEAVVEYPSAVR                                                                     | 1.201266255        | 2              | 4.480585  |
| Q68FT5        | AIAEELAPER                                                                            | 1.673079474        | 2              | 3.70167   |
| Q68FT5        | DAGLQAHLMVQCLGFHTPCGK                                                                 | 1.093581122        | 3              | 4.236025  |
| Q68FT5        | EVGAPVAVTCIGPEGDMHGVTPGEC AVR                                                         | 1.23256296         | 3              | 3.514765  |

|               |                                                                   |                    |                |           |
|---------------|-------------------------------------------------------------------|--------------------|----------------|-----------|
| Q68FT5        | FGPWTSLQTMK                                                       | 1.030938129        | 2              | 2.389893  |
| Q68FT5        | GFLPPASEK                                                         | 2.343079502        | 1              | 1.906607  |
| Q68FT5        | GGFVDLPEYPFGLLEPR                                                 | 1.0725287          | 2              | 4.278891  |
| Q68FT5        | LDSGEVVVDGGFLFLEK                                                 | 0.951269684        | 2              | 2.945224  |
| Q68FT5        | YIGGCCGFEPYHIR                                                    | 2.946521307        | 2              | 4.420866  |
| <b>Q68FT9</b> | <b>SCLY Selenocysteine lyase</b>                                  | <b>0.670377966</b> | <b>9.9E-20</b> | <b>4</b>  |
| Q68FT9        | AEVDLIVQDLK                                                       | 0.669868491        | 2              | 3.615599  |
| Q68FT9        | CFHEQQTLOGR                                                       | 0.719375944        | 2              | 2.595431  |
| Q68FT9        | RVDVEDLGVDFLTIVGHK                                                | 0.979898503        | 3              | 5.676523  |
| Q68FT9        | VLVHTDAAQALGK                                                     | 0.625272483        | 2              | 2.854839  |
| <b>Q68FU3</b> | <b>ETFB Electron transfer flavoprotein subunit beta</b>           | <b>0.894075748</b> | <b>9.9E-20</b> | <b>8</b>  |
| Q68FU3        | AGDLGVDLTSK                                                       | 0.918487356        | 2              | 3.816684  |
| Q68FU3        | EIIAVSCGPPQCQETIR                                                 | 0.88887552         | 2              | 4.803982  |
| Q68FU3        | GIHVEVPGAEENLGPLQVAR                                              | 0.427877248        | 2              | 5.866375  |
| Q68FU3        | HSMNPFCEIAVEEAVR                                                  | 1.361388835        | 2              | 4.739328  |
| Q68FU3        | HSMNPFCEIAVEEAVR+Oxidation(2)                                     | 0.829222923        | 2              | 4.382783  |
| Q68FU3        | VDLLFLGK                                                          | 1.251471972        | 2              | 2.803738  |
| Q68FU3        | VETTEDLVAK                                                        | 0.79088559         | 2              | 3.278349  |
| Q68FU3        | VSVISVEEPPQR                                                      | 0.881140029        | 2              | 3.440971  |
| <b>Q68FY0</b> | <b>QCR1 Cytochrome b_c1 complex subunit 1_mitochondrial</b>       | <b>1.218623878</b> | <b>0.09245</b> | <b>11</b> |
| Q68FY0        | EMQENDASMQNVVFDYLHATAFQGTPLAQAVEGPSENV                            | 1.888152033        | 3              | 4.4138    |
| Q68FY0        | EVESIGAHNLNAYSTR                                                  | 1.003847817        | 2              | 3.12697   |
| Q68FY0        | HQQLDLAQDHFSSVSQVVEEDAVPSITPCR                                    | 1.163073085        | 3              | 5.211556  |
| Q68FY0        | IEEVDAQMVR                                                        | 0.895455507        | 2              | 3.662644  |
| Q68FY0        | LCTSATESEVTR                                                      | 1.103707499        | 2              | 2.983982  |
| Q68FY0        | NALISHLDGTTVCEDIGR                                                | 0.939543569        | 2              | 4.192996  |
| Q68FY0        | NNGAGYFLEHLAFK                                                    | 1.048761338        | 2              | 3.487449  |
| Q68FY0        | RIPLAEWESR                                                        | 1.139123244        | 2              | 2.594026  |
| Q68FY0        | TDLTDYLSR                                                         | 1.001757341        | 2              | 2.657713  |
| Q68FY0        | VVELLADIVQNISLEDSQIEK                                             | 0.971243175        | 3              | 5.977706  |
| Q68FY0        | YFYDQCPAVAGYGPVIEQLSDYNR                                          | 1.027532622        | 3              | 5.097607  |
| <b>Q68G31</b> | <b>PBLD Phenazine biosynthesis_like domain_containing protein</b> | <b>0.727881617</b> | <b>9.9E-20</b> | <b>7</b>  |
| Q68G31        | AAIGDTTVQDIQYSPDTR                                                | 0.730650957        | 2              | 4.440315  |
| Q68G31        | AEDGIVLDFPLYPTFPQDFHEVK                                           | 0.780956523        | 3              | 3.64173   |
| Q68G31        | GESGGQTPPYDFYSR                                                   | 0.898055347        | 2              | 3.915401  |
| Q68G31        | LQPTDSFSQSSCFGLR                                                  | 0.808230421        | 2              | 3.267365  |
| Q68G31        | NVNSTLTFVTLGELK                                                   | 0.776329454        | 2              | 3.972027  |
| Q68G31        | RAEDGIVLDFPLYPTFPQDFHEVK                                          | 0.852128294        | 3              | 4.928851  |
| Q68G31        | VNTEPLPGIEK                                                       | 0.735787925        | 2              | 2.955717  |
| <b>Q69Z66</b> | <b>MYSM1 Histone H2A deubiquitinase MYSM1</b>                     | <b>0.948588833</b> | <b>0.31329</b> | <b>3</b>  |
| Q69Z66        | KYTNSLQK                                                          | 1.998235816        | 1              | 1.983686  |

|               |                                                                    |                    |                |          |
|---------------|--------------------------------------------------------------------|--------------------|----------------|----------|
| Q69Z66        | NSAELNEK                                                           | 0.753336382        | 1              | 1.950879 |
| Q69Z66        | QTKTPERYLK                                                         | 0.895711588        | 2              | 2.308583 |
| <b>Q6A000</b> | <b>K0753 Uncharacterized protein KIAA0753</b>                      | <b>0.857525541</b> | <b>0.04085</b> | <b>2</b> |
| Q6A000        | EIQEELDKLSPQK                                                      | 0.838744386        | 2              | 2.355461 |
| Q6A000        | ILGSET SARLGDSK                                                    | 0.863791056        | 2              | 2.551587 |
| <b>Q6A0A9</b> | <b>F120A Constitutive coactivator of PPAR_gamma_like protein 1</b> | <b>0.850523414</b> | <b>0.0008</b>  | <b>2</b> |
| Q6A0A9        | SQGGVQIPPSQGGK                                                     | 2.335348917        | 2              | 2.665821 |
| Q6A0A9        | VEGSSTASSGSQLAEGK                                                  | 0.850108702        | 2              | 4.217848 |
| <b>Q6AXM8</b> | <b>PON2 Serum paraoxonase/arylesterase 2</b>                       | <b>0.905846826</b> | <b>0.05548</b> | <b>2</b> |
| Q6AXM8        | FQEEENSLHLK                                                        | 1.012560369        | 2              | 2.57851  |
| Q6AXM8        | LFVYDPNHPPSSEVLR                                                   | 0.698304716        | 2              | 2.300478 |
| <b>Q6AXS5</b> | <b>PAIRB Plasminogen activator inhibitor 1 RNA_binding protein</b> | <b>0.817953121</b> | <b>1.8E-09</b> | <b>2</b> |
| Q6AXS5        | FDQLFDESDFEVLK                                                     | 0.841631213        | 2              | 4.72208  |
| Q6AXS5        | SAAQAAAQTNNAAGK                                                    | 1.78270606         | 2              | 4.594045 |
| <b>Q6AXY0</b> | <b>GSTA6 Glutathione S_transferase A6</b>                          | <b>0.806823327</b> | <b>2.3E-05</b> | <b>2</b> |
| Q6AXY0        | FLQPGSQR                                                           | 0.759912483        | 2              | 2.452293 |
| Q6AXY0        | YFPAFEK                                                            | 0.807780362        | 1              | 1.994576 |
| <b>Q6AY09</b> | <b>HNRH2 Heterogeneous nuclear ribonucleoprotein H2</b>            | <b>1.178117924</b> | <b>0.01667</b> | <b>3</b> |
| Q6AY09        | ATENDIYNFFSPLNPMR                                                  | 1.514926085        | 2              | 2.522285 |
| Q6AY09        | HTGPNPDTANDGFVR                                                    | 0.972908802        | 2              | 4.611254 |
| Q6AY09        | STGEAFVQFASQEIAEK                                                  | 1.477864182        | 2              | 3.943142 |
| <b>Q6AY30</b> | <b>SCPDH Probable saccharopine dehydrogenase</b>                   | <b>0.706470501</b> | <b>9.9E-20</b> | <b>4</b> |
| Q6AY30        | ACIENGTSICIDGEPQFLELMHVK                                           | 0.83646598         | 3              | 3.828575 |
| Q6AY30        | GVYIIGSSGFDSIPADLGVLYTR                                            | 1.063087478        | 2              | 3.90887  |
| Q6AY30        | LQQVLEK                                                            | 0.699151077        | 1              | 1.982102 |
| Q6AY30        | SVSNLKPVPVIGSK                                                     | 0.702602059        | 2              | 3.210643 |
| <b>Q6AY56</b> | <b>TBA8 Tubulin alpha_8 chain</b>                                  | <b>1.044256991</b> | <b>0.00381</b> | <b>7</b> |
| Q6AY56        | AVCMLSNTTAAEAWAR                                                   | 0.841223354        | 2              | 4.09488  |
| Q6AY56        | FDGALNVDLTFEQTNLVPYPR                                              | 1.05707329         | 2              | 5.401331 |
| Q6AY56        | LISQIVSSITASLR                                                     | 1.015246135        | 2              | 3.319748 |
| Q6AY56        | NLDIERPTYTNLNR                                                     | 0.986297805        | 2              | 3.097337 |
| Q6AY56        | QLFHPEQLITGK                                                       | 0.87772222         | 2              | 2.35307  |
| Q6AY56        | TIQFVDWCPTGFK                                                      | 1.229649619        | 2              | 3.721541 |
| Q6AY56        | VGINYQPPTVPPGGDLAK                                                 | 0.92920523         | 2              | 4.904021 |
| <b>Q6AY80</b> | <b>NQO2 Ribosyldihyronicotinamide dehydrogenase [quinone]</b>      | <b>0.837385877</b> | <b>0.56697</b> | <b>2</b> |
| Q6AY80        | NDVTGALSNEVFK                                                      | 0.736137925        | 2              | 3.466573 |
| Q6AY80        | VLAPQISFGPEVSSEEQR                                                 | 1.088578548        | 2              | 3.7164   |
| <b>Q6AYG5</b> | <b>ECHD1 Enoyl_CoA hydratase domain_containing protein 1</b>       | <b>0.659565589</b> | <b>1.4E-08</b> | <b>2</b> |
| Q6AYG5        | DVLETLWGGPANLEIAIK                                                 | 0.664885131        | 2              | 3.741493 |
| Q6AYG5        | ILEQFPGGSIDLQK                                                     | 0.60209559         | 2              | 3.068047 |

|               |                                                             |                    |                |           |
|---------------|-------------------------------------------------------------|--------------------|----------------|-----------|
| <b>Q6AYQ8</b> | <b>FAHD1 Acylpyruvase FAHD1_mitochondrial</b>               | <b>0.803361583</b> | <b>9.9E-20</b> | <b>3</b>  |
| Q6AYQ8        | IITLEEGDLILTGTK                                             | 0.750848253        | 2              | 3.71954   |
| Q6AYQ8        | NLHHEVELGVLLGR                                              | 0.835362975        | 3              | 4.703354  |
| Q6AYQ8        | SFTSSCPVSAFVPK                                              | 0.789081124        | 2              | 3.875191  |
| <b>Q6AYS8</b> | <b>DHB11 Estradiol 17_beta_dehydrogenase 11</b>             | <b>0.893640934</b> | <b>6.2E-12</b> | <b>3</b>  |
| Q6AYS8        | ALTDELAALGCTGVR                                             | 0.698731815        | 2              | 3.576901  |
| Q6AYS8        | FDAVVGYK                                                    | 0.631711866        | 1              | 2.097917  |
| Q6AYS8        | SVAGEIVLITGAGHGIGR                                          | 0.900830207        | 2              | 3.346679  |
| <b>Q6AYT9</b> | <b>ACSM5 Acyl_coenzyme A synthetase ACSM5_mitochondrial</b> | <b>0.651179325</b> | <b>0.43275</b> | <b>2</b>  |
| Q6AYT9        | ASPPYDVQIVDEEGNVLPQK                                        | 0.608884988        | 2              | 3.12929   |
| Q6AYT9        | NDDVINSSSYR                                                 | 0.797331943        | 2              | 3.377671  |
| <b>Q6AYZ1</b> | <b>TBA1C Tubulin alpha_1C chain</b>                         | <b>1.18588558</b>  | <b>9.9E-20</b> | <b>5</b>  |
| Q6AYZ1        | AVFVDLEPTVIDEVR                                             | 1.215715334        | 2              | 5.318069  |
| Q6AYZ1        | DVNAAIATIK                                                  | 0.982456157        | 2              | 3.211862  |
| Q6AYZ1        | IHFPLATYAPVISA EK                                           | 1.040847915        | 2              | 3.049576  |
| Q6AYZ1        | TIGGGDDSFNTFFSETGAGK                                        | 1.708476106        | 2              | 5.430105  |
| Q6AYZ1        | VGINYQPPTVPPGDLAR                                           | 1.254318566        | 2              | 4.59305   |
| <b>Q6DGG1</b> | <b>ABHEB Abhydrolase domain_containing protein 14B</b>      | <b>0.961707056</b> | <b>9.9E-20</b> | <b>7</b>  |
| Q6DGG1        | AVAIDLPLGLR                                                 | 0.796248778        | 2              | 3.33265   |
| Q6DGG1        | FSSETWQNLGLTHR                                              | 0.997225069        | 2              | 3.52961   |
| Q6DGG1        | FSVLLHGIR                                                   | 1.085679244        | 2              | 2.806667  |
| Q6DGG1        | GYVPVAPICTDK                                                | 0.75075496         | 2              | 3.010204  |
| Q6DGG1        | INAADYAR                                                    | 0.814111211        | 2              | 2.372388  |
| Q6DGG1        | TPTLIVYGDQDPMGSSSFQHLK                                      | 1.290073574        | 3              | 5.227358  |
| Q6DGG1        | VLVMEGAGHPCYLDKPEWHTGLLDFLQELA                              | 1.075760165        | 3              | 3.58092   |
| <b>Q6EDY6</b> | <b>LR16A Leucine_rich repeat_containing protein 16A</b>     | <b>0.872718101</b> | <b>0.00598</b> | <b>3</b>  |
| Q6EDY6        | ELMESIK+Oxidation(2)                                        | 0.952097314        | 1              | 1.950341  |
| Q6EDY6        | IENYLLR                                                     | 0.872203111        | 2              | 2.572936  |
| Q6EDY6        | SSDAHELGEDEKCK                                              | 0.794422338        | 2              | 2.432307  |
| <b>Q6GQP4</b> | <b>RAB31 Ras_related protein Rab_31</b>                     | <b>0.805440713</b> | <b>0.00331</b> | <b>2</b>  |
| Q6GQP4        | CDLSDIREVPLK                                                | 0.646478635        | 2              | 2.544029  |
| Q6GQP4        | CDLSDIREVPLKDAK                                             | 1.041411625        | 2              | 2.630132  |
| <b>Q6IE52</b> | <b>MUG2 Murinoglobulin_2</b>                                | <b>1.071814903</b> | <b>0.0382</b>  | <b>15</b> |
| Q6IE52        | AHFSVMGDILSSAIK                                             | 0.991527732        | 2              | 3.28282   |
| Q6IE52        | GDPIPNEQVFIK                                                | 0.916596072        | 2              | 2.438287  |
| Q6IE52        | HGIPFFVK                                                    | 1.883320068        | 2              | 2.545252  |
| Q6IE52        | HTSSWLVTPK                                                  | 1.219840472        | 2              | 2.583892  |
| Q6IE52        | LPSSEEEESLDINIEGAK                                          | 1.38510345         | 2              | 4.964682  |
| Q6IE52        | MLIYTILPDGEVIADSVK                                          | 1.104330959        | 2              | 4.175538  |
| Q6IE52        | MLIYTILPDGEVIADSVK+Oxidation(0)                             | 0.82314462         | 2              | 3.315023  |
| Q6IE52        | MLSGFIPLKPTVK+Oxidation(0)                                  | 1.053888199        | 2              | 2.587598  |



|               |                                                                 |                    |                |          |
|---------------|-----------------------------------------------------------------|--------------------|----------------|----------|
| Q6IE52        | NLYPLKELVQDPK                                                   | 0.97532219         | 1              | 1.910462 |
| Q6IE52        | QLSFSLSAEPIQGPYK                                                | 1.26487708         | 2              | 4.064075 |
| Q6IE52        | VKTVPLTCNNPK                                                    | 1.024268185        | 2              | 3.028707 |
| Q6IE52        | VLIVEPEGIKK                                                     | 1.147233625        | 2              | 2.405734 |
| Q6IE52        | VTASPSQLCGLR                                                    | 1.138986512        | 2              | 2.571673 |
| Q6IE52        | YMVLVPSQLYTETPEK                                                | 1.053547125        | 2              | 3.810358 |
| Q6IE52        | YMVLVPSQLYTETPEK+Oxidation(1)                                   | 0.81991548         | 2              | 3.261446 |
| <b>Q6IMF3</b> | <b>K2C1 Keratin_type II cytoskeletal 1</b>                      | <b>0.743984844</b> | <b>9.9E-20</b> | <b>3</b> |
| Q6IMF3        | TNAENEFVTIK                                                     | 0.685302786        | 2              | 2.502182 |
| Q6IMF3        | WELLQQVDTSTR                                                    | 0.746078444        | 2              | 3.496271 |
| Q6IMF3        | YEELQITAGK                                                      | 0.736917745        | 2              | 3.323662 |
| <b>Q6IRK9</b> | <b>PGCP Plasma glutamate carboxypeptidase</b>                   | <b>0.994067062</b> | <b>3.2E-09</b> | <b>2</b> |
| Q6IRK9        | AIQIMYQNLQQDGLNVHLEQVR                                          | 1.033814215        | 3              | 5.170481 |
| Q6IRK9        | TYPDTDSFNTVAEITGSK                                              | 0.740419749        | 2              | 4.380447 |
| <b>Q6MGB5</b> | <b>DHB8 Estradiol 17_beta_dehydrogenase 8</b>                   | <b>0.780398187</b> | <b>1.1E-07</b> | <b>3</b> |
| Q6MGB5        | AGVIGLTQTAAR                                                    | 0.778134032        | 2              | 3.482303 |
| Q6MGB5        | GSIINISSIVGK                                                    | 0.758040666        | 2              | 2.479659 |
| Q6MGB5        | SALALVTGAGSGIGR                                                 | 0.929247783        | 2              | 2.642201 |
| <b>Q6NYB7</b> | <b>RAB1A Ras_related protein Rab_1A</b>                         | <b>1.22123156</b>  | <b>0.0005</b>  | <b>4</b> |
| Q6NYB7        | EFADSLGIPFLETSK                                                 | 1.228839368        | 2              | 3.452065 |
| Q6NYB7        | MGPATAGGAEK+Oxidation(0)                                        | 2.104140424        | 2              | 2.381153 |
| Q6NYB7        | NATNVEQSFMTMAAEIK                                               | 1.146795883        | 2              | 4.223239 |
| Q6NYB7        | RMGPATAGGAEKSNVK                                                | 1.156419577        | 2              | 2.504136 |
| <b>Q6NZJ6</b> | <b>IF4G1 Eukaryotic translation initiation factor 4 gamma 1</b> | <b>0.936364745</b> | <b>0.97506</b> | <b>7</b> |
| Q6NZJ6        | GLPLVDDGGWNTVPISK                                               | 0.929299214        | 2              | 2.762463 |
| Q6NZJ6        | GSSGGSGAKPSDTASEATRPATLNR                                       | 1.013047993        | 3              | 3.360265 |
| Q6NZJ6        | IHNAENIQPGEQK                                                   | 0.944486152        | 2              | 4.330977 |
| Q6NZJ6        | ITKPGSIDSNNQLFAPGGR                                             | 1.116985685        | 3              | 3.563276 |
| Q6NZJ6        | LKEELEEAR                                                       | 0.934935789        | 2              | 2.530767 |
| Q6NZJ6        | QVTQLAIDTEER                                                    | 0.999391179        | 2              | 3.241071 |
| Q6NZJ6        | TASTPTPPQTGGSLPQPNGESPQAVIIRPDDR                                | 0.971710215        | 3              | 4.13048  |
| <b>Q6P502</b> | <b>TCPG T_complex protein 1 subunit gamma</b>                   | <b>0.982902976</b> | <b>0.75307</b> | <b>6</b> |
| Q6P502        | AVAQALEVIPR                                                     | 0.981990144        | 2              | 2.51775  |
| Q6P502        | KGESQTDIEITR                                                    | 1.199536096        | 2              | 2.419455 |
| Q6P502        | NLQDAMQVCR                                                      | 0.945320865        | 2              | 2.982199 |
| Q6P502        | TAVETAVLLLR                                                     | 1.07625267         | 2              | 3.398251 |
| Q6P502        | TLIQNCGASTIR                                                    | 0.93792171         | 2              | 2.870304 |
| Q6P502        | WSSLACNIALDAVK                                                  | 1.037090891        | 2              | 3.492018 |
| <b>Q6P6R2</b> | <b>DLDH Dihydrolipoyl dehydrogenase_mitochondrial</b>           | <b>0.779869501</b> | <b>9.9E-20</b> | <b>9</b> |
| Q6P6R2        | IDVSVEAASGGK                                                    | 0.853104861        | 2              | 3.584298 |
| Q6P6R2        | ILGAHILPGAGEMVNEAALALEYGASCEDVAR                                | 0.865051527        | 3              | 3.382485 |
| Q6P6R2        | NETLGGTCLNVGCIPSK                                               | 0.851310001        | 2              | 5.130776 |

|               |                                                                   |                    |                |           |
|---------------|-------------------------------------------------------------------|--------------------|----------------|-----------|
| Q6P6R2        | NQVTATTADGSTQVIGTK                                                | 0.844532873        | 2              | 5.755962  |
| Q6P6R2        | RPFTQNLGLEELGIELDPK                                               | 1.734620141        | 3              | 4.766781  |
| Q6P6R2        | SEEQLKEEGVEFK                                                     | 0.890707386        | 3              | 3.824153  |
| Q6P6R2        | TNADTDGMVK                                                        | 0.729060732        | 2              | 2.601839  |
| Q6P6R2        | TNADTDGMVK+Oxidation(7)                                           | 0.957880861        | 2              | 2.797984  |
| Q6P6R2        | VCHAHPTLSEAFR                                                     | 0.851755905        | 3              | 3.437882  |
| <b>Q6P6S9</b> | <b>ENTP5 Ectonucleoside triphosphate diphosphohydrolase 5</b>     | <b>0.708898528</b> | <b>3.1E-10</b> | <b>6</b>  |
| Q6P6S9        | AAETHLIDYEK                                                       | 0.935213109        | 2              | 2.33201   |
| Q6P6S9        | AQTLLEVEEIFK                                                      | 0.706874082        | 2              | 3.065655  |
| Q6P6S9        | GQETVGTLDLGGASTQITFLPQLEK                                         | 0.751185743        | 2              | 4.315549  |
| Q6P6S9        | QGAETVQELLEVAK                                                    | 0.707737325        | 2              | 3.175282  |
| Q6P6S9        | TSGQLPFLEGEIFDSVKPGLSAFVDQPK                                      | 0.644700973        | 3              | 3.498775  |
| Q6P6S9        | WLEAEWIFGGVK                                                      | 0.674558765        | 2              | 2.481003  |
| <b>Q6P6V0</b> | <b>G6PI Glucose_6_phosphate isomerase</b>                         | <b>1.030137699</b> | <b>2.4E-11</b> | <b>7</b>  |
| Q6P6V0        | DVMPEVNKVLDK+Oxidation(2)                                         | 0.927286767        | 2              | 2.715573  |
| Q6P6V0        | HFVALSTNTDK                                                       | 1.150907312        | 2              | 2.64157   |
| Q6P6V0        | KIEPELDGSSAVTSHDSSTNGLIGFIK                                       | 1.101937993        | 3              | 5.279137  |
| Q6P6V0        | TFTTQETITNAETAK                                                   | 1.145542629        | 2              | 4.742327  |
| Q6P6V0        | TLANLNPESSLFIIASK                                                 | 1.232823955        | 3              | 4.639544  |
| Q6P6V0        | VFEGNRPTSIVFTK                                                    | 1.286725455        | 2              | 2.973778  |
| Q6P6V0        | VVFSNIDGTHIAK                                                     | 1.33879507         | 2              | 3.655668  |
| <b>Q6P7Q4</b> | <b>LGUL Lactoylglutathione lyase</b>                              | <b>0.969244404</b> | <b>0.02927</b> | <b>3</b>  |
| Q6P7Q4        | DLLQQTMLR                                                         | 0.723578539        | 2              | 3.113421  |
| Q6P7Q4        | GLAFVQDPDGYWIEILNPNK                                              | 1.03169664         | 2              | 5.517168  |
| Q6P7Q4        | RFEELGVK                                                          | 0.969447925        | 2              | 2.496509  |
| <b>Q6P7R8</b> | <b>DHB12 Estradiol 17_beta_dehydrogenase 12</b>                   | <b>0.950387658</b> | <b>0.00206</b> | <b>2</b>  |
| Q6P7R8        | GIFVQSVLPFFVATK                                                   | 1.522991831        | 2              | 2.799876  |
| Q6P7R8        | LGEWAVVTGGTDGIGK                                                  | 0.819404389        | 2              | 3.532351  |
| <b>Q6P9T8</b> | <b>TBB2C Tubulin beta_2C chain</b>                                | <b>1.086881099</b> | <b>9.9E-20</b> | <b>11</b> |
| Q6P9T8        | AVLVDLEPGTMDSVR                                                   | 1.084049875        | 2              | 3.057495  |
| Q6P9T8        | AVLVDLEPGTMDSVR+Oxidation(10)                                     | 0.889114255        | 2              | 3.907806  |
| Q6P9T8        | EAESCDCLQGFQLTHSLGGGTGSGMGTLISK                                   | 0.963513599        | 3              | 5.467319  |
| Q6P9T8        | EIVHLQAGQCGNQIGAK                                                 | 1.053556716        | 2              | 5.062567  |
| Q6P9T8        | EVDEQMLNVQNK                                                      | 0.897992761        | 2              | 4.346983  |
| Q6P9T8        | FWEVISDEHGIDPTGTYHGDSDLQLER                                       | 1.326183929        | 3              | 4.322352  |
| Q6P9T8        | INVYYNEATGGK                                                      | 1.551847241        | 2              | 3.070583  |
| Q6P9T8        | KEAESCDCLQGFQLTHSLGGGTGSGMGTLISK                                  | 1.007160904        | 3              | 6.148393  |
| Q6P9T8        | MSATFIGNSTAIQELFK                                                 | 1.522026746        | 2              | 4.05878   |
| Q6P9T8        | TAVCDIPPR                                                         | 1.124315101        | 2              | 2.595361  |
| Q6P9T8        | YLTVAAVFR                                                         | 1.105521297        | 2              | 2.397625  |
| <b>Q6P9U8</b> | <b>EIF3H Eukaryotic translation initiation factor 3 subunit H</b> | <b>0.990933963</b> | <b>0.15899</b> | <b>2</b>  |
| Q6P9U8        | ANITFEHMFEEVPIVIK                                                 | 1.144964955        | 3              | 3.433859  |

|               |                                                                                   |                    |                |           |
|---------------|-----------------------------------------------------------------------------------|--------------------|----------------|-----------|
| Q6P9U8        | EGTGSTATSSSTGGAVGK                                                                | 0.858321465        | 2              | 4.249612  |
| <b>Q6PA06</b> | <b>ATLA2 Atlastin_2</b>                                                           | <b>1.067038316</b> | <b>0.99476</b> | <b>2</b>  |
| Q6PA06        | NLVPLLLAPENLVEK                                                                   | 1.069276568        | 2              | 3.07585   |
| Q6PA06        | QNQHEELQNVR                                                                       | 1.00307074         | 2              | 2.740132  |
| <b>Q6PEC1</b> | <b>TBCA Tubulin_specific chaperone A</b>                                          | <b>1.130091161</b> | <b>8.7E-06</b> | <b>3</b>  |
| Q6PEC1        | LEAAYTDLR                                                                         | 0.985796198        | 2              | 2.862629  |
| Q6PEC1        | QAEILQESR                                                                         | 1.623630296        | 2              | 2.848119  |
| Q6PEC1        | RLEAAYTDLR                                                                        | 1.108583714        | 2              | 2.361752  |
| <b>Q6PEC4</b> | <b>SKP1 S_phase kinase_associated protein 1</b>                                   | <b>1.01840189</b>  | <b>0.50548</b> | <b>4</b>  |
| Q6PEC4        | NDFTEEEAQVR                                                                       | 1.038963066        | 2              | 3.249994  |
| Q6PEC4        | RTDDIPVWDQEFLK                                                                    | 0.908342726        | 2              | 2.375908  |
| Q6PEC4        | TDDIPVWDQEFLK                                                                     | 1.010809872        | 2              | 2.532832  |
| Q6PEC4        | TVANMIKKGKTPPEIR+Oxidation(4)                                                     | 1.178398016        | 2              | 2.327264  |
| <b>Q6Q0N1</b> | <b>CNDP2 Cytosolic non_specific dipeptidase</b>                                   | <b>0.958831271</b> | <b>7.1E-09</b> | <b>4</b>  |
| Q6Q0N1        | EGGSIPVTLTFQEATGK                                                                 | 1.317617873        | 2              | 2.673471  |
| Q6Q0N1        | LGGVELVDIGK                                                                       | 0.847896575        | 2              | 2.941091  |
| Q6Q0N1        | MTEAAAADVQR                                                                       | 0.835025739        | 2              | 2.576043  |
| Q6Q0N1        | TVFGVEPDLTR                                                                       | 0.938330824        | 2              | 2.464374  |
| <b>Q6TUG0</b> | <b>DJB11 DnaJ homolog subfamily B member 11</b>                                   | <b>1.149131678</b> | <b>2.9E-07</b> | <b>4</b>  |
| Q6TUG0        | FQDLGAAYEVLSDSEK                                                                  | 1.085168092        | 2              | 4.798786  |
| Q6TUG0        | FQMTQEVVCECPNVK                                                                   | 1.468979068        | 2              | 4.662275  |
| Q6TUG0        | KGEGLPNFDNNDIK                                                                    | 1.421013818        | 2              | 2.883686  |
| Q6TUG0        | TLEVEIEPGVR                                                                       | 1.069551397        | 2              | 2.381402  |
| <b>Q6UPE1</b> | <b>ETFDElectron transfer flavoprotein_ubiquinone oxidoreductase_mitochondrial</b> | <b>1.090162735</b> | <b>9.9E-20</b> | <b>13</b> |
| Q6UPE1        | AAQIGAHTLSGACLDPAAFK                                                              | 1.650519536        | 2              | 4.280781  |
| Q6UPE1        | ALNEGGLQSIK                                                                       | 0.867395156        | 2              | 3.167406  |
| Q6UPE1        | ASCDAQTYGIGLK                                                                     | 1.188913075        | 2              | 3.477417  |
| Q6UPE1        | FCPAGVYEFVPLEQGDGFR                                                               | 0.896509554        | 2              | 4.818525  |
| Q6UPE1        | GAPLNTPVTEDR                                                                      | 0.923677576        | 2              | 3.381248  |
| Q6UPE1        | GIATNDVGIQK                                                                       | 0.898522066        | 2              | 3.193973  |
| Q6UPE1        | LQINAQNCVHCK                                                                      | 0.914463492        | 2              | 3.188929  |
| Q6UPE1        | NLSIYDGPEQR                                                                       | 0.89407504         | 2              | 3.042401  |
| Q6UPE1        | QLTSENLOSK                                                                        | 0.835274398        | 2              | 2.591437  |
| Q6UPE1        | SGSLAAEAIFK                                                                       | 0.966890873        | 2              | 3.320204  |
| Q6UPE1        | TAGLHVTEYEDNLK                                                                    | 0.694981097        | 2              | 3.141437  |
| Q6UPE1        | TCDIKDPSQINWVWVPEGGGPAYNGM                                                        | 0.935125915        | 2              | 3.761909  |
| Q6UPE1        | VTIFAEGCHGLAK                                                                     | 0.650873208        | 2              | 3.184931  |
| <b>Q6URK4</b> | <b>ROA3 Heterogeneous nuclear ribonucleoprotein A3</b>                            | <b>1.055325063</b> | <b>2.4E-06</b> | <b>7</b>  |
| Q6URK4        | EDSVKPGAHLTVK                                                                     | 0.805357067        | 2              | 3.459554  |
| Q6URK4        | GFAFVTFDDHDTVDK                                                                   | 1.035084101        | 2              | 3.842396  |
| Q6URK4        | IETIEVMEDR                                                                        | 0.865692236        | 2              | 3.402972  |
| Q6URK4        | IFVGGIKEDTEEYNLR                                                                  | 1.09710637         | 3              | 3.363607  |

|               |                                                                    |                    |                |          |
|---------------|--------------------------------------------------------------------|--------------------|----------------|----------|
| Q6URK4        | SSGSPYGGGYGSGGGSGGYGSR                                             | 1.156555548        | 2              | 5.106761 |
| Q6URK4        | WGTLTDCVVMR                                                        | 0.761807812        | 2              | 2.932795 |
| Q6URK4        | YHTINGHNCEVK                                                       | 0.894094906        | 2              | 3.540127 |
| <b>Q6URW6</b> | <b>MYH14 Myosin_14</b>                                             | <b>0.903970871</b> | <b>9.9E-20</b> | <b>4</b> |
| Q6URW6        | EDQSILCTGESGAGK                                                    | 0.751527502        | 2              | 3.940934 |
| Q6URW6        | FDQLLAEEK                                                          | 0.853955207        | 2              | 2.510147 |
| Q6URW6        | KFDQLLAEEK                                                         | 0.905912147        | 2              | 2.886504 |
| Q6URW6        | QLLQANPILEAFGNAK                                                   | 0.77783902         | 2              | 4.355002 |
| <b>Q6VGS5</b> | <b>DAPLE Protein Daple</b>                                         | <b>1.145576719</b> | <b>0.27931</b> | <b>2</b> |
| Q6VGS5        | ELKTSLNNSQLELSR                                                    | 1.1999923          | 2              | 2.302331 |
| Q6VGS5        | YGELEKENQQLSKK                                                     | 1.037003576        | 2              | 2.324618 |
| <b>Q6XQN1</b> | <b>PNCB Nicotinate phosphoribosyltransferase</b>                   | <b>0.402875343</b> | <b>3.2E-10</b> | <b>4</b> |
| Q6XQN1        | GSEVNVIGITNVVTCPK                                                  | 0.40708541         | 2              | 4.090353 |
| Q6XQN1        | LDSGDLQQAQK                                                        | 0.874963964        | 2              | 2.783299 |
| Q6XQN1        | LYLQQGQPYEPLSLEESR                                                 | 0.401772021        | 2              | 4.5337   |
| Q6XQN1        | QLQNPAVYQVALSEK                                                    | 0.509758658        | 2              | 3.484419 |
| <b>Q6ZPF3</b> | <b>TIAM2 T_lymphoma invasion and metastasis_inducing protein 2</b> | <b>1.108662702</b> | <b>0.23916</b> | <b>2</b> |
| Q6ZPF3        | KMAELQLSVSDPK+Oxidation(1)                                         | 1.075461693        | 2              | 2.302119 |
| Q6ZPF3        | STELEKDAQEGLAEFPDGLIK                                              | 1.234406663        | 2              | 2.408516 |
| <b>Q6ZPJ3</b> | <b>UBE2O Ubiquitin_conjugating enzyme E2 O</b>                     | <b>0.931059012</b> | <b>0.43275</b> | <b>3</b> |
| Q6ZPJ3        | FLDDIKKLQENLK                                                      | 0.951022628        | 2              | 2.384369 |
| Q6ZPJ3        | FRTTDIVIR                                                          | 0.881355932        | 2              | 2.326805 |
| Q6ZPJ3        | NCAQGECSMAKKVK                                                     | 0.971266584        | 2              | 2.480072 |
| <b>Q70FJ1</b> | <b>AKAP9 A_kinase anchor protein 9</b>                             | <b>0.7579203</b>   | <b>0.00763</b> | <b>2</b> |
| Q70FJ1        | LMKEKLEVQCQAEK+Oxidation(1)                                        | 0.759373527        | 2              | 2.509394 |
| Q70FJ1        | QRNTFAFAEK                                                         | 0.72388404         | 1              | 1.952147 |
| <b>Q711G3</b> | <b>IAH1 Isoamyl acetate_hydrolyzing esterase 1 homolog</b>         | <b>0.93751411</b>  | <b>0.99367</b> | <b>4</b> |
| Q711G3        | DCGTDVLDLWTLMQK                                                    | 1.057844844        | 2              | 3.880005 |
| Q711G3        | DVEETKPELSLLGDGDH                                                  | 0.944574521        | 2              | 3.432467 |
| Q711G3        | QHVPLDEYSANLR                                                      | 1.011071078        | 2              | 2.585967 |
| Q711G3        | VILITPPPLCEAAWEK                                                   | 0.922717506        | 2              | 2.633911 |
| <b>Q71LX4</b> | <b>TLN2 Talin_2</b>                                                | <b>0.825739818</b> | <b>0.04027</b> | <b>2</b> |
| Q71LX4        | QEDVIATANLSR                                                       | 0.817120929        | 2              | 2.950649 |
| Q71LX4        | QVAASTAQLLVACK                                                     | 0.841736202        | 2              | 3.028237 |
| <b>Q75N33</b> | <b>SC16B Protein transport protein Sec16B</b>                      | <b>1.198423194</b> | <b>0.00077</b> | <b>2</b> |
| Q75N33        | EALEWAMK                                                           | 2.423063848        | 1              | 1.947769 |
| Q75N33        | NLLTGEIPLNVDTPAQIVEK                                               | 1.081665578        | 2              | 4.311049 |
| <b>Q75Q39</b> | <b>TOM70 Mitochondrial import receptor subunit TOM70</b>           | <b>1.033224835</b> | <b>0.46265</b> | <b>2</b> |
| Q75Q39        | NADLSTFYQNR                                                        | 1.110760721        | 2              | 2.579278 |
| Q75Q39        | SDEKDKEGEALVVK                                                     | 1.006523605        | 2              | 3.685772 |
| <b>Q75WE7</b> | <b>VWASA von Willebrand factor A domain_containing protein 5A</b>  | <b>0.834858568</b> | <b>0.07108</b> | <b>2</b> |

|               |                                                                                               |                    |                |          |
|---------------|-----------------------------------------------------------------------------------------------|--------------------|----------------|----------|
| Q75WE7        | LDADLGGTEILTPLR                                                                               | 1.053330199        | 2              | 2.44487  |
| Q75WE7        | YVQELPLESDGALR                                                                                | 0.512686739        | 2              | 2.895805 |
| <b>Q76MZ3</b> | <b>2AAA Serine/threonine_protein phosphatase 2A 65 kDa regulatory subunit A alpha isoform</b> | <b>1.028982874</b> | <b>0.06128</b> | <b>8</b> |
| Q76MZ3        | AISHEHSPSDEAHFVPLVK                                                                           | 1.081083253        | 3              | 4.433817 |
| Q76MZ3        | DNTIEHLLPLFLAQLK                                                                              | 1.057372023        | 3              | 3.6036   |
| Q76MZ3        | DNTIEHLLPLFLAQLKDECEVVR                                                                       | 1.06988061         | 3              | 3.862123 |
| Q76MZ3        | IGPILDNSTLQSEVKPILEK                                                                          | 0.972966208        | 2              | 4.53703  |
| Q76MZ3        | LTQDQDVDVK                                                                                    | 0.872050643        | 2              | 2.622095 |
| Q76MZ3        | QLSQSLLPAIVELAEDAK                                                                            | 0.902832241        | 2              | 3.681839 |
| Q76MZ3        | SALASVIMGLSPILGK                                                                              | 1.042426357        | 2              | 3.252979 |
| Q76MZ3        | SEIIPMFSNLASDEQDSVR                                                                           | 0.719050304        | 2              | 3.544723 |
| <b>Q791V5</b> | <b>MTCH2 Mitochondrial carrier homolog 2</b>                                                  | <b>0.955905469</b> | <b>0.00038</b> | <b>5</b> |
| Q791V5        | EEGIVGFFAGLIPR                                                                                | 1.783935194        | 2              | 3.865932 |
| Q791V5        | GLFTGLTPR                                                                                     | 1.007115901        | 2              | 2.363672 |
| Q791V5        | SAATLITHPFHVITLR                                                                              | 1.213604879        | 3              | 3.535018 |
| Q791V5        | VLIQVGYEPLPPTIGR                                                                              | 0.971761415        | 2              | 4.156374 |
| Q791V5        | YCGLCDSIVTIYR                                                                                 | 1.121910528        | 2              | 3.034861 |
| <b>Q794E4</b> | <b>HNRPF Heterogeneous nuclear ribonucleoprotein F</b>                                        | <b>1.239582993</b> | <b>3.9E-06</b> | <b>3</b> |
| Q794E4        | ATENDIYNFFSPLNPVR                                                                             | 1.273983859        | 3              | 4.333314 |
| Q794E4        | HSGPNSADSANDGFVR                                                                              | 0.891410773        | 2              | 3.96095  |
| Q794E4        | VHIEIGPDGR                                                                                    | 0.807680003        | 2              | 3.119194 |
| <b>Q7TMA5</b> | <b>APOB Apolipoprotein B_100</b>                                                              | <b>0.656841389</b> | <b>2E-09</b>   | <b>6</b> |
| Q7TMA5        | GFEPTLEALFGK                                                                                  | 0.813040718        | 2              | 2.874983 |
| Q7TMA5        | IEGNLVFDPSSYLPK                                                                               | 0.661907414        | 2              | 3.16996  |
| Q7TMA5        | IEIDIPLPGGK                                                                                   | 0.575609398        | 2              | 2.923283 |
| Q7TMA5        | ITDNDVLIALDSAK                                                                                | 1.022079956        | 2              | 3.138131 |
| Q7TMA5        | KGTVATEMSTER                                                                                  | 0.51325617         | 2              | 2.704306 |
| Q7TMA5        | TILFDTFVNDVAPVEK                                                                              | 1.124439647        | 2              | 3.307117 |
| <b>Q7TNG8</b> | <b>LDHD Probable D_lactate dehydrogenase_ mitochondrial</b>                                   | <b>0.813186685</b> | <b>2.8E-11</b> | <b>3</b> |
| Q7TNG8        | AVVGSPHVSTASAVR                                                                               | 0.798555485        | 2              | 2.955059 |
| Q7TNG8        | AYSTDVCPISR                                                                                   | 0.773257919        | 2              | 3.091918 |
| Q7TNG8        | GSQGGLSQDFVEALK                                                                               | 0.839560493        | 2              | 3.502352 |
| <b>Q7TP47</b> | <b>HNRPQ Heterogeneous nuclear ribonucleoprotein Q</b>                                        | <b>0.908714928</b> | <b>0.00014</b> | <b>2</b> |
| Q7TP47        | DLFEDELVPLFEK                                                                                 | 1.32309026         | 2              | 3.208024 |
| Q7TP47        | NLANTVTEEILEK                                                                                 | 0.908233452        | 2              | 3.661824 |
| <b>Q7TP48</b> | <b>APMAP Adipocyte plasma membrane_associated protein</b>                                     | <b>1.392611123</b> | <b>0.00294</b> | <b>4</b> |
| Q7TP48        | GLFEVNPQK                                                                                     | 1.01034149         | 1              | 2.123389 |
| Q7TP48        | LENGEIETIAR                                                                                   | 1.001244734        | 2              | 3.027943 |
| Q7TP48        | LLEYDTVTK                                                                                     | 1.028218575        | 2              | 2.413787 |
| Q7TP48        | LLSSETPIEGK                                                                                   | 1.415216483        | 2              | 2.854828 |

|               |                                                         |                    |                |           |
|---------------|---------------------------------------------------------|--------------------|----------------|-----------|
| <b>Q7TP52</b> | <b>CMBL Carboxymethylenebutenolidase homolog</b>        | <b>0.922035893</b> | <b>3.4E-06</b> | <b>7</b>  |
| Q7TP52        | AGVSVYGIIR                                              | 0.702574214        | 2              | 2.591967  |
| Q7TP52        | EDCSPADKPYIEEAR                                         | 0.889523773        | 2              | 3.283609  |
| Q7TP52        | KREDCSPADKPYIEEAR                                       | 0.888309902        | 3              | 4.448145  |
| Q7TP52        | LDYGGMGQEVQVEHIK                                        | 0.998841983        | 2              | 4.537138  |
| Q7TP52        | LKEHCIVNYQVK                                            | 1.322894556        | 2              | 3.532428  |
| Q7TP52        | NLIEWLNK                                                | 0.81853345         | 1              | 2.51928   |
| Q7TP52        | TFSGQTHGFVHR                                            | 0.98345432         | 2              | 3.387561  |
| <b>Q7TPB1</b> | <b>TCPD T_complex protein 1 subunit delta</b>           | <b>0.932453675</b> | <b>0.1713</b>  | <b>6</b>  |
| Q7TPB1        | AFADAMEVIPSTLAENAGLNPISTVTELR                           | 0.914532396        | 3              | 3.384226  |
| Q7TPB1        | ALIAGGGAPEIELALR                                        | 1.12958094         | 2              | 3.546707  |
| Q7TPB1        | ETLLNSATTSLSNK                                          | 1.080006219        | 2              | 3.432967  |
| Q7TPB1        | GDVTITNDGATILK                                          | 1.025776882        | 2              | 3.445557  |
| Q7TPB1        | GIHPTIISESFQK                                           | 0.843896991        | 2              | 2.384657  |
| Q7TPB1        | VIDPATATSVDLR                                           | 0.903208446        | 2              | 3.341628  |
| <b>Q7TPJ0</b> | <b>SSRA Translocon_associated protein subunit alpha</b> | <b>1.058557359</b> | <b>9.6E-06</b> | <b>2</b>  |
| Q7TPJ0        | GEDFPANNIVK                                             | 1.143934885        | 2              | 2.737093  |
| Q7TPJ0        | GTEDFIVESLDASFR                                         | 1.042822605        | 2              | 4.332164  |
| <b>Q7TQM4</b> | <b>SOAT2 Sterol O_acyltransferase 2</b>                 | <b>0.834049936</b> | <b>0.0623</b>  | <b>3</b>  |
| Q7TQM4        | AIWEAVQAYPK                                             | 0.865255124        | 2              | 2.336154  |
| Q7TQM4        | QDRPLPSTASDSTR                                          | 0.830639026        | 2              | 3.149165  |
| Q7TQM4        | TQCLEQAQR                                               | 0.341087925        | 2              | 2.629607  |
| <b>Q7TSI0</b> | <b>ZNF12 Zinc finger protein 12</b>                     | <b>0.457523565</b> | <b>0.31765</b> | <b>2</b>  |
| Q7TSI0        | HMSRLMEEDQGGREENQSSSAVFSYR+Oxidation(1)                 | 0.457523565        | 3              | 3.572107  |
| Q7TSI0        | HMSRLMEEDQGGREENQSSSAVFSYR+Oxidation(5)                 | 0.457523565        | 3              | 3.562283  |
| <b>Q80W21</b> | <b>GSTM7 Glutathione S_transferase Mu 7</b>             | <b>0.818917095</b> | <b>9.9E-20</b> | <b>10</b> |
| Q80W21        | CLDAFPNLK                                               | 0.746934668        | 2              | 3.148868  |
| Q80W21        | CLDAFPNLKDFIAR                                          | 1.007894266        | 2              | 3.252597  |
| Q80W21        | FKLGLDFPNLPYLIDGSHK                                     | 0.845446061        | 3              | 3.794268  |
| Q80W21        | HNLCGETEEER                                             | 0.841584972        | 2              | 3.997768  |
| Q80W21        | ITQSNAILR                                               | 0.77668174         | 2              | 3.11647   |
| Q80W21        | KHNLCGETEEER                                            | 0.609042093        | 3              | 4.130913  |
| Q80W21        | LFLEYTDSSYEK                                            | 0.849492042        | 2              | 3.742438  |
| Q80W21        | LGLDFPNLPYLIDGSHK                                       | 0.873917519        | 3              | 4.35242   |
| Q80W21        | LYSEFLGK                                                | 0.840998593        | 1              | 2.429498  |
| Q80W21        | VDILENQLMDNR                                            | 0.537138265        | 2              | 3.503875  |
| <b>Q80W93</b> | <b>HYDIN Hydrocephalus_inducing protein</b>             | <b>1.53200863</b>  | <b>9.3E-10</b> | <b>2</b>  |
| Q80W93        | FIVPVKAR                                                | 1.159069511        | 2              | 2.427654  |
| Q80W93        | LAKEMQEK                                                | 2.423063848        | 1              | 2.033756  |
| <b>Q80WE4</b> | <b>KI20B Kinesin_like protein KIF20B</b>                | <b>0.971877816</b> | <b>0.90379</b> | <b>2</b>  |
| Q80WE4        | ELLDLIEK                                                | 0.97187782         | 1              | 2.111984  |
| Q80WE4        | LNTGTMDLVLTR+Oxidation(5)                               | 0.968515127        | 2              | 2.602783  |

|               |                                                              |                    |                |          |
|---------------|--------------------------------------------------------------|--------------------|----------------|----------|
| <b>Q80WP8</b> | <b>GADL1 Glutamate decarboxylase_like protein 1</b>          | <b>1.09724008</b>  | <b>0.06884</b> | <b>3</b> |
| Q80WP8        | ADSVAWNPHK                                                   | 1.059935256        | 2              | 2.702766 |
| Q80WP8        | MLMAGIQCSALLVK+Oxidation(0)                                  | 0.778185726        | 2              | 2.428595 |
| Q80WP8        | MMKKGSLMLGYQPHR                                              | 1.329262749        | 2              | 2.493221 |
| <b>Q80X90</b> | <b>FLNB Filamin_B</b>                                        | <b>0.899287315</b> | <b>0.78821</b> | <b>6</b> |
| Q80X90        | GAGIGGLGITVEGPSESK                                           | 1.072747289        | 2              | 3.662366 |
| Q80X90        | GEAGIPAEFSIWTR                                               | 1.005954022        | 2              | 2.588229 |
| Q80X90        | IGNLQTDLSDGLR                                                | 0.834172582        | 2              | 3.204597 |
| Q80X90        | VDIQTEDELDGTCK                                               | 0.994513351        | 2              | 3.514197 |
| Q80X90        | VGEPGILCVDCEAGPGLGLEAVSDSGAK                                 | 1.05423413         | 2              | 4.965069 |
| Q80X90        | VTASGPGLSAYGVPSLPEFAIDAR                                     | 1.010872404        | 2              | 4.239129 |
| <b>Q80Y84</b> | <b>KDM5B Lysine_specific demethylase 5B</b>                  | <b>0.829950058</b> | <b>0.23839</b> | <b>2</b> |
| Q80Y84        | CDIGLLGLK                                                    | 0.816119466        | 2              | 2.568292 |
| Q80Y84        | YRYTLDDLYPMMNALK+Oxidation(10)                               | 1.001501656        |                | 2.304153 |
| <b>Q80Z25</b> | <b>OFD1 Oral_facial_digital syndrome 1 protein homolog</b>   | <b>0.894867432</b> | <b>0.62282</b> | <b>2</b> |
| Q80Z25        | MIEESLK+Oxidation(0)                                         | 0.940219522        | 2              | 2.369057 |
| Q80Z25        | RMIEESLK+Oxidation(1)                                        | 0.885738548        | 2              | 2.312514 |
| <b>Q80Z29</b> | <b>NAMPT Nicotinamide phosphoribosyltransferase</b>          | <b>1.065045753</b> | <b>0.11723</b> | <b>4</b> |
| Q80Z29        | STEAPLIIRPDSGNPLDVLK                                         | 1.192409653        | 2              | 3.691751 |
| Q80Z29        | TPAGTFVTLEEGKGDLEEYGHDLHTVFK                                 | 1.404767642        | 5              | 4.812943 |
| Q80Z29        | VIQGDGVDINTLQIEVEGMK                                         | 1.010359679        | 2              | 4.506372 |
| Q80Z29        | YLLETSGNLDGLEYSK                                             | 0.76120473         | 2              | 3.903606 |
| <b>Q811X6</b> | <b>CRYL1 Lambda_crystallin homolog</b>                       | <b>0.868819683</b> | <b>0.58248</b> | <b>2</b> |
| Q811X6        | LYDIEQQQITNALESIR                                            | 0.890904069        | 2              | 3.169236 |
| Q811X6        | TFGPVPEFSGDTEVK                                              | 0.992765507        | 2              | 3.107295 |
| <b>Q8BFZ3</b> | <b>ACTBL Beta_actin_like protein 2</b>                       | <b>0.890224519</b> | <b>9.9E-20</b> | <b>9</b> |
| Q8BFZ3        | CDVDIR                                                       | 0.801986548        | 2              | 2.381123 |
| Q8BFZ3        | HQGVMVGMGQK                                                  | 0.57222724         | 2              | 3.214974 |
| Q8BFZ3        | HQGVMVGMGQK+Oxidation(4)                                     | 0.749490196        | 3              | 3.499029 |
| Q8BFZ3        | HQGVMVGMGQK+Oxidation(4)                                     | 0.730872074        |                | 3.938262 |
| Q8BFZ3        | HQGVMVGMGQK+Oxidation(7)                                     | 0.785231621        | 3              | 3.314152 |
| Q8BFZ3        | SYELPDGQVITIGNER                                             | 0.860844684        | 2              | 5.051468 |
| Q8BFZ3        | TTGIVMDSGDGVTHTVPIYEGYALPHAILR                               | 1.092836512        | 3              | 6.455184 |
| Q8BFZ3        | TTGIVMDSGDGVTHTVPIYEGYALPHAILR+Oxidation(5)                  | 0.965634873        | 3              | 5.974591 |
| Q8BFZ3        | VAPDEHPILLTEAPLNPK                                           | 0.918144415        | 3              | 4.276495 |
| <b>Q8BG32</b> | <b>PSD11 26S proteasome non_ATPase regulatory subunit 11</b> | <b>0.836768769</b> | <b>2E-11</b>   | <b>3</b> |
| Q8BG32        | LYDNLLEQNLIR                                                 | 0.83794295         | 2              | 3.633115 |
| Q8BG32        | TTANAIYCPPK                                                  | 0.83715052         | 2              | 3.140503 |
| Q8BG32        | VQIEHISSLIK                                                  | 0.687929976        | 2              | 2.794554 |
| <b>Q8BGT6</b> | <b>MILK1 MICAL_like protein 1</b>                            | <b>0.837943885</b> | <b>0.19651</b> | <b>2</b> |
| Q8BGT6        | EEEEDKMLETMIKK                                               | 0.836553332        | 2              | 2.339371 |

|               |                                                                      |                    |                |           |
|---------------|----------------------------------------------------------------------|--------------------|----------------|-----------|
| Q8BGT6        | KDPPWITLVQTEPKK                                                      | 0.945760621        | 2              | 2.347662  |
| <b>Q8BGY2</b> | <b>IF5A2 Eukaryotic translation initiation factor 5A_2</b>           | <b>1.12570065</b>  | <b>9.9E-20</b> | <b>5</b>  |
| Q8BGY2        | IVEMSTSK+Oxidation(3)                                                | 0.536520375        | 2              | 2.310062  |
| Q8BGY2        | KYEDICPSTHNMDVPNIK                                                   | 1.210914558        | 3              | 4.160377  |
| Q8BGY2        | KYEDICPSTHNMDVPNIK+Oxidation(11)                                     | 0.901688992        | 3              | 3.411568  |
| Q8BGY2        | VHLVGIDIFTGK                                                         | 1.21292884         | 2              | 3.402694  |
| Q8BGY2        | YEDICPSTHNMDVPNIK                                                    | 1.003289722        | 2              | 3.760373  |
| <b>Q8BH00</b> | <b>AL8A1 Aldehyde dehydrogenase family 8 member A1</b>               | <b>1.105244139</b> | <b>1E-15</b>   | <b>10</b> |
| Q8BH00        | DSYDFFTEIK                                                           | 0.672873093        | 2              | 2.334916  |
| Q8BH00        | ELLMLENFIGGK                                                         | 0.97228745         | 2              | 3.536484  |
| Q8BH00        | ELNLPFGGMK                                                           | 0.919059814        | 1              | 2.291637  |
| Q8BH00        | FLPCNSYIDSYDPSTGEVYCK                                                | 1.178289083        | 2              | 5.06076   |
| Q8BH00        | ILCGEGVDQLSLPLR                                                      | 1.144079358        | 3              | 4.148017  |
| Q8BH00        | ITQLSAPHCK                                                           | 1.06484006         | 2              | 2.815052  |
| Q8BH00        | KLSLELGK                                                             | 1.009760195        | 2              | 2.3087    |
| Q8BH00        | NPAIIFEDANLEECIPATVR                                                 | 1.061042766        | 3              | 4.403743  |
| Q8BH00        | NQAGYFMLPTVITDIK                                                     | 1.179901359        | 2              | 3.43048   |
| Q8BH00        | SSFANQGEICLCTSR                                                      | 2.40119486         | 2              | 3.865173  |
| <b>Q8BHN3</b> | <b>GANAB Neutral alpha_glucosidase AB</b>                            | <b>0.916178282</b> | <b>0.07195</b> | <b>8</b>  |
| Q8BHN3        | AEKDEPGAWEETFK                                                       | 0.889102975        | 2              | 2.916621  |
| Q8BHN3        | DDNSVELTVAEGPYK                                                      | 1.002496285        | 2              | 3.228969  |
| Q8BHN3        | MLDYLQSGGETPQTDIR                                                    | 1.082980167        | 2              | 4.773614  |
| Q8BHN3        | MLDYLQSGGETPQTDIR+Oxidation(0)                                       | 0.767431994        | 2              | 5.255156  |
| Q8BHN3        | REPWLLASQYQDAIR                                                      | 0.948532092        | 3              | 3.601709  |
| Q8BHN3        | SGGIERPFVLSR                                                         | 0.947199107        | 2              | 2.358219  |
| Q8BHN3        | SIRPGLSPYR                                                           | 0.804696556        | 2              | 2.373337  |
| Q8BHN3        | THSDSKPYGPTSVGLDFSLPGMEHVYGIPEHADSLR                                 | 0.893528626        | 5              | 4.589782  |
| <b>Q8BIJ6</b> | <b>SYIM Isoleucyl_tRNA synthetase_mitochondrial</b>                  | <b>0.921217426</b> | <b>0.22215</b> | <b>2</b>  |
| Q8BIJ6        | DTVLLPQTSFPMK                                                        | 1.034169968        | 1              | 2.177176  |
| Q8BIJ6        | SCQTALAEILDVLR                                                       | 0.857465122        | 2              | 3.903869  |
| <b>Q8BJ64</b> | <b>CHDH Choline dehydrogenase_mitochondrial</b>                      | <b>0.830518524</b> | <b>4.9E-12</b> | <b>7</b>  |
| Q8BJ64        | ADSAYHPSCTCK                                                         | 0.494971512        | 2              | 3.338553  |
| Q8BJ64        | AEVQTLVSR                                                            | 0.828812609        | 2              | 2.461307  |
| Q8BJ64        | ELQPGSHVQSDKEIDAFVR                                                  | 0.791021231        | 2              | 4.100091  |
| Q8BJ64        | GGDGPLHVS                                                            | 0.802069683        | 2              | 2.438989  |
| Q8BJ64        | SRPGVPHPDIQFHLPSQVIDHGR                                              | 1.869492259        | 5              | 4.991092  |
| Q8BJ64        | TNHPLHQAFQAAR                                                        | 0.862231769        | 3              | 4.021713  |
| Q8BJ64        | VLLLEAGPK                                                            | 0.8511819          | 2              | 2.649873  |
| <b>Q8BK64</b> | <b>AHSA1 Activator of 90 kDa heat shock protein ATPase homolog 1</b> | <b>0.96686566</b>  | <b>0.74468</b> | <b>2</b>  |
| Q8BK64        | ADATNVNWHWTER                                                        | 0.877216573        | 2              | 2.877216  |
| Q8BK64        | LDGEASINNR                                                           | 1.065152266        | 2              | 2.63895   |



|               |                                                          |                    |                |          |
|---------------|----------------------------------------------------------|--------------------|----------------|----------|
| <b>Q8BL97</b> | <b>SRSF7 Serine/arginine_rich splicing factor 7</b>      | <b>1.000914717</b> | <b>0.53466</b> | <b>2</b> |
| Q8BL97        | NPPGFAFVEFEDPR                                           | 0.935598227        | 2              | 2.491876 |
| Q8BL97        | VYVGNLGTGAGK                                             | 1.070821729        | 2              | 2.802097 |
| <b>Q8BMJ2</b> | <b>SYLC Leucyl_tRNA synthetase_cytoplasmic</b>           | <b>0.879369572</b> | <b>0.60893</b> | <b>2</b> |
| Q8BMJ2        | SFITTDVNPYYDSFVR                                         | 0.87962222         | 2              | 3.414272 |
| Q8BMJ2        | STGNFLTSQLAVDK                                           | 0.798140527        | 2              | 2.607379 |
| <b>Q8BP47</b> | <b>SYNC Asparaginyl_tRNA synthetase_cytoplasmic</b>      | <b>0.892686397</b> | <b>7.9E-05</b> | <b>2</b> |
| Q8BP47        | KEDGTFYEFGDDIPEAPER                                      | 1.420705504        | 2              | 4.32333  |
| Q8BP47        | LTESVDVLPNPNVGEIVGGSMR                                   | 0.652415274        | 2              | 2.622137 |
| <b>Q8BQ33</b> | <b>TICRR Treslin</b>                                     | <b>0.972988445</b> | <b>0.31369</b> | <b>2</b> |
| Q8BQ33        | MNTMSRSLK+Oxidation(0)                                   | 0.614779389        | 1              | 2.239679 |
| Q8BQ33        | QKMNTMSRSLK+Oxidation(2)                                 | 1.048302532        |                | 2.515048 |
| <b>Q8BTM8</b> | <b>FLNA Filamin_A</b>                                    | <b>0.828668737</b> | <b>9.9E-20</b> | <b>3</b> |
| Q8BTM8        | AFGPGLQGGNAGSPAR                                         | 0.952034463        | 2              | 3.85674  |
| Q8BTM8        | GAGTGGLGLAVEGPSEAK                                       | 0.792002599        | 2              | 3.703381 |
| Q8BTM8        | GLVEPVDVVDNADGTQTVNVVPSR                                 | 0.515367211        | 2              | 5.163867 |
| <b>Q8BTZ7</b> | <b>GMPPB Mannose_1_phosphate guanyltransferase beta</b>  | <b>0.91761075</b>  | <b>0.17086</b> | <b>2</b> |
| Q8BTZ7        | HHGQEGSILVTK                                             | 0.936477864        | 3              | 3.35131  |
| Q8BTZ7        | YGVVCEADTGR                                              | 0.899582379        | 2              | 2.772907 |
| <b>Q8BU14</b> | <b>SEC62 Translocation protein SEC62</b>                 | <b>1.140187114</b> | <b>0.04826</b> | <b>2</b> |
| Q8BU14        | AVECLDSKWAK                                              | 1.174024504        | 2              | 2.489779 |
| Q8BU14        | IQEVGEPKKEEK                                             | 0.949202049        | 2              | 3.418259 |
| <b>Q8BU33</b> | <b>ILVBL Acetolactate synthase_like protein</b>          | <b>0.783122042</b> | <b>1.6E-05</b> | <b>2</b> |
| Q8BU33        | LPNSLMGR+Oxidation(5)                                    | 0.707997908        | 2              | 2.63353  |
| Q8BU33        | NAQVAQSPVLLGGAASTLLQK                                    | 0.922038627        | 2              | 5.112653 |
| <b>Q8BV79</b> | <b>TRNK1 TPR and ankyrin repeat_containing protein 1</b> | <b>0.589001151</b> | <b>1.7E-05</b> | <b>2</b> |
| Q8BV79        | LQLMSMDWPGQVPKRLLK+Oxidation(3)                          | 0.589001151        | 2              | 2.456984 |
| Q8BV79        | LQLMSMDWPGQVPKRLLK+Oxidation(5)                          | 0.589001151        | 2              | 2.394155 |
| <b>Q8BVE3</b> | <b>VATH V_type proton ATPase subunit H</b>               | <b>1.164994803</b> | <b>0.46382</b> | <b>2</b> |
| Q8BVE3        | GAVDAAVPTNIIAAK                                          | 1.055686988        | 2              | 2.55597  |
| Q8BVE3        | QLQSEQPQTAAAR                                            | 1.167859975        | 2              | 2.412417 |
| <b>Q8C147</b> | <b>DOCK8 Dedicator of cytokinesis protein 8</b>          | <b>1.014334841</b> | <b>0.69714</b> | <b>2</b> |
| Q8C147        | LNFASKLASAR                                              | 0.938093245        | 2              | 2.466516 |
| Q8C147        | RFMYTTPFTLEGRPR+Oxidation(2)                             | 1.078695938        | 2              | 2.527167 |
| <b>Q8C8R3</b> | <b>ANK2 Ankyrin_2</b>                                    | <b>1.105749492</b> | <b>0.00932</b> | <b>2</b> |
| Q8C8R3        | STSSSRPGTSPPTRESR                                        | 0.733062044        | 2              | 2.540637 |
| Q8C8R3        | TSTDFSEVIKQLEDNDK                                        | 1.11022255         | 2              | 2.983017 |
| <b>Q8CC88</b> | <b>K0564 Uncharacterized protein KIAA0564 homolog</b>    | <b>0.971112059</b> | <b>0.37004</b> | <b>3</b> |
| Q8CC88        | HQATGELDDAK                                              | 0.629116864        | 2              | 3.35348  |
| Q8CC88        | NLADQGIINYPYSTR                                          | 1.123670432        | 2              | 2.992636 |
| Q8CC88        | VSSDQLSSENLTSAVGQK                                       | 0.949385293        | 2              | 3.602432 |

|               |                                                       |                    |                |           |
|---------------|-------------------------------------------------------|--------------------|----------------|-----------|
| <b>Q8CFN2</b> | <b>CDC42 Cell division control protein 42 homolog</b> | <b>0.900474976</b> | <b>0.0002</b>  | <b>3</b>  |
| Q8CFN2        | DDPSTIEK                                              | 0.901813255        | 1              | 1.968742  |
| Q8CFN2        | NVFDEAILAALPEPEPK                                     | 0.928031364        | 3              | 5.090896  |
| Q8CFN2        | YVECSALTQK                                            | 0.816908295        | 2              | 2.892807  |
| <b>Q8CG45</b> | <b>ARK72 Aflatoxin B1 aldehyde reductase member 2</b> | <b>0.75888595</b>  | <b>2.8E-15</b> | <b>9</b>  |
| Q8CG45        | AVSGAPLRPGTVLGTMEMGR                                  | 0.932190761        | 2              | 2.640775  |
| Q8CG45        | EHHFEAIALVEK                                          | 0.883594262        | 2              | 2.688471  |
| Q8CG45        | FFGNSWSETYR                                           | 0.982527176        | 2              | 2.760707  |
| Q8CG45        | FYAYNPLAGLLTGK                                        | 1.125918164        | 2              | 4.211129  |
| Q8CG45        | MDASASAATVR                                           | 0.757923751        | 2              | 3.724972  |
| Q8CG45        | QVETELLPLCR                                           | 0.784527517        | 2              | 2.679578  |
| Q8CG45        | RMDASASAATVR                                          | 0.926782799        | 2              | 2.490785  |
| Q8CG45        | TTYGTSAPSM TSAALR                                     | 0.886033717        | 2              | 4.256329  |
| Q8CG45        | VDFYLHAPDHGTPIVETLQACQQLHQEGK                         | 1.590288818        | 3              | 4.244577  |
| <b>Q8CGC7</b> | <b>SYEP Bifunctional aminoacyl_tRNA synthetase</b>    | <b>1.015004711</b> | <b>0.00017</b> | <b>10</b> |
| Q8CGC7        | AIQGATSHHLGQNFSK                                      | 1.065083822        | 2              | 4.108176  |
| Q8CGC7        | DQDVEPGAPSMGAK                                        | 0.825037834        | 2              | 3.082859  |
| Q8CGC7        | DQVDSAVQELLQLK                                        | 1.00906629         | 2              | 4.0168    |
| Q8CGC7        | GDVSISVEEGKENLLR                                      | 1.098805751        | 2              | 3.316414  |
| Q8CGC7        | GSQFGQSCCLR                                           | 1.070806214        | 2              | 2.365304  |
| Q8CGC7        | KEENLAEWYSQVITK                                       | 1.322546487        | 2              | 4.084888  |
| Q8CGC7        | SLCIPFNPLCELQPGAMCVCGK                                | 0.93590634         | 2              | 4.219921  |
| Q8CGC7        | SQGSGLSSGGAGEGQGPK                                    | 0.991390314        | 2              | 4.89804   |
| Q8CGC7        | TELAEP AI RPTSETVMYPAYAK                              | 0.902514925        | 2              | 2.921504  |
| Q8CGC7        | VYEELLAIPVVR                                          | 1.061918781        | 2              | 2.78672   |
| <b>Q8CGN4</b> | <b>BCOR BCL_6 corepressor</b>                         | <b>1.223702369</b> | <b>0.05237</b> | <b>2</b>  |
| Q8CGN4        | FLTDYLN DLQGR                                         | 0.980855808        | 1              | 2.003734  |
| Q8CGN4        | NWLLLS DV LK                                          | 1.316417826        | 2              | 2.496962  |
| <b>Q8CHB8</b> | <b>TTL5 Tubulin polyglutamylase TTL5</b>              | <b>1.08762775</b>  | <b>0.63637</b> | <b>2</b>  |
| Q8CHB8        | ASSNLQHSLRMVLP SR+Oxidation(10)                       | 0.981167434        | 2              | 2.505867  |
| Q8CHB8        | DSGGQTLSPSWAAK                                        | 1.09646518         | 1              | 2.004535  |
| <b>Q8CHM7</b> | <b>HACL1 2_hydroxyacyl_CoA lyase 1</b>                | <b>0.996023365</b> | <b>0.85228</b> | <b>8</b>  |
| Q8CHM7        | DTSKPCLINIMIEPQSTR                                    | 1.065958566        | 2              | 3.478301  |
| Q8CHM7        | DTSKPCLINIMIEPQSTRK                                   | 1.028445619        | 2              | 2.320571  |
| Q8CHM7        | GAAYSHAEDSIR                                          | 0.048682141        | 2              | 3.295164  |
| Q8CHM7        | GVVPDNHPNCVGAAR                                       | 1.011406216        | 2              | 3.369596  |
| Q8CHM7        | GYFVQTPEELQDSL R                                      | 0.99031178         | 2              | 4.16779   |
| Q8CHM7        | LVELCNLPFLPTPMGK                                      | 0.996348088        | 2              | 4.131654  |
| Q8CHM7        | NCFIVSEGANTMDIGR                                      | 0.985072281        | 2              | 4.733199  |
| Q8CHM7        | NQEAMGAFQEFPPQVEACR                                   | 1.141890512        | 2              | 4.908587  |
| <b>Q8CIB5</b> | <b>FERM2 Fermitin family homolog 2</b>                | <b>0.7042552</b>   | <b>9.9E-20</b> | <b>2</b>  |
| Q8CIB5        | GCEVTPDVNISGQK                                        | 0.701529657        | 2              | 3.299987  |

|               |                                                                    |                    |                |           |
|---------------|--------------------------------------------------------------------|--------------------|----------------|-----------|
| Q8CIB5        | TSTILGDITSIPELADYIK                                                | 0.830991095        | 2              | 3.079289  |
| <b>Q8CIE6</b> | <b>COPA Coatomer subunit alpha</b>                                 | <b>1.052475903</b> | <b>1.3E-08</b> | <b>6</b>  |
| Q8CIE6        | ASNLENSTYDLYTIPK                                                   | 1.584555395        | 2              | 4.008404  |
| Q8CIE6        | DADSQNPDAPEGK                                                      | 0.871443013        | 2              | 3.417788  |
| Q8CIE6        | GITGVDLFGTTDAVVK                                                   | 1.058158878        | 2              | 2.702979  |
| Q8CIE6        | LLELGPKEVAQQTR                                                     | 1.008235754        | 2              | 2.595017  |
| Q8CIE6        | SILLSVPLLVDNK                                                      | 1.077460006        | 2              | 3.189211  |
| Q8CIE6        | TLDLPIYVTR                                                         | 1.043542498        | 2              | 2.623641  |
| <b>Q8JZN5</b> | <b>ACAD9 Acyl-CoA dehydrogenase family member 9_mitochondrial</b>  | <b>0.891234701</b> | <b>0.00606</b> | <b>2</b>  |
| Q8JZN5        | GSNTCEVHFENTR                                                      | 0.924807094        | 2              | 4.255743  |
| Q8JZN5        | NLSEFGLIQEK                                                        | 0.880917332        | 2              | 3.136089  |
| <b>Q8K009</b> | <b>AL1L2 Mitochondrial 10-formyltetrahydrofolate dehydrogenase</b> | <b>1.221642208</b> | <b>9.9E-20</b> | <b>16</b> |
| Q8K009        | ADPLALAAEK                                                         | 1.260532286        | 2              | 2.603598  |
| Q8K009        | AGFSVFWADDGLDTPILLQR                                               | 1.561599637        | 2              | 2.350046  |
| Q8K009        | AMVEAVQLIADGK                                                      | 1.638896864        | 2              | 3.677979  |
| Q8K009        | ANNTEYGLASGVFTR                                                    | 0.673588097        | 2              | 4.742697  |
| Q8K009        | DLGEEALNEYLK                                                       | 1.147105125        | 2              | 3.686132  |
| Q8K009        | FLFPEGIK                                                           | 0.882670619        | 2              | 2.311523  |
| Q8K009        | FQNGDIDGVLQR                                                       | 1.260217498        | 2              | 2.990376  |
| Q8K009        | GVINIIPGSGGVAGQR                                                   | 1.21727026         | 2              | 2.779066  |
| Q8K009        | HGSIHYPSLLPR                                                       | 0.699269982        | 2              | 3.764791  |
| Q8K009        | NLQFEDGK                                                           | 1.184643961        | 1              | 2.187108  |
| Q8K009        | SAACLAAGNTLVLPKPAQVPTLTK                                           | 1.687620965        | 3              | 3.445929  |
| Q8K009        | SCDVKPNDTVDSLNR                                                    | 1.408693104        | 2              | 4.634255  |
| Q8K009        | SPLIIFSDCDLEK                                                      | 2.977418872        | 2              | 2.434675  |
| Q8K009        | TPQPEEGATYEGIQK                                                    | 5.635393585        | 2              | 2.980946  |
| Q8K009        | VSYASLADVDR                                                        | 1.459065695        | 2              | 3.613731  |
| Q8K009        | VVGVTVPDKDGK                                                       | 1.233368969        | 2              | 2.953269  |
| <b>Q8K2F0</b> | <b>BRD3 Bromodomain-containing protein 3</b>                       | <b>1.180802611</b> | <b>0.01052</b> | <b>2</b>  |
| Q8K2F0        | KMDSREYPDAAQGAADIR                                                 | 2.084252204        | 2              | 2.314347  |
| Q8K2F0        | QLSLDINRLPGEK                                                      | 0.976211116        | 2              | 2.392806  |
| <b>Q8K442</b> | <b>ABC8A ATP-binding cassette sub_family A member 8_A</b>          | <b>0.873757916</b> | <b>0.85137</b> | <b>4</b>  |
| Q8K442        | GQITAILGHSGAGK                                                     | 0.884951401        | 2              | 3.354488  |
| Q8K442        | IDDFIHSLEQQNIALEVDAFGTR                                            | 0.934044014        | 3              | 3.615723  |
| Q8K442        | NTQNILVQNLGGQK                                                     | 0.748100319        | 2              | 2.648678  |
| Q8K442        | STLLNVLSGLCVPTK                                                    | 0.913739651        | 2              | 3.203812  |
| <b>Q8K4C0</b> | <b>FM05 Dimethylaniline monooxygenase [N_oxide-forming] 5</b>      | <b>0.828133333</b> | <b>9.9E-20</b> | <b>9</b>  |
| Q8K4C0        | CCLEEGLEPVCFER                                                     | 0.659470947        | 2              | 4.081275  |
| Q8K4C0        | EYKNPVEFTGK                                                        | 0.642988505        | 2              | 2.327073  |
| Q8K4C0        | GYPIDILLSSR                                                        | 0.576264799        | 2              | 3.55792   |
| Q8K4C0        | HSALGQHPTINDLPCR                                                   | 0.543273113        | 2              | 4.982573  |

|               |                                                                     |                    |                |          |
|---------------|---------------------------------------------------------------------|--------------------|----------------|----------|
| Q8K4C0        | IAVIGSGASGLTCIK                                                     | 0.716828505        | 2              | 3.294501 |
| Q8K4C0        | KLPSQSEMMAEINK                                                      | 0.606721703        | 2              | 3.64247  |
| Q8K4C0        | KQPDFSTSGQWQVVTEHEGK                                                | 0.625147298        | 3              | 4.322129 |
| Q8K4C0        | KTILTTEDR                                                           | 0.512180992        | 2              | 2.424112 |
| Q8K4C0        | SDDIGGLWR                                                           | 0.534669108        | 2              | 2.91392  |
| <b>Q8K4Q0</b> | <b>RPTOR Regulatory associated protein of mTOR</b>                  | <b>1.098402512</b> | <b>0.01064</b> | <b>2</b> |
| Q8K4Q0        | MPESVNVMIQVK+Oxidation(0)                                           | 0.842548771        |                | 2.337292 |
| Q8K4Q0        | QAQQVIQKGITR                                                        | 1.538142975        | 1              | 2.120605 |
| <b>Q8K4Z3</b> | <b>AIBP Apolipoprotein A_I binding protein</b>                      | <b>0.910619173</b> | <b>9.2E-06</b> | <b>2</b> |
| Q8K4Z3        | GNPSGIQPDLLISLTAPK                                                  | 0.850284345        | 2              | 4.118026 |
| Q8K4Z3        | SPPTVLVICPGNNGDGLVCAR                                               | 0.918715074        | 2              | 5.589459 |
| <b>Q8K586</b> | <b>RANT GTP binding nuclear protein Ran_testis_specific isoform</b> | <b>1.075479733</b> | <b>0.27073</b> | <b>3</b> |
| Q8K586        | FNVWDTAGQEK                                                         | 1.111044167        | 2              | 3.005875 |
| Q8K586        | NLQYYDISAK                                                          | 1.159366963        | 1              | 2.333461 |
| Q8K586        | VCENIPIVLCGNK                                                       | 1.002296273        | 2              | 3.393962 |
| <b>Q8QZY1</b> | <b>EIF3L Eukaryotic translation initiation factor 3 subunit L</b>   | <b>0.988524364</b> | <b>0.84496</b> | <b>3</b> |
| Q8QZY1        | QYEQQTYQVIPEVIK                                                     | 1.084386435        | 2              | 2.673627 |
| Q8QZY1        | VFSDEVQQQAQLSTIR                                                    | 0.979856191        | 2              | 4.068167 |
| Q8QZY1        | VYEIQDIYENSWTK                                                      | 0.946428207        | 2              | 2.503316 |
| <b>Q8R081</b> | <b>HNRPL Heterogeneous nuclear ribonucleoprotein L</b>              | <b>1.213479198</b> | <b>3.3E-16</b> | <b>4</b> |
| Q8R081        | ASLNGADIYSGCCTLK                                                    | 1.489288894        | 2              | 3.507277 |
| Q8R081        | NDQDTWDYTNPNLSGGDPGSNPNKR                                           | 0.994932639        | 3              | 4.911361 |
| Q8R081        | SDALETGLFLNHYQMK                                                    | 0.917118992        | 2              | 2.995269 |
| Q8R081        | TENAGDQHGGGGGGGGAAGGGGGENYDDPHK                                     | 0.802212185        | 3              | 7.470517 |
| <b>Q8R0F9</b> | <b>S14L4 SEC14_like protein 4</b>                                   | <b>0.84226998</b>  | <b>0.00027</b> | <b>2</b> |
| Q8R0F9        | FDNTYSLHHTK                                                         | 0.897376604        | 2              | 2.903017 |
| Q8R0F9        | GSSHQVENEILFPGCVLR                                                  | 0.649953652        | 2              | 5.486315 |
| <b>Q8R0K2</b> | <b>TRI31 E3 ubiquitin_protein ligase TRIM31</b>                     | <b>0.906902515</b> | <b>0.18688</b> | <b>2</b> |
| Q8R0K2        | AQVDLEKLIHEEFK                                                      | 0.908629509        | 2              | 2.465328 |
| Q8R0K2        | QRLDEEESFLLSR                                                       | 0.557128264        | 2              | 2.412374 |
| <b>Q8R146</b> | <b>APEH Acylamino_acid_releasing enzyme</b>                         | <b>0.795174809</b> | <b>1.2E-07</b> | <b>2</b> |
| Q8R146        | GSTGFGQDSILSLPGNVGHQDVK                                             | 0.962868301        | 2              | 3.556288 |
| Q8R146        | QVLLSEPEAAALYR                                                      | 0.772780488        | 2              | 3.611272 |
| <b>Q8R164</b> | <b>BPHL Valacyclovir hydrolase</b>                                  | <b>0.923688432</b> | <b>9.9E-20</b> | <b>2</b> |
| Q8R164        | QVSLLGWSDGGITALIAAAK                                                | 1.006998977        | 2              | 3.756064 |
| Q8R164        | TDFAPQLQSLNK                                                        | 0.721642987        | 2              | 3.249377 |
| <b>Q8R1V4</b> | <b>TMED4 Transmembrane emp24 domain_containing protein 4</b>        | <b>0.855293989</b> | <b>0.04089</b> | <b>2</b> |
| Q8R1V4        | CFIEEIPDETMVIGNYR                                                   | 0.915650132        | 2              | 3.692452 |
| Q8R1V4        | QLLDQVEQIQK                                                         | 0.852294307        | 2              | 3.239424 |
| <b>Q8R491</b> | <b>EHD3 EH domain_containing protein 3</b>                          | <b>0.950753677</b> | <b>0.6991</b>  | <b>3</b> |
| Q8R491        | LDISDEFSEVIK                                                        | 1.037139871        | 2              | 3.374796 |

|               |                                                                     |                    |                |          |
|---------------|---------------------------------------------------------------------|--------------------|----------------|----------|
| Q8R491        | LFEAEEQDLFK                                                         | 0.947796429        | 2              | 3.123803 |
| Q8R491        | MQDQLQAQDFSK                                                        | 0.845214315        | 2              | 3.12121  |
| <b>Q8VBU2</b> | <b>NDRG2 Protein NDRG2</b>                                          | <b>0.776345809</b> | <b>0.00524</b> | <b>6</b> |
| Q8VBU2        | CPVMLVVGDAQPHEDAVVECNSK                                             | 0.852593528        | 3              | 4.637897 |
| Q8VBU2        | CPVMLVVGDAQPHEDAVVECNSK+Oxidation(3)                                | 0.755829841        | 3              | 4.70909  |
| Q8VBU2        | LDPTQTSFLK                                                          | 0.867997938        | 2              | 2.394476 |
| Q8VBU2        | MADSGGQPQLTQPGK                                                     | 0.806496979        | 2              | 3.083048 |
| Q8VBU2        | TASLTAASIDGSR                                                       | 1.452723154        | 2              | 3.381552 |
| Q8VBU2        | YALNHPDPTVEGLVLINIDPNAK                                             | 1.198998113        | 2              | 3.55328  |
| <b>Q8VC12</b> | <b>HUTU Urocanate hydratase</b>                                     | <b>1.191826341</b> | <b>0.00021</b> | <b>6</b> |
| Q8VC12        | HQLVVSQAR                                                           | 0.936787898        | 2              | 2.878387 |
| Q8VC12        | LLALEFAQELR                                                         | 1.212056038        | 2              | 3.638972 |
| Q8VC12        | LVITNGMVIPNYSSR                                                     | 1.160210759        | 2              | 2.743924 |
| Q8VC12        | VAIAVAINQAIASGK                                                     | 2.250740714        | 2              | 2.991126 |
| Q8VC12        | VFVTSGLGGMSGAAK                                                     | 0.919877194        | 2              | 4.373806 |
| Q8VC12        | VFVTSGLGGMSGAAK+Oxidation(9)                                        | 0.91261499         | 2              | 2.726278 |
| <b>Q8VCD5</b> | <b>MED17 Mediator of RNA polymerase II transcription subunit 17</b> | <b>0.724108018</b> | <b>0.13132</b> | <b>2</b> |
| Q8VCD5        | EIFAQLSREAVQIK                                                      | 0.814115494        | 1              | 2.10893  |
| Q8VCD5        | MELLSALSPELL+Oxidation(0)                                           | 0.723988224        |                | 2.325292 |
| <b>Q8VED5</b> | <b>K2C79 Keratin_ type II cytoskeletal 79</b>                       | <b>0.73380817</b>  | <b>3E-08</b>   | <b>4</b> |
| Q8VED5        | NKYEDEINK                                                           | 0.663704842        | 2              | 2.554667 |
| Q8VED5        | NKYEDEINKR                                                          | 0.658376218        | 2              | 2.535197 |
| Q8VED5        | NLDLDSIAEVK                                                         | 0.660183164        | 2              | 2.760166 |
| Q8VED5        | YEDEINK                                                             | 0.846694626        | 1              | 2.053252 |
| <b>Q8VEK3</b> | <b>HNRPU Heterogeneous nuclear ribonucleoprotein U</b>              | <b>0.978149083</b> | <b>3.7E-06</b> | <b>9</b> |
| Q8VEK3        | EKPYFPIPEDCTFIQNVPLEDR                                              | 1.080385973        | 3              | 4.289993 |
| Q8VEK3        | GYFEYIEENK                                                          | 1.015247377        | 2              | 3.316532 |
| Q8VEK3        | LLEQYKEESK                                                          | 0.822806815        | 2              | 2.923428 |
| Q8VEK3        | LLEQYKEESKK                                                         | 0.891637791        | 2              | 3.189782 |
| Q8VEK3        | LQAALDNEAGGRPAMEPGNGSLDLGGDAAGR                                     | 0.967003551        | 3              | 4.986965 |
| Q8VEK3        | NFIELDQTNVAAAQR                                                     | 0.869046243        | 2              | 4.662938 |
| Q8VEK3        | TCNCETEDYGEK                                                        | 0.960389149        | 2              | 3.4796   |
| Q8VEK3        | VSELKEELKK                                                          | 0.866751784        | 2              | 3.031257 |
| Q8VEK3        | YNILGTNTIMDK                                                        | 0.936739831        | 2              | 3.624905 |
| <b>Q8VHE9</b> | <b>RETST All_trans_retinol 13_14_reductase</b>                      | <b>0.589555154</b> | <b>9.9E-20</b> | <b>4</b> |
| Q8VHE9        | ATVQSVLLDSAGR                                                       | 0.605576192        | 2              | 3.822774 |
| Q8VHE9        | GATYGADHDLAR                                                        | 0.704009691        | 2              | 3.008013 |
| Q8VHE9        | NLYSDLQALGSK                                                        | 0.573262362        | 2              | 3.072435 |
| Q8VHE9        | RPPEPLVTDK                                                          | 0.580006872        | 2              | 2.970709 |
| <b>Q8VHF5</b> | <b>CISY Citrate synthase_mitochondrial</b>                          | <b>0.86609349</b>  | <b>5.3E-10</b> | <b>3</b> |
| Q8VHF5        | DILSNLIPK                                                           | 0.849258354        | 2              | 2.420434 |
| Q8VHF5        | EGSSIGAIDSK                                                         | 0.829134899        | 1              | 2.139305 |

|               |                                                                 |                    |                |          |
|---------------|-----------------------------------------------------------------|--------------------|----------------|----------|
| Q8VHF5        | GLVYETSVLDPDEGIR                                                | 0.866280178        | 2              | 4.023195 |
| <b>Q8VHT6</b> | <b>AS3MT Arsenite methyltransferase</b>                         | <b>1.447924309</b> | <b>6E-06</b>   | <b>3</b> |
| Q8VHT6        | ILDLGSGSGR                                                      | 0.854877986        | 2              | 2.962378 |
| Q8VHT6        | SLQNVHEEVISR                                                    | 2.002366868        | 2              | 2.937655 |
| Q8VHT6        | TSADLQTNACVTPAK                                                 | 1.656370226        | 2              | 3.497228 |
| <b>Q8VID1</b> | <b>DHRS4 Dehydrogenase/reductase SDR family member 4</b>        | <b>1.050189901</b> | <b>9.8E-06</b> | <b>4</b> |
| Q8VID1        | AVATLQGEGLSVTVGVCHVGK                                           | 1.050112907        | 2              | 4.487993 |
| Q8VID1        | LAEDGAHVVISSR                                                   | 1.421478195        | 2              | 3.255774 |
| Q8VID1        | NFAAELAPK                                                       | 0.809205848        | 2              | 2.59451  |
| Q8VID1        | VALVTASTDGIGLAIAR                                               | 2.394841564        | 2              | 2.989326 |
| <b>Q8VID6</b> | <b>PDE11 Dual 3_5_cyclic_AMP and _GMP phosphodiesterase 11A</b> | <b>0.805011777</b> | <b>0.02263</b> | <b>2</b> |
| Q8VID6        | MFMEELGMVQKFK+Oxidation(0)                                      | 0.805011777        | 1              | 1.917717 |
| Q8VID6        | MFMEELGMVQKFK+Oxidation(2)                                      | 0.805011777        | 1              | 1.906426 |
| <b>Q8VIF7</b> | <b>SBP1 Selenium_binding protein 1</b>                          | <b>0.897440134</b> | <b>0.02369</b> | <b>8</b> |
| Q8VIF7        | CGPGYATPLEAMK                                                   | 0.742077955        | 2              | 3.234827 |
| Q8VIF7        | FLHDPDATQGFVGCALSSNIQR                                          | 0.900096255        | 2              | 4.390937 |
| Q8VIF7        | GGFVLLDGETFEVK                                                  | 0.892851875        | 2              | 3.940814 |
| Q8VIF7        | GTWEKPGGEAPMGYDFWYQPR                                           | 0.922202786        | 3              | 4.056978 |
| Q8VIF7        | NEGGTWSVEK                                                      | 0.859925234        | 2              | 2.331684 |
| Q8VIF7        | NTGIEAPDYLATVDVDPK                                              | 0.842263789        | 2              | 5.022693 |
| Q8VIF7        | QYDISNPK                                                        | 0.749544364        | 1              | 2.100129 |
| Q8VIF7        | VIEPNEIHAK                                                      | 0.740793551        | 2              | 2.491315 |
| <b>Q8VIJ6</b> | <b>SFPQ Splicing factor_proline_ and glutamine_rich</b>         | <b>1.110049098</b> | <b>0.01222</b> | <b>2</b> |
| Q8VIJ6        | NLSPYVSNELLEAFSQFGPIER                                          | 0.904822071        | 3              | 3.434645 |
| Q8VIJ6        | YGEPGEVFINK                                                     | 1.156695512        | 2              | 2.69571  |
| <b>Q91VA0</b> | <b>ACSM1 Acyl_coenzyme A synthetase ACSM1_mitochondrial</b>     | <b>0.786326659</b> | <b>2.9E-06</b> | <b>5</b> |
| Q91VA0        | AFIVLNPEFLSHDQEQLIK                                             | 0.899638626        | 2              | 5.306589 |
| Q91VA0        | AILPFDLQIIDEK                                                   | 0.864069787        | 2              | 4.146455 |
| Q91VA0        | GNILPPNTEGYIGIR                                                 | 0.808640791        | 2              | 2.922953 |
| Q91VA0        | HNQGLAFR                                                        | 0.574924421        | 2              | 2.380603 |
| Q91VA0        | KVEFVSELPK                                                      | 1.170490136        | 2              | 2.630617 |
| <b>Q91VA6</b> | <b>PDIP2 Polymerase delta_interacting protein 2</b>             | <b>1.011839024</b> | <b>0.98054</b> | <b>2</b> |
| Q91VA6        | NHPWLELSDVHR                                                    | 1.011827185        | 3              | 3.707343 |
| Q91VA6        | VLETVGVFVFPK                                                    | 1.035779926        | 2              | 2.373256 |
| <b>Q91VH2</b> | <b>SNX9 Sorting nexin_9</b>                                     | <b>1.579598398</b> | <b>4.1E-07</b> | <b>2</b> |
| Q91VH2        | GEQGLVPTDYVEILPNDGK                                             | 0.900132631        | 2              | 2.384259 |
| Q91VH2        | ITPQDKQTMVK+Oxidation(8)                                        | 1.773837283        | 1              | 2.10074  |
| <b>Q91VM9</b> | <b>IPYR2 Inorganic pyrophosphatase 2_mitochondrial</b>          | <b>0.927668106</b> | <b>0.02036</b> | <b>2</b> |
| Q91VM9        | IIAINVNDPEAEK                                                   | 0.669017035        | 2              | 3.193566 |
| Q91VM9        | MEIATEEPLNPIK                                                   | 1.074433848        | 2              | 3.632252 |

|               |                                                                            |                    |                |           |
|---------------|----------------------------------------------------------------------------|--------------------|----------------|-----------|
| <b>Q91W43</b> | <b>GCSP Glycine dehydrogenase [decarboxylating]_ mitochondrial</b>         | <b>0.736691013</b> | <b>0.00017</b> | <b>3</b>  |
| Q91W43        | IDDIYGDQHLVCTCPPMEVYESPFSEQK                                               | 0.727700953        | 3              | 3.697707  |
| Q91W43        | NLLENSGWVTQYTPYQPEVSQGR                                                    | 0.754454966        | 2              | 4.245063  |
| Q91W43        | VSFQPNSSGAQGEYAGLATIR                                                      | 0.873004655        | 2              | 4.526313  |
| <b>Q91X77</b> | <b>CY250 Cytochrome P450 2C50</b>                                          | <b>0.523834081</b> | <b>9.9E-20</b> | <b>3</b>  |
| Q91X77        | IKEHEESLDVTIPR                                                             | 0.454450112        | 3              | 3.919033  |
| Q91X77        | NFLLEK                                                                     | 0.387952207        | 1              | 1.965251  |
| Q91X77        | YALLLLLK                                                                   | 0.865811011        | 2              | 2.597866  |
| <b>Q91X78</b> | <b>ERLN1 Erlin_1</b>                                                       | <b>0.87490686</b>  | <b>0.0212</b>  | <b>2</b>  |
| Q91X78        | ISEIEDAAFLAR                                                               | 0.926567189        | 2              | 3.67408   |
| Q91X78        | SVQTTLQTDEVK                                                               | 0.87490414         | 2              | 3.416668  |
| <b>Q91Y81</b> | <b>SEPT2 Septin_2</b>                                                      | <b>0.921137371</b> | <b>0.81586</b> | <b>2</b>  |
| Q91Y81        | ASIPFSVVGSNQLIEAK                                                          | 1.1251192          | 2              | 2.700763  |
| Q91Y81        | LTVVDTPGYGDAINSR                                                           | 0.919767297        | 2              | 3.797487  |
| <b>Q91YT0</b> | <b>NDUV1 NADH dehydrogenase [ubiquinone] flavoprotein 1_ mitochondrial</b> | <b>1.228153683</b> | <b>0.02158</b> | <b>8</b>  |
| Q91YT0        | GAGAYICGEETALIESIEGK                                                       | 0.985292417        | 2              | 3.476463  |
| Q91YT0        | GDARPAEIDSLWEISK                                                           | 0.783734933        | 2              | 3.091804  |
| Q91YT0        | GGAGFPTGLK                                                                 | 1.104883478        | 2              | 2.302608  |
| Q91YT0        | KTSFGSLKDEDR                                                               | 1.243317819        | 2              | 3.030969  |
| Q91YT0        | LKPPFPADVGVFGCPTTVANVETVAVSPTICR                                           | 1.128277328        | 3              | 4.964741  |
| Q91YT0        | LVEGCLVGGR                                                                 | 0.855974138        | 2              | 2.44372   |
| Q91YT0        | TSFGSLKDEDR                                                                | 1.054191173        | 2              | 2.551834  |
| Q91YT0        | YLVVNADEGEPGTCK                                                            | 0.938682203        | 2              | 5.297962  |
| <b>Q91Z53</b> | <b>GRHPR Glyoxylate reductase/hydroxypyruvate reductase</b>                | <b>0.905341278</b> | <b>9.9E-20</b> | <b>7</b>  |
| Q91Z53        | GDVVNQEDLYQALASGQIAAAGLDVTTPEPLPPSHPLTLK                                   | 0.939963901        | 3              | 6.320993  |
| Q91Z53        | LLDAAGANLR                                                                 | 0.798351016        | 2              | 3.221628  |
| Q91Z53        | NCVILPHIGSATYK                                                             | 1.016100711        | 2              | 3.315368  |
| Q91Z53        | NTMSLLAANNLLAGLR                                                           | 0.831943044        | 2              | 3.664772  |
| Q91Z53        | NTMSLLAANNLLAGLR+Oxidation(2)                                              | 0.713300966        | 2              | 3.657813  |
| Q91Z53        | RLPEAIEEVK                                                                 | 0.831682653        | 2              | 2.64402   |
| Q91Z53        | VISTLSVGVVDHLALDEIK                                                        | 0.960776191        | 2              | 3.912876  |
| <b>Q91ZJ5</b> | <b>UGPA UTP__glucose_1_phosphate uridylyltransferase</b>                   | <b>0.660273843</b> | <b>9.9E-20</b> | <b>12</b> |
| Q91ZJ5        | AMSQDGASQFQEVILQELELSVK                                                    | 0.721967353        | 3              | 4.748354  |
| Q91ZJ5        | GGTLTQYEGK                                                                 | 0.58218526         | 2              | 2.493003  |
| Q91ZJ5        | GLPDNISSVLNK                                                               | 0.578787284        | 2              | 3.269696  |
| Q91ZJ5        | GTVIIIANHGDR                                                               | 0.566089888        | 2              | 3.200039  |
| Q91ZJ5        | IDIPPGAVLENK                                                               | 0.628947128        | 2              | 2.740689  |
| Q91ZJ5        | IQRPPEDSIQPYEK                                                             | 0.62340468         | 2              | 3.90405   |
| Q91ZJ5        | LQEQNAIDMEIIVNPK                                                           | 0.883728157        | 2              | 3.344863  |
| Q91ZJ5        | LVEIAQVPK                                                                  | 0.610608477        | 2              | 3.378064  |

|               |                                                                                     |                    |                |           |
|---------------|-------------------------------------------------------------------------------------|--------------------|----------------|-----------|
| Q91ZJ5        | NENTFLDLTVQQIEHLNK                                                                  | 0.615533787        | 2              | 5.33607   |
| Q91ZJ5        | SFENSLGINVPR                                                                        | 0.599969995        | 2              | 3.392874  |
| Q91ZJ5        | TLDGGLNVIQLETAVGAAIK                                                                | 0.64868117         | 2              | 4.7902    |
| Q91ZJ5        | TYNTDVPLVLMNSFNTDEDTKK                                                              | 1.112367934        | 2              | 4.565436  |
| <b>Q91ZX7</b> | <b>LRP1 Prolow_density lipoprotein receptor_related protein 1</b>                   | <b>1.209266066</b> | <b>0.11411</b> | <b>3</b>  |
| Q91ZX7        | AVTDEEPFLIFANR                                                                      | 1.218162736        | 2              | 2.613464  |
| Q91ZX7        | GCHVNECLSR                                                                          | 0.949038603        | 2              | 2.630216  |
| Q91ZX7        | MYDAQQQVGTNK                                                                        | 0.690640939        | 2              | 4.146696  |
| <b>Q920A6</b> | <b>RISC Retinoid_inducible serine carboxypeptidase</b>                              | <b>0.667283156</b> | <b>2.7E-06</b> | <b>2</b>  |
| Q920A6        | DLDTVASDMMVLLK                                                                      | 0.654041311        | 2              | 2.695241  |
| Q920A6        | GLAEVSDIAEQVLNAVNK                                                                  | 0.680764357        | 3              | 5.02439   |
| <b>Q920D2</b> | <b>DYR Dihydrofolate reductase</b>                                                  | <b>1.147452954</b> | <b>0.02508</b> | <b>3</b>  |
| Q920D2        | LIEQPELASK                                                                          | 0.973016402        | 2              | 2.849247  |
| Q920D2        | LLPEYPGVLSEIQEEK                                                                    | 1.187217988        | 2              | 3.457096  |
| Q920D2        | NGDLPWPLLR                                                                          | 1.168870629        | 2              | 3.043258  |
| <b>Q920F5</b> | <b>DCMC Malonyl_CoA decarboxylase_mitochondrial</b>                                 | <b>0.832850127</b> | <b>0.25838</b> | <b>3</b>  |
| Q920F5        | EIAEVTGDPVHESLK                                                                     | 0.746194257        | 2              | 3.268419  |
| Q920F5        | ISECEAVHPVK                                                                         | 0.865059761        | 2              | 3.404402  |
| Q920F5        | WLLGLLNVQ GK                                                                        | 1.081663739        | 2              | 3.261451  |
| <b>Q920J4</b> | <b>TXNL1 Thioredoxin_like protein 1</b>                                             | <b>1.08410023</b>  | <b>0.62897</b> | <b>2</b>  |
| Q920J4        | AGCECLNESDEHGFNDCLR                                                                 | 1.114239387        | 3              | 3.571455  |
| Q920J4        | IDQYQGADAVGLEEK                                                                     | 1.03150137         | 2              | 3.965451  |
| <b>Q920L2</b> | <b>DHSA Succinate dehydrogenase [ubiquinone] flavoprotein subunit_mitochondrial</b> | <b>0.988032071</b> | <b>8.1E-05</b> | <b>20</b> |
| Q920L2        | AAFGLSEAGFNTACTLK                                                                   | 0.805615374        | 2              | 2.373381  |
| Q920L2        | ACALSIAESCRPGDK                                                                     | 0.976142969        | 2              | 2.873477  |
| Q920L2        | AGLPCQDLEFVQFHPTGIYGAGCLITEGCR                                                      | 1.053347937        | 3              | 4.80377   |
| Q920L2        | ANAGEESVMNLDK                                                                       | 0.991124283        | 2              | 3.518165  |
| Q920L2        | DVVSRSMTLEIR+Oxidation(6)                                                           | 0.942650288        | 2              | 2.365701  |
| Q920L2        | GEGGILINSQGER                                                                       | 0.961165912        | 2              | 3.956033  |
| Q920L2        | GVIALCIEDGSIHR                                                                      | 1.225433648        | 2              | 3.21592   |
| Q920L2        | HTLSYVDTK                                                                           | 1.143412482        | 2              | 2.309959  |
| Q920L2        | HVNGQDQIVPGLYACGEAACASVHGANKR                                                       | 0.995973192        | 3              | 6.712187  |
| Q920L2        | IDEYDYSKPIEGQQK                                                                     | 0.887606953        | 2              | 4.472471  |
| Q920L2        | KHTLSYVDTK                                                                          | 0.106925343        | 2              | 2.608169  |
| Q920L2        | NTIIATGGYGR                                                                         | 0.953123472        | 2              | 3.000479  |
| Q920L2        | SMQSHAAVFR+Oxidation(1)                                                             | 1.013489275        | 2              | 2.417603  |
| Q920L2        | TGHSLHLYGR                                                                          | 1.280863204        | 2              | 2.581045  |
| Q920L2        | TLNEADCATVPPAIR                                                                     | 0.894888274        | 2              | 3.639167  |
| Q920L2        | TYFSCTSHTSTGDGTAMVTR                                                                | 1.271022574        | 2              | 5.378039  |
| Q920L2        | VGSVLQEGCEK                                                                         | 0.957006626        | 2              | 3.691905  |
| Q920L2        | VSDAISTQYPVVDHEFDVAVVVGAGGAGLR                                                      | 0.810604805        | 3              | 4.451532  |



|               |                                                                               |                    |                |          |
|---------------|-------------------------------------------------------------------------------|--------------------|----------------|----------|
| Q920L2        | VSQLYGDLQHLK                                                                  | 1.034055126        | 2              | 2.902638 |
| Q920L2        | VTLDYRPVIDK                                                                   | 0.898554781        | 2              | 2.953038 |
| <b>Q920P0</b> | <b>DCXR L_xylulose reductase</b>                                              | <b>0.703686277</b> | <b>9.9E-20</b> | <b>4</b> |
| Q920P0        | AVVQVSQIVAR                                                                   | 0.751472807        | 2              | 3.100543 |
| Q920P0        | GVPGAIVNVSSQASQR                                                              | 0.695070823        | 2              | 5.668148 |
| Q920P0        | STVLALQAAGAQQVAVSR                                                            | 1.127584829        | 2              | 3.833537 |
| Q920P0        | TRELDLSLVR                                                                    | 0.676590911        | 2              | 2.799525 |
| <b>Q921F2</b> | <b>TADBP TAR DNA_binding protein 43</b>                                       | <b>0.946332003</b> | <b>0.00299</b> | <b>3</b> |
| Q921F2        | FGGNPGGFGNQGGFGNSR                                                            | 0.86547442         | 2              | 4.213485 |
| Q921F2        | KDLKTGHSK                                                                     | 0.916906947        | 2              | 2.480493 |
| Q921F2        | TSDLIVLGLPWK                                                                  | 0.951370799        | 2              | 3.120826 |
| <b>Q922F4</b> | <b>TBB6 Tubulin beta_6 chain</b>                                              | <b>1.202902872</b> | <b>9.9E-20</b> | <b>5</b> |
| Q922F4        | ALTVPELTQQMFDAK                                                               | 1.292848135        | 2              | 4.033437 |
| Q922F4        | GHYTEGAELVDSVLDVVR                                                            | 0.966456477        | 2              | 6.553408 |
| Q922F4        | IREEYPDR                                                                      | 0.993116667        | 2              | 2.636642 |
| Q922F4        | MASTFIGNSTAIQELFK                                                             | 1.522026746        | 2              | 3.981064 |
| Q922F4        | NSSYFVEWIPNNVK                                                                | 1.138301521        | 2              | 4.496965 |
| <b>Q922J3</b> | <b>CLIP1 CAP_Gly domain_containing linker protein 1</b>                       | <b>1.030462127</b> | <b>0.02795</b> | <b>3</b> |
| Q922J3        | EMETMQAKLMK+Oxidation(4)                                                      | 1.048302532        | 2              | 2.55292  |
| Q922J3        | LQNELDTLKNNLK                                                                 | 0.793626702        | 2              | 2.316234 |
| Q922J3        | TASESISNLSEAGSVK                                                              | 0.6486396          | 2              | 2.384444 |
| <b>Q923D2</b> |                                                                               | <b>0.816574085</b> | <b>0.0005</b>  | <b>3</b> |
| Q923D2        | LQDVTDDHIR                                                                    | 0.813609474        | 2              | 3.232939 |
| Q923D2        | TGLTTLAQAVQAGYEVTVLVR                                                         | 0.966853278        | 3              | 4.75114  |
| Q923D2        | YVAVMPPHIGDQPLTGAYVTLDGR                                                      | 0.953728437        | 3              | 4.619811 |
| <b>Q923M1</b> | <b>MSRA Mitochondrial peptide methionine sulfoxide reductase</b>              | <b>0.701610519</b> | <b>4.9E-05</b> | <b>2</b> |
| Q923M1        | SAVYPTSAVQMEALK                                                               | 2.647563087        | 2              | 3.193392 |
| Q923M1        | VISAEALPGR                                                                    | 0.701602092        | 2              | 2.429511 |
| <b>Q923V8</b> | <b>SEP15 15 kDa selenoprotein</b>                                             | <b>0.865737403</b> | <b>2.2E-10</b> | <b>3</b> |
| Q923V8        | GCCQEEAQFETK                                                                  | 0.819315605        | 2              | 3.87992  |
| Q923V8        | LLDDNGNIAEELSILK                                                              | 1.020339065        | 2              | 3.227501 |
| Q923V8        | WNTDSVEEFLSEK                                                                 | 1.448986954        | 2              | 3.260803 |
| <b>Q924C3</b> | <b>ENPP1 Ectonucleotide pyrophosphatase/phosphodiesterase family member 1</b> | <b>1.117215947</b> | <b>0.00149</b> | <b>2</b> |
| Q924C3        | AEYLHTWGGLLPVISK                                                              | 1.123831469        | 3              | 3.915133 |
| Q924C3        | SGTYFWPGSDVEIDGILPDIYK                                                        | 1.005507511        | 2              | 4.208027 |
| <b>Q924S5</b> | <b>LONM Lon protease homolog_mitochondrial</b>                                | <b>0.88786762</b>  | <b>0.04053</b> | <b>8</b> |
| Q924S5        | AQLSATVLTLLIK                                                                 | 1.311675842        | 2              | 2.643406 |
| Q924S5        | EHQEALAVR                                                                     | 0.73846315         | 2              | 2.493512 |
| Q924S5        | ELGLEKDDKDAIEEK                                                               | 1.028857017        | 2              | 3.400943 |
| Q924S5        | HVMDVVEELSK                                                                   | 0.991122393        | 2              | 2.449279 |

|               |                                                                         |                    |                |          |
|---------------|-------------------------------------------------------------------------|--------------------|----------------|----------|
| Q924S5        | IVSGEAQTVHVTPENLQDFVGKPVFTVER                                           | 1.185302202        | 3              | 5.975319 |
| Q924S5        | QLEVEPEGLEPEAENK                                                        | 0.994728832        | 2              | 4.358443 |
| Q924S5        | QSDENLDLAR                                                              | 0.815850836        | 2              | 2.492522 |
| Q924S5        | TENPLVLIDEVDK                                                           | 0.986520826        | 2              | 3.306731 |
| <b>Q99020</b> | <b>ROAA Heterogeneous nuclear ribonucleoprotein A/B</b>                 | <b>0.891014047</b> | <b>8E-06</b>   | <b>2</b> |
| Q99020        | FGEVVDCTIK                                                              | 0.745030775        | 2              | 2.919915 |
| Q99020        | IFVGGLNPEATEEK                                                          | 1.012099439        | 2              | 3.604638 |
| <b>Q99JI4</b> | <b>PSMD6 26S proteasome non_ATPase regulatory subunit 6</b>             | <b>0.942499325</b> | <b>0.96148</b> | <b>2</b> |
| Q99JI4        | RLDEELEDAEK                                                             | 0.945568208        | 2              | 2.953217 |
| Q99JI4        | VNEIVETNRPDSK                                                           | 0.931113882        | 2              | 3.476076 |
| <b>Q99L04</b> | <b>DHRS1 Dehydrogenase/reductase SDR family member 1</b>                | <b>0.876783035</b> | <b>0.98358</b> | <b>2</b> |
| Q99L04        | ATAQEAQSLGGR                                                            | 0.876204609        | 2              | 3.306137 |
| Q99L04        | CVPVCDSSQESEVK                                                          | 0.986586164        | 2              | 3.270591 |
| <b>Q99LF4</b> | <b>RTCB tRNA_splicing ligase RtcB homolog</b>                           | <b>1.076267332</b> | <b>0.99052</b> | <b>4</b> |
| Q99LF4        | NLDFQDVLDK                                                              | 0.967209762        | 2              | 2.731571 |
| Q99LF4        | NVTDVVNTCHDAGISK                                                        | 1.026118891        | 2              | 4.2084   |
| Q99LF4        | NYNDELQFLDK                                                             | 1.084593177        | 2              | 3.058101 |
| Q99LF4        | TNLDES DVQPVK                                                           | 1.076312468        | 2              | 3.468498 |
| <b>Q99ML5</b> | <b>PCYOX Prenylcysteine oxidase</b>                                     | <b>0.910734145</b> | <b>0.30636</b> | <b>2</b> |
| Q99ML5        | LLNQTLRENK                                                              | 0.909882407        | 2              | 2.401019 |
| Q99ML5        | NFDPPIEEFNDPYQLVTTLIK                                                   | 0.927776173        | 3              | 3.432255 |
| <b>Q99MR9</b> | <b>PPR3A Protein phosphatase 1 regulatory subunit 3A</b>                | <b>1.118544672</b> | <b>0.06432</b> | <b>2</b> |
| Q99MR9        | DDLGANHPNVDDINK                                                         | 1.125727038        | 2              | 2.443571 |
| Q99MR9        | SRSKEEPLLAPEENK                                                         | 1.109679804        | 2              | 2.457809 |
| <b>Q99MS0</b> | <b>S14L2 SEC14_like protein 2</b>                                       | <b>1.087628554</b> | <b>0.19701</b> | <b>2</b> |
| Q99MS0        | AGEMTEVLPNQR                                                            | 0.86925634         | 2              | 3.111687 |
| Q99MS0        | HISPDQLPVEYGGTMDPDGNPK                                                  | 1.088198142        | 3              | 4.444666 |
| <b>Q99MZ8</b> | <b>LASP1 LIM and SH3 domain protein 1</b>                               | <b>0.889744722</b> | <b>1.2E-14</b> | <b>5</b> |
| Q99MZ8        | GFSVVADTPELQR                                                           | 0.753257964        | 2              | 3.588353 |
| Q99MZ8        | TGDTGMLPANYVEAI                                                         | 1.089207043        | 1              | 2.078625 |
| Q99MZ8        | TQDQISNIK                                                               | 1.004365819        | 2              | 2.460155 |
| Q99MZ8        | YHEEFEK                                                                 | 0.854799349        | 1              | 2.480466 |
| Q99MZ8        | YKEEFEK                                                                 | 0.925103066        | 1              | 2.229951 |
| <b>Q99NA5</b> | <b>IDH3A Isocitrate dehydrogenase [NAD] subunit alpha_mitochondrial</b> | <b>0.931552341</b> | <b>0.51408</b> | <b>2</b> |
| Q99NA5        | ENTEGEYSGIEHVIVDGVVQSIK                                                 | 0.812797015        | 2              | 4.050434 |
| Q99NA5        | NVTAIQGPGGK                                                             | 0.931769076        | 2              | 2.589353 |
| <b>Q99PF5</b> | <b>FUBP2 Far upstream element_binding protein 2</b>                     | <b>0.847826756</b> | <b>8.8E-08</b> | <b>5</b> |
| Q99PF5        | GGGGPGGGPGGGGASGGPSQPPGGGGPGIR                                          | 0.878608379        | 2              | 5.755085 |
| Q99PF5        | IGGDAATTVNNNTPDFGFGGQK                                                  | 0.718430819        | 2              | 4.311572 |
| Q99PF5        | IGQQPQQPGAPPQQDYTK                                                      | 0.8324796          | 2              | 2.534653 |

|               |                                                                                            |                    |                |           |
|---------------|--------------------------------------------------------------------------------------------|--------------------|----------------|-----------|
| Q99PF5        | SVSLTGAPESVQK                                                                              | 0.849724771        | 2              | 3.304205  |
| Q99PF5        | VGGGIDVPVPR                                                                                | 0.739274419        | 2              | 2.397245  |
| <b>Q99PL5</b> | <b>RRBP1 Ribosome_binding protein 1</b>                                                    | <b>0.885015777</b> | <b>1.3E-11</b> | <b>20</b> |
| Q99PL5        | AMEALALAER                                                                                 | 1.271932927        | 2              | 2.394023  |
| Q99PL5        | DALNQATSQVESK                                                                              | 0.92197795         | 2              | 3.547411  |
| Q99PL5        | EAEETQNSLQAECQYR                                                                           | 1.032084666        | 2              | 5.193424  |
| Q99PL5        | EHTSHLEAELEK                                                                               | 0.86922286         | 2              | 3.492528  |
| Q99PL5        | ELESQVSCLEK                                                                                | 0.87664476         | 2              | 2.580797  |
| Q99PL5        | GELESSDQVR                                                                                 | 0.922065634        | 2              | 2.839402  |
| Q99PL5        | HMAAASAECQNYAK                                                                             | 0.832739965        | 2              | 4.177485  |
| Q99PL5        | HMAAASAECQNYAK+Oxidation(1)                                                                | 1.036718742        | 2              | 4.407171  |
| Q99PL5        | LKELESQVSCLEK                                                                              | 1.013730799        | 2              | 3.503247  |
| Q99PL5        | LLATEQEDAAVAK                                                                              | 0.976121917        | 2              | 3.728318  |
| Q99PL5        | LQQENSILR                                                                                  | 1.004874687        | 2              | 2.660317  |
| Q99PL5        | LQSSEVEVK                                                                                  | 0.991261192        | 2              | 2.305017  |
| Q99PL5        | LRAEETQNSLQAECQYR                                                                          | 0.985464705        | 3              | 4.046802  |
| Q99PL5        | QLHLAEAQTK                                                                                 | 1.01416078         | 2              | 2.583905  |
| Q99PL5        | QLLLESQSQLDEAK                                                                             | 0.81658996         | 2              | 2.599088  |
| Q99PL5        | TILAETEGMLK                                                                                | 1.060525857        | 2              | 2.427948  |
| Q99PL5        | TILAETEGMLK+Oxidation(8)                                                                   | 1.060654646        | 2              | 2.314815  |
| Q99PL5        | TLQEQLENGPNQLAR                                                                            | 0.981167434        | 2              | 5.447884  |
| Q99PL5        | TLVSTVGSVMVFSEGEAQR                                                                        | 1.260972778        | 2              | 4.561435  |
| Q99PL5        | VEPAVSSIVNSIQVLASK                                                                         | 1.325253306        | 3              | 3.971125  |
| <b>Q99PV0</b> | <b>PRP8 Pre_mRNA_processing splicing factor 8</b>                                          | <b>0.998897728</b> | <b>0.98825</b> | <b>3</b>  |
| Q99PV0        | AAVMHDILDMMPGK+Oxidation(3)                                                                | 0.998841983        |                | 2.435894  |
| Q99PV0        | AAVMHDILDMMPGK+Oxidation(3)                                                                | 0.998841983        |                | 2.508493  |
| Q99PV0        | KGMLDPLEVHLLDFPNIVIK                                                                       | 1.077922887        | 2              | 2.334692  |
| <b>Q9CPQ1</b> | <b>COX6C Cytochrome c oxidase subunit 6C</b>                                               | <b>0.976322827</b> | <b>0.988</b>   | <b>2</b>  |
| Q9CPQ1        | FGVAEPR                                                                                    | 1.089477489        | 2              | 2.340449  |
| Q9CPQ1        | NYDSMKDFEEMR                                                                               | 0.965519337        | 2              | 3.295806  |
| <b>Q9CQZ5</b> | <b>NDUA6 NADH dehydrogenase [ubiquinone] 1 alpha subcomplex subunit 6</b>                  | <b>0.995087289</b> | <b>0.99479</b> | <b>2</b>  |
| Q9CQZ5        | FFHETETPRPK                                                                                | 1.014634994        | 2              | 2.859283  |
| Q9CQZ5        | VVDLLVIK                                                                                   | 0.982268088        | 2              | 2.487111  |
| <b>Q9CRB9</b> | <b>CHCH3 Coiled_coil_helix_coiled_coil_helix domain_containing protein 3_mitochondrial</b> | <b>1.053623013</b> | <b>0.941</b>   | <b>2</b>  |
| Q9CRB9        | VAEELALEQAK                                                                                | 1.085683944        | 2              | 3.470028  |
| Q9CRB9        | YEYHPVCADLQTK                                                                              | 0.945033988        | 2              | 3.456891  |
| <b>Q9CW42</b> | <b>MOSC1 MOSC domain_containing protein 1_mitochondrial</b>                                | <b>0.933513377</b> | <b>0.44682</b> | <b>2</b>  |
| Q9CW42        | DLLLPIPPATNPLLQCR                                                                          | 0.867552648        | 2              | 4.031782  |
| Q9CW42        | GLSVSEAECTAMGLR                                                                            | 1.002464133        | 2              | 3.794089  |
| <b>Q9CWH6</b> | <b>PSA7L Proteasome subunit alpha type_7_like</b>                                          | <b>0.965032724</b> | <b>2.9E-10</b> | <b>4</b>  |
| Q9CWH6        | AITVFSFDGHLFQVEYAQAVK                                                                      | 1.495328076        | 2              | 4.295112  |

|               |                                                                         |                    |                |          |
|---------------|-------------------------------------------------------------------------|--------------------|----------------|----------|
| Q9CWH6        | ALLEVVQSGGK                                                             | 1.233299112        | 2              | 3.026201 |
| Q9CWH6        | LTVEDPVTVEYITR                                                          | 1.211298223        | 2              | 4.003379 |
| Q9CWH6        | LYQTDPSGTYHAWK                                                          | 1.068477382        | 2              | 2.347267 |
| <b>Q9CWK8</b> | <b>SNX2 Sorting nexin_2</b>                                             | <b>1.018462607</b> | <b>0.88961</b> | <b>4</b> |
| Q9CWK8        | AVNTQALSGAGILR                                                          | 1.09114023         | 2              | 3.160701 |
| Q9CWK8        | QQQFENLDQQLR                                                            | 0.995935379        | 2              | 2.690773 |
| Q9CWK8        | WEDAQITLLK                                                              | 1.033910834        | 2              | 2.640582 |
| Q9CWK8        | YWEAFLPEAK                                                              | 0.904828107        | 2              | 2.609057 |
| <b>Q9CXS4</b> | <b>CENPV Centromere protein V</b>                                       | <b>0.936223377</b> | <b>0.99608</b> | <b>2</b> |
| Q9CXS4        | LLLDTFEYQGLVK                                                           | 0.919413923        | 2              | 3.676038 |
| Q9CXS4        | SVVTEEFNGSDWER                                                          | 0.984005053        | 2              | 3.546664 |
| <b>Q9CYN2</b> | <b>SPCS2 Signal peptidase complex subunit 2</b>                         | <b>0.926186385</b> | <b>0.81973</b> | <b>2</b> |
| Q9CYN2        | LHDSLATER                                                               | 0.846525241        | 2              | 2.65284  |
| Q9CYN2        | YVENFLIDGR                                                              | 0.956432887        | 2              | 2.829926 |
| <b>Q9CZY3</b> | <b>UB2V1 Ubiquitin_conjugating enzyme E2 variant 1</b>                  | <b>0.913184745</b> | <b>0.49047</b> | <b>2</b> |
| Q9CZY3        | LLEELEEGQK                                                              | 0.802238328        | 2              | 2.42698  |
| Q9CZY3        | VNMSGVSSNGVVDPR                                                         | 0.965867155        | 2              | 2.910943 |
| <b>Q9D0M3</b> | <b>CY1 Cytochrome c1_heme protein_mitochondrial</b>                     | <b>1.141368893</b> | <b>6.6E-15</b> | <b>5</b> |
| Q9D0M3        | ALAEVEVQDGPNDGEMFMRPGK                                                  | 1.126713623        | 3              | 3.559956 |
| Q9D0M3        | GLLSSLDHTSIR                                                            | 1.090864041        | 2              | 2.888515 |
| Q9D0M3        | HGGEDYVFSLLTGYCEPPTGVSLR                                                | 1.541234475        | 3              | 5.570314 |
| Q9D0M3        | HLVGVCYTEEEAK                                                           | 0.970784247        | 2              | 3.58469  |
| Q9D0M3        | LSDYFPKYPNPEAAR                                                         | 1.033588133        | 3              | 3.499436 |
| <b>Q9D0S9</b> | <b>HINT2 Histidine triad nucleotide_binding protein 2_mitochondrial</b> | <b>0.959326458</b> | <b>0.90675</b> | <b>2</b> |
| Q9D0S9        | ISQAEDDQQLLGHLLLVAK                                                     | 1.104379563        | 2              | 4.959614 |
| Q9D0S9        | SLPADILYEDQQCLVFR                                                       | 0.940649777        | 2              | 3.445046 |
| <b>Q9D172</b> | <b>ES1 ES1 protein homolog_mitochondrial</b>                            | <b>0.820067114</b> | <b>0.20357</b> | <b>4</b> |
| Q9D172        | GVEVTVGHEQEEGGK                                                         | 0.826264601        | 2              | 3.647312 |
| Q9D172        | ITSLAQLNAAHDAIFPGGFGAAK                                                 | 0.874490382        | 3              | 4.529002 |
| Q9D172        | NLSTFAVDGK                                                              | 1.017190384        | 1              | 2.444968 |
| Q9D172        | NVLAESAR                                                                | 0.860387033        | 1              | 1.943514 |
| <b>Q9D1Q6</b> | <b>ERP44 Endoplasmic reticulum resident protein 44</b>                  | <b>0.97976903</b>  | <b>1.1E-16</b> | <b>4</b> |
| Q9D1Q6        | MNPAVFLSLADLR+Oxidation(0)                                              | 6.417905415        | 2              | 2.695593 |
| Q9D1Q6        | NIIGYFEQK                                                               | 0.894350932        | 1              | 2.296551 |
| Q9D1Q6        | SNPVHEIQSLDEVTLNDR                                                      | 0.912499191        | 2              | 4.967291 |
| Q9D1Q6        | VDCDQHSDIAQR                                                            | 0.964908297        | 2              | 3.821754 |
| <b>Q9D2U9</b> | <b>H2B3A Histone H2B type 3_A</b>                                       | <b>0.923253774</b> | <b>0.01685</b> | <b>5</b> |
| Q9D2U9        | AMGIMNSFVNDIFER                                                         | 0.982076243        | 2              | 4.803142 |
| Q9D2U9        | AMGIMNSFVNDIFER+Oxidation(1)                                            | 0.950974081        | 2              | 4.48539  |
| Q9D2U9        | AMGIMNSFVNDIFER+Oxidation(1)                                            | 0.826612208        |                | 2.960929 |
| Q9D2U9        | AMGIMNSFVNDIFER+Oxidation(4)                                            | 0.936059312        | 2              | 3.665537 |

|               |                                                                                  |                    |                |          |
|---------------|----------------------------------------------------------------------------------|--------------------|----------------|----------|
| Q9D2U9        | LLPGELAK                                                                         | 0.909281607        | 2              | 2.53921  |
| <b>Q9D552</b> | <b>SPT17 Spermatogenesis-associated protein 17</b>                               | <b>0.976137439</b> | <b>0.51865</b> | <b>3</b> |
| Q9D552        | DINEVLEQR                                                                        | 0.97768896         | 2              | 2.541532 |
| Q9D552        | FENDAAMIQSWFR                                                                    | 0.5968894          | 2              | 2.539365 |
| Q9D552        | MNLYNEMAVRIQR+Oxidation(0)                                                       | 0.924883135        | 2              | 2.406679 |
| <b>Q9D6M3</b> | <b>GHC1 Mitochondrial glutamate carrier 1</b>                                    | <b>1.385634919</b> | <b>4.2E-09</b> | <b>2</b> |
| Q9D6M3        | GAAVNLTVTPEK                                                                     | 1.560131509        | 2              | 3.443393 |
| Q9D6M3        | GVNEDTYSGLDCAR                                                                   | 1.214775278        | 2              | 4.474363 |
| <b>Q9D6Y9</b> | <b>GLGB 1_4_alpha_glucan_branching enzyme</b>                                    | <b>1.027113959</b> | <b>6.9E-05</b> | <b>9</b> |
| Q9D6Y9        | CSDGGIYCK                                                                        | 1.132355988        | 1              | 2.147859 |
| Q9D6Y9        | CVAYAESHDAQLVGDK                                                                 | 0.965062502        | 2              | 4.355373 |
| Q9D6Y9        | EFKDEDWNMGIVYTLTNR                                                               | 1.788238298        | 3              | 3.482711 |
| Q9D6Y9        | GTHDLWDSR                                                                        | 1.017970068        | 2              | 2.527989 |
| Q9D6Y9        | IVLSDAAEYGGHQR                                                                   | 1.150540659        | 2              | 4.098411 |
| Q9D6Y9        | IYESHVGISSHEGK                                                                   | 0.876900427        | 2              | 3.068556 |
| Q9D6Y9        | NSEDGLNMFDTSCYFHSQPR                                                             | 1.925989528        | 3              | 3.918929 |
| Q9D6Y9        | QFNLTDDDLLR                                                                      | 0.960159052        | 2              | 2.55812  |
| Q9D6Y9        | WELYIPPK                                                                         | 1.037478984        | 2              | 2.458507 |
| <b>Q9D7B6</b> | <b>ACAD8 Isobutyryl-CoA dehydrogenase_mitochondrial</b>                          | <b>1.032724664</b> | <b>0.34611</b> | <b>3</b> |
| Q9D7B6        | AVIFEDCAVPVANR                                                                   | 0.908462344        | 2              | 3.642513 |
| Q9D7B6        | FASYCLTEPGSGSDAASLLTSAK                                                          | 1.027278782        | 2              | 4.336489 |
| Q9D7B6        | VHQJLEGSNEVMR                                                                    | 1.202075832        | 2              | 2.435715 |
| <b>Q9D819</b> | <b>IPYR Inorganic pyrophosphatase</b>                                            | <b>1.088637042</b> | <b>3.7E-10</b> | <b>4</b> |
| Q9D819        | GISCNMTTVSESPFK                                                                  | 1.272937146        | 2              | 4.205544 |
| Q9D819        | GISCNMTTVSESPFK+Oxidation(4)                                                     | 1.090086926        | 2              | 4.208474 |
| Q9D819        | VLGILAMIDEGETDWK                                                                 | 1.320030346        | 2              | 2.599179 |
| Q9D819        | YVANLFPYK                                                                        | 1.323922736        | 1              | 2.027217 |
| <b>Q9D880</b> | <b>TIM50 Mitochondrial import inner membrane translocase subunit TIM50</b>       | <b>1.513135151</b> | <b>0.00011</b> | <b>2</b> |
| Q9D880        | TIALNQVEDVR                                                                      | 0.546040895        | 2              | 2.569459 |
| Q9D880        | TVLEHYALEDDPLEAFK                                                                | 1.426469264        | 2              | 3.429388 |
| <b>Q9D8V0</b> | <b>HM13 Minor histocompatibility antigen H13</b>                                 | <b>1.043026754</b> | <b>0.10564</b> | <b>2</b> |
| Q9D8V0        | EESTEASASKRLEK                                                                   | 1.186506212        | 2              | 2.734516 |
| Q9D8V0        | SSSDMPETISR                                                                      | 1.042961204        | 2              | 2.806141 |
| <b>Q9DC70</b> | <b>NDU57 NADH dehydrogenase [ubiquinone] iron_sulfur protein 7_mitochondrial</b> | <b>0.977946542</b> | <b>0.10586</b> | <b>2</b> |
| Q9DC70        | LDDLINWAR                                                                        | 0.978877017        | 2              | 3.613633 |
| Q9DC70        | QADVMIVAGTLTNK                                                                   | 1.45370904         | 2              | 2.744044 |
| <b>Q9DCM0</b> | <b>ETHE1 Protein ETHE1_mitochondrial</b>                                         | <b>1.042787521</b> | <b>0.95271</b> | <b>3</b> |
| Q9DCM0        | IFTLPGNCLIYPAHDYHGLTVSTVEER                                                      | 1.053071871        | 3              | 3.315753 |
| Q9DCM0        | SLLPGCQSVISR                                                                     | 1.026253851        | 2              | 3.339358 |
| Q9DCM0        | TDFQQGCAK                                                                        | 1.332298678        | 2              | 2.910632 |
| <b>Q9DCS9</b> | <b>NDUBA NADH dehydrogenase [ubiquinone] 1 beta subcomplex subunit 10</b>        | <b>0.988315731</b> | <b>0.05328</b> | <b>2</b> |

|               |                                                                                  |                    |                |           |
|---------------|----------------------------------------------------------------------------------|--------------------|----------------|-----------|
| Q9DCS9        | AYDLVVDWPVTLVR                                                                   | 0.99303824         | 2              | 4.543563  |
| Q9DCS9        | TPAPSPQTSLPNPITYLTK                                                              | 2.036284818        | 2              | 2.384007  |
| <b>Q9DCT2</b> | <b>NDUS3 NADH dehydrogenase [ubiquinone] iron_sulfur protein 3_mitochondrial</b> | <b>1.084232024</b> | <b>0.29776</b> | <b>4</b>  |
| Q9DCT2        | FDLNSPWEAFPAYR                                                                   | 0.970573863        | 2              | 2.980884  |
| Q9DCT2        | KFDLNSPWEAFPAYR                                                                  | 0.891937399        | 2              | 3.493932  |
| Q9DCT2        | SLADLTAVDVPTR                                                                    | 1.084541348        | 2              | 3.670814  |
| Q9DCT2        | VVAEPVELAQEFR                                                                    | 0.47853957         | 2              | 3.31772   |
| <b>Q9DCU9</b> | <b>HOGA1 Probable 4_hydroxy_2_oxoglutarate aldolase_mitochondrial</b>            | <b>0.876095712</b> | <b>9.9E-20</b> | <b>3</b>  |
| Q9DCU9        | GFVVQGSGTEFPFLTSER                                                               | 0.783769368        | 2              | 5.203297  |
| Q9DCU9        | LIEPNTAVTR                                                                       | 0.874490704        | 2              | 3.05442   |
| Q9DCU9        | TMDWFGYYGGPCR                                                                    | 1.431613895        | 2              | 3.064458  |
| <b>Q9EP75</b> | <b>CP4FE Leukotriene_B4 omega_hydroxylase 3</b>                                  | <b>0.918467509</b> | <b>0.23428</b> | <b>2</b>  |
| Q9EP75        | DEDGKELSDER                                                                      | 0.955587409        | 2              | 3.155837  |
| Q9EP75        | IFNDSTNIMHAK                                                                     | 0.828315998        | 2              | 3.003646  |
| <b>Q9EP89</b> | <b>LACTB Serine beta_lactamase_like protein LACTB_mitochondrial</b>              | <b>1.094362284</b> | <b>1.1E-16</b> | <b>7</b>  |
| Q9EP89        | EVWSEGLGYADVENR                                                                  | 0.906103348        | 2              | 3.553724  |
| Q9EP89        | FENSIESLR                                                                        | 0.939728698        | 2              | 2.494253  |
| Q9EP89        | IKDEVGAPGIVVGVSDGK                                                               | 0.852044437        | 2              | 4.804358  |
| Q9EP89        | KNDFEQGELYLK                                                                     | 1.333531347        | 2              | 2.347702  |
| Q9EP89        | LDLDPVQHYVPEFPEKEYEGEK                                                           | 1.098233462        | 3              | 3.774042  |
| Q9EP89        | LVNTPYVDNSYK                                                                     | 1.308243649        | 2              | 3.073922  |
| Q9EP89        | WAGGGFLSTVGDLLK                                                                  | 1.765421972        | 2              | 4.588952  |
| <b>Q9EPE9</b> | <b>AT131 Probable cation_transporting ATPase 13A1</b>                            | <b>0.953093429</b> | <b>0.30593</b> | <b>2</b>  |
| Q9EPE9        | MAVVGNAVPCGARPGGAR+Oxidation(0)                                                  | 0.952697607        | 2              | 2.824174  |
| Q9EPE9        | VLALGYK                                                                          | 1.24758673         | 2              | 2.331106  |
| <b>Q9EPH2</b> | <b>MRP MARCKS_related protein</b>                                                | <b>0.990438929</b> | <b>0.00792</b> | <b>2</b>  |
| Q9EPH2        | AAATPESQEPQAK                                                                    | 0.991944232        | 2              | 2.423409  |
| Q9EPH2        | GDVTAEEAAGASPAK                                                                  | 0.698525273        | 2              | 2.695908  |
| <b>Q9EPH8</b> | <b>PABP1 Polyadenylate_binding protein 1</b>                                     | <b>0.973723841</b> | <b>0.00038</b> | <b>5</b>  |
| Q9EPH8        | ALDTMNFVVIK                                                                      | 1.287276119        | 2              | 3.220999  |
| Q9EPH8        | EFSPFGTITSAK                                                                     | 0.871605499        | 2              | 2.52382   |
| Q9EPH8        | GFGVFSFER                                                                        | 1.01873779         | 2              | 2.559175  |
| Q9EPH8        | KEFSPFGTITSAK                                                                    | 0.875729078        | 2              | 2.583291  |
| Q9EPH8        | SKVDEAVAVLQAHQAK                                                                 | 0.963628185        | 2              | 5.093401  |
| <b>Q9EQ76</b> | <b>FMO3 Dimethylaniline monooxygenase [N_oxide_forming] 3</b>                    | <b>1.675553841</b> | <b>1.6E-15</b> | <b>12</b> |
| Q9EQ76        | ASIQSVFTNSSK                                                                     | 3.535488364        | 2              | 2.764112  |
| Q9EQ76        | GTCILPSVNDMMDDIDEK                                                               | 2.083641275        | 2              | 4.043437  |
| Q9EQ76        | KEPVFNDELPAR                                                                     | 1.560609339        | 3              | 3.716878  |
| Q9EQ76        | LQEYITSFATEK                                                                     | 2.669061424        | 2              | 3.199283  |
| Q9EQ76        | NNEVTLYK                                                                         | 3.619313477        | 2              | 2.401145  |

|               |                                                             |                    |                |           |
|---------------|-------------------------------------------------------------|--------------------|----------------|-----------|
| Q9EQ76        | NNLPTAISDWWYMK                                              | 1.675553721        | 2              | 2.860033  |
| Q9EQ76        | SCLEEGLEPTCFER                                              | 1.875736546        | 2              | 4.425112  |
| Q9EQ76        | SDDVGGLWK                                                   | 2.435628129        | 2              | 2.712121  |
| Q9EQ76        | VAVIGAGVSGLAAIR                                             | 1.258591443        | 2              | 2.838715  |
| Q9EQ76        | VLVIGLNSGCDIAAELSHVAQQVIISR                                 | 2.500618486        | 3              | 3.86818   |
| Q9EQ76        | VWNDGYPWDMVVITR                                             | 1.320478557        | 2              | 3.954114  |
| Q9EQ76        | YIQFETLVTR                                                  | 2.417949053        | 2              | 3.153888  |
| <b>Q9EQH3</b> | <b>VPS35 Vacuolar protein sorting_associated protein 35</b> | <b>1.029196951</b> | <b>0.54308</b> | <b>4</b>  |
| Q9EQH3        | IREDLPNLESSEETEINK                                          | 1.020211297        | 2              | 5.477065  |
| Q9EQH3        | LNLEHIATSSAVSK                                              | 1.019722191        | 2              | 3.465947  |
| Q9EQH3        | LSQLEGVNVVER                                                | 0.87052172         | 2              | 2.779352  |
| Q9EQH3        | VLETTVEIFNK                                                 | 1.080215506        | 2              | 2.559355  |
| <b>Q9EQS0</b> | <b>TALDO Transaldolase</b>                                  | <b>0.997081886</b> | <b>0.48604</b> | <b>6</b>  |
| Q9EQS0        | ALAGCDFLTISPK                                               | 0.920079469        | 2              | 3.391461  |
| Q9EQS0        | ILDWHVANTDKK                                                | 1.029437736        | 2              | 3.083594  |
| Q9EQS0        | LGGPQEEQIK                                                  | 1.114598165        | 2              | 2.810715  |
| Q9EQS0        | SYEPQEDPGVK                                                 | 0.86359738         | 2              | 2.884957  |
| Q9EQS0        | VSTEVDAR                                                    | 0.897288764        | 1              | 1.926685  |
| Q9EQS0        | WLHNEDQMAVEK                                                | 0.862765402        | 2              | 2.495158  |
| <b>Q9EQX9</b> | <b>UBE2N Ubiquitin_conjugating enzyme E2 N</b>              | <b>0.890204601</b> | <b>0.21238</b> | <b>3</b>  |
| Q9EQX9        | LELFLPEEYPMAAPK                                             | 0.867086013        | 2              | 4.242614  |
| Q9EQX9        | SNEAQAIETAR                                                 | 1.060756034        | 2              | 3.388136  |
| Q9EQX9        | YFHVVIAGPQDSPFEGGTFK                                        | 1.070723282        | 3              | 4.304299  |
| <b>Q9ER34</b> | <b>ACON Aconitate hydratase_mitochondrial</b>               | <b>0.987139129</b> | <b>1.6E-05</b> | <b>18</b> |
| Q9ER34        | ADIANLAEFEK                                                 | 0.926680264        | 2              | 3.016905  |
| Q9ER34        | CTTDHISAAGPWLK                                              | 0.907347177        | 2              | 3.915968  |
| Q9ER34        | DINQEVYNFLATAGAK                                            | 1.565727076        | 2              | 4.354849  |
| Q9ER34        | DLEDLQILIK                                                  | 1.050458647        | 2              | 2.443531  |
| Q9ER34        | FKLEAPDADELPR                                               | 1.018169714        | 3              | 3.969935  |
| Q9ER34        | FNPETDFLTGK                                                 | 1.048672708        | 1              | 2.270272  |
| Q9ER34        | GHLDNISNLLIGAINIENGK                                        | 0.951145277        | 2              | 5.655514  |
| Q9ER34        | IVYGHLDPANQEIER                                             | 1.535100238        | 2              | 4.65566   |
| Q9ER34        | LEAPDADELPR                                                 | 1.02645416         | 2              | 2.513052  |
| Q9ER34        | LTGTLSGWTSFK                                                | 1.057279379        | 2              | 2.86316   |
| Q9ER34        | NAVQEQFGVVPDPTAR                                            | 0.857840532        | 2              | 4.35867   |
| Q9ER34        | NDANPETHAFVTSPEIVTALAIAGTLK                                 | 1.130128915        | 3              | 4.07107   |
| Q9ER34        | QGLLPLTFADPSDYNK                                            | 1.008676353        | 2              | 3.347855  |
| Q9ER34        | SDFDPGQDQTYQHPPK                                            | 1.025606413        | 2              | 2.668009  |
| Q9ER34        | SQFTITPGSEQIR                                               | 0.969475347        | 2              | 3.229641  |
| Q9ER34        | VDVSPTSQR                                                   | 0.891244145        | 2              | 2.451645  |
| Q9ER34        | VGLIGSCTNSSYEDMGR                                           | 1.020246456        | 2              | 4.129498  |
| Q9ER34        | WVIGDENYGEQSSR                                              | 1.128425521        | 2              | 4.312664  |

|               |                                                                            |                    |                |           |
|---------------|----------------------------------------------------------------------------|--------------------|----------------|-----------|
| <b>Q9ES21</b> | <b>SAC1 Phosphatidylinositide phosphatase SAC1</b>                         | <b>0.894624059</b> | <b>0.00188</b> | <b>4</b>  |
| Q9ES21        | GSEKPLEQTFAK                                                               | 0.80284873         | 2              | 2.576208  |
| Q9ES21        | LEEQDEFEK                                                                  | 0.722754826        | 2              | 2.504466  |
| Q9ES21        | TQLGLVMDGFNSLLR                                                            | 0.985860402        | 2              | 3.156574  |
| Q9ES21        | VVTNQEGVFR                                                                 | 0.904996057        | 2              | 2.472775  |
| <b>Q9ES38</b> | <b>S27A5 Bile acyl_CoA synthetase</b>                                      | <b>0.810257557</b> | <b>2.2E-06</b> | <b>11</b> |
| Q9ES38        | ACQAAWALK                                                                  | 0.920601616        | 2              | 2.36709   |
| Q9ES38        | ADVWENFQQR                                                                 | 0.928314151        | 2              | 3.144682  |
| Q9ES38        | EGFDVGVADPLYILDNK                                                          | 0.933389343        | 2              | 5.336772  |
| Q9ES38        | GATAILVLP SK                                                               | 0.919534019        | 1              | 2.092693  |
| Q9ES38        | IQDSLEITNTYK                                                               | 0.82220943         | 2              | 3.541666  |
| Q9ES38        | LKEATIQEDK                                                                 | 0.756045404        | 2              | 2.514682  |
| Q9ES38        | QGFCIPVETGKPGLLLT                                                          | 0.952706875        | 3              | 3.439604  |
| Q9ES38        | SISALSVFLGLAK                                                              | 1.188329089        | 2              | 3.095566  |
| Q9ES38        | SLMPDVYQAVCEGTWK                                                           | 0.845963544        | 2              | 3.852618  |
| Q9ES38        | YLCNVPGQPEDK                                                               | 0.762398269        | 2              | 2.882055  |
| Q9ES38        | YLCNVPGQPEDKK                                                              | 0.763003292        | 2              | 3.075578  |
| <b>Q9ES40</b> | <b>PRAF3 PRA1 family protein 3</b>                                         | <b>1.0000659</b>   | <b>0.36187</b> | <b>2</b>  |
| Q9ES40        | AWDDFFPGSDR                                                                | 1.011564445        | 2              | 2.762496  |
| Q9ES40        | LENKMEGIGLK                                                                | 0.873150613        | 2              | 2.324797  |
| <b>Q9EST6</b> | <b>AN32B Acidic leucine_rich nuclear phosphoprotein 32 family member B</b> | <b>0.944943628</b> | <b>0.07487</b> | <b>3</b>  |
| Q9EST6        | LAEELPSLTHLNLSGNNLK                                                        | 0.951087932        | 2              | 4.149755  |
| Q9EST6        | SLDLFGCEVTNR                                                               | 0.898252002        | 2              | 2.684158  |
| Q9EST6        | TPAAVQELVLDNCK                                                             | 1.491855944        | 2              | 3.611392  |
| <b>Q9ESW0</b> | <b>DDB1 DNA damage_binding protein 1</b>                                   | <b>1.011312796</b> | <b>0.82031</b> | <b>3</b>  |
| Q9ESW0        | IEVQDTSGGTTALRPSASTQALSSSVSSSK                                             | 1.026589633        | 3              | 5.805196  |
| Q9ESW0        | KTEPATGFIDGDLIESFLDISRPK                                                   | 1.14574158         | 3              | 4.380011  |
| Q9ESW0        | QGQGQLVTCGAFK                                                              | 1.021598975        | 2              | 2.793206  |
| <b>Q9HB97</b> | <b>PARVA Alpha_parvin</b>                                                  | <b>0.882150455</b> | <b>0.01057</b> | <b>2</b>  |
| Q9HB97        | LNVAEVTQSEIAQK                                                             | 0.882161513        | 2              | 4.271971  |
| Q9HB97        | QIQEEITGNTEALSGR                                                           | 0.830929501        | 2              | 2.477274  |
| <b>Q9JHL4</b> | <b>DBNL Drebrin_like protein</b>                                           | <b>1.210731233</b> | <b>2.2E-05</b> | <b>2</b>  |
| Q9JHL4        | AMSTTSVSSSQPGK                                                             | 0.699744964        | 2              | 2.355576  |
| Q9JHL4        | TGELEQEVVSR                                                                | 1.219810316        | 2              | 3.02602   |
| <b>Q9JI85</b> | <b>NUCB2 Nucleobindin_2</b>                                                | <b>1.157832436</b> | <b>6E-07</b>   | <b>6</b>  |
| Q9JI85        | FQQGIAPSGPAGELK                                                            | 1.25249069         | 2              | 2.923585  |
| Q9JI85        | LSQELDLVSHK                                                                | 1.083071398        | 2              | 2.321695  |
| Q9JI85        | QEYQQAVQLEQK                                                               | 1.187210319        | 2              | 4.023011  |
| Q9JI85        | QVIEVLETPHFR                                                               | 1.014897606        | 2              | 2.431912  |
| Q9JI85        | TRLDELK                                                                    | 0.721420885        | 1              | 1.903174  |
| Q9JI85        | VHNVEPVESAR                                                                | 1.085994752        | 2              | 2.676739  |
| <b>Q9JI91</b> | <b>ACTN2 Alpha_actinin_2</b>                                               | <b>0.859760351</b> | <b>0.03116</b> | <b>6</b>  |



|               |                                                                 |                    |                |          |
|---------------|-----------------------------------------------------------------|--------------------|----------------|----------|
| Q9JI91        | ETADTDTAEQVIASFR                                                | 0.859761085        | 2              | 3.00439  |
| Q9JI91        | GYEEWLLNEIR                                                     | 0.844118922        | 2              | 3.775782 |
| Q9JI91        | HTNYTMEHIR                                                      | 1.178138908        | 3              | 3.542534 |
| Q9JI91        | KHEAFESDLAAHQDR                                                 | 0.743616709        | 2              | 5.401426 |
| Q9JI91        | QSILAIQNEVEK                                                    | 0.534552229        | 2              | 2.808401 |
| Q9JI91        | TINEVETQILTR                                                    | 0.777993504        | 2              | 2.673617 |
| <b>Q9JIL8</b> | <b>RAD50 DNA repair protein RAD50</b>                           | <b>1.053129073</b> | <b>0.6638</b>  | <b>2</b> |
| Q9JIL8        | KEEQLSSYEDK                                                     | 1.048302532        | 2              | 2.306278 |
| Q9JIL8        | MIELKTEILTK+Oxidation(0)                                        | 1.078170689        | 2              | 2.338447 |
| <b>Q9JJ19</b> | <b>NHRF1 Na( )/H( ) exchange regulatory cofactor NHE_RF1</b>    | <b>0.980598843</b> | <b>9.9E-20</b> | <b>3</b> |
| Q9JJ19        | AVDPDSPAEEASGLR                                                 | 0.738680249        | 2              | 3.159119 |
| Q9JJ19        | LVEVNGENVEK                                                     | 0.685247029        | 2              | 2.426538 |
| Q9JJ19        | SEHTEPPAAADTK                                                   | 1.862818237        | 2              | 3.02143  |
| <b>Q9JJ46</b> | <b>EBP 3_beta_hydroxysteroid_Delta(8)_Delta(7)_isomerase</b>    | <b>0.89833787</b>  | <b>0.34675</b> | <b>2</b> |
| Q9JJ46        | HLTNAQSMLDNK                                                    | 0.933339697        | 2              | 3.14961  |
| Q9JJ46        | HLTNAQSMLDNK+Oxidation(7)                                       | 0.691783655        | 2              | 2.919941 |
| <b>Q9JJ54</b> | <b>HNRPD Heterogeneous nuclear ribonucleoprotein D0</b>         | <b>0.805152076</b> | <b>1.1E-11</b> | <b>2</b> |
| Q9JJ54        | FGDVVDCTLK                                                      | 0.804789299        | 2              | 2.683613 |
| Q9JJ54        | IFVGGLSPDTPEEK                                                  | 0.819611916        | 2              | 4.00692  |
| <b>Q9JJ79</b> | <b>DYHC2 Cytoplasmic dynein 2 heavy chain 1</b>                 | <b>1.064282686</b> | <b>0.82204</b> | <b>5</b> |
| Q9JJ79        | DQIEVMKGNVKS                                                    | 0.898584748        | 2              | 2.313487 |
| Q9JJ79        | LVQSVHQSLAALS                                                   | 0.561133881        | 2              | 2.629113 |
| Q9JJ79        | NCLEEWTKAAGLEK                                                  | 1.066588493        | 2              | 2.560909 |
| Q9JJ79        | TVLRGSGNLLR                                                     | 1.07625267         | 2              | 2.58366  |
| Q9JJ79        | YVVQIGDK                                                        | 1.011261692        | 1              | 2.294213 |
| <b>Q9JJU8</b> | <b>SH3L1 SH3 domain_binding glutamic acid_rich_like protein</b> | <b>1.006887144</b> | <b>0.64332</b> | <b>2</b> |
| Q9JJU8        | GDYDAFFEAR                                                      | 0.977896844        | 2              | 2.836132 |
| Q9JJU8        | QQDVLCFLEANK                                                    | 1.076565283        | 2              | 3.314485 |
| <b>Q9JK38</b> | <b>GNA1 Glucosamine 6_phosphate N_acetyltransferase</b>         | <b>0.937096223</b> | <b>0.072</b>   | <b>4</b> |
| Q9JK38        | GRVEDVVVSDECR                                                   | 0.837328789        | 2              | 3.032683 |
| Q9JK38        | ITLECLPQNVGFYK                                                  | 1.255841241        | 2              | 3.012092 |
| Q9JK38        | VEDVVVSDECR                                                     | 0.956194297        | 2              | 3.153153 |
| Q9JK38        | VLGQLTETGVVSPEQFMK                                              | 1.010494136        | 2              | 2.467033 |
| <b>Q9JLA3</b> | <b>UGGG1 UDP_glucose:glycoprotein glucosyltransferase 1</b>     | <b>0.939010539</b> | <b>0.3697</b>  | <b>5</b> |
| Q9JLA3        | GQYQGLSQDPNLSNLDQDLPNNMIHQVPIK                                  | 0.904371569        | 3              | 5.820751 |
| Q9JLA3        | IVPEWQDYDQEIK                                                   | 0.862331797        | 2              | 3.440546 |
| Q9JLA3        | LGIEGLSLHNILK                                                   | 1.221625018        | 3              | 3.37365  |
| Q9JLA3        | LNIQSETDYAVDIR                                                  | 1.07810282         | 2              | 2.62119  |
| Q9JLA3        | VWQLQDLSFQTAAR                                                  | 1.083049895        | 2              | 4.56084  |

|               |                                                           |                    |                |           |
|---------------|-----------------------------------------------------------|--------------------|----------------|-----------|
| <b>Q9JLJ3</b> | <b>AL9A1 4_trimethylaminobutyraldehyde dehydrogenase</b>  | <b>1.158410885</b> | <b>9.9E-20</b> | <b>17</b> |
| Q9JLJ3        | AGAPNGLFNVVQGAATGQFLCQHR                                  | 1.431990013        | 2              | 3.896283  |
| Q9JLJ3        | ANDTTFGLAAGVFTR                                           | 1.187654029        | 2              | 4.752796  |
| Q9JLJ3        | CQVLLAAR                                                  | 0.943365861        | 2              | 3.123832  |
| Q9JLJ3        | EQGATVLCGGEPYAPEDPK                                       | 0.973622171        | 2              | 4.831931  |
| Q9JLJ3        | EQGATVLCGGEPYAPEDPKLK                                     | 1.039307573        | 3              | 3.403797  |
| Q9JLJ3        | EVNLAVENAK                                                | 0.826293431        | 1              | 2.863234  |
| Q9JLJ3        | GALLANFLTQQVCCNGTR                                        | 1.253258185        | 3              | 4.661617  |
| Q9JLJ3        | GIKPITLLEGGK                                              | 0.966480084        | 3              | 4.028418  |
| Q9JLJ3        | IGDPILLEDTR                                               | 1.093497796        | 2              | 3.913923  |
| Q9JLJ3        | MGPLINAPHLER                                              | 1.066107941        | 2              | 3.084427  |
| Q9JLJ3        | MGPLINAPHLER+Oxidation(0)                                 | 0.867487789        | 2              | 2.823889  |
| Q9JLJ3        | RDEIAIMETINNGK                                            | 1.190073731        | 2              | 5.144137  |
| Q9JLJ3        | SAPALACGNAMIFKPSFPTVSALLAEIYTK                            | 1.22894874         | 3              | 3.977435  |
| Q9JLJ3        | VEPVDASGTEK                                               | 0.903874357        | 2              | 2.312576  |
| Q9JLJ3        | VSFTGSVPTGMK                                              | 1.082532832        | 2              | 3.47068   |
| Q9JLJ3        | VSFTGSVPTGMK+Oxidation(10)                                | 0.937443944        | 2              | 2.656249  |
| Q9JLJ3        | VTIEYSQLK                                                 | 2.298576           | 2              | 2.911028  |
| <b>Q9JLZ3</b> | <b>AUHM Methylglutaconyl_CoA hydratase_ mitochondrial</b> | <b>0.787191009</b> | <b>0.00223</b> | <b>4</b>  |
| Q9JLZ3        | AVGLISHVLEQNQEGDAAAYR                                     | 0.854159329        | 2              | 4.932627  |
| Q9JLZ3        | AVGLISHVLEQNQEGDAAAYRK                                    | 0.797361062        | 3              | 3.944791  |
| Q9JLZ3        | GIVVLGINR                                                 | 0.945511843        | 2              | 2.873643  |
| Q9JLZ3        | SEVPGIFCAGADLK                                            | 0.781277628        | 2              | 2.603277  |
| <b>Q9JM53</b> | <b>AIFM1 Apoptosis inducing factor 1_ mitochondrial</b>   | <b>0.860457751</b> | <b>1E-12</b>   | <b>14</b> |
| Q9JM53        | AIASAAEGGSVPPIR                                           | 0.867943434        | 2              | 2.585572  |
| Q9JM53        | CLIATGGTPR                                                | 0.803867546        | 2              | 2.727941  |
| Q9JM53        | DGEQHEDLNEVAK                                             | 0.994011993        | 2              | 3.591244  |
| Q9JM53        | KSQASGIEVIQLFPEK                                          | 1.062835453        | 2              | 3.515223  |
| Q9JM53        | KVETDHIVTAVGLEPNVELAK                                     | 0.88504835         | 2              | 6.353092  |
| Q9JM53        | LNDGSQITFEK                                               | 0.931853236        | 2              | 3.377095  |
| Q9JM53        | SATEQSGTGIR                                               | 1.625648287        | 2              | 2.347409  |
| Q9JM53        | SITVIGGGFLGSELACALGR                                      | 1.091957042        | 2              | 3.041913  |
| Q9JM53        | SQASGIEVIQLFPEK                                           | 0.975701079        | 2              | 4.257881  |
| Q9JM53        | TGGLEIDSDFGGFR                                            | 0.867990209        | 2              | 3.857955  |
| Q9JM53        | VETDHIVTAVGLEPNVELAK                                      | 0.863940499        | 2              | 4.658452  |
| Q9JM53        | VLIVSEDPPELPMRPLSK                                        | 0.919716503        | 2              | 2.695096  |
| Q9JM53        | VMPNAIVQSVGVSGGK                                          | 1.047477166        | 2              | 2.859402  |
| Q9JM53        | VMPNAIVQSVGVSGGK+Oxidation(1)                             | 0.678759197        | 2              | 3.20344   |
| <b>Q9JMD3</b> | <b>PCTL PCTP_like protein</b>                             | <b>1.027984539</b> | <b>0.99917</b> | <b>5</b>  |
| Q9JMD3        | AVSIQTGYLIQSTGPK                                          | 0.990105301        | 2              | 4.74025   |
| Q9JMD3        | ESVQVPDDQDFR                                              | 0.966888979        | 2              | 2.59228   |

|               |                                                        |                    |                |           |
|---------------|--------------------------------------------------------|--------------------|----------------|-----------|
| Q9JMD3        | MECCDVPAETLYDVLHDIERYR                                 | 1.127539457        | 2              | 4.291899  |
| Q9JMD3        | MECCDVPAETLYDVLHDIERYR+Oxidation(0)                    | 1.041483256        | 3              | 3.768256  |
| Q9JMD3        | WDSNVIETFDIAR                                          | 1.025056543        | 2              | 4.048635  |
| <b>Q9QVC8</b> | <b>FKBP4 Peptidyl_prolyl cis_trans isomerase FKBP4</b> | <b>0.804526746</b> | <b>9.9E-20</b> | <b>5</b>  |
| Q9QVC8        | GEPNNVAGNQAQVK                                         | 0.702298254        | 2              | 3.734932  |
| Q9QVC8        | RGEAHLAVNDFDLAR                                        | 1.329846803        | 3              | 3.367903  |
| Q9QVC8        | TQLAVCQQR                                              | 0.673068386        | 2              | 2.467332  |
| Q9QVC8        | VAENGAQSAPLPLEGVDISPK                                  | 1.004059486        | 2              | 4.044621  |
| Q9QVC8        | VGEVCHITCKPEYAYGSAGSPPK                                | 0.826572128        | 3              | 5.934323  |
| <b>Q9QX79</b> | <b>FETUB Fetuin_B</b>                                  | <b>0.755267206</b> | <b>1.7E-05</b> | <b>2</b>  |
| Q9QX79        | GSIQHLPEQEEPEDSKGK                                     | 0.815979024        | 3              | 3.892594  |
| Q9QX79        | NTAPTSSPSITAPR                                         | 0.755263767        | 2              | 2.880602  |
| <b>Q9QXG4</b> | <b>ACSA Acetyl_coenzyme A synthetase_cytoplasmic</b>   | <b>0.775922746</b> | <b>0.34086</b> | <b>2</b>  |
| Q9QXG4        | AELGMNDSPSQSPPVK                                       | 1.070032212        | 2              | 3.486866  |
| Q9QXG4        | IGPIATPDYIQNAPGLPK                                     | 0.647087554        | 2              | 2.847365  |
| <b>Q9QXQ0</b> | <b>ACTN4 Alpha_actinin_4</b>                           | <b>0.953545955</b> | <b>9.1E-05</b> | <b>25</b> |
| Q9QXQ0        | ACLISLGYDVENDR                                         | 1.138105458        | 2              | 3.161388  |
| Q9QXQ0        | AGTQIENIDEDFR                                          | 1.146460882        | 2              | 3.37348   |
| Q9QXQ0        | AGTQIENIDEDFRDGLK                                      | 1.093558           | 2              | 4.409533  |
| Q9QXQ0        | ASFNFHFDKDHGGALGPEEFK                                  | 1.070427955        | 3              | 3.551919  |
| Q9QXQ0        | DDPVTNLNNAFEVAEK                                       | 0.820132657        | 2              | 2.906906  |
| Q9QXQ0        | ETTDTDADQVIASFK                                        | 0.982338607        | 2              | 4.744575  |
| Q9QXQ0        | GISQEQMQEFR                                            | 1.064303634        | 2              | 3.000239  |
| Q9QXQ0        | HRDYETATLSDIK                                          | 1.120144405        | 2              | 3.743639  |
| Q9QXQ0        | HRPELIEYDK                                             | 0.984180592        | 3              | 3.963071  |
| Q9QXQ0        | HTNYTMEHLR                                             | 1.178138908        | 3              | 3.542534  |
| Q9QXQ0        | ICDQWDNLGSLTHSR                                        | 0.952583224        | 3              | 4.23142   |
| Q9QXQ0        | KDDPVTNLNNAFEVAEK                                      | 0.966144246        | 3              | 4.841766  |
| Q9QXQ0        | LSGSNPYTSVTPQIINSK                                     | 1.239974782        | 2              | 4.534512  |
| Q9QXQ0        | LVSIGAEIIVDGNK                                         | 1.047548827        | 2              | 3.254972  |
| Q9QXQ0        | MAPYQGPDAAPGALDYK                                      | 1.068234836        | 2              | 4.422648  |
| Q9QXQ0        | MAPYQGPDAAPGALDYK+Oxidation(0)                         | 0.867814687        | 2              | 4.274773  |
| Q9QXQ0        | MLDAEDIVNTARPDEK                                       | 1.333499278        | 2              | 3.097188  |
| Q9QXQ0        | MLDAEDIVNTARPDEK+Oxidation(0)                          | 1.270973733        | 2              | 2.603706  |
| Q9QXQ0        | QFASQANMVGPIWQTK                                       | 1.106531167        | 2              | 3.232535  |
| Q9QXQ0        | RDHALLEEQSK                                            | 0.97422204         | 2              | 4.052082  |
| Q9QXQ0        | SIVDYKPNLDLLEQQHQLIQEALIFDNK                           | 1.116537508        | 3              | 4.500773  |
| Q9QXQ0        | TINEVENQILTR                                           | 0.715553428        | 2              | 3.616865  |
| Q9QXQ0        | VGWEQLLTIAR                                            | 0.957959169        | 2              | 4.08855   |
| Q9QXQ0        | VLAGDKNFITAEELR                                        | 2.016383617        | 2              | 2.49605   |
| Q9QXQ0        | VLAVNQENEHLMEDYER                                      | 1.339755747        | 2              | 4.561548  |
| <b>Q9QXT0</b> | <b>CNPY2 Protein canopy homolog 2</b>                  | <b>0.968263489</b> | <b>0.00064</b> | <b>4</b>  |

|               |                                                                   |                    |                |           |
|---------------|-------------------------------------------------------------------|--------------------|----------------|-----------|
| Q9QXT0        | ALVDELEWEIAR                                                      | 0.867015103        | 2              | 4.078684  |
| Q9QXT0        | IDSDISGTLK                                                        | 0.816129275        | 2              | 2.521428  |
| Q9QXT0        | INPDGSQSVVEVPYAR                                                  | 0.989261342        | 2              | 3.942912  |
| Q9QXT0        | TDLCDHALHR                                                        | 0.864343422        | 2              | 2.333884  |
| <b>Q9QXX4</b> | <b>CMC2 Calcium_binding mitochondrial carrier protein Aralar2</b> | <b>0.922593945</b> | <b>9.9E-20</b> | <b>15</b> |
| Q9QXX4        | ASGDAARPFLLQLAESAYR                                               | 1.228830523        | 3              | 4.441804  |
| Q9QXX4        | DVEVTKEEFALAAQK                                                   | 0.944670251        | 2              | 4.440639  |
| Q9QXX4        | FGLGSIAGAVGATAVYPIDLVK                                            | 0.790397339        | 2              | 5.221288  |
| Q9QXX4        | GLLPQLLGVAPEK                                                     | 0.926011567        | 2              | 3.049683  |
| Q9QXX4        | IAPLEEGMLPFNLAEQR                                                 | 1.127399977        | 2              | 4.311089  |
| Q9QXX4        | ITLPAPNPDHVGQYK                                                   | 1.551181402        | 2              | 2.350061  |
| Q9QXX4        | KDVEVTKEEFALAAQK                                                  | 0.980953358        | 2              | 4.542936  |
| Q9QXX4        | LQVAGEITTGPR                                                      | 0.86028186         | 2              | 3.464944  |
| Q9QXX4        | LTVNDFVR                                                          | 1.104319167        | 2              | 2.592443  |
| Q9QXX4        | NGEFFMSPHDFVTR                                                    | 1.206741911        | 2              | 3.614104  |
| Q9QXX4        | SSPQFGVTLTYELLQR                                                  | 1.789237369        | 2              | 4.179051  |
| Q9QXX4        | STGSFVGELMYK                                                      | 0.990294608        | 2              | 2.773062  |
| Q9QXX4        | TVELLSGVVDQTK                                                     | 0.85807254         | 2              | 4.100215  |
| Q9QXX4        | YEGFFGLYR                                                         | 0.991147992        | 1              | 2.228602  |
| Q9QXX4        | YLNIFGESQPNPK                                                     | 0.826775086        | 2              | 4.552802  |
| <b>Q9QY44</b> | <b>ABCD2 ATP_binding cassette sub_family D member 2</b>           | <b>1.282092349</b> | <b>0.00939</b> | <b>2</b>  |
| Q9QY44        | EGGWDAVMDWKDVLSSGGEK+Oxidation(7)                                 | 1.116831147        | 2              | 2.742043  |
| Q9QY44        | VLKACSPKFGTLVAEEAHR                                               | 1.986436861        | 2              | 2.442595  |
| <b>Q9QYU4</b> | <b>CRYM Thiomorpholine_carboxylate dehydrogenase</b>              | <b>0.88946568</b>  | <b>0.01954</b> | <b>2</b>  |
| Q9QYU4        | GFLGVMPAYSAAEDALTTK                                               | 1.04943455         | 2              | 2.538795  |
| Q9QYU4        | SSSLIPPLEAALANFSK                                                 | 0.81156605         | 2              | 2.40248   |
| <b>Q9QZ09</b> | <b>PHTF1 Putative homeodomain transcription factor 1</b>          | <b>1.383559319</b> | <b>4E-06</b>   | <b>2</b>  |
| Q9QZ09        | KMDMSVLEISGIIMSR+Oxidation(1)                                     | 0.782376975        |                | 2.786609  |
| Q9QZ09        | MGHIKPDLDVLDLIRGSTFAK+Oxidation(0)                                | 1.391234944        | 2              | 2.433168  |
| <b>Q9QZ76</b> | <b>MYG Myoglobin</b>                                              | <b>0.791029705</b> | <b>0.998</b>   | <b>4</b>  |
| Q9QZ76        | GQHAAEIQLAQSHATK                                                  | 0.908447484        | 2              | 5.104966  |
| Q9QZ76        | HGCTVLTALGTILK                                                    | 0.775953322        | 2              | 3.089586  |
| Q9QZ76        | KGQHAAEIQLAQSHATK                                                 | 0.64398501         | 4              | 5.424273  |
| Q9QZ76        | VEGDLAGHGQEVLSLFK                                                 | 0.673029793        | 3              | 5.314981  |
| <b>Q9QZA2</b> | <b>PDC6I Programmed cell death 6_interacting protein</b>          | <b>1.068964056</b> | <b>0.91526</b> | <b>7</b>  |
| Q9QZA2        | ATLVKPTPVNVPISQK                                                  | 1.054197538        | 2              | 3.449319  |
| Q9QZA2        | DTIALLCKPEPELNAAIPSANPAK                                          | 1.089435731        | 2              | 3.211684  |
| Q9QZA2        | FYNELTEILVR                                                       | 0.883581351        | 2              | 2.960599  |
| Q9QZA2        | LLDEEEATDNDLR                                                     | 0.952033827        | 2              | 3.597755  |
| Q9QZA2        | NIQVSHQEFQSK                                                      | 1.030272801        | 2              | 3.024239  |

|               |                                                                         |                    |                |          |
|---------------|-------------------------------------------------------------------------|--------------------|----------------|----------|
| Q9QZA2        | NLATAYDNFVELVANLK                                                       | 1.017151675        | 3              | 3.589597 |
| Q9QZA2        | STAVVEQGGIQTVDQLIK                                                      | 0.962033498        | 2              | 3.87014  |
| <b>Q9QZD8</b> | <b>DIC Mitochondrial dicarboxylate carrier</b>                          | <b>0.925257866</b> | <b>0.11842</b> | <b>4</b> |
| Q9QZD8        | GALVTVGQLSCYDQAK                                                        | 0.877417137        | 2              | 3.824465 |
| Q9QZD8        | NYSHALDGLYR                                                             | 0.980081474        | 2              | 2.725634 |
| Q9QZD8        | VHLQTQQEVK                                                              | 0.840402555        | 1              | 2.760561 |
| Q9QZD8        | VLLGGISGLTGGFVGTADLVNVR                                                 | 0.912362951        | 2              | 5.712021 |
| <b>Q9QZH8</b> | <b>AAAD Arylacetamide deacetylase</b>                                   | <b>1.157559789</b> | <b>7.5E-05</b> | <b>2</b> |
| Q9QZH8        | LDVVVSTDYGLAPK                                                          | 1.211179034        | 2              | 3.972656 |
| Q9QZH8        | WFLQEDILEK                                                              | 1.107677204        | 2              | 3.350094 |
| <b>Q9QZU7</b> | <b>BODG Gamma_butyrobetaine dioxygenase</b>                             | <b>1.659583425</b> | <b>2E-14</b>   | <b>5</b> |
| Q9QZU7        | DNCQCSDCYLHSAK                                                          | 1.570339541        | 2              | 2.909052 |
| Q9QZU7        | IDANNVAYTTGK                                                            | 1.715712988        | 2              | 3.262721 |
| Q9QZU7        | IIELDKQVVR                                                              | 1.28087573         | 2              | 2.425088 |
| Q9QZU7        | MNPGDVITFDNWR                                                           | 1.049971139        | 2              | 2.57743  |
| Q9QZU7        | QTVTGGDSEIVDGFNVCK                                                      | 1.084038098        | 2              | 4.423891 |
| <b>Q9QZX8</b> | <b>SO1B2 Solute carrier organic anion transporter family member 1B2</b> | <b>1.335353732</b> | <b>3.5E-08</b> | <b>2</b> |
| Q9QZX8        | GIGETPIVPLGISYLDFAK                                                     | 1.440395688        | 2              | 3.737144 |
| Q9QZX8        | QFTDEGNPDSVVK                                                           | 1.267154364        | 2              | 3.410762 |
| <b>Q9R063</b> | <b>PRDX5 Peroxiredoxin_5_mitochondrial</b>                              | <b>0.866118081</b> | <b>9.9E-20</b> | <b>9</b> |
| Q9R063        | ALNVEPDGTGLTCSLAPNILSQL                                                 | 1.093307065        | 2              | 3.7077   |
| Q9R063        | ETDLLLDDSLVSLFGNR                                                       | 0.880398346        | 2              | 4.407073 |
| Q9R063        | GVLFVPGAFTPGCSK                                                         | 0.812414546        | 2              | 4.177969 |
| Q9R063        | KGVLFGVPGAFTPGCSK                                                       | 0.868993198        | 2              | 3.106069 |
| Q9R063        | THLPGFVEQAGALK                                                          | 0.779240653        | 3              | 3.977988 |
| Q9R063        | VGDTIPSVEVFEGEPGK                                                       | 0.782246321        | 2              | 4.235331 |
| Q9R063        | VGDTIPSVEVFEGEPGKK                                                      | 0.863852901        | 2              | 3.688788 |
| Q9R063        | VNLAELFK                                                                | 0.865527823        | 2              | 2.82648  |
| Q9R063        | VQLLADPTGAFGK                                                           | 0.871008224        | 2              | 4.035326 |
| <b>Q9R0N0</b> | <b>GALK1 Galactokinase</b>                                              | <b>0.823996903</b> | <b>0.06482</b> | <b>5</b> |
| Q9R0N0        | AEHSFAGVPCGIMDQLIALLGQK                                                 | 0.903481383        | 3              | 4.34018  |
| Q9R0N0        | RQCEEVAQALGK                                                            | 0.965570382        | 2              | 2.818537 |
| Q9R0N0        | SLETSLVPLSDPK                                                           | 0.785719477        | 2              | 2.694597 |
| Q9R0N0        | TDGLVSLTTSK                                                             | 0.853195813        | 2              | 3.598156 |
| Q9R0N0        | VEELLAEAR                                                               | 0.829148584        | 2              | 2.656608 |
| <b>Q9R0T3</b> | <b>DNJC3 DnaJ homolog subfamily C member 3</b>                          | <b>1.079834073</b> | <b>0.07892</b> | <b>5</b> |
| Q9R0T3        | AEPSVAEYTVR                                                             | 1.050533839        | 2              | 3.021717 |
| Q9R0T3        | FDDGEDPLDAETQGGGSPFHR                                                   | 1.094506413        | 3              | 3.579365 |
| Q9R0T3        | ICSEVLQLEPDNVNALK                                                       | 1.206205055        | 2              | 4.955377 |
| Q9R0T3        | KFDDGEDPLDAETQGGGSPFHR                                                  | 1.036320577        | 3              | 5.367971 |
| Q9R0T3        | SNPSENEEKEAQSQLVK                                                       | 0.924948007        | 2              | 4.646805 |
| <b>Q9R112</b> | <b>SQRD Sulfide:quinone oxidoreductase_mitochondrial</b>                | <b>1.289867091</b> | <b>0.02608</b> | <b>4</b> |

|               |                                                                  |                    |                |          |
|---------------|------------------------------------------------------------------|--------------------|----------------|----------|
| Q9R112        | EGNALFTFPNTPVK                                                   | 1.891802584        | 2              | 2.567956 |
| Q9R112        | STLSVIPSGVQWIQDR                                                 | 1.44297228         | 2              | 2.391535 |
| Q9R112        | TAAAVAAQSGILDR                                                   | 1.097132463        | 2              | 2.335433 |
| Q9R112        | VGAENVAIVEPSEK                                                   | 1.098023999        | 2              | 2.324897 |
| <b>Q9R1T3</b> | <b>CATZ Cathepsin Z</b>                                          | <b>0.839986149</b> | <b>0.02916</b> | <b>2</b> |
| Q9R1T3        | HGIPDETCNNYQAK                                                   | 0.840045291        | 2              | 3.900777 |
| Q9R1T3        | VGDYGSLSGR                                                       | 0.811321793        | 2              | 2.552134 |
| <b>Q9R1Z0</b> | <b>VDAC3 Voltage_dependent anion_selective channel protein 3</b> | <b>0.97220831</b>  | <b>0.01502</b> | <b>3</b> |
| Q9R1Z0        | LTLSALVDGK                                                       | 1.845732153        | 2              | 2.63151  |
| Q9R1Z0        | LTVDTIFVPNTGK                                                    | 0.922786984        | 2              | 3.086001 |
| Q9R1Z0        | VNNASLIGLGYTQSLRPGVK                                             | 1.10031573         | 2              | 3.917221 |
| <b>Q9R257</b> | <b>HEBP1 Heme_binding protein 1</b>                              | <b>1.207322923</b> | <b>0.00547</b> | <b>2</b> |
| Q9R257        | FATVEVTDKPVDEALR                                                 | 1.203123482        | 2              | 2.706884 |
| Q9R257        | NSLFGSVETWPWQVLSTGGK                                             | 1.190900525        | 2              | 3.743525 |
| <b>Q9WTR8</b> | <b>PHLP1 PH domain leucine_rich repeat protein phosphatase 1</b> | <b>0.916317931</b> | <b>0.56756</b> | <b>2</b> |
| Q9WTR8        | LEELEEDISGNK                                                     | 0.62146799         | 2              | 2.716123 |
| Q9WTR8        | LEELEEDISGNKLK                                                   | 0.921115125        | 2              | 2.316741 |
| <b>Q9WTT6</b> | <b>GUAD Guanine deaminase</b>                                    | <b>1.081122914</b> | <b>0.90632</b> | <b>7</b> |
| Q9WTT6        | EIGNFEVKGDFDALLINPR                                              | 0.908287007        | 2              | 3.537149 |
| Q9WTT6        | ETTEESVKETER                                                     | 0.940367549        | 2              | 3.239579 |
| Q9WTT6        | FQSTDVAEEVYTR                                                    | 1.081388226        | 2              | 3.585751 |
| Q9WTT6        | IVFLEESSQKEK                                                     | 1.123536161        | 2              | 3.757311 |
| Q9WTT6        | NIEEVYVGGK                                                       | 1.259523917        | 1              | 1.932361 |
| Q9WTT6        | NYTDVYDKNLLTNK                                                   | 0.999013263        | 2              | 4.372304 |
| Q9WTT6        | VCMDLNNTVPEYK                                                    | 1.108981665        | 2              | 3.7372   |
| <b>Q9WTV5</b> | <b>PSMD9 26S proteasome non_ATPase regulatory subunit 9</b>      | <b>0.973328541</b> | <b>0.08096</b> | <b>2</b> |
| Q9WTV5        | ADVDLYQVR                                                        | 1.625897879        | 2              | 2.620523 |
| Q9WTV5        | RKEEIEAQIK                                                       | 0.840757395        | 3              | 3.329694 |
| <b>Q9WU19</b> | <b>HAOX1 Hydroxyacid oxidase 1</b>                               | <b>0.756111284</b> | <b>9.9E-20</b> | <b>7</b> |
| Q9WU19        | AVFVGRPIIWGLAFQGEK                                               | 1.352652291        | 3              | 3.389856 |
| Q9WU19        | GVQDVLEILK                                                       | 0.811070595        | 1              | 2.007855 |
| Q9WU19        | GVQDVLEILKEEFR                                                   | 0.752491068        | 2              | 4.049794 |
| Q9WU19        | HGVDGILVSNHGAR                                                   | 0.790532539        | 3              | 5.176381 |
| Q9WU19        | NFETNDLAFSPK                                                     | 0.838354173        | 2              | 2.947986 |
| Q9WU19        | NVADIDLSTSVLGQR                                                  | 0.80004956         | 2              | 4.974604 |
| Q9WU19        | VEVFLDGGVR                                                       | 1.026103236        | 2              | 2.906112 |
| <b>Q9WU82</b> | <b>CTNB1 Catenin beta_1</b>                                      | <b>0.88637218</b>  | <b>0.01285</b> | <b>4</b> |
| Q9WU82        | AGDREDITEPAICALR                                                 | 0.899748917        | 2              | 2.376073 |
| Q9WU82        | HQEAEMAQNAVR                                                     | 0.858584079        | 2              | 3.240118 |
| Q9WU82        | LLNDEDQVVVVK                                                     | 0.886247985        | 2              | 3.15532  |
| Q9WU82        | TMQNTNDVETAR                                                     | 0.698899706        | 2              | 3.089158 |

|               |                                                                  |                    |                |           |
|---------------|------------------------------------------------------------------|--------------------|----------------|-----------|
| <b>Q9WUC4</b> | <b>ATOX1 Copper transport protein ATOX1</b>                      | <b>1.194798247</b> | <b>8.5E-08</b> | <b>4</b>  |
| Q9WUC4        | LGGVEFNIDLPNK                                                    | 1.015225876        | 2              | 2.839043  |
| Q9WUC4        | LGGVEFNIDLPNKK                                                   | 1.12409762         | 3              | 3.33666   |
| Q9WUC4        | VCIESEHSSDILLATLNK                                               | 1.191579417        | 2              | 5.479169  |
| Q9WUC4        | VLNKLGGVEFNIDLPNK                                                | 0.979070546        | 2              | 2.314406  |
| <b>Q9WUJ8</b> | <b>ORC6 Origin recognition complex subunit 6</b>                 | <b>0.896608573</b> | <b>0.8427</b>  | <b>2</b>  |
| Q9WUJ8        | LSGLNKMMYQSQLK+Oxidation(6)                                      | 0.896608573        | 2              | 2.31794   |
| Q9WUJ8        | LSGLNKMMYQSQLK+Oxidation(7)                                      | 0.896608573        | 2              | 2.375822  |
| <b>Q9WUS0</b> | <b>KAD4 Adenylate kinase isoenzyme 4_ mitochondrial</b>          | <b>0.741139096</b> | <b>9.9E-20</b> | <b>4</b>  |
| Q9WUS0        | AVILGPPGSGK                                                      | 0.625129941        | 2              | 2.392797  |
| Q9WUS0        | GVLHQFSGTETNR                                                    | 0.785798567        | 2              | 3.179753  |
| Q9WUS0        | TLVQAEALDR                                                       | 0.623078341        | 2              | 2.751311  |
| Q9WUS0        | VYNLDFNPPQVLGVDDITGEPLVQQEDDKPEALAAR                             | 0.945333359        | 3              | 5.107171  |
| <b>Q9WVC0</b> | <b>SEPT7 Septin_7</b>                                            | <b>1.013707349</b> | <b>0.37183</b> | <b>2</b>  |
| Q9WVC0        | NLEGVYGFANLPNQVYR                                                | 0.86304829         | 2              | 3.740113  |
| Q9WVC0        | STLINSFLTDLYSPEYGPSPHR                                           | 1.015340217        | 3              | 3.375935  |
| <b>Q9WVF7</b> | <b>DPOE1 DNA polymerase epsilon catalytic subunit A</b>          | <b>0.605561952</b> | <b>0.00263</b> | <b>2</b>  |
| Q9WVF7        | AANMPDSELFELISENR                                                | 0.604164016        | 2              | 2.301883  |
| Q9WVF7        | MAWQWRGEFMPASR+Oxidation(0)                                      | 0.666268464        |                | 2.44538   |
| <b>Q9WVK3</b> | <b>PECR Peroxisomal trans_2_ enoyl_ CoA reductase</b>            | <b>0.852627342</b> | <b>9.9E-20</b> | <b>11</b> |
| Q9WVK3        | AGVYNLTK                                                         | 0.909779851        | 2              | 2.539975  |
| Q9WVK3        | ASQPPSSSTQVTAIQCNR                                               | 0.883914871        | 2              | 5.49192   |
| Q9WVK3        | DHGGIVNIIVLLNNGFPTAAHSGAAR                                       | 1.102620023        | 3              | 5.98571   |
| Q9WVK3        | ELLHLGCNVVIASR                                                   | 0.805388898        | 2              | 3.905399  |
| Q9WVK3        | INFLVNNAGGQFMAPAEDITAK                                           | 1.12661042         | 2              | 5.524289  |
| Q9WVK3        | KEEEVNNLVK                                                       | 0.783666329        | 3              | 3.988356  |
| Q9WVK3        | LTAAVDELK                                                        | 1.192745391        | 2              | 3.072181  |
| Q9WVK3        | NFTIPDHDNWPVAGDSSFIK                                             | 0.709630965        | 2              | 5.143161  |
| Q9WVK3        | SGQSYLAAGLLQNQVAVVTGGATGIGK                                      | 0.941703511        | 2              | 6.003706  |
| Q9WVK3        | TMALTWASSGVR                                                     | 1.177758507        | 2              | 3.388549  |
| Q9WVK3        | TMALTWASSGVR+Oxidation(1)                                        | 0.758500019        | 2              | 2.938118  |
| <b>Q9WVK7</b> | <b>HCDH Hydroxyacyl_ coenzyme A dehydrogenase_ mitochondrial</b> | <b>0.837777158</b> | <b>9.9E-20</b> | <b>12</b> |
| Q9WVK7        | AADEFVEK                                                         | 0.855000146        | 2              | 3.174679  |
| Q9WVK7        | DTPGFIVNR                                                        | 0.745714748        | 2              | 2.32094   |
| Q9WVK7        | EDIDTAMK                                                         | 0.646117298        | 1              | 2.161886  |
| Q9WVK7        | FAAEHTIFASNTSSLQITNIANATTR                                       | 1.457319447        | 3              | 4.210552  |
| Q9WVK7        | FILDGWHEMDPENPLFQPSMNNLVAQK                                      | 0.658205126        | 3              | 5.341331  |
| Q9WVK7        | GDASKEDIDTAMK                                                    | 0.716329013        | 2              | 3.471156  |
| Q9WVK7        | GDASKEDIDTAMK+Oxidation(11)                                      | 0.889884773        | 2              | 3.246618  |
| Q9WVK7        | HVTVIGGLMGAGIAQVAAATGHTVVLVDQTEDILAK                             | 0.824048672        | 4              | 5.136415  |
| Q9WVK7        | KGIEESLKR                                                        | 0.78140976         | 2              | 2.786056  |

|               |                                                                           |                    |                |           |
|---------------|---------------------------------------------------------------------------|--------------------|----------------|-----------|
| Q9WVK7        | LKNELFQR                                                                  | 0.981722229        | 2              | 2.631053  |
| Q9WVK7        | LLVPYLIEAIR                                                               | 1.339622016        | 2              | 2.447847  |
| Q9WVK7        | TFESLVDFCK                                                                | 0.83491435         | 2              | 3.394188  |
| <b>Q9Z0N2</b> | <b>IF2H Eukaryotic translation initiation factor 2 subunit 3_Y_linked</b> | <b>0.930901573</b> | <b>0.97473</b> | <b>3</b>  |
| Q9Z0N2        | IVLTNPVCTEVEGK                                                            | 0.92128128         | 2              | 3.240149  |
| Q9Z0N2        | SFDVKNKPGCEVDDLK                                                          | 0.914753656        | 2              | 3.05022   |
| Q9Z0N2        | VGQEIEVRPGIVSK                                                            | 0.940178272        | 2              | 3.05574   |
| <b>Q9Z0U5</b> | <b>ADO Aldehyde oxidase</b>                                               | <b>0.519512718</b> | <b>3E-12</b>   | <b>8</b>  |
| Q9Z0U5        | CTGYRPIIDACK                                                              | 0.354406356        | 2              | 2.665351  |
| Q9Z0U5        | DLEPLILTIEEAIQHK                                                          | 1.173972347        | 2              | 2.789691  |
| Q9Z0U5        | ELSILYGGVGPPTIGAK                                                         | 0.518375624        | 2              | 3.799639  |
| Q9Z0U5        | GTSTETVPNTNASGGSVVADNLGLAVK                                               | 0.51659794         | 2              | 4.603137  |
| Q9Z0U5        | KLECGNVDEAFK                                                              | 0.488681465        | 2              | 3.42765   |
| Q9Z0U5        | LVLDEVTLAGSAPGGK                                                          | 0.448183054        | 2              | 3.2858    |
| Q9Z0U5        | MTWISPVTLEELVEAK                                                          | 0.668568908        | 2              | 3.200564  |
| Q9Z0U5        | VVENNVDPPEMMLLPYLR                                                        | 0.672797571        | 2              | 2.531185  |
| <b>Q9Z0V5</b> | <b>PRDX4 Peroxiredoxin_4</b>                                              | <b>0.870103479</b> | <b>1.2E-15</b> | <b>4</b>  |
| Q9Z0V5        | ENECHFYAGGQVYPGEVSR                                                       | 0.876707641        | 3              | 4.570931  |
| Q9Z0V5        | GLFIIDDK                                                                  | 0.994516199        | 2              | 3.118104  |
| Q9Z0V5        | QITLNDLPVGR                                                               | 0.834129924        | 2              | 3.085922  |
| Q9Z0V5        | TRENECHFYAGGQVYPGEVSR                                                     | 1.008903493        | 3              | 5.810099  |
| <b>Q9Z0V6</b> | <b>PRDX3 Thioredoxin_dependent peroxide reductase_mitochondrial</b>       | <b>0.94753192</b>  | <b>0.5885</b>  | <b>4</b>  |
| Q9Z0V6        | AFQFVETHGEVCPANWTPESPTIKPSPTASK                                           | 1.028187202        | 3              | 6.444004  |
| Q9Z0V6        | GLFIIDPNGVIK                                                              | 0.949176347        | 2              | 3.126246  |
| Q9Z0V6        | GTAVVNGEFK                                                                | 0.983621806        | 2              | 2.407655  |
| Q9Z0V6        | HLSVNDLPVGR                                                               | 0.874652357        | 2              | 2.800171  |
| <b>Q9Z122</b> | <b>FADS2 Fatty acid desaturase 2</b>                                      | <b>0.80949375</b>  | <b>0.03884</b> | <b>2</b>  |
| Q9Z122        | AFHLDLDFVGK                                                               | 0.829762883        | 3              | 3.605964  |
| Q9Z122        | HGIEYQEKPLLR                                                              | 0.624757247        | 3              | 3.633338  |
| <b>Q9Z1A6</b> | <b>VIGLN Vigilin</b>                                                      | <b>1.031054319</b> | <b>0.68449</b> | <b>17</b> |
| Q9Z1A6        | ASVITQVFHVPLEER                                                           | 1.155943192        | 2              | 2.957259  |
| Q9Z1A6        | DKFPEVIINFDPDAQK                                                          | 0.89056615         | 3              | 3.477537  |
| Q9Z1A6        | DLANIAEVEVSIPAK                                                           | 1.060837474        | 2              | 2.336405  |
| Q9Z1A6        | EALEALVPVTIEVEVPFDLHR                                                     | 1.084270532        | 2              | 3.174293  |
| Q9Z1A6        | GNSLQEILER                                                                | 1.150068386        | 2              | 2.834247  |
| Q9Z1A6        | IDLPAENSNSSETIVITGK                                                       | 1.026803799        | 2              | 5.205644  |
| Q9Z1A6        | IEGDPQGVQQAQK                                                             | 1.018864441        | 2              | 3.600262  |
| Q9Z1A6        | IQIPRPDDPSNQIK                                                            | 0.98310541         | 2              | 2.853973  |
| Q9Z1A6        | ITLEGPTEDVNVAQEQIEGMVK                                                    | 1.263510071        | 2              | 2.723991  |
| Q9Z1A6        | IVGELEQMVSEDPVLDHR                                                        | 1.04408496         | 2              | 3.993789  |
| Q9Z1A6        | LQDLELK                                                                   | 1.095353367        | 1              | 2.362921  |
| Q9Z1A6        | LQTQASATVPIPK                                                             | 1.032982688        | 2              | 3.505463  |



|               |                                                                           |                    |                |           |
|---------------|---------------------------------------------------------------------------|--------------------|----------------|-----------|
| Q9Z1A6        | LVGEIMQETGTR                                                              | 1.001634782        | 2              | 3.483627  |
| Q9Z1A6        | RCDIIVISGR                                                                | 0.995325387        | 2              | 2.761325  |
| Q9Z1A6        | TGAHLELSLAK                                                               | 1.194781118        | 3              | 3.41978   |
| Q9Z1A6        | TGVSVEIPPSDSISETVILR                                                      | 1.108292971        | 2              | 2.634761  |
| Q9Z1A6        | VKELQAEQEDR                                                               | 1.117814367        | 3              | 3.411653  |
| <b>Q9Z1J8</b> | <b>S14L3 SEC14_like protein 3</b>                                         | <b>0.836323956</b> | <b>0.00303</b> | <b>3</b>  |
| Q9Z1J8        | ENVQDVLPALPNPDDYFLLR                                                      | 0.932246137        | 2              | 3.204896  |
| Q9Z1J8        | FRENVQDVLPALPNPDDYFLLR                                                    | 0.79697975         | 2              | 4.413899  |
| Q9Z1J8        | GSSHQVEYEILFPGCVLR                                                        | 0.815637919        | 2              | 4.310538  |
| <b>Q9Z1M9</b> | <b>SMC1A Structural maintenance of chromosomes protein 1A</b>             | <b>0.953584499</b> | <b>0.70605</b> | <b>2</b>  |
| Q9Z1M9        | EIKEKDESELNQK                                                             | 0.962291071        | 2              | 2.318438  |
| Q9Z1M9        | MDKVEDELKEK                                                               | 0.921843158        | 2              | 2.365237  |
| <b>Q9Z1W6</b> | <b>LYRIC Protein LYRIC</b>                                                | <b>0.876389489</b> | <b>0.02656</b> | <b>3</b>  |
| Q9Z1W6        | KREEVTPPTAPEDPAQLK                                                        | 1.034274494        | 3              | 3.473717  |
| Q9Z1W6        | SWQDELAQQAEEGSAR                                                          | 0.86551282         | 2              | 5.594696  |
| Q9Z1W6        | TELGLDLGLEPK                                                              | 0.916879157        | 2              | 3.013438  |
| <b>Q9Z269</b> | <b>VAPB Vesicle_associated membrane protein_associated protein B</b>      | <b>0.9740364</b>   | <b>0.40184</b> | <b>2</b>  |
| Q9Z269        | TEAPVAAKPLTSPLDDAEVKK                                                     | 0.832684951        | 3              | 3.455758  |
| Q9Z269        | VEQVLSLEPQHELK                                                            | 0.975120903        | 2              | 3.784723  |
| <b>Q9Z277</b> | <b>BAZ1B Tyrosine_protein kinase BAZ1B</b>                                | <b>0.855062407</b> | <b>2.5E-05</b> | <b>2</b>  |
| Q9Z277        | IHPLEKVDEEAVER                                                            | 0.527564305        | 2              | 2.451706  |
| Q9Z277        | LQKGGLYMEGTSEFEARVISLEK                                                   | 1.039703607        | 2              | 2.399335  |
| <b>Q9Z2I8</b> | <b>SUCB2 Succinyl_CoA ligase [GDP_forming] subunit beta_mitochondrial</b> | <b>0.824520477</b> | <b>9.9E-20</b> | <b>8</b>  |
| Q9Z2I8        | DIFAMDDKSENEPIENEAR                                                       | 1.068430621        | 3              | 4.11281   |
| Q9Z2I8        | IDATQVEVNPFGETPEGQVVCFDAK                                                 | 1.226789382        | 2              | 4.60788   |
| Q9Z2I8        | INFDDNAEFR                                                                | 0.981570898        | 2              | 3.195362  |
| Q9Z2I8        | LEGTNVQEAQNILK                                                            | 0.838744386        | 2              | 5.071438  |
| Q9Z2I8        | SENEPIENEAR                                                               | 0.804876986        | 2              | 3.753941  |
| Q9Z2I8        | SHNGPVIVGSPQGGVDIEEVAASSPELIFK                                            | 0.843338829        | 2              | 5.947838  |
| Q9Z2I8        | SSGLPITSAVDLEDAAK                                                         | 0.821921374        | 2              | 4.56245   |
| Q9Z2I8        | SSGLPITSAVDLEDAAKK                                                        | 0.785337538        | 2              | 3.544195  |
| <b>Q9Z2I9</b> | <b>SUCB1 Succinyl_CoA ligase [ADP_forming] subunit beta_mitochondrial</b> | <b>1.008043337</b> | <b>0.14419</b> | <b>6</b>  |
| Q9Z2I9        | ALIADSGLK                                                                 | 0.954192282        | 1              | 1.986279  |
| Q9Z2I9        | ILACDDLDEAAK                                                              | 0.865466819        | 2              | 2.909318  |
| Q9Z2I9        | INFDSNSAYR                                                                | 1.135415026        | 2              | 2.672813  |
| Q9Z2I9        | LSEIVTLAK                                                                 | 0.983520078        | 2              | 2.413548  |
| Q9Z2I9        | MGFPSNIVDSAAENMIK                                                         | 1.025196787        | 2              | 2.775173  |
| Q9Z2I9        | SSDEAYAIK                                                                 | 1.094639107        | 2              | 3.569951  |
| <b>Q9Z2L0</b> | <b>VDAC1 Voltage_dependent anion_selective channel protein 1</b>          | <b>0.81247315</b>  | <b>4.1E-05</b> | <b>11</b> |
| Q9Z2L0        | KLETAVNLAWTAGNSNTR                                                        | 0.982574277        | 2              | 4.832703  |

|               |                                                   |                    |                |           |
|---------------|---------------------------------------------------|--------------------|----------------|-----------|
| Q9Z2L0        | LTFDSSFSPTNGK                                     | 0.974891387        | 2              | 3.719875  |
| Q9Z2L0        | LTFDSSFSPTNGKK                                    | 0.909428679        | 2              | 2.848589  |
| Q9Z2L0        | SENGLEFTSSGSANTETTK                               | 0.91523878         | 2              | 4.256815  |
| Q9Z2L0        | TDEFQLHTNVNDGTEFGGSIVQK                           | 0.848485758        | 3              | 5.04215   |
| Q9Z2L0        | TKSENGLEFTSSGSANTETTK                             | 0.636252928        | 3              | 3.518906  |
| Q9Z2L0        | VNSSLIGLGYTQLKPGIK                                | 0.890352997        | 2              | 4.44197   |
| Q9Z2L0        | VTQSNFAVGYK                                       | 0.997839865        | 2              | 2.804039  |
| Q9Z2L0        | WNTDNTLGTEITVEDQLAR                               | 0.875375988        | 2              | 4.44851   |
| Q9Z2L0        | WTEYGLTFTEK                                       | 0.918099574        | 2              | 2.794506  |
| Q9Z2L0        | YQVDPDACFSAK                                      | 0.891000345        | 2              | 3.792374  |
| <b>Q9Z2M4</b> | <b>DEC2 Peroxisomal 2_4_dienoyl_CoA reductase</b> | <b>0.684733193</b> | <b>1.1E-14</b> | <b>3</b>  |
| Q9Z2M4        | GQVLQLHAGAAK                                      | 0.913865528        | 2              | 2.949733  |
| Q9Z2M4        | HLAVEWGPQNIR                                      | 0.609445136        | 2              | 3.113725  |
| Q9Z2M4        | VNSLAPGAISGTEGLR                                  | 0.600750512        | 2              | 4.3013    |
| <b>Q9Z2M7</b> | <b>PMM2 Phosphomannomutase 2</b>                  | <b>0.864553815</b> | <b>0.01014</b> | <b>3</b>  |
| Q9Z2M7        | LQEQLGNDVVEK                                      | 0.790598103        | 2              | 3.597403  |
| Q9Z2M7        | TVGYVTAPEDTR                                      | 1.109141211        | 2              | 2.689261  |
| Q9Z2M7        | YDYVFPENGLVAYK                                    | 0.991639573        | 2              | 3.186829  |
| <b>Q9Z2Q1</b> | <b>SC31A Protein transport protein Sec31A</b>     | <b>0.931753314</b> | <b>0.06318</b> | <b>12</b> |
| Q9Z2Q1        | AQDGSNPLSLQDLIEK                                  | 1.067082328        | 2              | 4.14739   |
| Q9Z2Q1        | AVQLTQALDNTVIGALLAEK                              | 0.959228559        | 2              | 5.077232  |
| Q9Z2Q1        | CLSSATDPQTK                                       | 1.026769695        | 2              | 3.008002  |
| Q9Z2Q1        | DQTLSPTIISGLHSIAR                                 | 0.67330893         | 2              | 2.565691  |
| Q9Z2Q1        | GGPGPLAGHPQVSR                                    | 1.233882393        | 2              | 3.043104  |
| Q9Z2Q1        | KIDASQDFEK                                        | 0.968725239        | 2              | 2.658661  |
| Q9Z2Q1        | LVTFENVGQPQQGAEQPR                                | 1.315468879        | 2              | 3.63777   |
| Q9Z2Q1        | QVQHILASASPSGR                                    | 0.859858348        | 2              | 2.732763  |
| Q9Z2Q1        | SSYEQPLPK                                         | 0.966686341        | 2              | 2.438343  |
| Q9Z2Q1        | TQPPEDISCIAWNR                                    | 0.921151656        | 2              | 3.071422  |
| Q9Z2Q1        | TFEDLIQR                                          | 1.045898478        | 2              | 2.896065  |
| Q9Z2Q1        | VNFEEDSR                                          | 0.801940723        | 2              | 2.325756  |
| <b>Q9Z2U2</b> | <b>ZN292 Zinc finger protein 292</b>              | <b>0.952690892</b> | <b>0.51217</b> | <b>2</b>  |
| Q9Z2U2        | KLEVLNNPDRTVLK                                    | 1.135995605        | 2              | 2.376967  |
| Q9Z2U2        | LINEDSTNAENQGNTTLK                                | 0.904228468        | 2              | 2.699266  |
| <b>Q9Z2Z8</b> | <b>DHCR7 7_dehydrocholesterol reductase</b>       | <b>0.75741339</b>  | <b>0.00169</b> | <b>4</b>  |
| Q9Z2Z8        | AIECSYTSADGLK                                     | 0.723829674        | 2              | 3.86921   |
| Q9Z2Z8        | ASLADIWAK                                         | 1.014991597        | 2              | 2.306351  |
| Q9Z2Z8        | FLPGYVGGVQEGAITPAGIVNK                            | 0.7485868          | 2              | 4.896404  |
| Q9Z2Z8        | GYLFPTSAEDCK                                      | 0.797414081        | 2              | 2.370106  |
| <b>Q9Z339</b> | <b>GSTO1 Glutathione S_transferase omega_1</b>    | <b>0.838808681</b> | <b>9.9E-20</b> | <b>2</b>  |
| Q9Z339        | GSAPPGPVPEGQIR                                    | 0.768471207        | 2              | 2.909402  |
| Q9Z339        | LEALELNECIDHTPK                                   | 0.839663093        | 2              | 4.100388  |

*Time point 66 hours*

| Accession number | Protein DESCRIPTION                                               | Protein Ratio (66 h) | P-value (66 h) | Peptide number (66 h) |
|------------------|-------------------------------------------------------------------|----------------------|----------------|-----------------------|
| Accession number | Peptide sequence                                                  | Peptide Ratio (66 h) | Charge state   | Xcorr                 |
| <b>A0JPQ8</b>    | <b>ALKMO Alkylglycerol monooxygenase</b>                          | <b>0.977039765</b>   | <b>0.7258</b>  | <b>2</b>              |
| A0JPQ8           | LDDILTSMSAGVVS                                                    | 1.08682981           | 2              | 3.10371               |
| A0JPQ8           | SITHLASGSWK                                                       | 0.976568413          | 2              | 2.59728               |
| <b>A2ADY9</b>    | <b>DDI2 Protein DDI1 homolog 2</b>                                | <b>1.039565215</b>   | <b>0.9987</b>  | <b>2</b>              |
| A2ADY9           | NPPLAEALLSGDLEK                                                   | 1.069951413          | 2              | 2.80264               |
| A2ADY9           | VLVEQQQDR                                                         | 0.97052706           | 2              | 2.47317               |
| <b>A2AJL3</b>    | <b>FGGY FGGY carbohydrate kinase domain_containing protein</b>    | <b>0.983261361</b>   | <b>0.987</b>   | <b>3</b>              |
| A2AJL3           | GHGLTCEGQPVTSR                                                    | 0.976238127          | 2              | 3.51308               |
| A2AJL3           | MSKVGKVFPEHADK                                                    | 1.014926556          | 2              | 2.39486               |
| A2AJL3           | YQVFLRMVEHQK                                                      | 1.022011431          | 2              | 2.35528               |
| <b>A2AL36</b>    | <b>CNTRL Centriolin</b>                                           | <b>0.878483602</b>   | <b>0.826</b>   | <b>2</b>              |
| A2AL36           | LEVLNLSYNLIVK                                                     | 0.878441228          | 2              | 2.43445               |
| A2AL36           | NQDKLNK                                                           | 0.971867431          | 1              | 1.98164               |
| <b>A2APV2</b>    | <b>FMNL2 Formin_like protein 2</b>                                | <b>1.582510334</b>   | <b>0.0036</b>  | <b>2</b>              |
| A2APV2           | QAEENELRKK                                                        | 1.017582409          | 2              | 2.31474               |
| A2APV2           | QEQALMEK                                                          | 2.349134844          | 1              | 2.01194               |
| <b>A2AQP0</b>    | <b>MYH7B Myosin_7B</b>                                            | <b>1.275064355</b>   | <b>0.9962</b>  | <b>6</b>              |
| A2AQP0           | AITDAAMMAEELKK                                                    | 1.234626899          | 2              | 3.03906               |
| A2AQP0           | DIDDELETLAK                                                       | 1.459878621          | 2              | 3.71527               |
| A2AQP0           | ELEELSER                                                          | 1.299778758          | 1              | 2.06178               |
| A2AQP0           | HDCDLLR                                                           | 1.112767778          | 2              | 2.38601               |
| A2AQP0           | TEELEEK                                                           | 1.132401558          | 2              | 2.63558               |
| A2AQP0           | VGNEYVTK                                                          | 1.353596879          | 2              | 2.44774               |
| <b>A2ASS6</b>    | <b>TITIN Titin</b>                                                | <b>1.173427039</b>   | <b>0.3243</b>  | <b>3</b>              |
| A2ASS6           | AENRFGIGPPAETIQR                                                  | 1.169400505          | 2              | 2.68462               |
| A2ASS6           | APPIEAPPTIAAPVAVGK                                                | 1.344861157          | 2              | 3.8926                |
| A2ASS6           | RAPEPKPEFHVHEPGK                                                  | 1.838102412          | 2              | 2.33522               |
| <b>A2AWL7</b>    | <b>MGAP MAX gene_associated protein</b>                           | <b>0.903390993</b>   | <b>0.0544</b>  | <b>3</b>              |
| A2AWL7           | ADVSLTLLTAQASLK                                                   | 0.904159748          | 1              | 2.0943                |
| A2AWL7           | ELIEDLKSLR                                                        | 0.792759482          | 2              | 2.39361               |
| A2AWL7           | TDQGILVTNRDARALLSR                                                | 1.283274561          | 2              | 2.42502               |
| <b>A2VCW9</b>    | <b>AASS Alpha_aminoadipic semialdehyde synthase_mitochondrial</b> | <b>1.174269325</b>   | <b>0.425</b>   | <b>10</b>             |
| A2VCW9           | AEGIVNTQSTIK                                                      | 1.040207567          | 2              | 2.55488               |
| A2VCW9           | AGGILQEDITEACLIGVK                                                | 1.021361374          | 2              | 2.72345               |
| A2VCW9           | AQEANMSLLDEVLK                                                    | 1.185839058          | 2              | 3.45389               |
| A2VCW9           | GAQEVFNELPCEYVEPHELK                                              | 1.039326058          | 2              | 4.53272               |
| A2VCW9           | KTDGVYDPVEYKYPYR                                                  | 1.240433164          | 3              | 3.4038                |
| A2VCW9           | KYDINTVNVTVGK                                                     | 1.171806074          | 2              | 3.70572               |
| A2VCW9           | QDAQSLLVPVK                                                       | 1.143696773          | 2              | 2.69529               |
| A2VCW9           | REDVNAWER                                                         | 1.186279494          | 2              | 2.77684               |
| A2VCW9           | SSVVPVEGCPELPHK                                                   | 1.215766068          | 2              | 2.87285               |
| A2VCW9           | YDINTVNVTVGK                                                      | 0.773774731          | 2              | 2.74854               |
| <b>A6H584</b>    | <b>chain</b>                                                      | <b>0.852424902</b>   | <b>0.4929</b>  | <b>2</b>              |
| A6H584           | FVNRVFRMANGIDR+Oxidation(8)                                       | 0.887451427          | 2              | 2.59459               |
| A6H584           | NEHSFQVVGIVR                                                      | 0.958491161          | 2              | 2.51254               |
| <b>A6N6J5</b>    | <b>WDR35 WD repeat_containing protein 35</b>                      | <b>0.838232804</b>   | <b>0.437</b>   | <b>2</b>              |
| A6N6J5           | LMYKIADEEAKK+Oxidation(1)                                         | 1.013449204          | 1              | 2.06362               |
| A6N6J5           | MYLDMDRRLAIGLR+Oxidation(0)                                       | 0.835307774          | 2              | 2.33987               |
| <b>A7VJC2</b>    | <b>ROA2 Heterogeneous nuclear ribonucleoproteins A2/B1</b>        | <b>1.001292763</b>   | <b>0.0004</b>  | <b>10</b>             |
| A7VJC2           | GFGFVTFDDHDPVDK                                                   | 1.086853288          | 2              | 3.8426                |

|               |                                                                        |                    |               |          |
|---------------|------------------------------------------------------------------------|--------------------|---------------|----------|
| A7VJC2        | GGGGNFGPGGSNFR                                                         | 1.022598593        | 2             | 2.64694  |
| A7VJC2        | GGNFGFGDSR                                                             | 1.146946781        | 2             | 2.50304  |
| A7VJC2        | IDTIEIITDR                                                             | 0.955633852        | 2             | 3.66959  |
| A7VJC2        | LTDCVVMR                                                               | 1.009920711        | 2             | 2.43318  |
| A7VJC2        | NMGGPYGGGNYGPGSGSGGGYGGR                                               | 0.788414802        | 2             | 5.33568  |
| A7VJC2        | NYEQWQWK                                                               | 0.892684543        | 2             | 2.34783  |
| A7VJC2        | QEMQEVQSSR                                                             | 0.940004075        | 2             | 3.40655  |
| A7VJC2        | QEMQEVQSSR+Oxidation(2)                                                | 1.243987687        | 2             | 2.68398  |
| A7VJC2        | YHTINGHNAEVR                                                           | 1.482971979        | 2             | 3.5312   |
| <b>B0BN93</b> | <b>PSD13 26S proteasome non_ATPase regulatory subunit 13</b>           | <b>1.089914056</b> | <b>0.9318</b> | <b>2</b> |
| B0BN93        | QMTDPNVALTFLEK                                                         | 1.036081415        | 2             | 2.71463  |
| B0BN93        | SAWGQQPDLAANEALLR                                                      | 1.095874177        | 2             | 3.92688  |
| <b>B0BNA7</b> | <b>EIF3I Eukaryotic translation initiation factor 3 subunit I</b>      | <b>1.019717954</b> | <b>0.1554</b> | <b>3</b> |
| B0BNA7        | HVLTGSADNSCR                                                           | 1.404444176        | 2             | 3.05887  |
| B0BNA7        | MKPILLQGHERSITQIK+Oxidation(0)                                         | 1.007372121        | 2             | 2.36636  |
| B0BNA7        | SYSSGGEDGYVR                                                           | 0.985307713        | 2             | 2.65244  |
| <b>B0BNE5</b> | <b>ESTD S_formylglutathione hydrolase</b>                              | <b>1.045076159</b> | <b>0.0019</b> | <b>9</b> |
| B0BNE5        | AFNGYLGPDQSK                                                           | 1.125725997        | 2             | 2.9167   |
| B0BNE5        | AYDATCLVK                                                              | 1.132111827        | 2             | 2.58357  |
| B0BNE5        | FAIYLPPQAESAK                                                          | 1.191638734        | 2             | 2.89302  |
| B0BNE5        | MYSYVTEELPQLINANFPVDPQR                                                | 0.933637137        | 3             | 5.24364  |
| B0BNE5        | MYSYVTEELPQLINANFPVDPQR+Oxidation(0)                                   | 0.880564972        | 3             | 3.46762  |
| B0BNE5        | SGCQQAASEHGLVVIAPDTSR                                                  | 1.015675422        | 2             | 5.55281  |
| B0BNE5        | SVSAFAPICNPVLCPWGK                                                     | 0.986217633        | 2             | 4.51576  |
| B0BNE5        | SYSGPQIDILIDQKDFLNSGQLLPDNFIAAETK                                      | 0.996872864        | 3             | 4.87516  |
| B0BNE5        | VFEHSSVELK                                                             | 0.987474465        | 2             | 2.4656   |
| <b>B0BNN3</b> | <b>CAH1 Carbonic anhydrase 1</b>                                       | <b>0.457555666</b> | <b>0.0047</b> | <b>2</b> |
| B0BNN3        | HDSSLKPVSVSYNPATAK                                                     | 0.539151541        | 3             | 4.36903  |
| B0BNN3        | VGPANPNLQK                                                             | 0.437919103        | 2             | 3.02796  |
| <b>B0K020</b> | <b>CISD1 CDGSH iron_sulfur domain_containing protein 1</b>             | <b>1.027171914</b> | <b>0.9789</b> | <b>2</b> |
| B0K020        | HNEETGDNVGPLIK                                                         | 1.034414459        | 2             | 5.54202  |
| B0K020        | VVHAFDMEDLGDK                                                          | 1.095867895        | 3             | 4.25234  |
| <b>B2GUZ5</b> | <b>CAZA1 F_actin_capping protein subunit alpha_1</b>                   | <b>0.948327375</b> | <b>0.7822</b> | <b>2</b> |
| B2GUZ5        | EASDPQPEDVDGGLK                                                        | 0.95495972         | 2             | 3.45563  |
| B2GUZ5        | FTITPPTAQVGVVK                                                         | 0.942887989        | 2             | 2.7424   |
| <b>B2RX88</b> | <b>CSPP1 Centrosome and spindle pole associated protein 1</b>          | <b>1.538066585</b> | <b>2E-06</b>  | <b>2</b> |
| B2RX88        | SISSVNVQVRMRNEDR                                                       | 1.545190728        | 2             | 2.4924   |
| B2RX88        | SISSVNVQVRMRNEDR+Oxidation(11)                                         | 1.503268032        | 2             | 2.31585  |
| <b>B2RYW9</b> | <b>FAHD2 Fumarylacetoacetate hydrolase domain_containing protein 2</b> | <b>0.864051565</b> | <b>6E-07</b>  | <b>2</b> |
| B2RYW9        | KGDEVQCEIEELGVIINK                                                     | 0.875010325        | 2             | 4.62402  |
| B2RYW9        | TFDTFCPLGPALVTK                                                        | 0.862788015        | 2             | 4.50219  |
| <b>B3DMA2</b> | <b>ACD11 Acyl_CoA dehydrogenase family member 11</b>                   | <b>0.794543883</b> | <b>0.0302</b> | <b>3</b> |
| B3DMA2        | NLPDSNNEECLVHGDFK                                                      | 0.957700042        | 2             | 3.13201  |
| B3DMA2        | RGQEVLTRVK                                                             | 0.79432622         | 1             | 1.94488  |
| B3DMA2        | SLEAYLNQHLPFGSDHR                                                      | 1.057771867        | 3             | 3.30798  |
| <b>D3ZW55</b> | <b>ITPA Inosine triphosphate pyrophosphatase</b>                       | <b>1.161723563</b> | <b>0.3045</b> | <b>4</b> |
| D3ZW55        | IDLPEYQGEPEISIQK                                                       | 1.038149178        | 2             | 4.38239  |
| D3ZW55        | KLEEVILGDKFPCTLVAQK                                                    | 1.174478101        | 3             | 3.47464  |
| D3ZW55        | LKPEGLYQLLAGFEDK                                                       | 1.063991371        | 3             | 3.52695  |
| D3ZW55        | LQEFYFVTDGAGDH                                                         | 0.891032404        | 2             | 2.58604  |
| <b>E9Q557</b> | <b>DESP Desmoplakin</b>                                                | <b>0.886607002</b> | <b>0.4281</b> | <b>2</b> |
| E9Q557        | KQVQTSQKNTLR                                                           | 0.861262607        | 1             | 1.97503  |
| E9Q557        | SQCTQVVQER                                                             | 0.887263902        | 2             | 2.58448  |
| <b>O08557</b> | <b>DDAH1 N(G)_N(G)_dimethylarginine dimethylaminohydrolase 1</b>       | <b>0.955735985</b> | <b>3E-05</b>  | <b>9</b> |
| O08557        | DENATLDGGDVLFTGR                                                       | 0.913355413        | 2             | 3.20031  |
| O08557        | DYAVSTVPVADSLHLK                                                       | 0.931407019        | 2             | 3.4802   |

|               |                                                                   |                    |               |           |
|---------------|-------------------------------------------------------------------|--------------------|---------------|-----------|
| O08557        | GAEILADTFK                                                        | 0.903698697        | 1             | 2.28705   |
| O08557        | GAEILADTFKDYAVSTVPVADSLHLK                                        | 0.915278915        | 3             | 3.89538   |
| O08557        | KEVDMMK+Oxidation(5)                                              | 0.436501501        | 1             | 1.98577   |
| O08557        | SFCSMAGPNLIAIGSSESAQK                                             | 0.876152451        | 2             | 4.44352   |
| O08557        | SQGEEVDFAR                                                        | 0.887238458        | 2             | 2.93232   |
| O08557        | TPEEYPESAK                                                        | 1.66030248         | 2             | 2.63983   |
| O08557        | VDGLLTCCSVFINK                                                    | 1.175914076        | 2             | 3.0177    |
| <b>O08583</b> | <b>THOC4 THO complex subunit 4</b>                                | <b>0.981999568</b> | <b>0.8388</b> | <b>2</b>  |
| O08583        | QQLSAEELDAQLDAYNAR                                                | 0.914071858        | 2             | 4.45257   |
| O08583        | SLGTADVHFER                                                       | 0.890626229        | 2             | 2.53574   |
| <b>O08601</b> | <b>MTP Microsomal triglyceride transfer protein large subunit</b> | <b>1.026906686</b> | <b>0.2155</b> | <b>14</b> |
| O08601        | EFYSYENEPVGIENLK                                                  | 1.04375587         | 2             | 4.34502   |
| O08601        | GCPSLAEHWKSIR                                                     | 1.013086186        | 2             | 3.54183   |
| O08601        | GHTTGSLNNER                                                       | 0.944260536        | 2             | 2.57247   |
| O08601        | GSFASNDIR                                                         | 1.046644016        | 2             | 2.3416    |
| O08601        | MLSASGDPVSVVK                                                     | 1.324998334        | 2             | 2.82819   |
| O08601        | NALLPEGIPLLLK                                                     | 1.105822852        | 2             | 2.9961    |
| O08601        | NILLSIGELPK                                                       | 0.952846908        | 2             | 4.04163   |
| O08601        | REEILQILK                                                         | 0.938086477        | 2             | 2.5196    |
| O08601        | SDSSIILQER                                                        | 0.887151344        | 2             | 3.02227   |
| O08601        | SGSSSAYTGYVER                                                     | 1.04542791         | 2             | 3.53629   |
| O08601        | SNLNIFQYIGK                                                       | 1.007554621        | 2             | 3.3661    |
| O08601        | VKEFYSYENEPVGIENLK                                                | 1.241406681        | 2             | 3.08446   |
| O08601        | YAEAGEGPVSHLATTVLQR                                               | 0.73117463         | 2             | 3.05761   |
| O08601        | YMLTVVQDILHFEMPASK+Oxidation(1)                                   | 1.187664869        | 2             | 2.42827   |
| <b>O08795</b> | <b>GLU2B Glucosidase 2 subunit beta</b>                           | <b>1.109706152</b> | <b>2E-11</b>  | <b>6</b>  |
| O08795        | ETVVTSTTEPSR                                                      | 0.967857676        | 2             | 2.58546   |
| O08795        | KLWEEQAAAK                                                        | 1.101801409        | 2             | 3.31464   |
| O08795        | LWEEQAAAK                                                         | 1.146932854        | 2             | 3.06576   |
| O08795        | MPPYDEETQAIIDAAQEAR                                               | 1.286505683        | 2             | 4.31299   |
| O08795        | SLEDQVETLR                                                        | 1.052976534        | 2             | 2.71696   |
| O08795        | YEQGTGCWQGNR                                                      | 1.241882348        | 2             | 3.8744    |
| <b>O08810</b> | <b>U5S1 116 kDa U5 small nuclear ribonucleoprotein component</b>  | <b>1.161949325</b> | <b>2E-08</b>  | <b>2</b>  |
| O08810        | GGGQIIPTAR                                                        | 1.184551743        | 2             | 2.78534   |
| O08810        | GLAEDIENEVVQJTWNR                                                 | 0.998953458        | 2             | 2.57116   |
| <b>O09171</b> | <b>BHMT1 Betaine_homocysteine S_methyltransferase 1</b>           | <b>1.560655511</b> | <b>1E-19</b>  | <b>11</b> |
| O09171        | AGAAIVGNCHFDPSTSLQTIK                                             | 1.660777182        | 2             | 5.99127   |
| O09171        | AGPWTPEAAVEHPEAVR                                                 | 1.939872425        | 2             | 5.07384   |
| O09171        | GAAELMQQK                                                         | 1.812168062        | 2             | 3.7103    |
| O09171        | GAAELMQQK+Oxidation(5)                                            | 2.064328691        | 2             | 2.85269   |
| O09171        | KEYWQNLR                                                          | 1.820580351        | 3             | 3.6449    |
| O09171        | LNAGEVVIGDGGFVFALEK                                               | 1.768762434        | 3             | 6.39853   |
| O09171        | QGFIDLPEFPFGLPR                                                   | 1.492365368        | 2             | 4.98133   |
| O09171        | QVADEGDALVAGGVSQTPSYLSCK                                          | 1.813676518        | 3             | 6.08999   |
| O09171        | TSGKPIAATMCIGPEGDLHGVSPEGCAVR                                     | 1.914878045        | 3             | 6.48554   |
| O09171        | TSGKPIAATMCIGPEGDLHGVSPEGCAVR+Oxidation(9)                        | 1.905952206        | 4             | 6.06096   |
| O09171        | VNEAACDIAR                                                        | 1.577562345        | 2             | 4.05109   |
| <b>O09173</b> | <b>HGD Homogentisate 1_2_dioxygenase</b>                          | <b>1.324751096</b> | <b>1E-19</b>  | <b>8</b>  |
| O09173        | CFYNSDGDFLIVPQK                                                   | 1.139976402        | 2             | 3.61275   |
| O09173        | FSVDVFEETR                                                        | 1.379689224        | 2             | 3.34478   |
| O09173        | GYILEVYGVHFLPDLGPIGANLANPR                                        | 1.49352711         | 3             | 5.00312   |
| O09173        | NCMSEFMGLIK                                                       | 1.165638488        | 2             | 3.0691    |
| O09173        | QDVSPFNVAWHGNYTPYK                                                | 1.295069152        | 2             | 3.37068   |
| O09173        | SLRPGVAIADFVIFPPR                                                 | 1.339733991        | 3             | 3.51326   |
| O09173        | WKPFEIPK                                                          | 1.335678762        | 2             | 2.41659   |
| O09173        | YISGFGNECASEDRP                                                   | 1.409964759        | 2             | 4.40342   |

|               |                                                                              |                    |               |           |
|---------------|------------------------------------------------------------------------------|--------------------|---------------|-----------|
| <b>O35077</b> | <b>GPDA Glycerol_3_phosphate dehydrogenase [NAD_]_ cytoplasmic</b>           | <b>1.133834653</b> | <b>4E-05</b>  | <b>17</b> |
| O35077        | ANTIGISLIK                                                                   | 1.093613029        | 2             | 3.04334   |
| O35077        | DPAQGQLLK                                                                    | 1.450559964        | 2             | 2.7762    |
| O35077        | ELHSILQHK                                                                    | 1.120635975        | 2             | 2.7721    |
| O35077        | FCETTIGCK                                                                    | 1.077539482        | 2             | 2.64942   |
| O35077        | FCETTIGCKDPAQGQLLK                                                           | 0.977490006        | 2             | 4.937     |
| O35077        | GIDEGPNGLK                                                                   | 1.053076323        | 2             | 2.33991   |
| O35077        | GLVDKFLFTAVYK                                                                | 1.255490773        | 2             | 2.83968   |
| O35077        | ICDQLKGHLK                                                                   | 0.9804299          | 2             | 2.56844   |
| O35077        | ITVVQEVDTVEICGALK                                                            | 1.148911955        | 2             | 3.30308   |
| O35077        | IVGSNASQLAHFDPR                                                              | 1.482179473        | 2             | 3.07806   |
| O35077        | KLTEIINTQHENVK                                                               | 0.943062215        | 2             | 5.00165   |
| O35077        | LTEIINTQHENVK                                                                | 1.033355885        | 2             | 4.6994    |
| O35077        | NIVAVGAGFCDLGFGDNTK                                                          | 1.12340611         | 2             | 4.34747   |
| O35077        | SIEQLEK                                                                      | 1.0580032          | 2             | 2.32702   |
| O35077        | VCIVGSGNWGSAIAK                                                              | 1.111599192        | 2             | 4.05635   |
| O35077        | VCYEGQPVGEFICCLQNHPEHM                                                       | 1.270008835        | 2             | 3.82081   |
| O35077        | VTMWVFEEDIGGR                                                                | 1.053537931        | 2             | 3.45636   |
| <b>O35078</b> | <b>OXDA D_amino_acid oxidase</b>                                             | <b>0.633930975</b> | <b>0.0038</b> | <b>2</b>  |
| O35078        | GQIIQVEAPWIK                                                                 | 0.596443286        | 2             | 2.9603    |
| O35078        | SCCQLEPTLK                                                                   | 0.840665236        | 2             | 2.36446   |
| <b>O35094</b> | <b>TIM44 Mitochondrial import inner membrane translocase subunit TIM44</b>   | <b>0.955390196</b> | <b>0.8869</b> | <b>3</b>  |
| O35094        | ILDISNVDLAMGK                                                                | 0.955759123        | 2             | 2.88608   |
| O35094        | KLEESDALQEAR                                                                 | 0.955024375        | 2             | 3.4135    |
| O35094        | TEMSEVLTEILR                                                                 | 0.975778104        | 2             | 3.07197   |
| <b>O35142</b> | <b>COPB2 Coatomer subunit beta_</b>                                          | <b>1.146935069</b> | <b>0.0107</b> | <b>3</b>  |
| O35142        | AAESLADPTEYENLFPGLK                                                          | 1.182378154        | 2             | 3.93119   |
| O35142        | FELALQLGELK                                                                  | 1.070700703        | 2             | 3.17329   |
| O35142        | GSNNVALGYDEGSIVK                                                             | 0.893795676        | 2             | 3.08323   |
| <b>O35244</b> | <b>PRDX6 Peroxiredoxin_6</b>                                                 | <b>1.077632383</b> | <b>0.0687</b> | <b>10</b> |
| O35244        | DFTPVCTTELGR                                                                 | 0.682499736        | 2             | 2.31061   |
| O35244        | DINAYNGAAPTEK                                                                | 0.997801042        | 2             | 3.91735   |
| O35244        | DLAILLGMLDPAEKDEK                                                            | 0.862072139        | 2             | 3.80084   |
| O35244        | GESVMVLPTLPEEEAK                                                             | 1.123369064        | 2             | 3.03433   |
| O35244        | KGESVMVLPTLPEEEAK                                                            | 1.009818481        | 2             | 4.92625   |
| O35244        | KGESVMVLPTLPEEEAK+Oxidation(5)                                               | 0.981274159        | 2             | 3.06644   |
| O35244        | LSILYPATTGR                                                                  | 1.136774941        | 2             | 2.43602   |
| O35244        | NFDEILR                                                                      | 0.933612953        | 1             | 2.04712   |
| O35244        | VVDSLQLTASNVPVATPDWK                                                         | 1.038451467        | 2             | 5.01557   |
| O35244        | VVFIFGPDKK                                                                   | 1.106509325        | 2             | 2.34258   |
| <b>O35469</b> | <b>3BHS6 3 beta_hydroxysteroid dehydrogenase/Delta 5__4_isomerase type 6</b> | <b>0.790907282</b> | <b>0.0044</b> | <b>2</b>  |
| O35469        | DLGYEPLVSWEAK                                                                | 0.787303388        | 2             | 4.20855   |
| O35469        | TSEWIGTLVEQHR                                                                | 0.815073348        | 2             | 3.47278   |
| <b>O35509</b> | <b>RB11B Ras_related protein Rab_11B</b>                                     | <b>1.063034209</b> | <b>0.5426</b> | <b>4</b>  |
| O35509        | AQIWDTAGQER                                                                  | 1.09580322         | 2             | 2.74767   |
| O35509        | GAVGALLVYDIAK                                                                | 1.07218662         | 2             | 3.74561   |
| O35509        | NEFNLESK                                                                     | 0.973434466        | 1             | 2.13872   |
| O35509        | VVLIGDSGVGK                                                                  | 1.063102635        | 2             | 2.40239   |
| <b>O35567</b> | <b>PUR9 Bifunctional purine biosynthesis protein PURH</b>                    | <b>0.985217125</b> | <b>0.4789</b> | <b>7</b>  |
| O35567        | AEVSNADQYVTGTIGEGEDLVK                                                       | 0.791445396        | 2             | 3.3009    |
| O35567        | ALFEEVPELLTEAEK                                                              | 0.993782193        | 2             | 3.60044   |
| O35567        | DGQVIGIGAGQQSR                                                               | 0.157464622        | 2             | 3.34445   |
| O35567        | EVSDGIVAPGYEEALK                                                             | 0.954540163        | 2             | 3.7194    |
| O35567        | HVSPAGAAVGVPLSEDEAR                                                          | 0.93553221         | 2             | 4.17339   |

|               |                                                                                          |                    |               |          |
|---------------|------------------------------------------------------------------------------------------|--------------------|---------------|----------|
| O35567        | SGVAYIVAPSGSTADK                                                                         | 1.065786428        | 2             | 2.79479  |
| O35567        | VTVVCEPEDYGAVAAEMQGGGNK                                                                  | 1.019274763        | 2             | 5.16152  |
| <b>O35760</b> | <b>IDI1 Isopentenyl_diphosphate Delta_isomerase 1</b>                                    | <b>0.350496017</b> | <b>1E-05</b>  | <b>3</b> |
| O35760        | AELGIPLLEVDLNEMNYLTR                                                                     | 0.312230013        | 2             | 4.35606  |
| O35760        | NCHLNENIDK                                                                               | 0.206447321        | 2             | 3.00521  |
| O35760        | NVTLNPDPEIK                                                                              | 0.570940021        | 2             | 3.35603  |
| <b>O35763</b> | <b>MOES Moesin</b>                                                                       | <b>1.000159387</b> | <b>0.9907</b> | <b>2</b> |
| O35763        | ALTSELANAR                                                                               | 1.019482115        | 2             | 2.7736   |
| O35763        | FYPEDVSEELIQDITQR                                                                        | 0.939763902        | 2             | 2.8711   |
| <b>O35796</b> | <b>C1QBP Complement component 1 Q subcomponent_binding protein_mitochondrial</b>         | <b>0.937558392</b> | <b>9E-12</b>  | <b>4</b> |
| O35796        | AEEQEPELTSTPNFVVEVTK                                                                     | 0.936464105        | 2             | 4.76318  |
| O35796        | AFVEFLTDEIK                                                                              | 0.853436395        | 2             | 2.61207  |
| O35796        | AFVEFLTDEIKEEK                                                                           | 1.03803288         | 2             | 3.54245  |
| O35796        | TLVLDCHYPEDEIGHDEAESDIFSIK                                                               | 1.516413076        | 3             | 5.09834  |
| <b>O35814</b> | <b>STIP1 Stress_induced_phosphoprotein 1</b>                                             | <b>1.055924431</b> | <b>0.9707</b> | <b>3</b> |
| O35814        | ALSAGNIDDALQCYSEAIK                                                                      | 1.098434987        | 2             | 5.09771  |
| O35814        | DCEECIQLEPTFIK                                                                           | 1.036570237        | 2             | 4.12397  |
| O35814        | ELIEQLQNKPSDLGTK                                                                         | 0.960999236        | 2             | 4.20155  |
| <b>O35824</b> | <b>DNJA2 Dnaj homolog subfamily A member 2</b>                                           | <b>1.095235701</b> | <b>0.0304</b> | <b>2</b> |
| O35824        | FDVQFPENNWINPDK                                                                          | 0.89643231         | 2             | 3.32257  |
| O35824        | NVLSACSGQGGK                                                                             | 1.121739964        | 2             | 3.07385  |
| <b>O35826</b> | <b>GLCNE Bifunctional UDP_N_acetylglucosamine 2_epimerase/N_acetylmannosamine kinase</b> | <b>1.319452582</b> | <b>0.0025</b> | <b>5</b> |
| O35826        | DEAVGALHLIQAAC                                                                           | 1.33461357         | 2             | 2.8906   |
| O35826        | IYGDGNVAVPR                                                                              | 1.203792315        | 2             | 2.33168  |
| O35826        | SIDLQEPLQK                                                                               | 1.257561655        | 2             | 2.56714  |
| O35826        | TLVLFNIDAGSK                                                                             | 1.226225826        | 2             | 3.03097  |
| O35826        | TPLSDTLHLPVWVDNDGNCAAMAER                                                                | 1.321034003        | 3             | 4.70305  |
| <b>O35913</b> | <b>SO1A4 Solute carrier organic anion transporter family member 1A4</b>                  | <b>0.62625766</b>  | <b>1E-19</b>  | <b>3</b> |
| O35913        | EGLQENVDTENAK                                                                            | 0.622375187        | 2             | 3.1736   |
| O35913        | SLSGTYMNSMLTQIER                                                                         | 0.983799144        | 2             | 3.07852  |
| O35913        | SQTLNPTQDPSECVK                                                                          | 0.639609687        | 2             | 4.19016  |
| <b>O35952</b> | <b>GLO2 Hydroxyacylglutathione hydrolase_mitochondrial</b>                               | <b>1.035317231</b> | <b>0.3268</b> | <b>7</b> |
| O35952        | ALLEVLGR                                                                                 | 1.038568688        | 2             | 2.90278  |
| O35952        | FYEGTADAMYK                                                                              | 1.093293134        | 2             | 2.4948   |
| O35952        | HVEPGNTAVQEK                                                                             | 1.383086781        | 3             | 3.86585  |
| O35952        | LTTVLTTHHHWDHAGGNEK                                                                      | 1.222577298        | 3             | 3.46286  |
| O35952        | NAIGEPTVPSTLAEFEFTYNPFMR                                                                 | 1.07234415         | 2             | 3.8837   |
| O35952        | TVQQHAGETDPVTMTMR                                                                        | 1.015288317        | 2             | 4.67488  |
| O35952        | TVQQHAGETDPVTMTMR+Oxidation(14)                                                          | 0.960900456        | 2             | 3.41978  |
| <b>O35987</b> | <b>NSF1C NSF1 cofactor p47</b>                                                           | <b>0.866529739</b> | <b>0.0055</b> | <b>4</b> |
| O35987        | ASSSILINEAEPPTNIQIR                                                                      | 0.866124533        | 2             | 5.17698  |
| O35987        | EANLLNAVIVQR                                                                             | 1.19242431         | 2             | 3.16812  |
| O35987        | LGAAPPEESAYVAGER                                                                         | 1.032071788        | 2             | 4.01184  |
| O35987        | SYQDPSNAQFLESIR                                                                          | 0.907603877        | 2             | 3.99571  |
| <b>O54753</b> | <b>H17B6 17_beta_hydroxysteroid dehydrogenase type 6</b>                                 | <b>1.284812237</b> | <b>0.2412</b> | <b>2</b> |
| O54753        | TWEATPEHIR                                                                               | 1.361340751        | 2             | 2.63641  |
| O54753        | YGVEAFSDVLR                                                                              | 1.257136394        | 2             | 2.65806  |
| <b>O55012</b> | <b>PICA Phosphatidylinositol_binding clathrin assembly protein</b>                       | <b>1.191010731</b> | <b>0.0018</b> | <b>5</b> |
| O55012        | ATTLNSAVSSLASTGLSLTK                                                                     | 1.330184965        | 2             | 3.74115  |
| O55012        | ITAAQHSVTGSAVSK                                                                          | 1.251673641        | 2             | 4.19213  |
| O55012        | LVSDDLSSLANLVGNLIGINGTTK                                                                 | 1.053521706        | 3             | 3.97863  |
| O55012        | NTLFNLSNFLDK                                                                             | 1.013406908        | 2             | 2.77379  |
| O55012        | STNVAVDSGGGLLKPTVASQNSLPVAK                                                              | 1.093060425        | 3             | 4.79728  |
| <b>O55096</b> | <b>DPP3 Dipeptidyl peptidase 3</b>                                                       | <b>0.974562412</b> | <b>0.0444</b> | <b>4</b> |

|               |                                                           |                    |               |           |
|---------------|-----------------------------------------------------------|--------------------|---------------|-----------|
| O55096        | AGLLALEFYTPETANWR                                         | 1.197184939        | 2             | 4.36667   |
| O55096        | LASVLNTEPALDSELTSK                                        | 1.229956753        | 2             | 4.12362   |
| O55096        | NVSLGNVLAVAYATK                                           | 1.055449119        | 2             | 2.45591   |
| O55096        | SYEFQGNHFQVTR                                             | 0.970112905        | 2             | 3.55768   |
| <b>O55125</b> | <b>NIPS1 Protein NipSnap homolog 1</b>                    | <b>1.027909486</b> | <b>0.0207</b> | <b>3</b>  |
| O55125        | AGPNIYELR                                                 | 0.992970575        | 2             | 3.04714   |
| O55125        | GWDEVVYTVPLVR                                             | 1.093964976        | 2             | 3.0029    |
| O55125        | IQFHNVKPECLDAYNSLTEAVLPK                                  | 1.293902019        | 3             | 4.67729   |
| <b>O55148</b> | <b>GAS7 Growth arrest_specific protein 7</b>              | <b>0.80684335</b>  | <b>0.0899</b> | <b>2</b>  |
| O55148        | EMSEFIRERIK                                               | 0.806479485        | 2             | 2.37041   |
| O55148        | QKDLEMKTQQLEIK+Oxidation(5)                               | 1.200959489        | 2             | 2.48296   |
| <b>O55171</b> | <b>ACOT2 Acyl_coenzyme A thioesterase 2_mitochondrial</b> | <b>0.931014511</b> | <b>1E-19</b>  | <b>6</b>  |
| O55171        | ADAGGELDLAR                                               | 0.952380279        | 2             | 2.35312   |
| O55171        | DGLLDVVEALQSPVLDKK                                        | 0.624517457        | 2             | 5.49106   |
| O55171        | DVQKPYVVELEVLDGHEPDGGQR                                   | 0.943717773        | 3             | 4.41281   |
| O55171        | GGELGLAMASFLK                                             | 0.735400045        | 2             | 3.63433   |
| O55171        | IEYFEEAVNYLR                                              | 0.805793282        | 2             | 4.02657   |
| O55171        | SCWDEPLSITVR                                              | 0.764664048        | 2             | 3.4834    |
| <b>O70127</b> | <b>ABCBB Bile salt export pump</b>                        | <b>0.970041496</b> | <b>0.9942</b> | <b>4</b>  |
| O70127        | AGQITSEALS NIR                                            | 0.973610923        | 2             | 3.32875   |
| O70127        | AGSIADDEVLSIR                                             | 0.928512998        | 2             | 2.62044   |
| O70127        | ILDNLSMVIKPGETTALVGSSGAGK                                 | 1.011836241        | 3             | 3.43363   |
| O70127        | ILLDEATSALDTESEK                                          | 0.90952986         | 2             | 3.85611   |
| <b>O70133</b> | <b>DHX9 ATP_dependent RNA helicase A</b>                  | <b>1.084675218</b> | <b>0.6544</b> | <b>2</b>  |
| O70133        | KMTPAYEIRAVGNK                                            | 0.890557819        | 2             | 2.45681   |
| O70133        | YSPFFVFGEKIR                                              | 1.096820346        | 2             | 2.51043   |
| <b>O70199</b> | <b>UGDH UDP_glucose 6_dehydrogenase</b>                   | <b>0.974840132</b> | <b>1E-19</b>  | <b>11</b> |
| O70199        | EQIVVDLSHPGVSADDQVSR                                      | 0.783215102        | 2             | 5.70369   |
| O70199        | IFDANTKPNLNLQVLSNPEFLAEGTAIK                              | 0.955724383        | 3             | 6.00645   |
| O70199        | IIDSLFNTVTDK                                              | 0.964443495        | 2             | 2.71253   |
| O70199        | IIDSLFNTVTDKK                                             | 0.908125155        | 2             | 3.00261   |
| O70199        | ILTTNTWSSELSK                                             | 1.152307534        | 2             | 3.03688   |
| O70199        | INAWNSPTLPIYEPGLK                                         | 0.980900423        | 2             | 3.57343   |
| O70199        | NLFFSTNIDDAIR                                             | 1.007331594        | 2             | 3.18491   |
| O70199        | VLDGLHNELQTIGFQJTIETIGK                                   | 0.984891248        | 2             | 5.59397   |
| O70199        | VLIGGETPEGQR                                              | 0.829223449        | 2             | 2.97425   |
| O70199        | VTVVDVNEAR                                                | 0.82202228         | 2             | 3.11762   |
| O70199        | YWQQVIDMNDYQR                                             | 0.923028964        | 2             | 4.3363    |
| <b>O70251</b> | <b>EF1B Elongation factor 1_beta</b>                      | <b>1.142551256</b> | <b>1E-19</b>  | <b>4</b>  |
| O70251        | SIQADGLVWGSSK                                             | 1.050255755        | 2             | 3.66027   |
| O70251        | SSILLDVKPWDEDTDMTK                                        | 1.154325691        | 2             | 4.1752    |
| O70251        | SSILLDVKPWDEDTDMTKLEECVR                                  | 0.934447499        | 3             | 4.29966   |
| O70251        | TPAGLQVLNDYLADK                                           | 1.347886154        | 2             | 3.95566   |
| <b>O70351</b> | <b>HCD2 3_hydroxyacyl_CoA dehydrogenase type_2</b>        | <b>1.268639369</b> | <b>2E-13</b>  | <b>18</b> |
| O70351        | EVQAALT LAK                                               | 0.972551404        | 2             | 2.53856   |
| O70351        | GGIVGMTLPIAR                                              | 0.954261882        | 2             | 3.45863   |
| O70351        | GGIVGMTLPIAR+Oxidation(5)                                 | 0.871840789        | 2             | 3.15261   |
| O70351        | GLVAVITGGASGLGLSTAK                                       | 1.072176142        | 2             | 4.58147   |
| O70351        | GVIINTASVAAFEGQVQQAAYSASK                                 | 1.514286666        | 2             | 3.71829   |
| O70351        | IDVAVNCAGIAVAIK                                           | 0.977069007        | 2             | 3.13309   |
| O70351        | KLGGNCIFAPANVTSEK                                         | 0.955711632        | 2             | 4.47584   |
| O70351        | KNQVHTLEDFQR                                              | 0.879733667        | 2             | 3.97714   |
| O70351        | LGGNCIFAPANVTSEK                                          | 1.072715633        | 2             | 3.3499    |
| O70351        | LGGNCIFAPANVTSEKEVQAALT LAK                               | 1.116233012        | 3             | 3.41653   |
| O70351        | LVAGVMGQNEPDQGGQR                                         | 0.941000214        | 2             | 5.19519   |
| O70351        | LVGQGATAVLLDVPNSEGETEAK                                   | 1.337777475        | 2             | 4.82237   |
| O70351        | NFLASQVPPFSR                                              | 0.908976379        | 2             | 4.46925   |



|               |                                                                            |                    |               |           |
|---------------|----------------------------------------------------------------------------|--------------------|---------------|-----------|
| O70351        | NQVHTLEDFQR                                                                | 0.908727011        | 3             | 3.41504   |
| O70351        | RLVGQGATAVLLDVPNSEGETEAK                                                   | 1.036717598        | 3             | 5.05846   |
| O70351        | RLVGQGATAVLLDVPNSEGETEAKK                                                  | 0.811301474        | 3             | 3.55671   |
| O70351        | VINVNLIGTFNVIR                                                             | 1.093539534        | 2             | 3.34882   |
| O70351        | VVTIAPGLFATPLLTLTPDK                                                       | 1.03662024         | 2             | 3.33551   |
| <b>O70456</b> | <b>1433S 14_3_3 protein sigma</b>                                          | <b>1.080590185</b> | <b>0.8679</b> | <b>4</b>  |
| O70456        | DSTLIMQLLR                                                                 | 1.070250168        | 2             | 3.27557   |
| O70456        | DSTLIMQLLR+Oxidation(5)                                                    | 0.965188811        | 2             | 2.83038   |
| O70456        | VLSSIEQK                                                                   | 1.038211756        | 2             | 2.326     |
| O70456        | YEDMAAFMKSAVEK+Oxidation(3)                                                | 1.208087488        | 2             | 2.33081   |
| <b>O88202</b> | <b>LPP60 60 kDa lysophospholipase</b>                                      | <b>0.934189464</b> | <b>0.6057</b> | <b>3</b>  |
| O88202        | AAGAHLSPQELEDVGTLCR                                                        | 0.973661843        | 3             | 3.90841   |
| O88202        | DYSGQTPLHVAAR                                                              | 0.812895074        | 2             | 2.65868   |
| O88202        | GVDVDACNEDGQSPLLA VR                                                       | 1.128269583        | 2             | 4.96926   |
| <b>O88428</b> | <b>PAPS2 Bifunctional 3__phosphoadenosine 5__phosphosulfate synthase 2</b> | <b>0.961377006</b> | <b>0.9994</b> | <b>3</b>  |
| O88428        | GCTVWLTGLSGAGK                                                             | 0.929048292        | 2             | 2.93747   |
| O88428        | IHESAGLPFFEIFVDAPLNICESR                                                   | 0.986149903        | 3             | 3.76869   |
| O88428        | NLGFSA GDREENIR                                                            | 0.957288883        | 2             | 3.01183   |
| <b>O88600</b> | <b>HSP74 Heat shock 70 kDa protein 4</b>                                   | <b>0.924726033</b> | <b>0.2141</b> | <b>15</b> |
| O88600        | AESEEMETSQAGSK                                                             | 0.956625043        | 2             | 4.48381   |
| O88600        | AESEEMETSQAGSK+Oxidation(5)                                                | 1.474608351        | 2             | 3.9179    |
| O88600        | AFSDPFVEAEK                                                                | 0.959940025        | 2             | 2.52537   |
| O88600        | AGGIETIANEYSDR                                                             | 0.956457579        | 2             | 3.4878    |
| O88600        | EFSITDVVPYPISLR                                                            | 1.021193438        | 2             | 2.52834   |
| O88600        | ELSTTLNADEAVTR                                                             | 0.911072088        | 2             | 2.35192   |
| O88600        | GCALQCAILS PAFK                                                            | 1.057260614        | 2             | 3.42905   |
| O88600        | HAEQNGPVDGQGDNPQTAAEHGADTAVPSDGDK                                          | 1.075477155        | 3             | 4.69788   |
| O88600        | MIMQDKLEK+Oxidation(0)                                                     | 1.073985341        | 2             | 2.39926   |
| O88600        | NFTTEQVTAMLLSK                                                             | 1.14049144         | 2             | 3.45573   |
| O88600        | NKEDQYEH LDAADMTK                                                          | 1.257328642        | 3             | 3.48827   |
| O88600        | SNLAYDIVQLPTGLTG I K                                                       | 0.975005949        | 2             | 4.43311   |
| O88600        | TSTVDLP IESQLLWQLDR                                                        | 1.06271907         | 2             | 4.16192   |
| O88600        | VLATAFD T T L GGR                                                          | 0.893514685        | 2             | 3.38455   |
| O88600        | WNSPAEEGSSDCEVFPK                                                          | 1.085362248        | 2             | 3.40843   |
| <b>O88618</b> | <b>FTCD Formimidoyltransferase cyclodeaminase</b>                          | <b>1.278577903</b> | <b>1E-19</b>  | <b>20</b> |
| O88618        | AFAACLGA I K                                                               | 1.304764442        | 2             | 2.74629   |
| O88618        | AGEYEALPEK                                                                 | 1.271318095        | 2             | 2.92188   |
| O88618        | ALLDAAAFYCDK                                                               | 1.413651887        | 2             | 3.93278   |
| O88618        | ALLDAAAFYCDKEK                                                             | 1.140519204        | 2             | 3.82882   |
| O88618        | EAQELNLPVVGSQLVGLVPLK                                                      | 1.13620343         | 3             | 4.36034   |
| O88618        | GVSMDECVLCAK                                                               | 1.507287843        | 2             | 3.83545   |
| O88618        | IIEYLV PDSGPEQSLLDASLR                                                     | 1.277613781        | 2             | 4.95072   |
| O88618        | ISSLLQEAK                                                                  | 1.267519423        | 1             | 2.10303   |
| O88618        | KVQGIGWYLEEK                                                               | 1.216585336        | 2             | 2.63684   |
| O88618        | LAEELNVPVLYG EAAQMPSR                                                      | 1.456340275        | 2             | 5.02098   |
| O88618        | LFVLEEEHR                                                                  | 1.233132792        | 2             | 2.80888   |
| O88618        | LGLDSLAPFDPK                                                               | 1.259892468        | 2             | 3.81037   |
| O88618        | MGALDVCPFIPVR                                                              | 1.383729062        | 2             | 3.35725   |
| O88618        | MGALDVCPFIPVR+Oxidation(0)                                                 | 1.259684369        | 2             | 2.67308   |
| O88618        | NLAQVSTNLLDFEVTALHTVYEEAR                                                  | 1.547473039        | 3             | 4.2934    |
| O88618        | QAEWVPDFG PSSFVPSWGATVTGAR                                                 | 1.180893311        | 2             | 3.9104    |
| O88618        | TCALQEGLR                                                                  | 1.662707868        | 2             | 2.74222   |
| O88618        | TQAALVLSLEAR                                                               | 1.14744042         | 2             | 5.05592   |
| O88618        | TVYTFVGQPECVVEGALSAAR                                                      | 1.504458062        | 2             | 4.3361    |
| O88618        | VQGIGWYLEEK                                                                | 1.288667465        | 2             | 3.42189   |
| <b>O88637</b> | <b>PCY2 Ethanolamine_phosphate cytidyltransferase</b>                      | <b>1.090604661</b> | <b>0.9848</b> | <b>6</b>  |

|               |                                                                  |                    |               |          |
|---------------|------------------------------------------------------------------|--------------------|---------------|----------|
| O88637        | GPPVFTQEER                                                       | 0.979812311        | 2             | 2.55598  |
| O88637        | HKGPPVFTQEER                                                     | 0.984400615        | 2             | 3.01824  |
| O88637        | TEIVPDRDGSDPYEEP                                                 | 1.011155271        | 2             | 2.7517   |
| O88637        | TQGVSTDLVGR                                                      | 0.978914674        | 2             | 2.92766  |
| O88637        | WVDEVVPAAPYVTTLETLDK                                             | 1.086374209        | 2             | 2.93986  |
| O88637        | YVSEVVIGAPYSVTAELLNHF                                            | 1.20720904         | 3             | 3.32313  |
| <b>O88746</b> | <b>TOM1 Target of Myb protein 1</b>                              | <b>0.95380647</b>  | <b>0.9751</b> | <b>2</b> |
| O88746        | GDLSQHATPLPTPAVLPGDSPITPTEQIGK                                   | 0.947977874        | 3             | 5.4896   |
| O88746        | QQSTGAIPATQAR                                                    | 1.088127901        | 2             | 2.39602  |
| <b>O88761</b> | <b>PSMD1 26S proteasome non_ATPase regulatory subunit 1</b>      | <b>1.085444262</b> | <b>0.8128</b> | <b>2</b> |
| O88761        | DTSEDIIEELVEPVAAHGPK                                             | 1.016968309        | 2             | 3.39472  |
| O88761        | TVGTPIASVPGSTNTGTVPGEK                                           | 1.085747418        | 2             | 3.18583  |
| <b>O88767</b> | <b>PARK7 Protein DJ_1</b>                                        | <b>1.676602542</b> | <b>7E-08</b>  | <b>6</b> |
| O88767        | DVVICPDTSLEEAK                                                   | 1.016633309        | 2             | 3.04603  |
| O88767        | GAEEMETVIPVDIMR                                                  | 1.04749498         | 2             | 4.12876  |
| O88767        | GAEEMETVIPVDIMR+Oxidation(13)                                    | 1.209088603        | 2             | 2.96104  |
| O88767        | GLIAAICAGPTALLAHEVGFCK                                           | 0.698613889        | 2             | 4.94179  |
| O88767        | TQGPYDVVPLPGGNLGAQNLSALVK                                        | 0.961162072        | 2             | 4.54039  |
| O88767        | VTVAGLAGKDPVQCSR                                                 | 0.873997212        | 2             | 3.95268  |
| <b>O88813</b> | <b>ACSL5 Long_chain_fatty_acid_CoA ligase 5</b>                  | <b>0.722056456</b> | <b>1E-19</b>  | <b>8</b> |
| O88813        | AILEDLQK                                                         | 0.841094828        | 1             | 1.91715  |
| O88813        | GLAVSDNGPCLGYR                                                   | 0.860745012        | 2             | 2.99222  |
| O88813        | GSFEELCQNQCVK                                                    | 0.769597215        | 2             | 4.38467  |
| O88813        | IGFFQDIR                                                         | 1.182544648        | 2             | 2.66737  |
| O88813        | SFLIGVVVPDPESLPSFAAK                                             | 0.705807964        | 2             | 3.87398  |
| O88813        | SIFVHPEPFSIENLLTPTLK                                             | 1.007430063        | 3             | 3.7044   |
| O88813        | SRPILQVVFHGESLR                                                  | 0.81414948         | 3             | 3.78981  |
| O88813        | TQEVLDKDGWLHTGDIGR                                               | 0.862072863        | 3             | 3.32836  |
| <b>O88867</b> | <b>KMO Kynurenine 3_monooxygenase</b>                            | <b>1.164929702</b> | <b>0.0823</b> | <b>4</b> |
| O88867        | AVGLEDQIVSK                                                      | 0.904683091        | 1             | 2.46724  |
| O88867        | FNNDLSVCLPEFSR                                                   | 1.462139192        | 2             | 3.62959  |
| O88867        | NFPDAIPLMGEQALMR                                                 | 0.939786041        | 2             | 2.51779  |
| O88867        | NFQVDVYEAR                                                       | 1.016963129        | 2             | 2.58554  |
| <b>O88941</b> | <b>MOGS Mannosyl_oligosaccharide glucosidase</b>                 | <b>0.899830782</b> | <b>0.3304</b> | <b>3</b> |
| O88941        | DLALPTLLNPK                                                      | 0.85026452         | 2             | 2.30048  |
| O88941        | LGPLLDVLADSR                                                     | 0.948177861        | 2             | 2.79674  |
| O88941        | MDPSLFPPVPLFSGVPSR                                               | 0.884308774        | 2             | 2.48009  |
| <b>O88986</b> | <b>KBL_2_amin_3_ketobutyrate coenzyme A ligase_mitochondrial</b> | <b>0.948894482</b> | <b>0.1223</b> | <b>2</b> |
| O88986        | GTDELLGVMDQVTIINSTLKG                                            | 0.902422849        | 2             | 3.38865  |
| O88986        | VQISAVHSEEDIDR                                                   | 1.016623956        | 2             | 3.54225  |
| <b>O88989</b> | <b>MDHC Malate dehydrogenase_cytoplasmic</b>                     | <b>1.138357844</b> | <b>1E-19</b>  | <b>8</b> |
| O88989        | DLDVAVLVGSMR                                                     | 0.978952083        | 3             | 3.97206  |
| O88989        | ELTEEKETAFFLSSA                                                  | 1.127772012        | 2             | 3.72744  |
| O88989        | EVGVYEALKDDSWLK                                                  | 1.029160115        | 2             | 3.82034  |
| O88989        | FVEGLPINDFSR                                                     | 1.162221454        | 2             | 3.29685  |
| O88989        | GEFITTQQR                                                        | 1.133578174        | 2             | 3.98853  |
| O88989        | LGVTADDVK                                                        | 1.240214806        | 2             | 2.81549  |
| O88989        | NVIWGNHSSTQYPDVNHAK                                              | 1.178849693        | 2             | 5.757    |
| O88989        | VIVVGNPANTNCLTASK                                                | 1.153362003        | 2             | 5.17125  |
| <b>O88990</b> | <b>ACTN3 Alpha_actinin_3</b>                                     | <b>1.166111007</b> | <b>2E-05</b>  | <b>5</b> |
| O88990        | AGTQIENIEEDFR                                                    | 1.087991188        | 2             | 3.06405  |
| O88990        | CQLEINFNTLQTK                                                    | 1.14760315         | 2             | 4.11349  |
| O88990        | FAIQDISVEETS                                                     | 0.958907067        | 2             | 4.19023  |
| O88990        | GLSQEQLNEFR                                                      | 1.425369331        | 2             | 2.41592  |
| O88990        | HEAFESDLAAHQDR                                                   | 1.449791507        | 3             | 4.299    |
| <b>O88994</b> | <b>MOSC2 MOSC domain_containing protein 2_mitochondrial</b>      | <b>0.937426875</b> | <b>0.9999</b> | <b>2</b> |
| O88994        | CVLTTVDPDTGIIDR                                                  | 0.905060082        | 2             | 4.30261  |

|               |                                                         |                    |               |           |
|---------------|---------------------------------------------------------|--------------------|---------------|-----------|
| O88994        | QLQQVGTVSK                                              | 1.027533883        | 2             | 2.36573   |
| <b>O89000</b> | <b>DPYD Dihydropyrimidine dehydrogenase [NADP_]</b>     | <b>0.906224624</b> | <b>0.3649</b> | <b>5</b>  |
| O89000        | EGGADGVTATNTVSGLMGLK                                    | 0.832287956        | 2             | 2.70685   |
| O89000        | GTTSGPLYGPGQSSFLNIELISEK                                | 1.113874704        | 2             | 4.05998   |
| O89000        | LTPNVTDIVSIAR                                           | 0.47273526         | 2             | 2.55182   |
| O89000        | QEYVGGGLSTSEIPQFR                                       | 1.028395168        | 2             | 3.52097   |
| O89000        | TEQDETGNWVEDEEQIVR                                      | 1.182885329        | 2             | 4.56216   |
| <b>O89032</b> | <b>SPD2A SH3 and PX domain_containing protein 2A</b>    | <b>0.904814702</b> | <b>0.2903</b> | <b>2</b>  |
| O89032        | EGWAPASYIDKRR                                           | 0.901512109        | 1             | 1.96327   |
| O89032        | MLAYCVQDATVVDVEK                                        | 1.120635435        | 2             | 2.45512   |
| <b>O89046</b> | <b>COR1B Coronin_1B</b>                                 | <b>1.077396418</b> | <b>0.4297</b> | <b>2</b>  |
| O89046        | NDQCYEDIR                                               | 0.980281981        | 2             | 3.01493   |
| O89046        | NVLSDSKPAGYSR                                           | 1.100654867        | 2             | 3.32397   |
| <b>O89049</b> | <b>TRXR1 Thioredoxin reductase 1_cytoplasmic</b>        | <b>1.006121695</b> | <b>0.6999</b> | <b>5</b>  |
| O89049        | IEQIEAGTPGR                                             | 1.030830177        | 2             | 3.358     |
| O89049        | IEQIEAGTPGRLK                                           | 0.470264912        | 2             | 2.37186   |
| O89049        | LELTPVAIQAGR                                            | 0.990508007        | 2             | 2.74066   |
| O89049        | STNSEETIEDEFNTVLLAVGR                                   | 1.049240188        | 3             | 3.44283   |
| O89049        | WGLGGTCVNVGCIPK                                         | 0.998586026        | 2             | 3.06956   |
| <b>P00173</b> | <b>CYB5 Cytochrome b5</b>                               | <b>0.88514399</b>  | <b>1E-19</b>  | <b>6</b>  |
| P00173        | EQAGGDATENFEDVGHSTDAR                                   | 0.781123204        | 2             | 5.38046   |
| P00173        | FLEEHPGGEEVLR                                           | 0.853547403        | 2             | 4.17672   |
| P00173        | STWVILHHK                                               | 1.034535052        | 2             | 2.73728   |
| P00173        | TYIIGELHPDDR                                            | 0.910177731        | 2             | 3.87577   |
| P00173        | VYDLTK                                                  | 0.838147773        | 1             | 2.13226   |
| P00173        | YTTLEEIQK                                               | 0.809257745        | 2             | 3.09618   |
| <b>P00388</b> | <b>NCPR NADPH_cytochrome P450 reductase</b>             | <b>1.216206847</b> | <b>1E-05</b>  | <b>7</b>  |
| P00388        | DVQNTFYDIVAEFGPMEHTQAVDYVK                              | 1.100100728        | 3             | 4.97609   |
| P00388        | GMSADPEEYDLADLSSLPEIDK                                  | 1.341514306        | 2             | 4.67908   |
| P00388        | LEQLGAQR                                                | 1.375009202        | 2             | 2.32892   |
| P00388        | RSDEDLYR                                                | 1.328413562        | 2             | 3.23283   |
| P00388        | SDEDLYR                                                 | 1.316557288        | 2             | 2.38762   |
| P00388        | SYENQKPPFDAK                                            | 1.077826909        | 2             | 3.01685   |
| P00388        | TNVLYELAQYASEPSEQEHLHK                                  | 1.176383271        | 3             | 3.58361   |
| <b>P00406</b> | <b>COX2 Cytochrome c oxidase subunit 2</b>              | <b>1.129353547</b> | <b>0.0806</b> | <b>2</b>  |
| P00406        | LLEVDNR                                                 | 1.184294509        | 2             | 2.54921   |
| P00406        | VVLPMELPIR                                              | 1.127455138        | 2             | 2.33376   |
| <b>P00481</b> | <b>OTC Ornithine carbamoyltransferase_mitochondrial</b> | <b>1.024987767</b> | <b>8E-11</b>  | <b>14</b> |
| P00481        | FGMHLQAATPK                                             | 0.966140865        | 3             | 3.4573    |
| P00481        | GEYLPLLQGK                                              | 0.982571065        | 2             | 3.04845   |
| P00481        | GGNVLITDTWISMGQEDEK                                     | 1.045723798        | 2             | 4.5317    |
| P00481        | GGNVLITDTWISMGQEDEKK                                    | 0.986341514        | 2             | 4.63328   |
| P00481        | GLTSLWIGDGNLHLSIMMSAAK                                  | 1.285373227        | 2             | 4.12862   |
| P00481        | GYEPDPNIVK                                              | 1.019249213        | 2             | 2.7553    |
| P00481        | LQAFQGYQVTMK                                            | 1.34140911         | 2             | 3.41781   |
| P00481        | LSTETGFALLGGHPSFLTQDIHLGVNESLTDAR                       | 1.117633876        | 3             | 5.72871   |
| P00481        | QKGEYLPLLQGK                                            | 1.060689879        | 2             | 3.19065   |
| P00481        | SLVFPEAENR                                              | 1.056438611        | 2             | 2.47201   |
| P00481        | SLVFPEAENRK                                             | 1.03252082         | 2             | 2.88699   |
| P00481        | VLSSMTDAVLAR                                            | 1.053331785        | 2             | 3.71847   |
| P00481        | VLSSMTDAVLAR+Oxidation(4)                               | 1.011847798        | 2             | 2.77119   |
| P00481        | YGKPVQSQVQLK                                            | 0.345153813        | 2             | 2.8169    |
| <b>P00502</b> | <b>GSTA1 Glutathione S_transferase alpha_1</b>          | <b>0.733494703</b> | <b>0.9999</b> | <b>2</b>  |
| P00502        | FIQSPEDLEK                                              | 0.768672388        | 2             | 2.7878    |
| P00502        | WLLAAAGVEFDEK                                           | 0.802509909        | 2             | 4.41792   |
| <b>P00507</b> | <b>AATM Aspartate aminotransferase_mitochondrial</b>    | <b>0.998241179</b> | <b>4E-05</b>  | <b>17</b> |
| P00507        | ASAELALGENSEVLK                                         | 1.003411396        | 2             | 4.82794   |

|               |                                               |                    |               |           |
|---------------|-----------------------------------------------|--------------------|---------------|-----------|
| P00507        | DAGMQLQGYR                                    | 0.885203805        | 2             | 2.31843   |
| P00507        | DDNGKPYVLPVSR                                 | 0.984514928        | 2             | 3.32851   |
| P00507        | DDNGKPYVLPVSRKAEAQIAGK                        | 0.839959682        | 2             | 2.38324   |
| P00507        | EGSSHNWQHITDQIGMFCFTGLKPEQVER                 | 1.144279076        | 3             | 4.83554   |
| P00507        | FVTVQITSGTGALR                                | 1.008228769        | 2             | 5.15682   |
| P00507        | HFIEQGINVCLCQSYAK                             | 1.006927985        | 2             | 3.69049   |
| P00507        | IAATILTSPDLR                                  | 1.676843883        | 2             | 3.05703   |
| P00507        | IPEQSVLLLHACAHNPTGVDP RPREQWK                 | 1.192137907        | 3             | 4.32644   |
| P00507        | KQWLQEVK                                      | 0.894088437        | 1             | 2.11343   |
| P00507        | MNLGVGAYR                                     | 1.115123937        | 2             | 2.93142   |
| P00507        | NLDKEYLPIGGLADFCK                             | 0.935344658        | 2             | 5.36405   |
| P00507        | NMGLYGER                                      | 1.011535785        | 1             | 2.19264   |
| P00507        | TCGFDFSGALEDISK                               | 0.948101214        | 2             | 4.69468   |
| P00507        | TQLVSNLK                                      | 0.948805306        | 2             | 2.68159   |
| P00507        | VGAFVVCK                                      | 1.045116948        | 2             | 3.1257    |
| P00507        | VGASFLQR                                      | 1.193118128        | 2             | 2.97282   |
| <b>P00564</b> | <b>KCRM Creatine kinase M_type</b>            | <b>1.201539148</b> | <b>1</b>      | <b>11</b> |
| P00564        | DLFDP IIQDR                                   | 1.276272293        | 2             | 2.47413   |
| P00564        | FEEILTR                                       | 1.462333893        | 2             | 2.44762   |
| P00564        | GGDDLDPNYVLSRR                                | 1.270534769        | 2             | 4.17961   |
| P00564        | GQSIDDMIPAQK                                  | 1.457512757        | 2             | 2.86245   |
| P00564        | GTGGVDTAAVGAVFDISNADR                         | 1.308989431        | 2             | 5.89431   |
| P00564        | LGSSEVEQVQLVVDGVK                             | 1.470800938        | 2             | 3.65185   |
| P00564        | LSVEALNSLTGEFK                                | 1.312591091        | 2             | 3.74195   |
| P00564        | RGTGGVDTAAVGAVFDISNADR                        | 1.193130946        | 2             | 4.17341   |
| P00564        | SMTEQEQQQLIDHFLFDKPVSPLLLASGMAR               | 1.198106017        | 3             | 6.0096    |
| P00564        | SMTEQEQQQLIDHFLFDKPVSPLLLASGMAR+Oxidation(1)  | 1.315330111        | 4             | 4.55809   |
| P00564        | TDLNHENLK                                     | 1.079855908        | 2             | 2.63888   |
| <b>P00787</b> | <b>CATB Cathepsin B</b>                       | <b>1.156419395</b> | <b>3E-07</b>  | <b>4</b>  |
| P00787        | GENHCGIESEIVAGIPR                             | 1.177198053        | 2             | 4.23511   |
| P00787        | HEAGDVMGGHAIR                                 | 1.162163558        | 3             | 3.88735   |
| P00787        | MCEAGYSTSYKEDK                                | 1.224809384        | 2             | 3.72682   |
| P00787        | NGPVEGAFVTFSDFLTYK                            | 1.192546046        | 2             | 3.62001   |
| <b>P00884</b> | <b>ALDOB Fructose_bisphosphate aldolase B</b> | <b>1.385476054</b> | <b>1E-19</b>  | <b>18</b> |
| P00884        | ALQASALAAWGGK                                 | 1.587584483        | 2             | 4.72071   |
| P00884        | ATQEAFMK                                      | 1.189089917        | 2             | 2.67401   |
| P00884        | ATQEAFMK+Oxidation(6)                         | 1.609721609        | 1             | 2.21641   |
| P00884        | ELLFSVDNSISQSIGGVILFHETLYQK                   | 1.473021793        | 3             | 4.12183   |
| P00884        | ELSEIAQR                                      | 0.976850724        | 1             | 2.1754    |
| P00884        | ETTIQGLDGLSER                                 | 1.110384317        | 2             | 3.7022    |
| P00884        | GILAADESVGTMGNR                               | 1.225740185        | 2             | 5.43682   |
| P00884        | GILAADESVGTMGNR+Oxidation(11)                 | 1.394234857        | 2             | 5.1026    |
| P00884        | IKVENTEENR                                    | 1.49061219         | 2             | 3.15553   |
| P00884        | IKVENTEENRR                                   | 1.455178           | 2             | 3.16388   |
| P00884        | ISDQCPSLAIQENANALAR                           | 1.251781512        | 2             | 6.46809   |
| P00884        | KELSEIAQR                                     | 1.346947077        | 3             | 3.5845    |
| P00884        | KYTPEQVAMATVTALHR                             | 1.367999581        | 3             | 6.00846   |
| P00884        | KYTPEQVAMATVTALHR+Oxidation(8)                | 1.484466917        | 3             | 4.79752   |
| P00884        | LDQGGAPLAGTNK                                 | 1.279005679        | 2             | 4.56857   |
| P00884        | YASICQQNGLVPIVEPEVLPDGDHDLHCQYVSEK            | 1.39085073         | 3             | 5.04742   |
| P00884        | YTPEQVAMATVTALHR                              | 1.508174577        | 2             | 4.71481   |
| P00884        | YTPEQVAMATVTALHR+Oxidation(7)                 | 1.369805827        | 2             | 4.17035   |
| <b>P01015</b> | <b>ANGT Angiotensinogen</b>                   | <b>0.73956745</b>  | <b>0.12</b>   | <b>2</b>  |
| P01015        | GSYNLQDLLAQAK                                 | 0.745397787        | 2             | 2.34024   |
| P01015        | SLDLSTDPVLAAQK                                | 0.526879875        | 2             | 2.69179   |
| <b>P01026</b> | <b>CO3 Complement C3</b>                      | <b>1.002709044</b> | <b>0.0691</b> | <b>12</b> |
| P01026        | ADIGCTPGSGK                                   | 0.922144183        | 2             | 2.41277   |

|               |                                             |                    |               |           |
|---------------|---------------------------------------------|--------------------|---------------|-----------|
| P01026        | DSCVGTLVVKG DPR                             | 0.784267665        | 2             | 2.36007   |
| P01026        | EYVLPSEFVLEPTEK                             | 0.850477214        | 2             | 4.08405   |
| P01026        | IFTVDNLLPVGK                                | 0.973372197        | 2             | 2.7684    |
| P01026        | RVPVVTQGS DAQALTQDDGVAK                     | 0.854654031        | 2             | 4.88799   |
| P01026        | SGSDEVQAGQER                                | 1.448996697        | 2             | 4.2324    |
| P01026        | SSVAVPYVIVPLK                               | 1.105576775        | 2             | 2.45118   |
| P01026        | TVLTGATGHLNR                                | 0.941865073        | 2             | 2.75466   |
| P01026        | VELKPGDNLNVNFHLR                            | 0.847555989        | 3             | 4.97326   |
| P01026        | VHQFFNVGLIQPGSVK                            | 1.063607772        | 3             | 3.57012   |
| P01026        | VLIEDGSGEAVLSR                              | 1.003671789        | 2             | 3.52488   |
| P01026        | VLMDGVRPSSPEALVGK                           | 1.106347395        | 2             | 2.64887   |
| <b>P01946</b> | <b>HBA Hemoglobin subunit alpha_1/2</b>     | <b>0.439406131</b> | <b>1E-19</b>  | <b>8</b>  |
| P01946        | AADHVEDLPGALSTLSDLHAHK                      | 0.571431976        | 3             | 7.35119   |
| P01946        | FLASVSTVLTSK                                | 0.431279939        | 2             | 3.99818   |
| P01946        | FLSHCLLVTLACHHPGDFTPAMHASL DKFLASVSTVLTSK   | 0.770133933        | 6             | 4.98911   |
| P01946        | IGGHGGEYGEALQR                              | 0.572221945        | 3             | 5.07364   |
| P01946        | LRVDPVNFK                                   | 0.485379064        | 2             | 2.46616   |
| P01946        | MFAAFPTTK                                   | 0.503010527        | 2             | 2.49243   |
| P01946        | MFAAFPTTK+Oxidation(0)                      | 0.391143394        | 2             | 2.69809   |
| P01946        | TYFSHIDVSPGSAQVK                            | 0.506990341        | 2             | 5.19758   |
| <b>P02089</b> | <b>HBB2 Hemoglobin subunit beta_2</b>       | <b>0.539177986</b> | <b>1E-19</b>  | <b>4</b>  |
| P02089        | GTFASLSELHCDK                               | 0.332506984        | 2             | 3.21935   |
| P02089        | LHVDPENFR                                   | 0.455002171        | 2             | 2.49771   |
| P02089        | YFDSFGDLSASAIMGNPK                          | 0.382230325        | 2             | 6.62883   |
| P02089        | YFDSFGDLSASAIMGNPK+Oxidation(14)            | 0.419065493        | 2             | 5.5711    |
| <b>P02091</b> | <b>HBB1 Hemoglobin subunit beta_1</b>       | <b>0.644254961</b> | <b>1E-19</b>  | <b>9</b>  |
| P02091        | AAVNGLWVK                                   | 1.245771683        | 2             | 2.76822   |
| P02091        | EFTPCAQA AFQK                               | 0.400751519        | 2             | 3.1865    |
| P02091        | GTF AHLSELHCDK                              | 0.542889873        | 2             | 4.261     |
| P02091        | GTF AHLSELHCDK LHVDPENFR                    | 0.392660149        | 3             | 3.83835   |
| P02091        | KVINAFNDGLK                                 | 0.493657097        | 3             | 3.87784   |
| P02091        | LLGNMIVIVLGHHLGK                            | 0.63074209         | 2             | 2.70511   |
| P02091        | VINAFNDGLK                                  | 0.49545302         | 2             | 2.92403   |
| P02091        | VNPDDVGG EALGR                              | 0.484833564        | 2             | 4.07351   |
| P02091        | VVAGVASALAHK                                | 0.489280445        | 2             | 3.4872    |
| <b>P02401</b> | <b>RLA2 60S acidic ribosomal protein P2</b> | <b>0.999447142</b> | <b>3E-06</b>  | <b>6</b>  |
| P02401        | ILDSVGIEADDER                               | 1.266370297        | 2             | 4.74632   |
| P02401        | KILDSVGIEADDER                              | 1.141676438        | 2             | 3.84707   |
| P02401        | LASVPAGGAVAVSAAPGSAAPAAGSAPAAAEEK           | 1.287921827        | 3             | 5.83732   |
| P02401        | NIEDVIAQGVGK                                | 1.003580431        | 2             | 4.60631   |
| P02401        | VISELNGK                                    | 1.046092301        | 1             | 2.01128   |
| P02401        | YVASYLLAALGGNSNPSAK                         | 1.246865231        | 2             | 5.09139   |
| <b>P02563</b> | <b>MYH6 Myosin_6</b>                        | <b>1.613888273</b> | <b>0.296</b>  | <b>2</b>  |
| P02563        | DTQLQLDDAVR                                 | 1.456280404        | 2             | 2.63058   |
| P02563        | VKLEQQVDDLEGSLEQEKK                         | 1.901282001        | 3             | 3.69309   |
| <b>P02564</b> | <b>MYH7 Myosin_7</b>                        | <b>1.104747552</b> | <b>0.2386</b> | <b>32</b> |
| P02564        | ALQEAHQALDDLQAEEDKVNTLTK                    | 1.158343025        | 3             | 4.51483   |
| P02564        | ANDDLKENIAIVER                              | 1.210157581        | 2             | 3.46824   |
| P02564        | DLEEATLQHEATAAALR                           | 1.015670279        | 2             | 4.96094   |
| P02564        | DTQIQLDDAVR                                 | 1.456280404        | 2             | 2.63058   |
| P02564        | DVFVPDDKEEFVK                               | 1.397832563        | 2             | 2.58631   |
| P02564        | ELENELEAEQK                                 | 1.05907832         | 2             | 2.33688   |
| P02564        | EQYEEET EAK                                 | 1.47412684         | 2             | 2.38641   |
| P02564        | GQNVQQVAYAIGALAK                            | 1.425247547        | 2             | 3.43065   |
| P02564        | GTLEDQIIQANPALEAFGNAK                       | 1.08705397         | 2             | 5.28435   |
| P02564        | IEDEQALGSQLQK                               | 1.451398456        | 2             | 4.41359   |
| P02564        | IEEEEELEAER                                 | 1.149533863        | 2             | 3.77815   |

|               |                                                             |                    |               |           |
|---------------|-------------------------------------------------------------|--------------------|---------------|-----------|
| P02564        | ILNPAAIPEGQFIDSR                                            | 1.451573473        | 2             | 2.8353    |
| P02564        | KLEDECSELKR                                                 | 1.148927118        | 3             | 3.49448   |
| P02564        | KVQHELDEAEER                                                | 1.085043736        | 2             | 3.6028    |
| P02564        | LAEQELIETSER                                                | 1.038548286        | 2             | 3.2148    |
| P02564        | LDEAEQIALK                                                  | 1.264316219        | 2             | 3.59203   |
| P02564        | LELDDVTSNMEQIHK                                             | 1.135143282        | 2             | 3.7856    |
| P02564        | LQDAEEAVEAVNAK                                              | 1.324959363        | 2             | 4.40889   |
| P02564        | LQNEIEDLMVDVER                                              | 1.37483185         | 2             | 2.97147   |
| P02564        | LTQESIMDLENDKQQLDER                                         | 1.525647731        | 3             | 3.58578   |
| P02564        | MDADLSQLQTEVEEAVQECR                                        | 1.200341014        | 2             | 4.24579   |
| P02564        | NAYEESLEHLETFK                                              | 1.00502117         | 2             | 2.85012   |
| P02564        | NLQEEISDLTEQLGSGTCK                                         | 1.083267449        | 2             | 5.52592   |
| P02564        | NLTEEMAGLDEIVK                                              | 1.216096146        | 2             | 3.70306   |
| P02564        | NNLLQAELEELR                                                | 1.36510035         | 2             | 3.45335   |
| P02564        | QAEEAEQANTNLSK                                              | 1.443863997        | 2             | 4.89664   |
| P02564        | QKYEESQSELESSQK                                             | 1.169960873        | 2             | 3.41548   |
| P02564        | TLEDQMNEHR                                                  | 1.07065129         | 2             | 2.64317   |
| P02564        | VKEMTERLEDEEEMNAELTAK                                       | 1.387771294        | 2             | 2.3221    |
| P02564        | VQHELDEAEER                                                 | 0.946037407        | 3             | 3.38028   |
| P02564        | VQLLHSQNTSLINQK                                             | 1.090250607        | 2             | 3.94321   |
| P02564        | VVDSLQTSLDAETR                                              | 1.120904547        | 2             | 3.64335   |
| <b>P02600</b> | <b>MYL1 Myosin light chain 1/3_ skeletal muscle isoform</b> | <b>1.217321312</b> | <b>0.9828</b> | <b>11</b> |
| P02600        | ALGTNPTNAEVK                                                | 1.225533727        | 2             | 3.27284   |
| P02600        | ALGTNPTNAEVKK                                               | 1.312012138        | 2             | 3.03803   |
| P02600        | DQGGYEDFVEGLR                                               | 1.643254597        | 2             | 3.97068   |
| P02600        | IDLSAIK                                                     | 1.373974272        | 2             | 2.32837   |
| P02600        | IEFEQFLPMMQAISNNK                                           | 1.39030863         | 2             | 3.65012   |
| P02600        | ITLSQVGDVLR                                                 | 2.030405938        | 2             | 3.50964   |
| P02600        | KIEFEQFLPMMQAISNNK                                          | 1.203968679        | 2             | 5.38094   |
| P02600        | KPAAAPAPAPAPAPAPAKPK                                        | 6.232659665        | 3             | 3.36854   |
| P02600        | KVLGNPSNEEMNAK                                              | 1.01227467         | 2             | 3.28092   |
| P02600        | VLGNPSNEEMNAK                                               | 1.305534585        | 2             | 3.57022   |
| P02600        | VLGNPSNEEMNAK+Oxidation(9)                                  | 1.454308395        | 2             | 2.80717   |
| <b>P02625</b> | <b>PRVA Parvalbumin alpha</b>                               | <b>1.082137771</b> | <b>0.433</b>  | <b>4</b>  |
| P02625        | AIGAFATAADSFCHK                                             | 1.285369056        | 2             | 2.41835   |
| P02625        | SGFIEDELGSILK                                               | 1.497666635        | 2             | 3.93653   |
| P02625        | TLMAAGDKDGDGK                                               | 0.878173509        | 2             | 2.91694   |
| P02625        | TLMAAGDKDGDGK+Oxidation(2)                                  | 1.486527682        | 2             | 3.02344   |
| <b>P02650</b> | <b>APOE Apolipoprotein E</b>                                | <b>1.027671868</b> | <b>0.9699</b> | <b>12</b> |
| P02650        | ELEEQLGPVAEETR                                              | 1.010668566        | 2             | 4.59738   |
| P02650        | GRLEEVGNQAR                                                 | 0.927752081        | 2             | 3.6228    |
| P02650        | GWFEPLVEDMQR                                                | 0.897750333        | 2             | 3.14161   |
| P02650        | LEEVGNQAR                                                   | 1.007503794        | 2             | 2.81307   |
| P02650        | LGADMEDLR                                                   | 1.119338278        | 2             | 2.60618   |
| P02650        | LGPLVEQGR                                                   | 1.150640197        | 2             | 2.44497   |
| P02650        | LQAEIFQAR                                                   | 1.22158236         | 2             | 2.32147   |
| P02650        | MEEQTQQIR                                                   | 0.909656617        | 2             | 2.54281   |
| P02650        | NEVNTMLGQSTEELR                                             | 0.995037983        | 2             | 4.40386   |
| P02650        | SKMEEQTQQIR                                                 | 0.750452927        | 2             | 3.39656   |
| P02650        | SKMEEQTQQIR+Oxidation(2)                                    | 1.064458899        | 2             | 2.96943   |
| P02650        | TANLGAGAAQPLR                                               | 1.048956738        | 2             | 3.19287   |
| <b>P02680</b> | <b>FIBG Fibrinogen gamma chain</b>                          | <b>0.925883784</b> | <b>0.9075</b> | <b>4</b>  |
| P02680        | VAQLEAQCQEPCK                                               | 1.158177415        | 2             | 2.75134   |
| P02680        | VGPEADKYR                                                   | 0.301224198        | 2             | 2.8417    |
| P02680        | YEALLTHESSIR                                                | 0.8441684          | 2             | 3.54532   |
| P02680        | YLQDIYTSNK                                                  | 0.931886234        | 2             | 2.44483   |
| <b>P02692</b> | <b>FABPL Fatty acid binding protein_liver</b>               | <b>0.915977093</b> | <b>1E-19</b>  | <b>12</b> |

|               |                                            |                    |               |           |
|---------------|--------------------------------------------|--------------------|---------------|-----------|
| P02692        | AMGLPEDLIQK                                | 0.89143978         | 2             | 3.60376   |
| P02692        | AMGLPEDLIQK+Oxidation(1)                   | 0.885062863        | 2             | 3.74659   |
| P02692        | GVSEIVHEGK                                 | 0.950515082        | 2             | 3.32548   |
| P02692        | GVSEIVHEGKK                                | 0.837856293        | 2             | 3.20362   |
| P02692        | MVTTFK+Oxidation(0)                        | 0.722150694        | 1             | 1.99584   |
| P02692        | SVTEFNGDTITNTMTLGDIVYK                     | 0.860889466        | 3             | 5.72758   |
| P02692        | SVTEFNGDTITNTMTLGDIVYK+Oxidation(13)       | 1.041849996        | 2             | 5.24005   |
| P02692        | SVTEFNGDTITNTMTLGDIVYKR                    | 1.065534381        | 2             | 3.57648   |
| P02692        | VIHNEFTLGEECELETMTGEK                      | 0.908875122        | 3             | 6.17015   |
| P02692        | VIHNEFTLGEECELETMTGEK+Oxidation(16)        | 0.927575308        | 3             | 5.80079   |
| P02692        | YQVQSQENFEPFMK                             | 0.895335828        | 2             | 5.80917   |
| P02692        | YQVQSQENFEPFMK+Oxidation(12)               | 0.938890716        | 2             | 5.22381   |
| <b>P02696</b> | <b>RET1 Retinol_binding protein 1</b>      | <b>0.915559835</b> | <b>0.9982</b> | <b>6</b>  |
| P02696        | ALDVNVVALR                                 | 0.971240982        | 2             | 3.02512   |
| P02696        | CMTTVSWDGDKLQCVQK                          | 0.787601594        | 2             | 3.76211   |
| P02696        | EFEEDLTGIDDR                               | 0.862041875        | 2             | 2.47283   |
| P02696        | EFEEDLTGIDDRK                              | 0.897751322        | 2             | 2.85427   |
| P02696        | MLSNENFEEYLR                               | 0.949975132        | 2             | 3.32878   |
| P02696        | MLSNENFEEYLR+Oxidation(0)                  | 0.989518878        | 2             | 3.18666   |
| <b>P02706</b> | <b>ASGR1 Asialoglycoprotein receptor 1</b> | <b>1.170378402</b> | <b>0.2256</b> | <b>4</b>  |
| P02706        | DYQDFQHLDNENDHHQLQR                        | 1.235768845        | 3             | 4.48717   |
| P02706        | LVESQLEK                                   | 1.173585241        | 2             | 2.47237   |
| P02706        | SLSCQMAALR                                 | 1.171040115        | 2             | 2.63668   |
| P02706        | WVDGTDYETGFK                               | 1.006388114        | 2             | 3.02956   |
| <b>P02770</b> | <b>ALBU Serum albumin</b>                  | <b>1.004097201</b> | <b>0.9993</b> | <b>22</b> |
| P02770        | AADKDNCFATEGPNLVAR                         | 1.390895552        | 2             | 4.31594   |
| P02770        | AETFFHSDICTLPDKEK                          | 1.749724221        | 2             | 4.11612   |
| P02770        | CCAEGDPPACYGTVLAEFQPLVEEPK                 | 1.043517275        | 2             | 5.14804   |
| P02770        | CCSGSLVER                                  | 1.012638263        | 2             | 2.70419   |
| P02770        | CCTLPEAQR                                  | 0.985731181        | 2             | 3.02986   |
| P02770        | ECCHGDLLECADDR                             | 1.073167473        | 2             | 3.67682   |
| P02770        | ECCHGDLLECADDRRAELAK                       | 0.95576197         | 2             | 5.08551   |
| P02770        | FKDLGEQHFK                                 | 0.910359714        | 3             | 4.18436   |
| P02770        | GLVLIAFSQYLQK                              | 1.163387419        | 2             | 3.6445    |
| P02770        | KQTALAELVK                                 | 1.000615143        | 3             | 4.13387   |
| P02770        | KYEATLEK                                   | 0.874538324        | 1             | 2.96991   |
| P02770        | LQACCDKPVLQK                               | 0.974648381        | 2             | 4.16405   |
| P02770        | LVQEVDFAK                                  | 0.986370419        | 2             | 3.27122   |
| P02770        | RHPDYSVSLLR                                | 1.328090385        | 3             | 5.08933   |
| P02770        | SIHTLFGDK                                  | 0.939878077        | 1             | 2.36102   |
| P02770        | TCVADENAENCDK                              | 0.909442671        | 2             | 4.41626   |
| P02770        | TNCELYEK                                   | 1.021388379        | 2             | 2.75763   |
| P02770        | TVMGDFAQFVDK                               | 0.982192816        | 2             | 2.89356   |
| P02770        | TVMGDFAQFVDK+Oxidation(2)                  | 0.762004349        | 2             | 2.44096   |
| P02770        | YMCENQATISSK                               | 0.798475961        | 2             | 4.21156   |
| P02770        | YMCENQATISSK+Oxidation(1)                  | 0.978794392        | 2             | 3.54505   |
| P02770        | YNEVLTQCCTESDK                             | 1.059772253        | 2             | 5.67112   |
| <b>P02803</b> | <b>MT1 Metallothionein_1</b>               | <b>1.232305223</b> | <b>0.0097</b> | <b>2</b>  |
| <b>P04041</b> | <b>GPX1 Glutathione peroxidase 1</b>       | <b>0.794499317</b> | <b>1E-19</b>  | <b>9</b>  |
| P04041        | FLVGPDGVVPR                                | 0.789658695        | 2             | 3.5217    |
| P04041        | GLVVLGFPCNQFGHQEN GK                       | 0.819444281        | 2             | 4.2078    |
| P04041        | NALPAPSDDPTALMTDPK                         | 0.875920749        | 2             | 3.255     |
| P04041        | NALPAPSDDPTALMTDPK+Oxidation(13)           | 0.902390982        | 2             | 2.70153   |
| P04041        | NDISWNFEK                                  | 0.81116324         | 2             | 2.77702   |
| P04041        | NEEILNSLK                                  | 0.842619526        | 2             | 2.47548   |
| P04041        | TIDIEPDIEALLSK                             | 0.941732916        | 3             | 4.35711   |
| P04041        | YIWSPVCR                                   | 0.908181867        | 2             | 2.46742   |

|               |                                                        |                    |               |           |
|---------------|--------------------------------------------------------|--------------------|---------------|-----------|
| P04041        | YVRPGGGFEPNFTLFEK                                      | 0.812358265        | 3             | 4.41242   |
| <b>P04167</b> | <b>CP2B2 Cytochrome P450 2B2</b>                       | <b>0.848942192</b> | <b>1E-06</b>  | <b>2</b>  |
| P04167        | GTIAVIEPIFK                                            | 0.784435824        | 2             | 2.61487   |
| P04167        | NLQEILDYIGHIVEK                                        | 0.549689911        | 2             | 3.80253   |
| <b>P04176</b> | <b>PH4H Phenylalanine_4_hydroxylase</b>                | <b>1.198690515</b> | <b>0.0054</b> | <b>14</b> |
| P04176        | AYGAGLLSSFGLQYCLSDKPK                                  | 1.340369776        | 3             | 3.50996   |
| P04176        | EDNIPQLEDVSQLTCTGFR                                    | 1.118841746        | 3             | 4.76325   |
| P04176        | FANQILSYGAELDADHPGKDPVYR                               | 1.319607462        | 3             | 4.49207   |
| P04176        | ILADSINSEVGILCNALQK                                    | 0.955919449        | 2             | 5.05858   |
| P04176        | LRPVAGLLSSR                                            | 2.342655218        | 2             | 2.50035   |
| P04176        | NDIGATVHELRS                                           | 1.079148939        | 2             | 3.69054   |
| P04176        | QFADIAYNYR                                             | 1.108377126        | 2             | 2.48142   |
| P04176        | SFAQFSQEIGLASLGAPDEYIEK                                | 1.075476174        | 2             | 4.38874   |
| P04176        | TACQEYSVTEFQPLYVAESFSDAK                               | 1.38258968         | 2             | 4.99959   |
| P04176        | THACYEHNHIFP LLEK                                      | 1.152186424        | 2             | 4.49733   |
| P04176        | VEVDNTQQLK                                             | 1.041171536        | 2             | 3.54631   |
| P04176        | VEYTEEEK                                               | 1.174248898        | 2             | 2.73883   |
| P04176        | VEYTEEEKQTWGTVFR                                       | 0.958289297        | 2             | 3.76266   |
| P04176        | YCGFREDNIPQLEDVSQLTCTGFR                               | 1.147016769        | 3             | 3.55336   |
| <b>P04182</b> | <b>OAT Ornithine aminotransferase_mitochondrial</b>    | <b>1.007215536</b> | <b>0.3471</b> | <b>6</b>  |
| P04182        | AFYNNVLGEYEEYITK                                       | 0.950075567        | 2             | 4.36976   |
| P04182        | GLLNAIVIR                                              | 1.05204954         | 2             | 2.79088   |
| P04182        | KTEQGPPSSEYIFER                                        | 1.01916349         | 2             | 3.93442   |
| P04182        | TEQGPPSSEYIFER                                         | 0.960609268        | 2             | 3.55382   |
| P04182        | VLPMNTGVEAGETACK                                       | 0.965672812        | 2             | 4.93869   |
| P04182        | WLAVDHENVRPDIVLLGK                                     | 0.56895086         | 2             | 4.38126   |
| <b>P04256</b> | <b>ROA1 Heterogeneous nuclear ribonucleoprotein A1</b> | <b>0.836686922</b> | <b>1E-08</b>  | <b>5</b>  |
| P04256        | EDSQRPGAHLTVK                                          | 0.75147835         | 2             | 3.32671   |
| P04256        | IEVIEIMTDR                                             | 0.804044787        | 2             | 3.41041   |
| P04256        | MSKSESPKEPEQLR                                         | 0.981441354        | 2             | 2.39829   |
| P04256        | NQGGYGGSSSSSYGSGR                                      | 0.906075339        | 2             | 4.69573   |
| P04256        | SESPKEPEQLR                                            | 0.877429308        | 2             | 2.51384   |
| <b>P04355</b> | <b>MT2 Metallothionein_2</b>                           | <b>1.463556628</b> | <b>0.0724</b> | <b>2</b>  |
| <b>P04462</b> |                                                        | <b>0.811519386</b> | <b>6E-16</b>  | <b>53</b> |
| P04462        | AEVSELPVVVR                                            | 0.844227128        | 2             | 2.8961    |
| P04462        | ALLTPVAIAAGR                                           | 0.85629774         | 2             | 2.33306   |
| P04462        | ASMMGQRASLLTAR+Oxidation(2)                            | 1.10080434         | 2             | 2.39155   |
| P04462        | AVAENQPFLIEAMTYR                                       | 1.185363104        | 2             | 3.97277   |
| P04462        | AVDEAADALLK                                            | 0.87988811         | 2             | 2.31355   |
| P04462        | AVEIAHALCLTERQIK                                       | 0.838870514        | 2             | 2.49514   |
| P04462        | DEELSCSVLELK                                           | 1.130476714        | 2             | 2.71877   |
| P04462        | DQMVKNNHFTLK+Oxidation(2)                              | 0.935508335        | 2             | 2.44572   |
| P04462        | EELEKMK                                                | 0.865629988        | 1             | 1.90928   |
| P04462        | EIAGATPYITAAEEK                                        | 0.723700527        | 2             | 2.76163   |
| P04462        | EKMNKPELFNGGEKK                                        | 1.142081341        | 2             | 2.35309   |
| P04462        | ELDSITPDITPGWK                                         | 0.878001706        | 2             | 2.58184   |
| P04462        | FDQPKLKP KSDPK                                         | 1.090574969        | 2             | 2.30108   |
| P04462        | FFRPHFLQAPGDLTVQEGK                                    | 0.905419521        | 2             | 2.81524   |
| P04462        | FKLINSTNIR                                             | 1.675307345        | 1             | 1.9087    |
| P04462        | GIEQAVQSHAVAE EEAR                                     | 0.968523099        | 2             | 4.83597   |
| P04462        | GNIYSLNEG YAK                                          | 1.135678566        | 2             | 4.13688   |
| P04462        | GVYSEETLR                                              | 0.934921402        | 2             | 2.31634   |
| P04462        | HLQTYGEHYPLDHF DK                                      | 1.524181872        | 3             | 3.56397   |
| P04462        | HVIHTVGPIAVGQPTASQAAELR                                | 0.908746287        | 3             | 4.17103   |
| P04462        | IEEMEKMLK+Oxidation(3)                                 | 0.983529762        | 1             | 1.98371   |
| P04462        | IGHHSTSD DSSAYR                                        | 2.468118223        | 3             | 4.20108   |
| P04462        | KAMQEI NYGPS D NSIKLVR                                 | 0.950830483        | 2             | 2.50625   |



|               |                                                                      |                    |               |           |
|---------------|----------------------------------------------------------------------|--------------------|---------------|-----------|
| P04462        | KGNIYSLNEGYAK                                                        | 1.140153195        | 2             | 4.00568   |
| P04462        | KLQHELEEAER                                                          | 1.27576202         | 3             | 4.04226   |
| P04462        | KVVSDDLVDVIMSHLK                                                     | 1.052112926        | 2             | 2.61307   |
| P04462        | LEFIQPNVISGIPIYR                                                     | 1.131076197        | 2             | 2.60935   |
| P04462        | LGDAVEQGVINNSVLGYFIGR                                                | 0.672277136        | 2             | 3.6388    |
| P04462        | LKLVMMNFIYQTK                                                        | 1.189237955        | 2             | 2.42867   |
| P04462        | LNNIYQNNLTK                                                          | 0.906455915        | 2             | 3.04488   |
| P04462        | LQHELEEAER                                                           | 1.465968865        | 2             | 3.57284   |
| P04462        | MNLQDELDELK                                                          | 0.818465769        | 2             | 2.55021   |
| P04462        | MNLQDELDELK+Oxidation(0)                                             | 1.009872156        | 2             | 2.53545   |
| P04462        | NNGYAISTPTSEQYR                                                      | 0.989286687        | 2             | 3.76692   |
| P04462        | QGQIINPSEDPHLPQEEVLK                                                 | 0.768622489        | 2             | 2.55509   |
| P04462        | QRAEQETKTK                                                           | 0.948756463        | 1             | 1.93396   |
| P04462        | QTITAQNAAVQAVK                                                       | 0.811017782        | 2             | 4.55435   |
| P04462        | QYLLNQGWWDDEEQEK                                                     | 0.979937184        | 2             | 3.39574   |
| P04462        | RAALQAEIEELR                                                         | 0.811473975        | 2             | 3.884     |
| P04462        | SEIQAEQDR                                                            | 0.992147192        | 2             | 2.81657   |
| P04462        | SLEDALNQTATVTR                                                       | 0.87004108         | 2             | 3.76818   |
| P04462        | SSLLAKSPSK                                                           | 1.185095278        | 2             | 2.35213   |
| P04462        | SVDEVNYWDK                                                           | 1.30807979         | 2             | 2.53541   |
| P04462        | TNTGEDGQYFLK                                                         | 0.799575203        | 2             | 2.31673   |
| P04462        | TSSAEMPTIPLGSAVEAIR                                                  | 0.943186737        | 2             | 2.76497   |
| P04462        | TVNVVQFEPNK                                                          | 0.866993555        | 2             | 2.37832   |
| P04462        | VDDSSGSIQR                                                           | 1.324541187        | 2             | 2.67065   |
| P04462        | VDGNDVFAVYNATK                                                       | 0.984380496        | 2             | 2.33335   |
| P04462        | VMEAFEQAER                                                           | 0.910271378        | 2             | 3.05327   |
| P04462        | VSCSDNEFTQALTAAPPELTR                                                | 0.966773563        | 2             | 2.70738   |
| P04462        | VVSQYHELWVQAR                                                        | 0.979536798        | 2             | 3.3983    |
| P04462        | YNENHQHGK                                                            | 0.833509264        | 1             | 1.94403   |
| P04462        | YSTSSSGVTAGK                                                         | 0.469114285        | 2             | 2.86426   |
| <b>P04466</b> | <b>MLRS Myosin regulatory light chain 2_ skeletal muscle isoform</b> | <b>1.585683196</b> | <b>0.9979</b> | <b>7</b>  |
| P04466        | AAAEGSSNVFSMFDQTIQEFK                                                | 1.126129475        | 2             | 4.80417   |
| P04466        | GADPEDVITGAFK                                                        | 1.475868778        | 2             | 4.06462   |
| P04466        | KQFLEELLTQCQR                                                        | 0.810472221        | 2             | 3.56261   |
| P04466        | LKGADPEDVITGAFK                                                      | 1.172909331        | 2             | 2.97065   |
| P04466        | NEELDAMMK                                                            | 1.127709774        | 1             | 1.96214   |
| P04466        | NICYVITHGDAK                                                         | 1.524884396        | 2             | 2.74876   |
| P04466        | QFLEELLTQCQR                                                         | 1.205487769        | 2             | 3.34434   |
| <b>P04550</b> | <b>PTMS Parathymosin</b>                                             | <b>1.150493155</b> | <b>3E-09</b>  | <b>4</b>  |
| P04550        | RTAEEDEADPKR                                                         | 1.368341347        | 3             | 4.26104   |
| P04550        | SVEAAAELSAK                                                          | 1.130118826        | 2             | 3.70334   |
| P04550        | TAEEDEADPK                                                           | 1.345169563        | 2             | 3.67157   |
| P04550        | TAEEDEADPKR                                                          | 1.15288413         | 2             | 3.69355   |
| <b>P04636</b> | <b>MDHM Malate dehydrogenase_ mitochondrial</b>                      | <b>0.841358593</b> | <b>1E-19</b>  | <b>18</b> |
| P04636        | AGAGSATLSMAYAGAR                                                     | 1.077955222        | 2             | 4.69084   |
| P04636        | AGAGSATLSMAYAGAR+Oxidation(9)                                        | 1.105338408        | 2             | 3.67959   |
| P04636        | ANTFVAELK                                                            | 1.061491903        | 2             | 2.64407   |
| P04636        | EGVIECSFVQSK                                                         | 0.901749251        | 2             | 3.21326   |
| P04636        | ETECTYFSTPLLLGK                                                      | 0.871654039        | 2             | 4.08631   |
| P04636        | FVFSLVDAMNGK                                                         | 0.924778886        | 2             | 4.39535   |
| P04636        | GCDVVVIPAGVPR                                                        | 0.869993521        | 2             | 4.37623   |
| P04636        | GYLGPEQLPDCLK                                                        | 0.906786769        | 2             | 4.11833   |
| P04636        | IFGVTTLDIVR                                                          | 1.252624881        | 2             | 3.69829   |
| P04636        | IQEAGTEVVK                                                           | 0.935438569        | 2             | 2.96222   |
| P04636        | ITPFEEK                                                              | 0.912207302        | 1             | 2.03893   |
| P04636        | LTLYDIAHTPGVAADLSHIETR                                               | 1.058217179        | 3             | 6.65212   |
| P04636        | MIAEAIPELK                                                           | 0.947590951        | 2             | 2.72139   |

|               |                                             |                    |               |           |
|---------------|---------------------------------------------|--------------------|---------------|-----------|
| P04636        | MIAEAIPELK+Oxidation(0)                     | 0.978107064        | 2             | 2.92239   |
| P04636        | TIIP LISQCTPK                               | 0.964656987        | 2             | 3.30404   |
| P04636        | VAVLGASGGIGQPLSLLLK                         | 2.115090049        | 2             | 6.15261   |
| P04636        | VDFPQDQLATLTGR                              | 0.973173595        | 2             | 4.60552   |
| P04636        | VNVVPVIGGHAGK                               | 0.73796227         | 1             | 2.29442   |
| <b>P04639</b> | <b>APOA1 Apolipoprotein A_I</b>             | <b>0.723761706</b> | <b>0.1384</b> | <b>6</b>  |
| P04639        | AKPALDDLGGQLMPVLEAWK                        | 0.609324638        | 2             | 3.66509   |
| P04639        | LQEQLGPVTQEFWANLEK                          | 0.8893875          | 2             | 4.55062   |
| P04639        | MRVNADALR+Oxidation(0)                      | 0.47166987         | 2             | 2.52142   |
| P04639        | NEMNKDLENVK                                 | 0.677144834        | 2             | 3.23845   |
| P04639        | QLNLNLLDNWDTLGSTVGR                         | 0.684601874        | 2             | 3.69543   |
| P04639        | WNEEVEAYR                                   | 0.817665862        | 2             | 2.79467   |
| <b>P04642</b> | <b>LDHA L_lactate dehydrogenase A chain</b> | <b>1.04922394</b>  | <b>2E-05</b>  | <b>16</b> |
| P04642        | DLADELALVDVIEDK                             | 1.080016572        | 2             | 5.27033   |
| P04642        | DLADELALVDVIEDKLLK                          | 0.942131282        | 2             | 3.35795   |
| P04642        | DQLIVNLLK                                   | 1.116937733        | 2             | 3.0834    |
| P04642        | DQLIVNLLKEEQVPQNK                           | 1.001407489        | 2             | 4.86108   |
| P04642        | EDVFLSVPCLGQNGISDVVK                        | 1.069971618        | 2             | 4.75731   |
| P04642        | FIIPNVVK                                    | 1.063185912        | 2             | 2.441     |
| P04642        | GEMMDLQHGSFLK                               | 1.344284115        | 2             | 3.29578   |
| P04642        | GEMMDLQHGSFLK+Oxidation(2)                  | 0.896613122        | 2             | 2.3176    |
| P04642        | KSADTLWGIQK                                 | 1.22762387         | 2             | 3.08222   |
| P04642        | NVNIFK                                      | 1.142344049        | 1             | 2.20089   |
| P04642        | QVVD SAYEVIK                                | 1.049814659        | 2             | 3.27613   |
| P04642        | RVHPISTMIK+Oxidation(7)                     | 1.130199234        | 2             | 2.57455   |
| P04642        | SADTLWGIQK                                  | 1.123696437        | 2             | 3.82974   |
| P04642        | SLNPQLGTDADK                                | 1.340611964        | 2             | 2.53043   |
| P04642        | SLNPQLGTDADKEQWK                            | 1.085245021        | 2             | 4.83564   |
| P04642        | VTLTPDEEAR                                  | 1.093519283        | 2             | 2.87673   |
| <b>P04644</b> | <b>RS17 40S ribosomal protein S17</b>       | <b>0.935019285</b> | <b>0.7946</b> | <b>2</b>  |
| P04644        | LLDFGSLSNLQVTQPTVGMNFK                      | 0.873369325        | 2             | 3.69171   |
| P04644        | VCEEIAIIPSK                                 | 1.013477177        | 2             | 2.94859   |
| <b>P04692</b> | <b>TPM1 Tropomyosin alpha_1 chain</b>       | <b>1.25056132</b>  | <b>0.9996</b> | <b>9</b>  |
| P04692        | AISEELDHALNDMTSI                            | 1.483349679        | 2             | 2.97861   |
| P04692        | GTEDELDKYSEALK                              | 1.257680422        | 2             | 3.73447   |
| P04692        | KLVIIESDLER                                 | 1.186330619        | 2             | 3.1257    |
| P04692        | LDKENALDR                                   | 1.666157898        | 1             | 2.07886   |
| P04692        | LKGTEDELDK                                  | 1.476190077        | 2             | 2.76048   |
| P04692        | LVIIIESDLER                                 | 0.97320155         | 2             | 2.66133   |
| P04692        | MEIQEIQLK                                   | 1.104689359        | 2             | 3.09523   |
| P04692        | QLEDELVSLQK                                 | 1.166660121        | 2             | 2.81521   |
| P04692        | SIDDEDELYAQK                                | 1.44862034         | 2             | 4.12576   |
| <b>P04694</b> | <b>ATTY Tyrosine aminotransferase</b>       | <b>0.937411042</b> | <b>0.9525</b> | <b>2</b>  |
| <b>P04762</b> | <b>CATA Catalase</b>                        | <b>0.922529504</b> | <b>1E-19</b>  | <b>30</b> |
| P04762        | APQKPDVLTGGGNPIGDK                          | 2.981020261        | 2             | 4.50064   |
| P04762        | DAMLFPSFIHSQK+Oxidation(2)                  | 0.916629968        | 2             | 2.73084   |
| P04762        | DAQLFIQR                                    | 0.817786775        | 2             | 2.99976   |
| P04762        | DGPMCMHDNQGGAPNYPNSFSAPEQQGSALEHHSQCSADVK   | 1.033354783        | 4             | 4.9636    |
| P04762        | DPASDQMK                                    | 1.071057683        | 1             | 2.03358   |
| P04762        | DPASDQMK+Oxidation(6)                       | 1.09640433         | 2             | 2.49865   |
| P04762        | DYPLIPVGK                                   | 0.789397068        | 1             | 2.22076   |
| P04762        | EAETFPFNPFDLTK                              | 0.835422862        | 2             | 4.29561   |
| P04762        | FNSANEDNVTQVR                               | 0.93721678         | 2             | 4.70968   |
| P04762        | FSTVAGESGSADTVR                             | 0.958557285        | 2             | 5.17287   |
| P04762        | FSTVAGESGSADTVRDP                           | 0.889641238        | 2             | 2.3877    |
| P04762        | FYTEDGNWDLVGNNTPIFFIR                       | 1.081799171        | 3             | 5.88305   |
| P04762        | GAGAFGYFEVTHDITR                            | 0.929468868        | 2             | 4.9663    |

|               |                                          |                    |               |           |
|---------------|------------------------------------------|--------------------|---------------|-----------|
| P04762        | GPLLVDVVFTDEMAHFDR                       | 1.083000837        | 2             | 5.74036   |
| P04762        | HMNGYGSHTFK                              | 0.873573081        | 3             | 4.35929   |
| P04762        | HMNGYGSHTFK+Oxidation(1)                 | 0.880076528        | 3             | 3.37125   |
| P04762        | LCENIANHLK                               | 0.98661931         | 3             | 3.71506   |
| P04762        | LFAYPDTHR                                | 1.027948866        | 2             | 2.90744   |
| P04762        | LGPNYLQIPVNCYPYR                         | 1.181375372        | 2             | 4.22078   |
| P04762        | LNIMTAGPR                                | 0.97857524         | 2             | 3.08237   |
| P04762        | LNIMTAGPR+Oxidation(3)                   | 1.150006305        | 2             | 2.3431    |
| P04762        | LVNANGEAVYCK                             | 1.056484091        | 2             | 3.7106    |
| P04762        | NAIHTYVQAGSHIAAK                         | 0.932794783        | 3             | 5.57551   |
| P04762        | NFTDVHPDYGAR                             | 0.863445096        | 2             | 3.96613   |
| P04762        | NLPVEEAGR                                | 0.821621077        | 1             | 2.26028   |
| P04762        | NPANYFAVEQMAFDPSNMPPGIEPSPDK             | 1.158317637        | 3             | 5.15325   |
| P04762        | RFNSANEDNVTQVR                           | 0.836268969        | 2             | 4.57431   |
| P04762        | VFEHIGK                                  | 0.979798486        | 2             | 2.33709   |
| P04762        | VQALLDQYNSQPKP                           | 0.894183016        | 2             | 4.9452    |
| P04762        | VVPHKDYPLIPVGK                           | 0.832893046        | 2             | 3.70789   |
| <b>P04764</b> | <b>ENOA Alpha_enolase</b>                | <b>1.069038209</b> | <b>1E-19</b>  | <b>14</b> |
| P04764        | AGYTDQVVIGMDVAASEFYR                     | 1.06007141         | 2             | 4.92137   |
| P04764        | DATNVGDEGGFAPNILENK                      | 1.056363359        | 2             | 5.93217   |
| P04764        | FTATAGIQVVGDDLTVTNPK                     | 1.213705779        | 2             | 4.79274   |
| P04764        | GNPTVEVDLYTAK                            | 1.263375541        | 2             | 3.73241   |
| P04764        | HIADLAGNPEVILPVPFNVINGGSHAGNK            | 1.030364662        | 3             | 6.47355   |
| P04764        | IDQLMIEMDGTENK                           | 1.18412624         | 2             | 4.08548   |
| P04764        | IEEELGSK                                 | 1.073057065        | 2             | 2.499     |
| P04764        | IGAEVYHNLK                               | 1.405755983        | 2             | 3.09145   |
| P04764        | KLNVVEQEKIDQLMIEMDGTENK                  | 0.995390915        | 3             | 4.75003   |
| P04764        | LNVVEQEK                                 | 1.175005853        | 2             | 2.37395   |
| P04764        | LNVVEQEKIDQLMIEMDGTENK                   | 1.016292676        | 3             | 4.53131   |
| P04764        | SCNCLLLK                                 | 1.276603211        | 2             | 2.7912    |
| P04764        | VNQIGSVTESLQACK                          | 1.071418899        | 2             | 5.13829   |
| P04764        | YITPDQLADLYK                             | 1.038954874        | 2             | 3.45887   |
| <b>P04785</b> | <b>PDIA1 Protein disulfide_isomerase</b> | <b>0.916757098</b> | <b>0.7408</b> | <b>24</b> |
| P04785        | DHENIVIAK                                | 1.05619795         | 2             | 2.90361   |
| P04785        | EADDIVNWLK                               | 0.797111316        | 2             | 2.55014   |
| P04785        | HNQLPLVIEFTEQTAPK                        | 1.060701211        | 2             | 5.35538   |
| P04785        | IKPHLMSQELPEDWDKQPVK                     | 1.140659204        | 3             | 4.09824   |
| P04785        | IKPHLMSQELPEDWDKQPVK+Oxidation(5)        | 1.09285396         | 3             | 3.51186   |
| P04785        | ILEFFGLK                                 | 1.283007776        | 2             | 2.80848   |
| P04785        | LGETYKDHENIVIAK                          | 1.021827841        | 3             | 4.90121   |
| P04785        | LITLEEEMTK                               | 1.029133375        | 2             | 3.55391   |
| P04785        | LITLEEEMTK+Oxidation(7)                  | 1.146537201        | 2             | 2.55561   |
| P04785        | LKAEGSEIR                                | 1.11122031         | 1             | 2.02934   |
| P04785        | LLDFIK                                   | 1.058012313        | 2             | 2.31833   |
| P04785        | MDSTANEVEAVK                             | 1.013059184        | 2             | 4.13078   |
| P04785        | MDSTANEVEAVK+Oxidation(0)                | 0.996009123        | 2             | 3.79399   |
| P04785        | NFEEVAFDEK                               | 1.046702009        | 2             | 3.01144   |
| P04785        | NFEEVAFDEKK                              | 0.975525173        | 2             | 3.83634   |
| P04785        | NNFEGEITK                                | 0.926780667        | 2             | 2.54112   |
| P04785        | QFLLAEEAVDDIPFGITSNSDVFSK                | 1.010324339        | 3             | 6.62069   |
| P04785        | SVSDYDGK                                 | 1.124396437        | 1             | 1.90107   |
| P04785        | TGPAATTLSDTAAAESLVDSSSEVTVIGFFK          | 1.04773135         | 3             | 6.35974   |
| P04785        | THILLFLPK                                | 1.101209887        | 2             | 2.6554    |
| P04785        | TVIDYNGER                                | 1.037802634        | 2             | 2.63938   |
| P04785        | VDATEESDLAQQYGVR                         | 0.995477829        | 2             | 5.72147   |
| P04785        | YKPESDELTAEK                             | 1.015810841        | 3             | 3.93578   |
| P04785        | YQLDKDGVVLFK                             | 0.996728412        | 2             | 3.97975   |

|               |                                                     |                    |              |           |
|---------------|-----------------------------------------------------|--------------------|--------------|-----------|
| <b>P04797</b> | <b>G3P Glyceraldehyde_3_phosphate dehydrogenase</b> | <b>1.75190058</b>  | <b>1E-19</b> | <b>16</b> |
| P04797        | GAAQNIIPASTGAAK                                     | 1.222610548        | 2            | 3.97963   |
| P04797        | GILGYTEDQVVSCDFNSNSHSSTFDAGAGIALNDNFVK              | 1.020526082        | 3            | 3.96129   |
| P04797        | IVSNASCTTNCLAPLAK                                   | 1.176709771        | 2            | 4.76052   |
| P04797        | LISWYDNEYGYSNR                                      | 1.972737839        | 2            | 4.00233   |
| P04797        | LVINGKPITIFQER                                      | 1.531139172        | 3            | 4.5246    |
| P04797        | RVIISAPSADAPMFVMGVNHEK                              | 1.07886451         | 3            | 5.01622   |
| P04797        | RVIISAPSADAPMFVMGVNHEK+Oxidation(12)                | 0.971709778        | 3            | 3.33437   |
| P04797        | VGVNGFGR                                            | 1.221828584        | 2            | 2.55568   |
| P04797        | VIHDNFGIVEGLMTTVHAITATQK                            | 1.142675647        | 3            | 7.99555   |
| P04797        | VIHDNFGIVEGLMTTVHAITATQK+Oxidation(12)              | 1.195752934        | 3            | 5.51522   |
| P04797        | VIISAPSADAPMFVMGVNHEK                               | 1.069754002        | 2            | 4.441     |
| P04797        | VIISAPSADAPMFVMGVNHEK+Oxidation(11)                 | 1.173337166        | 2            | 3.77393   |
| P04797        | VIISAPSADAPMFVMGVNHEK+Oxidation(14)                 | 1.173337166        | 2            | 3.58297   |
| P04797        | VPTPNVSVVDLTCR                                      | 1.908979662        | 2            | 3.13401   |
| P04797        | VVDLMAYMASK                                         | 1.119369384        | 2            | 3.14948   |
| P04797        | WGDAGAEEYVVESTGVFTTMEK                              | 1.14792402         | 2            | 5.46422   |
| <b>P04799</b> | <b>CP1A2 Cytochrome P450 1A2</b>                    | <b>0.677969204</b> | <b>1E-19</b> | <b>4</b>  |
| P04799        | DFVENVTSGNAVDFFPVLR                                 | 0.844222766        | 2            | 3.11468   |
| P04799        | NSIQDITGALFK                                        | 0.571620934        | 2            | 3.34912   |
| P04799        | TVQEHYQDFNK                                         | 0.741861854        | 2            | 3.14533   |
| P04799        | VDLTPSYGLTMKPR                                      | 0.948007808        | 2            | 2.69608   |
| <b>P04903</b> | <b>GSTA2 Glutathione S_transferase alpha_2</b>      | <b>1.083412955</b> | <b>1E-19</b> | <b>11</b> |
| P04903        | DGNLMFDQVPMVEIDGMK                                  | 0.699256953        | 2            | 4.69398   |
| P04903        | DGNLMFDQVPMVEIDGMK+Oxidation(10)                    | 0.719744697        | 2            | 4.14919   |
| P04903        | DGNLMFDQVPMVEIDGMK+Oxidation(10)                    | 0.753980344        | 2            | 3.26706   |
| P04903        | DGNLMFDQVPMVEIDGMK+Oxidation(16)                    | 0.716964608        | 2            | 3.53962   |
| P04903        | DGNLMFDQVPMVEIDGMK+Oxidation(4)                     | 0.716909248        | 2            | 4.34506   |
| P04903        | DGNLMFDQVPMVEIDGMK+Oxidation(4)                     | 0.761705471        | 2            | 2.38629   |
| P04903        | DGNLMFDQVPMVEIDGMK+Oxidation(4)                     | 0.738385411        | 2            | 3.06701   |
| P04903        | KDGNLMFDQVPMVEIDGMK                                 | 0.502512371        | 2            | 4.00736   |
| P04903        | LIQSPEDLEK                                          | 0.692123626        | 2            | 2.83462   |
| P04903        | WLLAAAGVEFEEK                                       | 0.747385351        | 2            | 3.45386   |
| P04903        | YLPAFEK                                             | 0.685157509        | 1            | 1.99262   |
| <b>P04904</b> | <b>GSTA3 Glutathione S_transferase alpha_3</b>      | <b>0.837612865</b> | <b>1E-19</b> | <b>8</b>  |
| P04904        | ALIDMYAEGVADLDEIVLHYPYIPPGKEK+Oxidation(4)          | 0.967257578        | 3            | 4.0127    |
| P04904        | NDGSLMFQQVPMVEIDGMK                                 | 0.805509054        | 2            | 4.7908    |
| P04904        | NDGSLMFQQVPMVEIDGMK+Oxidation(11)                   | 0.85973184         | 2            | 4.20346   |
| P04904        | NDGSLMFQQVPMVEIDGMK+Oxidation(11)                   | 1.003762852        | 2            | 2.30344   |
| P04904        | NDGSLMFQQVPMVEIDGMK+Oxidation(17)                   | 0.851478172        | 2            | 3.56311   |
| P04904        | NDGSLMFQQVPMVEIDGMK+Oxidation(5)                    | 0.857837973        | 2            | 4.34212   |
| P04904        | SHGQDYLVGNR                                         | 0.792933326        | 2            | 4.15224   |
| P04904        | WLLAAAGVEFEEQFLK                                    | 0.83490269         | 2            | 5.49633   |
| <b>P04905</b> | <b>GSTM1 Glutathione S_transferase Mu 1</b>         | <b>0.968372529</b> | <b>8E-16</b> | <b>15</b> |
| P04905        | ADIVENQVMDNR                                        | 0.997837798        | 2            | 4.20142   |
| P04905        | ADIVENQVMDNR+Oxidation(8)                           | 0.954615363        | 2            | 3.80151   |
| P04905        | CLDAFPNLKDFLAR                                      | 1.045493747        | 2            | 3.2526    |
| P04905        | FKLGLDFPNLPYLIDGSR                                  | 1.621993537        | 3            | 4.25101   |
| P04905        | HHLCGETEER                                          | 1.402596213        | 3            | 4.25113   |
| P04905        | IRADIVENQVMDNR                                      | 0.919110872        | 2            | 3.83015   |
| P04905        | ITQSNAIMR                                           | 1.008075864        | 2            | 3.02927   |
| P04905        | ITQSNAIMR+Oxidation(7)                              | 1.249752798        | 2            | 2.79195   |
| P04905        | KHHLCGETEER                                         | 1.119685084        | 3            | 3.39392   |
| P04905        | KITQSNAIMR                                          | 0.956118807        | 3            | 3.39499   |
| P04905        | KITQSNAIMR+Oxidation(8)                             | 1.204655998        | 3            | 3.4261    |
| P04905        | LGLDFPNLPYLIDGSR                                    | 1.066289059        | 2            | 5.02103   |
| P04905        | MQLIMLCYNPDFEK                                      | 0.836893825        | 2            | 3.94328   |

|               |                                               |                    |              |           |
|---------------|-----------------------------------------------|--------------------|--------------|-----------|
| P04905        | VTYVDFLAYDILDQYHIFEPK                         | 0.754490669        | 2            | 2.35857   |
| P04905        | YLSTPIFSK                                     | 1.056797077        | 2            | 2.65989   |
| <b>P05065</b> | <b>ALDOA Fructose_bisphosphate aldolase A</b> | <b>1.030390325</b> | <b>1</b>     | <b>7</b>  |
| P05065        | ALANSLACQ GK                                  | 1.208085309        | 2            | 2.80479   |
| P05065        | FSNEEIAMATVTALR                               | 1.159486376        | 2            | 4.30675   |
| P05065        | GILAADESTGSI AK                               | 1.117036754        | 2            | 3.76995   |
| P05065        | GVVPLAGTNGETTQGLDGLSER                        | 1.04495817         | 2            | 5.34768   |
| P05065        | IGEHTPSSLAIMENANVLAR                          | 0.819898118        | 2            | 4.54636   |
| P05065        | LQSIGTENTEENR                                 | 1.321217402        | 2            | 3.64431   |
| P05065        | RLQSIGTENTEENRR                               | 0.970107944        | 3            | 3.42005   |
| <b>P05178</b> | <b>CP2C6 Cytochrome P450 2C6</b>              | <b>0.664379598</b> | <b>1E-19</b> | <b>6</b>  |
| P05178        | EALIDHGEEFAER                                 | 0.65053373         | 2            | 3.1914    |
| P05178        | FFPDPEIFDPGHFLDGNGK                           | 0.57923583         | 2            | 2.53109   |
| P05178        | FDYKDDFLNLMEK                                 | 0.722302554        | 3            | 3.58338   |
| P05178        | FIDLPTNLPHAVTCDIK                             | 0.609566774        | 2            | 3.14412   |
| P05178        | GTTIITSLSSVLHDSK                              | 0.699211252        | 2            | 3.32618   |
| P05178        | NITQSLTSFSK                                   | 0.690607134        | 2            | 2.71881   |
| <b>P05179</b> | <b>CP2C7 Cytochrome P450 2C7</b>              | <b>2.086434037</b> | <b>1E-19</b> | <b>6</b>  |
| P05179        | ACVGEGLAR                                     | 1.768459767        | 2            | 2.91695   |
| P05179        | FINFVPTNLPHAVTCDIK                            | 1.948864995        | 2            | 2.73564   |
| P05179        | IEEHQESLDVTNPR                                | 2.199409162        | 2            | 4.59598   |
| P05179        | KIEEHQESLDVTNPR                               | 2.160780885        | 2            | 4.98166   |
| P05179        | KLPPGPTPLPIIGNFLQIDVK                         | 1.230752184        | 3            | 4.91412   |
| P05179        | VLTSLSVLHDSK                                  | 2.47202574         | 2            | 2.95063   |
| <b>P05182</b> | <b>CP2E1 Cytochrome P450 2E1</b>              | <b>0.900179805</b> | <b>2E-10</b> | <b>12</b> |
| P05182        | AKEHLQSLDINCAR                                | 0.723702006        | 2            | 4.3612    |
| P05182        | DIDLSPVTVGFGSIPPQFK                           | 0.627495376        | 2            | 3.00024   |
| P05182        | DRLDMPYMDAVVHEIQR                             | 0.699823249        | 3            | 4.82271   |
| P05182        | DVTDCLLIEMEKEK                                | 0.960966056        | 2            | 3.07266   |
| P05182        | EHLQSLDINCAR                                  | 0.818157371        | 2            | 3.07995   |
| P05182        | FINLVPSNLPHEATR                               | 0.701238281        | 2            | 3.79202   |
| P05182        | FKPEHFLNENGK                                  | 0.814305032        | 2            | 2.82957   |
| P05182        | GTVVIPITLDSLLYDSHEFPDPEK                      | 0.690888123        | 2            | 4.59551   |
| P05182        | LHEEIDR                                       | 0.63014901         | 1            | 1.96858   |
| P05182        | VCVGEGLAR                                     | 0.72590669         | 2            | 2.65443   |
| P05182        | YGLLLIMK                                      | 0.887293726        | 2            | 2.89152   |
| P05182        | YSDYFK                                        | 0.649219582        | 1            | 1.90978   |
| <b>P05183</b> | <b>CP3A2 Cytochrome P450 3A2</b>              | <b>0.95067739</b>  | <b>3E-05</b> | <b>10</b> |
| P05183        | AVSVAKDEEWK                                   | 1.248266369        | 2            | 2.53399   |
| P05183        | DIELDGLFIPK                                   | 0.892231531        | 2            | 3.21154   |
| P05183        | EMFPIIEQYGDI LVK                              | 0.999627229        | 2            | 3.84097   |
| P05183        | KDIELDGLFIPK                                  | 1.068370824        | 3            | 3.31983   |
| P05183        | KLQEEIDGALPSK                                 | 1.147773306        | 2            | 2.33237   |
| P05183        | LQEEIDGALPSK                                  | 1.089960968        | 2            | 3.61645   |
| P05183        | QAILEPEKPIVLK                                 | 1.458534396        | 2            | 2.70757   |
| P05183        | QEAETGKPVMTK                                  | 1.580819662        | 2            | 3.48824   |
| P05183        | QEAETGKPVMTK+Oxidation(10)                    | 1.420689677        | 2            | 3.03829   |
| P05183        | VDFLQLMLNAHNNSK                               | 1.114593611        | 2            | 3.27252   |
| <b>P05197</b> | <b>EF2 Elongation factor 2</b>                | <b>1.110068404</b> | <b>1E-19</b> | <b>26</b> |
| P05197        | ALLELQLEPEELYQTFQR                            | 1.219670883        | 3            | 5.2195    |
| P05197        | ARPPFDGLAEDIDKGEVSAR                          | 1.113661673        | 3            | 6.45789   |
| P05197        | AYLPVNESFGFTADLR                              | 1.135967675        | 2            | 3.79735   |
| P05197        | CELLYEGPPDDEAAMGIK                            | 1.095532496        | 2            | 3.33144   |
| P05197        | DLEEDHACIPIK                                  | 0.993546813        | 2            | 3.39429   |
| P05197        | DLEEDHACIPIKK                                 | 0.90368634         | 2            | 3.23299   |
| P05197        | EGIPALDNFLDK                                  | 0.40788079         | 2            | 2.57943   |
| P05197        | EGIPALDNFLDKL                                 | 1.462662054        | 2            | 3.76211   |

|               |                                                   |                    |               |           |
|---------------|---------------------------------------------------|--------------------|---------------|-----------|
| P05197        | ETVSEESNVLCLSK                                    | 1.159113305        | 2             | 3.94589   |
| P05197        | GEGQLGAAER                                        | 1.249768283        | 2             | 3.24832   |
| P05197        | GHVFEESQVAGTPMFVVK                                | 1.365047043        | 2             | 5.28469   |
| P05197        | IWCFGPDGTGPNILTDITK                               | 1.297307476        | 2             | 4.98118   |
| P05197        | KEDLYLKPIQR                                       | 1.303018503        | 2             | 3.11876   |
| P05197        | KIWCFGPDGTGPNILTDITK                              | 1.021286644        | 2             | 4.65113   |
| P05197        | KVEDMMK+Oxidation(4)                              | 1.000982968        | 2             | 2.31953   |
| P05197        | KVEDMMK+Oxidation(5)                              | 0.935269214        | 2             | 2.49959   |
| P05197        | LDSEDKDKEGKPLLK                                   | 0.999462032        | 2             | 3.40883   |
| P05197        | NMSVIAHVDHGK                                      | 1.110076699        | 2             | 3.17086   |
| P05197        | NMSVIAHVDHGK+Oxidation(1)                         | 1.131866868        | 2             | 3.32973   |
| P05197        | STLTDSLCK                                         | 1.106224925        | 2             | 2.8802    |
| P05197        | TFCQLLDPIFK                                       | 1.213953286        | 2             | 3.9626    |
| P05197        | VFSGVVSTGLK                                       | 1.096492409        | 2             | 2.42868   |
| P05197        | WLPAGDALLQMITIHLSPVTAQK                           | 1.082723497        | 2             | 4.03908   |
| P05197        | YEWVVAEAR                                         | 1.159101705        | 2             | 3.00161   |
| P05197        | YFDPANGK                                          | 1.080253742        | 1             | 1.93718   |
| P05197        | YVEPIEDVPCGNIVLGVVDQFLVK                          | 1.218351913        | 2             | 4.51237   |
| <b>P05369</b> | <b>FPPS Farnesyl pyrophosphate synthase</b>       | <b>0.399765613</b> | <b>1E-19</b>  | <b>11</b> |
| P05369        | ALYEELDLR                                         | 0.515572687        | 2             | 2.80723   |
| P05369        | EVLEYNTVGGK                                       | 0.372975353        | 2             | 2.82149   |
| P05369        | GLTVVQTFQELVEPR                                   | 0.448840812        | 2             | 3.81667   |
| P05369        | IKEVLEYNTVGGK                                     | 0.37160084         | 3             | 4.12844   |
| P05369        | QILEENYGQK                                        | 0.472619062        | 2             | 2.32503   |
| P05369        | QILEENYGQKDPEK                                    | 0.543723045        | 2             | 3.88729   |
| P05369        | QNFIQHFSQIVK                                      | 0.871437454        | 2             | 2.6151    |
| P05369        | SLIEQCSAPLPPSIFLELANK                             | 0.446584078        | 3             | 5.14045   |
| P05369        | VGTDIQDNK                                         | 0.483618018        | 2             | 3.74066   |
| P05369        | VLTEDELGHPEK                                      | 0.368572347        | 2             | 2.65078   |
| P05369        | VLTEDELGHPEKGDATR                                 | 0.33158253         | 2             | 4.68234   |
| <b>P05426</b> | <b>RL7 60S ribosomal protein L7</b>               | <b>1.019434801</b> | <b>6E-05</b>  | <b>5</b>  |
| P05426        | AGNFYVPAEPK                                       | 1.17950004         | 2             | 2.71074   |
| P05426        | FGIICMEDLIHEIYTVGK                                | 1.209381301        | 2             | 4.47247   |
| P05426        | KKVPAVPETLK                                       | 0.768654318        | 2             | 2.85221   |
| P05426        | TTHFVEGGDAGNR                                     | 1.069720949        | 2             | 2.85694   |
| P05426        | TTHFVEGGDAGNREDQINR                               | 1.018214559        | 2             | 4.64643   |
| <b>P05544</b> | <b>SPA3L Serine protease inhibitor A3L</b>        | <b>1.165154401</b> | <b>0.0006</b> | <b>5</b>  |
| P05544        | AVLDVDETGTEATAATGVATVIR                           | 1.371875471        | 2             | 4.9754    |
| P05544        | DSTMEEILEGLK                                      | 1.139358972        | 2             | 2.94567   |
| P05544        | IAELFSDLEER                                       | 1.021044778        | 2             | 2.72042   |
| P05544        | MQQVESLQPETLK                                     | 0.968410548        | 2             | 2.58066   |
| P05544        | VFSQQADLSR                                        | 1.161445112        | 2             | 2.487     |
| <b>P05545</b> | <b>SPA3K Serine protease inhibitor A3K</b>        | <b>1.165598161</b> | <b>0.0262</b> | <b>4</b>  |
| P05545        | ALYQAEAFVADFK                                     | 1.092997293        | 2             | 3.26306   |
| P05545        | AVLDVDETGTEGAAATAVTAALK                           | 1.07146625         | 2             | 5.44742   |
| P05545        | FSISTDYNLEEVLPDELGIR                              | 1.247128279        | 2             | 3.1398    |
| P05545        | IAELFSELDER                                       | 1.467437118        | 2             | 3.03559   |
| <b>P05765</b> | <b>RS21 40S ribosomal protein S21</b>             | <b>1.125468113</b> | <b>0.4757</b> | <b>3</b>  |
| P05765        | DHASIQMNVAEVDR                                    | 1.059072798        | 2             | 3.31481   |
| P05765        | MGESDDSILR                                        | 1.079569264        | 2             | 2.97994   |
| P05765        | TYGICGAIR                                         | 1.13500197         | 2             | 3.0551    |
| <b>P06214</b> | <b>HEM2 Delta_aminolevulinic acid dehydratase</b> | <b>0.665268712</b> | <b>1E-19</b>  | <b>5</b>  |
| P06214        | AGCQVVAPSDMMDGR                                   | 0.762122143        | 2             | 3.13577   |
| P06214        | DEQGSAADESDSPTIEAVR                               | 0.728334897        | 2             | 5.83752   |
| P06214        | DIQEGADILMVKGPLPLVDMVQEVK                         | 0.78779354         | 3             | 4.64615   |
| P06214        | VPKDEQGSAADESDSPTIEAVR                            | 0.772157696        | 2             | 5.73066   |
| P06214        | YGVNQLEEMLRPLVEAGLR                               | 0.780207293        | 3             | 4.40248   |

|               |                                                                   |                    |                |           |
|---------------|-------------------------------------------------------------------|--------------------|----------------|-----------|
| <b>P06302</b> | <b>PTMA Prothymosin alpha</b>                                     | <b>0.847861166</b> | <b>0.1348</b>  | <b>3</b>  |
| P06302        | RVAEDEDVETKK                                                      | 0.801185681        | 2              | 5.02914   |
| P06302        | VAEDEDVETK                                                        | 1.095466925        | 2              | 3.48457   |
| P06302        | VAEDEDVETKK                                                       | 0.837588582        | 2              | 4.58238   |
| <b>P06399</b> | <b>FIBA Fibrinogen alpha chain</b>                                | <b>0.830275353</b> | <b>0.0203</b>  | <b>6</b>  |
| P06399        | EVVTSDDGSDCGMDLGLTHSFSGR                                          | 0.643222551        | 3              | 3.87309   |
| P06399        | GDFANANNFNTFGQVSEDLR                                              | 0.717744068        | 2              | 5.69648   |
| P06399        | GDKELLIGNEK                                                       | 0.954062457        | 2              | 2.61072   |
| P06399        | GLIDEANQDFTNR                                                     | 0.923151003        | 2              | 3.14982   |
| P06399        | MADEAASEAHQEGDTR                                                  | 0.616524953        | 2              | 4.16596   |
| P06399        | SQLQEGPPEWK                                                       | 0.77852322         | 2              | 2.81461   |
| <b>P06685</b> | <b>AT1A1 Sodium/potassium_transporting ATPase subunit alpha_1</b> | <b>1.103082206</b> | <b>0.02025</b> | <b>4</b>  |
| P06685        | AVAGDASESALLK                                                     | 1.171383841        | 2              | 3.00524   |
| P06685        | AVFQANQENLPILK                                                    | 1.102473227        | 2              | 3.74414   |
| P06685        | EQPLDEELKDAFQAYLELGGGER                                           | 1.013952351        | 3              | 3.59852   |
| P06685        | LNIPVNQVNPR                                                       | 1.079357162        | 2              | 3.03207   |
| <b>P06687</b> | <b>AT1A3 Sodium/potassium_transporting ATPase subunit alpha_3</b> | <b>1.118591457</b> | <b>0.0002</b>  | <b>3</b>  |
| P06687        | DGNALTPPTPEWVK                                                    | 1.108026864        | 2              | 2.77579   |
| P06687        | GVGISEGNETVEDIAAR                                                 | 1.128107035        | 2              | 4.46011   |
| P06687        | QGAIIVTGDGVNDSPALK                                                | 1.116734001        | 2              | 4.8093    |
| <b>P06757</b> | <b>ADH1 Alcohol dehydrogenase 1</b>                               | <b>1.072169826</b> | <b>6E-12</b>   | <b>16</b> |
| P06757        | AAVLWEPHKPFTIEDIEVAPPK                                            | 1.221955607        | 3              | 5.58455   |
| P06757        | FPLEPLITHVLPFEK                                                   | 1.441380361        | 3              | 4.60416   |
| P06757        | GAIFGGFK                                                          | 1.093639301        | 2              | 2.5717    |
| P06757        | GALLDGTSR                                                         | 1.1189688          | 2              | 2.84624   |
| P06757        | HPESNLCCQTK                                                       | 0.80011559         | 2              | 3.48851   |
| P06757        | IDAAAPLDK                                                         | 1.029981107        | 2              | 2.80341   |
| P06757        | IIAVDINKDK                                                        | 1.041968318        | 2              | 2.82971   |
| P06757        | INEAFDLLR                                                         | 1.11250077         | 2              | 3.66088   |
| P06757        | KFPLEPLITHVLPFEK                                                  | 1.116937856        | 3              | 4.75988   |
| P06757        | KFPLEPLITHVLPFEKINEAFDLLR                                         | 1.519725633        | 4              | 4.65175   |
| P06757        | MVATGVCR                                                          | 1.269558808        | 2              | 2.49038   |
| P06757        | MVATGVCR+Oxidation(0)                                             | 1.444041684        | 2              | 2.36406   |
| P06757        | SDDHAVSGSLFTPLPAVLGHGAGIVESIGEGVTCVKPGDK                          | 1.235332559        | 4              | 8.2233    |
| P06757        | VCLIGCGFSTGYGSQVAK                                                | 1.245621192        | 2              | 6.30436   |
| P06757        | VIPLFSPQCGK                                                       | 1.101860899        | 2              | 2.62798   |
| P06757        | VTPGSTCAVFLGGVGLSVVIGCK                                           | 1.402573317        | 2              | 5.24661   |
| <b>P06761</b> | <b>GRP78 78 kDa glucose_regulated protein</b>                     | <b>1.23287665</b>  | <b>1E-19</b>   | <b>30</b> |
| P06761        | AKFEELNMDLFR                                                      | 1.165102723        | 3              | 4.00088   |
| P06761        | DAGTIAGLNVMR                                                      | 0.942869535        | 2              | 3.53968   |
| P06761        | DAGTIAGLNVMR+Oxidation(10)                                        | 1.255240421        | 2              | 2.87661   |
| P06761        | DNHLLGTFDLTGIPPAPR                                                | 0.972010891        | 2              | 4.74585   |
| P06761        | ELEEIVQPIISK                                                      | 0.960960425        | 2              | 4.29275   |
| P06761        | FEELNMDLFR                                                        | 1.103205055        | 2              | 3.58301   |
| P06761        | IEIESFFEGEDFSETLTR                                                | 1.116481843        | 2              | 5.09407   |
| P06761        | IEWLESHQDADIEDFK                                                  | 1.15391347         | 2              | 5.49742   |
| P06761        | IEWLESHQDADIEDFKAK                                                | 1.134965138        | 2              | 2.31976   |
| P06761        | IINEPTAAAIYGLDKR                                                  | 1.129495594        | 2              | 4.23022   |
| P06761        | ITITNDQNR                                                         | 1.173160554        | 2              | 2.58406   |
| P06761        | ITPSYVAFTPEGER                                                    | 1.252069129        | 2              | 3.82739   |
| P06761        | KKELEEIVQPIISK                                                    | 0.933166486        | 2              | 4.57662   |
| P06761        | KSDIDEIVLVGGSTR                                                   | 1.068139989        | 2              | 4.27584   |
| P06761        | KSQIFSTASDNQPTVTIK                                                | 1.134442323        | 2              | 5.16088   |
| P06761        | LTPEEIER                                                          | 0.984238258        | 1              | 1.9218    |
| P06761        | LYGSGGPPPTGEEDTSEKDEL                                             | 1.425638336        | 2              | 5.20613   |
| P06761        | MKETAEAYLGK                                                       | 1.096342627        | 2              | 3.15425   |
| P06761        | MKETAEAYLGK+Oxidation(0)                                          | 1.185042914        | 2              | 2.71836   |

|               |                                                                                      |                    |               |           |
|---------------|--------------------------------------------------------------------------------------|--------------------|---------------|-----------|
| P06761        | NELESYAYSLK                                                                          | 1.235552849        | 2             | 3.6203    |
| P06761        | NQLTSNPENTVFDK                                                                       | 1.081033364        | 2             | 5.22401   |
| P06761        | SDIDEIVLVGGSTR                                                                       | 1.131359996        | 2             | 3.79084   |
| P06761        | SQIFSTASDNQPTVTIK                                                                    | 1.050326785        | 2             | 5.46378   |
| P06761        | TFAPEEISAMVLTK                                                                       | 1.088253517        | 2             | 4.78528   |
| P06761        | TFAPEEISAMVLTK+Oxidation(9)                                                          | 1.048573332        | 2             | 3.49771   |
| P06761        | TKPYIQVDIGGGQTK                                                                      | 1.107878988        | 3             | 4.15096   |
| P06761        | TWNDPSVQQDIK                                                                         | 1.055824557        | 2             | 3.87526   |
| P06761        | VLEDSDLK                                                                             | 1.082799986        | 2             | 2.39971   |
| P06761        | VTHAVVTVPAYFNDAQR                                                                    | 1.193052707        | 2             | 4.91365   |
| P06761        | VYEGERPLTK                                                                           | 1.037663564        | 2             | 2.98314   |
| <b>P06866</b> | <b>HPT Haptoglobin</b>                                                               | <b>1.157414007</b> | <b>0.9981</b> | <b>6</b>  |
| P06866        | ATDLKDWVQETMAK                                                                       | 1.142373773        | 2             | 2.7945    |
| P06866        | CELHYEK                                                                              | 1.25294966         | 2             | 2.36053   |
| P06866        | GAVSPVGVQPILNK                                                                       | 1.042127245        | 2             | 3.99235   |
| P06866        | LQTEGDGIYTLNSEK                                                                      | 1.151486391        | 2             | 4.31338   |
| P06866        | NQLVEIEK                                                                             | 0.933339111        | 1             | 2.70688   |
| P06866        | SCAVAEYGVYVR                                                                         | 1.101068124        | 2             | 3.06088   |
| <b>P07153</b> | <b>RPN1 Dolichyl_diphosphooligosaccharide__protein glycosyltransferase subunit 1</b> | <b>1.106653118</b> | <b>1E-19</b>  | <b>10</b> |
| P07153        | ASSFVLALEPELESR                                                                      | 1.096454857        | 2             | 4.23024   |
| P07153        | AVTSEIAVLQSR                                                                         | 1.318048874        | 2             | 3.84404   |
| P07153        | FVDHVFDEQVIDSLTVK                                                                    | 0.991160053        | 2             | 4.6203    |
| P07153        | GEDEEDNNLEVR                                                                         | 1.144023285        | 2             | 3.59344   |
| P07153        | HFDETVNR                                                                             | 0.915551966        | 2             | 2.75677   |
| P07153        | LKTEGSDLCDR                                                                          | 1.224843337        | 3             | 3.33266   |
| P07153        | NIQVDSPYDISR                                                                         | 1.269645943        | 2             | 3.37952   |
| P07153        | NLVEQHIQDIVVHYTFNK                                                                   | 0.866782301        | 3             | 4.88493   |
| P07153        | SEDILDYGPFK                                                                          | 1.091521427        | 2             | 3.4371    |
| P07153        | VTAEVVLAHPGGSTAR                                                                     | 1.032794935        | 2             | 4.66203   |
| <b>P07323</b> | <b>ENOG Gamma_enolase</b>                                                            | <b>1.122099668</b> | <b>1E-19</b>  | <b>3</b>  |
| P07323        | AAVPSGASTGIYEALER                                                                    | 1.322006368        | 2             | 5.05395   |
| P07323        | GNPTVEVDLHTAK                                                                        | 1.052881989        | 2             | 2.76812   |
| P07323        | SGETEDTFIADLVVGLCTGQIK                                                               | 1.100044817        | 3             | 4.83842   |
| <b>P07340</b> | <b>AT1B1 Sodium/potassium_transporting ATPase subunit beta_1</b>                     | <b>1.204008203</b> | <b>0.0063</b> | <b>2</b>  |
| P07340        | SYEAYVLNIIIR                                                                         | 1.531751769        | 2             | 2.64703   |
| P07340        | VAPPGLTQIPQIQK                                                                       | 1.201891638        | 2             | 2.46226   |
| <b>P07379</b> | <b>PCKGC Phosphoenolpyruvate carboxykinase_cytosolic [GTP]</b>                       | <b>1.199880882</b> | <b>0.2155</b> | <b>11</b> |
| P07379        | AINPENGGFVAPGTSVK                                                                    | 0.963105276        | 2             | 3.49523   |
| P07379        | FVEGNAQLCQPEYIHICDGSEEEYGR                                                           | 1.170236799        | 3             | 4.41145   |
| P07379        | GLGDVNVEELFGISK                                                                      | 1.271564465        | 2             | 3.96584   |
| P07379        | IGIELTDSPIYVVASMR                                                                    | 1.067219867        | 2             | 3.355     |
| P07379        | MGTSVLEALGDGEFIK                                                                     | 1.069488125        | 2             | 3.55587   |
| P07379        | MGTSVLEALGDGEFIK+Oxidation(0)                                                        | 1.318195671        | 2             | 3.85884   |
| P07379        | TVIITQEQR                                                                            | 1.234012414        | 2             | 2.51903   |
| P07379        | VECVGDDIAWMK                                                                         | 1.140735804        | 2             | 2.709     |
| P07379        | VIQGSLSLDPQEVNR                                                                      | 1.278794402        | 2             | 4.14271   |
| P07379        | YLAAAFPSACGK                                                                         | 1.029329035        | 2             | 2.78207   |
| P07379        | YLEDQVNADLPYEIER                                                                     | 1.72971945         | 2             | 2.82477   |
| <b>P07632</b> | <b>SODC Superoxide dismutase [Cu_Zn]</b>                                             | <b>1.007717758</b> | <b>7E-08</b>  | <b>4</b>  |
| P07632        | DGVANVSIEDR                                                                          | 0.962129224        | 1             | 2.79032   |
| P07632        | GDGPVQGVHFEQK                                                                        | 1.171505127        | 2             | 3.61196   |
| P07632        | HVGDLGNVAAGK                                                                         | 0.96600425         | 2             | 3.92121   |
| P07632        | VISLSGEHSIIGR                                                                        | 1.166557394        | 2             | 3.29178   |
| <b>P07633</b> | <b>PCCB Propionyl_CoA carboxylase beta chain_mitochondrial</b>                       | <b>0.909220073</b> | <b>4E-05</b>  | <b>9</b>  |
| P07633        | AFDNDVDALCNLR                                                                        | 1.26492815         | 2             | 3.66709   |
| P07633        | AYNMLDIIHAVIDER                                                                      | 0.910194073        | 2             | 3.71967   |



|               |                                                                   |                   |              |           |
|---------------|-------------------------------------------------------------------|-------------------|--------------|-----------|
| P07633        | GFVDDIIQPSSTR                                                     | 1.006967125       | 2            | 3.37257   |
| P07633        | ICCDLEVLASK                                                       | 0.990433417       | 2            | 2.85103   |
| P07633        | IMDQAITVGAPVIGLNDSGGAR                                            | 1.005689144       | 2            | 3.99946   |
| P07633        | IQEGVESLAGYADIFLR                                                 | 0.98469533        | 2            | 4.28661   |
| P07633        | LVPELDTVVPLESSK                                                   | 1.024854117       | 2            | 3.79062   |
| P07633        | SVTNEDVTQEQLGGAK                                                  | 0.938535693       | 2            | 4.81075   |
| P07633        | TVGIVGNQPNVASGCLDINSSVK                                           | 0.987629188       | 2            | 4.49648   |
| <b>P07687</b> | <b>HYEP Epoxide hydrolase 1</b>                                   | <b>0.77145065</b> | <b>1E-19</b> | <b>19</b> |
| P07687        | DIELLYPYK                                                         | 0.611779801       | 1            | 2.35865   |
| P07687        | DKEETLPLGDGWWGPGSKPSAK                                            | 0.702318886       | 3            | 5.29264   |
| P07687        | EDESIRPFK                                                         | 0.772947662       | 2            | 2.60809   |
| P07687        | EDESIRPFKVETSDEEIKDLHQR                                           | 0.71606596        | 3            | 5.76      |
| P07687        | ENLGQGIMVHK                                                       | 0.752753063       | 2            | 2.47239   |
| P07687        | ESGYLHIQATKPDTVGCALNDSPVGLAAYILEK                                 | 0.977760594       | 3            | 6.62719   |
| P07687        | FLGYTEK                                                           | 0.634681884       | 1            | 1.95672   |
| P07687        | FLGYTEKDIELLYPYK                                                  | 0.707210907       | 3            | 4.55371   |
| P07687        | GGHFAAFEEP                                                        | 0.776423668       | 2            | 3.46736   |
| P07687        | IIPLLTDPK                                                         | 0.812129561       | 2            | 2.41002   |
| P07687        | KFVSLAELQ                                                         | 0.843406607       | 2            | 2.73101   |
| P07687        | KQVEILNQYPHFK                                                     | 0.709168964       | 3            | 4.61721   |
| P07687        | LLAQDIR                                                           | 1.062656106       | 2            | 2.41673   |
| P07687        | QVEILNQYPHFK                                                      | 0.761941987       | 3            | 3.63661   |
| P07687        | SEYRELEDGGLER                                                     | 0.724377668       | 3            | 3.53322   |
| P07687        | SHGLSDEHVFEVICPSIPGYGYSEASSK                                      | 0.796782273       | 3            | 6.29245   |
| P07687        | VETSDEEIK                                                         | 0.961707145       | 2            | 2.4693    |
| P07687        | VETSDEEIKDLHQR                                                    | 0.69734889        | 2            | 4.61429   |
| P07687        | VFVPTGFSAFPSELLHAPEK                                              | 0.667741834       | 2            | 4.36904   |
| <b>P07756</b> | <b>CPSM Carbamoyl_phosphate synthase [ammonia]_ mitochondrial</b> | <b>1.17519978</b> | <b>1E-19</b> | <b>87</b> |
| P07756        | AADTIGYPVMIR                                                      | 1.385794688       | 2            | 3.68063   |
| P07756        | AADTIGYPVMIR+Oxidation(9)                                         | 1.593874153       | 2            | 3.20642   |
| P07756        | AERPDGLILGMGGQTALNCGVELFK                                         | 1.153451487       | 3            | 6.51702   |
| P07756        | AERPDGLILGMGGQTALNCGVELFK+Oxidation(10)                           | 1.15235617        | 3            | 4.9769    |
| P07756        | AFAISGPFNVQFLVK                                                   | 1.829143933       | 2            | 4.98343   |
| P07756        | AFAMTNQILVER                                                      | 1.142155335       | 2            | 4.26855   |
| P07756        | AFAMTNQILVER+Oxidation(3)                                         | 1.184146881       | 2            | 3.75847   |
| P07756        | ALENNMSLDEIVK                                                     | 1.03958628        | 2            | 4.66244   |
| P07756        | ALENNMSLDEIVK+Oxidation(5)                                        | 1.125675426       | 2            | 3.92037   |
| P07756        | AQTAHIVLEDGTK                                                     | 0.830137145       | 2            | 4.2685    |
| P07756        | ATGYPLAFIAAK                                                      | 1.204488808       | 2            | 3.30611   |
| P07756        | CEMASTGEVACFGEGIHAFK                                              | 1.165278825       | 3            | 4.86925   |
| P07756        | CEMASTGEVACFGEGIHAFK+Oxidation(2)                                 | 1.160771896       | 3            | 5.68054   |
| P07756        | CLGLTEAQTR                                                        | 1.075209089       | 2            | 3.6297    |
| P07756        | DELGLNK                                                           | 0.984507324       | 1            | 2.22431   |
| P07756        | DGSIDLVINLPNNNTK                                                  | 1.087067968       | 2            | 5.47779   |
| P07756        | DILNMDK                                                           | 0.922601662       | 1            | 1.94096   |
| P07756        | EIEYEVVR                                                          | 0.88644731        | 1            | 2.17758   |
| P07756        | EPLFGISTGNIITGLAAGAK                                              | 1.378759822       | 2            | 5.76389   |
| P07756        | ETLMDLGTK                                                         | 0.963350855       | 1            | 2.18081   |
| P07756        | EVEMDAVGK                                                         | 0.874482206       | 1            | 2.07544   |
| P07756        | FLEEATR                                                           | 1.073378415       | 2            | 2.60958   |
| P07756        | FLGVAEQLHNEGFK                                                    | 1.13283035        | 2            | 4.73825   |
| P07756        | FVHDNYVIR                                                         | 1.317533403       | 3            | 3.49733   |
| P07756        | GAEVHLPWNHDFQMDYDGLLIAGGPGNPALAQPLIQNVK                           | 1.280883052       | 3            | 5.97234   |
| P07756        | GAEVHLPWNHDFQMDYDGLLIAGGPGNPALAQPLIQNVK+Oxidation(15)             | 1.313218786       | 4            | 5.22321   |
| P07756        | GILIGIQSFRRP                                                      | 1.351103492       | 2            | 2.39768   |

|        |                                                    |             |   |         |
|--------|----------------------------------------------------|-------------|---|---------|
| P07756 | GLNSESVTEETLR                                      | 1.235961753 | 2 | 4.90722 |
| P07756 | GNDVLVIECNLR                                       | 1.108939043 | 2 | 4.24574 |
| P07756 | GQILTMANPIIGNGGAPDPTAR                             | 1.066400072 | 2 | 5.9855  |
| P07756 | GQILTMANPIIGNGGAPDPTAR+Oxidation(5)                | 1.071936145 | 2 | 5.42398 |
| P07756 | GQILTMANPIIGNGGAPDPTARDELGLNK                      | 1.020265071 | 3 | 4.16101 |
| P07756 | GQNPVNLITNR                                        | 1.066962207 | 2 | 4.32179 |
| P07756 | GTTITSVLPKPALVASR                                  | 1.148456029 | 2 | 3.25384 |
| P07756 | GYSFGHPSSVAGEVVFNTGLGGYSEALDTPAYK                  | 1.367800133 | 3 | 6.38812 |
| P07756 | HLPTLEQPIIPSDYVAIK                                 | 1.120927231 | 2 | 5.59448 |
| P07756 | IAPSFAVESMEDALK                                    | 1.203647663 | 2 | 5.04501 |
| P07756 | IAPSFAVESMEDALK+Oxidation(9)                       | 1.072777087 | 2 | 2.60833 |
| P07756 | IEFEGQSVDFVDPNK                                    | 1.181665057 | 2 | 5.2604  |
| P07756 | IEFEGQSVDFVDPNKQNLIAEVSTK                          | 1.122380743 | 3 | 5.28257 |
| P07756 | ILDYHQEACNGCIISVGGQIPNNLAVPLYK                     | 1.321824195 | 3 | 5.73916 |
| P07756 | IMGTSPLQIDR                                        | 1.615623493 | 2 | 2.65404 |
| P07756 | IMGTSPLQIDR+Oxidation(1)                           | 1.625737346 | 2 | 2.96529 |
| P07756 | IMGTSPLQIDRAEDR                                    | 0.70697663  | 2 | 2.42006 |
| P07756 | KEPLFGISTGNIITGLAAGAK                              | 1.15222807  | 2 | 5.48389 |
| P07756 | KTVVVCNCPETVSTDFDECDK                              | 0.404869634 | 2 | 4.65234 |
| P07756 | LFAEAVQK                                           | 1.157560154 | 2 | 2.89322 |
| P07756 | LFATEATSDWLNANNVPATPVAWPSQEGQNPSLSSIR              | 1.281843194 | 4 | 4.88679 |
| P07756 | LRDADPILR                                          | 1.154309832 | 2 | 3.01713 |
| P07756 | LTSIDKWFLYK                                        | 1.121350215 | 2 | 2.76941 |
| P07756 | LYFEELSLER                                         | 1.729631976 | 2 | 3.5359  |
| P07756 | MCHPSVDGFTPR                                       | 1.181207827 | 3 | 4.75227 |
| P07756 | MCHPSVDGFTPR+Oxidation(0)                          | 1.125126641 | 3 | 4.03931 |
| P07756 | QADAVYFLPITPQFVTEVIK                               | 1.72717222  | 3 | 5.01443 |
| P07756 | QLFSDKLEINEK                                       | 1.023825147 | 2 | 3.65547 |
| P07756 | QNLIAEVSTK                                         | 1.225815639 | 2 | 2.79289 |
| P07756 | RFLLEEATR                                          | 1.131891301 | 2 | 2.80717 |
| P07756 | RTAVDSGIALLTNFQVTK                                 | 1.200306516 | 2 | 4.16927 |
| P07756 | SAYALGGLGSGICPNK                                   | 1.377073234 | 2 | 4.93893 |
| P07756 | SAYALGGLGSGICPNKETLMDLGTK                          | 1.185578407 | 2 | 4.22007 |
| P07756 | SFPFVSK                                            | 1.13191466  | 1 | 2.06943 |
| P07756 | SIFSAVLDELK                                        | 1.065165794 | 2 | 3.97828 |
| P07756 | SIFSAVLDELKVAQAPWK                                 | 1.493699044 | 3 | 3.53515 |
| P07756 | SLGQWLQEEK                                         | 1.113298612 | 2 | 4.10247 |
| P07756 | SVGEVMAIGR                                         | 1.11863     | 2 | 3.7593  |
| P07756 | SVGEVMAIGR+Oxidation(5)                            | 1.170008126 | 2 | 2.99907 |
| P07756 | TAVDSGIALLTNFQVTK                                  | 1.223381808 | 3 | 6.09045 |
| P07756 | TAVDSGIALLTNFQVTKLFAEAVQK                          | 1.779111085 | 3 | 4.01003 |
| P07756 | TFEESFQK                                           | 1.073388873 | 2 | 2.52637 |
| P07756 | TLGVDFIDVATK                                       | 1.138496578 | 2 | 4.10881 |
| P07756 | TSACFEPSLDYMVTK                                    | 1.153427232 | 2 | 4.76156 |
| P07756 | TSACFEPSLDYMVTK+Oxidation(11)                      | 1.170312493 | 2 | 3.97974 |
| P07756 | TVLMNPNIASVQTNEVGLK                                | 1.080053303 | 2 | 6.30413 |
| P07756 | TVLMNPNIASVQTNEVGLK+Oxidation(3)                   | 1.093128136 | 2 | 6.05757 |
| P07756 | TVVVNCNCPETVSTDFDECDK                              | 0.693329813 | 2 | 5.78116 |
| P07756 | TVVVNCNCPETVSTDFDECDKLYFEELSLER                    | 1.249392047 | 3 | 5.22531 |
| P07756 | VISHAISEHVEDAGVHSGDATLMLPTQTISQGAIEK               | 1.236388518 | 3 | 7.24794 |
| P07756 | VISHAISEHVEDAGVHSGDATLMLPTQTISQGAIEK+Oxidation(22) | 1.213701963 | 3 | 6.76799 |
| P07756 | VLGTSVESIMATEDR                                    | 1.113382792 | 2 | 4.82837 |
| P07756 | VLGTSVESIMATEDR+Oxidation(9)                       | 1.161348304 | 2 | 4.34238 |
| P07756 | VLILGSGLSIGQAGEFDYSGSQAVK                          | 1.096200795 | 2 | 5.32272 |
| P07756 | VMIGESVDEK                                         | 1.129209755 | 2 | 3.48661 |
| P07756 | VMIGESVDEK+Oxidation(1)                            | 1.1341978   | 2 | 3.03701 |
| P07756 | VSQEHVVLTK                                         | 1.163951704 | 2 | 3.90386 |

|               |                                                     |                    |              |           |
|---------------|-----------------------------------------------------|--------------------|--------------|-----------|
| P07756        | VVAVDCGIK                                           | 1.14118096         | 2            | 2.39105   |
| P07756        | YMESDGIK                                            | 1.082840198        | 2            | 2.71498   |
| P07756        | YMESDGIK+Oxidation(1)                               | 1.173790405        | 1            | 2.24009   |
| <b>P07824</b> | <b>ARGI1 Arginase_1</b>                             | <b>1.319612785</b> | <b>1E-19</b> | <b>15</b> |
| P07824        | ANEQLAAVVAETQK                                      | 1.372755078        | 2            | 5.33103   |
| P07824        | DHGDALAFVDVPNDSPFQIVK                               | 1.232130709        | 2            | 6.87653   |
| P07824        | DIVYIGLR                                            | 1.240172081        | 2            | 2.73046   |
| P07824        | DVDPGEHYIK                                          | 1.331007837        | 2            | 3.09735   |
| P07824        | EGLYTEEIIYK                                         | 1.155561325        | 2            | 2.44874   |
| P07824        | EGNHKPEDYKPPK                                       | 1.31979235         | 2            | 2.80001   |
| P07824        | GKFPDVPGFVWVTPCISAK                                 | 1.268415567        | 3            | 4.70311   |
| P07824        | LKETEYNVR                                           | 1.391767247        | 3            | 3.66586   |
| P07824        | NGTISVVLGGDHSMAIGSISGHAR                            | 1.303903621        | 3            | 4.40073   |
| P07824        | TGLLSGLDIMEVNP TLGK                                 | 1.253828633        | 2            | 5.8082    |
| P07824        | TGLLSGLDIMEVNP TLGK+Oxidation(9)                    | 1.218366695        | 2            | 4.68328   |
| P07824        | TVNTAVALTLSCFGTK                                    | 1.597351602        | 2            | 4.7521    |
| P07824        | VMEETFSYLLGR                                        | 1.675928561        | 2            | 3.25469   |
| P07824        | YFSMTEVDK                                           | 1.274236314        | 1            | 2.27196   |
| P07824        | YFSMTEVDKLGIGK+Oxidation(3)                         | 1.118099728        | 2            | 2.46165   |
| <b>P07871</b> | <b>THIKB 3_ketoacyl_CoA thiolase B_peroxisomal</b>  | <b>0.713513579</b> | <b>1E-19</b> | <b>15</b> |
| P07871        | AEELGLPILGVLR                                       | 0.764517449        | 2            | 4.44025   |
| P07871        | AEIVPVTTT VLDDK                                     | 0.80322685         | 2            | 4.12761   |
| P07871        | AEIVPVTTT VLDDK GDR                                 | 0.659048752        | 2            | 4.02655   |
| P07871        | AEIVPVTTT VLDDK GDRK                                | 0.724643726        | 2            | 3.59403   |
| P07871        | DCLIPMGITSENVAER                                    | 0.697170027        | 2            | 3.58652   |
| P07871        | DCLIPMGITSENVAER+Oxidation(5)                       | 0.718704816        | 2            | 2.93319   |
| P07871        | DGGSTTAGNSSQVSDGAAAVLLAR                            | 0.773102723        | 2            | 6.09779   |
| P07871        | IAQFLSGIPETVPLSAVNR                                 | 1.202117399        | 2            | 2.60835   |
| P07871        | QCSSGLQAVANIAGGIR                                   | 0.706976663        | 2            | 4.32394   |
| P07871        | QDAFALASQQK                                         | 0.72626031         | 2            | 3.33284   |
| P07871        | QKQDAFALASQQK                                       | 0.696884845        | 2            | 4.12029   |
| P07871        | SKAEELGLPILGVLR                                     | 0.689232928        | 3            | 4.24892   |
| P07871        | SYAVVGVPPDIMGIGPAYAIPAALQK                          | 0.729453183        | 2            | 4.31419   |
| P07871        | TITVSQDEGVRPSTTMEGLAK                               | 0.784777703        | 2            | 4.27451   |
| P07871        | VNPLGGAIALGHPLGCTGAR                                | 0.651786025        | 2            | 4.96146   |
| <b>P07872</b> | <b>ACOX1 Peroxisomal acyl_coenzyme A oxidase 1</b>  | <b>0.614017235</b> | <b>1E-19</b> | <b>16</b> |
| P07872        | AFTTWTANAGIEECR                                     | 0.669313322        | 2            | 4.10125   |
| P07872        | ASATFNPELITHLDGSPENTR                               | 0.626972564        | 2            | 4.74864   |
| P07872        | ASEAHCHYVVVK                                        | 0.889922868        | 3            | 4.15646   |
| P07872        | EIENLILNDPDPFHEDYNFLTR                              | 0.707610374        | 2            | 4.45525   |
| P07872        | EIGTHKPLPGITVGDIGPK                                 | 0.574092686        | 3            | 4.11358   |
| P07872        | EVAWNLTSDVLR                                        | 0.588790283        | 2            | 3.40482   |
| P07872        | EYGISDPEEIMWFK                                      | 0.765203478        | 2            | 3.36196   |
| P07872        | FGYEEMDNGYLK                                        | 0.647207554        | 2            | 3.5982    |
| P07872        | GGDFLEGSIIITGAQLSQVNAR                              | 0.668157874        | 2            | 5.15751   |
| P07872        | GLETTATYDPK                                         | 0.665418011        | 2            | 3.39936   |
| P07872        | INESIGQGDLSPELHALTAGLK                              | 0.636115074        | 3            | 5.30832   |
| P07872        | LVEIAAK                                             | 0.706536672        | 1            | 2.02405   |
| P07872        | QSEPEPQILDFQTQQYK                                   | 0.612338842        | 2            | 4.76811   |
| P07872        | SFLVGNAASLSK                                        | 0.624747856        | 2            | 3.85384   |
| P07872        | TQEFILNSPTVTSIK                                     | 0.633677681        | 2            | 4.89097   |
| P07872        | YDGNVYENLFEWAK                                      | 0.608539867        | 2            | 4.62809   |
| <b>P07895</b> | <b>SODM Superoxide dismutase [Mn]_mitochondrial</b> | <b>0.918713173</b> | <b>1E-19</b> | <b>3</b>  |
| P07895        | AIWNVINWENVSQR                                      | 0.903222386        | 2            | 3.90512   |
| P07895        | GDVTTQVALQPALK                                      | 0.790096412        | 2            | 3.44255   |
| P07895        | HHATVNNLNVTTEK                                      | 1.176364712        | 2            | 4.21489   |
| <b>P07896</b> | <b>ECHP Peroxisomal bifunctional enzyme</b>         | <b>0.772881361</b> | <b>1E-19</b> | <b>21</b> |

|               |                                                                                                                     |                    |               |           |
|---------------|---------------------------------------------------------------------------------------------------------------------|--------------------|---------------|-----------|
| P07896        | GQGLTGPSLPPGTPVR                                                                                                    | 0.638412236        | 2             | 4.07126   |
| P07896        | GWYQYDKPLGR                                                                                                         | 0.548891366        | 2             | 2.74778   |
| P07896        | IFNKVPVSLPNMDSVFAEIAIK                                                                                              | 0.828795144        | 3             | 3.57907   |
| P07896        | IGVVVGNCYGFVGNR                                                                                                     | 0.923959783        | 2             | 2.43636   |
| P07896        | IIDKPIEPR                                                                                                           | 0.633362837        | 2             | 2.4244    |
| P07896        | KGQGLTGPSLPPGTPVR                                                                                                   | 0.57699035         | 2             | 3.89557   |
| P07896        | KQYPGVLAPETCVR                                                                                                      | 0.643438051        | 2             | 3.73214   |
| P07896        | LCNPPVNAVSPVIR                                                                                                      | 0.725604812        | 2             | 4.3034    |
| P07896        | LGILDAVVK                                                                                                           | 0.750416256        | 2             | 2.91247   |
| P07896        | LLEVIPSR                                                                                                            | 0.626718554        | 2             | 2.72852   |
| P07896        | QNPDIQLEPSDYLR                                                                                                      | 0.654994034        | 2             | 3.8005    |
| P07896        | QYPGVLAPETCVR                                                                                                       | 0.695745109        | 2             | 3.59297   |
| P07896        | TASAQPVSSVGLGLGTMGR                                                                                                 | 0.863785442        | 2             | 4.61298   |
| P07896        | TASAQPVSSVGLGLGTMGR+Oxidation(17)                                                                                   | 0.773647182        | 2             | 4.03293   |
| P07896        | TISKEEILER                                                                                                          | 0.555541491        | 2             | 2.86702   |
| P07896        | VGISVVAVESDPK                                                                                                       | 0.659730265        | 2             | 3.33062   |
| P07896        | VGLPEVTLGILPGAR                                                                                                     | 0.517012001        | 2             | 3.34847   |
| P07896        | VSDLAGLDVGWK                                                                                                        | 0.654596079        | 2             | 4.21677   |
| P07896        | YLSADEALR                                                                                                           | 0.695002056        | 2             | 2.55121   |
| P07896        | YSPLGDMLEAGR                                                                                                        | 0.607009178        | 2             | 4.30915   |
| P07896        | YSSPTTIATVMSLSK                                                                                                     | 1.235494578        | 2             | 3.43817   |
| <b>P08009</b> | <b>GSTM4 Glutathione S_transferase Yb_3</b>                                                                         | <b>1.091168492</b> | <b>0.8641</b> | <b>5</b>  |
| P08009        | LCYNPDFEK                                                                                                           | 1.263906719        | 2             | 2.79096   |
| P08009        | LLLEYDSSYEK                                                                                                         | 1.038637684        | 2             | 4.84057   |
| P08009        | LLLEYDSSYEKRR                                                                                                       | 1.046936109        | 2             | 3.82751   |
| P08009        | NQVFEATCLDAFPNLK                                                                                                    | 0.957209602        | 2             | 4.52542   |
| P08009        | SQWLNEK                                                                                                             | 1.067769624        | 2             | 2.63898   |
| <b>P08010</b> | <b>GSTM2 Glutathione S_transferase Mu 2</b>                                                                         | <b>0.976347253</b> | <b>0.5576</b> | <b>15</b> |
| P08010        | CLDAFPNLKDFVAR                                                                                                      | 1.084127734        | 2             | 2.45433   |
| P08010        | IRVDVLENQAMDTR                                                                                                      | 1.01580497         | 3             | 4.28244   |
| P08010        | ITYVDFLVYDVLQHR                                                                                                     | 1.194972894        | 2             | 5.04518   |
| P08010        | KKPEYLEGLPEK                                                                                                        | 0.924351132        | 3             | 4.4175    |
| P08010        | KPEYLEGLPEK                                                                                                         | 1.370837536        | 2             | 3.48164   |
| P08010        | KYSMGDAPDYDR                                                                                                        | 0.958778812        | 2             | 3.32848   |
| P08010        | LFLEYDTSYEDK                                                                                                        | 1.053615862        | 2             | 5.118     |
| P08010        | LFLEYDTSYEDKK                                                                                                       | 0.957098062        | 2             | 4.40394   |
| P08010        | LQLAMVCYSPDFER                                                                                                      | 0.990226444        | 2             | 3.51967   |
| P08010        | LQLAMVCYSPDFER+Oxidation(4)                                                                                         | 1.106704579        | 2             | 3.34586   |
| P08010        | SQWLSEK                                                                                                             | 1.14721254         | 2             | 2.41802   |
| P08010        | VDVLENQAMDTR                                                                                                        | 0.979119011        | 2             | 4.48135   |
| P08010        | VDVLENQAMDTR+Oxidation(8)                                                                                           | 1.034762894        | 2             | 4.03432   |
| P08010        | YSMGDAPDYDR                                                                                                         | 1.025376587        | 2             | 2.94254   |
| P08010        | YSMGDAPDYDR+Oxidation(2)                                                                                            | 1.241147808        | 2             | 2.71719   |
| <b>P08011</b> | <b>MGST1 Microsomal glutathione S_transferase 1</b>                                                                 | <b>1.009685145</b> | <b>0.0003</b> | <b>4</b>  |
| P08011        | IYHTIAYLTPQPNR                                                                                                      | 0.948473804        | 2             | 5.72021   |
| P08011        | MMFLSSATAFQR+Oxidation(0)                                                                                           | 1.049196288        | 2             | 2.55147   |
| P08011        | VFANPEDCAGFGK                                                                                                       | 1.005430881        | 2             | 4.69275   |
| P08011        | VFANPEDCAGFGKGENAK                                                                                                  | 0.809506297        | 2             | 4.4225    |
| <b>P08122</b> | <b>chain</b>                                                                                                        | <b>1.386491744</b> | <b>0.0175</b> | <b>3</b>  |
| P08122        | DEKSLAYPEGK                                                                                                         | 1.397576132        | 2             | 2.4155    |
| P08122        | DGAPGFGTEGAKGNRGPGLR                                                                                                | 1.426531978        | 2             | 2.32739   |
| P08122        | GPAGRFGPDGPPGQPGIEGLAGPLGR                                                                                          | 1.046337921        | 2             | 2.50669   |
| <b>P08290</b> | <b>ASGR2 Asialoglycoprotein receptor 2</b>                                                                          | <b>1.015765687</b> | <b>0.9614</b> | <b>2</b>  |
| P08290        | DFQDIQQLDSEENDHQLIGDEEQGSHVQNLN                                                                                     | 1.07647039         | 3             | 6.28217   |
| P08290        | EEQEFVVK                                                                                                            | 0.975744465        | 1             | 1.93437   |
| <b>P08461</b> | <b>ODP2 Dihydroliopyllysine_residue acetyltransferase component of pyruvate dehydrogenase complex_mitochondrial</b> | <b>0.959585289</b> | <b>0.0004</b> | <b>5</b>  |

|               |                                                                                |                    |               |           |
|---------------|--------------------------------------------------------------------------------|--------------------|---------------|-----------|
| P08461        | AAPAAAAAPPGR                                                                   | 0.80459977         | 2             | 3.04361   |
| P08461        | DVPLGTPLCIIVEK                                                                 | 0.950112249        | 2             | 3.02493   |
| P08461        | DVPVGSIICTVEKPDIEAFK                                                           | 0.706688132        | 2             | 4.09604   |
| P08461        | GLETIASDVVSLASK                                                                | 0.874044407        | 2             | 4.20219   |
| P08461        | VAPTPAGVFIDIPIISNIR                                                            | 1.027826046        | 2             | 4.7875    |
| <b>P08503</b> | <b>ACADM Medium_chain specific acyl_CoA dehydrogenase_mitochondrial</b>        | <b>1.080050035</b> | <b>0.0041</b> | <b>7</b>  |
| P08503        | AFTGFIVEADTPGIHIGK                                                             | 0.989827411        | 2             | 4.22431   |
| P08503        | EEIIPVAPDYDK                                                                   | 0.854993163        | 2             | 3.04153   |
| P08503        | IYQIYEGTAQIQR                                                                  | 1.066856998        | 2             | 4.95122   |
| P08503        | KGDEYVINGQK                                                                    | 0.932049433        | 2             | 3.6154    |
| P08503        | QEPGLGFSFELTEQQK                                                               | 0.887555863        | 2             | 2.6851    |
| P08503        | SGEYFPFLIK                                                                     | 0.968516212        | 2             | 2.57755   |
| P08503        | TRPTVAAGAVGLAQR                                                                | 0.976491703        | 2             | 4.1779    |
| <b>P08541</b> | <b>UD2B2 UDP_glucuronosyltransferase 2B2</b>                                   | <b>2.003205345</b> | <b>1E-19</b>  | <b>9</b>  |
| P08541        | DELQNHFIK                                                                      | 1.924166689        | 2             | 2.64171   |
| P08541        | FEIFSTSISKDELQNHFIK                                                            | 1.448763525        | 3             | 3.55588   |
| P08541        | FILPPSYVPVILSGLAGK                                                             | 2.56778364         | 3             | 5.91516   |
| P08541        | GAAVSLNIR                                                                      | 3.239138601        | 2             | 2.3769    |
| P08541        | GHEVTVLKPSAYFFLDPK                                                             | 2.126997171        | 3             | 4.32887   |
| P08541        | HKEWDTFYSEILGRPTTVDEMSK                                                        | 1.609466506        | 3             | 4.63379   |
| P08541        | LLDVWTYELPR                                                                    | 2.56924966         | 2             | 3.84913   |
| P08541        | SYWDLK                                                                         | 1.751184258        | 2             | 2.33312   |
| P08541        | VEIWLIR                                                                        | 1.882540675        | 2             | 2.76257   |
| <b>P08542</b> | <b>UDB17 UDP_glucuronosyltransferase 2B17</b>                                  | <b>1.038813872</b> | <b>0.0002</b> | <b>6</b>  |
| P08542        | EIINNPFYK                                                                      | 0.828861631        | 1             | 2.10229   |
| P08542        | FETFPTSIVSKDELENYFIK                                                           | 1.045729047        | 2             | 4.06619   |
| P08542        | KWDPFYSEILGRPTTLAETMGK                                                         | 1.442711705        | 2             | 4.04321   |
| P08542        | LVDVWTYELQR                                                                    | 1.170671628        | 2             | 3.34658   |
| P08542        | NAVWLSTIHHDQPMKPLDK                                                            | 1.356197207        | 3             | 3.67979   |
| P08542        | WDPFYSEILGRPTTLAETMGK                                                          | 1.162465049        | 2             | 4.08456   |
| <b>P08649</b> | <b>CO4 Complement C4</b>                                                       | <b>1.060661369</b> | <b>0.9333</b> | <b>2</b>  |
| P08649        | SLEIPGSSDPNVIPDGFSSFVR                                                         | 1.126778966        | 2             | 3.15712   |
| P08649        | VTASEPLETLGSEGALSPGGVASLLR                                                     | 1.119631384        | 2             | 2.96551   |
| <b>P08661</b> | <b>MBL2 Mannose_binding protein C</b>                                          | <b>0.889280217</b> | <b>0.7412</b> | <b>2</b>  |
| P08661        | ALCSELQGTVATPR                                                                 | 0.847113985        | 2             | 2.5405    |
| P08661        | TENVFEDLTGNR                                                                   | 1.031931473        | 2             | 2.77853   |
| <b>P08683</b> | <b>CP2CB Cytochrome P450 2C11</b>                                              | <b>0.96509295</b>  | <b>0.0007</b> | <b>14</b> |
| P08683        | DIDTPAISGFHLPFYACFIPVQR                                                        | 0.829436194        | 3             | 4.98646   |
| P08683        | EALVDLGEEFSGR                                                                  | 1.011711186        | 2             | 3.71539   |
| P08683        | EHQESLDKDNPR                                                                   | 0.900743532        | 2             | 3.99545   |
| P08683        | FDYKDPTFLNLMHR                                                                 | 1.080554769        | 3             | 4.86114   |
| P08683        | GTNVIVSLSSILHDDKEFPNPEK                                                        | 0.857679399        | 2             | 5.09761   |
| P08683        | ICAGEALAR                                                                      | 0.923731453        | 2             | 3.12089   |
| P08683        | LPPGPTPLPIIGNTLQIYMK                                                           | 1.127077509        | 2             | 3.28221   |
| P08683        | NYVLEK                                                                         | 0.725528262        | 1             | 2.06439   |
| P08683        | SQMPYTDVAVVHEIQR                                                               | 0.910107257        | 2             | 3.94216   |
| P08683        | SQMPYTDVAVVHEIQR+Oxidation(2)                                                  | 0.79841571         | 2             | 3.69887   |
| P08683        | VKEHQESLDKDNPR                                                                 | 1.074518018        | 3             | 5.02415   |
| P08683        | VQEEIER                                                                        | 0.910504559        | 2             | 2.62616   |
| P08683        | YGLLLLLK                                                                       | 1.585987545        | 2             | 3.18896   |
| P08683        | YIDLVPNTLPHLVTR                                                                | 0.827756189        | 2             | 4.03654   |
| <b>P08733</b> | <b>MLRV Myosin regulatory light chain 2_ventricular/cardiac muscle isoform</b> | <b>1.248097903</b> | <b>0.9166</b> | <b>2</b>  |
| P08733        | GADPEETILNAFK                                                                  | 1.258984819        | 2             | 2.58905   |
| P08733        | NLVHIITHGEEKD                                                                  | 1.183132503        | 2             | 3.34575   |
| <b>P09034</b> | <b>ASSY Argininosuccinate synthase</b>                                         | <b>1.647181805</b> | <b>1E-19</b>  | <b>16</b> |

|               |                                                                           |                    |               |           |
|---------------|---------------------------------------------------------------------------|--------------------|---------------|-----------|
| P09034        | APNTPDVLIEFK                                                              | 2.028774063        | 2             | 3.4704    |
| P09034        | DGTTHTSLDLFMYLNEVAGK                                                      | 2.267538855        | 2             | 5.92603   |
| P09034        | EFVEEFIWPAVQSSALYEDR                                                      | 1.887086025        | 3             | 5.71584   |
| P09034        | EQGYDVIAYLANIGQK                                                          | 1.989636856        | 2             | 2.33856   |
| P09034        | FAELVYTGFWHSPECFVR                                                        | 1.480715277        | 2             | 4.04209   |
| P09034        | FELTCYSLAPQIK                                                             | 2.149241269        | 2             | 4.26078   |
| P09034        | GRNDLMEYAK                                                                | 1.759695505        | 2             | 3.01792   |
| P09034        | GRNDLMEYAK+Oxidation(5)                                                   | 1.792122568        | 2             | 2.58016   |
| P09034        | IDIVENR                                                                   | 1.528306936        | 2             | 2.40713   |
| P09034        | KVFIEDVSK                                                                 | 1.4277292          | 3             | 3.3453    |
| P09034        | NDLMEYAK                                                                  | 1.694517212        | 2             | 2.5351    |
| P09034        | SPWSMDENLMHISYEAGILENPK                                                   | 1.694618975        | 3             | 5.76887   |
| P09034        | TQDPAKAPNTPDVLIEFK                                                        | 1.614458782        | 2             | 4.88041   |
| P09034        | TQDPAKAPNTPDVLIEFKK                                                       | 1.722395552        | 3             | 4.42726   |
| P09034        | VFIEDVSK                                                                  | 1.647901908        | 2             | 2.91569   |
| P09034        | VQVSVFK                                                                   | 1.766586147        | 1             | 2.05468   |
| <b>P09041</b> | <b>PGK2 Phosphoglycerate kinase 2</b>                                     | <b>1.039164564</b> | <b>1</b>      | <b>3</b>  |
| P09041        | FHVEEEGK                                                                  | 1.000211082        | 1             | 2.43788   |
| P09041        | LGDVYVNDAFGTAHR                                                           | 1.048317897        | 3             | 4.28295   |
| P09041        | VSHVSTGGGASLELLEGGK                                                       | 1.034117486        | 2             | 5.66092   |
| <b>P09117</b> | <b>ALDOC Fructose_bisphosphate aldolase C</b>                             | <b>1.393948931</b> | <b>4E-10</b>  | <b>2</b>  |
| P09117        | VLAAYVK                                                                   | 1.356682706        | 2             | 2.64218   |
| P09117        | YSPEEIAMATVTALR                                                           | 1.159486376        | 2             | 2.43262   |
| <b>P09139</b> | <b>SPYA Serine_pyruvate aminotransferase_mitochondrial</b>                | <b>1.440421193</b> | <b>9E-08</b>  | <b>2</b>  |
| P09139        | IGLLGYNATTENADR                                                           | 1.440276695        | 2             | 3.36369   |
| P09139        | VLNAPPGISLISFNDK                                                          | 1.451390809        | 2             | 2.79901   |
| <b>P09367</b> | <b>SDHL L_serine dehydratase/L_threonine deaminase</b>                    | <b>1.311843967</b> | <b>0.0121</b> | <b>3</b>  |
| <b>P09456</b> | <b>KAP0 cAMP_dependent protein kinase type I_alpha regulatory subunit</b> | <b>1.038918681</b> | <b>0.0019</b> | <b>2</b>  |
| P09456        | FERVLGPCSDILK                                                             | 0.318384202        | 2             | 2.37866   |
| P09456        | LTVADALEPVQFEDGQK                                                         | 1.18594695         | 2             | 3.83237   |
| <b>P09495</b> | <b>TPM4 Tropomyosin alpha_4 chain</b>                                     | <b>1.148175661</b> | <b>0.0025</b> | <b>13</b> |
| P09495        | AEGDAAALNR                                                                | 0.817017445        | 2             | 2.37429   |
| P09495        | EDKYEIEIK                                                                 | 0.983529762        | 1             | 2.92953   |
| P09495        | EENVGLHQTLDQTLNELNCI                                                      | 1.504950154        | 2             | 4.95796   |
| P09495        | IQALQQQADDAEDR                                                            | 1.196069459        | 2             | 4.40027   |
| P09495        | IQLVEEELDR                                                                | 1.11070041         | 2             | 3.42217   |
| P09495        | IQLVEEELDRAQER                                                            | 0.973660038        | 2             | 2.68907   |
| P09495        | KLVILEGELER                                                               | 1.251534268        | 3             | 3.48331   |
| P09495        | LEEAEKAADESER                                                             | 1.086911598        | 2             | 3.91638   |
| P09495        | LVILEGELER                                                                | 1.209965389        | 2             | 2.7667    |
| P09495        | MEIQEMQLK                                                                 | 0.80188551         | 2             | 2.62533   |
| P09495        | RIQLVEEELDR                                                               | 1.005543478        | 2             | 2.7144    |
| P09495        | YEEIEIK                                                                   | 1.199192222        | 1             | 1.92017   |
| P09495        | YSEKEDKYEEIEIK                                                            | 0.656693077        | 2             | 4.20341   |
| <b>P09527</b> | <b>RAB7A Ras_related protein Rab_7a</b>                                   | <b>1.46467339</b>  | <b>2E-08</b>  | <b>3</b>  |
| P09527        | GADCCVLVFDVTAPNTFK                                                        | 1.437989983        | 2             | 4.52464   |
| P09527        | TLDSWRDEFLIQASPR                                                          | 1.082971297        | 2             | 2.36226   |
| P09527        | VIIIGDSGVGK                                                               | 1.185495186        | 2             | 2.71133   |
| <b>P09605</b> | <b>KCRS Creatine kinase S_type_mitochondrial</b>                          | <b>1.37077605</b>  | <b>0.8311</b> | <b>2</b>  |
| P09605        | GTGGVDTAADVVDISNIDR                                                       | 1.32391193         | 2             | 3.99974   |
| P09605        | LSEMTEQDQQR                                                               | 1.47678754         | 2             | 2.87406   |
| <b>P09606</b> | <b>GLNA Glutamine synthetase</b>                                          | <b>1.415919205</b> | <b>1E-19</b>  | <b>5</b>  |
| P09606        | CIEEAIDK                                                                  | 1.164532215        | 2             | 2.52721   |
| P09606        | ITGTNAEVMPAQWFEQIGPCEGIR                                                  | 1.367188699        | 2             | 4.37536   |
| P09606        | LTGFHETSNINDFSAGVANR                                                      | 1.376395873        | 2             | 5.78821   |
| P09606        | TCLLNETGDPEPFQYK                                                          | 1.44614563         | 2             | 4.97161   |

|               |                                                                           |                    |               |           |
|---------------|---------------------------------------------------------------------------|--------------------|---------------|-----------|
| P09606        | TCLLNETGDEPFQYKN                                                          | 2.146609784        | 2             | 4.62527   |
| <b>P09811</b> | <b>PYGL Glycogen phosphorylase_ liver form</b>                            | <b>0.950240761</b> | <b>2E-08</b>  | <b>19</b> |
| P09811        | DFSELEPDKFQNK                                                             | 0.868493139        | 2             | 3.50535   |
| P09811        | DGVGTVFDAFPDQVAIQLNDTHPALAIPELMR                                          | 1.018942318        | 3             | 4.93877   |
| P09811        | DLSQLTK                                                                   | 0.756731916        | 1             | 2.09888   |
| P09811        | EGWQVEEADDWLR                                                             | 0.862938258        | 2             | 3.32008   |
| P09811        | GIVGVENVAELK                                                              | 0.894644831        | 2             | 3.06156   |
| P09811        | GIVGVENVAELKK                                                             | 1.053175314        | 2             | 2.88879   |
| P09811        | HLQIYEINQK                                                                | 0.923831612        | 2             | 3.44767   |
| P09811        | INPSSMFDVHVK                                                              | 0.972985958        | 2             | 2.69644   |
| P09811        | LVIDQIDNGFFSPNPDLFK                                                       | 1.050455903        | 3             | 4.57253   |
| P09811        | LVTSAEVVNNNDPMVGSK                                                        | 1.099932923        | 2             | 2.81257   |
| P09811        | MSLIEEGGKR                                                                | 1.093543736        | 2             | 2.74615   |
| P09811        | TFAYTNHTVLPALER                                                           | 0.959830248        | 2             | 3.72269   |
| P09811        | VDDVAALDK                                                                 | 0.979711014        | 2             | 2.34852   |
| P09811        | VDDVAALDKK                                                                | 0.834882299        | 3             | 3.46648   |
| P09811        | VFADYEAYVK                                                                | 0.802914285        | 1             | 2.22267   |
| P09811        | VIPATDLSEQISTAGTEASGTGNMK                                                 | 0.935023471        | 2             | 6.07575   |
| P09811        | VLYPNDNFFEGK                                                              | 0.9253168          | 2             | 3.10938   |
| P09811        | WLLLCNPLGLADLIAEK                                                         | 1.014496268        | 3             | 4.91197   |
| P09811        | YEYGFNQK                                                                  | 1.085545142        | 1             | 2.45306   |
| <b>P09812</b> | <b>PYGM Glycogen phosphorylase_ muscle form</b>                           | <b>0.897725192</b> | <b>0.0881</b> | <b>2</b>  |
| P09812        | NLAENISR                                                                  | 0.89805498         | 1             | 2.5304    |
| P09812        | QIIEQLSSGFFSPK                                                            | 0.996042536        | 2             | 3.6396    |
| <b>P09875</b> | <b>UD2B1 UDP_glucuronosyltransferase 2B1</b>                              | <b>0.680167333</b> | <b>1E-19</b>  | <b>6</b>  |
| P09875        | ANVVASALAIQIPQK                                                           | 0.454791991        | 3             | 4.09168   |
| P09875        | ESSINFEIYSVPLSK                                                           | 1.030681527        | 2             | 2.70575   |
| P09875        | FSGGLPLPPSYVPPVLSLSDR                                                     | 0.6943977          | 3             | 4.73414   |
| P09875        | IILNELAQR                                                                 | 0.527722379        | 2             | 2.85629   |
| P09875        | SDLEYSFAK                                                                 | 0.553655327        | 2             | 2.3952    |
| P09875        | VDFSILSTGLLTALK                                                           | 0.606263846        | 2             | 4.40457   |
| <b>P09895</b> | <b>RL5 60S ribosomal protein L5</b>                                       | <b>1.114194151</b> | <b>0.4832</b> | <b>4</b>  |
| P09895        | GAVDGGLSIPHSTK                                                            | 1.114380377        | 2             | 4.19612   |
| P09895        | NNVTPDMMMEEMYK                                                            | 0.900974809        | 2             | 2.96021   |
| P09895        | RFPGYDSESK                                                                | 1.127914081        | 2             | 2.70129   |
| P09895        | YLMEEDEDAYKK                                                              | 0.93795578         | 2             | 3.06726   |
| <b>POC057</b> | <b>H2AZ Histone H2A.Z</b>                                                 | <b>0.876436291</b> | <b>1E-19</b>  | <b>2</b>  |
| POC057        | ATIAGGGVIPHIHK                                                            | 0.793448865        | 2             | 3.2025    |
| POC057        | GDEELDSLK                                                                 | 0.865010803        | 2             | 3.06284   |
| <b>POC2X9</b> | <b>AL4A1 Delta_1_pyrraline_5_carboxylate dehydrogenase_ mitochondrial</b> | <b>0.910529503</b> | <b>6E-06</b>  | <b>15</b> |
| POC2X9        | AIEAAVLAR                                                                 | 1.017276912        | 2             | 2.35292   |
| POC2X9        | ALNDLKDQTEAIPCVVGDEEVWTS DVR                                              | 0.916573745        | 3             | 5.34308   |
| POC2X9        | DQTEAIPCVVGDEEVWTS DVR                                                    | 0.830105596        | 2             | 4.43744   |
| POC2X9        | EAGLPPNVIQFVPADGPTFGDVTSSHLGINTGSVPTFK                                    | 0.902121901        | 3             | 3.73458   |
| POC2X9        | EEIFGPVLT VYVYPDEK                                                        | 1.024858323        | 2             | 3.14096   |
| POC2X9        | ETLQLVDSTTSYGLTGAVFAQDK                                                   | 1.0430435          | 2             | 5.17611   |
| POC2X9        | KEWDLKPVADR                                                               | 0.894396195        | 2             | 3.05046   |
| POC2X9        | LYVPQSLWPQIK                                                              | 1.340825938        | 2             | 3.33873   |
| POC2X9        | NAAGNFYINDK                                                               | 1.387517163        | 2             | 2.88047   |
| POC2X9        | NFHVHSSADVDSVSVGTLR                                                       | 1.125952576        | 2             | 5.13643   |
| POC2X9        | SAFEYGGQK                                                                 | 1.011213532        | 2             | 2.53826   |
| POC2X9        | SSPSLSILAGGQCNEVGVFVEPCIIESK                                              | 0.940789009        | 3             | 5.11982   |
| POC2X9        | STGSVVGQQPFGGAR                                                           | 0.944316635        | 2             | 4.45013   |
| POC2X9        | VANEPILAFTQGSPER                                                          | 1.084987728        | 2             | 5.37271   |
| POC2X9        | YQLSPFNHGK                                                                | 1.303758227        | 2             | 2.92388   |
| <b>POC5H9</b> | <b>MANF Mesencephalic astrocyte_derived neurotrophic factor</b>           | <b>1.124569727</b> | <b>0.9871</b> | <b>5</b>  |

|               |                                                     |                    |               |           |
|---------------|-----------------------------------------------------|--------------------|---------------|-----------|
| P0C5H9        | DRDVTFSPATIEEELIK                                   | 0.95560635         | 2             | 4.51081   |
| P0C5H9        | DVTFSPATIEEELIK                                     | 0.980978386        | 2             | 3.17285   |
| P0C5H9        | IINEVSKPLAHHIPVEK                                   | 1.126366077        | 3             | 3.65737   |
| P0C5H9        | ILDDWGEMCK                                          | 0.981307355        | 2             | 2.97863   |
| P0C5H9        | QIDLSTVDLKK                                         | 0.910460142        | 2             | 2.88173   |
| <b>P10111</b> | <b>PPIA Peptidyl_prolyl cis_trans isomerase A</b>   | <b>0.992473269</b> | <b>5E-12</b>  | <b>10</b> |
| P10111        | EGMSIVEAMER                                         | 0.842472728        | 2             | 2.63675   |
| P10111        | FEDENFILK                                           | 0.920213778        | 2             | 3.35598   |
| P10111        | HTGPGILSMANAGPNTNGSQFFICTAK                         | 1.214412836        | 3             | 6.1487    |
| P10111        | IIPGFMCQGGDFTR                                      | 1.023335846        | 2             | 2.59665   |
| P10111        | KITISDCGQL                                          | 1.301982788        | 2             | 3.19316   |
| P10111        | SIYGEKFEDEFILK                                      | 0.801992348        | 2             | 4.39976   |
| P10111        | TEWLDGK                                             | 0.942679719        | 2             | 2.31304   |
| P10111        | VCFELFADK                                           | 1.14968609         | 2             | 3.41076   |
| P10111        | VCFELFADKVPK                                        | 0.978142785        | 3             | 3.82748   |
| P10111        | VKEGMSIVEAMER                                       | 1.058759837        | 2             | 2.81733   |
| <b>P10536</b> | <b>RAB1B Ras_related protein Rab_1B</b>             | <b>1.028140158</b> | <b>0.8582</b> | <b>3</b>  |
| P10536        | MGPAAASGGERPNLK                                     | 0.815929236        | 2             | 3.37291   |
| P10536        | NATNVEQAFMTMAAEIK+Oxidation(11)                     | 1.027397157        | 2             | 3.4369    |
| P10536        | NATNVEQAFMTMAAEIK+Oxidation(9)                      | 1.027397157        | 2             | 3.86406   |
| <b>P10633</b> | <b>CP2D1 Cytochrome P450 2D1</b>                    | <b>0.988471082</b> | <b>6E-12</b>  | <b>3</b>  |
| P10633        | SQGVILASYGPEWR                                      | 0.501114066        | 2             | 4.28449   |
| P10633        | TFMALLDNLLAENR                                      | 0.958270561        | 2             | 3.54045   |
| P10633        | YGDVFLSQK                                           | 0.990759279        | 2             | 2.79462   |
| <b>P10634</b> | <b>CP2DQ Cytochrome P450 2D26</b>                   | <b>1.09839336</b>  | <b>1E-19</b>  | <b>17</b> |
| P10634        | ACLGEPLAR                                           | 1.043018649        | 2             | 2.42703   |
| P10634        | AVSNVIASLVYAR                                       | 1.497882996        | 2             | 4.10439   |
| P10634        | DMTDAFLAEMQK                                        | 0.898914957        | 2             | 4.18845   |
| P10634        | EAEHPFNPSILLSK                                      | 0.865036012        | 2             | 2.32553   |
| P10634        | ELLVTYGEDTADRPLLPIYNHLGYGNK                         | 0.991776287        | 3             | 5.50769   |
| P10634        | FADIVPTNIPHMTSR                                     | 0.871301364        | 2             | 3.65109   |
| P10634        | FEYEDPFFNR                                          | 1.127303457        | 2             | 2.54424   |
| P10634        | FHPEHFLDAQGNFVK                                     | 1.108147382        | 2             | 4.28254   |
| P10634        | GNPESSFNDENLR                                       | 1.153134264        | 2             | 4.27573   |
| P10634        | GTTLIPNLSSVLK                                       | 1.105686105        | 2             | 2.31188   |
| P10634        | GTTLIPNLSSVLKDETVWEKPLR                             | 0.877150123        | 2             | 4.0284    |
| P10634        | GVVLAPYGPEWR                                        | 0.913994066        | 2             | 3.50425   |
| P10634        | LNSFIALVDK                                          | 1.204063215        | 2             | 2.87291   |
| P10634        | RFEYEDPFFNR                                         | 1.009121165        | 3             | 3.30915   |
| P10634        | SLEQWVTEEAGHLCDTFAK                                 | 1.028787188        | 2             | 4.5506    |
| P10634        | SWDPAQPPR                                           | 1.084526785        | 2             | 2.5022    |
| P10634        | VHEEIDEVIGQVR                                       | 0.994985968        | 2             | 4.19711   |
| <b>P10719</b> | <b>ATPB ATP synthase subunit beta_mitochondrial</b> | <b>1.251305201</b> | <b>3E-13</b>  | <b>30</b> |
| P10719        | AHGGYSVFAGVGER                                      | 0.934921885        | 2             | 4.06566   |
| P10719        | AIAELGIYPAVDPLDSTSR                                 | 1.017060295        | 2             | 4.97554   |
| P10719        | EGNDLYHEMIESGVINLK                                  | 0.930015505        | 2             | 4.91859   |
| P10719        | FLSQPFQVAEVFTGHMGK                                  | 1.183041506        | 2             | 3.84749   |
| P10719        | FTQAGSEVSALLGR                                      | 0.998817436        | 2             | 4.66546   |
| P10719        | GFQQILAGDYDHLPEQAFYMGPIEEAVAK                       | 1.292619965        | 3             | 5.20985   |
| P10719        | IGLFGGAGVGK                                         | 0.987826964        | 2             | 2.91816   |
| P10719        | ILQDYK                                              | 1.078438022        | 1             | 2.18793   |
| P10719        | IMDPNIVGSEHYDVAR                                    | 1.146628553        | 2             | 4.60339   |
| P10719        | IMDPNIVGSEHYDVAR+Oxidation(1)                       | 0.970081239        | 2             | 4.09585   |
| P10719        | IMNVIGEPIDER                                        | 1.152518036        | 2             | 3.49167   |
| P10719        | IMNVIGEPIDER+Oxidation(1)                           | 1.249892371        | 2             | 3.41598   |
| P10719        | IPSAVGYQPTLATDMGMTQER                               | 1.50843574         | 2             | 5.11105   |
| P10719        | IPSAVGYQPTLATDMGMTQER+Oxidation(14)                 | 1.486698468        | 2             | 3.60815   |



|               |                                                      |                    |               |           |
|---------------|------------------------------------------------------|--------------------|---------------|-----------|
| P10719        | IPSAVGYQPTLATDMGTMQER+Oxidation(17)                  | 1.486698468        | 2             | 4.28651   |
| P10719        | LVLEVAQHLGESTVR                                      | 1.011618732        | 2             | 4.67235   |
| P10719        | QFAPIHAEAPEFIEMSVEQEILVTGIK                          | 0.938608953        | 3             | 4.66544   |
| P10719        | SLQDIIAILGMDELSEEDKLTVSR                             | 0.988083573        | 4             | 5.2123    |
| P10719        | SLQDIIAILGMDELSEEDKLTVSR+Oxidation(10)               | 1.074602906        | 3             | 4.01515   |
| P10719        | TIAMDGTEGLVR                                         | 0.991448056        | 2             | 3.40632   |
| P10719        | TIAMDGTEGLVR+Oxidation(3)                            | 0.998773281        | 2             | 3.01524   |
| P10719        | TREGNDLYHEMIESGVINLK                                 | 0.986811236        | 2             | 6.02625   |
| P10719        | TVLIMELINNVAK                                        | 0.969965278        | 2             | 4.68446   |
| P10719        | TVLIMELINNVAK+Oxidation(4)                           | 0.947267386        | 2             | 3.20977   |
| P10719        | VALTGLTVAEYFR                                        | 1.485213399        | 2             | 3.78607   |
| P10719        | VALVYQGMNEPPGAR                                      | 1.045515303        | 2             | 4.2203    |
| P10719        | VALVYQGMNEPPGAR+Oxidation(7)                         | 1.037999086        | 2             | 2.85746   |
| P10719        | VLDSGAPIK                                            | 1.005906497        | 2             | 2.83192   |
| P10719        | VLDSGAPIKIPVGPETLGR                                  | 0.95852787         | 3             | 5.11197   |
| P10719        | VVDLLAPYAK                                           | 0.999334453        | 2             | 3.10671   |
| <b>P10760</b> | <b>SAHH Adenosylhomocysteinase</b>                   | <b>1.139827856</b> | <b>3E-13</b>  | <b>16</b> |
| P10760        | ALDIAENEMPLMR                                        | 1.184225206        | 2             | 4.34191   |
| P10760        | ATDVMIAGK                                            | 1.002826782        | 1             | 1.90328   |
| P10760        | DGPLNMILDDGGDLNLIHTK                                 | 1.096152456        | 2             | 5.65661   |
| P10760        | DGPLNMILDDGGDLNLIHTK+Oxidation(5)                    | 1.028071475        | 3             | 4.40284   |
| P10760        | FDNLYGCR                                             | 1.136647502        | 2             | 2.68631   |
| P10760        | GETDEEYLWCIEQLTHFK                                   | 1.25074035         | 2             | 4.41574   |
| P10760        | GISEETTTGVHNLK                                       | 1.084257212        | 2             | 4.1665    |
| P10760        | IILLAAGR                                             | 1.457490738        | 2             | 2.40728   |
| P10760        | KLDEAVAEHLGK                                         | 1.100774496        | 3             | 4.99554   |
| P10760        | LDEAVAEHLGK                                          | 1.199628466        | 2             | 3.79647   |
| P10760        | RATDVMIAGK                                           | 1.197698768        | 2             | 2.66402   |
| P10760        | SKFDNLYGCR                                           | 1.215761491        | 2             | 2.86388   |
| P10760        | VAVVAGYGDVVK                                         | 1.237332296        | 2             | 3.68172   |
| P10760        | VNIKPQVDR                                            | 1.030709758        | 2             | 2.74905   |
| P10760        | WLNENAVEK                                            | 1.129523502        | 2             | 2.82622   |
| P10760        | WSSCNIFSTQDHAAAAIAK                                  | 1.237969417        | 2             | 5.05698   |
| <b>P10860</b> | <b>DHE3 Glutamate dehydrogenase 1_ mitochondrial</b> | <b>0.924603533</b> | <b>0.0053</b> | <b>29</b> |
| P10860        | ALASLMTYK                                            | 1.251833456        | 2             | 3.06579   |
| P10860        | CAVVDVPFGGAK                                         | 1.228588537        | 2             | 3.00041   |
| P10860        | CVGVGESDGSIWNPDGIDPK                                 | 0.897905867        | 2             | 5.17605   |
| P10860        | DDGSWEVIEGYR                                         | 0.901368448        | 2             | 3.89267   |
| P10860        | DIVHSGLAYTMER                                        | 0.971538138        | 2             | 3.37566   |
| P10860        | DIVHSGLAYTMER+Oxidation(10)                          | 1.050056396        | 2             | 2.42727   |
| P10860        | DSNYHLLMSVQESLER                                     | 0.980415016        | 2             | 3.10739   |
| P10860        | EDDPNFFK                                             | 1.226261316        | 1             | 2.12518   |
| P10860        | GASIVEDKLVEDLK                                       | 0.902094674        | 2             | 3.13382   |
| P10860        | GFIGPGIDVPAPDMSTGER                                  | 0.990934309        | 2             | 5.33373   |
| P10860        | GFIGPGIDVPAPDMSTGER+Oxidation(13)                    | 1.018376353        | 2             | 4.89171   |
| P10860        | HGGTIPVVPTAEFQDR                                     | 1.020781411        | 2             | 4.66855   |
| P10860        | IIAEGANGPTTPEADK                                     | 0.995595761        | 2             | 5.12161   |
| P10860        | IIAEGANGPTTPEADKIFLER                                | 0.843902682        | 2             | 4.64327   |
| P10860        | KGFIGPGIDVPAPDMSTGER                                 | 0.993915869        | 2             | 4.98003   |
| P10860        | KGFIGPGIDVPAPDMSTGER+Oxidation(14)                   | 0.907002396        | 2             | 4.14138   |
| P10860        | LQHGSILGFPK                                          | 0.922317624        | 2             | 2.73973   |
| P10860        | MVEGFFDR                                             | 1.025882212        | 2             | 2.71835   |
| P10860        | MVEGFFDR+Oxidation(0)                                | 0.980543903        | 2             | 2.74262   |
| P10860        | NLNHVSYGR                                            | 0.897739255        | 2             | 2.36716   |
| P10860        | NYTDNELEK                                            | 0.933031155        | 2             | 2.48778   |
| P10860        | RDDGSWEVIEGYR                                        | 1.059452013        | 2             | 4.26359   |
| P10860        | RFTMELAK                                             | 1.140146116        | 2             | 2.32058   |

|               |                                                                     |                    |               |           |
|---------------|---------------------------------------------------------------------|--------------------|---------------|-----------|
| P10860        | TAAYVNAIEK                                                          | 1.094839188        | 2             | 3.33783   |
| P10860        | TFVVQGFQGNVGLHSMR                                                   | 1.268009184        | 2             | 4.02515   |
| P10860        | TFVVQGFQGNVGLHSMR+Oxidation(14)                                     | 0.833645998        | 2             | 2.86318   |
| P10860        | VYEGSILEADCDILIPAASEK                                               | 0.929435817        | 3             | 6.09714   |
| P10860        | YNLGLDLR                                                            | 0.975424804        | 2             | 3.2503    |
| P10860        | YSTDYSVDEVK                                                         | 1.000116849        | 2             | 3.55404   |
| <b>P10867</b> | <b>GGLO L_gulonolactone oxidase</b>                                 | <b>0.856430477</b> | <b>4E-06</b>  | <b>6</b>  |
| P10867        | GDDILLSPCFQR                                                        | 0.792857216        | 1             | 2.01663   |
| P10867        | LDPTGMFLNSYLEK                                                      | 0.892500496        | 2             | 4.23529   |
| P10867        | LDYWLAYETIMK                                                        | 1.000592693        | 2             | 3.97834   |
| P10867        | NADVQQAAR                                                           | 0.885300121        | 2             | 2.75382   |
| P10867        | TYGCSPEVYYQPTSVEEVR                                                 | 0.826061844        | 2             | 4.83521   |
| P10867        | VVAHYVPEVR                                                          | 0.852518874        | 2             | 2.77746   |
| <b>P10868</b> | <b>GAMT Guanidinoacetate N_methyltransferase</b>                    | <b>1.119088628</b> | <b>0.4553</b> | <b>4</b>  |
| P10868        | EHWIECNDGVFQR                                                       | 1.028519125        | 2             | 4.50167   |
| P10868        | ENICTEVMALVPPADCR                                                   | 0.882276597        | 2             | 2.36402   |
| P10868        | YTDITAMFEETQVPALLEAGFQR                                             | 1.078807386        | 3             | 4.62068   |
| P10868        | YYAFPQMITPLVTK                                                      | 0.716381747        | 2             | 2.74588   |
| <b>P10888</b> | <b>COX41 Cytochrome c oxidase subunit 4 isoform 1_mitochondrial</b> | <b>1.176713469</b> | <b>1E-19</b>  | <b>4</b>  |
| P10888        | DYPLPDVAHVK                                                         | 0.928201304        | 2             | 2.55961   |
| P10888        | IQFNESFAEMNK                                                        | 1.194846355        | 2             | 3.63557   |
| P10888        | SEDYALPSYVDR                                                        | 1.158536696        | 2             | 3.79781   |
| P10888        | VNPIQGFSAK                                                          | 1.106946202        | 1             | 1.95289   |
| <b>P11030</b> | <b>ACBP Acyl_CoA_binding protein</b>                                | <b>1.408525932</b> | <b>1E-16</b>  | <b>4</b>  |
| P11030        | QATVGDVNTDRPGLLDLK                                                  | 1.36609379         | 2             | 3.49085   |
| P11030        | TQPTDEEMLFYSHFK                                                     | 1.609264356        | 2             | 4.20891   |
| P11030        | TYVEKVEELK                                                          | 0.919777255        | 2             | 2.32323   |
| P11030        | WDSWVK                                                              | 1.031085728        | 1             | 2.0451    |
| <b>P11232</b> | <b>THIO Thioredoxin</b>                                             | <b>0.921771818</b> | <b>0.342</b>  | <b>2</b>  |
| P11232        | EAFQEALAAAGDK                                                       | 0.899950437        | 2             | 4.00479   |
| P11232        | VGEFSGANK                                                           | 1.074726416        | 2             | 2.77732   |
| <b>P11240</b> | <b>COX5A Cytochrome c oxidase subunit 5A_mitochondrial</b>          | <b>1.069591998</b> | <b>0.0402</b> | <b>5</b>  |
| P11240        | EIYPYVIQELRPTLNELGISTPEELGLDK                                       | 0.186500215        | 3             | 6.36189   |
| P11240        | EIYPYVIQELRPTLNELGISTPEELGLDKV                                      | 1.449206924        | 3             | 7.085     |
| P11240        | GMNNTLVGYDLVPEPK                                                    | 1.06035516         | 2             | 3.67895   |
| P11240        | LNDFASAVR                                                           | 0.951363528        | 2             | 3.21372   |
| P11240        | RLNDFASAVR                                                          | 1.071312423        | 2             | 2.73666   |
| <b>P11348</b> | <b>DHPR Dihydropteridine reductase</b>                              | <b>1.119061763</b> | <b>2E-15</b>  | <b>10</b> |
| P11348        | AALDGTGMIGYGMAK                                                     | 1.074792842        | 2             | 3.55316   |
| P11348        | EGLLTLGAK                                                           | 0.957605296        | 2             | 2.72901   |
| P11348        | GAVHQLCQSLAGK                                                       | 1.38861815         | 2             | 3.85914   |
| P11348        | MTDSFTEQADQVTAEVGK                                                  | 1.13225138         | 2             | 5.36276   |
| P11348        | MTDSFTEQADQVTAEVGK+Oxidation(0)                                     | 1.014854276        | 2             | 5.75007   |
| P11348        | NSGMPSGAAAIAVLPVTLTPMNR                                             | 1.008416723        | 2             | 5.51986   |
| P11348        | NSGMPSGAAAIAVLPVTLTPMNR+Oxidation(3)                                | 0.970671139        | 2             | 3.92542   |
| P11348        | QSIWTSTISSHLATK                                                     | 1.062369652        | 2             | 3.47213   |
| P11348        | RPNSGSLIQVTTDQK                                                     | 1.206301968        | 2             | 3.71083   |
| P11348        | VDAILCVAGGWAGGNAK                                                   | 1.113468617        | 2             | 4.05102   |
| <b>P11442</b> | <b>CLH Clathrin heavy chain 1</b>                                   | <b>1.106366358</b> | <b>0.552</b>  | <b>31</b> |
| P11442        | AHIAQLCEK                                                           | 1.056111801        | 1             | 2.22511   |
| P11442        | ALEHFTDLYDIK                                                        | 0.958260509        | 3             | 3.99356   |
| P11442        | AVDVFFPEAQNDPVMQISEK                                                | 1.016956004        | 2             | 2.6707    |
| P11442        | FDVNTSAVQVLIHIGNLDR                                                 | 1.034206979        | 3             | 4.11058   |
| P11442        | FNALFAQGNYSAAK                                                      | 0.986164879        | 2             | 4.35935   |
| P11442        | GQCDLELINVCNENSLFK                                                  | 1.002042907        | 2             | 5.22617   |
| P11442        | GQFSTDELVAEVEK                                                      | 1.015689312        | 2             | 4.15261   |
| P11442        | GQFSTDELVAEVEKR                                                     | 0.877892152        | 2             | 3.46663   |

|               |                                                                  |                    |              |           |
|---------------|------------------------------------------------------------------|--------------------|--------------|-----------|
| P11442        | IHEGCEEPATHNALAK                                                 | 1.111737842        | 2            | 5.20139   |
| P11442        | ISGETIFVTAPHEATAGIIGVNR                                          | 1.095526891        | 2            | 5.21374   |
| P11442        | IYIDSNNNPER                                                      | 0.942925806        | 2            | 3.23465   |
| P11442        | KFDVNTSAVQVLIHIGNLDR                                             | 1.049408486        | 3            | 5.84506   |
| P11442        | KFNALFAQGNYSAAK                                                  | 0.893032335        | 2            | 4.17144   |
| P11442        | LAELEEFINGPNNNAHIQQVGDR                                          | 0.953569408        | 2            | 4.95949   |
| P11442        | LHIIIEVGTPTGNQPFPK                                               | 0.997407119        | 2            | 4.29717   |
| P11442        | LPVVIGGLLDVDCSEDIK                                               | 1.076076529        | 2            | 4.08267   |
| P11442        | LTDQLPLIIVCDR                                                    | 1.097766438        | 2            | 3.09415   |
| P11442        | MAVRNNLAGAEELFARK+Oxidation(0)                                   | 1.082461326        | 2            | 2.32133   |
| P11442        | NLQNLLILTAIK                                                     | 1.116461572        | 2            | 4.21254   |
| P11442        | NNLAGAEELFAR                                                     | 0.908260719        | 2            | 4.02265   |
| P11442        | NNRPSEGPLQTR                                                     | 1.040322242        | 3            | 4.09894   |
| P11442        | RPLIDQVVQTALSETQDPEEVSIVK                                        | 1.014986484        | 3            | 6.50088   |
| P11442        | SVDPTLALSIVLR                                                    | 1.107101874        | 2            | 2.98997   |
| P11442        | SVNESLNNLFITEEDYQALR                                             | 1.072670544        | 2            | 4.49644   |
| P11442        | TLQIFNIEMK                                                       | 1.122721503        | 2            | 2.79051   |
| P11442        | TSIDAYDNFNDISLAQR                                                | 1.079035645        | 2            | 4.24445   |
| P11442        | VDKLDASESLR                                                      | 1.021992014        | 2            | 2.45173   |
| P11442        | VGEQAQVVIIDMNDPSNPIR                                             | 1.022798729        | 2            | 4.0766    |
| P11442        | VIQCFAGTGVQVK                                                    | 1.110137745        | 2            | 4.1028    |
| P11442        | VSQPIEGHAASFAQFK                                                 | 1.064127948        | 2            | 4.23661   |
| P11442        | WLLLTGISAQQNR                                                    | 1.213982951        | 2            | 2.96393   |
| <b>P11497</b> | <b>ACACA Acetyl_CoA carboxylase 1</b>                            | <b>1.512981686</b> | <b>8E-14</b> | <b>5</b>  |
| P11497        | GGSWVVIDPTINPR                                                   | 1.528852465        | 2            | 2.93255   |
| P11497        | GSVLEPEGTVEIK                                                    | 1.698504305        | 2            | 2.64811   |
| P11497        | ITSENPDEGFKPSSGTVQELNFR                                          | 1.616964179        | 3            | 4.01538   |
| P11497        | TLRDPSPLELQDIMTSVSGR                                             | 1.333395394        | 3            | 3.9537    |
| P11497        | VQQAELHTGSLPQIQSTALR                                             | 0.947240566        | 3            | 3.6202    |
| <b>P11507</b> | <b>AT2A2 Sarcoplasmic/endoplasmic reticulum calcium ATPase 2</b> | <b>1.004062419</b> | <b>1</b>     | <b>6</b>  |
| P11507        | DIVPGDIVEIIVGDKVPADIR                                            | 1.00167254         | 2            | 2.79958   |
| P11507        | IGIFGQDEDVTSK                                                    | 1.004794596        | 2            | 2.97166   |
| P11507        | IRDEMVAEQER                                                      | 0.989713295        | 2            | 3.15128   |
| P11507        | LDFGGEQLSK                                                       | 1.144813203        | 2            | 2.32801   |
| P11507        | TASEMVLADDNFSTIVAAVEEGR                                          | 1.009009168        | 3            | 3.71279   |
| P11507        | VDQSILTGESVSVIK                                                  | 1.068077354        | 2            | 4.10658   |
| <b>P11598</b> | <b>PDIA3 Protein disulfide_isomerase A3</b>                      | <b>1.003913368</b> | <b>2E-06</b> | <b>25</b> |
| P11598        | DASVVGFFR                                                        | 1.110047578        | 2            | 2.37527   |
| P11598        | DGEEAGAYDGPR                                                     | 1.025456281        | 2            | 3.30388   |
| P11598        | DLFSDGHSEFLK                                                     | 0.875566169        | 2            | 2.51279   |
| P11598        | EATNPPIIQEEKPK                                                   | 0.93679067         | 2            | 3.65639   |
| P11598        | ELNDFISYLQR                                                      | 0.922000014        | 2            | 2.65313   |
| P11598        | EYDDNGEGITIFRPLHLANK                                             | 1.002839434        | 2            | 4.47825   |
| P11598        | FAHTNVESLVK                                                      | 1.266842022        | 2            | 2.69624   |
| P11598        | FIQESIFGLCPHMTEDNKDLIQGK                                         | 1.043579371        | 3            | 4.86536   |
| P11598        | FISDKDASVVGFFR                                                   | 1.15736883         | 2            | 4.22607   |
| P11598        | FLQEYFDGNLK                                                      | 1.023586315        | 2            | 3.50307   |
| P11598        | FLQEYFDGNLKR                                                     | 1.041139043        | 2            | 3.13786   |
| P11598        | FVMQEEFSR                                                        | 1.191884778        | 2            | 2.67988   |
| P11598        | IFRDGEEAGAYDGPR                                                  | 0.941739676        | 2            | 3.27863   |
| P11598        | LAPEYAAAATR                                                      | 1.009470663        | 2            | 3.23146   |
| P11598        | LNFAVASR                                                         | 1.392635867        | 2            | 2.44914   |
| P11598        | LSKDPNIVIAK                                                      | 1.041559401        | 3            | 4.0165    |
| P11598        | MDATANDVPSPYEVK                                                  | 1.175164898        | 2            | 4.28889   |
| P11598        | MDATANDVPSPYEVK+Oxidation(0)                                     | 1.169596607        | 2            | 4.16164   |
| P11598        | QAGPASVPLRTEDEFK                                                 | 0.970312204        | 2            | 2.45539   |
| P11598        | RLAPEYAAAATR                                                     | 0.945630683        | 2            | 3.82363   |

|               |                                                    |                    |               |           |
|---------------|----------------------------------------------------|--------------------|---------------|-----------|
| P11598        | SEPIPETNEGPVK                                      | 1.05875321         | 2             | 3.18496   |
| P11598        | TFLDAGHK                                           | 1.073705152        | 2             | 2.59197   |
| P11598        | TFSHELDFGLESTTGEIPVVAIR                            | 1.156609686        | 2             | 5.9575    |
| P11598        | VDCTANTNTCNK                                       | 2.127785209        | 2             | 4.25445   |
| P11598        | YGVSGYPTLK                                         | 1.037586671        | 2             | 3.07815   |
| <b>P11610</b> | <b>CD1D2 Antigen_presenting glycoprotein CD1d2</b> | <b>0.86449973</b>  | <b>0.353</b>  | <b>2</b>  |
| P11610        | DIQELVKMMSPK+Oxidation(7)                          | 0.86449973         | 2             | 2.57732   |
| P11610        | DIQELVKMMSPK+Oxidation(8)                          | 0.86449973         | 2             | 2.44676   |
| <b>P11711</b> | <b>CP2A1 Cytochrome P450 2A1</b>                   | <b>0.929455717</b> | <b>1E-19</b>  | <b>6</b>  |
| P11711        | GEQATYNTLFK                                        | 0.935901891        | 2             | 2.62691   |
| P11711        | GTDVFPILGSLMTDPK                                   | 0.738046236        | 2             | 3.34395   |
| P11711        | ILEEAGYLIK                                         | 0.652055916        | 2             | 2.31033   |
| P11711        | LEDINESPKPLGFTR                                    | 0.929906983        | 2             | 3.5059    |
| P11711        | TVSNVISSIVFGER                                     | 0.694930479        | 2             | 3.58015   |
| P11711        | VHEEIEQVIGR                                        | 0.719305748        | 2             | 3.02198   |
| <b>P11714</b> | <b>CP2D9 Cytochrome P450 2D9</b>                   | <b>0.913846831</b> | <b>0.9735</b> | <b>2</b>  |
| P11714        | GNPESSFNDENLLMVVR                                  | 0.980415016        | 2             | 2.67546   |
| P11714        | VQQEIDEVIGQVR                                      | 0.951066084        | 2             | 4.8384    |
| <b>P11862</b> | <b>GAS2 Growth arrest_specific protein 2</b>       | <b>1.054342483</b> | <b>0.4459</b> | <b>2</b>  |
| P11862        | EIEQEETLSAPSPSPSSK                                 | 1.144360778        | 2             | 4.0178    |
| P11862        | LDNGALLCQLAATVQEK                                  | 0.96220193         | 2             | 3.86493   |
| <b>P11884</b> | <b>ALDH2 Aldehyde dehydrogenase_mitochondrial</b>  | <b>0.967381442</b> | <b>1E-19</b>  | <b>24</b> |
| P11884        | EAGFPPGVVNVPGFGPTAGAAIASHEDVDK                     | 0.196491249        | 3             | 4.27599   |
| P11884        | EEIFGPVMQILK                                       | 0.853597523        | 2             | 3.42229   |
| P11884        | EEIFGPVMQILK+Oxidation(7)                          | 0.837613647        | 2             | 2.85709   |
| P11884        | ELGEYGLQAYTEVK                                     | 0.881049902        | 2             | 4.4711    |
| P11884        | GYFIQPTVFGDVK                                      | 0.873166869        | 2             | 4.0773    |
| P11884        | KTFPTVNPSTGEVICQVAEGNKEDVDK                        | 0.855029951        | 3             | 6.42725   |
| P11884        | LGPALATGNVVVMK                                     | 0.999931719        | 2             | 3.41518   |
| P11884        | LGPALATGNVVVMK+Oxidation(12)                       | 0.97750493         | 2             | 3.62352   |
| P11884        | LLCGGAAADR                                         | 1.088475289        | 2             | 3.32116   |
| P11884        | RVTLELGGK                                          | 0.72670914         | 2             | 2.78252   |
| P11884        | TEQGPQVDETQFK                                      | 0.916428277        | 2             | 4.57507   |
| P11884        | TEQGPQVDETQFKK                                     | 0.82400489         | 2             | 2.91465   |
| P11884        | TFPTVNPSTGEVICQVAEGNK                              | 1.251734967        | 2             | 5.1005    |
| P11884        | TFPTVNPSTGEVICQVAEGNKEDVDK                         | 0.838289297        | 2             | 4.25493   |
| P11884        | TFVQEDVYDEFVER                                     | 0.917180542        | 2             | 5.2426    |
| P11884        | TIEEVVGR                                           | 0.867014684        | 2             | 2.91617   |
| P11884        | TIPIDGFFSYTR                                       | 0.901561991        | 2             | 2.79592   |
| P11884        | VAEQTPLTALYVANLIK                                  | 1.104474063        | 3             | 4.93584   |
| P11884        | VAFTGSTEVGHLIQVAAGSSNLK                            | 1.147353381        | 2             | 6.18298   |
| P11884        | VAFTGSTEVGHLIQVAAGSSNLKR                           | 1.3335259          | 3             | 3.44299   |
| P11884        | VTLELGGK                                           | 0.741417245        | 1             | 1.9703    |
| P11884        | VGNPFDSR                                           | 0.908326779        | 2             | 2.82367   |
| P11884        | YGLAAAVFTK                                         | 1.06133802         | 2             | 3.54829   |
| P11884        | YYAGWADK                                           | 0.789417932        | 1             | 1.94905   |
| <b>P11915</b> | <b>NLTP Non_specific lipid_transfer protein</b>    | <b>1.067507828</b> | <b>0.9987</b> | <b>19</b> |
| P11915        | ADCTITMADSDLLALMTGK                                | 1.045188679        | 2             | 5.55962   |
| P11915        | ADCTITMADSDLLALMTGK+Oxidation(15)                  | 1.050619646        | 2             | 2.75623   |
| P11915        | ADCTITMADSDLLALMTGK+Oxidation(6)                   | 1.053684988        | 2             | 4.30821   |
| P11915        | ANLIFK                                             | 1.118599627        | 2             | 2.34476   |
| P11915        | GSVLPDSDKK                                         | 1.113771121        | 2             | 2.50576   |
| P11915        | HIDVLINK                                           | 0.858889098        | 2             | 2.74944   |
| P11915        | HSVNNPYSQFQDEYSLDEIMK                              | 0.986604701        | 2             | 5.43992   |
| P11915        | KADCTITMADSDLLALMTGK                               | 0.998029192        | 2             | 3.96418   |
| P11915        | KLEEEGEEFVK                                        | 1.05042536         | 2             | 4.33594   |
| P11915        | KLEEEGEEFVKK                                       | 1.028760849        | 3             | 4.56222   |

|               |                                                                              |                    |               |           |
|---------------|------------------------------------------------------------------------------|--------------------|---------------|-----------|
| P11915        | LEEEGEEFVK                                                                   | 1.048970801        | 1             | 2.31585   |
| P11915        | LEEEGEEFVKK                                                                  | 0.968302854        | 2             | 3.48208   |
| P11915        | LQSLQLQPDK                                                                   | 1.159883638        | 2             | 3.41548   |
| P11915        | MNPQSAFFQ GK                                                                 | 1.110759147        | 2             | 3.23762   |
| P11915        | MNPQSAFFQ GK+Oxidation(0)                                                    | 1.005251031        | 2             | 3.08633   |
| P11915        | SRPVDFLTVLQCCPTSDGAAAAIVSSEEFVQK                                             | 0.833314258        | 3             | 5.73303   |
| P11915        | THQJSAAPTSSAGDGFK                                                            | 0.985704412        | 2             | 4.43614   |
| P11915        | WVINPSGGLISK                                                                 | 0.939249979        | 2             | 2.88732   |
| P11915        | YGMSACPFAPQLFGSAGK                                                           | 0.942250625        | 2             | 2.81079   |
| <b>P11980</b> | <b>KPYM Pyruvate kinase isozymes M1/M2</b>                                   | <b>1.094545853</b> | <b>0.8485</b> | <b>3</b>  |
| P11980        | GVNLPGAAVDLPVSEK                                                             | 1.088681928        | 2             | 3.70176   |
| P11980        | LDIDSAPITAR                                                                  | 1.221719905        | 2             | 2.95984   |
| P11980        | NTGICTIGPASR                                                                 | 0.939453144        | 2             | 3.30736   |
| <b>P12001</b> | <b>RL18 60S ribosomal protein L18</b>                                        | <b>1.179753791</b> | <b>1E-15</b>  | <b>5</b>  |
| P12001        | GTVLLSGPR                                                                    | 1.321313429        | 2             | 2.45826   |
| P12001        | ILTFDQLALESPK                                                                | 1.243751904        | 2             | 4.99403   |
| P12001        | TAVVVGITITDDVR                                                               | 1.203053241        | 2             | 4.34303   |
| P12001        | TNRPPLSLR                                                                    | 1.186688337        | 3             | 3.4478    |
| P12001        | TNSTFNQVVLK                                                                  | 1.128539183        | 2             | 2.80472   |
| <b>P12007</b> | <b>IVD Isovaleryl_CoA dehydrogenase_mitochondrial</b>                        | <b>1.127285414</b> | <b>0.0103</b> | <b>8</b>  |
| P12007        | AQEIDQSNDFK                                                                  | 0.832059576        | 2             | 3.35193   |
| P12007        | FVQENLAPK                                                                    | 1.007941681        | 2             | 2.75339   |
| P12007        | FWITNGPDADVLVVYAK                                                            | 1.180352383        | 2             | 3.74319   |
| P12007        | GSNTCELVFEDCK                                                                | 1.224943889        | 2             | 4.42634   |
| P12007        | GSNTCELVFEDCKVPAANILSQESK                                                    | 0.972634956        | 3             | 5.05041   |
| P12007        | GVYVLMGSLDLER                                                                | 0.98376663         | 2             | 3.10002   |
| P12007        | LYEIGGGTSEVR                                                                 | 1.109313286        | 2             | 3.54919   |
| P12007        | TDLTAVPASR                                                                   | 1.111437228        | 2             | 3.05182   |
| <b>P12336</b> | <b>GTR2 Solute carrier family 2_facilitated glucose transporter member 2</b> | <b>0.876801892</b> | <b>0.8587</b> | <b>2</b>  |
| P12336        | SFDEIAAEFR                                                                   | 0.906053932        | 2             | 3.01804   |
| P12336        | VSVIQLFTDPNYR                                                                | 0.997390927        | 2             | 2.37902   |
| <b>P12346</b> | <b>TRFE Serotransferrin</b>                                                  | <b>0.790967825</b> | <b>0.0516</b> | <b>21</b> |
| P12346        | ADRDQYELLCLDNTR                                                              | 0.960949413        | 2             | 4.40271   |
| P12346        | ASDSSINWNNLK                                                                 | 1.074019427        | 2             | 3.29467   |
| P12346        | DGGGDVAFVK                                                                   | 0.913331184        | 2             | 2.98725   |
| P12346        | DLKQEDFQLLCPDGTK                                                             | 0.680933167        | 2             | 4.1231    |
| P12346        | EGVCPESIDSAPVK                                                               | 0.94699394         | 2             | 3.42913   |
| P12346        | EGYNGYTGAFCQLEK                                                              | 0.787735661        | 2             | 2.94909   |
| P12346        | FDEFFSQGCAPGYK                                                               | 0.738662588        | 2             | 4.19877   |
| P12346        | GDKDCTGNFCLFR                                                                | 1.064895352        | 3             | 3.55691   |
| P12346        | GTDQFLNQLQ GK                                                                | 1.139407846        | 2             | 3.10873   |
| P12346        | GYAVAVVK                                                                     | 0.97974789         | 2             | 3.29512   |
| P12346        | HTTIFEVLPQK                                                                  | 1.003061676        | 3             | 3.62988   |
| P12346        | KGTDQFLNQLQ GK                                                               | 1.078245906        | 3             | 3.94376   |
| P12346        | KTSYQDCIK                                                                    | 1.165096844        | 2             | 2.59595   |
| P12346        | LPEGTTYEYLGAEYLQAVGNIR                                                       | 1.087411181        | 2             | 4.71108   |
| P12346        | NGDGKEDLIWEILK                                                               | 1.003201456        | 2             | 3.66043   |
| P12346        | QEDFQLLCPDGTK                                                                | 0.865396685        | 2             | 2.81841   |
| P12346        | SKDFQLFGSPLGK                                                                | 1.028217505        | 2             | 2.91055   |
| P12346        | TSYQDCIK                                                                     | 1.035269791        | 2             | 2.44955   |
| P12346        | VSTVLTAQK                                                                    | 1.104314162        | 2             | 2.73783   |
| P12346        | WCALSHQER                                                                    | 0.887345484        | 2             | 2.95126   |
| P12346        | WCAVSEHENTK                                                                  | 0.992067194        | 2             | 3.58468   |
| <b>P12368</b> | <b>KAP2 cAMP_dependent protein kinase type II_alpha regulatory subunit</b>   | <b>0.909886799</b> | <b>0.899</b>  | <b>2</b>  |
| P12368        | NISHYEEQLVK                                                                  | 0.954457043        | 2             | 2.69296   |

|               |                                           |                    |               |           |
|---------------|-------------------------------------------|--------------------|---------------|-----------|
| P12368        | NLDQEQLSQVLDAMFEK                         | 0.915083465        | 2             | 4.10658   |
| <b>P12711</b> | <b>ADHX Alcohol dehydrogenase class_3</b> | <b>1.035200201</b> | <b>2E-08</b>  | <b>9</b>  |
| P12711        | AAVAWEAGKPLSIEIEVAPPQAHEVR                | 0.997174129        | 3             | 5.69425   |
| P12711        | AGDTVIPLYIPQCGECK                         | 0.980415016        | 2             | 3.92611   |
| P12711        | AKEFGATECINPQDFSK                         | 0.909460603        | 2             | 3.87219   |
| P12711        | EFGATECINPQDFSK                           | 0.763593575        | 2             | 4.63195   |
| P12711        | IDPSAPLKD                                 | 0.865706816        | 1             | 2.06998   |
| P12711        | IIGIDINK                                  | 1.152232025        | 1             | 2.0943    |
| P12711        | IIGIDINKDK                                | 1.049169634        | 2             | 2.55734   |
| P12711        | VCLLGCISTGYGAAVNTAK                       | 1.065202619        | 2             | 5.67619   |
| P12711        | VDEFVTGNLSFDQINK                          | 1.028829843        | 2             | 4.89218   |
| <b>P12749</b> | <b>RL26 60S ribosomal protein L26</b>     | <b>1.031045943</b> | <b>0.5172</b> | <b>5</b>  |
| P12749        | DDEVQVVR                                  | 1.229954635        | 2             | 2.52155   |
| P12749        | FNPFVTSR                                  | 0.967403731        | 2             | 2.66377   |
| P12749        | HFNAPSHIR                                 | 1.305122076        | 3             | 3.7266    |
| P12749        | KDDEVQVVR                                 | 1.022086531        | 2             | 3.17106   |
| P12749        | KIMSSPLSKELR+Oxidation(2)                 | 1.055240737        | 2             | 2.47963   |
| <b>P12785</b> | <b>FAS Fatty acid synthase</b>            | <b>1.166777222</b> | <b>5E-08</b>  | <b>42</b> |
| P12785        | ACIDTALENLSTLK                            | 1.192628474        | 2             | 4.56794   |
| P12785        | AEAVVAVLLTK                               | 1.301411372        | 2             | 3.17935   |
| P12785        | AGSDTELAAPK                               | 1.15567961         | 2             | 3.61858   |
| P12785        | CPPGVVPACHNSEDTVTISGPQAAVNEFVEQLK         | 1.205476719        | 3             | 5.67573   |
| P12785        | DHKDNLEFFLTNLGK                           | 1.013829374        | 2             | 2.59948   |
| P12785        | DPETLLGYSMVGCQR                           | 1.024667886        | 2             | 2.80292   |
| P12785        | EEEEPEAMLPGAQPTLISAISK                    | 1.187848349        | 2             | 3.87558   |
| P12785        | EQGVTFPSGEAQEQLIR                         | 1.178739471        | 2             | 4.22071   |
| P12785        | FDASFFGVHPK                               | 1.004170209        | 2             | 3.21539   |
| P12785        | FVFTPHVEPECLSESAILQK                      | 1.127053268        | 2             | 4.42806   |
| P12785        | GHALGETLACLPEVQPGPSFLSQEEWESLFSR          | 1.297406497        | 3             | 5.99437   |
| P12785        | GLESIIIIHSSLAEPK                          | 1.151234079        | 2             | 4.30355   |
| P12785        | GNAGQSNYGFANSTMER                         | 1.339802961        | 2             | 4.32393   |
| P12785        | GVDLVLSLAEEK                              | 1.223375514        | 2             | 3.67086   |
| P12785        | GYDYGPHFQGVYEATLEGEQGK                    | 1.811003042        | 3             | 3.5711    |
| P12785        | LDPGSSSELQK                               | 1.24556094         | 2             | 2.54974   |
| P12785        | LFDHPEVPIPAESVSRS                         | 1.288779329        | 2             | 4.03284   |
| P12785        | LLLPEDPLISGLLSQALK                        | 1.468412489        | 3             | 4.88959   |
| P12785        | LTPGCEAEAEAEICFFIK                        | 1.080554476        | 2             | 3.92684   |
| P12785        | MTVPGLEDLPQHGLPR                          | 1.207901606        | 2             | 3.50128   |
| P12785        | QAQLNLSILLVNPPEGTLTR                      | 1.320069383        | 2             | 4.50285   |
| P12785        | QFVDAEHSK                                 | 0.673059035        | 2             | 2.36727   |
| P12785        | QQEQLVPTLEK                               | 1.255359624        | 2             | 2.43878   |
| P12785        | RQQEQLVPTLEK                              | 1.335986369        | 2             | 2.92069   |
| P12785        | RVYATILNAGTNTDGCK                         | 0.778148266        | 2             | 2.48279   |
| P12785        | SDEALKPLGVK                               | 1.199588473        | 2             | 3.05559   |
| P12785        | SFDDSGNGYCR                               | 0.766441933        | 2             | 2.34025   |
| P12785        | SLSLSLEETPVVFENVTFHQATILPR                | 1.235454346        | 3             | 4.4737    |
| P12785        | SLYQPGGVAPESLEYIAHGTGK                    | 1.148790401        | 2             | 5.39777   |
| P12785        | SNMGHPEPASGLAALTK                         | 1.387227461        | 2             | 2.96478   |
| P12785        | SNMGHPEPASGLAALTK+Oxidation(2)            | 1.308608775        | 2             | 3.26107   |
| P12785        | TGGTYGEDLGADYNLSQVCDGK                    | 1.237393938        | 2             | 4.99308   |
| P12785        | TMEAVQGLLEQGR                             | 1.085505967        | 2             | 3.77631   |
| P12785        | TMEAVQGLLEQGR+Oxidation(1)                | 0.955835705        | 2             | 3.41256   |
| P12785        | VGDPQELNGITR                              | 1.234989333        | 2             | 3.44143   |
| P12785        | VHLTGIDINPNALFPPVEFPVPR                   | 1.135434248        | 2             | 4.63587   |
| P12785        | VLEALLPK                                  | 1.178293132        | 2             | 2.82442   |
| P12785        | VLES DLVMNVYR                             | 0.978936486        | 2             | 2.99136   |
| P12785        | VSVHIEGDHR                                | 1.149431484        | 2             | 2.79637   |

|               |                                                                               |                    |               |           |
|---------------|-------------------------------------------------------------------------------|--------------------|---------------|-----------|
| P12785        | VTAIYIDPATHLQK                                                                | 1.150818076        | 2             | 3.41565   |
| P12785        | VYATILNAGTNTDGCK                                                              | 1.010626937        | 2             | 4.13514   |
| P12785        | VYQWEDPDSK                                                                    | 1.142238324        | 2             | 2.94497   |
| <b>P12791</b> | <b>CP2BA Cytochrome P450 2B10</b>                                             | <b>0.863881355</b> | <b>0.0011</b> | <b>2</b>  |
| P12791        | IQEEAQLVEELR                                                                  | 0.961391759        | 2             | 4.39904   |
| P12791        | IQEEAQLVEELRK                                                                 | 0.786449854        | 2             | 3.63835   |
| <b>P12847</b> | <b>MYH3 Myosin_3</b>                                                          | <b>1.142658639</b> | <b>0.8503</b> | <b>4</b>  |
| P12847        | GTLEDQIISANPLLEAFGNAK                                                         | 1.17026145         | 2             | 2.98504   |
| P12847        | MKGTLEDQIISANPLLEAFGNAK                                                       | 1.183965685        | 3             | 6.32139   |
| P12847        | MKGTLEDQIISANPLLEAFGNAK+Oxidation(0)                                          | 1.082792353        | 3             | 4.84786   |
| P12847        | NLTEELAGLDETIK                                                                | 0.828427802        | 2             | 2.35153   |
| <b>P12928</b> | <b>KPYR Pyruvate kinase isozymes R/L</b>                                      | <b>1.272981718</b> | <b>1E-19</b>  | <b>18</b> |
| P12928        | AAVIAVTR                                                                      | 1.800284544        | 2             | 2.55618   |
| P12928        | AETSDVANAVLDGADCIMLSGETAK                                                     | 1.359354078        | 2             | 5.58516   |
| P12928        | CCAAAIIVLTK                                                                   | 0.932080509        | 2             | 2.54685   |
| P12928        | CNLAGKPVVCATQMLSEMITK                                                         | 1.203696297        | 3             | 4.97367   |
| P12928        | EATESFATSPLSYRPAIALDTK                                                        | 1.53830567         | 2             | 4.36712   |
| P12928        | EPPEAIWADDVDRR                                                                | 1.425436456        | 2             | 2.45048   |
| P12928        | GDLGIEIPA EK                                                                  | 1.27604471         | 2             | 2.78384   |
| P12928        | GSQVLVTDPK                                                                    | 1.558073445        | 2             | 3.14199   |
| P12928        | GVNLPNTEVDLPGLSEQDLLDLR                                                       | 1.512217081        | 2             | 5.02403   |
| P12928        | IGPEGLVTEVEHGILGSR                                                            | 1.451644347        | 2             | 5.25555   |
| P12928        | IYIDGLISLVVQK                                                                 | 1.562346358        | 2             | 4.39408   |
| P12928        | KGVNLPNTEVDLPGLSEQDLLDLR                                                      | 1.539768796        | 3             | 4.63622   |
| P12928        | RVQFGIESGK                                                                    | 0.858578276        | 2             | 2.40448   |
| P12928        | STSIIATIGPASR                                                                 | 1.286446873        | 2             | 3.7229    |
| P12928        | TGVLQGGPESEVEIVK                                                              | 1.622809864        | 2             | 4.75941   |
| P12928        | TVWVDYHNITR                                                                   | 1.409507227        | 2             | 2.41708   |
| P12928        | VGDLVIVVTGWRPGSGYTINIMR                                                       | 1.357656846        | 3             | 3.59263   |
| P12928        | VQFGIESGK                                                                     | 1.347665807        | 1             | 1.99521   |
| <b>P12938</b> | <b>CP2D3 Cytochrome P450 2D3</b>                                              | <b>0.84484625</b>  | <b>3E-12</b>  | <b>4</b>  |
| P12938        | DLTDAFLAEIEK                                                                  | 0.767267661        | 2             | 4.41802   |
| P12938        | FDYGDPDFIK                                                                    | 0.847091102        | 2             | 2.5738    |
| P12938        | GNPESSFNDANLR                                                                 | 0.820102702        | 2             | 4.39534   |
| P12938        | RFDYGDPDFIK                                                                   | 0.799575203        | 2             | 2.88214   |
| <b>P12939</b> | <b>CP2DA Cytochrome P450 2D10</b>                                             | <b>1.170368233</b> | <b>0.2976</b> | <b>8</b>  |
| P12939        | ALCNVIASLIFAR                                                                 | 1.11560512         | 2             | 2.39347   |
| P12939        | AVQEVLVTHGEDTADRPPVPIFK                                                       | 1.082416172        | 3             | 5.43044   |
| P12939        | FEYEDPYLIR                                                                    | 1.394946295        | 2             | 3.15457   |
| P12939        | FGDIAPLNLPR                                                                   | 1.343907632        | 2             | 3.28706   |
| P12939        | ITSCDIEVQDFVIPK                                                               | 1.218521091        | 2             | 4.1894    |
| P12939        | NLTDAFLAEVEK                                                                  | 1.15947007         | 2             | 4.17721   |
| P12939        | RFEYEDPYLIR                                                                   | 1.151082836        | 3             | 3.65449   |
| P12939        | TTWDPAQPPR                                                                    | 1.15357385         | 2             | 2.76574   |
| <b>P13084</b> | <b>NPM Nucleophosmin</b>                                                      | <b>1.128929066</b> | <b>0.6431</b> | <b>2</b>  |
| P13084        | MTDQEAIQDLWQWR                                                                | 1.136921073        | 2             | 2.97916   |
| P13084        | VDNDENEHQLSLR                                                                 | 1.071481312        | 2             | 3.98822   |
| <b>P13086</b> | <b>SUCA Succinyl_CoA ligase [ADP/GDP_forming] subunit alpha_mitochondrial</b> | <b>0.997782559</b> | <b>0.9872</b> | <b>3</b>  |
| P13086        | LIGPNCPGIINPGECK                                                              | 1.07660874         | 2             | 4.14703   |
| P13086        | MGHAGAIAGGK                                                                   | 0.836128118        | 2             | 2.80029   |
| P13086        | QGTFFHSQALEYGTK                                                               | 0.930956591        | 2             | 2.82405   |
| <b>P13107</b> | <b>CP2B3 Cytochrome P450 2B3</b>                                              | <b>0.980033231</b> | <b>0.9066</b> | <b>7</b>  |
| P13107        | DFIDTFLHMEK                                                                   | 1.092072489        | 2             | 3.22798   |
| P13107        | EIDQVIGSQR                                                                    | 0.899592035        | 2             | 2.34813   |
| P13107        | EVLDYIDHSVENHR                                                                | 0.913939967        | 2             | 3.74617   |
| P13107        | FSDVSPMGLPCR+Oxidation(6)                                                     | 0.995016219        | 2             | 2.50464   |

|               |                                                           |                    |               |           |
|---------------|-----------------------------------------------------------|--------------------|---------------|-----------|
| P13107        | GIIAVLQPIMQEYGVSVFVNEER                                   | 1.30747132         | 3             | 6.51599   |
| P13107        | QSVEDQIKKEAK                                              | 1.111358068        | 2             | 2.68427   |
| P13107        | SFIQLQEK                                                  | 1.000811791        | 2             | 2.55245   |
| <b>P13221</b> | <b>AATC Aspartate aminotransferase_ cytoplasmic</b>       | <b>2.224996412</b> | <b>1E-19</b>  | <b>6</b>  |
| P13221        | ITWSNPPAQGAR                                              | 1.540651146        | 2             | 3.56399   |
| P13221        | IVATTLNPELFK                                              | 1.883086194        | 2             | 3.42102   |
| P13221        | NLDYVATSINEAVTK                                           | 1.909912659        | 2             | 4.61579   |
| P13221        | SCASQLVLGDNSPALR                                          | 2.232766661        | 2             | 4.44989   |
| P13221        | TDDSQPWVLPVVR                                             | 2.228367356        | 2             | 3.43986   |
| P13221        | VGGVQSLGGTGALR                                            | 2.871758871        | 2             | 2.60102   |
| <b>P13255</b> | <b>GNMT Glycine N_methyltransferase</b>                   | <b>1.077697045</b> | <b>0.1597</b> | <b>7</b>  |
| P13255        | AHMTLDYTVQVPGAGR                                          | 0.986393354        | 2             | 4.60463   |
| P13255        | AWLLGLLR                                                  | 2.195127794        | 2             | 2.62566   |
| P13255        | DITTSVLTVNNK                                              | 1.023994396        | 2             | 3.78676   |
| P13255        | NIASMVRPGLLVIDHR+Oxidation(4)                             | 1.21475091         | 3             | 3.85525   |
| P13255        | NYDYILSTGCAPP GK                                          | 0.990193035        | 2             | 4.50686   |
| P13255        | SDLTKDITTSVLTVNNK                                         | 0.878797303        | 2             | 2.98036   |
| P13255        | SLGVAAEGIPDQYADGEAAR                                      | 1.091916761        | 2             | 5.39579   |
| <b>P13383</b> | <b>NUCL Nucleolin</b>                                     | <b>0.893038663</b> | <b>0.0004</b> | <b>4</b>  |
| P13383        | GFGFVDFNSEEDAK                                            | 1.166964499        | 2             | 3.38593   |
| P13383        | GLSEDTTEETLK                                              | 0.919678122        | 2             | 2.89546   |
| P13383        | IEGSEPTTFFNLFIGNLNPKN                                     | 0.681216657        | 2             | 2.73831   |
| P13383        | SEADAENLEEK                                               | 0.859575072        | 2             | 3.01915   |
| <b>P13437</b> | <b>THIM 3_ketoacyl_CoA thiolase_ mitochondrial</b>        | <b>0.820014916</b> | <b>1E-19</b>  | <b>21</b> |
| P13437        | AANEAGYFNEEMAPIEVK                                        | 0.836213049        | 2             | 5.32065   |
| P13437        | AANEAGYFNEEMAPIEVK+Oxidation(11)                          | 0.778712593        | 2             | 5.1164    |
| P13437        | DAEVVLCGGTESMSQSPYSVR                                     | 0.779916089        | 2             | 5.06921   |
| P13437        | DAEVVLCGGTESMSQSPYSVR+Oxidation(12)                       | 1.242608646        | 2             | 3.18735   |
| P13437        | DFTATDLTEFAAR                                             | 0.730824141        | 2             | 4.03871   |
| P13437        | DMDLIDVNEAFAPQFLAVQK                                      | 0.784898157        | 3             | 6.02509   |
| P13437        | DMDLIDVNEAFAPQFLAVQK+Oxidation(1)                         | 0.801962697        | 2             | 4.5104    |
| P13437        | EGTVTAGNASGMSDGAGVVIIASEDAVK                              | 0.764940863        | 2             | 5.59789   |
| P13437        | EGTVTAGNASGMSDGAGVVIIASEDAVKK                             | 0.676998421        | 3             | 4.51279   |
| P13437        | EGTVTAGNASGMSDGAGVVIIASEDAVKK+Oxidation(11)               | 0.673837277        | 3             | 3.53606   |
| P13437        | FGLDLK                                                    | 0.866480616        | 2             | 2.34252   |
| P13437        | GVFIVA AK                                                 | 0.907895703        | 2             | 2.46682   |
| P13437        | ITAHLVHEL R                                               | 1.291168867        | 2             | 2.97402   |
| P13437        | LCGSGFQSI VSGCQEICK                                       | 1.010037376        | 2             | 5.14019   |
| P13437        | LEDTLWAGLTDQHVK                                           | 0.791726983        | 2             | 5.06184   |
| P13437        | RTPFGAYGGLLK                                              | 0.781842149        | 2             | 2.53273   |
| P13437        | SLDLDP SK                                                 | 0.737754807        | 2             | 2.89667   |
| P13437        | TNVSGGAI ALGHP LGSGSR                                     | 0.748136639        | 2             | 6.08917   |
| P13437        | VGVPTETGALTLNR                                            | 0.792470723        | 2             | 3.7811    |
| P13437        | VPPETIDSVIVGNVMQSSDAAYLAR                                 | 0.748389063        | 2             | 6.12936   |
| P13437        | VVG YFVSGCDPAIMGIGPVPAITGALK                              | 1.031772878        | 3             | 4.8471    |
| <b>P13444</b> | <b>METK1 S_adenosylmethionine synthase isoform type_1</b> | <b>1.210347327</b> | <b>1E-19</b>  | <b>8</b>  |
| P13444        | FVIGGPQGDAGVTGR                                           | 1.205679079        | 2             | 4.81984   |
| P13444        | HIGYDDSAK                                                 | 1.441676729        | 2             | 2.78495   |
| P13444        | ICDQISDAVLDAHLK                                           | 1.288413114        | 3             | 5.10603   |
| P13444        | NEEDVGAGDQGLMFGYATDETEECMPLTIVLAHK                        | 1.06818823         | 3             | 6.60046   |
| P13444        | SEFPWEV PK                                                | 1.232504013        | 2             | 2.45008   |
| P13444        | SGVLPWLRPDSK                                              | 0.928171716        | 2             | 2.91682   |
| P13444        | TCNVLVALEQQSPDIAQC VHLD R                                 | 1.403286367        | 3             | 5.00903   |
| P13444        | TQVTVQYVQDNGAVIPVR                                        | 1.355039901        | 2             | 4.75377   |
| <b>P13471</b> | <b>RS14 40S ribosomal protein S14</b>                     | <b>0.991290102</b> | <b>0.0876</b> | <b>4</b>  |
| P13471        | ADRDESSPYAAMLA AQDVAQR                                    | 1.074659924        | 2             | 5.67141   |
| P13471        | DESSPYAAMLA AQDVAQR                                       | 1.233794675        | 2             | 3.34797   |



|               |                                                                         |                    |               |           |
|---------------|-------------------------------------------------------------------------|--------------------|---------------|-----------|
| P13471        | ELGITALHIK                                                              | 1.366475038        | 2             | 2.46862   |
| P13471        | IEDVTPIPSDSTR                                                           | 0.987536236        | 2             | 3.74114   |
| <b>P13601</b> | <b>AL1A7 Aldehyde dehydrogenase_ cytosolic 1</b>                        | <b>0.373902981</b> | <b>1E-19</b>  | <b>15</b> |
| P13601        | EEIFGPVQQIMK                                                            | 0.360558035        | 2             | 3.42742   |
| P13601        | EMGEQGVVEYTELK                                                          | 0.267176045        | 2             | 3.30121   |
| P13601        | FPVINPATEEVICHVEEGDKADVDK                                               | 0.433421868        | 4             | 5.15345   |
| P13601        | IAKEEIFGPVQQIMK                                                         | 0.514991325        | 2             | 3.1116    |
| P13601        | IHGQTIPSDGDVFTYTR                                                       | 0.545296759        | 2             | 3.81836   |
| P13601        | ILDLIESGK                                                               | 0.38101494         | 2             | 3.25449   |
| P13601        | ILDLIESGKK                                                              | 0.32363887         | 3             | 3.54331   |
| P13601        | KFPVINPATEEVICHVEEGDKADVDK                                              | 0.519150375        | 3             | 3.63965   |
| P13601        | KYVLGNPLDSGISQGPQIDKEQHAK                                               | 0.076522818        | 3             | 4.51551   |
| P13601        | LFVEESYDEFVR                                                            | 0.36209133         | 2             | 3.72501   |
| P13601        | VLLATMESMNAGK                                                           | 0.838827598        | 2             | 2.86151   |
| P13601        | VSFTGSTEVGK                                                             | 0.324192195        | 2             | 2.35532   |
| P13601        | YFAGWADK                                                                | 0.649942361        | 1             | 2.09162   |
| P13601        | YVLGNPLDSGISQGPQIDK                                                     | 0.333300575        | 2             | 4.85262   |
| P13601        | YVLGNPLDSGISQGPQIDKEQHAK                                                | 0.220155982        | 2             | 4.20875   |
| <b>P13697</b> | <b>MAOX NADP_ dependent malic enzyme</b>                                | <b>0.701659652</b> | <b>8E-07</b>  | <b>5</b>  |
| P13697        | AECSAEECYK                                                              | 0.684132866        | 2             | 3.03468   |
| P13697        | AIFASGSPFDPVTLPDGR                                                      | 0.756099905        | 2             | 4.28198   |
| P13697        | GHIASVLNAWPEDVVK                                                        | 0.899639022        | 2             | 2.84262   |
| P13697        | HINDSVLTTAEVISQVSDK                                                     | 0.681229115        | 3             | 4.09601   |
| P13697        | ILGLDGLGCGMGIPIVGK                                                      | 0.706703527        | 2             | 2.38563   |
| <b>P13803</b> | <b>ETFA Electron transfer flavoprotein subunit alpha_ mitochondrial</b> | <b>0.986249649</b> | <b>0.0015</b> | <b>13</b> |
| P13803        | AAVDAGFVPNDMQVGQTGK                                                     | 0.919266902        | 2             | 4.38862   |
| P13803        | AAVDAGFVPNDMQVGQTGK+Oxidation(11)                                       | 1.031695265        | 2             | 3.84849   |
| P13803        | GLLPEELTPILETQK                                                         | 0.97378028         | 2             | 4.51459   |
| P13803        | GTSFEEAAAASGGSASSEK                                                     | 0.991565749        | 2             | 5.1656    |
| P13803        | LGGEVSLVAGTK                                                            | 0.953627792        | 2             | 4.51105   |
| P13803        | LLYDLADQLHAAVAVGASR                                                     | 1.075616703        | 2             | 5.12332   |
| P13803        | LNVAPVSDIIEIK                                                           | 1.134614421        | 3             | 4.64965   |
| P13803        | QFSYTHICAGASAFGK                                                        | 0.986211189        | 2             | 2.8531    |
| P13803        | SDRPELTGAK                                                              | 0.960876272        | 3             | 3.40216   |
| P13803        | TIVAINKDPEAPIFQVADYIVADLFK                                              | 0.921075554        | 3             | 7.17158   |
| P13803        | TIYAGNALCTVK                                                            | 0.986373726        | 2             | 3.51976   |
| P13803        | VLVAQHDAYK                                                              | 0.917078672        | 2             | 3.3737    |
| P13803        | VVQDLCK                                                                 | 1.032959097        | 2             | 2.61792   |
| <b>P13832</b> | <b>MRLCA Myosin regulatory light chain RLC_A</b>                        | <b>1.09746804</b>  | <b>0.4819</b> | <b>3</b>  |
| P13832        | ATSNVFMFDQSQIQEFK                                                       | 1.081362851        | 2             | 4.96734   |
| P13832        | FTDEEVDELYR                                                             | 1.165498112        | 2             | 3.42814   |
| P13832        | GNFNIEFTR                                                               | 1.090943542        | 2             | 2.52402   |
| <b>P14046</b> | <b>A1I3 Alpha_1 inhibitor 3</b>                                         | <b>1.06637279</b>  | <b>0.7735</b> | <b>7</b>  |
| P14046        | FSIDTNGISDYSLNK                                                         | 1.369124656        | 2             | 2.31945   |
| P14046        | GDPIPNEQVLIK                                                            | 1.02875018         | 2             | 2.48965   |
| P14046        | GMYESLPVAVK                                                             | 0.984389527        | 2             | 3.09285   |
| P14046        | GMYESLPVAVK+Oxidation(1)                                                | 0.894292049        | 2             | 2.80014   |
| P14046        | ISLCHGNPTFSSETK                                                         | 1.097931909        | 2             | 3.18366   |
| P14046        | QQNSYGGFSSTQDTVVALDALS                                                  | 1.159475091        | 2             | 4.10768   |
| P14046        | QSPGPCGSEVATVPETGR                                                      | 1.042391157        | 2             | 3.60634   |
| <b>P14141</b> | <b>CAH3 Carbonic anhydrase 3</b>                                        | <b>0.978870106</b> | <b>3E-10</b>  | <b>17</b> |
| P14141        | EAPFNHFDPSCLFPACR                                                       | 0.891225015        | 2             | 4.10022   |
| P14141        | EKGEFQILLDALDK                                                          | 0.917613382        | 2             | 4.34433   |
| P14141        | EPMTVSSDQMAK                                                            | 1.49933544         | 2             | 2.64079   |
| P14141        | EWGYASHNGPEHWHELYPIAK                                                   | 0.929093849        | 3             | 4.7989    |
| P14141        | GDNQSPIELHTK                                                            | 0.968090999        | 2             | 3.51034   |
| P14141        | GEFQILLDALDK                                                            | 0.938831218        | 2             | 4.75077   |

|               |                                                |                    |               |           |
|---------------|------------------------------------------------|--------------------|---------------|-----------|
| P14141        | GEFQILLDALDKIK                                 | 0.897072142        | 2             | 3.00972   |
| P14141        | GGPLSGPYR                                      | 1.02056662         | 2             | 2.97935   |
| P14141        | GKEAPFNHFDPSCLFPACR                            | 0.902636201        | 2             | 3.88513   |
| P14141        | HDPSLQPWSVSYDPGSAK                             | 0.990235211        | 3             | 5.33305   |
| P14141        | QFHLHWGSSDDHGSEHTVDGVK                         | 0.843537402        | 2             | 4.54561   |
| P14141        | QPDGIAVVGIFLK                                  | 1.222991367        | 2             | 2.69548   |
| P14141        | SLFASAENEPVPLVGNWRPPQPIK                       | 0.932164988        | 3             | 5.7628    |
| P14141        | VVFDDTFDR                                      | 0.947246179        | 2             | 3.2788    |
| P14141        | YAAELHLVHWNPK                                  | 1.480068423        | 2             | 4.10161   |
| P14141        | YNTFGEALK                                      | 1.008518711        | 2             | 2.52015   |
| P14141        | YNTFGEALKQPDGIAVVGIFLK                         | 0.979533887        | 3             | 5.95166   |
| <b>P14173</b> | <b>DDC Aromatic_L_amino_acid decarboxylase</b> | <b>1.01914091</b>  | <b>0.2403</b> | <b>7</b>  |
| P14173        | AGEGGVIQGSASEATLVALLAAR                        | 1.177536231        | 2             | 5.2869    |
| P14173        | ALIPTTAPQEPETYEDIIR                            | 1.038339565        | 2             | 3.48248   |
| P14173        | GSNQLNETLLQR                                   | 1.004807633        | 2             | 2.88497   |
| P14173        | HSHQDSGLITDYR                                  | 0.940385525        | 3             | 3.68244   |
| P14173        | MLELPEAFLAGR                                   | 1.110353977        | 2             | 2.63082   |
| P14173        | QLQAASPELTQAALMEK                              | 1.016867107        | 2             | 3.70303   |
| P14173        | TDLTEAFNMDPVYLR                                | 0.972192679        | 2             | 3.54349   |
| <b>P14408</b> | <b>FUMH Fumarate hydratase_mitochondrial</b>   | <b>0.963445504</b> | <b>4E-06</b>  | <b>11</b> |
| P14408        | AAAEVNQEYGLDPK                                 | 1.081679188        | 2             | 4.28679   |
| P14408        | AIEMLGELGSK                                    | 0.879212788        | 2             | 3.94295   |
| P14408        | IEYDTFGELKVPTDK                                | 1.001133083        | 2             | 3.03899   |
| P14408        | IYELAAGGTAVGTGLNTR                             | 0.956114467        | 2             | 5.51948   |
| P14408        | LNDHFPLVVWQTGSGTQTNMNVNEVISNR                  | 0.988391256        | 3             | 5.99212   |
| P14408        | SGLGELILPENEPGSSIMPGK                          | 0.920566658        | 2             | 4.60818   |
| P14408        | SGLGELILPENEPGSSIMPGK+Oxidation(17)            | 0.903814189        | 2             | 3.06904   |
| P14408        | SQSSNDTFTAMHIAAALEVHQVLLPGLQK                  | 0.856159758        | 3             | 4.38157   |
| P14408        | TAIELGYLTAEQFDEWVWPK                           | 0.929701628        | 2             | 4.93693   |
| P14408        | THTQDAVPLTLGQEFSGYVQVQYAMER                    | 1.024671372        | 3             | 6.25283   |
| P14408        | YYGAQTVR                                       | 0.763614392        | 2             | 2.50347   |
| <b>P14480</b> | <b>FIBB Fibrinogen beta chain</b>              | <b>0.768288957</b> | <b>0.0003</b> | <b>6</b>  |
| P14480        | AHYGGFTVQTEANK                                 | 0.749367049        | 2             | 2.36867   |
| P14480        | GFGNIATNEDTKK                                  | 0.738100325        | 2             | 2.92216   |
| P14480        | LESDISAQTEYCHTPCTVNCNIPVVS GK                  | 0.815859248        | 3             | 4.75645   |
| P14480        | LYIDETVNDNIPLNLR                               | 0.894533894        | 2             | 2.54741   |
| P14480        | TENGWTVIQNR                                    | 0.712085139        | 2             | 3.48412   |
| P14480        | YCGLPGEYWLGN DK                                | 0.689076451        | 2             | 3.2445    |
| <b>P14604</b> | <b>ECHM Enoyl_CoA hydratase_mitochondrial</b>  | <b>0.985048322</b> | <b>1</b>      | <b>7</b>  |
| P14604        | AFAAGADIK                                      | 1.014695137        | 2             | 3.13213   |
| P14604        | AQFGQPEILLGTIPGAGGTQR                          | 0.981647025        | 2             | 5.72905   |
| P14604        | FLSHWDHITR                                     | 0.942479845        | 2             | 3.0123    |
| P14604        | IFPVETLVEEAIQCAEK                              | 0.885514228        | 2             | 5.63218   |
| P14604        | NSSVGLIQLNRPK                                  | 1.028898314        | 2             | 3.51359   |
| <b>P14668</b> | <b>ANXA5 Annexin A5</b>                        | <b>0.837007161</b> | <b>0.1371</b> | <b>5</b>  |
| P14668        | EFRKNFATSLYSMIK                                | 1.049933813        | 2             | 2.39026   |
| P14668        | ETSGNLELLAVVK                                  | 0.83698039         | 2             | 3.33549   |
| P14668        | GAGTDDHTLIR                                    | 0.809001077        | 2             | 2.7146    |
| P14668        | GLGTDEDSILNLLTAR                               | 0.905558007        | 2             | 3.95647   |
| P14668        | GTVTDFSGFDGR                                   | 0.879317032        | 2             | 2.56835   |
| <b>P14669</b> | <b>ANXA3 Annexin A3</b>                        | <b>0.793693672</b> | <b>0.0008</b> | <b>6</b>  |
| P14669        | GMGTDEDTLIEILTTR                               | 0.772731798        | 2             | 3.12885   |
| P14669        | GTINNYPGFNPSVDAEAIR                            | 0.793550786        | 2             | 4.62311   |
| P14669        | KDAQTLYDAGEKK                                  | 0.689990727        | 3             | 3.76387   |
| P14669        | QYQEAYEQALK                                    | 0.848531531        | 2             | 2.78182   |
| P14669        | SEIDLLDIR                                      | 1.063022765        | 2             | 2.99695   |
| P14669        | WGTDDEKFEILCLR                                 | 0.869886564        | 3             | 3.48555   |

|               |                                                                       |                    |               |           |
|---------------|-----------------------------------------------------------------------|--------------------|---------------|-----------|
| <b>P14685</b> | <b>PSMD3 26S proteasome non_ATPase regulatory subunit 3</b>           | <b>1.10909052</b>  | <b>2E-06</b>  | <b>2</b>  |
| P14685        | LQLDSPEDAEIFIAK                                                       | 1.094838752        | 2             | 4.04152   |
| P14685        | SVFPEQANNNEWAR                                                        | 1.147015789        | 2             | 3.14449   |
| <b>P14740</b> | <b>DPP4 Dipeptidyl peptidase 4</b>                                    | <b>0.896354853</b> | <b>3E-06</b>  | <b>3</b>  |
| P14740        | FRPAEPHFTSDGSSFYK                                                     | 0.948377879        | 2             | 2.72321   |
| P14740        | LGTLEVEDQIEAAR                                                        | 0.846363633        | 2             | 3.55022   |
| P14740        | VLEDNSALDK                                                            | 0.826008362        | 2             | 2.68994   |
| <b>P14882</b> | <b>PCCA Propionyl_CoA carboxylase alpha chain_mitochondrial</b>       | <b>0.971036502</b> | <b>0.0012</b> | <b>11</b> |
| P14882        | EIGYPVMIKASAGGGK+Oxidation(6)                                         | 0.976730355        | 2             | 2.40752   |
| P14882        | FLSDVYPDGFK                                                           | 0.939166603        | 2             | 2.9276    |
| P14882        | FSSQEAASSFQDDR                                                        | 1.089757738        | 2             | 2.91851   |
| P14882        | HGNALWLNER                                                            | 1.27839689         | 2             | 2.9325    |
| P14882        | HKQEDIPIGWAVECR                                                       | 0.995753955        | 3             | 3.52011   |
| P14882        | MADEAVCVGPAPTSK                                                       | 0.945228582        | 2             | 3.96764   |
| P14882        | MEDALDSYVIR                                                           | 0.92542238         | 2             | 3.03372   |
| P14882        | SYLNMDAIMEAIK                                                         | 0.775253184        | 2             | 2.33653   |
| P14882        | TGAQAVHPGYGFLSENK                                                     | 0.989464829        | 2             | 4.03558   |
| P14882        | TVAIHSVDVDASSVHVK                                                     | 1.075889118        | 3             | 3.44137   |
| P14882        | VVEEAPSIFLDPETR                                                       | 0.934861268        | 2             | 3.53563   |
| <b>P14942</b> | <b>GSTA4 Glutathione S_transferase alpha_4</b>                        | <b>0.831332103</b> | <b>0.0061</b> | <b>2</b>  |
| P14942        | KPPPDGHYVDVVR                                                         | 0.832051308        | 2             | 2.70752   |
| P14942        | YFPVFEK                                                               | 0.806117578        | 1             | 1.91788   |
| <b>P15083</b> | <b>PIGR Polymeric immunoglobulin receptor</b>                         | <b>1.041590086</b> | <b>0.9759</b> | <b>3</b>  |
| P15083        | EIQNAGDQAQENR                                                         | 1.043760159        | 2             | 3.98802   |
| P15083        | GVTGGSVAIIVCPYNPK                                                     | 1.051932323        | 2             | 3.7448    |
| P15083        | NNADLQVLEPEPELLYK                                                     | 0.834709275        | 2             | 3.0054    |
| <b>P15149</b> | <b>CP2A2 Cytochrome P450 2A2</b>                                      | <b>0.767289192</b> | <b>1E-19</b>  | <b>10</b> |
| P15149        | DVQECILEEAGYLIK                                                       | 0.687033549        | 3             | 5.15156   |
| P15149        | DVYSSITQLSER                                                          | 0.845541141        | 2             | 3.06834   |
| P15149        | FSNLAPLIPR                                                            | 0.869186806        | 2             | 3.20062   |
| P15149        | GELPTFNILFK                                                           | 0.690823352        | 2             | 2.70464   |
| P15149        | GTDVFPPIIGSLMTEPK                                                     | 0.682233579        | 3             | 3.72354   |
| P15149        | GYGFSLSNVEQAK                                                         | 0.78341775         | 2             | 3.43775   |
| P15149        | NFIDSFLIR                                                             | 0.765538271        | 2             | 2.45658   |
| P15149        | QNHSTLDPNSPR                                                          | 0.953560497        | 2             | 2.96759   |
| P15149        | TLQGTGCGAPIDPSIYLSK                                                   | 0.76602681         | 2             | 4.72555   |
| P15149        | TVSNVINSIVFGNR                                                        | 0.835559817        | 2             | 3.46598   |
| <b>P15178</b> | <b>SYDC Aspartyl_tRNA synthetase_cytoplasmic</b>                      | <b>1.06983947</b>  | <b>0.8479</b> | <b>2</b>  |
| P15178        | GEEILSGAQR                                                            | 1.05487397         | 2             | 2.73186   |
| P15178        | QMVKFAANINK+Oxidation(1)                                              | 1.08246136         | 2             | 2.35481   |
| <b>P15429</b> | <b>ENOB Beta_enolase</b>                                              | <b>1.074700144</b> | <b>1</b>      | <b>5</b>  |
| P15429        | DATNVGDEGGFAPNILENNEALELLK                                            | 1.157211684        | 2             | 4.98473   |
| P15429        | HIADLAGNPDVLPVPAFNVINGGSHAGNK                                         | 0.970036281        | 3             | 5.20497   |
| P15429        | IEEALGDK                                                              | 1.13530916         | 1             | 2.11577   |
| P15429        | TAIQAAGYPDK                                                           | 1.333834169        | 2             | 2.74873   |
| P15429        | VNQIGSVTESIQACK                                                       | 1.071418899        | 2             | 5.13829   |
| <b>P15650</b> | <b>ACADL Long_chain specific acyl_CoA dehydrogenase_mitochondrial</b> | <b>0.959644727</b> | <b>1E-14</b>  | <b>21</b> |
| P15650        | AFVDSCLQLHETK                                                         | 1.029697697        | 2             | 4.12089   |
| P15650        | AQDTAELFFEDVR                                                         | 1.171475794        | 2             | 4.8683    |
| P15650        | AQDTAELFFEDVRLPASALLGEENK                                             | 1.005313966        | 3             | 4.4008    |
| P15650        | CIGAIAMTEPGAGSDLQGVR                                                  | 0.917950217        | 2             | 6.15964   |
| P15650        | CIGAIAMTEPGAGSDLQGVR+Oxidation(6)                                     | 0.92920317         | 2             | 5.63947   |
| P15650        | EQIEQFIPQMTAGK                                                        | 0.791626483        | 2             | 5.02133   |
| P15650        | FFQEEVIPYHEEWEK                                                       | 1.38108102         | 2             | 4.74433   |
| P15650        | GFYYLMQELPQER                                                         | 1.040011833        | 2             | 2.97616   |
| P15650        | GFYYLMQELPQER+Oxidation(5)                                            | 1.15680216         | 2             | 2.65493   |

|               |                                                                        |                    |               |           |
|---------------|------------------------------------------------------------------------|--------------------|---------------|-----------|
| P15650        | IFSSEHDIFR                                                             | 1.067340298        | 2             | 2.84125   |
| P15650        | KFFQEEVIPYHEEWEK                                                       | 1.133728956        | 2             | 4.77187   |
| P15650        | LDSASASMAK                                                             | 0.850410992        | 2             | 2.41946   |
| P15650        | LDSASASMAK+Oxidation(7)                                                | 1.010904942        | 2             | 2.44125   |
| P15650        | LPASALLGEENK                                                           | 0.968376101        | 2             | 3.33571   |
| P15650        | LPASALLGEENKGFYLYMQELPQER                                              | 1.657911835        | 3             | 3.96827   |
| P15650        | QGLLGINIAEK                                                            | 0.935741848        | 2             | 3.28251   |
| P15650        | RLDSASASMAK                                                            | 0.810374518        | 2             | 2.9681    |
| P15650        | RLDSASASMAK+Oxidation(8)                                               | 1.072550589        | 2             | 2.79229   |
| P15650        | SGSDWILNGSK                                                            | 1.110438642        | 2             | 2.97819   |
| P15650        | VQPIYGGTNEIMK                                                          | 1.003914472        | 2             | 3.55062   |
| P15650        | VQPIYGGTNEIMK+Oxidation(11)                                            | 0.99818557         | 2             | 3.06033   |
| <b>P15651</b> | <b>ACADS Short_chain specific acyl_CoA dehydrogenase_mitochondrial</b> | <b>0.9262205</b>   | <b>0.0001</b> | <b>7</b>  |
| P15651        | ASSTANLIFEDCR                                                          | 1.101744842        | 2             | 3.42759   |
| P15651        | EEGDSWVLNGTK                                                           | 0.789269013        | 2             | 2.71993   |
| P15651        | ELVPAAQLDKEHLFPTSQVK                                                   | 0.61144417         | 2             | 4.54529   |
| P15651        | IGCFALSEPGENGSDAGAASTTAR                                               | 1.079664431        | 2             | 5.90469   |
| P15651        | IGIASQALGIAQASLDCAVK                                                   | 1.17727388         | 2             | 4.64005   |
| P15651        | ITEIYEGTSEIQR                                                          | 0.924850626        | 2             | 4.28648   |
| P15651        | LAASEAATAISHQAIQLGGMGYVTEMPAER                                         | 1.077985435        | 4             | 4.80843   |
| <b>P15684</b> | <b>AMPN Aminopeptidase N</b>                                           | <b>0.765986821</b> | <b>0.1369</b> | <b>3</b>  |
| P15684        | ALGDTAPAPNIDTTELVER                                                    | 0.893190205        | 2             | 3.73857   |
| P15684        | AQIHDSEFNLASAGK                                                        | 0.746183746        | 2             | 3.4102    |
| P15684        | VVATTQMQAADAR                                                          | 0.989388963        | 2             | 3.26723   |
| <b>P15709</b> | <b>ST2A1 Bile salt sulfotransferase</b>                                | <b>0.513886477</b> | <b>0.0001</b> | <b>2</b>  |
| P15709        | GNVLYGSWFEHIR                                                          | 0.716120674        | 2             | 2.9798    |
| P15709        | NHFTVSQAEAFDK                                                          | 0.511476869        | 2             | 3.6919    |
| <b>P15999</b> | <b>ATPA ATP synthase subunit alpha_mitochondrial</b>                   | <b>1.025218397</b> | <b>7E-13</b>  | <b>23</b> |
| P15999        | AVDSLVPIGR                                                             | 0.987199998        | 2             | 3.48319   |
| P15999        | EVAFAQFGSDLDAAATQQLLSR                                                 | 1.070605819        | 2             | 6.42532   |
| P15999        | FESAFLSHVVSQHQSLLGNIR                                                  | 1.154881076        | 3             | 5.9234    |
| P15999        | GIRPAINVGLSVSR                                                         | 1.559996675        | 2             | 3.02806   |
| P15999        | GMSLNLEPDNVGVVVFVFNNDK                                                 | 1.141754313        | 2             | 4.95854   |
| P15999        | GMSLNLEPDNVGVVVFVFNNDK+Oxidation(1)                                    | 1.030463219        | 2             | 3.55332   |
| P15999        | GYLDKLEPSK                                                             | 0.876552534        | 2             | 2.44305   |
| P15999        | HALIYDDLK                                                              | 1.397988942        | 2             | 2.46942   |
| P15999        | ILGADTSVDLEETGR                                                        | 1.1107306          | 2             | 5.07682   |
| P15999        | LELAQYR                                                                | 1.07304988         | 2             | 2.74124   |
| P15999        | LKEIVTNFLAGFEP                                                         | 1.055554686        | 2             | 2.36143   |
| P15999        | LYCIYVAIGQK                                                            | 1.046394216        | 2             | 2.49529   |
| P15999        | NVQAEEMVEFSSGLK                                                        | 1.360038514        | 2             | 4.41445   |
| P15999        | QGQYSPMAIEEQVAVIYAGVR                                                  | 1.017336464        | 3             | 4.95107   |
| P15999        | RLTDADAMK                                                              | 0.854390702        | 2             | 2.33588   |
| P15999        | RTGAIVDVPVGDELLGR                                                      | 1.152425433        | 2             | 3.09704   |
| P15999        | STVAQLVK                                                               | 1.021596966        | 2             | 2.32218   |
| P15999        | TGAIVDVPVGDELLGR                                                       | 0.988276586        | 2             | 4.58103   |
| P15999        | TGTAEMSSILEER                                                          | 1.043408428        | 2             | 4.26712   |
| P15999        | TGTAEMSSILEER+Oxidation(5)                                             | 0.99704226         | 2             | 3.36895   |
| P15999        | TSIAIDTIINQK                                                           | 0.968143182        | 2             | 4.34086   |
| P15999        | VLSIGDGIAR                                                             | 1.093892606        | 2             | 3.24282   |
| P15999        | VVDALGNAIDGK                                                           | 0.983543045        | 2             | 4.31178   |
| <b>P16036</b> | <b>MPCP Phosphate carrier protein_mitochondrial</b>                    | <b>1.072103426</b> | <b>0.0024</b> | <b>8</b>  |
| P16036        | ALYSNILGEENTYLWR                                                       | 0.900589717        | 2             | 2.72008   |
| P16036        | EEGLNAFYK                                                              | 1.114748112        | 1             | 2.08078   |
| P16036        | EKGSTASQVLQR                                                           | 0.957699315        | 2             | 3.08668   |
| P16036        | FGFYEVFK                                                               | 1.050870589        | 1             | 1.99456   |

|               |                                                            |                    |               |           |
|---------------|------------------------------------------------------------|--------------------|---------------|-----------|
| P16036        | GIFNGFSITLK                                                | 1.218243279        | 2             | 2.69391   |
| P16036        | GSTASQVLQR                                                 | 1.036400217        | 2             | 3.04368   |
| P16036        | IQTQPGYANTLR                                               | 1.121106305        | 2             | 3.26257   |
| P16036        | MYKEEGLNAFYK+Oxidation(0)                                  | 0.924642632        | 2             | 2.6755    |
| <b>P16086</b> | <b>SPTA2 Spectrin alpha chain_ brain</b>                   | <b>0.976142934</b> | <b>0.8543</b> | <b>28</b> |
| P16086        | ALINADELANDVAGAEALLDR                                      | 0.960285468        | 3             | 4.29678   |
| P16086        | ALSSEKPYVTK                                                | 0.910869606        | 2             | 3.24581   |
| P16086        | CNSLEEIKALREAHDAFR                                         | 1.537040245        | 2             | 2.58024   |
| P16086        | DVTGAEALLER                                                | 1.11638454         | 2             | 2.52613   |
| P16086        | GVIDMGNSLIER                                               | 0.91933702         | 2             | 2.94299   |
| P16086        | HQALQAEIAGHEPR                                             | 0.959705598        | 3             | 3.43094   |
| P16086        | KFEFQTDLAAHEER                                             | 1.045128661        | 2             | 4.444     |
| P16086        | LFGAAEVQR                                                  | 0.972103273        | 2             | 2.35294   |
| P16086        | LGDSHDLQR                                                  | 0.926839518        | 2             | 3.01277   |
| P16086        | LGESQTLQQFSR                                               | 0.903443333        | 2             | 3.24827   |
| P16086        | LIQEQHPPEELIK                                              | 0.891197529        | 2             | 2.85121   |
| P16086        | LQQSHPLSANQIQVK                                            | 1.091937027        | 2             | 3.67016   |
| P16086        | LQTASDESYKDPTNIQSK                                         | 1.081790965        | 2             | 5.07851   |
| P16086        | LQVASDENYKDPTNLQGK                                         | 0.907586138        | 2             | 4.90293   |
| P16086        | LSDNTIGQEEIQQR                                             | 0.858479456        | 2             | 4.33598   |
| P16086        | MQHNLEQQIQAR+Oxidation(0)                                  | 0.963890723        | 2             | 2.62275   |
| P16086        | NQALNTDNYGHDLASVQALQR                                      | 0.999238259        | 2             | 5.815     |
| P16086        | NTTGVTEEALK                                                | 0.930976511        | 2             | 2.41464   |
| P16086        | QFQDAGHFDAENIKK                                            | 1.02499093         | 2             | 2.5176    |
| P16086        | SADESGQALLAAGHYASDEVV                                      | 1.015567344        | 2             | 5.21896   |
| P16086        | SLQLAEER                                                   | 1.000249044        | 2             | 2.61294   |
| P16086        | SLLGSAHEVQR                                                | 0.959714307        | 2             | 3.25905   |
| P16086        | SSLSSAQADFNQLAELDR                                         | 1.045147193        | 2             | 5.19909   |
| P16086        | TATDEAYKDPNQLQGK                                           | 0.904208745        | 2             | 3.8134    |
| P16086        | TKQEEVNAAWQR                                               | 0.974648381        | 2             | 3.06743   |
| P16086        | VLETAEDIQER                                                | 0.896084511        | 2             | 2.83283   |
| P16086        | VNDVCTNGQDLIK                                              | 0.947610173        | 2             | 2.66141   |
| P16086        | VNSLGETAQR                                                 | 1.04356073         | 2             | 2.59214   |
| <b>P16232</b> | <b>DHI1 Corticosteroid 11_beta_dehydrogenase isozyme 1</b> | <b>0.674771133</b> | <b>3E-11</b>  | <b>6</b>  |
| P16232        | EECALEIK                                                   | 0.650033645        | 1             | 2.28021   |
| P16232        | ETSGIILSQAAPK                                              | 0.623951842        | 2             | 3.55305   |
| P16232        | FALDGGFFSTIR                                               | 0.968243158        | 2             | 2.72643   |
| P16232        | KDEVYYDK                                                   | 0.644525839        | 1             | 2.55453   |
| P16232        | MTQPLIASYSASK                                              | 0.855917561        | 2             | 2.55557   |
| P16232        | SSWTPLLLGNPGR                                              | 0.682217748        | 2             | 3.50762   |
| <b>P16290</b> | <b>PGAM2 Phosphoglycerate mutase 2</b>                     | <b>1.064642122</b> | <b>0.9846</b> | <b>4</b>  |
| P16290        | AMEAVAAQGK                                                 | 1.110174241        | 2             | 2.50142   |
| P16290        | AMEAVAAQGK+Oxidation(1)                                    | 0.542148016        | 2             | 3.03278   |
| P16290        | HYGGTLGLNK                                                 | 1.071825909        | 1             | 2.83401   |
| P16290        | VLIAAHGNSLR                                                | 1.008782579        | 2             | 2.50912   |
| <b>P16303</b> | <b>CES3 Carboxylesterase 3</b>                             | <b>0.734320701</b> | <b>1E-19</b>  | <b>13</b> |
| P16303        | AKEAAEESHWK                                                | 0.858975052        | 2             | 3.94873   |
| P16303        | DGASEEETNLSK                                               | 0.676448604        | 2             | 4.30071   |
| P16303        | ESYPFLPTVIDGVVLPK                                          | 0.583030995        | 2             | 4.29574   |
| P16303        | LDLLGNPK                                                   | 0.79406456         | 2             | 2.39438   |
| P16303        | MIPVVAEK                                                   | 0.603114399        | 1             | 1.94573   |
| P16303        | QFEGWIIPTLMGYPLSEK                                         | 0.958868093        | 2             | 3.86512   |
| P16303        | QKTEDELLETSLK                                              | 0.647727349        | 2             | 3.44549   |
| P16303        | SFNTVPYIVGINK                                              | 0.849078028        | 2             | 2.59327   |
| P16303        | TEDELLETSLK                                                | 0.706276161        | 2             | 3.62898   |
| P16303        | TPEEILAEK                                                  | 0.978711337        | 2             | 2.33163   |
| P16303        | TTTSAVMVHCLR                                               | 0.762365149        | 2             | 2.49585   |

|               |                                                         |                    |               |           |
|---------------|---------------------------------------------------------|--------------------|---------------|-----------|
| P16303        | TVIGDHGDELFSVFGSPFLK                                    | 0.791370567        | 2             | 5.55486   |
| P16303        | YFGGTDDPAK                                              | 0.625474591        | 2             | 3.07163   |
| <b>P16332</b> | <b>MUTA Methylmalonyl_CoA mutase_ mitochondrial</b>     | <b>1.233501981</b> | <b>0.0007</b> | <b>4</b>  |
| P16332        | AHCQTSQSWSLTEQDPYNNIVR                                  | 1.138579202        | 3             | 4.28628   |
| P16332        | IDSGSEVIVGVNK                                           | 1.233505784        | 2             | 3.52451   |
| P16332        | NTQIIIQEESGIPK                                          | 1.209873736        | 2             | 3.88251   |
| P16332        | TGLQAGLTIDEFAPR                                         | 1.102306067        | 2             | 3.04656   |
| <b>P16409</b> | <b>MYL3 Myosin light chain 3</b>                        | <b>1.300529651</b> | <b>0.9693</b> | <b>6</b>  |
| P16409        | AAPAPAAAPAAPEPERPK                                      | 1.24202742         | 2             | 4.31258   |
| P16409        | ALGQNPTQAEVLR                                           | 1.785029413        | 2             | 3.85524   |
| P16409        | DTGTIEDFVEGLR                                           | 1.291589121        | 2             | 3.06671   |
| P16409        | IEFTPEQIEEFK                                            | 1.285600272        | 2             | 2.46709   |
| P16409        | NKDTGTIEDFVEGLR                                         | 1.421143566        | 2             | 3.40117   |
| P16409        | VFDKEGNGTVMGAELR                                        | 1.235262295        | 2             | 3.81775   |
| <b>P16617</b> | <b>PGK1 Phosphoglycerate kinase 1</b>                   | <b>1.167414476</b> | <b>0.0056</b> | <b>19</b> |
| P16617        | AHSSMVGVNLPQK                                           | 1.083117802        | 2             | 3.50766   |
| P16617        | AHSSMVGVNLPQK+Oxidation(4)                              | 0.82286463         | 2             | 2.81574   |
| P16617        | ALESPERFLAILGGAK                                        | 0.9986512          | 3             | 4.45404   |
| P16617        | DCVGSEVENACANPAAGTVILLENLR                              | 1.006299874        | 3             | 5.92439   |
| P16617        | FCLDNGAK                                                | 0.888897707        | 1             | 2.02842   |
| P16617        | GCITIIGGGDTATCCA                                        | 0.994623733        | 2             | 5.30764   |
| P16617        | IQLINNMLDK                                              | 1.037098712        | 2             | 2.3349    |
| P16617        | IQLINNMLDK+Oxidation(6)                                 | 1.415735628        | 2             | 2.45683   |
| P16617        | ITLPVDFVTADK                                            | 1.071031858        | 2             | 2.33842   |
| P16617        | ITLPVDFVTADKFDENAK                                      | 1.305953314        | 2             | 4.6603    |
| P16617        | QIVWNGPVGVFWEAFAR                                       | 1.204321523        | 2             | 3.04603   |
| P16617        | SVVLMShLGRDPGVPMPDKYSLEPVAAELK                          | 1.205146744        | 4             | 4.70571   |
| P16617        | TGQATVASGIPAGWMLDCGTESSK                                | 1.088467107        | 2             | 4.72055   |
| P16617        | TGQATVASGIPAGWMLDCGTESSK                                | 0.993553596        | 3             | 4.14253   |
| P16617        | VLNNMEIGTSLYDEEGAK                                      | 1.135095169        | 2             | 4.84194   |
| P16617        | VLNNMEIGTSLYDEEGAK+Oxidation(4)                         | 0.967564631        | 2             | 2.67029   |
| P16617        | VLPGVDALSNV                                             | 1.171486237        | 2             | 2.40267   |
| P16617        | WNTEDKVSHVSTGGASLELLEGK                                 | 1.009547666        | 3             | 4.5441    |
| P16617        | YSLEPVAAELK                                             | 1.010214944        | 2             | 2.97467   |
| <b>P16638</b> | <b>ACLY ATP_citrate synthase</b>                        | <b>1.170632222</b> | <b>3E-07</b>  | <b>20</b> |
| P16638        | AFDSGIIPMEFVNK                                          | 0.91665319         | 2             | 3.47556   |
| P16638        | AFDSGIIPMEFVNK+Oxidation(8)                             | 0.852738663        | 2             | 3.19852   |
| P16638        | DEPSVAAMVYPFTGDHK                                       | 1.005748088        | 2             | 3.52614   |
| P16638        | DGVYILDAAK                                              | 0.897534882        | 2             | 2.3298    |
| P16638        | DLVSSLTGLLTIGDR                                         | 0.846856221        | 2             | 3.74462   |
| P16638        | EAYPEEAYIADLDAK                                         | 1.017970436        | 2             | 3.24635   |
| P16638        | FGGALDAAK                                               | 1.018222708        | 2             | 2.72558   |
| P16638        | GAIVPAQEVPPPTVPMDDYSWAR                                 | 1.002014627        | 2             | 4.0506    |
| P16638        | GGPNYQEGLR                                              | 1.121208058        | 2             | 2.95501   |
| P16638        | GVTIIGPATVGGIKPGCFK                                     | 1.083512259        | 2             | 3.40001   |
| P16638        | IGNTGGMLDNILASK                                         | 1.104933343        | 2             | 3.59441   |
| P16638        | LGLVGVNLSLDGVK                                          | 1.333444888        | 2             | 2.49912   |
| P16638        | LLVGVDEK                                                | 1.118090692        | 2             | 2.31624   |
| P16638        | RGPNYQEGLR                                              | 1.156768263        | 2             | 3.29658   |
| P16638        | SGGMSNELNIIISR                                          | 1.13266165         | 2             | 3.33239   |
| P16638        | TIAIIAEGIPEALTR                                         | 1.008986343        | 2             | 4.54741   |
| P16638        | TTDGVYEGVAIGGDR                                         | 1.230581252        | 2             | 2.81797   |
| P16638        | TTDGVYEGVAIGGDRYPGSTFMDHVL                              | 0.922155777        | 3             | 3.6497    |
| P16638        | WGDIEFPPPFGR                                            | 0.788908265        | 2             | 3.9985    |
| P16638        | YICTTSAIQNR                                             | 1.125134585        | 2             | 2.99804   |
| <b>P16970</b> | <b>ABCD3 ATP_binding cassette sub_family D member 3</b> | <b>0.753501819</b> | <b>1E-13</b>  | <b>7</b>  |
| P16970        | EGGWDSVQDWMDVLSGGEK                                     | 0.916877987        | 2             | 3.99481   |

|               |                                                             |                    |               |           |
|---------------|-------------------------------------------------------------|--------------------|---------------|-----------|
| P16970        | FDHVPLATPNGDILIQDLSFEVR                                     | 0.984685752        | 3             | 4.00784   |
| P16970        | GIEGAQASPLIPGAGEIINADNIIK                                   | 0.691135408        | 3             | 4.55975   |
| P16970        | GYLDNVQLGHILER                                              | 0.783260051        | 2             | 3.37217   |
| P16970        | HLHSTHSELLEDYYQSGR                                          | 0.815425819        | 3             | 4.73919   |
| P16970        | IANPDQLLTQDVEK                                              | 0.937580061        | 2             | 3.17072   |
| P16970        | SGANVLICGPNCGCK                                             | 0.827607212        | 2             | 3.45422   |
| <b>P17077</b> | <b>RL9 60S ribosomal protein L9</b>                         | <b>1.133013538</b> | <b>0.9392</b> | <b>7</b>  |
| P17077        | FLDGIYVSEK                                                  | 0.954945353        | 2             | 3.36401   |
| P17077        | GTVQQPDE                                                    | 1.180791465        | 1             | 2.05099   |
| P17077        | KFLDGIYVSEK                                                 | 1.08424726         | 2             | 2.4775    |
| P17077        | SVYAHFPINVVIQENGLVEIR                                       | 1.058573016        | 3             | 3.38509   |
| P17077        | TGVACSVSQAQK                                                | 1.176146978        | 2             | 3.08648   |
| P17077        | TICSHVQNMIIK                                                | 0.832290847        | 2             | 2.91288   |
| P17077        | TILSNQTVDIPENVDTLTK                                         | 0.961114875        | 2             | 3.92861   |
| <b>P17078</b> | <b>RL35 60S ribosomal protein L35</b>                       | <b>1.000485261</b> | <b>0.9667</b> | <b>2</b>  |
| P17078        | QLDDLKVELSQLR                                               | 0.93064247         | 2             | 2.41582   |
| P17078        | VLTVINQTQK                                                  | 1.028716223        | 2             | 2.97669   |
| <b>P17178</b> | <b>CP27A Sterol 26_hydroxylase_mitochondrial</b>            | <b>0.992750097</b> | <b>0.4645</b> | <b>3</b>  |
| P17178        | MLKPAEAALYTDALNEVISDFIAR                                    | 1.223664692        | 3             | 3.71891   |
| P17178        | VGCLEPSIPEDTATFIR                                           | 1.116184094        | 2             | 3.06342   |
| P17178        | YEVVLSPGMGEVK                                               | 0.955209167        | 2             | 3.23402   |
| <b>P17425</b> | <b>HMCS1 Hydroxymethylglutaryl_CoA synthase_cytoplasmic</b> | <b>0.282571466</b> | <b>1E-19</b>  | <b>10</b> |
| P17425        | ASAELEFNQK                                                  | 0.314308337        | 2             | 3.01004   |
| P17425        | GTHMQHAYDFYKPDMLSEYPVVDGK+Oxidation(3)                      | 0.263553172        | 3             | 4.79415   |
| P17425        | LEDTYFDRDVEK                                                | 0.235846862        | 2             | 2.82849   |
| P17425        | MFLNDFLNDQNR                                                | 0.401300518        | 2             | 2.61977   |
| P17425        | MFLNDFLNDQNR+Oxidation(0)                                   | 0.301759413        | 2             | 3.40863   |
| P17425        | NSLSYDCIGR                                                  | 0.243441323        | 2             | 2.67405   |
| P17425        | RPSTNDHSLDEGVGLVHSNTATEHIPSPAK                              | 0.474642392        | 4             | 4.6524    |
| P17425        | TCVAPDVFAENMK                                               | 0.287340398        | 2             | 2.46807   |
| P17425        | VTQDATPGSALDK                                               | 0.322564737        | 2             | 3.92519   |
| P17425        | YTIGLGQAR                                                   | 0.295620208        | 2             | 2.61365   |
| <b>P17426</b> | <b>AP2A1 AP_2 complex subunit alpha_1</b>                   | <b>1.025332354</b> | <b>0.0941</b> | <b>3</b>  |
| P17426        | FVCKNSGVLFFENQLLQIGVK                                       | 3.091223262        | 2             | 2.30254   |
| P17426        | NADVLELQQR                                                  | 0.957336094        | 2             | 2.64329   |
| P17426        | VGGYILGEFGNLIAGDPR                                          | 0.989716841        | 2             | 3.42639   |
| <b>P17475</b> | <b>A1AT Alpha_1_antiproteinase</b>                          | <b>1.032911572</b> | <b>0.1662</b> | <b>6</b>  |
| P17475        | IVDLMK+Oxidation(4)                                         | 1.142344049        | 1             | 2.05017   |
| P17475        | MQHLEQTLTK                                                  | 0.751270439        | 2             | 2.31718   |
| P17475        | NNYHSEAFSVNFADSEEAKK                                        | 1.162605537        | 3             | 4.3516    |
| P17475        | TLLSSLGTR                                                   | 1.048299115        | 2             | 2.9887    |
| P17475        | VFNNADLSGITEDAPLK                                           | 0.952049644        | 2             | 5.46066   |
| P17475        | VINDYVEK                                                    | 0.825845383        | 1             | 2.1906    |
| <b>P17712</b> | <b>HXK4 Glucokinase</b>                                     | <b>1.138729333</b> | <b>0.3754</b> | <b>4</b>  |
| P17712        | ASGAEGNNIVGLLR                                              | 1.148080793        | 2             | 2.90532   |
| P17712        | LETHEEASVK                                                  | 1.276780955        | 2             | 2.51661   |
| P17712        | STPEGSEVGFSLDLGGTNFR                                        | 1.14318969         | 2             | 4.22112   |
| P17712        | VGEAGEAGQWSVK                                               | 1.110788096        | 2             | 3.03338   |
| <b>P17764</b> | <b>THIL Acetyl_CoA acetyltransferase_mitochondrial</b>      | <b>1.056566739</b> | <b>1E-19</b>  | <b>16</b> |
| P17764        | EEQDKYAIGSYTR                                               | 0.887480344        | 2             | 3.54635   |
| P17764        | ENGTVAANASTLNDGAAAVVLMTAEAAQR                               | 0.935968614        | 3             | 3.38944   |
| P17764        | EVYMGNVIQGGEGQAPTR                                          | 1.068228333        | 2             | 4.75122   |
| P17764        | FANEITPITISVK                                               | 1.20537248         | 2             | 3.71886   |
| P17764        | GKPDVVVKEDEEYK                                              | 0.80890842         | 2             | 3.23836   |
| P17764        | GKPDVVVKEDEEYKR                                             | 0.92699493         | 2             | 4.57542   |
| P17764        | IAAFADAADVPIDFPLAPAYAVPK                                    | 1.282282419        | 2             | 3.88792   |
| P17764        | IHMGNCAENTAK                                                | 1.026503143        | 2             | 3.19775   |

|               |                                                           |                    |               |           |
|---------------|-----------------------------------------------------------|--------------------|---------------|-----------|
| P17764        | IHMGNCAENTAK+Oxidation(2)                                 | 1.350956397        | 2             | 3.02954   |
| P17764        | LEDLIVK                                                   | 0.869237823        | 1             | 2.18632   |
| P17764        | LGTIAIQGAIEK                                              | 1.317088547        | 2             | 2.88635   |
| P17764        | QATLGAGLIATPCTTVNK                                        | 0.97866362         | 2             | 4.6391    |
| P17764        | QGEFGLASICNGGGGASAVLIEK                                   | 1.064998878        | 2             | 4.76139   |
| P17764        | TPIGSFLGSLASQPATK                                         | 1.590897341        | 2             | 3.99727   |
| P17764        | VNVHGGAVSLGHPIGMSGAR                                      | 0.751591309        | 3             | 3.64917   |
| P17764        | VNVHGGAVSLGHPIGMSGAR+Oxidation(15)                        | 0.964939963        | 3             | 3.31125   |
| <b>P17879</b> | <b>HS71B Heat shock 70 kDa protein 1B</b>                 | <b>1.116851879</b> | <b>0.0194</b> | <b>3</b>  |
| P17879        | QTQTFTTYSNQPGLIQQVYEGER                                   | 1.093899134        | 3             | 4.6592    |
| P17879        | TTPSYVAFTDTER                                             | 1.274121076        | 2             | 3.6979    |
| P17879        | VEIANDQGNR                                                | 1.084045742        | 2             | 3.8048    |
| <b>P17988</b> | <b>ST1A1 Sulfotransferase 1A1</b>                         | <b>1.361139378</b> | <b>1E-19</b>  | <b>4</b>  |
| P17988        | CPGVPSGLETLEETPAPR                                        | 1.676560565        | 2             | 4.92401   |
| P17988        | NTFTVAQNER                                                | 1.42245412         | 2             | 3.46223   |
| P17988        | SLPEETVDSIVHHTSFK                                         | 1.479716208        | 2             | 4.3453    |
| P17988        | THLPLSLLPQSLLDQK                                          | 1.695819877        | 2             | 4.72451   |
| <b>P18163</b> | <b>ACSL1 Long_chain_fatty_acid_CoA ligase 1</b>           | <b>1.024042676</b> | <b>0.1711</b> | <b>23</b> |
| P18163        | AELSVIFADKPEK                                             | 0.96251852         | 2             | 3.35586   |
| P18163        | ALKPPCDLSMQSVEVTGTTEGVR                                   | 0.934037424        | 2             | 4.49232   |
| P18163        | ALKPPCDLSMQSVEVTGTTEGVR+Oxidation(9)                      | 1.003152849        | 3             | 3.65705   |
| P18163        | CGVEIIGLK                                                 | 0.857110165        | 2             | 3.07871   |
| P18163        | DGWLHTGDIGK                                               | 0.915769159        | 2             | 2.87043   |
| P18163        | GAMVTHQNMNDCSGFIK+Oxidation(2)                            | 1.349301677        | 3             | 3.73793   |
| P18163        | GFQGSFEELCR                                               | 1.073209198        | 2             | 3.2005    |
| P18163        | GIAVHPELFSIDNGLLTPTLK                                     | 1.539627685        | 2             | 5.66803   |
| P18163        | GIQVSNDBGPCLSGR                                           | 0.976010804        | 2             | 4.57707   |
| P18163        | IENIYLR                                                   | 1.021187214        | 2             | 2.84489   |
| P18163        | IFGQANTSVK                                                | 1.003553856        | 2             | 2.4036    |
| P18163        | IIVIMDSYDNDLVER                                           | 1.042915325        | 2             | 4.29589   |
| P18163        | LLLEGVENK                                                 | 0.955298915        | 2             | 3.22922   |
| P18163        | LVDVEDMNYQAAK                                             | 1.048438261        | 2             | 4.5051    |
| P18163        | LVDVEDMNYQAAK+Oxidation(6)                                | 1.003666735        | 2             | 3.40841   |
| P18163        | NAGLKPFEQVK                                               | 0.988707834        | 2             | 3.57308   |
| P18163        | NNSLWDK                                                   | 0.93708175         | 2             | 2.6721    |
| P18163        | QVAEMAECIGSALIQQ                                          | 1.026434604        | 2             | 5.34555   |
| P18163        | SQIDELYSTIK                                               | 0.931338233        | 2             | 3.57992   |
| P18163        | SQIDELYSTIKI                                              | 1.015931863        | 2             | 3.95376   |
| P18163        | TAEALDKDGLHTGDIGK                                         | 1.012206307        | 2             | 5.24855   |
| P18163        | VLQPTIFPVVPR                                              | 0.98184834         | 2             | 3.63525   |
| P18163        | WLLDFASK                                                  | 1.12393097         | 2             | 2.3317    |
| <b>P18297</b> | <b>SPRE Sepiapterin reductase</b>                         | <b>0.951640453</b> | <b>0.0219</b> | <b>4</b>  |
| P18297        | ALAPQLAGLLSPGSVLLLSAR                                     | 0.880816618        | 3             | 4.80423   |
| P18297        | LNSEGELVDCGTSAQK                                          | 0.931614582        | 2             | 4.74238   |
| P18297        | TVVNISSLCALQPFK                                           | 1.163517228        | 2             | 2.69967   |
| P18297        | VLSYAPGPLDTNMQLLAR                                        | 0.966551454        | 2             | 2.48966   |
| <b>P18298</b> | <b>METK2 S_adenosylmethionine synthase isoform type_2</b> | <b>1.320131029</b> | <b>3E-10</b>  | <b>2</b>  |
| P18298        | IIVDTYGGWGAHGGGAFSGK                                      | 0.988511237        | 2             | 5.27725   |
| P18298        | YLDEDTIYHLQPSGR                                           | 1.749557335        | 2             | 4.52686   |
| <b>P18418</b> | <b>CALR Calreticulin</b>                                  | <b>1.0150793</b>   | <b>8E-10</b>  | <b>19</b> |
| P18418        | AKIDDPDTSKPEDWDKPEHIPDPDAK                                | 0.921964105        | 3             | 5.90937   |
| P18418        | CKDDEFTHLYTLIVRPDNTYEVK                                   | 1.339918021        | 4             | 4.89991   |
| P18418        | DMHGDSEYNIMFGPDICGPGTK                                    | 1.110809217        | 2             | 5.8518    |
| P18418        | DMHGDSEYNIMFGPDICGPGTK+Oxidation(1)                       | 1.102946042        | 3             | 3.70668   |
| P18418        | DMHGDSEYNIMFGPDICGPGTK+Oxidation(10)                      | 1.102946042        | 3             | 3.4793    |
| P18418        | EQFLDGDWATNR                                              | 0.860422337        | 2             | 3.08592   |
| P18418        | FYGDQEK                                                   | 1.117626561        | 1             | 1.9565    |



|               |                                                                  |                    |               |           |
|---------------|------------------------------------------------------------------|--------------------|---------------|-----------|
| P18418        | FYGDQEKDK                                                        | 1.107943889        | 1             | 2.91121   |
| P18418        | GQTLVVQFTVK                                                      | 1.112585766        | 2             | 3.3287    |
| P18418        | HEQNIDCGGGYVK                                                    | 1.031761536        | 2             | 4.50742   |
| P18418        | IDDPTDSKPEDWDKPEHIPDPAK                                          | 1.224570783        | 3             | 4.04155   |
| P18418        | IDNSQVESGSLEDDWDFLPPK                                            | 1.256378495        | 2             | 5.15647   |
| P18418        | IDNSQVESGSLEDDWDFLPPKK                                           | 1.357627636        | 2             | 4.71347   |
| P18418        | IKDPDAAKPEDWDER                                                  | 1.055106354        | 2             | 4.24478   |
| P18418        | KPEDWDEEMDGEWEPVVIQNPEYK                                         | 0.989281672        | 3             | 4.97388   |
| P18418        | LFPGGLDQK                                                        | 1.090942139        | 1             | 2.18857   |
| P18418        | QIDNPDYK                                                         | 1.021448752        | 1             | 2.17454   |
| P18418        | SGTIFDNFLITNDEAYAEFGNETWGVTK                                     | 1.105503725        | 3             | 5.72654   |
| P18418        | VHVIFNYK                                                         | 1.311790853        | 1             | 2.32342   |
| <b>P18420</b> | <b>PSA1 Proteasome subunit alpha type_1</b>                      | <b>0.994963161</b> | <b>0.7771</b> | <b>3</b>  |
| P18420        | AQPSQAADEPAEK                                                    | 1.110239173        | 2             | 3.73488   |
| P18420        | ETLPAEQDLTTK                                                     | 0.85409441         | 2             | 2.42912   |
| P18420        | NQYDNDVTWVSPQGR                                                  | 0.988370857        | 2             | 3.65085   |
| <b>P18421</b> | <b>PSB1 Proteasome subunit beta type_1</b>                       | <b>1.087687154</b> | <b>0.0528</b> | <b>2</b>  |
| P18421        | AGGSASAMLQPLLDNQVGFK                                             | 1.020222613        | 3             | 4.45752   |
| P18421        | GAVYSFDPVGSYQR                                                   | 1.506795959        | 2             | 3.66226   |
| <b>P18445</b> | <b>RL27A 60S ribosomal protein L27a</b>                          | <b>0.908814047</b> | <b>0.1369</b> | <b>2</b>  |
| P18445        | NGVAPIIDVVR                                                      | 0.926847674        | 2             | 2.64837   |
| P18445        | NQSFCTVNLDK                                                      | 1.071711191        | 2             | 2.97949   |
| <b>P18484</b> | <b>AP2A2 AP_2 complex subunit alpha_2</b>                        | <b>0.944357427</b> | <b>0.4199</b> | <b>5</b>  |
| P18484        | FVNLFPEVK                                                        | 0.887624754        | 2             | 2.75243   |
| P18484        | KGPSTVTDLEETKR                                                   | 1.021228312        | 3             | 3.39886   |
| P18484        | NNGVLFENQLLQIGLK                                                 | 1.280604759        | 2             | 3.26417   |
| P18484        | QLSNPQQEVQNIKF                                                   | 1.141412648        | 2             | 3.38691   |
| P18484        | THIETVINALK                                                      | 1.07784023         | 2             | 2.31337   |
| <b>P18596</b> | <b>AT2A3 Sarcoplasmic/endoplasmic reticulum calcium ATPase 3</b> | <b>1.077521059</b> | <b>1</b>      | <b>3</b>  |
| P18596        | DIVPGDIVEVAVGDKVPADLR                                            | 1.0637976          | 2             | 3.05682   |
| P18596        | SLPSVETLGCTSVICSDK                                               | 1.082264273        | 2             | 4.12725   |
| P18596        | VGEATETALTCLVEK                                                  | 1.04927942         | 2             | 4.18403   |
| <b>P18757</b> | <b>CGL Cystathionine gamma_lyase</b>                             | <b>0.962343887</b> | <b>0.0458</b> | <b>16</b> |
| P18757        | AGDEVICMDEVYGGTNR                                                | 0.885873396        | 2             | 5.11028   |
| P18757        | AGDEVICMDEVYGGTNR+Oxidation(7)                                   | 1.030920874        | 2             | 3.87536   |
| P18757        | ATLGISDTLIR                                                      | 0.967020037        | 2             | 3.61405   |
| P18757        | AVAALDGAK                                                        | 1.05562096         | 2             | 2.35464   |
| P18757        | AVVLPISLATTFK                                                    | 0.962006009        | 3             | 4.00649   |
| P18757        | FLQNSLGAVPSPFDCYLCCR                                             | 1.171915277        | 2             | 3.3921    |
| P18757        | GTLQHAQVFLK                                                      | 0.940950612        | 2             | 2.75793   |
| P18757        | LFALAESLGGYESLAELPAIMTHASVPEK                                    | 1.383974249        | 3             | 4.27541   |
| P18757        | LFALAESLGGYESLAELPAIMTHASVPEKDR                                  | 1.067167803        | 4             | 4.96069   |
| P18757        | LLEAAITPQTK                                                      | 0.904797237        | 2             | 3.87627   |
| P18757        | LSVGLEDEKDLLEDLGQALK                                             | 0.950017344        | 3             | 6.23347   |
| P18757        | LVWIETPTNPTLK                                                    | 0.929728347        | 2             | 3.67406   |
| P18757        | QCTGCPGMVSFYIK                                                   | 0.942851244        | 2             | 3.75661   |
| P18757        | QDSPGQSSGFVYSR                                                   | 1.09555618         | 2             | 3.90645   |
| P18757        | RVASEFGLK                                                        | 0.904785997        | 2             | 2.62401   |
| P18757        | VIYPGLPSHPQHELAK                                                 | 0.825110506        | 2             | 3.89286   |
| <b>P18886</b> | <b>CPT2 Carnitine O_palmitoyltransferase 2_mitochondrial</b>     | <b>1.000870368</b> | <b>0.9781</b> | <b>11</b> |
| P18886        | ATNLTVSAVR                                                       | 1.025923438        | 2             | 3.17474   |
| P18886        | ELHAHLAQQDK                                                      | 0.823684503        | 2             | 2.86276   |
| P18886        | LIFDGNEETLK                                                      | 0.94348512         | 2             | 2.68689   |
| P18886        | QKLIFDGNEETLKK                                                   | 1.04533505         | 2             | 2.40026   |
| P18886        | QYGQTVATYESCSTAAFK                                               | 0.899928908        | 2             | 4.11356   |
| P18886        | SEYNDQLTR                                                        | 1.023656481        | 2             | 2.84606   |
| P18886        | TETIRPASIFTK                                                     | 0.932560747        | 2             | 2.45677   |

|               |                                                                            |                    |               |           |
|---------------|----------------------------------------------------------------------------|--------------------|---------------|-----------|
| P18886        | TLQAGLLEPEVFHNLNPSK                                                        | 3.280646257        | 2             | 3.46711   |
| P18886        | TLSIDSIQFQR                                                                | 0.937988276        | 2             | 3.16756   |
| P18886        | YILSDSSPVPEFPVAYLTSENR                                                     | 0.898562471        | 2             | 5.20472   |
| P18886        | YLNAQKPLLDSDQFR                                                            | 0.985431562        | 2             | 3.83311   |
| <b>P19112</b> | <b>F16P1 Fructose_1_6_bisphosphatase 1</b>                                 | <b>1.092790499</b> | <b>2E-12</b>  | <b>18</b> |
| P19112        | AGGLATTGNEDILDIVPTEIHQK                                                    | 1.042826002        | 3             | 6.20588   |
| P19112        | AGGTGEMTQLLNSLCTAIK                                                        | 1.093876443        | 2             | 5.32427   |
| P19112        | AGGTGEMTQLLNSLCTAIK+Oxidation(6)                                           | 1.238946023        | 2             | 3.36578   |
| P19112        | APVIMGSTEDVQEFLEIYNK                                                       | 1.266161069        | 2             | 5.0439    |
| P19112        | APVIMGSTEDVQEFLEIYNKDK                                                     | 0.958228959        | 3             | 3.67353   |
| P19112        | DFDPAINIYIQR                                                               | 0.862187926        | 2             | 3.82698   |
| P19112        | FPPDNSAPYGAR                                                               | 1.148552424        | 2             | 2.59981   |
| P19112        | GNIYSINEGYAK                                                               | 1.135678566        | 2             | 4.13688   |
| P19112        | KGNIYSINEGYAK                                                              | 1.140153195        | 2             | 4.00568   |
| P19112        | KLDILSNDLVINMLK                                                            | 1.06727895         | 2             | 5.29614   |
| P19112        | KTSANEPSEKDALQPGR                                                          | 0.886504813        | 3             | 4.05417   |
| P19112        | LDILSNDLVINMLK                                                             | 1.056578586        | 2             | 4.91645   |
| P19112        | LLYECNPIAYVMEK                                                             | 1.20843647         | 2             | 4.13245   |
| P19112        | QAGIAQLYGIAGSTNVTGDQVK                                                     | 1.111542187        | 3             | 5.94876   |
| P19112        | SRPSLPLQSR                                                                 | 0.964200663        | 2             | 3.41265   |
| P19112        | SSYATCVLVSEEDTHAIIIEPKR                                                    | 1.099192526        | 3             | 5.30585   |
| P19112        | TLVYGGIFLYPANK                                                             | 0.996103913        | 2             | 3.763     |
| P19112        | TSANEPSEKDALQPGR                                                           | 0.988914813        | 2             | 3.70776   |
| <b>P19225</b> | <b>CP270 Cytochrome P450 2C70</b>                                          | <b>0.810472944</b> | <b>0.0012</b> | <b>9</b>  |
| P19225        | ACIGEGLAR                                                                  | 0.828372549        | 2             | 2.60974   |
| P19225        | ASLNLSNPQDFIDYFLIK                                                         | 1.142912623        | 2             | 3.83638   |
| P19225        | EALIDRGEEFSDK                                                              | 0.924642632        | 2             | 3.02281   |
| P19225        | IQEEVVYLLEALR                                                              | 0.988606348        | 2             | 2.78222   |
| P19225        | KLPPGPTPLPIFGNILQVGVK                                                      | 1.123699304        | 3             | 3.49089   |
| P19225        | KTTQDVEFR                                                                  | 0.830024128        | 2             | 2.32936   |
| P19225        | LPPGPTPLPIFGNILQVGVK                                                       | 0.828039586        | 2             | 4.95572   |
| P19225        | SDYFMAFSAGRR+Oxidation(4)                                                  | 1.058157676        | 1             | 1.96065   |
| P19225        | YIDFVPIPLR                                                                 | 0.804512782        | 2             | 3.09975   |
| <b>P19234</b> | <b>NDUV2 NADH dehydrogenase [ubiquinone] flavoprotein 2_ mitochondrial</b> | <b>0.99998977</b>  | <b>0.1509</b> | <b>4</b>  |
| P19234        | DIEEIIDELR                                                                 | 0.939354309        | 2             | 3.41742   |
| P19234        | DTPENNPDPDFDTPENYER                                                        | 1.376706121        | 2             | 4.25552   |
| P19234        | FCCEPAGGLTSLTEPPK                                                          | 1.208277386        | 2             | 2.85983   |
| P19234        | YHIQVCTTTPCMLR                                                             | 1.048006262        | 2             | 2.47098   |
| <b>P19468</b> | <b>GSH1 Glutamate__cysteine ligase catalytic subunit</b>                   | <b>0.960578711</b> | <b>0.7847</b> | <b>6</b>  |
| P19468        | CNQIANELCEPELLGSGFR                                                        | 1.023277426        | 2             | 5.12767   |
| P19468        | EATSVLGEHQALCTITSFPR                                                       | 0.822425667        | 2             | 3.72695   |
| P19468        | LDFLIPLSKVDENMK                                                            | 0.86193835         | 2             | 2.46578   |
| P19468        | NTPSPFVETFPEDDEASK                                                         | 1.119222649        | 2             | 4.42126   |
| P19468        | SLFFPDEAINK                                                                | 0.942086223        | 2             | 2.62129   |
| P19468        | VQLLLNGGDVLETQEK                                                           | 0.985650407        | 2             | 4.81689   |
| <b>P19488</b> | <b>UDB37 UDP_gluconosyltransferase 2B37</b>                                | <b>0.930472473</b> | <b>1E-19</b>  | <b>7</b>  |
| P19488        | ANAIAWALAIQIPQK                                                            | 1.292970314        | 3             | 6.17779   |
| P19488        | EVINNPYK                                                                   | 1.102538343        | 1             | 2.29306   |
| P19488        | FETFPTSFSKDELEK                                                            | 0.885222622        | 2             | 3.87159   |
| P19488        | GHEVTVLKPSAYYVLDPK                                                         | 1.405132337        | 3             | 4.39868   |
| P19488        | NWDPFYTEILGRPPTLAETMGK                                                     | 1.442711705        | 2             | 4.81902   |
| P19488        | SDLFNALK                                                                   | 0.715463612        | 2             | 2.79247   |
| P19488        | TILDELVQR                                                                  | 1.079120658        | 2             | 3.15476   |
| <b>P19511</b> | <b>AT5F1 ATP synthase subunit b_ mitochondrial</b>                         | <b>0.904642832</b> | <b>0.1324</b> | <b>8</b>  |
| P19511        | HVIQSISAQKEK                                                               | 0.995592281        | 2             | 3.88344   |
| P19511        | HVIQSISAQKEKETIAK                                                          | 0.98194472         | 3             | 4.0154    |

|               |                                                              |                    |               |           |
|---------------|--------------------------------------------------------------|--------------------|---------------|-----------|
| P19511        | HYLFDVQR                                                     | 0.923906478        | 2             | 2.44848   |
| P19511        | LDYHISVQDMMR                                                 | 1.067991347        | 3             | 3.99332   |
| P19511        | LNEEKIAQLEEEK                                                | 0.927668594        | 2             | 2.6918    |
| P19511        | RKEGEHMINWVEK                                                | 0.747973946        | 2             | 2.52264   |
| P19511        | YGASIGEFIDK                                                  | 0.987507866        | 2             | 2.91781   |
| P19511        | YGASIGEFIDKLNEEK                                             | 1.006795659        | 2             | 3.60312   |
| <b>P19643</b> | <b>AOFB Amine oxidase [flavin_containing] B</b>              | <b>1.021815999</b> | <b>0.9691</b> | <b>11</b> |
| P19643        | FIGGSGQVSER                                                  | 1.073042168        | 2             | 3.21318   |
| P19643        | IISTTNGGQER                                                  | 1.227201034        | 2             | 2.82676   |
| P19643        | IPEDIWQPEPESVDVPPARPITNTFLER                                 | 1.380462415        | 3             | 5.00739   |
| P19643        | KFIGGSGQVSER                                                 | 1.182311704        | 2             | 2.95702   |
| P19643        | LERPVIHIDQTGENVVVK                                           | 1.132572375        | 3             | 5.09073   |
| P19643        | TLNHEIYEAK                                                   | 1.011464809        | 2             | 2.99146   |
| P19643        | TMDEMGQEIPSDAPWK                                             | 1.145514849        | 2             | 3.21928   |
| P19643        | VLNSQEALQPVHYEEK                                             | 1.05020348         | 2             | 4.56713   |
| P19643        | YVDLGGSYVGPQNR                                               | 0.985843302        | 2             | 4.19194   |
| P19643        | YVISAIPPVLGMK                                                | 0.963076113        | 2             | 3.15493   |
| P19643        | YVISAIPPVLGMK+Oxidation(11)                                  | 0.882448024        | 2             | 2.44538   |
| <b>P19686</b> | <b>GCYA3 Guanylate cyclase soluble subunit alpha_3</b>       | <b>0.86288225</b>  | <b>0.0144</b> | <b>2</b>  |
| P19686        | DLAILQLNGIR                                                  | 0.866132384        | 2             | 2.70777   |
| P19686        | MMELSNEVMSPHGPIK+Oxidation(8)                                | 0.810238421        | 2             | 2.72507   |
| <b>P19804</b> | <b>NDKB Nucleoside diphosphate kinase B</b>                  | <b>0.989165522</b> | <b>0.0033</b> | <b>8</b>  |
| P19804        | DRPFFPGLVK                                                   | 0.688994455        | 2             | 2.42531   |
| P19804        | EIGLWFKPEELIDYK                                              | 0.908389029        | 2             | 3.92629   |
| P19804        | GDFCIQVGR                                                    | 1.020913457        | 2             | 3.35049   |
| P19804        | NIIHGSDSVESAEK                                               | 0.975620284        | 1             | 3.90311   |
| P19804        | TFIAIKPDGVQR                                                 | 0.998419215        | 2             | 2.88821   |
| P19804        | VMLGETNPADSKPGTIR                                            | 1.136749514        | 2             | 4.02131   |
| P19804        | VMLGETNPADSKPGTIR+Oxidation(1)                               | 0.998058671        | 2             | 4.23787   |
| P19804        | YMNSGPVAMVWEGLNVVK                                           | 1.226153573        | 2             | 4.93064   |
| <b>P19944</b> | <b>RLA1 60S acidic ribosomal protein P1</b>                  | <b>1.07190233</b>  | <b>1E-09</b>  | <b>2</b>  |
| P19944        | AAGVNVPEFPWGLFAK                                             | 1.874330211        | 2             | 2.75832   |
| P19944        | ALANVNIGSLICNVGAGGPAPAAGAAPAGGPAPSAAAAPAEK                   | 1.0708035          | 4             | 6.73869   |
| <b>P19945</b> | <b>RLA0 60S acidic ribosomal protein P0</b>                  | <b>1.080814239</b> | <b>3E-13</b>  | <b>9</b>  |
| P19945        | AFLADPSAFAAAAAPVAAAATTAAPAAAAAPAK                            | 0.977245027        | 2             | 5.7766    |
| P19945        | AGAIAPCEVTVPAQNTGLGPEK                                       | 0.974031774        | 3             | 4.38966   |
| P19945        | CFIVGADNVGSK                                                 | 1.088331482        | 2             | 3.24024   |
| P19945        | GHLNPPALEK                                                   | 0.956521147        | 2             | 3.54428   |
| P19945        | GNVGFVFTK                                                    | 1.082317312        | 2             | 2.71427   |
| P19945        | GTIEILSDVQLIK                                                | 1.088975828        | 2             | 3.06176   |
| P19945        | IIQLLDYYPK                                                   | 0.582979865        | 2             | 3.82948   |
| P19945        | TSFFQALGITTK                                                 | 1.203144409        | 2             | 3.99835   |
| P19945        | VLALSVETDYTFPLAEK                                            | 1.328521166        | 2             | 2.45887   |
| <b>P20059</b> | <b>HEMO Hemopexin</b>                                        | <b>0.873503183</b> | <b>0.9703</b> | <b>6</b>  |
| P20059        | ELGSPPGISLDTIDAAFSCPGSSK                                     | 0.896696988        | 2             | 4.4177    |
| P20059        | FNPVTGEVPPR                                                  | 0.909252939        | 2             | 2.45819   |
| P20059        | GECQSEGLVFFQGSR                                              | 0.870000943        | 2             | 3.78654   |
| P20059        | GGNNLVSGYPK                                                  | 0.923728421        | 2             | 2.37534   |
| P20059        | LFQEEFPGIPYPPDAAVECHR                                        | 0.939277337        | 3             | 3.6533    |
| P20059        | SGAQATWAELSWPHEK                                             | 0.802994956        | 3             | 3.48147   |
| <b>P20069</b> | <b>MPPA Mitochondrial_processing peptidase subunit alpha</b> | <b>1.123898205</b> | <b>0.9184</b> | <b>2</b>  |
| P20069        | HGGICDCQTSR                                                  | 1.125831525        | 2             | 2.80956   |
| P20069        | LTDEEIMTR                                                    | 1.079614808        | 2             | 2.94816   |
| <b>P20070</b> | <b>NB5R3 NADH_cytochrome b5 reductase 3</b>                  | <b>1.007952499</b> | <b>0.541</b>  | <b>8</b>  |
| P20070        | DILLRPELELR                                                  | 0.903975521        | 2             | 2.55524   |
| P20070        | IDGNLVIRPYTPVSSDDDKGFVDLVVK                                  | 1.056481774        | 3             | 5.77773   |
| P20070        | LIDKEIISHDTR                                                 | 0.993727966        | 3             | 3.51053   |

|               |                                                                   |                    |               |           |
|---------------|-------------------------------------------------------------------|--------------------|---------------|-----------|
| P20070        | MSQYLENMNIGDTIEFR                                                 | 1.476870306        | 2             | 3.92273   |
| P20070        | SSPAITLENPDIK                                                     | 0.99584961         | 2             | 4.06346   |
| P20070        | SSPAITLENPDIKYPLR                                                 | 0.913517007        | 2             | 3.40195   |
| P20070        | SVGMIAGGTGITPMLQVIR                                               | 0.895643089        | 2             | 4.37545   |
| P20070        | SVGMIAGGTGITPMLQVIR+Oxidation(3)                                  | 1.008108941        | 2             | 2.44581   |
| <b>P20280</b> | <b>RL21 60S ribosomal protein L21</b>                             | <b>0.941770299</b> | <b>0.0026</b> | <b>3</b>  |
| P20280        | KGDIVDIK                                                          | 0.948381909        | 1             | 1.90231   |
| P20280        | TNGKEPELLEPIPYEFMA                                                | 0.533368814        | 2             | 2.94176   |
| P20280        | VYNVTQHAVGIIVNK                                                   | 1.029796507        | 2             | 4.29937   |
| <b>P20673</b> | <b>ARLY Argininosuccinate lyase</b>                               | <b>1.045577706</b> | <b>1E-09</b>  | <b>15</b> |
| P20673        | AEAECEVLFPGYTHLQR                                                 | 0.99792882         | 2             | 4.25052   |
| P20673        | AEMQQILQLGDK                                                      | 0.968245612        | 2             | 3.79675   |
| P20673        | AEMQQILQLGDK+Oxidation(2)                                         | 0.917419086        | 2             | 3.15258   |
| P20673        | EFNFVQLSDAYSTGSSLMPQK                                             | 1.032183389        | 2             | 5.649     |
| P20673        | FNSSIAYDR                                                         | 1.104894159        | 2             | 2.59438   |
| P20673        | HLWNVDLQGSK                                                       | 1.024920728        | 1             | 3.21947   |
| P20673        | INVLPLGSGAIGNPLGVDR                                               | 1.132903052        | 2             | 4.91881   |
| P20673        | KNPDSLELIR                                                        | 1.079499426        | 2             | 2.43733   |
| P20673        | LKELIGEAAAGK                                                      | 1.011852033        | 2             | 2.81665   |
| P20673        | LYPNDEDIHTANER                                                    | 1.051795985        | 2             | 3.83043   |
| P20673        | MAEDLILYGTK                                                       | 0.933563213        | 2             | 3.49914   |
| P20673        | MAEDLILYGTK+Oxidation(0)                                          | 1.021579283        | 2             | 2.46255   |
| P20673        | NDQVVTDLR                                                         | 1.013666983        | 2             | 3.43802   |
| P20673        | SRNDQVVTDLR                                                       | 0.647606722        | 2             | 2.77456   |
| P20673        | VAEewaQGIFK                                                       | 1.37807099         | 2             | 3.29224   |
| <b>P20788</b> | <b>UCRI Cytochrome b_c1 complex subunit Rieske_ mitochondrial</b> | <b>1.086624323</b> | <b>0.4796</b> | <b>3</b>  |
| P20788        | EIDQEAAVEVSQLR                                                    | 1.096820346        | 2             | 4.34408   |
| P20788        | GVAGALRPLLQSAVPATSEPPVLVDK                                        | 1.095283331        | 3             | 4.56071   |
| P20788        | SGPFAPVLSATSR                                                     | 1.107808303        | 2             | 2.95112   |
| <b>P20801</b> | <b>TNNC2 Troponin C_skeletal muscle</b>                           | <b>1.088256695</b> | <b>0.8667</b> | <b>3</b>  |
| P20801        | GKSEEEEAECFR                                                      | 1.149912835        | 2             | 3.04579   |
| P20801        | NADGYIDAEELAEIFR                                                  | 1.08228099         | 2             | 4.4879    |
| P20801        | SEEEEAECFR                                                        | 1.551890323        | 2             | 2.83499   |
| <b>P20814</b> | <b>CP2CD Cytochrome P450 2C13_male specific</b>                   | <b>1.153788809</b> | <b>0.8576</b> | <b>3</b>  |
| P20814        | FDYEDKDFLNLEK                                                     | 1.043998281        | 3             | 3.6812    |
| P20814        | GTAVLTSLSVLHDSK                                                   | 1.042383597        | 2             | 3.31265   |
| P20814        | IKEHEESLDVSNPR                                                    | 1.15855067         | 3             | 3.85185   |
| <b>P20817</b> | <b>CP4AE Cytochrome P450 4A14</b>                                 | <b>0.785813208</b> | <b>2E-13</b>  | <b>6</b>  |
| P20817        | ACQIAHEHTDGVK                                                     | 0.401017968        | 2             | 3.81262   |
| P20817        | AQLQNEEELQK                                                       | 0.424818275        | 2             | 3.39083   |
| P20817        | AVEDLNNLFFR                                                       | 0.576334542        | 2             | 3.26148   |
| P20817        | EFQQVLTWVEK                                                       | 0.539859001        | 2             | 2.70812   |
| P20817        | MRKAQLQNEEELQK+Oxidation(0)                                       | 0.879399995        | 2             | 2.91101   |
| P20817        | VLLYDPDYVK                                                        | 0.364771421        | 2             | 2.83023   |
| <b>P20852</b> | <b>CP2A5 Cytochrome P450 2A5</b>                                  | <b>0.82543569</b>  | <b>0.0101</b> | <b>2</b>  |
| P20852        | DFIDSFLIR                                                         | 0.857624202        | 2             | 2.50323   |
| P20852        | EALVDQAEFFSGR                                                     | 0.824583997        | 2             | 3.40568   |
| <b>P21213</b> | <b>HUTH Histidine ammonia_lyase</b>                               | <b>0.882602169</b> | <b>0.4988</b> | <b>10</b> |
| P21213        | DIITTELSATDNPMVFASR                                               | 1.074482295        | 2             | 2.98424   |
| P21213        | GETISGGNFHGEYPAK                                                  | 0.870113446        | 2             | 3.87225   |
| P21213        | LQELQVNLVR                                                        | 0.880287907        | 2             | 3.0479    |
| P21213        | NKPDNGGFTSVDEVK                                                   | 0.83826106         | 2             | 3.41548   |
| P21213        | SHSSGVGKPLSPER                                                    | 1.350981981        | 2             | 4.09309   |
| P21213        | SLLSDHHPSEIAESHR                                                  | 0.791022962        | 3             | 4.53264   |
| P21213        | TVVYGITTFGFK                                                      | 1.061591013        | 2             | 2.90026   |
| P21213        | VQDAYTLR                                                          | 0.885196265        | 2             | 2.3822    |
| P21213        | VWEVAAPYIEK                                                       | 0.898260544        | 2             | 2.36307   |

|               |                                                                                    |                    |               |           |
|---------------|------------------------------------------------------------------------------------|--------------------|---------------|-----------|
| P21213        | YIALDGDSLSTEDLVNLGK                                                                | 0.774870453        | 2             | 4.67255   |
| <b>P21396</b> | <b>AOFA Amine oxidase [flavin_containing] A</b>                                    | <b>1.019546767</b> | <b>0.7834</b> | <b>6</b>  |
| P21396        | DVPAIEITHFLER                                                                      | 0.950489538        | 2             | 3.17589   |
| P21396        | INLVLEAR                                                                           | 1.162193303        | 2             | 3.14378   |
| P21396        | KDIWVEEPESK                                                                        | 0.910956377        | 2             | 3.25748   |
| P21396        | VLGSQEALYPVHYEEK                                                                   | 0.985619973        | 2             | 3.90242   |
| P21396        | WVDVGGAYVGPQTQNR                                                                   | 0.950465824        | 2             | 4.23585   |
| P21396        | YVISAIPPILTAK                                                                      | 1.252939832        | 2             | 2.53902   |
| <b>P21531</b> | <b>RL3 60S ribosomal protein L3</b>                                                | <b>1.106301504</b> | <b>0.4939</b> | <b>6</b>  |
| P21531        | AHLMEIQVNGGTVAEK                                                                   | 1.076765004        | 2             | 3.86823   |
| P21531        | ERLEQQVPVNQVFGQDEMIDVIGVTK                                                         | 0.987868743        | 3             | 5.46125   |
| P21531        | HGSLGFLPR                                                                          | 1.031246341        | 2             | 2.69091   |
| P21531        | LEQQVPVNQVFGQDEMIDVIGVTK                                                           | 1.297187668        | 2             | 4.05551   |
| P21531        | NNASTDYDLSDK                                                                       | 1.049897002        | 2             | 3.30835   |
| P21531        | TVFAEHISDECK                                                                       | 1.06471977         | 2             | 3.12186   |
| <b>P21533</b> | <b>RL6 60S ribosomal protein L6</b>                                                | <b>1.204541254</b> | <b>1E-19</b>  | <b>6</b>  |
| P21533        | HQEGEIFDTEK                                                                        | 1.21518382         | 2             | 3.2541    |
| P21533        | HQEGEIFDTEKEK                                                                      | 1.03290539         | 2             | 3.92587   |
| P21533        | HQEGEIFDTEKEKYEITEQR                                                               | 1.089533878        | 3             | 3.79087   |
| P21533        | QLGSGLLLVGTGPLALNR                                                                 | 1.341609291        | 2             | 4.89407   |
| P21533        | SSITPGTVLIILTGR                                                                    | 1.094548958        | 2             | 4.06855   |
| P21533        | YYPTEDVPR                                                                          | 1.060144844        | 1             | 2.09765   |
| <b>P21571</b> | <b>ATP5J ATP synthase_coupling factor 6_mitochondrial</b>                          | <b>1.10563733</b>  | <b>6E-12</b>  | <b>6</b>  |
| P21571        | FEVLDPKQS                                                                          | 1.073573277        | 2             | 3.11043   |
| P21571        | GEMDKFPTFNFDPK                                                                     | 1.084507104        | 3             | 3.707     |
| P21571        | GEMDKFPTFNFDPKFEVLDPKQS                                                            | 0.981951649        | 3             | 3.4255    |
| P21571        | LASGGPVDTGPEYQQEVDR                                                                | 1.416483837        | 2             | 5.13274   |
| P21571        | LASGGPVDTGPEYQQEVDRLEFK                                                            | 1.112960282        | 2             | 2.48142   |
| P21571        | RLASGGPVDTGPEYQQEVDR                                                               | 1.020322952        | 3             | 4.11158   |
| <b>P21643</b> | <b>T23O Tryptophan 2_3_dioxygenase</b>                                             | <b>1.101649771</b> | <b>0.1965</b> | <b>2</b>  |
| <b>P21775</b> | <b>THIKA 3_ketoacyl_CoA thiolase A_peroxisomal</b>                                 | <b>0.803694301</b> | <b>8E-14</b>  | <b>2</b>  |
| P21775        | LKPECLGDISVGNVLEPGAGAVMAR                                                          | 0.794488065        | 3             | 5.87609   |
| P21775        | LKPECLGDISVGNVLEPGAGAVMAR+Oxidation(22)                                            | 0.857657114        | 3             | 4.06459   |
| <b>P21913</b> | <b>DHSB Succinate dehydrogenase [ubiquinone] iron_sulfur subunit_mitochondrial</b> | <b>1.025332716</b> | <b>0.056</b>  | <b>7</b>  |
| P21913        | CGPMVLDALIKIK                                                                      | 0.916349932        | 2             | 2.42095   |
| P21913        | CHTIMNCTQTCPK                                                                      | 0.875394664        | 2             | 4.29317   |
| P21913        | CHTIMNCTQTCPK+Oxidation(4)                                                         | 1.317821248        | 2             | 3.79977   |
| P21913        | IKNEIDSTLTFR                                                                       | 1.17627892         | 2             | 2.44128   |
| P21913        | LQDPFSLYR                                                                          | 1.311676271        | 2             | 2.60086   |
| P21913        | NEIDSTLTFR                                                                         | 1.052171322        | 2             | 2.35649   |
| P21913        | RIDTDLGK                                                                           | 1.003804259        | 2             | 2.54245   |
| <b>P21981</b> | <b>TGM2 Protein_glutamine gamma_glutamyltransferase 2</b>                          | <b>1.062633494</b> | <b>0.9449</b> | <b>4</b>  |
| P21981        | CDLEIQANGR                                                                         | 1.046947219        | 2             | 3.26577   |
| P21981        | DLYLENPEIK                                                                         | 1.00077791         | 2             | 2.6983    |
| P21981        | SEGTCCGPVSVR                                                                       | 1.062747696        | 2             | 3.55967   |
| P21981        | YSGCLTESNLIK                                                                       | 1.140419209        | 2             | 3.05601   |
| <b>P22734</b> | <b>COMT Catechol O_methyltransferase</b>                                           | <b>1.298999256</b> | <b>1E-19</b>  | <b>12</b> |
| P22734        | AIYQGPSSPKS                                                                        | 1.261281582        | 2             | 2.97669   |
| P22734        | EWAMNVGDAK                                                                         | 1.263440047        | 1             | 2.62291   |
| P22734        | GQIMDAVIR                                                                          | 1.312947481        | 2             | 2.33831   |
| P22734        | GQIMDAVIR+Oxidation(3)                                                             | 1.355172307        | 2             | 2.54982   |
| P22734        | GTVLLADNVIVGTPDFLAYVR                                                              | 1.716651892        | 3             | 4.70601   |
| P22734        | KGTVLLADNVIVGTPDFLAYVR                                                             | 1.809305658        | 2             | 4.687     |
| P22734        | KYDVDTLDMVFLDHWK                                                                   | 1.529901335        | 3             | 4.873     |
| P22734        | VTILNGASQDLIPQLK                                                                   | 1.222314148        | 2             | 4.35623   |
| P22734        | VVDGLEK                                                                            | 1.430292658        | 2             | 2.43901   |

|               |                                                               |                    |               |           |
|---------------|---------------------------------------------------------------|--------------------|---------------|-----------|
| P22734        | YDVTLDMMVFLDHWK                                               | 1.36669213         | 3             | 4.28956   |
| P22734        | YLPDTLLLEK                                                    | 1.301136818        | 1             | 2.67115   |
| P22734        | YVQQNAKPGDPQSVLEAIDTYCTQK                                     | 1.461578612        | 3             | 5.96864   |
| <b>P22789</b> | <b>ST2A2 Alcohol sulfotransferase A</b>                       | <b>1.088660245</b> | <b>9E-06</b>  | <b>4</b>  |
| P22789        | EEDLILLTPK                                                    | 1.181104628        | 2             | 2.32095   |
| P22789        | ETLQNVCK                                                      | 0.387291169        | 1             | 2.27839   |
| P22789        | KLEPDELDELVLK                                                 | 0.471673278        | 3             | 3.90803   |
| P22789        | NHFTVAQAEAFDK                                                 | 1.039156909        | 2             | 3.71498   |
| <b>P22791</b> | <b>HMCS2 Hydroxymethylglutaryl_CoA synthase_mitochondrial</b> | <b>0.963151736</b> | <b>7E-13</b>  | <b>19</b> |
| P22791        | ASLDMFNK                                                      | 1.057400026        | 2             | 2.90056   |
| P22791        | ASLDMFNKK                                                     | 0.88547807         | 2             | 2.51672   |
| P22791        | GLKLEETYTNK                                                   | 1.068618013        | 2             | 2.99163   |
| P22791        | GTHMENAYDFYKPNLASEYPLVDGK                                     | 1.086008626        | 3             | 6.62505   |
| P22791        | GTHMENAYDFYKPNLASEYPLVDGK+Oxidation(3)                        | 1.04080698         | 3             | 5.79219   |
| P22791        | IGAFSYGSLAASFSSFR                                             | 1.15282661         | 2             | 3.0814    |
| P22791        | LEETYTNK                                                      | 1.075204706        | 2             | 2.87661   |
| P22791        | LEETYTNKDVDK                                                  | 0.986646314        | 2             | 4.3151    |
| P22791        | LEVGTETIDK                                                    | 0.980905745        | 2             | 3.73095   |
| P22791        | LMFNDFLSSSSDK                                                 | 1.379524622        | 2             | 4.13389   |
| P22791        | LMFNDFLSSSSDK+Oxidation(1)                                    | 1.381912067        | 2             | 4.02719   |
| P22791        | LVSSVSDLPK                                                    | 1.103103904        | 2             | 3.61719   |
| P22791        | MGFCSVQEDINSLCLTVVQR                                          | 1.180690095        | 2             | 3.11578   |
| P22791        | MSPEEFTEIMNQR                                                 | 0.985163262        | 2             | 4.83076   |
| P22791        | MSPEEFTEIMNQR+Oxidation(0)                                    | 1.017105871        | 2             | 4.04699   |
| P22791        | MSPEEFTEIMNQR+Oxidation(9)                                    | 1.019084845        | 2             | 3.32034   |
| P22791        | TKLPWDAVGR                                                    | 0.96903264         | 3             | 4.0271    |
| P22791        | VNFSPPGDTSNLFPGTWYLER                                         | 1.263484667        | 2             | 5.05121   |
| P22791        | YTVGLGQTR                                                     | 1.012483592        | 2             | 3.29762   |
| <b>P22985</b> | <b>XDH Xanthine dehydrogenase/oxidase</b>                     | <b>1.053935868</b> | <b>0.9988</b> | <b>8</b>  |
| P22985        | DEVTCVGHIGAVVADTPEHAQR                                        | 1.010092272        | 3             | 3.67183   |
| P22985        | ITSIDTSEAK                                                    | 1.140092641        | 1             | 1.90107   |
| P22985        | LDPTFASATLLFQK                                                | 1.157433208        | 2             | 3.83405   |
| P22985        | NQPEPTVEEIEAFQGNLCR                                           | 1.027688392        | 2             | 4.90342   |
| P22985        | QLFQLDSPATPEK                                                 | 1.082957515        | 2             | 3.00266   |
| P22985        | SVASIGGNIITASPIDLNPVFMASGAK                                   | 1.074714184        | 3             | 5.62266   |
| P22985        | TGTVVALEVAHFSNGGNTEDLSR                                       | 0.972135092        | 3             | 4.89942   |
| P22985        | TNLPSNTAFR                                                    | 0.939938023        | 1             | 2.07468   |
| <b>P23358</b> | <b>RL12 60S ribosomal protein L12</b>                         | <b>0.974684481</b> | <b>8E-12</b>  | <b>5</b>  |
| P23358        | CTGGEVGATSALAPK                                               | 1.035469157        | 2             | 3.82629   |
| P23358        | EILGTAQSVGCNVDGR                                              | 0.858490883        | 2             | 4.81103   |
| P23358        | HNGNITFDEIVNIAR                                               | 1.091570694        | 2             | 4.09509   |
| P23358        | HPHDIIDDINSGAVECPAS                                           | 0.990496026        | 2             | 4.10481   |
| P23358        | QAQIEVVPSASALIIK                                              | 1.331504899        | 2             | 3.92014   |
| <b>P23457</b> | <b>DIDH 3_alpha_hydroxysteroid dehydrogenase</b>              | <b>1.219566661</b> | <b>1E-19</b>  | <b>8</b>  |
| P23457        | ALDGLNR                                                       | 1.081941505        | 2             | 2.43837   |
| P23457        | ELTQVFEFLASEDMK                                               | 1.08049898         | 2             | 3.49398   |
| P23457        | HFDSAYLYEVEEVGQAIR                                            | 1.218903106        | 2             | 5.92174   |
| P23457        | MLDYCK                                                        | 0.885573267        | 1             | 1.91229   |
| P23457        | SIGVSNFNCR                                                    | 1.081995336        | 2             | 3.46889   |
| P23457        | SPVLLDDPVLCIAIK                                               | 1.780159272        | 2             | 4.0377    |
| P23457        | VALNDGNFIPVLGFGTTVPEK                                         | 1.573233712        | 2             | 4.85325   |
| P23457        | YFDDHPNHPFTDE                                                 | 1.362532227        | 2             | 4.19453   |
| <b>P23514</b> | <b>COPB Coatomer subunit beta</b>                             | <b>1.016245017</b> | <b>0.0306</b> | <b>5</b>  |
| P23514        | EAGELKPEEITVGPVQK                                             | 0.994481045        | 2             | 4.5155    |
| P23514        | NFENLIPDAPELIHDFLVNEK                                         | 0.958099231        | 3             | 4.45395   |
| P23514        | TNNVSEHEDTDKYR                                                | 1.640714006        | 2             | 4.32995   |
| P23514        | VLQDLVMDILR                                                   | 0.996235382        | 2             | 3.00051   |

|               |                                                       |                    |               |           |
|---------------|-------------------------------------------------------|--------------------|---------------|-----------|
| P23514        | YEAAGTLVTLSSAPTAIK                                    | 1.181824913        | 2             | 4.79541   |
| <b>P23591</b> | <b>FCL GDP_L_fucose synthase</b>                      | <b>1.011972388</b> | <b>0.8774</b> | <b>2</b>  |
| P23591        | DADLTDAAQQTALFQK                                      | 1.083554231        | 2             | 3.37049   |
| P23591        | VVADGAGLPGEWVVFVSSK                                   | 0.954951317        | 2             | 3.73895   |
| <b>P23965</b> | <b>EC11 Enoyl_CoA delta isomerase 1_mitochondrial</b> | <b>0.659173612</b> | <b>1E-19</b>  | <b>7</b>  |
| P23965        | ALQLGTLFPPAEALK                                       | 0.596316112        | 2             | 4.76797   |
| P23965        | DNYVNTIGHR                                            | 0.53796173         | 2             | 2.76127   |
| P23965        | GVILTSEKPGIFASGLDLMEMYGR                              | 0.795742508        | 3             | 5.55288   |
| P23965        | QREADIQNFTSFISR                                       | 0.960762876        | 2             | 2.66451   |
| P23965        | SLHVYLEK                                              | 0.587566585        | 2             | 2.3176    |
| P23965        | VGLVDEVVPEDQVHSK                                      | 0.626686804        | 2             | 4.53712   |
| P23965        | WFTIPDHSR                                             | 1.025976814        | 2             | 3.17508   |
| <b>P24049</b> | <b>RL17 60S ribosomal protein L17</b>                 | <b>0.984681167</b> | <b>1E-16</b>  | <b>3</b>  |
| P24049        | EQIVPKPEEEVAQK                                        | 0.986074282        | 2             | 3.65681   |
| P24049        | GLDVDSLVIHQVQNK                                       | 1.016675912        | 2             | 4.55785   |
| P24049        | YSLDPENPTK                                            | 0.785284592        | 1             | 2.73131   |
| <b>P24090</b> | <b>FETUA Alpha_2_HS glycoprotein</b>                  | <b>0.899946665</b> | <b>0.8324</b> | <b>6</b>  |
| P24090        | ELACDDPETEHVALIAVDYLNK                                | 1.036538672        | 2             | 4.73212   |
| P24090        | HAFSPVASVESASGEVLHSPK                                 | 0.954527278        | 3             | 5.55562   |
| P24090        | LGGEVSVACK                                            | 0.852002852        | 2             | 3.37913   |
| P24090        | QQAHEHAVEGDCDFHILK                                    | 1.091614863        | 3             | 3.35075   |
| P24090        | VGQPGDAGAAGPVAPLCPGR                                  | 0.812716325        | 2             | 4.78992   |
| P24090        | VLHAQCHSTPDSAEDVRK                                    | 0.829714421        | 3             | 3.46941   |
| <b>P24268</b> | <b>CATD Cathepsin D</b>                               | <b>1.177241522</b> | <b>0.0073</b> | <b>3</b>  |
| P24268        | AIGAVPLIQGEYMIPCEK                                    | 0.975006408        | 2             | 3.12601   |
| P24268        | DPTGQPGEMLLGGTDSR                                     | 1.104575135        | 2             | 3.82147   |
| P24268        | LGGQNYELHPEK                                          | 1.303103753        | 2             | 2.99286   |
| <b>P24329</b> | <b>THTR Thiosulfate sulfurtransferase</b>             | <b>0.883955316</b> | <b>1E-19</b>  | <b>12</b> |
| P24329        | EGHPVTSEPSRPEPAVFK                                    | 0.816049189        | 2             | 4.90278   |
| P24329        | FQLVDSR                                               | 0.92531874         | 2             | 2.61509   |
| P24329        | GSVNVPFMFLTEDGFKE                                     | 1.158984259        | 2             | 3.52668   |
| P24329        | HVPGASFFDIEECR                                        | 1.261019996        | 2             | 3.43571   |
| P24329        | KVDLSQPLIATCR                                         | 1.125381206        | 2             | 4.1364    |
| P24329        | RFQLVDSR                                              | 0.999838689        | 2             | 2.3782    |
| P24329        | TVSVLNGGFR                                            | 0.912899019        | 2             | 3.16413   |
| P24329        | TYEQVLENLQSK                                          | 0.88413763         | 2             | 5.03022   |
| P24329        | VDLSQPLIATCR                                          | 1.114652139        | 2             | 3.83573   |
| P24329        | VLDAWYSPGTR                                           | 0.925623628        | 2             | 3.72661   |
| P24329        | WLAESIR                                               | 0.82617343         | 2             | 2.3667    |
| P24329        | YLGTOPEPDAVGLDSGHIR                                   | 0.992789263        | 3             | 4.78427   |
| <b>P24368</b> | <b>PPIB Peptidyl_prolyl cis_trans isomerase B</b>     | <b>0.933215041</b> | <b>0.9634</b> | <b>8</b>  |
| P24368        | DKPLKDVIIVDCGK                                        | 0.942710571        | 2             | 3.77821   |
| P24368        | DTNGSQFFITTVK                                         | 0.904334002        | 2             | 4.035     |
| P24368        | HYGPGWVSMANAGK                                        | 1.020631036        | 2             | 3.27285   |
| P24368        | IEVEKPFIAIK                                           | 0.944118448        | 2             | 3.18201   |
| P24368        | IEVEKPFIAIAE                                          | 0.759901462        | 2             | 3.05273   |
| P24368        | TVDNFVALATGEK                                         | 0.994264369        | 2             | 3.54878   |
| P24368        | VLEGMDEVVR                                            | 1.02268285         | 2             | 2.67682   |
| P24368        | VYFDQIGDEPVGR                                         | 0.965153172        | 2             | 3.80976   |
| <b>P24457</b> | <b>CP2DB Cytochrome P450 2D11</b>                     | <b>1.414207591</b> | <b>0.0104</b> | <b>2</b>  |
| P24457        | RFSVSTLR                                              | 1.423669679        | 2             | 2.82721   |
| P24457        | SLEEWVTK                                              | 1.293923936        | 2             | 2.65561   |
| <b>P24470</b> | <b>CP2CN Cytochrome P450 2C23</b>                     | <b>0.817759883</b> | <b>1E-19</b>  | <b>7</b>  |
| P24470        | ACVGESLAR                                             | 0.871842575        | 2             | 2.46286   |
| P24470        | DLDIKPITGGIINLPPPYK                                   | 0.741858921        | 3             | 3.78334   |
| P24470        | EALLQQGDEFLGR                                         | 0.630949972        | 2             | 2.5545    |
| P24470        | GYGLIFSNGER                                           | 0.804680139        | 2             | 3.6168    |

|               |                                                                                      |                    |               |           |
|---------------|--------------------------------------------------------------------------------------|--------------------|---------------|-----------|
| P24470        | IEEEKDNLK                                                                            | 1.019130998        | 1             | 2.92438   |
| P24470        | TFLNLMDLLNK                                                                          | 0.876717791        | 2             | 3.60569   |
| P24470        | YITLLPSSLPHAVVQDTK                                                                   | 0.693332544        | 2             | 3.16862   |
| <b>P24473</b> | <b>GSTK1 Glutathione S transferase kappa 1</b>                                       | <b>0.963240486</b> | <b>0.1514</b> | <b>7</b>  |
| P24473        | AGMATAQAQHLLNK                                                                       | 0.949063174        | 2             | 3.88455   |
| P24473        | DEDITESQNILSAAEK                                                                     | 1.123954751        | 2             | 5.43109   |
| P24473        | DSGNQPPAMVPHK                                                                        | 0.905150191        | 2             | 2.32207   |
| P24473        | FLTAVSMEQPEMLEK                                                                      | 0.925732653        | 2             | 3.98601   |
| P24473        | IWSRDEDITESQNILSAAEK                                                                 | 0.904816846        | 3             | 3.43273   |
| P24473        | MELLAYLLGEK                                                                          | 1.201205713        | 2             | 3.94634   |
| P24473        | YGAFGLPTTVAHVDGK                                                                     | 0.952930439        | 2             | 3.8203    |
| <b>P25093</b> | <b>FAAA Fumarylacetoacetase</b>                                                      | <b>0.95884728</b>  | <b>1E-12</b>  | <b>14</b> |
| P25093        | AIDVGQGQTR                                                                           | 1.017344357        | 2             | 3.54454   |
| P25093        | ASLQNLLSASQAQLR                                                                      | 1.139872187        | 2             | 4.66278   |
| P25093        | ASLQNLLSASQAQLRDDK                                                                   | 1.084365964        | 2             | 3.00562   |
| P25093        | ASSVVVSGTPIR                                                                         | 1.066343704        | 2             | 3.4442    |
| P25093        | DIQQWEYVPLGPFGLGK                                                                    | 0.867804028        | 2             | 4.64119   |
| P25093        | FGPEPIISK                                                                            | 1.04013807         | 2             | 2.8973    |
| P25093        | GEGMSQAATICR                                                                         | 0.882924706        | 2             | 3.61084   |
| P25093        | GEGMSQAATICR+Oxidation(3)                                                            | 0.951010669        | 2             | 2.90214   |
| P25093        | GKENALLPNWLHLPVGYHGR                                                                 | 2.422512134        | 3             | 3.33274   |
| P25093        | HLFTGPVLSK                                                                           | 0.918854344        | 1             | 2.47116   |
| P25093        | HQHVFDETTLNSFMGLGQAAWK                                                               | 1.106541129        | 2             | 5.51093   |
| P25093        | IGVAIGDQJLDLSVIK                                                                     | 1.250790669        | 2             | 5.53254   |
| P25093        | TFLLDGDEVIIITGHCQGDGYR                                                               | 0.88854425         | 2             | 5.01644   |
| P25093        | VGFGQCAGK                                                                            | 0.998667746        | 1             | 1.93865   |
| <b>P25113</b> | <b>PGAM1 Phosphoglycerate mutase 1</b>                                               | <b>1.118823071</b> | <b>0.1065</b> | <b>6</b>  |
| P25113        | ALPFWNEEIVPQIK                                                                       | 1.133298773        | 2             | 3.88551   |
| P25113        | FSGWYDADLSPAGHEEAK                                                                   | 1.074376512        | 2             | 4.73097   |
| P25113        | HGESAWNLENR                                                                          | 1.04244922         | 2             | 3.78752   |
| P25113        | SYDVPPPPMEPDHPFYSNISK                                                                | 1.159097165        | 2             | 4.29675   |
| P25113        | YADLTEDQLPSCESLK                                                                     | 1.050644318        | 2             | 5.34707   |
| P25113        | YADLTEDQLPSCESLKDITAR                                                                | 1.023308553        | 2             | 5.01171   |
| <b>P25235</b> | <b>RPN2 Dolichyl_diphosphooligosaccharide__protein glycosyltransferase subunit 2</b> | <b>1.00744185</b>  | <b>1E-19</b>  | <b>13</b> |
| P25235        | EDQVIQLMNTIFSK                                                                       | 1.129700586        | 2             | 3.26069   |
| P25235        | EETVLATVQALHTASHLSQQADLR                                                             | 1.084118861        | 3             | 5.23806   |
| P25235        | FELDTSER                                                                             | 0.990840135        | 1             | 2.00651   |
| P25235        | FPEEEAPSTVLSQNLFTPK                                                                  | 0.732073313        | 2             | 3.90851   |
| P25235        | ISTEVGITNVDLSTVDKQSIAPK                                                              | 1.096642986        | 2             | 4.62573   |
| P25235        | LQVSSVLSQPLAQAAVK                                                                    | 1.256165549        | 2             | 4.86108   |
| P25235        | LSKEETVLATVQALHTASHLSQQADLR                                                          | 1.024412764        | 3             | 5.42841   |
| P25235        | NFESLSEAFSVASAAAALSQNR                                                               | 1.059020623        | 3             | 4.31454   |
| P25235        | NIVEEIEDLVAR                                                                         | 0.896183352        | 3             | 4.72779   |
| P25235        | NPILWNVADVVIK                                                                        | 1.324977832        | 2             | 2.37568   |
| P25235        | TGQEVVFAEPDNK                                                                        | 1.008243987        | 2             | 3.87823   |
| P25235        | YHVPVVVVPEGSASDTQEQAIRL                                                              | 1.253786377        | 3             | 5.42244   |
| P25235        | YIANTVELR                                                                            | 1.014187203        | 2             | 2.66046   |
| <b>P25318</b> | <b>chain</b>                                                                         | <b>0.734022028</b> | <b>0.005</b>  | <b>2</b>  |
| P25318        | GQYLEMPLPMLPMDLKGEPGPPGKPGPR+Oxidation(5)                                            | 0.721457147        | 2             | 2.65632   |
| P25318        | GQYLEMPLPMLPMDLKGEPGPPGKPGPR+Oxidation(5)                                            | 0.721457147        | 2             | 2.5496    |
| <b>P25409</b> | <b>ALAT1 Alanine aminotransferase 1</b>                                              | <b>3.179640749</b> | <b>1E-19</b>  | <b>3</b>  |
| P25409        | AWALDIAELR                                                                           | 3.729669316        | 2             | 2.56619   |
| P25409        | LTEQVFNEAPGIR                                                                        | 2.703796764        | 2             | 3.57794   |
| P25409        | VLCVINPGNPTGQVQTR                                                                    | 11.62432022        | 2             | 4.27352   |
| <b>P26039</b> | <b>TLN1 Talin_1</b>                                                                  | <b>0.869162888</b> | <b>0.0111</b> | <b>14</b> |
| P26039        | AGALQCSPSDVYTK                                                                       | 0.818499852        | 2             | 2.63114   |



|               |                                                                                          |                    |               |           |
|---------------|------------------------------------------------------------------------------------------|--------------------|---------------|-----------|
| P26039        | AQEACGPLEMDSALSVVQNLEK                                                                   | 1.073270993        | 2             | 3.79139   |
| P26039        | ASAGPQPLLVSCK                                                                            | 0.954117057        | 2             | 2.53924   |
| P26039        | AVAEQIPLLQGVV                                                                            | 0.884811439        | 2             | 3.405     |
| P26039        | EAAEGLRMATNAAAQNAIKK                                                                     | 0.955919449        | 2             | 2.80724   |
| P26039        | GVGAAATAVTQALNELLQHVK                                                                    | 0.865124576        | 3             | 4.44852   |
| P26039        | LGAASLGAEDPETQVVLINAVK                                                                   | 1.183038814        | 2             | 3.58318   |
| P26039        | LLGEIAQGNENYAGIAAR                                                                       | 1.049127225        | 2             | 3.79113   |
| P26039        | LNEAAAGLNQAATELVQASR                                                                     | 0.987958104        | 2             | 5.26423   |
| P26039        | SNTSPEELGPLANQLTSDYGR                                                                    | 0.943157394        | 2             | 3.9661    |
| P26039        | VGAIPANALDDGQWSQGLISAAR                                                                  | 0.891137262        | 2             | 4.50898   |
| P26039        | VGDDPAVWQLK                                                                              | 0.879435433        | 2             | 3.13115   |
| P26039        | VLVQNAAGSQEK                                                                             | 0.9571052          | 2             | 2.83711   |
| P26039        | VVAPTISSPVCQEQLVEAGR                                                                     | 0.873668329        | 2             | 4.75194   |
| <b>P26043</b> | <b>RADI Radixin</b>                                                                      | <b>0.981679072</b> | <b>0.9788</b> | <b>10</b> |
| P26043        | AFAAQEDLEK                                                                               | 1.011719245        | 2             | 2.36415   |
| P26043        | ALELEQER                                                                                 | 0.938531362        | 1             | 1.95868   |
| P26043        | FFPEDVSEELIQEITQR                                                                        | 0.96334808         | 3             | 4.11106   |
| P26043        | KKEEEATEWQHK                                                                             | 0.55563302         | 3             | 4.27476   |
| P26043        | KTQNDVLHAENVK                                                                            | 0.987855087        | 2             | 4.92621   |
| P26043        | NQEQLAAELAEFTAK                                                                          | 0.946825058        | 2             | 4.91598   |
| P26043        | QLQALSSELAQAR                                                                            | 0.978262523        | 2             | 3.36235   |
| P26043        | RKPDITIEVQQMK                                                                            | 0.876718582        | 2             | 3.70748   |
| P26043        | RKPDITIEVQQMK+Oxidation(10)                                                              | 1.08680357         | 2             | 2.48106   |
| P26043        | TQNDVLHAENVK                                                                             | 1.023086553        | 2             | 3.58634   |
| <b>P26231</b> | <b>CTNA1 Catenin alpha_1</b>                                                             | <b>1.017930686</b> | <b>0.6497</b> | <b>7</b>  |
| P26231        | AVMDHVSDSFLETNVPLLVLEAAK                                                                 | 0.888209998        | 3             | 3.64538   |
| P26231        | IAEQVASFQEEK                                                                             | 1.161361643        | 2             | 2.65031   |
| P26231        | LIEVANLACSISNNEEGVK                                                                      | 0.963718538        | 2             | 3.85995   |
| P26231        | LLEPLVTQVTTLVNTNSK                                                                       | 0.983628607        | 2             | 3.72508   |
| P26231        | QIIVDPLSFSEER                                                                            | 1.005418192        | 2             | 2.48735   |
| P26231        | SAAGEFADDPCCSVK                                                                          | 1.017264561        | 2             | 4.0184    |
| P26231        | TIADHCPDSACK                                                                             | 0.18152912         | 2             | 3.07811   |
| <b>P26284</b> | <b>ODPA Pyruvate dehydrogenase E1 component subunit alpha_somatic form_mitochondrial</b> | <b>0.867571378</b> | <b>0.0627</b> | <b>7</b>  |
| P26284        | AILAELTGR                                                                                | 0.855733363        | 2             | 2.62506   |
| P26284        | EEIQEVRSK                                                                                | 0.998201554        | 1             | 1.96172   |
| P26284        | GFCHLCDGQEACCVGLEAGINPTDHLITAYR                                                          | 0.968233947        | 3             | 6.47797   |
| P26284        | LEEGPPVTTVLTR                                                                            | 0.875184665        | 2             | 3.60521   |
| P26284        | RGDFIPGLR                                                                                | 1.047031653        | 2             | 2.70311   |
| P26284        | TREEIQEVR                                                                                | 1.038916823        | 2             | 2.8873    |
| P26284        | VDGMDILCVR                                                                               | 0.945390776        | 2             | 3.25842   |
| <b>P26453</b> | <b>BAS1 Basigin</b>                                                                      | <b>1.13055712</b>  | <b>2E-06</b>  | <b>6</b>  |
| P26453        | GNINVEGPPR                                                                               | 1.15485978         | 2             | 3.34943   |
| P26453        | RKPDQTLDEDDPGAAPLK                                                                       | 1.181251808        | 3             | 3.75508   |
| P26453        | SEASHPPVDEWVWFK                                                                          | 1.102044885        | 3             | 3.8958    |
| P26453        | SEHASEGEFVK                                                                              | 1.326698545        | 2             | 3.00601   |
| P26453        | SGEYSCIFLPEPVGR                                                                          | 1.119473898        | 2             | 3.15877   |
| P26453        | VLQEDTLPDLQMK                                                                            | 0.986232575        | 2             | 4.10628   |
| <b>P26772</b> | <b>CH10 10 kDa heat shock protein_mitochondrial</b>                                      | <b>1.124915661</b> | <b>0.0084</b> | <b>6</b>  |
| P26772        | GGEIQPVSVK                                                                               | 0.97267288         | 2             | 3.37843   |
| P26772        | GGIMLPEK+Oxidation(3)                                                                    | 0.983658604        | 2             | 2.4629    |
| P26772        | GKGGEIQPVSVK                                                                             | 0.964978952        | 2             | 3.08695   |
| P26772        | VLLPEYGGTK                                                                               | 0.845235922        | 1             | 2.10664   |
| P26772        | VLQATVVAVGSGGK                                                                           | 0.929482959        | 2             | 5.08633   |
| P26772        | VVLDDKDYFLFR                                                                             | 1.101652272        | 3             | 3.62946   |
| <b>P27139</b> | <b>CAH2 Carbonic anhydrase 2</b>                                                         | <b>0.704050819</b> | <b>0.1074</b> | <b>2</b>  |
| P27139        | AVQHPDGLAVLGIFLK                                                                         | 0.702506614        | 2             | 3.22529   |

|               |                                                            |                    |               |           |
|---------------|------------------------------------------------------------|--------------------|---------------|-----------|
| P27139        | IGPASQGLQK                                                 | 0.618446888        | 2             | 3.13077   |
| <b>P27321</b> | <b>ICAL Calpastatin</b>                                    | <b>0.88598605</b>  | <b>0.0074</b> | <b>3</b>  |
| P27321        | KGSDEVTASSAATGTSPR                                         | 0.890303313        | 2             | 5.0186    |
| P27321        | LSAAVSETVSQVPAPSNHTAAPPPTER                                | 1.178957086        | 3             | 4.31722   |
| P27321        | SQSSEPPVIHEK                                               | 0.919308913        | 2             | 3.1737    |
| <b>P27364</b> | <b>3BHSS 3 beta_hydroxysteroid dehydrogenase type 5</b>    | <b>0.891872427</b> | <b>0.0949</b> | <b>5</b>  |
| P27364        | AVLAANGSILK                                                | 0.863358104        | 2             | 2.7384    |
| P27364        | ETILNDREEEHR                                               | 0.886519947        | 2             | 2.73543   |
| P27364        | GDIVDAQFLR                                                 | 0.859380008        | 2             | 3.12632   |
| P27364        | NGGTFHTCALR                                                | 1.131299936        | 2             | 2.57344   |
| P27364        | QTILDVNVK                                                  | 0.814622191        | 1             | 2.17894   |
| <b>P27605</b> | <b>HPRT Hypoxanthine_guanine phosphoribosyltransferase</b> | <b>0.812261764</b> | <b>1E-05</b>  | <b>6</b>  |
| P27605        | DLNHVCVISESGK                                              | 0.771108536        | 2             | 3.50849   |
| P27605        | FFADLLDYIK                                                 | 0.875632108        | 2             | 3.4555    |
| P27605        | NVLIVEDIIDTGK                                              | 0.893807213        | 2             | 3.79786   |
| P27605        | SVGYRPFVGFPEIPDK                                           | 0.885385349        | 3             | 3.57219   |
| P27605        | SYCNDQSTGDIK                                               | 0.897306269        | 2             | 3.95982   |
| P27605        | VIGGDDLSTLTGK                                              | 1.228872877        | 2             | 3.18914   |
| <b>P27653</b> | <b>C1TC C_1_tetrahydrofolate synthase_cytoplasmic</b>      | <b>0.934833531</b> | <b>1E-11</b>  | <b>17</b> |
| P27653        | ASQAPSSFQLLYDLK                                            | 1.450921545        | 2             | 4.30461   |
| P27653        | AYTEEDLDLVEK                                               | 1.161362482        | 2             | 2.5063    |
| P27653        | GEWIKPGAVVIDCGINYPDDTKPNGR                                 | 1.060187506        | 3             | 3.77893   |
| P27653        | IFHELTQTDK                                                 | 0.981277886        | 2             | 2.84866   |
| P27653        | ITIGQAPTEK                                                 | 1.155807867        | 2             | 2.47841   |
| P27653        | IYGADDIELLPEAQNK                                           | 1.379678367        | 2             | 5.25658   |
| P27653        | KITIGQAPTEK                                                | 1.055870599        | 2             | 3.18077   |
| P27653        | KVVGDVAYDEAK                                               | 0.992674117        | 2             | 3.81902   |
| P27653        | LDIDPETITWQR                                               | 1.071561295        | 2             | 3.63466   |
| P27653        | MHGGGPTVTAGLPLPK+Oxidation(0)                              | 0.942874783        | 2             | 3.6224    |
| P27653        | QGFGLPICMAK                                                | 0.89824001         | 2             | 3.27286   |
| P27653        | TADLDKEVNGDILVVATGQPEMVK                                   | 0.981851084        | 3             | 4.16299   |
| P27653        | TDPAALTDDEINR                                              | 0.895070853        | 2             | 4.33579   |
| P27653        | THLSLSHNPEQK                                               | 1.190846138        | 2             | 3.81897   |
| P27653        | VVGDVAYDEAK                                                | 1.072869043        | 2             | 3.35609   |
| P27653        | YSQLQPHVVVAVTVR                                            | 1.201428943        | 3             | 3.30683   |
| P27653        | YVVVTGITPTPLGEGK                                           | 1.081260556        | 2             | 4.21329   |
| <b>P27657</b> | <b>LIPP Pancreatic triacylglycerol lipase</b>              | <b>0.718000673</b> | <b>0.1431</b> | <b>2</b>  |
| P27657        | ATYTQATQNVK                                                | 0.266646871        | 2             | 2.49848   |
| P27657        | ITGLDAAEPYFQGTPEEVR                                        | 0.770130596        | 2             | 2.51092   |
| <b>P27661</b> | <b>H2AX Histone H2A.x</b>                                  | <b>0.998379486</b> | <b>0.566</b>  | <b>3</b>  |
| P27661        | AGLQFPVGR                                                  | 0.965891755        | 2             | 3.23277   |
| P27661        | HLQLAIR                                                    | 1.061367903        | 2             | 2.60604   |
| P27661        | LLGGVTIAQGGVLPNIQAVLLPK                                    | 0.949241228        | 3             | 4.10022   |
| <b>P27867</b> | <b>DHSO Sorbitol dehydrogenase</b>                         | <b>0.945204824</b> | <b>1E-08</b>  | <b>13</b> |
| P27867        | AMGASQVVVIDLSASR                                           | 1.000538142        | 2             | 4.11757   |
| P27867        | AVEAFETAK                                                  | 0.880664517        | 2             | 3.01735   |
| P27867        | EVGADFTIQVAK                                               | 0.909660606        | 2             | 2.64929   |
| P27867        | GENLSLVVHGPGDIR                                            | 0.942571411        | 3             | 3.80431   |
| P27867        | HSADFCYK                                                   | 1.006281749        | 2             | 2.85      |
| P27867        | IGDFVVK                                                    | 1.019074948        | 2             | 2.54351   |
| P27867        | LENYPIPELGPNDVLLK                                          | 0.946579977        | 2             | 4.85463   |
| P27867        | LPDSVTFEEGALIEPLSVGIYACR                                   | 1.285182887        | 2             | 4.72599   |
| P27867        | MHSVGICGSDVHYWEHGR+Oxidation(0)                            | 1.088206537        | 3             | 3.88586   |
| P27867        | TLNVKPLVTHR                                                | 0.969792431        | 2             | 3.17169   |
| P27867        | VAIEPGVPR                                                  | 1.233520378        | 2             | 2.40722   |
| P27867        | VAIEPGVPREIDEFCIKGR                                        | 0.84858655         | 2             | 2.34694   |
| P27867        | VLVCGAGPIGIVTLLVAK                                         | 1.308924702        | 2             | 5.42327   |

|               |                                                                |                    |               |           |
|---------------|----------------------------------------------------------------|--------------------|---------------|-----------|
| <b>P27952</b> | <b>RS2 40S ribosomal protein S2</b>                            | <b>1.07034887</b>  | <b>0.4232</b> | <b>5</b>  |
| P27952        | AEDKEWIPVTK                                                    | 1.072606047        | 3             | 3.35124   |
| P27952        | AFVAIGDYNGHVGLGVK                                              | 1.270840062        | 2             | 4.06886   |
| P27952        | GCTATLGNFAK                                                    | 1.051068484        | 2             | 2.80629   |
| P27952        | GTGIVSAPVPK                                                    | 1.080941163        | 2             | 2.77703   |
| P27952        | TYSYLTPLDWK                                                    | 1.093192208        | 2             | 2.593     |
| <b>P28037</b> | <b>AL1L1 Cytosolic 10_formyltetrahydrofolate dehydrogenase</b> | <b>0.961029482</b> | <b>9E-06</b>  | <b>25</b> |
| P28037        | ADPLGLEAEK                                                     | 1.122320196        | 2             | 2.53789   |
| P28037        | ANATEFGLASGVFTR                                                | 1.109831595        | 2             | 4.16629   |
| P28037        | AVQMGMSVFFNK                                                   | 1.037503571        | 2             | 2.86603   |
| P28037        | CPQSEEGATYEGIQK                                                | 2.253800182        | 2             | 4.59369   |
| P28037        | DLGEAALNEYLR                                                   | 0.795746396        | 2             | 3.65357   |
| P28037        | ECEVLPPDDTVSTLYNR                                              | 1.156192917        | 2             | 3.88477   |
| P28037        | EGHEVVGVTIPDKDGK                                               | 0.951651825        | 2             | 4.85121   |
| P28037        | GNDKVPGAWTEACGQK                                               | 0.904455116        | 2             | 3.55453   |
| P28037        | GQALPEVVAK                                                     | 0.963738798        | 2             | 2.52297   |
| P28037        | GSASSDELTEAELATAEA VR                                          | 1.022317367        | 2             | 6.49627   |
| P28037        | GVVNIPGSGSLVGQR                                                | 0.939827967        | 2             | 4.84727   |
| P28037        | IGFTGSTEVGK                                                    | 1.025580653        | 2             | 3.00185   |
| P28037        | ILPNVPEVEDSTDFFK                                               | 1.067851902        | 2             | 3.8518    |
| P28037        | INWDQPAEAIHNWIR                                                | 0.955385004        | 2             | 3.83085   |
| P28037        | IQGATIPINQARPNR                                                | 0.980139662        | 2             | 2.33813   |
| P28037        | KEGHEVVGVTIPDKDGK                                              | 0.800693644        | 3             | 3.37735   |
| P28037        | KIGFTGSTEVGK                                                   | 0.941405853        | 2             | 2.82224   |
| P28037        | KLVEYCQR                                                       | 1.229166104        | 2             | 2.42457   |
| P28037        | LFVEESIHNQFVQK                                                 | 0.897531201        | 2             | 4.41216   |
| P28037        | LIAEGTAPR                                                      | 0.959290984        | 2             | 2.4941    |
| P28037        | LSDHPDVR                                                       | 0.807809755        | 1             | 2.12673   |
| P28037        | NIQLEDGK                                                       | 0.936104647        | 1             | 2.32416   |
| P28037        | TAACLAAGNTVVIKPAQVPTLTK                                        | 1.08421701         | 3             | 4.18165   |
| P28037        | TDVAAPFGGFK                                                    | 0.903519742        | 2             | 3.01462   |
| P28037        | TYNTINPTDGSVICQVSLAQVSDV DK                                    | 1.015365195        | 2             | 5.16575   |
| <b>P28064</b> | <b>PSB8 Proteasome subunit beta type_8</b>                     | <b>1.041372274</b> | <b>0.6087</b> | <b>3</b>  |
| P28064        | ASAGSYIATIR                                                    | 0.920265009        | 2             | 2.87183   |
| P28064        | QDLSPEEAYDLAR                                                  | 1.04228139         | 2             | 2.90783   |
| P28064        | VESTDVSDLLHK                                                   | 1.282593448        | 2             | 2.39108   |
| <b>P28480</b> | <b>TCPA T_complex protein 1 subunit alpha</b>                  | <b>0.948964785</b> | <b>0.0375</b> | <b>8</b>  |
| P28480        | AFHNEAQVNPER                                                   | 0.919800287        | 2             | 3.47714   |
| P28480        | FATEAAITILR                                                    | 1.044450183        | 2             | 2.72551   |
| P28480        | HGGYENAVHSGALDD                                                | 1.246251099        | 2             | 3.71735   |
| P28480        | ICDELILIK                                                      | 1.096831983        | 2             | 2.55301   |
| P28480        | LLEVEHPAAK                                                     | 0.942249018        | 2             | 2.46742   |
| P28480        | SLLVIPNTLAVNAAQDSTDLVAK                                        | 1.035698217        | 2             | 4.15325   |
| P28480        | SQNVMAASIANIVK                                                 | 1.136200114        | 2             | 3.53311   |
| P28480        | YINENLIINTDELGR                                                | 1.07639334         | 2             | 4.68646   |
| <b>P28492</b> | <b>GLSL Glutaminase liver isoform_mitochondrial</b>            | <b>1.066688107</b> | <b>0.4526</b> | <b>3</b>  |
| P28492        | ATGLQTS DPR                                                    | 0.988015122        | 2             | 2.44686   |
| P28492        | LSLNEEGIPHPNMVNAGAI VVSSLIK                                    | 1.092302015        | 3             | 4.75565   |
| P28492        | SNPDLWGVSLCTVDGQR                                              | 1.13204751         | 2             | 2.58539   |
| <b>P29147</b> | <b>BDH D_beta_hydroxybutyrate dehydrogenase_mitochondrial</b>  | <b>0.97066651</b>  | <b>1E-19</b>  | <b>16</b> |
| P29147        | AVLVTGCDSGFGFLAK                                               | 0.93802623         | 2             | 5.55481   |
| P29147        | FGVEAFSDCLR                                                    | 1.011031842        | 2             | 3.361     |
| P29147        | GFLVFAGCLLK                                                    | 1.047731074        | 2             | 3.2531    |
| P29147        | KMWDELPEVVR                                                    | 1.240464725        | 2             | 2.48633   |
| P29147        | MANPARSPYCITK+Oxidation(0)                                     | 0.839449252        | 2             | 2.41989   |
| P29147        | METYCNSGSTDSSVINAVTHALTAATPYTR                                 | 1.247666293        | 3             | 4.85652   |
| P29147        | METYCNSGSTDSSVINAVTHALTAATPYTR+Oxidation(0)                    | 1.081545472        | 3             | 4.83018   |

|               |                                                               |                    |               |           |
|---------------|---------------------------------------------------------------|--------------------|---------------|-----------|
| P29147        | MQVMTHFPGAISDK                                                | 1.155970065        | 2             | 3.57599   |
| P29147        | MQVMTHFPGAISDK+Oxidation(0)                                   | 1.002265944        | 2             | 2.78998   |
| P29147        | MQVMTHFPGAISDK+Oxidation(3)                                   | 1.002265944        | 2             | 2.96961   |
| P29147        | MWDELPEVVR                                                    | 0.791444206        | 2             | 2.46938   |
| P29147        | MWDELPEVVR+Oxidation(0)                                       | 0.83022116         | 2             | 3.22726   |
| P29147        | TIQLNVCNSEEVEK                                                | 0.944770145        | 2             | 4.42579   |
| P29147        | VSVVEPGNFIAATSLYSER                                           | 0.864866908        | 2             | 6.25877   |
| P29147        | VVNISMLGR                                                     | 0.865773045        | 2             | 3.75515   |
| P29147        | YEMHPLGVK                                                     | 0.77866848         | 2             | 2.54178   |
| <b>P29266</b> | <b>3HIDH 3_hydroxyisobutyrate dehydrogenase_mitochondrial</b> | <b>0.829641549</b> | <b>1E-19</b>  | <b>8</b>  |
| P29266        | DLGLAQDSATSK                                                  | 0.782899317        | 2             | 3.85325   |
| P29266        | EAGEQVASSPADVAEK                                              | 0.843279169        | 2             | 4.75589   |
| P29266        | GSLIDSSTIDPSVSK                                               | 0.950018662        | 2             | 4.46235   |
| P29266        | HGYPLILYDVFPDVCK                                              | 1.056620089        | 2             | 5.17433   |
| P29266        | KGSLIDSSTIDPSVSK                                              | 1.008215142        | 2             | 4.36925   |
| P29266        | MGAVFMDAPVSGGVGAAR                                            | 0.938512647        | 2             | 4.60188   |
| P29266        | MGAVFMDAPVSGGVGAAR+Oxidation(0)                               | 0.833723032        | 2             | 4.19421   |
| P29266        | MGAVFMDAPVSGGVGAAR+Oxidation(5)                               | 0.833723032        | 2             | 3.24167   |
| <b>P29314</b> | <b>RS9 40S ribosomal protein S9</b>                           | <b>1.143813414</b> | <b>0.0006</b> | <b>5</b>  |
| P29314        | IEDFLER                                                       | 1.033805006        | 2             | 2.36702   |
| P29314        | KGQGGAGAGDDEEED                                               | 1.215263915        | 2             | 3.59923   |
| P29314        | LDYILGLK                                                      | 1.151739702        | 2             | 2.65572   |
| P29314        | LFEGNALLR                                                     | 1.177048182        | 2             | 2.96702   |
| P29314        | SRLDQELK                                                      | 0.997615538        | 2             | 2.36779   |
| <b>P29315</b> | <b>RINI Ribonuclease inhibitor</b>                            | <b>1.045396777</b> | <b>0.3995</b> | <b>5</b>  |
| P29315        | ASLQELDLGSNK                                                  | 1.020885736        | 2             | 2.48623   |
| P29315        | LDDCGLTEVR                                                    | 1.026638952        | 2             | 3.14782   |
| P29315        | LENGGITSANCK                                                  | 1.010680961        | 2             | 3.02173   |
| P29315        | SAIQANPALTELSLR                                               | 1.180131446        | 2             | 4.20273   |
| P29315        | TNELGDAGVGLVLQQLNPTCK                                         | 1.046815746        | 2             | 5.24535   |
| <b>P29410</b> | <b>KAD2 Adenylate kinase 2_mitochondrial</b>                  | <b>1.013285092</b> | <b>0.8015</b> | <b>10</b> |
| P29410        | AMVASGSELGK                                                   | 0.968065203        | 2             | 2.62889   |
| P29410        | AMVASGSELGKK                                                  | 0.777316587        | 2             | 2.6265    |
| P29410        | AVLLGPPGAGK                                                   | 0.885100812        | 2             | 2.46397   |
| P29410        | EAMKDDITGEPLIR                                                | 1.046870798        | 2             | 2.4345    |
| P29410        | GIHCAIDASQTPDVVFASILAAFSK                                     | 1.139809998        | 3             | 4.30324   |
| P29410        | LEAYHTQTTPVVEYYR                                              | 1.085727619        | 2             | 4.8241    |
| P29410        | LVSDEMVELIEK                                                  | 1.052333349        | 2             | 4.34415   |
| P29410        | NGFLLDGFPR                                                    | 0.995817853        | 2             | 2.98944   |
| P29410        | NLETPSCK                                                      | 1.004555304        | 1             | 2.01153   |
| P29410        | SYHEEFNPPK                                                    | 1.001783537        | 3             | 3.31996   |
| <b>P29411</b> | <b>KAD3 GTP:AMP phosphotransferase_mitochondrial</b>          | <b>1.177652271</b> | <b>0.8862</b> | <b>4</b>  |
| P29411        | AYEAQTEPVLQYYQK                                               | 0.971153429        | 2             | 5.00317   |
| P29411        | EDDKPETVIK                                                    | 0.866605355        | 2             | 2.60277   |
| P29411        | TVGIDDLTGEPLIQR                                               | 1.011882598        | 2             | 3.52663   |
| P29411        | VYNIEFNPPK                                                    | 1.179206489        | 2             | 2.67018   |
| <b>P29419</b> | <b>ATP5I ATP synthase subunit e_mitochondrial</b>             | <b>0.910389907</b> | <b>0.0011</b> | <b>2</b>  |
| P29419        | ELAEAEDVSIFK                                                  | 0.911479226        | 1             | 3.32243   |
| P29419        | YSALILGMAYGAK                                                 | 1.514918968        | 2             | 3.44123   |
| <b>P30009</b> | <b>MARCS Myristoylated alanine_rich C_kinase substrate</b>    | <b>1.122904515</b> | <b>0.0011</b> | <b>2</b>  |
| P30009        | AEDGAAPSPSETPK                                                | 0.955296378        | 2             | 3.61428   |
| P30009        | GEAAAERPGEA AVASSPSK                                          | 1.236927835        | 2             | 4.37953   |
| <b>P30276</b> | <b>CCNB2 G2/mitotic_specific cyclin_B2</b>                    | <b>0.853756168</b> | <b>0.2569</b> | <b>2</b>  |
| P30276        | AVLEEIGNK                                                     | 0.924265197        | 1             | 2.06732   |
| P30276        | FELGRPLPLHFLRR                                                | 0.827775735        | 2             | 2.47323   |
| <b>P30349</b> | <b>LKHA4 Leukotriene A_4 hydrolase</b>                        | <b>0.963729283</b> | <b>0.8785</b> | <b>2</b>  |
| P30349        | SLSNVIAHEISHSWTGNLVTNK                                        | 1.064802067        | 3             | 4.4457    |

|               |                                                         |                    |               |           |
|---------------|---------------------------------------------------------|--------------------|---------------|-----------|
| P30349        | SSALQWLTPTEQTS GK                                       | 1.021360716        | 2             | 3.21243   |
| <b>P30427</b> | <b>PLEC Plectin</b>                                     | <b>1.014395126</b> | <b>0.1654</b> | <b>6</b>  |
| P30427        | AQVEQELTTLR                                             | 0.854256992        | 2             | 2.67106   |
| P30427        | LLDPEDVDVPQ PDEK                                        | 0.797147016        | 2             | 3.32022   |
| P30427        | MSAAQALKKGWLYEAGQR+Oxidation(0)                         | 0.905419521        | 2             | 2.3988    |
| P30427        | SDQLTGSLLLP LSEK                                        | 1.051727314        | 2             | 2.84238   |
| P30427        | SQVEEELFSVR                                             | 1.304813013        | 2             | 2.34276   |
| P30427        | YLYGTGSVAGVYLP GSR                                      | 1.363376954        | 2             | 2.5481    |
| <b>P30713</b> | <b>GSTT2 Glutathione S_transferase theta_2</b>          | <b>0.827114542</b> | <b>1E-19</b>  | <b>5</b>  |
| P30713        | AQVHEYLGWHADNIR                                         | 0.792897458        | 2             | 4.52083   |
| P30713        | GQHLSEQFSQVNCLK                                         | 0.824571281        | 2             | 4.76745   |
| P30713        | VEAFLGAELCQEAHNPI MSVLGQAAK                             | 0.827243343        | 3             | 3.41161   |
| P30713        | VLGPLIGVQVPEEK                                          | 0.860808235        | 2             | 3.93285   |
| P30713        | YQVADHWYPADLQAR                                         | 0.757255842        | 2             | 4.56313   |
| <b>P30839</b> | <b>AL3A2 Fatty aldehyde dehydrogenase</b>               | <b>0.866686776</b> | <b>1E-19</b>  | <b>9</b>  |
| P30839        | DILAAIAADLSK                                            | 0.763519796        | 2             | 2.67238   |
| P30839        | EKDILAAIAADLSK                                          | 0.737108896        | 2             | 3.69608   |
| P30839        | FDHILYTGNTAVGK                                          | 0.894460876        | 2             | 3.50277   |
| P30839        | HLTPVTLELGK                                             | 0.905945851        | 2             | 2.92693   |
| P30839        | NVEEAINFINDR                                            | 1.094860013        | 2             | 3.95834   |
| P30839        | QRFDHILYTGNTAVGK                                        | 1.219399131        | 2             | 3.03698   |
| P30839        | VMQEEIFGPILIVSVK                                        | 0.745436381        | 3             | 4.32109   |
| P30839        | VMQEEIFGPILIVSVK+Oxidation(1)                           | 0.826590048        | 2             | 4.66052   |
| P30839        | YIAPTILTDVDPNSK                                         | 0.841251424        | 2             | 4.32633   |
| <b>P30904</b> | <b>MIF Macrophage migration inhibitory factor</b>       | <b>1.123019906</b> | <b>0.3784</b> | <b>2</b>  |
| P30904        | LHISDR                                                  | 0.931844132        | 1             | 2.04431   |
| P30904        | LLCGLLSDR                                               | 1.51211749         | 2             | 2.54545   |
| <b>P31000</b> | <b>VIME Vimentin</b>                                    | <b>0.814366415</b> | <b>2E-08</b>  | <b>14</b> |
| P31000        | DGQVINETSQHHDDLE                                        | 0.937778484        | 2             | 3.24235   |
| P31000        | ETNLESPLVDTHSK                                          | 0.919338811        | 2             | 2.62891   |
| P31000        | FADLSEAA NR                                             | 0.896196241        | 2             | 2.73474   |
| P31000        | KLLEGEESR                                               | 0.893263485        | 2             | 2.66326   |
| P31000        | KVESLQEEIAFLK                                           | 0.718459232        | 2             | 3.76883   |
| P31000        | LGDLYEEEMR                                              | 0.862686784        | 2             | 2.36507   |
| P31000        | LLEGEESR                                                | 0.87131758         | 2             | 2.65074   |
| P31000        | NLQEAEEWYK                                              | 0.859025369        | 2             | 2.78847   |
| P31000        | QDVDNASLAR                                              | 0.724073491        | 2             | 2.53648   |
| P31000        | QVQSLTCEVDALK                                           | 0.955671761        | 2             | 3.32225   |
| P31000        | RQVDQLTNDK                                              | 0.827683221        | 2             | 2.66143   |
| P31000        | SLYSSSPGGAYVTR                                          | 0.957089283        | 2             | 2.37995   |
| P31000        | TNEKVELQELNDR                                           | 0.792095173        | 2             | 2.44468   |
| P31000        | VELQELNDR                                               | 0.806185511        | 2             | 2.71593   |
| <b>P31044</b> | <b>PEBP1 Phosphatidylethanolamine_binding protein 1</b> | <b>0.998757401</b> | <b>0.0183</b> | <b>6</b>  |
| P31044        | GNDISSGTVLSEYVGSPPK                                     | 1.005433646        | 2             | 6.04556   |
| P31044        | LYTLVLTDPDAPSR                                          | 1.256119984        | 2             | 4.43865   |
| P31044        | VDYGGVTVDELGK                                           | 0.920741525        | 2             | 4.49212   |
| P31044        | VLTPQTQVMNRPSISWDGLDPGK                                 | 0.967902047        | 3             | 4.84973   |
| P31044        | YHLGAPVAGTCFQAEWDDSVPK                                  | 0.936147381        | 2             | 5.33946   |
| P31044        | YVWLVYEQEQLNCDEPILSNK                                   | 1.005048588        | 2             | 5.23354   |
| <b>P31210</b> | <b>AK1D1 3_oxo_5_beta_steroid 4_dehydrogenase</b>       | <b>0.866939636</b> | <b>0.9824</b> | <b>17</b> |
| P31210        | DELLTSLGK                                               | 0.708812877        | 2             | 2.58049   |
| P31210        | DIEALNK                                                 | 0.645063981        | 1             | 2.47355   |
| P31210        | EEMKDIEALNK                                             | 0.793188617        | 2             | 3.36921   |
| P31210        | ENFQIFDFSLTK                                            | 0.89678947         | 2             | 3.1913    |
| P31210        | HIDGAYVYR                                               | 0.827912951        | 2             | 3.21222   |
| P31210        | IKENFQIFDFSLTK                                          | 1.039338885        | 2             | 3.90028   |
| P31210        | NEHEVGEAIR                                              | 0.819943805        | 2             | 3.0926    |

|               |                                                                |                    |               |           |
|---------------|----------------------------------------------------------------|--------------------|---------------|-----------|
| P31210        | NPLWVNVSSPPLLK                                                 | 0.971045959        | 2             | 4.30871   |
| P31210        | NPLWVNVSSPPLLKDELLTSLGK                                        | 0.812790731        | 3             | 4.68551   |
| P31210        | QLEVILNKPGLK                                                   | 0.764721632        | 2             | 3.32212   |
| P31210        | REEIFYCGK                                                      | 0.808851372        | 2             | 2.96265   |
| P31210        | SLGVSNFNR                                                      | 1.038906801        | 2             | 2.58314   |
| P31210        | SNLCATWEALEACK                                                 | 0.883446399        | 2             | 4.38785   |
| P31210        | SNLCATWEALEACKDAGLVK                                           | 0.53217759         | 2             | 4.71038   |
| P31210        | TAIDEGYR                                                       | 0.917992805        | 2             | 2.61565   |
| P31210        | TQAQIVLR                                                       | 0.882538554        | 2             | 3.08622   |
| P31210        | YKPVTNQVECHPYFTQTK                                             | 0.956855094        | 2             | 5.0516    |
| <b>P31399</b> | <b>ATP5H ATP synthase subunit d_ mitochondrial</b>             | <b>1.003429542</b> | <b>0.0826</b> | <b>8</b>  |
| P31399        | ANVDKPGLVDDFK                                                  | 0.994467504        | 2             | 3.52002   |
| P31399        | NCAQFVTGSQAR                                                   | 1.023101814        | 2             | 4.75305   |
| P31399        | NMIPFDQMTIDDLNEVPETK                                           | 1.039933542        | 2             | 4.98344   |
| P31399        | NMIPFDQMTIDDLNEVPETK+Oxidation(1)                              | 0.964544357        | 2             | 4.06988   |
| P31399        | NMIPFDQMTIDDLNEVPETK+Oxidation(7)                              | 0.905834431        | 2             | 3.93758   |
| P31399        | SWNETFHTR                                                      | 1.003508606        | 2             | 2.60636   |
| P31399        | TIDWVSFVEIMPQNQK                                               | 1.246284244        | 3             | 3.51429   |
| P31399        | YTALVDAEEKEDVK                                                 | 1.167722293        | 2             | 3.4593    |
| <b>P32089</b> | <b>TXTP Tricarboxylate transport protein_ mitochondrial</b>    | <b>1.028300679</b> | <b>0.957</b>  | <b>5</b>  |
| P32089        | FIHDQTSSNPK                                                    | 1.257057934        | 1             | 3.60147   |
| P32089        | GLSLLYGSIPK                                                    | 1.044342016        | 2             | 3.06509   |
| P32089        | GTYQGLTATVLK                                                   | 0.907913818        | 2             | 2.43997   |
| P32089        | SHGVLGLYR                                                      | 0.890127578        | 1             | 2.09772   |
| P32089        | TQLQLDER                                                       | 1.063230527        | 2             | 2.61708   |
| <b>P32198</b> | <b>CPT1A Carnitine O_palmitoyltransferase 1_ liver isoform</b> | <b>1.001269393</b> | <b>0.6419</b> | <b>4</b>  |
| P32198        | ELEQQMQILDDPSEPQGEAK                                           | 0.995374129        | 2             | 4.37218   |
| P32198        | GDTNPNIPKPTR                                                   | 0.898070939        | 2             | 2.4931    |
| P32198        | MTALAQDFAVNLGPK                                                | 0.975187624        | 2             | 3.25762   |
| P32198        | MTALAQDFAVNLGPK+Oxidation(0)                                   | 0.654114934        | 2             | 3.76634   |
| <b>P32232</b> | <b>CBS Cystathionine beta_ synthase</b>                        | <b>1.229687198</b> | <b>1E-19</b>  | <b>8</b>  |
| P32232        | AGTLKPGDIIIEPTSGNTGIGLALAAVK                                   | 1.563451975        | 3             | 5.92462   |
| P32232        | FDSPESHVGVAVR                                                  | 1.142332977        | 2             | 3.46856   |
| P32232        | LKNEIPNSHILDQYR                                                | 1.258261746        | 3             | 3.4666    |
| P32232        | NASNPLAHYDDTAEIILQQCDGK                                        | 1.713601851        | 2             | 5.38436   |
| P32232        | SNDDDSFAFAR                                                    | 1.739469608        | 2             | 3.36945   |
| P32232        | VDMLVASAGTGGTITGIAR                                            | 1.329489438        | 2             | 4.32904   |
| P32232        | VQELSLSAPLTVLPTVTEHTAILR                                       | 1.772165637        | 3             | 4.1958    |
| P32232        | VRPSDEVCK                                                      | 2.044418134        | 2             | 2.50546   |
| <b>P32551</b> | <b>QCR2 Cytochrome b_c1 complex subunit 2_ mitochondrial</b>   | <b>1.124233484</b> | <b>0.038</b>  | <b>10</b> |
| P32551        | AVAFQNPQTR                                                     | 1.121823022        | 2             | 2.79525   |
| P32551        | AVAQGNLSSADVQAAK                                               | 1.023509949        | 2             | 4.78252   |
| P32551        | GNNTTLLSQSVAK                                                  | 1.06916504         | 2             | 4.21587   |
| P32551        | IENLHDVAYK                                                     | 1.040477143        | 2             | 3.69603   |
| P32551        | LPNGLVIASLENYAPLSR                                             | 1.321410917        | 3             | 3.42979   |
| P32551        | RGNNTTLLSQSVAK                                                 | 0.58958681         | 2             | 2.96213   |
| P32551        | SMTASGNLGHPTFLDEL                                              | 1.102098832        | 2             | 3.16481   |
| P32551        | SMTASGNLGHPTFLDEL+Oxidation(1)                                 | 1.088068917        | 2             | 3.37443   |
| P32551        | TSAPGGVPLQPQLEFTK                                              | 0.986397569        | 2             | 3.57565   |
| P32551        | YENYNLGTSHLLR                                                  | 1.284686503        | 2             | 4.00042   |
| <b>P32755</b> | <b>HPPD 4_hydroxyphenylpyruvate dioxygenase</b>                | <b>1.411757355</b> | <b>1E-19</b>  | <b>16</b> |
| P32755        | AFEEEEQALR                                                     | 1.326055842        | 2             | 3.36486   |
| P32755        | DIAFEVEDCEHIVQK                                                | 1.232974781        | 2             | 3.29479   |
| P32755        | FAVLQTYGDTTHTLVEK                                              | 1.382906351        | 2             | 5.07312   |
| P32755        | FLPGFEAPTYK                                                    | 1.23283973         | 2             | 2.51381   |
| P32755        | FWSVDDTQVHTEYSSLR                                              | 1.377012183        | 2             | 5.5479    |
| P32755        | GMEFLAVPSSYYR                                                  | 1.435870464        | 2             | 3.04553   |

|               |                                                              |                    |               |           |
|---------------|--------------------------------------------------------------|--------------------|---------------|-----------|
| P32755        | GNLTDLETNGVR                                                 | 1.177186743        | 2             | 3.61468   |
| P32755        | HNHQGFGAGNFNSLFK                                             | 1.489953761        | 3             | 4.99724   |
| P32755        | ILVDYDEK                                                     | 1.28684757         | 2             | 2.87203   |
| P32755        | IVFVLCSALNPWNK                                               | 1.327778569        | 2             | 3.05992   |
| P32755        | IVREPWVEEDKFGK                                               | 1.259025876        | 3             | 4.24686   |
| P32755        | LPSCNLEIIDHIVGNQPDQEMESASEWYLK                               | 1.293789574        | 3             | 7.49554   |
| P32755        | MGFEPLAYK                                                    | 1.696995058        | 2             | 2.34365   |
| P32755        | SIVVANYEESIK                                                 | 1.284193169        | 2             | 4.15149   |
| P32755        | SQIQEYVDYNGGAGVQHIALR                                        | 1.397866557        | 2             | 5.48854   |
| P32755        | TEDIITIR                                                     | 1.301408189        | 2             | 3.40263   |
| <b>P33124</b> | <b>ACSL6 Long_chain_fatty_acid__CoA ligase 6</b>             | <b>1.006676989</b> | <b>1</b>      | <b>2</b>  |
| P33124        | ALRPTIFPVVPR                                                 | 0.983731104        | 2             | 3.07722   |
| P33124        | IENIYIR                                                      | 1.021187214        | 2             | 2.84489   |
| <b>P33273</b> | <b>CP255 Cytochrome P450 2C55</b>                            | <b>0.726414075</b> | <b>1E-06</b>  | <b>2</b>  |
| P33273        | ELRHFSMLTLR                                                  | 0.898827378        | 2             | 2.31736   |
| P33273        | FDYKDENFLNLMEK                                               | 0.722302554        | 3             | 3.54445   |
| <b>P34058</b> | <b>HS90B Heat shock protein HSP 90_beta</b>                  | <b>1.014563596</b> | <b>1E-19</b>  | <b>24</b> |
| P34058        | ADLNNLGTIAK                                                  | 1.026769523        | 2             | 4.10553   |
| P34058        | EDQTEYLEER                                                   | 1.157144812        | 2             | 3.34114   |
| P34058        | EGLELPEDEEEKK                                                | 1.024216468        | 2             | 3.1422    |
| P34058        | ELISNASDALDK                                                 | 0.858863322        | 2             | 3.63725   |
| P34058        | ELISNASDALDKIR                                               | 0.26595971         | 2             | 2.98653   |
| P34058        | GVVDSDELPLNISR                                               | 1.040937654        | 2             | 4.74997   |
| P34058        | HLEINPDHPIVETLR                                              | 1.063168947        | 2             | 4.41815   |
| P34058        | HSQFIGYPITLYLEK                                              | 1.819680567        | 2             | 3.80158   |
| P34058        | IDIIPNPQER                                                   | 1.025325599        | 2             | 2.96713   |
| P34058        | KHLEINPDHPIVETLR                                             | 0.956412421        | 2             | 3.26683   |
| P34058        | LGIHEDSTNR                                                   | 1.012872834        | 2             | 3.29688   |
| P34058        | NPDDITQEEYGFYK                                               | 1.353565938        | 2             | 4.88495   |
| P34058        | RAPFDLFENK                                                   | 1.069349986        | 2             | 2.91025   |
| P34058        | RAPFDLFENKK                                                  | 0.760877838        | 2             | 2.33402   |
| P34058        | SIYYITGESK                                                   | 1.194748112        | 2             | 3.0952    |
| P34058        | SLTNDWEDHLAVK                                                | 1.063774252        | 2             | 3.89272   |
| P34058        | TLTLVDTGIGMTK                                                | 1.007382287        | 2             | 3.86571   |
| P34058        | TLTLVDTGIGMTK+Oxidation(10)                                  | 0.994355936        | 2             | 3.91848   |
| P34058        | VFIMDSCDELIPEYLNFR                                           | 1.236207203        | 2             | 2.85972   |
| P34058        | VILHLKEDQTEYLEER                                             | 0.943621059        | 3             | 4.21972   |
| P34058        | YESLTDPSK                                                    | 1.074674212        | 2             | 2.84651   |
| P34058        | YESLTDPSKLDGK                                                | 0.947415993        | 2             | 3.66766   |
| P34058        | YHTSQSGDEMTSLSEYVSR                                          | 1.147716119        | 2             | 5.42996   |
| P34058        | YIDQEELNK                                                    | 1.077571496        | 2             | 3.63116   |
| <b>P34067</b> | <b>PSB4 Proteasome subunit beta type_4</b>                   | <b>0.915200711</b> | <b>0.7642</b> | <b>3</b>  |
| P34067        | GVEIEGPLSAQTNWDIAHMISGFE                                     | 0.910636389        | 2             | 3.44295   |
| P34067        | TQNPMVTGTSVLGVK                                              | 0.917383283        | 2             | 2.54274   |
| P34067        | VNDSTMLGASGDYADFQYLK                                         | 0.931582571        | 2             | 4.18301   |
| <b>P35171</b> | <b>CX7A2 Cytochrome c oxidase subunit 7A2_mitochondrial</b>  | <b>1.095015593</b> | <b>0.3798</b> | <b>3</b>  |
| P35171        | GGTSDALLYR                                                   | 1.078145449        | 2             | 3.28033   |
| P35171        | LFQEDNGMPVHLK                                                | 1.091948174        | 2             | 3.8312    |
| P35171        | LFQEDNGMPVHLK+Oxidation(7)                                   | 0.933960717        | 2             | 2.69428   |
| <b>P35213</b> | <b>1433B 14_3_3 protein beta/alpha</b>                       | <b>1.05724524</b>  | <b>0.4941</b> | <b>5</b>  |
| P35213        | AVTEQGHLSNEER                                                | 1.340701177        | 2             | 4.56786   |
| P35213        | EKIEAELQDICSVDLLELDK                                         | 1.088045244        | 3             | 4.37551   |
| P35213        | QTTVNSQAYQEAFEISK                                            | 1.000985625        | 2             | 5.24787   |
| P35213        | TAFDEAIAELDTLNEESYK                                          | 1.065881197        | 2             | 5.3102    |
| P35213        | YLSEVASGDNK                                                  | 1.042584087        | 1             | 3.12953   |
| <b>P35233</b> | <b>PTN2 Tyrosine_protein phosphatase non_receptor type 2</b> | <b>0.904246003</b> | <b>0.3218</b> | <b>2</b>  |
| P35233        | CAQYWPTDDREMVFK+Oxidation(11)                                | 1.736001287        | 2             | 2.36275   |

|               |                                                                      |                    |               |          |
|---------------|----------------------------------------------------------------------|--------------------|---------------|----------|
| P35233        | KRWLYWQPILTK                                                         | 0.904159748        | 1             | 2.09969  |
| <b>P35278</b> | <b>RAB5C Ras_related protein Rab_5C</b>                              | <b>0.900946538</b> | <b>0.6526</b> | <b>2</b> |
| P35278        | FEIWDTAGQER                                                          | 0.892003719        | 2             | 2.66588  |
| P35278        | GVDLQESNPASR                                                         | 1.00930532         | 2             | 2.90358  |
| <b>P35427</b> | <b>RL13A 60S ribosomal protein L13a</b>                              | <b>1.123533407</b> | <b>0.8985</b> | <b>2</b> |
| P35427        | CEGINISGNFYR                                                         | 1.128385178        | 2             | 2.71695  |
| P35427        | YQAVTATLEEK                                                          | 1.002867986        | 2             | 2.98451  |
| <b>P35434</b> | <b>ATPD ATP synthase subunit delta_mitochondrial</b>                 | <b>1.011050166</b> | <b>1</b>      | <b>2</b> |
| P35434        | AQSELSGAADEAAR                                                       | 1.023038495        | 2             | 4.63804  |
| P35434        | IEANEALVK                                                            | 1.012498414        | 2             | 3.30401  |
| <b>P35435</b> | <b>ATPG ATP synthase subunit gamma_mitochondrial</b>                 | <b>1.030637571</b> | <b>0.0005</b> | <b>6</b> |
| P35435        | GLCGAIHSSVAK                                                         | 1.029093009        | 2             | 3.69751  |
| P35435        | HLIIGVSSDR                                                           | 0.993094961        | 2             | 2.91291  |
| P35435        | NASDMIDK                                                             | 1.007660308        | 1             | 2.10388  |
| P35435        | NDMAALTAAGK                                                          | 1.022812302        | 2             | 3.34334  |
| P35435        | THSDQFLVSFK                                                          | 1.204850639        | 2             | 3.12993  |
| P35435        | VYGTGSLALYEK                                                         | 1.454718161        | 2             | 2.87493  |
| <b>P35565</b> | <b>CALX Calnexin</b>                                                 | <b>1.033981654</b> | <b>0.6769</b> | <b>8</b> |
| P35565        | AEEDEILNR                                                            | 1.150422202        | 2             | 2.59397  |
| P35565        | GSLSGWILSK                                                           | 1.152588002        | 2             | 2.31165  |
| P35565        | KIPNPdffedLEPFR                                                      | 0.992503036        | 3             | 4.4728   |
| P35565        | NKGDEEEEEKLEEK                                                       | 1.079888289        | 2             | 4.7012   |
| P35565        | TDAPQPDVKDEEGKEEEK                                                   | 0.984584642        | 3             | 3.75537  |
| P35565        | TSELNLDQFHDK                                                         | 1.026877252        | 2             | 3.64798  |
| P35565        | VVDDWANDGWGLK                                                        | 1.030347319        | 2             | 3.88499  |
| P35565        | VVDDWANDGWGLKK                                                       | 0.848519959        | 2             | 3.45435  |
| <b>P35704</b> | <b>PRDX2 Peroxiredoxin_2</b>                                         | <b>0.932558874</b> | <b>0.1403</b> | <b>5</b> |
| P35704        | EGGLGPLNIPLADVTK                                                     | 0.816050163        | 2             | 2.89706  |
| P35704        | KEGGLGPLNIPLADVTK                                                    | 0.860868672        | 2             | 4.29223  |
| P35704        | NDEGIAYR                                                             | 0.92359259         | 1             | 2.07535  |
| P35704        | QITVNDLPVGR                                                          | 0.964535914        | 2             | 2.8042   |
| P35704        | SLSQNYGVVK                                                           | 0.860069731        | 2             | 2.41341  |
| <b>P35738</b> | <b>ODDB2 oxoisovalerate dehydrogenase subunit beta_mitochondrial</b> | <b>0.929488809</b> | <b>0.6648</b> | <b>2</b> |
| P35738        | AAVEQVPVEPYK                                                         | 0.930101511        | 2             | 2.31245  |
| P35738        | GLLLSCIEDKNPCIFFEPK                                                  | 0.858387856        | 2             | 2.81734  |
| <b>P36201</b> | <b>CRIP2 Cysteine_rich protein 2</b>                                 | <b>1.062858843</b> | <b>0.9993</b> | <b>3</b> |
| P36201        | GVNIGGAGSYIYEKPTEAPQVTGPIEVPVVR                                      | 1.062352721        | 3             | 6.76126  |
| P36201        | GVNTGAVGSYIYDKDPEGTVPQ                                               | 1.050932339        | 2             | 4.43165  |
| P36201        | VYFAEKVTSLGK                                                         | 1.017614904        | 2             | 2.46953  |
| <b>P36365</b> | <b>FMO1 Dimethylaniline monooxygenase [N_oxide_forming] 1</b>        | <b>1.066759272</b> | <b>0.0007</b> | <b>9</b> |
| P36365        | ALQSDYITYIDDLTSSINAKPDLR                                             | 0.947524288        | 3             | 3.73404  |
| P36365        | ASLYNSVVSNSK                                                         | 1.09501683         | 2             | 2.97712  |
| P36365        | ENSVVFNNTPK                                                          | 1.110091524        | 2             | 2.45723  |
| P36365        | FTEHVEEGR                                                            | 0.867339989        | 2             | 2.88866  |
| P36365        | NLLPTPVVSWLISK                                                       | 0.894061377        | 2             | 2.30393  |
| P36365        | SCDLGGLWR                                                            | 0.84115803         | 2             | 2.82858  |
| P36365        | TQLREPVLNDELPGR                                                      | 0.350691524        | 2             | 2.94378  |
| P36365        | VEDGQASLYK                                                           | 0.938146424        | 2             | 3.30455  |
| P36365        | VLVVGMGNSGTDIHAVEASHLAK                                              | 0.811948254        | 2             | 2.48082  |
| <b>P36511</b> | <b>UDB15 UDP_glucuronosyltransferase 2B15</b>                        | <b>1.213645965</b> | <b>7E-07</b>  | <b>6</b> |
| P36511        | ANIIAWALAQIPQK                                                       | 0.758345033        | 3             | 4.37607  |
| P36511        | FVNVVWYELPR                                                          | 0.84073465         | 2             | 2.78159  |
| P36511        | FVTFPTSFSHDLNFFTR                                                    | 1.324759488        | 2             | 3.88148  |
| P36511        | GHEVTVLRPSAFVFLDPK                                                   | 0.397518742        | 2             | 2.96172  |
| P36511        | IILEELVQK                                                            | 0.847887053        | 2             | 3.40104  |
| P36511        | TLGRPTTLAEIMGK                                                       | 0.832007992        | 2             | 2.58266  |



|               |                                                       |                    |               |           |
|---------------|-------------------------------------------------------|--------------------|---------------|-----------|
| <b>P36972</b> | <b>APT Adenine phosphoribosyltransferase</b>          | <b>1.071543386</b> | <b>0.0122</b> | <b>3</b>  |
| P36972        | GFLFGPSLAQELGVGCVLIR                                  | 1.434306254        | 2             | 2.78198   |
| P36972        | IDYIAGLDSR                                            | 1.118675828        | 1             | 2.29404   |
| P36972        | SFPDFPIPGVLFRR                                        | 0.939757958        | 2             | 3.14498   |
| <b>P38650</b> | <b>DYHC1 Cytoplasmic dynein 1 heavy chain 1</b>       | <b>1.155964112</b> | <b>0.5536</b> | <b>7</b>  |
| P38650        | EALELTDGLLSGSEER                                      | 0.883296594        | 2             | 2.40881   |
| P38650        | FGNPLLQDVEYDPLNPNVLR                                  | 1.111988632        | 3             | 3.39261   |
| P38650        | ILDDDTIITLENLK                                        | 1.163670761        | 2             | 2.3526    |
| P38650        | QLQNISQAAAAGGAK                                       | 1.000625364        | 2             | 2.80931   |
| P38650        | SSLQSQCNEVLK                                          | 1.034829696        | 2             | 3.11208   |
| P38650        | VQGLTVEQAEAVAR                                        | 0.905648264        | 2             | 3.09291   |
| P38650        | VQVALEELQDLK                                          | 0.990578895        | 2             | 2.64115   |
| <b>P38652</b> | <b>PGM1 Phosphoglucomutase_1</b>                      | <b>0.935936581</b> | <b>2E-05</b>  | <b>16</b> |
| P38652        | ADNFEYSDPVDGSISK                                      | 0.958556303        | 2             | 4.86348   |
| P38652        | AIGGIILTASHNPGGPNDFGIK                                | 1.038219507        | 2             | 5.27492   |
| P38652        | FNISNGGPAPEAITDK                                      | 1.140892416        | 2             | 4.24181   |
| P38652        | IDAMHGVVGPYVK                                         | 0.460171438        | 2             | 3.11898   |
| P38652        | INQDPQVMLAPLISIALK                                    | 1.051428015        | 2             | 4.72899   |
| P38652        | KQRVEDILK                                             | 1.058518641        | 1             | 2.05302   |
| P38652        | LSGTGSAGATIR                                          | 1.544724814        | 2             | 2.67467   |
| P38652        | LSLCGEESFGTGSDBIR                                     | 1.763461232        | 2             | 3.24331   |
| P38652        | LVIGQNGILSTPAVSCIIR                                   | 1.100583098        | 2             | 3.55415   |
| P38652        | NIFDFNALK                                             | 1.036344021        | 1             | 2.10787   |
| P38652        | QEATLVVGGDGR                                          | 1.037470923        | 2             | 3.02026   |
| P38652        | SFVGKQFSANDK                                          | 1.033638732        | 1             | 2.06125   |
| P38652        | SGEHDFGAADFDDGDR                                      | 0.931366606        | 2             | 4.39383   |
| P38652        | TIEEYAIKPDILK                                         | 0.88706252         | 2             | 2.92078   |
| P38652        | TQAYPDQKPGTSGLR                                       | 0.830106384        | 2             | 3.70698   |
| P38652        | YDYEEVEAEGANK                                         | 1.089374404        | 2             | 4.93605   |
| <b>P38656</b> | <b>LA Lupus La protein homolog</b>                    | <b>1.184481929</b> | <b>0.1451</b> | <b>3</b>  |
| P38656        | GSIFAVFDSIQSAK                                        | 1.182407251        | 2             | 2.35563   |
| P38656        | ITDDQESLNK                                            | 1.184460835        | 2             | 3.98058   |
| P38656        | LDEGWVPLETMIK                                         | 1.767019299        | 2             | 2.94786   |
| <b>P38659</b> | <b>PDIA4 Protein disulfide isomerase A4</b>           | <b>1.205274238</b> | <b>1E-16</b>  | <b>18</b> |
| P38659        | DLGLSESGEDVNAAILDESGK                                 | 1.234380735        | 2             | 4.99685   |
| P38659        | EVSQPDWTPPEVTLTLTK                                    | 1.033856853        | 2             | 3.43654   |
| P38659        | FDVSGYPTIK                                            | 1.058199952        | 2             | 3.29415   |
| P38659        | FDVSGYPTLK                                            | 1.058199952        | 2             | 3.29415   |
| P38659        | FIDEHATK                                              | 1.289775915        | 2             | 2.47149   |
| P38659        | FIDEHATKR                                             | 1.367710332        | 2             | 2.57292   |
| P38659        | GQAVDYDGSR                                            | 0.775206112        | 2             | 2.42531   |
| P38659        | GRPFDYNGPR                                            | 1.142733742        | 2             | 2.92812   |
| P38659        | IDATSASMLASK                                          | 1.200771155        | 2             | 3.49741   |
| P38659        | IDATSASMLASK+Oxidation(7)                             | 1.169784651        | 2             | 3.21176   |
| P38659        | KGQAVDYDGSR                                           | 1.564655234        | 2             | 2.43213   |
| P38659        | MDATANDITNDR                                          | 1.231023921        | 2             | 3.83002   |
| P38659        | QLEPVYTSLGK                                           | 1.078806242        | 2             | 2.46622   |
| P38659        | RFDVSGYPTLK                                           | 1.179467186        | 2             | 3.06469   |
| P38659        | RSPPIPLAK                                             | 1.27561496         | 2             | 2.48976   |
| P38659        | VDATEQTDLAK                                           | 1.128076746        | 2             | 3.95297   |
| P38659        | VEGFPTIYFAPSGDK                                       | 0.787794578        | 2             | 3.2346    |
| P38659        | YGIVDYMVEQSGPPSK                                      | 1.388755282        | 2             | 4.40117   |
| <b>P38918</b> | <b>ARK73 Aflatoxin B1 aldehyde reductase member 3</b> | <b>0.912663448</b> | <b>0.0039</b> | <b>4</b>  |
| P38918        | FYAFNPLAGLLTGR                                        | 1.047595673        | 2             | 4.32189   |
| P38918        | MDVTSSASVR                                            | 0.786063994        | 2             | 3.49402   |
| P38918        | RMDVTSSASVR                                           | 0.710242858        | 2             | 2.92389   |
| P38918        | TTYGPTAPSMISAAVR                                      | 0.918334806        | 2             | 3.53978   |

|               |                                                                      |                    |               |           |
|---------------|----------------------------------------------------------------------|--------------------|---------------|-----------|
| <b>P38983</b> | <b>RSSA 40S ribosomal protein SA</b>                                 | <b>1.126975426</b> | <b>4E-11</b>  | <b>6</b>  |
| P38983        | ADHQLTEASYVNLPTIALCNTDSPLR                                           | 1.117081755        | 3             | 5.73563   |
| P38983        | AIVAIENPADVSVISSR                                                    | 1.071020921        | 2             | 5.55578   |
| P38983        | FTPGFTTNQIQAAFR                                                      | 1.243410055        | 2             | 4.70143   |
| P38983        | KSDGIYIINLK                                                          | 2.544416725        | 2             | 2.86672   |
| P38983        | SDGIYIINLK                                                           | 0.971589979        | 2             | 2.92307   |
| P38983        | YVDIAIPCNNK                                                          | 1.212198907        | 2             | 3.33045   |
| <b>P40307</b> | <b>PSB2 Proteasome subunit beta type_2</b>                           | <b>1.100553484</b> | <b>0.0071</b> | <b>2</b>  |
| P40307        | FILNLPFVSVR                                                          | 1.37369857         | 2             | 2.63939   |
| P40307        | NGYELSPTAAANFTR                                                      | 1.094225655        | 2             | 3.28974   |
| <b>P40329</b> | <b>SYRC Arginyl_tRNA synthetase_cytoplasmic</b>                      | <b>1.009331936</b> | <b>0.9653</b> | <b>2</b>  |
| P40329        | EENLKLK                                                              | 1.076846691        | 1             | 1.94561   |
| P40329        | SDGGYTYDTSDLAAIK                                                     | 0.997694581        | 2             | 3.69103   |
| <b>P41034</b> | <b>TTPA Alpha_tocopherol transfer protein</b>                        | <b>1.170823002</b> | <b>1E-05</b>  | <b>6</b>  |
| P41034        | AECPELSADLHPR                                                        | 0.928157846        | 2             | 2.48415   |
| P41034        | AIFDLEGWQISHAFQITPSVAK                                               | 1.040508847        | 2             | 4.57545   |
| P41034        | AQEEGVPETPQPLTDAFLLR                                                 | 1.31906432         | 2             | 3.38788   |
| P41034        | QLNEQPDHSPVQPGLAELR                                                  | 1.116787268        | 3             | 3.39409   |
| P41034        | SEDYLSISSETIQ                                                        | 1.335062376        | 2             | 2.32095   |
| P41034        | VSLITSELIVQEVETQR                                                    | 1.27250238         | 2             | 3.53946   |
| <b>P41123</b> | <b>RL13 60S ribosomal protein L13</b>                                | <b>1.097821066</b> | <b>0.0647</b> | <b>3</b>  |
| P41123        | LATQLTGPVMPPIR                                                       | 1.302345585        | 2             | 2.46074   |
| P41123        | STESLQANVQR                                                          | 1.013094964        | 2             | 3.925     |
| P41123        | VDTWFNQPAR                                                           | 1.123377097        | 2             | 3.55145   |
| <b>P41498</b> | <b>PPAC Low molecular weight phosphotyrosine protein phosphatase</b> | <b>1.013521087</b> | <b>0.9191</b> | <b>3</b>  |
| P41498        | IDSAATSTYEVGNPPDYR                                                   | 1.074804566        | 2             | 4.77351   |
| P41498        | IELLGSYDPQK                                                          | 0.924197788        | 2             | 3.73886   |
| P41498        | LVTDENVSNDWR                                                         | 0.949691302        | 2             | 3.45028   |
| <b>P41542</b> | <b>USO1 General vesicular transport factor p115</b>                  | <b>1.13783064</b>  | <b>0.927</b>  | <b>13</b> |
| P41542        | AWFEVGDENPGWSAQK                                                     | 1.140478986        | 2             | 4.0297    |
| P41542        | CQNEQLQTAVTQQASQIQHK                                                 | 1.036234473        | 3             | 4.86563   |
| P41542        | EQDDLVLVLLADQDQK                                                     | 1.042033071        | 2             | 2.68509   |
| P41542        | LQTENSELQQR                                                          | 1.039287784        | 2             | 2.8181    |
| P41542        | LREEIEELR                                                            | 0.967641928        | 2             | 2.41329   |
| P41542        | NDGVLLQLALTR                                                         | 1.086461879        | 2             | 3.84166   |
| P41542        | NNNSNQNFVK                                                           | 0.997240229        | 2             | 2.5191    |
| P41542        | QLDSSNSTIAILQTEK                                                     | 1.132966814        | 2             | 3.4837    |
| P41542        | QSEDLGSQFTEIFIK                                                      | 0.926362894        | 2             | 3.19642   |
| P41542        | SQLCSQSELETR                                                         | 1.144931282        | 2             | 3.1228    |
| P41542        | SVPVEGESELVTAAK                                                      | 1.073323822        | 2             | 3.75491   |
| P41542        | TLEQHDNIVTHYK                                                        | 1.030027435        | 2             | 3.23454   |
| P41542        | VLVSPTNPPGATSSCQK                                                    | 1.077069215        | 2             | 3.26783   |
| <b>P41562</b> | <b>IDHC Isocitrate dehydrogenase [NADP] cytoplasmic</b>              | <b>0.924609018</b> | <b>9E-12</b>  | <b>16</b> |
| P41562        | ATDFVVPGPVK                                                          | 0.971399488        | 2             | 3.37105   |
| P41562        | CATITPDEK                                                            | 1.110343633        | 2             | 2.58677   |
| P41562        | DIFQEYDK                                                             | 0.774653759        | 1             | 2.46158   |
| P41562        | FKDIFQEYDK                                                           | 0.902250257        | 3             | 4.43045   |
| P41562        | GQETSTNPIASIFAWSR                                                    | 1.079573344        | 2             | 5.1142    |
| P41562        | IIWELIK                                                              | 1.066494093        | 2             | 2.56511   |
| P41562        | LIDDMVAQAMK                                                          | 0.920654611        | 2             | 3.52528   |
| P41562        | LIDDMVAQAMK+Oxidation(9)                                             | 1.025598971        | 2             | 2.3334    |
| P41562        | LILPYVELDLHSYDLGIENR                                                 | 1.292723581        | 3             | 3.66364   |
| P41562        | LVTGWVKPIIIGR                                                        | 1.185384158        | 3             | 4.0294    |
| P41562        | SDYLNTFEFMDK                                                         | 0.923433134        | 2             | 4.08199   |
| P41562        | SDYLNTFEFMDK+Oxidation(9)                                            | 0.969412562        | 2             | 2.98484   |
| P41562        | SEGFIWACK                                                            | 0.926895628        | 2             | 3.31787   |

|               |                                                                            |                    |               |           |
|---------------|----------------------------------------------------------------------------|--------------------|---------------|-----------|
| P41562        | SIEDFAHSSFQMALS                                                            | 1.005545316        | 2             | 4.40045   |
| P41562        | TVEAEAAHGTVTR                                                              | 0.902352628        | 2             | 3.54924   |
| P41562        | VEITYTPK                                                                   | 1.013556995        | 2             | 2.53725   |
| <b>P42123</b> | <b>LDHB L_lactate dehydrogenase B chain</b>                                | <b>1.042599256</b> | <b>0.9935</b> | <b>4</b>  |
| P42123        | DYSVTANSK                                                                  | 1.024677499        | 2             | 2.65798   |
| P42123        | LIAPVADETAVPNNK                                                            | 0.97574171         | 2             | 3.36886   |
| P42123        | SLADELALVDVLEDK                                                            | 1.20590416         | 2             | 3.42354   |
| P42123        | VIGSGCNLDSAR                                                               | 1.078650347        | 2             | 3.75145   |
| <b>P42676</b> | <b>NEUL Neurolysin_mitochondrial</b>                                       | <b>0.929352962</b> | <b>0.4592</b> | <b>2</b>  |
| P42676        | AELGALPDDFIDSLEK                                                           | 1.071642648        | 2             | 2.4118    |
| P42676        | TRTEQLIAQTK                                                                | 0.851348998        | 2             | 3.17631   |
| <b>P42932</b> | <b>TCPQ T_complex protein 1 subunit theta</b>                              | <b>0.952144672</b> | <b>0.0961</b> | <b>6</b>  |
| P42932        | AIAGTGANVIVTGGK                                                            | 1.111572499        | 2             | 4.0802    |
| P42932        | AVDDGVNTFK                                                                 | 1.243868511        | 2             | 2.82986   |
| P42932        | ELEVQHAAK                                                                  | 0.922744768        | 2             | 2.79269   |
| P42932        | GEENLMDAQVK                                                                | 1.029168292        | 2             | 3.01129   |
| P42932        | NVGLDIEAEVPAVK                                                             | 1.062390517        | 2             | 3.98783   |
| P42932        | QITSYGETCPGLEQYAIK                                                         | 0.954943082        | 2             | 4.78094   |
| <b>P43244</b> | <b>MATR3 Matrin_3</b>                                                      | <b>0.905592451</b> | <b>0.061</b>  | <b>3</b>  |
| P43244        | GNLGAGNGNLQGPR                                                             | 0.782398223        | 2             | 2.36443   |
| P43244        | ITPENLPQILLQK                                                              | 1.150719112        | 2             | 3.46125   |
| P43244        | TEEGPTLSYGR                                                                | 1.006203541        | 2             | 2.4744    |
| <b>P43274</b> | <b>H14 Histone H1.4</b>                                                    | <b>0.907644865</b> | <b>1E-19</b>  | <b>3</b>  |
| P43274        | ALAAAGYDVEK                                                                | 0.877527244        | 2             | 3.52905   |
| P43274        | SGVSLAALK                                                                  | 0.939461222        | 2             | 3.14896   |
| P43274        | SGVSLAALKK                                                                 | 0.876306944        | 2             | 2.66596   |
| <b>P43276</b> | <b>H15 Histone H1.5</b>                                                    | <b>1.020231069</b> | <b>0.7926</b> | <b>2</b>  |
| P43276        | ALAAGGYDVEK                                                                | 1.056619402        | 2             | 2.35007   |
| P43276        | ATGPPVSELITK                                                               | 0.879232488        | 2             | 2.34949   |
| <b>P43278</b> | <b>H10 Histone H1.0</b>                                                    | <b>0.878404336</b> | <b>0.1398</b> | <b>2</b>  |
| P43278        | VGENADSQIK                                                                 | 0.898956966        | 2             | 3.52504   |
| P43278        | YSDMIVAAIQAEK                                                              | 0.965878803        | 2             | 3.5231    |
| <b>P45591</b> | <b>COF2 Cofilin_2</b>                                                      | <b>0.942094652</b> | <b>0.957</b>  | <b>2</b>  |
| P45591        | HEWQVNGLDDIKDR                                                             | 1.064313           | 3             | 4.24089   |
| P45591        | QLVGDIGDTEDPYTSFVK                                                         | 0.942901951        | 2             | 4.52944   |
| <b>P45592</b> | <b>COF1 Cofilin_1</b>                                                      | <b>0.968413506</b> | <b>0.9998</b> | <b>3</b>  |
| P45592        | EILVGDVGQTVDDPYTTFVK                                                       | 1.018148274        | 2             | 4.65155   |
| P45592        | HELQANCYEEVKDR                                                             | 0.944810338        | 3             | 4.69718   |
| P45592        | NIILEEGKEILVGDVGQTVDDPYTTFVK                                               | 0.982606014        | 3             | 3.66372   |
| <b>P45878</b> | <b>FKBP2 Peptidyl_cis_trans isomerase FKBP2</b>                            | <b>1.121110271</b> | <b>0.106</b>  | <b>4</b>  |
| P45878        | GWDQGLLMCEGEK                                                              | 1.124227046        | 2             | 3.93231   |
| P45878        | KLVIPSELGYGER                                                              | 0.994638798        | 2             | 2.56855   |
| P45878        | LEDGTEFDSSLPQNPQPFVSLGTGQVIK                                               | 1.187009559        | 3             | 4.28806   |
| P45878        | LVIPSELGYGER                                                               | 1.176471502        | 2             | 2.5386    |
| <b>P45953</b> | <b>ACADV Very long_chain specific acyl_CoA dehydrogenase_mitochondrial</b> | <b>1.077060775</b> | <b>1E-19</b>  | <b>17</b> |
| P45953        | AMVENGGGLVTSNPLR                                                           | 1.027408151        | 2             | 2.64419   |
| P45953        | AMVENGGGLVTSNPLRV                                                          | 1.259925718        | 2             | 3.19195   |
| P45953        | ASNTSEVYFDGVK                                                              | 1.541567521        | 2             | 4.16431   |
| P45953        | ELGAFGLQVPSELGGLGSLNTQYAR                                                  | 0.999072698        | 2             | 4.90607   |
| P45953        | ENMASLQSNPQQQELFR                                                          | 0.937025008        | 2             | 4.45201   |
| P45953        | FFEEVNDPAK                                                                 | 1.122633228        | 2             | 2.42576   |
| P45953        | FFEEVNDPAKNDSLEKVEEDTLQGLK                                                 | 0.984279061        | 3             | 6.28358   |
| P45953        | GIVNEQFLLQR                                                                | 1.184458074        | 2             | 2.98357   |
| P45953        | IFEGTNDILR                                                                 | 1.032630864        | 2             | 2.80414   |
| P45953        | NDSLEKVEEDTLQGLK                                                           | 1.116942767        | 2             | 3.59756   |
| P45953        | NPLGNVGLLIGEASK                                                            | 1.637633842        | 2             | 3.5549    |

|               |                                                                                           |                    |               |           |
|---------------|-------------------------------------------------------------------------------------------|--------------------|---------------|-----------|
| P45953        | SFGGVTHGLPEK                                                                              | 1.090459469        | 2             | 2.89819   |
| P45953        | SFGGVTHGLPEKK                                                                             | 1.595282823        | 2             | 2.80309   |
| P45953        | SGELAVQALEQFATVVEAK                                                                       | 1.13739099         | 3             | 5.00038   |
| P45953        | SLSEGYPTAQHEK                                                                             | 1.057148837        | 2             | 3.24165   |
| P45953        | TGIGSGLSLSGIVHPELSR                                                                       | 1.054546184        | 3             | 4.58204   |
| P45953        | VEEDTLQGLK                                                                                | 1.180474625        | 2             | 2.62239   |
| <b>P46418</b> | <b>GSTA5 Glutathione S_transferase alpha_5</b>                                            | <b>0.571470652</b> | <b>7E-08</b>  | <b>3</b>  |
| P46418        | AILNYIATK                                                                                 | 0.782952719        | 2             | 3.08858   |
| P46418        | SHGQDYLVGNK                                                                               | 0.401768273        | 2             | 3.00017   |
| P46418        | VSNLPTVK                                                                                  | 0.892757766        | 2             | 2.60299   |
| <b>P46425</b> | <b>GSTP2 Glutathione S_transferase P 2</b>                                                | <b>0.789510825</b> | <b>0.0285</b> | <b>2</b>  |
| P46425        | ALPGHLKPFETLLSQNQGGK                                                                      | 0.86021505         | 3             | 3.98809   |
| P46425        | FEDGDLTYQSNAILR                                                                           | 0.670412079        | 2             | 4.07114   |
| <b>P46462</b> | <b>TERA Transitional endoplasmic reticulum ATPase</b>                                     | <b>0.967226974</b> | <b>0.081</b>  | <b>23</b> |
| P46462        | AIANECQANFISIK                                                                            | 0.899996016        | 2             | 3.10789   |
| P46462        | ELQELVQYPVEHPDK                                                                           | 0.909448379        | 2             | 4.37007   |
| P46462        | ETVVEVPQVTWEDIGLEDVK                                                                      | 0.962396083        | 2             | 3.18303   |
| P46462        | ETVVEVPQVTWEDIGLEDVKR                                                                     | 0.856484738        | 2             | 4.28812   |
| P46462        | EVDIGIPDATGR                                                                              | 0.777999391        | 2             | 2.6448    |
| P46462        | GDDLSTAILK                                                                                | 1.047742627        | 2             | 3.02562   |
| P46462        | GGNIGDGGGAADR                                                                             | 1.188308907        | 2             | 3.32362   |
| P46462        | GILLYGPPGTGK                                                                              | 0.957542191        | 2             | 3.17706   |
| P46462        | LADDVDLEQVANETHGHVGADLAALCSEALQAIR                                                        | 1.183782834        | 3             | 6.83826   |
| P46462        | LAGESESNLRKAFEEAEK                                                                        | 0.737186094        | 2             | 2.34734   |
| P46462        | LDQLIYIPLPDEK                                                                             | 0.918924956        | 2             | 4.26556   |
| P46462        | LEILQIHTK                                                                                 | 0.902100132        | 1             | 2.3388    |
| P46462        | LGDVISIQPCPDVK                                                                            | 0.916523399        | 2             | 4.10316   |
| P46462        | LIVDEAINEDNSVVSLSQPK                                                                      | 1.033630825        | 2             | 5.61971   |
| P46462        | MDELQLFR                                                                                  | 0.866006292        | 2             | 2.48809   |
| P46462        | MTNGFSGADLTEICQR+Oxidation(0)                                                             | 0.985491042        | 2             | 3.87168   |
| P46462        | NAPAIIFIDELDAIAPK                                                                         | 0.946463711        | 2             | 4.68887   |
| P46462        | QAAPCVLFFDELDSIAK                                                                         | 1.27371473         | 2             | 3.46075   |
| P46462        | QTNPSAMEVEEDDPVPEIR                                                                       | 0.958804934        | 2             | 4.40537   |
| P46462        | RSVSDNDIR                                                                                 | 0.47166987         | 2             | 2.92965   |
| P46462        | VINQILTEMDGMSTK                                                                           | 1.030568863        | 2             | 3.54364   |
| P46462        | VINQILTEMDGMSTK+Oxidation(8)                                                              | 0.398226779        | 2             | 2.37183   |
| P46462        | WALSQSNPSALR                                                                              | 1.221040127        | 2             | 3.00092   |
| <b>P46664</b> | <b>PURA2 Adenylosuccinate synthetase isozyme 2</b>                                        | <b>0.956708427</b> | <b>0.2371</b> | <b>4</b>  |
| P46664        | FIEDELQIPVK                                                                               | 0.94457372         | 2             | 3.07449   |
| P46664        | LDILDMFTEIK                                                                               | 0.854606403        | 2             | 3.70676   |
| P46664        | VGIGAFPTEQDNEIGELLQTR                                                                     | 1.51326979         | 2             | 4.04445   |
| P46664        | VVDLLAQDADIVCR                                                                            | 1.05958482         | 2             | 3.7339    |
| <b>P46720</b> | <b>SO1A1 Solute carrier organic anion transporter family member 1A1</b>                   | <b>1.100700773</b> | <b>0.1705</b> | <b>3</b>  |
| P46720        | ESEHTDVHGSPQVENDGELK                                                                      | 1.12807755         | 3             | 3.44242   |
| P46720        | GIGETPIVPLGISYIEDFAK                                                                      | 1.11647497         | 2             | 3.36015   |
| P46720        | SENSPLYIGILEMGK                                                                           | 0.882966455        | 2             | 2.91782   |
| <b>P46953</b> | <b>3HAO 3_hydroxyanthranilate 3_4_dioxygenase</b>                                         | <b>0.991086643</b> | <b>0.5364</b> | <b>6</b>  |
| P46953        | AQGSVALSVTQDPACK                                                                          | 0.307409996        | 2             | 4.2429    |
| P46953        | DLGTQLAPIIQEFFHSEQYR                                                                      | 1.052353896        | 2             | 3.98507   |
| P46953        | QDQDVVWLWQLEGSSK                                                                          | 0.869755163        | 2             | 3.47318   |
| P46953        | QGEIFLLPAR                                                                                | 1.005995209        | 2             | 3.03658   |
| P46953        | TGKPNPDQLLK                                                                               | 0.934272631        | 3             | 3.79759   |
| P46953        | YYVGDTEDEVLFK                                                                             | 1.019832537        | 2             | 3.57261   |
| <b>P46978</b> | <b>STT3A Dolichyl_diphosphooligosaccharide__protein glycosyltransferase subunit STT3A</b> | <b>1.38094155</b>  | <b>0.0002</b> | <b>6</b>  |
| P46978        | FESVIHEFDYFNRYR                                                                           | 1.064390684        | 3             | 3.82331   |

|               |                                                          |                    |               |           |
|---------------|----------------------------------------------------------|--------------------|---------------|-----------|
| P46978        | FGQVYTEAK                                                | 1.173315607        | 2             | 2.41714   |
| P46978        | FYSLLDPSYAK                                              | 1.147203431        | 2             | 3.28769   |
| P46978        | NLDISRPKK                                                | 1.060683238        | 2             | 2.54968   |
| P46978        | VGQAMASTEEL                                              | 1.381548504        | 2             | 3.24323   |
| P46978        | VGQAMASTEEL+Oxidation(4)                                 | 1.535875309        | 2             | 3.25699   |
| <b>P47198</b> | <b>RL22 60S ribosomal protein L22</b>                    | <b>1.026785317</b> | <b>0.1908</b> | <b>2</b>  |
| P47198        | AGNLGGGVVTIER                                            | 1.002360646        | 2             | 2.97492   |
| P47198        | FTLDCTHPVEDGIMDAANFEQLQER                                | 1.250068531        | 3             | 5.09232   |
| <b>P47875</b> | <b>CSRP1 Cysteine and glycine_rich protein 1</b>         | <b>1.139090439</b> | <b>0.241</b>  | <b>3</b>  |
| P47875        | GFGFGQGAGALVHSE                                          | 1.060229207        | 2             | 3.15471   |
| P47875        | GLESTTLADKDGIEYCK                                        | 1.175008968        | 2             | 4.74863   |
| P47875        | NLDSTTVAHVHGEIYCK                                        | 0.920697136        | 2             | 4.80259   |
| <b>P47942</b> | <b>DPYL2 Dihydropyrimidinase_related protein 2</b>       | <b>0.840655388</b> | <b>2E-07</b>  | <b>2</b>  |
| P47942        | GLYDGPVCEVSVTPK                                          | 0.851308067        | 2             | 3.09319   |
| P47942        | SITIANQTNCPYVTK                                          | 0.812398145        | 2             | 3.28508   |
| <b>P48004</b> | <b>PSA7 Proteasome subunit alpha type_7</b>              | <b>0.943678608</b> | <b>0.0007</b> | <b>3</b>  |
| P48004        | GRDIVVLGVEK                                              | 0.876126215        | 2             | 2.65837   |
| P48004        | NYTDDAIETDDLTIK                                          | 1.077858025        | 2             | 3.89874   |
| P48004        | YVAEIEKEKEENEK                                           | 0.539206527        | 2             | 4.99171   |
| <b>P48024</b> | <b>EIF1 Eukaryotic translation initiation factor 1</b>   | <b>1.153584623</b> | <b>0.0505</b> | <b>2</b>  |
| P48024        | FACNGTVIEHPEYGEVIQLQGDQR                                 | 1.159560594        | 3             | 4.82772   |
| P48024        | TLTTVQGIADDYDK                                           | 1.149956278        | 2             | 3.23139   |
| <b>P48037</b> | <b>ANXA6 Annexin A6</b>                                  | <b>0.854729006</b> | <b>3E-08</b>  | <b>15</b> |
| P48037        | AANDFNPADAK                                              | 0.97853024         | 2             | 3.01725   |
| P48037        | AINEAYKEDYHK                                             | 0.87106052         | 2             | 3.12415   |
| P48037        | DAFVAIVQSVK                                              | 0.892311489        | 2             | 2.89361   |
| P48037        | DLESIIIGDTSGHFQK                                         | 0.83683456         | 2             | 4.10617   |
| P48037        | ENDDVVEDLVQQVDQDLYEAGELK                                 | 1.051065459        | 2             | 4.67014   |
| P48037        | GELSGDFEK                                                | 0.916022878        | 1             | 2.06645   |
| P48037        | GFGSDKESILELITSR                                         | 0.933420071        | 2             | 3.96482   |
| P48037        | GIGTDEATIIDIITQR                                         | 0.742760606        | 2             | 4.32599   |
| P48037        | QRQEICQSYK                                               | 0.675857245        | 2             | 2.95098   |
| P48037        | SEIDLLNIR                                                | 1.079816861        | 2             | 3.12238   |
| P48037        | SEISGLAR                                                 | 0.937886821        | 2             | 2.35896   |
| P48037        | SLEDALSDTSGHFK                                           | 0.968470536        | 2             | 3.81991   |
| P48037        | TNEQIHQLVAAYK                                            | 0.8776303          | 2             | 4.02107   |
| P48037        | TNYDIEHVIK                                               | 0.874189139        | 2             | 3.29197   |
| P48037        | TTGKPIEASIR                                              | 0.890712684        | 2             | 2.62764   |
| <b>P48500</b> | <b>TPIS Triosephosphate isomerase</b>                    | <b>1.052852894</b> | <b>1E-19</b>  | <b>12</b> |
| P48500        | CNVSEGVACQTR                                             | 1.009365351        | 2             | 3.61883   |
| P48500        | DLGATWVVLGHSER                                           | 0.914542949        | 2             | 3.13717   |
| P48500        | ELASQPDVDGFLVGGASLKPEFVDIINAK                            | 0.974871679        | 4             | 6.58527   |
| P48500        | HIFGESDELIGQK                                            | 1.185791614        | 2             | 4.07179   |
| P48500        | IYGGSVTGATCK                                             | 1.188175959        | 2             | 3.88552   |
| P48500        | LPADTEVVCAPPTAYIDFAR                                     | 2.099859437        | 2             | 5.21575   |
| P48500        | RHIFGESDELIGQK                                           | 1.056748649        | 2             | 3.30636   |
| P48500        | TATPQQAQEVHEK                                            | 1.400594064        | 2             | 3.74413   |
| P48500        | VNHALSEGLVIACIGEK                                        | 1.044724704        | 2             | 5.46101   |
| P48500        | VTNGAFTGEISPGMIK                                         | 1.00292697         | 2             | 4.79841   |
| P48500        | VTNGAFTGEISPGMIK+Oxidation(13)                           | 0.909445772        | 2             | 3.60527   |
| P48500        | VVLAYEPVWAIGTGK                                          | 1.066999455        | 2             | 3.81503   |
| <b>P48508</b> | <b>GSH0 Glutamate_cysteine ligase regulatory subunit</b> | <b>0.918842029</b> | <b>0.0355</b> | <b>5</b>  |
| P48508        | ASTLHLQGTGNLLNWGR                                        | 1.444226793        | 3             | 4.03284   |
| P48508        | EFPDVLECTMSHAVEK                                         | 0.877019511        | 2             | 3.14434   |
| P48508        | INPDEREEMK+Oxidation(8)                                  | 1.095190543        | 2             | 2.32567   |
| P48508        | QFDIQLLTHNDPK                                            | 0.966280473        | 2             | 3.05097   |
| P48508        | TLNEWSSQSPDLVR                                           | 0.873094709        | 2             | 5.12403   |

|               |                                              |                    |               |           |
|---------------|----------------------------------------------|--------------------|---------------|-----------|
| <b>P48675</b> | <b>DESM Desmin</b>                           | <b>1.154748344</b> | <b>0.9283</b> | <b>2</b>  |
| P48675        | TSGGAGGLGSLR                                 | 1.160853857        | 2             | 2.41495   |
| P48675        | VSDLTQAANK                                   | 1.110615693        | 2             | 2.9215    |
| <b>P48679</b> | <b>LMNA Prelamin_A/C</b>                     | <b>0.943043814</b> | <b>0.3652</b> | <b>16</b> |
| P48679        | AASGSGAQVGGSSISSGSSASSVTVTR                  | 0.925621844        | 2             | 3.67184   |
| P48679        | AA YEAE LGDAR                                | 1.084785089        | 2             | 2.62455   |
| P48679        | AQHEDQVEQYKK                                 | 1.20017656         | 2             | 3.91219   |
| P48679        | GSHCSSGDPAEYNLR                              | 0.919417705        | 2             | 4.05365   |
| P48679        | IDSLSAQLS QLQK                               | 0.896118057        | 2             | 3.08751   |
| P48679        | ITESEEVVSR                                   | 0.932842167        | 2             | 3.15237   |
| P48679        | LKDLEALLNSK                                  | 0.988366429        | 2             | 2.79663   |
| P48679        | LQEKEDLQELNDR                                | 0.822104654        | 2             | 4.15137   |
| P48679        | MQQQLDEYQELLDIK                              | 1.03389044         | 2             | 4.5597    |
| P48679        | MQQQLDEYQELLDIK+Oxidation(0)                 | 1.036322318        | 2             | 4.32563   |
| P48679        | NSNLVGA AHEELQQSR                            | 1.016337867        | 2             | 3.7401    |
| P48679        | SGA QASSTPLSPTR                              | 0.851010605        | 2             | 3.02487   |
| P48679        | SVGGSGGSGFGDNLVTR                            | 1.119625582        | 2             | 3.54155   |
| P48679        | TALINATGEEVAMR                               | 0.965954582        | 2             | 3.1932    |
| P48679        | TLEGELHDLR                                   | 0.936982746        | 2             | 2.54717   |
| P48679        | TVLCGTCGQPADK                                | 0.944846639        | 2             | 3.27734   |
| <b>P48721</b> | <b>GRP75 Stress_70 protein_mitochondrial</b> | <b>0.996933009</b> | <b>0.0037</b> | <b>26</b> |
| P48721        | AQFEGIVTDLIK                                 | 0.995204855        | 2             | 3.77469   |
| P48721        | ASNGDAWVEAHGK                                | 1.09528302         | 2             | 3.85942   |
| P48721        | DAGQISGLNVLR                                 | 1.036050067        | 2             | 3.70301   |
| P48721        | EQQIVIQSSGGLSK                               | 1.044696643        | 2             | 4.04772   |
| P48721        | ERVEAVNMAEGIIHDTEK                           | 0.929812154        | 3             | 4.91217   |
| P48721        | ETAENYLGH TAK                                | 0.959942473        | 2             | 3.36357   |
| P48721        | GAVVGIDLGTTNSCVAVMEGK                        | 1.074799941        | 2             | 4.48086   |
| P48721        | LLGQFTLIGIPPAPR                              | 1.291574061        | 2             | 3.15183   |
| P48721        | MEEFKDQLPADECNK                              | 0.986941751        | 2             | 4.16089   |
| P48721        | MEEFKDQLPADECNK+Oxidation(0)                 | 1.041632395        | 2             | 3.61134   |
| P48721        | MKETAENYLGH TAK                              | 1.030741116        | 3             | 3.63569   |
| P48721        | MKETAENYLGH TAK+Oxidation(0)                 | 1.278885408        | 2             | 3.81875   |
| P48721        | NAVITVPAYFNDSQR                              | 1.018827999        | 2             | 3.47406   |
| P48721        | QAASSLQQASK                                  | 2.329012042        | 2             | 2.44278   |
| P48721        | QAVTNPNTFYATK                                | 1.367926999        | 2             | 3.57466   |
| P48721        | RYDDPEVQK                                    | 1.086959011        | 2             | 2.51901   |
| P48721        | RYDDPEVQKDTK                                 | 1.398632116        | 2             | 3.7613    |
| P48721        | SDIGEVILVGGMTR                               | 0.996581717        | 2             | 3.92496   |
| P48721        | SQVFSTAADGQTQVEIK                            | 1.366515025        | 2             | 4.80987   |
| P48721        | STNGDTFLGGEDFDQALLR                          | 0.947513008        | 2             | 5.63714   |
| P48721        | TTPSVVAFTPDGER                               | 1.032841568        | 2             | 3.7806    |
| P48721        | VEAVNMAEGIIHDTEK                             | 1.007712051        | 2             | 4.53974   |
| P48721        | VINEPTAAALAYGLDK                             | 1.257546725        | 2             | 3.39653   |
| P48721        | VLENAEGAR                                    | 1.04559559         | 2             | 3.0295    |
| P48721        | VQQTVQDLFGR                                  | 1.04458295         | 2             | 3.85575   |
| P48721        | YDDPEVQKDTK                                  | 0.935371205        | 2             | 2.82338   |
| <b>P49134</b> | <b>ITB1 Integrin beta_1</b>                  | <b>1.023886096</b> | <b>0.7571</b> | <b>4</b>  |
| P49134        | CNCQSHGIPASPK                                | 1.02391009         | 2             | 3.54162   |
| P49134        | GEFFNELVGQQR                                 | 0.927470603        | 2             | 2.87632   |
| P49134        | RITSDFRIGFGSFVEK                             | 1.113436118        | 2             | 2.43621   |
| P49134        | SAVTTVNPKN                                   | 1.038094694        | 2             | 2.53363   |
| <b>P49242</b> | <b>RS3A 40S ribosomal protein S3a</b>        | <b>0.947967662</b> | <b>1E-05</b>  | <b>8</b>  |
| P49242        | ACQSIYPLHDVFVR                               | 1.229859234        | 2             | 3.64877   |
| P49242        | ADGYEPPVQESV                                 | 1.435145929        | 1             | 1.92742   |
| P49242        | LITEDVQ GK                                   | 1.02575519         | 2             | 2.71349   |
| P49242        | LMELHGE GSSGK                                | 1.044897573        | 2             | 3.47221   |

|               |                                                                            |                    |               |           |
|---------------|----------------------------------------------------------------------------|--------------------|---------------|-----------|
| P49242        | LMELHGEGSSGK+Oxidation(1)                                                  | 1.363055782        | 2             | 3.34476   |
| P49242        | NCLTNFHGMDLTR                                                              | 0.895956651        | 2             | 3.24013   |
| P49242        | TTDGYLLR                                                                   | 1.051830699        | 2             | 2.67832   |
| P49242        | VFEVSLADLQNDEVAFR                                                          | 1.000452148        | 2             | 4.10222   |
| <b>P49432</b> | <b>ODPB Pyruvate dehydrogenase E1 component subunit beta_mitochondrial</b> | <b>0.968610265</b> | <b>0.6193</b> | <b>5</b>  |
| P49432        | ILEDNSIPQVK                                                                | 1.003472289        | 2             | 3.54815   |
| P49432        | IMEGPAFNFLDAPAVR                                                           | 0.948198383        | 2             | 4.30943   |
| P49432        | IMEGPAFNFLDAPAVR+Oxidation(1)                                              | 0.977138393        | 2             | 3.15926   |
| P49432        | TIRPMDIEAIEASVMK                                                           | 0.87755205         | 3             | 4.08455   |
| P49432        | VFLLGEEVAQYDGAYK                                                           | 1.261751023        | 2             | 3.58158   |
| <b>P49889</b> | <b>ST1E3 Estrogen sulfotransferase_ isoform 3</b>                          | <b>0.913507776</b> | <b>1</b>      | <b>12</b> |
| P49889        | CKEDALFNR                                                                  | 1.036245883        | 2             | 2.67502   |
| P49889        | FEEHYQQQMK                                                                 | 1.162897357        | 2             | 2.64004   |
| P49889        | FMEGQVPYGSWYDHSV                                                           | 1.009822568        | 2             | 3.46074   |
| P49889        | IIQHTSFQEMK                                                                | 0.989388963        | 2             | 2.77055   |
| P49889        | LIEFLER                                                                    | 1.199640562        | 2             | 2.50028   |
| P49889        | LIEFLERDPSAELVDR                                                           | 0.978778423        | 3             | 5.06749   |
| P49889        | NEDLINGIK                                                                  | 0.964483735        | 2             | 3.06086   |
| P49889        | NNPCTNYSMLPETMIDLK                                                         | 0.991830562        | 2             | 5.6164    |
| P49889        | NNPCTNYSMLPETMIDLK+Oxidation(13)                                           | 0.952231131        | 2             | 3.53226   |
| P49889        | NNPCTNYSMLPETMIDLK+Oxidation(8)                                            | 0.953035027        | 2             | 4.64175   |
| P49889        | SFSEFVEK                                                                   | 1.032676888        | 2             | 2.34377   |
| P49889        | SGSTWISEIVDMIYK                                                            | 0.982135384        | 3             | 4.73795   |
| <b>P50137</b> | <b>TKT Transketolase</b>                                                   | <b>0.962923743</b> | <b>1E-19</b>  | <b>20</b> |
| P50137        | AVELAANTK                                                                  | 0.931257093        | 1             | 1.99058   |
| P50137        | GHAAPILYAVWAEAGFLPEALLNLR                                                  | 0.953590527        | 3             | 3.38643   |
| P50137        | GITGIEDK                                                                   | 0.855535576        | 1             | 2.50284   |
| P50137        | IIALDGDTK                                                                  | 0.946543918        | 2             | 2.74987   |
| P50137        | ILATPPQEDAPSVDIANIR                                                        | 1.031231971        | 2             | 4.65536   |
| P50137        | ISSDLDGHPVPK                                                               | 0.846149114        | 2             | 3.20853   |
| P50137        | KISSDLDGHPVPK                                                              | 0.917793659        | 2             | 4.5077    |
| P50137        | LAVSQVPRSGKPAELLK                                                          | 2.125081464        | 2             | 2.6875    |
| P50137        | LDNLVAIFDINR                                                               | 0.876276193        | 2             | 3.64367   |
| P50137        | LGQSDPAPLQHQVDVYQK                                                         | 1.015656665        | 2             | 4.0932    |
| P50137        | MFGIDKDAIVQAVK                                                             | 0.937837849        | 2             | 3.79272   |
| P50137        | MFGIDKDAIVQAVK+Oxidation(0)                                                | 0.867525172        | 2             | 4.54005   |
| P50137        | NMAEQIIQEIYSQVQSK                                                          | 0.907731724        | 3             | 6.01915   |
| P50137        | NMAEQIIQEIYSQVQSK+Oxidation(1)                                             | 1.324185447        | 3             | 3.80804   |
| P50137        | SKDDQVTVIGAGVTLHEALAAEMLK                                                  | 0.84964807         | 4             | 5.04938   |
| P50137        | SVPMSTVFYPSDGVATEK                                                         | 0.963166182        | 2             | 4.5178    |
| P50137        | SVPMSTVFYPSDGVATEK+Oxidation(3)                                            | 0.882259121        | 2             | 3.4201    |
| P50137        | TSRPENAIISNNEDFQVQAK                                                       | 1.057806517        | 3             | 5.64093   |
| P50137        | VLDPFTIKPLDK                                                               | 0.915483404        | 2             | 3.2029    |
| P50137        | VLDPFTIKPLDKK                                                              | 0.895791237        | 2             | 2.84944   |
| <b>P50169</b> | <b>RDH3 Retinol dehydrogenase 3</b>                                        | <b>0.907609452</b> | <b>4E-07</b>  | <b>9</b>  |
| P50169        | AMESLVNTCSGDLSLVTDCMEHALTSCHPR                                             | 0.869377322        | 3             | 5.58879   |
| P50169        | AMESLVNTCSGDLSLVTDCMEHALTSCHPR+Oxidation(1)                                | 0.996979623        | 4             | 5.06103   |
| P50169        | FQDSYMK                                                                    | 0.936363589        | 1             | 1.94389   |
| P50169        | KLWDQTTEEVK                                                                | 0.931323316        | 2             | 3.06398   |
| P50169        | KLWDQTTEEVKEIYGEK                                                          | 0.872052322        | 3             | 4.00357   |
| P50169        | LWDQTTEEVK                                                                 | 0.987955531        | 2             | 3.16059   |
| P50169        | LWDQTTEEVKEIYGEK                                                           | 0.882870077        | 2             | 4.88275   |
| P50169        | MSLVGGGYCISK                                                               | 0.78107559         | 2             | 3.43716   |
| P50169        | MSLVGGGYCISK+Oxidation(0)                                                  | 0.982595303        | 2             | 2.63029   |
| <b>P50237</b> | <b>ST1C1 Sulfotransferase 1C1</b>                                          | <b>0.900667064</b> | <b>7E-08</b>  | <b>6</b>  |
| P50237        | AGTTWTQEIVDMIQNDGDVQK                                                      | 0.882884842        | 2             | 5.31967   |

|               |                                                             |                    |               |           |
|---------------|-------------------------------------------------------------|--------------------|---------------|-----------|
| P50237        | DISEEVLNK                                                   | 0.829153017        | 1             | 2.49385   |
| P50237        | DLHLGEQDLQPETR                                              | 0.917369061        | 2             | 4.45397   |
| P50237        | MLPDPGTLGEYIEQFK                                            | 0.86692893         | 3             | 4.95733   |
| P50237        | MLPDPGTLGEYIEQFK+Oxidation(0)                               | 0.927086473        | 2             | 3.01235   |
| P50237        | VLWGSWYDHVK                                                 | 0.815139157        | 2             | 2.68481   |
| <b>P50398</b> | <b>GDIA Rab GDP dissociation inhibitor alpha</b>            | <b>1.065361798</b> | <b>0.0007</b> | <b>7</b>  |
| P50398        | FDLGQDVIDFTGHALALYR                                         | 1.16991482         | 3             | 4.63797   |
| P50398        | FQLLEGPPESMGR                                               | 1.044235422        | 2             | 3.09211   |
| P50398        | KQNDVFGIADQ                                                 | 1.059956966        | 2             | 2.66786   |
| P50398        | NPYYGGESSITPLEELYK                                          | 1.205864276        | 2             | 5.31777   |
| P50398        | QLICDPYIPDR                                                 | 0.976239998        | 2             | 3.11675   |
| P50398        | TDDYLDQPCLETINR                                             | 1.114642921        | 2             | 4.47608   |
| P50398        | TFEGVDPQTSMR                                                | 1.073561372        | 2             | 2.46836   |
| <b>P50399</b> | <b>GDIB Rab GDP dissociation inhibitor beta</b>             | <b>1.154783141</b> | <b>7E-07</b>  | <b>6</b>  |
| P50399        | AYDATTFETTCDDIKDIYK                                         | 1.160762531        | 3             | 5.26483   |
| P50399        | EIRPALELLEPIEQK                                             | 1.128692234        | 3             | 3.68457   |
| P50399        | FDLGQDVIDFTGHSLALYR                                         | 1.143115053        | 3             | 4.21286   |
| P50399        | FVSISDLFVPK                                                 | 1.159851868        | 2             | 3.5785    |
| P50399        | NTNDANSCQIIHPQNQVNR                                         | 1.165820209        | 2             | 4.14893   |
| P50399        | TDDYLDQPCLETINR                                             | 1.188822465        | 2             | 4.82915   |
| <b>P50431</b> | <b>GLYC Serine hydroxymethyltransferase_ cytosolic</b>      | <b>1.175408387</b> | <b>5E-12</b>  | <b>5</b>  |
| P50431        | ALSDALTELGK                                                 | 1.119414824        | 2             | 3.72758   |
| P50431        | AVLEALGSLNNK                                                | 1.236011223        | 2             | 3.9784    |
| P50431        | GLLEEDFQK                                                   | 1.092139275        | 1             | 2.02447   |
| P50431        | NLDYAR                                                      | 1.473282003        | 1             | 1.91591   |
| P50431        | VLEACSIACNK                                                 | 1.097082027        | 2             | 3.22227   |
| <b>P50475</b> | <b>SYAC Alanyl_tRNA synthetase_ cytoplasmic</b>             | <b>0.98859584</b>  | <b>2E-05</b>  | <b>14</b> |
| P50475        | ASEWVQVSGGLMDGK                                             | 0.963147556        | 2             | 4.02502   |
| P50475        | AVFDETYDPVPR                                                | 1.004561498        | 2             | 3.44916   |
| P50475        | DIINEEEVQFLK                                                | 0.913854494        | 2             | 3.23143   |
| P50475        | ESDGVLKPLPK                                                 | 0.749759796        | 2             | 2.49095   |
| P50475        | GLEATDDSPK                                                  | 0.907737566        | 1             | 2.02287   |
| P50475        | ITCLCQVPQNAANR                                              | 1.141980628        | 2             | 4.36458   |
| P50475        | IVAVTGAEAQK                                                 | 1.028875054        | 2             | 2.5993    |
| P50475        | NVGCLQEALQLATSAFQLR                                         | 0.927466616        | 2             | 3.89468   |
| P50475        | RIVAVTGAEAQK                                                | 0.858928962        | 2             | 3.12074   |
| P50475        | SVLGDADQK                                                   | 0.756860317        | 1             | 2.14714   |
| P50475        | TEEIVNGMIEAAKPVYTLDCPLAAAK                                  | 0.988789458        | 3             | 3.50432   |
| P50475        | TITVALADGGRPDNTGR                                           | 0.930828648        | 2             | 2.9626    |
| P50475        | VDDSSSEDKTEFTVK                                             | 1.354445251        | 2             | 3.31742   |
| P50475        | VGAEDTDGIDMAYR                                              | 1.058491093        | 2             | 3.36262   |
| <b>P50503</b> | <b>F10A1 Hsc70_interacting protein</b>                      | <b>1.499837982</b> | <b>1E-19</b>  | <b>4</b>  |
| P50503        | AIDLFTDAIK                                                  | 1.239878792        | 1             | 2.15544   |
| P50503        | AIEINPDSAQPYK                                               | 1.538712904        | 2             | 2.80614   |
| P50503        | GAAIDALNDGELQK                                              | 1.43601219         | 2             | 3.75628   |
| P50503        | KGAAIDALNDGELQK                                             | 1.386576106        | 2             | 4.47207   |
| <b>P50554</b> | <b>GABT 4_aminobutyrate aminotransferase_ mitochondrial</b> | <b>1.10398192</b>  | <b>9E-05</b>  | <b>9</b>  |
| P50554        | GNYLVDVDGNR                                                 | 1.075804871        | 1             | 2.12301   |
| P50554        | GTFCSFDPDEAIR                                               | 1.010308879        | 2             | 3.42426   |
| P50554        | HGCAFLVDEVQTGGGCTGK                                         | 1.477785541        | 2             | 4.5514    |
| P50554        | IDIPSFWDWPIAFPFR                                            | 1.037108686        | 2             | 3.75551   |
| P50554        | NLLLAEVINIK                                                 | 1.115213061        | 3             | 4.54306   |
| P50554        | REDLLNVAHAGK                                                | 1.026624544        | 2             | 2.45902   |
| P50554        | TLLTGLLDLQAQYPQFVSR                                         | 1.192509297        | 3             | 4.10356   |
| P50554        | TVAGIIVEPIQSEGGDNHASDDFFR                                   | 1.107110924        | 2             | 3.76339   |
| P50554        | VDFEFDYDGPLMK                                               | 0.183108528        | 2             | 2.47293   |
| <b>P50580</b> | <b>PA2G4 Proliferation_associated protein 2G4</b>           | <b>1.097235293</b> | <b>0.568</b>  | <b>2</b>  |



|               |                                                                 |                    |               |           |
|---------------|-----------------------------------------------------------------|--------------------|---------------|-----------|
| P50580        | HELLQPFNVLYEK                                                   | 1.191663393        | 2             | 2.70909   |
| P50580        | TIQNPTDQQK                                                      | 1.094963145        | 2             | 3.0938    |
| <b>P50878</b> | <b>RL4 60S ribosomal protein L4</b>                             | <b>1.069867235</b> | <b>0.0008</b> | <b>7</b>  |
| P50878        | KLDELYGTWR                                                      | 1.028585911        | 2             | 2.624     |
| P50878        | KLEAAAAALAAK                                                    | 1.102442929        | 2             | 3.14033   |
| P50878        | LDELYGTWR                                                       | 1.074337531        | 2             | 2.63756   |
| P50878        | LEAAAAALAAK                                                     | 1.205260916        | 2             | 3.05621   |
| P50878        | NIPGITLLNVSK                                                    | 1.241483559        | 1             | 2.55968   |
| P50878        | RGPCIIYNEDNGIIK                                                 | 1.038362377        | 2             | 3.17715   |
| P50878        | SGQGAFGNMCR                                                     | 0.972039765        | 2             | 2.8714    |
| <b>P51635</b> | <b>AK1A1 Alcohol dehydrogenase [NADP_]</b>                      | <b>0.73372062</b>  | <b>6E-13</b>  | <b>7</b>  |
| P51635        | ALEALVAK                                                        | 0.964276648        | 2             | 2.5996    |
| P51635        | GLEVTAYSPLGSSDR                                                 | 0.890561324        | 2             | 3.99151   |
| P51635        | HHPEDVEPAVR                                                     | 0.887980154        | 3             | 3.74727   |
| P51635        | HIDCASVYGNETEIGEALK                                             | 0.997438721        | 2             | 5.98395   |
| P51635        | HIDCASVYGNETEIGEALKESVGAGK                                      | 0.676941031        | 3             | 5.31116   |
| P51635        | HPDEPVLLLEPPVVLALAEK                                            | 1.241502944        | 3             | 5.81331   |
| P51635        | YIVPMITVDGK                                                     | 0.835227496        | 2             | 2.3039    |
| <b>P51647</b> | <b>AL1A1 Retinal dehydrogenase 1</b>                            | <b>0.61584068</b>  | <b>1E-19</b>  | <b>14</b> |
| P51647        | ANNTTYGLAAGVFTK                                                 | 0.457682114        | 2             | 4.58405   |
| P51647        | EAGFPPGVVNVIPGYGPTAGAAISSHMDVDK                                 | 0.616564179        | 3             | 3.97622   |
| P51647        | ELGEHGLYEYTELK                                                  | 0.408005559        | 2             | 3.46419   |
| P51647        | FPVLNPATEEVICHVEEGDKADVDK                                       | 0.433421868        | 4             | 5.15345   |
| P51647        | IFINNEWHDSVSGK                                                  | 0.518615812        | 2             | 4.25935   |
| P51647        | IFVEESVYDEFVR                                                   | 0.539930334        | 2             | 4.1608    |
| P51647        | IGPALSCGNTVVVKPAEQTPLTALHMASLIK                                 | 0.514523419        | 3             | 4.8077    |
| P51647        | IHGQTIPSDGDIPTFR                                                | 0.591203963        | 2             | 3.83275   |
| P51647        | KFPVLNPATEEVICHVEEGDKADVDK                                      | 0.519150375        | 3             | 3.63965   |
| P51647        | LLLATIEAINGGK                                                   | 1.540429872        | 2             | 3.32114   |
| P51647        | VFANAYLSDLGGSIK                                                 | 0.459836032        | 2             | 4.13326   |
| P51647        | YCAGWADK                                                        | 0.44425712         | 1             | 1.95946   |
| P51647        | YVLGNPLTQGINQGPPQIDK                                            | 0.54498596         | 2             | 4.88056   |
| P51647        | YVLGNPLTQGINQGPPQIDKEQHDK                                       | 0.460429061        | 2             | 3.72434   |
| <b>P51650</b> | <b>SSDH Succinate semialdehyde dehydrogenase_ mitochondrial</b> | <b>1.014357794</b> | <b>0.5853</b> | <b>9</b>  |
| P51650        | EVGEVLCTDPLVSK                                                  | 0.896637704        | 2             | 3.82619   |
| P51650        | GIHDSFVTK                                                       | 0.796420006        | 1             | 1.9289    |
| P51650        | HQSGGNFFFEPTLLSNVTR                                             | 1.060120132        | 2             | 3.62814   |
| P51650        | IITAESGKPLK                                                     | 1.09072385         | 2             | 2.45695   |
| P51650        | LGTVADCGVPEAR                                                   | 1.044136432        | 2             | 3.29468   |
| P51650        | VGNGFEEGTTQGPIINEK                                              | 0.938129974        | 2             | 4.7433    |
| P51650        | VYGDIIYTSK                                                      | 0.98049386         | 2             | 2.54581   |
| P51650        | WLPTPATFPVYDPASGAK                                              | 0.902956214        | 2             | 2.78812   |
| P51650        | YGIDEYLEVK                                                      | 0.930367824        | 2             | 2.94467   |
| <b>P51869</b> | <b>CP4F4 Cytochrome P450 4F4</b>                                | <b>1.191449401</b> | <b>7E-07</b>  | <b>4</b>  |
| P51869        | ALPSQHEDDILK                                                    | 1.237601675        | 2             | 2.65231   |
| P51869        | NISLMTLDSLQK                                                    | 1.059978215        | 2             | 2.90265   |
| P51869        | TLDFIDVLLLTk                                                    | 1.559635332        | 2             | 2.87039   |
| P51869        | WQDLASGGSAR                                                     | 1.191297472        | 2             | 2.55183   |
| <b>P51886</b> | <b>LUM Lumican</b>                                              | <b>0.923889989</b> | <b>0.789</b>  | <b>2</b>  |
| P51886        | NNQIDHIDEK                                                      | 1.132762052        | 2             | 3.32161   |
| P51886        | SLQDLQLANNK                                                     | 0.82418493         | 2             | 3.09091   |
| <b>P52296</b> | <b>IMB1 Importin subunit beta_1</b>                             | <b>1.018349077</b> | <b>0.2001</b> | <b>4</b>  |
| P52296        | AAVENLPTFLVELSR                                                 | 0.88164679         | 2             | 2.59822   |
| P52296        | SNEILTAIIQGMR                                                   | 0.888126038        | 2             | 2.72962   |
| P52296        | TVSPDRLELEAAQK                                                  | 0.919391614        | 2             | 2.52815   |
| P52296        | VLANPGNSQVAR                                                    | 1.087403256        | 2             | 3.18862   |
| <b>P52303</b> | <b>AP1B1 AP_1 complex subunit beta_1</b>                        | <b>0.973264008</b> | <b>0.0081</b> | <b>3</b>  |

|               |                                                            |                    |               |           |
|---------------|------------------------------------------------------------|--------------------|---------------|-----------|
| P52303        | NINLIVQK                                                   | 0.913001628        | 1             | 2.21432   |
| P52303        | NSFGLAPAAPLQVHAPLSPNQTVIEISLPLNTVGSVMK                     | 1.068993987        | 3             | 4.00899   |
| P52303        | YNDPIYVK                                                   | 1.243695557        | 2             | 2.48967   |
| <b>P52555</b> | <b>ERP29 Endoplasmic reticulum resident protein 29</b>     | <b>1.167660959</b> | <b>0.0829</b> | <b>3</b>  |
| P52555        | ILDQGEDFPASELAR                                            | 1.126445186        | 2             | 4.53079   |
| P52555        | QGQDGLSGVK                                                 | 1.313186697        | 2             | 2.46315   |
| P52555        | SLNILTAFR                                                  | 1.167534109        | 2             | 2.76702   |
| <b>P52759</b> | <b>UK114 Ribonuclease UK114</b>                            | <b>1.105046039</b> | <b>0.0028</b> | <b>7</b>  |
| P52759        | AAGCDFTNVVK                                                | 1.502961234        | 2             | 2.8162    |
| P52759        | APAAIGAYSQAVLVDR                                           | 1.286967489        | 2             | 3.94013   |
| P52759        | IEIEAIAVQGPFTTAGL                                          | 1.132760381        | 1             | 3.48095   |
| P52759        | NLGEILK                                                    | 0.904583168        | 1             | 2.2241    |
| P52759        | TIYVSGQIGMDPSSGQLVPGGVAEEAK                                | 1.0638508          | 2             | 3.92437   |
| P52759        | TTVLLADINDFGTVNEIYK                                        | 1.063304409        | 2             | 5.19122   |
| P52759        | TYFQGNLPAR                                                 | 0.979897887        | 2             | 2.97519   |
| <b>P52845</b> | <b>ST1E2 Estrogen sulfotransferase_ isoform 2</b>          | <b>0.911244068</b> | <b>0.9971</b> | <b>2</b>  |
| P52845        | CKEDAIFNR                                                  | 1.036245883        | 2             | 2.67502   |
| P52845        | SGSTWIGEIVDMIYK                                            | 0.909648013        | 2             | 4.48599   |
| <b>P52847</b> | <b>ST1B1 Sulfotransferase family cytosolic 1B member 1</b> | <b>1.188613292</b> | <b>9E-09</b>  | <b>6</b>  |
| P52847        | DNPLVNYTHLPTIEMDHSK                                        | 1.192533864        | 2             | 4.16266   |
| P52847        | FLAGNVAYGSWFDHVK                                           | 1.293080977        | 2             | 2.59062   |
| P52847        | IEEFQSRPCDIVIPTYPK                                         | 1.048537537        | 3             | 4.40213   |
| P52847        | NYFTMTQSEK                                                 | 1.05960318         | 1             | 2.68298   |
| P52847        | THLPIDLLPK                                                 | 1.099574461        | 3             | 3.40365   |
| P52847        | TLDEHTLER                                                  | 1.178352506        | 2             | 2.97859   |
| <b>P52873</b> | <b>PYC Pyruvate carboxylase_ mitochondrial</b>             | <b>1.019477197</b> | <b>1E-19</b>  | <b>32</b> |
| P52873        | ADEAYLIGR                                                  | 1.164947304        | 2             | 2.84      |
| P52873        | ADFAQACQDAGVR                                              | 1.052431499        | 2             | 4.14713   |
| P52873        | AEAEAQAELSFPFR                                             | 1.134310325        | 2             | 4.38919   |
| P52873        | AGTHILCIK                                                  | 1.589057368        | 2             | 2.66686   |
| P52873        | ALAVSDLNR                                                  | 1.032737458        | 2             | 2.74746   |
| P52873        | AYSEALAAFNGALFVEK                                          | 1.090177897        | 2             | 4.01858   |
| P52873        | AYVEANQMLGDLIK                                             | 1.062022099        | 2             | 4.58683   |
| P52873        | DAHQSSLATR                                                 | 0.945082337        | 1             | 3.14014   |
| P52873        | DFTATFGPLDSLNR                                             | 0.82373272         | 2             | 4.26398   |
| P52873        | DMAGLLKPAACTMLVSSLR                                        | 1.115928785        | 2             | 2.96559   |
| P52873        | ELIPNIPFQMLLR                                              | 1.406782006        | 2             | 2.34254   |
| P52873        | ENGVDAVHPGYGFLSER                                          | 1.222578122        | 2             | 2.86456   |
| P52873        | FLYECPCR                                                   | 1.148629988        | 1             | 2.14017   |
| P52873        | GANAVGYTNYPDNVVFK                                          | 1.469930305        | 2             | 4.37819   |
| P52873        | GTPLDTEVPLER                                               | 1.029309165        | 2             | 3.59878   |
| P52873        | HGEEVTPEDVLSAAMYPDVFAQFK                                   | 1.133608204        | 2             | 5.65172   |
| P52873        | HIEVQILGDQYGNILHLYER                                       | 1.200031443        | 3             | 5.40582   |
| P52873        | HYFIEVNSR                                                  | 1.151860301        | 2             | 2.72182   |
| P52873        | IAEEFEVELER                                                | 1.005653392        | 2             | 3.24918   |
| P52873        | IEGRPGASLPLNLK                                             | 0.921014583        | 2             | 3.60173   |
| P52873        | INGCAIQCR                                                  | 1.225503407        | 2             | 2.43643   |
| P52873        | IVGDLAQFMVQNGLSR                                           | 1.201069887        | 2             | 4.01246   |
| P52873        | LDNASAFQGAIVISPHYDSLK                                      | 1.126124548        | 3             | 5.6108    |
| P52873        | LQVEHTVTEITDVLVHAQIHVSEGR                                  | 1.089382925        | 4             | 4.61287   |
| P52873        | QVGYENAGTVEFLVDK                                           | 1.211403346        | 2             | 3.76786   |
| P52873        | SVVEFLQYIGIPHGGFPEPFR                                      | 1.328229973        | 2             | 4.17808   |
| P52873        | TVAVYSEQDTGQMHR                                            | 1.186285188        | 2             | 4.05088   |
| P52873        | VFDYSEYWEGAR                                               | 1.105256335        | 2             | 4.57888   |
| P52873        | VSPSPVDIVPVVPIGPPAGFR                                      | 1.019505374        | 2             | 4.32831   |
| P52873        | VVEIAPATHLDPQLR                                            | 1.024617983        | 2             | 4.87125   |
| P52873        | VVHSYEELEENYTR                                             | 1.103960342        | 2             | 5.10714   |

|               |                                                                                                                       |                    |               |           |
|---------------|-----------------------------------------------------------------------------------------------------------------------|--------------------|---------------|-----------|
| P52873        | YSLEYMGLAEELVR                                                                                                        | 1.24796054         | 3             | 4.43642   |
| <b>P52944</b> | <b>PDL1 PDZ and LIM domain protein 1</b>                                                                              | <b>0.92199904</b>  | <b>0.1202</b> | <b>4</b>  |
| P52944        | GHFFVGDQIYCEK                                                                                                         | 0.949991098        | 2             | 3.48473   |
| P52944        | QSTSFLVLQEILESDGK                                                                                                     | 0.939569244        | 2             | 2.35759   |
| P52944        | TSASGEEANSRPSAQPHPSGGLIIDK                                                                                            | 0.841396416        | 3             | 4.28578   |
| P52944        | VTPPEGYDVVTVFPK                                                                                                       | 0.820633804        | 2             | 2.73218   |
| <b>P53395</b> | <b>ODB2 Lipoamide acyltransferase component of branched_chain alpha_keto acid dehydrogenase complex_mitochondrial</b> | <b>0.91633629</b>  | <b>0.5294</b> | <b>3</b>  |
| P53395        | LSDIGEGIR                                                                                                             | 1.044596912        | 2             | 2.35938   |
| P53395        | LSEVVGSGK                                                                                                             | 1.223214035        | 1             | 2.03584   |
| P53395        | SYLENPAFMLLDLK                                                                                                        | 1.155835601        | 2             | 4.02904   |
| <b>P53987</b> | <b>MOT1 Monocarboxylate transporter 1</b>                                                                             | <b>1.172386746</b> | <b>2E-14</b>  | <b>4</b>  |
| P53987        | DGKEDETSTDVDEKPK                                                                                                      | 1.557731135        | 3             | 5.22769   |
| P53987        | DGKEDETSTDVDEKPKK                                                                                                     | 1.038601779        | 3             | 3.69507   |
| P53987        | ETQSPAPLQNSSGDPAAEEESPV                                                                                               | 1.163874219        | 2             | 4.73893   |
| P53987        | SDANTDLIGGSPK                                                                                                         | 1.1656626          | 2             | 3.75559   |
| <b>P54319</b> | <b>PLAP Phospholipase A_2 activating protein</b>                                                                      | <b>1.015361586</b> | <b>0.995</b>  | <b>4</b>  |
| P54319        | GQTLGLGNTSFSDPFTGGGR                                                                                                  | 0.936027865        | 2             | 3.28922   |
| P54319        | IGDVVGSSGANQQTSGK                                                                                                     | 1.017400242        | 2             | 4.17649   |
| P54319        | TGDLGDINAEQLPGR                                                                                                       | 0.784832016        | 2             | 3.79812   |
| P54319        | YVPGTSGPSNTVQTADPFTGAGR                                                                                               | 1.071443388        | 2             | 3.30035   |
| <b>P54921</b> | <b>SNAA Alpha_soluble NSF attachment protein</b>                                                                      | <b>0.981382803</b> | <b>0.0398</b> | <b>5</b>  |
| P54921        | AIAHYEQSADYYKGEESNSSANK                                                                                               | 0.975407923        | 3             | 3.7382    |
| P54921        | AIDIYEQVGTSAMDSPLLK                                                                                                   | 1.142470358        | 2             | 3.40204   |
| P54921        | HDAATCFVDAGNAFK                                                                                                       | 0.881537233        | 2             | 2.51986   |
| P54921        | NSQSFFSGLFGGSSK                                                                                                       | 0.988034822        | 2             | 3.24861   |
| P54921        | YEELFPAFSDSR                                                                                                          | 0.994024021        | 2             | 2.61775   |
| <b>P55006</b> | <b>RDH7 Retinol dehydrogenase 7</b>                                                                                   | <b>1.053464591</b> | <b>1E-09</b>  | <b>11</b> |
| P55006        | LETVILDVTK                                                                                                            | 0.993455421        | 2             | 2.95732   |
| P55006        | TESIVAATQWVK                                                                                                          | 0.894988465        | 2             | 3.96016   |
| P55006        | TNVTNMER                                                                                                              | 1.095468688        | 2             | 2.30728   |
| P55006        | TNVTNMER+Oxidation(5)                                                                                                 | 1.277443981        | 2             | 2.45132   |
| P55006        | TSDRLETVILDVTK                                                                                                        | 1.025326248        | 3             | 4.42367   |
| P55006        | VAIIEPGGFK                                                                                                            | 1.35456187         | 2             | 2.34095   |
| P55006        | VLAACLTEK                                                                                                             | 1.212598285        | 2             | 2.79519   |
| P55006        | VVNIASTMGR                                                                                                            | 0.954603952        | 2             | 3.49625   |
| P55006        | VVNIASTMGR+Oxidation(7)                                                                                               | 0.940235065        | 2             | 2.67002   |
| P55006        | YGVEAFSDSLR                                                                                                           | 1.173840397        | 2             | 3.48712   |
| P55006        | YVFITGCDSGFGNLLAR                                                                                                     | 1.306778972        | 2             | 3.77707   |
| <b>P55051</b> | <b>FABP7 Fatty acid binding protein_brain</b>                                                                         | <b>0.984189175</b> | <b>0.2702</b> | <b>2</b>  |
| P55051        | LTDSQNFDEYMK                                                                                                          | 0.835298526        | 2             | 4.02945   |
| P55051        | QVGNVTKPTVIISQEGGK                                                                                                    | 0.992741743        | 3             | 3.86626   |
| <b>P55053</b> | <b>FABP5 Fatty acid binding protein_epidermal</b>                                                                     | <b>0.769210097</b> | <b>4E-09</b>  | <b>4</b>  |
| P55053        | KTETVCTFTD GALVQHQQ                                                                                                   | 0.725373112        | 3             | 4.39169   |
| P55053        | LVESHG FEDYMK                                                                                                         | 0.869992569        | 2             | 2.83176   |
| P55053        | MGAMAKPDCIITLDGNNLTVK                                                                                                 | 1.106746324        | 3             | 3.33938   |
| P55053        | TETVCTFTD GALVQHQQ                                                                                                    | 0.734259477        | 2             | 4.51512   |
| <b>P55159</b> | <b>PON1 Serum paraoxonase/arylesterase 1</b>                                                                          | <b>0.8417403</b>   | <b>4E-07</b>  | <b>6</b>  |
| P55159        | GIEAGAEDLEILPGLTFFSTGLK                                                                                               | 1.271051369        | 3             | 5.33763   |
| P55159        | IFFYDSENPPGSEVLR                                                                                                      | 0.832336719        | 2             | 5.41295   |
| P55159        | IQSILSEDPK                                                                                                            | 0.903906508        | 2             | 3.12762   |
| P55159        | TITHELLPSINDIAAVGPESFYATNDHYFADPYLR                                                                                   | 0.950511202        | 3             | 4.07429   |
| P55159        | VVADGDFDANGIGISLDGK                                                                                                   | 0.841710409        | 2             | 4.61414   |
| P55159        | YVYIAELLAHK                                                                                                           | 0.992679916        | 2             | 2.9503    |
| <b>P55260</b> | <b>ANXA4 Annexin A4</b>                                                                                               | <b>0.962632281</b> | <b>0.6894</b> | <b>6</b>  |
| P55260        | AEIDMLDIPANFK                                                                                                         | 1.24431045         | 1             | 2.1351    |
| P55260        | GAGTDEGLIEILASR                                                                                                       | 0.983109086        | 2             | 3.60862   |

|               |                                                           |                    |               |           |
|---------------|-----------------------------------------------------------|--------------------|---------------|-----------|
| P55260        | GLGTDDSTLIR                                               | 0.972125546        | 2             | 2.89776   |
| P55260        | GLGTDEDAIIGVLACR                                          | 0.980759225        | 2             | 3.2461    |
| P55260        | KAMKGLGTDEDAIIGVLACR+Oxidation(2)                         | 0.732073313        | 2             | 2.44394   |
| P55260        | SETSGSFEDALLAIVK                                          | 1.023866365        | 2             | 2.77143   |
| <b>P55770</b> | <b>NH2L1 NHP2_like protein 1</b>                          | <b>0.919256743</b> | <b>0.3476</b> | <b>2</b>  |
| P55770        | LLDLVQQSCNYK                                              | 1.063975664        | 2             | 3.00273   |
| P55770        | QQIQSIQQSIER                                              | 0.915078381        | 2             | 2.7288    |
| <b>P56399</b> | <b>UBP5 Ubiquitin carboxyl terminal hydrolase 5</b>       | <b>1.096468405</b> | <b>0.4454</b> | <b>3</b>  |
| P56399        | GTGLQPGEELPDIAPPLVTPDEPK                                  | 0.996414668        | 2             | 4.51432   |
| P56399        | IFQNAPTDPTQDFSTQVAK                                       | 1.092244101        | 2             | 3.6315    |
| P56399        | IGEWELIQESGVPLKPLFGPGYTIR                                 | 1.255259212        | 3             | 4.09165   |
| <b>P56522</b> | <b>ADRO NADPH:adenodoxin oxidoreductase_mitochondrial</b> | <b>0.888596537</b> | <b>0.0778</b> | <b>4</b>  |
| P56522        | AVPTGDVEDLPCGLLLSSVGYK                                    | 0.915123156        | 2             | 4.13537   |
| P56522        | NVINTFTQATAR                                              | 0.93510356         | 2             | 2.52749   |
| P56522        | TATEKPGVEEAR                                              | 0.893908081        | 2             | 3.12471   |
| P56522        | TDITEVALGVLR                                              | 0.872682028        | 2             | 3.46133   |
| <b>P56574</b> | <b>IDHP Isocitrate dehydrogenase [NADP]_mitochondrial</b> | <b>1.04605336</b>  | <b>0.0006</b> | <b>10</b> |
| P56574        | ATDFVVDVDR                                                | 1.304546227        | 2             | 2.57967   |
| P56574        | CATITPDEAR                                                | 1.19100918         | 2             | 2.33323   |
| P56574        | DQTNDQVTIDSALATQK                                         | 1.037157558        | 2             | 5.50417   |
| P56574        | GKLDGNQDLIR                                               | 1.054528201        | 2             | 3.108     |
| P56574        | LDGNQDLIR                                                 | 1.003843483        | 2             | 2.35427   |
| P56574        | LIDDMVAQVLK                                               | 1.026605666        | 2             | 4.07631   |
| P56574        | LNEHFLNTDFLDTIK                                           | 1.179060882        | 3             | 3.49321   |
| P56574        | NILGGTVFR                                                 | 0.884592877        | 2             | 2.50328   |
| P56574        | SSGGFVWACK                                                | 1.126319613        | 2             | 2.525     |
| P56574        | TIEAEEAHGTVTR                                             | 1.31986198         | 2             | 3.85152   |
| <b>P56593</b> | <b>CP2AC Cytochrome P450 2A12</b>                         | <b>1.189261058</b> | <b>0.1621</b> | <b>3</b>  |
| P56593        | MLQGTGAPIDPTIYLSK                                         | 0.777291123        | 2             | 3.9414    |
| P56593        | MLQGTGAPIDPTIYLSK+Oxidation(0)                            | 1.242683368        | 2             | 3.07027   |
| P56593        | NRQPQYEDHMK                                               | 0.908198334        | 3             | 3.4141    |
| <b>P56656</b> | <b>CP239 Cytochrome P450 2C39</b>                         | <b>0.810215578</b> | <b>1E-19</b>  | <b>5</b>  |
| P56656        | EHQESLDVTNPR                                              | 0.536441254        | 2             | 3.37415   |
| P56656        | IKEHQESLDVTNPR                                            | 0.63604717         | 2             | 5.08095   |
| P56656        | NYLIPK                                                    | 1.119909252        | 1             | 1.98419   |
| P56656        | VCAGEGLAR                                                 | 1.768459767        | 2             | 2.39504   |
| P56656        | VQEEIDHVIGR                                               | 0.88137951         | 2             | 2.70477   |
| <b>P57093</b> | <b>PAHX Phytanoyl-CoA dioxygenase_peroxisomal</b>         | <b>0.93287066</b>  | <b>6E-07</b>  | <b>3</b>  |
| P57093        | AISCHYGSSDCK                                              | 0.979629775        | 2             | 3.07568   |
| P57093        | IQDFQQNEELFR                                              | 1.076229676        | 2             | 4.03726   |
| P57093        | NLVSDDDIQR                                                | 0.685947222        | 1             | 2.50934   |
| <b>P57113</b> | <b>MAAI Maleylacetoacetate isomerase</b>                  | <b>0.900648093</b> | <b>0.8335</b> | <b>12</b> |
| P57113        | AITSGFNALEK                                               | 0.853701237        | 2             | 3.32191   |
| P57113        | ALLALEAFQVSHPCR                                           | 1.121173073        | 2             | 4.43866   |
| P57113        | DGGQQFSEEFQTLNPMK                                         | 0.934994088        | 2             | 4.8539    |
| P57113        | DGGQQFSEEFQTLNPMK+Oxidation(15)                           | 0.942324842        | 2             | 2.3882    |
| P57113        | FKVDLSPYPTISHINK                                          | 0.983762355        | 3             | 4.89407   |
| P57113        | GIDYEIVPINLIK                                             | 0.960028644        | 2             | 4.25431   |
| P57113        | IDGITIGQSLAILEYLEETRPIPR                                  | 1.003220104        | 3             | 3.83377   |
| P57113        | MISDLIASGIQPLQNLSVLK                                      | 1.093069675        | 2             | 4.55273   |
| P57113        | MISDLIASGIQPLQNLSVLK+Oxidation(0)                         | 1.113890013        | 2             | 5.44221   |
| P57113        | QVGQENQMPWAQK                                             | 0.952341502        | 2             | 3.62146   |
| P57113        | VDLSPYPTISHINK                                            | 1.052112926        | 2             | 3.7296    |
| P57113        | YCVGDEVSMADVCLAPQVANAER                                   | 1.007432934        | 2             | 5.95365   |
| <b>P57722</b> | <b>PCBP3 Poly(rC)_binding protein 3</b>                   | <b>0.937967073</b> | <b>0.1117</b> | <b>2</b>  |
| P57722        | ESTGAQVQVAGDMLPNSTER                                      | 0.887568922        | 2             | 4.82714   |
| P57722        | INISEGNCPER                                               | 1.070808967        | 2             | 3.35926   |

|               |                                                               |                    |               |           |
|---------------|---------------------------------------------------------------|--------------------|---------------|-----------|
| <b>P58321</b> | <b>UCHL4 Ubiquitin carboxyl-terminal hydrolase isozyme L4</b> | <b>0.968830737</b> | <b>1</b>      | <b>2</b>  |
| P58321        | VTHETSAHEGQTEAPSIDEK                                          | 0.958303516        | 2             | 4.40929   |
| P58321        | WLPLEANPEVTNQFLK                                              | 0.968830737        | 2             | 3.53485   |
| <b>P58751</b> | <b>RELN Reelin</b>                                            | <b>0.992259655</b> | <b>0.5325</b> | <b>2</b>  |
| <b>P58775</b> | <b>TPM2 Tropomyosin beta chain</b>                            | <b>1.843633236</b> | <b>0.9998</b> | <b>10</b> |
| P58775        | AISEELDNALNDITSL                                              | 1.781782106        | 2             | 4.33054   |
| P58775        | ATDAEADVASLNR                                                 | 1.436102864        | 2             | 3.80096   |
| P58775        | CGDLEELK                                                      | 1.278350696        | 2             | 2.82984   |
| P58775        | KATDAEADVASLNR                                                | 1.449743931        | 2             | 4.32546   |
| P58775        | LDKENAIDR                                                     | 1.666157898        | 1             | 2.07886   |
| P58775        | LKGTEDEVEK                                                    | 1.468130369        | 3             | 3.54806   |
| P58775        | MELQEMQLK                                                     | 0.80188551         | 2             | 2.62533   |
| P58775        | QLEEEQALQK                                                    | 1.31891501         | 2             | 3.97325   |
| P58775        | SLEAQADKYSTK                                                  | 1.10452639         | 2             | 3.14157   |
| P58775        | TIDDLEDEVYAQK                                                 | 1.698356855        | 2             | 3.71379   |
| <b>P59279</b> | <b>RAB2B Ras-related protein Rab_2B</b>                       | <b>1.071613872</b> | <b>0.8842</b> | <b>2</b>  |
| P59279        | LQIWDTAGQESFR                                                 | 1.028691047        | 2             | 3.15208   |
| P59279        | SYRGAAGALLVYDITR                                              | 1.184835142        | 2             | 2.79916   |
| <b>P60335</b> | <b>PCBP1 Poly(rC)-binding protein 1</b>                       | <b>1.085059795</b> | <b>0.4014</b> | <b>2</b>  |
| P60335        | AITIAGVPQSVTECVK                                              | 1.077771315        | 2             | 3.13124   |
| P60335        | LVVPATQCGSLIGK                                                | 1.188747285        | 2             | 3.07523   |
| <b>P60843</b> | <b>IF4A1 Eukaryotic initiation factor 4A_I</b>                | <b>1.016450605</b> | <b>0.9992</b> | <b>4</b>  |
| P60843        | ATQALVLAPTR                                                   | 0.972844364        | 1             | 2.28062   |
| P60843        | GFKDQIYDIFQK                                                  | 1.019204185        | 2             | 3.33683   |
| P60843        | KGVAINMVTEEDKR                                                | 1.023180997        | 3             | 3.47956   |
| P60843        | LQMEAPHIIVGTPGR                                               | 1.104703796        | 3             | 3.39221   |
| <b>P60868</b> | <b>RS20 40S ribosomal protein S20</b>                         | <b>0.807350637</b> | <b>0.0003</b> | <b>2</b>  |
| P60868        | DTGKTPVEPEVAIHR                                               | 0.72661741         | 3             | 4.15312   |
| P60868        | LIDLHSPSEIVK                                                  | 1.094102856        | 2             | 3.01281   |
| <b>P60901</b> | <b>PSA6 Proteasome subunit alpha type_6</b>                   | <b>1.285423408</b> | <b>0.0065</b> | <b>2</b>  |
| P60901        | AINQGGLTSVAVR                                                 | 1.284681299        | 2             | 3.5068    |
| P60901        | LLDSTVTHLFK                                                   | 1.46762413         | 2             | 2.56895   |
| <b>P61087</b> | <b>UBE2K Ubiquitin-conjugating enzyme E2 K</b>                | <b>1.104289992</b> | <b>0.1231</b> | <b>2</b>  |
| P61087        | GEIAGPPDTPYEGGR                                               | 1.102215457        | 2             | 3.52621   |
| P61087        | VLDVDENFTELR                                                  | 1.165823832        | 2             | 2.60081   |
| <b>P61107</b> | <b>RAB14 Ras-related protein Rab_14</b>                       | <b>0.950867833</b> | <b>0.718</b>  | <b>3</b>  |
| P61107        | NLTNPNTVILIGNK                                                | 0.932631691        | 2             | 3.90158   |
| P61107        | SCLLHQFTEK                                                    | 0.976261273        | 2             | 2.93796   |
| P61107        | STYNHLSSWLT DAR                                               | 0.850763326        | 2             | 2.54797   |
| <b>P61222</b> | <b>ABCE1 ATP-binding cassette sub-family E member 1</b>       | <b>0.957695267</b> | <b>0.6847</b> | <b>2</b>  |
| P61222        | NTVANSPQTL LAGMNK                                             | 0.930162945        | 2             | 2.88966   |
| P61222        | NVEDLSGGELQR                                                  | 0.986467903        | 2             | 2.93536   |
| <b>P61314</b> | <b>RL15 60S ribosomal protein L15</b>                         | <b>1.042546518</b> | <b>0.3004</b> | <b>5</b>  |
| P61314        | FFEVLIDPFHK                                                   | 0.970493281        | 3             | 3.83222   |
| P61314        | GATYGKPVHHGVNQLK                                              | 1.496641213        | 2             | 4.2882    |
| P61314        | SLQSVAEER                                                     | 1.038025579        | 2             | 2.90032   |
| P61314        | VLNSYWVGEDSTYK                                                | 1.05954561         | 2             | 3.17686   |
| P61314        | YIQELWR                                                       | 1.094338774        | 2             | 2.3221    |
| <b>P61459</b> | <b>PHS Pterin_4-alpha-carbinolamine dehydratase</b>           | <b>1.061417523</b> | <b>0.4022</b> | <b>3</b>  |
| P61459        | AVGWNELEGR                                                    | 1.047437476        | 2             | 2.81039   |
| P61459        | LDHHPWFVFNYNK                                                 | 1.022642999        | 3             | 4.89418   |
| P61459        | LSAEERDQLLPNLR                                                | 1.073795327        | 3             | 4.08985   |
| <b>P61589</b> | <b>RHOA Transforming protein RhoA</b>                         | <b>1.066213648</b> | <b>0.9668</b> | <b>2</b>  |
| P61589        | MKQEPVKPEEGR                                                  | 1.04399826         | 3             | 3.57017   |
| P61589        | MKQEPVKPEEGR+Oxidation(0)                                     | 1.094607731        | 2             | 2.96881   |
| <b>P61751</b> | <b>ARF4 ADP-ribosylation factor 4</b>                         | <b>1.144760922</b> | <b>0.4428</b> | <b>3</b>  |
| P61751        | IQEAAVLQK                                                     | 1.07066413         | 2             | 2.48765   |

|               |                                                                                         |                    |               |          |
|---------------|-----------------------------------------------------------------------------------------|--------------------|---------------|----------|
| P61751        | LGEIVTTIPTIGFNVETVEYK                                                                   | 1.071771281        | 3             | 4.82535  |
| P61751        | NICFTVWVDVGGQDK                                                                         | 1.256406311        | 2             | 3.55078  |
| <b>P61805</b> | <b>DAD1 Dolichyl_diphosphooligosaccharide__protein glycosyltransferase subunit DAD1</b> | <b>1.1212356</b>   | <b>0.2144</b> | <b>2</b> |
| P61805        | ADFQGISPER                                                                              | 0.996205387        | 2             | 2.65911  |
| P61805        | FLEEYLSSTPQR                                                                            | 1.108981967        | 2             | 3.69794  |
| <b>P61924</b> | <b>COPZ1 Coatomer subunit zeta_1</b>                                                    | <b>1.16716573</b>  | <b>4E-06</b>  | <b>2</b> |
| P61924        | GEDVPLTEQTVSQVLQSAK                                                                     | 1.173736435        | 2             | 3.79322  |
| P61924        | YYDDTYPSVK                                                                              | 1.091327295        | 2             | 2.77864  |
| <b>P61980</b> | <b>HNRPK Heterogeneous nuclear ribonucleoprotein K</b>                                  | <b>0.967151836</b> | <b>1E-12</b>  | <b>7</b> |
| P61980        | GSDFDCELR                                                                               | 0.948775475        | 2             | 2.63631  |
| P61980        | GSYGDLDGGPIITQVTIPK                                                                     | 0.886287082        | 2             | 4.77486  |
| P61980        | IDEPLEGSEDR                                                                             | 0.928947428        | 2             | 3.35345  |
| P61980        | IILDISESPIK                                                                             | 0.937662524        | 2             | 4.13629  |
| P61980        | IITITGTQDQIQNAQYLLQNSVK                                                                 | 0.959341939        | 3             | 5.27998  |
| P61980        | LFQECCPHSTDR                                                                            | 0.984408678        | 2             | 3.45565  |
| P61980        | TDYNASVSVDPSSGPER                                                                       | 0.945085416        | 2             | 4.40746  |
| <b>P61983</b> | <b>1433G 14_3_3 protein gamma</b>                                                       | <b>1.041458508</b> | <b>1</b>      | <b>4</b> |
| P61983        | AYSEAHEISK                                                                              | 1.005137314        | 2             | 3.42011  |
| P61983        | NVTELENEPLSNEER                                                                         | 0.973897676        | 2             | 4.89528  |
| P61983        | TAFDDAIAELDTLNEDSYK                                                                     | 1.023752109        | 2             | 4.36381  |
| P61983        | YLAEVATGEK                                                                              | 1.137732432        | 2             | 2.81219  |
| <b>P62076</b> | <b>TIM13 Mitochondrial import inner membrane translocase subunit Tim13</b>              | <b>0.878577898</b> | <b>1E-08</b>  | <b>4</b> |
| P62076        | CIGKPGGSLDNSEQK                                                                         | 0.842020522        | 2             | 3.9513   |
| P62076        | KCIGKPGGSLDNSEQK                                                                        | 1.087577437        | 3             | 3.96031  |
| P62076        | LDPGAIMEQVK                                                                             | 0.88478567         | 2             | 2.8421   |
| P62076        | VQIAVANAQELLQR                                                                          | 0.948061621        | 2             | 4.20429  |
| <b>P62083</b> | <b>RS7 40S ribosomal protein S7</b>                                                     | <b>1.083901004</b> | <b>0.302</b>  | <b>3</b> |
| P62083        | AIIIFVVPQLK                                                                             | 1.096532728        | 2             | 3.73099  |
| P62083        | KAIIFVVPQLK                                                                             | 1.086072488        | 2             | 3.73043  |
| P62083        | TLTAVHDAILEDLVFPSEIVGK                                                                  | 1.042666533        | 2             | 5.25204  |
| <b>P62161</b> | <b>CALM Calmodulin</b>                                                                  | <b>1.123617103</b> | <b>0.0009</b> | <b>3</b> |
| P62161        | EADIDGGQVNYEEFVQMMTAK                                                                   | 1.504564367        | 2             | 4.76689  |
| P62161        | EAFSLFDKDGDTITTK                                                                        | 1.177634866        | 2             | 4.05378  |
| P62161        | VFDKDGNGYISAAELR                                                                        | 1.096823788        | 2             | 4.87202  |
| <b>P62198</b> | <b>PRS8 26S protease regulatory subunit 8</b>                                           | <b>1.062592431</b> | <b>0.0002</b> | <b>3</b> |
| P62198        | IEELQLIVNDK                                                                             | 1.088303708        | 2             | 2.74543  |
| P62198        | LEGGSGGDSEVQR                                                                           | 1.070911352        | 2             | 3.44481  |
| P62198        | TMLELLNQLDGFEATK                                                                        | 1.254091288        | 2             | 3.12486  |
| <b>P62243</b> | <b>RS8 40S ribosomal protein S8</b>                                                     | <b>1.248360112</b> | <b>4E-12</b>  | <b>9</b> |
| P62243        | ADGYVLE GK                                                                              | 1.117720548        | 2             | 2.82564  |
| P62243        | IIDVVYNASNNE LVR                                                                        | 1.063024259        | 2             | 3.63052  |
| P62243        | ISSLLEE QFQQGK                                                                          | 1.359539649        | 2             | 3.62546  |
| P62243        | KYELGRPAANTK                                                                            | 1.028463681        | 2             | 3.51506  |
| P62243        | LDVGNFSWGSECCTR                                                                         | 1.120672644        | 2             | 3.43152  |
| P62243        | LTPEEEI LNK                                                                             | 1.009717063        | 2             | 3.14226  |
| P62243        | NCIVLIDSTPYR                                                                            | 1.136123443        | 2             | 3.13019  |
| P62243        | QWYESHYALPLGR                                                                           | 0.998541302        | 2             | 2.33818  |
| P62243        | YELGRPAANTK                                                                             | 0.894310768        | 2             | 2.77112  |
| <b>P62246</b> | <b>RS15A 40S ribosomal protein S15a</b>                                                 | <b>1.128160374</b> | <b>4E-05</b>  | <b>3</b> |
| P62246        | HGYIGEFEIIDDHR                                                                          | 1.083441755        | 3             | 4.61457  |
| P62246        | IVVNL TGR                                                                               | 1.160329448        | 2             | 2.46352  |
| P62246        | WQNNLLPSR                                                                               | 1.069398932        | 2             | 2.58888  |
| <b>P62250</b> | <b>RS16 40S ribosomal protein S16</b>                                                   | <b>1.31949107</b>  | <b>7E-05</b>  | <b>4</b> |
| P62250        | ALVAYYQK                                                                                | 1.030158924        | 1             | 2.00934  |
| P62250        | GGGHVAQYAIR                                                                             | 1.424034351        | 2             | 3.04808  |

|               |                                                  |                    |               |           |
|---------------|--------------------------------------------------|--------------------|---------------|-----------|
| P62250        | LLEPVLLLGK                                       | 1.110541484        | 2             | 2.75476   |
| P62250        | TLLVADPR                                         | 1.034355597        | 2             | 2.46284   |
| <b>P62260</b> | <b>1433E 14_3_3 protein epsilon</b>              | <b>0.961061631</b> | <b>7E-07</b>  | <b>4</b>  |
| P62260        | AAFDDAIAELDTLSEESYK                              | 1.068128529        | 2             | 5.83026   |
| P62260        | HLIPAANTGESK                                     | 0.978947623        | 2             | 2.34773   |
| P62260        | LICCDILDVLDK                                     | 1.339603307        | 2             | 3.57556   |
| P62260        | YLAEFATGNDRK                                     | 0.960749174        | 2             | 2.65621   |
| <b>P62271</b> | <b>RS18 40S ribosomal protein S18</b>            | <b>1.024742935</b> | <b>0.9781</b> | <b>5</b>  |
| P62271        | AGELTEDEVER                                      | 1.076592345        | 2             | 3.22494   |
| P62271        | LREDLER                                          | 0.949389748        | 1             | 2.00734   |
| P62271        | RAGELTEDEVER                                     | 0.71440908         | 2             | 3.31675   |
| P62271        | VLNTNIDGR                                        | 1.025414912        | 2             | 2.82521   |
| P62271        | YSQVLANGLDNK                                     | 1.02844937         | 1             | 3.5095    |
| <b>P62278</b> | <b>RS13 40S ribosomal protein S13</b>            | <b>1.029111349</b> | <b>0.3698</b> | <b>4</b>  |
| P62278        | GLAPDLPEDLYHLIK                                  | 0.996083986        | 2             | 2.91285   |
| P62278        | GLSQSALPYR                                       | 1.303080815        | 1             | 2.03685   |
| P62278        | GLTPSQIGVILR                                     | 1.082986412        | 2             | 2.54795   |
| P62278        | KGLTPSQIGVILR                                    | 1.005048177        | 2             | 2.66401   |
| <b>P62332</b> | <b>ARF6 ADP_ribosylation factor 6</b>            | <b>1.174625018</b> | <b>0.7856</b> | <b>2</b>  |
| P62332        | FNVWDVGGQDK                                      | 1.176873605        | 2             | 3.05842   |
| P62332        | LGQSVTTIPTVGFNVETVYK                             | 1.081471071        | 2             | 2.50828   |
| <b>P62334</b> | <b>PRS10 26S protease regulatory subunit 10B</b> | <b>0.988958295</b> | <b>0.0488</b> | <b>4</b>  |
| P62334        | ALQSVGQIVGEVLK                                   | 1.133316481        | 2             | 3.43536   |
| P62334        | EVIELPLTNPELFQR                                  | 0.864411156        | 2             | 3.3984    |
| P62334        | HGEIDYEAIVK                                      | 0.722915087        | 2             | 2.52707   |
| P62334        | IHIDLPEQAR                                       | 0.995385221        | 2             | 2.43277   |
| <b>P62425</b> | <b>RL7A 60S ribosomal protein L7a</b>            | <b>1.030506811</b> | <b>0.2558</b> | <b>9</b>  |
| P62425        | AGVNTVTTLVENK                                    | 1.030214492        | 2             | 4.15003   |
| P62425        | AGVNTVTTLVENKK                                   | 0.987721482        | 2             | 2.91987   |
| P62425        | NFGIGQDIQPK                                      | 1.041365815        | 2             | 3.54022   |
| P62425        | TCTTVAFTQVNSEDK                                  | 1.06888589         | 2             | 3.85201   |
| P62425        | TCTTVAFTQVNSEDKGALAK                             | 1.492270532        | 2             | 4.34496   |
| P62425        | TNYNDRYDEIR                                      | 0.832406873        | 2             | 2.31982   |
| P62425        | VAPAPAVVK                                        | 1.104070006        | 1             | 1.95917   |
| P62425        | VPPAINQFTQALDR                                   | 1.167331607        | 2             | 3.79195   |
| P62425        | VVNPLFEK                                         | 1.334835363        | 1             | 1.90689   |
| <b>P62630</b> | <b>EF1A1 Elongation factor 1_alpha 1</b>         | <b>1.059909236</b> | <b>1E-19</b>  | <b>13</b> |
| P62630        | DGSASGTTLLEALDCILPPTTRPTDKPLR                    | 1.041952665        | 3             | 4.87193   |
| P62630        | KDGSASGTTLLEALDCILPPTTRPTDKPLR                   | 1.14177424         | 4             | 5.13988   |
| P62630        | MDSTEPYPYSQK                                     | 0.906463616        | 2             | 3.81272   |
| P62630        | MDSTEPYPYSQK+Oxidation(0)                        | 1.059827974        | 2             | 3.03707   |
| P62630        | NDPPMEAAGFTAQVIILNHPGQISAGYAPVLDCHTAHIACK        | 1.204898637        | 5             | 6.6669    |
| P62630        | RYEEIVK                                          | 0.985542791        | 2             | 2.37998   |
| P62630        | SGDAAIVDMVPGKPMCVESFSDYPPLGR                     | 1.11705532         | 3             | 5.26733   |
| P62630        | SGDAAIVDMVPGKPMCVESFSDYPPLGR+Oxidation(14)       | 1.161686786        | 3             | 4.48349   |
| P62630        | SGDAAIVDMVPGKPMCVESFSDYPPLGR+Oxidation(8)        | 1.17878409         | 3             | 4.08079   |
| P62630        | VETGVLPKGMVVTFAPVNVVTEVK                         | 1.042402267        | 2             | 5.37011   |
| P62630        | VETGVLPKGMVVTFAPVNVVTEVK+Oxidation(9)            | 1.059621923        | 3             | 5.04586   |
| P62630        | YEEIVK                                           | 1.009683184        | 1             | 2.17746   |
| P62630        | YYVTIIDAPGHR                                     | 1.01975701         | 3             | 3.61709   |
| <b>P62632</b> | <b>EF1A2 Elongation factor 1_alpha 2</b>         | <b>1.097792063</b> | <b>2E-16</b>  | <b>8</b>  |
| P62632        | EHALLAYTLGVK                                     | 1.130766098        | 1             | 3.54115   |
| P62632        | IGGIGTVPVGR                                      | 1.255479704        | 2             | 3.50874   |
| P62632        | NMITGTSQADCAVLIVAAGVGEFEAGISK                    | 1.027203109        | 3             | 5.18758   |
| P62632        | QLIVGVNK                                         | 0.957808643        | 1             | 2.77082   |
| P62632        | QTVAVGVK                                         | 0.955245683        | 1             | 2.06439   |
| P62632        | STTTGHLIYK                                       | 1.117050173        | 2             | 2.89936   |

|               |                                                            |                    |               |          |
|---------------|------------------------------------------------------------|--------------------|---------------|----------|
| P62632        | THINIVVIGHVDSGK                                            | 1.07806307         | 2             | 4.84455  |
| P62632        | VETGILRPGMVVTFAPVNITTEVK                                   | 1.286823146        | 3             | 3.6685   |
| <b>P62703</b> | <b>RS4X 40S ribosomal protein S4_X isoform</b>             | <b>1.134617155</b> | <b>0.8603</b> | <b>6</b> |
| P62703        | FDTGNLCMVTGGANLGR                                          | 0.992151252        | 2             | 4.62941  |
| P62703        | FDTGNLCMVTGGANLGR+Oxidation(7)                             | 0.678814487        | 2             | 4.25834  |
| P62703        | GIPHLVTHDAR                                                | 0.996326896        | 2             | 2.48957  |
| P62703        | LSNIFVIGK                                                  | 0.90486318         | 2             | 2.46587  |
| P62703        | TDITYPAGFMDVISIDK                                          | 0.975328617        | 2             | 3.8332   |
| P62703        | VNDTIQIDLETGK                                              | 1.083075697        | 2             | 3.77194  |
| <b>P62718</b> | <b>RL18A 60S ribosomal protein L18a</b>                    | <b>0.926375652</b> | <b>0.3925</b> | <b>2</b> |
| P62718        | DLTTAGAVTQCYR                                              | 0.925050993        | 2             | 3.01477  |
| P62718        | SSGEIVYCGQVFEKSPLR                                         | 0.947355275        | 2             | 2.46834  |
| <b>P62752</b> | <b>RL23A 60S ribosomal protein L23a</b>                    | <b>1.025467205</b> | <b>0.1626</b> | <b>5</b> |
| P62752        | LAPDYDALDVANK                                              | 0.993955677        | 2             | 3.85355  |
| P62752        | LDHYAIK                                                    | 1.042029415        | 2             | 2.64419  |
| P62752        | NKLDHYAIK                                                  | 1.247849256        | 2             | 2.79978  |
| P62752        | VNTLIRPDGEK                                                | 1.075646461        | 2             | 2.81972  |
| P62752        | VNTLIRPDGEKK                                               | 1.074083527        | 2             | 2.86813  |
| <b>P62755</b> | <b>RS6 40S ribosomal protein S6</b>                        | <b>1.000045671</b> | <b>0.7049</b> | <b>5</b> |
| P62755        | DIPGLTDTTVPR                                               | 0.809323465        | 2             | 2.63617  |
| P62755        | LIEVDDER                                                   | 1.029522716        | 2             | 2.73585  |
| P62755        | LNISFPATGCQK                                               | 0.870447032        | 2             | 2.99794  |
| P62755        | MATEVAADALGEEWK                                            | 1.071319359        | 2             | 3.75005  |
| P62755        | MATEVAADALGEEWK+Oxidation(0)                               | 1.024274109        | 2             | 4.35912  |
| <b>P62804</b> | <b>H4 Histone H4</b>                                       | <b>0.885245728</b> | <b>1E-19</b>  | <b>7</b> |
| P62804        | DAVITYTEHAK                                                | 0.69954547         | 2             | 3.03361  |
| P62804        | DNIQGITKPAIR                                               | 0.742738469        | 2             | 3.42249  |
| P62804        | ISGLIYEETR                                                 | 1.346450139        | 2             | 3.32766  |
| P62804        | RISGLIYEETR                                                | 0.896496717        | 2             | 2.41841  |
| P62804        | TVTAMDVVYALK                                               | 0.993291487        | 2             | 3.98923  |
| P62804        | TVTAMDVVYALK+Oxidation(4)                                  | 0.98406101         | 2             | 3.22767  |
| P62804        | VFLENVIR                                                   | 0.882682507        | 2             | 3.25071  |
| <b>P62815</b> | <b>VATB2 V_type proton ATPase subunit B_ brain isoform</b> | <b>0.892260565</b> | <b>0.0095</b> | <b>2</b> |
| P62815        | AVVQVFEGTSGIDAK                                            | 0.498767152        | 2             | 3.22027  |
| P62815        | QYPPINVLPLSLR                                              | 1.101803157        | 2             | 2.38589  |
| <b>P62853</b> | <b>RS25 40S ribosomal protein S25</b>                      | <b>1.33123926</b>  | <b>2E-05</b>  | <b>2</b> |
| P62853        | GGDAPAAGEDA                                                | 1.062441151        | 1             | 2.02221  |
| P62853        | LNNLVLFDK                                                  | 1.427351381        | 2             | 2.80851  |
| <b>P62856</b> | <b>RS26 40S ribosomal protein S26</b>                      | <b>0.935830319</b> | <b>0.7208</b> | <b>2</b> |
| P62856        | DISEASVFDAYVLPK                                            | 0.9391135          | 2             | 3.40282  |
| P62856        | NIVEAAVR                                                   | 0.956164935        | 2             | 2.8791   |
| <b>P62890</b> | <b>RL30 60S ribosomal protein L30</b>                      | <b>1.054687123</b> | <b>0.617</b>  | <b>2</b> |
| P62890        | TGVHHYSGNNIELGTACGK                                        | 1.027704071        | 2             | 5.55729  |
| P62890        | VCTLAIIDPGDSDIIR                                           | 1.120863464        | 2             | 3.71755  |
| <b>P62898</b> | <b>CYC Cytochrome c_somatic</b>                            | <b>1.105059087</b> | <b>0.2196</b> | <b>6</b> |
| P62898        | ADLIAYLK                                                   | 1.022612239        | 2             | 2.77708  |
| P62898        | GITWGEDTLMEYLENPK                                          | 1.092787993        | 2             | 4.88249  |
| P62898        | GITWGEDTLMEYLENPKK                                         | 0.991674253        | 2             | 4.3341   |
| P62898        | KTGQAAGFSYTDANK                                            | 1.130703457        | 2             | 4.89112  |
| P62898        | TGPNLHGLFGR                                                | 0.986562745        | 2             | 3.25397  |
| P62898        | TGQAAGFSYTDANK                                             | 1.128070699        | 2             | 4.15838  |
| <b>P62902</b> | <b>RL31 60S ribosomal protein L31</b>                      | <b>1.155031538</b> | <b>0.0004</b> | <b>2</b> |
| P62902        | NLQTVNVN DEN                                               | 1.433285254        | 1             | 2.29141  |
| P62902        | SAINEVVTR                                                  | 1.141036917        | 2             | 3.11726  |
| <b>P62907</b> | <b>RL10A 60S ribosomal protein L10a</b>                    | <b>1.008423184</b> | <b>0.8262</b> | <b>5</b> |
| P62907        | AVDIPHMDIEALK                                              | 0.990317763        | 2             | 2.32868  |
| P62907        | AVDIPHMDIEALKK                                             | 0.851218374        | 2             | 2.63058  |



|               |                                                           |                    |               |           |
|---------------|-----------------------------------------------------------|--------------------|---------------|-----------|
| P62907        | FSVCLVDQQHCDEAK                                           | 1.021952823        | 2             | 3.92255   |
| P62907        | KYDAFLASESLIK                                             | 0.980717086        | 2             | 3.71356   |
| P62907        | YDAFLASESLIK                                              | 1.202750383        | 2             | 3.74726   |
| <b>P62909</b> | <b>RS3 40S ribosomal protein S3</b>                       | <b>0.941385531</b> | <b>3E-13</b>  | <b>10</b> |
| P62909        | AELNEFLTR                                                 | 1.064994454        | 2             | 2.86139   |
| P62909        | DEILPTTPISEQK                                             | 0.899228226        | 2             | 3.75529   |
| P62909        | ELAEDGYSGVEVR                                             | 0.919259226        | 2             | 3.42427   |
| P62909        | ELTAVVQK                                                  | 0.898565997        | 2             | 2.31501   |
| P62909        | FGFPEGSVELYAEK                                            | 1.743909618        | 2             | 3.34449   |
| P62909        | FVDGLMIHSGDPVNYVVDTA VR                                   | 1.039586695        | 3             | 4.01566   |
| P62909        | GCEVVVSGK                                                 | 1.105457086        | 2             | 2.49661   |
| P62909        | GGKPEPPAMPQPVP TA                                         | 1.346666568        | 2             | 3.73576   |
| P62909        | GLCAIAQAESLR                                              | 1.082656963        | 2             | 3.16031   |
| P62909        | TEIILATR                                                  | 1.119386595        | 2             | 2.79602   |
| <b>P62912</b> | <b>RL32 60S ribosomal protein L32</b>                     | <b>1.134839248</b> | <b>0.2777</b> | <b>2</b>  |
| P62912        | ELEVLLMCNK                                                | 1.147305412        | 2             | 2.53029   |
| P62912        | SYCAEIAHNVSSK                                             | 1.132004205        | 2             | 4.36585   |
| <b>P62914</b> | <b>RL11 60S ribosomal protein L11</b>                     | <b>1.016979606</b> | <b>0.9993</b> | <b>2</b>  |
| P62914        | VLEQLTGQTPVFSK                                            | 1.010264385        | 2             | 4.05051   |
| P62914        | YDGIILPGK                                                 | 1.039342106        | 2             | 2.92345   |
| <b>P62919</b> | <b>RL8 60S ribosomal protein L8</b>                       | <b>1.065561682</b> | <b>0.1944</b> | <b>3</b>  |
| P62919        | ASGNYATVISHNPETK                                          | 1.090106143        | 2             | 4.45845   |
| P62919        | AVVGVVAGGGR                                               | 1.020650645        | 2             | 3.55993   |
| P62919        | KAQLNIGNVLPVGTMP EGTIVCCLEEKPGDR                          | 1.045325686        | 3             | 4.88739   |
| <b>P62959</b> | <b>HINT1 Histidine triad nucleotide_binding protein 1</b> | <b>0.993184127</b> | <b>0.8591</b> | <b>3</b>  |
| P62959        | AQVAQPGGDTIFGK                                            | 0.972581125        | 2             | 4.58619   |
| P62959        | CLAFHDISPQAPTHFLVIPK                                      | 1.062574396        | 3             | 4.56672   |
| P62959        | KHISQISVADDDDESLLGHLMIVGK                                 | 0.861604348        | 3             | 4.15185   |
| <b>P62961</b> | <b>YBOX1 Nuclease_sensitive element_binding protein 1</b> | <b>1.06882323</b>  | <b>4E-08</b>  | <b>4</b>  |
| P62961        | EDGNEEDKENQGDETQGGQPPQR                                   | 1.019409159        | 3             | 5.16661   |
| P62961        | GAEAAANVTGPGGVPVQGSK                                      | 1.078069391        | 2             | 5.04964   |
| P62961        | NEGSESAPEGQAQQR                                           | 1.5739721          | 2             | 4.98983   |
| P62961        | NYQQNYQNSSESGEKNESSESAPEGQAQQR                            | 1.488380245        | 3             | 5.49586   |
| <b>P62963</b> | <b>PROF1 Profilin_1</b>                                   | <b>1.137771875</b> | <b>0.0111</b> | <b>4</b>  |
| P62963        | DSPSVWAAVPGK                                              | 1.096347964        | 1             | 2.20515   |
| P62963        | SSFFVNGLTLGGQK                                            | 1.158172783        | 2             | 4.52821   |
| P62963        | STGGAPTFNVTVTMTAK                                         | 0.944335888        | 2             | 2.63065   |
| P62963        | TFVSITPAEVGLVVGK                                          | 0.841259823        | 2             | 4.50028   |
| <b>P63018</b> | <b>HSP7C Heat shock cognate 71 kDa protein</b>            | <b>0.950101877</b> | <b>1E-19</b>  | <b>22</b> |
| P63018        | ARFEELNADLFR                                              | 1.073298597        | 3             | 3.62338   |
| P63018        | CNEIISWLDK                                                | 1.305816786        | 2             | 3.1373    |
| P63018        | DAGTIAGLNVLR                                              | 0.97935224         | 2             | 3.59799   |
| P63018        | FDDAVVQSDMK                                               | 1.202434691        | 2             | 3.70682   |
| P63018        | FEELNADLFR                                                | 1.045279605        | 2             | 3.10022   |
| P63018        | FELTGIPPAPR                                               | 1.048010974        | 2             | 3.1347    |
| P63018        | IINEPTAAAIAYGLDK                                          | 1.326054744        | 2             | 4.7496    |
| P63018        | IINEPTAAAIAYGLDKK                                         | 1.05641981         | 2             | 4.55417   |
| P63018        | LLQDFFNKG                                                 | 1.261473276        | 2             | 2.67693   |
| P63018        | NQTAEKEEFHQK                                              | 1.357608815        | 2             | 5.24712   |
| P63018        | NQVAMNPTNTVFD AK                                          | 1.142025661        | 2             | 4.50646   |
| P63018        | NQVAMNPTNTVFD AK+Oxidation(4)                             | 1.128188288        | 2             | 4.27117   |
| P63018        | NSLESYAFNMK                                               | 1.422370488        | 2             | 3.24587   |
| P63018        | QATKDAGTIAGLNVLR                                          | 0.839823086        | 2             | 2.44163   |
| P63018        | RFDDAVVQSDMK                                              | 1.008003994        | 2             | 2.74919   |
| P63018        | SFYPEEVSSMVLTK                                            | 1.090670762        | 2             | 4.13757   |
| P63018        | SFYPEEVSSMVLTK+Oxidation(9)                               | 1.035447877        | 2             | 2.89805   |
| P63018        | SINPDEAVAYGAAVQAAILSGDK                                   | 1.168924981        | 2             | 6.27647   |

|               |                                                                              |                    |               |           |
|---------------|------------------------------------------------------------------------------|--------------------|---------------|-----------|
| P63018        | SQIHDIVLVGGSTR                                                               | 1.062256522        | 2             | 4.9614    |
| P63018        | STAGDTHLGGEDFDNR                                                             | 1.076022704        | 2             | 4.42649   |
| P63018        | TVTNAVVTVPAYFNDSQR                                                           | 1.066914359        | 2             | 4.08492   |
| P63018        | VCNPIITK                                                                     | 1.189164901        | 2             | 2.40217   |
| <b>P63029</b> | <b>TCTP Translationally_controlled tumor protein</b>                         | <b>0.968938024</b> | <b>1</b>      | <b>2</b>  |
| P63029        | DLISHDELFSDIYK                                                               | 0.968374164        | 2             | 3.55469   |
| P63029        | EIADGLCLEVEGK                                                                | 0.988189646        | 2             | 3.25748   |
| <b>P63036</b> | <b>DNJA1 Dnaj homolog subfamily A member 1</b>                               | <b>1.007110477</b> | <b>0.0995</b> | <b>6</b>  |
| P63036        | HYNGEAYEDDEHHR                                                               | 1.428140238        | 3             | 4.90377   |
| P63036        | ITFHGEGDQEPGLEPGDIIIVLDQK                                                    | 1.094183316        | 3             | 3.76342   |
| P63036        | NVVHQLSVTLEDLYNGATR                                                          | 0.99065332         | 2             | 5.87586   |
| P63036        | QISQAYEVLADSK                                                                | 1.012584298        | 2             | 3.60797   |
| P63036        | TIVITSHPGQIVK                                                                | 1.07930988         | 2             | 2.92738   |
| P63036        | VNFPENGFSPDK                                                                 | 1.096906714        | 2             | 2.93688   |
| <b>P63039</b> | <b>CH60 60 kDa heat shock protein_mitochondrial</b>                          | <b>0.922163544</b> | <b>1E-19</b>  | <b>28</b> |
| P63039        | AAVEEGIVLGGGCALLR                                                            | 0.982656684        | 3             | 5.97951   |
| P63039        | ALMLQGVDLLADAVAVTMGPK+Oxidation(17)                                          | 1.041641631        | 3             | 3.31645   |
| P63039        | CEFQDAYVLLSEK                                                                | 1.330161956        | 2             | 4.69298   |
| P63039        | CIPALDSLKPANEDQK                                                             | 0.832682521        | 2             | 3.31315   |
| P63039        | DDAMLLKGGKDK+Oxidation(3)                                                    | 1.193220166        | 2             | 2.40922   |
| P63039        | DIGNIISDAMK                                                                  | 0.994347954        | 2             | 3.61682   |
| P63039        | GVMLAVDAVIAELKK                                                              | 0.831744549        | 2             | 4.30389   |
| P63039        | GYISPYFINTSK                                                                 | 0.954835562        | 2             | 3.63694   |
| P63039        | ILQSSSEVGYDAMLGDFVNMVEK                                                      | 1.113948362        | 2             | 4.96898   |
| P63039        | IQEITEQLDITTSEYEK                                                            | 1.024746006        | 2             | 5.60253   |
| P63039        | IQEITEQLDITTSEYEKEK                                                          | 0.64725913         | 2             | 5.16319   |
| P63039        | ISSVQSIVPALEIANHR                                                            | 1.176371215        | 2             | 4.0915    |
| P63039        | KISSVQSIVPALEIANHR                                                           | 1.433446276        | 3             | 3.30923   |
| P63039        | KPLVIAEDVDGGEALSTLVNLR                                                       | 1.169345708        | 2             | 5.91552   |
| P63039        | LSDGVAVLK                                                                    | 1.063344134        | 2             | 2.69831   |
| P63039        | LVQDVANNTNEEAGDGTATVLR                                                       | 1.010072111        | 2             | 6.63829   |
| P63039        | NAGVEGSLIVEK                                                                 | 1.001211937        | 2             | 3.4665    |
| P63039        | QSKPVTTPEEIAQVATISANGDK                                                      | 1.013580826        | 2             | 3.82041   |
| P63039        | QSKPVTTPEEIAQVATISANGDKDIGNIISDAMK                                           | 0.812000335        | 3             | 5.26728   |
| P63039        | RGVMLAVDAVIAELKK                                                             | 1.13448362         | 3             | 4.54621   |
| P63039        | TLNDELEIIEGMK                                                                | 0.903885229        | 2             | 4.58435   |
| P63039        | TLNDELEIIEGMK+Oxidation(11)                                                  | 0.973489057        | 2             | 3.49444   |
| P63039        | TVIIEQSWGSPK                                                                 | 0.906540324        | 2             | 4.45821   |
| P63039        | VGEVIVTK                                                                     | 0.918368017        | 2             | 2.98112   |
| P63039        | VGGTSDVEVNEK                                                                 | 0.931000165        | 2             | 3.84081   |
| P63039        | VGGTSDVEVNEKK                                                                | 0.912893132        | 2             | 3.07049   |
| P63039        | VGLQVAVK                                                                     | 0.98539465         | 2             | 3.453     |
| P63039        | VTDALNATR                                                                    | 0.96063389         | 2             | 3.47774   |
| <b>P63088</b> | <b>PP1G Serine/threonine_protein phosphatase PP1_gamma catalytic subunit</b> | <b>1.056294251</b> | <b>0.6424</b> | <b>2</b>  |
| P63088        | EIFLSQPILLELEAPLK                                                            | 1.266202104        | 2             | 3.06916   |
| P63088        | TFTDCFNCLPIAAIVDEK                                                           | 1.021375491        | 2             | 3.3464    |
| <b>P63095</b> | <b>subunit alpha isoforms short</b>                                          | <b>1.109947825</b> | <b>0.3355</b> | <b>2</b>  |
| P63095        | AFEPFYDEIKSGALVK                                                             | 1.061666627        | 2             | 2.79722   |
| P63095        | YTPPEDATPEPGEDPR                                                             | 1.121456058        | 2             | 2.93099   |
| <b>P63102</b> | <b>1433Z 14_3_3 protein zeta/delta</b>                                       | <b>0.982573649</b> | <b>1</b>      | <b>7</b>  |
| P63102        | DICNDVLSLLEK                                                                 | 0.916730559        | 3             | 3.90997   |
| P63102        | FLIPNASQPESK                                                                 | 1.012339639        | 2             | 3.0245    |
| P63102        | GIVDQSQQAYQEAFFEISK                                                          | 0.981734054        | 2             | 5.71689   |
| P63102        | KGIVDQSQQAYQEAFFEISK                                                         | 0.946595457        | 2             | 5.32462   |
| P63102        | SVTEQGAELSNEER                                                               | 1.095137194        | 2             | 4.96664   |
| P63102        | TAFDEAIAELDTLSEESYK                                                          | 1.068087167        | 2             | 5.78041   |

|               |                                                                      |                    |               |           |
|---------------|----------------------------------------------------------------------|--------------------|---------------|-----------|
| P63102        | YLAEVAAGDDKK                                                         | 1.00539402         | 2             | 2.92751   |
| <b>P63159</b> | <b>HMGB1 High mobility group protein B1</b>                          | <b>1.010773973</b> | <b>0.9681</b> | <b>3</b>  |
| P63159        | GEHPGLSIGDVAK                                                        | 0.916929675        | 2             | 3.05594   |
| P63159        | IKGEHPGLSIGDVAK                                                      | 1.09893544         | 3             | 3.71582   |
| P63159        | KHPDASVNFSEFSK                                                       | 0.945410474        | 2             | 3.87865   |
| <b>P63174</b> | <b>RL38 60S ribosomal protein L38</b>                                | <b>1.018811071</b> | <b>0.6905</b> | <b>2</b>  |
| P63174        | KIEEIKDFLLTAR                                                        | 1.023806048        | 3             | 3.97775   |
| P63174        | YLTLVITDKEK                                                          | 1.125873284        | 2             | 2.3242    |
| <b>P63245</b> | <b>GBLP Guanine nucleotide binding protein subunit beta_2_like 1</b> | <b>1.008941626</b> | <b>3E-07</b>  | <b>8</b>  |
| P63245        | DGQAMLWDLNEGK                                                        | 1.058651265        | 2             | 2.42034   |
| P63245        | FSPNSSNPIIVSCGWDK                                                    | 1.11127701         | 2             | 4.53951   |
| P63245        | HLYLDGGDIINALCFSPNR                                                  | 1.115278916        | 2             | 5.68484   |
| P63245        | IIVDELKQEVISTSSK                                                     | 0.955653778        | 2             | 4.00242   |
| P63245        | LWDLTTGTTR                                                           | 1.170981464        | 1             | 2.155     |
| P63245        | TNHIGHTGYLNTVTVSPDGLCASGGK                                           | 1.125953805        | 3             | 5.23219   |
| P63245        | VWQVTIGTR                                                            | 1.203524782        | 2             | 2.74027   |
| P63245        | YTVQDESHSEWVSCVR                                                     | 1.160312962        | 2             | 4.20818   |
| <b>P63259</b> | <b>ACTG Actin_cytoplasmic 2</b>                                      | <b>0.992924251</b> | <b>0.1568</b> | <b>8</b>  |
| P63259        | CPEALFQPSFLGMESCGIHETTFNSIMK                                         | 1.529885342        | 3             | 4.29657   |
| P63259        | DLYANTVLSGGTTMYPGIADR                                                | 0.930575098        | 2             | 5.75515   |
| P63259        | DLYANTVLSGGTTMYPGIADR+Oxidation(13)                                  | 0.852841773        | 2             | 4.15426   |
| P63259        | GYSFTTAER                                                            | 0.975004435        | 2             | 3.22664   |
| P63259        | KDLYANTVLSGGTTMYPGIADR                                               | 1.019801802        | 2             | 5.74754   |
| P63259        | KDLYANTVLSGGTTMYPGIADR+Oxidation(14)                                 | 0.998403571        | 3             | 4.13513   |
| P63259        | QEYDESGPSIVHR                                                        | 0.964632582        | 3             | 3.51557   |
| P63259        | VAPEEHPVLLTEAPLNPK                                                   | 1.021141352        | 2             | 4.48851   |
| <b>P63324</b> | <b>RS12 40S ribosomal protein S12</b>                                | <b>1.040347597</b> | <b>0.646</b>  | <b>3</b>  |
| P63324        | KVVGCSVVVK                                                           | 1.038343899        | 2             | 2.72043   |
| P63324        | LGEWVGLCK                                                            | 1.154286478        | 1             | 2.25158   |
| P63324        | VVGCSCVVVK                                                           | 1.103375323        | 2             | 2.35862   |
| <b>P67779</b> | <b>PHB Prohibitin</b>                                                | <b>0.794633017</b> | <b>1E-19</b>  | <b>9</b>  |
| P67779        | AAELIANSLATAGDGLIELR                                                 | 0.888566596        | 3             | 5.03152   |
| P67779        | AAISAEGDSK                                                           | 1.13290949         | 2             | 2.45583   |
| P67779        | DLQNVNITLR                                                           | 0.798490932        | 2             | 3.26906   |
| P67779        | FDAGELITQR                                                           | 0.839677667        | 2             | 3.83395   |
| P67779        | GVQDIVVGEGETHFLIPWVQKPIIFDCR                                         | 1.10138794         | 3             | 4.14826   |
| P67779        | IYTSIGEDYDER                                                         | 1.23917202         | 2             | 3.07873   |
| P67779        | KLEAAEDIAYQLSR                                                       | 0.863934881        | 2             | 4.40247   |
| P67779        | NVPVITGSK                                                            | 0.770554765        | 1             | 2.20591   |
| P67779        | VLPSITTEILK                                                          | 0.878850199        | 2             | 2.34398   |
| <b>P68037</b> | <b>UB2L3 Ubiquitin_conjugating enzyme E2 L3</b>                      | <b>1.06521682</b>  | <b>0.0011</b> | <b>3</b>  |
| P68037        | ADLAEEYSK                                                            | 1.173353565        | 2             | 2.56233   |
| P68037        | GQVCLPVISAENWKPATK                                                   | 1.163935922        | 2             | 3.00738   |
| P68037        | TDQVIQSLIALVNDPQPEHPLR                                               | 1.107272046        | 2             | 4.95021   |
| <b>P68101</b> | <b>IF2A Eukaryotic translation initiation factor 2 subunit 1</b>     | <b>1.024832184</b> | <b>0.9588</b> | <b>3</b>  |
| P68101        | HAVSDPSILDSLNLNEDEREVLINNINR                                         | 0.846562071        | 3             | 3.44658   |
| P68101        | TEGLSVLNQAMAVIK                                                      | 1.066211198        | 2             | 3.86983   |
| P68101        | VVTDTDETELAR                                                         | 1.022206638        | 2             | 2.38498   |
| <b>P68136</b> | <b>ACTS Actin_alpha skeletal muscle</b>                              | <b>0.942265243</b> | <b>0.0556</b> | <b>15</b> |
| P68136        | AGFAGDDAPR                                                           | 1.376202975        | 2             | 3.2151    |
| P68136        | AVFPSIVGRPR                                                          | 0.966187005        | 2             | 2.53418   |
| P68136        | DLYANNVMSGGTTMYPGIADR                                                | 1.203380273        | 2             | 4.44604   |
| P68136        | DSYVGDEAQSK                                                          | 0.876307657        | 2             | 3.6203    |
| P68136        | EITALAPSTMK                                                          | 0.92142577         | 2             | 3.00928   |
| P68136        | EITALAPSTMK+Oxidation(9)                                             | 0.929919168        | 2             | 2.85863   |
| P68136        | GYSFVTTAER                                                           | 1.0573835          | 2             | 3.37831   |
| P68136        | KDLYANNVMSGGTTMYPGIADR                                               | 1.258047229        | 2             | 5.46115   |

|               |                                                                    |                    |               |           |
|---------------|--------------------------------------------------------------------|--------------------|---------------|-----------|
| P68136        | KDLYANNVMSGTTMYPGIADR+Oxidation(14)                                | 1.193381778        | 3             | 3.68418   |
| P68136        | QEYDEAGPSIVHR                                                      | 1.440923604        | 2             | 2.95769   |
| P68136        | TTGIVLDSGDGVTHNVPIYEGYALPHAIMR                                     | 1.515669004        | 3             | 6.36245   |
| P68136        | TTGIVLDSGDGVTHNVPIYEGYALPHAIMR+Oxidation(28)                       | 1.672831594        | 3             | 4.60274   |
| P68136        | VAPEEHPTLLTEAPLNPK                                                 | 1.197924197        | 2             | 4.436     |
| P68136        | YPIEHGIITNWDDMEK                                                   | 1.38233825         | 2             | 4.56606   |
| P68136        | YPIEHGIITNWDDMEK+Oxidation(13)                                     | 0.930000753        | 2             | 3.45926   |
| <b>P68255</b> | <b>1433T 14_3_3 protein theta</b>                                  | <b>0.920581295</b> | <b>0.9904</b> | <b>4</b>  |
| P68255        | AVTEQGAELSNEER                                                     | 0.941407541        | 2             | 4.71373   |
| P68255        | SICTTVLELLDK                                                       | 1.150454196        | 2             | 3.25298   |
| P68255        | TAFDEAIAELDTLNEDSYK                                                | 0.979170876        | 2             | 4.26542   |
| P68255        | VISSIEQK                                                           | 1.038211756        | 2             | 2.326     |
| <b>P68511</b> | <b>1433F 14_3_3 protein eta</b>                                    | <b>1.107538451</b> | <b>0.3947</b> | <b>3</b>  |
| P68511        | AVTELNEPLSNEDR                                                     | 1.000549163        | 2             | 4.50381   |
| P68511        | ELETVCNDVLALLDK                                                    | 1.138083089        | 2             | 3.27648   |
| P68511        | NSVVEASEAAYK                                                       | 1.106412149        | 2             | 2.63407   |
| <b>P69735</b> |                                                                    | <b>1.032227774</b> | <b>0.1443</b> | <b>6</b>  |
| P69735        | AKMEENPPVK+Oxidation(2)                                            | 1.10200396         | 1             | 1.94467   |
| P69735        | DYLGDFIEHYAQLGPSQPPDLAQAQDEPR                                      | 0.890673514        | 3             | 3.74464   |
| P69735        | EDEVQLLVEK                                                         | 0.813345439        | 1             | 1.91127   |
| P69735        | GEPKLPAMDKPGGK+Oxidation(7)                                        | 0.945947383        | 2             | 2.31241   |
| P69735        | LIDDYGVVEEPAELPEGTSLVDNKR                                          | 0.88203466         | 3             | 4.68484   |
| P69735        | QFDKMQAQLK                                                         | 1.072345288        | 2             | 2.56431   |
| <b>P69897</b> | <b>TBB5 Tubulin beta_5 chain</b>                                   | <b>1.024039682</b> | <b>0.9279</b> | <b>3</b>  |
| P69897        | ALTVPELTQQVFDKAK                                                   | 1.007433177        | 2             | 2.3053    |
| P69897        | ISVYYNEATGGK                                                       | 1.145364778        | 2             | 2.89591   |
| P69897        | LTTPTYGDLNHLVSATMSGVTTCLR                                          | 1.283634447        | 2             | 4.92111   |
| <b>P70372</b> | <b>ELAV1 ELAV_like protein 1</b>                                   | <b>0.871587534</b> | <b>0.1496</b> | <b>3</b>  |
| P70372        | SLFSSIGEVESAK                                                      | 0.442130086        | 2             | 3.54891   |
| P70372        | TNLIVNYLPQNMTQEELR                                                 | 0.841176927        | 2             | 2.98183   |
| P70372        | VLVDQTTGLSR                                                        | 0.871672769        | 2             | 2.81549   |
| <b>P70470</b> | <b>LYPA1 Acyl_protein thioesterase 1</b>                           | <b>1.189993608</b> | <b>0.044</b>  | <b>2</b>  |
| P70470        | ASFSQGPINSANR                                                      | 2.39995249         | 2             | 2.80932   |
| P70470        | DISVLQCHGDCDPLVPLMFGSLTVER                                         | 1.135461167        | 3             | 3.53478   |
| <b>P70473</b> | <b>AMACR Alpha_methylacyl_CoA racemase</b>                         | <b>0.807164997</b> | <b>1E-19</b>  | <b>12</b> |
| P70473        | ADVLLPEFR                                                          | 0.836847617        | 2             | 3.40322   |
| P70473        | AEWCQIFDGTDACVTPVLTLEEALHHQHNR                                     | 0.825144873        | 5             | 5.02812   |
| P70473        | DYGFQSEIHLHSDR                                                     | 0.731193046        | 2             | 4.88701   |
| P70473        | GLGLESEELPSQMSIEDWPEMK                                             | 0.787428262        | 3             | 4.70272   |
| P70473        | GQNLLDGGAPFYTTYK                                                   | 0.852577137        | 2             | 4.89444   |
| P70473        | LGSVNHPHSLAR                                                       | 1.296382076        | 2             | 2.85048   |
| P70473        | LQLGPETLR                                                          | 0.841866813        | 2             | 2.30093   |
| P70473        | LSGFGQSGIFSK                                                       | 1.094529355        | 2             | 2.41753   |
| P70473        | RDPSVGEHTVEVLK                                                     | 0.810562986        | 3             | 4.29321   |
| P70473        | RDPSVGEHTVEVLKDYGFQSEIHLHSDR                                       | 0.797876305        | 5             | 4.78818   |
| P70473        | TADGEFMAVGAIEPQFYTLKLLK                                            | 1.232563006        | 3             | 3.9656    |
| P70473        | TQAMGLWAQPR                                                        | 0.833762082        | 2             | 2.81047   |
| <b>P70552</b> | <b>GFRP GTP cyclohydrolase 1 feedback regulatory protein</b>       | <b>1.246349603</b> | <b>0.0117</b> | <b>2</b>  |
| P70552        | MEVGPTMVGDEHSDPELMQQLGASK                                          | 1.116589202        | 3             | 3.70346   |
| P70552        | VLGNNFYEYVNDPPR                                                    | 1.338052629        | 2             | 3.88821   |
| <b>P70580</b> | <b>PGRC1 Membrane_associated progesterone receptor component 1</b> | <b>1.051739904</b> | <b>0.3378</b> | <b>7</b>  |
| P70580        | EGEPTVYSDDEEPKDEAAR                                                | 0.778104872        | 2             | 4.24125   |
| P70580        | FYGPEGPYGVFAGR                                                     | 0.973619607        | 2             | 3.58662   |
| P70580        | GDQPGASGDNDDEPPPLPR                                                | 0.972729996        | 2             | 4.95271   |
| P70580        | IVRGDQPGASGDNDDEPPPLPR                                             | 0.670323676        | 3             | 4.23778   |
| P70580        | KFYGPEGPYGVFAGR                                                    | 0.962515261        | 2             | 3.74459   |

|               |                                                                                  |                    |               |          |
|---------------|----------------------------------------------------------------------------------|--------------------|---------------|----------|
| P70580        | RYDGVQDPR                                                                        | 0.744570746        | 1             | 2.32899  |
| P70580        | YDGVQDPR                                                                         | 0.929596702        | 2             | 2.54432  |
| <b>P70584</b> | <b>ACDSB Short/branched chain specific acyl_CoA dehydrogenase_ mitochondrial</b> | <b>0.709946189</b> | <b>1E-19</b>  | <b>8</b> |
| P70584        | ASSTCQLTFENVK                                                                    | 0.715451727        | 2             | 3.12806  |
| P70584        | FAQEIQIAPLVSTMDENSK                                                              | 0.737186094        | 2             | 4.06228  |
| P70584        | IFDFQGLQHVAHVATQLEAAR                                                            | 0.679609188        | 3             | 6.08649  |
| P70584        | IGTIYEGTSNIQLNTIAK                                                               | 0.790056619        | 2             | 4.33642  |
| P70584        | KFAQEIQIAPLVSTMDENSK                                                             | 0.616449105        | 2             | 5.47095  |
| P70584        | SGNYVINGSK                                                                       | 0.669050465        | 2             | 3.12127  |
| P70584        | VDASVALLCDIQNTVINK                                                               | 1.268277944        | 2             | 4.67323  |
| P70584        | YYASEVAGLTTSK                                                                    | 0.761260893        | 2             | 3.57634  |
| <b>P70615</b> | <b>LMNB1 Lamin_B1</b>                                                            | <b>0.916281479</b> | <b>0.3251</b> | <b>3</b> |
| P70615        | ALYETELADAR                                                                      | 0.94382307         | 2             | 3.11318  |
| P70615        | LSSEMNTSTVNSAR                                                                   | 0.763708588        | 2             | 2.70259  |
| P70615        | MLSDKEREMAEIR+Oxidation(0)                                                       | 1.019082934        | 2             | 2.38043  |
| <b>P70694</b> | <b>DHB5 Estradiol 17 beta_dehydrogenase 5</b>                                    | <b>1.048731483</b> | <b>0.9988</b> | <b>2</b> |
| P70694        | REDIFYTSK                                                                        | 1.065704117        | 2             | 2.97953  |
| P70694        | SIGVSNFNR                                                                        | 1.038906801        | 2             | 2.58314  |
| <b>P70712</b> | <b>KYNU Kynureninase</b>                                                         | <b>1.260926446</b> | <b>1E-05</b>  | <b>8</b> |
| P70712        | IATELNCDPTDER                                                                    | 1.349240477        | 2             | 3.82167  |
| P70712        | IGAYGHEVGK                                                                       | 1.336117448        | 2             | 2.4907   |
| P70712        | LDEEDKLKR                                                                        | 1.25841111         | 2             | 2.51528  |
| P70712        | LLTAILDSTERN                                                                     | 1.253944193        | 2             | 3.29521  |
| P70712        | TYLEEELDK                                                                        | 1.315989743        | 1             | 2.0387   |
| P70712        | TYLEEELDKWAK                                                                     | 1.157914969        | 2             | 2.40375  |
| P70712        | VAPVPLYNSFHDVYK                                                                  | 1.543939664        | 2             | 3.10541  |
| P70712        | YLNSEGAGLAGAFIHEK                                                                | 1.295403192        | 2             | 4.07879  |
| <b>P80067</b> | <b>CATC Dipeptidyl peptidase 1</b>                                               | <b>1.15012501</b>  | <b>0.0879</b> | <b>4</b> |
| P80067        | GTDECAIESIAMAAPIPK                                                               | 1.108530481        | 3             | 4.95378  |
| P80067        | NSWGSQWGEGSYFR                                                                   | 1.165233635        | 2             | 3.49413  |
| P80067        | RGTDECAIESIAMAAPIPK                                                              | 0.933164967        | 2             | 3.65765  |
| P80067        | YAQDFGVEENCFFPYTADAPCKPK                                                         | 1.24884162         | 3             | 4.70029  |
| <b>P80254</b> | <b>DOPD D_dopachrome decarboxylase</b>                                           | <b>0.64925075</b>  | <b>2E-07</b>  | <b>4</b> |
| P80254        | FFLEPWQIGK                                                                       | 0.642766304        | 2             | 2.51926  |
| P80254        | FLTEELSLDQDR                                                                     | 0.774349314        | 2             | 3.54553  |
| P80254        | LCAATATILDKPEDR                                                                  | 0.907964632        | 2             | 4.56479  |
| P80254        | STEPCAHLLISSIGVGTAEQNR                                                           | 0.748923631        | 2             | 5.31799  |
| <b>P80299</b> | <b>HYES Epoxide hydrolase 2</b>                                                  | <b>0.93033258</b>  | <b>0.3171</b> | <b>2</b> |
| P80299        | GHIEDCGHWQTQIEKPAEVNQLIK                                                         | 0.952642508        | 3             | 4.83779  |
| P80299        | TEIQNPSVTSK                                                                      | 0.902561429        | 2             | 2.91395  |
| <b>P80313</b> | <b>TCPH T_complex protein 1 subunit eta</b>                                      | <b>1.042610095</b> | <b>0.9569</b> | <b>6</b> |
| P80313        | ATISNDGATILK                                                                     | 1.03032521         | 2             | 2.5459   |
| P80313        | EGTDSSQGIPQLVSNISACQVIAEAVR                                                      | 0.863101018        | 3             | 3.72948  |
| P80313        | GGAEQFMEETER                                                                     | 1.074001874        | 2             | 2.90607  |
| P80313        | LLDVVHPAAK                                                                       | 1.064368091        | 2             | 2.32272  |
| P80313        | QLCDNAGFDATNILNK                                                                 | 1.051442272        | 2             | 3.91719  |
| P80313        | SQDAEVGDGTTSVTLAAEFLK                                                            | 1.073601241        | 2             | 5.25033  |
| <b>P80317</b> | <b>TCPZ T_complex protein 1 subunit zeta</b>                                     | <b>1.140176935</b> | <b>0.1022</b> | <b>8</b> |
| P80317        | ALQFLEQVK                                                                        | 1.096823497        | 2             | 2.73788  |
| P80317        | DGNVLLHEMQIQHPTASLIAK                                                            | 1.029263371        | 3             | 4.1148   |
| P80317        | GIDPFLDALAK                                                                      | 1.175634175        | 2             | 2.43048  |
| P80317        | HKSETDTSLR                                                                       | 1.202095956        | 2             | 2.30049  |
| P80317        | NAIDDGCVVPGAGAVEVALAEALIK                                                        | 0.936155027        | 3             | 5.68314  |
| P80317        | TEVNSGFFYK                                                                       | 1.293531319        | 2             | 2.48864  |
| P80317        | VATAQDDITGDGTTSNVLIIGELLK                                                        | 1.027483853        | 2             | 4.92921  |
| P80317        | VLAQNSGFDLQETLVK                                                                 | 1.073786018        | 2             | 3.8775   |

|               |                                                                  |                    |               |           |
|---------------|------------------------------------------------------------------|--------------------|---------------|-----------|
| <b>P81155</b> | <b>VDAC2 Voltage_dependent anion_selective channel protein 2</b> | <b>1.016108922</b> | <b>0.9936</b> | <b>4</b>  |
| P81155        | LTFDITTFSPNTGK                                                   | 0.980501631        | 2             | 3.17595   |
| P81155        | TGDFQLHTNVNNGTEFGGSIYQK                                          | 1.084098852        | 3             | 3.54564   |
| P81155        | VNSSLIGVGYTQLRPGVK                                               | 1.135051275        | 2             | 3.62247   |
| P81155        | YQLDPTASISAK                                                     | 0.98648521         | 1             | 3.00689   |
| <b>P82995</b> | <b>HS90A Heat shock protein HSP 90_alpha</b>                     | <b>0.920022215</b> | <b>1E-07</b>  | <b>13</b> |
| P82995        | ELHINLIPNKQDR                                                    | 0.983169514        | 2             | 3.03204   |
| P82995        | ELISNSSDALDK                                                     | 0.942062179        | 2             | 2.83532   |
| P82995        | HIYFITGETK                                                       | 1.085358034        | 2             | 2.40486   |
| P82995        | HLEINPDHSIETLR                                                   | 1.09629726         | 2             | 4.0038    |
| P82995        | HSQFIGYPITLFVEK                                                  | 2.471680792        | 2             | 2.90459   |
| P82995        | LGIHEDSQNR                                                       | 0.226788794        | 3             | 3.47087   |
| P82995        | NPDDITNEEYGEFYK                                                  | 1.308219299        | 2             | 4.72333   |
| P82995        | RAPFDLFENR                                                       | 1.05039437         | 2             | 2.92167   |
| P82995        | SLTNDWEEHLAVK                                                    | 1.17587261         | 2             | 4.10598   |
| P82995        | TLTIVDTGIGMTK                                                    | 1.007382287        | 2             | 3.86571   |
| P82995        | TLTIVDTGIGMTK+Oxidation(10)                                      | 0.994355936        | 2             | 3.91848   |
| P82995        | VFIMDNCEELIPEYLNFR                                               | 1.642697141        | 3             | 3.48798   |
| P82995        | YYTSASGDEMVSLEK                                                  | 1.293496017        | 2             | 3.29257   |
| <b>P83868</b> | <b>TEBP Prostaglandin E synthase 3</b>                           | <b>1.249717817</b> | <b>0.0031</b> | <b>2</b>  |
| P83868        | HLNEIDLHFCIDPNDSK                                                | 1.643729355        | 3             | 3.52715   |
| P83868        | LTFSCGGSDNFK                                                     | 1.192574906        | 2             | 2.5286    |
| <b>P83883</b> | <b>RL36A 60S ribosomal protein L36a</b>                          | <b>1.033139535</b> | <b>0.8303</b> | <b>2</b>  |
| P83883        | HFELGGDK                                                         | 1.022663681        | 1             | 2.02057   |
| P83883        | LECVENCR                                                         | 1.117296589        | 2             | 2.52882   |
| <b>P84082</b> | <b>ARF2 ADP_ribosylation factor 2</b>                            | <b>0.936764872</b> | <b>0.9805</b> | <b>2</b>  |
| P84082        | NISFTVWDVGGQDK                                                   | 1.094404017        | 2             | 3.98987   |
| P84082        | QDLPNAMNAAEITDK                                                  | 0.935533747        | 2             | 4.20974   |
| <b>P84083</b> | <b>ARF5 ADP_ribosylation factor 5</b>                            | <b>1.066964726</b> | <b>0.2432</b> | <b>3</b>  |
| P84083        | DAVLLVFANK                                                       | 1.281797819        | 2             | 3.05868   |
| P84083        | QDMPNAMPVSELTDK+Oxidation(2)                                     | 0.799338683        | 2             | 2.7171    |
| P84083        | VQESADELQK                                                       | 1.038719261        | 2             | 2.59998   |
| <b>P84100</b> | <b>RL19 60S ribosomal protein L19</b>                            | <b>1.03576273</b>  | <b>0.6703</b> | <b>2</b>  |
| P84100        | LLADQAEAR                                                        | 1.079786721        | 2             | 3.33508   |
| P84100        | VWLDPNETNEIANANSR                                                | 1.012796971        | 2             | 5.16201   |
| <b>P84245</b> | <b>H33 Histone H3.3</b>                                          | <b>0.786730454</b> | <b>0.0258</b> | <b>4</b>  |
| P84245        | DIQLAR                                                           | 0.705139101        | 1             | 1.97694   |
| P84245        | FQSAAGALQEASEAYLVGLFEDTNLCAIHAK                                  | 0.900563415        | 3             | 6.78579   |
| P84245        | RVTIMPKDIQLAR+Oxidation(4)                                       | 0.869618817        | 1             | 1.91577   |
| P84245        | STELLIR                                                          | 0.970708316        | 2             | 2.45772   |
| <b>P84817</b> | <b>FIS1 Mitochondrial fission 1 protein</b>                      | <b>1.046295659</b> | <b>0.0619</b> | <b>4</b>  |
| P84817        | FQSEQAAGSVSK                                                     | 1.011549827        | 2             | 2.54949   |
| P84817        | GIVLLELLPK                                                       | 1.032996967        | 2             | 2.65863   |
| P84817        | GLLQTEPQNNQAK                                                    | 1.106423438        | 2             | 3.53933   |
| P84817        | KFQSEQAAGSVSK                                                    | 1.448666167        | 2             | 3.49916   |
| <b>P85834</b> | <b>EFTU Elongation factor Tu_mitochondrial</b>                   | <b>0.978464256</b> | <b>0.9093</b> | <b>14</b> |
| P85834        | AEAGDNLGALVR                                                     | 1.040148807        | 2             | 3.41324   |
| P85834        | DKPHVNVGTIGHVDHGK                                                | 0.85800585         | 2             | 3.49496   |
| P85834        | DLEKPFLLPVESVYSIPGR                                              | 1.037244084        | 2             | 4.12934   |
| P85834        | GDECELLGHNK                                                      | 1.022008633        | 2             | 2.57568   |
| P85834        | GEETPVIVGSALCALEQR                                               | 1.012335511        | 2             | 4.28836   |
| P85834        | GITINAAHVEYSTAAR                                                 | 0.907964632        | 2             | 4.01904   |
| P85834        | GTVVTGTLER                                                       | 1.015092534        | 2             | 2.64555   |
| P85834        | HYAHTDCPGHADYVK                                                  | 0.978453702        | 2             | 4.1168    |
| P85834        | KGDECELLGHNK                                                     | 0.959600405        | 3             | 3.86336   |
| P85834        | KYEEIDNAPEER                                                     | 0.902780118        | 2             | 3.66724   |
| P85834        | LLDAVDYIPVPTR                                                    | 0.90361558         | 2             | 3.22709   |

|               |                                                                   |                    |               |           |
|---------------|-------------------------------------------------------------------|--------------------|---------------|-----------|
| P85834        | TIGTGLVTDVPAMTEEDK                                                | 0.979378868        | 2             | 3.40355   |
| P85834        | TIGTGLVTDVPAMTEEDKNIK                                             | 0.866719392        | 2             | 4.00458   |
| P85834        | YEEIDNAPEER                                                       | 0.980320455        | 2             | 3.33106   |
| <b>P85968</b> | <b>6PGD 6_phosphogluconate dehydrogenase_ decarboxylating</b>     | <b>1.052913769</b> | <b>0.0003</b> | <b>8</b>  |
| P85968        | AGQAVDDFIEK                                                       | 1.08456102         | 2             | 3.10356   |
| P85968        | CLSSLKEER                                                         | 1.076941739        | 2             | 2.42336   |
| P85968        | FQDTDGKELLPK                                                      | 0.886042175        | 2             | 3.03017   |
| P85968        | GILFVSGVSGGEEGAR                                                  | 1.025802397        | 2             | 4.72588   |
| P85968        | LVPLLDTGDIIDGGNSEYR                                               | 1.030450951        | 2             | 5.26126   |
| P85968        | NPQLNLLDDFFK                                                      | 1.27911826         | 2             | 4.66022   |
| P85968        | SAVDDCQDSWR                                                       | 1.104509168        | 2             | 2.50686   |
| P85968        | VGTGEPCCDWVGDGAGHFVK                                              | 1.076377689        | 3             | 4.65039   |
| <b>P85971</b> | <b>6PGL 6_phosphogluconolactonase</b>                             | <b>0.993560289</b> | <b>0.0015</b> | <b>5</b>  |
| P85971        | DLPAATAPAGPASFAR                                                  | 0.958491161        | 2             | 2.54599   |
| P85971        | ILEDQESALPAMVQPR                                                  | 1.14566123         | 2             | 4.2331    |
| P85971        | LPIPDSQVLTIDPALPVEDAAEDYAR                                        | 0.938202266        | 2             | 4.75659   |
| P85971        | TGALCWFLDEAAR                                                     | 1.222604037        | 2             | 3.85347   |
| P85971        | WTLGFCDER                                                         | 1.188201566        | 2             | 2.49302   |
| <b>P85972</b> | <b>VINC Vinculin</b>                                              | <b>0.946348658</b> | <b>0.0416</b> | <b>6</b>  |
| P85972        | ALASQLQDSLK                                                       | 0.883457974        | 2             | 2.32211   |
| P85972        | AQVVSQGLDVLTA                                                     | 1.01765016         | 2             | 4.20348   |
| P85972        | AVAGNISDPGLQK                                                     | 0.900016668        | 2             | 3.26817   |
| P85972        | KIDAAQNWLADPNGGPEGEEQIR                                           | 0.819120958        | 3             | 5.29389   |
| P85972        | QVATALQNLQTK                                                      | 1.000042195        | 2             | 3.1181    |
| P85972        | WIDNPTVDDR                                                        | 0.945512768        | 2             | 2.72919   |
| <b>P85973</b> | <b>PNPH Purine nucleoside phosphorylase</b>                       | <b>0.973043226</b> | <b>0.0002</b> | <b>10</b> |
| P85973        | ASHQEVLEAGK                                                       | 1.080125163        | 2             | 3.80538   |
| P85973        | DHINLPGFCGQNPLR                                                   | 0.822765339        | 2             | 3.52973   |
| P85973        | ELQEGTYIMSAGPTFETVAESCLLR                                         | 0.986657556        | 2             | 5.17002   |
| P85973        | HRPQVAVICGSLGGLTAK                                                | 0.954616247        | 3             | 5.79437   |
| P85973        | LTQPQAFDYNEIPNPQSTVQGHAGR                                         | 1.255232439        | 3             | 4.30745   |
| P85973        | MLGADAVGMSTVPEVIVAR                                               | 0.888419318        | 2             | 4.22285   |
| P85973        | MLGADAVGMSTVPEVIVAR+Oxidation(0)                                  | 0.934609585        | 2             | 5.2815    |
| P85973        | MLGADAVGMSTVPEVIVAR+Oxidation(8)                                  | 0.934609585        | 2             | 3.41608   |
| P85973        | VFGFSLITNK                                                        | 1.004646616        | 2             | 2.47214   |
| P85973        | VFHLLGVDTLVVTAAGGLNPK                                             | 0.963818506        | 2             | 4.92463   |
| <b>P86048</b> | <b>RL10L 60S ribosomal protein L10_like</b>                       | <b>1.08524451</b>  | <b>0.9852</b> | <b>2</b>  |
| P86048        | AKVDFEPLCGHMVSDEYEQLSSEALEAAR                                     | 1.004989307        | 3             | 6.14916   |
| P86048        | VDFEPLCGHMVSDEYEQLSSEALEAAR                                       | 1.117428667        | 3             | 4.87255   |
| <b>P97313</b> | <b>PRKDC DNA_dependent protein kinase catalytic subunit</b>       | <b>0.95274043</b>  | <b>0.5347</b> | <b>2</b>  |
| P97313        | FHGVMKTLCLLEVLLCR+Oxidation(4)                                    | 0.833766032        | 2             | 2.30776   |
| P97313        | LCHDAFTENMVGESLLEK                                                | 1.443804424        | 2             | 2.55094   |
| <b>P97384</b> | <b>ANX11 Annexin A11</b>                                          | <b>0.932463066</b> | <b>0.0734</b> | <b>2</b>  |
| P97384        | GFGTDEQAIIDCLGSR                                                  | 0.922944019        | 2             | 3.61506   |
| P97384        | SELDLLDIR                                                         | 1.063022765        | 2             | 2.99695   |
| <b>P97519</b> | <b>HMGCL Hydroxymethylglutaryl_ CoA lyase_ mitochondrial</b>      | <b>0.975929385</b> | <b>2E-06</b>  | <b>7</b>  |
| P97519        | EVSIFGAASELFTR                                                    | 1.025071753        | 2             | 2.97662   |
| P97519        | GFEAEVAAGAK                                                       | 0.989037688        | 2             | 3.45354   |
| P97519        | GYVSCALGCPYEGK                                                    | 0.958571077        | 2             | 4.11287   |
| P97519        | KNVNCISIEESFQR                                                    | 0.949942668        | 2             | 3.45766   |
| P97519        | LLEAGDFICQALNR                                                    | 1.189966354        | 2             | 4.46894   |
| P97519        | NVNCISIEESFQR                                                     | 0.975378884        | 2             | 3.62254   |
| P97519        | WVPQMADHSDVLK                                                     | 1.025749853        | 2             | 2.31539   |
| <b>P97521</b> | <b>MCAT Mitochondrial carnitine/acylcarnitine carrier protein</b> | <b>0.912337663</b> | <b>0.2803</b> | <b>4</b>  |
| P97521        | CLLQIASSGK                                                        | 0.848080136        | 2             | 3.04065   |
| P97521        | LQTQPPSLPGQPPMYSGTIDCFR                                           | 0.923326401        | 2             | 3.70087   |
| P97521        | SVHDLVPR                                                          | 0.872003086        | 2             | 2.35477   |

|               |                                                            |                    |               |           |
|---------------|------------------------------------------------------------|--------------------|---------------|-----------|
| P97521        | YSGTLDCAK                                                  | 1.017935939        | 2             | 2.45393   |
| <b>P97524</b> | <b>S27A2 Very long chain acyl_CoA synthetase</b>           | <b>0.996457568</b> | <b>0.9626</b> | <b>11</b> |
| P97524        | GEVGLLICK                                                  | 1.02834812         | 2             | 2.34005   |
| P97524        | IQDTIEITGTFK                                               | 1.13996301         | 2             | 2.81144   |
| P97524        | TILHVFLEQAR                                                | 0.914688488        | 2             | 2.9432    |
| P97524        | TSNTNGVDTVLDK                                              | 0.962654348        | 2             | 2.70655   |
| P97524        | TSNTNGVDTVLDKVDGVSADPIPESWR                                | 0.909454768        | 3             | 4.73825   |
| P97524        | TYVPMTEDIYNAIIDK                                           | 0.960652419        | 2             | 2.78521   |
| P97524        | VLLASPELHEAVEEVLP TLK                                      | 0.918415501        | 3             | 4.21283   |
| P97524        | VTLMEEGFNPSVIK                                             | 1.073420244        | 2             | 3.9528    |
| P97524        | YDVEKDEPVR                                                 | 0.963036082        | 2             | 2.74465   |
| P97524        | YLCNTPQKPNDR                                               | 1.137400252        | 2             | 2.82635   |
| P97524        | YNATVIQYIGELLR                                             | 1.22736354         | 2             | 3.5824    |
| <b>P97532</b> | <b>THTM 3_mercaptopyruvate sulfurtransferase</b>           | <b>1.020629661</b> | <b>0.0016</b> | <b>9</b>  |
| P97532        | AFGHHSVSLLDGGFR                                            | 1.020999617        | 2             | 3.22254   |
| P97532        | ALVSAQWVAEALK                                              | 1.191641735        | 2             | 3.22225   |
| P97532        | AQPEHVISQGR                                                | 0.948094226        | 1             | 2.67728   |
| P97532        | DGIEPGHIPGSVNIPFTEFLTSEGLEK                                | 0.968075121        | 3             | 6.65042   |
| P97532        | FQGTQPEPR                                                  | 0.921359011        | 2             | 3.33701   |
| P97532        | LLDASWYLPK                                                 | 1.293361208        | 2             | 3.35326   |
| P97532        | SPSEPAEFCAQLDPSFIK                                         | 0.415031506        | 2             | 2.84577   |
| P97532        | THEDILENLDR                                                | 0.916347141        | 2             | 3.67338   |
| P97532        | YWLSQNLPISSGK                                              | 0.959504634        | 2             | 3.39403   |
| <b>P97536</b> | <b>CAND1 Cullin_associated NEDD8_dissociated protein 1</b> | <b>1.074507697</b> | <b>0.0462</b> | <b>5</b>  |
| P97536        | AADIDQEVK                                                  | 1.340985455        | 2             | 2.44515   |
| P97536        | AVAALLTIPEAEK                                              | 1.008811037        | 2             | 2.98288   |
| P97536        | EGPAVVGQFIQDVK                                             | 1.013517967        | 2             | 2.41236   |
| P97536        | ITSEALLVTQQLVK                                             | 1.075166289        | 2             | 2.63474   |
| P97536        | SVILEAFSSPSEEVK                                            | 1.023540096        | 2             | 2.4738    |
| <b>P97562</b> | <b>ACOX2 Peroxisomal acyl_coenzyme A oxidase 2</b>         | <b>1.196769679</b> | <b>1E-19</b>  | <b>17</b> |
| P97562        | ATFADFCAQGAEICR                                            | 1.169496198        | 2             | 4.85067   |
| P97562        | CSAQTAAEFR                                                 | 1.488244679        | 2             | 3.0859    |
| P97562        | DFSLLPELHALSTGMK                                           | 0.96463293         | 2             | 2.34036   |
| P97562        | EAFDLLPLIR                                                 | 1.077973223        | 2             | 2.7272    |
| P97562        | FAEVLDPDGTYQR                                              | 1.51318693         | 2             | 2.4534    |
| P97562        | HSPSFSVER                                                  | 1.115991952        | 2             | 2.4285    |
| P97562        | ILEYQTQQQK                                                 | 1.144102795        | 2             | 3.83991   |
| P97562        | KVESIIQSDPVFNLK                                            | 1.163721133        | 2             | 4.78679   |
| P97562        | LDKEPEIQR                                                  | 1.011025144        | 2             | 3.24491   |
| P97562        | LGTPQSNYLGMLVTR                                            | 1.200044099        | 2             | 2.53585   |
| P97562        | LTNILDGGLPNTVLR                                            | 1.302568091        | 2             | 4.59799   |
| P97562        | MGLEHIDNGFLQLNHVR                                          | 1.174063905        | 3             | 4.82818   |
| P97562        | MGLEHIDNGFLQLNHVR+Oxidation(0)                             | 0.927849401        | 3             | 3.61944   |
| P97562        | SGVDQHDAWNQTTVIHLQAAK                                      | 1.275492632        | 3             | 6.05918   |
| P97562        | SLEDHTPLPGITVGDIGPK                                        | 1.065652999        | 3             | 4.70285   |
| P97562        | SLGSDEQIAK                                                 | 1.115220298        | 2             | 3.04997   |
| P97562        | VESIIQSDPVFNLK                                             | 1.182617186        | 2             | 4.59149   |
| <b>P97576</b> | <b>GRPE1 GrpE protein homolog 1_mitochondrial</b>          | <b>0.910625968</b> | <b>0.0055</b> | <b>2</b>  |
| P97576        | ATQSVPKKEEVSNNPHLK                                         | 0.925839653        | 3             | 3.40799   |
| P97576        | DLLEVADILEK                                                | 0.869534712        | 2             | 3.05581   |
| <b>P97584</b> | <b>PTGR1 Prostaglandin reductase 1</b>                     | <b>0.855115416</b> | <b>1E-19</b>  | <b>5</b>  |
| P97584        | ALTDLMNWWVSEK                                              | 0.754464882        | 2             | 4.1307    |
| P97584        | GGETVLVNAAAGAVGSVVGQIAK                                    | 0.886722431        | 2             | 5.00809   |
| P97584        | HFEFGPTDSNFELR                                             | 0.779862611        | 2             | 3.69526   |
| P97584        | TGPCPPGPSPEVIYQQLR                                         | 0.968011548        | 2             | 4.30028   |
| P97584        | YHEYITEGF EK                                               | 0.762963457        | 2             | 2.85119   |
| <b>P97608</b> | <b>OPLA 5_oxoprolinase</b>                                 | <b>1.047030099</b> | <b>0.0794</b> | <b>7</b>  |



|               |                                                                                                                            |                    |               |           |
|---------------|----------------------------------------------------------------------------------------------------------------------------|--------------------|---------------|-----------|
| P97608        | AGDFGAAFVER                                                                                                                | 1.204641837        | 2             | 3.00888   |
| P97608        | GSILDPSPEAAVVGGNVLTSQLR                                                                                                    | 0.886308831        | 2             | 4.88557   |
| P97608        | ISVGAEGPSMADTR                                                                                                             | 1.008310195        | 2             | 2.71408   |
| P97608        | ISVGAEGPSMADTR+Oxidation(9)                                                                                                | 1.22945588         | 2             | 2.46619   |
| P97608        | LEEQCVDALQVQGFPFR                                                                                                          | 0.917633459        | 2             | 3.04927   |
| P97608        | LLESDPANYADAPTEGIR                                                                                                         | 1.003565528        | 2             | 2.83912   |
| P97608        | TGDLLLEIQQPVDLEALR                                                                                                         | 0.946468303        | 2             | 4.8292    |
| <b>P97612</b> | <b>FAAH1 Fatty_acid amide hydrolase 1</b>                                                                                  | <b>1.180687408</b> | <b>0.0342</b> | <b>4</b>  |
| P97612        | GHDSTLGLSLNEGMPSESDCVVVQVLK                                                                                                | 1.279795375        | 3             | 3.5913    |
| P97612        | GTNCVTSYLTDCETQLSQAPR                                                                                                      | 1.119076818        | 2             | 4.87985   |
| P97612        | NSVGLPVAVQCVALPWQEELCLR                                                                                                    | 1.284030237        | 2             | 4.06335   |
| P97612        | SPGGSSGGEGALIGSGGSPGLGTDIGGSIR                                                                                             | 1.324761126        | 2             | 4.87486   |
| <b>P97700</b> | <b>M2OM Mitochondrial 2_oxoglutarate/malate carrier protein</b>                                                            | <b>0.955879061</b> | <b>1E-10</b>  | <b>3</b>  |
| P97700        | AVVVNAAQLASYSQSK                                                                                                           | 0.814943786        | 2             | 4.31182   |
| P97700        | GIYTGLSAGLLR                                                                                                               | 0.99230568         | 2             | 2.62217   |
| P97700        | LTGADGTPPGFLLK                                                                                                             | 0.953158172        | 2             | 3.42235   |
| <b>P97840</b> | <b>LEG9 Galectin_9</b>                                                                                                     | <b>1.1894621</b>   | <b>2E-07</b>  | <b>3</b>  |
| P97840        | FEEGGYVVCNTK                                                                                                               | 1.113211434        | 2             | 3.23733   |
| P97840        | NTQINNSWGPEER                                                                                                              | 1.700491653        | 2             | 2.72305   |
| P97840        | SINISGVVLPDAK                                                                                                              | 1.515848251        | 2             | 3.43342   |
| <b>P97852</b> | <b>DHB4 Peroxisomal multifunctional enzyme type 2</b>                                                                      | <b>0.923609173</b> | <b>1E-12</b>  | <b>18</b> |
| P97852        | AVANYDSVEAGEK                                                                                                              | 0.926887516        | 2             | 3.92973   |
| P97852        | AYALAFER                                                                                                                   | 1.056542371        | 2             | 3.26389   |
| P97852        | DTTSLNQAALYR                                                                                                               | 0.808087037        | 2             | 3.22986   |
| P97852        | FVYEGSADFSLPTFGVIVAQK                                                                                                      | 0.974187011        | 2             | 2.94755   |
| P97852        | GALVVVNDLGGDFK                                                                                                             | 1.176421261        | 2             | 4.20091   |
| P97852        | GSSAADKVVEEIR                                                                                                              | 0.761231132        | 2             | 2.39747   |
| P97852        | HVLQQFADNDVSR                                                                                                              | 0.868014246        | 2             | 4.40733   |
| P97852        | ICDFSNASKPK                                                                                                                | 0.866593287        | 2             | 3.2545    |
| P97852        | IDSEGISQNHTGQVASADASGFAGVVGHK                                                                                              | 0.89239            | 3             | 5.58683   |
| P97852        | IDVVVNNAGILR                                                                                                               | 0.876700197        | 2             | 3.94408   |
| P97852        | ISDEDWDIIQR                                                                                                                | 0.829110203        | 2             | 4.12311   |
| P97852        | KNNIHCNTIAPNAGSR                                                                                                           | 1.018088276        | 2             | 4.65894   |
| P97852        | NGSGEVYQGPAK                                                                                                               | 1.002609271        | 2             | 3.57651   |
| P97852        | NNIHCNTIAPNAGSR                                                                                                            | 0.858489552        | 2             | 4.35841   |
| P97852        | SIQUESTGGIIEVLHK                                                                                                           | 0.927317644        | 2             | 4.30546   |
| P97852        | SLMSGGLAEVPGLSINFAK                                                                                                        | 0.838054018        | 2             | 3.5113    |
| P97852        | VLHGSEQYLELYKPLPR                                                                                                          | 0.842780776        | 2             | 3.99406   |
| P97852        | VVLVTGAGGGLGR                                                                                                              | 0.973128515        | 2             | 3.59703   |
| <b>Q00438</b> | <b>PTBP1 Polypyrimidine tract_binding protein 1</b>                                                                        | <b>1.014971899</b> | <b>0.5022</b> | <b>3</b>  |
| Q00438        | KLPSDVTEGEVISLGLPFGK                                                                                                       | 1.01923788         | 2             | 4.22799   |
| Q00438        | LSLDGQNIYNACCTLR                                                                                                           | 1.197950108        | 2             | 3.75361   |
| Q00438        | NNQFQALLQYADPVSAQHAK                                                                                                       | 1.064984065        | 2             | 5.37589   |
| <b>Q00P19</b> | <b>HNRL2 Heterogeneous nuclear ribonucleoprotein U_like protein 2</b>                                                      | <b>0.96013045</b>  | <b>6E-07</b>  | <b>2</b>  |
| Q00P19        | AVEEQGDDQDSEK                                                                                                              | 0.543516804        | 2             | 3.89722   |
| Q00P19        | EEAQPIVTKYK                                                                                                                | 1.949530295        | 1             | 1.98446   |
| <b>Q01177</b> | <b>PLMN Plasminogen</b>                                                                                                    | <b>0.956967793</b> | <b>0.8892</b> | <b>3</b>  |
| Q01177        | CTTPPPPPGPTYQCLK                                                                                                           | 0.952610829        | 2             | 2.53773   |
| Q01177        | ILGSDVQQIAVTK                                                                                                              | 1.000008373        | 2             | 3.47818   |
| Q01177        | LVLEPNDADIALLK                                                                                                             | 1.128203338        | 2             | 2.8149    |
| <b>Q01205</b> | <b>ODO2 Dihydrolipoylysine_residue succinyltransferase component of 2_oxoglutarate dehydrogenase complex_mitochondrial</b> | <b>1.056582781</b> | <b>1E-06</b>  | <b>4</b>  |
| Q01205        | ASAFALQEQPVVNAVIDDATK                                                                                                      | 0.905183718        | 2             | 6.29209   |
| Q01205        | NDVITVQTPAFAESVTEGDVR                                                                                                      | 1.088770942        | 2             | 5.23766   |
| Q01205        | NVETMNYADIER                                                                                                               | 0.990962325        | 2             | 3.53902   |

|               |                                                                                 |                    |               |           |
|---------------|---------------------------------------------------------------------------------|--------------------|---------------|-----------|
| Q01205        | VEGGTPLFLTR                                                                     | 0.997368655        | 2             | 3.12645   |
| <b>Q01279</b> | <b>EGFR Epidermal growth factor receptor</b>                                    | <b>1.143380092</b> | <b>0.3663</b> | <b>2</b>  |
| Q01279        | NLQEILIGAVR                                                                     | 1.143487019        | 2             | 3.52345   |
| Q01279        | NYVVDTHGSCVR                                                                    | 0.751863873        | 2             | 2.72102   |
| <b>Q01405</b> | <b>SC23A Protein transport protein Sec23A</b>                                   | <b>1.079968003</b> | <b>1E-19</b>  | <b>4</b>  |
| Q01405        | AETEEGPDVLR                                                                     | 0.300500164        | 2             | 3.10498   |
| Q01405        | AVLNPLCQVDYR                                                                    | 1.078677247        | 2             | 2.91763   |
| Q01405        | HLLQAPVDDAQEILHSR                                                               | 1.266596629        | 3             | 5.48907   |
| Q01405        | YIDTEHGGSQAR                                                                    | 2.084678536        | 2             | 3.12801   |
| <b>Q02253</b> | <b>MMSA Methylmalonate semialdehyde dehydrogenase [acylating]_mitochondrial</b> | <b>0.898872192</b> | <b>1E-19</b>  | <b>29</b> |
| Q02253        | AEMEAAVAACK                                                                     | 0.976690145        | 2             | 3.75611   |
| Q02253        | AEMEAAVAACK+Oxidation(2)                                                        | 0.891848382        | 2             | 2.36936   |
| Q02253        | AEMEAAVAACKR                                                                    | 0.973152402        | 2             | 2.44191   |
| Q02253        | AFPAWADTSILSR                                                                   | 1.066567905        | 2             | 4.04344   |
| Q02253        | AISFVGSNQAGEYIFER                                                               | 1.018992113        | 2             | 5.21023   |
| Q02253        | CMALSTAVLVGEAK                                                                  | 1.145587756        | 2             | 4.28448   |
| Q02253        | CMALSTAVLVGEAK+Oxidation(1)                                                     | 0.959407963        | 2             | 3.39011   |
| Q02253        | EEDATLSSPAVVMPTMGR                                                              | 0.876491604        | 2             | 4.36403   |
| Q02253        | EEDATLSSPAVVMPTMGR+Oxidation(12)                                                | 0.871120595        | 2             | 2.65885   |
| Q02253        | EEDATLSSPAVVMPTMGR+Oxidation(15)                                                | 0.871120595        | 2             | 2.99436   |
| Q02253        | EGASILLDGR                                                                      | 0.749419992        | 2             | 2.5253    |
| Q02253        | ENTLNQLVGAAFGAAGQR                                                              | 0.849525733        | 2             | 5.26509   |
| Q02253        | GLQVVEHACSVTSLMLGETMPSITK                                                       | 0.9280922          | 2             | 3.12899   |
| Q02253        | IVNDNPYNGTAIFTTNGAIAR                                                           | 1.00255563         | 2             | 5.46838   |
| Q02253        | LFIDGK                                                                          | 0.892730088        | 1             | 1.98009   |
| Q02253        | LITLEQ GK                                                                       | 0.969783809        | 2             | 2.54244   |
| Q02253        | LLQDSGAPDGTLLNIHQHEAVNFICDHPDIK                                                 | 1.410770075        | 3             | 4.53488   |
| Q02253        | NHGVMMPDANK                                                                     | 0.827757078        | 1             | 3.7557    |
| Q02253        | NHGVMMPDANK+Oxidation(5)                                                        | 1.212923817        | 2             | 3.13333   |
| Q02253        | NHGVMMPDANKENTLNQLVGAAFGAAGQR                                                   | 0.852367986        | 3             | 5.583     |
| Q02253        | NHGVMMPDANKENTLNQLVGAAFGAAGQR+Oxidation(5)                                      | 0.793011429        | 3             | 4.53694   |
| Q02253        | QGIQFYTLK                                                                       | 1.277265748        | 2             | 2.63347   |
| Q02253        | SDKWIDIHNPATNEVVGR                                                              | 0.932562047        | 2             | 5.00344   |
| Q02253        | TITSQWKEEDATLSSPAVVMPTMGR                                                       | 0.887295241        | 2             | 5.22912   |
| Q02253        | TLADAEGDVFR                                                                     | 0.928037044        | 2             | 3.55727   |
| Q02253        | VCNLIDSGAK                                                                      | 0.985183612        | 2             | 3.41987   |
| Q02253        | VNAGDQPGADLGPLITPQAK                                                            | 0.924111707        | 2             | 5.87265   |
| Q02253        | WIDIHNPATNEVVGR                                                                 | 0.967300202        | 2             | 4.80653   |
| Q02253        | WLPELVER                                                                        | 0.794984633        | 1             | 2.04743   |
| <b>Q02769</b> | <b>FDFT Squalene synthase</b>                                                   | <b>0.853563943</b> | <b>0.0348</b> | <b>3</b>  |
| Q02769        | KLEDFVKPENVDVAVK                                                                | 1.068268651        | 2             | 4.00819   |
| Q02769        | TQSLPNCQLISR                                                                    | 0.276870803        | 2             | 2.3738    |
| Q02769        | VVLEDFPTISLEFR                                                                  | 0.709335385        | 2             | 3.19125   |
| <b>Q02874</b> | <b>H2AY Core histone macro_H2A.1</b>                                            | <b>0.964538552</b> | <b>0.9903</b> | <b>2</b>  |
| Q02874        | AASADSTTEGAPTDFVLSVK                                                            | 0.975798437        | 2             | 3.90074   |
| Q02874        | GVTIASGGVLPNIHPELLAK                                                            | 0.931133341        | 2             | 3.7257    |
| <b>Q02974</b> | <b>KHK Ketohexokinase</b>                                                       | <b>0.96865887</b>  | <b>0.9867</b> | <b>7</b>  |
| Q02974        | CGLQFGDGV                                                                       | 0.966374537        | 1             | 1.9318    |
| Q02974        | GATLICAWAEEGADALPGDQLLHSDAFPPPR                                                 | 1.004791982        | 3             | 5.78986   |
| Q02974        | GGNASNSCTVLSLLGAR                                                               | 1.062275328        | 2             | 4.76952   |
| Q02974        | GNSMQEALR                                                                       | 0.915486613        | 2             | 2.79644   |
| Q02974        | GVDVSQVAWQSQGDTPCSCCIVNNSNGSR                                                   | 0.917404741        | 3             | 5.77613   |
| Q02974        | IEQYNATQPLQK                                                                    | 0.99242866         | 2             | 4.82333   |
| Q02974        | TIILYDTNLPDVSAK                                                                 | 0.923280155        | 2             | 4.1603    |
| <b>Q03070</b> | <b>CHIO Beta_chimaerin</b>                                                      | <b>0.956514355</b> | <b>0.5651</b> | <b>2</b>  |
| <b>Q03248</b> | <b>BUP1 Beta_ureidopropionase</b>                                               | <b>0.980218397</b> | <b>1E-19</b>  | <b>12</b> |

|               |                                                        |                    |               |           |
|---------------|--------------------------------------------------------|--------------------|---------------|-----------|
| Q03248        | AHHDLGIFYGSSYVAAPDGSR                                  | 1.061071328        | 2             | 6.31155   |
| Q03248        | EDLVLPSSG                                              | 0.874597389        | 1             | 2.16939   |
| Q03248        | EKLPWTEFAESAEDGLTTR                                    | 0.905880211        | 3             | 5.42065   |
| Q03248        | ELAEAVKPNYSPNIVK                                       | 0.76410967         | 2             | 3.99963   |
| Q03248        | ELAEAVKPNYSPNIVKEDLVLPSSG                              | 0.934393411        | 3             | 3.45047   |
| Q03248        | HNMVVISPILER+Oxidation(2)                              | 1.078877901        | 3             | 3.32312   |
| Q03248        | IPLPTSAPVAEQVSALHK                                     | 1.379918213        | 3             | 4.73686   |
| Q03248        | KHNMVVISPILER+Oxidation(3)                             | 0.915623113        | 2             | 2.8544    |
| Q03248        | NAAIANHCFTCALNR                                        | 1.07490362         | 2             | 4.61519   |
| Q03248        | VGDFNESTYYMEGNLGHVPVFTQFGR                             | 1.375828185        | 3             | 4.76682   |
| Q03248        | VGQEHYPNEFTSGDGK                                       | 1.233013758        | 2             | 4.20286   |
| Q03248        | VGQEHYPNEFTSGDGKK                                      | 1.006607733        | 3             | 4.39057   |
| <b>Q03336</b> | <b>RGN Regucalcin</b>                                  | <b>1.013994577</b> | <b>2E-09</b>  | <b>16</b> |
| Q03336        | CGESPVWEEASK                                           | 0.975605054        | 2             | 4.63456   |
| Q03336        | CLLFVDIPSK                                             | 1.093186138        | 2             | 3.58707   |
| Q03336        | DEQIPDGMCIDVEGK                                        | 1.161530222        | 2             | 3.84422   |
| Q03336        | DYSEMYVTCAR                                            | 0.834955403        | 2             | 3.53396   |
| Q03336        | FNDGKVPDAGR                                            | 1.068232978        | 2             | 3.09441   |
| Q03336        | HQGSLSLFPDHSVK                                         | 1.368426658        | 2             | 4.67337   |
| Q03336        | KYFDQVDISNGLDWSLDHK                                    | 1.028307072        | 3             | 5.10245   |
| Q03336        | LWVACYNGGR                                             | 1.122633228        | 2             | 2.36953   |
| Q03336        | MEKDEQIPDGMCIDVEGK                                     | 1.05633456         | 2             | 4.94173   |
| Q03336        | MEKDEQIPDGMCIDVEGK+Oxidation(0)                        | 1.076663663        | 2             | 4.42183   |
| Q03336        | MEKDEQIPDGMCIDVEGK+Oxidation(10)                       | 1.082887858        | 2             | 2.58264   |
| Q03336        | QSGGYVATIGTK                                           | 1.075317358        | 2             | 2.83251   |
| Q03336        | VGVDAPVSSVALR                                          | 1.07285946         | 2             | 3.73256   |
| Q03336        | YFAGTMAEETAPAVLER                                      | 1.076036577        | 2             | 5.61584   |
| Q03336        | YFAGTMAEETAPAVLER+Oxidation(5)                         | 1.025788598        | 2             | 5.25827   |
| Q03336        | YFDQVDISNGLDWSLDHK                                     | 1.048890453        | 3             | 4.20341   |
| <b>Q03626</b> | <b>MUG1 Murinoglobulin_1</b>                           | <b>0.993760112</b> | <b>0.0269</b> | <b>7</b>  |
| Q03626        | EESSCIHSSCTAER                                         | 1.120974402        | 2             | 4.0157    |
| Q03626        | FQVDNSNR                                               | 0.792477022        | 1             | 2.28701   |
| Q03626        | GGEFEMMPLGVNK                                          | 0.785235888        | 2             | 2.40922   |
| Q03626        | LTAQPAPSPEDLALSMGTIK                                   | 1.001203433        | 2             | 3.48027   |
| Q03626        | NLHPLNELFPLAYIEDPK                                     | 1.395367234        | 3             | 4.3533    |
| Q03626        | VQTVPLTCNNPK                                           | 0.920686707        | 2             | 3.02871   |
| Q03626        | VYHKEESSCIHSSCTAER                                     | 1.136609647        | 3             | 4.32211   |
| <b>Q04462</b> | <b>SYVC Valyl_tRNA synthetase</b>                      | <b>0.874822728</b> | <b>0.0869</b> | <b>2</b>  |
| Q04462        | ALNPLEEWLR                                             | 0.995668716        | 2             | 2.6182    |
| Q04462        | SVTQQPGEITAPQK                                         | 0.897100724        | 2             | 3.72762   |
| <b>Q05144</b> | <b>RAC2 Ras_related C3 botulinum toxin substrate 2</b> | <b>0.999431585</b> | <b>0.511</b>  | <b>2</b>  |
| Q05144        | MQAICVVVGDGAVGK+Oxidation(0)                           | 0.897843193        | 2             | 2.59498   |
| Q05144        | YLECSALTQR                                             | 1.043042915        | 2             | 2.62865   |
| <b>Q06647</b> | <b>ATPO ATP synthase subunit O_mitochondrial</b>       | <b>1.010577487</b> | <b>0.4365</b> | <b>5</b>  |
| Q06647        | FSPLTANLMNLLAENGR                                      | 1.197638616        | 3             | 3.96317   |
| Q06647        | GEVPCTVTTAFPLDEAVLSELK                                 | 1.012646862        | 3             | 5.99183   |
| Q06647        | GQILNLEVK                                              | 1.097140616        | 2             | 2.61595   |
| Q06647        | LGNTQGVISAFSTIMSVHR                                    | 1.120849048        | 3             | 3.54184   |
| Q06647        | TDPSIMGGMIVR                                           | 1.006858433        | 2             | 2.30175   |
| <b>Q07071</b> | <b>GCKR Glucokinase regulatory protein</b>             | <b>1.354868586</b> | <b>7E-12</b>  | <b>8</b>  |
| Q07071        | AAPISCHVQVAHEK                                         | 1.212832427        | 2             | 4.98641   |
| Q07071        | LLGQCDAEIFQEEGQIVPTYQR                                 | 2.429135584        | 2             | 2.985     |
| Q07071        | QEAFLNPAIGPEGLSGSSR                                    | 1.199349889        | 2             | 4.1022    |
| Q07071        | STQALEDPPACGTLN                                        | 1.175722996        | 2             | 2.64691   |
| Q07071        | TVDQGVVSSQR                                            | 1.172438148        | 2             | 3.20456   |
| Q07071        | VIPTALLSLLLR                                           | 1.600860519        | 2             | 2.58984   |
| Q07071        | VQEVLEKPDGGLVVLVLSGGTSGR                               | 0.961748065        | 2             | 5.32051   |

|               |                                                                    |                    |               |           |
|---------------|--------------------------------------------------------------------|--------------------|---------------|-----------|
| Q07071        | YQHVIETPEPGEWELSGYEAAVPITEK                                        | 1.285571304        | 3             | 5.38837   |
| <b>Q07116</b> | <b>SUOX Sulfite oxidase_ mitochondrial</b>                         | <b>0.9010566</b>   | <b>0.2147</b> | <b>6</b>  |
| Q07116        | AVDDSYNVQPDTVAPIWNLR                                               | 0.91327096         | 2             | 4.81601   |
| Q07116        | FVDLHPGGQSK                                                        | 0.79461232         | 2             | 2.82156   |
| Q07116        | IGELNPEDR                                                          | 0.966804346        | 2             | 2.32568   |
| Q07116        | LHVVGAPGGQSLSLDLDLHK                                               | 1.098599729        | 3             | 3.88607   |
| Q07116        | NHLPVPNLDPDTYR                                                     | 0.900291057        | 2             | 2.47862   |
| Q07116        | VSESEESYSHWQR                                                      | 0.913460458        | 2             | 3.83073   |
| <b>Q07523</b> | <b>HAOX2 Hydroxyacid oxidase 2</b>                                 | <b>0.961715985</b> | <b>0.0116</b> | <b>11</b> |
| Q07523        | ALKEEKPTQSVPVSPFK                                                  | 0.877712875        | 2             | 4.13306   |
| Q07523        | ALVITIDTPVLGNR                                                     | 0.98785661         | 2             | 4.48049   |
| Q07523        | ASFVWVNDLSLLQSITR                                                  | 1.081352167        | 2             | 4.3169    |
| Q07523        | EKPTQSVPVSPFK                                                      | 1.02495873         | 2             | 3.17334   |
| Q07523        | EVLDTLAEHR                                                         | 0.913484332        | 2             | 3.35861   |
| Q07523        | GEDGVKEVLDILAEHR                                                   | 0.81160679         | 3             | 5.20111   |
| Q07523        | HNVQGIVVSNHGGR                                                     | 0.947944264        | 3             | 5.9516    |
| Q07523        | NQLNLEANILLK                                                       | 0.985368891        | 2             | 3.47047   |
| Q07523        | QLDEVASIDALR                                                       | 0.98335361         | 2             | 3.48437   |
| Q07523        | TSWDFIEGEADDGITYSENAFAK                                            | 1.008189236        | 3             | 3.5434    |
| Q07523        | TTIQGQEIAPICISPTAFHSIAWPDGK                                        | 1.059617074        | 3             | 3.98979   |
| <b>Q07936</b> | <b>ANXA2 Annexin A2</b>                                            | <b>0.757397374</b> | <b>0.001</b>  | <b>2</b>  |
| Q07936        | GLGTDEDSLIEICSR                                                    | 0.947006906        | 2             | 2.93208   |
| Q07936        | GVDEVTIVNLTNR                                                      | 0.741857254        | 2             | 3.44998   |
| <b>Q07984</b> | <b>SSRD Translocon_ associated protein subunit delta</b>           | <b>1.004647868</b> | <b>0.8495</b> | <b>2</b>  |
| Q07984        | FFDEESYLLR                                                         | 1.173061128        | 2             | 3.22459   |
| Q07984        | NNEDVSIIPPLFTVSDHR                                                 | 1.015636999        | 3             | 3.84233   |
| <b>Q08163</b> | <b>CAP1 Adenylyl cyclase_ associated protein 1</b>                 | <b>1.094540151</b> | <b>0.2241</b> | <b>5</b>  |
| Q08163        | ALLVTASQCQPAGNK                                                    | 0.699610958        | 2             | 4.61304   |
| Q08163        | LEAVSHTSDMHCGYGDSPSK                                               | 0.963926287        | 3             | 4.2197    |
| Q08163        | SALFAQINQGESITHALK                                                 | 1.039651407        | 2             | 4.03799   |
| Q08163        | SSEMNVLIPTGGDFNEFPVPEQFK                                           | 1.043274262        | 2             | 3.93078   |
| Q08163        | VENQENVSNLVIDDELK                                                  | 0.960118649        | 2             | 4.95315   |
| <b>Q08415</b> | <b>KAT1 Kynurenine_ oxoglutarate transaminase 1_ mitochondrial</b> | <b>1.005318328</b> | <b>0.2128</b> | <b>3</b>  |
| Q08415        | EQQHFGQPSSYFLQLPQAMELNR                                            | 0.993454021        | 3             | 4.52657   |
| Q08415        | ILVLNTPNPLGK                                                       | 1.212052757        | 2             | 2.83256   |
| Q08415        | LGASNDWQLDPAELASK                                                  | 0.493848017        | 2             | 3.29377   |
| <b>Q09073</b> | <b>ADT2 ADP/ATP translocase 2</b>                                  | <b>1.424371467</b> | <b>0.1316</b> | <b>7</b>  |
| Q09073        | AAYFGIYDTAK                                                        | 1.304455473        | 2             | 2.48069   |
| Q09073        | DFLAGGVAAAIK                                                       | 0.948022041        | 2             | 4.6752    |
| Q09073        | GLGDCLVK                                                           | 1.089421297        | 2             | 2.62315   |
| Q09073        | GTDIMYTGTLDCWR                                                     | 1.217537368        | 2             | 3.47945   |
| Q09073        | LLLQVQHASK                                                         | 1.424439263        | 2             | 2.47651   |
| Q09073        | QIFLGGVDK                                                          | 0.981661175        | 2             | 2.50334   |
| Q09073        | QIFLGGVDKR                                                         | 0.982171161        | 2             | 2.57101   |
| <b>Q09199</b> | <b>B4GN2 Beta_1_4 N_ acetylgalactosaminyltransferase 2</b>         | <b>0.988046401</b> | <b>0.7411</b> | <b>2</b>  |
| Q09199        | MKYKFQDAYNQK+Oxidation(0)                                          | 0.982256142        | 2             | 3.00798   |
| Q09199        | QQTVPKLYDPGPER                                                     | 1.052170284        | 2             | 2.30905   |
| <b>Q0D2L3</b> | <b>SPEB Agmatinase_ mitochondrial</b>                              | <b>0.928714026</b> | <b>3E-15</b>  | <b>5</b>  |
| Q0D2L3        | EHGPVGLVHVGHAHSNTSDKPLEDK                                          | 1.051073963        | 3             | 3.74122   |
| Q0D2L3        | IREESLMLGTVNPNSTGALPFQSLR                                          | 1.064056935        | 3             | 3.91361   |
| Q0D2L3        | SVDEGLLDSK                                                         | 0.902966384        | 1             | 1.90349   |
| Q0D2L3        | SVDEGLLDSKR                                                        | 0.836277574        | 2             | 2.74898   |
| Q0D2L3        | VADLGNVNVNLYNLQDSCR                                                | 1.299377304        | 2             | 5.48389   |
| <b>Q0VGK3</b> | <b>GLCK Glycerate kinase</b>                                       | <b>0.969685312</b> | <b>0.1408</b> | <b>4</b>  |
| Q0VGK3        | AVLGMAAAADELLGQHLVQGVISVPK                                         | 0.809463858        | 3             | 5.45504   |
| Q0VGK3        | GATIQLNTIR                                                         | 0.935422366        | 2             | 3.50195   |
| Q0VGK3        | QLFDSAVGAVQPGPMLQR                                                 | 0.934491601        | 2             | 2.39961   |

|               |                                                                            |                    |               |           |
|---------------|----------------------------------------------------------------------------|--------------------|---------------|-----------|
| Q0VGK3        | VAAACLTSSAERPLEEAAK                                                        | 1.162937488        | 3             | 3.37933   |
| <b>Q0ZHH6</b> | <b>ATLA3 Atlastin_3</b>                                                    | <b>1.046711597</b> | <b>0.9999</b> | <b>4</b>  |
| Q0ZHH6        | EHGHSNWLGDPEEPLTGFSWR                                                      | 0.935450266        | 3             | 4.16363   |
| Q0ZHH6        | EQLQTLIPYVLNPSK                                                            | 1.046515507        | 2             | 2.87554   |
| Q0ZHH6        | GGSDPETTGIIQWSEVFTVK                                                       | 1.055498625        | 2             | 4.5745    |
| Q0ZHH6        | YQQUEEEEEITELYENFCK                                                        | 1.068537428        | 2             | 5.47397   |
| <b>Q10758</b> | <b>K2C8 Keratin_type II cytoskeletal 8</b>                                 | <b>0.788376125</b> | <b>1E-19</b>  | <b>23</b> |
| Q10758        | AEAETMYQIK                                                                 | 0.922424219        | 2             | 3.21711   |
| Q10758        | AQYEEIANR                                                                  | 0.836270398        | 2             | 3.31733   |
| Q10758        | ATLEAAIADAEQR                                                              | 0.834334788        | 2             | 4.67324   |
| Q10758        | ELQSQISDTSVVLMSDNSR                                                        | 0.8774367          | 2             | 6.02147   |
| Q10758        | GSLGGFGGAGVGGITAVTVNQSLNPLK                                                | 1.020971555        | 2             | 4.4565    |
| Q10758        | LEGLTDEINFLR                                                               | 0.844656614        | 2             | 4.17265   |
| Q10758        | LESGMQNMSIHTK                                                              | 0.749872888        | 2             | 3.79113   |
| Q10758        | LEVDPNIQAVR                                                                | 0.880578672        | 2             | 3.75479   |
| Q10758        | LEVELGNMQGLVEDFK                                                           | 0.821895727        | 2             | 4.83817   |
| Q10758        | LKLEVELGNMQGLVEDFK                                                         | 1.010763328        | 3             | 3.92451   |
| Q10758        | LQAEIDALK                                                                  | 0.884985734        | 2             | 2.71283   |
| Q10758        | LVSESSDIMSK                                                                | 0.916063374        | 2             | 3.27688   |
| Q10758        | QHHEEIR                                                                    | 0.820222081        | 1             | 2.26044   |
| Q10758        | RQLEALGQEK                                                                 | 0.742143381        | 2             | 2.34214   |
| Q10758        | SKTEISEMNR                                                                 | 0.763401685        | 3             | 3.43588   |
| Q10758        | SKTEISEMNR+Oxidation(7)                                                    | 0.834742988        | 3             | 3.31696   |
| Q10758        | SLDMDSIIAEVR                                                               | 0.832418174        | 2             | 4.38511   |
| Q10758        | SNMDNMFESYINNL                                                             | 0.967060165        | 2             | 3.931     |
| Q10758        | SRAEAETMYQIK                                                               | 0.829718135        | 2             | 3.41921   |
| Q10758        | TEMENEFVLK                                                                 | 0.834625896        | 2             | 3.70411   |
| Q10758        | TEMENEFVLK+Oxidation(2)                                                    | 0.795697556        | 2             | 2.60711   |
| Q10758        | WSLLQQQK                                                                   | 0.811828567        | 2             | 2.62178   |
| Q10758        | YEELQTLAGK                                                                 | 0.848174048        | 2             | 3.53382   |
| <b>Q14DH7</b> | <b>ACSS3 Acyl_CoA synthetase short_chain family member 3_mitochondrial</b> | <b>0.827866715</b> | <b>7E-12</b>  | <b>4</b>  |
| Q14DH7        | STLSALVNGKPYK                                                              | 0.806522041        | 2             | 2.8071    |
| Q14DH7        | THFAASVADPER                                                               | 0.809319713        | 2             | 3.36301   |
| Q14DH7        | VDDVINVAGHR                                                                | 0.685753402        | 2             | 3.01359   |
| Q14DH7        | VTPTIEDPSIFGHIEEVLK                                                        | 0.913425863        | 2             | 3.44813   |
| <b>Q1HCL7</b> | <b>NAKD1 NAD kinase domain_containing protein 1</b>                        | <b>0.838691355</b> | <b>9E-06</b>  | <b>10</b> |
| Q1HCL7        | ALNEVFIGESLSSR                                                             | 0.736839648        | 2             | 2.59747   |
| Q1HCL7        | ASYEISVDDGPWEK                                                             | 0.937247347        | 2             | 3.46948   |
| Q1HCL7        | LKPVIGVNTDPER                                                              | 0.853615833        | 2             | 2.84285   |
| Q1HCL7        | LYLEGTGINPSPVDLHEQQLSLNQHSR                                                | 1.013003361        | 3             | 3.94495   |
| Q1HCL7        | NVEHIIDSLRDEGIEVR                                                          | 0.88192993         | 2             | 2.6372    |
| Q1HCL7        | QGNLTLPLNK                                                                 | 0.790292368        | 2             | 2.57634   |
| Q1HCL7        | SEASGPQLLPVR                                                               | 0.929777522        | 2             | 3.09542   |
| Q1HCL7        | SEGLHCLPVR                                                                 | 0.790140607        | 2             | 2.40608   |
| Q1HCL7        | SSGLNLCTGTGSK                                                              | 0.837030431        | 2             | 3.35412   |
| Q1HCL7        | VTNEYNESLLYSPEEPK                                                          | 0.965236992        | 2             | 4.72075   |
| <b>Q1JU68</b> | <b>EIF3A Eukaryotic translation initiation factor 3 subunit A</b>          | <b>1.007620247</b> | <b>0.9707</b> | <b>5</b>  |
| Q1JU68        | EEEEQRRAEQMLK                                                              | 0.970455988        | 2             | 2.59425   |
| Q1JU68        | EQPEKEPELQYVPLQNNILR                                                       | 0.94164232         | 3             | 3.70921   |
| Q1JU68        | FNVLQYVPEVK                                                                | 1.040933795        | 2             | 3.46859   |
| Q1JU68        | ILQEHEQIK                                                                  | 1.20577431         | 2             | 2.48497   |
| Q1JU68        | MPAYFQRPENALK                                                              | 1.080188695        | 2             | 2.50114   |
| <b>Q29RW1</b> | <b>MYH4 Myosin_4</b>                                                       | <b>0.919986078</b> | <b>0.9882</b> | <b>5</b>  |
| Q29RW1        | LQDAEEHVEAVNSK                                                             | 0.894175735        | 2             | 4.55867   |
| Q29RW1        | NAYEESLDQLETLK                                                             | 0.902091657        | 2             | 4.67246   |
| Q29RW1        | NAYEESLDQLETLR                                                             | 1.185221371        | 2             | 3.78842   |

|               |                                                                            |                    |               |          |
|---------------|----------------------------------------------------------------------------|--------------------|---------------|----------|
| Q29RW1        | TLEDQLSEVK                                                                 | 1.188796218        | 1             | 1.93845  |
| Q29RW1        | VKNLTEEMAGLDENIVKLTk+Oxidation(7)                                          | 0.935509179        | 2             | 2.48752  |
| <b>Q2V057</b> | <b>PROD2 Probable proline dehydrogenase 2</b>                              | <b>1.083170528</b> | <b>0.3016</b> | <b>5</b> |
| Q2V057        | EDCTQPDYEATSR                                                              | 0.920814867        | 2             | 3.19085  |
| Q2V057        | GCVQQLQAIGLQPLAVPTTEEPDSSAAK                                               | 1.124456299        | 3             | 3.58326  |
| Q2V057        | NLQLSCLSTEQNQHLLQASLSR                                                     | 1.116423231        | 2             | 5.54773  |
| Q2V057        | REQALLSQELWR                                                               | 1.095176552        | 2             | 3.06729  |
| Q2V057        | SIPYGCLEEVIPYLIR                                                           | 1.445542744        | 2             | 2.36529  |
| <b>Q3B7D0</b> | <b>HEM6 Coproporphyrinogen_III oxidase_mitochondrial</b>                   | <b>0.876619821</b> | <b>0.4813</b> | <b>3</b> |
| Q3B7D0        | AGVNI5VVHGNLSEEAANQMR                                                      | 0.864155903        | 3             | 3.80679  |
| Q3B7D0        | HCDDSYTPQDK                                                                | 1.298626071        | 2             | 2.98564  |
| Q3B7D0        | LEEDGDELAR                                                                 | 0.975615146        | 2             | 2.45005  |
| <b>Q3B7U9</b> | <b>FKBP8 Peptidyl_prolyl cis_trans isomerase FKBP8</b>                     | <b>0.937265195</b> | <b>0.6331</b> | <b>4</b> |
| Q3B7U9        | SCSQVLEHQPDNIK                                                             | 0.88142215         | 2             | 3.92912  |
| Q3B7U9        | TAEDGPDLEMLSGQER                                                           | 0.948821694        | 2             | 3.19839  |
| Q3B7U9        | VDMTCEEEEELLQLK                                                            | 1.015346898        | 2             | 3.34904  |
| Q3B7U9        | VLAQQGEYSEAIPIR                                                            | 0.88966895         | 2             | 3.62744  |
| <b>Q3KRD8</b> | <b>IF6 Eukaryotic translation initiation factor 6</b>                      | <b>0.998334051</b> | <b>0.3789</b> | <b>2</b> |
| Q3KRD8        | HGLLVPNNTTDQELQHIR                                                         | 1.01102417         | 3             | 4.52834  |
| Q3KRD8        | TSIEDQDELSSLLQVPLVAGTVNR                                                   | 1.038653606        | 3             | 4.26425  |
| <b>Q3KRE0</b> | <b>ATAD3 ATPase family AAA domain_containing protein 3</b>                 | <b>1.074123104</b> | <b>0.4303</b> | <b>2</b> |
| Q3KRE0        | GEGTGPPPLPPAQPGAESGGDR                                                     | 1.101406894        | 2             | 3.39096  |
| Q3KRE0        | QEESVQKQEAIRR                                                              | 1.068696413        | 2             | 2.44646  |
| <b>Q3KRE8</b> | <b>TBB2B Tubulin beta_2B chain</b>                                         | <b>1.199411259</b> | <b>0.1283</b> | <b>2</b> |
| Q3KRE8        | ALTVPELTQQMFDSK                                                            | 1.120791178        | 2             | 3.12692  |
| Q3KRE8        | ESESCDCLQGFQLTHSLGGGTGSGMGTLLISK                                           | 1.196768782        | 3             | 4.44284  |
| <b>Q3MIE0</b> | <b>ECHD3 Enoyl_CoA hydratase domain_containing protein 3_mitochondrial</b> | <b>0.938912404</b> | <b>0.0022</b> | <b>5</b> |
| Q3MIE0        | DGQEGIEAFIQK                                                               | 0.982135705        | 2             | 3.31548  |
| Q3MIE0        | SDILHEAESEDLK                                                              | 0.920747296        | 2             | 3.21786  |
| Q3MIE0        | SSFATPGVNVGLFCSTPAVALGR                                                    | 1.005048723        | 2             | 4.29326  |
| Q3MIE0        | VIIISAEGPVFSSGHDLK                                                         | 0.910465522        | 2             | 4.24602  |
| Q3MIE0        | VVPEEQLEEEATR                                                              | 0.874478553        | 2             | 3.8628   |
| <b>Q3MIF4</b> | <b>XYLB Xylulose kinase</b>                                                | <b>1.023707025</b> | <b>0.9936</b> | <b>6</b> |
| Q3MIF4        | DLPEFGTQGGVHVHK                                                            | 0.961517394        | 2             | 2.58044  |
| Q3MIF4        | FNADNMEVSAFP GDVEIR                                                        | 0.98542102         | 2             | 3.54328  |
| Q3MIF4        | IRDESASCSWNK                                                               | 0.983238582        | 2             | 4.03811  |
| Q3MIF4        | VVAFTGDNPASLAGMR                                                           | 1.097985199        | 2             | 3.41045  |
| Q3MIF4        | VWSQAACLDACAPHLK                                                           | 1.068709254        | 2             | 3.48241  |
| Q3MIF4        | YSPIDYSDGSGMNLQLQIEK                                                       | 1.070367434        | 2             | 5.23297  |
| <b>Q3T1J1</b> | <b>IF5A1 Eukaryotic translation initiation factor 5A_1</b>                 | <b>0.998099211</b> | <b>0.5119</b> | <b>4</b> |
| Q3T1J1        | EDLRLPEGDLGK                                                               | 1.017614904        | 2             | 2.93007  |
| Q3T1J1        | EDLRLPEGDLGKEIEQK                                                          | 0.988288422        | 2             | 3.86186  |
| Q3T1J1        | NDFQLIGIQDGYLSLLQDSGEVR                                                    | 1.17492055         | 3             | 5.47226  |
| Q3T1J1        | RNDFQLIGIQDGYLSLLQDSGEVR                                                   | 1.143024598        | 3             | 3.90233  |
| <b>Q3T1K5</b> | <b>CAZA2 F_actin_capping protein subunit alpha_2</b>                       | <b>1.049548176</b> | <b>0.8787</b> | <b>2</b> |
| Q3T1K5        | FIIHAPPGEFNEVFNDVR                                                         | 1.04486089         | 3             | 3.79289  |
| Q3T1K5        | FTVTPSTTQVVGILK                                                            | 1.047047416        | 2             | 3.44804  |
| <b>Q3U2P1</b> | <b>SC24A Protein transport protein Sec24A</b>                              | <b>1.04881475</b>  | <b>0.5215</b> | <b>2</b> |
| Q3U2P1        | SVTASLSDAR                                                                 | 1.096858651        | 2             | 2.60314  |
| Q3U2P1        | TLETQSALGPALQAAFK                                                          | 0.985356742        | 2             | 3.10147  |
| <b>Q3UHR0</b> | <b>BAHC1 BAH and coiled_coil domain_containing protein 1</b>               | <b>1.008912254</b> | <b>0.9331</b> | <b>2</b> |
| Q3UHR0        | MQILQRKDTWAPK+Oxidation(0)                                                 | 0.946282238        | 2             | 2.32107  |
| Q3UHR0        | NLEEPGLLSR                                                                 | 1.011025144        | 2             | 2.32372  |
| <b>Q3ULJ0</b> | <b>GPD1L Glycerol_3_phosphate dehydrogenase_1_like protein</b>             | <b>1.004782375</b> | <b>0.4228</b> | <b>2</b> |
| Q3ULJ0        | GIDEGPDGLK                                                                 | 1.015671932        | 2             | 2.67981  |
| Q3ULJ0        | LGLMEMIAFAK                                                                | 1.207694636        | 2             | 3.30973  |

|               |                                                                |                    |               |           |
|---------------|----------------------------------------------------------------|--------------------|---------------|-----------|
| <b>Q3UQ44</b> | <b>IQGA2 Ras GTPase_activating_like protein IQGAP2</b>         | <b>1.107071733</b> | <b>1E-06</b>  | <b>13</b> |
| Q3UQ44        | ALVGSNPPLTVIR                                                  | 1.111598073        | 2             | 3.41862   |
| Q3UQ44        | AWVNQLETQTGEASK                                                | 1.073158863        | 2             | 5.00814   |
| Q3UQ44        | GVLLGIDDLQTNQFK                                                | 1.130366939        | 2             | 4.80286   |
| Q3UQ44        | HTDNTVQWLR                                                     | 0.949597088        | 2             | 2.32222   |
| Q3UQ44        | LFEGENEHLSSMNNYLSEYQEFR                                        | 1.462060612        | 3             | 4.13605   |
| Q3UQ44        | LGIAPQIQDLLGK                                                  | 1.429122758        | 2             | 2.56322   |
| Q3UQ44        | LPYDVTTEQALTYPEVK                                              | 1.132358771        | 2             | 4.8749    |
| Q3UQ44        | LSAEEMDER                                                      | 1.231111235        | 2             | 2.67249   |
| Q3UQ44        | NPNAVLTCVDDSLSQEYQK                                            | 1.043038994        | 2             | 4.9455    |
| Q3UQ44        | TALEEEIK                                                       | 0.915861465        | 1             | 1.90905   |
| Q3UQ44        | TLDTLLLPTANIR                                                  | 1.033491129        | 2             | 2.73328   |
| Q3UQ44        | VDQVQDIVTGNPTVIK                                               | 1.152350257        | 2             | 5.28731   |
| Q3UQ44        | YQDILNEIAK                                                     | 1.13893033         | 2             | 2.58773   |
| <b>Q3UU35</b> | <b>OVOS Ovostatin homolog</b>                                  | <b>0.37143081</b>  | <b>0.0672</b> | <b>2</b>  |
| Q3UU35        | EQQAKSLLSILDK                                                  | 0.319933087        | 2             | 2.37259   |
| Q3UU35        | FSGPNNTPLVDK                                                   | 1.05100737         | 2             | 2.36487   |
| <b>Q3V0K9</b> | <b>PLSI Plastin_1</b>                                          | <b>0.935924825</b> | <b>2E-11</b>  | <b>3</b>  |
| Q3V0K9        | AYFHLLNQIAPK                                                   | 0.935955887        | 2             | 2.66322   |
| Q3V0K9        | KIENCNYAVELGK                                                  | 0.724565035        | 2             | 3.58923   |
| Q3V0K9        | QFVTPADVVSIGNPK                                                | 0.846991638        | 2             | 3.49965   |
| <b>Q3V132</b> | <b>ADT4 ADP/ATP translocase 4</b>                              | <b>1.178499671</b> | <b>0.0743</b> | <b>2</b>  |
| Q3V132        | GNLANVIR                                                       | 1.040358866        | 2             | 2.64625   |
| Q3V132        | YFPTQALNFAFK                                                   | 1.683240053        | 2             | 2.50243   |
| <b>Q497B0</b> | <b>NIT2 Omega_amidase NIT2</b>                                 | <b>1.224180406</b> | <b>7E-05</b>  | <b>14</b> |
| Q497B0        | ADLYSVESK                                                      | 1.075087422        | 2             | 3.00803   |
| Q497B0        | AGTEETILYSIDLK                                                 | 1.071159011        | 2             | 3.69965   |
| Q497B0        | ASYVAWGHSTVVDVPGVLTGK                                          | 1.100920044        | 2             | 4.76271   |
| Q497B0        | AVDNQVYVATASPAR                                                | 0.952912809        | 2             | 4.74165   |
| Q497B0        | AVDNQVYVATASPARDEK                                             | 0.766703217        | 2             | 3.29263   |
| Q497B0        | ENSIYLIGGSIPEDDGK                                              | 0.912481095        | 2             | 2.58646   |
| Q497B0        | ENSIYLIGGSIPEDDGKLYNTCAVFGPDGNLLVK                             | 0.924618151        | 3             | 4.02408   |
| Q497B0        | FAELAQIYAR                                                     | 1.283067928        | 2             | 3.68881   |
| Q497B0        | IHLFDIDVPGK                                                    | 1.124091598        | 2             | 2.80904   |
| Q497B0        | KIHLFDIDVPGK                                                   | 1.014427369        | 3             | 4.67906   |
| Q497B0        | LALIQLQVSSIK                                                   | 1.225702487        | 2             | 3.06025   |
| Q497B0        | LYNTCAVFGPDGNLLVK                                              | 1.1444818          | 2             | 4.11781   |
| Q497B0        | QGANIVSLPECFNSPYGTNYFPEYAEK                                    | 0.955013782        | 2             | 4.25036   |
| Q497B0        | TLSPGDSFSTFTPYCR                                               | 1.13220831         | 2             | 4.69905   |
| <b>Q499N5</b> | <b>ACSF2 Acyl_CoA synthetase family member 2_mitochondrial</b> | <b>1.094928813</b> | <b>0.2356</b> | <b>7</b>  |
| Q499N5        | GATLSHHNIVNNSNLIGQR                                            | 0.971752552        | 2             | 4.68265   |
| Q499N5        | GGENIYPAELEDFHFK                                               | 1.049942147        | 2             | 2.7422    |
| Q499N5        | GGVIAGSLAPPELIR                                                | 0.959062537        | 2             | 2.78532   |
| Q499N5        | SGETTTEEEIK                                                    | 1.093616728        | 2             | 3.2943    |
| Q499N5        | TGDIASMDEQGFCR                                                 | 1.126611217        | 2             | 3.37253   |
| Q499N5        | TVGECLDATAQR                                                   | 1.087409067        | 2             | 2.63107   |
| Q499N5        | YIVFVEGYPLTVSGK                                                | 1.156879511        | 2             | 4.14755   |
| <b>Q4AEF8</b> | <b>COPG Coatomer subunit gamma</b>                             | <b>1.214185006</b> | <b>5E-09</b>  | <b>4</b>  |
| Q4AEF8        | FGAQNEEMLPSILVLLK                                              | 1.271075881        | 2             | 4.00944   |
| Q4AEF8        | QEIFQEQLAAVPEFQGLGPLFK                                         | 1.145132736        | 2             | 3.80168   |
| Q4AEF8        | SSPEPVALTESETEVVIR                                             | 1.280266246        | 2             | 3.88168   |
| Q4AEF8        | TLEEAVGNIVK                                                    | 1.098144862        | 2             | 2.43452   |
| <b>Q4FZT0</b> | <b>STML2 Stomatin_like protein 2</b>                           | <b>1.217275677</b> | <b>0.0052</b> | <b>7</b>  |
| Q4FZT0        | AEQINQAAGEASAVLAK                                              | 1.000274848        | 2             | 5.2182    |
| Q4FZT0        | ASYGVEDPEYAVTQLAQTMR                                           | 0.935489017        | 2             | 4.07367   |
| Q4FZT0        | ATVLESEGTR                                                     | 0.623757898        | 2             | 2.57217   |
| Q4FZT0        | DVQTTDTSIEELGR                                                 | 2.395689612        | 2             | 2.91735   |

|               |                                                                   |                    |               |           |
|---------------|-------------------------------------------------------------------|--------------------|---------------|-----------|
| Q4FZT0        | ESLNANIVDAINQAADCWGIR                                             | 0.758529398        | 2             | 3.01485   |
| Q4FZT0        | ILEPGLNVLPVLDR                                                    | 0.885595531        | 2             | 2.651     |
| Q4FZT0        | NTVILFVPQQEAWVVVER                                                | 0.950955036        | 2             | 3.3097    |
| <b>Q4FZT9</b> | <b>PSMD2 26S proteasome non_ATPase regulatory subunit 2</b>       | <b>1.056782563</b> | <b>0.8933</b> | <b>5</b>  |
| Q4FZT9        | DKTPVQSQPSATAPSGADEK                                              | 0.87083778         | 3             | 4.87964   |
| Q4FZT9        | FGSGSQVDSAR                                                       | 1.058004415        | 2             | 3.54568   |
| Q4FZT9        | SGALLACGIVNSGVR                                                   | 0.98691535         | 2             | 3.5387    |
| Q4FZT9        | TPVQSQPSATAPSGADEK                                                | 1.029230423        | 2             | 4.18017   |
| Q4FZT9        | VGQAVDVVGQAGKPK                                                   | 1.287528133        | 2             | 2.71734   |
| <b>Q4FZX7</b> | <b>SRPRB Signal recognition particle receptor subunit beta</b>    | <b>1.275343602</b> | <b>1E-19</b>  | <b>4</b>  |
| Q4FZX7        | GDAGSADVQDLEK                                                     | 1.246572105        | 2             | 3.07603   |
| Q4FZX7        | GNSLTLIDLPGHESLR                                                  | 1.051606225        | 2             | 3.20831   |
| Q4FZX7        | SAAPSTLDSSTAPAQLGK                                                | 1.573055755        | 2             | 4.37316   |
| Q4FZX7        | VGDGAGGAFQPYLDSLRL                                                | 1.243692156        | 2             | 3.32009   |
| <b>Q4G061</b> | <b>EIF3B Eukaryotic translation initiation factor 3 subunit B</b> | <b>1.050217649</b> | <b>0.7667</b> | <b>3</b>  |
| Q4G061        | AEEEGSDGSAAEAEPR                                                  | 0.86283299         | 2             | 4.59944   |
| Q4G061        | AKPAAQSEETAASPAASPTPQSAQEPSAPGK                                   | 0.272688663        | 3             | 5.27545   |
| Q4G061        | GTQGVVTFNFEIFR                                                    | 1.035228469        | 2             | 3.06553   |
| <b>Q4KLP0</b> | <b>DHTK1 Probable 2_oxoglutarate dehydrogenase E1 component</b>   |                    |               |           |
| <b>Q4KLP0</b> | <b>DHKT1_ mitochondrial</b>                                       | <b>1.14777944</b>  | <b>1E-19</b>  | <b>9</b>  |
| Q4KLP0        | KSIPDTYAEHLIASGLMTQEEVSDIK                                        | 1.222621131        | 3             | 4.8656    |
| Q4KLP0        | LEELCPFPLDSLQEQEMGK                                               | 1.193999591        | 2             | 4.99239   |
| Q4KLP0        | LLLESQEFDFHFLATK                                                  | 1.15164996         | 2             | 3.3713    |
| Q4KLP0        | LVTYCEHGK                                                         | 1.502614508        | 2             | 2.36755   |
| Q4KLP0        | SIPDTYAEHLIASGLMTQEEVSDIK                                         | 1.185687987        | 3             | 5.0542    |
| Q4KLP0        | SSLYSSDIGK                                                        | 1.228679396        | 1             | 2.06288   |
| Q4KLP0        | SVEVPEELQLHSHLLK                                                  | 1.253689745        | 2             | 3.52528   |
| Q4KLP0        | YGGEGAESMMGMFFHELLK                                               | 1.284595026        | 3             | 4.72278   |
| Q4KLP0        | YPVAVSTLEEMAPGTAFAKPVIGDSSVDPK                                    | 1.087193381        | 3             | 4.71288   |
| <b>Q4KLZ6</b> |                                                                   | <b>0.920235565</b> | <b>1E-07</b>  | <b>12</b> |
| Q4KLZ6        | AAPTEPAEPEATAAGGVASK                                              | 1.036052778        | 2             | 5.05164   |
| Q4KLZ6        | AILEVLQTK                                                         | 1.169984663        | 2             | 3.14129   |
| Q4KLZ6        | ANTDLPAWSAAMDAGLK                                                 | 1.150201525        | 2             | 3.14783   |
| Q4KLZ6        | ASYISSAQLDQDPGAVAAAAIFR                                           | 0.927510466        | 2             | 5.35219   |
| Q4KLZ6        | AVAQAGTAGTLLIVK                                                   | 1.244636674        | 2             | 3.99246   |
| Q4KLZ6        | EGPTPASPAQVLSK                                                    | 1.113740164        | 1             | 3.08632   |
| Q4KLZ6        | ISTTLIGLEEHLNALDR                                                 | 2.148427085        | 2             | 3.04408   |
| Q4KLZ6        | LIDAETNAK                                                         | 1.134049251        | 2             | 2.53858   |
| Q4KLZ6        | LNFLAMEQAK                                                        | 0.84677681         | 2             | 2.75687   |
| Q4KLZ6        | LSVLLLEK                                                          | 1.68263089         | 2             | 2.38109   |
| Q4KLZ6        | MVNSVEGCAGDALAGFVACNPDLQLLQGYR                                    | 1.103345066        | 3             | 5.41391   |
| Q4KLZ6        | VAGALAEEMGLEEITK                                                  | 1.407012668        | 2             | 4.00246   |
| <b>Q4KM49</b> | <b>SYYC Tyrosyl_tRNA synthetase_ cytoplasmic</b>                  | <b>1.196811728</b> | <b>2E-08</b>  | <b>6</b>  |
| Q4KM49        | AFCEPGNVENNGVLSFVK                                                | 1.242683368        | 2             | 3.16033   |
| Q4KM49        | IDVGAEPR                                                          | 1.061867508        | 2             | 2.33178   |
| Q4KM49        | QVEHPLLSGLLYPGLQALDEEYK                                           | 0.848536633        | 3             | 3.43755   |
| Q4KM49        | QVEPLDPPAGSAPGER                                                  | 0.994426506        | 2             | 2.73163   |
| Q4KM49        | TVVSGLVQFVPK                                                      | 1.114933201        | 2             | 2.93474   |
| Q4KM49        | VDAQFGGIDQR                                                       | 1.299485398        | 2             | 3.16366   |
| <b>Q4KM73</b> | <b>KCY UMP_CMP kinase</b>                                         | <b>1.028268635</b> | <b>0.9467</b> | <b>6</b>  |
| Q4KM73        | EMDQTMMAANAQK+Oxidation(1)                                        | 0.693866931        | 2             | 2.5465    |
| Q4KM73        | IQTYLESTKPIIDLYEEMGK                                              | 1.084648966        | 2             | 4.26574   |
| Q4KM73        | KNPDSQYGELIEK                                                     | 1.052169237        | 2             | 4.05924   |
| Q4KM73        | NQDNLQGWNK                                                        | 1.069898053        | 2             | 3.00312   |
| Q4KM73        | SVDEVFGDVMK                                                       | 1.051693597        | 1             | 2.38003   |
| Q4KM73        | YGYTHLSAGELLR                                                     | 1.076653624        | 3             | 4.36374   |
| <b>Q4KM74</b> | <b>SC22B Vesicle_trafficking protein SEC22b</b>                   | <b>1.186797266</b> | <b>0.0009</b> | <b>3</b>  |



|               |                                                                                           |                    |               |          |
|---------------|-------------------------------------------------------------------------------------------|--------------------|---------------|----------|
| Q4KM74        | DLQQYQSQAK                                                                                | 1.184683078        | 2             | 3.04468  |
| Q4KM74        | GEALSALDSK                                                                                | 1.224701416        | 2             | 2.94312  |
| Q4KM74        | NLGSINTELQDVQR                                                                            | 1.167089932        | 2             | 4.12268  |
| <b>Q4KMA2</b> | <b>RD23B UV excision repair protein RAD23 homolog B</b>                                   | <b>1.074739993</b> | <b>0.2573</b> | <b>2</b> |
| Q4KMA2        | IDIDPEETVK                                                                                | 1.10200396         | 1             | 2.55256  |
| Q4KMA2        | QIIQQNPSLLPALLQQIGR                                                                       | 1.094672675        | 2             | 4.85145  |
| <b>Q4LDD4</b> | <b>ARAP1 Arf_GAP with Rho_GAP domain_ ANK repeat and PH domain_ containing protein 1</b>  | <b>1.062510056</b> | <b>0.6786</b> | <b>2</b> |
| Q4LDD4        | LLDSLRQDAR                                                                                | 1.03529965         | 2             | 2.35372  |
| Q4LDD4        | LSSASVLGVRGSEQPDR                                                                         | 1.120863464        | 2             | 2.46986  |
| <b>Q4QQV3</b> | <b>F162A Protein FAM162A</b>                                                              | <b>0.966279046</b> | <b>0.646</b>  | <b>2</b> |
| Q4QQV3        | EEEIPETISFEMLDAAK                                                                         | 0.870243374        | 2             | 3.69103  |
| Q4QQV3        | RHESLTSNLNER                                                                              | 0.970849258        | 3             | 3.91306  |
| <b>Q4QQW3</b> | <b>HOT Hydroxyacid_oxoacid transhydrogenase_ mitochondrial</b>                            | <b>0.960636005</b> | <b>0.8644</b> | <b>3</b> |
| Q4QQW3        | HLETAELGANIR                                                                              | 0.974863447        | 2             | 2.34029  |
| Q4QQW3        | NLSQLPPVQIVMDSLSK                                                                         | 0.941552421        | 2             | 2.71356  |
| Q4QQW3        | VEPTDGSFMDAIEFAK                                                                          | 0.960426147        | 2             | 3.16251  |
| <b>Q4QRB4</b> | <b>TBB3 Tubulin beta_3 chain</b>                                                          | <b>1.072230043</b> | <b>0.0003</b> | <b>4</b> |
| Q4QRB4        | AILVDLEPGTMDSVR                                                                           | 1.014351381        | 2             | 3.54907  |
| Q4QRB4        | AILVDLEPGTMDSVR+Oxidation(10)                                                             | 0.912866535        | 2             | 3.75968  |
| Q4QRB4        | EIVHIQAGQCGNQIGAK                                                                         | 0.93027656         | 2             | 5.06257  |
| Q4QRB4        | ISEQFTAMFR                                                                                | 1.265675172        | 2             | 3.34963  |
| <b>Q4V7C7</b> | <b>ARP3 Actin_ related protein 3</b>                                                      | <b>0.964178002</b> | <b>0.1918</b> | <b>4</b> |
| Q4V7C7        | KDYEEIGPSICR                                                                              | 0.940650701        | 2             | 3.17963  |
| Q4V7C7        | LGYAGNTEPQFIIPSCIAIK                                                                      | 1.280205976        | 2             | 2.61928  |
| Q4V7C7        | LSEELSGGR                                                                                 | 0.914011999        | 2             | 2.44701  |
| Q4V7C7        | YSYVCPDLVK                                                                                | 1.24507065         | 2             | 2.42144  |
| <b>Q4V8K1</b> | <b>STE4A Metalloreductase STEAP4</b>                                                      | <b>0.980785981</b> | <b>0.6542</b> | <b>3</b> |
| Q4V8K1        | MNQYPESNAEYLAQLVPGAHVVK+Oxidation(0)                                                      | 1.201501186        | 3             | 3.37502  |
| Q4V8K1        | SDVIVLAVHR                                                                                | 1.145911225        | 2             | 2.301    |
| Q4V8K1        | TCADFPLTVDSSEK                                                                            | 0.980026327        | 2             | 4.5081   |
| <b>Q505J8</b> | <b>SYFA Phenylalanyl_ tRNA synthetase alpha chain</b>                                     | <b>0.987836882</b> | <b>0.9883</b> | <b>2</b> |
| Q505J8        | LQQVQAGQAEK                                                                               | 1.147838111        | 2             | 2.70053  |
| Q505J8        | SLQALGEVIEAELR                                                                            | 0.983152859        | 2             | 3.16297  |
| <b>Q561R9</b> | <b>LACB2 Beta_ lactamase_ like protein 2</b>                                              | <b>0.783341793</b> | <b>0.0005</b> | <b>3</b> |
| Q561R9        | ANIIYPGHGPVIHNAEAK                                                                        | 0.787888626        | 2             | 4.07384  |
| Q561R9        | ILIDTGEPSVPEYISCLK                                                                        | 0.783446586        | 2             | 3.59189  |
| Q561R9        | NISNDATYCIK                                                                               | 0.779677178        | 2             | 2.50869  |
| <b>Q561S0</b> | <b>NDUAA NADH dehydrogenase [ubiquinone] 1 alpha subcomplex subunit 10_ mitochondrial</b> | <b>1.243018015</b> | <b>0.0004</b> | <b>3</b> |
| Q561S0        | VITVDGNICSGK                                                                              | 1.251746091        | 2             | 3.29776  |
| Q561S0        | VVEDIEYLNYNK                                                                              | 1.217129779        | 2             | 3.91076  |
| Q561S0        | YGLLASILGDK                                                                               | 1.207648035        | 2             | 3.63839  |
| <b>Q562C4</b> | <b>MET7B Methyltransferase_ like protein 7B</b>                                           | <b>0.750175182</b> | <b>0.6509</b> | <b>4</b> |
| Q562C4        | AQFSEVQLEWQPPPFK                                                                          | 0.726902761        | 2             | 4.92883  |
| Q562C4        | HIGDGCHLTR                                                                                | 0.747256328        | 3             | 3.3981   |
| Q562C4        | VLQEVQR                                                                                   | 0.58423486         | 1             | 1.9042   |
| Q562C4        | VTCVDPNPNFEK                                                                              | 0.910088164        | 2             | 3.53056  |
| <b>Q562C9</b> | <b>MTND 1_2_ dihydroxy_3_ keto_5_ methylthiopentene dioxygenase</b>                       | <b>1.063238018</b> | <b>0.9484</b> | <b>2</b> |
| Q562C9        | LDADKYENDPELEQIR                                                                          | 1.070676972        | 2             | 3.77164  |
| Q562C9        | LDADKYENDPELEQIRK                                                                         | 0.965684436        | 3             | 3.79158  |
| <b>Q58FK9</b> | <b>KAT3 Kynurenine_ oxoglutarate transaminase 3</b>                                       | <b>1.434763925</b> | <b>0.0018</b> | <b>8</b> |
| Q58FK9        | AIILNTPHNPIGK                                                                             | 1.290122819        | 2             | 3.31121  |
| Q58FK9        | ALSCLYGK                                                                                  | 1.331789832        | 1             | 2.00117  |
| Q58FK9        | DSTLDAEEIFR                                                                               | 1.08676158         | 2             | 3.07597  |
| Q58FK9        | IEGLDQNVWVEFTK                                                                            | 1.097538739        | 2             | 4.02499  |

|               |                                                                                         |                    |               |           |
|---------------|-----------------------------------------------------------------------------------------|--------------------|---------------|-----------|
| Q58FK9        | LAADPSVVNLGQGFPDITLPSYVQEELSK                                                           | 1.435743738        | 3             | 5.25334   |
| Q58FK9        | MDDPECYFNLSLK                                                                           | 1.255096647        | 2             | 3.72679   |
| Q58FK9        | RIEGLDQNVVVEFTK                                                                         | 1.2686234          | 2             | 4.38706   |
| Q58FK9        | WTSSDWFNPNQELESK                                                                        | 1.297725409        | 2             | 5.09691   |
| <b>Q5BJQ0</b> | <b>ADCK3 Chaperone activity of bc1 complex_like_mitochondrial</b>                       | <b>1.128575289</b> | <b>0.2348</b> | <b>3</b>  |
| Q5BJQ0        | AVLDSSPFLSEANAER                                                                        | 1.127313393        | 2             | 4.84283   |
| Q5BJQ0        | MGGSFLLCSKLLK+Oxidation(0)                                                              | 1.202750383        | 2             | 2.32613   |
| Q5BJQ0        | TLNNDLGPVHR                                                                             | 1.125676698        | 2             | 2.41275   |
| <b>Q5BJY9</b> | <b>K1C18 Keratin_type I cytoskeletal 18</b>                                             | <b>0.842262471</b> | <b>1E-19</b>  | <b>21</b> |
| Q5BJY9        | AQIFANSVDNAR                                                                            | 0.81883124         | 2             | 3.21205   |
| Q5BJY9        | AQYEQLAQK                                                                               | 0.83593251         | 2             | 3.08697   |
| Q5BJY9        | DAETTLLELR                                                                              | 0.641876768        | 2             | 3.57211   |
| Q5BJY9        | KVVDDTNITR                                                                              | 0.820582521        | 2             | 3.02396   |
| Q5BJY9        | LEAEIATYR                                                                               | 0.841546931        | 2             | 2.95828   |
| Q5BJY9        | LLEDGDDFSLNDALDSSNSMQTVQR                                                               | 0.693555753        | 2             | 3.58432   |
| Q5BJY9        | LQLETEIEALK                                                                             | 0.894766006        | 2             | 2.33407   |
| Q5BJY9        | LQLETEIEALKEELLFMK                                                                      | 1.01722619         | 2             | 4.95938   |
| Q5BJY9        | NHEEEVQGLEAQJASSGLTVEVDAPK                                                              | 0.884649544        | 2             | 5.93171   |
| Q5BJY9        | NQNINLENNLGEVEAR                                                                        | 0.876154243        | 2             | 5.396     |
| Q5BJY9        | NREELDKYWSQQIEESTTVVTTK                                                                 | 0.898337351        | 3             | 4.904     |
| Q5BJY9        | QSVESDIHGLR                                                                             | 0.820360286        | 2             | 2.75445   |
| Q5BJY9        | QTQEYEALLNIK                                                                            | 0.870464323        | 2             | 3.81838   |
| Q5BJY9        | SVWGGSVGSAGLAGMGGVQTEK                                                                  | 0.793550786        | 2             | 6.06866   |
| Q5BJY9        | SVWGGSVGSAGLAGMGGVQTEK+Oxidation(14)                                                    | 1.000533904        | 2             | 4.62451   |
| Q5BJY9        | TLQTLLEIDLDSMK                                                                          | 0.804358555        | 2             | 4.18777   |
| Q5BJY9        | VKLEAEIATYR                                                                             | 0.866482464        | 2             | 2.89355   |
| Q5BJY9        | VQMEQLNGVLLHLESELAQTR                                                                   | 0.872700926        | 2             | 5.02855   |
| Q5BJY9        | VRPASSAASVYAGAGGSGSR                                                                    | 0.689155016        | 2             | 4.95988   |
| Q5BJY9        | VVDDTNITR                                                                               | 0.871090111        | 2             | 3.51254   |
| Q5BJY9        | YWSQQIEESTTVVTTK                                                                        | 0.945011648        | 2             | 4.2408    |
| <b>Q5BK63</b> | <b>NDUA9 NADH dehydrogenase [ubiquinone] 1 alpha subcomplex subunit 9_mitochondrial</b> | <b>1.071436545</b> | <b>0.0754</b> | <b>3</b>  |
| Q5BK63        | IHISDVMTDLPLGLEDLGVQPTPLELK                                                             | 1.339574625        | 3             | 4.82217   |
| Q5BK63        | NDFDFDVFNIPR                                                                            | 1.026644114        | 2             | 4.03915   |
| Q5BK63        | WLSSEIETKPAK                                                                            | 1.050723421        | 2             | 2.54913   |
| <b>Q5BK81</b> | <b>PTGR2 Prostaglandin reductase 2</b>                                                  | <b>0.944209528</b> | <b>0.9704</b> | <b>2</b>  |
| Q5BK81        | VEEVSLPDTINEGQVR                                                                        | 0.938271815        | 2             | 4.29747   |
| <b>Q5EB77</b> | <b>RAB18 Ras_related protein Rab_18</b>                                                 | <b>1.109391747</b> | <b>0.2617</b> | <b>2</b>  |
| Q5EB77        | LDNWLNELETYCTR                                                                          | 0.884522034        | 2             | 3.12767   |
| Q5EB77        | NDIVNMLVGNK                                                                             | 1.103331853        | 2             | 3.27066   |
| <b>Q5FVM6</b> | <b>MTMRC Myotubularin_related protein 12</b>                                            | <b>0.955372893</b> | <b>0.0056</b> | <b>3</b>  |
| Q5FVM6        | IVSGIIHHTQSPK                                                                           | 0.759564416        | 2             | 2.57723   |
| Q5FVM6        | LLEMMEEVQSLQEK+Oxidation(3)                                                             | 2.192190791        | 2             | 2.73012   |
| Q5FVM6        | LLEMMEEVQSLQEK+Oxidation(4)                                                             | 2.192190791        | 2             | 2.67655   |
| <b>Q5FVN1</b> | <b>STBD1 Starch_binding domain_containing protein 1</b>                                 | <b>0.93990284</b>  | <b>0.5317</b> | <b>3</b>  |
| Q5FVN1        | DGGAELPKDAPPGEAAAPGGGGGGGGLSPEPSDR                                                      | 0.981241189        | 3             | 5.40767   |
| Q5FVN1        | DLGNLTEAQR                                                                              | 0.90747938         | 2             | 2.49159   |
| Q5FVN1        | NSLVGGGWEVDGK                                                                           | 1.520464015        | 2             | 2.39608   |
| <b>Q5FVQ4</b> | <b>MLEC Malectin</b>                                                                    | <b>0.986278256</b> | <b>1</b>      | <b>2</b>  |
| Q5FVQ4        | KEEEEEEEYDEGSNLKR                                                                       | 0.994261796        | 3             | 5.36425   |
| Q5FVQ4        | STPEDQILYQTER                                                                           | 0.982256142        | 2             | 2.93495   |
| <b>Q5FVR2</b> | <b>TYPH Thymidine phosphorylase</b>                                                     | <b>0.95163655</b>  | <b>0.998</b>  | <b>2</b>  |
| Q5FVR2        | AQDTQIGAMLMAIR+Oxidation(10)                                                            | 0.957205727        | 2             | 2.66791   |
| Q5FVR2        | AQDTQIGAMLMAIR+Oxidation(8)                                                             | 0.951995299        | 2             | 2.40685   |
| <b>Q5FVR5</b> | <b>ACNT2 Acyl_coenzyme A amino acid N_acyltransferase 2</b>                             | <b>1.916962691</b> | <b>0.0084</b> | <b>3</b>  |
| Q5FVR5        | DEKENLFQSK                                                                              | 1.544979803        | 2             | 2.50989   |
| Q5FVR5        | ILFIVGENDQCLASK                                                                         | 1.195561972        | 2             | 3.51952   |

|               |                                                                         |                    |               |          |
|---------------|-------------------------------------------------------------------------|--------------------|---------------|----------|
| Q5FVR5        | IQQPGIGVISVSK                                                           | 2.100087169        | 2             | 2.7653   |
| <b>Q5FW57</b> | <b>GLYAL Glycine N_acyltransferase_like protein</b>                     | <b>0.915938465</b> | <b>0.9194</b> | <b>2</b> |
| Q5FW57        | AIDQEMFK                                                                | 0.906868712        | 2             | 2.45172  |
| Q5FW57        | SSQMLQMLESLR                                                            | 1.029802074        | 2             | 3.60312  |
| <b>Q5HZV9</b> | <b>PP1R7 Protein phosphatase 1 regulatory subunit 7</b>                 | <b>1.05513877</b>  | <b>0.9337</b> | <b>2</b> |
| Q5HZV9        | AIENIDLTNLESFLGK                                                        | 0.934740891        | 2             | 2.58709  |
| Q5HZV9        | ELDLYDNQKK                                                              | 1.198523525        | 2             | 2.51766  |
| <b>Q5HZY0</b> | <b>UBXN4 UBX domain_containing protein 4</b>                            | <b>0.963691841</b> | <b>0.9366</b> | <b>2</b> |
| Q5HZY0        | LPDGSSFTNQFSPDAPLEEAR                                                   | 1.002941219        | 2             | 4.45228  |
| Q5HZY0        | NTELCETPTTSDPK                                                          | 0.963611946        | 2             | 3.90686  |
| <b>Q5I0C3</b> | <b>MCCA Methylcrotonoyl_CoA carboxylase subunit alpha_mitochondrial</b> | <b>0.991684356</b> | <b>0.0006</b> | <b>4</b> |
| Q5I0C3        | HAPLVEFEEEEV                                                            | 0.993578014        | 2             | 2.60123  |
| Q5I0C3        | IIEEAPAPGIDPEVR                                                         | 0.890360063        | 2             | 3.8031   |
| Q5I0C3        | SEKEFQEQLSAR                                                            | 0.836331398        | 2             | 3.13714  |
| Q5I0C3        | YLSPVSAEGTQGGTIAPMTGTIEK                                                | 0.937017173        | 2             | 5.25078  |
| <b>Q5I0D1</b> | <b>GLOD4 Glyoxalase domain_containing protein 4</b>                     | <b>0.840688929</b> | <b>0.0137</b> | <b>2</b> |
| Q5I0D1        | ESQSILTPLVSLDTPGK                                                       | 0.838324653        | 2             | 3.62535  |
| Q5I0D1        | HEEFEEGCK                                                               | 0.997485478        | 2             | 2.58027  |
| <b>Q5I0E7</b> | <b>TMED9 Transmembrane emp24 domain_containing protein 9</b>            | <b>0.911984207</b> | <b>0.4893</b> | <b>2</b> |
| Q5I0E7        | QLVEQVEQIQK                                                             | 0.958068263        | 2             | 3.77522  |
| Q5I0E7        | QREEYQPATPGLGMFVEVKDPEDK                                                | 0.815319889        | 3             | 3.45501  |
| <b>Q5I0H9</b> | <b>PDIA5 Protein disulfide_isomerase A5</b>                             | <b>1.098602602</b> | <b>0.0013</b> | <b>7</b> |
| Q5I0H9        | DKNQDLCQQESVK                                                           | 0.908025244        | 2             | 4.36469  |
| Q5I0H9        | DVVHIDSEKDFR                                                            | 0.932562951        | 2             | 2.4113   |
| Q5I0H9        | GPPLWEEDPGAK                                                            | 1.023451877        | 2             | 2.99178  |
| Q5I0H9        | GQGTICWVDCGDAESR                                                        | 1.034694807        | 2             | 3.93327  |
| Q5I0H9        | NPQPPQPVPETPWADGGSVYHLTDEDFDQFVK                                        | 1.222705335        | 3             | 3.49596  |
| Q5I0H9        | NQDLCQQESVK                                                             | 1.227719864        | 2             | 3.27369  |
| Q5I0H9        | TELGFTSFIR                                                              | 1.213638478        | 2             | 2.81583  |
| <b>Q5I0J9</b> | <b>ASPD Putative L_aspartate dehydrogenase</b>                          | <b>1.014159131</b> | <b>0.6462</b> | <b>6</b> |
| Q5I0J9        | HANLLVGSPSALADQTTER                                                     | 1.060348744        | 2             | 5.25548  |
| Q5I0J9        | LDAAGGLQSLR                                                             | 1.07119935         | 2             | 3.73436  |
| Q5I0J9        | LEGPLAAHSSGPR                                                           | 0.904594473        | 2             | 3.40162  |
| Q5I0J9        | MAGSVPPALQLEDLTTLEER                                                    | 1.12382685         | 2             | 3.6543   |
| Q5I0J9        | NSNTMAAAAALAPSLGFDR                                                     | 0.903031745        | 2             | 4.0275   |
| Q5I0J9        | NSNTMAAAAALAPSLGFDR+Oxidation(4)                                        | 0.927433074        | 2             | 2.83042  |
| <b>Q5I0M2</b> | <b>NADC Nicotinate_nucleotide pyrophosphorylase [carboxylating]</b>     | <b>1.041628878</b> | <b>0.9982</b> | <b>3</b> |
| Q5I0M2        | DNHVVAAGSMEK                                                            | 0.953041392        | 2             | 2.52527  |
| Q5I0M2        | EALQAAEAGADLVMLDNFKPEELHPTAATLK                                         | 1.033688154        | 3             | 4.90322  |
| Q5I0M2        | LYAEGDIPVPHAR                                                           | 1.043676229        | 2             | 3.49706  |
| <b>Q5I0P2</b> | <b>GCSH Glycine cleavage system H protein_mitochondrial</b>             | <b>0.984719325</b> | <b>0.2136</b> | <b>2</b> |
| Q5I0P2        | MTLSDPSELDELMESEAYEK                                                    | 0.734812261        | 2             | 4.96954  |
| Q5I0P2        | SCYEDGWLK                                                               | 1.039926043        | 2             | 2.60166  |
| <b>Q5M7U6</b> | <b>ARP2 Actin_related protein 2</b>                                     | <b>0.931521712</b> | <b>0.246</b>  | <b>3</b> |
| Q5M7U6        | GYAFNHSADFETVR                                                          | 0.94871576         | 2             | 3.55326  |
| Q5M7U6        | HLWDYTFGPEK                                                             | 0.951982587        | 2             | 3.08675  |
| Q5M7U6        | KVVVCDNGTGFVK                                                           | 0.744399221        | 2             | 2.48113  |
| <b>Q5M7W5</b> | <b>MAP4 Microtubule_associated protein 4</b>                            | <b>0.811147288</b> | <b>4E-11</b>  | <b>7</b> |
| Q5M7W5        | AAVGLTGNDIATPPNK                                                        | 0.820725538        | 2             | 3.34035  |
| Q5M7W5        | ATSPSTLVSTGSSSR                                                         | 0.806479485        | 2             | 3.85022  |
| Q5M7W5        | NTAPPTEETVPGK                                                           | 0.913196485        | 2             | 2.46544  |
| Q5M7W5        | NTTPTGATPPAGMASTR                                                       | 0.755035179        | 2             | 2.77565  |
| Q5M7W5        | STLPVDEGSPEK                                                            | 0.935264403        | 2             | 2.50582  |
| Q5M7W5        | VGSLDNVGHLPAGGTVK                                                       | 0.803108668        | 2             | 3.65     |
| Q5M7W5        | VTEFNNVTPLSEEEVASIK                                                     | 0.892018099        | 2             | 3.57993  |
| <b>Q5M875</b> | <b>DHB13 17_beta_hydroxysteroid dehydrogenase 13</b>                    | <b>1.493772872</b> | <b>8E-08</b>  | <b>6</b> |

|               |                                                                          |                    |               |           |
|---------------|--------------------------------------------------------------------------|--------------------|---------------|-----------|
| Q5M875        | ALTAELDTL GK                                                             | 1.248349139        | 1             | 2.00957   |
| Q5M875        | IQNIQFEAIVGHR                                                            | 1.396088245        | 3             | 3.42727   |
| Q5M875        | LWPVLEPDEVAR                                                             | 1.215610281        | 2             | 2.75059   |
| Q5M875        | NSGHIVTVASVCGHR                                                          | 0.986490352        | 2             | 2.89139   |
| Q5M875        | SVAGQTVLITGAGHGIGR                                                       | 1.254384376        | 2             | 4.07124   |
| Q5M875        | TSCLCPVFNVTGFTK                                                          | 2.036236307        | 2             | 3.54883   |
| <b>Q5M9G3</b> | <b>CAPR1 Caprin_1</b>                                                    | <b>1.073839705</b> | <b>0.982</b>  | <b>2</b>  |
| Q5M9G3        | LNQDQLDAVSK                                                              | 1.021310128        | 2             | 3.38426   |
| Q5M9G3        | YQEVNNELEFAK                                                             | 0.956774329        | 2             | 2.47077   |
| <b>Q5PPL3</b> | <b>NSDHL Sterol_4_alpha_carboxylate 3_dehydrogenase_ decarboxylating</b> | <b>0.814497685</b> | <b>1E-19</b>  | <b>8</b>  |
| Q5PPL3        | AVLDANDPKK                                                               | 0.599883519        | 2             | 2.31806   |
| Q5PPL3        | CTVIGSGFLGQHMVEQLLSR                                                     | 0.704174065        | 2             | 4.76149   |
| Q5PPL3        | GQVTGTDLINEVSK                                                           | 0.599492653        | 2             | 3.78243   |
| Q5PPL3        | GVSTVFHCASPPSNSNNK                                                       | 0.520008871        | 2             | 3.94223   |
| Q5PPL3        | GYAVNVFDVR                                                               | 0.704429165        | 2             | 3.43059   |
| Q5PPL3        | ILTGLNIEAPK                                                              | 0.547821068        | 2             | 2.7866    |
| Q5PPL3        | KGQVTGTDLINEVSK                                                          | 0.589854673        | 2             | 4.61658   |
| Q5PPL3        | VQFFIGDLCNQDLYPALK                                                       | 0.635376816        | 2             | 5.28494   |
| <b>Q5PQT3</b> | <b>GLYAT Glycine N_acyltransferase</b>                                   | <b>0.931868459</b> | <b>2E-13</b>  | <b>4</b>  |
| Q5PQT3        | AIQNLASIHSLQVK                                                           | 1.008746416        | 2             | 3.01343   |
| Q5PQT3        | DPENCQEFLLGSSEVINWK                                                      | 0.839737455        | 2             | 4.73794   |
| Q5PQT3        | LSSLDVTHAALVNK                                                           | 1.532084902        | 2             | 3.05235   |
| Q5PQT3        | QHLQIQSSQSHLNK                                                           | 0.687514667        | 2             | 3.55053   |
| <b>Q5RJR2</b> | <b>TWF1 Twinfilin_1</b>                                                  | <b>1.065009193</b> | <b>0.0831</b> | <b>2</b>  |
| Q5RJR2        | HQTLQGVAFPI SR                                                           | 1.0684154          | 2             | 2.34311   |
| Q5RJR2        | YLLSQSSPAPLTAEEELR                                                       | 1.189632199        | 2             | 3.58955   |
| <b>Q5RJR8</b> | <b>LRC59 Leucine_rich repeat_containing protein 59</b>                   | <b>1.027587084</b> | <b>0.4603</b> | <b>5</b>  |
| Q5RJR8        | ATVLDLSCNK                                                               | 0.960906589        | 2             | 2.69356   |
| Q5RJR8        | DKLDGNELDLSLSDLENEVPVK                                                   | 0.951094916        | 2             | 5.99664   |
| Q5RJR8        | LDGNELDLSLSDLENEVPVK                                                     | 1.111081244        | 2             | 3.12499   |
| Q5RJR8        | LQQLPADFGR                                                               | 1.206720463        | 2             | 2.63103   |
| Q5RJR8        | LSTLPSDFCGLTHLVK                                                         | 1.396400478        | 2             | 2.3977    |
| <b>Q5RKI0</b> | <b>WDR1 WD repeat_containing protein 1</b>                               | <b>1.0240516</b>   | <b>0.9738</b> | <b>3</b>  |
| Q5RKI0        | AHDGGIYAIWSPDSTHLLSASGDK                                                 | 1.10235427         | 3             | 4.83996   |
| Q5RKI0        | CFSIDNPGYEPEVVAVHPGGDTVAVGGSDGNVR                                        | 1.018654109        | 3             | 4.40759   |
| Q5RKI0        | YAPSGFYIASGDISGK                                                         | 1.019849662        | 2             | 4.4148    |
| <b>Q5RKI1</b> | <b>IF4A2 Eukaryotic initiation factor 4A_II</b>                          | <b>1.096348901</b> | <b>0.2597</b> | <b>4</b>  |
| Q5RKI1        | ELAQQIQK                                                                 | 0.965822325        | 1             | 2.1123    |
| Q5RKI1        | GIDVQQVSLVINYLPTNR                                                       | 1.145835122        | 2             | 4.48256   |
| Q5RKI1        | GYDVIAQAQSGTGK                                                           | 1.075128228        | 2             | 5.12246   |
| Q5RKI1        | MFVLDEADEMLSR                                                            | 0.985212326        | 2             | 3.71357   |
| <b>Q5SGE0</b> | <b>LPPRC Leucine_rich PPR motif_containing protein_mitochondrial</b>     | <b>0.914826084</b> | <b>0.0315</b> | <b>11</b> |
| Q5SGE0        | AALDLEQVPSELAVTR                                                         | 0.887030477        | 2             | 3.78792   |
| Q5SGE0        | CIANNQVETLEK                                                             | 0.867715402        | 2             | 2.86599   |
| Q5SGE0        | GLDAIELSR                                                                | 0.973514772        | 2             | 2.4475    |
| Q5SGE0        | HCVTMDTPAEK                                                              | 0.51880452         | 2             | 3.0397    |
| Q5SGE0        | HDNAEDALNLK                                                              | 0.920735698        | 2             | 3.427     |
| Q5SGE0        | MEGANIQPNR                                                               | 0.897662024        | 2             | 2.65386   |
| Q5SGE0        | SCGSLPELSLAER                                                            | 0.953182206        | 2             | 2.49183   |
| Q5SGE0        | SGSPGSNQALLLR                                                            | 0.977982769        | 2             | 2.80307   |
| Q5SGE0        | SSLSSSPSAGDVTVEK                                                         | 0.835473048        | 2             | 4.04511   |
| Q5SGE0        | SYVADKDVASAK                                                             | 0.811582425        | 2             | 2.45732   |
| Q5SGE0        | TLLELPELR                                                                | 0.824651269        | 2             | 2.73224   |
| <b>Q5SNZ0</b> | <b>GRDN Girdin</b>                                                       | <b>1.100829067</b> | <b>0.7568</b> | <b>2</b>  |
| Q5SNZ0        | KVEILENEIQEK                                                             | 1.102473227        | 2             | 2.5229    |

|               |                                      |                    |          |           |
|---------------|--------------------------------------|--------------------|----------|-----------|
| Q5SNZ0        | LEMENQSLTKTVEELR                     | 1.074445285        | 2        | 2.36422   |
| <b>Q5SX40</b> | <b>MYH1 Myosin_1</b>                 | <b>1.050054903</b> | <b>1</b> | <b>69</b> |
| Q5SX40        | AAYLQNLNSADLLK                       | 0.318384202        | 2        | 4.36819   |
| Q5SX40        | ADIAESQVNK                           | 1.247741413        | 2        | 3.50964   |
| Q5SX40        | AEDEEEINAELTAK                       | 1.409909077        | 2        | 4.01398   |
| Q5SX40        | AGLLGLLEEMR                          | 1.269013539        | 2        | 3.42772   |
| Q5SX40        | AGLLGLLEEMRDDK                       | 1.006442228        | 2        | 3.17781   |
| Q5SX40        | ALQEAHQQTLLDQLAEEDKVNTLTK            | 1.289789216        | 3        | 6.30463   |
| Q5SX40        | ANLLQAEIEELR                         | 0.830800322        | 2        | 3.87706   |
| Q5SX40        | ANSEVAQWR                            | 1.105668696        | 2        | 3.15769   |
| Q5SX40        | DLEEATLQHEATAATLR                    | 1.453113816        | 2        | 4.85521   |
| Q5SX40        | DTQLHLDDALR                          | 1.329081956        | 2        | 3.19818   |
| Q5SX40        | EEQAEPDGTEVADK                       | 1.348568094        | 2        | 3.29626   |
| Q5SX40        | ELEEISER                             | 1.299778758        | 1        | 2.06178   |
| Q5SX40        | ELEGEVENEQK                          | 1.587620367        | 2        | 2.54884   |
| Q5SX40        | ELEGEVENEQKR                         | 1.297865073        | 2        | 3.28148   |
| Q5SX40        | ELTYQTEEDRK                          | 1.49228984         | 2        | 3.07815   |
| Q5SX40        | ENQSILITGESGAGK                      | 1.379650843        | 2        | 4.18193   |
| Q5SX40        | EQYEEQEAK                            | 1.222441045        | 1        | 3.34458   |
| Q5SX40        | GQEDLKEQLAMVER                       | 1.249831507        | 2        | 4.11823   |
| Q5SX40        | GSSFQTVSALFR                         | 1.808983439        | 2        | 3.08222   |
| Q5SX40        | HADSVAEELGEQIDNLQR                   | 1.333190042        | 2        | 5.58638   |
| Q5SX40        | IAEQELLDASER                         | 1.628116377        | 2        | 3.24455   |
| Q5SX40        | IEDEQALGMQLQK                        | 1.390928887        | 2        | 4.09116   |
| Q5SX40        | IEEEEEIEAER                          | 1.149533863        | 2        | 3.77815   |
| Q5SX40        | IKLEQQVDDLEGSLEQEK                   | 1.218605495        | 2        | 5.02405   |
| Q5SX40        | IQHELEEAER                           | 1.465968865        | 2        | 3.57284   |
| Q5SX40        | IQLELNQVK                            | 1.188765147        | 2        | 2.88145   |
| Q5SX40        | KALQEAHQQTLLDQLAEEDKVNTLTK           | 1.21574441         | 3        | 6.36394   |
| Q5SX40        | KIAEQELLDASER                        | 1.139019404        | 2        | 3.76416   |
| Q5SX40        | KIQHELEEAER                          | 1.27576202         | 3        | 4.04226   |
| Q5SX40        | KKLETDISQIQGEMEDIVQEAR               | 1.074533072        | 3        | 4.50565   |
| Q5SX40        | KLEDECSSELK                          | 1.102240257        | 2        | 2.7194    |
| Q5SX40        | KLEDECSSELKK                         | 1.070767541        | 3        | 4.91678   |
| Q5SX40        | KLETDISQIQGEMEDIVQEAR                | 0.958764844        | 2        | 5.62567   |
| Q5SX40        | LAQESTMDVENDKQQLDEK                  | 1.443804424        | 2        | 4.90519   |
| Q5SX40        | LDEAEQLALK                           | 1.264316219        | 2        | 3.59203   |
| Q5SX40        | LEEAGGATSQIEMNK                      | 1.084257212        | 2        | 3.56629   |
| Q5SX40        | LEQQVDDLEGSLEQEK                     | 1.516157015        | 2        | 5.02346   |
| Q5SX40        | LEQQVDDLEGSLEQEKK                    | 1.166117404        | 2        | 3.91195   |
| Q5SX40        | LETDISQIQGEMEDIVQEAR                 | 1.108787455        | 2        | 5.3709    |
| Q5SX40        | LINELTAQR                            | 1.437878377        | 2        | 3.1303    |
| Q5SX40        | LQDAEEHVAVNAK                        | 1.349550015        | 2        | 4.68479   |
| Q5SX40        | LQDLVDK                              | 1.333529857        | 1        | 2.01056   |
| Q5SX40        | LQNEVEDLMIDVER                       | 1.22753884         | 2        | 3.96971   |
| Q5SX40        | LQTESGEYSR                           | 1.33330701         | 2        | 2.35999   |
| Q5SX40        | MEIDDLASNMEVISK                      | 1.201424301        | 2        | 4.62605   |
| Q5SX40        | MEIDDLASNMEVISKSGNLEK                | 1.430280173        | 2        | 2.31264   |
| Q5SX40        | MQGTLEDQIISANPLLEAFGNAK              | 1.186474441        | 3        | 6.0546    |
| Q5SX40        | MQGTLEDQIISANPLLEAFGNAK+Oxidation(0) | 1.082792353        | 3        | 4.77429   |
| Q5SX40        | NDLQLQVQSEADSLADAER                  | 1.277640953        | 2        | 6.22834   |
| Q5SX40        | NKDPLNETVVGlyQK                      | 1.386901789        | 2        | 4.19736   |
| Q5SX40        | NLQQEISDLTEQIAEGGK                   | 1.157534931        | 2        | 5.72428   |
| Q5SX40        | NLQQEISDLTEQIAEGGKR                  | 1.015774012        | 2        | 4.70023   |
| Q5SX40        | NLTEEMAGLDETIK                       | 1.413434976        | 2        | 4.40276   |
| Q5SX40        | QAEEAEEQSNVNLAK                      | 1.191968498        | 2        | 4.41463   |
| Q5SX40        | QKYEETHAELEASQK                      | 1.366719884        | 2        | 4.12408   |

|               |                                                               |                    |               |           |
|---------------|---------------------------------------------------------------|--------------------|---------------|-----------|
| Q5SX40        | QLDEKDSLVSQLSR                                                | 1.022174623        | 2             | 3.12892   |
| Q5SX40        | QREEQAEPDGTVEADK                                              | 1.297940249        | 2             | 3.99264   |
| Q5SX40        | SELQAALAEAEASLEHEEGK                                          | 1.202775018        | 2             | 5.3967    |
| Q5SX40        | SSVFVVDK                                                      | 1.170462533        | 2             | 2.6903    |
| Q5SX40        | TKYETDAIQR                                                    | 1.166585252        | 3             | 3.58655   |
| Q5SX40        | TLEDQVSELK                                                    | 1.209188247        | 2             | 2.86684   |
| Q5SX40        | TNAACAALDK                                                    | 1.479645951        | 2             | 2.90554   |
| Q5SX40        | TNAACAALDKK                                                   | 1.026030777        | 2             | 2.96631   |
| Q5SX40        | VLNASAIPEGQFIDSK                                              | 1.356341164        | 2             | 3.6488    |
| Q5SX40        | VQLLHTQNTSLINTK                                               | 1.373549058        | 2             | 4.96899   |
| Q5SX40        | VRELEGEVENEQK                                                 | 0.965043381        | 2             | 2.58607   |
| Q5SX40        | VRELEGEVENEQKR                                                | 1.258075064        | 3             | 3.51247   |
| Q5SX40        | VVESMQSTLDAEIR                                                | 1.063124967        | 2             | 3.97063   |
| Q5SX40        | YETDAIQR                                                      | 1.154011251        | 2             | 2.30081   |
| <b>Q5U206</b> | <b>CALL3 Calmodulin_like protein 3</b>                        | <b>1.051858124</b> | <b>0.0002</b> | <b>3</b>  |
| Q5U206        | DTDSEEEIR                                                     | 1.065697457        | 2             | 2.85672   |
| Q5U206        | MKDTDSEEEIR                                                   | 1.071684877        | 3             | 3.90192   |
| Q5U206        | MKDTDSEEEIR+Oxidation(0)                                      | 1.571908103        | 2             | 3.65695   |
| <b>Q5U211</b> | <b>SNX3 Sorting nexin_3</b>                                   | <b>0.855122816</b> | <b>0.1089</b> | <b>2</b>  |
| Q5U211        | CLHMFLQDEIIDK                                                 | 0.822521985        | 2             | 2.51261   |
| Q5U211        | GDDGIFDDNFIEER                                                | 1.192708022        | 2             | 2.74731   |
| <b>Q5U2Q7</b> | <b>ERF1 Eukaryotic peptide chain release factor subunit 1</b> | <b>1.166544206</b> | <b>1E-19</b>  | <b>3</b>  |
| Q5U2Q7        | GFGGIGGILR                                                    | 1.105301795        | 2             | 2.72618   |
| Q5U2Q7        | YFDEISQDTGK                                                   | 1.061145403        | 2             | 3.00252   |
| Q5U2Q7        | YVLHCQGTEEEK                                                  | 1.30119427         | 2             | 3.45781   |
| <b>Q5U2Z3</b> | <b>NP1L4 Nucleosome assembly protein 1_like 4</b>             | <b>1.026713914</b> | <b>0.1825</b> | <b>2</b>  |
| Q5U2Z3        | LDNVSHTPSSYIETLPK                                             | 1.011247693        | 3             | 3.51845   |
| Q5U2Z3        | TYKMKSEPK                                                     | 1.465439739        | 1             | 2.3071    |
| <b>Q5U300</b> | <b>UBA1 Ubiquitin_like modifier_activating enzyme 1</b>       | <b>1.11680252</b>  | <b>0.5694</b> | <b>10</b> |
| Q5U300        | AAVASLLQSVQVPEFTP                                             | 0.925534995        | 3             | 3.66384   |
| Q5U300        | AENYDISPADR                                                   | 0.988726167        | 2             | 3.15248   |
| Q5U300        | DNPGVVTCLDEAR                                                 | 0.96681277         | 2             | 3.13419   |
| Q5U300        | IYDDDFQNLQDGVANALDNVDAR                                       | 0.986440253        | 3             | 4.48319   |
| Q5U300        | LDQPMTEIVSR                                                   | 1.263722775        | 2             | 2.74506   |
| Q5U300        | NEEDATELVTLAQAVNAR                                            | 1.100374134        | 2             | 4.58514   |
| Q5U300        | NFPNAIEHTLQWAR                                                | 1.140012993        | 2             | 2.32908   |
| Q5U300        | SLPASLAEPDFVMTDFAK                                            | 0.936990312        | 2             | 3.86816   |
| Q5U300        | SPPAVQQDNVDEDLIR                                              | 0.991937218        | 2             | 4.67607   |
| Q5U300        | VVQGHQQLDSYK                                                  | 1.141965012        | 2             | 3.24777   |
| <b>Q5U312</b> | <b>RAI14 Ankyrin</b>                                          | <b>1.133150248</b> | <b>0.1515</b> | <b>2</b>  |
| Q5U312        | ISQDADLKTPTK                                                  | 0.654055419        | 2             | 2.35152   |
| Q5U312        | MHLLYAVQGMDEVDVQKVLK                                          | 1.166138467        | 2             | 2.52444   |
| <b>Q5U315</b> | <b>RNA polymerase GLD2</b>                                    | <b>0.989151736</b> | <b>0.6456</b> | <b>3</b>  |
| Q5U315        | KLDSAQQQCTEFLELIQSLKDK                                        | 1.059744551        | 3             | 3.89171   |
| Q5U315        | QANNINMLKDGMK                                                 | 1.24431045         | 1             | 2.10137   |
| Q5U315        | WEMDDPRPIAKAER                                                | 0.930828648        | 2             | 2.41845   |
| <b>Q5XFW8</b> | <b>SEC13 Protein SEC13 homolog</b>                            | <b>0.961436131</b> | <b>0.9993</b> | <b>2</b>  |
| Q5XFW8        | DVAWAPSIGLPTSTIASCSQDGR                                       | 0.989409602        | 2             | 3.58338   |
| Q5XFW8        | NGGQILIADLR                                                   | 1.023465451        | 2             | 2.93064   |
| <b>Q5XFX0</b> | <b>TAGL2 Transgelin_2</b>                                     | <b>0.886722319</b> | <b>2E-12</b>  | <b>3</b>  |
| Q5XFX0        | DDGLFSGDPNWFPK                                                | 0.796222679        | 2             | 3.69449   |
| Q5XFX0        | NFSDNQLQEGK                                                   | 0.910355941        | 2             | 2.93938   |
| Q5XFX0        | YGINTTDFQTVDLWEGK                                             | 0.915343303        | 2             | 4.764     |
| <b>Q5XHYS</b> | <b>SYTC Threonyl_tRNA synthetase_cytoplasmic</b>              | <b>1.132046462</b> | <b>0.0968</b> | <b>7</b>  |
| Q5XHYS        | AEHDSILAEK                                                    | 1.127735128        | 2             | 2.75744   |
| Q5XHYS        | FLGDIEIWNQAEK                                                 | 1.04833846         | 2             | 3.65248   |
| Q5XHYS        | GFQEVVTPNIFNSR                                                | 1.539021391        | 2             | 3.17693   |

|               |                                                         |                    |               |           |
|---------------|---------------------------------------------------------|--------------------|---------------|-----------|
| Q5XH5         | QLENSLNEFGEK                                            | 1.148321559        | 2             | 3.05734   |
| Q5XH5         | TPYQIACGISQGLADNTVVAK                                   | 1.110643401        | 2             | 4.13682   |
| Q5XH5         | VVWDLDRPLETDCTLELLK                                     | 1.244403239        | 2             | 3.95537   |
| Q5XH5         | WELNPGDGAIFYGPK                                         | 1.180318469        | 2             | 3.82698   |
| <b>Q5XH20</b> | <b>TRAP1 Heat shock protein 75 kDa_ mitochondrial</b>   | <b>1.037185201</b> | <b>1</b>      | <b>11</b> |
| Q5XH20        | AFLEALQHQAEISSR                                         | 0.994782928        | 2             | 4.42413   |
| Q5XH20        | AQLLQPTLEINPR                                           | 0.900711569        | 2             | 3.76916   |
| Q5XH20        | EELVSNLGTIAR                                            | 0.986266658        | 2             | 2.38036   |
| Q5XH20        | FEDTSPAGER                                              | 1.00817785         | 2             | 2.82867   |
| Q5XH20        | GTITIQDTGIGMTK                                          | 0.93738331         | 2             | 3.35475   |
| Q5XH20        | GVVDEDIPLNLSR                                           | 1.040937654        | 2             | 4.74997   |
| Q5XH20        | HLAEHSPYYEAMK                                           | 1.11775829         | 2             | 2.33802   |
| Q5XH20        | LDTHPAMVTVLEMGAAR                                       | 0.977801188        | 3             | 3.74412   |
| Q5XH20        | SDCKDFANESR                                             | 1.026048909        | 2             | 2.91195   |
| Q5XH20        | YESSALPAGQLTSLSDYASR                                    | 1.076461195        | 2             | 4.79422   |
| Q5XH20        | YIAQAYDKPR                                              | 0.96087984         | 2             | 2.60285   |
| <b>Q5XI22</b> | <b>THIC Acetyl_CoA acetyltransferase_ cytosolic</b>     | <b>0.70315415</b>  | <b>4E-05</b>  | <b>5</b>  |
| Q5XI22        | AGHFDKEIVPVHSSR                                         | 0.827498004        | 2             | 3.86483   |
| Q5XI22        | LKPYFLTDGTGTVTPANASGMNDGAAAVLKM                         | 0.677782665        | 3             | 4.46889   |
| Q5XI22        | TAIGSFNGALSTVPVHNLGTTVIK                                | 0.675386832        | 2             | 5.00217   |
| Q5XI22        | VAPEEVSEVIFGHVLTAGCGQNPTK                               | 0.567129413        | 3             | 4.57248   |
| Q5XI22        | VNIDGGAIALGHPLGASGCR                                    | 0.620566687        | 2             | 5.47193   |
| <b>Q5XI32</b> | <b>CAPZB F_actin_capping protein subunit beta</b>       | <b>0.879589911</b> | <b>0.1134</b> | <b>4</b>  |
| Q5XI32        | GCWDSIHVVEVQEK                                          | 1.020565394        | 2             | 3.06121   |
| Q5XI32        | KLEVEANNAFDQYR                                          | 0.841436109        | 2             | 4.07821   |
| Q5XI32        | LEVEANNAFDQYR                                           | 0.912854344        | 2             | 3.36615   |
| Q5XI32        | STLNEIFYGK                                              | 0.985608104        | 2             | 2.40468   |
| <b>Q5XI60</b> | <b>REEP6 Receptor expression_enhancing protein 6</b>    | <b>1.061905952</b> | <b>0.5189</b> | <b>3</b>  |
| Q5XI60        | ALDIAAGITR                                              | 0.921739557        | 2             | 3.05507   |
| Q5XI60        | HHVALDSAASQLSGR                                         | 1.244821703        | 2             | 3.62374   |
| Q5XI60        | NVATDALGALEAR                                           | 0.955238524        | 2             | 4.19022   |
| <b>Q5XI73</b> | <b>GDIR1 Rho GDP_dissociation inhibitor 1</b>           | <b>1.027713835</b> | <b>0.0496</b> | <b>3</b>  |
| Q5XI73        | AEEYFLPMEEAPK                                           | 1.018586517        | 2             | 4.38174   |
| Q5XI73        | SIQEIQLDKDDESLR                                         | 1.233281562        | 2             | 4.68881   |
| Q5XI73        | VAVSADPNVNVIVTR                                         | 1.083725006        | 2             | 4.14052   |
| <b>Q5XI78</b> | <b>ODO1 2_oxoglutarate dehydrogenase_ mitochondrial</b> | <b>1.025933765</b> | <b>4E-12</b>  | <b>11</b> |
| Q5XI78        | FGLEGCEVLIPALK                                          | 0.921953717        | 2             | 3.33971   |
| Q5XI78        | FLDTAFDLDAFKK                                           | 0.67518664         | 2             | 2.81303   |
| Q5XI78        | GHHVAQLDPLGLDADLDSSVPADIISSTDK                          | 0.838259138        | 3             | 4.39293   |
| Q5XI78        | ICEEAFTR                                                | 0.994218489        | 2             | 2.63135   |
| Q5XI78        | IEQLSPFPFDLLK                                           | 0.996716183        | 2             | 3.81311   |
| Q5XI78        | LEAADEGSGDMK                                            | 0.965087518        | 2             | 3.32373   |
| Q5XI78        | LNVLNVIR                                                | 0.723244166        | 2             | 2.32263   |
| Q5XI78        | NITLSLVANPSHLEAADPVVMGK                                 | 1.189383522        | 3             | 4.67448   |
| Q5XI78        | NTNAGAPPGTAYQSPLSLR                                     | 0.97851571         | 2             | 4.11785   |
| Q5XI78        | VIPEDGPAAQNPDK                                          | 0.901346443        | 2             | 3.18819   |
| Q5XI78        | YAELLSVQGVVNPQPEYEEISK                                  | 1.063447726        | 2             | 4.32488   |
| <b>Q5XI95</b> | <b>ADH6 Alcohol dehydrogenase 6</b>                     | <b>1.011965546</b> | <b>0.0568</b> | <b>4</b>  |
| Q5XI95        | ATVLWKPGAPLAIEIEVAPPK                                   | 0.721305512        | 2             | 3.9448    |
| Q5XI95        | IIAVDINK                                                | 1.149481118        | 2             | 2.78274   |
| Q5XI95        | NNICTEIR                                                | 0.769682754        | 2             | 2.31509   |
| Q5XI95        | TVGATDCV DPR                                            | 0.704122496        | 2             | 2.72137   |
| <b>Q5XIC0</b> | <b>ECI2 Enoyl_CoA delta isomerase 2_ mitochondrial</b>  | <b>0.938301427</b> | <b>0.3586</b> | <b>5</b>  |
| Q5XIC0        | ATQQDFENAMNQVK                                          | 0.936972768        | 2             | 4.65977   |
| Q5XIC0        | GILVTSEGGITK                                            | 0.914423722        | 2             | 3.94582   |
| Q5XIC0        | LHAVNEEECTTLR                                           | 0.947633832        | 2             | 3.72783   |
| Q5XIC0        | QNYVDLVSSLSSSEASSQ GK                                   | 0.966981198        | 2             | 4.54003   |

|               |                                                                                  |                    |               |          |
|---------------|----------------------------------------------------------------------------------|--------------------|---------------|----------|
| Q5XIC0        | WDAWNALGSLPK                                                                     | 0.85297122         | 2             | 3.72013  |
| <b>Q5XIC1</b> | <b>GMPPA Mannose_1_phosphate guanyltransferase alpha</b>                         | <b>1.036727601</b> | <b>0.9485</b> | <b>2</b> |
| Q5XIC1        | NQQDQGLEESPGSWPGAGTIR                                                            | 1.053881687        | 2             | 4.4455   |
| Q5XIC1        | VEGTPNDPNPNDR                                                                    | 1.036723023        | 2             | 3.21192  |
| <b>Q5XIE6</b> | <b>HIBCH 3_hydroxyisobutyryl_CoA hydrolase_mitochondrial</b>                     | <b>0.983785332</b> | <b>0.7772</b> | <b>4</b> |
| Q5XIE6        | AGIATHFVDESEK                                                                    | 1.006107616        | 2             | 3.3862   |
| Q5XIE6        | AGQTLSQLFR                                                                       | 1.000814317        | 2             | 2.64133  |
| Q5XIE6        | AVLIDKQTPK                                                                       | 0.848175601        | 2             | 2.39078  |
| Q5XIE6        | INSCFSANTVEQILENLR                                                               | 0.916154452        | 2             | 4.05447  |
| <b>Q5XIF3</b> | <b>NDUS4 NADH dehydrogenase [ubiquinone] iron_sulfur protein 4_mitochondrial</b> | <b>1.136727007</b> | <b>0.0222</b> | <b>2</b> |
| Q5XIF3        | HGWSYDVEGR                                                                       | 1.09236609         | 2             | 2.73058  |
| Q5XIF3        | LDVTPLTGVPEEHIK                                                                  | 1.152015304        | 2             | 3.47746  |
| <b>Q5XIF6</b> | <b>TBA4A Tubulin alpha_4A chain</b>                                              | <b>0.990499874</b> | <b>0.0288</b> | <b>5</b> |
| Q5XIF6        | AVFVDLEPTVIDEIR                                                                  | 0.910723748        | 2             | 3.90375  |
| Q5XIF6        | AYHEQLSVAEITNACFEPANQMVK                                                         | 1.064353987        | 3             | 4.69404  |
| Q5XIF6        | DVNAIAIAIK                                                                       | 1.049560228        | 2             | 2.87089  |
| Q5XIF6        | SIQFVDWCPTGFK                                                                    | 0.82569217         | 2             | 3.77968  |
| Q5XIF6        | TIGGGDDSTFFCETGAGK                                                               | 1.264595325        | 2             | 3.97955  |
| <b>Q5XIG4</b> | <b>OCAD1 OCIA domain_containing protein 1</b>                                    | <b>1.016979871</b> | <b>0.9869</b> | <b>3</b> |
| Q5XIG4        | SVPLAATSMILITQGLISK                                                              | 0.937469842        | 2             | 3.56214  |
| Q5XIG4        | YDSNVSGQSSFGTSPAADNIEK                                                           | 1.08315947         | 2             | 5.29973  |
| Q5XIG4        | YDSNVSGQSSFGTSPAADNIEKETLPR                                                      | 0.999615548        | 3             | 3.84246  |
| <b>Q5XIH7</b> | <b>PHB2 Prohibitin_2</b>                                                         | <b>0.917576123</b> | <b>1E-16</b>  | <b>7</b> |
| Q5XIH7        | DLQMVNISLR                                                                       | 1.514594634        | 2             | 2.91434  |
| Q5XIH7        | FNASQLITQR                                                                       | 0.870744159        | 2             | 3.94119  |
| Q5XIH7        | IGGVQQDTILAEGLHFR                                                                | 1.259604825        | 3             | 4.6695   |
| Q5XIH7        | IVQAEGEAAK                                                                       | 0.919926725        | 2             | 4.23622  |
| Q5XIH7        | IYLTADNLVNLQDESFTFR                                                              | 1.327359882        | 2             | 3.98079  |
| Q5XIH7        | LGLDYER                                                                          | 0.957188632        | 1             | 2.50945  |
| Q5XIH7        | VLPSIVNEVLK                                                                      | 0.89645793         | 2             | 2.62547  |
| <b>Q5XIM9</b> | <b>TCPB T_complex protein 1 subunit beta</b>                                     | <b>1.081076001</b> | <b>6E-16</b>  | <b>6</b> |
| Q5XIM9        | EALLSSAVDHGSDEVK                                                                 | 0.983101825        | 2             | 4.03453  |
| Q5XIM9        | GATQQILDEAER                                                                     | 1.164085891        | 2             | 3.9354   |
| Q5XIM9        | GSGNLEAIHVIK                                                                     | 1.068236632        | 2             | 2.64783  |
| Q5XIM9        | NIGVDNPAAK                                                                       | 1.071742153        | 1             | 2.01951  |
| Q5XIM9        | SLHDALCVLAQTVK                                                                   | 0.457203985        | 2             | 3.24651  |
| Q5XIM9        | VQDDEVDGDTTSVTVLAELLR                                                            | 1.060241519        | 2             | 4.55136  |
| <b>Q5XIN6</b> | <b>LETM1 LETM1 and EF_hand domain_containing protein 1_mitochondrial</b>         | <b>1.026619593</b> | <b>0.1858</b> | <b>8</b> |
| Q5XIN6        | AAEVEGEQVDNK                                                                     | 1.080104543        | 2             | 3.73909  |
| Q5XIN6        | DIQPEVAEATVPGRPGAELQPK                                                           | 0.829089038        | 2             | 4.53597  |
| Q5XIN6        | FLQDTIEEMALK                                                                     | 0.99205265         | 2             | 2.94561  |
| Q5XIN6        | LDPAAASSPTGESVISVDELISAMK                                                        | 0.870489782        | 2             | 5.34761  |
| Q5XIN6        | LEEGPVVYPPAQVVVK                                                                 | 0.805832198        | 2             | 2.75055  |
| Q5XIN6        | LFDELTLNLRPQLVALCK                                                               | 1.004592053        | 3             | 4.06422  |
| Q5XIN6        | LLELQSIGTNNFLR                                                                   | 0.525052689        | 2             | 2.46313  |
| Q5XIN6        | STLQTLPEIVAK                                                                     | 0.966721465        | 2             | 2.31867  |
| <b>Q5XIT9</b> | <b>MCCB Methylcrotonoyl_CoA carboxylase beta chain_mitochondrial</b>             | <b>0.896873539</b> | <b>4E-13</b>  | <b>8</b> |
| Q5XIT9        | AATGEEVSAEDLGGADLHCR                                                             | 0.878937701        | 2             | 4.72403  |
| Q5XIT9        | ALYGDTLVTGFAR                                                                    | 0.961215854        | 2             | 3.4031   |
| Q5XIT9        | AQEIALQNR                                                                        | 0.91269089         | 2             | 2.85476  |
| Q5XIT9        | DRIDNLIDPGSPFLEFSQFAGYK                                                          | 0.966283079        | 3             | 4.57605  |
| Q5XIT9        | KLDVTVEPSEELFPADELYGIVGANLK                                                      | 1.027434943        | 3             | 4.91976  |
| Q5XIT9        | LGTQPDSGSSTYQENYEQMK                                                             | 1.066690725        | 2             | 5.12345  |
| Q5XIT9        | LWDDGIIDPVDR                                                                     | 1.0923334          | 2             | 3.26987  |



|               |                                                                                |                    |               |          |
|---------------|--------------------------------------------------------------------------------|--------------------|---------------|----------|
| Q5XIT9        | LYGEEVVPAGGIITGIGR                                                             | 0.910716379        | 2             | 4.30929  |
| <b>Q5XIU9</b> | <b>PGRC2 Membrane_associated progesterone receptor component 2</b>             | <b>0.917101696</b> | <b>0.8345</b> | <b>2</b> |
| Q5XIU9        | GLATFCLDK                                                                      | 1.175907723        | 2             | 2.73602  |
| Q5XIU9        | GLCSGPGAGEESPAATLPR                                                            | 0.917238043        | 2             | 4.02121  |
| <b>Q60587</b> | <b>ECHB Trifunctional enzyme subunit beta_mitochondrial</b>                    | <b>0.901808125</b> | <b>3E-15</b>  | <b>6</b> |
| Q60587        | AQDEGHLSDIVPFK                                                                 | 0.969697396        | 2             | 3.18987  |
| Q60587        | DFIYVSQDPK                                                                     | 0.920706892        | 2             | 2.94157  |
| Q60587        | DGGQYALVAACAAGGQGHAMIVEAYPK                                                    | 0.954948704        | 3             | 4.11985  |
| Q60587        | DNGIRPSSLEQMAK                                                                 | 0.930197341        | 2             | 2.79037  |
| Q60587        | DQLLLGPTYATPK                                                                  | 0.733934767        | 2             | 3.4083   |
| Q60587        | NIVVVEGVR                                                                      | 0.814645268        | 2             | 2.83845  |
| <b>Q60759</b> | <b>GCDH Glutaryl_CoA dehydrogenase_mitochondrial</b>                           | <b>0.917400846</b> | <b>0.0038</b> | <b>4</b> |
| Q60759        | DILGGNGISDEYHVIR                                                               | 0.855930113        | 2             | 4.07044  |
| Q60759        | DIVYEMGELGVLGPTIK                                                              | 1.025349443        | 2             | 3.51354  |
| Q60759        | GYGCAGVSSVAYGLLTR                                                              | 1.224177847        | 2             | 3.35245  |
| Q60759        | HAMNLEAVNTYEGTHDIHALILGR                                                       | 1.284221509        | 4             | 5.06404  |
| <b>Q61029</b> | <b>LAP2B Lamina_associated polypeptide 2_isoforms beta/delta/epsilon/gamma</b> | <b>0.935782475</b> | <b>0.0277</b> | <b>2</b> |
| Q61029        | SELVANNVTLPAGEQR                                                               | 0.967023656        | 2             | 4.07399  |
| Q61029        | SSTPLPTVSSAENTR                                                                | 0.872859899        | 2             | 2.93379  |
| <b>Q61035</b> | <b>SYHC Histidyl_tRNA synthetase_cytoplasmic</b>                               | <b>1.038369383</b> | <b>0.9584</b> | <b>2</b> |
| Q61035        | ASAEQIEEVTK                                                                    | 1.038365818        | 2             | 3.25026  |
| Q61035        | REDLVEEIR                                                                      | 1.039670723        | 2             | 2.35553  |
| <b>Q61092</b> | <b>LAMC2 Laminin subunit gamma_2</b>                                           | <b>1.062069022</b> | <b>0.3395</b> | <b>3</b> |
| Q61092        | DRRQTSQQLSR                                                                    | 1.307671669        | 2             | 2.41435  |
| Q61092        | LDDLKMTAER+Oxidation(5)                                                        | 0.909504152        | 2             | 2.5347   |
| Q61092        | TKSLSQQLSLEGTQADIEADR                                                          | 1.099901789        | 2             | 2.47665  |
| <b>Q61301</b> | <b>CTNA2 Catenin alpha_2</b>                                                   | <b>1.035856781</b> | <b>0.7474</b> | <b>3</b> |
| Q61301        | LLEPLVTQVTTLVNTSNK                                                             | 0.983628607        | 2             | 3.57184  |
| Q61301        | TSVQTEDDQLIAGQSAR                                                              | 1.129837002        | 2             | 4.74149  |
| Q61301        | WDDSGNDIIVLAK                                                                  | 1.046735397        | 2             | 3.10773  |
| <b>Q61335</b> | <b>BAP31 B_cell receptor_associated protein 31</b>                             | <b>1.02010266</b>  | <b>0.6582</b> | <b>4</b> |
| Q61335        | AENEALAMQK                                                                     | 1.005964447        | 2             | 3.47405  |
| Q61335        | AENEALAMQK+Oxidation(7)                                                        | 1.066147949        | 2             | 2.30297  |
| Q61335        | KYMEENDQLKK+Oxidation(2)                                                       | 0.365923763        | 3             | 3.77462  |
| Q61335        | YMEENDQLKK+Oxidation(1)                                                        | 1.362669425        | 2             | 2.45354  |
| <b>Q61550</b> | <b>RAD21 Double_strand_break repair protein rad21 homolog</b>                  | <b>1.17085646</b>  | <b>0.522</b>  | <b>2</b> |
| Q61550        | KLMMWKETGGVEK                                                                  | 1.174536772        | 2             | 2.33304  |
| Q61550        | TTIEESAMPPPPQGVK+Oxidation(7)                                                  | 0.94976621         | 2             | 2.38721  |
| <b>Q61595</b> | <b>KTN1 Kinectin</b>                                                           | <b>0.921905463</b> | <b>0.7499</b> | <b>2</b> |
| Q61595        | TAEHEAAQQLQSK                                                                  | 1.023293382        | 2             | 3.30937  |
| Q61595        | VEPVLVTK                                                                       | 0.821264287        | 2             | 2.39416  |
| <b>Q61941</b> | <b>transhydrogenase_mitochondrial</b>                                          | <b>0.939544177</b> | <b>0.1366</b> | <b>9</b> |
| Q61941        | AISPDKDNFHFVEK                                                                 | 0.973639484        | 2             | 3.53288  |
| Q61941        | EANSIVITPGYGLCAAK                                                              | 0.857726669        | 2             | 3.64774  |
| Q61941        | FGIHPVAGR                                                                      | 1.082885914        | 2             | 2.30262  |
| Q61941        | GITHIGYTDLPSR                                                                  | 0.940800714        | 2             | 3.65284  |
| Q61941        | KTTVLAMDQVPR                                                                   | 0.982691614        | 2             | 2.47119  |
| Q61941        | QGFNVVVEVGAEASK                                                                | 1.031659358        | 2             | 4.35052  |
| Q61941        | SLGAEPLEVDLK                                                                   | 1.007025657        | 2             | 2.61531  |
| Q61941        | TTVLAMDQVPR                                                                    | 1.007558036        | 2             | 2.8229   |
| Q61941        | VTIAQGYDALSSMANISGYK                                                           | 1.029942412        | 2             | 5.43501  |
| <b>Q62095</b> | <b>DDX3Y ATP_dependent RNA helicase DDX3Y</b>                                  | <b>1.037162261</b> | <b>0.6822</b> | <b>3</b> |
| Q62095        | SFLDLLLNATGK                                                                   | 1.019890254        | 2             | 4.17336  |
| Q62095        | VGNLGLATSFNER                                                                  | 1.314137845        | 2             | 2.34604  |
| Q62095        | VGSTSENITQK                                                                    | 1.262443615        | 2             | 3.03079  |

|               |                                                                           |                    |               |           |
|---------------|---------------------------------------------------------------------------|--------------------|---------------|-----------|
| <b>Q62261</b> | <b>SPTB2 Spectrin beta chain_ brain 1</b>                                 | <b>0.918350816</b> | <b>0.0006</b> | <b>8</b>  |
| Q62261        | ALVADSHPESE                                                               | 0.955983535        | 2             | 3.09841   |
| Q62261        | EAEKLESEHPDQAQILSR                                                        | 0.91279162         | 3             | 3.45419   |
| Q62261        | HLLGVEDLLQK                                                               | 1.518331015        | 2             | 2.72689   |
| Q62261        | HQILEQAVEDYAETVHQLSK                                                      | 1.186215257        | 3             | 4.1181    |
| Q62261        | LVSDGNINSDR                                                               | 1.074422962        | 2             | 3.20324   |
| Q62261        | SQNIITDSSSLNAEAIR                                                         | 0.887824773        | 2             | 5.2605    |
| Q62261        | TLETPAAQMEGFLNR                                                           | 1.554051101        | 2             | 3.54291   |
| Q62261        | VIESTQDLGNDLAGVMALQR                                                      | 0.919871538        | 2             | 3.33983   |
| <b>Q62425</b> | <b>NDUA4 NADH dehydrogenase [ubiquinone] 1 alpha subcomplex subunit 4</b> | <b>1.217456113</b> | <b>0.0013</b> | <b>2</b>  |
| Q62425        | FYSVNVDYSK                                                                | 1.218095161        | 1             | 2.77669   |
| Q62425        | LGPNEQYK                                                                  | 1.155339817        | 2             | 2.37314   |
| <b>Q62452</b> | <b>UD19 UDP_ glucuronosyltransferase 1_9</b>                              | <b>1.069022463</b> | <b>1E-19</b>  | <b>5</b>  |
| Q62452        | AMEIAEALGR                                                                | 0.71669378         | 2             | 3.27057   |
| Q62452        | GAGVTLNVLEMTADDLENALK                                                     | 0.629874316        | 3             | 6.27366   |
| Q62452        | GAGVTLNVLEMTADDLENALK+Oxidation(10)                                       | 0.929419868        | 2             | 4.25056   |
| Q62452        | WLPQNDLLGHPK                                                              | 0.943121983        | 2             | 2.96823   |
| Q62452        | YTGTRPSNLAK                                                               | 0.689757131        | 2             | 2.79702   |
| <b>Q62465</b> | <b>VAT1 Synaptic vesicle membrane protein VAT_1 homolog</b>               | <b>0.904877323</b> | <b>0.6681</b> | <b>6</b>  |
| Q62465        | ACGLNFADLMGR                                                              | 1.10072569         | 2             | 2.84327   |
| Q62465        | CLVLTGFGGYDK                                                              | 0.903237254        | 2             | 2.58057   |
| Q62465        | ENGVTHPIDYHTTDYVDEIKK                                                     | 1.183339762        | 3             | 3.47864   |
| Q62465        | GVDIVMDPLGGSDTAK                                                          | 0.901189895        | 2             | 4.32106   |
| Q62465        | TVENVTVFGTASASK                                                           | 1.046063057        | 2             | 3.25373   |
| Q62465        | VLLVPGPEKET                                                               | 0.951568844        | 2             | 2.51432   |
| <b>Q62468</b> | <b>VILI Villin_1</b>                                                      | <b>1.344388477</b> | <b>6E-06</b>  | <b>2</b>  |
| Q62468        | HEDCYILDQGGKIFVWK                                                         | 1.176524162        | 2             | 2.44237   |
| Q62468        | SGAMSQALNFIKAK                                                            | 1.344003594        | 2             | 2.82686   |
| <b>Q62636</b> | <b>RAP1B Ras_ related protein Rap_1b</b>                                  | <b>0.81377813</b>  | <b>0.0005</b> | <b>2</b>  |
| Q62636        | INVNEIFYDLVR                                                              | 1.425767014        | 2             | 4.08528   |
| Q62636        | VVGKEQGQNLAR                                                              | 0.762384752        | 2             | 2.48075   |
| <b>Q62638</b> | <b>GSLG1 Golgi apparatus protein 1</b>                                    | <b>1.081819928</b> | <b>0.6416</b> | <b>2</b>  |
| Q62638        | LNDRIEMWSYAAK                                                             | 1.08926084         | 2             | 2.35153   |
| Q62638        | NSELMDPKCKQMITK+Oxidation(4)                                              | 0.855762246        | 2             | 2.34578   |
| <b>Q62651</b> | <b>ECH1 Delta(3_5)_Delta(2_4)_dienoyl_ CoA isomerase_ mitochondrial</b>   | <b>0.554192652</b> | <b>1E-19</b>  | <b>5</b>  |
| Q62651        | EVDVGLAADVGTLQR                                                           | 0.397968444        | 2             | 3.48631   |
| Q62651        | HVLHVQLNRPEK                                                              | 0.537157058        | 2             | 2.99119   |
| Q62651        | IPEEVSDHNYESIQTSAQK                                                       | 0.750087266        | 3             | 4.51687   |
| Q62651        | RIPEEVSDHNYESIQTSAQK                                                      | 0.558518826        | 3             | 4.8227    |
| Q62651        | SLVNELTFTAR                                                               | 0.542952793        | 2             | 3.26219   |
| <b>Q62730</b> | <b>DHB2 Estradiol 17_beta_ dehydrogenase 2</b>                            | <b>0.784951544</b> | <b>0.1125</b> | <b>5</b>  |
| Q62730        | AVLVTGADSGFGHALAK                                                         | 0.6744629          | 2             | 4.34663   |
| Q62730        | EIQENYQQEYVHTQK                                                           | 0.844307487        | 2             | 4.25664   |
| Q62730        | LSVLQMDVTKPEQIK                                                           | 0.584445646        | 2             | 2.85363   |
| Q62730        | LSVLQMDVTKPEQIKDVHSEVAEK                                                  | 0.806468066        | 3             | 5.20745   |
| Q62730        | VVTIHPGGFQTNIVGSQDSWDK                                                    | 0.730236611        | 2             | 5.41076   |
| <b>Q62736</b> | <b>CALD1 Non_ muscle caldesmon</b>                                        | <b>1.09418729</b>  | <b>0.9977</b> | <b>10</b> |
| Q62736        | ASGDKEAEGAPQVEAGKR                                                        | 0.966332831        | 3             | 4.0665    |
| Q62736        | EFDPITIDGSLVPSR                                                           | 1.029060059        | 2             | 3.4269    |
| Q62736        | GETESEFEK                                                                 | 1.352612313        | 2             | 2.36579   |
| Q62736        | GGNLGENQIKDEK                                                             | 0.944308311        | 2             | 3.27289   |
| Q62736        | LEQYTNAIEGTK                                                              | 1.101219459        | 2             | 3.26561   |
| Q62736        | MQNNSAENETAEGEEKGESR                                                      | 0.992412404        | 3             | 4.6323    |
| Q62736        | MQNNSAENETAEGEEKGESR+Oxidation(0)                                         | 1.074347798        | 3             | 4.78866   |
| Q62736        | NDDDEEEAAR                                                                | 1.647150443        | 2             | 3.40921   |

|               |                                                          |                    |               |           |
|---------------|----------------------------------------------------------|--------------------|---------------|-----------|
| Q62736        | RGETESEEFEK                                              | 1.108608069        | 2             | 3.12807   |
| Q62736        | VLEEEEQR                                                 | 1.012130505        | 1             | 1.95714   |
| <b>Q62745</b> | <b>CD81 CD81 antigen</b>                                 | <b>0.883108085</b> | <b>0.2593</b> | <b>2</b>  |
| Q62745        | NSLCPSSNSFTQLLK                                          | 0.806152649        | 2             | 2.83213   |
| Q62745        | QFYDQALQQAVMDDDANNAK                                     | 0.937412869        | 2             | 4.5501    |
| <b>Q62769</b> | <b>UN13B Protein unc_13 homolog B</b>                    | <b>0.825600463</b> | <b>0.0008</b> | <b>2</b>  |
| Q62769        | DHMVREETRNLTPK                                           | 0.770656443        | 2             | 2.48372   |
| Q62769        | SNDEVAREFVK                                              | 0.982809593        | 1             | 1.99004   |
| <b>Q62785</b> | <b>HAP28 28 kDa heat_ and acid_stable phosphoprotein</b> | <b>0.950199423</b> | <b>0.9537</b> | <b>3</b>  |
| Q62785        | ANEEDQEEGGDGASGDPK                                       | 1.138971452        | 2             | 4.12502   |
| Q62785        | GVEGLIDIENPNR                                            | 0.940595515        | 2             | 2.96677   |
| Q62785        | QYTSPEEIDAQLQAEK                                         | 0.95128552         | 2             | 3.37712   |
| <b>Q62789</b> | <b>UD2B7 UDP_glucuronosyltransferase 2B7</b>             | <b>0.992385051</b> | <b>1E-19</b>  | <b>2</b>  |
| Q62789        | IILDELVQR                                                | 1.795683973        | 2             | 3.50917   |
| Q62789        | WIPQNDLLGHPK                                             | 0.943121983        | 2             | 2.96823   |
| <b>Q62812</b> | <b>MYH9 Myosin_9</b>                                     | <b>0.981148027</b> | <b>0.0809</b> | <b>57</b> |
| Q62812        | ALEEAMEQK                                                | 0.893564417        | 2             | 2.96158   |
| Q62812        | ALELDSNLYR                                               | 0.920817211        | 2             | 3.40032   |
| Q62812        | ALEQQVEEMK                                               | 0.992681154        | 2             | 2.93722   |
| Q62812        | ANLQIDQINTDLNLER                                         | 0.992941904        | 2             | 5.01623   |
| Q62812        | ASIAALEAK                                                | 1.051139664        | 2             | 2.60282   |
| Q62812        | ASREEILAQAK                                              | 0.996676299        | 2             | 2.70698   |
| Q62812        | CQYLQAEK                                                 | 1.047034038        | 2             | 2.52924   |
| Q62812        | DFSALSQQLQDTQELLQEENR                                    | 0.937947613        | 3             | 5.97507   |
| Q62812        | DLEAHIDTANK                                              | 0.935282843        | 2             | 3.41565   |
| Q62812        | DLQGRDEQSEK                                              | 1.047961901        | 2             | 2.56895   |
| Q62812        | EEILAQAK                                                 | 0.979157907        | 1             | 2.19908   |
| Q62812        | ELEDATETADAMNR                                           | 0.908958245        | 2             | 3.69872   |
| Q62812        | ELETQISELQEDLESER                                        | 0.867874797        | 2             | 3.89905   |
| Q62812        | HEDELLAK                                                 | 0.974607808        | 2             | 3.10068   |
| Q62812        | HSQAVEELAEQLEQTK                                         | 1.010818588        | 2             | 4.96254   |
| Q62812        | HSQAVEELAEQLEQTKR                                        | 0.935077111        | 3             | 5.54691   |
| Q62812        | IAQLEEQLDNETK                                            | 1.00258736         | 2             | 4.01623   |
| Q62812        | IIGLDQVAGMSETALPGAFK                                     | 0.910665825        | 2             | 3.78374   |
| Q62812        | IRELETQISELQEDLESER                                      | 1.077684844        | 3             | 3.83592   |
| Q62812        | KEEELQAALAR                                              | 0.920598494        | 2             | 3.10038   |
| Q62812        | KKVEAQLQELQVK                                            | 0.928380991        | 2             | 4.66188   |
| Q62812        | KLEEDQIIMEDQNCK                                          | 0.807597991        | 2             | 5.65819   |
| Q62812        | KLEGDSTLSDQIAELQAQIAELK                                  | 0.891067532        | 2             | 6.29156   |
| Q62812        | KQELLEEICHLEAR                                           | 1.011299443        | 2             | 4.28188   |
| Q62812        | KVEAQLQELQVK                                             | 1.029266372        | 2             | 4.21173   |
| Q62812        | LEEDQIIMEDQNCK                                           | 1.125535376        | 2             | 3.81416   |
| Q62812        | LEGDSTLSDQIAELQAQIAELK                                   | 0.898118504        | 2             | 4.91829   |
| Q62812        | LQQELDDLVDLDHQR                                          | 0.860131898        | 2             | 4.85152   |
| Q62812        | LQVELDSVTGLLNQSDSK                                       | 0.966180077        | 2             | 5.96439   |
| Q62812        | LTEMETMQSQLMAEK                                          | 1.426216559        | 2             | 3.32464   |
| Q62812        | MQQNIQELEEQLLEEEESAR                                     | 1.107234473        | 2             | 6.00335   |
| Q62812        | MQQNIQELEEQLLEEEESAR+Oxidation(0)                        | 1.111326928        | 2             | 4.65277   |
| Q62812        | NAEQFKDQADK                                              | 0.942543753        | 2             | 3.68965   |
| Q62812        | NLPIYSEEIVDMYK                                           | 1.105663119        | 2             | 3.77623   |
| Q62812        | NMDPLNDNIATLLHQSSDK                                      | 1.039314673        | 2             | 4.42769   |
| Q62812        | NTDQASMPDNTAAQK                                          | 0.992406104        | 2             | 5.27744   |
| Q62812        | NTDQASMPDNTAAQK+Oxidation(6)                             | 1.10196097         | 2             | 5.07344   |
| Q62812        | QAQQRDELADEIANSSGK                                       | 1.012084536        | 3             | 4.12031   |
| Q62812        | QIATLHAQVTDMK                                            | 1.105341378        | 2             | 2.6809    |
| Q62812        | QLEEAEEEAQR                                              | 0.967762838        | 2             | 3.27016   |
| Q62812        | QNKELK                                                   | 1.370402107        | 1             | 2.19138   |

|               |                                                        |                    |               |           |
|---------------|--------------------------------------------------------|--------------------|---------------|-----------|
| Q62812        | QSVSNLEK                                               | 1.102771849        | 2             | 2.58709   |
| Q62812        | QTLENERGELANEVK                                        | 1.095421854        | 2             | 3.29656   |
| Q62812        | RGDMPPFVVTR                                            | 0.991920686        | 2             | 2.33096   |
| Q62812        | RKLEGDSTDLSQIAELQAQIAELK                               | 1.041082455        | 3             | 5.60279   |
| Q62812        | RQLEEAEEEEAQR                                          | 0.990057654        | 2             | 4.41887   |
| Q62812        | SMEAEMIQEQEELAAAER                                     | 0.914403479        | 2             | 4.25543   |
| Q62812        | SMEAEMIQEQEELAAAERAKR+Oxidation(1)                     | 0.999898822        | 2             | 2.30145   |
| Q62812        | TDLLEPYNK                                              | 1.016423254        | 2             | 3.19375   |
| Q62812        | TELEDTLDSTAAQQELR                                      | 1.074445285        | 2             | 4.91138   |
| Q62812        | THEAQIQEMR                                             | 0.848636195        | 2             | 3.15137   |
| Q62812        | THEAQIQEMR+Oxidation(8)                                | 1.290174034        | 2             | 3.4003    |
| Q62812        | TQLEEELEDELQATEDAK                                     | 0.958684683        | 2             | 6.10976   |
| Q62812        | VEAQLQELQVK                                            | 0.791181897        | 2             | 3.24004   |
| Q62812        | VEDMAELTCLNEASVLHNLK                                   | 1.130757613        | 2             | 4.39552   |
| Q62812        | VSHLLGINVDFTR                                          | 1.271750619        | 2             | 3.70919   |
| Q62812        | YEILTPNSIPK                                            | 0.871025194        | 2             | 2.80418   |
| <b>Q62826</b> | <b>HNRPM Heterogeneous nuclear ribonucleoprotein M</b> | <b>0.980725472</b> | <b>1</b>      | <b>4</b>  |
| Q62826        | ADILEDKDGK                                             | 0.978193042        | 2             | 2.3082    |
| Q62826        | AFITNIPFDVK                                            | 0.971403922        | 2             | 3.19885   |
| Q62826        | GNFGGSFAGSFGGAGGHAPGVAR                                | 0.891172708        | 2             | 3.86221   |
| Q62826        | MGPVMDRMTGLER+Oxidation(0)                             | 0.990357243        | 2             | 2.46011   |
| <b>Q62868</b> | <b>ROCK2 Rho associated protein kinase 2</b>           | <b>0.652226388</b> | <b>0.0563</b> | <b>2</b>  |
| Q62868        | EENEKTKLCK                                             | 0.412056031        | 2             | 2.36738   |
| Q62868        | LAEIMNRK+Oxidation(4)                                  | 0.726641784        | 1             | 2.05368   |
| <b>Q62871</b> | <b>DC1I2 Cytoplasmic dynein 1 intermediate chain 2</b> | <b>1.120317406</b> | <b>0.8064</b> | <b>2</b>  |
| Q62871        | ADAEAAAATR                                             | 1.133071321        | 2             | 3.27852   |
| Q62871        | SVSTPSEAGSQSDSGDGVGSR                                  | 1.046190334        | 2             | 4.73295   |
| <b>Q62902</b> | <b>LMAN1 Protein ERGIC_53</b>                          | <b>1.191234093</b> | <b>2E-16</b>  | <b>6</b>  |
| Q62902        | GAGTPGQPGQVVSQQLDVTVR                                  | 1.199997663        | 2             | 4.22636   |
| Q62902        | GHPDLQGPADDIFESIGDR                                    | 1.140492673        | 2             | 4.89019   |
| Q62902        | NNPAIVVVGNNQINVDHQNDGATQALASCQR                        | 1.190184636        | 3             | 5.00546   |
| Q62902        | RGAGTPGQPGQVVSQQLDVTVR                                 | 1.083664655        | 3             | 5.04385   |
| Q62902        | YQEEFEHFQQLDK                                          | 1.044656662        | 2             | 5.1436    |
| Q62902        | YVSSLTEEISR                                            | 1.012107137        | 2             | 3.40039   |
| <b>Q63041</b> | <b>A1M Alpha_1_macroglobulin</b>                       | <b>0.73429342</b>  | <b>1E-19</b>  | <b>8</b>  |
| Q63041        | AEDITHNGIVYTPK                                         | 0.682890635        | 2             | 3.52898   |
| Q63041        | AEQGAYLGPLPYK                                          | 0.809033663        | 2             | 3.3371    |
| Q63041        | DTVVKPVIVEPEGIEK                                       | 0.722690295        | 2             | 3.12329   |
| Q63041        | GSIFNSGSHVLPLEQ GK                                     | 0.689426322        | 2             | 3.69715   |
| Q63041        | LQDQSNIQR                                              | 0.774893455        | 2             | 3.06841   |
| Q63041        | QDLNDNDAYSVFQSIGLK                                     | 0.727979474        | 2             | 3.23403   |
| Q63041        | YNILPEAEGEAPFTLK                                       | 0.805310248        | 2             | 3.9193    |
| Q63041        | YVVLVPSELYAGVPEK                                       | 0.855250837        | 2             | 3.31287   |
| <b>Q63060</b> | <b>GLPK Glycerol kinase</b>                            | <b>1.524245296</b> | <b>1E-19</b>  | <b>10</b> |
| Q63060        | AVLGPLVGAVDQGTSSSTR                                    | 1.40776511         | 2             | 5.32653   |
| Q63060        | DCGIPLSHLQVDGGMSTSNK                                   | 1.503279683        | 2             | 3.26533   |
| Q63060        | EILQSVYECIEK                                           | 1.267279913        | 2             | 3.87281   |
| Q63060        | FEPQINAESEIR                                           | 1.230843608        | 2             | 3.48312   |
| Q63060        | KAVLGPLVGAVDQGTSSSTR                                   | 0.891679216        | 3             | 3.50119   |
| Q63060        | KVQEAveenr                                             | 1.356937511        | 2             | 3.32033   |
| Q63060        | LGQLNIDISNIK                                           | 1.528057518        | 2             | 3.02982   |
| Q63060        | NTYGTGCFLLCNTGHK                                       | 1.206840134        | 2             | 3.91685   |
| Q63060        | TAELLSHHQVEIK                                          | 1.454139934        | 2             | 3.17095   |
| Q63060        | VQEAveenr                                              | 1.244467535        | 2             | 3.06073   |
| <b>Q63081</b> | <b>PDIA6 Protein disulfide isomerase A6</b>            | <b>1.051824731</b> | <b>0.8502</b> | <b>9</b>  |
| Q63081        | GESPVDYDGGR                                            | 1.057357249        | 2             | 2.94421   |
| Q63081        | GSFSEQGINEFLR                                          | 1.052136657        | 2             | 3.62426   |

|               |                                                                   |                    |               |           |
|---------------|-------------------------------------------------------------------|--------------------|---------------|-----------|
| Q63081        | GSTAPVGGGSPFNITPR                                                 | 1.018704913        | 2             | 4.28021   |
| Q63081        | HQSLGGQYGVQGFPTIK                                                 | 1.053074165        | 2             | 5.04369   |
| Q63081        | KTCEEHQLCVVAVLPHILDTGATGR                                         | 1.077636094        | 3             | 4.08478   |
| Q63081        | NLEPEWAAAATEVK                                                    | 1.055932808        | 2             | 3.90702   |
| Q63081        | NSYLEVLLK                                                         | 1.028739498        | 2             | 2.91281   |
| Q63081        | TCEEHQLCVVAVLPHILDTGATGR                                          | 1.182348925        | 3             | 4.69039   |
| Q63081        | TGEAIVDAALSALR                                                    | 1.042090738        | 3             | 4.68916   |
| <b>Q63108</b> | <b>EST3 Liver carboxylesterase 3</b>                              | <b>0.824707855</b> | <b>4E-16</b>  | <b>5</b>  |
| Q63108        | DFNTVPYIVGINK                                                     | 0.976160218        | 2             | 2.6296    |
| Q63108        | GGTSKEEINLSK                                                      | 0.862221548        | 2             | 3.49264   |
| Q63108        | LDPMTATSLK                                                        | 1.004471773        | 2             | 3.05915   |
| Q63108        | QKTEEELETTLK                                                      | 0.907176243        | 2             | 3.58062   |
| Q63108        | SSFLNLPEEAIPVAEK                                                  | 0.759015297        | 2             | 4.65714   |
| <b>Q63120</b> | <b>MRP2 Canalicular multispecific organic anion transporter 1</b> | <b>1.265490749</b> | <b>0.2541</b> | <b>2</b>  |
| Q63120        | ACALLPDEILPGGDMAEIGEK                                             | 1.133141324        | 2             | 2.96548   |
| Q63120        | YFAWEPSFQEQVQIR                                                   | 1.088990589        | 2             | 3.74345   |
| <b>Q63150</b> | <b>DPYS Dihydropyrimidinase</b>                                   | <b>0.848255717</b> | <b>1E-19</b>  | <b>10</b> |
| Q63150        | ALGKDDFTK                                                         | 0.944615678        | 2             | 2.62096   |
| Q63150        | DQTCTPIPVK                                                        | 0.710945717        | 1             | 2.12038   |
| Q63150        | DQTCTPIPVKR                                                       | 0.826417849        | 2             | 2.63375   |
| Q63150        | EIGAIAQVHAENGDLIAEGAK                                             | 0.898634664        | 2             | 5.48412   |
| Q63150        | FVAVTSTNAAK                                                       | 0.879054557        | 2             | 3.1109    |
| Q63150        | GEVITLKPR                                                         | 0.799619657        | 2             | 2.31463   |
| Q63150        | GSSLIEAFETWR                                                      | 0.866111612        | 2             | 2.99476   |
| Q63150        | VVNDDFSQVADVLVEDGVVR                                              | 0.810869489        | 2             | 5.24056   |
| Q63150        | VVYEAGVFDVTAGHGK                                                  | 0.939464676        | 2             | 3.86045   |
| Q63150        | VVYGEPIAAGLGTGTQYWNK                                              | 0.898810572        | 2             | 5.62722   |
| <b>Q63270</b> | <b>ACOC Cytoplasmic aconitate hydratase</b>                       | <b>1.050335913</b> | <b>4E-06</b>  | <b>16</b> |
| Q63270        | AVEAGLNVPYVK                                                      | 0.942212581        | 2             | 3.14445   |
| Q63270        | AVLAESYER                                                         | 0.951720725        | 2             | 2.86139   |
| Q63270        | FVEFFGPGVAQLSIADR                                                 | 1.124032607        | 2             | 4.41195   |
| Q63270        | GFQVAPDHNDHK                                                      | 1.409966904        | 2             | 3.03708   |
| Q63270        | IDFEKEPLGVNAQGGQVFLK                                              | 0.933468675        | 3             | 4.60964   |
| Q63270        | KNDIENILNWSIMQHK                                                  | 0.933053249        | 3             | 3.82754   |
| Q63270        | NDIENILNWSIMQHK                                                   | 0.942409704        | 2             | 2.45794   |
| Q63270        | NQDLEFER                                                          | 0.810489987        | 2             | 2.3738    |
| Q63270        | QAPQTVHLPSGETLDVFAAER                                             | 0.997941669        | 3             | 3.9533    |
| Q63270        | SIEVPFKPAR                                                        | 0.915959983        | 2             | 2.42862   |
| Q63270        | SIVDAYVLLNLGDSVTTDHISPAGNIAR                                      | 1.092746615        | 3             | 4.80059   |
| Q63270        | SPPFFESLTLDLQPPK                                                  | 0.965541631        | 2             | 2.68145   |
| Q63270        | SWNALAAPSEK                                                       | 0.870917892        | 1             | 2.60438   |
| Q63270        | TSLSPGSGVVYYLR                                                    | 1.161585899        | 2             | 2.9123    |
| Q63270        | VILQDFTGVPVAVVDFAAAMR                                             | 0.842650791        | 3             | 4.06327   |
| Q63270        | YQQAGLPLIVLAGK                                                    | 1.051750184        | 2             | 3.21348   |
| <b>Q63276</b> | <b>BAAT Bile acid_CoA:amino acid N_acyltransferase</b>            | <b>1.093647891</b> | <b>0.1268</b> | <b>13</b> |
| Q63276        | AHGHLFVVGEDDKNLNSK                                                | 1.19261652         | 2             | 5.96721   |
| Q63276        | ASEVGEVDLER                                                       | 1.063644094        | 2             | 3.97332   |
| Q63276        | DDKGNLFNSQAFYR                                                    | 1.079700153        | 3             | 3.42137   |
| Q63276        | GNLFNSQAFYR                                                       | 1.316738063        | 2             | 2.76085   |
| Q63276        | LTAVPLSALVDEPVHIR                                                 | 1.832308897        | 3             | 3.43337   |
| Q63276        | QHNLNPGFNSQL                                                      | 1.30578584         | 2             | 3.5194    |
| Q63276        | QITATVLLINGPNFVSSNPVHYR                                           | 1.064545634        | 3             | 4.94574   |
| Q63276        | TFEETADKDSK                                                       | 0.887263503        | 2             | 3.79294   |
| Q63276        | VFQPTPCSEEFVTTNALGLVEFYR                                          | 1.145430123        | 2             | 5.23463   |
| Q63276        | VISSLDLILR                                                        | 0.84476254         | 2             | 3.94121   |
| Q63276        | VTGLTPFQVVCLQASLK                                                 | 1.153190526        | 3             | 3.64786   |
| Q63276        | WYVAPGVTR                                                         | 0.656532212        | 2             | 2.74042   |

|               |                                                                           |                    |               |           |
|---------------|---------------------------------------------------------------------------|--------------------|---------------|-----------|
| Q63276        | YCFPIEK                                                                   | 1.016958222        | 2             | 2.54156   |
| <b>Q63279</b> | <b>K1C19 Keratin_type I cytoskeletal 19</b>                               | <b>1.011347955</b> | <b>0.9965</b> | <b>2</b>  |
| Q63279        | IVLQIDNAR                                                                 | 1.009206316        | 2             | 2.96024   |
| Q63279        | TIEDLRDKILGATIENSK                                                        | 1.014956083        | 2             | 2.32248   |
| <b>Q63342</b> | <b>M2GD Dimethylglycine dehydrogenase_mitochondrial</b>                   | <b>1.177596549</b> | <b>1E-19</b>  | <b>20</b> |
| Q63342        | ADIINIVNGPITYSPDILPMVGP HQGVR                                             | 1.224181996        | 3             | 5.46054   |
| Q63342        | AWGSEMNCDTNPLEAGLDYFIK                                                    | 1.283936767        | 2             | 4.50589   |
| Q63342        | EGQESPPSPEWK                                                              | 0.813020074        | 2             | 2.66461   |
| Q63342        | GQDSTQLLDHLCANVIPK                                                        | 1.145436034        | 2             | 4.08773   |
| Q63342        | IMNAGQEEGIDNFGTYALNALR                                                    | 0.838820519        | 2             | 4.73565   |
| Q63342        | ISDIPVTAIR                                                                | 1.167220766        | 2             | 3.03494   |
| Q63342        | KADIINIVNGPITYSPDILPMVGP HQGVR                                            | 1.100276376        | 3             | 6.02937   |
| Q63342        | LEEETGQVVGFGHPQGSIR                                                       | 1.100469146        | 2             | 4.58648   |
| Q63342        | LNKPADFTGK                                                                | 1.588091213        | 1             | 2.53007   |
| Q63342        | LTSEDLSDDFVK                                                              | 1.135612808        | 2             | 3.30914   |
| Q63342        | NITDELGVLVGAGPYAR                                                         | 1.143120547        | 2             | 4.23884   |
| Q63342        | NYPATIIQEPLVLTPTTR                                                        | 1.278686358        | 3             | 4.33988   |
| Q63342        | REDSAALYER                                                                | 0.566446655        | 2             | 2.96674   |
| Q63342        | TNWHATEQYIIIEPEK                                                          | 1.240692298        | 2             | 4.07105   |
| Q63342        | VGVIDLSPFGK                                                               | 1.216939566        | 2             | 3.63084   |
| Q63342        | VIGNTTSGSYSYIQK                                                           | 1.139707056        | 2             | 4.26892   |
| Q63342        | VYAELTVSHQSPGFEILLITGSGSELHDLR                                            | 1.275659034        | 3             | 4.25547   |
| Q63342        | WIEEA AVR                                                                 | 1.105647408        | 2             | 2.70467   |
| Q63342        | WTTTQYTEAK                                                                | 1.182720726        | 2             | 2.307     |
| Q63342        | YLSDWILHGEPFDLIELDPNR                                                     | 1.316615574        | 3             | 4.06442   |
| <b>Q63347</b> | <b>PR57 26S protease regulatory subunit 7</b>                             | <b>0.921676978</b> | <b>0.0611</b> | <b>6</b>  |
| Q63347        | ALDEGDIALLK                                                               | 0.920656544        | 2             | 2.81046   |
| Q63347        | FDDGAGGDNEVQR                                                             | 0.94062045         | 2             | 3.57591   |
| Q63347        | IINADSEDPK                                                                | 1.026579689        | 2             | 2.53634   |
| Q63347        | QTLQSEQPLQVAR                                                             | 1.092944236        | 2             | 4.10368   |
| Q63347        | QVEDDIQQLLK                                                               | 1.022016594        | 2             | 2.61795   |
| Q63347        | TMLELINQLDGF DPR                                                          | 0.934022396        | 2             | 2.67088   |
| <b>Q63362</b> | <b>NDUA5 NADH dehydrogenase [ubiquinone] 1 alpha subcomplex subunit 5</b> | <b>1.043423231</b> | <b>0.0107</b> | <b>3</b>  |
| Q63362        | KLENLLQGGVEEVLQAEK                                                        | 1.046920323        | 2             | 4.67545   |
| Q63362        | TTGLVGLAVCDTPHER                                                          | 1.026358802        | 2             | 4.07293   |
| Q63362        | YTEQITSEK                                                                 | 1.346123714        | 2             | 2.43544   |
| <b>Q63429</b> | <b>UBC Polyubiquitin_C</b>                                                | <b>0.991356191</b> | <b>0.925</b>  | <b>3</b>  |
| Q63429        | ESTLHLVLR                                                                 | 0.967419295        | 2             | 2.34047   |
| Q63429        | TITLEVEPSDTIENVK                                                          | 1.006302936        | 2             | 4.72344   |
| Q63429        | TLSDYNIQK                                                                 | 1.057590441        | 2             | 2.49632   |
| <b>Q63448</b> | <b>ACOX3 Peroxisomal acyl_coenzyme A oxidase 3</b>                        | <b>1.012238206</b> | <b>1</b>      | <b>9</b>  |
| Q63448        | ADWLDSEAPLAAYR                                                            | 1.012607171        | 2             | 4.53859   |
| Q63448        | EIHALASAGKPLASWTAQR                                                       | 0.996847113        | 2             | 4.21823   |
| Q63448        | GGYISGEQTGK                                                               | 1.038188415        | 1             | 2.3837    |
| Q63448        | NLWAAVLQSGVLER                                                            | 1.016397075        | 2             | 4.0974    |
| Q63448        | QFGPTDKEEIPVLEYLQQWR                                                      | 0.906598623        | 3             | 5.08842   |
| Q63448        | TIFLDLIELQR                                                               | 1.048804232        | 2             | 3.46772   |
| Q63448        | TIFSTLENDPLFARPFADLPLEK                                                   | 0.916864474        | 3             | 4.33692   |
| Q63448        | TTAHYDPATQEFILHSPDFEAAK                                                   | 1.017481174        | 3             | 4.35303   |
| Q63448        | TVNFLEAYPGILGQK                                                           | 1.08307759         | 2             | 4.9494    |
| <b>Q63493</b> | <b>CD1D Antigen_presenting glycoprotein CD1d</b>                          | <b>1.191638734</b> | <b>0.0239</b> | <b>2</b>  |
| Q63493        | DIKEIVKMMSPK+Oxidation(7)                                                 | 1.191638734        | 2             | 2.62599   |
| Q63493        | DIKEIVKMMSPK+Oxidation(8)                                                 | 1.191638734        | 2             | 2.47016   |
| <b>Q63505</b> | <b>TF3C1 General transcription factor 3C polypeptide 1</b>                | <b>1.164400498</b> | <b>0.0196</b> | <b>2</b>  |
| Q63505        | NPNLEIPDTLQELFAKYR                                                        | 1.169666459        | 2             | 2.54708   |
| Q63505        | YEEIDLETGILESRR                                                           | 0.561324189        | 2             | 2.74006   |

|               |                                                               |                    |               |           |
|---------------|---------------------------------------------------------------|--------------------|---------------|-----------|
| <b>Q63524</b> | <b>TMED2 Transmembrane emp24 domain_containing protein 2</b>  | <b>1.08093675</b>  | <b>0.9931</b> | <b>2</b>  |
| Q63524        | GQDMETEAHQNKLEEMINELAVAMTAVK                                  | 1.011839234        | 3             | 5.03396   |
| Q63524        | HEQEYMEVR                                                     | 1.080984748        | 2             | 2.81175   |
| <b>Q63525</b> | <b>NUDC Nuclear migration protein nudC</b>                    | <b>1.069950137</b> | <b>0.9635</b> | <b>3</b>  |
| Q63525        | GQAPVIDGELYNEVK                                               | 1.053946359        | 2             | 3.08018   |
| Q63525        | LSDLSETR                                                      | 1.181890456        | 2             | 2.50884   |
| Q63525        | VEESSWLIEDGK                                                  | 1.135561993        | 2             | 2.80843   |
| <b>Q63569</b> | <b>PRS6A 26S protease regulatory subunit 6A</b>               | <b>0.968606408</b> | <b>0.428</b>  | <b>7</b>  |
| Q63569        | AMEVDERPTEQYSDIGGLDK                                          | 1.120933044        | 3             | 3.90371   |
| Q63569        | CTDDFNQAQCK                                                   | 0.927674116        | 2             | 2.73155   |
| Q63569        | DSYLILELTPTEYDSR                                              | 0.910066459        | 2             | 3.40302   |
| Q63569        | MNVSPDVNYEELAR                                                | 0.969549503        | 2             | 3.03285   |
| Q63569        | QTYFLPVIGLVDAEK                                               | 1.111219722        | 2             | 2.69761   |
| Q63569        | TMLELLNQLDGFQPNQVK                                            | 0.742138134        | 2             | 2.54887   |
| Q63569        | VDILDPALLR                                                    | 0.969493389        | 2             | 2.39299   |
| <b>Q63584</b> | <b>TMEDA Transmembrane emp24 domain_containing protein 10</b> | <b>1.071422401</b> | <b>0.4602</b> | <b>4</b>  |
| Q63584        | ITDSAGHILYAK                                                  | 1.168367723        | 2             | 3.57769   |
| Q63584        | LEDLSESIVNDFAYMK                                              | 1.042010535        | 2             | 3.55448   |
| Q63584        | NYEEIAK                                                       | 1.004007923        | 1             | 2.23362   |
| Q63584        | RLEDLSESIVNDFAYMK                                             | 0.768178111        | 2             | 4.04176   |
| <b>Q63598</b> | <b>PLST Plastin_3</b>                                         | <b>0.901592976</b> | <b>5E-07</b>  | <b>8</b>  |
| Q63598        | AESMLQQADK                                                    | 0.973347816        | 2             | 2.73197   |
| Q63598        | ATDDIIVNWVNGTLSEAGK                                           | 0.845283918        | 2             | 4.55638   |
| Q63598        | IDINMSGFNETDDLKR                                              | 0.867274169        | 2             | 3.48928   |
| Q63598        | KLENCNYAVELGK                                                 | 0.724565035        | 2             | 3.58923   |
| Q63598        | VDLNSNGFICYELHELK                                             | 1.000877196        | 2             | 4.03626   |
| Q63598        | VYALPEDLVEVKPK                                                | 0.893200149        | 2             | 3.18946   |
| Q63598        | YPALTKPENQDIDWTLLEGETR                                        | 0.85008841         | 3             | 5.64059   |
| Q63598        | YTLNVMEDLGEQK                                                 | 0.897220669        | 2             | 3.3985    |
| <b>Q63610</b> | <b>TPM3 Tropomyosin alpha_3 chain</b>                         | <b>1.230366655</b> | <b>6E-11</b>  | <b>8</b>  |
| Q63610        | EQAEAEVASLNR                                                  | 1.079054502        | 2             | 2.92513   |
| Q63610        | IQVLQQQADDAEER                                                | 1.262001161        | 2             | 4.82078   |
| Q63610        | KIQVLQQQADDAEER                                               | 1.175645474        | 2             | 5.40084   |
| Q63610        | KLVIIEGDLR                                                    | 1.078549234        | 2             | 2.30448   |
| Q63610        | LVIIEGDLR                                                     | 1.09334508         | 2             | 2.69653   |
| Q63610        | MELQEIQLK                                                     | 1.104689359        | 2             | 3.09523   |
| Q63610        | TIDLEDKLK                                                     | 1.043682216        | 2             | 2.67984   |
| Q63610        | YSQKEDKYEEIK                                                  | 1.076746016        | 2             | 4.47917   |
| <b>Q63617</b> | <b>HYOU1 Hypoxia up_regulated protein 1</b>                   | <b>1.138014815</b> | <b>2E-06</b>  | <b>13</b> |
| Q63617        | AANSLEAFIFETQDK                                               | 1.30734392         | 2             | 3.98516   |
| Q63617        | DAVITVPAFFNQAER                                               | 0.997559455        | 2             | 2.46626   |
| Q63617        | EGETPDEKESGDKSEAQPNEK                                         | 1.22647598         | 3             | 3.86946   |
| Q63617        | FLGDSAAGMAIK                                                  | 1.052699904        | 2             | 2.3732    |
| Q63617        | GQAGPEGVPPAPEEEKK                                             | 0.910719344        | 2             | 3.22551   |
| Q63617        | LGNTISSLFGGGTSSDAK                                            | 1.177876811        | 2             | 3.25162   |
| Q63617        | LYQPEYQEVSTEEQR                                               | 1.35096848         | 2             | 4.60917   |
| Q63617        | NINADEAAAAMGAVYQAAALS                                         | 1.108019944        | 2             | 4.64856   |
| Q63617        | SLAEDFAEQPIK                                                  | 1.10657279         | 2             | 2.75734   |
| Q63617        | SLAEDFAEQPIKDAVITVPAFFNQAER                                   | 1.100849763        | 3             | 3.80923   |
| Q63617        | VEFEELCADLFDR                                                 | 0.966416925        | 2             | 3.39113   |
| Q63617        | VESVFETLVEDSPEEESTLTK                                         | 0.931961996        | 3             | 4.17932   |
| Q63617        | VLQLINDNTATALSYGVFR                                           | 1.099544937        | 2             | 4.00108   |
| <b>Q63692</b> | <b>CDC37 Hsp90 co_chaperone Cdc37</b>                         | <b>1.156283993</b> | <b>0.0006</b> | <b>2</b>  |
| Q63692        | EGEEAGPDPDLEAVPK                                              | 0.822522938        | 2             | 3.82494   |
| Q63692        | LPGGGLDPVEVYESLPEELQK                                         | 1.165244085        | 2             | 2.77542   |
| <b>Q63716</b> | <b>PRDX1 Peroxiredoxin_1</b>                                  | <b>0.911522112</b> | <b>0.0009</b> | <b>15</b> |
| Q63716        | ADEGISFR                                                      | 0.977282172        | 2             | 3.13706   |

|               |                                                                    |                    |               |           |
|---------------|--------------------------------------------------------------------|--------------------|---------------|-----------|
| Q63716        | ATAVMPDGQFK                                                        | 0.932677003        | 2             | 2.77505   |
| Q63716        | ATAVMPDGQFK+Oxidation(4)                                           | 1.089191033        | 2             | 2.33678   |
| Q63716        | DISLSDYK                                                           | 0.800746966        | 1             | 2.04732   |
| Q63716        | HGEVCPAGWKPGSDTIKPDVVK                                             | 0.930576553        | 3             | 6.00501   |
| Q63716        | IGHPAPSFK                                                          | 2.549752018        | 1             | 2.04062   |
| Q63716        | KQGGLGPMNIPLVSDPK                                                  | 0.85919344         | 2             | 3.26397   |
| Q63716        | KQGGLGPMNIPLVSDPK+Oxidation(7)                                     | 1.078474338        | 2             | 2.54693   |
| Q63716        | LVQAFQFTDK                                                         | 1.541631571        | 2             | 2.89571   |
| Q63716        | QGGLGPMNIPLVSDPK                                                   | 1.006224186        | 2             | 3.83508   |
| Q63716        | QGGLGPMNIPLVSDPK+Oxidation(6)                                      | 0.983237446        | 2             | 3.25654   |
| Q63716        | QITINDLPVGR                                                        | 0.931279745        | 2             | 3.08592   |
| Q63716        | RTIAQDYGVLK                                                        | 1.077082994        | 2             | 2.57225   |
| Q63716        | SVDEILR                                                            | 0.931225743        | 2             | 2.37259   |
| Q63716        | TIAQDYGVLK                                                         | 0.966406519        | 2             | 3.39276   |
| <b>Q63787</b> | <b>P85A Phosphatidylinositol 3_kinase regulatory subunit alpha</b> | <b>0.812162042</b> | <b>0.3131</b> | <b>2</b>  |
| Q63787        | MHGDYTLTRKGGNNK+Oxidation(0)                                       | 0.813891933        | 2             | 2.30273   |
| Q63787        | SRISEIISR                                                          | 0.768483728        | 1             | 2.03854   |
| <b>Q63797</b> | <b>PSME1 Proteasome activator complex subunit 1</b>                | <b>0.991622024</b> | <b>0.2485</b> | <b>8</b>  |
| Q63797        | ISELDAFLKEPALNEANLSNLK                                             | 0.986257683        | 2             | 5.31646   |
| Q63797        | KGDEDDKGPVNCNEK                                                    | 1.038888469        | 3             | 4.31563   |
| Q63797        | KISELDAFLKEPALNEANLSNLK                                            | 0.964446979        | 3             | 4.83323   |
| Q63797        | LEGFQTQISK                                                         | 1.002222875        | 2             | 2.7417    |
| Q63797        | NAYAVLYDIILK                                                       | 1.272206945        | 2             | 4.11996   |
| Q63797        | QLVHELDEAEYQEIR                                                    | 0.882920222        | 2             | 4.09165   |
| Q63797        | TENLLGSYFPK                                                        | 1.026392497        | 2             | 3.42015   |
| Q63797        | VDVFREDLCSK                                                        | 0.920390977        | 2             | 2.64134   |
| <b>Q63798</b> | <b>PSME2 Proteasome activator complex subunit 2</b>                | <b>0.968004125</b> | <b>0.962</b>  | <b>4</b>  |
| Q63798        | AFYAEHLHIISSNLEK                                                   | 0.964703178        | 3             | 3.5007    |
| Q63798        | IEDGNDFGVAIQEK                                                     | 0.960243973        | 2             | 4.38716   |
| Q63798        | TKVEAFQTAISK                                                       | 0.947348132        | 2             | 3.18013   |
| Q63798        | VEAFQTAISK                                                         | 0.880937605        | 2             | 2.30816   |
| <b>Q63836</b> | <b>SBP2 Selenium_binding protein 2</b>                             | <b>1.037591981</b> | <b>0.0021</b> | <b>4</b>  |
| Q63836        | GGSVQVLEdqELTCQPEPLVVK                                             | 1.068356025        | 3             | 5.65349   |
| Q63836        | IYVVDVGSEPR                                                        | 0.804173819        | 2             | 3.22778   |
| Q63836        | LNPNFLVDFGK                                                        | 1.197783663        | 2             | 2.41039   |
| Q63836        | LNPNFLVDFGKEPLGALAEHLR                                             | 0.912549909        | 3             | 4.40079   |
| <b>Q63965</b> | <b>SFXN1 Sideroflexin_1</b>                                        | <b>1.110861407</b> | <b>0.009</b>  | <b>6</b>  |
| Q63965        | MSGVEPPNINIK+Oxidation(0)                                          | 0.959229637        | 1             | 1.92955   |
| Q63965        | NILLTNEQLENAR                                                      | 1.090574969        | 2             | 4.62913   |
| Q63965        | QAITQVVISR                                                         | 1.326622061        | 2             | 2.61143   |
| Q63965        | QGIVPAGLTENELWR                                                    | 1.071297076        | 2             | 2.90478   |
| Q63965        | WDQSTFIGR                                                          | 1.024702108        | 2             | 2.57481   |
| Q63965        | YAYDSAFHPDTGEK                                                     | 1.155855569        | 2             | 4.02994   |
| <b>Q64057</b> | <b>AL7A1 Alpha_aminoadipic semialdehyde dehydrogenase</b>          | <b>0.979638255</b> | <b>0.0008</b> | <b>16</b> |
| Q64057        | AWNIIWADIPAPK                                                      | 0.957401346        | 2             | 3.65717   |
| Q64057        | EDNEGVFNGSWGGR                                                     | 0.88732358         | 2             | 3.54155   |
| Q64057        | FKNEEEVFEWNNEVK                                                    | 0.950173261        | 2             | 5.35176   |
| Q64057        | GAPTTSLVSIATK                                                      | 0.878527703        | 2             | 4.53102   |
| Q64057        | GEVITTYCPANNEPIAR                                                  | 0.977630037        | 2             | 5.23091   |
| Q64057        | GSDCGIVNVNIPTSGAEIGGAFGGEK                                         | 0.993813836        | 2             | 5.73102   |
| Q64057        | LFLHESIHDEVVDR                                                     | 0.972387622        | 2             | 2.8614    |
| Q64057        | NEEEVFEWNNEVK                                                      | 1.088547853        | 2             | 4.3744    |
| Q64057        | QAVSMFVQAVEEAK                                                     | 1.074810377        | 2             | 2.92136   |
| Q64057        | QGLSSSIFTK                                                         | 1.067455899        | 2             | 2.56712   |
| Q64057        | QVALMVQER                                                          | 0.835854798        | 2             | 2.46026   |
| Q64057        | STCTINYSTALPLAQGIK                                                 | 0.966052423        | 2             | 3.98954   |
| Q64057        | VGNPWPDPNIIYGLPHTK                                                 | 1.360600641        | 3             | 3.64423   |



|               |                                                                                            |                    |               |           |
|---------------|--------------------------------------------------------------------------------------------|--------------------|---------------|-----------|
| Q64057        | VMDHPGNYVEPTIVTGLVHDAPIVHK                                                                 | 1.092337154        | 3             | 5.5145    |
| Q64057        | VMDHPGNYVEPTIVTGLVHDAPIVHK+Oxidation(1)                                                    | 0.944123138        | 3             | 5.97842   |
| Q64057        | VNLLSFTGSTQVVGK                                                                            | 1.464724334        | 2             | 4.53876   |
| <b>Q64060</b> | <b>DDX4 Probable ATP_dependent RNA helicase DDX4</b>                                       | <b>0.898914957</b> | <b>0.4008</b> | <b>2</b>  |
| Q64060        | MLDMGFPEMKK+Oxidation(0)                                                                   | 0.898914957        | 2             | 2.4291    |
| Q64060        | MLDMGFPEMKK+Oxidation(3)                                                                   | 0.898914957        | 2             | 2.32356   |
| <b>Q64119</b> | <b>MYL6 Myosin light polypeptide 6</b>                                                     | <b>1.104517465</b> | <b>0.0786</b> | <b>5</b>  |
| Q64119        | DQGTIEDYVEGLR                                                                              | 0.878761969        | 2             | 3.35391   |
| Q64119        | HVLVTLGEK                                                                                  | 0.992638067        | 2             | 2.39061   |
| Q64119        | NKDQGTIEDYVEGLR                                                                            | 1.044684244        | 2             | 4.31594   |
| Q64119        | VFDKEGNGTVMGAEIR                                                                           | 1.235262295        | 2             | 3.81775   |
| Q64119        | VLDFEHFLPMLQTVAK                                                                           | 1.003205262        | 3             | 4.49315   |
| <b>Q64122</b> | <b>MYL9 Myosin regulatory light polypeptide 9</b>                                          | <b>0.881993509</b> | <b>9E-08</b>  | <b>2</b>  |
| Q64122        | DGFIDKEDLHDMLASLGK                                                                         | 0.746349078        | 2             | 4.82231   |
| Q64122        | LNGTDPEDVIR                                                                                | 0.922378222        | 2             | 2.6019    |
| <b>Q64176</b> | <b>EST22 Liver carboxylesterase 22</b>                                                     | <b>0.740476315</b> | <b>1E-19</b>  | <b>4</b>  |
| Q64176        | AISESGVALTAGLVK                                                                            | 0.763708146        | 2             | 4.2377    |
| Q64176        | EGYLQIGATTQQAQK                                                                            | 0.710925682        | 2             | 4.31814   |
| Q64176        | LDQMTAMSLK+Oxidation(3)                                                                    | 0.57205584         | 2             | 2.51784   |
| Q64176        | NFNTVPYIVGINK                                                                              | 1.145424966        | 2             | 2.69482   |
| <b>Q641K1</b> | <b>CBPC1 Cytosolic carboxypeptidase 1</b>                                                  | <b>1.505632271</b> | <b>0.0606</b> | <b>2</b>  |
| Q641K1        | GTLEYLMSNSPTAQLSR                                                                          | 1.505170167        | 2             | 2.3375    |
| Q641K1        | KDFGLPLTVLSCTK                                                                             | 1.505819822        | 2             | 2.37878   |
| <b>Q641Y0</b> | <b>OST48 Dolichyl_diphosphooligosaccharide__protein glycosyltransferase 48 kDa subunit</b> | <b>1.220289851</b> | <b>4E-10</b>  | <b>8</b>  |
| Q641Y0        | ELGSECGIEFDEEK                                                                             | 1.710084548        | 2             | 2.3807    |
| Q641Y0        | GFELTFK                                                                                    | 1.00645711         | 2             | 2.5462    |
| Q641Y0        | NLLIAGLQAR                                                                                 | 1.140796086        | 2             | 3.61323   |
| Q641Y0        | SSLNPILFR                                                                                  | 1.379669179        | 2             | 2.56217   |
| Q641Y0        | TAVIDHHNYDVSIDLQHTLIVADTENLLK                                                              | 1.272874265        | 3             | 6.58361   |
| Q641Y0        | TLVLLDNLNVR                                                                                | 1.16340338         | 2             | 3.46115   |
| Q641Y0        | WVPFDGDDIQLEFVR                                                                            | 0.978445944        | 2             | 3.25475   |
| Q641Y0        | YSQTGNELAVALS                                                                              | 1.11424325         | 2             | 3.22133   |
| <b>Q641Y2</b> | <b>NDUS2 NADH dehydrogenase [ubiquinone] iron_sulfur protein 2_ mitochondrial</b>          | <b>1.234556203</b> | <b>0.0275</b> | <b>3</b>  |
| Q641Y2        | IDEVEEMLTNNR                                                                               | 1.092861354        | 2             | 3.38024   |
| Q641Y2        | IIEQCLNK                                                                                   | 1.186440632        | 2             | 2.36141   |
| Q641Y2        | TQPYDVYDQVEFDVPIGSR                                                                        | 1.230685434        | 2             | 4.09984   |
| <b>Q641Y8</b> | <b>DDX1 ATP_dependent RNA helicase DDX1</b>                                                | <b>1.097865421</b> | <b>0.9783</b> | <b>2</b>  |
| Q641Y8        | GHVLDILAPTVQELAALEK                                                                        | 0.992089463        | 3             | 3.46178   |
| Q641Y8        | GSAFAIGSDGLCCQSR                                                                           | 1.113823303        | 2             | 3.20167   |
| <b>Q641Z6</b> | <b>EHD1 EH domain_containing protein 1</b>                                                 | <b>1.070653297</b> | <b>0.5228</b> | <b>2</b>  |
| Q641Z6        | KEMPNVFGKESK+Oxidation(2)                                                                  | 1.101828584        | 2             | 2.31129   |
| Q641Z6        | LLDTVDDMLANDIAR                                                                            | 1.064545528        | 2             | 2.6704    |
| <b>Q64232</b> | <b>TECR Trans_2_3_enoyl_CoA reductase</b>                                                  | <b>0.916319685</b> | <b>0.5943</b> | <b>3</b>  |
| Q64232        | LCFLDKVEPQATISEIK                                                                          | 0.938456609        | 2             | 4.08523   |
| Q64232        | SLKDEDVLQK                                                                                 | 0.905577261        | 2             | 2.90039   |
| Q64232        | THPQWYPAR                                                                                  | 0.870427926        | 2             | 2.52925   |
| <b>Q64240</b> | <b>AMBP Protein AMBP</b>                                                                   | <b>0.869752229</b> | <b>5E-05</b>  | <b>3</b>  |
| Q64240        | AFAELWAFDAAQ GK                                                                            | 1.01075201         | 2             | 3.82506   |
| Q64240        | AVLPQENEGSGSEPLITGTLK                                                                      | 0.796093709        | 2             | 4.34526   |
| Q64240        | TIAACNLPIVQGPCR                                                                            | 0.521302066        | 2             | 3.54196   |
| <b>Q64380</b> | <b>SARDH Sarcosine dehydrogenase_ mitochondrial</b>                                        | <b>0.823074359</b> | <b>5E-15</b>  | <b>19</b> |
| Q64380        | AIDSLSIEK                                                                                  | 1.039119113        | 2             | 2.57966   |
| Q64380        | AYGIESHVLSPAETK                                                                            | 0.83586336         | 2             | 4.65886   |
| Q64380        | DGTMDPAGTCTTLTR                                                                            | 0.746315384        | 2             | 3.78573   |
| Q64380        | DILQDVLADLSDNEAFPSTHQLVR                                                                   | 0.966703363        | 3             | 5.71569   |

|               |                                                               |                    |               |           |
|---------------|---------------------------------------------------------------|--------------------|---------------|-----------|
| Q64380        | DLYPLMNVDDLYGTLYVPR                                           | 0.797710144        | 2             | 2.61801   |
| Q64380        | EEAQGASVVPQGPSQLPSTANVVVIGGSLGCQTLYHLAK                       | 0.988362152        | 3             | 4.30358   |
| Q64380        | FHSLTDHPR                                                     | 0.837041197        | 2             | 2.35478   |
| Q64380        | FYLLGADAR                                                     | 0.979049235        | 2             | 2.84094   |
| Q64380        | GAQVIENCAVTGIR                                                | 1.102564535        | 2             | 4.32882   |
| Q64380        | HGLVNAGYR                                                     | 1.104949171        | 2             | 2.51591   |
| Q64380        | IEGIQNMPNVR                                                   | 0.852574052        | 2             | 2.80898   |
| Q64380        | LQGDALSVGGYEANPIFVWDEVSDK                                     | 0.719000759        | 2             | 4.57527   |
| Q64380        | NYSVVPHPDEPLAGR                                               | 0.839772914        | 2             | 4.44087   |
| Q64380        | QVVDHLEETGLHTGWIQNGGLFIASNQQR                                 | 0.898359338        | 3             | 4.74978   |
| Q64380        | RDPLHEELLGQGCVFQER                                            | 0.929841382        | 3             | 5.38756   |
| Q64380        | SDDSPLEAGLAFTCK                                               | 0.984012052        | 2             | 4.04966   |
| Q64380        | STVCGPESFTPDKPLMGEAPELR                                       | 1.069723166        | 3             | 4.08844   |
| Q64380        | STVCGPESFTPDKPLMGEAPELR+Oxidation(16)                         | 0.893938681        | 3             | 3.93777   |
| Q64380        | VTAVETQHGSIQTPCVVNCAGVWASSVGR                                 | 0.968395558        | 3             | 4.93879   |
| <b>Q64428</b> | <b>ECHA Trifunctional enzyme subunit alpha_ mitochondrial</b> | <b>0.906855968</b> | <b>1E-19</b>  | <b>26</b> |
| Q64428        | ADMVIEAVFEDLAVK                                               | 0.736254928        | 3             | 4.25756   |
| Q64428        | ADMVIEAVFEDLAVK+Oxidation(2)                                  | 0.762951734        | 2             | 2.66073   |
| Q64428        | ALMGLYNGQVLCK                                                 | 0.930376788        | 2             | 2.64749   |
| Q64428        | DSIFSNLIGQLDYK                                                | 0.778766706        | 2             | 2.781     |
| Q64428        | DTTASAVAVGLK                                                  | 0.749727883        | 2             | 3.3925    |
| Q64428        | DTTDTGLGR                                                     | 0.802802302        | 2             | 2.92376   |
| Q64428        | EVESVTPHECIFASNTSALPINQIAAVSQRPEK                             | 0.913417799        | 3             | 5.4017    |
| Q64428        | EVQSEFVEVMNEIWANDQIR                                          | 0.771461966        | 3             | 5.76725   |
| Q64428        | FGELALTK                                                      | 0.925331955        | 2             | 2.76605   |
| Q64428        | FGGGSVELLK                                                    | 0.881072825        | 2             | 2.95207   |
| Q64428        | FVDLYGAQK                                                     | 0.898243421        | 2             | 2.90537   |
| Q64428        | GFYIYQSGSK                                                    | 0.815240518        | 1             | 2.11367   |
| Q64428        | ILQEGVDPK                                                     | 0.842012629        | 2             | 2.65965   |
| Q64428        | KTVLGVPEVLLGILPGAGGTQR                                        | 0.803772805        | 2             | 3.76652   |
| Q64428        | LPAKPEVSSDEDIQYR                                              | 1.445750038        | 2             | 4.45614   |
| Q64428        | MGLVDQLVDPLPGGIK                                              | 0.74622709         | 2             | 4.5254    |
| Q64428        | MGLVDQLVDPLPGGIK+Oxidation(0)                                 | 0.806413519        | 2             | 4.19966   |
| Q64428        | MQLLEIITDK                                                    | 0.838887891        | 2             | 3.89846   |
| Q64428        | MQLLEIITDK+Oxidation(0)                                       | 0.812015321        | 2             | 2.9167    |
| Q64428        | MVGVPAAFDMMMLTGR                                              | 0.961571454        | 2             | 2.8855    |
| Q64428        | NLNSEIDNILVNLR                                                | 0.832430818        | 2             | 4.5758    |
| Q64428        | SAVLISSKPGCFVAGADINMLASCTTPQEAAAR                             | 0.932261504        | 3             | 3.8613    |
| Q64428        | TGLEQNDAGYLAESEK                                              | 0.987168638        | 2             | 5.07455   |
| Q64428        | TIEYLEEVAVNFAK                                                | 0.835520992        | 2             | 3.43744   |
| Q64428        | TVLGVPEVLLGILPGAGGTQR                                         | 0.868882724        | 3             | 4.91002   |
| Q64428        | TVQQLAILGAGLMGAGIAQVSVDK                                      | 0.881206429        | 3             | 5.37674   |
| <b>Q64458</b> | <b>CP2CT Cytochrome P450 2C29</b>                             | <b>1.949317754</b> | <b>1E-19</b>  | <b>5</b>  |
| Q64458        | EHKESLDVTNPR                                                  | 0.536441254        | 2             | 3.37415   |
| Q64458        | IKEHESLDVTNPR                                                 | 0.642448483        | 3             | 5.17661   |
| Q64458        | LPPGPTPLPIIGNFLQJDVK                                          | 1.86937826         | 3             | 4.46102   |
| Q64458        | VQEEAQCLVEELR                                                 | 2.103786734        | 2             | 4.22867   |
| Q64458        | VQEEAQCLVEELRK                                                | 2.023433933        | 2             | 3.69962   |
| <b>Q64464</b> | <b>CP3AD Cytochrome P450 3A13</b>                             | <b>0.727204135</b> | <b>0.1334</b> | <b>2</b>  |
| Q64464        | ALLSPTFTSGR                                                   | 1.06069056         | 2             | 2.70603   |
| Q64464        | LQDEIDAALPNK                                                  | 0.684699938        | 2             | 2.53917   |
| <b>Q64550</b> | <b>UD11 UDP-glucuronosyltransferase 1_1</b>                   | <b>1.136708863</b> | <b>6E-16</b>  | <b>4</b>  |
| Q64550        | GHEVVVIAPEASIIHK                                              | 0.546329794        | 2             | 4.54839   |
| Q64550        | NMIIALTENFLCR                                                 | 0.824186954        | 2             | 3.99684   |
| Q64550        | SVFDQDPFLLR                                                   | 0.737370198        | 2             | 3.46312   |
| Q64550        | VVYSPYGLATEILQK                                               | 0.657908028        | 3             | 4.38318   |
| <b>Q64560</b> | <b>TPP2 Tripeptidyl-peptidase 2</b>                           | <b>0.882319627</b> | <b>0.0232</b> | <b>4</b>  |

|               |                                                                           |                    |               |           |
|---------------|---------------------------------------------------------------------------|--------------------|---------------|-----------|
| Q64560        | ACVDSNENGLGK                                                              | 0.716336323        | 2             | 2.66859   |
| Q64560        | DPVQVAAPSDHGVGIEPVFPENTENSEK                                              | 1.487647412        | 3             | 4.16925   |
| Q64560        | GTLIEAFPVLGGK                                                             | 0.882302286        | 2             | 3.03531   |
| Q64560        | HEQISDLDR                                                                 | 1.251162522        | 2             | 2.36494   |
| <b>Q64563</b> | <b>ADH4 Alcohol dehydrogenase 4</b>                                       | <b>0.531624092</b> | <b>1E-19</b>  | <b>13</b> |
| Q64563        | AAVDCTVVGWGSCTVVGAK                                                       | 0.398998426        | 2             | 2.83725   |
| Q64563        | ALFPVVLGHECAGIVESVGPVGNFKPGDK                                             | 0.687001945        | 3             | 4.20972   |
| Q64563        | ALGATDCLNPR                                                               | 0.504696492        | 2             | 3.32316   |
| Q64563        | DLDKPVQDVITELTGGGVDFSLDCAGTAQTLK                                          | 0.59496912         | 3             | 3.96249   |
| Q64563        | FDLLLVTHALPFDK                                                            | 0.88360911         | 2             | 3.9491    |
| Q64563        | INDAIDL MNQ GK                                                            | 0.675901744        | 2             | 3.80934   |
| Q64563        | KFDLLLVTHALPFDK                                                           | 0.423538549        | 3             | 5.11897   |
| Q64563        | SVDSVPLNLVTDYK                                                            | 0.422951719        | 2             | 3.699     |
| Q64563        | TDSPLCIEEIEVSPPK                                                          | 0.548651626        | 2             | 4.00042   |
| Q64563        | VCLIGCGFTSGYGAAINTAK                                                      | 0.648778838        | 2             | 4.41473   |
| Q64563        | VDDEANLER                                                                 | 0.534685639        | 2             | 2.61144   |
| Q64563        | VDEMNI STVDMILGR                                                          | 0.594432371        | 2             | 3.65356   |
| Q64563        | VIATCVPTDINATNPK                                                          | 0.488706453        | 2             | 4.61527   |
| <b>Q64565</b> | <b>AGT2 Alanine_glyoxylate aminotransferase 2_mitochondrial</b>           | <b>0.96174522</b>  | <b>0.9988</b> | <b>11</b> |
| Q64565        | AYSNHTDIISFR                                                              | 0.993541202        | 2             | 2.88498   |
| Q64565        | GGVCI ADEVQTGFGR                                                          | 0.91392334         | 2             | 4.10384   |
| Q64565        | GINGFPMAAVVTTPEIASSLAK                                                    | 0.921685089        | 2             | 4.28113   |
| Q64565        | HNMPPCDFSPEK                                                              | 0.975063732        | 2             | 2.35069   |
| Q64565        | LRDEFDIVGDVR                                                              | 1.08330028         | 2             | 2.44488   |
| Q64565        | LSALLPEPLK                                                                | 1.194148096        | 2             | 3.19558   |
| Q64565        | SALTQHMER                                                                 | 1.018896907        | 2             | 2.66144   |
| Q64565        | SALTQHMER+Oxidation(6)                                                    | 0.682420533        | 2             | 2.69212   |
| Q64565        | TEVNQIHEDCK                                                               | 1.04458758         | 2             | 2.92372   |
| Q64565        | TEVNQIHEDCKDMGLLVGR                                                       | 0.904677165        | 2             | 5.30421   |
| Q64565        | YIEQFK                                                                    | 0.934393546        | 1             | 2.03067   |
| <b>Q64578</b> | <b>AT2A1 Sarcoplasmic/endoplasmic reticulum calcium ATPase 1</b>          | <b>1.026389971</b> | <b>0.9934</b> | <b>4</b>  |
| Q64578        | DIVPGDIVEVAVGDKVPADIR                                                     | 1.0637976          | 2             | 3.05682   |
| Q64578        | IGIFSENEEVADR                                                             | 1.133421891        | 2             | 2.79268   |
| Q64578        | VGEATETALTTLVEK                                                           | 0.914198349        | 2             | 4.40429   |
| Q64578        | YGPNELPAEEGK                                                              | 1.350362227        | 2             | 2.78259   |
| <b>Q64591</b> | <b>DECR 2_4_dienoyl_CoA reductase_mitochondrial</b>                       | <b>0.692036795</b> | <b>1E-19</b>  | <b>8</b>  |
| Q64591        | ATAEEITSK                                                                 | 0.909729941        | 2             | 2.85052   |
| Q64591        | CDVRDPDMVHNTVLELIK                                                        | 0.633784862        | 4             | 4.58439   |
| Q64591        | EEWDVIEGLIR                                                               | 0.552674717        | 2             | 3.90097   |
| Q64591        | FNIIQPGPIK                                                                | 0.733990058        | 2             | 2.75594   |
| Q64591        | NIDVLK                                                                    | 0.560405556        | 1             | 1.98223   |
| Q64591        | SLAAEWGR                                                                  | 0.683042213        | 2             | 2.64881   |
| Q64591        | VAGHPDVVINNAAGNFISPSER                                                    | 0.887312189        | 2             | 6.15307   |
| Q64591        | VTKEEWDVIEGLIR                                                            | 0.698710817        | 3             | 4.5253    |
| <b>Q64602</b> | <b>AADAT Kynurenine/alpha_aminoadipate aminotransferase_mitochondrial</b> | <b>0.969421753</b> | <b>0.9797</b> | <b>7</b>  |
| Q64602        | ASFSQVTPAQMDLVFQR                                                         | 0.997056407        | 2             | 4.61395   |
| Q64602        | DIISLAPGSPNPK                                                             | 1.025965282        | 2             | 3.0493    |
| Q64602        | EILLVPGNSFFVDNSAPSSFFR                                                    | 0.888952754        | 3             | 3.50378   |
| Q64602        | FLYTIPNGNPTGNSLTGDR                                                       | 0.990733219        | 2             | 4.06963   |
| Q64602        | LHNPPTVNYSPNEGQMDLCITSGCQDGLCK                                            | 1.061567644        | 3             | 5.65472   |
| Q64602        | SAVFTVENGSTIR                                                             | 0.938894046        | 2             | 3.25726   |
| Q64602        | VLSQWKPEDSKDPTKR                                                          | 0.401769683        | 3             | 4.20015   |
| <b>Q64604</b> | <b>PTPRF Receptor_type tyrosine_protein phosphatase F</b>                 | <b>0.759757694</b> | <b>0.0019</b> | <b>2</b>  |
| Q64604        | DHPPPIPITDLADNIERLK                                                       | 0.738302566        | 2             | 2.31108   |
| Q64604        | RADEARPNTIDFGK                                                            | 0.765174709        | 2             | 2.36615   |
| <b>Q64611</b> | <b>CSAD Cysteine sulfinic acid decarboxylase</b>                          | <b>1.077141779</b> | <b>1</b>      | <b>11</b> |

|               |                                              |                    |               |           |
|---------------|----------------------------------------------|--------------------|---------------|-----------|
| Q64611        | AQGGQGLEWR                                   | 0.984196054        | 2             | 2.95097   |
| Q64611        | CHGSQASYLFQQDK                               | 0.952985677        | 2             | 4.93477   |
| Q64611        | DVFGIVVDEAIR                                 | 1.041367082        | 2             | 3.26128   |
| Q64611        | FFNQLFSGLDPHALAGR                            | 1.396791712        | 3             | 3.9409    |
| Q64611        | FYNVALDTGDK                                  | 0.928913674        | 2             | 2.87234   |
| Q64611        | GAAFLGLGTDSVR                                | 1.091365632        | 2             | 3.10568   |
| Q64611        | IDQAFALTR                                    | 1.039877703        | 2             | 3.17386   |
| Q64611        | QLLDLELQSQGESR                               | 0.916680851        | 2             | 4.21569   |
| Q64611        | TLDGDPVAVEALLR                               | 1.022514035        | 2             | 4.51316   |
| Q64611        | VCEWKEPEELK                                  | 1.007813013        | 3             | 3.4601    |
| Q64611        | YLVEEIK                                      | 0.884524981        | 1             | 2.29215   |
| <b>Q64640</b> | <b>ADK Adenosine kinase</b>                  | <b>1.052332721</b> | <b>1E-19</b>  | <b>10</b> |
| Q64640        | AADAHVDAHYYEQNEQPTGTCAACITGGNR               | 1.304739377        | 3             | 7.07768   |
| Q64640        | AATFFGCIGIDK                                 | 0.824970901        | 2             | 2.95619   |
| Q64640        | AGHYAASVIIR                                  | 1.209353238        | 2             | 2.87764   |
| Q64640        | FGEILK                                       | 1.192782271        | 2             | 2.33908   |
| Q64640        | HKELFDELVK                                   | 1.259692109        | 3             | 3.54821   |
| Q64640        | HLDLENNWMLVEK                                | 1.144606565        | 2             | 3.32582   |
| Q64640        | SLVANLAAANCYK                                | 1.197725084        | 2             | 4.68054   |
| Q64640        | VEYHAGGSTQNSMK                               | 0.017292931        | 2             | 3.78348   |
| Q64640        | VEYHAGGSTQNSMK+Oxidation(12)                 | 1.521613054        | 2             | 4.03429   |
| Q64640        | YSLKPNQILAEDK                                | 1.177473234        | 3             | 4.24766   |
| <b>Q64654</b> | <b>CP51A Lanosterol 14_alpha demethylase</b> | <b>0.276186692</b> | <b>1E-19</b>  | <b>5</b>  |
| Q64654        | EPAEDILQTLDDSTYK                             | 0.511100237        | 2             | 3.14244   |
| Q64654        | GVAYDVPNAVFLQK                               | 0.457323711        | 2             | 3.27983   |
| Q64654        | NEDLNAEEVYGR                                 | 0.437245214        | 2             | 4.03508   |
| Q64654        | TVCGEDLPPLTYEQLK                             | 0.26910774         | 2             | 4.14721   |
| Q64654        | YLQDNPASGEK                                  | 0.285945379        | 2             | 2.44868   |
| <b>Q64725</b> | <b>KSYK Tyrosine_protein kinase SYK</b>      | <b>0.916368177</b> | <b>0.6325</b> | <b>2</b>  |
| Q64725        | GMKGSEVTAMLEKGER+Oxidation(1)                | 0.916368177        | 2             | 2.41366   |
| Q64725        | GMKGSEVTAMLEKGER+Oxidation(9)                | 0.916368177        | 2             | 2.44539   |
| <b>Q65Z40</b> | <b>WAPL Wings apart_like protein homolog</b> | <b>1.002111072</b> | <b>1</b>      | <b>2</b>  |
| Q65Z40        | EKSISRIPEDNANK                               | 1.002039763        | 2             | 2.47202   |
| Q65Z40        | LGQKRPNFKPDIQIPIK                            | 1.007372121        | 2             | 2.84779   |
| <b>Q66H12</b> | <b>NAGAB Alpha_N_acetylgalactosaminidase</b> | <b>0.86656948</b>  | <b>0.3749</b> | <b>2</b>  |
| Q66H12        | INQDPLGIQGR                                  | 0.866317203        | 2             | 3.38079   |
| Q66H12        | TISPQNIDILQNPLLIK                            | 0.869580527        | 2             | 2.46993   |
| <b>Q66H80</b> | <b>COPD Coatomer subunit delta</b>           | <b>0.972016823</b> | <b>0.9976</b> | <b>5</b>  |
| Q66H80        | GVQLQTHPNVDKK                                | 0.911170913        | 2             | 3.54685   |
| Q66H80        | IEGLLAAPFK                                   | 1.083106446        | 2             | 2.42501   |
| Q66H80        | NSNILEDLETLR                                 | 0.997927326        | 2             | 3.34523   |
| Q66H80        | NTLEWCLPVIDAK                                | 0.954616518        | 2             | 2.98865   |
| Q66H80        | VTQVDGNSPVR                                  | 1.203317477        | 2             | 2.90752   |
| <b>Q66HA8</b> | <b>HS105 Heat shock protein 105 kDa</b>      | <b>1.142125374</b> | <b>8E-06</b>  | <b>6</b>  |
| Q66HA8        | AGGIETIANEFSDR                               | 1.178047303        | 2             | 3.4842    |
| Q66HA8        | NQQITHANNTVSSFK                              | 1.129734168        | 2             | 4.55478   |
| Q66HA8        | SVLDAAQIVGLNCLR                              | 1.243553194        | 2             | 2.95345   |
| Q66HA8        | TEEVSAIEIVGGATR                              | 0.801488957        | 2             | 2.91511   |
| Q66HA8        | VLGTAFFDPFLGGK                               | 1.025250309        | 2             | 3.07786   |
| Q66HA8        | YNHIDSEMKKVEK                                | 1.00578274         | 2             | 2.32349   |
| <b>Q66HD0</b> | <b>ENPL Endoplasmic</b>                      | <b>1.051310548</b> | <b>1E-19</b>  | <b>22</b> |
| Q66HD0        | DISTNYYASQK                                  | 0.845061279        | 2             | 3.08035   |
| Q66HD0        | EATEKEFEPLLNWMK                              | 1.010529037        | 2             | 3.68222   |
| Q66HD0        | EEASDYLELDTIK                                | 1.044782985        | 2             | 4.12642   |
| Q66HD0        | EEEAQLDGLNASQIR                              | 1.131235918        | 2             | 4.33877   |
| Q66HD0        | EVEEDEYK                                     | 0.915629999        | 1             | 2.54878   |
| Q66HD0        | FQSSHSTDITSLDQYVER                           | 1.112004795        | 2             | 5.87734   |

|               |                                                                           |                    |               |           |
|---------------|---------------------------------------------------------------------------|--------------------|---------------|-----------|
| Q66HD0        | GVVDSDDLPLNVSR                                                            | 1.105828116        | 2             | 4.4227    |
| Q66HD0        | GYEVVYLTEPVDEYCIQALPEFDGKR                                                | 1.383107302        | 3             | 3.71086   |
| Q66HD0        | KEAESSPFVER                                                               | 1.125183846        | 2             | 3.02475   |
| Q66HD0        | LGVIEDHSNR                                                                | 1.127648283        | 2             | 2.86495   |
| Q66HD0        | LISLTDENALAGNEELTVK                                                       | 1.404324854        | 2             | 4.98911   |
| Q66HD0        | LTESPCALVASQYGWWSGNMER                                                    | 1.133778514        | 2             | 5.47744   |
| Q66HD0        | NLLHVTDGTGVGMTR                                                           | 1.131506341        | 2             | 3.45042   |
| Q66HD0        | NLLHVTDGTGVGMTR+Oxidation(11)                                             | 0.934617603        | 2             | 3.22203   |
| Q66HD0        | SGTSEFLNK                                                                 | 1.135665043        | 2             | 3.14956   |
| Q66HD0        | SGYLLPDTK                                                                 | 1.065531351        | 2             | 3.22208   |
| Q66HD0        | SILFVPTSAPR                                                               | 1.042531872        | 2             | 3.48098   |
| Q66HD0        | TDDEVVQR                                                                  | 1.30383285         | 2             | 3.2864    |
| Q66HD0        | TDDEVVQREEEAIQDLGLNASQIR                                                  | 0.995550588        | 3             | 4.96581   |
| Q66HD0        | TVWDWELMNDIKPIWQRPSK                                                      | 1.208661136        | 3             | 3.44037   |
| Q66HD0        | VFITDDFHDMMPK                                                             | 1.000470503        | 2             | 2.75423   |
| Q66HD0        | YNDTFWK                                                                   | 0.994850386        | 1             | 2.13521   |
| <b>Q66HF1</b> | <b>NDUS1 NADH_ubiquinone oxidoreductase 75 kDa subunit_ mitochondrial</b> | <b>1.010767001</b> | <b>0.0004</b> | <b>10</b> |
| Q66HF1        | ALSEIAGITLPHYDLDQVR                                                       | 1.004588939        | 2             | 4.92581   |
| Q66HF1        | DDGAAILAAVSSIAQK                                                          | 1.006281693        | 2             | 4.88352   |
| Q66HF1        | FASEIAGVDDLGTGR                                                           | 1.237815482        | 2             | 4.18272   |
| Q66HF1        | GLLTYTSWEDALSR                                                            | 1.059113546        | 2             | 3.8635    |
| Q66HF1        | ILQDIASGNHEFSK                                                            | 1.172165423        | 2             | 3.80436   |
| Q66HF1        | LGEVSPNLVR                                                                | 1.243956189        | 2             | 2.58907   |
| Q66HF1        | LVDQEFLADPLVPPQLTIK                                                       | 1.072079674        | 3             | 3.58954   |
| Q66HF1        | SATVNTTEGR                                                                | 1.044917623        | 2             | 2.34487   |
| Q66HF1        | VSDTLCTEEIFPNEGAGTDLR                                                     | 1.208717337        | 2             | 4.0963    |
| Q66HF1        | YDHLGDSPK                                                                 | 1.127980371        | 2             | 2.33414   |
| <b>Q66HF8</b> | <b>AL1B1 Aldehyde dehydrogenase X_ mitochondrial</b>                      | <b>1.535793479</b> | <b>1E-19</b>  | <b>10</b> |
| Q66HF8        | EAGFPPGVVNIITGYGPTAGAAIAQHMDVVK                                           | 1.630302325        | 3             | 3.30618   |
| Q66HF8        | EEIFGPVQPLFK                                                              | 0.860384097        | 2             | 2.98464   |
| Q66HF8        | KTFPTVNPTTGEVIGHVAEGDR                                                    | 1.856382001        | 3             | 4.18721   |
| Q66HF8        | KVGNPFELDTQQGPQVDKEQFEK                                                   | 1.540473377        | 3             | 3.37276   |
| Q66HF8        | TFPTVNPTTGEVIGHVAEGDR                                                     | 1.900118958        | 2             | 4.38989   |
| Q66HF8        | TFVEESIYHEFLER                                                            | 1.547860379        | 2             | 3.87797   |
| Q66HF8        | VAEQTPLSALYLASLIK                                                         | 2.315330795        | 2             | 3.06982   |
| Q66HF8        | VAFTGSTEVGHLIQK                                                           | 2.378179337        | 2             | 3.01021   |
| Q66HF8        | VGNPFELDTQQGPQVDKEQFEK                                                    | 1.356006838        | 2             | 4.423     |
| Q66HF8        | YGLAAAVFTR                                                                | 1.099768702        | 2             | 2.67892   |
| <b>Q66HG4</b> | <b>GALM Aldose 1_epimerase</b>                                            | <b>0.716840137</b> | <b>1E-19</b>  | <b>3</b>  |
| Q66HG4        | ASDVVLGF AELEGYLQK                                                        | 0.723914148        | 2             | 3.56574   |
| Q66HG4        | TVFGELPSGGGAVEK                                                           | 0.745590368        | 2             | 3.63367   |
| Q66HG4        | VSPDGEGYPGELK                                                             | 0.706491           | 2             | 3.71394   |
| <b>Q66HG9</b> | <b>MAVS Mitochondrial antiviral signaling protein</b>                     | <b>1.043898031</b> | <b>0.5127</b> | <b>2</b>  |
| Q66HG9        | ICELPGLAEQVTR                                                             | 1.01880118         | 2             | 2.6565    |
| Q66HG9        | STAATPSTVPTNIAPSK                                                         | 1.090313791        | 2             | 2.38438   |
| <b>Q66X93</b> | <b>SND1 Staphylococcal nuclease domain_containing protein 1</b>           | <b>1.089659499</b> | <b>9E-09</b>  | <b>18</b> |
| Q66X93        | ALLLPDHYLVTVMLSGIK                                                        | 1.019900935        | 3             | 3.84643   |
| Q66X93        | DIQNTQCLLNV EHLASCPHVTLQFADSK                                             | 1.063421339        | 3             | 5.45938   |
| Q66X93        | DTNGENIAESLVAEGLASR                                                       | 1.017121706        | 2             | 5.08052   |
| Q66X93        | DVQIILESCHNQNILGTILHPNGNITELLLK                                           | 1.100550014        | 3             | 6.25671   |
| Q66X93        | ETDGSETPEPFAAEAK                                                          | 1.209092677        | 2             | 3.47693   |
| Q66X93        | GDVGLGLVK                                                                 | 1.096140112        | 2             | 2.47306   |
| Q66X93        | LEGDNIQDK                                                                 | 1.114310378        | 2             | 2.60373   |
| Q66X93        | NLPGLVQEGEPFSEATLFTK                                                      | 1.50217067         | 2             | 5.63891   |
| Q66X93        | SAYYKPLLSAEAAK                                                            | 1.059584317        | 2             | 3.11932   |
| Q66X93        | SDISSHPPVEGAYAPR                                                          | 1.072599346        | 3             | 4.06537   |

|               |                                                 |                    |               |           |
|---------------|-------------------------------------------------|--------------------|---------------|-----------|
| Q66X93        | SEAVVEYVFSGR                                    | 1.12952522         | 2             | 2.61583   |
| Q66X93        | SSHYDELLAAEAR                                   | 1.05369727         | 2             | 3.61264   |
| Q66X93        | TCATVTIGGINIAEALVSK                             | 0.990778404        | 2             | 3.91251   |
| Q66X93        | TDAVDSVVR                                       | 1.072809073        | 2             | 2.51206   |
| Q66X93        | VADISGDTQK                                      | 1.055069547        | 2             | 2.4124    |
| Q66X93        | VITEYLNAQESAK                                   | 1.345016476        | 2             | 4.20499   |
| Q66X93        | VSVTVDYIRPASPATETVPAFSE                         | 1.112537053        | 3             | 4.6836    |
| Q66X93        | VVAHYEEQPVVEVMPVLEEK                            | 0.983740082        | 3             | 3.82219   |
| <b>Q68FP2</b> | <b>PON3 Serum paraoxonase/lactonase 3</b>       | <b>0.825072991</b> | <b>7E-16</b>  | <b>8</b>  |
| Q68FP2        | EIKPTEPQNCHLIELENGSEDIDILPSGLAFISTGLK           | 1.237759535        | 3             | 4.45309   |
| Q68FP2        | HELFESVNDIVVLGPEQFYATR                          | 1.095160076        | 3             | 3.34134   |
| Q68FP2        | HNNWDLTPVK                                      | 0.824691154        | 2             | 3.00581   |
| Q68FP2        | IFLMDLNEPYPK                                    | 1.017032612        | 2             | 2.82245   |
| Q68FP2        | IQDPLSDNPR                                      | 0.91532356         | 2             | 2.8887    |
| Q68FP2        | LLIYNPEDPPGSEVLR                                | 1.097292583        | 2             | 3.91172   |
| Q68FP2        | VVAQGFSSANGITVSLDQK                             | 0.627538836        | 2             | 3.56188   |
| Q68FP2        | YVYVADVTA                                       | 0.837539864        | 1             | 2.96802   |
| <b>Q68FQ0</b> | <b>TCPE T_complex protein 1 subunit epsilon</b> | <b>0.994571556</b> | <b>1</b>      | <b>3</b>  |
| Q68FQ0        | HKLDVTSVEDYK                                    | 0.992615122        | 2             | 3.56082   |
| Q68FQ0        | ISDNVLVDINNPEPLIQTAK                            | 1.032176033        | 2             | 5.37216   |
| Q68FQ0        | WVGGPEIELIAIATGGR                               | 1.029740616        | 2             | 3.52353   |
| <b>Q68FR6</b> | <b>EF1G Elongation factor 1_gamma</b>           | <b>0.95177634</b>  | <b>4E-09</b>  | <b>6</b>  |
| Q68FR6        | AAAPAPEEEMDECEQALAAEPK                          | 1.095141908        | 2             | 5.32889   |
| Q68FR6        | ALIAAQYSGAQIR                                   | 1.198437277        | 2             | 3.82993   |
| Q68FR6        | GQDLAFPLSPDWQVDYESYTW                           | 1.628139309        | 2             | 3.98325   |
| Q68FR6        | KAAAPAPEEEMDECEQALAAEPK                         | 1.015370828        | 3             | 3.74121   |
| Q68FR6        | KLDPGSEETQLVR                                   | 0.91753571         | 2             | 4.24968   |
| Q68FR6        | LDPGSEETQLVR                                    | 1.305154147        | 2             | 3.32643   |
| <b>Q68FR9</b> | <b>EF1D Elongation factor 1_delta</b>           | <b>1.065160002</b> | <b>0.9983</b> | <b>6</b>  |
| Q68FR9        | ATAPQTQHVSPMR                                   | 0.90518227         | 2             | 3.25445   |
| Q68FR9        | FYEQMNGPVTAGSR                                  | 1.018212436        | 2             | 4.04438   |
| Q68FR9        | GVVQDLQQAISK                                    | 1.033700587        | 2             | 3.94137   |
| Q68FR9        | SIQLDGLVWGASK                                   | 1.033459845        | 2             | 3.06955   |
| Q68FR9        | SLAGSSGPGASSGPGGDHSDLIVR                        | 1.006359657        | 2             | 5.43173   |
| Q68FR9        | VGTDLLEEEITK                                    | 1.169584165        | 2             | 3.06004   |
| <b>Q68FS2</b> | <b>CSN4 COP9 signalosome complex subunit 4</b>  | <b>0.961966678</b> | <b>0.9985</b> | <b>2</b>  |
| Q68FS2        | NAAQVLVGIPILETGQK                               | 1.10039673         | 2             | 3.09318   |
| Q68FS2        | QDLAQLMNSSGSHK                                  | 0.958268866        | 2             | 2.85077   |
| <b>Q68FS4</b> | <b>AMPL Cytosol aminopeptidase</b>              | <b>1.074689969</b> | <b>0.014</b>  | <b>19</b> |
| Q68FS4        | ADMGGAATICSIVSAAK                               | 1.056177183        | 2             | 4.93695   |
| Q68FS4        | ADMGGAATICSIVSAAK+Oxidation(2)                  | 0.985122812        | 2             | 4.23116   |
| Q68FS4        | DKDDDVPQFTSAGENFNK                              | 1.081678986        | 2             | 4.221     |
| Q68FS4        | GITFDSGGISIK                                    | 0.991202666        | 2             | 2.78281   |
| Q68FS4        | GLVLGIYSK                                       | 1.017223476        | 1             | 2.07524   |
| Q68FS4        | GSEPPVFLEIHYTGSPNATEAPLVFVGK                    | 1.164978393        | 3             | 6.03729   |
| Q68FS4        | GVLFASGQNLAR                                    | 1.078324553        | 2             | 3.06796   |
| Q68FS4        | LFEASVETGDR                                     | 1.09273186         | 2             | 2.7428    |
| Q68FS4        | LHGSGDLEAWEK                                    | 1.074381579        | 2             | 2.80802   |
| Q68FS4        | LNLPINIIGLAPLCENMPGSK                           | 1.375399193        | 2             | 4.5735    |
| Q68FS4        | QLMESPANEMTPTR                                  | 0.995948384        | 2             | 3.88785   |
| Q68FS4        | QVIDCQLADVNNLKG                                 | 0.992269993        | 2             | 4.65348   |
| Q68FS4        | SAGACTAAAFRL                                    | 1.146261608        | 2             | 3.38734   |
| Q68FS4        | SAGVDDQENWHEGK                                  | 1.104464959        | 2             | 3.81368   |
| Q68FS4        | SAGVDDQENWHEGKENIR                              | 1.019529805        | 3             | 3.41094   |
| Q68FS4        | SWIEEQEMGSFLSVAK                                | 1.059474234        | 2             | 5.25653   |
| Q68FS4        | TFYGLHQDFPSVVVVGLGK                             | 1.146845458        | 2             | 4.16792   |
| Q68FS4        | TIQVDNTDAEGR                                    | 1.023275315        | 2             | 3.8174    |

|               |                                                                                       |                    |               |           |
|---------------|---------------------------------------------------------------------------------------|--------------------|---------------|-----------|
| Q68FS4        | TLIEFLLR                                                                              | 1.268057625        | 2             | 2.63057   |
| <b>Q68FT1</b> | <b>COQ9 Ubiquinone biosynthesis protein COQ9_mitochondrial</b>                        | <b>0.948246437</b> | <b>0.9198</b> | <b>3</b>  |
| Q68FT1        | LNHVLEEEQK                                                                            | 0.935654902        | 2             | 3.19416   |
| Q68FT1        | STGEALVQGLMGAAVTLK                                                                    | 0.9715715          | 2             | 3.25109   |
| Q68FT1        | YTDQSGEEEEEDYESEEQIQR                                                                 | 0.94888476         | 3             | 4.99451   |
| <b>Q68FT3</b> | <b>PYRD2 Pyridine nucleotide_disulfide oxidoreductase domain_containing protein 2</b> | <b>0.830450443</b> | <b>0.002</b>  | <b>6</b>  |
| Q68FT3        | ISQLDTQSPVTK                                                                          | 0.654055419        | 2             | 3.36576   |
| Q68FT3        | SLLLGTDVAENQK                                                                         | 0.685603539        | 2             | 3.49195   |
| Q68FT3        | TLGAQLPQYYEVLTAISK                                                                    | 0.574004254        | 2             | 3.9835    |
| Q68FT3        | VFDCIEAYAPGFK                                                                         | 0.870088827        | 2             | 2.46249   |
| Q68FT3        | VLDQWFSEPLK                                                                           | 0.862928953        | 2             | 3.10449   |
| Q68FT3        | VQGVVLQGGEEVR                                                                         | 0.576009952        | 2             | 3.37119   |
| <b>Q68FT5</b> | <b>BHMT2 Betaine_homocysteine S_methyltransferase 2</b>                               | <b>1.390386411</b> | <b>1E-19</b>  | <b>10</b> |
| Q68FT5        | AGANIIGVNCR                                                                           | 1.260039986        | 2             | 3.7503    |
| Q68FT5        | AGLWTPEAVVEYPSAVR                                                                     | 1.32995216         | 2             | 4.48058   |
| Q68FT5        | AIAEELAPER                                                                            | 1.613030998        | 2             | 3.70167   |
| Q68FT5        | DAGLQAHLMVQCLGFHTPDCGK                                                                | 1.184589567        | 3             | 4.23602   |
| Q68FT5        | EVGAPVAVTCIGPEGDMHGVTPGEC AVR                                                         | 1.166729409        | 3             | 3.51477   |
| Q68FT5        | FGPWTSLQTMK                                                                           | 1.194465354        | 2             | 2.38989   |
| Q68FT5        | GFLPPASEK                                                                             | 2.067699105        | 1             | 1.90661   |
| Q68FT5        | GGFVDLPEYPFGLPR                                                                       | 1.237751378        | 2             | 4.27889   |
| Q68FT5        | LDSGEVVVDGGFLFTLEK                                                                    | 1.20460441         | 2             | 2.94522   |
| Q68FT5        | YIGGCCGFEPYHIR                                                                        | 3.209213219        | 2             | 4.42087   |
| <b>Q68FT9</b> | <b>SCLY Selenocysteine lyase</b>                                                      | <b>0.715945658</b> | <b>1E-19</b>  | <b>4</b>  |
| Q68FT9        | AEVDLIVQDLK                                                                           | 0.714809228        | 2             | 3.6156    |
| Q68FT9        | CFHEQQTLOGR                                                                           | 0.785541702        | 2             | 2.59543   |
| Q68FT9        | RVDVEDLGVDLFTIVGHK                                                                    | 0.950710398        | 3             | 5.67652   |
| Q68FT9        | VLVHTDAAQALGK                                                                         | 0.806197043        | 2             | 2.85484   |
| <b>Q68FU3</b> | <b>ETFB Electron transfer flavoprotein subunit beta</b>                               | <b>0.9412602</b>   | <b>3E-09</b>  | <b>8</b>  |
| Q68FU3        | AGDLGVDLTSK                                                                           | 0.9447635          | 2             | 3.81668   |
| Q68FU3        | EIIAVSCGPPQCQETIR                                                                     | 0.896281764        | 2             | 4.80398   |
| Q68FU3        | GIHVEVPGAEAEENLGPLQVAR                                                                | 1.078830323        | 2             | 5.86638   |
| Q68FU3        | HSMNPFCEIAVEEAVR                                                                      | 1.13501555         | 2             | 4.73933   |
| Q68FU3        | HSMNPFCEIAVEEAVR+Oxidation(2)                                                         | 0.939749875        | 2             | 4.38278   |
| Q68FU3        | VDLLFLGK                                                                              | 1.007295285        | 2             | 2.80374   |
| Q68FU3        | VETTEDLVAK                                                                            | 0.84024181         | 2             | 3.27835   |
| Q68FU3        | VSVISVEEPPQR                                                                          | 0.962805026        | 2             | 3.44097   |
| <b>Q68FY0</b> | <b>QCR1 Cytochrome b_c1 complex subunit 1_mitochondrial</b>                           | <b>1.000573616</b> | <b>0.0001</b> | <b>11</b> |
| Q68FY0        | EMQENDASMQNVVFDYLHATAFQGTPLAQAVEGPSNVNR                                               | 1.323149616        | 3             | 4.4138    |
| Q68FY0        | EVESIGAHNLAYSTR                                                                       | 0.971732256        | 2             | 3.12697   |
| Q68FY0        | HQQLDLAQDHFSSVSQVVEEDAVPSITPCR                                                        | 1.078451746        | 3             | 5.21156   |
| Q68FY0        | IEEVDAQMVR                                                                            | 0.999519197        | 2             | 3.66264   |
| Q68FY0        | LCTSATESEVTR                                                                          | 1.293906858        | 2             | 2.98398   |
| Q68FY0        | NALISHLDGTTVPCEIDGR                                                                   | 0.98753382         | 2             | 4.193     |
| Q68FY0        | NNGAGYFLEHLAFK                                                                        | 1.173907031        | 2             | 3.48745   |
| Q68FY0        | RIPLAEWESR                                                                            | 1.102610897        | 2             | 2.59403   |
| Q68FY0        | TDLTDYLSR                                                                             | 0.985378858        | 2             | 2.65771   |
| Q68FY0        | VVELLADIVQNISLEDSQIEK                                                                 | 0.992575868        | 3             | 5.97771   |
| Q68FY0        | YFYDQCPAVAGYGPIEQLSYNR                                                                | 1.085805176        | 3             | 5.09761   |
| <b>Q68G31</b> | <b>PBLD Phenazine biosynthesis_like domain_containing protein</b>                     | <b>0.904235994</b> | <b>0.0363</b> | <b>7</b>  |
| Q68G31        | AAIGDTTVQDIQYSPDTR                                                                    | 0.80265949         | 2             | 4.44032   |
| Q68G31        | AEDGIVLDFPLYTPFPQDFHEVK                                                               | 0.906380481        | 3             | 3.64173   |
| Q68G31        | GESGGQTPYDFYSR                                                                        | 1.115706497        | 2             | 3.9154    |
| Q68G31        | LQPTDSFSQSSCFGLR                                                                      | 1.007646264        | 2             | 3.26736   |
| Q68G31        | NVNSTLTFVTLSGELK                                                                      | 0.909290468        | 2             | 3.97203   |
| Q68G31        | RAEDGIVLDFPLYTPFPQDFHEVK                                                              | 0.925130905        | 3             | 4.92885   |

|               |                                                                    |                    |               |          |
|---------------|--------------------------------------------------------------------|--------------------|---------------|----------|
| Q68G31        | VNTEPLPGIEK                                                        | 0.920085233        | 2             | 2.95572  |
| <b>Q69Z66</b> | <b>MYSM1 Histone H2A deubiquitinase MYSM1</b>                      | <b>0.91086155</b>  | <b>0.9739</b> | <b>3</b> |
| Q69Z66        | KYTNSLQK                                                           | 0.849454725        | 1             | 1.98369  |
| Q69Z66        | NSAELNEK                                                           | 1.030479643        | 1             | 1.95088  |
| Q69Z66        | QTKTPERYLK                                                         | 1.077082994        | 2             | 2.30858  |
| <b>Q6A000</b> | <b>K0753 Uncharacterized protein KIAA0753</b>                      | <b>1.027567632</b> | <b>0.5046</b> | <b>2</b> |
| Q6A000        | EIQEELDKLSPQK                                                      | 0.927668594        | 2             | 2.35546  |
| Q6A000        | ILGSETSARLGD SK                                                    | 1.044051987        | 2             | 2.55159  |
| <b>Q6A0A9</b> | <b>F120A Constitutive coactivator of PPAR_gamma_like protein 1</b> | <b>1.024628043</b> | <b>0.232</b>  | <b>2</b> |
| Q6A0A9        | SQGGVQPIPSQGGK                                                     | 1.245683918        | 2             | 2.66582  |
| Q6A0A9        | VEGSSTASSGSQLAEGK                                                  | 1.016132031        | 2             | 4.21785  |
| <b>Q6AXM8</b> | <b>PON2 Serum paraoxonase/arylesterase 2</b>                       | <b>0.835523221</b> | <b>0.4083</b> | <b>2</b> |
| Q6AXM8        | FQEEENSLHLK                                                        | 1.037668291        | 2             | 2.57851  |
| Q6AXM8        | LFVYDPNHPPSSEVLR                                                   | 0.835307774        | 2             | 2.30048  |
| <b>Q6AXS5</b> | <b>PAIRB Plasminogen activator inhibitor 1 RNA_binding protein</b> | <b>0.856181659</b> | <b>0.0021</b> | <b>2</b> |
| Q6AXS5        | FDQLFDDSDPFV LK                                                    | 0.834864488        | 2             | 4.72208  |
| Q6AXS5        | SAAQAAAQTNSNAAGK                                                   | 1.273885387        | 2             | 4.59404  |
| <b>Q6AXY0</b> | <b>GSTA6 Glutathione S_transferase A6</b>                          | <b>0.728486566</b> | <b>5E-07</b>  | <b>2</b> |
| Q6AXY0        | FLQPGSQR                                                           | 0.879194614        | 2             | 2.45229  |
| Q6AXY0        | YFPAFEK                                                            | 0.712287346        | 1             | 1.99458  |
| <b>Q6AY09</b> | <b>HNRH2 Heterogeneous nuclear ribonucleoprotein H2</b>            | <b>0.965338834</b> | <b>0.5268</b> | <b>3</b> |
| Q6AY09        | ATENDIYNFFSPLNPMR                                                  | 0.982765841        | 2             | 2.52228  |
| Q6AY09        | HTGPNSPDTANDGFVR                                                   | 0.983069701        | 2             | 4.61125  |
| Q6AY09        | STGEAFVQFASQEIAEK                                                  | 0.787408243        | 2             | 3.94314  |
| <b>Q6AY30</b> | <b>SCPDH Probable saccharopine dehydrogenase</b>                   | <b>0.886561712</b> | <b>0.0089</b> | <b>4</b> |
| Q6AY30        | ACIENGTS CIDIGEPQFLELMHVK                                          | 0.983854809        | 3             | 3.82857  |
| Q6AY30        | GVYIIGSSGFDSIPADLGVLYTR                                            | 1.225037681        | 2             | 3.90887  |
| Q6AY30        | LQQVLEK                                                            | 0.831434056        | 1             | 1.9821   |
| Q6AY30        | SVSNLKPVPVIGSK                                                     | 0.866506848        | 2             | 3.21064  |
| <b>Q6AY56</b> | <b>TBA8 Tubulin alpha_8 chain</b>                                  | <b>1.049963249</b> | <b>0.0195</b> | <b>7</b> |
| Q6AY56        | AVCMLSNTTAIAEAWAR                                                  | 0.969165818        | 2             | 4.09488  |
| Q6AY56        | FDGALNVDLTFEQTNLVPYPR                                              | 1.012089496        | 2             | 5.40133  |
| Q6AY56        | LISQIVSSITASLR                                                     | 1.111321161        | 2             | 3.31975  |
| Q6AY56        | NLDIERPTYTNLNR                                                     | 1.034903704        | 2             | 3.09734  |
| Q6AY56        | QLFHPEQLITGK                                                       | 1.041950635        | 2             | 2.35307  |
| Q6AY56        | TIQFVDWCPTGFK                                                      | 1.085011782        | 2             | 3.72154  |
| Q6AY56        | VGINYQPPTVVPGGDLAK                                                 | 0.972557605        | 2             | 4.90402  |
| <b>Q6AY80</b> | <b>NQO2 Ribosyldihydro nicotinamide dehydrogenase [quinone]</b>    | <b>1.18090495</b>  | <b>0.5686</b> | <b>2</b> |
| Q6AY80        | NDVTGALS NPEVFK                                                    | 0.997513935        | 2             | 3.46657  |
| Q6AY80        | VLAPQISFGPEVSSEQR                                                  | 1.387073181        | 2             | 3.7164   |
| <b>Q6AYG5</b> | <b>ECHD1 Enoyl_CoA hydratase domain_containing protein 1</b>       | <b>0.679000676</b> | <b>2E-05</b>  | <b>2</b> |
| Q6AYG5        | DVLETLWGGPANLEIAIK                                                 | 0.710431237        | 2             | 3.74149  |
| Q6AYG5        | ILEQFPGGSIDLQK                                                     | 0.686153696        | 2             | 3.06805  |
| <b>Q6AYQ8</b> | <b>FAHD1 Acylpyruvate FAHD1_mitochondrial</b>                      | <b>0.90605421</b>  | <b>0.0334</b> | <b>3</b> |
| Q6AYQ8        | IITLEEGDLILTGTPK                                                   | 0.896490019        | 2             | 3.71954  |
| Q6AYQ8        | NLHHEVELGVLLGR                                                     | 0.930707634        | 3             | 4.70335  |
| Q6AYQ8        | SFTSSCPVSAFVPK                                                     | 0.915957363        | 2             | 3.87519  |
| <b>Q6AYS8</b> | <b>DHB11 Estradiol 17_beta_dehydrogenase 11</b>                    | <b>0.989880049</b> | <b>0.1301</b> | <b>3</b> |
| Q6AYS8        | ALTDELAALGCTGVR                                                    | 0.920990298        | 2             | 3.5769   |
| Q6AYS8        | FDAVVGYK                                                           | 0.603640101        | 1             | 2.09792  |
| Q6AYS8        | SVAGEIVLITGAGHGIGR                                                 | 1.081267844        | 2             | 3.34668  |
| <b>Q6AYT9</b> | <b>ACSM5 Acyl_coenzyme A synthetase ACSM5_mitochondrial</b>        | <b>0.715046736</b> | <b>0.5338</b> | <b>2</b> |
| Q6AYT9        | ASPPYDVQIVDEEGNVLP PPGK                                            | 0.753578562        | 2             | 3.12929  |
| Q6AYT9        | NDDVINSSSYR                                                        | 0.680967143        | 2             | 3.37767  |
| <b>Q6AYZ1</b> | <b>TBA1C Tubulin alpha_1C chain</b>                                | <b>1.111498845</b> | <b>1E-19</b>  | <b>5</b> |
| Q6AYZ1        | AVFVDLEPTVIDEVR                                                    | 1.066856139        | 2             | 5.31807  |
| Q6AYZ1        | DVNAAIATIK                                                         | 1.036164501        | 2             | 3.21186  |



|               |                                                                 |                    |               |           |
|---------------|-----------------------------------------------------------------|--------------------|---------------|-----------|
| Q6AYZ1        | IHFPLATYAPVISA EK                                               | 1.032995721        | 2             | 3.04958   |
| Q6AYZ1        | TIGGGDDSFNTFFSETGAGK                                            | 1.250464547        | 2             | 5.43011   |
| Q6AYZ1        | VGINYQPPTVVPGGDLAR                                              | 1.206930248        | 2             | 4.59305   |
| <b>Q6DGG1</b> | <b>ABHEB Abhydrolase domain_containing protein 14B</b>          | <b>0.913868552</b> | <b>1E-09</b>  | <b>7</b>  |
| Q6DGG1        | AVAILPGLGR                                                      | 0.896767525        | 2             | 3.33265   |
| Q6DGG1        | FSSETWQNLGTLHR                                                  | 0.962342458        | 2             | 3.52961   |
| Q6DGG1        | FSVLLHGIR                                                       | 1.075711718        | 2             | 2.80667   |
| Q6DGG1        | GYVPVAPICTDK                                                    | 0.87533744         | 2             | 3.0102    |
| Q6DGG1        | INAADYAR                                                        | 0.96518196         | 2             | 2.37239   |
| Q6DGG1        | TPTLIVYGDQDPMGSSSFQHLK                                          | 1.182561165        | 3             | 5.22736   |
| Q6DGG1        | VLVMEGAGHPCYLDKPDWHTGLLDFLQELA                                  | 1.237128835        | 3             | 3.58092   |
| <b>Q6EDY6</b> | <b>LR16A Leucine_rich repeat_containing protein 16A</b>         | <b>1.048702696</b> | <b>0.3106</b> | <b>3</b>  |
| Q6EDY6        | ELMESIK+Oxidation(2)                                            | 1.068443924        | 1             | 1.95034   |
| Q6EDY6        | IENYLLR                                                         | 1.020521477        | 2             | 2.57294   |
| Q6EDY6        | SSDAHELGEDEKKK                                                  | 0.829332938        | 2             | 2.43231   |
| <b>Q6GQP4</b> | <b>RAB31 Ras_related protein Rab_31</b>                         | <b>1.063550261</b> | <b>0.7629</b> | <b>2</b>  |
| Q6GQP4        | CDLSDIREVPLK                                                    | 1.074854224        | 2             | 2.54403   |
| Q6GQP4        | CDLSDIREVPLKDAK                                                 | 0.901194189        | 2             | 2.63013   |
| <b>Q6IE52</b> | <b>MUG2 Murinoglobulin_2</b>                                    | <b>0.976063815</b> | <b>0.983</b>  | <b>15</b> |
| Q6IE52        | AHFSVMGDILSSAIK                                                 | 1.014703754        | 2             | 3.28282   |
| Q6IE52        | GDPIPNEQVFIK                                                    | 0.657917696        | 2             | 2.43829   |
| Q6IE52        | HGIPFFVK                                                        | 1.302510553        | 2             | 2.54525   |
| Q6IE52        | HTSSWLVTPK                                                      | 1.041344225        | 2             | 2.58389   |
| Q6IE52        | LPSSEEEESLDINIEGAK                                              | 1.12471078         | 2             | 4.96468   |
| Q6IE52        | MLIYTILPDGEVIADSVK                                              | 0.960673386        | 2             | 4.17554   |
| Q6IE52        | MLIYTILPDGEVIADSVK+Oxidation(0)                                 | 0.945855046        | 2             | 3.31502   |
| Q6IE52        | MLSGFIPLKPTVK+Oxidation(0)                                      | 0.879529541        | 2             | 2.5876    |
| Q6IE52        | NLYPLKELVQDPK                                                   | 0.869618817        | 1             | 1.91046   |
| Q6IE52        | QLSFSLSAEPHQGPYK                                                | 1.022327464        | 2             | 4.06407   |
| Q6IE52        | VKTVPLTCNNPK                                                    | 0.931346865        | 2             | 3.02871   |
| Q6IE52        | VLIVEPEGIKK                                                     | 0.880094814        | 2             | 2.40573   |
| Q6IE52        | VTASPSQLCGLR                                                    | 1.228468149        | 2             | 2.57167   |
| Q6IE52        | YMVVLVPSQLYTETPEK                                               | 1.082040061        | 2             | 3.81036   |
| Q6IE52        | YMVVLVPSQLYTETPEK+Oxidation(1)                                  | 0.997268102        | 2             | 3.26145   |
| <b>Q6IMF3</b> | <b>K2C1 Keratin_type II cytoskeletal 1</b>                      | <b>0.766709815</b> | <b>1E-14</b>  | <b>3</b>  |
| Q6IMF3        | TNAENEFVTIK                                                     | 1.102756208        | 2             | 2.50218   |
| Q6IMF3        | WELLQQVDTSTR                                                    | 0.792532394        | 2             | 3.49627   |
| Q6IMF3        | YEELQITAGK                                                      | 0.853448934        | 2             | 3.32366   |
| <b>Q6IRK9</b> | <b>PGCP Plasma glutamate carboxypeptidase</b>                   | <b>0.866734079</b> | <b>0.0637</b> | <b>2</b>  |
| Q6IRK9        | AIQIMYQNLQDGLENVHLEQVR                                          | 0.893806116        | 3             | 5.17048   |
| Q6IRK9        | TYPDTDSFNTVAEITGSK                                              | 0.865498826        | 2             | 4.38045   |
| <b>Q6MGB5</b> | <b>DHB8 Estradiol_17_beta_dehydrogenase 8</b>                   | <b>0.908649901</b> | <b>0.0216</b> | <b>3</b>  |
| Q6MGB5        | AGVIGLTQTAAR                                                    | 0.883044257        | 2             | 3.4823    |
| Q6MGB5        | GSIIINISSIVGK                                                   | 0.954452075        | 2             | 2.47966   |
| Q6MGB5        | SALALVTGAGSGIGR                                                 | 0.834087455        | 2             | 2.6422    |
| <b>Q6NYB7</b> | <b>RAB1A Ras_related protein Rab_1A</b>                         | <b>1.044447848</b> | <b>0.6709</b> | <b>4</b>  |
| Q6NYB7        | EFADSLGIPFLETSK                                                 | 0.966676778        | 2             | 3.45207   |
| Q6NYB7        | MGPATAGGAEK+Oxidation(0)                                        | 0.872946849        | 2             | 2.38115   |
| Q6NYB7        | NATNVEQSFMTMAAEIK                                               | 1.027397157        | 2             | 4.22324   |
| Q6NYB7        | RMGPATAGGAEKSNVK                                                | 1.200136812        | 2             | 2.50414   |
| <b>Q6NZJ6</b> | <b>IF4G1 Eukaryotic translation initiation factor 4 gamma 1</b> | <b>1.195681987</b> | <b>0.0043</b> | <b>7</b>  |
| Q6NZJ6        | GLPLVDDGGWNTVPISK                                               | 1.112939336        | 2             | 2.76246   |
| Q6NZJ6        | GSSGGSGAKPSDTASEATRPATLNR                                       | 1.074304856        | 3             | 3.36027   |
| Q6NZJ6        | IHNAENIQPGEQK                                                   | 1.005000991        | 2             | 4.33098   |
| Q6NZJ6        | ITKPGSIDSNNQLFAPGGR                                             | 1.265338695        | 3             | 3.56328   |
| Q6NZJ6        | LKEELEEAR                                                       | 1.247418953        | 2             | 2.53077   |
| Q6NZJ6        | QVTQLAIDTEER                                                    | 1.055520278        | 2             | 3.24107   |

|               |                                                                   |                    |               |           |
|---------------|-------------------------------------------------------------------|--------------------|---------------|-----------|
| Q6NZJ6        | TASTPTPPQTGGSLPQPNGESPQVAVIIRPDDR                                 | 0.982212357        | 3             | 4.13048   |
| <b>Q6P502</b> | <b>TCPG T_complex protein 1 subunit gamma</b>                     | <b>1.181691758</b> | <b>3E-15</b>  | <b>6</b>  |
| Q6P502        | AVAQALEVIPR                                                       | 1.01332864         | 2             | 2.51775   |
| Q6P502        | KGESQTDIEITR                                                      | 1.166949918        | 2             | 2.41945   |
| Q6P502        | NLQDAMQVCR                                                        | 1.188119332        | 2             | 2.9822    |
| Q6P502        | TAVETAVLLLR                                                       | 1.237741493        | 2             | 3.39825   |
| Q6P502        | TLIQNCGASTIR                                                      | 1.090727227        | 2             | 2.8703    |
| Q6P502        | WSSLACNIALDAVK                                                    | 1.197952386        | 2             | 3.49202   |
| <b>Q6P6R2</b> | <b>DLDH Dihydropolyl dehydrogenase_mitochondrial</b>              | <b>0.958924979</b> | <b>9E-13</b>  | <b>9</b>  |
| Q6P6R2        | IDVSVEAASGGK                                                      | 0.856510301        | 2             | 3.5843    |
| Q6P6R2        | ILGAHILPGAGEMVNEAALALEYGASCEDVAR                                  | 1.490133402        | 3             | 3.38248   |
| Q6P6R2        | NETLGGTCLNVGCIPSK                                                 | 0.883296594        | 2             | 5.13078   |
| Q6P6R2        | NQVTATTADGSTQVIGTK                                                | 0.897318515        | 2             | 5.75596   |
| Q6P6R2        | RPFTQNLGLEELGIELDPK                                               | 1.234090619        | 3             | 4.76678   |
| Q6P6R2        | SEEQLKEEGVEFK                                                     | 0.849406458        | 3             | 3.82415   |
| Q6P6R2        | TNADTDGMVK                                                        | 0.901201769        | 2             | 2.60184   |
| Q6P6R2        | TNADTDGMVK+Oxidation(7)                                           | 1.109779645        | 2             | 2.79798   |
| Q6P6R2        | VCHAHPTLSEAFR                                                     | 0.956009766        | 3             | 3.43788   |
| <b>Q6P6S9</b> | <b>ENTP5 Ectonucleoside triphosphate diphosphohydrolase 5</b>     | <b>0.857308266</b> | <b>0.0966</b> | <b>6</b>  |
| Q6P6S9        | AAETHLIDYEK                                                       | 1.057366809        | 2             | 2.33201   |
| Q6P6S9        | AQTLLEVEEIFK                                                      | 0.79438067         | 2             | 3.06565   |
| Q6P6S9        | GQETVGTLDLGGASTQITFLPQLEK                                         | 0.76923148         | 2             | 4.31555   |
| Q6P6S9        | QGAETVQELLEVAK                                                    | 0.868931688        | 2             | 3.17528   |
| Q6P6S9        | TSGQLPFLGEIFDSVKPGLSAFVDQPK                                       | 0.849496848        | 3             | 3.49878   |
| Q6P6S9        | WLEAEWIFGGVK                                                      | 0.745543848        | 2             | 2.481     |
| <b>Q6P6V0</b> | <b>G6PI Glucose_6_phosphate isomerase</b>                         | <b>1.073549412</b> | <b>3E-07</b>  | <b>7</b>  |
| Q6P6V0        | DVMPEVNVLDK+Oxidation(2)                                          | 0.905819394        | 2             | 2.71557   |
| Q6P6V0        | HFVALSTNTDK                                                       | 1.236434563        | 2             | 2.64157   |
| Q6P6V0        | KIEPELDGSSAVTSHDSSSTNGLIGFIK                                      | 1.062160637        | 3             | 5.27914   |
| Q6P6V0        | TFTTQETITNAETAK                                                   | 1.194656377        | 2             | 4.74233   |
| Q6P6V0        | TLANLNPESSLFIIASK                                                 | 1.140140126        | 3             | 4.63954   |
| Q6P6V0        | VFEGNRPTNSIVFTK                                                   | 1.04348943         | 2             | 2.97378   |
| Q6P6V0        | VWFVSNIDGTHIAK                                                    | 1.043971063        | 2             | 3.65567   |
| <b>Q6P7Q4</b> | <b>LGUL Lactoylglutathione lyase</b>                              | <b>1.064310214</b> | <b>0.8811</b> | <b>3</b>  |
| Q6P7Q4        | DFLLQQTMLR                                                        | 1.282086748        | 2             | 3.11342   |
| Q6P7Q4        | GLAFVQDPDGYWIEILNPKN                                              | 1.046650611        | 2             | 5.51717   |
| Q6P7Q4        | RFEELGVK                                                          | 1.096725482        | 2             | 2.49651   |
| <b>Q6P7R8</b> | <b>DHB12 Estradiol 17_beta_dehydrogenase 12</b>                   | <b>1.127253635</b> | <b>0.3099</b> | <b>2</b>  |
| Q6P7R8        | GIFVQSVLPFFVATK                                                   | 1.423423623        | 2             | 2.79988   |
| Q6P7R8        | LGEWAVVTGGTDGIGK                                                  | 1.130357747        | 2             | 3.53235   |
| <b>Q6P9T8</b> | <b>TBB2C Tubulin beta_2C chain</b>                                | <b>1.070789001</b> | <b>5E-08</b>  | <b>11</b> |
| Q6P9T8        | AVLVDLEPGTMDSVR                                                   | 1.080148853        | 2             | 3.05749   |
| Q6P9T8        | AVLVDLEPGTMDSVR+Oxidation(10)                                     | 1.063020873        | 2             | 3.90781   |
| Q6P9T8        | EAESCDCLQGFLTHSLGGGTGSGMGTLISK                                    | 1.079724375        | 3             | 5.46732   |
| Q6P9T8        | EIVHLQAGQCGNQIGAK                                                 | 0.93027656         | 2             | 5.06257   |
| Q6P9T8        | EVDEQMLNVQNK                                                      | 0.989607278        | 2             | 4.34698   |
| Q6P9T8        | FWEVISDEHGIDPTGYHGDSDLQLER                                        | 1.226804524        | 3             | 4.32235   |
| Q6P9T8        | INVYYNEATGGK                                                      | 1.209048948        | 2             | 3.07058   |
| Q6P9T8        | KEAESCDCLQGFLTHSLGGGTGSGMGTLISK                                   | 1.108361852        | 3             | 6.14839   |
| Q6P9T8        | MSATFIGNSTAIQELFK                                                 | 1.196071666        | 2             | 4.05878   |
| Q6P9T8        | TAVCDIPPR                                                         | 1.123322239        | 2             | 2.59536   |
| Q6P9T8        | YLTVAAVFR                                                         | 1.283989667        | 2             | 2.39762   |
| <b>Q6P9U8</b> | <b>EIF3H Eukaryotic translation initiation factor 3 subunit H</b> | <b>0.831439373</b> | <b>5E-07</b>  | <b>2</b>  |
| Q6P9U8        | ANITFEHMFEEVPIVIK                                                 | 0.986153699        | 3             | 3.43386   |
| Q6P9U8        | EGTGSTATSSSTGGAVGK                                                | 0.829619124        | 2             | 4.24961   |
| <b>Q6PA06</b> | <b>ATLA2 Atlantin_2</b>                                           | <b>1.135315035</b> | <b>0.1827</b> | <b>2</b>  |
| Q6PA06        | NLVPLLLAPENLVEK                                                   | 1.130988549        | 2             | 3.07585   |

|               |                                                                                    |                    |               |           |
|---------------|------------------------------------------------------------------------------------|--------------------|---------------|-----------|
| Q6PA06        | QNQHEELQNVR                                                                        | 1.144197826        | 2             | 2.74013   |
| <b>Q6PEC1</b> | <b>TBCA Tubulin_specific chaperone A</b>                                           | <b>1.5100007</b>   | <b>0.0771</b> | <b>3</b>  |
| Q6PEC1        | LEAAYTDLR                                                                          | 1.08847523         | 2             | 2.86263   |
| Q6PEC1        | QAEILQESR                                                                          | 1.25559387         | 2             | 2.84812   |
| Q6PEC1        | RLEAAYTDLR                                                                         | 1.092512652        | 2             | 2.36175   |
| <b>Q6PEC4</b> | <b>SKP1 S_phase kinase_associated protein 1</b>                                    | <b>0.91884852</b>  | <b>0.8941</b> | <b>4</b>  |
| Q6PEC4        | NDFTEEEAQVR                                                                        | 1.028383675        | 2             | 3.24999   |
| Q6PEC4        | RTDDIPVWDQEFK                                                                      | 0.876880078        | 2             | 2.37591   |
| Q6PEC4        | TDDIPVWDQEFK                                                                       | 1.027209922        | 2             | 2.53283   |
| Q6PEC4        | TVANMIKGTPEEIR+Oxidation(4)                                                        | 1.086325903        | 2             | 2.32726   |
| <b>Q6Q0N1</b> | <b>CNDP2 Cytosolic non_specific dipeptidase</b>                                    | <b>1.087829614</b> | <b>0.013</b>  | <b>4</b>  |
| Q6Q0N1        | EGGSIPVTLTFQEATGK                                                                  | 1.158729243        | 2             | 2.67347   |
| Q6Q0N1        | LGGSEVELDIGK                                                                       | 0.808052074        | 2             | 2.94109   |
| Q6Q0N1        | MTEAAAADVQR                                                                        | 1.095746216        | 2             | 2.57604   |
| Q6Q0N1        | TVFGVEPDLTR                                                                        | 1.00077791         | 2             | 2.46437   |
| <b>Q6TUG0</b> | <b>DJB11 DnaJ homolog subfamily B member 11</b>                                    | <b>1.275378916</b> | <b>2E-15</b>  | <b>4</b>  |
| Q6TUG0        | FQDLGAAAYEVLSDEK                                                                   | 1.241215482        | 2             | 4.79879   |
| Q6TUG0        | FQMTQEVVCDCEPNVK                                                                   | 1.438453427        | 2             | 4.66228   |
| Q6TUG0        | KGEGLPNFDNNDIK                                                                     | 1.217925183        | 2             | 2.88369   |
| Q6TUG0        | TLEVEIEPGVR                                                                        | 1.153397658        | 2             | 2.3814    |
| <b>Q6UPE1</b> | <b>ETFD Electron transfer flavoprotein_ubiquinone oxidoreductase_mitochondrial</b> | <b>0.925417448</b> | <b>7E-16</b>  | <b>13</b> |
| Q6UPE1        | AAQIGAHTLSGACLDPAAFK                                                               | 1.244000481        | 2             | 4.28078   |
| Q6UPE1        | ALNEGGLQSIK                                                                        | 0.974124986        | 2             | 3.16741   |
| Q6UPE1        | ASCDAAQTYGIGLK                                                                     | 1.010408062        | 2             | 3.47742   |
| Q6UPE1        | FCPAGVYEFVPLEQGDGFR                                                                | 0.867184679        | 2             | 4.81853   |
| Q6UPE1        | GAPLNTPTVEDR                                                                       | 0.947610209        | 2             | 3.38125   |
| Q6UPE1        | GIATNDVGIQK                                                                        | 0.904241536        | 2             | 3.19397   |
| Q6UPE1        | LQINAQNCVHCK                                                                       | 0.996610377        | 2             | 3.18893   |
| Q6UPE1        | NLSIYDGPEQR                                                                        | 0.917741009        | 2             | 3.0424    |
| Q6UPE1        | QLTSENLOSK                                                                         | 0.934934392        | 2             | 2.59144   |
| Q6UPE1        | SGSLAAEAIFK                                                                        | 0.898502837        | 2             | 3.3202    |
| Q6UPE1        | TAGLHVTEYEDNLK                                                                     | 0.765174709        | 2             | 3.14144   |
| Q6UPE1        | TCDIKDPSQINWVWVPEGGGGPAYNGM                                                        | 0.916278085        | 2             | 3.76191   |
| Q6UPE1        | VTIFAEGCHGLAK                                                                      | 0.757414815        | 2             | 3.18493   |
| <b>Q6URK4</b> | <b>ROA3 Heterogeneous nuclear ribonucleoprotein A3</b>                             | <b>0.936833423</b> | <b>6E-11</b>  | <b>7</b>  |
| Q6URK4        | EDSVKPGAHLTVK                                                                      | 0.716967206        | 2             | 3.45955   |
| Q6URK4        | GFAFVTFDDHDTVDK                                                                    | 1.001141281        | 2             | 3.8424    |
| Q6URK4        | IETIEVMEDR                                                                         | 0.9391752          | 2             | 3.40297   |
| Q6URK4        | IFVGGIKEDTEENLR                                                                    | 1.242104664        | 3             | 3.36361   |
| Q6URK4        | SSGSPYGGGYGSGGGGGYGSR                                                              | 1.044665217        | 2             | 5.10676   |
| Q6URK4        | WGTLTDCVVMR                                                                        | 0.866153448        | 2             | 2.9328    |
| Q6URK4        | YHTINGHNCEVK                                                                       | 1.476049648        | 2             | 3.54013   |
| <b>Q6URW6</b> | <b>MYH14 Myosin_14</b>                                                             | <b>0.972661175</b> | <b>0.9843</b> | <b>4</b>  |
| Q6URW6        | EDQSILCTGESGAGK                                                                    | 0.960146475        | 2             | 3.94093   |
| Q6URW6        | FDQLLAEEK                                                                          | 0.964677832        | 2             | 2.51015   |
| Q6URW6        | KFDQLLAEEK                                                                         | 1.038092639        | 2             | 2.8865    |
| Q6URW6        | QLLQANPILEAFGNAK                                                                   | 0.959228439        | 2             | 4.355     |
| <b>Q6VGS5</b> | <b>DAPLE Protein Daple</b>                                                         | <b>1.119437591</b> | <b>0.4748</b> | <b>2</b>  |
| Q6VGS5        | ELKTSLNNSQLELSR                                                                    | 1.138083089        | 2             | 2.30233   |
| Q6VGS5        | YGELEKENQQLSKK                                                                     | 1.023467252        | 2             | 2.32462   |
| <b>Q6XQN1</b> | <b>PNCB Nicotinate phosphoribosyltransferase</b>                                   | <b>0.813702023</b> | <b>0.992</b>  | <b>4</b>  |
| Q6XQN1        | GSEVNVIGITNVVTCPK                                                                  | 0.778890154        | 2             | 4.09035   |
| Q6XQN1        | LDSGDLQQAQK                                                                        | 0.922965811        | 2             | 2.7833    |
| Q6XQN1        | LYLQQGQPYEPLPSLEESR                                                                | 0.844631229        | 2             | 4.5337    |
| Q6XQN1        | QLQNPVAVYQVALSEK                                                                   | 0.823298591        | 2             | 3.48442   |
| <b>Q6ZPF3</b> | <b>TIAM2 T_lymphoma invasion and metastasis_inducing protein 2</b>                 | <b>1.103353584</b> | <b>0.3074</b> | <b>2</b>  |

|               |                                                                                               |                    |               |          |
|---------------|-----------------------------------------------------------------------------------------------|--------------------|---------------|----------|
| Q6ZPF3        | KMAELQLSVVSDPK+Oxidation(1)                                                                   | 1.255640666        | 2             | 2.30212  |
| Q6ZPF3        | STLEKDAQEGLAEFPDGLIK                                                                          | 1.100963905        | 2             | 2.40852  |
| <b>Q6ZPJ3</b> | <b>UBE2O Ubiquitin_conjugating enzyme E2 O</b>                                                | <b>1.086124544</b> | <b>0.7381</b> | <b>3</b> |
| Q6ZPJ3        | FLDDIKKLQENLK                                                                                 | 1.029897179        | 2             | 2.38437  |
| Q6ZPJ3        | FRTTIVIR                                                                                      | 0.95792019         | 2             | 2.3268   |
| Q6ZPJ3        | NCAQGEQSMKVK                                                                                  | 1.110137745        | 2             | 2.48007  |
| <b>Q70FJ1</b> | <b>AKAP9 A_kinase anchor protein 9</b>                                                        | <b>1.032720159</b> | <b>0.9357</b> | <b>2</b> |
| Q70FJ1        | LMKEKLEVQCQAEK+Oxidation(1)                                                                   | 1.03273458         | 2             | 2.50939  |
| Q70FJ1        | QRNTFAFAEK                                                                                    | 0.985582782        | 1             | 1.95215  |
| <b>Q711G3</b> | <b>IAH1 Isoamyl acetate_hydrolyzing esterase 1 homolog</b>                                    | <b>1.018225797</b> | <b>0.1056</b> | <b>4</b> |
| Q711G3        | DCGTDVLDLWTLMQK                                                                               | 1.152204885        | 2             | 3.88     |
| Q711G3        | DVEETKPELSLLGDGDH                                                                             | 1.047650209        | 2             | 3.43247  |
| Q711G3        | QHVPLDEYSANLR                                                                                 | 0.840822262        | 2             | 2.58597  |
| Q711G3        | VILITPPPLCEAAWEK                                                                              | 0.936743803        | 2             | 2.63391  |
| <b>Q71LX4</b> | <b>TLN2 Talin_2</b>                                                                           | <b>0.997542993</b> | <b>0.8389</b> | <b>2</b> |
| Q71LX4        | QEDVIATANLSR                                                                                  | 1.109767104        | 2             | 2.95065  |
| Q71LX4        | QVAASTAQLLVACK                                                                                | 0.997471267        | 2             | 3.02824  |
| <b>Q75N33</b> | <b>SC16B Protein transport protein Sec16B</b>                                                 | <b>1.272660673</b> | <b>0.0398</b> | <b>2</b> |
| Q75N33        | EALEWAMK                                                                                      | 2.349134844        | 1             | 1.94777  |
| Q75N33        | NLLTGEIPLNVDTPAQIVEK                                                                          | 0.942233742        | 2             | 4.31105  |
| <b>Q75Q39</b> | <b>TOM70 Mitochondrial import receptor subunit TOM70</b>                                      | <b>1.029806354</b> | <b>0.1282</b> | <b>2</b> |
| Q75Q39        | NADLSTFYQNR                                                                                   | 1.052141027        | 2             | 2.57928  |
| Q75Q39        | SDEKDKKEGEALVK                                                                                | 0.790628869        | 2             | 3.68577  |
| <b>Q75WE7</b> | <b>VWASA von Willebrand factor A domain_containing protein 5A</b>                             | <b>1.182850251</b> | <b>0.0172</b> | <b>2</b> |
| Q75WE7        | LDADLGGTEILTPLR                                                                               | 1.296878786        | 2             | 2.44487  |
| Q75WE7        | YVQELPLESDGALR                                                                                | 0.565240467        | 2             | 2.8958   |
| <b>Q76MZ3</b> | <b>2AAA Serine/threonine_protein phosphatase 2A 65 kDa regulatory subunit A alpha isoform</b> | <b>1.202183397</b> | <b>4E-06</b>  | <b>8</b> |
| Q76MZ3        | AISHEHSPDLEAHFVPLVK                                                                           | 0.990733746        | 3             | 4.43382  |
| Q76MZ3        | DNTIEHLLPLFLAQLK                                                                              | 1.090472353        | 3             | 3.6036   |
| Q76MZ3        | DNTIEHLLPLFLAQLKDECEVPR                                                                       | 0.972382604        | 3             | 3.86212  |
| Q76MZ3        | IGPILDNSTLQSEVKPILEK                                                                          | 1.009249051        | 2             | 4.53703  |
| Q76MZ3        | LTQDQDQDVK                                                                                    | 0.623077141        | 2             | 2.6221   |
| Q76MZ3        | QLSQSLLPAIVELAEDAK                                                                            | 0.876487983        | 2             | 3.68184  |
| Q76MZ3        | SALASVIMGLSPILGK                                                                              | 0.936903578        | 2             | 3.25298  |
| Q76MZ3        | SEIIPMFSNLASDEQDSVR                                                                           | 0.574040507        | 2             | 3.54472  |
| <b>Q791V5</b> | <b>MTCH2 Mitochondrial carrier homolog 2</b>                                                  | <b>0.978533779</b> | <b>0.0002</b> | <b>5</b> |
| Q791V5        | EEGIVGFFAGLIPR                                                                                | 1.491002242        | 2             | 3.86593  |
| Q791V5        | GLFTGLTPR                                                                                     | 0.930355586        | 2             | 2.36367  |
| Q791V5        | SAATLITHPFHVITLR                                                                              | 1.14336661         | 3             | 3.53502  |
| Q791V5        | VLIQVGYEPLPPTIGR                                                                              | 0.987486482        | 2             | 4.15637  |
| Q791V5        | YCGLCDSIVTIYR                                                                                 | 1.167285576        | 2             | 3.03486  |
| <b>Q794E4</b> | <b>HNRPF Heterogeneous nuclear ribonucleoprotein F</b>                                        | <b>0.917229968</b> | <b>0.604</b>  | <b>3</b> |
| Q794E4        | ATENDIYNFFSPLNPVR                                                                             | 1.046004847        | 3             | 4.33331  |
| Q794E4        | HSGPNSADSANDGFVR                                                                              | 0.913284499        | 2             | 3.96095  |
| Q794E4        | VHIEIGPDGR                                                                                    | 0.911040026        | 2             | 3.11919  |
| <b>Q7TMA5</b> | <b>APOB Apolipoprotein B_100</b>                                                              | <b>0.743416269</b> | <b>0.0006</b> | <b>6</b> |
| Q7TMA5        | GFEPTLEALFGK                                                                                  | 0.822192211        | 2             | 2.87498  |
| Q7TMA5        | IEGNLVDFPSSYLK                                                                                | 0.746265968        | 2             | 3.16996  |
| Q7TMA5        | IEIDIPLPLGGK                                                                                  | 0.733685422        | 2             | 2.92328  |
| Q7TMA5        | ITDNDVLIALDSAK                                                                                | 1.03742751         | 2             | 3.13813  |
| Q7TMA5        | KGTVATEMSTER                                                                                  | 0.392438662        | 2             | 2.70431  |
| Q7TMA5        | TILFDTFVNDVAPVEK                                                                              | 0.937236081        | 2             | 3.30712  |
| <b>Q7TNG8</b> | <b>LDHD Probable D_lactate dehydrogenase_mitochondrial</b>                                    | <b>1.089113307</b> | <b>0.8344</b> | <b>3</b> |
| Q7TNG8        | AVVGSPhVSTASAVR                                                                               | 1.092462384        | 2             | 2.95506  |
| Q7TNG8        | AYSTDVCPISR                                                                                   | 1.080229741        | 2             | 3.09192  |
| Q7TNG8        | GSQGLSQDFVEALK                                                                                | 0.982949295        | 2             | 3.50235  |

|               |                                                           |                    |               |           |
|---------------|-----------------------------------------------------------|--------------------|---------------|-----------|
| <b>Q7TP47</b> | <b>HNRPQ Heterogeneous nuclear ribonucleoprotein Q</b>    | <b>1.020441645</b> | <b>0.3238</b> | <b>2</b>  |
| Q7TP47        | DLFEDELVPLFEK                                             | 1.223309577        | 2             | 3.20802   |
| Q7TP47        | NLANTVTEEILEK                                             | 1.017673267        | 2             | 3.66182   |
| <b>Q7TP48</b> | <b>APMAP Adipocyte plasma membrane-associated protein</b> | <b>0.998463206</b> | <b>0.0142</b> | <b>4</b>  |
| Q7TP48        | GLFEVNPQK                                                 | 0.945857487        | 1             | 2.12339   |
| Q7TP48        | LENGEIETIAR                                               | 0.943144085        | 2             | 3.02794   |
| Q7TP48        | LLEYDTVTK                                                 | 1.009022522        | 2             | 2.41379   |
| Q7TP48        | LLSSETPIEGK                                               | 1.284914917        | 2             | 2.85483   |
| <b>Q7TP52</b> | <b>CMBL Carboxymethylenebutenolidase homolog</b>          | <b>0.921533884</b> | <b>0.0239</b> | <b>7</b>  |
| Q7TP52        | AGVSVYGIIR                                                | 0.843406607        | 2             | 2.59197   |
| Q7TP52        | EDCSPADKPYIEEAR                                           | 0.901628092        | 2             | 3.28361   |
| Q7TP52        | KREDCSPADKPYIEEAR                                         | 0.859223903        | 3             | 4.44815   |
| Q7TP52        | LDYGGMGQEVQVEHIK                                          | 0.969992855        | 2             | 4.53714   |
| Q7TP52        | LKEHCIVNYQVK                                              | 1.239147016        | 2             | 3.53243   |
| Q7TP52        | NLIEWLNK                                                  | 0.894165075        | 1             | 2.51928   |
| Q7TP52        | TFSGQTHGFVHR                                              | 0.929956412        | 2             | 3.38756   |
| <b>Q7TPB1</b> | <b>TCPD T-complex protein 1 subunit delta</b>             | <b>1.039313188</b> | <b>0.9515</b> | <b>6</b>  |
| Q7TPB1        | AFADAMEVIPSTLAENAGLNPISTVTELR                             | 1.018128382        | 3             | 3.38423   |
| Q7TPB1        | ALIAGGGAPEIELALR                                          | 1.152101364        | 2             | 3.54671   |
| Q7TPB1        | ETLLNSATTSLSNK                                            | 1.095407393        | 2             | 3.43297   |
| Q7TPB1        | GDVTITNDGATILK                                            | 1.04544578         | 2             | 3.44556   |
| Q7TPB1        | GIHPTIISESFQK                                             | 0.974493129        | 2             | 2.38466   |
| Q7TPB1        | VIDPATATSVDLR                                             | 1.010302056        | 2             | 3.34163   |
| <b>Q7TPJ0</b> | <b>SSRA Translocon-associated protein subunit alpha</b>   | <b>1.051033399</b> | <b>3E-10</b>  | <b>2</b>  |
| Q7TPJ0        | GEDFPANNIVK                                               | 1.193509768        | 2             | 2.73709   |
| Q7TPJ0        | GTEDFIVESLDASFR                                           | 1.02480153         | 2             | 4.33216   |
| <b>Q7TQM4</b> | <b>SOAT2 Sterol O-acyltransferase 2</b>                   | <b>0.939456057</b> | <b>0.7765</b> | <b>3</b>  |
| Q7TQM4        | AIWEAVQAYPK                                               | 0.892953167        | 2             | 2.33615   |
| Q7TQM4        | QDRPLPSTASDSTR                                            | 0.945211972        | 2             | 3.14916   |
| Q7TQM4        | TQCLEQAQR                                                 | 0.576141876        | 2             | 2.62961   |
| <b>Q7TSI0</b> | <b>ZNF12 Zinc finger protein 12</b>                       | <b>0.398838936</b> | <b>0.2984</b> | <b>2</b>  |
| Q7TSI0        | HMSRLMEEDQGGEEQSSSAVFSYR+Oxidation(1)                     | 0.398838936        | 3             | 3.57211   |
| Q7TSI0        | HMSRLMEEDQGGEEQSSSAVFSYR+Oxidation(5)                     | 0.398838936        | 3             | 3.56228   |
| <b>Q80W21</b> | <b>GSTM7 Glutathione S-transferase Mu 7</b>               | <b>0.985703973</b> | <b>0.0419</b> | <b>10</b> |
| Q80W21        | CLDAFPNLK                                                 | 0.977641925        | 2             | 3.14887   |
| Q80W21        | CLDAFPNLKDFIAR                                            | 1.045493747        | 2             | 3.2526    |
| Q80W21        | FKLGLDFPNLPYLIDGSHK                                       | 0.993864969        | 3             | 3.79427   |
| Q80W21        | HNLCGETEER                                                | 1.190068089        | 2             | 3.99777   |
| Q80W21        | ITQSNAILR                                                 | 1.118232937        | 2             | 3.11647   |
| Q80W21        | KHNLCGETEER                                               | 0.821657185        | 3             | 4.13091   |
| Q80W21        | LFLEYTDSSYEK                                              | 1.055298352        | 2             | 3.74244   |
| Q80W21        | LGLDFPNLPYLIDGSHK                                         | 1.098522385        | 3             | 4.35242   |
| Q80W21        | LYSEFLGK                                                  | 0.997027649        | 1             | 2.4295    |
| Q80W21        | VDILENQLMDNR                                              | 0.96434596         | 2             | 3.50387   |
| <b>Q80W93</b> | <b>HYDIN Hydrocephalus-inducing protein</b>               | <b>2.082735038</b> | <b>0.0003</b> | <b>2</b>  |
| Q80W93        | FIVPVKAR                                                  | 1.063185912        | 2             | 2.42765   |
| Q80W93        | LAKEMQEK                                                  | 2.349134844        | 1             | 2.03376   |
| <b>Q80WE4</b> | <b>KI20B Kinesin-like protein KIF20B</b>                  | <b>0.980863713</b> | <b>0.939</b>  | <b>2</b>  |
| Q80WE4        | ELLDLIEK                                                  | 0.933339111        | 1             | 2.11198   |
| Q80WE4        | LNTGTMDLVLTR+Oxidation(5)                                 | 0.982256142        | 2             | 2.60278   |
| <b>Q80WP8</b> | <b>GADL1 Glutamate decarboxylase-like protein 1</b>       | <b>1.026579934</b> | <b>0.0301</b> | <b>3</b>  |
| Q80WP8        | ADSVAWNPHK                                                | 1.029240156        | 2             | 2.70277   |
| Q80WP8        | MLMAGIQCSALLVK+Oxidation(0)                               | 0.878252259        | 2             | 2.42859   |
| Q80WP8        | MMKKGSLMLGYQPHR                                           | 1.379790451        | 2             | 2.49322   |
| <b>Q80X90</b> | <b>FLNB Filamin B</b>                                     | <b>0.993093232</b> | <b>0.9935</b> | <b>6</b>  |
| Q80X90        | GAGIGGLGITVEGPSEK                                         | 1.101465449        | 2             | 3.66237   |
| Q80X90        | GEAGIPAEFSIWTR                                            | 0.994342           | 2             | 2.58823   |

|               |                                                              |                    |               |           |
|---------------|--------------------------------------------------------------|--------------------|---------------|-----------|
| Q80X90        | IGNLQTDLSDGRL                                                | 1.031491563        | 2             | 3.2046    |
| Q80X90        | VDIQTEDLEDGTCK                                               | 1.101115569        | 2             | 3.5142    |
| Q80X90        | VGEPGILCVDCSEAGPGTLGLEAVSDSGAK                               | 1.042216703        | 2             | 4.96507   |
| Q80X90        | VTASGPGLSAYGVPASLPVEFAIDAR                                   | 0.965982776        | 2             | 4.23913   |
| <b>Q80Y84</b> | <b>KDM5B Lysine_specific demethylase 5B</b>                  | <b>0.926501378</b> | <b>0.1831</b> | <b>2</b>  |
| Q80Y84        | CDIGLLGLK                                                    | 0.870465998        | 2             | 2.56829   |
| Q80Y84        | YRYTLDDLYPMMNALK+Oxidation(10)                               | 1.107896957        | 2             | 2.30415   |
| <b>Q80Z25</b> | <b>OFD1 Oral_facial_digital syndrome 1 protein homolog</b>   | <b>1.129003014</b> | <b>0.3451</b> | <b>2</b>  |
| Q80Z25        | MIEESLK+Oxidation(0)                                         | 1.08589837         | 2             | 2.36906   |
| Q80Z25        | RMIEESLK+Oxidation(1)                                        | 1.131891301        | 2             | 2.31251   |
| <b>Q80Z29</b> | <b>NAMPT Nicotinamide phosphoribosyltransferase</b>          | <b>0.988340078</b> | <b>0.7333</b> | <b>4</b>  |
| Q80Z29        | STEAPLIIRPDSGNPLDVLK                                         | 1.071709323        | 2             | 3.69175   |
| Q80Z29        | TPAGTFVTLEEGGDLEEYGHDLHTVFK                                  | 1.395976854        | 5             | 4.81294   |
| Q80Z29        | VIQGDGVDINTLQIEVEGMK                                         | 0.990422713        | 2             | 4.50637   |
| Q80Z29        | YLLETSGNLDGLEYK                                              | 1.112773159        | 2             | 3.90361   |
| <b>Q811X6</b> | <b>CRYL1 Lambda_crystallin homolog</b>                       | <b>1.083666504</b> | <b>0.1384</b> | <b>2</b>  |
| Q811X6        | LYDIEQQITNALESIR                                             | 0.977155465        | 2             | 3.16924   |
| Q811X6        | TFGPVPEFSGDTVEK                                              | 1.165392687        | 2             | 3.10729   |
| <b>Q8BFZ3</b> | <b>ACTBL Beta_actin_like protein 2</b>                       | <b>1.016418897</b> | <b>0.0044</b> | <b>9</b>  |
| Q8BFZ3        | CDVDIR                                                       | 0.997736835        | 2             | 2.38123   |
| Q8BFZ3        | HQGVMMVGMGQK                                                 | 0.860657205        | 2             | 3.21497   |
| Q8BFZ3        | HQGVMMVGMGQK+Oxidation(4)                                    | 0.975435533        | 3             | 3.49903   |
| Q8BFZ3        | HQGVMMVGMGQK+Oxidation(4)                                    | 1.115299383        | 3             | 3.93826   |
| Q8BFZ3        | HQGVMMVGMGQK+Oxidation(7)                                    | 0.961193906        | 3             | 3.31415   |
| Q8BFZ3        | SYELPDGQVITIGNER                                             | 1.032277715        | 2             | 5.05147   |
| Q8BFZ3        | TTGIVMDSGDGVTHTVPIYEGYALPHAILR                               | 1.124003961        | 3             | 6.45518   |
| Q8BFZ3        | TTGIVMDSGDGVTHTVPIYEGYALPHAILR+Oxidation(5)                  | 1.121803125        | 3             | 5.97459   |
| Q8BFZ3        | VAPDEHPILLTEAPLNPK                                           | 1.023945632        | 3             | 4.2765    |
| <b>Q8BG32</b> | <b>PSD11 26S proteasome non_ATPase regulatory subunit 11</b> | <b>0.926208782</b> | <b>0.2777</b> | <b>3</b>  |
| Q8BG32        | LYDNLLEQNLIIR                                                | 0.925906798        | 2             | 3.63311   |
| Q8BG32        | TTANAIYCPPK                                                  | 0.989347659        | 2             | 3.1405    |
| Q8BG32        | VQIEHISSLIK                                                  | 0.765747881        | 2             | 2.79455   |
| <b>Q8BGT6</b> | <b>MILK1 MICAL_like protein 1</b>                            | <b>0.946352666</b> | <b>0.8084</b> | <b>2</b>  |
| Q8BGT6        | EEEEEDKMLETMIKK                                              | 0.946174828        | 2             | 2.33937   |
| Q8BGT6        | KDPPWITLVQTEPKK                                              | 0.950963616        | 2             | 2.34766   |
| <b>Q8BGY2</b> | <b>IF5A2 Eukaryotic translation initiation factor 5A_2</b>   | <b>1.066282581</b> | <b>0.1601</b> | <b>5</b>  |
| Q8BGY2        | IVEMSTSK+Oxidation(3)                                        | 0.536014942        | 2             | 2.31006   |
| Q8BGY2        | KYEDICPSTHNMDVPNIK                                           | 1.131924773        | 3             | 4.16038   |
| Q8BGY2        | KYEDICPSTHNMDVPNIK+Oxidation(11)                             | 1.103504131        | 3             | 3.41157   |
| Q8BGY2        | VHLVGIDIFTGK                                                 | 1.096659082        | 2             | 3.40269   |
| Q8BGY2        | YEDICPSTHNMDVPNIK                                            | 1.033216917        | 2             | 3.76037   |
| <b>Q8BH00</b> | <b>AL8A1 Aldehyde dehydrogenase family 8 member A1</b>       | <b>1.045750726</b> | <b>1E-19</b>  | <b>10</b> |
| Q8BH00        | DSYDFFTEIK                                                   | 0.64024285         | 2             | 2.33492   |
| Q8BH00        | ELLMLENFIGGK                                                 | 0.826930009        | 2             | 3.53648   |
| Q8BH00        | ELNLPGGGMK                                                   | 0.862364166        | 1             | 2.29164   |
| Q8BH00        | FLPCNSYIDSYDPSTGEVYCK                                        | 1.101945808        | 2             | 5.06076   |
| Q8BH00        | ILCGEGVDQLSLPLR                                              | 1.180992476        | 3             | 4.14802   |
| Q8BH00        | ITQLSAPHCK                                                   | 1.314617325        | 2             | 2.81505   |
| Q8BH00        | KLSLELGGK                                                    | 0.936707801        | 2             | 2.3087    |
| Q8BH00        | NPAIIFEDANLEECIPATVR                                         | 1.054795049        | 3             | 4.40374   |
| Q8BH00        | NQAGYFMLPTVITDIK                                             | 1.374739478        | 2             | 3.43048   |
| Q8BH00        | SSFANQGEICLCTSR                                              | 2.672094351        | 2             | 3.86517   |
| <b>Q8BHN3</b> | <b>GANAB Neutral alpha_glucosidase AB</b>                    | <b>1.106621436</b> | <b>0.8843</b> | <b>8</b>  |
| Q8BHN3        | AEKDEPGAWEEFK                                                | 1.009017374        | 2             | 2.91662   |
| Q8BHN3        | DDNSVELTVAEGPYK                                              | 1.073647496        | 2             | 3.22897   |
| Q8BHN3        | MLDYLQGSGETPQTDIR                                            | 1.064332065        | 2             | 4.77361   |
| Q8BHN3        | MLDYLQGSGETPQTDIR+Oxidation(0)                               | 1.025600713        | 2             | 5.25516   |

|               |                                                                      |                    |               |          |
|---------------|----------------------------------------------------------------------|--------------------|---------------|----------|
| Q8BHN3        | REPWLLASQYQDAIR                                                      | 1.043878224        | 3             | 3.60171  |
| Q8BHN3        | SGGIERPFVLSR                                                         | 1.106648988        | 2             | 2.35822  |
| Q8BHN3        | SIRPGLSPYR                                                           | 0.795639839        | 2             | 2.37334  |
| Q8BHN3        | THSDSKPYGPTSVGLDFSLPGMEHVYGIPEHADSLR                                 | 1.043879234        | 5             | 4.58978  |
| <b>Q8BIJ6</b> | <b>SYIM Isoleucyl_tRNA synthetase_mitochondrial</b>                  | <b>0.924739934</b> | <b>0.6876</b> | <b>2</b> |
| Q8BIJ6        | DTVLLPQTSFPMK                                                        | 1.24431045         | 1             | 2.17718  |
| Q8BIJ6        | SCQTALAEILDVLR                                                       | 0.912635043        | 2             | 3.90387  |
| <b>Q8BJ64</b> | <b>CHDH Choline dehydrogenase_mitochondrial</b>                      | <b>1.001459137</b> | <b>0.7095</b> | <b>7</b> |
| Q8BJ64        | ADSAYHPSCTCK                                                         | 2.047669343        | 2             | 3.33855  |
| Q8BJ64        | AEVQTLVSR                                                            | 1.016008471        | 2             | 2.46131  |
| Q8BJ64        | ELQPGSHVQSDKEIDAFVR                                                  | 0.954107663        | 2             | 4.10009  |
| Q8BJ64        | GGDGPLHVSR                                                           | 1.011661645        | 2             | 2.43899  |
| Q8BJ64        | SRPGVPHPIQFHFLPSQVIDHGR                                              | 0.94445171         | 5             | 4.99109  |
| Q8BJ64        | TNHPLHQAFQAAR                                                        | 1.1336676          | 3             | 4.02171  |
| Q8BJ64        | VLLLEAGPK                                                            | 0.959155769        | 2             | 2.64987  |
| <b>Q8BK64</b> | <b>AHSA1 Activator of 90 kDa heat shock protein ATPase homolog 1</b> | <b>1.278544415</b> | <b>0.126</b>  | <b>2</b> |
| Q8BK64        | ADATNVNWHWTER                                                        | 1.046821504        | 2             | 2.87722  |
| Q8BK64        | LDGEASINNR                                                           | 1.308160715        | 2             | 2.63895  |
| <b>Q8BL97</b> | <b>SRSF7 Serine/arginine_rich splicing factor 7</b>                  | <b>1.134609532</b> | <b>0.0552</b> | <b>2</b> |
| Q8BL97        | NPPGFAFVEFEDPR                                                       | 1.065514111        | 2             | 2.49188  |
| Q8BL97        | VYVGNLGTGAGK                                                         | 1.135206768        | 2             | 2.8021   |
| <b>Q8BMJ2</b> | <b>SYLC Leucyl_tRNA synthetase_cytoplasmic</b>                       | <b>0.908433501</b> | <b>0.665</b>  | <b>2</b> |
| Q8BMJ2        | SFITTDVNPYYDSFVR                                                     | 0.924416046        | 2             | 3.41427  |
| Q8BMJ2        | STGNFLTSQAQVVK                                                       | 0.769170838        | 2             | 2.60738  |
| <b>Q8BP47</b> | <b>SYNC Asparaginy_tRNA synthetase_cytoplasmic</b>                   | <b>0.836182436</b> | <b>0.0003</b> | <b>2</b> |
| Q8BP47        | KEDGTFYEFDDIPEAPER                                                   | 1.617650211        | 2             | 4.32333  |
| Q8BP47        | LTESVDVLMPNVGEIVGGSMR                                                | 0.756358486        | 2             | 2.62214  |
| <b>Q8BQ33</b> | <b>TICRR Treslin</b>                                                 | <b>0.975943732</b> | <b>0.9897</b> | <b>2</b> |
| Q8BQ33        | MNTMSRSLK+Oxidation(0)                                               | 1.020908932        | 1             | 2.23968  |
| Q8BQ33        | QKMNTMSRSLK+Oxidation(2)                                             | 0.975525173        | 2             | 2.51505  |
| <b>Q8BTM8</b> | <b>FLNA Filamin_A</b>                                                | <b>0.99003048</b>  | <b>0.9756</b> | <b>3</b> |
| Q8BTM8        | AFGPGQLQGGNAGSPAR                                                    | 0.954426883        | 2             | 3.85674  |
| Q8BTM8        | GAGTGGLGLAVEGPSEAK                                                   | 1.015662856        | 2             | 3.70338  |
| Q8BTM8        | GLVEPVDVVDNADGTQTVNYPVSR                                             | 0.857074962        | 2             | 5.16387  |
| <b>Q8BTZ7</b> | <b>GMPPB Mannose_1_phosphate guanyltransferase beta</b>              | <b>1.145354083</b> | <b>0.1274</b> | <b>2</b> |
| Q8BTZ7        | HHGQEGSILVTK                                                         | 1.131684498        | 3             | 3.35131  |
| Q8BTZ7        | YGVVCEADTGR                                                          | 1.145355782        | 2             | 2.77291  |
| <b>Q8BU14</b> | <b>SEC62 Translocation protein SEC62</b>                             | <b>1.227860449</b> | <b>0.0003</b> | <b>2</b> |
| Q8BU14        | AVECLLDKWKAK                                                         | 1.169340175        | 2             | 2.48978  |
| Q8BU14        | IQEVGEPKKEEK                                                         | 1.230638812        | 2             | 3.41826  |
| <b>Q8BU33</b> | <b>ILVBL Acetolactate synthase_like protein</b>                      | <b>0.967379938</b> | <b>0.9999</b> | <b>2</b> |
| Q8BU33        | LPNSLMGR+Oxidation(5)                                                | 1.007140593        | 2             | 2.63353  |
| Q8BU33        | NAQVAQSPVLLGGAASTLLQK                                                | 0.974819221        | 2             | 5.11265  |
| <b>Q8BV79</b> | <b>TRNK1 TPR and ankyrin repeat_containing protein 1</b>             | <b>0.668308926</b> | <b>0.0031</b> | <b>2</b> |
| Q8BV79        | LQLMSMDWPGVQPKRLLK+Oxidation(3)                                      | 0.668308926        | 2             | 2.45698  |
| Q8BV79        | LQLMSMDWPGVQPKRLLK+Oxidation(5)                                      | 0.668308926        | 2             | 2.39415  |
| <b>Q8BVE3</b> | <b>VATH V_type proton ATPase subunit H</b>                           | <b>0.985588899</b> | <b>0.9333</b> | <b>2</b> |
| Q8BVE3        | GAVDAAVPTNIIAAK                                                      | 1.048473427        | 2             | 2.55597  |
| Q8BVE3        | QLQSEQPQTAAAR                                                        | 0.978980348        | 2             | 2.41242  |
| <b>Q8C147</b> | <b>DOCK8 Dedicator of cytokinesis protein 8</b>                      | <b>0.948368287</b> | <b>0.094</b>  | <b>2</b> |
| Q8C147        | LNFASKLASAR                                                          | 0.893102858        | 2             | 2.46652  |
| Q8C147        | RFMYTTPFTLEGRPR+Oxidation(2)                                         | 1.024222209        | 2             | 2.52717  |
| <b>Q8C8R3</b> | <b>ANK2 Ankyrin_2</b>                                                | <b>0.878368818</b> | <b>0.57</b>   | <b>2</b> |
| Q8C8R3        | STSSSGRPGTSPRESR                                                     | 0.975581594        | 2             | 2.54064  |
| Q8C8R3        | TSTDFSEVIKQELEDNDK                                                   | 0.890710463        | 2             | 2.98302  |
| <b>Q8CC88</b> | <b>K0564 Uncharacterized protein KIAA0564 homolog</b>                | <b>1.007162808</b> | <b>0.9995</b> | <b>3</b> |
| Q8CC88        | HQATGELDDAK                                                          | 1.076345737        | 2             | 3.35348  |

|               |                                                                    |                    |               |           |
|---------------|--------------------------------------------------------------------|--------------------|---------------|-----------|
| Q8CC88        | NLADQGIINYPYSTR                                                    | 0.965407421        | 2             | 2.99264   |
| Q8CC88        | VSSDQLSSENLTSAVGQK                                                 | 1.006724737        | 2             | 3.60243   |
| <b>Q8CFN2</b> | <b>CDC42 Cell division control protein 42 homolog</b>              | <b>1.01328433</b>  | <b>0.9492</b> | <b>3</b>  |
| Q8CFN2        | DDPSTIEK                                                           | 1.028449561        | 1             | 1.96874   |
| Q8CFN2        | NVFDEAILAALEPPEPK                                                  | 1.013873829        | 3             | 5.0909    |
| Q8CFN2        | YVECSALTQK                                                         | 0.994970229        | 2             | 2.89281   |
| <b>Q8CG45</b> | <b>ARK72 Aflatoxin B1 aldehyde reductase member 2</b>              | <b>1.071684911</b> | <b>0.153</b>  | <b>9</b>  |
| Q8CG45        | AVSGAPLRPGTVLGTMEMGR                                               | 0.73117463         | 2             | 2.64077   |
| Q8CG45        | EHHFEAIALVEK                                                       | 0.890015254        | 2             | 2.68847   |
| Q8CG45        | FFGNSWSETYR                                                        | 0.944727077        | 2             | 2.76071   |
| Q8CG45        | FYAYNPLAGLLTGK                                                     | 1.194110467        | 2             | 4.21113   |
| Q8CG45        | MDASASAATVR                                                        | 0.976964478        | 2             | 3.72497   |
| Q8CG45        | QVETELLPCR                                                         | 0.976954389        | 2             | 2.67958   |
| Q8CG45        | RMDASASAATVR                                                       | 1.198921422        | 2             | 2.49078   |
| Q8CG45        | TTYGTSAPSMTSAALR                                                   | 1.102325205        | 2             | 4.25633   |
| Q8CG45        | VDLFYLHAPDHGTPIVETLQACQQLHQEGK                                     | 1.294902523        | 3             | 4.24458   |
| <b>Q8CGC7</b> | <b>SYEP Bifunctional aminoacyl_tRNA synthetase</b>                 | <b>0.958600854</b> | <b>0.982</b>  | <b>10</b> |
| Q8CGC7        | AIQGATSHHLGQNFSK                                                   | 1.128113224        | 2             | 4.10818   |
| Q8CGC7        | DQDVEPGAPSMGAK                                                     | 0.971347377        | 2             | 3.08286   |
| Q8CGC7        | DQVDSAVQELLQK                                                      | 1.012419942        | 2             | 4.0168    |
| Q8CGC7        | GDVSISVEEGKENLLR                                                   | 0.970427659        | 2             | 3.31641   |
| Q8CGC7        | GSQFGQSCCLR                                                        | 1.02983447         | 2             | 2.3653    |
| Q8CGC7        | KEENLAEWYSQVITK                                                    | 0.88820829         | 2             | 4.08489   |
| Q8CGC7        | SLCIPFNPLCELQPGAMCVCGK                                             | 1.116206273        | 2             | 4.21992   |
| Q8CGC7        | SQGGSLSSGGAGEGQGPK                                                 | 1.013400801        | 2             | 4.89804   |
| Q8CGC7        | TELAEPPIAIRPTSETVMYPAYAK                                           | 0.84506083         | 2             | 2.9215    |
| Q8CGC7        | VYEELLAIPVVR                                                       | 0.938902733        | 2             | 2.78672   |
| <b>Q8CGN4</b> | <b>BCOR BCL_6 corepressor</b>                                      | <b>0.981780244</b> | <b>0.9268</b> | <b>2</b>  |
| Q8CGN4        | FLTDYLNLDLQGR                                                      | 0.888938484        | 1             | 2.00373   |
| Q8CGN4        | NWLLLSDVLK                                                         | 0.985768007        | 2             | 2.49696   |
| <b>Q8CHB8</b> | <b>TTL5 Tubulin polyglutamylase TTL5</b>                           | <b>0.953722547</b> | <b>0.8313</b> | <b>2</b>  |
| Q8CHB8        | ASSNLQHSLRMVLPSP+Oxidation(10)                                     | 0.960762876        | 2             | 2.50587   |
| Q8CHB8        | DSGGQTLSPSWAAK                                                     | 0.946787799        | 1             | 2.00453   |
| <b>Q8CHM7</b> | <b>HACL1 2_hydroxyacyl_CoA lyase 1</b>                             | <b>1.133609434</b> | <b>0.0144</b> | <b>8</b>  |
| Q8CHM7        | DTSKPCLINIMIEPQSTR                                                 | 1.06061298         | 2             | 3.4783    |
| Q8CHM7        | DTSKPCLINIMIEPQSTRK                                                | 0.928279412        | 2             | 2.32057   |
| Q8CHM7        | GAAYSHAEDSIR                                                       | 1.311797589        | 2             | 3.29516   |
| Q8CHM7        | GVVPDNHPNCVGAAR                                                    | 0.841453022        | 2             | 3.3696    |
| Q8CHM7        | GYFVQTPEELQDSL                                                     | 1.17285203         | 2             | 4.16779   |
| Q8CHM7        | LVELCNLPFLPTPMGK                                                   | 1.269876901        | 2             | 4.13165   |
| Q8CHM7        | NCFIVSEGANTMDIGR                                                   | 0.973943954        | 2             | 4.7332    |
| Q8CHM7        | NQEAMGAFQEFPPQVEACR                                                | 1.037555481        | 2             | 4.90859   |
| <b>Q8CIB5</b> | <b>FERM2 Fermitin family homolog 2</b>                             | <b>0.930014208</b> | <b>0.196</b>  | <b>2</b>  |
| Q8CIB5        | GCEVTPDVNISGQK                                                     | 0.929051072        | 2             | 3.29999   |
| Q8CIB5        | TSTILGDITSPELADYIK                                                 | 0.869335568        | 2             | 3.07929   |
| <b>Q8CIE6</b> | <b>COPA Coatomer subunit alpha</b>                                 | <b>1.08561134</b>  | <b>0.0004</b> | <b>6</b>  |
| Q8CIE6        | ASNLENSTYDLYTIPK                                                   | 1.359963961        | 2             | 4.0084    |
| Q8CIE6        | DADSQNPDAPEGK                                                      | 0.84704567         | 2             | 3.41779   |
| Q8CIE6        | GITGVDLFGTTDAVVK                                                   | 1.123600519        | 2             | 2.70298   |
| Q8CIE6        | LLELGPKEVAQQTR                                                     | 1.127170237        | 2             | 2.59502   |
| Q8CIE6        | SILLSVPLLVDNK                                                      | 1.077301282        | 2             | 3.18921   |
| Q8CIE6        | TLDLPIYVTR                                                         | 1.085607986        | 2             | 2.62364   |
| <b>Q8JZN5</b> | <b>ACAD9 Acyl_CoA dehydrogenase family member 9_mitochondrial</b>  | <b>0.955015387</b> | <b>0.9357</b> | <b>2</b>  |
| Q8JZN5        | GSNTCEVHFENTR                                                      | 1.053483504        | 2             | 4.25574   |
| Q8JZN5        | NLSEFGLIQEK                                                        | 0.94320869         | 2             | 3.13609   |
| <b>Q8K009</b> | <b>AL1L2 Mitochondrial 10_formyltetrahydrofolate dehydrogenase</b> | <b>0.938516069</b> | <b>0.2352</b> | <b>16</b> |



|               |                                                                     |                    |               |          |
|---------------|---------------------------------------------------------------------|--------------------|---------------|----------|
| Q8K009        | ADPLALAAEK                                                          | 1.172402959        | 2             | 2.6036   |
| Q8K009        | AGFSVFWADDGLDTGPILLQR                                               | 1.141705017        | 2             | 2.35005  |
| Q8K009        | AMVEAVQLIADGK                                                       | 0.986074439        | 2             | 3.67798  |
| Q8K009        | ANNTEYGLASGVFTR                                                     | 0.417699217        | 2             | 4.7427   |
| Q8K009        | DLGEEALNEYLK                                                        | 1.006195176        | 2             | 3.68613  |
| Q8K009        | FLFPEGIK                                                            | 0.977046957        | 2             | 2.31152  |
| Q8K009        | FQNGDIDGVLQR                                                        | 1.075492207        | 2             | 2.99038  |
| Q8K009        | GVINIIPGSGGVAGQR                                                    | 0.944743282        | 2             | 2.77907  |
| Q8K009        | HGSIIYHPSLLPR                                                       | 0.897395463        | 2             | 3.76479  |
| Q8K009        | NLQFEDGK                                                            | 0.973140773        | 1             | 2.18711  |
| Q8K009        | SAACLAAGNTLVLPKPAQVPTLTK                                            | 1.302632883        | 3             | 3.44593  |
| Q8K009        | SCDVKPNDTVDSLNR                                                     | 1.042971842        | 2             | 4.63426  |
| Q8K009        | SPLIIFSDCDLEK                                                       | 1.533490271        | 2             | 2.43467  |
| Q8K009        | TPQPEEGATYEGIQK                                                     | 1.811783168        | 2             | 2.98095  |
| Q8K009        | VSYASLADVDR                                                         | 1.2448116          | 2             | 3.61373  |
| Q8K009        | VVGVTVPDKDGK                                                        | 0.989337058        | 2             | 2.95327  |
| <b>Q8K2F0</b> | <b>BRD3 Bromodomain containing protein 3</b>                        | <b>1.031024876</b> | <b>0.2242</b> | <b>2</b> |
| Q8K2F0        | KMDSREYPDAQGFAADIR                                                  | 1.403747628        | 2             | 2.31435  |
| Q8K2F0        | QLSLDINRLPGEK                                                       | 0.89531239         | 2             | 2.39281  |
| <b>Q8K442</b> | <b>ABC8A ATP binding cassette sub_family A member 8_A</b>           | <b>0.836621841</b> | <b>0.1518</b> | <b>4</b> |
| Q8K442        | GQITAILGHSGAGK                                                      | 0.748051511        | 2             | 3.35449  |
| Q8K442        | IDDFIHSLEQQNIALEVDAGFTR                                             | 0.820532681        | 3             | 3.61572  |
| Q8K442        | NTQNILVQNLGGQK                                                      | 0.689831904        | 2             | 2.64868  |
| Q8K442        | STLLNVLSGLCVPTK                                                     | 0.892019529        | 2             | 3.20381  |
| <b>Q8K4C0</b> | <b>FM05 Dimethylaniline monooxygenase [N_oxide_forming] 5</b>       | <b>0.703471682</b> | <b>1E-19</b>  | <b>9</b> |
| Q8K4C0        | CCLEEGLEPVCFER                                                      | 0.721894333        | 2             | 4.08128  |
| Q8K4C0        | EYKNPVEFTGK                                                         | 0.593264329        | 2             | 2.32707  |
| Q8K4C0        | GYPIDILLSSR                                                         | 0.807770399        | 2             | 3.55792  |
| Q8K4C0        | HSALGQHPTINDDLPNR                                                   | 0.689340128        | 2             | 4.98257  |
| Q8K4C0        | IAVIGSGASGLTCIK                                                     | 0.920750866        | 2             | 3.2945   |
| Q8K4C0        | KLPSQSEMMAEINK                                                      | 0.691431368        | 2             | 3.64247  |
| Q8K4C0        | KQPDFSTSGQWQVVTEHEGK                                                | 0.743014926        | 3             | 4.32213  |
| Q8K4C0        | KTILTTEDR                                                           | 0.75747056         | 2             | 2.42411  |
| Q8K4C0        | SDDIGGLWR                                                           | 0.697238096        | 2             | 2.91392  |
| <b>Q8K4Q0</b> | <b>RPTOR Regulatory associated protein of mTOR</b>                  | <b>0.993421629</b> | <b>0.0096</b> | <b>2</b> |
| Q8K4Q0        | MPESVNVMIQVK+Oxidation(0)                                           | 0.749371914        | 2             | 2.33729  |
| Q8K4Q0        | QAQQVIQKGITR                                                        | 1.254264254        | 1             | 2.1206   |
| <b>Q8K4Z3</b> | <b>AIBP Apolipoprotein A_I binding protein</b>                      | <b>1.029520121</b> | <b>3E-09</b>  | <b>2</b> |
| Q8K4Z3        | GNPSGIQPDLLISLTAPK                                                  | 0.832358891        | 2             | 4.11803  |
| Q8K4Z3        | SPPTVLVICGPGNNGDGLVCAR                                              | 1.01162411         | 2             | 5.58946  |
| <b>Q8K586</b> | <b>RANT GTP binding nuclear protein Ran_testis_specific isoform</b> | <b>0.983870922</b> | <b>0.9618</b> | <b>3</b> |
| Q8K586        | FNVWDTAGQEK                                                         | 1.023461907        | 2             | 3.00587  |
| Q8K586        | NLQYYDISAK                                                          | 1.093953901        | 1             | 2.33346  |
| Q8K586        | VCENIPIVLCGNK                                                       | 0.924715447        | 2             | 3.39396  |
| <b>Q8QZY1</b> | <b>EIF3L Eukaryotic translation initiation factor 3 subunit L</b>   | <b>0.946386228</b> | <b>0.9766</b> | <b>3</b> |
| Q8QZY1        | QYEQQTYQVIPEVIK                                                     | 1.04043008         | 2             | 2.67363  |
| Q8QZY1        | VFSDEVQQQAQLSTIR                                                    | 0.942073971        | 2             | 4.06817  |
| Q8QZY1        | VYEIQDIYENSWTK                                                      | 0.987450927        | 2             | 2.50332  |
| <b>Q8R081</b> | <b>HNRPL Heterogeneous nuclear ribonucleoprotein L</b>              | <b>0.929408177</b> | <b>0.2543</b> | <b>4</b> |
| Q8R081        | ASLNGADIYSGCCTLK                                                    | 1.215337397        | 2             | 3.50728  |
| Q8R081        | NDQDTWDYTNPNLSGGQDPSNPDKR                                           | 0.997752515        | 3             | 4.91136  |
| Q8R081        | SDALETGLFLNHQMK                                                     | 0.942741856        | 2             | 2.99527  |
| Q8R081        | TENAGDQHGGGGGGGGAAGGGGGENYDDPHK                                     | 0.806611226        | 3             | 7.47052  |
| <b>Q8R0F9</b> | <b>S14L4 SEC14_like protein 4</b>                                   | <b>0.827779868</b> | <b>0.0002</b> | <b>2</b> |
| Q8R0F9        | FDNTYLLHTK                                                          | 0.827795083        | 2             | 2.90302  |
| Q8R0F9        | GSSHQVENEILFPGCVLR                                                  | 0.670316243        | 2             | 5.48631  |
| <b>Q8R0K2</b> | <b>TRI31 E3 ubiquitin_protein ligase TRIM31</b>                     | <b>1.061488351</b> | <b>0.8559</b> | <b>2</b> |

|               |                                                                     |                    |               |          |
|---------------|---------------------------------------------------------------------|--------------------|---------------|----------|
| Q8R0K2        | AQVDLEKLIHEEFK                                                      | 1.061276349        | 2             | 2.46533  |
| Q8R0K2        | QRLDEEESFLLSR                                                       | 1.092349696        | 2             | 2.41237  |
| <b>Q8R146</b> | <b>APEH Acylamino_acid_releasing enzyme</b>                         | <b>0.924397891</b> | <b>0.9011</b> | <b>2</b> |
| Q8R146        | GSTGFGQDSILSLPGNVGHQDVK                                             | 1.061888745        | 2             | 3.55629  |
| Q8R146        | QVLLSEPQEAALYR                                                      | 0.922385946        | 2             | 3.61127  |
| <b>Q8R164</b> | <b>BPHL Valacyclovir hydrolase</b>                                  | <b>0.868424679</b> | <b>2E-05</b>  | <b>2</b> |
| Q8R164        | QVSLLGWSDGGITALIAAAK                                                | 1.078013296        | 2             | 3.75606  |
| Q8R164        | TDFAPQLQLSNK                                                        | 0.822135425        | 2             | 3.24938  |
| <b>Q8R1V4</b> | <b>TMED4 Transmembrane emp24 domain_containing protein 4</b>        | <b>0.957929295</b> | <b>0.9392</b> | <b>2</b> |
| Q8R1V4        | CFIEEIPDETMVIGNYR                                                   | 0.946274642        | 2             | 3.69245  |
| Q8R1V4        | QLLDQVEQIQK                                                         | 0.958068263        | 2             | 3.23942  |
| <b>Q8R491</b> | <b>EHD3 EH domain_containing protein 3</b>                          | <b>1.02224544</b>  | <b>0.8479</b> | <b>3</b> |
| Q8R491        | LDISDEFSEVIK                                                        | 1.060967299        | 2             | 3.3748   |
| Q8R491        | LFEAEEQDLFK                                                         | 1.022802936        | 2             | 3.1238   |
| Q8R491        | MQDQLQAQDFSK                                                        | 0.875683524        | 2             | 3.12121  |
| <b>Q8VBU2</b> | <b>NDRG2 Protein NDRG2</b>                                          | <b>1.015744601</b> | <b>0.089</b>  | <b>6</b> |
| Q8VBU2        | CPVMLLVGDAQPHEDAVVECNSK                                             | 0.94739929         | 3             | 4.6379   |
| Q8VBU2        | CPVMLLVGDAQPHEDAVVECNSK+Oxidation(3)                                | 1.095870311        | 3             | 4.70909  |
| Q8VBU2        | LDPTQTSFLK                                                          | 0.897099448        | 2             | 2.39448  |
| Q8VBU2        | MADSGGQPQLTQPGK                                                     | 0.549176463        | 2             | 3.08305  |
| Q8VBU2        | TASLTSAAIDGSR                                                       | 1.486564015        | 2             | 3.38155  |
| Q8VBU2        | YALNHPDTEVGLVLINIDPNAK                                              | 1.427178991        | 2             | 3.55328  |
| <b>Q8VC12</b> | <b>HUTU Urocanate hydratase</b>                                     | <b>1.046868816</b> | <b>2E-09</b>  | <b>6</b> |
| Q8VC12        | HQLVVGSQAR                                                          | 1.172565188        | 2             | 2.87839  |
| Q8VC12        | LLALEFAQELR                                                         | 1.410657902        | 2             | 3.63897  |
| Q8VC12        | LVITNGMVIPNYSSR                                                     | 1.176449904        | 2             | 2.74392  |
| Q8VC12        | VAIAVAINQAIASGK                                                     | 1.525206449        | 2             | 2.99113  |
| Q8VC12        | VFVTSGLGGMGAQAK                                                     | 0.961841478        | 2             | 4.37381  |
| Q8VC12        | VFVTSGLGGMGAQAK+Oxidation(9)                                        | 1.236900411        | 2             | 2.72628  |
| <b>Q8VCD5</b> | <b>MED17 Mediator of RNA polymerase II transcription subunit 17</b> | <b>0.904499141</b> | <b>0.5149</b> | <b>2</b> |
| Q8VCD5        | EIFAQLSREAVQIK                                                      | 0.904159748        | 1             | 2.10893  |
| Q8VCD5        | MELLSALSPELL+Oxidation(0)                                           | 1.18567409         | 2             | 2.32529  |
| <b>Q8VED5</b> | <b>K2C79 Keratin_type II cytoskeletal 79</b>                        | <b>0.780625628</b> | <b>0.0023</b> | <b>4</b> |
| Q8VED5        | NKYEDEINK                                                           | 0.851496291        | 2             | 2.55467  |
| Q8VED5        | NKYEDEINKR                                                          | 0.735392772        | 2             | 2.5352   |
| Q8VED5        | NLDLDSIIAEVK                                                        | 0.621306059        | 2             | 2.76017  |
| Q8VED5        | YEDEINK                                                             | 1.024489416        | 1             | 2.05325  |
| <b>Q8VEK3</b> | <b>HNRPU Heterogeneous nuclear ribonucleoprotein U</b>              | <b>1.020327718</b> | <b>0.9972</b> | <b>9</b> |
| Q8VEK3        | EKPYFPIPEDCTFIQNVPLEDR                                              | 0.970799474        | 3             | 4.28999  |
| Q8VEK3        | GYFEYIEENK                                                          | 0.837643191        | 2             | 3.31653  |
| Q8VEK3        | LLEQYKEESK                                                          | 0.992945185        | 2             | 2.92343  |
| Q8VEK3        | LLEQYKEESKK                                                         | 1.014718549        | 2             | 3.18978  |
| Q8VEK3        | LQAALDNEAGGRPAMEPGNGSLDLGGDAAGR                                     | 1.051486942        | 3             | 4.98696  |
| Q8VEK3        | NFILDQTNVSAQAQR                                                     | 0.896705014        | 2             | 4.66294  |
| Q8VEK3        | TCNCETEDYGEK                                                        | 1.047594721        | 2             | 3.4796   |
| Q8VEK3        | VSELKEELKK                                                          | 0.992934855        | 2             | 3.03126  |
| Q8VEK3        | YNILGTNTIMDK                                                        | 0.925005112        | 2             | 3.62491  |
| <b>Q8VHE9</b> | <b>RETST All_trans_retinol 13_14_reductase</b>                      | <b>0.620754922</b> | <b>1E-19</b>  | <b>4</b> |
| Q8VHE9        | ATVQSVLLDSAGR                                                       | 0.679580521        | 2             | 3.82277  |
| Q8VHE9        | GATYGADHDLAR                                                        | 0.68510145         | 2             | 3.00801  |
| Q8VHE9        | NLYSDLQALGSK                                                        | 0.633367126        | 2             | 3.07243  |
| Q8VHE9        | RPPEPLVTDK                                                          | 0.614543365        | 2             | 2.97071  |
| <b>Q8VHF5</b> | <b>CISY Citrate synthase_mitochondrial</b>                          | <b>0.90459752</b>  | <b>0.0003</b> | <b>3</b> |
| Q8VHF5        | DILSNLIPK                                                           | 0.765027111        | 2             | 2.42043  |
| Q8VHF5        | EGSSIGAIDSK                                                         | 0.79064731         | 1             | 2.13931  |
| Q8VHF5        | GLVYETSVLDPDEGIR                                                    | 0.916133306        | 2             | 4.02319  |
| <b>Q8VHT6</b> | <b>AS3MT Arsenite methyltransferase</b>                             | <b>1.077290457</b> | <b>1E-19</b>  | <b>3</b> |

|               |                                                                           |                    |               |          |
|---------------|---------------------------------------------------------------------------|--------------------|---------------|----------|
| Q8VHT6        | ILDGSGSGR                                                                 | 0.985231544        | 2             | 2.96238  |
| Q8VHT6        | SLQNVHEEVISR                                                              | 1.693808796        | 2             | 2.93766  |
| Q8VHT6        | TSADLQTNACVTPAK                                                           | 1.470844037        | 2             | 3.49723  |
| <b>Q8VID1</b> | <b>DHRS4 Dehydrogenase/reductase SDR family member 4</b>                  | <b>0.872910146</b> | <b>0.0009</b> | <b>4</b> |
| Q8VID1        | AVATLQGEGLSVTVVCHVGK                                                      | 0.935555884        | 2             | 4.48799  |
| Q8VID1        | LAEDGAHVVISSR                                                             | 1.214167056        | 2             | 3.25577  |
| Q8VID1        | NFAAELAPK                                                                 | 0.812967052        | 2             | 2.59451  |
| Q8VID1        | VALVTASTDGIGLAIR                                                          | 1.18412371         | 2             | 2.98933  |
| <b>Q8VID6</b> | <b>PDE11 Dual 3_5_cyclic_AMP and _GMP phosphodiesterase 11A</b>           | <b>0.690773558</b> | <b>0.0013</b> | <b>2</b> |
| Q8VID6        | MFMEELGMVQKFK+Oxidation(0)                                                | 0.690773558        | 1             | 1.91772  |
| Q8VID6        | MFMEELGMVQKFK+Oxidation(2)                                                | 0.690773558        | 1             | 1.90643  |
| <b>Q8VIF7</b> | <b>SBP1 Selenium binding protein 1</b>                                    | <b>0.901061041</b> | <b>0.0787</b> | <b>8</b> |
| Q8VIF7        | CGPGYATPLEAMK                                                             | 0.875307359        | 2             | 3.23483  |
| Q8VIF7        | FLHDPDATQGFVGCALSSNIQR                                                    | 0.899627663        | 2             | 4.39094  |
| Q8VIF7        | GGFVLLDGETFEVK                                                            | 0.904574053        | 2             | 3.94081  |
| Q8VIF7        | GTWEKPGGEAPMGYDFWYQPR                                                     | 0.894968348        | 3             | 4.05698  |
| Q8VIF7        | NEGGTWSVEK                                                                | 0.873475964        | 2             | 2.33168  |
| Q8VIF7        | NTGIEAPDYLATVDVDPK                                                        | 0.847835288        | 2             | 5.02269  |
| Q8VIF7        | QYDISNPK                                                                  | 0.751245054        | 1             | 2.10013  |
| Q8VIF7        | VIEPNEIHAK                                                                | 0.805787524        | 2             | 2.49132  |
| <b>Q8VIJ6</b> | <b>SFPQ Splicing factor_proline_and glutamine_rich</b>                    | <b>1.071437027</b> | <b>0.8783</b> | <b>2</b> |
| Q8VIJ6        | NLSPYVSNELLEAFSQFGPIER                                                    | 0.966489974        | 3             | 3.43464  |
| Q8VIJ6        | YGEPGEVFINK                                                               | 1.077561189        | 2             | 2.69571  |
| <b>Q91VA0</b> | <b>ACSM1 Acyl_coenzyme A synthetase ACSM1_mitochondrial</b>               | <b>0.771793306</b> | <b>9E-08</b>  | <b>5</b> |
| Q91VA0        | AFIVLNPEFLSHDQEQLIK                                                       | 0.771432143        | 2             | 5.30659  |
| Q91VA0        | AILPFDLQIIDEK                                                             | 0.813934519        | 2             | 4.14646  |
| Q91VA0        | GNILPPNTEGYIGIR                                                           | 0.80648854         | 2             | 2.92295  |
| Q91VA0        | HNQGLAFR                                                                  | 0.615382319        | 2             | 2.3806   |
| Q91VA0        | KVEFVSELPK                                                                | 0.857645772        | 2             | 2.63062  |
| <b>Q91VA6</b> | <b>PDIP2 Polymerase delta_interacting protein 2</b>                       | <b>1.231156911</b> | <b>0.6069</b> | <b>2</b> |
| Q91VA6        | NHPWLELSDVHR                                                              | 1.048320051        | 3             | 3.70734  |
| Q91VA6        | VLETVGVEVFPK                                                              | 1.234489125        | 2             | 2.37326  |
| <b>Q91VH2</b> | <b>SNX9 Sorting nexin_9</b>                                               | <b>1.176143241</b> | <b>7E-07</b>  | <b>2</b> |
| Q91VH2        | GEQGLVPTDYVEILPNDGK                                                       | 0.941508337        | 2             | 2.38426  |
| Q91VH2        | ITPQDKQTMVK+Oxidation(8)                                                  | 1.991618516        | 1             | 2.10074  |
| <b>Q91VM9</b> | <b>IPYR2 Inorganic pyrophosphatase 2_mitochondrial</b>                    | <b>0.930433051</b> | <b>0.0034</b> | <b>2</b> |
| Q91VM9        | IIAINVNDPEAEK                                                             | 0.629428785        | 2             | 3.19357  |
| Q91VM9        | MEIATEEPLNPIK                                                             | 0.996791651        | 2             | 3.63225  |
| <b>Q91W43</b> | <b>GCSP Glycine dehydrogenase [decarboxylating]_mitochondrial</b>         | <b>0.911991698</b> | <b>0.4515</b> | <b>3</b> |
| Q91W43        | IDDIYGDQHLVCTCPPMEVYESPFSEQK                                              | 1.102381728        | 3             | 3.69771  |
| Q91W43        | NLLENSGWVTQYTPYQPEVSQGR                                                   | 0.860333133        | 2             | 4.24506  |
| Q91W43        | VSFQPNSGAQGEYAGLATIR                                                      | 0.992661058        | 2             | 4.52631  |
| <b>Q91X77</b> | <b>CY250 Cytochrome P450 2C50</b>                                         | <b>0.687559604</b> | <b>1E-15</b>  | <b>3</b> |
| Q91X77        | IKEHEESLDVTIPR                                                            | 0.629352706        | 3             | 3.91903  |
| Q91X77        | NFLLEK                                                                    | 0.703559694        | 1             | 1.96525  |
| Q91X77        | YALLLLLK                                                                  | 1.220496735        | 2             | 2.59787  |
| <b>Q91X78</b> | <b>ERLN1 Erlin_1</b>                                                      | <b>0.95963327</b>  | <b>0.984</b>  | <b>2</b> |
| Q91X78        | ISEIEDAAFLAR                                                              | 0.987433583        | 2             | 3.67408  |
| Q91X78        | SVQTTLQTDEVK                                                              | 0.952859885        | 2             | 3.41667  |
| <b>Q91Y81</b> | <b>SEPT2 Septin_2</b>                                                     | <b>1.118049721</b> | <b>0.2948</b> | <b>2</b> |
| Q91Y81        | ASIPFSVVGSNQLIEAK                                                         | 1.327336473        | 2             | 2.70076  |
| Q91Y81        | LTVVDTPGYGDAINSR                                                          | 1.072715633        | 2             | 3.79749  |
| <b>Q91YT0</b> | <b>NDUV1 NADH dehydrogenase [ubiquinone] flavoprotein 1_mitochondrial</b> | <b>1.178389952</b> | <b>7E-06</b>  | <b>8</b> |
| Q91YT0        | GAGAYICGEETALIESIEGK                                                      | 1.125374018        | 2             | 3.47646  |
| Q91YT0        | GDARPAEIDSLWEISK                                                          | 0.969584569        | 2             | 3.0918   |

|               |                                                                                     |                    |               |           |
|---------------|-------------------------------------------------------------------------------------|--------------------|---------------|-----------|
| Q91YT0        | GGAGFPTGLK                                                                          | 1.117861304        | 2             | 2.30261   |
| Q91YT0        | KTSFGSLKDEDR                                                                        | 1.210332591        | 2             | 3.03097   |
| Q91YT0        | LKPPFPADVGVFGCPTTVANVETVAVSPTICR                                                    | 1.411612902        | 3             | 4.96474   |
| Q91YT0        | LVEGCLVGGR                                                                          | 0.87079331         | 2             | 2.44372   |
| Q91YT0        | TSGSLKDEDR                                                                          | 1.276404654        | 2             | 2.55183   |
| Q91YT0        | YLVVNADEGEPGTCK                                                                     | 1.208087488        | 2             | 5.29796   |
| <b>Q91Z53</b> | <b>GRHPR Glyoxylate reductase/hydroxypyruvate reductase</b>                         | <b>0.990793626</b> | <b>0.0134</b> | <b>7</b>  |
| Q91Z53        | GDVVNQEDLYQALASGQIAAAGLDVTTPEPLPPSHPLTLK                                            | 0.976950364        | 3             | 6.32099   |
| Q91Z53        | LLDAAGANLR                                                                          | 0.961236446        | 2             | 3.22163   |
| Q91Z53        | NCVILPHIGSATYK                                                                      | 1.053433089        | 2             | 3.31537   |
| Q91Z53        | NTMSLLAANNLLAGLR                                                                    | 0.961795557        | 2             | 3.66477   |
| Q91Z53        | NTMSLLAANNLLAGLR+Oxidation(2)                                                       | 0.952971385        | 2             | 3.65781   |
| Q91Z53        | RLPEAIEEVK                                                                          | 0.824118568        | 2             | 2.64402   |
| Q91Z53        | VISTLSVGV DHLALDEIK                                                                 | 1.140487445        | 2             | 3.91288   |
| <b>Q91ZJ5</b> | <b>UGPA UTP__glucose_1_phosphate uridylyltransferase</b>                            | <b>0.820162917</b> | <b>1E-19</b>  | <b>12</b> |
| Q91ZJ5        | AMSQDGASQFQEVILQELELSVK                                                             | 0.87114346         | 3             | 4.74835   |
| Q91ZJ5        | GGTLTQYEGK                                                                          | 0.816106209        | 2             | 2.493     |
| Q91ZJ5        | GLPDNISSVLNK                                                                        | 0.824179447        | 2             | 3.2697    |
| Q91ZJ5        | GTVIIIANHGDR                                                                        | 0.888737068        | 2             | 3.20004   |
| Q91ZJ5        | IDIPPGAVLENK                                                                        | 0.798492434        | 2             | 2.74069   |
| Q91ZJ5        | IQRPPEDSIQPYEK                                                                      | 0.825963886        | 2             | 3.90405   |
| Q91ZJ5        | LQEQNAIDMEIIVNPK                                                                    | 1.931858903        | 2             | 3.34486   |
| Q91ZJ5        | LVEIAQVPK                                                                           | 0.796257766        | 2             | 3.37806   |
| Q91ZJ5        | NENTFLDLTVQQIEHLNK                                                                  | 0.704766083        | 2             | 5.33607   |
| Q91ZJ5        | SFENSLGINVPR                                                                        | 0.783274122        | 2             | 3.39287   |
| Q91ZJ5        | TLDGGLNVIQLETAVGAAIK                                                                | 0.773241685        | 2             | 4.7902    |
| Q91ZJ5        | TYNTDVPLVLMNSFNTDEDTKK                                                              | 0.937553305        | 2             | 4.56544   |
| <b>Q91ZX7</b> | <b>LRP1 Prolow_density lipoprotein receptor_related protein 1</b>                   | <b>1.056805821</b> | <b>0.7723</b> | <b>3</b>  |
| Q91ZX7        | AVTDEEPFLIFANR                                                                      | 1.086518564        | 2             | 2.61346   |
| Q91ZX7        | GCHVNECLSR                                                                          | 1.182347567        | 2             | 2.63022   |
| Q91ZX7        | MYDAQQQVGTNK                                                                        | 0.960383908        | 2             | 4.1467    |
| <b>Q920A6</b> | <b>RISC Retinoid_inducible serine carboxypeptidase</b>                              | <b>0.753547691</b> | <b>0.0837</b> | <b>2</b>  |
| Q920A6        | DLDTVASDMMVLLK                                                                      | 0.803163085        | 2             | 2.69524   |
| Q920A6        | GLAEVSDIAEQVLNAVNK                                                                  | 0.779482696        | 3             | 5.02439   |
| <b>Q920D2</b> | <b>DYR Dihydrofolate reductase</b>                                                  | <b>1.089944132</b> | <b>0.8016</b> | <b>3</b>  |
| Q920D2        | LIEQPELASK                                                                          | 0.916264813        | 2             | 2.84925   |
| Q920D2        | LLPEYPGVLSIEQEEK                                                                    | 1.115118849        | 2             | 3.4571    |
| Q920D2        | NGDLPWPLLR                                                                          | 1.195406893        | 2             | 3.04326   |
| <b>Q920F5</b> | <b>DCMC Malonyl_CoA decarboxylase_mitochondrial</b>                                 | <b>0.957567789</b> | <b>0.5764</b> | <b>3</b>  |
| Q920F5        | EIAEVTGDPVHESLK                                                                     | 0.762072501        | 2             | 3.26842   |
| Q920F5        | ISECEAVHPVK                                                                         | 0.966445109        | 2             | 3.4044    |
| Q920F5        | WLLGLLNVQGK                                                                         | 1.140531029        | 2             | 3.26145   |
| <b>Q920J4</b> | <b>TXNL1 Thioredoxin_like protein 1</b>                                             | <b>1.054270544</b> | <b>0.0594</b> | <b>2</b>  |
| Q920J4        | AGCECLNESDEHGFNCLR                                                                  | 1.159887677        | 3             | 3.57145   |
| Q920J4        | IDQYQGADAVGLEEK                                                                     | 1.035057502        | 2             | 3.96545   |
| <b>Q920L2</b> | <b>DHSA Succinate dehydrogenase [ubiquinone] flavoprotein subunit_mitochondrial</b> | <b>0.914769237</b> | <b>0.0002</b> | <b>20</b> |
| Q920L2        | AAFGLSEAGFNACTLK                                                                    | 0.862479036        | 2             | 2.37338   |
| Q920L2        | ACALSIAESCRPGDK                                                                     | 1.050969708        | 2             | 2.87348   |
| Q920L2        | AGLPCQDLEFVQFHPTGIYGAGCLITEGCR                                                      | 1.106909743        | 3             | 4.80377   |
| Q920L2        | ANAGEESVMNLDK                                                                       | 1.029108394        | 2             | 3.51816   |
| Q920L2        | DVVSRSMTLEIR+Oxidation(6)                                                           | 1.091156235        | 2             | 2.3657    |
| Q920L2        | GEGGILINSQGER                                                                       | 0.956041821        | 2             | 3.95603   |
| Q920L2        | GVIALCIEDGSIHR                                                                      | 1.146849466        | 2             | 3.21592   |
| Q920L2        | HTLSYVDTK                                                                           | 1.162465361        | 2             | 2.30996   |
| Q920L2        | HVNGQDQIVPGLYACGEAACASVHGANK                                                        | 1.021483142        | 3             | 6.71219   |
| Q920L2        | IDEYDYSKPIEGQQK                                                                     | 0.906768551        | 2             | 4.47247   |

|               |                                                                               |                    |               |          |
|---------------|-------------------------------------------------------------------------------|--------------------|---------------|----------|
| Q920L2        | KHTLSYVDTK                                                                    | 0.122153673        | 2             | 2.60817  |
| Q920L2        | NTIATGGYGR                                                                    | 0.943256864        | 2             | 3.00048  |
| Q920L2        | SMQSHAAVFR+Oxidation(1)                                                       | 0.968417884        | 2             | 2.4176   |
| Q920L2        | TGHSLHTLYGR                                                                   | 0.871641708        | 2             | 2.58104  |
| Q920L2        | TLNEADCATVPPAIR                                                               | 1.057499916        | 2             | 3.63917  |
| Q920L2        | TYFSCSAHTSTGDGTAMVTR                                                          | 1.056343177        | 2             | 5.37804  |
| Q920L2        | VGSVLQEGCEK                                                                   | 1.079293319        | 2             | 3.6919   |
| Q920L2        | VSDAISTQYPVVDHEFDVAVVVGAGGAGLR                                                | 0.912585549        | 3             | 4.45153  |
| Q920L2        | VSQLYGDLQHLK                                                                  | 1.000493706        | 2             | 2.90264  |
| Q920L2        | VTLDYRPVIDK                                                                   | 0.969645781        | 2             | 2.95304  |
| <b>Q920P0</b> | <b>DCXR L_xylulose reductase</b>                                              | <b>0.933428278</b> | <b>0.0008</b> | <b>4</b> |
| Q920P0        | AVVQVSQIVAR                                                                   | 0.946898337        | 2             | 3.10054  |
| Q920P0        | GVPGAIVNVSSQASQR                                                              | 0.910720831        | 2             | 5.66815  |
| Q920P0        | STVLALQAAGAQQVAVSR                                                            | 1.177533591        | 2             | 3.83354  |
| Q920P0        | TREDLDSLVR                                                                    | 0.870879236        | 2             | 2.79953  |
| <b>Q921F2</b> | <b>TADBP TAR DNA_binding protein 43</b>                                       | <b>0.964248258</b> | <b>0.9831</b> | <b>3</b> |
| Q921F2        | FGGNPGGFGNQGGFGNSR                                                            | 0.939030165        | 2             | 4.21349  |
| Q921F2        | KDLKTGHSK                                                                     | 0.971212508        | 2             | 2.48049  |
| Q921F2        | TSDLIVLGLPWK                                                                  | 0.991601679        | 2             | 3.12083  |
| <b>Q922F4</b> | <b>TBB6 Tubulin beta_6 chain</b>                                              | <b>1.024008199</b> | <b>0.1255</b> | <b>5</b> |
| Q922F4        | ALTVPELTQQMFDAK                                                               | 1.08291942         | 2             | 4.03344  |
| Q922F4        | GHYTEGAELVDSVLDVVR                                                            | 1.021389939        | 2             | 6.55341  |
| Q922F4        | IREEYPDR                                                                      | 1.02734604         | 2             | 2.63664  |
| Q922F4        | MASTFIGNSTAIQELFK                                                             | 1.196071666        | 2             | 3.98106  |
| Q922F4        | NSSYFVEWIPNNVK                                                                | 1.075766906        | 2             | 4.49696  |
| <b>Q922J3</b> | <b>CLIP1 CAP_Gly domain_containing linker protein 1</b>                       | <b>0.975609633</b> | <b>0.7782</b> | <b>3</b> |
| Q922J3        | EMETMQAKLMK+Oxidation(4)                                                      | 0.975525173        | 2             | 2.55292  |
| Q922J3        | LQNELDTLKENNLK                                                                | 1.014926556        | 2             | 2.31623  |
| Q922J3        | TASESISNLSAAGSVK                                                              | 0.547134884        | 2             | 2.38444  |
| <b>Q923D2</b> |                                                                               | <b>0.933749211</b> | <b>0.5058</b> | <b>3</b> |
| Q923D2        | LQDVTDDHIR                                                                    | 0.895511307        | 2             | 3.23294  |
| Q923D2        | TGLTTLAQAVQAGYEVTLVLR                                                         | 0.990050199        | 3             | 4.75114  |
| Q923D2        | YVAVMPPHIGDQPLTGAYTVTLDR                                                      | 0.96120168         | 3             | 4.61981  |
| <b>Q923M1</b> | <b>MSRA Mitochondrial peptide methionine sulfoxide reductase</b>              | <b>1.021873225</b> | <b>0.1596</b> | <b>2</b> |
| Q923M1        | SAVYPTSAVQMEAAALK                                                             | 1.931231041        | 2             | 3.19339  |
| Q923M1        | VISAEALPGR                                                                    | 0.941505627        | 2             | 2.42951  |
| <b>Q923V8</b> | <b>SEP15 15 kDa selenoprotein</b>                                             | <b>1.029483151</b> | <b>0.401</b>  | <b>3</b> |
| Q923V8        | GCCQEEAQFETK                                                                  | 0.976533512        | 2             | 3.87992  |
| Q923V8        | LLDDNGNIAEELSILK                                                              | 1.027918425        | 2             | 3.2275   |
| Q923V8        | WNTDSVEEFLSEK                                                                 | 1.306080417        | 2             | 3.2608   |
| <b>Q924C3</b> | <b>ENPP1 Ectonucleotide pyrophosphatase/phosphodiesterase family member 1</b> | <b>1.141402825</b> | <b>4E-09</b>  | <b>2</b> |
| Q924C3        | AEYLHTWGGLLPVISK                                                              | 1.148293423        | 3             | 3.91513  |
| Q924C3        | SGTYFWPGSDVEIDGILPDIYK                                                        | 1.030093197        | 2             | 4.20803  |
| <b>Q924S5</b> | <b>LONM Lon protease homolog_mitochondrial</b>                                | <b>0.99711816</b>  | <b>0.6336</b> | <b>8</b> |
| Q924S5        | AQLSATVLTLLIK                                                                 | 1.268971075        | 2             | 2.64341  |
| Q924S5        | EHQEALAVR                                                                     | 0.810011601        | 2             | 2.49351  |
| Q924S5        | ELGLEKDDKDAIEEK                                                               | 0.963351766        | 2             | 3.40094  |
| Q924S5        | HVMDVVDEELSK                                                                  | 1.067928441        | 2             | 2.44928  |
| Q924S5        | IVSGEAQTVHVTENLQDFVKGKPVFTVER                                                 | 1.096900122        | 3             | 5.97532  |
| Q924S5        | QLEVEPEGLEPEAENK                                                              | 1.129579884        | 2             | 4.35844  |
| Q924S5        | QSDENLDLAR                                                                    | 0.927117739        | 2             | 2.49252  |
| Q924S5        | TENPLVLIDEVDK                                                                 | 0.978676818        | 2             | 3.30673  |
| <b>Q99020</b> | <b>ROAA Heterogeneous nuclear ribonucleoprotein A/B</b>                       | <b>0.932881706</b> | <b>0.0005</b> | <b>2</b> |
| Q99020        | FGEVVDCTIK                                                                    | 0.771620826        | 2             | 2.91991  |
| Q99020        | IFVGGLNPEATEEK                                                                | 1.108624659        | 2             | 3.60464  |
| <b>Q991J4</b> | <b>PSMD6 26S proteasome non_ATPase regulatory subunit 6</b>                   | <b>1.003378899</b> | <b>0.9414</b> | <b>2</b> |

|               |                                                                         |                    |               |           |
|---------------|-------------------------------------------------------------------------|--------------------|---------------|-----------|
| Q99JI4        | RLDEELEDAAEK                                                            | 0.987319592        | 2             | 2.95322   |
| Q99JI4        | VNEIVETNRPDSK                                                           | 1.082461361        | 2             | 3.47608   |
| <b>Q99L04</b> | <b>DHRS1 Dehydrogenase/reductase SDR family member 1</b>                | <b>0.948290174</b> | <b>0.8639</b> | <b>2</b>  |
| Q99L04        | ATAQEAQSLGGR                                                            | 0.950787477        | 2             | 3.30614   |
| Q99L04        | CVPVVCDSSESEVK                                                          | 0.913460458        | 2             | 3.27059   |
| <b>Q99LF4</b> | <b>RTCB tRNA_splicing ligase RtcB homolog</b>                           | <b>1.115613421</b> | <b>0.9304</b> | <b>4</b>  |
| Q99LF4        | NLDFQDVLDK                                                              | 1.069676848        | 2             | 2.73157   |
| Q99LF4        | NVTDVVNTCHDAGISK                                                        | 1.058705596        | 2             | 4.2084    |
| Q99LF4        | NYNDELQFLDK                                                             | 1.090175037        | 2             | 3.0581    |
| Q99LF4        | TNLDES DVQPVK                                                           | 1.128853569        | 2             | 3.4685    |
| <b>Q99ML5</b> | <b>PCYOX Prenylcysteine oxidase</b>                                     | <b>1.016285859</b> | <b>0.004</b>  | <b>2</b>  |
| Q99ML5        | LLNQTLRENK                                                              | 1.074601626        | 2             | 2.40102   |
| Q99ML5        | NFDPPIEEFNDPYQLVTLLIK                                                   | 0.791371073        | 3             | 3.43225   |
| <b>Q99MR9</b> | <b>PPR3A Protein phosphatase 1 regulatory subunit 3A</b>                | <b>1.174106021</b> | <b>0.0071</b> | <b>2</b>  |
| Q99MR9        | DDLGANHPNVDDINK                                                         | 1.175008825        | 2             | 2.44357   |
| Q99MR9        | SRSKEEPLLAPEENK                                                         | 1.166822193        | 2             | 2.45781   |
| <b>Q99MS0</b> | <b>S14L2 SEC14_like protein 2</b>                                       | <b>0.981692101</b> | <b>0.0938</b> | <b>2</b>  |
| Q99MS0        | AGEMTEVLPNQR                                                            | 0.76295295         | 2             | 3.11169   |
| Q99MS0        | HISPDQLPVEYGGTMDPDGNPK                                                  | 1.044230934        | 3             | 4.44467   |
| <b>Q99MZ8</b> | <b>LASP1 LIM and SH3 domain protein 1</b>                               | <b>0.911453853</b> | <b>0.8834</b> | <b>5</b>  |
| Q99MZ8        | GFSVVADTPELQR                                                           | 0.894119033        | 2             | 3.58835   |
| Q99MZ8        | TGDTGMLPANYVEAI                                                         | 1.079180234        | 1             | 2.07862   |
| Q99MZ8        | TQDQISNIK                                                               | 1.072641568        | 2             | 2.46016   |
| Q99MZ8        | YHEEFEK                                                                 | 0.910456323        | 1             | 2.48047   |
| Q99MZ8        | YKEEFEK                                                                 | 1.049181608        | 1             | 2.22995   |
| <b>Q99NA5</b> | <b>IDH3A Isocitrate dehydrogenase [NAD] subunit alpha_mitochondrial</b> | <b>0.976106692</b> | <b>0.7431</b> | <b>2</b>  |
| Q99NA5        | ENTEGEYSGIEHVIVDGVVQSIK                                                 | 0.835786565        | 2             | 4.05043   |
| Q99NA5        | NVTAIQGPGGK                                                             | 0.976355653        | 2             | 2.58935   |
| <b>Q99PF5</b> | <b>FUBP2 Far upstream element_binding protein 2</b>                     | <b>0.913042984</b> | <b>0.4441</b> | <b>5</b>  |
| Q99PF5        | GGGGPGGGGPGGGGASGGPSQPPGGGGPGIR                                         | 0.922389166        | 2             | 5.75508   |
| Q99PF5        | IGGDAATTVNNNTPDFGFGGQK                                                  | 0.92284829         | 2             | 4.31157   |
| Q99PF5        | IGQQPQPGAPPQQDYTK                                                       | 0.813788656        | 2             | 2.53465   |
| Q99PF5        | SVSLTGAPESVQK                                                           | 0.967856842        | 2             | 3.3042    |
| Q99PF5        | VGGGIDVPVPR                                                             | 1.057392134        | 2             | 2.39725   |
| <b>Q99PL5</b> | <b>RRBP1 Ribosome_binding protein 1</b>                                 | <b>0.9717565</b>   | <b>0.0059</b> | <b>20</b> |
| Q99PL5        | AMEALALAER                                                              | 1.080084733        | 2             | 2.39402   |
| Q99PL5        | DALNQATSQVESK                                                           | 0.941471268        | 2             | 3.54741   |
| Q99PL5        | EAEETQNSLQAECQYR                                                        | 0.984199359        | 2             | 5.19342   |
| Q99PL5        | EHTSHLEAELEK                                                            | 0.904462157        | 2             | 3.49253   |
| Q99PL5        | ELESQVSCLEK                                                             | 0.997332783        | 2             | 2.5808    |
| Q99PL5        | GELESSDQVR                                                              | 1.07840816         | 2             | 2.8394    |
| Q99PL5        | HMAAASAECQNYAK                                                          | 0.788337811        | 2             | 4.17748   |
| Q99PL5        | HMAAASAECQNYAK+Oxidation(1)                                             | 1.216084624        | 2             | 4.40717   |
| Q99PL5        | LKELESQVSCLEK                                                           | 0.88593371         | 2             | 3.50325   |
| Q99PL5        | LLATEQEDA AVAK                                                          | 0.947879683        | 2             | 3.72832   |
| Q99PL5        | LQQENSILR                                                               | 1.11599356         | 2             | 2.66032   |
| Q99PL5        | LQSSEVEVK                                                               | 1.05037854         | 2             | 2.30502   |
| Q99PL5        | LREAEETQNSLQAECQYR                                                      | 0.947815877        | 3             | 4.0468    |
| Q99PL5        | QLHLAEAQTK                                                              | 1.199210168        | 2             | 2.5839    |
| Q99PL5        | QLLLESQSQLDEAK                                                          | 0.960691949        | 2             | 2.59909   |
| Q99PL5        | TILAETEGMLK                                                             | 0.958397402        | 2             | 2.42795   |
| Q99PL5        | TILAETEGMLK+Oxidation(8)                                                | 1.25311143         | 2             | 2.31481   |
| Q99PL5        | TLQEQLNGPNTQLAR                                                         | 0.960762876        | 2             | 5.44788   |
| Q99PL5        | TLVSTVGSVMVFSEGEAQR                                                     | 1.162909989        | 2             | 4.56144   |
| Q99PL5        | VEPAVSSIVNSIQVLASK                                                      | 1.017265994        | 3             | 3.97112   |
| <b>Q99PV0</b> | <b>PRP8 Pre_mRNA_processing_splicing factor 8</b>                       | <b>0.963412926</b> | <b>0.9718</b> | <b>3</b>  |

|               |                                                                                            |                    |               |          |
|---------------|--------------------------------------------------------------------------------------------|--------------------|---------------|----------|
| Q99PV0        | AAVMHDILDMMPGK+Oxidation(3)                                                                | 0.969992855        | 2             | 2.43589  |
| Q99PV0        | AAVMHDILDMMPGK+Oxidation(3)                                                                | 0.969992855        | 2             | 2.50849  |
| Q99PV0        | KGMLDPLEVHLLDFPNIVIK                                                                       | 0.935248053        | 2             | 2.33469  |
| <b>Q9CPQ1</b> | <b>COX6C Cytochrome c oxidase subunit 6C</b>                                               | <b>1.010258139</b> | <b>0.696</b>  | <b>2</b> |
| Q9CPQ1        | FGVAEPR                                                                                    | 1.155506969        | 2             | 2.34045  |
| Q9CPQ1        | NYDSMKDFEEMR                                                                               | 1.006544026        | 2             | 3.29581  |
| <b>Q9CQZ5</b> | <b>NDUA6 NADH dehydrogenase [ubiquinone] 1 alpha subcomplex subunit 6</b>                  | <b>1.250912719</b> | <b>0.2533</b> | <b>2</b> |
| Q9CQZ5        | FFHETETPRPK                                                                                | 1.112209166        | 2             | 2.85928  |
| Q9CQZ5        | VVDLLVIK                                                                                   | 1.347843462        | 2             | 2.48711  |
| <b>Q9CRB9</b> | <b>CHCH3 Coiled_coil_helix_coiled_coil_helix domain_containing protein 3_mitochondrial</b> | <b>1.007947145</b> | <b>1</b>      | <b>2</b> |
| Q9CRB9        | VAEELALEQAK                                                                                | 0.993828502        | 2             | 3.47003  |
| Q9CRB9        | YEYHPVCADLQTK                                                                              | 1.008050921        | 2             | 3.45689  |
| <b>Q9CW42</b> | <b>MOSC1 MOSC domain_containing protein 1_mitochondrial</b>                                | <b>0.796534879</b> | <b>7E-05</b>  | <b>2</b> |
| Q9CW42        | DLLLPIPPATNPLLQCR                                                                          | 0.748288331        | 2             | 4.03178  |
| Q9CW42        | GLSVSEAECTAMGLR                                                                            | 0.964065601        | 2             | 3.79409  |
| <b>Q9CWH6</b> | <b>PSA7L Proteasome subunit alpha type 7_like</b>                                          | <b>1.098708722</b> | <b>0.7796</b> | <b>4</b> |
| Q9CWH6        | AITVFPDGHFLQVEYAQEAVK                                                                      | 1.042767109        | 2             | 4.29511  |
| Q9CWH6        | ALLEVVQSGGK                                                                                | 1.101419778        | 2             | 3.0262   |
| Q9CWH6        | LTVEDPVTVEYITR                                                                             | 1.08550948         | 2             | 4.00338  |
| Q9CWH6        | LYQTDPSGTYHAWK                                                                             | 1.303190483        | 2             | 2.34727  |
| <b>Q9CWK8</b> | <b>SNX2 Sorting nexin 2</b>                                                                | <b>1.146297181</b> | <b>0.5728</b> | <b>4</b> |
| Q9CWK8        | AVNTQALSGAGILR                                                                             | 1.039797468        | 2             | 3.1607   |
| Q9CWK8        | QQQFENLDQQLR                                                                               | 1.167234091        | 2             | 2.69077  |
| Q9CWK8        | WEDAQITLLK                                                                                 | 1.091139353        | 2             | 2.64058  |
| Q9CWK8        | YWEAFLPEAK                                                                                 | 1.149636045        | 2             | 2.60906  |
| <b>Q9CXS4</b> | <b>CENPV Centromere protein V</b>                                                          | <b>0.906987168</b> | <b>0.0023</b> | <b>2</b> |
| Q9CXS4        | LLLDTFEYQGLVK                                                                              | 0.899018833        | 2             | 3.67604  |
| Q9CXS4        | SVVTEEFNGSDWER                                                                             | 0.907794001        | 2             | 3.54666  |
| <b>Q9CYN2</b> | <b>SPCS2 Signal peptidase complex subunit 2</b>                                            | <b>0.9132239</b>   | <b>0.6635</b> | <b>2</b> |
| Q9CYN2        | LHDSLATER                                                                                  | 0.940933293        | 2             | 2.65284  |
| Q9CYN2        | YVENFGLIDGR                                                                                | 0.859395743        | 2             | 2.82993  |
| <b>Q9CZY3</b> | <b>UB2V1 Ubiquitin_conjugating enzyme E2 variant 1</b>                                     | <b>0.970716232</b> | <b>0.9878</b> | <b>2</b> |
| Q9CZY3        | LLEELEEGQK                                                                                 | 0.9672078          | 2             | 2.42698  |
| Q9CZY3        | VNMSGVSSNGVVDP                                                                             | 0.991158613        | 2             | 2.91094  |
| <b>Q9D0M3</b> | <b>CY1 Cytochrome c1_heme protein_mitochondrial</b>                                        | <b>1.035789662</b> | <b>0.0557</b> | <b>5</b> |
| Q9D0M3        | ALAEVEVQDGPNDGEMFMRPGK                                                                     | 1.005724683        | 3             | 3.55996  |
| Q9D0M3        | GLLSSLDHTSIR                                                                               | 1.020237957        | 2             | 2.88851  |
| Q9D0M3        | HGGEDYVFSLLTGYCEPPTGVSLR                                                                   | 1.303991758        | 3             | 5.57031  |
| Q9D0M3        | HLVGVCYTEEEAK                                                                              | 1.041146097        | 2             | 3.58469  |
| Q9D0M3        | LSDYFPKYPNPEAAR                                                                            | 1.069181113        | 3             | 3.49944  |
| <b>Q9D0S9</b> | <b>HINT2 Histidine triad nucleotide_binding protein 2_mitochondrial</b>                    | <b>1.006573331</b> | <b>0.8887</b> | <b>2</b> |
| Q9D0S9        | ISQAEEDDQQLLGHLLLVAK                                                                       | 1.075122418        | 2             | 4.95961  |
| Q9D0S9        | SLPADILYEDQQCLVFR                                                                          | 0.969932067        | 2             | 3.44505  |
| <b>Q9D172</b> | <b>ES1 ES1 protein homolog_mitochondrial</b>                                               | <b>1.044589389</b> | <b>0.8016</b> | <b>4</b> |
| Q9D172        | GVEVTVGHEQEEGGK                                                                            | 0.988717354        | 2             | 3.64731  |
| Q9D172        | ITSLAQLNAAHDAIFPGGFGAAK                                                                    | 1.170215524        | 3             | 4.529    |
| Q9D172        | NLSTFAVDGK                                                                                 | 1.01954653         | 1             | 2.44497  |
| Q9D172        | NVLAESAR                                                                                   | 1.077709543        | 1             | 1.94351  |
| <b>Q9D1Q6</b> | <b>ERP44 Endoplasmic reticulum resident protein 44</b>                                     | <b>1.079832139</b> | <b>3E-16</b>  | <b>4</b> |
| Q9D1Q6        | MNPAVFLSLADLR+Oxidation(0)                                                                 | 6.683869625        | 2             | 2.69559  |
| Q9D1Q6        | NIIGYFEQK                                                                                  | 1.055742802        | 1             | 2.29655  |
| Q9D1Q6        | SNPVHEIQSLDEVNTLDR                                                                         | 1.03651792         | 2             | 4.96729  |
| Q9D1Q6        | VDCDQHS DIAQR                                                                              | 1.132601431        | 2             | 3.82175  |
| <b>Q9D2U9</b> | <b>H2B3A Histone H2B type 3_A</b>                                                          | <b>0.940690882</b> | <b>0.2829</b> | <b>5</b> |

|               |                                                                                   |                    |               |          |
|---------------|-----------------------------------------------------------------------------------|--------------------|---------------|----------|
| Q9D2U9        | AMGIMNSFVNDIFER                                                                   | 0.930071449        | 2             | 4.80314  |
| Q9D2U9        | AMGIMNSFVNDIFER+Oxidation(1)                                                      | 0.955860381        | 2             | 4.48539  |
| Q9D2U9        | AMGIMNSFVNDIFER+Oxidation(1)                                                      | 0.846931637        | 2             | 2.96093  |
| Q9D2U9        | AMGIMNSFVNDIFER+Oxidation(4)                                                      | 0.951607651        | 2             | 3.66554  |
| Q9D2U9        | LLLPGELAK                                                                         | 1.025224716        | 2             | 2.53921  |
| <b>Q9D552</b> | <b>SPT17 Spermatogenesis associated protein 17</b>                                | <b>1.103314793</b> | <b>0.2305</b> | <b>3</b> |
| Q9D552        | DINEVLEQR                                                                         | 1.17850813         | 2             | 2.54153  |
| Q9D552        | FENDAAMVIQSWFR                                                                    | 1.205510895        | 2             | 2.53936  |
| Q9D552        | MNLYNEMAVRIQR+Oxidation(0)                                                        | 1.058177856        | 2             | 2.40668  |
| <b>Q9D6M3</b> | <b>GHC1 Mitochondrial glutamate carrier 1</b>                                     | <b>1.3281011</b>   | <b>4E-14</b>  | <b>2</b> |
| Q9D6M3        | GAAVNLTLPTEK                                                                      | 1.439582482        | 2             | 3.44339  |
| Q9D6M3        | GVNEDTYSGLDCAR                                                                    | 1.27911452         | 2             | 4.47436  |
| <b>Q9D6Y9</b> | <b>GLGB 1_4 alpha glucan branching enzyme</b>                                     | <b>1.0580988</b>   | <b>0.7752</b> | <b>9</b> |
| Q9D6Y9        | CSDGGIYCK                                                                         | 1.273917425        | 1             | 2.14786  |
| Q9D6Y9        | CVAYAESHQALVGDK                                                                   | 0.984833289        | 2             | 4.35537  |
| Q9D6Y9        | EFKDEDWNMGIVYTLNTR                                                                | 1.56462446         | 3             | 3.48271  |
| Q9D6Y9        | GTHDLWDSR                                                                         | 0.971017251        | 2             | 2.52799  |
| Q9D6Y9        | IVLSDAAEYGGHQR                                                                    | 1.008546574        | 2             | 4.09841  |
| Q9D6Y9        | IYESHVGISSEHGK                                                                    | 0.949668479        | 2             | 3.06856  |
| Q9D6Y9        | NSEDGLNMFDTGDCYFHSGPR                                                             | 1.273316845        | 3             | 3.91893  |
| Q9D6Y9        | QFNLTDDLLR                                                                        | 1.022004741        | 2             | 2.55812  |
| Q9D6Y9        | WELYIPPK                                                                          | 1.097380893        | 2             | 2.45851  |
| <b>Q9D7B6</b> | <b>ACAD8 Isobutyryl-CoA dehydrogenase mitochondrial</b>                           | <b>1.097777211</b> | <b>0.9034</b> | <b>3</b> |
| Q9D7B6        | AVIFEDCAVPVANR                                                                    | 0.93281698         | 2             | 3.64251  |
| Q9D7B6        | FASYCLTEPGSGSDAASLLTSAK                                                           | 1.057356441        | 2             | 4.33649  |
| Q9D7B6        | VHQILEGSNEVMR                                                                     | 1.086415454        | 2             | 2.43571  |
| <b>Q9D819</b> | <b>IPYR Inorganic pyrophosphatase</b>                                             | <b>0.974109695</b> | <b>9E-12</b>  | <b>4</b> |
| Q9D819        | GISCMNTTVSESPFK                                                                   | 1.161644277        | 2             | 4.20554  |
| Q9D819        | GISCMNTTVSESPFK+Oxidation(4)                                                      | 0.977832736        | 2             | 4.20847  |
| Q9D819        | VLGILAMIDEGETDWK                                                                  | 1.185687716        | 2             | 2.59918  |
| Q9D819        | YVANLFPYK                                                                         | 1.005321278        | 1             | 2.02722  |
| <b>Q9D880</b> | <b>TIM50 Mitochondrial import inner membrane translocase subunit TIM50</b>        | <b>1.170553814</b> | <b>0.5327</b> | <b>2</b> |
| Q9D880        | TIALNQVEDVR                                                                       | 1.105920044        | 2             | 2.56946  |
| Q9D880        | TVLEHYALEDDPLEAFK                                                                 | 1.181103516        | 2             | 3.42939  |
| <b>Q9D8V0</b> | <b>HM13 Minor histocompatibility antigen H13</b>                                  | <b>1.042163711</b> | <b>0.7539</b> | <b>2</b> |
| Q9D8V0        | EESTEASASKRLEK                                                                    | 1.080188695        | 2             | 2.73452  |
| Q9D8V0        | SSSDMPETISR                                                                       | 1.038120595        | 2             | 2.80614  |
| <b>Q9DC70</b> | <b>NDU57 NADH dehydrogenase [ubiquinone] iron_sulfur protein 7_ mitochondrial</b> | <b>1.173680408</b> | <b>0.0006</b> | <b>2</b> |
| Q9DC70        | LDDLINWAR                                                                         | 1.175343377        | 2             | 3.61363  |
| Q9DC70        | QADVMIAGTLTNK                                                                     | 1.222115067        | 2             | 2.74404  |
| <b>Q9DCM0</b> | <b>ETHE1 Protein ETHE1_ mitochondrial</b>                                         | <b>1.112484643</b> | <b>0.1081</b> | <b>3</b> |
| Q9DCM0        | IFTLPGNCLYPAHDYHGLTVSTVEER                                                        | 1.176298495        | 3             | 3.31575  |
| Q9DCM0        | SLLPGCQSVISR                                                                      | 1.104244535        | 2             | 3.33936  |
| Q9DCM0        | TDFQQGCAK                                                                         | 1.297501876        | 2             | 2.91063  |
| <b>Q9DCS9</b> | <b>NDUBA NADH dehydrogenase [ubiquinone] 1 beta subcomplex subunit 10</b>         | <b>1.268260861</b> | <b>3E-09</b>  | <b>2</b> |
| Q9DCS9        | AYDLVVDWPVTLVR                                                                    | 1.261020848        | 2             | 4.54356  |
| Q9DCS9        | TPAPSPQTSLPNPITYLTK                                                               | 2.284632625        | 2             | 2.38401  |
| <b>Q9DCT2</b> | <b>NDU3 NADH dehydrogenase [ubiquinone] iron_sulfur protein 3_ mitochondrial</b>  | <b>1.16793421</b>  | <b>9E-07</b>  | <b>4</b> |
| Q9DCT2        | FDLNSPWEAFPAYR                                                                    | 1.173564088        | 2             | 2.98088  |
| Q9DCT2        | KFDLNSPWEAFPAYR                                                                   | 0.942867464        | 2             | 3.49393  |
| Q9DCT2        | SLADLTAVDVPTR                                                                     | 1.211257689        | 2             | 3.67081  |
| Q9DCT2        | VVAEPELAQEFR                                                                      | 0.701277359        | 2             | 3.31772  |



|               |                                                                       |                    |               |           |
|---------------|-----------------------------------------------------------------------|--------------------|---------------|-----------|
| <b>Q9DCU9</b> | <b>HOGA1 Probable 4_hydroxy_2_oxoglutarate aldolase_mitochondrial</b> | <b>0.987427591</b> | <b>0.5981</b> | <b>3</b>  |
| Q9DCU9        | GFVVQGSGTEFPFLTSLER                                                   | 0.997540542        | 2             | 5.2033    |
| Q9DCU9        | LIEPNTAVTR                                                            | 0.982026957        | 2             | 3.05442   |
| Q9DCU9        | TMDWFGYYGGPCR                                                         | 1.269671575        | 2             | 3.06446   |
| <b>Q9EP75</b> | <b>CP4FE Leukotriene_B4 omega_hydroxylase 3</b>                       | <b>1.008504101</b> | <b>0.0036</b> | <b>2</b>  |
| Q9EP75        | DEDGKELSDIEDIR                                                        | 1.649452687        | 2             | 3.15584   |
| Q9EP75        | IFNDSTNIMHAK                                                          | 0.924886575        | 2             | 3.00365   |
| <b>Q9EP89</b> | <b>LACTB Serine beta_lactamase_like protein LACTB_mitochondrial</b>   | <b>0.9941122</b>   | <b>0.2648</b> | <b>7</b>  |
| Q9EP89        | EVWSEGLGYADVENR                                                       | 0.893488018        | 2             | 3.55372   |
| Q9EP89        | FENSIESLR                                                             | 0.918528779        | 2             | 2.49425   |
| Q9EP89        | IKDEVGAPGIVVGVSDGK                                                    | 0.846846549        | 2             | 4.80436   |
| Q9EP89        | KNDFEQGELYLK                                                          | 1.041265756        | 2             | 2.3477    |
| Q9EP89        | LDLDPVQHYVPEFPEKEYEGEK                                                | 1.05974173         | 3             | 3.77404   |
| Q9EP89        | LVNTPYVDNSYK                                                          | 1.132213014        | 2             | 3.07392   |
| Q9EP89        | WAGGGFLSTVGDLLK                                                       | 1.203045681        | 2             | 4.58895   |
| <b>Q9EPE9</b> | <b>AT131 Probable cation_transporting ATPase 13A1</b>                 | <b>0.949513936</b> | <b>0.1092</b> | <b>2</b>  |
| Q9EPE9        | MAVVGNAVPCGARPGGAR+Oxidation(0)                                       | 0.941000214        | 2             | 2.82417   |
| Q9EPE9        | VLALGYK                                                               | 1.330833639        | 2             | 2.33111   |
| <b>Q9EPH2</b> | <b>MRP MARCKS_related protein</b>                                     | <b>0.983931834</b> | <b>0.0281</b> | <b>2</b>  |
| Q9EPH2        | AAATPESQEPQAK                                                         | 0.99040396         | 2             | 2.42341   |
| Q9EPH2        | GDVTAEAAAGASPAK                                                       | 0.736305933        | 2             | 2.69591   |
| <b>Q9EPH8</b> | <b>PABP1 Polyadenylate_binding protein 1</b>                          | <b>1.090364154</b> | <b>0.1507</b> | <b>5</b>  |
| Q9EPH8        | ALDTMNFDFVIK                                                          | 1.16408017         | 2             | 3.221     |
| Q9EPH8        | EFSPFGTITSAK                                                          | 1.06214763         | 2             | 2.52382   |
| Q9EPH8        | GFGFVSFER                                                             | 1.17809696         | 2             | 2.55918   |
| Q9EPH8        | KEFSPFGTITSAK                                                         | 0.83288197         | 2             | 2.58329   |
| Q9EPH8        | SKVDEAVAVLQAHQAK                                                      | 1.003409117        | 2             | 5.0934    |
| <b>Q9EQ76</b> | <b>FMO3 Dimethylaniiline monooxygenase [N_oxide_forming] 3</b>        | <b>1.721466471</b> | <b>1E-19</b>  | <b>12</b> |
| Q9EQ76        | ASIQSVFTNSSK                                                          | 1.967488342        | 2             | 2.76411   |
| Q9EQ76        | GTCILPSVNDMMDDIDEK                                                    | 1.615965861        | 2             | 4.04344   |
| Q9EQ76        | KEPVFNDELPAR                                                          | 1.712176419        | 3             | 3.71688   |
| Q9EQ76        | LQEYITSFATEK                                                          | 1.833354634        | 2             | 3.19928   |
| Q9EQ76        | NNEVTLYK                                                              | 2.024878362        | 2             | 2.40115   |
| Q9EQ76        | NNLPTAISDWWYMK                                                        | 1.520988752        | 2             | 2.86003   |
| Q9EQ76        | SCLEEGLEPTCFER                                                        | 1.460533822        | 2             | 4.42511   |
| Q9EQ76        | SDDVGGLWK                                                             | 2.089635992        | 2             | 2.71212   |
| Q9EQ76        | VAVIGAGVSGLAAIR                                                       | 1.182877931        | 2             | 2.83871   |
| Q9EQ76        | VLVIGLGNSGCDIAAELSHVAQQVIISR                                          | 2.039832947        | 3             | 3.86818   |
| Q9EQ76        | VWNDGYPWDMVVITR                                                       | 1.295258637        | 2             | 3.95411   |
| Q9EQ76        | YIQFETLVTR                                                            | 2.082739851        | 2             | 3.15389   |
| <b>Q9EQH3</b> | <b>VPS35 Vacuolar protein sorting_associated protein 35</b>           | <b>1.167732575</b> | <b>0.645</b>  | <b>4</b>  |
| Q9EQH3        | IREDLPNLESSEETEINK                                                    | 1.086879632        | 2             | 5.47707   |
| Q9EQH3        | LNLEHIATSSAVSK                                                        | 1.07870909         | 2             | 3.46595   |
| Q9EQH3        | LSQLEGVNVVER                                                          | 0.965123076        | 2             | 2.77935   |
| Q9EQH3        | VLETTVEIFNK                                                           | 1.212175356        | 2             | 2.55935   |
| <b>Q9EQS0</b> | <b>TALDO Transaldolase</b>                                            | <b>1.081216803</b> | <b>0.0193</b> | <b>6</b>  |
| Q9EQS0        | ALAGCDFLTISPK                                                         | 1.048633589        | 2             | 3.39146   |
| Q9EQS0        | ILDWHVANTDKK                                                          | 0.744855271        | 2             | 3.08359   |
| Q9EQS0        | LGGPQEEQIK                                                            | 1.176054361        | 2             | 2.81071   |
| Q9EQS0        | SYEPQEDPGVK                                                           | 0.814561067        | 2             | 2.88496   |
| Q9EQS0        | VSTEV DAR                                                             | 1.293270048        | 1             | 1.92669   |
| Q9EQS0        | WLHNEDQMAVEK                                                          | 0.95787411         | 2             | 2.49516   |
| <b>Q9EQX9</b> | <b>UBE2N Ubiquitin_conjugating enzyme E2 N</b>                        | <b>1.064066789</b> | <b>0.5096</b> | <b>3</b>  |
| Q9EQX9        | LELFLPEEYPMAAPK                                                       | 1.028095271        | 2             | 4.24261   |
| Q9EQX9        | SNEAQAIETAR                                                           | 1.085186192        | 2             | 3.38814   |
| Q9EQX9        | YFHVVIAGPQDSPFEGGTFK                                                  | 1.164619409        | 3             | 4.3043    |

|               |                                                                            |                    |               |           |
|---------------|----------------------------------------------------------------------------|--------------------|---------------|-----------|
| <b>Q9ER34</b> | <b>ACON Aconitate hydratase_mitochondrial</b>                              | <b>1.068747873</b> | <b>0.004</b>  | <b>18</b> |
| Q9ER34        | ADIANLAEFEK                                                                | 1.033547652        | 2             | 3.0169    |
| Q9ER34        | CTTDHISAAGPWLK                                                             | 0.947797848        | 2             | 3.91597   |
| Q9ER34        | DINQEVYNFLATAGAK                                                           | 0.998970992        | 2             | 4.35485   |
| Q9ER34        | DLEDLQILIK                                                                 | 1.008654172        | 2             | 2.44353   |
| Q9ER34        | FKLEAPDADELPR                                                              | 1.04999188         | 3             | 3.96993   |
| Q9ER34        | FNPETDFLTGK                                                                | 1.112960282        | 1             | 2.27027   |
| Q9ER34        | GHLDNISNLLIGAINIENGK                                                       | 1.101250968        | 2             | 5.65551   |
| Q9ER34        | IVYGHLDPPANQEIER                                                           | 1.459713696        | 2             | 4.65566   |
| Q9ER34        | LEAPDADELPR                                                                | 1.245109128        | 2             | 2.51305   |
| Q9ER34        | LTGTLGWTSPK                                                                | 1.241261237        | 2             | 2.86316   |
| Q9ER34        | NAVQEQFGVVPDAR                                                             | 1.018519657        | 2             | 4.35867   |
| Q9ER34        | NDANPETHAFVTSPEIVTALAIAGTLK                                                | 1.105191975        | 3             | 4.07107   |
| Q9ER34        | QGLLPLTFADPSDYNK                                                           | 1.099303411        | 2             | 3.34785   |
| Q9ER34        | SDFDPGQDTYQHPPK                                                            | 1.024350874        | 2             | 2.66801   |
| Q9ER34        | SQFTITPGSEQIR                                                              | 1.054164099        | 2             | 3.22964   |
| Q9ER34        | VDVSPTSQR                                                                  | 1.035634896        | 2             | 2.45164   |
| Q9ER34        | VGLIGSCTNSSYEDMGR                                                          | 1.272551846        | 2             | 4.1295    |
| Q9ER34        | WVIGDENYEGESSR                                                             | 1.112546559        | 2             | 4.31266   |
| <b>Q9ES21</b> | <b>SAC1 Phosphatidylinositide phosphatase SAC1</b>                         | <b>0.93157238</b>  | <b>0.8136</b> | <b>4</b>  |
| Q9ES21        | GSEKPLEQTFK                                                                | 0.968148957        | 2             | 2.57621   |
| Q9ES21        | LEEQDEFK                                                                   | 0.892455448        | 2             | 2.50447   |
| Q9ES21        | TQLGLVMDGFNSLLR                                                            | 1.055857599        | 2             | 3.15657   |
| Q9ES21        | VVTNQEGVFR                                                                 | 1.071312423        | 2             | 2.47277   |
| <b>Q9ES38</b> | <b>S27A5 Bile acyl_CoA synthetase</b>                                      | <b>0.866885644</b> | <b>0.1183</b> | <b>11</b> |
| Q9ES38        | ACQAAWALK                                                                  | 1.191263779        | 2             | 2.36709   |
| Q9ES38        | ADVWENFQQR                                                                 | 0.862935114        | 2             | 3.14468   |
| Q9ES38        | EGFDVGVADPLYLDNK                                                           | 0.865067158        | 2             | 5.33677   |
| Q9ES38        | GATAILVLPK                                                                 | 0.759249688        | 1             | 2.09269   |
| Q9ES38        | IQDSLEITNTYK                                                               | 0.915893837        | 2             | 3.54167   |
| Q9ES38        | LKEATIQEDK                                                                 | 0.842086564        | 2             | 2.51468   |
| Q9ES38        | QGFCIPVETGKPGLLTK                                                          | 0.983498149        | 3             | 3.4396    |
| Q9ES38        | SISALSVFLGLAK                                                              | 0.837418844        | 2             | 3.09557   |
| Q9ES38        | SLMPDVYQAVCEGTWK                                                           | 1.009171995        | 2             | 3.85262   |
| Q9ES38        | YLCNVPGQPEDK                                                               | 0.957777728        | 2             | 2.88206   |
| Q9ES38        | YLCNVPGQPEDKK                                                              | 0.602048707        | 2             | 3.07558   |
| <b>Q9ES40</b> | <b>PRAF3 PRA1 family protein 3</b>                                         | <b>1.105634288</b> | <b>0.3451</b> | <b>2</b>  |
| Q9ES40        | AWDDFFPGSDR                                                                | 1.075872102        | 2             | 2.7625    |
| Q9ES40        | LENKMEGIGLK                                                                | 1.132985832        | 2             | 2.3248    |
| <b>Q9EST6</b> | <b>AN32B Acidic leucine_rich nuclear phosphoprotein 32 family member B</b> | <b>0.971556156</b> | <b>0.1438</b> | <b>3</b>  |
| Q9EST6        | LAEELPSLTHLNSGNNLK                                                         | 0.903752218        | 2             | 4.14976   |
| Q9EST6        | SLDLFGCEVTNR                                                               | 0.97953135         | 2             | 2.68416   |
| Q9EST6        | TPAAVQELVLDNCK                                                             | 1.275103176        | 2             | 3.61139   |
| <b>Q9ESW0</b> | <b>DDB1 DNA damage_binding protein 1</b>                                   | <b>1.040729878</b> | <b>0.8156</b> | <b>3</b>  |
| Q9ESW0        | IEVQDTSGGTTALRPSASTQALSSSVSSK                                              | 1.095261844        | 3             | 5.8052    |
| Q9ESW0        | KTEPATGFIDGDLIESFLDISRPK                                                   | 1.087082274        | 3             | 4.38001   |
| Q9ESW0        | QGQGLVTCGAFK                                                               | 0.986918918        | 2             | 2.79321   |
| <b>Q9HB97</b> | <b>PARVA Alpha_parvin</b>                                                  | <b>1.051970524</b> | <b>0.9704</b> | <b>2</b>  |
| Q9HB97        | LNVAEVTQSEIAQK                                                             | 1.052917995        | 2             | 4.27197   |
| Q9HB97        | QIQEEITGNTEALSGR                                                           | 1.047035117        | 2             | 2.47727   |
| <b>Q9JHL4</b> | <b>DBNL Drebrin_like protein</b>                                           | <b>1.093120276</b> | <b>0.0805</b> | <b>2</b>  |
| Q9JHL4        | AMSTTSVSSSQPK                                                              | 1.042328762        | 2             | 2.35558   |
| Q9JHL4        | TGELEQEVVSR                                                                | 1.110788096        | 2             | 3.02602   |
| <b>Q9JI85</b> | <b>NUCB2 Nucleobindin_2</b>                                                | <b>1.230626724</b> | <b>1E-19</b>  | <b>6</b>  |
| Q9JI85        | FQQGIAPSGPAGELK                                                            | 1.339548474        | 2             | 2.92359   |
| Q9JI85        | LSQELDLVSHK                                                                | 0.99340574         | 2             | 2.3217    |

|               |                                                                 |                    |               |           |
|---------------|-----------------------------------------------------------------|--------------------|---------------|-----------|
| Q9JI85        | QEYQQAVQQLLEQK                                                  | 1.234904643        | 2             | 4.02301   |
| Q9JI85        | QVIEVLETPHFR                                                    | 0.951642136        | 2             | 2.43191   |
| Q9JI85        | TRLDELK                                                         | 1.123314101        | 1             | 1.90317   |
| Q9JI85        | VHNVEPVESAR                                                     | 1.414926162        | 2             | 2.67674   |
| <b>Q9JI91</b> | <b>ACTN2 Alpha_actinin_2</b>                                    | <b>0.856302404</b> | <b>0.7036</b> | <b>6</b>  |
| Q9JI91        | ETADDTAEQVIASFR                                                 | 1.292197117        | 2             | 3.00439   |
| Q9JI91        | GYEEWLLNEIR                                                     | 0.856229585        | 2             | 3.77578   |
| Q9JI91        | HTNYTMEHIR                                                      | 1.042986786        | 3             | 3.54253   |
| Q9JI91        | KHEAFESDLAAHQDR                                                 | 0.852000006        | 2             | 5.40143   |
| Q9JI91        | QSILAIQNEVEK                                                    | 1.087754753        | 2             | 2.8084    |
| Q9JI91        | TINEVETQILTR                                                    | 1.216335985        | 2             | 2.67362   |
| <b>Q9JIL8</b> | <b>RAD50 DNA repair protein RAD50</b>                           | <b>0.975740985</b> | <b>0.9171</b> | <b>2</b>  |
| Q9JIL8        | KEEQLSSYEDK                                                     | 0.975525173        | 2             | 2.30628   |
| Q9JIL8        | MIELKTEILTK+Oxidation(0)                                        | 0.982377876        | 2             | 2.33845   |
| <b>Q9JJ19</b> | <b>NHRF1 Na( )/H( ) exchange regulatory cofactor NHE_RF1</b>    | <b>1.018792999</b> | <b>0.9724</b> | <b>3</b>  |
| Q9JJ19        | AVDPDSPAEASGLR                                                  | 1.018734556        | 2             | 3.15912   |
| Q9JJ19        | LVEVNGENVEK                                                     | 0.681159294        | 2             | 2.42654   |
| Q9JJ19        | SEHTEPPAAADTK                                                   | 1.114870224        | 2             | 3.02143   |
| <b>Q9JJ46</b> | <b>EBP 3_beta_hydroxysteroid_Delta(8)_Delta(7)_isomerase</b>    | <b>1.052240571</b> | <b>0.0003</b> | <b>2</b>  |
| Q9JJ46        | HLTNAQSMLDNK                                                    | 1.222416458        | 2             | 3.14961   |
| Q9JJ46        | HLTNAQSMLDNK+Oxidation(7)                                       | 0.845995673        | 2             | 2.91994   |
| <b>Q9JJ54</b> | <b>HNRPD Heterogeneous nuclear ribonucleoprotein D0</b>         | <b>0.85303401</b>  | <b>0.0003</b> | <b>2</b>  |
| Q9JJ54        | FGDVVDCTLK                                                      | 0.839009084        | 2             | 2.68361   |
| Q9JJ54        | IFVGGLSPDTPEEK                                                  | 1.042191838        | 2             | 4.00692   |
| <b>Q9JJ79</b> | <b>DYHC2 Cytoplasmic dynein 2 heavy chain 1</b>                 | <b>1.098471628</b> | <b>0.1447</b> | <b>5</b>  |
| Q9JJ79        | DQIEVMKGNVKS                                                    | 1.337175436        | 2             | 2.31349   |
| Q9JJ79        | LVQSVHQSLAALS                                                   | 1.061758811        | 2             | 2.62911   |
| Q9JJ79        | NCLEEWTKAAGLEK                                                  | 1.067180182        | 2             | 2.56091   |
| Q9JJ79        | TVLRGSGNLLR                                                     | 1.237741493        | 2             | 2.58366   |
| Q9JJ79        | YVVQIGDK                                                        | 0.944643311        | 1             | 2.29421   |
| <b>Q9JU08</b> | <b>SH3L1 SH3 domain_binding glutamic acid_rich_like protein</b> | <b>1.030860742</b> | <b>0.8652</b> | <b>2</b>  |
| Q9JU08        | GDYDAFFEAR                                                      | 1.022674838        | 2             | 2.83613   |
| Q9JU08        | QQDVLCFLEANK                                                    | 1.316520618        | 2             | 3.31448   |
| <b>Q9JK38</b> | <b>GNA1 Glucosamine 6_phosphate N_acetyltransferase</b>         | <b>1.066961337</b> | <b>0.0031</b> | <b>4</b>  |
| Q9JK38        | GRVEDVVVSDECR                                                   | 0.940416545        | 2             | 3.03268   |
| Q9JK38        | ITLECLPQNVGFYK                                                  | 1.635597939        | 2             | 3.01209   |
| Q9JK38        | VEDVVVSDECR                                                     | 1.085212737        | 2             | 3.15315   |
| Q9JK38        | VLGQLTETGVVSPEQFMK                                              | 1.042714232        | 2             | 2.46703   |
| <b>Q9JLA3</b> | <b>UGGG1 UDP_glucose:glycoprotein glucosyltransferase 1</b>     | <b>1.000277006</b> | <b>0.6864</b> | <b>5</b>  |
| Q9JLA3        | GQYQGLSQDPNLSNLDQDLPNMIIHQVPIK                                  | 1.012248739        | 3             | 5.82075   |
| Q9JLA3        | IVPEWQDYDQEI                                                    | 0.907713665        | 2             | 3.44055   |
| Q9JLA3        | LGIEGLSLHNILK                                                   | 1.406918321        | 3             | 3.37365   |
| Q9JLA3        | LNIQPSETDYAVDIR                                                 | 1.080721002        | 2             | 2.62119   |
| Q9JLA3        | VWQLQDLSFQTAAR                                                  | 1.094104112        | 2             | 4.56084   |
| <b>Q9JLJ3</b> | <b>AL9A1 4_trimethylaminobutyraldehyde dehydrogenase</b>        | <b>1.076291952</b> | <b>1E-19</b>  | <b>17</b> |
| Q9JLJ3        | AGAPNGLFNVVQGGAAATGQFLCQHR                                      | 1.367442302        | 2             | 3.89628   |
| Q9JLJ3        | ANDTTFLAAGVFTR                                                  | 1.260719633        | 2             | 4.7528    |
| Q9JLJ3        | CQVLEAAR                                                        | 1.041148723        | 2             | 3.12383   |
| Q9JLJ3        | EQGATVLCGGEPYAPEDPK                                             | 1.055211084        | 2             | 4.83193   |
| Q9JLJ3        | EQGATVLCGGEPYAPEDPKLK                                           | 0.976833373        | 3             | 3.4038    |
| Q9JLJ3        | EVNLAVENAK                                                      | 0.886462698        | 1             | 2.86323   |
| Q9JLJ3        | GALLANFLTQGGVCCNGTR                                             | 1.172854419        | 3             | 4.66162   |
| Q9JLJ3        | GIKPITLELGGK                                                    | 1.182823134        | 3             | 4.02842   |
| Q9JLJ3        | IGDPLLEDTR                                                      | 1.119498983        | 2             | 3.91392   |
| Q9JLJ3        | MGPLINAPHLER                                                    | 1.155603045        | 2             | 3.08443   |
| Q9JLJ3        | MGPLINAPHLER+Oxidation(0)                                       | 1.084382506        | 2             | 2.82389   |
| Q9JLJ3        | RDEIAIMETINNGK                                                  | 1.118099728        | 2             | 5.14414   |

|               |                                                          |                    |               |           |
|---------------|----------------------------------------------------------|--------------------|---------------|-----------|
| Q9JLJ3        | SAPALACGNAMIFKPSFPTVPSALLLAEIYTK                         | 1.520511685        | 3             | 3.97744   |
| Q9JLJ3        | VEPVDASGTEK                                              | 1.083736286        | 2             | 2.31258   |
| Q9JLJ3        | VSFTGSVPTGMK                                             | 1.084080734        | 2             | 3.47068   |
| Q9JLJ3        | VSFTGSVPTGMK+Oxidation(10)                               | 1.095525085        | 2             | 2.65625   |
| Q9JLJ3        | VTIEYYSQLK                                               | 1.476657117        | 2             | 2.91103   |
| <b>Q9JLZ3</b> | <b>AUHM Methylglutaconyl_CoA hydratase_mitochondrial</b> | <b>0.878806511</b> | <b>0.0339</b> | <b>4</b>  |
| Q9JLZ3        | AVGLISHVLEQNQEGDAAYR                                     | 0.85723251         | 2             | 4.93263   |
| Q9JLZ3        | AVGLISHVLEQNQEGDAAYRK                                    | 0.809419763        | 3             | 3.94479   |
| Q9JLZ3        | GIVVLGINR                                                | 1.113437086        | 2             | 2.87364   |
| Q9JLZ3        | SEVPGIFCAGADLK                                           | 0.879317054        | 2             | 2.60328   |
| <b>Q9JM53</b> | <b>AIFM1 Apoptosis_inducing factor 1_mitochondrial</b>   | <b>0.945602027</b> | <b>3E-08</b>  | <b>14</b> |
| Q9JM53        | AIASAAEGGSVPPIR                                          | 0.98416367         | 2             | 2.58557   |
| Q9JM53        | CLIATGGTPR                                               | 0.99967185         | 2             | 2.72794   |
| Q9JM53        | DGEQHEDLNEVAK                                            | 0.848509557        | 2             | 3.59124   |
| Q9JM53        | KSQASGIEVIQLFPEK                                         | 0.761194809        | 2             | 3.51522   |
| Q9JM53        | KVETDHIVTAVGLEPNVELAK                                    | 0.865209996        | 2             | 6.35309   |
| Q9JM53        | LNDGSQITFEK                                              | 0.958577381        | 2             | 3.3771    |
| Q9JM53        | SATEQSGTGIR                                              | 1.053067825        | 2             | 2.34741   |
| Q9JM53        | SITVIGGGFLGSELACALGR                                     | 1.019281543        | 2             | 3.04191   |
| Q9JM53        | SQASGIEVIQLFPEK                                          | 1.033127586        | 2             | 4.25788   |
| Q9JM53        | TGGLEIDSDFGGFR                                           | 0.941585098        | 2             | 3.85795   |
| Q9JM53        | VETDHIVTAVGLEPNVELAK                                     | 1.120168472        | 2             | 4.65845   |
| Q9JM53        | VLIVSEDPPELYMRPPLSK                                      | 0.940183289        | 2             | 2.6951    |
| Q9JM53        | VMPNAIVQSVGVSQGGK                                        | 1.067205114        | 2             | 2.8594    |
| Q9JM53        | VMPNAIVQSVGVSQGGK+Oxidation(1)                           | 0.897625036        | 2             | 3.20344   |
| <b>Q9JMD3</b> | <b>PCTL PCTL_like protein</b>                            | <b>1.044262616</b> | <b>0.1951</b> | <b>5</b>  |
| Q9JMD3        | AVSIQTGYLIQSTGPK                                         | 1.04533505         | 2             | 4.74025   |
| Q9JMD3        | ESVQVPDDQDFR                                             | 1.028436333        | 2             | 2.59228   |
| Q9JMD3        | MECCDVPAETLYDVLHDIERY                                    | 1.151880795        | 2             | 4.2919    |
| Q9JMD3        | MECCDVPAETLYDVLHDIERY+Oxidation(0)                       | 1.17093836         | 3             | 3.76826   |
| Q9JMD3        | WDSNVIETFDIAR                                            | 1.049448746        | 2             | 4.04863   |
| <b>Q9QVC8</b> | <b>FKBP4 Peptidyl_prolyl cis_trans isomerase FKBP4</b>   | <b>0.88156416</b>  | <b>6E-05</b>  | <b>5</b>  |
| Q9QVC8        | GEPNNVAGNQAQVK                                           | 0.862877136        | 2             | 3.73493   |
| Q9QVC8        | RGEAHLAVNDFDLAR                                          | 1.137103289        | 3             | 3.3679    |
| Q9QVC8        | TQLAVCQQR                                                | 0.905487811        | 2             | 2.46733   |
| Q9QVC8        | VAENGAQSAPLPLEGVDISPK                                    | 0.79057343         | 2             | 4.04462   |
| Q9QVC8        | VGEVCHITCKPEYAYGSAGSPPK                                  | 0.82384606         | 3             | 5.93432   |
| <b>Q9QX79</b> | <b>FETUB Fetuin_B</b>                                    | <b>0.805654204</b> | <b>0.1015</b> | <b>2</b>  |
| Q9QX79        | GSIQHLPEQEPEDESKGK                                       | 0.780696813        | 3             | 3.89259   |
| Q9QX79        | NTAPTSSPSITAPR                                           | 0.813761385        | 2             | 2.8806    |
| <b>Q9QXG4</b> | <b>ACSA Acetyl_coenzyme A synthetase_cytoplasmic</b>     | <b>0.747354154</b> | <b>0.1612</b> | <b>2</b>  |
| Q9QXG4        | AELGMNDSPSQSPPVK                                         | 0.760565287        | 2             | 3.48687   |
| Q9QXG4        | IGPIATPDYIQNAPGLPK                                       | 0.707891344        | 2             | 2.84736   |
| <b>Q9QXQ0</b> | <b>ACTN4 Alpha_actinin_4</b>                             | <b>1.22383035</b>  | <b>4E-09</b>  | <b>25</b> |
| Q9QXQ0        | ACLISLGYDVENDR                                           | 1.088782955        | 2             | 3.16139   |
| Q9QXQ0        | AGTQIENIDEDFR                                            | 1.223875606        | 2             | 3.37348   |
| Q9QXQ0        | AGTQIENIDEDFRDGLK                                        | 0.937419306        | 2             | 4.40953   |
| Q9QXQ0        | ASFNHFDDKHGGALGPEEFK                                     | 1.062659199        | 3             | 3.55192   |
| Q9QXQ0        | DDPVTNLNNAFEVAEK                                         | 0.840762228        | 2             | 2.90691   |
| Q9QXQ0        | ETTDTDADQVIASFK                                          | 1.167467239        | 2             | 4.74458   |
| Q9QXQ0        | GISQEQMQEFR                                              | 1.086352773        | 2             | 3.00024   |
| Q9QXQ0        | HRDYETATLSDIK                                            | 1.210479296        | 2             | 3.74364   |
| Q9QXQ0        | HRPELIEYDK                                               | 1.026277096        | 3             | 3.96307   |
| Q9QXQ0        | HTNYTMEHLR                                               | 1.042986786        | 3             | 3.54253   |
| Q9QXQ0        | ICDQWDNLGSLTHSR                                          | 0.943986591        | 3             | 4.23142   |
| Q9QXQ0        | KDDPVTNLNNAFEVAEK                                        | 0.907925588        | 3             | 4.84177   |
| Q9QXQ0        | LSGSPYTSVTPQINSK                                         | 1.204490248        | 2             | 4.53451   |

|               |                                                                   |                    |               |           |
|---------------|-------------------------------------------------------------------|--------------------|---------------|-----------|
| Q9QXQ0        | LVSIGAEIIVDGNAK                                                   | 1.115343069        | 2             | 3.25497   |
| Q9QXQ0        | MAPYQGPDAAPGALDYK                                                 | 1.037608092        | 2             | 4.42265   |
| Q9QXQ0        | MAPYQGPDAAPGALDYK+Oxidation(0)                                    | 1.048006262        | 2             | 4.27477   |
| Q9QXQ0        | MLDAEDIVNTARPDEK                                                  | 1.012175132        | 2             | 3.09719   |
| Q9QXQ0        | MLDAEDIVNTARPDEK+Oxidation(0)                                     | 1.23561778         | 2             | 2.60371   |
| Q9QXQ0        | QFASQANMVG PWIQTK                                                 | 1.052153055        | 2             | 3.23254   |
| Q9QXQ0        | RDHALLEEQSK                                                       | 1.278599788        | 2             | 4.05208   |
| Q9QXQ0        | SIVDYKPNLDLLEQQHQLIQEALIFDNK                                      | 1.200364333        | 3             | 4.50077   |
| Q9QXQ0        | TINEVENQILTR                                                      | 0.837060905        | 2             | 3.61686   |
| Q9QXQ0        | VGWEQLLTIAR                                                       | 1.225311583        | 2             | 4.08855   |
| Q9QXQ0        | VLAGDKNFITAEELR                                                   | 1.888409463        | 2             | 2.49605   |
| Q9QXQ0        | VLAVNQENEHLMEDYER                                                 | 1.210938761        | 2             | 4.56155   |
| <b>Q9QXT0</b> | <b>CNPY2 Protein canopy homolog 2</b>                             | <b>1.097884192</b> | <b>0.4916</b> | <b>4</b>  |
| Q9QXT0        | ALVDELEWEIAR                                                      | 1.056182154        | 2             | 4.07868   |
| Q9QXT0        | IDSISGTLK                                                         | 0.983580628        | 2             | 2.52143   |
| Q9QXT0        | INPDGSQSVVEVPYAR                                                  | 1.148634639        | 2             | 3.94291   |
| Q9QXT0        | TDLCDHALHR                                                        | 1.00520233         | 2             | 2.33388   |
| <b>Q9QXX4</b> | <b>CMC2 Calcium_binding mitochondrial carrier protein Aralar2</b> | <b>1.098184143</b> | <b>5E-05</b>  | <b>15</b> |
| Q9QXX4        | ASGDAARPFLLQLAESAYR                                               | 1.090197722        | 3             | 4.4418    |
| Q9QXX4        | DVEVTKEEFALAAQK                                                   | 0.884235676        | 2             | 4.44064   |
| Q9QXX4        | FGLGSIAGAVGATAVYPIDLVK                                            | 1.031069248        | 2             | 5.22129   |
| Q9QXX4        | GLLPQLLGVAP EK                                                    | 1.07512456         | 2             | 3.04968   |
| Q9QXX4        | IAPLEEGMLPFNLAE AQR                                               | 1.072841889        | 2             | 4.31109   |
| Q9QXX4        | ITLPAPNP DHVGGYK                                                  | 1.505819822        | 2             | 2.35006   |
| Q9QXX4        | KDVEVTKEEFALAAQK                                                  | 0.99054038         | 2             | 4.54294   |
| Q9QXX4        | LQVAGEITTGPR                                                      | 1.15209845         | 2             | 3.46494   |
| Q9QXX4        | LTVNDFVR                                                          | 1.310635748        | 2             | 2.59244   |
| Q9QXX4        | NGEFFMSPHDFVTR                                                    | 1.024447211        | 2             | 3.6141    |
| Q9QXX4        | SSPQFGVTLTYELLQR                                                  | 1.204879069        | 2             | 4.17905   |
| Q9QXX4        | STGSFVGELMYK                                                      | 0.949629681        | 2             | 2.77306   |
| Q9QXX4        | TVELLSGVVDQTK                                                     | 1.030652864        | 2             | 4.10021   |
| Q9QXX4        | YEGFFGLYR                                                         | 1.076043931        | 1             | 2.2286    |
| Q9QXX4        | YLNIFGESQPNPK                                                     | 0.957109162        | 2             | 4.5528    |
| <b>Q9QY44</b> | <b>ABCD2 ATP_binding cassette sub_family D member 2</b>           | <b>1.503084676</b> | <b>0.0027</b> | <b>2</b>  |
| Q9QY44        | EGGWDAVMDWKDVLGG EK+Oxidation(7)                                  | 1.093109831        | 2             | 2.74204   |
| Q9QY44        | VLKACSPKFGTLVAEEAHR                                               | 1.593969524        | 2             | 2.4426    |
| <b>Q9QYU4</b> | <b>CRYM Thiomorpholine_carboxylate dehydrogenase</b>              | <b>0.947108516</b> | <b>0.8456</b> | <b>2</b>  |
| Q9QYU4        | GFLGVMPAYSAE DALTTK                                               | 0.946920802        | 2             | 2.5388    |
| Q9QYU4        | SSLLIPPLEAALANFSK                                                 | 0.955972555        | 2             | 2.40248   |
| <b>Q9QZ09</b> | <b>PHTF1 Putative homeodomain transcription factor 1</b>          | <b>0.86929387</b>  | <b>0.0095</b> | <b>2</b>  |
| Q9QZ09        | KMDMSVLEISGIIMSR+Oxidation(1)                                     | 0.862242553        | 2             | 2.78661   |
| Q9QZ09        | MGHIKPDLDV DLRGSTFAK+Oxidation(0)                                 | 1.172189193        | 2             | 2.43317   |
| <b>Q9QZ76</b> | <b>MYG Myoglobin</b>                                              | <b>1.244549438</b> | <b>0.9982</b> | <b>4</b>  |
| Q9QZ76        | GQHAAEQPLAQSHATK                                                  | 1.077996837        | 2             | 5.10497   |
| Q9QZ76        | HGCTVLTALGTILK                                                    | 1.415692689        | 2             | 3.08959   |
| Q9QZ76        | KGQHAAEQPLAQSHATK                                                 | 1.381586228        | 4             | 5.42427   |
| Q9QZ76        | VEGDLAGHQEV LSLFK                                                 | 1.193086575        | 3             | 5.31498   |
| <b>Q9QZA2</b> | <b>PDC6I Programmed cell death 6_interacting protein</b>          | <b>1.032575418</b> | <b>0.4689</b> | <b>7</b>  |
| Q9QZA2        | ATLVKPTPVNVPISQK                                                  | 1.032716938        | 2             | 3.44932   |
| Q9QZA2        | DTIALLCKPEPELNAAIP SANPAK                                         | 1.509782217        | 2             | 3.21168   |
| Q9QZA2        | FYNELTEILVR                                                       | 1.113316042        | 2             | 2.9606    |
| Q9QZA2        | LLDEEEATDN DLR                                                    | 1.086607796        | 2             | 3.59775   |
| Q9QZA2        | NIQVSHQEFSK                                                       | 1.100691004        | 2             | 3.02424   |
| Q9QZA2        | NLATAYDNFVELVANLK                                                 | 1.061193712        | 3             | 3.5896    |
| Q9QZA2        | STAVVEQGGIQTV DQLIK                                               | 0.999801153        | 2             | 3.87014   |
| <b>Q9QZD8</b> | <b>DIC Mitochondrial dicarboxylate carrier</b>                    | <b>1.005778923</b> | <b>0.9984</b> | <b>4</b>  |
| Q9QZD8        | GALVTVGQLSCYDQAK                                                  | 0.965093577        | 2             | 3.82447   |

|               |                                                                         |                    |               |          |
|---------------|-------------------------------------------------------------------------|--------------------|---------------|----------|
| Q9QZD8        | NYSHALDGLYR                                                             | 1.059793352        | 2             | 2.72563  |
| Q9QZD8        | VHLQTQQEVK                                                              | 1.013878519        | 1             | 2.76056  |
| Q9QZD8        | VLLGGISGLTGGFVGTADLVNVR                                                 | 1.037551842        | 2             | 5.71202  |
| <b>Q9QZH8</b> | <b>AAAD Arylacetamide deacetylase</b>                                   | <b>1.122317465</b> | <b>0.2802</b> | <b>2</b> |
| Q9QZH8        | LDVVVSTDYGLAPK                                                          | 1.203926367        | 2             | 3.97266  |
| Q9QZH8        | WFLQEDILEK                                                              | 1.114884868        | 2             | 3.35009  |
| <b>Q9QZU7</b> | <b>BODG Gamma_butyrobetaine dioxygenase</b>                             | <b>1.215639373</b> | <b>0.2634</b> | <b>5</b> |
| Q9QZU7        | DNCQCSDCYLHSAK                                                          | 0.8983261          | 2             | 2.90905  |
| Q9QZU7        | IDANNVAYTTGK                                                            | 1.26800536         | 2             | 3.26272  |
| Q9QZU7        | IIELDKKGQVVR                                                            | 0.937046041        | 2             | 2.42509  |
| Q9QZU7        | MNPGDVITFDNWR                                                           | 0.865718788        | 2             | 2.57743  |
| Q9QZU7        | QTVTGGDSEIVDGFNVCCQK                                                    | 1.01815149         | 2             | 4.42389  |
| <b>Q9QZX8</b> | <b>SO1B2 Solute carrier organic anion transporter family member 1B2</b> | <b>1.246393841</b> | <b>3E-05</b>  | <b>2</b> |
| Q9QZX8        | GIGETPIVPLGISYLDDFAK                                                    | 1.384186637        | 2             | 3.73714  |
| Q9QZX8        | QFTDEGNPDSVNK                                                           | 1.217824062        | 2             | 3.41076  |
| <b>Q9R063</b> | <b>PRDX5 Peroxiredoxin_5_mitochondrial</b>                              | <b>0.863730401</b> | <b>1E-19</b>  | <b>9</b> |
| Q9R063        | ALNVEPDGTGLTCSLAPNILSQL                                                 | 1.178800827        | 2             | 3.7077   |
| Q9R063        | ETDLLLDDSLVSLFGNR                                                       | 0.908513948        | 2             | 4.40707  |
| Q9R063        | GVLFGVPGAFTPGCSK                                                        | 0.869517667        | 2             | 4.17797  |
| Q9R063        | KGVLFGVPGAFTPGCSK                                                       | 0.908616539        | 2             | 3.10607  |
| Q9R063        | THLPGFVEQAGALK                                                          | 0.857878676        | 3             | 3.97799  |
| Q9R063        | VGDTIPSVEVFEGEPGK                                                       | 0.909990295        | 2             | 4.23533  |
| Q9R063        | VGDTIPSVEVFEGEPGKK                                                      | 0.8115824          | 2             | 3.68879  |
| Q9R063        | VNLAELFK                                                                | 0.946940561        | 2             | 2.82648  |
| Q9R063        | VQLLADPTGAFGK                                                           | 0.952411325        | 2             | 4.03533  |
| <b>Q9R0N0</b> | <b>GALK1 Galactokinase</b>                                              | <b>0.855528437</b> | <b>0.0136</b> | <b>5</b> |
| Q9R0N0        | AEHSFAGVPCGIMDQIALLGQK                                                  | 0.871745345        | 3             | 4.34018  |
| Q9R0N0        | RQCEEVAQALGK                                                            | 0.846720191        | 2             | 2.81854  |
| Q9R0N0        | SLETSLVPLSDPK                                                           | 0.858026687        | 2             | 2.6946   |
| Q9R0N0        | TDGLVSLTTSK                                                             | 0.808864589        | 2             | 3.59816  |
| Q9R0N0        | VEELLAEAR                                                               | 0.985623898        | 2             | 2.65661  |
| <b>Q9R0T3</b> | <b>DNJC3 Dnaj homolog subfamily C member 3</b>                          | <b>1.112240465</b> | <b>0.0153</b> | <b>5</b> |
| Q9R0T3        | AEPSVAEYTVR                                                             | 1.121713999        | 2             | 3.02172  |
| Q9R0T3        | FDDGEDPLDAETQQGGGSPNFHR                                                 | 1.257947853        | 3             | 3.57937  |
| Q9R0T3        | ICSEVLQLEPDNVNALK                                                       | 1.08067762         | 2             | 4.95538  |
| Q9R0T3        | KFDDGEDPLDAETQQGGGSPNFHR                                                | 1.08159589         | 3             | 5.36797  |
| Q9R0T3        | SNPSENEEKEAQSQLVK                                                       | 0.868029168        | 2             | 4.64681  |
| <b>Q9R112</b> | <b>SQRD Sulfide:quinone oxidoreductase_mitochondrial</b>                | <b>1.009961305</b> | <b>0.8914</b> | <b>4</b> |
| Q9R112        | EGNALFTFPNTPVK                                                          | 0.984945137        | 2             | 2.56796  |
| Q9R112        | STLSVIPSGVQWVIQDR                                                       | 1.271044669        | 2             | 2.39154  |
| Q9R112        | TAAAVAAQSGILDR                                                          | 1.031555557        | 2             | 2.33543  |
| Q9R112        | VGAENVAIVEPSEK                                                          | 0.943543567        | 2             | 2.3249   |
| <b>Q9R1T3</b> | <b>CATZ Cathepsin Z</b>                                                 | <b>0.906853703</b> | <b>0.3153</b> | <b>2</b> |
| Q9R1T3        | HGIPDETCNNYQAK                                                          | 0.906891757        | 2             | 3.90078  |
| Q9R1T3        | VDYGSLSGR                                                               | 0.855086366        | 2             | 2.55213  |
| <b>Q9R1Z0</b> | <b>VDAC3 Voltage_dependent anion_selective channel protein 3</b>        | <b>1.028463611</b> | <b>0.0393</b> | <b>3</b> |
| Q9R1Z0        | LTLALVDGK                                                               | 1.463087382        | 2             | 2.63151  |
| Q9R1Z0        | LTVDTIFVPNTGK                                                           | 1.028796035        | 2             | 3.086    |
| Q9R1Z0        | VNNASLIGLGYTQSLRPGVK                                                    | 0.97642593         | 2             | 3.91722  |
| <b>Q9R257</b> | <b>HEBP1 Heme_binding protein 1</b>                                     | <b>1.121261364</b> | <b>0.282</b>  | <b>2</b> |
| Q9R257        | FATVEVTDKPVDEALR                                                        | 1.080705815        | 2             | 2.70688  |
| Q9R257        | NSLFGSVETWPWQVLSTGGK                                                    | 1.170385696        | 2             | 3.74353  |
| <b>Q9WTR8</b> | <b>PHLP1 PH domain leucine_rich repeat protein phosphatase 1</b>        | <b>1.047189211</b> | <b>0.9637</b> | <b>2</b> |
| Q9WTR8        | LEELEIDISGNK                                                            | 1.230758927        | 2             | 2.71612  |
| Q9WTR8        | LEELEIDISGNKLNK                                                         | 1.028295085        | 2             | 2.31674  |
| <b>Q9WTT6</b> | <b>GUAD Guanine deaminase</b>                                           | <b>1.18697585</b>  | <b>0.0057</b> | <b>7</b> |

|               |                                                                |                    |               |           |
|---------------|----------------------------------------------------------------|--------------------|---------------|-----------|
| Q9WTT6        | EIGNFEVGKDFDALLINPR                                            | 0.944492114        | 2             | 3.53715   |
| Q9WTT6        | ETTEESVKETER                                                   | 1.055774908        | 2             | 3.23958   |
| Q9WTT6        | FQSTDVAEEVYTR                                                  | 1.186978842        | 2             | 3.58575   |
| Q9WTT6        | IVFLEESSQKEK                                                   | 1.406465138        | 2             | 3.75731   |
| Q9WTT6        | NIEEVYVGK                                                      | 1.269369136        | 1             | 1.93236   |
| Q9WTT6        | NYTDVYDKNNLLTNK                                                | 0.92759179         | 2             | 4.3723    |
| Q9WTT6        | VCMDLNNTVPEYK                                                  | 1.083495651        | 2             | 3.7372    |
| <b>Q9WTV5</b> | <b>PSMD9 26S proteasome non_ATPase regulatory subunit 9</b>    | <b>1.062481136</b> | <b>0.9873</b> | <b>2</b>  |
| Q9WTV5        | ADVDLYQVR                                                      | 1.064369014        | 2             | 2.62052   |
| Q9WTV5        | RKEEIEAQIK                                                     | 1.040367911        | 3             | 3.32969   |
| <b>Q9WU19</b> | <b>HAOX1 Hydroxyacid oxidase 1</b>                             | <b>0.891366204</b> | <b>0.2669</b> | <b>7</b>  |
| Q9WU19        | AVFVGRPIIWGLAFQGEK                                             | 1.382304989        | 3             | 3.38986   |
| Q9WU19        | GVQDVLEILK                                                     | 0.966005599        | 1             | 2.00785   |
| Q9WU19        | GVQDVLEILKEEFR                                                 | 0.850071765        | 2             | 4.04979   |
| Q9WU19        | HGVDGILVSNHGAR                                                 | 1.020302726        | 3             | 5.17638   |
| Q9WU19        | NFETNDLAFSPK                                                   | 0.996736353        | 2             | 2.94799   |
| Q9WU19        | NVADIDLSTSVLGQR                                                | 1.004897325        | 2             | 4.9746    |
| Q9WU19        | VEVFLDGGVR                                                     | 1.054216877        | 2             | 2.90611   |
| <b>Q9WU82</b> | <b>CTNB1 Catenin beta_1</b>                                    | <b>0.950805019</b> | <b>0.8826</b> | <b>4</b>  |
| Q9WU82        | AGDREDITEPAICALR                                               | 1.189871637        | 2             | 2.37607   |
| Q9WU82        | HQEAEMAQNAVR                                                   | 0.909874188        | 2             | 3.24012   |
| Q9WU82        | LLNDEDQVVVVK                                                   | 0.975215734        | 2             | 3.15532   |
| Q9WU82        | TMQNTNDVETAR                                                   | 0.941186992        | 2             | 3.08916   |
| <b>Q9WUC4</b> | <b>ATOX1 Copper transport protein ATOX1</b>                    | <b>0.973350295</b> | <b>1E-19</b>  | <b>4</b>  |
| Q9WUC4        | LGGVEFNIDLPNK                                                  | 1.16317515         | 2             | 2.83904   |
| Q9WUC4        | LGGVEFNIDLPNKK                                                 | 1.252420718        | 3             | 3.33666   |
| Q9WUC4        | VCIESEHSSDILLATLNK                                             | 1.396201713        | 2             | 5.47917   |
| Q9WUC4        | VLNKLGGVEFNIDLPNK                                              | 0.949390697        | 2             | 2.31441   |
| <b>Q9WUJ8</b> | <b>ORC6 Origin recognition complex subunit 6</b>               | <b>1.076746016</b> | <b>0.9648</b> | <b>2</b>  |
| Q9WUJ8        | LSGLNKMMYQSKL+Oxidation(6)                                     | 1.076746016        | 2             | 2.31794   |
| Q9WUJ8        | LSGLNKMMYQSKL+Oxidation(7)                                     | 1.076746016        | 2             | 2.37582   |
| <b>Q9WUS0</b> | <b>KAD4 Adenylate kinase isoenzyme 4_mitochondrial</b>         | <b>0.831486333</b> | <b>0.0055</b> | <b>4</b>  |
| Q9WUS0        | AVILGPPGSGK                                                    | 0.796137332        | 2             | 2.3928    |
| Q9WUS0        | GVLHQFSGTETNR                                                  | 0.851050603        | 2             | 3.17975   |
| Q9WUS0        | TLVQAEALDR                                                     | 0.844332594        | 2             | 2.75131   |
| Q9WUS0        | VYNLDFNPPQVLGVDDITGEPLVQQEDDKPEALAAR                           | 1.099247534        | 3             | 5.10717   |
| <b>Q9WVC0</b> | <b>SEPT7 Septin_7</b>                                          | <b>0.929619485</b> | <b>0.7221</b> | <b>2</b>  |
| Q9WVC0        | NLEGYVGFANLPNQVYR                                              | 0.86721628         | 2             | 3.74011   |
| Q9WVC0        | STLINSFLTDLYSPEYGPSPHR                                         | 0.983780995        | 3             | 3.37594   |
| <b>Q9WVF7</b> | <b>DPOE1 DNA polymerase epsilon catalytic subunit A</b>        | <b>0.78755696</b>  | <b>0.0971</b> | <b>2</b>  |
| Q9WVF7        | AANMPDSELFELISENR                                              | 0.773328984        | 2             | 2.30188   |
| Q9WVF7        | MAWQWRGEFMPASR+Oxidation(0)                                    | 1.314364843        | 2             | 2.44538   |
| <b>Q9WVK3</b> | <b>PECR Peroxisomal trans_2_enoyl_CoA reductase</b>            | <b>0.908611283</b> | <b>1E-19</b>  | <b>11</b> |
| Q9WVK3        | AGVYNLTK                                                       | 0.985575448        | 2             | 2.53997   |
| Q9WVK3        | ASQPPSSSTQVTAIQCNIR                                            | 0.873584919        | 2             | 5.49192   |
| Q9WVK3        | DHGGSIVNIIVLLNNGFPTAAHSGAAR                                    | 0.960872414        | 3             | 5.98571   |
| Q9WVK3        | ELLHLGCNVVIASR                                                 | 0.73000491         | 2             | 3.9054    |
| Q9WVK3        | INFLVNNAGGQFMAPAEDITAK                                         | 0.924939905        | 2             | 5.52429   |
| Q9WVK3        | KEEEVNNLVK                                                     | 0.835239459        | 3             | 3.98836   |
| Q9WVK3        | LTAAVDELRL                                                     | 1.08837107         | 2             | 3.07218   |
| Q9WVK3        | NFTIPDHDNWPVAGDSSFIK                                           | 0.788941974        | 2             | 5.14316   |
| Q9WVK3        | SGQSYLAAGLLQNQVAVVTGGATGIGK                                    | 0.910013208        | 2             | 6.00371   |
| Q9WVK3        | TMALTWASSGVR                                                   | 0.914851806        | 2             | 3.38855   |
| Q9WVK3        | TMALTWASSGVR+Oxidation(1)                                      | 0.856066849        | 2             | 2.93812   |
| <b>Q9WVK7</b> | <b>HCDH Hydroxyacyl_coenzyme A dehydrogenase_mitochondrial</b> | <b>0.831931001</b> | <b>1E-19</b>  | <b>12</b> |
| Q9WVK7        | AADEFVEK                                                       | 0.946398486        | 2             | 3.17468   |
| Q9WVK7        | DTPGFIVNR                                                      | 0.741233039        | 2             | 2.32094   |

|               |                                                                           |                    |               |           |
|---------------|---------------------------------------------------------------------------|--------------------|---------------|-----------|
| Q9WVK7        | EDIDTAMK                                                                  | 0.725592719        | 1             | 2.16189   |
| Q9WVK7        | FAAEHTIFASNTSSLQITNIANATTR                                                | 1.081945453        | 3             | 4.21055   |
| Q9WVK7        | FILDGWHEMDPENPLFQSPSPMNNLVAQK                                             | 0.854686068        | 3             | 5.34133   |
| Q9WVK7        | GDASKEDIDTAMK                                                             | 0.729609171        | 2             | 3.47116   |
| Q9WVK7        | GDASKEDIDTAMK+Oxidation(11)                                               | 0.969319283        | 2             | 3.24662   |
| Q9WVK7        | HVTVIGGGLMGAGIAQVAAATGHTVVLDQTEDILAK                                      | 0.829588483        | 4             | 5.13642   |
| Q9WVK7        | KGIEESLKR                                                                 | 0.875845611        | 2             | 2.78606   |
| Q9WVK7        | LKNELFQR                                                                  | 0.898749365        | 2             | 2.63105   |
| Q9WVK7        | LLVPYLIEAIR                                                               | 1.169042678        | 2             | 2.44785   |
| Q9WVK7        | TFESLVDFCK                                                                | 0.880588132        | 2             | 3.39419   |
| <b>Q9Z0N2</b> | <b>IF2H Eukaryotic translation initiation factor 2 subunit 3_Y_linked</b> | <b>0.981421378</b> | <b>0.9582</b> | <b>3</b>  |
| Q9Z0N2        | IVLTNPVCTEVGEK                                                            | 1.077633658        | 2             | 3.24015   |
| Q9Z0N2        | SFDVNKPGCEVDDLK                                                           | 0.956345668        | 2             | 3.05022   |
| Q9Z0N2        | VGQEIEVRPGIVSK                                                            | 0.959966209        | 2             | 3.05574   |
| <b>Q9Z0U5</b> | <b>ADO Aldehyde oxidase</b>                                               | <b>1.0211829</b>   | <b>0.9996</b> | <b>8</b>  |
| Q9Z0U5        | CTGYRPIIDACK                                                              | 0.82650306         | 2             | 2.66535   |
| Q9Z0U5        | DLEPLILTIEEAIQHK                                                          | 1.080101575        | 2             | 2.78969   |
| Q9Z0U5        | ELSILYGGVGPPTTIGAK                                                        | 0.808060033        | 2             | 3.79964   |
| Q9Z0U5        | GTSTETVPNTNASGGSVVADLNLGLAVK                                              | 0.939709119        | 2             | 4.60314   |
| Q9Z0U5        | KLECGNVDEAFK                                                              | 0.810653523        | 2             | 3.42765   |
| Q9Z0U5        | LVLDEVTLGASAPGGK                                                          | 0.854524396        | 2             | 3.2858    |
| Q9Z0U5        | MTWISPVTLLEELVEAK                                                         | 1.022955757        | 2             | 3.20056   |
| Q9Z0U5        | VVENNVDEPMMMLLPYLR                                                        | 0.913987335        | 2             | 2.53118   |
| <b>Q9Z0V5</b> | <b>PRDX4 Peroxiredoxin_4</b>                                              | <b>0.951690439</b> | <b>0.2331</b> | <b>4</b>  |
| Q9Z0V5        | ENECHFYAGGQVYPGEVSR                                                       | 0.947097107        | 3             | 4.57093   |
| Q9Z0V5        | GLFIIDDK                                                                  | 1.021118734        | 2             | 3.1181    |
| Q9Z0V5        | QITLNDLPVGR                                                               | 0.931279745        | 2             | 3.08592   |
| Q9Z0V5        | TRENECHFYAGGQVYPGEVSR                                                     | 0.847279926        | 3             | 5.8101    |
| <b>Q9Z0V6</b> | <b>PRDX3 Thioredoxin_dependent peroxide reductase_mitochondrial</b>       | <b>0.972348765</b> | <b>0.1336</b> | <b>4</b>  |
| Q9Z0V6        | AFQFVETHGEVCPANWTPESPTIKPSPTASK                                           | 0.944798913        | 3             | 6.444     |
| Q9Z0V6        | GLFIIDPNGVIK                                                              | 0.93631304         | 2             | 3.12625   |
| Q9Z0V6        | GTAVVNGEFK                                                                | 0.95710048         | 2             | 2.40765   |
| Q9Z0V6        | HLSVNDLPVGR                                                               | 0.921432641        | 2             | 2.80017   |
| <b>Q9Z122</b> | <b>FADS2 Fatty acid desaturase 2</b>                                      | <b>0.545195605</b> | <b>0.0069</b> | <b>2</b>  |
| Q9Z122        | AFHLDLDFVGK                                                               | 0.651137423        | 3             | 3.60596   |
| Q9Z122        | HGIEYQEKPLLR                                                              | 0.54460551         | 3             | 3.63334   |
| <b>Q9Z1A6</b> | <b>VIGLN Vigilin</b>                                                      | <b>0.998410254</b> | <b>0.8176</b> | <b>17</b> |
| Q9Z1A6        | ASVITQVFHVPLEER                                                           | 1.241504289        | 2             | 2.95726   |
| Q9Z1A6        | DKFPEVIINFDPAPAK                                                          | 0.901235143        | 3             | 3.47754   |
| Q9Z1A6        | DLANIAEVEVSIPAK                                                           | 1.018948041        | 2             | 2.3364    |
| Q9Z1A6        | EALEALVPVTIEVEVPFDLHR                                                     | 1.050258445        | 2             | 3.17429   |
| Q9Z1A6        | GNSLQEILER                                                                | 1.030924046        | 2             | 2.83425   |
| Q9Z1A6        | IDLPAENSNSSETIVITGK                                                       | 0.996221754        | 2             | 5.20564   |
| Q9Z1A6        | IEGDPQGVQQAQ                                                              | 1.093958675        | 2             | 3.60026   |
| Q9Z1A6        | IQIPRPDDPSNQIK                                                            | 0.914947222        | 2             | 2.85397   |
| Q9Z1A6        | ITLEGPTEDVNVAQEIQIEGMVK                                                   | 1.25954239         | 2             | 2.72399   |
| Q9Z1A6        | IVGELEQMVSEDPVLDHR                                                        | 0.94839866         | 2             | 3.99379   |
| Q9Z1A6        | LQDLELK                                                                   | 0.967195612        | 1             | 2.36292   |
| Q9Z1A6        | LQTQASATVPIPK                                                             | 1.059939458        | 2             | 3.50546   |
| Q9Z1A6        | LVGEIMQETGTR                                                              | 1.085860247        | 2             | 3.48363   |
| Q9Z1A6        | RCDIIVISGR                                                                | 1.039788835        | 2             | 2.76133   |
| Q9Z1A6        | TGAHLELSLAK                                                               | 1.201538332        | 3             | 3.41978   |
| Q9Z1A6        | TGVSVEIPPSDSISSETVILR                                                     | 1.058569043        | 2             | 2.63476   |
| Q9Z1A6        | VKELQAEQEDR                                                               | 1.109130389        | 3             | 3.41165   |
| <b>Q9Z1J8</b> | <b>S14L3 SEC14_like protein 3</b>                                         | <b>0.90394261</b>  | <b>0.985</b>  | <b>3</b>  |
| Q9Z1J8        | ENVQDVLPALPNDDYFLLR                                                       | 0.955090134        | 2             | 3.2049    |



|               |                                                                           |                    |               |           |
|---------------|---------------------------------------------------------------------------|--------------------|---------------|-----------|
| Q9Z1J8        | FRENVQDVLPALPNDDYFLLR                                                     | 0.907838304        | 2             | 4.4139    |
| Q9Z1J8        | GSSHQVEYELFPGCVLR                                                         | 0.984155292        | 2             | 4.31054   |
| <b>Q9Z1M9</b> | <b>SMC1A Structural maintenance of chromosomes protein 1A</b>             | <b>0.946135066</b> | <b>0.4255</b> | <b>2</b>  |
| Q9Z1M9        | EIKEKDESELNQK                                                             | 0.873939891        | 2             | 2.31844   |
| Q9Z1M9        | MDKVEDELKEK                                                               | 1.00337728         | 2             | 2.36524   |
| <b>Q9Z1W6</b> | <b>LYRIC Protein LYRIC</b>                                                | <b>0.980067837</b> | <b>0.9989</b> | <b>3</b>  |
| Q9Z1W6        | KREEVTPPTAPEDPAQLK                                                        | 1.017056841        | 3             | 3.47372   |
| Q9Z1W6        | SWQDELAQQAEEGSAR                                                          | 0.974637064        | 2             | 5.5947    |
| Q9Z1W6        | TELGDLGLLEPK                                                              | 0.986285864        | 2             | 3.01344   |
| <b>Q9Z269</b> | <b>VAPB Vesicle associated membrane protein associated protein B</b>      | <b>1.020997748</b> | <b>0.9997</b> | <b>2</b>  |
| Q9Z269        | TEAPVAAKPLTSPDDAEVKK                                                      | 0.994327203        | 3             | 3.45576   |
| Q9Z269        | VEQVLSLEPQHELK                                                            | 1.02216846         | 2             | 3.78472   |
| <b>Q9Z277</b> | <b>BAZ1B Tyrosine protein kinase BAZ1B</b>                                | <b>0.9631552</b>   | <b>0.0004</b> | <b>2</b>  |
| Q9Z277        | IHPLEKVDEEAVEK                                                            | 0.710060803        | 2             | 2.45171   |
| Q9Z277        | LQKGGLYMEGTSEFEARVISLEK                                                   | 1.160744208        | 2             | 2.39933   |
| <b>Q9Z2I8</b> | <b>SUCB2 Succinyl CoA ligase [GDP_forming] subunit beta mitochondrial</b> | <b>0.977701036</b> | <b>1E-12</b>  | <b>8</b>  |
| Q9Z2I8        | DIFAMDDKSENEPIEENAAAR                                                     | 1.075260988        | 3             | 4.11281   |
| Q9Z2I8        | IDATQVEVNPFGETPEGQVVCFAK                                                  | 0.90132146         | 2             | 4.60788   |
| Q9Z2I8        | INFDDNAEFR                                                                | 0.889637105        | 2             | 3.19536   |
| Q9Z2I8        | LEGTNVQEAQNILK                                                            | 0.927668594        | 2             | 5.07144   |
| Q9Z2I8        | SENEPIEENAAAR                                                             | 0.957804742        | 2             | 3.75394   |
| Q9Z2I8        | SHNGPVIVGSPQGGVDIEEVAASSPELIFK                                            | 0.800927079        | 2             | 5.94784   |
| Q9Z2I8        | SSGLPITSAVDLEDAAK                                                         | 0.926722487        | 2             | 4.56245   |
| Q9Z2I8        | SSGLPITSAVDLEDAAKK                                                        | 0.696443987        | 2             | 3.5442    |
| <b>Q9Z2I9</b> | <b>SUCB1 Succinyl CoA ligase [ADP_forming] subunit beta mitochondrial</b> | <b>1.001596981</b> | <b>0.6349</b> | <b>6</b>  |
| Q9Z2I9        | ALIADSGLK                                                                 | 0.876894421        | 1             | 1.98628   |
| Q9Z2I9        | ILACDDLDEAAK                                                              | 0.979812262        | 2             | 2.90932   |
| Q9Z2I9        | INFDSNSAYR                                                                | 1.057387354        | 2             | 2.67281   |
| Q9Z2I9        | LSEIVTLAK                                                                 | 1.115414487        | 2             | 2.41355   |
| Q9Z2I9        | MGFPSNIVDSAAENMIK                                                         | 0.474279494        | 2             | 2.77517   |
| Q9Z2I9        | SSDEAYAIK                                                                 | 1.048830289        | 2             | 3.56995   |
| <b>Q9Z2L0</b> | <b>VDAC1 Voltage dependent anion selective channel protein 1</b>          | <b>1.043564827</b> | <b>1</b>      | <b>11</b> |
| Q9Z2L0        | KLETAVNLAWTAGNSNTR                                                        | 1.037667178        | 2             | 4.8327    |
| Q9Z2L0        | LTFDSSFSPNTGK                                                             | 1.088576539        | 2             | 3.71987   |
| Q9Z2L0        | LTFDSSFSPNTGKK                                                            | 0.905304772        | 2             | 2.84859   |
| Q9Z2L0        | SENGLEFTSSGSANTETTK                                                       | 1.042482648        | 2             | 4.25682   |
| Q9Z2L0        | TDEFQLHTNVNDGTEFGGSYIYQK                                                  | 1.038839336        | 3             | 5.04215   |
| Q9Z2L0        | TKSENGLEFTSSGSANTETTK                                                     | 0.728824635        | 3             | 3.51891   |
| Q9Z2L0        | VNSSLIGLGYTQTLKPGIK                                                       | 1.073653057        | 2             | 4.44197   |
| Q9Z2L0        | VTQSNFAVGK                                                                | 1.022877038        | 2             | 2.80404   |
| Q9Z2L0        | WNTDNTLGTEITVEDQLAR                                                       | 1.039289125        | 2             | 4.44851   |
| Q9Z2L0        | WTEYGLTFTEK                                                               | 0.967181591        | 2             | 2.79451   |
| Q9Z2L0        | YQVDPDACFSAK                                                              | 1.027356188        | 2             | 3.79237   |
| <b>Q9Z2M4</b> | <b>DECR2 Peroxisomal 2_4_dienoyl CoA reductase</b>                        | <b>0.997759663</b> | <b>0.0002</b> | <b>3</b>  |
| Q9Z2M4        | GQVLQLHAGAAK                                                              | 1.004155595        | 2             | 2.94973   |
| Q9Z2M4        | HLAVEWGPQNIR                                                              | 0.727182296        | 2             | 3.11372   |
| Q9Z2M4        | VNSLAPGAISGTEGLR                                                          | 0.82455822         | 2             | 4.3013    |
| <b>Q9Z2M7</b> | <b>PMM2 Phosphomannomutase 2</b>                                          | <b>1.07155276</b>  | <b>0.3396</b> | <b>3</b>  |
| Q9Z2M7        | LQEQLGNDVVEK                                                              | 0.848233251        | 2             | 3.5974    |
| Q9Z2M7        | TVGYTVTAPEDTR                                                             | 1.071552788        | 2             | 2.68926   |
| Q9Z2M7        | YDYVFPENGLVAYK                                                            | 1.016695322        | 2             | 3.18683   |
| <b>Q9Z2Q1</b> | <b>SC31A Protein transport protein Sec31A</b>                             | <b>1.042555077</b> | <b>0.9075</b> | <b>12</b> |
| Q9Z2Q1        | AQDGSNPLSLQDLIEK                                                          | 1.115092083        | 2             | 4.14739   |
| Q9Z2Q1        | AVQLTQALDTNTVGALLAEK                                                      | 1.098076239        | 2             | 5.07723   |

|               |                                                |                    |               |          |
|---------------|------------------------------------------------|--------------------|---------------|----------|
| Q9Z2Q1        | CLSSATDPQTK                                    | 1.282867529        | 2             | 3.008    |
| Q9Z2Q1        | DQTLSPTIISGLHSIAR                              | 0.976503377        | 2             | 2.56569  |
| Q9Z2Q1        | GGPGPLAGHPQVSR                                 | 0.870635684        | 2             | 3.0431   |
| Q9Z2Q1        | KIDASQDFEK                                     | 1.009257868        | 2             | 2.65866  |
| Q9Z2Q1        | LVTFENVTVGQPQQGAEQPR                           | 1.166866472        | 2             | 3.63777  |
| Q9Z2Q1        | QVQHILASASPSGR                                 | 1.036955558        | 2             | 2.73276  |
| Q9Z2Q1        | SSYEGQLPK                                      | 1.000302919        | 2             | 2.43834  |
| Q9Z2Q1        | TQPPEDISCIAWNR                                 | 0.986465437        | 2             | 3.07142  |
| Q9Z2Q1        | TTFEDLIQR                                      | 1.036592666        | 2             | 2.89606  |
| Q9Z2Q1        | VNFEEDSR                                       | 0.946063171        | 2             | 2.32576  |
| <b>Q9Z2U2</b> | <b>ZN292 Zinc finger protein 292</b>           | <b>0.99126158</b>  | <b>0.7282</b> | <b>2</b> |
| Q9Z2U2        | KLEVLNNPDRTVLK                                 | 1.154882887        | 2             | 2.37697  |
| Q9Z2U2        | LINEDSTNAENQGNTTLK                             | 0.963804957        | 2             | 2.69927  |
| <b>Q9Z2Z8</b> | <b>DHCR7 7_dehydrocholesterol reductase</b>    | <b>0.749325202</b> | <b>9E-06</b>  | <b>4</b> |
| Q9Z2Z8        | AIECSYTSADGLK                                  | 0.655646069        | 2             | 3.86921  |
| Q9Z2Z8        | ASLADIWAK                                      | 0.685095103        | 2             | 2.30635  |
| Q9Z2Z8        | FLPGYVGGVQEGAITPAGIVNK                         | 0.680257401        | 2             | 4.8964   |
| Q9Z2Z8        | GYLFPTSAEDCK                                   | 0.678517826        | 2             | 2.37011  |
| <b>Q9Z339</b> | <b>GSTO1 Glutathione S_transferase omega_1</b> | <b>0.920050177</b> | <b>4E-07</b>  | <b>2</b> |
| Q9Z339        | GSAPPGPVPEGQIR                                 | 0.838812418        | 2             | 2.9094   |
| Q9Z339        | LEALELNECIDHTPK                                | 0.937530297        | 2             | 4.10039  |
